# Supplementary material for: Extending the Coding Potential of Viral Genomes with Overlapping Antisense ORFs: A Case for the De Novo Creation of the Gene Encoding the Antisense Protein ASP of HIV-1
Source: Viruses. 2022 Jan 14;14(1):146. doi: 10.3390/v14010146 (PMC8781085; doi:10.3390/v14010146)
Supplement: Supplementary file 1 [file viruses-14-00146-s001.zip]

Archive with 9 entries (9 files):
- Supplementary File S1A.pdf
- Supplementary File S1B.pdf
- Supplementary File S2A.pdf
- Supplementary File S2B.pdf
- Supplementary File S3.pdf
- Supplementary File S4.pdf
- Supplementary File S5.pdf
- Supplementary Table S1.pdf
- Supplementary Table S2.pdf
