# Supplementary material for: Extending the Coding Potential of Viral Genomes with Overlapping Antisense ORFs: A Case for the De Novo Creation of the Gene Encoding the Antisense Protein ASP of HIV-1
Source: Viruses. 2022 Jan 14;14(1):146. doi: 10.3390/v14010146 (PMC8781085; doi:10.3390/v14010146)
Supplement: Supplementary file 1 [file viruses-14-00146-s001.zip › Supplementary File S1A.pdf]

## Supplementary File S1A.

Sample set of 3725 *env/asp* overlapping regions fulfilling the following criteria: i) an *asp* anti-sense frame not interrupted by premature *stop* codons; ii) delimited by an ATG initiator at canonical nucleotide positions (triplet CAT at the end of the sequence) and a *stop* codon at canonical nucleotide positions (triplet CTA at the beginning of the sequence). Definition of canonical nucleotide positions is reported in the Materials and Methods; 2.1 *Assembly of a sample set of 3725 env/asp overlaps*. All sequences belong to the group M of HIV-1 except for SIVcpzMB66 (NCBI acc. number DQ373063). The nucleotide sequence of each *env/asp* overlap is reported both in the alignment format with gaps and in the format without gaps.

```
>K03455
TTCTACTGTAATTCAACACAACCTGTTTAAATAGTACTTGGTTTAAATAGTACTTGGAGTACTGAAGGGTCAAATA
ACACT-----
-----
GAAGGAAGTGACACAATCACCCCTCCCATGCAGAATAAAACAAATTATAAACATGTGGCAGAAAGTAGGAAAAG
CAATGTATGCCCCCTCCCATCAGTGGACAAATTAGATGTTTCATCAAAT---
ATTACAGGGCTGCTATTAACAAGAGATGGTGGTAATAGCAACAAT-----
-----
GAGTCCGAGATCTTCAGACCTGGAGGAGGAGATATGAGGGACAATTGGAGAAGTGAATTATATAAATATAAAG
TAGTAAAAATTGAACCATTA---GGAGTAGCACCCACCAAGGCAAAGAGAAGAGTGGTG-----
-----CAGAGAGAAAAAAGAGCA---GTGGGA---ATAGGAGCT-----
TTGTTCTTGGGTTCTTGGGAGCA---GCAGGAAGCACTATG---GGCGCAGCCTCA---
ATGACGCTGACGGTACAG---GCCAGACAA---TTATTG---TCTGGTATAGTGCAACAGCAGAAC---
AATTTG---CTGAGG---GCTATTGAGGCGCAACAGCATCTGTTGCAACTCACAGTCTGGGGCATC
>KF725913
TTCTATTGTAATACATCAGGACTGTTTAAATAGCACCTGGAGGAATGGAACCATGCAGGAGCCAAACAGCACAC
AG-----
-----
TTAAATGACACTATAACTCTCAAGTGCAGAATAAGGCAAATTATAAATATGTGGCAGAGAGCAGGAAAAGCAA
TGTATGCCCCCTCCCATCCAAGGAAAAATACAGTGTAAATCAAAT---
ATTACAGGATTACTATTGACAAGAGATGGTGGTGCAGGAAAAATAAT-----
-----
GCAAGTGTACCTGAAATCTTCAGACCTGGAGGGGGAGATATGAGAGACAATTGGAGAAGTGAATTATATAGGT
ATAAAGTAGTAAAAATTGAACCACTA---GGAGTAGCACCCACCAAGGCAAAGAGAAGAGTGGTG-----
-----GAGAGAGAAAAAAGAGCACTAATTGGA---CTAGGAGCT---
-----GTCTTCATTGGGTTCTTAGGAGCA---GCAGGAAGCACTATG---GGCGCGGCGTCA---
ATAACGCTGACGGTACAG---GCCAGGCAA---TTATTG---TCTGGCATAGTGCAACAGCAAGCC---
AACTTG---CTGAGG---GCTATAGAGGCGCAACAACACCTGTTGAGACTCACGGTCTGGGGCATT
>KY968401
TTCTACTGTAATACAACACAGCTGTTTAAATTTTAAATAGTACTTGGGAATAATAATGACACTGAAGGAAATTTCA
CTGAAGAT-----
-----
AATAAACTACTATCACACTCCCATGCAGAATAAAACAAATTATAAACAGGTGGCAGGAAGTAGGAAAAGCAA
TGTATGCCCCCTCCCATCAGAGGACAAATTAGCTGTTTCATCAAAT---
ATTACAGGGCTGCTATTAACAAGAGATGGTGGTAACAACACTAAC-----
-----
AACAAATGAAACTTTTCAGACCTGGAGGAGGAGATATGAGGGACAATTGGAGAAGTGAATTATATAAATATAAAG
TAGTAAGAATTGAGCCATTG---GGAATAGCACCCACCAAGGCAAAGAGAAGAGTGGTG-----
-----CAGAGAGAAAGAAGAGCA---GTGGGA---ATGGGAGCC-----
ATGTTCTTGGGTTCTTGGGAGCA---GCAGGAAGCACTATG---GGCGCAGCGTCA---
ATAACGCTGACGGTACAG---GCCAGACAA---TTATTG---TCTGGTATAGTGCAACAGCAGAAC---
AATCTG---CTGAGA---GCTATTGATGCGCAACAGCATCTGTTGCAACTCACAGTCTGGGGCATC
>KY968403
```

TTTACTGTAATACATCAAAGCTGTTTAATAAACTTGGAAATGGCACTGCATGGCCAAGCACTGAA-----  
-----  
-----  
GAAAATGAACTATCACACTTCCATGCAGAATAAAACAAATTATAAACAGGTGGCAGGAAGTAGGAAAGGCAA  
TGTATGCCCCCTCCCATCAAAGGTGTAATTAGCTGTTTCATCAAAT---  
ATCACAGGGCTGTTATTAACAAGAGATGGGGATAACAATAACGGG-----  
-----  
-----  
TCCGAGACTTTCAGACCTGGAGGAGGAGATATGAGGGACAATTGGAGAAGTGAATTATATAAATATAAAGTAG  
TAAGAATTGAGCCATTA---GGAATAGCACCCACCGAGGCAAAGAGAAGAGTGGTG-----  
-----CAGAGAGAAAAAAGAGCA---GTGGGA---ATGGGAGCT-----  
ATGTTCCCTTGGGTTCTTGGGAGCA---GCAGGAAGCACTATG---GGCGCAGCGTCC---  
ATGACGCTGACGGTACAG---GCCAGACAA---TTATTG---TCTGGTATAGTGCAACAGCAGAAC---  
AACCTG---CTGAGA---GCTATTAAGGCGCAACAGCATCTGTTGCAGCTCACAGTCTGGGGCATC  
>AY037269  
TTCTACTGTAATACAACAAAGCTGTTTAATAGTACTTGGGTAAATGGCACTTTAAATAAACTGCAGGAAATG  
AC-----  
-----  
AGTGACACAAGCATCATACTCCCATGCAGAATAAAACAAATTATAAACAGATGGCAGGAAGTAGGAAAAGCAA  
TGTATGCCCCCTCCCATTAGCGGAGTAATTAGCTGTGTATCAAAT---  
ATTACAGGGCTGCTATTAGCAAGAGATGGTGGTGGGAACACGAGC-----  
-----  
-----  
AGAGACAACGAAACCTTCAGACCTGTAGGGGGAGATATGAGGGACAATTGGAGAAGTGAATTATATAAATATA  
AAGTAGTAAGAATTGAGCCAGTA---GGAATAGCACCCACCAAGGCAAAGAGAAGAGTGGTG-----  
-----CAGAGAGAAAAAAGAGCA---GTGGGA---TTAGGAGCT-----  
---ATGTTCCCTTGGGTTCTTGGGAGCA---GCAGGAAGCACTATG---GGCGCAGCGTCA---  
GTGACGTTGACGGTACAG---GCCAGACAA---TTGTTG---TCTGGTATAGTGCAACAGCAGAAC---  
AATCTG---CTGAGA---GCTATTGAGGCGCAACAACACCTGTTGCAACTCACAGTCTGGGGCATC  
>KY968394  
TTCTACTGTAATTCATCACAACTGTTTAATAGCACTTGGGCTTTGAATAGTACTAACACTACTGCTGAA---  
-----  
-----  
GGAAAATGAACTATCATACTCCCATGCAGAATAAAACAAATTATAAACATGTGGCAACAAGTAGGAAGAGCAA  
TGTATGCCCCCTCCTATCAAAGGACTAATTAGATGCTCATCAAAT---  
ATTACAGGGATACTATTAACAAGAGATGGTGATAGTAATAGAACT-----  
-----  
-----  
AATAATGAGACCTTCAGACCTGGAGGAGGAAATATGAAGGATAATTGGAGAAGTGAATTATATAAATATAAAG  
TAGTAAAGATTGAGCCATTA---GGAATAGCACCCACCAAGGCAAAAAGAAGAGTGGTG-----  
-----CAGAGAGAGAAAAAGAGCA---GTGGGA---TTAGGAGCT-----  
ATGTTCCCTTGGGTTCTTGGGAGCA---GCAGGAAGCACTATG---GGCGCAGCGTCA---  
TTGACGCTGACGGTACAG---GCCAGACTA---TTATTG---TCTGGTATAGTGCAACAGCAGAAC---  
AATCTG---CTGAGA---GCTATTGAGGCGCAACAACATATGTTGCAACTCACAGTCTGGGGCATT  
>KY968407  
TTCTACTGTAATTCATCAAAGCTGTTTAACAGTATTTGGTGGTCTAATAATACTAATACTACAGAGGGAATT-  
-----  
-----  
GCAGGAAAAAATATCACACTCCCATGCAGAATAAAACAAATTATAAACAGATGGCAGGAAGTAGGAAAAGCAA  
TGTATGCCCCCTCCCATCAGTGGACTAGTTAGATGTTTCATCAAAT---  
ATTACAGGACTGCTATTAACAAGAGATGGGGGTAAAGATAATGAAAATAGCAAT-----  
-----  
-----  
AATAGGACTGAAACCTTCAGACCTGGAGGAGGAAATATGAAGGACAATTGGAGAAGTGAATTATATAAATATA  
AAGTAGTGAAGATTGAGCCATTA---GGAGTAGCACCCACCAGGGCAAAGAGAAGAGTGGTG-----  
-----CAGAGAGAAAAAAGAGCA---GTAACA---ATAGGAGCT-----  
---GTGTTCCCTTGGGTTCTTGGGAGCA---GCAGGAAGCACTATG---GGCGCAGCGTCA---  
ATGACGCTGACGGTACAG---GCCAGACAA---TTACTG---TCTGGTATAGTGCAACAGCAGAAC---  
AATTTG---CTGAGG---GCTATTGAGGCGCAACAGCATCTGTTGCAACTCACAGTCTGGGGCATC  
>DQ383746

TTCTACTGTAATACAACAACAACTGTTCAATAGTACTTGGAATTCAACACAACCTTAATCCTAATAGCTCTTTGA  
 GTACC-----  
 -----  
 AATGATACTGCTACTATCACACTCCCATGCAGAATAAAACAAATTATAAACATGTGGCAGAGAGTAGGAAAAG  
 CAATGTATGCCCCCTCCCATTTGAAGGACACATTAGGTGTTTCATCAAAT---  
 ATTACAGGACTGCTATTAACAAGAGATGGTGGTAACGAGAGCGAG-----  
 -----  
 -----  
 TCTGAGATCTTCAGGCCTGGAGGAGGAGATATGAGGGATAATTGGAGAAGCGAATTATATAAATATAAAGTAG  
 TAAAAGTTGAACCATTA---GGAATAGCACCCACCAAGGCAAAGAGAAGAGTGGTG-----  
 -----CAGAGAGAAAAAAGAGCA---GTGGGA---CTAGGAGCT-----  
 ATGTTCTTGGGTTCTTGGGAGCA---GCAGGAAGCACTATG---GGCGCAGCGTCA---  
 ATGGCGCTGACGGTACAG---GCCAGACAA---TTATTG---TCTGGTATAGTGCAACAGCAAAAC---  
 AATTTG---CTGATG---GCTATTGAGGCGCAACAGCATATGTTGCGACTCACAGTCTGGGGCATT  
 >KY968396  
 TTCTACTGTAATACAACACAGCTATTTAATAGTACGTGGAACGAGACATGGGCAAATGACACAGAA-----  
 -----  
 -----  
 GGAAATGACACAATCACACTCCCATGCAGAATAAAACAAATTATAAACATGTGGCAGGAAGTAGGAAAAGCAA  
 TGTATGCCCCCTCCCATCAGCGGACCAATTAAGTGTACATCCAAT---  
 ATTACAGGGCTGCTATTAACAAGAGATGGTGGGAATAGGAATACAAGCGAG-----  
 -----  
 -----  
 CTCCTCGAGACCTTCAGACCTGGAGGAGGAGATATGAGGGACAATTGGAGAAGTGAATTATATAAATATAAAG  
 TAGTAAAGATTGAACCATTA---GGAGTAGCGCCCCACCAAGGCAAAGAGAAGAGTGGTG-----  
 -----CAAAGAGAAAAAAGAGCA---GTGGGA---TTTGGAGCT-----  
 ATATTCCTTGGGTTCTTGGGAGCA---GCAGGAAGCACTATG---GGCGCAGCGTCA---  
 GTGACGCTGACGGTACAG---GCCAGACAA---TTATTG---TCTGGTATAGTGCAACAGCAGAAC---  
 AATCTG---CTGAGG---GCTATTGAGGCGCAACAACACCTGTTGCAACTCACAGTCTGGGGCATC  
 >DQ383748  
 TTCTACTGTAATACAACAAAACCTGTTTGATAATAGTACTTGGAATAAACTGAGGAGTCA-----  
 -----  
 -----  
 AATAGCACTATATTCACACTCCCATGCAGAATAAAACAAATTATAAACATGTGGCAGGAAGTAGGAAAAGCAA  
 TGTATGCCCCCTCCCATCAGAGGACAAATTAAGTGTTCATCAAAT---  
 ATTACAGGGCTGCTATTAACAAGAGATGGTGGGACCGAGGAGAAG-----  
 -----  
 -----  
 GAGATCTTCAGACCTGGAGGAGGAGATATGAGGGACAATTGGAGAAGTGAATTATATAAATACAAAGTAGTAA  
 AAATTGAACCATTA---GGAGTAGCACCCACCAAGGCAAAGAGAAGAGTGGTG-----  
 -----CAAAGAGAGAGAAGAGCA---GTGGGA---ATAGGAGCC-----  
 CTGTTCTTGGGTTCTTAGGAGCA---GCAGGAAGCACTATG---GGCGCAGCGTCG---  
 CTGACGCTGACGGTACAG---GCCAGACAA---TTATTG---TCTGGTATAGTGCAACAGCAGAAC---  
 AATATG---CTGAGG---GCTATTGAGGCGCAACAGCATATGTTGCAACTCACAGTCTGGGGCATC  
 >DQ383751  
 TTCTACTGTAATACAACAACAACTGTTTAAATAGTGCTTGGAATGATACTAATATAAACAGAACTGAAGGGTTAA  
 ACAAC-----  
 -----  
 -----  
 ACAGGAAGTGGCACTATCACACTCCCATGCAGAATAAAACAAATTATAAACCTGTGGCAGGAAGTAGGAAAAG  
 CAATGTATGCCCCCTCCCATCAGTGACAAATTAATTGTTTCATCAAAT---  
 ATTACAGGGTTGCTATTAACAAGAGATGGGGGTAATGGTAATAACACA-----  
 -----  
 -----  
 AACAAAGACAGAGATCTTCAGACCTGGAGGAGGAAATATGAAGGACAATTGGAGAAGTGAATTATATAAATATA  
 AAGTAGTAAAAGTTGAACCATTA---GGAATAGCACCCACCATGGCAAAGAGAAGAGTGGTG-----  
 -----CAAAGAGAAAAAAGAGCA---GTGGGA---ATAGGAGCG-----  
 ---TTGTTCTTGGGTTCTTGGGAGCA---GCAGGAAGCACTATG---GGCGCAGCGTCA---  
 ATAACGCTGACGGTACAG---GCCAGACAA---CTATTG---TCTGGTATAGTGCAACAGCAAAAT---  
 AATTTG---CTGAGA---GCTATTGAAGCGCAACAGCATATGTTGCAGCTCACAGTCTGGGGCATC  
 >KY968399

TTCTACTGTAATACAACAACCACTGTTTAAATAGTACTTGGAGTACTTGGGAATAGTACTAAAGGGGTAAATGGCA  
 CT-----  
 -----  
 GAAGAAAAGAACATCACACTCCCATGCAGAATAAAACAAATTATAAACATGTGGCAGGAAGTAGGAAGAGCAA  
 TGTATGCCCCCTCCCATCAATGGACAAATTAGATGTTTCATCAAAA---  
 ATTACAGGGCTACTATTAACAAGAGATGGTGGTACTAACAGTACC-----  
 -----  
 -----  
 AACGAGACCTTCAGACCTGGAGGAGGAGATATGAGGGACAATTGGAGAAGTGAATTATATAAATACAAAGTAG  
 TAAAAATTGAACCATTA---GGAGTAGCACCCACCGAGGCAAAGAGAAGAGTGGTG-----  
 -----CAGAGAGAAAAAAGAGCA---CTGGGA---CTAGGAGCT-----  
 CTGTTCCCTTGGGTTCTTGGGAGCA---GCAGGAAGCACTATG---GGCGCAGCGTCA---  
 CTGACGCTGACGGTACAG---GCCAGACAA---TTATTG---TCTGGTATAGTGCAACAGCAGAAC---  
 AATTTG---CTGAGG---GCTATTGAGGCGCAACAGCATATGTTGCAACTCACAGTCTGGGGCATC  
 >KY658686  
 TTCTACTGTAATATATCACAACCTGTTTAAATAGTACTTGGGAATCCAAATACTACAGAATCAGACAACACAAAT-  
 -----  
 -----  
 AACACTGAACTTATCATACTCCCATGTAGAATAAAACAAATTATAAACTTGTGGCAGGAAGTAGGAAAAGCAA  
 TGTATGCTCCTCCCATCCAAGGAAACATTACCTGTTTCATCAAAAT---  
 ATTACAGGGCTAGTATTAACAAGAGATGGTGGTGATAATGCTACT-----  
 -----  
 -----  
 CTTGAGGTCTTCAGACCTGGAGGAGGAAATATGAAGGACAATTGGAGAAGTGAATTATATAAATATAAAGTAG  
 TAAGAATTGAACCATTA---GGAGTAGCACCCACCAAGGCAAAGAGAAGAGTGGTG-----  
 -----CAGAGAGAAAGAAGAGCA---GTGGGAGCGCTAGGAGCT-----  
 ATGTTCCCTTGGGTTCTTGGGAACA---GCAGGAAGCACTATG---GGCGCAGCGGCA---  
 ATGACGCTGACGGTACAG---GCCAGACAA---TTATTG---TCTGGTATAGTGCAACAGCAAAAC---  
 AATTTG---CTGAGA---GCTATTGAGGCGCAACAGCATCTGTTGCAACTCACAGTCTGGGGCATC  
 >KY658683  
 TTCTACTGTAATACAACACAGTTGTTTAAATAGTACTTGGGAATGCAAATAATACCCAAGGGTCAAATGGA----  
 -----  
 -----  
 ACTGGAGAAATTATCACACTCCCATGCAGAATAAAACAAATTATAAACAAATGGCAGGAAGTAGGAAAAGCAA  
 TGTATGCCCCCTCCCATCAAAGGAAACATTAGTTGTTTCCTCAAAT---  
 ATCACAGGGCTGCTACTAACAAGGGATGGTGGTAGCAATAGCAGC-----  
 -----  
 -----  
 AACGAAACCTTCAGACCTGGAGGAGGAGATATGAGGGACAATTGGAGAAGTGAATATATAAATATAAAGTGG  
 TAAAAATTGAACCATTA---GGAGTAGCACCTACCAGGGCAAGGAGAAGAGTGGTG-----  
 -----CAAAGAGAAAAAAGAGCA---CTAGGGATTGTGGGAGCT-----  
 GGGCTCCTTGGGTTCTTAGCAGCA---GCAGGAAGCACTATG---GGCGCAGCGTCG---  
 GTGACGCTGACGGTACAG---GCCAGACTA---TTATTG---TCTGGTATAGTGCAACAGCAGAAC---  
 AATCTG---CTGAGG---GCTATTGAGGCGCAACAGCACCTGTTGCAACTCACAGTCTGGGGCATC  
 >MH078530  
 TTCTACTGTAATACAACAAAGCTGTTTAAATAGTAATAGTAATTGGCATTCCAATAAGACTTGGGAGGGG----  
 -----  
 -----  
 CTAAATGACACTATCACACTCCCATGCAGAATAAAACAAATTATAAACACATGGCAGGAAGTAGGAAAAGCAA  
 TGTATGCCCCCTCCCATCAGAGGACGAATTAATTGTTTCATCAAAAT---  
 ATTACAGGGCTGCTACTAACAAGAGATGGTAGTGGCAGCAATGACACT-----  
 -----  
 -----  
 AATAATACCGAGATCTTCAGACCTGGAGGAGGAAATATGAGGGACAATTGGAGAAGTGAATTATATAAATATA  
 AAGTAGTGAAAATTGAACCAATA---GGAATAGCACCCACCAAGGCAAAGAGAAGAGTGGTG-----  
 -----CAGAGAGAAAAAAGAGCG---ATAACG---CTGGGAGCT-----  
 ---ATGTTCCCTTGGGTTCTTGGGAACA---GCAGGAAGCACTATG---GGCGCAGCGTCG---  
 CTGACGCTGACGGTACAA---GCCAGACAA---TTGTTG---TCTGGTATAGTGCAACAGCAGAAC---  
 AATCTG---CTGAGA---GCTATTGAGGCGCAACAGCATCTGTTGCAGCTCACAGTCTGGGGCATC  
 >KY658685

TTCTACTGTAACACAACACAACACTGTTTAAATAGTACTTGGAACAGTACTTGGGAATTGGAACAGTACTACTGAGA  
 ACTCA-----  
 -----  
 ACAAACCTTTAACATAACAATTCCATGCAAAATAAAACAAATTGTAAACAGGTGGCAAGAGGTAGGAAAAGCAA  
 TGTATGCCCCCTCCCATCAGAGGAATAATCCAATGCACATCAAAC---  
 ATTACAGGGTTGCTATTAACAAGAGATGGTGGTAATGAGAATAAT-----  
 -----  
 -----  
 ATTAGTGAGATTTTCAGACCTGGAGGAGGAGATATGAGGGACAATTGGAGAAGTGAATTATATAAATACAAAG  
 TAGTACAAATTGAACCAATA---GGAATAGCACCCACCAAGGCAAAGAGAAGAGTGGTG-----  
 -----CAGAGAGAGAAAAAGAGCA---GTGGGA---ATAGGAGCT-----  
 ATGTTTCCTTGGGTTCTTGAGCGCA---GCAGGAAGCACTATG---GGCGCAGCGTCA---  
 GTGACGCTGACGGTACAG---GCCAGACAA---TTATTG---TCTGGTATAGTGACAGCAGCAGAAC---  
 AATCTG---CTGAAG---GCTATTGAGGCACAACAGCATCTGTTGCAACTCACAGTCTGGGGCATC  
 >MH078533  
 TTCTACTGTAATTCAACACCATTGTTTAAATAGTACTTGGGAATAGTAGTACTTGGAAATAATAGTAATATTGAAC  
 AGGTTAAT-----  
 -----GGA---  
 ACTGAACAGGATACTATCACACTCCACTGCAGAATAAAACAAATAGTAAACATGTGGCAGGAAGTAGGAAAAG  
 CAATGTATGCCCCCTCCTATCAGAGGACAAATTAGATGTTTCATCAAAG---  
 ATTACGGGGCTACTGTTAGTAAGAGATGGGGGTAAAAACAACACA-----  
 -----  
 -----  
 CAGAACGAGACCTTCAGGCCTACAGGAGGAAACATGAAGGACAATTGGAGAAGTGAATTATATAAATATAAAG  
 TAGTAGAAATTAAGCCATTA---GGAATAGCACCAACCAAGGCAAAGAGAAGAGTGGTG-----  
 -----CAGAGAGAAAAAAGAGCA---GTGGGA---GTAGGAGCT-----  
 ATGATCCTTGGTTTCTTGAGTACA---GCAGGAAGCACTATG---GGCGCAGCGTCA---  
 GTGACGCTGACGGTACAA---GCCAGACAA---TTATTG---TCTGGTATAGTGACAGCAGCAAAGC---  
 AATTTG---CTGAGG---GCTATTGAGGCGCAACAACATATGTTGCAACTCACAGTCTGGGGCATC  
 >AY037268  
 TTCTACTGTAATACAACACAACACTGTTTAGTAGTACTTGGGAATGAGACTAATATTTGGAATGAGACTAATACA-  
 -----  
 -----  
 -----  
 GATAATAGCACAATCACACTCCAATGCAGAATAAAGCAATTTATAAACATGTGGCAGAAAGTAGGAAAAGCAA  
 TGTATGCCCCCTCCCATCAGAGGACACATTAGATGTTTCATCAAAT---  
 ATTACAGGGCTGCTATTAACAAGAGATGGTGGTATTATCAACACC-----  
 -----  
 -----  
 ACCGAGACCTTCAGACCTGGAGGAGGAGATATGAGGGACAATTGGAGAAGTGAATTATATAAATACAAAGTAG  
 TAAGAATTGAACCATTA---GGAGTAGCACCCACCAAGGCAAAGAGAAGAGTGGTG-----  
 -----CAGAGAGAAAAAAGAGCA---ATAGGGGTAATAGGAGCT-----  
 TTGTTTCCTTGGGTTCTTGGGAGCA---GCAGGAAGCACTATG---GGCGCAGCGTCA---  
 GTGACGTTGACGGTACAG---GCCAGACAA---TTATTG---TCTGGTATAGTGCAACAGCAGAAC---  
 AATCTG---CTAAGG---GCTATTGAGGCGCAACAGCATCTGTTGCAACTCACAGTCTGGGGCATT  
 >AY037282  
 TTCTACTGTGATACAACAAAACACTGTTTAAATAGTACTTGGACTACTGAAGGGTTAAATAGCACTGAAGGAAAT-  
 -----  
 -----  
 -----  
 AGCACAAAAATAATCACACTCCCATGTAGAATAAGACAAATTATAAACATGTGGCAGGAAGTAGGAAAAGCAA  
 TGTATGCCCCCTCCCATCAGTGGACAAATTAAGTGTTCATCAAAT---  
 ATTACAGGGCTGCTATTAACAAGAGATGGTGGTAATGACACTAACAGT-----  
 -----  
 -----  
 AGCAATACCGAGATATTTCAGACCTGGAGGAGGAAATATGAAGGACAATTGGAGAAGTGAATTATATAAATACA  
 AAGTAGTACAAATTGAACCAATA---GGAGTAGCGCCACCAAGGCAAAGAGAAGAGTGGTG-----  
 -----CAGAGAGAAAAAAGAGCA---GTGGGA---CTAGGAGCC-----  
 ---TTGTTTCCTTGGGTTCTTGGGAGCA---GCAGGAAGCACTATG---GGCGCAGCGTCA---  
 ATAACGCTGACGGTACAG---GCCAGACAA---TTATTG---TCTGGTATAGTGCAACAGCAGAAC---  
 AATCTG---CTGAGA---GCTATTGAGGCGCAACAACATCTGTTGCAACTCACAGTCTGGGGCATC  
 >FJ952154

TTCTACTGTAACACAACAAAATTGTTTAAATAGTACTTGGAATAGTAATGCTCCTTGGAATAGTACTGAATGG-  
-----  
-----  
TTAAATGACACTATCACACTCCCATGCAGAATAAAACAAATTATAAACATGTGGCAGAAAGTAGGAAAAGCAA  
TGTATGCCCCCTCCCATCAGGGGACAAATTAGATGCTCATCAAAT---  
ATTACAGGGCTAATATTAACAAGAGATGGTGGCAGAAATGGTAACAGTAGC-----  
-----  
-----  
AACAAACGGGAGCGAGACCTTCAGACCTGGAGGAGGAGATATGAGGGACAATTGGAGAAGTGAATTATATAAAAT  
ATAAAGTAGTAAAAATTGAGCCATTA---GGACTAGCACCCACCAAGGCAAAGAGAAGAGTGGTG-----  
-----CAGAGAGAAAAAAGAGCA---GTGGGA---CTAGGAGCT---  
-----GTGTTTCCTTGGGTTCTTGGGAGCA---GCAGGAAGCACTATG---GGCGCAGCGTCA---  
GTAACGCTGACGGTACAG---GCCAGACTA---TTATTG---TCTGGTATAGTGCAACAGCAAAGC---  
AATTTG---CTGAGG---GCTATTGAGGCGCAACAGCATCTGTTGCAACTCACAGTCTGGGGCATC  
>DQ676886  
TTCTACTGTAATTCAACACCACTGTTTAAATAGTACTTGGGTGCAGATGGTAATACTTGAGGGAGTCTAATA  
GAACTAAT-----  
-----AGTAGT-----  
ACTTCAAGTGTTAATATCACACTCCCATGCAGAATAAAACAAATTATAAACATGTGGCAGGAAGTAGGAAAAG  
CAATGTATGCCCCCTCCTATCAAAGGACTAATTAGATGTTTCATCAAAT---  
ATTACAGGGATACTATTAACAAGAGATGGTGGTAATAACAATACC-----  
-----  
-----  
ACCAATGAAACTTTTCAGACCTGGAGGAGGAGATATGAGAGACAATTGGAGAAGTGAATTATATAAAATATAAAG  
TAGTAAAAATTGAACCATTA---GGGATAGCACCCACCAGGGCAAAGAGAAGAGTGGTG-----  
-----CAGAGAGAAAAAAGAGCA---GTAACA---TTAGGAGCT-----  
ATGTTTCCTTGGGTTCTTGGGAGCA---GCAGGAAGCACTATG---GGCGCAGCGTCA---  
CTGACGCTGACGGTACAG---GCCAGACTA---TTATTG---TCTGGTATAGTGCAACAGCAGAAC---  
AATCTG---CTGAGG---GCTATTGAGGCGCAACAACATCTGTTGCAACTCACAGTCTGGGGCATT  
>AF042100  
TTCTACTGTAATTCAACACAACCTGTTTAAATAGTACTTGGAATATTAATAGTACTTGGAATGATACTGGAGAGT  
CAAATAAC-----  
-----ACT---  
GTAGGCAATGTCACACTCACACTCCCATGCAGAATAAAACAAATTGTAAACCTGTGGCAGGAAGTAGGAAAAG  
CAATGTATGCCCCCTCCCATCAGCGGACTAATTAGATGTTTCATCAAAT---  
ATTACAGGGCTGCTATTAACAAGAGATGGGGGTAAGGGTAATGAC-----  
-----  
-----  
ACGGTCGAGACCTTCAGACCTGGAGGAGGAGATATGAGGGACAATTGGAGAAGTGAATTATATAAAATATAAAG  
TAGTAAAAATTGAACCATTA---GGAGTAGCACCCACTAAGGCTAAGAGAAGAGTGGTG-----  
-----CAGAGAGAAAAAAGAGCA---GTGGGAATAGGAGCTGTG-----  
TTGTTTCCTTGGGTTCTTGGGAGCA---GCAGGAAGCACTATG---GGCGCAGCGTCA---  
ATAACGCTGACGGTACAG---GCCAGACAA---TTATTG---TCTGGTATAGTGCAACAGCAGAAC---  
AATTTG---CTGAGG---GCTACTGAGGCGCAACAGCATCTGTTGCAACTCACAGTCTGGGGCATC  
>AF042101  
TTTTACTGTAATTCAACACAACCTGTTTAAATGGTACTTGGAATGATACTGAAAGGTCATGGTCATATAACACTG  
CA-----  
-----  
-----  
GAAAATAATGACACAATCACGCTCCCATGTAAAATAAAACAAATTATAAACAGGTGGCAGGAAGTAGGAAAAG  
CAATATATGCCCCCTCCCATCAGAGGACAAATTAAATGTTTCATCAAAC---  
ATTACAGGGCTGCTCTTAACAAGAGATGGTGGCCCTGACAATAAA-----  
-----  
-----  
GACACTGAGATCTTCAGACCTGGAGGAGGAGATATGAGGGACAATTGGAGAAGTGAATTATATAAAATATAAAG  
TAGTAAAAATTGAACCATTA---GGAATAGCACCCACTAAGGCAAAGAGAAGAGTGGTG-----  
-----CAGAGAGAAAAAAGAGCA---GTGGGA---CTAGGAGCT-----  
TTGTTTCCTTGGGTTCTTGGGAGCA---GCAGGAAGCACTATG---GGCGCAGCGTCA---  
ATAACGCTGACGGTACAG---GCCAGACAA---TTATTG---TCTGGTATAGTGCAAGCAGCAGAAC---  
AATCTG---CTGAGG---GCTATTGAGGCGCAACAGCATCTGTTGCAACTCACAGTCTGGGGCATC  
>AF538304

TTCTACTGTAATACAACAACAACTGTTTAAATAGTACTTGGAATGTTACTGAAAGGTTAAATAACACTGAAAGA-  
 -----  
 -----  
 GATAATACTACAATCACACTCCCATGCAGAATAAAACAACTTATAAACATGTGGCAGGAGGTAGGAAAAGCAA  
 TGTATGCCCCCTCCCATTAGCGGACGAATTAGATGTTTCATCAAAT ---  
 ATTACAGGGCTGATATTAACAAGAGATAGTGGTAGCGGGAACGGG-----  
 -----  
 -----  
 ACCGAGACCTTCAGACCTGGAGGAGGAAATATGAAGGACAATTGGAGAAGTGAATTATATAAATATAAAGTAG  
 TAAGAATTGAACCATTA---GGAGTAGCACCCACCAAGGCAAAGAGAAGAGTGGTG-----  
 -----CAGAGAGAAAAAAGAGCA---TTAGGGGGACTAGGAGCT-----  
 ATGTTCCCTTGGGTTCTTGGGAGCA---GCAGGAAGCACTATG---GGCGCAGCGTCA---  
 ATGGCGCTGACGGTACAG---GCCAGACAA---TTATTG---TCTGGTATAGTGCAACAGCAGAAC---  
 AATCTG---CTGAGA---GCTATTGAGGCGCAACAGCATCTGTTGCAACTCACAGTCTGGGGCATT  
 >AF538306  
 TTCTACTGTAATTCAACACCACTGTTTAAATAGTACTTGGAATGTTACTACAGGGTCAAGTAACATGGAAGAGG  
 AT-----  
 -----  
 AGTCCAGAAAATATTACACTCACATGCAGAATAAAACAAATTATAAACATGTGGCAGGAAGTAGGAAAAGCAA  
 TGTATGCCCCCTCCCATCAAAGGACTAATTAGCTGTTTCATCAAAC---  
 ATTACAGGGCTGCTATTAACAAGAGATGGTGGTAATAATAGCGAGACC-----  
 -----  
 -----  
 AAGACCACCGAGACCTTCAGACCTGGAGGAGGAGATATGAGGGACAATTGGAGAAGTGAATTATATAAATACA  
 AAGTAGTAAAAATTGAACCATTA---GGAGTAGCACCCACCAGGGCAAAGAGAAGAGTGGTG-----  
 -----CAGAGAGAAGAGAGAGCA---GTGGGA---ATAGGAGCT-----  
 ---TTGTTCCCTTGGGTTCTTGGGAGCA---GCAGGAAGCGCTATG---GGCGCAGCATCA---  
 ATGACGCTGACGGTACAG---GCCAGACAA---TTATTG---TCTGGTATAGTGCAAGCAGCAGAAC---  
 AATTTG---CTGTGG---GCTATTGAGGCGCAACAGCATCTGTTGCAACTCACAGTCTGGGGCATC  
 >AF042103  
 TTCTACTGTGATTCAACACGACTGTTTAAATAGTACTTGGAATTAATGGTACTCGGAATGAACTGAAGGC---  
 -----  
 -----  
 AATGGAAGCACTATCACACTCCCCTGCAAAATAAAACAAATTATAAACCTGTGGCAGGAAGTAGGAAAAGCAA  
 TGTATGCCCCCTCCCATCAGAGGACAAATTAGATGTACATCAAAT---  
 ATTACAGGGCTGATATTAACAAGAGATGGTGGTAATAACACGAAC-----  
 -----  
 -----  
 GAGACCGAGATCTTCAGACCTGGAGGAGGAGATATGAGGGACAATTGGAGAAGTGAATTATATAGGTATAAAG  
 TAGTAAAAATTGAACCATTA---GGAGTAGCACCCACCAAGGCAAAGAGAAGAGTGGTG-----  
 -----CAGAGAGAAAAAAGAGCA---GTGGGA---ATAGGAGCT-----  
 GTGTTCCCTTGGGTTCTTAGGAGCA---GCAGGAAGCACTATG---GGCGCAGCGTCA---  
 CTGACGCTGACGGTACAA---GCCAGACAA---TTATTG---TCTGGTATAGTGCAAGCAGCAGAGC---  
 AATTTG---CTGAGG---GCTATTGAGGCGCAACAGCATCTGTTGCAACTCACAGTCTGGGGCATT  
 >AF042104  
 TTCTACTGTAATTCAACACAACCTGTTTAAATAGTATTTGGAAAAATGATACTTGGAATAATAGTACTTGGGATG  
 AC-----  
 -----  
 ACTGCAGGACATATCACACTTCCATGCAGAATAAAACACATTGTAAACATGTGGCAGGAAGTAGGAAAAGCCA  
 TGTATGCCCCCTCCCATCAGAGGACAAATTAGATGTACATCAAAT---  
 ATTACAGGGATGCTACTAACAAGAGATGGTGGTAATAGCGATAACGCG-----  
 -----  
 -----  
 AACGGGACCGAGACCTTCAGACCTGGAGGCGGAGATATGAGGGACAATTGGAGATGTGAAGTATATAGATATA  
 AAGTAGTAAAAATTGAACCATTA---GGGATAGCACCCACCAAGGCAAAGAGAAGAGTGGTG-----  
 -----CAGAGAGAAAAAAGAGCA---GTGGGA---ATAGGAGCT-----  
 ---GTGTTCCCTTGGGTTCTTGGGAGCA---GCAGGAAGCACTATG---GGCGCAGCGTCA---  
 ATGACGCTGACGGTACAG---GCCAGACTA---TTATTG---TCTGGTATAGTGCAACAGCAGATC---  
 ATTTTG---CTGAGG---GCTATTGAGGCGCAACAGCATCTGTTGCAACTCACAGTCTGGGGCATC  
 >AF042105

TTCTACTGTAATACAACACCACTGTTTAAATAGAACATGGGTAAATGGTACCTGGGATAATACTTGGGATAATA  
 CTACA-----  
 -----  
 GACATTAACGGAAATATCATACTTCCATGCAGAATAAAACAAATTATAAACATGTGGCAGAAAGTAGGAAAAG  
 CAATGTATGCCCCCTCCCATCAGAGGAATAATTAAGTGTACATCAAAT---  
 ATTACAGGGCTGATATTAACAAGAGATGGTGGTTTGAATAGTACA-----  
 -----  
 -----  
 AACGAGACTTTCAGACCTGGAGGAGGAGATATGAGGGACAATTGGAAAAGTAAATTATATAAGTATAAAGTAG  
 TAGAAATTGAACCATTA---GGAGTAGCACCCACCAAGGCAAAAAGAAGAGTGGTG-----  
 -----CAGAGAGAAAAAAGAGCG---GTGACA---CTAGGAGCT-----  
 ATGTTCCCTTGGGTTCTTAGGAGCA---GCAGGAAGCACTATG---GGCGCAGCGTCA---  
 ATAACGCTGACGGCACAA---GCCAGACAA---TTATTG---TCTGGTATAGTGCAACAGCAGAAC---  
 ACTCTG---CTGAGG---GCTATTAAGGCGCAACAGCATCTGTTGCAACTCACAGTCTGGGGCATC  
 >AF538302  
 TTCTATTGTAATTCAACAGGATTGTTTAAATAGTACCTGGAATAATAGTACCTGGAATGATACTGAAAAGTCAA  
 ATAGC-----  
 -----ACT---  
 GGAGGAAATGATACAATCACACTCCAATGCAGAATAAAACAAATTATAAACTTGTGGCAGGAAGTAGGAAAAG  
 CAATGTATGCCCCCTCCCATCAGAGGAGAAATTAGATGTACATCAAAT---  
 ATTACAGGGCTGTTATTAACAAGAGATGGTGGTATTGTCAAGGAG-----  
 -----  
 -----AACGAGACCTTCAGACCTGGAGGAGGC---GATATGAGG---  
 GACAAATTGGAGAAGTGAATTATATAAAGTAGTACAAATTGAACCATTA---  
 GGAGTAGCACCCACCGAGGCAAAGAGAAGAGTGGTG-----  
 ---CAGAGAGAAAAAAGAGCA---ATAGGA---ATAGGAGCT-----  
 GTGTTCCCTTGGGTTCTTGGGAGCA---GCAGGAAGCACTATG---GGCGCAGCGTCA---  
 ATGACGCTGACGGTACAG---GCCAGACTA---TTATTG---TCTGGTATAGTGCAACAGCAGAAC---  
 AATTTG---CTGAGG---GCTATTGAGGCGCAACAGCATCTGTTGCAACTCACAGTCTGGGGCATC  
 >AY624305  
 TTCTACTGTAATACATCAAACTGTTTAAATAGCACTTGAATAGTAATGGGACTTGAATGGTGATAAGGAA-  
 -----  
 -----  
 ACTAAAGGAATTATCGTACTCCCATGTAGAATAAAACAAATTATAAACATGTGGCAGGGAGTAGGAAAAGCAA  
 TGTATGCCCCCTCCCGTCAAAGGAAAAATTGAATGTTTCATCAAAT---  
 ATTACAGGGCTGCTATTAACAAGAGATGGTGGTATTAACAGCAGC-----  
 -----  
 -----  
 GATAGCGAAACCTTCAGACCTGGAGGAGGAAATATGAAGGACAATTGGAGAAGTGAATTATATAAATATAAAG  
 TAGTAGAAATTGAACCATTA---GGAGTAGCACCCACCAAGGCAAAGAGAAGAGTGGTG-----  
 -----CAGAGAGAAAAAAGAGCA---GTGGGAATGATAGGAGCT-----  
 ATGTTCCCTTGGGTTCTTGGGAGCA---GCAGGAAGCACTATG---GGCGCAGCGTCA---  
 ATGGCGCTGACGGTACAG---ACCAGACAA---TTATTG---TCTGGTATAGTGCAACAGCAGAAC---  
 AACTTG---CTGAAG---GCTATTGAGGCGCAACAGCATCTGTTGCAACTCACAGTCTGGGGCATC  
 >JN002002  
 TTCTACTGTAACACAACACAGCTGTTTAAATAGTACTTGAATTCAACACAACCTGTTTAAATAGTACTGGGGATG  
 ATACT-----  
 -----GGA---  
 GAGTCAAATAAAATAATCACACTCCCATGTAGAATAAAACAAATTATAAACATGTGGCAGGAAGTAGGAAAAG  
 CAATGTATGCCCCCTCCCATCAGAGGACAAATTAGATGTTTATCAAAT---  
 ATTACAGGGCTGATATTAACAAGAGATGGTGGTAATAACAGTGACACG-----  
 -----  
 -----  
 AACACCACCGAGATCTTCAGACCGGGAGGAGGAGATATGAGGGACAATTGGAGAAGTGAAGTATATAAATATA  
 AAGTAGTAAAAATTGAACCATTA---GGAGTAGCACCTACCAAGGCAAAGAGAAGAGTGGTG-----  
 -----CAGAGAGAAAAAAGAGCA---GTGGGAACGCTGGGAGCT-----  
 ---ATGTTCCCTTGGGTTCTTGGGAGCA---GCAGGAAGCACTATG---GGCGCAGCGTCA---  
 ATAACGCTGACGGTACAG---GCCAGACTA---TTATTG---ACTGGTATAGTGCAACAGCAGAAC---  
 AACCTG---CTGAGG---GCTATTGAGGCGCAACAGCATCTGTTGCAACTCACAGTCTGGGGCATC  
 >JN002009

TTCTACTGTAATTCAACACAACCTGTTTAAATAGTACTTGGTTTAAATAGTATTTGGAAAGTTAATGATACTGAAG  
 AGTCAAAT-----  
 -----AGCACT-----  
 ACAGAAAATATTACAATCACACTCCCATGTAGAATAAAACAAATTATAAATATGTGGCAGGAAGTAGGAAAAG  
 CAATGTATGCCCCCTCCCATCAGAGGACAAATTAGCTGTTTATCAAAT---  
 ATTACAGGGCTGTTATTAACAAGAGATGGTGGTAAGAATAACCAGAGC-----  
 -----  
 -----  
 AACACCACCGAGACCTTCAGACCAGGAGGAGGAAATATGAAGGACAATTGGAGAAGTGAATTATATAAATATA  
 AAGTAGTAAGAATTGAACCATTA---GGAGTAGCACCCACCAAGGCAAAGAGAAGAGTGGTG-----  
 -----CAGAGAGAAAAAAGAGCA---GTGGGAACGATAGGAGCT-----  
 ---ATGTTCCCTTGGGTTCTTGGGAGCA---GCAGGAAGCACTATG---GGCGCAGCGTCG---  
 CTGACGCTGACGGTACAG---GCCAGACTA---TTATTG---TCTGGTATAGTGCAGCAGCAGAAC---  
 AATCTG---CTGAGG---GCTATTGAGGCGCAACAGCATCTGTTGCAACTCACAGTCTGGGGCATC  
 >GU367406  
 TTCTACTGTAATTCAACACAACCTGTTTGATAGTACATGGAATGATACTGAAAGTCCAAATAGCAAT-----  
 -----  
 -----  
 GACACCACAAATATCACACTCCCATGTAGAATAAAACAAATTATAAACATGTGGCAGAAAGTAGGAAAAGCAA  
 TGTATGCCCCCTCCCATCAGCGGAATAATCAAATGTTTCATCAAGT---  
 ATTACAGGGCTGCTTCTAACAAGAGATGGTGGTAGAAGTAACAGCAATGAC-----  
 -----  
 -----  
 ACTAATAACACTGAGATCTTCAGACCTGCAGGGGGAGATATGAAGGACAATTGGAGAAGTGAATTATATAAGT  
 ATAAAGTAGTAAAAATTGAACCATTA---GGAGTAGCACCCACCAAGGCAAAGAGAAGAGTGGTG-----  
 -----CAGAGAGAAAAAAGAGCA---GTGGGAATGCTAGGAGCT---  
 -----ATGTTCCCTCGGGTTCTTGGGAGCA---GCAGGAAGCACTATG---GGCGCAGCGTCA---  
 ATGACGCTGACGGTACAG---GCCAGACAA---TTATTG---TCTGGTATAGTGCAGCAGCAGAAC---  
 AACTTG---CTGAAG---GCTATTGAGGCGCAACAGCATCTGTTGCAACTCACAGTCTGGGGCATC  
 >GU367395  
 TTCTACTGTGATACATCAAACTGTTTAAATAGTACTTGGAAATGGTCGGAATGAAAGTATCACAAAT-----  
 -----  
 -----  
 AGCACTGCAAATTTCACTCCCATGTAGAATAAAACAGATTATAAACATGTGGCAGGGAGTAGGAAAAGCAA  
 TGTATGCCCCCTCCCATCAGAGGACAAATTAGATGTTTATCAAAT---  
 ATTACAGGGATACTATTAACAAGAGATGGTGGTAATACTGGGAAC-----  
 -----  
 -----  
 AACACCACCGAGATATTTCAGACCTGGAGGAGGAGATATGAGGGACAATTGGAGAAGTGAATTATATAAATATA  
 AAGTAGTAGAAATTAAACCATTA---GGAGTAGCACCCACCCAGGCAAAGAGAAGAGTGGTG-----  
 -----CAAAGAGAAAAAAGAGCA---GTGGGAGTAATAGGAGCT-----  
 ---ATGTTCCCTTGGGTTCTTGGGAGCA---GCAGGAAGCACTATG---GGCGCAGCGTCA---  
 ATGACACTGACGGTACAA---GCCAGACAA---TTATTG---TCTGGTATAGTGCAGCAGCAGAAC---  
 AATCTG---CTGAGA---GCTATTGAGGCACAACAGCATCTGTTGCAACTCACAGTCTGGGGCATC  
 >FJ653258  
 TTCTACTGTAATACAATAACAATTGTTCAACAGTACTTGGAAATGAAAATGATACTGAGAATGACAATAGTACTG  
 AA-----  
 -----  
 -----  
 GGATCAAATGACACTATCACACTCCAATGCAAAATAAAGCAAATTGTAAACATGTGGCAGGAAGTAGGAAAAG  
 CAATGTATGCCCCCTCCCATCAGCGGGAACATTACATGCTCATCACAC---  
 ATTACAGGGTTGCTATTAACAAGAGATGGTGGTGCGAACAGCAAC-----  
 -----  
 -----  
 AATACCGAGATCTTCAGACCTGGAGGAGGAGATATGAGGGACAATTGGAGAAGTGAATTATATAAATATAAAG  
 TAGTAAGAATTGAACCATTA---GGAGTAGCACCCACCAAGGCAAAAAGAAGAGTGGTG-----  
 -----CAGAGAGAAAAAAGAGCA---GTGGGA---TTAGGAGTT-----  
 GTGTTCCCTTGGGTTCTTGGGAGCA---GCAGGAAGCATTATG---GGCGCAGCGTCA---  
 CTAACGCTGACGGTACAA---GCCAGACAA---TTATTG---TCTGGTATAGTGCAACAGCAGGAC---  
 AACCTG---CTGAGA---GCTATTGAGGCGCAACAGCACCTGTTGCAACTCACAGTCTGGGGCATC  
 >MN485973

TTCTACTGTAATTCAACACAGCTGTTTAAATAAGTACTTGG-----  
-----  
-----AAT---  
GAAACTGATAACATTATCACACTCCCATTGCAGAATAAAACAAATTATAAACAGATGGCAGGAAGTAGGAAAAG  
CAATGTATGCCCCCTCCCATTCAGGACAAATTAGATGTTTCATCAAAC---  
ATTACAGGGCTGCTATTAACAAGAGATGGTGGTGAGAACGCAAGC-----  
-----  
-----  
GCCGAGGTCTTCAGACCGGGAGGAGGAGATATGAGGGATAATTGGAGAAGTGAATTATATAAATATAAGGTAG  
TAAAAATCGAACCATTA---GGGGTAGCACCCACCAAGGCAAAGAGAAGAGTGGTG-----  
-----CAGAGAGAAAAAGAGCA---GTGGGA---ATAGGAGCC-----  
ATGTTCCCTTGGGTTCTTGGGAGCA---GCAGGGAGCACTATG---GGCGCAGCGTCA---  
ATGACGCTGACGGTACAG---GCCAGACTA---TTATTG---TCTGGTATAGTGCAACAGCAGAAC---  
AATCTG---CTGAGG---GCTATTGAGGCACAACAGCATATATTGCAACTCACAGTCTGGGGCATC  
>MN485981  
TTCTACTGTAATTCATCACAACCTGTTTAAATAAGTACTTGGCAGTCTAATGATACTTGGCAGAGTAATAGTGAG-  
-----  
-----  
AATGATACTATCATCACGCTTCCATGCAGAATAAAACAAATTATAAACAGATGGCAGGAAGTAGGAAAAGCAA  
TATATGCCCCCTCCCATTCAGCGACTCATTAAGTACATCAAAC---  
ATTACAGGGCTAATACTAACAAGAGATGGTGGTAATGTTAGCGAC-----  
-----  
-----  
AACCCCTGAGACCTTCAGACCTACAGGAGGAGATATGAAGGACAATTGGAGGAGTGAACCTATATAAATATAAAG  
TAGTAAAAATTGAGCCATTA---GGAATAGCACCCACCAAGGCAAAGAGAAGAGTGGTG-----  
-----CAGAGAGAGAAAAAGCA-----GTGGGAGCACTAGGAGCT-----  
GTGTTCCCTTGGGTTCTTGGGAACA---GCAGGAAGCACTATG---GGCGCAGCGTCA---  
TTGACGCTGACGGTACAG---GCCAGAAC---TTATTG---TCTGGTATAGTGCAACAGCAGAAC---  
AATTTG---CTGAAG---GCTATTGAGGCGCAACAACATCTGTTGCAACTCACAGTCTGGGGCATC  
>MN485993  
TTCTACTGTAATACAACACAACCTATTTAAATAAGTACTTGGAGTGGTAATGAGACTAAGACTGCAGAAAAC---  
-----  
-----  
AATACAGAACTATCACGCTCCCATGCAGAATAAAACAAATTGTGCGCCTGTGGCAGGAAGTAGGAACAGCAA  
TGTATGCCCCCTCCCATCAGTGGACTAATTCGGTGTTTCATCAAAT---  
ATTACAGGACTGTTATTGGTAAGAGATGGTGGTAATATCAATGGAACC-----  
-----  
-----  
AATAACACTGAGATATTTCAGACCTGGGGGAGGAGATATGAGGGACAATTGGAGAAGTGAATTATATAAATATA  
AAGTAGTAAAAATTGAACCAATA---GGAGTAGCACCCACCAAGGCGAAGAGAAGAGTGGTG-----  
-----CAGAGAGAAAAAGAGCA---GTGACA---CTGGGAGCT-----  
---ATGTTCCCTTGGGTTCTTGGGAGCA---GCCGGAAGCACTATG---GGCGCAGCATCA---  
GTAACGCTGACGGTACAA---GCCAGACAA---TTATTG---TCTGGTATAGTGCAACAGCAGAAC---  
AATCTG---CTGAGG---GCTATTGAGGCGCAACAGCATCTGTTGCAACTCACAGTCTGGGGCATC  
>MN485996  
TTCTATTGTAATACAACGCAGCTGTTTAAATAAGTACTTGGAAATAGTACTTTGGAAAATAGTACTAGGAATAAT-  
-----  
-----  
ACAAATGCCACCATTACACTCCCATTGCAGAATAAAGCAAATTGTAAACCTGTGGCAAGAAGTAGGAAAAGCAA  
TGTATGCCCCCTCCCATCAGAGGACAAATTAGATGTATATCAAAT---  
ATTACAGGGATGCTATTAACAAGAGATGGTGGTACAGGTAATAACACT-----  
-----  
-----  
AACAACTACTGAGATCTTCAGACCTGGAGGAGGAGATATGAGAGACAATTGGAGAAGTGAACCTATATAAATATA  
AAGTAGTAAAAATTGAACCATTA---GGAGTAGCACCCACCAAGGCAAAGAGAAGAGTGGTG-----  
-----CAGAGAGAAAAAGAGCA---GTGGGA---CTAGGAGCT-----  
---TTGTTCCCTTGGGTTCTTGGGAGCA---GCAGGAAGCACTATG---GGCGCAGCGTCA---  
GTGACGCTGACGGTACAG---GCTAGACAA---TTATTG---TCTGGTATAGTGACGAGCAGCAGAAC---  
AACCTG---CTGAGG---GCTATTGAGGCGCAACAACATCTGTTGCAACTCACAGTCTGGGGCATC  
>MN485998

TTCTACTGTAATACATCACAGCTGTTTAAATAGTACTTGGAGTAGTAGCAATTGGACTGATAATAGCAATAACA  
 GCACACAA-----  
 -----  
 GGGTCAAATGACACTATAACTCTCCCATGCAGAATAAAACAAATTATAAACAAATGGCAAGAAGTAGGAAGAG  
 CAATGTATGCCCCCTCCCATTAGAGGACAAATTAGATGCGAATCAAAT---  
 ATTACAGGGCTGCTATTAACAAGAGATGGAGGGATCCTGAACAGT-----  
 -----  
 -----  
 ACCAATGAGACTTTTCAGACCTGAAGGAGGAGATATGAGGAACAATTGGAGGAGTGAATTATATAAATATAAAG  
 TAGTAGAAATTGAACCATTA---GGAATAGCACCCACCAAGGCAAAGAGAAGAGTGGTG-----  
 -----CAGAGAGAAAAAAGAGCA---GTGGGA---ATAGGAGCT-----  
 CTGTTCCCTTGGGTTCTTGGGAGCA---GCAGGAAGCACTATG---GGCGCAGCATCA---  
 ATGACGCTGACGGTACAG---GCCAGGCAA---TTACTG---TCTGGTATAGTGCAACAGCAGAAC---  
 AATTTG---CTGAGG---GCTATTGAGGCGCAACAGCATATGTTGCAACTCACAGTCTGGGGCATC  
 >MN486009  
 TTCTATTGTAATACATCACAACTGTTTAAATAGCACTTGGGGGGTTAATAGTACCAGGAATGGTACACTTGCTT  
 GGTGGGTAAAT-----  
 -GGTACCAGGAATGATACA-----  
 CTTGTAAATGATACTATCACACTCCCATGCAGAATAAAACAAATTTATAAACCTGTGGCAGGAAGTAGGAAAAG  
 CAATGTATGCCCCCTCCCATCAAAGGACTAATTAAATGCTCATCAAAC---  
 ATTACAGGGTTACTATTAACAAGAGATGGTGGTAAACCAATGAAACA-----  
 -----  
 -----  
 AATAACACCGAGATCTTCAGACCGGGAGGAGGAAATATGAAGGATAATTGGAGAAGTGAATTATATAAATATA  
 AAGTAGTAAAAATTGAACCATTA---GGAGTAGCACCCACCAAGGCAAAGAGAAGAGTGGTG-----  
 -----CAAAGAGAAAAAAGAGCA---GTGGGA---ATAGGAACA-----  
 ---TTGTTCCCTTGGGTTCTTGGGAGCA---GCAGGAAGCACTATG---GGCGCAGCATCA---  
 ATAACGCTGACGGTACAG---GCCAGACAA---TTATTG---TCTGGTATAGTGCAACAGCAGAAC---  
 AACCTG---CTGAGA---GCTATTGAGGCGCAACAACATATGTTGCAACTCACAGTCTGGGGCATC  
 >MN486010  
 TTCTACTGTAATACATCACAGCTGTTTAAATAGTACTTGGGAGTTTAAATGATACAAGTAAACTTGGTACATCA  
 ACAATACAATT-----  
 -----AGCAAC-----  
 AACACAAATAGCACAAATCATACTCCCATGCAGAATAAAACAAATTATAAACAAATGGCAGGAAGTAGGAAGAG  
 CAATATATGCCCCCTCCCATCGAAGGACAAATTAGATGCGAATCAAAT---  
 ATTACAGGGCTGCTATTAACAAGAGATGGAGGGATGAATAACACC-----  
 -----  
 -----  
 AATGAGACCTTCAGACCTGAAGGAGGAGATATGAGGAACAATTGGAGGAGTGAATTATATAAATATAAAGTAG  
 TAGAAATTGAACCATTA---GGAGTAGCACCCACCAAGGCAAAGAGAAGAGTGGTG-----  
 -----CAGAGAGAAAAAAGAGCA---GTGGGA---ATAGGAGCT-----  
 TTGTTCCCTTGGGTTCTTGGGAGCA---GCAGGAAGCACTATG---GGCGCAGCGTCA---  
 TTAACGCTGACGGTACAG---GCCAGACAA---CTACTG---TCTGGTATAGTGCAACAGCAGAAC---  
 AATTTG---CTGAGA---GCTATTGAGGCGCAACAGCATATGTTGCAACTCACAGTCTGGGGCATC  
 >MN486013  
 TTCTACTGTAATACAACAAAAGTGT-----  
 -----  
 -----ACTGAAAAC-----  
 ATAAATAGCACAAATATCACACTCCCATGCAGAATAAAACAAATTATAAACATGTGGCAAAAAGTTGGAAAAG  
 CAATGTATGCCCCCTCCCATCAGTGAATAATTAGGTGTTTCATCAAAT---  
 ATCACAGGGCTACTATTAATGAGAGATGGTGGTAATAGTAGTGGT-----  
 -----  
 -----  
 AATGAGTCCGAGGTCTTCAGACCTGGAGGAGGAAATATGAAGGACAATTGGAGAAGTGAATTATATAAATATA  
 AAGTAGTAAGAGTTGAACCATTA---GGAATAGCACCCACCACGGCAAAGAGAAGAGTGGTG-----  
 -----CAGAGAGAAAAAAGAGCA---GTAGGA---CTAGGAGCT-----  
 ---GTGTTCCCTTGGGTTCTTGGGAGCA---GCAGGAAGCACTATG---GGCGCAGCGTCA---  
 ATAACGCTGACGGTACAG---GCCAGACAA---TTATTG---TCTGGTATAGTGCAACAGCAAAAC---  
 AATATG---CTGAGA---GCTATTGAGGCGCAACAACATATGTTGCAACTCACAGTCTGGGGCATC  
 >MN486014

CTCTATTGTAATACATCACAGCTGTTTAAATAGTACTTGGTTTAAATGGTACTTGGAATGAGACTGGAGAGTCAA  
AT-----  
-----  
AAAACAGAACTTATCATACTCCCATGCAGAATAAAACAAATCATAAACATGTGGCAGGAAGTAGGAAAAGCAA  
TGTATGCCCCCTCCCATCAAAGGAAACATTTCTGTTTCATCAAAT---  
ATTACAGGACTGCTATTAACAAGGGATGGTGGTAACCTCAACGGGAGT-----  
-----  
AATGAGACCGAGATCTTCAGACCTGCAGGGGGAGATATGAGGGACAATTGGAGAAGTGAATTATATAAAATATA  
AAGTAGTAAGAATTGAACCATTA---GGAGTAGCACCCACCAGGGCAAAAAGAAGAGTGGTG-----  
-----CAGAGAGAAAAAAGAGCA---TTGGGA---TTTGGAGCT-----  
---GTGTTTCATTGGGTTCTTGGGAGCA---GCAGGAAGCACTATG---GGCGCAGCGTCA---  
TTGACGCTGACGGTACAG---GCCAGAAAC---TTATTA---TCTGGTATAGTGCAACAGCAGAAC---  
AATCTG---CTGAGG---GCTATTGAGGCGCAACAGCATCTGTTGCAACTCACAGTCTGGGGCATC  
>MN486022  
TTCTACTGTAATACAACAACACTGTTTAAATAGTACTTGGTATGCCAATAATACTTGAATAATACTGGAGAG-  
-----  
-----  
TCAAACATCACAATCACACTCCCCTGCAGAATAAGACAAATTGTAAACCTGTGGCAGGAAGTAGGAAAAGCAA  
TGTATGCCCCCTCCCATTAGAGGACCAATTACCTGTAGATCAAAT---  
ATTACAGGGCTAATATTAACAAGAGATGGTGGTGAGAGTAACAATACC-----  
-----  
-----  
AAGAACAATGAGACCTTCAGACCCGGAGGAGGAGATATGAGGGACAATTGGAGAAGTGAATTATATAAAATATA  
AAGTAGTAAAAATTGAACCATTA---GGAGTAGCACCTACCAAGGCAAAGAGAAGAGTGGTG-----  
-----CAGAGAGAAAGAAGAGCA---ATAGGA---TTAGGAGCT-----  
---ATGTTCCCTTGGTTTCTTGGGAGCA---GCAGGAAGCACTATG---GGCGCAGCGTCA---  
GTGACGCTGACGGTACAG---GCCAGACAA---TTATTG---TCTGGTATAGTGCAACAGCAGAGC---  
AATCTG---CTGCAG---GCTATTGAGGCACAACAGCATCTGTTGAAACTCACAGTCTGGGGCATC  
>DQ313249  
TTCTACTGTAATACAACAAAACACTGTTTAAATAGTACTTGAATGGTACTGAAGGGTCAAACAACACTGGAGGA-  
-----  
-----  
GAAAAATGACACGATCACACTCCCATGCAGAATAAAACAAATTGTAAACATGTGGCAGGAAGTAGGAAAAGCAA  
TGTATGCACCTCCCATCAGAGGACAAATTAGATGTTTCATCAAAT---  
ATTACAGGGCTGATATTAACAAGAGATGGTGGTAATAATAAAC-----  
-----  
-----  
ACGAACGAGACCTTCAGACCTGGAGGAGGAGATATGAGGGACAATTGGAGAAGTGAATTATATAAAATATAAAG  
TAGTAAAAATTGAACCATTA---GGAGTAGCACCCACCAGGGCAAAGAGAAGAGTGGTG-----  
-----CAGAGAGAAAAAAGAGCA---ATAGCG---GGAGCT-----  
GTGTTCCCTTGGGTTCTTGGGAGCA---GCAGGAAGCACTATG---GGCGCAGCGTCA---  
GTGGCGCTGACGGTACAG---GCCAGACTA---TTATTA---TCTGGTATAGTGCAACAGCAGAAC---  
AATTTG---CTGAGG---GCTATTGAGGCGCAACAGCATCTGTTGCAACTCACAGTCTGGGGCATC  
>L07421  
TTCTACTGTAATTCAACAAAGCTGTTTAAATAGTACTTGAATGATACTAGTACTTGAATGATACTACAGGAT  
CA-----  
-----  
AATAAAGGAAATATCACACTCCTATGCAGAATAAAACAAATTATAAACAGGTGGCAAGAAGTAGGAAAAGCAA  
TGTATGCCCCCTCCCATCGAAGGACATATTAGATGTTTCATCAAAT---  
ATTACAGGGCTGTTACTAACAAGAGATGGTGGTAAGAACGAGAGC-----  
-----  
-----  
GAGACCACCGAGACCTTCAGACCTGGAGGAGGAGATATGAGGGATAATTGGAGAAGTGAATTATACAAATATA  
AAGTGGTGAAGATTGAGCCATTA---GGAGTAGCACCCACCAAGGCAAAGAGAAGAGTGGTG-----  
-----CAGAGAGAAAAAAGAGCA---GTGGGACTGATAGGAGCT-----  
---TTGTTCCCTTGGATTCTTGGGAGCA---GCAGGAAGCACTATG---GGCGCGGCGTCA---  
ATGACGCTGACGGTACAG---GCCAGACAA---TTATTG---TCTGGTATAGTGCAACAGCAGAGC---  
AATTTG---CTGAGG---GCTATTGAGGCGCAACAGCATCTGTTGCAACTCACAGTCTGGGGCATC  
>DQ313250

TTCTACTGTAATACATCACAACCTGTTTAACTACTTGGAGTGATACTACTACTTGGAAATAATACTAACAAC-  
 -----  
 -----  
 ACAAATGGCAATATCACACTCCCATGCAGAATAAAACAAATTATAAACATGTGGCAGGGAGTAGGAAAAGCAA  
 TGTATGCTCCTCCCATCAGTGGACAAATTAGATGTTTCATCAAAT---  
 ATTACAGGGCTGATATTAACAAGAGATGGTGGTCTCGCGAACAGG-----  
 -----  
 -----  
 ACCAAAGAGACCTTCAGACCTGGAGGAGGAGATATGAGGGACAATTGGAGAAGTGAATTATATAAATATAAAG  
 TAGTAAAAATTGAACCATTA---GGAGTAGCACCCACCAAGGCAAAGAGAAGAGTGGTG-----  
 -----CAGAGAGAAAAAAGAGCA---GTGGGAATGCTAGGAGCT-----  
 GTGTTTCCTTGGGTTCTTGGGAGCA---GCAGGAAGCACTATG---GGCGCAGCGTCA---  
 ATAACGCTGACGGTACAG---GCCAGACAA---TTATTG---TCTGGTATAGTGCAACAGCAGAAC---  
 AATCTG---CTGAAG---GCTATTGAGGCGCAACAGCATCTGTTGCAACTCACAGTCTGGGGCATC  
 >DQ313253  
 TTCTACTGTGATACAACACAACCTGTTTAACTAGTACTTGGCCTGTAGGGTCAAATACAAATGCCACAAATACC-  
 -----  
 -----  
 ACTGAAGAAATACTCACGCTCCCATGCAAAATAAAACAGATTATAAACAGGTGGCAGGAAGTAGGAAAAGCAA  
 TGTATGCCCCCTCCCATCAGAGGAAAAATTAGATGTTTCATCAAAT---  
 ATTACAGGGCTGCTAATAACAAGAGATGGTGGTAATAACAATAAC-----  
 -----  
 -----  
 AATACGAACGAGACCTTCAGACCTGGAGGGGGAGATATGAGGGACAATTGGAGAAGTGAATTATATAAATATA  
 AAGTAGTAAAAATTGAACCATTA---GGAATAGCACCCACCAAGGCAAAGAGAAGAGTGGTG-----  
 -----CAGAGAGAAAAAAGGACA---GTGGGA---ATAGGAGCT-----  
 ---TTGTTTCCTTGGTTTCTTGGGAGCA---GCAGGAAGCACTATG---GGCGCAGCGTCA---  
 CTGACGCTGACGGTACAG---GCCAGACAA---TTATTG---TCTGGTATAGTGCAACAGCAGAAC---  
 AATTTG---CTGAGG---GCTATTGAGGCGCAACAGCATATGTTGCAACTCACAGTCTGGGGCATC  
 >DQ313252  
 TTCTACTGTAATTCAACACCACTGTTTAACTAGTACTTGGAAATGATACTTGGAAATGATAATGAACAGTCAAATG  
 AC-----  
 -----  
 -----  
 ACTGAAGACACAATCACACTCCAATGCAGAATAAAACAAATTATAAACATGTGGCAGGAAGTAGGAAAAGCAA  
 TGTATGCCCCCTCCCATCAGAGGACAAATTAGATGTTTCATCAAAT---  
 ATTACAGGGCTACTATTAACAAGAGATGGTGGTAAAAATGATACCAATGAT-----  
 -----  
 -----  
 ACCGAGACCATCGAGGTCTTCAGACCTGGAGGAGGAGATATGAGGGACAATTGGAGAAGTGAATTATATAAAT  
 ATAAAGTAGTAAAAATTGAACCATTA---GGAGTAGCACCCACCAAGGCAAAGAGAAGAGTGGTG-----  
 -----CAGAGAGAAAAAAGAGCA---GTGGGA---ATAGGAGCT---  
 -----GTGTTTCCTTGGGTTCTTGGGAGCA---GCAGGAAGCACTATG---GGCGCAGCGTCA---  
 ATAACGCTGACGGTACAG---GCCAGACTA---TTATTG---TCTGGTATAGTGCAACAGCAGAAC---  
 AATTTG---CTGAGG---GCTATTGAGGCGCAACAACATCTGTTGCAACTCACAGTCTGGGGCATC  
 >EU191616  
 TTCTACTGTAATACAGCACAACCTGTTTAACTAGTACTTGGCATGCAAATGGCACTGTAGAGTCAACT-----  
 -----  
 -----  
 ACCACTGGAAATATCACACTCCCATGCAGAATAAAACAAATTATAAACATGTGGCAGGGAGTAGGAAAAGCAA  
 TGTATGCCCCCTCCCATCAGAGGACAAATAAGATGTTTCATCAAAT---  
 ATTACAGGGCTGCTCTTAACGAGAGATGGGGGGGATAATAACACG-----  
 -----  
 -----  
 GACGAACCCGAAACCTTCAGACCTGCAGGAGGAGATATGAGGGACAATTGGAGAAGTGAAGTATATAAATATA  
 AAGTAGTACAAATTGAACCATTA---GGAGTAGCACCCACCAAGGCAAAGAGGAGAGTGGTG-----  
 -----CAGAGAGAAAAAAGAGCA---ATAGGAACGATAGGAGCT-----  
 ---ATGTTTCCTTGGGTTCTTGGGAGCA---GCAGGAAGCACTATG---GGCGCAGCGTCA---  
 ATAACGCTGACGGTACAG---GCCAGACAA---TTATTG---TCTGGTATAGTGCAACAGCAGAAC---  
 AACTTG---CTGAGG---GCTATTGAGGCGCAACAGCATCTGTTGCAACTCACAGTCTGGGGCATC  
 >MH746266

TTTTACTGTAATTCAACACAGCTATTTTAATAGTACTTGGCTATTTAATAGTACTTGGAATGATACCAATTGGA  
 AGGGTACC-----  
 -----  
 GAAGGGAATGGTACCATCATACTCCCATGCAGAATAAAACAAATTATAAACAGATGGCAGGAAGTAGGACAAG  
 CAATGTATGCCCCCTCCCATCAGCGGACTAATTAAATGTACATCAAAC---  
 ATTACAGGGCTATTACTAACAAGAGATGGTGGTAATAATGGAAGT-----  
 -----  
 -----  
 AGTAACAATGAGACCTTCAGACCTGGAGGAGGAGACATGAGGGACAATTGGAGAAGTGAATTATATAAAATATA  
 AGGTAGTAAAAATTGAGCCATTA---GGAGTAGCACCCACCAAGGCAAAGAGAAGAGTGGTG-----  
 -----CAGAGAGAAAAAAGAGCG---GTGGGAGCAATAGGAGCT-----  
 ---ATGTTCCCTTGGGTTCTTGGGAGCA---GCAGGAAGCACTATG---GGCGCAGCGTCG---  
 ATGACGCTGACGGTACAG---GCCAGACAA---TTATTG---TCTGGTATAGTGCAACAGCAGAAC---  
 AACCTG---CTGAGG---GCTATTGAGGCGCAACAGCATCTGTTGCAACTCACAGTCTGGGGCATC  
 >MH746265  
 TTCTACTGTAATTCATCACAACCTGTTTAAATAGTACTTGGGATAGGAATAGTACTTGGAATGATCCTAAT----  
 -----  
 -----  
 AATAGCACTACTATCACACTCCCATGCAGAATAAAACAAATTATAAACATGTGGCAGGAAGTAGGAAAAGCAA  
 TGTATGCTCCTCCCATCAGTGGACTAATTAAATGCTCATCAAAT---  
 ATTACAGGACTACTATTGACAAGAGATGGTGGTAATAATAACACA-----  
 -----  
 -----  
 AATGAGACAGAGGTCTTCAGACCTGGAGGAGGAGATATGAGGGACAATTGGAGAAGTGAATTATATAAAATATA  
 AAGTAGTACAAATTGAACCATTA---GGAGTAGCACCCACTAAGGCAAAAAGAAGAGTGGTG-----  
 -----CAGAGAGAAAAAAGAGCT---CTGGGA---ATGGGAGCT-----  
 ---TTGTTCCCTTGGGTTCTTGGGAGCA---GCAGGAAGCACTATG---GGCGCAGCGTCA---  
 ATAACGCTGACGGTACAA---GCCAGACAA---CTATTG---TCTGGTATAGTGCAACAGCAGAAC---  
 AATCTG---CTGAGG---GCTATTGAGGCGCAACAGCATATGTTGCAACTCACAGTCTGGGGCATC  
 >MH746264  
 TTCTACTGTAATTCACACAACCTGTTTAAATAGCAGTTGGAGTTGGAATGGTACTAATGGTAATTGGAGTACTG  
 AAGAGCTAAAT-----  
 -----  
 -----  
 GGCACCTGAAAATATTACACTCCCATGTAGAATAAAACAAATAATAAACATGTGGCAAACAGTAGGAAAAGCAA  
 TGTATGCCCCCTCCCATCAGAGGACAAATTAGATGTGCATCAAAT---  
 ATTACAGGGATGATACTAATAAGAGATGGTGGAAATGATGGAGGA-----  
 -----  
 -----  
 GCCAACGAGACCTTCAGACCTGGAGGAGGAAATATGAGGGATAATTGGAGAAGTGAATTATATAAAATATAAAG  
 TAGTACAAATTGAACCATTA---GGAGTAGCACCCACCAAGGCAAAGAGAAGAGTGGTG-----  
 -----CAGAGAGAAAAAAGAGCA---GTGGGAACAATAGGAGCT-----  
 ATGTTCCCTTGGGTTCTTGGGAGCA---GCAGGAAGCACTATG---GGCGCAGCGTCA---  
 ATGACACTGACGGTACAG---GCCAGACAA---TTATTG---TCTGGTATAGTGCAACAGCAGAAC---  
 AATCTG---CTGAGG---GCTATTGAGGCGCAACAGCATCTGTTGCAACTCACAGTCTGGGGCATT  
 >MH746261  
 TTCTATTGTAATACATCAGAGTTGTTTAAATAGCACTTGGAAATGAGACTACTACAAATTTAACTGGTATA----  
 -----  
 -----  
 AATGACTCAACTATCATACTCCCATGTAGAATAAAACAAATTATAAATATGTGGCAGGGAGTAGGAAAAGCAA  
 TGTATGCCCCCTCCCATCAACGGAATAATTATGTGTAACCTCAACT---  
 ATTACAGGACTGCTCTTAACAAGAGATGGTGGTAGTAATAATGAGACC-----  
 -----  
 -----  
 AACACCACCGAGATCTTCAGACCTGCAGGAGGAGATATGAGGGACAATTGGAGAAGTGAATTATATAAAATATA  
 AAGTAGTAAAAATTGAGCCAATA---GGAATAGCACCCACCAAGGCAAAGAGAAGAGTGGTG-----  
 -----CAGAGAGAAAAAAGAGCA---GTGGGAGTACTGGGAGCT-----  
 ---ATGTTCCCTTGGGTTCTTGGGAGCA---GCAGGAAGCACTATG---GGCGCAGCGGCA---  
 ACAGCGCTGACGGTACAG---ACCAGACAA---TTATTG---TCTGGTATAGTGCGACAGCAGGAC---  
 AATCTG---CTGAAG---GCTATTGAGGCGCAACAGCACATGTTGCAACTCACAGTCTGGGGCATC  
 >MH746254

TTCTACTGTAATACAACAAAACCTGTTTAAATAGTACTTGGTATAGGAATAATACCAGTGACAGTAAAGAA-----  
-----  
-----  
GGAAATGGCACTATCACAATCCAATGCAGAATAAGACAAGTGATAAACATGTGGCAGGAAGTTGGCAAAGCAA  
TGTATGCCCCCTCCTATCAGAGGAAAAATTATCTGTTTCATCAAAT---  
ATCACAGGAATAATATTGACAAGAGATGGTGGTGAGAATAACACA-----  
-----  
-----  
AATAACAACGAGACCTTCAGACCTGGAGGAGGAGATATGAGGGACAATTGGAGAAGTGAATTATACAAATATA  
AAGTAGTAAAAATTGAACCACTA---GGAGTAGCACCCACCAAGGCAAAGAGAAGAGTGGTG-----  
-----CAGAGAGAAAAAAGAGCA---ATAACA---CTAGGAGCT-----  
---ATGTTCCCTTGGGTTCTTGGGAGCA---GCAGGAAGCACTATG---GGCGCAGCGTCA---  
CTGACGCTGACGGTACAG---GCCAGACAA---TTATTG---TCTGGTATAGTGCAACAGCAGAAC---  
AATCTG---CTGAGG---GCTATTGAGGCGCAACAACATCTGTTGCAACTCACGGTCTGGGGCATC  
>DQ358809  
TTTTACTGTAATACAACAAAGCTGTTTAAATAGTACTTGGAAATGATAATAGTACTGGAGAGGCTACTAGTACCT  
GGAATAGTACT-----  
-----GAAGAGCCA-----  
GAAAATAGCGCAATTATCATACTCCCATGCATAATACAACCTCATCATAAACAGGTGGCAGGAAGTAGGAAAAG  
CAATGTATGCCCCCTCCCATCAAGGGAATAATTAGCTGCTCATCAAAT---  
ATTACAGGGTTGCTATTAACAAGAGATGGTGGTAACAATAGCGAG-----  
-----  
-----  
ACCAATGAGACCTTCAGACCTGGAGGAGGAGATATGAGGGACAATTGGAGAAGTGAATTATATAAATATAAAG  
TAGTAAAAATTGAGCCATTA---GGAGTAGCACCCACCAAGGCAAAGAGAAGAGTGGTG-----  
-----CAGAGAGAAAAAAGAGCA---GTGGGAACGCTAGGAGCT-----  
ATGTTCCCTTGGGTTCTTGGGAGCA---GCAGGAAGCACTATG---GGCGCAGCGTCA---  
GTGACGCTGACGGTACAG---GCCAGACAA---TTATTG---TCTGGTATAGTGCAACAGCAAAAC---  
AATTTG---CTGAAG---GCTATTGAGGCGCAACAACATTTGTTGCAACTCACAGTCTGGGGCATC  
>DQ358810  
TTCTACTGCAATACATCACGGCTGTTTAAATACTACTTGGAACTACTACTTGGAACAGTACTGAGCTGGCTA  
ATATTAGT-----  
-----GCTATT-----  
AACGATAATGAACTATCACACTCCAGTGCAGGATAAAACAAATTATAAACATGTGGCAGGCGGTAGGAAAAG  
CAATGTATGCCCCCTCCCATCCAAGGACTAATTAGATGTTTCATCAAAT---  
ATAACAGGGCTGCTATTAACAAGGGATGGTGGTAATAATAGTATTAAGTGGAAC-----  
-----  
-  
CAGAGCACATCCGACTCCGAGGTCTTCAGACCCCTAGGAGGAAATATGAAGGACAATTGGAGAAGTGAATTAT  
ATAAATATAAAGTAGTACAAATTGAGCCATTA---GGAATAGCACCCACCAAGGCAAAGAGAAGAGTGGTG--  
-----CAGAGAGAGAAAAGAGCA---GTGGGA---  
CTAGGAGCT-----GTGTTCAATTGGGTTCTTGGGAGCA---GCAGGAAGCACTATG---  
GGCGCAGCGTCA---ATAACGCTGACGGTACAA---GCCAGACAA---TTGTTG---  
TCTGGTATAGTGCAACAGCAAAAC---AATTTG---CTGAAG---  
GCTATTGAGGCGCAACAGCATCTGTTGCAACTCACAGTCTGGGGCATT  
>JN692435  
TTTTACTGTAATTCAACACAGCTGTTTAAATAGTACTTGGCTGCATAATAACACTTGGAAATGGTACTACAGGAT  
CA-----  
-----  
-----  
AATAACAATGACACTATCACACTCCCATGCAGAATAAGACAATTTATAAACAGGTGGCAAGAAGTAGGAAAAG  
CAATGTATGCCCCCTCCCATCGCAGGACTAATTAGGTGTTTCATCAAAT---  
ATTACAGGGTTACTCTTAACAAGAGATGGTGGTCCGAACGTGACC-----  
-----  
-----  
ACCGAAATCTTTAGACCTGGAGGAGGAGATATGAGGGACAATTGGAGAAGTGAATTATATAAATATAAAGTAG  
TAAGAATTGAGCCATTA---GGAGTAGCACCCACCAAGGCAAAGAGAAGAGTGGTG-----  
-----CAGAGAGAAAAAAGAGCG---GTGACG---CTGGGAGCT-----  
ATGTTCCCTTGGGTTCTTGGGAGCA---GCAGGAAGCACTATG---GGCGCAGCGTCG---  
ATAACGCTGACGGTACAG---GCCAGACAA---TTATTG---TCTGGTATAGTGCAACAGCAAAAC---  
AATTTG---CTGAGA---GCTATTGAGGCGCAACAGCATCTGTTGCAGCTCACAGTCTGGGGCATC

>JN692440

TTCTACTGTGATACAACAAAGCTGTTTAAATAGTACTTGGAATACTACTAGGAATACAACCTAAAAGTGAAGAAG  
AA-----

-----  
GGAGATAGCACAAATCATACTCCCATGCAGAATAAAACAAATTGTAAATATGTGGCAGGAAGTAGGAAACGCAA  
TGTATGCCCCCTCCCATCAGCGGACTAATTAGATGTTTCATCAAAT---  
ATTACAGGGCTGCTATTAACAAGAGATGGTGGGGGTGGTAACAGG-----

-----  
TCGAACGAGGAGACCTTCAGACCTATAGGAGGAGATATGAGGGACAATTGGAGAAGTGAATTATATAAAATATA  
AAGTAGTAAAAATTGAACCACTA---GGAATAGCACCCACCAAGGCAAAGAGAAGAGTGGTG-----  
-----CAGAGAGAAAAAAGAGCA---GTGGGA---CTAGGAGCT-----  
---TTGTTCCCTTGGGTTCTTGGGAGCA---GCAGGAAGCACTATG---GGCGCAGCGGCA---  
ATGACGCTGACGGTACAG---ACCAGACAA---TTGTTG---TCTGGTATAGTGCAACAGCAGAAC---  
AATTTG---CTGAGA---GCTATTGAGGCGCAACAGCATCTGTTGCAACTCACAGTCTGGGGCATC

>JN692443

TTCTACTGTAATACAACAAAACTGTTCAATAGTAGTTGGCAGATTAATGGTACTGGTAGTGGAGAGCCAGATG  
AT-----

-----  
GAGAAATGGCACTATCACACTCCCATGCAGAATAAAACAAATTATAAACAGGTGGCAGGAAGTAGGAAAAGCAA  
TATATGCTCCTCCCATCAGAGGACTAATTAGATGTTCCCTCAAAT---  
ATTACAGGGCTGCTACTCACAAGAGATGGTGGTAATAGTAACAG-----

-----  
AGCAATAATGAGACATTTCAGACCTGGAGGAGGAAATATGAAGGACAATTGGAGAAGTGAATTATATAAAATATA  
AAGTAGTACAAATTGAGCCATTA---GGAGTAGCACCCACTAAGGCAAAAAGAAGAGTGGTG-----  
-----CAGAGAGAAAAAAGAGCA---GTAACG---CTGGGAGCT-----  
---ATGTTCCCTTGGGTTCTTGGGAGCA---GCAGGAAGCACTATG---GGCGCAGCATCG---  
GTGACGCTGACGGTACAG---GCCAGACTA---TTATTG---TCTGGTATAGTGCAACAGCAAAAC---  
AATTTG---CTGAGG---GCTATTGAGGCGCAACAGCACCTGTTGCAACTCACAGTCTGGGGCATC

>JN692444

TTCTATTGTAATACAACACGGCTGTTTAAATAGTACTTGGCCTATTAATGATACAAATATGAATAATACAAATA  
ACTCA-----

-----  
AATAGCACTAGAATTATCACACTCCAATGCAAAATAAAACAAATTATAAACAGGTGGCAGGAAGTAGGAAAAG  
CAATGTATGCCCCCTCCCATTAAGGACCAATTAGCTGTTTCATCAAAT---  
ATTACAGGGCTATTATTAACAAGAGATGGTGGTAATACTAGTAGAACT-----

-----  
AATGGTACTGAAATCTTCAGACCTGGAGGAGGAAATATGAAGGACAATTGGAGAAGTGAATTATACAAATATA  
AAATAGTACAAATTAACCCATTA---GGAGTAGCACCCACCAAGGCAAAGAGAAGAGTGGTG-----  
-----CAGAGAGAGAAAAAGAGCA---GTGGGAGCGCTGGGAGCT-----  
---ATGTTCCCTTGGGTTCTTGGGAGCA---GCAGGAAGCACTATG---GGCGCAGCGTCA---  
CTGACGCTGACGGTACAG---GCCAGACAA---TTATTG---TCTGGTATAGTGCAACAGCAAAAC---  
AATTTG---CTGAAA---GCTATTGAGGCGCAGCAGCATCTGTTGCAACTCACAGTCTGGGGCATC

>JN692445

TTCTACTGTAACACAACAAAGCTGTTTAAATAGTGATTGGGACAATGGTACTTGGAATGATACTAAC-----  
-----

-----  
AAGGGAGAAAATATCACAATCCCATGCAGAATAAAACAAATCATAAACAGATGGCAGGAAGTAGGAAAAGCAA  
TGTATGCCCCCTCCCATCCAAGGACAAATTAGATGTTTCATCAAAT---  
ATTACAGGGCTGTTATTGACAAGAGATGGTGGCCTTAACACTAGCGAG-----

-----  
ACTAACAGGACCGAAATCTTCAGGCCTACAGGAGGAGATATGAGGGACAATTGGAGAAGTGAATTATATAAAAT  
ATAAAGTAGTAAGAATTGAGCCACTA---GGAATAGCACCCACCAAGGCAAAGAGAAGAGTGGTG-----  
-----CAGAGAGAAAAAAGAGCA---GTGGGAACATTAGGAGCT---  
-----ATGTTCCCTTGGGTTCTTGGGAGCA---GCAGGAAGCACTATG---GGCGCAGCGTCA---  
ATGACGCTGACGGTACAG---GCCAGACTA---TTATTG---TCTGGTATAGTGCAACAGCAGAAC---  
AATTTG---CTGAAG---GCTATTGAGGCGCAACAGCATATGTTGCAACTCACAGTCTGGGGCATT

>JN692447

TTCTATTGTAACACAACAATTGTTTAAATTGGGATGATAATAGTACTTGG-----

-----  
-----

ACAGAGGGCAAATCATACTCCCATGCAGAATAAAACAAATAGTAAACAGGTGGCAGGAAGTAGGCAAAGCAA  
TGTATGCCCCCTCCCATCAGAGGATCAATTAAGTGTACATCAAAC---

ATTACAGGGTTGCTATTAACAAGAGATGGTGGTAATGGAACCAAC-----

-----  
-----

AATGAGACCTTCAGACCTGGAGGAGGAGATATGAGGGACAGTTGGAGAAGTGAATTATATAAATATAAAGTAG  
TAAAAATTGAACCTTTA---GGAGTAGCACCCACCAAGGCAAAGAGAAGGGTGGTG-----

-----CAGAGAGAAAAAAGAGCA---GTGGGAGCAATAGGAGCT-----

GTGTTCCCTTGGGTTCTTGGGAACA---GCAGGAAGCACTATG---GGCGCAGCGTCA---

CTAACGCTGACGGTACAA---GCCAGACTA---TTACTG---TCTGGTATAGTGCAACAGCAGAAC---

AATCTG---CTGAGA---GCTATTGAGGCGCAACAACATCTGTTGCAACTCACGGTCTGGGGCATT

>EF637056

TTCTACTGTAATACAACAAGGCTGTTTAAATGGCACTTGGGATGGTACTAAATGGAATAATACTGTATGG----

-----  
-----

GGAAATAACACGCTTATACTTCCATGCAGAATAAAACAAATTATAAATAAGTGGCAGGAAGTAGGAAAAGCAA  
TGTATGCCCCCTCCCATTAGAGGACAAATTAGATGTTTCATCAAAT---

ATTACAGGGCTGCTATTAACAAGAGATGGTGGTAACAGTAACAAT-----

-----  
-----

AAGTCTGAAATTTTCAGACCAGGAGGAGGATATATGAAGGACAATTGGAGAAGTGAATTATATAAATATAAAG  
TAGTAAGAATCGAGCCATTA---GGAATAGCACCCAACAGGGCAAGGAGAAGAGTGGTG-----

-----CAAAGAGAAAAAAGGGCA---GTGGGG---ACCGATAGG-----

ATGTTCCCTTGGGTTCTTGGGAGCA---GCAGGAAGCACTATG---GGCGCAGCGTCA---

GTGACGCTGACGGTACAG---GCCAGACAA---TTATTG---TCTGGTATAGTGCAAGCAGCAAAAC---

AATTTG---CTGAGA---GCTATTGAGGCGCAACAACATATGTTGCAACTCACAGTCTGGGGCATC

>EF637054

TTCTACTGTGATACAGCGAAGCTGTTCAATAGCACGTGGATTTGGAATAGTACTCGGAATGATTCTAGCACTA  
AT-----

-----  
-----

GAAACCAGCATAATCACACTCCCATGCAAAATAAAACAAATTATAAACAGGTGGCAGGAAGTAGGAAAAGCAA  
TGTATGCCCCCTCCTATCAGAGGACAAATTGAATGTTCTTCCAAT---

ATTACAGGGTTGCTATTAACCAGAGATGGTGGTAACAGTAGTAAC-----

-----  
-----

AACGAGACCTTCAGACCTGGAGGAGGAGATATGAGGGACAATTGGAGAAGTGAATTATATAAATATAAGGTAG  
TAAAAATTGAACCATTA---GGATTAGCACCCACCAAGGCAAAGAGAAGAGTGGTG-----

-----CAGAGAGAAAAAAGAGCA---GTGGGAACAATGGGAGCT-----

ATGTTCCCTTGGGTTCTTGGGAGCA---GCAGGAAGCACTATG---GGCGCAGCGTCA---

CTGACGCTGACGGTACAG---GCCAGACTA---TTATTG---TCTGGTATAGTGCAACAGCAGAAC---

AATTTG---CTGAGA---GCTATTGAGGCGCAACAGCATATGTTGCAGCTCACAGTCTGGGGCATC

>EF637051

TTCTACTGTAATACAACACAGCTGTTTAAATAGTACTTGGGGGTTAAATAGTAATGGCACAAATAGTAATGGCA  
CAAAT-----

-----  
-----

AGTAATGGCACAAATATCACACTCCCATGCAGAATAAAACAAATTATAAACAGGTGGCAGGAAGTAGGAAAAG  
CAATGTATGCTCCTCCCATCAGGGGAAATATTAGCTGTACATCAAAT---

ATCACAGGGATACTATTAACAAGGGATGGTGGTACCAACCAGACC-----

-----  
-----

AGTGAAACCGAAACCTTCAGACCTGGAGGGGGCGATATGAGGGATAATTGGAGAAATGAATTATATAAATATA  
AAGTAGTAAAAATTGAGCCATTA---GGAGTAGCACCCACCACGGCAAAGAGAAGAGTGGTG-----

-----CAGAGAGAAAAAAGAGCA---GTGGGG---ATAGGAGCT-----

---TTGTTCCCTTGGGTTCTTGGGAGCA---GCGGGAAGCACTATG---GGCGCAGCGTCA---

ATGACGCTGACGGTACAG---GCCAGACTA---TTATTG---TCTGGTATAGTGCAACAGCAGAAC---

AATCTG---CTGAGG---GCTATTGAGGCGCAACAGCATATGTTGCAACTCACAGTCTGGGGCATC

>EF637050

TTCTACTGTAATACAACACAGCTGTTTAAATAGTACTTGGTATTCTAATGGTACTTTGAATGATACTGGTACTT  
GGAATGGT-----

-----ACTGAG-----

GGGTAAATGACACTATCACACTCCCATGCAAAATAAAACAATTTATAAACAGGTGGCAAGAAGTAGGAAAAG  
CAATGTATGCCCCCTCCCATCAGAGGACAAATTAGATGCTCATCAAAT---

ATTACAGGGCTGCTATTAACAAGAGATGGAGGGAAAGTGAACGGGTCT-----  
-----

AACGGGACTGAGATCTTCAGACCTGGAGGAGGAAATATGAGGGACAATTGGAGAAGGGAATTATATAAAATATA  
AAGTAGTAAAAATTGAACCATTA---GGAGTAGGACCCACCAGAGCAAAAAGAAGAGTGGTG-----

-----CAGAGAGAGAAAAAGAGCA---GTGGGA---ATAGGAGCT-----  
---CTGTTCCCTTGGGTTCTTGGGAGCA---GCAGGAAGCACTATG---GGCGCAGCGTCA---

TTGACGCTGACGGTACAG---GCCAGACAA---TTATTG---TCTGGTATAGTGCAACAGCAAAAC---

AACTTG---CTGATG---GCTATTGAAGCGCAACAGCATCTGTTGAAGCTCACAGTCTGGGGCATC

>EF637048

TTCTACTGTAATACAACACAGTTGTTTAAATAGTACTTGGGTAAATGGTGCTTGGATTAATGGTACTTGGTCC-  
-----

AATAATACTAATATCATACTCCCATGCAGAATAAAACAAATTATAAACAGGTGGCAGGAAGTAGGAAGAGCAA  
TGTATGCCCCCTCCCATCAGAGGACAAATTAGCTGTTTCATCAAAT---

ATTACAGGGCTGCTATTAATGAGAGATGGTGGTAAGGACAACAAT-----  
-----

ATTTCCGAAATCTTTAGACCTGCAGGAGGAGATATGAGGGACAATTGGAGAAGTGAATTATATAAAATATAAAAG  
TAGTAAAAATTGAGCCATTA---GGAATAGCACCCACCAAGGCAAGGAGAAGGGTGGTG-----

-----CAGAGAGAAAAAAGAGCA---GTGACA---CTAGGAGCT-----  
GTGTTCCCTTGGGTTCTTGGGAGCA---GCAGGAAGCACTATG---GGCGCAGCGTCA---

GTGACGCTGACGGTACAG---GCCAGGCTA---TTATTG---TCTGGTATAGTGCAACAGCAAAAC---

AACTTG---CTGAGG---GCTATTGAGGCGCAACAGAGTATGTTGCAACTCACCGTCTGGGGCATC

>EF637047

TTTTACTGTAATACATCAAAGCTGTTTAAATAGTACTTGGACTTGAATGGTACTGGGCCTGAAATGGTAAATA  
ACAAC-----

-----ACA---

GAAACACAACAGAAATTACACTCCCATGCAGAATAAAACAAATTATAAACAGGTGGCAGGAAGTAGGAAAAG  
CAATGTATGCCCCCTCCCATCAGTGGGAATAATTAGATGTACATCAAAT---

ATTACAGGGCTACTGTTAACAAGAGATGGTGGTAATGTAAGTAAT-----  
-----

ACCACTGATATCTTCAGACCTGGAGGAGGAGATATGAGGGACAATTGGAGAAGTGAACTATATAAAATATAAAAG  
TAGTAAAAATTGAGCCATTA---GGAGTAGCACCCACCAAGGCAAGGAGAAGAGTGGTG-----

-----CAGAGAGAAAAAAGAGAA---GTGGGAACATTTCGAGCT-----  
ATGTTCCCTTGGGTTCTTAGGAGCA---GCAGGAAGCACTATG---GGCGCAGCGTCA---

GTGACGCTGACGGTACAG---GCCAGACAA---TTATTG---TCTGGTATAGTGCAACAGCAGAAC---

AATTTG---CTGAGG---GCTATTGAGGCGCAACAGCATATGTTGCAACTCACAGTCTGGGGCATC

>EF637046

TTCTACTGTAATACAACACCGCTGTTTAAATAATAGTAAGTGGGTGAATGGTGGGTGGAATAGTACTATG----  
-----

AAGAAATGGAACTATCACCCCTCCCATGCAGAATAAAACAAATTGTAAACAGGTGGCAGGAAGTAGGAAAAGCAA  
TGTATGCCCCCTCCCATCAGAGGACAAATTAAGTGTACATCACAA---

ATTACAGGGCTGCTCTTAACAAGAGATGGTGGTATTAACCAGACC-----  
-----

AACAATGAAACCTTCAGACCAGCAGGAGGAGATATGAGGGACAATTGGAGAAGTGAATTATATAAAATATAAAAG  
TAGTGAAAATTGAGCCATTA---GGAGTAGCACCCACCAAGGCAAGGAGAAGAGTGGTG-----

-----CAAAGAGAAAAAAGAGCA---GTGGGAACAATAGGAGCT-----  
ATGTTCCCTTGGGTTCTTGGGAGCA---GCAGGAAGCACTATG---GGCGCAGCGGCA---

ATGACGCTGACGGTACAG---GCCAGACTA---TTATTG---TCTGGTATAGTGCAACAGCAGAAC---

AACTTG---CTGAGA---GCTATTGAGGCGCAACAGCATATGTTGCAGCTCACAGTCTGGGGCATC

>JN692450

TTCTACTGCAATACAACAGATCTGTTTAATAGTGCTTGGGATTCTACAAATGATACTGACAATCTTACAGATG  
ATACTGGC-----

-----ATGGGA-----

GGAGATGGTTTCAGTTATCATACTCCCATGCAGAATAAAACAAATTATAAACAGATGGCAGGAAGTAGGAAAAG  
CAATGTATGCCCCCTCCCATCAGAGGACAAATTAGCTGTTTCATCAAAT---

ATTACAGGGCTGATATTAACAAGAGATGGTGGTAAAAATGGTAATAAC-----  
-----

ACAAACGGGACTGAAACCTTCAGACCTGGAGGAGGAGATATGAGGGACAATTGGAGAAGTGAATTATATAAAAT  
ATAAAGTAGTAAAAATTGAGCCATTA---GGGAGTACACCCACCAAGGCAAAGAGGAGAACGGTG-----

-----CAGAGAGAAAAAAGAGCA---GTGGGAACGCTAGGAGCT---  
-----ATGTTTCCTTGGGTTCTTGGGAACA---GCAGGAAGCACTATG---GGCGCAGCGTCA---

ATAACGCTGACGGTACAG---GCCAGACAA---TTATTG---TCTGGTATAGTGCAACAGCAGAAC---  
AATTTG---CTGAGG---GCTATTGAGGCGCAACAGCATATGTTGCAACTCACAGTCTGGGGCATT

>JN692451

TTCTACTGTAATACAACACCACTGTTTAATAGCACATGGCATGATAATAATAATGTAAGCATATGGCATGTTA  
ATAGAACTGTA-----

-AATAGTACTGAAGG-----

TTAAAGGGAGAAAATATCACACTCCAATGCAGAATAAAACAGATTATAAACAGGTGGCAGGAAGTAGGAAAAG  
CAATGTATAACCTCCCATTAGGGGCTTAATTAGATGTTTCATCAAAT---

ATTACAGGGATACTATTAATGAGAGATGGTGGTGGTCCTAACAAAC-----  
-----

CGTACTAACGAAACCTTCAGACCAGGAGGAGGAAATATGAAGGACAATTGGAGAAGTGAATTATATAAAATACA  
AAGTAGTAAAAATTGAGCCATTA---GGACTAGCACCCACAAGGGCAAAGAGAAGAGTGGTG-----

-----CAGAGAGAAAAAAGAGCA--GTGGGAACAATAGGAGCT-----  
---ATGTTCCCTTGGGTTCTTGGGAGCA--GCAGGAAGCACTATG--GGTGCAGCGGCA---

GTGACGCTGACGGTACAG---GCCAGGCTA---TTGTTG---TCTGGTATAGTGCAACAGCAGAAC---  
AATCTG---CTGAAG---GCTATTGAGGCGCAACAACGTATGTTGCAACTCACAGTCTGGGGCATT

>JN692452

TTCTACTGTAATACATCACAACCTGTTTAATAGTACTTGGGGGCCTAATGGTACTTGGCTGTCAAATAGTACTG  
AGAATAGG-----

-----GCTAAT-----

GGGTCTAATGACATTATCATACTCCCATGCAGAATAAAACAAATTATAAACATGTGGCAGGAAGTAGGAAAAG  
CAATGTATGCCCCCTCCCATCCAAGGACAAATTAACGTTCATCACAT---

ATAACAGGACTGCTATTAACAAGAGATGGTGGAAATAGTAATAGAACAAAC-----  
-----

GGGTCCGAAACCGAAATCTTCAGACCTGGAGGAGGAGATATGAGGGACAATTGGAGAAGTGAATTATATAAAAT  
ATAAAGTAGTAAAAATTGAGCCATTA---GGAATAGCACCCACCAAGGCAAAGAGAAGAGTGGTG-----

-----CAGAGAGAAAGAAGAGCA---ATAACA---CTAGGAGCT---  
-----ATGTTCCCTTGGGTTCTTGGGAGCA---GCAGGAAGCACTATG---GGCGCAGTGTCTG---

ATGACGCTGACGGTACAG---GCCAGACAA---TTATTG---TCTGGAATAGTGCAACAGCAGAAC---  
AATCTG---CTGAAG---GCTATTGAGGCGCAACAGCATATGTTGAAACTCACAGTCTGGGGCATC

>JN692453

TTCTATTGTAATTCATCACAGCTGTTTAATAGCACTTGAATAATACCAATTGGAATGATACTAATATACAGG  
CA-----

-----

AATGACACTGAAATATCACACTCCCATGCAGGATAAAACAAATTATAAACAGATGGCAGGAAGTAGGAAAAG  
CAATGTACGCCCTCCCATCAGCGGAATAATTAAATGTACATCAAAT---

ATTACAGGGCTACTATTAACAAGAGATGGTGGTAACAAGAATGGGACG-----  
-----

GAAAGGAATGAGACCTTCAGACCTATAGGAGGAAATATGAAGGACAATTGGAGAAGTGAATTATATAAAATATA  
AAGTAGTAAAAATTGAGCCATTA---GGAATAGCACCCACCAAGGCAAAGAGAAGAGTGGTG-----

-----CAGAGAGAAAAAAGAGCA---GTCACA---ATAGGAGCT-----  
---ATGTTCCCTTGGGTTCTTGGGAGCA---GCAGGAAGCACTATG---GGCGCAGCGTCA---

ATGACGCTGACGGTACAG---GCCAGACTA---TTATTG---TCTGGTATAGTGCAACAGCAGAAC---  
AATTTG---CTGAGA---GCTATTGAGGCGCAACAGCATATATTGCAACTCACAGTCTGGGGCATT

>JN692457

TTCTACTGTAATACAACAAAGCTGTTTAAATAGTACTTGGCATATTAATGGTACTTGGAAATGACACTAAA-----

-----  
-----

GGTAATGAGACTATCACACTCCCATGCAGAATAAAACAAATTATAAACAGGTGGCAGGAGGTAGGAAGAGCAA  
TGTATGCCCCCTCCCATTAGTGGATGGATCAACTGTTTCATCAAAT---  
ATTACAGGGCTGATATTAACAAGAGATGGTGGTAACCAAAGCGGG-----

-----  
-----

CCCGACTCCGAAACCTTCAGACCTGGAGGAGGAGATATGAGGGACAATTGGAGAAGTGAATTATATAAAATATA  
AAGTAGTAAAAATTGAGCCATTA---GGAATAGCACCCACCAAGGCAAAGAGAAGAGTGGTG-----  
-----CAAAGAGAAAAAAGAGAA---CTAACA---CTAGGAGCG-----  
---TTGTTTCTTGGGTTCTTGGGAGCA---GCAGGAAGCACTATG---GGCGCAGCGTCA---  
TTAACGCTGACGGTACAG---GCCAGACAA---TTATTG---TCTGGTATAGTGCAACAGCAGAAC---  
AATCTG---CTGAGG---GCTATTGAGGCGCAACAGCATATGTTGCAACTCACAGTCTGGGGCATC

>FJ195090

TTCTACTGTAATACAACACAACCTATTTAAATTTCACTTGGAAATGGTACTGAGATTGGAAATAATAGTACT----

-----  
-----

AAAGAAAAAATATCACACTCCCATGTAGAATAAAACAAATTGTAAACAGATGGCAGGAAGTAGGAAAAGCAA  
TGTATGCCCCCTCCCATCAGTGGATACATTAAATGTGTATCAAAT---  
ATTACAGGGCTGCTATTAGCAAGAGATGGTGGTAATACTAGTGAAAAAT-----

-----  
-----

AACAACACCGAGATCTTTAGACCTTTAGGAGGAAATATGAAGGACAATTGGAGAAATGAATTATATAAAATATA  
AAGTAGTAAAAATTGAGCCATTA---GGAGTAGCACCCACCTTGGCAAAGAGAAGAGTGGTG-----  
-----CAAAGAGAAAAAAGAGCA---GTGGGAACAATAGGAGCT-----  
---ATGTTCCCTTGGGTTCTTGGGAGCA---GCAGGAAGCACTATG---GGCGCAGCATCA---  
CTAACGCTGACGGTACAA---GCCAGGCTA---CTACTG---TCTGGTATAGTGCAACAGCAGAAC---  
AATCTG---CTGAGG---GCTATTGAGGCGCAACAACATCTGTTGCAACTCACAGTCTGGGGCATC

>JN692459

TTCTACTGTAATACAACACAGCTATTTAAGGATACTTGGAAATGGCACTTGGATTGATAATATTTGGAAGGAGA  
ATGATACT-----

-----GAAAAG-----

ACAGATAACACTACTATCACACTCCCATGCAGAATAAAACAAATTATAAACAGGTGGCAGGACGTAGGAAAAG  
CAATGTATGCCCCCTCCTATCAGAGGATACATTAACTGTTTCATCAAAT---  
ATTACAGGGCTAATATTAACAAGAGATGGGGGTGACAGCAACTTGAATAAGACC-----  
TCGAATGGGACCTGCTTGAAGGGGACC-----

-----  
TGCTCGAATGAGACTGAGACCTTTAGACCTGTAGGAGGAGATATGAGGGATAATTGGAGAAGTGAATTATATA  
AATATAAAGTAGTAAAAATTGAGCCATTA---GGGATAGCACCCACCAAGGCAAAGAGAAGAGTGGTG-----  
-----CAAAGAGAAAAAAGAGCA---

GTGGGAACGATAGGAGCT-----ATGTTCCCTTGGGTTCTTGGGAGCA---GCAGGAAGCACTATG---  
GGCGCAGCGTCA---CTGACGCTGACGGTACAG---GCCAGACTA---TTATTG---  
TCTGGTATAGTGCAACAGCAGAAAT---AATTTG---CTGAGG---  
GCTATTAAGGCGCAACAACATCTGTTGCAACTCACAGTCTGGGGCATC

>JN692460

TTCTACTGTAATACATCAGGGCTGTTTAAATAGTACTTGGCTAAATAATGGTACTAGGAATGATACTAACTCTA  
CAAGT-----

-----GAT---

AATAGCCCCAAGAATATCACACTCCCATGCAGAATAAAACAAATTATAAACAGGTGGCAGGAAACGGGAAGAG  
CAGTATATGCCCCCTCCCATCAAAGGAATAATTAGCTGTTTCATCCAAT---  
ATTACAGGGCTGCTATTAACAAGAGATGGTGGCAGCGGTGGGAACGACACC-----

-----  
-----

GGAAACGCCACCGAGGTCTTCAGACCTGGGGGAGGAGATATGAGGGACAATTGGAGAAGTGAATTATATAAAAT  
ATAAAGTAGTAAGAATTGAACCATTA---GGAATGGCACCCACCGAGGCAAAGAGAAGAGTGGTG-----  
-----CAGAGAGAAAAAAGAGCA---GTGGGA---ATAGGAGCT---  
-----TTGTTCCCTTGGGTTCTTGGGAGCA---GCAGGAAGCACTATG---GGCGCAGCGGCA---

ATGACGCTGACGGTACAG---GCCAGACTA---TTATTG---TCTGGTATAGTGCAACAGCAAAAT---  
 AATTTG---CTGAGA---GCTATTGAAGCACAACAGCATATGTTGCAACTCACAGTCTGGGGCATC  
 >JN692463  
 TTCTACTGTAATACGACACAACCTGTTTAATAGTACTTGGGGTATGGATGACAAGGATGTGAATGGTACTACA-  
 -----  
 -----  
 GGAAATGAAACTATCATACTTCCATGCAGAATAAAACAAATTGTAAACATGTGGCAGGAAGTAGGAAAAGCAA  
 TGTATGCCCCCTCCCATCAGAGGACAAATTAGATGTTTCATCAAAT---  
 ATCACAGGGCTGCTATTAACAAGAGATGGTGGTGGCAATAAAAAAC-----  
 -----  
 -----  
 AGAAGTAATGAGACCTTCAGACCTGGAGGAGGAGATATGAAGGACAATTGGAGAAGTGAATTATATAAAATATA  
 AAGTAGTAAAAATTGAACCATTA---GGAGTAGCACCCACCAAGGCAAGGAGAAGAGTGGTG-----  
 -----CAGAGAGAAAAAAGAGCA---GTGGGAACACTAGGAGCT-----  
 ---CTGTTCCCTTGGGTTCTTGGGAGCA---GCAGGAAGCACTATG---GGCGCAGCGTCA---  
 ATGACGCTGACGGTACAG---GCCAGACTA---TTATTG---TCTGGTATAGTGCAACAGCAGAAC---  
 AATTTG---CTGAGG---GCTATTGAGGCGCAACAGCATATGTTGCAACTCACAGTCTGGGGCATC  
 >JN692467  
 TTCTACTGTAATTCAACACAACCTGTTTGATACTTGAATGATACTACCCATGGA-----  
 -----  
 -----  
 GGAAATGACACAATCATACTCCCATGCAGAATAAAACAAATTATAAACAGGTGGCAGGAAGTAGGAAAAGCAA  
 TGTATGCCCCCTCCCATCAAAGGACAAATTAATTGTGTATCAAAT---  
 ATCACAGGGCTGATATTAACAAGAGATGGTGGTAACACGAATGACCAG-----  
 -----  
 -----  
 AACGGGTCCGAGATCTTCAGACCTGGAGGAGGAAACATGAAGGACAATTGGAGAAGTGAATTATATAAAATATA  
 AAGTAGTAAAAATTGAACCATTA---GGAGTAGCACCCACCAGGGCAAAAAGAAGAGTGGTG-----  
 -----CAGAGAGAAAAAAGAGCA---GTGGGA---CTAGGAGCT-----  
 ---TTGTTCCCTTGGGTTCTTGGGAGCA---GCAGGAAGCACTATG---GGCGCAGCGTCA---  
 ATGACGCTGACGGTACAG---GCCAGACAA---TTATTG---TCTGGTATAGTGCAACAGCAAAAC---  
 AACTTG---CTGAGG---GCTATTGAGGCGCAACAGCGTCTGTTGCAACTCACAGTCTGGGGCATC  
 >JN692475  
 TTCTACTGTAATACAACACAGCTGTTTAATAGTACTTGAAGTTTAATGGTACCTGGAGTATGTCCAATGGGA  
 AT-----  
 -----  
 AGTACTGAAAAGAATATCACACTCCCATGCAGAATAAAACAAATTATAAATAAGTGGCAAGAAGTAGGAAAGG  
 CAATGTATGCCCCCTCCCATCAGCGGAATAATTAAATGTTTCATCAAAT---  
 ATTACAGGGCTGCTATTAACAAGAGATGGGGGTGATAAT-----  
 -----  
 -----  
 TCGACAGAAACCTTCAGACCGGGAGGAGGAGATATGAGGGACAATTGGAGAAGTGAATTATATAAAATATAAAG  
 TAATAAGGATTGAGCCATTA---GGAATAGCACCCACCAAGGCAAGAGAAGAGTGGTG-----  
 -----CAGAGAGAAAAAAGAGCA---ATAGGA---ATAGGAGCT-----  
 GTGTTCCCTTGGGTTCTTGGGAGCA---GCAGGAAGCACTATG---GGCGCAGCGTCA---  
 GTAACGCTGACGGTACAG---GCCAGACAA---TTATTG---TCTGGTATAGTGCAACAGCAGAAC---  
 AATTTG---CTGAAG---GCTATTGAGGCGCAGCAGCATATGTTGCAACTCACTGTCTGGGGCATC  
 >FJ195091  
 TTCTACTGTGATACAACCTAGGCTGTTTAATAATGAAACACAG-----  
 -----  
 -----  
 AATGACACTATCACACTCCCATGCAAAATAAGACAAATTATAAACAGATGGCAGGAAGTAGGAAAATCAATGT  
 ATGCCCCCTCCCATCAGAGGAGAAATTAAATGTTTCATCAAAT---  
 ATTACAGGGCTGATATTAACAAGAGATGGTGGTAACAGTACCAGC-----  
 -----  
 -----  
 ACCATTGAGACCTTCAGACCTGGAGGAGGAAATATGAAGGACAATTGGAGGAGTGAATTATATAAAATATAAAG  
 TAGTAAAAATTGAGCCACTA---GGAATAGCACCCACCAAGGCAAGGAGAAGAGTGGTG-----  
 -----CAAAGAGAAAAAAGGGCA---GTGGGAACGTTTGGAGCT-----  
 ATGTTCCCTTGGATTCTTGGGAGCA---GCAGGAAGCACTATG---GGCGCAGCGTCA---

CTGACGCTGACGGTACAG---GCCAGACTA---TTATTG---TCTGGTATAGTGCAACAGCAAAAC---  
AATTTG---CTGAGA---GCTATTGAGGCGCAACAACATATGTTGCAACTCACAGTCTGGGGCATC  
>FJ195088  
TTCTACTGTAATACAACACAGTTATTTAATAGTACTTGGGAGTTTAATAGTACTACGCAGTTGAATATT-----  
-----  
ACAGGTAAACTATCACACTTCCATGCAGAATAAAACAAATTATAAACAGGTGGCAGGAAGTAGGAAAAGCAA  
TGTATGCCCCCTCCCATCGGAGGACAAATTAGCTGTTTCATCAAAA---  
ATTACAGGGCTGCTATTAACAAGAGATGGTGGAATGATGGTAACAAT-----  
-----  
ACTGGGAACGAGACCTTCAGACCTGGAGGAGGAGATATGAGGGACAATTGGAGAAGTGAATTATATAAATATA  
AAGTAGTAAAAATTGAACCATTA---GGAGTAGCACCCACCACGGCAAAGAGAAGAGTGGTG-----  
-----CAGAGAGAAAAAAGAGCA---GTGGGAACGATAGGAGCT-----  
---ATGTTCCCTTGGGTTCTTGGGAGCA---GCAGGAAGCACTATG---GGCGCAGCGTCA---  
ATAACGCTGACGGTACAG---GCCAGACTA---TTATTG---TCTGGTATAGTGCAAGCAGCAGAAC---  
AATTTG---CTGAGG---GCTATTGAGGCGCAACAGCATATGTTGCAACTCACAGTCTGGGGCATC  
>FJ195089  
TTCTACTGTAACACAACAAAGCTGTTTAATAGTATTTGGAAGCATAATAGTACTACTAATATTAAAGGAAATT  
CC-----  
-----  
ACTAGTAATGACACTATTACACTCCCATGCAGAATAAAACAAATTATAACAAGTGGCAGGAAGTAGGAAAAG  
CAATGTATGCCCCCTCCCATCAGAGGACAAATTAAATGTAAATCAAAT---  
ATTACAGGGCTGCTATTAACAAGAGATGGTGGAACACCAACAATAGTGAA-----  
-----  
GCCAACAGCAGTGAAACCTTCAGACCTGGAGGAGGAGATATAAGGGACAATTGGAGAAGTGAATTATATAAAT  
ATAAAGTAGTAAGAATTGAGCCATTA---GGAATAGCACCCACCAAGGCAAAGAGAAGAGTGGTG-----  
-----CAGAGAGAAAAAAGAGCA---GTGGGAACATTAGGAGCT---  
-----GTGTTCCCTTGGGTTCTTGGGAACA---GCAGGAAGCACGATG---GGCGCAGCGTCA---  
ATAACGCTGACGGTACAG---GCCAGACTA---TTATTG---TCTGGTATAGTGCAACAGCAGAAC---  
AATTTG---CTGAGG---GCTATTGAGGCGCAACAGCATATGTTGCAACTCACAGTCTGGGGCATC  
>JN692479  
TTCTACTGTGATTCAACACAGTTGTTTAATAGTACTTGGCATAATACTACAGACAATAATACTACA-----  
-----  
GACAAAGCAATATCACACTCCCATGCAGAATAAAACAAATTATAAACAGGTGGCAAAAAGTAGGAAAAGCAA  
TGTATGCCCCCTCCCATCGCAGGACCAATTAGCTGTACATCAAAAC---  
ATTACAGGGCTGCTATTAACAAGAGATGGTGGAAGCAATGGG-----  
-----  
ACTGAGACCTTCAGACCTGGAGGGGAGATATGAGGGACAATTGGAGAAGTGAATTATATAAATACAAAGTAG  
TAAAAATTGAGCCATTA---GGAATAGCACCCACCAAGGCAAGGAGGAGAGTGGTG-----  
-----CAAAAAGAGAAAAGAGCA---GTGACG---CTGGGAGCT-----  
ATGTTCCCTTGGGTTCTTGGGAGCA---GCAGGAAGCACTATG---GGCGCAGCGTCA---  
CTGACGCTGACGGTACAG---GCCAGACTA---TTGTTG---TCTGGTATAGTGCAACAGCAAAAT---  
AATTTG---CTGAAT---GCTATTGAGGCGCAACAACATCTGTTGCAACTCACAGTCTGGGGCATC  
>HQ377443  
TTCTACTGCAATACATCACAACCTGTTTAATAGTACTTGGGAATATTGATGGTACTTGGGAATGATACTGGA-----  
-----  
GGAAAGCAAAATATCACACTCCCATGCAGAATAAGACAAATTGTAAACAGATGGCAAGAAGTAGGGAAGGCAA  
TGTATGCCCCCTCCCATCCAGGACAAATTACATGTAGATCAAAT---  
ATTACAGGGATACTATTAACAAGAGATGGTGCGGCAAAAATGAT-----  
-----  
AGCCTTAATGAAACCTTCAGACCTGGAGGAGGAGATATGAGGGACAATTGGAGAAGTGAATTATATAAATATA  
AAGTAGTAAGAATTGAACCATTA---GGAATAGCACCCACCAAGGCAAAGAGAAGAGTGGTG-----  
-----CAGAGAGAAAAAAGAGCA---GTGACA---TTAGGAGCT-----  
---ATGTTCCCTTGGGTTCTTGGGAGCA---GCAGGAAGCACTATG---GGCGCAGCGGCA---

ACAACGCTGACGGTACAG---GCCAGACAA---TTATTG---TCTGGTATAGTGCAACAGCAGAAC---  
 AATCTG---CTGATG---GCTATTGAGGCGCAACAGCATATGTTGCAACTCACAGTCTGGGGCATC  
 >HQ377487  
 TTCTACTGCAATACAACACAGCTGTTTAATAGTACCTGGACCCAGGTAAACGGTACTACAGTTAGGAATGGTA  
 CAAATAGC-----  
 -----ACTGCT-----  
 AACACAAATGGCACTATCACACTCCCATGCAGAATAAAACAAATTGTAAACACGTGGCAGGCAGTAGGGAAAG  
 CAATGTATGCCCCCTCCCATCAGAGGACAGATTAGCTGTAACCTCAAGT---  
 ATTACAGGGCTGTTATTAACAAGAGATGGTGGTAGTGGTGTCAATGTC-----  
 -----  
 -----  
 ACGAACGACACCGAAATCTTCAGACCTGCAGGAGGAGATATGAGGGACAATTGGAGAAGTGAATTATATAAAAT  
 ATAAAGTAGTGAAAATTGAGCCACTA---GGAATAGCACCCACCAAGGCAAGGAGAAGAGTGGTG-----  
 -----CAAAGAGAAAAAAGAGCA---GTGGGA---ATAGGAGCT---  
 -----GTGTTTCCTTGGGTTCTTGGGAGCA---GCAGGAAGCACTATG---GGCGCAGCGTCA---  
 GTGACGCTGACGGTACAG---GCCAGACTA---TTATTG---TCTGGTATAGTGCAACAGCAGAAC---  
 AATTTG---CTGAGA---GCTATTGAGGCGCAACAGCACATGTTGCAACTCACAGTCTGGGGCATC  
 >JN687739  
 TTCTACTGTAATACAACAAAACCTGTTTAATAGTATTTGGACTTGGAATGATACACAGCTGTTGAATGATACTG  
 GAGAG-----  
 -----  
 CCAGACAATGAACTATCACACTCCCATGCAGAATAAGACAAATTATAAACAGGTGGCAGGAAGTAGGAAAAG  
 CAATGTATGCCCCCTCCCATCAGAGGACATATTAACCTGTTTCATCAAAT---  
 ATTACAGGGCTGCTATTAACAAGGGATGGTGGTAATAACACGAAC-----  
 -----  
 -----  
 GGGACCGAGACCTTCAGACCTGGGGGAGGAGATATGAGGGACAATTGGAGAAGTGAATTATATAAAATATAAAG  
 TAGTACAAATTGAGCCAGTA---GGAGTAGCACCTCCAAGGCAAGAGAAGAGTGGTG-----  
 -----CAGAGAGAGAAAAGAGCA---GTGGGAGCAATAGGAGCT-----  
 ATGTTTCCTTGGGTTCTTGGGAGCA---GCAGGAAGCACTATG---GGCGCAGCGTCA---  
 CTCACGCTGACGGTACAG---GCCAGACAA---TTATTG---TCTGGTATAGTGCAACAGCAGAAC---  
 AATATG---CTGAGG---GCTATTGAGGCGCAACAACATCTGTTGCAACTCACAGTCTGGGGCATC  
 >JF680907  
 TTCTACTGTAATACAACAAAACCTGTTTAATAGTAACCGGACTATAGGGTCGAATGACACTAAAGAG-----  
 -----  
 -----  
 AATGACACAGACATCACACTCCCATGCAAAATAAAACAAATTGTAAACATGTGGCAGGAAGTAGGAAAAGCAA  
 TGTATGCCCCCTCCTATCAAGGGAAAATTGAATGTTTCATCAAAT---  
 ATTACAGGGATACTATTAACAAGAGATGGAGGTGATAATAGAACA-----  
 -----  
 -----  
 AACGAGACCTTCAGACCAGCAGGAGGAGATATGAGGGACAATTGGAGAAGTGAATTATATAAAATATAAAGTAG  
 TAAGAATTGAACCATTA---GGAGTAGCACCTACCAGGGCAAGGAGAAGAGTGGTG-----  
 -----CAGAGAGAAAAAAGAGCA---GTGGGAACAATAGGAGCT-----  
 ATGTTTCCTTGGGTTCTTAGGAGCA---GCAGGAAGCACTATG---GGCGCAGCGTCA---  
 GTAACGCTGACGGTACAG---GCCAGACTA---TTATTG---TCTGGTATAGTGCAACAGCAAAAC---  
 AATTTG---CTGAAG---GCTATTGAGGCGCAACAGCATCTGTTGCAACTCACGGTCTGGGGCATC  
 >KU749389  
 TTCTACTGTAACACAACAAAACCTGTTTAATAGTAGTTGGCCTCTTAATGGTTCAGCAAATATAACT-----  
 -----  
 -----  
 GCAGAAGACCCTATCAGACTCCCATGCAGAATTAGACAAATTGTAAACATGTGGCAGAAAGTAGGAAAAGCAA  
 TGTATGCCCCCTCCCATCGAAGGACAGATTAGATGTTTCATCAAAT---  
 ATTACAGGACTGCTATTAGTAAGAGATGGTGGTAATGGTGGTAATGAC-----  
 -----  
 -----  
 ACAAACACGACCGAGATCTTCAGACCTGAAGGAGGAAAATATGAAGGACAATTGGAGAAGTGAATTATATAAAAT  
 ATAAAGTAGTAAGAATTGAACCTTA---GGAATAGCACCCACCAAGGCAAGGAGAAGAGTGGTG-----  
 -----CAGAGAGAAAAAAGAGCA---TTGGGA---TTCGGAGCG---  
 -----TTGTTTCCTTGGGTTCTTGGGAGCA---GCAGGAAGCACTATG---GGCGCAGCGTCA---

GTGACGCTGACGGTACAG---GCCAGACAA---TTATTG---TCTGGTATAGTGCAACAGCAAAAC---  
AACTTG---CTGAGG---GCTATTGAGGCGCAACAACATCTGTTGCAACTCACAGTCTGGGGCATC  
>KT427690  
TTCTACTGTAATACCACAACGCTATTTAATAGTACGTGGAATAAGAATGATACTAGGAATGATACTACT-----  
-----  
AGGAATGATACTATCACACTCCAATGCAGAATAAAACAAATTATAAACAGGTGGCAGGAAGTAGGAAAAGCAA  
TATATGCCCCCTCCCATCCCAGGACAAATTAAATGCTCATCCAAT---  
ATTACAGGGCTGCTACTAACAAGAGATGGTGGTAACAGTACCGAG-----  
-----  
AGTGAAACCTTCAGACCTGGAGGAGGAGATATAAGGGACAATTGGAGAAGTGAATTATATAAATATAAAGTAG  
TACAGATTGAGCCATTA---GGAGTAGCACCCACCAGGGCAAAAAGACAAGTGGTG-----  
-----AGGAGAGAAAAAAGAGCA---GTGGGA---CTGGGAGCT-----  
TTGTTTCCTTGGGTTCTTGGGAGCA---GCAGGAAGCACTATG---GGCGCGGCGTCA---  
CTAACGCTGACGGTACAG---GCCAGGCAA---TTATTG---TCTGGGATAGTGCAACAGCAGAAC---  
AATCTG---CTGAGG---GCTATTGAAGCGCAACAGCACCTGTTGCAGCTCACAGTCTGGGGCATT  
>KT427688  
TTCTACTGTAATACATCAAACTGTTTAATAGTACTGAGAATGGTAATGACACCAATAGTACTGGGCAA-----  
-----  
TCTAACAGTACCATCACACTCCAATGCAGAATAAAACAAATTATTAATAGGTGGCAGGAAGTAGGAAAAGCAA  
TGTATGCCCCCTCCCATCAGAGGAAACATTAGCTGTTTCATCAAAC---  
ATTACAGGGCTACTATTAACAAGAGATGGGGGTAACACAACCTGAC-----  
-----  
AATGAGACCTTCAGGCCAACAGGAGGAGATATGAAGGACAATTGGAGAAGTGAGTTATATAAATATAAAGTAG  
TAAGAATTGAACCAATA---GGAGTAGCCCCCACCAGGCAAAGAGAAGAGTGGTG-----  
-----CAGAGAGAAAAAAGAGCA---GTAACA---CTGGGAGCT-----  
GTGTTTCCTTGGGTTCTTGGGAGCA---GCAGGAAGCACTATG---GGCGCAGCGTCA---  
ATAACGCTGACGGCACAG---GCCAGACAA---TTGTTG---TCTGGTATAGTGCAACAGCAGAGC---  
AATCTG---CTGAGA---GCTATTGAGGCGCAACAGCATCTGTTGCAACTCACAGTCTGGGGCATC  
>KT427686  
TTCTACTGTGATACAACACAGCTGTTTAATAGTACTTGGGATGGAAATAGTACTGAAAACAATAACACAGGA-----  
-----  
GGAAATGAACTATCATACTCCCATGCAGAATAAAACAAATTATAAATACATGGCAGGGAGTAGGAAAAGCAA  
TATATGCCCCCTCCCATCAGTGGAAGATTAATTGTTTATCAAAT---  
ATTACAGGGCTGCTATTAACAAGAGATGGTGGG-----  
-----  
TCCAATGAGAGTGAGACCTTCAGACCCACAGGAGGAAATATGATGGATAATTGGAGAAGTGAATTATATAAAT  
ATAAGTAGTAAGAATTGAGCCCTTA---GGAGTAGCACCCACCAGGCAAAGAGAAGAGTGGTG-----  
-----CAAAGAGAAAAAAGAGCT---GTGGGAGCAATAGGAGCT---  
-----ATGTTTCCTTGGGTTCTTGGGAGCA---GCAGGAAGCACTATG---GGCGCAGCGTCG---  
CTGACGCTGACGGTACAG---GCCAGACTA---TTATTG---TCTGGTATAGTGCAACAGCAAAAC---  
AACTTG---CTGAGG---GCTATTGAGGCGCAACAGCACCTGTTGCAACTCACAGTCTGGGGCATT  
>KT427685  
TTCTACTGTAATACAACACAACCTGTTTAACAGGACCTGGAATGAGACTACCTTGAATGGTACTAACCTTAATG  
TAACT-----  
-----  
TCCAATGAAAATATCACAATTCCATGCAGAATAAAACAAATTATAAACAGATGGCAGGAAGTGGGAAAAGCAA  
TGTATGCCCCCTCCCATCAGAGGACAAATTAGGTGCTCATCAAAT---  
ATTACAGGACTGTTATTAACAAGAGATGGTGGCGGAGAGAACAGG-----  
-----  
TCCAATGAAACATTTCAGACCTGGAGGAGGAGATATGAGGGACAATTGGAGAAGTGAATTATATAAATATAAAG  
TGGTAAAAAATTGAGCCATTA---GGAATAGCACCCACCAGGCAAAGAGAATAGTGGTG-----  
-----CAGAGAGAAAAAAGAGCA---GTAACA---CTAGGAGCT-----  
ATGTTTCCTTGGGTTCTTGGGAACA---GCAGGAAGCACTATG---GGCGCAGCGTCA---

CTAACGCTGACGGTACAG---GCCAGACTA---TTATTG---TCTGGTATAGTGCAACAGCAGAAC---  
AATTTG---CTGAGA---GCTATTGAGGCGCAACAGCATATGTTGAACTCACAGTCTGGGGCATC  
>KT427683  
TTCTACTGTAATACATCAGGACTGTTTAATAGTACTTGGTTGGTTAATGGCACCAGCAATACAGAT-----  
-----  
-----  
TCAAATGAAACAATCGAACTTCCATGTAGAATAAAACAAATTATAAACAGATGGCAGGAAGTAGGAAAAGCAA  
TGTATGCCCCCTCCCATCAGAGGACAAATTAGCTGTTTCATCAAAC---  
ATTACAGGGCTGCTATTAATAAGAGATGGCGGTAATGGGTCTGGG-----  
-----  
-----  
AACAAATGAGACCTTCAGACCTGGTGGAGGAGATATGAGGGACAATTGGAGAAGTGAATTATATAAATATAAAG  
TAGTAAAAATTGAGCCATTG---GGAGTAGCGCCTTCCAAGGCAAAGAGAAGAGTGGTG-----  
-----CAGAGAGAAAAAAGAGCG---GTGGGAACACTAGGAGCC-----  
ATGTTTCCTTGGGTTCTTGGGAGCA---GCAGGAAGCACTATG---GGCGCAGCGTCA---  
ATAACGCTGACGGTACAG---GCCAGACAA---TTACTG---TCTGGTATAGTGCAACAGCAGAAC---  
AATCTG---CTGAGA---GCTATTGAGGCGCAACAACACCTGTTGCAACTCACAGTCTGGGGCATC  
>KT427682  
TTTTACTGTAATACAACACAGCTGTTTAATAGTACTTGGAAATGGGACACAGCTGTTTAATAGTACTTGGAAATG  
GGACGGAATCA---TCA-----GAT-----  
-----  
AACTCAAATGACACTATCATACTCCCATGCAGAATAAAACAAATTATAAATAGGTGGCAGGAAGTAGGAAAAG  
CAATGTATGCCCCCTCCCATCAAAGGAATAATTAGATGTTTCATCAAAT---  
ATTACAGGGCTACTACTAACAAGAGATGGTGGTAGCGACAGTAGT-----  
-----  
-----  
AATGGCACCGAAACCTTCAGGCCTATAGGAGGAGATATGAGGGACAATTGGAGAAGTGAATTATATAAATATA  
AAGTAGTAAGAATTGAGCCATTA---GGAATAGCACCCACCAAGGCAAAGAGAAGAGTGGTG-----  
-----CAGAGAGAAAAAAGAGCA---GTGGGC---ATAGGAGCT-----  
---GTGTTTCCTTGGGTTCTTGGGAGCA---GCAGGAAGCACTATG---GGCGCAGCGTCA---  
CTGACGCTGACGGTACAA---GCCAGACAA---TTACTG---TCTGGTATAGTGCAACAGCAAAAC---  
AATTTG---CTGAGA---GCTATTGAGGCGCAACAACATCTGTTGCAACTCACAGTCTGGGGCATC  
>KT427680  
TTCTACTGTAAGACAACAAACCTATTTAATAGTAGTTGGTCAAAGAATAATAGTATTTGGTCAAAGGATAATA  
CTGAGTCA-----  
-----  
GATAATAATGATACCATCACACTCCAGTGTAGAATAAAGCAAATTATAAACAGGTGGCAGGAAGTAGGAAAAG  
CAATGTATGCCCCCTCCCATCAGCGGAGTAATTAAGTGTATCAAAC---  
ATTACAGGGCTGATATTAACAAGAGATGGTGGCAACGATGATAATAACGCCACC-----  
-----  
-----  
AAGAACGGGCCTGAAATCTTCAGACCTGGAGGAGGAAATATGAAGGACAATTGGAGAAGTGAATTATACAAAT  
ATAAGTAGTAAAAATTGAGCCATTA---GGAATAGCACCCACCAAGGCAAAGAGAAGAGTGGTG-----  
-----CAGAAAGAAAAAAGAGCA---GTAACA---CTAGGAGCT---  
-----GTGTTTCCTTGGGTTCTTGGGAGCA---GCAGGAAGCACTATG---GGCGCAGCGTCA---  
ATAACGCTGACGGCACAG---GCCAGACAA---TTACTG---TCTGGTATAGTGCAACAGCAGAAC---  
AATCTG---CTGAGA---GCTATTGAGGCGCAACAGCATATGTTGCAACTCACGATCTGGGGCATC  
>KT427675  
TTCTATTGTAATACAACACAACCTATTTAATAGTACCTGGGTCTGGAATGCTACTAGGAATGATACTGGAGGAC  
TAAATAAC-----  
-----  
ATCACACTTCCATGCAGAATAAAACAAATTATAAACATGTGGCAGGAAGTAGGAAAAGCAATGTATGCCCCCTC  
CCATCAGAGGACAAATTAGATGTTTCATCAAAT---  
ATCACAGGGCTACTATTAACAAGAGATGGTGATAATGGGACTAAC-----  
-----  
-----  
AATGAGACCTTCAGACCTGGAGGAGGAGATATGAGGGACAATTGGAGAAGTGAATTATATAAATATAAAGTAG  
TAAAAATTGAACCATTG---GGAGTAGCACCCACCAAGGCAAAGAGAAGAGTGGTG-----  
-----CAGAGAGAAAAAAGAGCA---GTAGGAGCGCTAGGAGCT-----  
ATGTTTCCTTGGGTTCTTGGGAGCA---GCAGGAAGCACTATG---GGCGCAGCGTCA---

CTGACGCTGACGGTACAG---GCCAGACGA---TTATTG---TCTGGTATAGTGCAACAGCAAAAC---  
 AATTTG---CTGAGA---GCTATTGAGGCGCAACAGCATATGTTGCAACTCACAGTCTGGGGCATC  
 >KT427671  
 TTCTACTGTAATACAACACCATTATTTAATAAGACTTGGAATGGTACATCGACAGGGGACTGGGAAAAT----  
 -----  
 -----  
 GCCACAGGAAGTATCACACTCCATTGCAGGATAAAAACAAATCATAAACAGGTGGCAGGAAGTAGGAAAAGCAA  
 TGTATGCCCCCTCCCATCAGAGGAGAGATTAGCTGTTTCATCAAAT---  
 ATTACAGGGCTGCTATTAACAAGAGATGGTGGGTCTAATAATGGGACT-----  
 -----  
 -----  
 AAAAAATGACAATGAGACCTTCAGACCTGGAGGAGGAGATATGAGGGACAATTGGAGAAGTGAATTATATAAAAT  
 ATAAAGTAGTAAAAATTGAGCCATTA---GGAATAGCACCCACCAGGGCAAGGAGAAGAGTGGTG-----  
 -----  
 -----CAGAGAGAAAAAAGAGCG---GTAACG---CTGGGAGCT---  
 -----ATGTTTCCTTGGGTTCTTGGGAGCA---GCAGGAAGCACTATG---GGCGCAGCGTCA---  
 ATAACGCTGACGGTACAG---GCTAGACAA---TTATTG---TCTGGTATAGTGCAACAGCAGAGC---  
 AATCTG---CTGAAT---GCTATTGAGGCGCAACAGCGTCTGTTGCAGCTCACAGTCTGGGGCATC  
 >KT427745  
 TTCTACTGTAATACATCAAGGCTGTTTAATAGTGCTTGGCTGAATAATGGTACTAGGAATGGTACTAACTCTA  
 ATTCA-----  
 -----  
 ACAGATAATAAGATCACACTCCCATGCAGAATAAAAACAAATTATAAACAGGTGGCAGGAAACAGGAAAAGCAA  
 TGTATGCCCCCTCCCATCAGAGGAACAATTAGATGTTTCATCCAAC---  
 ATTACAGGGCTGCTATTAACAAGAGATGGTGGCAGTGGTGGGAACGACACCGGG-----  
 -----  
 -----  
 AACGCCACCGAGGTCTTCAGACCTGGAGGAGGAGATATGAGGGACAATTGGAGAAGTGAATTATATAAAATATA  
 AAGTAGTAAGAATTGAACCATTA---GGAATAGCACCCACCGAGGCAAAGAGAAGAGTGGTG-----  
 -----  
 -----CAGAGAGAAAAAAGAGCA--GTAGGGGGACTAGGAGCT-----  
 ---TTGTTCCCTTGGGTTCTTGGGAGCA--GCAGGAAGCACTATG--GGCGCAGCGGCA---  
 ATGACGCTGACGGTACAG---GCCAGAATA---TTATTG---TCTGGTATAGTGCAACAGCAAAAT---  
 AATTTG---CTGAGA---GCTATTGAAGCACAAACAGCATATGTTGCAACTCACAGTCTGGGGCATC  
 >KJ849788  
 TTCTACTGTAATACAACACCACTGTTTAATAGTACTTGGCATAATAATGGTACT-----  
 -----  
 -----AGGCCTAATAGTACT-----  
 TGGTCAAATAACACAATCACACTCCAATGCAGAATAAAAACAAATTGTAAACCTGTGGCAGCAAGTAGGAAAAG  
 CAATGTATGCCCCCTCCCATAGTGGATATATTAATTGTTTCATCAAAT---  
 ATTACAGGGCTACTATTAACAAGAGATGGTAGT-----  
 -----  
 -----  
 ATCAGCAGTAGCAGTAAT---  
 AACACTGAAGTCTTTAGGCCTAGAGGAGGAGATATGAAGGACAATTGGAGAAGTGAATTATATAAAATATAAAG  
 TAGTACAACCTGAACCACTA---GGAGTAGCACCAACCAAGGCAAAGAGGAGAACGGTG-----  
 -----  
 -----CAGAGAGAAAAAAGAGCA---GTGGGA---CTGGGAGCT-----  
 CTGTTTCATTGGGTTCTTGGGAGCA---GCAGGAAGCACTATG---GGCGCAGCGTCA---  
 GTGACGCTGACGGTACAA---GCCAGACAA---TTATTG---TCTGGTATAGTGACAGCAGCAAAAC---  
 AATTTG---CTGAGG---GCTATTGAGGCGCAACAGCATCTGTTGCAACTCACAGTCTGGGGCATT  
 >KT427740  
 TTCTACTGTAATACAACACAGCTGTTTAATAGTACTTGGAAATGAAACACAGCTGGATGATTGGAATAAAAGTA  
 AT-----  
 -----  
 -----  
 GATACAAGTAATATCACACTCCCATGCAGAATAAGACAAATTGTAAATAAGTGGCAGGAAGTAGGAAAAGCAA  
 TGTATGCCCCCTCCCATCCAAGGACAAATTAAATGTACATCAAAT---  
 ATTACAGGGATGCTATTGACAAGAGATGGGGGTAGTAAAAATGACACG-----  
 -----  
 -----  
 AACGGGAGCGAAACCTTCAGACCTGCAGGAGGAGATATGAGGGACAATTGGAGAAGTGAATTATATAAAATACA  
 AAGTGGTAAAAATTGAACCATTA---GGAATAGCACCCACCAAGGCAAGGAGAATAGTGGTG-----  
 -----  
 -----CAAAGAGAAAAAAGAGCA---GTGGGA---ATAGGAGCT-----  
 ---GTGTTCCCTTGGGTTCTTGGGAGCA---GCGGGAAGCACTATG---GGCGCAGCGTCA---

ATAGCGCTGACGGCACAG---GCCAGACAA---TTATTG---TCTGGTATAGTGCAACAGCAAAAC---  
 AATTTG---CTGAGG---GCTATTGAGGCGCAACAGCATATGTTGCAACTCACAGTTTGGGGCATC  
 >KT427739  
 TTCTACTGTAATACATCAGGGCTGTTTAATAGTACTTGGCTAAATAATGGTACTAGGAATGATACTAACTCTA  
 CAAGTGAT-----  
 -----  
 ACTAACTCTAATATCACACTCCCATGCAGAATAAAACAAATTATAAACAGGTGGCAGGAAACGGGGAAAGCAA  
 TATATGCCCCCTCCCATCAGAGGAATGATTAGCTGTTTCATCCAAC---  
 ATTACAGGGCTGCTATTAACAAGGGATGGTGGCAGCGGTGGGAACGCCACCGGG-----  
 -----  
 -----  
 AACGCCACCGAGATCTTCAGACCTGGAGGGGGAGATATGAGAGACAATTGGAGAAAGTGAATTATACAAATATA  
 AAGTAGTAAGAATTGAACCATTA---GGAATAGCACCCACTGAGGCAAAGAGAAGAGTGGTG-----  
 -----CAAAGAGAAAAAAGAGCA---GTGGGA---ATAGGAGCT-----  
 ---TTGTTCCCTTGGGTTCTTGGAACA---GCAGGAAGCACTATG---GGCGCAGCGGCA---  
 ATGACGCTGACGGTACAG---GCCAGACTA---TTATTG---TCTGGTATAGTGCAACAGCAAAAT---  
 AATTTG---CTGAGA---GCTATTGAGGCACAACAGCATATATTGCAACTCACAGTCTGGGGCATC  
 >KT427738  
 TTCTACTGTAATACAACAACCACTGTTTAATAGTACCTGGCAAAGTAATGGTACCTGGAATAATAGTAATAATA  
 AA-----  
 -----  
 GAGAAATGACACATACACACTCCCATGCAGAATAAAACAAATTATAAACAGGTGGCAGGAAGTAGGAAGAGCAA  
 TATATGCCCCCTCCCATCAGTGGACAAATTAAGTGTTCATCAAAT---  
 ATTACAGGGATAATATTAACAAGAGATGGTGGTAGGAACGAAAGT-----  
 -----  
 -----  
 AATGGGACAGAAATCTTCAGACCTGGAGGAGGAGATATGAGGGACAATTGGAGAAAGTGAATTATATAAATATA  
 AAGTAGTAAAAATTGAGCCATTA---GGAGTAGCACCCACCAAGGCAAGGAGAAGAGTGGTG-----  
 -----CAGAGAGAAAAAAGAGCA---GTAACA---CTAGGAGCT-----  
 ---GTGTTCAATTGGGTTCTTGGAACA---GCAGGAAGCACTATG---GGCGCAGCGTCA---  
 GTGACGCTGACGGTACAG---GCCAGACAA---TTATTG---TCTGGTATAGTGCAACAGCAGAGC---  
 AATTTG---CTGAGG---GCTATTGAGGCGCAACACCACATGTTGCAACTCACAGTCTGGGGCATT  
 >KT427735  
 TTCTACTGTAATACAGCACAGTTGTTTAATTCTGATTGGAATTCTACTTGGACTTGGAGTGATAATACAAATA  
 ATACTGGGTTT-----  
 -----  
 GAAAACAAACTATCACACTCCTGTGTAGATAAAACAAATCATAAACAGGTGGCAGGGAGTAGGAAAAGCAA  
 TGTACGCCCCCTCCAATCCAAGGAAATATTAGCTGTTTCATCAAAT---  
 ATTACAGGGCTGCTATTAACAAGAGATGGAGGCAACAATACCGGT-----  
 -----  
 -----  
 AACGATACCGAGACCTTCAGACCTGGAGGAGGAAATATGAAGGACAATTGGAGAAAGTGAATTATATAAATACA  
 AAGTAGTAAGAATTAAGCCATTA---GGAGTAGCACCCACCAAGGCAAAGAGAAGAGTGGTG-----  
 -----CAGAGAGAAAAAAGAGCA---GTGGGAACATTAGGAGCT-----  
 ---GTGTTCCCTTGGGTTCTTGGAACA---GCAGGAAGCACTATG---GGCGCAGCGTCA---  
 CTGACGCTGACGGTACAG---GCCAGACAA---TTATTG---TCTGGTATAGTGCAACAGCAGAAC---  
 AATCTG---CTGAGG---GCTATTGAGGCGCAACAGCACCTGTTGCAACTCACAGTCTGGGGCATC  
 >KT427734  
 TTCTACTGTAATACAACAACCACTGTTTAATAGTACCTGGAATAATGGTACTGAAAAG-----  
 -----  
 -----  
 ACCAATGGCACAATAACACTCCCATGCAGAATAAAACAAATTGTGAACAAGTGGCAGGAAGTAGGAAAAGCAA  
 TGTATGCCCCCTCCCATCAGGGGATACATTAAGTGTTCATCAAAT---  
 ATTACAGGGCTGCTATTAACAAGAGATGGTGGCAACAATAATAAC-----  
 -----  
 -----  
 AGCCAGAACGAGACCTTCAGACCAGGAGGAGGAGATATGAGGGACAATTGGAGAAAGTGAATTATATAAATATA  
 AAGTAGTAAGGATTGAACCATTA---GGAATAGCACCCACCAGGGCAAAGAGAAGAGTGGTG-----  
 -----CAAAGAGAAAAAAGAGCA---GTGGGAGCACTAGGAGCT-----  
 ---ATGTTCCCTTGGGTTCTTGGAACA---GCAGGAAGCACTATG---GGCGCAGCGTCA---

ATAACGCTGACGGTACAG---GCCAGACAA---TTATTG---TCTGGTATAGTGCAACAGCAAAAT---  
 AATTTG---CTGAGA---GCTATTGAGGCGCAGCAGCATCTGCTGCAACTCACGGTCTGGGGCATT  
 >KT427733  
 TTCTACTGTAATACAACAAAGCTGTTTAATAGTACTTGGGGGTCTAATGGTACTTGGGAAGGGTACAAATGAC-  
 -----  
 -----  
 AGTAATAGTAATATCACAATACAATGCAGAATAAAACAAATTATAAACAGGTGGCAAGAAGTAGGAAAAGCAA  
 TGTATGCCCCCTCCCGTCAAAGGACCAATCAAATGTTTCATCAAAT---  
 ATTACAGGACTACTATTAACAAGAGATGGTAGTAGTAGTAGTAAT-----  
 -----  
 -----  
 GATACTGAGACCTTCAGACCTGGAGGAGGAAATATGAAGGACAATTGGAGAAGTGAATTATATAAATACAAAAG  
 TAGTAAAAATTGAGCCATTA---GGAGTAGCACCCACCAGGGCAAGGAGAAGAGTGGTG-----  
 -----CAGAGAGAAAAGAGAGCG---GTAACA---CTAGGAGCT-----  
 ATGTTTCCTTGGGTTCTTGGGAGCA---GCAGGAAGCACTATG---GGCGCAGCGTCA---  
 ATGACGCTGACGGTACAG---GCCAGACTA---TTATTG---TCTGGTATAGTGCAAGCAGCAGAGC---  
 AATTTG---CTGAGG---GCTATTGAGGCGCAACAGCATCTGTTGCAACTCACAGTCTGGGGCATC  
 >KJ849803  
 TTCTACTGTAATACATCAGGGCTGTTTAATAGTACCTGGTATGGGAATGAG-----  
 -----  
 -ACTGCAGAGGCAAAT-----  
 AGTACAAATACTAATATCACACTCCCATGTAGAATAAAGCAAATTATAAACAGGTGGCAGGAAGTAGGAAAAG  
 CAATGTATGCCCCCTCCCATCAGGGGACAAATAAGATGTTTCATCAAAT---  
 ATTACAGGGATACTACTAACAAGAGATGGTGGT-----  
 -----  
 -  
 GATAACAATACCGAGATCGAGACCTTCAGACCTGGAGGGGGAGATATGAGGGACAATTGGAGAAGTGAATTAT  
 AATAATATAAAGTAGTAGAAATTGAGCCATTA---GGAATAGCACCTACCAAGGCAAAAAGAAGAGTGGTG--  
 -----CAGAGAGAAAAAGAGCA---ATAACA---  
 CTGGGAGCT-----ATGTTTCCTTGGGTTCTTGGGAGCA---GCAGGAAGCACTATG---  
 GGCGCAGCGTCA---GTAACGCTGACGGTACAG---GCCAGACAA---TTATTG---  
 TCTGGTATAGTGCAACAGCAGAAC---AATCTG---CTGAAG---  
 GCTATTGAGGCGCAACAACATCTGTTGCAACTCACAGTCTGGGGCATC  
 >KT427730  
 TTCTACTGTAATACAACACAGCTGTTTAATAGTACTTGGGTGGGGAATAGTACTATAAATGATACTGCC---  
 -----  
 -----  
 AAGACAGAACTATCACACTCCCATGCAGAATAAAACAAATTATAAACAGATGGCAGGAAGTAGGAAAAGCAA  
 TGTATGCCCCCTCCCATCAGGGGACCAATTAAGTGTTCATCAAAT---  
 ATTACAGGGATACTATTACTAAGAGATGGTGGTGTAAATACCACG-----  
 -----  
 -----  
 AATGAGACCTTCAGACCTGGAGGAGGAGATATGAGGGACAATTGGAGAAGTGAATTATATAAATATAAAATAG  
 TAAAAATTGAGCCATTA---GGAGTAGCACCCACCAAGGCAAAAAGAAGAGTGGTG-----  
 -----CAGAGAGAAAAAGAGCA---GTAACA---TTAGGAGCT-----  
 ATGTTTCCTTGGGTTCTTGGGAGCA---GCAGGAAGCACTATG---GGCGCAGCGTCA---  
 CTGACGCTGACGGTACAG---GCCAGACAA---TTATTG---TCTGGTATAGTGCAACAGCAGAGC---  
 AATATG---CTGAGA---GCTATTGAGGCGCAACAGCATCTGTTGCAACTCACAGTCTGGGGCATT  
 >KT427728  
 TTCTATTGTAATACAACAAAAGCTGTTTAATAGTACGTGGCCGTGGCCGCATAACAGTACTATAAATAGGACTG  
 AAGAG-----  
 -----  
 TCAGATAATAGCACAAATCACACTCCCATGCAAAATAAAACAAATTATAAACAGATGGCAGGAAATAGGAAAAG  
 CAATGTATGCCCCCTCCCATCAGGGGACAAATTAGATGTTTCATCAAAT---  
 ATTACAGGGCTGCTATTAACAAGAGATGGTGGAAATGTTGGTAAT-----  
 -----  
 -----  
 AAGACCAGTGAGACCTTCAGACCTGGAGGAGGAGATATGAGGGACAATTGGAGAAGTGAGTTATATAAATATA  
 AAGTAGTACAAATTGAACCATTA---GGAGTAGCACCCACCAAGGCAAGAGAAGAGTGGTG-----  
 -----CAGAGAGAAAAAGAGCA---TTGGGAACGCTGGGAGCT-----

---ATGTTCCCTTGGGTTCTTGGGAGCA---GCAGGAAGCACTATG---GGCGCAGCGTCA---  
 ATGACGCTGACGGTACAG---GCCAGGCAA---TTATTG---TCTGGTATAGTGCAACAGCAGAAC---  
 AATCTG---CTGAGG---GCTATTGAGGCGCAACAACATATGTTGCAACTCACAGTCTGGGGCATC  
 >KT427727  
 TTCTACTGTAATACATCAAACTGTTTAATAGTACTTGGACTAATGATACTTTGGATACCAGGTTCAATATG-  
 -----  
 -----  
 ACAGATGATAATATCACACTCCCATGCAGAATAAGACAAATTATAAACAGGTGGCAGGAAGTAGGAAAAGCAA  
 TGTATGCCCCCTCCAATCAGTGGACCAATTAGATGTTTCATCAAAT---  
 ATTACAGGGCTATTATTAACAAGAGATGGTGGTAATAGTAATAGC-----  
 -----  
 -----  
 ACGAATGAGACCTTCAGACCTGGAGGAGGAGATATGAGGGACAATTGGAGAAGTGAATTATATAAATATAAAG  
 TGGTACAAATTGAGCCATTA---GGAGTAGCACCCACCAGGGCAAAGAGAAGAGTGGTG-----  
 -----CAGAGAGAAAAAAGAGAA---ATAACAACACTAGGAGTT-----  
 ATGTTCCCTTGGGTTCTTGGGAGCA---GCAGGAAGCACTATG---GGCGCAGCGTCA---  
 ATGACGCTGACGGTACAG---GCCAGACAA---TTATTG---TCTGGTATAGTGCAACAGCAGAAC---  
 AATTTG---CTGAGA---GCTATTGAGGCGCAACAGCATCTGTTGCAACTCACAGTCTGGGGCATC  
 >KT427725  
 TTCTACTGCAATACATCCAGACTGTTTAATAGTACATGGAATAGCACTGAACTGGAGGAGAGGAATAAC----  
 -----  
 -----  
 ACTGATAAAATTATCACACTCCCATGCAAAATAAAACAAATTATAAATATGTGGCAAGAAGTAGGAAAAGCAA  
 TGTATGCCCCCTCCTATCAGAGGACAGCTTAACTGTTTCATCAAAT---  
 ATTACAGGGCTGATACTAACAAGAGATGGTGGCCAAGGGAACGAG-----  
 -----  
 -----  
 ACCAATAATGAAACATTTCAGACCTGGAGGAGGAGATATGAGGGACAATTGGAGAAGTGAATTATATAAATACA  
 AAGTAGTAAAAATTGAACCACTA---GGAATAGCACCCACCAAGGCAAAGAGAAGAGTGGTG-----  
 -----CAGAGAGAAAAAAGAGCC---GTGGGAACGCTAGGAGCT-----  
 ---ATGTTCCCTTGGGTTCTTGGGAGCA---GCAGGAAGCACTATG---GGCGCAGCGTCA---  
 ATGACGCTGACGGTACAG---GCCAGGCAA---TTATTG---TCTGGTATAGTGCAACAGCAGAGC---  
 AATCTG---CTGAGA---GCTATTGAGGCGCAGCAGCATATGTTGCAACTCACAGTCTGGGGCATC  
 >KT427724  
 TTCTACTGTAATACAACACAACCTGTTTACAACACAACCTGTTTAATAGGACATGGGAGTTTAAATAGTACTGGAC  
 CAAAT-----  
 -----  
 GCTACAGGTAATATCACACTCCCATGCAGAATAAAACAAATTATAAATAGGTGGCAAGAAGTAGGAAAAGCAA  
 TGTATGCCCCCTCCCATCAGCGGATATATTAATGTTTCATCAAAT---  
 ATTACAGGACTCCTATTAATAAGAGATGGGGGCAATGAAACCGAT-----  
 -----  
 -----  
 GGGAGCGAGACCTTTAGACCTATAGGAGGAAATATGAGGGATAATTGGAGAAGTGAATTATATAAATATAAAG  
 TAGTAAGAATTGAGCCATTA---GGAGTAGCACCCACCAAGGCAAGGCGAAGAGTGGTG-----  
 -----CAGAGAGAAAAAAGAGCC---ATAACA---ATGGGAGCT-----  
 ATGTTCCCTTGGGTTCTTGGGAGCA---GCAGGAAGCACTATG---GGCGCAGCGTCA---  
 ATGGCGCTGACGGTACAG---GCCAGATTA---TTATTA---TCTGGTATAGTGCAACAGCAGAGC---  
 AATTTG---CTGAGG---GCTATTGAGGCGCAACAACATCTGTTGCAACTCACAGTCTGGGGCATC  
 >KT427723  
 TTCTACTGTAATACATCAGGGCTGTTTAATAGTACTTGGATACATAATGGTACTCGGCTAAATAATGGTACT-  
 -----  
 -----  
 AGGAATGGTACTATCACACTCCCATGCAGAATAAAACAAATTATAAACAGGTGGCAGGAAACGGGAAAAGCAA  
 TGTATGCCCCCTCCCATCAGAGGAATAATTAGATGTTTCATCCAAC---  
 ATTACAGGGCTGCTATTAACAAGAGATGGTGGTGGTGGGAATGACACC-----  
 -----  
 -----  
 GACAACTCCACCGAGGTCTTCAGACCCGGAGGAGGAGATATGAGGGACAATTGGAGAAGTGAATTATATAAAT  
 ATAAAGTAGTAAAAATTGAACCATTA---GGAATAGCACCCAACAAGGCAAGGAGAAGAGTGGTG-----  
 -----CAGAGAGAAAAAAGAGCA---GTGGGAACGCTAGGAGCT---

-----CTGTTTCCTTGGGTTCTTGGGAACA---GCAGGAAGCACTATG---GGCGCAGCGTCA---  
 GTCACGCTGACGGTACAG---GCCAGACTA---TTATTG---TCTGGTATAGTGCAACAGCAGAAC---  
 AATATG---CTGAGA---GCTATTGAGGCGCAACAGCACATGTTGCAACTCACAGTCTGGGGCATC  
 >KT427720  
 TTCTATTGTAATACAACAAAGCTATTTAATGATACATGGTTGAATGAAAATGAAACT-----  
 -----  
 -----  
 AGCACTAGCAATATCACACTCCCATGCAGAATAAAACAAATTATAAACAGATGGCAGGAAGTAGGAAGAGCAA  
 TGTATGCCCCCTCCCATCCAAGGACAAATTAGCTGTTTCATCAAAT---  
 ATTACAGGGCTGCTATTAACAAGAGATGGTGGTTTCAGGAGCCACT-----  
 -----  
 -----  
 AATGAAACCTTCAGACCTGTGGGAGGAGATATGAGAGACAACTGGAGAAGTGAATTATATAAATATAAAGTAG  
 TAAAAATTGAGCCATTA---GGACTGGCACCCACCAAGTCAAGGAGAGTAGTGGTG-----  
 -----CAAAGAGAAAAAAGAGCA---GTGGGA---ATGGGAGCT-----  
 ATGTTTCCTTGGGTTCTTGGGAGCA---GCAGGAAGCACTATG---GGCGCAGCGGCA---  
 GTGACGCTGACGGTACAG---GCCAGACAA---TTATTG---TCTGGTATAGTGCAACAGCAAAAC---  
 AATTTG---CTGAGA---GCTATTGAGGCGCAACAGCACATGTTGCAACTCACAGTCTGGGGCATC  
 >KT427716  
 TTCTACTGTAATACAACAGGGCTGTTTAATAGTACGTGGAACTCTACTACAAAGATAAATACT-----  
 -----  
 -----  
 ACAAGGTCAAATATCATACTCCCATGCAGAATAAAACAAATTATAAACAGGTGGCAGGAAGTAAGAAAAGCAA  
 TGTATAACCCTCCCATCAAAGGAAGAATTAAGTGTTTATCAAAT---  
 ATTACAGAGATACTATTAACAAGAGATAGTAGTAGTAACAATGACACG-----  
 -----  
 -----  
 AACAGGACCGAGATCTTCAGACCAGGAGGAGGAGATATGAGGGACAATTGGAGAAGTGAATTATATAAATATA  
 AAGTAGTAAGAATTAAGCCATTA---AGAATAGCACCCACCAAGGCAAAGAGAAGAGTGGTG-----  
 -----CAGAGAGAAAAAAGAGCA---GTAACA---CTAGGAGCT-----  
 ---ATGTTTCCTTGGGTTCTTGGGAACA---GCAGGAAGCACTATG---GGCGCAGCGGCA---  
 CTGACGCTGACGGTACAG---GCCAGGCTA---TTATTG---TCTGGTATAGTGCAACAGCAGAAC---  
 AATTTG---CTGAGA---GCTATTGAGGCGCAACAGCATATGTTGCAACTCACAGTCTGGGGCATC  
 >KJ849767  
 TTCTACTGTAATACAACACAACCTGTTTAATAGCAGGTGGAATATGACTGCTAAT-----  
 -----  
 TGGACTATGAATGTTACT-----  
 ACAGGGACAGATAATATCACACTCCCATGCAGAATAAAACAAATTATAAATAGATGGCAGGAAGTAGGAAAAG  
 CAATGTATGCCCCCTCCCATCGCAGGACAAATCAAATGCTTATCAAAT---  
 ATTACAGGGCTACTATTAACAAGAGATGGTAGT-----  
 -----  
 -  
 AACCAGACTAATGGGACAGAGACCTTCAGACCAGGAGGAGGAGATATGAGGGACAATTGGAGAAGTGAATTAT  
 ATAAATATAAAGTAGTAAAAATTGAGCCATTA---GGAGTAGCACCCACCAAGGCAAAGAGAAGAGTGGTG--  
 -----CAGAGAGAAAGAAGAGCA---ATAACA---  
 ATGGGAGCT-----ATGTTTCCTTGGGTTCTTGGGAGCA---GCAGGAAGCACTATG---  
 GGCGCAGCGTCA---TTGACGCTGACGGTACAG---GCCAGACAA---TTATTG---  
 TCTGGTATAGTGCAACAGCAGAAC---AATTTG---CTGAGG---  
 GCTATTGAGGCGCAACAGCACCTGTTGCAACTCACAGTCTGGGGCATC  
 >KT427847  
 TTCTACTGTAATACAACACAGCTGTTTAATAATGCTTGGAGTGAGACTGAGCTGTTTAATAGTACTGAGAATG  
 AT-----  
 -----  
 GCAAAACAGCACACTCACACTCCCATGCAGAATAAAACAAATTATAAACAGGTGGCAGGAAGTTGGAAGAGCAA  
 TGTATGCCCCCTCCCATCAAAGGACCAATTAGGTGTGTATCAAAC---  
 ATTACAGGGCTACTATTAACAAGAGATGGTGGTAACAATTCTTCT-----  
 -----  
 -----  
 GAAACCAATTCTTCTGAAATCTTCAGACCTGGAGGAGGAGATATGAGGGACAATTGGAGAAGTGAATTATATA  
 AATATAAAGTAGTAAAAATTGAGCCATTA---GGAGTAGCACCCACCAAGGCAAAGAGAAGAGTGGTG-----

-----CAGAGAGAAAAAAGAGCA---  
GTGGGGACAATAGGAGCT-----ATGTTTCCTTGGGTTCTTGGGAGCA---GCAGGAAGCACTATG---  
GGCGCAGCGTCA---ATGACGCTGACGGTACAA---GCTAGACAA---TTATTG---  
TCTGGTATAGTGCAACAGCAGAAC---AATCTG---CTGAGG---  
GCTATTGAGGCGCAACAGCATATGTTGCAACTCACAGTCTGGGGCATC  
>KT427853  
TTCTATTGTAATACAACACAGCTGTTTAATAGTACTTGGATGGGGAATGATACCATATCAAATACTACAGGA-  
-----  
-----  
TTAAATGACACTATCACACTCCCATGCAGAATAAAACAAATTATAAACAGGTGGCAGGAAGTAGGAAAAGCAA  
TATATGCCCCCTCCCATCAGCGGACAGATTAACTGTTTATCAAAT---  
ATTACAGGGCTGCTATTAAACAAGAGATGGTGGTGATAACACCACC-----  
-----  
-----  
ATCGAGACCTTCAGACCTGGAGGAGGAAATATGAAGGACAATTGGAGAAGTGAATTATATAAATATAAAGTAG  
TAAAAATTGAGCCAGTA---GGAATAGCGCCACCAAGGCAAAGAGAAGAGTGTTG-----  
-----CAGAGAGAAAGAAGAGCA---GTAACG---CTAGGAGCT-----  
ATGTTTCCTTGGGTTCTTGGGAGCA---GCAGGAAGCACTATG---GGCGCAGCGTCA---  
ATGACGCTGACGGTACAG---GCCAGACAA---CTATTG---TCTGGTATAGTGCAACAGCAGAAC---  
AATTTG---CTGAGG---GCTATTGAGGCGCAACAGCATCTGTTGCAACTCACAGTATGGGGCATC  
>KT427709  
TTCTATTGTAATACAACAGACCTGTTTAATAGTGCTTGGCTGTCTAACAGTACTGGGAATGAGACT-----  
-----  
-----  
GGACAGTCAAATATTACACTCCCATGCAGAATAAAACAAATTATAAACATGTGGCAGGAGGTAGGAAAAGCAA  
TGTATGCCCCCCCCCATCCAAGGACAAATTAGGTGTTTCATCAAAT---  
GTTACAGGGCTAATATTAGTAAGAGATGGTGGTGACAATACCAAC-----  
-----  
-----  
GGGACCGAGACCTTCAGACCTGGAGGAGGAGATATGAGGGACAATTGGAGAAGTAAATTATATAAATATAAAG  
TAGTAAAAATTGAGCCAGTA---GGATTAGCACCCACCAAGGCAAGGAGAAGAGTGTTG-----  
-----CAGAGAAAAAAAAGAGCG---GTGGGAACGCTGGGAGCT-----  
GTGTTCCCTTGGGTTCTTGGGAGCA---GCAGGAAGCACTATG---GGCGCAGCGTCA---  
ATGACACTGACGGTACAG---GCCAGACAA---TTATTG---TCTGGTATAGTGCAAGCAGCAGAAC---  
AATTTG---CTGAAG---GCTATTGAGGCGCAACACCATCTGTTGCAACTCACAGTCTGGGGCATC  
>KT427702  
TTCTACTGTAATTCAACACAACCTGTTTAATAGTACTTGGGGGGTTAATGGTACTTGAATGATACTAGG---  
-----  
-----  
TCAAATGACACTATCACACTCCCATGCAGAATAAAACAAATTATAAACATGTGGCAGGAAGTAGGAAAAGCAA  
TGTATGCCCCCTCCCATCAGTGGACAAATTAACTGTTTCATCAAAT---  
ATTACAGGGTTGCTATTAAACAAGAGATGGAGGTAATAACGGGACG-----  
-----  
-----  
AACGAGACCTTCAGACCTGGAGGAGGAAATATGAGGGACAATTGGAGAAGTGAATTATATAAATATAAAGTAG  
TAAAAATTGAACCATTA---GGAATAGCACCCACCAAGGCAAGAAGAAGAGTGTTG-----  
-----CAAAGAGAAAAAAGAGCA---ATAGGA---TTCGGAGCT-----  
ATGTTTCCTTGGGTTCTTGGGAGCA---GCAGGAAGCACTATG---GGCGCAGCGTCG---  
GTGACGCTGACGGTACAG---GCCAGACAA---TTATTG---TCTGGTATAGTGCAACAGCAGAGC---  
AATTTG---CTGAAG---GCTATTGAGGCGCAACAGCATCTGTTGCAACTCACAGTCTGGGGCATC  
>KT427700  
TTCTACTGTAATACAACAAAGCTGTTTAATAGTACCTGGCCTTTGAATGATACTACTTTGAATGATACTACAG  
GG-----  
-----  
TCAGATAAAAATATCACTCTCCCATGCAGAATAAAACAAATTATAAACAGGTGGCAAGAAGTAGGAAAAGCAA  
TGTATGCCCCCTCCCATCAGAGGACAAATTAGGTGTTTCATCAAAT---  
ATTACAGGTCTATTATTAAACAAGAGATGGTGGTAATGTCAACGGGACC-----  
-----  
-----  
ACCACCACCGAGACCTTCAGACCTGGAGGAGGAGATATGAGGGACAATTGGAGAAGTAAATTATATAAATATA

AAGTAGTGAAAATTGAGCCATTA---GGAGTAGCACCTACCAAGGCAAAGAGAAGAGTGGTG-----  
-----CAGAGGGAAAAAAGAGCA---ATAACAGGGCTAGGAGCT-----  
---GTGTTCCCTTGGGTTCTTGGGAGCA---GCAGGAAGCACTATG---GGCGCAGCGTCG---  
GTAACGCTGACGGTACAG---GCCAGACAA---TTATTG---TCTGGCATAGTGCAGCAGCAGAAC---  
AATCTG---CTGAGG---GCTATTGAGGCGCAACAGCATATGTTGCAACTCACAGTCTGGGGCATC  
>KT427699  
TTCTACTGTAATACAAACCGACTGTTTAAACATAAATGAAACTACTCTAAATAAACTATAAATGAACTAGA-  
-----  
-----  
GTCAATGAGACAATCACACTCCCATGTAGAATAAAAGCAAATTATAAACATGTGGCAGACAGTAGGAAAAGCAA  
TGTATGCCCCCTCCCATCAACGGACAAATTAATTGTACATCAAAT---  
ATTACAGGGCTACTATTAACAAGAGATGGTGGTAAAACTAATGAGACC-----  
-----  
-----  
AATGATACCGAGGTCTTCAGACCTGGAGGAGGAGATATGAGGGATAATTGGAGAAGTGAATTATATAAATATA  
AAGTAGTAAAAATTGAACCATTA---GGAATAGCACCTACCAAGGCCAGGAGAAGAGTGGTG-----  
-----CAGAGAGAAAAAAGAGCA---GTGGGAATGCTAGGAGCT-----  
---ATGTTCCCTTGGGTTCTTGGGAGCA---GCAGGAAGCACTATG---GGCGCAGCGTCA---  
ATGGCGCTGACGGTACAG---ACCAGACAA---TTATTG---TCTGGTATAGTGCAACAGCAGAAT---  
AATCTG---CTGAGG---GCTATTGAGGCGCAACAACATATGTTGCAACTCACAGTCTGGGGCATC  
>KT427692  
TTCTACTGTAATACATCAGGGCTGTTTAAATAGTACTTGGCTAACTAATAGTACTAGGAATAGTACTAACC-  
-----  
-----  
GGCAATAGTACTATCACACTCCCATGCAGAATAAAACAAATTATAAACAGGTGGCAGGAAACGAGAAAAGCAA  
TGTATGCCCCCTCCCATCAGAGGAATAATTAGATGTTTCATCCAAC---  
ATTACAGGGCTGCTATTAACAAGAGATGGTAGTAGTAAGAACGGCACC-----  
-----  
-----  
GACAACTCCACCGAGGTCTTCAGACCTAGAAGAGGAGATATGAAGGACAATTGGAGAAGTGAATTATATAAAT  
ATAAAGTAGTAAAAATTGAACCATTA---AGAATAGCACCCAACAAGGCAAGGAGAAGAGTGGTG-----  
-----CAGAGAGAAAAAAGAGCA---GTGACA---CTAGGAGCT---  
-----TTGTTCCCTTGGGTTCTTGGGAACA---GCAGGAAGCACTATG---GGCGCAGCGGCA---  
CTGACGCTGACGGTACAG---GCCAGAACA---TTACTG---TCTGGTATAGTGCAACAGCAAAAT---  
AATTTG---CTGAGA---GCTATTGAAGCACAAACAGCATATGTTGCAACTCACAGTCTGGGGCATC  
>KT427792  
TTCTACTGCAGTACAACAAAGCTGTTTAAATAGTACTTGGTCTGAGAATAATACCGCAGAGAATAATACCGCAG  
GG-----  
-----  
GTAAATGAACTATCACACTCCCATGCAGAATAAAACAAATCATAAACAGATGGCAGGGAGTAGGAAGAGCAA  
TGTATGCCCCCTCCCATCAGAGGATATATTAAGTGTTCAGCAAAT---  
ATTACAGGGATGCTATTAACAAGAGATGGTGGCAATAATAGCAGC-----  
-----  
-----  
CCCAACGAGACTTTTCAGACCTGAAGGGGGAAATATGAAGGACAATTGGAGAAGTGAAGTTATATAAATATAAGG  
TAGTCCAAATTGAGCCATTA---GGAATAGCACCCACCAAGGCGAAGAGAAGAGTGGTG-----  
-----CAGAAAGAAAAAAGAGCA---GTGACA---CTGGGAGCT-----  
ATGTTCCCTTGGGTTCTTGGGAGCA---GCAGGAAGCACTATG---GGCGCAGCGTCA---  
CTGACGCTGACGGTACAG---GCCAGACAA---TTATTG---TCTGGTATAGTGCAACAGCAGAAC---  
AATCTG---CTGAGG---GCTATTGAGGCGCAACAGCATCTGTTGCAACTCACAGTCTGGGGCATT  
>KT427791  
TTCTACTGTAATACAACACAGCTATTTAATAGTACCTGGTATGCTAATGGTACTACTGAAAATAGTACT----  
-----  
-----  
GGAACGAAACTATCACACTCCCATGCAGAATAAAACAAATTATAAACATGTGGCAAGAAGTAGGAAGAGCAA  
TGTATGCCCCCTCCTATCAAGGGACAAATTAAGTGTACATCAAAT---  
ATTACAGGGCTGATATTAACAAGAGATGGTGGTAAAAACGACACA-----  
-----  
-----  
GAGACAGAGACCTTCAGACCTGGAGGAGGAAATATGAAGGACAATTGGAGAAGTGAATTATATAAATATAAAG

TAGTAAGAATTGAACCATTA---GGAGTAGCACCCACCAAGGCAAAGAGAAGAGTGGTG-----  
 -----CAGAGAGAAAAAAGAGCA---GTGGGAACACTGGGAGCC-----  
 ATGTTTCCTTGGGTTCTTGGGAGCA---GCAGGAAGCACTATG---GGCGCAGCGTCA---  
 ATAACGCTGACGGTACAG---GCCAGACAA---TTATTG---TCTGGTATAGTGCAACAGCAGAAC---  
 AATTTG---CTGAGG---GCTATTGAGGCGCAACAACATCTGTTGCAACTCACAGTCTGGGGCATC  
 >KT427787  
 TTCTACTGTGACACAGCAGAACTGTTTAATAGTACTTGAATAATACTGAAGAGGCAGATAACATGGGA----  
 -----  
 -----  
 GGAAATGATACCATCATACTCCCATGTAGAATAAGACAAATTATAAACAGGTGGCAGGAAGTAGGAAAAGCAA  
 TGTATGCCCCCTCCCATCCAAGGACATATTAATTGCTTATCAAAT---  
 ATTACAGGGCTACTATTAATGAGAGATGGTGGTAATAACGTGAGC-----  
 -----  
 -----  
 GGGCCCGAGATCTTCAGACCTGGAGGAGGAGATATGAGGGACAATTGGAGAAGTGAATTATATAAATATAAAG  
 TAGTAAAAATTAAACCATTA---GGAATAGCACCCACTAAAGCAAAGAGAAGAGTGGTG-----  
 -----CAGAGAGAAAAAAGAGCA---GTGGGA---ATAGGAGCT-----  
 GTGTTTCCTTGGGTTCTTGGGAGCA---GCAGGAAGCACTATG---GGCGCAGCGTCA---  
 ATGACGCTGACGGTACAA---GCCAGACTA---TTATTG---TCTGGTATAGTGCAAGCAGCAAAAC---  
 AATTTG---CTGCAG---GCTATTGAGGCGCAACAGCGTCTGTTGCAACTCACAGTCTGGGGCATC  
 >KT427786  
 TTCTACTGTAATACAACACGACTGTTTAATAGTACTTGGCCCGCTGGGGACACTTGAATGATACTGAA----  
 -----  
 -----  
 AACACAGCCAATATCACACTCCCATGTAGAATAAAACAAATTATAAACAGGTGGCAGGCAGTAGGAAAAGCAA  
 TGTATGCCCCCTCCCATCAGAGGACAAATTAGCTGCTCATCAAAC---  
 ATTACAGGGTTGCTATTAACAAGAGATGGTGGTAATGATAATGCTACA-----  
 -----  
 -----  
 AGGAACGAGACCTTCAGACCGGGAGGAGGAGATATGAGGGACAATTGGAGAAGTGAATTATATAAATATAAAG  
 TAGTAAAAATTGAACCATTG---GGAATAGCACCCACCAAGGCAAAGAGAAGAGTGGTG-----  
 -----CAGAGAGAAAAAAGAGCA---GTGGGAGTACTAGGAGCT-----  
 ACGTTCCTTGGGTTCTTGGGAGCA---GCAGGAAGCACTATG---GGCGCAGCGTCA---  
 ATGACGCTGACGGTACAG---GCCAGACTA---TTATTG---TCTGGTATAGTGCAACAGCAGAAC---  
 AATTTG---CTGAAG---GCTATTGAGGCGCAACAGCATCTGTTGCAACTCACAGTCTGGGGCATT  
 >KT427784  
 TTTTACTGTAATACAACAAAGCTGTTTAATAGTAGGTGGAATATTAGTGGAGAGTCAAATAACACA-----  
 -----  
 -----  
 GAAGGAGAACTATCATACTCCCATGCAGAATAAAACAAATTATAAACAGATGGCAGGAAGTAGGAAAAGCAA  
 TGTATGCCCCCTCCAATCAGCGGATATATTAGATGTTTATCAAAT---  
 ATTACAGGGCTACTATTAACAAGAGATGGTGGTAATAATGGAACA-----  
 -----  
 -----  
 AATGAGACCTTCAGACCAGGAGGAGGAGACATAAAGGATAATTGGAGAAGTGAATTATATAAATATAAAGTAG  
 TAAAAATTGAACCATTA---GGAGTAGCACCCACCAAGGCAAAGAGAAGAGTGGTG-----  
 -----CAGAGAGAAAAAAGAGCA---GTGGGA---ATAGGAGCT-----  
 ATGTTTCCTTGGGTTCTTGGGAGCA---GCAGGAAGCACTATG---GGCGCAGCGTCA---  
 CTAACGCTGACGGTACAG---GCCAGACTA---TTATTG---TCTGGTATAGTGCAACAGCAGAAC---  
 AATTTG---CTGAGA---GCTATTGAGGCGCAACAGCATCTGTTGCAACTCACAGTCTGGGGCATC  
 >KT427781  
 TTCTACTGTAATACAACACAGCTGTTTAATAGTATTTGGCCTTGAATGATACTGATTCAAATAGTACTAAAG  
 GG-----  
 -----  
 -----  
 TCAAATAGCAATATCACACTCCCATGCAGAATAAAACAAATCATAAACAGGTGGCAGGAAGTAGGAAAAGCAA  
 TGTATGCCCCCTCCCATCAGAGGAGAAATCAGGTGTACATCAAAT---  
 ATTACAGGACTACTATTAACAAGAGATGGTGGTTCTGAGGACAACACT-----  
 -----  
 -----  
 TCTATATCTGAGATCTTCAGACCTGGAGGAGGAGATATGAGGGATAATTGGAGAAGTGAATTATATAAATATA

AAGTAGTACAAGTTGAGCCATTA---GGAATAGCACCCACCAGGGCAAGGAGAAGAGTGGTG-----  
-----CAGAGAGAAAAGAAGAGCA---GTAACA---ATGGGAGCT-----  
---CTGTTCCCTTGGGTTCTTGGGAGCA---GCAGGAAGCACTATG---GGCGCAGCGTCA---  
ATGACGCTGACGGTACAG---GCCAGACAA---TTATTG---TCTGGTATAGTGCAGCAGCAGAGC---  
AATTTG---CTGAAG---GCTATTGAGGCGCAACAGCACCTGTTGCAACTCACAGTCTGGGGCATC  
>KT427656  
TTCTACTGTAATTCATCACAGCTGTTTAATAGTACTTGGTATACTAATGGTACTTGGAAATGCTAATGGCACTG  
AAAAAAAT-----  
-----  
TTCAATGACACCATTACGCTCCCATGCAGAATAAAACAAATTATAAACAGGTGGCAGGACATAGGAAGAGCAA  
TATATGCTCCTCCCATCAGAGGATACATTAATTGTTTCATCAAAT---  
ATTACAGGAATGATATTAACAAGAGATGGGAGTGACAATGACTCT-----  
-----  
-----  
AGTCCTGAAATCTTCAGACCTGGAGGAGGAAATATGAAGGACAATTGGAGAAGTGAATTATATAAATATAAAG  
TAGTAAAAATTGAGCCATTA---GGAATAGCACCCACCAAGGCAAAGAGAAGAGTGGTG-----  
-----CAGAGAGAAAAAAGAGCA---GTGGGAACGTTGGGAGCT-----  
ATGTTCCCTTGGGTTCTTGGGAACA---GCCGGAAGCACTATG---GGCGCAGCGGCA---  
GTAACGCTGACGGTACAG---GCCAGACAA---TTATTG---TCTGGTATAGTGCAACAGCAGAAC---  
AATCTG---CTGAGG---GCTATTGAGGCGCAACAGCATATGTTGCAACTCACAGTTTGGGGCATC  
>KT427650  
TTCTACTGTAATACATCACAGTTGTTTAACAGTACCTGGAGTCTTAACAGTACTTGGAAATGGTACTAATACT-  
-----  
-----  
AACAAATGGCACTATCACACTCCCATGCAGAATAAAACAAATCATAAACAGGTGGCAGGAAGTAGGAAGATCAA  
TGTATGCCCCCTCCCATCAAAGGACTAATTAATTGTTTGTCAAAT---  
ATTACAGGGCTCCTGTTAACAAGAGATGGTAGTAATGGGTCCGAT-----  
-----  
-----  
CCCGAAATCTTCAGACCTGGAGGAGGAGATATGAGGGACAATTGGAGAAGTGAATTATATAAATATAAAATAG  
TAAAAATCGAGCCATTA---GGAATAGCACCCACCAAGGCAAAGAGAAGAGTGGTG-----  
-----CAGAGAGAGAAAAGAGGA---GTAACA---TTAGGAGCT-----  
GTGTTCCCTTGGGTTCTTGGGAACG---GCAGGAAGCACTATG---GGCGCAGCGGCC---  
ACGACGCTGACGGTACAG---GCCAGACAA---TTATTG---TCTGGTATAGTGCAACAGCAGAAC---  
AATTTG---CTGAGA---GCTATTGAGGCGCAACAGCATATGTTGCAACTCACAGTCTGGGGCATT  
>KJ849811  
TTCTACTGTAATACAACAGAACTATTTAATTCCACTTGGAAATGGTACTGCTGGT-----  
-----  
GAGAACAAATAGTACTAGT-----  
ACTGAGGGAGGAAACATCACACTCCCATGTAGAATAAAACAAATTGTAAACAGATGGCAGGAAGTAGGAAAAT  
CAATGTATGCCCCCTCCCATCAGTGGATACATCAAGTGTGTATCAAAT---  
ATTACAGGGCTGCTATTAAACAAGAGATGGTGGT-----  
-----  
ATTACTAATGAACTAAC---  
CACAACGAGACTTTTAGACCTTTAGGAGGAAATATGAAGGACAATTGGAGAAATGAATTATATAAATATAAAG  
TAGTAAAAATTGAGCCATTA---GGAGTAGCACCCACCAAGGCAAAGAGAAGAGTGGTG-----  
-----CAAAGAGAAAAAAGAGCA---GTGGGAGCAATAGGAGCT-----  
ATGTTCCCTTGGGATCTTGGGAGCA---GCAGGAAGCACTATG---GGCGCAGCGTCA---  
ATAACGCTGACGGTACAA---GCCAGGCTA---CTCTTG---TCTGGTATAGTGCAACAGCAGAAC---  
AATCTG---CTGAGG---GCTATTGAGGCGCAACAACATCTGTTGCAACTCACAGTCTGGGGCATC  
>KJ849825  
TTCTATTGTAATACAACAAAACCTGTTTAATAATACTTGGAAATAGTACTGCTGGAAATTGGACT-----  
-----GGAAAT---  
TGGACTGTGACTAAAGGGCCA-----  
AGTGGTACTGATATTATCATACTCCCATGCAGAATGAAAACAAATCATAAACAGGTGGCAGGAAGTAGGAAAAG  
CAATGTATGCTCCTCCCATCAGTGGAGAATTAGCTGTTTATCAAAT---  
ATCACAGGGCTGATATTAACAAGAGATGGTGGT-----  
-----  
AATAACAAGAACAGGAAC---  
CGGACCGACAATTTTCAGACCTGAAGGAGGAGATATGAGGAATAATTGGAGAAGTGAATTATATAAATACAAAG

TAGTAAAAATTGAGCCATTA---GGAATAGCACCCACCAAGGCAAGGAGAAGAGTGGTG-----  
 -----CAGAGAGAAAAAAGAGCA---ATGGGAACACTAGGAGCT-----  
 GTGTTCCCTTGGGTTCTTGGGAACA---GCAGGAAGCACTATG---GGCGCAGCGTCA---  
 CTGACGCTGACGGTACAG---GCCAGACAA---CTATTG---ACTGGTATAGTGCAACAGCAGAAC---  
 AATTTG---CTGAGG---GCTATTGAGGCGCAACAGCATCTGTTGCAGCTCACAGTCTGGGGCATC  
 >KT427775  
 TTCTACTGTAATACAACACAGCTGTTTAATAGTACTTGGCTGAATAGTACTTGAATGATAATGAGACAAAAT  
 CA-----  
 -----  
 GACAAATAGCACTATCACTCTTCCATGCAGAATAAAACAAATTATAAATAGATGGCAGGAAGTAGGAAAAGCAA  
 TGTATGCCCCCTCCCATCGCAGGAAAAATTAGATGTTTCATCAAAT---  
 ATTACAGGGCTGCTATTAACAAGAGATGGAGGCAATACCAGTAAT-----  
 -----  
 -----  
 GGCCACAGTGAGATCTTCAGGCCTGCAGGAGGAGATATGAGGGACAATTGGAGAAGTGAATTATATAAATATA  
 AAGTAGTAAAAATTGAGCCTTTA---GGAATAGCACCCACCAAGGCAAGGAGAAGAGTGGTG-----  
 -----CAGAGAGAAAAAAGAGCA---GTGGGA---ATAGGAGCT-----  
 ---GTGTTCCCTTGGGTTCTTGGGAGCA---GCAGGAAGCACTATG---GGCGCAGCGTCA---  
 GTGACGCTGACGGTACAG---GCCAGGCAA---TTATTG---TCTGGTATAGTGCAACAGCAGAAC---  
 AATTTG---CTGAAG---GCTATTGAGGCGCAACAGCATCTGTTGCAACTCACAGTCTGGGGCATC  
 >KT427769  
 TTTTACTGTAATACAACAAAGCTGTTTAATAGGACTTGGATTAGAAATGGGGGATTTTGAATACTACTGAAG  
 AG-----  
 -----  
 GAAAAAATACTGAAATCACACTCCCATGCAAAATAAAGCAAATCATAAACAGGTGGCAGGAAGTAGGAAAAT  
 CGATATATGCCCCCTCCCATCAGAGGACAAATTAGATGTGTATCAAAT---  
 ATTACAGGGCTGCTATTAACAAGAGATGGTGGTATTAACAATACTACT-----  
 -----  
 -----  
 AACGAGACCGAGATCTTTAGACCTGCAGGGGGAGATATGAGGGACAATTGGAGAAGTGAATTATATAAATATA  
 AAGTAGTAAAAATTGAACCATTA---GGAGTAGCACCCACCAAGGCAAAGAGAAGAGTGGTG-----  
 -----CAGAGAGAAAAAAGGGCA---GTGGGAGTAATAGGAGCT-----  
 ---ATGTTCCCTTGGGTTCTTGGGAGCA---GCAGGAAGCACTATG---GGCGCAGCGTCA---  
 GTGACGCTGACGGTACAG---GCCAGACAA---TTACTG---TCTGGTATAGTGCAACAGCAGAAC---  
 AATCTG---CTGAGG---GCTATTGAGGCGCAACAACATCTGTTGCAACTCACAGTCTGGGGCATC  
 >KT427767  
 TTCTACTGTAATACAACACAACCTGTTTAATAGTACTTGGTTTAATAGTACATGGACTACTGCAGAGTCAAATA  
 ACACT-----  
 -----  
 GAAGGAAGTGACTCAATCACCTCCCATGCAGAATAAAGCAAGTAGTAAACATGTGGCAGGAAGTAGGAAAAG  
 CAATGTATGCCCCCTCCCATCAGCGGACGAATTAAGTGTTCATCAAAC---  
 ATTACAGGGTTGCTATTAACAAGAGATGGTGGTAATGGGAGTGAA-----  
 -----  
 -----  
 CCTATAGAGATCTTCAGACCTGGAGGAGGAGATATGAGGGACAATTGGAGGAGTGAATTATATAAATATAAAG  
 TAGTAAAAATAGAACCATTA---GGAATAGCACCTACCAAGGCAAAGAGAAGAGTGGTG-----  
 -----CAGAGAGAAAAGAGAGCA---GTGACA---CTAGGAGCT-----  
 GTGTTCCCTTGGGTTCTTGGCAGCA---GCAGGAAGCACTATG---GGCGCAGCGTCA---  
 ATGACGCTGACGGTACAG---GCCAGACTA---TTATTG---TCTGGTATAGTGCAACAGCAGAAC---  
 AATTTG---CTGAGG---GCTATTGAGGCGCAACAACATCTGTTGCAACTCACAGTCTGGGGCATC  
 >KT427764  
 TTCTACTGTAATACATCACAGCTGTTTAACAGTACTTGGATTAATGATACTAATACAGAA-----  
 -----  
 -----  
 AATAACACCCATATCACCTCCCATGCAGAATAAGACAAATCATAAACAGGTGGCAAGAAGTAGGAAAAGCAA  
 TGTATGCCCCCTCCCATTAGCGGACAGATTAAATGTTTCATCAAAT---  
 ATTACAGGGTTGCTATTAACAAGAGATGGTGGTGTCAATGGTACC-----  
 -----  
 -----  
 AATGGAAGTGAACCTTCAGACCTGGAGGAGGAGATATGAGGGACAATTGGAGAAGTGAATTATATAAATATA

AAGTAGTAAAAATTGAACCATTA---GGAATAGCACCCACCAAGGCAAGGAGAAGAGTGGTG-----  
-----CAAAGAGAAAAAAGAGCG---GTGGGAGCACTAGGAGCT-----  
---ATGTTCCCTTGATTCTTGCGCACA---GCAGGAAGCACTATG---GGCGCAGCGTCA---  
ATAACGCTGACGGTACAG---GCCAGACAA---TTATTG---TCTGGTATAGTGCAACAGCAGAAC---  
AATCTG---CTGAGA---GCTATTGAGGCGCAACAGCACTTGTGCAACTCACAGTCTGGGGCATC  
>KT427761  
TTCTACTGTAATACAACAAAACCTGTTTAATAGTACTTGGAAAAATAATAATGTTAGTTGGAATGTTGCGGCT-  
-----  
-----  
GAAAAATGACACTATCACACTCCCATGTAGAATCAAACAAATTATAAACCTGTGGCAGGAAGTGGGAAAAGCAA  
TGTATGCCCCCTCCCATCCAAGGACAAATTAAGTGTTCATCAAAT---  
ATTACAGGGCTGTTATTAATAAGAGATGGTGGTATTAACAACAGACC-----  
-----  
-----  
AAGGACACCGAGACCTTCAGACCTGGAGGAGGAGATATGAGGGACAATTGGAGAAGTGAATTATATAAATATA  
AAGTAGTAAAAATTGAACCAGTA---GGAATAGCACCCACCAAGGCAAAGAGAAGAGTGGTG-----  
-----CAAAGAGAAAAAAGAGCA---GTGGGAATGGTAGGAGCT-----  
---ATGTTCCCTTGGGTTCTTGCGGAGCA---GCAGGAAGCACTATG---GGCGCAGCGTCA---  
ATAACGCTGACGGTACAG---GCCAGACAA---CTATTG---TCTGGTATAGTGCAACAGCAGAAC---  
AATATG---CTGAGA---GCTATTGAGGCGCAACAGCATCTGTGCAACTCACAGTCTGGGGCATC  
>KT427757  
TTCTACTGCAATACAACACAGCTGTTTAATAGTACTTGGCCTGAGAATAATATTAGTACTACAGGGGTAAAT-  
-----  
-----  
GTAAGTGATACTATCACAATTCCATGCAGAATAAAACAATTCATAAACAGGTGGCAGGCAGTAGGAAGAGCAA  
TGTATGCCCCCTCCCATCAGAGGATATATTAAGTGTTCATCAAAT---  
ATTACAGGGCTGCTATTAACAAGAGATGGTGGTAGTAACAGCTCC-----  
-----  
-----  
TTAAATGAGACTTTTCAGACCTGAAGGGGGAAATATAAAGGACAATTGGAGAAGTGAGTTATATAAATATAAGG  
TAGTCCAAATTGAGCCATTA---GGAGTAGCACCCACCAAGGCAAAGAGAAGAGTGGTG-----  
-----CAGAGAGAAAGAAGAGCA---GTGACA---CTAGGAGCT-----  
ATGTTCCCTTGGGTTCTTGCGGAGCA---GCAGGAAGCACTATG---GGCGCAGCGTCA---  
CTGACGCTGACGGTACAG---GCCAGACAA---TTGTTG---TCTGGTATAGTGCAACAGCAGAAC---  
AATCTG---CTGAGG---GCTATTGAGGCGCAACAGCATCTGTGCAACTCACAGTCTGGGGCATT  
>KT427756  
TTCTACTGCAATACATCAAATCTGTTTAATAAGTCTTGGACTAATAGTTCTTGGTCTGGTAATGAAGGGTCAA  
ATAAC-----  
-----AAT---  
ACAGAAAATGACACAATCACACTCCAATGCAGAATAAAACAAATTATAAACATGTGGCAGAAAGTAGGAAAAG  
CAATGTATGCCCCCTCCTATCCGAGGAACAATTAAATGTTTCATCAAAT---  
ATCACAGGGCTGCTATTAACAAGAGATGGTGGCAATAACAGCACC-----  
-----  
-----  
AATGAGACCTTCAGACCTGGAGGAGGAGATATGAGAGATAATTGGAGAAGTGAATTATATAAATATAAAGTAG  
TAAAAATTGAACCATTA---GGAGTAGCACCCACCAGGGCAAAAAGAAGAGTGGTG-----  
-----CAGAAAGAAAAAAGAGCA---GTGGGA---ATAGGAGCT-----  
TTATTCCCTTGGGTTCTTGTCGGCA---GCAGGAAGCACTATG---GGCGCAGCGTCA---  
ATGACGCTGACGGTACAG---GCCAGACAA---TTATTG---ACTGGTATAGTGCAACAGCAAAAC---  
AATTTG---CTGAGA---GCTATTGAGGCGCAACAGCATATGTGCAACTCACAGTCTGGGGCATA  
>KT427755  
TTCTACTGTAATACATCAAAAACCTGTTTAATAGTACGTGGAACAGTGGGAATTTAGCAGTAGATAATAGTACTG  
AT-----  
-----  
GATAATGGGACTATCATACTCCCATGTAGAATAAAACAAATCATAAACATGTGGCAGGAAGTAGGAAAAGCAA  
TGTATGCCCCCTCCTATTTCGAGGAATAATTAAATGTTTATCAAAT---  
ATCACAGGGATAATTTTAACAAGAGATGGTGGTAATAACAATAATAGCAACGAG-----  
-----  
-----  
ACCACCGAAATCTTCAGACCTGGAGGAGGAGACATGAGGGACAATTGGAGAAGTGAATTATATAAATATAAAG

TAGTAAAAATTGAACCATTA---GGAGTAGCACCCACTGAGGCAAGGAGGAGAGTGGTG-----  
 -----CAGAGAGAAAAAAGAGCA---ATAACG---ATGGGAGCT-----  
 ATGTTCCCTTGGGTTCTTGGGAGCA---GCAGGAAGCACTATG---GGCGCAGCATCA---  
 ATAACGCTGACGGTACAG---GCCAGACAA---TTATTG---TCTGGAAAAGGGCGACAGCAGAAC---  
 AATCTG---CTGAGG---GCTATTGAGGCGCAACAGCATCTGTTGCAACTCACGGTCTGGGGCATT  
 >KT427754  
 TTCTACTGTAATACATCACAGCTGTTTAAACAGTACTTGGCCTTGGAACAGTGCTGGGAATGAGAGT-----  
 -----  
 -----  
 GATAGTACTAATATCACACTCCCATGCAGAATAAGACAAATCATAAACAGATGGCAGGAAGTAGGAAAAGCAA  
 TGTATGCCCCCTCCCATCAAAGGACCAATTAGATGCTCATCAAAT---  
 ATTACAGGGATACTATTAACAAGAGATGGTGGTAATACCAACCAG-----  
 -----  
 -----  
 ACCACGGAGATCTTTAGACCGGGAGGAGGAAATATGAAGGACAATTGGAGAAGTGAATTATATAAATATAAAG  
 TAGTAAAAATTGAGCCATTA---GGAGTAGCACCCACCAAGGCAAGGAGAAGAGTGGTG-----  
 -----CAGAGAGACAAAAAGAGCA---GTAACA---CTAGGAGCT-----  
 ATGTTCCCTTGGGTTCTTGGGAGCA---GCAGGAAGCACTATG---GGCGCAGCGTCA---  
 ATGACGCTGACGGTACAG---GCCAGACTA---TTATTG---TCTGGTATAGTGCAACAGCAGAAC---  
 AATTTG---CTGAAG---GCTATTGAGGCGCAACAGCGTCTGTTGCAACTCACAGTCTGGGGCATC  
 >KT427750  
 TTTTACTGTAATACAACACTGCTATTTAAACAGAACTTGGAAGTTTAATGGCACTTGGGAATAGTGTGAAGAATA  
 GTACTGGA-----  
 -----  
 -----  
 GAGTCAAACAATATTACACTCCCATGCAGAATAAAACAAATCATAAACAGGTGGCAGGAAGTAGGAAAAGCAA  
 TGTATGCCCCCTCCCATCAGAGGACTAATTAAGTGTATCAAAT---  
 ATTACAGGGCTACTATTAACAAGAGATGGTGGTAATGCGAATAGC-----  
 -----  
 -----  
 AGCAATGAGACCTTCAGACCGGGAGGGGAGATATGAGGGACAATTGGAGAAGTGAATTATATAAATATAAAG  
 TAGTAAAAATTGAACCATTA---GGAGTAGCACCCACCAAGGCAAAGAGAAGAGTGGTG-----  
 -----CAGAGAGAAAAAAGAGCA---ATAGGAACAATAGGAGCT-----  
 ATGTTCCCTTGGGTTCTTGGGAGCA---GCAGGAAGCACTATG---GGCGCAGCGTCA---  
 GTGACGCTGACGGTACAG---GCCAGACAA---TTATTG---TCTGGTATAGTGCAACAGCAGAGC---  
 AATCTG---CTGAGA---GCTATTGAGGCGCAACAACATATGTTGCAACTCACAGTCTGGGGCATC  
 >KT427830  
 TTCTACTGTGATACAACATAAACTGTTTAAACAGTACTTGGAAATAATAGCATTGATACTTGGGAGAATAGCACT-  
 -----  
 -----  
 -----  
 AATACTGGGAATATCACACTCCCATGTAGAATAAAACAAATTATAAACATGTGGCAGGAAGTAGGAAAAGCAA  
 TGTACGCCCCCTCCTATCAGAGGACAAATTAGATGCTCATCAAAC---  
 ATTACAGGGCTGCTACTAGTGAGAGATGGTGGTACAAATAACACA-----  
 -----  
 -----  
 AACAGCTCCGAGATTTTCAGACCTGGAGGAGGAGACATGAGGGACAATTGGAGAAGTGAATTATACAGGTATA  
 AAGTGGTAAAAATTGAACCATTA---GGAGTAGCACCCACCAAGGCAAAGAGAAGAGTGGTG-----  
 -----CAGAGAGAAAAAAGAGCA---GTGGGAACGCTGGGAGCT-----  
 ---ATGTTCCCTTGGGTTCTTGGGAGCA---GCAGGAAGCACTATG---GGCGCAGCGTCA---  
 ATAACGCTGACGGCACAG---GCCAGGCAA---TTATTG---TCTGGTATAGTGACAGCAGAAC---  
 AATTTG---CTGAGA---GCTATTGAGGCGCAACAGCATCTGTTGCAACTCACAGTCTGGGGCATC  
 >KT427829  
 TTCTACTGTAATACAACACAACACTGTTTAAATAGTACTTGGCATAATAATGGTAGTACTTGGTATACTAATGATA  
 GTATTTGG-----  
 -----  
 -----  
 TATACTAATGGTACTGAA-----  
 -----  
 GAACTAAATGACACTATCACCCCTTCCATGCAGAATAAAACAAATTGTAAACATGTGGCAGGAAGTAGGAAAAG  
 CAATGTATGCCCCCTCCCATCAAAGGACAAATTAGATGTTTCATCAAAT---  
 ATCACAGGGCTGCTATTAACAAGAGATGGTGGTAATACTAATGGCACA-----  
 -----  
 -----  
 AATGGTACTGAGATTTTCAGACCTGGAGGAGGAGATATGAGGGACAATTGGAGAAGTGAATTATATAAATATA

AAGTAATAAAAAATTGAACCATTA---GGAATAGCACCCACCAAGGCAAGGAGAAGAGTGGTG-----  
-----CAGAGAGAAAAAAGAGCA---CTGGGAACGCTAGGAGCT-----  
---ATGTTCCCTTGGGTTCTTGGGAACA---GCAGGAAGCACTATG---GGCGCAGCGTCA---  
CTGACGCTGACGGTACAG---GCCAGACAA---TTATTG---TCTGGTATAGTGCAGCAGCAGAAC---  
AATTTG---CTGAGG---GCTATTGAGGCGCAACAGCATATGTTACAACCTCACAGTCTGGGGCATC  
>KT427824  
TTCTACTGTAACACAACACCACTGTTTAATAGTAGTTGGCAGAAAAATAATGGAACCTTGGAGTACCAATATTA  
CTGGAAAT-----  
TGGAGTACTGATACTACTGGG-----  
AATAATAGCACTAATATCACACTCCAATGTAGAATAAAACAAATTATAAACTTGTGGCAGGAAGTAGGAAAAG  
CAATGTATGCCCCCTCCCATCAGGGGACCAATTAAATGTGAATCAAAT---  
ATTACAGGACTGCTATTAACAAGAGATGGGGGAGGAGATGGGGGTAATAAA-----  
-----  
AGTAATGACCATAAC---  
AAGACCGAGATCTTCAGACCTGGAGGAGGAGATATGAGGGACAATTGGAGAAGTGAATTATATAAATATAAAG  
TAGTAAAAAATTGAACCATTA---GGAGTAGCACCCACCAAGGCAAAGAGAAGAGTGGTG-----  
-----CAGAGAGAAAAAAGAGCA--ATAGGG---CTGGGAGCT-----  
ATGTTCCCTTGGGTTCTTGGGAACA---GCAGGAAGCACTATG---GGCGCAGCGTCA---  
ATAACGCTGACGGTACAG---GCCAGACAA---TTATTG---TCTGGTATAGTGCAACAGCAAAAT---  
AATTTG---CTGAAG---GCTATTGAGGCGCAACAGCATCTGTTGCAACTCACAGTCTGGGGCATC  
>KJ849790  
TTCTACTGCAATACAACAAAGCTGTTTAGTAATTTTAATAGTACTTGG-----  
-----  
-----AATAATACTGAA-----  
GGGTCAAATGACACAATCATACTCCCATGCAGAATAAAACAAATTGTAAACAGGTGGCAGGAAGTAGGAAAAG  
CAATGTATGCCCCCTCCCATCAAAGGACAAATTAAATGTTTCATCAAAT---  
ATTACAGGGCTGCTATTAACAAGAGATGGTGGTATA-----  
-----  
AGGAATGAGTCTGGAGGAAAT-----  
GAGTCTGAGACCTTCAGACCTGCAGGAGGGGATATGAAAGACAATTGGAGAAGTGAATTATATAAATATAAAG  
TAGTACAAATTGAACCATTA---GGAGTAGCACCCACCAAGGCAAAGAAGAAGAGTGGTG-----  
-----CAGAGAGAAAAAAGAGAA--GTAACA---CTAGGGGCT-----  
TTATTCCTTGGGTTCTTGGGAGCA---GCAGGAAGCACTATG---GGCGCAGCGTCA---  
GTGACGCTGACGGTACAA---GCCAGACAA---TTATTG---TCTGGTATAGTGCAACAGCAGAAC---  
AATTTG---CTGAGA---GCTATTGAGGCGCAACAGCATCTGTTGCAACTCACAGTCTGGGGCATC  
>KT427819  
TTCTACTGTAATACATCACAACCTGTTTAATAGTACTTGGCTGCCTAATGGTACTTGGCTGTCTAATAGTACTA  
GGAATGAG-----  
-----  
ACAAATGGAAATATCACACTCTCATGCAGAATAAAACAAATTATAAACAGGTGGCAGGAAGTAGGAAAAGCAA  
TGTATGCCCCCTCCCATCGCAGGGAAAATTAGCTGTTTCATCAAC---  
ATTACAGGGCTGATATTAACAAGAGATGGTAGCAGCACAAATAGC-----  
-----  
-----  
ACGTCTGAAACCTTCAGACCTGGAGGAGGAGACATGAGGGACAATTGGAGAAGTGAATTATATAAATATAAAG  
TAGTAAGAGTTGAGCCAGTA---GGAATAGCACCCACCAAGGCAAAGAGAAGAGTGGTG-----  
-----CAGAGAGAAAAAAGAGCA---ATAGGA---TTAGGAGCT-----  
ATGTTCCCTTGGGTTCTTGGGAGCA---GCAGGAAGCACTATG---GGCGCAGCATCA---  
GTGACGCTGACGGTACAA---GCCAGACAA---TTATTG---TCTGGTATAGTGCAACAGCAGAAAT---  
AATCTG---CTGAGA---GCTATTGAGGCGCAACAACATATGTTGCAACTCACAGTCTGGGGCATC  
>KJ849796  
TTCTACTGTAATTC AACACAGCTGTTTAATAGTTCTTGGCATTTTAATGGTTCTTGG-----  
-----  
TATGGTAATGAACCTGAAAGA-----  
AATAAACTGTCAATATCACACTCCCATGCAGAATAAAACAAATTATAAACATGTGGCAGGAAGTAGGAAAAG  
CAATGTATGCCCCCTCCCATCAGGGGACAAATTATGTGCAAAATCAAAT---  
ATTACAGGGCTGTTACTAGCAAGAGATGGTGGT-----  
-----  
-----  
AATAATGAATCTGAAATCTTCAGACCTGGAGGAGGAGATATGAGGGACAATTGGAGAAGTGAATTATATAAAT

ATAAAGTAGTACAAATTGAGCCATTA---GGAATAGCACCCACCACGGCAAGGAGAAGAGTGGTG-----  
 -----CAGAGAGAAAAAAGAGCA---GTGGGG---ATAGGAGCT---  
 -----ATGATCCTTGGGTTCTTGGGAGCA---GCCGGAAGCACTATG---GGCGCAGCGTCA---  
 ATAACGCTGACGGTACAG---GCCAGACTA---TTATTG---TCTGGTATAGTGCAACAGCAGAAC---  
 AATTTG---CTGAGG---GCTATTGAGGCGCACCAGCATATGTTGCAACTCACAGTCTGGGGCATT  
 >KT427815  
 TTCTACTGTAATACATCACGACTGTTTAATAGTACTTGGGCTACAAATGAAACTAATGAGAGA-----  
 -----  
 -----  
 AATGAATCTACAATCACGCTCCCATGCAGAATAAGACAAATTATAAACAGGTGGCAAGAAGTAGGAAAAGCGA  
 TGTATGCCCCCTCCCATTCAGAGACAAATTAAGTGTTCATCAAAT---  
 ATTACAGGGCTACTATTAACAAGAGATGGTGGTACTGATAATAGT-----  
 -----  
 -----  
 ACCGAGGTCTTCAGACCTGGAGGAGGAGATATGAGGGACAATTGGAGAAGTGAATTATATAAATACAAAGTAG  
 TACAAATTGAACCAATA---GGAATAGCACCCACCAAGGCAAGGAGAAGAGTGGTG-----  
 -----CAGAGAGAAAAAAGAGCA---ATAGGA---ATAGGAGCT-----  
 CTGTTTCGTTGGGTTCTTGTCTAGCA---GCAGGAAGCACTATA---GGCGCAGCGTCA---  
 GTGACGCTGACGGTACAG---GCCAGACAA---TTACTG---TCTAGTATAGTGCAACAGCAAAAC---  
 AATTTG---CTGAGG---GCTATTGAGGCGCAACAGCATCTGTTGCAACTCACAGTCTGGGGCATC  
 >KJ849807  
 TTCTACTGTAATACAACACAACCTGTTTAATAGTACTTGGAAATGATACATGGGTATAT-----  
 -----  
 AACATAGCTACAGGAAACATA-----  
 ACTACAGATAATAAAATCACACTCCCATGCAGAATAAAACAAATTATAAACAGGTGGCAGGAAGTAGGAAAAG  
 CAATGTATGCCCCCTCCCATCGAAGGACTAATTAGATGCTCATCAAAT---  
 ATTACAGGACTACTATTAACAAGAGATGGGGGT-----  
 -----  
 GTTAACAGCAGCAAC---  
 CAGTATGAGATCTTCAGACCTGGAGGAGGAGATATGAGAGATAATTGGAGAAGTGAATTATATAAATACAAAG  
 TAGTAAGAATTGAACCGTTA---GGAATAGCACCCACCAAGGCAAGGAGAAGAGTGGTG-----  
 -----CAGAGGGAAAAAAGAGCA---GTGGGA---ATAGGAGCT-----  
 TTGTTCCCTTGGGTTCTTGGGAGCA---GCAGGAAGCACTATG---GGCGCAGCGTCA---  
 ATGACGCTGACGGTACAG---GCCAGACAA---TTATTG---TCTGGTATAGTGCAACAGCAAAGC---  
 AATCTG---CTGAGA---GCTATTGAGGCGCAACAGCATATGTTGCAGCTCACAGTCTGGGGCATC  
 >KT427805  
 TTCTACTGTGAAACAACACAGCTATTTAATAGTACTTGGACTTTTAAATAGGACGTCTAATAGTACCGGG---  
 -----  
 -----  
 AATGATACTATTATCACACTCCCATGCAGGATAAAACAAATTATAAACAGGTGGCAGGAAGTAGGAAAAGCAA  
 TGTATGCCCCCTCCCATCAGAGGATCAATTAAGTGCACATCAAAC---  
 ATCACAGGGCTAATACTAACAAGAGATGGTGGGATTAACAGGACT-----  
 -----  
 -----  
 GAGAAATGAAACCTTCAGACCTGGAGGAGGAGATATGAGGGACAATTGGAGAAGTGAATTATATAAATATAAAG  
 TAGTAAAAATTGAACCATTA---GGATTAGCACCCACCAAGGCAAGAGAAGAGTGGTA-----  
 -----CAGAGAGAAAAAAGAGCA---GTAACG---CTGGGAGCT-----  
 ATGTTCCCTTGGGTTCTTGGGAACA---GCAGGAAGCACTATG---GGCGCAGCGTCA---  
 TTGACGCTGACGGTACAG---GCCAGACAA---TTATTG---TCTGGTATAGTGCAACAGCAGAAC---  
 AATATG---CTGAGG---GCTATTGAGGCGCAACAGCATATGTTGCAACTCACAGTCTGGGGCATC  
 >KJ849808  
 TTCTACTGTAACACAACACAGCTGTTTAATGGCACATGGTCCAATGGTACA-----  
 -----  
 -----TGGACAACACCG-----  
 CTGCTTAATGGGACTATCACACTCCCATGCAGAATAAAACAAATTATAAACAGATGGCAGGAAGTAGGAAAAG  
 CAATATATGCCCCCTCCCATCAGAGGACAAATTAGCTGTACATCAAAT---  
 ATCACAGGACTGCTATTAACAAGAGATGGGGGG-----  
 -----  
 -  
 GTTGGCCAGAGAGAGAATGAAACCTTCAGACCTGGAGGAGGAAATATGAAAGACAATTGGAGAAGTGAAGTAT

ATAAATATAAAGTAGTAAAAATTGAACCATTA---GGAGTAGCACCCACCCCAGCAAAGAGAAGAGTGGTG---  
 -----CAGAGAGAAAAAAGAGCA---  
 GTGGGAACAATAGGAGCT-----ATGTTTCCTTGGGTTCTTAGGAGCA---GCAGGAAGCACTATG---  
 GGCGCAGCGTCG---CTGACGCTGACGGTACAG---GCCAGACTA---TTATTG---  
 TCTGGTATAGTGCAACAGCAAAAC---AATTTG---CTGAGG---  
 GCTATTGAGGCGCAACAGCATCTGTTGCAACTCACAGTCTGGGGCATC  
 >KT427799  
 TTCTACTGTAATACAACACAGTTATTTAATAGTACTTGGCATGCTAATAGCACTTGGAAATGAGACTACAGGAT  
 CA-----  
 -----  
 GGGTCAAATGACACTATCTCACTCCCATGCAGAATAAAACAAATTATAAACAGATGGCAGGAAGTAGGAAAAG  
 CAATGTATGCCCTCCCATCGGAGGACAAATTAGATGTTTCATCAAAT---  
 ATTACAGGGATACTATTAACAAGAGATGGTGGTACAGAGAACAAAC-----  
 -----  
 -----  
 ACGTCCGAGACTTTTCAGACCTGGAGGAGGAAATATGAAGGACAATTGGAGAAGTGAATTATATAAATATAAAG  
 TAGTAAGAATTGAGCCATTA---GGAGTAGCACCCACCAAGGCAAAGAGAAGAGTGGTG-----  
 -----CAGAGAGAAAAAAGAGCA---GTGACG---TTTGGAGCT-----  
 TTTTTCCTTGGGTTCTTAGGAACA---GCAGGAAGCACTATG---GGCGCAGCATCA---  
 ATAACGCTGACGGTACAG---GCCAGACAA---TTATTG---TCTGGTATAGTGCAACAGCAGAGC---  
 AACCTG---CTGAGA---GCTATTGAGGCGCAACAACGTATGTTGCAACTCACAGTCTGGGGCATC  
 >KT427667  
 TTCTACTGTAACACAACACAACCTGTTTAAACAGTACCTGGACTAATGGTACCTGGGAGACGACTAGTACTGGG-  
 -----  
 -----  
 AATATAAGTAATATCACACTCCCATGCAGGATAAAACAAATTATAAATAGGTGGCAGGAAGTAGGAAAAGCAA  
 TGTATAACCCTCCCATCAGGGGAAAAATTAACTGTTTATCAAAC---  
 ATTACAGGAATACTATTAACAAGAGATGGAGGAGGTAACGGGTCT-----  
 -----  
 -----  
 AGTAACGAGACCTTCAGACCTGGAGGAGGAAATATGAAGGATAATTGGAGAAGTGAACATATAAATATAAAG  
 TAGTAAAAATTGAACCATTA---GGACTAGCGCCCACCAGGGCAAGGAGAAGAGTGGTG-----  
 -----CAAAGAGAAAAAAGAGCA---GTGGGAACACTAGGAGCT-----  
 ATGTTTCCTTGGATTCTTGGGAGCA---GCAGGAAGCACTATG---GGCGCAGCGTCA---  
 ATGGCGCTGACGGTACAA---GCCAGACAA---TTATTG---GCTGGTATAGTGCAACAGCAGAAC---  
 AATATG---CTGAGA---GCTATTGAGGCGCAACAGCATATGTTGCAACTCACAGTCTGGGGCATC  
 >KT427794  
 TTCTACTGTAATACAACAAAGTTGTTTAAATAGTACTTGGAAGTACAACGATACTAGCAACACTTGGACTGAAG  
 GAAACCAT-----  
 ACTAAAGAAGGAAACCATACT-----  
 GAAGGAAATAACACAATCACACTCCCATGTAGAATAAAGCAAATTATAAACAGGTGGCAGGAGGTAGGAAAAG  
 CAATGTATGCCCTCCCATAGGGGACTAATTAAATGTACATCAAAT---  
 ATTACAGGGATGATATTAACAAGAGATGGTGGTAAGGAGAATGAGACCGAG-----  
 -----  
 -----  
 AATACCGAGACCTTCAGACCTGGAGGAGGAGATATGAGGGACAACCTGGAGAAGTGAATTATATAAATATAAAA  
 TAGTAAAAATTGAGCCATTA---GGAATAGCACCCACCAAGGCAAGGAGAAGAGTGGTG-----  
 -----CAGAGAGAAAAAAGAGCA---GTGGGAACAATAGGAGCT-----  
 ATGTTTCCTTGGGTTCTTGGGAACA---GCAGGAAGCACTATG---GGCGCAGCGTCA---  
 ATCAGCTGACGGTACAG---GCCAGACAA---TTATTG---TCTGGTATAGTGACAGCAGAAC---  
 AATTTG---CTGAAG---GCTATTGAGGCGCAACAACATCTGTTGCAACTCACAGTCTGGGGCATC  
 >KU749390  
 TTCTACTGTAATACAACACAATTGTTTAAACAGTACTTGGAAATGCTACTGGGAATGGTACTATAGAGGGA----  
 -----  
 -----  
 GATAGCGATAACATCACACTCCAATGCAAAATAAAACAAATTATAAACATGTGGCAGGAAGTAGGAAAAGCAA  
 TGTATGCCCTCCCATCAGAGGAGAAATTAGATGTTTCATCAAAT---  
 ATTACAGGGCTGCTATTAACAAGAGATGGTGGTGATAATGAGTCC-----  
 -----  
 -----

AGTACTGATGAGACCTTTAGACCTGGAGGAGGAGATATGAAGGATAATTGGAGAAATGAATTATATAAAATATA  
AAGTAGTAAAAATTGAACCATTA---GGAATAGCACCCACCAAGGCCAAAAGAAGAGTGGTG-----  
-----CAAAGAGAAAAAAGAGCA---GTGGGA---ATAGGAGCT-----  
---TTGTTCCCTTGGGTTCTTGGGAGCA---GCAGGAAGCACTATG---GGCGCAGCGTCC---  
ATGACGCTGACGGTACAG---GCCAGACAA---TTACTG---TCTGGTATAGTGCAACAGCAGAAC---  
AATTTG---CTGAGA---GCTATTGAGGCGCAACAGCACCTGTTGCAACTCACAGTCTGGGGCATC  
>KX181912  
TTCTACTGTAATACAACATCACTGTTTAATAGTACTTGGGAATAATACTAAAGAGTGGCATGGTACTACAGGG-  
-----  
-----  
AGAAACAACACTATCACACTCCCATGTAAAATAAAACAAATCATAAACAGATGGCAGGAAGTAGGACAAGCTA  
TGTATGCCCCCTCCCATCAGTGGAAAAATTAACTGCTTATCAAAT---  
ATTACAGGGCTGTTATTAATAAGAGATGGTGGTGTAAACGTTAGC-----  
-----  
-----  
AACACCACAGAGACCTTCAGGCCTGGGGGGGGAAATATAAAGGACAATTGGAGAAAGTGAATTATATAAAATATA  
AAGTAGTAAAAATTGAACCTTT---GGAGTAGCCCCCCCCCGGTCAAAGAGAAGAGTGGGG-----  
-----CAGAGAGAAAAAAGAGCA---GTGACG---CTAGGAGCT-----  
---ATGTTCCCTTGGGTTTTTGGGAGCA---GCAGGAAGCACTATG---GGCGCAGCGTCA---  
ATGGGGCTGACGGTACAG---GCAAAACAA---TTATTG---TCTGGTATAGTGCAACAGCAGCAAT---  
AATTTT---CTGAGG---GCTATTGAGGCGCAACAGCATATGTTGCAACTCACAGTCTGGGGCATT  
>KX181906  
TTCTACTGTAACACATCACAGCTGTTTAATAGTACTTGGTATTGGAATGGATCAAATTTCAATGAAACAAATC  
TCAAT-----  
-----  
GAATCTGAAACTATCACAATCCCATGCAGAATAAAACAAATTATAAACAGGTGGCAGGAAGTGGGAAAAGCAA  
TGTATGCCCCCTCCCATCAGAGGAATGATTAACTGCACATCAAAT---  
ATTACAGGGCTGCTATTAACATGGGATGGTGGTAACAATAACAGA-----  
-----  
-----  
ACGAACGAGACCTTTAGACCTGGAGGAGGAGATATGAGGGACAATTGGAGAAGTGAATTATATAAAATATAAAG  
TAGTAAAAATTGAGCCATTA---GGACTAGCACCCACCAAGGCCAAAGAGAAGAGTGGTG-----  
-----CAGAGAGAAAAACGAGCA---GTGGGAACAATAGGAGCT-----  
ATGTTCCCTTGGGTTTTTGGGAGCA---GCAGGAAGCACTATG---GGCGCAGCGTCA---  
GTAACGCTGACGGTACAG---GCCAGACTA---TTATTG---TCTGGTATAGTGCAACAGCAAAAC---  
AATTTG---CTGAGG---GCTATTGAGGCGCAACAACATATGTTGCAACTCACAGTCTGGGGCATT  
>KX181900  
TTCTACTGTAATACAACAAAACCTGTTTAATAGTACTTGGAAATAGTAGTAGTACTTGGTATAATAAAAGTGCTG  
AA-----  
-----  
GGAAATTCCTACTATTATACTCCCATGCAGAATAAAACAAATTATAAATAGGTGGCAGGAAGTAGGGAAAGCAA  
TGTATGCCCCCTCCCATCCAGGACACATTAACTGTTTATCAAAT---  
ATTACAGGGCTACTATTGACAAGAGATGGTGGAAACAACAACAGT-----  
-----  
-----  
AGCTCCGAAACTTTTAGACCTGGAGGAGGAGATATGAGGGACAATTGGAGAAGTGAATTATATAAGTATAAAG  
TAGTAAGAATTGAACCATTA---GGAGTAGCACCCACCAAGGCCAAGGAGAAGAGTGGTG-----  
-----CAGAGAGAAAAAAGAGCA---GTGGGAACAATAGGAGCT-----  
ATGTTCCCTTGGGTTCTTGGGAGCA---GCAGGAAGCACTATG---GGCGCAGCATCA---  
ATAACGCTGACGGTACAA---GCCAGACTA---TTATTG---TCTGGTATAGTGCAACAGCAGAAC---  
AATCTG---CTGAGA---GCTATTGAGGCGCAACAGCATATGTTGCAACTCACAGTCTGGGGCATT  
>KX181901  
TTCTACTGTGATTCAACACAGCTGTTTAATAGTACTTGGCTGTTTAATGATACTCGGAATGGTACTGACATTG  
AA-----  
-----  
GGTAATGAAACTATCACACTCCCATGTAGAATAAAACAAATTATAAACAGGTGGCAAGAAGTAGGAAAAGCAA  
TATATGCCCCCTCCCATCGAAGGACAAATTAGATGTACATCAAAT---  
ATTACAGGGCTGTTATTAACAAGAGATGGTGGT-----  
-----  
-----

AACAGTGGGACAGAACTTTTCAGACCTGGAGGAGGAGATATGAGGGACAATTGGAGAAGTGAATTATATAAAT  
ATAAAGTAGTGAAAATTGAGCCATTA---GGAATAGCACCCACCAAGGCAAAGAGAAGAGTGGTG-----  
-----CAGAGAGAAAAAAGAGCA---GTGGGAACGATAGAAGCT---  
-----ATGTTTCCTTGGGTTCTTGGGAGCA---GCAGGAAGCACTATG---GGCGCAGCGTCA---  
GTAACGCTGACGGTACAG---GCCAGACTA---TTATTG---TCTGGTATAGTGCAACAGCAAAAC---  
AATTTG---CTGAAG---GCTATTGAGGCGCAACAGCATATGTTGCAACTCACAGTCTGGGGCATT  
>KX181891  
TTCTACTGTGATACAACAAAGCTGTTCAATAGTACTTGGGTGATCAATAATACTTGGCAAAGAGTAAATAACA  
CCAAA-----  
-----  
AATGAATCAAAGATCATACTCCCATGCAAAATAAAACAAATTATAAACAGGTGGCAGGAGGTAGGAAAAGCAA  
TGTATGCCCCCTCCCATCAGAGGATACATTAAGTGTTCATCGAAT---  
ATTACAGGGCTGCTATTAAACAAGAGATGGGGGAGACAATAATAAT-----  
-----  
AATAATGAGACCTTCAGACCCCAAGGGGGAAATATGAAGGATAATTGGAGAAGTGAATTATATAAATATAAAG  
TAATAAAAATTGAGCCATTA---GGAGTAGCACCCACCGAGGCAAAGAGAAGAGTGGTG-----  
-----CAGAGAGAAAAAAGAGCA---ATAGGAGTGCTAGGAGCT-----  
GTGTTTCCTTGGGTTCTTAGGAGCA---GCAGGAAGCACTATG---GGCGCAGCGTCA---  
ATAACGCTGACGGTACAG---GCCAGACAA---TTATTG---TCTGGTATAGTGCAACAGCAGAGC---  
AATCTG---CTGCAG---GCTATTGAGGCGCAACAGCATCTGTTGCAACTCACAGTCTGGGGCATC  
>KX181907  
TTCTATTGTAATACAACACAAGTGTTCATAGCACCTGGAATAATACAGAAATGGTTAATGGTACTACTAATG  
GTACT-----  
-----  
ACTAATGATACAATTATACTCCCATGCAGAATAAAACAAATTGTAAACATGTGGCAGGAAGTAGGAAAAGCAA  
TGTATGCCCCCTCCCCTCAGGGGAAAAATTAACTGTGTATCAAAT---  
ATTACAGGGCTAATATTAAACAAGAGATGGGGGAATAAATAGGACG-----  
-----  
AAGAACGAGACCGAGACCTTCAGACCTGGGGGGGAGATATGAGGGACAATTGGAGAAGTGAATTATATAAAT  
ATAAAGTAGTAAAAATTGAACCCCTTA---GGGGTAGCCCCCCCCCGGGCAAAGAGAAGAGTGGTG-----  
-----CAAAGAGAAAAAAGAGCA---GTAACC---CTAGGAGCT---  
-----ATGTTTCCTTGGGTTTTTGGGAGCA---GCAGGAAGCAATATG---GGCGCAGCGTCA---  
ATAACGCTGACGGTACAG---GCCCGACAA---TTATTG---TCTGGTATAGTGCAACAGCAAAAC---  
AATTTG---CTGAGA---GCTATTGAGGCGCAACAGCATCTGTTGCAACTCACGGTCTGGGGCATC  
>KX181910  
TTCTACTGTAATACATCACAGCTGTTTAATAGTACTTGGTTTGCGAATGGTACTAGAAAAGAAAATGGAAGT  
CA-----  
-----  
GGAAACAACACATTCATCACACTCCCATGCAGAATAAAACAGATCATAAACAGGTGGCAGGAAGTAGGAAAAG  
CAATGTATGCCCCCTCCCATCAGTGGATACATTAATTGTTTCATCAAAT---  
ATTACAGGGCTGTTATTAAACAAGAGATGGTGGTACCGGAAACAAA-----  
-----  
ACCGAGCCCGAGATCTTCAGACCTAGAAGGGGAGATATGAAGGACAATTGGAGAAGTGAATTATATAAATACA  
AAGTAGTAGAAATTGAGCCATTA---GGAATAGCCCCCACCAAGGCAAAGAGAAGAGTGGTG-----  
-----CAGAGAGAAAAAAGAGCA---GTAGAAATGCTAGGAGCT-----  
---ATGTTCCCTTAGGTCCCTTAGGAGCA---GCAGGAAGCACTATA---GGCGCAGCGTCG---  
GTGGCGCTGACGGTACAG---GCCAGACAA---TTATTG---TCTGGTATAGTGCAACAGCAGAGC---  
AATTTG---CTGAAG---GCTATTGAAGCGCAACAACATATGTTGCAACTCACAGTCTGGGGCATT  
>KX181911  
TTCTACTGTAATTCACACAGCTGTTTAATAGTAGTTGGACTAATGGTAGTTGGACTGGCATTGAAGGAAATA  
ATACA-----  
-----  
AGTAATGAAAGTATCACACTCCCATGCAGAATAAAACAAATAATAAATAGGTGGCAGGAAGTAGGAAGAGCAA  
TATATGCCCCCTCCCATCAGTGGACAACCTTAAGTGTTCATCAAAT---  
ATTACAGGGCTGCTATTAAACAAGAGATGGTGGTAATAGGACCAATGGG-----  
-----  
-----

GAGGCCGAAGTCTTCAGACCTGGAGGAGGAAATATGAAAGACAATTGGAGAAGTGAATTATATAAATATAAAG  
TAGTAAAAATTGAGCCATTA---GGAATAGCACCCACCAAGGCGAAGAGAAGAGTGGTG-----  
-----CAGAGAGAAAAAAGAGCA---GTGGGAACAATAGGAGCT-----  
ATGTTCCCTTGGGTTCTTGGGAGCA---GCAGGAAGCACTATG---GGCGCAGCGTCA---  
ATAACGCTGACGGTACAG---GCCAGACTA---TTATTG---TCTGGTATAGTGCAACAGCAGAAC---  
AATCTG---CTGAGA---GCTATTGAGGCGCAACAGCATATGTTGCAACTCACTGTCTGGGGCATC  
>KX181895  
TTTTACTGTAATACAACACGGCTGTTTAATAGTTTTTGGGTGAAAGGTAAGTGGGGGAATAGTACTTTACAG-  
-----  
-----  
AACAAATGGTACTATCATACTTCCCTGCAGAATAAAACAGATTATAAACAGGTGGCAAGAAGTAGGAAAAACAA  
AGTACGCCCCCCCCCTCAGAGGACACCTTAACTGTTTTTCAAAC---  
ATTACAGGGGTGATATTAGCAAGGGATGGTGGTATTAATGTGACC-----  
-----  
-----  
AACAAATACCGAGACCTTCAGACCTGGGGGAGGGGACAAGAGGGGCAATTGGGGAAAGTGAATTATACAAATATA  
AAATAGTAAAAAATGAGCCATTA---GGAGTAGCACCCACCAAGGCAAAGAGAAGAGTGGTG-----  
-----CAGAGAGAAAAAAGAGCA---GTGGGAACTATAGGAGCT-----  
---ATGTTCCCTTGGGTTCTTGGGAGCA---GCAGGAAGCACTATG---GGCGCAGCATCA---  
GTGACGCTGACGGTACAG---GCCAGACTA---TTATTG---TCTGGTATAGTGCAACAGCAGAGC---  
AATCTG---CTGAGG---GCTATTGAGGCGCAACAGCATTTGTTGCAACTCACAGTCTGGGGCATC  
>KX181897  
TTCTATTGTAATACAACACAGCTGTTTAATAGTACTTGGAAATGGCACACATCTGTCTAATAGTATT-----  
-----  
-----  
GGGAATGAGACTATCACACTCCCATGCAGAATAAAACAAATTATAAACAGATGGCAGGAAGTAGGAAAGGCAA  
TGTATGCCCCCTCCCATCAGTGGACAAATTAGCTGTTTCATCAAAT---  
ATAACAGGGCTGATATTAACAAGAGATGGTAGTAATGATAATAGC-----  
-----  
-----  
AGCACGAATGAACTTTTCAGACCGGGAGGAGGAAATATGAAAGACAATTGGAGAAGTGAATTATATAAATATA  
AAGTAGTAGAAATTGAGCCAGTA---GGATTAGCACCCACCAAGGCAAAAAGAAGAGTGGTG-----  
-----CAGAGAGAAAAAAGAGCA---GTAGGAACGCTAGGAGCT-----  
---ATGTTCCCTTGGGTTCTTGGGAACA---GCAGGAAGCACTATG---GGCGCAGCGTCA---  
TTGACGCTGACGGTACAG---GCCAGACAA---TTAATG---TCTGGTATAGTGCAACAGCAGAAC---  
AATCTG---CTGAGG---GCTATTGAGGCGCAACAACATATGTTGCAACTCACAGTCTGGGGCATC  
>KX181915  
TTTTACTGTAATACAACAAACCTGTTTAATAATGGTACCCAGCTGCTGCCTAATGATACTTGGCAGTTTAATG  
GAAGTAAATT-----  
-----  
GAAAAATGGGACTATCATACTCCCATGCAGAATAAAACAAATTATAAACAGGTGGCAGGAAGTAGGAAAAGCAA  
TGTATGCCCCCTCCCATCAGTGGACTAATTAGATGTTTCATCAAAC---  
ATTACAGGGCTGATATTAACAAGAGATGGTGGGTACAACAACAAGTCT-----  
-----  
-----  
AACAACTACTGAGACCTTTAGACCTGGAGGAGGAGATATGAGGGACAATTGGAGAAGTGAATTATATAAATATA  
AAGTAGTAAAAATTAAGCCATTA---GGGGTAGCACCCACCAAGGCAAAGAGAAGAGTGGTG-----  
-----CAAAGAGAAAAAAGAGCA---GTAACA---ATAGGAGCT-----  
---ATGTTCCCTTGGGTTTTTGGGAGCA---GCAGGAAGCACTATG---GGCGCAGCATCA---  
CTAACGCTGACGGTACAG---GCCAGACAA---TTATTG---ACTGGTATAGTGCAACAGCAAAAC---  
AATTTG---TTGAGG---GCTATTGAGGCGCAACAGCATTTGTTGCAACTCACAGTCTGGGGCATC  
>KX181916  
TTTTACTGTAATTCAACACAGCTGTTCAACAGTAGTTGGAGGTTTAATAATAATACTTGGAAAGTTGTTAATA  
ATAATACT-----  
-----GGG---  
AATTCAAATGACAACATCACACTCCCATGCAGAATAAAACAAATTATAAACAGGTGGCAGGATGTAGGAAAAG  
CAATGTATGCCCCCTCCCATCAGGGGACAAATTAGCTGTTTCATCAAGT---  
ATTACAGGGCTGCTATTAACAAGAGATGGTGGTAATAATAAAGAG-----  
-----  
-----

TCCCCGGAGGCCTTCAGACCTGGAGGGGGGATATGAAGGGCAATTGGGGAAGTGAATTATATAAATATAAAG  
TAGTAAAAAATAAGCCATTA---GGAATAGCCCCCCCCAAGGCAAAGAGAAGAGTGGTG-----  
-----CAAAGAGAAAAAAGAGCA---GTAGGAACGATAGGAGGT-----  
ATGTTCCCTTGGGTTTTTGGGAGCA---GCAGGAAGCAGTATG---GGCGCAGCGTCC---  
TTGACGCTGACGGTACAG---GCCAGACTA---TTATTG---TCTGGTATAGTGCAACAGCAGAAT---  
AATTTG---CTGAGG---GCTATTGAGGCGCAACAACATCTGTTGCAACTCACAGTCTGGGGCATC  
>MK041584  
TTCTACTGTAACACAACAAAGCTGTTTAATAGTACTTGGAAATAGTACTGACTGGTCAAATACCACTGAT----  
-----  
-----  
GATAATGACACCATCACACTCCCATGCAGAATAAAACAAATTATAAACAGGTGGCAGGAAGTAGGAAAAGCAA  
TGTATGCCCCCTCCCATTGCAGGACAGATTATGTGTTTCATCAAAT---  
ATTACAGGGCTAATATTAACAAGAGATGGTGGTAACAGTAACGGGTCG-----  
-----  
-----  
ACTAATGAGACCTTCAGACCTGCAGGAGGAGATATGAGGGACAATTGGAGAAGTGAATTATATAAATATAAAG  
TAGTAAAAATAGAGCCATTA---GGAATAGCACCTACCAAGGCAAGGAGAAGAGTGGTG-----  
-----CAAAGAGAGAAAAAGAGCA---GTGGGA---CTAGGAGCT-----  
CTGTTTCTTGGGTTCTTGGGAGCA---GCAGGAAGCACTATG---GGCGCAGCGTCA---  
ATGACGCTGACGGTACAG---GCCAGACAA---CTATTG---TCTGGTATAGTGCAACAGCAAAAC---  
AATTTG---CTGATG---GCTATTGAGGCGCAACAGCGTATGTTGCAACTCACAGTCTGGGGCATC  
>MK041586  
TTCTACTGCAATACAACACAGCTGTTTAATTCAACTTGGGATACTAATTCAACTTGGACTGCTGAGGAAGCAG  
AT-----  
-----  
GGAAATATCACTATCACACTCCCATGTAGAATAAAACAATTTATAAACAGATGGCAGGAGGTAGGAAAAGCAA  
TGTATGCCCCCTCCCATCAGAGGAATAATTAAGTGTGTATCAAAT---  
ATTACAGGACTACTATTAGTGAGAGATGGTGGTGAGAACAATGCA-----  
-----  
-----  
ACCAATGAGACCTTCAGGCCTGGAGGAGGCGATATGAGGGACAATTGGAGAAGTGAACATATAAATATAAAG  
TAGTACAGATTGAGCCGTTA---GGAATAGCACCCACCAGGGCAAGGAGAAGAGTGGTG-----  
-----CAGAGAGAAAAAAGAGCA---GTGGGAACAATAGGAGCT-----  
ATGTTCCCTTGGGTTCTTGGGAGCA---GCAGGAAGCACTATG---GGCGCAGCGTCA---  
ATGACGCTGACGGTACAG---GCCAGACTA---CTACTG---TCTGGTATAGTGCAACAGCAGAAC---  
AACTTG---CTGAGA---GCTATTGAGGCGCAACAACATCTGTTGCAACTCACAGTCTGGGGCATC  
>MK041551  
TTTTACTGTGATACAACAACACTGTTTAATAGTACTTGGTCACTTAATAAGACTTCTTGGTATAATACTACTA  
CT-----  
-----  
GAAGGAATAGATATCACACTCCCATGCAAAATAAAACAAATCATAAACAGGTGGCAGGGAGCAGGAAAAGCAA  
TGTATGCCCCCTCCCATCAGAGGAAAAATTTTCTGTTTCATCAAAA---  
ATTACAGGAATACTATTAAACAAGAGATGGTGGGTTTAAACAATGCCAGT-----  
-----  
-----  
AACAAATAGCGAGACCTTCAGACCTGGAGGGGGAGATATGAGGGACAATTGGAGAAGTGAATTATACAAATATA  
AAGTAGTAAAAATTGAGCCATTA---GGAGTAGCACCCACCAAGGCAAAAAGAAGAGTGGTG-----  
-----CAAAGAGACAAAAGAGCA---GTGGGAACGTTAGGAGCT-----  
---ATGTTCCCTTGGGTTCTTGGGAGCA---GCAGGAAGCACTATG---GGCGCAGCGTCA---  
ATGGCGCTGACGGTACAG---GCCAGACAA---TTATTG---TCTGGTATAGTGACAGCAGCAAAAC---  
AATTTG---CTGAGA---GCTATTGAGGCGCAACAACATCTGTTGCAACTCACAGTCTGGGGCATC  
>MK041554  
TTCTACTGTAATACATCACAGCTGTTTAATGAACTTTTTTTGAAGAAGAAT-----  
-----  
-----  
GATACTGAACCTATCACACTCCAATGCAGAATAAAACAAATTATAAACAGGTGGCAGGAAGTGGGAAAAGCAA  
TGTATGCCCCCTCCCATCAGTGGACAAATTAAGTGTTCATCAAAT---  
ATTACAGGGTTGATACTAACGAGAGATGGTGGCATCAATAATACC-----  
-----  
-----

ATGAATGAGACTTTTCAGACCTGGAGGAGGAGACATGAGGGACAATTGGAGAAGTGAATTATATAAATATAAAG  
 TAGTAAAAATTGAGCCATTA---GGAGTAGCACCCACCAAGGCAAAGAGAAGAGTGGTG-----  
 -----CAGAGAGAAAAAAGAGCA---GTGGGAACGATAGGAGCT-----  
 ATGTTTCCTTGGGTTCTTGGGAGCA---GCAGGAAGCACTATG---GGCGCAGCGTCG---  
 CTGACGCTGACGGTACAG---GCCAGACTA---TTATTG---TCTGGTATAGTGCAACAGCAAAAC---  
 AATTTG---CTGAGG---GCTATTGAGGCGCAACAGCATCTGTTGCAACTCACAGTCTGGGGCATC  
 >MK041558  
 TTCTACTGTAATACAACACAGTTGTTTAATAGTACTTGGAATAGTACTGACACTAACTGGATAAATAATGCTA  
 GTTCG-----  
 -----  
 ACAAAGGGTAATATCACACTCCCATGCAGGATAAAACAAATTATAAACAGGTGGCAAGAAGTAGGAAAAGCAA  
 TGTATGCCCCCTCCCATCAGCGGACAAATTAAGTGTTTCATCAAAT---  
 ATTACAGGACTGCTATTAACAAGAGATGGTGGTCTCTGAAAATGAC-----  
 -----  
 -----  
 TCTGCGACCTTCAGACCTGGAGGAGGAGATATGAGGAATAATTGGAGAAGTGAATTATATAAATACAAAGTAG  
 TAAAAATTGAGCCATTA---GGAGTAGCACCCACCAAGGCAAAGAGAAGAGTGGTG-----  
 -----GAGAGAGAAAAAAGAGCA---GTGACA---CTAGGAGCA-----  
 ATGTTTCCTTGGGTTCTTGGGAGCA---GCAGGAAGCACTATG---GGCGCAGCGTCA---  
 ATAACGCTGACGGTACAG---GCCAGACAA---TTATTG---TCTGGTATAGTGCAACAGCAGAAC---  
 AATCTG---CTGAAG---GCTATTGAGGCGCAACAGCACCTGTTGCAACTCACAGTCTGGGGCATC  
 >MK041556  
 TTCTACTGTAATACATCACAGCTGTTTAATAGTATGGAGTTGGAGGCTTTGAGGAATAACAATAAA-----  
 -----  
 -----  
 ACTAATGACACTATCACACTCCAATGCAGAATAAAACAAATTATAAACAGGTGGCAGGAAGTAGGAAAAGCAA  
 TGTATGCCCCCTCCCATCAGTGGACAAATTAAGTGTGTATCAAAT---  
 ATTACAGGGTTGATACTAACAAGAGATGGTGGTAACGGGACTAAC-----  
 -----  
 -----  
 GGGACTGAGACTTTTCAGACCAGGAGGAGGAGATATGAGGGACAATTGGAGAAGTGAATTATATAAATATAAAG  
 TAGTAAAAATTGAGCCATTA---GGAATAGCACCCACCAAGGCAAAGAGAAGAGTGGTG-----  
 -----CAGAGAGAAAAAAGAGCA---TTGGGAACGATAGGAGCT-----  
 ATGTTTCCTTGGGTTCTTGGGAGCA---GCAGGAAGCACTATG---GGCGCAGCGTCA---  
 CTGACGCTGACGGTACAG---GCCAGACAA---TTATTG---TCTGGTATAGTGCAACAGCAAAAC---  
 AATTTG---CTGAGG---GCTATTGAGGCGCAACAGCATCTGTTGCAACTCACAGTCTGGGGCATC  
 >MK041562  
 TTCTATTGTGATTTCAGCACAGCTGTTTAATAGTACTTGGAATGAACTGATAGTTGGAATAATACTTCT---  
 -----  
 -----  
 GAAGAATCAACTATCACACTCCCATGCAGAATAAAACAAATTGTAAACCTGTGGCAGGAAGTAGGAAAAGCAA  
 TGTATGCCCCCTCCAGAGAAGGGGTTATTAGCTGTTTATCAAAT---  
 ATCACAGGGCTGCTCTTAACAAGAGATGGTGGTAATGAGAACACGGAAGTCT-----  
 -----  
 -----  
 AGCACTGAAACCTTCAGACCTGGAGGAGGCAATATGAAAGACAATTGGAGAAGTGAATTATACAAATATAAAG  
 TAGTAAGAATTGAACCATTA---GGAGTAGCACCTACCTGGCAAAAAGAAGAGTGGTG-----  
 -----CAGAGAGAAAAAAGAGCA---GTGGGA---ATAGGAGCT-----  
 GTGTTTCCTTGGGTTCTTGGGAGCA---GCAGGAAGCACTATG---GGCGCAGCGTCG---  
 GTGACGCTGACGGTACAA---GCCAGACAA---TTATTG---TCTGGTATAGTGCAACAGCAGAAC---  
 AATTTG---CTGATG---GCTATTGAGGCGCAACAGCGTCTGTTGCAACTCACAGTCTGGGGCATC  
 >MG571981  
 TTCTACTGTAATACAACACAGCTGTTTAATAGTACTTGGAATGAAACACAGCTGTTTAATAATATTAATAATA  
 GTACTAAA-----  
 -----  
 -----  
 GAGAATGAGAATATCACACTCCCATGCAGAATAAAACAAATTGTAAACAGGTGGCAGGAAGTAGGAAAAGCAA  
 TGTATGCCCCCTCCCATCAGAGGACAAATTAGCTGTTTCATCAAAC---  
 ATTACAGGGCTGATACTAACAAGAGATGGTAGCGGTAACGGGTCTGCG-----  
 -----  
 -----

AGCAATGAGACTTTTCAGACCTGGAGGAGGAAATATGAGGGACAATTGGAGAAGTGAATTATATAAATATAAAG  
TAGTAAAAATAGAGCCATTA---GGAGTAGCACCCACCAGGGCAAAGAGAAGAGTGGTG-----  
-----CAGAGAGAAAAAAGAGCA---GTGGGGACGTTAGGAGCT-----  
ATGTTCCCTTGGGTTCTTGGGAGCA---GCAGGAAGCACTATG---GGCGCAGCGTCA---  
GTGACGCTGACGGTACAG---GCCAGACAA---TTATTG---TCTGGTATAGTGCAACAGCAGAAT---  
AATCTG---CTGAAG---GCTATTGAGGCGCAACAACATCTGTTGCAACTCACAGTCTGGGGCATC  
>MG571996  
TTCTACTGCAATACAACACAGCTGTTTAATTCAACTTGGGATACTAATTCAACTTGGACTGCTGAGGAAGCAG  
AT-----  
-----  
GGAAATATCACTATCACACTCCCATGTAGAATAAAACAATTTATAAACAGATGGCAGGAGGTAGGAAAAGCAA  
TGTATGCCCCCTCCCATCAGAGGAATAATTAAGTGTGTATCAAAT---  
ATTACAGGACTACTATTAGTGAGAGATGGTGGTGAGAAACAATGCA-----  
-----  
-----  
ACCAATGAGACCTTCAGGCCTGGAGGAGGCGATATGAGGGACAATTGGAGAAGTGAAGTATATAAATATAAAG  
TAGTACAGATTGAGCCGTTA---GGAATAGCACCCACCAGGGCAAAGAGAAGAGTGGTG-----  
-----CAGAGAGAAAAAAGAGCA---GTGGGAACAATAGGAGCT-----  
ATGTTCCCTTGGGTTCTTGGGAGCA---GCAGGAAGCACTATG---GGCGCAGCGTCA---  
ATGACGCTGACGGTACAG---GCCAGACTA---CTACTG---TCTGGTATAGTGCAACAGCAGAAC---  
AACTTG---CTGAGA---GCTATTGAGGCGCAACAACATCTGTTGCAACTCACAGTCTGGGGCATC  
>MG571999  
TTCTACTGTAATACAACAAAGCTGTTTAATGGTACTTGGAAATGGTACGGATTTCAATAATACTGGAGAA----  
-----  
-----  
TCAAATGACACTATCACACTCCCCCTGCAGAATAAGACAAATTATAAATAGATGGCAGGAAGTAGGAAAAGCAA  
TGTATGCACCTCCCATCAGTGGACCAATTAGCTGTTTCATCAAAT---  
ATTACAGGGCTAATGTTAACAAGAGATGGGGGTGAGGATAACAGT-----  
-----  
-----  
TCTACTGAAACCTTCAGACCTGGAGGAGGAAATATGAAAGACAATTGGAGAAGTGAATTATATAAATATAAAA  
TAGTAAAAATTGAGCCATTA---GGAGTAGCACCCACCACGGCAAAGAGAAGAGTGGTG-----  
-----CAGAGAGAAAAAAGAGCA---GTGGGAACGCTAGGAGCT-----  
ATGTTCCCTTGGGTTCTTGGGAGCA---GCAGGAAGCACTATG---GGCGCAGCGTCA---  
GTGACGCTGACGGTACAG---GCCAGACAA---TTATTG---TCTGGTATAGTGCAACAGCAGAAC---  
AATTTG---CTGAGA---GCTATTGAGGCGCAACAGCACATGTTGCAACTCACAGTCTGGGGCATT  
>MG572006  
TTCTACTGTAATACAACACAGCTGTTTAATAGTACTTGGGGTAATAATACTTGGAAATGGTACTGAAGGAAAT-  
-----  
-----  
GGAAATGACACTATCACACTTCCATGTAGAATAAAACAATTTATAAACAGATGGCAGGAAGTAGGAAAAGCAA  
TATATAACCCCTCCAGTCAGAGGAATAATTAAGTGTGCATCAAAT---  
ATTACAGGGCTGCTATTAAACAAGAGATGGTGGTAACACAAACACAACC-----  
-----  
-----  
AATAGGTCTGAAATCTTCAGACCTGGAGGAGGAAATATGAAGGACAATTGGAGAAGTGAATTATATAAATATA  
AAGTAGTAAAAATAGAACCAATA---GGAATAGCACCCACCACGGCAAAGAGAAGAGTGGTG-----  
-----CAGAGAGAAAAAAGAGCA---CTGCCG---CTGGGAGCT-----  
---ATGTTCCCTTGGGTTCTTGGGAGCA---GCAGGGAGCACTATG---GGCGCAGCGTCA---  
ATGACGCTGACGGTACAG---ACCAGACAA---TTATTG---TCTGGTATAGTGCAACAGCAGAGC---  
AATCTG---CTGAGG---GCTATTGAGGCGCAACAACATATGTTGCAACTCACAGTCTGGGGCATC  
>AY173956  
TTCTACTGTAATTCACACAACCTGTTTAACAGTACTTGGAAATAGTACTTGGAAATGTTGATGAAAGATCAAAT-  
-----  
-----  
-----  
GACACTGCAACACTCAAACCTCCCATGCAGAATAAAACAATTTGTAAACATGTGGCAGGAAGTAGGAAAAGCAA  
TGTATGCCCCCTCCCATCGATGGGCAAATTAGTTGTTTCATCAAAT---  
ATTACAGGGTTACTATTAAACAAGAGATGGTGGTAATAACACAAAC-----  
-----  
-----

GAGACTGAGACCTTCAGACCTGGAGGAGGAGATATGAGGGACAATTGGAGAAGTGAATTATATAAATATAAAG  
TAGTAAAAGTTGAACCATTA---GGAGTAGCACCCACCAGGGCAAAGAGAAGAGTGGTG-----  
-----CAAAGAGAAAAAAGAGCA---GTGGGA---ATAGGAGCT-----  
GTGCTCCTTGGGTTCTTGGGAGCA---GCAGGAAGCACTATG---GGCGCAGCGTCA---  
CTGACGCTGACGGTACAG---GCCAGACAA---TTATTG---TCTGGTATAGTGCAACAGCAAAAC---  
AATTTG---CTGAGG---GCTATTGAGGCGCAACAGCATCTGTTGCAACTCACAGTCTGGGGCATC  
>AY779552  
TTCTACTGTAATTCAACACCACTGTTTAATAGTACTTGGGAATAGTACTACTTGGAACAGCACTAAAGGGTCAC  
ATAAC-----  
-----AGT---  
ACAGGAAATGAACTATCACACTCCAATGCATAATAAAACAAATTATAAACCTGTGGCAGGAAGTAGGAAAAG  
CAATGTATGCCCCCTCCCATCAAAGGACAAATTAAATGCTCATCAAAT---  
ATTACAGGGCTGCTATTAACAAGAGATGGTGGTAGGGGCAATGACACG-----  
-----  
-----  
GACAATACCAACCGAGATCTTCAGACCTGGAGGAGGAGATATGAGGGATAATTGGAGAAGTGAATTATACAAAT  
ATAAAGTAGTAAGAATTGAGCCATTA---GGGGTAGCACCTACCAAGGCAAAGAGAAGAGTGGTG-----  
-----CAGAGAGAAAAAAGAGCA---GTGGGA---ATAGGAGCC---  
-----TTGTTTCCTTGGGTTCTTGGGAGCA---GCAGGAAGCACTATG---GGCGCAGCGTCA---  
ATAACGCTGACGGTACAG---GCCAGACTA---TTATTG---TCTGGTATAGTGCAAGCAGCAGAAC---  
AATCTG---CTGAGG---GCTATTGAGGCGCAACAGCACCTGTTGCAACTCACAGTTTGGGGCATC  
>GU562135  
TTCTACTGCAACTCATCAAACTGTTTAATTGGAATTCAACACATTGGAATTCAACACATTGGAATTCAACAC  
AACAGGGT-----  
-----AATAGT-----  
ACTGGAAATGATACTATTACACTCACATGTAGGATAAAACAAATTATAAACATGTGGCAGGAAGTAGGAAAAG  
CAATGTATGCCCCCTCCCATCAAAGGACAAATTAGATGTTTCATCAAAT---  
ATTACAGGGATACTATTAACAAGAGATGGTGGAAATAACAATGACACC-----  
-----  
-----  
AACAAAACCGAGATCTTCAGACCAGGAGGAGGAGATATGAGGGACAATTGGAGAAGTGAATTATATAAATATA  
AAGTAGTAAAAATTGAACCATTA---GGAGTAGCACCCACCAAGGCAAAGAGAAGAGTGGTG-----  
-----CAGAGAGAAAAAAGAGCG---GTAACG---CTAGGAGCT-----  
---ATGTTTCCTTGGGTTCTTGGGAGCA---GCAGGAAGCACTATG---GGCGCAGCGTCA---  
CTAACGCTGACGGTACAG---GCCAGACTA---TTATTG---TCTGGTATAGTGCAACAGCAGAAC---  
AATCTG---CTGAGG---GCTATTGAGGCGCAGCAGCATCTGTTGCAACTCACAGTCTGGGGCATC  
>GU562272  
TTCTACTGTAATTCAACACCACTGTTTAATAGTACTTGGCCTAGAAATTCAACAACACAACAGTCTAAT---  
-----  
-----  
AATAGTACACCCATTGTACTCAAATGTAGAATAAAGCAAATTATAAACATGTGGCAGGAAGTAGGAAAAGCAA  
TGTATGCCCCCTCCCATTAAGGAGTAATTAGGTGTTTCATCAAAT---  
ATCACAGGGATAATATTAACAAGAGATGGTGGTGCTAATAATACTAAC-----  
-----  
-----  
CATAATAATACCGAGACTTTTCAGACCTGCAGGAGGAGATATGAGGGACAATTGGAGAAGTGAATTATATAAAT  
ATAAAGTAGTAAAAATTGAACCATTA---GGAGTAGCACCCACCAGGGCAAAGAGAAGAGTGGTG-----  
-----CAAAGAGAAAAAAGAGCA---GTGGGAGTAGTAGGAGCA---  
-----ATGTTTCCTTGGGTTCTTGGGAGCA---GCAGGAAGCACTATG---GGCGCAGCGTCA---  
ATAACGCTGACGGTACAG---GCCAGACAA---TTACTG---TCTGGTATAGTGCAACAGCAGAAC---  
AATCTG---CTGAAG---GCTATTGAGGCGCAACAGCATCTGTTGCAACTCACAGTCTGGGGCATA  
>GU562155  
TTTTACTGTAATTCAACACACCTATTTAATTCAACTTGGGAATAAGAATGATTCAACTTGGGAATAAGAATGATT  
CAACTTGGACT-----  
-AAGAATGATTCAACA-----  
GTAATAACGAACTATCACCCCTCCCATGCAGAATAAAACAAATTATAAACAAAGTGGCAGGAAGTAGGAAAAG  
CAATGTATGCCCCCTCCCATCAAAGGACAAATTAGATGCTCATCAAAT---  
ATTACAGGGCTAATATTAGTAAGAGATGGTGGGAACACGAACACC-----  
-----  
-----

ACCGAGACCTTCAGACCTGCAGGAGGAGATATGAGGGACAATTGGAGAAGTGAATTATATAAAATATAAAGTAG  
TAAAAATTGAACCATTA---GGAGTAGCACCTACCAAGGCAAAGAGAAGAGTGGTG-----  
-----CAGAGAGAAAAAGAGCA---GTGGGA---CTAGGAGCT-----  
GTGTTCTTTGGGTTCTTGGGAGCA---GCAGGAAGCACTATG---GGCGCAGCGTCA---  
GTGACGCTGACGGTACAG---GCCAGACAA---TTATTG---TCTGGTATAGTGCAACAGCAGAAT---  
AATTTG---CTGAGG---GCTATTGAGGCGCAACAGCATATGTTGCAACTCACAGTCTGGGGCATC  
>JF320413  
TTCTACTGTGACTCAACACCACTGTTTAATAGTACTTGAATAAGACTGAAAATGAGTGGAATAGTACTACTG  
AC-----  
-----  
ATACCAGAGAACATCACCCCTCAGATGTAGAATAAGACAAATTATAAACATGTGGCAGGAAGTAGGAAAAGCAA  
TGTATGCCCCCTCCTATCAGTGGCCCAATTAAGTGTACATCAAAT---  
ATTACAGGGCTGCTATTAACAAGAGATGGTGGTAACCTCAGCAGC-----  
-----  
-----  
ACTAATGAGACCTTCAGACCTGGAGGAGGAAATATGAGGGATAATTGGAGAAGTGAATTATATAAAATATAAAG  
TAGTAAAAATTGAACCATTA---GGAGTAGCACCCACCAAGGCAAGGAGGAGAGTGGTG-----  
-----CAGAGAGAGAAAAAGAGCA---GTGGGA---ATAGGAGCA-----  
TTGTTCTTTGGGTTCTTGGGAGCA---GCAGGAAGCACTATG---GGCGCAGCGTCA---  
ATGACGCTGACGGTACAA---GCCAGGCTA---TTATTG---TCTGGTATAGTGCAACAGCAGAAT---  
AACTTG---CTGAGA---GCTATTGAGGCGCAACAGCATATGCTGCAACTCACAGTCTGGGGCATC  
>GU562266  
TTCTACTGTAATACATCACAATTGTTTAATGGTACTTGAATAGTACTACATGGTCAAATTCAATTAAC----  
-----  
-----  
AGCACTGAAAATATCACACTCCCATGCAGAATAAAACAATTTATAAACATGTGGCAGGAAGTAGGAAAAGCAA  
TGTATGCCCCCTCCCATCCAAGGACCAATTAGATGTTTATCAAAT---  
ATTACAGGGCTACTATTAACAAGAGATGGTGGTAATAATAATGACATG-----  
-----  
-----  
AATAACACCGAGACTTTCAGACCTGGAGGAGGAGATATGAGGGACAATTGGAGAAGTGAATTATATAAAATATA  
AAGTAGTACAAATTGAACCATTA---GGAGTAGCACCCACCAAGGCAAGGAGAAGAGTGGTG-----  
-----CAGAGAGAGAAAAAGAGCA---GTAATGGGACTAGGAGCT-----  
---ATGTTCTTTGGGTTCTTGGGAGCA---GCAGGAAGCACTATG---GGCGCAGCATCA---  
ATAACGCTGACGGTACAG---GCCAGACAA---TTATTG---TCTGGCATAGTGCAACAGCAGAGC---  
AATTTG---CTGAGG---GCTATTGAGGCGCAACAGCACATGTTGCAACTCACAGTCTGGGGCATC  
>AY314061  
TTCTACTGTAATACAACATCACTGTTTAACAGTACTTGAATGGTACTGAAGGGTCAATTAACACTACA----  
-----  
-----  
GAAAATGACCCACTCACACTCCCATGCAGGATAAAACAAATTATAAATATGTGGCAGGAAGTAGGAAAAGCAA  
TGTATGCCCCCTCCCATCGCAGGACAAATTAGATGTACATCAAAT---  
ATTACAGGGCTGCTACTAACAAGAGATGGTGGTAATGACACCATCAAT-----  
-----  
-----  
AAGGGGACCGAGGTCTTCAGACCTGGAGGAGGAGATATGAGGGACAATTGGAGAAGTGAATTATATAAAATATA  
AAGTAGTAAAAATTGAACCATTA---GGAGTAGCACCCACCAGGGCAAAGAGAAGAGTGGTG-----  
-----CAAAGAGAAAAGAGAGCA---GCGGGA---ATAGGAGCT-----  
---GTGCTCCCTGGGTTCTTGGGAGCA---GCAGGAAGCACTAAG---GGCGAA---TCC---  
AGCACACTGACGGTACAA---GCCAGACAA---TTATTG---TCTGGTATAGTGCAACAGCAGAGT---  
AATCTG---CTGAGG---GCTATTGAGGCGCAACAGCATCTGTTGCAACTCACAGTCTGGGGCATC  
>GU562033  
TTCTACTGTAATTCACACAACCTGTTTAATAGTACTTGAATGTTAGTAGTACTTGAATAGTACTGAAGAG-  
-----  
-----  
TCAAATGACACTATTATACTCCCATGTAGGATAAAACAAATTATAAACATGTGGCAGAAAGTAGGAAAAGCCA  
TGTATGCCCCCTCCCATCAGAGGACAAAGTTAAATGTTTCATCAAAA---  
ATTACAGGGATACTATTAACAAGAGATGGTGGTAATAGTGGTAATAAC-----  
-----  
-----

ACGAACGAGACCGAGACCTTCAGGCCTGGAGGAGGAGATATGAGGGACAATTGGAGAAGTGAATTATATAAAAT  
ATAAAGTAGTAAAAATTAAACCATTA---GGAGTAGCACCCACCAAGGCAAAGAGAAGAGTGGTG-----  
-----CAGAGAGAAAAAAGAGCA---GTGGGAACAATAGGAGCT---  
-----ATGTTTCCTTGGGTTCTTGGGAGCA---GCAGGAAGCACTATG---GGCGCAGCGTCA---  
ATGACGCTGACGGTACAG---GCCAGACAA---TTATTG---TCTGGTATAGTGCAACAGCAAAAC---  
AATTTG---CTGAGG---GCTATTGAGGCGCAACAGCATCTGTTGCAACTCACAGTCTGGGGCATC  
>GU562058  
TTCTACTGTAATTCAACACAGCTGTTTAATAGTACTTGGTTTAAGAATAATACTTGGATAGGGTCAAAT----  
-----  
-----  
GGCACTGAAAATATCACACTCCCATGCAGAATAAAACAAATTATAAACAGGTGGCAGGAAGTAGGAAAAGCAA  
TGTATGCCCCCTCCCATCAGTGGAGTAATTAGCTGTTTCATCAAAT---  
ATTACAGGGCTGATATTAACAAGAGATGGGGGAAGAGGTGATGTTAATAAC-----  
-----  
-----  
ACCAACGAGACTGAGATCTTCAGGCCTGGAGGAGGAGATATGAGGGACAATTGGAGAAGTGAATTATATAAAAT  
ATAAAGTAGTAAAAATTGAGCCATTA---GGAATAGCACCCACCAAGGCAAAGAGAAGAGTGGTG-----  
-----CAAAGAGAAAAAAGAGCA---GTAACG---TTTGGAGCT---  
-----TTGTTTCCTTGGGTTCTTGGGAGCA---GCAGGAAGCACTATG---GGCGCAGCGTCA---  
ATAACGCTGACGGCACAG---GCCAGACTA---TTATTG---TCTGGTATAGTGCAACAGCAGAAC---  
AATTTG---CTGAGA---GCTATTGAGGCGCAACAGCATCTGTTGCAACTCACAGTCTGGGGCATC  
>GU562001  
TTCTACTGTACTACAACACAGATGTTTAATAGTACTTGGGAAGGATGGTACTTGGACTGAAGGATCAAATAAC-  
-----  
-----  
ACTGGCGGAAATATCATACTCCCATGCAGAATAAAACAAATTATAAACATGTGGCAGAAAGTAGGAAAAGCAA  
TATATGCCCCCTCCCATTAGTGGACAAATTAACTGTTTCATCAAAT---  
ATTACAGGGCTGCTATTAACAAGAGATGGTGGTAACGAGGGCAATGCT-----  
-----  
-----  
ACTAATAATACTGAAACCTTCAGACCTGGTGGAGGAGATATGAGGGACAATTGGAGAAGTGAATTATATAAAAT  
ATAAAGTAGTAAAAATTGAACCAATA---GGAATAGCACCCACCAAGGCAAAGAGAAGAGTGGTG-----  
-----CAGAGAGAAAAAAGAGCA---GTGGGA---ATAGGAGCT---  
-----GTGTTTCCTTGGGTTCTTGGGAGCA---GCAGGAAGCACTATG---GGCGCAGCGTCA---  
ATAACGCTGACGGTACAG---GCCAGACAA---TTATTG---TCTGGTATAGTGCAACAGCAGAAC---  
AATTTG---CTGAGG---GCTATTGAGGCGCAACAGCACCTGTTGCAACTCACAGTCTGGGGCATC  
>GU562080  
TTCTACTGTAATACAACACAACCTATTTAATTCAACTTGAATAATAACTCAACTTGGAGTAGTAATTCAACGG  
GAGAT-----  
-----  
AATGAAAATATCACTATCACCTCCCATGCAGAATAAAACAAATTATAAACATGTGGCAGGAAGTAGGAAAAG  
CAATGTATGCCCCCTCCCATCGGAGGGCAAATTAGATGCTCATCAAAT---  
ATTACAGGGATGATTTTAAACAAGAGATGGTGGTGAGAAACAACACC-----  
-----  
-----  
ACTGAGATCTTCAGACCTGGAGGAGGAGATATGAGGGACAATTGGAGAAGTGAATTATATAAATATAAAGTAG  
TAAAAATTGAACCAATA---GGAGTAGCACCCACCAAGGCAAAGAGAAGAGTGGTG-----  
-----CAGAGAGAAAAAAGAGCA---GTGGGA---ATGGGAGCT-----  
TTGTTTCCTTGGGTTCTTGGGAGCA---GCAGGAAGCACTATG---GGCGCAGCATCA---  
ATAACGCTGACGGTACAG---GCCAGGCAA---TTATTG---TCTGGTATAGTGCAACAGCAGAAAT---  
AATTTG---CTGAGA---GCTATTGAGGCGCAACAGCATCTGTTGCAACTCACAGTCTGGGGCATC  
>DQ322223  
TTCTACTGTAATGTAACAGAACTGTTTAATAGTACTTGAATGGAAGTGAACAGAATAGTACCCAG-----  
-----  
-----  
AATGAGGATACTATCACACTCCCATGCAGAATAAAACAAATTATAAACATGTGGCAGGAAGTAGGAAAAGCAA  
TGTATGCCCCCTCCCATCAGAGGAAATATTACTTGTTCATCAAAT---  
ATTACAGGGCTGCTATTGACAAGAGATGGTGGAAACAATGAGAGC-----  
-----  
-----

ACGAATGAAACCTTCAGACCTGGAGGAGGAGATATGAGGGACAATTGGAGAAGTGAACCTATATAAATATAAAG  
TAGTAAACCTTGAACCATTA---GGAGTAGCACCCACCAAGGCAAAGAGAAGAGTGGTG-----  
-----CAAAGAGAAAAAAGAGCA---GTGGGA---ATAGGAGCT-----  
ATGTTCCCTTGGGTTCTTGGGAGCA---GCAGGAAGCACTATG---GGCGCAGCGTCA---  
ATAACGCTGACGGTACAG---GCCAGACAA---TTACTG---TCTGGTATAGTGCAACAGCAGAGC---  
AATTTG---CTGAGA---GCTATTGAGGCACAACAGCATATGTTGCAACTCACAGTCTGGGGCATC  
>DQ322227  
TTCTATTGTAATACAACAAAACCTGTTTAATAGTACTTGGCCTAGAAACAACACTGAAGGGTCTGAA-----  
-----  
-----  
GGAAATGACACAATCACACTCCCATGCAGAATAAAACAAATTATAAACATGTGGCAGGAAGTAGGAAAAGCAA  
TGTATGCCCCCTCCCATCAGAGGACAAATTAAATGTTTCATCAAAT---  
ATTACAGGGCTGTTATTAACAAGAGATGGGGGTAATAATGAGACC-----  
-----  
-----  
AATGGGATTGAGACCTTCAGACCTGGAGGAGGAAATATGAAGGACAATTGGAGAAGTGAATTATATAAATATA  
AAGTAGTACAAATTGAACCATTA---GGAATAGCACCCACCAAGGCAAAGAGAAGAGTGGTG-----  
-----CAGAGAGAAAAAAGAGAC---CTAGGA---CTAGGAGCT-----  
---TTGTTAATCGGGTTCTTGGGAGCA---GCAGGAAGCACTATG---GGCGCAGCGTCA---  
GTGACGCTGACGGTACAG---GCCAGGCAA---TTAATG---TCTGGTATAGTGCAACAGCAGAAC---  
AATCTG---CTGAGA---GCTATTGAGGCGCAACAGCACATGTTGCAACTCACAGTCTGGGGCATT  
>DQ322225  
TTCTACTGTAATACAACAAAACCTGTTCAATAGTACTTGGAAATAGTACTGAGAATGGGAATACTTGGAAATAAAA  
CTACATGGTTA-----  
-----GATAAC-----  
CCGAAAAATGACACAATCACACTCCCATGCAGAATAAGACAAATTATAAACATGTGGCAGGAAGTAGGAAAAG  
CAATGTATGCCCCCTCCCATCCAAGGACAGATTAACTGTTTCATCAAAT---  
ATTACAGGGCTGCTATTAACAAGAGATGGTGGTGAGGATCGTAACAATAGC-----  
-----  
-----  
GAGAATGAGGAGAATGAGATCTTCAGACCTGGAGGAGGAGATATGAGGGATAATTGGAGAAGTGAATTATATA  
AATATAAAGTAGTAAAAATTGAACCATTA--GGAGTAGCACCCACCAAGGCAAAGAGAAGAGTGGTG-----  
-----CAAAGAGAAAGAAGAGCA---GTGGGA---  
CTAGGAGCT-----ATGTTCCCTTGGGTTCTTGGGAGCA---GCAGGAAGCACTATG---  
GGCGCAGCGTCA---ATAACGCTGACGGTACAG---GCCAGACAA---TTATTG---  
TCTGGTATAGTGCAAGCAGCAAAAC---AATTTG---CTGAGA---  
GCTATTGAGGCGCAACAGCATTTGTTGCAACTCACAGTCTGGGGCATC  
>DQ322239  
TTTTACTGTGATACAAAACCGCTGTTTAATAGTACTTGGAAATCCAAAACAACCAGTTAATAGTACTGGGAATG  
GT-----  
-----  
ACTGACGGAGATATCATACTCCAATGTAGAATAAAACAAATTATAAACATGTGGCAGAAAGTAGGAAAAGCAA  
TGTATGCCCCCTCCCATCAGAGGACCAATTAGTTGTTTATCAAAT---  
ATTACAGGGCTACTATTAACAAGAGATGGTGGTAACGTGAGTGATAGT-----  
-----  
-----  
AATATCACCGAGATCTTCAGACCTGTAGGAGGAGATATGAAGGACAATTGGAGAAGTGAATTATATAAATATA  
AAGTAGTAAAAATTGAACCATTA---GGAATAGCACCCACCAAGGCAAAAAGAAGAGTGGTG-----  
-----CAAAGAGAAAAAAGAGCA---GTGGGAGTGATAGGAGCT-----  
---ATGTTCCCTTGGGTTCTTGGGAGCA---GCAGGAAGCACTATG---GGCGCAGCGTCA---  
TTGACGCTGACGGTACAA---GCCAGACTA---TTATTG---TCTGGTATAGTGCAACAGCAGAAC---  
AATTTG---CTGAGA---GCTATTGAGGCGCAACAGCATCTGTTGCAACTCACAGTCTGGGGCATC  
>JQ403022  
TTCTACTGCAATACATCACAACCTATTTAATAGTACCTGGAATAGTACTTGGTCTGATACTTGGAAATAGTACTG  
GAGGA-----  
-----  
AAGAACGGGCACAATCACACTCCCATGTAGAATAAAACAAATTATAAACAGGTGGCAGGAAGTAGGAACAGCAA  
TGTATGCCCCCTCCCATCAGAGGACTAATTAAGTGTACATCAAAT---  
ATTACAGGGCTGTTATTAACAAGAGATGGTGGTAATACCACCAAC-----  
-----

-----  
AACACAGCGAGACCTTCAGACCTGGAGGAGGAGATATGAGAGACAATTGGAGAAGTGAATTATATAAATATA  
AAGTAGTAAGAATTGAACCATTA---GGAGTAGCACCCACCAAGGCAAAGAGAAGAGTGGTG-----  
-----CAGAGAGAAAAAAGGGCA---GCA-----CTAGGAGCT-----  
---ATGTTCCCTTGGGTTCTTGGGAGCA---GCAGGAAGCACTATG---GGCGCAGCGTCA---  
GTAGCGCTGACGGTACAA---GCCAGACAA---TTATTG---TCTGGTATAGTGCAACAGCAGAAC---  
AATTTG---CTGAGA---GCTATTGAGGCGCAAACAAATATGTTGCGACTCACGGTCTGGGGCATT  
>JQ403023  
TTCTATTGTGATTCAACAAAATTGTTTAATAGTAATTGGACTATAGGTGAGGATACTGATTGGTTCAATAATA  
CTGATTGG-----  
-----  
TTAAATGGCACAATCACACTCCCATGCAGAATAAAACAAATTGTAAACATGTGGCAGGAAGTAGGAAAAGCAA  
TGTATGCCCCCTCCCATCAGCGGACAAATTAGCTGTAATTCAACT---  
ATTACAGGGCTGTTATTAACAAGAGATGGTGGTGTGGATAATAACACC-----  
-----  
-----  
GATAATAACACTGAGATCTTCAGGCCAGGAGGAGGAGATATGAGGGACAATTGGAGAAGTGAATTGTATAAAT  
ATAAAGTAGTACAAATTGAACCATTA---GGAATAGCACCCACTAAGGCAAAGAGAAGAGTGGTG-----  
-----CAGAGAGAAAAAAGGGGC-----ATAGGAGCT---  
-----GTGTTCCCTTGGGTTCTTGGGAGCA---GCAGGAAGCACTATG---GGCGCAGCGTCA---  
GTGACGCTGACGGTACAG---GCCAGACAA---TTATTG---TCTGGTATAGTGCAACAGCAAAAC---  
AATTTG---CTGAAG---GCTATTGATGCGCAACAGCATCTGTTGCAACTCACAGTCTGGGGCATC  
>KC797171  
TTCTACTGTAATACAACACAACCTGTTTAATAGTACCTGGTCCAATAGTAGTGGTACTTGGAATTCAACACATA  
ATAGTACT-----  
-----GAGGAG-----  
TTAGATAACGACACAATCACACTCCCATGCAGAATAAAACAAATTATAAACATGTGGCAGGAAGTAGGAAAAG  
CAATGTATGCCCCCTCCCATCAAGGGAATAATTAGATGTTTCATCAAAC---  
ATTACAGGTCTGCTATTAACAAGAGATGGTGGCAATACTAATAATACTAAT-----  
-----  
-----  
AATACCATTGAAACCTTCAGACCTGGAGGAGGGGATATGAGGGACAATTGGAGAAGTGAATTATTTAAATATA  
AAGTAGTACAAATTGAACCATTA---GGAGTAGCACCTTCCAGGGCAAAGAGAAGAGCGGTG-----  
-----CAGAGAGAAAAAAGAGCA---GTAGGAACACTAGGAGCT-----  
---ATGTTCCCTTGGGTTCTTGGGAGCA---GCCGGAAGCACTATG---GGCGCAGTGTC---  
ATGACGCTGACGGTACAG---GCCAGACAA---TTATTG---TCTGGTATAGTGCAACAGCAGAGC---  
AATCTG---CTGAGG---GCTATTGAGGCGCAACAGCATATGTTGCAACTCACAGTCTGGGGCATC  
>JQ403025  
TTCTACTGTAATTCAACAAAACCTGTTTAATAGTACTTGGGATACTAATACTACAGGGTTAGATAATGACACTA  
AAGGA-----  
-----  
GATAATGACACATTCATACTCCCATGTAGAATAAAACAGATTATAAACCTGTGGCAGGAAGTAGGAAAAGCAA  
TGTATGCCCCCTCCCATCAAAGGACAAATTAGATGTTCTTCAAAT---  
ATTACAGGACTGCTAATAACAAGAGATGGTGGTAGTAACGGGACT-----  
-----  
-----  
GATGAGATCTTCAGACCTGGAGGAGGAGATATGAGGGACAATTGGAGAAGTGAATTATATAAATATAAAGTAG  
TAAAAATTGAACCATTA---GGATTAGCACCCACCAAGGCAAAGAGAAGAGTGGTG-----  
-----CAAAGAGAAAAAAGAGCA---GTGGGA---TTCGGAGCT-----  
CTGTTCCCTTGGGTTCTTGGGAGCA---GCAGGAAGCACTATG---GGCGCAGCGTCA---  
GTGACGCTGACGGTACAG---GCCAGACAA---TTATTG---TCTGGTATAGTGCAACAGCAAAAC---  
AATTTG---CTGAAG---GCTATTGAGGCGCAACAGCATCTGTTGCAACTCACAGTCTGGGGCATC  
>JQ403026  
TTCTACTGTAATACAACACATTTGTTTAAGGGTACTTGGGAATGGTACTGAATGGTCAAATAACACTGAAGGGT  
CAAAT-----  
-----GACACT-----  
GCAAGAAATGACACAATCATACTCCCATGCAGAATAAGACAATTTATAAACATGTGGCAGGAAGTAGGAAAAG  
CAATGTATGCCCCCTCCCATCAAAGGACAAATTAGTTGTTTCATCAAAT---  
ATTACAGGGCTGATATTAACAAGAGATGGTGGTAATGAGACCGAAAAG-----  
-----

-----  
 AATGAGACTGAGACCTTCAGACCTGGAGGGGGAGATATGAGGGACAATTGGAGAAGTGAATTATATAAATATA  
 AAGTAGTAAAAATTGAACCATTA---GGAGTAGCACCCACCAAGGCAAAGAGAAGAGTGGTG-----  
 -----CAGAGAGAAAAAAGAGCA---GTGGGA---ATAGGAGCT-----  
 ---CTGTTCCCTTGGGTTCTTGGGAGCA---GCAGGAAGCACTATG---GGCGCAGCGTCA---  
 ATGACGCTGACGGTACAG---GCCAGACTA---TTATTG---TCTGGTATAGTGCAGCAGCAGAAC---  
 AATCTG---CTGAGG---GCTATTGAGGCGCAACAACATCTGTTGCAACTCACAGTCTGGGGCATC  
 >EU023916  
 TTCTACTGTAATACAACACAGCTATTTAATAGTACCTGGGTAAATGGTACTAATACTGGGAATAGTACT----  
 -----  
 -----  
 AATAGCACCGATATCACACTCCCGTGCAGAATAAAACAAATTGTAAACAGGTGGCAGGAAGTAGGAAAAGCAA  
 TGTATGCCCCCTCCCATCAGAGGACAGATTAGATGTAACCTCAAGT---  
 ATTACAGGGCTGCTATTAACAAGAGATGGTGGAGGTAACAGGACCGAG-----  
 -----  
 -----  
 AACAGGACCGAAACCTTCAGACCTGGAGGAGGAGATATGAGGGACAATTGGAGAAGTGAATTATACAAATATA  
 AAGTAGTAAAAATTGAGCCATTA---GGAGTAGCACCCACCAAGGCAAAGAGAAGAGTGGTG-----  
 -----CAGAGAGAAAAAAGAGCA---GCACTA-----GGAGCC-----  
 ---ATGTTCCCTTGGGTTCTTGGGAGCA---GCAGGAAGCACTATG---GGCGCAGCGTCA---  
 GTGACGCTGACGGTACAG---GCCAGACTA---TTATTG---TCTGGTATAGTGCAACAGCAGAAC---  
 AATCTG---CTGAGA---GCTATTGAGGCGCAACAGCATATGTTGCAACTCACAGTCTGGGGCATC  
 >JQ403019  
 TTCTACTGTAATACAACACAACCTGTTTAATAGTACCTGGTCTGATAATAGTACCGGGAATGGTACTGAA----  
 -----  
 -----  
 GGAGGAGAGGTCATCACAATCCCATGCAGAATAAAACAAATTGTAAACATGTGGCAGAGAGTAGGAAAAGCAA  
 TATATGCCCCCTCCTATTAAGGGACAAATTAACTGTACTTCAAAT---  
 ATTACAGGGTTGCTCTTAACAAGAGATGGTGGTAATACTAGTAGG-----  
 -----  
 -----  
 GACAACGAGACCTTCAGACCTGGAGGAGGAAATATGAGAGACAATTGGAGAAGTGAATTATATAAATACAAAG  
 TAGTAAGAATTGAGCCATTA---GGAGTAGCACCCACCAAGGCAAAGAGAAGAGTGGTG-----  
 -----CAAAGAGAAAAAAGAGCA---GTGGGAACAATAGGAGCT-----  
 ATGTTCCCTTGGGTTCTTGGGAGCA---GCAGGAAGCACTATG---GGCGCAGCGTCG---  
 ATGGCGCTGACGGTACAG---GCCAGACAA---TTATTG---TCTGGTATAGTGCAACAGCAAAAC---  
 AATTTG---CTGAGA---GCTATTGAGGCGCAACAACATATGTTGCAACTCACAGTCTGGGGCATT  
 >JQ403029  
 TTCTACTGTAATACAGCACAACCTGTTTAATAGTACTTGGGGGGTTGCTAATAGTACTTGGAAAT-----  
 -----  
 -----  
 GTTAGTGACAATATCACACTCCCATGCAGAATAAAACAAATTATAAACATGTGGCAAGAAGTAGGAAAAGCAA  
 TGTATGCCCCCTCCCATCCAAGGACAAATTAGATGTTTCATCAAAT---  
 ATTACAGGGATAATATTAACAAGAGATGGTGGTAACGGAAATGGGACC-----  
 -----  
 -----  
 GACAACACCACCGAGATCTTCAGACCTGGAGGGGGAGATATGAGGGACAATTGGAGAAGTGAATTATATAAAT  
 ATAAAGTAGTAAAAATTAAACCATTA---GGAGTAGCACCCACCAAGGCAAAGAGAAGAGTGGTG-----  
 -----CAGAGAGAAAAAAGAGCA---GTAACG---TTAGGAGCT---  
 -----ATGTTCCCTTGGGTTCTTGGGAGCA---GCAGGAAGCACTATG---GGCGCAGCGTCA---  
 ATAACGCTGACGGTACAG---GCCAGACAA---TTGTTG---TCTGGTATAGTGCAACAGCAGAGC---  
 AATTTG---CTGAGA---GCTATTGAGGCGCAACAACATCTGTTGCAACTCACAGTCTGGGGCATC  
 >JQ403044  
 TTCTACTGTGATACAGCAAACTGTTTGATAGTACTTGGCATAATAGTACTTGGAAATGATACTACAGGAGTCA  
 ATAACACT-----  
 -----GAGGGA-----  
 AATAGCACAGACCCAATCGAACTCCCATGCAGAATAAAACAAATTATAAACATGTGGCAGGGAGTAGGAAGAG  
 CAATGTATGCCCCCTCCCATCAGTGGACGAATTAGCTGTTTCATCAAAT---  
 ATTACAGGACTGCTATTAACAAGAGATGGTGGCACAAATGATACA-----  
 -----

-----  
 AAAGATAATGAGACCTTCAGACCTGGAGGAGGAGATATGAGAGACAATTGGAGAAGTGAATTATGGAAATATA  
 AAGTAGTAAAAGTTGAACCATTA---GGACTAGCACCTACCAAGGCAAAGAGAAGAGTGGTG-----  
 -----CAGAGGGAAAAAAGAGCA---ATAACA---CTAGGAGCT-----  
 ---ATGTTCCCTTGGGTTCTTGGGAGCA---GCAGGAAGCACTATG---GGCGCAGCGTCA---  
 ATGACGCTGACGGTACAG---GCCAGACAA---TTATTG---TCTGGTATAGTGCAACAGCAAAAT---  
 AATTTG---CTGAGA---GCTATTGAGGCGCAGCAGCATATGTTGCAACTCACAGTCTGGGGCATC  
 >KX792621  
 TTCTATTGTAATACAACAGGACTGTTTAAACAGCACTTGGGAATTCAACACAACCTGTCTAATGATACTGGGAATG  
 AAAGTGGGG---TCA-----GGT-----  
 -----  
 AACACTACTACAGAGATCATACTCCAATGCAGAATAAAACAAATTATAAACATGTGGCTGGAAGTAGGAAAAG  
 CAATGTATGCCCCCTCCCATCAGAGGACAAATCAGATGTTTCATCTAAT---  
 ATTACAGGGCTATTATTAACACGGGATGGTGGTAATACTAATAATACA-----  
 -----  
 GAAGGGAATGGCACCGAGACT-----  
 TTCCTGAGATCTTCAGACCTGAGGGAGGAGACATGAGGGACAATTGGAGAAGTGAATTATATAAAATATAAAG  
 TAGTAAAAATTGAACCATTA---GGAGTAGCACCCACCAAGGCAAAGAGAAGAGTGGTG-----  
 -----CAGAGAGAAAAAAGAGCG---GCA-----ATAGGAGCT-----  
 TTGTTCCCTTGGGTTCTTGGGAGCA---GCAGGAAGCACTATG---GGCGCAGCGTCA---  
 ATGACGCTGACGGTACAG---GCCAGACAA---TTGTTG---TCTGGTATAGTGCAACAGCAGAGC---  
 AACTTG---CTGAGA---GCTATTGAGGCGCAACAGCACCTGTTGCAACTCACAGTCTGGGGCATC  
 >JQ403043  
 TTCTACTGTAATTCAACAAAACTGTTCAATAGTACTTGGTATAGGAATGATACAGGAACTTGGAAATATTACAG  
 GAACTGGA-----  
 -----  
 GAGAATGACACACTCACACTCCCATGCAGAATAAAACAAATTATAAACAGGTGGCAGGAAGTAGGAAAAGCAA  
 TGTATGCCCCCTCCCATCAGAGGACAAATTAGATGTACATCAAAAT---  
 ATTACTGGGATACTATTAACAAGAGATGGTGGTAATAACAATAATAATACC-----ATG-----  
 -----  
 -----  
 AACGAGACTGAGATCTTCAGACCTGGAGGAGGAGATATGAGGGACAATTGGAGAAGTGAATTATATAAAATATA  
 AAGTAGTAAAATTGAACCATTA---GGACTAGCACCCACCAGGGCAAAGAGAAGAGTGGTG-----  
 -----CGGATAGAAAAAAGAGCA---GTGACA---CTAGGAGCT-----  
 ---ATGTTCCCTTGGGTTCTTGGGAGCA---GCAGGAAGCACTATG---GGCGCAGCGTCA---  
 GTAACGCTGACGGTACAG---GCCAGACAA---TTATTG---ACTGGTATAGTGCAACAGCAGAAT---  
 AATTTG---CTGAAG---GCTATTGAGGCGCAACAACATCTGTTGCAACTCACAGTCTGGGGCATC  
 >JQ403045  
 TTCTACTGTAATACAACACAACCTGTTTAAATAGTAGCTGGGATAATAGTACTGAGAATGGAAATGATACTGAAG  
 GG-----  
 -----  
 TCAAATAACCTTATCATACTCCCATGCAGAATAAAACAAATTATAAACATGTGGCAGAAAGTAGGAAAAGCAA  
 TGTATAACCCTCCCATCCAGGGACAAATTAGCTGTTTCATCAAAAT---  
 ATTACAGGGCTGCTATTAAACACGAGATGGTGGTAAGAGTGAGAACAAGACT-----  
 -----  
 -----  
 GAGAACAAAGACCACTGAGATCTTCAGACCGGGAGGAGGAGATATGAGGGACAATTGGAGAAGTGAATTATATA  
 AATATAAAGTAGTAAAAATTGAACCATTA---GGAGTAGCACCCACCAAGGCAAAGAGAAGAGTGGTG-----  
 -----CAGAGAGAAAAAAGAGCA---GTGGGA---  
 TTAGGAGCT-----CTGTTCCCTTGGGTTCTTGGGAGCA---GCAGGAAGCACTATG---  
 GGCGCAGCGTCA---GTGACGCTGACGGTACAG---GCCAGACAA---TTATTG---  
 TCTGGTATAGTGACAGCAGCAAAAC---AATTTG---CTGAGG---  
 GCTATTGAGGCGCAGCAGCATCTGTTGCAACTCACAGTCTGGGGCATC  
 >JQ403046  
 TTCTACTGTGATACAACACAGCTGTTTAAATAGTACTTGGACGGTACTGAAGGAAATTTCT-----  
 -----  
 -----  
 ACTGAACTAACATCACACTCCCATGCAGAATAAAACAAATTGTAAACAGGTGGCAGGAAGTAGGGAGAGCGA  
 TGTATGCCCCCTCCCATCAGCGGAATCATTAGATGTTTCATCAAAAT---  
 ATTACAGGGCTGCTACTAACAAGAGATGGTGGTATCAGCAACAATGGG-----

-----  
-----  
TCCGAAAATGGGTCCGAAACCTTCAGACCTGGAGGAGGAGATATGAGGGACAATTGGAGAAGTGAATTATATA  
AATATAAAGTAGTAAAAATTGAGCCATTA---GGATTAGCACCCACCAAGGCAAAGAGAAGAGTGGTG-----  
-----CAAAGAGAAAAAAGAGCA---GTAACG---  
CTGGGAGCT-----GTGTTCCCTTGGGTTCTTGGGAGCA---GCAGGAAGCACTATG---  
GGCGCAGCGTCA---ATAACGCTGACGGTACAA---GCCAGACTC---TTATTG---  
TCTGGTATAGTGACAGCAGCAGAAC---AATCTG---CTGAAA---  
GCTATTGAGGCGCAACAGCATATGTTGCAACTCACAGTCTGGGGCATC  
>EU023919  
TTCTACTGTAATACAACAACCACTGTTTAATAGTACTTGGGAGGTTAATAATACTGAGAGTAATACTACCATA-  
-----  
-----  
TCAAAATGACACTATTACTCTCCCATGCAGAATAAAACAAATTATAAACATGTGGCAGAAGGTAGGAAAAGCAA  
TGTATGCCCCCTCCCATCAAAGGACTAATTAGATGTTTCATCAAAT---  
ATTACAGGGCTGCTATTAAACAAGAGATGGTGGTAATGGCCCCAAC-----  
-----  
-----  
GGGACAAATGAGGCCTTCAGACCTGCAGGAGGAGATATGAGGGACAATTGGAGAAGTGAACATATATAAATATA  
AAGTAGTACAACCTTGAACCATTA---GGAATAGCACCCACCAAGGCAAAGAGGAGAGTGGTG-----  
-----CAGAGAGAAAAAAGAGCA---GTGGGAATGATAGGAGCT-----  
---ATGTTCCCTTGGGTTCTTGGGAGCA---GCAGGAAGCACTATG---GGCGCAGCGTCA---  
TTGACGCTGACGGTACAG---GCCAGACAG---TTACTG---TCTGGTATAGTGCAACAGCAGAAT---  
AATCTG---CTGAGG---GCTATTGAGGCGCAACAGCATCTGTTGCAACTCACAGTCTGGGGCATC  
>EU023922  
TTCTACTGTAATACAACAACCACTGTTTAATAGTACTTGGAAATGGGACTAATACTGAAGGCACTGAA-----  
-----  
-----  
GGAAATGACACAATCACACTCCCATGCAGAATAAGACAGATTATAAACATGTGGCAGGAAGTAGGAAAAGCAA  
TGTATGCCCCCTCCCATCAGAGGACAAATTAGATGTTTCATCAAAT---  
ATTACAGGGCTGCTATTAAACAAGGGATGGTGGTACGAACGAGACC-----  
-----  
-----  
AACGAGACCGAGATCTTCAGACCAGGAGGAGGAGATATGAGGGACAATTGGAGAAGTGAATTATATAAATATA  
AAGTAGTAAAAATTGAACCATTA---GGAGTAGCACCCACCAAGGCAAAGAGAAGGGTGGTG-----  
-----CAGAGAGAAAAAAGAGCA---GTGGGA---CTAGGAGCT-----  
---ATGTTCCCTTGGGTTCTTGGGAGCA---GCAGGAAGCACTATG---GGCGCAGCGTCA---  
GTGACGCTGACGGTACAG---GCCAGACAA---TTATTG---TCTGGTATAGTGCAACAGCAGAAT---  
AATCTG---CTGAAG---GCTATTAAGGCGCAACAACATCTGTTGCAACTCACAGTCTGGGGCATC  
>KX792557  
TTCTACTGTAATACAACACAGCTGTTTAACAGTACGTGGACTTGGGAATAATACTGATAGTGCTGGGAACGAG-  
-----  
-----  
ACTGAAAAAATTATCACACTCCCGTGCAGGATAAGACAAATTGTAAATAGATGGCAAGAAGTAGGAAAAGCAA  
TGTATGCCAATCCCATTAGTGGACCAATTAGCTGTTTCATCAAAT---  
ATTACAGGGCTGCTATTAAACAAGAGATGGTGGTATTAAACAACGAGACC-----  
-----  
-----  
AATACCACCGAGACCTTCAGACCTTGGGGGGGAGATATGAGGGACAATTGGAGAAGTAAATTATATAAATATA  
AAGTAGTAAAAATTAAACCATTA---GGACTAGCACCCACCAAGGCAAAGAGAAGAGTGGTG-----  
-----CAGAGAGAAAAAAGAGCA---GTAACA---TTGGGAGCT-----  
---ATGTTTCTTGGGTTCTTGGGAACA---GCAGGAAGCACTATG---GGCGCAGCGTCA---  
CTGACGCTGACGGTACAG---GCCAGACTA---TTATTG---TCTGGTATAGTGCAACAGCAGAAC---  
AACCTG---CTGAGG---GCTATTGAGGCGCAACAGCATCTGTTGCAACTCACAGTCTGGGGCATC  
>KX792831  
TTCTACTGTAATACAACAAAACCTGTTTGTAGTACCTGGTATCCGAATGGTACTTGGTATTCGAATGGTATTA  
CTTGGTATCCG---AATGGTACTACAAGGTATCCGAATGGTACTACAAAGGCAAATAGC---  
ACAGGGTCAAAT-----  
AGCACTGAGGATACGATCACACTCCCATGCAGAATAAAACAAATTATAAACAGGTGGCAAGAAGTAGGAAAAG  
CAATGTATGCCCCCTCCCGCCCGAGGACAAATTAAATGCTCATCAAAT---

ATTACAGGGCTGCTATTGACAAGAGATGGTGGTAAGAGCAATACCAGTGAG-----  
-----  
-----  
AACGAGGAGACCTTCAGACCGGGAGGAGGAAATATGAGGGACAATTGGAGAAGTGAATTATATAAATATAAAG  
TAGTAAAAATTGAACCATTA---GGAATAGCACCCACCAAGGCAAGGAGAAGAGTGGTG-----  
-----CAGAAAGAAAAAAGAGCA--GTAACA---CTAGGAGCT-----  
GTGTTTCCTTGGGTTCTTGGGAGCA---GCAGGAAGCACTATG---GGCGCAGCGTCA---  
ATGACGCTGACGGTACAA---GCCAGACAA---TTATTG---TCTGGTATAGTGCAACAGCAGAGC---  
AATCTG---CTGAGG---GCTATTGAGGCGCAACAGCACCTGTTGCAACTCACAGTCTGGGGCATC  
>JQ403042  
TTCTACTGTAATACAGCACAACTGTTTAATAGTACTTGGAATTGGAATGATACTACCAAATCAAATAATACA-  
-----  
-----  
GGGCCAGATAACATCACACTCCCATGCAGAATTAAAACAAATTATAAACAGGTGGCAGGAAGTAGGAAAAGCAA  
TGTATGCCCCCTCCCATCAGCGGACTAGTTAGATGTGTATCAAAT---  
ATTACAGGGCTACTATTAACAAGGGATGGTGGTACGGACAACACC-----  
-----  
-----  
ACCGAGATCTTCAGACCTGGAGGAGGAAATATGAAGGACAATTGGAGAAGTGAATTATATAAATATAAAGTAG  
TAAAAATTGAGCCATTA---GGAATAGCACCCACCAAGGCAAAAAGAAGAGTGGTG-----  
-----CAGAGAGAAAAAAGAGCA--ATAACG---ATAGGAGCT-----  
ATGTTTCCTTGGGTTCTTGGGAGCA---GCAGGAAGCACTATG---GGCGCAGCGTCA---  
ATGACGCTGACGGTACAG---GCCAGACTA---TTATTG---TCTGGTATAGTGCAACAGCAGAAC---  
AATCTG---CTGAGG---GCTATTGAGGCGCAACAGCATCTGTTGCAACTCACAGTCTGGGGCATC  
>KX792664  
TTCTACTGTAATTCATCACGACTGTTTAATTGGACAGGGAATGGGACTAATATAACATCAAATAGCAATATCA  
CA-----  
-----  
TCAAATATCAATATCACAATCCCATGCAGGATAAAACAAATTATAAACATGTGGCAGGAAGTAGGAAAAGCAA  
TGTATGCCCCCTCCTATCATGGGACAAATCAAGTGTTCAACAAAT---  
ATTACAGGGATAATATTAACAAGAGATGGTGGGAACAACGAACT-----  
-----  
-----  
AACGCCACCGAGATCTTCAGACCTGGAGGAGGAAATATGAAGGACAATTGGAGAAGTGAATTATATAGATATA  
AAGTAGTAAAAATTGAACCATTA---GGAGTAGCACCCACCAAGGCAAAGAGAAGAGTGGTG-----  
-----CAGAGAGAAAAAAGAGCA--ATACCA---TTAGGAGCT-----  
---ATGTTTCCTTGGGTTCTTGGGAGCA---GCAGGAAGCACTATG---GGCGCAGCGTCA---  
ATGGCGCTGACGGTACAA---GCCAGACAA---TTATTG---TCTGGTATAGTGCAGCAGCAGAAC---  
AATTTG---CTGAGG---GCTATTGAGGCGCAACAGCATCTGTTGCAACTCACAGTCTGGGGCATC  
>KX792688  
TTCTACTGTAATACATCACAACCTGTTTAATAGCACTTGGTATTTTAATAGCACTGGGGATAACAATAGTACTG  
GGAATACT-----  
-----  
ACTAACAAAAATATCACACTCCCATGTAGAATAAAACAAATTATAAACATGTGGCAGGCAGTAGGAAAAGCAA  
TATATGCCCCCTCCCATCAGTGGACAAATTAGTTGTTTCATCAAAC---  
ATTACAGGGCTAATATTAACAAGAGATGGTGGTACAAACACCACA-----  
-----  
-----  
AATGATACCTTCAGACCTGCAGGGGGGAATATGAAAGACAATTGGAGAAGTGAATTATATAAATATAAAGTAG  
TAAAAATTGAACCATTA---GGAGTGGCACCCACCAAGGCAAAGAGAAGAGTGGTG-----  
-----CAGAGAGAAAAAAGAGCC---GTGGGA---CTAGGAGCT-----  
TTGTTTCCTTGGGTTCTTGGGAGCA---GCAGGAAGCACTATG---GGCGCAGCGTCA---  
ATGACGCTGACGGTACAG---GCCAGACAA---TTATTG---TCTGGTATAGTGCAGCAGCAGAAC---  
AATATG---CTGAGG---GCTATTGAGGCGCAACAGCATATGTTGCAACTCACAGTCTGGGGCATC  
>KX792771  
TTCTACTGTGATTCAACACCACTGTTTAACAGTACTTGGAACAGTACTTGAGTGGTAAATGATACGGGAGTAA  
ACAAC-----  
-----  
ACTGAAAAGACTATCACACTCCAATGTAGAATAAAACAAATTATAAACATGTGGCAGAGAGTAGGAAAAGCAA  
TGTATAACCCTCCCATCAGTGGACAAATTAATTGCTCATCAAAT---

ATTACAGGGATGATATTATCAAGAGATGGTGGTAGTATGAACAGG-----  
-----  
-----  
AGTAACGAGACCTTCAGACCTGGAGGAGGAGATATGAGGGACAATTGGAGAAGTGAATTATATAAATATAAAG  
TAGTAAAAGTTGAACCATTA---GGAGTAGCACCCACCAAGGCAAAGAGAAGAGTGGTG-----  
-----CAGAGAGAAAAAAGAGCA--ATGGGA--ATAGGAGCT-----  
TTGTTTCCTTGGGTTCTTGGGAGCA--GCAGGAAGCACTATG--GGCGCAGCGTCA---  
ATAACGCTGACGGTACAG---GCCAGACAA--TTATTG---TCTGGTATAGTGCAACAGCAGAAC---  
AATTTG---CTGAAA---GCTATTGAGGCGCAACAGCATCTGTTGCAACTCACAGTCTGGGGCATC  
>KX792725  
TTCTACTGTAATACAACACAACCTATTTAATAGTACTTGGCTGTTTAATAGTACATGGAATAGTACT-----  
-----GAA---  
AGATTAGGGAATGATACTAAA-----  
AGGACAAATGACACTATCACACTCCCATGCAAAATAAAACAAGTTATAAACATGTGGCAGACAGTAGGAAAAG  
CAATGTATGCTCCTCCCATCAGAGGACTAATTAGATGTTTCATCAAAT---  
ATTACAGGGCTGATATTGACAAGAGATGGTAGTGGTAACACCACC-----  
-----  
-----  
GGTAACGAGACCTTTAGGCCTGGAGGAGGAAATATGAAGGACAATTGGAGAAGTGAATTATATAAATATAAAG  
TGGTAAAAAATTGAACCCTTA---GGAGTAGCACCCACTAGGGCAAAGAGAAGAGTGGTG-----  
-----CAGAGAGAAAAAAGAGCA--GCGGGA--CTAGGAGCT-----  
TTGTTTCCTTGGGTTCTTGGGAATG---GCAGGAAGCACTATG--GGCGCAGCGTCA---  
CTAACGCTGACGGTACAG---GCCAGACAA--TTATTG---TCTGGTATAGTGCAACAGCAGAAC---  
AATCTG---CTGAGG---GCTATTGAGGCGCAACAGCATCTGTTGCAACTCACAGTCTGGGGCATC  
>KX792808  
TTCTACTGTAATTCAACACAACCTGTTTAATAGTAGTCGGGATAATAATAGAAGGTCAGATAACTCTGAA----  
-----  
-----  
GGAAATAAAACAATCACACTCCCATGCAGAATAAAACAATTTATAAACATGTGGCAGAAAGTAGGAAAAGCAA  
TGTATGCCCCCTCCCATCAGAGGACAAATTAGATGTTTCATCAAAT---  
ATTACAGGGATAATATTAACAAGAGATGGTGGTAATGGTAATGAGTCCAAT-----  
-----  
-----  
AACGAGACCGAGACCTTCAGACCTGGAGGAGGGGATATGAGGGACAATTGGAGAAGTGAATTATATAAATATA  
AAGTAGTAAGAATTGAACCATTA---GGATTGGCACCCACCAAGGCAAAGAGAAGAGTGGTA-----  
-----CAGAGAGAAAAAAGAGCA--GTGGGA--ATAGGAGCT-----  
--GTGTTTCCTTGGGTTCTTGGGAGCA--GCAGGAAGCACTATG--GGCGCAGCCTCG---  
ATGACGCTGACGGTACAA--GCCAGACTA--TTATTG---TCTGGTATAGTGCAACAGCAGAAC---  
AATCTG---CTGAGA--GCTATTGAGGCGCAACAACATCTGTTGCAACTCACAGTCTGGGGCATC  
>EU023929  
TTCTACTGCAATACAACACAACCTGTTTAATAGTACTTGGTATAGTAATAGTACTTGAATAGTACTGAAGGGG  
CAAAT-----  
-----  
AACACTGCAGGAAATATCACACTCCCATGCAGAATAAAACAATTTGTAACAGGTGGCAGGGAGTAGGAAAAG  
CAATGTATGCCCCCTCCCATCAGAGGACAAATTAGGTGTTTCATCAAAT---  
ATTACAGGGCTAATATTAACAAGAGATGGGGGGCCTAACACACG-----  
-----  
-----  
ACAGAGACCTTCAGACCTGGAGGAGGAGATATGAGGGACAATTGGAGAAGTGAATTATATAAATATAAAGTAG  
TACAAATTGAACCATTA---GGAGTAGCACCCACCAAGGCAAAGAAGAGTGGTG-----  
-----CAGAGAGAAAAAAGAGCA--GTGGGA--ATAGGAGCT-----  
GTGTTTCCTCGGGTTCTTGGGAGCA--GCAGGAAGCACTATG--GGCGCAGCGTCA---  
CTGACGCTGACGGTACAG---GCCAGACAA--TTATTG---TCTGGTATAGTGCAACAGCAGAAC---  
AATCTG---CTGAGG---GCTATTGAGGCGCAACAGCATCTGTTGCAACTCACAGTCTGGGGCATC  
>EU023933  
TTCTACTGTAACACATCACAGCTGTTTAATAGTACTTGGAACGGTACTGAGAGTGGTATTACAAACCTTACAA  
AC-----  
-----  
CCAGATGAGACTATCTCACTCCCATGCAGAATAAGACAAATTGTAACAGGTGGCAGGAAGTAGGAAAAGCAA  
TGTATGCCCCCTCAATCAGTGGACAAATTAATTGTTTCATCAAAT---

ATTACAGGGCTGCTATTAGTAAGAGACGGTGGTGTGTATAATAGTACA-----  
-----  
-----  
AGTGATAACGAGACTTTCAGACCTGAAGGAGGAAATATGAAAGACAATTGGAGAAGTGAATTATATAAAATATA  
AAGTAGTAAAAATTGAGCCATTA---GGAATAGCACCCACCAAGGCAAGGAGAAGAGTGGTG-----  
-----CAAAGAGAAAAAAGAGCA---GTGGGAACGTTAGGAGCT-----  
---ATGTTCCCTTGGTTTCTTGGGAGCA---GCAGGAAGCACTATG---GGCGCAGCGTCA---  
CTGACGCTGACGGTACAA---GCCAGATTA---TTATTA---TCTGGTATAGTGCAACAGCAAAAC---  
AATTTG---CTGAGA---GCTATTGAGGCGCAACAGCATCTGTTGCAGCTCACAGTCTGGGGCATT  
>EU023927  
TTCTACTGTAATGTAACACCACTATTTAATAGTACTTGGAAGCCTGGTAATGAGACTGTGAATGATACT----  
-----  
-----  
AAAGAAGAAGTCATCACACTCCCATGCAGGATAAAAACAAATTATAAACCTGTGGCAGGAAGTAGGAAAAGCAA  
TGTATGCCCCCTCCCATCAGCGGAAAAATTAGATGTTTCATCAAAT---  
ATTACAGGGCTATTATTAACAAGAGATGGTGGTGTAAACGTGAGC-----  
-----  
-----  
GAAAAACTGAGATCTTCAGACCTGGAGGAGGAGATATGAGGGATAATTGGAGAAGTGAATTATATAAAATATA  
AAGTAGTAAAAATTGAACCATTA---GGAGTAGCACCCACCAGGGCAAAGAGAAGAGTGGTG-----  
-----CAGAGAGAAAAAAGAGCA---ATGGGA---ATAGGAGCT-----  
---CTGTTCCCTTGGGTTCTTGGGAGCA---GCAGGAAGCACTATG---GGCGCAGCGTCA---  
GTAACGCTGACGGTACAG---GCCAGACTA---TTATTG---TCTGGTATAGTGCAACAGCAGAAC---  
AACCTG---CTGAGG---GCTATTGAGGCGCAACAGCATGTGTTGCAGCTCACAGTCTGGGGCATC  
>MH714351  
TTCTACTGTAATACAACACAACCTGTTTAATAGTACTTGGGATAGTACTGAAGGGTTGAATAAACTGAAAGAA  
ATGAA-----  
-----  
AATGACACAAAGATCATACTCCCATGCAGAATAAAAACAAATTTATAAACATGTGGCAGGAAGTAGGAAAAGCAA  
TGTATGCCCCCTCCCATCAGAGGACAAATTAAATGTATATCAAAT---  
ATTACAGGGCTGATATTAACAAGAGATGGTGGTAATAACAATAATGGG-----  
-----  
-----  
AATAATGAGACCTTCAGACCTGTAGGAGGAGATATGAGGGACAATTGGAGAAGTGAATTATATAAAATATAAAG  
TAGTAAAAATTGAACCATTA---GGATTAGCACCCACCAGGGCAAAGAGAAGAGTGGTG-----  
-----CAGAGAGAAAAAAGAGCA---GTGGGA---TTAGGAGCT-----  
ATGTTCCCTTGGGTTCTTGGGAGCA---GCAGGAAGCACTATG---GGCGCAGCGTCA---  
GTAACGCTGACGGTACAG---GCCAGACTA---TTATTG---TCTGGTATAGTGCAACAGCAAAAC---  
AATTTG---CTGAGG---GCTATTGAGGCGCAACAGCATCTGTTGCAACTCACAGTCTGGGGCATC  
>MH714324  
TTCTACTGTAATACATCACAACCTGTTTAATAGTACTTGAATACCTGGAATAGTACTGACTGGTCAAAAAAC-  
-----  
-----  
ACTACAGAAAATATCACACTCCCATGCAGAATAAAAACAAATTATAAACATGTGGCAGGAAGTAGGAAAAGCAA  
TGTATGCCCCCTCCCATCAGGGGACGAATTAAATGTTTCATCAAAT---  
ATTACAGGGTTGTTATTAACAAGAGATGGTGGTAACGGTACCAATACT-----  
-----  
-----  
ACCACCGAGGTCTTCAGACCTATAGGAGGAAATATGAAGGACAATTGGAGAAGTGAATTGTATAAAATATAAAG  
TGGTACAAATTGAACCATTA---GGAATAGCACCCACCAAGGCAAAGAGAAGAGTGGTG-----  
-----CAGAGAGAAAAGCGAGCA---GTGGGA---ATAGGAGCT-----  
ATGTTCCCTTGGGTTCTTGGGAGCA---GCAGGAAGCACTATG---GGCGCAGCATCA---  
ATGATGCTGACGGTACAG---GCCAGACAA---TTATTG---TCTGGTATAGTGCAACAGCAAAAC---  
AATTTG---CTGAGA---GCCATTGAGGCGCAACAACATCTGTTGCAACTCACAGTCTGGGGCATC  
>MH714343  
TTCTACTGTAATACATCAAACTGTTTGATAGTATTTGGAATGGTACTGAAAGGATAAATAACACTGAAGAA-  
-----  
-----  
AATAGCACATAATCACACTCCCATGCAGAATAAAAACAAATTATAAACATGTGGCAGGAAGTAGGAAAAGCAA  
TGTATGCCCCCTCCCATCAGAGGACAAATTAGCTGTTTCATCAAAC---

ATTACAGGGCTGATATTAACAAGAGATGGTGGTAATAGAACGGAGAATGGGACT-----  
-----  
-----  
GAGAATGATAAAGAGATCTTCAGACCTGTAGGAGGAGATATGAGGGACAATTGGAGAAGTGAATTATATAAAT  
ATAAAGTAGTAAAAATTGAACCATTA---GGAGTAGCACCCACCGAGGCAAAGAGAAGAGTGGTG-----  
-----CAAAGAGAAAAAAGAGCA---GTGGGA---TTAGGAGCT---  
-----ATGTTTCCTTGGGTTCTTGGGAGCA---GCAGGAAGCACTATG---GGCGCAGCGTCA---  
ATAACGCTGACGGTACAG---GCCAGACTA---TTATTG---ACTGGTATAGTGCAACAGCAGAAC---  
AATCTG---CTGAGG---GCTATTGAGGCGCAACAGCATCTGTTGCAACTCACAGTCTGGGGCATC  
>MH714329  
TTCTACTGTAACACAACAAAACCTGTTTAAACAGTACTTGGGATGCTAACAGTACTTGGGATGAAAATAATACTA  
CAAATGAC-----  
-----  
AATGATGAAAATATCACACTCCCATGTAGAATAAAAACAAATTATAAACCTGTGGCAGGAAGTAGGAAAAGCAA  
TGTATGCCCCCTCCCATCAGTGGACCAATTATCTGTAACCTCAAGT---  
ATTACAGGGCTCCTAATAACAAGGGATGGTGGTAATGACACAAAC-----  
-----  
-----  
CAGAACGAGACCTTCAGACCTGGAGGAGGAGATATGAGGGATAATTGGAGAAGTGAATTATATAAATATAAAG  
TAGTAAAAAATTGAACCATTA---GGAATAGCACCCACCAAGGCAAAAAGAAGAGTGGTG-----  
-----CAGAGAGAAAAAAGAGCA---GTGGGA---ATAGGAGCT-----  
GTGTTTCCTTGGGTTCTTGTACAGCA---GCAGGAAGCACTATG---GGCGCAGCGTCA---  
GTGACGCTGACGGTACAG---GCCAGACTA---TTATTG---TCTGGTATAGTGCAACAGCAGAAAT---  
AATTTG---CTGAGG---GCTATTGAGGCGCAGCAGCGTATGTTGCAACTCACAGTCTGGGGCATC  
>KU600814  
TTCTACTGTAATTCAACACCACTGTTTAAATAGTACTTGGTATGGTAATAATACTGGGAATGGTACTGACGAAT  
TAGGGAAC-----  
-----  
AGTGGAATAACACAATTACACTACAATGCAGAATAAAAACAAATTATAAACATGTGGCAGGAAGTAGGAAAAG  
CAATGTATGCCCCCTCCCATCAGAGGACGTATTAACTGTACATCAAAT---  
ATTACAGGGTTGCTATTAAACAAGAGATGGGGGAAATACTAATAATGATAGT-----  
-----  
-----  
AGCGAGCCCGAGATCTTCAGACCTGGAGGAGGAAATATGAAGGACAATTGGAGAAGTGAATTATATAAATATA  
AAGTAGTAAAAAATTGAACCATTA---GGAGTAGCACCCACCAAGGCAAAGAGAAGAGTGGTG-----  
-----CAGAGAGAAAAAAGAGCA---GTGGGA---ATAGGAGCT-----  
---CTGTTTCCTTGGGTTCTTGGGAGCA---GCAGGAAGCACTATG---GGCGCAGCGTCA---  
CTGACGCTGACGGTACAG---GCCAGACAA---TTATTG---TCTGGTATAGTGCAACAGCAGAAC---  
AATTTG---CTGAGG---GCTATTGAGGCGCAACAGCATCTGTTGCAACTCACAGTCTGGGGCATC  
>KU600818  
TTCTACTGTAATACAACACAACCTGTTTAAATAGTACTTGGGAAAATCCTGAAAGGTCAAATAGCACTGAA---  
-----  
-----  
GGAAATAGCACAATCACACTCCCATGCAGAATAAAAACAAATTATAAACATGTGGCAGGAAGTAGGAAAAGCAA  
TGTATGCCCCCTCCCATCAGAGGACAAATTAAGTGTATATCAAAT---  
ATTACAGGGTTGCTACTAACAAGAGATGGTGGTAATAATGGTACC-----  
-----  
-----  
ACGAACGAGACCTTCAGACCTGGAGGAGGAGATATGAGGAACAATTGGAGAAGTGAATTATATAAATATAAAG  
TAGTAAAAAATTGAACCATTA---GGAGTAGCACCCACCAAGGCAAAGAGAAGAGTGGTG-----  
-----CAAAGAGAAAAAAGAGCA---GTGGGA---ATAGGAGCT-----  
TTGTTTCCTTGGGTTCTTGGGAGCA---GCAGGAAGCACTATG---GGCGCAGCGTCA---  
ATGACGCTGACGGTACAG---GCCAGACAA---TTATTG---TCTGGTATAGTGCAACAGCAGAAAT---  
AATCTG---CTGAGG---GCTATTGAGGCGCAACAGCATATGTTGCAACTCACAGTCTGGGGCATC  
>KU600815  
TTCTACTGTAATACAACACAACCTGTTTAAATAGTACTTGGGATAAGGAGTCAAATAATACTTCGAAT-----  
-----  
-----  
GAGACTGAAATAATCACACTCCCATGCAGAATAAAAACAAATTATAAACATGTGGCAGGAAGTAGGAAAAGCAA  
TGTATGCACCTCCCATCAGAGGAAACATTAGCTGTTTCATCAAAT---

ATTACAGGGCTGCTATTAACAAGAGATGGTGGGGTGGTGAATGGTAGT-----  
-----  
-----  
AGCAATGAGACAGAGACCTTCAGACCTGGAGGAGGAAATATGAAGGACAATTGGAGAAGTGAATTATATAAAT  
ATAAGGTAGTACAAATTGAACCATTA---GGACTAGCACCCACCACGGCAAAAAGAAGAGTGGTG-----  
-----CAAAGAGAAAAAAGAGCA---GTGGGA---TTAGGAGCT---  
-----ATGTTCCCTTGGGTTCTTGGGAGCA---GCAGGAAGCACTATG---GGCGCAGCGTCA---  
ATAACGCTGACGGTACAG---GCCAGACAA---TTATTG---TCTGGTATAGTGCAACAGCAGAGC---  
AATTTG---CTGAGG---GCTATTGAGGCGCAACAGCATCTGTTGCAACTCACAGTCTGGGGCATC  
>AY180905  
TTCTACTGTAATACATCACGACTGTTTAATAGTACTTGGGAATAGTACTAGGAATAATATA-----  
-----  
-----  
GGAAATGGCACTATCACGCTCCCTTGCAGAATAAAACAAATTATAAACATGTGGCAGGAAGTAGGGAAAGCAA  
TGTATGCCCCCTCCCATTTGCAGGAAATATTAGCTGTTTCATCAAAT---  
ATTACAGGGTTGTTATTAACAAGAGATGGTGGTAAGAATGAGAGC-----  
-----  
-----  
AACACCACCGAGACCTTCAGACCTGCAGGAGGAGATATGAGGGACAATTGGAGAAGTGAATTATATAAATATA  
AAGTAGTAAGAATTGAACCATTA---GGAGTAGCACCCACCAAGGCAAAGAGAAGAGTGGTG-----  
-----CAGAGAGAAAAGAAGAGCA---GTGGGAGCGATAGGAGCT-----  
---ATGTTCCCTTGGGTTCTTGGGAGCA---GCAGGAAGCACTATG---GGCGCAGCGTCA---  
ATAACGCTGACGGTACAG---ACCAGACAA---TTGTTG---TCTGGTATAGTGCAACAGCAGAGA---  
AATCTG---CTGAGG---GCTATTGAGGCGCAACAGCATCTGTTGCAACTCACAGTCTGGGGCATC  
>EU363827  
TTCTACTGTAATACATCACGACTGTTTAATAGTACTTGGGAATGAGACTAGTGCTTGGGAATGATACTACA----  
-----  
-----  
GGAAATGACACTATCACGCTCCCTTGCAGAATAAAACAAATTGTAAACATGTGGCAGGAGGTAGGGAAAGCAA  
TGTATGCCCCCTCCCATTTAGTGACGCATTAAATGCTCATCAAAT---  
ATTACAGGGTTACTATTGACAAGAGATGGTGGTAGGAATAACGAGAGC-----  
-----  
-----  
AACACCACCGAGACCTTCAGACCTGTAGGAGGAAATATGAGAGACAATTGGAGAAGTGAATTATATAAATATA  
AAGTAGTAAAAATTGAACCATTA---GGATTAGCACCCACCAGGGCAAAGAGAAGAGTGGTG-----  
-----CAGAGAGAAAAAAGAGCA---GTGGGA---ATAGGAGCT-----  
---ATGTTCCCTTGGGTTCTTGGGAGCA---GCAGGAAGCACTATG---GGCGCAGCGTCA---  
ATAACGCTGACGGTACAG---GCCAGACAA---TTGCTG---TCTGGTATAGTGCAACAGCAGAGA---  
AATCTG---CTGAGT---GCTATTGAGGCGCAACAACATTTGTTGCAACTCACAGTCTGGGGCATC  
>AY905493  
TTCTATTGTAATACATCACAACTGTTCAATAGTACTTGGGAATGGTAATACTACTTGGGAATAATACTGCA----  
-----  
-----  
GGAAATAGCAATATCACGCTCCCTTGCAGAATAAAACAAATTGTAAACATGTGGCAGGAAGTAGGGAAAGCAA  
TGTATGCCCCCTCCCATTTAGAGGACAAATTAGATGTTTCATCAAAT---  
ATTACAGGGTTGCTATTAACAAGAGATGGTGGTACTAATAAGAGC-----  
-----  
-----  
GAGAACACCGAGACATTTCAGACCTGGAGGAGGAGATATGAAAGACAATTGGAGAAGTGAATTATATAAATATA  
AAGTAGTAAAAATTGAACCATTA---GGAATAGCACCCACCAAGGCAAAGAGAAGAGTGGTG-----  
-----CAGAGAGAAAAAAGAGCA---GTGGGAACAATAGGAGCT-----  
---ATGTTCCCTTGGGTTCTTGGGAGCA---GCAGGAAGCACTATG---GGCGCAGCGTCA---  
ATAACGCTGACGGTACAG---GCCAGACAA---TTGTTG---TCTGGTATAGTGCAACAGCAGAGA---  
AATTTG---CTGAGG---GCTATTGAGGCGCAACAGCATATGTTGCAACTCACAGTCTGGGGCATC  
>JF932492  
TTCTACTGTAATACATCACAACTGTTTAATAGTATTTGGTATAATAATGATACTTGGGAATGGTACTACA----  
-----  
-----  
GGAGATGACAATATCACACTCCCTTGCAGAATAAGACAAATTGTAAACCTATGGCAGGAAGTAGGGAAAGCAA  
TGTATGCCCCCTCCCATTTAAAGGACAAATTAGATGTTTCATCAAAT---

ATTACAGGGTTGCTATTAACAAGAGATGGTGGGACGAATGAGGGC-----  
-----  
-----  
AATACCAATGAGACCTTCAGACCTGGAGGAGGAGATATGAGAGACAATTGGAGAAGTGAATTATATAAATATA  
AAGTAGTAAAAATTGAACCATTA---GGAGTAGCACCCACCAAGGCAAAGAGAAGAGTGGTG-----  
-----CAGAGAGAAAAAAGAGCA--GTGGGAATGATGGGAGCT-----  
---ATGTTCCCTTGGGTTCTTGGGAGCA--GCAGGAAGCACTATG--GGCGCAGCGTCA---  
ATGACGCTGACGGTACAG---GCCAGACAA---TTATTG---TCTGGTATAGTGCAACAGCAAAGA---  
AATTTG---CTGAGG---GCTATTGAGGCGCAACAGCATCTGTTGCAACTCACAGTCTGGGGCATT  
>AY905497  
TTCTACTGTAATACATCACAACCTGTTTAATAGTATTAATGGTACCTGGAATGGTACTACA-----  
-----  
-----  
AAAAATGGCAATATCACGCTCCCTTGCAGAATAAGACAAATTGTAAACAGGTGGCAGGAAGTAGGGAAAGCAA  
TGTATGCTCCTCCCATTAGCGGGCAAATTAGATGTTTCATCAAAT---  
ATTACAGGGTTACTATTAACAAGAGATGGTGGTACTAATGAGAGC-----  
-----  
-----  
AGCAACAACGAGACCTTCAGACCTGGAGGAGGAGATATGAGGGACAATTGGAGAAGTGAATTATATAAATATA  
AAGTAGTAAAAATTGAACCATTA---GGAGTAGCACCCACCAAGGCAAGGAGAAGAGTGGTG-----  
-----CAGAGAGAAAAAAGAGCA--GTGGGAACGATAGGAGCT-----  
---ATGTTCCCTTGGGTTCTTGGGAGCA--GCAGGAAGCACTATG--GGCGCAGCGTCA---  
ATAACGCTGACGGTACAG---GCCAGACAA---TTGTTG---TCTGGTATAGTGCAACAGCAGAGA---  
AATTTG---CTGAGG---GCTATTGAGGCGCAACAGCATATGTTGCAACTCACAGTCTGGGGCATC  
>AY905495  
TTCTACTGTAATACAACAAAACCTGTTTAATAGTATTTGGAATACTAATGGTACTTGAATGATACTAGTACTT  
GGAATAAT-----  
-----AGT---  
ACAGGGAATGATACTATCACGCTCCCTTGCAGAATAAAACAAATTGTAAACATGTGGCAGGAAGTAGGGAAAG  
CAATGTATGCCCCCTCCCATTAGAGGACAAATTAGATGTTTCATCAAAT---  
ATTACAGGGCTGCTATTAACAAGAGATGGTGGTAATAATGGGACCAAC-----  
-----  
-----  
ACCACCGACACAGAGATCTTCAGACCTGCAGGAGGAGATATGAGGGACAATTGGAGAAGTGAATTATATAAAT  
ATAAAGTAGTAAAAATTGAACCATTA---GGAGTAGCACCCACCAGGGCAAAGAGAAGAGTGGTG-----  
-----CAAAGAGAAAAAAGAGCA--GTGGGAACAATAGGAGCT---  
-----ATGTTCCCTTGGGTTCTTGGGAGCA--GCAGGAAGCACTATG--GGCGCAGCGTCA---  
GTAACGCTGACGGTACAG---GCCAGACAA---TTGTTG---TCTGGTATAGTGCAACAGCAGAGA---  
AATTTG---CTGAGG---GCTATTGAGGCGCAACAGCATATGTTGCAACTCACAGTCTGGGGCATT  
>AY905494  
TTCTACTGTAATACGACACAACCTGTTTAATAGTACTTGAAGTTTAATAGTACTTGAATGATACTAGTACA-  
-----  
-----  
GAGAAATGGTACTATCATACTCCCTTGCAGAATAAAACAAATTGTAAACATGTGGCAGGAAGTAGGGAAAGCAA  
TGTATGCCCCCTCCCATTAGTGGGCAAATTAGATGTTTCATCAAAT---  
ATTACAGGGTTGCTATTAACAAGAGATGGTGGTAAGGAGGAGAAC-----  
-----  
-----  
AACACCACCGAGACCTTCAGACCTGGAGGAGGAGATATGAGAGATAATTGGAGAAGTGAATTATATAAATATA  
AAGTAGTAAAAATTGAACCATTA---GGAGTAGCACCCACCAAGGCAAAGAGAAGAGTGGTG-----  
-----CAGAGAGAAAAAAGAGCA--GTGGGAACGATAGGAGCT-----  
---ATGTTCCCTTGGGTTTTTGGGAGCA--GCAGGAAGCACTATG--GGCGCAGCGTCA---  
ATAACGCTGACGGTACAG---GCCAGACAA---TTGTTG---TCTGGTATAGTGCAACAGCAGAGA---  
AATTTG---CTGAGG---GCTATTGAGGCGCAACAGCATATGTTGCAACTCACAGTCTGGGGCATC  
>HM215397  
TTCTACTGTAATACATCACAACCTGTTTAATAGTACTTGAATGTTACTGGTACTGTGAATGGTACTACA----  
-----  
-----  
GGAAATGGCACTATCACGCTCCCTTGCAGCATAAAACAAATTGTAAACAGGTGGCAGGAAGTAGGGAGAGCAA  
TATATGCCCCCTCCCATTAGAGGACAAATTAGATGTTTCATCAAAT---

ATTACAGGGTTGCTATTAACAAGAGATGGTGGTAATGAGAGCACGACC-----  
-----  
-----  
ACCGAGACCGAGACCTTCAGACCTGCAGGAGGAGATATGAGAGACAATTGGAGAAGTGAATTATATAAATATA  
AAGTAGTAAAAATTGAACCATTA---GGAGTAGCACCCACCAAGGCAAAGAGAAGAGTGGTG-----  
-----CAGAGAGAAAAAAGAGCA---GTGGGAACGATAGGAGCT-----  
---ATGTTCCCTTGGGTTCTTGGGAGCA---GCAGGAAGCACTATG---GGCGCAGCGTCA---  
ATCACGCTGACGGTACAG---GCCAGACAA---TTGTTG---TCTGGTATAGTGCAACAGCAGAGA---  
AATTTG---CTGAGG---GCTATTGAGGCGCAACAGCATCTGTTGCAACTCACAGTCTGGGGCATC  
>HQ699990  
TTCTATTGTGATACATCACAACCTGTTTAATAATATTTGGTTTAATAGTACTTGGAAATGATAGTACTTGGAAATA  
AT-----  
-----ACT---  
ACAGGAGATAGCAACATCACGCTCCCCTGCAGAATAAAAACAAATTGTAAACATGTGGCAGGGAGTAGGGAAAAG  
CAATGTATGCCCCCTCCCATTAAGGACAAATTAAATGTTTCATCAAAT---  
ATTACAGGGTTGCTATTAACAAGAGATGGTGGTAAAAATGTGAGC-----  
-----  
-----  
AATACCAGCGAGACCTTCAGACCTGGAGGAGGAGATATGAAAGACAATTGGAGAAGTGAATTATATAAATATA  
AAGTAGTAAAAATTGAACCATTA---GGAGTAGCACCCACCAAGGCAAAGAGAAGAGTGGTG-----  
-----CAGAGAGAAAAAAGAGCA---GTGGGA---ATGGGAGCT-----  
---ATGTTCCCTTGGGTTCTTGGGAGCA---GCAGGAAGCACTATG---GGCGCAGCGTCA---  
ATAACGCTGACGGTACAG---GCCAGACAA---TTGTTG---TCTGGTACAGTGCAACAGCAGAGA---  
AATTTG---CTGAGG---GCTACTGAGGCGCGACAGCATCTGTTGCAACTCACGGTCTGGGGCATC  
>HQ699996  
TTCTACTGTAATACATCACAACCTGTTTAATAGTACTTGGAGTTGGAATAATACTAATACTGAGAATAATACTA  
CAGAA-----  
-----  
AACAGCAATATCACTATCACGCTCCCTTGCAGAATAAAAACAAATTGTAAACATGTGGCAGGAAGTAGGGAAAAG  
CAATGTATGCCCCCTCCCATTTGCAGGACAAATTAGATGTTTCATCAAAT---  
ATTACAGGGTTGCTATTAACAAGAGATGGTGGCAACAGTACCAAC-----  
-----  
-----  
GAGACCTTCAGGCCTGAAGGAGGAAATATGAGAGACAATTGGAGAAGTGAATTATATAAATATAAAGTAGTAA  
GAATTGAACCATTA---GGAGTAGCACCCACCAAGGCAAAGAGAAGAGTGGTG-----  
-----CAGAGAGAAAAAAGAGCA---GTGGGAACGATAGGAGCT-----  
ATGTTCCCTTGGGTTCTTGGGAGCA---GCAGGAAGCACTATG---GGCGCAGCGTCA---  
ATGACGCTGACGGTACAG---GCCAGACAA---TTGTTG---TCTGGTATAGTGCAACAGCAAAGA---  
AATTTG---CTGAGG---GCTATTGAGGCGCAACAGCATCTGTTGCAACCCACAGTCTGGGGCATC  
>EU131797  
TTCTACTGTAATACATCACAACCTGTTTAATAGTATTTGGTATAATAATGGTACTTGGAAATGGTACTACA---  
-----  
-----  
GGAAATGACACTATCACGCTCCCTTGCAGAATAAAAACAAATTGTAAACATGTGGCAGGAAGTAGGGAAAGCAA  
TGTATGCCCCCTCCCATTTGAAGGACAAATTAGTTGTAAATCAAAT---  
ATTACAGGGTCGCTATTAACAAGAGATGGTGGTAATAATGGGAGC-----  
-----  
-----  
AGGACCAACGAGACCTTCAGACCTACAGGAGGAGATATGAGAGACAACCTGGAGAAGTGAATTATATAAATATA  
AAGTAGTAAAAGTTGAACCATTA---GGAGTAGCACCCACCAAGGCAAAGAGAAGAGTGGTG-----  
-----CAGAGAGAAAAAAGAGCA---GTGGGAACGATAGGAGCT-----  
---ATGTTCCCTTGGGTTCTTGGGAGCA---GCAGGAAGCACTATG---GGCGCAGCGTCA---  
ATGACGCTGACGGTACAG---GCCAGACAA---TTGTTG---TCTGGTGTAGTGCAACAGCAGAGA---  
AATTTG---CTGAGG---GCTATTGAGGCGCAACAGCATATGTTGCAACTCACAGTCTGGGGCATC  
>EU131791  
TTCTACTGTAATACATCACAACCTGTTTAAGAGTACTTGGAAATGTTACTACTGGTACTCCGAATGGTACTACA-  
-----  
-----  
GGAAATGACAATATCACGCTCCCTTGCAGAATAAGACAAATTGTAAACATGTGGCAGGAAGTAGGGAAAGCAA  
TGTATGCCCCCTCCCATTTACAGGAGTAATTAGCTGTTTCATCAAAT---

ATTACAGGGTTACTATTAACAAGAGATGGTGGTAAAAATGTGACCAAT-----  
-----  
-----  
AATGACACCGAGACCTTCAGACCTGGAGGAGGAGATATGAGAGGCAATTGGAGAAGTGAATTATATAAAATATA  
AAGTAGTAAAAATTGAACCATTA---GGAATAGCACCCACCAAGGCAAAGAGAAGAGTGGTG-----  
-----CAGAGAGAAAAAAGAGCA--GTGGGAGTAATAGGAGCT-----  
---ATGTTCCCTTGGGTTCTTGGGAGCA--GCAGGAAGCACTATG---GGCGCGCGTCA---  
ATAACGCTGACGGTACAG---GCCAGACAA---ATGTTG---TCTGGTATAGTGCAACAGCAGAGA---  
AATTTG---CTGAGG---GCTATTGAGGCGCAACAGCACATGTTGCAACTCACAGTCTGGGGCATC  
>EU131790  
TTCTACTGTAATACATCACAACCTGTTTAATAGTACTTGGCATAATAATGGTACTTGGGGTGATACTACA----  
-----  
-----  
GGAAATAGCTCTATCACGCTCCCTTGCAGAATAAAACAAATTGTAAACATGTGGCAGGAAGTAGGGAAAGCAA  
TGTATGCTCCTCCCATTGAAGGGCAAATTAGATGTTTCATCAAAT---  
ATTACAGGGTTGATATTAACAAGAGATGGTGGTAAAAATGAGAGC-----  
-----  
-----  
GCCACCGAGACCTTCAGACCTGAGGGAGGAGATATGAGAGACAATTGGAGAAGTGAATTATATAAAATATAAAG  
TAGTAAAAATTGAACCATTA---GGACTAGCACCCACCAAGGCAAAGAGAAGAGTGGTG-----  
-----CAAAGAGAAAAAAGAGCA--GTGGGAACAATAGGAGCT-----  
ATGTTCCCTTGGGTTCTTGGGAGCA---GCAGGAAGCACTATG---GGCGCAGCGTCA---  
ATGACGCTGACGGTACAG---GCCAGACAA---TTGTTG---TCTGGTATAGTGCAACAGCAGAGA---  
AATCTG---CTGAGG---GCTATTGAGGCGCAACAGCATATGTTGCAACTCACAGTCTGGGGCATC  
>EU131788  
TTCTACTGTAATACATCACAACCTGTTTAATAGTACTTGGAAATAATAATGGTACTTGGAAATGATACTACA----  
-----  
-----  
GACAATAGCACTATCACACTCCCTTGCAGAATAAAACAAATTATAAATAGGTGGCAGGAAGTAGGGAAAGCAA  
TGTATGCCCCCTCCCATTTAGTGGACTAATTAGATGCTCATCAAAT---  
ATTACAGGGTTACTATTAACAAGAGATGGTGGTACTAATAAGAGC-----  
-----  
-----  
AGCACCACCGAGACCTTCAGACCTGCAGGAGGAAATATGAGAGACAATTGGAGAAGTGAATTATATAAAATATA  
AAGTAGTACAAATTGAACCATTA---GGAGTAGCACCCACCAAGGCTAAGAGAAGAGTGGTG-----  
-----CAAAGAGAAAAAAGAGCA--GTGGGAGCAATAGGAGCT-----  
---ATGTTCCCTTGGGTTCTTGGGAGCA--GCAGGAAGCACAATG---GGCGCAGCGTCA---  
ATAACGCTGACGGTACAG---GCCAGGCAA---TTGCTG---TCTGGTATAGTGCAACAGCAGAGA---  
AATTTG---CTGAGG---GCTATTGAGGCGCAACAGCATATGTTGCAACTCACAGTCTGGGGCATA  
>EU131808  
TTCTACTGTAATACAACACAACCTGTTTAGTAGTACTTGGTATGAGAATGGTACTTGGAAATGGGACTAGTAATT  
GGAATGGG-----  
-----ACT---  
ACAGGAAATGACATTATCACACTCCCTTGCAGAATAAAACAAATTGTAAACATGTGGCAGGAAGTAGGGAAAG  
CAATGTATGCCCCCTCCTATTGAAGGACAAATTAGATGTTTCATCAAAT---  
ATTACAGGGCTGCTATTAACAAGAGATGGTGGCAATAATGAGAGC-----  
-----  
-----  
AGTGCCAATGAGACCTTCAGACCTGCAGGAGGAAATATGAAAGACAATTGGAGAAGTGAATTATATAAAATATA  
AAGTAGTAAAAATTGAACCATTA---GGAGTAGCACCCACCAAGGCAAAGAAGAGTGGTG-----  
-----CAGAGAGGAAAAAAGAGCA--GTGGGAACGATAGGAGCT-----  
---ATGTTCCCTTGGGTTCTTGGGAGCA--GCAGGAAGCACTATG---GGCGCAGCGTCA---  
ATAACGCTGACGGTACAG---GCCAGACAA---ATGTTG---TCTGGTATAGTGCAACAGCAAAGA---  
AATCTG---CTGAGG---GCTATTGAGGCGCAACAGCATCTGTTGCAACTCACAGTCTGGGGCATC  
>EU131789  
TTCTACTGTAATACATCACAACCTGTTTAATAGTACTTGGGATAGAAATAGTAGTACTTGGAGTAATACTACAG  
GA-----  
-----  
CATAACAATAGCACTATCACACTCCCTTGCAGAATAAAACAAATTGTAAACAGGTGGCAGGAAGTAGGGAAAG  
CAATGTATGCCCCCTCCCATTTAGCGGACTAATTAGATGCTCATCAAAG---

ATTACAGGGTTATTATTAACAAGAGATGGTGGTACTAATGAGAACAACACC-----  
-----  
-----  
ATCGAGAACACCACCGAGATCTTCAGACCTGGAGGAGGAGATATGAGAGACAATTGGAGAAGTGAATTATATA  
AATATAAAGTAGTACAAATTGAACCATTA---GGAGTAGCACCCACCAAGGCAAAGAGAAGGGTGGTG-----  
-----CAGAGAGAAAAAAGAGCA---  
GTGGGAACAATAGGAGCT-----ATGTTCCCTTGGGTTCTTGGGAGCA---GCAGGAAGCACTATG---  
GGCGCAGCGTCA---ATAACGCTGACGGTACAG---GCCAGACAA---TTATTG---  
TCTGGTATAGTGCAACAGCAGAGA---AATTTG---CTGAGG---  
GCTATTGAGGCGCAACAGCATATGTTGCAACTCACAGTCTGGGGCATA  
>MK053935  
TTCTACTGTAATACAACAACCACTGTTTAATAGTACTTGGAAATGAGAATAGTACTTGGAAATGAGACTAGTACT-  
-----  
-----  
GAGAAATAATATTATCACACTCCCTTGCAGAATAAAACAAATTGTAAACATGTGGCAGGAAGTAGGGAAAGCAA  
TGTATGCCCCCTCCCATTTAGCGGACAAATTAGATGTTTCATCAAAT---  
ATTACAGGATTACTATTAACAAGAGATGGTGGTAATGAGACCAAC-----  
-----  
-----  
ACCACCGAGATTTTCAGACCTGGAGGAGGAGATATGAGAGACAATTGGAGAAGTGAATTATATAAATATAAAG  
TAGTAAAAAATTGAACCATTA---GGAGTAGCACCCACCAAGGCAAAGAGAAGAGTGGTG-----  
-----CAGAGAGAAAAAAGAGCA---GTAACA---CTTGGAGCT-----  
ATGTTCCCTTGGGTTCTTGGGAGCA---GCAGGAAGCACTATG---GGCGCAGCGTCA---  
ATAACGCTGACGGTACAG---GCCAGACAA---TTGTTG---TCTGGTATAGTGCAACAGCAGAGA---  
AATTTG---CTGAGG---GCTATTGAGGCGCAACAGCATCTGTTGCAACTCACAGTCTGGGGCATC  
>DQ990880  
TTCTACTGTAATACCTCACGACTGTTTAATAGTACTTGGTATAATAATGGTACTTGGAAATAATGCTAGTACTG  
GG-----  
-----  
AATGATAGCACTATTATACTCCCTTGCAGAATAAAACAAATTGTAAACAGGTGGCAGGAAGTAGGGAAAGCAA  
TATATGCCCCCTCCCATTTGAGGACCAATTAATTGTTTCATCAAAA---  
ATTACAGGGTTACTATTAACAAGAGATGGTGGGATTAATAAGACT-----  
-----  
-----  
GACACCGAGACCTTCAGACCTGGAGGAGGAGATATGAGAGACAATTGGAGAAGTGAATTATATAAATATAAAG  
TAGTGAAAATTGAACCATTA---GGAGTAGCACCCACCAGGGCAAAGAGAAGAGTGGTG-----  
-----CAAAGAGAAAAAAGAGCA---GTGGGAGCAATAGGAGCG-----  
ATGTTCCCTTGGGTTCTTGGGAGCA---GCAGGAAGCACTATG---GGCGCAGCGTCA---  
ATAACGCTGACGGTACAG---GCCAGACAA---TTGTTG---ACTGGTATAGTGCAACAGCAAAGA---  
AATTTG---CTGAGA---GCTATTGAGGCGCAACAGCATCTGTTGCAACTCACAGTCTGGGGCATC  
>HM215420  
TTTTATTGTAATACATCACAACCTGTTTAATGAACTTGGACTTGGAAATAATAGTACTAGGAATGATAATACA-  
-----  
-----  
GGAAATGGCACTATCACGCTCCCTTGCAGAATAAAACAAATTGTAAACATGTGGCAGGAAGTAGGGAAAGCAA  
TGTATGCCCCCTCCCATTTAGAGGACAAATTAGATGTTTCATCAAAT---  
ATTACAGGGTTACTATTAACAAGAGATGGTGGTAATAATACCGAC-----  
-----  
-----  
AAAAACACCGAGATCTTCAGACCTGGAGGAGGAAACATGAGAGACAATTGGAGAAGTGAATTATATAAATATA  
AAGTAGTAAAAAATTGAACCATTA---GGAGTAGCACCCACCAAGGCAAAGAGAAGAGTGGTG-----  
-----CAGAGAGAAAAAAGAGCA---GTGGGA---ATAGGAGCT-----  
---GTGTTCCCTTGGGTTCTTGGGAGCA---GCAGGAAGCACTATG---GGCGCAGCGTCA---  
ATAACGCTGACGGTACAG---GCCAGACAA---TTGTTG---TCTGGTATAGTGCAAGCAGCAGAGA---  
AATTTG---CTGATG---GCTATTGAGGCGCAACAGCATCTGTTGCAACTCACAGTCTGGGGCATC  
>HQ699995  
TTCTACTGTAATACATCACAACCTGTTTAATAGTACTTGGTATAATAATGGCACTTGGGATGGTACTACA----  
-----  
-----  
GAAAAATGGCAATATCACGCTCCCTTGCAGAATAAAACAAATTGTAAACATGTGGCAGGGAGTAGGGAGAGCAA

TGTATGCCCCCTCCATTACAGGAAAGATTACATGTTTATCAAAT ---  
 ATTACAGGGTTGATATTAACAAGAGATGGTGGGAATAATAAGACC -----  
 -----  
 -----  
 AACACCACCGAGACCTTCAGACCTGAAGGAGGAAATATGAAAGACAATTGGAGAAGTGAATTATATAAAATATA  
 AAGTAGTAAAAATTGAACCATTA --- GGAGTAGCACCCACCAAGGCAAAGAGAAGAGTGGTG -----  
 ----- CAGAGAGAAAAAAGAGCA --- GTGGGAGCACTAGGAGCT -----  
 --- ATGTTCCCTTGGGTTCTTGGGAGCA --- GCAGGAAGCACTATG --- GGCGCAGCGTCA ---  
 ATAACGCTGACGGTACAG --- GCCAGACAA --- TTGTTG --- TCTGGTATAGTGCAGCAGCAAAGA ---  
 AATTTG --- CTGAGA --- GCTATTGAGGCGCAACAGCATCTGTTGCAACTCACAGTCTGGGGCATC  
 >HM215428  
 TTCTACTGTAATACATCACAACCTGTTTAACAGTACTTGGTATGTGAATGGTACTTGGAGTGGTACTACA ----  
 -----  
 -----  
 GAAAAATGGCACTATCACACTCCCTTGCAGAATAAAACAAATTGTAAACATGTGGCAGGCAGTAGGGAAAGCAA  
 TGTATGCCCCCTCCATTGCAGGAAAAATTAGATGTTTCATCAAAT ---  
 ATTACAGGGCTGCTATTAACAAGAGATGGTGGTATTAATGTGAGC -----  
 -----  
 -----  
 AATGACACAGAGACCTTCAGACCTGGAGGAGGAAATATGAAAGACAATTGGAGAAGTGAATTATATAAAATATA  
 AAGTAGTAAGAATTGAACCATTA --- GGAGTAGCACCCACCAAGGCAAAGAGAAGAGTGGTG -----  
 ----- CAGAGAGAAAAAAGAGCA --- GTGGGAACAATAGGAGCT -----  
 --- ATGTTCCCTTGGGTTCTTGGGAGCA --- GCAGGAAGCACTATG --- GGCGCAGCGTCA ---  
 ATAACGCTGACGGTACAG --- GCCAGACAA --- TTGTTG --- TCTGGTATAGTGCAACAGCAGAGA ---  
 AATTTG --- CTGATG --- GCTATTGAGGCGCAACAGCATATGTTGCAACTCACAGTCTGGGGCATC  
 >EU363828  
 TTCTACTGTAATACATCACAACCTGTTTAATAGTACTTGGAAATGTTACTACAGAAAATAGCAATATTACA ----  
 -----  
 -----  
 GGAAATGACACTATCACGCTCCCTTGCAGAATAAAACAAATTATAAACATGTGGCAGGAAGTAGGGAGAGCAA  
 TGTATGCCCCCTCCATTAGTGGACAAATTAGATGCTCATCAAAT ---  
 ATTACAGGGTTGCTATTAACAAGGGATGGTGGTAATAAGACCAACGAG -----  
 -----  
 -----  
 ACCGAAGACACCGAGATCTTCAGACCTGGAGGAGGAGATATGAGAGACAATTGGAGAAGTGAATTATATAAAAT  
 ATAAAGTAGTACAAATTGAACCATTA --- GGCGTAGCACCCACCAAGGCAAAGAGAAGAGTGGTG -----  
 ----- CAGAGAGAGAAAAGAGCA --- GTGGGAACGATAGGAGCT ---  
 ----- ATGTTCCCTTGGGTTCTTGGGAGCA --- GCAGGAAGCACTATG --- GGCGCAGCGTCA ---  
 ATGACGCTGACGGTACAG --- GCCAGACAA --- TTGTTG --- TCTGGTATAGTGCAACAGCAGAGA ---  
 AATTTG --- CTGAGG --- GCTATTGAGGCGCAACAACATCTGTTGCAACTCACAGTCTGGGGCATC  
 >MF591612  
 TTCTACTGTAATACATCAAACTGTTTAATAGTACTTGGAAATGGTAATAGTACTTGGAAATGATACTACA ----  
 -----  
 -----  
 GGAGATGATCCTATCACGCTCCCTTGCAGAATAAAACAAATTGTAAACATGTGGCAGGAAGTAGGGAAAGCAA  
 TGTATGCCCCCTCCATTAGAGGACAAATTAGATGCTCATCAAAT ---  
 ATTACAGGGTTGCTATTAACAAGAGATGGTGGTAATAATACGAACGAGACCACC -----  
 -----  
 -----  
 GAGGAGACCGAGACCTTCAGACCTGGAGGAGGAGATATGAGAGACAATTGGAGAAGTGAAGTATATAAAATATA  
 AAGTAGTAAAAATTGAACCATTA --- GGAGTAGCACCCACCAAGGCAAAGAGAAGAGTGGTG -----  
 ----- CAGAGAGAAAAAAGAGCA --- GTGGGAACGATAGGAGCT -----  
 --- ATGTTCCCTTGGGTTCTTGGGAACA --- GCAGGAAGCACTATG --- GGCGCAGCGTCA ---  
 ATAACGCTGACGGTACAG --- GCCAGACAG --- TTGTTA --- TCTGGTATAGTGCAACAGCAGAGA ---  
 AATTTG --- CTGAGG --- GCTATTGAGGCGCAACAGCATCTGTTGCAACTCACAGTCTGGGGCATC  
 >JF932482  
 TTCTACTGTAATACATCACAACCTGTTTAATAGTACTTGGGATTCAAATGGTACTAATACTTGGACA -----  
 -----  
 -----  
 GAAAAATGGCACTATCACGCTCCCTTGCAGAATAAAACAGATTGTAAACATGTGGCAGGAAGTAGGGAAAGCAA

TGTATGCCCCCTCCCATTTAGCGGACAAATTAAGTGTTCATCAAAT ---  
 ATTACAGGGTTGCTATTAACAAGAGATGGTGGTAAAAATGAGAGC-----  
 -----  
 -----  
 AATACCACCGAGACCTTCAGACCTGGAGGAGGAGATATGAGAGACAATTGGAGAAGTGAATTATATAAATATA  
 AAGTAGTAAAAATTGAACCATTA---GGAGTAGCACCCACCAAGGCAAAGAGAAGAGTGGTG-----  
 -----CAGAGAGAAAAAAGAGCA---GTGGGAACGATAGGAGCT-----  
 ---ATGTTCCCTTGGGTTCTTGGGAGCA---GCAGGAAGCACTATG---GGCGCAGCGTCA---  
 ATAACGCTGACGGTACAG---GCCAGACAA---TTGTTG---TCTGGTATAGTGCAACAGCAGAGA---  
 AATTTG---CTGATG---GCTATTGAGGCGCAACAGCATCTGTTGCAACTCACAGTCTGGGGCATC  
 >HQ699949  
 TTCTACTGTAATACATCACAACCTGTTTGATAGTACTTGGTGGGAATAATGATACTAGTACTTGGAAATGGTACTG  
 CA-----  
 -----  
 GAAAAATAACTATCACGCTCCCTTGCAGAATAAAACAAATTGTAAACATGTGGCAGGAAGTAGGAAGAGCAA  
 TGTATGCCCCCTCCCATTTGAAGGACGAATTAGATGTTTCATCAAAT ---  
 ATTACAGGGTTGCTATTAACAAGAGATGGTGGTGTATGATGAGAAC-----  
 -----  
 -----  
 ACCACTGAGATCTTCAGACCTGGAGGAGGAAATATGAGGGACAATTGGAGAAGTGAATTATATAAATATAAAG  
 TAGTAAAAATTGAACCATTA---GGAGTAGCACCCACCAAGGCAAAGAGAAGAGTGGTG-----  
 -----CAGAGAGAAAAAAGAGCA---GTGGGAACGATAGGAGCT-----  
 ATGTTCCCTTGGGTTCTTGGGAGCA---GCAGGAAGCACTATG---GGCGCAGCGTCA---  
 ATAACGCTGACGGTACAG---GCCAGACAA---TTGTTG---TCTGGTATAGTGCAACAGCAGAGA---  
 AATCTG---CTGAGA---GCTATTGAGGCGCAACAACATATGTTGCAACTCACAGTCTGGGGCATC  
 >HM215423  
 TTCTACTGTAATACATCACAACCTATTTAATAGTACTTGGCATGTTAATGGTACTTGGAAATGGTACTACA----  
 -----  
 -----  
 GAAAAATGGCACTATCACGCTCCCTTGCAGAATAAAACAAATTGTAAACATGTGGCAGGAAGTAGGAAAAGCAA  
 TGTATGCCCCCCCCCATTTAGCGGGAAAATCAGATGTTTCATCAAAA ---  
 ATTACAGGGTTGCTATTAACAAGAGATGGTGGTGCTAATGAAAGC-----  
 -----  
 -----  
 GACCTCATCTTCAGACCTACAGGAGGAGATATGAGGGACAATTGGAGAAGTGAATTATATAAATATAAAGTAG  
 TAAAAATTGAACCATTA---GGAATAGCACCCACCAAGGCAAAGAGAAGAGTGGTG-----  
 -----CAGAGAGAAAAAAGAGCA---GTGGGAACAATAGGAGCT-----  
 ATGTTCCCTTGGGTTCTTGGGAGCA---GCAGGAAGCACTATG---GGCGCAGCGTCG---  
 GTAACGCTGACGGTACAG---GCCAGACAA---TTGTTG---TCTGGTATAGTGCAACAGCAGAGA---  
 AATCTG---CTGATG---GCTATTGAGGCGCAACAGCATTTGTTGCAACTCACCGTCTGGGGCATC  
 >EU131805  
 TTCTACTGTAATACATCAAACTGTTTAGTAGTATTTGGCATGACAATGGTACTAGTATTTGGAATGATACTA  
 TA-----  
 -----  
 AAAGATGAAAATATCACACTCCCTTGCAGAATAAAACAAATTATAAACATGTGGCAGCAAGTAGGAAAAGCAA  
 TGTATGCCCCCTCCCATTTAGAGGACAAATTAGATGTTTCATCAACT ---  
 ATTACAGGGTTGCTATTAACAAGAGATGGTGGCAATGATACCACT-----  
 -----  
 -----  
 AACACGAGACCTTCAGACCAACAGGAGGAAATATGAGAGACAATTGGAGAAGTGAATTATATAAATATAAAG  
 TAGTAAAAATTGAACCATTA---GGAATAGCACCCGCCAGGGCAAAGAGAATAGTGGTG-----  
 -----CAGAGAGAAAAAAGAGCA---GTGGGAACAATAGGAGCT-----  
 ATGTTCCCTTGGGTTCTTGGGAGCA---GCCGGAAGCACTATG---GGCGCAGCGTCA---  
 ATAACGCTGACGGTACAG---GCCAGACAA---ATGTTG---TCTGGTATAGTGCAACAGCAGAGA---  
 AATTTG---CTGATG---GCTATTGAGGCGCAACAGCATATGTTGCAACTCACAGTCTGGGGCATC  
 >EU131800  
 TTCTACTGTAATACATCACAACCTGTTTAATAGTACTTGGACTTGGAAATGATACTAATAATTGGACTAATACTA  
 CA-----  
 -----  
 -----  
 GAAAAGGGCAATATCACACTCCCATGCAAAATAAAACAAATTGTAAACATGTGGCAGGAAGTAGGGAAAGCAA

TGTATGCCCCCTCCCATTCAGAGACAGATTAGATGTTTCATCAAAT ---  
 ATTACAGGGTTGCTATTAACAAGAGATGGTGGTAAGAATGAGAGC-----  
 -----  
 -----  
 AACACCACCGAGACCTTCAGACCTGGAGGAGGAGAGATGAGAGATAATTGGAGAAGTGAATTATATAAAATATA  
 AAGTAGTAAAAATTGAACCTTTA---GGAGTAGCACCCACCAAGGCAAAGAGAAGAGTGGTG-----  
 -----CAGAGAGAAAAAAGAGCA---GCGGGAACGTTAGGAGCT-----  
 ---ATGTTCCCTTGGGTTCTTGGGAGCA---GCAGGAAGCACTATG---GGCGCAGCGTCA---  
 ATGACGCTGACGGTACCG---GCCAGACAA---TTGTTG---TCTGGTATAGCGCAACAGCACAGA---  
 AATTTG---CTGAGA---GCTATTGAGGCCAACAGCATATGCTGCAACTCACAGCCTGGGGCATC  
 >EU131794  
 TTCTACTGTGATACATCACAATTGTTTATTAGTACTTGGGAATAATACTAGTACTTGGGAGAATACTACA----  
 -----  
 -----  
 GGAAATAGCGATATCACGCTCCCTTGCAGAATAAAACAAATTATAAATATGTGGCGGGAAGTAGGGAAAGCAA  
 TGTATGCCCCCTCCCATTCAGAGACAAATTAGATGTTTCATCAAAT ---  
 ATTACAGGGTTACTATTAACAAGAGATGGTGGTAATAAGAACGAGACC-----  
 -----  
 -----  
 ACCAAGACGGAGACCTTCAGGCCTGGAGGAGGAGATATGAGAGATAATTGGAGAAGTGAATTATATAAGTATA  
 AAGTAGTAAAAATTGAACCACTA---GGAGTAGCACCCACCAAGGCAAAGAGAAGAGTGGTG-----  
 -----CAGAGAGAAAAAAGAGCA---GTGGAAACGATAGGAGCT-----  
 ---GTGTTCCCTTGGGTTCTTGGGAGCA---GCAGGAAGCACTATG---GGCGCAGCGTCA---  
 ATAACGCTGACGGCACAG---GCCAGACAA---TTGTTG---TCTGGTATAGTGCAACAGCAGAGA---  
 AATTTG---CTGAGG---GCTATTGAGGCGCAACAGCATCTGTTGCAACTCACAGTCTGGGGCATC  
 >EU131807  
 TTCTACTGCAATACATCACAACCTGTTTAATAGTACTTGGGAATAATAATACTAGTACTTGGACCAATACTACA-  
 -----  
 -----  
 GACAATAGCACTATCACACTTCCTTGCAGAATAAAACAAATTGTAAACATGTGGCAGGAAGTAGGGAAAGCAA  
 TGTATGCCCCCTCCCATTCAGAGACAAATCAGATGTTTCATCAAAT ---  
 ATTACAGGGTTACTATTAACAAGAGATGGTGGTGATAATAAGGAC-----  
 -----  
 -----  
 AGTACCACTGAGACCTTCAGATCTGGAGGAGGAGATATGAGAGACAATTGGAGAAGTAAATTATATAAAATATA  
 AAATAGTAAAAATTGGACCACTA---GGAGTAGCACCCACCAAGGCAAAGAGAAGAGTGGTG-----  
 -----CAGAGAGAAAAAAGAGCA---GTGGGAACAATAGGAGCT-----  
 ---ATGTTCCCTTGGGTTCTTGGGAGCA---GCAGGAAGCACGATG---GGCGCAGCGTCA---  
 ATAACGCTAACGGTACAG---GCCAGACAA---TTGTTG---TCTGGTATAGTGCAACAGCAGAGA---  
 AATTTG---CTGAGG---GCTATTGAGGCGCAACAGCATCTGTTGCAACTCACAGTCTGGGGCATC  
 >EU131809  
 TTCTACTGTAATACAACAAAGCTATTTAATAATACTTTGCAGGATAATAATACTTGGAAATAGTCCTTGGCAAG  
 GG-----  
 -----  
 TCAAATGACACTATCACACTCCAATGCAGAATAAAACAAATTATAAACAGATGGCAGGAAGTAGGAAAAGCAA  
 TGTATGCCCCCTCCCATCAGGGGACAAATTAGATGCTCATCAAAT ---  
 ATTACAGGACTGCTACTAACAAGAGATGGTGGTAACGAAAGCGGG-----  
 -----  
 -----  
 TCCGAAATCTTCAGACCTGGAGGAGGAAATATGAGGGACAATTGGAGAAGTGAATTATATAAAATATAAAGTAG  
 TAAAAATTGAGCCATTA---GGACTAGCACCCACCAAGGCAAAAAGAAGAGTGGTG-----  
 -----CAGAGAGAAAAAAGAGCA---GTGGGAACACTAGGAGCT-----  
 CTGTTCCCTTGGGTTCTTGGGAGCA---GCAGGAAGCACTATG---GGCGCAGCGTCA---  
 ATCACGCTGACGGTACAG---GCCAGACTA---TTACTG---TCTGGTATAGTGCAACAGCAGAAC---  
 AATTTG---CTGAGA---GCTATTGAGGCGCAACAGCATATGTTGCAACTCACAGTCTGGGGCATC  
 >MH479968  
 TTCTACTGTAATACATCAGAACTGTTT-----AATTGGAATGATACTAGTCCTTGGGAAGAAAT-----  
 -----  
 -----  
 ATCACAAGAAATATCACGCTCCCTTGCAGAATAAGACAAATTGTAAACATGTGGCAGGAAGTAGGGAAAGCAA

TGTATGCCCCCTCCCATTTAGAGGAAAAATTAGATGTTTCATCAAAT ---  
 ATTACAGGGTTGCTATTAACAAGAGATGGTGGTGAGAATGAGAGC-----  
 -----  
 -----  
 AATGTCACCGAGACCTTCAGACCTGGAGGAGGAAATATGAAGGACAATTGGAGAAGTGAATTATATAAAATATA  
 AAGTAGTAAAAATTGAACCATTA---GGAGTAGCACCCACCAAGGCAAAGAGAAGAGTGGTG-----  
 -----CAGAGAGAAAAAAGAGCA---GTGGGAACAATAGGAGCT-----  
 ---ATGTTCCCTTGGGTTCTTGGGAGCA---GCAGGAAGCACTATG---GGCGCAGCGTCA---  
 ATAACGCTGACGGTACAG---GCCAGACAA---TTATTG---TCTGGTATAGTGCAACAGCAGAGA---  
 AATTTG---CTGAGG---GCTATTGAGGCGCAACAGCATCTGTTGCAACTCACAGTCTGGGGCATC  
 >JF932468  
 TTCTACTGTAATACATCACAACTGTTTAAATGGTACTTGGAAATAATAATGGTACTTGGAGTGGTACTGCTTGGGA  
 ATACTACA-----  
 -----  
 GGAAATAACACTATCACGCTCCCTTGCAGAATAAAACAAATTGTAAACATGTGGCAGGAAGTAGGGAAAGCAA  
 TATACGCCCCCTCCCATTTAGAGGACAAATCAACTGTTTCATCAATT---  
 ATTACAGGGTTACTATTAACAAGAGATGGTGGTAAGAATGTGAGC-----  
 -----  
 -----  
 AACACCACCGAGATCTTCAGACCTGCAGGGGGAGATATGAGAGACAATTGGAGAAGTGAATTATATAAAATATA  
 AAGTAGTAAAAATTGAACCATTA---GGAATAGCACCCACCAAGGCAAAGAGAAGAGTGGTG-----  
 -----CAAAGAGAAAAAAGAGCA---GTGGGAACGATAGGAGCT-----  
 ---ATGTTCCCTTGGGTTCTTAGGAGCA---GCAGGAAGCACTATG---GGCGCAGCGTCA---  
 ATAACGCTGACGGTACAG---GCCAAACAA---TTGTTG---TCTGGTATAGTGCAACAGCAGAGA---  
 AATTTG---CTGAAT---GCTATTGAGGCGCAACAACGTCTGTTGCAACTCACAGTCTGGGGCATC  
 >JF932470  
 TTCTACTGTAATACAACAAAATTGTTTAAATAGTACTTGGAAATGATACTAGTACTGAGAATGTTACTACA----  
 -----  
 -----  
 GAAAATAGCACTATCGTACTCCATTGCAGAATAAGACAAATTGTAAACATGTGGCAGGAAGTAGGGAAAGCAA  
 TGTATGCCCCCTCCCATTTGAAGGACGAATTAGATGTTTCATCAAAC---  
 ATTACAGGATTGCTATTAACAAGAGATGGTGGTAATAATAAAGGC-----  
 -----  
 -----  
 AACACCACCGAGACCTTCAGACCTGGAGGAGGAAATATGAAAGACAATTGGAGAAGTGAATTATATAAAATATA  
 AAGTAGTAAAAATTGAACCATTA---GGAGTAGCACCCACCAAGGCAAAGAGAAGAGTGGTG-----  
 -----CAAAGAGAAAAAAGAGCA---GTGGGAACGATAGGAGCT-----  
 ---ATGTTCCCTTGGGTTCTTGGGAGCA---GCAGGAAGCACTATG---GGCGCAGCGTCA---  
 ATAACGCTGACGGTACAG---GCCAGACAA---CTGTTG---TCTGGTATAGTGCAACAGCAGAGA---  
 AATTTG---CTGAGG---GCTATTGAGGCGCAACAGCATCTGTTGCAACTCACAGTCTGGGGCATC  
 >JF932471  
 TTCTATTGTAATACAGCAAACTATTTAAATAGTACTTGGCATGCTAATAATACTTGGACTGGTGATAGTACTA  
 TA-----  
 -----  
 GGAAATAGCAATATCACGCTCCCTTGCAAAATAAAACAAATTTATAAACAAGTGGCAGGAAGTAGGGAAAGCAA  
 TGTATGCCCCCTCCCATTTAGCGGACTCATTAAATGCCCATCAAAG---  
 ATCACAGGGTTGCTATTAACAAGAGATGGTGGTAAGGAGACCAATACC-----  
 -----  
 -----  
 ACCGACATTGAGATCTTTAGACCTGGAGGAGGAGATATGAGAGACAATTGGAGAAGTGAATTATATAAAATATA  
 AAGTAGTAAAAATTGAACCATTA---GGGGTAGCACCCACCAAGGCAAAGAGAAGAGTGGTG-----  
 -----CAGAGAGAAAAAAGAGCA---GTGGGAACACTAGGAGCT-----  
 ---ATGTTCCCTTGGGTTCTTGGGAGCA---GCAGGAAGCACTATG---GGCGCAGCGTCA---  
 ATGACGCTGACGGTACAG---GCCAGACAA---TTGCTG---TCTGGTATAGTGCAACAGCAGAGA---  
 AATCTG---CTGAGG---GCTATTGAGGCGCAACAGCGTCTGTTGCAACTCACAGTCTGGGGCATC  
 >JF932473  
 TTCTACTGTAATACATCACAACTGTTTAAATAGTACTTGGAGTAATAATAGTACCAGTACTTGGAAATAATACTA  
 CA-----  
 -----  
 GGAAATGACACTATCACGCTTCCTTGCAGAATAAAACAAATTGTAAATATGTGGCAGGAAGTAGGGAAAGCAA

TGTATGCCCCCTCCCATTCAGAGCAAATTAGATGTTTCATCAAAT ---  
 ATTACAGGGTTGCTATTAACAAGAGATGGTGGTAATAATGGGAGC-----  
 -----  
 -----  
 GACATTGAGATCTTCAGACCTGGAGGAGGAGACATGAGAGACAATTGGAGAAGTGAATTATATAAATATAAAG  
 TAGTAAAAATTGAACCATTA---GGAGTAGCACCCACCAAGGCAAAGAGAAGAGTGGTG-----  
 -----CAGAGAGAAAAAAGAGCA--GTGGGAACAATAGGAGCT-----  
 ATGTTCCCTTGGGTTCTTGGGAGCA--GCAGGAAGCACTATG--GGCGCAGCGTCA---  
 ATAACGCTGACGGTACAG---GCCAGACAA---TTGTTG---TCTGGTATAGTGCAACAGCAGAGA---  
 AATTTG---CTGAGG---GCTATTGAGGCGCAACAGCATATGTTGCAACTCACAGTCTGGGGCATC  
 >KM217584  
 TTCTACTGCAATACAACAAAGCTGTTTAATAATACTTTGTTGGCTAATGACACTTGGAATAGAACTTGGCAAC  
 AG-----  
 -----  
 TCAAAATGATACTATCATACTCCAATGCAGAATAAAACAAATTATAAACAGGTGGCAGGAAGTAGGAAAAGCAA  
 TGTATGCTCCTCCCATCAGGGGACAAATTAGCTGTTTCATCAAAT---  
 ATTACAGGGCTGCTATTAACAAGAGATGGTGGTGACACGAATGACACG-----  
 -----  
 -----  
 AATAGGTCTGAAATCTTCAGACCTGGAGGAGGAGATATGAGGGACAATTGGAGAAGTGAATTATATAAATATA  
 AAGTAGTAAAACTTGAGCCACTA---GGAATAGCACCTACCAAGGCAAAGAGAAGAGTGGTG-----  
 -----CAGAGAGAAAGAAGAGCA--GTGGGAACAATAGGAGCT-----  
 ---GTGTTCCCTTGGGTTCTTGGGAGCA--GCAGGAAGCACTATG--GGCGCAGCGTCA---  
 GTGACGCTGACGGTACAG---GCCAGACTA---TTACTG---TCTGGTATAGTGCAACAGCAGAAC---  
 AATCTG---CTGAGA---GCTATTGAGGCGCAACAGAACATGTTGCAACTCACAGTCTGGGGCATC  
 >KM217662  
 TTCTACTGTAATACATCAAAGCTGTTTAATAATACTTGGACTAATAATACTTGAATGGTACTTGGCCA----  
 -----  
 -----  
 AATAGTACCATCATAATCATCCCATGCAGAATAAAACAAATTATAAACAGGTGGCAGGAAGTAGGAAGGGCAA  
 TGTATGCCCCCTCCCATCAGTGGACAAATTAGATGTTTCATCAAAT---  
 ATTACAGGGTTGCTATTAACAAGGGATGGTGGTGGTGGTAATAACTCAACTAAC-----TCAACTGAG---  
 CCA-----  
 -----  
 ACTGAGGAAATCTTCAGACCTGCAGGAGGAGATATGAGGGACAATTGGAGAAGTGAATTATATAAATATAAAG  
 TGGTAAAAATTGAGCCAATA---GGACTAGCACCCACCAAGGCAAAGAGAAGAGTGGTG-----  
 -----CAGAGAGAAAAAAGAGCA--GTGGGAACCTTAGGAGCT-----  
 GTGTTCCCTTGGGTTCTTGGGAGCA--GCAGGAAGCACTATG--GGCGCAGCGTCA---  
 TTGACGCTGACGGTACAG---GCCAGACTA---TTACTG---TCTGGTATAGTGCAACAGCAGAAC---  
 AATCTG---CTGAGA---GCTATTGAGGCGCAACAACACATGTTGCAACTCACAGTCTGGGGCATC  
 >KM217802  
 TTTTACTGTAATACAACACAGCTGTTTAATAGTACTTGAATGGTACTGAAGGGGTAAATACCACTGAAGGAG  
 AG-----  
 -----  
 ATCATACTCCCATGCAGAATAAAACAAATTATAAACAGGTGGCAAGAAGTAGGAAAAGCAATATATGCCCCCTC  
 CCATCAGCGGACAGATCAATTGTTTCATCAAAT---  
 ATTACAGGGCTATTATTAACAAGAGATGGTGGTATTAATAACGAGACC-----  
 -----  
 -----  
 CAGACTACTGAGACCTTCAGACCTGGAGGAGGAGATATGAGGGACAATTGGAGAAGTGAATTATATAAATATA  
 AAGTAGTAAAAATTGAACCATTA---GGAGTAGCACCCACCAAGGCAAAGAGAAGAGTGGTG-----  
 -----CAAAGAGAAAAAAGAGCA--GTGGGA---ATAGGAGCT-----  
 ---GTGTTCCCTTGGGTTCTTGGGAGCA--GCAGGAAGCACTATG--GGCGCAGCGTCG---  
 ATAACGCTGACGGTACAG---GCCAGACAA---TTATTG---TCTGGTATAGTGCAACAGCAGGGT---  
 AACTTG---CTGAGA---GCTATTGAGGCGCAACAACATCTGTTGCAACTCACAGTCTGGGGCATC  
 >KM217995  
 TTCTACTGTAATACAACAAAGTTGTTTAATAATACTTTGCTGACTAATGATACTTGGCGAGATACTTGGCAAG  
 AGTCA-----  
 -----AATAAT-----  
 ACTGAAGGAAATGTCATTACACTCCAATGCAGAATAAAACAAATTATAAACAGATGGCAGGAAGTAGGAAAAG

CAATGTATGCCCCCTCCCATCAGGGGACAAATTAGTTGTTTCATCAAAT---  
ATTACAGGGCTTCTATTAACAAGAGATGGTGGCAGCATGAATGAGTCC-----  
-----  
-----  
ATAAATGAAACCTTCAGACCTGGAGGAGGAAATATGAGGGACAATTGGAGGAGTGAATTATATAAATATAAAG  
TAGTAAAAAATTGAGCCACTA---GGAATAGCACCCACCAAGGCAAAGAGAAGAGTGGTG-----  
-----CAGAGGGAAAAAAGAGCA--GTGGGAACAATAGGAGCT-----  
ATGTTCCCTTGGTTTCTTGGGAGCA---GCAGGAAGCACTATG---GGCGCAGCGTCA---  
ATGACGCTGACGGTACAG---GCCAGACTA---TTACTG---TCTGGTATAGTGCAACAGCAGAAC---  
AATCTG---CTGAAA---GCTATTGAGGCGCAACAGCACCTGTTGCAACTCACAGTCTGGGGCATC  
>JF932475  
TTCTACTGTAATACATCACAACCTGTTTAATAGTACTTGGTATGGTAATGATACTTGGGAATAATACTACA----  
-----  
-----  
AAAGATAGCAATATCACGCTCCATTGCAGAATAAAACAAGTTGTAAACATGTGGCAGGAAGTAGGGAAAGCAA  
TGTATGCCCCCTCCCATTCAGGACTAATTAGATGTACATCAAAC---  
ATTACCGGGTTGCTACTAACAAGAGATGGGGGTAATAATAGGAGCGGG-----  
-----  
-----  
GACACCGAGATCTTCAGACCTGGAGGAGGAGATATGAGAGACAATTGGAGAAGTGAATTATATAAATATAAAG  
TAGTGAAAATTGAACCATTA---GGAGTAGCACCCACCAGGGCACAGAGAAGAGTGGTG-----  
-----CAGAGAGAAAAAAGGGCA--GTGGGAACGATAGGAGCT-----  
ATGTTCCCTTGGGTTCTTGGGAGCA---GCAGGAAGCACTATG---GGCGCAGCGTCA---  
ATGACGCTGACGGTACAG---GCCAGACAA---CTGTTG---TCTGGTATAGTGCAACAGCAGAGA---  
AATTTG---CTGATG---GCTATTGAGGCGCAACAGCATCTGTTGCAACTCACAGTCTGGGGCATC  
>JF932476  
TTTTACTGTAATACATCAAACTGTTTAATAGTACTTGGGATAGGACTGATAATAATACTCGAAATGAT----  
-----  
-----  
AATAATAATACAATCACGCTCCCTTGCAGAATAAAACAACCTTATAAACATGTGGCAGGAAGTAGGGAAAGCAA  
TGTATGCCCCCTCCCATTAAGGACAAATTAACTGTTTCATCACAT---  
ATTACGGGATTGCTATTAACAAGAGATGGTGGTACTAATGAGAGC-----  
-----  
-----  
AACACCACCGAGACCTTCAGACCTGGAGGAGGAGATATGAGAGACAATTGGAGAAGTGAATTATATAAATATA  
AAGTAGTAAAAATTGAACCATTA---GGAGTAGCACCCACCAAGGCAAAGAGAAGAGTGGTG-----  
-----CAGAGAGAAAAAAGAGCA--GTGGGAGCGTTAGGAGCT-----  
---ATGTTCCCTTGGGTTCTTGGGAGCA--GCAGGAAGCACGATG---GGCGCAGCGTCA---  
ATAGCGCTGACGGTACAG---GCCAGACAA---TTATTG---TCTGGTATAGTGCAACAGCAGAGA---  
AATTTG---CTGAGG---GCTATTGAGGCGCAACAGCATATGTTGCAACTCACAGTCTGGGGCATC  
>JF932477  
TTCTACTGTAATACATCACAACCTGTTTAATAGTACTTGGGATGGTAATGATACTAGTACTTGGACTAACGCTA  
CA-----  
-----  
-----  
GAAAATCGCACTATCACACTCCCTTGCAGAATAAAACAATTTGTAAACATGTGGCAGGAAGTAGGGAAAGCAA  
TGTATGCCCCCTCCCATTAGAGGACAAATTAGATGTTTCATCAAAT---  
ATTACAGGGCTGATATTAATAAGAGATGGTGGTAATAATGAGAGCACG-----  
-----  
-----  
ACCAACAACGAGACCTTTAGACCTGCAGGAGGAAATATGAAAGATAATTGGAGAAGTGAATTATATAAATATA  
AAGTAGTAAAAATTGAACCATTA---GGAGTAGCACCCACCAAGGCAAAGAGAAGAGTGGTG-----  
-----CAGAGAGAAAAAAGAGCA--GTGGGAACGATAGGAGCT-----  
---ATGTTCCCTTGGGTTCTTGGGAGCA--GCAGGAAGCACTATG---GGCGCAGCGTCA---  
ATAACGCTGACGGTACAG---GCCAGACAA---TTGATG---TCTGGTATAGTGCAACAGCAGAGA---  
AATTTG---CTGAGG---GCTATTGAGGCGCAACAGCATATGTTGCAACTCACAGTCTGGGGCATC  
>JF932483  
TTCTACTGTAATACATCAAACTGTTTAATGATACTATTGCTTGGGAATGATACAGAACTAGAACTGTTTAAACG  
ATACTAGTACT-----  
-----  
-----  
GAGAAATGATACTATCACACTCCCTTGCAGAATAAAACAAGTTGTAAATATGTGGCAGGAAGTAGGGAAAGCAA

TGTATGCCCCCTCCCATTTAGTGGACAAATTAGATGTTTCATCAAAT ---  
 ATTACAGGGGATGATATTAACAAGAGATGGTGGTAATGTGACCAAC -----  
 -----  
 -----  
 AACAAAGACTGAGGTCTTCAGACCTGGAGGAGGAGATATGAGAGACAATTGGAGAAGTGAATTATATAAAATATA  
 AAGTAGTAAAAATTGAACCATTA --- GGAGTAGCACCCACCAAGGCAAAG -----  
 -----  
 -----AGAAAAAAAAGAGCA --- GTGGGAACAAAAGGAGCT -----  
 ---ATGTTCCCTTGGGTTCTTGGGAGCA --- GCAGGAAGCACTATG --- GGCGCAGCATCA ---  
 ATAACGCTGACGGTACAG --- GCCAGACAA --- TTATTG --- TCTGGTATAGTGCAACAGCAGAGA ---  
 AATTTG --- CTGAGG --- GCTATTGAGGCGCAACAGCATCTGTTGCAACTCACAGTCTGGGGCATC  
 >JF932484  
 TTCTACTGTAATACCTCACAACCTGTTTAATAGTACTTGGTATGCTAATAGGACTTGGGAAGGGTGATACA ----  
 -----  
 -----  
 GGAAATGACACTATCACAACCTCCCTTGCAGAATAAAACAAATTGTAAACATGTGGCAGGAAGTAGGAAAAGCAA  
 TGTATGCCCCCTCCCATTTAAAGGACAAATTAGATGTTTCATCAAAT ---  
 ATTACAGGGTTGTTATTAACAAGAGATGGTGGTAATGGGAACAAGACC -----  
 -----  
 -----  
 AACAACTGAGACCTTCAGACCGGGAGGAGGAGACATGAGAGACAATTGGAGAAGTGAATTATATAAAATATA  
 AAGTAGTACAAATTGAACCATTA --- GGAGTAGCACCCACCAAGGCAAAGAGAAGAGTGGTG -----  
 -----  
 -----CAAAGAGAAAAAAGAGCA --- GTGGGAACGATAGGAGCT -----  
 ---ATGTTCCCTTGGGTTCTTGGGAGCA --- GCAGGAAGCACTATG --- GGCGCAGCGTCA ---  
 ATACCGCTGACGGTACAG --- GCCAGACAA --- TTGTTG --- TCTGGTATAGTGCAACAGCAGAGA ---  
 AATTTG --- CTGAGG --- GCTATTGAGGCGCAACAGCATATGTTGCAACTCACAGTCTGGGGCATT  
 >JF932485  
 TTCTACTGTAATACATCACAACCTGTTTAATAGTACTTGGCATAATAAGGGTACTTGAATAGTACTCGGAATG  
 ATACTGCA -----  
 -----  
 -----  
 GAAATGACACTATCACGCTCCCTTGCAGAATAAAACAAATTGTAAACATGTGGCAGGAAGTAGGAAAAGCAA  
 TGTATGCCCCCTCCCATTTAAAGGACAAATTAGATGTTTCATCAAAT ---  
 ATTACAGGGTTGCTATTAACAAGAGATGGTGGTAATAATGAGAACAAGACCACC -----  
 -----  
 -----  
 AACGAGACCGAGACCTTCAGACCTGGAGGAGGAGATATGAGAGACAATTGGAGAAGTGAATTATATAAAATATA  
 AAGTAGTAAAAATTGAACCATTA --- GGAGTAGCACCCACCAAGGCAAAAAGAAGAGTGGTG -----  
 -----  
 -----CAGAGAGAAAAAAGAGCA --- GTGGGAACGATAGGAGCT -----  
 ---ATGTTCCCTTGGGTTCTTGGGAGCA --- GCAGGAAGCACTATG --- GGCGCAGCGTCA ---  
 ATAACGCTGACGGTACAG --- GCCAGACAA --- TTGTTG --- TCTGGTATAGTGCAACAGCAGAGA ---  
 AATTTG --- CTGAGG --- GCTATTGAGGCGCAACAACATCTGTTGCAACTCACAGTCTGGGGCATC  
 >JF932486  
 TTCTACTGTGACACATCACAACCTGTTTAATAGTTCTTGAATAGTAATACTAGTACTTGAATAAGACA ----  
 -----  
 -----  
 GGAGATAGTAATATCACGCTCCCTTGCAGAATAAAACAAATTATAAACATGTGGCAGAAAGTAGGGAAAGCAA  
 TGTATGCCCCCTCCTATTAGAGGACAAATTAGATGTTTCATCAAAT ---  
 ATTACAGGGTTGCTATTAACAAGAGATGGTGGTGAGGGGAACAGG -----  
 -----  
 -----  
 ACCAACGAGACCTTCAGACCTGGAGGAGGAGATATGAGAGACAATTGGAGAAGTGAATTATATAAAATATAAAG  
 TAGTAAGAATTGAACCATTA --- GGAGTAGCACCCACCAAGGCAAAGAGAAGAGTGGTG -----  
 -----  
 -----CAGAGAGAAAAAAGAGCA --- GTGGGAACGCTAGGAGCT -----  
 ATGTTCCCTTGGGTTCTTGGGAGCA --- GCAGGAAGCACTATG --- GGCGCAGCGTCA ---  
 ATAACGCTGACGGTACAG --- GCCAGACAA --- TTGTTG --- TCTGGTATAGTGCAACAGCAGAGA ---  
 AATTTG --- CTGAGG --- GCTATTGAGGCGCAACAGCATCTGTTGCAACTCACAGTCTGGGGCATC  
 >MH479957  
 TTCTACTGTAATACATCACAACCTGTTTAACAGTACTTGAATAATACCAGTACTGGGAATGATACTAATACT-  
 -----  
 -----  
 ACAGATAGAATTATCACGCTCCCTTGCAGGATAAAACAAATTGTAAACATGTGGCAGGAAGTAGGAAAAGCAA

TGTATGCCCCCTCCCATTTGGAGGACAGATTAGGTGCTCATCAAAT ---  
 ATTACAGGGTTGCTATTAACAAGAGATGGTGGTAATACCACCGAGTCTACCGAG-----  
 -----  
 -----  
 TCTACCGAGACCTTCAGACCTGCAGGAGGAAATATGAAGGACAATTGGAGAAGTGAATTATATAAAATATAAAG  
 TAGTAAAAATTGAACCATTA---GGAGTAGCACCCACCAGGGCAAAGAGAAGAGTGGTG-----  
 -----CAAAGAGAAAAAAGAGCA--GTGGGAACGATAGGAGCT-----  
 ATGTTCCCTTGGGTTCTTGGGAGCA--GCAGGAAGCACTATG--GGCGCAGCGTCA---  
 ATAACGCTGACGGTACAG---GCCAGACAA---TTGCTG---TCTGGTATAGTGCAACAGCAGAGA---  
 AATTTG---CTGAGG---GCTATTGAGGCGCAACAACACCTGTTGCAACTCACAGTCTGGGGCATC  
 >JF932487  
 TTCTACTGTAATACATCAAACTGTTTAAACAGTACTTGGCATGCTAATGGTACTTGGACTAATAGTACA----  
 -----  
 -----  
 GTAGATAGCAATATCACGCTCCATTGTAGAATAAAACAAATTGTAAACATGTGGCAAGAAGTAGGGAAAGCAA  
 TGTATGCCCCCTCCCATTTGCAGGAAAAATTAGATGTTTCATCAAAT ---  
 ATTACAGGGTTGCTATTAACAAGAGATGGGGGTAATACTGGGAAC-----  
 -----  
 -----  
 ACTGACAACGAGACCTTCAGACCTGGAGGAGGAGATATGAGAGACAATTGGAGAAGTGAATTATATAAAATATA  
 AAGTAGTTAAAAATTGAGCCAATA---GGAGTAGCACCCACCAAGGCAAAGAGAAGAGTGGTG-----  
 -----CAGAGAGAAAAAAGAGCA--GTGGGAACAATAGGAGCT-----  
 ---ATGTTCCCTTGGGTTCTTGGGAGCA--GCAGGAAGCTCTATG--GGCGCAGCGTCA---  
 ATAACGCTGACGGTACAG---GCCAGACAA---TTGTTG---TCTGGTATAGTGCAACAGCAGAGA---  
 AATTTG---CTGAGG---GCTATTGAGGCGCAACAGCATATGTTGCAACTCACAGTCTGGGGCATC  
 >JF932489  
 TTCTACTGTAATACATCACAACCTGTTTAAATGGGAATGGTACTAGTACTGGGAATAAGACTACA-----  
 -----  
 -----  
 GGAAATGACACTATCACACTCCCTTGCAGAATAAAACAAATTGTAAACATGTGGCAGGAGGTAGGGAAAGCAA  
 TGTATGCCCCCTCCCATTTTCAGGACGAATTAGATGTGTATCAAAC ---  
 ATTACAGGGTTGCTATTAACAAGAGATGGTGGTAATGAGACCGAT-----  
 -----  
 -----  
 ACCACCGAGACCTTCCGACCTTGGGGAGGAGATATGAGAGACAATTGGAGAAGTGAATTATATAAAATATAAAG  
 TAGTAAAAATTGAACCATTA---GGAGTAGCACCCACCAAGGCAAAGAGAAGAGTGGTG-----  
 -----CAGAGAGAAAAAAGAGCA--GTGGGA---CTAGGAGCT-----  
 ATGTTCCCTTGGGTTCTTGGGAGCA--GCAGGAAGCAGCATG--GGCGCAGCGTCA---  
 ATAACGCTGACGGTACAG---GCCAGACAA---TTGATG---TCTGGTATAGTGCAACAGCAGAGA---  
 AATTTG---CTGAGG---GCTATTGAGGCGCAACAGCATATGTTGCAACTCACAGTCTGGGGCATC  
 >JF932490  
 TTCTACTGTAATACATCACAACCTGTTTAAATAGTACTTGGTATGAGAATGGTACTATTACTACTAAGAATTTT-  
 -----  
 -----  
 ACTACAGGAACCTATCACACTCCCTTGCAGAATAAAACAAATTGTAAACATGTGGCAGCAAGTAGGGAAAGCAA  
 TGTATGCCCCCTCCCATTTGCAGGAAAAATTAGATGTTTCATCAAAT ---  
 ATTACAGGATTGCTATTAACAAGAGATGGGGGTACGGGTAATGAGACCAACAAC-----  
 -----  
 -----  
 AATGACACTGAGACTTTCAGACCTGAAGGAGGAAATATGAAAGACAATTGGAGAAGTGAATTATATAAAATATA  
 AAGTAGTAAGAATTGAACCATTA---GGAAGTAGCACCCACCAAGGCAAAGAGAAGAGTGGTG-----  
 -----CAGAGAGAAAAAAGAGCA--GTGGGAACAATAGGAGCT-----  
 ---ATGTTCCCTTGGGTTCTTGGGAGCA--GCAGGAAGCACTATG--GGCGCAGCGTCA---  
 ATAACGCTGACGGTACAG---GCCAGACAA---TTGTTG---TCTGGTATAGTGCAACAGCAAAGA---  
 AATTTG---CTGAGG---GCTATTGAGGCGCAACAGCATCTGTTGCAACTCACAGTCTGGGGCATC  
 >JF932491  
 TTCTACTGTAATACAACACAACCTGTTTAAATAGTACTTGGCCTGGGAATAATACTAGTACTAAGACA-----  
 -----  
 -----  
 GAAAAATGATAATATCACGCTCCCTTGCAAAATAAGACAAATTGTAAACATGTGGCAGAAAGTAGGGAAAGCAA

TGTATGCCCCCTCCCATTAAGGACAAATTAGATGTTTCATCAAAT ---  
 ATTACAGGGTTGCTGTTAACAAGAGATGGTGGTAGTAATGAGAACACG-----  
 -----  
 ATCAACGAGACCTTCAGACCTGGAGGAGGAGATATGAGAGACAATTGGAGAAGTGAATTATATAGATATAAAG  
 TAGTAAAAAATTGAACCTTTA---GGAGTAGCACCCACCAAGGCAAAGAGAAGAGTGGTG-----  
 -----CAGAGAGAAAAAAGAGCA--GTGGGAACGCTAGGAGCT-----  
 ATGTTCCCTTGGGTTCTTGGGAGCA--GCAGGAAGCACTATG--GGCGCAGCGTCA---  
 ATAACGCTGACGGTACAG---GCCAGACAA---TTGCTG---TCTGGTATAGTGCAACAGCAGAGA---  
 AATTTG---CTGATG---GCTATTGAGGCGCAACAACATCTGTTGCAACTCACAGTCTGGGGCATC  
 >JF932493  
 TTCTACTGTAATACAACAACCACTGTTTAATAGTACTTGGGAATAATACTAGTATTTGGAATAATGTTACA----  
 -----  
 -----  
 GAAAAATGGCACTATCACGCTTCCTTGCAGAATAAAACAAATTGTAAACATGTGGCAGGGAGTAGGGAAAGCAA  
 TGTATGCCCCCTCCCATTTGCAGGACAAATTAAGTGTTCATCAAAT ---  
 ATTACAGGGTTGCTATTAACAAGAGATGGTGGTGGTAAATAAGAGC-----  
 -----  
 ----  
 GAGGGCAACACCACCGAGACCTTCAGACCTGCAGGAGGAAATATGAGAGACAATTGGAGAAGTGAATTATATA  
 AATATAAAGTAGTAAAAAATTGAACCATTA--GGATTAGCACCCACCAAGGCAAAGAGAAGAGTGGTG-----  
 -----CAAAGAGAAAAAAGAGCA---  
 GTGGGAACGATAGGAGCT-----ATGTTCCCTTGGGTTCTTGGGAGCA--GCAGGAAGCACGATG---  
 GGCGCAGCGTCG--ATGACGCTGACGGTACAG---GCCAGGCAA---TTGTTG---  
 TCTGGTATAGTGCAACAGCAAAGA---AATTTG---CTGAGG---  
 GCTATTGAGGTGCAACAGCATCTGTTGCAACTCACAGTCTGGGGCATC  
 >JF932499  
 TTCTACTGTAATACATCACAACCTGTTTAATAGTTCTTGGGAATGATACTAGTACTTGGGAATAATACTACA----  
 -----  
 -----  
 GAAAAATAGCACTATCATGCTCCCTTGCAGAATAAAACAAATTGTAAACATGTGGCAGGAAGTAGGGAAAGCAA  
 TGTATGCCCCCTCCCATTTAGTGGGAATAATTAAGTGCAAATCAAAT ---  
 ATTACAGGGTTGCTATTAACGAGAGATGGTGGTGGTAATGAGACT-----  
 -----  
 -----  
 AACACTGAGATCTTTAGACCAGGAGGAGGAAATATGAAAGACAATTGGAGAAGTAAATTATATAAATATAAAG  
 TAGTAAAAAATTGAACCATTA--GGAGTAGCACCCACCAAGGCAAAGAGAAGAGTGGTG-----  
 -----CAGAGAGAAAAAAGAGCA--GTGGGAACGATAGGAGCT-----  
 ATGTTCCCTTGGGTTCTTGGGAACA--GCAGGAAGCACTATG--GGCGCAGCGTCA---  
 ATAACGCTGACGGTACAG--GCCAGACAA--TTGCTG--TCTGGTATAGTGCAACAGCAGAGA---  
 AATTTG---CTGAGG--GCTATTGAGGCGCAACAGCATCTGTTGCAACTCACAGTCTGGGGCATC  
 >JF932500  
 TTCTACTGTAATACATCACAACCTGTTTAATAGTACTTGGCCTAATAATGGTACTTGGGAATGATACTGCA----  
 -----  
 -----  
 AAAAAATGACAATATCACTCTCCCTTGCAGAATAAAACAAATTATAAACATGTGGCAGGAAGTAGGGAAAGCAA  
 TGTATGCCCCCTCCCATTTGGAGGACAAATTAGATGTTTCATCAAAT ---  
 ATTACAGGGTTGCTATTAACAAGAGATGGTGGTAGGAATGAGAGT-----  
 -----  
 -----  
 AACACCACCGAGACCTTCAGACCTGGAGGAGGAGACATGAGAGACAATTGGAGAAGTGAATTATATAAATATA  
 AAGTAGTAAAAAATTGAACCATTA--GGAGTAGCACCCACCAAGGCAAAGAGAAGAGTGGTG-----  
 -----CAGAGAGAAAAAAGAGCA--GTGGGAACGATAGGAGCT-----  
 ---ATGTTCCCTTGGGTTCTTGGGAGCA--GCAGGAAGCACTATG--GGCGCAGCGTCA---  
 ATAACGCTGACGGTACAG---GCCAGACAA---TTGTTG---TCTGGTATAGTGCAACAGCAGAGA---  
 AATTTG---CTGATG---GCTATTGAGGCGCAACAGCATCTGTTGCAACTCACAGTCTGGGGCATC  
 >KM218168  
 TTCTACTGTAATACAACAAGCTATTTAGTAATACTTGGCAGACTAATAACTCTTGGGAATGGTACTTGGCAAG  
 GGTCAAATAAT-----  
 -----

AGTGATAGAAATGTCCTTATACTCCAATGCAGAATAAAACAAATTATAAACAGATGGCAGGAAGTAGGAAAAG  
CAATGTATGCCCCCTCCCATCAGGGGAGAAATTAAATGTTTCATCAAAT---  
ATTACAGGGCTTCTATTAACAAGAGATGGTGGTAACACAACCTGAGTCCAGA-----  
-----  
-----  
AATGGGACTGAAATCTTCAGACCTGGAGGAGGAGATATGAGGGACAATTGGAAAAGTGAATTATATAAATATA  
AAGTAGTAAAAATTGAGCCACTA---GGAATAGCACCCACCAAGGCAAAGAGAAGAGTGGTG-----  
-----CAGAGAGACAAAAGAGCG---GTAGGAACACTAGGAGCT-----  
---ATGTTCCCTTGGGTTCTTGGGAGCA---GCAGGAAGCACTATG---GGCGCAGCGTCG---  
ATGACGCTGACGGTACAG---GCCAGACTA---TTACTG---TCTGGTATAGTGCAACAGCAGAAC---  
AATATG---CTGAAA---GCTATTGAGGCGCAACAGCACCTGTTGCAACTCACAGTCTGGGGCATC  
>KM218228  
TTCTACTGTAATACATCAAAATTGTTTAATAATACTTTACAGCCTAATAATACTTGGAAATAGTACTTGGCAAA  
CAGAT-----  
-----  
ATTAACGGAACCATCACACTCCCATGCAGAATAAAACAAATTATAAACAGGTGGCAGGAAGTAGGAAGAGCAA  
TGTATGCCCCCTCCCATCAGTGGACAAATTAAATGTTTATCAAAT---  
ATTACAGGGCTGCTATTAACAAGGGATGGTGGTAAACGAATGGGTCCGAA-----  
-----  
-----  
AATGAGACCGAAATCTTCAGGCCTGGAGGAGGAGATATGAGAGACAATTGGAGAAGTGAATTATATAAATATA  
AAGTAGTAAAAATTGAGCCACTA---GGAATAGCACCCACCAAGGCAAAGAGAAGAGTGGTG-----  
-----CAGAGAGAAAAAGAGAGCG---GTGGGAACACTGGGAGCT-----  
---GTGTTCCCTCGGGTTCTTGGGAGCA---GCAGGAAGCACTATG---GGCGCAGCGTCA---  
ATGACGCTGACGGTACAG---GCCAGACTA---TTGCTG---TCTGGTATAGTGCAACAGCAGAAC---  
AATATG---CTGAGA---GCTATTGAGGCGCAACAGCACATGTTGCAACTCACAGTCTGGGGCATC  
>JF932479  
TTCTACTGTAATACATCACAACCTGTTTAATAGTGTTAATGGTACTTGGAAATGGTACTGGTACA-----  
-----  
-----  
GGAAATAACACTATCACGCTCCCTTGCAGAATAAAACAAATTGTAAACATGTGGCAGGAAGTAGGGAAAGCAA  
TGTATGCCCCCTCCCATTAGTGGACAAATTAGATGTTTATCAAAT---  
ATTACAGGGTTGCTATTAACAAGAGATGGTGGTAATAATGGGAGC-----  
-----  
-----  
AACACCACCGAGACCTTCAGACCAGGAGGAGGAGATATGAGAGACAATTGGAGAAGTGAATTATATAAATATA  
AAGTAGTACAAATTGAACCATTA---GGAGTAGCACCCACCAGGGCAAAGAGAAGAGTGGTG-----  
-----CAGAGAGAAAAAGAGAGCA---GTGGGAACAATAGGAGCT-----  
---ATGTTCCCTTGGGTTCTTGGGAGCA---GCAGGAAGCACTATG---GGCGCAGCATCG---  
ATAACGCTGACGGTACAG---GCCAGACAA---TTGTTG---TCTGGTATAGTGCAACAGCAAAGA---  
AATTTG---CTGAGG---GCTATTGAGGCGCAACAGCACATGTTGCAACTCACAGTCTGGGGCATC  
>JF932480  
TTTTACTGTAATACATCACAACCTGTTTAATAGTTCTTGGCATGCTAATAGTACTAGGAATAACACAGATAAG-  
-----  
-----  
ATCATACTTCCTTGTAGAATAAAACAAATTGTAAACATATGGCAGGGAGTAGGGAAAGCAATATATGCCCCCTC  
CCATTGAAGGACAAATTAGTTGTTTATCAAAG---  
ATTACAGGGTTACTATTAACAAGAGATGGTGGTGGTGGTAGAAATGCGAGT-----  
-----  
-----  
GAGAACAACACCGAGACCTTCAGACCTGGAGGGGGAGATATGAGAGACAATTGGAGAAGTGAATTATATAAAT  
ATAAAGTAGTAAAAATTAAACCATTA---GGAATAGCACCCACCAAGGCAAAAAGAAGAGTGGTG-----  
-----CAAAGAGAAAAAAGAGCA---GTGGGAACGATAGGAGCT---  
-----ATGTTCCCTTGGGTTCTTGGGAACA---GCAGGAAGCACTATG---GGCGCAGCGTCA---  
ATGACGCTGACGGTACAG---GCCAGACAA---TTGTTG---TCTGGTATGGTGCAACAGCAGAGA---  
AATTTG---CTGAGG---GCTATTGAGGCGCAACAGCATCTGTTGCAACTCACAGTCTGGGGCATC  
>JF932481  
TTCTACTGTGATACATCACAACCTGTTTAATAGTACTTGGATTTGGAATGATACTAGTACTTGGAAATGGTACTG  
CA-----  
-----

GAAGATAGCACTATCACGCTCCCTTGCAGAATAAGACAAATTGTAAACATGTGGCAGGAAGTAGGGAAAGCAA  
TGTATGCCCCCTCCCATAGCAGGACAAATTAGATGTTTCATCAAAT ---  
ATTATAGGGTTGCTATTAACAAGAGATGGTGGTAATGAGAACAC -----  
-----  
-----  
AAGACCACCGAGACCTTCAGACCTGGAGGAGGAGATATGAGAGACAATTGGAGGAGTGAATTATATAAATATA  
AAGTAGTAAAAATTGAACCATTA --- GGAGTAGCACCCACCAGGGCAAAGAGAAGAGTGGTG -----  
----- CAGAGAGAAAAAAGAGCA --- GTGGGA --- ATAGGAGCT -----  
--- ATGTTCCCTTGGGTTCTTGGGAGCA --- GCAGGAAGCACTATG --- GGCGCAGCGTCA ---  
ATAACGCTGACGGTACAG --- GCCAGACAA --- TTGTTG --- TCTGGTATAGTGCAACAGCAGAGA ---  
AATCTG --- CTGAGG --- GCTATTGAGGCGCAACAGCATCTGTTGCAACTCACAGTCTGGGGCATC  
>JF346919  
TTCTACTGTAATACATCACTACTGTTTAATAGTACTTGGTATGAGAATGATACTAGTAATTGGAATGCT ----  
-----  
-----  
ACTAAAGAAAAAATCACGCTCCCTTGCAGAATAAGACAAATTGTAAACATGTGGCAGGAAGTAGGGAAAGCAA  
TGTATGCCCCCTCCCATTCAGGACAACTTAACTGCTCATCAAAC ---  
ATTACAGGGTTGCTATTAACAAGAGATGGTGGTGGTGGTATGGTAAT -----  
-----  
-----  
AGTACGGACGAGATCTTCAGACCTGGAGGAGGAGATATGAGGGACAATTGGAGAAGTGAATTATATAAATATA  
AAGTAGTAAAAATTGAACCATTA --- GGAGTAGCACCCACCAAGGCAAAGAGAAGAGTGGTG -----  
----- CAGAGAGAAAAAAGAGCA --- GTGGGAACGATAGGAGCT -----  
--- ATGTTCCCTTGGGTTCTTGGGAGCA --- GCAGGAAGCACTATG --- GGCGCAGCGTCA ---  
ATAACGCTGACGGTACAG --- GCCAGACAA --- TTATTG --- TCTGGTATAGTGCAACAGCAGAGA ---  
AATTTG --- CTGAGG --- GCTATTGAGGCGCAACAGCATTTGTTGCAACTCACAGTCTGGGGCATC  
>JF932498  
TTCTACTGTAATACATCACGCTTGTTTAACAGTATTTGGAATGGTACTAGTACTTGAATGATACTACA ----  
-----  
-----  
GAAAAATGACACTATCATACTCCCTTGCAGAATAAAACAATTTGTAAACATGTGGCAGAAAGTAGGGAAGGCAA  
TGTATGCCCCCTCCCATTCAGCGACCGATTAGCTGTTTCATCAAAA ---  
ATTACAGGGTTGCTATTAACAAGAGATGGTGGTAATGAGAGCCAG -----  
-----  
-----  
ATTTCCGAGACCTTCAGACCTGAAGGAGGGGATATGAGAGATAATTGGAGAAGTGAATTATATAAATATAAAG  
TAGTAAAAATTGAACCATTA --- GGAATAGCACCCACCAGGGCAAAGAAGAGTGGTG -----  
----- CAGAGAGAAAAAAGAGCA --- GTGGGAACGATAGGAGCT -----  
ATGTTCCCTTGGGTTCTTAGGAGCA --- GCGGGAAGCACTATG --- GGCGCAGCGTCA ---  
ATAACGCTGACGGTACAG --- GCCAGACAA --- TTGCTG --- TCTGGTATAGTGCAACAGCAGAGA ---  
AATTTG --- CTGAGG --- GCTATTGAGGCGCAACAGCATCTGTTGCAACTCACAGTCTGGGGCATT  
>JX960597  
TTCTACTGTAACCAACACCACTGTTTAACAGTACTTGGGAGAATGGGACACAGGAAGAATGGACACAGCTTA  
ATGAG -----  
----- AATAAT -----  
ACTGAAGAGTCAAATATCACCTCCAATGCAGAATAAAACAATTTATAAACATGTGGCAGGAAGTAGGAAAAG  
CAATGTATGCCCCCTCCCATCAGTGGACAAATCAGGTGTTTCATCAAAT ---  
ATTACAGGACTGCTATTAACAAGAGATGGGGGAGGG -----  
-----  
-----  
GAGAACGAGACCTTCAGGCCTGAAGGAGGAGATATGAGGGACAATTGGAGAAGTGAATTATATAAATATAAAG  
TAGTGAAAATTGAACCATTA --- GGAGTAGCACCCACTAAGGCAAAGAGAAGAGTGGTG -----  
----- CAGAGAGAAAAAAGAGCA --- GCG --- ATAGGAGCT -----  
ATGTTCCCTTGGGTTCTTGGGAGCA --- GCAGGAAGCACTATG --- GGCGCAGCGTCA ---  
GTAACGCTGACGGTACAG --- GCCAGACAA --- TTATTG --- TCTGGTATAGTGCAACAGCAGAAT ---  
AATTTG --- CTGAGA --- GCTATTGAGGCGCAACAGCATCTGTTGCAACTCACAGTCTGGGGCATC  
>JX960598  
TTCTACTGTAATACAACACAACTGTTTAATAGTACTTGGGAATGACACTCGTATTGAGAATAGTACTGGGAACG  
CA -----  
-----

AATGGAAGCCATATCACACTCCCATGCAGAATAAAACAAATTATAAACATGTGGCAGGAAGTAGGAAAAGCAA  
TGTATGCCCCCTCCCATCAAAGGACTACTTAGATGTTTCATCAAAT ---  
ATTACAGGGCTGATATTAGTAAGAGATGGTGGTGTCTCAATACT -----  
-----  
-----  
ACCACCGAGACCTTCAGACCTGGAGGAGGAGATATGAGGGACAATTGGAGAAGTGAATTATATAAATATAAAG  
TAGTAAAAAATTGAACCATTA --- GGACTAGCACCCACCAAGGCAAAAAGAAGAGTGGTG -----  
----- CAAAGAGAAAAAAGAGCA --- GTGGGA --- ATAGGAGCT -----  
CTGTTTCCTTGGGTTCTTGGGAGCA --- GCAGGAAGCACTATG --- GGCGCAGCGTCG ---  
ATGACGTTGACGGTACAG --- GCCAGACAA --- TTATTG --- TCTGGTATAGTGCAACAGCAAAAC ---  
AACTTG --- CTGAAG --- GCTATTGAGGCGCAACAGCATATGTTGCAACTCACAGTATGGGGCATC  
>KC899011  
TTTTACTGTAATACATCAAACTGTTTAATAGTACTTGGAAATGATACTAAA -----  
-----  
-----  
GGAAATGGCACTATCACGCTCGATTGCAGAATAAAACAAATTGTAAATATGTGGCAGGGAGTAGGAAAAGCAA  
TATATGCCCCCTCCCATGAAAGGACAAATTAGATGTTTCATCAAAG ---  
ATTACAGGGTTACTATTAACAAGAGATGGTGGCAATAATGGGAACAACGAG -----  
-----  
-----  
ACCACCGAGACCTTCAGACCTGGAGGAGGAAATATGAAAAGACAATTGGAGAAGTGAATTATATAAATATAAAG  
TAGTAAAACTTGAACCATTA --- GGAGTGGCACCCACCAAGGCAAGAGAAGGGTGGTG -----  
----- CAGAGAGAAAAAAGAGCA --- GTGGGAACGATAGGAGCT -----  
ATGTTTCCTTGGGTTCTTGGGAGCA --- GCAGGAAGCACTATG --- GGCGCAGCGTCA ---  
ATAACGCTGACGGTACAG --- GCCAGACAA --- TTGTTG --- TCTGGTATAGTGCAACAGCAGAGA ---  
AATTTG --- CTGATG --- GCAATTGAGGCGCAACAGCATCTGTTGCAACTCACCGTCTGGGGCATC  
>HQ215556  
TTCTACTGTAATACAACAAAGCTGTTTAATAATACTTTTAATAGTGCCTGGCAAGAGTCAAAAGATAATGGC-  
-----  
-----  
ACCGAAGGAGTCATCAAACCTTCCATGCAAAATAAAACAAATAATAAATAGATGGCAGGAAGTAGGAAAAGCAA  
TGTATGCTCCTCCCATCGAGGGACAAATTAGATGTTTCATCAAAT ---  
ATTACAGGATTACTATTAACACGAGATGGTGGTAACAAGAGTGAG -----  
-----  
-----  
ACTGAGCCTGAAACCTTCAGACCTGGGGGAGGAGATATGAGGGACAATTGGAGAAGTGAATTATATAAATATA  
AAGTAATAAAAATTGAGCCATTA --- GGACTGGCACCCACCAGGGCAAAGAGAAGAGTGGTG -----  
----- CAGAGACAAAAAAGAGCA --- GTGGGAGTACTAGGAGCT -----  
--- ATGTTTCCTTGGGTTCTTGGGAGCA --- GCAGGAAGCACTATG --- GGCGCAGCGTCA ---  
GTCACGCTGACGGTACAG --- GCCAGACTA --- TTGCTG --- TCTGGTATAGTGCAACAGCAGAAC ---  
AATTTG --- CTGAGA --- GCTGTTGAGGCGCAACAACACCTGTTGCAACTCACAGTCTGGGGCATC  
>JF346916  
TTCTACTGTAATACATCACAACCTGTTTAATAGTACTTGGTATGCTAATGGTACTTGGGAGGGTAATTCA ---  
-----  
-----  
AGAAATGACAATATCACGCTCCCTTGCAGAATAAGACAAATTGTAAACATGTGGCAGGAAGTAGGGAAAGCAA  
TGTATGCCCCCTCCCATGCAAGGACAAATTAGTTGTTTATCAAAT ---  
ATTACAGGGTTGCTATTAACAAGAGATGGTGGTAATGAGACCAAT -----  
-----  
-----  
ACCACCGAGACCTTCAGACCTGGAGGAGGAGATATGAGAGACAATTGGAGAAGTGAATTATATAAATATAAAG  
TAGTAAAAAATTGAACCATTA --- GGAGTAGCACCCACCAAGGCAAGAGAAGAGTGGTG -----  
----- CAGAGAGAAAAAAGAGCA --- GTGGGAATGATAGGAGCT -----  
ATGTTTCCTTGGGTTCTTGGGAGCA --- GCAGGAAGCACTATG --- GGCGCAGCGTCA ---  
ATAACGCTGACGGTACAA --- GCCAGACAA --- TTGTTG --- TCTGGCATAGTGCAACAGCAGAGA ---  
AATTTG --- CTGAGG --- GCTATTGAGGCGCAACAGCATCTGTTGCAACTCACAGTCTGGGGCATC  
>JF932494  
TTCTACTGTAATACAACAAACCTGTTTGATAGCACTTGGCATAAAAGTAATAATTGGACA -----  
-----  
-----

GAAAAATGGCACTATCGAGCTCCCCTGCAGAATAAAACAAATTGTAAACATGTGGCAGGAAGTAGGAAAAGCAA  
TGTATGCCCCCTCCCATCAGTGGACGAATTAGCTGTTTATCAAAT---  
ATTACAGGGTTGCTCTTAACAAGAGATGGTGGTGGTAATGAGACCAAT-----  
-----  
-----  
ACGACCACCGAGATCTTTAGACCTGGAGGAGGAGATATGAGGGACAATTGGAGAAGTGAATTATATAAATATA  
AAGTAGTAAAAATTGAACCATTA---GGAGTAGCACCCACCCAGGCAAAGAGAAGAGTGGTG-----  
-----CAGAGAGAAAAAAGAGCA---GTGGGAACGATAGGAGCT-----  
---ATGTTCCCTTGGGTTCTTGGGAGCA---GCAGGAAGCACTATG---GGCGCAGCGTCA---  
ATAACGCTGACGGTACAG---GCCAGACAA---TTATTG---TCTGGTATAGTGCAACAGCAGAGA---  
AATTTG---CTGAGG---GCTATTGAGGCGCAACAGCATCTGTTGCAACTCACAGTCTGGGGCATC  
>JX140658  
TTCTACTGTAATACATCAAACTGTTTAATAGCACTTGGCCAAGTGATGGTACTGATGGTAATGTTACTGGAG  
GG-----  
-----  
TCAAAATGACACTATCACACTCCAATGCAGAATAAGACAAATTATAAACAGATGGCAGGAAGTAGGAAAAGCAA  
TGTATGCTCCTCCCATCAGAGGAGTAATCAACTGTACATCAAAT---  
ATTACAGGACTACTGTTAGTAAGAGATGGTGGGATTAACAACAGC-----  
-----  
-----  
ACTAATGAGACCTTCAGACCTGGAGGAGGAGATATGAGAGACAATTGGAGAAGTGAATTATACAAATACAAAG  
TAGTAAGACTTGAGCCATTA---GGAGTAGCACCCACCGAGGCAAAGAGAATAGTGGTG-----  
-----CAGAGAGAAAAAAGAGCA---GTAGGA---CTAGGAGCT-----  
ATGTTCCCTTGGGTTCTTGGGAGCA---GCAGGAAGCACGATG---GGCGCAGCGTCA---  
ATAACGCTGATGGTACAA---GCCAGACAA---TTATTG---ACTGGTATAGTGCAACAGCAAAGC---  
AATTTG---CTGAGG---GCTATTGAGGCGCAACAGCATATGTTGCAACTCACAGTCTGGGGCATC  
>KX692916  
TTCTACTGTAAGACATCACAACCTGTTTAATAGTATTTGGTATAGTAATAGTACTTGGAATGATACTACAGGAA  
AT-----  
-----  
AGTACTGGGAATATCACGCTCCCTTGCAGAATAAAACAAATTATAAACATGTGGCAGGAAGTAGGGAAAGCAA  
TGTATGCCCCCTCCCATTAGAGGACAAATTAGCTGTTTATCAAAT---  
ATTACAGGGTTGCTATTAACAAGAGATGGTGGTAAGAATGAGAGC-----  
-----  
-----  
AATACCACCGAGACCTTTAGACCTGCAGGAGGAGATTTGAGAGACAATTGGAGAAGTGAATTATATAAATATA  
AAGTAGTAAAAATTGAACCATTA---GGAGTAGCACCCACCAAGGCAAGGAGAAGAGTGGTG-----  
-----CAAAGAGAAAAAAGAGCA---GTGGGAGCGCTAGGAGCT-----  
---ATGTTCCCTTGGGTTCTTGGGAGCA---GCAGGAAGCACTATG---GGCGCAGCGTCA---  
ATAACGCTGACGGTACAG---GCCAGACAA---TTGTTG---TCTGGTATAGTGCAACAGCAGAGA---  
AATTTG---CTGAGG---GCTATTGAGGCGCAACAGCATCTGTTGCAACTCACAGTCTGGGGCATC  
>KX692929  
TTCTACTGTAATACATCACAACCTGTTTAGTAGTACTTGGAATAATACTGGTACTCGGACTGGTACTACT---  
-----  
-----  
GGAAATGACACTATCTCGCTCCCTTGCAGAATAAGACAAATTGTAAACATGTGGCAGGAAGTAGGGAAAGCAA  
TGTATGCCCCCTCCCATTCAGGACAAATTAATTGTTTCATCAAAT---  
ATTACAGGGTTGCTATTAACAAGAGATGGTGGGGAGGGGAACGCGACCAGT-----  
-----  
-----  
ACTAACGACACAGAGATCTTCAGACCTACAGGAGGAAATATGAGAGACAATTGGAGAAGTGAATTATATAAAT  
ATAAAGTAGTAAAAATTGAACCATTA---GGAGTAGCACCCACCAGGGCAAAGAGAAGAGTGGTG-----  
-----CAGAGAGAAAAAAGAGCA---GTGGGAACGATAGGAGCT---  
-----ATGTTCCCTTGGGTTCTTGGGAGCA---GCAGGAAGCACTATG---GGCGCAGCGTCA---  
ATAACGCTGACGGTACAG---GCCAGACAA---TTGTTG---TCTGGTATAGTGCAACAGCAGAGA---  
AATTTG---CTGAGG---GCTATTGAGGCGCAACAGCATCTGTTGCAACTCACAGTCTGGGGCATC  
>KX692941  
TTCTACTGTAATACATCACAACCTGTTTAATAGTAGGTGGGATGATGTGGATGAGAATGAGACTAGTACTAGTA  
ATGGCACT-----  
-----

ACAGGGAATGATACTATCACGCTCCCTTGCAGAATAAAACAAATTATAAACATGTGGCAGGAAGTAGGAAAAG  
CAATGTATGCCCCCTCCCATTTGCAGGACTAATTAGATGCTCATCAAAT---  
ATTACAGGGTTGCTATTAACAAGGGATGGTGGTAATATTAATGCTACT-----  
-----  
GGGAACAATACCAACAAGAATAAT-----  
AACACCGAGATCTTCAGACCTGCAGGGGGAATATGAAAGACAATTGGAGAAGTGAATTATATAGATATAAAG  
TAGTAAAAGTTGAACCATTA---GGAGTAGCACCCACCAGGGCACAGAGAAGAGTGGTG-----  
-----CAAAGAGAAAAAAGAGCA---GTGGGAATGATAGGAGCT-----  
ATGTTCCCTTGGGTTCTTGGGAACA---GCAGGAAGCACTATG---GGCGCAGCGTCA---  
CTAACGCTGACGGTACAG---GCCAGACAA---TTGTTG---TCTGGTATAGTGCAACAGCAGAGA---  
AATCTG---CTGAGG---GCTATTGAGGCGCAACAACATCTGTTGCAACTCACAGTCTGGGGCATC  
>KX692973  
TTCTACTGTAATACATCAAACTATTTGATAGTACTTGGAAATGCTACTAGTGATTGGAATGATACTGAG----  
-----  
-----  
ACTACAAAAAATATCACGCTCCCTTGCAGAATAAAACAAATTGTAAACATGTGGCAGGAAGTAGGGAAAGCAA  
TGTATGCCCCCTCCCATTTGAAGGACAAATTGGATGTTTCATCAAAT---  
ATTACAGGGTTGCTATTAGCAAGAGATGGTGGTAATAGTGAGAAC-----  
-----  
-----  
ACCACCGAGACCTTCAGACCTGCAGGAGGAAACATGAGAGACAATTGGAGAAGTGAATTATATAGATATAAAA  
TAGTAAAAAATTGAACCATTA---GGAGTAGCACCCACCAAGGCAAAGAGAAGAGTGGTG-----  
-----CAGAGAGAAAAAAGAGCA---GTGGGAACAATAGGAGCT-----  
ATGTTCCCTTGGGTTCTTGGGAGCA---GCAGGAAGCACTATG---GGCGCAGCGTCA---  
ATAACGCTGACGGTACAG---GCCAGACAA---TTGTTG---TCTGGTATAGTGCAACAGCAAAGA---  
AATTTG---CTGATG---GCTATTGAGGCGCAACAGCATCTGTTGCAACTCACAGTCTGGGGCATC  
>KX692981  
TTCTACTGTAATACATCACAACCTGTTTAATAGTACTTGGTATAAAAAACAGTACTTGGAAATGGTGCTACA----  
-----  
-----  
GGAAATGGCACTATCACGCTCCCTTGCAGAATAAAACAAATTGTAAACATGTGGCAGGAAGTAGGAAAAGCAA  
TGTATGCCCCCTCCCATTTAGCGGACAAATTAGATGTTTCATCAAAT---  
ATTACAGGGTTGCTATTAACAAGAGATGGTGGTAATAATGGGAACAAT-----  
-----  
-----  
ACCACTGAGACTGAGACCTTCAGACCTGGAGGAGGAGATATGAGAGACAATTGGAGAAGTGAATTATATAAAT  
ATAAAGTAGTAAAAAATTGAACCATTA---GGAGTAGCACCCACCAAGGCAAAGAGAAGAGTGGTG-----  
-----CAGAGAGAAAAAAGAGCA---GTGGGATTGGTAGGAGCT---  
-----ATGTTCCCTTGGGTTCTTGGGAGCA---GCAGGAAGCACTATG---GGCGCAGCGTCA---  
ATAACGCTGACGGTACAG---GCCAGACAA---TTGTTG---TCTGGTATAGTGCAACAGCAAAGA---  
AATTTG---CTGAGG---GCTATTGAGGCGCAACAGCATCTGTTGCAACTCACAGTCTGGGGCATC  
>KX693001  
TTCTACTGTAATACATCACAACCTGTTTAATAGTACTTGGAAATAATAATGGCACTTGGAAATGGTGCTACA----  
-----  
-----  
GGAAACGACACTGTCACGCTCCCTTGCAGAATAAAACAAATTGTAAACATGTGGCAGGAAGTAGGGAAAGCAA  
TGTATGCCCCCTCCCATTTAGAGGACTAATTAAGTGTTCATCAAAT---  
ATTACAGGGTTGCTATTAACAAGAGATGGTGGTACAAATGAGAGC-----  
-----  
-----  
AATACCACCGAGACCTTCAGACCTGGAGGAGGAGATATGAGAGACAATTGGAGAAGTGAATTATATAAATATA  
AAGTAGTAAAAAATTGAACCATTA---GGAGTAGCACCCACCAAGGCAAAGAGAAGAGTGGTG-----  
-----CAGAGAGAAAAAAGAGCA---GTGGGAACGATAGGAGCT-----  
---ATGTTCCCTTGGGTTCTTGGGAGCA---GCAGGAAGCACTATG---GGCGCAGCGTCA---  
ATAACGCTGACGGTACAG---GCCAGACAA---TTGTTG---TCTGGTATAGTGCAACAGCAGAGA---  
AATTTG---CTGAGA---GCTATTGAGGCGCAACAGCATATGTTGCAACTCACAGTCTGGGGCATC  
>KX693029  
TTCTACTGTAATACATCACAACCTGTTTAACAGTACTTGGCCTTGGAAATGATACTAGTACTGGGAATGATACTA  
CA-----  
-----

GGAAATAGCACTATCACGCTCCCTTGCAAAATAAGACAAATTGTAAACAGGTGGCAGGAAGTAGGGAAAGCAA  
TGTATGCCCCCTCCCATTGCAGGACCAATTAGCTGCTCATCAAAT ---  
ATTACAGGGTTGCTATTAACAAGAGATGGTGGTAATGGGAGCGCG-----  
-----  
GACAACGAGACCTTCAGACCTGGAGGAGGAGATATGAGAGACAATTGGAGAAGTGAATTATATAAATATAAAG  
TAGTACAAATTGAACCATTA---GGAGTAGCACCCACCAAGGCAAAGAGAAGAGTGGTG-----  
-----CAGAGAGAAAAAAGAGCA--GTGGGAACGATAGGAGCT-----  
ATGTTCCCTTGGGTTCTTGGGAGCA---GCAGGAAGCACTATG---GGCGCAGCGTCA---  
ATAACGCTGACGGTACAG---GCCAGACAA---TTGTTG---TCTGGTATAGTGCAACAGCAGAGA---  
AATTTG---CTGAGG---GCTATTGAGGCGCAACAGCATCTGTTGCAACTCACAGTCTGGGGCATC  
>KX693036  
TTCTACTGTAATACATCACAACCTATTTAATAGTACTTGGAAATAATAATAGTACTTGGAAATGGTACCAGTTTTT-  
-----  
-----  
AAGAATGATACTATCACGCTCCCTTGTTAGAATAAAACAAATTGTAAACATGTGGCAGGGAATAGGGAAAGCAA  
TGTATGCCCCCTCCCATTGCAGGACAAATTAAGTCTGCTCATCAAAA---  
ATTACAGGGTTGCTACTAACAAGAGATGGTGGTGGTAAGAATGAGAGC-----  
-----  
-----  
AATACCACCGAGACCTTCAGACCTGGAGGAGGAGATATGAAAGACAATTGGAGAAGTGAATTATATAAATATA  
AAGTAGTAAAAATTGAACCATTA---GGATTAGCACCCACCAAGGCAAAGAGAAGAGTGGTG-----  
-----CAGAGAGAAAAAAGAGCA--GTGGGAACGATAGGAGCT-----  
---ATGTTCCCTTGGGTTCTTGGGAGCA--GCAGGAAGCACTATG---GGCGCAGCGTCA---  
CTAACGCTGACGGTACAG---GACAGACAA---TTGTTG---TCTGGTATAGTGCAACAGCAAAGA---  
AATTTG---CTGAGG---GCTATTGAGGCGCAACAGCATCTGTTGCAACTCACAGTCTGGGGCATC  
>KX693575  
TTCTACTGTAATACATCAAACTGTTTAATAGTACTTGGAGTAATACTAGTGCTTGGAAATGATACTACA----  
-----  
-----  
GGAAATGACACTATCACACTCCCTTGCAAGAATAAAACAAATTGTAAACATGTGGCAGGAAGTAGGGAAAGCAA  
TGTATGCCCCCTCCCATTAGAGGAAAAATTAGCTGTTTCATCAAAAC---  
ATTACAGGGTTGCTATTAACAAGAGATGGTGGTAATAATGGGAGC-----  
-----  
-----  
AACACCAACGAGACCTTCAGACCTGCAGGAGGAGATATGAGAGACAATTGGAGAAGTGAATTATATAAATATA  
AAATAGTAAAAATTGAACCATTA---GGAGTAGCACCCACCAAGGCAAAGAGAAGAGTGGTG-----  
-----CAGAGAGAAAAAAGAGCA--GTGGGAACACTAGGAGCT-----  
---ATGTTCCCTTGGGTTCTTGGGAGCA--GCAGGAAGCACTATG---GGCGCAGCGTCA---  
ATAACGCTGACGGTACAG---GCCAGACAA---ATGTTG---TCTGGTATAGTGCAACAGCAAAGA---  
AATTTG---CTGAGG---GCTATTGAGGCGCAACAGCATATGTTGCAACTCACAGTCTGGGGCATC  
>KX693068  
TTCTACTGTAATACATCAAACTGTTTAATAGTACTTGGCCTAGTACTGGGAATGATACTCCTAGTACTGGGA  
ATGATACT-----  
-----  
ACAGGAAATGGCACTATCACACTCCCTTGCAAGAATAAAACAAATTGTAAACATGTGGCAGGAAGTAGGGAAAG  
CAATGTATGCCCCCTCCCATTAAGGGCAAATTAGCTGTGTATCAAAT---  
ATTACAGGGTTGCTATTAATGAGAGATGGTGGTAAT-----  
-----  
-----  
AATGAGAACGAGACCTTCAGACCTGGAGGAGGAGATATGAGAGACAATTGGAGAAGTGAATTATATAAATATA  
AAGTAGTAAAAATTGAACCATTA---GGAGTAGCACCCACCAAGGCAAAGAGAAGAGTGGTG-----  
-----CAGAGAGAAAAAAGAGCA---GTGGGA---ATAGGAGCT-----  
---ATGTTCCCTTGGGTTCTTGGGAGCA--GCAGGAAGCACTATG---GGCGCAGCGTCA---  
ATAACGCTGACGGTACAG---GCCAGGCAA---TTGTTG---TCTGGTATAGTGCAACAGCAGAGA---  
AATTTG---CTGATG---GCTATTGAGGCGCAACAGCATCTGTTGCAACTCACAGTCTGGGGCATC  
>KX693091  
TTCTACTGTAATACATCACAATTGTTTAATAGTACCTGGAACAGTAATGGTACTCGGAATGGTACCACA-----  
-----  
-----

GGAAATGACATTATCACGCTCCCTTGCAGAATAAAACAAATTGTAAACATGTGGCAGGAAGTAGGGAAAGCAA  
TGTATGCCCCCTCCCATTTAGTGGACAAATTAGATGTTTCATCAAAT---  
ATTACAGGGTTGCTATTAACAAGAGATGGTGGTAAAAATGAGACC-----  
-----  
-----  
AACACCACCGAGACCTTCAGACCCGCAGGAGGAGATATGAGAGACAATTGGAGAAGTGAATTATATAAATATA  
AAGTAGTAAAAATTGAACCATTA---GGAGTAGCACCCACCAAGGCAAAGAGAAGAGTGGTG-----  
-----CAGAGAGAAAAAAGAGCA--GTGGGAACAATAGGAGCT-----  
---ATGTTCCCTTGGGTTCTTGGGAGCA--GCAGGAAGCACTATG--GGCGCAGCGTCA---  
ATAACGCTGACGGTACAG---GCCAGACAA---TTGTTG---TCTGGTATAGTGCAACAGCAGAGA---  
AATCTG---CTGAGG---GCTATTGAGGCGCAACAGCATATATTGCAACTCACAGTCTGGGGCATT  
>KX693093  
TTCTACTGTAATACATCAAGACTGTTTAATGAGACTTGGGATAATATTACTACTGGGAATATTGGGAGTAACA  
TTACA-----  
-----  
GAAGATGATATTATCACGCTCCCTTGCAGAATAAAACAAATTGTAAACAGGTGGCAGGAAGTAGGGAAAGCAA  
TGTATGCCCCCTCCCATTTAGCGGACTAGTTAGATGTTTCATCAAAT---  
ATTACAGGGTTGCTATTAACAAGAGATGGTGGTACTAGTAAGGCCAATGACACC-----  
-----  
AATACTGGGACCAATAAT---  
AACACAGAAATTTTCAGACCTGGAGGAGGAGATATGAGAGACAATTGGAGAAGTGAATTATATAAATATAAAG  
TAATAAACTTGAACCATTA---GGAGTAGCACCCACCAAGGCAAAGAGAAGAGTGGTG-----  
-----CAGAGAGAAAAAAGAGCA--GTGGGA--ATCGGAGCT-----  
ATGTTCCCTTGGGTTCTTGGGAGCA--GCAGGAAGCACCATG--GGCGCAGCGTCA---  
ATAACGCTGACGGTACAG---GCCAGACAA---TTGTTG---TCTGGTATAGTGCAACAGCAGAGT---  
AATTTG---CTGAGG---GCTATTGAGGCGCAACAACATCTGTTGCAACTCACAGTCTGGGGCATA  
>KX693114  
TTCTACTGTAACACATCAAACTGTTTAATAGTACTTGGAGTAATACTAGTGCTTGAATGATACTGCA----  
-----  
-----  
GAAATGACACTGTACGCTCCCTTGCAGAATAAAACAAATTATAAACATGTGGCAGGGAGTAGGGAAAGCAA  
TGTATGCCCCCTCCCATTTAGTGGACAAATTAGATGTTTCATCAAAT---  
ATTACAGGATTGCTATTAACAAGAGATGGTGGTAATGGTGGTAATAATGGGAGC-----  
-----  
-----  
AATACCACCGAAACCTTCAGACCTGCAGGAGGAAATATGAAAGACAATTGGAGAAGTGAATTATATAAATATA  
AAGTAGTACAAATTGAACCATTA---GGAGTAGCACCCACCAAGGCAAAGAGAAGAGTGGTG-----  
-----CAAAAAGAAAAAAGAGCA--GTGGGAACAATAGGAGCT-----  
---ATGTTCCCTTGGGTTCTTGGGAGCA--GCAGGAAGCACTATG--GGCGCAGCGTCA---  
TTAACGCTGACGGTACAG---GCCAGACAA---CTGTTG---TCTGGTATAGTGCAACAGCAGAGA---  
AATCTG---CTGAGG---GCTATTGAGGCGCAACAGCATCTGTTGCAACTCACAGTCTGGGGCATC  
>KX693689  
TTCTACTGTGATACATCACAACCTGTTTAACAGTACTTGGGACAAGAATGGTACTTGGGAAGGTACTGTAGGAA  
AT-----  
-----  
GGAAATGGCACTATCACTCTCCCCTGCAGGATAAAACAAATTGTAAACATGTGGCAGGAAGTAGGGAAAGCAA  
TGTATGCCCCCTCCCATTTGCAGGACAAATTAAATGTTTCATCAAAT---  
ATTACAGGGTTACTATTAACAAGAGACGGTGGTAGTGGTAAAAAT-----  
-----  
-----  
GAGAGCAATACCACC---  
GAGACCGAGACCTTCAGGCCTGCAGGAGGAGATATGAGAGACAATTGGAGAAGTGAATTATATAAATATAAAG  
TAGTAAGAATTGAACCATTA---GGAGTAGCACCCACCAAGGCAAAGAGAAGAGTGGTG-----  
-----CAAAGAGAAAAAAGAGCA--GTGGGAACACTAGGAGCT-----  
ATGTTCCCTTGGGTTCTTGGGAGCA--GCAGGAAGCACTATG--GGCGCAGCGTCA---  
ATAACGCTGACGGTACAG---GCCAGACAG---TTATTG---TCTGGTATAGTGCAACAGCAGAGA---  
AATTTG---CTGAGG---GCTATTGAGGCGCAACAGCATATGTTGCAACTCACAGTCTGGGGCATC  
>KX693720  
TTCTACTGTAATACATCACAACCTGTTTAATAGTACTTGGAAATGTTAATGGTAATTGGGATGGTACTACAGGAA  
ATGATACT-----  
-----

ACAGGAAATGGCACTATCATGCTCCCTTGCAGAATAAAACAAATTATAAACATGTGGCAGGAAGTAGGGAAAG  
 CAATGTATGCCCCCTCCCATTAAGGAAAGATTAAATGTTTCATCAAAT---  
 ATTACAGGGTTGCTATTAACAAGAGATGGTGGTGAATGTGACC-----  
 -----  
 -----  
 AACACCACCGAGACCTTCAGACCTGGAGGGGGAGATATGAGAGACAATTGGAGAAGTGAATTATATAAATACA  
 AAGTAGTAAAAATTGAACCATTA---GGAGTAGCACCCACTAAGGCAAAGAGAAGAGTGGTG-----  
 -----CAGAGAGAAAAAAGAGCA---GTGGGAACGATAGGAGCT-----  
 ---ATGTTCCCTTGGGTTCTTGGGAGCA---GCAGGAAGCACTATG---GGCGCAGCGTCA---  
 ATAACGCTGACGGTACAG---GCCAGACAA---TTGTTG---TCTGGTATAGTGCAACAGCAGAGA---  
 AATTTG---CTGATG---GCTATTGAGGCGCAACAGCATCTGTTGCAACTCACAGTCTGGGGCATT  
 >KX693770  
 TTCTACTGTAATACATCAAACTGTTTAGTAGTACTTGGTATAATAATGGTACTTGGACTAGTACTTGGAAATG  
 AGACTATA-----  
 -----  
 GAAAAATGACACTATCACACTCCCTTGCAGAATAAAACAAATTGTAAACATGTGGCAGGAAGTAGGGAGAGCAA  
 TGTATGCCCCCTCCCATTCAGAGAAAAATTAGATGTTTCATCAAAC---  
 ATTACAGGGTTGCTATTAACAAGAGATGGTGGTAATAATAATGAGACCAACGCC-----  
 -----  
 -----  
 ACCACCACCGAGGAGATCTTCAGACCTGCAGGAGGAGATATGAGAGACAATTGGAGAAGTGAATTATATAAAT  
 AAAAAATAGTAAAAATTGAACCATTA---GGAATAGCACCCACCAAGGCAAAGAGAAGAGTGGTG-----  
 -----CAGAGAGAAAAAAGAGCA---GTGGGAACGCTAGGAGCT---  
 -----ATGTTCCCTTGGGTTCTTGGGAGCA---GCAGGAAGCACTATG---GGCGCAGCGTCA---  
 ATAACGCTGACGGTACAG---GCCAGACAA---TTGTTG---TCTGGTATAGTGCAACAGCAAAGA---  
 AATTTG---CTGAGG---GCTATTGAGGCGCAACAGCATATGTTGCAACTCACAGTCTGGGGCATC  
 >KX693223  
 TTCTACTGTAATTCATCACAATTGTTTAATAGTACTTGGTATGTTAATGGTACTCGGATTGGTACTACA---  
 -----  
 -----  
 GGAAATGACACTATCACGCTCCCTTGCAGAATAAGACAAATTGTAAACATGTGGCAGGAAGTAGGGAAGGCAA  
 TGTATGCCCCCTCCCATTCAGAGACCAATTAGATGTTTATCAAAT---  
 ATTACAGGGTTGCTATTAACAAGAGATGGTGGTAATAATACAGAT-----  
 -----  
 -----  
 AATACCACCGAGACCTTCAGACCTGGAGGAGGAGATATGAGAGACAATTGGAGAAGTGAATTATATAAATATA  
 AAGTAGTAAAAATTGAGCCATTA---GGAGTAGCACCCACCAAGGCAAAGAGAAGAGTGGTG-----  
 -----CAGAGAGAAAAAAGAGCA---GTGGGAACAATAGGAGCT-----  
 ---ATGTTCCCTTGGGTTCTTGGGAGCA---GCAGGAAGCACCATG---GGCGCAGCGTCA---  
 ATAACGCTGACGGTACAG---GCCAGACAA---TTGTTG---TCTGGTATAGTGCAACAGCAGAGA---  
 AATTTG---CTGAGG---GCTATTGAGGCGCAACAACATCTGTTGCAACTCACAGTCTGGGGCATC  
 >KX693238  
 TTCTATTGTAATACATCACAGCTGTTTAATAGTAATTGGAATGATAGTACTTTGAATGATAATAGTACTTGG-  
 -----  
 -----  
 AATGAACTACTATCACGCTCCCTTGCAGAATAAAACAAATTGTAAACATGTGGCAGGAAGTAGGAAAAGCAA  
 TGTATGCCCCCTCCCATTCAGAGACAAATTAAGTGTTCATCAGAT---  
 ATTACAGGGTTGCTATTAACAAGAGATGGTGGTAAGAAGAATGAGAGCAAT-----  
 -----  
 -----  
 AATAACACTGAGACCTTCAGACCTGAAGGAGGAGATATGAGAGACAATTGGAGAAGTGAATTATACAAATATA  
 AAGTAGTAAAAATTGAACCATTA---GGAGTAGCACCCACCAAGGCAAAGAGAAGAGTGGTG-----  
 -----CAGAGAGAAAAAAGAGCA---GTGGGAACGATAGGAGCT-----  
 ---ATGTTCCCTTGGGTTCTTGGGAGCA---GCAGGAAGCACTATG---GGCGCAGCGTCA---  
 ATAACGCTGACGGTACAG---GCCAGACAA---TTGTTG---TCTGGTATAGTGCAACAGCAGAGA---  
 AATTTG---CTGAGG---GCTATTGAGGCGCAACAGCATCTGTTGCAACTCACAGTCTGGGGCATC  
 >KX693247  
 TTCTACTGTAATACATCACAACCTGTTTAATAGTACTTGGGATGATACTAATATTTGGAATGATACTAGTACTG  
 GGAATGGTACT-----  
 -----

ACAGAAAATAGCACTATCACGCTCCCTTGCAGAATAAAACAAATTGTAAACATGTGGCAGGAAGTAGGGAAAG  
CAATGTATGCCCCCTCCCATTTGAAGGACGAATTAGATGTTTCATCAAAT---  
ATTACAGGGTTGCTACTAACAAGAGATGGTGGTAATGGGAGCGATACC-----  
-----  
-----  
ACCAATAACACCGAGACCTTCAGACCTGGAGGAGGAGATATGAGAGACAATTGGAGAAGTGAATTATATAAAT  
ATAAAGTAGTAAAAATTGAACCATTA---GGAGTAGCACCCACCAAGGCAAAGAGAAGAGTGGTG-----  
-----CAGAGAGAAAAAAGAGCA---GTGGGAACGATAGGAGCT---  
-----ATGTTCCCTTGGGTTCTTGGGAGCA---GCAGGAAGCACTATG---GGCGCAGCGTCA---  
ATAACGCTGACGGTACAG---GCCAGACAA---TTATTG---TCTGGTATAGTGCAACAGCAGAGA---  
AATTTG---CTGAGG---GCTATTGAGGCGCAACAGCATCTGTTGCAACTCACAGTCTGGGGCATC  
>KX693268  
TTCTATTGTAATACATCACAACCTGTTTAATAGTACTTGGTATACTAATAATACTTGGAAATGGTACTACA----  
-----  
-----  
GGAAATGATACTATCACGCTCCCTTGCAGAATAAAACAAATTGTAAACATGTGGCAGGAAGTAGGGAAAGCAA  
TGTATGCCCCCTCCTATTGCAGGAAAAATTAAATGTTTCATCAAAT---  
ATTACAGGGTTGCTATTAAACAAGAGATGGTGGTATAAAACAATACC-----  
-----  
-----  
AATACCACTGAGACCTTCAGACCTGGAGGAGGAGATATGAGAGACAATTGGAGAAGTGAATTATATAAATATA  
AAGTAGTAAAAATTGAACCATTA---GGAATAGCACCCACCAAGGCAAAAAGAAGAGTGGTG-----  
-----CAGAGAGAAAAAAGAGCA---GTAGGAGCACTAGGAGCT-----  
---ATGTTCCCTTGGGTTCTTGGGAGCA---GCAGGAAGCACTATG---GGCGCAGCGTCA---  
ATAACGCTGACGGTACAG---GCCAGACAA---TTGTTG---TCTGGTATAGTGCAACAGCAGAGG---  
AATCTG---CTGAGG---GCTATTGAGGCGCAACAGCATCTGTTGCAACTCACAGTCTGGGGCATA  
>KX693886  
TTCTACTGTAATACATCACAACCTGTTTAATAGTACTTGGAAACAATAGTATTTGGAATAATAATATTACTTGA  
GTGAT-----  
-----AAA---  
ACAGGAAATGACACTATCTCGCTCCCTTGCAGAATAAAACAAATTATAAACACGTGGCAGAAAGTAGGAAAAG  
CAATATATGCCCCCTCCCATTTGCAGGACAAATTAAATGTTTCATCAAAT---  
ATTACAGGGTTAATATTAAACAAGAGATGGTGGTAATGAAAACAAGACC-----  
-----  
-----  
ACCGAGACCGAGACCTTCAGACCTGGAGGAGGAGAGATGAGAGACAATTGGAGAAGTGAATTATATAAATATA  
AAGTAGTAAAAATTGAACCATTA---GGAGTAGCACCTACCAAGGCAAAGAGAAGAGTGGTG-----  
-----CAAAGAGAGAAAAAGAGCA---GTGGGA---ATAGGAGCT-----  
---ATGTTCCCTTGGGTTCTTGGGAGCA---GCAGGAAGCACTATG---GGCGCAGCATCA---  
ATAACGCTGACGGTACAG---GCCAGACAA---TTGTTG---TCTGGTATAGTGCAACAGCAGAGA---  
AATTTG---CTGAGG---GCTATTGAGGCGCAACAACAACCTGTTGCAACTCACAGTCTGGGGCATC  
>KX693314  
TTCTACTGTAATACAACACGGCTGTTTAATAGTACTTGGAAATGAGACTAGTACTTGGAAATGATACTGCA----  
-----  
-----  
GAAAATGACAATATCACGCTCCCTTGCAGAATAAGACAAATTATAAACAGGTGGCAGGAAGTAGGGAAGGCAA  
TATATGCCCCCTCCCATTTGCAGGACAAATTAGATGTTTCATCAAAT---  
ATTACAGGGTTGCTATTAAACAAGAGATGGTGGTAATAATGAGAAC-----  
-----  
-----  
GAGACCACCGAGATCTTCAGACCTGCAGGAGGAGATATGAAAGACAATTGGAGAAGTGAATTGTATAAATATA  
AAGTAGTAAAAATTGAACCATTA---GGAGTAGCACCCACCAAGGCAAAGAGAAGAGTGGTG-----  
-----CAGAGAGAAAAAAGAGCA---GTGGGAACGATAGGAGCT-----  
---ATGTTCCCTTGGGTTCTTGGGAGCA---GCAGGAAGCACTATG---GGCGCAGCGTCA---  
ATAACGCTGACGGTACAG---GCCAGACAA---TTGTTG---TCTGGTATAGTGCAACAGCAAAGA---  
AATTTG---CTGAGA---GCTATTGAGGCGCAACAGCATCTGTTGCAACTCACAGTCTGGGGCATC  
>KX693326  
TTCTACTGTAATACATCAAACTGTTCAATAGTACTTGGTATGGGAATGGTAATAGTACTTTGAATGATACCA  
CA-----  
-----

GAAAAATAGCACTATCACGCTCCCTTGCAGAATAAAACAAATTGTAAACATGTGGCAGGAGGTAGGGAAAGCAA  
 TGTATGCCCCCTCCCATTAAGGACCAATTAGTTGTTTCATCAAAT ---  
 ATTACAGGGCTGCTATTAACAAGAGATGGTGGTAAAAATAATGATACTGAGAGC-----  
 -----  
 -----  
 AATACCACCGAGATCTTCAGACCTGGAGGAGGAGATATGAGAGACAATTGGAGAAGTGAATTATATAAATATA  
 AAGTAGTAAAAATTGAACCATTA---GGAGTAGCACCCACCAAGGCAAAGAGAAGAGTGGTG-----  
 -----CAGAGAGAAAAAAGAGCA---GTGGGAACGATAGGAGCT-----  
 ---ATGTTCCCTTGGGTTCTTGGGAGCA---GCAGGAAGCACTATG---GGCGCAGCGTCA---  
 ATAACGCTGACGGTACAG---GCCAGACAA---TTGTTG---TCTGGTATAGTGCAACAGCAGAGA---  
 AATTTG---CTGAGG---GCTATTGAGGCGCAACAGCAGATGTTGCAACTCACAGTCTGGGGCATC  
 >KX693339  
 TTCTACTGTAATACATCAAACTGTTTACTAATATTACAGGAAAT-----  
 -----  
 -----  
 AGCACTGACCCTATCATGCTCCCTTGCAGAATAAAACAAATTGTAAACATGTGGCAGGAAGTAGGGAGAGCAC  
 TGTATGCCCCCTCCCATTAAGGACCAATTAATTGTTTCATCAAAG---  
 ATTACAGGGTTGCTATTAACAAGAGATGGTGGTAATAGTGAGAAC-----  
 -----  
 -----  
 AAGACCGAGACCTTCAGACCTGGAGGAGGAAATATGAGAGACAATTGGAGAAGTGAATTATATAAATATAAAG  
 TAGTAAAAATTGAACCATTA---GGAGTAGCACCCACCAAGGCAAAGAGAAGAGTGGTG-----  
 -----CAGAGAGAAAAAAGAGCA---GTGGGAACGATAGGAGCT-----  
 ATGTTCCCTTGGGTTCTTGGGAGCA---GCAGGAAGCACTATG---GGCGCAGCGTCA---  
 ATAACGCTGACGGTACAG---GCCAGACAA---TTGTTG---TCTGGTATAGTGCAACAGCAGAGA---  
 AATTTG---CTGAGG---GCTATTGAGGCGCAACAGCATCTGTTGCAACTCACAGTCTGGGGCATC  
 >KX693374  
 TTCTACTGTAATACATCACAACCTGTTTGATAGTACTTGGAAATGATAGTAGTACTTGGAAATGATACTAGTACTT  
 GGAATGTTACT-----  
 -----  
 -----  
 ACAAAAAATGACACTATCACGCTCCCTTGCAGAATAAAACAAATTGTAAACATGTGGCAGGAAGTAGGGAAAG  
 CAATGTATGCCCCCTCCTATTAGAGGACTAATTAGTTGTTTCATCAAAA---  
 ATTACAGGGTTGTTATTAACAAGAGATGGTGGTAATAAGAATGATAGCAAT-----  
 -----  
 -----  
 ACCACCGAGATCGAGATCTTCAGACCTGGAGGAGGAGATATGAGAGACAATTGGAGAAGTGAATTATATAAAT  
 ATAAAGTAGTAAAAATTGAACCATTA---GGAGTAGCACCCACCAGGGCAAAGAGAAGAGTGGTG-----  
 -----CAAAGAGAAAAAAGAGCA---GTGGGAACGATAGGAGCT---  
 -----ATGTTCCCTTGGATTCTTGGGAGCA---GCAGGAAGCACTATG---GGCGCAGCGTCA---  
 TTAACGCTGACGGTACAG---GCCAGACAA---TTGCTG---TCTGGTATAGTGCAACAGCAGAGA---  
 AATTTG---CTGATG---GCTATTGAGGCGCAACAGCATCTGTTGCAACTCACAGTCTGGGGCATC  
 >KX693390  
 TTCTACTGTGATACATCACAACCTGTTTAATAGTACTTGGGATGAAAATAGTACTAAGAATGATAATAACTT  
 GAAA-----  
 -----GATACT-----  
 ACAGGAAATGACACTATCACACTCCATTGCAGAATAAAACAAGTTATAAACATGTGGCAGGAAGTAGGGAGAG  
 CAATGTATGCCCCCTCCCATTAAGGACAAATTAGATGTTTCATCAAAT---  
 ATTACAGGGTTGCTATTAACAAGAGATGGGGGTACGAATGTGAGC-----  
 -----  
 -----  
 AATACCAACGAGACCTTCAGACCTGGGGGAGGAAATATGAAAGACAATTGGAGAAGTGAATTATATAAATATA  
 AAGTAGTAAAAATTGAACCATTA---GGAGTAGCACCCACCAAGGCAAAGAGAAGAGTGGTG-----  
 -----CAGAGAGAAAAAAGAGCA---GTGGG---CTCGGAGCT-----  
 ---ATGTTCCCTTGGGTTCTTGGGAGCA---GCAGGAAGCACTATG---GGCGCAGCGTCA---  
 ATAACGCTGACGGTACAG---GCCAGACAA---TTGTTG---TCTGGTATAGTGCAACAGCAGAGA---  
 AATTTG---CTGAGG---GCTATTGAGGCGCAACAGCGTATGTTGCAACTCACAGTCTGGGGCATC  
 >KX693437  
 TTCTACTGTAATACATCACAACCTGTTTAACAGTACTTGGAAATGATAATAGTACTTGGAAATGGAACAGGAAAA  
 ATACT-----  
 -----

ACAGATAATGACACTCTCACGCTCCCTTGCAGGATAAAACAAATTGTAAACATGTGGCAGGAAGTAGGGAAAG  
CAATGTATGCCCCCTCCCATTTAGAGGACCAATTAAATGTAGATCAAAT---  
ATTACAGGGCTGCTATTAACAAGAGATGGTGGCAATAATGGGACC-----  
-----  
-----  
AGTAACAACGAGACCTTCAGACCTGGAGGAGGAGATATGAGAGACAATTGGAGAAGTGAATTATATAAAATATA  
AAGTAGTACAAATTGAACCATTA---GGAGTAGCACCCACCAGGGCAAAGAGAAGAGTGGTG-----  
-----CAGAGAGAAAAAAGAGCA---GTGGGAACGATAGGAGCT-----  
---ATGTTCCCTTGGGTTCTTGGGAGCA---GCAGGAAGCACGATG---GGCGCAGCGTCA---  
ATAACGCTGACGGTACAG---GCCAGACAA---TTGCTG---TCTGGTATAGTGCAACAGCAGAGA---  
AATTTG---CTGAGG---GCTATTGAGGCGCAACAACATCTGTTGCAACTCACCGTCTGGGGCATC  
>KX693455  
TTCTACTGCAATACATCACAACCTGTTTAATAGTACTTGGAAATGATACTAGTACTTGGAAATGAGACTACA----  
-----  
-----  
GGAAATAGCACTATCACGCTCCCTTGCAGAATAAGACAATTTGTAAACATGTGGCAGGAAGTAGGAAAAGCAA  
TGTATGCCCCCTCCCATTTAGAGGACAAATTAGATGTTTCATCAAAT---  
ATTACAGGGTTGCTATTAACAAGAGATGGTGGTATTAATGGGAGC-----  
-----  
-----  
GAGACCACCGAGACCTTCAGACCTGGAGGAGGAAATATGAGAGACAATTGGAGAAGTAAATTATATAAAATATA  
AAGTAGTAAAAATTGAACCATTA---GGAGTAGCACCCACCAAGGCAAAGAGAAGAGTGGTG-----  
-----CAGAGAGAAAAAAGAGCA---GTGGGAACGATAGGAGCT-----  
---ATGTTCCCTTGGGTTCTTGGGAGCA---GCAGGAAGCACTATG---GGCGCAGCATCA---  
ATAACGCTGACGGTACAG---GCCAGACAA---TTGTTG---TCTGGTATAGTGCAACAGCAGAGA---  
AATTTG---CTGAGA---GCTATTGAGGCGCAACAGCATCTGTTGCAGCTCACAGTCTGGGGCATC  
>KX693469  
TTCTACTGTGATACATCAAACTGTTTAGTAGTACTTGGACTAATACTAGTACTTGGAAATAAGACTGAGACTT  
GGAATGTTTCT-----  
-----  
GCAGAACATGACACTATCACGCTCCATTGCAGAATAAAACAAATTGTAAACATGTGGCAGGAAGTAGGGAAAG  
CAATGTATGCCCCCTCCCATTTGCAGGACAAATTAAGTGTTCATCAAAT---  
ATTACAGGGTTGCTATTAACAAGAGATGGTGGTAATAATACCAAT-----  
-----  
-----  
AACACCGAGACCTTCAGACCTGGAGGAGGAAATATGAGAGACAATTGGAGAAGTGAATTATATAAAATATAAAG  
TAGTAAAAATTGAACCATTA---GGAGTAGCACCCACCAAGGCAAAGAGAAGAGTGGTG-----  
-----CAGAGAGAAAAAAGAGCA---GTGGGAACGCTAGGAGCT-----  
ATGTTCCCTTGGGTTCTTGGGAGCA---GCAGGAAGCACTATG---GGCGCAGCGTCA---  
CTAACGCTGACGGTACAG---GCCAGACAA---TTGCTG---TCTGGTATAGTGCAACAGCAGAGA---  
AATTTG---CTGAGG---GCTATTGAGGCGCAACAGCGTATGTTGCAACTCACAGTCTGGGGCATC  
>KX693475  
TTCTATTGTAATACATCAAAGCTGTTTGATAGTACTTGGAAATAATACTAGTACTGAGAATAAT-----  
-----  
-----  
AATGATACTAATATCACGCTCCCTTGCAGAATAAGACAATTTATAAACAGGTGGCAGGAAGTAGGGAAAGCAA  
TGTATGCCCCCTCCCATTTGCAGGACAAATTAGATGTTTCATCAAAT---  
ATCACAGGGTTAATATTAACAAGAGATGGTGGTAATAATGGGACC-----  
-----  
-----  
AACAACTGAGATCTTCAGACCTGCAGGAGGAGATATGAGGGACAATTGGAGAAGTGAATTATATAAAATATA  
AAGTAGTAAAAATTGAACCATTA---GGAGTAGCACCCACCAAGGCAAAGAGAAGAGTGGTG-----  
-----CAGAGAGAAAAAAGAGCA---GTGGGA---TTAGGAGCT-----  
---ATGTTCCCTTGGGTTCTTGGGAGCA---GCAGGAAGCACTATG---GGCGCAGCGTCA---  
ATAACGCTGACGGTACAG---GCCAGACAA---TTGTTG---TCTGGTATGGTGCAACAGCAGAGA---  
AATTTG---CTGAGG---GCTATTGAGGCGCAACAACATCTGTTGCAACTCACAGTCTGGGGCATC  
>KX693489  
TTCTACTGTAATACATCACAATTGTTTAATAGTACTTGGACTTGGAAATGATACTAGTGCTTGGAAATAATAGTA  
CA-----  
-----

GAAAAATGACACTATCACGCTCCCTTGCAGAATAAAACAAATTGTAAACATGTGGCAGGAAGTAGGGAAAGCAA  
TGTATGCCCCCTCCTATTGCAGGACAAATTAGATGTTTATCAAAT---  
ATTACAGGGTTGCTATTAACAAGAGATGGTGGTAAGAATGAGAGC-----  
-----  
-----  
AACACCACCGAGACCTTCAGACCTGCAGGAGGAGATATGAGAGACAATTGGAGGAGTGAATTATATAAAATATA  
AAGTAGTAGAAATTGAACCATTA---GGAGTAGCACCCACCAAGGCAAAGAGAAGAGTGGTG-----  
-----CAGAGAGAAAAAAGAGCA---GTGGGAACGATAGGAGCT-----  
---ATGTTCCCTTGGGTTCTTGGGAGCA---GCAGGAAGCACTATG---GGCGCAGCGTCA---  
ATAACGCTGACGGCACAG---GCCAGACAA---TTGTTG---TCTGGTATAGTGCAACAGCAGAGA---  
AATTTG---CTGAGG---GCTATTGAGGCGCAACAGCATCTGTTGCAACTCACAGTCTGGGGCATC  
>KX693491  
TTCTACTGTGATACATCACAACCTGTTTAAACAGTACTTGGCCTTGGGAATGATAATAGTACTTGGGAATAATTCTA  
CA-----  
-----  
GGAAATGGCACTATCACGCTCCCTTGCAGAATAAAACAAATTATAAACATGTGGCAGGAAGTAGGGAAAGCAA  
TGTATGCCCCCTCCCATTCAGGGCAAATTAAGTGTTCATCAAAA---  
ATTACAGGGTTGCTATTAACAAGAGATGGTGGTATTGATAACTACTACGAAC-----  
-----  
GATACCACCAAGAAC---  
AACACCGAGACCTTCAGACCTGCAGGAGGAGATATGAGGGACAATTGGAGAAGTGAATTATATAAAATATAAAG  
TAGTAAAAAATTGAACCATTA---GGAGTAGCACCCACCAAGGCAAAGAGAAGAGTGGTG-----  
-----CAGAGAGAAAAAAGAGCA---GTAGGAACGATAGGAGCT-----  
ATGTTCCCTTGGGTTCTTGGGAGCA---GCAGGAAGCACTATG---GGCGCAGCGTCA---  
ATAACGCTGACGGTACAG---GCCAGACAA---TTATTG---TCTGGTATAGTGCAACAGCAGAGA---  
AATTTG---CTGAGG---GCTATTGAGGCGCAACAGCATATATTGCAACTCACAGTCTGGGGCATC  
>KX693496  
TTCTACTGTAATACATCACAATTATTTAATAGTACTTGGGAATTGGAATGATACTATTCCTTGGGAATGATACTA  
CA-----  
-----  
GGAAATGACACTATCGTGCTCCCTTGCAAAATAAAACAAATTGTAAACATGTGGCAAGAGGTAGGGAAAGCAA  
TGTATGCCCCCTCCCATTTAGTGGACAAATTAGATGTTCCCTCAAAT---  
ATTACAGGGTTACTATTAACAAGAGATGGTGGTATTAATGAGAGC-----  
-----  
-----  
AACACCGCCGAGACCTTCAGACCTGGAGGAGGAGATATGAGAGACAATTGGAGAAGTGAATTATATAAAATATA  
AAGTAGTAAAAAATTGAACCATTA---GGAGTAGCACCCACCAAGGCAAAGAGAAGAGTGGTG-----  
-----CAGAGAGAAAAAGA-----CTAGGAGCT-----  
---ATGTTCCCTTGGGTTCTTGGGAGCA---GCAGGAAGCACTATG---GGCGCAGCGTCA---  
ATAACGCTGACGGTACAG---GCCAGACAA---TTATTG---TCTGGTATAGTGCAACAGCAGAGA---  
AATTTG---CTGAGG---GCTATTGAGGCGCAACAACATCTGTTGCAACTCACAGTCTGGGGCATC  
>KX693539  
TTCTACTGTGATACATCACGACTGTTCAATAGTACTTGGACTAATACTGGTACTTGGGAATGCTACTACAGGAA  
ATAATGAT-----  
-----  
ACTACAGGAAATATTATCAGACTCCCTTGTAGGATAAAACAAATTGTAAACATGTGGCAGGAAGTAGGGAGGG  
CAATGTATGCCCCCTCCCATTTGAAGGACAAATTAGATGTTTCATCTAAT---  
ATTACAGGGTTGCTATTAACAAGAGATGGTGGTGAGAATGAGAGC-----  
-----  
-----  
AATACCACCGAAACCTTCAGACCTGAAGGAGGAGATATGAGGGACAATTGGAGAAGTGAATTATATAAAATATA  
AAGTAGTAAAAAATTGAACCATTA---GGAGTAGCACCCACCAAGGCAAAGAGAAGAGTGGTG-----  
-----CAGAGAGAAAAAAGAGCA---GTGGGAACGATAGGAGCT-----  
---ATGTTCCCTTGGGTTCTTGGGAGCA---GCAGGAAGCACTATG---GGCGCAGCGTCA---  
ATAACGCTGACGGTACAG---GCCAGACAA---TTGTTG---TCTGGTATAGTGCAACAGCAGAGA---  
AATTTG---CTGAGG---GCTATTGAGGCGCAACAGCATCTGTTGCAACTCACAGTCTGGGGCATC  
>KP109512  
TTCTACTGTAATACAACAACCACTGTTTAAATAGTACTTGGGAATGGTACTATGTTTAAATGGTAGTAGTACTTGGGA  
ATAATACT-----  
-----GGAATAGT-----

ACTGAAAATGACACTATCACCCCTCCCATGCAGAATAAAACAAATTATAAACATGTGGCAGGAAGTAGGAAAAG  
 CAATGTATGCCCCCTCCCATCAGTGGACTAATCAGATGTTTCATCAAAT---  
 ATTACAGGACTGATATTAACAAGAGATGGGGGGGTGGAACAGAACAGCACG-----  
 -----  
 -----  
 AACGACACCGAGACCTTCAGGCCTGGAGGAGGAGATATGAGGGACAATTGGAGAAGTGAATTATATAAATACA  
 AAGTAGTGAAACTTGAACCATTA---GGAGTAGCACCCACTAGGGCAAAAAGAAGAGTGGTG-----  
 -----CAGAGAGAAAAAAGAGCA---TTGGGA---CTAGGAGCT-----  
 ---ATGTTCCCTTGGGTTCTTGGGAACA---GCCGGAAGCACTATG---GGCGCAGCGTCA---  
 ATAACGCTGACGGTACAG---GCCAGACAA---TTATTG---TCTGGTATAGTGCAACAGCAGAAC---  
 AATTTG---CTGAGG---GCTATTGAGGCGCAACAGCATCTGTTGCAACTCACAGTCTGGGGCATC  
 >JF932495  
 TTCTACTGTAATACATCAAACTGTTTAATAGTACTTGGAAATGAGACTAGTGCTTGGAAATGATACTGCA----  
 -----  
 -----  
 GAAAAATGACACTATCACGCTCCCTTGCAGAATAAAACAAATTGTAAACATGTGGCAGGAAGTAGGAAGAGCAA  
 TGTATGCCCCCTCCCATCAGAGGACAAATTAGATGTTTCATCAAAC---  
 ATTACAGGGTTGCTATTAACAAGAGATGGTGGTAAGAATGAGAGC-----  
 -----  
 -----  
 AATACCACCGAGACCTTCAGACCTGGAGGAGGAGATATGAAGGACAATTGGAGAAGTGAATTATATAAATATA  
 AAGTAGTAAAAATTGAACCATTA---GGAGTAGCACCCACCAAGGCAAAGAGAAGAGTGGTG-----  
 -----CAGAGAGAAAAAAGAGCG---GTGGGAGCGATAGGAGCT-----  
 ---ATGTTCCCTTGGGTTCTTGGGAACG---GCAGGAAGCGCTATG---GGCGCAGCGTCA---  
 CTGACGCTGACGGTACAG---GCCAGACAA---TTGTTG---TCTGGTATAGTGCAACAGCAAAGA---  
 AATTTG---CTGAGG---GCTATTGAGGCGCAACAGCATCTGTTGCAACTCACCGTCTGGGGCATC  
 >JF932496  
 TTCTACTGTAATACACAACAATTGTTTAATAGTACTTGGACTTGGAAATGATATTAGTACTTGGAAATAACTA  
 CA-----  
 -----  
 -----  
 GGAAATAGCACTATCACGCTTCCTTGCAGAATAAAACAAATTATAAACATGTGGCAGGAAGTAGGAACAGCAA  
 TGTATGCCCCCTCCCATCGAAGGAAAAATTAGATGTTTCATCAAAT---  
 ATTACAGGGTTACTATTAACAAGAGATGGTGGTAATAAGAACGAGACC-----  
 -----  
 -----  
 CCCGACACCGAGACCTTCAGACCTACAGGAGGAAATATGAGGGACAATTGGAGAAGTGAATTATATAAATATA  
 AAGTAGTAAAAATTGAACCATTA---GGAGTAGCACCCACCAGGGCAAAGAGAAGAGTGGTG-----  
 -----CAAAGAGAAAAAAGAGCA---GTGGGAACGATAGGAGCT-----  
 ---ATGTTCCCTTGGGTTCTTGGGAGCA---GCAGGAAGCACTATG---GGCGCAGCGTCA---  
 ATAACGCTGACGGTACAG---GCCAGACAA---TTGCTG---TCTGGTATAGTGCAACAGCAGAGA---  
 AATTTG---CTGAGA---GCTATTGAGGCGCAACAGCATATGTTGCAACTCACCGTCTGGGGCATC  
 >GU647196  
 TTCTACTGTAATACAGCACAACCTGTTTAATAGTACTTGGAAATAACTAGTACTTGGAAATGGTACTACA----  
 -----  
 -----  
 GGAAATAGCATTATTACGCTCCCTTGCAGGATAAGACAAATTGTAAACATGTGGCAGAAAGTAGGGAAAGCAA  
 TGTATGCCCCCTCCCATGAAGGACCAATTAAATGCTCATCAAAT---  
 ATTACAGGGTTGCTATTAACAAGAGATGGTGGACATAATGAGAGC-----  
 -----  
 -----  
 AATACCACTGAGACCTTCAGACCTGGAGGAGGAGATATGAGAGACAATTGGAGGAGTGAATTATATAAATATA  
 AAGTAGTAAAAATTGAACCATTA---GGAGTAGCACCCACCAAGGCAAAGAGAAGAGTGGTG-----  
 -----CAGAGAGAAAAAAGAGCA---GTGGGAATGATAGGAGCT-----  
 ---ATGTTCCCTTGGGTTCTTGGGAGCA---GCAGGAAGCACTATG---GGCGCAGCGTCA---  
 ATAACGCTGACGGTACAG---GCCAGACAG---TTGTTG---TCTGGTATAGTGCAACAGCAGAGA---  
 AATTTG---CTGAGG---GCTATTGAGGCGCAACAGCATCTGTTGCAACTCACAGTCTGGGGCATC  
 >EU363830  
 TTCTACTGTAATACATCACAATTGTTTAACAGTACTTGGACTCCTAATAGTACTTGGAAATGGTACTGGTACT-  
 -----  
 -----

TGGAATGATACTATCACACTCCCTTGCAGGATAAAACAAATTGTAAACATGTGGCAGGAAGTAGGGAAAGCAA  
TGTATGCCCCCTCCCATTTGAAGGACCAATTAGATGTTTCATCAAAT---  
ATTACAGGGTTATTATTAAACAAGAGATGGTGGTAAAAATGAGAACAACACT-----  
-----  
-----  
GAGAACAACACCGAGACCTTCAGACCTGCAGGAGGAGATATGAGAGACAATTGGAGAAGTGAATTATATAAAT  
ATAAAGTAGTAAAAATTGAACCATTA---GGAGTAGCACCCACCAGGGCAAAGAGAAGAGTGGTG-----  
-----CAGAGAGAAAAAAGAGCA---GTGGGAACGATAGGAGCT---  
-----ATGTTCCCTTGGGTTCTTGGGAGCA---GCAGGAAGCACTATG---GGCGCAGCATCA---  
ATAACGCTGACGGTACAG---GCCAGACAA---TTATTG---TCTGGTATAGTGCAACAGCAGAGA---  
AATTTG---CTGAGG---GCTATTGAGGCGCAACAGCATCTGTTGCAACTCACAGTCTGGGGCATC  
>AY561236  
TTCTACTGTAATACAACAACAACTGTTTAATAGTACTTGGAAATGAGAATAGTACTTGGAAATGGGACTATTACTG  
AAAAAT-----  
-----  
TCAAAATAACACTAATATCACACTCCCATGTAAAATAAAAGCAAATTATAAATATGTGGCAGAGAGTAGGAAAAG  
CAATGTATGCCCCCTCCCATCAGAGGAGTAATAAGATGTGTATCAAAC---  
ATCACAGGGCTACTATTAAACAAGAGATGGTGGGAACAACGATACT-----  
-----  
-----  
AACACAATGAGACCTTCAGACCTGGAGGAGGAAACATGAGGGATAATTGGAGAAGTGAATTATATAAATATA  
AAGTAGTAAAAATTGAACCATTA---GGAGTAGCACCCACCAAGGCAAAGAGAAGAGTGGTG-----  
-----CAGAGAGAAAAAAGAGCA---GTAACA---CTAGGAGCT-----  
---ATGTTCCCTTGGGTTCTTGGGAGCA---GCAGGAAGCACTATG---GGCGCAGCGTCA---  
ATAACGCTGACGGTACAG---GCCAGACAA---TTATTG---TCTGGTATAGTGCAACAGCAGAAC---  
AATCTG---CTGAGG---GCTATTGAGGCGCAACAACATCTGTTGCAACTCACAGTCTGGGGCATT  
>AY561239  
TTCTACTGTAATACAGCACAACTGTTTAATAGTACTTGGAAATGCTACTGATACTTGGAACTACTACTACAGGGT  
TAAAT-----  
-----  
GATACTGGTAAAAATATCACACTCCCATGCAGAATAAAACAAATTATAAACATGTGGCAGACAGTAGGAAAAG  
CAATGTATGCCCCCTCCCATCAGAGGACAAATTAGGTGTTTCATCAAAT---  
ATCACAGGGTTGTTATTAAACAAGAGATGGAGGTAATAACAGCATA-----  
-----  
-----  
AACACAGAGATCTTCAGACCTGGAGGAGGAGATATGAGGGACAATTGGAGAAGTGAATTATATAAATATAAAG  
TAGTAAAAATTGAACCATTA---GGAGTAGCACCCACCAAGGCAAAGAGAAGAGTGGTG-----  
-----CAGAGGGAAAAAAGAGCA---GTAACA---CTAGGAGCT-----  
ATGTTCCCTTGGGTTCTTGGGAGCA---GCAGGAAGCACTATG---GGCGCAGCATCA---  
ATAACGCTGACGGCACAG---GCCAGACAA---TTATTG---TCTGGTATAGTGCAACAGCAGAAC---  
AATCTG---CTGAGG---GCTATTGAGGCGCAACAGCATATGTTGCAGCTCACAGTCTGGGGCATC  
>HQ377377  
TTCTACTGTAATACAACAAAATTGTTTAATAGTACTTGGTATAGTAATGGAACGCGACTTGCAAATGACAGTG  
AT-----  
-----  
ACAAGTGAAAACATCACACTCCCATGCAGAATAAAACAAATTGTAAACATGTGGCAGGAAGTAGGAAAAGCAA  
TGATGCCCCCTCCTATCAGCGGACAAATTAGATGTGTATCAAAT---  
ATAACAGGGCTACTATTAAACAAGGGATGGTGGGAAAGGGAATGGGAACGGA-----  
-----  
-----  
ACGAACAATAACACCGAGACCTTCAGACCTGAAGGAGGAAATATGAAGGATAATTGGAGAAGTGAATTATACA  
AATATAAAGTAGTAAAAGTTGAGCCATTA---GGAGTAGCACCCACCAAGGCAAAGAGAAGAGTGGTG-----  
-----CAGAGAGAAAAAAGAACA---GTGGGA---  
CTGGGAGCT-----TTGTTCCCTTGGGTTCTTGGGAGCA---GCAGGAAGCACTATG---  
GGCGCAGCGTCA---GTGACGCTGACGGTACAA---GCCAGACAA---TTATTG---  
TCTGGTATAGTGCAACAGCAGAAC---AAGTTG---CTGATG---  
GCTATTGAGGCGCAACAAAATATGTTGCGACTCACAGTCTGGGGCATC  
>AY586542  
TTCTACTGTAATACAACAAAACCTGTTTAATAGTACTTGGGATGTTAATAATAATATTAGCGGGCAAATAAC-

-----  
ACTGAAGCTAATATTACACTCCCATGTAGATAAAAACAAATTGTAAACCTGTGGCAGGAAGTAGGAAAAGCAA  
TGTATGCCCCCTCCCATCAAAGGACAAATTAGCTGTTTCATCAAAT---  
ATTACAGGGCTGCTATTAACAAGAGATGGTGGTAATAACGGGACC-----  
-----  
-----  
AATAACACCGAGACCTTCAGACCTGGAGGAGGAGATATGAGGGACAATTGGAGAAGTGAATTATATAAATATA  
AAGTAGTAAAAATTGAACCATTA---GGAGTAGCACCCACCAAGGCAAAGAGAAGAGTGGTG-----  
-----CAAAGAGAAAAAAGAGCA---GTGGGAATGGTAGGAGCT-----  
---ATGTTCCCTTGGGTTCTTGGGAGCA---GCAGGAAGCACTATG---GGCGCAGCGGCA---  
ATGACGCTGACGGTACAG---ACCAGACAA---TTATTG---TCTGGTATAGTGCAGCAGCAAAAC---  
AATTTG---CTGAGG---GCTATTGAGGCGCAACAACATCTGTTGCAACTCACAGTCTGGGGCATC  
>EU668963  
TTCTACTGTAATACAACAAGGCTGTTTAATAGTACTTGGAAATGGGAATAATACTTGGAAATAATACTGATGACG  
CTGCTACT-----  
-----ATC---  
ACTGAGAATGCGACTATCACACTCCCATGTAGAATAAAAACAAATTATAAACAGGTGGCAGGAAGTAGGAAAAG  
CAATGTATGCCCCCTCCCATCCGAGGACATATTAGCTGTTTATCAAAC---  
ATTACAGGGCTGATACTAACAAGAGATGGTGGTAAGGGCAATGACACC-----  
-----  
-----  
AACAAACAACACTGAGGTCTTCAGACCTGGAGGAGGAGATATGAGGGACAATTGGAGAAGTGAATTATATAAAT  
ATAAAGTAGTAAGAATTGAGCCATTA---GGAATAGCACCCACCAAGGCAAGGAGAAGAGTGGTG-----  
-----CAGAGAGAAAAAAGAGCA---GTAACA---ATAGGAGCG---  
-----ATGTTCCCTTGGGTTCTTGGGAGCA---GCAGGAAGCACTATG---GGCGCAGCGTCA---  
ATAACGCTGACGGTACAG---GCCAGACTA---TTATTG---TCTGGTATAGTGCAGCAGCAGAGC---  
AATATG---CTGAGA---GCTATTGAGGCGCAACAACACCTGTTGCAACTCACAGTTTGGGGCATC  
>FJ388890  
TTCTACTGTAATACAACAGCACTGTTTAATAGTACTTGGAAATAATACTGGATGGTCAGCTGACACAAATGGCA  
CTAAT-----  
-----  
GGCACTGAAGGAAATATCACACTCAAATGCAGAATAAAAACAAATTTATAAACCTGTGGCAGCAAGTAGAAAAAG  
CAATGTACGCCCTCCCATCGAAGGACTAATTAGATGCTCATCAAAC---  
ATTACCGGGATACTATTAACAAGAGATGGGGGCAATAATAATGGGACC-----  
-----  
-----  
AACACGACAGAGGTATTTCAGACCTGGAGGAGGAAATATGAAAGATAATTGGAGGAGTGAATTATATAAATATA  
AAGTAGTACAAATTGAACCCTTA---GGAATAGCACCCACAAGGCACAGAGAAGAGTGGTG-----  
-----CAGAGAGAAAAAAGAGCA---GTAGGA---ATAGGAGCT-----  
---GTGTTCCCTTGGGTTCTTGGGAGCA---GCAGGAAGCACTATG---GGCGCAGCATCA---  
GTGATGCTGACGGTACAA---GCCAGACAA---TTATTG---TCTGGTATAGTGCAACAGCAAAAC---  
AATTTG---CTGAGA---GATAGGGAGGCGCAACAACATCTGTTGCAACTCCCTGTCTGGGGCATC  
>FJ388895  
TTCTACTGTAACACAACACCACTGTTCAATAGTACTTGGAAATCCTAATGGTATTTGGGAGGGTACTACAGGGT  
CAAATGAC-----  
-----ACT---  
GGGTCAAATGACACTGTACACTCCAATGCAGAATAAAAACAAATTGTAAACCTGTGGCAGGAAGTAGGAAAAG  
CAATGTATGCCCCCTCCCATCGAAGGACCAATTAAATGTTTCATCAAAT---  
ATTACAGGGATGCTATTAACAAGAGATGGTGGTAATAGTACTAAT-----  
-----  
-----  
AATGAGACCTTCAGACCTGGAGGAGGAGATATGAGGGACAATTGGAGAAGTGAAGTATATAAATATAAAGTAG  
TAAAAATTGAACCATTA---GGAATAGCACCCACCAAGGCAAAGAGAAGAGTGGTG-----  
-----CAGAGAGACAAAAGAGCA---GTGGGAATAATGGGAGCT-----  
ATGTTCCCTTGGGTTCTTGGGAACA---GCAGGAAGCACTATG---GGCGCAGCGGCA---  
CTGACGCTGACGGTACAG---GCCAGACAA---TTATTG---TCTGGTATAGTGCAACAGCAGAAT---  
AATTTG---CTGAGG---GCTATTGAGGCGCAGCAGCATATGTTGCGACTCACTTTTTTTTGGGCATC  
>FJ388898  
TTCTACTGTAATTCAACACCACTGTTTAATAATACCTGGAATGGTACCGAATTGACAAATAATAATAATG  
AAGAAAAT-----

-----ATCACA-----  
AATAATGAAGAAATATCACACTCCAATGCAGAATAAAACAAATTATAAACAGGTGGCAGGAAGTAGGAAAAG  
CAATGTATGCCCCCTCCCATTCAGAGACAAATTAGATGCTCATCAAAC---  
ATTACAGGGCTGCTATTGACAAGAGATGGTGGTAATGATAGTAAC-----  
-----  
-----  
ACAACCGAAATCTTCAGACCTGGAGGAGGAGATATGAGGGACAATTGGAGAAGTGAATTATATAAATATAAAG  
TAGTAAAGCTTGAACCATTA---GGAATAGCACCCACCAAGGCAAAGAGAAGAGTGGTG-----  
-----CAAAGAGAAAAAAGAGCA---GTGGGA---ATAGGAGCT-----  
ATGTTTCCTTGGGTTCTTGGGAGCA---GCAGGAAGCACTATG---GGCGCAGCGTCA---  
ATAACGCTGACGGTACAG---GCCAGACAA---TTATTG---TCTGGTATAGTGCAACAGCAGAGC---  
AATCTG---CTGAGG---GCTATTGAGGCGCAACAGCATATGTTGCAACTCACAGTTTGGGGCATC  
>FJ388905  
TTCTACTGTAATACAACATCACTGTTTAAATAGTACTTTGAAACCAAAAAATAGCACTATCCAAAGATATAGAG  
ATAAT-----  
-----  
AGAGATAATGACACTATTGTACTCCAATGCAGAATAAAACAAATTTATAAACATGTGGCAGGAAGTAGGAAAAG  
CAATGTATGCCCCCTCCCATCAGAGGACAGCTTAACTGCTCATCAAAT---  
ATTACAGGGCTGCTATTAACAAGAGATGGTGATGTTAATATCACCGAG-----  
-----  
-----  
AACGGGACTGAGACCTTCAGACCTATAGGAGGAGATATGAGGGACAATTGGAGAAGTGAATTATATAAATATA  
AAGTAATAAACTTGAACCATTA---GGAGTAGCACCCACCAAGGCACAGAGAAGAGTGGTG-----  
-----CAGAGAGAAAAAAGAGCA---GCGATA-----GGAGCT-----  
---ATGATCCTTGGGTTCTTGGGAGCA---GCAGGAAGCACTATG---GGCGCAGCGTCA---  
GTGACGCTGACGGTACAG---GCCAGACTA---TTATTG---TCTGGTATAGTGCAACAGCAGAGC---  
AATCTG---CTGAGG---GCTATTGAGGCGCAACAACATCTGTTGCAACTCACAGTCTGGGGCATC  
>FJ388910  
TTCTACTGTAATACAACACAACCTGTTTAAATAGTACCTGGAATGCTGATGGTACTCGGAACGATACTGAAGGGT  
CAGATAAC-----  
-----AAC---  
AACAAACAGAAACAATCACACTCCCATGCAGAATAAAGCAAGTCATAAACCTGTGGCAGGAAGTAGGAAAAG  
CAATGTATGCCCCCTCCCATCAGAGGACAAATTAAGTGTCTCAAGC---  
ATTACAGGGCTACTATTAACAAGAGACGGTGGTGACAACCTCCACT-----  
-----  
-----  
AGCAGCCCTGAGATCTTCAGACCTGGAGGAGGAGATATGAGGGACAATTGGAGAAGTGAATTATATAAATATA  
AAGTAGTAAGAGTTGAACCATTA---GGAGTAGCACCCACCAAGGCAAAGAGAAGAGTGGTG-----  
-----CAGAGAGAAAAAAGAGCA---GTGACA---CTAGGAGCT-----  
---GTGTTTCCTTGGGTTCTTGGGAGCA---GCAGGAAGCACTATG---GGCGCAGCGTCA---  
TTGACGCTGACGGTACAG---GCCAGACAA---TTATTG---TCTGGTATAGTGCAACAGCAAAAC---  
AATTTG---CTGAGG---GCTATTGAGGCGCAACAGCACCTGTTGCAACTCACAGTCTGGGGCATC  
>FJ388911  
TTCTACTGTAATACAACACAGCTGTTTAAATAGTACTTGGTGGGCTAATAGTACTGGGCCTGGTAATGGAAATG  
GAAATATC-----  
-----ACA---  
ATCACATCTGAAAGCATCATAACTCCATGCAGAATAAAACAACTTATAATCAGAAGACCGCAAGAAGTAAGAA  
CAACATCTGCCCCCTCCTATAGCAGCAGAAAATATTTGTTGTTCAAAA---  
ATTACAAGAGTGCTATTAACAACAGAAGGTGGTGATAATACAAAC-----  
-----  
-----  
GGGAGTGAGACCTTCAGACCTGGAGGAGGAAATATGAGGGACAATTGGAGAAGTGAATTATATAAATATAAAG  
TAGTAAGAATTGAACCATTA---GGAGTAGCACCCACCAAGGCAAAGAGAAGAGTGGTG-----  
-----CAAAGAGAAAAAAGAGCA---GTGGGAACAATAGGAGCT-----  
ATGTTTCCTTGGGTTCTTGGGAGCA---GCAGGAAGCACTATG---GGCGCAGCGTCA---  
ATAACGCTGACGGTACAG---GCCAGACAA---TTATTG---TCTGGTATAGTGCAACAGCAGAGC---  
AATTTG---CTGAGA---GCTATTGAGGCGCAACAGCATCTGTTGCAACTCACAGTCTGGGGCATC  
>FJ388912  
TTCTACTGTAATTCAACACAACCTGTTTAAATAGTACTTGGAAATGTTAATAGTACTTGGAAATGATACCGAAAGGT  
CAAATATC-----

-----ACA-----  
GAAGAAAATTTCAATATCACATTCCCATTGAGAATAATTCTAATTATAAGCAGGGGACTGGAAATAGCAAAAT  
CAGCCCCCTCCCCCACCAGGCATAAGTAAAATTTTCATGTTCTTCAACG---  
AGTACGGGGTTGACAAGAGCAAGAGGTGAAGGTAATGATAACAAC-----  
-----  
-----  
GGGACCGAGACCTTCAGACCTGGAGGAGGAGACATGAGGGACAATTGGAGAAGTGAATTATATAAAATATAAAG  
TAGTAAAAAATTGAACCATTA---GGAGTAGCACCCACCAGGGCAAAAAGAAGAGTGGTG-----  
-----CAAAGAGAAAAAAGAGGA---GTGGGA---CTAGGAGCT-----  
TTGTTCTTGGGTTCTTGGGAGCA---GCAGGAAGCACTATG---GGCGCAGCGTCG---  
ATAACGCTGACGGTACAG---GCCAGGCAA---TTATTG---TCTGGTATAGTGCAACAACAAAAC---  
AATTTG---TTGAGA---GCTATTGAGGCGCAACAGCATCTGTTGCAGCTCACAGTCTGGGGCATC  
>FJ388960  
TTCTACTGTAATACAACACAACCTGTTTACTAGTAAGTGGAGAATGGTACTAGATTGTCAGAGAACAAAAC  
TAAC-----  
-----  
ACAGAAGAAAATATCACACTCCCATGCAGAATAAAACAAATTATAAACATGTGGCAGGAAGTAGGAAAAGCAA  
TGTATGCCCCCTCCCATCAGAGGACAAATTAGATGTTCTTCAAAT---  
ATTACTGGGTTGCTATTAACAAGAGATGGGGGTGATACCGGGGAG-----  
-----  
-----  
AACGAGACAGAGGTCTTCAGACCTGGAGGAGGAAATATGAGGGACAATTGGAGAGGTGAATTATATAAAATATA  
AAGTGGTACAAATTGAACCTTA---GGAGTAGCACCCACCAAGGCAAAGAGAAGAGTGGTG-----  
-----CAGAGAGAAAAAAGAGCA---GTAATA-----GGAGCT-----  
---ATGTTCTTGGGTTCTTGGGAGCA---GCAGGAAGCACTATG---GGCGCAGCATCA---  
GTGGTGCTGACGGTACAG---GCCAGACAA---TTATTG---TCTGGTATAGTGCAACAGCAAAAC---  
AATTTG---CTGAAG---GCTATTGAGGCGCAACAACATCTGTTGCAACTCACAGTCTGGGGCATC  
>FJ388914  
TTCTACTGTAATACAACACCACTGTTTAATAGTACTTGGAAATAGTACTAGCTGGCCAAATAACACAAATAACA  
CAAATGAC-----  
-----ACT-----  
AACACAAATGACACTATCACACTCAGATGCAGAATAAAACAAATTATAAACCTGTGGCAGGAAGTAGGAAAAG  
CAATGTATGCCCCCTCCCATCAGAGGACAAATTAATTGTACATCAAAT---  
ATTACCGGGTTGCTATTAACAAGAGATGGGAGTGATGCGAACAGC-----  
-----  
-----  
ACGATCGAGGTCTTCAGACCTATAGGAGGAAATATGAAGGACAATTGGAGAAGTGAATTATATAAAATATAAAG  
TGGTAAAAAATTGAACCATTA---GGAATAGCACCCACCACGGCAAGGAGAAGAGTGGTG-----  
-----CAGAGAGAAAAAAGAGCA---GTGGGA---CTAGGAGCT-----  
TTGTTCTTGGGTTCTTGGGAGCA---GCAGGAAGCACTATG---GGCGCAGCATCA---  
ATGGGGCTGACGGTACAG---GCCAGACAA---TTATTG---TCTGGTATAGTGCAACAGCAAAAC---  
AATTTG---CTGAGG---GCTATTGAGGCGCAACATAATCTGTTGCAACTCACAGTCTGGGGCATC  
>FJ388915  
TTCTACTGTAACACAACAAAACCTGTTTAACAGTACTTGGACTTGGAAATAGTGGTACTTGGAAATCAACAAATA  
GTAGT-----  
-----ACT-----  
AATGGAATTGACACTATCACACTGATGCCCCAATAAGGCTAAGTGTAACGCGTGGCAGGAAGTAGGAATAG  
CAATGTCTATCTCTGCCCTCAGAGGCCGAATCAAGAGTTTATCAACG---  
TTTACAGGTACAGGATTAACAAGAACAAGTGGTGGCGCCAACGAGGAT-----  
-----  
-----  
GAGAACAGGAATGAGACCTTCAGACCTGGGGGAGGAAATATGAAGGACAATTGGAGAAGTGAATTATATAAAAT  
ATAAAGTAGTAGAAATTGAACCTTTA---GGAATAGCACCCACCAAGGCAAAGAGAAGAGTGGTG-----  
-----CAGAGAGAAAAAAGAGCA---GCATTA-----GGAGCT---  
-----TTGTTCTTGGGTTCTTGGGAGCA---GCAGGAAGCACTATG---GGCGCAGCGTCA---  
ATAACGCTGACGGTACAA---GCCAGACTA---TTGTTG---TCTGGTATAGTGCAACAGCAAAAGT---  
AACTTG---CTGAAA---GCTATTGAGGCGCAACAGCATCTGTTGCAACTCACAGTCTGGGGCATC  
>FJ388918  
TTCTACTGTAACACAACACAACCTGTTCAATAGTACTTGGAAATTAACACAATCGTTTAAATAGTAGTACTGAAG  
GGTCAAGT-----

-----GGCACT-----  
GGGTCAAGTGGCACTATCACACTCCCATGCAGAATAAGACAAATTGTACACTTGTGGCAGGAAGTAGGAAAAG  
CAATGTATGCCCCCTCCCATCAGAGGACTAATCAGGTGTTTCATCAAAT---  
ATTACAGGGCTGCTGTTAACAAGAGATGGTGGTAATGATGGTAATGAC-----  
-----  
-----  
TCCAATACTGAGGTCTTCAGACCTGGGGGAGGAAATATGAAGGACAATTGGAGAAGTGAATTATATAAATATA  
AAGTAGTAGAAATTGAACCATTA---GGAGTAGCACCCACCAGGGCAAAGAGAAGAGTGGTG-----  
-----CAGAGAGAAAAAAGAGCA---GTGCTA-----GGAGCT-----  
---TTGCTCCTTGGGTTCTTGGGAGCA---GCAGGAAGCACTATG---GGCGCAGCGTCA---  
ATAGCGCTGACGGCACAA---GCCAGACAA---TTGATG---TCTGGTATAGTGCAACAGCAAAAC---  
AACTTG---CTGAGA---GCTATTGAGGCGCAACAGCATATGTTGCAACTCACAGTCTGGGGCATC  
>FJ388920  
TTCTACTGTAGTACAACACCACTGTTTAATAGTACTTGGGATAATAATACTGAATGGTCAAATAACACAAGTA  
AAAAAT-----  
-----  
AAAAATGACAGTAATATCACACTCCCATGCAGAATAAAACAAATTATAAACCTGTGGCAGGAAGTAGGAAAAG  
CAATGTATGCCCCCTCCCATCAAAGGACAAATTAAGTGTTCATCAAAT---  
ATTACTGGACTACTATTAACAAGAGATGGGGGTGGAACGAGAGC-----  
-----  
-----  
AATATCGAGACCTTCAGACCCGCAGGGGGAGATATGAGGGATAATTGGAGAAGTGAATTATATAAATACAAAG  
TGGTACAAATTGAACCATTA---GGAGTAGCACCCACCAAGGCAAAGAGAAGAGTGGTG-----  
-----CAGAGAGAAAAAAGAGCA---GTGGGA---CTAGGAGCT-----  
GTGCTCTTTGGGTTCTTGGGAGCA---GCAGGAAGCACTATG---GGCGCAGCATCA---  
GTGATGCTGACGGTACAG---GCCAGACAA---TTATTG---TCTGGTATAGTGCAAGCAGCAAAAC---  
AATTTG---CTGAGA---GCTATTGAGGCGCAACAACATCTGTTGCAACTCACAGTCTGGGGCATC  
>FJ388923  
TTCTACTGTAATACAACACCACTGTTTAATAGTACTTGGAAATGATACTAGTCGGCCAAATATCACAGGTGAGG  
AAGAT-----  
-----AAT---  
GGTGAGGAAGATAATATGATACTCACATGCAGAATAAAGCAAATTATAAACCTGTGGCAGGAAGTAGGAAAAG  
CAATGTATGCCCCCTCCCATCAGAGGACAAATTAGATGTTTCATCAAAT---  
ATTACCGGGTTGCTCTTAACAAGAGATGGGGGTAATGACAGCAGC-----  
-----  
-----  
AGGACCGAGGTCTTCAGACCTATGGGAGGAAATATGAGGGACAATTGGAGAAGTGAATTATATAAATATAAAG  
TGGTGCAAGTTGAACCATTA---GGAGTAGCACCTACCACAGCAAAGAGAAGAGTGGTG-----  
-----CAGAGAGAAAAAAGAGCA---GTGGGA---ATAGGAGCT-----  
GTGTTCTTTGGGTTCTTGGGAGCA---GCAGGAAGCACTATG---GGCGCAGCATCA---  
GTGATGCTGACGGTACAA---GCCAGACAA---TTATTG---TCTGGTATAGTGCAAGCAGCAAAAC---  
AATTTG---CTGAGG---GCTATTGAGGCGCAACAACATCTGTTGCAACTCACAGTCTGGGGCATC  
>FJ388963  
TTCTACTGTAATACAACAAAACCTGTTTAATAGTACTTGGAAATGTTAGTACTGGGAATGGAAATAAACTGGAG  
AGGGCACAAAT-----  
-----AGTAAT-----  
GGCACAAATAGGAATATCACACTTCCATGCAGAATAAAACAAATTATAACATGTGGCAGGAAGTAGGAAAAG  
CAATGTATGCCCCCTCCCATCAAAGGACAAATTAATGCTCATCAAAT---  
ATTACAGGGCTGTTATTACCAAGAGATGGTGGTTTAAATAATAGC-----  
-----  
-----  
ACTAATGAGACCTTCAGACCTGGAGGAGGAAATATGAGGGACAATTGGAGAAGTGAATTATATAAATATAAAG  
TAGTAAAAATTGAACCATTA---GGAGTAGCACCTTCCAGGGCAAAGAGAAGAGTGGTG-----  
-----CAGAGAGAAAAAAGAGCA---GTAGGG---CTAGGAGCT-----  
GTGTTCAATTGGGTTCTTAGGAGCA---GCCGGAAGCACTATG---GGCGCAGCGTCA---  
ATAACGCTGACGGTACAG---GCCAGACAA---TTATTG---TCTGGTATAGTGCAACAGCAGAGC---  
AACCTG---CTGAGG---GCTATTGAGGCGCAACAGCATCTGTTGCAACTCACAGTCTGGGGCATC  
>FJ388924  
TTCTACTGTAATACAACACCACTGTTTAATAGTACTTGGGGTAATGGTACTGAATGGTCAAATAACACAAATA  
ACCCT-----

-----AAT---  
AACCTGACAGAGATATCACACTCACATGCAGAATAAAACAAATTATAAACCTGTGGCAGGAAGTAGGAAAAG  
CAATGTATGCCCCCTCCCATCAGAGGACAAATTAGATGTTTCATCAAAT---  
ATTACTGGGTTACTATTAAACAAGAGATGGGGGTAAAAACGAGAGC-----  
-----  
-----  
GAGGCCACCGAGGTCTTCAGACCTGCAGGGGGAGATATGAGGGACAATTGGAGAAGTGAATTATATAAATATA  
AAGTGGTACAAATTGAACCATTA---GGAGTAGCACCCACCAAGGCAAAGAGAAGAGTGGTG-----  
-----CAAAGAGAAAAAGAGCA---GTGGGA---CTAGGAGCT-----  
---ATGCTCTTTGGGTTCTTGGGAGCA---GCAGGAAGCACTATG---GGCGCAGCATCA---  
GTGATGCTGACGGTACAG---GCCAGACAA---TTATTG---TCTGGTATAGTGCAACAGCAAAAC---  
AATTTG---CTGAGG---GCTATTGAGGCGCAACAACATCTGTTGCAACTCACAGTCTGGGGCATC  
>FJ388964  
TTCTACTGTGACACAAAACCACTGTTTAATAGTACCTGGAATAGTAATAGTACTTGGAAATGTTACAAATGACA  
CT-----  
-----  
GACACTGCAGAAAATATCACACTCCAATGCAAGATAAAACAAATTATAAACTTGTGGCAGAGAGTAGGAAGAG  
CAATGTATGCCCCCTCCCATCAGAGGACAAATTAGATGTTTCATCAAAT---  
ATTACAGGGCTGCTACTAACAAGAGATGGTGGTAAGGAAAAATAACACG-----  
-----  
-----  
AACTCTACTGAGATCTTCAGACCTGGAGGAGGAGACATGAGGGACAATTGGAGAAGTGAATTATATAAATATA  
AAGTAGTAAAACTTGAACCATTA---GGAGTAGCACCTTCCAAGGCAAAGAGAAGAGTGGTG-----  
-----CAGAGAGAAAAAGAGCA---GTGGGA---CTAGGAGCT-----  
---ATGTTCTTGGGTTCTTGGGAGCA---GCAGGAAGCACTATG---GGCGCAGCGTCA---  
ATGACGCTGACGGTACAG---GCCAGGCAA---TTACTG---TCTGGTATAGTGCAACAGCAGAGT---  
AATTTG---CTGCGG---GCTATTGAGGCGCAACAGCATCTGCTGCAACTCACAGTTTGGGGCATC  
>FJ388927  
TTCTACTGTAATTCAACAGAACTGTTTAATAGTATTTGGTATGCAAATGGTACTAGGAATAGTACTGAAGGGG  
CACATAAC-----  
-----GAA---  
TCACATAACGAACTATCACGCTCCCATGCAGAATAAAACAAATTATAAATATGTGGCAAGAAGTAGGAAAAG  
CAATGTGTGCCCCCTCCCATCAGAGGACAGATTAGGTGTTTCATCAAAT---  
ATTACAGGGCTACTATTAAACAAGAGATGGTGGTAACGAGAACAAAC-----  
-----  
-----  
ACCAACACAGAGACCTTCAGACCGGGAGGAGGAGATATGAGGGACAATTGGAGAAGTGAATTATATAAATATA  
AAGTAGTAAAAATTGAACCGTTA---GGAGTAGCACCTACCAAGGCAAAGAGAAGAGTGGTG-----  
-----CAAAGAGAAAAAGAGCA---ATAGGA---ATGGGAGCT-----  
---ATGTTCTTGGGTTCTTGGGAGCG---GCAGGAAGCACTATG---GGCGCAGCGTCA---  
CTGACGCTGACGGTACAG---GTCAGACAA---TTATTG---TCTGGTATAGTGCAACAGCAGAAC---  
AATCTG---CTGATG---GCTATTGAGGCGCAACAACATCTGTTGCAACTCACAGTCTGGGGCATC  
>FJ388933  
TTCTACTGTAATACAACAAAATTGTTTAATAGTACTTGGAAATGGTACTGAAGGGTCAAGTAACGGTACTGACA  
GTGAAAATAAC-----  
-----ATCAAT-----  
AATAACAACACTGAAATCGTACTCCCATGCAAAATAAAACAAATTATAAACATGTGGCAGGAAGTAGGAAAAG  
CAATGTATGCCCCCTCCCATCCAAGGACAAATTAATTGTACATCAAAT---  
ATTACAGGGCTGCTACTAACAAGAGATGGTGGTAATAGTAGCGGG-----  
-----  
-----  
ACTAATGAGACCTTCAGACCTGGAGGAGGAGATATGAGGGACAATTGGAGAAGTGAATTATATAAATATAAAG  
TAGTAAGAATTGAACCATTA---GGAGTAGCACCCACTAGGGCAAAGAGAAGAGTGGTG-----  
-----CAGAGAGAAAAAGAGCA---GCGATA---GGAGCT-----  
ATGTTCTTGGGTTCTTGGGAGCA---GCAGGAAGCACTATG---GGCGCAGCGTCA---  
ATAACGCTGACGGTACAG---GCCAGACTA---TTATTG---TCTGGTATAGTGCAACAGCAGAAC---  
AATCTG---CTGAGG---GCTATTGAGGCGCAACAGCATCTGTTGCAACTCACAGTTTGGGGCATT  
>FJ388935  
TTTTACTGTAATACATCACAACCTGTTTAATAGTAGTTGGGATGAGAATGCTAATGCTGGGAATAATACTCCTG  
GGAATGAT-----

-----ACT---  
CCTGGGAATGATACTATCACGCTTCCATGCAGAATAAAACAAATTATAAACATGTGGCAGGAAGTAGGAAAAG  
CAATGTATGCCCCCTCCCATCAGAGGACAAATTAAATGTGTATCAAAT---  
ATTACAGGGCTGTTATTGACAAGAGATGGTGGTAAGAACAACAGTAAT-----  
-----  
-----  
GATAACAATACTGAGATCTTCAGACCTGAAGGAGGAAATATGAAGGATAATTGGAGAAGTGAATTATATAAAT  
ATAAAGTAGTGAAGATTGAACCATTA---GGAATAGCACCCACCAAGGCAAAGAGAAGAGTGGTG-----  
-----CAAAGAGAAAAAGAGCA---GTGGGAACAATAGGAGCT---  
-----ATGTTCTAGGGTTCTTGGGAGCA---GCAGGAAGCACTATG---GGCGCAGCGTCA---  
ATGACGCTGACGGTACAG---GCTAGACAA---TTATTG---TCTGGTATAGTGCAACAGCAAAAC---  
AACTTG---CTGAAG---GCTATTGATGCGCAACAGCATATGTTGCAGCTCACAGTTTGGGGCATC  
>FJ388936  
TTCTACTGTAATACAACGCCACTGTTTAATAGTACTTGGAAATTGGAATAATACTGGAGAGCCAGAAACCACAA  
ATGAC-----  
-----ACT---  
GACACTAATAAGAATATCACACTCAAATGCAGAATAAAACAAATTATAAACTTGTGGCAGGAAGTAGGAAAAG  
CAATGTATGCCCCCTCCCATCAGAGGACAAATTAGATGTTTCATCAAAC---  
ATTACTGGGTTACTATTAACAAGAGATGGGGGTAGTACCAAGAACGGGACC-----  
-----  
-----  
CAGAACGAGACTGAGGTCTTCAGACCTGAAGGAGGAAATATGAAGGACAATTGGAGAAGTGAATTATATAAAT  
ATAAAGTGGTACAAATTGAACCATTA---GGAATAGCACCCACCAAGGCAAAGAGAAGAGTGGTG-----  
-----CAGAGAGAAAAAGAGCA---GTGGGA---ATAGGAGCT---  
-----ATGTTCTTGGGTTCTTGGGAGCA---GCAGGAAGCACTATG---GGCGCAGCGGCA---  
GTGACGCTGACGGTACAG---GCCAGACAA---TTGTTG---TCTGGTATAGTGCAACAGCAAAAC---  
AATTTG---CTGAGA---GCTATTGAGGCGCAACAACATATGTTGCAACTCACAGTCTGGGGCATC  
>FJ388937  
TTCTACTGTAATTCATCACAACCTGTTTAATAGTACTTGGAAATAGTACTAAATGGTTAAATAGCACTGAAGGAG  
AAAACATC-----  
-----ACA---  
ACTGAAGGAGAAAACATCACACTCCCATGCAGAATAAAACAAATTATAAACATGTGGCAGACAGTAGGAAAAG  
CAATGTATGCCCCCTCCCATCAGTGGACTAATTAGATGTTTCATCAAAT---  
ATTACAGGGCTACTATTAGTAAGGGATGGTGGTAATACCACTAGTAGC-----  
-----  
-----  
AATTCACCGAGACCTTCAGACCGGCAGGTGGAGATATGAGGGACAATTGGAGAAGTGAATTGTATAAATACA  
AAGTAGTAAAAATTGAACCAATA---GGAATAGCACCCACCAGGGCAAGGAGAAGAATGGTG-----  
-----CAGAGAGAAAAAGAGCA---GCAATAGGAGTAGGAGCT-----  
---GTGTTCTTGGGTTCTTGAGTGCA---GCAGGAAGCACTATG---GGCGCAGCGTCA---  
CTGACGCTGACGGTACAG---GCCAGGCAG---TTATTG---TCTGGTATAGTGCAACAGCAGAAC---  
AACTTG---CTGAGG---GCTATTGAGGCGCAACAGCATCTGTTGCAACTCACAGTTTGGGGCATC  
>FJ388939  
TTCTACTGTAATACAACACAACCTGTTTAATAGTATTTGGAATCGGGATGATATTTGGAATACTACTGGGGGGA  
ATGGT-----  
-----ACT---  
GAGTCAAATAACAATATTACTCTCCCATGCAGAATAAGACAAATTGTAAATAGGTGGCAGGAAGTAGGAAAAG  
CAATGTATGCCCCCTCCCATCGCAGGACACATTAGTTGTTTATCAAAT---  
ATTACAGGGCTACTATTAACAAGAGATGGTGGTGTAAATAAAAGT-----  
-----  
-----  
GCCATCGAGACCTTCAGACCATTAGGAGGAAATATAAAGGATAATTGGAGAAGTGAATTATATAAATATAAAG  
TAGTAAAAATTGAACCATTA---GGGGTAGCACCCACCAAGGCAAAGAGAAGAGTGGTG-----  
-----CAGAGAGAAAAAGAGCG---GCACTA-----GGAGCG-----  
CTGTTACTCGGGTTCTTGGGAGCA---GCAGGAAGCACTATG---GGCGCAGCGTCA---  
CTGACGCTGACGGTACAG---GCCAGACAA---TTATTG---TCTGGTATAGTGCAACAGCAGAAC---  
AACTTG---CTGAGA---GCTATTGAGGCGCAACAACATCTGTTGCAGCTCACAGTCTGGGGCATT  
>FJ388955  
TTCTACTGTAATACATCACAACCTGTTCAATAGTACTTGGAACACCCTGAGCTTGAGTCAAATATCACAGATG  
AAAAAT-----

-----  
ATCACAGATGAAAATATCACACTCCCATGCAGAATAAAACAAATCATAAATATGTGGCAGGAAGTAGGAAAAG  
CAATGTACGCCCCCTCCCATTAAGGACAAATTAGATGTTTCATCAAAT---  
ATTACAGGGCTGCTATTAACAAGAGATGGTGGTAGTAATACCACA-----  
-----  
-----  
AATGGAACCGAGATTTTCAGACCTGGAGGAGGAGATATGAGGGACAATTGGAGAAGTGAATTATATAAATACA  
AAGTAGTAAAAATTGAACCATTA---GGAATAGCACCCACCAAGGCAAAGAGAAGAGTGGTG-----  
-----CAGAGAGAAAAAAGAGCA---GCAATA-----GGAGCT-----  
---TTGTTCCCTTGGGTTCTTGGGAGCA---GCAGGAAGCACTATG---GGCGCAGCGTCA---  
ATGACGCTGACGGTACAG---GCCAGACTA---TTATTG---TCTGGTATAGTGCAACAGCAAAAC---  
AATTTG---CTGAAA---GCTATTGAGGCACAACAGCATCTGTTGCAACTCACAGTCTGGGGCATT  
>JF683736  
TTCTACTGTAATTCAACTGCACTGTTTAATAGTACTTGGGAATAATACTGCAGGGTCAAATAACACTACAGGAA  
ATAAC-----  
-----ACT---  
ACAGGAAATGACACAATCACACTCCAATGCAGAATAAAACAAATTGTAAACATGTGGCAGGAAGTAGGAAGAG  
CAATGTATGCCCCCTCCCATCAGAGGACCAATTAGATGTTTCATCAAAT---  
ATTACAGGGATACTATTAACAAGAGATGGTGGTAATAATAATAGCACAAAC-----  
-----  
-----  
AAGTCTGAGTCTGAGACCTTCAGACCTGGAGGAGGAAATATGAAGGACAATTGGAGAAGTGAATTATATAAAT  
ATAAAGTAGTACAAATTGAACCATTA---GGATTAGCACCCACCAAGGCAAAGAGAAGAGTGGTG-----  
-----CAGAGAGAAAAAAGAGCA---ATAGGA---CTAGGAGCT---  
-----ATGTTCCCTTGGGTTCTTGGGAGCA---GCAGGAAGCACTATG---GGCGCAGCATCA---  
GTAACGCTGACGGTACAG---GCCAGACAA---TTATTG---TCTGGTATAGTGCAACAGCAGAAT---  
AATCTG---CTGAGA---GCTATTGAGGCGCAACAGCACATGTTGCAACTCACAGTCTGGGGCATT  
>JF683741  
TTCTACTGTAATTGAGCGGGACTGTTTAATAGTACTTGGGGGACTACTAATGGTACTTGGGAAGGGGACTGAAG  
GGTCA-----  
-----  
GCTAACAATAAACTCTCATACTCCCATGCAGAATAAAACAAATTATAAACATGTGGCAGAGAGTAGGAAAAG  
CAATGTATGCCCCCTCCTATTAGAGGAAATATTAGCTGTTTCATCAAAT---  
ATTACAGGGTTACTGTTGACAAGAGATGGTGGTAATAATAATAAT-----  
-----  
-----  
AGTGGGACGGAGACTTTCAGACCTGGAGGAGGAGATATGAGAGACAATTGGAGAAGTGAATTATATAAATATA  
AAGTAGTAAAAATTGAACCATTA---GGAGTAGCACCCACTAAGGCAAAGAGAAGAGTGGTG-----  
-----CAGAGAGAAAAAAGAGCA---GTGGGA---TTAGGAGCT-----  
---TTGTTCCCTTGGGTTCTTGGGAGCA---GCAGGAAGCACTATG---GGCGCAGCGTCA---  
GTGACGCTGACGGTACAG---GCCAGACTA---TTATTG---TCTGGTATAGTGCAACAGCAGAAC---  
AATTTG---CTGATG---GCTATTGAGGCGCAACAGCATCTGTTGCAACTCACAGTCTGGGGCATC  
>JF683743  
TTCTACTGTAATACAACACCATTGTTTAGTAGTATTTGGAATGGTACTAAGAGGGTAAATGGAACATAACGAAA  
CT-----  
-----  
GAAACTGGAGACAATATCACACTCACATGCAGAATAAAACAAATTATAAACATGTGGCAGGAAGTAGGAAAAG  
CAATGTATGCCCCCTCCCATCGCAGGACAAATTAAGTGTTCATCAAAT---  
ATTACAGGGCTGTTACTAACAAGAGATGGTGGTGTAGTAATAACACT-----  
-----  
-----  
ACAGGGAATGAAACCTTCAGACCTGGAGGAGGAAATATGAAGGACAATTGGAGAAGTGAATTATATAAATATA  
AAGTAGTAAGAATTGAACCATTA---GGAATAGCACCCACTAAGGCAAAGAGAAGAGTGGTG-----  
-----CAGAGAGAAAAAAGAGCA---GCA-----TTTGGAGCC-----  
---TTGTTCCCTTGGGTTCTTGGGAGCA---GCAGGAAGCACTATG---GGCGCAGCGTCA---  
GTAACGCTGACGGTACAG---GCCAGACAA---TTATTG---TCTGGTATAGTGCAACAGCAGAAC---  
AATTTG---CTGAGA---GCTATTGAGGCGCAACAGCATCTGTTGCAACTCACAGTCTGGGGCATC  
>JF683747  
TTCTACTGTAATACATCACAACCTGTTTAATAGTACTTGGGAATAGTACTTTGGGGGTGAATAGTACTTTGGGGG  
TTAATAAT-----

-----GGTACT-----  
GACAATGACACTATCATCTCACTCCCATGTAGAATAAAACAAATTATAAACATGTGGCAGGAAGTAGGAAAAG  
CAATGTATGCCCCCTCCCATCAGAGGACTAATTAGATGTTTCATCAAAT---  
ATTACAGGGCTGATATTAACAAGAGATGGTGGGAGTAGCAAGAATAAC-----  
-----  
AGCACGAATGAGACTTTCAGACCTGGAGGAGGAGATATGAGGGACAATTGGAGAAGTGAATTATATAAATATA  
AAGTAGTAAAAATTGAACCATTA---GGAATAGCACCCACCCAGGCAAAGAGAAGAGTGGTG-----  
-----CAGAGAGAAAAAAGAGCA---GTGGGG---ATAGGAGCT-----  
---GTGTTCTTGGGTTCTTGGGAGCA---GCAGGAAGCACTATG---GGCGCAGCGTCT---  
GTGACGCTGACGGTACAG---GCCAGACTA---TTATTG---TCTGGTATAGTGCAACAGCAGAAC---  
AATCTG---CTGAAG---GCTATTGAGGCGCAACAACATCTGTTGCAACTCACAGTCTGGGGCATT  
>JF683751  
TTCTACTGTAATTCAACACAACCTGTTTAATAGTACTTGGACTTGAATGGTACTGAAGGGTCAAATAACACTG  
AA-----  
-----  
GGAAATGGCACAATCACACTCCCATGCAAAATAAAACAAATTGTAAACATGTGGCAGGAAGTAGGAAAAGCAA  
TGTATGCCCCCTCCCATCAGGGGACAAATTAAATGTTTCATCAAAT---  
ATTACAGGGCTGCTATTAACAAGAGATGGGGGTAATAGCACCATC-----  
-----  
AACGAGACCTTCAGACCTGGAGGAGGAGATATGAGGGATAATTGGAGAAGTGAGTTATATAAATATAAAGTAG  
TAAAAATTGAACCATTA---GGGGTAGCACCCACCAAGGCAAAGAGAAGAGTGGTG-----  
-----CAGAGAGAAAAAAGAGTG---GCAGGA---CTAGGAGCT-----  
ATGTTCTTGGGTTCTTGGGAGCA---GCAGGAAGCACTATG---GGCGCAGCGTCA---  
ATAACGCTGACGGTACAG---GCCAGACAG---TTATTG---TCTGGTATAGTGCAACAGCAGAAC---  
AATCTG---CTGAGG---GCTATTGAGGCGCAACAGCATCTGTTGCAACTCACAGTCTGGGGCATC  
>JF683753  
TTCTACTGTAATACAACAAAACCTATTTAATAGTGCTTGGATTAAATGGTACTTGAATGGTACTGAAGGGTCA-  
-----  
-----  
AATAAATCAACCACCATCACACTCCCATGCAGAATAAAACAAGTTATAAACCTGTGGCAGGAAGTAGGAAAAG  
CAATGTATGCCCCCTCCCATCAGGGGATACATTAATTGTTTCATCAAAT---  
ATTACAGGACTGCTATTAACAAGGGATGGTGGTAATAAT-----  
-----  
GAGACCGAGACCTTCAGACCTGGAGGAGGAAATATGAAGGACAATTGGAGAAGTGAATTATATAAATATAAAG  
TAGTAAAAATTGAACCATTA---GGAATAGCACCCACCAAGGCAAGGAGACGAGTGGTG-----  
-----CAGAGAGAAAAAAGAGCA---GTCACA---CTAGGAGCT-----  
ATGTTCTTGGGTTCTTGGGGGCA---GCAGGAAGCACTATG---GGCGCAGCGTCA---  
CTGACGCTGACGGTACAA---GCCAGACTA---TTATTG---TCTGGTATAGTGCAAGCAGCAAAAC---  
AATTTG---CTGAGG---GCTATTGGGGCGCAACAACATCTGTTGCAACTCACAGTCTGGGGCATC  
>JF683754  
TTCTACTGTAATACAACACCACTATTTAATAGTACCTGGAATGATACTAGCTGGTCAGTGGCCACTAAG----  
-----  
-----  
AATGATACAAATATCACACTCGCATGCAGAATAAAACAAATTATAAACCTGGGGCAGGAAGTAGGAAGAGCAA  
TGTATGCCCCCTCCCATCAGAGGACTAATTAGATGTTTCATCAAAT---  
ATTACAGGGTTGCTATTAACAAGAGATGGGGGTAGCAACGAGAAC-----  
-----  
AATGGAAGTGAAGTCTTCAGACCTGCAGGAGGAAATATGAAGGACAATTGGAGAAGTGAATTATACAAATATA  
AAGTGGTACAAATTGAACCATTA---GGAGTAGCACCCACCAGGGCACGGAGAAGAGTGGTG-----  
-----CAAAGAGGAAAAAAGAGCA---GTGGGA---ATAGGAGCT-----  
---GTTCTCTTGGGTTCTTGGGAGCA---GCAGGAAGCACTATG---GGGGCAGCTTCA---  
ATTGGGCTGACGGTACAG---GCCAGACAA---TTATTG---TCTGGTATAGTGCAAGCAGCAAAGC---  
AATTTG---CTGAGA---GCTATTGAGGCGCAACAACATCTGTTGCAACTCACAGTCTGGGGCATC  
>JF683769  
TTCTACTGTAATACAACATCACTGTTTAATAGTACTTGAATGAAACACAATTGCATAATAGCACTTGAATG  
AG-----

-----  
ACTAGAAATGACAATATCACACTCCCATGCAAAATAAAACAAATTATAAACATGTGGCAGGAAGTAGGAAAAG  
CAATGTATGCCCCCTCCCATCAGAGGACTAATTAAATGTACATCAAAT---  
ATTACAGGAATGTTACTGACAAGAGATGGGGGTAGTAACCCCTAACAAT-----  
-----  
-----  
ACTAACAATACTGAGATTTTCAGACCTGGAGGAGGAGATATGAGGGACAATTGGAGAAGTGAATTATATAAAT  
ATAAAGTAGTACAAATTGAACCATTA---GGAATAGCACCCACCAAGGCAAAGAGAAGAGTGGTG-----  
-----CAGAGAGAAAAAAGAGCA---CTGGGA---ATAGGAGCT---  
-----ATGTTCCCTTGGGTTCTTGGGAGCA---GCAGGAAGCACTATG---GGCGCAGCGTCA---  
CTGACGCTGACGGTACAG---GCCAGGCAA---TTGTTG---TCTGGTATAGTGCAACAGCAAAAC---  
AATTTG---CTGAGA---GCTGTTGAGGCGCAACAGCATCTGTTGCAACTCACAGTCTGGGGCATT  
>JF683775  
TTCTACTGTAATACAACACAACCTATTTAATAGTAATTGGACAGTAGTTAATAGTACTTGGTCAGCTAATAGTA  
CTTGGAATAGT-----  
-----ACTACA-----  
GGGTCAAATAACACTATCACACTCCAATGCAGAATAAAACAAATTATAAACATGTGGCAGGAAGTAGGAAAAG  
CAATGTATGCCCCCTCCCATCAGAGGAAATATTAGTTGTTTCATCAAAT---  
ATTACAGGGCTGCTCCTAGTAAGAGGAGGT---AATGAATCAAAA-----  
-----  
-----  
TCACAAGAGATCTTCAGACCTATAGGAGGAAACATGAAGGACAATTGGAGAAGTGAATTATACAAATATAAAG  
TAGTAAAAATTGAGCCATTA---GGAGTAGCACCTACCAAGGCAAAGAGAAGAGTGGTG-----  
-----CAAAGAGAAAAAAGAGCT---GTGGGA---CTAGGAGCT-----  
TTGTTCCCTTGGGTTCTTGGGAGCA---GCAGGAAGCACTATG---GGCGCAGCGTCA---  
ATAACGCTGACGGTACAG---GCCAGACAA---TTATTG---TCTGGTATAGTGCAACAGCAGAAC---  
AACCTG---CTGAGA---GCTATTGAGGCGCAACAGCATATGTTGCAACTCACAGTCTGGGGCATT  
>JF683778  
TTCTACTGTAATACAACACAACCTGTTTAATAGTACTTGGATTTTTACTGGGAATACCACACAACCTGGTTAATG  
GG-----  
-----  
AGTGTGAATGAGAATATCACACTCCCATGCAAAATAAAACAAATTGTAAACATGTGGCAGAAAGTAGGAAAAG  
CAATGTATGCCCCCTCCAATCAGAGGACCAATTAGCTGTACATCAAAT---  
ATTACAGGGCTGCTATTAATAAGAGATGGTGGTGTGGCAATGAGACC-----  
-----  
-----  
AATAGCACCGAGATCTTTAGGCCTGGAGGAGGAGATATGAGGGACAATTGGAGAAGTGAATTATATAAATATA  
AAGTAGTAAGAATTGAGCCAATA---GGAGTAGCACCCACTAAGGCAAAGAGAAGAGTGGTG-----  
-----CAGAGAGAAAAAAGAGCA---GTGGGA---CTAGGAGCT-----  
---GTGCTCTTTGGGTTCTTGGGAGCA---GCAGGAAGCACTATG---GGCGCAGCGTCA---  
GTGACGCTGACGGTACAG---GCCAGACAA---TTATTG---TCTGGTATAGTGCAACAGCAGAAC---  
AATTTG---CTGAAG---GCTATTGAGGCGCAACAGCATTTGTTGCAACTCACAGTCTGGGGCATC  
>JF683785  
TTCTACTGTAATTCATCACAACCTGTTTGATAGGTCTTGGCATACTAGTGGTACTCGGAAGGATAATAATACAA  
GT-----  
-----  
ATAAATGGAACTATCATACTCCCATGTAGAATAAAACAAATTATACATATGTGGCAGGAAGTAGGGAAAGCAA  
TGACGCCCCCTCCCATCAGAGGAGCAATTAAGTGTACATCAAAT---  
ATTACAGGGCTGCTATTAACAAGAGATGGTGGTAATGGCAGTAAT-----  
-----  
-----  
AATGAACTGAACTTTTCAGACCTATAGGAGGGAATATGAAGGACAATTGGAGAAGTGAATTATATAAATATA  
AAGTGGTAAAAATTGAACCATTA---GGAGTAGCACCCACCAAGGCAAAGAGAAGAGTGGTG-----  
-----CAAAGAGAAAAAAGAGCA---GTGGGAGTAATAGGAGCT-----  
---ATGTTCCCTCGGGTTCTTGGGAGCA---GCAGGAAGCACTATG---GGCGCAGCGTCA---  
CTGACGCTGACGGTACAG---GCCAGACAA---TTATTG---TCTGGTATAGTGACGAGCAGAAC---  
AATCTG---CTGAGG---GCTATTGAGGCGCAACAGCATCTGTTGCAACTCACAGTCTGGGGCATC  
>JF683787  
TTCTACTGTAATACAACACAATTGTTTAATAGTACTTGGGAATACAACAGGGAATACAACAGAATGGGGTAATA  
GTACTGAA-----

-----AGTAAT-----  
AGTACTGAAGAACTATCACACTCCCATGCAGAATAAAACAAATTATAAACAGATGGCAGGAAGTAGGAAAAG  
CAATGTATGCCCCCTCCCATCAGCGGAAAAATTAAATGCTCATCAAAT---  
ATTACAGGGTTACTATTAACAAGAGATGGGGGTGATAATAACGAGACC-----  
-----  
AACGGAAGTGAAGTCTTCAGACCTGGAGGAGGAGATATGAGGGACAATTGGAGAAGTGAATTATATAAATATA  
AAGTAGTAAAAATTGAACCATTA---GGAGTAGCACCCACCCAGGCAAGGAGAAGAGTGGTG-----  
-----CAGAGAGAAAAAAGAGGA---GTAGGA---CTAGGAGCT-----  
---TTGTTCCCTTGGGTTCTTGGGAGCA---GCAGGAAGCACTATG---GGCGCAGCGTCA---  
ATGACGCTGACGGTACAG---GCCAGACAA---CTATTG---TCTGGTATAGTGCAACAGCAAAAC---  
AATTTG---CTGAGA---GCTATTGAGGCGCAACAGCGTCTGTTGCAACTCACAGTCTGGGGCATC  
>JF683788  
TTCTACTGTAATACAACACAGCTGTTTAATAGTACCTGGTATAATATTGATAATGCTACAGGGACAGAT----  
-----  
GGTAATGAGACTATCACACTCCCATGCAGAATAAAACAAATTATAAACAGATGGCAGGAAGTAGGAAAAGCAA  
TGTATGCTCCTCCCATCAGTGGACAAATTAATTGTTCTTCAAAT---  
ATTACAGGGTTACTATTAACAAGAGATGGTGGTAATAGTAATAACAGT-----  
-----  
AATGAGAGTGAGACCTTCAGACCTGGAGGAGGAGATATGAAGGACAATTGGAGAAGTGAATTATATAAATATA  
AAGTAGTAAGAATTGAACCATTA---GGAGTAGCACCCACCAAGGCAAGGAGAAGAGTGGTG-----  
-----CAGAGAGAAAAAAGAGCA---GTGGGAACGCTAGGAGCT-----  
---ATGTTCCCTTGGGTTCTTGGGAGCA---GCAGGAAGCACTATG---GGCGCAGCATCA---  
ATAACGCTGACGGTACAG---GCCAGACAA---TTATTG---TCTGGTATAGTGCAACAGCAGAAC---  
AATTTG---CTGAGA---GCTATTGAGGCGCAACAGCATCTGTTGCAACTCACAGTCTGGGGCATC  
>JF683790  
TTCTACTGTAATACAACAAAACCTGTTTAATAGTACTTGGCCTTGGAATAGTACTGATACTGGGGGTGAA----  
-----  
ACTAATGAAAATATCACACTCCCTTGCAGAATAAGACAAATTGTAAACAGGTGGCAGGAAGTAGGAAAGGCAA  
TGTATGCCCCCTCCCATCAGCGGAGTAATTAATTGTCTATCAAAT---  
ATTACAGGGATACTATTAACAAGAGATGGTGGTAATAATAATGAGACT-----  
-----  
AACAACTGAGATCTTCAGACCTGGAGGAGGAGATATGAGGGACAATTGGAGAAGTGAATTATATAAATACA  
AAGTAGTAAGAATTGAACCATTA---GGAATAGCACCCACCAAGGCAAAGAGAAGAGTGGTG-----  
-----CAGAGAGAAAGAAGAGCA---GTGGGA---TTTGGAGCT-----  
---TTTTCCCTTGGGTTCTTGGGAGCA---GCAGGAAGCACTATG---GGCGCAGCGTCA---  
GTAACGCTGACGGTACAG---GCCAGACAA---TTATTG---TCTGGTATAGTGCAACAGCAGAAC---  
AACTTG---CTGAGA---GCTATTGAGGCGCAACAACATCTGTTGCAACTCACAGTCTGGGGCATC  
>JF683794  
TTCTACTGTGATACATCAGAACTGTTTAATAGTACTTGAATAATACTAAAAGGGTAAATAACACGAATAAC-  
-----  
ACAAATGAAAATATCACACTTCCATGCAGAATAAAACAAATTATAAACATGTGGCAGGGAGTAGGAAAAGCAA  
TGTATGCCCCCTCCCATCAGTGGACCAATTAATGTACATCAAAT---  
ATTACAGGGCTGTTATTGACTAGAGATGGTGGTAAGAATAACACG-----  
-----  
AATGGGACTGAGATCTTCAGACCAGGAGGAGGAGATATGAGGGACAATTGGAGAAGTGAATTATATAAATATA  
AAGTAGTACAAATTGAACCATTA---GGAATAGCACCCACCAAGGCAAAAAGAAGAGTGGTG-----  
-----CAAAGAGAAAAAAGAGAA---CTAACG---ATGGGAGCT-----  
---CTGTTCCCTTGGGTTCTTGGAGCGCA---GCAGGAAGCACTATG---GGCGCAGCGTCA---  
ATAACGCTGACGGTACAG---GCCAGACAA---TTATTG---TCTGGTATAGTGCAACAGCAGAAC---  
AATCTG---CTGAGA---GCTATTGAGGCGCAACAGCATATGTTGCAACTCACAGTCTGGGGCATC  
>JF683801  
TTCTACTGTAAGACATCACAACCTGTTTAATAGTACTTGGCAGTCTAATGATACTTGGCTGCCTAATGGTAACG  
AG-----

-----  
AGTGATGCCAAGATCACACTCCCATGCAGAATAAAACAAATTATAAATAGGTGGCAGGAAGTAGGAAAAGCAA  
TGTATGCCCCCTCCCATAGCAGGACAAATTAGCTGTTTCATCAAAT---  
ATTACAGGGCTGCTATTAACAAGAGATGGTGGCAACAACAATGAC-----  
-----  
-----  
AATAACAGCGAGATCTTCAGGCCTGCAGGAGGAGATATGAGGGACAATTGGAGAAGTGAATTATATAAATATA  
AAGTAGTAAAAATTGAGCCATTA---GGAGTAGCACCCACCAAGGCAAAGAGAAGAGTGGTG-----  
-----CAAAGAGAAAAAAGAGCA---GTGGGAGCAATAGGAGCT-----  
---ATGTTCCCTTGGGTTCTTGGGAACA---GCAGGAAGCACTATG---GGCGCAGCGTCA---  
CTAACGCTGACGGTACAG---GCCAGACAA---TTATTG---TCTGGTATAGTGCAACAGCAGAAC---  
AATCTG---CTGAGG---GCTATTGAGGCGCAACAGCATCTGTTGCAACTCACAGTCTGGGGCATC  
>JF683804  
TTCTACTGTAATTCAACACGACTATTTAATAGTACTTGGTATAATAATGGTACTTGGAAAGGTACTGAAGGGA  
TAAATAAC-----  
-----ACC---  
GGGATAAATAACACCATCATACTCCCATGCAGAATAAAACAAATTATAAACATGTGGCAGGAAGTAGGAAAAG  
CAATGTATGCCCCCTCCCATCGAAGGACAAATTAAATGTACATCAAAT---  
ATTACAGGGCTGTTATTAACAAGAGATGGTGGTACTAACGGGACGACCGATGGT-----  
ACTAACGGGACGACCGAT---GGTACTAAC-----  
-----  
GGGACCGAGATCTTCAGACCTATAGGAGGAAATATGAGGGACAATTGGAGAAGTAAATTATATAAATATAAAG  
TAATAAAAATTGAACCATTA---GGAGTAGCACCCACCAAGGCAAAGAGAAGAGTGGTG-----  
-----CAGAGAGAAAAAAGAGGA---GCA-----CTAGAAGTT-----  
TTTTTCCTTGGGTTCTTGGGAGCA---GCAGGAAGCACTATG---GGCGCAGCGTCA---  
ATGGCGCTGACGGTACAG---GCCAGACTA---TTGTTG---TCTGGTATAGTGCAACAGCAGAAC---  
AATTTG---CTGAGA---GCCATTGAGGCGCAACAGCATATGTTGCAACTCACAGTCTGGGGCATC  
>JQ403048  
TTCTACTGTAATACAGCACAACCTGTTCAACAGTACGTGGACAAATGATACTGGGGAAGTGAATGATACTAAAG  
AG-----  
-----  
TCAAATGACACTATCACACTCCCATGCAGGATAAAACAAATTCATAAATATGTGGCAGGAAGTAGGAAAAGCAA  
TGTATGCCCCCTCCCATCCAAGGATCAATTAGGTGTTTATCAAAT---  
ATTACAGGGCTGCTACTAACAAGAGATGGTGGTAATGGTAATAGGTCC-----  
-----  
-----  
GATAATGAGACCTTCAGACCTGGAGGAGGAGATATGAGGGACAATTGGAAAAGTGAATTATATAAATATAAAG  
TAGTAAAAATTGAACCATTA---GGAGTAGCACCCACCAAGGCAAAGAGAAGAGTGGTG-----  
-----CAGAGAGAAAAAAGAGCA---GTGGGA---GTAGGAGCT-----  
TTGTTCCCTTGGGTTCTTGGGAGCA---GCAGGAAGCACTATG---GGCGCAGCATCA---  
GTGATGCTGACGGTACAG---GCCAGACAA---TTATTG---TCTGGTATAGTGCAACAGCAGAAC---  
AATTTG---CTGAGG---GCTATTGAGGCGCAACAGCATATGTTGCAACTCACAGTCTGGGGCATC  
>KT124812  
TTTTACTGTAATACAACAAACCTGTTTAAATAGTACTTGGTCTAAAAATGATACTAATGTGACAAACAAACCT-  
-----  
-----  
GATAATGACATTATAACACTCCCATGCAGAATAAAACAAATTATAAACATGTGGCAGGAAGTAGGAAAAGCAA  
TGTATGCCCCCTCCCATCAGGGGACAAATTAGATGTTCTTCAAAT---  
ATTACAGGGTTGCTATTAACAAGAGATGGTGGCAATAATAGCACC-----  
-----  
-----  
AATGGGTCCGAGATCTTCAGACCTGGAGGAGGAGATATGAGGGACAATTGGAGAAGTGAAGTATATAAATATA  
AAGTAGTAAAAATTGAACCATTA---GGAATAGCACCCACCAGGGCAAAGAGAAGAGTGGTG-----  
-----CAGAGAGAGAAAAGAGCA---GTGGGA---ATAGGAGCG-----  
---TTGTTCCCTTGGGTTCTTGGGAGCA---GCAGGAAGCACTATG---GGCGCAGCGTCA---  
ATGACGCTGACGGTACAG---GCCAGACTA---TTACTG---TCTGGTATAGTGCAACAGCAGAAC---  
AATTTG---CTGAGA---GCTATTGAGGCGCAACAGCATATGTTGCAACTTACAGTCTGGGGCATC  
>KT124752  
TTCTACTGTAATACAACAAAATTGTTTAGTAGTAATTGGACTTGGGATAATAATAATACGGGTAATTGGACTG  
GT-----

ACTTGGAATAGTGTTAAT-----  
AACACTGAACATAATATCACACTCATATGCAGAATAAAACAAATTATAAACATGTGGCAGGGAGTAGGAAAAG  
CGATGTATGCCCCCTCCCATCAGAGGACAAATTAAATGTTTCATCAAAT---  
ATTACAGGGCTGCTGTTAACAAGAGATGGTGGTATTACTAACACTAGC-----  
-----  
-----  
AATAATACAGAGACCTTCAGACCTGGAGGAGGAGATATGAGGGACAATTGGAGAAGTGAATTATACAAATATA  
AAGTAGTACAAATTGAACCATTA---GGAGTAGCACCCACCAAGGCAAAGAGAAGAGTGGTG-----  
-----CAAAGAGAAAAAAGAGAT---TTGGGA---ATAGGAGCT-----  
---TTGTTCCCTTGGGTTCTTGGGAGCA---GCAGGAAGCACTATG---GGCACAGCATCA---  
ATAATGCTGACGGTACAG---GCCAGACAA---TTACTG---TCTGGTATAGTGCAAGCAGCAGAAC---  
AATCTG---CTGAGA---GCTATTGAGGCGCAACAGCATATGTTGCAACTCACAGTCTGGGGCATC  
>KT124755  
TTCTATTGTAATACAACACAACCTGTTTAAATAGTACTTGGAAATAGTACTGAACGTTTAAATAGCACTGAA----  
-----  
-----  
AGTAATGATAATATCACTATCCCATGCAGAATAAAACAAATTATAAACTTGTGGCAGGAAGTAGGAAAAGCAA  
TGTATGCCCCCTCCCATCAGAGGACAAATTAGATGCTCATCAAAT---  
ATTACAGGGCTGCTATTAAACAAGAGATGGTGGTAATAACGAAAAC-----  
-----  
-----  
AATACCATCGAGATCTTCAGACCTGGAGGAGGAGATATGAGGGACAATTGGAGAAATGAACTATATAAAATATA  
AAGTAGTAAAAATTGAACCATTA---GGAATAGCACCCACCAAGGCAAAGAGAAGAGTGGTG-----  
-----CAGAGAGAAAAAAGAGCA---GTGGGA---CTAGGAGCT-----  
---TTGTTCCCTTGGGTTCTTGGGAGCA---GCAGGAAGCACTATG---GGCGCAGCGTCA---  
ATAACGCTGACGGTACAG---GCCAGACAA---TTACTG---TCTGGTATAGTGCAACAGCAGAAC---  
AATCTG---CTGAGG---GCTATTGAGGCGCAACACCAGCTGTTGCAACTCACAGTCTGGGGCATT  
>KT124757  
TTCTACTGTAATACATCACGATTGTTTAAATAGTACTTGGAAATAACACTAAAAACAGAGATATAGATATGACTG  
GAGAC-----  
-----  
-----  
ATAAATGGAACCATCACGCTCCAATGCAGAATAAAACAAATTTATAAACATGTGGCAGGGAGTAGGAAAAGCAA  
TGTATGCCCCCTCCCATCCCGGACTAATTAGATGTTTCATCAAAT---  
ATTACAGGGCTGCTATTAAACAAGAGATGGGGGTAATGATACTAAG-----  
-----  
-----  
AACAACTACTGAGATCTTCAGACCTGGAGGAGGAGATATGAGGGACAATTGGAGAAGTGAATTATATAAAT  
ACAAAGTAGTAAAAATTGAACCATTA---GGACTAGCACCCACCAGGGCAAAGAGAAGAGTGGTG-----  
-----CAGAGAGAAAAAAGAGCA---GTGACA---CTAGGAGCT---  
-----GTGTTCCCTTGGGTTCTTGGGAACA---GCAGGAAGCACTATG---GGCGCAGCGTCA---  
CTAACGCTGACGGTACAG---GCCAGACAA---TTACTG---TCTGGTATAGTGCAACAGCAGAGC---  
AACCTG---CTGAGA---GCTATTGAGGCGCAACAGCACATGTTGCAACTCACGGTCTGGGGCATC  
>KT124794  
TTCTACTGTAATTCAACAAAGCTGTTTAAACAGTACTTGGTATCCTAAAGGTAATAGTAGTAATAGTACTAGTG  
GTAAGTACTGAG-----  
-----  
-----  
AATACTACTGAGATCATCACGCTCCCATGCAGAATAAAGCAAGTTATAAACATGTGGCAGACAGTAGGAAAAG  
CAATGTATGCCCCCTCCCATCAGAGGAATAATTAGCTGTTTCATCAAAT---  
ATTACAGGGATACTATTAAACAAGAGATGGTGGTACAAACCAAAT-----  
-----  
-----  
GAAAATGAGACCTTCAGACCTGCAGGAGGAAATATGAGGGACAATTGGAGAAGTGAATTATATAAATATAAAG  
TAGTAAAAGTTGAACCATTA---GGAGTAGCACCCACCAAGGCAAAGAGAAGAGTGGTG-----  
-----CAGAGAGAAAGAAGAGCAGTAGTGGGA---ATAGGAGCT-----  
GTGTTCCCTTGGGTTCTTGTACAGCA---GCAGGAAGCACTATG---GGCGCAGCGGCA---  
GTGACGCTGACGGTACAG---GCCAGACAA---TTATTG---TCTGGTATAGTGCAACAGCAGAAAT---  
AATCTG---CTGAGA---GCTATTGAGGCGCAACAGCATCTGTTGCAACTCACAGTCTGGGGCATC  
>KT124800  
TTCTACTGTAATACAACACAACCTGTTTAAACAGTAATTGGACGACTAATAACTGGGAGTAATGATACGGAGA  
TTAATGATACT-----

-----ATG---

GAGATTAATGATACTATCACCTCCCATGCAGAATAAAACAAATTATAAACAGGTGGCAGGAAGTAGGAAAAG  
CAATGTTTGGCCCTCCTATTAGAGGACAAATCAGCTGTTTCATCAAAT---

ATTACAGGGCTGCTATTAACAAGAGATGGTGGCGACAACAACGAGACAGAA-----  
-----  
-----

ACCACCGAAATCTTTAGGCCTGGAGGAGGAGATATGAGGGACAATTGGAGAAGTGAATTATATAAATATAAAG  
TAGTAAGGGTTGAACCATTA---GGAGTAGCACCCACCAAGGCAAAGAGAAGAGTGGTG-----  
-----CAGAGAGAAAAAAGAGCA---GCG-----ATAGGAGCT-----  
GTGTTCCCTTGGGTTCTTGGGAGCA---GCAGGAAGCACTATG---GGCGCAGCGTCA---  
GTGGCGCTGACGGTACAG---GCCAGACAA---TTATTG---TCTGGTATAGTGCAACAGCAGAAC---  
AATCTG---TTGAGA---GCTATTGAGGCGCAACAGCACCTGTTGCAACTCACAGTCTGGGGCATT  
>KT124810

TTCTACTGTGAGTCAACACCATTATTTAATAATAGTTCAGAAGGGAACTTTAGTAGTTCAGAAGGGAGCTTTA  
GTAGAAGC-----  
-----TCAAGT-----

AACAACAACAGCACAAATCACGCTGTCATGTAAAATAAGACAAATTATAAACATGTGGCAGGAAGTAGGAAAAG  
CAATGTATGCCCCCTCCCATCAGAGGGCAAATTAGATGCTCATCAAAT---

ATTACAGGGCTGTTATTAACAAGAGATGGTGGTAAGGAGACAGAA-----  
-----  
-----

AATAACTGAGATCTTCAGACCAGGAGGAGGAAATATGAAGGACAATTGGAGAAGTGAATTATATAAATATA  
AAGTAGTAAAAATTGAACCATTA---GGAGTAGCACCCACCAAGGCAAAGAGAAGAGTGGTG-----  
-----CAGAGAGAAAAAAGAGCA---ATAGGAACACTAGGAGCT-----  
---ATGTTCCCTTGGTTTCTTGGGAGCA---GCAGGAAGCACTATG---GGCGCAGCGTCA---  
ATAACGCTGACGGTACAG---GCCAGACAA---TTATTG---TCTGGTATAGTGCAACAGCAGAAC---  
AATTTG---CTGAGG---GCTATTGAGGCGCAACAACATCTGTTGCAACTCACAGTCTGGGGCATC  
>KT124749

TTCTACTGTGATACAACAAAACCTGTTTAATAGTACTTGAATAGTACTTGAATAATACTACTAGGAATGACA  
CT-----  
-----

GGAGGTGAAGATAAAATTACACTCCCATGCAGAATAAAACAAATTGTAAACCTGTGGCAGGAAGTAGGAAAAG  
CAATGTATGCCCCCTCCCATCAGTGGACAAATTAGTTGTTTCATCAAAT---

ATTACAGGGATACTATTAACAAGAGATGGAGGTAATACAAGCAGT-----  
-----  
-----

ACTATTGAGACCTTCAGACCTGGAGGAGGAGATATGAGGGACAATTGGAGAAGTGAATTATATAAATATAAAG  
TAGTAAAAATTGAACCATTA---GGAATAGCACCCACCAAGGCAAAGAGAAGAGTGGTG-----  
-----CAAAGAGAAAAAAGAGCA---TTGGGA---ATAGGAGCT-----  
GTGTTCCCTTGGGTTCTTGGGAGCA---GCAGGAAGCACTATG---GGCGCAGCATCA---  
ATAACGCTGACGGTACAG---GCCAGACTA---TTATTG---TCTGGTATAGTGCAACAGCAAAAC---  
AATTTG---CTGAGA---GCTATTGAGGCGCAACAGCATCTGTTGCAACTCACAGTCTGGGGCATT  
>KT124753

TTCTACTGTAATTCAACACCACTGTTCAATAGTACTTGAATGAGACTAGTATTTGGAATGATCCTAATAATA  
ATACTTGG-----  
-----AATGCT-----

AATGCTACTGAATTTATCATACTCCCATGCAGAATAAAACAAATTATAAACATGTGGCAGGAAGTAGGAAAAG  
CAATGTATGCCCCCTCCCATCAGGGGAATAATTAGATGTTTCATCAAAC---

ATTACAGGACTGATATTAACAAGAGATGGTGGTAATAACAATGACACA-----  
-----  
-----

AATGACACCGAGATCTTCAGACCTGGAGGAGGAGATATGAGGGACAATTGGAGAAGTGAATTATATAAATATA  
AAGTGGTAGAAATTGAACCATTA---GGAATAGCACCCACCAAGGCAAAGAGAAGAGTGGTG-----  
-----CAGAGAGAAAAAAGAGCA---ATAGGAGCACTAGGAGCT-----  
---GTGTTCCCTTGGGTTCTTGGGAGCA---GCAGGAAGCACTATG---GGCGCAGCGTCA---  
CTGACGCTGACGGTACAG---GCCAGACAA---TTATTG---TCTGGTATAGTGCAACAGCAGAAC---  
AATTTG---CTGAGG---GCTATTGAGGCGCAACAACATCTGTTGCAACTCACAGTCTGGGGCATC  
>KT124754

TTCTACTGTAATACAGCAGCACTGTTTAATAGTACTTGAATAGTACTGAAGGGTTAAATAGCACTAACGAAA  
AT-----

-----  
GGTACTATCCCTATCACACTCCCATGCAAGATAAAACAAATTATAAACAGGTGGCAGGAAGTAGGAAAAGCAA  
TGTATGCCCCCTCCCATTAGTGGAAGAATTAAGTGTATCAAAT---  
ATTACAGGGCTGCTACTAACAAGAGATGGTGGTAATAATAGAGAG-----  
-----  
-----  
AGCAATGAAACCTTTAGACCTGGAGGAGGAGATATGAGGGACAATTGGAGAAGTGAATTATATAAATATAAAG  
TAGTAAGAATTGAACCATTA---GGAGTAGCACCCACCAGGGCAAAGAGAAGAGTGGTG-----  
-----CAGAGAGAAAAAAGAGCA---GTAGGA---CTAGGAGCT-----  
TTGTTTCCTTGGGTTCTTGGGAGCA---GCAGGAAGCGCTATG---GGCGCAGCGTCA---  
ATAACGCTGACGGTACAG---GCCAGACAA---TTATTG---TCTGGAATAGTGCAACAGCAGAAC---  
AATCTG---CTAAGA---GCTATTGAGGCGCAACAGCATCTGTTGCAACTCACAGTCTGGGGCATC  
>KC247955  
TTCTACTGTAATACATCAAACTGTTTAATGTGAGCACTAGACAGACAAATGAC-----  
-----  
-----  
ACAAATAGAAATATCACACTCCCATGCAGAATAAAACAAATTATAAACAGGTGGCAGGAGGTAGGAAAAGCAA  
TGTATGCCCCCTCCCATCAGAGGACAAATTAGATGTTTCATCAAAC---  
ATTACAGGGCTACTATTAACAAGAGATGGTGGTAACAGCAGCAAC-----  
-----  
-----  
AATGAGACCTTCAGACCTGGAGGAGGAGATATGAGAGACAATTGGAGAAGTGAATTATATAAATATAAAGTAG  
TAAAAATTGAACCATTA---GGAATAGCACCCACCAAGGCAAGGAGAAGAGTGGTG-----  
-----CAGAGAGAAAAAAGAGCA---GTGACA---CTGGGAGCT-----  
ATGTTTCCTTGGGTTCTTAGGCATG---GCAGGAAGCACTATG---GGCGCAGCGTCA---  
GTGACGCTGACGGTACAG---GCCAGACAA---TTATTG---TCTGGTATAGTGCAACAGCAAAAC---  
AATTTG---CTGAGA---GCTATTGAGGCGCAACAGCATCTGTTGCAACTCACGGTCTGGGGCATT  
>KT124772  
TTCTACTGTAATACATCAAAATTGTTCAATAGTACTTGGCATAGGAATAATAATACAGTCTCAGGAAAT----  
-----  
-----  
GTCACAGGGAATATCACACTCCAATGTAGAATAAAACAATTTATAAACATGTGGCAGGAAGTAGGAAAAGCAA  
TGTATGCCCCCTCCCGTCAGCGGAAAAATTAGTTGTGTATCAAAT---  
ATTACAGGGATACTTTTAACAAGAGATGGAGGTAATAACAACACA-----  
-----  
-----  
GAGAACAGCACAGAGACCTTCAGACCTGGAGGAGGAGATATGAGGGACAATTGGAGAAGTGAATTATATAAAT  
ATAAGTAGTAAAAATTGAACCATTA---GGACTGGCACCCACCAAGGCAAAGAGAAGAGTGGTG-----  
-----CAGAGAGAAAAAAGAGCA---ATAACG---CTGGGAGCT---  
-----ATGTTTCCTTGGGTTCTTGGGAGCA---GCAGGAAGCACTATG---GGCGCAGCGTCG---  
ATGACGCTGACGGTACAG---GCCAGACTA---TTATTG---TCTGGTATAGTGCAACAGCAAAAC---  
AACTTG---CTGAGA---GCTATTGAGGCGCAACAACATCTGTTGCAGCTCACAGTCTGGGGCATC  
>KT124797  
TTCTACTGTGATACATCAAACTGTTTAATAGTACCTGGATTAGTAATGGTACCTGGATTATAAATAGTACTG  
GTAATGGGACT-----  
-----AATGAT-----  
ACTGAAGGGTCAGATATCACGCTCCCATGCAGAATAAGACAAATTGTAAATAGGTGGCAGGAAGTAGGAAAAG  
CAATGTATGCCCCCTCCTATCAGTGGATATATTAGATGTTTCATCAAAT---  
ATTACAGGGATACTATTAACAAGAGATGGTGGTAATGACGAGAATACC-----  
-----  
-----  
ACCGATACCGAGACCTTCAGACCTGGAGGAGGAGATATGAGGGACAATTGGAGAAGTGAATTATATAAATATA  
AAGTAGTAAAACCTTGAACCTTA---GGAATAGCACCCACCAAGGCAAAGAGGAGAGTGGTG-----  
-----CAGAGAGAAAAAAGAGCA---GTGGGA---CTAGGAGCT-----  
---ATGTTTCCTTGGGTTCTTGGGAGCA---GCAGGAAGCACTATG---GGCGCAGCGTCA---  
ATAACGCTGACGGTACAG---GCCAGACTA---TTATTG---TCTGGTATAGTGCAAGCAGCAAAAC---  
AACTTG---CTGCAG---GCTATTGAGGCGCAACAACATCTGTTGCAACTCACAGTCTGGGGCATC  
>KC248026  
TTCTATTGTGACACAACAACAACTGTTTAATAGCACTTGGATTAATGGTACCAGGAATGATACTGAAGGG----

-----  
TCAAATAATACTATCACACTCCAATGCAGAATAAAACAGATTATAAACATGTGGCAGGAAGTAGGAAAAGCAA  
TGTATGCCCCCTCCCATCAAAGGACAAATTAGATGTTTCATCAAAT---  
ATTACAGGGTTACTATTAACAAGAGATGGTGGTACGGACAATGACACAAGT-----  
-----  
-----  
AATGAGACCGAGATCTTCAGACCGGGAGGAGGAAATATGAAGGACAATTGGAGAAGTGAATTATATAAATATA  
AAGTTGTAAAAATTGAACCATTA---GGAGTAGCACCCACCAAGGCAAAGAGAAGAGTGGTG-----  
-----CAAAGAGAAAAAAGAGCA---GTGGGA---ATAGGAGCA-----  
---TTGTTCTTGGGTTCTTGGGAGCA---GCAGGAAGCACTATG---GGCGCAGCATCA---  
ATAACGCTGACGGTACAG---GCCAGACAA---TTATTG---TCTGGGATAGTGCAACAGCAGAAC---  
AACTTG---CTGAGA---GCTATTGAGGCGCAACAACATATGTTGCAACTCACAGTCTGGGGCATC  
>KC248015  
TTCTACTGTGATTCATCAAACTGTTTAATAGTACTTGGAAATGATTCTACTTCAGGGAATACCAAT-----  
-----  
-----  
GCAAAATGACACTATCATACTCCCATGCAGAATAAGGCAAATTATAAACATGTGGCAGGAAGTAGGAAAAGCAA  
TGTATGCCCCCTCCCATTAGTGAATAATTAGATGTTTCATCAAAT---  
ATTACAGGGCTGCTATTAACAAGAGATGGTGGTATTAACAAGAGTGAA-----  
-----  
-----  
ACCACCGAGATCTTCAGACCTGGAGGAGGAGATATGAGGGATAATTGGAGAAGTGAATTATATAAATATAAAG  
TAGTAAAAATTGAACCAGTA---GGAGTAGCACCTACCAAGGCAAAGAGAAGAGTGGTG-----  
-----CAGAGAGAAAAAAGAGCA---GTGGGA---CTAGGAGCT-----  
TTGTTCTTGGGTTCTTGGGAGCA---GCAGGAAGCACTATG---GGCGCAGCGTCA---  
ATAACGCTGACGGTACAG---GCCAGACAA---GTATTG---TCTGGTATAGTGCAACAGCAGAAC---  
AATCTG---CTGAGA---GCTATTGAGGCGCAACAGCACCTGTTGCAACTCACAGTCTGGGGCATC  
>KT124802  
TTCTACTGTAATACTTCACAACTGTTTAATAGTTCCTGGAACGGGACACAGAGCGAGACAAATAACACCAAC-  
-----  
-----  
AGAAATGACACACTCACACTCCAATGCAAAATAAGACAAATTGTAAACATGTGGCAGGAAGTAGGAAAAGCAA  
TGTATGCCCCCTCCCATCAGGGGACCAATTAGATGTTTCATCAAAC---  
ATTACAGGGCTACTATTAACAAGAGATGGTGGTAGTGGTAATACAACC-----  
-----  
-----  
AGCAACACTACTGAGATCTTCAGACCTGGAGGAGGGAATATGAGGGACAATTGGAGAAGTGAATTATATAAAT  
ATAAGTAGTAAGAATTGAACCATTA---GGAGTAGCACCCACCAAGGCAAAGAGAAGAGTGGTG-----  
-----CAGAGAGAAAAAAGAGCA---GTGGGA---CTGGGAGCT---  
-----CTGTTCTTGGGTTCTTGGGAGCA---GCAGGGAGCACTATG---GGCGCAGCGTCA---  
TTGACGCTGACGGTACAG---GCCAGACAA---TTATTG---TCTGGTATAGTGCAACAGCAGAAC---  
AATTTG---CTGAAG---GCTATTGAGGCGCAACAGCATCTGTTGCAACTCACAGTCTGGGGCATC  
>KT124765  
TTTTACTGTAATACAACAGAACTGTTTAATAGTATTTGGGTAAATGGTTCTTGGGTAAATGGGACTAATAATG  
ATACTGAA-----  
-----  
-----  
TCAAATTCCAATATCACACTTCCATGCAGAATAAAACAAATTATAAACATGTGGCAAAAAGTAGGAAAAGCAA  
TATATGCCCCCTCCTATCAGAGGACAAATTAGATGTTTCATCAAAT---  
ATTACAGGGCTGCTACTAACAAGGGATGGTGGGATAGACAATAAC-----  
-----  
-----  
AAAACCAATGAGACCTTCAGGCCTGGAGGAGGAGATATGAGAGACAATTGGAGAAGTGAATTATACAAATATA  
AAGTAGTAAAAATTGAACCATTA---GGAGTAGCACCCACCAGGGCAAAGAGAAGAGTGGTG-----  
-----CAGAGAGAAAAAAGAGGA-----CTAGGACTT-----  
---GTGTTCTTGGGTTCTTGGGAGCA---GCAGGAAGCACTATG---GGCGCAGCGTCA---  
GTGACGCTGACGGTACAG---GCCAGACAA---TTATTG---TCTGGTATAGTGCAACAGCAAAAC---  
AATTTG---CTGAAG---GCTATTGAGGCGCAACAGCATCTGTTGCAACTCACAGTCTGGGGCATT  
>KT124811  
TTCTACTGTAATACATCACAGTTGTTTAATGGTACTTGGAAATAGTACTGTGGGATGGATAACTGAAGGATCAA  
ATAAC-----

-----  
ACTGGAGGAATTATCACACTCCCGTGCAGAATAAAACAAATTGTAAACAGATGGCAGGAAGTAGGAAAGGCCAA  
TGTATGCCCCCTCCTATCAGAGGAAATATTAGCTGTCTATCCAAT---  
ATCACAGGGCTATTATTGACAAGAGATGGTGGTAGCACAAACAGTAGT-----  
-----  
-----  
AATGATACAGAGACCTTCAGACCTGGAGGAGGAAATATGATGGATAATTGGAGAAGTGAATTATATAAAATATA  
AAGTAGTAAAAATCGAACCATTA---GGAGTAGCACCCACCGAGGCAAAGAGAAGAGTGGTG-----  
-----CAAAGAGACAAAAGAGCA---GTGGGAACAATAGGAGCT-----  
---ATGTTCCCTTGGGTTCTTGGGAGCA---GCAGGAAGCACTATG---GGCGCAGCGTCA---  
ATAACGCTGACGGTACAG---GCCAGACAA---TTGTTG---TCTGGTATAGTGCAACAGCAGAGC---  
AATCTG---CTGAAG---GCTATTGAGGCGCAACAGCGTATGTTGCAACTCACAGTCTGGGGCATC  
>KT124767  
TTCTACTGTAATACAACAGAACTGTTTAATAGTGTTTGGGAATAATAGTGGAAGGGTAACTGGCACTGGA----  
-----  
-----  
AATAGTACTAACATCACACTCCCATGCAGAATAAAACAAATTTATAAATATGTGGCAAGAAGTAGGAAAAGCAA  
TGTATGCCCCCTCCCATCAGTGGACAAATTAAATGTTTCATCAAAT---  
ATTACAGGGCTGCTACTAACAAGAGATGGTGGTCCTAACAAAACG-----  
-----  
-----  
GAGAAATGATACCTTCAGACCTACAGGAGGAGATATGAGAAATAATTGGAGAAGTGAATTATATAAAATATAAAG  
TAGTACAAATTGAACCATTA---GGAATAGCACCCACCACGGCAAAGAGAAGAGTGGTG-----  
-----CAGAGAGAAAAAAGAGAC---CTAGGA---CTAGGAGCT-----  
TTGTTTCATTGGGTTCTTGGGAGCA---GCAGGAAGCACTATG---GGCGCAGCGTCA---  
GTGACGCTGACGGTACAG---GCCAGACAA---TTATTG---TCTGGTATAGTGCAACAGCAGAAC---  
AATTTG---CTGAGA---GCTATTGAGGCGCAACAACATCTGTTGCAACTCACAGTCTGGGGCATC  
>KY324301  
TTCTACTGTAATACAACACAACCTGTTTAATAGTGAAGTGGACGATTAATAATGGTACTGGGAATGATACTGAAG  
GGTCATTA-----  
-----  
AATAGCAGTGACATCACACTCCCATGCAGAATAAGACAAATTATAAATATGTGGCAGAAAGTAGGAAAAGCAA  
TGTATGCCCCCTCCTATCAGAGGACAAATTAGATGCTCATCAAAT---  
ATTACAGGGCTGCTATTAAACAAGAGATGGTGGACAGGGTAGTAATGCT-----  
-----  
-----  
ACAAATGAAACCTTCAGACCTGCAGGAGGAAATATGAAAGATAATTGGAGAAGTGAATTATATAAAATATAAAG  
TAGTAAAAATTGAACCATTA---GGAGTAGCACCCACCAAGGCAAAGAGAAGAGTGGTG-----  
-----CAGAGAGAAAAAAGAGCA---GCA-----CTAGGAGCT-----  
ATGTTCCCTTGGGTTCTTGGGAGCA---GCAGGAAGCACTATG---GGCGCAGCGTCA---  
ATAACGCTGACGGTACAG---GCCAGACTG---TTATTG---TCTGGTATAGTGCAACAGCAAAAC---  
AATTTG---CTGAGG---GCTATTGAGGCGCAACAGCATCTGTTGCAACTCACAGTCTGGGGCATC  
>KY324379  
TTTTATTGTAACACAACACAACCTGTTTAATAGTACATGGGATAATGGTACATGGCATAATGAGAATAATGAGA  
ATAATGGAACA---TTT-----  
-----AATGCA-----  
ACAAGCCATGAAATATCACAATCCCATGCAGAATAAAACAAATTATAAATATGTGGCAGACAGTAGGAAAAG  
CAATGTATGCCCCCTCCCATTAGTGGAATAATCAGATGTTTCATCAAAT---  
ATTACAGGGCTGCTATTAAACAAGAGATGGTGGTAGTAATAACAGC-----  
-----  
-----  
CTTAATGAGACCTTCAGACCTGGAGGAGGAGATATGAGGGACAATTGGAGAAGTGAATTATATAAAATATAAAG  
TAGTAAAAATTGAACCATTA---GGAATAGCACCTCCAAGGCAAAGAGAAGAGTGGTG-----  
-----CAGAGAGAAAAAAGAGCA---GTGGGA---CTAGGAGCC-----  
ATGTTCCCTTGGGTTCTTGGGAGCA---GCAGGAAGCACTATG---GGCGCAGCGTCA---  
ATGACGCTGACGGTACAG---GCCAGACAA---TTATTG---TCTGGTATAGTGCAACAGCAGAGC---  
AATTTG---CTGAGA---GCTATTGAGGCGCAACAGCACATGTTGCAGCTAACAGTCTGGGGCATC  
>KY324630  
TTTTACTGTAATACAACCCAGCTATTTAATAGCAGTTGGAATGCAACACAACCTATGGAATACTGGGATGGAGA  
ATAATAGCTTT-----

-----GGGATGGAGAAT-----  
AATAGCTTAGAAATTATCACACTCCCATGTAGAATAAAACAAATTATAAACATGTGGCAGGAAGTAGGAAAAG  
CAATGTATGCCCCCTCCCATCAGCGGATTAATTAGATGTTTCATCAAAT---  
ATCACAGGGCTGCTATTAACAAGAGATGGTGGGATGCACAATAAGAGT-----  
-----  
-----  
AATGAGACTGAGACCTTCAGACCTGCAGGGGGAGATATGAAGGACAATTGGAGAAGTGAATTATATAAATATA  
AAGTAGTAAAAATTGAACCTTTA---GGGATAGCACCCACCAAGGCAAAGAGAAGAGTGGTG-----  
-----CAAAGAGAAAAAAGAGCA---GTGACG---CTGGGAGCT-----  
---ATGTTCCCTTGGGTTCTTGGGAGCA---GCAGGAAGCACTATG---GGCGCAGCGTCA---  
ATGACGCTGACGGTACAA---GCCAGACAA---TTATTG---TCTGGTATAGTGCAACAGCAGAAC---  
AATTTG---CTGAGA---GCTATTGAGGCGCAACAGCATCTGTTGCAACTCACGGTCTGGGGCATC  
>KY324641  
CTCTACTGTAATACAACACAACCTGTTTAAACAGTACTTGGTTTAAACAGTACCAACATTACTGACACTAGAGAAA  
AT-----  
-----  
AGCACAGAAATAATCACACTCCCATGTAGAATAAAACAAATTGTAAACATGTGGCAGGAGGTAGGAAAAGCAA  
TGTATGCCCCCTCCCATCAAAGGAAACATTAGCTGCATATCGAAT---  
ATTACAGGGCTGCTGTTAATAAGAGATGGTGGTAACATCACCAAT-----  
-----  
-----  
AGTACATCCGAGACCTTCAGACCAGGAGGAGGAGATATGAGGGACAATTGGAGAAGTGAATTATACAGATATA  
AAGTAGTAAAAATTGAACCATTA---GGAGTAGCCCCCACCAGGCAAGGAGAAGAGTGGTG-----  
-----CAGAGAGAAAAAAGAGCA---ATAGGGACATTTGGAGCT-----  
---ATGTTCCCTTGGTTTCTTGGGAGCA---GCAGGAAGCACTATG---GGCGCAGCGTCA---  
ATGGCGCTGACGGTACAG---GCCAGACTA---TTATTG---TCTGGTATAGTGCAACAGCAGAAC---  
AATTTG---CTGAGA---GCTATTGAGGCGCAACAGCACATGTTGCAACTCACAGTCTGGGGCATC  
>KY324761  
TTCTACTGTAATACAACAAAATTGTTTAAATAGTACTTGGAATTTTAATAGTACTTGGAAATACAACACAATTGC  
TTAATAGT-----  
-AATTGGAATACAAC-----  
AGTACTGAGAAGAACATCACACTCCCATGTAGAATAAAACAAATTATAAACAGGTGGCAGGACGTAGGAAAAG  
CAATGTATGCCCCCTCCCATCAGAGGACAAATTAGATGTTTCATCAAAC---  
ATTACAGGGCTACTATTAACAAGAGATGGTGGTGGTTGAGAACACC-----  
-----  
-----  
AACACCACAGAAGTCTTCAGACCTGGAGGAGGAGATATGAGAGACAATTGGAGAAGTGAATTATATAAATATA  
AAATAGTAAAAATTGAACCATTA---GGAATAGCACCCACCAAGGCAAAGAGAAGAGTGGTG-----  
-----CAAAGAGAAAAAAGAGCT---GTAACA---TTAGGAGCT-----  
---CTGTTCCCTTGGGTTCTTGGGAGCA---GCAGGAAGCACTATG---GGCGCAGCGTCA---  
ATGACGCTGACGGTACAG---GCCAGACTA---TTATTG---TCTGGTATAGTGCAACAGCAAAAC---  
AACTTG---CTGCAG---GCTATTGAGGCGCAACAGCATCTGTTGCAACTCACAGTCTGGGGCATC  
>KY324808  
TTCTACTGTAATACAACACCACTGTTTAAATAGTACTTGGGGGACTAATACTACAAAGCCAGAAATC-----  
-----  
-----  
GCAAAATGGAACCATCACACTCCAATGCAGAATAAAACAAATTATAAACATGTGGCAGGAAGTAGGAAAAGCAA  
TGTATGCCCCCTCCCATCAGGGGAGAAATTAGATGTTTCATCAAAT---  
ATTACAGGGCTGCTATTAACAAGAGATGGTGGTGGTTAACAAGACAAATGAT-----  
-----  
-----  
ACAAATGACACAAAT---  
AACACAGAGACCTTTAGACCTGGAGGAGGAGATATGAGGGACAATTGGAGAAATGAGTTATATAAATATAAAG  
TAGTAAAAATTGAACCATTA---GGAATAGCACCCACCAAGGCAAAGAGAAGAGTGGTG-----  
-----CAGAGAGAAAAAAGAGCG---GCA-----CTAGGAGCT-----  
CTTGTCCTTGGGTTCTTGGGAGCA---GCAGGAAGCACTATG---GGCGCAGCGTCA---  
GTGACGCTGACGGTACAG---GCCAGACTA---TTATTG---TCTGGTATAGTGCAACAACAGAAC---  
AATCTG---TTGAGA---GCTATTGAGGCGCAACAGCATATGTTGCAACTCACAGTCTGGGGCATC  
>MK115683  
TTCTACTGTGATTCAACGCAACTGTTTAAATAGTACCTGGCTGCCTAATAATGAGAGTAATTGGTATAATAATG  
GGAAT-----

-AATACTACAGGGTCAAAC-----  
AACAGTACAGCCAATATCACACTCCCATGCAGAATAAAACAAATTATAAACCTGTGGCAAGAAGTAGGAAAAG  
CAATGTATGCCCCCTCCCATCAGAGGAGCAATCAATTGCTTGTCAAAT---  
ATTACAGGGTTGTTACTAACAAGAGATGGTGGGAATAATAACGAG-----  
-----  
-----  
ACAACCGACCCACCGAGATCTTTAGACCTGGAGGAGGAAATATGAAGGACAATTGGAGAAGTGAATTATATA  
GATATAAAGTAGTAAAAATTGAACCATTA---GGAGTAGCACCCACCACGGCAAAGAGAAGAGTGGTG-----  
-----CAGAGAGAAAAAAGAGCA---GTGGGT---  
CTCGGAGCC-----TTGTTCCCTTGGGTTCTTGAGGAGCA---GCAGGAAGCACTATG---  
GGCGCAGCGTCA---GTAACGCTGACGGTACAG---GCCAGACAA---TTATTG---  
TCTGGTATAGTGCAGCAGCAGAAC---AATTTG---CTGAGG---  
GCTATTGAGGCGCAACAGCATATGTTGCAACTCACAGTCTGGGGCATC  
>MK115918  
TTTTACTGTAATACAACACAACCTGTTTAATAGTACTTGGAAATAGTACTGGGGATAGTACTTGGAAAT-----  
-----  
-----  
AATACAGATAATATCACACTCCCATGTAGAATAAGGCAAATTGTAAACATGTGGCAGGAAGTAGGAAAGGCAA  
TGTATGCTCCTCCCATCCGTGGACAAATTAAATGTTTCATCAAAT---  
ATTACAGGGCTGTTATTAACAAGGGATGGTGGTAACGGGAATGAGACG-----  
-----  
-----  
AGAGAAACAGAAACCTTCAGACCTGGAGGAGGAGATATGAGGGACAATTGGAGAAGTGAATTATATAAATATA  
AAGTAGTAAGAATTGAACCATTA---GGAATAGCACCCACTAAGGCAAAGAGAAGAGTGGTG-----  
-----CAAAGAGAAAAAAGAGCA---ATAGGAACACTGGGAGCT-----  
---GTGTTCCCTTGGGTTCTTGAGGAGCA---GCAGGAAGCACTATG---GGCGCAGCGTCA---  
ATGACGCTGACGGTACAG---GCCAGGCAA---TTATTG---ACTGGTATAGTGCAGCAGCAGAAC---  
AATCTG---CTGAAG---GCTATTGAGGCGCAACAGCATCTGTTGCAACTCACAGTCTGGGGCATT  
>MK116058  
TTCTATTGTAATACAACACAATTGTTTAATAGCACTTGGGATAATGGTACTGAAAAGTCAAGTAACCTTGGAG  
GA-----  
-----  
-----  
AATGATACAACCATCATTCTCCCATGCAGAATAAAACAAATTATAAACATGTGGCAGGAAGTAGGAAAAGCAA  
TGTATGCCCCCTCCCATCAAAGGAATAATTAGATGTTTCATCAAAT---  
ATTACAGGGCTGCTATTGACAAGAGATGGAGGTAATAGTACTGACACA-----  
-----  
-----  
AATGGGAGCGAGATCTTCAGACCTGGAGGAGGAGATATGAGGGACAATTGGAGAAGTGAATTATATAAGTATA  
AAGTAGTAAAAATTGAACCATTA---GGAGTAGCACCTACCAAGGCAAAGAGAAGAGTGGTG-----  
-----CAGAGAGAAAAAAGAGCA---GTGGGA---CTAGGAGCT-----  
---TTGTTCCCTTGGGTTCTTGAGGAGCA---GCAGGAAGCACTATG---GGCGCAGCGTCT---  
CTGACGCTGACGGTACAG---GCCAGACAA---TTGTTG---TCTGGTATAGTGCAACAGCAGAAC---  
AATTTG---CTGAGG---GCAATTGAGGCGCAACAGCATCTGTTGCAACTCACAGTCTGGGGCATC  
>MK116212  
TTTTACTGTAATTCAACACAACCTGTTTAATAGTACTTGGAAATAATAATGGTACTAATACTTGGAAAT-----  
-----  
-----  
AGTACAGGTAATATCACACTCCCATGTAAATAAGGCAAATTGTAAACATGTGGCAGAAAGTAGGAAAAGCAA  
TGTATGCTCCTCCCATCCGTGGACAAATTAAATGTTTCATCAAAT---  
ATTACAGGGCTGCTATTAACAAGAGATGGTGGTAACGAGAGTGAG-----  
-----  
-----  
AGCGAAACCTTCAGACCTGGCGGAGGAGATATGAGGGACAATTGGAGAAGTGAATTATACAAATATAAAGTAG  
TAAGAATTGAACCATTA---GGACTAGCACCCACTAAGGCAAAGAGAAGAGTGGTG-----  
-----CAGAGAGAAAAAAGAGCA---ATAGGAACACTGGGAGCT-----  
GTGTTCCCTTGGGTTCTTGGAACA---GCAGGAAGCACTATG---GGCGCAGCGTCA---  
ATGACGCTGACGGTACAG---GCCAGGCAA---TTATTG---TCTGGTATAGTGCAGCAGCAGAAC---  
AATCTG---CTGAAG---GCTATTGAGGCGCAACAGCATCTGTTGCAACTCACAGTCTGGGGCATT  
>MK086129

TTCTACTGTAATACAACAAAACCTGTTTAAATAGGACCTTTAATAGTACTTGGAATAGTACTGAAGGGTCA-----  
-----  
-----  
AATAGTACAACCTATTACACTCCCATGCAGAATAAAACAAATTATAAACATGTGGCAGGAAATAGGAAAAGCAA  
TGTATGCCCCCTCCCATCAGCGGACAAATTAGATGTTTCATCAAAT---  
ATCACAGGGCTGATATTAACAAGAGATGGTGGTAATGACACTAAC-----  
-----  
-----  
AATGAGACCTTCAGACCTGGAGGAGGAAATATGAAAGATAATTGGAGAAGTGAATTATATAAATATAAAGTAG  
TAAAAATTGAACCATTA---GGAGTAGCACCCACCAGGGCAAAGAGGAGAGTGGTG-----  
-----CAGAGAGAAAAAAGAGCA---GTGGGAGTAATAGGAGCT-----  
ATGTTCCCTTGGGTTTCTGGGAGCA---GCAGGAAGCACTATG---GGCGCAGCATCA---  
ATAACGCTGACGGTACAG---ACCAGACGA---TTAGTG---TCTGGTATAGTGCAACAGCAGAAC---  
AATCTG---CTGAGA---GCTATTGAGGCGCAACACAATCTGTTGCAACTCACAGTCTGGGGCATC  
>MN090868  
TTTTACTGTAATTCAACACAACCTGTTTAAATAGTACTTGGAATAATAATGGTACTAATACTTGGAAT-----  
-----  
-----  
AGTACAGGTAATATCACACTCCCATGTAAAATAAGGCAAATTGTAAACATGTGGCAGAAAGTAGGAAAAGCAA  
TGTATGCTCCTCCCATCCGTGGACAAATTAAATGTTTCATCAAAT---  
ATTACAGGGCTGCTATTAACAAGAGATGGTGGTAACGAGAGTGAG-----  
-----  
-----  
AGCGAAACCTTCAGACCTGGCGGAGGAGATATGAGGGACAATTGGAGAAGTGAATTATATAAATATAAAGTAG  
TAAGAATTGAACCATTA---GGACTAGCACCCACTAAGGCAAAGAGAAGAGTGGTG-----  
-----CAGAGAGAAAAAAGAGCA---ATAGGAACACTGGGAGCT-----  
GTGTTCCCTTGGGTTCTTGGGAACA---GCAGGAAGCACTATG---GGCGCAGCGTCA---  
ATGACGCTGACGGTACAG---GCCAGGCAA---TTATTG---TCTGGTATAGTGCAACAGCAGAAC---  
AATCTG---CTGAAG---GCTATTGAGGCGCAACAGCATCTGTTGCAACTCACAGTCTGGGGCATT  
>AF490512  
TTCTACTGTAATACAACAAAACCTGTTTAAATAGTACTTGGAAGTTTAAATGGTACTTGGAAGGTTGTTGAAGGAT  
CAAGT-----  
-----  
-----  
GACACTGCAGAAAATATCACACTCCCATGCAGAATAAAACAAATTATAAACATGTGGCAGGAAGTAGGAAAAG  
CAATGTATGCCCCCTCCCATCAGAGGACAAATTAGATGTTTCATCAAAT---  
ATTACAGGGTTACTATTAACAAGAGATGGTGGTAATAACACAAAC-----  
-----  
-----  
GAGACCCCCGAGACCTTCAGACCTGGAGGAGGAAATATGAAGGACAATTGGAGAAGTGAATTATATAAATATA  
AAGTAGTAAAAATTGAACCATTA---GGAGTAGCACCCACCAAGGCAAAGAGAAGAGTGGTG-----  
-----CAGAGAGAAAAAAGAGCA---GTGGGA---ATAGGAGCT-----  
---TTGTTCCCTTGGGTTCTTGGGAGCA---GCAGGAAGCACTATG---GGCGCAGCGTCA---  
ATAACGCTGACGGTACAG---GCCAGACAA---TTATTG---TCTGGTATAGTGCAACAGCAAAAC---  
AATTTG---CTGAGG---GCTATTGAGGCGCAACAGCATCTGTTGCAACTCACAGTCTGGGGCATC  
>U43096  
TTCTACTGTAATTGAGCACAACCTGTTTAAATAGTACTTGGAATGATACTAAAGAGTCAAATAAC-----  
-----  
-----  
ACAAATGGAACCTATCACACTCCCATGCAGAATAAAACAAATTATAAACATGTGGCAGGAAGTAGGAAAAGCAA  
TGTATGCCCCCTCCCATCAGTGGACAAATTAGATGTTTCATCAAAT---  
ATTACAGGGCTGCTATTAACAAGAGATGGTGGTAAAAATAAGGAC-----  
-----  
-----  
AACGAGACCGAGACCTTCAGACCTGGAGGAGGAAATATGAGGGACAATTGGAGAAGTGAATTATATAAATATA  
AAGTAGTAAAAATTGAACCATTA---GGAGTAGCACCCACCAAGGCAAAGAGAAGAGTGGTG-----  
-----CAGAGAGAAAAAAGAGCA---GTGGGACTGCTGGGAGCT-----  
---GTGTTCCCTTGGGTTCTTGGGAGCA---GCAGGAAGCACTATG---GGCGCACGGTCA---  
ATGGCGCTGACGGTACAG---GCCAGACAG---TTATTG---TCTGGTATAGTGCAACAGCAGAAC---  
AATTTG---CTGAGG---GCTATTGAGGCGCAACAGCATCTGTTGCAACTCACAGTCTGGGGCATC  
>U43141

TTCTACTGTAATTCAACAAAACGTGTTTAATAGTACTTGGAATAATACTAGTACTTGGAATGATAAT-----  
-----  
-----  
GGAAATGACACTATCATACTGCCATGTAGAATAAAACAAATTATAAACATGTGGCAGGAAGTAGGAAAAGCAA  
TGTATGCCCCCTCCCATTTGGAGGACTAATTAGATGTTTCATCAAAT---  
ATTACAGGGCTGATATTAACAAGAGATGGTGGTAATGATAACAGT-----  
-----  
-----  
AGTACCACCGAGATCTTCAGACCTGGAGGGGGAAATATGAGGGACAATTGGAGAAATGAATTATATAAAATATA  
AAGTAGTAAAAATTGAACCATTA---GGAGTAGCACCCACCAAGGCAAAGAGAAGAGTGGTG-----  
-----CAGAGAGAAAAAAGAGCG---GTGGGAATGCTAGGAGCT-----  
---ATGTTCCCTTGGGTTCTTGGGAGCA---GCAGGAAGCACTATG---GGCGCACGGTCA---  
CTGACGCTGACGGTACAG---GCCAGACAA---TTATTG---TCTGGTATAGTGCAACAGCAAAAC---  
AATTTG---CTGAGA---GCTATTGAGGCGCAACAACATCTGTTGCAACTCACAGTCTGGGGCATC  
>EF514704  
TTCTACTGTAGTACAACACAATTGTTTAATAGTACTTGAGTAGTACTGGAGAGTCAAATAACACCAATGGCA  
CA-----  
-----  
GGAACAAATGGCAATATCATACTCCCATGCAGAATAAGACAAATTGTAACTTGTGGCAGGAAGTAGGAAAAG  
CAATGTATGCCCCCTCCCATCAGAGGACTAATTAGATGTTTCATCAAAT---  
ATTACAGGGCTGCTATTAACAAGAGATGGTGGTAGTGGTAATAACACG-----  
-----  
-----  
GACAAATGCCACCGAGATCTTCAGACCTGGAGGAGGAAATATGAGGGACAATTGGAGAAGTGAATTATATAAAAT  
ATAAAGTAGTAAAAATTGAACCACTA---GGAGTAGCACCCACCAAGGCAAAGAGAAGAGTGGTG-----  
-----CAGAGAGAAAAAAGAGCA---GTGGGAGTAATGGGAGCT---  
-----ATGTTCCCTTGGGTTCTTGGGAGCA---GCAGGAAGCACTATG---GGCGCAGCATCA---  
ATGACGCTGACGGTACAG---GCCAGACAA---TTATTG---TCTGGTATAGTGCAACAGCAAAAC---  
AATTTG---CTGAAG---GCTATTGAGGCGCAGCAGAATCTGTTGCAACTCACAGTCTGGGGCATC  
>EF514705  
TTCTACTGTAACACTTCACAACTGTTTAATAGTACTTGGTATAGCACTTGGAATAGTACTTGGTATAGCAATA  
GGAATAGTACT-----  
-----GGAGGGTCAACT-----  
AACGAGAGCGACATAATCTCAATCCCATGCAAGATAAAACAAATTATAAACATGTGGCAGGAAGTAGGAAAAG  
CAATGTATGCCCCCTCCCATTAGAGGACAAATTAAGTGTCTCAAAC---  
ATTACAGGGCTACTATTAACAAGAGATGGTGGTCTAAATGTTACC-----  
-----  
-----  
AATACCAGTGAGACCTTCAGACCTGGAGGAGGAGATATGAGGGACAATTGGAGAAGTGAATTATATAAAATATA  
AAGTAGTAAAAATTGAACCATTA---GGAATAGCACCTACCCAGGCAAAGAGAAGAGTGGTG-----  
-----CAGAGAGAAAAAAGAGCA---GTGGGA---ATAGGAGCT-----  
---GTATTCCTTGGGTTCTTGGGAGCA---GCAGGAAGCACTATG---GGCGCAGCGTCA---  
GTGGCGCTGACGGTACAA---GCCAGACAA---TTATTG---TCTGGTATAGTGCAACAGCAAAAT---  
AATTTG---CTGAGG---GCTATTGAGGCGCAACAGCACCTGTTGCAACTCACAGTCTGGGGCATC  
>EF514706  
TTCTACTGTAATACAACACTACTGTTTAATAGTACTTGGAATGATACTACAGGAAGGTTAAAT-----  
-----  
-----  
ACCACTGAAGACATCACACTCCCATGCAGAATAAAACAAATTATAAACATGTGGCAGGAAGTAGGAAAAGCAA  
TGTATGCCCCCTCCCATCAGAGGACAAATTAGCTGTTTCATCAAAT---  
ATTACAGGAATACTATTAACAAGAGATGGTGGTAATAATAAAT-----  
-----  
-----  
ACCAACGAGACCTTCAGACCTGCAGGAGGAAATATGAAGGATAATTGGAGAAGTGAATTATATAAAATATAAAG  
TAGTAAAAATTGAACCATTA---GGAGTAGCACCCACCGAGGCAAAGAGAAGAGTGGTG-----  
-----CAAAGAGAAAAAAGAGCA---GTGGGA---CTAGGAGCT-----  
CTGTTCCCTTGGGTTCTTGGGAGCA---GCAGGAAGCACTATG---GGCGCAGCGTCA---  
ATGACGCTGACGGTACAA---GCCAGACAA---TTATTG---TCTGGTATAGTGCAACAGCAGAAC---  
AATTTG---CTGAGG---GCTATTGAGGCGCAACAGCGTATGTTGCAACTCACAGTCTGGGGCATC  
>EF514707

TTCTACTGTAATACAACACCACTGTTTAAATAGTACGTGGAATACTAATACTACAGAGCTAAATAACACTGATG  
 AC-----  
 -----  
 AACAAATGGCACATTACACTCTCATGCAGAATAAAACAAATTATAAACATGTGGCAGGAAGTAGGAAAAGCAA  
 TGTATGCCCCCTCCAATCAAAGGACGAATTAGCTGTTTCATCAAAT---  
 ATTACAGGGCTGCTACTAACAAGAGATGGTGGTAACCCAAACAGTACC-----  
 -----  
 -----  
 AGTACCAACGAGACCTTCAGACCTGCAGGAGGAGATATGAGAGATAATTGGAGAAGTGAATTATATAAAATATA  
 AAGTAGTAAGAATTGAACCATTA---GGAGTAGCACCCACCAAGGCAAAGAGAAGAGTGGTG-----  
 -----CAGAGAGAAAAAAGAGGA-----ATAGGAGTT-----  
 ---ATGCTCCTTGGGTTCTTGGGAGCA---GCAGGAAGCACTATG---GGCGCAGCGTCA---  
 ATGGCGCTGACGGTACAG---GCCAGACGA---TTATTG---TCTGGTATAGTGCAACAGCAGAAC---  
 AATTTG---CTGAGA---GCTATTGAGGCGCAACAGCATATGTTGCAACTCACAGTCTGGGGCATC  
 >EF514709  
 TTCTACTGTAATACAACACAACCTGTTTAAATAGTACTTGGAAATAGTACTACAGGGTCAAATAACACTGAA----  
 -----  
 -----  
 AGAAATGACACAATCACACTCCCTTGCAGAATAAAACAAATTGTAAACAGGTGGCAGGAAGTAGGAAAAGCAA  
 TGTATGCCCCCTCCCATCAAAGGACAAATTAGATGTTTCATCAAAT---  
 ATTACAGGGCTGCTATTAAACAAGAGATGGTGGTAATAACGCAAGC-----  
 -----  
 -----  
 GGGCCTGAGATCTTCAGACCTGGAGGAGGAGATATGAGGGATAATTGGAGAAGTGAGTTATATAAAATATAAAG  
 TAGTAAAAAATTGAACCATTA---GGAGTAGCACCCACCAAGGCAAAGAGAAGAGTGGTG-----  
 -----CAGAGAGAAAAAAGAGCG---GCAGGA---CTAGGAGCT-----  
 ATGTTCTTGGGTTCTTGGGAGCA---GCAGGAAGCACTATG---GGCGCAGCGTCA---  
 ATAACGCTGACGGTACAG---GCCAGACAA---TTATTG---TCTGGTATAGTGCAACAGCAGAAC---  
 AATCTG---CTGAGG---GCTATTGAGGCGCAACAGCATCTGTTGCAACTCACAGTCTGGGGCATC  
 >EF514710  
 TTCTACTGTAATACAACACAACCTGTTTAAATAGTACTTGGAAATGATACTAGCAACTCAAATACC-----  
 -----  
 -----  
 ACAAATGGCACTATCACACTCCCATGTAGAATAAGACAAATTGTAAATTTGTGGCAGGAAGTAGGAAAAGCAA  
 TGTATGCCCCCTCCCATCAGGGGACTAATTAAATGCTCATCAAAT---  
 ATTACAGGGCTGATATTAAACAAGAGATGGTGGTAATAACATAAGC-----  
 -----  
 -----  
 AATACCACCGAGATCTTCAGACCTGGAGGAGGGGATATGAGGGACAATTGGAGAAGTGAATTATATAAGTATA  
 AAGTAGTAAAAAATTGAACCATTA---GGAGTAGCACCCACCAAGGCAAAGAGAAGAGTGGTG-----  
 -----CAGAGAGAAAAAAGAGCA---GTGGGA---ATAGGAGCT-----  
 ---GTGTTCTTGGGTTCTTGGGAGCG---GCAGGAAGCACTATG---GGCGCAGCGTCA---  
 CTGACGCTGACGGTACAG---GCCAGACAA---TTATTG---TCTGGTATAGTGCAACAGCAAAAC---  
 AATTTG---CTGAAG---GCTATTGAGGCGCAGCAGCATCTGTTGCAACTCACAGTCTGGGGCATC  
 >EF514711  
 TTTTACTGTAACACAACACAATTGTTTAAATAGTACTTGGAAATGATACTAGAGAGTCAAATAATAATGTA----  
 -----  
 -----  
 GGAAATGACACAATCACACTCCCATGTAGAATAAAACAAATTATAAACATGTGGCAGGAAGTAGGAAAAGCAA  
 TGTATGCCCCCTCCCATCAGAGGACAAATTAGATGCTCATCAAAT---  
 ATTACAGGGCTGATATTAAACAAGAGATGGTGGTAAGAAGGGAAC-----  
 -----  
 -----  
 GGGACGACCGAGACCTTCAGACCAGGAGGAGGAGATATGAGGGACAATTGGAGAAGTGAATTATATAAAATATA  
 AAGTAGTAAAAAATTGAACCTCTA---GGAGTAGCACCCACCAAGGCAAAGGAGAAGAGTGGTG-----  
 -----CAGAGAGAAAAAAGAGCA---GCGGGA---CTAGGAGCT-----  
 ---TTGTTCTTGGGTTCTTGGGAGCG---GCAGGAAGCACTATG---GGCGCAGCGTCA---  
 GTGACGCTGACGGTACAG---GCCAGACAA---TTACTG---TCTGGTATAGTGCAACAGCAAAAC---  
 AATTTG---CTGATG---GCTATTGAGGCGCAACAGCATCTGTTGAAACTCACAGTCTGGGGCATC  
 >EF514712

TTCTACTGTAATACAACAACAACTGTTTGTAGTAGTACTTGGAATGAGAGTACTTGGAATGAGAGTACATGGAATA  
 ATACAGGGAAT-----  
 -----ACTACCCCT-----  
 GAAAGAAATGAACTATCACACTCTCATGCAGAATAAAACAAATTATAAACATGTGGCAGGAAGTAGGAAAAG  
 CAATGTATGCCCCGCCCATAGAAGGACACATTAAGTGTTCATCAAAT---  
 ATTACAGGGCTGCTATTAGTAAGAGATGGGGGTAACAGGAGCAAGAGCGAG-----  
 -----  
 -----  
 AATAACGGGAACGAGACCTTCAGACCTGGAGGAGGAGATATGAGGGATAATTGGAGAAGTGAATTATATAAAAT  
 ATAAAGTAGTAAAAATTGAACCATTA---GGAATAGCACCCACCAAGGCAAAGAGAAGAGTGGTG-----  
 -----CAGAGAGAAAAAAGAGGA---GTA-----ATAGGAGCT---  
 -----ATGTTTCCTTGGGTTCTTGGGAGCA---GCAGGAAGCACTATG---GGCGCAGCGTCA---  
 ATGACGCTGACGGTACAG---GCCAAACAA---TTATTG---TCTGGCATAGTGCAACAGCAGAAC---  
 AATTTG---CTGAAG---GCTATTGAGGCGCAACAGCATCTGTTGCAACTCACAGTCTGGGGCATC  
 >EF514697  
 TTCTACTGTAATACAGCAAAGCTGTTTAAATAGTACTCTGAATAATACTGAATGGTCAAATATCACTGCAGAAA  
 AT-----  
 -----  
 AATGAAGACAAAATCATACTCCAATGCAGAATAAAACAAATTATAAACATGTGGCAGGAAGTAGGAAAAGCAA  
 TGTATGCCCCCTCCCATTAGCGGACCAATTAAGTGTTCATCAAGT---  
 ATTACAGGGCTGATATTAACAAGAGATGGTGGTAATATTAATAATAATAGC-----  
 -----  
 -----  
 ATGAGAGATAATGACACCTTCAGACCTGGAGGAGGAGATATGAGGGATAATTGGAGAAGTGAATTATATAAAAT  
 ATAAAGTAGTAAGAATTGAACCATTA---GGAGTAGCACCCACCAAGGCAAAGAGAAGAGTGGTG-----  
 -----CAGAGAGAAAAAAGAGCA---GTGGGA---ATAGGAGCT---  
 -----GTACTCCTTGGGTTCTTGGGAGCA---GCAGGAAGCACTATG---GGCGCAGCATCA---  
 GTGATGCTGACGGTACAA---GCCAGGCAA---TTATTG---TCTGGTATAGTGCAACAGCAGAAC---  
 AATCTG---CTGAGA---GCTATTGAGGCGCAACAACATCTGTTGCAACTCACAGTCTGGGGCATC  
 >EF514701  
 TTCTACTGTAATTCATCACAACCTGTTTAAATAGTACTTGGAACAGTAACAGTACCTTAACTTTAACTGGTCTTG  
 AAGAGTCA-----  
 -----AAC---  
 AGCACTGATAATAATATCACACTCCCATGCAGAATAAAGCAGTTTATAAACCTGTGGCAGGGAGTAGGAAAAG  
 CAATGTATGCCCCCTCCCATCCAAGGACGAATTAAATGTACATCAAAT---  
 ATTACAGGGCTGATATTAACAAGAGATGGTGGGAATAGCAGCAAC-----  
 -----  
 -----  
 ACCACCACCGAAATCTTCAGACCTGGAGGAGGAGATATGAGGGACAATTGGAGAAGTGAATTATATAAAATATA  
 AAGTAGTAAAAATTGAACCATTA---GGAGTAGCACCCACCAAGGCAAAGAGAAGAGTGGTG-----  
 -----CAGAGAGAAAAAAGAGCA---GTGGGG---CTAGGAGCT-----  
 ---CTGTTCCCTTGGGTTCTTGGGAGCA---GCGGGAAGCACTATG---GGCGCAGCGTCA---  
 GTGACGCTGACGGTACAG---GCCAGACAA---TTGTTG---TCTGGTATAGTGCAACAGCAAAAC---  
 AACTTG---CTGATG---GCTATTGAGGCGCAACAGCATCTGTTGCAACTCACAGTCTGGGGCATT  
 >FJ694790  
 TTCTACTGTAATACGACACGACTGTTCAATAGTATGTTCAATGGTACTTTGAAGAATACTACAGGGTCAAATA  
 ACACA-----  
 -----  
 GGGAAATAATGACACAATCATACTCCCATGCAGAATAAAACAAATTATAAACATGTGGCAGGAAGTAGGAAAAG  
 CAATGTATGCCCCCTCCCATCGAAGGACTAATTAAGTGTGTGTCAAAT---  
 ATTACAGGGCTGATATTAACAAGAGATGGGGGTAAGAGTAGTAAC-----  
 -----  
 -----  
 GAAAACGAGACCTTCAGACCTATAGGAGGAAATATGAGGGACAACCTGGAGAAGTGAATTATATAAAATATAAAG  
 TAGTAAGAATTGAACCATTA---GGAGTAGCACCCACTGCGGCAAAGAGAAGAGTGGTG-----  
 -----CAGAGAGAAAAAAGAGCA---GTGGGA---ATAGGAGCT-----  
 GTGTTCCCTTGGGTTCTTGGGAGCA---GCAGGAAGCACTATG---GGCGCAGCGTCA---  
 ATGACGCTGACGGTACAG---GCCAGACAA---TTATTG---TCTGGTATAGTGCAACAGCAGAAAT---  
 AATCTG---CTGAGA---GCTATTGAGGCGCAACAGCATCTGTTGCAACTCACAGTCTGGGGCATC  
 >EU839597

TTCTACTGTAATGCAACAGAGCTGTTTAAATAGTACTTGGAAATGATACTACTGGGAGTGTTACTGAA-----  
-----  
-----  
GGTAATGACACAATCACACTTCCATGCAGAATAAAACAAATTATAAACATGTGGCAAGAAGTAGGAAAAGCAA  
TGTATGCCCCCTCCCATCAGGGGATATATTAAGTGTTCATCAAAC---  
ATTACAGGGCTGCTATTAATAAGAGATGGGGGTATTAATAATACA-----  
-----  
-----  
GGCAATGAGACCTTTAGACCTGGAGGGGGAAATATGAAGGACAATTGGAGAAGTGAATTATATAAATATAAAG  
TAGTAAGAATTGAACCATTA---GGAGTAGCACCCACCAAGGCAAAGAGAAGAGTGGTG-----  
-----CAGAGAGAAAAAAGAGCA---GTGGGA---ATAGGAGCT-----  
GTGTTCCCTTGGGTTCTTGGGAGCA---GCAGGAAGCACTATG---GGCGCAGCGTCA---  
ATGACGCTGACGGTACAG---GCCAGACAA---TTATTG---TCTGGTATAGTGCAACAGCAAAAC---  
AATTTG---CTGAGA---GCTATTGAGGCGCAACAGCATCTGTTGCAACTCACAGTCTGGGGCATC  
>EU839596  
TTCTACTGTAATTCAACACAACCTGTTTAAATAGTACTTGGCTTGCTAATAGTACTTGGAAATGATAATGATACTA  
GT-----  
-----  
ACTGATAATAGTACTATCACACTCCCCTGTAGAATAAAACAAATTATAAACATGTGGCAGGAAGTAGGCAAAG  
CAATGTATGCCCCCTCCCATCAGTGGACAAATTAAGTGTTCATCAAAT---  
ATCACAGGGCTACTATTAACAAGAGATGGTGGTAATGAAAGTGAG-----  
-----  
-----  
TTCGAGATCTTCAGACCTGGAGGAGGAAATATGAAGGACAATTGGAGAAGTGAATTGTATAAATATAAAGTAG  
TAAAAATTGAACCATTA---GGAGTAGCACCCACCAGGGCAAGGAGAAGAGTGGTG-----  
-----CAGAGAGAAAAAAGAGCA---GTGGGA---ATAGGAGCT-----  
GTGTTCCCTTGGGTTCTTAGGAGCA---GCAGGAAGCACTATG---GGCGCAGCGTCC---  
ATAACGCTGACGGTACAA---GCCAGACAA---TTATTG---TCTGGTATAGTGCAAGCAGCAAAAC---  
AATTTG---CTGAGG---GCTATTGAGGCGCAACAACATTTGTTGCAACTCACAGTCTGGGGCATC  
>FJ817365  
TTCTACTGTAATACAACACAACCTGTTTAAATAGTAGTTGGAATGTAAATAAACTGTAAATGACACT-----  
-----  
-----  
GAAAAGGAAAATATCACACTCCCATGTAGAATAAAACAAATTATAAACCTGTGGCAGGAAGTAGGAAAAGCAA  
TGTATGCCCCCTCCCATCAGTGGACAAATTAGATGTTTCATCAAAT---  
ATTACAGGGTTACTACTAATGAGAGATGGTGGTAAAGAGGAAAAC-----  
-----  
-----  
GGGACCATCATCTTCAGACCTGGAGGAGGAAATATGAGGGACAATTGGAGAAGTGAATTATACAAATATAAAG  
TAGTAAAACCTGAACCATTA---GGAATAGCACCCACCAGGGCAAAGAGAAGAGCGGTG-----  
-----CAGAGAGAAAAAAGAGCA---GTGGGC---ATAGGAGCT-----  
CTGTTCCCTTGGGTTCTTGGGAGCA---GCAGGAAGCACTATG---GGCGCAGCGTCG---  
ATGACGCTGACGGTACAG---GCCAGACAA---TTATTG---TCTGGTATAGTGCAACAGCAAAAC---  
AATCTG---CTGAGG---GCTATTGAGGCGCAACAACATCTGTTGCAACTCACAGTCTGGGGCATC  
>KY658702  
TTCTACTGTAATACAACACCATTGTTTAAATAGTACTTGGAAATAGTACTACTTGGAAATAGTAATAATACTGCAA  
ATGAA-----  
-----  
-----  
AATGATACAACCATCACACTGCAATGTAGAATAAAACAAATCATAAACATGTGGCAGGAAGTAGGAAAAGCAA  
TGTATGCTCCTCCCATCAGGGGAAATATTACATGTATGTCAAAT---  
ATTACAGGAGTATTATTAATAAGAGATGGTGGCAATACAAGTGAGGCA-----  
-----  
-----  
AACAGCACTGAGATCTTCAGACCAGGAGGAGGAGATATGAGGGACAATTGGAGAAGTGAATTATATAAATATA  
AGGTAGTAAAAATTGAACCATTA---GGTATAGCACCCACCAAGGCAAGAAGAAGAGTGGTG-----  
-----CAGAGAGAAAGAAGAGCA---GTGGGAACACTGGGAGCT-----  
---CTGTTCCCTTGGGTTCTTGGGAGCA---GCAGGAAGCACTATG---GGCGCAGCGTCA---  
GTGGCGCTGACGGTACAG---GCCAGACAA---TTATTG---TCTGGTATAGTGCAACAGCAGAAC---  
AATTTG---CTGAGA---GCTATTGAGGCGCAACAGCATATGTTGCAGCTCACGGTCTGGGGCATC  
>AY173960

TTCTACTGTGATACAACAAACCTGTTTAAATAGTACTTGGAATGAAACACAACCTATTTAAATAGTACTTGGAATA  
 AT-----  
 -----  
 ACTGGAATGAAAATATCACACTTCCATGCAGAATAAAACAAATTATAAACAGGTGGCAGGAAGTAGGAAGAG  
 CAATGTATGCCCCCTCCCATCCAAGGACAAATAAACTGCTCCTCAAAT---  
 ATTACAGGGCTGCTATTGACAAGAGATGGTGATAATAGTACAAAT-----  
 -----  
 -----  
 AATGAAACCTTCAGACCTATAGGAGGAGATATGAAGGATAATTGGAGAAGTGAATTATATAAATATAAAGTAG  
 TACAAATTGAGCCATTA---GGACTAGCACCCACCAAGGCAAGGAGAAGAGTGGTG-----  
 -----CAAAGAGAAAAAAGAGCA---GTGGGAACATTAGGAGCT-----  
 ATGTTTCCTTGGGTTCTTGGGAGCA---GCAGGAAGCACTATG---GGCGCAGCGTCA---  
 ATGGCGCTGACGGTACAG---GCCAGACAA---TTACTG---TCTGGTATAGTGCAACAGCAAAAC---  
 AATTTG---CTGAGA---GCTATTGAGGCGCAGCAGCATATGTTGCAACTCACAGTCTGGGGCATT  
 >KC595150  
 TTCTACTGTAATTCATCACAACTGTTTAAATAGTACTTGGAATAATAATACTAAAGGGTTAAATAACACTGAA-  
 -----  
 -----  
 GGAAATGGCACAATCACACTCCCATGCAGAATAAAACAAATTATAAACATGCGGCAGGAAGTAGGAAAAGCAA  
 TGTATGCCCCCTCCTATCAGAGGACAAATTAGATGTTTCATCAAAT---  
 ATTACAGGGCTAATATTAACAAGAGATGGTGGAATAACACGAAC-----  
 -----  
 -----  
 GGGTCCGAGATCTTCAGACCTGGAGGAGGAAATATGAGGGACAATTGGAGAAGTGAATTATATAAATATAAAG  
 TAGTAGAAATTGAACCATTA---GGAGTAGCACCCACCAAGGCAAAGAGAAGAGTGGTG-----  
 -----CAGAGAGAAAAAAGAGCA---GTGGGA---ATAGGAGCT-----  
 ATGTTTCCTTGGGTTCTTGGGAGCA---GCAGGAAGCACTATG---GGCGCAGCGTCA---  
 ATGACGCTGACGGTACAG---GCCAGACTG---TTATTG---TCTGGTATAGTGCAACAGCAGAAT---  
 AATTTG---CTGAGG---GCTATTGAGGCGCAACAGCATCTGTTGCAACTCACAGTCTGGGGCATC  
 >KC595152  
 TTCTACTGTAATTC AACACAACCTGTTTAAATAGTACTTGGAATAATACTCGGAATAATACTAAAGGG-----  
 -----  
 -----  
 TCAAATAACACTATCACACTCCCATGTAGAATAAAACAAATTGTAAACATGTGGCAGGAGGTAGGAAAAGCAA  
 TGTATGCCCCCTCCCATCAGAGGACAAATTAGATGTTTCATCAAAT---  
 ATTACAGGGCTGCTATTAACAAGAGATGGTGGAATAAAACGATAAC-----  
 -----  
 -----  
 GAGACTGAGATCTTCAGGCCTGGAGGAGGAGATATGAGGGACAATTGGAGAAGTGAATTATATAAATATAAAG  
 TAGTAAAAATTGAACCATTA---GGAGTAGCACCCACCAAGGCAAAGAGAAGAGTGGTG-----  
 -----CAGAGAGAAAAAAGAGCA---GTGGGA---ATAGGAGCT-----  
 GTGTTTCCTTGGGTTCTTGGGAGCA---GCAGGAAGCACTATG---GGCGCAGCGTCA---  
 ATGACGCTGACGGTACAG---GCCAGACAA---TTATTG---TCTGGTATAGTGCAACAGCAGAAC---  
 AATCTG---CTGAGG---GCTATTGAGGCGCAACAGCATCTGTTGCAACTCACAGTCTGGGGCATC  
 >KC595154  
 TTCTACTGTAATACATCACAACTGTTTAAATAGTATTTGGAATAATAATAATAGTACCTGGAATAGGACGGGGG  
 AGGGGTCA-----  
 -----AAC---  
 AACACTGAAGAAATTATTATGCTCCCATGCAGAATAAAGCAAATTATAACATGTGGCAGGAAGTAGGAAAAG  
 CAATGTATGCCCCCTCCCATCCGTGGAATAATTAGATGCTCATCAAAT---  
 ATTACAGGGCTACTATTAACAGGAGATGGTGGAATAAACACTGACACT-----  
 -----  
 -----  
 AACGCCAACGAGACTTTCAGACCTGGGGGAGGAGATATGAGGGACAATTGGAGAAGTGAATTATATAAATATA  
 AAGTAGTAAAAATTGAACCATTA---GGAGCAGCACCCACCAAGGAAAAGAGAAGAGTGGTG-----  
 -----CAGAGAGAAAAAAGAGCA---GGGGGG---ATAGTCTTT-----  
 ---TTGTTTCCTTGGGTTCTTGGGAGCA---ACAGGAAGCACTATG---CCCGCAACGTCA---  
 TTGACGTTGACGGTACAG---GCCAGACTA---TTATTG---TCTGGTATAGTGCAACAGCAGAAC---  
 AACCTG---CTGAGG---GCTATTGAGGCGCAACAGCATCTATTGCAACTCACAGTCTGGGGCATC  
 >KC595157

TTCTACTGTAACCAACACCGTTGTTTAAATAGTACTTGGAGTAATACTACCGAGTCAAATAGC-----  
-----  
-----  
ACAGCCAATAATATCACACTCCAATGCAAAATAAAACAAATTATAAACCTGTGGCAAGAAGTAGGAAAAGCAA  
TGTATGCCCCCTCCCATCAGAGGACAGATTAGATGTTTCATCAAAT---  
ATTACAGGACTGTTATTAACAAGAGATGGTGGTGACAAGAATGAC-----  
-----  
-----  
ACCGAGGTCTTCAGACCGGGAGGAGGAAATATGAAGGACAATTGGAGAAGTGAATTATATAAATATAAAGTAG  
TAAAAATTGAACCATTA---GGAGTAGCACCCACCAAGGCAAAGAGAAGAACGGTG-----  
-----CAGAGAGAAAAAAGAGCA---GTA-----ATAGGAGCA-----  
ATGTTTCCTTGGGTTCTTGGGAGCA---GCAGGAAGCACTATG---GGCGCAGCGTCA---  
GTGACGTTGACGGTACAG---GCCAGACTA---TTATTG---TCTGGTATAGTGCAACAGCAGAGC---  
AATCTG---CTGAGG---GCTATTGAGGCGCAACAGCATCTGTTGCAACTCACAGTCTGGGGCATC  
>KC595160  
TTCTACTGTAATTCAACACAACCTGTTTAAATAGTACTTGGAAATAATAATAGTACTTGGAAAGACTTGGGAGATTG  
GAGGG-----  
-----  
CCAAATGACACACTCACACTCCCATGCAGAATAAAACAAATTATAAACATGTGGCAGGAAGTAGGAAAAGCAA  
TGTATGCCCCGCCCATCAGAGGACAAATTAGATGCTCATCAAAT---  
ATTACAGGGTTGCTATTAACAAGAGATGGAGGTAGTAACACTAAC-----  
-----  
-----  
GAGACCGAGATTTTCAGACCTGGAGGAGGAGATATGAGGGACAATTGGAGAAGTGAATTGTATAAATATAAAG  
TAGTAAAAATTGAACCATTA---GGAGTAGCACCCACCAGGGCAAAGAGAAGAGTGGTG-----  
-----CAGAGAGAAAAAAGAGCA---GCA-----ATAGGAGCT-----  
TTGTTTCCTTGGGTTCTTGGGAGCA---GCAGGAAGCACTATG---GGCGCAGCGTCA---  
ATGACGCTGACGGTACAG---GCCAGACTA---TTATTG---TCTGGTATAGTGCAACAGCAGAAC---  
AATTTG---CTGAGG---GCTATTGAGGCGCAACAGCATCTGTTGCAACTCACAGTCTGGGGCATC  
>KC595161  
TTCTACTGTAATACAACACAACCTGTTTAAATAGTACTTGGAGTAATACTGGAGCGTCAAATGGCACTGAA-----  
-----  
-----  
GGAAATGACACAATCACACTCCCATGCAAGATAAGACAAATTATAAACATGTGGCAGGAAGTAGGAAAAGCAA  
TGTATGCTCCTCCCATCAGAGGACAAATTAGATGTTTCATCAAAT---  
ATTACAGGGCTGCTATTAACAAGAGATGGTGGTAATAACACGAAC-----  
-----  
-----  
GGGACCGAGATCTTCAGACCTGGGGGAGGAGATATGAGGGACAATTGGAGAAGTGAATTATATAAATATAAAG  
TAGTAAAAATTGAACCATTA---GGAGTAGCACCCACCAAGGCAAAGAGAAGAGTGGTG-----  
-----CAGAGAGAAAAAAGAGCG-----GGA---ATAGGAGCT-----  
TTGTTTCCTTGGGTTCTTGGGAGCA---GCAGGAAGCACTATG---GGCGCAGCGTCA---  
ATAACGCTGACGGTACAG---GCCAGACTA---TTATTG---TCTGGTATAGTGCAACAGCAGAAAT---  
AATTTG---CTGAGG---GCTATTGAGGCGCAACAGCACCTGTTGCAACTCACAGTCTGGGGCATC  
>KC595162  
TTCTACTGTAATTCAACACAACCTGTTTAAATAGTACTTGGAAATGCTAATAGTACTTGGAAATGGTACTGAAGAGC  
CAAGTAAC-----  
-----  
TTTGCAGAAAATATCACACTCCCATGCAAAATAAAACAAATTATAAACATGTGGCAGGAAGTAGGAAAAGCAA  
TGTATGCCCCCTCCCATCAGAGGACAAATTAGATGCTCATCAAAT---  
ATTACAGGGTTGCTATTAACAAGAGATGGTGGTAATAACAAAAGC-----  
-----  
-----  
GAGGCCACCGAGACCTTCAGACCTGGAGGAGGAGATATGAGGGACAATTGGAGAAGTGAATTATATAAATATA  
AAGTAGTAAAAATTGAACCATTA---GGAGTAGCACCCACCAGGGCAAAGAGAAGAGTGGTG-----  
-----CAGAGAGAAAAAAGAGCA---GTGGGA---ATAGGAGCG-----  
---TTGTTTCCTTGGGTTCTTGGGAGCA---GCAGGAAGCACTATG---GGCGCAGCGTCA---  
ATGACGTTGACGGTACAG---GCCAGACTA---TTATTG---TCTGGTATAGTGCAACAGCAGAAC---  
AATTTG---CTGAGG---GCTATTGAGGCGCAACAGCATCTGTTGCAACTCACAGTCTGGGGCATC  
>KC595163

TTCTACTGTGATACAACACAACCTGTTTAAATAGTACTTGGAATGATACTACAAATGACACTGGCAAAAAT-----  
-----  
-----  
GACAATGACACAATCATTCTCCAATGCAGAATAAAACAAATTATAAACATGTGGCAGGAAGTAGGAAAAGCAA  
TATATGCCCCCTCCCATCCAAGGACAAATTAAGTGTTCATCAAAT---  
ATTACAGGGCTGCTACTAACAAGAGATGGTGGTAATACTAATAACACG-----  
-----  
-----  
AACGGGACTGAGACCTTCAGACCTGGAGGAGGAGATATGAGGGACAATTGGAGAAGTGAATTATATAAATATA  
AAGTAGTAAAAATTGAACCATTA---GGAGTAGCACCCACCAAGGCAAAGAGAAGAGTGGTG-----  
-----CAGAGAGAAAAAAGAGCA---GTGGGA---ATAGGAGCT-----  
---GTGTTCCCTTGGGTTCTTGGGAGCA---GCAGGGAGCACTATG---GGCGCAGCGTCA---  
ATGACGCTGACGGTACAG---GCCAGACAA---TTATTG---TCTGGTATAGTGCAACAGCAGAAT---  
AATTTG---CTGAGA---GCTATTGAGGCGCAACAACATATGTTGCAACTCACAGTCTGGGGCATC  
>KC595165  
TTCTACTGTAATTCAACACAATTGTTTAAATAGTACTTGGAACCGGACTGGTACTGAGGGGTAAATACCACTG  
AA-----  
-----  
GGAAATGGCACATTCACACTTCCATGTAGAATAAAACAAATTTATAAACTTGTGGCAGGGAGTAGGAAAAGCAA  
TGTATGCCCCCTCCCATCAGGGGACAAATTAGATGTTTCATCAAAC---  
ATTACAGGGCTACTATTAACAAGAGATGGTGGTAATAAAATGAAC-----  
-----  
-----  
GAGACAAGCGAGACCGAGACCTTCAGACCTGGAGGAGGAAATATGAGGGACAATTGGAGAAGTGAATTATATA  
AATATAAAGTAGTAAGAATTGAACCATTA---GGAATAGCACCCACCAAGGCAAAGAGAAGAGTGGTG-----  
-----CAGAGAGAAAAAAGAGCA---GTGGGA---  
ATAGGAGCT-----GTGTTCCCTTGGGTTCTTGGGAGCA---GCAGGAAGCACTATG---  
GGCGCAGCGTCA---ATGACGCTGACGGTACAG---GCTAGACTA---TTATTG---  
TCTGGTATAGTGCAACAGCAGAAT---AATTTG---CTGAGA---  
GCTATTGAGGCGCAACAACATCTGTTGCAACTCACAGTCTGGGGCATC  
>KC595197  
TTCTACTGCAATACAACACAACCTGTTTAAATAGTACTTGGAATAGTACTACTAGGAATGAC-----  
-----  
-----  
ACTGAAGGAAATATTACACTCCCATGCAGAATAAAACAAATTATAAACATGTGGCAGGAAGTAGGAAAAGCAA  
TGTATGCCCCCTCCCATCAGTGGACAAATTAGTTGTTTCGTCAAAT---  
ATTACAGGGATACTATTAACAAGAGATGGGGGTAATACGAACGGT-----  
-----  
-----  
AATAAATACTGAAACCTTCAGACCTGGAGGAGGAGATATGAGGGACAATTGGAGAAGTGAATTATATAAATATA  
AAGTAGTAAAAATTGAACCATTA---GGAATAGCACCCACCAAGGCAAAGAGAAGAGTGGTG-----  
-----CAGAAAGAAAAAAGAGCA---GTGGGG---ATAGGAGCT-----  
---GTGTTCCCTTGGGTTCTTGGGAGCA---GCAGGAAGCACTATG---GGCGCAGCATCA---  
ATGACGCTGACGGTACAG---GCCAGACTA---TTATTG---TCTGGTATAGTGCAACAGCAAAAC---  
AATTTG---CTGAGA---GCTATTGAGGCGCAACAGCATCTGTTGCAACTCACAGTCTGGGGCATC  
>KC595202  
TTCTACTGTAATACAACACAACCTGTTTAAATAGTACTTGGAATGCTACTGAAGAGACAAATAAC-----  
-----  
-----  
ACTGAAGGCACAATCACACTTCCATGCAGAATAAAACAAATTATAAACATGTGGCAGGAAGTAGGAAAAGCAA  
TGTATGCCCCCTCCCATCAGAGGAAATATTAGCTGCTCATCAAAT---  
ATTACAGGGGTGATATTAACAAGAGATGGTGGCACAGACAATAGC-----  
-----  
-----  
GAGACCGAGACCTTTAGACCGGGAGGAGGAGATATGAAGGACAATTGGAGAAGTGAATTGTATAAATATAAAG  
TAGTAAAAATTGAGCCATTA---GGAATAGCACCCACCAAGGCAAAAAGAAGAGTGGTG-----  
-----CAGAGAGAAAAAAGAGCA---GTGGGA---ATAGGAGCT-----  
GTGTTCCCTTGGGTTCTTGGGAGCA---GCAGGAAGCACTATG---GGCGCAGCGTCA---  
ATGACGTTGACGGTACAG---GCCAGACTA---TTATTG---TCTGGTATAGTGCAACAGCAGAAC---  
AATTTG---CTGAGG---GCTATTGAGGCGCAACAGCATCTGTTGAAACTCACAGTCTGGGGCATC

>KC595203

TTCTACTGTAATTCAACACAACCTGTTTAAATAGTACCTGGGATAATAGTAGTATTGAGAATAATACAGAGTCA-

-----  
-----

GGAAATGAAACTATCACACTCCCATGCAGGATAAAACAAATTATAAACTTGTGGCAGGAAGTAGGAAAAGCAA  
TGTATGCCCCCTCCCATCAGAGGGCCAATTAATTGCTCATCAGAT---  
ATTACAGGGCTGCTATTAACAAGAGATGGTGGTACTAATGGCCCT-----

-----  
-----

AACGATACTGAGACCTTCAGACCTGGAGGAGGAAACATGAAGGACAATTGGAGAAGTGAATTATATAAAATATA  
AAGTAGTAAGAATTGAACCACTA---GGAATAGCACCCACCAATGCAAGGAGAAGAGTGGTG-----  
-----CAGAGAGAAAAAAGAGCA---GTGGGG---CTAGGAGCC-----  
---TTGTTCCCTTGGGTTCTTGGGAGCA---GCAGGAAGCACTATG---GGCGCAACGTCA---  
ATGGCGTTGACGGTACAG---GCCAGACAA---TTATTG---TCTGGTATAGTGCAACAGCAAAAC---  
AATTTG---CTGAGG---GCCATTGAGGCGCAACAGCAACTGTTGCAACTCACAGTTTGGGGCATC

>KC595158

TTCTACTGTAATACAACACAACCTGTTTAAATAGTACTTGGGGTAATAATAGTACTTGGAGTAATACTACCGAGT  
CAGGTGGC-----

-----  
-----

AATGGAACAAATATCATACTTCCATGCAGAATAAAACAAATTATAAACATGTGGCAGGAAGTAGGAAAAGCAA  
TGTATGCCCCCTCCCATCAGAGGACAAATTAGCTGCTCATCAAAT---  
ATTACAGGGCTGCTATTAACAAGAGATGGTGGTAACAGTAACACG-----

-----  
-----

ACTGAGACCTTCAGACCTGGAGGAGGAAATATGAAGGACAATTGGAGAAGTGAATTATATAAAATATAAAGTAG  
TAAAAATTGAACCATTA---GGAGTAGCACCCACCAGGGCAAAGAGAAGAGTGGTG-----  
-----CAAAGAGAAAAAAGAGCA---GTGGGA---ATAGGAGCT-----  
GTGTTCCCTTGGGTTCTTGGGAGCA---GCAGGAAGCACTATG---GGCGCAGCGTCC---  
ATGACGTTGACGGTACAG---GCCAGACTA---TTATTG---TCTGGTATAGTGCAACAGCAGAAC---  
AATTTG---CTGAGA---GCTATTGAGGCACAACAGCATCTGTTGCAACTCACAGTCTGGGGCATC

>KC595168

TTTTACTGTAATTCAACACAACCTGTTTAAATAGTACTTGGGAGTTTAAATAGTACTTGAATAGTACTTGAATG  
AT-----

-----  
-----

ACTGGAGAAAAGATCACACTCCCATGCAGAATAAAACAAATTATAAACATGTGGCAGGAAGTAGGAAAAGCAA  
TGTATGCCCCCTCCCATCAGAGGACAAATTAGATGCTCATCAAAT---  
ATTACAGGACTGCTATTAACAAGAGATGGTGGCAATAACAAGAGC-----

-----  
-----

GACACTGAAACCTTCAGACCTGGAGGAGGAGACATGAGGGACAATTGGAGAAGTGAATTATATAAAATATAAAG  
TAGTAAAAATTAAACCATTA---GGAGTAGCACCCACCAAGGCAAAAAGAAGAGTGGTG-----  
-----CAGAGAGAAAAAAGAGCA---GTGGGA---ATAGGAGCT-----  
ATATTCCTTGGGTTCTTGGGAGCA---GCCGGAAGCACTATG---GGCGCAGCGTCA---  
ATGACGTTGACGGTACCG---GCCAGACAA---TTATTG---TCTGGTATAGTGCAACAGCAGAAC---  
AATTTG---CTGAGG---GCTATTGAGGCGCAACAACATCTGTTGCAACTCACAGTCTGGGGCATT

>KC595190

TTTTACTGTAATACAACGGGACTGTTTAAATAGTACTTGGAGTTGGAATGATACTAACACAAATGACACAAGAG  
AA-----

-----  
-----

AATAACACACATATCATACTCCCATGCAGAATAAAACAAATTATAAACATGTGGCAGGGAGTAGGAAAAGCAA  
TGTATGCCCCGCCCATCAGAGGACAAATTAGATGTTTCATCAAAT---  
ATTACCGGTTGCTATTAACAAGAGATGGTGGTGGTAACGGGAAC-----

-----  
-----

AATACCACCGAGGTCTTCAGACCTGGAGGAGGAGATATGAAGGACAATTGGAGAAGTGAATTATATAAAATATA  
AAGTAGTAAAAATTGAACCATTA---GGAGTAGCACCCACCAAGGCAAGAGAAGAGTGGTG-----  
-----CAGAGAGAAAAAAGAGCA---ATAGGA---ATAGGAGCT-----  
---ATGTTCCCTTGGGTTCTTGGGAGCA---GCAGGAAGCACTATG---GGCGCAGCATCA---  
ATAACGCTGACGGTACAG---GCCAGACAA---TTGTTG---TCTGGTATAGTGCAACAGCAGAAC---  
AATTTG---CTGAGG---GCTATTGAGGCGCAACAACATCTGTTGCAACTCACAGTCTGGGGCATC

>KT200351

TTCTACTGTGATACATCAAAATTGTTTAATAGTACTTGGTCTAATAATGATAGTGTATTATTAATAGCACTGAAG  
TA-----

-----  
AATAACACAGTCATCACACTCCCATGTAGAATAAAACAAATTATAAACATGTGGCAGGAAGTAGGAAAAGCAA  
TGTATGCCCCGCCCATCAGAGGACAAATTAAGTGTTCATCAAAT---  
ATTACAGGGCTGTTATTAACAAGAGATGGTGGTAACAATGCCACC-----

-----  
AATGAGACTTTCAGACCGGCAGGAGGAGATATGAGGGACAATTGGAGAAGTGAATTATATAAAATACAAAGTAG  
TAAGAATTGAACCACTA---GGAATAGCACCCACCAAGGCAAAGAGAAGAGTGGTG-----  
-----CAAAGAGAAAAAAGAGCA---GTGGGA---ATAGGAGCT-----  
GTGTTTCCTTGGGTTTCTGGGAGCA---GCAGGAAGCACGATG---GGCGCAGCGTCA---  
TTGACGCTGACGGTACAG---GCCAGACTA---TTATTG---TCTGGTATAGTGCAACAGCAGAAC---  
AATCTG---CTGAGG---GCTATTGAGGCGCAACAGCATCTGTTGCAACTCACAGTCTGGGGCATC

>EU786676

TTTTACTGTAATACATCACTACTGTTTAATAGTACCTGGAATGGTACTGGAGGGACAGATACTGAA-----

-----  
GGAAATGAAACAATCACACTCCCATGCAGAATAAAACAAATTATAAACATGTGGCAAGAAGTAGGAAAAGCAA  
TGTATGCCCCCTCCCATCAGAGGACTAATTAGATGCTCATCAAAC---  
ATTACAGGGTTGCTATTAACAAGAGATGGTGGGAAAGAGAGTAAT-----

-----  
AGCACTACAGAAACCTTCAGACCTGGAGGAGGAGATATGAGGGACAATTGGAGAAATGAATTATACAAATATA  
AAGTAGTAAAAATTGAACCATTA---GGAGTAGCACCCACCAAGGCAAAGAGAAGAGTGGTG-----  
-----CAGAGAGAAAAAAGAGCA---GTGGGA---ATAGGAGCT-----  
---TTGTTTCCTTGGGTTCTTGGGAGCA---GCAGGAAGCACTATG---GGCGCAGCGTCG---  
ATGACGTTGACGGTACAA---GCCAGACAA---TTATTG---TCTGGTATAGTGCAACAGCAGAAC---  
AACTTG---CTGAGG---GCTATTGAGGCGCAACAGCATCTGTTGCAACTCACAGTCTGGGGCATC

>KC595196

TTCTACTGTAATTCAACACAACCTGTTTAATAGTACTTGGAACGATACTGGAGGATCAAATAATACTGGAGAAT  
CAAAT-----

-----  
AGCACTGGAACAATCACACTCCCATGCAGAATAAGACAAGTTGTAAACATGTGGCAGGAAGTAGGAAAAGCAA  
TGTACGCCCCCTCCCATCAAAGGACAAATTAGATGTTTCATCAAAT---  
ATTACGGGGCTGCTCTTAACAAGAGATGGTGGTGATAACGGGACC-----

-----  
ACCGAGATTTTCAGACCTGGGGGAGGAGATATGAGGGACAATTGGAGAAGTGAATTATATAAAATATAAGGTAG  
TAAAAATTGAGCCATTG---GGAGTGGCACCCACCAAGGCAAAGAGAAGGGTGGTG-----  
-----CAGAGAGAAAAAAGAGCA---ATGGGA---ATAGGAGCT-----  
CTGTTTCCTTGGGTTCTTGGGAGCA---GCAGGAAGCACTATG---GGCGCAGCGTCA---  
ATGACGTTGACGGTACAG---GCCAGACTA---TTGTTG---TCTGGTATAGTGCAACAGCAGAAC---  
AATTG---CTGAGG---GCTATTGAGGCGCAACAGCATCTATTGCAACTCACAGTCTGGGGCATC

>EU786678

TTCTACTGTAATACAACAGCACTGTTTAATAGTACCTGGAATACTAATGGTACTTGAAGGGTACAACAGGA-

-----  
GAAAATGACACCATCACACTCCAATGCAGAATAAAACAAATCATAAACATGTGGCAGGAAGTAGGAAAAGCAA  
TGTATGCTCCTCCCATCAGAGGACAAATTAGATGCACATCAAAT---  
ATTACAGGAATTCTATTAACAAGAGATGGTGGTAAAAGCAATAACAAT-----

-----  
AGCAATGGGAGCGAGATCTTCAGACCTGGAGGAGGAGATATGAGGGACAATTGGAGAAGTGAAGTATATAAAT  
ATAAAGTAGTAAAAATTGAACCATTA---GGAATAGCACCCCTCCAAGGCAAAGGAGAAGAGTGGTG-----  
-----CAGAGAGAAAAAAGAGCA---GTGGGA---ATAGGAGCT---  
-----CTGTTTCCTTGGGTTCTTGGGAGCA---GCAGGAAGCACTATG---GGCGCAGCGTCA---  
ATGGCGTTGACGGTACAG---GCCAGACAA---TTATTG---TCTGGTATAGTGCAACAGCAGAAC---  
AATCTG---CTGAGG---GCTATTGAGGTGCAACAGCATATGTTGCAACTCACAGTCTGGGGCATT

>EU786680

TTCTACTGTGATTCAACAAAACCTGTTTAAATAGTACCTGGTATTTTAAATGGTACTTGGAATAATACAAATAATA  
ATAAT-----

-----  
GATACCCATGATCCCATCACACTCCCATGCAGAATAAAACAAATTGTAAACATGTGGCAGGAAGTAGGAAAAG  
CAATGTATGCCCCCTCCCATCAAGGGACAAATTAGATGCTCATCAAAT---  
ATTACAGGGCTGATATTAACAAGAGATGGTGGTGGTGATAACAGC-----

-----  
AGCACCAATGAGACCTTCAGACCTGGAGGAGGAGATATGAGGGACAATTGGAGAAGTGAATTATATAAAATATA  
AAGTAGTAGAACTTAAACCATTA---GGAATAGCACCCACCAGGGCAAAGAGAAGAGTGGTG-----  
-----CAAAGAGAGAAAAGAGCA---GTGGGA---ATAGGAGCT-----  
---ATGTTCCCTTGGGTTCTTGGGAGCA---GCAGGAAGCACTATG---GGCGCAGCGTCA---  
ATGACGCTGACGGTACAG---GCCAGACTA---TTATTG---TCTGGTATAGTGCAACAGCAGAGC---  
AATTTG---CTGAGA---GCTATTGAGGCGCAACAGCATCTGTTGCAACTCACAGTCTGGGGCATC

>HQ236609

TTCTACTGTGATTCAACACAACCTGTTTAAATAGTACTTGGTCGTATAATAGTACTAAGAATAGTTGGAGTAGTA  
CTGAA-----

-----GGG---  
ACAAATGGCACCACCATCACACTTCCATGCAGTATAAAACAATTTGTGAGAATGTGGCAAAGAGTTGGACAAG  
CAATGTATGCCCCCTCCCATCGCAGGAAACATATCATGCAGGTCAAAC---  
ATTACAGGGTTGATATTAACAAGAGATGGTGGCACCCCGATGAT-----

-----  
GGCAATAACGAAACCTTCAGACCTGGAGGTGGAGACATGAAAGACAATTGGAGAAGTGAATTATATAAAATATA  
AAGTAGTAAAGCTTGAACCATTA---GAAATAGCACCCACCAGGGCACAGAGAAGAGTGGTG-----  
-----CAGAGAGAAAAGAG-----CGGGGA---CTAGGAGCT-----  
---CTGTTCCCTTGGGTTCTTGGGAGCA---GCAGGAAGCACTATG---GGCGCAGCGTCA---  
ATGACGTTGACGGTACAG---GCCAGACAA---CTACTG---TCTGGTATAGTGCAACAGCAGAAC---  
AATCTG---CTGAGG---GCTATTGAGGCGCAACAGCATATGTTGCAACTCACAGTCTGGGGCATA

>FJ817366

TTCTACTGTAATTCATCACAACTGTTTAAATAGTACTTGGTATAGTAATGGGACTAGTAATGGAGGGTTAAAT-

-----  
AACAGTGCCAACATTACACTTCCATGCAGAATAAAACAAATTATAAATCTGTGGCAGGAAGTAGGAAAAGCAA  
TGTATGCCCCCTCCCATCAAAGGAGTAATTAACCTGTTTATCAAAT---  
ATTACAGGGATAATATTAACAAGAGATGGTGGTGAGAACAATGGC-----

-----  
ACCACCGAGACCTTCAGACCTGGAGGGGGAGATATGAGGGACAATTGGAGAAGTGAATTATATAAAATATAAAG  
TAGTAAAAATTGAACCATTA---GGAATAGCACCCACCAAGGCAAAAAGAAGAGTGGTG-----  
-----CAAAGAGAGAAAAGAGCA---GTGGGA---TTAGGAGCT-----  
GTGTTCCCTTGGGTTCTTGGGACTA---GCCGGAAGCACTATG---GGCGCAGCGTCA---  
GTGACGTTGACGGTACAG---GCCAGGCTA---TTATTG---TCTGGTATAGTGCAACAGCAGAAC---  
AATTTG---CTGAGG---GCTATTGAGGCGCAGCAGCAGCTGCTGCAACTCACAGTCTGGGGCATC

>GQ372988

TTCTACTGTAATACATCAAAGCTGTTTAAATAGTACGTTGTTTAGTAATAATACTTGGTTCAATAGTACTATGA  
ATGAA-----

-----ACT---  
AATACAAATGACACTATCATGATTCATGCAGGATAAAACAAATTATAAACAGGTGGCAAGAAGTAGGAAAAG  
CAATGTATGCCCCCTCCCATCAGTGGACTAGTTAGATGTTTCATCAAAT---  
ATTACAGGGCTGTTATTAACAAGAGATGGTGGTGGAGGCCAGAACCAGACT-----

-----  
GAAAACCAGACTGAGATCTTCAGACCTGGAGGAGGAGATATGAGGGACAATTGGAGAAGTGAATTATATAAGT  
ATAAAGTAGTAAGAATTGAACCATTA---GGAATAGCACCCACCAAGGCAAAGAGAAGAGTGGTG-----  
-----CAGAGAGAAAAAAGAGCA---GTGGGAACAATAGGAGCT---  
-----ATGTTCCCTTGGGTTCTTGGGAGCA---GCAGGAAGCACTATG---GGCGCAGCGTCA---  
GTCACGCTGACGGTACAG---GCCAGACTA---TTGTTG---TCTGGTATAGTGCAACAGCAGAAC---  
AACTTG---CTGAAG---GCTATTGAGGCGCAACAACATCTGTTGCAACTCACAGTCTGGGGCATC

>FJ670531

TTCTACTGTGATTCAAAGGACTGTTTAATAGTACTTGGAAGCTGGTTAATAGTACTTGGGAGCTGGTTAATG  
GTA CTTTGGAT-----

-----TCAATAACA-----

AATGGTACTGTCAATATCACACTCCCATGCAAAATAAAACAAATTGTAAACCGGTGGCAGGAAGTAGGGAAAG  
CAATGTATGCCCCCTCCCATCAAAGGGCCAATTAAGTGCACATCAAAT---

ATTACAGGGCTGCTATTAACAAGAGATGGTGGTAATGACAAAAAC-----

-----  
CAGTCCATTGAGATCTTCAGACCGGGAGGAGGAGATATGAGGGACAATTGGAGAAGTGAATTATATAAAATATA  
AAGTAGTAAAAATTGAACCATTA---GGAGTAGCACCCACCAAGGCAAAGAGAAGAGTGGTG-----

-----CAGAGAGAAAAAAGAGCA---GTGGGA---TTAGGAGCT-----

---ATGTTCCCTTGGGTTCTTGGGAGCA---GCAGGAAGCACTATG---GGCGCAGCGTCA---

GTGACGTTGACGGTACAG---GCCAGACTA---TTATTG---TCTGGTATAGTGCAACAGCAGAAC---

AATTTG---CTGAGG---GCTATTGAGGCGCAACAGCATCTGTTGCAACTCACAGTCTGGGGCATC

>FJ853620

TTCTACTGTAATACAACAACCACTGTTTAATAGTACTTGGAATAGTACTATTAGGAATGACACTGAA-----

-----  
GCTGGAGAAAATATTACACTCACATGCAGAATAAAACAAATTATAAATCTGTGGCAGGAAGTAGGAAAAGCAA  
TGTATGCCCCCTCCCATCAGCGGACAAATTAGTTGTTTCATCAAAT---

ATTACAGGGATACTATTAACAAGGGATGGGGGTAAAAACAGTAAT-----

-----  
GATACTGAGATCTTCAGACCTGGAGGAGGAGATATGAGGGACAATTGGAGAAGTGAATTATATAAAATATAAAG  
TAGTAAAAATTGAACCATTA---GGAATAGCACCCACCAAGGCAAAGAGAAGAGTGGTG-----

-----CAAAGAGAAAAAAGAGCA---GTGGGA---ATAGGAGCT-----

GTGATCCTTGGGTTCTTGGGAGCA---GCAGGAAGCACTATG---GGCGCAGCATCA---

ATAACGCTGACGGTACAG---GCCAGGCTA---TTACTG---TCTGGTATAGTGCAACAGCAAAGC---

AATTTG---CTGAGA---GCTATTGAGGTGCAACAGCATCTGTTGCAACTCACAGTCTGGGGCATC

>KT200349

TTCTACTGTAATACATCAGAACTATTTAATAGTACTTGGCAGTTTAATAATAATAACTGGAAATAATAGT-

-----  
GCTGAAAGAAATATCACAATCCCATGTAGAGTAAGACAAATTATAAACATGTGGCAGAGAGTAGGAAAAGCAA  
TGTATGCCCCCTCCCATCGCAGGACAAATTAGATGTGTATCAAAT---

ATTACGGGGATGCTATTAACAAGAGATGGTGGTAATGATGGTGGT-----

-----  
AATAACAGCACGAAC---

GTGAGCGAGATCTTCAGACCGGCAGGAGGAGAGATGAGGGACAATTGGAGAAGTGAATTATATAAATACAAAG  
TAGTAAAAATTGAACCATTA---GGGATAGCGCCCACCAAGGCAAAGAGAAGAGTGGTG-----

-----CAGAGAGAAAAAAGAGCA---GTGGGA---ATAGGAGCT-----

GTGTTCCCTTGGGTTCTTGGGAGCA---GCAGGAAGCACTATG---GGCGCAGCATCA---

ATGATGCTGACGGTACAG---GCTAGACAA---CTATTG---TCTGGTATAGTGCAACAGCAGAAC---

AATCTG---TTGAGA---GCTATTGAGGCGCAACAACATCTGTTGCAACTCACAGTCTGGGGCATC

>KT200354

TTCTACTGTAATACAACAAAACCTATTTAATAGTACTTGGCAGTTTAATAGTACTGAGAGTGGTACTGGGAAAC  
TA-----

-----  
AATACCACTGACATCATACTTCCATGCAGGATAAAACAAATTGTAAACATGTGGCAGGAAGTAGGAAAAGCAA  
TGTATGCCCCCTCCAGTCACAGGAATAATTAGTTGTTTATCAAAT---

ATTACAGGACTGCTAATAACAAGAGATGGTGGTAATGATAATAAGACC-----

-----  
AACAACTGAGATCTTTAGACCTGGAGGAGGAAATATGAAGGACAATTGGAGAAGCGAATTATATAAAATATA  
AAGTAGTAAAAATTGAACCAATA---GGAATAGCACCCACCAAGGCAAAGAGAAGAGTGGTG-----

-----CAGAGAGAAAAAAGAGCAATAGTGGGA---ATAGGAGCT-----

---GTGTTCCCTTGGGTTCTTGGGAGCA---GCAGGAAGCACTATG---GGCGCAGCATCA---

ATAACGCTGACGGTACAA---GCCAGACAG---CTATTG---TCTGGTATAGTGCAACAGCAGAAC---

AATCTG---CTGAGG---GCTGTTGAGGCGCAACAGCATCTGTTGCAACTCACAGTCTGGGGCATC

>KT200358

TTCTACTGTAATACAACAAAGCTGTTTAAATAGTACCTGGGAAACAAACAGGAGTGAAAGTGCAAAT-----

-----  
-----

ACCAGTGAAACAATTATACTCCCATGTAGAATAAGACAAATTATAAACTTGTGGCAGAGAGTAGGAAAAGCAA  
TGTATGCCCCCTCCTATCAGAGGACAAATTAAGTCTCATCAAAT---

ATTACAGGGCTAATATTAACAAGAGATGGTGGGAATGATAATGATACT-----

-----  
-----

AATAAATACTGAGACCTTTAGACCTGGAGGAGGAGATATGAGGGACAATTGGAGAAATGAATTATATAAAATATA  
AAGTGGTACAAATTGAACCAATA---GGACTGGCACCCACCAAGGCAAAGAGAAGAGTGGTG-----

-----CAGAGAGAAAAAGAGCA---GTAACC---ATAGGAGCT-----

---TTGTTCTTGGGTTCTTAAGAGCA---GCAGGCAGCACTATA---GGCGCAGCGTCA---

ATGGCGCTGACGGTACAG---GCCAGACAA---TTATTG---TCTGGTATAGTGCAACAGCAGAGC---

AATCTG---CTAAGA---GCTATTGAGGCGCAACAGCATCTGTTGCAACTCACAGTCTGGGGCATC

>FJ853622

TTCTACTGTAATACAACAACACTGTTTAAACAGTACTTGGTATAATAATGGAAGTTCAAATGACTCTGAAAAA-

-----  
-----

AATGGCACCATCATCACACTCCCATGTAAAATAAGCAAATTATAAACATGTGGCAGGAAGTAGGAAAAGCAA  
TATATGCCCCCTCCTATCGCAGGACAAATTAAGTGTTCATCAAAT---

ATTACAGGGCTGCTATTAACAAGAGATGGTGGTAACAGAACTGATAGT-----

-----  
-----

AACCAGACCGAGACATTCAGACCTGAAGGGGGAAATATGAGGGACAATTGGAGAAGTGAATTATATAAAATATA  
AGGTAGTAAAAATTGAACCATTA---GGAGTAGCACCCACCAAGGCAAAGAGAAGAGTGGTG-----

-----CAGAGAGAAAGAGAGCA---GTGGGAACGATGGGAGCT-----

---ATGTTCTTGGGTTCTTGGGAGCA---GCAGGAAGCACTATG---GGCGCAGCGTCA---

ATGACGCTGACGGTACAG---GCCAGGCTA---TTATTG---TCTGGTATAGTGCAACAGCAAAAC---

AACTTG---CTGAAG---GCTATTGAGGCGCAACAACATCTGTTGCAACTCACAGTCTGGGGCATC

>GU362883

TTCTACTGTAATACTACACAACACTGTTTAAATAGTACTTGGCTGCCTAATAGTACTTGAATGATACTGCAAAC-

-----  
-----

GACACAATCACAATCACACTCCCCTGCAGAATAAAACAAATTGTAAACATGTGGCAGGAAGTAGGAAAAGCAA  
TGTATGCCCCCTCCCATCAGAGGACCAATTATCTGTAAATCAAAT---

ATTACAGGGCTACTATTAACAAGAGATGGGGGTAACAAGACCAAT-----

-----  
-----

GACACATACGAGACCTTCAGACCTGGAGGAGGAGATATGAAGGACAATTGGAGAAGTGAATTATATAAAATACA  
AAGTAGTAAAAATTGAACCATTA---GGAGTAGCACCCACCAAGGCAAAGAGAAGAGTGGTG-----

-----CAGAGAGAAAAAGAGCT---GTGGGA---ATAGGAGCT-----

---GTATTCTTTGGGTTCTTGGGAGCA---GCAGGAAGCACTATG---GGCGCAGCGTCA---

CTGACGCTGACGGTACAG---GCCAGACAA---TTATTG---TCTGGTATAGTGCAACAGCAGAGC---

AATCTG---CTGAGG---GCTATTGAGGCGCAACAGCATCTGTTGCAACTCACAGTCTGGGGCATC

>GU362886

TTCTACTGTAATACAACAACACTATTTAAATAGTACTTGAATGAAACTAAGAATGAACTGAGACAGGGAAC-

-----  
-----

ACAAGTGACAGTATCACACTCCCATGCAGAATAAAACAAATTATAAACCTATGGCAGGAAGTAGGAAAAGCAA  
TGTATGCCCCCTCCCATCAAAGGACCAATTAGCTGTTTCATCAAAT---

ATTACAGGGTTACTATTAACAAGAGATGGTGGCATAGAAAGCAAC-----

-----  
-----

GAGACAGAGATCTTCAGACCTGGAGGAGGAGATATGAGGGACAATTGGAGAAATGAATTATATAAAATATAAAG  
TAGTAAAAATTGAACCATTA---GGAATAGCACCCACCAAGGCAAGGAGAAGAGTGGTG-----

-----CAGAGAGAAAAGAGAGCA---GTAACA---TTGGGAGCT-----

CTGTTCTTGGGTTCTTGGGAGCA---GCAGGAAGCACTATG---GGCGCAGCGTCA---

ATGACGCTGACGGTACAG---GCCAGACTA---TTATTA---ACTGGTATAGTGCAACAGCAGAAC---

AATCTG---CTGAGA---GCTATTGAGGCGCAACAGCACCTGTTGCAACTCACAGTCTGGGGCATT

>JX140656

TTCTACTGTAATACAACGAGACTATTTTAATAGGACTTGGAATAGTAATGATAATATTACAAATAATACAAATT  
CA-----

-----  
AATGACTCAGATATCACACTCCCATGCAGAATAAAACAAATTATAAACAGATGGCAGGAAGTAGGGAAAGCAA  
TGTATGCCCCCTCCCATCCAAGGACAAATTAGATGTTTCATCAAAT---  
ATTACCGGGATGCTATTAACAAGAGATGGTGGACATGGGAATGAACT-----

-----  
AATAAATACTGAGGTATTCAGACCTGGAGGAGGAGATATGAGGGACAATTGGAGAAGTGAATTATATAAAATATA  
AAGTAGTAAGAATTGAACCGTTA---GGAGTAGCACCCACCAAGGCAAAGAGAAGAGTGGTG-----  
-----CAGAGAGAAAAAAGAGCA---ATAGGA---ATAGGAGCT-----  
---GTGTTCCCTTGGGTTCTTGGGAGCA---GCAGGAAGCACTATG---GGCGCAGCATCA---  
ATGACGCTGACGGTACAG---GCCAGACAA---TTATTG---TCTGGTATAGTGCAGCAGCAAAAC---  
AATTTG---CTGAGG---GCTATTGAGGCGCAACAACATCTGTTGCAACTCACAGTCTGGGGCATC

>GU362881

TTCTACTGTAATACATCAAGTCTATTTAACAGTACTTGGGGGGTTAACGATACTTGGAATAATACTTGGAATA  
GG-----

-----  
AATGAAAATGACAATATCACACTCCAATGCAGGATAAAAACAAATTATAAACATGTGGCAGGCAGTAGGGAAAAG  
CAATATATGCCCCCTCCCATTCAGGATCAATTAGATGTTTCATCAAAT---  
ATTACAGGGCTACTATTAACAAGAGATGGTGGAAATGGTAATAATACT-----

-----  
AATAATACCATCGAGATTTTCAGACCAGGAGGAGGAGACATGAGGGACAATTGGAGAAGTGAATTATATAAAAT  
ATAAAGTAGTAAGAATTGAACCATTA---GGAATAGCACCCACCAAGGCAAAGAGAAGAGTGGTG-----  
-----CAGAGAGAAAAAAGAGCA---GTGGGA---CTAGGAGCT---  
-----CTGTTCCCTTGGGTTCTTGGGAGCA---GCAGGAAGCACTATG---GGCGCAGCGTCA---  
GTGACGCTGACGGTACAG---GCCAGACAA---TTATTG---TCTGGTATAGTGCAGCAGCAGAAC---  
AATCTG---CTGAGG---GCTATTGAGGCGCAACAACATCTGTTGCAACTCACAGTCTGGGGCATC

>GU362885

TTCTACTGTAATACAACAAAGCTGTTTAAACAGTACTTGGTCTGACTAATGATACTTTGAATAATACTACAAGGG  
GT-----

-----  
AATGACACTATCATAACACTCCCCTGTAGAATAAAAACAAATTATAAACATGTGGCAGGAAGTGGGAAAAGCAA  
TGTATGCCCCCTCCTATCAAAGGACAAATTAGATGTTTCATCAAAT---  
ATTACAGGACTGCTATTAACAAGAGATGGTGGTAATAAAAACAGAA-----

-----  
AACGAGACCGAGACCTTTAGACCTGGAGGAGGAAATATGAAGGACAATTGGAGAAGTGAATTATATAAAATATA  
AAGTAGTGCAAATTGAACCATTA---GGAGTAGCACCTACCAAGGCAAAGAGAAGAGTGGTG-----  
-----CAAAGAGAAAAAAGAGCA---GTGGGAGCATTAGGAGCT-----  
---ATGGTCCTTGGGTTCTTGGGAGCA---GCAGGAAGCACTATG---GGCGCAGCATCA---  
ATAACGCTGACGGTACAG---GCCAGACGA---TTAATG---TCTGGAATAGTGCAACAGCAGAAC---  
AATCTG---CTGAAG---GCTATTGATGCGCAACAACAGATGTTGCAACTCACAGTCTGGGGCATC

>KC473842

TTCTACTGTAATACAACACAACCTGTTTAAATAATACTTGGAATGAACTGCTTGGAATGAGACTAACAATGTAA  
AT-----

-----  
AACAGTGAAACTATCACACTCAAATGCAGAATAAAAACAAATTATAAACAGGTGGCAGGGAGTAGGAAAAGCAA  
TGTATGCCCCCTCCCATCAGAGGATCAATTAGATGTTTCATCAGAT---  
ATTACAGGGCTGCTATTAACAAGAGATGGTGGGAACACGAATGAG-----

-----  
ACCACTGAGATCTTCAGACCGGGAGGAGGAGATATGAGGGATAATTGGAGAAGTGAATTATATAAAATATAAAG  
TAGTACAAATTGAACCAATA---GGAATAGCACCCACCAAGGCAAAGAGAAGAGTGGTG-----  
-----CAGAGAGAAAAAAGGGCA---GCG-----TTCGGAGCA-----  
TTGTTCCCTTGGGTTCTTGGGAGCA---GCAGGAAGCACTATG---GGCGCAGCGTCA---  
CTAACGCTGACGGTACAG---GCCAGACAA---TTATTG---TCTGGTATAGTGCAACAGCAGAGC---  
AATCTG---CTGAGG---GCTATTGAGGCGCAACAGCATATGTTGCAACTCACAGTCTGGGGCATC

>KT200353

TTCTACTGTGATACATCAAACTGTTTAATAGTACTTGGCCGCCTAATAGTACTGTTAATGGTACTGATAATG  
GA-----

AGTAATGAAAATATCACACTCCAATGTAGAATAAAACAAATTATAAACATGTGGCAGGAAGTAGGAAAAGCAA  
TGTATGCCCCCTCCCATTAAGGACTAATTAAATGCTCATCAAAT---  
ATCACAGGGCTGCTGATAGCAAGAGATGGTGGTAATAGTGGTAAT-----

AACACTACTGAGATCTTCAGACCTTGGGGAGGAGATATGAGGGACAATTGGAGAAGTGAGTTATACAAATATA  
AAGTAGTGAAAATTGAACCATTA---GGGTTAGCACCCACCAAGGCACAGAGAAGAGTGGTG-----  
-----CAGAGAGAGAAAAAGAGCA---GTGGGA---ATAGGAGCC-----  
---GTGTTCCCTTGGGTTCTTGGGAGCA---GCAGGAAGCACTATG---GGCGCAGCGTCA---  
TTGACGCTGACGGTACAG---GCCAGATTA---TTATTA---TCTGGTATAGTGCAACAGCAGAAC---  
AATCTG---CTGAGA---GCTATTGAGGCGCAACAACATCTGTTGCAACTCACAGTCTGGGGCATC

>KT200355

TTCTATTGTAATACATCAACACTGTTTAACAGTACTTGGAAATGCTAACAGTACTTGGAAATGATACTGAAGGAA  
CAGATGACCAC-----AAC---

ACAAATAATCTTAACATCACACTCCAGTGCAGAATAAAACAAATTGTAAACATGTGGCAGGAAGTAGGAAAAG  
CAATGTATGCCCCCTCCCATTAGAGGACAAATTAGATGTACATCAAAC---  
ATTACAGGGGTGTTATTAACAAGAGATGGGGGAATAATAACACAAGA-----

AACGGGAATGAGACTTTCAGACCTGGAGGAGGAGATATGAGGGACAATTGGAGAAGTGAATTATATAAAATATA  
AGGTAGTACAAATTGAACCATTA---GGAATAGCACCCACCAAGGCAAAGAGAAGAGTGGTG-----  
-----CAGAGAGAAAAAGAGCA---GTGGGA---CTAGGAGCT-----  
---GTGTTCCCTTGGGTTCTTGGGAGCA---GCCGGAAGCACTATG---GGCGCAGCGTCA---  
CTGACGCTGACGGTACAG---GCCAGACTA---TTATTG---TCTGGTATAGTGCAACAGCAAAAC---  
AATTTG---CTGAGA---GCTATTGAGGCGCAACAGCATCTGTTGCAACTCACAGTCTGGGGCATC

>KT200356

TTCTACTGTAATACAACAGAACTGTTTAATAGTACATGGAATGGTAATGTAAGCAATAATACTGAA-----

GGAGATAAAATTATCACAATCCCATGCAGAATAAAACAAATTATAAACAGGTGGCAGGAAGTAGGAAAATCAA  
TGTATGCCCCCTCCTATCAGCGGAATAATTAGTTGTTTCATCAAAT---  
ATTACAGGGTTGCTATTAACAAGAGATGGTGGTAATACAGGGAAC-----

AACGCCACCGAGATCTTCAGACCTGGAGGAGGAGATATGAGGGACAATTGGAGAAGTGAATTATATAAAATATA  
AAGTAGTAAAAATTGAACCAATA---GGAGTAGCACCCACCAAGGCAAAGAGAAGAGTGGTG-----  
-----CAGAGAGAAAAAGAGCA---ATAGGA---CTAGGAGCT-----  
---TTGTTCCCTTGGGTTCTTGGGAGCA---GCAGGAAGCACTATG---GGCGCAGCGTCA---  
GTGACGCTGACGGTACAG---GCCAGACAA---TTATTG---TCTGGTATAGTGCAACAGCAGAAC---  
AATTTG---CTGAGG---GCTATTGAGGCGCAGCAGCATCTGTTGCAACTCACAGTCTGGGGCATC

>KY465967

TTCTACTGTAATTCAACACCACTGTTTAACTGGACTTTGAATGATACTAAGAAGGAGAATGACACTGAA----

GAAGATAAAAATATCACACTCCAATGCAGAATAAAACAAATTATAAACATGTGGCAGGGAGTAGGAAGAGCAA  
TGTATGCCCCGCCCATCCAAGGACAAATTAAATGTTTCATCAAAT---  
ATTACAGGGCTAATATTAACAAGAGATGGTGGTAAGAGTGATAAC-----

CCAAGTGAGATCTTCAGACCTGGAGGAGGAAATATGAAGGACAATTGGAGAAGTGAATTATATAAAATATAAAG  
TAGTAAAAATTGAACCATTA---GGAGTAGCACCCACCAAGGCAAGGAGAAGAGTGGTG-----  
-----CAGAGAGAAAAAGAGCA---GCA-----CTAGGAGCT-----  
TTGTTCCCTTGGGTTCTTGGGAGCA---GCAGGAAGCACTATG---GGCGCAGCGTCG---  
CTAACGCTGACGGTACAG---GCCAGACAA---TTATTG---TCTGGTATAGTGCAACAGCAAAGC---  
AATTTG---CTGAGG---GCTATTGAGGCGCAACAGCATATGTTGCAACTCACAGTCTGGGGCATC

>KT276263

TTCTACTGTAATACAACAACCACTGTTTAAACAGTACTTGGGATAATAATACTACACAATCAAATAAT-----

-----  
-----

ACCAATGGAACATCACACTCCACTGCAGAATAAAACAAATTATAAACATGTGGCAGGAAGTAGGAAAAGCAA  
TGTATGCCCCGCCCATCGCAGGACAAATTAGTTGTTTCATCAAAT---

ATTACAGGGCTGCTATTAACAAGAGATGGTGGTAATAGCAGTAGT-----

-----  
-----

GGCAATGAGACCTTTAGACCTGCAGGAGGAGATATGAAAGACAATTGGAGAAGTGAATTATATAAATACAAAG  
TAGTAAAAATTGAGCCATTA---GGAGTAGCACCCACCAGGGCAAAAAGGAGAGTGGTG-----

-----CAGAGAGAAAAAAGAGCA---GTGGGAGCGATAGGAGCA-----

ATGTTCTTTGGGTTCTTGGGGGCA---GCAGGAAGCACTATG---GGCGCAGCGTCG---

ATGGCGCTGACGGTACAG---GCCAGACAA---TTATTG---TCTGGTATAGTGCAGCAGCAAAAT---

AACTTG---CTGAGA---GCTATTGAGGCGCAACAGCATATGTTGCAACTCACAGTCTGGGGGCATC

>KT276266

TTCTACTGTAATACATCAGACCTGTTTAAATGAGACTAAGTTTAAAT-----

-----  
-----

GAGACTGAGTCTATCATACTTCCATGCAGGATAAAGCAAATTATAAACATGTGGCAAGAAGCAGGAAAAGCAA  
TGTATGCCCCCTCCCATTAGCGGAATTATTAGCTGTTTCATCAAAT---

ATTACAGGGCTGCTATTAACAAGAGATGGTGGTAATGGCACAAAC-----

-----  
-----

AACACGGAGATCTTCAGGCCTGCAGGAGGAAATATGAAAGATAATTGGAGAAGTGAATTATATAAATACAAAG  
TAGTAAAAATTGAGCCATTA---GGAGTAGCACCCACCAAGGCAAGGAGAAGAGTGGTG-----

-----CAGAGAGAAAAAAGAGCA---ATAGGA---ATGGGAGCT-----

ATGTTCTTTGGGTTCTTGGGAGCA---GCAGGAAGCACTATG---GGCGCAGCGTCA---

ATGACGCTGACGGTACAG---GCCAGACAA---TTATTG---TCTGGTATAGTGCAACAGCAGAAC---

AACCTG---CTGAAG---GCTATTGATGCGCAACAGCATATGTTGCAGCTCACAGTCTGGGGGCATC

>KT276267

TTCTACTGCAATACATCAAACTGTTTGATAGTACTTGGCTTAATGGTACTAGGTCTAATAGTACTGGAAATA  
ACAAC-----

-----  
-----

ACTGGAGAACTATCACACTCCCATGTAGAATAAAACAAATCATAAACATGTGGCAGCAGGTAGGAAAAGCAA  
TGTATGCCCCCTCCTATCGAAGGACATATTAGGTGTTTCATCAAAT---

ATTACAGGGCTGATCTTAACAAGAGATGGCGGTGATGACAACAAT-----

-----  
-----

AATAGCACAGAGATCTTCAGACCGGGAGGAGGAGATATGAGGGACAATTGGAGAAGTGAATTATATAAATACA  
AAGTAGTAAAAATTGAACCATTA---GGGATAGCACCCACCAAGGCAAGAGAAGAGTGGTG-----

-----CAGAGAGAAAAAAGGGCA---GTGGGA---ATAGGAGCT-----

---GTGTTCTTTGGGTTCTTGGGAGCA---GCAGGAAGCACTATG---GGCGCAGCGTCA---

CTGACGCTGACGGTACAG---GCTAGACAA---TTACTG---TCTGGTATAGTGCAACAGCAGAAC---

AATTTG---CTGAGG---GCTATTGAGGCGCAACAACATTTGCTGCAACTCACAGTCTGGGGGCATC

>KU685585

TTCTACTGCAATACATCACAACCTGTTTAAATAGTACTTGGGAATAATAATGGTACCCGGATTAAATGATACCTGGT  
CTAATAGT-----

-----ACTAGC-----

AACACTAACGAACTATCACACTCCCATGTAGAATAAAACAAATTATAAACATGTGGCAGAGGGTAGGAAAAG  
CAATGTATGCCCCCTCCCATCAGAGGATACATTAATTGTTTCATCAAAT---

ATTACAGGGCTGATCTTAACAAGAGATGGCGGTGTTAACAGCAGT-----

-----  
-----

GGGAGCGAGATCTTCAGACCGGGAGGAGGAGATATGAGGGACAATTGGAGAAGTGAATTGTATAAATACAAAG  
TAGTACAAATTGAACCATTA---GGGATAGCACCCACCAAGGCAAGAGAAGAGTGGTG-----

-----CAAAGAGAAAAAAGAGCA---GTGGGA---TTAGGAGCT-----

ATGTTCTTTGGGTTCTTGGGAGCA---GCAGGAAGCACTATG---GGCGCAGCGTCA---

ATAACGCTGACGGCACAG---GCTAGACAA---TTATTG---TCTGGTATAGTGCAACAGCAGAAC---

AATTTG---CTGAGG---GCTATTGAGGCGCAACAACATTTGTTGCAACTCACAGTCTGGGGGCATC

>KU685589

TTCTACTGTAATACATCACAACCTGTTTAAACAGTACTTGGGATAACAGTACTTGAATAATAATGGAAGCTCAA  
GTAACAGCACA---TCC-----

TCAAATGACATCATCACACTCAGGTGTAGAATAAAACAAATTATAAACATGTGGCAGAAAGTAGGAAGAGCAA  
TGTATGCCCCCTCCCATCAGCGGAAACATTAGCTGTTTCATCCAAT---  
ATCACAGGGCTGCTCTTAACAAGAGATGGTGGCAGTGGCAACAATACC-----

AACAACACTGAGGTCTTTAGACCTGAAGGAGGAGATATGAGGGACAATTGGAGAAGTGAATTATACAAATACA  
AAGTAGTAAAAATTGAACCATTA---GGAATAGCACCCACCAAGGCAAAAAGAAGAGTGGTG-----  
-----CAGCGAGAAAAAAGAGCA---ATAACA---TTTGGAGCT-----  
---ATGATCCTTGGTTCTTGGGAGCA---GCCGGAAGCACTATG---GGCGCAGCGTCA---  
ATAGCGCTGACGGCACAG---GCCAGACAA---TTATTG---TCTGGTATAGTGCAACAGCAGAAC---  
AATCTG---CTGAGG---GCTATTGAGGCGCAACAGCATCTGTTGCAACTCACAGTCTGGGGCATC

>KY989949

TTCTATTGTAATACAACACAACCTGTTTAAACAGTACATGGGTTAGTAATGAAAACCTTAATAATAGTACCAATG  
AA-----

GACAAATAGCACAATCACACTCCCATGTAGAATAAAACAAATCATAAACATGTGGCAGGAAATAGGAAAAGCAA  
TGTATGCCCCCTCCCATCAGTGGACAAATTAGATGTTTCATCAAAT---  
ATCACAGGACTGCTATTAACAAGAGATGGTGGCAACACAAGCAAC-----

CCCAACACAGAGACCTTCAGACCTGGAGGAGGAGATATGAGGGACAATTGGAGAAGTGAATTATATAAATATA  
AAGTAGTAAAAATTGAACCATTA---GGAGTAGCACCCACCAGGGCAAGGAGAAGAGTGGTG-----  
-----CAGAGAGAAAAAAGAGCA---GTGGAA---CTAGGAGCT-----  
---TTGTTTCTTGGGTTCTTGGGAGCA---GCAGGAAGCACTATG---GGCGCAGCGTCA---  
GTGACGCTGACGGTACAG---GCCAGACAA---TTATTG---TCTGGTATAGTGCAACAGCAGAAC---  
AATTTG---CTGATG---GCGATTGAGGCGCAACAACGCATGTTGCAACTCACAGTCTGGGGCATC

>KY989954

TTCTACTGTAATACAACACCACTGTTTAAATAGTACTTGGAGTAATGGTACTTGAATGGG-----

AGTGCTGAGAATATCACACTCCCATGCAGAATAAAACAAATCATAAACATGTGGCAAGAAGTAGGAAGAGCAA  
TGTATGCCCCCTCCCATCAGCGGACTAATTAGGTGCTCATCAAAC---  
ATTACAGGACTGATATTAACAAGAGATGGTGGCAATAGCAATGATACC-----

AATGGCACCGAGATCTTCAGACCTGGAGGAGGAGATATGAGGGATAATTGGAGAAGTGAATTATATAAATACA  
AAGTAATAGAACTTGAACCATTA---GGAATAGCACCCACCAAGGCAAGAGACGAGTGGTG-----  
-----CAGAGAGAAAAAAGAGCA---GTGGGA---CTAGGAGCC-----  
---ATGTTCTTTGGGTTCTTGGGTGCA---GCAGGAAGCACTATG---GGCGCAGCGTCA---  
GTGACGCTGACGGTACAG---GCCAGACGC---TTGTTG---TCTGGTATAGTGCAACAGCAAAAC---  
AATTTG---CTGAAG---GCTATTGAGGCGCAACAGCATCTGTTGCAACTCACAGTCTGGGGCATT

>KY989956

TTCTACTGTAATACAACAAAACCTGTTTAAATAGTAGTTGGGATATGAGCAACCTAAATAGCACAGAAGCAAATA  
GCAGC-----

AGCGAAGCAAAGATCACACTCCCATGCAGAATAAAACAAATTATAAATATGTGGCAGGGAGTAGGCAAAGCAA  
TGTATGCCCCCTCCCATCAGAGGACAAATTAAATGTGTATCAGAT---  
ATTACAGGGCTGCTATTAACAAGAGATGGT---ACTGGAAACGAT-----

ACCCTTGAAATCTTTAGACCTGGAGGAGGAAATATGAAGGACAATTGGAGAAGTGAATTATATAAATATAAAG  
TAGTAAGAATTGAACCATTA---GGAGTAGCACCCACCAAGGCAAGAGAAGAGTGGTG-----  
-----CAGAGAGAAAAAAGAGCA---TTGGGAACACTAGGAGCT-----  
GTGTTTCTTGGGTTCTTGGGAACA---GCAGGGAGCACTATG---GGCGCAGCGTCA---  
CTGACGCTGACGGTACAG---GCCAGACAA---TTATTA---TCTGGTATAGTGCAACAGCAGAAC---  
AATCTG---CTGAAA---GCTATTGATGCACAACAGCATCTGTTGCAACTCACGGTCTGGGGCATC

>KC595171

TTCTACTGTAATACAACAACCACTGTTTAAATAGTACTTGGAATGGTACTGAAGGGTCAAATAACACTGAA----

-----  
-----

GGAAATGACACAATCACACTCCCATGCAGAATAAAACAAATTGTAAACAGGTGGCAGGAAGTAGGAAAAGCAA  
TGTATGCCCCCTCCCATCAGAGGACAGATTAGATGTTTCATCCAAT---  
ATTACAGGGCTGCTCTTAACAAGAGATGGGGGTGAGAACAATACT-----

-----  
-----

ACTGGGACCGAGACCTTCAGACCTGGAGGAGGAGATATGAGGGACAATTGGAGAAGTGAATTATATAAAATATA  
AAGTAGTAAAAATTGAGCCATTA---GGAATAGCACCCACCAAGGCAAAGAGAAGAGTGGTG-----  
-----CAGAGAGAAAAAAGAGCA---GTGGGA---ATAGGAGCT-----  
---GTGTTCCCTTGGGTTCTTGGGAGCA---GCAGGAAGCACTATG---GGCGCAGCGTCA---  
ATGACGCTGACGGTACAG---GCCAGACTA---TTATTG---TCTGGTATAGTGCAACAGCAGAAC---  
AATTTG---CTGAGG---GCTATTGAGGCGCAACAGCATCTGTTGCAACTCACAGTCTGGGGCATC

>KC595172

TTCTACTGTAATACAACAAAACTGTTTAAATAGTACCTGGAGTGATACTGAAGGGTTAAATACCACTGAAGGAA  
ATAAA-----

-----  
-----

ACAAATGAAATAATCACACTCCCATGCAGAATAAAACAAATTGTAAACATGTGGCAGGAAGTAGGAAAAGCAA  
TGTATGCCCCCTCCCATCAATGGAATAATTAGATGTTTCATCAAAT---  
ATTACAGGGCTGCTATTAACAAGAGATGGTGGTAATAACACGAAC-----

-----  
-----

GGGTCCGAGATTTTCAGACCTGGAGGAGGAAATATGAGGGACAATTGGAGAAGTGAATTATATAAAATATAAAG  
TAGTAAAAATTGAACCATTA---GGAGTAGCACCCAACAAGGCAAAGAGAAGAGTGGTG-----  
-----CAGAGAGAAAAAAGAGCA---CTGGGAATAGGAGCTGCT-----  
GTGTTCCCTTGGGTTCTTGGGAGCA---GCAGGAAGCACTATG---GGCGCAGCGGCA---  
CTGACGCTGACGGTACAG---GCCAGACTA---TTATTG---TCTGGTATAGTGCAACAGCAGCAAT---  
AAATTG---CTGAGA---GCTATTGAGGCGCAACAGCATCTGTTGCAACTCACAGTCTGGGGCATC

>KC595174

TTCTACTGTAATACAACAACCACTGTTTAAATAGTACTTGGAATATTACTGAAGGGTTAATGGTACTTGGAATG  
AT-----

-----  
-----

ACTGCAAATAATATCACACTCCCATGTAGAATAAAACAAATTGTAAACATGTGGCAGGAAGTAGGAAAAGCAA  
TGTATGCCCCCTCCCATCAAAGGACAAATTAGATGTTTCATCAAAT---  
ATTACAGGGCTGATATTAACAAGAGATGGTGGTAATACTACCAAC-----

-----  
-----

AACGAGACCGAGACTTTCAGACCTGGAGGAGGAGATATGAGGGACAATTGGAGAAGTGAATTATATAAAATATA  
AAGTAGTAAACTTTGAACCATTA---GGAATAGCACCCACCAAGGCAAAGAGAAGAGTGGTG-----  
-----CAAAGAGAAAAAAGAGCA---GTA-----ATAGGAGCT-----  
---TTGTTCCCTTGGGTTCTTGGGAGCA---GCAGGAAGCACTATG---GGCGCAGCGTCA---  
GTGACGTTGACGGTACAG---GCCAGACAA---TTATTG---TCTGGTATAGTGCAACAGCAGCAAT---  
AATTTG---CTGAGG---GCTATTGAGGCGCAACAGCATCTGTTGCAACTCACAGTCTGGGGCATC

>KC595177

TTCTACTGTAATTCAACAACCACTGTTTAAATAGTACTTGGAATAGTACTGAAGGGTCAAATAATATTACA----

-----  
-----

GCAAAATGGAACAATCACACTCCCATGCAGAATAAAACAAATTATAAACATGTGGCAGGAAGTAGGAAAAGCAA  
TGTATGCTCCTCCCATCAGAGGACAAATTAGATGCTCATCAAAT---  
ATTACAGGGCTGCTATTAACAAGAGATGGTGGTAATGGTAACGAG-----

-----  
-----

ACCACCGAGATTTTCAGACCTGGGGGAGGAGATATGAGGGACAATTGGAGAAGTGAATTATATAAAATATAAAG  
TAGTAAAAATTGAACCATTA---GGAGTAGCACCCACCAGGGCAAAGAGAAGAGTGGTG-----  
-----CAGAGAGAAAAAAGAGCA---GTGGGA---ATAGGAGCT-----  
TTGTTCCCTTGGGTTCTTGGGAGCA---GCAGGAAGCACTATG---GGCGCAGCGTCA---  
CTGACGTTGACGGTACAG---GCCAGACAA---TTATTG---TCTGGTATAGTGCAACAACAGAAC---  
AATTTG---CTGAGG---GCTATTGAGGCGCAACAGCATCTGTTGCAACTCACAGTCTGGGGCATC

>KC595178

TTCTACTGTAATTCAACACAACCTGTTTAAATAGTACTTGGAAGGATACTGAAGGGTCAAATGACACTACA-----

-----  
-----

GGAAATGACACAATCACACTCCCATGCAGAATAAAACAAATTGTAAACATGTGGCAGGAAGTAGGAAAAGCAA  
TGTATGCCCCCTCCCATCAGAGGACAAATTAGATGTTTCATCAAAT---  
ATTACAGGGCTGATATTAACAAGAGACGGTGGTACAGACAATAAC-----

-----  
-----

AAGACCGAGACCTTCAGACCTGGAGGAGGAGATATGAGGGACAATTGGAGAAGTGAATTATATAAATATAAAG  
TAGTAAAAGTTGAACCATTA---GGAGTAGCACCCACCAGGGCAAAGAGAAGAGTGGTG-----  
-----CAAAGAGAAAAAAGAGCA---GTGGGA---ATAGGAGCT-----  
GTGTTCCCTTGGGTTCTTGGGAGCA---GCAGGAAGCACTATG---GGCGCAGCGCCA---  
ATGACGCTGACGGTACAG---GCCAGACTA---TTATTG---TCTGGTATAGTGCAACAGCAGAAC---  
AATTTG---CTGAGG---GCTATTGAGGCGCAACAGCATCTGTTGCAACTCACAGTCTGGGGCATC

>KC595195

TTCTACTGTAATACAACAGAACTGTTTAAATAGTACTTGGAAGGTACTGAAAGGTTAAATAGCTCTTCTACAA  
ATTCA-----

-----  
-----

AATCCTACAGAAATCATGCTCCCATGCAGAATAAAGCAAATTATAAACATGTGGCAGGAAGTAGGAAAAGCAA  
TGTATGCCCCCTCCCATCAAAGGACAAATTAAATGTTTCATCAAAC---  
ATTACAGGGTTGCTACTAACAAGGGATGGTGGTAATGATAATAACACT-----

-----  
-----

AACGGGACCGAGATCTTCAGACCTGGAGGAGGAGATATGAGGGATAATTGGAGAAGTGAATTATATAAATATA  
AAGTAGTAAGACTTGAACCATTA---GGAGTAGCACCCACCAAGGCAAAAAGGAGAGTGGTG-----  
-----CAAAGAGAAAAAAGAGCA---ATAGGA---ATAGGAGCG-----  
---ATGTTCCCTTGGGTTCTTGGGAACA---GCAGGAAGCACTATG---GGCGCAGCGTCA---  
CTGACGTTGACGGTACAG---GCCAGACTA---TTGTTG---TCTGGTATAGTACAACAGCAGAAC---  
AATTTG---CTGAGA---GCTATAGAGGCGCAACAACATCTGTTGCAACTCACTGTCTGGGGCATT

>DQ854716

TTCTACTGTAATTCAACACAACCTGTTTAAACAGTACTTGGAATGGTACTGCATGGTCAAATAACACTGAAGGAA  
AT-----

-----  
-----

GAAATGACACAATCACACTCCCATGCAGAATAAAACAAATTATAAACATGTGGCAGGAAGTAGGAAAAGCAA  
TGTATGCCCCCTCCCATCAGAGGACAAATTAGATGTTTCATCAAAT---  
ATTACAGGGCTGATATTAACAAGAGATGGTGGTATTAACCAGACC-----

-----  
-----

AACACCACCGAAATCTTCAGGCCTGGAGGAGGAGATATGAGGGACAATTGGAGAAGTGAATTATATAAATATA  
AAGTAGTAAAAATTGAACCATTA---GGAATAGCACCCACCAAGGCAAAGAGAAGAGTGGTG-----  
-----CAGAGAGAAAAAAGAGCA---GTGGGAATAATAGGAGCT-----  
---ATGCTCCTTGGGTTCTTGGGAGCA---GCAGGAAGCACTATG---GGCGCAGCGTCA---  
ATGACGCTGACGGTACAG---GCCAGACAA---TTATTG---TCTGGTATAGTGCAACAGCAGAAC---  
AATTTG---CTGAGG---GCTATTGAGGCGCAACAGCATCTGTTGCAACTCACAGTCTGGGGCATC

>KC595182

TTCTACTGTAATTCATCACAACCTGTTTAAATAGTACTTGGGAGTTTAAATAGTACTTGGGAGTTTAAATAGTACTG  
GGAATAGTACT-----

-----  
-----

GAAGAAGACCCCTATCATACTCCCATGCAGAATAAAACAAATTATAAACATGTGGCAGGAAGTAGGAAAAGCAA  
TGTATGCCCCCTCCCATCAGAGGACAAATTAGATGCTTATCAAAT---  
ATTACAGGACTGCTATTAACAAGAGATGGTGGTAAGGACGATAAC-----

-----  
-----

ATGACCGAGACCTTCAGACCTGGAGGAGGAGATATGAGGGACAATTGGAGAAGTGAATTATATAAATATAAAG  
TAGTAAAAGTTGAACCATTA---GGAGTAGCACCCACCAAGGCAAAGAGAAGAGTGGTG-----  
-----CAGAGAGAAAAAAGAGCA---GTGGGA---ATAGGAGCT-----  
GTGTTCCCTTGGGTTCTTGGGAGCA---GCAGGAAGCACTATG---GGCGCAGCGTCG---  
ATGACGTTGACGGTACAA---GCCAGACAA---TTATTG---TCTGGTATAGTGCAACAGCAAAAC---  
AATTTG---CTGAGG---GCTATTGAGGCGCAACAGCATCTGTTGCAACTCACAGTCTGGGGCATC

>KC595159

TTCTACTGTAATTCAACACAACCTGTTTAAATAGTACGTGGAATGGTACTGAAAGGTCAAATAACACT-----

-----  
-----

GAAGGAAATATAATCACACTCCCATGCAGAATAAAACAAATTATAAATATGTGGCAGGAAGTAGGAAAAGCAA  
TGTATGCCCCCTCCTATCAGAGGACAAATTAGATGTTTCATCAAAT---

ATTACAGGGCTGATATTAACAAGAGATGGTGGTAAGAACGAGAAC-----

-----  
-----

GAGACCGAGATCTTCAGACCTGGAGGAGGAGATATGAGGGATAATTGGAGAAGTGAATTATATAAATATAAAG  
TAGTAAAAATTGAACCATTA---GGAGTAGCACCCACCAAGGCAAAGAGGAGAGTGGTG-----

-----CAGAGAGAGAAAAAGAGCA---GTGGGA---ATAGGAGCT-----

GTGTTTCTTGGGTTCTTGGGAGCA---GCAGGAAGCACTATG---GGCGCAGCGTCA---

GTGACGCTGACGGTACAG---GCCAGACTA---TTATTG---TCTGGTATAGTGCAACAGCAGAGC---

AATTTG---CTGAGG---GCTATTGAAGCGCAACAGCATCTGTTGCAACTCACAGTCTGGGGCATT

>KC595225

TTTTATTGTAATTCAACACAACCTGTTTAAATAGTACTTGGTATACAAATGATACAAATGTTACTGCTGAA----

-----  
-----

GGAAGTGACACAATTGTACTCCCATGCAAAATAAAACAAATTATAAACATGTGGCAGGAAGTAGGAAAAGCAA  
TGTATGCCCCCTCCCATCAGAGGACAAATTAAGTGTCTCATCAAAC---

ATTACAGGGTTGCTATTAACAAGAGATGGTGGTCCAAATAATACC-----

-----  
-----

AACGAGACCTTTAGACCTGGAGGAGGAAATATGAAGGACAATTGGAGAAGTGAATTATATAAATATAAAGTAG  
TAAAAATTGAACCATTA---GGAGTAGCACCCACCGAGGCAAAAAGAAGAGTGGTG-----

-----CAGAGAGAAAAAAGAGCA---GTGGGA---ATGGGAGCT-----

ATGTTCTTGGGTTCTTGGCCACA---GCAGGAGGCACTATG---GGCGCAGCGTCA---

GTGACGCTGACGGTACAG---ACCAGACAA---TTATTG---TCTGGTATAGTGCAACAGCAGAGC---

AATTTG---CTGAGG---GCTATTGAGGCGCAACAGCATATGTTGCAACTCACAGTCTGGGGCATC

>KC595222

TTCTACTGTAATTCAACACAACCTGTTTAAACAGTACTTGGTATGCGAATGGTACTAGAGAGCCAAATGACACTG  
CA-----

-----  
-----

AGAAATGGCACAATCACACTCCCATGCAGAATAAAACAAATTATAAACATGTGGCAGAAAGTAGGAAAAGCAA  
TGTATGCCCCCTCCCATCAAAGGACCAATTAGATGTTTCATCAAAT---

ATCACAGGGGTGATATTAACAAGGGATGGTGGCGGTAATGACAGTAGTGAG-----

-----  
-----

GAGACCTTCAGACCTGGAGGAGGAGACATGAGGGACAATTGGAGAAGTGAATTATATAAATATAAAGTAGTAG  
AACTTGAGCCATTA---GGAGTAGCACCCACCAGGGCAAAGAGAAGAGTGGTG-----

-----CAGAGGGAAAAAAGAGCA---GTGGGAATATTAGGAGCT-----

ATGTTCTTGGGTTCTTGGGAGCA---GCAGGAAGCACTATG---GGCGCAGCGGCA---

GTGACGCTGACGGTACAG---GCCAGACAA---CTAATG---TCTGGTATAGTGCAACAGCAGAAC---

AACTTG---CTGAGG---GCTATTGAGGCGCAACAGCATCTGTTGCAACTCACAGTCTGGGGCATC

>KC595206

TTCTACTGTGACTCAACACAACCTGTTCAATAGTACTTGGAAATGGTACTAAAAGGATAATAGGAACTGAA----

-----  
-----

GAGAAATGGCACGATCACGCTCCCATGCAGAATAAAACAAATTGTAAACATGTGGCAGGAAGTAGGAAAAGCAA  
TGTATGCCCCCTCCCATCAGAGGAAACATTAAGTGTCTCATCAAAT---

ATTACAGGACTGTTATTAACAAGAGATGGTGGTAAAGACGAAAAT-----

-----  
-----

GAGACCGATACTGAGACCTTCAGACCTGGAGGAGGAGATATGAGGGACAATTGGAGAAGTGAATTATATAAAT  
ATAAAGTAGTAAAAATTGAACCATTA---GGAGTAGCACCCACCAGGGCAAAGAGAAGAGTGGTG-----

-----CAGAGAGAAAAAAGAGCA---ATTGGAGCA---GGAGTT---

-----ATGCTCTTTGGGTTCTTGGGAGCA---GCAGGAAGCACTATG---GGCGCAGCGTCA---

ATGGCGTTGACGGTACAG---GCCAGACAA---TTATTG---TCTGGTATAGTGCAACAGCAGAGA---

AATTTG---CTGAGG---GCTATTGAGGCGCAACAACATCTGTTGCAACTCACAGTCTGGGGCATC

>DQ141341

TTCTACTGTAATTCATCACAACCTGTTTAAATAGTTCTTGGAATGTTAATGGAGAATCAAATAACACTGAA-----

-----  
-----

GGAAATGACACAATCACACTCCCATGCAGAATAAAACAAATTATAAACATGTGGCAGGAAGTAGGAAAAGCAA  
TGTATGCCCCCTCCCATTAGAGGACAAATTAGCTGTTTCATCAAAT---  
ATTACAGGGCTGCTATTAACAAGAGATGGTGGTAACAATAACGAGACC-----

-----  
-----

ACCACCACCGAGACCTTCAGACCTGGAGGAGGAGATATGAGGGACAATTGGAGAAGTGAATTATATAAAATATA  
AAGTAGTAAAAATTGAACCATTA---GGAATAGCACCCACCAGGGCAAAGAGAAGAGTGGTG-----  
-----CAGAGAGAAAAAAGAGCA---GTGGGA---ATAGGAGCT-----  
---ATGTTCCCTTGGGTTCTTGAGGAGCA---GCAGGAAGCACTATG---GGCGCAGCGTCA---  
GTGACGTTGACGGTACAG---GCCAGACTA---TTATTG---TCTGGTATAGTGCAACAGCAGAAC---  
AATTTG---CTGAGG---GCTATTGAGGCGCAACAGCGTATGTTGCAACTCACAGTCTGGGGCATC

>DQ141345

TTCTACTGTAATACAACACAACCTGTTTAAATAGTACTTGGGAGGCTAATGGTACTTGGGAATGGTGCTAAC-----

-----  
-----

AAGTCAGGTGACATCATACTCCCATGCAGAATAAAACAAATTATAAACATGTGGCAGGGAGTAGGAAAAGCAA  
TGTATGCCCCCTCCCATCAGTGGACAAATTAGATGTTTCATCAAAC---  
ATTACAGGGCTGCTATTAACAAGAGATGGTGGTAGTAACGAGACC-----

-----  
-----

AACGGGACTGAGATCTTCAGACCTGGAGGAGGAGATATGAGGGATAATTGGAGAAGTGAATTATATAAAATATA  
AAGTAGTAAAAATTGAACCATTA---GGAATAGCACCCACCAAGGCAAAGAGAAGAGTGGTG-----  
-----CAGAGAGAAAAAAGAGCA---GCATTT-----GGAGCT-----  
---ATGTTCCCTTGGGTTCTTGAGGAGCA---GCAGGAAGCACTATG---GGCGCAGCGTCA---  
CTGACGCTGACGGTACAG---GCCAGGCAA---TTATTG---TCTGGTATAGTGCAACAGCAGAAC---  
AATCTG---CTGAGG---GCTATTGAGGCGCAACAGCATCTGTTGCAACTCACAGTCTGGGGCATC

>EF531330

TTCTACTGTAATACATCACAGCTATTTAATAATACTTTTAAATAGTACTGGGCCTAATAATAGTACTAAGAAG-

-----  
-----

TTAAATGACACTATCACACTCCCATGCAGAATAAAACAAATTATAAACATGTGGCAGGAAGTAGGAAAAGCAA  
TGTATGCCCCCTCCCATTAGTGGACAAATTAACTGCTCATCAATT---  
ATTACAGGGTTGCTATTAACAAGAGATGGTGGTGAGGGCAATGAGACC-----

-----  
-----

AATGGGAACGAGACCTTCAGACCTGGAGGAGGAGATATGAGGGATAATTGGAGGAGTGAATTATATAAAATATA  
AAGTAGTACAAATTGAACCAGTA---GGAGTAGCACCCACCAAGGCAAAGAGAAGAGTGGTG-----  
-----CAGAGAGAAAAAAGAGCA---GTATTA-----GGAGCT-----  
---ATGTTCCCTTGGGTTCTTGAGGAGCA---ACAGGAAGCACTATG---GGCGCAGCGTCA---  
ATGGCGTTGACGGTACAG---GCCAGACAA---TTATTG---TCTGGTATAGTGCAACAGCAGAAC---  
AATTTG---CTGAAG---GCTATTGAGGCGCAACAGCATCTGTTGCAACTCACAGTCTGGGGCATC

>EF531333

TTCTACTGTAATACAACACAACCTGTTTACTTGGATTGTTGATGGTAATGGGAATATTAGTAGTATTGGGAATG  
GTACTAAT-----

-----ACTACT-----

GATGCTAACAAGAATATCACACTCCCATGTAGAATAAAACAAATTGTAAACATGTGGCAGGAAGTAGGAAAAG  
CAATGTATGCTCCTCCATAAGGGGACAAATTAGATGCTTATCAAAT---  
ATTACCGGGTTGCTAATAACAAGAGATGGAGGTAGTAATAACAGT-----

-----  
-----

GCTAACGAGACTTTTCAGACCTGGAGGAGGAGATATGAGGGACAATTGGAGAAGTGAATTATATAAAATATAAAG  
TGGTAAAAAATTGAACCATTA---GGAGTAGCACCCACCAAGGCAAAGAGAAGAGTGGTG-----  
-----CAGAGAGAAAAAAGAGCA---GTGGGA---ATAGGAGCT-----  
GTGTTCCCTTGGGTTCTTGAGGAGCA---GCAGGAAGCACTATG---GGCGCAGCGTCA---  
ATGACGTTGACGGTACAG---GCCAGACAA---TTATTG---TCTGGTATAGTGCAACAGCAGGAC---  
AATCTG---CTGAGG---GCTATTGAGGCGCAACAGCATCTGTTGCAACTCACAGTCTGGGGCATC

>JX422195

TTCTACTGTAATACAACAACCACTGTTTAAATACAGCACTGCTTAATAGTTCT-----

-----  
-----

AACGAGACAAATCTCACACTCCCATGCAGAATAAAACAAATTGTAAATATGTGGCAGGAAGTAGGAAGAGCAA  
TGTATGCCCCCTCCCAGACAAGGAATAATTAGATGTTTCATCAAAT---

ATCACAGGATTGATATTAACAAGAGATGGTGGGGTCACGAACGGGTCC-----

-----  
-----

GAGACCGAGACCTTCAGACCAGGAGGAGGAGATATGAGGGACAATTGGAGAAGTGAATTATACAAATATAAAG  
TAGTAAAAATAGAACCATTG---GGAATAGCACCCACCAAGGCAAGGAGAAGAGTGGTG-----

-----CAGAGAGAAAAAAGAGCA---GCA-----CTAGGAGCT-----

ATGTTTCCTTGGGTTCTTGGGAGCA---GCAGGAAGCACTATG---GGCGCAGTGTC---

CTAACACTGACGGTACAA---GCCAGAATG---TTATTG---TCTGGTATAGTGCAACAGCAGAAT---

AATCTG---CTGAGG---GCTATTGAGGCGCAACAGCATATGTTGCAACTCACAGTCTGGGGCATC

>AY535455

TTCTACTGTAATACAACAACCACTGTTTAAATAGTACTTGGAAAAATAATACTACAAGTCCGAATAAA-----

-----  
-----

GGAAATGGCACAATCACACTCCCATGCAGAATAAAACAAATTATAAACATGTGGCAGGAAGTAGGAAAAGCAA  
TGTATGCCCCCTCCCATCGCAGGACAAATTAGATGTGTATCAAAT---

ATTACAGGGCTGCTATTAACAAGAGATGGTGGTGGTGGTGGTAATATG-----

-----  
-----

ACTAATGGGACCGAGATCTTCAGACCGGGAGGAGGAGATATGAGGGACAATTGGAGAAGTGAATTATATAAAT  
ATAAAGTAGTAAAAATTGAGCCATTG---GGAGTAGCACCCACCAAGGCAAAAAGAAGAGTGGTG-----

-----CAGAGAGAAAAAAGAGCA---GTGGGA---ATAGGAGCT---

-----TTGCTCTTTGGGTTCTTGGGAGCA---GCAGGAAGCACTATG---GGCGCAGCATCA---

ATGACGCTGACGGTACAG---GCCAGACTA---TTATTG---TCTGGTATAGTGCAACAGCAGAAT---

AATCTG---CTGAGG---GCTATTGAGGCGCAACAACATCTGTTGCAACTCACAGTCTGGGGCATC

>KC699018

TTCTACTGTAATACAACAACCACTGTTTAAATAGTACTTGGGATGCTACGGATGCTAATAACACTAGAGTAGAT-

-----  
-----

AACACCACTGTCATCACACTCCCATGCAGAATAAAACAAATTATAAACATGTGGCAGGAGGTAGGAAAGGCAA  
TGTATGCCCCCTCCCATCAGCGGACAAATTAAGTCTCATCAAAT---

ATTACAGGGCTGCTATTAACAAGCGATGGGGGTAATAGTAATAAT-----

-----  
-----

GAGAGCGAGACCTTCAGACCTGGAGGGGGAGATATGAGGGACAATTGGAGAAGTGAATTATATAAATATAAAG  
TAGTAGAAATTGAACCACTA---GGAGTAGCACCCACCGAGGCAAAAAGAAGAGTGGTG-----

-----CAGAGAGAAAAAAGAGCA---GTGACA---CTAGGAGCT-----

TTTTTCCTCGGGTTCTTGGGAGCA---GCAGGAAGCACTATG---GGCGCAGCGTCA---

ATGACGCTGACGGTACAG---GCCAGACAA---TTATTG---TCTGGTATAGTGCAACAGCAGAAC---

AATCTG---CTGAGG---GCTATTGAGGCGCAACAGCATCTGTTGCAACTCACAGTCTGGGGCATC

>KU168261

TTCTACTGTGATTCATCACCCTGTTTAAACAGTACTTGGAGGAGAAATAGCACGGAAGGAAATGCCACCATTG  
TAGGAAAT-----

-----GCCACCATT-----

GGAAAAAATAACACACTTACACTCCAATGCAGAATAAAACAAATTATAAACATGTGGCAGGGAGTAGGAAGAG  
CCATGTATGCCCCCTCCATTAGCGGAATCATTAGCTGCTCATCAAAT---

ATTACGGGGCTGATACTAACAAGAGATGGTGGTGACGAGAATAGGACC-----

-----  
-----

ACTGACGAGAATAAT---

ACCACTGAGACCTTCAGACCTGGAGGGGGAGATATGAGGGATAATTGGAGAAGTGAATTATATAAATACAAAG  
TAGTAAAGATTGAACCATTA---GGAGTAGCACCCACCGAGGCCAAGAGAAGAGTGGTG-----

-----CAGAGAGAAAAAAGAGCG---ATAGGA---CTAGGAGCT-----

ATGTTTCCTCGGGTTCTTAGGAGCA---GCAGGAAGCACTATG---GGCGCAGCGTCA---

TTGACGTTGACGGTACAG---GCCAGACAA---TTATTG---TCTGGTATAGTGCAACAGCAAAAC---

AACTTG---CTGAGG---GCTATTGAGGCGCAACAGCATCTGTTGCAACTCACAGTCTGGGGCATC

>JX140652

TTCTACTGTAATTCAACGCAACTGTTTAAATAGTACTTGGCTGTTTAAATAGTACTGGGAATGATACAACA-----

-----  
-----

GAAAAATGGTACCATCACACTCCAATGCAGAATAAAACAAATTATAAACATGTGGCAGGAAGTAGGAAAAGCAA  
TGTATGCCCCCTCCCATCAGAGGAAACATTAGGTGTTCTCAAAT---

ATTACCGGGTTGCTATTAACAAGAGATGGTGGTAGCCATGAGAACGGGACCAAC-----

-----  
-----

ACCACCAACACTGAGGTCTTCAGACCTGGAGGAGGAAATATGAGGGACAATTGGAGAAGTGAATTATATAAAAT  
ATAAAGTAATAGAAATTGAACCATTA---GGAATAGCACCCACCAAGGCAAAGAGAAGAGTGGTG-----

-----CAGAGAGAAAAAAGAGCA---GCG-----CTAGGAGCT---

-----GTATTCCTTGGGTTCTTGGGAGCA---GCAGGAAGCACTATG---GGCGCAGCATCA---

ATGACGCTGACGGTACAG---GCCAGACAA---TTATTG---TCTGGTATAGTGCAGCAGCAAAAC---

AACTTG---CTGAGG---GCTATTGAGGCGCAACAACATCTGTTGCAACTCACAGTCTGGGGCATC

>KC699029

TTCTACTGTAATACATCACAACCTGTTTAAACAGTACTTGGTCAAATGATACTAATAAG-----

-----  
-----

TCAAAATGCAATAATCACACTCCCATGCAGAATAAAACAAATTATAAACATGTGGCAGGAAGTAGGAAAAGCAA  
TGTATGCCCCCTCCTATCAGAGGAGAAATTAAATGTTTCATCAAAT---

ATTACAGGGCTGCTATTAACAAGAGATGGTGGTAATGGGAATAAGACA-----

-----  
-----

AACATCAGCATTGAAATCTTCAGACCTGGAGGAGGAAACATGAAGGACAATTGGAGAAGTGAATTATATAAAAT  
ATAAAGTAGTAAAAATTGAACCATTA---GGAGTAGCACCCACCAAGGCAAAGAGAAGAGTGGTG-----

-----CAGAGAGAAAAAAGAGCA---GTAGGA---ATAGGAGCT---

-----TTGTTTCCTTGGGTTCTTGGGAGCA---GCAGGGAGCACTATG---GGCGCAGCGTCA---

CTGACGCTGACGGTACAG---GCCAGACAA---TTATTG---TCTGGTATAGTGCAGCAGCAGAAC---

AATCTG---CTGAAG---GCTATTGAGGCGCAACAGCATCTGTTGCAACTCACAGTCTGGGGCATC

>KC699030

TTCTATTGTAATACAACAAGACTGTTTAGTAGTACTTGGTATAATAATGGTACTTGGTATACTAATGGTACTG  
AGAATGGTATT-----

-----AAA---

GAGTCAAATGCAACAATCATGCTGCCATGCAGGATAAAACAAATTATAAACATGTGGCAGAGTGTAGGAAAAG  
CAATGTATGCCCCCTCCCATCAGGGGACCACTTAGGTGTTTCATCAAAT---

ATTACAGGGCTGCTATTAATGAGAGATGGTGGAGGTAATGAGAGC-----

-----  
----

GAGACCACCCACAATGAGACCTTCAGACCCGGAGGGGGAGACATGAGGGACAATTGGAGAAGTGAAGTATATA  
AATATAAAGTAGTAGCAGTTGAACCATTA---GGAATAGCGCCACCAAGGCAAAGAGAAGAGTGGTG-----

-----CAGAGAGAAAAAAGAGCA---GTAACA---

ATGGGAGCT-----ATGTTTCCTTGGGTTCTTGGGAGCA---GCAGGAAGCACTATG---

GGCGCAGCGTCA---ATGACGCTGACGGTACAG---GCCAGACAA---TTATTG---

TCTGGTATAGTGCAACAGCAAAGC---AATTTG---CTGAAG---

GCTATTGAGGCGCAGCAACATTTGTTGCAACTCACGGTCTGGGGCATT

>KC699028

TTCTACTGTAACACAACACAGCTGTTTAAATAGTACTTGGACATTCAATGATACTAGGAGTAATGATACAGAGT  
CA-----

-----  
-----

GATAACGCTACGATTATACTCCCATGCAGAATAAAACAAATTATAAACAGGTGGCAGGAAGTAGGAAAAGCAA  
TGTATGCCCCCTCCCATCAGTGGAATAATTAGATGCTCATCAAAT---

ATTACAGGGCTGCTATTAACAAGAGATGGTGGTAATGAGAAAAAT-----

-----  
-----

AAGAGTACCAATGAGACCTTCAGACCTGGAGGAGGAGACATGAGAGACAATTGGAGAAGTGAATTATATAAAAT  
ATAAAGTAGTAAGAATTGAGCCAATA---GGAATAGCACCCACCAGGGCAAAGGAGAAGAGTGGTG-----

-----CAGAGAGAAAAAAGAGCA---GTGGGAACGCTGGGAGCT---

-----ATGTTTCCTTGGGTTCTTGGGAGCA---GCAGGAAGCACTATG---GGCGCAGCGTCA---

ATGACGCTGACGGTACAG---GCCAGACAA---TTATTG---TCTGGTATAGTGCAACAGCAAAAC---  
 AATTTG---CTGAGA---GCTATTGAGGCGCAACAGCATCTGTTGCAACTCACAGTCTGGGGCATT  
 >KC699039  
 TTCTACTGTAATACAACACAACCTGTTTAATGGTACTTGGAAATGGTACCTGGGATGGTACTTGGAAATGGTACTT  
 GGACTCGGATA-----  
 -----GAGCCAAAT-----  
 ATCAATGATACAAATATCACACTCCCATGCAGAATAAAACAAATTATAAACATGTGGCAGGGAATAGGAAGAG  
 CAATGTATGCCCCCTCCCATCAGGGGACAAATTAAATGTATATCAAAT---  
 ATTACCGGGTTGCTAATAACAAGAGATGGTGGTGTATGAGGAGAAC-----  
 -----  
 -----  
 AAGACTGAGGAGGTCTTCAGACCTGGAGGAGGAGATATGAGAGACAATTGGAGAAGTGAATTATATAAAATATA  
 AAGTAGTACAAATTGAACCAATA---GGAATAGCACCCACCAAGGCAAAGAGAAGAGTGGTG-----  
 -----CAGAGAGAGAAAAAGAGCG-----GGA---ATAGGAGCT-----  
 ---TTGTTCCCTTGGGTTCTTGGGAGCA---GCAGGAAGCACTATG---GGCGCAGCATCA---  
 ATAACGCTGACGGTACAG---GCCAGACAA---TTGTTG---TCTGGTATAGTGCAACAGCAGAAC---  
 AATTTG---CTGAGA---GCTATTGAGGCGCAACACCATCTGTTGCAACTCACAGTCTGGGGCATC  
 >JX140654  
 TTCTACTGTAATACAACACCACTGTTTAATAGTGCTTGGAAATAGGAATAAGAGTAAGGATACTTGGAGTATCA  
 AAGGGTCAAAT-----  
 -----AATAGCACT-----  
 GGAGGAAATAACACTATCATACTCCAATGTAAAATAAAACAAATTATAAACATGTGGCAAAGAGTAGGAAAAG  
 CAATGTATGCCCCCTCCCATCAGAGGACAAATTAACTGTTTATCAAAT---  
 ATTACAGGGCTACTATTAACAAGAGATGGTGGTAATATCAGTAGC-----  
 -----  
 -----  
 ACTAATGAAACCTTCAGACCTGGAGGAGGAGATATGAGGGACAATTGGAGAAGTGAATTGTATAAAATATAAGG  
 TAGTACAAATTGAACCATTA---GGATTAGCACCCACCAAGGCAAAGAGAAGAGTGGTA-----  
 -----CAAAGAGAAAAAAGAGCA---GTGGGGACACTAGGAGCT-----  
 ATGTTCCCTTGGGTTCTTGGGAGCA---GCAGGAAGCACTATG---GGCGCAGCGTCA---  
 ATAACGCTGACGGCACAG---GCCAGACAA---TTATTG---TCTGGTATAGTGCAACAGCAGAAC---  
 AACTTG---CTGAAG---GCTATTGATGCGCAACAGCATATGTTGCAACTCACAGTCTGGGGCATC  
 >KC699035  
 TTCTACTGTGATACAAACAAAACCTGTTTAATAGCACTTGGAAATAGCACTTGGTATAGTAATAGTACTGGGAGTG  
 ATATTAA-----  
 -----  
 GGAAATGACACAATCACACTCCCGTGCAGAATAAAACAAATTATAAACATGTGGCAGGAAGTAGGAAAAGCAA  
 TGTACGCCCCCTCCCATCAGAGGATCAATTAAATGTTTCATCAAAT---  
 ATTACAGGGTTGCTACTAACAAGAGATGGGGGTACAGACAATAGT-----  
 -----  
 -----  
 AGTACTACAGAGACCTTCAGACCTGGAGGAGGAAATATGAAGGACAATTGGAGAAGTGAATTATATAAAATATA  
 AAGTAGTACAAATTGAACCATTA---GGAGTAGCACCCACCAAGGCAAAGAGAAGAGTGGTG-----  
 -----CAGAGAGAAAAAAGAGCA---GTGGGA---CTAGGAGCT-----  
 ---ATGTTCCCTTGGGTTCTTGGGAGCA---GCAGGAAGCACTATG---GGCGCAGCGTCA---  
 ATAACGCTGACGGTACAG---GCCAGACAA---TTATTG---TCTGGTATAGTGCAACAGCAAAAC---  
 AATTTG---CTGAGA---GCTATTGAGGCGCAACAACATCTGTTGCAACTCACAGTCTGGGGCATC  
 >KC699036  
 TTCTACTGTGAAACAGAAAACTGTTTAATAGTACTTGGTGGAAATAGTACTTGGAAATAGTACTGAAGGGTCAA  
 ATAGT-----  
 -----  
 ACTGGGGTAAATATCACACTCCCATGCAGAATAAGACAAATTATAAACATGTGGCAGAAAGTAGGAAAAGCAA  
 TGTATGCCCCCTCCCATCGCAGGACCAATTAGATGTGTATCAAAT---  
 ATCACAGGGATATTCTTAACAAGAGATGGTGGTAATGAGACCAGC-----  
 -----  
 -----  
 AACGAGACCTTCAGACCTGGAGGAGGAGATATGAGGGACAATTGGAGAAGTGAATTATATAAAATATAAAATAG  
 TAAAAATTGAGCCAATA---GGAGTAGCACCCACCAAGGCAAAGAGAAGAGTGGTG-----  
 -----CAGAGAGAAAAAAGAGCA---GTGGGA---CTAGGAGCT-----  
 ATGTTCCCTTGGGTTCTTGGGAGCA---GCAGGAAGCACTATG---GGCGCAGCATCA---

ATAACGCTGACGGTACAG---GCCAGACAA---TTACTG---TCTGGTATAGTGCAACAGCAGAAT---  
 AATCTG---CTGAGG---GCTATTGAAGCGCAACAACATATGTTGCAACTCACAGTCTGGGGCATA  
 >KF716494  
 TTCTACTGTAATACAACAGAACTATTTAATAGTACTTGGAAGATTGAGAATAATACTGGGAATATTACTGAAC  
 AGGCAAAT-----  
 -----AACACT-----  
 GCAAGAAATGACACAATCATACTCCCATGCAGAATAAAGCAAATTATAAACCTGTGGCAGGAAGTAGGAAAAG  
 CAATGTATGCCCCCTCCCATTGAGGGACTAATTAAGTGTACATCAAAT---  
 ATCACAGGGCTAATACTAACAAGGGATGGTGGCAATAACAATAGCACT-----  
 -----  
 -----  
 AATGAGACCGAGATCTTCAGACCTGGAGGAGGAAATATGAGGGACAATTGGAGAAGTGAATTATATAAATATA  
 AAGTAGTACAAATTGAACCAATA---GGACTAGCACCCACCAAGGCAAAGAGAAGAGTGGTG-----  
 -----CAGAGAGAAAAAAGAGCA---CTGGGA---ATAGGAGCT-----  
 ---GTGTTCTTGGGTTCTTGGGAGCA---GCAGGAAGCACTATG---GGCGCAGCGTCG---  
 CTGACGCTGACGGTACAG---GCCAGGCAA---TTACTG---TCTGGTATAGTGCAACAGCAGAGC---  
 AATTTG---CTGAGA---GCTATTGAGGCGCAACAGCATATGTTGCAACTCACAGTCTGGGGCATT  
 >KF716495  
 TTCTACTGTAATACAACACAACCTGTTTAATAGTACTTGGAAATGCTACTAGCGAGTCAAGTGAC-----  
 -----  
 -----  
 CTAAATGACACAATCACACTCCCATGCAGAATAAAACAAATTATAAACATGTGGCAGAAAGTAGGAAAAGCAA  
 TGTATGCCCCCTCCCATCAAAGGACTAATTAATTGTACATCAAAT---  
 ATCACAGGGCTCCTATTAAACAAGAGATGGTGGTAACAAGGTTAAT-----  
 -----  
 -----  
 GAGAGCAACCATGAGACCTTCAGACCGGGAGGAGGAAATATGAAGGACAATTGGAGAAGTGAATTATATAAAT  
 ACAAAATAGTAAAAATTGAACCATTA---GGAGTAGCCCCACCAAGGCAAAGAGAAGAGTGGTG-----  
 -----CAGAGAGAAAAAAGAGCA---GTGGGA---ATAGGAGCT---  
 -----ATGTTCTTGGGTTCTTGGGAGCA---GCAGGAAGCACTATG---GGCGCAGCGTCA---  
 GTGACGCTGACGGTACAG---GCCAGAAAA---TTATTG---TCTGGTATAGTGCAACAGCAGAAC---  
 AATTTG---CTGAGG---GCTGTTGAGGCGCAACAACGTATGTTGCAACTCACAGTCTGGGGCATT  
 >KC699031  
 TTCTACTGTGATACAACACAGCTATTTAATAGTACCTGGAATAGTACTACTTTGAATAATACTTGAATAATA  
 CTTGG-----  
 -----AATAAT-----  
 AGTGAAAATGACACTATCATACTCAGATGCAGAATAAAACAGATCATAAACAGGTGGCAGGAAGTAGGAAAAG  
 CAACGTATGCCCCCTCCCATCAGTGGAGAAATTAGATGTACATCAAAT---  
 ATTACAGGGCTACTATTAAACAAGAGATGGTGGTAAAAACAACAAC-----  
 -----  
 -----  
 GACAACGAGACCTTCAGACCTGGAGGAGGAGATATGAGGGACAATTGGAGAAGTGAATTATATAAATATAAAG  
 TAGTAAAAATTGAGCCATTA---GGACTGGCACCCACCAAGGCAAAGAGAAGAGTGGTG-----  
 -----CAGAGAGAAAAAAGAGCA---GTGACA---ATGGGAGCT-----  
 TTGTTCTTGGGTTCTTGGGAACA---GCGGGAAGCACTATG---GGCGCAGCGTCA---  
 GTGACGCTGACGGTACAG---GCCAGACTA---TTGTTG---TCTGGTATAGTGACAGCAGCAAAAC---  
 AATTTG---CTGAGG---GCTATTGAGGCGCAACAACATTTGTTGCAACTCACAGTCTGGGGCATC  
 >KC699034  
 TTCTATTGTAATGTAACACAACCTGTTTAATAGTACTTGGCATGGTAATGAGACTGTGAATAGTACTGAA----  
 -----  
 -----  
 GAAGGAGAAGTCATCACACTTCCATGCAGAATAAAACAAATTATAAACCTGTGGCAGGAAGTAGGAAAAGCAA  
 TGTATGCCCCCTCCCATCAGTGGAAAAATTAGATGTTTCATCAAAT---  
 ATTACAGGGCTGTTATTAAACAAGAGATGGTGGATACAACGGGGAC-----  
 -----  
 -----  
 AACAACTACTGAGACCTTCAGACCTGGAGGAGGAGATATGAGGGATAATTGGAGAAGTGAATTATACAAATATA  
 AAGTAGTAAAAGTTGAACCATTA---GGAATAGCACCCACCAAGGCAAAGAGAAGAGTGGTG-----  
 -----CAGAGAGAAAAAAGAGCA---GTGGGA---GTAGGAGCT-----  
 ---ATGATCATTGGGTTCTTGGGAGCA---GCAGGAAGCACTATG---GGCGCAGCGTCA---

GTGACGCTGACGGTACAG---GCCAGACTA---TTGTTG---TCTGGTATAGTGCAACAGCAGAGC---  
AACCTG---CTGAGG---GCTATTGAGGCGCAACAGCATATGTTGCAGCTCACAGTCTGGGGCATT  
>KF716496  
TTCTACTGTAATACAACACCACTGTTTGACAGTACCTGGAATGGGGGAGAGCCAGTGTCAAATAACACTGGAG  
GA-----  
-----  
AATGACACAATAATCACACTCCAATGTAGAATAAAACAAATTATAAACATGTGGCAGGAAGTTGGAAAAGCAA  
TGTATGCCCCCTCCCATCAGAGGACAAATTAGATGCTCATCAAAT---  
ATTACAGGGCTGATATTAACAAGAGATGGTGATCTTAACAATACC-----  
-----  
-----  
CAGAACGAGACCTTCAGACCTGGAGGAGGAGATATGAGGGACAATTGGAGAAGTGAATTATATAAATATAAAG  
TAGTAAAAATTGAACCATTA---GGAGTAGCACCCACCAAGGCAAAGAGAAGAGTGGTG-----  
-----CAGAGAGAGAAAAAGAGCA---GTGGGA---ATAGGAGCT-----  
CTGTTTCCTTGGGTTCTTAGGAGCA---GCAGGAAGCACTATG---GGCGCAGCGTCA---  
ATGACGCTGACGGTACAG---GCCAGACAA---CTATTG---TCTGGTATAGTGCAACAGCAGAAC---  
AATCTG---CTAAGG---GCTATTGAGGCGCAACAACATATGTTGCAACTCACAGTCTGGGGCATC  
>MH000302  
TTCTACTGTAATACAACACAACCTGTTTAATAGTACGTGGGCTTCG-----  
-----  
-----  
AATACTAACACTATCACACTCCCATGCAGAATAAAACAAATTATAAACATGTGGCAACAAGTAGGAAAAGCAA  
TGTATGCCCCCTCCCATCAGAGGAACAATTAAATGTTTCATCAAAT---  
ATTACAGGGCTACTATTATCAAGAGATGGAAGT-----  
-----  
-----  
ATCGAGACCTTCAGACCTGGAGGAGGAGATATGAGAGATAATTGGAGAAGTGAATTATATAAATATAAAGTAG  
TAAAAGTTAAGCCATTA---GGAGTAGCACCCACCAAGTGCAAAAAGAAGAGTGGTG-----  
-----CAGAGAGAAAAAAGAGCA---ATAGGA---TTCGGAGCT-----  
ATGTTTCATTGGATTCTTGGGAGCT---GCAGGAAGCACTATG---GGCGCAGCGTCA---  
GTGACGCTGACGGTACAG---GCCAGACAA---TTATTG---TCTGGTATAGTGCAACAGCAGAAAT---  
AATCTG---CTGAGG---GCTATTGAGGCGCAACAGCATCTGTTGCAACTCACAGTCTGGGGCATC  
>MH000296  
TTCTACTGCAATACAACAGCACTGTTTAATAGTACTTGGGTTATG-----  
-----  
-----  
AATGATTCCACTATCACACTCCCATGCAGAATAAAACAAATTATAAACAGATGGCAGGAAGTAGGAAAAGCAA  
TGTATGCCCCCTCCCATTCAGAGACCAATTAGGTGTTTCATCAAAT---  
ATTACAGGGCTGCTATTAAACAAGAGATGGGGGA-----  
-----  
-----  
GAGGAGATCTTCAGACCAGGAGGAGGAGATATGAGGGACAATTGGAGAAGTGAATTATATAAGTATAAAGTAG  
TGAAAATTGAACCATTA---GGAGTAGCACCCACCAAGGCAAAAAGAAGAGTGGTG-----  
-----CAGAGAGAAAAAAGAGCA---ATAGGA---ATAGGAGCT-----  
ATGTTTCATTGGGTTCTTGGGAGCA---GCAGGAAGCACTATG---GGCGCAGCGTCA---  
GTGACGCTGACGGTACAG---GCCAGACAA---TTATTG---TCTGGTATAGTGCAACAGCAGAAC---  
AATTTG---CTGAGG---GCTATTGAGGCGCAACAACATCTGTTGCAACTCACAGTCTGGGGCATC  
>MH000299  
TTCTATTGTGATACATCACAACCTGTTTAATAGTACTTGGAAAT-----  
-----  
-----  
AGTACTGTTAATATCACTCTCCCATGCAGATTAAAGCAATTTATAAACATGTGGCAGCAAGTAGGAAAAGCAA  
TGTATGCCCCCTCCCATCAGCGGACTAATCCAGTGCTCATCAAAT---  
ATTACAGGGCTGCTGTTAGTAAGGGATGGTGGT-----  
-----  
-----  
ACTGAAATCTTCAGACCTGGAGGGGGAGATATGAGGGACAATTGGAGAAGTGAAGTATATAAATATAAAGTAG  
TAAAGCTTGCACCATTA---GGAATAGCACCCACCAAGGCAAAGAGAAGAGTGGTG-----  
-----CAGAGAGAAAAAAGAGCA---GTGGGA---CTAGGAGCT-----  
ATGTTTCCTCGGGTTCTTGGGAGCA---GCAGGAAGCACTATG---GGCGCAGCGTCA---

GTGACGCTGACGGTACAG---GCCAGACAA---TTATTG---TCTGGTATAGTGCAACAGCAGAGC---  
 AATCTG---CTGAGA---GCTATTGAGGCGCAACAACATATGTTGCAACTCACAGTCTGGGGCATA  
 >KC699002  
 TTCTACTGTAATTCAACACAACCTGTTTAATAGTATCTGGAATGGTACTTGGGAATGATACTTGGGAATGGTACTA  
 GAGGGGTA-----  
 -----AAT---  
 AACACTGAAGACAATATCATACTCCCATGTAGAATAAAACAAATTATAAACATGTGGCAGGAAGTAGGAAAAG  
 CAATGTATGCCCCCTCCCATCAAAGGACGAATTATGTGTTTCATCAAAT---  
 ATTACAGGGCTGCTATTAACAAGAGATGGTGGTAATAGTAACGCT-----  
 -----  
 -----  
 ACCACCGAGATCTTCAGACCTGGAGGAGGAGATATGAGGGACAATTGGAGAAGTGAATTATATAAATATAAAAG  
 TAGTAAAAATTAAACCATTA---GGAGTAGCACCTACCAAGGCAAAGAGAAGAGTGGTG-----  
 -----CAGAGAGAAAAAAGAGCA---GTGGGA---ATAGGAGCT-----  
 GTGTTTCCTTGGGTTCTTGGGAGCA---GCAGGAAGCACTATG---GGCGCAGCGTCA---  
 ATGACGCTGACGGTACAG---GCCAGACGA---TTATTG---TCTGGTATAGTGCAACAGCAGAAC---  
 AATTTG---CTGAGG---GCTATTGAGGCGCAACAGCATCTGTTGCAACTCACAGTCTGGGGCATC  
 >KC699011  
 TTCTACTGTAACCTCAACACAACCTGTTTAATAGTACTTGGGTGTTTAATAATACTTGGGAATAGAACTGAAGGGT  
 TAAATAAC-----  
 -----  
 ACTGCAGAAAATATCACACTCCCATGCAGAATAAAACAAATTGTAAATATGTGGCAGGAAGTAGGAAAAGCAA  
 TGTATGCCCCCTCCCATCAGAGGACAAATTAGATGTTTCATCAAAT---  
 ATTACAGGGCTGCTATTAACAAGAGATGGTGGTAATAACACGAGA-----  
 -----  
 -----  
 AATAGCGAGACCTTCAGACCTGGGGGAGGAGATATGAGGGACAATTGGAGAAGTGAATTATATAAATATAAAAG  
 TAGTACAAATTGAACCATTA---GGAGTAGCACCCACTAAGGCAAGAAGAAGAGTGGTG-----  
 -----CAGAGAGAAAAAAGAGCA---ATAACA---CTAGGAGCT-----  
 GTGTTTCCTTGGGTTCTTGGGAGCA---GCAGGAAGCACTATG---GGCGCAGCGTCA---  
 GTGACGCTGACGGTACAG---GCCAGACAA---TTACTG---TCTGGTATAGTGCAACAGCAGAAC---  
 AATTTG---CTGAGG---GCTATTGAGGCGCAACAGCATCTGTTGCAACTCACAGTCTGGGGCATC  
 >KC699010  
 TTCTACTGTAATACAACACAACCTGTTTAATAGCACTTGGGAATAGTACTAGGATTGAAAATGATACTGAAGAGT  
 CAAATAGC-----  
 -----  
 ACTGAAAGAACGATCACACTCCCATGCAGAATAAGACAAATTATAAACAGGTGGCAGGAAGTAGGGAAAGCAA  
 TGTATGCCCCCTCCCATCAGCGGACAAATTAGATGCTCATCAAAC---  
 ATTACAGGGCTGCTATTAACAAGAGATGGCGGTAATGACAAGAAAAACGAG-----  
 -----  
 -----  
 ACTACTGAGGTCTTCAGACCTGGAGGAGGAGATATGAAGGACAATTGGAGAAGTGAATTATATAAATATAAAAG  
 TAGTAAAAATTGAACCATTA---GGAGTAGCACCCACTAAGGCAAAGAGAAGAGTGGTG-----  
 -----CAGAGAGAAAAAAGAGCA---GTGGGA---CTAGGAGCT-----  
 GTGTTTCCTTGGGTTCTTGGGAGCA---GCAGGAAGCACTATG---GGCGCAGCGTCA---  
 ATGACGCTGACGGTACAG---GCCAGACTA---TTATTG---TCTGGTATAGTGCAACAGCAGAAC---  
 AATTTG---CTGAGG---GCTATTGAGGCGCAACAGCATCTGTTGCAACTCACAGTCTGGGGCATC  
 >KC699009  
 TTCTACTGTAATTCAACACAACCTGTTTAATAGTACTTGGGAATGGTACTAATAGTACTTGGGAAT-----  
 -----  
 -----  
 GGTACTGAAAGTATCACACTCCCATGCAGAATAAAACAAATTTATAAACATGTGGCAGGAAGTAGGAAAAGCAA  
 TGTATGCCCCCTCCCATCAAAGGACAAATTAGATGTTTCATCAAAT---  
 ATTACAGGGCTGCTATTAACAAGAGATGGTGGTAATAACAATAAC-----  
 -----  
 -----  
 GAGAGCGAGACCTTCAGACCTGGAGGAGGAGATATGAGGGACAATTGGAGAAGTGAATTATACAAATATAAAAG  
 TAGTAAAAATTGAACCATTA---GGAGTAGCACCCACCAAGGCAAAGAGAAGAGTGGTG-----  
 -----CAGAGAGAAAAAAGAGCA---GTGGGA---ATAGGAGCT-----  
 TTGTTTCCTTGGGTTCTTGGGAGCA---GCAGGAAGCACTATG---GGCGCAGCGTCA---

ATAACGCTGACGGTACAG---GCCAGACTA---TTATTG---TCTGGTATAGTGCAACAGCAAAAC---  
 AATTTG---CTGAGG---GCTATTGAGGCGCAACAGCATCTGTTGCAACTCACAGTCTGGGGCATC  
 >KC699008  
 TTCTACTGTAATTCAACACCACTATTTTAATAGTACTTGGCATAATAATGACACTGAAGGAAATAACATC-----  
 -----  
 -----  
 ACTAACGGAAACATCACACTCCCATGCAGAATAAAACAAATTATAAACATGTGGCAGGAAGTAGGAAAAGCAA  
 TGTATGCCCCCTCCCATCAAAGGACAAATTAGATGCTCATCAAAT---  
 ATTACAGGGCTGCTATTAACAAGAGATGGAGGTAATAATAACAATAGT-----  
 -----  
 -----  
 ACCAATGACACTGAGATCTTCAGACCTGGAGGGGGAGATATGAGGGACAATTGGAGAAGTGAATTATATAAAAT  
 ATAAAGTAGTAAAAATTGAACCATTA---GGAGTAGCACCCACCAAGGCAAAGAGAAGAGTGGTG-----  
 -----CAGAGAGAAAAAAGAGCA---GTGGGAACGTTGGGAGCC---  
 -----ATGTTTCCTTGGGTTCTTGGGAGCA---GCAGGAAGCACTATG---GGCGCAGCGTCA---  
 ATGACGCTGACGGTACAG---GCCAGACAA---TTATTG---TCTGGTATAGTGCAACAGCAGAAC---  
 AATCTG---CTGAGG---GCTATTGAGGCGCAACAGCATATGTTGCAACTCACAGTCTGGGGCATC  
 >KC699003  
 TTCTACTGTAACACAACAAAACCTGTTTAATAGTACTTGGAAATGTTGCTGAAGGGTCAAATAAC-----  
 -----  
 -----  
 ACTGAAGGAAATATCACACTCCCATGCAGAATAAAACAAATTATAAACATGTGGCAGGAAGTAGGAAAGGCAA  
 TGTATGCCCCCTCCCATCAGAGGACAAATTAGATGTGTATCAAAT---  
 ATTACAGGGCTGCTATTAACAAGAGATGGTGGTAATAACAGGAATGGG-----  
 -----  
 -----  
 ACCAACGGGACCGAGATCTTCAGACCTGGAGGAGGAGATATGAGGGACAATTGGAGAAGTGAATTATATAAAAT  
 ATAAAGTAGTAAAAATTGAACCATTA---GGAATAGCACCCACCAAGGCAAAGAGAAGAGTGGTG-----  
 -----CAGAGAGAAAAAAGAGCA---GTCACA---TTAGGAGCT---  
 -----ATGTTTCCTTGGGTTCTTGGGAGCA---GCAGGAAGCACTATG---GGCGCAGCGTCA---  
 ATAACGCTGACGGTACAG---GCCAGACTA---TTATTG---TCTGGTATAGTGCAACAGCAGAGC---  
 AATTTG---CTGAGA---GCTATTGAGGCGCAACAACATTTGTTGCAACTCACAGTCTGGGGCATC  
 >KC699004  
 TTCTACTGTAATACAACAAAACCTGTTTAATAGTACTTGGGCTTGGGAATAATGGTACTTGGAAATAGTACTGAAG  
 GGTCAAAT-----  
 -----  
 -----  
 AACACAGCAAATATCACACTCTCATGCAGAATAAGACAAATTATAAACATGTGGCAAGAAGTAGGAAAAGCAA  
 TGTATGCCCCCTCCCATCAGCGGACAAATTAAATGCTCATCAAAT---  
 ATTACAGGGCTGCTGTTAACAAGAGATGGTGGTACTAACAATAGC-----  
 -----  
 -----  
 GAGACCGAGACTTTTCAGACCTGGAGGAGGAGATATGAGGGACAATTGGAGAAGTGAATTATACAAATATAAAG  
 TAGTAAAAATTGAACCATTA---GGAGTAGCTCCCACCAAGGCAAAGAGAAGAGTGGTG-----  
 -----CAGAGAGAAAAAAGAGCA---GTGGGA---ATAGGAGCT-----  
 TTGTTTCCTTGGGTTCTTGGGAGCA---GCAGGAAGCACTATG---GGCGCAGCATCA---  
 ATGACGCTGACGGTACAG---GCCAGACAA---TTACTG---TCTGGTATAGTGCAACAGCAGAAC---  
 AATTTG---CTGAGG---GCTATTGAGGCGCAACAGCATATGTTGCAACTCACAGTCTGGGGCATC  
 >KC699005  
 TTCTACTGTAATACAACACAACCTGTTTAATAGTACTTGGAAATGATACTAAAGGGCCAGATAGCACTGACAATA  
 GTACTTGG-----  
 -----  
 -----  
 ATCATACTACCATGCAGAATAAAACAAATTATAAACATGTGGCAGGAAGTAGGAAAAGCAATGTATGCCCCCTC  
 CTATCAGAGGACAAATTAGATGTTTCATCAAAT---  
 ATTACAGGGCTACTATTAACAAGAGATGGTGGGGGAAACAAGAAC-----  
 -----  
 -----  
 GAGAGCACCGAGACCTTCAGACCTGGAGGAGGAGATATGAGGGACAATTGGAGAAGTGAATTATATAAAATATA  
 AAGTAGTACAAATTGAACCATTA---GGAGTAGCACCCACCAAGGCAAAGAGAAGAGTGGTG-----  
 -----CAGAGAGAAAAAAGAGCA---GTGGGA---ATAGGAGCT-----  
 ---GTGTTTCCTTGGGTTCTTGGAGCGCA---GCAGGAAGCACTATG---GGCGCAGCGTCG---

GTGACGCTGACGGTACAG---GCCAGACAA---TTATTG---TCTGGTATAGTGCAGCAGCAAAAC---  
 AATTTG---CTGAGG---GCTATTGAGGCGCAACAACATCTGTTGCAACTCACAGTCTGGGGCATC  
 >KC699001  
 TTCTACTGTGATTCAACACAACCTGTTTAATAGTACTTGGAAATAGTACTACTTGAATAGTACTGAAGGGTTAA  
 ATAAC-----  
 -----  
 ACTGAAGGCAATATCACACTCCAATGCAGAATAAAACAAATTATAAACATGTGGCAGGAAGTAGGAAAAGCAA  
 TGTATGCTCCTCCCATCAGAGGACATATTAAATGTTTCATCAAAT---  
 ATTACAGGGCTGTTATTAACAAGAGATGGTGGTAATAACGAGAGTAGA-----  
 -----  
 -----  
 ACCAACGAGACCTTTAGACCTGAAGGAGGAAATATGAAAAGACAATTGGAGAAGTGAATTATATAAATATAAAG  
 TAGTAAAAATTGAACCATTA---GGAATAGCACCCACCAAGGCAAAGAGAAGAGTGGTG-----  
 -----CAGAGAGAAAAAAGAGCA---GTGGGA---TTAGGAGCT-----  
 GTGTTCCCTTGGGTTCTTGGGAGCA---GCAGGAAGCACTATG---GGCGCAGCGTCA---  
 CTGACGCTGACGGTACAG---GCCAGAACA---TTATTG---TCTGGTATAGTGC AACAGCAGAAC---  
 AATCTG---CTGAGG---GCTATTGAGGCGCAACAGCACCTGTTGCAACTCACAGTCTGGGGCATC  
 >AY535425  
 TTCTACTGTAATACAACACAACCTGTTTAATAGTACTTGGATGCTTAATAATACTTGGGATGGTACT-----  
 -----  
 -----  
 AAAGAGGAAAATATTACACTCCCATGCAGAATAAAACAAATTATAAACATGTGGCAGGAAGTAGGAAAAGCAA  
 TGTATGCCCCCTCCCATCAAAGGACAAATTAGATGTTTCATCAAAC---  
 ATTACAGGGCTGCTATTAACAAGAGATGGTGGTGGTAACACGAGC-----  
 -----  
 -----  
 AGCGATAATGAGACCTTCAGACCTGGAGGAGGAGATATGAGGGATAATTGGAGAAGTGAATTATATAAATATA  
 AAGTAGTAAAAATTGAACCATTA---GGAGTAGCACCCACCAAGGCAAAGAGAAGAGTGGTG-----  
 -----CAGAGAGAAAAAAGAGCA---GTGGGAATGCTAGGAGCC-----  
 ---ATGTTCCCTTGGGTTCTTGGGAGCA---GCAGGAAGCACTATG---GGCGCAGCGTCA---  
 CTGGCGTTGACGGTACAG---GCCAGACAA---GTATTG---TCTGGTATAGTGC AACAGCGGAAC---  
 AATTTG---CTGAGG---GCTATTGAGGCGCAACAGCATCTGTTGCAACTCACAGTCTGGGGCATC  
 >AY713411  
 TTCTACTGTAATACAACACAACCTGTTTAATAGTACTTGGAAATGAACTAACAGTGAAGGAAATATC-----  
 -----  
 -----  
 ACCAGTGGAATATAACACTCCCATGCAGAATAAAACAAATTATAAACATGTGGCAGGAAGTAGGAAAAGCAA  
 TGTATGCCCCCTCCCATCGGAGGACAAATTAAATGTTTGTCAAAC---  
 ATCACAGGGCTGTTATTAACAAGAGATGGTGGTAGTGATAACAGTAGT-----  
 -----  
 -----  
 AGTGGGAAAGAGATCTTCAGACCTGGAGGGGGAGATATGAGGGACAATTGGAGAAGTGAATTATATAAATATA  
 AGGTAGTAAAAATTGAACCATTA---GGAATAGCACCCACCAAGGCAAAGAGAAGAGTGGTG-----  
 -----CAGAGAGAAAAAAGAGCA---GTGGGA---ATAGGAGCC-----  
 ---ATGTTCCCTTGGGTTCTTGGGAGCA---GCAGGAAGCACTATG---GGCGCAGCGTCA---  
 CTAACGCTGACGGTACAG---GCCAGACAA---TTATTG---TCTGGTATAGTGCAGCAGCAAAAC---  
 AATTTG---CTGAGG---GCTATTGAGGCGCAACAGCACCTGTTGCAACTCACAGTCTGGGGCATC  
 >AF041125  
 TTCTACTGTAACCAACAAAACCTGTTTAACAGTACTTGGAGTGCTAATGGTACTGTCATGCCAAATGACACTG  
 AA-----  
 -----  
 GGGAAATGGCACAATCATGCTCACATGCAGAATAAAACAAATTGTAAACAGGTGGCAGGAAGTAGGAAAAGCAA  
 TGTATGCCCCCTCCCATCAGAGGACAAATTAGATGTTTCATCAAAT---  
 ATTACAGGGCTAATATTAACAAGAGGTGGTGGTGATAAAGAGAAC-----  
 -----  
 -----  
 GAGACTACTGAGACCTTCAGACCTGGAGGAGGAAATATGAGGGATAATTGGAGAAGTGAATTATATAAATATA  
 AAGTAGTAAAACTCGAACCATTA---GGGATAGCACCCACCAAGGCAAAGAGAAGAGTGGTG-----  
 -----CAGAGAGAAAAAAGAGCA---GTGGGA---ATAGGAGCT-----  
 ---TTGTTCCCTTGGGTTCTTGGGAGCA---GCAGGAAGCACTATG---GGCGCAGCGTCA---

CTGACGCTGACGGTACAG---GCCAGACTA---TTATTG---TCTGGTATAGTGCAACAGCAGAAC---  
 AATTTG---CTGAGA---GCTATTGAGGCGCAACAGCATCTGTTGCAACTCACAGTCTGGGGCATC  
 >AY535471  
 TTTTACTGTAATACAACAACAACTGTTTAATAGTACTTGGAAATGCTAACCATATTAGGAATGTTACTAGAGGGT  
 CAAATAGA-----  
 -----ACAACT-----  
 GGAGGAAATGACACACTCATACTCCCATGTAGAATAAAACAAATTATAAATATGTGGCAGGAAGTAGGAAAAG  
 CAATGTATGCCCCCTCCCGTCAGAGGACAAATTAGATGTTTCATCAAAT---  
 ATTACAGGGTTGCTATTAACAAGAGATGGTGGTAATAACGGAATGAG-----  
 -----  
 -----  
 ACCAACGGGACTGAGATCTTCAGACCTGGAGGGGGAGATATGAGGAACAATTGGAGAAGTGAATTATATAAAT  
 ATAAAGTAGTAAAAATTGAACCATTA---GGAGTACCACCCACCAAGGCAAGGAGAAGAGTGGTG-----  
 -----CAGAGAGAAAAAAGAGCA---GTGACA---CTAGGAGCT---  
 -----ATGTTCCCTTGGGTTCTTAGGAGCA---GCAGGAAGCACTATG---GGCGCAGCGTCA---  
 ATGACGCTGACGGTACAG---GCCAGACAA---TTATTG---TCTGGTATAGTGCAACAGCAAAGC---  
 AATTTG---CTGAGG---GCTATTGAGGCGCAACAGCATCTGTTGCAACTCACAGTCTGGGGCATC  
 >AF041130  
 TTCTACTGTAATACAACACAGCTGTTTAATAGTACTTGGCTGGTTAATAGTACTGGGGATGATACTAAT----  
 -----  
 -----  
 ACTACCACCAATATCACACTCCCATGCAGAATAAAACAAATTATAAACATGTGGCAGAAAGTAGGAAAAGCAA  
 TGTATGCCCCCTCCCATCAGAGGACAAATTAGATGTTTATCAAAT---  
 ATTACAGGGATACTATTAACAAGGGATGGTGGTAATAACACAAAC-----  
 -----  
 -----  
 GGGACCGAGATCTTCAGACCTGGAGGAGGAGATATGAGGGATAATTGGAGAAGTGAATTATATAAATATAAAG  
 TAGTAAAAATTGAACCATTG---GGAATAGCACCCACCAAGGCAAAGAGAAGAGTGGTG-----  
 -----CAAAGAGAAAAAAGAGCA---GTGGGA---TTAGGAGCT-----  
 ATGTTCCCTTGGGTTCTTGGGAGCA---GCAGGAAGCACTATG---GGCGCAGCGTCA---  
 CTGACGCTGACGGTACAG---GCCAGACAA---TTATTG---TCTGGTATAGTGCAACAGCAGAAC---  
 AATTTG---CTGAGA---GCTATTGAGGCGCAACAGCATCTGTTGCAACTCACAGTCTGGGGCATC  
 >AF041131  
 TTCTACTGTAATACAACACGACTGTTCAATAGTACTTGGAAATGCTAGTAACATTGAAGAAAATAGCACCCT-  
 -----  
 -----  
 GAAGGAAATATCACCCTATCCCATGCAGAATAAAACAAATTATAAACATGTGGCAGGAAGTAGGAAAAGCAA  
 TGTATGCCCCCTCCCATCAGAGGACAAATTAGATGTTTCATCAAAT---  
 ATTACAGGGCTGCTATTAATAAGAGATGGTGGTAATGATAACAAT-----  
 -----  
 -----  
 AATGACACCGAGATCTTCAGACCTGGAGGGGGAGATATGAGGGACAATTGGAGAAGTGAATTATATAAATATA  
 AAGTAGTAAAAATTGAACCATTA---GGAATAGCACCCACCAAGGCAAAGAGAAGAGTGGTG-----  
 -----CAGAGAGAAAAAAGAGCA---GTGGGAACGCTAGGAGCC-----  
 ---ATGTTCCCTTGGGTTCTTGGGAGCA---GCAGGAAGCACTATG---GGCGCAGCGTCA---  
 ATGACGCTGACGGTACAG---GCCAGACAA---TTATTG---TCTGGTATAGTGCAACAGCAGAGT---  
 AATCTG---CTGAGG---GCTATTGAGGCGCAACAGCATCTGTTGCAACTCACAGTCTGGGGCATC  
 >AF041134  
 TTCTACTGTAATACAACCCAACTGTTTGATAGTATTTGGAATGATACTGAAGGGTCATATAAAGTGA---  
 -----  
 -----  
 GGAAATGACACAATCACTCTCCCATGCAGGATAAAACAAATTATAAACTTGTGGCAGGAAGTAGGAAAAGCAA  
 TGTATGCCCCCTCCCATCAGAGGACAAATTAGATGTTTCATCAAAT---  
 ATTACAGGGCTGCTATTAACAAGAGATGGTGGGAACGAGAGCGAA-----  
 -----  
 -----  
 GCCACCGAGATCTTCAGACCTGGAGGAGGAGATATGAGGGACAATTGGAGAAGTGAATTATATAAATATAAAA  
 TAGTAAAAATTGAACCATTA---GGAGTAGCACCCACCAAGGCAAAGAGAAGAGTGGTG-----  
 -----CAAAGAGAGAAAAAAGAGCA---GTGGGA---TTAGGAGCT-----  
 TTGTTCCCTTGGGTTCTTGGGAGCA---GCAGGAAGCACTATG---GGCGCAGCGTCA---

ATAACGCTGACGGTACAG---GCCAGACAA---TTATTG---TCTGGTATAGTGCAACAACAGAAC---  
 AATTTG---TTGAGG---GCTATTGAGGCGCAACAGCATCTGTTGCAACTCACAGTCTGGGGCATC  
 >AF041133  
 TTCTACTGTGATTCAACACAACCTATTTAATAGTACTTGGAGTATTAATAGTACTTGGAAATAGTACTGAA-----  
 -----  
 -----  
 ATAACAGATAATATCACACTCCCATGCAGAATAAAACAAATTATAAACATGTGGCAGGAAGTAGGGAAAGCAA  
 TGTATGCCCCCTCCCATCAGAGGACAAATTAGATGTTTCATCAAAT---  
 ATTACAGGGCTGCTATTAACAAGAGATGGTAGTGGCACGAATGAGACG-----  
 -----  
 -----  
 AACGGGACTGAGACCTTCAGACCGGGAGGAGGAGATATGAGGGACAATTGGAGAAAGTGAATTATATAAATATA  
 AAGTAGTAAAAATTGAACCATTA---GGAGTAGCACCCACCAAGGCAAAGAGAAGAGTGGTG-----  
 -----CAGAAAGAAAAAGAGCA---GTGGGG---ATAGGAGCT-----  
 ---GTGTTCCCTTGGGTTCTTGGGAGCA---GCAGGAAGCACTATG---GGCGCAGCGTCA---  
 CTGACGCTGACGGTACAG---GCCAGACTA---TTATTG---TCTGGTATAGTGCAACAGCAGAAC---  
 AATTTG---CTGAGG---GCTATTGAGGCGCAACAGCATCTGTTGCAACTCACAGTCTGGGGCATC  
 >KC699014  
 TTCTACTGTAATACAACACCACTGTTTAAATAGTACTTGGACTTTTAAATGGTACTACTTGGAACACAACCTAACA  
 CTGAA-----  
 -----  
 GGAAATGACACAATCACACTCCAATGTAAATAAAGCAAATTATAAACATGTGGCAGGAAGTAGGAAAAGCAA  
 TGTATGCCCCCTCCCATCAAAGGACTAATTAAATGTTTCATCAAAT---  
 ATTACTGGGTTGCTACTAACAAGGGATGGTGGTAGTAATACTACC-----  
 -----  
 -----  
 AATACCACCGAGACCTTCAGACCTGGAGGAGGAGATATGAAGGACAATTGGAGAAAGTGAATTATATAAATATA  
 AAGTAGTAAAAATTGAACCATTA---GGAGTAGCACCCACCAAGGCAAAGAGAAGAGTGGTG-----  
 -----CAGAGAGAAAAAGAGCA---GTAACA---CTAGGAGCT-----  
 ---ATGTTCCCTTGGGTTCTTGGGAGCA---GCAGGAAGCACTATG---GGCGCAGCGTCA---  
 ATAACGCTGACGGTACAG---GCCAGACAA---TTATTG---TCTGGTATAGTGCAACAGCAGAAC---  
 AATTTG---CTGAGG---GCTATTGAGGCGCAACAACATCTGTTGCAACTCACAGTCTGGGGCATC  
 >KC699016  
 TTCTACTGTGATACAACAAAACCTGTTTAGTAGTACTTGGAAATAGGACTGAGACTACTTGGAAATATTGCTGAAG  
 GGTTA-----  
 -----AAT---  
 GAGACTGAAACCACCATCACACTCCAATGCAGAATAAAACAAATTGTAAACAAGTGGCAGGAAGTAGGAAAAG  
 CAATGTATGCCCCCTCCCATCAAAGGACAAATTAAATGCTCATCAAAT---  
 ATTACAGGGCTGCTCTTAAACAAGAGATGGTGGGAGCGGGAACGAGACCGAG-----  
 -----  
 -----  
 AACGGGACCGAGACTTTCAGACCTGGAGGAGGAGATATGAGGGACAATTGGAGGAGTGAATTATACAAATATA  
 AAGTAGTACAAATTGAACCATTA---GGAGTAGCACCCACCAAGGCAAAGAGAAGAGTGGTG-----  
 -----CAGAGAGAAAAAGAGCA---GTGGGA---ATAGGAGCT-----  
 ---ATGTTCCCTTGGGTTCTTGGGAGCA---GCAGGAAGCACTATG---GGCGCAGCGTCA---  
 ATGATGCTGACGGTACAG---GCCAGACAA---TTATTG---TCTGGTATAGTGCAACAGCAGAAC---  
 AATTTG---CTGAGG---GCTATTGAGGCGCAACAGCATATGTTGCAACTCACAGTCTGGGGCATT  
 >KC699017  
 TTCTACTGCAATACAACACAGCTGTTTAAACAGTACTTGGTATAATAATAGTGCTTGGAAATGGTACTGCACAGG  
 AAAAT-----  
 -----  
 AGCACTGAAATTATCACACTCCCATGCAGAATAAAACAGATTATAAACAGGTGGCAGGAAGTAGGAAGAGCAA  
 TGTATGCCCCCTCCCATCGCAGGACAAATTAGATGTTTCATCAAAC---  
 ATTACAGGACTGCTATTAACAAGAGACGGTGGAACTCCAATAAT-----  
 -----  
 -----  
 AGTGAATGAAACCTTTAGACCTGGAGGAGGAGATATGAGAGACAATTGGAGAAAGTGAGTTATATAAATATA  
 AAGTAGTACAAATTAAACCATTA---GGAGTAGCACCTACCATGGCAAAGAGAAGAGTGGTA-----  
 -----CAGAGAGAAAAAGAGCA---GTGGGAATGCTAGGAGCT-----  
 ---ATGTTCCCTTGGGTTCTTGGGAGCA---GCAGGAAGCACTATG---GGCGCAGCGTCA---

ATGACGCTGACGGTACAG---GCCAGACAA---TTATTA---TCTGGTATAGTGCAACAGCAAAAC---  
 AATTTG---CTGAGG---GCTATTGAGGCGCAGCAGCATCTGTTGCAACTCACAGTCTGGGGCATC  
 >KC699012  
 TTCTACTGTAATTCAACAGAACTGTTTAATAGTACTTGGACTTGGGAATGATACTAGGGGGTTAAATAACACTG  
 AAGGA-----  
 -----  
 AATAGCACATAATCAAACCTCCCATGCAGAATAAAACAAATTATAAACATGTGGCAGGAAGTAGGAAAAGCAA  
 TGTATGCCCCCTCCCATCAGAGGACAAATTAAGTGTATCCAAT---  
 ATTACAGGGCTGCTATTAACGAGGGATGGTGGTATTATTACCACAAATGGGTCC-----  
 -----  
 -----  
 GAGAACGAGACCTTCAGACCTGGAGGAGGAGATATGAGGGACAATTGGAGAAGTGAATTATACAAATATAAAAG  
 TAGTAAAAATTGAACCATTA---GGATTGGCACCCACCAAGGCAAAGAGAAGAGTGGTG-----  
 -----CAGAGAGAAAAAAGAGCA---GTGGGA---ATAGGAGCT-----  
 TTGTTTCCTTGGGTTCTTGGGAGCA---GCAGGAAGCACTATG---GGCGCAGCGTCA---  
 ATAACGCTGACGGTACAG---GCCAGACAA---TTATTT---TCTGGTATAGTGCAAGCAGCAGAAT---  
 AATCTG---CTGAGG---GCTATTGAGGCGCAACAGCATCTGTTGCAACTCACAGTCTGGGGCATC  
 >KC699020  
 TTCTACTGTGATACAACACAACCTGTTTAATAGTACTTGGGAATGATACATGGTCAAATAACACAATGAT----  
 -----  
 -----  
 ATTGCAGAAAATATTACACTCCCATGCAGAATAAAACAAATTATAAACATGTGGCAGGAAGTAGGAAAAGCAA  
 TGTATGCCCCCTCCCATCAGAGGACAAATTAGATGTATATCAAAT---  
 ATTACCGGGCTGCTATTAACAAGAGATGGTGGCAAT-----  
 -----  
 -----  
 AATGAGACCGAGGTCTTCAGGCCAGGAGGAGGAGATATGAGGGACAATTGGAGAAGTGAATTATATAAATATA  
 AAGTGGTACAAATTGAACCATTA---GGAATAGCACCCACCAAGGCAAAGAGAAGAGTGGTG-----  
 -----CAGAGAGAGAAAAAGAGCA---GTGGGA---ATAGGAGCT-----  
 ---GTGTTTCCTTGGGTTCTTGGGAGCA---GCAGGAAGCACTATG---GGCGCAGCATCA---  
 GTGATGCTGACGGTACAG---GCCAGACAA---TTATTG---TCTGGTATAGTGCAACAGCAAAAC---  
 AATTTG---CTGAGA---GCTATTGAGGCGCAACAACATCTGTTGCAACTCACAGTCTGGGGCATT  
 >KC699026  
 TTCTACTGTAATACATCAGGACTGTTTAATAGTACTTGGATTTGGAATGATACTACTTGGGAATGATACTATGG  
 GGTCC-----  
 -----AAT---  
 GACACAAAGGAAAATATCACACTCATATGCAGAATAAAACAAATTGTCAACATGTGGCAGGAAGTAGGAAAAG  
 CAATGTATGCCCCCTCCCATCAGGGGACTAATTAGATGTTCAATCAAAT---  
 ATTACAGGGCTGCTATTAACAAGAGATGGTGGTAATAATAATGAAAGC-----  
 -----  
 -----  
 AACACGACACTGAGACTTTCAGACCTGGAGGAGGAGATATGAGGGACAATTGGAGAAGTGAATTATATAAAT  
 ATAAAGTAGTAAAGATTGAACCTTA---GGAGTAGCACCTACCAGGGCAAAGAGAAGAGTGGTG-----  
 -----CAGAGAGAAAAAAGAGCA---GTAACG---CTGGGAGCT---  
 -----TTGTTTCCTTGGGTTCTTGGGAGCA---GCAGGAAGCACTATG---GGCGCAGCGTCA---  
 ATGACGCTGACGGTACAG---GCCAGACAA---TTGTTG---TCTGGTATAGTGCAAGCAGCAGAGT---  
 AATCTA---CTGAGA---GCTATTGAGGCGCAACAACATCTGTTGCAACTCACAGTCTGGGGCATC  
 >KC699015  
 TTCTACTGTAATACAACAAAACCTGTTTAATAGTACTTGGACTTGGGAATAATACTGAAGAGGCAAATAACAATA  
 GTACT-----  
 -----GACGGG-----  
 GCAAAATGACACTATCATCACACTTCCATGCAGAATAAAACAAATTATAAACATGTGGCAGACAGTAGGAAAAG  
 CAATGTATGCCCCCTCCCATCAAAGGAAAAATTGAATGCTCATCAAAT---  
 ATTACAGGGCTGCTATTAACAAGAGATGGTGGTGAAAACAACACT-----  
 -----  
 -----  
 ACCAAAGAGATCTTCAGACCTGGAGGAGGAGATATGAGGGACAATTGGAGAAGTGAATTATATAAATATAAAAG  
 TAGTAAAAATTGAACCATTA---GGAGTAGCACCCACCAAGGCAAAGAGAAGAGTGGTG-----  
 -----CAGAGAGAAAAAAGAGCA---GTGGGA---ATAGGAGCT-----  
 TTGTTTCCTTGGGTTCTTGGGAGCA---GCAGGAAGCACTATG---GGCGCAGCGTCA---

ATGACGCTGACGGTACAG---GCCAGACAA---TTATTG---TCTGGTATAGTGCAACAGCAGAAC---  
 AATCTG---CTGAGA---GCTATTGAGGCGCAACAGCATATGTTGCAACTCACAGTCTGGGGCATC  
 >KC699013  
 TTCTACTGTAATACAGCAGAACTGTTTAATAGTACTTGGAATGTAAGTGGTACTGAAGAGTTAAATAAC----  
 -----  
 -----  
 ACTGAAAAATAATCACACTCCCATGCAGAATAAGACAAATTATAAACAAAGTGGCAGGAAGTAGGAAAAGCAA  
 TATATGCCCCCTCCCATTAGGGGACAAATTAGATGCTCATCAAAC---  
 ATTACAGGGCTGCTATTAACAAGAGATGGTGGGAACGAGAACGGGACC-----  
 -----  
 -----  
 AACGGGACCACCGAGGTCTTCAGACCTGGAGGAGGAAATATGAAGGACAATTGGAGGAGTGAATTATATAAAT  
 ATAAAGTAGTAAAAATTGAACCATTA---GGAGTAGCACCCACCAGGGCAAAGAGAAGAGTGGTG-----  
 -----CAGAGAGAAAAAAGAGCA---GCGGGA---ATAGGAGCT---  
 -----CTGTTTCCTTGGGTTCTTGGGAGCA---GCAGGAAGCACTATG---GGCGCAGCGTCA---  
 CTGACGCTGACGGTACAG---GCCAGACAA---TTATTG---TCTGGTATAGTGCAACAGCAGAAC---  
 AATTTG---CTGAGG---GCTATTGAGGCGCAACAGCATATGTTGCAACTCACAGTCTGGGGCATC  
 >KC699021  
 TTCTACTGTAATACAACAACAACTGTTTAATGGTACTTGGAATTGGACTGATAATAGCTGGCCAAATGACACAA  
 AT-----  
 -----  
 ATTAATGACACTATCACACTCCCATGCAGAATAAGACAAATTATAAATATGTGGCAGGGAGTAGGAAAAGCAA  
 TGTATGCCCCCTCCTATCAGCGGATACATTAAGTGTTCATCAAAT---  
 ATTACAGGGCTGATATTAACAAGAGATGGTGGTAACACAAACACATCA-----  
 -----  
 -----  
 AATGGGACCGAGACCTTCAGACCTGGAGGAGGAAATATGAAAGACAATTGGAGAAGTGAATTATATAAATATA  
 AAGTAGTAAAAATTGAACCATTA---GGAATAGCACCCACCAGGGCAAAAAGAAGAGTGGTG-----  
 -----CAAAGAGAAAAAAGAGCA--GTGGGA---CTAGGAGCT-----  
 ---TTGTTCCCTTGGGTTCTTGGGAGCA--GCAGGAAGCACTATG---GGCGCAGCGTCA---  
 GTGACGCTGACGGTACAG---GCCAGACAA---TTAATG---TCTGGTATAGTGCAACAGCAGAAC---  
 AATCTG---CTGAAG---GCTATTGAGGCGCAACAGCGTATGTTGCAGCTCACAGTCTGGGGCATC  
 >KF695111  
 TTCTACTGTAACCAACAAAACCTGTTTAATAGAACTTGGTCTAATGGTACTTGGGATGATGCTTGAATGATA  
 CT-----  
 -----ACA---  
 GACGTTAACGGAACGATCATACTCCCATGCAGAATAAAACAAATTATAACATGTGGCAGAAAGTAGGAAAAG  
 CAATGTATGCCCCCTCCCATCAGAGGAATAATTAAGTGTACATCAAAT---  
 ATTACAGGGCTGATATTAACAAGAGATGGTGGTGTGAATAATACA-----  
 -----  
 -----  
 AACGAGACCTTCAGACCTGGAGGGGAGATATGAGGGACAATTGGAGAAGTGAATTATATAGATATAAAGTAG  
 TAGAAATTGAACCATTA---GGAGTAGCACCCACCAAGGCAAAAAGAAGAGTGGTG-----  
 -----CAGAGAGAAAAAAGAGCA---GTGCCA---CTAGGAGCT-----  
 ATGTTCCCTTGGGTTCTTAGGAGCA---GCAGGAAGCACTATG---GGCGCAGCGTCA---  
 ATAGCGCTGACGGCACA---GCCAGACAA---TTATTG---TCTGGTATAGTGACAGCAGCAGAAC---  
 AATCTG---CTGAGG---GCTATTGAGGCGCAACAGCATCTGTTGCAACTCACAGTCTGGGGCATC  
 >EF033658  
 TTCTACTGTAATACAACAGAACTGTTTAATAGTACCTGGAATGATACTGAAAGGGTAGATGACACCGAT----  
 -----  
 -----  
 AGGGGTGACAATATCAAACCTTCCATGCAGAATAAAACAAATTGTAAACAGGTGGCAGGAAGTAGGAATAGCAA  
 TGTATGCCCCCTCCCATCGAAGGAAATATTAGATGTTTCATCAAAT---  
 ACTACAGGACTGCTATTAACAAGAGATGGGGGTAATGATAACACGACA-----  
 -----  
 -----  
 GCTAACAAAGACTGAGACCTTCAGACCTGGAGGAGGAGATATGAGGGACAATTGGAGAAGTGAATTATATAAAT  
 ATAAAGTAGTAAAAATTGAACCATTA---GGAGTAGCACCCACCCAGGCAAAAAGAAGAGTGGTG-----  
 -----CAGAGAGAAAAAAGAGCA---GTGACA---CTAGGAGCT---  
 -----ATGTTCCCTTGGGTTCTTGGGAGCA---GCAGGAAGCACTATG---GGCGCAGCGTCA---

ACGGTGCTGACGGTACAG---GCCAGACAA---TTATTG---TCTGGTATAGTGCAACAGCAGAAT---  
 AATCTG---CTGAGA---GCTATTGAGGCGCAACAGCATCTGTTGCAACTCACAGTCTGGGGCATC  
 >AF321080  
 TTCTACTGTGATACAACACAGCTGTTTAATAGTACTTGGAATGTTACTTGGAATGAACTGGAGAGTCAAAT-  
 -----  
 -----  
 AGCACTGGAAATATCACACTCCCATGCAGAATAAGACAAATTATAAACAGGTGGCAGGAAGTAGGAAAAGCAA  
 TGTATGCTCCTCCCATCAAAGGACAAATTAGATGTTTCATCAAAC---  
 ATTACAGGGCTGCTATTAACAAGAGACGGTGGTGCTGAGAACGCC-----  
 -----  
 -----  
 ACCACCGAGACCTTTAGACCTGGAGGAGGAGATATGAGAGACAATTGGAGAAGTGAGTTATATAAATATAAAG  
 TAGTGCAAATTAAGCCATTA---GGAGTAGCACCCACCAGGGCAAAGAGAAGAGTGGTG-----  
 -----CAGAGAGAAAAAAGAGCA---GTGGGAACGCTAGGAGCT-----  
 ATGTTCCCTTGGGTTCTTGGGAGCA---GCAGGAAGCACTATG---GGCGCAGCGTCA---  
 ATGACGCTGACGGTACAG---GCCAGACAA---TTATTG---TCTGGTATAGTGCAACAGCAAAAC---  
 AATTTG---CTGAGA---GCTATTGAGGCGCAACAGCATCTGTTGCAACTCACAGTCTGGGGCATT  
 >M26727  
 TTCTACTGTAATACATCACAACTGTTTAATAGTACTTGGAATGATACTACAAGGGCAAATAGC-----  
 -----  
 -----  
 ACTGAAGTAACTATCACACTCCCATGTAGAATAAAACAAATTGTAAACATGTGGCAGGAAGTAGGAAAAGCAA  
 TGTATGCCCCCTCCCATCAGTGGAACAAATTAGATGTTTCATCAAAG---  
 ATTACAGGGCTGCTATTAACAAGAGATGGTGGTAAGAACACCACG-----  
 -----  
 -----  
 AACGGGATCGAAATCTTCAGACCTGCAGGAGGAGACATGAGGGACAATTGGAGAAGTGAATTATATAAATATA  
 AAGTAGTAAAAATTGAACCATTA---GGAGTAGCACCCACCAAGGCAAGGAGAAGAGTGGTG-----  
 -----CAGAGAGAAAAAAGAGCA---GTGGGAATGCTAGGAGCT-----  
 ---ATGTTCCCTTGGGTTCTTGGGAGCA---GCAGGAAGCACTATG---GGCGCACGGTCG---  
 ATGACGCTGACGGTACAG---GCCAGACAA---TTATTG---TCTGGTATAGTGCAAGCAGCAGAAC---  
 AATCTG---CTGAGG---GCTATTGAGGCGCAACAGCACCTGTTGCAACTCACAGTCTGGGGCATC  
 >JN034158  
 TTCTACTGCAATTCAACACCACTGTTTAATAGTACTTGGAATGGTACTTTGGATAGTGCTGGAGAA-----  
 -----  
 -----  
 TCAAGTGACAATATCACACTCATATGCAGAATAAAACAGTTTATAAACCTGTGGCAGGAAGTAGGAAAAGCAA  
 TGTATGCCCCCTCCCATCAGAGGACAAATTAGCTGTTTCATCAAAG---  
 ATTACAGGGCTGCTATTAACAAGAGATGGTGGTATTAAGAATGACACC-----  
 -----  
 -----  
 AACAAAGACTGAGATTTTTTAGACCTGCAGGAGGAGATATGAGGGACAATTGGAGAAGTGAATTATATAAATATA  
 AAGTAGTAAAAATTGAACCATTA---GGAGTAGCACCCACCACGGCAAAGAGAAGAGTGGTG-----  
 -----CAGAGAGAAAAAAGAGCA---GTGGGAACGATAGGAGCT-----  
 ---ATGTTCCCTTGGGCTCTTGGGAGCA---GCAGGAAGCACTATG---GGCGCAGCGTCA---  
 GTGACGCTGACGGTACAG---GCCAGACTA---TTATTG---TCTGGTATAGTGCAACAGCAGAAC---  
 AATTTG---CTGAAG---GCTATTGAGGCGCAACAGCATATGTTGCAACTCACAGTCTGGGGCATT  
 >JN034139  
 TTCTACTGTAATTCAACACAGCTGTTTAATAGTACTTGGAATAATGGTATTATACAGTCAAATATCACTGCT-  
 -----  
 -----  
 GAAAATGACAACATCACACTCCCATGCAGAATAAAACAAATTATAAACAGGTGGCAGGAAGTAGGAAAAGCAA  
 TGTATGCCCCCTCCCATCAGAGGAATAATTAGATGCACATCAAAC---  
 ATTACAGGGCTGCTACTAACAAGAGATGGTGGTAATAAGAATGGGAGC-----  
 -----  
 -----  
 AACACAATGAGACCTTTAGACCTGGAGGAGGAGATATGAGAGACAATTGGAGAAGTGAATTATATAAATATA  
 AAGTAGTAAAAATTGAGCCATTA---GGAGTAGCACCCACCAAGGCAAAAAGAAGAGTGGTG-----  
 -----CAGAGAGAAAAAAGAGCA---GTAACG---CTAGGAGCT-----  
 ---ATGTTCCCTTGGGTTCTTGGGAGCA---GCAGGAAGCACTATG---GGCGCAGCGTCC---

ATGACGCTGACGGTACAG---GCCAGACAA---TTATTG---TCTGGTATAGTGCAACAGCAGAAT---  
 AATTTG---CTGAGG---GCTATTGAGGCGCAACAGCATCTGTTGCAACTCACAGTCTGGGGCATC  
 >MG902199  
 TTTTACTGTAATACAACACAGCTGTTTAATAGTACTTGGAATAGTACTTGGAATTGGAATAATACTGAAGAGT  
 CAGCTAAC-----  
 -----  
 ACTACAGCAAACATAACACTCCCATGCAGAATAAAACAAATTATAAACATGTGGCAGGAAGTAGGAAAAGCAA  
 TGTATGCCCCCCCCATCTCAGGACAGATTAGATGCTCATCAAAT---  
 ATTACAGGGCTGATCTTAACAAGAGATGGTGGTAATGATACTAGCAAT-----  
 -----  
 -----  
 AACGGGACCGAGATCTTCAGACCTGGAGGAGGAAATATGAAGGACAATTGGAGAAGTGAATTATATAAAATATA  
 AAGTAGTAAAAATTGAACCATTA---GGAGTAGCCCCACCAAGGCAAAGAGAAGAGTGGTG-----  
 -----CAAAGAGAAAAAAGAGAC---ATGGGA---CTAGGAGCT-----  
 ---TTGTTCCCTTGGGTTCTTGGGAGCA---GCAGGAAGCACTATG---GGCGCAGCGTCA---  
 TTGACGTTGACGGTACAG---GCCAGACAA---TTATTG---TCTGGTATAGTGCAACAGCAGAAC---  
 AATTTG---CTGAGA---GCTATTGAGGCGCAACAACATTTGTTGCAGCTCACAGTCTGGGGCATC  
 >MG902157  
 TTCTACTGTAATACAACAACACTGTTTAATAGCACTTGGAATACTACTGATGGTAGTACTTGGAATAATACTG  
 ATAATAGTACT-----  
 GCA---AATGACATTAGT-----  
 ACTGCAAATGACACTATCATACTCCCATGTAGAATAAAACAAATTATAAACATGTGGCAGGAAGTAGGAAAAG  
 CAATGTATGCCCCCTCCCATTAAGGACTAATTAGATGTTTCATCAAAC---  
 ATTACAGGACTGATATTAACAAGAGATGGTGGTAATAATAGTAGC-----  
 -----  
 -----  
 AACGAGACCTTCAGACCTGCAGGGGGAAATATGAAGGACAATTGGAGAAGTGAATTATATAAAATACAAAGTAG  
 TAAAAATTGAACCATTA---GGAATAGCACCCACCAAGGCAAAGAGAAGAGTGGTG-----  
 -----CAAAGAGAAAAAAGAGCA---GTGACA---CTGGGAACC-----  
 ATGCTCCTTGGGTTCTTGGGAGCA---GCAGGAAGCACTATG---GGCGCAGCGTCC---  
 TTGACGCTGACGGTACAG---GCCAGACAA---TTATTG---TCTGGTATAGTGCAACAGCAGAAC---  
 AATCTG---CTGAGG---GCTATTGAGGCGCAGCAGCATCTGTTGCAGCTCACAGTCTGGGGCATC  
 >HM586193  
 TTCTACTGTAGTACAACAACACTGTTTAATAGTACTTGGAATTGGAATGAGACTGACAATGATCCTGGGAATA  
 CA-----  
 -----  
 ACTGGTAATGGCACACTCACACTCCCATGCAGAATAAAACAATTTGTAAACATGTGGCAAGAAGTAGGAAAAG  
 CAATGTATGCCCCCTCCTATCAGCGGACCGATTAACTGTACATCAAAT---  
 ATTACAGGGCTGCTATTAAACCAGAGATGGTGGTAATAGCTCGAAT-----  
 -----  
 -----  
 GATTACAGAGACCTTTAGACCTGGAGGAGGAGATATGAGGGACAATTGGAGAAGTGAATTATATAAAATACAAAG  
 TAGTAAAAATTGAACCATTA---GGAGTAGCACCCACCAAGGCAAAGAGAAGAGTGGTG-----  
 -----CAAAGAGAAAAAAGAGCA---GTGGGA---CTAGGAGCT-----  
 ATGTTCCCTTGGGTTCTTGGGAGCA---GCAGGAAGCACTATG---GGCGCAGCGTCA---  
 GTGACGCTGACGGTACAG---GCCAGACTG---TTATTG---TCTGGTATAGTGCAACAGCAGAAT---  
 AATCTG---CTGAGA---GCTATTGAGGCGCAACAACATCTGTTGCAACTCACAGTCTGGGGCATC  
 >HM586198  
 TTCTACTGCAATACAACAACACTATTTAATAGTACTTGGAATAAGAACACAACC-----  
 -----  
 -----  
 ATGAATGACACAATCATACTCCCATGTAGAATAAAACAGATTATAAACATGTGGCAGGAAGTAGGAAAAGCAA  
 TGTATGCCCCCTCCCATCAGAGGACAAATTAATTGTTTATCAAAT---  
 ATTACAGGGCTGCTATTAAACAAGAGACGGGGGTGATACCAATGGCACC-----  
 -----  
 -----  
 AATGGCACAGAAATATTTCAGACCTGGAGGAGGAGATATGAGGGACAATTGGAGAAGTGAATTATACAAATATA  
 AAGTAGTAAAAATTGAACCTTTA---GGAGTAGCACCCACTAGGGCAAAGAGAAGAGTGGTG-----  
 -----CAAAGAGAAAAAAGGGCA---GTGGGA---CTGGGAGCT-----  
 ---CTGTTCCCTTGGGTTCTTAGGAGCA---GCAGGAAGCACTATG---GGCGCAGCGTCA---

ATGACGCTGACGGTACAG---GCCAGACAA---CTGCTG---TCTGGTATAGTGCAACAGCAGAAC---  
 AATCTG---CTGAGA---GCTATTGAGGCGCAACAGCATCTGTTGCAACTCACAGTCTGGGGCATC  
 >HM586210  
 TTCTACTGCAATTCAACACAGCTGTTTAATAGTACTTGGAATAGTACTGAAGGCAGTATTGAAGGGTCAAATA  
 GCACT-----  
 -----GAA---  
 AAGAACATCACACTCATCACACTCCCATGCAGAATAAAGCAAATTGTAAACCTGTGGCAGGGAGTAGGAAAAG  
 CAATATATGCCCCCTCCCATCAGGGGGCTAATTAGCTGTTTCATCAAAT---  
 ATTACAGGGTTGATATTAACAAGAGATGTTGGTAATGGTGAGAACATA-----  
 -----  
 -----  
 AGCAACAATACTGAAACCTTCAGACCAGGAGGAGGAGATATGAGGGACAATTGGAGAAGTGAATTATATAAAT  
 ATAAAGTAGTAAAAATTGAACCATTA---GGAGTAGCACCCACTAAGGCAAAGAGAAGAGTGGTG-----  
 -----CAGAGAGAAAAAAGAGCA---ATAGGA---CTAGGAGCT---  
 -----GTGTTCTTGGGTTCTTGGGAGCA---GCAGGAAGCACTATG---GGCGCAGCATCA---  
 GTGACGCTGACGGTACAG---GCCAGACAA---TTATTG---TCTGGTATAGTGCAACAGCAGAAC---  
 AATCTG---CTGAAG---GCTATTGAGGCGCAACAGCATCTGTTGCAACTCACAGTCTGGGGCATC  
 >FJ653437  
 TTCTACTGTAATTCAACGAAACTGTTTAGTAGTACTTGGATGGCTAATAGTACTTGGACTAATAGTACTTTGG  
 AGAAG-----  
 -----AAT---  
 AGCACTGAAAAAATATCACACTCCCATGTAAAATAAAACAAATTATAAACATGTGGCAGAAAGTAGGAAAAG  
 CAATGTATGCCCCCTCCTATCAGAGGACAGATTAGATGTTCAACAAAT---  
 ATCACAGGTCTGTTATTAACAAGAGATGGTGGTGACAACACGACC-----  
 -----  
 -----  
 GACAGCGAGGAGGTCTTTAGACCTGGAGGAGGAAATATGAAGGACAATTGGAGAAGTGAATTATATAAATATA  
 AAGTAGTAAGAATTGAACCATTA---GGAGTAGCACCCACCAAGGCAAAGAGAAGAGTGGTG-----  
 -----CAAAGAGAAAAAAGAGCA--GTGGGAGTTGTAGGAGCT-----  
 ---ATGTTCTTGGGTTCTTAGGAGCA--GCAGGAAGCACTATG--GGCGCAGCGGCA---  
 GTGACGCTGACGGTACAG---GCCAGACAA---TTATTG---TCTGGTATAGTGCAAGCAGCAGAAAT---  
 AATCTG---CTGAAG---GCTATTGAGGCGCAACAACATCTGTTGCAACTCACAGTCTGGGGCATC  
 >HQ595768  
 TTCTACTGTAATACAACACAACCTGTTTAATAGTACCTGGTATGGAAATGAGACTTGAATAATACTGAAGGTG  
 CAGAC-----  
 -----  
 AACACTAATGACACCATCATACTCCCATGCAGAATAAAACAAATTATAAACATGTGGCAGGAAGTAGGAAAAG  
 CAATGTATGCCCCCTCCCATCAGTGGACTAATTAGATGCTCATCAAAC---  
 ATTACAGGGCTACTATTAACAAGAGATGGGGGTACTACCAATGTCACG-----  
 -----  
 -----  
 AACGAGACCGAGACCTTCAGACCAGGAGGAGGAGATATGAGGGACAATTGGAGAAGTGAATTATACAAATATA  
 AAGTAGTAAAAATTGAGCCATTA---GGAATAGCACCCACCAAGGCAAAAAGAAGAGTGGTG-----  
 -----CAGAGAGAAAGAAGAGCA--GTGGGG---CTAGGAGCT-----  
 ---TTGTTCTGTCGGGTTCTTGGGAGCA---GCAGGAAGCACTATG---GGCACAGCATCA---  
 ATAATGCTGACGGCACAG---ACCAGACAA---TTACTG---TCTGGTATAGTGCAACAGCAGAAC---  
 AATCTG---CTGAGA---GCTATTGAGGCGCAACAACATCTGTTGCAACTCACAGTCTGGGGCATT  
 >HQ595771  
 TTTTACTGTAATACAACACAACCTGTTCAAAGGGACTTGAATGGTACTAGTGGTACTTGGGAAAGTACTAAT-  
 -----  
 -----  
 AGTACTGAGAATATTACACTCCCATGCAGAATAAAACAAATTGTAAACATGTGGCAGGAAGTAGGAAAAGCAA  
 TGTATGCCCCCTCCCATCAGGGGACTAATTAGATGTGAATCAAAT---  
 ATTACAGGGCTGCTATTAATAAGAGATGGTGGTAATAATAGTAGC-----  
 -----  
 -----  
 GATAATGAGACTTTTCAGACCTATAGGAGGAAACATGAGGGACAATTGGAGAAGTGAATTATATAAATACAAAA  
 TAGTAAAAGTTGAACCAATA---GGAATAGCACCCACCATGGCAAAGAGAAGAGTGGTG-----  
 -----CAAAGAGAAAAAAGAGCA--GTGGGA---TTAGGAGCT-----  
 ATGTTCTTGGGTTCTTGGGAGCA---GCAGGAAGCACTATG---GGCGCAGCGTCG---

ATGACGCTGACGGTACAA---GCCAGACAA---TTATTG---TCTGGTATAGTGCAGCAGCAGAGC---  
 AATCTG---CTGAGG---GCTATTGAGGCGCAACAGCATATGTTGCAACTCACAGTCTGGGGCATC  
 >HQ595772  
 TTCTATTGCAATACAACACAACCTGTTTAATAATATTTGGATTACTGATAATGTTACTGTTAATGAAACTAATA  
 GT-----  
 -----  
 GACAATAGCAATATCACACTCCCATGCAGAATAAAACAAATTATAAACATGTGGCAGGAAGTAGGAAAAGCAA  
 TGTACGCCCCCTCCCATCAGAGGACAGATTAGATGTTTCATCAAAT---  
 ATTACAGGGCTACTATTAACAAGAGATGGTGGTAATACGAACAATACG-----  
 -----  
 -----  
 AACGGGTCTGAGACCTTCAGACCTGGAGGAGGAAATATGAAGGACAATTGGAGAAGTGAATTATATAAATATA  
 AAGTAGTAAAAGTTGAACCATTA---GGATTAGCACCCACCAAGGCAAAAAGAAGAGTGGTC-----  
 -----CAAAGAGAAAAAAGAGCA---ATAACA---CTAGGAGCT-----  
 ---GTTTTCCCTTGGGTTCTTGGGAGCA---GCAGGAAGCACTATG---GGCGCAGCGTCA---  
 ATAACGCTGACGGTACAG---GCCAGACAA---TTATTG---TCTGGTATAGTGC AACAGCAGAAC---  
 AACTTG---CTGAGG---GCTATTGAGGCGCAACAACATATGTTGCAACTCACAGTCTGGGGCATC  
 >HQ595774  
 TTCTACTGTAATACAACACAATTGTTTAATAGTACCTGGAATGATACTAATATTAATAGTACTGAAGAGTCAA  
 AT-----  
 -----  
 AACACTGACACTATCACACTCCAATGCAGAATAAAACAAATTATAAACATGTGGCAGGAAGTAGGAAAAGCAA  
 TGTATGCCCCCTCCTATCCGAGGACATATTAATTGTTTCATCAAAT---  
 ATTACAGGGCTGCTATTAACAAGAGATGGTGGTAGTAATACTACC-----  
 -----  
 -----  
 ACCCAGGAGACCTTCAGACCTGGAGGAGGAAATATGAAGGACAATTGGAGAAGTGAATTATATAAATATAAAG  
 TAGTAAAAATTGAACCATTA---GGAGTAGCACCCCTCCAAGGCAAAAAGAAGAGTGGTG-----  
 -----CAGAGAGAAAAAAGAGCA---GTAGGA---CTGGGAGCT-----  
 TTGTTCCCTTGGGTTCTTGGGAGCA---GCAGGAAGCACTATG---GGCGCAGCATCA---  
 CTAACGCTGACGGTACAG---GCCAGACAA---TTATTG---TCTGGTATAGTGC AACAGCAGAAC---  
 AATTTG---CTGAGA---GCTATTGAGGCGCAACAGCATCTGTTGCAACTCACAGTCTGGGGCATC  
 >HM204626  
 TTCTACTGTAATACAACAAAACCTGTTTAATAGCACTTGGGAATAGTAATAGTACTTGGGAATAGTACGCAA---  
 -----  
 -----  
 GGAAATGACACAATCACACTCCCGTGCAGAATAAAACAAATTATAAACCTGTGGCAGGAAGTAGGAAAAGCAA  
 TGTATGCCCCCTCCCATCAGAGGATCAATTAAATGTTTCATCAAAT---  
 ATTACAGGGCTGCTACTAACAAGAGATGGGGGTATAACAATAGTAAT-----  
 -----  
 -----  
 AATAATATAGAGACCTTCAGACCTGGAGGAGGAGATATGAGGGACAATTGGAGAAGTGAATTATATAAATATA  
 AAGTAGTACAAATTGAACCATTA---GGAGTAGCACCCACCAGGGCAAAGAGAAGAGTGGTG-----  
 -----CAAAGAGAAAAAAGAGCA---GTGGGA---CTAGGAGCT-----  
 ---TTGTTCCCTTGGGTTCTTGGGAGCA---GCAGGAAGCACTATG---GGCGCAGCGTCA---  
 ATAACGCTGACGGTACAG---GCCAGACAA---TTATTG---TCTGGTATAGTGC AACAGCAGAAC---  
 AATTTG---CTGAGA---GCTATTGAGGCGCAACAACATCTGTTGCAACTCACAGTCTGGGGCATC  
 >HM204627  
 TTCTACTGTAATACAACACAACCTGTTTAATAGTACTTGGACTTGGGAATGATACTACTTGGGAATGGTACTAATG  
 GCGGG-----  
 -----AAT---  
 AACACTGAAAAAACCATCACACTCCCATGCAGAATAAAACAAATTATAAACATGTGGCATGAAGTAGGAAAAG  
 CAATGTATGCCCCCTCCCATCAGGGGAATAATTAGCTGTTTCATCAAAT---  
 ATTACAGGTCTGCTATTAACAAGAGATGGTGGTAGTGGTAATATGAGC-----  
 -----  
 -----  
 AACACCACCGAGACCTTCAGACCTGAAGGAGGAAATATGAAGGACAATTGGAGAAGTGAATTATATAAATATA  
 AAGTAGTAAGAATTGAACCATTG---GGAATAGCACCCACCAAGGCAAGAGAAGAGTGGTG-----  
 -----CAAAGAGAAAAGAGGCA---GTGGGA---TTCGGAGCT-----  
 ---ATGTTCCCTTGGGTTCTTGGGAGCA---GCAGGAAGCACTATG---GGCGCAGCGTCA---

GTGACGCTGACGGTACAG---GCCAGACAA---TTATTG---TCTGGTATAGTGCAACAGCAGAAC---  
AATCTG---CTGAGG---GCTATTGAGGCGCAACAGCATCTGTTGCAACTCACAGTCTGGGGCATC  
>HM204628  
TTCTACTGTAATACAACACCGATATTTAGTAGTACATGGAATAGTAATAGTACTAAAGATGATATTGAGAGAT  
CAAAT-----  
-----  
AGCACTGACAGGAATATCACACTCCAATGCAGAATAAGACAAATTATAAACATGTGGCAGAAAGTAGGAAAAG  
CAATGTATGCCCCCTCCCATCCAAGGGCTAATTAGATGTTTCATCAAAT---  
ATTACAGGGCTGCTATTAACAAGGGATGGTGGTAAGGACAACAAT-----  
-----  
-----  
AACAAACACCGAGACCTTCAGACCTGGGGGAGGAGATATGAGGGACAATTGGAGAAAGTGAATTATATAAAATATA  
AAGTAGTACAAATTGAACCAGTA---GGAGTGGCACCCACTAAGGCAAAGAGAAGAGTGGTG-----  
-----CAGAGAGAAAAAGAGCA---GTGGGA---ATAGGAGCT-----  
---TTGTTCCCTTGGGTTCTTGGGAGCA---GCAGGAAGCACTATG---GGCGCAGCGTCA---  
ATGACACTGACGGTACAG---GCCAGACAA---TTGTTG---TCTGGTATAGTGCAACAGCAAAAC---  
AATCTG---CTGAGG---GCTATTGAGGCGCAACAGCATCTGTTGCAACTCACAGTCTGGGGCATC  
>HM204629  
TTCTACTGTAATACAACAACAACTGTTTAATAGTACTTGGCCATTCAATGATACTGGGAATGATAATAGTAGTA  
GC-----  
-----  
ACTGACAATACAACAATCTCACTCCCATGTAGAATAAAAACAAATTGTAAACATGTGGCAGGAAGTAGGAAAAG  
CAATGTATGCCCCCTCCCATTAGAGGACAAATTAGATGTTTCATCAAAT---  
ATTACAGGACTGATATTAACAAGAGATGGTGGCACACCCGACAACCAA-----  
-----  
-----  
AGTAGTGAGGAGGTCTTCAGACCTAGTGGAGGAAATATGAAAGACAATTGGAGAAAGTGAAGTATATAAAATATA  
AAGTAGTAAAAATTGAACCGTTA---GGAATAGCACCCACCAAGGCAAAAAGAAGAGTGGTG-----  
-----CAGAGAGAGAAAAAGAGCA---GCCACA---CTGGGAGCT-----  
---ATGTTCCCTTGGATTCTTGGGAGCA---GCAGGAAGCACTATG---GGCGCAGCATCA---  
ATAACGCTGACGGTACAG---GCCAGACTA---TTACTG---TCTGGTATAGTGACAGCAGCAGAGC---  
AATCTG---CTGAGG---GCTATTGAGGCGCAACAGCATATGTTGCAACTCACAGTCTGGGGCATC  
>HM204632  
TTCTACTGTAATTCAACACAACCTGTTTAATAGCACTTGGAAATAGTAATAGTACTTGGAAATGATACTATGGGCA  
CTAAT-----  
-----GAT---  
ACTATGGACACTAATATCACACTTCCATGTAGAATAAAAACAAATTATAAACTTGTGGCAGGAAGTAGGAAAAG  
CAATGTATGCCCCCTCCCATCGCAGGACAAATTAGATGTTTCATCAAAT---  
ATTACAGGGTTGCTGTTAAACAAGAGATGGTGGTAGTAATAGCACC-----  
-----  
-----  
AACAAATGAGACCTTCAGACCTGGAGGAGGAAATATGAGGGACAATTGGAGAAATGAATTATATAAAATATAAAG  
TAGTACAAATTGAACCATTA---GGAATAGCACCCACCAAGGCAAAGAGAAGAGTGGTG-----  
-----CAGAGAGAGAAAAAGAGCA---GTGGGAACGCTAGGAGCT-----  
ATGTTCCCTTGGGTTCTTGGGAGCA---GCAGGAAGCACTATG---GGCGCAGCGTCA---  
GTGACGCTGACGGTACAG---GCCAGGCAA---TTGCTG---TCTGGTATAGTGACAGCAGCAGAAC---  
AATCTG---CTGAAG---GCTATTGAGGCACAACAGCATATGTTGCAACTCACAGTCTGGGGCATT  
>HM204633  
TTCTACTGTAGTACAGCAGAACTGTTTAATAGTACCTGGTTTAACAATGGTACATGGATAAGTGACAATGGAA  
AA-----  
-----  
AATGACACAAATATCACACTCCCATGCAGAATAAAAACAAATCATAAACATGTGGCAGGGAGTAGGAAAAGCAA  
TGTATGCCCCCTCCCATCAGTGGACTAATTAGCTGTTTCATCACAA---  
ATTACAGGGTTGCTATTAACAAGAGATGGTGGTAATGCGAGTGTTAAC-----  
-----  
-----  
AACTGGACCGAGACCTTCAGACCTGTGGGAGGAGATATGAGGGACAATTGGAGAAAGTGAATTATATAAAATATA  
AAGTAGTAAAAATTGAACCATTA---GGAGTAGCACCCACCAAGGCAAAGGAGAAGAGTGGTG-----  
-----CAGAGAGAGAAAAAGAGCA---GTGGGA---ATAGGAGCT-----  
---GTGTTTCTTGGGTTCTTGGGAGCA---GCAGGAAGCACTATG---GGCGCAGCATCA---

GTGATGCTGACGGTACAA---GCCAGGCAA---TTATTG---TCTGGTATAGTGCAGCAGCAAAAC---  
 AATTTG---CTGAGA---GCTATTGAGGCGCAACAGCATCTGTTGCAACTCACTGTCTGGGGCATC  
 >HM204638  
 TTCTACTGTAATACAACACAGCTGTTTAATAGTACTTGGCAGCTGTCTAATAGTACTCTGAAGGAAACA-----  
 -----  
 -----  
 CAAGAGAGTAATATCACACTCCCATGCAGAATAAAACAAATTATAAACAAATGGCAGGAAGTAGGAAAAGCAA  
 TGTATGCCCCCTCCCATCCAAGGAAAGATTAGTTGTACATCAAAT---  
 ATTACAGGGCTGCTATTAACAAGAGATGGTGGTGTCTGAGAACAAGACT-----  
 -----  
 -----  
 AACGAGACTAACGAAACCTTCAGACCTGGAGGAGGAGATATGAGGGATAATTGGAGAAGTGAATTATATAAAAT  
 ATAAAGTAGTAAGAATTGAGCCATTA---GGAGTAGCACCTTCCAAGGCAAGGAGAAGAGTGGTG-----  
 -----  
 -----CAGAGAGAAAAAAGAGCA---GTAGGA---CTGGGAGCT---  
 -----TTGTTTCCTTGGGTTCTTGGGAGCA---GCAGGAAGCACTATG---GGCGCAGCGTCA---  
 TTAACGCTGACGGTACAG---GCCAGACAA---CTATTG---TCTGGTATAGTGCAACAGCAGAAC---  
 AACCTG---ATGAAA---GCTATTGAGGCGCAACAGCATTTGTTGCAACTCACAGTCTGGGGCATC  
 >HM204640  
 TTCTACTGCAATTCATCACTGCTGTTCAATAATACTTGAATGGCAATGATACA-----  
 -----  
 -----  
 AATAATACTATACTCACACTCCCATGCAAAATAAAACAAATTATAAACCTGTGGCAGGCAGTAGGAAAAGCAA  
 TGTATGCCCCGCCCATCCAAGGACTAATTAGATGTTTCATCAAAT---  
 ATTACAGGGCTGTTATTAACAAGAGATGGTGGTAATGATAATAGCACA-----  
 -----  
 -----  
 AACCAGACCGAGGTCTTCAGACCTGGAGGAGGAAATATGAAGGACAATTGGAGAAGTGAATTATATAGATATA  
 AAGTAGCAAAATTGAACCATTA---GGAGTAGCACCCACCAAGGCAAAGAGAAGAGTGGTG-----  
 -----  
 -----CAGAGAGAGAAAAAGAGCA--GTAACG---TTAGGGGCA-----  
 ---ATGTTCCCTTGGGTTCTTGGGAACA--GCAGGAAGCACTATG--GGCGCAGCGTCG---  
 ATGACGCTGACGGTACAG---GCCAGACTC---TTATTG---TCTGGTATAGTGCAACAGCAGAAC---  
 AACTTG---CTGAGA---GCTATTGAGGCGCAACAGCATCTGTTGCAACTCACAGTCTGGGGCATT  
 >HM204641  
 TTCTATTGTAATACAACAAAGCTGTTTAATTCTACTTGAACAATACTAGTACTTGAATAATAGTACTTGA  
 ATAATACAATT-----  
 -----TGGGATACT-----  
 GATGGCAATGACACTATCATACTCCAATGCAGAATAAGACAAATTATAAACAGGTGGCAGGAAGTAGGGAAAG  
 CCATGTATGCCCCCTCCCATCCAAGGACAAATTAAGTGCTCCTCAAAT---  
 ATTACAGGGCTGCTATTAGCAAGAGATGGAGGAAGTAATGGAAGT-----  
 -----  
 -----  
 AACACATAGAGACCTTCAGACCAGGAGGAGGAAATATGAAGGATAATTGGAGAAGTGAATTATATAAATATA  
 AAGTAGTACAAATTGAGCCATTA---GGAATAGCACCCACCAAGGCAAAGAGAAGAGTGGTG-----  
 -----  
 -----CAGAGAGAAAAAAGAGCA--GTGGGGGCACTGGGAGCT-----  
 ---ATGTTCCCTTGGGTTCTTGGGAGCA---GCAGGAAGCACTATG---GGCGCAGCGTCA---  
 ATAGCGCTGACGGCACAG---GCCAGACAA---TTATTG---TCTGGTATAGTGCAACAGCAAAAC---  
 AATTTG---CTGAGG---GCTATTGAGGCGCAGCAGCATCTGTTGCAACTCACAGTCTGGGGCATC  
 >HM204642  
 TTCTACTGTAATACATCACAACCTGTTTAATAGTACCTGGGTTAATGGTACCTGGAATGGTACTGAAGGGTCA-  
 -----  
 -----  
 -----  
 AATAGCCCAAACATCACACTCCAATGTAAATAAAACAAATTATAAACATGTGGCAAGGAGTGGGAAAAGCAA  
 TGTATGCCCCCTCCCATCGCAGGAAAAATTAGCTGTTTCATCACAA---  
 ATCACAGGGCTGCTATTAGCAAGAGATGGTGGTAATGACAATTCCACT-----  
 -----  
 -----  
 GACAATAACACTGAGATCTTCAGACCTTCAGGAGGAAATATGAAAGACAATTGGAGAAGTGAATTATATAAAAT  
 ATAAAGTAGTAAAAATTGAACCAATA---GGAATAGCACCCACCAAGGCAAAAAAGAAGAGTGGTG-----  
 -----  
 -----CAGAGAGAAAAAAGAGCA---GTAGGAATGATGGGAGCT---  
 -----ATGTTCCCTTGGGTTCTTGGGAGCA---GCAGGAAGCACTATG---GGCGCAGCGTCA---

GTGACGCTGACGGTACAG---GCCAGGCAA---TTATTG---GCTGGTATAGTGCAACAGCAGAAC---  
 AATTTG---CTGAGA---GCTATTGAGGCGCAACAGCATCTGTTGCAACTCACAGTCTGGGGCATT  
 >HM204643  
 TTCTACTGTAATACAACAAAACCTGTTTAAATAGTACTTGGAAATGTTAATAGTACTTGGAACTACTAATAGTACTT  
 GGAAT-----  
 -----  
 ACTACTGAAGAGATAGTAAATATCCCATGCAGAATAAGACAAATTGTAAATAGGTGGCAAGAAGTAGGAAAAG  
 CAATGTATGCCCCCTCCCATCAGAGGACAAATTAGATGTTTCATCAAAC---  
 ATTACAGGGTTACTATTAACAAGAGATGGTGGTAATGGCAACCAG-----  
 -----  
 -----  
 TCCAATAACGAGACCTTCAGACCTGGAGGAGGGGATATGAGGGACAAATGGAGAAAGTGAATTATATAAAATATA  
 AAGTAGTAAGAGTTGAACCATTA---GGAGTAGCACCCACCAAGGCAAAGAGAAGAGTGGTG-----  
 -----CAGAGAGAAAAAAGAGCA---GTGGGA---ATAGGAGCT-----  
 ---GTGTTCCCTTGGGTTCTTGGGAGCA---GCAGGAAGCACTATG---GGCGCAGCCTCA---  
 ATAACGCTGACGGTACAA---GCCAGACTA---TTATTG---TCTGGTATAGTGCAACAGCAGAAC---  
 AATCTG---CTGAGG---GCTATTGAGGCGCAACAACATCTGTTGCAACTCACAGTCTGGGGCATC  
 >HM204646  
 TTTTACTGTAATTCATCACAACCTGTTTACTTGGAAATGAGACTAGTATTCGGAATAAGACAAATAAT-----  
 -----  
 -----  
 ACAAATGATACTATCACACTCCCATGTAAATAAAACAAATTATAAACAGGTGGCAGGAAGTAGGAAGAGCAA  
 TGTATAACCCTCCCATCAAAGGAATAATTAGATGTGAATCAAAT---  
 ATTACAGGGTTACTGTTAACAAGAGATGGTGGTACTAATAATAAC-----  
 -----  
 -----  
 ACCAACGAGACCTTCAGACCTGCAGGAGGAGACATGAGGGACAATTGGAGAAGTGAACCTATATAAAATATAAAG  
 TAGTACAAATTGAACCCTTA---GGAGTAGCACCCACCAAGGCAAAGAAGAGTGGTG-----  
 -----CAGAGAGAAAGAAGAGCA---GTGGGA---ATAGGAGCT-----  
 ATGTTCCCTTGGGTTCTTGGGGGCA---GCAGGAAGCACTATG---GGCGCAGCGTCG---  
 GTGACGCTGACGGTACAG---ACCAGACAA---TTATTG---TCTGGTATAGTGCAACAGCAGAAC---  
 AATCTG---CTGAGG---GCTATTGAGGCGCAACAGCACATGTTGCAACTCACAGTCTGGGGCATT  
 >KY658697  
 TTCTACTGTAATACATCACACCTGTTTAAATAGTACTTGGGAACGTAATAGTAGTACTTGGAACCTTACTAAAG  
 GGTAAAT-----  
 -----  
 GACACTGGAGGAAATATCACACTCCAATGCAAAATAAGACAATTCGTAAGACTGTGGCAGGAAGTAGGGAAAG  
 CAATGTATGCCCCCTCCCATCAAAGGACTAATTAGATGTTTCATCAAAT---  
 ATTACAGGACTGTTATTAAACAAGAGATGGTGGTAATAATAATAATGAAACA-----  
 -----  
 -----  
 AACACGACTGAAACCTTCAGACCTGCAGGAGGAGATATGAGGGATAATTGGAGAAGTGAATTATATAGATATA  
 AAGTAGTGAGAATTGAACCAATA---GGAGTAGCACCCACCAGGGCAAAGAGAAGAGTGGTG-----  
 -----CAGAGAGAAAAAAGAGCG---GCA---CTAGGAGTT-----  
 ---TGGTTCCTTGGGTTCTTGGGAGCA---GCAGGAAGCACTATG---GGCGCAGCGTCA---  
 GTGACGCTGACGGCACAG---GCCAGACAA---TTATTG---TCTGGTATAGTGCAACAGCAGAGC---  
 AATTTG---TTGAAG---GCTATTGATGCGCAACAGCATCTGCTGCAACTCACAGTCTGGGGCATC  
 >HQ595776  
 TTCTACTGTAATACATCAAAACCTGTTTGATAGTAGTTGGCTGCCCAACAATACTGGTGGGCTGCCTACCAAT-  
 -----  
 -----  
 TCTGCAGACCCAATCATACTCCCATGCAGAATAAGACAAATTATAAACATGTGGCAAAGGGTAGGAAAAGCAA  
 TGTATGCCCCCTCCCATCAGTGGACAAATTAAGTGTACATCCAAT---  
 ATTACAGGGCTACTATTAACAAGAGATGGTGGTAAGGGAAATGACACT-----  
 -----  
 -----  
 AACCAGACCGAGATCTTTAGACCTGCAGGAGGAGATATGAAGGACAATTGGAGAAGTGAACCTATATAAAATATA  
 AAGTAGTAAGAATTGAACCATTA---GGAGTAGCACCCACCAAGGCAAAGAGAAGAGTGGTG-----  
 -----CAGAGAGAAAAAAGAGCA---GTGGGA---TTAGGAGCT-----  
 ---GTGTTCCCTTGGGTTTTTGGGAGCA---GCAGGAAGCACTATG---GGCGCAGCGTCA---

GTGACGCTGACGGTACAG---GCCAGACAA---TTATTG---TCTGGTATAGTGCAACAGCAGAGC---  
 AATCTG---CTGAGA---GCTATAGATGCACAACAGCATCTGTTGCAGCTCACAGTCTGGGGCATA  
 >HQ595778  
 TTCTACTGTAATTCAACACTACTGTTTAATGGTACTTGGCATGATTCTAATAGGACTTGGCATAACCCCTAAAG  
 GA-----  
 -----  
 AATAACAGTGACACAATCACACTCCCATGCAGAATAAAACAAATTATAAACATGTGGCAGGAAGTAGGAAAAG  
 CAATGTATGCCCCCTCCCATCCAAGGACTAATTAGATGTAATTCAAGT---  
 ATTACAGGGCTGATGATAACAAGAGATGGTGGTAATAAACTAACGAGACC-----  
 -----  
 -----  
 ATCGAGAACGTCGAGACTTTTAGACCTGGAGGAGGAAATATGAAGGACAATTGGAGAAGTGAATTATATAAAAT  
 ATAAAGTAGTAAAAATTAAACCATTA---GGAATAGCACCCACTAAGGCAAAGAGAAGAGTGGTG-----  
 -----CAGAGAGAAAAAAGAGCA---GTGATA-----GGAGCT---  
 -----ATGTTTCCTTGGGTTCTTGGGAGCA---GCAGGAAGCACTATG---GGCGCAGCGTCA---  
 CTGACGCTGACGGTACAG---GCCAGACAA---TTATTG---TCTGGTATAGTGCAACAGCAGAAT---  
 AATTTG---CTGAGA---GCTATTGAGGCGCAACAGCATCTGTTGCAACTCACAGTCTGGGGCATC  
 >HQ595779  
 TTCTACTGTAATTCCACACAGCTGTTTAATAGTACTTGGGGAATAGGGGCAAATGTCACAAATACC-----  
 -----  
 -----  
 ACTGAATACAATATCACACTCCCATGTAGAATAAAACAAATTATAAACAGGTGGCAGGAAGTAGGAAGAGCAA  
 TGTATGCCCCCTCCCATCAGTGGACAAATTAGATGTTTCATCAAAT---  
 ATTACAGGGCTGCTATTAACAAGAGATGGTGGTGGTGGTGGTAATATT-----  
 -----  
 -----  
 AGTAATACAACCTGAGATCTTCAGACCTGGGGGAGGAGATATGAGGGACAATTGGAGAAGTGAATTATATAAAAT  
 ATAAAGTAGTAAAAATTGAGCCATTA---GGAGTAGCACCCACCACGGCAAAGAGAAGGGTGGTG-----  
 -----CAAAGAGAAAAAAGAGCA---CTGACG---CTAGGAGCT---  
 -----ATGTTTCCTTGGGTTTTTGGGAGCA---GCAGGAAGCACTATG---GGCGCAGCGTCA---  
 ATAACACTGACGGTACAG---GCCAGACAA---TTATTG---TCTGGTATAGTGCAACAGCAGAAC---  
 AATATG---CTGAAA---GCTATTGAGGCGCAACAGCACTTGTGCAACTCACAGTCTGGGGCATT  
 >HQ595788  
 TTCTACTGTGATACAGCAAACCTGTTTAATAGTACTTGGTATGCTAATGGGAGTGGGAATATTAATGAAAGT-  
 -----  
 -----  
 TCAAGTAGCAATATCACAATCATGTAGAATAAAACAAATCATAAACATGTGGCAGAAAGTAGGAAAAGCAA  
 TGTATGCCCCCTCCCATCAGAGGACCAATTAGCTGTTTCATCAAAT---  
 ATTACAGGGCTGCTATTAGTAAGAGATGGAGGTAACGTGACCAGT-----  
 -----  
 -----  
 GAGAACGAGATCTTCAGACCTGCAGGGGGAGATATGAGGGACAATTGGAGAAGTGAATTATACAAATATAAGG  
 TAGTAAAAATTGAACCATTA---GGAATAGCACCCACCAAGGCAAAGAGAAGAGTGGTG-----  
 -----CAAAGAGAAAAAAGAGCA---GTGGGAACAATAGGAGCT-----  
 ATGATCCTTGGGTTCTTGGGAACA---GCAGGAAGCACTATG---GGCGCAGCGTCA---  
 CTGACGCTGACGGTACAA---GCCAGACAA---TTATTG---TCTGGTATAGTGCAACAGCAGAAC---  
 AATTTG---CTGAAG---GCTATTGAGGCGCAACAACATCTGTTGCAACTCACAGTCTGGGGCATT  
 >HQ595790  
 TTCTACTGTGATACAGCAAACTGTTTAATAGTACTTGGCTGCTGTCTAATGGTACTTGGGAATAATTCAGCAG  
 TTAAT-----  
 -----AGT---  
 ACTGGGAATGGAATATCACGCTCCAATGCAGAATAAAACAAATTATAAACATGTGGCAGAGAGTAGGAAGAG  
 CAATGTATGCCCCCTCCCATTAAGGACAAATTAGATGTTTCATCAAAT---  
 ATTACAGGGCTGCTATTGACGAGAGATGGTGGTAACACCAATAACACT-----  
 -----  
 -----  
 AATGGCACCGAGACTTTTCAGACCTGGAGGGGGAAATATGAAGGACAATTGGAGAAGTGAATTATATAAAATATA  
 AGGTAGTACAAATTGAGCCCTTA---GGAATAGCACCCACCAAGGCAAAGAGAAGAGTGGTG-----  
 -----CAAAGAGAAAAAAGAGGA---GTGGGA---TTAGGAGCT-----  
 ---CTGTTCCCTTGGGTTCTTGGGAGCA---GCAGGAAGCACTATG---GGCGCAGCGTCA---

ATAACGCTGACGGTACAG---GCCAGACAG---TTATTG---TCTGGTATAGTGCAACAGCAGAAC---  
 AATCTG---CTGAAG---GCTATTGAGGCGCAACAGCATCTGTTGCAACTCACAGTCTGGGGCATT  
 >HQ595792  
 TTCTACTGTAATACATCACAACCTGTTTAATAGTACTTGGAAATAGTACTTTGGAGGTGAATAATGGTACT-----  
 -----  
 -----  
 GACAATGACAATATCACACTCCCATGTAAATAAAACAAATTATAAACATGTGGCAGGAAGTAGGAAAAGCAA  
 TGTATGCCCCCTCCCATCGAAGGACTAATTAGTTGTTTCATCAAAT---  
 ATTACAGGGCTGATATTAACAAGAGATGGTGGGAGTAACAGCACG-----  
 -----  
 -----  
 AATGAGACTTTTCAGACCTGGAGGAGGAGATATGAGGGACAATTGGAGAAGTGAATTATATAAATATAAAGTAG  
 TAAAAATTGAACCATTA---GGAATAGCACCCACCCAGGCAAAGAGAAGAGTGGTG-----  
 -----CAAAGAGAAAAAAGAACAA---GTGGGG---ATAGGAGCT-----  
 GTGTTTCCTTGGGTTCTTGGGAGCA---GCAGGAAGCACTATG---GGCGCAGCGTCA---  
 GTGACGCTGACGGTACAG---GCCAGACTA---TTATTG---TCTGGTATAGTGCAACAGCAGAAC---  
 AATCTG---CTGAAG---GCTATTGAGGCGCAACAACATCTGTTGCAACTCACAGTCTGGGGCATT  
 >HQ595794  
 TTCTACTGTAATACATCAAACTGTTTAATAGTACTTGGAAATAGTACTGAAGGGTTAAATGACACTGAAGAA-  
 -----  
 -----  
 GGAAATGGCACAATTGTACTCCCATGCAGAATAAAACAGATTATAAACATGTGGCAGGAAGTAGGAAAAGCGA  
 TGTATGCCCCCTCCCATCAGTGGACAAATTAACTGTGTATCAAAT---  
 ATTACAGGGATGATATTAACAAGAGATGGTGGACAGGATAATAGG-----  
 -----  
 -----  
 AGCAGCGAGACCTTCAGACCTGGAGGGGGAGATATGAGGGACAATTGGAGGAGTGAACATATAAATATAAAG  
 TAGTACAAATTGAACCACTA---GGAGTAGCACCCACCAAGGCAAAGAGAAGAGTGGTG-----  
 -----CAGAGGGAAAAAAGAGCA---ATAGGGGTACTAGGAGCT-----  
 ATGTTCAATTGGGTTCTTGGGAGCA---GCAGGAAGCACTATG---GGCGCAGCGTCA---  
 ATGACGCTGACGGTACAA---GCCAGACTA---TTATTG---TCTGGTATAGTGCAACAGCAGAAC---  
 AACTTG---CTGAGG---GCTATTGAGGCGCAACAGCATCTGTTGCAACTCACAGTCTGGGGCATT  
 >HQ595803  
 TTCTACTGTAATACAACACAGCTATTTAATAGTACTTGGAGTTGGAATGGTACTGACATTAGAGATAATGGCA  
 CTGAC-----  
 -----ATT---  
 AGAGATAATGGCACAATCATACTCCCATGCAGGATAAAACAAATTATAAACAGGTGGCAGGAAGTGGGAAAAG  
 CAATGTATGCCCCCTCCCATCAAGGGACAAATTATGTGTAACCTCAACC---  
 ATTACAGGGTTGCTATTAAACAAGAGATGGTGGTGATAACAATAAT-----  
 -----  
 -----  
 GAGACTGAGATCTTCAGACCTGGAGGAGGAAATATGAAGGACAATTGGAGAAGTGAATTATTTAAATATAAAG  
 TAGTAAAAATTGAGCCATTA---GGAATAGCACCCACCAAGGCAAAGAGAAGAGTGGTG-----  
 -----CAGAGAGAAAAAAGAGCA---GTGGAA---ATAGGAGCT-----  
 GTGTTTCCTTGGGTTCTTGGGAGCA---GCAGGAAGCACTATG---GGCGCAGCGTCA---  
 GTAACGCTGACGGTACAA---GCCAGACAA---TTATTA---TCTGGTATAGTGCAACAGCAGAAAT---  
 AATTG---CTGAAG---GCTATTGAAGCGCAACAGCATCTGTTGCAACTCACAGTCTGGGGCATC  
 >JF680906  
 TTCTACTGTGATACAGCAAAGCTGTTTAATAGTACTTGGAAAAATGGTAATATAAGCATCGCA-----  
 -----  
 -----  
 AAGGACAACCCTATCATACTCCCATGCAGAATAAAACAAATTATAAACAGGTGGCAGGAGGTAGGAAAAGCAA  
 TGTATGCCCCCTCCCATCAGAGGAAAGATTAGCTGTTTCATCAAAT---  
 ATTACAGGGTTGCTTTTAACAAGAGATGGTGGCAGTAAAAATGTGACA-----  
 -----  
 -----  
 GATAATAAGACAGAGATCTTCAGACCTGGAGGAGGAGATATGAGGGACAATTGGAGAAGTGAATTATATAAAT  
 ACAAAGTAGTAAGAATTGAGCCATTA---GGAGTAGCACCCACCAAGGCAAAGAGAAGAGTGGTG-----  
 -----CAGAGAGAAAAAAGAGCA---GTGGGA---ATAGGAGCT---  
 -----TTGTTTCCTTGGGTTCTTGGGAGCA---GCAGGAAGCACTATG---GGCGCAGCGTCA---

ATGACGCTGACGGTACAG---GCCAGACAA---TTATTG---TCTGGTATAGTGCAACAGCAGAAC---  
 AATCTG---CTGAGG---GCTATTGAGGCGCAACAGCATCTGTTGCAACTCACAGTCTGGGGCATC  
 >HQ595769  
 TTCTACTGTAATACATCACAACGTTTTAATAGTACTTGGAAATTCGAGTGATACTACTTGGAAATTCAAATGATA  
 CTAAT-----  
 -----ATT---  
 AATGGAACGGGTACAATCACACTCCCATGTAAAATAAGACAAATTATAAATATGTGGCAGGAAGTAGGAAAAG  
 CAATGTATGCCCCCTCCCATCAGAGGATTCATTAAGTGTTCATCAAAT---  
 ATTACAGGGCTGCTAATAACAAGAGATGGTGGTAGTGAGAATGGC-----  
 -----  
 -----  
 ACAAACACTGAGACCTTCAGACCTGGAGGAGGAAATATGAGGGACAATTGGAGAAAGTGAATTATATAAATATA  
 AAACAGTAAAAGTTGAACCATTA---GGAGTAGCACCAACCAGGGCAAGGAGAAGAGTGGTG-----  
 -----CAGAGAGAGAAAAAGAGG---CTAACT---CTAGGAGCT-----  
 ---TTGTTCCCTTGGGTTCTTGGGAGCA---GCAGGAAGCACTATG---GGCGCAGCGTCA---  
 GTGACGCTGACGGTACAG---GCCAGACAA---TTATTG---TCTGGTATAGTGCAACAGCAGAGC---  
 AATCTG---CTGAGG---GCTATTGAGGCGCAACAGCATATGTTGCAACTCACAGTCTGGGGCATC  
 >HQ595770  
 TTCTACTGTAATACAACAACACTGTTTAACAGTACTTGGAAACAAGGATGGTAGTATTGGGAATACTACTAAGG  
 GGTCA-----  
 -----  
 ATTAACACAGACACACTCACACTCCCATGCAGAATAAAAACAAATTATAAACCTGTGGCAGGAAGTAGGAAAAG  
 CAATGTATGCCCCCTCCCATCAGAGGACAAATTAGATGTACATCAAAT---  
 ATTACAGGGCTGATGTTAACAAGGATGGTGGTAATAATGGGAGC-----  
 -----  
 -----  
 GAGACCGAGATCTTCAGACCTGCAGGAGGAAATATGAGGGACAATTGGAGAAAGTGAATTATATAAATATAAAG  
 TAGTAAAAAATTGAACCATTA---GGAGTAGCACCCACCAAGGCAAAAAGAAGAGTGGTG-----  
 -----CAGAGAGAAAAAAGAGCA---GTAGTGGGAATAGGAGCT-----  
 GTGTTCCCTTGGGTTCTTGGGAGCA---GCAGGAAGCACTATG---GGCGCAGCGTCA---  
 ATGACGCTGACGGTACAG---GCCAGACAA---TTATTG---TCTGGTATAGTGCAACAGCAGAAC---  
 AATCTG---CTGAGA---GCTATTGAGGCGCAACAGCATCTGTTGCAACTCACAGTCTGGGGCATC  
 >JF680910  
 TTCTACTGTGATTCAACGCGATTGTTTAATAGTACTTGGACAAATGGAAGTTGGACAAATGGTACTGAAGAG-  
 -----  
 -----  
 AAAAAATGACACTATCACGCTCCCATGCAGAATAAAAACAAATTATAAACAGGTGGCAGGAAGTAGGAAAAGCAA  
 TGTATGCCCCCTCCCATCAGAGGACTAATTAAATGTTTCATCAAAC---  
 ATTACAGGGCTGTTGTTAACAAGAGATGGTGGTGAGAAGAAGAACAAC-----  
 -----  
 -----  
 AGTAATAGTACAGAAACCTTCAGACCTGGAGGAGGGGATATGAGGGATAATTGGAGAAAGTGAATTATATAAAT  
 ATAAAGTAGTAAAAAATTGAACCATTA---GGAGTAGCACCTACCAAGGCAAAGAGAAGAGTGGTA-----  
 -----CAGAGAGAAAAAAGAGCA---ATAGGAACGCTAGGAGCT---  
 ---GTGTTCCCTTGGATTCTTGGGAGCA---GCAGGAAGCACTATG---GGCGCAGCGTCG---  
 CTGACGCTGACGGTACAG---GCCAGACAA---TTATTG---TCTGGTATAGTGCAACAGCAGAAC---  
 AATCTG---CTAAGG---GCTATTGAGGCGCAACAACATCTGTTGCAACTCACAGTCTGGGGCATC  
 >JF680911  
 TTCTACTGTGAAACAGCACAGCTGTTTAATAGTACTTGGTATGGGAATGAAACTGAAGAGTCACAAAAT----  
 -----  
 -----  
 AAGACAGACCCTATCATACTCCCATGCAGAATAAAAACAAATCATAAATAGGTGGCAAGAAGTAGGAAAAGCAA  
 TGTATGCCCCCTCCCATCAGTGGATACATTAAGTGTTCATCAAAT---  
 ATTACAGGGCTATTATTAACAAGAGATGGTGGTAAGGATGATAAC-----  
 -----  
 -----  
 ACCACCGAGACCTTCAGACCTGGAGGAGGAGATATGAGGGATAATTGGCGAAGTGAATTATATAAATATAAAG  
 TAGTAAGAATTGAACCAGTA---GGAATAGCACCCACCAGGGCAAAAAGACGAGTGGTG-----  
 -----CAGAGAGAAAAAAGAGCA---GTGGGAACAATAGGAGCT-----  
 ATGTTCCCTTGGGTTCTTGGGAGCA---GCAGGAAGCACTATG---GGCGCAGCGTCA---

GTGACGCTGACGGTACAG---GCCAGACAA---TTATTG---TCTGGTATAGTGCAACAGCAAAAC---  
 AATTTG---CTGAAA---GCTATTGAGGCGCAACAACATCTGTTGCAACTCACAGTCTGGGGCATC  
 >JF680913  
 TTCTATTGTAATACAACAAATCTGTTTAATGCAACATTTAATATAACAAACAATACAACAAAGCTACCTAAC-  
 -----  
 -----  
 ACAGGTGACACTATCATACTCCCATGCAGAATAAAACAGATTATAAACAGGTGGCAGGAAGTAGGAAAAGCAA  
 TGTATGCCCCCTCCCATCAGGGGACGAATTAGCTGTTTCATCAAAT---  
 ATTACAGGGCTGCTATTAACAAGAGATGGTGGCACTAACATGACTGAT-----  
 -----  
 -----  
 AATGGTACAGAGACCTTCAGACCTGCAGGAGGAGATATGAGGGACAATTGGAGAAGTGAATTATATAAAATACA  
 AAGTAGTAAGAATTGAGCCATTA---GGAATAGCACCCACCAAGGCAAAGAGAAGAGTGGTG-----  
 -----CAAAGAGAAAAAAGAGCA---GTGGGA---ATAGGAGCT-----  
 ---TTGTTTCATTGGGTTCTTGGGAGCA---GCAGGAAGCGCTATG---GGCGCAGCGTCA---  
 ATGACGCTGACGGTACAG---GCCAGACAA---TTATTG---TCTGGTATAGTGCAACAGCAGAAC---  
 AATTTG---CTGATG---GCTATTGAGGCGCAACAGCATATGTTGCAACTCACAGTTTGGGGCATC  
 >HQ595783  
 TTCTACTGTAATTCAACACCACTATTTAATGAGAGCTTTAGAAGATCAAATGAAAGG-----  
 -----  
 -----  
 AGTGAAGGGAATATCACTCTCTCATGTAGAATAAAACAAATTATAAACTTGTGGCAGGAAGTAGGAAAAGCAA  
 TGTATGCCCCCTCCCATCAGAGGACAAATTAGATGTTTCATCAAAT---  
 ATTACAGGGCTGCTATTAATAAGAGATGGTGGGGAAAAATGGGACAGAG-----  
 -----  
 -----  
 GGAAATAATGAGACCTTCAGACCTGGAGGGGGAGATATGAAGGACAATTGGAGAAGTGAATTATATAAATATA  
 AAGTAGTAAAAATTGAACCATTG---GGAGTAGCACCCACCAAGGCAAAGAGAAGAGTGGTG-----  
 -----CAGAGAGAAAAAAGAGCA---GTGGGAACGCTAGGAGCT-----  
 ---ATGTTCCCTTGGGTTCTTGGGAGCA---GCAGGAAGCACTATG---GGCGCAGCGTCA---  
 ATAACGCTGACGGTACAG---GCCAGACAA---TTATTG---TCTGGTATAGTGCAACAGCAGAAC---  
 AATTTG---CTGAGG---GCTATTGAGGCGCAACAACATATGTTGCAACTCACAGTCTGGGGCATC  
 >JF680919  
 TTCTACTGTAATACAACACAGCTGTTTAATAGTACTTGGACCACTGATACTTGAATAGTACTAATGGGTCAA  
 GC-----  
 -----  
 -----  
 AATAGCAATGACACTATTATACTCCCATGTAGAATAAAACAAATTATAAACAGGTGGCAGGAAGTAGGAAAAG  
 CAATGTATGCCCCCTCCCATCAGCGGACAAATTATATGTCCATCAAAT---  
 ATTACAGGGCTACTATTAACAAGAGATGGTGGTAATGATAATAGCACC-----  
 -----  
 -----  
 AAAACGGGACTGAAACCTTCAGACCTGGAGGAGGAGATATGAAGGACAATTGGAGAAGTGAATTATATAAAT  
 ATAAAGTAGTAAGAATTGAGCCATTA---GGAGTAGCACCCACCAGGGCAAAGAGAAGAGTGGTG-----  
 -----CAGAGAGAAAAAAGAGCA---GCG-----TTCGGAGCT---  
 -----TTGTTCCCTTGGGTTCTTGGGAGCA---GCAGGAAGCACTATG---GGCGCAGCGTCC---  
 CTGACGCTGACGGTACAG---GCCAGAACA---TTATTG---TCTGGTATAGTGCAACAGCAGAAC---  
 AATTTG---CTGAGA---GCTATTGAGGCGCAACAGCATCTGTTGCAACTCACAGTCTGGGGCATC  
 >JF680920  
 TTCTACTGTAATACAACAAAACCTGTTTAATAGTACTTGGCCTGTTAATGGTAATGATACTGGGTCAAATATC-  
 -----  
 -----  
 -----  
 ACTGAAGAAAATATTACACTCCCATGTAGAATAAAACAAATTATAAACATGTGGCAGGAAGTAGGAAAAGCAA  
 TGTATGCCCCCTCCCATCAAAGGACTAATTAGATGTTTCATCAAAC---  
 ATTACAGGGATACTACTAACAAGAGATGGTGGGGACGGGAGCAAT-----  
 -----  
 -----  
 GCCAACGAGACCTTCAGACCTGGAGGAGGGAATATGAGGGACAATTGGAGAAGTGAATTATATAAATATAAAG  
 TAGTACAAATTGAACCATTA---GGAGTAGCACCCACCAAGGCAAAGAGAAGAGTGGTG-----  
 -----CAGAGAGAAAAAAGAGCA---GTGGGA---ATAGGAGCT-----  
 TTGTTCCCTTGGGTTCTTGGGAGCA---GCAGGAAGCACTATG---GGCGCAGCATCA---

ATGACGCTGACGGTACAG---GCCAGACAA---TTATTG---TCTGGTATAGTGCAACAGCAGAAC---  
 AATTTG---CTGAGA---GCTATTGAGGCGCAACAGCATCTGTTGCAACTCACAGTCTGGGGCATC  
 >HQ595786  
 TTCTACTGTGATACAACACAGCTATTTAATAGTACTTGGAAATATAACACAGCTGTCTAATAATAATAACAG  
 GAAAT-----  
 -----GAC---  
 ATAAATAACACAACAATCGTGCTTCCATGTAGAATAAAACAAATTATAAACAGGTGGCAGGAAGTAGGAAAAG  
 CAATGTATGCCCCCTCCCATCAGAGGAGTAATTAAATGTTTCATCAAAT---  
 ATTACGGGGCTGATTTTAGCAAGAGATGGTGGAATTAATGAGACT-----  
 -----  
 -----  
 AATGACACCGAGATCTTTTCGACCTGCAGGAGGAGATATGAGGGACAATTGGAGAAAGTGAATTATATAAAATATA  
 AAGTAGTAAAAATTGAACCATTA---GGAGTAGCACCCACCAAGGCAAAGAGAAGAGTGGTG-----  
 -----CAGAGAGAAAAAAGAGCA---GTGGGAACATTAGGAGCT-----  
 ---ATGTTCCCTTGGGTTCTTGGGAGCA---GCAGGAAGCACTATG---GGCGCAGCGTCA---  
 ATAACGCTGACGGTACAG---GCCAGACAA---TTATTG---TCTGGTATAGTGCAACAGCAGAGC---  
 AATTTG---CTGAGA---GCTATTGAGGCGCAACAGCACCTGTTGCAACTCACAGTCTGGGGCATC  
 >JF680928  
 TTCTACTGTAATACAACAAAACCTGTTTAATAGTACTTGGGAGAATGGTACTTGGCAGAATACTACAGAG----  
 -----  
 -----  
 TTGAATGGCACTATCACTCTTCCTTGTAGAATAAAACAAATTATAAACATGTGGCAGGAAGTAGGGAAAGCAA  
 TGTATGCCCCCTCCCATCAGAGGACAAATTAAGTGTTTCATCAAAT---  
 ATTACAGGGATACTATTAACAAGAGATGGGGGTAATAGCACCAAC-----  
 -----  
 -----  
 AACACTGAGACCTTCAGACCTGCAGGAGGAAATATGAAGGACAATTGGAGAAGTGAATTATATAAAATATAAAG  
 TAGTAAAAATTGAACCATTA---GGAGTAGCACCCACCAAGGCAAAGAGAAGAGTGGTG-----  
 -----CAGAGAGAAAAAAGAGCA---GCGGGA---CTAGGAGCT-----  
 GTGCTCATTGGGTTCTTGGGAGCA---GCAGGAAGCACTATG---GGCGCAGCGTCA---  
 CTAACGCTGACGGTACAG---GCCAGACAA---TTATTG---TCTGGTATAGTGCAACAGCAGAAT---  
 AATCTG---CTGAGA---GCTATTGAGGCGCAACAACATCTGTTGCAACTCACAGTCTGGGGCATT  
 >JF680929  
 TTCTACTGTAATACATCACAGCTGTTTAATAGTACTTGGGAGAATAGTGCTGGGGAGAATAATACAGAGTCAA  
 AC-----  
 -----  
 GCTACAGAGGTAAATATCATACTCCCATGCAGAATAAAACAAATCATAAACAGGTGGCAGGAGGTAGGAAAAG  
 CAATGTATGCCCCCTCCCATCAGAGGAAATATCAGCTGTTTCATCAAAT---  
 ATTACAGGGCTGATATTGACAAGAGATGGTGGAACGAAAAATCGC-----  
 -----  
 -----  
 ACAGGCAACGAGACCTTCAGGCCGGGAGGGGGAGATATGAAAGACAATTGGAGGAGTGAATTATATAAAATATA  
 AAGTAGTAAAAATTGAGCCATTA---GGAATAGCACCCACAAAGGCAAGGAGAAGAGTGGTG-----  
 -----CAGAGAGAAAAAAGAGCA---GTGACA---ATAGGAGCT-----  
 ---GTACTCCTTGGGTTCTTGGGAACA---GCAGGAAGCACTATG---GGCGCAGCGGCA---  
 GTGACGCTGACGGTACAG---GCCAGACAA---TTACTG---TCTGGTATAGTGCAACAGCAAAAC---  
 AATTTG---CTGAGA---GCTATTGAGGCGCAACAACATCTGTTGCAACTCACAGTCTGGGGCATC  
 >JF680934  
 TTCTACTGTAATTCAACACAGCTGTTTAATAGTACTTGGACGTTTAATGGTACTTGGATGTTTAATGGTACTA  
 CTTGGAATAAT-----  
 -----ACTGATAAC-----  
 AGTAACCATAACCAATATTACACTCCCATGCAGAATAAAACAAATTATAAACATGTGGCAGAGAGTAGGAAAGG  
 CAATGTATGCCCCCTCCCATCAGAGGACTAATTAGATGTAAATCGAAT---  
 ATTACAGGGATACTATTAACAAGGGATGGTGGTGATGGGAACAAT-----  
 -----  
 -----  
 AGTGAAGAGATCTTCAGACCTGGAGGAGGAGATATGAAGGACAATTGGAGAAGTGAATTATATAAGTACAAAAG  
 TAGTAAAAATTGAGCCATTA---GGAGTAGCACCCACTAAGGCAAGGAGAAGAGTGGTG-----  
 -----CAGAGAGAAAAAAGAGCA---GTGGGAACACTAGGAGCT-----  
 ATGTTCCCTTGGGTTCTTGGGAGCA---GCAGGAAGCACTATG---GGCGCAGCGTCG---

GTGACGCTGACGGTACAG---GCCAGACTA---TTATTG---TCTGGTATAGTGCAACAGCAGAGC---  
 AATTTG---CTGAGA---GCTATTGAGGCGCAACAGCATATGTTGCAACTCACAGTCTGGGGCATC  
 >HQ595801  
 TTCTACTGTAATACAACACAACCTGTTTAATAGCACTTGGAAATAGTACTGAGAATGTTGATAAT-----  
 -----  
 -----  
 AGGACAGATAACATCACGCTCCCATGCAAAATAAAACAATTTATAAATATGTGGCAGGAAGTAGGAAAAGCAA  
 TGTATGCCCCCTCCCATTAGAGGACAAATTAGCTGTTTCATCAAAT---  
 ATTACAGGGCTTCTATTAACAAGAGATGGTGGTAAGATAACAATAGCAAT-----  
 -----  
 -----  
 GACAACAATATTGAGGTCTTTAGACCTGGAGGAGGAAATATGAAAGACAATTGGAGAAGTGAATTATATAAAT  
 ATAAAGTAGTAAAAATTGAACCATTA---GGAATAGCACCCACCAAGGCAAAGAGAAGAGTGGTA-----  
 -----  
 -----CAGAGAGAAAAAAGAGCA---GTGGGC---CTAGGAGCT---  
 -----TTGTTCCCTTGGGTTCTTGGGAACA---GCAGGAAGCACTATG---GGCGCAGCGTCA---  
 ATAACGCTGACGGTACAG---GCCAGACAA---TTATTG---TCTGGTATAGTGCAACAGCAGAAC---  
 AATCTG---CTGAGA---GCTATTGAGGCGCAGCAGCGTATGTTGCAACTCACAGTCTGGGGCATC  
 >HQ595802  
 TTCTACTGTAATACAACACAACCTGTTTAATAGCACTTGGAACTGGTTAATAACACTTGGAGTAAGATTGATA  
 ATAAGAATGAG-----  
 ACTGGTAATAGTAATATC-----  
 ACACTCCCTAGTAATATCACACTCCCATGTAGAATAAAACAATTATAAACATGTGGCAGAAAGTAGGAAAAG  
 CAATGTATGCCCCCTCCTATTGGAGGACAAATTAAATGTTTCATCAAAC---  
 ATTACAGGGCTAATATTAGTAAGAGATGGTGGTAATGACACAGGA-----  
 -----  
 -----  
 GGCAACGAGACCTTCAGACCTGCAGGGGGAGATATGAGGGACAATTGGAGAAGTGAATTATATAAATACAAAG  
 TAGTAAAAATTGAACCATTA---GGAATAGCACCCACCAGGGCAAAGAGAAGAGTGGTG-----  
 -----CAAAGAGAAAGAAGAGCA---GTGACA---CTGGGAACC-----  
 ATGCTCCTTGGGTTCTTGGGAGCA---GCAGGAAGCACTATG---GGCGCAGCGTCC---  
 TTGACGCTGACGGTACAG---GCCAGACAA---TTATTG---TCTGGTATAGTGCAACAGCAGAAC---  
 AATCTG---CTGAGG---GCTATTGAGGCGCAACAGCATCTGTTGCAGCTCACAGTCTGGGGCATC  
 >HQ595804  
 TTCTACTGTAATACATCAGAACTGTTTAATAGTACTTGGAAATGATACTGCAGGGTTAAATAACACTAACACTA  
 CA-----  
 -----  
 -----  
 GACCAAGGCACAATCACACTCCCATGCAGAATAAAACAATTATAAACATGTGGCAAAAAGTAGGAAAAGCAA  
 TGTATGCCCCCTCCCATTCAGGACAAATTAAGTCTCAACAAAT---  
 ATTACAGGAATACTACTAACAAGAGATGGTGGTGGTAATAGCAGT-----  
 -----  
 -----  
 AACACCACCGAGACCTTCAGACCAGCAGGAGGAGATATGAGGGATAATTGGAGAAGTGAATTATATAAATATA  
 AAGTAGTAAAAATTGAACCATTA---GGAATAGCACCCACCAAGGCAAAGGAGAGTGGTG-----  
 -----CAAAGAGAAAAAGAGCA---ATAGGGGGATTGGGAGCT-----  
 ---TTGTTCCCTTGGGTTCTTGGGAGCA---GCAGGAAGCACTATG---GGCGCAGCGTCA---  
 CTAACGCTGACGGTACAG---GCCAGACAA---TTATTG---TCTGGTATAGTGACAGCAGCAGAAC---  
 AATCTG---CTGAGA---GCTATTGAGGCGCAACAACATTTGTTGCAACTCACAGTCTGGGGCATC  
 >HQ595806  
 TTCTACTGTAATACAACACAATTGTTTAATAGTACTTGGAAATATAAAGAGAATACAACAAAACGGGATAATA  
 GTACT-----  
 -----GAA---  
 AGTAATAGTACTACTATCGTACTCCCATGCAGAATAAAACAATTATAAACAGATGGCAGGAAGTAGGAAAAG  
 CAATGTATGCCCCCTCCCATCAGCGGAACAATTAAATGCTCATCAAAT---  
 ATTACAGGGTTACTATTAACAAGAGATGGGGGTAATAATAACGAGACC-----  
 -----  
 -----  
 AATGGAAGTGAAGTCTTCAGACCTGGAGGAGGAGATATGAGGGACAATTGGAGAAGTGAATTATATAAATATA  
 AAGTAGTAAAAATTGAACCATTA---GGAGTAGCACCCACCCAGGCAAGGAGAAGAGTGGTG-----  
 -----CAGAGAGAAAAAAGAGGA---GTAGGA---CTAGGAGCT-----  
 ---TTGTTCCCTTGGGTTCTTGGGAGCA---GCAGGGAGCACTATG---GGCGCAGCGTCA---

ATGACGCTGACGGTACAG---GCCAGACAA---CTATTG---TCTGGTATAGTGCAACAGCAAAAC---  
 AATTTG---CTGAGA---GCTATTGAGGCGCAACAGCGTCTGTTGCAACTCACAGTCTGGGGCATC  
 >JF680937  
 TTCTACTGTAATACAACAACAACTGTTTAATAGCGATTGGAATATTACTGAAAGGGCAAATGACACTGAA-----  
 -----  
 -----  
 GGAAATGGCACAATTACACTCCCATGCAGAATAAAACAAATTATAAACATGTGGCAGGAAGTAGGAAAAGCAA  
 TGTATGCCCCCTCCCATCAAAGGAGAAATTGGATGTTTCATCAACC---  
 ATCACAGGGATACTCTTAACAAGAGATGGTGGAACGAACAGTACC-----  
 -----  
 -----  
 AATGAGACCTTCAGACCTGGAGGAGGGGATATGAGAGACAATTGGAGAAGTGAATTATTTAAATATAAAGTAG  
 TACAAATTGAACCATTA---GGAATAGCACCCACCAGGGCAAAGAGAAGAGTGGTG-----  
 -----  
 -----CAGAGAGAAAAAAGAGCA---GTGGGA---CTAGGAGCC-----  
 TTGTTCCCTTGGGTTCTTGGGAGCA---GCAGGAAGCACTATG---GGCGCAGTGTC---  
 ATGACGCTGACGGTACAG---GCCAGACAA---TTATTG---TCTGGTATAGTGCAACAGCAGAAC---  
 AATTTG---CTGAGA---GCTATTGAGGCGCAACAGCATCTGTTGCAACTCACAGTCTGGGGCATC  
 >D10112  
 TTCTACTGTAATACAACACAGCTGTTTAATACTACTTGGCTGTTTAATGGTACTTGAATGATACTGAAGGGT  
 TAAAT-----  
 -----  
 AACACTGAAAGAAATATTACACTTCCATGCAGAATAAAACAAATTATAAACAGGTGGCAGGAAGTAGGAAAAG  
 CAATGTATGCCCCCTCCCATCACAGGAACAATTAGCTGTTTCATCAAAT---  
 ATTACAGGGCTGCTATTAACAAGAGATGGTGGTAGAGGCGAAAAT-----  
 -----  
 -----  
 GAGACCGAGACCTTCAGACCTGGAGGAGGAGATATGAGGGACAATTGGAGAAGTGAATTATATAAATATAAAG  
 TAGTAAAAATTGAACCATTA---GGAGTAGCACCCACCAAGGCAAAGAGAAGAGTGGTG-----  
 -----  
 -----CAGAGAGAAAAAAGAGCA---GTGGGAGCGATAGGAGCT-----  
 CTGTTCCCTTGGGTTCTTGGGAGCA---GCAGGAAGCACTATG---GGCGCAGTGGA---  
 CTGACGCTGACGGTACAG---ACCAGACAA---TTATTG---TCTGGTATAGTGCAACAGCAGAAC---  
 AATCTG---CTGAGG---GCTATTGAGGCGCAACAGCATCTGTTGCAACTCACAGTCTGGGGCATC  
 >Y13716  
 TTCTACTGTAAGACAGCACAACTGTTTAATAGTACTTGAATAGTACTGGAAATGGTACTATAAAGTCAAAT-  
 -----  
 -----  
 ACCACTGAAATTATCACACTCCCATGTAGAATAAAACAAATTGTAAACATGTGGCAGGAAGTAGGAAAAGCAA  
 TGTATGCCCCCTCCCATCACAGGACAAATTAGATGTGCATCACAT---  
 ATTACAGGGCTACTATTAACAAGAGATGGAGGTAGGGAGAACAAATACC-----  
 -----  
 -----  
 AACGAGACCGAGACCTTCAGACCTGGGGGAGGAGATATGAGGGACAATTGGAGAAGTGAATTATATAAATATA  
 AAGTAGTAAAAATTGAACCATTA---GGAGTAGCACCCACCAAGGCAAAGAGAAGAGTGGTG-----  
 -----  
 -----CAGAGAGAAAAAAGAGCA---GTGGGAATGATAGGAGCT-----  
 ---ATGTTCCCTTGGGTTCTTGGGAGCA---GCAGGAAGCACTATG---GGCGCAGCCTCA---  
 CTGACGCTGACGGTACAG---GCCAGACTA---TTATTG---TCTGGTATAGTGACAGCAGCAAAAT---  
 AATTTG---CTGAGG---GCTATTGAGGCGCAACAGCATCTGTTGCGACTCACAGTCTGGGGCATC  
 >JF706393  
 TTCTACTGTAATACATCAAACTGTTTAATAGTACTTGGACTAATATTACTGAAGGGTTAAATAAACTGAA-  
 -----  
 -----  
 AGAAATGGCACATTCTACTCCCATGCAGAATAAAACAAATTATAAACAGGTGGCAGGAAGTAGGAAAAGCAA  
 TGTATGCCCCCTCCCATCAGAGGACAAATTAGATGTTTCATCAAAT---  
 ATTACAGGGCTGCTATTAATGAGAGATGGTGGTAATACTAACGAGAGC-----  
 -----  
 -----  
 AAGACCACCGAGGTCTTCAGACCTGGAGGAGGAGACATGAGGGACAATTGGAGAAGTGAATTATATAAATATA  
 AAGTAGTAAGAATTGAACCATTA---GGAGTAGCACCCACCAAGGCAAAGAGAAGAGTGGTG-----  
 -----  
 -----CAGAGGGAAAAAAGAGCA---GTGGGA---ATAGGAGCT-----  
 ---TTGTTCCCTTGGGTTCTTGGGAGCA---GCAGGAAGCACTATG---GGCGCAGCGTCA---

ATGACGCTGACGGTACAG---GCCAGACAA---TTATTG---TCTGGTATAGTGCAGCAGCAGAAC---  
 AATCTG---CTGAGG---GCTATTGAGGCGCAACAGCATCTGTTGCAACTCACAGTCTGGGGCATC  
 >JN786861  
 TTCTACTGCAATTCAACACAACCTGTTTAAATAGTACTTGGAATGTTAAAGGTACTTGGAATGGTACTGAAGAGT  
 CAAATAAC-----  
 -----AAT---  
 GAAGGAAATGACACAATCACACTCCAATGCAGAATAAAACAAATTATAAACATGTGGCAGGAAGTAGGAAAAG  
 CAATGTATGCCCCCTCCCATCAGAGGACAAATTAGATGTTTCATCAAAT---  
 ATTACAGGGCTGATATTAACAAGAGATGGTGGTAATGAGAATACC-----  
 -----  
 -----  
 ACCACAGAGATCTTCAGACCTGGAGGAGGAAATATGAGGGACAATTGGAGAAGTGAATTATATAAAATATAAAG  
 TAGTAAAAATTGAACCATTA---GGAGTAGCACCCACCAGGGCAAAGAGAAGAGTGGTG-----  
 -----CAGAGAGAAAAAAGAGCA---GTGGGA---CTAGGAGCT-----  
 TTGTTCCCTTGGGTTCTTGGGAGCA---GCAGGAAGCACTATG---GGCGCAGCGTCA---  
 CTGACGCTGACGGTACAA---GCCGGACAA---TTATTG---TCTGGTATAGTGC AACAGCAGAAC---  
 AACTTG---CTGAGG---GCTATTGAGGCGCAACAGCACCTGTTGCAACTCACAGTCTGGGGCATC  
 >AJ535594  
 TTCTACTGTGATACAACACAACCTGTTTAAATGGGAGTGTTCCTAAAGGAAATAACACTGAAGGAAGTAGT----  
 -----  
 -----AATGACCTATCACACTCCCATGTT---  
 AGAATAAAACAAATTATAAACAGGTGGCAGGAAGTAGGAAAAGCAATGTATGCCCCCTCCCATCAGTGGAATAG  
 TTACATGTTTCATCAAAT---ATTACAGGGCTGCTATTAACAAGAGATGGGGGTGTGACTAACGATACT-----  
 -----  
 -----  
 AACGGCACTGAGATTTTCAGACCTGGAGGAGGAAATATGAGGGACAATTGGAGAAGTGAATTATATAAAATATA  
 AAGTAGTAAGAATTGAACCATTA---GGAGTAGCACCCACTACGGCAAAGAGAAGAGTGGTG-----  
 -----CAAAGAGAAAAAAGAGCA---GTGGGA---CTAGGAGCT-----  
 ---ATGTTCCCTTGGGTTCTTGGGAGCA---GCAGGAAGCACTATG---GGCGCAGCGTCA---  
 ATAACGCTGACGGTACAG---GCCAGACTA---TTATTG---TCTGGTATAGTGC AACAGCAAAAC---  
 AATTTG---CTGAGG---GCTATTGAGGCACAACAGCATCTGTTGCAGCTCACAGTCTGGGGCATC  
 >AJ535607  
 TTCTACTGTAATACATCACAACCTGTTTAAATAGTACTTGGAATGAGAATAATACTTGACAGAGTCAAATAGC-  
 -----  
 -----  
 ACTGGAGAAAATATCACACTCCCATGTAGGATAAAACAAATTATAAACATGTGGCAGGATGTAGGAAGAGCAA  
 TGTATGCCCCCTCCCATCAGTGGACAAATTAGATGTTTCATCAAAT---  
 ATTACAGGGCTGCTATTAGTAAGAGATGGTGGTATTAACGTGACCAAC-----  
 -----  
 -----  
 GAGGCCGGCACCGAGGTCTTCAGACCTGGGGGAGGAGATATGAAGGACAATTGGAGAAGTGAATTATATAAAT  
 ATAAAGTAGTAAAAATTGAACCATTA---GGAATAGCACCCACCAAGGCAAAAAGAAGAGTGGTG-----  
 -----CAGAGAGAAAAAAGAGCA---GCA-----ATAGGAGCT---  
 -----ATGTTCCCTTGGGTTCTTGGGAGCA---GCAGGAAGCACTATG---GGCGCAGCGTCA---  
 CTGACGCTGACGGTACAG---GCCAGACAA---TTATTG---TCTGGTATAGTGC AACAGCAGAAC---  
 AATCTG---CTGAGG---GCTATTGAGGCGCAACAGCATCTGTTGCAACTCACTGTCTGGGGCATC  
 >AJ535612  
 TTCTACTGTAATTCAACAAAACCTGTTTAGTAGTACTTGGAATAGTAATAGTACTTGGAATAGTGCTGAAGAGT  
 CA-----  
 -----  
 AATAGCACTGAAGTTATCACACTCCCATGCAGAATAAAACAAATTATAAACATGTGGCAGGAAGTAGGAAAAG  
 CAATGTATGCCCCCTCCCATCAGAGGACAAATTAGATGCTCATCAAAT---  
 ATTACAGGGCTGCTATTAACAAGAGATGGTGGTAAGAATCCGAACGAG-----  
 -----  
 -----  
 AACACCACCGAGACCTTCAGACCTGGAGGAGGAAATATGAGGGACAATTGGAGAAGTGAATTATATAAAATATA  
 AAGTAGTAAAAATTGAACCATTA---GGAGTAGCACCCACCAAGGCAAGGAGAAGAGTGGTG-----  
 -----CAGAGAGAAAAAAGAGCA---ATAGGA---ATGGGAGCT-----  
 ---TTGTTCCCTTGGGTTCTTGGGAGCA---GCAGGAAGCACTATG---GGCGCAGCGTCA---

CTGACGCTGACGGTACAG---GCCAGGCTA---TTATTG---TCTGGTATAGTGCAACAGCAGAAT---  
 AATTTG---CTGAGG---GCTATTGAGGCGCAACAGCATCTGTTGCAACTCACAGTCTGGGGCATC  
 >AJ418531  
 TTCTACTGTAATACTACTAAGCTGTTTAATAGTACTTGGAAATAGTACTTGGACTGGGGATACTACT-----  
 -----  
 -----  
 GGAGATGACAATATCACACTCCCATGTAGAATAAAACAATTTATAAACAGGTGGCAGGAAGTAGGAAAAGCAA  
 TGTATGCCCCCTCCCATCAGTGGACAAATTAGATGTTTATCAAAT---  
 ATTACAGGGCTGCTATTAACAAGAGATGGTGGTAGTACCAAGAACGAGACC-----  
 -----  
 -----  
 AGTAACCAGACCGAGATTTTCAGACCTGGAGGAGGAGATATGAGGGACAATTGGAGAAGTGAATTATATAAAAT  
 ATAAAGTAGTAAAAATTGAGCCATTA---GGAGTAGCACCTACCAGGGCAAAGAGAAGAGTGGTG-----  
 -----CAAAGAGAAAAAAGAGCA---GTGGGAACAATAGGAGCT---  
 -----ATGTTCCCTTGGGTTCTTGGGAGCA---GCAGGAAGCACTATG---GGCGCAGCGTCA---  
 TTGACGCTGACGGTACAG---GCCAGACTA---TTATTG---TCTGGTATAGTGCAAGCAGCAAAGC---  
 AATTTG---CTGAGG---GCTATTGAGGCGCAACAGCATCTGTTGCAACTCACAGTCTGGGACATC  
 >AJ418494  
 TTCTACTGTAATACAACAACCACTGTTTAATAGTACCTGGAATGTTAGTAATACTGAAGGATTAAATATCAATA  
 TCACT-----  
 -----  
 GAAAGAAATGACACATTCACACTCCCATGCAGAATAAAACAATTTATAAACATGTGGCAGGAAGTAGGAAAAG  
 CAATGTATGCCCCCTCCCATCAAAGGAAAAATTAGATGTTTCATCAAAT---  
 ATTACAGGGCTGCTATTAACAAGAGATGGTGGTGGTAACGAGAGC-----  
 -----  
 -----  
 AGCAGCAGCGAGACCTTCAGACCTGGAGGAGGAGATATGAGGGACAATTGGAGAAGTGAATTATATAAAATATA  
 AAGTAGTAAGAATTGAACCATTA---GGAGTAGCACCCACTAAGGCAAAAAGAAGAGTGGTG-----  
 -----CAGAGAGAAAAAAGAGCA--GCA-----CTAGGAGCT-----  
 ---ATGTTCCCTTGGATTCTTGGGAGCA--GCAGGAAGCACTATG--GGCGCAGCGTCA---  
 ATGGCGCTGACGGTACAG---GCCAGACAA--TTATTG---TCTGGTATAGTGCAACAGCAGAAT---  
 AATCTG---CTGAGA--GCTATTGAGGCGCAACAGCACCTGTTGCAACTCACAGTCTGGGGCATT  
 >AJ418495  
 TTCTACTGTAATACAACAAAACCTGTTTAATAGTACTTGGCAAAATGAGACTAGCGGGTCCATTAACTAACTG  
 AC-----  
 -----  
 ATTGGAGAAAATATCACACTCCCATGCAGAATAAAACAATTTATAAACCTGTGGCAGGGAGTAGGAAAAGCTA  
 TGTATGCCCCCTCCCATCCAAGGACAAATTAGTTGTTTCATCAAAT---  
 ATTACAGGGCTGCTATTAACAAGAGATGGTGGTAACAACAACGAGACA-----  
 -----  
 -----  
 AACAGGACCGAGACCTTCAGACCTGGAGGAGGAAATATGAGGGACAATTGGAGAAGTGAATTATATAAAATATA  
 AAGTAGTAAAAATTGAGCCATTA---GGAGTAGCACCCACCAAGGCAAAGAGAAGAGTGGTG-----  
 -----CAGAGAGAAAAAAGAGCA--GTAACG---CTAGGAGCT-----  
 ---ATGTTCCCTTGGGTTCTTGGGAGCA---GCAGGAAGCACAATG---GGCGCAGCGTCA---  
 ATGACGCTGACGGTACAG---GCCAGACTA---TTATTG---TCTGGTATAGTGCAACAGCAGAAC---  
 AACCTG---CTGAGG---GCTATTGAGGCGCAACAGCATCTGTTGCAACTCACAGTCTGGGGCATC  
 >AJ418519  
 TTCTACTGTGATTCATCACAGCTGTTTAATGGTACTTGGAAATGATACTAATACTAATGAA-----  
 -----  
 -----  
 GGAAATGGCACAATCACACTCCAATGCAAAATAAAACAATTTATAAACCTGTGGCAGGAAGTAGGAAAAGCAA  
 TGTATGCCCCCTCCCATCAGAGGACGAATTAGATGTTTCATCAAAT---  
 ATTACAGGGCTGTTATTAACAAGAGATGGTGGTAATACTAATGAC-----  
 -----  
 -----  
 ACAGACGAGATATTCAGACCTGGAGGAGGAGATATGAGGGACAATTGGAGAAGTGAATTATATAAAATATAAAG  
 TAGTTAAAATTGAACCATTA---GGAGTGGCACCCACCAAGGCAAAGAGAAGAGTGGTG-----  
 -----CAGAGAGAAAAAAGAGCA--GTGGGA---ATAGGAGCT-----  
 GTGTTCCCTTGGGTTCTTGGGAGCA---GCAGGAAGCACTATG---GGCGCAGCGTCA---

ATGACGCTGACGGTACAG---GCCAGACTA---TTATTG---TCTGGTATAGTGCAACAGCAGAAC---  
 AATTTG---CTGAGG---GCTATTGAGGCGCAACAGCATCTGTTGCAGCTCACAGTCTGGGGCATC  
 >AJ418521  
 TTCTACTGTAATACATCACAAC TATTTAATAGTATTTGGAATAGTACTGAAAAGACAAATATC-----  
 -----  
 -----  
 ACTAAAGGAATTATCACACTCCCATGCAGAATAAAACAAATTATAAACATGTGGCAGGAAGTAGGGAAAGCAA  
 TGTACGCCCCCTCCCATCAGAGGAAATATTAGTTGTTTCATCAAAT---  
 ATTACAGGGCTACTATTAACAAGAGATGGTAGTAACGGGAACGGGACC-----  
 -----  
 -----  
 GGGAACAGGACCGAGATCTTTAGACCTGGAGGAGGAGATATGAGGGACAATTGGAGAAGTGAATTATATAAAAT  
 ATAAAGTAGTAAAAATCGAACCATTA---GGAGTAGCACCCCTCCAAGGCAAAGAGAAGAGTGGTG-----  
 -----  
 -----CAGAGAGAAAAAAGAGCA---GTGACA---T TAGGAGCT---  
 -----TTGTTTCCTTGGGTTCTTGGGAGCA---GCAGGAAGCACTATG---GGCGCAGCGACA---  
 ATGACGCTGACGGTACAG---GCCAGACTA---TTATTG---TCTGGTATAGTGCAACAGCAGAAC---  
 AATTTG---CTGAGG---GCTATTGAGGCGCAACAGCATCTGTTGCAACTCACAGTCTGGGGCATC  
 >U36869  
 TTCTACTGTAACACAACGCAACTGTTTAATAGTACTTGGAA TGGTACTGAAGGGTCTTGGAA TGATACTAAA-  
 -----  
 -----  
 GGGCCAGAAAACATCACACTCCCATGCAGAATAAAACAAATTATAAACATGTGGCAAGAAGTAGGAAAAGCAA  
 TGTATGCCCCCTCCCATTAGTGGACAAATTAGATGCTCATCAAAT---  
 ATTACAGGACTGCTATTAACAAGAGATGGTGGTAAGGGCAATAATACC-----  
 -----  
 -----  
 AATACCACCGAGATCTTTAGACCGGGAGGAGGAGATATGAGGGACAATTGGAGAAGTGAATTATATAAAATATA  
 AAGTAGTAAGAATTGAACCATTA---GGAGTAGCACCCACCAAGGCAAAGAGAAGAGTGGTG-----  
 -----  
 -----CAGAGAGAAAGGAGATCA--ATAACA---CTAGGAGCT-----  
 ---ATGTTCCCTTGGGTTCTTGGGAGCA--GCAGGAAGCACTATG---GGCGCAGCGTCA---  
 ATAACGCTGACGGTACAG---GCCAGACAA--TTATTG---TCTGGTATAGTGCAACAGCAGAAC---  
 AATTTG---CTGAGG---GCTATTGAGGCGCAACAGCATCTGTTGCAGCTCACAGTCTGGGGCATC  
 >U36872  
 TTCTACTGTAATACAACAAAATTATTCAATAGTACTTGGACTTGGAA TGATACTGAAGGGTCAGATAGC---  
 -----  
 -----  
 ACTGAAGGAAGTATCACACTCCCATGCAGAATAAAACAAATTATAAACATGTGGCAGGAAGTAGGAAAAGCAA  
 TGTATGCCCCCTCCCATCAGAGGACAAATTAGATGTTTCATCAAAT---  
 ATTACAGGGCTGCTATTAACAAGAGATGGTGGTAATGATAACAAGACT-----  
 -----  
 -----  
 AACACCACCGAGACCTTCAGACCTGGAGGAGGAGATATGAGGGACAATTGGAGAAGTGAATTATACAAATATA  
 AAGTAGTAAAAATTGAACCATTA---GGAGTAGCACCCACTAAGTCAAGGAGAAGAGTGGTG-----  
 -----  
 -----CAGAGAGAAAAAAGAGCA---GTGGGA---ATAGGAGCT-----  
 ---GTGTTCCCTTGGGTTCTTGGGAGCA---GCAGGAAGCACTATG---GGCGCAGCGTCA---  
 CTGACACTGACGGTACAG---GCCAGACTA---TTATTG---TCTGGTATAGTGCAACAGCAGAAC---  
 AATTTG---CTGAGG---GCTATTGAGGCGCAACAGCATCTGTTGCAACTCACAGTCTGGGGCATC  
 >AJ286342  
 TTCTACTGTAATACAAAACAGCTGTTTAATTGGAGTAGTACTTGGAA TGATACTATAAGGTCAGAT-----  
 -----  
 -----  
 GCTCCAGAAATTATCACACTCCCATGCAGAATAAAACAAATTATAAACAGGTGGCAGGAAGTAGGAAAAGCAA  
 TGTATGCCCCCTCCAATCGAAGGACAAATTAGATGTTTCATCAAAC---  
 ATTACAGGGCTGCTATTAACAAGAGATGGTGGTAGTAGCAACAATACC-----  
 -----  
 -----  
 AACAAATACCACCGAGATCTTCAGACCTGGAGGGGGAAATATGAAAGACAATTGGAGAAGTGAATTATATAAAAT  
 ATAAAGTAGTAAAAATTGAGCCATTA---GGAGTAGCACCCACCAAGGCAAAGAGAAGAGTGGTG-----  
 -----  
 -----CAGAGAGAAAAAAGAGCA---ATAGGAACGCTGGGAGCT---  
 -----ATGTTCCCTTGGGTTCTTGGGAGCA---GCAGGAAGCACTATG---GGCGCAGCGGCA---

ATGACGCTGACGGTACAA---ACCAGACAA---TTATTG---TCTGGTATAGTGCAACAGCAAAAT---  
 AATTTG---CTGAGG---GCTATTGAGGCGCAACAGCATCTGTTGCAACTCACAGTCTGGGGCATC  
 >U36875  
 TTCTACTGTAATACAACAAAACCTGTTTAATAGTATTTGGATGCCTAATGGTACTTGAATAGTACTGACACGT  
 CA-----  
 -----  
 AATAGCACTGAGATCAGGCTCCCATGCAGAATAAAACAAATTGTAAACATGTGGCAGGAAGTAGGAAAAGCAA  
 TGTATGCCCCCTCCCATCAGTGGACGAATTAGATGTGTATCAAAT---  
 ATTACAGGGCTGCTATTAACAAGAGATGGTGGTAATAACAACGAG-----  
 -----  
 -----  
 ACCACCGAGATCTTCAGACCTGGAGGAGGAGATATGAGGGACAATTGGAGAAGTGAATTATACAAATACAAAT  
 TAATAAAAATTGAACCATTA---GGAATAGCACCCACCAAGGCAAAAGAAGAGTGGTG-----  
 -----CAAAGAGAAAAAAGAGCA---GTGGGA---ATAGGAGCT-----  
 GTGCTCCTTGGGTTCTTGGGAGCA---GCAGGAAGCACTATG---GGCGCAGCGTCA---  
 CTGACGCTGACGGTACAG---GCCAGACTA---TTACTG---TCTGGTATAGTGCAACAGCAGAAC---  
 AATTTG---CTGAGG---GCTATTGAGGCGCAACAGCATATGTTGCAACTCACAGTCTGGGGCATC  
 >U36879  
 TTCTACTGTAATTCAACACAATTGTTTAATAGTACTTGAATAATGGTACTAGGAATAATACTGAAGGAGGTA  
 AC-----  
 -----  
 ATTACAGACACAATTACACTCCCATGTAGAATAAAACAAATTATAAACATGTGGCAGGAAGTAGGAAAAGCAA  
 TGTATGCCCCCTCCCATCAGAGGACAAATTAGATGTTTCATCAAAT---  
 ATTACAGGGCTGTTATTAACAAGAGATGGTGGCAGGAATGAGACC-----  
 -----  
 -----  
 ACCACCACTGAGATCTTCAGACCTGGGGGAGGAAATATGAAGGACAATTGGAGAAGTGAATTATATAAATATA  
 AAGTAGTAAAAATTGAACCATTA---GGAGTAGCACCCACCAAGGCAAAGAGAAGAGTGGTG-----  
 -----CAGAGAGAAAAAAGAGCA---ATAGGA---ATAGGAGCT-----  
 ---ATGTTCCCTTGGGTTCTTGGGAGCA---GCAGGAAGCACTATG---GGCGCAGCGTCA---  
 ATAACGCTGACGGTACAG---GCCAGACAA---TTATTG---TCTGGTATAGTGCAACAGCAGAAC---  
 AATTTG---CTGAGG---GCTATTGAGGCGCAACAGCATATGTTGCAACTCACAGTCTGGGGCATT  
 >U36880  
 TTCTACTGTAATTCAACACCATTGTTTAGTGGTACTTGAATACTAGTACTTGAATGATACTACAGGGTCGA  
 ATGAC-----  
 -----ACT---  
 GTAGGAAATAACACCATCATACTCCAATGTAGAATAAAACAAATTATAAACCTCTGCCAGAAAGTAGGAAAAG  
 CAATGTATGCCCCCTCCCATAGAGGACAAATTAGATGTTTCATCAAAG---  
 ATTACAGGGCTGCTATTAACAAGAGATGGTGGGACTGACAATAAG-----  
 -----  
 -----  
 AATATCGAGATCTTCAGACCTGGAGGAGGAGATATGAGGGACAATTGGAGAAGTGAATTATATAAATATAAAG  
 TAGTAAAAATTGAACCATTA---GGACTAGCACCCACTAAGGCAAAGAGAAGAGTGGTG-----  
 -----CAGAGAGAAAAAAGAGCA---GTGGGA---CTAGGAGCT-----  
 ATGTTCCCTTGGGTTCTTGGGAGCA---GCAGGAAGCACTATG---GGCGCAGCGTCA---  
 TTAACGCTGACGGTACAG---GCCAGACAA---TTATTG---TCTGGTATAGTGCAACAGCAGAGC---  
 GATTTG---CTGAGG---GCTATTGAGGCGCAACAGCATATGTTGCAACTCACAGTCTGGGGCATC  
 >U23487  
 TTCTACTGTAATTCAACACAATTGTTTAATAGTACTTGAATACTGGGAATGATACTAGAGAGTCAAATGACA  
 CA-----  
 -----  
 -----  
 AATAATACTGGAAATATCACACTCCCATGCAGAATAAAACAAATATTAAATTTGTGGCAGGAAGTAGGAAAAG  
 CAATGTATGCCCCCTCCCATCAGCGGACAAATTAGCTGTTTCATCAAAT---  
 ATTACAGGGCTATTATTAACAAGAGATGGTGGTAATACTAATACTACT-----  
 -----  
 -----  
 GGGAACACCACCGAGACCTTCAGACCTGGAGGAGGAAATATGAGGGACAATTGGAGAAGTGAATTATATAAAT  
 ATAAAGTAGTAAAAGTTGAACCATTA---GGAATAGCACCCACCAAGGCAAAGAGAAGAGTGGTG-----  
 -----CAGAGAGAAAAAAGAGCA---GTGGGAATGCTAGGAGCT---  
 -----ATGTTCCCTTGGGTTCTTGGGAGCA---GCAGGAAGCACTATG---GGCGCACGGTCA---

ATAACGCTGACGGTACAG---GCCAGACAA---TTATTG---TCTGGTATAGTGCAACAGCAGAAC---  
 AATCTG---CTGAGG---GCTATTGAGGCGCAACAGCATCTGTTGCAACTCACAGTCTGGGGCATC  
 >Y13719  
 TTCTACTGTAATTCAACACAACCTGTTTAATAGTACTTGGAATGGTACTGGAGGGTCAAATAACACTGGA-----  
 -----  
 -----  
 GGAAATGACACAATCACACTCCCATGCAGAATAAAACAAATTATAAACATGTGGCAGGAAGTAGGAAAAGCAA  
 TGTATGCCCCCTCCCATCAGAGGAATTATTAGCTGTTTCATCAAAT---  
 ATTACAGGGCTGATATTAACAAGAGATGGTGGTAACAACAGCACA-----  
 -----  
 -----  
 AACGATACCGAGACCTTCAGACCCGGAGGAGGTGATATGAGGGATAATTGGAGAAAGTGAATTATATAAAATATA  
 AAGTAGTACAAATTGAACCATTA---GGAATAGCACCCACCAAGGCAAAGAGAAGAGTGGTG-----  
 -----CAGAGAGAAAAAAGAGCG---GTGACA---CTAGGAGCT-----  
 ---ATGTTCCCTTGGGTTCTTGGGAGCA---GCAGGAAGCACTATG---GGCGCAGCGTCA---  
 ATAACGCTGACGGTACAG---GCCAGACAA---TTATTG---ACTGGTATAGTGCAACAGCAAAGC---  
 AATTTG---CTGAGG---GCTATTGAGGCGCAACAGCATCTGTTGCAACTCACAGTCTGGGGCATC  
 >AJ286330  
 TTCTACTGTAATACAACACAACCTGTTTAATAGTACTTGGGTGCGTGATGCTAATAGTTCTTGGAGGCTAA  
 ATAGCTCT-----  
 -----GAA---  
 GGAAATGACACACTTATCATACTCCAGTGCAGAATAAAACAAATTATAAACATGTGGCAGGAAGTAGGAAGAG  
 CAATGTATGCCCCCTCCCATCAGAGGAAACATTAGCTGTTTATCAAAT---  
 ATTACAGGGCTGATATTAACAAGAGATGGTGGGATCCAGAACGAGTCCCAGTCC-----CAG---  
 -----  
 -  
 AACGGGTCCGAGAGCGAGGAGACCTTCAGACCTGTAGGAGGAGATATGAGGGACAATTGGAGAAGTGAATTAT  
 ACAAATATAAAGTAGTAAAAATTGAACCATTA---GGAGTAGCACCCACCAGGGCAAAGAGAAGAGTGGTG--  
 -----GCAAGAGAAAAAAGAGCG---GTGGCC---  
 CTAGGAGCT-----GTATTCATTGGGTTCTTGGGAGCA---GCAGGAAGCACTATG---  
 GGCGCAGCGTCA---ATGACGCTGACGGTACAG---GCCAGACAA---TTATTG---  
 TCTGGTATAGTGCAACAGCAGAAC---AATTTG---CTGAGG---  
 GCTATTGAGGCGCAACAACATCTGTTGCAACTCACAGTCTGGGGCATT  
 >AJ286332  
 TTCTACTGTAATACAACAAAACCTGTTTAACAGTACTTGGCTTAATAATGGTACCTGGATTAATGGTACTTGG  
 AATAAT-----  
 -----ATT---  
 GATGGAAATGACACAATCACACTCCCATGCAGAATAAAACAAATTGTACACATGTGGCAGGAAGTAGGAAAAG  
 CAATGTATGCCCCCTCCCATCAGTGGACAAATTAGATGTTTCATCAAAT---  
 ATTACAGGGCTATTATTAACAAGAGATGGTGGTACTGACAACAGTACT-----  
 -----  
 -----  
 GACAATAACACTGAGACCTTCAGACCTGGAGGAGGAAATATGAAGGACAATTGGAGAAGTGAATTATATAAAT  
 ATAAAGTAGTAAAAATTGAACCATTA---GGAATAGCACCCACGAAGGCAAAGAGAAGAGTGGTG-----  
 -----CAGAGAGAAAAAAGAGCA---ATACCA---CTAGGAGCT---  
 -----TTGTTCCCTTGGGTTCTTGGGAGCA---GCAGGAAGCACTATG---GGCGCAGCGTCA---  
 ATAGCGCTGACGGCACAG---GCCAGACTA---TTATTG---ACTGGTATAGTGCAACAGCAAAAC---  
 AATTTG---CTGAGG---GCTATTGAGGCGCAACAGCATCTGTTGCAACTCACAGTCTGGGGCATT  
 >AJ286334  
 TTCTACTGTAATACATCACAACCTGTTTAATAGTACTTGGTATGGGAATGAGACTGAAGGGTCAAATAAC-----  
 -----  
 -----  
 CCTGATAGAAATATCACACTCCCATGCAGAATAAGACAAATTGTAAACAGATGGCAGGAAGTAGGAAAAGCAA  
 TGTATGCCCCCTCCCATCAAAGGACTAATTAGATGTACATCAAAT---  
 ATTACAGGGCTGTTATTAACAAGGGATGGTGGTAATAATAATGTCACA-----  
 -----  
 -----  
 AACCCACACAGAGATCTTCAGACCTATAGGAGGAAATATGAGGGATAATTGGAGAAGTGAATTATATAAAATATA  
 AAGTAGTAAAAATTGAACCATTA---GGAATAGCACCCACCAGGGCAAAGAGGAGAGTGGTG-----  
 -----CAGAGAGAAAAAAGAGCA---GTGGGA---ATAGGAGCT-----

---GTGTTCCCTTGGGTTCTTGGGAGCA---GCAGGAAGCACTATG---GGCGCAGCGTCA---  
 ATAACGCTGACGGTACAG---GCCAGACAA---TTATTG---TCTGGTATAGTGCAGCAGCAGAGC---  
 AACTTG---CTGAGG---GCTATTGATGCGCAACAGCATCTGTTGCAACTCACAGTCTGGGGCATC  
 >AJ286336  
 TTCTACTGTAATACAACAAAGCTGTTTAATAGTACTTGGACTTGAATGATACTAAAGGGTCAAATAACACTG  
 GG-----  
 -----  
 TCAAAATGACACTATCATACTCCCATGCAGAATAAAACAAATTATAAACAGGTGGCAAGGAGTAGGAAAAGCAA  
 TGTATGCCCCCTCCCATCAAAGGACCAATTAGATGTTTCATCAAAC---  
 ATTACAGGGCTACTATTAACAAGAGATGGTGGTAATGATAATAGTAGT-----  
 -----  
 -----  
 GACAAATTCCTCCGAGACCTTCAGACCTGGAGGAGGAGATATGAAGGACAATTGGAGAAGTGAATTATATAAAAT  
 ATAAAGTAGTGAGAATTGAACCATTA---GGAGTAGCACCTACCAAGGCAAAGAGAAGAGTGGTG-----  
 -----  
 -----CAGAGAGAAAAAAGAGCA---GTGGGAATGCTAGGAGCT---  
 -----CTGTTCCCTTGGGTTCTTGGGAGCA---GCAGGAAGCACTATG---GGCGCAGCGGCA---  
 ATGACGCTGACGGTACAA---ACCAGACAA---TTATTG---TCTGGTATAGTGCAACAGCAAAAC---  
 AATCTG---CTGAGG---GCTATTGAGGCGCAACAGCATCTGTTGCAACTCACAGTCTGGGGCATC  
 >AJ286337  
 TTCTACTGTAATACAACACCACTGTTTAATAGTACTTGAATAGTAATGGTACTAGGGTGTCAAATGACACTG  
 AA-----  
 -----  
 GGAAATAATACCACTATCACACTCAAATGCAGAATAAAACAATTTATAAACATGTGGCAGGAAGTAGGAAAAG  
 CAATGTATGCCCCCTCCCATCAGAGGACAAATTAGATGTTTCATCAAAT---  
 ATCACAGGGCTGCTATTAACAAGAGATGGTGGCCATGGTATTAATGGG-----  
 -----  
 -----  
 ACTAACGACACTGAGACCTTCAGACCTGGAGGAGGAGATATGAGGGACAATTGGAGAAGTGAATTATATAAAAT  
 ATAAAGTAGTAAAAATTGAGCCATTA---GGAGTAGCACCCACCAGGGCAAAGAGAAGAGTGGTG-----  
 -----  
 -----CAGAGAGAAAAAAGAGCA---GCGGGA---ATAGGAGCT---  
 -----GTGTTCCCTTGGGTTCTTGGGAGCA---GCTGGAAGCACTATG---GGCGCAGCATCA---  
 ATAACGCTGACGGTACAG---GCCAGACAA---TTATTG---TCTGGTATAGTGCAACAGCAGAAC---  
 AATCTG---CTGAGG---GCTATTGACGCGCAGCAGCATATGTTGCAACTCACAGTCTGGGGCATT  
 >AF491740  
 TTCTACTGTGATTCATCACAACTGTTTAATAGTACTTGGATGTTTAATAGTACTTGAATGATACTGACGGGG  
 CAAATAGC-----  
 -----  
 -----ACT---  
 AGGAAAAATGATACAATCACACTCCAGTGCAGAATAAAACAAATTATAAACATGTGGCAGCAAGTAGGAAAAG  
 CAATGTATGCCCCCTCCCATCAGAGGACAGATTAGATGTACATCAAAC---  
 ATTACAGGGCTGATATTAACAAGAGATGGTGGTGATACCCAAAACAAG-----  
 -----  
 -----  
 AGCGACCCCGAGATCTTTAGACCTGGAGGAGGAGATATGAGGGACAATTGGAGAAGTGAATTATATAAAATATA  
 AAGTAGTAAAAATTGAACCACTA---GGAATAGCACCCACCAGGGCAAAGAGAAGAGTGGTG-----  
 -----  
 -----CAGAGAGAAAAAAGAGCA---GTGGGG---ATGGGAGCT-----  
 ---ATGTTCCCTTGGGTTCTTGGGAGCA---GCAGGAAGCACTATG---GGCGCAGCGTCA---  
 GTGACGCTGACGGTACAG---GCCAGACAA---TTATTG---TCTGGTATAGTGCAACAGCAGAGC---  
 AATTTG---CTGAGG---GCTATTGAGGCGCAACAGCATCTGTTGCAACGCACAGTCTGGGGCATC  
 >HQ122397  
 TTCTACTGTAATTTAACAAAACCTGTTTAATAGTACTTGAATGTTAATAGTACTTGAATGGTACTGAAAGGT  
 CAAATAGC-----  
 -----  
 -----AAT---  
 GCAGAAAATGACACAATCACACTCCCATGCAGAATAAAACAAATTATAAACATGTGGCAGGAAGTAGGAAAAG  
 CAATGTATGCCCCCTCCCATTAGAGGACAAATTAGCTGTTTCATCAAAT---  
 ATTACAGGGCTGATATTAACAAGAGATGGTGGTAATAATGGAAGC-----  
 -----  
 -----  
 GAGACCACCGAAATCTTCAGACCTGGAGGAGGAGACATGAGGGACAATTGGAGAAGTGAATTATATAAAATATA  
 AAGTAGTAAAAATTGAACCATTA---GGAGTAGCACCCACCAGGGCAAAGAGAAGAGTGGTG-----  
 -----  
 -----CAGAGAGAAAAAAGAGCA---GTGGGA---ATAGGAGCT-----

---ATGTTCCCTTGGGTTCTTGGGAGCA---GCAGGAAGCACTATG---GGCGCAGCGTCA---  
 CTGACGCTGACGGTACAG---GCCAGACAA---TTATTG---TCTGGTATAGTGCAACAGCAGAGC---  
 AATCTG---CTGAGG---GCTATTGAGGCGCAACAGCATCTGTTGCAACTCACAGTCTGGGGCATC  
 >JN002029  
 TTCTACTGTAATACAACACAACCTGTTTAATAGTACTTGGAAATGATACTGAAGAGTCAAAGGGCATTGAA-----  
 -----  
 -----  
 GGAAATGACACAATCACACTCCCATGCAGAATAAAACAAATTGTAAACATGTGGCAGGAAGTAGGAAAAGCAA  
 TGTATGCCCCCTCCCATCAGAGGACAAATTAGATGTTTCATCAAGT---  
 ATTACAGGGTTAATATTAACAAGGGATGGTGGTGATACCGAGAAC-----  
 -----  
 -----  
 GGGACAGAGATCTTCAGACCTGGAGGAGGAGATATGAGGGACAATTGGAGAAGTGAATTATATAAATATAAAAG  
 TAGTAAAAATTGAACCATTA---GGAATAGCACCCACCAAGGCAAAGAGAAGAGTGGTG-----  
 -----CAGAGAGAAAAAAGAGCA---GTGGGA---ATAGGAGCT-----  
 GTGTTCCCTTGGGTTCTTGGGAGCA---GCAGGAAGCACTATG---GGCGCAGCGTCA---  
 GTGACGCTGACGGTACAG---GCCAGACTA---TTATTG---CCTGGTATAGTGCAACAGAAC---  
 AATTTG---CTGAGG---GCTATTGAGGCGCAACAGCATCTGTTGCAACTCACAGTCTGGGGCATC  
 >U36882  
 TTCTACTGTAATACAACACAGCTGTTTAATAGTACTTGGCTGTCTAATGGTGCTAGGAAGGAAGAGTCAAATA  
 AC-----  
 -----  
 AATGAAACAACCATCATACTCCCATGCAGAATAAAACAAATTATAAACAGGTGGCAGGAAGTAGGAAAAGCAA  
 TGTATGCCCCCTCCCATCAGCGGATATATTAAGTGTTCATCAAAT---  
 ATTACAGGGCTAATATTAACAAGAGATGGTGGTACTACTAACAATACC-----  
 -----  
 -----  
 AATGCCACCGAGATTTTCAGACCTGGAGGAGGAAATATGAAGGACAATTGGAGAAGTGAATTATATAGATATA  
 AAGTAGTAAAAATTGAGCCATTA---GGAGTAGCACCAACCAAAGCAAAGAGAAGAGTGGTG-----  
 -----CAGAGAGAGAAAAAGAGCA---GTGGGAACGCTAGGAGCT-----  
 ---ATGTTCCCTTGGTTTCTTGGGAGCA---GCAGGAAGCACTATG---GGCGCAGCGTCA---  
 CTGACGCTGACGGTACAG---GCCAGACAA---TTATTG---TCTGGTATAGTGCAACAACAGAAC---  
 AATCTG---CTGAGA---GCTATTGAGGCGCAACAGCATCTGTTGCAACTCACAGTCTGGGGCATC  
 >DQ207940  
 TTCTACTGTGATACAAAACAATTGTTTAATAGTACTTGGAAATCTAATGATACTTGGAAATCTAATGGTACGA  
 GG-----  
 -----  
 AATGATTCAGAAATTATCACACTCCCATGTAGAATAAGACAAATTGTAAACATGTGGCAAGAAGTAGGAAAAG  
 CAATGTATGCCCCCTCCAATCAAAGGACAAATTAAATGTGTATCAAAT---  
 ATTACAGGAATAATACTAACAAGAGATGGTGGTGATAATGAGACT-----  
 -----  
 -----  
 AGAGGCAATGAGACTTTTCAGACCTGGAGGAGGAGATATGAGGAACAATTGGAGAAGTGAATTATATAAATATA  
 AAGTAGTAAGAATTGAACCATTA---GGAATAGCACCCACCCAGGCAAGGAGAAGAGTGGTG-----  
 -----CAAAGAGAAAAAAGAGCA---GTGGGAACGCTAGGAGCT-----  
 ---ATGTTCCCTTGGGTTCTTAGGAGCA---GCAGGAAGCACTATG---GGCGCAGCGTCA---  
 ATGACGCTGACGGTACAG---GCCAGACTA---TTATTG---TCTGGTATAGTGCAAGCAGAGAAC---  
 AATCTA---CTGAGG---GCTATTGAGGCGCAACAGCATCTGTTGCAACTCACAGTCTGGGGCATC  
 >HQ385456  
 TTCTACTGCAATTCATCACAATTGTTTAATAGTACTTGGAAATGCTACTGATACTGGGAATACTAGTATTAGGA  
 AT-----  
 -----  
 -----  
 GAGGCTGAGAATATCACACTCCCTTGCAGAATAAAACAAATTATAAACATGTGGCAGGAAGTAGGAAAAGCAA  
 TGTATGCCCCCTCCCATCAGAGGACAAATTAGATGTGTATCAAAT---  
 ATCACAGGACTGCTATTAACAAGAGATGGTGGTGACAAGAACACT-----  
 -----  
 -----  
 ACCACCGAGACCTTCAGACCTGGAGGAGGAAATATGAAGGATAATTGGAGAAGTGAATTATATAAATATAAAAG  
 TAGTAAGAATTGAACCATTA---GGAGTAGCACCCACCAAGGCAAAGAGAAGAGTGGTG-----  
 -----CAGAGAGAAAAAAGAGCA---GTGGGA---ATAGGAGCT-----

ATGTTTCCTTGGGTTCTTGGGAGCA---GCAGGAAGCACTATG---GGCGCAGCGTCA---  
 GTGACGCTGACGGTACAG---GCCAGACAA---TTATTG---TCTGGTATAGTGCAACAGCAAAAC---  
 AATTTG---CTGAGG---GCTATTGAAGCGCAACAGCATATGTTGCAGCTCACAGTCTGGGGCATC  
 >EU839603  
 TTCTACTGTAATACAACAAAACCTGTTTAATAGTACCTGGAACAGTACTATGAATGGAACCTACAGAAGGAGAT-  
 -----  
 -----  
 GACACGGAAGTTATCATACTCCCATGCAGAATAAAACAAATTATAAACATGTGGCAGAAAGTAGGCAAAGCAA  
 TGTATGCCCCCTCCCATTCAGAGAGAAATTAGATGTTTCATCAAAT---  
 ATTACAGGGCTGCTATTAACAAGAGATGGTGGTAATAATGCCACC-----  
 -----  
 -----  
 ACCGAGACCTTCAGACCTGGAGGAGGAAATATGAAGGACAATTGGAGAAGTGAATTATATAAATATAAAGTAG  
 TAAAAATTAAACCATTA---GGAGTAGCACCCACCAAGGCAAAGAGAAGAGTGGTG-----  
 -----CAGAGAGAAAAAAGAGCA---GTGGGAACACTAGGAGCT-----  
 GTGTTTCCTTGGGTTCTTGGGAGCA---GCAGGAAGCACTATG---GGCGCAGCGTCA---  
 ATGACGCTGACGGTACAG---GCCAGACAA---TTATTG---TCTGGTATAGTGCAACAGCAGAAC---  
 AATTTG---CTGAGG---GCTATTGAGGCGCAACAGCATTTGTTGCAACTCACAGTCTGGGGCATC  
 >EU839601  
 TTCTACTGTAATACAACAAGGCTGTTTAATAGTACTTGGAAATGATGCTACACTAGACAGTGCTGGGAATAGTA  
 CTGAA-----  
 -----  
 GGGCCAGATAAAAAATATCACACTCCCATGCAGAATAAAACAAATTATAAACATGTGGCAGGGAGTAGGCAAAG  
 CAATGTATGCCCCCTCCTATCAGCGGACAAATTGCATGTTTCATCAAAA---  
 ATTACAGGGATGATATTAACAAGAGATGGTGGGCTGAGAATGAA-----  
 -----  
 -----  
 ACTGAGATCTTCAGACCTGGAGGAGGAAATATGATGGACAATTGGAGAAGTGAATTATATAAATATAAAGTAG  
 TAAAAATTGAACCATTA---GGAGTAGCACCCACCAAGGCAAAGAGAAGAGTGGTG-----  
 -----CAGAGAGAAAAAAGAGCA---GTGGGAACACTAGGAGCT-----  
 GTGTTTCCTTGGGTTCTTGGGAGCA---GCAGGAAGCACTATG---GGCGCAGCGTCA---  
 ATGACGCTGACGGTACAG---GCCAGACAA---TTATTG---TCTGGTATAGTGCAACAGCAGAAT---  
 AATCTG---CTGAGG---GCTGTTGAGGCGCAACAGCATCTGTTGCAACTCACAGTCTGGGGCATC  
 >MH078551  
 TTCTACTGTAACACAACAAAGCTGTTTAATAGTACTTGGACTGGAAATGAGACAGAGAATAGTCTAAGG---  
 -----  
 -----  
 TCAATGGCACAATCACACTCCCATGCAGGATAAAACAAATTGTAAACATGTGGCAGGAAGTAGGCAAAGCAA  
 TGTATGCCCCCTCCAGAAAGAGGAATGATCAACTGTACATCAAAC---  
 ATTACAGGGCTACTATTGACAAGAGATGGTGGTACTAACAGTACT-----  
 -----  
 -----  
 AATGAGACCTTCAGACCTGGAGGAGGAGATATGAGGGACAATTGGAGAAGTGAACCTATATAAATATAAAGTAG  
 TAAAAATTGAACCATTA---GGAGTAGCACCCACCAGGGCGAAAAGAAGAGTGGTG-----  
 -----CAGAGAGAGAAAAAGAGCA---GTGGGA---CTAGGAGCT-----  
 CTGTTTCCTTGGGTTCTTGGGAACA---GCAGGAAGCACTATG---GGCGCAGCGTCA---  
 ATAACGCTGACGGTACAG---GCCAGACAA---TTATTG---TCTGGTATAGTGCAACAGCAGAGC---  
 AATTTG---CTGAGG---GCTATTGAGGCGCAGCAGCATATGTTGCAACTCACGGTCTGGGGCATC  
 >MK303352  
 TTCTACTGTAATACAACAAAACCTGTTTAACAATGATTCAACACAACCTGCCTAATGAG-----  
 -----  
 -----  
 ACTAATGAGAATATCATACTTCCATGCAGAGTAAAAACAAATTATAAACATGTGGCAGAGAGTAGGAAAAGCAA  
 TGTACGCCCCCTCCCATCAGAGGACAAATTAGATGTTTCATCAAAT---  
 ATTACAGGGCTGCTATTAACAAGAGATGGGGGTAATGAGAACAAC-----  
 -----  
 -----  
 AACAGTAACCCTGAGATCTTCAGACCTGCAGGAGGAGATATGAGGGATAATTGGAGAAGTGAATTATATAAAT  
 ATAAAGTAGTGCAAATTGAACCATTA---GGAGTAGCACCCACCAAGCAAAGAGAAGAGTGGTG-----  
 -----CAGAGAGAAAAAAGAGCG---GTGGGA---CTAGGAGCT---

-----TTGTTTCCTTGGGTTCTTGGGAGCA---GCAGGAAGCACTATG---GGCGCAGCATCA---  
 ATAACGCTGACGGTACAG---GCCAGGCAA---TTATTG---TCTGGGATAGTGCAACAGCAGAAT---  
 AATCTG---CTGAGG---GCTATTGAGGCGCAGCAGCATCTGTTGCAACTCACAGTCTGGGGCATC  
 >MK303348  
 TTCTACTGTAATTCATCACAATTGTTTAATAGTACTTGGGAATAGTACTAGGAATAATGATACTAGTACTAGGA  
 ATAATGATACA-----  
 -----  
 GAGTCAGGAGTTATCACACTCCAATGCAGAATAAAACAAATTATAAACATGTGGCAGAGAGTAGGAAAAGCAA  
 TGTATGCCCCCTCCCATCAAAGGAAAGATTAGCTGCTCATCAAAT---  
 ATTACAGGGCTGCTATTAAACAAGAGATGGTGGTAATGAGACCAA-----  
 -----  
 -----  
 AACAACTGAGATCTTCAGACCTGCAGGAGGAAATATGAAGGATAATTGGAGAAGTGAATTATATAAATATA  
 AAGTAGTAAAAATTGAACCATTA---GGAATAGCACCCACCAAGGCAAAGAGACGAGTGGTG-----  
 -----CAGAGAGAAAAAAGAGCA---GTGGGA---CTAGGAGCT-----  
 ---TTGTTTCCTTGGGTTCTTGGGAGCA---GCAGGAAGCACTATG---GGCGCAGCGTCA---  
 ATAACGCTGACGGTACAG---GCCAGACAA---TTATTG---TCTGGTATAGTGCAACAGCAGAAC---  
 AATCTG---CTGAGG---GCTATTGAGGCGCAGCAGCATCTGTTGCAACTCACAGTCTGGGGCATC  
 >MK303350  
 TTCTACTGTGATACAACAAAACCTGTTTAATAGTACTTGGAAATGGTACTGCTTGGAAATGGTACGGAGGAT---  
 -----  
 -----  
 GATAACGGTACTATCACACTCCCCGTGTAATAAAACAAGTTATAAAAATGTGGCAGAGAGTAGGAAAAGCAA  
 TATATGCCCCCTCCCATTCAGGACAAATTAAGTGTACATCAAAT---  
 ATTACAGGGCTGCTATTACTAAGAGATGGTGGAAAGTGGTAGTAACAATAGCATT-----  
 -----  
 -  
 GTTACCAACAACAACACTGAGATCTTCAGACCTGGAGGAGGAGATATGAGAGACAATTGGAGAAGTGAATTAT  
 ACAAATATAAAGTAGTAGAAATTAAACCATTA---GGAGTAGCACCCACCAAGGCAAAGAGAAGAGTGGTG--  
 -----CAGAGAGAAAAAAGAGCA---GTGGGG---  
 ATAGGAGCA-----TTGTTTCCTTGGGTTCTTGGGAGCA---GCAGGAAGCACTATG---  
 GGCGCAGCGTCA---ATAACGCTGACGGCACAG---GCCAGACAA---TTATTG---  
 TCTGGTATAGTGCAACAGCAGAAC---AATCTG---CTGCAG---  
 GCTATTGAGGCGCAACAGCATCTGTTGCAACTCACAGTCTGGGGCATC  
 >MK303351  
 TTCTACTGTAACACAACAGGACTGTTTAATAGTAGTTCAATACAACCTGCTTAATGAACTTGGAAATAGTACTG  
 GGAAT-----  
 -----  
 GAAAAATGAAAATATCACACTCCCATGCAGAATAAAACAAATTGTAAACATGTGGCAAAGAGTAGGAAAAGCAA  
 TGTATGCCCCCTCCCATCAGTGGACAAATTAGATGTTTCGTCAAAT---  
 ATTACAGGGCTGCTATTAAACAAGAGATGGGGGTAACAACACCAAC-----  
 -----  
 -----  
 AACAAACACAGAGATCTTCAGACCTGTAGGAGGAAATATGAAGGATAATTGGAGAAGTGAATTATATAAAT  
 ATAAAGTAGTACAAATTGAACCATTA---GGAGTAGCACCCACCAAGGCAAAGAGAAGAGTGGTG-----  
 -----CAGAGAGAAAAAAGAGCA---GTGGGA---CTAGGAGCT---  
 -----TTGTTTCCTTGGGTTCTTGGGAGCA---GCAGGAAGCACTATG---GGCGCAGCGTCA---  
 ATGACGCTGACGGTACAG---GCCAGGCAA---TTATTG---TCTGGGATAGTGCAACAGCAGAAC---  
 AATCTG---CTGAGG---GCTATTGAGGCGCAGCAGCATCTGTTGCAACTCACAGTCTGGGGCATC  
 >MK303353  
 TTCTACTGTAATACATCACAGCTGTTTAATAGTATTTGGTTTAATGGTACCTGGAATGGTACTAGATCAAAT-  
 -----  
 -AGGACTGGGGATGATACT-----  
 ATATCAAATAACACTATCACTCTTCCATGTAGGATAAAACAAATTATAAATAGATGGCAGGAGGTAGGGAAAG  
 CAATGTATGCCCCCTCCCATCAGGGGACTAATTCGATGTTTCATCAGAC---  
 ATTACAGGGCTGCTATTAAACAAGAGATGGAGGTGAAGGTACAGAG-----  
 -----  
 -----  
 AAGGACAACACGACTGAGGTCTTCAGACCAGGAGGAGGAGATATGAGGGACAATTGGAGAAGTGAATTATATA  
 AATATAAAGTAGTAAAAGTTGAACCAATA---GGAATAGCACCCACCAAGGCACAGAGAAGAGTGGTG-----

-----CAGAGAGAAAAAGAGCA---GTAACG---  
 CTGGGAGCT-----GTGTTCTTGGGTTCTTGGGAGCA---GCAGGAAGCACTATG---  
 GGCGCAGCGTCG---ATAACGCTGACGGCACAG---GCCAGACAA---TTATTG---  
 TCTGGTATAGTGCAACAGCAAAAC---AATTTG---CTGAGA---  
 GCTATTGAGGCGCAACAGCACATGTTGCAACTCACAGTCTGGGGCATC  
 >MK303354  
 TTCTACTGTAATACATCAGCACTGTTTAATAGTACCTGGAATAATACTTTGACTAATACTACAGGGTCAAAT-  
 -----  
 -----  
 GACACTGACACTATCACACTCCCATGCAGAATAAAACAAATTATAAACATGTGGCAGGAAGTAGGAAAAGCAA  
 TGTATGCCCCCTCCCATCAGCGGACACATTAAGTGTGTATCAAAT---  
 ATTACAGGGCTGATATTAACAAGAGATGGTGGTAATTCTAGCAAC-----  
 -----  
 -----  
 GAGACCTTCAGACCCGAGGAGGAGATATGAGGGACAATTGGAGAAGTGAATTATATAAATATAAAGTAGTAA  
 AAATTAAACCATTA---GGAATAGCACCCACCGAGGCAAAGAGAAGAGTGGTG-----  
 -----CAGAGAGAAAAAGAGCA---GTGGGA---ATGGGAGCT-----  
 TTGTTCTTGGGTTCTTGGGAGCA---GCAGGAAGCACTATG---GGCGCAGCGTCA---  
 ATGACGCTGACGGTACAG---GCCAGACAG---CTATTG---TCTGGTATAGTGCAACAGCAAAAC---  
 AATTTG---CTGAGA---GCTATTGAGGCGCAACAACATATGTTGCAACTCACAGTCTGGGGCATC  
 >MK303355  
 TTCTACTGTAATACATCAAACTGTTTAATAATAATATTACTGCTGAT-----  
 -----  
 -----  
 GAGAATGGGACTATCATACTCCCATGCAGAATAAGACAAATTGTAAACATGTGGCAGAGAGTAGGAAAAGCAA  
 TGTATGCCCCCTCCCATCAGTGGACTAATTAGATGCTCATCAAAT---  
 ATTACGGGGCTGCTATTAACAAGAGATGGTGGTAACAGGATCAACAGCACTGAT-----  
 -----  
 AACAGCACTATTGGGTACAGCAATGACAAC---  
 AACACTGAGACCTTCAGACCTGGAGGAGGAAATATGAAAGATAATTGGAGAAGTGAATTATATAAATATAAAG  
 TAGTAAAAATTGAACCATTA---GGAGTAGCACCCACCAAGGCAAAGAGAAGAGTGGTG-----  
 -----CAGAGAGAAAAAGAGCA---GTGGGA---CTAGGAGCT-----  
 TTGTTCTTGGGTTCTTGGGAGCA---GCAGGAAGCACTATG---GGCGCAGCGTCA---  
 ATAACGCTGACGGTACAG---GCCAGACAA---TTATTG---TCTGGTATAGTGCAACAGCAGAAC---  
 AATCTG---CTGAGG---GCTATTGAGGCGCAGCAACATCTGTTGCAACTCACAGTCTGGGGCATC  
 >GU191372  
 TTCTACTGTAATACAACCCCACTGTTTAATAGTACATGGAATGACACTAAACAATTCCTGTAAGTAAT---  
 -----  
 -----  
 AGCACCGAAGTTATCACACTCCCATGCAGAATAAAACAAATTATAAACATGTGGCAGGAAGTAGGAAAAGCAA  
 TGTATGCCCCCTCCTATCAGAGGACAACCTTAGCTGCTCATCAAAG---  
 ATTACAGGGCTGATACTAACAAGGGATGGTGGTGGTACCGAGTCT-----  
 -----  
 -----  
 AAGGAAAACGAGACATTTCAGACCTGCAGGAGGAGATATGAGGGACAATTGGAGAAGTGAATTATATAAATATA  
 AAGTAGTAAAAGTTGAACCATTA---GGAATAGCACCCACCAAGGCAAAGCGAAGAGTGGTG-----  
 -----CAGAGAGAAAAAGAGCA---GTAACA---ATAGGAGCT-----  
 ---ATGTTCTTGGGTTCTTGGGAGCA---GCAGGAAGCACTATG---GGCGCAGCGTCA---  
 ATGACGCTGACGGTACAG---GCCAGGCAA---TTATTG---TCTGGTATAGTGCAACAGCAGAGC---  
 AATTTG---CTGAGA---GCTATTGAGGCGCAACAGCATATGTTGCAACTCACAGTCTGGGGCATC  
 >JF680936  
 TTCTACTGTAATACAACAAAACCTGTTTAATAGTACTTGGGAATGGTACTGAATCATCAAACACCACC-----  
 -----  
 -----  
 ACCACTGGAAGCATCACGCTCCCATGCAAAATAAGACAAATTGTAAACATGTGGCAGGAAGTAGGAAAAGCAA  
 TGTATGCCCCCTCCTATCAGAGGAAAGATTAGTTGTTTCATCAAAT---  
 ATTACAGGGATACTATTAACAAGAGATGGTGGTAATGATAATGGC-----  
 -----  
 -----  
 AGTAACCCTGAAATCTTCAGACCTGGAGGAGGAGATATGAGGGACAATTGGAGAAGTGAATTATTTAAATATA

AAGTAGTAAAAATTGAACCATTA---GGAATAGCACCATCTAAGGCAAGAAGAAGAGTGGTG-----  
-----CAGAGAGAAAAAAGAGCA---GTGGGA---TTTGGAGCC-----  
---TTGTTCCCTTGGGTTCTTGGGAGCA---GCAGGAAGCACTATG---GGCGCAGCGTCA---  
ATGGCGCTGACGGTACAG---GCCAGACAA---TTATTG---TCTGGTATAGTGCAACAGCAAAAC---  
AATTTG---CTGAGA---GCTATTGAGGCGCAACAGCATATGTTGCAACTCACAGTCTGGGGCATT  
>KF061032  
TTCTACTGTGATTCAACACAACCTGTTTAATAGTACTTGGGAATAGTACTTGGGAATAGTACTGGAGGGTCAGAA-  
-----  
-----  
GAAAAATGACACAATCACACTCCCATGCAGAATAAAACAAATTATAAACATGTGGCAGGAAGTAGGAAAAGCAA  
TGTATGCCCCCTCCCATCAGAGGACAAATTAGATGCTCATCAGAT---  
ATTACAGGGCTGATATTAACAAGAGATGGTGGTAATAACGAGAAC-----  
-----  
-----  
GGGTCTGAGATCTTCAGACCTGGAGGAGGAGATATGAGGGACAATTGGAGAAGTGAATTATATAAATATAAAG  
TAGTAAAAATTGAACCATTA---GGAATAGCACCCACCAAGGCAAAGAGAAGAGTGGTG-----  
-----CAGAGAGAAAAAAGAGCA---GCA-----CTAGGAGCT-----  
ATGTTCCCTTGGGTTCTTGGGAGCA---GCAGGAAGCACTATG---GGCGCAGCGTCA---  
GTAACGCTGACGGTACAG---GCCAGACTA---TTATTG---TCTGGTATAGTGCAACAGCAGAAC---  
AATTTG---CTGAGG---GCTATTGAGGCGCAACAGCACCTGTTGCAACTCACAGTCTGGGGCATC  
>KF061031  
TTCTACTGCAATTCAACACAACCTGTTTAATAGTACATGGAATGTTACTGAAGGGTCAAATAACACT-----  
-----  
-----  
GCAGGAGAAAATATCACACTCCCATGCAGAATAAAACAAATTATAAACATGTGGCAGGAAGTAGGAAAAGCAA  
TGTATGCCCCCTCCCATCAGAGGACAAATTAAATGCTCATCAAAT---  
ATTACAGGGCTGATATTAACAAGAGATGGTGGTAATAGCAGTAAC-----  
-----  
-----  
ACGACCGAGATCTTCAGACCTATAGGAGGAGATATGAGAGACAATTGGAGAAGCGAATTATATAAATATAAAG  
TAGTAGAATTGAACCATTA---GGAGTAGCACCCACCAAGGCAAAGAGAAGAGTGGTG-----  
-----CAGAGAGAAAAAAGAGCA---GTGGGA---CTAGGAGCT-----  
TTGTTCCCTTGGGTTCTTGGGAGCA---GCAGGAAGCACTATG---GGCGCAGCGTCA---  
ATAACGCTGACGGTACAG---GCCAGACTA---TTATTG---TCTGGTATAGTGCAACAGCAAAAT---  
AATTTG---CTGAGA---GCTATTGAGGCGCAACAGCATATGTTGCAACTCACAGTCTGGGGCATT  
>AY835445  
TTCTACTGTAATACAACAAAACCTGTTTAATAGTACCTGGAATGGGAATAATACTACAGAATCAGATAGC---  
-----  
-----  
ACAGGAGAAAATATCACACTCCCATGCAGAATAAAACAGATTATAAACCTGTGGCAAGAAGTAGGAAAAGCAA  
TGTATGCCCCCTCCTATCAAAGGACAAATTAGTTGTTTCATCAAAT---  
ATTACAGGGCTACTATTAACAAGAGATGGTGGAAATAACAATAGC-----  
-----  
-----  
AGCGGGCCCGAGACCTTTAGACCTGGAGGAGGAAATATGAAGGACAATTGGAGAAGTGAATTATATAAATATA  
AAGTAATAAAAATTGAACCATTA---GGAGTAGCACCCACCAGGGCAAAGAGAAGAGTGGTG-----  
-----CAAAGAGAAAAAAGAGCA---GTGGGAACACTAGGAGCT-----  
---ATGTTCCCTTGGTTTCTTGGGAGCA---GCAGGAAGCACTATG---GGCGCAGCGTCA---  
GTGACGCTGACGGTACAA---GCCAGACTA---CTGTTG---TCTGGTATAGTGACAGCAGAGAAC---  
AATTTG---CTGAGA---GCTATTGAGGCGCAACAGCATATGTTGCAACTCACAGTCTGGGGCATT  
>AY835444  
TTCTACTGTAATACAACAAAACCTGTTTAATAGTACTTGGGATGCTAATGGTAATTGCACCGGTTGTGATGAAA  
GT-----  
-----  
-----  
GATGGAAATAACACTATCACACTTCCATGCAGAATAAAACAAATTGTAAACATGTGGCAGGAAGTAGGCAAAG  
CAATGTATGCCCCCTCCCATCAAGGGACTAATTAAATGTACATCAAAC---  
ATTACAGGGCTGCTATTAACAAGAGATGGTGGTGCTAATAATACA-----  
-----  
-----  
AACGAGACCTTCAGACCTGGAGGAGGAGATATGAGGGACAATTGGAGAAGTGAATTATATAAATATAAAGTAG

TACAAATTGAACCATTA---GGAATAGCACCCACCAGGGCAAGGAGAAGAGTGGTG-----  
-----CAGAGAGAAAAAAGAGCA---GTGGGAACACTAGGAGCT-----  
ATGTTTCCTTGGGTTCTTGGGGGCA---GCAGGAAGCACTATG---GGCGCAGCGTCA---  
GTGACGCTGACGGTACAG---GCCAGACAA---TTGTTG---TCTGGTATAGTGCAACAGCAGAAC---  
AATCTG---CTGAAA---GCTATTGAGGCGCAACAGCATATGTTGCAACTCACGGTCTGGGGCATC  
>EU839605  
TTCTACTGTAATACAGCACAACTGTTTAATAGTACTTTTAATGGTACTCTTAGTCCAGGGGAG-----  
-----  
-----  
AATACTACCACTATCACACTCCCATGCAGAATAAAACAAATTATAAACAGGTGGCAGGAAGTAGGCAAAGCAA  
TGTATGCCCCCTCCCATCAAAGGACTAATTAGATGTTTATCAAAT---  
ATTACAGGGCTGCTATTAACAAGAGATGGTGGTAATAATAGTGAT-----  
-----  
-----  
GCTAATGAGACCTTCAGACCACAAGGAGGAAATATGAAAAGACAATTGGAGAAGTGAATTGTATAAATATAAAG  
TAGTAAGAATTGAACCATTA---GGAATAGCACCCACCAGAGCAAGGAGAAGAGTGGTG-----  
-----CAGAGAGAAAAAAGAGCA---GTGGGAGTAATAGGAGCT-----  
ATGTTTCCTTGGGTTCTTGGGAGCA---GCAGGAAGCACTATG---GGCGCAGCGTCG---  
CTGACGCTGACGGTACAG---GCCAGACAA---TTATTG---TCTGGTATAGTGCAACAGCAGAAC---  
AATCTG---CTGAAG---GCTATTGAGGCGCAACAACATCTGTTGCAACTCACGGTCTGGGGCATC  
>JF680925  
TTCTACTGTAACACAACAGAGCTGTTTAATAGTACTTGGAAATGCTAATGGTTCCTGGACGGGTACTGAAAAGA  
ATGATACT-----  
-----AATACT-----  
AACAAAACAGGCATAATCACACTCCCATGCAAAATAAAGCAGATTATAAACATGTGGCAGGAAGTAGGAAAAG  
CAATGTATGCCCCCTCCCATCCGAGGACCGATTTCCTGTACATCAAAT---  
ATTACAGGACTACTGTTAACAAGAGATGGTGGTAGTAATGAGAGC-----  
-----  
-----  
ACAGAGATCTTCAGACCTGGAGGAGGAGATATGAGGGACAATTGGAGAAGTGAATTATATAAGTATAAAGTAG  
TAAAGTTGAACCATTA---GGAGTAGCACCTTCCAAGGCAAGGAGGAGAGTGGTG-----  
-----CAGAGAGAAAAAAGAGCA---GTGGGA---ATAGGAGCT-----  
GTGTTCCCTTGGGTTCTTGGGGGCA---GCAGGAAGCACTATG---GGCGCAGCGTCA---  
ATGACGCTGACGGTACAA---GCCAGACTA---CTACTG---TCTGGTATAGTGCAACAGCAGAAC---  
AATCTG---CTGAGA---GCTATTGAGGCGCAACAACATTTGTTGCAACTCACAGTCTGGGGCATC  
>HM030564  
TTCTACTGTGATACAAAAGGGCTATTCAATAGCACATTCAATAGCACGTGGAATGCTACAGAAGATACTGGAC  
TGCCA-----  
-----AAT---  
AGCACTAGCACTAATATTACACTCCCATGCAGAATAAAACAAATTATAAACACGTGGCAGGGAGTAGGCAAGG  
CAATGTATGCCCCCTCCCATCCAAGGACTAATTAGATGTAGATCAAAT---  
ATTACAGGGATACTATTGACAAGAGATGGTGGGAGTGGAATAGTAGT-----  
-----  
-----  
GATAATACAGAGATCTTCAGACCGGGAGGAGGAGATATGAGGGACAATTGGAGAAGTGAATTATATAAATATA  
AAGTAGTACAAATTGAACCATTA---GGAGTAGCACCCACCAAGGCAAGAGAAGAGTGGTG-----  
-----CAGAGAGAAAAAAGAGCA---GTGACA---CTGGGAGCT-----  
---CTGTTCCCTTGGGTTCTTGGGAGCA---GCAGGAAGCACTATG---GGCGCAGCGTCA---  
ATGACGCTGACGGTACAG---GCCAGACTA---CTATTG---TCTGGTATAGTGCAACAGCAGAAC---  
AATTTG---CTGAGA---GCTATTGAGGCGCAACAGCATCTGTTGCAACTCACAGTCTGGGGCATT  
>HM030559  
TTCTACTGCAATACACAACAACTATTTAATAGTACTTGGAAATATTGGGTAAATAACACAAATGACACTGTAG  
AA-----  
-----  
AATGATACTAATATCATACTACCGTGCAAAATAAAACAAATAGTGAACATGTGGCAGGAAGTAGGCAAAGCAA  
TGTATGCCCCCTCCCATCAATGGAGTAATTAATGTTTCATCAAAT---  
ATTACAGGACTGTTATTAACCAGAGATGGTGGTAACACCACCGGGATTGAGAAC-----  
-----  
-----  
AATATTAGCAATACTGAGGTCTTCAGACCTGGAGGAGGAAATATGAGGGACAATTGGAGAAGTGAATTATATA

AATATAAAGTAATAAAAAATTGAACCATTA--GGAATAGCACCTACCAGGGCAAAAAGGAGAGTGGTG-----  
-----CAGAGAGAAAAAAGAGCA---GTAGGG---  
CTAGGAGCT-----ATGTTCCCTTGGGTTCTTGGGAGCA---GCAGGAAGCACTATG---  
GGCGCAGCGTCA---ATAACGCTGACGGTACAG---GCCAGACAA---TTGCTG---  
TCTGGTATAGTGCAACAGCAGAAC---AATCTG---CTGAGA---  
GCTATTGAGGCGCAACAACATATGTTGCAACTCACGGTCTGGGGCATC  
>HM030562  
TTCTATTGTGACTCAACACAACCTGTTTAATAGCACTTGGACTAAGAATGATAGTACTTGGACTTTGAATGACA  
AAGAG-----  
-----TCA---  
AATAGAACTGAGAATATCACACTCCCATGCAGAATAAAACAAATTGTAAACCTGTGGCAGGAGGTAGGAAAAG  
CAATGTATGCCCTCCCATCAAAGGACCCATTAAATGCGAATCAAAT---  
ATTACAGGGATGCTCTTAACAAGAGATGGTGGTAATAACGAGAGC-----  
-----  
-----  
ACAAATGAAACCTTCAGACCTGGAGGAGGAGATATGAGGGACAATTGGAGAAGTGAATTATATAAATATAAAG  
TAGTACAGATTGAGCCATTA---GGATTAGCACCCACCAAGGCAAAGAGAAGAGTGGTG-----  
-----CAGAGAGAAAAAAGAGCA---GTGGGA---ATAGGAGCT-----  
TTGTTCCCTTGGGTTCTTGGGAGCA---GCAGGAAGCACTATG---GGCGCAGCGTCA---  
CTAACGCTGACGGTACAG---GCCAGATCA---TTATTG---TCTGGTATAGTGCAACAGCAGAAC---  
AATCTG---CTGAGG---GCTATTGAGGCGCAACAGCATCTGTTGAGACTCACAGTCTGGGGCATC  
>HM030565  
TTCTATTGTAACACAACACCGCTGTTTAATAGTATACACAAGGAAAATGACACACTCACTAACGAGACTGAA-  
-----  
-----  
GGAAATGACACACTCACACTCCAATGCAGAATAAAACAAATCATAAACATGTGGCAGAGAGTAGGAAAAGCAA  
TGTATGCCCCCTCCCATCAGCGGATGGATTAGATGTTTCATCAAAT---  
ATTACAGGACTGCTATTAAACAAGAGATGGGGGTAATAATAATAGCACT-----  
-----  
-----  
AATGAGACCGAGACCTTCAGACCGGGAGGAGGAGATATGAGGGACAATTGGAGAAGTGAATTATATAAATATA  
AAGTAGTAAAAATTGAACCATTA---GGAGTGGCACCCACCAAGGCAAAGAGAAGAGTGGTG-----  
-----CAGAGAGAAAAAAGAGCA---GTGGGA---GTAGGAGCT-----  
---ATGGTCCTTGGGTTCTTGGGAGCA---GCGGGAAGCACTATG---GGCGCAGCGTCA---  
TTGACGCTGACGGTACAG---GCCAGGCTA---TTACTG---TCTGGTATAGTGCAACAGCAAAAC---  
AATTTG---CTGAGG---GCTATTGAGGCGCAACAACATCTGTTGCAACTCACAGTCTGGGGCATC  
>AB428551  
TTCTACTGTAATACATCATCACTGTTTAATTGGAGTACTAATGGGTCAAATATTACTAATGGG-----  
-----  
-----  
TCAAATATTACAAAACCATCCCATGCAGAATAAAACAAATTATAAACATGTGGCAGAAAGTAGGAAAAGCAA  
TGTATGCCCCCTCCCATCAGAGGACAAATTAATTGTTTATCAAAT---  
ATTACAGGGCTGCTATTAAACAAGAGATGGTGGTAACCAGACTGAGTTT-----  
-----  
-----  
AATAACTGAGATCTTCAGACCTGGAGGAGGAGATATGAGGGACAATTGGAGAAGTGAATTATATAAATATA  
AAGTAGTAAAAATTGAACCATTA---GGAGTAGCACCCACCAAGGCAAGGAGAAGAGTGGTG-----  
-----CAAAGAGAAAAAAGAGCA---GTGGGAACAATAGGAGCT-----  
---ATGTTCCCTTGGGTTCTTGGGAGCA---GCAGGAAGCACTATG---GGCGCAGCGTCA---  
TTGACGCTGACGGTACAG---GCCAGACTA---TTATTG---TCTGGTATAGTGCAACAGCAGAAC---  
AATCTG---CTGAGG---GCTATTGAGGCGCAACAACATCTGTTGCAACTCACAGTCTGGGGCATC  
>AB289588  
TTCTACTGTAATTCAACACCACTGTTTAATAGTACTTGGAAATTTTACTAATACTTGAATATGACTGAAGGCA  
TAACT-----  
-----  
AACACTGAAGGAAATATCACACTCAAATGCAGAATAAAACAAATTATAAACATGTGGCAGGAAGTAGGAAAAG  
CAATGTATGCCCCCTCCCATCGAGGGACTAATTAGATGTACATCAAAT---  
ATTACAGGGCTGCTATTAAACAAGAGATGGGGGAATAATAGGACA-----  
-----  
-----

AATGAGACTGAGACCTTCAGACCTGGAGGAGGAGACATGAGGAACAATTGGAGAAGTGAATTATATAAAATATA  
AAGTAGTAAAAATTGAACCATTA---GGAGTAGCACCCACCAGGGCAAGGAGAAGAGTGGTG-----  
-----CAGAGAGAGAAAAAGAGCA---GTGGGAGTACTAGGAGCT-----  
---ATGTTCCCTTGGGTTCTTGGGAGCA---GCAGGAAGCACTATG---GGCGCAGCGTCA---  
TTAACGCTGACGGTACAG---GCCAGACAA---TTATTG---TCTGGTATAGTGCAACAGCAAAAC---  
AATTTG---CTGAGA---GCTATTGAGGCGCAACAGCAGTTGTTGCAACTCACTGTCTGGGGCATC  
>AB289590  
TTTTACTGTAATACAACACAATTGTTTAATAGTACTTGGGAATGAAACAAACCTGTTTAATAATACTGGGAATA  
AT-----  
-----  
ACTGAGGGTAATACTATCACACTCCCATGCAGAATAAAACAGATTATAAACATGTGGCAGGAAGTAGGAAAAG  
CAATGTATGCCCCCTCCTATCAGAGGACAAATTAAATGTTTCATCAAAC---  
ATTACAGGGCTGCTATTAAACAAGAGATGGTAGTACTAATGACACA-----  
-----  
-----  
AACAACTACTGAGATATTCAGACCTACAGGAGGGAATATGAGGGACAATTGGAGAAGTGAATTATATAAAATATA  
AAATAGTACAAATTGAACCATTA---GGAGTAGCACCTACCAAGGCAAAGAGAAGAGTGGTG-----  
-----CAGAGAGAAAAAAGAGCA---GTGGGA---CTAGGAGCT-----  
---ATGTTCCCTTGGGTTCTTGGGAGCA---GCAGGAAGCACTATG---GGCGCAGCGTCA---  
ATAACGCTGACGGTACAG---GCCAGACAA---TTATTG---TCTGGTATAGTGCAACAGCAAAAC---  
AATTTG---CTGAGA---GCTATTGAGGCGCAACAGAATCTGTTGCAACTCACAGTCTGGGGCATT  
>AB428558  
TTCTACTGCAATACAACAGAACTGTTTAATAGTACTTGGATTAATGGTACTAGGACAACCAACACTACG----  
-----  
-----  
TCAAATGGCACTATCACACTCCGATGTAGAATAAAACAAATTATAAACATGTGGCAGAGAGTAGGAAAAGCAA  
TGTATAACCCTCCCATCGCAGGACAAATTAGATGTTTCATCAAAT---  
ATTACAGGGATATTATTAGTGAGAGATGGTGGTGATAACAGTACG-----  
-----  
-----  
ACCAACGAAACCTTCAGACCTGGAGGAGGGAATATAAGAGACAATTGGAGAAGTGAATTATATAAAATATAAAG  
TAGTAAAAATTGAACCATTA---GGAGTAGCACCCACCAAGGCAAAGAGAAGAGTGGTG-----  
-----CAGAGAGAAAAAAGAGGA---GTGGGA---ATAGGAGCT-----  
GTGTTCCCTTGGGTTCTTGGGAGCA---GCAGGAAGCACTATG---GGCGCAGCGTCA---  
ATAACGCTGACGGTACAG---GCCAGACAA---TTATTG---TCTGGTATAGTGCAACAGCAGAAC---  
AATTTG---CTGAGG---GCCATTGAGGCGCAACAGCATATGTTGCAACTCACAGTCTGGGGCATC  
>AB221126  
TTCTACTGTAATACAACACAGCTGTTTAATAGCACTTGGACTTGGGAATAGTACTACGGGCACCTTGAATAATA  
CTGGGAGC-----  
-----AGG---  
AGTGAGAATGACACTATCACACTCCCATGCAGAATAAAACAAATTATAAACAGGTGGCAGGAAGTAGGAAAAG  
CAATGTATGCCCCCTCCCATCCAAGGACAAATTAAGTGTTCATCAAAT---  
ATTACAGGACTGCTATTAAACAAGAGATGGTGGTAACGAAACTGAG-----  
-----  
-----  
AACGGGTATGATACCTTCAGACCTGGAGGAGGAGATATGAGGGATAATTGGAGAAGTGAATTATATAAAATATA  
AAGTGGTACAAATTGAGCCATTA---GGAATAGCACCCACCAGGGCAAAGAGAAGAGTGGTG-----  
-----CAGAGAGAAAAAAGAGCA---GTGGGAACGCTAGGAGCT-----  
---GTGTTCCCTTGGGTTCTTGGGAGCA---GCAGGAAGCACTATG---GGCGCAGCGTCA---  
CTAACGCTGACGGTACAG---GCCAGACTA---TTACTG---TCTGGTATAGTGCAACAGCAGAAC---  
AATCTG---CTGAAA---GCTATTGAGGCGCAACAGCATCTGTTGCAACTCACAGTCTGGGGCATC  
>AB480697  
TTCTACTGTAACACATCAGCACTGTTTAATAGTACTTGGGAATAATAACACTTGGTATGTAAATGGCACTGAAG  
GGTCA-----  
-----AAT---  
GACACTGATAAAAATATCACCCCTCCCATGCAGAATAAAACAAATTTATAAACATGTGGCAGGCAGTAGGAAAAG  
CAATATATGCCCCCTCCTATTAAAGGACAAATTAGCTGTTTCATCAAAT---  
ATTACAGGGCTGCTATTAAACAAGAGATGGTGGTGAAGGTAACGAAACT-----  
-----  
-----

GACAACCAGACTGAAGTCTTCAGACCTGGAGGAGGGGATATGAGGGACAATTGGAGAAGTGAATTATACAAAT  
ATAAGTAGTAAAAATTGAACCATTA---GGAGTAGCACCCACCAAGGCAAAGAGAAGAGTGGTG-----  
-----GAAAGAGAAAAAAGAGCA---ATAGGGGGAATAGGAGCT---  
-----TTGTTTCCTTGGGTTCTTGGGAGCA---GCAGGAAGCACTATG---GGCGCAGCGTCA---  
CTGACGCTGACGGTACAG---GCCAGACTA---TTATTG---ACTGGTATAGTGCAACAGCAGAAC---  
AATTG---CTGAGG---GCTATTGAGGCGCAACAGCATCTGTTGCAACTCACAGTCTGGGGCATC  
>AB480695  
TTCTATTGTAATACATCAGGACTGTTTAATAGTACTTGGGAGTTTAATAGTACTTGGAAATGATAAT-----  
-----  
-----  
AGTACTGAAAAAATCGTACTCCCATGCAGAATAAGACAAATTGTAAGCATGTGGCAGGGAGTAGGAAAAGCAA  
TGTATGCCCCCTCCCATTAAGGACAAATTAGCTGTTTCATCAAAT---  
ATTACAGGGCTGCTATTAACAAGAGATGGTGGTGGTAATGGTACT-----  
-----  
-----  
GAGACCTTCAGACCTGAAGGAGGAAATATGAAGGACAATTGGAGAAGTGAATTATATAAATATAAAGTAGTAA  
AACTTGAGCCTTTA---GGAATAGCACCTACTCCAGCAAGGAGAAGAGTGGTG-----  
-----CAGAGAGAAAAAAGAGCA---GTGGGA---TTCGGAGTT-----  
TTGTTTCCTAGGGTTCTTGGGAGCA---GCCGGAAGCACTATG---GGCGCAGCGTCA---  
ATGGCGCTGACGGTACAG---ACCAGACAA---TTGTTG---TCTGGTATAGTGCAACAGCAGAAC---  
AATCTG---CTGAGG---GCTATTGAGGCGCAACAACATCTGTTGCAACTCACAGTCTGGGGCATT  
>AB287363  
TTCTACTGTAATTCAACACAGCTGTTTAATAGTACTTGGCATGGAAACATATCAAATGTGTCAAATAACATTG  
GA-----  
-----  
AAAAATAGCAACATCACACTCCCGTGTAGAATAAGACAAATTGTAACATGTGGCAGACAGTAGGAAAAGCAA  
TGTATGCCCCCTCCCATCAGCGGATACATTAAATGTACATCAAAT---  
ATTACAGGACTGCTATTGACAAGAGATGGTGGAAAGGGAAATAAC-----  
-----  
-----  
ACGGACACGGAGGTCTTCAGACCTGGAGGAGGAGATATGAGGGACAATTGGAGAAGTGAATTATACAAATATA  
AAGTAGTAAAAATTGAACCATTA---GGAATAGCACCCACCAAGGCAAAGGAGAAGAGTGGTG-----  
-----CAGAGAGAAAAAAGAGCA---GTAATA-----GGAGCT-----  
---ATGTTTCCTTGGGTTCTTGGGAGCA---GCAGGAAGCACTATG---GGCGCAGCGTCA---  
GTGACGCTGACGGTACAG---GCCAGGCAA---TTATTG---TCTGGTATAGTGCAACAGCAGAAC---  
AATCTG---CTGAAA---GCTATTGAGGCGCAACAGCATCTGTTGCAACTCACAGTCTGGGGCATC  
>AB287364  
TTCTACTGCAATACAACAAAATTGTTTAATAGTACATGGATCTGGAATAAAACACTAATGGTTAATGACACAA  
GA-----  
-----  
GAGTCAAATGACATTATCAGGTTCCAATGCAGAATAAAACAGATTATAAACATGTGGCAGGAAGTAGGAAGAG  
CAATGTATGCCCCCTCCCATCGAAGGACTAATTAGATGCTCATCAAAT---  
ATTACAGGGCTGATATTAACAAGAGATGGTGGTAATAGCAAAAAC-----  
-----  
-----  
GATACAGAAACCTTCAGACCTGCAGGAGGAAATATGAAGGACAATTGGAGAAGTGAATTATATAAATATAAAG  
TAGTACAAGTTGAACCATTA---GGAATAGCACCCACCAGGGCAAAGAGAAGAGTGGTG-----  
-----CAAAGAGAGAAAAGAGCC---GTGGGA---TTAGGAGCT-----  
TTGTTTCCTTGGGTTCTTGGGAGCA---GCAGGAAGCACTATG---GGCGCAGCGTCA---  
CTAACGCTGACGGTACAG---GCCAGACAA---TTATTG---TCTGGTATAGTGCAACAGCAAAAAC---  
AACTTG---CTGAGG---GCTATTGAGGCGCAACAACATCTGTTGCAACTCACAGTCTGGGGCATC  
>AB588283  
TTCTACTGTAATACAACAAAGCTGTTTAATAGTACTTGGCATCCTAATGGGAGTATGATTGCAGAACCAAATA  
AC-----  
-----  
ACTAACAACATTATTACACTCCCATGCAGAATAAAACAAATTATAAACAGGTGGCAGGAGGTAGGAAAAGCAA  
TATATGCCCCCTCCCATCCAAGGACAAATTAAGTGTTCATCAAAT---  
ATTACAGGACTGCTATTAACAAGAGATGGTGGTAAGGAGGATAAGGAG-----  
-----  
-----

AATAGGTCACAGGAGACCTTCAGACCTGGAGGAGGAGATATGAGGGACAATTGGAGAAGTGAATTATATAAGT  
ATAAAGTAGTACAAATTGAGCCATTA---GGAGTAGCACCCACCAGGGCAAAGAGAAGAGTGGTG-----  
-----CAAAGAGAAAAGAAGAGCA---GTGGGG---ATAGGAGCT---  
-----ATGTTCCCTTGGGTTCTTGGGAGCA---GCAGGAAGCACTATG---GGCGCAGCGTCA---  
CTAACGCTGACGGTACAG---GCCAGACTA---TTATTG---TCTGGTATAGTGCAACAGCAAAAT---  
AATCTG---CTGAGA---GCTATTGAGGCGCAACAGCATATGTTGCAACTCACAGTCTGGGGCATT  
>AB588296  
TTCTACTGTAACACAACACAACCTGTTTGATAGTACTTGGAATAGTACTTTAAATATTACTGAGAGGTCAAAT-  
-----  
-----  
GACTCTGGTATAATCACCTCCCATGCAGAATAAAACAATATATAAATTTGTGGCAGGAAGTAGGAAGAGCAA  
TGTATGCCCCCTCCCATCAGTGGACAAATTAAATGTTTCATCAAAT---  
ATTACAGGGCTGTTATTAACAAGAGATGGTGGTAAGGGGAACGAAAAC-----  
-----  
-----  
AATATCACTGAGACCTTCAGACCTGGAGGAGGAAACATGAGGGACAATTGGAGAAGTGAATTATACAAATATA  
AAGTAGTAAAAATTGAACCATTA---GGAATAGCACCCACCAGGGCAAAGAGAAGAGTGGTG-----  
-----CAGAGAGAAAAAAGAGCA---GTGGGA---CTGGGAGCT-----  
---ATGTTCCCTTGGGTTCTTGGGAGCA---GCAGGAAGCACTATG---GGCGCAGCGTCA---  
GTGACGCTGACGGTACAG---GCCAGACAG---TTATTG---TCTGGTATAGTGCAACAGCAGAAC---  
AATTTG---CTGAGG---GCTATTGAGGCGCAACAACATCTGTTGCAACTCACAGTCTGGGGCATC  
>AB287367  
TTCTACTGTAATACAACAGGGCTATTTAATGATAGTATGCTGAATGATACTACT-----  
-----  
-----  
GAAGGTAACAACCTCACACTCCCGTGCAGAATAAAACAAATTATAAACAGATGGCAGGAAGTAGGAAAAGCAA  
TGTATGCCCCCTCCCATCCAAGGACAAATTAGATGTTTCATCAAAT---  
ATTACAGGGTTGCTATTAACAAGAGATGGAGGAAATAGTGGCAATAAA-----  
-----  
-----  
ACTAATAATACTGAGACTTTCAGACCTGGAGGAGGAAATATGAAGGATAATTGGAGAAGTGAATTATATAAAT  
ATAAAGTAGTAAAAATTGAACCATTA---GGAGTAGCACCCACCAAGGCAAGAAGAAGAGTGGTG-----  
-----CAAAGAGAAAAAAGAGCA---GTGGGAACGCTGGGAGCT---  
-----ATGTTCCCTTGGGTTCTTGGGAGCA---GCAGGAAGCACTATG---GGCGCAGCGTCA---  
ATGGCGCTGACGGTACAG---GCCAGACAA---TTATTG---TCTGGTATAGTGCAACAGCAGAAC---  
AATCTG---CTGAAA---GCTATTGAGGCGCAACAGCATATGTTGCAACTCACAGTCTGGGGCATC  
>AB287368  
TTCTACTGTAATACAACACCACTGTTTAATAGTAGCTGGTATGAAAATGGAAGTAGTATCTGGTATAGCATAA  
AT-----  
-----  
AACACAACCTGAAAACATCACACTCCCATGCAGAATAAAACAAATTATAAACATGTGGCAGGGAGTAGGAAAAG  
CAATGTATGCCCCCTCCCATCGCGGGACAAATTAAATGTTTCATCAAAT---  
ATTACAGGACTGCTATTAACAAGAGATGGGGGTGGTATGGTAAT-----  
-----  
-----  
AATGATAGTGAGATCTTCAGACCTGAAGGAGGAAATATGAAGGACAATTGGAGAAGTGAATTATATAAATATA  
AAGTAGTAAAAATTGAACCATTA---GGAATAGCACCCACCAAGGCAAGGAGAAGAGTGGTG-----  
-----CAGAGAGAAAAAAGAGCA---GTG---ACGATGGGAGCT-----  
---ATGTTCCCTTGGGTTCTTGGGAGCA---GCAGGAAGCACTATG---GGCGCAGCATCA---  
ATGACGCTGACGGTACAG---GCCAGACTA---TTATTG---TCTGGTATAGTGCAACAGCAAAAC---  
AACTTG---CTGAGA---GCTATTGAGGCGCAACAGCATCTGTTGCAGCTCACGGTCTGGGGCATT  
>AB588311  
TTCTACTGTAATACATCAGACTTGTTTAATAATGACACTTGAATAACCCTAACAGTACA-----  
-----  
-----  
AAAGGAGAGAATATCACCTCCAATGCAGAATAAAACAAATTATAAACATGTGGCAGGAAGTAGGAAGAGCAA  
TGTATGCTCCTCCCATCAGCGGACCAATTAGATGTTTCATCAAAT---  
ATTACAGGGCTGATACTAACAAGAGATGGTGGTACTAACCAGACC-----  
-----  
-----

ACCGAGATCTTCAGACCTGGAGGAGGAGATATGAGGGACAATTGGAGAAGTGAATTATACAAGTATAAAGTAG  
TAAAAATTGAACCATTA---GGACTAGCACCCACCAAGGCAAAGAGAAGAGTGGTG-----  
-----CAGAGAGAAAAAAGAGCA---GTGGGA---ATAGGAGCT-----  
TTGTTCTTGGGTTCTTGGGAGCA---GCAGGAAGCACTATG---GGCGCAGCGTCA---  
TTGACGCTGACGGTACAA---GCCAGACTA---TTATTG---TCTGGTATAGTGCAACAGCAAAAC---  
AATTG---CTGAGG---GCTATTGAGGCGCAACAGCACATGTTGCAACTCACAGTCTGGGGCATC  
>AB731663  
TTCTACTGTAATTCAACACAACCTGTTTAATAGTACTTGGCTGCTTAATAGTACTTGGAAATAGTAATGATACAA  
AT-----  
-----AGCATT-----  
GGAGAAAATGACACTATCATACTCCCATGCAGAATAAAACAAATTATAAACATGTGGCAGGAAGTAGGAAAAG  
CAATGTATGCCCTCCTAGAGAAGGACCAATTAGATGTTTCATCAAAC---  
ATTACAGGGCTGATATTAACAAGAGATGGTGGTAGTAATGGGTAT-----  
-----  
-----  
AACAAATGAGACCTTCAGACCTGGAGGAGGAGATATGAGGGACAATTGGAGAAGTGAATTATATAAATATAAAG  
TAATAAAAATTGAACCATTA---GGAGTAGCACCAACCAAGGCAAAAGGCGAGTGGTG-----  
-----CAGAGAGAAAAAAGAGCA---GTGGGA---CTAGGAGCC-----  
TTGCTCGTTGGGTTCTTGGGAGCA---GCAGGAAGCACTATG---GGCGCAGCGTCA---  
CTGACGCTGACGGTACAG---GCCAGACAA---TTACTG---TCTGGTATAGTGCAACAGCAAAAC---  
AACTTG---CTGAGG---GCTATTGAGGCGCAACAACATCTGTTGCAACTCACAGTCTGGGGCATC  
>AB731667  
TTTTACTGTAATACAACACCATTTGTTTAACAGTACTTGGAAATGGAACAAATCTGACTACTTGGAAAT-----  
-----  
-----  
ACTGGAGCAAATATCACACTCCAATGCAAAATAAAACAGATTATAAACATGTGGCAGCAAGTAGGAAAAGCAA  
TGTATGCCCCCTCCCATCAGAGGACAAATTAGATGTTTCATCAAAT---  
ATTACAGGGCTGCTATTAACAAGAGATGGT---AATACTAATAGCACA-----  
-----  
-----  
AACAACTACTGAGATCTTCAGACCTACAGGAGGGAATATGAAGGACAATTGGAGAAGTGAATTATATAAATATA  
AAATAGTACAAATTGAACCATTA---GGAGTAGCACCTACCAAGGCAAAGAGAAGAGTGGTG-----  
-----CAGAGAGAAAAAAGAGCA---GTGGGA---CTAGGAGCT-----  
---ATGTTCTTGGATTCTTGGGAGCA---GCAGGAAGCACTATG---GGCGCAGCGTCA---  
ATAACGCTGACGGTACAG---GCCAGACAA---TTATTG---TCTGGTATAGTGCAACAGCAAAAC---  
AACTTG---CTGAGA---GCTATTGAGGCGCAACAGAATATGTTGCAACTCACAGTCTGGGGCATC  
>KF716497  
TTCTACTGCGATACAACACAACCTATTTAATAGTACCTGGGATAATAGTACTATGAATAGTACTAAGAAT---  
-----  
-----  
TCAAATGACACTATCACGCTCCCATGTAGAATAAAACAAATTATAAACATGTGGCAGACAGTAGGAAAAGCAA  
TGTATGCCCCCTCCCATCGCAGGACCAATTAGATGTTTCATCAAAT---  
ATTACAGGGTTGTTATTAGAGAGAGATGGTGGTATTAACAAGACG-----  
-----  
-----  
ACCACAGAAACCTTCAGACCTGGGGGAGGAAATATGAAGGACAATTGGAGAAGTGAACTATATAAATATAAAG  
TAGTAAAAATTGAACCATTA---GGAGTAGCACCCACCAAGGCAAAGAGAAGAGTGGTG-----  
-----CAGAGAGAAAAAAGAGCA---GTGGGA---ATAGGAGCT-----  
GTGTTCTTGGGTTCTTGGGAGCA---GCAGGAAGCACTATG---GGCGCAGCGTCA---  
ATGGCGCTGACGGTACAG---GCCAGACAA---TTATTG---TCTGGTATAGTGCAACAGCAGAAC---  
AATTG---CTGAGA---GCCATTGAGGCGCAACAGCATATGTTGCAACTCACAGTCTGGGGCATC  
>KF716498  
TTCTACTGCAATACAACAAAACCTGTTTAATAGTACTTGGAAATAATAGTAATTGGCCAAATGACACTATGCCA-  
-----  
-----  
AATAATAACACTATCACACTCCCATGTAGAATAAAACAAATTGTAAACATGTGGCAGAAAGTAGGAAAAGCAA  
TGTATAACCCTCCCATCGCAGGACTAATTAGATGTTTCATCAAAT---  
ATTACAGGGCTATTATTAGTGAGAGATGGTGGGAACACAACGAATACA-----  
-----  
-----

ACCACCGAAACCTTCAGACCTGGAGGAGGAGATATGAGGGACAATTGGAGAAGTGAATTATATAAATACAAAG  
TAGTAAAAATTGAACCATTA---GGAGTAGCACCCACTAAGGCAAAGAGAAGAGTGGTG-----  
-----CAGAGAGAAAAAAGAGCA---GTGGGG---ATAGGAGCT-----  
GTGTTCTTGGGTTCTTGGGAGCA---GCAGGAAGCACTATG---GGCGCAGCGTCA---  
CTAATGCTGACGGTACAG---GCCAGACAA---TTATTG---TCTGGTATAGTGCAACAGCAGAAC---  
AATCTG---CTGAGG---GCCATTGAGGCGCAACAGCATATGTTGCAACTCACAGTCTGGGGCATC  
>AB588201  
TTCTACTGTAACCTTATCACAACTGTTTAATAGTTCTTGGAATGTAAATGGTACTGAAGGGTCAAAT-----  
-----  
-----  
AACACTGGAATTATCACACTCCCATGCAGAATAAAACAAATTATAAACATGTGGCAGGAAGTAGGAAAGGCAA  
TGTATGCCCCCTCCCATCAGAGGACAAATTAGATGTTTCATCAAAT---  
ATTACAGGGCTGCTATTAACAAGAGATGGTGGTATTAACAAGAGCGAG-----  
-----  
-----  
AGCACCAACACCGAGGTCTTCAGACCTGCAGGAGGAAAATATGAAGGACAATTGGAGAAGTGAATTATATAAAT  
ATAAAGTAGTAAAAATTGAACCATTA---GGAGTAGCACCCACCAAGGCAAAGAGAAGAGTGGTG-----  
-----CAGAGAGAAAAAAGAGCA---GTGGGA---CTAGGAGCT---  
-----ATGTTCTTGGGTTCTTGGGAGCA---GCAGGAAGCACTATG---GGCGCAGCGTCG---  
TTGACGCTGACGGTACAG---GCCAGACTA---TTATTG---TCTGGTATAGTGCAACAGCAGAGC---  
AATTTG---CTGAGG---GCTATTGAGGCGCAACAGCATCTGTTGCAACTCACAGTCTGGGGCATC  
>AB588207  
TTCTACTGTGATACATCACGACTGTTTAATAGTACTTGGAATGAGACTACTAAAGGGTTAAATATTACTGGG-  
-----  
-----  
GAAAAATGACACAATCACAATCCCATGCAGAATAAAACAAATTATAAACATGTGGCAGGAAGTAGGGAAAGCAA  
TGTATGCCCCCTCCCATCAGTGGAGTAATTAGATGTTTCATCAAAT---  
ATTACAGGGCTGCTATTAACAAGAGATGGTGGTAACGGTAACGGGAGC-----  
-----  
-----  
AATACCACTGAGATCTTCAGACCTATAGGAGGAGATATGAGGGACAATTGGAGAAGTGAATTATATAAATATA  
AAGTAGTAAACTTGAACCATTA---GGAATAGCACCCACCAAGGCAAAGAGAAGAGTGGTG-----  
-----CAGAGAGAAAAAAGAGCA---GTGGGA---ATGGGAGCT-----  
---ATGTTCTTGGGTTCTTGGGAGCA---GCAGGAAGCACTATG---GGCGCAGCGTCA---  
ATAACGCTGACGGTACAG---GCCAGACAA---TTATTG---TCTGGTATAGTGCAACAGCAGAGC---  
AATTTG---CTGAGG---GCTATTGAGGCGCAACAGCATATGTTGCAACTCACAGTCTGGGGCATC  
>AB588209  
TTCTACTGTAATACAACACAGCTGTTTAATAGTACTTGGAATTGGACTGGGAATAATACTGAAGGAAATAAC-  
-----  
-----  
ACTGAATACAATATCACACTCCCATGCAGAATAAAACAAATTATAAACAGGTGGCAGGAAGTAGGAAAAGCAA  
TGTATGCCCCCTCCCATCAAAGGACAAATTAGTTGTTTCATCAAAT---  
ATTACAGGGCTGCTATTAACAAGAGATGGTGGTGGTGGCAATAAC-----  
-----  
-----  
GAGTCCGAGACCTTCAGACCTGGAGGAGGAGATATGAGGGACAATTGGAGAAGTGAATTATATAAATATAAAG  
TAGTACAAATTGAGCCATTA---GGAGTAGCACCCACCAAGGCAAAGAGAAGAGTGGTG-----  
-----CAAAGAGAAAAAAGAGCA---GTGGGA---ATAGGAGCT-----  
ATGTTCAATTGGGTTCTTGGGAGCA---GCAGGAAGCACTATG---GGCGCAGCGTCA---  
GTAACGCTGACGGTACAG---GCCAGACTA---TTATTG---TCTGGTATAGTGCAACAGCAGAAC---  
AATCTG---CTGAAA---GCTATTGAGGCGCAACAGCATCTGTTGCAACTCACAGTCTGGGGCATC  
>AB588211  
TTCTACTGTAATACAACAAAGCTATTTAATAATAGTATGCTGTCTTCTAATAATACTGGAGGA-----  
-----  
-----  
TCAAATAAGACTATCACAACTCCCATGCAGAATAAAACAAATTATAAACAGGTGGCAGGAAGTAGGAAAAGCAA  
TGTATGCCCCCTCCCATCAAAGGACAAATTAGCTGTTTCATCAAAT---  
ATTACAGGACTGCTATTAACAAGAGATGGTGGTGGCGGGAACGGT-----  
-----  
-----

TCCGAGACCGAGACCTTCAGACCTGCAGGAGGAGATATGAGGGACAATTGGAGAAGTGAATTATATAAAATATA  
AAGTAGTAAAAATTGAGCCATTA---GGAGTAGCACCCACCAAGGCAAAGAGAAGAGTGGTG-----  
-----CAGAGAGAAAAAAGAGCA---GTGGGAACACTGGGAGCT-----  
---ATGTTCCCTTGGGTTCTTGGGAGCA---GCAGGAAGCACTATG---GGCGCAGCGTCA---  
CTAACGCTGACGGTACAG---GCCAGACTA---TTATTG---TCTGGTATAGTGCAACAGCAGAAC---  
AACATG---CTGAGA---GCTATTGAGGCGCAACAGCACCTGTTGCAACTCACAGTCTGGGGCATC  
>AB588233  
TTCTACTGTAATTCAACACCACTGTTTAATAGTGCTTGGAAATTTTACTAGTACTTGGAAATATTATTGAAGGAT  
CA-----  
-----  
GATAACACTGAAAATATCACACTCCAATGCAGAATAAAACAAATTATAAACATGTGGCAGGAAGTAGGAAAAG  
CAATGTATGCCCCCTCCCATCCAGGGACAAATTAAGTGCACATCAAAT---  
ATTACAGGACTGTTATTAACAAGAGATGGGGGTAAGGATGAGAAT-----  
-----  
-----  
AAGACGGAGGAGACCTTCAGACCTGGAGGAGGAGATATGAGGGACAATTGGAGAAGTGAATTATATAAAATATA  
AAGTAGTAAAAATTGAACCATTA---GGAATAGCACCCACCAAGGCGAGGAGAAGAGTGGTG-----  
-----CAGAGAGAAAAAAGAGCA---GTGGGAGCAATAGGAGCT-----  
---ATGTTCCCTTGGGTTCTTGGGAGCA---GCAGGAAGCACTATG---GGCGCAGCGTCA---  
ATAACGCTGACGGTACAG---GCCAGACAA---TTATTG---TCTGGTATAGTGCAACAGCAGAAC---  
AATTTG---CTGAGA---GCTATTGAGGCGCAACAGCATCTGTTGCAACTCACTGTCTGGGGCATC  
>AB480698  
TTCTACTGTAATACAACACAGCTGTTTGATAGTACTTGGCTGTCTAATGGTACTAGGAATGATACTACAGAGT  
CA-----  
-----  
GATAGCACTGAGATCATACTCCAGTGCAGAATAAAACAAATTATAAATAGATGGCAGGAAGTAGGAAAAGCAA  
TGTATGCCCCCTCCCATCAGTGGACAAATTAGATGTACATCAAAT---  
ATTACAGGGATGATAATAACAAGAGATGGTGGTACCAATGACACG-----  
-----  
-----  
CACGGAGACGAGATCTTCAGACCAGCAGGAGGAGACATGAGGGACAATTGGAGAAGTGAATTATATAAAATATA  
AAGTAGTAAAAATTGAACCATTA---GGAATAGCACCCACCAAGGCAAAGAGAAGAGTGGTG-----  
-----CAGAGAGGAAAAAAGAGCA---GTGGGAACATTAGGAGCT-----  
---ATGTTCCCTTGGGTTCTTGGGAGCA---GCAGGAAGCACTATG---GGCGCAGCGTCG---  
CTGACGCTGACGGTACAG---GCCAGACAA---TTATTG---TCTGGTATAGTGCAACAGCAAAAC---  
AACATG---CTGAAA---GCTATTGAGGCGCAACAACATATGTTGCAACTCACAGTCTGGGGCATC  
>AB564745  
TTCTACTGTAATACAACAAAACCTGTTTAATAGTACTTGGAAATAATACTGAAAGGGTAAATAGCACTATG---  
-----  
-----  
GAAAAATGGCACAATCACACTCCCATGCAGAATAAAACAAATTATACACATGTGGCAAGAGGTAGGAAAAGCAA  
TGTATGCCCCCTCCCATCGAAGGAAACATTAGCTGCTCATCAAAT---  
ATTACAGGGCTGCTATTAAACAAGAGATGGGGGTATTAAGAACGAG-----  
-----  
-----  
AACAGCCCCGAGATCTTCAGACCTATAGGAGGAAATATGAAGGACAATTGGAGAAGTGAATTATATAAAATATA  
AAGTAGTAAAAATTGAACCATTA---GGAATAGCACCCACTAGGGCAAAGAGGAGAGTGGTG-----  
-----CAGAGAGAAAAAAGAGCA---GTGGGA---CTAGGAGCT-----  
---TTGTTCCCTTGGGTTCTTGGGAGCA---GCAGGAAGCACTATG---GGCGCAGCGTCA---  
ATGACACTGACGGTACAG---GCCAGACAA---TTATTG---TCTGGTATAGTGCAACAGCAAAAT---  
AATTTG---CTGAGG---GCTATTGAGGCGCAACAGCATCTGTTGCAACTCACAGTCTGGGGCATC  
>AB604946  
TTCTACTGTAACACAACACAACCTGTTTAACAGTACTTGGCTGTCTAATGGTACTTTGAATAGTACTGAAACGT  
CA-----  
-----  
AATGACACCATTAATCACACTCCCATGCAGAATAAAACAAAGTTATAAACATGTGGCAGGAAGTAGGAAAAGCCA  
TGTATGCCCCCTCCCATCAGTGGACAAATTAAGTGTACATCAAAT---  
ATTACAGGGTTGCTATTGACAAGAGATGGGGGTGAGAATAATACT-----  
-----  
-----

GAAGAGATCTTCAGACCTGGAGGAGGAAATATGAAAGACAATTGGAGAAGTGAATTATACAAATATAAAGTAG  
TAAGAATTAAACCATTA---GGAGTAGCACCCACCAAGGCAAAGAGAAGAGTGGTG-----  
-----CAGAGAGAAAAAAGAGAA---CTGACA---CTAGGAGCT-----  
TTGTTCTTGGGTTCTTGGGAGCA---GCAGGAAGCACTATG---GGCGCAGCGTCA---  
TTGACGCTGACGGTACAG---GCCAGACAA---TTGCTG---TCTGGTATAGTGCAACAGCAAAAC---  
AATTTG---CTGAGG---GCTATTGAGGCGCAGCAGCATCTGTTGCAACTCACAGTCTGGGGCATT  
>D12582  
TTCTACTGTGATTCATCACAACCTGTTTAATAGTACACACCTGTCTAATGGTACTTGGTGGAATGGTACT----  
-----  
-----  
GGGCCAGAAAATATCACACTCCCCTGCAGAATAAAACAAATTGTAAACATGTGGCAGGAAGTAGGAAAAGCAA  
TGTATGCCCCCTCCCATCAGAGGACAAATTAGATGTTTCATCAAAT---  
ATTACAGGGCTGCTATTAACAAGAGATGGTGGTAACACCCAGAACAATAAC-----  
-----  
-----  
ACCAATAGCAGTATCGAGATCTTCAGACCTGGAGGAGGAGATATGAGGGACAATTGGAGAAGTGAATTATATA  
AATATAAAGTAGTAAAAATTGAACCATTA---GGAGTAGCACCCACCAGGGCAAAGAGAAGAGTGGTG-----  
-----CAGAGAGAAAAAAGAGCA---GTGGGA---  
ATAGGAGCT-----GTGTTCTTGGGTTCTTGGGAGCA---GCAGGAAGCACTATG---  
GGCGCAGCGGCA---GTGACGCTGACGGTACAG---GCCAGACAA---TTATTG---  
CCTGGTATAGTGCAACAGCAGAAC---AATTTG---CTGAGG---  
GCTATTGATGCGCAACAACATCTGTTGCAACTCACAGTCTGGGGCATC  
>AB565497  
TTCTACTGTAATACAACACAACCTATTTAATAGTACTTGGCATTGGAATTGGAATAATTCTACTTGGGAGCGGA  
ATGATACTGAA-----  
-----GGGTCAAAT-----  
AATACTGAGGACAAAATTACACTCCCATGCAGAATAAAACAAATTATAAACATGTGGCAGGAAGTAGGAAAAG  
CAATGTATGCCCCCTCCCATCAGAGGACTAATTAGATGTGCATCAAAT---  
ATTACAGGGCTGATATTAACAAGAGATGGTGGTGGTGTGAACAGA-----  
-----  
-----  
ACCACCGAGACATTTCAGACCTGGAGGAGGGAATATGAGGGACAATTGGAGAAGTGAATTATATAAATATAAAG  
TAGTAAAAATTGAACCATTA---GGAGTAGCACCCACTAAGGCAAAGAGAAGAGTGGTG-----  
-----CAGAGAGAAAAAAGAGCA---GTGGGA---ATTGGAGCT-----  
ATATTCCTTGGGTTCTTGGGAGCA---GCAGGAAGCACTATG---GGCGCAGCGTCA---  
GTGACGCTGACGGTACAA---GCCAGACAA---TTACTG---TCTGGTATAGTGCAACAGCAGAGC---  
AATCTG---CTGCAG---GCTATTGAGGCGCAACAACAACCTGTTGAAACTCACAGTCTGGGGCATC  
>AB565502  
TTCTACTGTAATACATCAAACTGTTTAATAGTTCTTGAATATTAATGGTACTTGAATGGTACTACA----  
-----  
-----  
GGAAATGGCACTCTCACGCTCCCTTGCAGAATAAGACAAATTGTAAACATGTGGCAGCAAGTAGGAAAAGCAA  
TGTATGCCCCCTCCCGTTGCAGGAATAATTAGATGTTTCATCAAAT---  
ATTACAGGGATGATATTAACAAGAGATGGTGGTACTAATGAGACC-----  
-----  
-----  
ATCGAGGTGGAGACCTTCAGACCTGCAGGAGGAGATATGAGGGACAATTGGCGAAGTGAATTGTATAAATATA  
AAGTAGTAAGAATTGAACCATTA---GGAGTAGCACCCACCAAGGCAAGGAGAAGAGTGGTG-----  
-----CAGAGAGAAAAAAGAGCA---GTGGGA---CTAGGAGCT-----  
---GTGTTCTTGGGTTCTTGGGAGCA---GCAGGAAGCACTATG---GGCGCAGCATCA---  
ATAACGCTGACGGTACAG---GCCAGACAA---TTGCTG---TCTGGTATAGTGCAACAGCAGAGA---  
AATTTG---CTGAGA---GCTATTGAGGTGCAGCAGCATCTGTTGCAACTCACAGTCTGGGGCATC  
>KT961002  
TTCTATTGTAATACAACAAAACCTGTTTAATAGTAGTTGGAATGAAACAACACTGTTTAATAACTTGAATA  
GTACTGAA-----  
-----  
GAGTCAAATAGCACAAATCACACTCCCATGCAGAATAAAACAACTATAAACATGTGGCAGGAAGTAGGAAAAG  
CAATGTATGCCCCCTCCCATCCGCGGACAAATTAATTGTTTCATCAAAT---  
ATTACAGGGCTGCTATTAACCTAGAGATGGTGGTAATAATAACACG-----  
-----

-----  
AATAAAAACGAGACCTTCAGACCTGGAGGAGGAAATATGAAGGACAATTGGAGAAGTGAATTATATAAAATATA  
AAGTAGTAAAAATTGAACCATTA---GGAATAGCACCCACCAAGGCCAAAAGAAGAGTGGTG-----  
-----CAGAGAGAAAAAAGAGCA---GCA-----ATAGGAGCT-----  
---ATGTTCCCTTGGGTTCTTGGGAGCA---GCAGGAAGCACTATG---GGCGCAGCGGCA---  
GTGACGCTGACGGTACAG---GCCAGACAA---TTATTG---TCTGGTATAGTGCAACAGCAAAAC---  
AATTTG---CTGAGA---GCTATTGAGGCGCAACAACATATGTTGCAACTCACAGTCTGGGGCATC  
>AB742153  
TTCTACTGTAGTACAACATAAATTGTTTAATAGTACTTGGGAATAGTACTGAGAATTTGAATATTACTACTGAAA  
GGTCAAAT-----  
-----AGCACT-----  
GGAGAAAACGACACAATCATACTCCACTGTAGAATAAAAACAAATTATAAATATGTGGCAAGAAGTAGGAAAAG  
CAATGTATGCCCCCTCCCATCAGTGGGCCAATTAAGTCTCATCAAAA---  
ATTACAGGGCTGCTGTTAACAAGAGATGGTGGTAGTGGTAATGAGACT-----  
-----  
-----  
ACCAATAACACTGAAACCTTCAGACCTGGAGGAGGAGATATGAGGGACAATTGGAGAAGTGAATTATATAAAAT  
ATAAAGTAATAAAAAATTGAACCATTA---GGAATAGCACCCACCAAGGCACAGAGAAGAGTGGTG-----  
-----CAGAGAGAGAAAAAGAGCA---GTGGGA---ATAGGAGCT---  
-----GTGTTCCCTTGGGTTCTTGGGAGCA---GCAGGAAGCACTATG---GGCGCAGCGTCA---  
GTGACGCTGACGGTACAG---GCCAGACTA---TTATTG---TCTGGTATAGTGCAACAGCAGAAT---  
AATCTG---CTGAGA---GCTATTGAGGCGCAACAGCATCTGTTGCAACTCACAGTCTGGGGCATC  
>AB641836  
TTCTACTGCAATACAACAGAACTATTTAATAGTAGTTGGAATGAGAGTACCTGGAATGAGAGTACTCGGAATG  
ATACT-----  
-----GAC---  
GGGTCAGGAAATATCATCACACTCCCATGTAGAATAAAAACAAATTATAAACATGTGGCAGGAAGTAGGAAAAG  
CAATGTATGCCCCCTCCCATCAGAGGACAAATTAATTGTACATCAAAC---  
ATCACAGGGTTGCTATTAAACAAGAGATGGTGGTAATAATAATAGCACC-----  
-----  
-----  
AATGAGACGGAGACCTTCAGACCTGGAGGAGGAGACATGAAGGACAATTGGAGAAGTGAATTATATAAAATATA  
AAGTAGTAAAACTTGAACCATTA---GGAATAGCACCCACCAAGGCCAAGAGAAGAGTGGTG-----  
-----CAGAGAGAAAAAAGAGCA---GTGGGAACAATAGGAGCT-----  
---ATGTTCCCTTGGGTTCTTGGGAGCA---GCAGGAAGCACTATG---GGCGCAGCGTCA---  
ATGACGCTGACGGTACAG---GCCAGGCTA---TTATTG---TCTGGTATAGTGCAAGCAGCAGAAT---  
AATCTG---CTGAAG---GCTATTGAGGCGCAACAGCATCTGTTGCAACTCACAGTCTGGGGCATC  
>KU869602  
TTCTACTGTAATACAACACAACCTGTTTAATAGTACTTGGGATTTTAATAGTACTTGGGAATAGTACTGAAGGG-  
-----  
-----  
TCAAATATCACACTCACACTCCCATGCAGAATAAAAACAAATTATAAACAGGTGGCAGGAAGTAGGAAAAGCAA  
TGTATGCCCCCTCCCATCAGTGGACAAATTAGATGTTTCATCAAAT---  
ATTACAGGGCTGCTATTAAACAAGAGATGGGGGGAAGACTGGGGAC-----  
-----  
-----  
AACGGGAGTGAGATCTTCAGACCTGGGGGAGGAGATATGAGGGACAATTGGAGAAGTGAATTATATAAAATATA  
AAGTAGTAAAAATTGAACCATTA---GGGATAGCACCCACCGAGGCAAGGAGAAGAGTGGTG-----  
-----CAGAGAGAAAAAAGAGCA---GTGGGAACAATAGGAGCT-----  
---ATGTTCCCTTGGGTTCTTGGGAGCA---GCAGGAAGCACTATG---GGCGCAGCGTCA---  
ATGACGTTGACGGTACAG---GCCAGACTA---TTGTTG---TCTGGTATAGTGCAACAGCAGAAT---  
AACTTG---CTGAGA---GCTGTTGAGGCGCAACAACATCTGTTGCAACTCACAGTCTGGGGCATC  
>MN043590  
TTCTACTGTAATACAACACAACCTGTTTAATAGTACTTGGGATTTTAATAGTACTTGGGAATAGTACTGAAGGG-  
-----  
-----  
TCAAATATCACACTCACACTCCCATGCAGAATAAAAACAAATTATAAACAGGTGGCAGGAAGTAGGAAAAGCAA  
TGTATGCCCCCTCCCATCAGTGGACAAATTAGATGTTTCATCAAAT---  
ATTACAGGGCTGCTATTAAACAAGAGATGGGGGGAAGACTGGGGAC-----  
-----

-----  
 AACGGGAGTGAGATCTTCAGACCTGGGGGAGGAGATATGAGGGACAATTGGAGAAGTGAATTATATAAAATATA  
 AAGTAGTAAAAATTGAACCATTA---GGGATAGCACCCACCGAGGCAAGGAGAAGAGTGGTG-----  
 -----CAGAGAGAAAAAAGAGCA---GTGGGAACAATAGGAGCT-----  
 ---ATGTTCCCTTGGGTTCTTGGGAGCA---GCAGGAAGCACTATG---GGCGCAGCGTCA---  
 ATGACGTTGACGGTACAG---GCCAGACTA---TTGTTG---TCTGGTATAGTGCAACAGCAGAAT---  
 AACTTG---CTGAGA---GCTGTTGAGGCGCAACAACATCTGTTGCAACTCACAGTCTGGGGCATC  
 >MN043603  
 TTCTACTGTAATACAACAAAACCTGTTCAATAGTACTTGGGAATAGTACTGGAGAGTTGCTTAATAGTACTGGGA  
 ATAGTACT-----  
 -----  
 AACAAATGGAACATATCATACTCCAATGCAGAATAAAAACAAATTATAAACAGGTGGCAGGAAGTAGGAAAAGCAA  
 TGTATGCCCCCTCCCATTTGAAGGGATAATTAGATGTTTCATCAAAT---  
 ATTACAGGGCTGCTATTAACAAGAGATGGGGGGAATGAAAACGGGACT-----  
 -----  
 -----  
 AACAGTACTGAGACCTTCAGACCTGGGGGAGGAAATATGAAGGACAATTGGAGAAGTGAATTATATAAAATATA  
 AAGTAGTAAGAATTGAGCCATTA---GGGATAGCACCCACCGAGGCAAGGAGAAGAGTGGTG-----  
 -----CAGAGAGAAAAAAGAGCA---GTGGGAACAATAGGAGCT-----  
 ---ATGTTCCCTTGGGTTCTTGGGAGCA---GCAGGAAGCACTATG---GGCGCAGCGTCG---  
 ATGACGCTGACGGTACAG---GCCAGACTA---TTATTG---TCTGGTATAGTGCAACAGCAGAAT---  
 AATTTG---CTGAGA---GCTATTGAGGCGCAACAGCATCTGTTGCAACTCACAGTCTGGGGCATC  
 >JQ316128  
 TTCTACTGTAATACAACAAAACCTGTTTAGTAGTACTTGGGAATGATACTGAAGGCCCAAATAATGGA-----  
 -----  
 -----  
 ACCAATAGAAATATCACACTCCAATGCAGAATAAAAACAAATTATCAACAGGTGGCAGGAAGTAGGAAAGGCAA  
 TGTATGCCCCCTCCCATCGCAGGAATAATTAGATGTTTCATCAAAT---  
 ATTACAGGACTGCTATTAACAAGAGATGGGGGGAATAATGAGAATGGG-----  
 -----  
 -----  
 ACCAGTGGGAATGAGACCTTCAGACCTGGGGGAGGAAATATGAAGGACAATTGGAGAAGTGAATTATATAAAAT  
 ATAAAGTAGTAAAAATTGAGCCATTG---GGGATAGCACCCACCGAGGCAAGGAGAAGAGTGGTG-----  
 -----CAGAGAGAAAAAAGAGCA---GTGGGAGCGCTAGGAGCT---  
 -----ATGTTCCCTTGGGTTCTTGGGAGCA---GCAGGAAGCACTATG---GGCGCAGCGTCA---  
 CTGACGCTGACGGTACAG---GCCAGACAA---TTATTG---TCTGGTATAGTGCAACAGCAGAAT---  
 AATTTG---CTGAGA---GCTATTGAGGCGCAACAGCATCTGTTGCAACTCACAGTCTGGGGCATC  
 >JQ316132  
 TTTTACTGTAATACAACACAACCTGTTTAATAGTACTTGGAGGGTGAATGGTACTGAAGGGTTAAATGTAACG  
 AA-----  
 -----  
 GGAAATAGACACTTTACCTCCCATGCAGAATAAAAACAAATTATAAACAGGTGGCAGGAAGTAGGAAGAGCAA  
 TGTATGCCCCCTCCCATCGCGGGACAAATTAGATGTTCTTCAAAT---  
 ATTACAGGACTGCTATTAACAAGAGATGGGGGAACTAAGAACAACAGCAACAAC-----  
 -----  
 -----  
 GAGACTGATACTGAGATCTTCAGACCTGGGGGAGGAGATATGAGGGACAATTGGAGAAGTGAATTATATAAAAT  
 ATAAAGTAGTAAAAATTGAGCCATTA---GGGATAGCACCCACCGAGGCAAGGAGAAGAGTGGTG-----  
 -----CAGAGAGAAAAAAGAGCA---GTGGGAGTGATAGGAGCT---  
 -----ATGTTCCCTTGGGTTCTTGGGAGCA---GCAGGAAGCGCTATG---GGCGCAGCGGCA---  
 ATAACGCTGACGGTACAG---GCCAGACAA---TTATTG---TCTGGTATAGTGCAACAGCAAAAT---  
 AATTTG---CTGAGA---GCTATTGAGGCGCAACAGCATCTGTTGCAACTCACAGTCTGGGGCATC  
 >JQ316127  
 TTCTACTGTAATACAACACAACCTGTTTAATAGTACTTGGGAGTTTAATAGTACTGAAGGGTCAAATACAACG  
 AAGGA-----  
 -----  
 AATAACACACTTATCACACTCCCATGCAGAATAAAAACAAATTATAAACAGGTGGCAGGAAGTAGGAAAAGCAA  
 TGTATGCCCCCTCCCATCAGAGGACAAATTAAATGTTTCATCAAAT---  
 ATTACAGGGTTGCTATTAACAAGAGATGGGGGGACTGGGAACAACAAG-----  
 -----

----  
 ACTGACAACGGGACTGAGATCTTCAGACCTGGGGGAGGAGATATGAGGGACAATTGGAGAAGTGAATTATATA  
 AATATAAAGTAGTAAAAATTGAGCCATTA---GGGATAGCACCCCTCCAAGGCAAGGAGAAGAGTGGTG-----  
 -----CAGAGAGAAAAAAGAGCA---  
 GTGGGAACGATAGGAGCT-----ATGTTTCCTTGGGTTCTTGGGAGCA---GCAGGAAGCACTATG---  
 GGCGCAGCGTCA---CTGACGCTGACGGTACAG---GCCAGACTC---TTATTG---  
 TCTGGTATAGTGCAACAGCAGAAT---AATTTG---CTGAGA---  
 GCTATTGAAGCGCAACAGCATCTGTTGCAACTCACAGTCTGGGGCATC  
 >JQ316135  
 TTTTATTGTAATACAACACAACCTGTTTAATAGTACTTGGGAATGGTATTACTTTTAATAGAAGTGGGGTGAC-  
 -----  
 -----  
 CTTAATAAAAAGATTATATTCCTTGCAAATTAACAATAATATAAACAGGTGCCAGGAAGTAGGAAAAGCAA  
 TGTATGCCCCCTCCCTTCAGAGGACAAATTAGATGTTTCATCAAAT---  
 ATTACAGGGCTGTTATTACCAAGAGATGGGGGGACCAAGAACAAAAGTAC-----  
 -----  
 -----  
 AAGGCCATTATTAAATTTTTTCAGCCTTGGGGGAGGAGATATGAGGGACAATTGGAGAAGTAAATTATATAAAT  
 ATAAAGTAGTAAAAATTGAGCCATTA---GGGATAGCACCCACCACGGCAAGGAAAAAGAGTGGTG-----  
 -----CAGAGAGAAAAAAGAGCA---GTGGGAACGATAGGAGCT---  
 -----ATGTTTCCTTGGGTTCTTGGGAGCA---GCAGGAAGCACTATG---GGCGCAGCGTCA---  
 ATGACGCTGACGGTACAG---GCCAGACTA---TTATTG---TCTGGTATAGTGCAACAGCAGAAT---  
 AATTTG---CTGAAA---GCTATTGAGGCGCAACAGCATCTGTTGCAACTCACAGTCTGGGGCATC  
 >JQ316130  
 TTCTACTGTAATACCACACCACTGTTTAATAGTACTTGGCGGTATAATAGTACTGGG-----  
 -----  
 -----  
 GAAGAGGAACTATCATACTCCCATCCAGGATAAAACAAATTATTATCAGCTGGCAGGAAGTAGGAACAGCAA  
 CGTATGCCCCCTCCCATCAGCGGAATAATTAGCTGTTTCATCAAAT---  
 ATTACAGGGGGGCTATTAAACAACAGATGGGGGGAGTGAGAAAAACGGG-----  
 -----  
 -----  
 ACTAACGATACTGAGACCTTCAGACCTGGGGGAGGAGATATGAGGGACAATTGGAGAAGTGAATTATATAAAT  
 ATAAAGTAGTAAAAATTGAGCCATTA---GGGATAGCACCCACCAGGCAAGGAGAAGAGTGGTG-----  
 -----CAGAGAGAAAAAAGAGCA---GTAACA---ATAGGAGCT---  
 -----CTGTTTCCTTGGGTTCTTGGGAGCA---GCAGGAAGCACTATG---GGCGCAGCGTCA---  
 ATGACGTTGACGGTACAG---GCCAGACTA---TTGTTG---TCTGGTATAGTGCAACAGCAGAAT---  
 AACTTG---CTGAGA---GCTATTGAGGCGCAACAGCATATGTTGCAACTCACAGTCTGGGGCATC  
 >DQ295195  
 TTTTACTGTAATACAACACAGCTGTTTAATAGCACTTGGCCTAATAGTAGTGAGAATTCCAATAATACTGCT-  
 -----  
 -----  
 GATAATGGCACATTTATCCTCCCCTGCAGAATAAAACAAATTATAATCAGCTGGCAGGAAGTAGGAAAAGCAA  
 TATATGCCCCCTCCCATCAGTGGACTAATTAAATGTTTCATCAAAT---  
 ATTACAGGGCTAATATTAACAAGAGATGGGGGAACTAAAAACAATTGCATT-----  
 -----  
 -----  
 AACATCACCGGGGAGATCTTCAGACCTGGGGGAGGAAATATGAAGGACAATTGGAGAAGTGAATTATATAAAT  
 ATAAAGTAGTAAGAATTGAGCCATTA---GGGGTAGCACCCACTGGGGCAAAGAGAAGAGTGGTG-----  
 -----CAGAGAGAAAAAAGAGCA---GTGGGAACGATAGGAGCT---  
 -----ATGTTTCCTTGGGTTCTTGGGAGCA---GCAGGAAGCACTATG---GGCGTCGCGTCA---  
 ATGACGCTGACGGTACAG---GCCAGACTA---TTATTGCTGGCTGTATAGTGCAACAGCAGAAT---  
 AATCTG---CTGAGA---GCTATTGAGGCGCAACAGCATCTGTTGCAACTCACAGTTTGGGGCATC  
 >DQ295193  
 TTCTACTGTAATACAACACAACCTGTTTAATAGTACTTGGCTGCTTAATGATACTGGGAATGAGAGTAAACAG-  
 -----  
 -----  
 CCAAAATGAACTATCACACTCCCATGCAGAATAAAACAAATTATAAACAGGTGGCAGGAAGTAGGAAAAGCAA  
 TGTATGCCCCCTCCCATCAGCGGACAAATTAGATGTTTCATCAAAT---  
 ATTACAGGGCTGTTGTTAAACAAGAGATGGGGGGAATACTAATGAGACT-----

-----  
-----  
GGGAATGGGACTGAGACCTTCAGACCTGGGGGAGGAGATATGAGGGACAATTGGAGAAGTGAATTATATAAAAT  
ATAAAGTAGTACAAATTGAGCCATTA---GGGATAGCACCCACTAAGGCAAGGAGAAGAGTGGTG-----  
-----CAGAGAGAAAAAAGAGCA---GTGGGAGTAATAGGAGCT---  
-----ATGTTTCCTTGGGTTCTTGGGAGCA---GCAGGAAGCACTATG---GGCGCAGCGTCA---  
GTGACGTTGACGGTACAG---GCCAGACTA---TTATTG---TCTGGTATAGTGCAACAGCAAAAT---  
AATTTG---CTGAGA---GCTATTGAGGCGCAACAGCATCTGTTGCAACTCACAGTCTGGGGCATC  
>JQ316126

TTTACTGTAATACAACAAAACCTGTTTAATAGTACTTGGTATGGTAATGGTACTCGGAAGGAAGGGTCAAAT-  
-----  
-----  
GAAAAATGGAACATATCATACTCCCATGCAGGATAAGACAAATTGTAAACAGGTGGCAGGAAGTAGGAAAAGCAA  
TGTATGCCCCCTCCCATTACAGGACAAATTAGATGTTTCATCAAAT---  
ATTACAGGGCTGCTATTAACAAGAGATGGGGGGACTGGGAACGGGACC-----  
-----  
-----

AACACGAATGAGACTTTCAGACCTGGGGGAGGAAATATGAAGGACAATTGGAGAAGTGAATTATATAAAATATA  
AAGTAGTAAGAATTGAGCCATTA---GGGATAGCACCCACCAGGCAAGGAGAAGAGTGGTG-----  
-----CAGAGAGAAAAAAGAGCA---GTAACG---CTAGGAGCT-----  
---ATGTTTCCTTGGGTTCTTGGGAGCA---GCAGGAAGCACTATG---GGCGCAGCGTCA---  
ATAACACTGACGGTACAG---GCCAGACTA---TTATTG---TCTGGTATAGTGCAACAGCAAAAT---  
AATTTG---CTGAGA---GCTATTGAGGCGCAACAGCATCTGTTGCAACTCACAGTCTGGGGCATC  
>DQ295196

TTCTACTGTAATACATCACAACCTGTTTAATAGAGCTTGGAAATGGTTCTGAAAGGTCCAATAACACTGAA----  
-----  
-----  
GGAAATACAACATATCACAACCTCCCATGCAGAATAAAACAAATTATAAACAGGTGGCAAGAAGTAGGAAAAGCAA  
TGTATGCCCCCTCCCATCAGCGGACAAATTAGATGTTTCATCAAAT---  
ATTACAGGGCTGTTATTAACAAGAGATGGGGGAATGGGAACGAGACT-----  
-----  
-----

GAGAACGGGACTGAAATCTTCAGACCTGGGGGAGGAAATATGAGGGACAATTGGAGAAGTGAATTATATAAAAT  
ATAAAGTAGTAAAAATTGAGCCATTA---GGGATAGCACCCACCAGGGCAAAGAGAAGAGTGGTG-----  
-----CAGAGAGAAAAAAGAGCA---GTGGGAACGATAGGAGCT---  
-----ATGTTTCCTTGGGTTCTTGGGAGCA---GCAGGAAGCACTATG---GGCGCAGCGTCA---  
GTAACGCTGACGGTACAG---GCCAGACTA---TTATTG---TCTGGTATAGTGCAACAGCAGAAT---  
AATTTA---CTGAAA---GCTATTGAGGCGCAACAGCGTCTGTTGCAACTCACAGTCTGGGGCATC  
>AY839827

TTCTACTGTAATACAACACAACCTGTTTAATAGTACTTGGTACAGTAATAATACTGAAGGGTCAAATAATACTA  
AA-----  
-----

GGAAATGACACAATTACCCTCCCATGCAGAATAAGACAAATTATAAACAGATGGCAGGAAGTAGGAAAAGCAA  
TGTATGCTCCTCCCATCAGTGGACAAATTAGATGTTTCATCAAAT---  
ATTACAGGGCTGCTGTTAACAAGAGATGGGGGAATCAACAATACA-----  
-----  
-----

ATTAATGAGACCTTCAGACCTGAGGGAGGAGATATGAGGGACAATTGGAGAAGTGAATTATATAAAATATAAAG  
TAGTAAGAATTGAGCCATTA---GGGATAGCACCCACCGAGTCAAAAAGAAGAGTGGTG-----  
-----CAGAGAGAAAAAAGAACA---GTGGGAACATTAGGAGCT-----  
ATGTTTCCTTGGGTTCTTGGGAGCA---GCAGGAAGCACTATG---GGCGCAGCGTCG---  
ATGACGTTGACGGTACAG---GCCAGACTA---TTATTG---TCTGGTATAGTGCAACAGCAAAAT---  
AACTTG---CTGAGA---GCTATTGAGGCGCAACAGCATCTGTTGCAACTCACAGTCTGGGGCATC  
>DQ837381

TTCTACTGTAATACAACACAACCTGTTTAATGGTAATTGGAGTAATGGTACCTGGAATGATCTAAACAACCTCT-  
-----  
-----  
AGTTCTATAAAATATCACACTTCCATGCAGAATAAAACAAATTGTAAACATGTGGCAGGAAGTAGGAAAAGCAA  
TGTATGCCCCCTCCCATCAAAGGACAAATTAGCTGTTTCATCAAAT---  
ATTACAGGGCTGATATTAACAAGAGATGGTGGTAAGGACAATACTACCGGCAGC-----  
-----

-----  
 ----  
 AATGAGACAAAAGGGGAGATCTTCAGACCTGCAGGAGGAGATATGAGGGACAATTGGAGAAGTGAATTATATA  
 AATATAAAGTAGTAAGAATTGAACCATTA---GGAGTAGCACCCACCAAGGCAAGGAGAAGAGTGGTG-----  
 -----CAGAGAGAAAAAAGAGCA---GTGACA---  
 CTGGGAGCG-----ATGTTTCCTTGGTTTCTTGGGAGCA---GCAGGAAGCACTATG---  
 GGCGCAGCGTCA---ATGACGCTGACGGTACAG---GCCAGACAA---TTATTA---  
 TCTGGTATAGTGCAACAGCAAAAC---AACTTG---CTGAGG---  
 GCTATTGAGGCGCAACAGCATCTGTTGCAACTCACAGTCTGGGGCATC  
 >JQ316134  
 TTCTACTGTAACACAACAAAACCTGTTCAATAGTACTTGGGAATAGTACTGAGAATGGTACTGGTATTGAACAT-  
 -----  
 -----  
 TTAAATGGGACTATCACACTCCCATGCAGAATAAAACAATTTATAAACAGGTGGCAGGAAGTAGGAAAAGCAA  
 TGTATGCCCCCTCCCATCAGAGGAATAATTAGATGTTTCATCAAAT---  
 ATTACAGGGCTGCTATTAAACAAGAGATGGGGGGACTGAGAACAACAAAACCTGAC-----  
 -----  
 -----  
 AGCACTGGGACTGACATCTTCGGACCTGGGGGAGGAGATATGAGGGACAATTGGAGAAGTGAATTATATAAAT  
 AATAAGTAGTAAGAATTGAGCCATTA---GGGATAGCACCCACCAAGGCAAGGAGAAGAGTGGTG-----  
 -----CAGAGAGAAAAAAGAGCA---GTAACG---ATAGGAGCT---  
 -----ATGTTTCCTTGGGTTCTTGGGAGCA---GCAGGAAGCACTACG---GCCGCGACGTCG---  
 ATGACACTGACCGTACAA---GCCATACTA---TTATTG---TCTGGTATAGTGCAACAGCAGAAT---  
 AATTTG---CTGAGA---GCTATTGAGGCGCAACAACATCTGTTGCAACTCACAGTCTGGGGCATC  
 >MN043605  
 TTCTACTGTAGTACAACAAATCTGTTTAATAGTTCTTGGGAATGAAACACTGCTTAATAGTACTTGGGAATGAGA  
 AT-----  
 -----  
 GACAATAAAAATATCACACTCCGATGCAGAATAAAACAATTTATAAACAGGTGGCAGGAAGTAGGAAAAGCAA  
 TGTATGCCCCCTCCCATCAGAGGACAACTAGATGTTTCATCAAAT---  
 ATTACAGGGCTGCTATTAAACAAGAGATGGGGGGCCTGAGAACAAT-----  
 -----  
 -----  
 AGCAATGAAATCTTCAGACCTGGGGGAGGAAATATGAAGGACAATTGGAGAAGTGAACCTATATAAATACAAAG  
 TAGTAAAGATAGAGCCATTA---GGGATAGCACCCACCAAGGCAAGGAGAAGAGTGGTG-----  
 -----CAGAGAGAAAAAAGAGAA---GTAACA---TTAGGAGCC-----  
 TTGTTTCCTTGGGTTCTTGGGAGCA---GCAGGAAGCACTATG---GGCGCAGCGTCA---  
 ATGACGCTGACGGTACAG---GCCAGACTA---TTATTG---TCTGGTATAGTGCAACAGCAAAAT---  
 AATTTG---CTGAGA---GCTATTGAGGCGCAACAGCATATGTTGCAACTCACAGTCTGGGGCATC  
 >KJ140263  
 TTCTACTGTGAGACAACAAAACCTGTTTAATAGTACTTGGAGGTTTAATAGTACT-----  
 -----  
 -----  
 -TGGAATGGTACTGAA-----  
 GAGATAAATGACCCAATTACACTCCCATGCAGAATAAAACAATTTATAAACAGGTGGCAGGAAGTAGGAAAAG  
 CAATGTATGCCCCCTCCCATCAGAGGACAAATTAAATGTTTCATCAAAT---  
 ATTACAGGGCTGCTATTAAACAAGAGATGGGGGGACT-----  
 -----  
 -----  
 GAGAACAACAAGACTGGGAGCAACAGGACTGAGATCTTCAGACCAGGGGGAGGAGATATGAGGGACAATTGGA  
 GAAGTGAATTATATAAATATAAAGTAGTAAGAATTGAGCCATTA---  
 GGGATAGCACCCACCAAGGCAAGGAGGAGAGTGGTG-----  
 ---CAGAGAGAAAAAAGAGCA---GTGGGAACGATAGGAGCT-----  
 ATGTTTCCTTGGGTTCTTGGGAGCA---GCAGGAAGCACTATG---GGCGCAGCGTCA---  
 ATGACGCTGACGGTACAG---GCCAGACTA---TTATTG---TCTGGTATAGTGCAACAGCAGAAT---  
 AATTTG---CTGAGA---GCTATTGAGGCGCAACAGCATCTGTTGCAACTCACAGTCTGGGGCATC  
 >KT878030  
 TTCTACTGTAATACATCACAACTGTTTAATAGTACTTGGGAATGATACTTGGAGGGGTAGTAAAAGA-----  
 -----  
 -----  
 TCCAATGGTACTATCACACTCCCATGCAGAATAAAACAATTTATAAATAGGTGGCAGGAAGTAGGGAAAAGCAA  
 TGTATGCCCCCTCCCATCAGTGGACAAATTAGATGTACATCAAAT---

ATTACAGGGCTGATATTAACAAGAGATGGGGGAATAACAGCGAG-----  
-----  
-----  
ACTACAGAGATCTTCAGACCTGGGGGAGGAAATATGAAGGACAATTGGAGAAGTGAATTATATAAATATAAAG  
TAGTAAGAATTGAGCCATTA---GGGATAGCACCCACCAAGTCAAAGAGAATAGTGATG-----  
-----CAGAGAGAAAAAAGAGCA--GTGGGAACAATAGGAGCT-----  
ATGTTTCCTTGGGTTCTTGGGAGCA--GCAGGAAGCACTATG--GGCGCAGCGTCA---  
TTGACGCTGACGGTACAG---GCCAGACAA--TTATTG---TCTGGTATAGTGCAACAGCAGAAT---  
AATTTG---CTGAGA---GCTATTGAGGCGCAACAACATATGTTGCAGCTCACAGTCTGGGGCATC  
>KT878031  
TTCTACTGTAATACATCACAATTGTTTAATAGTACCTGGAATGAAACACTGTTGAATAGTACCTGGAAT----  
-----GAA---  
ACACTGTCTGAATAGAACCTGG-----  
AATAGTAATGAACTATCACACTTCCATGCAGAATAAAACAAATTGTAAACAGGTGGCAGGAAGTAGGAACAG  
CAATGTATGCCCTCCCATCAAAGGACAAATTAAATGCTCATCAAAT---  
ATTACAGGGCTGTTATTAACAAGAGATGGGGGAACAACAGCAAC-----  
-----  
-----  
AGCAATGAGACCTTCAGACCTGGGGGAGGAGATATGAGGGACAATTGGAGAAGTGAATTATATAAATATAAAG  
TAGTAAAAAATTGAGCCATTA---GGGATAGCACCCACCAAGGCAAGGAGAAGAGTGGTG-----  
-----CAGAGAGAAAAAAGAGCA--GTGGGAACAATAGGAGCT-----  
ATGTTTCCTTGGGTTCTTGGGAGCA--GCAGGAAGCACTATG--GGCGCAGCGTCA---  
ATGACGCTGACGGTACAG---GCCAGACAA--TTATTG---TCTGGTATAGTGCAACAGCAGAAT---  
AACCTG---CTGAGA---GCTGTTGAGGCGCAACAGCATCTGTTGAAACTCACAGTCTGGGGCATC  
>KT878032  
TTCTACTGTAATACAACACGACTGTTTAATAGTACTTGGAGAATGGTACACTGATAAATGGAAGTGAAGACA  
ATAGC-----  
-----  
AATAGCACCTTCATCACACTCCCATGCAGAATAAAACAAATTATAAACAGGTGGCAGGAAGTAGGAAAGGCAA  
TGTATGCCCCCTCCCATCAGTGGACTAATTAGATGTACATCAAAT---  
ATTACAGGGCTGCTATTAACAAGAGATGGGGGAACGACAACAGT-----  
-----  
-----  
AGTAGCAACGAGACCTTCAGACCTGGGGGAGGAAATATGATGGACAATTGGAGAAGTGAATTATATAAATATA  
AAGTAGTAAGAATTGAGCCATTA---GGGATAGCACCCACCGATGCAAAGAGAAGAGTGGTG-----  
-----CAGAGAGAAAAAAGAGCA--GTGGGAACACTGGGAGCT-----  
--ATGTTTCCTTGGGTTCTTGGGAGCA--GCAGGAAGCACTATG--GGCGCAGCGTCA---  
ATGACGCTGACGGTACAG---GCCAGACTA--TTATTG---GCTGGTATAGTGCAACAGCAAAAT---  
AATTTG---ATGAGA---GCTATTGAGGCGCAACAGCATCTGTTGCAACTCACAGTCTGGGGCATC  
>KT878033  
TTCTACTGTAACACATCAAAATTGTTTAATACTACTTGGAGTAAGGATAATAATACTGAACCAAATGAAAATG  
GA-----  
-----  
ACTGAGAAAGTTATCACAATCCCATGCAGAATAAAACAAATTATAAACAGGTGGCAGGAAGTAGGAAGAGCAA  
CATATGCCCCCTCCCATCAAAGGAATAATTAGATGTTTCATCAAAT---  
ATTACAGGGCTGCTACTAACAAGAGATGGGGGAGGAGGAAACAAG-----  
-----  
-----  
ACAGAAGAAACCTTCAGACCTGGGGGAGGAGATATGAAGGACAATTGGAGAAGTGAATTATACAAATATAAAG  
TAGTAAAAAATTGAGCCATTA---GGGATAGCACCCACCGAGGCAAGGAGAAGAGTGGTG-----  
-----CAGAGAGAAAAAAGAGCA--GTGGGAACAATAGGAGCT-----  
ATGTTTCCTTGGGTTCTTGGGAGCA--GCAGGAAGCACTATG--GGCGCAGCGTCA---  
CTGACGCTGACGGTACAG---GCCAGACTA--TTATTG---TCTGGTATAGTGCAACAGCAGAGT---  
AATTTG---CTGAGA---GCTATTGAGGCGCAACAGCATATGTTGCAACTCACAGTCTGGGGCATC  
>KT878036  
TTCTACTGTAACACAACACAACCTGTTTAATAGTACCTGGCTTGGGAATGATACTAATAAC-----  
-----  
-----  
AATGAAACACCTATCAGCTCCCATGCAGAATAAAACAGTTTTATAAACAGGTGGCAGGGAGTAGGAAGAGCAA  
TGTATGCCCCCTCCCATCGCGGAAACATTAGCTGTTTCATCAAAT---

ATTACAGGGCTACTATTAGCAAGAGATGGGGGAAGAATGAGACC-----  
-----  
-----  
AAGTCTGAGACCTTCAGGCCTTGGGGAGGAAATATGAAGGACAATTGGAGAAGTGAATTATATAAATATAAAG  
TAGTAAAAATTGAGCCATTA---GGGATAGCACCCACCGAGGCAAGAAGAAGAGTGGTG-----  
-----CAGAGAGAAAAGAAGAGCA--GTGGGAACGATAGGAGCT-----  
ATGTTTCCTTGGGTTCTTGGGAACA--GCAGGAAGCACTATG--GGCGCAGCGTCA---  
CTGACGCTGACGGTACAG---GCCAGACAA--TTGTTG---TCTGGTATAGTGCAACAGCAAAGT---  
AATTTG---CTAAGA---GCTATTGAGGCGCAACAGCATATGTTGCAACTCACAGTCTGGGGCATT  
>KT878037  
TTCTACTGTAATACATCAAACTGTTTAATAGTACTTGGGATGATAATAATACTAGTACTTGGGAAAATAGTA  
CT-----  
-----  
GAAAAATGACATTATCGAACTCCCATGTAGAATAAAACAAATTATAAACAGGTGGCAGGAAGTAGGAAAAGCAA  
TGTTTTGCCCCCTCCCATAGCAGGATACATTAATTGCTCATCAAAT---  
ATTACAGGGCTGTTATTAGTGAGAGATGGTGGTATTGTTAACAGT-----  
-----  
-----  
ACCAACGACACCTTCAGACCTGGAGGAGGAAATATGAAGGACAATTGGAGAAGTGAATTATATAAATATAAAG  
TAGTAAAAATTGAACCATTA---GGAATAGCACCCACCAAGGCAAGGAGAAGAGTGGTG-----  
-----CAGAGAGAAAAAAGAGCA--GCGGGA--ATAGGAGCT-----  
TTGCTCCTTGGGTTCTTGGGAGCA--GCAGGAAGCACTATG--GGCGCAGCGTCA---  
ATGACGCTGACGGTACAG---GCCAGACAA--TTATTG---TCTGGTATAGTGCAACAGCAGAAC---  
AATCTG---CTGAAG---GCCATTGAGGCGCAACAGCGTGTGTTGCAACTCACAGTCTGGGGCATC  
>KT878038  
TTCTACTGTAATACAACAAAACTGTTTAGTGGTACCTGGAATGGTACTTGGTATGGTACCTGGAATGGTACTT  
GGGATGGT-----  
GCTACAGAAAATAGTACTAAT-----  
AAAAATATTACAGATATCATAATCCCATGCAGAATAAAACAAATTATAAACAGATGGCAAGAAGTAGGAAAAG  
CAATGTATGCCCCCTCCTATCGCAGGACGAATCAGATGTTTCATCAAAT---  
ATTACAGGACTGTTACTAACAAGAGATGGGGGCACAAACACAAGCACC-----  
-----  
-----  
AGCAATGAGACGGAGACCTTCAGACCTGGGGGAGGAGATATGAGAGACAATTGGAGAAGTGAATTATATAAAT  
ATAAAGTAGTAAGAATTGAGCCACTG---GGGATAGCACCCACCAAGGCAAAGAGAATAGTGGTG-----  
-----CAGAGAGAAAAAAGAGCT--GTGGGAACATTAGGAGCT---  
-----ATGTTTCCTTGGGTTCTTGGGAGCA--GCAGGAAGCACTATG--GGCGCAGCGTCA---  
GTGACGCTGACGGTACAG---GCCAGACAA--TTATTG---TCTGGTATAGTGCAACAGCAGAAAT---  
AATTTG---CTGAGA--GCTATTGAGGCGCAACAGCATATGTTGCAACTCACAATCTGGGGCATC  
>KT878022  
TTCTACTGTAATACAACAAAACTGTTTAATAGTATCTGGAATGGTACTTCGAATGGTTTTACA-----  
-----  
-----  
GGAAATGATACAATCGTACTCCCATGCAGAATAAAACAAATTATAAACAGATGGCAAGAAGTAGGAAAAGCAA  
TGATATGCCCCCTCCTATCGCAGGAAATATTAGCTGTTTCATCAAAT---  
ATTACAGGGCTGTTATTAAACAAGAGATGGGGGGCAGGAGAATGGCACC-----  
-----  
-----  
AATGGGACGGAGACCTTCAGACCTGGGGGAGGAGATATGAGGGACAATTGGAGAAGTGAATTATATAAATATA  
AAGTAGTAAGAATTGAGCCATTA---GGGATAGCACCCACCAAGGCAAAGAGAAGAGTGGTG-----  
-----CAGAGAGAAAAAAGAGCA--GTGGGAACAATAGGAGCT-----  
---ATGTTTCCTTGGGTTCTTGGGAGCA--GCAGGAAGCACTATG--GGCGCAGCGTCA---  
GTGACGCTGACGGTACAG---GCCAGGCAA--TTATTG---TCTGGTATAGTGCAACAGCAGCAT---  
AATTTG---CTAAGA---GCTATTGAGGCGCAACAGCATATGTTGCAACTCACAGTCTGGGGCATC  
>KT878023  
TTCTACTGTAATACAACATCATTGTTTAATAGTACTTGGACTACTAATGATACTAGGAATGATACTGAGAAT-  
-----  
-----  
AATAATGGAACAATCACACTCCAATGCAAAATAAAACAGATTATAAACTTGTGGCAGGAAGTAGGAAAAGCAA  
TGATATGCCCCCTCCCATCAGTGGACAAATTAAGTGTTCATCAAAC---

ATTACAGGGCTGATATTAACAAGAGATGGTGGTAATGACACAAAA-----  
-----  
-----  
GATAATGAGACCTTCAGACCTATAGGAGGGAATATGAAGGACAATTGGAGAAGTGAATTATATAAATATAAAA  
TAGTACAACCTGAACCATTA---GGAGTAGCACCCACCAAGGCAAAGAGAAGAGTGGTG-----  
-----CAGAGAGAAAAAAGAGCA--GTGGGA---CTAGGAGCT-----  
ATGTTTCCTTGGGTTCTTGGGAGCA---GCAGGAAGCACTATG---GGCGCAGCGTCA---  
ATAACGCTGACGGTACAG---GCCAGACAA---TTATTG---TCTGGTATAGTGCAACAGCAAAAC---  
AATTTG---CTGAGA---GCTATTGAGGCGCAACAGAATCTGTTGCAACTCACAGTCTGGGGCATT  
>KT878024  
TTCTACTGTGATACATCAAAAATTGTTTAATAGTACTTGGGAATAATACTGACACTTGGGAATAATACTGACACTG  
GGAATAGT-----  
-----  
ACTGAAACAAGAAATATCACACTCCCATGCCAAATAAAAACAATTTATAAACAGGTGGCAGGAAGTAGGAAGAG  
CAATGTATGCCCCCTCCCATCGCAGGACTAATTAGATGTTTCATCAAAC---  
ATTACAGGGCTGCTATTAACAAGAGATGGGGGGAATAAAAAATAATACA-----  
-----  
-----  
AGTAACGAGACCTTCAGGCCTGGGGGAGGAAATATGAAGGACAATTGGAGGAGTGAATTATATAAATATAAAG  
TAGTAAAAATTGAGCCATTA---GGGATAGCACCCACCAAGGCAAGGAGAAGAGTGGTG-----  
-----CAGAGAGAAAAAAGAGCA--ATAGGA---CTAGGAGCT-----  
GTGTTTCCTTGGGTTCTTGGGAGCA---GCAGGAAGCACTATG---GGCGCAGCGTCA---  
CTGACGCTGACGGCACAG---GCCAGACAA---TTATTG---TCCGGTATAGTGCAACAGCAGAAT---  
AATTTG---CTGAGA---GCTATTGAGGTGCAACAGCATATGTTGCAGCTCACAGTCTGGGGCATC  
>KT878025  
TTCTACTGTAATACAACAAAAATTGTTTAAGAGTACTTGGGAATAGTACTTGGAGTGATTGGAATAGTACTTGG  
GTGATAAT-----  
-----GAA---  
GGAAAAGAACATAATATCATACTCCCATGCAGAATAAGACAAATTATAAACAGGTGGCAGGAAGTAGGAAAAG  
CAATGTATGCCCCCTCCCATCGAAGGACAAATTAGATGCTCATCAAAT---  
ATTACAGGGCTGCTATTAACAAGAGATGGGGGGACAGAAGACAATAGG-----  
-----  
-----  
ACTAATGGGACTGAGACCTTCAGACCTGGGGGAGGAGATATGAGGGACAATTGGAGAAGTGAATTATATAAAT  
ATAAAGTAGTAAAAATTGAGCCATTA---GGGATAGCACCCACCAAGGCAAAGAGAAGAGTGGTG-----  
-----CAGAGAGAAAAAAGAGCA--GTAGGAACACTAGGAGCT---  
-----ATGTTTCCTTGGGTTCTTGGGAGCA---GCAGGAAGCACTATG---GGCGCAGCGTCA---  
ATGACGCTGACGGTACAG---GCCAGACTA---TTATTG---TCTGGTATAGTGCAACAGCAGAAT---  
AATTTG---CTGAGA---GCTGTTGAGGCGCAACAGCATCTGTTGCAACTCACAGTCTGGGGCATT  
>KT878027  
TTCTACTGTAATACAACACAACCTGTTTAACAGTACTTGGGAATGACACAAACCTGTATAATGCAACAAAA---  
-----  
-----  
CAGAAATGGCACAATTACACTCCCATGCAGAATAAAAACAAATTATAAACAGATGGCAGGAAGTAGGAAAAGCAA  
TGTATGCCCCCTCCCATCGCAGGACAAATTAGATGCTCATCAAAT---  
ATTACAGGGCTGCTATTAACAAGAGATGGGGGGATTAAATACCTCT-----  
-----  
-----  
ACGGAAACCTTCAGACCTGGGGGAGGAGATATGAGGGACAATTGGAGAAGTGAATTGTACAAATATAAGGTAG  
TAAGAATAGAACCATTA---GGGATAGCACCCACCAAGGCAAGGAGAAGAGTGGTG-----  
-----CAGAGAGAAAAAAGAGCA--GTGGGAACAATAGGAGCT-----  
ATGTTTCCTTGGGCTCTTGGGAGCA---GCAGGAAGCACTATG---GGCGCAGCGTCA---  
ATGACGCTGACGGTACAG---GCCAGACTG---TTATTG---TCTGGTATAGTGCAACAGCAAAAT---  
AATTTG---CTGAGA---GCTATTGAGGCGCAACAGCGTCTGTTGCAACTCACAGTCTGGGGCATC  
>MK871374  
TTCTACTGTGATACAACACCACTGTTTAATAGTACTTGGGAATATTAATGGGACTAAAAGGTCAAATGAAACTG  
CA-----  
-----  
GAAAAATGGCACAATTACCCTCCACTGCAGAATAAGACAAATTGTAAACAGGTGGCAGGAAGTAGGAAAAGCAA  
TGTATGCCCCCTCCCATCAGCGGACAAATTAAGTGTACATCAAAT---

ATTACAGGGCTGTTATTAACAAGAGATGGGGGCGGTAATCCCGCC-----  
-----  
-----  
AACAAACTAATGACACCTTCAGGCCTGGGGGAGGAGATATGAGGGACAATTGGAGAAGTGAATTGTATAAAT  
ATAAAGTAGTAGAAATTGAACCATTA---GGGATAGCACCCACCAGGGCAAGGAGAATAGTGGTG-----  
-----CAGAGAGAAAAAAGACCA---GTGGGAACATTAGGAGCC---  
-----ATGTTTCCTTGGGTTCTTGGGAGCA---GCAGGAAGCACTATG---GGCGCAGCGTCA---  
CTGACGCTGACGGTACAG---GCCAAGAAA---GTATTG---TCTGGTATAGTGCGACAGCAGCAT---  
AATTTG---CTGAGA---GCTATTGAGGCGCAACAGCGTCTGTTGCAACTCACAGTCTGGGGCATC  
>MN043576  
TTCTACTGTGATACACAACACAACCTGTTTAATAGTACTTGGGAATAGTACTTGGGAATAGTACTGAAGGGTCAAAAA  
CTGAA-----  
-----  
AGAAATGACACACTTACCCTCCCATGCAGAATAAAACAAATTATAAACAGGTGGCAGGAAGTAGGAAAAGCAA  
TGTATGCCCCCTCCCATCAAAGGACAAATTAGATGTTTCATCAAAT---  
ATTACAGGGCTGCTATTAACAAGAGATGGGGGGACTGAGAACAAC-----  
-----  
-----  
AGCGAGACTGAGATCTTCAGACCTGGGGGAGGAAATTTGAGGGACAATTGGAGAAGTGAATTATATAAATATA  
AAATAGTAAAAATTGAGCCATTA---GGGATAGCACCCACCAGGGCAAGGAGAAGAGTGGTG-----  
-----CAGAGAGAAAAAAGAGCA---GTGGGAACGATAGGAGCT-----  
---ATGTTTCCTTGGGTTCTTGGGAGCA---GCAGGAAGCACTATG---GGCGCAGCGTCA---  
ATGACGCTGACGGTACAG---GCCAGACTA---TTATTG---TCTGGTATAGTGCAACAGCAGAAT---  
AATTTG---CTGAGA---GCTATTGAGGCGCAACAGCATCTGTTGCAACTCACAGTCTGGGGCATC  
>KU896118  
TTCTACTGTGATACAGCACAACCTGTTTAATAGTACTTGGGAATGATACACAACCTGTTTAATAGTACTGGGAATG  
ATACTGAA-----  
-----  
GGGTAAAGTGAAAATATCACACTCCCATGCAGAATAAAACAAATTATAAACAGGTGGCAGGAAGTAGGAAAAG  
CAATGTATGCCCCCTCCCATCGCAGGACAAATTAGATGTTTCATCAAAT---  
ATTACAGGGCTGCTATTAACAAGAGATGGGGGGATTGAGAACAAC-----  
-----  
GGGACTAACAGGACT---  
GAGATTGAGATCTTCAGACCTGGGGGAGGAGATATGAGGGACAATTGGAGAAGTGAATTATATAAATATAAAG  
TAGTAAAAATTGATCCATTA---GGGATAGCACCCACCAGGGCAAGGAGAAGAGTGGTG-----  
-----CAGAGAGAAAAAAGAGCA---GTG---ACGATAGGAGCT-----  
ATGTTTCCTTGGGTTCTTGGGAGCA---GCAGGAAGCACTATG---GGCGCAGCGTCA---  
CTGACGCTGACGGTACAG---GCCAGACAA---TTATTG---TCTGGTATAGTGCAACAGCAGAAT---  
AATTTG---CTGAGA---GCTATTGAGGCGCAACAGCATCTGTTGCAACTCACAGTCTGGGGCATC  
>MN043598  
TTCTACTGTGATACAGCACAACCTGTTTAATAGTACTTGGGAATGATACACAACCTGTTTAATAGTACTGGGAATG  
ATACTGAA-----  
-----  
GGGTAAAGTGAAAATATCACACTCCCATGCAGAATAAAACAAATTATAAACAGGTGGCAGGAAGTAGGAAAAG  
CAATGTATGCCCCCTCCCATCGCAGGACAAATTAGATGTTTCATCAAAT---  
ATTACAGGGCTGCTATTAACAAGAGATGGGGGGATTGAGAACAACGGGACTAAC-----  
-----  
-----  
AGGACTGAGATTGAGATCTTCAGACCTGGGGGAGGAGATATGAGGGACAATTGGAGAAGTGAATTATATAAAT  
ATAAAGTAGTAAAAATTGATCCATTA---GGGATAGCACCCACCAGGGCAAGGAGAAGAGTGGTG-----  
-----CAGAGAGAAAAAAGAGCA---GTG---ACGATAGGAGCT---  
-----ATGTTTCCTTGGGTTCTTGGGAGCA---GCAGGAAGCACTATG---GGCGCAGCGTCA---  
CTGACGCTGACGGTACAG---GCCAGACAA---TTATTG---TCTGGTATAGTGCAACAGCAGAAT---  
AATTTG---CTGAGA---GCTATTGAGGCGCAACAGCATCTGTTGCAACTCACAGTCTGGGGCATC  
>MN043588  
TTCTACTGTAATACACAACCAATTGTTTAATAGTACTTGGGAATGGGAATGATACTGTAGGGTCAAATAAA---  
-----  
-----  
ACTGAAGGAAATATCACACTCCCATGCAGAATAAAACAAATTATAAACAGGTGGCAGGAAGTAGGAAAAGCAA  
TGTATGCCCCCTCCCATCAGAGGACAAATTAGATGTTTCATCAAAT---

ATTACAGGGCTGCTATTAACAAGAGATGGGGGGAATGAAGGCAAC-----  
-----  
-----  
GAGACTGAGATCTTCAGACCTGGGGGAGGAGACATGAGGGACAATTGGAGAAGTGAATTATATAAATATAAAG  
TAGTAAGAATTGAGCCATTA---GGGATAGCACCCACCAAGGCAAGGAGAAGAGTGGTG-----  
-----CAGAGAGAAAAAAGAGCA--GTGGGAACGATAGGAGCT-----  
ATGTTCCCTTGGGTTCTTGGGAGCA--GCAGGAAGCACTATG--GGCGCAGCGTCA---  
CTGACGCTGACGGTACAG---GCCAGACTA---TTATTG---TCTGGTATAGTGCAACAGCAGAAT---  
AATTTG---CTGAGA---GCTATTGAGGCGCAACAGCGTCTGTTGCAACTCACAGTCTGGGGCATC  
>KU869580  
TTCTACTGTAATACAACAACCACTGTTTAATAGTACTTGGGAATGAGAATAGTACTGAATGGTCAAATACAACCTG  
AA-----  
-----  
GGAAATGACACAATTATCACACTCCCATGTAGAATAAAAACAAATTATAAACAGGTGGCAGGAAGTAGGAAAAG  
CAATGTATGCCCCCTCCCATCAGAGGACAAATTAGATGTTTCATCAAAT---  
ATTACAGGGCTGCTATTAACAAGAGATGGAGGGACTGAGAAAAACAGG-----  
-----  
ACTGAGAACAACGGGACGACTGAGATCTTCAGGCCAACGGGAGGGAATATGAGGGACAATTGGAGAAGTGAAT  
TATATAAATATAAAGTAGTAAAAAATTGAGCCATTA---  
GGGATAGCACCCACCAAGGCAAGGAGAAGAGTGGTG-----  
--CAGAGAGAAAAAAGAGCA--GTGGGAACGATAGGAGCT-----  
ATGTTCCCTTGGGTTCTTGGGAGCA--GCAGGAAGCACTATG--GGCGCAGCGTCA---  
CTGACGCTGACGGTACAG---GCCAGACTA---CTATTG---TCTGGTATAGTGCAACCAGCAGAAT---  
AATTTG---CTGAGA---GCTATTGAGGCGCAACAGCATCTGTTGCAACTCACAGTCTGGGGCATC  
>MN043589  
TTCTACTGTAATACAACAACCACTGTTTAATAGCACTTGGGAATAGTACTGAAAGGTTCAATAACACTGAAGGA-  
-----  
-----  
AATATCACAACCTATCAGACTCCCATGCCGAATTATACACATTAGAAACGGGTGGCAAGAAGTAAGGAAAGCAA  
TGTATGCCCCCTCCCATCATAGGACGCACTACATGTTCTTCAGGC---  
ATTACAGGGCTGCTATTAGCAAGAGATGGGGGGACTGAGAACAAC-----  
-----  
-----  
GGGACTGAAATCTTCGGACCTGGGGGAGGAGATATGAGGGATAATTGGAGAAGTGAATTATATAAATATAAAG  
TAGTAAAAAATTGAGCCATTA---GGGATACCACCCACCCAGGCAAAGAGAAGAGTGGTG-----  
-----CAAAGAGAAAAAAGAGCA--GTGGGAACGATAGGGGCT-----  
ATGTTCCCTTGGGTTCTTGGGACCA---CCAGGAACCATATG--GGCGCAGCTTCA---  
ATGACGCTGACGGTACAG---GCCAGATTA---TTATTG---TCTGGTATAGTGCAACAGCAGAAT---  
AATTTG---CTGAGA---GCTATTGAGGCGCAACAGCATCTGTTGCAACTCACAGTTTGGGGCATC  
>KU869596  
TTCTACTGTAATACAACAACCACTGTTTAATAGTACTTGGACCGGGAATGGTACTGAAGGGTTAAATGAAACTG  
GA-----  
-----  
GGAAATAACACACTTATCACACTCCCATGCAGAATAAAAACAAATTATAAACAGGTGGCAGGAAGTAGGAAAAG  
CAATGTATGCCCCCTCCCATCAGCGGAGTAATTAGATGTTTCATCAAAT---  
ATTACAGGGCTACTATTAACAAGAGATGGGGGGATTGAGAACAAC-----  
-----  
-----  
GAGACTAATAGCAACAGGACTGAGATCTTCAGACCTGGGGGAGGAGATATGAGGGACAATTGGAGAAGTGAAT  
TATATAAATATAAAGTAGTAAAAAATTGAGCCATTA---  
GGGATAGCACCCACCATGGCAAGGAGAAGAGTGGTG-----  
--CAGAGAGAAAAAAGAGCA---GTGGGACTGATAGGAGCT-----  
ATGTTCCCTTGGGTTCTTGGGAGCA--GCAGGAAGCACTATG--GGCGCAGCGTCA---  
TTGACGCTGACGGTACAG---GCCAGACAA---TTATTG---TCTGGTATAGTGCAACAGCAGAAT---  
AATTTG---CTGAGA---GCTATTGAGGCGCAACAGCATCTGTTGCAACTCACCGTCTGGGGCATC  
>KX960971  
TTCTACTGTGATACAACAAAACCTGTTTAACAGTACTTGGGAATAATACTAAAAGGGTAGAGGGAACTGAAGGA-  
-----  
-----  
GAAAAATGGCACACTTACACTCCCATGCAGAATAAAAACAAATTATAAACAGATGGCAGGAAGTAGGAAAAGCAA  
TGTATGCCCCCTCCCATCAGAGGACAAATTAGATGTTTCATCAAAT---

ATTACAGGGCTGTTATTAACAAGAGATGGGGGTGAGAGGAATGACACC-----  
-----  
-----  
AACGAGACTGAAACCTTCAGACCTGGGGGAGGAGATATGAGGGACAATTGGAGAAGTGAATTATATAAATATA  
AAGTAGTAAAAATTGAGCCATTA---GGGATAGCACCCACCAAGGCAAGGAGAAGAGTGGTG-----  
-----CAGAGAGAAAAAAGAGCA---GTGGGAACAATAGGAGCT-----  
---ATGTTCCCTTGGGTTCTTGGGAGCA---GCAGGAAGCACTATG---GGCGCAGCGTCA---  
CTGACGTTGACGGTACAG---GCCAGACTA---TTATTG---TCTGGTATAGTGCAACAGCAGAAT---  
AATTTG---CTGAGA---GCTATTGAGGCGCAACAGCATCTGTTGCAACTCACAGTCTGGGGCATC  
>KJ140267  
TTCTACTGCAATACAACACAACCTGTTTAATAGTACTTGGTTTAATAGTACTTGAATGATACT-----  
-----  
-----  
GAAGGGTCAAATATCACTGGTACTGTAGGGTCAAATATCACACTCCCATGCAGAATAAAACAAATTATAAAACA  
GGTGGCAGGAAGTAGGAAAAGCAATGTATGCCCTCCCATCAGAGGACAAATTAGATGTTTCATCAAAT---  
ATTACAGGACTGCTATTAACAAGAGATGGGGGG-----  
-----  
AGTGGGGACAACGAGACTAACGGGACGACTGAGACCTTCAGACCTGGGGGAGGAGATATGAGGGACAATTGGA  
GAAGTGAATTATATAAATATAAAGTAGTAAAAATTGAGCCATTA---  
GGGATAGCACCCACCAAGGCAAAGAGAAGAGTGGTG-----  
---CAGAGAGAAAAAAGAGCA---GTGGGAACGATAGGAGCT-----  
ATGTTCCCTTGGGTTCTTGGGAGCA---GCAGGAAGCACTATG---GGCGCAGCGTCA---  
CTGACGCTGACGGTACAG---GCCAGACTA---CTATTG---TCTGGTATAGTGCAACAGCAGAAT---  
AATTTG---CTGAGA---GCTATTGAGGCGCAACAGCATCTGTTGCAACTCACAGTCTGGGGCATC  
>KJ140248  
TTCTACTGCAATACAACACGACTGTTTAATAGTACTTGAATATTAATAGTACTTGAATGATACTGAA----  
-----  
-----  
AGGTCAAATAAACTGCAAATGACACACTTACACTCCCATGCAGAATAAAACAAATTATAAACATGTGGCAGG  
AAGTAGGAAAAGCAATGTATGCCCTCCCATCAGTGGACAAATTAGATGTTTCATCAAAT---  
ATTACAGGGCTGCTATTAACAAGAGATGGGGGGGCTAAGAACAACGGGACT-----  
-----  
-----  
GAGAACAACGGGACTGAGATCTTCAGACCTGGGGGAGGAGATATGAAGGACAATTGGAGAAGTGAATTATATA  
AGTATAAAGTAGTAAAAATTGAGCCATTA---GGGATAGCACCCACCAAGGCAAGGAGAAGAGTGGTG-----  
-----CAGAGAGAAAAAAGAGCA---  
GTGGGAACGATAGGAGCT-----ATGTTCCCTTGGGTTCTTGGGAGCA---GCAGGAAGCACTATG---  
GGCGCAACGTCA---ATGACGCTAACAGTACAG---GCCGACTA---TTATTG---  
TCTGGTATAGTGCAACAGCAGAAT---AATTTG---CTGAGA---  
GCTATTGAGGCGCAACAGCATCTGTTGCAACTCACAGTCTGGGGCATC  
>KJ140252  
TTCTACTGTAATACAACACAACCTGTTTAATAGCACTTGAATAGTACTGAAGGGTTTAATAGTAGTACTGAAG  
GG-----  
-----TTA-----  
AATAAACTATCACACTCCCATGCAGAATAAAACAAATTATAAACAGATGGCAGGAAGTAGGAAAAGCAATGT  
ATGCCCCCTCCCATCAGAGGACAAATTAGATGTTTCATCAAAT---  
ATTACAGGGCTGCTATTAACAAGAGATGGGGGG-----  
-----  
-  
AATGAGAGCAACGAGGCTGAGATCTTCAGACCTGGGGGAGGAAATATGAGGGACAATTGGAGAAGTGAATTAT  
ATAAATATAAAGTAGTAAAAATTGAGCCATTA---GGGATAGCACCCACCCAGGCAAGGAGAAGAGTGGTG---  
-----CAGAGAGAAAAAAGAGCA---  
GTGGGAACGATAGGAGCT-----ATGTTCCCTTGGGTTCTTGGGAGCA---GCAGGAAGCACTATG---  
GGCGCAGCGTCG---ATGACGCTGACGGTACAG---GCCAGACTA---TTATTG---  
TCTGGTATAGTGCAACAGCAGAAT---AATCTG---CTAAGA---  
GCTATTGAGGCGCAACAGCATCTGTTGCAACTCACAGTCTGGGGCATC  
>AJ417425  
TTCTACTGTAATACAACACAACCTGTTTAATAGTACTTGAATGGGAACAGCACTTGAATAAGACTGATAAG-  
-----  
-----

GCAAAATGACACCATCACACTCCCATGCAGAATGAAGCAAGTCGTAAACATGTGGCAGGAGGTAGGAAAAGCAA  
TGTATGCCCCCTCCCATCAGAGGGCAAATTAGCTGTTTCATCAAAT ---  
ATTACAGGGCTGCTACTAACAAGAGATGGTGGTAATACCACGAAT-----  
-----  
-----  
GATACCGAGACCTTCAGACCTGGAGGAGGGGATATGAGGGACAATTGGAGAAGTGAATTATATAAATATAAAG  
TAGTAAAAAATTGAACCATTA---GGAGTAGCACCCACCAAGGCAAAAAGGAGAGTGGTG-----  
-----CAAAGAGAAAAAAGAGCA--GTGGGA---ATAGGAGCT-----  
TTGTTCTTGGGTTCTTGGGAGCA---GCAGGAAGCACTATG---GGCGCAGCGTCA---  
GTGACGCTGACGGTACAG---GCCAGACAA---TTATTG---TCTGGTATAGTGCAACAGCGGAGT---  
AATTTG---CTGATG---GCTATTGAGGCGCAACAACATCTATTGCAACTCACGGTCTGGGGCATC  
>KY820529  
TTCTACTGTAATACAACACAACCTGTTTAATAGTACTTGGAAATGGGATAATAGTACTTGAATAGAACTGAAG  
GGTTGAAT-----  
-----  
ATAACTGGAAGAAATATCACACTCCCATGCAGCATAAAAACAAATTATAAACAGGTGGCAGGAAGTAGGAAAAG  
CAATGTATGCCCCCTCCCATCAGTGGACAAATTAGATGTTTCATCAAAT---  
ATTACAGGGCTGCTACTAACAAGAGATGGGGGGCTGGGAACAAC-----  
-----  
----  
GGGACTAACGGGACTGAGATCTTCAGACCTGGGGGAGGAGATATGAGGGACAATTGGAGAAGTGAATTATATA  
AATATAAAGTAGTAAAAAATTGAGCCATTA---GGGATAGCACCCACCAGGGCAAAGAGAAGAGTGGTG-----  
-----CAGAGAGAAAAAAGAGCA---  
GTGGGAACGATAGGAGCT-----ATGTTCTTGGGTTCTTGGGAGCA---GCAGGAAGCACTATG---  
GGCGCAGCGTCA---CTGACGCTGACGGTACAG---GCCAGACTA---TTATTG---  
TCTGGTATAGTGCAACAGCAGAAT---AATTTG---CTGAGA---  
GCTATTGAGGCGCAACAGCATCTGTTGCAACTCACAGTCTGGGGCATC  
>MK577479  
TTCTACTGTAATACAACACAACCTGTTTAATAGTACTTGAATGAGAATAGTACTGAATGGTCAAATACAACCTG  
AAGGA-----  
-----  
AATGACACAATTATCACACTCCCATGTAGAATAAAAACAAATTATAAACAGGTGGCAGGAAGTAGGAAAAGCAA  
TGTATGCCCCCTCCCATCAGAGGACAAATTAGATGTTTCATCAAAT---  
ATTACAGGGCTGCTATTAAACAAGAGATGGAGGGACTGAGAAAAACAGGACTGAG-----  
-----  
----  
AACAAACGGGACGACTGAGATCTTCAGGCCAACGGGAGGGAATATGAGGGACAATTGGAGAAGTGAATTATATA  
AATATAAAGTAGTAAAAAATTGAGCCATTA---GGGATAGCACCCACCAAGGCAAGAGAAGAGTGGTG-----  
-----CAGAGAGAAAAAAGAGCA---  
GTGGGAACGATAGGAGCT-----ATGTTCTTGGGTTCTTGGGAGCA---GCAGGAAGCACTATG---  
GGCGCAGCGTCA---ATGACGCTGACGGTACAG---GCCAGACGA---TTATTG---  
TCTGGTATAGTGCAACAGCAGAAT---AATTTG---CTGAGA---  
GCTATTGAGGCGCAACAGCATCTGTTGCAACTCACAGTCTGGGGCATC  
>KU869586  
TTCTACTGTAATACAACACAACCTGTTTAATAGCACTTGAATAGTACTGAAAGGTTCAATAACACTGAAGGA-  
-----  
-----  
AATATCACAACCTATCAGACTCCCATGCCGAATTATACACATTAGAAACGGGTGGCAAGAAGTAAGGAAAGCAA  
TGTATGCCCCCTCCCATCATAGGACGCACTACATGTTCTTCAGGC---  
ATTACAGGGCTGCTATTAGCAAGAGATGGGGGGACTGAGAACAAC-----  
-----  
-----  
GGGACTGAAATCTTCGGACCTGGGGGAGGAGATATGAGGGATAATTGGAGAAGTGAATTATATAAATATAAAG  
TAGTAAAAAATTGAGCCATTA---GGGATACCACCCACCCAGGCAAGAGAAGAGTGGTG-----  
-----CAAAGAGAAAAAAGAGCA---GTGGGAACGATAGGGGCT-----  
ATGTTCTTGGGTTCTTGGGACCA---CCAGGAACCAATTATG---GGCGCAGCTTCA---  
ATGACGCTGACGGTACAG---GCCAGATTA---TTATTG---TCTGGTATAGTGCAACAGCAGAAT---  
AATTTG---CTGAGA---GCTATTGAGGCGCAACAGCATCTGTTGCAACTCACAGTTTGGGGCATC  
>MN043595

TTCTACTGTAATACAACAACCACTGTTTAAATAGTACTTGGACCGGGAATGGTACTGAAGGGTTAAATGAAACTG  
 GAGGA-----  
 -----  
 AATAACACACTTATCACACTCCCATGCAGAATAAAACAAATTATAAACAGGTGGCAGGAAGTAGGAAAAGCAA  
 TGTATGCCCCCTCCCATCAGCGGAGTAATTAGATGTTTCATCAAAT---  
 ATTACAGGGCTACTATTAACAAGAGATGGGGGGATTGAGAACAACGAGACT-----  
 -----  
 ----  
 AATAGCAACAGGACTGAGATCTTCAGACCTGGGGGAGGAGATATGAGGGACAATTGGAGAAGTGAATTATATA  
 AATATAAAGTAGTAAAAATTGAGCCATTA---GGGATAGCACCCACCATGGCAAGGAGAAGAGTGGTG-----  
 -----CAGAGAGAAAAAAGAGCA---  
 GTGGGACTGATAGGAGCT-----ATGTTTCCTTGGGTTCTTGGGAGCA---GCAGGAAGCACTATG---  
 GGCGCAGCGTCA---TTGACGCTGACGGTACAG---GCCAGACAA---TTATTG---  
 TCTGGTATAGTGCAACAGCAGAAT---AATTTG---CTGAGA---  
 GCTATTGAGGCGCAACAGCATCTGTTGCAACTCACCGTCTGGGGCATC  
 >KX960978  
 TTCTACTGTAATACAACAACCACTGTTTAAATAGTACTTGGAAATAGTAATAGTACTGAAGGGCCAAATAGAACTG  
 AA-----  
 -----  
 GGAAATAGCACACTTACCCTCCCATGCAGAATAAAACAAATTATAAACAGGTGGCAGGAAGTAGGAAAAGCAA  
 TGTATGCCCCCTCCCATCAGTGGACAAATTAGATGCTCATCAAAT---  
 ATTACAGGGCTGCTATTAACAAGAGATGGGGGGAATGGGACCAAC-----  
 -----  
 -----  
 GAGACTGAAACCTTCAGACCTGGGGGAGGAGATATGAGGGACAATTGGAGAAGTGAATTATATAAATATAAAG  
 TAGTAAAAATTGAGCCATTA---GGGATAGCACCCACCGGGGCAAGTAGAAGGGTGGTG-----  
 -----CAGAGAGAAAAAAGAGCA---GTGGGAACCATAGGAGCT-----  
 GTGTTTCCTTGGGTTCTTGGGAGCA---GCAGGAAGCACTATG---GGCGCAGCGGCA---  
 GTGACGCTGACGGTACAG---GCCAGACTA---TTATTG---TCTGGTATAGTGCAACAGCAGAAT---  
 AATTTG---CTGAGA---GCTATTGAGGCGCAACAGCATCTGTTGCAACTCACAGTCTGGGGCATC  
 >AJ417415  
 TTCTACTGTAATACAACAAACCTGTTTAAATGGTACTTGGAAATGGTACTGCTTGGAAATGGTACTTGGAAATGTTA  
 GT-----  
 -----  
 AAAACTGATAAAATATCACACTCTCATGCAGAATAAAACAAATTATAAACAGGTGGCAGGAAGTAGGAAAAG  
 CAATGTATGCCCCCTCCCATCGCAGGAAAAATTAGCTGTTTCATCTAAT---  
 ATTACAGGGCTGTTATTAACAAGAGATGGGGGGAATGAGACCAAC-----  
 -----  
 -----  
 GGGACCTGGAGATCTTCAGACCTGGGGGAGGAGATATGAGGGACAATTGGAGAAGTGAATTATATAAATATA  
 AAGTAGTAAAAATTGAGCCATTA---GGGATAGCACCCACCAAGGCAAGGAGAAGAGTGGTG-----  
 -----CAGAGAGAAAAAAGAGCA---GTGGGAACGATAGGAGCT-----  
 ---ATGTTTCCTTGGGTTCTTGGGAGCA---GCAGGAAGCACTATG---GGCGCAGCGTCA---  
 TTGACGCTGACGGTACAG---GCCAGACTA---TTATCG---TCTGGTATAGTGCAACAGCAGAGT---  
 AATTTG---CTGAGA---GCTATTGAGGCGCAACAGCATCTGTTGCAACTCACAGTCTGGGGCATT  
 >AJ417431  
 TTCTACTGTAATACATCAAACTGTTTAAATAGTACTTGGGGTCTTAACCAGACAGCTAACCATGAAGGA-----  
 -----  
 -----  
 AATGATACAACAATCACACTCCCATGCAGAATAAAACAAATTATAAACATGTGGCAGAAAGTAGGAAAAGCCA  
 TGTATGCCCCCTCCCATGCGGGACGGATTGCATGTTTCATCACAT---  
 ATTACAGGGCTACTATTAACAAGAGATGGGGGTAATGACACTAAC-----  
 -----  
 -----  
 AATGAGACCTTCAGACCTGGAGGAGGAAATATGAGGGACAATTGGAGGAGTGAATTATATAAATATAAAGTAG  
 TAAAAATTAAACCATTA---GGAATAGCACCCACCAAGGCAAAGAGAAGAGTGGTG-----  
 -----CAGAGAGAAAAAAGAGCA---GTGGGAACACTGGGAGCT-----  
 ATGTTTCCTTGGGTTCTTGGGAGCA---GCAGGAAGCACTATG---GGCGCAGCGTCA---  
 GTGACGCTGACGGTACAG---GCCAGACAA---TTATTG---TCTGGTATAGTGCAACAGCAGAAC---  
 AACTTG---CTGAGG---GCTATTGAGGCGCAACAGCATCTGTTGCAACTCACGGTCTGGGGCATC

>AJ417410

TTCTACTGTAATACAACAACCACTGTTTAAATAGTACTTGGAATATTACTGAAGGGTCAAATACAACCTGAAAGAA  
AT-----

-----  
AATAATACACATATCACACTCCAATGCAGAATAAGACAAATTATAAACAGATGGCAGGAAGTAGGAAAAGCAA  
TGTATGCCCCCTCCCATCAGAGGACAAATTAGATGTTTCATCAAAT---  
ATTACAGGGCTGCTATTAACAAGAGATGGGGGGATTGAGAACAACGAG-----

-----  
ACCAAGACTATTGAGATCTTCAGACCTGGGGGAGGAAACATGAAGGACAATTGGAGAAGTGAATTATATAAAAT  
ATAAAGTAGTAAAAATTGAGCCATTA---GGGATAGCACCCACCAAGGCAAGGAGAAGAGTGGTG-----  
-----CAGAGAGAAAAAAGAGCA---GTGGGAACGATAGGAGCT---  
-----ATGTTTCCTTGGAATTCTTGGGAGCA---GCAGGAAGCACTATG---GGCGCAGCGTCA---  
ATGACGCTGACGGTACAG---GCCAGACTA---TTATTG---TCTGGTATAGTGCAACAGCAGAAT---  
AATTTG---CTGAGA---GCTATTGAGGCGCAACAGCATATGTTGCAACTCACAGTCTGGGGCATC

>AJ417413

TTCTACTGTAATACAACAACCACTGTTTAAATAGTACTTGGAATAGTAATAGTACTTGGAATAGTACTGAA----

-----  
AGAAAATGACACAATTACCCTCCCATGCAGAATAAAACAAATTATAAACAGGTGGCAGGAAGTAGGAAAAGCAA  
TGTATGCCCCCTCCCATCAGAGGACAAATTAGATGCTCATCAAAT---  
ATTACAGGGTTGTTATTAACAAGAGATGGGGGAACTGGGAACAACGAG-----

-----  
ACCAACGAGACTGAGATCTTCAGACCTGGGGGAGGAGACATGAGGGACAATTGGAGAAGTGAATTATATAAAAT  
ATAAAGTAGTAAAAATTGAACCATTA---GGGATAGCACCCACCAAGGCAAGGAGAATAGTGGTG-----  
-----CAGAGAGAAAAAAGAGCA---GTGGGAACGCTAGGAGCC---  
-----ATGTTTCCTTGGGTTCTTGGGAGCA---GCAGGAAGCACTATG---GGCGCAGCGTCA---  
CTGACGCTGACGGTACAG---GCCAGACTA---TTATTG---TCTGGTATAGTGCAACAGCAGAAT---  
AATTTG---CTGAGA---GCTATTGAGGCGCAACAGCATCTGTTGCAACTCACAGTCTGGGGCATC

>AJ417419

TTCTACTGTAATACAACAAAACCTGTTTAAATAGTACTTGGAATGAAACAAGACTTAGTAATTGGAATAGTACTG  
AA-----

-----  
AAGTTAAATGAAAATATCACACTCCAATGCAGAATAAAACAAATTATAAACAGGTGGCAGGAAGTAGGAAAAG  
CAATGTATGCCCCCTCCCATCGAAGGAATAATTAGATGTTTCATCAAAT---  
ATTACAGGGCTGCTATTAACAAGAGATGGGGGAACTGGGAACAACGAGACT-----

-----  
GGCAACGAGACTGAGATCTTCAGACCTGGGGGAGGAGACATGAGGGACAATTGGAGAAGTGAATTATATAAAAT  
ATAAAGTAGTAAGAATTGAGCCATTA---GGGCTAGCACCCACCAAGGCAAGGAGAAGAGTGGTG-----  
-----CAGAGAGAAAAAAGAGCA---GTGGGAGCAATAGGAGCT---  
-----ATGTTTCCTTGGGCTCTTGGGAGCA---GCAGGAAGCACTATG---GGCGCAGCGTCA---  
CTGACGCTGACGGTACAG---GCCAGACTA---TTATTG---TCTGGTATAGTGCAACAGCAGAAT---  
AATTTG---CTGAGA---GCTATTGAGGCGCAACAGCGTTTGTGCAACTCACAGTCTGGGGCATC

>AF224507

TTCTACTGTAATACAACAACCACTGTCTAATAGTACTTGGCAGAGGTCTGATGGTACTTGGAATAGAACTGGAG  
GGTTA-----

-----AAT---

GAAACTAAAGAAAATATCACACTCCCATGCAGAATAAAACAAATTATAAACAGGTGGCAGGAAGTAGGAAAAG  
CAATGTATGCCCCCTCCCATCAGTGGACTAATTAGATGTTTCATCAAAT---  
ATTACAGGGCTGCTATTAACAAGAGATGGGGGGAATGAGAACAATGGG-----

-----  
ACCAATGGGACTGAGACCTTCAGACCTGAGGGAGGAAATATGAAGGACAATTGGAGAAGTAAATTATATAAAAT  
ATAAAGTAGTAAGAATTGAGCCATTA---GGGATAGCACCCACCAGGGCAAGGAGAAGAGTGGTG-----  
-----CAGAGAGAAAAAAGAGCA---GTAACA---TTCGGAGCT---  
-----CTGTTTCCTTGGGTTCTTGGGAGCA---GCAGGAAGCACTATG---GGCTGCACGTCA---  
ATGACGCTGACGGTACAG---GCCAGACTA---TTATTG---TCTGGTATAGTGCAACAGCAGAAT---  
AATTTG---CTGAGA---GCTATTGAGGCGCAACAGCATCTGTTGCAACTCACAGTCTGGGGCATC

>AB097870

TTCTACTGTAATACATCACAACCTGTTTAATAGTACTTGGTATGGGAATAATACTAGTACTTGGGAATAAT----

-----  
-----

ACTGCAGAAAATATCACGCTCCCCTGCAGAATAAAACAAATTGTAAACATGTGGCAGGAAGTAGGAAGAGCAA  
TGTATGCCCCCTCCCATCGCAGGACAAATTAAGTGTTTCATCAAAT---  
ATTACAGGGTTGCTGTTAACAAGAGATGGTGGTAATAAGACCAAC-----

-----  
-----

CCCACCGAGATCTTCAGACCTGCAGGAGGAGATATGAGGGACAATTGGAGAAGTGAATTATATAAATATAAAG  
TAGTAAGAATTGAACCATTA---GGAGTAGCACCCACCAGGGCAAAGAGAAGAGTGGTG-----  
-----CAAAGAGAAAAAAGAGCA---GTGGGAACGCTAGGAGCT-----  
ATGTTTCCTTGGGTTCTTGGGAGCA---GCAGGAAGCACTATG---GGCGCAGCGTCA---  
ATAACGCTGACGGTACAG---GCCAGACAA---TTATTG---TCTGGTATAGTGCAACAGCAAAGA---  
AATTTG---CTGAGA---GCTATTGAGGCGCAACAGCATTTGTTGCAACTCACAGTCTGGGGCATC

>AY423386

TTCTACTGTAATACATCACAGCTGTTTAATAGTACTTGGGATGTGAATGCTACTGGGAATGGTACTACAGAA-

-----  
-----

CCAAATAGTACTATAACACTCCCATGCAGAATAAAACAAATTATAAACAGATGGCAGGAAGTAGGAAAAGCAA  
TGTATGCCCCCTCCCATCGAAGGACAAATTAGCTGTTTCATCAAAC---  
ATCACAGGGCTGCTATTAAACAAGGGATGGTGGTAGGAATAGGAACGAG-----

-----  
-----

AGCACCGAGATCGAGATCTTTAGACCTGGAGGAGGAGATATGAGAGACAATTGGAGAAGTGAATTATATAAAT  
ATAAAGTAGTAAAAATTGAGCCATTA---GGAGTAGCACCCACCAAGGCAAAGAGAAGAGTGGTG-----  
-----CAGAGAGAAAAAAGAGCA---ATAGCG---CTAGGAGCT---  
-----ATGTTTCCTTGGGTTCTTGGGAGCA---GCAGGAAGCACTATG---GGCGCAGCGTCA---  
ATGGCGCTGACGGTACAG---GCCAGACAA---TTATTG---TCTGGTATAGTGCAACAGCAAAAC---  
AATTTG---CTGAGG---GCTATTGAGGCGCAACAGCATCTGTTGCAACTCACAGTCTGGGGCATT

>HQ386146

TTCTACTGTAATACAACACAACCTGTTTAATAGTACTTGGGAAAAGGATACTAAAGGGTCAAATGAC-----

-----  
-----

ACTGAACGCATAATCCAACCTCCATGCAGAATAAAACAAATTATAAATATGTGGCAGGAAGTAGGAAAAGCAA  
TGTATGCCCCCTCCCATCAAAGGACAAATTAGATGTTTCATCAAAT---  
ATTACAGGGCTGATATTAAACAAGAGATGGTGGTAATAGTAGTAATACCACGAGC-----

-----  
----

AATTCTAACAAAAATGAGACCTTCAGACCTGGAGGAGGAAACATGAAGGATAATTGGAGAAGTGAACCTATATA  
AATATAAAGTAGTACAAATTGAACCATTA---GGAGTAGCACCCACCAAGGCAAAGAGAAGAGTGGTG-----  
-----CAAAGAGAAAAAAGAGCA---GTGGGA---  
TTCGGAGCT-----CTGTTTCCTTGGGTTCTTGGGAGCA---GCAGGAAGCACTATG---  
GGCGCAGCATCA---ATAACGCTGACGGTACAG---GCCAGACAA---TTACTG---  
TCTGAAATAGTGCAACAGCAGAAC---AATCTG---CTGAAG---  
GCTATTGAGGCGCAACAGCATCTGTTGCAACTCACAGTCTGGGGCATT

>HQ386218

TTCTACTGTAATACAACAAAACCTGTTCAATAGTACTTGGTGGTCTAATGGTACTTCGATTGGTACAAATAAC-

-----  
-----

TCTAACGAAAATATCACTCTCCCATGCAGAATAAGACAAATTATAAACAGGTGGCAGGAAGTAGGAAAAGCAA  
TGTATGCCCCCTCCCATGGAGGACTAATTAGATGTTTCATCAAAT---  
ATTACAGGGATGATATTAAACAAGAGATGGGGGTAATAATAATACAACA-----

-----  
-----

AATGAGACAGAGACCTTCAGACCTGGAGGAGGAGATATGAGGGATAATTGGAGAAGTGAATTATATAAATATA  
AAGTAGTAAAAATTGAACCATTA---GGAGTAGCACCCACCAAGGCAAAGAGAAGAGTGGTG-----  
-----CAGAGAGAAAAAAGAGCA---GTGGGA---ATAGGAGCT-----  
---TTGTTTCCTTGGGTTCTTGGGAGCA---GCAGGAAGCACTATG---GGCGCAGCGTCA---

TTGACGCTGACGGTACAG---GCCAGACAA---TTATTG---TCTGGTATAGTGCAACAGCAGAAC---  
 GATCTG---CTGAGG---GCTATTGAGGCGCAACAGCATATATTGCAACTCACAGTCTGGGGCATC  
 >U34603  
 TTCTACTGTGATACAACACAACCTGTTTAATAGTACTTGGAATGGTACTGAAGGAAATAACACTGAA-----  
 -----  
 -----  
 GGAAATAGCACAATCACACTCCCATGCAGAATAAAACAAATTATAAACATGTGGCAGGGAGTAGGAAAAGCAA  
 TGTATGCCCCCTCCCATCAGTGGACAAATTAGATGTTTCATCAAAT---  
 ATTACAGGGCTGCTATTAACAAGAGATGGTGGTAAGGACGAGAACAAG-----  
 -----  
 -----  
 ACTGGGACTGAGATCTTCAGACCTGGAGGAGGAGATATGAAGGATAATTGGAGAAAGTGAATTATATAAAATATA  
 AAGTAGTAAAAATTGAACCATTA---GGAGTAGCACCCACCAGGGCAAAGAGAAGAGTGGTG-----  
 -----CAGAGAGAAAAAAGAGCA---GTGGGA---ATAGGAGCG-----  
 ---TTGTTCCCTTGGGTTCTTGCGCAGCA---GCAGGAAGCACTATG---GGCGCACGGTCA---  
 ATAACGCTGACGGTACAG---GCCAGACAA---TTATTG---TCTGGTATAGTGCAACAGCAAAAC---  
 AATTTG---CTGAGG---GCTATTGAGGCGCAACAGCATCTGTTGCAACTCACAGTCTGGGGCATC  
 >AY970946  
 TTCTACTGTAATTCAACACAACCTGTTTAATAGCACTTGGAAGATACTGGAAAGTTAAATAACCCTGAA----  
 -----  
 -----  
 GGAAATGGCAACATCACACTCCCATGTAAAATAAAACAAATTATAAACAGGTGGCAGGGAGTAGGAAAAGCAA  
 TGTATGCCCCCTCCCATCAGAGGACAAATTAGATGTTTCATCAAAT---  
 ATTACAGGGCTGCTATTAACAAGAGATGGTGGTAACAACGTGAAT-----  
 -----  
 -----AATACCACCGAGGTCTTCAGACCTGGAGGAGGAGATATGAGG-----  
 GAATTATATAAAATATAAAGTAGTAAAAATTGAACCATTA---  
 GGAGTAGCACCTACCAAGGCAAAGAGAAGAGTGGTG-----  
 --CAGAGAGAAAAAAGAGCA---GTGGGAACGATAGGAGCT-----  
 ATGTTCCCTTGATTCTTGGGAGCA---GCAGGAAGCACTATG---GGCGCAGCGTCA---  
 GTGGCGCTGACGGTACAG---GCCAGACAA---TTATTG---TCCGGTATAGTGCAACAGCAGAAT---  
 AATTTG---CTGAAA---GCTATTGAGGCGCAACAACATCTGTTGCAACTCACAGTCTGGGGCATC  
 >GU455480  
 TTCTACTGTAATTCAACAAAACCTGTTTAATAGTACTTGGAATTTGAATGGTACTTGGCATGGTACTGAAAGGC  
 CAAATAGC-----  
 -----ACT---  
 GAAAGAAATGACACACTCACAATCCCATGCAGAATAAAACAAATTATAAACATGTGGCAGGAAGTAGGAAAAG  
 CAATGTATGCCCCCTCCCATCAAAGGACAAATTAGCTGTGTATCAAAT---  
 ATTACAGGGTTGCTATTAACAAGAGATGGTGGTACCAGCAAGAACGGGACC-----  
 -----  
 -----  
 ACCAACGACACCGAGGTCTTCAGACCTGGAGGAGGAAATATGAAGGACAATTGGAGAAAGTGAATTATACAAAT  
 ATAAAGTAGTAAAAATTGAACCATTA---GGGGTAGCACCCACCAGGGCAAAGAGAAGAGTGGTG-----  
 -----CAGAGAGAAAAAAGAGGA---GTGGGA---  
 TTAGGAGTGCTGTATGGATTAGGAGCTTTGTTCCCTTGGGTTCTTGGGAGCAGGAAGCACTATGGGCGCAG  
 CGTCAATGACGCTGACGGTACAG---GCCAGACTA---TTATTG---TCTGGTATAGTGCAACAGCAGAAC--  
 -AATCTG---CTGAGG---GCTATTGAGACGCAACAGCATCTGTTGCAACTCACAGTCTGGGGCATC  
 >GU455465  
 TTCTACTGCAATACAACACAGCTGTTTAATAGTACTTGGCTGCTTAATAGTACTTGGAATAGTACTGACGAGT  
 CATCT-----  
 -----  
 AACAAGGAAATTAATATCACACTCCCATGCAGAATAAAACAAATTATAAACAGGTGGCAGGAAGTAGGAAAAG  
 CAATGTATGCCCCCTCCCATCCAAGGACTAATTAAATGTTTCATCAAAT---  
 ATTACAGGGCTGTTATTAACAAGAGATGGTGGTAATGGGACCGAG-----  
 -----  
 -----  
 AATGAGACCGAGACCTTCAGACCTGGGGGAGGAGATATGAGGGACAATTGGAGAAAGTGAATTATATAAAATATA  
 AAGTAGTTAAAAATTGAGCCATTA---GGAGTAGCACCCACCAAGGCAAAGAGAAGAGTGGTG-----  
 -----CGAAGAGAAAAAAGAGCA---GTGGGAGTGATAGGAGCT-----  
 ---ATGTTCCCTTGGGTTCTTGCGCAGCA---GCAGGAAGCGCTATG---GGCGCAGCGTCA---

GTGACGCTGACGGTACAG---GCCAGACAA---TTATTG---TCTGGTATAGTGCAACAGCAGAAC---  
 AATCTG---CTGAGA---GCTATTGAGGCGCAACAGCATCTGTTGCAACTCACAGTCTGGGGCATC  
 >EU744159  
 TTCTACTGTAATTCAGCACAACTGTTTAATAGTACTTGGGAGGTTAATAGAACGAAAGAAAAT-----  
 -----  
 -----  
 GACAATGGCACAATCACACTCCCATGCAGAATAAAACAGATTATAAACATGTGGCAGGAAGTAGGAAAAGCAA  
 TGTATGCCCCCTCCCATCAGCGGACAAATTAGATGTTTCATCAAAT---  
 ATTACAGGGCTGCTATTAACAAGAGATGGTGGTAACGAGACTAATGGG-----  
 -----  
 -----  
 ACTGAGACTGAGACCTTCAGACCTGGAGGAGGAAATATGAGGGACAATTGGAGAAAGTGAATTATATAAAATATA  
 AAGTAGTAAAAATTGAACCATTA---GGAGTAGCACCCACCAAGGCAAAGAGAAGAGTGGTG-----  
 -----CAAAGAGAAAAAAGAGCA---GTGGGA---ATAGGAGCT-----  
 ---GTGTTCCCTTGGGTTCTTAGGAGCA---GCAGGAAGTACTATG---GGCGCAGCGTCA---  
 ATAACGCTGACGGTACAG---GCCAGACTA---TTATTG---TCTGGTATAGTACAACAGCAGAAC---  
 AATCTG---CTGAGG---GCTATTGAGGCGCAACAACATCTGTTGCAACTCACAGTCTGGGGCATC  
 >GU455505  
 TTCTACTGTAATACAACAAAACCTGTTTAGTAGTACTTGGAAATTTTACTAACGGGTCATGGTCATCTAACAATG  
 CGGAAAAAT-----  
 -----ATC---  
 ACACTCTCAGAAAATACCACACTCCCATGCAGAATAAAACAAATTATAAACATGTGGCAGGAAGTAGGAAAGG  
 CAATGTATGCCCCCTCCCATCAGAGGACGAATTAGATGTTTCATCAAAT---  
 ATTACAGGGCTGCTATTAACAAGAGATGGTGGTAGGGACAATGAAACA-----  
 -----  
 -----  
 AACGGGACCGAGATATTCAGACCTGGAGGAGGAAATATGAAGGACAATTGGAGAAAGTGAATTATATAAAATATA  
 AAGTAGTAAAAATTGAACCATTA---GGAGTAGCACCCACCAAGGCAAAGAGAAGAGTGGTG-----  
 -----CAGAGAGAAAAAAGAGCA---GTGGGA---CTAGGAGCT-----  
 ---TTGTTCCCTTGGGTTCTTGGGAGCA---GCAGGAAGCACTATG---GGCGCAGCGTCA---  
 ATGACGCTGACGGTACAG---GCCAGACTA---TTATTG---TCTGGTATAGTGCAACAGCAGAAC---  
 AATTTG---CTGAGG---GCCATTGAGGCGCAACAGCATTTGTTGCAACTCACAGTCTGGGGCATC  
 >GU455448  
 TTCTACTGTAATACTTCAAAACCTGTTTAATAGTACTTGGAAATGATACTACTTTGACTTGGAAATGACACTATTT  
 TAAAT-----  
 -----GAG---  
 ACAATGGACACAAATATCACACTTCCATGCAGAATAAAACAAATTATAAACATGTGGCAGGAAGTAGGAAAAG  
 CAATGTATGCCCCCTCCCATCAAAGGACAAATTAGATGTTTCATCAAAC---  
 ATTACAGGGCTGCTATTAACAAGAGATGGTGGTACTACTGACAATAAA-----  
 -----  
 -----  
 ACAAACATCGAGACCTTCAGACCTGGAGGAGGAGATATGAGGGACAATTGGAGAAAGTGAATTATATAAAATATA  
 AAGTAGTAAGAATTGAACCATTA---GGAGTAGCACCCACCAAGGCAAAGAGAAGAGTGGTG-----  
 -----CAGAGAGAAAAAAGAGCAATAGGGGA---CTAGGAGCT-----  
 ---TTGTTCCCTTGGGTTCTTGGGAACA---GCAGGAAGCACTATG---GGCGCAGCGTCA---  
 ATAACGCTGACGGTACAG---GCCAGACAA---TTATTG---TCTGGTATAGTGCAACAGCAAAAC---  
 AATTTG---CTGAGG---GCTATTGAGGCGCAACAACATCTGTTGCAACTCACAGTCTGGGGCATC  
 >DQ178989  
 TTTTACTGTAATACATCACAGCTGTTTGATAGTATTTGGAATAATAGTACTAGGAATGACACTAGAGAGTCAA  
 AT-----  
 -----  
 AGCACTGATCCTATCATACTCCCATGCAGAATAAAGCAAATTATAAACAGGTGGCAGGAAGTAGGAAAAGCAA  
 TGTATGCCCCCTCCCATCAGTGGACTGATTAGGTGTTTCATCAAAT---  
 ATTACAGGGCTACTATTAACAAGAGATGGTGGTAATAGTGTTAACACCACC-----  
 -----  
 -----  
 AAGAACACCACCGAGACCTTCAGACCTGGAGGAGGAGATATGAGGGACAATTGGAGAAAGTAAATTATATAAAAT  
 ATAAAGTAGTAAAAATTGAACCATTA---GGAGTAGCACCCACCAAGGCAAAAAGAAGAGTGGTG-----  
 -----CAGAGAGAAAAAAGAGCA---GTAACG---CTAGGAGCT---  
 -----ATGTTCCCTTGGGTTCTTGGGAGCA---GCAGGAAGCACTATG---GGCGCAGCGTCG---

CTGACGCTGACGGTACAG---GCCAGACTA---TTATTG---TCTGGTATAGTGCAACAGCAAAAC---  
 AACTTG---CTGAGA---GCTATTGAGGCGCAACAGCATCTGTTGCAACTCACAGTCTGGGGCATC  
 >EU744007  
 TTCTACTGTAATACAACAGAACTGTTTAAAGGTATTTGGAATTTAAATAATACTTGGACTCCAAATAGTACTT  
 GGGATTCACTT-----AATAATACTTTGGAT---  
 ACATCATGGAATAGTACTATA-----  
 GAACCAAATAAGACTATCATACTCCCATGCAGAATAAAACAAATTATAAACATGTGGCAGGAAGTAGGAAAAG  
 TAATGTATGCCCCCTCCCATCAAAGGAATAATTAAATGCTCATCAAAC---  
 ATTACAGGGCTACTATTAACAAGAGATGGTGGTAATAAAGAGAATGAGACC-----  
 -----  
 -----  
 CAGAAATGGGACCGAGATCTTTAGACCTGGAGGAGGAGATATGAGGGACAATTGGAGAAGTGAATTATATAAAAT  
 ATAAAGTAGTAAAAATTGAACCATTA---GGAGTAGCACCCACCAGGGCAAAGAGAAGAGTGGTG-----  
 -----CAGAGAGAAAAAAGAGCA---ATGGGA---ATAGGAGCT---  
 -----ATGTTTCCTTGGGTTCTTGGGAGCA---GCAGGAAGCACTATG---GGCGCAGCGTCG---  
 ATAACGCTGACGGTACAG---GCCAGACAA---TTATTG---TCTGGTATAGTGCAACAGCAGAGC---  
 AATTTG---CTGAGG---GCTATTGAGGCGCAACAGCATCTGTTGCAACTCACAGTCTGGGGCATT  
 >GU455525  
 TTCTACTGTAATACAACAAAACCTGTTTGATTGGAAGGATACAACACAACAGTTTAATTGGAATATTACTAACG  
 GGTCA-----  
 -----  
 TATAACAATGGCACAATTACACTCCCATGCAGAATAAAACAAATTATAAACATGTGGCAGGAAGTAGGAAAAG  
 CAATGTATGCCCCCTCCCATCGAAGGACGAATTAGATGTTTATCAAAT---  
 ATTACAGGGCTGCTATTAACAAGAGATGGTGGTAATAATAAGACG-----  
 -----  
 -----  
 AGCGACCCCGAGATCTTCAGACCTGGAGGAGGAGATATGAGGGACAATTGGAGAAGTGAATTATATAAAATATA  
 AAGTAGTAAAAATTGAACCATTA---GGAGTAGCACCCACCAAGGCAAAGAGAAGAGTGGTG-----  
 -----CAGAGAGAAAAAAGAGCA--GTGGGA---ATAGGAGCT-----  
 ---CTGTTCCCTTGGGTTCTTGGGAGCA--GCAGGAAGCACTATG---GGCGCAGCGTCA---  
 CTAACGCTGACGGTACAG---GCCAGACAA---GTATTG---TCTGGTATAGTGCAACAGCAGAAC---  
 AATTTG---CTGAGG---GCTATTGAGGCGCAACAGCATCTGTTGCAACTCACAGTCTGGGGCATC  
 >EU744052  
 TTCTACTGTAATTCAACACCACTGTTTAATAGTACTTGGTATATTAATAGTACTGAGAATGTTACTGAAAAG-  
 -----  
 -----  
 GCAAAATGAAACAATTACACTCCAATGCAGAATAAAACAAATTATAAACATGTGGCAGGAAGTAGGAAAAGCAA  
 TGTATGCCCCCTCCCATCAGAGGACAAATTAAATGTTTCATCAAAT---  
 ATTACAGGGCTGCTATTAACAAGAGATGGTGGTGAGCACGAGAAC-----  
 -----  
 -----  
 AGCACCACCGAGACCTTCAGACCTGGAGGGGGAGATATGAGGGACAATTGGAGAAGTGAATTATATAAAATATA  
 AAGTAGTAAGAATTGAACCATTA---GGAGTAGCACCCACCAAGGCAAAGAGAAGAGTGGTG-----  
 -----CAGAGAGAAAAAAGAGCA--GTGGGA---ATAGGAGCT-----  
 ---TTATTCCCTTGGGTTCTTGGGAGCA--GCAGGAAGCACTATG---GGCGCAGCATCA---  
 ATAACGCTGACGGTACAG---GCCAGACAA---TTATTG---TCTGGTATAGTGCAACAGCAGAAC---  
 AATCTG---CTGAGG---GCTATTGAGGCGCAACAGCACCTGTTGCAACTCACAGTCTGGGGCATC  
 >U15030  
 TTCTACTGTAATACAACAGGACTGTTTAATAGTACTTGGAAATGGTACTGAAGAGATTGTTACTGAAAGGTCAA  
 ATAGA-----  
 -----ACA---  
 GGAGAAAATGACACACTCATACTCCAATGCAAAATAAGACAAATTGTAAACCTGTGGCAGCAAGTAGGAAAAG  
 CAATGTATGCCCCCTCCCATCCAAGGACAAATTAGCTGTTTCATCAAAT---  
 ATTACAGGGCTGCTATTAACAAGAGATGGTGGTAATAATAATAGTAGT-----  
 -----  
 -----  
 AATAACAACACTGAAATCTTCAGACCTGGAGGAGGAGATATGAGGGACAATTGGAGAAGTGAATTATATAAAAT  
 ATAAAGTAGTAAAAATTGAACCATTA---GGACTAGCACCCACCAAGGCAAAGAGAAGAGTGGTG-----  
 -----CAGAGAGAAAAAAGAGCA--GTGGGA---ATAGGAGTT---  
 -----TTGTTTCCTTGGGTTCTTAGGAGCA--GCAGGAAGCACTATG---GGCGCAGCGGCA---

GTGACGCTGACGGTACAG---GCCAGACAA---TTGTTG---TCTGGTATAGTGCAACAGCAGAAC---  
 AACCTG---CTGAGA---GCTATTGAGGCGCAACAGCATCTGTTGCAACTCACAGTCTGGGGCATC  
 >L08655  
 TTCTACTGTAATACAACACAACCTGTTTAATAGTACTTGGTATGCTAATGATACTGAAGGGTCAAATGAC-----  
 -----  
 -----  
 ACTAAAGCAAATATCACACTCCCATGTAGAATAAAACAAATTATAAACATGTGGCAGGAAGTAGGGAAAGCAA  
 TGTATGCCCCCTCCCATCAAAGGACAAATTAGATGTTTCATCAAAT---  
 ATTACAGGGCTACTATTAACAAGAGATGGTGGTAATAATGAGAACGGGACCGAT-----  
 -----  
 -----  
 GAGAACAGGACCGAGGAGATCTTCAGACCTGGAGGAGGAGATATGAGGGACAATTGGAGAAGTGAATTATATA  
 AATATAAAGTAGTAAAAATTGAGCCATTA---GGAGTAGCACCCACCAAGGCAAAGAGAAGAGTGGTG-----  
 -----CAGAGAGAAAAAAGAGCA---  
 GTGGGAATGATAGGAGCT-----ATGTTTCCTTGGGTTCTTGGGAGCA---GCAGGAAGCACTATG---  
 GGCGCAGCGTCG---CTGACGCTGACGGTACAG---GCCAGACAA---TTATTG---  
 TCTGGTATAGTGCAACAGCAGAAC---AATTTG---CTGAGG---  
 GCTATTGAGGCGCAACAGCATCTGTTGCAACTCACAGTCTGGGGCATC  
 >JF320008  
 TTTTACTGTAATACAACATCATTTGTTTAATGGGACTTGGAAATGGGACTTGGGATAATACCTGGCAAGGG-----  
 -----  
 -----  
 TCAAAATGGCACTATCACACTCCAATGTAGGATAAAACAAATTATAAACATGTGGCAGGAAGTAGGAAAAGCAA  
 TGTATGCTCCTCCCAGAGCAGGAATAATTAATTGTGTATCAAAT---  
 ATTACAGGGCTGATGTTAATGAGAGATGGTGGTAAGGAGGACAATAGTACC-----  
 -----  
 -----  
 GAGAATAGTACCGAGATCTTCAGACCTGGAGGAGGGAATATGAAGGACAATTGGAGAAGTGAATTATATAAAT  
 AATAAGTAGTAAAAATTGAACCATTA---GGAGTAGCACCCACCAAGGCAAAGAGAAGAGTGGTG-----  
 -----CAGAGAGAAAAAAGAGCA---GTAACG---ATAGGAGCT---  
 -----ATGTTTCCTTGGGTTCTTGGGAGCA---GCAGGAAGCACTATG---GGCGCAGCGTCA---  
 ATGACGCTGACGGTACAG---GCCAGGCAA---TTATTG---TCTGGTATAGTGCAACAGCAGAAC---  
 AATCTG---CTGAGA---GCTATTGAGGCGCAACAGCATCTGTTGCAACTCACAGTCTGGGGCATC  
 >JF320215  
 TTCTACTGTGATACAACACAACCTGTTTAATAGTACTTGGAACTACTACTACAGGGTCAAATGCTACTACAGGGT  
 CAAATGGC-----  
 -----ATT---  
 AGTACAAATGACACAATCACGCTCCCATGTAGAATAAAGCAAATTATAAACATGTGGCAGGAAGTAGGAAAAG  
 CAATGTATGCTCCTCCCATCAAAGGACTAATTAGATGTTTCATCAAAC---  
 ATTACAGGGCTACTATTAACAAGGGATGGTGGTGATAGCCCCAAC-----  
 -----  
 -----  
 AAGAGCCAAGAGACCTTTAGACCTGGCGGAGGAGATATGAGGGACAATTGGAGAAGTGAAGTATATAAATATA  
 AAGTAGTAAAAATTGAACCATTA---GGAGTAGCACCTACCATGGCAAAGAGAAGAGTGGTG-----  
 -----CAGAGAGAAAAAGAGAGCA---GTGGGA---CTAGGAGCT-----  
 ---CTGTTCCCTTGGGTTCTTGGGAGCA---GCAGGAAGCACTATG---GGCGCAGCGTCA---  
 ATAACGCTGACGGTACAG---GCCAGACAA---TTATTA---TCTGGTATAGTGCAACAGCAGAGC---  
 AATTTG---CTGAGG---GCTATTGAGGCGCAACAGCATATGTTGCAACTCACAGTCTGGGGCATC  
 >JF320208  
 TTCTACTGTAATACAACAAAACCTGTTTAATAGTACTTGGAAATTGGAATAATACAATAGAGGGCAATAGCACTG  
 AA-----  
 -----  
 -----  
 GATAATGAGACTATCACACTCCCATGTAGAATAAAACAAATTATAAACATGTGGCAGACAGTAGGAAAAGCAA  
 TGTATGCCCCCTCCCATCAGAGGACCAATTAGATGTTTCATCAAAC---  
 ATTACAGGGGATACTACTGACAAGGGATGGTGGTAATGAGAACAACAAC-----  
 -----  
 -----  
 TCCATCCCCGAGATCTTCAGACCTGGAGGAGGAGATATGAGGGACAATTGGAGAAGTGAAGTATATAAATATA  
 AAGTAGTACAAATTGAACCATTA---GGGATAGCACCCACCAAGGCAAAGAGAAGAGTGGTG-----  
 -----CAAAGAGAAAAAAGAGCA---GTGGGA---CTAGGAGCG-----

---TTGTTTCATTGGGTTCTTGGGAGCA---GCAGGAAGCACTATG---GGCGCAGCGTCA---  
 GTGACGCTGACGGTACAG---GCCAGACAA---TTACTG---TCTGGTATAGTGCAACAGCAGAAC---  
 AATTTG---CTGAGG---GCTATTGAGGCGCAACAGCATATGTTGCAACTCACAGTCTGGGGCATC  
 >JF320230  
 TTCTACTGTAATGCATCACAACCTGTTTAATAGTACTTGGAGTGTTTTTGC AAATAATGGTACTTGGACTGCAA  
 CTAATGGC-----  
 -----ACT---  
 GAAGGAAATGATACTATCACTCTCCCATGTAGAATAAAACAATTTGTAAACATGTGGCAGGAAGTAGGAAAAG  
 CAATGTATGCCCCCTCCTATCAGAGGACTAATTAGATGTTTCATCAAAT---  
 ATTACAGGGCTGCTATTAACAAGAGATGGTGGTAAGGATAATAGCAGC-----  
 -----  
 -----  
 AATAGCATGGAGGTCTTCAGACCTGGAGGAGGAAATATGAAGGACAATTGGAGAAAGTGAATTATATAAAATATA  
 AAGTAGTAAAAATTGAGCCATTA---GGAATAGCACCCACCAAGGCAAAGAGAAGAGTGGTG-----  
 -----CAGAGAGAAAAAGAGCA---GTGGGAGTACTGGGAGCT-----  
 ---ATGTTCCCTTGGGTTCTTGGGAACA---GCAGGAAGCACTATG---GGCGCAGCGTCA---  
 GTGACGCTGACGGTACAG---GCCAGACAA---TTATTG---TCTGGTATAGTGCAACAGCAGAAC---  
 AATCTG---CTGAAG---GCTATTGAGGCGCAACAGCATCTGTTGCAACTCACAGTCTGGGGCATC  
 >JF320013  
 TTCTACTGTAATACAACAAAACCTGTTTAACAGTACTTGGTATAGTAATGGTACTTGGACTGGTACTAATGAAA  
 CA-----  
 -----  
 AATAACAATGATACTATCACACTCCCATGCAGAATAAGACAAATTGTAAACATGTGGCAGGAAGTAGGAAAAG  
 CAATGTATGCCCCCTCCCATCAAAGGAGTAATCAGATGTACATCAAAT---  
 ATTACAGGGCTGCTATTAGTAAGAGATGGAGGCCAACAGAACAACTACT-----  
 -----  
 -----  
 GGGAACGAGACTGAGGTCTTCAGACCTTCAGGAGGAAATATGAAGGACAATTGGAGGAGTGAATTATATAAAAT  
 ATAAAGTAGTAAGAATTGAACCATTA---GGAATAGCGCCCACTAGGGCAAAGAGAAGAGTGGTG-----  
 -----CAAAGAGAAAAGAGAGCA---GTAGGA---CTAGGAGCT---  
 -----GTGTTCCCTTGGGTTCTTGGGAGCA---GCAGGAAGCACTATG---GGCGCAGCGTCA---  
 ATTACGCTGACGGTACAG---GCCAGACAA---TTATTG---TCTGGTATAGTGCAACAGCAGAAC---  
 AATTTG---CTGAGA---GCTATTGAGGCGCAACAGTATATGTTGCAACTCACAGTCTGGGGCATT  
 >JF320018  
 TTCTACTGTGACTCTACACAGCTGTTTAATAGTACTTGGAAATTGGAGTAATACTATAGGGATAAATGACACGG  
 AA-----  
 -----  
 GAAAAATTTCAATATCACACTCCCATGCAGAATAAAACAATTTGTAAACATGTGGCAGACAGTAGGAAAAGCAA  
 TGTATGCCCCCTCCCATCAGAGGACAAATTAGATGTTTCATCAAAT---  
 ATTACAGGACTAATATTAACAAGAGATGGTGGAAAAAATAATGATACT-----  
 -----  
 -----  
 AATAACACAGAAACCTTCAGACCAGGAGGAGGAAATATGAAGGATAATTGGAGAAGTGAATTATATAAAATATA  
 AAGTAGTAAGAATTGAACCATTA---GGAGTAGCACCCACCAAGGCAAAGAGAAGAGTGGTG-----  
 -----CAAAGAGAAAAAGAGCA---GTGGGA---ATGGGAGCT-----  
 ---TTGTTTCATTGGGTTCTTGGGAGCA---GCAGGAAGCACTATG---GGCGCAGCGTCA---  
 GTGACGCTGACGGTACAG---GCCAGACAA---TTATTG---TCTGGTATAGTGCAACAGCAGAAT---  
 AATCTG---CTGCAA---GCTATTGAGGCGCAACAGCATCTGTTGCAACTCACAGTCTGGGGCATC  
 >JF320028  
 TTCTACTGTAATACAACAAAATTATTTAATAGTACGTGGAATGAGAATGGGAGTTGGAATGATACTGACTGG-  
 -----  
 -----  
 TCAAATGACACTATCATACTCCCATGCAAAATAAAACAATTTATACGCATGTGGCAGGGGGTAGGACAAGCAA  
 TATATGCCCCCTCCCATCAGCGGACAAATCAGATGTTTCATCAAAC---  
 ATTACAGGGCTATTACTAACAAGAGATGGTGGTATCGAGAACAAAT-----  
 -----  
 -----  
 GACACTGAAACCTTCAGACCTGTAGGAGGAGATATGAGGGACAATTGGAGAAGTGAATTATATAAAATATAAAG  
 TAGTAAGAATTGAACCATTA---GGAGTAGCACCCACCAAGGCAAAAAGAAGAGTGGTG-----  
 -----CAGAGAGAAAAAGAGCA---GTGGGA---TTCGGAGCT-----

GTGTTTCCTTGGGTTCTTGGGAGCA---GCAGGAAGCACTATG---GGCGCAGCGTCA---  
 GTAACGCTGACGGTACAG---GCCAGACAA---TTATTG---TCTGGTATAGTGCAACAGCAGAAC---  
 AATTTG---CTGAGG---GCTATTGAGGCGCAACAGCATCTGTTGCAACTCACAGTCTGGGGCATC  
 >JF320019  
 TTCTACTGCAATACAACATCACTGTTTAATGGTACTTGGTTTAATAGTACTGATAATAATACTGCAGAAACCA  
 TT-----  
 -----  
 ACTGGAATAATACAATCACACTTCCATGCAGAATAAAACAAATTATAAACTTGTGGCAGGAAGTAGGAAAAG  
 CAATGTATGCCCCTCCCATCGCAGGACAAATTAATTGTTTATCGAAT---  
 ATTACGGGGCTGCTATTAACAAGAGATGGTGGTAATAACAACAGCACA-----  
 -----  
 -----  
 GACAATAATAATGAAACCTTCAGACCTGCAGGAGGAGATATGAGGGACAATTGGAGAAGTGAATTATATAAAAT  
 ATAAAGTAGTAAGAATTGAACCATTG---GGAGTAGCACCCACCAAGGCAAAGAGAAGAGTGGTG-----  
 -----  
 -----CAGAGAGAAAAAAGAGCA---GTAGGA---CTAGGAGCT---  
 -----TTGTTTCCTTGGGTTCTTGGGAGCA---GCAGGAAGCACTATG---GGCGCAGCATCA---  
 CTAACGCTGACGGTACAA---GCCAGACAA---TTATTG---TCTGGTATAGTGCAACAGCAGAAC---  
 AATTTG---CTGAGG---GCTATTGAGGCGCAACAGCATCTGTTGCAACTCACAGTCTGGGGCATC  
 >MH078552  
 TTCTACTGTAATACAACAACACTATTTAATAGTACTTGAATAGTACTGCAGTGACCACTCGGAATACTAATA  
 ATACT-----  
 -----  
 GATGATGATAAGATTATACTCCCATGCAGAATAAAACAAATTATAAACATGTGGCAGGAAGTAGGAAAAGCAA  
 TGTATGCTCCTCCCAGAGCAGGAAATATTAGATGTAATTCAAAT---  
 ATTACAGGGCTGCTATTAATAAGAGATGGGGGTCTGAATGAGACC-----  
 -----  
 -----  
 AACAAATACCGAGATCTTCAGACCTACAGGAGGGAACATGAAGGACAATTGGAGAAGTGAATTATATAAAATATA  
 AAGTAGTAGAAGTGGAACCAGTA---GGAGTAGCACCCACCAAGGCAAAGAGGAGAGTGGTG-----  
 -----  
 -----CAAAGAGAAAAAAGAGCA--GTAGTGACGGCAGGAGCT-----  
 ---ATGTTTCCTTGGGTTCTTGAGTGCA--GCAGGAAGCACTATG---GGCGCAGCGTCA---  
 CTAACGCTGACGGTACAG---GCCAGGCAA---TTATTG---TCTGGTATAGTGCAACAGCAGAAC---  
 AATCTG---CTGAGA---GCTATTGAGGCGCAACAGCATATGTTGCAACTCACAGTCTGGGGCATC  
 >MH078553  
 TTCTACTGTAACACAACACCACTATTTAATAGTACCTGGCATCCGAATAATACCAACATAACTAGC-----  
 -----  
 -----  
 ACTAGAGAAAACATCACACTCACATGTAAAATAAGACAAATTATAAACATGTGGCAGGAAGTAGGAAAAGCAA  
 TGTATGCCCCTCCCATCAGAGGACTAATTAGGTGTTTATCAAAT---  
 ATTACAGGACTATTACTAACAAGAGATGGGGGTAGTGATAAGAACAGTAAC-----  
 -----  
 -----  
 CTTAATGGGACTGAAACCTTCAGACCTGGAGGAGGAGATATGAGGGACAATTGGAGAAGTGAATTATATAAAAT  
 ATAAAGTAGTAGAAATTGAACCACTA---GGAATAGCACCCACCAAGGCAAAGAGAAGAGTGGTG-----  
 -----  
 -----CAAAGAGAAAAAAGAGCA---GTGGGA---CTAGGAGCT---  
 -----CTGTTTCCTTGGGTTCTTGGGAGCA---GCAGGAAGCACTATG---GGCGCAGCGTCA---  
 ATAACGCTGACGGTACAG---GCCAGACAA---TTATTG---TCTGGTATAGTGACAGCAGCAAAAC---  
 AATTTG---CTGAGA---GCTATTGAGGCGCAACAGCATATGTTGCAACTCACAGTCTGGGGCATC  
 >MH078555  
 TTCTACTGTAATACAGCACAACACTATTTAATGGTACTTGGGAGGCATATAAAAATAGCTCC-----  
 -----  
 -----  
 ATGAATGATACTATAACACTCCCATGTAGAATAAAGCAAATTATAAACATGTGGCAGAAAGTAGGAAAAGCAA  
 TGTATGCCCCTCCCATCAGTGGAATAATTAAGTGCACATCAAAT---  
 ATAACAGGGCTGTTCTTAACAAGAGATGGAGGCATTAACAATAGT-----  
 -----  
 -----  
 AATAATGAAACCTTCAGACCTGGAGGAGGAGACATGAAGGACAATTGGAGAAGTGAATTATATAAAATATAAGG  
 TAATAAAAGTTGAACCTATA---GGAAGTGGCAGCCACCAAGGCAAGAAGAAGAGTGGTA-----  
 -----  
 -----CAGAGGGAAAAAAGAGCA--ATAACA---CTGGGAGCT-----

ATGTTTCCTTGGGTTCTTGGGAACA---GCAGGAAGCACTATG---GGCGCAGCGTCA---  
 GTGGCGCTGACGGTACAG---GCCAGACAG---TTACTA---TCTGGTATAGTGCAACAGCAGAAC---  
 AATTTG---CTGAGG---GCTATTGAGGCGCAACAGCATATGTTGCAACTCACAGTCTGGGGCATC  
 >EF210726  
 TTCTACTGTAATACAACACCACTATTTAATACTACTTGGGTAAATGAGACTGGGCCTAATAATACCCAG----  
 -----  
 -----  
 GGGAAATGATACCATCACACTCCAATGCAGAATAAAACAAATTATAAACCTGTGGCAGAAAGTAGGAAAAGCAA  
 TGTATGCCCCCTCCTATCAGAGGACGAATTAGATGTTTCATCAAAT---  
 ATTACAGGACTACTATTAACAAGAGATGGTGGGAATAACAATACT-----  
 -----  
 -----  
 AATGAGACCTTCAGACCGGGAGGAGGAGATATGAGGGACAATTGGAGAAGTGAATTATATAAATATAAAGTAG  
 TACAAGTTGAACCATTA---GGATTAGCACCCACCAAGGCAAGGAGAAGAGTGGTG-----  
 -----CAGAGAGAAAAAAGAGCA---GTGGGA---CTGGGAGCT-----  
 GTGTTTCCTTGGGTTCTTGGGAGCA---GCAGGAAGCACTATG---GGCGCAGCGTCA---  
 ATGGCGCTGACGGTACAG---GCCAGACAA---TTATTG---TCTGGTATAGTGCAACAGCAGAAC---  
 AACATG---CTGCGG---GCTATTGAGGCGCAACAGCACCTGTTGCAACTCACAGTCTGGGGCATT  
 >EF210730  
 TTCTACTGTAATACATCACAACCTGTTTAATAGTACTTGAATGGAACAGAGCCAACTAATAGCAATAAA----  
 -----  
 -----  
 GAAAAATGGAACATATCACACTCCCATGTAGAATAAAACAAATTGTAAACATGTGGCAGGAAGTAGGAAAAGCAA  
 TGTATGCCCCCTCCCATCAGAGGACAAATTAGATGTTTCATCAAAT---  
 ATTACAGGGCTACTCTTAACAAGAGATGGTGGTAATAGCAGTACC-----  
 -----  
 -----  
 GAGACCTTCAGACCTGGAGGAGGAGATATGAGGGACAATTGGAGAAGTGAATTATATAAATATAAAGTAGTAA  
 AAATTGAACCATTA---GGAGTAGCCCCCACCAAGGCAAAAAGAAGAGTGGTG-----  
 -----CAGAGAGAAAAAAGAGCA---GTGACA---CTAGGAGCT-----  
 ATGTTTCCTTGGGTTCTTGGGAGCA---GCAGGAAGCACTATG---GGCGCAGCGTCA---  
 ATGACGCTGACGGTACAG---GCCAGACAA---TTATTG---TCTGGTATAGTGCAACAGCAGAAC---  
 AATTTG---CTGAAG---GCTATTGAGGCGCAACAGCATCTGTTGCAACTCACAGTCTGGGGCATC  
 >EF210732  
 TTCTACTGTAATTCATCACAACCTGTTTAACAGTACTTCAAAACAACCTGTTTAACAGTACTTGAATAAT----  
 -----  
 -----  
 ACAAATGCAAATATCGAACTCCCGTGCAGAATAAGACAAATTGTAAATATGTGGCAGAGAATAGGAAAAGCAA  
 TGTACGCCCCCTCCCATCAGTGGACAAATTAACTGTACATCAAAT---  
 ATTACAGGACTGCTATTAAACAAGAGATGGTGATAAGAACAACAAG-----  
 -----  
 -----  
 TCCACCGAGGTCTTCAGACCTATAGGAGGAGAAATGAGGGACAATTGGAGAAGTGAATTATATAAATATAAGG  
 TAGTACAAATTGAACCATTA---GGAGTAGCACCCACCAGGGGCAAAAAGAAGAGTGGTG-----  
 -----CAGAGAGAAAAAAGAGCA---GTGGGA---ATAGGAGCT-----  
 GTGTTTCCTTGGGTTCTTGGGAGCA---GCAGGAAGCACTATG---GGCGCAGCGGCA---  
 GTGACGCTGACGGTACAG---GCCAGACTA---TTATTG---TCTGGTATAGTGCAACAGCAAAGC---  
 AATTTG---CTGAGG---GCTATTGAGGCGCAACAGCATCTGTTGCAACTCACAGTCTGGGGCATC  
 >KC596069  
 CTCTACTGTAATACAACACAACCTGTTCAATGGGACTTGAATGGTACTGCCTGGTCAAATGGTACTGACTGGT  
 CAAATAGCACT-----GAA---  
 -----  
 GGAGATAATACCACACTCACACTCCCATGCAGAATAAAACAAATTATAAACATGTGGCAGAAGGTAGGAAAAG  
 CAATGTATGCCCCCTCCCATCAGAGGAGAAATTAGATGTTTCATCAAAT---  
 ATTACAGGTCTGCTATTAAACAAGAGATGGTGGTGAGCAAAATAGC-----  
 -----  
 -----  
 TCAGAAGAGACCTTCAGACCTGGAGGAGGAGATATGAGGGACAATTGGAGAAGTGAATTATACAAATATAAAG  
 TAGTAAAAAATTGAACCATTA---GGAATAGCACCCACCAAGGCAAGAGAAGAGTGGTG-----  
 -----CAAAGAGAAAAAAGAGCA---GTGGGA---TTCGGAGCT-----

CTGTTTCCTTGGGTTCTTGGGAGCA---GCAGGAAGCACTATG---GGCGCAGCGTCA---  
GTGACGCTGACGGTACAG---GCCAGACTG---TTACTG---TCTGGTATAGTGCAACAGCAAAAC---  
AACTTG---CTGAGG---GCTATTGAGGCGCAACAGCATCTGTTGCAACTCACAGTCTGGGGCATC  
>JN251896  
TTCTACTGTAATACAACACCGCTGTTTAATAAGACTTGAATACAACAGAGCTGTCACAGTATGATAGTAGTG  
ATACT-----  
-----  
AATAGTAATGCTACTATCATACTCCCATGCAGAATAAAACAAATTATAAACAGATGGCAGGAAGTAGGAAAAG  
CAATGTATGCCCCTCCCATCAGAGGACAAATTAGATGTAAATCAAAT---  
ATTACAGGGCTGCTATTAACAAGAGATGGTAGTACCAATGATACA-----  
-----  
-----  
ACCGAGACCTTCAGACCTGGAGGAGGAAATATGAAGGACAATTGGAGAAGTGAATTATATAAATATAAAGTAG  
TAAAAATTGAGCCATTA---GGAATAGCACCCACCAAGGCAAAGAGAAGAGTGGTG-----  
-----CAGAGAGAAAAAAGAGCA---GTAACG---ATGGGAGCT-----  
ATGTTTCCTTGGGTTCTTGGGAGCA---GCAGGAAGCACTATG---GGCGCAGCGTCA---  
GTGACGCTGACGGTACAG---GCCAGACTA---TTATTG---TCTGGTATAGTGCAACAGCAAAAC---  
AATTTG---CTGAGA---GCTATTGAGGCGCAACAGCATCTGTTGCAACTCACAGTCTGGGGCATC  
>JN251901  
TTCTACTGTAATACAACAAAATTGTTTAATAGCACTTTTAATATTAATAGTACTTTAAATGGGACTGAGAGC-  
-----  
-----  
AGTAATGAACTATCACACTCCCATGCAGAATAAAACAAATTATAAACAGGTGGCAGGAAGTAGGAAAGGCAA  
TGTATGCCCCTCCCATCAGTGGACAAATTAAGTGTGAATCAAAT---  
ATTACGGGGATGCTATTAACAAGAGATGGTGACGGGAACAACAGC-----  
-----  
-----  
AGCTCTGAGACCTTCAGACCTGGAGGAGGAGATATGAGGGATAATTGGAAAAGTGAATTATATAAATATAAAG  
TAGTAAAAATTGAACCACTA---GGAGTAGCACCCACCAAGGCAAAGAGAAGAGTGGTG-----  
-----CAGAGAGAAAAAAGAGCA---ATAGGA---ATAGGAGCT-----  
GTGTTTCCTTGGGTTCTTGGGAGCA---GCAGGAAGCACTATG---GGCGCAGCGTCG---  
GTGACGCTGACGGTACAG---GCCAGACAA---TTACTG---TCTGGTATAGTGCAACAGCAGAAC---  
AATCTG---CTGAGG---GCTATTGAGGCGCAACAGCATATGTTGCAACTCACAGTCTGGGGCATC  
>JN251906  
TTCTATTGTAATACAACACAACCTGTTTAATAGTACATGGAATGGTACTGAAGGGTCAAATAGCACA-----  
-----  
-----  
AAAAATGGCACTATCATACTCCCATGCAGAATAAAACAAATTATAAACATCTGGCAGAGAGTAGGAAAAGCAA  
TGTATGCCCCTCCCATCCAAGGACAAATTAGATGTTTCATCACAT---  
ATTACAGGGCTGCTATTAACAAGAGATGGAGGTATGCAAAATAACAAGAAA-----  
-----  
-----  
ACTAGCATAACTGAGATTTTCAGACCTGGAGGAGGAGACATGAGGGACAATTGGAGAAGTGAATTATATAAAT  
ATAAAGTAGTAAAAATTGAACCATTA---GGAATAGCACCCACTAAGGCAAAGAGAAGAGTGGTG-----  
-----CAGAGAGAAAAAAGAGCA---GTGGGA---ATAGGAGCT---  
-----TTGTTTCCTTGGGTTCTTGGGAGCA---GCAGGAAGCACTATG---GGCGCAGCGTCA---  
TTGACGCTGACGGTACAG---GCCAGACAA---TTATTG---TCTGGTATAGTGCAACAGCAGAAC---  
AATTTG---CTGAGG---GCTATTGAGGCGCAACAGCATATGTTGCAACTCACAGTCTGGGGCATC  
>AY819715  
TTCTACTGTAATACAGCACAACCTGTTTAATAGTACTTGAATACTAATGATACTAGGGATAGTACTAATGAC-  
-----  
-----  
-----  
ACAAATAAAAAATATCACACTCCCATGCAGAATAAAACAAATTATAAACATGTGGCAGGAAGTAGGAAAAGCAA  
TATATGCCCCTCCCATCGAGGGAGCAATTAAGTGTTCATCAAAT---  
ATTACAGGGTTGCTATTAACAAGAGATGGTGGTGAGGGTAATGTGAGC-----  
-----  
-----  
GGGAGCAATGAAACCTTCAGACCTGGAGGAGGAAATATGAGGGACAATTGGAGAAGTGAATTATATAAATACA  
AAGTAGTAAAAATCCAACCATTA---GGAGTAGCACCCACCAAGGCAAAGAGAAGAGTGGTG-----  
-----CAGAGAGAAAAAAGAGCA---GTAGGA---CTGGGAGCT-----

---GTGTTCCCTTGGGTTCTTGGGAGCA---GCAGGAAGCACTATG---GGCGCAGCGTCA---  
 GTGACGCTGACGGTACAG---GCCAGACAA---TTATTG---TCTGGTATAGTGCAACAGCAGAAC---  
 AATTTG---CTGAGA---GCTATTGAGGCGCAACAGCACCTGTTGCAACTCACAGTCTGGGGCATC  
 >HQ896488  
 TTCTACTGTAATACATCACAATTGTTTAATAGTACTTGGAAGAATGGTACTTTTGCCAATGGCACTGAA-----  
 -----  
 -----  
 GGAAATGGCACAATCACACTCCCATGCAGAATAAAGCAATTTATAAACATGTGGCAACAAGTAGGAAAAGCAA  
 TGTATGCCCCCTCCCATCAGTGGACAAATTAAGTCTCATCAAAT---  
 ATTACAGGGCTACTATTAACAAGAGATGGTGGTAGTGGTAACAGCACAGAG-----  
 -----  
 -----  
 AACGAGACTGAGATCTTCAGACCTGCAGGGCGAGATATGAGGGACAATTGGAGAAAGTGAATTATATAAAATATA  
 AAGTAGTACAAGTTGAGCCATTA---GGATTACCAACCACAGGGCAAAGAGAAGAGTGGTG-----  
 -----CAGAGAGAAAAAGAGCA---ATAGGA---CTGGGAGCT-----  
 ---GCCTTCCTTGGGTTCTTGGGAGCA---GCAGGAAGCACTATG---GGCGCAGCGTCA---  
 GTGACGCTGACGGTACAG---GCCAGACAA---TTATTG---TCTGGTATAGTGCAACAGCAAAAC---  
 AATTTG---CTGAGG---GCTATTGAGGCGCAACAGCATATGTTGCAACTCACAGTCTGGGGCATC  
 >JX500709  
 TTCTACTGCAAGACAACAGAACTGTTTAATAGTGCTTGGCATAATAATGGTACTAGTACTGTGAATAATACTG  
 GAAA-----  
 -----  
 AATACTGAAAATATTACACTCCCATGTAGAATAAAACAAATTATAAACATGTGGCAGGAAGTAGGAAAAGCAA  
 TGTATGCCCCCTCCCATCAAAGGACTAATTAGATGTACATCAAAT---  
 ATTACAGGCCTGATATTAACAAGAGATGGCGGTAATAATACTAGT-----  
 -----  
 -----  
 AGCAATGAGACCTTCAGACCTGTAGGGGGAGATATGAGGGACAATTGGAGAAGTGAATTATATAAAATATAAAG  
 TAGTAAAAATTGAACCATTA---GGAATAGCACCCACCAAGGCAAAGAGGAGAGTGGTG-----  
 -----CAAAGAGAGAAAAGAGCA---ATAGGAACAATGGGAGCT-----  
 GTGTTCCCTTGGGTTCTTGGGAACA---GCAGGAAGCACTATG---GGCGCAGCGTCA---  
 CTGACGCTGACGGTACAG---GCCAGACAA---TTATTG---TCTGGTATAGTGCAAGCAGCAGAAC---  
 AATCTG---CTGAGG---GCTATTGATGCGCAACAGCATATGTTGCAACTCACAGTCTGGGGCATT  
 >JX500707  
 TTCTATTGTAATACAACAAAACCTGTTTAATAGTACTTGGGAGAACAATAATACTACTAGTACT-----  
 -----  
 -----  
 GGGAAATGGGACAATCACACTCCCATGTAGAATAAAACAAATTATAAACAGATGGCAGGAAGTAGGAAAAGCAA  
 TGTATGCCCCCTCCCATCAAAGGAAAAATTCTATGCTCATCAAAT---  
 ATTACAGGGCTAATATTATCAAGAGATGGTGGTAACAGCAGCACC-----  
 -----  
 -----  
 ACCGAGACCTTCAGACCTGCAGGAGGAGATATGAGGGACAATTGGAGAAGTGAATTATACAAATATAAAGTAG  
 TAAAAATTGAACCATTG---GGAGTAGCACCCACCAAGGCAAAGAGGAGAGTGGTG-----  
 -----CAGAGAGAAAAAGAGCA---GTGGGA---CTAGGAGCG-----  
 TTATTCCTTGGGTTCTTGGGAGCA---GCAGGAAGCACTATG---GGCGCAGCGTCA---  
 CTGACGCTGACGGTACAG---GCCAGACAA---TTATTG---TCTGGTATAGTGCAACAGCAAAAC---  
 AATTTG---CTGAGG---GCTATTGAGGCGCAACAACATCTGTTGCAACTCACAGTCTGGGGCATC  
 >JX500708  
 TTCTACTGTAATACAACACAATTGTTTAATAGCACTTGGGATAAGAATATTACAGAGTTTAATAAGACTAATG  
 AGTTAAAT-----  
 -----  
 AACACTGAAATTATCACACTCCCATGTAGAATAAAACAAATTATAAACATGTGGCAGGCAGTAGGAAAAGCAA  
 TGTATGCCCCCTCCCATCTCAGGACAAATTAATGTTTCATCAAAT---  
 ATTACAGGACTGCTATTAACAAGAGATGGTGGTAACAATGACACC-----  
 -----  
 -----  
 GAGACCTTCAGACCTGGAGGAGGAGATATGAGGGACAATTGGAGAAGTGAATTATATAAAATATAAAGTAGTAA  
 GAATTGAACCATTA---GGAATAGCACCCACCAAGGCAAAGAGAAGAGTGGTG-----  
 -----CAGAGAGAGAAAAGAGCA---GTGGGA---ATAGGAGCT-----

GTGTTCTTGGGTTCTTGGGAGCA---GCAGGAAGCACTATG---GGCGCGGCGTCA---  
 ATAACGCTGACGGTACAG---GCCAGGCAA---TTATTG---GCTGGTATAGTGCAACAGCAGAAC---  
 AATCTG---CTGAGA---GCTATTGAGGCGCAACAACATCTGTTGCAACTCACAGTCTGGGGCATC  
 >MF373130  
 TTCTACTGTAATACAACAACACTATTTAATAGTTCTTGGGATATGAATAGAATTGTAAATAGTTCCGAAAATA  
 AC-----  
 -----  
 ACTGACAAGAATATCACACTCCCATGCAGAATAAAACAAATTGTAAACATGTGGCAGGAAGTAGGAAAAGCAA  
 TGTATGCCCCCTCCCATCAGTGGACAAATTAGATGTTTCATCAAAT---  
 ATTACAGGGCTGCTATTAACAAGAGATGGTGGTAAAAACAGCAGTAACGAG-----  
 -----  
 -----  
 ACCGAGACCGAAATCTTCAGACCTGTGGGAGGAAATATGAGGGACAATTGGAGAAAGTGAATTATATAAATATA  
 AAGTAGTACAAATTGAACCATTA---GGAGTAGCACCCACCAAGGCAAAGAGAAGAGTGGTG-----  
 -----CAAAGAGAAAAAAGAGCA---GTGGGA---TTAGGAGCA-----  
 ---ATGTTCTTGGGTTCTTGGGAGCA---GCAGGAAGCACTATG---GGCGCAGCGTCA---  
 ATAACGCTGACGGTACAG---GCCAGACAA---TTATTG---TCTGGTATAGTGCAACAGCAGAAAT---  
 AATTTG---CTGAGA---GCTATTGAGGCGCAACAGCATCTGTTGCAACTCACAGTCTGGGGCATC  
 >MF373142  
 TTCTACTGTAATACTACACAACACTATTTAATAGTACTTGAATGGTACTTTGGAAAATACTAATAGTACTGGGA  
 AT-----  
 -----  
 GGTGATAATAAACTATCACACTCCCATGCAGAATAAGACAAATTATAAACATGTGGCAGGAAGTAGGAAAAG  
 CAATGTATGCCCCCTCCCATCAAAGGACAAATTAAATGCTCATCAAAG---  
 ATTACAGGGCTGTTATTAACAAGAGATGGGGGCAATGTACCAAATGATGGGGGC-----  
 -----  
 -----  
 AATAATAGCACAGAAATCTTCAGACCTGGAGGAGGAGATATGAGGGACAATTGGAGAAAGTGAATTATATAAAT  
 ACAAAATAGTAAAGTTAAACCAATA---GGAATAGCACCCACCAAGGCAAAGAGAAGAGTGGTG-----  
 -----CAGAGAGAAAAAAGAGCA---GTAACG---CTGGGAGCT---  
 -----GTGTTCTTGGGTTCTTGGGAGCA---GCAGGAAGCACTATG---GGCGCAGCGTCG---  
 ATGACGCTGACGGTACAG---GCCAGACAA---TTATTG---TCTGGTATAGTGCAACAGCAGAAC---  
 AATCTG---CTGAAG---GCTATTGAGGCGCAGCAGCATATACTGCAACTCACAGTCTGGGGCATC  
 >MF373144  
 TTCTACTGCAATTCAACACCACTGTTTAATAGCACCTGGTATACTAATGGGACTAGCACCTGGTATACTAATG  
 GGACTTGG-----  
 AATGTCACTGAAGGGCAT-----  
 AATAGCACTACAAACATCACACTCCAATGCAGAATAAAACAAATTATAAACATGTGGCAGGAAGTAGGAAAAG  
 CAATGTATGCCCCCTCCCATTCAGGAATAATTAAATGCTCATCAAAT---  
 ATCACAGGGCTGCTATTAACAAGAGATGGTGGTAAGGGCAACGGGACTGAC-----  
 -----  
 -----  
 AACAACTACTGAGATCTTCAGACCTGGAGGAGGAGATATGAGGGACAATTGGAGAAATGAATTATATAAATATA  
 AAGTAGTACAAATTGAACCATTA---GGAGTAGCACCCACCATGGCAAAGAGAAGAGTGGTG-----  
 -----CAAAGAGAAAAAGAGAT---TTGGGA---CTAGGAGCT-----  
 ---CTGTTCTTGGGTTCTTGGGAGCA---GCAGGAAGCACTATG---GGCGCAGCGTCA---  
 ATAACGCTGACGGTACAG---GCCAGACAA---TTATTG---TCTGGTATAGTGCAACAGCAGAAC---  
 AACTTG---CTGAGG---GCTATTGAGGCGCAACAGCATCTGTTGCAACTCACAGTCTGGGGCATT  
 >MF373161  
 TTCTACTGTAACACAACAAAACACTATTTGATAGTACTTGAATACGAATGCTACTTGGGATAGGAATTGGAATG  
 ATACCACT-----  
 -----  
 GGAGAAAATGACACAATCAGACTCCCATGTAGAATAAAGCAAATTATAAACATGTGGCAGGAAGTAGGAAAAG  
 CAATGTATGCCCCCTCCCATTAGTGGACTAATTAGCTGCTCATCAAAC---  
 ATTACCGGTTGTTATTAGTAAGAGATGGTGGTGAAAACACTACC-----  
 -----  
 -----  
 GAAGAAGAGATCTTCAGACCTGGAGGAGGAAATATGAAAAGATAACTGGAGAAAGTGAATTATATAAATATAAAG  
 TAGTAAAAAATTGAACCATTA---GGAGTAGCACCCACCAAGGCAAAGAGGAGAGTGGTG-----  
 -----CAGAGAGAAAAAAGAGCA---GTAACG---TTCGGAGCT-----

ATGTTCCCTTGGGTTCTTGGGAGCA---GCAGGAAGCACTATG---GGCGCAGCGTCA---  
 ATAACGCTGACGGTACAG---GCCAGACAA---TTATTG---TCTGGGATAGTGCAACAGCAGAGC---  
 AATTTG---CTGAAA---GCTATTGAGGCGCAACAACATCTGTTGCAACTCACAGTCTGGGGCATT  
 >KP411828  
 TTCTACTGTAATACAACAACCACTGTTTAATAGCACTTGGAATATGACTAATAGGTCTAAAAATAACACTGCAG  
 AA-----  
 -----  
 AATAATACTACATTTCATACTCCCATGCAGAATAAAACAAATTGTAACTTGTGGCAAGAAGTAGGAAAAGCAA  
 TGTATGCCCCCTCCCATCGCAGGACAAATTAAGTGTTCATCAATT---  
 ATTACAGGACTGCTATTAACAAGAGATGGTGGTAGTAATAATGACACA-----  
 -----  
 -----  
 AATGAGACCGAGATCTTTAGACCTGGAGGAGGAGATATGAGTGACAATTGTAGAAAGTGAATTATATAAATATA  
 AAGTAGTAAAAATTGAACCATTA---GGAATAGCACCCACCAGGGCAAAGAGAAGAGTGGTG-----  
 -----CAGAGAGAGAAAAAGAGCA---GTGACG---CTAGGAGCT-----  
 ---GTGTTCCCTTGGGTTCTTGGGAGCA---GCAGGAAGCACTATG---GGCGCAGCGTCA---  
 GTAGCGCTGACGGCACAG---GCCAGACAA---TTGTTG---TTTGGTATAGTGCAACAGCAGAAC---  
 AATCTG---CTGCGA---GCTATTGAGGCGCAACAACATATGTTGCAACTCACAGTCTGGGGCATC  
 >MF373204  
 TTCTACTGTAACACAACAAGACTATTCAACAGTACTTGAGGATCAATGGTACTCTGAATAGTACTGAAGGGC  
 CA-----  
 -----  
 AATAATGCAACTATCATACTCCCATGCAGAATAAAACAAGTTATAAACCTGTGGCAAGAAGTAGGAAAAGCAA  
 TGTATGCCCCCTCCCATCAGGGGAAACATTAGTTGTTTCATCAAAC---  
 ATTACAGGACTGCTATTAACAAGGGATGGTGGTGAT-----  
 -----  
 -----  
 AATGAACTGAGACCTTCAGACCTGGAGGAGGAAATATGAAGGACAATTGGAGAAGTGAATTATATAGATATA  
 AAGTAGTAAAAATTGAACCATTA---GGAATAGCACCCACCACGGCAAGGAGACGAGTGGTG-----  
 -----CAGAGAGAAAAAGAGCA---GTAACA---CTAGGAGCT-----  
 ---ATGTTCCCTTGGGTTCTTGGGGGCA---GCAGGAAGCACTATG---GGCGCAGCGTCA---  
 CTGACGCTGACGGTACAA---GCCAGACAA---TTATTG---TCTGGTATAGTGACAGCAGCAAAAC---  
 AATTTG---CTGAGG---GCTATTGAAGCGCAACAGCATCTGTTGCAACTCACAGTCTGGGGCATT  
 >GU204920  
 TTCTACTGTAATACAACAACCACTGTTTAATAGTACTTGGAATGGTACTACTGGTACTTGGAGTAGAACTGATA  
 CTGAA-----  
 -----GTG---  
 TCAAATAGCACTAATATCATACTCCCCTGCAGAATAAAACAAATTATAAACATGTGGCAGGAAGTAGGAAAAG  
 CAATGTATGCCCCCTCCCATCAGTGGACCAATTAAGTGTTCATCAAAT---  
 ATTACAGGGCTGTTATTAACAAGAGATGGTGGTACTAACGAGACTAAC-----  
 -----  
 -----  
 GAAAGCAATGAGACCGTCAGACCTGGAGGAGGAGATATGAGGGACAATTGGAGAAGTGAATTATATAAATATA  
 AAGTAGTAAAAATTGAACCATTA---GGAGTAGCACCCACCAAGGCAAAAAGAAGAGTGGTG-----  
 -----CAGAGAGAAAAAGAGCA---ATAGGA---ATAGGAGCT-----  
 ---GTGTTCCCTTGGGTTCTTGGGAGCA---GCAGGAAGCACTATG---GGCGCAGCGTCA---  
 GTGACGCTGACGGTACAG---GCCAGACAA---TTATTG---TCTGGTATAGTGCAACAGCAGAAC---  
 AATTTG---CTGAGG---GCTATTGAGGCGCAACAGCATATGTTGCAACTCACAGTCTGGGGCATC  
 >JN251856  
 TTCTACTGTGATTCATCACCCTGTTTAATAGTACTTGCCCGTTAATGGTACTAGTACTAATAGC-----  
 -----  
 -----  
 ATTAACGAACTATCACACTCCCATGTAGAATAAAACAAATTATAAACATGTGGCAGGAGGTAGGAAAAGCAA  
 TGTATGCCCCCTCCCATCAGAGGACCAATTAAGTGTTCATCAAAT---  
 ATTACAGGGCTGATATTAACAAGAGATGGTGGTGATAACATGAAC-----  
 -----  
 -----  
 CAAAGCACAGAGACCTTCAGACCGGGAGGAGGAGATATGAGGGACAATTGGAGAAGTGAATTATATAAATACA  
 AAGTAGTAAAAATTGAACCATTA---GGGGTAGCACCCACCAAGGCAAGAGACGAGTGGTG-----  
 -----CAGAGAGAAAAAGATCA---GTGACA---CTAGGAGCT-----

---ATGTTCCCTTGATTCTTGGGAGCA---GCAGGAAGCACTATG---GGCGCAGCGTCA---  
 ATGGCGCTGACGGTACAG---GCTAGACAA---TTATTG---TCTGGTATAGTGCAACAGCAGAAC---  
 AATTTG---CTGAAG---GCTATTGAGGCGCAACAACATCTGTTGCAACTCACAGTCTGGGGCATC  
 >KY213741  
 TTCTACTGTAATACATCACAACATATTTAATAGTACTTGGGATGGAAATAGTACTAGGGAGAATAGC-----  
 -----  
 -----  
 ACTGGACAGTTATTACACTCCCATGCAGAATAAAACAAATTATAAACATGTGGCAGAAAGTAGGAAAAGCAA  
 TGTATGCCCCCTCCCATCGCGGGCCCAATTAAGTGTTCATCAAAC---  
 ATTACAGGGCTGTTATTAACAAGAGATGGTGGTGGTAATAATACA-----  
 -----  
 -----  
 AATAATGAGACCTTCAGACCAGGAGGAGGAGATATGAGGGACAATTGGAGAAGTGAACTATACAAATATAAAG  
 TAGTAAGAGTTGAACCATTA---GGACTGGCACCCACCAGGGCAAAGAGAAGAGTGGTG-----  
 -----CAGAGAGAAAAAAGAGCA---GTGGGA---CTAGGAGCA-----  
 TTGTTTCATTGGGTTCTTGGGAGCA---GCAGGAAGCACTATG---GGCGCAGCGTCA---  
 GTGACGCTGACGGTACAG---GCCAGACTA---TTATTG---TCTGGTATAGTGCAACAGCAGAAC---  
 AATCTG---CTGAGG---GCTATTGAGGCGCAACAGCATCTGTTGCAACTCACAGTCTGGGGCATC  
 >KY213740  
 TTTTACTGTAATACAAAACCACTGTTTAATAGTACTTGGACTGGGAAGAATAGTACCTGGAATAGTAATGATA  
 CTACA-----  
 -----  
 -----  
 GGAAATGAAACAATCACACTCCAGTGTAGAATAAAACAAATTATAAACATGTGGCAGAAAGTAGGAAGAGCAA  
 TGTATGCTCCTCCCATCAGTGGACAAATTAAGTGTTCATCAAAT---  
 ATTACAGGGCTAATATTAACAAGAGATTGGGAGAGAAATAACACG-----  
 -----  
 -----  
 AGGGAGAACGAGACCCTCAGACCGGGAGGAGGAGATATGAGGGACATTTGGAGAAATGAATTATACAAATATA  
 AAGTAGTAAAAATTGAACCATTA---GGAATAGCACCCACCAAGGCAAAGAGAAGAGTGGTG-----  
 -----CAGAGAGAAAAAAGAGCA---GTGGGA---ATGGGAGCC-----  
 ---TTGTTCCCTTGAGTTCTTGGGAGCA---GCAGGAAGCACTATG---GGCGCAGCATCA---  
 ATAACGCTGACGGTACAG---GCTAGACAA---TTATTG---TCTGGTATAGTGCAACAGCAAAAC---  
 AATTTG---CTGAGG---GCTATTGAGGCGCAACAACACATGTTGCAACTCACAGTCTGGGGCATC  
 >KY213747  
 TTCTACTGTAATACAACACAACCTGTTTAATTCAACACACCTGTTTGATACTACTAATAGCACTGGGAAT---  
 -----  
 -----  
 GCTACAGGAAATATCACACTTCCTTGCAGAATAAAACAAATTGTAAACATGTGGCAGGGAGTAGGAAAAGCAA  
 TGTATGCCCCCTCCCATTAGAGGACCAATTAGCTGTTTCATCAAAG---  
 ATTACAGGATTGCTATTAAACAAGAGATGGTGGTAGTAATAATGAGACA-----  
 -----  
 -----  
 AACACCACCGAGACCTTCAGACCTGGGGGAGGAGATATGAAGGACAATTGGAGAAGTGAAATTATATAAATATA  
 AAGTAGTAAAAATTGAACCATTA---GGAGTAGCACCTACCAAGGCAAAGAGAAGAGTGGTG-----  
 -----CAGAGAGAAAAAAGAGCA---GTGGGAACAATAGGAGCG-----  
 ---ATGTTCCCTTGAGTTCTTGGGAGCA---GCAGGAAGCACTATG---GGCGCAGCGTCA---  
 GTGACGCTGACGGTACAG---GCCAGACAA---TTGTTG---TCTGGTATAGTGCAACAGCAGAGA---  
 AATTTG---CTGAGA---GCTATTGAGGCGCAACAGCATATGTTGCAACTCACAGTCTGGGGCATC  
 >KY213751  
 TTCTACTGCAATACAACACAACCTGTTTAAGTCTACTTGGGAATAGTACTGGGAATATTGCAGAAAATAAT---  
 -----  
 -----  
 ACTGCAGAAAATATCACGCTTCCTTGCAGAATAAAACAAATTATAAACATGTGGCAGGGAGTAGGAAAAGCAA  
 TGTATGCCCCCTCCCATTAGCGGACCAATTAGCTGTTTCATCAAAT---  
 ATTACAGGGTTGCTATTAAACAAGAGATGGTGGTAATAATGAGACG-----  
 -----  
 -----  
 AACACCACCGAGACCTTCAGACCTGGGGGAGGAGATATGAGGGACAATTGGAGAAGTGAAATTATATAAATATA  
 AAATAGTAAAAATAGAACCACTA---GGAATAGCACCTACCAAGGCAAAGAGAAGAGTGGTG-----  
 -----CAGAGAGAAAAAAGAGCA---GTGGGAATGATGGGAGCG-----

---ATGTTCCCTTGGGTTCTTGGGAGCA---GCAGGAAGCACTATG---GGCGCAGCGTCA---  
 ATGGCGCTGACGGTACAG---GCCAGACAA---TTGTTG---TCTGGTATAGTGCAACAGCAGAGA---  
 AATCTG---CTGAGG---GCTATTGAGGCGCAACAGCATCTGTTGCAACTCACAGTCTGGGGCATC  
 >KY213748  
 TTCTACTGTAATACAACAACCACTGTTTAATTCAACACACCCGCCTAATACTACTTGGGAATGAGAAT-----  
 -----  
 -----  
 AATACTGACATTATCACGCTTCCTTGCAGAATAAAACAAATTGTAAACATGTGGCAGACAGTAGGAAAAGCAA  
 TGTATGCCCCCTCCCATTAGCGGACCAATTAGCTGTTTCATCAAAA---  
 ATTACAGGGTTGCTATTAACAAGAGATGGTGGTAATAGTAACAAT-----  
 -----  
 -----  
 GAGACAAACACCACCGAGACCTTCAGACCTGGGGGAGGAGATATGAGGGACAATTGGAGAAGCGAATTATATA  
 AATATAAAGTAGTAAAAATTGAACCATTA---GGAGTAGCACCTACCAAGGCAAAGAGAAGAGTGGTG-----  
 -----CAGAGAGAAAAAAGAGCA---  
 GTGGGAACAATAGGAGCG-----ATGTTCCCTTGGGTTCTTGGGAGCA---GCAGGAAGCACTATG---  
 GGCGCAGCGTCA---GTGACGCTGACGGTACAG---GCCAGACAA---TTGTTG---  
 TCTGGTATAGTGCAACAGCAGAGA---AATTTG---CTGAGA---  
 GCTATTGAGGCGCAACAGCATCTGTTGCAACTCACAGTCTGGGGCATC  
 >AY945710  
 TTCTACTGTAATACATCAAACTGTTTAATAGTACTTGGAACTAATGGTACTTGGGAATGATACTACA----  
 -----  
 -----  
 GGAGATGACACTATCACGCTCCCTTGCAGAATAAAGCAAATTGTAAACATGTGGCAGGAAGTAGGAAAAGCAA  
 TGTATGCCCCCTCCCATCGCAGGAAACATCAGCTGTTTCATCAAA---  
 ATTACAGGGTTAATATTAACATGGGATGGTGGTAATAAGAACGGGAACAAG-----  
 -----  
 -----  
 ACCACCAATGATACAGAGACCTTTAGACCTGGAGGAGGAGATATGAGGGACAATTGGAGAAGTGAAGTATATA  
 AATATAAAGTAGTGAAAATTGAACCATTA---GGAGTAGCACCCACCAAGGCAAAGAGAAGAGTGGTG-----  
 -----CAGAGAGAAAAAAGAGCA---GTGGGA---  
 ATAGGAGCT-----TTGTTCCCTTGGGTTCTTGGGAGCA---GCAGGAAGCACTATG---  
 GGCGCAGCGTCA---ATGACGCTGACGGTACAG---GCCAGACAA---TTGTTG---  
 TCTGGTATAGTGCAACAGCAAAGA---AATTTG---CTGAGT---  
 GCTATTGAGGCGCAACAGCGTCTGTTGCAACTCACAGTCTGGGGCATC  
 >KJ952535  
 TTCTACTGTAATACATCAAACTGTTTAATAGTACTTGGTATAATAATAGTACTTGGGAATGGTGCTTGGGAATA  
 ATACTAGA-----  
 -----  
 -----  
 GAAGATGACAATATCACGCTCCCTTGCAGAATAAAACAAATTGTAAACATGTGGCAGGAAGTAGGAAAAGCAA  
 TGTATGCCCCCTCCCATCAGAGGACTAATTAGATGTTTCATCAAGT---  
 ATTACAGGGTTGCTATTATTAAGAGATGGTGGTATTAAGAACCACAAACC-----  
 -----  
 -----  
 AACGAGACCGAGATCTTCAGACCTGCAGGAGGAGATATGAGGGATAATTGGAGAAGTGAATTATATAAATATA  
 AAGTAGTACAAATTGAACCATTA---GGAGTAGCACCCACCAGGGCAAAGAGAAGAGTGGTG-----  
 -----CAGAGAGAAAAAAGAGCA---GTGGGAACGATAGGAGCT-----  
 ---ATGTTCCCTTGGGTTCTTGGGAGCA---GCAGGAAGCACTATG---GGCGCAGCGTCA---  
 ATAACGCTGACGGTACAG---GCCAGACAA---TTGCTG---TCTGGTATAGTGCAACAGCAGAGA---  
 AATTTG---CTGAGG---GCTATTGAGGCGCAACAGCATCTGTTGCAACTCACAGTCTGGGGCATC  
 >JN248321  
 TTCTACTGCAATACATCACAGCTGTTTAATAGTACTTGGCTGTTTAATAGTACTTGGAAACAGTACTTGGGGTG  
 ATACTAGTACT-----  
 -----GAAGGGTCA-----  
 AATGGAACAAAAGACATCGTACTCCCATGCAAAATAAAACAAATTATAAACATGTGGCAGGAAGTAGGAAAAG  
 CAATGTATGCCCCCTCCCATCAGAGGACTAATTAAATGTTTCATCAAAC---  
 ATTACAGGGCTGTTATTAACAAGGGATGGAGGTGAAAAATAATGACACA-----  
 -----  
 -----  
 AACCAAACCTGAGGTCTTCAGACCTGGAGGAGGAGATATGAGGGACAATTGGAGAAGTGAATTATATAAATATA

AAGTAGTAAAAATTGAACCATTA---GGAGTGGCACCCACCAAGGCAAGGAGAAGAGTGGTG-----  
-----CAGAGAGAAAAAAGAGCA---GTGGGA---GTAGGAGCT-----  
---TTGCTTCTTGGGTTCTTAAGTGCA---GCAGGAAGCACTATG---GGCGCAGCGTCA---  
GTGACGTTGACGGTACAG---GCCAGACAA---TTATTG---TCTGGTATAGTGCAACAGCAGAAC---  
AATTTG---CTGAAG---GCTATTGATGCGCAACAGCATCTGTTGCAACTCACAGTCTGGGGCATC  
>JN248329  
TTCTACTGTAATACAGCACAACTGTTTAATAGCACTTGGGAATAATAATAGTACTGAGAATGATACTATA----  
-----  
-----  
GGAGATGGAACCTATCACGCTCCCTTGCAGAATAAGACAAATTGTAAACATGTGGCAGGAAGTAGGAAAAGCAA  
TGTATGCCCCCTCCCATTTGAAGGACAAATTAGATGTTTCATCAAAT---  
ATTACAGGGTTGCTATTAACAAGAGATGGTGGTAATAATGGGAGC-----  
-----  
-----  
AATACCAACGAGACCTTCAGACCTGGAGGAGGAGATATGAGGGACAATTGGAGAAGTGAATTATATAAGTATA  
AAGTAGTAAAAATTGAACCATTA---GGAGTAGCACCCACCGAGGCAAGGAGAAGAGTGGTG-----  
-----CAGAGAGAAAAAAGAGCA---GTGGGAGCGATAGGAGCT-----  
---ATGTTCCCTTGGGTTCTTGGGAGCA---GCAGGAAGCACTATG---GGCGCAGCGTCA---  
ATAACGCTGACGGTACAG---ACCAGACAA---TTGTTG---TCTGGTATAGTGCAACAGCAGAGA---  
AATCTG---CTGAGG---GCTATTGAGGCACAACAACATCTGTTGCAACTCACAGTCTGGGGCATC  
>JN248333  
TTCTACTGTAATACAACACAACCTGTTTAATAGTACTTGGAAAGGTTAATAGTACTTGGAAATGAGAATAGTACTG  
GGGACAAAT-----  
-----AATGAT-----  
GAAAAAATACAGCACTATCACACTCCCATGCAGAATAAAACAAATTATAAACAGGTGGCAGGAAGTAGGAAAAG  
CAATGTATGCCCCCTCCTATCAGCGGACTAATTAGCTGTTTCATCAAAT---  
ATTACAGGGCTGCTACTAACAAGAGATGGTGGGGATGATAGTAAT-----  
-----  
-----  
AATACTGAGACCTTCAGACCTGCAGGAGGAGATATGAAAGACAATTGGAGAAGTGAATTATATAAATATAAAG  
TAGTAAGAATTGAACCATTA---GGAGTAGCACCCACCAAGGCAAAGAGAAGAGTGGTG-----  
-----CAGAGAGAGAAAAAGAGCA---GTGGGAACACTAGGAGCT-----  
ATGTTCCCTTGGGTTCTTGGGAGCA---GCAGGAAGCACTATG---GGCGCAGCGTCA---  
ATAACGCTGACGGTACAG---GCCAGACAA---TTACTG---TCTGGTATAGTGCAACAGCAGAAC---  
AATTTG---CTGAGA---GCTATTGAGGCGCAACAGCACATCTGTTGCAACTCACAGTCTGGGGCATC  
>JN248335  
TTCTACTGTAATACATCACAACCTGTTTAATAGTACTTGGTATGCTAATGGTACTAGTACTGGGAATAATACTA  
TA-----  
-----  
AAAAATGGCACTATCACGCTCCCTTGCAGAATAAGACAAATTATAAACATGTGGCAGGAAGTAGGAAAAGCAA  
TGTATGCCCCCTCCCATTAAGGACTAATTAGATGTTTCATCAAAT---  
ATTACAGGGATACTATTAAACAAGAGATGGTGGTAGTGGTAATGAGACC-----  
-----  
-----  
ACCAATACCACTGAGACCTTCAGACCTACAGGAGGAGATATGAGGGATAATTGGAGAAGTGAATTATATAAAT  
ATAAAGTAGTAAAAATTGAACCATTA---GGAGTAGCACCCACCAAGGCAAAGAGAAGAGTGGTG-----  
-----CAGAGAGAAAAAAGAGCA---GTGACA---ATAGGAGCT---  
-----ATGTTCCCTTGGGTTCTTGGGAGCA---GCAGGAAGCACTATG---GGCGCAGCGTCA---  
ATAACGCTGACGGTACAG---GCCAGACAA---TTGCTG---TCTGGTATAGTGCAACAGCAGAGA---  
AATTTG---CTGAGG---GCGATTGAGGCGCAACAGCATCTGTTGCAGCTCACAGTCTGGGGCATC  
>JN248337  
TTCTACTGTAATACAACACGACTGTTTAACGGTACCTGGAGTAATGGTACCTGGGTTAATAGCACCTGGAATG  
AT-----  
-----  
-----  
ACCACTAACGAGATCACCTCCCATGCAGAATAAAACAAATTGTGAACATGTGGCAGGAAGTAGGAAAAGCCA  
TATATGCCCCCTCCCATCCAGGGACAAATTAAGTGTTCATCAAAT---  
ATTACAGGGCTGCTATTAACAAGAGATGGTGGTAATAATAATGATACAAAC-----  
-----  
-----  
AAGACCCAGGGCGAGATCTTCAGACCTGGAGGAGGAAATATGAAGGACAATTGGAGAAGTGAATTATATAAAT

ATAAAGTAGTAAGAATTGAACCATTA---GGAATAGCACCCACCAAGGCAAGGAGAAGAGTGGTG-----  
 -----CAAAGAGAAAAAAGAGCA---GTGGGAACAATAGGAGCT---  
 -----ATGTTTCCTTGGGTTCTTGGGAGCA---GCAGGAAGCACTATG---GGCGCAGCGTCA---  
 ATAACGCTGACGGTACAG---GCCAGACTA---TTGTTG---TCTGGTATAGTGCAACAGCAGAAT---  
 AATTTG---CTGAGA---GCTATTGAGGCGCAGCAGCACATGTTGCAACTCACAGTCTGGGGCATC  
 >JN248343  
 TTCTATTGTAATACAACACAGCTGTTTGAGAGTACTTGGCAGGGTGATAATATTGAAGAGTCAAACAGT----  
 -----  
 -----  
 ACTGAACAAAATATCACACTCCCATGCAGAATAAAACAAATTATAAACATGTGGCAGGAAGTAGGAAAAGCAA  
 TGTATGCCCCCTCCCATCGCAGGACCAATTAGATGTTTCATCAAAT---  
 ATTACAGGGTTGCTATTAAACAAGAGATGGGGGTAATGTCACTAAC-----  
 -----  
 -----  
 GGTACTGAGATCTTCAGACCTGGAGGAGGAGACATGAAGGACAATTGGAGAAGTGAATTATATAAATATAAAG  
 TAGTAAAAATTGAACCATTA---GGAATAGCACCCACTAAGGCAAAGAGAAGAGTGGTG-----  
 -----CAAAGAGAAAAAGAGAGCA---GTGGGTATAATAGGAGCT-----  
 ATGTTTCCTTGGGTTCTTGGGAGCA---GCAGGAAGCACTATG---GGCGCAGCGTCA---  
 ATAACGCTGACGGTACAG---GCCAGACAA---TTATTG---TCAGGTATAGTGCAACAGCAGAAC---  
 AATTTG---CTGAGG---GCTATTGAGGCGCAACAGCATTTGTTGCAACTCACAGTCTGGGGCATT  
 >JN248344  
 TTCTACTGCAATACAACACAGCTGTTTAATACTACTTGGATGCCTAATGGTACTTTGAATGGTACTTGGGAA-  
 -----  
 -----  
 CATAACAGCACAATCATACTCCCATGCAAAATAAAACAAATTATAAACAGGTGGCAGGAAGTAGGAAAAGCAA  
 TGTATGCCCCCTCCCATCCAAGGACTAATTAACTGTGCATCAAAT---  
 ATTACAGGACTGTTATTAAACAAGGGATGGTGGTGAGGGTAATGGCACA-----  
 -----  
 -----  
 AACCAGACTGCTGAGGTCTTCAGACCTGTAGGAGGAAATATGAAGGACAATTGGAGAAGTGAATTATATAAAT  
 ATAAAGTAGTAAAAATTGAACCACTA---GGAGTGGCACCCACCAAGGCAAGGAGAAGAGTGGTG-----  
 -----CAGAGAGAAAAGAAGAGCA---GTGGGA---GTAGGAGCT---  
 -----TTGCTCCTTGGGTTCTTGAGTGCA---GCAGGAAGCACTATG---GGCGCAGCGTCA---  
 GTGACGCTGACGGTACAG---GCCAGACAA---TTATTG---TCTGGTATAGTGCAACAGCAAAAC---  
 AATTTG---CTGAGG---GCTATTGATGCGCAACAGCATATGTTGCAGCTCACAGTCTGGGGCATC  
 >JN248347  
 TTCTACTGTAATACATCACAACCTGTTTAATAGTACTTGGCTGAATAGTACTTGGACTAACACCAGTACTTGGAA  
 AT-----  
 -----GATACT-----  
 GCAGGAAATGACACTATCACGCTCCCCTGCAGAATAAAACAAATTGTAAACATGTGGCAGGGAGTAGGAAAAG  
 CAATGTATGCCCCCTCCCATCGCAGGAAAAATTAGATGTTTCATCAAAT---  
 ATTACAGGGTTGTTATTAAACAAGAGATGGTGGTAATAGCACGAAC-----  
 -----  
 -----  
 GAGACCTTCAGACCTGGAGGAGGAGAGATGAGGGACAATTGGAGAAGTGAATTATATAAATATAAAGTAGTAA  
 AAATTGAACCATTA---GGAGTAGCACCCACCAGGGCAAAGAGAAGAGTGGTG-----  
 -----CAGAGAGAAAAGAGAGCG-----GGA---ATAGGAGCT-----  
 GTGTTTCCTTGGGTTTTTGGGAGCA---GCAGGAAGCACTATG---GGCGCAGCGTCA---  
 ATAACGCTGACGGTACAG---GCCAGACAA---TTGTTG---TCTGGTGTAGTGACAGCAGAGAGA---  
 AATTTG---CTGAAG---GCTATTGAGGCGCAACAGCATCTGTTGCAACTCACAGTCTGGGGCATC  
 >JN248353  
 TTTTACTGTAATACAACAACACTGTTTAATAGTACTTGGACTAATAGTACTTGGACTAGCAACTCAACTGACA  
 CTGAA-----  
 -----  
 -----  
 GGCAATATCACACTCACACTCCCATGCAGAATAAAACAAATTGTAAACATGTGGCAGGAAGTAGGAAAAGCAA  
 TGTATGCCCCCTCCCATCCAAGGAAAGATTACATGTTTATCAAAT---  
 ATTACAGGGCTGCTATTGACAAGAGATGGTGACAAAAACGAAACAGGG-----  
 -----  
 -----  
 GAGACCTTCAGACCTATAGGAGGAAATATTAAGGACAATTGGAGAAGTGAATTATATAAATATAAAGTAGTAC

AGATTGAACCATTA---GGAGTAGCACCCACCCAGGCAAAGAGAAGAGTGGTG-----  
 -----CAGAGAGAAAAAAGAGCA---ATAGGGGGAATGGGAGCT-----  
 ATGTTCCCTTGGGTTCTTGGCAGCA---GCAGGAAGCACTATG---GGCGCAGCGTCA---  
 GTGACGCTGACGGTACAG---GCCAGGCAA---TTATTG---TCTGGTATAGTGCAACAGCAGAAC---  
 AACCTG---CTGAGG---GCTATTGAGGCGCAACAGCACCTGTTGCAACTCACAGTCTGGGGCATC  
 >JN248354  
 TTCTACTGTAATACATCACAACCTGTTTAATAGTACTTGGTTTGTCAATGGTACTAATGGTACTACAGTGCCAA  
 ATAATGAC-----  
 -----  
 ACTGAAAAAATTATCACACTCCCATGTAAAATAAAACAAATTATAAACATGTGGCAAGAAGTAGGAAAAGCAA  
 TATATGCCCCCTCCCATTCAGGACCAATTAAGTGTTCATCAAAT---  
 ATTACAGGGCTGCTATTAACAAGAGATGGTGGTAATAATAACGAGACC-----  
 -----  
 -----  
 ACCACCAATGAAACCTTCAGACCTGGAGGAGGAGATATGAGGGACAATTGGAGAAAGTGAATTATATAAATATA  
 AAGTAGTAAAAATTGAACCTTTA---GGAATAGCACCCACCAGGGCAAAGAGAAGAGTGGTG-----  
 -----CAAAGAGAAAAAAGAGCA---GTAACG---CTAGGAGCT-----  
 ---ATGTTCCCTTGGGTTCTTGGGAGCA---GCAGGAAGCACTATG---GGCGCAGCGTCA---  
 ATGACGCTGACGGTACAG---GCCAGACTA---TTATTG---TCTGGTATAGTGCAAGCAGCAAAAC---  
 AATTTG---CTGAGA---GCTATTGAGGCGCAACAGCATATGTTGCAACTCACAGTCTGGGGCATC  
 >JF297222  
 TTCTACTGTAATACATCAAACTGTTTAATAGTGCTTGGCCGCCTAATAGTAATTGGAATAACAGGAATAAC-  
 -----  
 -----  
 ACTGGAGGAAATATCACACTCCCATGCAGAATAAAACAAATTATAAACATGTGGCAGAGAGTAGGACAAGCAA  
 TGTATGCCCCCTCCCATCAGTGGAATCATTAAGTGTGTATCAAAT---  
 ATTACAGGGCTAATATTAACAAGAGATGGGGGTAATACTAGTGATACTAAG-----  
 -----  
 -----  
 AATGACACAGAGATCTTCAGGCCTGCAGGAGGAGATATGAGAGACAATTGGAGAAAGTGAGTTATACAGATATA  
 AAGTAGTAAGAATTGAACCATTA---GGAGTAGCCCCCACCAGGCAAAAAGAAGAGTGGTG-----  
 -----CAGAGAGAAAAAAGAGCA---GTGGGA---ATAGGAGCT-----  
 ---GTGTTTCATTGGGTTCTTGGGAGCA---GCAGGAAGCGCTATG---GGCGCAGCGTCA---  
 ATGACGCTGACGGTACAG---GCCAGACAA---TTATTG---TCTGGTATAGTGCAACAGCAAAGT---  
 AATTTG---CTGAGA---GCTATTGAGGCGCAACAACATATGTTGCAACTCACAGTCTGGGGCATT  
 >JX446800  
 TTCTACTGTAATACAACACCATTTGTTTAATAGTACCTGGTTTAGTACTGAGAATAGTACCTGGAATAGTAATA  
 ATAGTATT-----  
 -----  
 GGGAAATGATACTATTATACTCACATGCAGAATAAAACAAATTATAAACATGTGGCAGCAAGTAGGAAAAGCGA  
 TGTATGCCCCCTCCCATCAAGGGACGAATTAAGTGTACCTCAAAT---  
 ATTACAGGACTGATATTAACAAGAGATGGTGGCCATAATAATTCT-----  
 -----  
 -----  
 AGCAAGAATGAGACCTTCAGACCTGGAGGAGGAGATATGAGGGACAATTGGAGAAATGAATTATATAAATATA  
 AAGTAGTAAAAATTGAACCATTA---GGAATAGCACCCACCAAGGCAAGAGGAGAGTGGTG-----  
 -----CAGAGAGAAAAAAGAGCA---ATAGGAACACTAGGAGCT-----  
 ---GTGTTCCCTTGGGTTCTTGGGAACA---GCAGGAAGCACTATG---GGCGCAGCAGCA---  
 GTGACGCTGACGGTACAG---GCCAGACAA---TTATTG---TCTGGTATAGTGCAACAGCAGAAC---  
 AATCTG---CTGATG---GCTATTGAGGCGCAACAGCGTCTGTTGCAACTCACAGTCTGGGGCATC  
 >JX446818  
 TTCTACTGTAATACATCAAAATTATTTAATAGTACTTGGGAATAATACAAGTAATGACAGTACA-----  
 -----  
 -----  
 AGTAATGGCACAATCACACTCCCATGCAGAATAAAACAAATCATAAACATGTGGCAGCAAGTAGGAAAAGCAA  
 TGTATGCCCCCTCCCATCCAGGGACAAATTAAGTGTTCATCAAAT---  
 ATCACAGGGATACTATTAACAAGAGATGGTGGTAATGGTGGTAATACC-----  
 -----  
 -----  
 AACGATACAGAGGTCTTCAGACCTGCAGGAGGGGATATGAGGAACAATTGGAGGAGTGAATTATACAAATATA

AAGTAGTACAAATTGAACCAGTA---GGAATAGCACCCACCAAGGCAAGGAGAAGAGTGGTG-----  
-----CAAAGAGAAAAAAGAGCA---GTAACA---CTAGGAGCT-----  
---GTGTTCCCTTGGGTTCTTGGAACA---GCAGGAAGCACTATG---GGCGCAGCGTCA---  
ATAGCGCTGACGGCACAG---GCCAGACAA---TTGTTG---TCTGGTATAGTGCAACAGCAGAAC---  
AATCTG---CTGAGG---GCTATTGAGGCGCAACAGCATCTGTTGCAACTCACGGTCTGGGGCATT  
>JX447795  
TTCTACTGTAATACCTCACAACTGTTTAATAGTACTTGGCATACTAATGATACTTGGAAATGGTACAAAGGGT-  
-----  
-----  
AACAAATGGCACTATCACGCTCCCTTGCAGAATAAAACAAATTATAAACATGTGGCAGGAAGTAGGAAAAGCAA  
TGTATGCCCCCTCCCATCAAAGGACCGATTGGATGTTTATCAAAC---  
ATTACAGGGTTGCTATTAACAAGAGATGGTGGTGGGGGGAACGAGACC-----  
-----  
-----  
AGGAAACAACGAGACCTTCAGACCTGCAGGAGGAGATATGAGGGACAATTGGAGAAGTGAATTATATAAATATA  
AAGTAGTAAGAATTGAACCATTA---GGAGTAGCACCTACCAAGGCAAAGAGAAGAGTGGTG-----  
-----CAGAGAGAAAAAAGAGCA---GTGGGAATGCTAGGAGCT-----  
---ATGTTCCCTTGGGTTCTTGGAACA---GCAGGAAGCACTATG---GGCGCAGCGTCA---  
ATAACGCTGACGGTACAG---GCCAGGCAA---TTGTTG---TCTGGTATAGTGCAACAGCAGAGA---  
AATCTG---CTGAGG---GCTATTGAGGCGCAGCAGCACCTGATGCAACTCACAGTCTGGGGCATC  
>JX447156  
TTCTACTGTGATACATCACAACTGTTTAATAGTACTTGGGATGTTAATAGTACTTGGAAATGGTACTGGGAATG  
ATACCCCA-----  
-----  
-----  
GAAAAATAGCACTATCATGCTCCCTTGCAGAATAAAACAAATTGTAAACATGTGGCAGGAAGTAGGAAAAGCAA  
TGTATGCCCCCTCCTATTGCAGGACAAATTAAGTGTTCATCAAAT---  
ATTACCGGGTTGCTATTAACAAGAGATGGTGGTGATAATAGCAAT-----  
-----  
-----  
ACCAGCGAGACCTTCAGACCTGGAGGAGGAAATATGAAGGACAATTGGAGAAGTGAATTATATAAATACAAAG  
TAGTAAAAATTGAACCATTA---GGAGTAGCACCTACCAGGGCTAAGAGAAGAGTGGTG-----  
-----CAGAGAGAAAAAAGAGCA---GTGGGAACGATAGGAGCT-----  
ATGTTCCCTTGGGTTCTTGGAACA---GCAGGAAGCACTATG---GGCGCAGCGTCA---  
ATAACGCTGACGGTACAG---GCCAGACAA---TTGTTG---TCTGGTATAGTGCAACAGCAGAGA---  
AATTTG---CTGAGA---GCTATTGAGGCGCAACAACATATGTTGCAACTCACAGTCTGGGGCATC  
>JF297229  
TTCTACTGTAATACATCACAACTGTTTAATAGTACTTGGAAATGTTAATGATACTAAGAATTGGAATAAT---  
-----  
-----  
ACTGCAGGAAATATCACGCTCATCTGTAGAATAAGACAAATTGTAAACATGTGGCAGGAAGTAGGAAAAGCAA  
TGTATGCCCCCTCCCATTCAGGAATAATTAAGTGTGTATCAAAT---  
ATTACAGGGTTGATTTTAAACAAGAGATGGTGGTAAAAATGGTGGTAATGAT-----  
-----  
-----  
ACAAATAAATTCACTGAGATCTTCAGACCTGGAGGAGGAGATATGAAGGACAATTGGAGAAGTGAATTATATA  
AATATAAAGTAGTAAAAATTGAACCATTA---GGAGTAGCACCTACCAAGGCAAAGAGAAGAGTGGTG-----  
-----CAGAGAGAAAAAAGAGCA---GTG-----  
CTAGGAGCT-----ATGTTCCCTTGGGTTCTTGGAACA---GCAGGAAGCACTATG---  
GGCGCAGCGTCA---ATAACGCTGACGGTACAG---GCCAGACAA---TTGTTG---  
TCGGGTATAGTGCAACAGCAGAGA---AATCTG---CTGAGG---  
GCTATTGAGCTGCAACAGCATCTGTTGCAACTCACAGTCTGGGGCATC  
>MG989620  
TTCTACTGTAACACAACAAAAGTGTTTAATAGTACTTGGAAATAATACTGGGGAGAACATTACTAGTCCTGCAG  
AT-----  
-----  
-----  
ACAAACGACACTATCATACTCCCATGCAGAATAAAACAAATTGTAGAATGTGGCAGGAAGAAGGCAAAGCAA  
TGTATGCCCCCTCCCATCAGAGGAAATATTAGCTGTTTCATCAAAT---  
ATTACAGGGTTGATATTAACAAGAGATGGCGGGGACGAAGGCAAC-----  
-----  
-----

CAAACCCAAGTAAATGAAACCTTCAGACCTGGAGGAGGAAAATATGATGGACAATTGGAGAAGTGAATTATATA  
GATATAAAGTAGTAAAAATTGAACCATTA---GGAATAGCACCCACCAAGGCAAAGAGAAGAGTGGTG-----  
-----CAAAGAGAAAGAAGAGCA---  
GTGGGAGTAATAGGAGCT-----ATGTTTCCTTGGATTCCCTAGGAACA---GCAGGAAGCACTATG---  
GGCGCAGCGTCA---ATAACGCTGACGGTACAA---GCCAGCAA---TTATTG---  
TCTGGTATAGTGCAACAGCAGAGC---AATCTG---CTGAGA---  
GCTATTGAGGCGCAACAGCATCTGTTGCAACTCACGGTCTGGGGCATT  
>MG989578  
TTCTACTGTAATACAACACCACTGTTTAATAGTATTTGGCATAGTAATAATACTTGAATAGTAGGACTGGA-  
-----  
-GAGCCAACTAACACCACT-----  
GGAGGAAATGGCACCATCACACTCCAATGCAGAATAAAACAAATTATAAACATGTGGCAGCAAGTAGGGAAAAG  
CAATGTATGCCCTCCCATCAGTGGACCAATTAAGTCTCATCAAAT---  
ATTACAGGGCTACTATTACTAAGAGACGGGGGTAACCAACAAAGATAGC-----  
-----  
-----  
AATGACACCGAGATCTTCAGACCGGGAGGAGGAGATATGAGGGACAATTGGAGAAGTGAATTATATAAAATATA  
AAGTAGTAAAAATTGAACCATTA---GGAGTAGCACCAACCATGGCAAGAAGAAGAGTGGTG-----  
-----CAGAGAGACAAAAGAGCG---GCA-----CTAGGAGCG-----  
---GTGTTTCCTTGCGTTCTTGGGAGCA---GCAGGAAGCACTATG---GGCGCAGCGTCA---  
TTGACGCTGACGGTACAG---GCCAGACAA---TTGCTG---TCTGGTATAGTGCAACAGCAGAAC---  
AATTTG---CTGAGA---GCTATTGAGGCGCAACAGCATATGTTGCAACTCACAGTCTGGGGCATA  
>MG989587  
TTCTACTGTAATACAACACCACTGTTTAATAGTACTTGAATTTTACTAGTGCTGGGGAGCTTAATAACACTG  
CTAATGAGACT-----  
-----  
AATGATGATAACATCACACTCCAATGCAGAATAAAACAAATTATAAACATGTGGCAGCAAACAGGAAAAGCAA  
TGTATGCCCCCTCCCATCAAAGGACTAATTGACTGTACATCAAAT---  
ATTACAGGGCTACTATTAATAAGAGATGGTGGTAACGAGAGTAGC-----  
-----  
-----  
ACAAATGAGACCTTCAGACCAGAAGGAGGAAATATGAAGGACAATTGGAGAAGTGAAGTATATAAAATATAAAG  
TAGTACAAATTGAACCATTA---GGAATAGCACCCACCAAGGCAAAGAGAAGAGTGGTG-----  
-----CAGAGAGAAAAAAGAGCA---GTGGGA---ATGGGAGCT-----  
TTGTTTCCTTACGTTCTTGGGAACA---GCAGGAAGCACTATG---GGCGCAGCGTCA---  
TTAACGCTGACGGTACAG---GCCAGACAA---TTATTG---TCTGGTATAGTGCAAGCAGCAGAGC---  
AATCTG---CTGAAG---GCTATTGAGGCGCAACAGCATATGTTGCAACTCACCGTCTGGGGCATC  
>MG989506  
TTTTATTGTAATACCTCACAGCTGTTTAATAGTATTTGGAATAGTAGTACTGGGAATAATAATAGTACTGGG-  
-----  
-----  
AATAAGAGCACTATCATACTCCCTTGTTAGTAATAAAACAAATTATAAACATGTGGCAGAAGGTAGGAAAAGCAA  
TGTACGCCCCCTCCCATCGAAGGAATGATTAACTGTTTATCAAAT---  
ATCACAGGGTTGCTGTTAAACAAGAGATGGTGGCAGGGTGAATGGGACT-----  
-----  
-----  
GAGGAAAATAGGACTGAGATCTTCAGACCTGGAGGAGGAGATATGAGGGACAATTGGAGAAGTGAATTATATA  
AATATAAAGTAGTAAAAATTGAACCATTA---GGAGTAGCACCCACCAAGCAAAGAGAAGAGTGGTG-----  
-----CAGAGAGAAAAAAGAGCA---GTAGGA---  
ATAGGAGCT-----GTGTTTCCTTGGGTTTCTAGGAGCA---GCAGGAAGCACTATG---  
GGCGCAGCGTCA---ATAACGCTGACGGTACAG---GCCAGACAA---TTAATG---  
TCTGGCATAGTGCAACAGCAAAGA---AATTTG---CTGAGG---  
GCTATTGAGGCGCAACAGCATCTGTTGCAACTCACAGTCTGGGGCATC  
>MG989541  
TTCTACTGTAATACAACACAGCTATTTAATAGTAAGTGGAAATGATAGTAATTGGAATAGTACTTGAATAATA  
CTGAAAAG-----  
-----  
TCAAATGATATAATCACACTCCCCTGCAGAATAAAACAGATTATAAACATGTGGCAGGAAGTAGGAAAAGCAA  
TGTATGCCCCCTCCCATCCAGGGACTAATTAAATGTTTCATCAAAC---  
ATTACAGGGATACTATTAACAAGAGATGGTGGTAAT-----

-----  
GTGACTTTAGATAATGGGACTTCCAGTAATGAGACTGAGATCTTCAGACCTGCAGGAGGAGATATGAGAGACA  
ATTGGAGAAGTGAATTATATAAAATATAAAGTAGTAAGAGTTGAACCAAGTA---  
GGAATAGCACCCACCAGGGCAAAGAGAAGAGTGGTG-----  
--CAGAGAGAAAAAAGAGCG--GTAACA--CTGGGAGCT-----  
GTGTTCCCTTGGGTTCTTGGGAACA--GCAGGAAGCACTATG--GGCGCAGCGTCA---  
ATAGCGCTGACGGCACAG--GCCAGACAA--TTATTG--TCTGGTATAGTGCAACAGCAAAAC---  
AATTTG--CTGAGA--GCTATTGAGGCGCAACAGCACCTGTTGCAACTCACGGTCTGGGGCATC  
>MG989610  
TTTTACTGTAATACAACACCACTGTTTAATGGGACACTGATTAATGGGACTTGGAATGGTATTGAATGGCCAA  
ATAAT-----  
-----  
ACGAATGGAACATATCACACTCCAGTGCAGAGTAAAACAAATTATAAACATGTGGCAAAAAGTAGGAAAAGCAA  
TGTATGCCCCGCCCATCAAAGGACTAATTAAATGCTCATCAAAT---  
ATTACAGGGCTGATATTAACAAGAGATGGTGGCGGGAATGGGACA-----  
-----  
-----  
AATGAGACCTTCAGACCTGCAGGAGGAGATATGAGGGACAATTGGAGAAGTGAATTATATAAGTATAAAGTAG  
TAAAACTTGAACCATTA---GGAGTAGCACCCACCAAGGCAAAGAGAAGAGTGGTG-----  
-----CAGAGAGAAAAAAGAGCA---GTGGGA--ATAGGAGCT-----  
TTGTTCAATTGGGTTCTTGGGAGCA--GCAGGAAGCACTATG--GGCGCAGCGTCA---  
CTAACGCTGACGGTACAG--GCCAGACAA--TTGTTG--TCTGGTATAGTGCAACAGCAGAGC---  
AATCTG--CTGAGG--GCTATTGAGGCGCAACAGCATATGTTGCAACTCACAGTCTGGGGCATT  
>MG989551  
TTCTACTGTAATACAACACCACTGTTTAATATTACTAACACCACAAATGACAAT-----  
-----  
-----  
GACAATAACACAATCATACTCCAATGCAAAATAAAACAGATTATAAATATGTGGCAGAAAGTAGGGAGAGCAA  
TGTATGCCCCCTCCCATCAGTGGAAAAATTATGTGTTTCATCAAAC---  
ATTACAGGGCTACTGTTAACAAGAGATGGTGGGAATAATAGGACT-----  
-----  
-----  
AATGAGACCTTCAGACCTGCAGGGGGAGATATGAGGGACAATTGGAGAAGTGAATTATATAAATATAAGGTAG  
TAAAAATTGAACCTTTA---GGAATAGCACCCACCAAGTCAAGGAGGCTAGTGGTG-----  
-----CAAAGAGAAAAACGAGCA---GTGGGA--ATGGGAGCT-----  
ATGTTCCCTTGGGTTCTTGGGAGCA--GCAGGAAGCACTATG--GGCGCGGCGTCA---  
ATGACGTTGACGGTACAG--GCCAGACAA--TTATTG--TCTGGTATAGTGCAACAGCAGAAC---  
AACTTG--CTGAAG--GCTATTGAGGCGCAACAGCACCTGTTGCGACTCACAGTCTGGGGCATC  
>U39258  
TTCTACTGTAATACATCACAACCTGTTTAATGGTACTTGGAATAATACTATA-----  
-----  
-----  
GAAAATAGCACTATCACGCTCCCTTGCAGAATAAGACAAATTGTAAACATGTGGCAGGAAGTAGGAAAAGCAA  
TGTATGCCCCCTCCCATCAGAGGACAAATTAGATGTTTCATCAAAT---  
ATTACAGGGCTGCTATTAACAAGAGATGGTGGTAATAATGGGAGC-----  
-----  
-----  
AATACCACCGAGACCTTCAGACCTGGAGGAGGAAATATGAGGGACAATTGGAGAAGTGAATTATATAGATATA  
AAGTAGTAAAAATTGAACCATTA---GGAGTAGCACCCACCAAGGCAAAGAGAAGAGTGGTG-----  
-----CAGAGAGAAAAAAGAGCA---GTGGGAACAATAGGAGCT-----  
---ATGTTCCCTTGGGTTCTTGGGAGCA--GCAGGAAGCACTATG--GGCGCAGCGTCA---  
ATAACGCTGACGGTACAG---GCCAGACAA--TTGTTG--TCTGGTATAGTGCAACAGCAGAGA---  
AATTTG--CTGAGG--GCTATTGAGGCGCAACAGCATCTGTTGCAACTCACAGTCTGGGGCATC  
>DQ354116  
TTCTACTGTAATACAACAGGACTGTTTAATAGTACTTGGAATAATACTAGTACTGGGAATAATACTACA----  
-----  
-----  
GGAAATGACAATATCACGCTCCCTTGCAGAATAAGACAAATTGTAAACATGTGGCAGGAAGTAGGAAGAGCAA  
TGTATGCCCCCTCCCATCGAGGGACAGATTAGATGTTTCATCAAAT---  
ATTACAGGGTTGCTATTAACAAGAGATGGTGGTAATGATAAGAAC-----

-----  
-----  
CGCACCACCGAGACCTTCAGACCTGGAGGAGGAGATATGAGGGACAATTGGAGAAGTGAATTATATAAAATATA  
AAGTAGTAAAAATTGAACCATTA---GGAGTAGCACCCACCAGGGCAAAGAGAAGAGTGGTG-----  
-----CAAAGAGAAAAAAGAGCA--GTGGGAACGATAGGAGCT-----  
---ATGTTCCCTTGGGTTCTTGGGAGCA--GCAGGAAGCACTATG--GGCGCAGCGTCA---  
ATAACGCTGACGGTACAG---GCCAGACAA---TTGTTG---TCTGGTATAGTGCAACAGCAGAGA---  
AATTTG---CTGAGA---GCTATTGAGGCGCAACAGCATCTGTTGCAACTCACAGTCTGGGGCATC  
>DQ354118  
TTCTACTGTAATACATCAAACTGTTTAATAGTACTTGGCATACTAATAGTACTTGGCATACTAATAGTACT-  
-----  
-----  
GGGAATGATACTATCACGCTCCCTTGCAGAATAAAACAAGTTGTAAACATGTGGCAAGAAGTAGGAAAAGCAA  
TGTATGCCCCCTCCCATCAAAAGGACCAATTAGATGCTCATCAAAT---  
ATTACAGGGTTGCTATTAAACAAGAGATGGTGGTAAAAAAGGGAACGAA-----  
-----  
-----  
ACCAACGAGACCGAAACCTTCAGACCTGCAGGAGGAAAATATGAAGGACAATTGGAGAAGTGAATTATATAAAAT  
ATAAAGTAGTAAAAATTGAACCATTA---GGAGTAGCACCCACCAGGGCAAAGAGAAGAGTGGTG-----  
-----CAGAGAGAAAAAAGAGCA--GTGGGGACGATAGGAGCT---  
-----ATGTTCCCTTGGGTTCTTGGGAGCA--GCAGGAAGCACTATG--GGCGCAGCGTCA---  
ATAACGCTGACGGTACAG---GCCAGACAA---TTGCTG---TCTGGTATAGTGCAACAGCAGAGA---  
AATTTG---CTGAGG---GCTATTGAGGCGCAACAGCATCTGTTGCAACTCACAGTCTGGGGCATT  
>DQ354119  
TTCTACTGTAATTCAACACCGCTGTTTAATGGGACGTTTAATAGTACTGGGAATGGAAGTGGAGAGTCACAG-  
-----  
-----  
AGCAATGGAAATATCACACTCCAGTGTAGAATAAGACAAATTATAAACAGGTGGCAGGAAGTAGGAAAAGCAA  
TGTATGCCCCCTCCCATCAGCGGACTAATTAGATGTTTCATCAAAT---  
ATTACAGGGCTACTATTAAACAAGAGATGGTGGAAACGGGAGTACG-----  
-----  
-----  
AATGAGACCTTCAGACCTGGGGGAGGAAACATGAGGGACAATTGGAGAAGTGAATTATATAAAATATAAAGTAG  
TAAAAATTGAGCCATTA---GGGGTAGCACCCACCAAGGCAAAGAGAAGAGTGGTG-----  
-----CAGAGAGAAAAAAGAGCA--GCGATA-----GGAGCT-----  
ATGTTCCCTTGGGTTCTTGGGAGCA--GCAGGAAGCACTATG--GGCGCAGCGTCG---  
GTGACGCTGACGGTACAG---GCCAGACAA---TTATTG---TCTGGTATAGTGCAAGCAGCAGAAC---  
AATCTG---CTGAGG---GCTATTACGCGCAACAGCATCTGTTGCAGCTCACAGTCTGGGGCATC  
>AY945711  
TTCTACTGTGATACATCAAACTGTTTACTTGAATAGTACTTGAATAGTACTTGAATAATAAATACTTGA  
ATGAT-----  
-----ACT---  
ATAGGAGATAGCAATATCACGCTCCCTTGCAGAATAAAACAAGTTGTAAACATGTGGCAGGAAGTGGGAAAAG  
CAATGTATGCCCCCTCCTATTGAAGGACAAATTAGATGTTTCATCAAAT---  
ATTACAGGGTTGCTATTAAACAAGAGATGGTGGTAATAATGGAGAC-----  
-----  
-----  
AATGACACCGAGATCTTCAGACCTGGAGGAGGAGATATGAGGGACAATTGGAGAAGTGAATTATATAAAATATA  
AAGTAGTAAAAATTGAACCATTA---GGAGTAGCACCCACCAGGGCAAAGAGAAGAGTGGTG-----  
-----CAGAGAGAAAAAAGAGCA--GTGGGAACAATAGGAGCT-----  
---ATGTTCCCTTGGGTTCTTGGGAGCA--GCAGGAAGCACTATG--GGCGCAGCGTCA---  
ATAACGCTGACGGTACAG---GCCAGACAG---CTGTTG---TCTGGTATAGTGCAACAGCAGAGA---  
AATTTG---CTGAGG---GCTATTGAGGCGCAACAGCATCTGTTGCAACTCACAGTCTGGGGCATC  
>HM215431  
TTCTACTGTGACTCAACACCACTGTTTAATAGTACTTGAAGAATATTACAGAGTTAGATGCTACAAAGTTAG  
ATAAC-----  
-----GCT---  
ACAGAAAAAGGAAATATCACACTCAAATGTAGAATAAAACAATTTATAAACATGTGGCAGGGAGTAGGAAAAG  
CAATGTATGCCCCCTCCTATCAGTGGACCAATTAGCTGTTTATCAGAA---  
ATTACTGGGCTACTATTAAACAAGAGATGGTGGTGTCACTAAGAATAATGAGACC-----

AATGGGACCACTGGGAAT---GAT-----  
-----  
AAGACCGAGGTCTTCAGACCTGGAGGAGGAGACATGAGGGACAATTGGAGAAGTGAATTATATAAATATAAAG  
TAGTACAAATTAAGCCATTA---GGAATAGCACCCACCAAGGCAAAGAGGAGAGTGGTG-----  
-----CAGAGAGAAAAAAGGGCA--GTGACA---TTTGGAGCT-----  
ATGTTTCCTTGGGTTCTTGGGAGCA--GCAGGAAGCACTATG--GGCGCAGCGTCA---  
ATAGCGCTGACGGGACAG---GCCAGACAA--TTATTG---TCTGGTATAGTGCAACAGCAGAAT---  
AATCTG---CTGAGG---GCTATTGAGGCGCAACAGCATCTGTTGCAACTCACTGTCTGGGGCATC  
>HM215435  
TTCTACTGTAATACATCACAACCTGTTTAATAGCACTTGGCTTAATAACAATTCA-----  
-----  
-----  
ACTAATGGAACCTATCATACTCCCATGCAGAATAAAACAATTTATAAACATGTGGCAGGAAGTAGGAAAAGCAA  
TGTATGCCCCCTCCCATCAGCGGAAATATTAGCTGTTTCATCAAAT---  
ATTACAGGGCTGCTATTAAACAAGAGATGGTGGTAATGGCAAAAACACC-----  
-----  
-----  
AACTCCTCTGAAACCTTCAGACCTGGAGGAGGAGATATGAGGGACAATTGGAGAAGTGAATTATATAAAATACA  
AAGTAGTAAGAATTGAACCACTA---GGAATAGCACCCACCAAGGCAAGGAGAAGAGTGGTG-----  
-----CAGAGAGAAAAAAGAGCG--GTAATA-----GGAGCT-----  
---ATGTTTCCTTGGGTTCTTGGGAGCA--GCAGGAAGCACTATG--GGCGCAGCGTCA---  
GTGACGCTGACGGTACAG---GCCAGACTA--TTATTG---TCTGGTATAGTGCAACAGCAGAAC---  
AATCTG---CTGAGA---GCTATTGAGGCGCAACAGCATATGTTGCAACTCACAGTCTGGGGCATC  
>EU839606  
TTCTACTGTAATACAACAAAACCTGTTTAATAGTACTTGGAAATAGTAATGGTATTTGGAATAATACTATAGAGT  
CAAATGAC-----  
-----ACA---  
GAGTCAAATGATACTATCACACTCCCATGCAGAATAAAACAATCATAAACATGTGGCAGGGAGTAGGTAAAG  
CAACGTATGCCCCCTCCCATTAGAGGACAAATTAGATGTTTCATCAAAT---  
ATTACAGGATTACTATTAAACAAGAGACGGTGGTAATAACACAAGT-----  
-----  
-----  
GGCACCGAGACCTTCAGACCTGGAGGAGGAGATATGAGGGACAATTGGAGAAGTGAATTATATAAATATAAAG  
TAGTAAAAAATTGAACCATTA---GGAGTAGCACCCACCAAGGCAAAGAAGAGTGGTG-----  
-----CAGAGAGAAAAAAGAGCA--GTGGGAACAATAGGAGCT-----  
ATGTTTCCTTGGGTTCTTGGGAGCA--GCAGGAAGCACTATG--GGCGCAGCATCA---  
CTAACGCTGACGGTACAG---GCCAGACAA--TTATTG---TCTGGTATAGTGCAACAGCAGAAC---  
AATCTG---CTGAGG---GCTATTGAGGCGCAACAACATCTGTTGCAACTCACGGTCTGGGGCATC  
>EU839607  
TTCTACTGTAACACATCACACCTGTTTAACAATACTTGGAAATGGTACTGAGACTGATACTTGGAAATATTACAG  
GG-----  
-----  
GAAGATAGTAATATCACACTTCCATGTAGAATAAAACAATTTGTAAACATGTGGCAGGAAGTAGGTAAAGCAA  
TGTATGCCCCCTCCCATCAGAGGACAAATTAGCTGTTTCATCAAAT---  
ATTACAGGGATGCTATTAAACAAGAGATGGTGGTAATGGTAATGACACG-----  
-----  
-----  
AACACGAGACTGAGATCTTCAGACCTGCAGGAGGAGATATGAGGGACAATTGGAGAAGTGAATTATATAAAT  
ATAAGTAGTACAAATTGAACCATTA---GGAGTAGCACCCACCAAGGCAAAGAGAAGAGTGGTG-----  
-----CAAAGAGAGAAAAGAGCA---GTGGGAGCAATAGGAGCT---  
-----ATGTTTCCTTGGGTTCTTGGGAGCA--GCAGGAAGCACTATG--GGCGCAGCGTCG---  
ATAACGCTGACGGTACAG---GCCAGACAA---CTACTG---TCTGGTATAGTGCAACAGCAGAAC---  
AATCTG---CTGAAG---GCTATTGAGGCGCAACAGCATCTGTTGCAACTCACGGTCTGGGGCATC  
>HQ217662  
TTCTATTGTAATGCAACACAATTGTTTAATAGTACTTGGAGTATTGGGAATGATACTATAGAAAAT-----  
-----  
-----  
AGCAATATCAATATCACACTCCCATGCAGAATAAAACAATTTGTAAACATGTGGCAGGAAGTAGGCAAGGCAA  
TATATGCCCCCTCCCATTAGAGGACAAATTAGATGTTTCATCAAAT---  
ATTACAGGAATACTATTAAACAAGAGATGGTGGTGATACTAATGAC-----

-----  
-----  
ACGACCGAGATCTTCAGACCTGGAGGAGGAGATATGAGGGAAAATTGGAGAAGTGAATTATATAAATATAAAG  
TAGTAAGGATTGAACCAATA---GGAGTAGCACCCACCAAGGCAAAGAGGAGAGTGGTG-----  
-----CAAAGAGAAAAAAGAGCA--GTGGGAGCAATAGGAGCT-----  
ATGTTTCCTTGGGTTCTTGGGAGCA--GCAGGAAGCACTATG--GGCGCAGCGTCA---  
CTGACGCTGACGGTACAG---GCCAGACAA---TTATTG---TCTGGTATAGTGCAACAGCAGAAC---  
AATCTG---CTGAGG---GCTATTGAGGCGCAACAACATCTGTTGCAACTCACGGTCTGGGGCATC  
>EU839608  
TTCTACTGTAATACATCCCAACTATTTAATAGTACTTGGAAGAATGGCACTTGGTATAGTAATAGTACTAATA  
CTACAGAG-----  
-----TCAAGC-----  
AGAAATATTACACTCATTACACTCCCATGCAGAATAAAACAAATTATAAACATGTGGCAGGCAGTAGGCAAAG  
CAATGTATGCCCCCTCCCATTAGAGGACCAATTACATGTGTATCAAAC---  
ATCACAGGGCTGCTATTAATAAGAGATGGTGGTAGAAACGAGAATGAC-----  
-----  
-----  
AATAACACTGAGATCTTCAGACCTGGAGGAGGAAATATGAAGGACAATTGGAGAAGTGAATTATATAAATATA  
AAGTAGTAAAAATTGAACCATTA---GGAATAGCACCCACCAAGGCAAAGAGAAGAGTGGTG-----  
-----CAGAGAGAAAAAAGAGCA--GTGGGAACAATAGGAGCT-----  
---ATGTTTCCTTGGGTTCTTGGGAGCA--GCAGGAAGCACTATG--GGCGCAGCGTCA---  
ATGACGCTGACGGTACAG---GCCAGACTA---TTATTG---TCTGGTATAGTGCAACAGCAAAAC---  
AATTTG---CTGAGG---GCTATTGAGGCGCAACAGCATCTGTTGCAACTCACGGTCTGGGGCATC  
>EF593260  
TTCTACTGTAATACAACACAGCTGTTTAATAGTACTTGGAATATTAGTAGTACTTGGAATGATACTGGAGGG-  
-----  
-----  
ACTGATAGTAACATCACACTCCCATGCAGAATAAAACAAATTATAAACATGTGGCAGCAAGTAGGCAGAGCAA  
TGTATGCCCCCTCCTATCAGAGGACAAATTAGATGTACATCAAAT---  
ATCACAGGGCTGCTATTAACAAGAGATGGTGGTAATGACACCCTAAT-----  
-----  
-----  
AATAATACAGAGATCTTCAGACCTGGAGGAGGAAATATGAAGGATAATTGGAGAAGTGAATTATATAAATATA  
AAGTAGTAAAAATTGAACCATTA---GGAGTAGCACCCACCAAGGCAAAGAGAAGAGTGGTG-----  
-----CAAAGAGAAAGAAGAGCA--GTGGGAACACTGGGAGCT-----  
---ATGTTTCCTTGGGTTCTTGGGAGCA--GCAGGAAGCACTATG--GGCGCAGCGTCA---  
CTGACGCTGACGGTACAG---GCCAGACTA---TTATTG---TCTGGTATAGTGCAACAGCAAAAC---  
AATTTG---CTGAGA---GCTATTGAGGCGCAACAGCATATGTTGCAACTCACTGTCTGGGGCATC  
>EU578580  
TTCTACTGTAATACAACACAGCTGTTTGATAGTACTTGGCTGTTTAATAGTACTTGGAATGATAGTAGTACTG  
AGAATGGTACT-----  
-----ACAAAGCAA-----  
AATGGCAATGACACACTCACACTTCCATGCAGAATAAAACAAATTGTAAACATGTGGCAGACAGTAGGCAAAG  
CAATGTATGCCCCCTCCCATCAAAGGACAAATTAGATGTTTCATCAAAA---  
ATTACAGGCTTGCTATTAACAAGAGATGGTGGTAATAGAGATGATGGT-----  
-----  
-----  
AATAACACCGAGATCTTCAGACCTGGAGGAGGAGATATGAGGGACAATTGGAGAAGTGAATTATATAAATATA  
AAATAGTAAAAATTGAACCATTA---GGAGTAGCACCCACCAAGGCAAAGAGAAGAGTGGTG-----  
-----CAAAGAGAAAAAAGAGCA--GTGGGAACAATAGGAGCT-----  
---ATGATCCTTGGGTTCTTGGGAACA--GCAGGAAGCACTATG--GGCGCAGCGTCA---  
ATAACGCTGACGGTACAG---GCCAGACAA---TTATTG---TCTGGTATAGTGCGACAGCAGAAC---  
AATCTG---CTGAGA---GCTGTTGAGGCGCAACAACATCTGTTGCAACTCACAGTCTGGGGCATC  
>EU578603  
TTTTACTGTAATACAACAAAGCTGTTTAGTAGTACTTGGCATACTAACCATACTAACGGCACTTGGAATAATA  
ATGGG-----  
-----GAT---  
AATACTGGAGAGAATATCACACTCCCATGCAGAATAAAACAAATTATAAACATGTGGCAGAGAGTAGGCAAAG  
CAATGTATGCCCCCTCCCATCAGAGGACAAATTAGATGTACATCAAAT---  
ATCACGGGGCTGCTATTAACAAGAGATGGTGGTAATGACAAGAAC-----

```

-----
-----
AGCACCTCCGAGACCTTCAGACCTGGAGGAGGAAATATGAAGGACAATTGGAGAAGTGAATTATATAAAATATA
AAGTAGTAAAAATTGAACCATTA---GGAGTAGCACCCACCAAGGCAAAGAGAAGAGTGGTG-----
-----CAAAGAGAAAAAAGAGCA--GTGGGAGCAATAGGAGCT-----
---ATGTTCCCTTGGGTTCTTGGGAGCA--GCAGGAAGCACTATG--GGCGCAGCGTCA---
GTGACGCTGACGGTACAA---GCCAGACAA---TTATTG---TCTGGTATAGTGCAACAGCAGAAC---
AATTTG---CTGAGG---GCTATTGAGGCGCAACAGCATATGTTGCAACTCACGGTCTGGGGCATC
>AF277060
TTCTACTGTAATACAACACAACACTGTTTAATAGTACTTGGAAATATTAATGATACTCGGAATGGTACTACAGAG-
-----
-----
TCAAGTAAACTATCACACTCCCATGCAGAATAAAACAAATTATAAACATGTGGCAGGAAGTAGGCAAAGCAA
TGTATGCCCCCTCCCATTAGAGGACAGATTAGATGTTTCATCAAAT---
ATTACAGGATTACTATTAACAAGAGACGGTGGTAACCAAAAACACG-----
-----
-----
AGCGGCACCGAGATTTTCAGACCTGGAGGAGGAAATATGAGAGACAATTGGAGAAGTGAATTATATAAAATATA
AAGTAGTAAAAATTGAACCATTA---GGAATAGCACCCACCAAGGCAAAGAGAAGAGTGGTG-----
-----CAAAGAGAAAAAAGAGCA--GTGGGAACAATAGGAGCT-----
---ATGTTCCCTTGGGTTCTTGGGAGCA--GCAGGAAGCACTATG--GGCGCAGCATCA---
ATAACGCTGACGGTACAG---GCCAGACTA---TTATTG---TCTGGTATAGTGCAACAGCAGAAC---
AATCTG---ATGAGG---GCTATTGAGGCGCAACAGCATATGTTGCAACTCACAGTCTGGGGCATC
>AF277055
TTCTACTGTAATGCAACACCACTGTTTAATAGTAGCTGGTATGTTAATGGTACTAACACTACAGGGTCA----
-----
-----
GATGGAGAAAATATCACACTCCTATGCAGAATAAAACAAATTGTAAACATGTGGCAGGAAGTAGGCAAAGCAA
TGTATGCCCCCTCCCATTAGAGGACAAATTACATGCTCATCAAAG---
ATCACAGGGTTGCTATTAACAAGAGATGGTGGTAACACGAACGGGACC-----
-----
-----
AACGACACCGAGACCTTCAGACCTGGAGGAGGAGATATGAGGGACAATTGGAGAAGTGAATTATATAAAATATA
AAGTAGTAAAAATTGAACCATTA---GGAGTAGCACCCACCAAGGCAAAGAGAAGAGTGGTG-----
-----CAGAGAGAAAAAAGAGCA--GTGGGAACAATAGGAGCT-----
---ATGTTCCCTTGGATTCTTGGGAGCA--GCAGGAAGCACTATG--GGCGCAGCGTCA---
CTGACGCTGACGGTACAG---GCCAGACTA---TTATTG---TCTGGTATAGTGCAACAGCAGAAC---
AATCTG---CTGAGG---GCTATTGAGGCGCAACAACATCTGTTGCAACTCACGGTCTGGGGCATT
>EF593245
TTCTACTGTAATTCAACACAACACTGTTTAATAGTACTTGGAAATAATAATGGTACTAGGAATGATACTAGGGAGT
CA-----
-----
AATGACACTATCATCACACTACCATGCAGAATCAAACAAATTATAAACATGTGGCAGCAAGTAGGCAAAGCAA
TGTATGCCCCCTCCCATCAGAGGACAAATTAGATGTTTCATCAAAT---
ATCACAGGGCTGCTGTTAACAAGAGATGGTGGTAACGAGAGCGAC-----
-----
-----
GCTGAGACCTTCAGACCTGGAGGAGGAGATATGAGGGACAATTGGAGAAGTGAATTATACAAATATAAAGTAG
TAAAAATTGAACCATTA---GGAGTAGCACCCCTCCAAGGCAAAGAGAAGAGTGGTG-----
-----CAGAGAGAAAAAAGAGCA--GTGGGAACAATAGGAGCT-----
ATGTTCCCTTGGGTTCTTGGGAGCA--GCAGGAAGCACTATG--GGCGCAGCGTCA---
CTGACGCTGACGGTACAG---GCCAGACTA---TTATTG---TCTGGTATAGTGCAACAGCAGAAC---
AATCTG---CTGAGG---GCTATTGAGGCGCAACAACATATTTTGCAACTCACGGTCTGGGGCATT
>AF277070
TTCTACTGTAATACAACACAGCTGTTTAATAGTACTTGGAAATGCTAACAGCACTTGGAAATGATACTAGAAAG-
-----
-----
TCAAATGACACTATCACACTCCCGTGCAGAATAAAACAAATTATAAACATGTGGCAGAGAGTAGGCAGAGCAA
TGTATGCCCCCTCCCATCAAAGGACAAATTAGATGTGCATCAAAT---
ATCACAGGGCTGTTATTAACAAGAGATGGTGGTAATGAGAACAGC-----

```

-----  
-----  
ACCGAGAACATCTTCAGACCTGGAGGAGGAAATATGAGGGACAATTGGAGAAGTGAATTATATAAATATAAAG  
TAGTAAAAATTGAACCATTA---GGAGTAGCACCCACCAAGGCAAAGAGAAGAGTGGTG-----  
-----CAGAGAGAAAAAAGAGCA--GTGGGAACAATAGGAGCT-----  
ATGTTTCCTTGGGTTCTTGGGAGCA--GCAGGAAGCACTATG--GGCGCAGCGTCA---  
CTGACGCTGACGGTACAG---GCCAGACTA---TTATTG---TCTGGTATAGTGCAACAGCAGAAC---  
AATTG---CTGAGA---GCTATTGAGGCGCAACAGCATCTGTTGCAACTCACGGTCTGGGGCATC  
>AF277072  
TTCTACTGTAATACAACAAAACCTGTTTAACACAACACTGCTTAATGATACTGCAGAG-----  
-----  
-----  
TCAAAATGACAATATCACAATCCCATGCAGAATAAAACAAATTATAAACATGTGGCAGGAAGTAGGTAAAGCAA  
TGTATGCCCCCTCCCATTAGAGGACAAATTAGATGTTTCATCAAAT---  
ATCACAGGATTACTATTAACAAGAGACGGTGGTAATGATAATAACACG-----  
-----  
-----  
GATAACACCACCGAGATCTTCAGACCTGGAGGAGGAGATATGAGGGACAATTGGAGAAGTGAATTATATAAAT  
ATAAAGTAGTACAAATTGAACCAATA---GGAATAGCACCCACCAAGGCAAAGAGAAGAGTGGTG-----  
-----CAAAGAGAAAAAAGAGCA--GTGGGAACAATAGGAGCT---  
-----ATGTTTCCTTGGGTTCTTGGGAGCA--GCAGGAAGCACTATG--GGCGCAGCATCA---  
ATAACGCTGACGGTACAG---GCCAGACAA---TTATTG---TCTGGTATAGTGCAAGCAGCAGAAC---  
AATCTG---CTGAGG---GCTATTGAGGCGCAACAGCATCTGTTGCAGCTCACGGTCTGGGGCATC  
>AF277073  
TTCTACTGTAATACAACACAGCTGTTTAATAGTACTTGGAAATGTTAATGGTACTTGGAAATGGTACT-----  
-----  
-----  
GGAAGTGAAAATATCACACTCCCATGCAGAATAAAACAAATTATAAACATGTGGCAAAAAGTAGGCAAAGCAA  
TGTATGCCCCCCCCCATCAAAGGACAAATTAGATGTGCATCAAAT---  
ATCACAGGGCTGCTGTTAACAAGAGATGGTGGAAATAGTAGTAATACA-----  
-----  
-----  
AGCAACACCGAGATCTTCAGACCTGGAGGAGGAAATATGAAGGACAATTGGCGAAGTGAATTATATAAATATA  
AAGTAGTAAAAATTGAACCATTA---GGAGTAGCACCCACCAAGGCAAAGAGAAGAGTGGTG-----  
-----CAGAGAGAAAAAAGAGCA--GTGGGAACAATAGGAGCT-----  
--ATGTTTCCTTGGGTTCTTGGGAGCA--GCAGGAAGCACTATG--GGCGCAGCGTCA---  
ATGACGCTGACGGTACAG---GCCAGACTA---TTATTG---TCTGGTATAGTGCAACAGCAGAAC---  
AATCTG---CTGAGA---GCTATTGAGGCGCAACAGCATCTGTTGCAACTCACGGTCTGGGGCATC  
>EU578429  
TTCTATTGTAATACAACACCACTGTTTAATAGTACTTGGTATGAAAATGGTACTTGGAGTGGTACTCCAAAGT  
CA-----  
-----  
GATAATGACACTATCACACTCCCATGCAGGATAAAACAAATTATAAACATGTGGCAGAGAGTAGGCAAAGCAA  
TGTATGCCCCCTCCCATCAGAGGACAAATTAGATGTTTCATCAAAT---  
ATCACAGGGCTGTTATTAACAAGAGATGGTGGTAGTAGTAATAAC-----  
-----  
-----  
AGCACCGAGACCTTCAGACCTGGAGGAGGAGATATGAGGGACAATTGGAGAAGTGAACATATAAATATAAAG  
TAGTAAAAATTGAACCATTA---GGAATAGCACCCACCAAGGCAAAGAGAAGAGTGGTG-----  
-----CAAAGAGAAAAAAGAGCA--GTGGGAACAATAGGAGCT-----  
ATGTTTCCTTGGGTTCTTGGGAGCA--GCAGGAAGCACTATG--GGCGCAGCATCA---  
CTAACGCTGACGGTACAG---GCCAGACTA---TTATTG---TCTGGTATAGTGCAACAGCAGAAC---  
AATCTG---CTGAGG---GCTATTGAGGCGCAACAGCACCTGTTGCAACTCACAGTCTGGGGCATC  
>EU578386  
TTCTACTGTAATTCAACACAACCTGTTCAATAGTACTTGGAAATGGGAATAATACTTGGAAATGGTACT-----  
-----  
-----  
GGGGAGGATACTATCACACTCCCATGCAGAATAAAACAAATTGTAAATATGTGGCAGAGAGTAGGCAAAGCAA  
TGTATGCCCCCTCCCATCAAAGGACAAATTAGATGTTTCATCAAAC---  
ATTACAGGGCTGCTATTAACAAGGGATGGTGGTACTAACGGGACC-----

-----  
-----  
ACCGAGACCTTCAGACCTGGAGGAGGAAATATGAAGGACAATTGGAGAAGTGAATTATATAAAATATAAAGTAG  
TAAAAATTGAACCATTA---GGAATAGCACCCACCAAGGCAAAGAGAAGAGTGGTG-----  
-----CAGAGAGAAAAAAGAGCA---GTGGGAGTAATAGGAGCT-----  
CTGTTCCCTTGGGTTCTTGGGAGCA---GCAGGAAGCACTATG---GGCGCAGCGTCA---  
CTGACGCTGACGGTACAG---GCCAGACAA---TTATTG---TCTGGTATAGTGCAACAGCAGAAC---  
AATCTG---CTGAGG---GCTATTGAAGCGCAACAGCATCTGTTGCAACTCACGGTCTGGGGCATT  
>EU577148  
TTCTACTGTAATTCAACACAACCTGTTTAACAGTACTTGGAATGCTACTGATACTTGGAATGGAATGATAGTA  
ATACT-----  
-----TGG---  
TATAATTCCAGCAATATCACACTTCCATGTAGAATAAAAGCAAATTATAAACATGTGGCAGAGAGTAGGCAAAG  
CAATGTATGCCCTCCCATCAGAGGACAAATTAAGTGTACATCCAAT---  
ATCACAGGGCTGCTATTAAACAAGAGATGGTGGTGATAACGAGAAC-----  
-----  
-----  
GACACCGAGACCTTCAGACCTGGAGGAGGAGATATGAGGAACAATTGGAGAAGTGAATTATATAGATATAAAG  
TAGTAAAAATTGAACCATTA---GGAGTAGCACCCACCAAGGCAAAGAGAAGAGTGGTG-----  
-----CAGAGAGAAAAACGAGCG---GTGGGAACACTAGGAGCT-----  
ATGTTCCCTTGGGTTCTTGGGAGCA---GCAGGAAGCACTATG---GGCGCAGCGTCG---  
CTGACGCTGACGGTACAG---GCCAGACTA---TTACTG---TCTGGTATAGTGCAAGCAGCAAAAT---  
AATTTG---CTGAGG---GCTATTGAGGCGCAACAGCATCTGTTGCAACTCACGGTCTGGGGCATC  
>EF593264  
TTCTACTGTAATACAACACAACCTGTTTAATAGTACTTGGAATAATAGTACTTGGAATGGTATTGACGAGTCAG  
GT-----  
-----  
GATGATGACAATATCACACTACCATGCAGAATAAAACAAATTATAAACATGTGGCAGCAAGTAGGCAAAGCAA  
TGTATGCCCTCCCATCAGAGGACAAATTAGCTGTTTCATCAAAT---  
ATCACAGGGCTGCTGTTAAACAAGAGATGGTGGTGGTAACAGTAGC-----  
-----  
-----  
AACAAATGAGACCTTCAGACCTGGAGGAGGAGATATGAGGGACAATTGGAGAAGTGAATTATATAAAATATAAAG  
TAGTAAAAATTGAACCATTA---GGAGTAGCACCCACCAAGGCAAAGAGAAGAGTGGTG-----  
-----CAGAGGGAAAAAAGAGCA---GTGGGAACAATAGGAGCT-----  
ATGTTCCCTTGGGTTCTTGGGAGCA---GCAGGAAGCACTATG---GGCGCAGCGTCA---  
GTGACGCTGACGGTACAG---GCCAGACTA---CTATTG---TCTGGGATAGTGCAACAGCAGAAC---  
AATCTG---CTGAGG---GCTATTGAGGCGCAACAGCACCTGTTGCAACTCACAGTCTGGGGCATC  
>EF593268  
TTCTACTGTAATTCAACAGCACTGTTTACTGGTACTTGGAATGGTACTACTTGGAATGGTACTACTTGGAATG  
GTAAGTACTGAGCCT-----  
-GATACTGAAGAGTCA-----  
AATAACACCACCACCATCATACTCCCATGCAGAATAAAACAAATTGTAAACATGTGGCAGGAGGTAGGCAAAG  
CAATGTATGCCCTCCCATCAGAGGACAAATTAAGTGTTCATCAAGT---  
ATTACAGGGCTGCTATTAAACATGGGATGGTGGTAATAACACGGACCAG-----  
-----  
-----  
AACATGACCGAGACCTTCAGACCTGGAGGAGGAAATATGAGGGACAATTGGAGAAGTGAAGTATATAAAATATA  
AAGTAGTAAAAATTGAACCATTA---GGAATAGCACCCACCAAGGCAAAGAGAAGAGTGGTG-----  
-----CAAAGAGAAAAAAGAGCA---GTGGGAACAATAGGAGCT-----  
---ATGTTCCCTTGGGTTCTTGGGAGCA---GCAGGAAGCACTATG---GGCGCAGCGTCA---  
CTAACGCTGACGGTACAG---GCCAGATTA---TTATTG---TCTGGTATAGTGCAACAGCAGAAC---  
AATTTG---CTGAGG---GCTATTGAGGCGCAACAGCATCTGTTGCAGCTCACGGTCTGGGGCATC  
>U32396  
TTCTACTGTAATTCAACACAACCTGTTTAATAGTACTTGGAATGCTAATGGTAATGGGAATGGTACTGGAGGAT  
CA-----  
-----  
AATGACAATGACACTATCACACTCCCATGCAGAATAAAACAAATTGTAAACATGTGGCAAGAAGTAGGCAAAG  
CAATGTATGCCCCCCCCATCAGAGGATACATTAAGTGTTCATCAAAT---  
ATTACAGGGCTGTTATTAAACAAGAGATGGTGGTATTGGCACGAAC-----

-----  
-----  
GGGACCGAGATATTCAGACCTGGAGGGGGAGATATGAGGGACAATTGGAGAAGTGAATTATATAAATATAAAG  
TAGTAGAAATCGAACCATTA---GGAGTAGCACCCACCAAGGCAAAGAGAAGAGTGGTG-----  
-----CAGAGAGAAAAAAGAGCA--GTGGGAACAATAGGAGCT-----  
ATGTTTCCTTGGGTTCTTGGGAGCA--GCAGGAAGCACTATG--GGCGCAGCGTCA---  
CTGACGCTGACGGTACAG---GCCAGACTA---TTATTG---TCTGGTATAGTGCAACAGCAGAAC---  
AATCTG---CTGAGG---GCTATTGAGGCGCAACAGCATCTGTTGCAGCTCACGGTCTGGGGCATC  
>AF086817  
TTCTACTGTAATGCAACACCACTGTTTAATAGTACTTGGAATGCTACCAGTACTTTGAATGCTACTAATGAA-

-----  
-----  
GAAAAATGAAAATATCACACTCCTATGTAGAATAAAAACAAATTATAAACATGTGGCAGAGAGTAGGAAAAGCAA  
TGTATGCTCCTCCCATCGAAGGACTAATTAAATGTTTCATCAAAT---  
ATTACAGGGCTGATGTTAAACAAGAGATGGGGGTACAAATGACAGT-----  
-----

-----  
GAGGTCGAGGTCTTCAGACCTGGAGGAGGAGATATGAAGGACATTTGGAGAAATGAATTATATAAATATAAAG  
TAGTAAAAGTTGAACCATTA---GGACTAGCACCCACCAGGGCAAAGAGAAGAGTGGTG-----  
-----CAGAGAGAAAAAAGAGCA--GTGGGA--ATAGGAGCT-----  
TTGTTTCCTTGGGTTCTTGGGAGCA--GCAGGAAGCACTATG--GGCGCAGCGTCA---  
CTAACGCTGACGGTACAG---GCCAGACAA---TTATTG---TCTGGTATAGTGCAACAGCAGAAC---  
AATCTG---CTGAGA---GCTATTGAGGCGCAACAGCACATGTTGCAACTCACAGTCTGGGGCATC  
>DQ823362  
TTCTATTGTAATACATCAAAGCTGTTCAATAGTACTTGGAATAATGGTACTTGGACGAGTAATATTGATGAGG  
GTAAT-----  
-----ACT---

ACAGGGCCAGACCACATCACACTCCCATGCAGAATAAAAACAAATTATAAACAGATGGCAGGAAGTAGGAAAAG  
CAATATATGCCCCCTCCCATCAGCGGACTAATTAGATGTTTCATCAAAT---  
ATTACAGGGATACTATTAGTAAGAGATGGTGGTAATAATAGTAGT-----  
-----

-----  
AACAACGAGACTTTTCAGACCTGGAGGAGGGAATATGAAGGACAATTGGAGAAGTGAATTATATAAATATAAAG  
TAGTAAAAATTGAGCCATTA---GGAGTAGCACCCACCAAGGCAAAGAGAAGAGTGGTG-----  
-----CAGAGAGAAAAAAGAAGT---CCAACG---CTTGGAGCT-----  
CTGTTTCCTTGGGTTCTTGGGAGCA--GCAGGAAGCACTATG--GGCGCAGCGTCA---  
ATAACGCTGACGGTACAG---GCCAGACAA---TTATTG---TCTGGTATAGTGCAACAGCAGAAC---  
AACTTG---CTGAGA---GCTATTGAGGCGCAACAGCATCTGTTGCAACTCACAGTCTGGGGCATT  
>DQ823363  
TTCTATTGTAATACAACACAGCTGTTCAATAGTACTTGGAATAATACTTGGAGTGGTGCTACA-----  
-----

-----  
GGATCAGACAACATCACACTCCCGTGCAGAATAAAAACAAATTATAAACAGGTGGCAGGAAGTAGGAAAAGCAA  
TGTATGCCCCCTCCCATCGAAGGACAAATTAAATGTTTCATCAAAT---  
ATTACAGGGCTATTATTAGTAAGAGATGGTGGTATTGGTAATAAT-----  
-----

-----  
GAAACAGAGATCTTCAGACCTGGAGGAGGAGATATGAAGGACAATTGGAGAAGTGAATTATATAAATATAAAG  
TAGTAAAAATTGAACCATTA---GGAGTAGCACCCACCAGGGCAAAGAGAAGAGTGGTG-----  
-----CAAAGAGAAAAAAGAGCA--GTAACG---TTTGGAGCT-----  
ATGTTTCCTTGGGTTCTTGGGAGCA--GCAGGAAGCACTATG--GGCGCAGCGTCA---  
ATAACGCTGACGGTACAG---GCCAGACAA---TTATTG---TCTGGTATAGTGCAACAGCAGAGT---  
AATTTG---CTGAGA---GCTATTGAAGCGCAACAGCATATGTTGCAACTCACAGTCTGGGGCATT  
>DQ823364  
TTCTATTGTAATACAACACAGCTGTTCAATAGTACTTGGCAGGCTAATAGTACTAGGAATGTTAGTACAACAT  
CAGAC-----  
-----AAC---

TCAGACAACAGCACAATCACACTCCCGTGCAGAATAAAAACAAATTATAAACAGGTGGCAAGAAGTAGGAAAAG  
CAATGTATGCCCCCTCCCATCAGAGGACAAATTAAATGTTTCATCAAAT---  
ATTACAGGGCTACTATTAGTAAGAGATGGTGGTAATGGTAATAATAGT-----  
-----

-----  
 -----  
 AGTAACGAGACAGAGATCTTCAGACCTGGAGGAGGAAATATAAAGGACAATTGGAGAAGTGAATTATATAAAT  
 ATAAAGTAGTAAAAATTGAGCCGTTA---GGAGTAGCACCCACCAGGGCAAAGAGAAGAGTGGTG-----  
 -----CAGAGAGAAAAAAGAGCA---ATAACA---TTTGGAGCT---  
 -----ATGTTCCCTTGGGTTCTTGGGAGCA---GCAGGAAGCACTATG---GGCGCAGCGTCA---  
 GTGACGCTGACGGTACAG---GCCAGACAA---TTATTG---TCTGGTATAGTGCAACAGCAGAGC---  
 AATTTG---CTGAGA---GCTATTGAGGCGCAACAGCATATGTTGCAACTCACAGTCTGGGGCATT  
 >JN562768  
 TTCTACTGTAATACATCACAACCTGTTTAAACAGTACTTCTAATGTTACTTGGACTACTGGAGAGTCA-----  
 -----  
 -----  
 GATAACAAAACAATCACACTCCCATGCAGAATAAAGCAAATTATAAACATGTGGCAGAAAGTAGGAAAAGCAA  
 TGTATGCCCCCTCCCATCCAAGGACTAATTAAATGTTTCATCAAAT---  
 ATTACAGGGCTGATATTAACAAGAGATGGTGGTGTAAATATGACAAATGGTGAT-----GTTAAT-----  
 -----  
 GGGACAAACAACAAC---  
 AACACAGAGACCTTTAGACCTGCAGGAGGAGATATGAGGGACAATTGGAGAAGTGAATTATATAAGTATAAAG  
 TAGTAAGAATTGAACCATTA---GGAGTAGCACCCACCAAGGCAAAGAGAAGAGTGGTG-----  
 -----CAAAAAGAAAAAAGAGCA---GTGGGA---ATAGGAGCT-----  
 CTGTTCCCTTGGGTTCTTGGGAACA---GCAGGAAGCACTATG---GGCGCAGCGTCA---  
 ATGGCGCTGACGGTACAG---GCCAGACAA---TTATTG---TCTGGTATAGTGCAACAGCAGAAC---  
 AACTTG---CTGAGG---GCTATTGAGGCGCAACAACATCTGTTGCAACTCACAGTCTGGGGCATC  
 >DQ869026  
 TTCTACTGTAATTCAACACAACCTGTTTAAATAGCACTTGGTATAGCAATAATACTTGGGAAGGGTTAAATAGC-  
 -----  
 -----  
 ACTGAAGCAAATATCACACTCCCATGCAGAATAAAACAAATTGTGAATATGTGGCAGCAAGTGGGAAAAGCAA  
 TGTATGCCCCCTCCCATCAGCGGACGAATTAGCTGCACATCAAAT---  
 ATTACAGGGCTGTTATTAACAAGAGATGGGGGTGGTAATAGCACAAAC-----  
 -----  
 -----  
 GAGACCACCGAGATCTTCAGACCTGGAGGAGGAGATATGAGGGACAATTGGAGAAGTGAATTATATAAATATA  
 AAGTAGTAGAAATTGAACCATTA---GGAGTAGCACCCACCAAGGCAAAGGAGAAGAGTGGTG-----  
 -----CAGAGAGAAAAAAGAGGA---GTA-----TTAGGAGCT-----  
 ---ATGTTCCCTTGGGTTCTTGGGAGCA---GCCGGAAGCACTATG---GGCGCAGCGTCA---  
 CTGACGCTGACGGTACAG---GCCAGACAA---TTATTG---TCTGGTATAGTGCAACAGCAGAAC---  
 AATCTG---CTGAGG---GCTATTGAGGCGCAACAGCATATGTTGCAACTCACAGTCTGGGGCATT  
 >EF363123  
 TTCTACTGTAATACAACAAAACCTATTTAATAGTACTTGGAAACAATGGTACTTGGACTTGGAAACAATGGTACTT  
 GGAATGGT-----ACTGAA-----  
 TGGTTAAATGACACTATCACACTCCCATGCAGAATAAAACAAATTATAAACATGTGGCAGGAAGTAGGAAAAG  
 CAATGTATGCCCCCTCCCATCAGAGGACAAATTAGATGTTTCATCAAAT---  
 ATTACAGGGCTGCTATTAACAAGAGATGGTGGTAATACTGAGAAC-----  
 -----  
 -----  
 AAGACCGAGGTCTTCAGACCTGGAGGAGGAAATATGAAGGACAATTGGAGAAGTGAATTATATAAATATAAAG  
 TAGTAAAAATTGAACCACTA---GGAGTAGCACCCACCAAGGCAAAGAGAAGAGTGGTG-----  
 -----CAGAGAGAAAAAAGAGCA---GTGGGA---ATAGGAGCT-----  
 ATGTTCCCTTGGGTTCTTGGGAGCA---GCAGGAAGCACTATG---GGCGCAGCGTCA---  
 ATGACGCTGACGGTACAG---GCCAGACAA---TTATTG---TCTGGTATAGTGCAACAGCAAAGC---  
 AATTTG---CTGAGG---GCTATTGAGGCGCAACAAAAACTGTTGCAACTCACAGTCTGGGGCATC  
 >EU289199  
 TTCTACTGTAATACAACAGGACTGTTTAAATAGTACTTGGTATAATGAGACTGAAAAGATAAATAGCACTACA-  
 -----  
 -----  
 AGTGACAATATACAACACTTCCATGCAGAATAAAACAAATTGTAAACATGTGGCAGGAAGTAGGAAAAGCAA  
 TGTATGCCCCCTCCCATCAGAGGACAAATTAAGTGTTCATCAAAT---  
 ATCACAGGGATGATATTAACAAGAGATGGTGGTAATAATAACAGT-----

-----  
 -----  
 AGCAATGACACGGAGATCTTCAGACCTGGAGGAGGAGATATGAGGGACAATTGGAGAAGTGAATTATATAAAT  
 ATAAAGTAGTACAAATTGAACCATTA---GGAGTAGCCCCCACCACGGCAAAGAGAAGAGTGGTG-----  
 -----CAGAGAGAAAAAAGAGCA---GTGGGA---CTAGGAGCT---  
 -----ATGTTTCCTTGGGTTCTTGGGAGCA---GCAGGAAGCACTATG---GGCGCAGCGTCA---  
 ATAACGCTGACGGTACAA---GCCAGACAA---TTATTG---TCTGGTATAGTGCAACAGCAGAGC---  
 AATCTG---CTGAGG---GCTATTGAGGCGCAACAGCATCTGTTGCAACTCACAGTCTGGGGCATT  
 >JN944917  
 TTCTACTGTAATACAACAAAATTGTTTACTAGTACTTGGAATAGTACTTGGAATAGTACTTGGAATAATACTG  
 AAGGGTCA-----  
 -----  
 AATAGCACTGTTATCACCCCTGCCATGCAGAATAAGACAAATCATAAACATGTGGCAGGAAGTAGGAAAAGCGA  
 TGTATGCCCCCTCCCATCCAAGGACAAATTAAATGTTTCATCAAAT---  
 ATTACAGGGCTGTTATTAACAAGAGATGGTGGTAATAACGACACC-----  
 -----  
 -----  
 ACAAAAGAGACCTTCAGACCTGGAGGAGGAAATATGAAGGACAATTGGAGAAGTGAATTATACAAATATAAAG  
 TAGTAAGAATTGAGCCATTA---GGAGTAGCCCCCACCAGGCAAAGAAGAGTGGTG-----  
 -----CAGAGAGAAAAAAGAGCA---GTGGGA---ATAGGAGCT-----  
 ATGTTTCCTTGGGTTCTTAGGAGCA---GCAGGAAGCACTATG---GGCGCAGCGTCA---  
 ATAACGCTGACGGTACAG---GCCAGACTA---CTATTG---TCTGGTATAGTGCAACAGCAGAGC---  
 AATCTG---CTGAGG---GCTATTGAGGCGCAACAGCATCTGTTGCAACTCACAGTCTGGGGCATC  
 >JN944930  
 TTCTACTGTAATACAACAAACCTGTTCAATAGTAGTTCAACAGAACTTAATAGTACTTGAGTGGTAATAGTA  
 AT-----  
 -----GACACA-----  
 GGAAAAAATGATACAATCACACTCCCATGCAGAATAAAACAAATTATAAACATGTGGCAGCAAGTAGGAAAAG  
 CAATGTATGCCCCCTCCCATCAGTGGAATAAATACTGTTTATCAAAT---  
 ATTACAGGGCTGCTATTAAACAAGAGATGGGGGTAGTGATGGGGGTAGT-----  
 -----  
 AAGAACAGTAGTAAGAATGAGACC-----  
 GGTACTGAGATCTTCAGACCTGGAGGAGGAGATATGAGGGACAATTGGAGAAGTGAATTATATAAATATAAAG  
 TAGTAAGAATTGAACCATTA---GGAGTAGCACCCACCAAGGCAAAGAGGAGAGCGGTA-----  
 -----CAGAGAGAAAAAAGAGAT---CTGGGA---CTAGGAGCT-----  
 TTGTTTCCTTGGGTTCTTGGGAGCA---GCAGGAAGCACTATG---GGCGCAGCGTCA---  
 GTGACGCTGACGGTACAG---GCCAGACAG---TTATTG---TCTGGTATAGTGCAACAGCAGAAC---  
 AATCTG---CTGAGA---GCTATTGAGGCGCAACAGCACCTGTTGCAACTCACAGTCTGGGGCATC  
 >JN944938  
 TTCTACTGTAATTCAACACAACCTGTTTAATAGTACTTGGTTTAATAATGGTACTAGTACTTGGAATAGT---  
 -----  
 -----  
 ACTGCAGACAATATCACACTCCCATGTAGAATAAAACAAAGTTATAAACATGTGGCAGGAAGTAGGAAAAGCAA  
 TGTATGCCCCCTCCCATCAGAGGACAAATTGATTGTTTCATCAAAT---  
 ATTACAGGGTTGATATTAACAAGAGATGGTGGTAGTAACAGTAGC-----  
 -----  
 -----  
 CAGAACGAAACCTTCAGACCTGGAGGAGGAAATATGAAGGACAATTGGAGAAGTGAATTATATAAATATAAAG  
 TAGTAAAAATTGAACCATTA---GGAATAGCACCCACCAGGGCAAAGAGAAGAGTGGTG-----  
 -----CAGAGAGAAAAAAGAGCA---GTGACG---CTGGGAGCT-----  
 GTGTTTCCTTGGGTTCTTGGGAGCT---GCAGGAAGCACTATG---GGCGCAGCGTCA---  
 CTGACGCTGACGGTACAG---GCCAGACTA---TTATTG---TCTGGTATAGTGCAACAGCAGAGC---  
 AATCTG---CTGAGA---GCTATTGAGGCGCAACAACATATGTTGCAACTCACAGTCTGGGGCATT  
 >EF593288  
 TTCTACTGTAATACAACACAACCTGTTTAATAGTACTTGGAATTCTAATGATACTTGGAATAGTACTACAGGGT  
 CAAAT-----  
 -----  
 GGCCTGGAGGAAATATCACACTCCCATGCAGAATAAAACAAATTATAAACATGTGGCAGAAAGTAGGAAAAG  
 CAATGTATGCCCCCTCCCATCAAAGGACAAATTAAATGTTTATCAAAT---  
 ATTACAGGGATACTATTAACAAGAGATGGGGGTAATGAGAACAGC-----

-----  
 -----  
 ACTATTGAGACCTTCAGACCTGCAGGAGGAGATATGAGGGACAATTGGAGAAGTGAATTATATAAATATAAAG  
 TAGTACAAGTTGAACCATTA---GGAGTAGCACCCACCAAGGCAAAGAGAAGAGTGGTG-----  
 -----CAAAGAGAAAAAAGAGCA--ATAGTGGAATAGGAGCT-----  
 GTGTTTCCTTGGTTTCTTGGGAGCA--GCAGGAAGCACTATG--GGCGCAGCGTCA---  
 TTGACGCTGACGGTACAG---GCCAGACAA--TTATTG---TCTGGTATAGTGCAACAGCAGAAT---  
 AATCTG---CTGAGG---GCTATTGAGGCGCAACAACATATATTGCAACTCACAGTCTGGGGCATC  
 >EF593289  
 TTCTACTGTAATACAACACAGCTGTTTAATAGTACTTGGGAATAGTACTAATTGGAATAATACTGAAAAGTCAA  
 AT-----  
 -----  
 AGCACTGAAGTCATCACACTCCCATGCAGAATAAAACAAATTATAAACATGTGGCAGAAGGTAGGAAAAGCAA  
 TGTATGCCCCCTCCCATTCAGGACAAATTAAGTGTTCATCAAGT---  
 ATTACAGGACTGATATTAACAAGAGATGGTGGTGACAACAGCACA-----  
 -----  
 -----  
 AACAAACAGAGATCTTCAGACCTGTAGGAGGAGATATGAGGGACAATTGGAGAAGTGAATTATATAAATATA  
 AAGTAGTAAGAATTGAACCATTA---GGAGTAGCGCCACCAGGGCAAGGAGAAGAGTGGTG-----  
 -----CAGAGAGAAAAAAGAGCA--ATAGGA---CTAGGAGCT-----  
 ---GTGTTTCATTGGGTTCTTGGGAGCA--GCAGGAAGCACTATG--GGCGCAGCGTCG---  
 GTGACGCTGACGGTACAA---GCCAGACAA--TTACTG---TCTGGTATAGTGCAACAGCAGAAC---  
 AATCTG---CTGAAG---GCTATTGAGGCGCAACAGCATATGTTGCAACTCACAGTCTGGGGCATT  
 >HM769944  
 TTCTACTGTAATACAACAGAACTGTTTAGTAGCACTTGGGAATATAACAGGAGATAGCATTGGGAATATAACAG  
 GA-----  
 -----  
 GAGTCTTTAAATATCACACTCCCATGCCGAATAAAACAAATTATAAACATGTGGCAGGGAGTAGGAAAAGCAA  
 TGTATGCCCCCTCCCATCAGTGGACAGATTAGATGCATATCAAAT---  
 ATTACAGGGCTGCTATTAACAAGAGATGGTGGTGATAATAACACCGAGAAT-----  
 -----  
 -----  
 GACAACAACACCGAAATCTTCAGACCTTGGGGAGGAGATATGAGGGATAATTGGAGAAGTGAATTATATAAAT  
 ATAAAGTAGTAAACTTGAACCATTA---GGATTAGCACCCACCAAGGCAAAGAGAAGAGTGGTG-----  
 -----CAAAGAGAAAAAAGAGCA--ATAGGA---GTTGGAGCT---  
 -----ATGTTTCCTTGGGTTCTTGGGAGCA--GCAGGAAGCACTATG--GGCGCAGCGTCA---  
 CTGACGCTGACGGTACAG---GCCAGGCAA--TTATTG---TCTGGTATAGTGCAACAGCAGAAC---  
 AATCTG---CTGAGG---GCTATTGAGGCGCAACAGCATCTGTTGCAACTCACAGTCTGGGGCATC  
 >JQ609746  
 TTCTACTGTAATACAACACAACCTGTTTAATAGCACTTGGCATGGGAATGAGACTGAAGAATCAAATACCACCA  
 AAGAC-----  
 -----  
 AATAGCACAAATAATCACTCTCCCATGCAGAATAAGACAAATTGTAAACCGGTGGCAGGAAGTAGGGAAAGCAA  
 TGTATGCCCCCTCCCATCAGCGGACGGATTAACTGTTTCATCAAAT---  
 ATTACTGGGCTGCTATTAACAAGAGATGGTGGTAATATCACGACC-----  
 -----  
 -----  
 GAGAATACTACTGAGACCTTCAGACCTGGAGGAGGAGATATGAGGGACAATTGGAGAAGTGAATTATATAAAT  
 ATAAAGTAGTAAAAATTGAACCATTA---GGAATAGCACCCACCAGGGCAAAGAGAAGAGTGGTG-----  
 -----CAAAGAGAAAAGAGAGCA---GTGGGA---ATAGGAGCT---  
 -----GTGTTTCCTTGGGTTCTTGGGAGCA---GCAGGAAGCACTATG--GGCGCAGCGTCA---  
 CTGACGCTGACGGTACAG---GCCAGACTC---TTATTG---TCTGGTATAGTGCAACAGCAGAAT---  
 AATTTG---CTGAGA---GCTATTGAGGCGCAACAACATCTGTTGCAACTCACAGTCTGGGGCATC  
 >DQ869017  
 TTCTACTGTAATACAGCACAATTGTTTAATAGTACTTGGGAAGAGGGATGGTACTACTGGGACCTGGAGTGGTA  
 ATAATACTGAG-----  
 -----AATGATACTGAA-----  
 CATTCAAATGACACTATCACACTCCCATGCAGAATAAGACAAATTGTAAACATGTGGCAAGAAGTAGGAAAAG  
 CCATGTATGCTCCTCCCATCAGTGGACAAATTAGATGTTTCATCAAAT---  
 ATTACAGGGTTACTATTAACAAGAGATGGTGGTGAGAGCAATGCC-----

-----  
-----  
ACTGAGGTCTTCAGACCCGCGAGGAGGAGATATGAGGGACAATTGGAGAAGTGAAGTATATAAATATAAAGTAG  
TAAAAATTGAACCATTA---GGAATAGCACCTTCCAAGGCAAAGAGAAGAGTGGTG-----  
-----CAGAGAGAAAAAAGAGCA---GTGGGA---ATAGGAGCT-----  
GTGTTTCCTTGGGTTCTTAGGAGCT---GCAGGAAGCACTATG---GGCGCAGCATCC---  
TTAACGCTGACGGTACAG---GCCAGACTA---TTATTG---TCTGGTATAGTGCAACAGCAAAAC---  
AATTTG---CTGAGA---GCTATTGAGGCGCAACAGCATCTGTTGCAACTCACAGTCTGGGGCATT  
>DQ869019  
TTCTACTGTAATACAACACAATTGTTTAATGGTACTTGGGAATAGTACTTGGAGTAGTACTGTA-----  
-----  
-----  
GAAAAATGGCACAATCACACTCCCATGCAAAATAAAACAGATTATAAACATGTGGCAGGAAGTAGGAAAAGCAA  
TGTATGCCCCCTCCCATCAGAGGACAAATTAAGTGTACATCAAAT---  
ATTACAGGGCTGCTATTAACAAGAGATGGTGGTAATAATAATAATACT-----  
-----  
-----  
GCTAATGAAACCGAGATCTTCAGACCTGGAGGAGGAGATATGAGGGACAATTGGAGAAGCGAATTGTATAAAT  
ATAAAGTAGTAAAAATTGAACCATTA---GGAATAGCACCCACTAAGGCAAAGAGAAGAGTGGTG-----  
-----CAAAGAGAAAAAAGAGCA---GTGGGA---CTAGGAGCT---  
-----TTGTTTCCTTGGGTTCTTAGGAGCA---GCAGGAAGCACTATG---GGCGCAGCGTCA---  
ATGACGCTGACGGTACAG---GCCAGACTA---TTATTG---TCTGGTATAGTGCAACAGCAAAAC---  
AACTTG---CTGAGA---GCTATTGAGGCGCAACAGCAGCTGTTGCAACTCACAGTCTGGGGCATT  
>DQ869014  
TTCTACTGTAATACAACACAGCTGTTTAATAGTACTTGGAACTACTACTCGGGAGAATGTAAAT-----  
-----  
-----  
AACACTGAAACTATCACACTCCCATGCAGAATAAAACAGATTGTAAACAGGTGGCAGGAAGTAGGAAAAGCAA  
TGTATGCCCCCTCCCATCAGTGGACAAATTAGATGTTTCATCAGAA---  
ATTACAGGGCTGCTATTAATAAGAGATGGTGGTAATAGTAACAATAGT-----  
-----  
-----  
AACGGGACTGAGACCTTCAGACCTGGAGGAGGAAATATGAAAGACAATTGGAGAAGTGAATTATATAAATATA  
AAGTAGTAAAAATTGAGCCATTA---GGAATAGCACCCACCAAGGCAAAGAGAAGAGTGGTG-----  
-----CAGAGAGAAAAAAGAGCG---GTGGGAACGCTGGGAGCT-----  
---GTGTTTCCTTGGGTTCTTGGGAACA---GCAGGAAGCACTATG---GGCGCAGCGTCA---  
ATAACGCTGACGGTACAG---GCCAGACAA---TTATTG---TCTGGTATAGTGCAAGCAGCAAAAC---  
AATTTG---CTGAGG---GCTATTGATGCGCAACAGCATATGTTGCAACTCACTGTTTGGGGCATC  
>DQ869027  
TTCTACTGTAATTCAACACAACCTGTTTAAAAGTACTTGGCATGTTAATGGTACTCGGAATGGTACTGAA---  
-----  
-----  
GGAAATGACACAATCACTCTCCCATGTAAATAAAACAAATTATAAACATGTGGCAGAAAGTAGGAAAAGCAA  
TGTATGCCCCCTCCCATCAAAGGAAATATTACATGTTTCATCAAAT---  
ATTACAGGGCTCATACTAACAAGAGATGGTGGTAGCAATGGCGAGAACACCACT-----  
-----  
-  
GAGATCGAGAACACCACCGAGATCTTCAGACCTGGGGGAGGAAATATGAGGGACAATTGGAGAAATGAATTAT  
ATAAATATAAAATAATAAACTTGAACCATTA---GGAATAGCACCCACTAAGGCAAAGAGAAGAGCGGTG--  
-----CAGAGAGAAAAAAGAGCT---GTGGGA---  
ATAGGAGCT-----ATGTTTCCTTGGGTTCTTGGGGGCA---GCAGGAAGCACTATG---  
GGCGCAGCGTCA---CTGACGCTGACGGTACAG---GCCAGGCAA---TTAATG---  
TCTGGTATAGTGCAACAGCAGAAC---AATTTG---CTGAGG---  
GCTATTGAGGCGCAGCAGCATATGTTGCAACTCACAGTCTGGGGCATC  
>EU578061  
TTCTACTGTAATACATCTGGGCTGTTTAATAGTACATGGGTGTTTAATAATAGTAATAAGGTGTATGAGAGTG  
ACTGGAAT-----  
-----AATACT-----  
GAAGAGCAAATATCACCACTCCAGTGCAGAATAAAACAAATTGTAACTTGTGGCAGGAAGTAGGAAAAG  
CAATGTATGCCCCCTCCCATCAGAGGAAAAATTAATGTAAATCAAAT---

ATCACAGGGCTGCTATTAACAAGAGATGGTGGTACAAATAGTACA-----  
 -----  
 -----  
 AATAAAAGTGAGACCTTCAGACCTGGAGGAGGAGATATGAGGGACAATTGGAGAAGTGAATTATATAAAATATA  
 AAGTAGTAAGAATTGAACCATTA---GGAATAGCACCCACCAAGGCAAGGAGAAGAGTGGTG-----  
 -----CAGAGAGAAAAAAGAGCA---GTGGGAGCAATAGGAGCT-----  
 ---TTGTTCCCTTGGGTTCTTGGGAGCA---GCAGGAAGCACTATG---GGCGCAGCGTCG---  
 ATGACGCTGACGGTACAG---ACCAGACAA---TTATTG---TCTGGTATAGTGCAACAGCAGAAC---  
 AATCTG---CTGAAG---GCTATTGAGGCGCAACAGCATATGTTGCAGCTCACGGTCTGGGGCATC  
 >FJ469738  
 TTCTACTGTAATACAACAACCACTGTTTAATAGTACTTGGTATAGGAATAGGACTGAAGGGTTAAATAAAACTA  
 AA-----  
 -----  
 GGAAATAACACAATCACACTCCCCTGCAGAATAAAACAAATTGTAAACATGTGGCAGGAAGTAGGAAAAGCAA  
 TGTATGCCCCCTCCTATCAGAGGACAGATTAACTGTTTCATCCAAT---  
 ATTACAGGGCTGCTATTAACAAGAGATGGTGGTGATACTAGCGAG-----  
 -----  
 -----  
 AACGAGAACGAGACCTTCAGACCTGGAGGAGGAGATATGAGGGACAATTGGAGAAGTGAATTATATAAAATATA  
 AAGTAGTAAAAATAGAACCATTA---GGAGTAGCACCCACCAAGGCAAAGAGAAGAGTGGTG-----  
 -----CAGAGAGAAAAAAGAGCA---GTAGGA---ATAGGAGCT-----  
 ---TTGTTCCCTTGGGTTCTTGGGAGCA---GCAGGAAGCACTATG---GGCGCAGCGTCA---  
 GTGACGCTGACGGTACAG---GCCAGACAA---TTACTG---TCTGGTATAGTGCAACAGCAGAAC---  
 AATTTG---CTGAGA---GCTATTGAGGCGCAACAACATCTGTTGCAACTCACAGTCTGGGGCATC  
 >KT283937  
 TTCTACTGTAATACAACAACCACTGTTTAATAGTGAATGGCCTTGGAATAGTACTAATAGTACTGGAGGGTCAA  
 AC-----  
 -----AGCACT-----  
 GAGGGAGATGACACTATCATACTCCAATGCAGAATAAAACAAATTATAAATATGTGGCAGGAAGTAGGGAAAG  
 CAATGTATGCCCCCTCCCATTTGGAGGACAAATTAAATGTGTATCAAAT---  
 ATTACAGGGCTGATATTAACAAGAGATGGAGGTAATGATAATAAG-----  
 -----  
 ----  
 ACGGACAATAACACAGAGACCTTCAGACCTGGAGGAGGAGATATGAGAGAAAATTGGAGAAGTGAATTATATA  
 AATATAAAGTAGTAAAAATTGAACCATTA---GGAGTAGCACCCACCAAGGCAAAGAGAAGAGTGGTG-----  
 -----CAGAGAGAGAAAAGAGCA---  
 GTGGGAACACTAGGAGCT-----ATGTTCCCTTGGGTTCTTGGGAGCA---GCAGGAAGCACTATG---  
 GGCGCAGCGTCA---ATGACGCTGACGGTACAG---GCCAGACAA---TTATTG---  
 TCTGGTATAGTGCAACAGCAGAAC---AATTG---CTGAGA---  
 GCTATTGAGGCGCAACAGCACCTGTTGCAACTCACGGTCTGGGGCATC  
 >EF593254  
 TTCTACTGTAATACAACAACCACTGTTTAATAGTAGTTGGAATGGGAATGATAATGATACTGAAGAGGTAAAC-  
 -----  
 -----  
 AGCACAATAAGCATCACACTCCCATGTAGAATAAAACAAATTATAAACATGTGGCAGGAAGTAGGAAAAGCAA  
 TGTATGCCCCCTCCCATCAAAGGACAAATTAGATGTTTCATCAAAT---  
 ATTACAGGGCTGCTATTAACAAGAGATGGTGGTATTGGGAACAATGCCACT-----  
 -----  
 -----  
 GAGAATACCACTGAGATCTTCAGACCGGGAGGAGGAAATATGAGGGACAATTGGAGAAGTGAATTATATAAAT  
 ACAAGTAGTAAAAATTGAACCATTA---GGAGTAGCACCCACCAGGGCAAAGAGAAGAACGGTG-----  
 -----CAGAGAGAAAAAAGAGCA---GTAACA---CTGGGAGCT---  
 -----TTGTTCCCTTGGGTTCTTGGGATCA---GCAGGGAGCACTATG---GGCGCAGCGTCA---  
 ATAACGCTGACGGTACAG---GCCAGACAA---TTACTG---TCTGGTATAGTGCAAGCAGCAGAGC---  
 AATTTG---CTGCGA---GCTATTGAGGCGCAACAACACCTGTTGCAACTCACAGTCTGGGGCATC  
 >JN944936  
 TTCTACTGTAATACATCAAACTGTTTAATGGAACCTGGAATAGTACTAAAAGAGCAAATAAC-----  
 -----  
 -----  
 ACGGAAGGGATTATCATACTCCAATGCAGAATAAAACAAATTATAAATAGGTGGCAAGAAGTAGGAAAAGCAA

TGTATGCCCCCTCCCATCGAAGGACAAATTAAATGCTCATCAAAT ---  
 ATTACAGGGTTGCTATTAACAAGAGATGGTGGTAAACCACCAAC -----  
 -----  
 -----  
 AACACCACAGAATTCTTCAGACCTGGAGGAGGAAATATGAAAGATAATTGGAGAAGTGAATTATATAAAATATA  
 AAGTAGTAAGAATTGAACCATTA --- GGAGTAGCACCCACCAAGGCAAAGAGAAGAGTGGTG -----  
 ----- CAGAGAGAAAAAAGAGCA --- ATAGGA --- ATAGGAGCT -----  
 --- GTGTTCCCTTGGGTTCTTAGGAGCA --- GCAGGAAGCACTATG --- GGCGCAGCGTCA ---  
 ATAACGCTGACGGTACAG --- GCCAGAAAA --- TTATTG --- TCTGGTATAGTGCAACAGCAGAAC ---  
 AATCTG --- CTGAGG --- GCTATTGAGGCGCAACAGCATCTGTTGCAACTCACAGTCTGGGGCATC  
 >EF593291  
 TTCTATTGTAATACATCAAACTGTTTAATAGTACTTGGGGTACTTGGGAATAGTACTAAAGGGTCAAATGAC-  
 -----  
 -----  
 ACTGGAGGAAATATCACACTCCCATGCAGAATAAAACAAATCATAAACATGTGGCAGGGAGTAGGAAGAGCAA  
 TGTATGCCCCCTCCCATCAGAGGACAAATTAAATGTTTCATCAAAT ---  
 ATTACAGGGCTGATATTAACAAGAGATGGTGGTAATGGCACAAAC -----  
 -----  
 -----  
 AGCACCACCGAGATCTTCAGACCTGGAGGAGGAGATATGAGGGACAATTGGAGAAGTGAATTATATAAAATATA  
 AAGTAGTGAAGAAATTGAACCATTA --- GGAATAGCACCCACCAAGGCAAAGAGAAGAGTGGTG -----  
 ----- CAAAGAGAAAAAAGAGCA --- GTGGGA --- ATAGGAGCT -----  
 --- ATGTTCCCTCGGGTTCTTGGGAGCA --- GCAGGAAGCACTATG --- GGCGCAGCGTCA ---  
 GTGACGCTGACGGTACAG --- GCCAGACAA --- TTATTG --- TCTGGTATAGTGCAACAGCAAAGC ---  
 AATTTG --- CTGAGA --- GCTATTGAGGCGCAGCAGCATATGTTGCAACTCACAGTCTGGGGCATC  
 >EF593293  
 TTCTACTGTAATACAGCACAACTGTTTAATAGTACTTGGAGTGGGGGACAGTCAAATGGAAGTGAAGAC ---  
 -----  
 -----  
 AATAGCACCAATATCAGACTCCCATGCAGAATAAAGCAAATTATAAACATGTGGCAGGAAGTAGGAAAAGCAA  
 TGTATGCCCCCTCCCATCAGAGGACAAATTAGATGTTTCATCAAAT ---  
 ATTACAGGGCTGCTATTAATAAGAGATGGTGGTAATAGTAACACCACGAAC -----  
 -----  
 -----  
 AACAGCAACACGGAGACCTTTAGACCTGGAGGAGGAAATATGAGGGATAATTGGAGAAGTGAATTATATAAAAT  
 ATAAAGTAGTAAAAATTGAACCATTA --- GGAGTAGCACCCACCAAGGCAAAGAGAAGAGTGGTG -----  
 ----- CAGAGAGAAAAAAGAGCA --- GTGGGA --- ATAGGAGCT ---  
 ----- GTGTTCCCTTGGGTTCTTGGGAGCA --- GCAGGAAGCACTATG --- GGCGCAGCGTCA ---  
 GTGGCGCTGACGGTACAG --- GCCAGACGA --- TTATTG --- TCTGGTATAGTGCAACAGCAGAAC ---  
 AATTTG --- CTGAGG --- GCTATTGAGGCGCAACAGCATCTGTTGCAACTCACAGTCTGGGGCATC  
 >EF593294  
 TTCTACTGTAATACAACAAAGCTGTTTAATAGTACTTGGCCGAGTAATGGTACTGAGCCGTTGAAT -----  
 -----  
 -----  
 GATACTGAAAATATCATACTCCCATGCAGAATAAAACAAATTATAAACAGATGGCAGGAAGTGGGAAAAGCAA  
 TGTATGCCCCCTCCCATCAGCGGACTAATTAGATGCTCATCAAAT ---  
 ATTACAGGACTGCTCTTAACAAGAGATGGTGGTAATAACAGCAGC -----  
 -----  
 -----  
 AAGAACGAGACTTTTCAGACCAGGAGGAGGAGATATGAGGGACAATTGGAGAAGTGAATTATATAAAATATAAAG  
 TAGTAAAAATTGAGCCATTA --- GGGATAGCACCCACCAAGGCAAAGGAGAAGAGTGGTG -----  
 ----- CAGAGAGAAAAAAGAGCA --- GTGGGA --- ATAGGAGCT -----  
 TTGTTCCCTTGGGTTCTTGGGAGCA --- GCAGGAAGCACTATG --- GGCGCAGCGTCA ---  
 GTGACGCTGACGGTACAG --- GCCAGACTA --- TTATTG --- TCTGGTATAGTGCAACAGCAAAAC ---  
 AATTTG --- CTGAGG --- GCTATTGAGGCGCAACAGCATATGTTGCAACTCACAGTCTGGGGCATT  
 >GU330249  
 TTCTACTGTAATTCAACACCACTGTTTAATAGTAGTTGGACATCTAATGGTACATCTAATGGTACTTGGAAAGC  
 CTGATGATGCT -----  
 ----- TGAATAAT -----  
 AATACTAAAGAAAATATCACACTCCTATGCAGAATAAAACAAATTATAAACATGTGGCAGGAAGTAGGAAAAG

CAATGTATGCCCCCTCCTATTAGAGGACAAATTAGTTGTTTATCAAAT---  
 ATTACAGGGCTGCTATTAACAAGAGATGGTGGGGGTAATAACGGG-----  
 -----  
 -----  
 AGCAACAATGAAACCTTCAGGCCTGGAGGAGGAAATATGAAAGACAATTGGAGAAGTGAATTATATAAAATATA  
 AAGTAGTAAAAATTGAACCATTA---GGAGTAGCACCCACCAAGGCCAAAAGAAGAGTGGTG-----  
 -----CAAAGAGAAAAAAGAGCA---GTGGGAACACTAGGAGCT-----  
 ---ATGTTTCTTGGGTTCTTGGGAGCA---GCAGGAAGCACTATG---GGCGCAGCGTCA---  
 ATGGCGCTGACGGTACAG---GCCAGACAA---TTATTG---TCTGGTATAGTGCAGCAGCAGAAC---  
 AATCTG---CTGAGA---GCTATTGAGGCGCAACAGCATATGTTGCAACTCACAGTCTGGGGCATT  
 >GU330333  
 TTCTATTGTAATACAACAAAACCTGTTTAATAGTACTTGGCATACTAATAGTACTGGGAATGAGACTACGGGGT  
 CAAATAAC-----  
 -----ACG---  
 GGAGAAAATGACACAATCATGCTCCCATGCAGAATAAAACAAATTATAAACAGGTGGCAGGAAGTAGGAACAG  
 CAATGTATGCCCCCTCCCATCAGAGGACAAATTAGCTGTTTCATCAAAT---  
 ATTACAGGGCTGCTATTGACAAGAGACGGTGGTATAAAATATCACT-----  
 -----  
 -----  
 AACGAGAATGAAACCTTCAGACCTGAAGGAGGAGATATGAGGAACAATTGGAGAAGTGAATTATATAAAATATA  
 AAGTAGTAAAAATTGAACCATTA---GGAATAGCACCCACCAAGGCCAAGAGAAGAGTGGTG-----  
 -----CAGAGAGAAAAAAGAGCA---GTGGGA---ATGGGAGCT-----  
 ---TTGTTCTTGGGTTCTTAGGAGCA---GCAGGAAGCACTATG---GGCGCAGCGTCA---  
 GTGACGTTGACGGTACAG---GCCAGACAA---TTATTG---TCTGGTATAGTGCAACAGCAGAAC---  
 AACTTG---CTGAGG---GCTATTGAGGCGCAACAACATATGTTGCAACTCACAGTCTGGGGCATC  
 >KT124777  
 TTCTACTGTAACCTCATCAAAATTGTTTAATAGTACTTGGTTTAATAGGACTGGGGAGGATAATAATACTACAG  
 CAGAT-----  
 -----AGCAGT-----  
 GCAGGAAATGGTACAATCACAATCCCATGCAGAATAAAACAAATTATAAACATGTGGCAGGAAGTAGGAAAAG  
 CAATGTATGCTCCTCCCATCAGAGGACAGATTAGATGTATATCAAAT---  
 ATTACAGGGCTGCTATTAACAAGGGATGGTGGCGAGGAAGAGAAC-----  
 -----  
 -----  
 GAGACCGAGGTCTTTAGACCCGGGGGAGGTGATATGAGGGACAATTGGAGAAGTGAATTATATAAGTATAAAG  
 TAGTAAGAATTGAACCATTA---GGAATAGCACCCACCAAGGCCAAGAGAAGAGTGGTG-----  
 -----CAGAGAGGAAAAAGAGCA---GTGGGG---ATAGGAGCT-----  
 CTGTTCTTGGGTTCTTGGGAGCA---GCAGGAAGCACTATG---GGCGCAGCGTCA---  
 ATGACGCTGACGGTACAG---GCCAGACTA---TTATTG---TCTGGTATAGTGCAACAGCAGAAC---  
 AACTTG---CTGAGG---GCTATTGAGGCGCAACAGCATCTGTTGCAACTCACAGTCTGGGGCATC  
 >KT124795  
 TTCTACTGCAATTCAACACAACCTGTTTAATAGTACTTGGAAATTGGAATGATACTGAAAGGATAAGTAATAAC-  
 -----  
 -----  
 ACTGGAAAAAATATCACACTCCCATGCAGAATAAAACAAAGTTATAAACCTGTGGCAGGAAGTAGGAAAAGCAA  
 TGTATGCCCCCTCCCATCAGCGGAAACATTAGCTGTTTCATCAAAT---  
 ATTACAGGGCTACTACTAACAAGAGATGGTGGTGGGGACAATAAC-----  
 -----  
 -----  
 AGGACGAACGAGACCTTCAGACCTGGAGGAGGAAATATGAGGGACAATTGGAGAAGTGAATTATATAAAATATA  
 AAGTAGTAAAAATTGAACCATTA---GGAGTAGCACCCACCAGGGCAAAGAGAAGAGTGGTG-----  
 -----CAAAGAGAAAAAAGAGCA---GTGGGAACAATAGGAGCT-----  
 ---ATGTTCTTGGGTTCTTGGGAGCA---GCAGGAAGCACTATG---GGCGCAGCGTCA---  
 CTAACGCTGACGGTACAG---GCCAGACTA---TTACTG---TCTGGTATAGTGCAACAGCAGAAC---  
 AATTTG---CTGAGA---GCTATTGAGGCACAACAGCATCTGTTGCAACTCACAGTCTGGGGCATC  
 >DQ869020  
 TTCTACTGTAATACAACACTACTGTTTGATAGTACTTGGAAATAATAATAGTACTTGGAAATGCAAAT-----  
 -----  
 -----  
 GTGTCAGAACTATCATACTCCCATGCAGAATAAAACAAATTATAAACATGTGGCAGGCAGTAGGAAAGGCAA

TGTATGCTCCTCCCATCAGAGGACTAATTAAGTGTTCCTCAAAT ---  
 ATCACAGGGCTGCTATTAACAAGAGATGGTGGTATTGGTAATAGTAAT-----  
 -----  
 -----  
 AGTGAAAATGAGACCTTCAGACCTGAAGGAGGAGATATGAGGGACAATTGGAGAAGTGAATTATATAAAATATA  
 AAGTAGTAAAAATTGAACCATTA --- GGAATAGCACCCACCAAGGCAAAGAGAAGAGTGGTG-----  
 -----CAGAGAGAGAAAAAGAGCA --- GTGGGA --- ATAGGAGCT-----  
 ---GTGTTTCTTGGGTTCTTGGGAGCT --- GCAGGAAGCACTATG --- GGCGCAGCGTCA ---  
 ATAACGCTGACGGTACAG --- GCCAGACTA --- TTGTTG --- TCTGGTATAGTGCAACAGCAAAAT ---  
 AATTTG --- CTGAGG --- GCTATTGAGGCGCAACAGCATCTGTTGCAACTCACAGTCTGGGGCATC  
 >DQ869021  
 TTCTACTGTGATTCAACACAACCTGTTTAGTAGTACTTGGAAATAATGGTACTGAGAAGGCAGAAGGAAATGAC-  
 -----  
 -----  
 ACAAGTGACACAATTACACTCCCATGCAAAATAAAACAAATTATAAACATGTGGCAGGAAGTGGGAAAAGCAA  
 TGTATGCTCCTCCCATCAGTGGATATATTAAGTGTCTATCAAAT ---  
 ATTACAGGGCTGATATTAACAAGAGATAGGGATGGAGGGGTGAACGAG-----  
 -----  
 -----  
 ACAAATATGAACGAGACCTTCAGACCTATAGGAGGAAATATGAAGGACAATTGGAGAAGTGAATTATATAAAAT  
 AATAAGTAGTGAATTTGAACCATTA --- GGAGTAGCACCCACTAAGGCAAAGAGAAGAGTGGTG-----  
 -----CAGAGAGGAAAAAGAGCA --- GTGGGA --- ATAGGAGCT---  
 -----CTGTTTCCTTGGGTTCTTGGGAGCA --- GCAGGAAGCACTATG --- GGCGCAGCGTCA ---  
 ATGACACTGACGGTACAG --- GCCAGACAA --- TTATTG --- TCTGGTATAGTGCAACAGCAAAAC ---  
 AATTTG --- CTGAGA --- GCTATTGAGGCGCAACAACATATGTTGCAACTCACAGTCTGGGGCATC  
 >DQ869022  
 TTCTACTGTAATTCAACACAGCTGTTTAATAGTACTTGGACCAGGAATGAGACCTTGAATGGGACTGAAGGGT  
 CAAAT-----  
 -----  
 AGCAATGACACATTCATCACACTCCCATGCAGAATAAAACAAATTATAAACATGTGGCAACAAGTAGGAAAAG  
 CAATGTATGCCCCCTCCCATCAGAGGAAACATTAGTTGCTCATCAAAT ---  
 ATTACAGGGTTGCTATTAACAAGAGATGGTAGTACCGAAAAATGAG-----  
 -----  
 -----  
 AGTAACACCGAGATTTTCAGACCTGGAGGAGGAGATATGAGGGACAATTGGAGAAGTGAATTATATAAAATATA  
 AAGTAGTAAGAATTGAACCATTA --- GGAATAGCACCCACCAAGGCACAGAGAAGAACGGTG-----  
 -----CAGAGAGAAAAAGAGCA --- GTGGGA --- CTAGGAGCT-----  
 ---TTGTTTCCTTGGGTTCTTGGGAGCA --- GCAGGAAGCACTATG --- GGCGCAGCGTCA ---  
 ATAACGCTGACGGTACAG --- GCCAGACTA --- TTATTG --- TCTGGTATAGTGCAACAGCAGAAC ---  
 AATTTG --- CTGAGG --- GCTATTGAGGCGCAACAGCATCTGTTGCAACTCACAGTCTGGGGCATC  
 >FJ469687  
 TTCTACTGTAGTACAACACCACTGTTTAATAGTACTTGGGAGCCTAATGATACTAGAAGGTTCAATGAC ---  
 -----  
 -----  
 ACTGAAGAAATTATCACACTCATATGCAAAATAAAACAAGTTGTAAACATGTGGCAGAAAGTAGGAAAAGCAA  
 TGTATGCCCCCTCCCATCAGAGGACAAATTAGATGTTTCATCAAAT ---  
 ATTACAGGGCTAATATTAACAAGAGATGGTGGTAGTGACGAGAAC-----  
 -----  
 -----  
 ACGACCACCGAGATCTTCAGACCTGGAGGAGGAGATATGAGGGACAATTGGAGAAGTGAATTATATAAAATATA  
 AAGTAGTAAAAATTGAACCATTA --- GGAGTAGCACCCACCAGGGCAAAGAGAAGAGTGGTG-----  
 -----CAGAGAGAAAAAGAGCA --- GTGGGA --- CTAGGAGCT-----  
 ---ATGTTTCCTTGGGTTCTTGGGAGCA --- GCAGGAAGCACTATG --- GGCGCAGCGTCA ---  
 ATAACGCTGACGGTACAG --- GCCAGACAA --- TTATTG --- TCTGGTATAGTGCAACAGCAGAAC ---  
 AACCTG --- CTGAAG --- GCTATTGAGGCGCAACAGCGTATGTTGCAACTCACTGTCTGGGGCATC  
 >FJ469688  
 TTCTACTGTAATACATCAAAGCTGTTTAATAGTACTTGGAAATACTAGCAGTACTGGGAATGTTACTGATGAG-  
 -----  
 -----  
 ACAAATGACACAATCACACTCCCATGCAGAATAAAACAGATTGTAAACCTGTGGCAGGAAGTAGGAAAAGCAA

TGTATGCCCCCTCCCATCAGAGGACAAATTAGATGTTTCATCAAAC ---  
 ATTACAGGGCTACTACTAACAAGAGATGGAGGTAATGGGAATAAT -----  
 -----  
 AGCACAATCGAGATCTTCAGACCTGGAGGAGGAGATATGAGGGACAATTGGAGAAGTGAATTATATAAATATA  
 AAGTAGTAAAAATTGAACCATTA --- GGAGTAGCACCCACCAAGGCAAAGAGAAGAGTGGTG -----  
 ----- CAGAGAGAAAAAAGAGCA --- GCGGGA --- CTAGGAGCT -----  
 --- TTGTTCCCTTGGGTTCTTGGGAGCA --- GCAGGAAGCACTATG --- GGCGCAGCGTCA ---  
 ATAACGCTGACGGTACAG --- GCCAGACAA --- TTATTG --- TCTGGTATAGTGCAACAGCAGAAC ---  
 AATTTG --- CTGAGG --- GCTATTGAGGCGCAACAGCATATGTTGCAACTCACAGTCTGGGGCATC  
 >FJ469693  
 TTCTACTGTAATACAACAGGACTGTTTAATAGTACTTGGGAATAGTACTGGGAATATTGAAGGGTCAAATGGGA  
 CT -----  
 -----  
 GAAGGAAATGACACAATTACACTCCCATGCAGAATAAAAACAAATTATAATCATGCGGCAGGAAGTAGAAAAAG  
 CAAAGTCTCCCCCTCCCATCAGAGGACAAATTAAATCTTCATCAATT ---  
 ACTACAGGGCTATTATCAACAAGAGATGGTGGTAATAAGAATGGGACTAAT -----  
 -----  
 ----  
 GAGAGTAGCGACACTGAGATCTTCAGACCTGGAGGAGGAGATATGAGGGACAATTGGAGAAGTGAATTATATA  
 AATATAAAGTAGTAAAAGTTGAACCATTA --- GGAGTAGCACCCACCAAGGCAAAGAGAAGAGTGGTG ----  
 ----- CAGAGAGAAAAAAGAGCA ---  
 GTAGTGGGATTAGGAGCC ----- GTGTTCCCTTGGGTTCTTGTCAGCA --- GCAGGAAGCACTATG ---  
 GGCGCAGCGTCA --- TTAACGCTGACGGTACAG --- GCCAGACAA --- TTATTG ---  
 TCTGGTATAGTGCAACAGCAGAAC --- AATTTG --- CTGAGA ---  
 GCTATTGAGGCGCAACAGCATATGTTGCAACTCACAGTCTGGGGCATC  
 >HQ217201  
 TTCTACTGTAATACAACAAAACCTGTTTAAGGGGACTTGGGAATGGTACTACTTGGTGGGAATGGTGCTAATGGGA  
 CAAATATCACA -----  
 ----- GATAACAATGAA -----  
 GGGTCAAATGACACAATCATACTCCCATGCAGGATAAAAACAAATTGTAACTTGTGGCAGGAAGTAGGAAAAG  
 CAATGTATGCCCCCTCCCATCCAAGGACAAATTAGATGTTTCATCAAAT ---  
 ATTACAGGGCTGATATTAACAAGAGATGGGGGTAACCAAAAACAAAACATGCAAC -----  
 -----  
 -  
 GAGACTAATCCATGCACTGAGACCTTCAGACCAGGAGGAGGAAATATGAAAGACAATTGGAGAAGTGAATTAT  
 ATAAATATAAAGTAGTAAAAATTGAACCATTA --- GGAGTAGCACCCACCAAGGCAAAGAGAAGAGTGGTG --  
 ----- CAAAGAGAAAAAAGAGCA --- GTGGGA ---  
 ATAGGAGCT - - - - - TTGTTCCCTTGGGTTCTTGGGAGCA - - - GCAGGAAGCACTATG - - -  
 GGCGCAGCGTCA - - - TTGACGCTGACGGTACAG - - - GCCAGACAA - - - TTATTG - - -  
 TCTGGTATAGTGCAACAGCAAAAC - - - AATTTG - - - CTGAGA - - -  
 GCTATTGAGGCGCAACAGCATATGTTGCAACTCACAGTCTGGGGCATT  
 >FJ469730  
 TTCTACTGTAATACAACACAGCTGTTTAATGGTACTTGGGAATAATGGTACTTGGGAATAATGGTACTTGGGAATA  
 GTACC -----  
 ----- GAA ---  
 GGGTCAAATGACACTATCACACTTCCATGCAGAATAAAAACAAATTATAAACATGTGGCAAAAAGTAGGAAAAG  
 CAATGTATGCCCCCTCCCATTAGAGGACAAATTAGATGTTTCATCAAAT ---  
 ATTACAGGGCTGCTATTAACAAGCGATGGTGGTGGTAATGGGAAT -----  
 -----  
 -----  
 AGTAGCGAGACGTTTCAGACCTGGAGGAGGGAATATGAAGGACAATTGGAGGAGTGAATTATATAAATATAAAG  
 TAGTGAAAATTGAACCATTA --- GGAGTAGCACCCACCAAGGCAAAGAGAAGAGTGGTG -----  
 ----- CAGAGAGAAAAAAGAGCA --- ATGGGA --- CTAGGAGCT -----  
 CTGTTCCCTTGGGTTCTTGGGAGCA --- GCAGGAAGCACTATG --- GGCGCAGCGTCA ---  
 GTGACGCTGACGGTACAG --- GCCAGACTA --- TTATTG --- TCTGGTATAGTGCAACAGCAGAAC ---  
 AATTTG --- CTGAGG --- GCTATTGAGGCGCAACAGCATCTGTTGCAACTCACAGTCTGGGGCATC  
 >FJ469737  
 TTCTACTGTAATACAACAAGGCTGTTTAATAGTACTTGGATAGGTACTAATAGTACTTGGGAAT -----  
 -----

-----  
GATACTGATATCATCACACTCCCATGCAGAATAAAACAAATTGTAAACATGTGGCAGGAAGTAGGAAAAGCAA  
TGTATGCCCCCTCCCATCAGTGGACAAATTAGATGTTTCATCAAAT---  
ATTACAGGGCTACTATTAACAAGAGATGGGGGTAGCCAGAACCAAACG-----  
-----  
-----  
GAGAACAAACACGGAGACCTTCAGACCTGGAGGAGGAGATATGAGGGACAATTGGAGAAGTGAATTATATAAAT  
ACAAAGTAGTAAGAATTGAACCATTA---GGAGTAGCACCCACCACGGCAAAAAGGAGAGTGGTG-----  
-----CAAAGAGAAAAAAGAGCA---GTGGGA---ATAGGAGCT---  
-----TTGTTCCCTTGGGATCTTGGGAGCA---GCAGGAAGCACTATG---GGCGCAGCATCA---  
CTGACGCTGACGGTACAG---ACCAGACTA---TTATTG---TCTGGTATAGTGCAACAGCAGAAC---  
AATTTG---CTGAGG---GCTATTGAGGCGCAACAGCATATGTTGCAACTCACAGTCTGGGGCATC  
>JQ403102  
TTCTACTGTAATACAACAACCACTATTTAATAGTAGTTGGGTTGTCAATGGGACTATAGAGTCAAATGCCACCG  
AA-----  
-----  
GGAGATAGCAAGATCACCTCCCATGCAGAATAAAACAAATTGTAAACATGTGGCAGGAAGTAGGAAAAGCAA  
TGTATGCCCCCTCCCATCAGAGGAAAAATTAGCTGTCCATCAAAT---  
ATTACAGGGCTGCTATTAACAAGAGATGGTGGGCATGATGGTAATGGGAATAGC-----  
-----  
-----  
AGCAACAGTGAGACATTTCAGACCTGGAGGAGGAGATATGAGGGACAATTGGAGAAGTGAATTATATAAATATA  
AAGTAGTAGAAATTAAACCATTA---GGACTAGCACCCAACAAGGCAAAGAGAAGAGTGGTG-----  
-----CAAAGAGAAAAAAGAGCA---GTGGGA---ATAGGAGCT-----  
---GTGTTCCCTTGGGTTCTTGGGAGCA---GCAGGAAGCACTATG---GGCGCAGCGGCA---  
GTGACGCTGACGGTACAG---GCCAGACAA---TTATTG---TCTGGTATAGTGCAACAGCAGAAC---  
AATTTG---CTGAGA---GCTATTGAGGCGCAACAGCATCTGTTGCAACTCACAGTCTGGGGCATC  
>FJ469741  
TTCTACTGTAATACAACACGACTGTTTAAACAGTACTTGGACTTGGGATAATGATACTGAAGAA-----  
-----  
-----  
TCAAATGACACTATCACACTCCCATGCAGAATAAAACAAATTATAAACATGTGGCAGGAAGTAGGAAAAGCAA  
TGTATGCCCCCTCCCATCAGAGGACAAATTAAATGTTTCATCAAAT---  
ATTACAGGGCTGCTATTAATAAGAGATGGTGGTGAGGACGGGAAC-----  
-----  
-----  
AGTACCACCGAGATCTTCAGACCTGGAGGAGGAAATATGAGGGACAATTGGAGAAGTGAATTGTATAAATATA  
AAGTAGTAAAAATTGAACCATTA---GGATTAGCACCCACCAAGGCAAAGAGAAGAGTGGTG-----  
-----CAGAGAGAAAAAAGAGCA---GCA-----ATAGGAGCT-----  
---ATGATCCCTTGGGTTCTTGGGAGCA---GCAGGAAGCACTATG---GGCGCAGCGTCA---  
CTGACGCTGACGGTACAG---GCCAGACTA---TTATTG---TCTGGTATAGTGCAACAGCAGAAC---  
AATTTG---CTGAGA---GCTATTGAGGCGCAACAGCATCTGTTGCAACTCACAGTCTGGGGCATC  
>FJ469748  
TTCTATTGTAATACTACACAACCTGTTTAAATAGTACTTGGTATGGAAATGGTACTGTACAGTCAATATCTGAA-  
-----  
-----  
GGAAATGAAACAATCACACTCCCATGCAGAATAAAACAGATTGTAAACATGTGGCAACAAGTAGGAAAAGCAA  
CGTATGCCCCCTCCCATCAGTGGACAAATTAAGTGTACATCAAAT---  
ATTACAGGGCTGCTAATAACAAGAGATGGTGGGGGTAACGAGTCC-----  
-----  
-----  
AGGAATAATGAGACCTTTAGACCTGCAGGAGGAGATATGAGGGACAATTGGAGAAGTGAATTATATAAATATA  
AAGTAGTAAAAATTGAACCATTA---GGAGTAGCACCCACCAAGGCAAAAAGAAGAGTGGTG-----  
-----CAGAGAGAAAAAAGAGCA---GTGACA---CTAGGAGCT-----  
---GTGTTCCCTTGGGTTCTTGGGAGCA---GCAGGAAGCACTATG---GGCGCAGCGTCA---  
ATGACGCTGACGGTACAG---GCCAGACTA---TTGATG---TCTGGTATAGTGCAACAGCAGAAC---  
AACTTG---CTGAAA---GCTATTGAGGCGCAACAGCATCTGTTGCAACTCACTGTCTGGGGCATC  
>FJ469760  
TTCTACTGTAATTCAACAAAACCTGTTTAAATAGTACTTGGCCACTTAATAGTACTGTGAATGATACTACCGGGT  
CA-----

-----  
AATAACAATGATACCATAGTTCTCCCATGCAGAATAAAACAAATTATAAACATGTGGCAACAAGTAGGAAGAG  
CAATGTATGCCCCCTCCTATCAGAGGAAAAATTAGATGTTTCATCAAAT---  
ATTACAGGGCTGATATTAACAAGGGATGGTGGTGGTGGTGCAAACGAG-----  
-----  
-----  
ACCACCAGGAACGAGACCTTCAGACCTGCAGGAGGAGATATGAGGGACAATTGGAGAAGTGAATTATATAAAT  
ATAAAGTAGTAAGAATTGAACCATTA---GGAGTAGCACCCACTAAGGCAAAGAGAAGAGTGGTG-----  
-----CAGAGAGAAAAAAGAGCC---GTGGGA---CTAGGAGCC---  
-----ATGTTTCCTTGGGTTCTTGGGAGCA---GCAGGAAGCACTATG---GGCACAGCGTCA---  
CTGACGCTGACGGTACAG---GCCAGACAA---TTATTG---TCTGGTATAGTGCAACAGCAGAAC---  
AATCTG---CTGAGG---GCTATTGAGGCGCAACAGCATCTGTTGCAACTCACAGTCTGGGGCATC  
>FJ469762  
TTCTACTGTAATACAACAACACTGTTTAAATAGTACTTGGACTGATAATAGTACTACCGGGTCAAATAAC-----  
-----  
-----  
ACAAAAGGAATTATCACACTCCCATGCAGAATAAAACAAATTATAAATATGTGGCAAGAAGTAGGAAAAGCAA  
TGTATGCCCCCTCCCATCAGTGGATTAATTAGATGTAAATCAAAT---  
ATTACAGGGCTGCTATTAACAAGAGATGGTGGTAATAAGAATAACAAC-----  
-----  
-----  
GAGACTGAGACCGAAATCTTTAGGCCTGGAGGAGGAGATATGAGGGACAATTGGAGAAGTGAATTATATAAAT  
ATAAAGTAGTAAAAATTGAACCATTA---GGAATAGCACCCACCAGGGCAAAGAGAAGAGTGGTG-----  
-----CAGAGAGAAAAAAGAGCA---GTGGGA---TTAGGAGCT---  
-----TTGTTTCCTTGGGTTCTTGGGTACA---GCAGGAAGCACTATG---GGCGCAGCGTCA---  
ATAACGCTGACGGTACAG---GCCAGACAA---TTATTG---TCTGGTATAGTGCAACAGCAGAAC---  
AACTTG---CTGAGA---GCTATTGAGGCGCAACAACATCTGTTGCAACTCACAGTCTGGGGCATC  
>EU578460  
TTCTACTGTAATACAACACAGCTGTTTAAATAGTACTTGGCCTAATGATACTAGTACTTGGTATGGGAATGAT-  
-----  
-----  
ACTGCAGGAGATATCACACTCCCATGCAGAATAAAACAAATTATAAACAGGTGGCAGGAAGTAGGAAAAGCAA  
TGTATGCCCCCTCCCATCAGCGGGATAATTAGATGTTTCATCAAAT---  
ATTACAGGGATAATTTTAAACAAGAGATGGTGGTAATAACATCACGAAC-----  
-----  
-----  
AACACCACCGAGACCTTCAGACCTGAAGGAGGAAATATGAAGGATAATTGGAGAAGTGAATTATATAAATACA  
AAGTAGTAAAAATTGAACCATTA---GGAATAGCACCCACCAAGGCAAGGAGAAGAGTGGTG-----  
-----CAGAGAGAAAAAAGAGCA---GTGGGAACAATAGGAGCT-----  
---ATGTTTCCTTGGGTTCTTGGGAGCA---GCAGGAAGCACTATG---GGCGCAGCGTCG---  
CTGACGCTGACGGTACAA---GCCAGACTA---TTATTG---TCTGGTATAGTGCAACAGCAGAAC---  
AATCTG---CTGAGG---GCTATTGAGGCGCAACAGCATATGTTGCAACTCACAGTCTGGGGCATC  
>EF593295  
TTCTACTGTGATTTCAGCACCACTGTTTAAATAGTAGTTGGATACGGAATACAAGTACTTGGACACGGAATGATA  
GCGCTTGGAAAT-----  
-AAAACTGAAGGGACA-----  
AATAGCACTGATCCAATCACACTCACATGTAGAATAAAACAATTTATAACATGTGGCAGAAAGTAGGAAAAG  
CAATGTATGCTCCTCCCATCAGTGGACAAATTAAATGTTTATCAAAT---  
ATTACAGGGCTGATACTAACAAGAGATGGTGGTAATAACAAAATACAAGT-----  
-----  
-----  
GACAACGAGACTAGCGAGATCTTCAGACCTGGAGGAGGAGATATGAGGGACAATTGGAGAAGTGAATTATATA  
AATATAAAGTGGTGAAAATTGAACCATTA---GGAGTAGCACCCACCAAGGCAAAGAGAAGAGTGGTG-----  
-----CAGAGAGAAAAAAGAGCA---GTGACG---  
CTAGGAGCT-----ATGTTTCCTTGGGTTCTTGGGAGCA---GCAGGAAGCACTATG---  
GGCGCAGCGTCA---ATGACGCTGACGGTACAG---GCCAGACTA---TTATTG---  
TCTGGTATAGTGCAACAGCAGAAC---AATCTG---CTGAGG---  
GCTATTGAGGCGCAGCAGCATCTGTTGCAACTCACAGTCTGGGGCATC  
>EF593296

TTCTACTGTAATACAACAAAACCTGTTTAAATAGTACAGGGGGGAATAATAACACTTGGACTGAT-----  
-----  
-----  
ACTACAGGAAATATCACACTCCAATGCAGAATAAAACAAATTATAAACATGTGGCAGGAAGTAGGAAAAGCAA  
TGTATGCCCCCTCCCATCAGAGGACACATTAAATGTTTCATCAAAT---  
ATTACAGGACTGATATTAACAAGAGATGGTGGTGGTAGTAATAAC-----  
-----  
-----  
AATACTACTGAGACCTTTAGGCCGGGAGGAGGAAATATGAAGGACAATTGGAGAAGTGAATTATATAAAATATA  
AAGTAGTACAAATTGAACCATTA---GGAGTAGCACCCACCAGGGCAAGGAGAAGAGTGGTG-----  
-----CAGAGAGAAAAAAGAGCA---ATAGGA---CTGGGAGCT-----  
---CTCCTCCTTGGGTTCTTGGGAACA---GCAGGAAGCACTATG---GGCGCAGCGTCA---  
CTGACGTTGACGGTACAA---GCCAGACAA---TTATTG---TCTGGTATAGTGCAACAGCAGAAC---  
AATCTG---CTGAGG---GCTATTGAGGCGCAGCAGCATATGTTGCAACTCACAGTCTGGGGCATC  
>EF593297  
TTCTACTGTAATACAGCAGAACTGTTTAAATAGTACTTGGGATACTACTACAGGGTCAAATAACACAAAT----  
-----  
-----  
GACACTGAAATTATCACACTTCCATGTAGAATAAAACAAATTATAAACATGTGGCAGCAAGTAGGAAAAGCAA  
TGTATGCCCCCTCCCATCAAAGGACAAATTAGATGTTTCATCAAAT---  
ATTACAGGACTACTATTAACAAGGGATGGAGGTAATAACACTGAC-----  
-----  
-----  
AACGAGACCTTCAGACCTGGAGGAGGAGATATGAGGGACAATTGGAGAAGTGAATTATATAAAATATAAAGTAG  
TAAAAATTGAACCATTA---GGACTAGCACCCACCAAGGCAAGGAGAAGAGTGGTG-----  
-----CAGAGAGAAAAAAGAGCA---GTGGGA---ATAGGAGCT-----  
CTGTTCCCTTGGGTTCTTGGGAGCA---GCAGGAAGCACTATG---GGCGCAGCGTCG---  
ATGACGCTGACGGTACAA---GCCAGGCAA---TTATTG---TCTGGTATAGTGCAACAGCAGAAC---  
AACTTG---CTGAGA---GCTATTGAGGCGCAACAGCATATGTTGCAACTCACAGTCTGGGGCATC  
>GU330460  
TTCTACTGTAATACAACAGGACTGTTTAAATAATACTTGGGGGTTTAAATAGTACTTGGGATGCTATTAATGTGC  
CA-----  
-----  
-----  
GAAAAATGACACAATCACACTCCCATGCAGAATAAAACAAATTGTAAACATGTGGCAGGAAGTAGGAAAAGCAA  
TGTATGCCCCCTCCCATCAGAGGACGACTTAATTGTTTCATCAAAT---  
ATTACAGGGCTGCTATTAACAAGAGATGGTGGTAATACCACAAAT-----  
-----  
-----  
AACACTGAGGTCTTCAGACCTGGAGGAGGAGATATGAGAGACAATTGGAGAAGTGAATTATATAAAATATAAAG  
TAGTAAAAATTGAACCATTA---GGAATAGCACCCACCAAGGCAAAGAGAAGAGTGGTG-----  
-----CAGAGAGAAAAAAGAGCA---GTGGGA---ATAGGAGCT-----  
TTGTTCCCTTGGGTTCTTGGGAGCA---GCAGGAAGCACTATG---GGCGCAGCGTCG---  
ATGACGCTGACGGTACAG---GCCAGACTA---TTATTG---TCTGGTATAGTGCAACAGCAGAAC---  
AATTTG---CTGAGA---GCTATTGAGGCGCAACAGCATCTGTTGCAACTCACAGTCTGGGGCATC  
>HM234503  
TTCTATTGTAATACAACGCAACTGTTTAAATAGTACTTGGAAAATTAATAGTACTTGAATGATACTGAAGGG-  
-----  
-----  
-----  
TCAAATGACACTATCGCACTCCCATGTAGAATAAAACAAATCATAAACATGTGGCAGAAAGTAGGAAAAGCAA  
TGTATGCCCCCTCCCATCCAAGGACAAATTAAGTGTTCATCAAAA---  
ATCACAGGGCTGCTATTAACAAGAGATGGTGGCAGCACCGATAAC-----  
-----  
-----  
AACAAACACCGAGACCTTCAGACCTGGAGGAGGAGATATGAGGGACAATTGGAGAAGTGAATTATATAAAATATA  
AAGTAGTAAAAGTTGAACCATTA---GGAATAGCACCCGCCAAGGCAAAGAGAAGAGTGGTG-----  
-----CAGAGAGAAAAAAGAGCA---GTGGGA---ATGGGAGCT-----  
---CTGTTCCCTTGGGTTCTTGGGAGCA---GCAGGAAGCACTATG---GGCGCAGCGTCA---  
CTAACGCTGACGGTACAG---GCCAGACAA---TTATTG---TCTGGTATAGTGCAACAGCAGAAC---  
AATTTG---CTGAGG---GCTATTGAGGCGCAACAGCATATGTTGCAACTCACAGTCTGGGGCATT  
>KC312470

TTCTACTGTAATACAACAACAACTGTTTAAATAGTACTATCAATGGTACTGAAATGTAC-----  
 -----  
 -----  
 AGTGCAGGAAATATCACACTCCCATGCAAAATAAAGCAAATTATAAACATGTGGCAGGAAGTAGGAAAAGCAA  
 TGTATGCCCCCTCCCATAGAGGACAAATTAGATGTTTCATCAAAT---  
 ATTACAGGGCTGCTATTAGTGAGAGATGGTGGTAATGCTGAGAATGATACCAAC-----  
 -----  
 -----  
 ACTACCAACATCGAGACCTTCAGACCTGGAGGAGGAGATATGAGGGACAATTGGAGAAGTGAATTATATAAAT  
 ATAAAGTAGTAAAAATTGAACCATTA---GGAATAGCACCCACCAAGGCAAAAAGAAGGGTGGTG-----  
 -----  
 -----CAGAGAGAGAAAAAGAGCG---GTGGGA---CTAGGAGCT---  
 -----TTGTTTCATTGGGTTCTTAGGAGCA---GCAGGAAGCACTATG---GGCGCAGCGTCA---  
 ATAACGCTGACGGTACAG---GCCAGGCTA---TTATTG---TCTGGTATAGTGCAACAGCAAAAC---  
 AATTTG---CTGAGA---GCTATTGAGGCGCAACAGCATCTGTTGCAACTCACAGTCTGGGGCATC  
 >KT124807  
 TTTTACTGTAATACAACACAGCTGTTTAGTACTTGGAAATAGTACTGGGCAGTCTAATAGTACT-----  
 -----  
 -----  
 GGGAAATGATACCATCACACTCCCATGCAGAATAAAACAAATTATAAACAAAGTGGCAGGGAGTAGGAAAAGCAA  
 TGTATGCCCCCTCCCATCAGCGGAGTAATTAATTGTACATCAAAT---  
 ATTACAGGGCTGCTATTGACAAGAGATGGTGGTAAGACGGGCGAG-----  
 -----  
 -----  
 AATGAGAGTGAGACCTTCAGACCTGGAGGGGGAGATATGAGGGACAATTGGAGAAGTGAATTATATAAATATA  
 AAGTAGTAAAAATTGAACCAATA---GGAGTAGCACCCACCAAGCCAAGAGAAGAGTGGTG-----  
 -----  
 -----CAGAGAGAAAAAGAGCA---GTAACA---CTGGGAGCT-----  
 ---ATGTTCCCTTGGGTTCTTGGGAGCA---GCAGGAAGCACTATG---GGCGCAGCGTCA---  
 ATGACGCTGACGGTACAG---GCCAGACAA---TTATTG---TCTGGTATAGTGCAACAGCAGAAC---  
 AATCTG---CTGAAG---GCTATTGAGGCGCAACAGCATCTGTTGCAACTTACAGTCTGGGGCATC  
 >KT124813  
 TTCTACTGTAATACGTCACAACTATTTAATAGTACTTGGAGTAATGGGACTAATGGTAATTGGACTATAAATA  
 ACACC-----  
 -ACAGGGGGAAATAAC-----  
 ATTGAGAATGACACTATCACACTCCCATGCAGGATAAAACAAATTATAAACTTGTGGCAGAAAGTAGGAAGGG  
 CAATGTATGCCCCCTCCCATAGTGGACAGATTAGCTGTTTCATCAAAT---  
 ATTACAGGGCTAATATTAACAAGAGATGGTGGTGCTACTGATAAT-----  
 -----  
 -----  
 AGCATGAACGAGACCTTCAGACCTGCAGGAGGAGATATGAAGGACAATTGGAGAAGTGAATTATATAAATATA  
 AAGTAGTAAGAATTGAACCATTA---GGAGTAGCACCCACCCCGCAAGGAGAAGAGTGGTG-----  
 -----  
 -----CAGAGAGAAAAAGAGAA---CTAACA---ATGGGAGCT-----  
 ---CTGTTCCCTTGGGTTCTTGGGAGCA---GCAGGAAGCACTATG---GGCGCAGCGTCG---  
 CTGACGCTGACGGTACAA---GCCAGACTA---TTATTG---TCTGGTATAGTGCAACAGCAGAAC---  
 AATATG---CTGAGG---GCTATTGAGGCGCAACAACATCTGTTGCAACTCACAGTCTGGGGCATC  
 >DQ869016  
 TTCTACTGTAATACAACAAAATTGTTCAATAGTACTTGGACAATACTGATTCAAATACCACTGAG-----  
 -----  
 -----  
 AACAAATGACACAATCACACTCCCATGCAGGATAAAACAAATCGTAAACTTGTGGCAGCAAGTAGGAAAAGCAA  
 TGTATGCCCCCTCCCATCAGCGGACAGATTAGATGTTTCATCAAAT---  
 ATCACAGGGCTTTTATTAACAAGAGATGGTGGTGATATTAATAGA-----  
 -----  
 -----  
 ACTGAGGAGATATTCAGACCTGGAGGAGGAAATATGAAGGACAATTGGAGAAGTGAATTATATAAATATAAGG  
 TAGTACAAATTGAACCATTA---GGAGTAGCACCCACCAAGGCAAGAGAAGAGTGGTG-----  
 -----  
 -----CAGAGAGAAAAAGAGCT---TTGGGA---ATGGGAGCT-----  
 TTGTTCCCTTGGGTTCTTGGGAGCA---GCAGGAAGCACTATG---GGCGCAGCGTCA---  
 TTGACGCTGACGGTACAG---GCCAGACAA---TTATTG---TCTGGTATAGTGCAACAGCAGAAC---  
 AATCTG---CTGAGA---GCTATTGAGGCGCAACAGCATCTGTTGCAACTCACAGTCTGGGGCATT  
 >DQ869024

TTCTACTGTAATACAACACAACACTGTTTAAATAGTACTTGGAGGAGTAATGATACAACACAACACTGTCTAATAGTA  
 CTTGGAGGAGT-----  
 AATGATACTGCTTCTGAA-----  
 GGGTCAAATGACACTATCATCTCCCATGTAGAATAAAACAAATTATAAACTTGTGGCAGGAAGTAGGAAAAG  
 CAATGTATGCCCCCTCCCATTAGTGGACCAATTAGCTGTTTCATCAAAT---  
 ATTACAGGGCTGCTATTAACAAGAGATGGTGGTAACAACAGCACC-----  
 -----  
 -----  
 AATAACACTGAGGTCTTCAGACCTGGAGGAGGAAATATGAGGGACAATTGGAGAAGTGAACCTATATAAAATATA  
 AAGTAGTAAAAATTGAACCATTA---GGAATAGCACCCACTAGGGCAAAGAGAAGAGTGGTG-----  
 -----CAAAGAGAAAAAAGAGCA---GTGGGA---ATCGGAGCT-----  
 ---GTGTTCTTGGGTTCTTGGGAGCA---GCAGGAAGCACTATG---GGCGCAGCGTCA---  
 ATGGCGCTGACGGTACAG---GCCAGACAA---TTATTG---TCTGGTATAGTGCAACAGCAGAAT---  
 GATCTG---CTGAGG---GCTATTGAGGCGCAACAACATCTGTTGCAACTCACAGTCTGGGGCATC  
 >DQ869025  
 TTCTATTGTAATACAACACAACACTGTTTAAATAGTATTTGGAACAGTACTTGGAGTGCTAATAGTAGTGGTAATG  
 TA-----  
 -----  
 GAAAAATAAACGATCACACTCCCATGCAGAATAAAACAAATTATAAACATGTGGCAGGAAGTAGGAAAAGCAA  
 TGTATGCCCCCTCCCATCGCAGGAATAATTAGCTGTTTCATCAAAT---  
 ATTACAGGGCTGATATTAACAAGAGATGGTGGTAATGATAATGATACG-----  
 -----  
 -----  
 AACAAAGGAGGAGGAGGTCTTCAGACCTGGAGGAGGAAATATGAAGGACAATTGGAGAAGTGAATTATATAAAAT  
 ATAAAGTAGTAAGAATTGAACCCCTTA---GGAGTAGCACCTACTAAGGCAAAGAGAAGAGTGGTG-----  
 -----CAGAGAGAAAAAAGAGCA---GTGGGA---ATAGGAGCT---  
 -----GTGTTCTTGGGTTCTTGGGAGCA---GCAGGAAGCACTATG---GGCGCAGCGTCA---  
 GTGGCGCTGACGGTACAG---GCCAGACAA---TTATTG---TCTGGTATAGTGCAACAGCAAAAC---  
 AATTTG---CTGAGG---GCTATTGAGGCGCAACAGCATATCTTGCAACTCACAGTCTGGGGCATC  
 >DQ869029  
 TTCTACTGTAATACAACACAACACTGTTTACTTGGAAATGATACTAGTATTGAAAATTCAAATGACACTGAGGGA-  
 -----  
 -----  
 TCAAATAAAATTATCATTCTTCCATGCAAAATAAAACAAATTATAAAAATGTGGCAGAGAGTAGGAAAAGCAA  
 CGTATGCCCCCTCCCATCAGAGGACAAATTAGATGTTTCATCGAAT---  
 ATTACAGGGCTGCTATTAACAAGAGATGGTGGTAGTAACCAGAGT-----  
 -----  
 -----  
 AATAGTGAGACCTTCAGACCTGGAGGAGGAGATATGAGGGACAATTGGAGGAGTGAATTATATAAAATATAAAG  
 TAGTAAAAATTGAACCATTA---GGAGTAGCACCCACCAAGGCAAAGAGAAGAGTGGTG-----  
 -----CAAAGGGAAAGAAGAGCA---GTGGGA---ATAGGAGCT-----  
 ATGCTCCTTGGGTTCTTAGGAACA---GCCGGAAGCACTATG---GGCGCAGCGTCA---  
 GTGGCGCTGACGGTACAG---GCCAGACTA---TTATTG---TCTGGTATAGTGCAAGCAGCAGAAC---  
 AATTTG---CTGAGA---GCTATTGAGGCGCAACAGCACCTGTTGCAACTCACAGTCTGGGGCATC  
 >DQ869030  
 TTCTATTGTAATACAACAGAGCTGTTTAAATAGTACTTGGCTGGATAATAATACTAGGAATGATACTGAAGGGT  
 CA-----  
 -----  
 AATAGCACTGATATCACACTCCAATGCAGAATAAAACAAATTATAAACAGGTGGCAGGAAGTAGGAAAAGCAA  
 TGTATGCCCCCTCCCATCAGAGGACCAATTAATTGTACATCAAAT---  
 ATTACAGGGCTACTATTAATAAGAGATGGTGGTAATGACAAATAGTACT-----  
 -----  
 -----  
 GACAATAACACTGAGATCTTCAGACCTACAGGAGGAAACATGAGGGGCAATTGGAGAAGTGAATTATATAAAAT  
 ATAAAGTAGTAAAAATTGAGCCATTA---GGAATAGCACCCACCGAGGCAAAGAGAAGAGTGGTG-----  
 -----CAGAGAGAAAAAAGAGCA---GTAGGC---CTGGGAGCT---  
 -----ATGTTCTTGGGTTCTTGGGAGCA---GCAGGCAGCACTATG---GGCGCAGCGTCA---  
 CTGACGCTGACGGTACAG---GCCAGACAA---TTACTG---TCTGGGATAGTGCAACAGCAAAAC---  
 AATTTG---CTGAGA---GCTATTGAGGCGCAACAGCATCTGTTGCAACTCACAGTCTGGGGCATC  
 >DQ869031

TTCTACTGTGATTCAACACAACCTGTTTAAATAGTACTTGGAACTACTTGGAAATGCTACAGAGTCGAATGGCACTA  
 GA-----  
 -----  
 GAAAATGACACAATCACACTCCCATGCAGAATAAGACAAATTATAAACATGTGGCAGAAAGTAGGAAAAGCAA  
 TGTATGCCCCCTCCCATCAGAGGACGAATTAAGTGTTCATCAATA---  
 ATTACAGGGCTGCTATTAACAAGAGATGGT---AGTAACAGTAGC-----  
 -----  
 -----  
 AATGAGACCTTCAGACCTGGAGGAGGAGATATGAGGGATAATTGGAGAAGTGAATTATATAAATATAAAGTAG  
 TAAAAGTTGAACCGTTA---GGAATAGCACCCACCACGGCAAGGAGAAGAGTGGTG-----  
 -----CAGAGAGAAAAAAGAGCA---CTAGGGGGACTAGGAGCT-----  
 ATGTTCCCTTGGGTTCTTGAGTGCA---GCAGGAAGCACTATG---GGCGCAGCGTCA---  
 CTGACGCTGACGGTACAG---GCCAGACAA---TTATTG---TCTGGTATAGTGCAACAGCAGAGC---  
 AATCTG---CTGATG---GCTATTGAGGCGCAACAACATATGTTGAAACTCACAGTCTGGGGCATT  
 >FJ469701  
 TTCTACTGTAATACATCAAACTGTTTAAATAGTACTTGGAGTACTAATAGTACTTGGAAATGATACTGAAAGG-  
 -----  
 -----  
 TTAAATGAGACTATCATACTCCCATGCAGAATAAAACAAGTTATAAACTTGTGGCAGGAAGTAGGAAAAGCAA  
 TGTATGCCCCCTCCCATCAGAGGAGAAATTAAGTGTGCATCAAAAT---  
 ATTACAGGACTGCTATTAATAAGAGATGGTGGAAATGAGAAAAACAAG-----  
 -----  
 -----  
 ACCGAGGAGATCGAGATCTTTAGACCTGGAGGAGGAGATATGAGGGACAATTGGAGAAGTGAATTATATAAAAT  
 ATAAGGTAGTAAAAATTGAACCATTA---GGAATAGCACCCACCAAGGCAAAGAGAAGAGTGGTG-----  
 -----CAGAGAGAAAAAAGAGCA---GCAGCG---CTAGGAACT---  
 -----ATGATCCTTGGGTTCTTGGGAGCA---GCAGGAAGCACTATG---GGCGCAGCGTCA---  
 CTGACGCTGACGGTACAG---GCCAGACAA---TTATTG---TCTGGTATAGTGCAACAGCAGAGC---  
 AATTTG---CTGAAG---GCTATTGAGGCGCAACAGCATCTGTTGCAACTCACAGTCTGGGGCATC  
 >KC473846  
 TTCTACTGCAATACAACACCACTGTTTAAATAGTACTTGGGATAGTAGTACTTGGAAATAGTACTAAAAATAATA  
 CGGGG-----  
 -----  
 TCAAAATGATACTATCACAATCCAATGTAGGATAAAACAATTTATAAACATGTGGCAGACAGTGGGAAAAGCGA  
 TGTATGCCCCCTCCCATCGCAGGACAAATTAGATGTTTATCAAAAT---  
 ATTACAGGGCTATTATTAGAGAGAGATGGTGGTAATAATAAGACA-----  
 -----  
 -----  
 GACCACAACGAAACCTTCAGACCTAGCGGAGGAAATATGAAGGACAATTGGAGAAGTGAATTATATAAATATA  
 AAGTAGTAAAAGTTGAACCAATA---GGAATAGCACCCACCAGGGCAAAGAGAAGAGTGGTG-----  
 -----CAGAGAGAAAAAAGAGCG-----GGA---ATAGGAGCT-----  
 ---GTGTTCCCTTGGGTTCTTGGGAGCA---GCAGGAAGCACTATG---GGCGCAGCGTCA---  
 GTAACGCTGACGGTACAG---GCCAGACAA---TTATTG---TCTGGTATAGTGCAACAGCAAAAT---  
 AATTTG---CTGAGG---GCCATTGAGGCGCAACAGCATATGTTGCAACTCACTGTCTGGGGCATC  
 >EF593222  
 TTCTACTGCAATACAACAAAACCTGTTTAAATAGTACTTGGAAATAGTGGGAATAATACTAATAAATACTGAAGGAT  
 CA-----  
 -----  
 -----  
 AATGACACTATTATCACACTCCCATGCAGAATAAAACAATTTATAAACTTATGGCAGGAAGTAGGAAAAGCAA  
 TGTATGCCCCCTCCCATCAGAGGACAAATTAAGTGTTCATCAAAAT---  
 ATTACAGGACTGTTATTAATAAGAGATGGGGGTAATACCACAAAC-----  
 -----  
 -----  
 AACACAGAGACCTTCAGACCTTTAGGAGGAAATATGAAGGACAATTGGAGAAGTGAATTATATAAATATAAAG  
 TAGTACAAATTGAACCATTA---GGAGTAGCACCCACTAAGGCAAAGAGAAGAGTGGTG-----  
 -----CAGAGAGAAAAAAGAGCA---GTGGGA---ATAGGAGCT-----  
 TTGTTCCCTTGGGTTCTTGGGAGCA---GCAGGAAGCACTATG---GGCGCAGCGTCA---  
 GTGACGCTGACGGTACAG---GCCAGACAA---TTATTG---TCTGGTATAGTGCAACAGCAGAAC---  
 AATTTG---CTGAGA---GCTATTGAGGCGCAACAGCATATGTTGCAACTCACAGTCTGGGGCATC  
 >DQ410465

TTCTACTGTAATACAACACAACACTGTTTAAATAGTACTTGGAAATACAACACAACACTGTTTAAATAGTACTTGGAAATG  
 ATACTGGG-----  
 -----CCAAAT-----  
 AACGAAAATGACACACTCACACTCCCATGCAGAATAAAACAAATTATAAACAGGTGGCAGGAAGTAGGAAAAG  
 CAATGTATGCCCCCTCCCATCAGAGGACAAATTAGATGTTTCATCAAAT---  
 ATTACGGGGCTGCTATTAACAAGAGATGGTGGTAACGACAATAACAAGACC-----  
 -----  
 AATAACCAGACCGAGATCTTCAGACCTGGAGGAGGAAATATGAGGGACAATTGGAGAAGTGAATTATATAAAAT  
 ATAAAGTAGTAAGAATTGAACCATTA---GGAGTAGCACCCACCCCGGCAAAGAGAAGAGTGGTG-----  
 -----CAAAGAGAAAAAAGAGCA---GTGGGA---ATAGGAGCT---  
 -----ATGTTTCCTTGGGTTCTTGGGAGCA---GCAGGAAGCACTATG---GGCGCAGCATCA---  
 ATGACGCTGACGGTACAG---GCCAGACTA---TTATTG---TCTGGTATAGTGCAACAGCAGAAC---  
 AATTTG---CTGAGG---GCTATTGAGGCGCAACAGCACCTGTTGCAACTCACAGTCTGGGGCATC  
 >DQ410422  
 TTTTACTGTAATACAACACAATTATTTAAATAGTACTTGGAAATGATACTGATAGTGGAGGGTCAAATAACACAA  
 AT-----  
 -----  
 AACAAATGATACTATCACACTCCCATGCAGAATAAAACAGATTATAAACATGTGGCAGGAAGTAGGAAAAGCAA  
 TGTATGCCCCCTCCCATCATGGGACAAATTAGCTGTTTCATCAAAT---  
 ATTACAGGGATGATATTAACAAGAGATGGTGGTACTAATAGGAGCAAGACC-----  
 -----  
 -----  
 GAGACCGAGACCGAGACCTTCAGACCTGGAGGAGGAGATATGAGGGACAATTGGAGAAGTGAATTATATAAAAT  
 ATAAAGTAGTAAACTTGAACCATTA---GGAGTAGCACCCACCAAGGCAAAGAGAAGAGTGGTG-----  
 -----CAGAGAGAAAAAAGAGCG---ATAACA---GTAGGAGCT---  
 -----ATGCTCCTTGGGTTCTTGGGAACA---GCAGGAAGCACTATG---GGCGCAGCGGCG---  
 ATAACGCTGACGGTACAG---GCCAGACAA---TTATTG---TCTGGTATAGTGCAACAGCAGAAC---  
 AATCTG---CTGAGG---GCTATTGAGGCGCAACAGCATCTGTTGCAACTCACAGTCTGGGGCATC  
 >FJ469739  
 TTTTACTGTAATACAACAAAACACTGTTTAAATAGTACTTGGACTTGGAAATAATACTGCAGAGTTAAATAACACTG  
 AA-----  
 -----  
 CAGGATGTCATAATCCCACTCCCCTGTAGAATAAAACAAATTGTAAACCTGTGGCAGGAAGTAGGAAAAGCAA  
 TGTATGCCCCCTCCCATCCAAGGACAAATTAGATGCTCATCAAAT---  
 ATCACAGGGGTGCTATTAACAAGAGATGGTGGTATAAAAGGGAGCAACGAGAGC-----  
 -----  
 -  
 TGCAACGAGAGCCAACCCGAGACCTTCAGACCTGGAGGAGGAGATATGAGGGACAATTGGAGAAGTGAATTAT  
 ATAAATATAAAGTAGTAAAAATTGAACCATTA---GGACTAGCACCCACCAGGGCAAAGAGAAGAGTGGTG---  
 -----CAAAGAGAAAAAAGAGCA---GTGGGA---  
 CTAGGAGCT-----TTGTTTCCTTGGGTTCTTGGGAGCA---GCAGGAAGCACTATG---  
 GGCGCAGCGTCA---CTGACGCTGACGGTACAG---GCCAGACTA---TTATTG---  
 TCTGGTATAGTGCGAGCAGCAGAAAT---AAGTTG---CTGATG---  
 GCTATTGAGGCGCAACAGCGTATGTTGCAACTCACAGTCTGGGGCATC  
 >FJ469743  
 TTCTACTGTAATACAACACCACTGTTCAATAGTACTTGGAGGACAAATGGAAGTTGGATAAATGGAACAGCAA  
 ATAAC-----  
 -----  
 ACTGGAGAAAACACTATCACACTCCAGTGCAAAATAAAGCAAATTGTAAACATGTGGCAGGAAGTAGGAAAAG  
 CAATGTATGCCCCCTCCCATCCGAGGACTAATTAGATGTTTATCAAAT---  
 ATTACAGGGCTGATATTAACAAGAGATGGTGGTAATCAAATAAGACTGATAAG-----  
 -----  
 ----  
 ACTGATACTACTAGTGAGATCTTCAGACCGGGAGGAGGAAATATGAAGGACAATTGGAGAAGTGAATTATATA  
 AATATAAAGTAGTAAAAATTGAACCATTA---GGAGTAGCACCCACCAAGGCAAAGAGAAGAGTGGTG-----  
 -----CAGAGAGAAAAAAGAGCA---  
 GTAGGAGCGATAGGAGCT-----ATGTTTCCTTGGGTTCTTGGGAGCA---GCAGGAAGCACTATG---  
 GGCGCAGCGTCA---ATGGCGCTGACGGTACAG---GCCAGACAA---TTATTG---

TCTGGTATAGTGCAACAGCAGAAT---AATTTG---CTGAGG---  
GCTATTGAGGCGCAACAGCACCTGTTGCAACTCACGGTCTGGGGCATC  
>EF593228  
TTCTATTGTAATACAACACAACCTGTTTAATAGTACTTGGGGGCCTAATAGAACTTTGAATGAGACTGGTGAG-  
-----  
-----  
TCAAATGAAACTATCACCCCTCCCATGCAGAATAAAACAAATTATAAACTTGTGGCAGGAAGTAGGAAAAGCAA  
TGTATGCCCCCTCCTATCAGTGACAAATTAGTTGTTTCATCAAAT---  
ATTACAGGGCTGCTATTAATAAGAGATGGTGGTGATGATAACAAT-----  
-----  
-----  
AACACCATCGAGATCTTCAGACCTGGAGGAGGAAATATGAGGGACAATTGGAGAAAGTGAATTATATAAATATA  
AAGTAGTAAAAATTGAACCATTA---GGAATAGCACCCACCAAGGCAAAGAGAAGAGTGGTG-----  
-----CAGAGAGAAAAAAGAGCA---GTGGGA---ATAGGAGCT-----  
---GTGTTCCCTTGGGTTCTTAGGAGCA---GCAGGAAGCACTATG---GGCGCAGCGTCA---  
GTAACGCTGACGGTACAA---GCCAGACTA---TTAATG---TCTGGTATAGTGCAACAGCAAAAC---  
AACTTG---CTGAGA---GCTATTGAGGCGCAACAGCATCTGTTGCAACTCACGGTCTGGGGCATC  
>FJ469753  
TTCTATTGTAATTCAACACAACCTGTTTAATAGTACTTGGTATACTAATGGTACTTGGAGTGGTACTAAC----  
-----  
-----  
AAAACTGGTGATATCACACTCCCATGCAAAGTAAAAACAAATTGTACACATGTGGCAGAGAGTAGGAAAAGCAA  
TGTATGCCCCCTCCCATCGAAGGAGTAATTAGCTGTTTCATCAAAT---  
ATTACAGGGCTGCTATTAACAAGAGACGGTGGTAATACCGATAATACCAAT-----  
-----  
-----  
AATGCCCAGATTGAGACTTTTCAGACCTGGAGGAGGAAATATGAGGGACAATTGGAGAAATGAATTATATAAAT  
ATAAGGTAGTAAAAATTGAACCAATA---GGAATAGCACCCACCAAGGCAAAGAGAAGAGTGGTG-----  
-----CAGAGAGAAAAAAGAGCA---GTGGGA---CTAGGAGCT---  
-----ATGTTCCCTTGGGTTCTTGGGAGCA---GCAGGAAGCACTATG---GGCGCAGCGTCA---  
ATAACGCTGACGGTACAG---GCCAGATCA---TTATTG---ACTGGTATAGTGCAACAACAGAGA---  
AATTTG---CTGACG---GCTATTGAGGCGCAACAGCATCTGTTGAACTCACAGTCTGGGGCATC  
>FJ469755  
TTCTACTGTAGTACAACACAACCTGTTTAATAGTACTTGGACAGGGAATGATACTGCAGAAGGAAAG-----  
-----  
-----  
GGAAATGGCACACTTACACTCCCTGCAGAATAAGACAAATTGTAAACCTGTGGCAGGAAGTAGGAAAAGCAA  
TGTATGCCCCCTCCCATCTCTGGACAAATTAAGTGTTCATCAAAA---  
ATTACAGGGATGATCTTAACAAGAGATGGTGGTACAAAACAGAAC-----  
-----  
-----  
AACGAGAGTGAGACCTTCAGGCCTGGAGGAGGAGATATGAGGGACAATTGGAGAAGTGAATTATATAAATATA  
AAGTAGTAAAAATTGAACCACTA---GGAGTAGCACCCACCAGGGCAAAGAGAAGAGTGGTG-----  
-----CAGAGAGAAAAAAGAGCA---GTGGGC---CTAGGAGCC-----  
---TTGTTCCCTTGGGTTCTTGGGAGCA---GCAGGAAGCACTATG---GGCGCAGCGTCA---  
GTGACGCTGACGGTACAG---GCCAGACTA---TTACTG---TCTGGTATAGTGACAGCAGCAAAAT---  
AACTTG---CTGAAG---GCTATTGAGGCGCAACAGCGTATGTTGCAACTCACAGTCTGGGGCATC  
>FJ469765  
TTCTACTGTAATTCAACACAACCTGTTTAATAGTACTTGGGATGCTAGGGAAGTTAATGAGACTAGGGAAGGGG  
CAAAT-----  
-----  
-----  
AACACTGATAAACTATCATACTCCCATGCAGAATAAAACAAATTGTAAATATGTGGCAGCAAGTAGGAAAGG  
CAATGTATGCCCCCTCCCATCAGAGGACAAATTAGATGCTCATCAAAT---  
ATTACAGGACTGCTATTAACCAGAGATGGTGGTAACAACAATAAC-----  
-----  
-----  
AGTACTGAGACCTTCAGACCTGGAGGGGGAGATATGAGGGACAATTGGAGAAGTGAATTATACAAATATAAAG  
TAGTAAGAATTGAACCATTA---GGAATAGCACCCACCAAGGCAAAAAGAAGAGTGGTG-----  
-----CAGAGAGAAAAAAGAGCA---GTAAGT---TTCGGAGCT-----  
ATGTTCCCTTGGGTTCTTGGGAGCA---GCAGGAAGCACTATG---GGCGCAGCGTCA---

CTAACGCTGACGGTACAG---GCCAGACAA---TTATTG---TCTGGTATAGTGCAACAGCAGAAC---  
AATCTG---CTGAGA---GCTATTGAGGCGCAACAGCATCTGTTGCAACTCACAGTCTGGGGCATC  
>FJ469770  
TTCTACTGTAATTCAACACAACCTGTTTAAATAGTACTTGGAAATGCTACTACAGGGTTACCTAACAAGGAA-----  
-----  
GAAAATGGCACGATCACACTCCCATGTAGAATAAAACAAATTATAAATATGTGGCAGGGAGTAGGAAGAGCAA  
TATATGCCCCCTCCCATCGCAGGACCAATTACCTGTTTCATCAAAC---  
ATTACAGGGCTAATATTAACAAGAGATGGTGGTAATGTGACGGGC-----  
-----  
CAGGAAGAAACCTTCAGACCAGGAGGAGGAAATATGAAGGACAATTGGAGAAGTGAATTATATAAATATAAAG  
TAGTAAAAAATTGAACCATTA---GGAGTAGCACCTACCAAGGCAAAGAGAAGAGTGGTG-----  
-----CAAAGAGAAAAAAGAGAT---CTGGGA---CTAGGAGCT-----  
TTGTTTCCTTGGGTTCTTGGGAGCA---GCAGGAAGCACTATG---GGCGCAGCGTCA---  
GTAACGCTGACGGTACAG---GCCAGACTA---TTATTG---TCTGGTATAGTGCAACAGCAGAAC---  
AATTTG---CTGAGG---GCTATTGAGGCGCAACAGCATCTGTTGCAACTCACAGTCTGGGGCATC  
>EF593256  
TTCTACTGCAATACAACACAACCTGTTTAAATAGTACTTGGGATGATACTACAGCGTCAAATATCACTAAA-----  
-----  
GGAAATGACAACATCACACTCCCATGCAGAATAAGACAAGTTGTACACTTGTGGCAGGAAGTGGGAAAAGCAA  
TGTATGCCCCCTCCCATCCAAGGACAAATTAGATGTTTCATCAAAT---  
ATTACAGGGCTGCTATTAACAAGAGATGGTGGTAATAGTGAAAACAAC-----  
-----  
ACCAACACCGAGGAGGTCTTCAGACCTGCAGGAGGAGATATGAGGGACAATTGGAGAAGTGAATTATATAAAT  
ATAAAGTAGTAAAAAATTGAGCCATTA---GGAATAGCACCCACCAAGGCAAAAAGAAGAGTGGTG-----  
-----CAGAGAGAAAAAAGAGCA---GTAGGC---ATAGGAGCT---  
-----GTGTTCCCTCGGGTTCTTGGGAGCA---GCAGGAAGCACTATG---GGCGCAGCGTCA---  
ATAACGCTGACGGTACAA---GCCAGACTA---TTATTG---TCTGGTATAGTGCAACAGCAGAAAT---  
AATTTG---CTGAGA---GCTATTGAGGCGCAACAGCATCTGTTGCAACTCACAGTTTGGGGCATC  
>EF593299  
TTCTACTGTAATACAACAAAGCTGTTTAAATAGTACTTGGTCATTTAATAGTACTGGGAATGGTAGTACTACAG  
AG-----  
-----  
TCAAACGCCACTATCACACTCCCATGCAGAATAAGACAATTTATAAACAGATGGCAAGAAGTAGGAAAAGCAA  
TGTATGCCCCCTCCCATCAGTGGAATAATTAGATGTAAATCAATT---  
ATTACAGGGCTGCTACTAACAAGAGATGGTGGTACAAACACCACC-----  
-----  
AACAAAACCTGAGATCTTCAGACCTGGAGGAGGAGATATGAGGGACAATTGGAGAAGTGAATTATATAAATATA  
AAGTAGTAAAAATCAAGCCATTA---GGAATAGCACCCACCAAGGCAAAGAGAAGAGTGGTG-----  
-----CAGAGAGAAAAAAGAGCA---GTGGGAACACTAGGAGCT-----  
---ATGTTCCCTTGGGTTCTTGGGAGCA---GCAGGAAGCACTATG---GGCGCAGCGTCA---  
GTGACGCTGACGGTACAG---GCCAGACTA---TTATTG---TCTGGTATAGTGACAGCAGCAGAAC---  
AATCTG---CTGAGG---GCTATTGAGGCGCAACAGCACCTGTTGCAACTCACAGTATGGGGCATC  
>FJ469684  
TTCTACTGTGATACAGCAAAATTGTTTAAATAGTACTTGGAAATAGTACTAAATCAAATAGC-----  
-----  
-----  
ACGGAAGTAAAGATCACACTACCATGCAAAATAAAACAAATTATAAACAGATGGCAGGAAGTAGGAAAAGCAA  
TGTATGCCCCCTCCCATCAGAGGACAGATTAAATGTTTCATCAAAT---  
ATTACAGGGCTGCTATTAACAAGAGATGGTGGTAATACCACAAAC-----  
-----  
-----  
AGGTCAGAGATCTTCAGACCTGGAGGAGGAGATATGAGGGACAATTGGAGAAGTGAATTATATAAATATAAAG  
TAGTACAAATTGAACCATTA---GGAATAGCACCCACCAAGGCAAAGAGAAGAGTGGTG-----  
-----CAGAGAGAAAAAAGAGCA---GTGGGA---TTAGGAGCT-----  
TTGTTCCCTTGGGTTCTTGGGAGCA---GCAGGAAGCACTATG---GGCGCAGCGTCA---

ATGACGCTGACGGTACAG---GCCAGACAA---TTATTG---TCTGTTATAGTGCAACAGCAGAAC---  
 AATTTG---CTGATG---GCTATTGAGGCGCAACAGCATCTGTTGCAACTCACAGTCTGGGGCATC  
 >HQ216370  
 TTCTACTGTGATACAACACCACTGTTTAGTAGTAGATGGTCACCTAATGGTAGTAGTAGTAGTACGATTAATG  
 AAACCT-----  
 -----AGC---  
 ACTGAAGGAAATATCACCACACTCCAATGCAGAATAAGACAAATTATAAATATGTGGCAGAGAGTAGGCCAAAG  
 CAATATATGCCCCCTCCCATCGCGGGACCAATTGGATGTAATTCAAGT---  
 ATCACAGGGCTGTTATTAACAAGAGATGGTGGGAGAAACAACAACAGC-----  
 -----  
 -----  
 AACAAACACAGAAGTTTTTCAGACCTGGAGGAGGAGATATGAGGGACAACCTGGAGAAAGTGAATTATACAAATATA  
 AAATAGTAAGGATTGAACCATTA---GGAATAGCACCCACCAAGGCAAAGAGAAGAGTGGTG-----  
 -----CAAAGAGAAAAAAGAGCA---GTGGGA---ATAGGAGCT-----  
 ---GTGTTCCCTTGGGTTCTTGGGAGCA---GCAGGAAGCACTATG---GGCGCAGCATCA---  
 ATAACGCTGACGGTACAG---GCCAGACAA---TTATTG---TCTGGTATAGTGCAACAGCAGAAC---  
 AATTTG---CTGAGA---GCTATTGAGGCGCAACAGCACCTGTTGCAACTCACGGTCTGGGGCATC  
 >HQ216504  
 TTCTACTGTAATACAACAGCACTGTTTAATAGCACCTGGAATATTACTGAAGGGTTAAATAGCACATTCTCAA  
 ATAAC-----  
 -----CCT---  
 GAAGGAAATGACACAATCACGCTTCCATGCAGAATAAAAACAAATTATAAACATGTGGCAGGAAGTAGGAAAAG  
 CAATGTATGCCCCCTCCCATCAGAGGACAAATTAGATGTTTCATCAAAT---  
 ATTACAGGGCTGCTATTAACAAGAGATGGTGGTGATAACAATAAC-----  
 -----  
 -----  
 AGTGACAACGAGACCTTCAGACCTGGAGGAGGAGATATGAGGGACAATTGGAGAAAGTGAATTATATAAATATA  
 AAGTAGTAAAAATTGAACCATTA---GGAGTAGCACCAACCAAGGCAAAGAGAAGAGTGGTG-----  
 -----CAGAGAGAAAAAAGAGCA---ATAGGA---ATAGGAGCT-----  
 ---GTGTTCCCTTGGGTTCTTGGGAGCA---GCAGGAAGCACTATG---GGCGCAGCGTCA---  
 ATAACGCTGACGGTACAG---GCCAGACAA---TTATTG---TCTGGTATAGTGCAACAGCAGAAC---  
 AACCTG---CTGAGA---GCTATTGAGGCGCAACAACATATGTTGCAACTCACAGTCTGGGGCATC  
 >JX863969  
 TTCTACTGTAATACAACACAACCTGTTTAATAGTACTTGGAAATAGTACTGAAGGGATTGAAGGGACAAAT---  
 -----  
 -----  
 AACACTGATAATATCACACTCCCATGCAGAATAAAAACAAATTATAAACCTGTGGCAGAGAGTAGGAAAAGCAA  
 TGTATGCCCCCTCCCATCAGAGGACAGATTAGATGTTTCATCAAAT---  
 ATCACAGGGCTGCTATTAGTAAGAGATGGTGGTAACGAACAGAACGGG-----  
 -----  
 -----  
 ACAAGCGCAACCGAGATCTTCAGACCTGGAGGAGGAGACATGAGGGACAATTGGAGAAAGTGAATTATATAAAT  
 ATAAAGTAGTAGAAATTAAACCATTA---GGAGTAGCACCCACCAGGGCAAAGAGAAGAGTGGTG-----  
 -----CAGAGAGAAAAAAGAGCA---GTGACA---CTAGGAGCT---  
 -----TTGTTCCCTTGGGTTCTTGGGAGCA---GCAGGAAGCACTATG---GGCGCAGCGTCA---  
 ATAACGCTGACGGTACAG---GCCAGACAA---TTGTTG---TCTGGTATAGTGCAACAGCAGAAC---  
 AATCTG---CTGAGG---GCTATTGAGGCGCAACAGCGTCTGTTGCAACTCACAGTCTGGGGCATC  
 >JN562798  
 TTCTACTGTACTACTACAGGACTGTTTAATAGTACTTGGCATTGGAATGGTACTAGGGAGAATAATACTACGG  
 AG-----  
 -----  
 CCAAATAGCAATATCACACTCCCATGCAGAATAAAAACAGATTATAAACATGTGGCAAGAAGTAGGAAAAGCAA  
 TGTATGCCCCCTCCAATCAAAGGACAAATTAGATGTTTCATCAAAC---  
 ATTACAGGGCTGCTAATAACAAGAGATGGTGGTAACAGTGACCATAGC-----  
 -----  
 -----  
 AACGAGACCGAGATCTTCAGACCTGGAGGAGGAGATATGAGGGACAATTGGAGAAAGTGAATTATATAAATATA  
 AAGTAGTAAAAATTGAACCATTA---GGAGTAGCACCCACTGAGGCAAGGAGAAGAGTGGTG-----  
 -----CAGAGAGAAAAAAGAGCG---ATAACA---CTGGGAGCT-----  
 ---TTGTTCCCTTGGGTTCTTGGGAGCA---GCAGGAAGCACTATG---GGCGCAGCGTCA---

ATGACGCTGACGGTACAG---GCCAGACAA---TTATTG---TCTGGTATAGTGCAACAGCAGAAC---  
 AATTTG---CTGAGG---GCTATTGAGGCGCAACAGCATCTGTTGCAACTCACAGTCTGGGGCATC  
 >EU577811  
 TTCTACTGTAATACAACACAACCTGTTCAATAGTACTTGGTATTGGAATAATACTCGGGATGAAGGGTCAAATA  
 ACACT-----  
 -----  
 GGAGGCAATGGCACAATCATACTCCCGTGTAGAATAAAACAATTTATAAACATGTGGCAGGAAGTAGGAAAAG  
 CAATGTATGCCCCCTCCCATCAGAGGACAAATTAGCTGTTTCATCAAAT---  
 ATTACAGGGCTGATGCTATTAAGAGATGGTGGTAATAACGTGAGC-----  
 -----  
 -----  
 AATACCACTGAGACCTTCAGACCTGGAGGAGGAGATATGAGGGACAATTGGAGAAGTGAATTATATAAAATATA  
 AAGTAGTAAAAATTGAACCATTA---GGAATAGCACCCACCAAGGCAAAGAGAAGAGTGGTG-----  
 -----CAGAGAGAAAAAAGAGCA---GTGGGA---ATAGGAGCT-----  
 ---ATGTTCCCTTGGGTTCTTGGGAGCA---GCAGGAAGCACTATG---GGCGCAGCGTCA---  
 GTGACGCTGACGGTACAA---GCCAGGCTA---TTATTG---TCTGGTATAGTGCAACAGCAGAGC---  
 AATTTG---CTGAGA---GCTATTGAGGCGCAACAGCATCTGCTGCAACTCACAGTCTGGGGCATC  
 >EU577862  
 TTCTATTGTAATACATCACAACCTGTATGATAGTACTTGGAACTTTACTAATACTGAAAG-----  
 -----  
 -----  
 TTAAATGACACTATCCAACCTCCCATGCAGAATAAAACAAATTATAAACATGTGGCAGGAAGTAGGAAAAGCAA  
 TGTATGCCCCCTCCCATCAGAGGACTAATTAAGTGTTTCATCAAAT---  
 ATTACAGGGCTGTTATTAACAAGAGATGGTGGTAGTGATAATGCCACA-----  
 -----  
 -----  
 AACGGTACTGAGACCTTCAGACCTGGAGGAGGAGATATGAGGGACAATTGGAGAAGCGAATTATACAAATATA  
 AAGTAATAGAAATTAAACCAGTA---GGATTAGCACCCACCAAGGCAAAGAGAAGAGTGGTG-----  
 -----CAGAGAGAAAAAAGAGCA---GCA-----CTAGGAGCT-----  
 ---ATGCTCCTTGGGTTCTTGGGAGCA---GCAGGAAGCACTATG---GGCGCAGCGTCA---  
 ATAACGCTGACGGTACAG---GCCAGACAA---CTGTTG---TCTGGTATAGTGCAACAGCAAAAT---  
 AATTTG---CTGAGA---GCTATTGAGGCGCAACAGCATCTATTGCAACTCACAGTCTGGGGCATT  
 >EU577947  
 TTCTACTGCAATACAACACAACCTGTTTAATAGTACTTGGCTGTTTAATGGTACTTGGAAATGGTACTGCATTAA  
 ATGGC-----  
 -----ACT---  
 GAAGGAAATGAAACAATTACACTTCCATGCAGAATAAAACAAATTATAAACATGTGGCAGGAAGTAGGAAAAG  
 CAATGTATGCCCCCTCCCATCAAAGGACTAATTGAATGTTTCATCAAAT---  
 ATTACAGGGCTACTGTTAACAAGAGATGGTGGTAATAATGAGAGC-----  
 -----  
 -----  
 ACTGAGACCTTTAGGCCTAGAGGAGGAGATATGAGGGACAATTGGAGAAGTGAATTATATAAAATATAAAGTAG  
 TACAAGTTGAACCATTA---GGAATAGCACCCACCAGGGCAAAGAGAAGAGTGGTG-----  
 -----CAGAGAGAAAAAAGAGCA---GGA-----ATAGGAGCT-----  
 CTGTTCCCTTGGGTTCTTGGGAGCA---GCAGGAAGCACTATG---GGCGCAGCTTCG---  
 ATAACGCTGACGGTACAA---GCCAGACAA---TTATTG---TCTGGTATAGTGCAACAGCAGAAC---  
 AATCTG---CTGAGG---GCTATTGAGGCGCAACAGCATATGTTGCAACTCACAGTCTGGGGCATC  
 >EU577989  
 TTCTACTGTAACACATCAAACTGTTTAATAGTAGTTGGAATGCTGATGGTAGTGTTAATACTACTGGA----  
 -----  
 -----  
 GAATCAGGAAACATAACACTCCAATGCAGAATAAAACAAATTATAAACATGTGGCAGGAAGTAGGAAAAGCAA  
 TGTATGCCCCCTCCCATCCAAGGACAAATTAATTGTTTCATCAAAC---  
 ATTACAGGGATACTATTAACAAGAGATGGTGGTAGTGATAACACAACAAAC-----  
 -----  
 -----  
 AATACTGAGATCGAGATCTTCAGACCTACAGGAGGAGATATGAGGGACAATTGGAGAAGTGAATTATATAAAAT  
 ATAAAGTAGTAAGAATTGAACCATTA---GGAATAGCACCCACCAAGGCAAAGAGAAGAGTGGTG-----  
 -----CAGAGAGATAAAAGAGCA---GTGGGA---CTAGGAGCT---  
 -----TTGTTCCCTTGGGTTCTTGGGAACA---GCAGGAAGCGCTATG---GGCGCAGCGTCA---

CTGACGCTGACGGTACAG---GCCAGACAA---TTATTG---TCTGGTATAGTGCAACAGCAAAAC---  
 AATTTG---CTGAGG---GCTATTGAGGCGCAACACCATATGTTGCAACTCACAGTCTGGGGCATC  
 >KX156438  
 TTTTACTGTAATACAACACAAATGTTTAATAGTACTTGGAAATGATACTGAGAATAATATT-----  
 -----  
 -----  
 GGAAATGGAACCTATCACACTCCCCTGCAGAATAAAACAAATTATAAATAAGTGGCAGGAAGTAGGAAAAGCAA  
 TGTATGCCCCCTCCCATTTGAAGGACGAATTAAGTGTACATCAAAT---  
 ATTACAGGGCTGATATTAACAAGAGATGGTGGTAGCGGGAACAAC-----  
 -----  
 -----  
 GACACCAACACCACCGAGATCTTCAGGCCTGCAGGGGGAGATATGAGGGACAATTGGAGAAGTGAATTATATA  
 AATATAAGGTAGTAAAAATTGAACCATTA---GGAGTAGCACCCACCAAGGCAAAGAGAAGAGTGGTA-----  
 -----CAGAGAGAAAAAAGAGCA---GTGGGA---  
 ATAGGAGCT-----TTGTTCCTTGGGTTCTTGGGAGCA---GCAGGAAGCACTATG---  
 GGCGCAGCGTCA---ATAACGCTGACGGTACAG---GCCAGACAA---TTACTG---  
 TCTGGTATAGTGCAACAGCAAAAC---AACTTG---CTGAGA---  
 GCTATTGAGGCGCAACAGCATCTGTTGCAACTCACAGTCTGGGGCATC  
 >EU578032  
 TTCTACTGTAACCAACACAACCTGTTTAATAGCTCTTGGAAATGGTACTGCTGGGAATGTTACTACAGGGGGGT  
 CA-----  
 -----  
 GATAACACCACTATCACACTCCCATGTAGAATAAAACAAATTATAAACATGTGGCAGGGAGTAGGAAAAGCAA  
 TGTATGCCCCCTCCGATCCCAGGAAAAATTAGCTGTAAATCAATT---  
 ATTACAGGGCTGCTATTAACAAGAGATGGTGGCAACAATAACAGT-----  
 -----  
 -----  
 GAGACCTTCGAAACCTTCAGACCTGGGGGAGGAAATATGAAAGACAATTGGAGAAATGAATTATATAAATATA  
 AAGTAGTAAAAATTGAACCAATA---GGAGTAGCACCCACCAAGGCAAAGAGAAGAGTGGTG-----  
 -----CAGAGAGAAAAAAGAGCA---GTGGGA---ATAGGAGCT-----  
 ---GTGCTCTTTGGGTTCTTGGGAGCA---GCAGGAAGCACTATG---GGCGCAGCGTCG---  
 ATAGCGCTGACGGTACAG---GCCAGACAA---TTATTG---TCTGGTATAGTGCAACAGCAGAAC---  
 AATCTG---CTGAGG---GCTATTGAGGCGCAACAACATATATTGCAACTCACAGTCTGGGGCATC  
 >KX156451  
 TTTTACTGTAACACAACACAACCTGTTTAATAGTACTTGGAAATATTACTGAAGTGTTAAATAGTACTGGAGAGT  
 CAAAA-----  
 -----  
 AGCAATGACTTAATCATACTCCCATGCAGGATAAAACAAATCGTAAACATGTGGCAGAGAGTAGGACAAGCAA  
 CGTATGCCCCCTCCCATCGAAGGATTGATTAGATGTTTCATCAAAA---  
 ATTACAGGGATACTATTAACAAGAGATGGTGGTATTAACAATAGG-----  
 -----  
 -----  
 ACCAACGAAACCTTCAGACCTGGAGGAGGAGACATGAGAGACAATTGGAGAAGTGAATTATATAGATATAAGG  
 TAGTACAAATTGAACAGTA---GGACTGGCACCCACCAAGGCGCAGCGAAGAGTGGTG-----  
 -----CAGAGGGAAAAAAGAGCA---GTGGGA---ATAGGAGCG-----  
 TTGTTCCTTGGGTTCTTGGGAACA---GCAGGAAGCACTATG---GGCGCAGCGTCA---  
 ATAACGCTGACGGCACAG---GCCAGACAA---TTATTG---TCTAGTATAGTGCAACAGCAGAAC---  
 AACTTG---CTGAGA---GCTATTGAGGCGCAACAGCATCTGTTGCAACTCACAGTCTGGGGCATC  
 >JN562778  
 TTCTACTGTAATTCAACACAACCTGTTTAATAGTACTTGGATTAGGAATGATACTAATAACTTGGCATAGTG  
 AAGG-----  
 -----TTA---  
 AATGGCACTGAAACAATCACACTCCCATGTAGAATAAAACAAATTTATAAACATGTGGCAGGAAGTAGGAAAAG  
 CAATGTATGCCCCCTCCCATCAGAGGACAAATAAAATGTTTCATCAAAT---  
 ATTACAGGGCTATTACTAGTAAGAGATGGTGGTAATAACAATAAGAGCAAT-----  
 -----  
 -----  
 AGCACTAACAATGCTGAGATCTTCAGACCTGGAGGAGGAAATATGAAAGACAATTGGAGAAGTGAATTATATA  
 GATATAAAGTGGTACAAGTTGAACCATTA---GGAATAGCACCCACCAGGGCAAAGAGAAGAGTGGTG-----  
 -----CAGAGAGAAAAAAGAGCT---GTGGGA---

GTAGGAGCT-----TTGTTCCCTTGGGTTCTTGTCTAGCA---GCGGGAAGCACTATG---  
 GGCGCAGCGTCA---ATGACGCTGACGGTACAG---GCCAGACAA---TTATTG---  
 TCTGGTATAGTGCAACAGCAGAGC---AATCTG---CTGAGG---  
 GCTATTGAGGCGCAACAGCATATGTTGCAACTCACAGTCTGGGGCATC  
 >JN562811  
 TTCTACTGTAATTCATCAGGACTGTTTAATAGTACTTGGCATAGTAATAGTACCCAGAATAGTACTGAAGGG-  
 -----  
 -----  
 TCAAAGGACACTATTACACTCCCATGCAGAATAAGACAAATCATAAACATGTGGCAGGAAGTAGGAAAAGCAA  
 TGTATGCCCCCTCCCATCCAAGGACAACCTTAGATGTTTCATCAAAT---  
 ATTACAGGGCTGCTCTTAACAAGAGATGGAGGTAATAACGGGGGC-----  
 -----  
 -----  
 GACAAACACCGAGATCTTCAGACCTGGAGGAGGAAATATGAAAGACAATTGGAGAAGTGAATTATATAAATATA  
 AAGTAGTAAAAATTGAACCATTA---GGATTAGCACCCACCAGGGCAAGGAGAAGAGTGGTG-----  
 -----CAGAGAGAAAAAAGAGCA---GTGGGA---ATGGGAGCT-----  
 ---TTGTTCCCTTGGGTTCTTGGGAGCA---GCAGGAAGCACTATG---GGCGCAGCGTCA---  
 ATGACGCTGACGGTACAG---GCCAGAACA---CTATTG---TCTGGTATAGTGCAACAGCAAAGC---  
 AACTTG---CTGAGG---GCTATTGAGGCGCAACAGCATCTGTTGCAACTCACAGTCTGGGGCATC  
 >DQ869015  
 TTCTACTGTGATACAACAACCACTCTTTAATAGTACTTGGAAATGATACTGTTGGGAATGATACTGAAGAG----  
 -----  
 -----  
 TCAAATAATACTATCACACTCCCATGCAGAATAAAACAAATTGTAAACCTGTGGCAGGAAGTAGGAAAAGCAA  
 TGTATGCCCCCTCCCATTAGAGGACAAATTAGATGTTTCATCAAAT---  
 ATTACAGGGCTGCTATTAACAAGAGATGGTGGTAATATCAGCACC-----  
 -----  
 -----  
 ACCACCACCGAGACCTTCAGACCTGGAGGAGGAAATATGAGGAACAATTGGAGAAGTGAATTATATAAATATA  
 AAGTAGTAAAAATTAAACCATTA---GGAGTAGCACCCACCAGCGCAAGGAGAAGAGTGGTG-----  
 -----CAGAGAGAAAAAAGAGCA---ATAGGA---ATAGGAGCT-----  
 ---ATGTTCCCTCGGGTTCTTGGGAGCA---GCAGGAAGCACTATG---GGCGCAGCGTCA---  
 ATAACGCTGACGGTACAG---GCCAGACAA---TTATTG---TCTGGTATAGTGCAACAGCAAAGC---  
 AATTTG---CTGAGG---GCTATAGAAGCGCAACAGCATCTGTTGCAGCTTACAGTCTGGGGCATT  
 >DQ869033  
 TTCTACTGTAATACAACAAAACCTGTTTAATAGTACTTGGAAATGAGACTAGTATTGAAAATAGCACTAGAGGAA  
 AT-----  
 -----  
 AGCACTGGAGGAGATATCACAATTCTATGCAGAATAAAACAAGTTATAAACCTGTGGCAGGAAGTAGGAAAAG  
 CAATGTATGCCCCCTCCCATCGAAGGACTAATCAATTGTACATCAAAT---  
 GTTACAGGGCTATTATTAATAAGAGATGGTGGTAACATTACCAAC-----  
 -----  
 -----  
 AACGACACAGAGATCTTTAGACCTGGAGGAGGAGATATGAGGGACAATTGGAGAAGTGAAGTGTACAAATATA  
 AAGTAGTAAGAATTGAACCATTA---GGAATAGCACCCACCAAGGCAAGAGAAGAGTGGTG-----  
 -----CAGAGAGAAAAAAGAGCA---GTGGGA---CTAGGAGCT-----  
 ---ATGTTCCCTTGGGTTCTTGGGAGCA---GCAGGAAGCACTATG---GGCGCAGCATCA---  
 GTGACGCTGACGGTACAG---GCCAGACAA---TTATTG---TCTGGTATAGTGCAACAGCAGAAC---  
 AATCTG---CTGAGG---GCTATTGAGGCGCAACAGCATCTGTTGCAACTCACAGTCTGGGGCATC  
 >KM259097  
 TTCTACTGTAATACAACAAAACCTGTTTAATAGTACTTGGAAATGATACTGCAGGG-----  
 -----  
 -----  
 AATGATACTGCAGGGAAT-----  
 GTTACTGAAGAAAATATAACACTCCCATGCAGAATAAAACAAATTATAAACATGTGGCAGGAAGTAGGAAAAG  
 CAATGTATGCCCCCTCCCATCAGAGGACAAATTAGCTGTTTCATCAAAT---  
 ATTACAGGGCTGCTATTAACAAGAGATGGTGGG-----  
 -----  
 -----  
 AAAACCAACGAAACAAAC---  
 GAGACCGAGATCTTTAGACCTGGAGGAGGGAATATGAAGGACAATTGGAGAAGTGAATTATATAAATATAAAG  
 TAGTAAAAATTGAACCATTA---GGAGTAGCACCCACCAAGGCAAGAGAAGAGTGGTG-----

-----CAGAGAGAAAAAAGAGCA---GTGGGAGTAATAGGAGCT-----  
ATGTTCTTGGGTTCTTGGGAACA---GCAGGAAGCACTATG---GGCGCAGCGTCA---  
GTGACGCTGACGGTACAG---GCCAGACAA---TTATTG---TCTGGTATAGTGCAACAGCAGAAC---  
AATTTG---CTGAGA---GCTATTGAGGCGCAACAGCATCTGTTGCAACTCACAGTCTGGGGCATC  
>DQ410535  
TTCTACTGTAATTCACACCACTGTTTAATAGTAGTTGGAATGATACTACCATAGAGCAAAATGACACA-----  
-----  
ACGGAAGAGAATATCACACTCACATGCAGAATAAAACAAATTATAAATATGTGGCAGGAAGTAGGAAAAGCAA  
TGTATGCCCCCTCCCATCAGAGGACAAATTAGATGTATATCAAAC---  
ATTACAGGGCTGCTATTAACAAGAGATGGTGGTATAAATGAGACC-----  
-----  
AACGGGACTGAGATCTTCAGACCTGGAGGAGGAGATATGAGGGACAATTGGAGAAAGTGAATTATACAAATATA  
AAGTAGTAAAAATTGAGCCATTA---GGAGTAGCACCCACCAAGGCAAAGAGAAGAGTGGTG-----  
-----CAGAGGGAAAAAAGAGCA---GTGGGG---ATAGGAGCT-----  
---CTGTTCTTGGGTTCTTGGGAGCA---GCAGGAAGCACTATG---GGCGCAGCGTCA---  
GTGACGCTGACGGTACAG---GCCAGGCAA---TTATTG---TCTGGTATAGTGCAACAGCAGAAC---  
AATTTG---CTGAGG---GCTATTGAGGCGCAACAGCATCTGTTGCAACTCACAGTCTGGGGCATC  
>AY835452  
TTTTACTGTAACCTCAACACAGCTGTTTAATAGTACTTGGTGGCCTAATGGTACTACGACTGAATGGTCAAATG  
AA-----  
-----  
ACGTCAAATGGGACTATCACACTCCCATGCAGAATAAAACAAATTATAAACATGTGGCAGGAAGTAGGAAAAG  
CAATGTATGCCCCCTCCTATCAGCGGACCAATTAGCTGTTTCATCGAAT---  
ATTACAGGGCTGCTATTAGTAAGAGATGGTGGTAATGACAAATGAGACT-----  
-----  
AACGGGACTGAGACCTTCAGACCTGGAGGAGGAGATATGAGAGACAATTGGAGAAAGTGAATTATATAAATATA  
AAGTAGTAAAAATTGAACCATTA---GGAGTAGCACCCACCAAGGCAAAGAGAAGAGTGGTG-----  
-----CAAAGAGAAAAAAGAGCA---GTGGGA---CTAGGAGCT-----  
---ATGTTCTTGGGTTCTTGGGAGCA---GCAGGAAGCACTATG---GGCGCAGCGTCA---  
ATAACGCTGACGGTACAG---GCCAGACTA---TTATTG---TCTGGTATAGTGCAACAGCAAAAC---  
AACTTG---CTGAGA---GCTATTGAGGCGCAACAGCATCTGTTGCAACTCACAGTCTGGGGCATC  
>KX156493  
TTCTACTGTAATTCACACCACTGTTTAATAGTATTTGGAATGTTAGTAGTGGTTGGAATGGTACTAAAGGG-  
-----  
-----  
TCAAATGGCACTATCACACTCTCATGCAGAATAAAACAAATTATAAACATGTGGCAGGAGGTAGGAAAAGCAA  
TGTATAACCCTCCCATCAGTGGAATAATTAGATGTAACCTCAACT---  
ATTACAGGGCTGCTATTAAACAAGAGATGGTGGTGAGAACAGGTCTGGGAGT-----  
-----  
GATAACTGGACCGAGACCTTCAGACCTGGGGGAGGAGATATGAGGGACAATTGGAGAAAGTGAATTATATAAAT  
ATAAAGTAGTAAAAATTGAACCATTA---GGAATAGCACCCACCAGGGCAAAGAGAAGAGTGGTG-----  
-----CAAAGAGAAAAAAGAGCA---GTGGGA---TTTGAGCT---  
-----ATGTTCTTGGGTTCTTGGGAGCA---GCAGGAAGCACTATG---GGCGCAGCGTCA---  
GTGACGCTGACGGTACAG---GCCAGACAA---TTATTG---TCTGGTATAGTGCAACAGCAGAGC---  
AACTTG---CTGAGG---GCTATTGAGGCGCAACAGCATCTGTTGCAACTCACAGTCTGGGGCATC  
>KX156542  
TTCTACTGTGATTCAACACAGCTATTTAATAGTACTTGAATAATACTGAACAGCCTACCTGGAATGAT-----  
-----  
-----  
ACTGGAGAAATTATCACACTCCCGTGCAGAATAAAACAAATTATAAACAGGTGGCAAGAAGTAGGAAAAGCAA  
TGTATGCCCCCTCCCATCAGAGGACAAATTAGCTGCTCATCACTT---  
ATTACAGGGATACTATTAACAAGAGATGGTGGTAAAAAGGAGAGC-----  
-----  
-----  
AATGAAACCGAAACCTTTAGACCTGGAGGAGGAGATATGAGGGACAATTGGAGAAATGAATTATATAAATATA  
AAGTAGTAAAAATTGAGCCATTA---GGAGTAGCACCCACCAAGGCAAAGAGAAGAGTGGTG-----

-----CAAAGAGAAAAAGAGCA---GTGGGAACAATAGGAGCT-----  
 ---ATGTTCCCTTGGGTTCTTGGGAGCA---GCAGGAAGCACTATG---GGCGCAGCGCA---  
 GTAACGCTGACGGTACAG---GCCAGACAA---TTATTG---TCTGGTATAGTGCAACAGCAAAAC---  
 AACTTG---CTGAGG---GCTATTGAGGCGCAACAGCATATGTTGCAACTCACAGTCTGGGGCATC  
 >KX156380  
 TTTTATTGTAATTCAACACCACTGTTTAATAGTACTTGGGCTTGAATGGTACTTTCAATAAGGAAAATAATA  
 CTGAAAAT-----  
 -----  
 TCAAAATAGCACTATCACCCCTCCAATGCAGAATAAGGCCAAATTGTAAACATGTGGCAGGAAGTAGGAAAAGCAA  
 TGTATGCCCCCTCCCATCAGAGGACAAATTAATTGTTTCATCAAAC---  
 ATTACAGGGCTGCTATTACTAAGAGATGGTGGTGTTAATAATAACACA-----  
 -----  
 -----  
 AATGATACAGAGATCTTCAGACCTGGAGGAGGAAACATGAAGGACAATTGGAGAAGTGAATTATATAAGTATA  
 AAGTAGTACAAATTGAACCATTA---GGAGTAGCACCCACCAAGGCAAAGAGAAGAGTGGTG-----  
 -----CAGAGAGAAAAAGAGCA---GTAACA---CTGGGAGCT-----  
 ---ATGTTCCCTTGGGTTCTTGGGAGCA---GCAGGAAGCACTATG---GGCGCAGCGTCA---  
 ATGGCGCTGACGGTACAA---GCCAGACAA---TTGTTG---TCTGGTATAGTGCAACAGCAAAAC---  
 AACTTG---CTGAGA---GCTATTGAGGCGCAACAGCACTTGTGCAACTCACAGTCTGGGGCATT  
 >FJ469697  
 TTCTACTGTGATACAACAACCACTGTTTAATAGTACTTGGAAATGATACTGAAGAGAATAGTGATAAAGGGAACA  
 CT-----  
 -----  
 GAAGGAAATGAACCAATCATACTCCCATGCAGAATAAAACAATTTATAAACATGTGGCAAGCAGTAGGAAAAG  
 CAATGTATGCCCCCTCCCATCAGAGGACTAATTAGATGTTTCATCAAAC---  
 ATTACAGGGCTGTTATTAACAAGAGATGGTGGTAACGAGACTAAT-----  
 -----  
 -----  
 ACTACTGAGACCTTCAGACCGCAAGGAGGAAATATGAGGGACAATTGGAGAAGTGAATTATATAGATATAAAA  
 TAGTGAAAATTGAACCATTA---GGGGTAGCACCCACCAAGGCAAAGAAGAGTGGTG-----  
 -----CAGAGAGAAAAAGAGCA---GTGGGAACATTAGGAGCT-----  
 ATGTTCCCTTGGGTTCTTGGGAGCA---GCAGGAAGCACTATG---GGCGCAGCGTCA---  
 TTGACGCTGACGGTACAG---GCCAGACTA---TTACTG---TCTGGTATAGTGCAACAGCAGAAT---  
 AATATG---CTGAGG---GCTATTGAGGCGCAACAGCATCTGTTGCAACTCACAGTCTGGGGCATC  
 >FJ469698  
 TTCTACTGTAATTCAACACCACTGTTTAATAGTACTTGGCATAGTAATGGTACTATAGAGTCAGCT-----  
 -----  
 -----  
 AACAGAACAAATATCAGACTCATGTGCAGAATAAAACAAATTATAAACATGTGGCAGGGAGTAGGAAAAGCAA  
 TGTATGCCCCCTCCCATCAGAGGATTAATTAGGTGTTTCATCAAAT---  
 ATTACAGGGCTGCTATTAAACAAGAGATGGTGGTCTTAATAATAGT-----  
 -----  
 -----  
 GACAAATGAGACCTTCAGACCTGGAGGAGGAAATATGAAGGACAATTGGAGAAGTGAATTATATAAATATAAAG  
 TAGTAAGAGTTGAACCACTA---GGAGTAGCACCCACCAAGGCAAAGAGAAGAGTGGTG-----  
 -----CAGAGAGAAAAAGAGCA---TTAGGGGTACTAGGAGCT-----  
 GTGTTCCCTTGGGTTCTTAGGAGCA---GCAGGAAGCACTATG---GGCGCAGCGTCA---  
 ATAGCGCTGACGGCACAG---GCCAGACTA---TTATTG---TCTGGTATAGTGCAACAGCAGAAC---  
 AACCTG---CTGAGG---GCTATTGAGGCGCAACAACATCTGTTGCAACTCACAGTCTGGGGCATT  
 >HQ217185  
 TTCTACTGTAATACAACAATGTTTAATAGTACTTGAAGAGTACCGAGTCTAATGATACTGGG-----  
 -----  
 -----  
 GGAAATGAACTATCATACTCCCATGCAGAATAAAACAAATTGTAAACATGTGGCAGGAAGTAGGAAAAGCAA  
 TGTATGCCCCCTCCCATCAGTGGACTAATTAAGTCTCATCAAAT---  
 ATTACAGGGTTATTATTAACAAGAGATGGTGATAATAGTACTAATGAC-----  
 -----  
 -----  
 ACTGACACTGAGATCTTCAGACCTATAGGAGGAAACATGAAAGACAATTGGAGAAGTGAATTATATAAATATA  
 AAGTAGTAAGAATTGAACCATTA---GGACTAGCACCCACCAAGGCAAAGAGAAGAGTGGTG-----

-----CAGAGAGAAAAAGAGCA---GTGGGA---TTAGGAGCT-----  
---GTGTTCTTTGGGTTCTTGGGAGCA---GCAGGAAGCACTATG---GGCGCAGCGTCA---  
ATGACGCTGACGGTACAG---GCCAGGCAA---TTACTG---TCTGGTATAGTGCAGCAGCAGAAC---  
AATCTG---CTGAGG---GCTATTGAGGCGCAACAACATCTGTTGCAACTCACAGTCTGGGGCATC  
>KC935957  
TTCTACTGTAATTCAACACAACACTATTTAATAGTACTTGGAAATGGAAGTGAATGACACTAGA-----  
-----  
-----  
GGAAATGACACAATCACACTCCCATGCAGAATAAAACAAATTATAAACATGTGGCAGGAAGTAGGAAAAGCAA  
TGTATGCCCCCTCCCATCAGAGGACAAATTAGATGTTTCATCAAAT---  
ATTACAGGGCTGCTATTAACAAGAGATGGTGGTGAAAACAAGAAC-----  
-----  
-----  
AAGACCGAGGTCTTCAGACCTGGAGGGGGAGATATGAGGGACAATTGGAGAAGTGAATTATATAAATATAAAG  
TAGTAAAAATTGAACCATTA---GGAATAGCACCCACCAGGCGAAGAGAAGAGTGGTG-----  
-----CAGAGAGAAAAAGAGCA---GTGGGA---ATAGGAGCT-----  
GTGTTCTTTGGGTTCTTGGGAGCA---GCAGGAAGCACTATG---GGCGCAGCGTCA---  
CTAGCGCTGACGGGACAG---GCCAGACTA---TTATTG---TCTGGTGTAGTGCAACAGCAGAAC---  
AATTTG---CTGAGG---GCTATTGAGGCGCAACAGCATCTGTTGCAACTCACAGTCTGGGGCATC  
>DQ410068  
TTCTACTGTGATTCAACACAACCTGTTTAACAGTACTTGGACTGAAGGGTCAAATAACACTGAA-----  
-----  
-----  
GGAAATGACCCAATCACACTCCCATGCAGAATAAAACAAATTATAAACATGTGGCAAGAAGTAGGAAAAGCAA  
TGTATGCCCCCTCCCGTCCGAGGACAAATTAGATGTTTCATCAAAT---  
ATTACAGGACTGATCTTGATAAGAGATGGTGGTAATAGTAGTTCC-----  
-----  
-----  
CACAATGAGACTTTTCAGACCTGGAGGAGGAGATATGAGAGACAATTGGAGGAGTGAATTATATAAATATAAAG  
TAGTAAAAATTGAACCATTA---GGAGTAGCACCCACCAAGGCAAAGAGAAGAGTGGTG-----  
-----CAGAGAGAAAAAGAACAA---GTGGGA---ATAGGAGCT-----  
GTGTTCTTTGGGTTCTTGGGAGCA---GCAGGAAGCACTATG---GGCGCAGCGTCA---  
GTGACGTTGACGGTACAG---GCCAGACTA---TTGTTA---TCTGGTATAGTGCAACAGCAGAAC---  
AATCTA---CTGAGG---GCTATTGATGCGCAACAGCATCTGTTGCAACTCACAGTCTGGGGCATC  
>EF363124  
TTCTACTGCGATTCAACACCACTGTTTAATAGTACTTGGAAATGTTACTAGTACTTGGAAATGTTACTAGTACTG  
GGAAT-----  
-----GAT---  
ACTGAGTCAAATAACATCACACTCCCATGCAGAATAAAGCAAATTATAAACATGTGGCAGGAAGTAGGAAAAG  
CAATATATGCCCCCTCCCATCAGAGGACAAATTAGATGTTTCATCAAAT---  
ATTACAGGGCTGCTATTAACAAGAGATGGTGGTAATAACAAGAAC-----  
-----  
-----  
GAGACCGAGATCTTCAGACCTGGAGGAGGAGATATGAGGGACAATTGGAGAAGTGAATTATATAAATATAAAG  
TAGTAAAAATTGAACCATTA---GGAATAGCACCCACCAAGGCAAAGAGAAGAGTGGTG-----  
-----CAGAGAGAAAAAGAGCA---GTGGGA---ATAGGAGCT-----  
GTGTTCTTTGGGTTCTTGGGAGCA---GCAGGAAGCACTATG---GGCGCAGCGTCA---  
ATGACGCTGGCGGTACAG---GCCAGACTA---TTATTG---TCCGGTATAGTGCAACAGCAGAAC---  
AATTTG---CTGAGG---GCTATTGAGGCGCAACAGCATCTGTTGCAACTCACCGTCTGGGGCATC  
>EF363126  
TTCTACTGTAACACATCACAACCTGTTTAATAACACTTGGAAATGGTACTGAGTTAAGTAATAGTAAA-----  
-----  
-----  
GAAAAATGGTAATATCACACTCCAATGCAGAATAAAACAAATTATAAACATGTGGCAGGAAGTAGGGAAAGCAA  
TGTATGCCCCCTCCCATCAGAGGACAAATTAGATGTGTGTCAAAT---  
ATTACAGGGCTGCTATTAACAAGAGATGGTGGTACAAACAGCACC-----  
-----  
-----  
ACCGAGACCTTCAGGCCTGCAGGAGGAAATATGAGGGACAATTGGAGAAGTGAATTATATAAATATAAAGTAG  
TAAAAATTGAACCATTA---GGAATAGCACCCACCAAGGCAAAGAGAAGAGTGGTG-----

-----CAGAGAGAAAAAGAGCA---GCGGGA---ATAGGAGCT-----  
 TTTTTCCTTGGGTTCTTGGGACTA---GCAGGAAGCACTATG---GGCGCAGCGTCA---  
 GTGACGCTGACGGTACAG---GCCAGACAA---TTATTG---TCTGGTATAGTGCAACAGCAGAAC---  
 AATCTG---CTGAGG---GCTATTGAGGCGCAACAGCACATGTTGCAACTCACAGTCTGGGGCATC  
 >DQ410498  
 TTCTACTGTAACCAACAAAACCTGTTTAATAGTACTTGGAAATGATACTAATAGTACTTGGAAATGGTACTGAGT  
 CACATAAC-----  
 -----ACA---  
 AAAGAAAATGACACAATCATACTCCAATGCAGAATAAAACAAATTATAAACATGTGGCAGAAAGTAGGAAAAG  
 CAATGTATGCCCCCTCCCATCATAGGACAAATTAGATGTTTCATCAAAT---  
 ATTACAGGGCTGCTATTAACAAGAGATGGTGGTAATAGCGGGAACAAT-----  
 -----  
 -----  
 ACCACCACCGAGACCTTCAGACCTGGAGGAGGAGAGATGAGGGACAATTGGAGAAAATGAATTATATAAAATATA  
 AAGTAGTAAAAATTGAACCATTA---GGAGTAGCACCCACCAAGGCAAAGAGAAGAGTGGTG-----  
 -----CAGAGAGAAAAAGAGCA---GTGGGA---ATAGGAGCT-----  
 ---CTGTTTCCTTGGGTTCTTGGGAGCA---GCAGGAAGCGCTATG---GGCGCAGCGTCA---  
 ATGGCGCTGACGGTACAG---GCCAGACCA---TTATTG---TCTGGTATAGTGCAACAGCAGAAC---  
 AATTTG---CTGAGG---GCTATTGAGGCGCAACAGCATCTGTTGCAACTCACAGTCTGGGGCATC  
 >JQ251132  
 TTCTACTGTAATACAACACCACTGTTTAATAGTAAGTGGACCAATGGTAATGGGAGTGGTTCTGAA-----  
 -----  
 -----  
 GGGAAATGAGACTATCACACTCCAATGTAGAATAAAACAAATTTATAAACATGTGGCAGGAAGTAGGAAAAGCAA  
 TGTATGCCCCCTCCTATCAAAGGACAAATTAGATGTTTATCAAAT---  
 ATTACAGGGCTACTATTAACAAGAGATGGGGGTAATAACCAGAACAATACC-----  
 -----  
 -----  
 CCTAATGCCACTGAGACCTTCAGACCTGGAGGAGGAGATATGAGGGACAATTGGAGAAGTGAATTATACAAAT  
 ATAAAGTAGTAAAAATTGAACCATTA---GGAGTAGCACCCACCAAGGCAAAGAGAAGAGTGGTG-----  
 -----CAGAGAGAAAAAGAGCAGCAATAGGA---ATGGGAGCC---  
 -----TTGTTTCCTTGGGTTCTTGTCAGCA---GCAGGAAGCACTATG---GGCGCAGCGTCA---  
 ATAACGCTGACGGTACAG---GCCAGGCAA---TTATTG---TCTGGAATAGTGCAACAGCAGAAC---  
 AATTTG---CTGAGG---GCTATTGAGGCGCAACAGCATCTGTTGCAACTCACAGTCTGGGGCATC  
 >DQ410260  
 TTCTACTGTGATACAGCACGACTGTTTAATAGTACTTGGAGTGTTAATGTTACTGAAGGAGCAAATAACACTG  
 CA-----  
 -----  
 GGAAATGACACAATCACACTCCCATGCAAAATAAAACAAATTATAAACATGTGGCAGGAAGTAGGAAAAGCAA  
 TGTATGCCCCCTCCCATCAGAGGACTAATTAATTGTTTCATCAAAT---  
 ATTACAGGGCTGCTATTAACAAGAGATGGTGGTCCTAACACAAAC-----  
 -----  
 -----  
 GAGACTGAGGTCTTTAGACCTGGAGGAGGAGATATGAGGGACAATTGGAGAAGTGAATTATATAAATATAAAG  
 TAGTAAAAATTGAACCATTA---GGAGTAGCACCCACCAAGGCAAAGAGAAGAGTGGTG-----  
 -----CAAAGAGAAAAAGGGCA---GTAGTGGGAATAGGAGCT-----  
 TTGTTTCCTTGGGTTCTTGGGAGCA---GCAGGAAGCACTATG---GGCGCAGCGTCA---  
 GTGACGCTGACGGTACAG---GCCAGACAC---TTATTG---TCTGGTATAGTGCAACAGCAAAAC---  
 AATTTG---CTGAGA---GCTATTGAGGCGCAACAACATCTGTTGCAACTCACAGTCTGGGGCATC  
 >DQ410292  
 TTCTACTGTAATTCAACACAACCTGTTTAATAGTACTTGGAAATAAACTAGGGATGGTACTTGGAACAGTACTG  
 GGTCA-----  
 -----ACT---  
 ACAGGAAATGAAACAATCACACTCCCATGCAGAATAAAACAAATTATAAACATGTGGCAGGAAGTAGGAAAAG  
 CAATGTATGCCCCCTCCCATCAGAGGACAAATTAGATGCTCATCAAAT---  
 ATTACAGGGCTGATATTAACAAGAGATGGTGGTAAAGACAACAATACC-----  
 -----  
 -----  
 AATACCATCGAGATCTTCAGACCTGGAGGAGGAGAGATGAGGGACAATTGGAGAAAATGAATTATATAAAATATA  
 AAGTAGTAAGAATTGAACCATTA---GGAATAGCACCCAACAGGGCAAAGAGAAGAGTGGTG-----

-----CAGAGAGAAAAAGAGCA---ATA-----GCGGGAGCT-----  
---TTGTTCCCTTGGGTTCTTGGAACA---GCAGGAAGCACTATG---GGCGCAGCGTCA---  
CTGACGCTGACGGTACAG---GCCAGACAA---TTATTG---TCTGGTATAGTGCAACAGCAGAAC---  
AATTTG---CTAAGG---GCTATTGAGGCGCAACAGCATCTGTTGCAACTCACAGTCTGGGGCATC  
>DQ410356  
TTCTACTGTAATACAACAAAACCTGTTTACCTGGAATAGTACTGAAGAGTCAAATAACACTGAG-----  
-----  
GGGAATAGAACAAATCACACTCCCATGCAGAATAAAACAAATTATAAACATGTGGCAGGAAGTAGGAAAAGCAA  
TGTATGCCCCCTCCCATCAAGGGACTAATTAAGTGTACATCAAAG---  
ATTACAGGACTACTATTAACAAGAGATGGTGGTGGTAATAGTACA-----  
-----  
AACAGGACTGAGATCTTCAGACCTGGAGGAGGAGATATGAGGGACAATTGGAGAAGTGAATTATATAAATATA  
AAGTAGTAAGAATTGAACCAGTA---GGAATAGCACCCGGCAAGGCAAAGAGAAGAGTGGTG-----  
-----CAGAGAGAAAAAGAGCG---GTAACA---CTGGGAGCT-----  
---ATGTTCCCTTGGGTTCTTGGAACA---GCAGGAAGCACTATG---GGCGTAGCGTCA---  
ATGACGCTGACGGTACAG---GCCAGACAA---TTACTG---TCTGGTATAGTGCAACAGCAGAAC---  
AACCTG---CTGAAG---GCGATTGAGGCGCAACAGCACCTGTTGCAACTCACGGTCTGGGGCATT  
>JQ403103  
TTCTACTGTAATACAACAAAACCTGTTTAAACAGTACTTGGAGGATTAGTAATGGTACGGAGATTAATGAT---  
-----  
ACTAATAGTACTATCACCTCCCATGCAGAATAAAACAAATTATAAACAGGTGGCAGGAAGTAGGAAAAGCAA  
TGTTTGCCCCCTCCTATCAGAGGACAAATTAGTTGTTTCATCAAAT---  
ATTACAGGGCTGCTATTAACAAGAGATGGTGGGAACGTCAGCAAC-----  
-----  
ACGGCAGAAACCTTTAGGCCTGGAGGAGGAGATATGAGGGACAATTGGAGAAGTGAATTATATAAATATAAAG  
TAGTAAGGGTTGAACCATTA---GGAGTAGCACCCACCAAGGCGAAGAGAAGAGTGGTG-----  
-----CAGAGAGAAAAAGAGCA---GCA-----ATAGGAGCT-----  
GTGTTCCCTTGGGTTCTTGGAACA---GCAGGAAGCACTATG---GGCGCAGCGTCA---  
GTGGCGCTGACGGTACAG---GCCAGGCAA---TTATTG---TCTGGTATAGTGCAACAGCAGAAC---  
AATCTG---CTGAGA---GCTATTGAGGCGCAACAGCATCTGTTGCAACTCACAGTCTGGGGCATC  
>JQ403104  
TTCTACTGTAATACATCACAACCTGTTTAAATAGCACTTTCAGTGGTAATGAGAGTATAAATACTACT-----  
-----  
GAGAACGCTACAATCACACTCCCATGTAGAATAAAACAAATTATAAATATGTGGCAGGAAGTAGGAAAAGCAA  
TGTATGCCCCCTCCCATCAGTGGACAAATTAAGTGTACATCAAAC---  
ATTACAGGCCTGTTATTAACAAGAGATGGTGGAGATAACAATACC-----  
-----  
ACCAACACTGAGACCTTCAGACCTACAGGGGGAAATATGAAGGACAATTGGAGAAGTGAATTATATAAATATA  
AAGTAGTAAAAATTGAACCATTA---GGACTAGCACCTCCAAGGCAAAGAGAAGAGTGGTG-----  
-----CAGAGAGAAAAAGAGCA---GTGGGA---CTAGGAGCT-----  
---TTGTTCAATTGGGTTCTTGGAACA---GCAGGAAGCACTATG---GGCGCAGCGTCG---  
ATGACGCTGACGGTACAG---GCCAGACAA---TTATTG---TCTGGTATAGTGCAACAGCAGAAC---  
AATCTG---CTGAGA---GCTATTGAGGCGCAACAACATCTGTTGCAACTCACAGTCTGGGGCATC  
>HQ217329  
TTCTACTGTAATTCAACACAACCTGTTTGATAGTACTTGAATGAGACTACAACAAGGTCAAAT-----  
-----  
AGAAGTGGTGACATCACACTCCCATGCAGAATAAAACAAATTTATAAACATGTGGCAGGGAGTAGGAAAAGCAA  
TATATGCCCCCTCCCATCAGTGGACAAATTAAGTGTCTCATCAAAT---  
ATTACTGGGCTACTATTAACAAGAGATGGTGGTAACGGAAACAAT-----  
-----  
ACCACCGAGATCTTCAGACCTGGAGGAGGAGATATGAGGGACAATTGGAGAAGTGAATTATATAAATATAAGG  
TAGTAAAAATTGAGCCATTA---GGAATAGCACCCACCAAGGCAAAAAGAAGAGTGGTG-----

-----CAGAGAGAAAAAAGAGCA---GTGGGA---CTAGGAGTT-----  
TTGTTCTTGGGTTCTTAGGAGCA---GCAGGAAGCACTATG---GGCGCAGCGTCA---  
GTGGCGCTGACGGTACAG---GCCAGACAA---TTATTG---TCTGGTATGGTGCAGCAGCAGAAC---  
AATCTG---CTGAGA---GCTATTGAGGCGCAACAGCATATGTTGCAACTCACAGTCTGGGGCATC  
>FJ469745  
TTCTACTGTAGTACAACACAACCTGTTTAGTAGTACTTGAATAGTACTAACAGGACCGATACA-----  
-----  
GGAAATGAACTATCACACTCCCATGCAAAATAAAACAAATTATAAACTTGTGGCAAGAAGTAGGAAAAGCAA  
TGTATGCCCCCTCCCATCAGAGGACAAATTAAATGTTTCATCAAAT---  
ATTACAGGGCTACTATTAACAAGAGATGGTGGTAATGACAATAAT-----  
-----  
ACCACCGAGGAAATTTTCAGACCTGCAGGAGGAGACATGAGGGACAATTGGAGAAGTGAGCTATATAAATATA  
AAGTAGTAAAAATTGAACCATTA---GGAGTAGCACCCACCAAGGCAAAGAGAAGAGTGGTG-----  
-----CAGAGAGAAAAAAGAGCA---ATAGGA---ATAGGAGCT-----  
---ATGTTCTTGGGTTCTTGGGAGCA---GCAGGAAGCACTATG---GGCGCAGCATCA---  
GTGACGCTGACGGTACAG---GCCAGACAA---TTATTG---TCTGGTATAGTGCAACAGCAGAGC---  
AATCTG---CTGAGG---GCTATTGAGGCGCAACAGCATCTGTTGCAACTCACAGTCTGGGGCATC  
>MK147530  
TTCTACTGTAATTCAACACAACCTGTTTAATAGTACTTGGACATTTAATAATACTTGAAGCCTAATATTACTG  
GGAATGATACT-----  
-----  
GGAGGGGACAATATCATACTCCAATGCAGAATAAAACAAATTATAAACATGTGGCAGGAAGTAGGAAAAGCAA  
TGTATGCCCCCTCCCATCAGGGGAGAAATTAGATGTACATCAAAT---  
ATTACAGGGCTGCTATTAACAAGAGATGGTGGTAAGGATAATACCACT-----  
-----  
AACGGGACTGAGACCTTCAGACCTGGAGGAGGAGATATGAGAGACAATTGGAGAAGTGAATTATATAAATATA  
AAGTAGTAAGAATTGAACCATTA---GGAGTAGCACCCACCAAGGCAAAGAGAAGAGTGGTG-----  
-----CAGAGAGAAAAAAGAGCA---GTGGGA---ATAGGAGCT-----  
---ATGTTCTTTGGGCTCTTGGGAGCA---GCAGGAAGCACTATG---GGCGCAGCGTCA---  
GTGACGCTGACGGTACAA---GCCAGACTA---TTATTG---TCTGGTATAGTGCAACAGCAAAAC---  
AATTTG---CTGAGG---GCTATTGAGGCGCAACAGCATTTGTTGCAACTCACAGTCTGGGGCATC  
>FJ469772  
TTCTACTGTAATACAACACAACCTGTTTAATAGTACTTGGCTTAACAGTAATAGTACTGAAAATGGGACT---  
-----  
-----  
ACTAACGGCACTATCACACTCCCCTGCAGAATAAAACAAATTATAAACATGTGGCAAGGAATAGGAAGAGCAA  
TGTATGCCCCCTCCCATCAGTGGACAAATTAGGTGCTTATCAAAT---  
ATTACAGGGCTACTATTAACAAGAGATGGTGGTGGTGGGAACGAGACC-----  
-----  
GAGACCAATACCGAGATTTTCAGACCTGCAGGAGGAGATATGAAGGACAATTGGAGAAGTGAATTATATAAAT  
ATAAAGTAGTAAGAATTGAACCTTA---GGAATAGCACCCACCAAGGCAAGGAGAAGAGTGGTG-----  
-----CAGAGGGAAAAAAGAGCA---GTGGGA---ATAGGAGCT---  
-----ATGTTCTTGGGATCTTGGGAGCA---GCAGGAAGCACTATG---GGCGCAGTGTCA---  
ATGACGCTGACGGTACAG---GCCAGACTA---TTATTG---TCTGGTATAGTGCAACAGCAGAAC---  
AATCTG---CTGAGG---GCTATTGAGGCGCAACAGCATCTGTTGAAACTCACAGTCTGGGGCATC  
>EF593269  
TTCTACTGTAATACAACACAACCTGTTTAATAGTACTTGGGGGACTAATAGTACTTGGGAGATTAATACTACT-  
-----  
-----  
GGGAATGATACTATCACACTCCCATGCAAGAATAAAACAAATTATAAACATGTGGCAGGAAGTAGGAAAAGCAA  
TATATGCCCCCTCCCATCAGAGGACAAATTAGATGTTTCGTCAAAT---  
ATTACAGGGCTGCTATTAACAAGAGATGGTGGTGAAAATAGCACA-----  
-----  
AACGGCACCGAGATCTTCAGACCTGGAGGAGGGGATATGAGGGACAATTGGAGAAGTGAATTATATAAATATA  
AAGTAGTACAAGTTGAACCATTA---GGAGTAGCACCCACCAAGGCAAAGAGAAGAGTGGTG-----

-----CAGAGAGAAAAAGAGCA---GTGGGT---ATAGGAGCT-----  
 ---CTATTCCTTGGGTTCTTAGGAGCA---GCAGGAAGCACTATG---GGCGCAGCGTCA---  
 ATAACGCTGACGGCACAG---GCCAGACAA---TTATTG---TCTGGTATAGTGCAGCAGCAGAGC---  
 AATTTG---CTGAGG---GCTATTGAGGCGCAACAGCATCTGTTGCAACTCACAGTCTGGGGCATC  
 >EF593271  
 TTCTACTGTGATACAAAATACTGTTTAATAGTACTTGGAAATTTTACTAACGGGAAAATTACTGCAGGGCCAA  
 ATAGC-----  
 -----ACT---  
 GAAGGAAATGACACAATCACAAATCCCATGCAGAATAAAACAAATTATAAATATGTGGCAAGAAGTAGGAAAAG  
 CAATGTATGCTCCTCCCATCAGAGGAATTATTAGCTGTTTATCAAAT---  
 ATTACAGGGCTGCTATTAACAAGAGATGGTGGTAGGAGTAATGATAGCGCG-----  
 -----  
 -----  
 ACCAATAAACTGAAGTCTTCAGACCTGGAGGAGGAGATATGAGGGACAATTGGAGAAGTGAATTATATAAAT  
 ATAAGGTAGTAAAAATTGAACCATTA---GGGGTAGCACCCACCAAGGCAAAGAGAAGAGTGGTG-----  
 -----CAGAGAGAAAAAGAGCA---GTGGGA---TTTGAGCT---  
 -----TTGTTTCCTTGGGTTCTTGGGAGCA---GCAGGAAGCACTATG---GGCGCAGCGTCG---  
 GTGACGCTGACGGTACAG---GCCAGACAA---CTATTG---TCTGGTATAGTGCAACAGCAAAAC---  
 AACTTG---CTGAGA---GCTATTGAGGCGCAACAACATCTGTTGCAACTCACAGTCTGGGGCATC  
 >EF593273  
 TTCTATTGTGATTCAACAAAATTGTTTAATAGTACTTGGGGAATTAATGGTACTTGGAAATACCACT-----  
 -----  
 -----  
 GAAGGGGCAAATATCACACTCCCATGCAGAATAAAACAGATTATAAATCTGTGGCAGCAAGTAGGAAAAGCAA  
 TGTATGCCCCCTCCCATCAAAGGAAAAATTAGCTGCTCATCAAAT---  
 ATTACAGGGCTGATATTGACAAGAGATGGTGGTGATAATGGAAAT-----  
 -----  
 -----  
 GGGACAGAGGAGATCTTCAGACCTGGAGGAGGAGATATGAGGGACAATTGGAGAAGTGAATTATATAAATATA  
 AGGTAGTAAAAATTGAACCATTA---GGAATAGCACCCACCAAGGCAAAGAGAAGAGTGGTG-----  
 -----CAGAGAGAGAAAAAGAGCA---GTGGGA---ATGGGAGCT-----  
 ---CTGTTTCCTTGGGTTCTTGGGAGCA---GCAGGAAGCACTATG---GGCGCAGCGTCA---  
 GTGACGCTGACGGTACAA---GCCAGACGA---TTATTG---TCTGGTATAGTGCAACAGCAGAAC---  
 AACTTG---CTGAGG---GCTATTGAGGCGCAACAGCATCTGTTGCAACTCACAGTCTGGGGCATT  
 >EF593274  
 TTCTACTGTAATACAACACAACCTGTTTAATAGTACTTGGTTTCCTAATGGTACTTGGTTTCCTAATGATACTG  
 TGAAT-----  
 -----AAT---  
 ACTGGAGATGTGAATATCACCTACCATGCAGAATAAAACAAATTGTAAACATGTGGCAGGAAGTAGGAAAAG  
 CAATGTATGCCCCCTCCCATTCAGGACAAATTAGATGTTTCATCAAAT---  
 ATTACAGGGTTACTATTAAACAAGAGATGGTGGTATTGGTAATAGCACA-----  
 -----  
 -----  
 AATAATGAGACCGAGACCTTCAGACCTGGAGGAGGAGATATGAGGGATAATTGGAGAAGTGAATTATATAATT  
 CCAAAGTAGTAAAAATTGAACCATTA---GGAATAGCACCCACCAAGGCCAAGAGAAGAGTGGTG-----  
 -----CAGAGAGAAAAAGAGCA---GTGGGA---ATAGGAGCT---  
 -----ATGTTTCCTTGGATTCTTGGGAGCA---GCAGGAAGCACTATG---GGCGCAGCGTCA---  
 CTGACGCTGACGGTACAG---GCCAGACAA---TTATTG---TCTGGTATAGTGCAACAGCAAAAC---  
 AACTTG---CTGAGA---GCTATTGAGGCGCAACAACATCTGTTGCAACTCACAGTCTGGGGCATC  
 >EF593276  
 TTCTACTGTAATACAACGAAGTTGTTTGATAGTGCTTGGCCTAATGCTACTTGGAGAATGCC-----  
 -----  
 -----  
 AATGATACAATTATCACACTCCCATGCAGAATAAAACAAATTATAAACATGTGGCAAGAAGTAGGAAAAGCCA  
 TGTATGCCCCCTCCCATCAGTGGACAAATTAAGTGTTCATCAAAT---  
 ATTACAGGGCTGCTATTAACAAGAGATGGTGGTACCGGGAACAATGAGACA-----  
 -----  
 -----  
 GACAATAATACTGAAATTTTCAGACCTGGGGGAGGAGACATGAGGGACAATTGGAGAAGTGAATTATATAAAT  
 ATAAAGTAGTACAAATTGAACCATTA---GGAATAGCACCCACCAAGGCAAGGAGGAGAACGGTG-----

-----CAGAGAGAAAGAAGAGCA---GCA-----ATAGGAGCT---  
 -----ATGATCCTTGGGTTCTTGGGAGTA---GCCGGAAGCACTATG---GGCGCAGCGTCA---  
 GTGACGCTGACGGTACAG---GCCAGACTA---TTATTG---TCTGGTATAGTGCAACAGCAGAAC---  
 AATCTG---CTGAGG---GCTATTGAGGCGCAACAGCATCTGTTGCAACTCACCGTCTGGGGCATT  
 >JN024210  
 TTCTACTGTAATACAACACAACACTGTTTAATAGTACTTGGAAATGTGACTGGGTCAAATAACACTGAA-----  
 -----  
 -----  
 GGAAATGACACAATCACGCTCCCATGCAGAATAAAACAAATTATAAACATGTGGCAGGAAGTAGGAAAAGCAA  
 TGTATGCCCCCTCCCACCAGAGGACAAATTAGATGTTTCATCAAAT---  
 ATTACAGGGCTGCTATTAACAAGAGATGGTGGTGTGAACACCACCACC-----  
 -----  
 -----  
 ACCAACGAGACAGAGGTCTTCAGACCTGGAGGAGGAAATATGAAGGACAATTGGAGAAGTGAATTATATAAAAT  
 ATAAAGTAGTAAAAATTGAACCATTA---GGAGTAGCACCCACCAAGGCAAAGAGAAGAGTGGTG-----  
 -----CAGAGAGAAAAAAGAGCA---ATAGGA---ATAGGAGCT---  
 -----GTGTTTCCTTGGGTTCTTGGGAGCA---GCAGGAAGCACTATG---GGCGCAGCGTCA---  
 ATAACGCTGACGGTACAG---GCCAGACAA---TTATTG---TCTGGTATAGTGCAACAGCAGAAC---  
 AACTTG---CTGAGA---GCTATTGAGGCGCAACAACATATGTTGCAACTCACAGTCTGGGGCATC  
 >FJ469683  
 TTCTACTGTAATACAACACAACACTGTTTAATAGTACTTGGTTTAATGGTACTTGGAAATGGTACTATAGAGTCAA  
 GT-----  
 -----  
 AACACTACTAATATCACACTCCCATGCAGAATAAAACAAATTGTAAACATGTGGCAGGAAGTAGGAAAAGCAA  
 TGTATGCCCCCTCCCATCAGAGGACAAATTAGATGTTTCATCAAAT---  
 ATTACAGGGCTGCTATTGACAAGAGATGGTGGTAAGAAACAACAGC-----  
 -----  
 -----  
 ACCAATGAGACCTTCAGACCTGAAGGAGGAAATATGAGGGACAATTGGAGAAGTGAATTATATAAAATATAAAG  
 TAGTAAGAATTGAACCATTA---GGAGTAGCACCCACCAAGGCAAAGAGAAGAGTGGTG-----  
 -----CAAAGAGAAAAAAGAGCA---GTGGGAACGATAGGAGCT-----  
 ATGTTTCCTTGGGTTCTTGGGAGCA---GCAGGAAGCACTATG---GGCGCAGCGTCA---  
 ATGACGCTGACGGTACAA---GCCAGACAA---TTATTG---TCTGGTATAGTGCAACAGCAAAAC---  
 AATTTG---CTGAGG---GCTATTGAGGCGCAACAACATCTGTTGCAACTCACAGTCTGGGGCATT  
 >HQ238279  
 TTCTACTGTAATACAACACAACACTGTTTAATAGTACTTGGAAATAATAATAGTACTGAGAATAAGAATGATACTA  
 AC-----  
 -----  
 AGCAATGAACTATCATGCTCCCATGCAGAATAAAACAAATTATAAACAGATGGCAAGAAGTAGGAAAAGCAA  
 TGTATGCCCCCTCCCATCGCTGGACAAATTAGATGTTTCATCAAAT---  
 ATTACAGGGCTGCTATTGACAAGAGATGGTGGTAATAGCAGCAGCGAC-----  
 -----  
 -----  
 AATACAAGTACAGAGATCTTCAGACCTGGAGGAGGAGATATGAGAGACAATTGGAGAAGTGAATTATATAAAAT  
 ATAAAGTAGTAAAAATTGAACCATTA---GGAGTAGCACCCACTAAGGCAAAGAGAAGAGTGGTG-----  
 -----CAGAGAGAAAAAAGAGCA---GTAGTGGGAATAGGAGCT---  
 -----GTGTTTCCTTGGGTTCTTGGGAGCA---GCAGGAAGCACTATG---GGCGCAGCATCA---  
 TTAACGCTGACGGTACAG---GCCAGACAA---TTATTG---TCTGGTATAGTGACAGCAGCAGAAC---  
 AATCTG---CTGAGG---GCTATTGAGGCGCAACAGCATCTGTTGCAACTCACAGTCTGGGGCATC  
 >FJ496085  
 TTCTACTGTAATTTAACACAACACTGTTTAATAGTACTTGGAAATAGTACTGAAAGCTTTAATAGTACTGAAAGCT  
 CTAATAGT-----  
 -----ACT---  
 GAAGGAAATGACACAATCAGCCTCCCATGCAGAATAAAACAAATTATAAACATGTGGCAGGAATAGGAAAAG  
 CAATGTATGCCCCCTCCCATTCAGGAATAATTAGATGTTTCATCAAAT---  
 ATTACAGGAATACTATTAACAAGAGATGGTGGTATAAATAGTACAGAT-----  
 -----  
 -----  
 AATACCACTGAGATCTTCAGACCTGCAGGAGGAGATATGAGAGACAATTGGAGAAGTGAATTATATAAATACA  
 AAGTAGTAAAAATTGAACCATTA---GGAATAGCACCCACCAAGGCAAAGAGAAGAGTGGTG-----

-----CAGAGAGAAAAAGAGCA---GTGGGA---ATAGGAGCT-----  
---GTGTTCCCTTGGGTTCTTGGGCGCA---GCAGGAAGCACTATG---GGCGCAGCGTCA---  
GTGGCGCTGACGGTACAG---GCCAGACAA---TTATTG---TCTGGTATAGTGCAACAGCAGAAC---  
AATTTG---CTGAGG---GCTATTGAGGCGCAACAGCATCTGTTGCAACTCACAGTCTGGGGCATC  
>JF689854  
TTCTACTGTAATACAACAACCACTGTTTAATAGTACTTGAATGATACTACTGAAGGGTCAAATAAC-----  
-----  
ACTGGAAGAACTATCACACTCCCATGCAGAATAAAACAAATTATAAATATGTGGCAGGAAGTAGGAAAAGCAA  
TGTATGCCCCCTCCCATCAGCGGACAAATTAGATGTTTCATCAAAT---  
ATTACAGGGCTTCTATTAACAAGGATGGTGGTAATAATAACGAGACC-----  
-----  
AATAACGGGACCGAGACCTTCAGACCTGGAGGGGGAAAATATAAGGGACAATTGGAGAAGTGAATTATATAAAT  
ATAAAGTAGTAAAAATTGAACCATTA---GGAGTAGCACCCACCAGGGCAAAGAGAAGAGTGGTG-----  
-----CAGAGAGAAAAAGAGCA---GTGGGA---ATAGGAGCT---  
-----GTGTTCCCTTGGGTTCTTGGGAGCA---GCAGGAAGCACTATG---GGCGCAGCGTCA---  
ATAACGCTGACGGTACAG---GCCAGACAA---TTATTG---TCTGGTATAGTGCAACAGCAAAGC---  
AATTTG---CTGAGG---GCTATTGAGGCGCAACAGCATATGTTGCAGCTCACAGTCTGGGGCATC  
>JF689856  
TTCTACTGTAATACAACAAGACTGTTTAATAGTACGTGGTTTTGAATAATGCTACTGCTAATTGGACTTTGA  
AAAATGATACT-----  
-AAGGGAGAATTCAAT-----  
ATCTCTGGAGGGAATATCACACTCCCATGCAGAATAAAACAAATTATAAACATGTGGCAGGAAGTAGGGAAAAG  
CAATGTATGCCCCCTCCCATCAGAGGACAAATTAGATGTTTCATCAAAT---  
ATTACAGGGCTGCTATTAACAAGAGATGGTGGAGAGGAGCCTAAC-----  
-----  
GATACTGAGACTTTTCAGACCTGCAGGAGGAAATATGAAGGACAATTGGAGAAGTGAATTATATAAATATAAAG  
TAGTAAAAATTGAACCATTA---GGAATAGCACCCACCAGGGCAAAGAGAAGAGTGGTG-----  
-----CAGAGAGAAAAAGAGCA---GTGGGA---ATAGGAGCT-----  
TTGTTCCCTTGGGTTCTTGGGAGCA---GCAGGAAGCACTATG---GGCGCAGCGTCA---  
GTAACGCTGACGGTACAG---GCCAGAAATG---CTATTG---TCTGGTATAGTGCAACAGCAGAAC---  
AATCTG---CTGAGG---GCTATTGAGGCGCAACAGCATCTGTTGCAACTCACAGTCTGGGGCATC  
>JF689857  
TTCTACTGTAACACATCACAACCTGTTTAATAATACTTGAATGGAAGTGCATGGTCAACTAACAGTTCA---  
-----  
-----  
AATAGCACTGATATCACACTCCCATGCAGAATAAAACAAATTATAAACATGTGGCAGGAAGTAGGAAAAGCAA  
TGTATGCCCCCTCCCATTAGAGGACTAATTAGATGTTTCATCAAAT---  
ATTACAGGGCTACTATTAACAAGAGATGGTGGTAATAATAAATAT-----  
-----  
ACTAATGAGACCTTCAGGCCTGGAGGAGGAGATATGAGGGACAATTGGAGAAGTGAATTATATAAATATAAAG  
TAGTAAAAATTGAACCATTA---GGAATAGCACCCACTAGGGCAAAGAGAAGAGTGGTG-----  
-----CAGAGAGAAAAAGAGCA---GTAGGA---ATAGGAGCT-----  
ATGTTCCCTTGGGTTCTTGGGAGCA---GCAGGAAGCACTATG---GGCGCAGCGTCA---  
ATGACGCTGACGGTACAA---GCCAGACAA---TTATTG---TCTGGTATAGTGCAACAGCAGAAC---  
AATCTG---CTGAGG---GCTATTGAGGCGCAACAGCATCTGTTGCAACTCACAGTCTGGGGCATC  
>JF689859  
TTCTACTGTGATTCAACACAACCTATTTAATAGTACTTGAATGGTACTGAAGGGTCAAATAACACTGAA---  
-----  
-----  
GGAAATAGCACACTCACACTCCCATGCAGAATAAAACAGATTATAAACATGTGGCAGGAAGTAGGAAAAGCAA  
TGTATGCCCCCTCCCATCAGAGGACAAATTAGATGTTTCATCAAAT---  
ATTACAGGGCTGCTATTAACAAGAGATGGTGGTACTAACAATAGC-----  
-----  
-----  
GAGAACACCGAGATCTTCAGACCTGGAGGAGGAGATATGAGGGATAATTGGAGAAGTGAATTATATAAATATA  
AAGTAGTAAAAATTGAACCATTA---GGAATAGCACCCACCAAGGCAAAGAGAAGAGTGGTG-----

-----CAGAGAGAAAAAAGAGCA---GTGGGA---ATAGGAGCT-----  
 ---GTGTTCCCTTGGGTTCTTGGGAGCA---GCAGGAAGCACTATG---GGCGCAGCGTCA---  
 CTGACGCTGACGGTACAG---GCCAGACTA---TTATTG---TCTGGTATAGTGCAACAGCAGAAC---  
 AATTTG---CTGAGG---GCTATTGAGGCGCAACAGCATCTGTTGCAACTCACAGTCTGGGGCATC  
 >JF689860  
 TTCTACTGTAATACATCAGAGCTATTTAATTGGACTGAGGGAAAACCTGCTAAC-----  
 -----  
 -----  
 ACTGAAGACAAAATTACAATCCAATGCAGAATAAAACAAATTATAAACATGTGGCAGGAAGTAGGAAAAGCAA  
 TGTATGCCCCCTCCCATCAGTGGACAAATTAGATGTTCCCTCAACT---  
 ATTACAGGGTTGATATTAACAAGAGATGGTGGTAATGACACAAGG-----  
 -----  
 -----  
 GAGAACGAGACCTTCAGACCTGGAGGAGGAGATATGAGGGACAATTGGAGAAGTGAATTATATAAATATAAAAG  
 TAGTAAAAATTGAACCATTA---GGAATAGCACCCACCAAGGCAAAGAGAAGAGTGGTG-----  
 -----CAGAGAGAAAAAAGAGCA---GTGGGA---ATAGGAGCT-----  
 TTATTCCTTGGGTTCTTGGGAGCA---GCAGGAAGCACTATG---GGCGCAGCGTCA---  
 CTGACGCTGACGGTACAG---GCCAGACAA---TTATTG---TCTGGTATAGTGCAACAGCAGAGC---  
 AATTTG---CTGAGG---GCTATTGAGGTGCAACAGCATCTGTTGCAACTCACAGTCTGGGGCATC  
 >MK383403  
 TTCTATTGTAATACAACAACCACTGTTTAATAGTACTTGGAA'TTAAACACAACCGTTTAATAGTACTTGGAAATG  
 GTAAGTAA-----  
 -----  
 GGGTCAAGTAATATAATCACACTCCCATGCAGAATAAAACAAGTTATAAACATGTGGCAGGAAGTAGGAAAAG  
 CAATGTATGCCCCCTCCCATCAGAGGATACATTAGATGTTTCATCAAAT---  
 ATTACAGGGCTACTATTAACAAGAGATGGTGGTAATGACAAAAACGGGACA-----  
 -----  
 -----  
 ACAACCGAGATCTTCAGACCTGGAGGAGGAGATATGAGGGATAATTGGAGAAGTGAATTATATAAATATAAAAG  
 TAGTAAAAATTGAACCATTA---GGAGTAGCACCCACCAAGGCAAAGAGAAGAGTGGTG-----  
 -----CAGAGAGAAAAAAGAGCA---GTGGGA---ATAGGAGCC-----  
 TTGTTCCCTTGGGTTCTTGGGAGCA---GCAGGAAGCACTATG---GGCGCAGCGTCA---  
 ATGACGCTGACGGTACAG---GCCAGACAA---TTATTG---TCTGGTATAGTGCAACAGCAGAAC---  
 AACTTG---CTGAGA---GCTATTGAGGCGCAACAACATCTGTTGCGACTCACAGTCTGGGGCATC  
 >HQ216575  
 TTCTACTGTAATACAACAAAACCTGTTTAATAGTACTTGGAGTGATAATAGTACTTGGAAATAATAGTAGTAAAT  
 GGTTT-----  
 -----AAT---  
 GGCCTGGAAAAAATATCACACTCCTATGCAGAATAAAACAAATTGTAAATATGTGGCAGGAAGTAGGAAGAG  
 CAATGTACGCCCCCTCCCATCAGTGGAAATAATTGACTGTACATCAAAT---  
 ATTACAGGGATAATACTAGTAAGAGATGGTGGTAATATAAATGGGAGT-----  
 -----  
 -----  
 AGGGAGAAAGAGACATTTCAGACCTATAGGTGGAAATATGAAGGACAATTGGAGAAGTGAAGTATATAAATATA  
 AAGTAGTAAACCTTGAACCATTA---GGAATAGCACCCACCAAGGCAAAGAGAAGAGTGGTG-----  
 -----CAGAGAGAAAAAAGAGCA---GTGGGA---CTAGGAGCT-----  
 ---CTGTTCTTTGGGTTCTTGGGAGCA---GCAGGAAGCACTATG---GGCGCAGCGTCA---  
 TTGACGCTGACGGTACAG---GCCAGACTA---TTATTG---TCTGGTATAGTGCAACAGCAAAAC---  
 AATTTG---CTAAAA---GCTATTGAGGCGCAACAGCATCTGTTGAAGCTCACAGTCTGGGGCATT  
 >HQ216584  
 TTCTACTGTAATACAACAAAACCTGTTTAATAGTACTTGGGTTAATGGAAGTAAGAATGACACAAAGGGG---  
 -----  
 -----  
 GGTAATGGAAGTATCACACTCCAATGCAGAATAAAACAAATTATAAACATGTGGCAGCAAGTAGGAAAAGCAA  
 TGTATGCCCCCTCCCATCAGCGGACCAATTAGTTGTTTCATCAAAT---  
 ATTACAGGGCTGATATTAACAAGAGATGGTGGTACAAACACCACC-----  
 -----  
 -----  
 AATGAGACCTTCAGACCTGGAGGAGGAGATATGAGGGACAATTGGAGAAGTGAATTATATAAATATAAAGTAG  
 TAAAAATTGAACCAATA---GGAGTAGCACCCACCAAGGCAAAGGAGAAGAGTGGTG-----

-----CAGAGAGAAAAAGGGCA---GTGGGA---ATAGGAGCT-----  
TTTTTCCTTGGGTTCTTGGGAGCA---GCAGGAAGCACTATG---GGCGCAGCATCA---  
ATAACGCTGACGGTACAA---GCCAGACTA---TTATTG---TCTGGTATAGTGCAACAGCAAAGC---  
AACTTG---CTGAGA---GCTATTGAGGCGCAACAGCACCTGTTGCAACTCACAGTCTGGGGCATC  
>HQ216686  
TTCTACTGTGATTCAACACAGCTGTTTAATAGTACTTGGCCGTCTAATAGTACTTGGTCGTTTAATGATACTA  
CAAAT-----  
-----AAT---  
ACTGTAGGCACAAATATCACACTCCCATGCAGAATAAAACAAATTATAAACATGTGGCAGGAAGTAGGAAAAG  
CAATGTATGCCCCCTCCCATCAGAGGACAAATTAGATGTTTCATCAAAT---  
ATTACAGGCCTGCTATTAACAAGGGATGGTGGGGTTGGTAATAATAGCAGC-----  
-----  
----  
AATACAACGAACCCCGAGATCTTCAGACCTGGAGGAGGAGATATGAGGGACAATTGGAGAAGTGAATTATATA  
AATATAAAGTAGTAAAAATTGAACCATTA---GGAATAGCGCCCACTAAGGCAAAGAGAAGAGTGGTG-----  
-----CAAAGAGAAAAAGAGCA---GTGGGG---  
CTAGGAGCT-----ATGTTCCCTTGGGTTCTTGGGAGCA---GCAGGAAGCACTATG---  
GGCGCAGCGTCA---ATAACGCTGACGGTACAG---GCCAGACAA---TTATTG---  
TCTGGTATAGTGCAACAGCAGAAC---AATTTG---CTGAAG---  
GCTATTGAGGCGCAACAGCATCTGTTGCAACTCACAGTCTGGGGCATC  
>HQ216727  
TTCTACTGTAATTCAACAAAGCTGTTTAATAGTACTTGGCATTGGAATGGTACGATGTTTAATAGTACTGGGA  
TTGAA-----  
-----AGG---  
TCAAAATGAGACTAATATCACACTCCCATGCAGAATAAAACAAATTGTAAACATGTGGCAGGAAGTAGGAAAAG  
CAATGTATGCCCCCTCCCATCAGAGGACAAATTAGATGTACATCAAAT---  
ATTACAGGGCTGCTGTTATTTAGAGATGGTGGTAATACCACGAAGAAC-----  
-----  
-----  
AATACCGACGAGACTTTCAGACCTGGAGGAGGAGAGATGAGGGACAATTGGAGAAGTGAATTATATAAATATA  
AAGTAGTAAAAATTGAACCATTA---GGAGTAGCACCCACTAAGGCAAAGAGAAGAGTGGTG-----  
-----CAGAGAGAAAAAGAGCA--GTGGGA---ATAGGAGCT-----  
---GTGTTCCCTTGGGTTCTTGGGAGCA--GCAGGAAGCACTATG--GGCGCAGCGTCA---  
ATGACGCTGACGGTACAG--GCCAGACTA--TTATTG--TCTGGTATAGTGCAACAGCAGAAC---  
AATTTG---CTGAGG--GCTATTGAGGCGCAACAGCATCTGTTGCAACTCACAGTCTGGAGCATT  
>HQ216762  
TTCTACTGTAATACAACACAACCTGTTTAATAGTACTTGGCCTACTGATAAAAAATATTACTGGGAAGGATAGT-  
-----  
-----  
GGCAATAGAAACATCACCTCCCATGCAGAATAAAACAAATTATAAACATGTGGCAGGAAGTAGGAAAAGCAA  
TGTATGCCCCCTCCCATTAAGGACAAATTAAGTCTTATCAAAT---  
ATTACAGGGTTGCTATTAAACAAGAGATGGTGGTAGTAACAACAAC-----  
-----  
-----  
AACAGCGAGATCTTCAGACCTGGAGGAGGAGATATGAGGGACAATTGGAGAAGTGAATTATATAAATATAAAG  
TAATAGAAATTGAACCATTA---GGAATAGCACCCACCAAGGCAAAAAGAAGAGTGGTG-----  
-----CAAAGAGAAAAAGAGCA---GTGGGAGTAGTAGGAGCT-----  
ATGATCCTTGGGTTCTTGGGAACA---GCAGGAAGCACTATG---GGCGCAGCGTCA---  
CTGACGCTGACGGTACAG---GCCAAACAA---TTATTG---TCTGGTATAGTGACAGCAGAAC---  
AATCTG---CTGAGA---GCTATTGAGGCGCAACAGCACCTGTTGCAACTCACCGTCTGGGGCATC  
>HQ216816  
TTCTACTGTAATACAACACAGCTGTTTAATAGTACTTGGGAATCTTAATGGTACTTGGAGTGGTACTACA----  
-----  
-----  
GGAGAGGGGAACATTACACTCCCATGCAGAATAAAACAAATTGTAAATAGGTGGCAGGAAGTAGGAAAAGCAA  
TGTATGCCCCCTCCCATCAGCGGAAGAATTAGCTGTTTCATCAAAT---  
ATTACAGGGTTATTATTAAACAATAGATGGTGGTAATAACAGGACA-----  
-----  
-----  
AACGAGACCTTCAGACCTGGAGGAGGAAATATGAGGGATAATTGGAGAAGTGAATTATATAAATATAAAGTAG

TACAAATTGAGCCATTA---GGAGTAGCACCCACCAAGGCAAAGAGAAGAGTGGTG-----  
-----CAGAGAGAAAAAGAGCA---GTGGGAATACTAGGAGCT-----  
ATGTTCCCTTGGGTTCTTGGGAGCA---GCAGGAAGCACTATG---GGCGCAGCATCG---  
ATGACGCTGACGGTACAG---GCCAGACAA---CTATTG---TCTGGTATAGTGCAGCAGCAAAAC---  
AATTTG---CTGAGG---GCTATTGAGGCGCAACAACATATGTTGCAACTCACAGTCTGGGGCATC  
>HQ216841  
TTCTACTGTAATACAACGAATCTGTTTAATAGTACTTGGGAATAGTACTAGTACTGTAAATAAGACTACAGGG-  
-----  
-----  
CCAAATGGGACTATCACACTCCCATGTAGGATAAAAACAAATTATAAACATGTGGCAGGAAGTAGGAAAAGCAA  
TGTATGCCCCCTCCCATCCAAGGAAAAATTAGATGTACATCAAAT---  
ATTACAGGGCTGTTATTAGTAAGAGATGGTGGCAACAACAATGAT-----  
-----  
-----  
ACTAATACAGAGATATTCAGACCTGGAGGAGGAAATATGAGGGACAATTGGAGAAGTGAATTATATAAATATA  
AAGTAGTAAAAGTTGAACCATTA---GGAATAGCGCCACCGAGGCAAAAAGAAGAGTGGTG-----  
-----CAGAGAGAGAAAAAGAGCA---GTGGGA---CTAGGAGCT-----  
---TTGTTCCCTTGGGTTCTTGGGAGCA---GCAGGAAGCACTATG---GGCGCAGCGTCA---  
ATGACGCTGACGGTACAG---GCCAGACAA---TTACTG---TCTGGTATAGTGC AACAGCAAAAC---  
AACTTG---CTGAAG---GCTATTGAGGCGCAACAGCATATGTTGCAACTCACAGTCTGGGGCATC  
>JX863966  
TTCTACTGTAATCTAACACAACCTGTTTAATAGTACTTGGGAATGTAAGTGAAGGGTTAAATATCACAGAAAGTG  
TC-----  
-----  
AATGACACAGATATCATACTCCCATGCAGGCTAAAACAAATTATAAACATGTGGCAGAAAGTAGGAAGAGCAA  
TGTATGCCCCCTCCCATCCCAGGACTAATTAAGTGTACCTCAAAT---  
ATTACAGGGTTGTTAATAACAAGAGATGGTGGTAACGAGAGCAAG-----  
-----  
-----  
AACGGGACTGAGATCTTCAGACCTTGGGGAGGAGATATGAGGGACAATTGGAGAAGTGAATTATATAAATATA  
AAGTAGTAAAAATTGAACCATTA---GGAGTAGCACCCACCAAGGCAAAGAGAAGAGTGGTG-----  
-----CAGAGAGAGAAAAAGAGCA---TTAGGAGGATTAGGAGCT-----  
---ATGTTCCCTTGGGTTCTTGGGAGCA---GCAGGAAGCACTATG---GGCGCAGCGTCA---  
GTGACGCTGACGGTACAG---GCCAGACTA---TTATTG---TCTGGTATAGTGCAGCAGCAAAAC---  
AATTTG---CTGAAG---GCTATTGAGGCGCAACAACATCTGTTGCAACTCACAGTCTGGGGCATC  
>JX863971  
TTCTACTGTAACACAACGCCACTGTTTACTAATTCTTGGGAATGGTACCCATTGGGCTGATGAGTGAATTGGG  
AGAATAGT-----  
-----  
ACTAATGGAACAATCACACTCCAATGCAGAATAAAAACAAATTATAAATATGTGGCAGGAAGTAGGAAAAGCAA  
TGTATGCCCCCTCCCATCAGGGGACAAATTAAGTGTACATCAAAT---  
ATTACAGGGCTGCTATTAGTAAGAGATGGTGGTAATAATGATAGC-----  
-----  
-----  
AGCACCAACGAGACCTTCAGACCTGGAGGAGGAAATATGAAGGACAATTGGAGAAGTGAATTATATAAATATA  
AAGTAGTAAGAATTGAACCATTA---GGAGTAGCACCCACCAAGGCAAAGAGAAGAGTGGTG-----  
-----CAAAGAGAAAAAGAGCA---GTGGGA---ATAGGAGCT-----  
---CTGTTCCCTTGGGTTCTTGGGAGCA---GCAGGAAGCACTATG---GGCGCAGCGTCA---  
GTGACGCTGACGGTACAG---GCCAGACTA---TTATTG---TCTGGTATAGTGC AACAGCAAAAC---  
AATTTG---CTGAGG---GCTATTGAGGCGCAACAGCACATGTTGCAGCTCACAGTCTGGGGCATC  
>JX863972  
TTCTACTGTAATACAACACCACTGTTTAATAGTAGTTGGAGGAATTC AAATAATACTTGGGATAGTACTGAAG  
GATCAAAT-----  
-----AACACT-----  
GCAGGAAATGACACAATCATACTCCAATGCAGAATAAAAACAAATTATAAACATGTGGCAAGAAGTAGGAAAAG  
CAATATATGCCCCCTCCCATCAGAGGAAACATTACATGTTTATCAAAT---  
ATTACAGGACTGCTATTAACAAGAGATGGAGGCAAAAAGAGATAATAGCAGTAAC-----  
-----  
-----  
AATAATGATACTGAAATCTTCAGACCTGGAGGAGGGGATATGAGGGACAATTGGAGAAGTGAATTATATAAAT

ATAAAGTAGTAAAAATTGAGCCATTA---GGAGTAGCACCCACTAAGGCAAAGAGAAGAGTGGTG-----  
-----CAAAGAGAAAAAAGAGCA---GTGGGA---TTAGGAGCT---  
-----ATGTTTCCTTGGGTTCTTGGGAGCA---GCAGGAAGCACTATG---GGCGCAGCGTCA---  
CTGACGCTGACGGTACAG---GCCAGACAA---TTATTG---TCTGGTATAGTGCAACAGCAGAAC---  
AATTTG---CTGAGA---GCTATTGAGGCGCAACAGCATCTGTTGCAACTCACAGTCTGGGGCATC  
>JX863919  
TTCTACTGTAATTCATCACGACTGTTTGATAGTACTTGGTCACTGGAGGACACT-----  
-----  
-----  
GGAAATGACACAATCATGCTACCATGCAGAATAAGACAAATTGTAAACATGTGGCAGGGAGTAGGAAAAGCAA  
TGTATGCCCCCTCCCATCAGAGGACAAATTAAGTGTACATCAAAT---  
ATTACAGGGCTGATATTAACAAGAGATGGTGGTGCTGATATGAAT-----  
-----  
-----  
GAGACTTTCAGACCTGGAGGAGGAAATATGAAGGACAATTGGAGAAGTGAATTATATAAATATAAAGTAGTAA  
GAATTGAACCAATA---GGATTAGCACCCACCAAGGCACAGAGAAGAGTGGTG-----  
-----CAGAGAGAAAAAAGAGCA---ATAGGA---CTAGGAGCT-----  
GTGTTTCCTTGGGTTTCTAGGAGCA---GCAGGAAGCACTATG---GGCGCAGCGTCA---  
CTGACGCTGACGGTACAG---GCCAGACAA---TTATTG---TCTGGTATAGTGCAACAGCAGAAC---  
AATTTG---CTGAGG---GCTATTGAGGCGCAACAACATATGTTGCAACTCACAGTCTGGGGCATC  
>JX863983  
TTCTACTGTAATACAACACCACTATTTAACAGTAGTTGGCATAGTAATGGGACTAGAAATGATACTGGAGGAT  
CAAAC-----  
-----  
-----  
AGCACAGACCCAATCACGCTCCAATGCAGAATAAAACAAATTATAAACATGTGGCAGGAAGTAGGAAAAGCAA  
TGTATGCCCCCTCCCATCAGTGGGCAAATTAAGTGTTCATCAAAT---  
ATTACAGGGCTGATATTAACAAGAGATGGTGGTACTAACAATAAC-----  
-----  
-----  
ACTACCACCGAGACCTTCAGACCTGGAGGAGGAGATATGAGGGACAATTGGAGAAGTGAAGTATATAAATATA  
AAGTAGTAAAAATTGAACCATTA---GGAATAGCACCCACCAGGGCAAAGAGAAGAGTGGTG-----  
-----CAGAGAGAAAAAAGAGCA---GCA-----CTAGGAGCT-----  
---CTGTTTCCTTGGGTTCTTGGGAGCA---GCAGGAAGCACTATG---GGCGCAGCATCA---  
ATGACGCTGACGGTACAG---GCCAGACTA---CTATTG---TCTGGTATAGTGCAACAGCAGAAC---  
AATTTG---CTGAGA---GCTATTGAGGCGCAACAGCATCTGTTGCAACTCACAGTCTGGGGCATC  
>JX863984  
TTCTACTGTAATACAACACTACTGTTTAATTGGACTGAAGAGGAAAATAACACAAATAAA-----  
-----  
-----  
TATAATAAAACAATCAAGCTCCCATGCAGAATAAAACAAGTTATAAACATGTGGCAGGAAGTAGGAAAAGCAA  
TGTATGCCCCCTCCCATCAAAGGAGTAATTAAGTGTTCATCAAAT---  
ATTACAGGACTGTTATTAGTAAGAGATGGGGGTAATGGCAATAACACC-----  
-----  
-----  
AACCGCACCGAGACCTTCAGACCTGGAGGAGGAGATATGAGGGACAATTGGAGAAGTGAAGTATATAAATATA  
AAGTAGTAAAAATTGAACCAATA---GGAATAGCACCCACTAAGGCAAAGAGAAGAGTGGTG-----  
-----CAAAGAGAAAAAAGAGCAGTAGTGGGA---ATAGGAGCT-----  
---ATGTTTCCTTGGGTTCTTGGGAGCT---GCAGGAAGCACTATG---GGCGCAGCGTCA---  
TTGACGCTGACGGTACAG---GCCAGACTA---TTATTG---TCTGGTATAGTGCAACAGCAGAAC---  
AATTTG---CTGAGG---GCTATTGAGGCGCAACAACGTATGTTGCAACTCACAGTCTGGGGCATC  
>JX863985  
TTCTACTGTAATTCACACCACTGTTTACAAGTGCATAAAGTCT-----  
-----  
-----  
GGAGGAGTTAATATCACACTCCAATGCAAAATAAAACAAGTTATAAACAGGTGGCAGGAAGTAGGAAAAGCAA  
TGTATGCCCCCTCCCATCAGAGGACAAATTAGATGTTTCATCAAAT---  
ATTACAGGGCTGCTATTAATAAGGGATGGTGGTAATAATAGCAAG-----  
-----  
-----  
AGTGATCCCGAGATCTTCAGACCTGGAGGAGGAGATATGAGGGACAATTGGAGAAGTGAATTATATAAATATA

AAGTAGTGAAAATTGAACCATTA---GGAATAGCACCCACCAAGGCAAAGAGAAGAGTGGTG-----  
-----CAGAGAGAAAAAAGAGCA---GTGGGA---CTAGGAGCT-----  
---ATGTTCCCTTGGGTTCTTGGGAGCA---GCAGGAAGCACTATG---GGCGCAGCATCA---  
ATAACGCTGACGGTACAG---GCCAGACAA---TTATTG---TCTGGTATAGTGCAACAGCAGAGC---  
AATCTG---CTGAGA---GCTATTGAGGCGCAACAGCATCTGTTGCAACTCACAGTCTGGGGCATC  
>JX863986  
TTCTACTGTAATTCAACACCACTGTTTAATAGTACTTGGTATGGGAATGGTACTAGTGCTGAGAATGATAGTA  
CAAAT-----  
-----  
CCAAGTGAAAATATCACACTCCAATGTAGAATAAAACAAATTATAAACATGTGGCAGGAAGTAGGAAAAGCAA  
TGTATGCCCCCTCCCATCAGTGGACAAATTAGCTGTACATCAAAT---  
ATTACAGGGCTGTTATTAACAAGAGATGGTGGTAAGAACAAATAGCACC-----  
-----  
-----  
AACAAACACCGATGAGATCTTTAGACCTGGAGGAGGAAAATATGAAGGACAATTGGAGAAGTGAATTATATAAAT  
ATAAAGTAGTACAAATTGAACCAATA---GGAATAGCACCCACCAAGGCAAAAAGAAGAGTGGTG-----  
-----CAAAGAGAAAAAAGAGGA---GTGGGA---ATAGGAGCT---  
-----TTGTTCCCTTGGGTTCTTGGGAGCA---GCAGGAAGCACTATG---GGCGCAGCATCA---  
ATAACGCTGACGGTACAG---GCCAGACAA---TTATTG---TCTGGTATAGTGCAACAGCAAAAT---  
AATTTG---CTGAGA---GCTATTGAGGCGCAACAGCATCTGTTGCAACTCACAGTCTGGGGCATC  
>JF320059  
TTCTATTGCAATACAACAATGTTTAATAGTATTTGGCCTACTAATGATACTAGCAAAGGGACTAAT----  
-----  
-----  
ATCAAGGGAAATATCACACTCCCATGCAGAATAAGACAAATTGTAAACAGGTGGCAGGAAGTAGGAAAAGCAA  
TGTATGCCCCCTCCCATTAAGGACCAATTACATGTATATCAAAT---  
ATTACAGGGTTGCTATTAACAAGAGATGGTGGAGGTGCCAGTAAT-----  
-----  
-----  
GGGACAAATGAGACCTTCAGACCTGGAGGAGGAGATATGAGGGACAATTGGAGAAGTGAATTATATAAATACA  
AAGTGGTGAAAATTGAACCATTA---GGAATAGCACCCACCAGGGCAAGGAGAAGAGTGGTG-----  
-----CAGAGAGAAAAAAGAGCA---GTGGGA---TTTGGAGCT-----  
---TTGTTCCCTTGGGTTCTTGGGAGCA---GCAGGAAGCACTATG---GGCGCAGCTTCA---  
ATGACGCTGACGGTACAG---GCCAGACAA---TTACTG---TCTGGTATAGTGCAACAGCAGAAC---  
AATCTG---CTGAGG---GCTATTGAGGCGCAACAGCATCTGTTGCAACTCACAGTCTGGGGCATA  
>JF320361  
TTCTACTGTAACACAACACCACTATTTAATAGTACTTGAATAATACTGAAAGGTGGAATGGTACTGAAGGG-  
-----  
-----  
TTAAATGGTACCATCACACTCCAATGCAGAATAAAACAAATTATAAACCTGTGGCAGGAAGTAGGAAAAGCAA  
TGTATGCCCCCTCCCATCAGCGGACAAATTAGATGTTTCAATCAAAT---  
ATTACAGGGCTGCTGATAGTAAGAGATGGTGGTATTAATACTACTAAC-----  
-----  
-----  
GAGACGACCGAGATCTTCAGACCTGGAGGAGGAGACATGAGGGACAATTGGAGAAGTGAATTATATAAATATA  
AAGTAGTAAAAATTGAACCATTA---GGAGTAGCACCCACCAAGGCAAAGAGAAGAGTGGTG-----  
-----CAAAGAGAAAAAAGAGCA---GTGGGA---GTGGGA---GTGGGA---GTGGGA---GTGGGA---  
---ATGTTCCCTTGGGTTCTTGGGAGCA---GCAGGAAGCACTATG---GGCGCAGCTTCA---  
ACAGCGCTGACGGTACAG---GCCAGACAA---TTATTG---TCTGGTATAGTGCAACAGCAGAGC---  
AATCTG---CTGAGG---GCTATTGAGGCGCAACAGCATCTGTTTACAACCTCACAGTCTGGGAGCATC  
>JF320054  
TTCTACTGTAATACAACAACCACTGTTTAATAGTTCTTGGAGGGTTAATGAGACTTGAATAATACT-----  
-----  
-----  
GAAGAGGGCAATATCATACTCCCCTGCAGAATAAAACAAATTTATAAACATGTGGCAGGGAGTAGGAAAAGCTA  
TGTATGCCTCTCCCATTCAGGACGAATTAAATGTAGATCAGAT---  
ATTACAGGGCTGCTATTACTAAGAGATGGTGGACAAGAAAATAACACAGAG-----  
-----  
-----  
ACCAATAACACAGAGACCTTCAGACCTGGAGGAGGAGATATGAAAGACAATTGGAGAAGTGAATTATATAAAT

ATAAAGTAGTAAAAATTGAACCATTA---GGGATAGCACCCACTAAGGCAAAGAGAAGAGTGGTG-----  
 -----CAGAGAGAGAAAAAGAGGA---GCGGGA---ATAGGAGCT---  
 -----CTGTTTCCTTGGGTTTCTGGGAGCA---GCAGGAAGCACTATG---GGCGCAGCGTCA---  
 ATGACGCTGACGGTACAG---GCCAGACAA---TTATTG---TCTGGTATAGTGCAACAGCAGAAT---  
 AATCTG---CTGAAG---GCTATTGAGGCGCAACAGCATATGTTGCAACTCACAGTCTGGGGCATC  
 >EU577917  
 TTCTACTGTGACACAACAAAACCTGTTTGATAGTATTTGGGAGTTTACTAAAGGGAATATTACGAATATTACTG  
 CAAGATCAAAT-----  
 -----AGCACT-----  
 GAAAGAAATAACACAATCACACTCCAATGTAGAATAAAACAAATTATAAATATGTGGCAGGAAGTAGGAAAAG  
 CAATGTATGCCCCCTCCCATTAGAGGAGATATTAGCTGTTTCATCAAAA---  
 ATTACAGGGCTGCTATTAACAAGAGATGGTGGTAGTAACAACGATAGCGAG-----  
 -----  
 -----  
 ACCAACACCACTGAGGTCTTCAGACCTGGAGGAGGAGATATGAGGGACAATTGGAGAAGTGAATTATATAAAT  
 ATAAGGTAGTAAGAATTGAACCATTA---GGAGTAGCACCCACCAAGGCAAAGAGAAGAGTGGTG-----  
 -----CAGAGAGAAAAAAGAGCA---TTGGGA---TTCGGAGCG---  
 -----TTGTTTCCTTGGGTTCTTGGGAGCA---GCAGGAAGCACTATG---GGCGCAGCGTCG---  
 GTGACGCTGACGGTACAG---GCCAGACAA---TTATTG---TCTGGTATAGTGCAACAGCAAAAC---  
 AACTTG---CTGAGA---GCTATTGAGGCGCAACAGCATCTGTTGCAACTCACCGTCTGGGGCATC  
 >EU578004  
 TTCTACTGTAATACATCAGGACTGTTTAATAGTACTTGGAAATGTTAATAAAAAATGAACTAATAGCACA---  
 -----  
 -----  
 CACAATACCAATATCACACTCCCATGTAGAATAAAACAAATTATAAACATGTGGCAGGAAGTAGGAAAAGCAA  
 TGTATGCCCCCTCCCATCAGAGGACAAATTAGATGTGTATCAAAT---  
 ATTACAGGATTGCTATTAACAAGAGATGGTGGTAATAGTAATGGCAATAGT-----  
 -----  
 -----  
 ACTGAAAATGAGACTGAGATCTTCAGACCTGGAGGAGGAGATATGAGGGACAATTGGAGAAGTGAATTATATA  
 AATATAAAGTAGTAAAAATTGAACCATTA---GGAATAGCACCCACCAAGGCAAAGAGAAGAGTGGTG-----  
 -----CAAAGAGAAAAAAGAGTA---GTGGGA---  
 CTAGGAGCT-----CTGTTTCCTTGGGTTCTTGGGAGCA---GCAGGAAGCACTATG---  
 GGCGCAGCGTCA---ATAACGCTGACGGTACAG---GCCAGAATA---TTACTG---  
 TCTGGTATAGTGCAACAGCAGAAC---AACCTG---CTGAAG---  
 GCTATTGAGGCGCAACAGCGTATGTTGCAACTCACAGTCTGGGGCATT  
 >KM258984  
 TTCTATTGTAATACAACAAAACCTGTTCAAAAATAGTACTTGG-----  
 -----  
 -----AAT---  
 GAGACTGAAGGGAATATCACAATCCCATGCAGAATAAAGCAAATTATAAACATGTGGCAGGAAGTAGGAAAAG  
 CAATGTATGCCCCCTCCCATTAGAGGACAAATCAGATGTTTCATCAAAT---  
 ATTACAGGGCTGATATTAACAAGAGATGGTGGG-----  
 -----  
 -----  
 ACTAATGGGACTAAT---  
 GAGACAGAAACCTTCAGACCGGGAGGAGGAAATATGAAGGACAATTGGAGAAGTGAATTATATAAATATAAAG  
 TAGTAAAAATTGAACCATTA---GGAGTAGCACCCACCAGGGCAAAGAGAAGAGTGGTG-----  
 -----CAAAGAGAAAAAAGAGCA---GTGGGA---CTAGGAGCC-----  
 TTGTTTCCTTGGGTTCTTGGGAGCA---GCAGGAAGCACTATG---GGCGCAGCGTCG---  
 ATAACGCTGACGGTACAG---GCCAGAATA---TTATTG---TCTGGTATAGTGCAACAGCAGAAC---  
 AACTTG---CTGAAA---GCTATTGAGGCGCAACAGCATATGTTGAAACTCACAGTCTGGGGCATC  
 >KM259000  
 TTCTACTGTGATACAACAAATCTGTTTAATAGTACTTGGTTTCGGAATGATACTGGAAAGTCACAGAATAATA  
 CTATGGAGCCA---TGGACTTGGAATAATGAGACAGGGACATGGGATGATAAAAAGTTA---  
 TGGACATGGACTAATATT-----  
 AATGATACAGAACACATCACACTCCAATGTAGAATAAAACAAATTATAAACAGATGGCAGGAAGTAGGAAAAG  
 CAATGTATGCCCCCTCCCATCAGCGGACTAATTAATTGTTTCATCAAAT---  
 ATTACAGGGCTAATATTAGCAAGAGATGGT-----  
 -----  
 -----  
 -----

ATTGACAATAAACTGAGACCTTCAGACCTATAGGAGGAAAATATGAAGGACAATTGGAGAAGTGAATTATATA  
 AATATAAAGTAGTAAAAATCGAACCATTA--GGAATAGCACCCACCAGGGCAAAGAGAAGAGTGGTG-----  
 -----CAGAGAGAAAAAAGATCA---GTGACG---  
 CTGGGAGCT-----ATGTTCCCTTGGGTTCTTGGGAGCA---GCAGGAAGCACTATG---  
 GGCGCAGCGTCG---CTGACGCTGACGGTACAG---GCCAGACTA---TTATTG---  
 TCTGGTATAGTGCAACAGCAGAAC---AATCTG---CTGAGG---  
 GCTATTGAGGCGCAACAGCATATGTTGCAACTCACAGTCTGGGGCATC  
 >KM259100  
 TTCTACTGTAATTCAACACAACCTGTTTAATAATACTTGGGATGGTACTAAGTGAATGAT-----  
 -----ACT---  
 GCTTGGAATGTTACTGCAGTG-----  
 TCAAAAAACGAAAGCATCACACTCCAATGCAAAATAAAACAAATTATAAACATGTGGCAGAAAGTAGGAAAAG  
 CAATGTATGCCCTCCCATTAGGGGAACAATTAGATGTTTCATCAAAC---  
 ATTACAGGACTGATATTAACAAGAGATGGTGGTATTAAG-----  
 -----  
 AACGAATCCGAGAATAACGGGTCC-----  
 AAGACCGAGATCTTCAGACCTGGAGGAGGAGATATGAGGGACAATTGGAGAAGTGAATTATATAAATATAAAG  
 TAGTAAAAATTGAACCATTA--GGAGTAGCACACACCAAGGCAAAGAGAAGAGTGGTG-----  
 -----CAGAGAGAAAAAAGAGCA--GTGGGA--ATAGGAGCT-----  
 GTGTTCCCTTGGGTTCTTGGGAGCA---GCAGGAAGCACTATG---GGCGCAGCATCA---  
 ATGACGCTGACGGTACAG---GCCAGGCTA---TTATTG---TCTGGTATAGTGCAACAGCAGAAC---  
 AATTTG---CTGAGG---GCTATTGAGGCGCAACAGCATCTGTTGCAACTCACAGTCTGGGGCATC  
 >DQ410616  
 TTCTACTGCAGTACAACAAGACTGTTCAATAGTACTTGGTATGGGAATGGTACTGGCACAATCGAGAAT----  
 -----  
 -----  
 GGTACTGACACAATCATACTCCCATGCCGAATAAAACAAATTATAAACATGTGGCAGGAAGTAGGAAAAGCAA  
 TGTATGCCCCCTCCCATCAGGGGAAAAATTATGTGTTTCATCAAAT---  
 ATTACAGGGCTGCTATTAACAAGAGATGGCGGGAATAACAATAACGAAACG-----  
 -----  
 -----  
 AACAACTGAGATCTTCAGACCTGGAGGAGGAGATATGAGGGACAATTGGGGGGAAAGTGAATTATATAAAT  
 AATAAGTAGTAAAAATTGAACCATTA--GGAATAGCACCCACCAAGGCAAAGAGAAGAGTGGTG-----  
 -----CAGAGAGAAAAAAGAGCA--GTGGGA--ATAGGAGCT---  
 -----GTGTTCCCTTGGGTTCTTGGGAGCA--GCAGGAAGCACTATG---GGCGCAGCGTCA---  
 GTGACGCTGACGGTACAG---GCCAGACTG---TTATTG---TCTGGTATAGTGCAACAGCAAAAC---  
 AATTTG---CTGAGG---GCTATTGAGGCGCAACAGCATCTGTTGCAACTCACAGTCTGGGGCATC  
 >DQ410553  
 TTCTACTGTAATACATCCCAACTGTTTAATAGTACTTGAATCCTAATGGTACTTGGGAAGGGACGAAT----  
 -----  
 -----  
 GTTACAGAAAATACCACACTCCCATGTAGAATAAAACAAATTATAAACATGTGGCAGGAAGTAGGAAAAGCAA  
 TGTACGCCCTCCCATCAGTGGAATAATTAAATGTACATCAAAT---  
 ATTACAGGGCTACTGTTAAACAAGAGATGGTAGTGGTGGTGGTACTACTAAC-----  
 -----  
 -----  
 AACACCACCGAGATCTTCAGACCATTAGGCGGAGATATGAGGGACAATTGGAGAAGTGAATTATATAAATATA  
 AAGTAGTAAAAATTGAACCATTA--GGAGTAGCACCCACCAGGGCAAAGAGAAGAGTGGTG-----  
 -----CAGAGAGAAAAAAGAGCA--GTGGGA--CTAGGAGCT-----  
 ---GTGTTCCCTTGGGTTCTTGGGAGCA---GCAGGAAGCACTATG---GGCGCAGCGTCA---  
 GTGGCGCTGACGGTACAG---GCCAGACAA---TTGTTG---TCTGGTATAGTGCAACAGCAGAAC---  
 AATCTG---CTGAGG---GCTATTGAGGCGCAACAACATCTGTTGCAACTCACAGTCTGGGGCATC  
 >DQ410585  
 TTCTACTGCAATACGACATCACTGTTTAATAGTACTTGGGATAATAGTACTTGGGGTAATACTATTGAAGGGT  
 CAAAT-----  
 -----  
 AACACAAACACAAATATCACACTCCTATGTAGAATAAAACAGATTATAAACATGTGGCAGGGAGTAGGAAAAG  
 CAATGTATGCCCTCCCGTCAGGGGACCAATTAAGTGACATCAATT---  
 ATTACAGGGCTGTTGTTAAACAAGGGATGGTGGTAGTAACAACCCT-----  
 -----

-----  
AATGAGACTTTTCAGACCTGGAGGAGGAGAGATGAGGGACAATTGGAGAAGTGAATTTAATAAATATAAAGTAG  
TAAAAATTGAACCCAATGGGA---GGGGTAGCACCCCCCCCCGGCAAAGAGGAGAGTGGTG-----  
-----CAGAGAGAGAAAAGAGCA---GTGGGAACGCTGGGAGCT-----  
ATGTTTCCTTGGGTTCTTGGGAGCA---GCAGGAAGCACTATG---GGCGCAGCGTCA---  
GTGACGTTGACGGTACAG---GCCAGACAG---TTATTG---TCTGGTATAGTGCAACAGCAGAAC---  
AATCTG---CTGAGG---GCTATTGAGGCGCAACAACATATATTGCAACTCACAGTCTGGGGCATC  
>DQ410596  
TTCTACTGTAATACAACACAGCTGTTTAACAGTACTTGGCCGAGTAATAGTACTGATAATAGTACTGGTGAAG  
GG-----  
-----  
TCAAAATAGCACTATCACACTTCCATGCAGAATAAAACAAATTATAAACATGTGGCAACAAGTAGGAAAAGCAA  
TATATAACCCTCCCATTTCGAGGACGAATTAAGTGTTCATCAAAAT---  
ATTACAGGGTTGCTACCCGTAAGGGATGGGGGGAGTGCCAATAGC-----  
-----  
-----  
AGTAGTGAGACCTTCAAACCTGGGGGAGGAGATATGAGGGACAATGGGAGAAGTGAATTTATATAAATATAAAG  
TAGTAAAAATTGAACCATTAGGG---GTAGCCCCCCCCCAAGGCAAAGAGAAGAGTGGTG-----  
-----CAGAGAGAAAAAAGAGCAGGGGGAACAATAGGAGTTTTT-----  
---ATGTTTCCTTGGGTTCTTGGGAGCA---GCAGGAAGCACTATG---GGCGCAGCGTCA---  
GTGACGCTGACGGTACAG---GCCAGACAA---TTATTT---TTTGGTATAGTGCAACAGCAGAAC---  
AATTTG---CTGAAA---GCCATTGAGGCACAACAACATATGTTGCAACTCACAGTCTGGGGCATC  
>KX156472  
TTCTACTGTAATACAACAGTACTGTTCAATAGTACTTGAATGGTACTGAAGGATCAATTGCTGGA-----  
-----  
-----  
GAAAAATGACACAATCACACTCCCATGCAGAATAAAACAAATTATAAACTTGTGGCAGGAAGTAGGAAAAGCAA  
TGTATGCCCCCTCCCATCAAAGGACTAATTAGATGTTTCATCAAAAT---  
ATTACAGGACTGTTATTAACAAGAGATGGTGGTGACCCAAATAGC-----  
-----  
-----  
ACTACTGAGACATTTCAGACCTGGAGGAGGAGATATGAGGGACAATTGGAGAAGTGAATTTATATAAATATAAAG  
TAGTAAAAATTGAACCATTA---GGAATAGCACCCACCAAGGCAAAGAGAAGAGTGGTG-----  
-----CAGAGAGAAAAAAGAGCA---GTGGGA---ATAGGAGCT-----  
GTGTTCCCTCGGGTTCTTGGGAGCA---GCAGGAAGCACTATG---GGCGCAGCGGCA---  
GTGACGCTGACGGTACAG---GCCAGACAA---TTATTG---TCTGGTATAGTGCAACAGCAGAAC---  
AATTTG---CTGAGA---GCTATTGAGGCGCAACAGCATATGTTGCAACTCACAGTCTGGGGCATC  
>KX156483  
TTCTACTGTAATTTCAGCACAACTGTTTAATAGTACTTGAATGGTACTGAAGGGATAAATACCACT-----  
-----  
-----  
GGCAATGAACTATCATACTCCCATGCAGAATAAAACAAATTATAAATATGTGGCAAGAAGTAGGAAAAGCAA  
TGTATGCCCCCTCCCATCAGAGGACAAATTAGATGTTTCATCAAAAT---  
ATTACAGGGCTGCTATTAAACAAGAGATGGTGGTAATAGCAATAGC-----  
-----  
-----  
ACAATCGAGACCTTCAGACCTGGGGGAGGAAATATGAAGGACAATTGGAGAAGTGAATTTATATAAATATAAAG  
TAGTAAAAATTGAGCCATTA---GGAATAGCACCCACCAAGGCAAAGAGAAGAGTGGTG-----  
-----CAGAGAGAAAAAAGAGCA---ATAGCA-----GGAGCG-----  
TTGTTTCCTTGGGTTCTTGGGAGCA---GCAGGAAGCACTATG---GGCGCAGCATCA---  
GTGACGCTGACGGTACAG---GCCAGACAA---TTATTG---TCTGGTATAGTGCAACAGCAGAAC---  
AATCTG---CTAAGG---GCTATTGAGGCGCAACAGCATATGTTGCAACTCACAGTCTGGGGCATC  
>KX156523  
TTCTACTGTAATTCAACACAACCTGTTTGATAGCACTTGAATATTACTTGGGATGGTAATAGTACTTGAATA  
GTACTGAG-----  
-----  
GAAGATAGAAATATCACACTCCCATGCAGAATAAAACAAATCATAAACATGTGGCAGGAAGTAGGAAAAGCGA  
TGTATGCCCCCTCCCATCAGTGACAAATTAGATGTTTCATCAAAAT---  
ATTACAGGGCTGCTAATAACAAGAGATGGTGGTAAGAGTAATGACACA-----  
-----

-----  
 AACACGAGACTGAGATCTTTAGACCTGGAGGAGGAAATATGAAGGACAATTGGAGAAGTGAATTATATAAAAT  
 ATAAAGTAGTAAGAATTGAACCATTA---GGAGTAGCACCCACCAAGGCAAAGAGAAGAGTGGTG-----  
 -----CAGAGAGAAAAAAGAGCA---GTGGGA---TTAGGAGCT---  
 -----TTGTTTCCTTGGGTTCTTGGGAGCA---GCAGGAAGCACTATG---GGCGCAGCATCA---  
 CTAACGCTGACGGTACAG---GCCAGACAA---TTATTG---TCTGGTATAGTGCAACAGCAGAAC---  
 AATTTG---CTGAGG---GCTATTGAGGCGCAACAGCATCTGTTGCAACTCACAGTCTGGGGCATC  
 >KX156374  
 TTCTACTGTAATACAACGCCATTGTTTAATAGTACTTCAACGCAGCTATTTGGGAATACTACTGAAGGG----  
 -----  
 -----  
 TCAAAATGCCATTATCAAACCTCCAATGCAGAATAAAACAAATTATAAACAGGTGGCAGGAAGTAGGAAAAGCAA  
 TGTATGCCCCCTCCCATCAAAGGACCAATTAGCTGTTTGTCAAAT---  
 ATTACAGGGCTGCTACTACTAAGGGACGGTGGTACAAAGAATGAGTCCAAT-----  
 -----  
 -----  
 GGTACAGGGTCCGAAATCTTTAGACCTGGAGGAGGAGATATGAGAGACAATTGGAGAAGTGAATTATATAAAAT  
 ACAAAGTAGTAAAAATTGAGCCATTA---GGAGTAGCACCTACCAAGGCAAAAAGAAGAGTGGTG-----  
 -----CAAAGAGAAAAAAGAGCA---GTGGGAACGATAGGAGCT---  
 -----ATGTTTCCTTGGATTCTTGGGAGCA---GCAGGAAGCACTATG---GGCGCAGCGTCA---  
 GTGACGCTGACGGTACAG---GCCAGACAA---TTATTG---TCTGGTATAGTGCAACAGCAGAAC---  
 AATTTG---CTGAGG---GCTATTGATGCGCAACAGCATATGTTGCAACTCACAGTCTGGGGCATC  
 >FJ469703  
 TTCTACTGTAATACAACACCACTGTTTAATAGTACTTGGACTTGGGAATAGTACTAGAATGTCTAGTACTGAAA  
 AT-----  
 -----  
 ATTACTGAGGGAAATATCACACTCCAATGCAGGATAAAACAAATTGTAAACATGTGGCAGGAAGTAGGAAAAG  
 CAATGTATGCCCCCTCCCATCAAAGGACAGATTAGATGTTTCATCAAAT---  
 ATTACAGGTCTAATATTAACAAGAGATGGTGGTAACATCAGCACT-----  
 -----  
 -----  
 AACACGAGACCTTCAGACCTGCAGGAGGAGATATGAGGGACAATTGGAGAAGTGAATTATATAAAATATAAAG  
 TAGTAAAAATTGAACCATTA---GGGGTAGCACCCACCAAGGCAAAGAGAAGAGTGGTG-----  
 -----CAAAGAGAAAAAAGAGCA---ATAGGA---ATAGGAGCT-----  
 GTGTTTCCTTGGGTTCTTGGGAGCA---GCAGGAAGCACTATG---GGCGCAGCGTCA---  
 GTAACGCTGACGGTACAG---GCCAGGCAA---TTATTG---TCTGGTATAGTGCAACAGCAGAAC---  
 AATCTG---CTGAGA---GCTATTGAGGCGCAACAGCATCTGTTGCAACTCACAGTCTGGGGCATC  
 >FJ469706  
 TTCTACTGTAATACATCAAACCTGTTTAATAGCACCTGGGAATGGAATAATAGTACCAAAGATTGGAATAATA  
 CTGAAATGTCA-----  
 -----AATAACACT-----  
 GAAGGAAATAGAACTATCACTCTCCAATGCAGAATAAAACAAATTGTAAATATGTGGCAGGAAGTAGGAAAAG  
 CAATGTATGCCCCCTCCCATCAGTGGACAAATTAAGTGTTCATCAAAT---  
 ATTACCGGTTTGCTCTTAACAAGAGATGGTGGTATTAGCAACAGC-----  
 -----  
 -----  
 AGCACCACCGAGATCTTCAGACTTGGAGGAGGAGATATGAGGGATAATTGGAGAAGTGAATTATACAGATATA  
 AAGTAGTAAAAATTGAACCATTA---GGAATAGCACCCACCAAGGCAAGGAGAAGAGTGGTG-----  
 -----CAAAGAGAAAAAAGAGCA---GTGGGA---TTAGGAGCT-----  
 ---ATGTTTCCTTGGGTTCTTGGGAGCA---GCAGGAAGCACTATG---GGCGCAGCATCA---  
 ATGATGCTGACGGTACAG---GCCAGACAA---TTATTG---TCTGGTATAGTGCAACAGCAGAGC---  
 AATCTG---CTGCAG---GCTATTGAGGCACAACAGCATCTGTTGAAACTCACAGTCTGGGGCATT  
 >FJ469718  
 TTCTACTGTAATTCAACACAACCTGTTTAATAGTACCTGGACTAATAGTACTTGGTATAATAGTACTTGAATA  
 AAACT-----  
 -----AAA---  
 GAGTCAAATGACACAATCATACTCCCATGCAGAATAAAACAAATTATAAACATGTGGCAGGAAGTAGGAAGAG  
 CAATGTATGCCAATCCCATCGCAGGACAAATTAGATGTTTCATCAAAT---  
 ATCACAGGGTTGCTACTAACAAGAGATGGTGGTAATAACACAAAT-----  
 -----

-----  
 GGGACCACCGAGATCTTCAGACCGGGAGGAGGAAATATGAAGGACAATTGGAGAAGTGAGCTATATAAATATA  
 AGGTAGTAGAAATTAAACCATTA---GGAGTAGCACCCACCAAGGCCAAAAGAAGAGTGGTG-----  
 -----CAGAGAGAAAAAAGAGCA---GTAACA---CTAGGAGCT-----  
 ---TTGTTCCCTTGGGTTCTTGAGTGCA---GCAGGAAGCACTATG---GGCGCAGCGTCA---  
 ATAACGCTGACGGTACAG---GCCAGACAA---ATGTTG---TCTGGTATAGTGCAACAGCAAACC---  
 AACTTG---CTGAGG---GCTATTGAGGCGCAGCAGCATCTGCTGCAACTCACAGTCTGGGGCATC  
 >DQ410115  
 TTCTACTGTAATTCAACACAACCTGTTTAATAGTACTTGGAATAGTAGTACTTGGAATAGTACTAGGTCAGATA  
 ATACT-----  
 -----  
 ACAGAAAATGGCACAATCACACTCCCATGCAGAATAAAACAAATTATAAACATGTGGCAGAAAGTAGGAAAAG  
 CAATGTATGCCCTCCCATCAGAGGACAAATTAGATGTTTCATCAAAT---  
 ATCACAGGGCTGCTATTAACAAGAGATGGTGGTAACGAGAACGAG-----  
 -----  
 -----  
 ACTGAGAGCTTCAGACCTGGAGGAGGAGATATGAGGGACAATTGGAGAAGTGAATTATATAAATATAAAGTAG  
 TAAAAATTGAACCATTA---GGAGTAGCACCCACCAGAGCAAAGAGAAGAGTGGTG-----  
 -----CAGAGAGAAAAAAGAGCA---GTGGGA---ATAGGAGCT-----  
 GTGTTCCCTTGGGTTCTTGGGAGCA---GCAGGAAGCACTATG---GGCGCAGCGTCA---  
 ATGACGCTGACGGTACAG---GCCAGACTA---TTATTG---TCTGGTATAGTGCAACAGCAGAAC---  
 AATTTG---CTGAGG---GCTATTGAAGCGCAACAGCATCTGTTGCAACTCACAGTCTGGGGCATC  
 >DQ886037  
 TTCTACTGTAATTCATCACAACTGTTTAATAGCACTTGGCATACGAATAAAACTAAGGGGTAAATGACACTG  
 GA-----  
 -----  
 ATTAATGGCACAATCATACTCCCATGCAGAATAAAACAAATTGCTATCTTGCGGTTGGAAGTAGGTAAAGCAA  
 TGTATGCCCCCCCCCAATTAAACAACAAGATGTGAGTCATAT---  
 ATTACAGGGCTGCTGTTAACAAGAGATGGTGGTAATAACAATAAT-----  
 -----  
 -----  
 ACCGAAAACGAGATATTCAGACCTGCAGGAGGAAATATGAAGGACAATTGGAGAAGTGAATTATATAAATACA  
 AAGTAGTACAAATTGAACCATTA---GGAATAGCACCCACCAAGGCCAAAGAGAAGAGTGGTG-----  
 -----CAGAGAGAAAAAAGAGCA---GTGGGA---CTAGGAGCA-----  
 ---CTGTTCCCTTGGGTTCTTGGGAGCA---GCAGGAAGCACTATG---GGCGCAGCGTCG---  
 GTGACGCTGACGGTACAG---GCCAGACAA---TTATTG---TCTGGTATAGTGCAACAGCAGAGC---  
 AATTTG---CTGAGA---GCTATTGAGGCGCAACAGCATCTGTTGCAACTCACAGTCTGGGGCATC  
 >FJ653236  
 TTCTACTGTAGTACAACAAACCTGTTTAATAGTACTTGGAATAGTACTAGGAATGATAGAGGG-----  
 -----  
 -----  
 TTCAATGGCACTATCACACTCCCATGCAGAATAAAACAAATTATAAACATGTGGCAGGAAGTAGGAAAAGCGA  
 TGTATGCCCTCCCATCAAAGGACAAATTAGATGTTTCATCAAAT---  
 ATTACAGGGCTGCTATTAACAAGAGATGGGGGTACTAATAATAATAATGGT-----  
 -----  
 -----  
 ACTGAGAACGGGACAGAGATCTTTAGACCTGGAGGAGGAAATATGAAGGACAATTGGAGAAGTGAATTATATA  
 AATATAAAGTAGTAAAAATTGAACCAGTA---GGAATAGCACCCACCAAGGCCAAAGAGAAGAGTGGTG-----  
 -----CAGAGAGAAAAAAGAGCA---GTGGGA---  
 ATAGGAGCT-----GTGTTCCCTTGGGTTCTTGGGAGCA---GCAGGAAGCACTATG---  
 GGCGCAGCGTCA---GTGACGCTGACGGTACAA---GCCAGACAA---TTATTG---  
 TCTGGTATAGTGCAACAGCAAAGC---AAGTTG---CTGAGG---  
 GCTATTGAGGCGCAACAGCATCTGTTGCAACTCACAGTCTGGGGCATC  
 >FJ653196  
 TTCTACTGTAATACAACAAAACCTGTTTAACAGTACTTGGAATAGTACTGAAGGGTCAGTGGATGACACAATTG  
 AAGGG-----  
 -----  
 ACAGGGAATGACACAATTACACTCCCATGCAGAATAAAACAAATTATAAACATGTGGCAGGAAGTAGGAAAAG  
 CAATGTATGCCCTCCCATCGAAGGACCAATTAAATGCACATCAAAT---  
 ATTACAGGGCTGCTACTAACAAGAGATGGTGGTAATGACACCACT-----

-----  
-----  
AATAATGAGACTTTTGTAGACCTGGAGGAGGAGATATGAGGGACAATTGGAGAAGTGAACCTATATAAATATAAAG  
TAGTAAAACTTGAACCATTA---GGAATAGCACCCACCAAGGCAAAGAGAAGAGTGGTG-----  
-----CAGAGAGAAAAAAGAGCA--GTAACA--ATAGGAGCC-----  
ATGTTTCCTTGGGTTCTTGGGAGCA--GCAGGAAGCACTATG--GGCGCAGCGTCA---  
GTGACGCTGACGGTACAG---GCCAGACTA--TTATTG---TCTGGTATAGTGACAGCAGCAGAAC---  
AATCTG--CTGAGG---GCTATTGAGGCGCAACAGCATCTGTTGCAACTCACAGTCTGGGGCATC  
>FJ653597  
TTCTACTGTGATACAACACAGCTGTTTAAACAGCACTTGGCAGTCTAATGGTACTAGGAATGATACTGAGGAGT  
CA-----  
-----  
GGGTCAAATGACGCTATCACACTCCAATGCAGAATAAAAACAAATTATAAACAGGTGGCAGGAAGTAGGAAAAAG  
CAATGTATGCCCCCTCCCATCAGTGGACACATCAACTGCTCATCAAAT---  
ATTACAGGGATACTATTAACAAGAGATGGTGGTAACGAGAGCAGT-----  
-----  
-----  
AGCACCGAGACCTTCAGACCTGCAGGAGGAGATATGAGGGACAATTGGAGAAATGAATTATATAAATATAAAG  
TAGTAAAAATAGAGCCATTA---GGAATAGCACCCACCAAGGCAAAGAGAAGAGTGGTG-----  
-----CAGAGAGAAAAAAGAGCA--GTGACG--CTGGGAGCT-----  
ATGTTTCCTTGGGTTCTTGGGAGCA--GCAGGAAGCACTATG--GGCGCAGCGTCG---  
ATGACGCTGACGGTACAG---GCCAGACAA--TTATTG---TCTGGTATAGTGCAACAGCAGAGT---  
AATTTG--CTGAAG---GCTATTGAGGCGCAACAACATCTGTTGCAACTCACAGTCTGGGGCATC  
>FJ653474  
TTCTACTGTAATACAACACCACTGTTTAAATAGTACTTGGAAATGGTAATGAAACTTGGAAATAGCACTGAAAAGT  
CA-----  
-----  
GATAACACCACCATCACACTCCAATGCAGAATAAAAACAAATTATAAACATGTGGCAGGAAGTAGGAAAAGCAA  
TGTATGCCCCCTCCCATCGCGGGACCAATTAGATGTTTCATCAAAT---  
ATTACAGGACTGCTATTAATAAGAGATGGTGGTAGTAATGGTAATGAG-----  
-----  
-----  
ACCAATAAACTGAGATTTTGTAGACCTGGAGGAGGAAATATGAAGGATAATTGGAGAAGTGAGTTATATAAAT  
ATAAAGTAGTAAAAATTGAACCATTA---GGAATAGCACCCACCAAGGCAAAGAGAAGAGTGGTG-----  
-----CAGAGAGAAAAAAGAGCA--GTGGGA--CTAGGAGCT---  
-----TTGTTTCCTTGGGTTCTTGGGAGCA--GCAGGAAGCACTATG--GGCGCAGCGTCA---  
GTGACGCTGACGGTACAG---GCCAGGCGA--TTATTG---TCTGGTATAGTGCAACAGCAGAAC---  
AACTTG--CTGAGG---GCTATTGAGGCGCAACAGCATCTGTTGCAACTCACGGTCTGGGGCATC  
>FJ653390  
TTCTACTGTAATACAACAAAGCTGTTTAGCAGTACTTGGAGTGGTAATAGTACTTTGAATGATACTGAAAGGT  
CAGATACT-----  
-----GAA---  
AGGTCAGATATCAATATCACACTCCCATGTAGAATAAGGCAAATTGTAAACAGATGGCAGGAAGTAGGGAAAG  
CAATGTATGCCCCCTCCCATCAGAGGACAAATTAGCTGTTTCATCAAAT---  
ATTACAGGGCTGCTATTAACAAGAGATGGTGGTGATATTAGTGACAGT-----  
-----  
-----  
AATGGGACCGAGACCTTCAGACCTGGAGGAGGAGATATGAGAGACAATTGGAGAAGTGAATTATATAAATATA  
AAGTAATAAAAATTGAACCATTA---GGAGTAGCACCCACCAAGGCAAAGAGAAGAGTGGTG-----  
-----CAGAGAGAAAAAAGAGCA--GTGGGA--TTGGGAGCT-----  
---GTGTTTCATTGGGTTCTTGGGAGCA--GCAGGAAGCACTATG--GGCGCAGCGTCA---  
GTGACGCTGACGGTACAG---GCTAGACAA--TTATTG---TCTGGTATAGTGCAACAGCAGAAC---  
AATCTG--CTGAGA---GCTATTGAGGCGCAACAACATTTGTTGCAACTCACAGTCTGGGGCATT  
>FJ653478  
TTCTACTGTAATACAACAGCACTGTTTAAATGGCACTTGGTATAATAGTACTTGGAACTACTTGGAACTACTG  
CAAAT-----  
-----GGC---  
ACCGCAGAGTCAAATATCACACTCCCCTGCAGAATAAAAACAAATTATAAACATGTGGCAGGGAGTAGGAAGAG  
CAATGTATGCTCCTCCTATCAGAGGACAAATTAAATGCTCATCAAAT---  
ATTACAGGGCTACTATTAACAAGAGATGGTGGGGATGGTAATGATACC-----

-----  
-----  
AATAGACCCGAGACCTTCAGACCTGGAGGAGGAGATATGAGGGACAATTGGAGAAGTGAATTATATAAAATATA  
AAGTAGTAAGCATTGAACCATTA---GGAGTAGCACCCACCAAGGCAAAGAGAAGAGTGGTG-----  
-----CAGAGAGAAAAAAGAGCA--GTGGGA--ATGGGAGCT-----  
---ATGATCCTTGGGTTCTTGGGAGCA--GCAGGAAGCACTATG--GGCGCAGCGTCA---  
ATAACGCTGACGGTACAG---GCCAGACAA---TTACTG---TCTGGTATAGTGCAACAGCAGAAT---  
AATTTG---CTGAGG---GCTATTGATGCGCAACAGCATATGTTGCAACTCACCGTCTGGGGCATC  
>FJ653547  
TTCTACTGTAATACATCAGGACTGTTTAATAACAGGACCGGAATAGTACTGAAGGA-----  
-----  
-----  
GTAAATACCACCATCACACTCCCATGCAAAATAAAACAAATTGTAAACATGTGGCAGGAAGTAGGAAAGGCAA  
TGTATGCCCCCTCCCATCAGAGGACAAATTAAGTGTACATCAAAT---  
ATTACAGGGATACTATTAACAAGAGATGGTGGTAACACAAATATCACC-----  
-----  
-----  
ACCACCACCGAGACCTTCAGACTTGGAGGAGGAGATATGAGGGACAATTGGAGAAATGAGTTATATAAAATATA  
AAGTAGTAAAAATTGAACCATTA---GGAGTAGCACCCACCAGGGCAAAGAGAAGAGTGGTG-----  
-----CAAAGAGAAAAAAGAGCA--GTGGGA--CTAGGAGCT-----  
---GTGCTCATTGGGTTCTTGGGAGCA--GCAGGAAGCACTATG--GGCGCAGCGTCA---  
ATAACGCTGACGGTACAG---GCCAGACAA---TTATTG---TCTGGTATAGTGCAACAGCAGAAC---  
AATCTG---CTGAGA---GCTATTGAGGCGCAACAGCATATGTTGCAACTCACAGTCTGGGGCATC  
>HQ217476  
TTCTACTGTGATACAACACAGCTGTTTAATAGTACTTGGGTAAATGGTAATTGGGTAAATGGTACTAGGCTGT  
CGAAT-----  
-----GAA---  
ACTGGGAATGATACTATCACACTCCCATGCAAAATAAAACAAATCATAAACAGATGGCAGGAAGTAGGAAAAG  
CAATGTATGCCCCCTCCCATCAGAGGACAAATTAGATGTTTCATCAAAT---  
ATTACAGGGCTGCTCTTGACAAGAGATGGTGGTCTACACAACAATAGC-----  
-----  
-----  
AATAGCAACGAGACTTTCAGACCTGGAGGAGGAGATATGAGGGACAATTGGAGAAGTGAATTATATAGATATA  
AAGTAGTAAAAATTGAACCATTA---GGAATAGCACCCACCAAGGCGAGGAGAAGAGTGGTG-----  
-----CAGAGAGAAAAAAGAGCA--GCGGGA--ATAGCAGCT-----  
---ATGCTCATTGGGTTCTTGGGAGCA--GCAGGAAGCACTATG--GGCGCAGCGTCA---  
GTGACGCTGACGGTACAA---GCCAGACAA---TTATTG---TCTGGTATAGTGCAACAGCAAAAC---  
AATTTG---CTGAGA---GCTATTGAGGCGCAACAGCATATGTTGCAACTCACAGTCTGGGGCATT  
>HQ217546  
TTCTACTGTAATTCACAGAACTGTTTAGTAGTACTTGGGATGGCACTAACTTGACTAATGATACTGAAAGGT  
CA-----  
-----  
-----  
AATGACACTGTTATCACACTCCCATGCAGAATAAAACAAATAATAAACATGCGGCAGGAAGTAGGAAAAGCAA  
TGTATGCCCCCTCCCATCAGAGACAAATTAGATGTTTCATCAAAT---  
ATTACAGGGCTGCTATTAACAAGAGATGGTGGTAAAGGCACCTAACGGAAC-----  
-----  
-----  
GATAACCAGACTGAGATCTTTAGACCTGCAGGAGGAGATATGAAGGACAATTGGAGAAGTGAATTATACAAAT  
ATAAAGTAGTAAAAGTTGAACCATTA---GGAGTAGCACCCACCAAGGCAAGGAGAAGAGTGGTG-----  
-----CAAAGAGAAAAAAGAGCA--GTGGGA--ATAGGAGTG---  
-----TTACTCCTTGGGTTCTTGGGAGCA--GCAGGAAGCACTATG--GGCGCAGCGGCG---  
ATGACGCTGACGGTACAG---ACCAGACAA---TTATTG---TCTGGTATAGTGCAACAGCAGAAC---  
AATCTG---CTGAGG---GCTATTGAGGCGCAACAGCATCTGTTGCAACTCACAGTCTGGGGCATC  
>HQ217818  
TTCTACTGTAATACAACACCACTGTTTACTGGTACTTGGGATGGTAGTACTTGGAATAGCAGTAACAATGAG-  
-----  
-----  
GAAAAATGAAACACTCACACTCCAATGCAGAATAAAACAAATTATACGCCGGTGGCAGGAAGTAGGACAAGCAA  
TGTATGCCCCCTCCCATCAGAGGACAGATTAGATGTTTCATCAAAT---  
ATTACAGGGTTACTAATAACAAGGGATGGTGGTGACGACAACGGG-----

-----  
-----  
ACGACCGAGGTCTTTAGACCTGGAGGAGGGGATATGAGAGACAATTGGAGAAGTGAATTATATAAATATAAAG  
TAGTAAAAATTGAACCATTA---GGAGTAGCACCCACCAAGGCAAAAAGAAGAGTGGTG-----  
-----CAGAGAGAAAAAAGAGCA--GTGGGA---TTCGGAGCT-----  
ATGTTTCCTTGGGTTCTTGGGAGCA--GCAGGAAGCACTATG--GGCGCAGCATCA---  
CTAACGCTGACGGTACAG---GCCAGACAA--TTGTTG---TCTGGTATAGTGCAACAGCAAAAC---  
AATCTG---CTGATG---GCTATTGAGGCGCAACAACATCTGTTGCAACTCACAGTCTGGGGCATC  
>HQ217889  
TTCTACTGTAATACAACAGATCTGTTTAAGAGCAATTGGACCTTTAATGAGAATGCTACTTGGCATGATAAAA  
GC-----  
-----  
AATGGAACAAATATCATACTCCCATGCAAGATAAAACAAATTATAAACATGTGGCAGGAGGTAGGAAAAGCAA  
TGTATGCCCCCTCCCATCAGAGGACTAATTAGCTGTTTCATCAAAT---  
ATTACAGGGCTGCTATTAACAAGAGATGGGGGTAACAAGAATGAGACT-----  
-----  
AACGAGACCGAAACCTTCAGACCTATAGGAGGAAATGTGAAGGACAATTGGAGAAGTGAATTATATAAATATA  
AAGTAGTAAGAATTGAACCATTA---GGAGTAGCACCCACCAAGGCAAGGAGAAGAGTGGTG-----  
-----CAGAGAGAAAAAAGAGCA--GTGGGAATAGTAGGAGCT-----  
---ATGTTTCCTTGGGTTCTTGGGAGCA--GCAGGAAGCACTATG--GGCGCAGCGTCA---  
TTGGCGCTGACGGTACAG---ACCAGACAA--TTATTG---TCTGGTATAGTGCAGCAGCAGAAC---  
AATTTG---CTGAGG---GCTATTGAGGCGCAACAGCATCTGTTGCAACTCACAGTCTGGGGCATC  
>GU330736  
TTCTACTGTAACCTCATCACAACCTGTTTAATAGTACTTGGAAATAGTACTGAGGATAATGAGACTAATAGC----  
-----  
-----  
ACTGAAAGAAATATCACAATCCCATGCAGAATAAAACAAATTATAAACATGTGGCAGGAAGTAGGAAGAGCAA  
TGTATGCCCCCTCCCATCCAAGGGCTAATTAGATGTTTCATCAAAT---  
ATTACAGGGCTACTCTTAACAAGAGATGGTGGTAATATAACTGAGACT-----  
-----  
-----  
AATAATACAGAGATCTTCAGACCTGAAGGAGGAAATATGAAGGACAATTGGAGAAGTGAATTATATAAATATA  
AAGTAGTACAAATTGAACCATTA---GGAATAGCACCCACCAAGGCAAAGAGAAGAGTGGTG-----  
-----CAGAGAGAAAAAAGAGCA--GTGGGAATGCTAGGAGCT-----  
---ATGTTTCCTTGGGTTCTTAGGAGCA--GCAGGAAGCACTATG--GGCGCAGCGTCA---  
TTGACGCTGACGGTACAG---GCCAGACAA--TTATTG---TCTGGTATAGTGCAGCAGCAAAAC---  
AACTTG---CTGAGA--GCTATTGAGGCGCAACAACATCTGTTGCAACTCACAGTCTGGGGCATT  
>GU330809  
TTCTACTGTAATTCAACACAACCTGTTTAATAGTACTTGGTTTAATGGTACTTGGGATAATACTGCAGAGTCAA  
ATAGC-----  
-----ACTGAA-----  
GGAAATGGCACAATGATCACACTCCCATGCAGAATAAAACAAATTATAAACATGTGGCAGGCAGTAGGAAAAG  
CAATGTATGCCCCCTCCCATCAGAGGACAAATTAGATGTTTCATCAAAT---  
ATTACAGGACTACTGTTAACAAGAGATGGTGGTATCAATACTCCCGAT-----  
-----  
-----  
AACAAATGAGACTGAGATCTTCAGACCTGCAGGGGGAAATATGAAGGACAATTGGAGAAGTGAATTATATAAAT  
ATAAAGTAGTAAAAATTGAACCATTA---GGGATAGCACCTACCAAGGCAAAGAGAAGAGTGGTG-----  
-----CAGAGAGAAAAGAGAGCA---ATAGGA---ATAGGAGCT---  
-----GTGTTTCCTTGGGTTCTTGGGAGCA--GCAGGAAGCACTATG--GGCGCAGCGTCA---  
ATAACGCTGACGGTACAG---GCCAGACAA--TTATTG---TCTGGTATAGTGCAGCAGCAGAGC---  
AATTTG---CTGAGG---GCTATTGATGCGCAACAACATCTGTTGCAACTCACAGTCTGGGGCATC  
>GU330839  
TTCTACTGTAATACAACACAACCTGTTTAATAGTACTTGGAAATATAACACAACCGCTTACTTTGAATAGGACTA  
AA-----  
-----  
GGGCCAAATGATACAATTACACTCCCATGCAGAATAAAACAAATTATAAATATGTGGCAGAAAGTAGGAAAAG  
CAATGTATGCCCCCTCCCATCAAAGGACAAATTAATTGTACATCGAAT---  
ATTACAGGACTAATATTAACAAGAGATGGTGGAAATGAGACTAGG-----

-----  
-----  
AACAACGAGACCTTCAGACCTACAGGAGGAGATATGAAGGACAATTGGAGAAGTGAATTATATAAATATAAAG  
TAGTAAAAAATTGAACCATTA---GGAGTAGCACCCACCAAGGCAAAGAGAAGAGTGGTG-----  
-----CAGAGAGAAAAAAGAGCA--GTGGGA---CTAGGAGCT-----  
CTGTTCCCTTGGGTTCTTGGGAGCA--GCAGGAAGCACTATG--GGCGCAGCGTCA---  
GTGACGTTGACGGTACAG---GCCAGACTA---TTATTG---TCTGGTATAGTGCAGCAGCAGAAC---  
AACCTG---CTGAGA---GCTATTGAGGCGCAACAACATCTGTTGCAACTCACAGTCTGGGGCATC  
>JF689862  
TTCTACTGTAGTACAACACACCTGTTTAATAGTTCTTGGAAATGGGACTGCATGGGTAAATGCCACAAATAAC-  
-----  
-----  
ACTGGAGAACTATCACACTCCCATGTAGAATTAAAACAAATTATAAATATGTGGCAGGAAGTAGGAAAAGCAA  
TGTATGCTCCTCCCATCAGTGGACCAATTAGATGTTTATCAAAC---  
ATTACAGGCCTAATATTAACAAGAGATGGTGGTATTAACAATGAC-----  
-----  
-----  
ACCGGGGTCGAGGTCTTCAGACCTGGAGGAGGAAATATGAAGGACAATTGGAGAAGTGAATTATATAAATATA  
AAGTAGTACAAATTGAACCATTA---GGAGTAGCACCTACCAAGGCAAAGAGAAGAGTGGTG-----  
-----CAGAGAGAAAAAAGAGCA--GTGGGAACGATAGGAGCT-----  
---ATGTTCCCTTGGGTTCTTGGGAGCA--GCAGGAAGCACTATG--GGCGCAGCGTCA---  
GTGACGCTGACGGTACAG---GCCAGACTA---TTATTG---TCTGGTATAGTGCAACAGCAGAAC---  
AATCTG---CTGAGA---GCTATTGAGGCGCAACAGCATCTGTTGCAACTCACAGTCTGGGGCATC  
>JF689863  
TTCTATTGTAATACAACACAACCTGTTTAATAGTACATGGTATAGTAATAGTACTTGGAAATGAGACTGAAGAG-  
-----  
-----  
ACAAATGACACTATCATACTCCCATGCAGAATAAAACAAATTATAAACCTGTGGCAGGAAGTAGGAAAAGCAA  
TGTATGCCCCCTCCCATCAAAGGAGTAATTAAGTGTATCAAAC---  
ATTACAGGGCTGTTATTGACAAGAGATGGTGGTAATGGTAATAGCAGC-----  
-----  
-----  
AATGGGACTGAGGTCTTCAGACCTGGAGGAGGAGATATGAGGGACAATTGGAGAAGTGAATTATATAAATATA  
AAGTAGTAAAAAATTGAACCATTA---GGAATAGCACCCACCAAGGCAAAAAGAAGGGTAGTG-----  
-----CAAAGAGAAAAAAGAGCA--GTGGGAACATTAGGAGCT-----  
---ATGTTCCCTTGGGTTCTTGGGAGCA--GCAGGAAGCACTATG--GGCGCAGCGTCA---  
ATGACGCTGACGGTACAG---GCCAGACTA---TTATTG---TCTGGTATAGTGCAGCAGCAGAGC---  
AATCTG---CTGAGA---GCTATTGAGGCGCAACAGCGACTGTTGCAACTCACAGTCTGGGGCATC  
>JF689866  
TTCTACTGTAACACAACAAAACCTGTTTAATAGTATTTGGTGGAGGAATGGTACTAATAATTGGAATGATACTA  
AG-----  
-----  
AGTGACAATGACACAATCACACTCAAATGCAGAATAAAGCAAATTATAAACATGTGGCAGGAGGTAGGAAAAG  
CAATGTATGCCCCCTCCCATCAGAGGACAAATTAGATGTTTCATCAAAT---  
ATTACAGGGCTGATATTAACAAGGGACGGTGGGCGTACCAATGAAACA-----  
-----  
-----  
AACAATACTGAGATCTTTAGACCTGCAGGAGGAAATATGAAGGACAATTGGAGAAGTGAATTATATAAATATA  
AAGTAGTACAAATTGAACCATTA---GGAATAGCACCCACCAAGGCAAAGAGAAGAGTGGTG-----  
-----CAGAGAGAAAAAAGAGCA--GTGGGA---ATAGGAGCT-----  
---CTGTTCCCTTGGGTTCTTGGGAGCA--GCAGGAAGCACTATG--GGCGTAGCGTCA---  
ATAACGCTAACGGTACAG---GCCAGACAA---TTATTG---TCTGGTATAGTGCAGCAGCAGAAC---  
AATCTG---CTGAGG---GCTATTGAGGCGCAACAACATATGTTGCAACTCACAGTCTGGGGCATA  
>JF689867  
TTCTACTGTAACACAACAGGACTGTTTAACTCAACATTTAACTCAACAAAACCTGCCTGATAGTAATAAT----  
-----  
-----  
ACTGATTCAAATTTACGATCCCATGCAGAATAAAACAAATTATAAACATGTGGCAGAAAGTAGGAAAAGCAA  
TGTATGCCCCCTCCCATCAGAGGACCAATTAGATGTTTCATCAAAC---  
ATTACAGGGCTGATATTAACAAGAGATGGTGGTGGTAATGAGAGC-----

-----  
-----  
GGTAGAGAGACTTTTCAGACCTGGAGGAGGAAATATGAAGGACAATTGGAGAAGTGAATTATATAAATATAAAG  
TAGTAAAAATTGAACCATTA---GGAGTAGCACCCAACAAGGCAAAGAGAAGAGTGGTG-----  
-----CAGAGAGAAAAAAGAGCA--GTGGGA--ATAGGAGCT-----  
CTGTTCCCTTGGGTTCTTGGGAGCA--GCAGGAAGCACTATG--GGCGCAGCGTCC---  
GTGACGCTGACGGTACAG---GCCAGAAAA--TTACTG---TCTGGTATAGTGCAACAGCAGAAC---  
AATTTG---CTGAAG---GCTATTGAGGCGCAACAGCATCTGTTGCAACTCACCGTCTGGGGCATC  
>JF689870  
TTCTATTGTAATTCAACACAACCTGTTTAATAGTACTTGGAAATGATACTTGGTCAAATAGCACTAGA-----  
-----  
-----  
GGAAATGATACAATCACACTCCCATGCAGAATAAAACAAATTATAAACATGTGGCAGAAAGTAGGAAAAGCAA  
TGTATGCCCCCTCCCATCAGAGGACAAATTAGATGCTCATCAAAT---  
ATTACAGGGCTGCTATTAACAAGAGATGGTGGCAATACAACCGGG-----  
-----  
-----  
AGCAGGTCAGAGACCTTTAGACCTGGAGGAGGAGACATGAGGGACAATTGGAGAAGTGAATTATATAAATATA  
AAGTAGTAAAAATTGAACCATTA---GGAGTAGCACCTACCAGGGCAAAGAGAAGAGTGGTG-----  
-----CAGAGAGAAAAAAGAGCA--GTGGGA--ATAGGAGCT-----  
---ATGTTCCCTTGGGTTATTGGGAGCA--GCAGGAAGCACTATG--GGCGCAGCGTCA---  
ATGACGCTGACGGTACAG---GCCAGACTA---TTATTG---TCTGGTATAGTGCAACAGCAGAAC---  
AACTTG---CTGAAG---GCTATTGAGGCGCAACAGCATCTGTTGCAACTCACAGTCTGGGGCATC  
>JF689871  
TTCTATTGTAATTCATCCCAATTGTTTAATAGTACTTGGAAATAGTACTGAAGGGTCAAATAATGGTACTGAAG  
TAACA-----  
-----AAT---  
AATGGTACTGAAGTAATTACACTCCCATGCAGAATAAAACAAATTATAAACATGTGGCAGGAAGTAGGAAAAG  
CAATGTATGCCCCCTCCCATCAGAGGACAAATTAAGTCTCATCAAAT---  
ATTACAGGGCTGTTATTAACAAGAGATGGTGGTCGTAACAGCACTGAG-----  
-----  
-----  
GACGATACTGAGACCTTCAGGCCTGGAGGAGGAGACATGAGGGACAATTGGAGAAGTGAATTATATAAATATA  
AAGTAGTAAAAATTGAACCATTA---GGAGTAGCACCCACCAGGGCAAAGAGAAGAGTGGTG-----  
-----CAGAGAGAAAGAAGAGCA--GTGGGAACAATAGGAGCT-----  
---ATGTTCCCTTGGGTTCTTGGGAGCA--GCAGGAAGCACTATG--GGCGCAGCGTCA---  
GTGACGCTGACGGTACAG---GCCAGACAA--TTATTA---TCTGGTATAGTGCAACAGCAGAAC---  
AATTTG---CTGAGA---GCTATTGAGGCGCAACAGCATCTGTTGCAACTCACAGTCTGGGGCATC  
>JF689872  
TTCTACTGTAATTCAACACAACCTGTTTAATAGTACTTGGACTTGGAAATGTTACTGGAGGAAATGCCCACTCA  
CATCATCAAAC-----  
-----AACACT-----  
GAAGGGAATGACACAATCAGACTCCCATGCAGAATAAAACAAATTATAAACATGTGGCAGGAAGTAGGAAAAG  
CAATGTATGCCCCCTCCCATCAGAGGGCAAATTAAGTCTCATCAAAT---  
ATTACAGGGCTACTATTAATAAGAGATGGTGGTAACAAGAGAGAGAGCGGGAAC-----AAG-----  
-----  
AACGAGAGCGGGAAC---  
AAGACTGAGATTTTTCAGACCTGGAGGAGGAGATATGAGGGACAATTGGAGAAGTGAATTATATAAATATAAAG  
TAGTAAAAATTGAACCATTA---GGAGTAGCACCCACCAAGGCAAAAAGAAGAGTGGTG-----  
-----CAGAGAGAAAAAAGAGCA--GTGGGA--TAGGAGCT-----  
ATGTTCCCTTGGGTTCTTGGGAGCA--GCAGGAAGCACTATG--GGCGCAGCGTCA---  
GTGACGCTGACGGTACAG---GCCAGACAA--TTATTG---TCTGGTATAGTGCAACAGCAGAAC---  
AATCTG---CTGAGG---GCTATTGAGGCGCAACAGCATCTGTTGCAACTCACAGTCTGGGGCATC  
>JF689873  
TTCTACTGTAATTCAACACAACCTGTTTAATAGTACTTGGAAATGTTACTAGTCCTTGGAAATGTTACTGAAGGGT  
CAAAT-----  
-----  
AACACTGAAAGAATATCACACTCCCATGCAGAATAAAACAAATTATAAACATGTGGCAGAAAGTAGGAAAAG  
CAATGTATGCCCCCTCCCATCAAAGGACAAATTAGATGTTTCATCAAAT---  
ATTACAGGGCTGCTATTAACAAGAGATGGTGGTAATAGCGAGAAC-----

-----  
-----  
GAGACCACCGAGATCTTCAGACCTGCAGGAGGAGATATGAGGGACAATTGGAGAAGTGAATTATATAAAATATA  
AAGTAGTAAAAATTGAGCCATTA---GGAGTAGCACCCACCAAGGCAAAGAGAAGAGTGGTG-----  
-----CAGAGAGAAAAAAGAGCA--GTGGGA--ATAGGAGCT-----  
---TTGTTCTTGGGTTCTTGGGAGCA--GCAGGAAGCACTATG--GGCGCAGCGGCA---  
GTGACGCTGACGGTACAG---GCCAGACTA---TTATTG---TCTGGTATAGTGCAACAGCAGAAC---  
AATTTG---CTGAGG---GCTATTGAGGCGCAACAGCATCTGTTGCAACTCACAGTCTGGGGCATC  
>JF689876  
TTCTACTGCAATACATCACAACCTGTTTAATAGTACTTGGAAATGGTACTAAGTCAAATAACAATGGA-----  
-----  
-----  
ATAAATGACACAATCATACTCCCATGTAGAATAAGACAAATTATAAACATGTGGCAGAAAGTAGGAAAAGCAA  
TGTATGCCCCCTCCCATCAGAGGAAAAATTGAGTGTAAGTCAAAT---  
ATTACAGGGCTGCTATTAACAAGAGATGGTGGTACAAACGAGAACAATACC-----  
-----  
-----  
AATACCAACACCGAGACCTTCAGGCCTGGAGGAGGGAATATGAAGGACAATTGGAGAAGTGAATTATATAAAAT  
ATAAAGTAGTAAAAATTGAACCATTA---GGAGTAGCACCCACCAGGGCAAAGAGAAGAGTGGTG-----  
-----CAGAGAGAGAAAAAGAGCA--GTGGGA--CTAGGGGCT---  
-----GTGTTCTTGGGTTCTTGGGAGCA--GCAGGAAGCACTATG--GGCGCAGCGTCA---  
ATAACGCTGACGGTACAG---GCCAGACTG---TTATTG---TCTGGTATAGTGCAACAGCAGAAC---  
AATTTG---CTGAGG---GCTATTGAGGCGCAACAGCATCTGTTGCAACTCACAGTCTGGGGCATT  
>HQ216908  
TTCTACTGTAATTCAACACAACCTGTTTAATAGTACTTGGGGGAATGATAATAGTACTTGGGAAAATGATACT-  
-----  
-----  
GAAGCAACTAACATCACTCTCCCATGCAGAATAAAACAAATTGTAAACATGTGGCAGCAAGTAGGAAAAGCAA  
TGTATGCCCCCTCCCATCAGAGGACAAATTAGATGTTTCATCAAAT---  
ATTACAGGGCTGATATTAACAAGAGATGGTGGTAACAACACGAAT-----  
-----  
-----  
GGGTCCGAGACCTTCAGACCTGGAGGAGGAGATATGAGGGATAATTGGAGAAGTGAATTATATAAAATATAAAG  
TAGTAAAGATTGAGCCATTA---GGAGTAGCACCCACCAAGGCAAAGAGAAGAGTGGTG-----  
-----CAGAGAGAAAAAAGAGCA--GTGGGA--ATGGGAGCT-----  
GTGTTCTTGGGTTCTTGGGAGCA--GCAGGGAGCACTATG--GGCGCAGCGTCA---  
ATGACGCTGACGGTACAG---GCCAGACTA---TTATTG---TCTGGTATAGTGCAACAGCAAAAC---  
AATTTG---CTGAGG---GCTATTGAGGCGCAACAGCATCTGTTGCAACTCACAGTCTGGGGCATC  
>HQ216925  
TTTTACTGTAATACAACAAAACCTGTTTAATAGTACAGAACTATTTAATAGTACTAAAGTATCAAATACA---  
-----  
-----  
ACTGGAGACACTATCACACTCCAATGCAGAATAAAACAAATTATAAACATGTGGCAGAAAGTAGGAAAAGCAA  
TGTATGCCCCCTCCCATCAAAGGGAGAATTAGTTGTTTCATCAAAC---  
ATTACAGGACTGCTACTAACAAGAGATGGTGGTAATAACACTGGTAAC-----  
-----  
-----  
AATGACAATGAGACCTTCAGACCTATAGGAGGAAATATGAAGGACAATTGGAGAAGTGAATTATATAAAATATA  
AAGTAGTGAAAATTGAACCATTA---GGAATAGCACCCACCAAGGCAAAGAGAAGAGTGGTG-----  
-----CAGAGAGAAAAAAGAGCA--GTGGGA--TTTGGAGCG-----  
---GTGATCTTTGGGTTCTTGGGAGCA--GCAGGAAGCACTATG--GGCGCAGCGGCG---  
GTAACGCTGACGGCACAG---GCCAGACTG---TTATTG---TCTGGTATAGTGCAACAACAGAAC---  
AATCTG---TTGAGG---GCTATTGAGGCGCAACAGCATCTGTTGCAACTCACAGTCTGGGGCATC  
>FJ152546  
TTCTACTGTGATACAACAAAACCTATTTAATAGTACTTGGAAATAATAGTACTGAACTGGTAAATGGCACA---  
-----  
-----  
GTTGACACAAATATCACACTCCCATGTAGAATAAAACAAATTATAAACATGTGGCAGGAAGTAGGAAAAGCAA  
TGTATGCCCCCTCCCATCAGAGGAAACATTAACCTGTACATCAAAT---  
ATTACAGGGCTGATATTAACCTAGAGATGGTGGTAATCCAGATAACACCACA-----

-----  
-----  
GATAACACCACTGAGACCTTCAGACCTGGAGGAGGAGACATGAGGGACAATTGGAGAAGTGAATTATATAAAT  
ATAAAGTAGTACAAATTGAGCCATTA---GGAATAGCACCCACCAAGGCAAAGAGAAGAGTGGTG-----  
-----CAAAGAGAAAAAAGAGCA---GTGGGAACGCTGGGAGCT---  
-----ATGTTTCCTTGGGTTCTTGGGAGCA---GCAGGAAGCACTATG---GGCGCAGCGTCA---  
CTAACGCTGACGGTACAA---GCCAGACTA---TTGTTG---TCTGGTATAGTGCAACAGCAGAAC---  
AATCTG---CTGAGA---GCTATTGAGGCGCAACAGCATCTGTTGCAACTCACAGTCTGGGGCATC  
>FJ152547  
TTCTACTGTGATACAACAAAACCTGTTTAATAATTCTTGGAAATGGTACATGGTCAAATAACAGTACA-----  
-----  
-----  
GCAAAATATCACAATCACACTCCCATGCAGAATAAGACAGATTGTAAACATGTGGCAGGAAGTAGGAAAAGCAA  
TGTATGCCCCCTCCTATCAGAGGAATAATTAAGTGTACATCAAAT---  
ATTACAGGGCTGCTATTAACAAGAGATGGTGGTAGTACCACGAGTAATAAT-----  
-----  
-----  
ACCATAAACAAAACCTGAAACCTTCAGACCTGGAGGAGGAGATATGAGAGACAATTGGAGAAGTGAATTATATA  
AATATAAAGTAGTACAAATTAAACCATTA---GGAATAGCACCCACCCAGGCAAAGAGAAGAGTGGTG-----  
-----CAAAGAGAA---AAAAGG---GGA-----  
ATAGGAGCT-----CTTTTCCTTGGGTTCTTGGGAGCA---GCAGGAAGCACTATG---  
GGCGCAGCATCA---GTAACGCTGACGGTACAG---GCCAGACTA---TTATTG---  
TCTGGTATAGTGCAACAGCAGAAC---AATCTG---CTGAGA---  
GCTATTGAGGCGCAACAGCATCTGTTGCAACTCACAGTCTGGGGCATC  
>JX863987  
TTCTACTGTAATTCAACACAACCTGTTCAATAGTTCTTGGAAAGTGAATAATGGTACTTGGAGTAGCAATGATT  
CTAAAGGG-----  
-----TTAAAT-----  
GGCACTGAGGACATAATCATACTCCCATGCAGAATAAAACAAATTATAAACATGTGGCAGAGAGTGGGAAAAG  
CAATGTATGCCCCCTCCCATCAGAGGAATAATTAAGTGTACATCAAAC---  
ATTACAGGGATACTGCTAACAAGAGATGGTGGTAGTAACACAAAC-----  
-----  
-----  
GATAATGAGACCTTCAGACCTGGAGGAGGAGATATGAGGGACAATTGGAGAAGTGAATTATATAAATATAAAG  
TAGTAAAAATTGAACCATTA---GGAATAGCACCTACCAGGGCAAAGAGAAGAGTGGTG-----  
-----CAGAGAGAAAAAAGAGCA---GTGGGA---ATAGGAGCT-----  
ATGTTTCCTTGGGTTCTTGGGAGCA---GCAGGGAGCACTATG---GGCGCAGCGTCA---  
CTGACGCTGACGGTACAG---GCCAGACAA---TTATTG---TCTGGTATAGTGCAACAGCAGAAC---  
AACCTG---CTGAGG---GCTATTGAGGCGCAACAGCATATGTTGCAACTCACAGTCTGGGGCATC  
>JX863988  
TTCTACTGTAGTACAACACAATTATTTAATGGTACTTGGAAATGGTACTTGGGTTAATAATACTTGGAAATGATA  
CTGGAAAC-----  
-----  
AGCAATATAACTATCTCACTCCCATGCAAAATAAAACAAATTATAAACATGTGGCAGGGAGTAGGGAAGGCAA  
TATATGCCCCCTCCAATCAGGGGAGTAATTAAATGTACATCAAAT---  
ATCACAGGGCTGATATTAACAAGAGATGGTGGTATTAATAATAGCGCC-----  
-----  
-----  
GAGGGCGAGACCTTCAGACCCCAAGGAGGAAATATGAAGGACAATTGGAGAAGTGAATTATATAAATATAAAG  
TAGTAAAAATTGAACCATTA---GGAGTAGCACCCACCAAGGCAAAGAGAAGAGTGGTG-----  
-----CAGAGAGAAAAAAGAGCA---GTGGGA---ATGGGAGCT-----  
TTGTTTCCTTGGGTTCTTGGGAGCA---GCAGGAAGCACTATG---GGCGCAGCGTCA---  
ATAACGCTGACGGTACAA---GCCAGACAA---TTGTTG---TCTGGTATAGTGCAACAGCAAAAC---  
AATTTG---CTGAGA---GCTATTGAGGCGCAGCAGCATCTGTTGCAACTCACAGTCTGGGGCATC  
>JX863991  
TTCTACTGTAATACAACAGAATTGTTTAATGGTACTTTGGAGGCTAATGATACTTGGGAAGTGGGACTATAA  
AGCCA-----  
-----  
CAGAACGCCAACATCACACTTCCATGCAGAATAAAACAAATTATAAACCTGTGGCAAGAAGTAGGAAAAGCAA  
TGTATGCCCCGCCCATCAGTGGACAAATTAGATGTTTCATCAAAT---

ATTACAGAGCTACTATTAACAAGAGATGGTGGTAATGGGAACGAGACC-----  
-----  
-----  
GACAAATGAGACCGAGATCTTCAGACCTGGAGGAGGAGATATGAGGGAAAATTGGAGAAGTGAATTATATAAAAT  
ATAAAGTAGTAAGAGTTGAACCATTA---GGATTAGCACCCACCAAGGCAAAGAGGAGAGTGGTG-----  
-----CAGAGAGAAAAAAGAGCA---GTGGGA---CTAGGAGCT---  
-----GTGTTCCCTGGGGTTCTTGGGAGCA---GCAGGAAGCACTATG---GGCGCAGCGTCG---  
TTGACGCTGACGGTACAG---GCCAGAATG---TTATTG---TCTGGTATAGTGCAACAGCAGAAC---  
AATCTG---CTGAGA---GCTATTGAGGCGCAACAGCGTATGTTGCAACTCACAGTCTGGGGCATC  
>JX863992  
TTCTACTGTAATTCAACACAACCTGTTTAATAGTAATAGCACTAAAGTAAATGAC-----  
-----  
-----  
ACTAGAGATAATATCACACTCCCATGTCAGAATAAAACAAATTGTAAACATGTGGCAGGAAGTAGGAAAAGCAA  
TGTATGCCCCCTCCCATCAGAGGACAAATTAAATGCTCATCAAAT---  
ATTACAGGGCTGATATTAACAAGAGATGGTGGTAATGCGACAGAC-----  
-----  
-----  
GGGAACGAGACTTTTAGACCTGGAGGAGGAAATATGAAGGACAATTGGAGAAGTGAATTATATAAAATATAAAG  
TAGTAAAAAATTGAACCAATA---GGAATAGCACCCACCAAGGCAAAGAGAAGAGTGGTG-----  
-----CAAAGAGAAAGAAGAGCA---GTGGGA---ATAGGAGCT-----  
GTGTTCCCTTGGGGTTCTTGGGAGCA---GCAGGAAGCACTATG---GGCGCAGCGTCA---  
CTAACGCTGACGGTACAG---GCCAGACTA---TTATTG---TCTGGTATAGTGCAACAGCAGAGC---  
AATCTG---CTGAGG---GCTATTGAGGCGCAACAACATCTGTTGCAACTCACAGTCTGGGGCATC  
>JN562781  
TTCTACTGTAATACATCAAACTGTTTAATAGTACTTGAATAGTACTAGTACTTGAATAATACTGAA----  
-----  
-----  
GAAAATAGCACACTCACACTCCCATGTAAATAAGACAAATTATAAACATGTGGCAGAAAGTAGGAAAAGCAA  
TGTATGCCCCCTCCCATCAGTGGACGAATTAACTGCTTATCAAAT---  
ATTACTGGGCTGCTATTAATAAGAGATGGTGGTGGTGGTGGTAAT-----  
-----  
-----  
GACACGACCGAGACCTTCAGACCTGGAGGAGGAGATATGAGGGACAATTGGAGAAGTGAGTTATATAAAATACA  
AAGTAATCAAAATTGAACCATTA---GGAATAGCACCCACCAAGGCAAAGAGAAGAGTGGTG-----  
-----CAGAGAGAAAAAAGAGCA---GTGGGA---TTAGGAGCT-----  
---GTGTTCCCTTGGGGTTCTTGGGAGCA---GCAGGAAGCACTATG---GGCGCAGCGTCA---  
CTAACGCTGACGGTACAG---GCCAGACAA---TTATTG---TCTGGTATAGTGCAACAGCAAAGC---  
AATTTG---CTGAGA---GCTATTGAGGCGCAACAGCATCTGTTGCAACTCACAGTCTGGGGCATA  
>JF320615  
TTCTATTGTAATACAGCACAGCTGTTTAATAGCACTTGGCCTAAGAATGATACTAACAGTACAGATACTGAAG  
AA-----  
-----  
AATGGAAATGGCACAATCACACTCCCATGTAGAATAAAACAAATTATAAATATGTGGCAGGAAGTAGGAAAAG  
CAATATATGCCCCCTCCCATCAGAGGACAAATTAGCTGTACATCAAAT---  
ATTACAGGGCTGCTATTAACAAGAGATGGTGGTAATGAGAGCAGT-----  
-----  
-----  
GCTGACGAGATCTTCAGACCTGGAGGAGGAGATATGAGGGACAATTGGAGAAGTGAATTATATAAAATATAAAG  
TAGTAAAAAATTGAACCATTA---GGAGTAGCACCCACTAAGGCAAAGAGAAGAGTGGTG-----  
-----CAGAGAGAAAAAAGAGCA---GTGGGA---ATAGGAGCT-----  
GTGTTCCCTTGGGGTTCTTGGGAGCA---GCAGGAAGCACTATG---GGCGCAGCGTCA---  
ATAACGCTGACGGTACAG---GCCAGACAA---TTATTG---TCTGGTATAGTGCAAGCAGCAAAAT---  
AATTTG---CTAAGG---GCTATTGATGCACAGCAGAGTCTGTTGCAACTCACAGTCTGGGGCATC  
>JF320613  
TTCTACTGTGATACAACAAAACCTGTTTAACAGTACTTGGCAGGATAACAGTACTGTGAATGCTAGTAGT----  
-----  
-----  
GATGAGGATCCCATCATACTCCCCTGTAAATAAGACAAATTATAAACATGTGGCAGGAAGTAGGAAAAGCAA  
TGTATACCCCCTCCCATCAGAGGACTAATTAAATGTTTCATCAAAT---

ATTACAGGGCTACTATTAACAAGAGATGGGGGGGAAGATAACGAC-----  
-----  
-----  
ACTGAGATATTCAGACCTGGAGGAGGAAATATGAGGGACAATTGGAGAAGTGAATTATATAAATATAAAGTAG  
TAAGAATTGAACCATTA---GGAGTAGCACCCACCAGGGCAAAGAGAAGAGTGGTG-----  
-----CAGAGAGAAAAAAGAGCA---GTGGGG---CTGGGAGCG-----  
TTGTTTCCTTGGGTTCTTGGGAGCA---GCAGGAAGCACTATG---GGCGCAGCGTCA---  
GTGACGCTGACGGTACAG---GCCAGACTA---TTATTG---TCTGGTATAGTGCAACAGCAGAAC---  
AACTTG---CTGAGA---GCTATTGAGGCGCAACAGCATCTGTTGCAACTCACAGTCTGGGGCATT  
>JF320048  
TTCTACTGTAATACAACAACCACTGTTTAAACAGTACTTGGGAATAGTACTGGAGAGTCTTGGGAATAGGACTGGAG  
GGTCAAAT-----  
-----AACACG-----  
GGAAGAAATGGCACAATCACACTCCAATGCAGAATAAAAACAAATTATAAACATGTGGCAGAAAGTAGGAAAAG  
CAATATATGCCCCCTCCCATCAAAGGACTAATTAGATGTTTCATCAAAC---  
ATTACAGGGCTGATATTAACAAGAGATGGTGGTAATAATAATAGC-----  
-----  
-----  
ACCATCTCCGAGATCTTCAGACCTGGAGGAGGAGATATAAGGGACAATTGGAGAAGTGAATTATATAAATACA  
AAGTAGTAAAAATTGTACCAATA---GGGATAGCACCCACTAAGGCAAAGAGAAGAGTGGTG-----  
-----CAGAGAGAAAAAAGGGCA---GTGGGA---ATAGGAGCT-----  
---ATGTTTCCTTGGGTTCTTGGGAGCA---GCAGGAAGCACTATG---GGCGCAGCGTCA---  
GTGACGCTGACGGTACAG---GCCAGACAA---TTATTG---TCTGGTATAGTGCAACAGCAAAAC---  
AACTTG---CTGAGG---GCTGTGGAGGCGCAACAGCATCTGTTGCAACTCACAGTCTGGGGCATC  
>JF320308  
TTCTACTGTAATACCACAGGACTGTTTAAATAGTACTTGGAAACAATGAACTAAAGAGTCAAAT-----  
-----  
-----  
AACACTGAACTATCATACTCCCATGCAGAATAAAAACAAATTATAAACATGTGGCAGAAAGTAGGAAAAGCAA  
TGTATGCCCCCTCCCATCAGTGGACTAATTAGCTGTTTCATCAAAT---  
ATTACAGGGCTACTATTGACAAGAGATGGTGGTAATAACAATGGTAGTGAT-----  
-----  
-----  
AACAACAGAAGTGAGATCTTCAGACCTGGAGGAGGAGATATGAGGGACAATTGGAGAAGTGAATTATATAAAT  
ATAAAGTAGTAAAAATTGAACCATTA---GGAATAGCACCCACCAAGGCAAAGAGAAGAGTGGTG-----  
-----CAGAGAGAAAAAAGAGCA---GTGGGA---TTAGGAGCT---  
-----TTGTTTCCTTGGGTTCTTGTTCAGCA---GCAGGAAGCACTATG---GGCGCAGCGTCA---  
ATGACGCTGACGGTACAG---GCCAGACAA---TTATTG---TCTGGTATAGTGCAACAGCAGAAC---  
AATTTG---CTGAGA---GCTATTGAGGCGCAACAGCATCTGTTGCAACTCACAGTCTGGGGCATC  
>JF320003  
TTCTACTGTGATACAACAACAACCTGTTTAAATAGTACTTGGAACTAGTAGTGCTTGGGAATAGTACTGAAGGG-  
-----  
-----  
TCAAATGACACTATCACACTCCCATGCAGAATAAAAACAAATTATAAACATGTGGCAGGAAGTAGGAAAAGCAA  
TGTATGCCCCCTCCCATCAGAGGAGAAATTAAATGTTTCATCAAAT---  
ATTACAGGGCTGCTATTAACAAGGGATGGTGGCAGTAGTAACGAGACT-----  
-----  
-----  
AACGGGACTGAGATATTCAGGCCTGGAGGAGGAGATATGAGGGACAATTGGAGAAGTGAGTTATATAAATATA  
AAGTAGTAAAAATTGAACCATTA---GGAGTAGCACCCACCAAGGCAAAGAGAAGAGTGGTG-----  
-----CAAAGAGAAAAAAGAGCA---GTGGGA---CTAGGAGCT-----  
---TTGTTTCCTTGGGTTCTTGGGAACA---GCAGGAAGCACTATG---GGCGCAGCGTCA---  
CTGACGCTGACGGTACAG---GCCAGACAA---TTATTG---TCTGGTATAGTGCAACAGCAGAGC---  
AACTTG---CTGAGA---GCTATTGAGGCGCAACAGCATATGTTGAAACTCACAGTCTGGGGCATC  
>JF320097  
TTCTACTGTAACCAACACCACTGTTTAAATAGTACTTGGGAATGCTAATGGTACTTGGGAATGGTACCGGAAATT  
TA-----  
-----  
ACTACTGGAACATCACACTCACATGTAGAATAAAAACAAATTATAAACATGTGGCAGGAAGTAGGAAAAGCAA  
TGTACGCCCCCTCCCATAGAGGACTAATTAGTTGTTTCATCAAAT---

ATTACAGGACTGTTATTAACAAGAGATGGTGGTGAAGGTAATGACACC-----  
-----  
-----  
AACAAATATCACCGAGGTCTTTAGACCTGGAGGAGGAGATATGAGGGACAATTGGAGAAGTGAATTATATAAAT  
ATAAAGTAGTAAAAATTGAGCCATTA---GGAGTAGCACCCACCAAGGCAAAGAGAAGAGTGGTG-----  
-----CAAAGAGAAAAAAGAGCA---GTGGGA---ATAGGAGCT---  
-----CTGTTTCCTTGGGTTCTTGGGAGCA---GCAGGAAGCACTATG---GGCGCAGCGTCG---  
ATGACGCTGACGGTACAA---GCCAGACAA---CTATTG---TCTGGTATAGTGCAACAGCAGAAC---  
AATCTG---CTGAGA---GCTATTGAAGCGCAACAACATCTGTTGCAACTCACAGTCTGGGGCATC  
>JF320038  
TTCTACTGTAATACAACAACACTGTTTAATAGCACTTGGGAATAATGGTACTAATAATGCTACTACAGACTCA-  
-----  
-----  
AATGCCACTGTCATTACACTCCCATGTAGAATAAAACAAATTGTAAACATGTGGCAAGAAGTAGGAAAAGCAA  
TGTATGCCCCCTCCCATCAAAGGAAAAATCAGATGTTTCATCAAAT---  
ATTACAGGGCTGCTATTAACAAGAGATGGTGGCAGCGATGGGAGCTCC-----  
-----  
-----  
TCGAATGAGACTGAGACCTTCAGACCTGGAGGAGGAAATATGAGGGACAATTGGAGGAGTGAATTATATAAAT  
ATAAAGTAGTAAGAGTTGAACCATTA---GGAGTAGCACCCACCAAGGCAAAGAGAAGAGTGGTG-----  
-----CAGAGAGAAAAAAGAGCA---GTGGGA---ATAGGAGCT---  
-----GTGTTTCCTTGGGTTCTTGGGAGCA---GCAGGAAGCACTATG---GGCGCAGCGTCA---  
ATAACGCTGACGGTACAG---GCTAGACAA---TTATTG---TCTGGTATAGTGCAACAACAGAAC---  
AATCTG---TTGAGG---GCTATTGAGGCGCAACAGCATCTGTTGCAACTCACAGTCTGGGGCATC  
>JF320526  
TTCTACTGTGATACAACAGAACTGTTTAATAGTACTTGGGAATAATACAAGGTCAAATGACACTGCA-----  
-----  
-----  
AGCAATAAGACTATCATACTCCAATGTAGAATAAGACAAATTATAAACAGATGGCAGGAAGTAGGAAAAGCAA  
TGTATGCCCCCTCCCATCAGCGGACAAATTAACTGTTTCATCAAAT---  
ATTACAGGGCTGATATTAACAAGAGATGGTGGAAACAATAGTCCAGGA-----  
-----  
-----  
AACGGGAGTGAGATCTTCAGACCTGGAGGGGGAGATATGAGGGACAATTGGAGAAGTGAATTATATAAATATA  
AAGTAGTAAAAGTTGAGCCATTA---GGAGTAGCACCCACCAAGGCAAAGAGAAGAGTGGTG-----  
-----CAGAGAGAAAAAAGAGCA---GTAGGAACAATGGGAGCT-----  
---TTGTTTCCTTGGGTTCTTGGGAACA---GCAGGAAGCACTATG---GGCGCAGCGGCA---  
ATGACGCTGACGGTACAG---GCCAGGCTA---TTATTG---TCTGGTATAGTGCAACAGCAGAAC---  
AATTTG---CTGAGG---GCTATTGAGGCGCAACAGCATCTGTTGCAACTCACAGTCTGGGGCATC  
>JF320160  
TTCTACTGTAATACATCACAACACTGTTTAATAGTACTTGGCCTTGGGAATGCTACTGAAGGAGTAAATAGC---  
-----  
-----  
ACTAATGATAATATCACACTCCCATGCAGAATAAAACAAATTGTAAACATGTGGCAGGAAGTAGGAAAAGCAA  
TGTATGCCCCCTCCTATCAGCGGAATAATTAGGTGTTTCATCAAAT---  
ATTACAGGAATGATATTAACAAGAGATGGGGGAGCGGGGAACGGGAGC-----  
-----  
-----  
AATAACGAGACTGAGATCTTCAGACCTGGAGGAGGAAATATGAAGGACAATTGGAGAAGTGAATTATATAAAT  
ATAAAGTAGTAAAAATTGAACCATTA---GGAATAGCACCCACCAGGGCAAAGAGAAGAGTGGTG-----  
-----CAGAGAGAAAAAAGAGCA---ATAACA---CTAGGAGCT---  
-----TTTTTCCTTGGGTTCTTGGGAGCA---GCAGGAAGCACTATG---GGCGCAGCGTCA---  
ATAACGCTGACGGTACAG---GCCAGACTA---TTACTG---TCTGGTATAGTGCAAGCAGCAGAGC---  
AATCTG---CTGAGG---GCTATTGAGGCGCAACAGCATATGTTGCAACTCACAGTCTGGGGCATC  
>JF320169  
TTCTATTGTAACACAACAGCACTGTTTAATAGTACTTGGGGGGCTAACAGTACTTGGGAGATTACA-----  
-----  
-----  
AATGACACTGAAATCATACTCCCATGCAGAATAAGACAAATCATAAACATGTGGCAGGAAGTAGGAAAAGCAA  
TGTATGCCCCCTCCCATTAGTGGAACATTAGTTGCTCATCAAAT---

ATTACAGGGTTACTATTAACAAGAGATGGGGGTAATGGAAATGGT-----  
-----  
-----  
ACCAAAAACGAGACCTTCAGACCTACAGGAGGGGATATGAGGGACAATTGGAGAAGTGAATTGTATAAATATA  
AAGTAGTAAGAATTGAACCATTA---GGAGTAGCACCCACCAAGGCAAAGAGAAGAGTGGTG-----  
-----CAGAGAGAAAAAAGAGCA---GTGGGA---CTAGGAGCT-----  
---ATGTTCCCTTGGGTTCTTGGGAGCA---GCAGGAAGCACTATG---GGCGCAGCGTCG---  
GTAACGCTGACGGTACAG---GCCAGACAA---TTATTG---TCTGGTATAGTGCAGCAGCAGAGC---  
AATCTG---CTGAGA---GCTATTGAGGCGCAACAGCATATGTTGCAACTCACAGTCTGGGGCATC  
>JF320053  
TTCTACTGTAATACAGCACAACTGTTCAATAGTACCTGGATCAATGGTACTGAAAGGTCAAATACCACTGAA-  
-----  
-----  
GGAAATACCACAATCACACTCCCATGCAGAATAAAACAAATAGTAAATATGTGGCAGGAAGTAGGAAAAGCCA  
TGTATGCCCCCTCCCATCAGAGGAAAAATTAAGTCTTCTCAAAT---  
ATCACAGGGCTGCTATTAACAAGAGATGGTGGCTCTGATAACAACACCACT-----  
-----  
-----  
GGCAACAACACCGAGATCTTCAGACCTGGAGGAGGAGATATGAGGGACAATTGGAGAAGTGAATTATATAAAT  
ATAAAGTAGTAAAAATCGAACCATTA---GGAGTAGCACCTACCAGGGCAAAGAGAAGAGTGGTG-----  
-----CAGAGAGAAAAAAGAGCA---GCAGGA---ATAGGAGCT---  
-----TTGTTCCCTTGGGTTCTTGGGAGCA---GCAGGAAGCACTATG---GGCGCAGCGTCA---  
GTGACGCTGACGGTACAG---GCCAGACAA---TTATTG---TCTGGTATAGTGCAGCAGCAAAAC---  
AATTTG---TTGAAG---GCTATTGAGGCGCAACAGCATCTGTTGCAACTCACAGTCTGGGGCATC  
>JF320356  
TTCTACTGTAATACAACAATACTGTTTAATAGCACTTGGAAATGATACTAAAGGGACAAATAGC-----  
-----  
-----  
ACAAATGACACTATCACACTCCCATGCAGAATAAAACAAATTATAAACATGTGGCAGAGAGTAGGAAAAGCAA  
TATATGCCCCCTCCCATCAGCGGACCAATTAGGTGTTTCATCAAAT---  
ATTACAGGGCTGCTATTAACAAGAGATGGTAGTACTAACAACAACAGC-----  
-----  
-----  
ACTAAGAATGAGACCTTCAGACCTGGAGGAGGAGACATGAGGGACAATTGGAGAAGTGAATTATATAAATATA  
AAGTAGTAAAAGTTGAACCAGTA---GGAATAGCACCCACCAAGGCAAAGAGAAGAGTGGTG-----  
-----CAGAGAGAAAAAAGAGCA---GTGGGAACACTAGGAGCT-----  
---GTGTTCCCTTGGGTTCTTGGGAGCA---GCAGGAAGCACTATG---GGCGCAGCGTCA---  
ATGACGCTGACGGTACAG---GCCAGACAA---CTATTG---TCTGGTATAGTGCAACAGCAGAAC---  
AATCTG---CTGAAG---GCTATTGAGGCGCAACAGCACATGTTGCAACTCACAGTCTGGGGCATT  
>JF320592  
TTCTACTGTAATACAACAAAGCTGTTTAATAGTACTTGGGTAAATGGTACTAGGAATGATACAGGGTCAAAT-  
-----  
-----  
GACACTGAAACCATAATACTCCCATGCAGAATAAAACAAATTATAAACATGTGGCAGAAAGTAGGAAAAGCAA  
TGTATGCCCCCTCCCATCAAAGGACAAATTAGCTGTTTCATCAAAC---  
ATTACAGGGCTGCTATTAACAAGAGATGGATCTCTAAAGAATGAG-----  
-----  
-----  
ACCACCTTGACCTTCAGACCTGGAGGAGGAAATATGAGGGACAATTGGAGAAGTGAATTATATAAATATAAAG  
TAGTAAAAATTGAACCATTA---GGGGTAGCACCTCCAAGGCAAAGAGACGGGTGGTG-----  
-----CAGAGAGAAAAAAGAGCA---GCGGGA---CTAGGAGCT-----  
ATGTTCCCTTGGGTTCTTGGGAGCA---GCAGGAAGCACTATG---GGCGCAGCGTCA---  
GTGACGCTGACGGTACAG---GCCAGACTA---TTATTG---TCTGGTATAGTGCAACAGCAGAAC---  
AATCTG---CTGAGA---GCTATTGAGGCGCAACAGCATCTGTTGCAGCTCACGGTCTGGGGCATC  
>KT124791  
TTCTACTGTAATACAACACAACCTGTTTAATAGTACTTGGAAATAGTACTAGAGAGAAAAATAGCAC-----  
-----  
-----  
AGAAATGACACTATCACACTCCCATGCAGAATAAAACAAATTATAAATATGTGGCAAAAAGTAGGAAAAGCAA  
TGTATGCCCCCTCCCATCAGGGGACAAATTAGATGTTTCATCAAAT---

ATTACAGGGTTGCTATTAACAAGAGATGGTGGTAGTAACCAAAT-----  
-----  
-----  
AGGACTGAGATCTTTAGACCTGCAGGAGGAAATATGAAGGACAATTGGAGAAGTGAATTATATAAATATAAAG  
TAGTAAGAATTGAACCATTA---GGAGTAGCACCCACTGGGGCAAAGAGAAGAGTGGTG-----  
-----CAGAGAGAAAAAAGAGCA--GTGGGA--ATAGGAGCT-----  
GTGTTCTTGGGTTCTTGGGAGCA--GCAGGAAGCACTATG--GGCGCAGCGTCA---  
CTGACGCTGACGGTACAG---GCCAGACTC--TTATTG--TCTGGTATAGTGCAACAGCAGAAC---  
AATCTG---CTGAGG---GCTATTGAGGCGCAACAGCATCTGTTGCAACTCACAGTCTGGGGCATC  
>KR423026  
TTCTATTGTAATACAGCAAGATTGTTTAATAGCTCTTGGAATGATACCGAAGGGTCAATCAATGAGACAAAC-  
-----  
-----  
TCAGAAAACATCATCACACTCCCATGCAGAATAAAACAAATTGTAAACATGTGGCAGGAAGTAGGAAAAGCAA  
TGTATGCCCCCTCCCATCAGGGGAATAATTAAGTGTTCATCAACT---  
ATTACAGGGCTGTTATTAACAAGAGATGGTGGTAATGGTAAGAATGGGAGC-----  
-----  
-----  
AATGAGACCAATGAGATTTTCAGACCTGGAGGAGGAGATATGAGGGACAATTGGAGAAGTGAATTATATAAAT  
ATAAAATAGTAAAAATTGAACCATTA---GGACTAGCACCCACCCCGGCAAAGAGAAGAGTGGTG-----  
-----CAGAGAGAAAAAAGAGCA--GTGGGA--CTAGGAGCA---  
-----TTGTTCTTGGGTTCTTGGGAGCA--GCAGGAAGCACTATG--GGCGCAGCGTCA---  
ATGACGCTGACGGTACAG---GCCAGACAA--TTATTG--TCTGGTATAGTGCAACAGCAGAAC---  
AATTTG---CTGAGA---GCTATTGAGGCGCAACAGCATATGTTGCAACTCACAGTCTGGGGCATA  
>GU331039  
TTCTACTGTAATACAACAGAACTGTTTAATAGTACTTGGAATAATGGTAGCAGTACTTGGAAGTAGCAATGATA  
CTAAA-----  
-----  
GGGTAAATAACACTATCACACTCCGATGCAGAATAAAACAAATTATAAACATGTGGCAGGAAGTGGGAAAAG  
CAATGTATGCCCCCTCCCATCAGAGGACAAATTAGATGTTTCATCAAAT---  
ATTACAGGGCTACTATTAACAAGAGATGGTGGTAATAATAAGACCGAA-----  
-----  
-----  
AACAAAACGGAGATCTTCAGACCTGGAGGAGGAGATATGAGGGACAATTGGAGAAGTGAATTATATAAATATA  
AAGTGGTACAAATTGAACCAATA---GGAGTAGCACCCACCAAGGCAAAGAGAAGAGTGGTG-----  
-----CAAAGAGAAAAAAGAGCA--GTAACA--CTGGGAGCT-----  
--ATGTTCTTGGGTTCTTGGGAGCA--GCAGGAAGCACTATG--GGCGCAGCGTCA---  
ATGGCGCTGACGGTACAG---GCCAGACAA--TTATTG--TCTGGTATAGTGCAACAGCAAAAC---  
AATTTG---CTGAGA---GCTATTGAGGCGCAACAGCACCTGTTGCAACTCACAGTCTGGGGCATC  
>GU331147  
TTCTACTGTAATTCAACACAACTGTTTAATAGTATCTGGACTAAAAATGATAATGGTATCTGGACTAAAAATG  
AGACTAATGGT-----AAT---  
TGGACTAGAAGCGGGAGCACA-----  
AATGACAATGACACAATCATACTCCCTTGAGAATAAGACAAATTATAAACATGTGGCAGGAAGTAGGAAAAG  
CAATGTACGCTCCTCCCATAGAGGAAACATTAGCTGTTTCATCAAAT---  
ATTACAGGGCTGTTACTAACAAGAGATGGAGGTAACAATAATGAT-----  
-----  
-----  
AGCGCAAATGAGACGTTTCAGACCTGGAGGAGGAAATATGAAGGACAATTGGAGAAGTGAATTATATAAATATA  
AAGTAGTAGAAATTGAGCCATTA---GGACTAGCACCCACCAGGGCAAAGAAGAGTGGTG-----  
-----CAGAGAGAAAAAAGAGCA--GCC-----CTAGGAGCT-----  
---TTGTTCTTGGGTTCTTAGGAGCT--GCAGGAAGCACTATG--GGCGCAGCGTCA---  
GTGACGCTGACGGTACAA---GCCAGACTA---TTATTG---ACTGGTATAGTGACAGCAGCAGAAC---  
AATCTG---CTGAAG---GCTATTGAGGCGCAACAACATCTGTTGCAACTCACAGTCTGGGGCATC  
>KM353701  
TTCTACTGCAATACAACAAAACATTTTAGCAGTACCTGGAGTATAAATGAAACTATCTGG-----  
-----  
CATCTAAATGAAACTACAAAT-----  
AACACTAATGACACTATCACACTCCCATGCAAAATAAAACAAATTTATAAACATGTGGCAGCAAGTAGGAAAAG  
CAATGTATGCCCCCTCCTATCAGAGGACAAATTAGATGTAAATCAGAT---

ATTACAGGGCTGATATTAATGAGAGATGGTGGTGAA-----  
-----  
ACTAACAGGGGCAACGAGACCTTC-----  
AGCAATGAGACCTTCAGACCTGGGGGAGGAAATATGAGGGACAATTGGAGAAGTGAATTATATAAATATAAAG  
TAGTAAAGATTGAGCCATTA---GGACTGGCACCCACCGAGGCAAAGAGAAGAGTGGTG-----  
-----CAGAGAGAAAAAAGAGCA--GTGGAA--ATAGGAGCT-----  
ATGTTTCCTTGGGTTCTTGGGAGCA--GCAGGAAGCACTATG--GGCGCAGCATCA---  
CTAACGCTGACGGTACAG---GCCAGAATG--TTATTG--TCTGGTATAGTGCAACAGCAGAGC---  
AATTTG---CTGAAG---GCTATTGAGGCGCAACAACATCTGTTGCAACTCACAGTCTGGGGCATC  
>JN687749  
TTCTACTGTGATACAACACCACTGTTTAATAGTACGTGGCCTTGGAATAGTACTTGGAATGATACAAATACA-  
-----  
-----  
AATAATACCAATATCACACTCCAGTGCAGAATAAAACAAATTATAAACATGTGGCAGGAAGTAGGAAAAGCAA  
TGTATGCCCCCTCCCATCAAAGGACAAATTAGGTGCTCATCAATT---  
ATTACAGGGCTGCTGTTAAACAAGAGATGGTGGTAATAGCAGCGAA-----  
-----  
-----  
AATAATACTGAGATCTTCAGACCTGGAGGGAGAGATATGAGGGACAATTGGAGAAGTGAATTATATAAATATA  
AAGTTGTAAAACTTGAACCATTA---GGAGTAGCACCCACCAAGGCAAAGAGAAGAGTGGTG-----  
-----CAAAGAGAAAAAAGAGCA--GTGAAA--ATAGGAGCT-----  
---CTGTTTCCTTGGATTCTTGGGAGCA--GCAGGAAGCACTATG--GGCGCAGCGTCA---  
GTGACGCTGACGGTACAG---GCCAGACTA--TTATTG--TCTGGTATAGTGCAACAGCAGAAC---  
AATCTG---CTGAGG---GCTATTGAGGCGCAACAACATATGTTGCAACTCACAGTCTGGGGCATC  
>JN687758  
TTCTACTGTAATACAACACAACATATTTGATAGTAATTGGACTCTATCTGATATTACTAAAGGGTCAAATACCA  
CTGAA-----  
-----  
GGCAACAGCACACACATCACACTCCCATGCAGAATAAAACAAATTATAAACATGTGGCAAGAAGTAGGAAAAG  
CAATGTATGCCCCCTCCTATCAGAGGAAACATTACTTGCATATCAAAT---  
ATTACAGGGTTGTTACTAGTAAGAGATGGTGGTAATAATAATGAG-----  
-----  
-----  
ACAGAGATCTTTAGACCTGGAGGAGGAGATATGAGGGACAATTGGAGAAGTGAATTGTATAAATATAAAGTAA  
TAAAAATTGAACCATTA---GGAATAGCACCCACCAAGGCAAAAAGAAGAGTGGTG-----  
-----CAGAGAGAAAAAAGAGCA--GCA-----TTAGGAGCT-----  
TTGTTTCCTTGGGTTCTTGGGAGCA--GCAGGAAGCACTATG--GGCGCAGCGTCA---  
CTGACGCTGACGGTACAG---GCCAGGCTA--TTATTG--TCTGGTATAGTGCAACAGCAGAAC---  
AATCTG---CTGAGG---GCTATTGAGGCGCAACAGCATCTGTTGCAACTCACAGTCTGGGGCATC  
>HQ908116  
TTCTACTGTAATACAACAGAACTGTTTAATAGTACTTGGAATGCTAATGAAGGATCAAATAAAACAGGATCA-  
-----  
-----  
AATGACACTACAATCATACTCCCATGTAGACTAAGACAAATTGTAAACATGTGGCAGGAAGTAGGAAAAGCAA  
TGTATGCTCCTCCCATTAGAGGACAGATTAGATGTTTCATCAAAT---  
ATTACAGGGCTGCTATTAACAAGAGATGGTGGTATTACTAATACTACCAAC-----  
-----  
-----  
AAGACTAAGACTGAGACCTTCAGACCTGCAGGAGGAGATATGAGGGACAATTGGAGAAGTGAATTATATAAAT  
ATAAAGTAGTAAAAATTGAACCATTA---GGAATAGCACCTTCCAGGGCAAAGAGAAGAGTGGTG-----  
-----CAAAGAGAAAAAAGAGCA--GTGGGA--ATAGGAGCT---  
-----CTGTTTCCTTGGGTTCTTGGGAGCA---GCAGGAAGCACTATG--GGCGCAGCGTCA---  
ATGACGCTGACGGTACAG---GCCAGACTA--TTATTG--TCTGGTATAGTGCAACAGCAGAAC---  
AACTTG---CTGAGA---GCTATTGAGGCGCAACAGCATTTGTTGCAACTCACAGTCTGGGGCATC  
>JQ251004  
TTCTACTGTAATACAACACAACATATTTAGTAGTACTTGGCTGCCTAATAGTACTCGGAATGATACT-----  
-----  
-----  
GATAATAGCCCTATCACACTCCCATGCAGAATAAAACAAATTGTAAACATGTGGCAGGAAGTAGGAAAAGCAA  
TGTATGCCCCCTCCCATCAGAGGAAACATTAGTTGCTCATCAAAT---

ATTACAGGGCTACTATTAACAAGAGATGGGGGTAATGATAATAAT-----  
-----  
-----  
AATACCGAGATCTTCAGACCTGGAGGAGGAGATATGAGGGACAATTGGAGAAGTGAATTATACAAATATAAAG  
TAGTAAAAATTGAACCATTA---GGAATAGCACCCACCAAGGCAAAGAGAAGAGTGGTG-----  
-----CAGAGAGAAAAAAGAGCA--GTGGGA--ATAGGAGCT-----  
GTGTTTCCTTGGGTTCTTGGGAGCA--GCAGGAAGCACTATG--GGCGCAGCGTCA---  
ATAACGCTGACGGTACAA---GCCAGACAA---TTATTG---TCTGGTATAGTGCAACAGCAGAAC---  
AATTTG---CTGAGG---GCTATTGAGGCGCAACAGCATCTGTTGCAACTCACAGTCTGGGGCATC  
>JN944897  
TTCTACTGCAATACAACACAACCTGTTTAATAGTACCTGGAATCTTAATAGTACCTGGAATGGAACATAAAATTT  
TAAATAAC-----  
-----ACT---  
ACAAGAAATGACACAATCATACTCCCATGCAGAATAAGACAAATTATAAACTTGTGGCAAAAAGTAGGAAAAG  
CAATGTATGCCCCCTCCCATCAGAGGACAAATTAATTGTACATCAAAT---  
ATCACAGGGCTGCTATTAACAAGAGATGGTGGAAATACAAGTGAGACC-----  
-----  
-----  
AACACCACTGAGGTCTTCAGACCTGGAGGAGGAAACATGAGGGACAATTGGAGAAGTGAATTATATAAAATATA  
AAGTAGTAGAAATTGAACCAATA---GGGATAGCACCCACCAAGGCAAAGAGAAGAGTGGTG-----  
-----CAGAGAGAAAAAAGAGCA--GTGGGA--ATAGGAGCT-----  
---GTGTTTCCTTGGGTTCTTGGGAGCA--GCAGGAAGCACTATG--GGCGCAGCGTCG---  
GTAGCGCTGACGGTACAG---GCCAGACAG---TTATTG---TCTGGTATAGTGCAACAGCAGAAC---  
AACTTG---CTGAGG---GCTATTGAGGCGCAACAACATATGTTGAAACTCACGGTCTGGGGCATT  
>JN944907  
TTCTACTGTGATACAAAACAACCTGTTTAATAGTACTTGGAAATGCTACTAAGGCAAAATGGCACTACA-----  
-----  
-----  
GGAAATGACACAATCATACTCCCATGCAGAATAAAGCAAATTATAAACATGTGGCAGAAAGTAGGAAAAGCAA  
TGTATGCCCCCTCCCATCAAAGGAAAAATTAGTTGCTCATCAAAT---  
ATCACAGGGCTGCTATTAACAAGAGATGGAGGAGGTGGGGGACAG-----  
-----  
-----  
AATGAGACCTTCAGACCTGCAGGGGGAGATATGAGGGACAATTGGAGAAGTGAATTATATAAAATATAAGGTAG  
TAAAAATTGAACCATTA---GGAGTAGCACCCACCAGGGCAAAGAGAAGAGTGGTG-----  
-----CAGAGAGAAAAAAGAGGA--GTAGGA--ATAGGAGCT-----  
ATGGTCCTTGGGTTCTTGGGAGCA--GCAGGAAGCACTATG--GGCGCAGCATCA---  
ATGATGCTGACGGTACAA---GCCAGACAA---TTGTTG---TCTGGTATAGTGCAACAGCAGAAC---  
AATCTG---CTGAGA---GCTATTGAGGCGCAACAACATATGTTGCAACTCACAGTCTGGGGCATC  
>JN944909  
TTCTACTGCGATTCAACAGCGCTGTTTAATAGTACATGGAGGAGAAATAACAACCTTGGACTGGT-----  
-----  
-----  
ACTACAGGAAATATCACACTCCAATGCAGAATAAAACAAATTATAAACATGTGGCAGAAAGTAGGAAAAGCAA  
TGTATGCCCCCTCCCATCAGAGGATACATTAAGTGTTCATCAAAT---  
ATTACAGGACTGATATTAACAAGAGATGGTGGTAATAATGATAGT-----  
-----  
-----  
GAAACCGAGATCTTCAGGCCTGGAGGAGGGAATATGAAGGACAATTGGAGAAGTGAATTATATAAAATATAAAG  
TAATAAAAATTGAACCATTA---GGAATAGCACCCACCAAGGCAAAGAGAAGAGTGGTG-----  
-----CAAAGAGAAAAAAGAGCA--ATAGGA--ATAGGAGCT-----  
CTTCTCCTTGGGTTCTTAGGAGCA--GCAGGAAGCACTATG--GGCGCAGCGTCA---  
GTGACGCTGACGGTACAA---GCCAGACAA---TTATTG---TCTGGTATAGTGCAACAGCAGAAC---  
AATCTG---CTGAGG---GCTATTGAGGCGCAACAGCATCTGTTGCAACTCACAGTCTGGGGCATC  
>FJ469691  
TTCTACTGTAATACAACACAACCTGTTTAATAGTACTTGGACTGGGAATAATACTACAAATAAC-----  
-----  
-----  
ATTTTCAGGATATATCACACTCCCATGCAGAATAAAACAAATTATAAACATGTGGCAAGAAGTAGGAAAAGCAA  
TGTATGCCCCCTCCCATCAGTGGACAAATCAGGTGTTTCATCAAAT---

ATTACAGGGCTACTATTAACAAGAGATGGTGGTAATAGTAATAACACC-----  
-----  
-----  
AACGGGACGACCGAGGTTTTTCAGACCTATAGGAGGAAATATGAGGGACAATTGGAGAAGTGAATTATATAAAT  
ATAAAGTAGTAAAAATTGAACCATTA---GGAGTAGCACCCACCACGGCAAAGAGAAGAGTGGTG-----  
-----CAAAGAGAAAAAAGAGCA---GTGGGA---ATAGGAGCT---  
-----TTGTTTCCTTGGGTTCTTGGGAGCA---GCAGGAAGCACTATG---GGCGCAGCGTCA---  
TTGACGCTGACGGTACAG---GCCAGGCTA---TTATTG---TCTGGTATAGTGCAACAGCAGAAC---  
AATCTG---CTGAGA---GCTATTGAGGCGCAACAACATCTGTTGCAACTCACAGTCTGGGGCATC  
>FJ469696  
TTCTACTGTAATACAACAATGTTTAAATAGTACTTGGGAATAGTACTGAAGGGTCAAATAAGACTGGAGGA-  
-----  
-----  
AATGACACAACAATCACACTCCCATGCAGAATAAAACAAATTATAAACATGTGGCAGGAAGTAGGAAAAGCAA  
TATATGCCCCCTCCCATCAGAGGACTAATTAGATGTTTCATCAAAT---  
ATTACAGGGTTGCTAATAACAAGAGATGGTGGTAATAACAATAAC-----  
-----  
-----  
AACAAAGACAGAGACCTTCAGACCTGGAGGAGGAGATATGAGGGACAATTGGAGAAGTGAATTATATAAATATA  
AAGTAGTAAAAATTGAACCATTA---GGAGTAGCACCAACCAAGGCAAAGAGGAGAGTGGTG-----  
-----CAGAGAGAAAAAAGAGCA---ATGGGA---ATGGGAGCT-----  
---TTGTTTCCTTGGGTTCTTGGCATCA---GCAGGAAGCACTATG---GGCGCAGCGTCA---  
ATAACGCTGACGGTACAG---GCCAGACAA---TTATTG---TCTGGTATAGTGCAACAGCAGAAC---  
AATTTG---CTGAGA---GCTATTGAGGCGCAACAGCATCTGTTGCAACTCACAGTCTGGGGCATC  
>FJ469700  
TTCTACTGTGACTCAACACAACCTGTTTAAATAGTTCCTGGAATGGTACTGGAGGGTCAAGTAAC-----  
-----  
-----  
ACTGCAGAGAATATCACACTCCATTGTAGAATAAGACAAATTGTAACTTGTGGCAAGAAGTGGGAAGAGCAA  
TGTATGCCCCCTCCTATCAGAGGACAAATTAGCTGCTCATCAAAT---  
ATTACAGGACTGATATTAACAAGAGATGGAGGTAATAACACTGAAAGT-----  
-----  
-----  
AATAACACCGAGACCTTCAGACCTGGAGGAGGAAATATGAGGGATAATTGGAGAAGTGAATTATATAAATATA  
AAGTAGTAAAAATTGAACCAATA---GGAGTAGCACCCACCAAGGCAAAGAGAAGAGTGGTG-----  
-----CAGAGAGAAAAAAGAGCG---GTGGGA---TTCGGAGCT-----  
---ATGTTTCCTTGGGTTCTTGGGAGCA---GCAGGAAGCACTATG---GGCGCAGCGTCG---  
ATAACGCTGACGGTACAG---GCCAGACAA---TTATTG---TCTGGTATAGTGCAACAGCAGAAC---  
AATTTG---CTGAGG---GCTATTGAGGCGCAACAGCATCTGTTGCAACTCACGGTCTGGGGCATC  
>FJ469708  
TTCTATTGTAATACAACAACCTGTTTAAATAGTACTTGGAACAGTAATGAAGAGACAAAGAATGTCACA---  
-----  
-----  
GGAAATGGAACCTATCACACTCCCATGCAGAATAAGACAAATTATAAACATGTGGCAACAAGTAGGAAAAGCAA  
TGTATGCCCCCTCCATTAGCGGAAAAATTAGCTGTTTCATCAAAC---  
ATTACAGGGCTACTATTAACAAGAGATGGGGGTGAAAACACGAGC-----  
-----  
-----  
GAGACCGAGATTTTTAGACCTGCAGGAGGAAATATGAAGGACAATTGGAGAAGTGAATTATACAAATATAAAG  
TAGTAAAAATTGAACCATTA---GGAATAGCACCCACCAAGGCAAAGCGAAGAGTGGTG-----  
-----CAAAGAGAAAAAAGAGCA---ATAGGA---ATAGGAGCT-----  
ATGTTTCCTTGGGTTCTTGGGAGCA---GCAGGAAGCACTATG---GGCGCAGCGTCA---  
CTGACGCTGACGGTACAG---GCCAGACTA---TTATTG---TCTGGTATAGTGCAACAGCAGAAC---  
AATCTG---CTGAGG---GCTATTGAGGCGCAGCAGCATCTGTTGCAACTCACAGTCTGGGGCATC  
>FJ469709  
TTCTACTGTGTTACAACAAAACCTGTTTAAATAGTACTTGGACGTTTAAATAGTACTAATGGTACTTGGACGTTGA  
ATAGTACTTGG-----  
AATAGCACTGAAGGGCTA-----  
AACAACAATGACACTATCATACTCCCATGCAGAATAAAACAAATTATAAACATGTGGCAAACAGTAGGAAAAG  
CAATGTATGCCCCCTCCAATCAGAGGACCAATTAACCTGTACATCAAAT---

ATTACAGGGTTGCTATTAACAAGAGATGGTGGTAAGGAGACCAAC-----  
-----  
-----  
ACCACCACCGAGACCTTCAGACCTGGAGGAGGAGACATGAGGGACAATTGGAGAAGTGAATTATATAAATATA  
AAGTAGTAAAAATTGAGCCATTA---GGAATAGCACCCACCAAGGCAAGGAGAAGAGTGGTG-----  
-----CAAAGAGAAAAAAGAGCA---GTGGGA---ATAGGAGCT-----  
---GTGTTCCCTTGGGTTCTTGGGAGCA---GCAGGAAGCACTATG---GGCGCAGCGTCA---  
CTGACGCTGACGGTACAG---GCCAGACTA---TTGTTG---TCTGGTATAGTGCAGCAGCAGAAC---  
AATCTG---CTGAGG---GCTCTTGAGGCGCAACAACATCTGTTGCAACTCACAGTCTGGGGCATC  
>JQ250880  
TTCTACTGTAATACAACACCATTGTTTAATGGTAGTAGTTGGAATCTAAATAAGACTAAAGAAAATACAACATA  
ATCTA-----  
-----  
GAAAAATGGCACAATCACCTTCCAATGCAGAATAAAACAATTTGTAAACATGTGGCAGAAAGTAGGAAAAGCAA  
TGTATGCTCCTCCCATCAGAGGACGGATTGAATGTTTCATCAAAT---  
ATTACAGGGCTGATATTAACAAGAGATGGGGACATGAATAGTACA-----  
-----  
-----  
GGGAACGAGACCTTCAGACCTGGAGGAGGAGATATGAGGGACAATTGGAGAAGTGAATTATACAAATACAAAG  
TAGTAAAAATTGAGCCATTA---GGAGTAGCACCCACCAAGGCAAAGAGAAGAGTGGTG-----  
-----CAGAGAGAAAAAAGAGCA---GTGGGAGCACTAGGAGCT-----  
ATGTTCCCTTGGGTTCTTGGGAGCA---GCAGGAAGCACTATG---GGCGCAGCGTCA---  
GTGACGCTGACGGTACAG---GCCAGACTA---TTATTG---TCTGGTATAGTGCAACAGCAAAAT---  
AATTTG---CTGAAG---GCTATTGAGGCGCAACAGCGTCTGTTGCAACTCACAGTCTGGGGCATC  
>HQ217266  
TTCTACTGTAACACAACACAATTGTTTAATAGTACTTGAATAAAAATAGTACTATTGAGGATAGA-----  
-----  
-----  
AATGATGCTAATATCACACTCCCATGCAGGATAAGGCAAATTGTAAACATGTGGCAGCGAGTAGGAAAAGCAA  
TGTATGCTCCTCCCATCAGCGGAATAATTAGATGTTTCATCAAAT---  
ATTACTGGGCTGCTATTAACAAGAGATGGAGGTAGTAATGCTACT-----  
-----  
-----  
ACCGAGACCTTCAGACCTGGAGGAGGAGATATGAGGGATAATTGGAGAAGTGAATTATATAAATACAAAGTAG  
TAAAAATTGAACCATTA---GGAATAGCACCCACCAAGGCAAAGAGAAGAGTGGTG-----  
-----CAGAGAGAAAAAAGAGCG---GCAATAGGACTAGGAGCT-----  
TTGTTCCCTTGGGTTCTTGGGAGCA---GCAGGAAGCACTATG---GGCGCAGCGTCA---  
ATAACGCTGACGGTACAG---GCCAGACTA---TTATTG---TCTGGTATAGTGCAGCAGCAGAAC---  
AATTTG---CTGAGG---GCTATTGAGGCGCAACACCATCTGTTGCAACTCACAGTCTGGGGCATC  
>JQ403068  
TTCTACTGTGATTTCATCAAACTGTTTAATAGTACTTGAATGTAAGTGTGGAATGTAAGTGGTTGGAATG  
GTACTGAA-----  
-----  
GAGTCAAATGGCACTATCACACTCCCATGCAGAATAAAACAGATTATAAACATGTGGCAAGAAGTAGGAAAAG  
CAATGTATGCCCCTCCCATCAGAGGACTAATTAGATGTTCAACAAAT---  
ATTACAGGGCTGATATTAACAAGAGATGGTGGTAACGAGAACAAT-----  
-----  
-----  
AACAAATAGTGAGGTCTTTAGACCTGGAGGAGGAGATATGAGGGACAATTGGAGAAGTGAATTATATAAATATA  
AAGTAGTAAAAATTGAACCATTA---GGAGTAGCACCCACCAGGGCAAAGAAGAGTGGTG-----  
-----CAGAGAGAAAAAAGAGCA---GTGGGA---CTAGGAGCA-----  
---CTGTTCCCTTGGGTTCTTGGGAGCA---GCAGGAAGCACTATG---GGCGCAGCGTCA---  
ATGACGCTGACGGTACAA---GCCAGACAA---TTATTG---TCTGGTATAGTGCAACAGCAGAAC---  
AATTTG---CTGAGG---GCTATTGAGGCGCAACAACATTTGTTGCAACTCACAGTCTGGGGCATC  
>JQ403095  
TTCTACTGTAATTCAACGCAACTGTTTAATAGTACTTGGGATATTAATAATACTAGTAGGGCAAAT-----  
-----  
-----  
AGCACTGGAAATATCACACTCCCATGCAGAATAAGACAAATTATAAACATGTGGCAGGAAGTAGGAAAAGCAA  
TGTATGCCCCTCCCATCGCGGGACAAATTAGATGTACATCAAAT---

ATTACAGGACTGTTATTAACAAGAGATGGTGGTAATGACACTACC-----  
-----  
-----  
ACCGAGATCTTCAGACCTGGAGGAGGAAATATGAAGGACAATTGGAGAAGTGAATTATATAAAATACAAAGTAG  
TAAAAATTGAACCATTA---GGAATAGCACCCACCAAGGCAAAGAGAAGAGTGGTG-----  
-----CAGAGAGAAAAAAGAGCA--ATAGGA--CTGGGAGCT-----  
ATGTTCTTGGGTTCTTGGGAGCA--GCAGGAAGCACCATG--GGCGCAGCGTCA---  
GTGACGCTGACGGTACAG---GCCAGACAA--TTATTG---T'TGGTATAGTGCAACAGCAGAAC---  
AATCTG---CTGAGG---GCTATTGAGGCGCAACAGCATATGTTGCAACTCACAGTCTGGGGCATC  
>KM259364  
TTCTACTGTGATACAACACCACTATTTAATAGTATTTGGAATACAACACAAATATTTAATGGT-----  
-----ACT---  
TGGAAATGATACTGTAGGGTCT-----  
GGAGAAAATGACACAATCATACTCCAATGCAGAATAAAACAAATTATAAACATGTGGCAAGAAGTAGGAAAAG  
CAATGTATGCCCCCTCCCATCAGAGGACAAATTAGATGTGAATCAAAT---  
ATTACAGGGCTGCTATTAACAAGAGATGGTGGTACT-----  
-----  
GGTGAGAACAACACTGGTGAGAAC-----  
AACACTGAGATCTTCAGACCTGGAGGAGGAGATATGAGGGACAATTGGAGAAGTGAATTATATAAAATATAAAG  
TAGTAAAAATTGAACCATTA---GGAGTAGCACCTACTAAGGCAAAGAGGAGAGTGGTG-----  
-----CAGAGAGAAAAAAGAGCA--GTGGGA--TTAGGAGCT-----  
GTGCTCTTTGGGTTCTTGGGAGCA--GCAGGAAGCACTATG--GGCGCAGCGTCA---  
ATAACGCTGACGGTACAG---GCCAGACAA--TTATTG---TCTGGTATAGTGCAACAGCAAAAC---  
AATTTG---CTGAAG---GCTATTGAGGCGCAACAGCATCTGTTGCAGCTCACAGTCTGGGGCATC  
>KM259479  
TTCTACTGTAATACAACACGGCTGTTTAATAGTGAGTGGCTGTCCAATGGTACT-----  
-----  
-TGGAAAGGGTCAAAT-----  
GACACTGGAGAAAATATTACACTCCCATGCAGAATAAAACAAATTATAAACATGTGGCAGGAAGTAGGAAAAG  
CAATGTATGCTCCTCCCATCAGAGGACAAATCAATTGTGTATCAAAT---  
ATTACAGGAATATTATTAACAAGAGATGGGGGT-----  
-----  
AATGGCAATAACAGT---  
ACCAATGAGACTTTTCAGACCTGGAGGAGGAGATATGAGGGACAATTGGAGAAGTGAATTATATAAAATATAAAG  
TAGTAAAAATTGAACCATTA---GGAGTAGCACCCACCAAGGCAAAGAGAAGAGTGGTG-----  
-----CAGAGAGAAAAAAGAGCA--GCA-----CTAGGAGCT-----  
ATATTCCTTGGGTTCTTGGGAGCA--GCAGGAAGCACTATG--GGCGCAGCGTCA---  
TTGACGCTGACGGTACAA--GCCAGACTT--TTATTG---TCTGGTATAGTGCAACAGCAAAAC---  
AATTTG---CTGAGG---GCTATTGAGGCGCAACAGCATCTGTTGCAACTCACAGTCTGGGGCATC  
>EU578667  
TTCTACTGCAATTCAACACAACCTGTTTAATAGTACTTGAATGATAGTACTTGAATGATACTACAGAGCCAA  
AT-----  
-----  
AACACTGACGACACAATCACACTCCCATGTAGAATAAGACAAATTGTAACAGGTGGCAGGAAGTAGGAAGAG  
CAATGTATGCCCCCTCCCATCAGTGGACAAATTAAGTGTTCATCACAG---  
ATTACAGGGCTGATATTAACAAGAGATGGTGGTATTAACGAGAGT-----  
-----  
-----  
AATACCGAGACCTTCAGACCTGGAGGAGGAGATATGAGGGACAATTGGAGAAGTGAATTATATAAAATATAAAG  
TAGTAAAAATTGAACCATTA---GGATTAGCACCCACCAAGGCAAAGAGAAGAGTGGTG-----  
-----CAGAGAGAAAAAAGAGCA--GCA-----CTAGGAGCT-----  
GTGTTCTTGGGTTCTTGGGAGCA--GCAGGAAGCACTATG--GGCGCAGCGTCA---  
ATAGCGCTGACGGTACAG---GCCAGACTA---CTATTG---TCTGGTATAGTGCAACAGCAGAGC---  
AATCTG---CTGAGA---GCTATTGAGGCGCAACAACATATGTTGCAACTCACAGTCTGGGGCATC  
>HQ217967  
TTCTACTGTAATACAACACAATTGTTTAATAGTACATGGAAGAATGGTACTGCTGGGGTCAATGATACTACA-  
-----  
-----  
GGAAATGACACCCATATCACCCCTCCCATGCAGAATAAAACAAATTATAAACATGTGGCAGCAAGTAGGAAAAG  
CAATGTATGCCCCGCCCATCAGAGGACAAATTAGTTGTTTATCAAAT---

ATTACAGGGCTACTATTAACAAGAGATGGTGGTAATAACGACAAAAACGGG-----  
-----  
-----  
ACCAACATCACCGAGATCTTCAGACCTGGAGGAGGAGATATGAGGGATAATTGGAGAAATGAATTATATAGAT  
ATAAAGTAGTAAAAATTGAACCATTA---GGAGTAGCACCCACCAAGGCAAAGAGAAGAGTGGTG-----  
-----CAAAGAGAAAAAAGAGCA---GCGGG---TTAGGAGCT---  
-----TTGTTTCCTCGGGTTCTTGGGAGCA---GCAGGAAGCACTATG---GGCGCAGCATCA---  
GTGACGCTGACGGTACAG---GCCAGACAA---TTATTG---TCTGGTATAGTGCAACAGCAGAAC---  
AATTTG---CTGAGG---GCTATTGAGGCGCAACAGCATCTGTTGCAACTCACAGTCTGGGGCATC  
>HQ218020  
TTCTACTGTAATACAGATAAACTGTTTAATAGTAATTGGACAACAAATACTAGCTCTGAGAATGTAACAAGTG  
GCACT-----  
-----  
GAAGGAAATGATATAATCACACTCCCATGCAGAATAAGACAAATTATAAACCTGTGGCAGGAAGTAGGAAAAG  
CAATGTATGCCCCCTCCCATCCAAGGACAAATTAATTGTTTCATCAAAT---  
ATTACAGGGCTGTTATTAACAAGAGATGGTGGTGCTAACCACAA-----  
-----  
-----  
AACAACTGAGGTCTTCAGACCTGGAGGAGGAGATATGAGGGACAATTGGAGAAGTGAATTGTATAAATATA  
AAGTAATAAAAAATTGAGCCAGTA---GGAATAGCACCCACCAAGGCAAAGAGAAGAGTGGTG-----  
-----CAGAGAGAAAAAAGAGCA---GTGACG---ATAGGAGCT-----  
---GTGTTCCCTTGGGTTCTTGGGAACA---GCAGGAAGCACTATG---GGCGTAGCGTCA---  
CTGACGCTGACGGTACAG---GCCAGACAA---TTATTG---TCTGGTATAGTGCAACAGCAGAAC---  
AATTTG---CTGAGA---GCTATTGAGGCGCAACAGCATCTATTGCAACTCACAGTCTGGGGCATC  
>HQ218034  
TTCTACTGTAATACATCAGGGCTGTTTAATAGTACTTGGAAATGTTTCTGCAGATTTGAATACCACTGAAGAGT  
CA-----  
-----  
AATAGTAATGAAACCATCACACTCCAATGCAGAATAAAACAATTTATAAACATGTGGCAGGAAGTAGGAAGAG  
CAATGTATGCTCCTCCCATCAGAGGACAAATTAATGTTTCATCAAAT---  
ATTACAGGGCTACTATTAACAAGAGATGGTGGTAACGACAGCGCC-----  
-----  
-----  
CCCACAGAGACCTTCAGACCAGGAGGAGGAGATATGAGGGACAATTGGAGAAGTGAATTATATAAATATAAAG  
TAGTACAGATTGAACCAATA---GGAGTAGCACCCACCAAGGCAAAGAGAAGAGTGGTG-----  
-----CAAAGAGAAAAAAGAGCA---GTGGGA---TTAGGAGCT-----  
ATGTTCCCTTGGGTTCTTGGGAGCA---GCAGGAAGCACTATG---GGCGCAGCGTCA---  
GTGACGCTGACGGTACAG---GCCAGACAA---TTATTG---TCTGGTATAGTGCAACAGCAGAAC---  
AATTTG---CTGATG---GCTATTGAGGCGCAACAAAACTGTTGCAACTCACAGTCTGGGGCATC  
>GU330865  
TTCTATTGTAATACAACAAAACTGTTTAACAGTACTTGGATGGCTAATAGTACTTGAATGATACTACACAGT  
CA-----  
-----  
GATAACAATGACACTATCATACTCCAATGCAGAATAAAACAATTTATAAACAGGTGGCAGGAAGTAGGAAGAG  
CTATGTATGCCCCCTCCCATTAAGGGAGAAATTAATGTTTCATCAAAT---  
ATTACAGGGTTGCTATTAACAAGAGATGGTGGTAATATTGATAAC-----  
-----  
-----  
GAGACTGAGACCTTTAGACCTGGGGGAGGAGACATGAGGGACAATTGGAGAAGTGAATTATATAAATATAAAG  
TAGTAAAAATTGAGCCATTA---GGAGTAGCACCCACCAAGGCAAAGAGAAGAGTGGTG-----  
-----CAGAGAGAAAAAAGAGCA---GTAACA---CTGGGAGCT-----  
ATGTTCCCTTGGGTTCTTGGGAGCA---GCAGGAAGCACTATG---GGCGCAGCGTCG---  
ATGACGCTGACGGTACAG---GCCAGACAA---TTATTG---TCTGGTATAGTGCAACAGCAGAGC---  
AACATG---CTGAGA---GCTATTGAGGCGCAACAACATCTGTTGCAACTCACAGTCTGGGGCATC  
>JF689877  
TTCTACTGTAATACATCACAATTGTTTAATATGAGTTCAACACAACCTGTTTAATAAGACTTGGACTAATGAC-  
-----  
-----  
ACTAGAGAAAACATCACACTCCCATGTAGGATAAGACAAATTGTAAACCTGTGGCAGGAAGTAGGAAAAGCAA  
TGTATGCCCCCTCCCATCAGTGGACCAATTAGATGTGAATCAAAT---

ATTACAGGGCTGATATTAACAAGAGATGGTGGTAATGAGACCAATGGG-----  
-----  
-----  
AATGAGACGATTGAGACTTTCAGACCTGGAGGAGGTAATATGAAGGACAATTGGAGAAGTGAATTATATAAAT  
ATAAAGTAGTAAGAATTGAACCAATA---GGAGTAGCACCCACCAAGGCAAAGAGAAGAGTGGTG-----  
-----CAGAGAGAAAAAAGAGCA---GTGGGA---ATAGGAGCT---  
-----GTGTTCCCTTGGGTTCTTGGGAGCA---GCAGGAAGCACTATG---GGCGCAGCGTCA---  
ATGACGCTGACGGTACAG---GCCAGACAA---TTATTG---TCTGGTATAGTGCAACAGCAGAAC---  
AATCTG---CTGAGG---GCTATTGAGGCGCAACAACATCTGTTGCAACTCACAGTCTGGGGCATC  
>JF689879  
TTCTACTGTGATACAACAAAGCTGTTTAATAGCACTTGGCAGGTTAATAGTACTTGGGAATGATACTGAAAAG-  
-----  
-----  
TCAAAATGACACTCTCACAATCCCATGTAGAATAAGGCAAATTGTAAATAGGTGGCAGGAAGTAGGAAAAGCAA  
TGTATGCCCCCTCCCATCAGTGGACTAATTAGTTGTTTCATCAAAT---  
ATTACAGGAATGATATTAACAAGAGATGGTGGGTATAATAATGGGAGC-----  
-----  
-----  
AATAATACGGAGGTCTTCAGACCTGGAGGAGGAAATATGAAGGATAATTGGAGAAGTGAATTATATAAATATA  
AAGTAGTAGAAATTGAGCCATTA---GGAGTAGCACCTACCAGGGCAAGGAGAAGAGTGGTG-----  
-----CAAAGAGAAAAAAGAGCA---GTGGGAACATTAGGAGTT-----  
---ATGTTCCCTTGGGTTCTTGGGAGCA---GCAGGAAGCACTATG---GGCGCAGCGTCG---  
CTGACGCTGACGGTACAA---GCCAGGCAA---TTATTG---TCTGGTATAGTGCAACAGCAGAGC---  
AATCTG---CTAAGG---GCTATTGAGGCGCAACAGCATATGTTGCAACTCACAGTCTGGGGCATC  
>JF689883  
TTCTACTGTAATTCAACACAACCTGTTTAATAGCACTTGGCATGCTAATGGGAGTAATACAAAT-----  
-----  
-----  
CTCGCTACTAACATCACACTCCCATGTAAAATAAAGCAAGTTATAAACATGTGGCAGGAAGTAGGAAAAGCAA  
TGTATGCCCCCTCCCATCGAAGGACTAATTAGATGCTCATCAAAT---  
ATTACAGGAATACTATTAACAAGAGATGGTGGTAACAGGAACGGGACC-----  
-----  
-----  
AGTGATACTGAGATCTTCAGGCCTGCAGGAGGAGATATGAGGGACAATTGGAGAAGTGAATTATATAAATATA  
AAGTAGTAAAAATTGAACCATTA---GGAGTAGCACCCACCAAGGCTAAGAGAAGAGTGGTG-----  
-----CAGAGAGAAAAAAGAGCA---GTGGGA---ATCGGAGCG-----  
---TTGTTCCCTTGGGTTCTTGGGAGCA---GCAGGAAGCACTATG---GGCGCAGCGTCA---  
ATGGCGCTGACGGTACAG---GCCAGACAA---TTATTG---TCTGGTATAGTGCAACAGCAGAAC---  
AATCTG---CTGAGG---GCTATTGAGGCGCAACAGCATCTGTTGCAACTCACAGTCTGGGGCATC  
>JF689885  
TTCTACTGTGATACAAAAGAACTGTTTAATAGTACTTGGACTAACAATGGGACTGAGAATAAGAATGAGACTG  
AG-----  
-----  
AATAAGAATGGGACTATCACACTCCCATGTAGAATAAAACAAATTGTAAACATGTGGCAGGAAGTAGGAAAAG  
CAATGTATGCCCCCTCCCATCAGGGGACAAATTAGATGTGAATCAAAT---  
ATTACAGGGCTGCTATTAACAAGAGATGGGGGTACGGATAATGATAATAGC-----  
-----  
-----  
ACAAACACCACCGAGATCTTTAGACCTGTGGGAGGAGACATGAAGGATAATTGGAGAAGTGAATTATATAAAT  
ACAAAGTAGTAAAAGTTGAACCATTA---GGAATAGCACCCACCAAGGCAAAGAGAAGAGTGGTG-----  
-----CAGAGAGAAAAAAGAGCA---TTAACA---CTAGGAGCG---  
-----ATGTTCCCTTGGGTTCTTAGGAGCA---GCAGGAAGCACTATG---GGCGCAGCGTCA---  
ATAACGCTGACGGTACAT---GCCAGGCAA---TTATTG---ACTGGTATAGTGCAACAGCAGAGC---  
AATCTG---CTGAAG---GCTATTGAGGCGCAACACCACCTGTTGCAACTCACAGTCTGGGGCATC  
>JF689890  
TTCTACTGTAATACAACAAAACCTGTTTAATAGTACTTGGGAGGTTAATGGAACCTTGGCCTGAAGGGTCAAATA  
ACACT-----  
-----  
GAAGGAAATGACACAATCACACTCCCATGCAGAATAAAACAAATTATAAACATGTGGCAGGAAGTAGGAAAAG  
CAATGTATGCCCCCTCCCATCAGAGGACAAATTAGATGTGTATCAAAT---

ATTACAGGGCTGCTATTAACAAGAGATGGTGGTAGTGACAACCAGACT-----  
-----  
-----  
AACACAATACTGAGACCTTCAGACCTGGAGGAGGAGATATGAAGGACAATTGGAGAAGTGAATTATATAAAT  
ATAAAGTAGTACAAATTGAACCATTA---GGAATAGCACCCAACAAGGCAAAGAGAAGAGTGGTG-----  
-----CAGAGAGAAAAAAGAGCA---GTGGGAGTAGTAGGAGCT---  
-----ATGTTTCCTTGGGTTCTTGGGAGCA---GCAGGAAGCACTATG---GGCGCAGCGTCA---  
GTGACGCTGACGGTACAG---GCCAGACTA---TTATTG---TCTGGTATAGTGCAACAGCAAAAC---  
AATTTG---CTGAGA---GCTATTGAGGCGCAACAGCATCTGTTGCAACTCACAGTCTGGGGCATC  
>JF689893  
TTCTACTGTAATTCAACACCACTGTTTAATAGTACTTGGAAGGTTAATGATACTCGGAATGATACTGGAGGA-  
-----  
-----  
GAAAAATATCACACTCACACTCATATGCAGAATAAAACAAATTATAAACATGTGGCAGACAGTAGGAAAAGCAA  
TGTATGCCCCCTCCTATCAAAGGACAAATTAGATGTTTCATCAAAT---  
ATTACAGGGCTGTTATTAACCAGAGATGGTGGTAATGAGAACGAG-----  
-----  
-----  
AACAACACCGAGATCTTCAGACCTGCAGGAGGAGATATGAGGGACAATTGGAGAAGTGAATTATATAAATATA  
AAGTAGTACAAATTGAACCATTA---GGAGTAGCACCCAACAGGGCAAAGAGAAGAGTGGTG-----  
-----CAGAGAGAAAAAAGAACA---GTGGGA---ATAGGAGCT-----  
---TTGTTTCCTTGGGTTCTTGGGAGCA---GCAGGAAGCACTATG---GGCGCAGCGTCA---  
ATGACGCTGACGGTACAG---GCCAGACAA---TTATTG---TCTGGTATAGTGCAACAGCAGAGC---  
AATCTG---CTGAGG---GCTATTGAGGCGCAACAGCATCTGTTGCAACTCACAGTCTGGGGCATT  
>MK383385  
TTCTACTGTAATACAACAAAACTATTTAATAGTACTTGGAATAGTACTGAAGAATTAAATATTACTGAAGGAT  
CAAATACC-----  
-----  
ACGGGAGACCCTATCATACTCCCATGCAGGATAAAACAAGTTATAAACCTGTGGCAGGAAGTAGGAACAGCGA  
TGTACGCCCCCTCCCATCAGTGGACAAATTAACTGTTTCATCAAAT---  
ATTACAGGGCTGCTATTAACAAGAGATGGTGGTGGTTGACAGTAAC-----  
-----  
-----  
ACGACCGAGATTTTCAGACCTGGAGGAGGAGATATGAGGGACAATTGGAGAAGTGAATTATATAAATATAAAG  
TAGTAAAAATTGAACCATTA---GGAGTAGCACCCACCAGGGCAAAGAGAAGAGTGGTG-----  
-----CAAAGAGAAAAAAGAGCA---GTGGGA---ATAGGAGTT-----  
TTGTTTCCTTGGGTTCTTGGGAGCA---GCAGGAAGCACTATG---GGCGCAGCATCA---  
CTGACGCTGACGGTACAG---GCCAGACAG---TTATTG---TCTGGTATAGTGCAACAGCAGAAC---  
AATCTG---CTGAGG---GCTATTGAGGCGCAACAGCACCTGTTGCAACTCACAGTCTGGGGCATC  
>JX863994  
TTCTACTGTAATACAACACAACCTGTTTAATAGCACTTGTTTGGGAATGATACTCGGAATGGTAGTGAAGAG-  
-----  
-----  
GCAAATGACACAATTACACTCCCATGCAGAATAAAACAGATTATAAACATGTGGCAGGAAGTAGGAAAAGCAA  
TGTATGCCCCCTCCCATCAGAGGACAAATTAGCTGTTCTTCAAAC---  
ATTACAGGGCTGTTATTAACAAGAGATGGTGGTATAAGAAATAAC-----  
-----  
-----  
AATAGCGAGACCTTCAGACCTGGGGGAGGAGACATGAGGGATAATTGGAGAAGTGAATTATATAAATATAAAG  
TAGTAAAAATTGAACCATTA---GGAATAGCACCCACCAAGGCAAAGAGAAGAGTGGTG-----  
-----CAGAGAGAAAAAAGAGCA---GTGGGA---TTGGGAGCT-----  
TTGTTTCCTTGGTGTCTTGGGAGCA---GCAGGAAGCACTATG---GGCGCAGCGTCG---  
ATAACGCTGACGGTACAA---GCCAGAACT---TTATTG---TCTGGTATAGTGCAACAGCAGAAC---  
AATCTG---CTGAGG---GCTATTGAGGCGCAACAGCATCTGTTGCAACTCACAGTCTGGGGCATC  
>JX863995  
TTCTACTGTAGTACATCACAACTCTTTAATAGTACTTGGTATGAGAATGGAAGTAGGAATATTAGTGGA----  
-----  
-----  
GGGACAGAAATTATCACACTCCCATGCAGAATAAAACAAATTATAAACATGTGGCAGCAGGTAGGAAAAGCAA  
TGTATGCCCCCTCCCATCAGGGGATTAATTAAGTCTGTTTCATCAAAT---

ATTACAGGGCTGCTATTAACAAGAGACGGTGGTGGGAGAATAGA-----  
-----  
-----  
ACTAATGAAACATTTCAGACCTGGAGGAGGAGACATGAGGGACAATTGGAGAAGTGAATTATATAAATATAAAG  
TAGTAAAAAATTGAACCTTA---GGATTAGCACCCACCAAGGCAAAGAGAAGAGTGGTG-----  
-----CAGAGAGAAAAAAGAGCA--GTGGGA--ATAGGAGCT-----  
CTGTTCCCTTGGGTTCTTGGGAGCA--GCAGGAAGCACTATG--GGCGCAGCGTCA---  
ATAACGCTGACGGTACAG---GCCAGGCTA--TTATTG---TCTGGTATAGTGCAGCAGCAGAAC---  
AATCTG---CTGAGG---GCTATTGAGGCGCAACAGCACCTGTTGCAACTCACAGTCTGGGGCATC  
>JX863921  
TTCTACTGTAATACAGCAGAACTGTTTAATAGTACTTGGGATAATGACAGGTCAAATAGCACAGAA-----  
-----  
-----  
ATCACACTCCAATGTAGAATAAAACAAATTATAAACATGTGGCAGGAAGTAGGAAGAGCAATGTATGCCCCCTC  
CCATTGCAGGACAAATTAACCTGCACATCAAAT---  
ATTACAGGGCTGCTATTGACAAGAGATGGTGGTACAGACAGTAAT-----  
-----  
-----  
AATACTGAGATCTTCAGACCTGGAGGAGGAGATATGAGGGATAATTGGAGAAGTGAATTATATAAATATAAGG  
TAGTAAAAAATTGAACCATTA---GGAATAGCACCCACCAAGGCAAAGAGAAGAGTGGTG-----  
-----CAGAGAGAGAAAAAGAGCA--GTGGGA--CTGGGAGCT-----  
TTGTTCCCTTGGGTTCTTGGGAACA--GCAGGAAGCACTATG--GGCGCAGCGTCA---  
ATAGCGCTGACGGTACAG---GCCAGACAA--TTATTG---TCTGGTATAGTGCAACAGCAGAAC---  
AATTTG---CTGAGG---GCTATTGAGGCGCAACAGCGTATGTTGCAACTCACAGTCTGGGGCATC  
>JX864007  
TTCTACTGTAATACAGCACAGCTGTTTAATAGTACTTGGAGTACTTGAATGGTACTGAAGGAGCAAATAACA  
CTGAA-----  
-----  
-----  
GGAAATGATACAATCACACTCCCATGCAGAATAAAACAAATTATAAACATGTGGCAGGAAGTAGGAAAAGCAA  
TGTATGCCCCCTCCCATCAGTGGAATAATTAACCTGTTTCATCAAAT---  
ATTACAGGGTTGCTATTAACAAGAGATGGTAGTAATAACACAAAG-----  
-----  
-----  
AACGAGACCTTCAGACCTGAAGGAGGGAATATGAGGGACAATTGGAGAAGTGAATTATATAAATACAAAGTAG  
TAAAAATTGAACCATTA---GGAGTAGCACCTACCAAGGCAAAGAGAAGAGTGGTG-----  
-----CAAAGAGAAAAAAGAGCA--GTGGGA--TTAGGAGCT-----  
ATGTTCCCTTGGGTTCTTGTACAGCA--GCAGGAAGCACTATG--GGCGCAGCGTCA---  
GTGACGCTGACGGTACAG---GCCAGACAA--TTATTG---TCTGGTATAGTGCAACAGCAAAAC---  
AACTTG---CTGAGG---GCTATTGAGGCGCAACAGCATCTGTTGCAACTCACAGTCTGGGGCATC  
>JX864008  
TTCTACTGTAATACAACAAGGCTGTTTAATAGTACCTGGCATCCGAATGGTGCTAAAATATCAAATGGC---  
-----  
-----  
-----  
ACTGAAGAACTATCACACTCCCATGTAGAATAAAACAAATTATAAACAGATGGCAGGAAGTGGGAAAAGCAA  
TGTATGCCCCCTCCCATCCAAGGAAAAATTAGCTGTGTATCAAAT---  
ATTACAGGGCTACTATTAACAAGAGACGGTGGTAACAAGAGCCAT-----  
-----  
-----  
AACAGTACCGAGACCTTCAGACCTGGAGGAGGAGATATGAGGGACAATTGGAGAAGTGAATTATATAAATATA  
AAGTAGTAAAAATTGAGCCATTA---GGAGTAGCACCCGACCAAGGCAAAGAGAAGAGTGGTG-----  
-----CAGAGAGAAAAAAGAGCA--GTAACG---CTGGGAGCT-----  
---ATGTTCCCTTGGTTTCTTGGGAGCA--GCAGGAAGCACTATG--GGCGCAGCGTCG---  
ATGACGCTGACGGTACAG---GCCAGACTA--TTATTG---TCTGGTATAGTGCAACAGCAGAAC---  
AACTTG---CTGAGA---GCTATTGAGGCGCAACAACATCTGTTGCAGCTCACAGTCTGGGGCATC  
>JX864020  
TTCTACTGTAATACAACAATGCTGTTTAATAGTACTTGGTGGGCTAATGATACTTGAATAGCACTTGAATA  
ATAATATC-----  
-----AGT---  
AAAGAAAATGACACAATCACACTCCCATGCAGAATAAGACAAATTGTAAACATGTGGCAACAAGTAGGAAAAG  
CAATGTATGCACCTCCCATCAGAGGAGAAATTAGATGTTTCATCAAAT---

ATTACAGGGCTGCTAATAACAAGAGATGGGGGAATAACAACACTGGGAGAGGG-----  
-----  
-----  
GAGAATAAGACTGAGATCTTCAGACCTGTAGGAGGAGATATGAAGGACAATTGGAGAAGTGAATTATATAAAT  
ATAAAGTAGTAAGAATTGAACCATTA---GGAATAGCACCCACCAAGGCAAAGAGAAGAGTGGTG-----  
-----CAGAGAGAAAAGAAGAGCA---GTGGGA---CTCGGAGTT---  
-----TTTTTTCTTGGGTTCTTGGCAACA---GCAGGAAGCACTATG---GGCGCAGCATCA---  
ATAACGCTGACGGTACAG---GCCAGACAA---TTATTG---TCTGGTATAGTGCAGCAGCAGAAC---  
AATCTG---CTGAGA---GCTATTGAGGCGCAACAGCATCTGTTGCAACTCACAGTCTGGGGCATT  
>JF320375  
TTCTACTGTAATACAACAAAGCTGTTTAATAGTACTTGGAAATGGTACTGATACTTGGGATACTACTACAGAGG  
CA-----  
-----  
GATAACAATGACACTATCACACTCCCATGCAGAATAAAAACAAATTATAAACAGGTGGCAGGAAGTAGGAAAAG  
CAATGTATGCCCCCTCCCATTCAGAGACAGATCAGATGCTCATCAAAT---  
ATTACAGGGATACTCTTAACAAGAGATGGTGGTAGTAATGACACA-----  
-----  
-----  
GACAGTGAGACCTTCAGACCAGGAGGAGGAGATATGAGGGACAATTGGAGAAGTGAATTATATAAGTATAAAG  
TAGTAAGAATTGAGCCATTA---GGAATAGCACCCACCCAGGCAAAAAGAAGAGTGGTG-----  
-----CAGAGAGAAAAAAGAGCA---GTGGGAACAATAGGAGCT-----  
ATGTTCCCTTGGGTTCTTGGGAGCA---GCAGGAAGCACTATG---GGCGCAGCGTCA---  
TTGACGCTGACGGTACAG---GCCAGACAA---TTATTG---TCTGGTATAGTGCAGCAGCAGAAC---  
AATCTG---CTGAGA---GCTATTGAGGCGCAACAGCATATGTTGCAACTCACAGTCTGGGGCATC  
>JF320563  
TTCTACTGTAATTCAACAAAACTGTTTAATAGTACTTGGAAATGCTAATGGTACTATTAATGATACTAACGGGT  
CA-----  
-----  
AATACAACAGAGGTGATCACGCTCCCATGCAGAATAAAAACAATTTATAAACATGTGGCAGGAAGTAGGAAAAG  
CAATGTATGCCCCCTCCCATCAGAGGAGCAATTAAGTCTCATCAAAT---  
ATTACAGGAATACTGTTAACAAGAGATGGTGGAAAGTAACCAAAGT-----  
-----  
-----  
AATAACATCGAGGTCTTCAGACCTGGAGGAGGAGATATGAGGGACAATTGGAGAAGTGAATTATATAAATATA  
AAGTAGTAAGAATTGAACCATTA---GGAATAGCACCTACTAAGGCAAGGAGAAGAGTGGTG-----  
-----CAGAGAGAAAAAAGAGCA---GCGGGC---CTGGGAGCT-----  
---GTGTTCCCTTGGGTTCTTGGCAGCA---GCAGGAAGCACTATG---GGCGCAGCGTCA---  
ATAACGCTGACGGTACAG---GCCAGACAA---TTATTG---TCTGGTATAGTGCACAGCAGAAC---  
AATTTG---CTGAGG---GCTATTGAGGCGCAACAACGCATGTTGCAACTCGCAGTCTGGGGCATC  
>JF320530  
TTCTACTGTGATACAACACCGCTGTTTAATTCTACTTGGACAATACTACCAATGAAAATAACATTACT---  
-----  
-----  
AGAGGAGAAAACATCACACTCCCATGCAGAATAAAAACAAATTATAAATAGGTGGCAAGAAGTAGGAAAAGCAA  
TGTACGCCCCCTCCCATCGCAGGACAAATTAGATGCTCATCAAAC---  
ATTACAGGGCTGTTATTAACAAGAGATGGTGGTAATAATAAATACACC-----  
-----  
-----  
ACCACCACCGAGACCTTCAGACCAGGAGGAGGGGATATGAGAGATAATTGGAGAAGTGAATTATATAAATATA  
AAGTAGTAAAAATTGAGCCATTA---GGAATAGCACCCACCAAGGCAAGGAGAAGAGTGGTG-----  
-----CAAAGAGAAAAGAGAGCA---GTGGGAACAATAGGAGCT-----  
---ATGTTCCCTTGGGTTCTTGGGAGCA---GCAGGAAGCACTATG---GGCGCAGCGTCA---  
ATAACGCTGACGGTACAA---GCCAGACTA---TTATTG---TCTGGTATAGTGCAGCAGCAGAAC---  
AATCTG---CTGCAA---GCTATTGAGGCGCAACAGCATCTGTTGCAGCTCACAGTCTGGGGCATC  
>JF320631  
TTCTACTGTGACTCAACACAACCTGTTTAATAGTACTTGGACATTTACTGACGGGAGGTTAAATGAAACTGGGT  
TAAAT-----  
-----GAA---  
ACTGAAGCTGGAAATATCACACTCCCATGCAGAATAAAAACAATTTATAAATATGTGGCAGGGAGTAGGAAGAG  
CAATGTATGCCCCCTCCCATCAGAGGACACATTAAGTGTACATCAAAT---

ATTACAGGGTTGCTATTAACAAGAGATAGTGGTAGTAATGAGACTAGT-----  
-----  
-----  
AAGAACGGGTCAGAGACCTTCAGACCTGGAGGAGAAAAATATGAAGGACAATTGGAGAAGTGAATTATATAAAT  
ACAAAGTAGTAAGAATTGAACCATTA---GGAATAGCACCCACCAGGGCAAGGAGAAGAGTGGTA-----  
-----CAAAGAGAAAAAAGAGCA---GTGGGA---ATAGGAGCT---  
-----ATGTTTCCTTGGGTTCTTGGGAGCA---GCAGGAAGCACTATG---GGCGCAGCGTCA---  
CTGACGCTGACGGTACAG---GCCAGACAA---TTATTG---ACTGGTATAGTGCAACAGCAAAGA---  
AATTTG---CTGAGA---GCTATTGAGGCGCAACAGCATATGTTGCAACTCACAGTCTGGGGCATT  
>JF320045  
TTCTACTGTAATACATCAAACTGTTTAAACAGTACTTGGAGTATGAATAGTACTGAAGGGAGTATGAATGGTA  
CTGAAGGG-----  
-----GCAAAT-----  
AACACTGATGAGAAAATCGTACTCCAATGCAGAATAAAAACAAATTATAAACATGTGGCAGGAAGTAGGAAAAG  
CAATGTATGCCCTCCCATCAGCGGACTAATTAGATGTTTCATCAAAT---  
ATTACAGGGTTGTTATTAACAAGAGATGGCGGTAAAAAGGATAACATGACA-----  
-----  
-----  
GAGAAGGATGAGACAGAGACTTTCAGACCTTGGGGAGGAGATATGAGGGACAATTGGAGAAGTGAATTATATA  
AATATAAAGTAGTACAAATTGAACCATTA---GGAATAGCACCCACCAGGGCAAAGAGAAGAGTGGTG-----  
-----CAGAGAGAAAAAAGAGCA---GTGGGA---  
ATAGGAGCT-----CTATTCCTTGGGTTCTTGGGAGCA---GCAGGAAGCACTATG---  
GGCGCAGCGGCA---GTGACGCTGACGGTACAG---GCCAGACAA---TTATTG---  
TCTGGTATAGTGCAACAGCAGAAC---AATCTG---CTGAGA---  
GCTATTGAGGCGCAACAGCATCTGTTGCAACTCACAGTCTGGGGCATC  
>JF320173  
TTCTATTGTAATACCACACAACCTGTTTAAATAACTTGGTCTAACGGTACTTGGAAATAGTACTTGGAAATAGT-  
-----  
-----  
AGTATCACACATATCACACTCCCATGCAAAATAAGACAAATTATAAACATGTGGCAGGAGGTAGGAAAAGCAA  
TATATGCCCCCTCCCATCAGAGGGCTAATTAGCTGTTTCATCAAAT---  
ATTACAGGGCTGCTGTTAGTAAGAGATGGTGGTACTAATACTACTGAA-----  
-----  
-----  
GACAATACTGAGATCTTCAGACCTGGAGGAGGAGATATGAGGGACAATTGGAGAAGTGAATTATATAAATATA  
AAGTAGTAAAAATTGAACCATTA---GGAGTAGCACCCACCAGGGCAAAGAGAAGAGTGGTG-----  
-----CAAAGAGAAAAAAGAGCA---GTGGGAACAATAGGAGCT-----  
---ATGTTTCCTTGGGTTCTTGGGAGCA---GCAGGAAGCACTATG---GGCGCAGCGTCA---  
ATGGCGCTGACGGTACAG---GCCAGACAA---TTATTG---TCTGGTATAGTGCAACAGCAAAT---  
AATTTG---CTGAGG---GCTATTGAGGCGCAACAACATTTGTTGCAACTCACAGTCTGGGGCATT  
>JF320387  
TTCTACTGTAATTTATCACAGCTGTTTAAATAGTACTTGGAAATTTTACTGAAGGGTCAAATAGCACAGGAAAT-  
-----  
-----  
TTGTCAGACACTATCACAAATCCCATGCAGAATAAAGCAAATTATAAACATGTGGCAGGAAGTAGGAAAAGCAA  
TATATGCTCCTCCTATCAGGGGACTAATTAGATGTTTCATCAAAT---  
ATTACAGGGCTGTTAATAACAAGAGATGGTGGTATTAATAATAGTGATAGT-----  
-----  
-----  
GATGATAACACCGAGATCTTTAGACCTGCAGGGGGAAATATGAAGAACAATTGGAGAAGTGAATTATATAAAT  
ATAAAGTAGTAAACTTGAACCATTA---GGAGTGGCACCCACCAAGGCAAAGAGAAGAGTGGTG-----  
-----CAAAGAGACAAAAGAGCA---GTGGGAATGATAGGAGCT---  
-----ATGTTTCCTTGGGTTCTTGGGAGCA---GCAGGAAGCACTATG---GGCGCAGCGTCA---  
CTAACGCTGACGGTACAG---GCCAGACAA---TTATTG---ACTGGTATAGTGCAACAGCAGAGC---  
AATTTG---CTGAGA---GCTATTGAGGCGCAACAGCACCTGTTGCAACTCACAGTCTGGGGCATC  
>JF320117  
TTCTACTGTAATTCACACAATTATTTAAACAGTACTTGGAAATGATACTACAGGGACAGGGAACATT-----  
-----  
-----  
ACAGGAAATATTATTACACTCCCATGCAGAATAAGACAAATTATAAATATGTGGCAGGAAGTAGGAAAAGCAA

TGTATGCCCCCTCCCATCAGAGGAATAATTAGCTGTTTCATCAAAT ---  
 ATTACAGGGCTGATATTAACAAGAGATGGGGGTAATAATGAGACC -----  
 -----  
 -----  
 AATGGACCTGAGATCTTCAGACCTCTAGGAGGAAATATGAGGGATAATTGGAGAAGTGAACCTATATAAATATA  
 AAGTAGTAAAGATAGAACCATTA --- GGAGTAGCACCCACCAAGGCAAAGAGAAGAGTGGTG -----  
 ----- CAGAGAGAAAAAAGAGCA --- ATAGGA --- CTAGGAGCT -----  
 --- GTGTTTCATTGGGTTCTTGGGAGCA --- GCAGGAAGCACTATG --- GGCGCAGCGTCA ---  
 GTGACGCTGACGGTACAG --- GCCAGACAA --- TTGTTG --- TCTGGTATAGTGCAACAGCAGAAC ---  
 AACTTG --- CTGAAG --- GCTATTGAGGCGCAACAGCATCTGTTGCAACTCACAGTCTGGGGCATC  
 >JF320182  
 TTCTACTGTAATACATCACAGCTGTTTAATAGCACGTGGCCAATTAATGGTGTCATGGAATGGAAC -----  
 -----  
 -----  
 GAAGGGTCAGATATCACACTTCCATGTAGAATAAGACAAATTGTAAACAGATGGCAGGAAGTAGGAAAAGCAA  
 TGTATGCCCCCTCCCATCAGTGGACTAATTAGATGTTTCATCAGAT ---  
 ATTACAGGGATACTATTAACAAGAGATGGTGGGGGCAATGAGACA -----  
 -----  
 -----  
 GAGACAGAGACCTTCAGACCTGGAGGAGGAAATATGAGGGACAATTGGAGAAGTGAATTATATAAATATAAAG  
 TAGTAAAAATTGAGCCATTA --- GGGATAGCACCCACCAAGGCAAGGAGAAGAGTGGTG -----  
 ----- CAGAGAGAAAAAAGAGCA --- GTGGGAACAATAGGAGCT -----  
 ATGTTCCCTTGGGTTCTTGGGAGCA --- GCAGGAAGCACTATG --- GGCGCAGCGTCA ---  
 GTGACGCTGACGGTACAG --- GCCAGACTA --- TTATTG --- TCTGGTATAGTGCAACAGCAGAA ---  
 AATCTG --- CTGAGG --- GCTATTGAGGCGCAGCAGCATCTGTTGCAGCTCACAGTCTGGGGCATC  
 >JF320577  
 TTCTACTGTAATACAACATCACTGTTTAATAGTACTTGGAAATAGTACTGGGAGGCTTAATGATACTGAAGGG-  
 -----  
 -----  
 TCAAATGACACCATTACACTCCAATGCAGAATAAAACAAGTTATAAACTTGTGGCAGGAAGTAGGAAAAGCAA  
 TGTATGCTCCTCCCATCAAAGGACCAATTAGGTGTTTCATCAAAT ---  
 ATTACAGGACTGATATTAACAAGAGATGGTGGTAACAGTAACGAG -----  
 -----  
 -----  
 AGCGAAAGCGAGACCTTCAGACCTGGAGGAGGAGATATGAGGGATAATTGGAGAAGTGAATTATATAAATACA  
 AAGTAGTAAAAATTGAACCATTA --- GGAGTAGCACCCACCAAGGCGAAGAGAAGAGTGGTG -----  
 ----- CAGAGAGAAAAAAGAGCA --- ATTGGA --- CTAGGAGCT -----  
 --- ATGTTCCCTTGGGTTCTTGGGAGCA --- GCAGGAAGCACTATG --- GGCGCAGCGTCA ---  
 ATAACGCTGACGGTACAG --- GCCAGACAA --- TTATTG --- TCTGGTATAGTGCAACAGCAGAAC ---  
 AATTTG --- CTGAGA --- GCTATTGAGGCGCAACAACATCTGTTGCAACTCACAGTCTGGGGCATC  
 >KX156431  
 TTCTACTGTAATACAACACGACTGTTTAATAGTACTTGGGATGTTAATAATACTTGGGTTGATGGTAATTGGA  
 GTGATACC -----  
 ----- AACAGCGGA -----  
 GTAAATATCACAATATCACCTCCCATGCAGAATAAAACAAATTGTAAACATGTGGCAGAAAGTAGGAAAAG  
 CAATGTATGCCCCCTCCCATAGAGGACAAATTAGATGCTCATCAAAT ---  
 ATTACAGGGCTGCTATTAACAAGAGATGGTGGTGATATCAATAGC -----  
 -----  
 -----  
 ACGACCGAGACCTTCAGACCTGGAGGAGGAGATATGAAGGACAATTGGAGAAGTGAATTATATAAATATAAAG  
 TAGTAAGAATTGAACCATTA --- GGAATAGCACCCACCAAGGCAAAGAGAAGAGTGGTG -----  
 ----- CAGAGAGAAAAAAGAGCA --- GTGGGA --- ATAGGAGCT -----  
 CTGTTCCCTTGGGTTCTTGGGAGCA --- GCAGGAAGCACTATG --- GGCGCAGTGTC ---  
 ATGACGCTGACGGTACAG --- GCCAGACTA --- TTATTG --- TCTGGTATAGTGCAACAGCAGAAC ---  
 AATTTG --- CTGAGG --- GCTATTGAGGCGCAACAGCATCTGTTGCAACTCACAGTCTGGGGCATC  
 >HQ216971  
 TTCTACTGTAATACAACAAGGCTGTTTAATAGTACTTGGAAATGGTACTGAGGTAACTAACAATGGAGAA ----  
 -----  
 -----  
 AATAGCACAATTATCACACTCCAATGCAAAATAAAACAATTTATAAACATGTGGCAGAGAGTAGGAATAGCAA

TGTATGCCCCCTCCCATCACAGGACAAATCAGTTGTTTCATCAAAT ---  
 ATTACAGGGCTGCTATTAACAAGAGACGGTGGTAATAATAACAGT-----  
 -----  
 ACAGAGACCTTCAGACCTCTAGGAGGAAATATGAGGGACAATTGGAGAAGTGAATTATATAAATATAAAGTAG  
 TAAAGGTTGAACCATTA---GGAATAGCACCCCTCCAGGGCAAGAAGAAGAGTGGTG-----  
 -----CAGAGAGAAAAAAGAGCG---GTGGGAGCACTAGGAGCT-----  
 TTGTTCCCTTGGGTTCTTGGGAGCA---GCAGGAAGCACTATG---GGCGCAGCGTCT---  
 CTGACACTGACGGTACAG---GCCAGACAA---TTATTG---TCTGGTATAGTGCAACAGCAGAAC---  
 AATCTG---CTGAGA---GCTGTTGAGGCGCAACAACATCTGTTGCAACTCACAGTCTGGGGCATC  
 >HQ908150  
 TTCTACTGTAATACAACAGGACTATTTAATAGTACTTGGAAATAGTACAGAAGGGTCAAATAAT-----  
 -----  
 -----  
 GATGGCAAAAACATAACACTCCAGTGCAGAATAAAACAAATTATAAACCTGTGGCAGGAAGTAGGAAAAGCAA  
 TGTATGCCCCCTCCCATCCGAGGAGAAATTAGATGTTTCATCAAAC---  
 ATTACAGGGTTGCTACTAACAAGAGATGGTGGTAATGACACAGAA-----  
 -----  
 -----  
 AACATCGAAACCTTCAGACCTGCAGGAGGGGATATGAGGGACAATTGGAGAAGTGAATTATATAAATATAAAG  
 TAGTAAAAATTGAACCATTA---GGAGTAGCACCCACCAAGGCAAAGAGAAGAGTGGTG-----  
 -----CAGAGAGAAAAAAGAGCA---GTGGGA---ATAGGAGCT-----  
 ATATTCCTTGGGTTCTTGGGAGCA---GCAGGAAGCACTATG---GGCGCAGCGTCA---  
 GTGACGTTGACGGTACAG---GCCAGACAA---TTATTG---TCTGGTATAGTGCAACAGCAAAAC---  
 AATTTG---CTGAGG---GCTATTGAGGCGCAACAAAGTCTGTTGCAACTCACAGTCTGGGGCATC  
 >HQ217045  
 TTCTACTGTGATACAGCAAACTGTTTAATGGTACTTTAAACAATACTATAAATAATACTACATGGAAGTTTG  
 AA-----  
 -----  
 GGGTCAAATGGCACTATCATACTCCCATGCAGAATAAGACAAATTGTAAACATGTGGCAGGAAGTAGGAAAAG  
 CAATGTATGCCCCCTCCCATCAAAGGAAACATTAGTTGTACATCAAAT---  
 ATTACAGGGCTGCTATTAGTAAGAGATGGTGGTGTAAAAACAGC-----  
 -----  
 -----  
 ACGAACGAGACCTTCAGACCTGGAGGAGGAAATATGAAAGACAATTGGAGGAGTGAATTATACAAATATAAAG  
 TAGTAAAAATTGAGCCATTA---GGAATAGCACCCACCAAGGCAAAGAGAAGAGTGGTG-----  
 -----CAGAGAGAAAAAAGAGCA---GTGGGA---ATAGGAGCT-----  
 TTGTTCCCTTGGGTTCTTGGGAGCA---GCAGGAAGCACTATG---GGCGCAGCGTCA---  
 ATGACGCTGACGGTACAG---GCCAGACTA---TTATTG---TCTGGTATAGTGCAACAGCAGAAC---  
 AATCTG---CTGAGG---GCTATTGAGGCGCAACAGCATCTGTTGCAACTCACAGTCTGGGGCATT  
 >HQ908184  
 TTCTACTGTAATACAACAAATCTGTTTACTAACGAGCTAAATGAC-----  
 -----  
 -----  
 ACTGATGGAAATATCATACTCCCATGTAGAATAAAACAAATTATAAACATGTGGCAGGAAGTAGGAAAAGCAA  
 TGTATGCTCCGCCCATTAGTGGACCAATTAATTGTTTATCAAAT---  
 ATCACAGGGCTGCTATTAACAAGAGATGGTGGTATAGGCAACAAC-----  
 -----  
 -----  
 ACCATCAACGAAACCTTCAGACCTGGAGGAGGAGATATGAGGGACAATTGGAGAAGTGAAGTATATAAATACA  
 AAGTAGTAAAAATTAAACCATTA---GGATTAGCACCCACTAAGGCAAAGAGAAGAGTGGTG-----  
 -----CAAAGAGAAAAAAGAGCA---GTGGGA---ATAGGAGCT-----  
 ---TTGTTCCCTTGGGTTCTTGGGAGCA---GCAGGAAGCACTATG---GGCGCAGCGTCA---  
 TTGACGTTGACGGTACAG---GCCAGATCC---TTATTG---TCTGGTATAGTGCAACAGCAGAAC---  
 AATCTG---CTGAGG---GCTATTGAGGCGCAACAGCATCTGTTGCAACTCACAGTCTGGGGCATC  
 >KM353733  
 TTCTACTGTAATACAACACAACTGTTTAATAGTACTTGGCCGCTTAATAGTACCTGG-----  
 -----  
 -----  
 GAGGAGACTGAAAGGTCA-----  
 AATGGCACTGGTGTATACACACTCCAATGCAAAATAAAACAAATTATAAACAGGTGGCAGGAAGTAGGAAAAG

CAATGTATGCTCCTCCCATCAAGGGAATCATCAGTTGTGCATCAAAT---  
ATTACAGGTCTGCTATTAACAAGAGATGGTGGTAAT-----  
-----  
AAGGCAAACACAAACGGAAGTGAAT-----  
GAGACTGAGATCTTCAGACCTGGAGGAGGAGATATGAGGGACAATTGGAGAAGTGAATTATATAAAATATAAAG  
TAGTAAGGATTGAGCCATTG---GGAGTAGCACCCACTAAGGCAAAAAGAAGAGTGGTG-----  
-----CAGAGAGAAAAAAGAGCA--GTAGGA--CTAGGAGCT-----  
ATGTTTCCTTGGGTTCTTGAGCACA--GCAGGAAGCACTATG--GGCGCAGCGTCA---  
GTGACGCTGACGGTACAA---GCCAGACAA---TTATTG---TCTGGTATAGTGCAACAGCAGAAC---  
AATTTG---CTGAGG---GCTATTGAGGCGCAACAGCATCTGTTGCAACTCACAGTCTGGGGCATC  
>KM354114  
TTCTACTGTAATACAACAAAACTGTTTAATGGTACTTGGTTTAATAGT-----  
-----  
-----ACTGTGAAT-----  
GATACTGAAGAAGAAATCATACTCCCATGCAGGATAAAAACAAATTATAAATAGATGGCAGGAAGTAGGAAAAG  
CAATGTATGCCCCCTCCCATCAGAGGATACATTAATTGTTTCATCAAAT---  
ATTACAGGAATGATATTGACAAGAGATGGTGGT-----  
-----  
----  
AATAACACCAGCAATGAGACCTTCAGACCTGGAGGAGGAGATATGAGGGACAATTGGAGAAGTGAATTATATA  
AATATAAAGTAGTAAGAATTGAACCATTA--GGAATAGCACCCACTAAGGCAAGAAGAAGAGTGGTG-----  
-----CAGAGAGAAAAAAGAGCA--GTGGGA---  
ATAGGAGCT-----ATATTCCTTGGGTTCTTGGGAGCA--GCAGGAAGCACTATG---  
GGCGCAGCATCA--ATGACGCTGACGGTACAG--GCCAGACAA---TTATTG---  
TCTGGTATAGTGCAACAGCAGAAC---AACCTG---CTGAGG---  
GCTATTGAGGCGCAACAGCATCTGTTGCAACTCACAGTCTGGGGCATT  
>HQ217096  
TTCTACTGTAATTCAACACAATTGTTTAATAGTACTTGGGATAAGGCTAATGACACTTTTTCTAGGAATGGGA  
CT-----  
-----  
AGGTAAATGGAAGTATCACACTCCCATGTAGAATAAAAACAAATTATAAACATGTGGCAGGGAGTAGGAAAAG  
CAATGTATGCCCCCTCCTATCAAAGGACAAATTAGCTGTTTCATCAAAT---  
ATTACAGGGCTGCTATTAACAAGAGATGGTGATAAGAATAAGAAC-----  
-----  
-----  
GAGACCGAGATCTTCAGACCGATAGGAGGAGATATGAGGGGCAATTGGAGAAATGAATTATATAAAATATAAAG  
TAGTAAAAATTGAACCATTA--GGAGTAGCACCCACCAAGGCAAAAAGAAGAGTGGTG-----  
-----CAGAGAGAAAAAAGAGCA--GTGGGA--ATAGGAGCA-----  
TTGTTTCCTTGGGTTCTTGGGAGCA--GCAGGAAGCACTATG--GGCGCAGCGTCA---  
CTAACGCTGACGGTACAG--GCCAGACAA--TTATTG--TCTGGTATAGTGCAACAGCAGCAAAGC---  
AATTTG---CTGAGG--GCTATTGAGGCGCAGCAGCAGCTGTTGCAACTCACAGTCTGGGGCATC  
>HQ217102  
TTCTACTGTAATACAACACCACTGTTTAGTAGTACTTGGAAATGAGACTACTTGGTCTAATAGTACTGCAAATA  
CCACT-----  
-----GAA---  
AAGGAAAGTGAAATATTACACTCCAATGTAGACTAAAACAAATTGTAAACCTGTGGCAGGAGGTAGGAAAAG  
CAATGTATGCCTCTCCCATCAGTGGACCAATTAGCTGTAAATCAAAT---  
ATTACAGGGCTGATATTAACAAGAGATGGTGGTACAAATAATAATACG-----  
-----  
-----  
AACGGGACCACCGAGACCTTCAGACCTGGAGGAGGAGATATGAGGGACAATTGGAGAAGTGAATTATATAAAT  
ACAAAGTAGTAAAAATTGAACCATTA--GGAATAGCACCCACCAGGGCAAAGAGAAGAGTGGTG-----  
-----CAGAGAGAAAAAAGAGCA---GTGGGA--ATAGGAGCT---  
-----TTGTTTCCTTGGGTTCTTGGGAGCA--GCAGGAAGCACTATG--GGCGCAGCGTCA---  
ATGACGCTGACGGTACAG--GCCAGACTA--TTATTG--TCTGGTATAGTGCAACAGCAGAAC---  
AATTTG---CTGAGG---GCTATTGAGGCGCAACAGCATCTGCTGCAACTTACAGTCTGGGGCATC  
>JN687759  
TTCTACTGTAATACATCATCACTGTTTAATAGTACTTGGAAATGAAAATACAACCTACAGATCTAAAT-----  
-----  
-----

AATAATGGAAATATCACACTCAAATGCAGGATAAAACAAATTATAAGAATGTGGCAGGAAGTAGGAAAAGCAA  
TGTATGCTCCTCCCATCGAAGGACAAATTAGCTGTTTCATCAAAT---  
ATTACAGGGCTGCTATTAACAAGAGATGGTGGAAATGAGAACGAGACC-----  
-----  
AACGCGACCACCGAGACCTTCAGACCTGGGGGAGGAGATATGAGGGACAACCTGGAGAAGTGAATTATATAAAT  
ATAAAGTAGTACAACCTGAACCATTA---GGAGTGGCACCCACCAAGGCAAAGAGAAGAGTGGTG-----  
-----CAGAGAGAAAAAAGAGCA---GTGGGA---ATAGGAGCT---  
-----GTGTTTCTTGGGTTCTTGGGAGCA---GCAGGAAGCACTATG---GGCGCAGCGTCA---  
CTGACGCTGACGGTACAG---GCCAGACAA---TTATTG---TCTGGTATAGTGCAACAGCAGAAC---  
AATCTG---CTGAGG---GCTATTGAGGCGCAACAGAGTCTGTTGCAACTCACAGTCTGGGGCATT  
>JN687761  
TTCTACTGTAATTCAACACAACTGTTTAATAGCACTTGGGATTCAAATAGCACTTGGGATGATTCAAATAATA  
CTATT-----  
-----  
GAGGAGAATGGGACTATCACACTCCCATGTAGAATAAAACAAATTGTAAACATGTGGCAAAAAGTAGGGAGAG  
CAATGTATGCCCCCTCCCATCAGGGGACAAATTAGATGCTCATCAAAT---  
ATTACAGGACTGCTATTAGCAAGAGATGGGAGTGACAACAGCATT-----  
-----  
-----  
AACGAGACCTTCCGACCTGGAGGAGGAGATATGAGGGACAATTGGAGAAGTGAATTATACAAATATAAAGTAG  
TACAAATTGAACCAGTA---GGAATAGCACCCACCAAGGCAAAGAGAAGAGTGGTG-----  
-----CAGAGAGAAAAAAGAGCA---GTGGGA---CTAGGAGCT-----  
ATGTTCCCTTGGGTTCTTGGGAGCA---GCAGGAAGCACTATG---GGCGCAGCGTCA---  
ATAACGCTGACGGTACAA---GCCAGACAA---TTATTG---TCTGGTATAGTGCAACAGCAGAAC---  
AACCTG---CTGAGA---GCTATTGAGGCGCAACAGCATCTGTTGCAACTCACAGTCTGGGGCATC  
>JN687762  
TTCTACTGCAATTCAACACAGCTGTTTAATAGTAGTTGGAATAGTACTGCTAATAGTACTGAAGGGAATGATG  
AAACT-----  
-----  
ATCAATAATGAAATTATCACACTCCCATGCAGAATAAAACAAATTATAAACATGTGGCAGGAAGTAGGAAAAG  
CAATGTATGCCCCCTCCCATCGCAGGACCAATTAGATGTTTCATCAAAT---  
ATTACAGGGCTGTTATTAACAAGAGATGGTGGGAATAATGGGACT-----  
-----  
-----  
AATGAGACCGAGACCTTCAGACCTGCAGGAGGAAATATGAAGGACAATTGGAGAAGTGAATTATATAAATATA  
AAGTAGTAAAAATTGAACCATTA---GGAGTAGCACCCACCAAGGCAAAGGAGAAGGGTGGTG-----  
-----CAGAGAGAAAAAAGGGCA---GCA-----CTAGGAGCT-----  
---GTGTTCCCTTGGGTTCTTGGGAGCA---GCAGGAAGCACTATG---GGCGCAGCATCA---  
GTAATGCTGACGGTACAG---GCCAGACAA---TTATTG---TCTGGTATAGTGCAACAGCAGAAC---  
AATCTG---CTGAGA---GCTATTGAGGCGCAACAGCACCTGTTGCAACTCACAGTCTGGGGCATC  
>HQ217115  
TTCTACTGTAATTCAACAAAACCTGTTTAATAGTACTTGGGAGACTAATGGTACTTCGAATTTCAATGAGACTA  
GA-----  
-----  
GGGTCAAATGACCATATCACACTCCCATGCAGAATAAAACAAATTATAAACATGTGGCAGGAAGTAGGAAAAG  
CAATGTATGCCCCCTCCTATCAGTGGACCAATTAGATGTTTCATCAAAT---  
ATTACAGGGCTGCTATTAACAAGAGATGGTGGTAATGAGAGCAGC-----  
-----  
-----  
ACCAACGAGACCTTCAGACCTGGGGGAGGAAACATGAAGGACAATTGGAGAAGTGAATTATATAAATATAAAG  
TAGTAAAAGTTGAACCATTA---GGATTAGCACCCACCAAGGCAAAGAAGAGTGGTG-----  
-----CAGAGAGAAAAAAGAGCA---ATAATGGGAATGGGAGCT-----  
TTGTTCCCTTGGGTTCTTGGGAGCA---GCAGGAAGCACTATG---GGCGCAGCGTCA---  
ATAACGCTGACGGCACAG---GCCAGACAA---TTATTG---TCTGGTATAGTGCAAGCAGCAAAAC---  
AACTTG---CTGAGA---GCTATTGAGGCGCAACAGCATATGTTGCAACTCACAGTCTGGGGCATC  
>KM259082  
TTCTACTGTAATACAACAAAACCTGTTTAATAGTACTTGGACTTGGGAATAGTACTATT-----  
-----  
AATAGTACCGAGAATAGT-----

AGAAATGACACTAATATCACACTCCCATGCAGAATAAAACAAATTATAAACATGTGGCAGAAAGTAGGAAGAG  
 CAATGTATGCCCCCTCCCATCGCAGGAATAATTAAATGCTCATCAAAT---  
 ATTACAGGGCTGCTATTAACAAGAGATGGTGGTAAAAAG-----  
 -----  
 ACTAAGGATAACGGGACTGAGAGC-----  
 GACACTGAGATCTTCAGGCCTGGAGGAGGAGATATGAGGGACAATTGGAGAAGTGAATTATATAAATATAAAG  
 TAGTAAAAAATTGAACCATTA---GGAGTAGCACCCACCAAGGCAAAAAGAAGAGTGGTG-----  
 -----CAAAGAGAAAAAAGAGCA--GTGGGA---ATAGGAGCT-----  
 GTGTTCCCTTGGGTTCTTGGGAGCA---GCAGGAAGCACTATG---GGCGCAGCGGCA---  
 TTAACGCTGACGGTACAG---GCCAGACAA---TTATTG---TCTGGTATAGTGCGACAGCAGAAC---  
 AATCTG---CTGAGA---GCTATTGAGGCGCAGCAACATCTGCTGCAACTCACAGTCTGGGGCATC  
 >HQ908139  
 TTCTACTGTAATACAACAAAACTGTTTAATAGTACTTGGTATAGTAATACAACCTGATACAGATAAT-----  
 -----  
 -----  
 ACTACAGGGAATATCACACTCCCATGCAGAATAAAACAAAGTTATAAACATGTGGCAGGAAGTAGGAAAAGCAA  
 TGTATGCCCCCTCCCATCAGAGGACAAATCAGATGTTTCATCAAAT---  
 ATTACAGGGCTGTTATTAACAAGAGACGGTGGTAAGAACATACC-----  
 -----  
 -----  
 AACGGTACCGAGACTTTCAGACCTGGAGGAGGAGATATGAGGGACAATTGGAGAAGTGAATTATATAAATATA  
 AAGTAGTAAAAATTGAACCATTA---GGAGTAGCACCTACCAAGGCAAGGAGAAGAGTGGTG-----  
 -----CAGAGAGAAAAAAGAGCA--GTGGGA---ATAGGAGCT-----  
 ---GTACTCCTTGGGTTCTTGGGAGCA---GCAGGAAGCACTATG---GGCGCAGCATCA---  
 ATAACGCTGACGGTACAG---GCCAGACAA---TTATTG---TCTGGTATAGTGCAACAGCAGACC---  
 AATTTG---CTGAGG---GCTATTGAGGCGCAACAGCACCTGTTGCAACTCACAGTCTGGGGCATC  
 >HQ217160  
 TTCTACTGTAACACAACACAATTGTTTAATAGTACTTGAATAATACTGAACTTAGTAGTACTTGGGAGACAG  
 AGCAA-----  
 -----  
 AATGACAATGACAATATCACACTCCCATGCAGAATAAAACAAATTATAAACACATGGCAGGAAGTAGGAAAAG  
 CAATGTATGCCCCCTCCCATCAAAGGAGTAATTAGATGTTTCATCAAAT---  
 ATTACAGGGTTGTTATTAACAAGAGATGGTGGTAAGAACACGAAC-----  
 -----  
 -----  
 ACCACCGAGACCTTCAGGCCTGGAGGAGGAGATATGAGGGACAATTGGAGGAGTGAATTATATAAATATAAAG  
 TAATACAAATTGAACCATTA---GGGGTAGCACCCACCAAGGCAAGAGAAGAGCGGTG-----  
 -----CAGAGAGAAAAAAGAGCA--ATAACA--ATAGGAGCT-----  
 ATGTTCCCTTGGGTTCTTGGGAGCA---GCAGGAAGCACTATG---GGCGCAGCGTCA---  
 TTGACGCTGACGGTACAG---GCCAGACAG---TTGTTG---TCCGGTATAGTGCAACAGCAGAAC---  
 AATCTG---CTGAGA---GCTATTGAGGCGCAACAGCACCTGTTGCAACTCACAGTCTGGGGCATC  
 >FJ469689  
 TTCTACTGTAATACAACGAAATTGTTTAATAGTACTTGAATAAGACTGATAGTGTTAATAGTACTTGAATT  
 TTATTGAAGGG-----  
 -----TTAAATAACACT-----  
 GGAGAAAATGATATAATCACACTCCCATGCAGAATAAAACAAATTATAAACATGTGGCAGGAAGTAGGAAAAG  
 CAATGTATGCCCCCTCCCATCAAAGGAATAATTAGCTGTAGATCAAAT---  
 ATTACAGGGCTGATATTAACAAGAGATGGTGGTAGTAATAACACA-----  
 -----  
 -----  
 AACGAGACCTTCAGACCTGGAGGAGGAGATATGAGGGACAATTGGAGAAGTGAATTATATAAATATAAAGTAG  
 TAAAAAATTGAACCATTA---GGAGTAGCACCCACCAGGGCAAAGAGAAGAGTGGTG-----  
 -----CAGAGAGAAAAAAGAGCA--GTGGGA---CTAGGAGCT-----  
 CTGTTCCCTTGGGTTCTTGGGAGCA---GCAGGAAGCACTATG---GGCGCAGCGTCA---  
 GTGACGCTGACGGTACAG---GCCAGACAA---TTACTG---TCTGGTATAGTGCAACAGCAGAAC---  
 AATTTG---CTGAGG---GCTATTGAGGCGCAACAGCATCTGTTGCAACTCACAGTCTGGGGCATC  
 >FJ469707  
 TTCTACTGTAACACAACACAACCTGTTTAATAGTACTTGAATGTTACTGAAGGAGAAGGGTCAAATGACACTG  
 AA-----  
 -----

ACAAATGACACAATCACACTCCCGTGCAGAATAAGACAAATTATAAATATGTGGCAGGAAGTAGGAAAAGCAA  
TGTATGCCCCCTCCCATCAGAGGACCAATTAGCTGTTTCATCAAAT ---  
ATTACAGGGTTACTGTTAACAAGAGATGGTGGTAATACCACGGGG-----  
-----  
-----  
GAAAGTGAGACCTTCAGACCTGGAGGAGGAAATATGAAGGACAATTGGAGAAGTGAATTATATAAATATAAAG  
TAGTAAAAAATTGAACCATTA---GGAATAGCACCCACCACGGCAAAGAGAAGAGTGGTG-----  
-----CAGAGAGAGAAAAAGAGCA--GTGGGA---ATAGGAGCT-----  
TTGTTCCCTTGGGTTCTTGGGAGCA---GCAGGAAGCACTATG---GGCGCAGCGTCA---  
ATGACGCTGACGGTACAA---GCCAGACTA---CTATTG---TCTGGTATAGTGCAACAGCAGAAC---  
AATTTG---CTGAGG---GCTATTGAGGCGCAACAGCATCTGTTGCAACTCACAGTCTGGGGCATC  
>FJ469716  
TTCTACTGTGATACAACAAAACTGTTTAATAGTATCTGGCATAGTAATGATACCTGGACTGGGGCAAATAAC-  
-----  
-----  
ACTGAAAAGAATATCACACTCCCATGCAGAATAAAACAAATTGTAAACATGTGGCAGGAAGTAGGAAAAGCAA  
TGTATGCCCCCTCCTATCGAGGGACAAATTAAATGTACATCAAAT ---  
ATTACAGGGCTGCTATTAACAAGAGATGGTGGTAATGAGACGAAG-----  
-----  
-----  
GAAACTTTCAGACCTGGAGGAGGAGATATGAGGGACAATTGGAGAAGTGAATTATATAAATATAAAGTAGTAA  
AAATTGAACCATTA---GGAATAGCACCCACCGAGGCAAAGAGAAGAGTGGTG-----  
-----CAGAGAGAAAAAAGAGCA--GTGGGAGCACTAGGAGTT-----  
ATGTTCCCTTGGGTTCTTGGGAGCA---GCAGGAAGCACTATG---GGCGCAGCGTCA---  
ATGGCGCTGACGGTACAG---ACCAGACAA---TTATTG---TCTGGTATAGTGCAACAGCAAAAC---  
AATCTG---CTGAAG---GCTATTGAGGCGCAACAGCATCTGTTGCAACTCACGGTCTGGGGCATC  
>FJ469721  
TTCTACTGTAATTCAACACAACCTGTTTAATAGTACTTGAATAGTACTACTTGAATAATACTAATGTGAATG  
ATACTATT-----  
-----GGG---  
AATGAGACTGACCCAATCATACTCCCATGCAGAATAAAACAAATTATAAACATGTGGCAGGGAGTAGGAAGAG  
CAATGTATGCCCCCTCCCATCAGTGGACTAATTAGATGTTTCATCAAAT ---  
ATTACAGGACTGCTATTAGTAAGGGATGGTGGTGTTAACAACAGC-----  
-----  
-----  
CGCACAAATGAGACCTTTAGACCTTTAGGAGGAAATATGAAGGATAATTGGAGAAGTGAATTATACAAATATA  
AAGTAGTAAGAATTGAACCATTA---GGAGTAGCACCCACCAAGGCAAGGAGAAGAGTGGTG-----  
-----CAGAGAGAAAAAAGAGCA--CTGGGA---ATAGGAGCT-----  
---GTGTTCAATTGGGTTCTTGGGAGCA--GCAGGAAGCACTATG---GGCGCAGCGTCA---  
GTGACGCTGACGGTACAG---GCCAGACTA---TTGCTG---TCTGGTATAGTGCAACAGCAGAAC---  
AACTTG---CTGAGA---GCTATTGAGGCGCAACAACATCTGTTGCAACTCACAGTCTGGGGCATT  
>MN516423  
TTCTACTGTAATACAACACAACCTATTTAATAGTACATGGACATGGAATACTACCGGGGATGGTACCTGGAAG-  
-----  
-----GTTACTGAAGGGTCAAAT-----  
AACACTGCAGAAAACATCACACTCCCATGTAGAATAAAACAAATTATAAATATGTGGCAGGAAGTAGGAAAAG  
CAATGTATGCCCCCTCCCATCAGAGGAAAAATTAGATGCTCATCAAAT ---  
ATTACAGGGCTACTATTAACAAGAGATGGGGGTGATACAAACGAA-----  
-----  
-----  
GGCAACAATGAGACCTTCAGACCTGCAGGAGGGGATATGAAGGACAATTGGAGAAGTGAACCTATATAAATATA  
AAGTAGTACAAATTGAACCATTA---GGAGTAGCACCCACCAAGGCAAAGAGAAGAGTGGTG-----  
-----CAGAGAGAAAAAAGAGCT---GTGGGA---CTAGGAGCG-----  
---TTGTTCCCTTGGGTTCTTGGGAGCA---GCAGGAAGCACTATG---GGCGCAGCGTCG---  
CTGACGCTGACGGTACAG---GCCAGACAA---TTATTG---TCTGGTATAGTGCAACAGCAAAAC---  
AATTTG---CTGCAG---GCTATTGAGGCGCAACAGCGTCTGTTGCAACTCACAGTCTGGGGCATC  
>HQ217308  
TTCTACTGTAATACAACAAAACTATTTAGTAGTACTTGAATAATACTTGAATAGTACTTGAATAGTACTA  
AT-----  
-----

GAATCAAATGACACAATTACACTCCCATGCAGAATAAAACAAATTATAAACAGATGGCAAGAAGTAGGAAGAG  
CAATGTATGCCCCCTCCCATCGAGGGACAAATCAGATGTTTCATCAAAT---  
ATTACAGGGTTGCTATTAACAAGAGATGGTGGCAATGGAGAGAATGAG-----  
-----  
-----  
TCTGATACTGAGATCTTCAGACCTGGGGGAGGAGATATGAGGGACAATTGGAGAAGTGAATTGTACAAATATA  
AAGTAGTAAAAATTGAGCCATTA---GGAGTAGCACCCACCAAGGCAAAGAGAAGAGTGGTG-----  
-----CAAAGAGAAAAAAGAGCA---ATAGGAACGATAGGAGCT-----  
---ATGTTCCCTTGGGTTCTTGGGAGCA---GCAGGAAGCACTATG---GGCGCAGCGTCA---  
ATAACGCTGACGGTACAA---GCCAGACAA---TTATTG---TCTGGTATAGTGCAACAGCAGAAC---  
AATCTG---CTGAGG---GCTATTGATGCGCAACAGCATATGTTGCAGCTCACAGTCTGGGGCATC  
>JQ403058  
TTCTACTGTGATTCAACACAACCTGTTTAATAGTACTTGGTCGTCCAATGGTACTTGGACTAATGATACTACAG  
GGTTAAAT-----  
-----ACAACT-----  
GATAAATATGATAACTTCACACTCCCATGCAAAATAAAACAAATTATAAACATGTGGCAGAAAGTAGGAAAAG  
CAATGTATGCCCCCTCCCATTAGCGGACTAATTAGCTGTGAATCAAAT---  
ATCACAGGACTGATATTAGTAAGAGATGGTGGTAATAATGCAAACGAGACC-----  
-----  
-----  
GACAACACCACCGAGATCTTCAGACCTGGAGGAGGAAATATGAAGGACAATTGGAGAAGTGAATTATATAAAT  
ATAAAGTAGTAAGAATTGAACCATTA---GGAGTAGCACCCACCAGGGCAAAGAGAAGAGTGGTG-----  
-----CAAAGAGAAAAAAGAGCA---GTGGGAACATTAGGAGCT---  
-----ATGTTCCCTTGGGTTCTTGGGAGCA---GCAGGAAGCACTATG---GGCGCAGCATCA---  
ATGACGCTGACGGTACAG---GCCAGACAA---TTATTG---TCTGGTATAGTGCAACAGCAGAAC---  
AATTTG---CTGAGG---GCTATTGAGGCGCAACAGCATTTGTTGCAACTCACAGTCTGGGGCATC  
>JQ403059  
TTCTACTGTAATACAACACAGCTGTTTAATAGTACTTGGAAATGTTACTGAAGAGACAAATAGCACTAGA----  
-----  
-----  
GGAAATGACACAATCACACTCCAATGCAGAATAAAACAAATTATAAACATGTGGCAGGAAGTAGGAAAAGCAA  
TGTATGCCCCCTCCCATCAGGGGACAGATTAGATGTTTCATCAAAT---  
ATTACAGGGTTGCTACTAACAAGAGATGGTGGTGGTAACAATAAC-----  
-----  
-----  
AACAGCGAGGAGGTCTTCAGACCTGGAGGAGGAGATATGAGGGACAATTGGAGAAGTGAATTATATAAATATA  
AAGTAGTAAAAGTTGAACCATTA---GGAGTAGCACCCACCAAGGCAAAGAGAAGAGCGGTG-----  
-----CAGAGAGAAAAAAGAGCA---GTGGGG---ATAGGAGCT-----  
---ATGTTCCCTTGGGTTCTTGGGAGCA---GCAGGAAGCACTATG---GGCGCAGCGTCA---  
CTAACGCTGACGGTACAG---GCCAGACTA---TTATTG---TCTGGTATAGTGCAACAGCAGAAC---  
AATTTG---CTGAAG---GCTATTGAGGCGCAACAGCATATGTTGCAACTCACAGTCTGGGGCATC  
>JQ403060  
TTCTACTGTAATTCAACACCACTGTTTAATAGTAATTGGTCAGCTAGTAGTCCTTGGAAATAGTAGTACT----  
-----  
-----  
GAACGAGGAAATATCACACTCCAATGCAGAATAAAACAAATTGTAAACATGTGGCAGGAAGTAGGAAGAGCAA  
TGTATGCACCTCCCATCAAAGGAGTAATTAAATGTACATCAAAT---  
ATTACAGGACTGATATTAACAAGAGATGGTAGTAATAACACTAGT-----  
-----  
-----  
GAAACTGAAACCTTCAGACCTGGAGGAGGAAATATGAAGGACAATTGGAGAAGTGAATTATATAAATATAAAG  
TAGTAAAAATTGAACCATTA---GGAGTAGCACCCACTACAGCCAAGAGAAGAGTGGTG-----  
-----CAGAGAGAAAAAAGAGCA---GTGGGA---ATAGGAGCT-----  
GTGTTCCCTTGGGTTCTTGGGAGCA---GCAGGAAGCACTATG---GGCGCAGCGTCA---  
ATAACGCTGACGGTACAG---GCCAGACTA---TTATTG---TCTGGTATAGTGCAACAGCAGAAC---  
AATCTG---CTGAGG---GCTATTGAGGCGCAACAGCACCTGTTGCAACTCACAGTCTGGGGCATT  
>JQ403064  
TTCTACTGTAATACAACACAACCTGTTTAACACTAATTGGACTAGGACTAATGCTAATTGGACTGTTACTAATT  
GGACTGAT-----  
-----

GCTGGAGTAAATATTACACTCCCATGCAGAATAAAACAAATTATAAATATGTGGCAGGAAGTAGGAAAAGCAA  
TGTATGCCCCCTCCCATCAGAGGACAAATTAGATGCTCATCAAAT---  
ATTACAGGGTTGCTATTAACAAGAGATGGTGGTAATATCACGAAC-----  
-----  
-----  
GAGACCACCGAGATCTTCAGGCCTGGAGGAGGAAATATGAGGGACAATTGGAGAAGTGAATTATATAAATATA  
AAGTAGTAAAAATTGAACCATTA---GGAATAGCACCCACCAAGGCAAGGAGAAGAGTGGTG-----  
-----CAAAGAGAAAAACGAACA---GTGGGA---CTAGGAGCT-----  
---TTGTTTCATTGGGTTCTTGGGAGCA---GCAGGAAGCACTATG---GGCGCAGCGTCA---  
CTGACGCTGACGGTACAA---GCCAGACTA---TTATTG---TCTGGTATAGTGCAACAGCAGAAC---  
AACCTG---CTGAAG---GCTATTGAGGCGCAACAGCATCTGTTGCAACTCACAGTCTGGGGCATC  
>JQ403077  
TTCTACTGTGATACAACAGGACTGTTTAAACAGCACTTGGAACCTCAACAGAATGGGATAATAGCACAGATAAAA  
AAGTCACA-----  
-----ATCAAT-----  
AGCACAGATAAAAAAGTCACAAATCAAATGTAGAATAAAACAAATTATAAACTTGTGGCAGGAAGTAGGAAAAG  
CAATGTATGCCCCCTCCCATCAAAGGACTAATTAGATGTAGTTCAAAT---  
ATTACAGGGCTGCTGTTAAACAAGAGATGGTGGTAACAGTAACAATAACAGTAAC-----  
-----  
-----  
AACGGGACCGAGGTCTTTAGACCTGGAGGAGGAAATATGAAAGACAATTGGAGAAGTGAATTATATAAATATA  
AAGTAGTGAAAATTGAGCCATTA---GGAATAGCACCCACCAAGGCAAAGAGACGAGTGGTG-----  
-----CAGAGAGAAAAAGAGCA---GTAACG---TTAGGAGCT-----  
---ATGTTCCCTTGGGTTCTTGGGAACA---GCAGGAAGCACTATG---GGCGCAGCGTCA---  
TTGACACTGACGGTACAG---GCCAGACTA---TTATTG---TCTGGTATAGTGCAACAGCAGAAT---  
AATCTG---CTGAGA---GCTATTGAGGCGCAACAGCATATGTTGCAACTCACAGTCTGGGGCATT  
>JQ403092  
TTCTACTGTAATACAACACAGTTATTTAATAGTACTTGGGGTAATGGTACTTGGCAAGGGTCAAAT-----  
-----  
-----  
GGGAATGATACTATCACACTCCCGTGCAGAATAAAACAGATTATAAACAGGTGGCAAGAAGTAGGAAAAGCAA  
TGTATGCCCCCTCCCATCAAAGGAATAATTAGATGTTTCATCAAAA---  
ATTACAGGGTTAATATTAACAAGAGATGGTGGTAACGTTAACAGT-----  
-----  
-----  
AGTGACCCCGAGATCTTCAGACCTGGAGGAGGAGATATGAGGGATAATTGGAGAAGTGAATTATATAAATATA  
AAGTAGTAAGAATTGAGCCATTA---GGAATAGCACCCACCAAGGCAAAGAGAAGAGTGGTG-----  
-----CGGAGAGAAAAAGAGCA---GTAACA---CTGGGAGCT-----  
---ATGTTCCCTTGGGTTCTTGGGAGCA---GCAGGAAGCACTATG---GGCGCAGCGTCA---  
ATAACGCTGACGGTACAG---GCCAGACAA---TTATTG---TCTGGTATAGTGCAACAGCAGAAC---  
AATTTG---CTGAGG---GCTATTGAGGCGCAACAACATATATTGCAACTCACAGTCTGGGGCATC  
>JQ403093  
TTCTACTGTAATACAACAGAATTGTTTAAATGGTACTTTGAATAACACTGGGTGGAGTAATAGTAGCACTGGG-  
-----  
-----  
GTAAATGGAACCTATCATACTCCCATGCAGAATAAAACAAATTATAAACCTGTGGCAGGAAGTAGGAAAAGCAA  
TGTATGCCCCCTCCCATCAGAGGACAAATTAAGTGTTCATCAAAG---  
ATTACAGGGCTGTTATTAACAAGAGATGGTGGTACTAATAACGAGACC-----  
-----  
-----  
ACGAACGCCACCACCGAGATCTTTAGACCTGGAGGAGGAGATATGAGGGACAATTGGAGAAGCGAATTATATA  
AATATAAAGTAGTAAAAATTGAACCATTA---GGAGTAGCACCCACCAAGGCAAAGAGAAGAGTGGTG-----  
-----CAGAGAGAAAAAGAGAA---  
GTGGGAACACTGGGAGCT-----ATGTTCCCTTGGGTTCTTGGGAGCA---GCAGGAAGCACTATG---  
GGCGCAGCGTCA---CTGACGCTGACGGTACAG---GCCAGACTA---TTATTG---  
TCTGGTATAGTGCAACAGCAGAAT---AATTTG---CTGAGG---  
GCTATTGAGGCGCAACAGCATCTGTTGCAACTCACGGTCTGGGGCATC  
>JQ403096  
TTCTACTGTGATACAACACGGCTGTTTAAATACTACCTGGAATGATACAAATAACAGTGGACTT-----  
-----

-----  
AACAAATGAAACTATCACCCCTCCCATGCAGAATAAGACAAATTATAAACAGGTGGCAGGAAGTAGGAAAAGCAA  
TGTATGCCCCCTCCCATCAGCGGACAAATTAATTGTTTCATCAAAA---  
ATTACAGGGCTGCTGTTAACAAGAGATGGTGGTACTAATGACACAAATAAC-----  
-----  
-----  
ACAAATAAGACCGAGACCTTCAGACCAGGGGGAGGAGATATGAGGGACAATTGGAGAAGTGAATTATATAAAT  
ATAAAGTAGTAAAAATTGAGCCATTA---GGAGTAGCACCCACCAAGGCAAAGAGAAGAGTGGTG-----  
-----CAAAGAGAAAAAAGAGCA---GTGGGAGTGATAGGAGCT---  
-----ATGTTTCCTTGGGTTCTTGGGAGCA---GCAGGAAGCACTATG---GGCGCAGCGTCA---  
ATGACGCTGACGGTACAG---GCCAGACAA---TTATTG---TCTGGTATAGTGCAACAGCAGAAT---  
AACTTG---CTGAGG---GCTATTGAGGCGCAACAGCACCTGTTGCAGCTCACAGTCTGGGGCATC  
>HQ217347  
TTCTACTGTAATTCAACAGTACTATTTAATAGTACTTGGAAATTCAACAACCTTGGAAATTCAACACTGTTTAATA  
GTACTGGG-----  
-----AATGAG-----  
ACTAGTGGAGAAAATATCACCCCTCAAATGCAGAATAAAACAGATTATAAACATGTGGCAAGAAGTAGGAAAAG  
CAATGTATGCCCCCTCCCATCAAAGGAAAAATTAAATGTAAATCAAAT---  
ATTACAGGGCTGCTTTTAAACAAGAGATGGGGGTAATGGGGGTAATGAT-----  
-----  
-----  
ACGAACAAGGAGATCTTCAGACCTGGAGGAGGAGATATGAGGGACAATTGGAGAAGTGAATTATATAAATATA  
AAGTAGTAAGAATTGAACCATTA---GGAATAGCGCCCAAGGCAAAGAGAAGAGTGGTG-----  
-----CAAAGAGAAAAAAGAGAT---TTGGGA---ATAGGAGCA-----  
---TTGTTTCCTTGGGTTCTTGGGAGCA---GCAGGAAGCACTATG---GGCGCAGCGTCA---  
ATGACGCTGACGGTACAG---GCCAGACAA---TTATTG---TCTGGTATAGTGCAACAGCAAAAC---  
AATCTG---CTGAGG---GCTATTGAGGCGCAACAACATCTGTTGCAACTCACAGTCTGGGGCATC  
>HQ217386  
TTCTACTGTAACCTCATCAAACTATTTAATAGTACTTGGAAATGTTAATAATACTTGGAAATAATACTGGAGAAA  
AA-----  
-----  
GAAATGACACAATAATACTCCCATGCAGAATAAAACAGATTATAAACATGTGGCAGGAAGTAGGAAAAGCAA  
TGTATGCCCCCTCCCATCAGAGGACAAATTAATGTTTCATCAAAT---  
ATTACAGGGTTGCTGTTAACAAGAGATGGAAGAAATAGTGAGGAC-----  
-----  
-----  
AATGACACTGAGACCTTCAGACCTGGAGGAGGGGATATGAGGGACAATTGGAGAAGTGAATTATATAAATATA  
AAGTAGTAAAACTTGAACCATTA---GGAATAGCACCCACCAGGGCAAAGAGAAGAGTGGTG-----  
-----CAGAGAGAAAAAAGAGCA---ATAGGA---ATAGGGGCT-----  
---ATGTTTCCTCGGGTTCTTGGGAGCA---GCCGGAAGCACTATG---GGCGCAGCGTCA---  
ATGACACTGACGGTACAG---GCCAGACAA---TTATTG---TCTGGTATAGTGCAACAGCAGAAC---  
AATCTG---CTGAAG---GCTATTGAGGCGCAACAACATCTGTTGCAACTCACTGTCTGGGGCATT  
>KC312583  
TTCTACTGTAATACAACAAAGCTGTTTAATAGCACTTGGTTGTCTAATGATACTACTACTTGGAAATGAGACTA  
AT-----  
-----  
GACAACAGCACAATCATACTCCCGTGCAGAATAAGACAAATTATAAATAGATGGCAGGAAGTAGGAAAAGCAA  
TGTATGCCCCCTCCCATCAGCGGTCTAATTAAATGTACATCAAAT---  
ATTACAGGGCTACTATTAACAAGAGATGGAGGTAATAATAATAATAATAGT-----  
-----  
-----  
AATACCTCAGAAGAGATCTTCAGACCTGGAGGAGGGGATATGAGGGACAATTGGAGAAGTGAATTATATAAAT  
ACAAAGTAGTCAAAATTGAGCCATTA---GGATTAGCACCCACCAAGGCAAAGAGAAGAGTGGTG-----  
-----CAGAGAGAAAAAAGAGCA---ATAACG---ATGGGAGCT---  
-----TTGTTTCCTTGGGTTCTTGGGAGCA---GCAGGAAGCACTATG---GGCGCAGCGTCA---  
TTGACGCTGACGGTACAG---GCCAGACTA---TTATTG---TCTGGTATAGTGCAACAGCAGAAC---  
AATCTG---CTGAGA---GCTATTGAGGCGCAACAGCATCTGTTGCAACTCACAGTCTGGGGCATC  
>HQ217430  
TTCTACTGTAATTCAACACAGCTGTTTAATAGTACTTGGACTTTTAAATAGTAATAATACTACCTCTAGCAATG  
GA-----

-----  
AATAGCAATGGAAATATCATACTCCCGTGCAGAATAAAACAAATTATAAATAGGTGGCAGGAAGTAGGAAAAG  
CAATGTATGCCCCCTCCCATCAGTGGATTAATTAATTGCTCATCAAAT---  
ATTACAGGGTTACTATTAACAAGAGATGGTGGTGATAATGAGACCAAC-----  
-----  
-----  
AACACCACCGAGACCTTCAGACCTGGGGGAGGAGATATGAGGGACAATTGGAGAAGTGAATTATATAAATATA  
AAGTAGTAAAAATTGAGCCATTA---GGGATAGCACCTCCAGGGCAAAGAGAAGAGTGGTG-----  
-----CAGAGAGAAAAAAGAGCA---GTGGGAGTAATAGGAGCT-----  
---ATGTTCCCTTGGGTTCTTGGGAGCA---GCAGGAAGCACTATG---GGCGCAGCGTCG---  
ATGACGCTGACGGTACAG---GCCAGACAA---TTATTG---TCTGGTATAGTGCAACAGCAGAAC---  
AATTTG---CTGAAA---GCTATTGAGGCGCAACAACATTTGTTGCAACTCACAGTCTGGGGCATC  
>KM259264  
TTCTACTGTAATACAACAGAATTGTTTAATAGTACTTGGAAATGGTACTGTG-----  
-----  
-----AACGAGTCAAAC-----  
AACACTGGAGAACTATCACACTCCCATGCAGAATAAAACAAATTATAAACATGTGGCAGGAAGTAGGAAAAG  
CAATGTACGCCCCCTCCCATCAAAGGACAAATTAAATGTTTCATCAAAT---  
ATTACAGGGCTGCTGTTAACACGAGATGGTGGT-----  
-----  
ACTAATAAGACTAAT---  
GATACTGAGACCTTTAGACCTGGAGGGGGAAATATGAAGGACAATTGGAGAAGTGAATTATATAAATATAAAA  
TAGTAAAAATTGAACCATTA---GGAATAGCACCCACCAAGGCAAAGAGAAGAGTGGTG-----  
-----CAGAGAGAAAAAAGAGCA---GTGGGAACATTAGGAGCT-----  
ATGTTCCCTTGGGTTCTTGGGAGCA---GCAGGAAGCACTATG---GGCGCAGCGTCA---  
CTGACGCTGACGGTACAG---GCCAGACTA---TTATTG---TCTGGTATAGTGCAACAGCAAAAC---  
AATTTG---CTGAGA---GCTATTGAGGCGCAACAACATATGTTGCAACTCACAGTCTGGGGCATC  
>KM259566  
TTCTACTGTAACCAACCACTGTTTAACAGTACTTGGTTGTCTAATGGTACT-----  
-----  
---TTGAATGAACTGAA-----  
GGCAACGGGGGCAACATCACCTCCTATGCAGAATAAAACAAATTATAAATGTATGGCAGGAAGTAGGAAAAG  
CAATGTATGCCCCCTCCTATCAGAGGACAAATTAAATGTACATCAAAT---  
ATTACAGGACTGCTATTAACAAGAGATGGTGGG-----  
-----  
AACAATGGGTCTGAA---  
CCCACCGAGACCTTCAGACCTGGAGGGGGAAATATGAAGGACAATTGGAGAAGTGAATTATATAAATATAAGG  
TAGTAAAAGTTGAACCATTA---GGATTGGCACCCACCAAGGCAAAGAGAAGAGTGGTG-----  
-----CAGAGAGAAAAAAGAGCAATAGGGGGA---CTAGGAGCT-----  
TTGTTCCCTTGGGCTCTTGGGAGCA---GCAGGAAGCACTATG---GGCGCAGCGTCA---  
CTAACGCTGACGGTACAG---GCTAGACAA---TTATTG---TCTGGTATAGTGCAACAGCAAAAC---  
AACTTG---CTGAGG---GCTATTGAGGCGCAACAGCATCTGTTGCAACTCACAGTCTGGGGCATC  
>HQ217509  
TTCTACTGTAATACAACAACCACTGTTTAATAGTACTTGGGGGTCAAATAAACACTGAAGAGCCAAATAAACA  
CTGGA-----  
-----  
GGAAATGACACAATCACACTCCCATGTAGACTAAAACAAATTATAAACATGTGGCAGGAAGTAGGAAAAGCAA  
TGTATGCCCCCTCCCATCAGAGGACAAATTAGATGTTTCATCAAAT---  
ATTACAGGACTGTTATTAACAAGAGATGGGGGGAACAGGAATGAGACTAAC-----  
-----  
-----  
GGGAACGGGACTGAGATCTTCAGGCCTGGAGGAGGAGATATGAGGGACAATTGGAGAAGTGAATTATACAAAT  
ATAAAGTAGTAAAAATTGAACCATTA---GGAGTAGCACCCACTAAGGCAAAAAGAAGAGTGGTG-----  
-----CAAAGAGAAAAAAGAGCA---GTGGGA---TTAGGAGCT---  
-----ATGTTCCCTTGGGTTCTTGGGAGCA---GCAGGAAGCACTATG---GGCGCAGCGTCA---  
ATGACGTTGACGGTACAG---GCCAGACTG---TTATTG---TCTGGTATAGTGCAACAGCAGAAC---  
AATCTG---CTGAGG---GCTATTGAGGCGCAACAACATCTGTTGCAGCTCACAGTCTGGGGCATC  
>HQ217601  
TTCTACTGTAATACAACAAAACCTGTTTAATAGTACTTGGAAATAGGACTACTAGGGAAAGCAATGTTACTGAAG  
GGTCA-----

-----  
GATAACAATGAACTATCACACTCCAATGCAGGATAAAACAGATTATAAACATGTGGCAGGAAGTAGGAAAAG  
CCATATATATGCCCCCTCTATCAGCGGACCGATTAGATGTTTCATCAAAT---  
ATCACAGGGCTGCTATTAACAAGAGATGGAGGTAATACAAATAAGAGCAAT-----  
-----  
-----  
GAGAACGAGACTGAGACCTTCAGACCTGGAGGAGGAGATATGAGGGACAATTGGAGAAGTGAATTATATAAAT  
ATAAAGTAGTACAAATTGAACCATTA---GGAGTAGCACCCACCAAGGCAAAGAGAAGAGTGGTG-----  
-----CAGAGAGAAAAAAGAGCA---GTGGGA---ATAGGAGCT---  
-----CTGTTCTTGGGTTCTTGGGAGCA---GCAGGAAGCACTATG---GGCGCAGCGTCA---  
ATAACGCTGACGGTACAG---GCCAGACAA---TTATTG---TCTGGTATAGTGCAACAGCAGAAC---  
AACTTG---CTGAGG---GCTATTGAGGCGCAACAGCATATGTTGCAACTCACAGTCTGGGGCATC  
>GQ256646  
TTCTATTGTAATACAGCACAACTGTTTAAATAGTACTTGGCCTGAGAATAGTACTTGGCCTGGGAATAATGGTA  
CTACAGAGTCA-----  
-----AATAACAACACT-----  
GGAGAAAATGACACAATCACACTCCCATGCAAAATAAAACAAATTATAAACATGTGGCAGAAAGTAGGAAAAG  
CAATGTATGCCCCCTCCCATCAAAGGGATAATTAAATGTTTCATCAAAT---  
ATTACAGGATTGCTATTAGTAAGAGATGGTGGTAACACCAGCATG-----  
-----  
-----  
ACCAACGAGACTTTTCAGACCTGGAGGAGGAGATATGAGAGACAATTGGAGAAGTGAATTATATAAATATAAAG  
TAGTAAAAAATTGAACCGTTA---GGAGTAGCACCCACCAAGGCAAAGAGAAGAGTGGTG-----  
-----CAGAGAGAAAAAAGAGCA---GTGGGA---TTAGGAGCT-----  
ATGTTCTTGGGTTCTTGGGAGCA---GCAGGAAGCACTATG---GGCGCAGCGTCA---  
CTATCGCTGACGGTACAG---GCCAGAAAC---TTATTG---TCTGGTATAGTGCAACAGCAAAAC---  
AATTTG---CTGAGG---GCTATTGAGGCGCAACAGCATATGTTGCAACTCACAGTCTGGGGCATC  
>JF689895  
TTCTACTGTAATACAACACAACCTGTTTAAATAGTACCTGGAATAATAATAACCTGGACTGGTAACACTGAA-  
-----  
-----  
GGAAATGACACACTCATACTCCCATGCAGAATAAAACAAATTATAAACAGGTGGCAAGAAGTAGGAAAAGCAA  
TGTATGCCCCCTCCCATCAGAGGACCAATTAACTGTTTATCAAAT---  
ATTACAGGGTTGCTATTAACAAGAGATGGAGGTGATAATAACAAC-----  
-----  
-----  
ATGAGTGAGATTTTCAGACCTGCAGGAGGAGATATGAGGGACAATTGGAGAAGTGAATTATATAAGTATAAAG  
TAGTAAAAAATTGAACCACTA---GGAATAGCACCTACCAAGGCAAAGAGAAGAGTGGTG-----  
-----CAGAGAGAAAAAAGAGCA---GTGGGA---ATAGGAGCT-----  
GTGCTCCTTGGGTTCTTAGGAGCA---GCAGGAAGCACTATG---GGCGCAGCGTCA---  
ATGACGCTGACGGTACAA---GCCAGGCTA---TTATTG---TCTGGTATAGTGCAACAGCAGAGC---  
AATTTG---CTGAGG---GCTATTGAGGCGCAACAGCATCTGTTGCAACTCACAGTCTGGGGCATT  
>JF689896  
TTCTACTGTAATTCAACACAACCTGTTTAAATAGTACTTGGAGGTTAAATAACACTGAAGGAAATAGCACTGGGT  
CAGGTAAC-----  
-----ACT---  
GAAGGAAATAACACAATCACACTCCCATGCAAAATAAAACAAATTGTAAACATGTGGCAGAAAGTAGGAAAAG  
CAATGTATGCCCCCTCCCATCAAAGGACAAATTAGATGTTTCATCAAAT---  
ATTACAGGGCTGCTATTAACAAGAGATGGGGGTAAAAACAACAGT-----  
-----  
-----  
GGGACCGAGACCTTCAGACCTGGAGGAGGAGATATGAGGGACAATTGGAGAAGTGAATTATATAAATATAAAG  
TAGTAAAGCTTGAACCATTA---GGAGTAGCACCCACCAGGCAAAGAGAAGAGTGGTG-----  
-----CAGAGAGAAAAGAGAGCA---ATAGGA---ATAGGAGCT-----  
ATGTTCTTGGGTTCTTGGGAGCA---GCAGGAAGCACTATG---GGCGCAGCGTCG---  
ATGACGCTGGCGGTACAG---GCCAGACAA---TTATTG---TCTGGTATAGTGCAACAGCAGAAC---  
AATTTG---CTGAAG---GCTATTGAGGCGCAACAGCATCTGTTGCAACTCACAGTCTGGGGCATC  
>JX864023  
TTCTATTGTAATACAACAAAGCTGTTTAAATAGTACTTGGGTGTTTAAATGGTACTTGGACTATTAATGGGAGTG  
TT-----

-----  
ACTGAAGGAAATATCACACTCCCGTGCAGAATAAAACAAATTATAAACAGATGGCAGGAAGTAGGAAAAGCAA  
TGTATGCCCCCTCCCATCAGAGGACAAATTAGATGTATATCAAAT---  
ATTACAGGGTTACTATTAACAAGAGATGGGGGTACTAAAAATAATAGTAATAAC-----  
-----  
-----  
ACCAGTGAACCCGAGATCTTCAGACCAGGAGGAGGGGATATGAGAGACAATTGGAGAAGTGAATTATATAAAT  
ATAAAGTAGTAAGAATTGAGCCATTA---GGAGTAGCACCCACCAAGGCAAAGAGAAGAGTGGTG-----  
-----CAAAGAGAAAAAAGAGCAGCAGTT-----ATGGGAGCT---  
-----ATGTTTCCTTGGGTTCTTGGGAGCA---GCAGGAAGCACTATG---GGCGCAGCGGCA---  
ATAACGCTGACGGTACAG---GCCAGACAA---TTATTG---TCTGGTATAGTGCAACAGCAAAAT---  
AATTTG---CTGAGA---GCTATTGAGGCGCAGCAGCATATGCTGCAACTCACAGTCTGGGGCATT  
>JX864024  
TTCTACTGCAATACAACACAACCTGTTTAATAGTACTTGGAACCTCTAATAGTACTTTGAAC-----  
-----  
-----  
AGTACTGGGAATATCACACTCCCATGTAGAATAAAACAAATTGTAAACATGTGGCAGGAAGTAGGAAAAGCAA  
TGTATGCCCCCTCCCATCCAAGGACTAATTAGATGCTCATCAAAT---  
ATTACAGGGCTGTTATTAGTAAGAGATGGTGGAACAGTAACAGA-----  
-----  
-----  
ACCAATGAAACCTTCAGACCTGGAGGAGGAAATATGAAGGACAATTGGAGAAATGAATTATATAAATATAAAG  
TAGTAAAAAATTGAACCATTA---GGAGTAGCACCCACCAGGGCAAAGAGAAGAGTGGTG-----  
-----CAGAGAGAAAAAAGAGCA---GTGGGA---ATAGGAGCT-----  
GTGTTTCCTTGGGTTCTTAGGAGCA---GCAGGAAGCACTATG---GGCGCAGCGTCA---  
GTGACGCTGACGGTACAG---GCCAGACAA---TTATTG---TCTGGTATAGTGCAAGCAGCAGAAC---  
AATCTG---CTGAGG---GCCATTGAGGCGCAACAGCATCTGTTGCAACTCACAGTCTGGGGCATT  
>JX864025  
TTCTACTGCAATACAACAAAGCTGTTTAACAGTACGTGGACTAATCGGACTACAACCTAACGAGACAACCTAGT-  
-----  
-----  
AGTAATGAACTATTACAATCCCATGCAGAATAAAACAAATTATAAACATGTGGCAGGAAGTAGGAAAAGCAA  
TGTATGCCCCCTCCTATCAGGGGACCAATTAGATGTTTCATCAAAT---  
ATTACAGGACTAATATTACTAAGAGATGGTGGAATAGCAATAACACAAACAAT-----AAC-----  
-----  
-----  
ACAAACAAGACTGAGATCTTCAGACCTGGAGGAGGAGACATGAGGGACAATTGGAGAAGTGAATTATATAAAT  
ATAAAGTAGTACAACCTGAACCATTA---GGAATAGCACCCACCAGGGCAAAGAGAAGAGTGGTG-----  
-----CAGAGAGAAAAAAGAGCA---ATAGGA---ATAGGAGCC---  
-----TTGTTTCCTTGGGTTCTTGGGAACA---GCAGGAAGCACTATG---GGCGCAGCGTCA---  
ATAACGCTGACGGTACAG---GCCAGACAA---TTATTG---TCTGGTATAGTGCAACAGCAGAAC---  
AATCTG---CTGAGG---GCTATTGAGGCGCAACAACATCTGTTGCAACTCACAGTCTGGGGCATC  
>HM638517  
TTCTACTGTAATTCACAAAACTGTTTAATAGTACCTGGAATGGGACTAGTACTGAAGAGAGCAAGGGA----  
-----  
-----  
GAAAATGACACAATCACACTCCCATGCAGAATAAAACAAATTATAAACATGTGGCAGAGAGTAGGAAAAGCAA  
TGTATGCCCCCTCCTATCAGCGGAAAAATTAGATGTTTCATCAAAT---  
ATTACAGGGCTGTTATTAACAAGAGATGGTGGCATTAACACCACCAACGAGACCTTCAGACCTGGAGGAGGAA  
ATATGAGGGACAATTGGAGAAGTGAATTATATAAATATAAAGTAGTAAGAGTTGAACCATTAGGAGTAGCACC  
TACCAAGGACACCACCAACGAGACCTTCAGACCTGGAGGAGGAAATATGAGGGACAATTGGAGAAGTGAATTA  
TATAAATATAAAGTAGTAAGAGTTGAACCATTA---GGAGTAGCACCTACCAAGGCAAAGAGAAGAGTGGTG-  
-----CAGAGAGAAAAAAGAGCA---GTGACA---  
TTTGGAGCT-----GTGTTTCCTTGGGTTCTTGGGAGCA---GCAGGAAGCACTATG---  
GGCGCAGCGTCA---GTGACGCTGACGGTACAG---GCCAGACAA---TTATTG---  
TCTGGTATAGTGCAACAGCAAAAGT---AATTTG---CTGAGG---  
GCTATTGAGGCGCAACAGCATCTGTTGCAACTCACAGTCTGGGGCATC  
>MF499166  
TTCTACTGTAATACAACAAAACTGTTCAACACGAATTTG-----  
-----

----ACACAACCTGTCTAAT-----  
 AACACTAAAGAAAACATCACACTCCCATGTAGGATAAAACAAATTATAAACATGTGGCAGGAAGTAGGAAAAG  
 CAATGTATGCCCCCTCCTATCAGTGGACTAATTAGATGCTCATCAAAT---  
 ATTACAGGGCTGCTGTTAACAAGAGATGGTGGTAATAACAACAAC-----  
 -----  
 -----  
 AGCCAAAATGAGACCTTCAGACCTATAGGGGGAAATATGAGGGACAATTGGAGAAGTGAATTATATAAATATA  
 AAGTAGTAAGAATTGAACCATTA---GGAATAGCACCCACCAAGGCAAAGAGAAGAGTGGTG-----  
 -----CAGAGAGAAAAAAGAGCA---GTGGGA---ATAGGAGCT-----  
 ---ATGTTCTTGGGTTCTTGGGAGCA---GCAGGAAGCACTATG---GGCGCAGCGTCA---  
 GTGACGCTGACGGTACAG---GCCAGACAA---TTATTG---TCTGGTATAGTGCAACAGCAGAAC---  
 AATCTG---CTGAGG---GCGATTGAGGTGCAACAGCATATGTTGCAACTCACAGTCTGGGGCATC  
 >KR423340  
 TTCTACTGTAACCTTAACAAAACCTATTTAATAGTACTTGGCCTAATAATGATACTTCAAAGTTTAATAGTACTG  
 GG-----  
 -----  
 GGTAATGATACTATCAGACTCCCATGTAGAATAAAACAAATTATAAACATGTGGCAGGAAGTAGGAAAAGCAA  
 TGTATGCCCCCTCCCATCGAAGGAGAAATTACATGTAATTCAGT---  
 ATTACAGGGCTGCTATTAACAAGAGATGGTGGTAATACTAATGACACT-----  
 -----  
 -----  
 AAGGTGAATGAGACCTTCAGGCCTGGAGGAGGAGACATGAGGGACAATTGGAGAAGTGAATTATATAAATATA  
 AAGTAGTAAGAATTGAACCATTA---GGAATAGCACCCACCAAGGCAAGGAGAAGAGTGGTG-----  
 -----CAGAGAGAAAAAAGAGCA---GTGGGA---ATAGGAGCT-----  
 ---GTGTTCAATTGGGTTCTTGGGAGCA---GCAGGAAGCACTATG---GGCGCAGCGTCA---  
 GTGGCGCTGACGGTACAG---ACCAAACAG---TTGCTG---TTTGGGATAGTGCAACAGCAAAAC---  
 AACTTG---CTGAGG---GCTATTGAGGCGCAACAGCATATGTTGCAACTCACAGTCTGGGGCATC  
 >HM638584  
 TTCTACTGCAATACAACACAGCTGTTTAATAGTACTTGGTATAGTAATGAGACTGAAGAATTAAATAACACAG  
 GAGTG-----  
 -----  
 AATAGCACAGAACTATCACACTCCCATGCAAGATAAAGCAAATTATAAACATGTGGCAAGGAGTAGGAAGAG  
 CAATGTATGCCCCCTCCCATCAGTGGACAAATTAATTGTTTCATCAAAT---  
 ATTACAGGGCTGCTACTACTAAGAGATGGTGGTAATATTAATGACACG-----  
 -----  
 -----  
 AGAGACAATGAAACCTTCAGACCTGGAGGAGGAAATATGAGGGACAATTGGAGAAGTGAATTATATAAATATA  
 AAGTAGTACAAATTGAACCATTA---GGAGTAGCACCCACCAAGCAAGGAGAAGAGTGGTG-----  
 -----CAGAGAGAAAAAAGAGCA---GCAGTGGGAATAGGAGCT-----  
 ---TTGCTCATTTGGGTTCTTGGGAACA---GCAGGAAGCACTATG---GGCGCAGCGTCA---  
 ATAACGCTGACGGTACAA---GCCAGACAA---TTATTG---TCTGGTATAGTGCAACAGCAGAAC---  
 AATCTG---CTGAGA---GCTATTGATGCGCAACAACATCTGTTGCAGCTCACGGTCTGGGGCATC  
 >KM354155  
 TTCTACTGTAATTTAACACAACCTGTTTAATAAAACATTTAATAACACCGGGGAT-----  
 -----  
 -GATACTGACAACAGT-----  
 GAAGGTAATGACACAATAATACTCCCGTGCAGAATAAAACAAATTATAAACATGTGGCAGGAAGTAGGAAAAG  
 CAATGTATGCCCCCTCCCATCAGAGGACAAATTAATGTTTCATCAAAT---  
 ATTACAGGGCTACTATTAACAAGAGATGGTGGT-----  
 -----  
 GTTGTGGAGGACAAT---  
 AACACTGAGACCTTCAGACCTGCAGGAGGAGATATGAGGGACAATTGGAGAAGTGAATTATATAAATATAAAG  
 TAGTAAAAATTGAACCATTA---GGAGTAGCACCCACCAGGGGAAAGAGACGGGTGGTG-----  
 -----CAAAGAGAAAAAAGAGCAGTAGTGGGA---ATAGGAGCT-----  
 GTGCTCTTTGGGTTCTTGGGAGCA---GCAGGAAGCACTATG---GGCGCAGCGGCA---  
 GTAACGCTGACGGTACAA---GCCAGACAA---TTATTG---TCTGGTATAGTGCAACAGCAGAAC---  
 AATCTG---CTGAGG---GCTATTGAGGCGCAACAGCATATGTTGCAACTCACAGTCTGGGGCATT  
 >KM354232  
 TTCTACTGTGATACAACAGCATTGTTTAATAATACTTGGGAATAATAATGATACT-----  
 -----

-TGGAAGGGTACTAGA-----  
 GCACCAAATGACACCATCACACTCCCATGTAGAATAAAACAAATTATAAACATGTGGCAGGAAGTAGGAAAAG  
 CAATGTATGCCCCCTCCCATTAGAGGACGAATTAGATGTGTATCAAAT---  
 ATTACAGGACTACTATTAATAAGGGATGGTGGT-----  
 -----  
 AATACTAACACAACAAAC---  
 AAGTCTGAAACCTTCAGACCTGGAGGAGGAAATATGAAAGACAATTGGAGAAGTGAATTATATAAATATAAAG  
 TAGTAAAAATTGAACCATTA---GGAGTAGCACCCACCAAGGCAAAGAGAAGAGTGGTG-----  
 -----CAAAGAGAAAAAAGAGCA---GTGGGAACAATAGGAGCT-----  
 ATGTTTCCTTGGGTTCTTGGGAGCA---GCAGGAAGCACTATG---GGCGCAGCGTCA---  
 CTGACGCTGACGGTACAG---GCCAGACTA---TTGTTG---TCTGGTATAGTGCAACAGCAGAAC---  
 AATCTG---CTGAGA---GCTATTGAGGCGCAACAGCACATGTTGCAACTCACAGTCTGGGGCATC  
 >KM354355  
 TTCTATTGTAATACAACAACCACTGTTTAATAGTACTTGGAAATGAGACT-----  
 -----  
 -----GGAGAGCCAGAT-----  
 AACATTGTAAAAGAGATCATACTCCCATGCAGAATAAAACAAATTATAAACATGTGGCAGGGAGTAGGAAAAGG  
 CAATGTATGCCCCCTCCCATCAGAGGACGAATTAGCTGTGTATCAAAT---  
 ATTACAGGGCTGCTACTAGTAAGAGACGGAGGT-----  
 -----  
 -  
 AACGAGACTAACGGGAATGAGACTTTCAGACCTGGAGGAGGAAATATGAAGGACAATTGGAGAAGTGAATTAT  
 AATAATATAAAGTAGTAGAAGTTGAACCATTA---GGAATAGCACCCACTAGGGCAAGGAGAAGAGTGGTG--  
 -----CAGAGAGAAAAAAGAGCA---GTGACA---  
 TTAGGAGCT-----CTGTTTCCTTGGGTTCTTGGGAGCA---GCAGGAAGCACTATG---  
 GGCGCAGCGTCA---GTGACGCTGACGGTACAG---GCCAGACAA---TTGTTG---  
 TCTGGTATAGTGCAACAGCAAAAC---AATTTG---CTGAGA---  
 GCTATTGATGCGCAACAACATATGTTGCAACTCACAGTCTGGGGCATC  
 >JN687773  
 TTCTACTGTAATACATCACAGCTGTTTAATACTACTTGGAAATGATACTAATAGCACCAGGTATGAG-----  
 -----  
 -----  
 AATAACAGCAATATCACACTCCCATGCAGAATAAAACAAATTATAAACAGATGGCAGGAAGTAGGAAAAGCAA  
 TGTACGCCCCCTCCCATCGCAGGACAAATTAGCTGTACATCAAAT---  
 ATTACAGGGGTGCTATTAAACAAGAGATGGTGGTATCAATGGGAGC-----  
 -----  
 -----  
 AACGAGACCGAGGTCTTCAGACCTGGAGGGGGAGATATGAGGGACAATTGGAGAAGTGAGTTATATAAATATA  
 AAGTAGTAAAAATTGAACCATTA---GGAATAGCACCCACCAAGGCAAAGAGAAGAGCGGTG-----  
 -----CAGAGAGAAAAAAGAGCA---GTGACA---TTCGGAGCT-----  
 ---ATGTTTCCTTGGGTTCTTGGGAGCA---GCAGGAAGCACTATG---GGCGCAGCATCA---  
 ATGACGCTGACGGTACAG---GCCAGACTA---TTATTG---TCTGGTATAGTGCAACAGCAGAAC---  
 AATCTG---CTGAGA---GCTATTGAGGCGCAACAACATCTGTTGCAACTCACAGTCTGGGGCATC  
 >HQ908219  
 TTCTATTGTAACACAACACGGCTGTTTAATAATTGGACTTCTAATAATACTTGGAAATGATACTACAGGGTCA-  
 -----  
 -----  
 AATAACAGCACAATCACACTCCCATGCAGAATAAAACAAATTATAAATAGGTGGCAGGAAATAGGAAAAGCAA  
 TGTATGCCCCCTCCCATCGCAGGACAAATTAAGTTCATCAAAT---  
 ATTACAGGGTTGCTATTAAACAAGAGATGGTGGTAAGACCAACAACAGC-----  
 -----  
 -----  
 AACAGCAGTGAGACCTTCAGACCAGGGGGAGGAAATATGAAGGACAATTGGAGAAGTGAATTATATAAATATA  
 AAGTAGTAAAAATTGAACCATTA---GGAATAGCACCCACCGAGGCAAGGAGAAGAGTGGTG-----  
 -----CAGAGAGAAAAAAGAACA---GTAACA---TTAGGAGCT-----  
 ---ATGTTTCCTTGGGTTCTTGGGAGCA---GCAGGAAGCACTATG---GGCGCAGCATCA---  
 ATGACGCTGACGGTACAG---GCCAGACAA---TTATTG---TCTGGTATAGTGCAACAGCAGAGC---  
 AATCTG---CTGAGG---GCTATTGAGGCGCAACAGCATATGTTGCAACTCACAGTCTGGGGCATC  
 >HM204596

TTCTACTGTAATACATCACAATTGTTCAATAGTACTTGGGAGTTTAAATAGTACTTGGAAATGGGAATGAAACTG  
 AA-----  
 -----  
 GGAAATGACACCATCATTCTCCCATGTAGAATAAAACAGATTATAAACCTGTGGCAGAGAGTAGGAAAAGCAA  
 TGTATGCCCCCTCCCATCAAAGGAATAATTAGATGTTTCGTCAAAT---  
 ATTACAGGGCTGCTATTAACAAGAGATGGTGGTAATAGTAATACCTCCAAC-----  
 -----  
 -----  
 TCCAGCAATATTGAAACCTTTAGACCTGGAGGAGGAAATATGAAGGACAATTGGAGAAGTGAATTATATAAAT  
 ATAAAGTAGTAAGACTTGAACCATTA---GGAGTAGCACCCACCAAGGCAAGGAGAAGAGTGGTG-----  
 -----CAGAGAGAAAAAAGAGCA---GTGGGA---CTAGGAGCT---  
 -----TTGTTTCCTTGGGTTCTTGGGAGCA---GCAGGAAGCACTATG---GGCGCAGCGTCA---  
 GTGACGCTGACGGTACAG---GCCAGACAA---TTGTTG---TCTGGTATAGTGCAACAGCAGAAC---  
 AACCTG---CTGAGA---GCTATTGAGGCGCAACAGCATCTGTTGCAACTCACAGTCTGGGGCATC  
 >KY112149  
 TTCTACTGTAATACATCACGACTGTTTAAATAGTACTTGGAACTACTACACAATTGTTTAAATAGTACTGAGAGTG  
 CTAATGATACT-----  
 -----GGAGGG-----  
 TTGAATAACACAGTTATTACCTCCCATGCAGAATAAAACAAATTATAAACATGTGGCAGGAAGTAGGAAAAG  
 CAATGTATGCCCCCTCCCATCGAAGGATTACTTAATTGTTTCATCAAAC---  
 ATTACAGGGCTGCTATTAACAAGAGATGGTGGTAGTGATCTTAACAGTACTGAC-----  
 -----  
 -----  
 AACAAATACCAATATAGAGGTCTTCAGACCGCAAGGAGGAGATATGAGGGATAATTGGAGAAGTGAATTATATA  
 AATATAAAGTAGTAAAAATTGAACCATTA---GGAGTAGCACCCACCAAGGCAAAGAGAAGAGTGGTG-----  
 -----CAGAGAGAAAAAAGAGCA---GTGGGA---  
 ATAGGAGCT-----CTGTTTCCTTGGGTTCTTGGGAGCA---GCAGGAAGCACTATG---  
 GGCGCAGCGTCC---ATGACGCTGACGGTACAG---GCCAGGCTA---TTATTG---  
 TCTGGTATAGTGACAGCAGCAAAAC---AATTTG---CTGAAG---  
 GCTATTGAGGCGCAACAGCGTCTGTTGCAACTCACAGTCTGGGGCATC  
 >KY112490  
 TTCTACTGTGATTCATCACAACCTGTTTAAATAGCACTTGGAAATAATGAGACTTGGAGTGATAATAGTACTAAAG  
 GGTCA-----  
 -----  
 AATAGCACAGAAATTATTACACTCCCATGCAGAATAAAACAATTTATAAACATGTGGCAGGAAGTAGGGAAAG  
 CAATGTATGCCCCCTCCTATCAAAGGACAACCTTAATTGTTTCATCAAAC---  
 ATTACAGGGCTGCTGTTAACAAGAGATGGCGGTAGTGGTCTTAACAGGACTGAC-----  
 -----  
 -----  
 AACAGGACTGAGAAC---  
 AATACTGAGGTCTTCAGACCGCAAGGAGGAGATATGAGGGATAATTGGAGAAGTGAATTATATAAATATAAAG  
 TAGTAAGAATTGAACCATTA---GGAATAGCACCCACCAAGGCAAAGAGAAGAGTGGTG-----  
 -----CAGAGAGAAAAAAGAGCA---GTGGGA---GTAGGAGCT-----  
 CTGTTTCCTTGGGTTCTTGGGAGCA---GCAGGAAGCACTATG---GGCGCAGCGTCA---  
 ATGACGCTGACGGTACAG---GCCAGGCTA---TTATTG---TCTGGTATAGTGCAACAGCAGAAC---  
 AATTTG---CTGAAG---GCTATTGAGGCGCAACAGCGTCTGTTGCAACTCACAGTCTGGGGCATC  
 >JQ403067  
 TTCTACTGTAATACAACAAAGCTGTTTAAATAGTACTTGGAAATGGTACTGAGAATGGTACTCTTACAGGGTCA-  
 -----  
 -----  
 AATGACACTAGCATCACACTCCCATGTAGAATAAAACAAATTATAAACAGGTGGCAAGAAGTAGGAAAAGCAA  
 TGTATGCCCCCTCCCATCAGTGGGCAAATTACATGTTTCATCAAAT---  
 ATTACAGGGCTACTATTAACAAGAGATGGAGGTCCGAATGAGAAT-----  
 -----  
 -----  
 GAGACTGAGACCTTCAGACCTGGAGGAGGAAATATGAGGGATAATTGGAGAAGTGAATTATATAGATATAAAG  
 TAGTAAGAATTGAGCCATTA---GGAGTAGCACCCACCAAGGCAAAGAGAAGAGTGGTG-----  
 -----CAGAGAGAAAAAAGAGCA---GTGACG---CTAGGAGCT-----  
 GTGTTTCCTTGGGTTCTTGGGAACA---GCAGGAAGCACTATG---GGCGCAGCGTCA---  
 GTGGCGCTGACGGCACAG---GCCAGACAA---TTATTG---TCTGGTATAGTGCAACAGCAGAAC---  
 AATTTG---CTGAGG---GCTATTGAGGCGCAACAGCATCTGTTGCAACTCACAGTCTGGGGCATC

>JQ403069

TTCTACTGCAATACAACACCACTATTTTAATAGTATTTGGAATGATACACAACCTGTCTAATAGTACTTGGAATG  
AGACTGACTGG-----

-----TCAAATAAA-----

ACTACAAGAGAAAACATCACACTCCAATGCAGAATAAAACAAATTGTAAACATGTGGCAGGAAGTAGGAAGAG  
CAATGTACGCCCCCTCCCATTAGGGGAATAATTAAATGTTTCATCAAAT---

ATCACAGGGCTACTATTAACAAGAGATGGAGGGGATTCTAATGAC-----  
-----

AATGAAACCTTCAGACCTGGAGGGGGAGATATGAGGGACAATTGGAGAAGTGAATTATATAAATATAAAGTTG  
TAAAAATTGAGCCATTA---GGAGTAGCACCCACCAAGGCAAAGAGAAGAGTGGTG-----

-----CAGAGAGAAAAAGAGCA---GTGGGA---TTAGGAGCT-----

ATGTTCTTGGGGTTTCTGGGAGCA---GCAGGAAGCACTATG---GGCGCAGCGTCA---

ATAACGCTGACGGTACAG---GCCAGACAA---CTATTG---TCTGGTATAGTGCAACAGCAGAGC---

AATTTG---CTGAGA---GCTATTGAGGCGCAACAGCATCTGTTGCAACTCACAGTCTGGGGCATC

>JQ403082

TTCTACTGTAATACATCACAGCTATTTAATACATCACTTCTATTTGATAAGAGTCCTGAAAAGCCA-----  
-----

AATAATGGCACTATCACACTCCCATGTAGAATAAAACAAATTATAAACCTGTGGCAGGAAGTAGGGAAAGCAA  
TGTATGCCCCCTCCCATCAGTGGACCAATTAACTGTTTCATCAGAA---

ATTACAGGGCTGCTATTAACAAGAGATGGTGGTAATAATAATGACACCAAT-----  
-----

AGCACCCACGAGGTCTTCAGACCTGGAGGAGGAGATATGAGGGACAATTGGAGAAGTGAATTATATAAATATA  
AAGTAGTGAAAATTGAACCATTA---GGAGTAGCACCCACCAAGGCAAAGAGAAGAGTGGTG-----

-----CAGAGAGAAAGAAGAGCA---GTGGGA---ATAGGAGCT-----  
---ATATTCCTTGGGTTCTTGGGAGCA---GCAGGAAGCACTATG---GGCGCAGCGTCA---

ATAACGCTGACGGTACAG---GCCAGGCAA---TTATTG---TCTGGTATAGTGCAACAGCAGAGC---

AATTTG---CTGAGA---GCTATCGAGGCGCAACAGCATCTGTTGCAGCTCACAGTCTGGGGCATT

>JQ403035

TTCTACTGTAATACATCAAGACTGTTTAATAGTACTTGGCATAGTAATGGTACTGTAGAGTCAAGTAACAAT-----  
-----

AACAGTACAAATATCACACTCCAATGCAGAATAAAACAAATTGTAAACATGTGGCAGGAAGTAGGAAGAGCAA  
TATATGCCCCCTCCCATCAGAGGACTAATTAGATGTTTCATCAAAC---

ATTACTGGGCTGCTATTAACAAGAGATGGTGGTAGTAACACCACC-----  
-----

AATGGGACCGAGATCTTCAGGCCTGGAGGAGGAGATATGAGGGACAACCTGGAGAAGTGAATTATACAAATATA  
AAGTAGTAAAAATTGAACCATTA---GGAATAGCACCCACCAAGGCAAAGAGAAGAGTGGTG-----

-----CAGAGAGAAAAAGAGCA---GTGGGA---CTAGGAGCT-----  
---ATGTTCTTGGGTTCTTGGGAGCA---GCAGGAAGCACTATG---GGCGCAGCGTCA---

GTGACGCTGACGGTACAA---GCCAGACAA---TTATTG---TCTGGTATAGTGCAACAGCAAAAC---

AATTTG---CTGAGG---GCCATTGAGGCGCAACAACATCTGTTGCAACTCACAGTCTGGGGCATT

>JQ403083

TTCTATTGTGATTCAACAAAACCTGTTTAATAGTACTTGGTATACTAATGGGAATACTACTGGAGAGCCAATTA  
ACACTGAC-----

GGAAATGGTACAATCACACTCCCATGCAGAATAAAACAAAGTATAAACATGTGGCAGGAAGTAGGAAAAGCAA  
TGTATGCCCCCTCCCATCAGCGGAATAATTAACTGTTTCATCAAGT---

ATTACAGGGCTAATATTAACAAGGGATGGTGGTAACGAGAACGGGACC-----  
-----

AACGAGACCGAGATCTTCAGACCTGGAGGAGGAGATATGAGGGATAATTGGAGAAGTGAATTATATAAATATA  
AAGTAGTGAAACTTGAACCATTA---GGAATAGCACCCACCAAGGCAAAGAGAAGAGTGGTG-----

-----CAAAGAGAAAAAGAACA---GTGGGA---CTAGGAGCT-----  
---ATGTTCTTGGGTTCTTGGGAGCA---GCAGGAAGCACTATG---GGCGCAGCGTCA---

GTGACGCTGACGGTACAG---GCCAGACTA---CTATTG---TCTGGTATAGTGCAACAGCAGAGC---

AATTTG---CTGAGG---GCTATTGAGGCGCAACAGCATATGTTGCAACTCACAGTCTGGGGCATC

>JQ403084

TTCTACTGTAATACAACACAGCTGTTTAAATGATAGTATTTGGAATGGGACTAGGACTAAAGAGCAAAAT----

-----  
-----

GAAAATGAACTATCACACTCCCATGCAGAATAAAACAAATTATAAACATGTGGCAGAAAGTGGGCAAAGCAA  
TGTATGCCCCCTCCCATCAGAGGACAGATTAAATGTTTCATCAAAT---

ATTACAGGGCTGCTATTAACAAGAGATGGTGGTACCCAGAGCAACGGT-----

-----  
-

ACCCAGGGCAATGAGACCGAGATCTTCAGACCTGCAGGAGGAGATATGAGGGACAATTGGAGAAGTGAATTAT  
ATAAATATAAAGTAGTACAAATTGAGCCAGTA---GGAGTGGCACCCACCAAGGCAAAGAGAAGAGTGGTG--

-----CAAAGAGAAAAAAGAGCA---

GTGGGAACAATAGGAGCT-----ATGTTCTTGGGTTCTTGGGAGCA---GCAGGAAGCACTATG---

GGCGCAGCGTCA---ATAACGCTGACGGCACAG---GCCAGACAA---TTATTG---

TCTGGTATAGTGCAACAGCAGAAC---AACTTG---CTGAGA---

GCTATTGAGGCGCAACAGCATTTGTTGCAACTCACAGTCTGGGGCATT

>JQ403086

TTCTACTGTAATACAACACAACCTGTTTAAATAGTGCTTGGAAATAGTACTAGGGATAATAGTACTGCAGAGTCAA  
GT-----

-----  
AACAGTACACATATCACACTCCCATGCAGAATAAAACAAATTATAAACATGTGGCAGGAAGTAGGAAGAGCAA  
TATATGCCCCCTCCCATCAGAGGACTGATTAGATGTTTCATCAAAT---

ATTACAGGGCTACTATTAACAAGAGATGGTGGTAGTAACAACACC-----

-----  
-----

AATGAGATCGAGACCTTCAGGCCAGCAGGAGGAGATATGAGGGACAATTGGAGAAGTGAATTATATAAATACA  
AAGTAGTAAAAATTGAACCATTA---GGAATAGCACCCACCAAGGCAAAGAGAAGAGTGGTG-----

-----CAAAGAGAAAAAAGAGCA---GTGGGAGTAATAGGAGCT-----

---ATGTTCTTGGGTTCTTGGGAACA---GCAGGAAGCACTATG---GGCGCAGCGTCA---

GTGACGCTGACGGTACAA---GCCAGACAA---TTATTG---TCTGGTATAGTGCAACAGCAAAAC---

AACTTG---CTGAGG---GCTATTGAGGCGCAACAACATCTGTTGCAACTCACAGTCTGGGGCATC

>JQ403087

TTCTATTGTAATACAACACAACCTGTTTAAATAGTACTTGGATAAATAATGGTACTTGGAAAGGGTACTAACGTGT  
CAGAT-----

-----  
-----

TCAAATGACACTGTCACACTCCCATGCAGAATAAAACAAATCATAAACAGGTGGCAAGAAGTAGGAAAAGCAA  
TATATGCCCCCCCCCATCGCAGGACGACTTGAGTGCATATCAAAT---

ATTACAGGGCTGCTATTAACAAGAGATGGTGGTATTATTAAACACCACC-----

-----  
-----

AAGGACAATGAGACCTTCAGACCTGGAGGAGGAGACATGAGGGACAATTGGAGAAATGAGTTATATAAATATA  
AAGTAGTAAAAATTGAACCATTA---GGAATAGCGCCCTCCAAGGCAAGGAGAAGAGTGGTG-----

-----CAAAGAGAAAAAAGAGCA---GTGGGG---TTCGGAGCC-----

---TTGTTCTTGGGTTCTTGGGAGCA---GCAGGAAGCACTATG---GGCGCAGCATCA---

TTGATGCTGACGGTACAG---GCCAGACAA---TTATTG---TCTGGTATAGTGCAACAGCAGAAC---

AATCTG---CTGAGA---GCTATTGAGGCGCAACAACATATGTTGCAACTCACAGTCTGGGGCATC

>JQ403088

TTCTACTGTAATACAACACAACCTGTTTAAATAGTAATTGGACTAATACAACCTAGAGAGGGA-----

-----  
-----

GAGAAATGGCACAATCACACTCCCATGCAGAATAAAACAAATTATAAACATGTGGCAGGAAGTAGGAAAGGCAA  
TGTATGCCCCCTCCCATCAGAGGACATATTAAGTGTTCATCAAAT---

ATTACAGGGTTGCTATTAACAAGAGATGGTGGTGAAAACAATGGGAGT-----

-----  
-----

AATGACAGCGAGACCTTCAGACCTGGAGGAGGAGATATGAGAGACAATTGGAGAAAGTGAATTATATAAATATA  
AAGTAGTACAAATTGAACCATTA---GGAGTAGCACCCACCAAGGCAAAGAGAAGAGTGGTG-----

-----CAGAGAGAAAAAAGAGCA---GTGACA---ATAGGAGCT-----

---ATGTTCTTGGGTTCTTGGGAGCA---GCAGGAAGCACTATG---GGCGCAGCGTCA---

ATAACGCTGACGGTACAG---GCCAGACAA---TTATTG---TCTGGTATAGTGCAACAGCAGAGC---  
 AATTTG---CTGAGG---GCTATTGAGGCGCAACAGCATCTGTTGCAACTCACAGTCTGGGGCATC  
 >JQ403089  
 TTCTACTGCAATACAACAAAACCTGTTTAATAGTACTTGGACTGAGAATAGAACTGTAGGGACTGAA-----  
 -----  
 -----  
 GGAAATGACACAATCACAATCCAATGCAGAATAAAACAAATTATAAACATGTGGCAGCAAGTAGGAAAAGCAA  
 TGTATGCCCCCTCCCATCAGCGGACCCATTAGATGCTCATCAAAT---  
 ATTACAGGACTGCTATTAATGAGAGATGGTGGTACAAACCAGACC-----  
 -----  
 -----  
 AACCAATACCGAGATCTTCAGACCTGGAGGAGGAGATATGAGGGACAATTGGAGAAGTGAACATATATAAATATA  
 AAGTAGTGCAAATTGAACCATTA---GGAATAGCACCCACCAAGGCAAGGAGAAGAGTGGTG-----  
 -----CAGAGAGAAAAAAGAGCA---GTGGGA---ATAGGAGCT-----  
 ---CTGTTCCCTTGGGTTCTTGGGAGCA---GCAGGAAGCACTATG---GGCGCAGCGTCA---  
 ATAACGCTGACGGTACAG---GCCAGACAA---TTATTG---TCTGGTATAGTGCAACAGCAGAAC---  
 AATTTG---CTGAAA---GCTATTGAGGCGCAACAGCATCTGTTGCAACTCACAGTCTGGGGCATC  
 >JQ403091  
 TTCTACTGTAATACAACACAACCTGTTTAATAGTAGTTGGGTAAATAGTAGTTGGGTAGTGGGAGTAATGAAT  
 CTAGCGAT-----  
 -----  
 GCCAATGGCACAATAACACTCCCATGCAGAATAAAACAAATTATAAACATGTGGCAGGAGGTAGGAAAAGCAA  
 TGTATGCCCCCTCCCATCAAGGGACAAATTAGATGCACATCAAAT---  
 ATCACAGGGCTGATATTAACAAGAGATGGTGGTAAAAATACAAGT-----  
 -----  
 -----  
 AACCAACAGCGAGACCTTCAGACCTGGAGGAGGAGATATGAGGGACAATTGGAGAAGTGAGCTATATAAATATA  
 AGGTAGTAAAAATTGAACCTTTA---GGAATAGCACCCACCAAGGCAAAGAGAAGGGTGGTG-----  
 -----CAGAGAGAAAAAAGAGCA---GTGGGA---GTAGGAGCT-----  
 ---TTGTTCCCTCGGGTTCTTGGGAGCA---GCAGGAAGCACTATG---GGCGCAGCGTCA---  
 ATAACGCTGACGGTACAG---GCCAGACTA---TTGTTG---TCTGGTATAGTGCAACAGCAGAAC---  
 AATTTG---CTGAGA---GCTATTGAGGCGCAACAGCATATGTTGCAACTCACAGTCTGGGGCATT  
 >JQ610123  
 TTCTATTGTAACACAACACAACCTATTTGATAGTACTTGGGATAGTAATAGTACTTGGAAATAGTACTGGGAATA  
 CAAATAAA-----  
 -----ACT---  
 GGAGGAAAGGACACAATCACACTCCCATGCAGAATAAAACAAATTATAAACAGGTGGCAGGAAGTAGGAAAAG  
 CAATGTATGCCCCCTCCCATCAGCGGACAAATTAGATGTTTCATCAAAT---  
 ATTACAGGACTGCTATTAACAAGAGATGGTGGTAAGAATAATAGTACG-----  
 -----  
 -----  
 AACAACTGAGACTTTTCAGACCTGCAGGAGGAGATATGAAAGACAATTGGAGAAGTGAATTATATAAATACA  
 AAGTGGTAAGAATTGAGCCATTA---GGAGTAGCACCCACCAAGGCAAAAAGAAGAGTGGTG-----  
 -----CAGAGAGAAAAAAGAGCA---GCA-----CTAGGAGCT-----  
 ---ATGTTCCCTTGGGTTCTTGGGAGCA---GCAGGAAGCACTATG---GGCGCAGCGTCA---  
 GTGACGCTGACGGTACAG---GCCAGACTA---TTATTG---TCTGGTATAGTGCAACAGCAGAAAT---  
 AATTTG---CTGAGG---GCTATTGAGGCGCAACAGCATATGTTGCAACTCACAGTCTGGGGCATC  
 >KM081848  
 TTCTACTGTAATTCAACACCACTGTTTGGTAGTACTTGGCTGTAAATAATACTGGGAATGGTACTTGGGAATA  
 GGAATGATACT-----  
 -----GAAAAGCCA-----  
 AATAAACTGACCCAATCACACTCCAATGCAGAATAAAACAAATTTATAAACATGTGGCAGGAAGTAGGAAAAG  
 CAATGTATGCCCCCTCCCATCCAAGGACATATTAGATGTTTCATCAAAT---  
 ATTACAGGGCTGCTATTGACAAGAGATGGTGGTAGTAATGACACCACG-----  
 -----  
 -----  
 AACGGCACAGAGACCTTCAGACCTGGAGGAGGAGATATGAGGGACAATTGGAGAAGTGAATTATATAAATATA  
 AAGTAGTAAAAATTGAACCATTA---GGAGTAGCACCCACTAGGGCAAAGAGGAGAGTGGTG-----  
 -----CAGAGAGAAAAAAGAGCA---GTGACA---TTAGGAGCT-----  
 ---ATGTTCCCTTGGGTTCTTGGGAGCA---GCAGGAAGCACTATG---GGCGCAGCGTCA---

ATAACGCTGACGGTACAG---GCCAGACAA---TTATTG---TCTGGTATAGTGCAACAGCAGAAC---  
 AATTTG---CTGAGA---GCCATTGAGGCGCAACAACATATGTTGCAACTCACAGTCTGGGGCATC  
 >KM081861  
 TTCTACTGTGACTCAACAAAACCTGTTTAAATAGTACTTGGGAATAATAACACTGGGAATGTAAGTGATACTGAAG  
 GG-----  
 -----  
 TCAAATAACACTATCACGCTCCCATGCAGGATAAAAACAAATTATAAACATGTGGCAGACAGTGGGAAAAGCAA  
 TGTACGCCCCCTCCTATCCGAGGACAAATTAAGTGTATCAAAT---  
 ATTACAGGGCTACTCTTAACAAGAGATGGTGGTAACGGGAACAACACT-----  
 -----  
 -----  
 AATACTAATGAGACCTTCAGACCTGGAGGAGGAGATATGAGGGACAATTGGAGAAAGTGAATTATATAAAATATA  
 AAGTAGTAAAAATTGAACCATTA---GGAGTAGCACCCACCAAGGCAAAGAGAAGAGTGGTG-----  
 -----CAAAGAGAAAAAAGAGCA---GTGGGA---ATAGGAGCT-----  
 ---GTGTTCCCTTGGGTTCTTGGGAGCA---GCAGGAAGCACTATG---GGCGCAGCGTCA---  
 CTGACGCTGACGGTACAG---GCCAGACAA---TTATTG---TCTGGTATAGTGCAACAGCAGAAC---  
 AATTTG---CTGAGG---GCTATCGAGATGCAACAGCATCTGTTGCAACTCACAGTCTGGGGCATC  
 >KM081893  
 TTCTACTGTAATACAACAACACTATTTAAATAGTACTTGGACTTGGGAATAGTACTGGGGAGGACAATAAC---  
 -----  
 -----  
 ACTGCAGAAAATATCACACTCCCCCTGTAGAATAAAAACAAATTATAAACATGTGGCAGGAAGTAGGAAAAGCAA  
 TGTATGCCCCCTCCCATCAGAGGACAAATTAGATGTTTCTCTAAT---  
 ATTACAGGGTTGCTATTAACAAGAGATGGTGGTAGAGGTAGCGGGAAC-----  
 -----  
 AATTCCAAGACCAAC---  
 GATTCCGAGATCTTCAGACCTGGAGGAGGAGATATGAGGGACAATTGGAGGAGTGAATTATATAAAATATAAAG  
 TAGTAAAAATTGAACCATTA---GGAGTAGCACCCACCAAGGCAAAGAGAAGAGTGGTG-----  
 -----CAGAGAGAAAAAAGAGCA---GTGGGAACACTGGGAGCT-----  
 ATGTTCCCTTGGGTTCTTGGGAGCA---GCAGGAAGCACTATG---GGCGCAGCGGCA---  
 GTGACGCTGACGGCACAG---GCCAGACAA---TTATTG---TCTGGTATAGTGCAACAGCAGAAC---  
 AATCTG---CTGAGG---GCTATTGAGGCGCAACAGCATCTGTTGCAACTCACAGTCTGGGGCATC  
 >KM081913  
 TTCTACTGTAACCAACCACTGTTTAAATAGCACTTGGTATCCTAATAATAGCACTTGGTATCCTAATGAGA  
 CTGTGGCAGAT-----  
 -----  
 ACTGAAGGAAATATCACACTCCAATGCCGAATAAAAACAAGTCATAAACCTGTGGCAGGAAGTAGGAAAGGCAA  
 TGTATGCCCCCTCCCATCAGCGGACCAATTAAATGTTTCTCTAAT---  
 ATTACAGGGCTGCTATTAACAAGAGATGGTGGTAATGGCAATACCACA-----  
 -----  
 -----  
 AACACCATCGAGGTCTTTAGACCTGGAGGAGGAGATATGAGGGATAATTGGAGAAGTGAGTTATACAAATACA  
 AAGTAGTAAGAATTGAACCATTA---GGAGTAGCACCCACCAGGGCAAAGAGAAGAGTGGTG-----  
 -----CAGAGAGAAAAAAGAGCA---ATAGGA---ATAGGAGCT-----  
 ---GTGTTCCCTTGGGTTCTTGGGAGCA---GCAGGAAGCACTATG---GGCGCAGCGTCA---  
 ATAACGCTGACGGTACAA---GCCAGACAA---TTATTG---TCTGGTATAGTGCAACAGCAGAAC---  
 AACTTG---CTGATG---GCTATTGAGGCGCAACAGCATCTGTTGCAACTCACAGTCTGGGGCATC  
 >KM081963  
 TTCTACTGTAATACATCACAGCTGTTTAAATGGTACTTTACAGCTTAATGGTACTTGGATTGGAATGGTACTT  
 GGAATGGTACT-----  
 -----TGGAAT-----  
 GGTACTATAGGTACCATCACACTTCCATGCAGAATAAAAACAAATTATAAACAGGTGGCAGGAAGTAGGAAAAG  
 CAATGTATGCCCCCTCCCATCAGTGGACAAATTAGATGCTCATCCAAT---  
 ATTACAGGGCTACTATTAACAAGAGATGGAGGAGATAAAAGTAGTAACAGC-----  
 -----  
 -----  
 ACAAACAATACTGAGACCTTCAGACCTGGAGGAGGAAAATATGAGGGACAATTGGAGAAGTGAATTATATAAAAT  
 ATAAAGTAGTAAGAATTGAGCCATTA---GGAATAGCACCCACCAAGGCAAAGAGAAGAGTGGTG-----  
 -----CAGAGAGAAAAAAGAGCA---GTGGGAACACTAGGAGCT---  
 -----ATGTTCCCTCGGGTTCTTGGGAGCA---GCAGGAAGCACTATG---GGCGCAGCGTCA---

ATGACGCTGACGGTACAA---GCCAGACAA---TTATTG---TCTGGTATAGTGCAACAGCAGAGC---  
 AATTTG---CTGAGA---GCTATTGAGGCGCAACAGCATATGTTGCAACTCACAGTCTGGGGCATC  
 >JX864027  
 TTCTACTGCAATACAACACCACTATTTTAATAGCACTTGGAAAAGGAATGGTAATTGGAGTAGAAATGATACTG  
 AAGAA-----  
 -----TCA---  
 AACAGCACAGAACCAATCACACTCCAATGCAGAATAAAACAAATTGTAAACATGTGGCAGGAAGTAGGAAGAG  
 CAATGTATGCCCCCTCCCATCAGTGGACGAATTAAGTGTTCATCAAAT---  
 ATTACAGGGCTGATACTAACAAGAGATGGTGGTAATAACAGTGCC-----  
 -----  
 -----  
 GCCAACGAGACCTTCAGACCAGCAGGAGGAGATATGAGGGACAATTGGAGAAGTGAACTATATAAATATAAAG  
 TAGTAAAAATTGAACCATTA---GGAATAGCACCCACCAAGGCAAAGAGAAGAGTGGTG-----  
 -----CAGAGAGAAAAAAGAGCA---GCA-----GTAGGAGCT-----  
 CTGTTCCCTTGGGTTCTTGGGAGCA---GCAGGAAGCACTATG---GGCGCAGCGTCA---  
 GTGACGCTGACGGTACAG---GCCAGACTA---TTATTG---TCTGGTATAGTGCAACAGCAGAAC---  
 AATTTG---CTGAAG---GCTATTGAGGCGCAACAGCATCTGTTGCAACTCACAGTCTGGGGCATC  
 >MH666175  
 TTCTACTGTAATACGACAATACTGTTTAATAGTACTTGGAAATCAACACAACCTGCAGAATAATGACACTGAAC  
 AG-----  
 -----  
 TCAAAATGACACTATCACACTCCCATGCAGAATAAAACAGTTTATAAACATGTGGCAGGAAGTAGGAAAAGCAA  
 TGTATGCCCCCTCCCATCAGAGGACAAATTAAATGTTTCATCAAAT---  
 ATTACAGGGCTGATATTAACAAGAGATGGTAATAAGGAAGAAAACAATACCGAA-----  
 -----  
 -----  
 GGGACCGAGATCTTCAGACCTGGAGGAGGAGATATGAGAGACAATTGGAGAAGTGAAATTATATAAATATAAAG  
 TAGTAAGAATTGAACCATTA---GGAGTAGCACCCACCAAGGCAAAGAAAAGAGTGGTG-----  
 -----CAGAGAGAAAAAAGAGCA---GTGGGA---ATAGGAGCT-----  
 TTGTTCCCTTGGTTTCTTGGGAGCA---GCAGGAAGCACTATG---GGCGCAGCGTCA---  
 GTGACGCTGACGGTACAA---GCCAGACAA---TTATTG---TCTGGTATAGTGCAAGCAGCAAAAT---  
 AATTTG---CTGAGG---GCTATTGAGGCGCAACAACATATGTTGCAACTCACAGTCTGGGGCATC  
 >MH666186  
 TTCTACTGTAATACAACAAAACCTATTTAATAGCATCTGGAATGGCACCAGGAGTGAGAATAATAACTGGAG  
 GG-----  
 -----  
 TCAAAATGAAAACATCACACTCCCATGCAGAATAAAACAAATTATAAACATGTGGCAGAGAGTAGGAAAAGCAA  
 TGTATGCCCCCTCCCATCAGAGGACAAATTAGATGTACATCAAAT---  
 ATTACAGGGCTGATATTAACAAGAGATGGAGGCCTAAACAACAAC-----  
 -----  
 -----  
 ACCAACGAGACCTTCAGACCGGGAGGAGGAAATATGAAGGATAAGTGGAGAAGTGAAATTATATAAATATAAAG  
 TAGTAAGAATTGAACCATTA---GGAGTAGCACCCACCAAGGCAAAGAGAGTGGTG-----  
 -----CAGAGAGAAAAAAGAGCA---GTAGGA---ATAGGAGCT-----  
 TTGTTCCCTTGGATTCTTGGGAGCA---GCAGGAAGCACTATG---GGCGCAGCGTCA---  
 CTGACGCTGACGGTACAG---GCCAGACAA---TTATTG---TCTGGTATAGTGCAACAGCAGAAC---  
 AACTTG---CTGAGA---GCTATAGAGGCGCAACAGCATATGTTGCAACTCACAGTCTGGGGCATC  
 >MH666216  
 TTCTACTGTAATACATCAAAGCTGTTTAGTAGTACTTGGAAATAGTACTACTAATTGGAATAGTACTAATTGGA  
 ATAGTACTACT-----  
 -----  
 GATGGGAATAATACTATCATACTCCCATGCAGAATAAAACAAATTATAAACATGTGGCAGGCAGTAGGAAAAG  
 CAATGTATGCCCCCTCCCATTAAGGAGTAATTAAGTGTTTATCAAAT---  
 ATTACAGGGTTGCTATTAGTAAGAGATGGTGGTATTAACCAGACCAACACCACC-----  
 -----  
 -----  
 GAGATCGAGACCTTCAGACCTGGAGGAGGAGATATGAGGGACAATTGGAGAAGTGAAATTATATAAATATAAAG  
 TAGTAAGAATTGAACCATTA---GGAGTAGCACCCACCAAGGCAAAGAGAGTGGTG-----  
 -----CAGAGAGAAAGAGCG---GTGGGA---ATAGGAGCT-----  
 GTGTTCCCTTGGGTTCTTGGGAGCA---GCAGGAAGCACTATG---GGCGCAGCGTCA---

ATAACGCTGACGGTACAG---GCCAGACAA---TTATTG---TCTGGTATAGTGCAACAGCAAAAC---  
AATTTG---CTGAGG---GCTATTGATGCGCAACAGCATCTGTTGCAACTCACAGTCTGGGGCATA  
>MH666227  
TTCTACTGTAATACAACAAAATTATTTAGTAGTACTTGGCATAATGAAACCAATAGCACTTTGAATGATCCTG  
AAAATAGC-----  
-----  
AATAACGACACAATCACACTCCCATGTAGAATAAAACAATTTATAAACATGTGGCAGGAAGTAGGAAAAGCAA  
TGTATGCCCCCTCCCATCCAAGGACTAATTAAGTGTTCATCAAAC---  
ATTACAGGGCTATTATTAGTAAGAGATGGTGGTGGTAATGATACA-----  
-----  
-----  
AGGGACAATGAGACCTTCAGACCTGGAGGAGGAAATATGAAAGACAATTGGAGAAAGTGAATTATATAAATATA  
AAGTAGTAAAAATTGAACCATTA---GGGGTAGCACCCACTAAGGCAAAGAGAAGAGTGGTG-----  
-----CAGAGAGAAAAAAGAGCA---GTGGGA---ATAGGAGCT-----  
---ATGTTCCCTTGGGTTCTTGGGAGCA---GCAGGAAGCACTATG---GGCGCAGCGTCA---  
ATAACGCTGACGGTACAG---GCCAGACAA---CTATTG---TCTGGTATAGTGCAACAGCAGAAC---  
AATTTG---CTGAGG---GCTATTGAGGCGCAACAGCATCTGTTGCAACTCACAGTCTGGGGCATT  
>MH666240  
TTCTACTGTAATACAACACAGCTGTTTAATAGCACTTGGAAAGGGGGAGAGTTAAATAGCACTGAAGAAAATA  
ATAGCACT-----  
-----  
AAAGAAAGTAATATCACACTCCCATGCAGGATAAAACAAATTATAAATATGTGGCAGGAAGTAGGAAAAGCAA  
TGTATGCCCCCTCCCATCAAAGGAGAAATTAGATGTTTCATCAAAT---  
ATTACAGGACTGCTAATAACAAGAGATGGTGGTAACAAGAAATGATACT-----  
-----  
-----  
AATGATACTGATACTGAGATCTTCAGACCTGGAGGAGGAAATATGAAGGACAATTGGAGAAAGTGAATTATATA  
AATATAAAGTAGTAAAAATTGAGCCATTA--GGAGTAGCACCCACCAAGGCAAAGAGAAGAGTGGTG-----  
-----CAGAGAGAAAAAAGAGCA---GTGGGA---  
ATAGGAGCT-----TTGTTCCCTTGGGTTCTTGTGAGCA---GCAGGAAGCACTATG---  
GGCGCAGCGTCA--ATAACGCTGACGGTACAG---GCCAGACAA---TACTG---  
TCTGGTATAGTGCAACAGCAGAAC---AATTTG---CTGAGG---  
GCTATTGAGGCGCAACAACATCTGTTGCAACTCACAGTCTGGGGCATC  
>MH666253  
TTCTATTGTAATACAACACCACTGTTTAATAGTACCTGGAATAAGAATGATAGTTCCGGGAAGTGGACTGGG-  
-----  
-AATGATACTGGAGTGGCA-----  
AATAACAATGGCACAATCACCTCCAATGCAGACTAAACAAATTATAAACATGTGGCAGGAAGTAGGAAAGG  
CAATGTATGCCCCCTCCCATCCGGGGAAACATTAGCTGTTTCATCAAAC--  
ATTACAGGGCTGCTATTAAACAAGAGATGGTGGTGTAAATGCCACA-----  
-----  
-----  
AGCAACGAAACCTTTAGACCTGCAGGAGGAGATATGAGGGACAATTGGAGAAAGTGAATTATATAAATATAAAG  
TAGTACAAATTGAACCATTA---GGAATAGCACCCACCAAGGCAAAGAGAAGAGTGGTG-----  
-----CAAAGAGAAAAAAGAGCA---GTGGGA---TTTGGAGCT-----  
ATGTTCCCTTGGGTTCTTGGGAGCA---GCAGGAAGCACTATG---GGCGCAGCGTCA---  
GTAACGCTGACGGTACAG---GCCAGACAA---TTATTG---TCTGGTATAGTGCAACAGCAGAGC---  
AACCTG---CTGAGA---GCTATTGAGGCGCAACAACATATGTTGCAACTCACGGTCTGGGGCATT  
>MH666262  
TTTTACTGTGATACAACACTACTGTTTAACAGTACTTGGAACAGTAACAGTACTGGGAACAGTACTGGGAATG  
GTAAGTAA-----  
-----  
GAGGGTGATCCAATCACACTCCAATGCAGAATAAAACAAATTATAAACATGTGGCAGGAAGTAGGAAAAGCAA  
TGTATGCCCCCTCCCATCAGAGGACAAATTAGATGTTTCATCAAAC---  
ATTACAGGGTTGCTATTAAACAAGAGATGGTGGCAACAGTGATAGCACT-----  
-----  
-----  
AACGGAAGTGAATCTTCAGACCTGCAGGAGGAGATATGAAGGACAATTGGAGAAAGTGAATTATACAAATATA  
AAGTAGTAAAAGTTGAACCATTA---GGAGTAGCACCCACCATGGCAAGGAGAAGAGTGGTG-----  
-----CAGAGAGAGAAAAAGAGCA---GTGGGA---CTAGGAGCT-----

---TTGTTCCCTTGGGTTCTTGGGAGCA---GCAGGAAGCACTATG---GGCGCAGCGTCA---  
 ATGACACTGACGGTACAG---GCCAGACAA---CTATTG---TCTGGTATAGTGCAGCAGCAGAAC---  
 AATCTG---CTGAGG---GCTATTGAGGCGCAACAGCATATGTTGCAACTCACAGTCTGGGGCATC  
 >KM354431  
 TTCTACTGTAATACATCACAACCTGTTTAATAATACTTGGGAATAGTACTGATAAA-----  
 -----  
 -ACGTTAATAAACAACCT-----  
 GAAGGAAATGACACAATTACCTCTCCCATGCAGAATAAGACAGATTATAAACAGGTGGCAGGAAGTAGGAAAAG  
 CAATGTATGCCCCCTCCAATCGCAGGAATAATTACATGTTTCATCAAAT---  
 ATTACAGGGTTAATATTAACAAGAGATGGGGGG-----  
 -----  
 ACAGAGAATGGGACTAACACC-----  
 ACCACTGAGACCTTCAGACCTGGGGGAGGAAACATGAAAAGACAATTGGAGAAGTGAATTATATAAATATAAAG  
 TAGTAAGAATTGAACCATTA---GGGATAGCACCCACCAGGGCAAGGAGAATAGTGGTG-----  
 -----CAGAGAGAAAAAAGAGCA---GTGGGAACGATAGGAGCC-----  
 ATGTTCCCTTGGGTTCTTGGGAGCA---GCAGGAAGCACTATG---GGCGCAGCGTCA---  
 GTGACGCTGACGGTACAG---GCCAGACTA---TTATTG---TCTGGTATAGTGC AACAGCAAAAT---  
 AATTTG---CTGAGA---GCTATTGAGGCGCAACAGCGTATGTTGCAACTCACAGTCTGGGGCATC  
 >KM354585  
 TTCTACTGTAATACATCAGGACTGTTTAATAGCACTTGGACTCGGAACAATACTACTGGCACT-----  
 -----TGG---  
 AACAGTATCAATACCACCACC-----  
 ATAGGAAATGACACCATCACACTCCAATGCAGAATAAGACAAATTATAAACAGGTGGCAGGAAGTAGGAAAAG  
 CAATGTATGCCCCCTCCCATCGCAGGAATAATTAGATGTTTCATCAAAT---  
 ATTACAGGGCTGCTAATAACAAGAGATGGTGGG-----  
 -----  
 -  
 AACGAAACAGTGCACAATGAGACCTTCAGACCTGCAGGAGGGGATATGAGGGACAATTGGAGAAGTGAATTAT  
 AATAATATAAAGTAGTAAAGTTGAACCATTA---GGAATAGCACCCACCAAGGCAAGGAGAAGAGTGGTG--  
 -----CAGAGAGAAAAAAGAGCA---GTGGGA---  
 ATAGGAGCT-----GTATTCCTTGGGTTCTTGGGAGCA---GCAGGAAGCACTATG---  
 GGCGCAGCGTCA---CTGACGCTGACGGTACAG---GCCAGACTA---TTATTG---  
 TCTGGTATAGTGC AACAGCAAAAC---AATTTG---CTGAAG---  
 GCTATTGAGGCGCAGCAGCATATGTTGCAACTCACAGTCTGGGGCATT  
 >KM354670  
 TTCTACTGTAATACAACACGACTATTTAATAGTATTTGGTATGCTAATGGTAGTAGTAAAGAG-----  
 -----ACA---  
 GAGCCTGTTAATAGTACTGAA-----  
 GGGACAAATGCCACTATCAGACTCCCATGCAGAATAAAACAAATTATAAACCTGTGGCAGGAAGTAGGAAAAG  
 CAATGTATGCCCCCTCCCATCAAAGGACTAATTAGATGTTTCATCAAAT---  
 ATTACAGGGATACTATTAAACAAGAGATGGTGGTAGT-----  
 -----  
 ATAAGGAATGACACAGATAAC-----  
 ACCACAGAGGTCTTCAGACCTGGAGGTGGAGATATGAGGGACAATTGGAGAAGTGAATTATATAAATATAAAG  
 TAGTAAAAATTGAACCATTA---GGAGTAGCACCCACCAAGGCAAGAGAAGAGTGGTG-----  
 -----CAGAGAGAAAAAAGAGCA---GTGGGA---ATAGGAGCT-----  
 GTGTTCCCTTGGGTTCTTGGGAGCA---GCCGGAAGCACTATG---GGCGCAGCGTCA---  
 ATAACGCTGACGGTACAG---GCCAGACAA---TTATTG---TCTGGTATAGTGC AACAGCAAAAGC---  
 AATTTG---CTGAGG---GCTATTGAGGCGCAACAACATCTGTTGCAACTCACAGTCTGGGGCATC  
 >KX587204  
 TTCTATTGTAATACATCAAACTGTTTAATAGTACTTGGGAATAGTACTAGGAATGATAGTGT TACTGGAGAG-  
 -----  
 -----  
 TCAATAACACTATCACACTCCAATGCAGGATAAAACAAATTATAAACATGTGGCAGGAAGTTGGAAAAGCAA  
 TGTATGCCCCCTCCCATCAGCGGACCAATTAGATGCTCATCAAAT---  
 ATTACAGGGTTGCTATTAAACAAGAGATGGTGGGAAGGAGTCCAAT-----  
 -----  
 -----  
 ACGACTGAGACCTTCAGACCAGGGGGAGGAAATATGAAGGATAATTGGAGAAATGAATTATATAAATATAAGG  
 TAGTAAAAATTGAACCATTA---GGAGTAGCACCCACCAAGGCAAGGAGAAGAGTGGTG-----

-----CAGAGAGAAAAAAGAGCA---GTGGGA---CTAGGAGCT-----  
 ATGTTCTTGGGTTCTTGGGAGCA---GCAGGAAGCACTATG---GGCGCAGCGTCA---  
 GTGACGCTGACGGTACAG---GCCAGACAA---TTATTG---TCTGGTATAGTGCAACAGCAAAAC---  
 AATTTG---CTGAGA---GCTATTGAGGCGCAACAGCATCTGTTGCAGCTCACAGTCTGGGGCATC  
 >KC473824  
 TTCTACTGTGATACAACACAACCTGTTTAATAGTACTTGAATAATACTAATATTAATTCAAATGACACTGAGA  
 GA-----  
 -----  
 TCAAAATAAACTATCATTCTTCCATGCAAAATAAAACAAATTGTAAAAATGTGGCAGAGAGTAGGAAAAGCAA  
 CGTATGCCCCCTCCCATCAGAGGACAAATTAGATGCTCATCAAAT---  
 ATTACAGGGCTGTTATTAACAAGAGATGGTGGTAGTAACCATAAT-----  
 -----  
 -----  
 AATAGTGAGACCTTCAGACCTGGAGGAGGAGATATGAGGGACAATTGGAGGAGTGAATTATATAAATATAAAG  
 TAGTAAAAATTGAACCATTA---GGAGTAGCACCCACCAGGGCAAAGAGAAGAGTGGTG-----  
 -----CAAAGGGAGAGAAGAGCA---GTGGGA---ATAGGAGCT-----  
 ATGCTCCTTGGGTTCTTAGGAACA---GCCGGAAGCACTATG---GGCGCAGCGTCA---  
 GTGGCGCTGACGGTACAG---GCCAGACTA---TTATTG---TCTGGTATAGTGCAAGCAGCAGAAC---  
 AATTTG---CTGAGA---GCTATTGAGGCGCAACAGCACCTGTTGCAACTCACAGTCTGGGGCATC  
 >MK164663  
 TTCTACTGTAATACAACAGAACTGTTTGAAAGAAGTTGGAGTAATAGTACTTGAATGTTACTACCAATAATA  
 CTGAAGGG-----  
 -----  
 GAAGATAAAAATATCACTCTCCCATGCAGAATCAAACAGATTATAAACATGTGGCAGGAAGTAGGAAAAGCAA  
 TGTATGCCCCCTCCCATCAAAGGACAAATTAGCTGTTTCATCAAAT---  
 ATTACAGGGCTAATATTAACAAGAGATGGTGGTAACAACAACGGCAGTAATAAC-----  
 -----  
 AACCAACGGCAGTAATAACAACAAC-----  
 AGTAGTGAGATCTTCAGACCTACAGGAGGAAATATGAGGGACAATTGGAGAAGTGAATTATATAAATATAAAG  
 TAGTAAAAATTGAACCATTA---GGAATAGCCCCCACCAAGGCAAAGAGAAGAGTGGTG-----  
 -----CAGAGAGAAAAAAGAGCA---GTGGGAGTACTAGGAGCT-----  
 ATGTTCTTGGGTTCTTGGGAGCA---GCAGGAAGCACTATG---GGCGCAGCGTCA---  
 CTGACGCTGACGGTACAG---GCCAGACAA---CTATTG---TCTGGTATAGTGCAACAGCAGAAC---  
 AACCTG---CTGAGG---GCTATTGAGGCGCAACAGCATCTGTTGCAACTCACAGTATGGGGCATC  
 >MK164670  
 TTCTACTGTAATACAACAAAACCTGTTTAATAATACTTGGGTAAATGGTACTTGGAGTAATATGCCTAACAATG  
 ATACTGAA-----  
 -----  
 GGGGCAGATGGAAAGATCACTCTCCCATGCAGAATCAAACAGATTATAAACATGTGGCAGGAAGTAGGAAAAG  
 CAATGTATGCCCCCTCCCATCAAAGGACAAATTAGCTGTTTCATCAAAT---  
 ATTACAGGGCTAATATTAACAAGAGATGGTGGCGACAACAACAGTCGGACCAAC-----  
 -----  
 -----  
 GACAGTAGTGAGATCTTCAGACCTAATGGAGGAAATATGAGGGACAATTGGAGAAGTGAATTATATAAATATA  
 AAGTAGTAAAAATTGAACCATTA---GGAATAGCCCCCACCAAGGCAAAGAGAAGAGTGGTG-----  
 -----CAGAGAGAAAAAAGAGCA---GTGGGAGTACTAGGAGCT-----  
 ---ATGTTCTTGGGTTCTTGGGAGCA---GCAGGAAGCACTATG---GGCGCAGCGTCA---  
 TTGACGCTGACGGTACAG---GCCAGACAA---CTATTG---TCTGGTATAGTGCAACAGCAGAAC---  
 AACCTG---CTGAGG---GCTATTGAGGCGCAACAGCATCTGTTGCAACTCACAGTCTGGGGCATC  
 >KC935958  
 TTCTACTGTAATACAACAAAACCTGTTTAATAGTACTTGAATGGTACTGAGTCAGCTAACAATACA-----  
 -----  
 -----  
 GAAAAATGGGACAATCACACTCCCATGCAGAATAAAACAAATCATAAATATGTGGCAGACAGTAGGAAAAGCAA  
 TGTATGCCCCCTCCCATTAGGGGACAAATTACATGTATATCAAAT---  
 ATTACAGGGCTGCTATTAACAAGAGATGGTGGTGAGGAAAATAATACAACC-----  
 -----  
 -----  
 AATGCAACCATCGAGACCTTTAGACCGGGAGGAGGAGATATGAGGGACAATTGGAGAAGTGAATTATATAAAT  
 ATAAAGTAGTAGAAATTGAACCATTA---GGAATAGCACCCACCAAGGCAAAGAGAAGAGTGGTG-----

-----CAGAGAGAAAAAGAGCA---GTGACA---CTAGGAGCT---  
 -----CTGTTTCCTTGGGTTCTTGGGAGCA---GCAGGAAGCACTATG---GGCGCAGCATCA---  
 ATGACGCTGACGGTACAA---GCCAGACAA---TTATTG---TCTGGTATAGTGCAACAGCAGAAT---  
 AATCTG---CTGAGG---GCTATTGAGGCGCAACAGCACCTGTTGCAGCTCACAGTCTGGGGCATC  
 >JF680914  
 TTCTACTGTAATACAACAAAACCTGTTTAATAGTACTTGGTATTCTGAATGATACTAGCAAGGGAGATAACAATG  
 AA-----  
 -----  
 GGAAATGATACAATCACACTCCCATGCAGAATAAAACAAATTGTAAACATGTGGCAGGAAGTAGGAAAAGCAA  
 TGTATGCCCCCTCCCATCAGAGGACAAATTAGATGTTTCATCAAAT---  
 ATTACAGGGCTGCTATTAACAAGAGATGGTGGTAACCATACTGAA-----  
 -----  
 -----  
 AATAACGAGACTTTTCAGACCTGGAGGAGGAGATATGAGGGACAATTGGAGAAGTGAATTATATAGGTATAAGG  
 TAGTAAAAATTGAACCATTA---GGAGTAGCACCCACCAAGGCAAAGAGAAGAGTGGTG-----  
 -----CAGAGAGAAAAAGAGCA---GTAGTGGGAATGGGAGCT-----  
 CTGTTTCCTTGGGTTCTTGGGAGCA---GCAGGAAGCACTATG---GGCGCAGCGTCA---  
 GTGACGCTGACGGTACAG---GCCAGACTA---TTATTG---TCTGGTATAGTGCAACAGCAGAAC---  
 AACTTG---CTGAGG---GCTATTGAGGCGCAACAACATCTGTTGCAACTCACAGTCTGGGGCATC  
 >JF680916  
 TTTTACTGTAATACAACAAGGCTGTTTAATAGTAATAGTACTATCTTGGATGCTTGGAAATGAACTACTGCTG  
 AT-----  
 -----  
 GAGAAACAAGACTATCACACTCCCATGTAGGATAAAACAAATTATAAACATGTGGCAGGAAGTAGGAAAAGCAA  
 TGTATGCCCCCTCCCATCAGTGGACAAATTAAGTGTTCATCAAAT---  
 ATTACAGGACTAATATTAACAAGAGATGGGGGTAATAATGATACA-----  
 -----  
 -----  
 AGCGGGACTGAGACCTTCAGACCTGGAGGAGGAGATATGAGAGACAATTGGAGAAGTGAATTATATAAATACA  
 AAGTAGTAAAAGTTGAACCATTA---GGAGTAGCACCCAATAAGGCAAAGAGAAGAGTGGTG-----  
 -----CAGAGAGAAAAAGAGCA---GTGGGA---ATAGGAGCT-----  
 ---ATGTTCCCTTGGGTTCTTGGGAGCA---GCAGGAAGCACTATG---GGCGCAGCGTCA---  
 CTGACGCTGACGGTACAG---GCCAGACAA---TTATTG---TCTGGTATAGTGCAACAGCAGAAC---  
 AATATG---CTGAGA---GCTATTGAGGCGCAACAACATCTGTTGCAACTCACAGTCTGGGGCATC  
 >MK383384  
 TTCTACTGTAATACAACAAAACCTGTTTAATAGTACCTGGATCTGGGATAATGGTGCTGAAAACCTGGAATGGTA  
 CTGAAAGGCCA-----  
 -----  
 GAGAAATGACACTATCACACTCAAATGCAGAATAAAACAAATTATAAACATGTGGCAGGAAGTGGGAAAAGCAA  
 TGTATGCCCCCTCCCATCAGTGGACAACTTAATTGTTTCATCAAAT---  
 ATTACAGGTCTGCTTTTAAACAAGAGATGGTGGTAAAAACAATAGT-----  
 -----  
 -----  
 ACTAATGAGACCTTCAGACCTGGAGGAGGGGATATGAGGGACAATTGGAGAAGTGAATTATATAAATATAAAG  
 TAGTAAAAATTGAACCATTA---GGAATCGCACCCACCAAGGCAAAGAGAAGAGTGGTG-----  
 -----CAAAGAGAAAAAGAGCA---GTGACA---TTTGGAGCT-----  
 ATGTTTCCTTGGGTTCTTGGGAGCA---GCAGGAAGCACTATG---GGCGCAGCGTCA---  
 ATGACGCTGACGGTACAG---GCCAGACAA---TTATTG---TCTGGTATAGTGCAACAGCAGAGC---  
 AATTTG---CTGAGA---GCTATTGAGGCGCAACAGCATCTGTTGCAACTTACGGTCTGGGGCATC  
 >KF526141  
 TTCTATTGTAATTCAACACCACTATTTAATAGTACTTGGAAATGTTAATGATACTAGTACTGGGAATGATACT-  
 -----  
 -----  
 GAAGAAGGAGATATCACACTCCAATGCAGAATAAAACAAATTGTAAACATGTGGCAAGAAGTAGGAAAAGCAA  
 TGTATGCCCCCTCCCATCAGAGGACCAATTAGTTGTTTCATCAAAT---  
 ATTACAGGGCTGCTATTAACAAGAGATGGCGGTGTTAATAGGAGC-----  
 -----  
 -----  
 AATGGAACCGAGGTCTTCAGACCTTCAGGGGGAGATATGAGGGACAATTGGAGAAGTGAATTATATAAATATA  
 AAGTAGTACAAATTGAACCATTA---GGAGTAGCACCCAGCAAGGCAAAAAGAAGAGTGGTG-----

-----CAGAGAGAAAAAGAGCA---GCGGGA---ATGGGAGCT-----  
 ---CTGTTCCCTTGGGTTCTTGGCAGCA---GCAGGAAGCACTATG---GGCGCAGCATCA---  
 ATGACGCTGACGGTACAG---GCCAGACAG---TTACTG---TCTGGTATAGTGCAACAGCAGAGC---  
 AATTTG---CTGAGG---GCTATTGAGGCGCAACAGCATCTGTTGCAACTCACAGTCTGGGGCATT  
 >KM081852  
 TTCTACTGTAATACAACACAGCTGTTTAATAGTACTTGGCTTAGCAATGGAAGTTGGACTAATGCTAGA----  
 -----  
 -----  
 AGCAATGAGACTATCATACTCCAATGCAGAATAAAACAAATTATAAACAAAGTGGCAGGGAGTAGGAAGAGTAA  
 TGTATGCCCCCTCCCATCAGTGGAATATTAGCTGTTTATCAAAT---  
 ATTACAGGGCTACTATTAACAAGAGATGGGGGTACAAAAAATGACATA-----  
 -----  
 -----  
 AATGAGGAGATCTTCAGACCTGGAGGAGGAGATATGAGGGACAATTGGAGAAGTGAATTATATAAATATAAAG  
 TAGTAAAAATTGAACCAATA---GGAGTAGCACCCACCAAGGCAAAGAGAAGAGTGGTG-----  
 -----CAGAGAGAAAGAAGAGCA---GCA-----TTAGGAGCT-----  
 ATGTTCCCTTGGGTTCTTGGGAGCA---GCAGGAAGCACTATG---GGCGCAGCGTCG---  
 GTGACGCTGACGGTACAG---GCCAGACAA---TTATTG---TCTGGTATAGTGCAACAGCAGAGC---  
 AATCTG---CTGAGG---GCTATTGAGGCGCAACAACATCTGTTGCAACTCACAGTCTGGGGCATT  
 >KM082074  
 TTCTACTGTAATACATCACAACCTGTTTAATAGTACTTGGACTTGGAAATGGTACTGAAGGGTCCAATAACACAA  
 AT-----  
 -----  
 AGCACTGATAATATCACACTCCAATGTAGAATAAAACAAATTGTAAATTTGTGGCAAGAAGTAGGGAAAGCAA  
 TGTATGCCCCCTCCCATTAGAGGACAGATTAGATGTTTCATCAAAT---  
 ATTACAGGGCTAATATTAACAAGAGATGGTGGACATGGAAATGAT-----  
 -----  
 -----  
 AACACCACCGAGATCTTCAGACCTGGAGGGGGAGATATGAGGGACAATTGGAGAAGTGAATTATATAAGTATA  
 AAGTAGTACAAATTGAACCATTG---GGAATAGCACCCACCAAGGCAAAGAGAAGAGTGGTG-----  
 -----CAGAGAGAAAAAGAGCA---GCA-----ATAGGAGCT-----  
 ---GTGTTCCCTTGGGTTCTTGGGAGCA---GCAGGAAGCACTATG---GGCGCAGCGTCG---  
 GTAGCGCTGACGGTACAG---GCCAGACAA---TTATTG---TCTGGTATAGTGCAACAGCAGAAC---  
 AATCTG---CTGAGA---GCTATTGATGCGCAACAGCATATGTTGCAGCTCACAGTCTGGGGCATC  
 >MG196787  
 TTCTACTGTAATACAACACAACCTGTTTAATAGTACTTGGCATTGGAATAGCACTGAAGAATCAAATACT----  
 -----  
 -----  
 ACTGAAAGAAATATCACACTTCCATGCAGAATAAAACAAATCATAAACATGTGGCAGGAAGTAGGAAAAGCAA  
 TGTATGCCCCCTCCCATCAGAGGACTAATTAAATGTTTCATCAAAT---  
 ATTACAGGGCTGCTATTGACAAAAGATGGGGGTACTGGAAATAAG-----  
 -----  
 -----  
 ACTGAGGAGATCTTCAGACCTGGGGGAGGAAATATGAAGGACAATTGGAGAAGTGAATTGTATAAATATAAAG  
 TAGTAAAAATTGAACCATTA---GGAATAGCACCCACCAGGGCAAAGAGAAGAGTGGTG-----  
 -----CAGAGAGAAAAAGAGCA---GTGGGA---CTAGGAGCT-----  
 GTGTTCCCTTGGGTTCTTGGGAGCA---GCAGGAAGCACTATG---GGCGCAGCGTCA---  
 GTGACGCTGACGGTACAG---GCCAGACAA---TTATTG---TCTGGCATAGTGCAACAGCAAAAC---  
 AATTTG---CTGAGG---GCTATTGATGCGCAACAGCATCTGTTGCAACTCACAGTCTGGGGCATC  
 >MG196997  
 TTCTATTGTAATTCAACACAACCTGTTCAACAGTACTTGGAAATAGTACTTTGACTAATAACTGGAATGATACTT  
 GGAATGCTAAT-----  
 -----AGCACT-----  
 GATGTCAATGACACTATCACAATCCCATGCAGAATAAAACAAATTATAAACATGTGGCAGGAAGTAGGAAAAG  
 CCATGTATGCCCCCTCCCATCAGAGGACAAATTAGATGTGAATCAAAT---  
 ATTACAGGGCTGCTATTGACAAGAGATGGTGGTGATAGCGATGGC-----  
 -----  
 -----  
 ACAGACGAGATCTTCAGACCTGGAGGAGGAGATATGAGGGACAATTGGAGAAGTGAATTATATAAATATAAAG  
 TAGTAAAAATTGAGCCATTA---GGAATAGCACCCACCAGGGCAAAGAGAAGAGTGGTG-----

-----CAGAGAGAAAAAAGAGCA---GTGGGA---CTAGGAGCT-----  
TTGTTCTTGGGTTCTTGGGAGCA---GCAGGAAGCACTATG---GGCGCAGCGTCA---  
ATAACGCTGACGGTACAG---GCCAGGCAA---TTATTG---TCTGGTATAGTGCAGCAGCAAAGC---  
AACTTG---CTGAGG---GCTATTGAGGCGCAACAACATCTGTTGCAACTCACAGTCTGGGGCATC  
>KM354703  
TTCTACTGTAATTCAACGCCACTATTTAACAGTAATTGGACTCGGAACAATGGGACT-----  
-----  
TGGAAGCTAAATAACACTTCA-----  
AATAGCACTGAGCCAATCACACTCCAATGCAGAATAAAACAAATTGTAAACAGGTGGCAAGAAGTAGGAAAAG  
CAATGTATGCCCCCTCCCATCGGAGGACAAATTAAGTGTACATCAAAT---  
ATTACAGGGCTACTAATAACAAGGATGGTGGT-----  
-----  
-  
GACCCGAACAGCAGCACTGAGACCTTCAGACCAGGAGGAGAGATATGAGGGACAATTGGAGAAGTGAATTAT  
ATAAATATAAAGTAGTAAAAATTGAACCATTG---GGAATAGCACCCACCAAGGCAAAGAGAAGAGTGGTG--  
-----CAGAGAGAAAAAAGAGCA---GTGACA---  
CTGGGAGCT-----ATGTTCTTGGGTTCTTGGGAGCA---GCAGGAAGCACTATG---  
GGCGCAGCGTCA---ATAACGCTGACGGTACAG---GCCAGACAA---TTACTG---  
TCTGGTATAGTGCACAGCAGAAC---AATCTG---CTGAAG---  
GCTATTGATGCGCAACAGCATATGTTGCAACTCACCGTCTGGGGCATC  
>KM354781  
TTCTACTGTAATACAACAAAAGTGTTTAATAGTACTTGGAAATAGTACTTGGAAATAGTGAG-----  
-----  
GAACAGTCAGGTGTTGATAAC-----  
ACATCAAATAAGATTATCACAATCCAATGCAGAATAAAACAAATTGTACACATGTGGCAGAGAGTAGGAAGGG  
CAATGTATGCCCCCTCCCATCAGTGGACCAATTAGATGTTTCATCAAAT---  
ATTACAGGGTTGCTATTAGTAAGAGATGGTGCC-----  
-----  
-----  
AACGATACCAAGGAGACTTTCAGACCAGGAGGAGGAAATATGAAGGACAATTGGAGAAGTGAATTATATAAAT  
ACAAAGTAGTAAAAATTGAACCATTA---GGAATAGCACCCACTAGGGCAAGGAGAAGAGTGGTG-----  
-----CAGAGAGAAAAAAGAGCA---GTGGGA---CTAGGAGCT---  
-----ATGTTCTTGGGTTCTTAGGAGCA---GCAGGAAGCACTATG---GGCGCAGCGTCG---  
ATGGCGCTGACGGTACAA---GCCAGACAA---TTATTG---TCTGGCATAGTGCAGCAGCAGAAC---  
AATCTG---CTGAGG---GCTATTGAGGCGCAACAGCACATGTTGCAACTCACAGTCTGGGGCATC  
>JN397365  
TTCTACTGTAACACATCAGGACTGTTTAATAGTACTTGGACTGTTATCGGTGAGTGGGAGGATCCTACACGG-  
-----  
-----  
AATGATACCAACATCACACTCCCATGTAGAATAAAACAAATTATAAACATGTGGCAGGAAGTAGGGAAAGCAA  
TGTATGCCCCCTCCCATCAAAGGACTAATCAACTGTACATCAAAT---  
ATCACAGGGCTGCTATTAAACAAGAGATGGTGGTATTAATAGAAGT-----  
-----  
-----  
AATAACGAGACCTTCAGACCTGCAGGAGGAAATATGAAGGACAATTGGAGAAGTGAATTATATAAATATAAAG  
TAGTACAAATTGAACCATTA---GGATTAGCACCCACCAAGGCAAAGAGGAGAGTGGTG-----  
-----CAGAGAGAAAGAAGAGCA---GTGACA---CTCGGAGCT-----  
ATGCTCCTTGGGTTCTTGAGCGCA---GCAGGAAGCACTATG---GGCGCAGCGTCG---  
CTGACGCTGACGGTACAG---GCCAGACTA---TTATTG---TCTGGTATAGTGCACAGCAGAAC---  
AATCTG---CTGAGA---GCTATTGAGGTGCAACAGCATCTGTTGCAACTCACAGTCTGGGGCATT  
>HQ846901  
TTCTACTGTAATTCAACACCACTGTTTAATAGTACTTGGAAATGTTACTGGAGAGTCTTGGAAATGATACAAAA-  
-----  
-----  
GGGGGAGTAAACATCACACTTCCATGCAGAATAAGACAAATTATAAACATGTGGCAGAAAGTAGGAAAAGCAA  
TGTATGCCCCCTCCCATCAGAGGACAAATTAGATGTACATCAAAT---  
ATTACAGGGTTGATATTAACAAGAGATGGTGGTAATAACAAGAGTGAG-----  
-----  
-----  
AACGAGACTGAGACCTTCAGACCTGGAGGAGGAGATATGAGGGACAATTGGAGAAGTGAAGTATATAAATATA

AAGTAGTAAAAATTGAACCATTA---GGAATAGCACCCACCAAGGCAAAGAGAAGAGTGGTG-----  
-----CAGAGAGAAAAAAGAGCA---GTGGGA---ATAGGAGCT-----  
---GTGTTCCCTTGGGTTCTTGGGAGCA---GCAGGAAGCACTATG---GGCGCAGCGTCA---  
CTGACGCTGACGGTACAG---GCCAGACTA---TTATTG---TCTGGTATAGTGCAACAGCAGAAC---  
AATCTG---CTGAGG---GCTATTGAGGCGCAACAGCATCTGTTGCAGCTCACAGTCTGGGGCATC  
>KC473825  
TTCTACTGTAATACAACAAGACTGTTTGCTTGAATAGTGCTTGAATAGTACTGGAATGAACT-----  
-----  
-----  
GCAGATAGAAATATTACACTCCCATGCAGAATAAAACAAATTATAAACATGTGGCAGGCAGTAGGAAAAGCAA  
TGTATGCCCCCTCCCATCAGAGGAGCAATTAATTGTGCATCAAAT---  
ATTACAGGGCTGTTATTATTATTAAGAGATGGTGGTAATAGCAGCGAA-----  
-----  
-----  
GAGATCTTCAGACCTGGAGGAGGAGATATGAGGGACAATTGGAGAAGTGAATTATATAAATATAAAGTAGTAA  
AAATTGAACCAATA---GGAGTAGCACCCACCAAGGCAAAGAGAAGAGTGGTG-----  
-----CAGAGAGAAAAAAGAGCA---GTAGGA---ATAGGAGCT-----  
CTGTTCCCTTGGGTTCTTGGGAGCA---GCAGGAAGCACTATG---GGCGCAGCGTCA---  
ATAACGCTGACGGTACAA---GCCAGACAA---TTATTG---ACTGGTATAGTGCAACAGCAGAAC---  
AATCTG---CTAAGG---GCTATTGAGGCGCAACAGCACCTGTTGCAACTCACAGTCTGGGGCATT  
>KC473827  
TTCTACTGTAATACAACAGCACTGTTTAATAGCACTTGGAAATAGGAATGAGACTTGAATTCTACTGGAGAG-  
-----  
-----  
TCAAAATGAACTATCACACTCCAATGTAGAATAAAACAAATTATAAACATGTGGCAGGAAGTAGGAAAAGCAA  
TGTATGCCCCCTCCCATCAGAGGACAAATTAGATGTTTCATCCAAT---  
ATTACAGGGCTGTTATTAAACAAGAGATGGGGGTAACACAAACGAG-----  
-----  
-----  
ACTACCTCTGAGACTTTTAGACCCGGAGGAGGAAATATGAGGGACAATTGGAGAAGTGAATTATATAAATATA  
AAGTAGTAAAGATTGAACCATTA---GGAATAGCACCCACCAAGGCAAAGAGAAGAGTGGTG-----  
-----CAGAGAGAAAAAAGAGCA---GTGGGA---ATAGGAGCT-----  
---ATGTTCCCTTGGGTTCTTGGGAGCA---GCAGGAAGCACTATG---GGCGCAGCGTCA---  
ATGACGCTGACGGTACAG---GCCAGACTA---TTATTG---TCTGGTATAGTGCAACAGCAGAAC---  
AATCTG---CTGAGG---GCTATTGAGGCGCAACAACATCTGTTGCAACTCACAGTCTGGGGCATC  
>KU678074  
TTCTACTGTAATACAACACAACCTGTTTAATAGTACTTGGTATCCTAATGATACAAGTACTTGAATGATACTA  
AT-----  
-----  
GGAATTAATGACACACTCACACTACCATGTAAAATAAAACAATTTGTAACTTGTGGCAGGAGGTAGGAAAGG  
CAATGTATGCCCCCTCCCATCCAGGGACAAATTAATTGTGCATCAAAT---  
ATTACAGGGCTGCTATTAAACAAGAGATGGAGGTGTTAACTACC-----  
-----  
-----  
AACACCACTGAGGTCTTCAGACCTGCAGGAGGAGATATGAGGGACAATTGGAGAAGTGAATATATAAATATA  
AAGTAGTAAAAATTGAACCATTA---GGAATAGCACCCACTAAGGCAAAGAGAAGAGTGGTA-----  
-----CAAAGAGAAAAAAGAGCA---GTGGGA---ATAGGAGCT-----  
---ATGTTCCCTTGGGTTCTTGGGAGCA---GCAGGAAGCACTATG---GGCGCAGCGTCA---  
GTGACGCTGACGGTACAG---GCCAGACAA---TTAATG---TCTGGTATAGTGCAACAGCAGAGA---  
AATTTG---CTGAGG---GCTATTGAGGCGCAGCAGCATCTGTTGCAACTCACAGTCTGGGGCATT  
>KM082156  
TTCTACTGCAATACAACACAACCTGTTTAATAGTACTTGGGCTAATAGTACTTGAATGACACTGAAGGGTTTA  
GTGACACT-----  
-----  
GGAATGATACAATCACACTCCCATGCAGAATAAAACAAATTATAAATCTGTGGCAGGAAGTAGGAAAAGCAA  
TGTACGCCCCCTCCCATCAGAGGACAAATTAGATGTTTCATCAAAT---  
ATTACAGGGCTGCTATTAAACAAGAGATGGTGGTAATATTACCAAT-----  
-----  
-  
AATAATACAAACAATAATGAGACCTTCAGACCTGGAGGAGGAGATATGAGGGACAATTGGAGAAGTGAATTAT

ATAAATATAAAGTAGTAAAAATTGAACCATTA---GGAATAGCCCCACCAAGGCAAAGAGGAGAGTGGTG--  
-----CAGAGAGAAAAAAGAGCA---GTGGGA---  
ATAGGAGCT-----GTGTTCTTGGGTTCTTGGGAGCA---GCAGGAAGCACTATG---  
GGCGCAGCGTCA---ATAACGCTGACGGTACAG---GCCAGACTG---TTATTG---  
TCTGGTATAGTGCAACAGCAGAAC---AATTTG---CTGAGA---  
GCTATTGAGGCGCAACAACATCTGTTGCAACTCACAGTCTGGGGCATC  
>KF526228  
TTCTACTGTAATACAACAACACTGTTTAACAGTACTTGGAATTCACCACAACCTAATAGGAATTGGACA----  
-----  
-----  
GGAAATGACACAATCACACTCCCATGCAGAATAAAACAATTTATAAACATGTGGCAGGAAGTAGGAAAAGCAA  
TGTATGCCCCCTCCCATCAAAGGAATAATTAGATGTGTATCAAAT---  
ATTACAGGAATGATATTAACAAGAGATGGTGGTATTGGTAAACACCACCGGG-----  
-----  
-----  
GAGAACGGAACAGAGATCTTTAGACCAGGAGGAGGAGATATGAGGGACAATTGGAGAAGTGAAGTATATAAAT  
ATAAAGTAGTAAGAATTGAACCATTA---GGAATAGCACCCACCAAGGCAAAGAGAAGAGCGGTG-----  
-----CAGAGAGAAAAAAGAGCA---GTGGGA---ATAGGAGCT---  
-----GTGTTCTTGGGTTCTTGGGAGCA---GCAGGAAGCACTATG---GGCGCAGCGTCA---  
CTAACGCTGACGGTACAA---GCCAGACTA---TTATTG---TCTGGTATAGTGCAACAGCAGAAC---  
AATCTG---CTGAGG---GCTATTGAGGCGCAACAGCATCTGTTGCAACTCACTGTCTGGGGCATC  
>KF526265  
TTCTACTGCAATTCATCACAATTGTTTAATAGTACTTGGAATGGTACTGAGTCTTGGAATAGTACTGGG----  
-----  
-----  
CATGACACTAACATCACACTCCAATGCAGAATTAAACAAATTATAAACATGTGGCAGGAAGTAGGAAAAGCAA  
TGTATGCCCCCTCCCATCCAAGGACCAATTAGCTGTTTCATCAAAT---  
ATTACAGGGCTGCTATTAACAAGAGATGGTGGTGGGAACAAGAGC-----  
-----  
-----  
GAGACTGAGACTGAGACTTTTCAGACCTGTAGGAGGAAATATGAGGGACAATTGGAGAAGTGAATTATATAAAT  
ATAAAGTAGTAAAAATTGAACCATTA---GGAATAGCACCCACCAAGGCAAAGAGAAGAGTGGTG-----  
-----CAGAGAGAAAAAAGAGCA---ATGGGA---CTAGGAGCT---  
-----TTGTTTCATTGGGTTCTTGGGAGCA---GCAGGAAGCACTATG---GGCGCAGCGTCA---  
ATAACGCTGACGGCACAG---GCCAGACTA---CTATTG---TCTGGTATAGTGCAACAGCAGAAC---  
AATTTG---CTGAGA---GCTATTGAGGTGCACCAACATATGTTGCAACTCACAGTCTGGGGCATC  
>KF526312  
TTCTACTGTAATGCAACAAAACACTGTTTAATTCTACGTGGAATAGTAGTACTTGGAATGATAATAATCCTGGG-  
-----  
-----  
GAAAAATGTTACCATCACACTCCCATGCAGGATAAAACAAATTATAAACATGTGGCAGAAAACAGGAAAAGCAA  
TGTATGCCCCCTCCCATCAGTGGACGAATTAGCTGTTTATCAAAT---  
ATTACAGGGCTGATATTAACAAGAGATGGGGGTATTAATAACACG-----  
-----  
-----  
AACGAGACCTTCAGACCTGCAGGAGGAGATATGAGGGACAATTGGAGAAGTGAATTATATAAATATAAAGTAG  
TAAAAATTGAACCATTA---GGAATAGCACCCAACAAGGCAAGGAGAAGAGTGGTG-----  
-----CAGAGAGAAAAAAGAGCA---GTGGGA---ATAGGAGCT-----  
GTGTTCTTGGGTTCTTGGGAGCA---GCAGGAAGCACTATG---GGCGCAGCGTCA---  
GTAACGCTGACGGTACAG---GCCAGACTA---TTGCTG---TCTGGTATAGTGCAACAGCAGAAC---  
AATCTG---CTGAGG---GCTATTGAGGCGCAACAGCATCTGTTGCAACTCACAGTCTGGGGCATC  
>KF526323  
TTCTATTGTAATACATCAAAATTATTTAATAGTACCTGGAATGAGACTAGTACTTGGAATGAGATGGGA----  
-----  
-----  
AAAGATGATAATATCATACTCCCATGTAGAATAAAACAAATTATAAACAGATGGCAGGAACCAGGAAAAGCAA  
TGTATGCCCCCTCCCATCGCAGGACTAATTAGATGTTTCATCAAAT---  
ATTACAGGGCTGCTATTAATAAGAGATGGTGGTAAACAAGGCGAGTAATGGT-----  
-----  
-----

AGCAACACCGAGATCTTCAGACCTGGAGGAGGAGACATGAGGGACAATTGGAGAAGTGAATTATATAAAATATA  
AAGTAGTAAAAATTGAACCATTA---GGAATAGCACCCACCAAGGCAAAGAGAAGAGTGGTG-----  
-----CAGAGAGAAAAAAGAGCA---GTGGGAGTACTAGGAGCT-----  
---ATGTTCCCTTGGGTTCTTGGAACA---GCAGGAAGCACTATG---GGCGCAGCGTCA---  
GTGACGCTGACGGTACAG---GCCAGGCAA---TTAATG---GCTGGTATAGTGCAACAGCAGAAC---  
AATCTG---CTGAGA---GCTATTGATGCGCAACAGCAACTGTTGCAACTCACGGTCTGGGGCATC  
>KT124766  
TTCTACTGTAACACAACAGAACTGTTTAACAGTACTTGGAATGTTACTAGTGATGAGTCAAATAACACA----  
-----  
-----  
AATAACACTACTATCACGCTCCAATGCAGAATAAAACAAATTGTAAACATGTGGCAGACAGTAGGAAAAGCAA  
TGTATGCCCCCTCCCATCCAAGGAATAATTAGATGTTTCATCAAAT---  
ATTACAGGGCTGCTATTAACAAGAGATGGTGGGTATAATAATGGCACCAAT-----  
-----  
-----  
AATGATACCGAGATCTTCAGACCTGGAGGAGGAGATATGAGGGACAATTGGAGAAGTGAATTATATAAAATATA  
AAATAGTAAGAATTGAACCATTA---GGAATAGCACCCAAACAGGCAAAGAGAAGAGTGGTG-----  
-----CAAAGAGAAAAAAGAGCA---GTGGGGATGATAGGAGCA-----  
---ATGTTCCCTTGGGTTCTTGGAACA---GCAGGAAGCACTATG---GGCGCAGCGTCA---  
CTAACGCTGACGGTACAT---GCCAGACAA---GTATTG---GCTGGTATAGTGCAACAGCAGAAC---  
AATCTG---CTGAGG---GCTATTGAGGCGCAACAACATATATTGCAACTCACAGTCTGGGGCATC  
>KT124773  
TTCTATTGTAATACAACACAACCTGTTTAATAGTACCTGGGTAAATAGTACATGGAATAGTACTGAAGGAATG-  
-----  
-----  
AACAAACACCAACATCACACTCCCATGCAGAATAAAACAGATTGTAAACATGTGGCAGGAAGTAGGAAAAGCAA  
TGTATGCCCCCTCCCATCAGAGGAAATATTACATGTGCATCAAAT---  
ATTACAGGGGTGCTATTAACAAGAGATGGTGGACATAATGGATCA-----  
-----  
-----  
AATGAGACCTTCAGACCTGCAGGAGGAGATATGAGGGATAATTGGAGAAGTGAATTATATAAAATATAAAATAG  
TAAAAATTGAACCATTA---GGAATAGCACCCACCAAGGCAAAAAGGAGAGTGGTG-----  
-----CAGAGAGAAAAAAGATCA---CCAACA---CTGGGAGCT-----  
TTGTTCAATTGGGTTCTTGGAACA---GCAGGAAGCACTATG---GGCGCAGCGTCA---  
CTGACGCTGACGGTACAA---GCCAGGCAA---TTATTG---TCTGGTATAGTGCAACAGCAGAGC---  
AATCTG---CTGAGG---GCTATTGAGGCGCAACAACACATATTGCAACTCACGGTCTGGGGCATC  
>KT124775  
TTCTACTGTAACACCACACAGCTGTTTAATGAAACCTGGATTAAACAGTAACAGTACCGGG-----  
-----  
-----  
AGTAATAGCAGTATCACACTCCCATGCAGAATAAAACAAATTATAAACAGATGGCAGGAAGTAGGAAAAGCAA  
TGTATGCCCCCTCCCATGCAAGGACAAATTAGTTGCTCATCAAAT---  
ATTACAGGACTACTATTAACAAGAGATGGAGGAGGAGGTAATGGCACA-----  
-----  
-----  
AACAACTACTGAGACCTTCAGACCTGGAGGAGGAGATATGAGAGATAATTGGAGAAGTGAATTATATAAAATATA  
AGGTAGTAAGAATTGAGCCATTA---GGAGTAGCACCCACCAAGGCAAAGAGAAGAGTGGTG-----  
-----CAGAGAGAAAAAAGAGCA---GTGGGAACAATAGGAGCT-----  
---ATGTTCCCTTGGGTTCTTGGAACA---GCTGGAAGCACTATG---GGCGCAGCATCA---  
GTGATGCTGACGGTACAG---GCCAGACAA---TTATTG---TCTGGTATAGTGCAACAGCAGAAAT---  
AATCTG---CTGAGA---GCTATTGAGGCGCAACAGCATATGTTGCAACTCACGGTCTGGGGCATC  
>MG196689  
TTCTATTGTAACCAACAAAACCTGTTCAACAGTATTTGGAATAGTAGTTTGATTAATGAGAATATTACTTGGA  
ATGCTAAT-----AGCACT-----  
GATGCCAATGACACTATCACACTCACATGCAGAATAAAACAAATTGTAAACATGTGGCAGGAAGTAGGAAAAG  
CCATGTATGCCCCCTCCCATCAGAGGACAAATTAGATGTGAATCAAAT---  
ATTACAGGGCTGCTATTAACAAGAGATGGTGGTGATACCAGTAGC-----  
-----  
-----

ACAAATGAGACCTTCAGACCTGGAGGAGGAGATATGAGGGACAATTGGAGAAGTGAATTATATAAATACAAGG  
TAGTAAAAAATTGAGCCATTA---GGAATAGCACCCACCAAGGCAAGGAGAAGAGTGGTG-----  
-----CAGAGAGAAAAAAGAGCA---GTGGGA---CTAGGAGCT-----  
TTTTTCCTTGGGTTCTTGGGAGCA---GCAGGAAGCACTATG---GGCGCAGCGTCA---  
ATAACGCTGACGGTACAG---GCCAGGCAA---TTATTG---TCTGGTATAGTGCAGCAGCAAAAC---  
AACTTG---CTGAGG---GCTATTGAGGCGCAACAACATCTGTTGCAACTCACAGTCTGGGGCATC  
>MG196815  
TTCTACTGTAATTCAACACAATTGTTTAATAGTACTTGGCATAGTAATAGTACTTTGAATAGTACTGAGAAT-  
-----  
-----  
GTAAATAAAACTATCACACTCCCATGCAAAATAAAACAAATTGTAAACATGTGGCAGGAAGTAGGAAGAGCAA  
TATATGCCCCCTCCCATCAGAGGAGTAATCAGATGTTTCATCAAAT---  
ATTACAGGGCTGCTACTAACAAGAGATGGTGGTAAGAGTAGCAACACCAGCAAC-----  
-----  
-----  
ACCACCGAGGAGGTCTTCAGACCTGAGGGAGGAAATATGAGGGACAATTGGAGAAGTGAATTATATAAATATA  
AAGTAGTAAGAATTGAACCATTA---GGAGTAGCACCCACCAAGGCAAAGAGAAGAGTGGTG-----  
-----CAGAGAGAAAAAGAGAGCA---GTGGGAACACTAGGAGCT-----  
---ATGTTCCCTTGGATTCTTGGGAACA---GCAGGAAGCACTATG---GGCGCAGCGTCA---  
CTGGCGCTGACGGTACAG---GCCAGACAA---TTATTG---TCTGGAATAGTGCAACAGCAAAAC---  
AATTTG---CTGAGA---GCTATTGAGGCGCAACAGCATCTGTTGCAACTCACAGTCTGGGGCATT  
>MG196840  
TTCTACTGTAATTCAACACCGTTGTTTAATAGTACTTGGTCTAATAATACTTGGAACGATACTGAAGAATTAA  
GTGCC-----  
-----ACT---  
GAAGGAAATGAAACAATCACACTCCCATGCAGAATAAAACAAATTATAAACATGTGGCAAGAAGTAGGAAAAG  
CAATGTATGCCCCCTCCCATCAGAGGACTGATTAGATGCTCATCAAAC---  
ATTACAGGGCTGCTATTAACAAGGATGGTGGTCCTAATAACACC-----  
-----  
-----  
AACGAAACCTTCAGACCTACAGGAGGAGATATGAGGGATAATTGGAGAAGTGAATTGTATAAATATAAAGTAG  
TAGAACTTGAACCATTA---GGAGTAGCACCCACCAAGGCAAAAAGAAGAGTGGTG-----  
-----CAGAGAGAAAAAAGAGCA---GTGGGA---CTAGGAACT-----  
TTGTTCCCTTGGGTTCTTGGGAGCA---GCAGGAAGCACTATG---GGCGCAGCATCA---  
ATGGTGCTGACGGTACAG---GCCAGGCAA---TTATTG---TCTGGTATAGTGCAACAGCAGAAC---  
AATTTG---CTGAGA---GCTATTGAGGCGCAACAGCATCTGTTGCAACTCACAGTCTGGGGCATC  
>MG196846  
TTCTATTGTGATACAGCAAGCCTGTTTAATAGTACTTGGCAGGCAAAGGAGACTGAAAGAAATGACACTGGA-  
-----  
-----  
GGAAATGACACAATCACACTCCCTGTAGAATAAAACAAATTATAAACATGTGGCAGGCAGTAGGGAAAGCAA  
TATATGCCCCCTCCTATTGCAGGGTTAATTAGATGTTTCATCAAAT---  
ATAACAGGGCTGCTGTTAACAAGAGATGGTGGTAATGAGACCATGACC-----  
-----  
-----  
AAGGATAACGAGACCTTCAGACCTGGAGAAGGAAATATGAGGGATAATTGGAGGAGTGAATTATATAAATATA  
AAGTAGTAAAAGTTGAACCATTA---GGAATAGCACCCACCAAGGCAAGGAGAAGAGTGGTG-----  
-----CAAAGAGAAAAAAGAGCA---GTGACA---ATAGGAGCT-----  
---GTGTTCCCTTGGGTTCTTGGGAGCA---GCAGGAAGCACTATG---GGCGCAGCATCA---  
GTGACGCTGACGGTACAG---GCCAGACAA---TTATTG---TCTGGTATAGTGACAGCAGCAAAAC---  
AACTTG---CTGAAA---GCTATTGAGGCGCAACAGCATCTGTTGCAACTCACAGTCTGGGGCATC  
>MG196942  
TTCTACTGTAACACAACAGCACTGTTTAATAGCAGTTGGAATGAGAATAATACTTGGGTTAATAATACTGAAA  
CA-----  
-----  
GGAGAGAGAAACATCACACTCCAATGTAGAATAAAACAAAGTTATAAACTTGTGGCAGCAAGTAGGAAAAGCAA  
TGTATGCCCCCTCCCATCAGAGGGCAAATTAGATGTTTCATCAAAT---  
ATTACAGGGATACTATTAACAAGAGATGGTGGTGAGCCTAACAATACC-----  
-----  
-----

CAAAATGAGACCTTTAGACCTGGGGGAGGAAATATGAAGGACAATTGGAGAAGTGAATTATATAAATATAAAG  
 TAGTAAGGATTGAACCATTA---GGAGTAGCACCCACCAAGGCAAAAAGAAGAGTGGTG-----  
 -----CAGAGAGAAAAAAGAGCA--GTGGGA---ATAGGAGCT-----  
 GTGTTCTTGGATTCTTGGGAGCA---GCAGGAAGCACTATG---GGCGCAGCGTCA---  
 CTGACGCTGACGGTACAG---GCCAGACAA---TTATTG---TCTGGTATAGTGCAACAGCAGAGC---  
 AATTTG---CTGAGA---GCTATTGAGGCGCAACAGCATATGTTGCAACTCACAGTCTGGGGCATC  
 >MG197084  
 TTCTATTGTAATACAACAAAACCTATTTGATAGTACTTGGAAATGTTACTTGGAAAGAGGCAAATAACACTGGA-  
 -----  
 -----  
 GAGAAATGACACAATCATCCTCCAGTGCAGGATAAAAACAAATTATAAACATGTGGCAGGAAGTAGGAAAAGCAA  
 TGTATGCCCCCTCCCATCAGAGGAAATATTAGTTGCTCATCAAAT---  
 ATTACTGGATTGCTATTAACAAGAGATGGTGGTGACGATAGGAAC-----  
 -----  
 -----  
 ACCACCGAGATCTTTCGACCTGGAGGAGGAGATATGAGGGACAATTGGAGAAGTGAATTATATAAATATAAAG  
 TAGTACAAGTTGAACCATTA---GGAATAGCACCTACCAAGGCAAAAAGAAGAGTGGTG-----  
 -----CAGAGAGAAAAAAGAGCA--GTGGGA---ATAGGAGCT-----  
 CTGTTCTTGGGTTCTTGGGAGCA---GCAGGAAGCACTATG---GGCGCAGCATCA---  
 ATGACGCTGACGGTACAG---GCCAGACAA---TTATTG---TCTGGTATAGTGCAACAGCAGAGC---  
 AATCTG---CTGAGA---GCTATTGAGGCGCAACAGCATCTGTTGCAACTCACAGTCTGGGGCATC  
 >MG197146  
 TTCTACTGTAATTCAATACCACTGTTTAATAGTACTTGGGATAGTAATAGTACTTGGGGTAATGATACCATAG  
 GG-----  
 -----  
 -----  
 TTAAATGAACTATTACACTCCAATGCAGAATAAAAACAAATTATAAACATGTGGCAGGAAGTAGGAAAAGCAA  
 TGTATGCCCCCTCCCATCAAAGGACAGATTGGATGTTCTTCTCAAAT---  
 ATTACAGGGCTATTGTTAACAAGAGATGGTGGTAATGCTAAGAGG-----  
 -----  
 -----  
 GACAAAAACGACACAGAGATCTTCAGACCTGCAGGAGGAGATATGAGGGACAATTGGAGAAGTGAATTATATA  
 GATATAAAGTAGTAAGAATTGAACCATTA--GGAGTAGCACCCACCAAGGCAAGGAGAAGAGTGGTG----  
 -----CAAAAAGAAAAAAGAGCA--GTGGGA---  
 ATAGGAGCT-----TTGTTTCATTGGGTTCTTGGGAGCA--GCTGGGAGCACTATG---  
 GGCGCAGCGTCA--CTGACGCTGACGGTACAG--GCCAGACAA--TTGTTG---  
 TCTGGTATAGTGCAAGCAGCAAAAC---AATTTG---CTGATG---  
 GCTATTGAGGCGCAACAGCATCTGTTGCAACTCACAGTCTGGGGCATT  
 >KM354470  
 TTCTACTGTAATACAACACAACCTGTTTAATAGTACTTGGAAATGATACAGAGTTA-----  
 -----  
 -----  
 AATAGTACTACAGGGAAT-----  
 AGTACTACAGACACAATCACACTCCCATGCAGAATAAAAACAAATTATAAACATGTGGCAGGAGGTAGGAAAAG  
 CAATGTATGCCCCCTCCCATAGGGGATACATTAAGTGTTCATCAAAT---  
 ATTACAGGGCTGCTATTAACAAGAGATGGAGGA-----  
 -----  
 -----  
 GAGGGCAACAACAGGAGTGAGACCTTTAGACCTGGAGGAGGAAATATGAGGGACAATTGGAGAAGTGAATTAT  
 ATAAATATAAAGTAGTAAAAATTGAACCATTA---GGAATAGCACCCACCAAGGCAAAGAGAAGAGTGGTG--  
 -----CAAAGAGAAAAAAGAGCA---  
 GTGGGAACAATAGGAGCT-----ATGTTCTTGGGTTCTTGGGAGCA---GCAGGAAGCACTATG---  
 GGCGCAGCGTCA--ATAACGCTGACGGTACAG--GCCAGACAA--TTATTG---  
 TCTGGTATAGTGCAACAGCAGAAC---AATCTG---CTGAGA---  
 GCTATTGAGGCGCAACAACATCTGTTGCAACTCACAGTCTGGGGCATC  
 >KM354904  
 TTCTACTGTAACACAACACAACCTGTTTAATAGTACTTGGACTAATAGTGGTGATGGT-----  
 -----  
 -----  
 AATTGGACTAGTAGTGAT-----  
 AAGTTAAATGGCACTATCACACTCCCATGTAGAATAAGACAAATTATAAACATGTGGCAGGAAGTAGGAAAAG  
 CAATGTATGCCCCCTCCCATCAGAGGATATATTAAGTGTTCATCAAAT---  
 ATTACAGGAATACTATTAACAAGAGATGGTGGT-----

-----  
 ATTGAGAACAATACCAAC---  
 AGTACTGAGATCTTCAGACCTGGAGGAGGAGATATGAGGGACAATTGGAGAAGTGAGCTATATAAATATAAAG  
 TAGTACAAATTAAACCATTA---GGAGTAGCACCCACCGAGGCAAAAAGAAGAGTGGTA-----  
 -----CAGAGAGAAAAAAGAGCA--GCA-----CTAGGAGCT-----  
 CTGTTTCCTTGGGTTCTTGGGAGCA---GCCGGAAGCACTATG---GGCGCAGCGTCA---  
 ATGACGCTGACGGTACAG---GCCAGACAA---TTATTG---TCTGGTATAGTGCAACAGCAGAGC---  
 AATCTG---CTGAGG---GCTATTGAGGCGCAACAGCATCTGTTGCAACTCACAGTCTGGGGCATA  
 >KM355003  
 TTCTACTGTAATACATCACGACTGTTTAATAGTACTTGAATAGTACTGGA-----  
 -----  
 -TCAAATAACACTGAG-----  
 GGAAATGACACAACAATCACAATCCCATGTAAAATAAAAAAAGTTATAAACCTGTGGCAGGAAGTAGGAAAAG  
 CAATGTATGCCCTCCCATCAGAGGACAGATTAAATGCTCATCAAAT---  
 ATTACAGGGTTATTACTAACAAGAGATGGGGGT-----  
 -----  
 ATTAATGCCACAAACGGG---  
 ACCATGGAGATCTTCAGACCTGGAGGAGGAGATATGAGGGACAATTGGAGAAGTGAATTATACAAATATAAAG  
 TAGTACAAATTGAACCATTA---GGAATAGCACCCACCAGGGCAAGAGAAGAGTGGTG-----  
 -----CAGAGAGAAAAAAGAGCA--GTAGGA---TTAGGAGCT-----  
 CTGTTTCCTTGGGTTCTTGGGAGCA---GCAGGAAGCACTATG---GGCGCAGCGTCA---  
 GTGACGCTGACGGTACAG---GCCAGACAA---TTATTG---TCTGGTATAGTGACAGCAGCAGAAC---  
 AATCTG---CTGAGG---GCTATTGAGGCGCAACAGCATCTGTTGCAACTCACAGTCTGGGGCATC  
 >KM355044  
 TTCTACTGTAATTCAACAAAATTGTTTAATAGTACTTGGACGAATAGTAGTTTG-----  
 -----  
 -GAAAATAATACTACA-----  
 GAGTCAAATATCAATATCACACTCCCATGCAGAATAAAACAGATTATAAACATGTGGCAGGGAGTAGGAAAAG  
 CGATGTATGCCCTCCCATCAGTGGACCAATTAGATGTTCAACAAAT---  
 ATCACAGGGCTACTATTAAACAAGAGATGGTG---  
 -----  
 -  
 AATATCACTAATAACACTGAGGTCTTCAGACCTGGAGGAGGAGATATGAGAGACAATTGGAGAAGTGAATTAT  
 AATAATATAAAGTAGTGAATAATTGAACCATTA---GGAGTAGCACCCACTAAGGCAAGAGAAGAGTGGTG--  
 -----CAGAGAGAAAAAAGAGCA--GTGGGA---  
 TTAGGAGCT-----ATGTTTCCTTGGGTTCTTGGGAGCA---GCCGGAAGCACTATG---  
 GGCGCAGCGTCA---ATAACGCTGACGGTACAG---GCCAGACAA---TTATTG---  
 TCTGGTATAGTGCAACAGCAGAAC---AATCTG---CTGAGG---  
 GCTATTGAGGCGCAACAGCATCTGTTGCAACTCACAGTCTGGGGCATC  
 >KU901727  
 TTCTACTGCGATACAACACAACCTGTTTAATAGTACTTGAATTGGAATGATACTCGGACAGGGTCAAAT---  
 -----  
 -----  
 GGCAATGACAAGATCATACTCCCATGTAGAATAAGACAAATTGTAAATAGGTGGCAGGAGGTAGGAAAGGCAA  
 TGTATGCTCCTCCATTAGAGGACAAATTAAATGCTCATCAAAC---  
 ATTACAGGGCTACTATTAAACAAGAGATGGGGGCAATAACAATACA-----  
 -----  
 -----  
 AATGAAAATGAGACCTTCAGACCTGGAGGAGGAGATATGAGGGACAATTGGAGAAGTGAATTATATAAATATA  
 AGGTGGTACAGGTTGAACCAATA---GGAATAGCACCCACCACGGCAAGGAGAAGAGTGGTG-----  
 -----CGAAGAGAAAAAAGAGCG---GTAACA---ATGGGAGCT-----  
 ---GTGTTTCCTTGGGTTCTTGGGAACA---GCAGGAAGCACTATG---GGCGCAGCGTCA---  
 CTGACGCTGACGGTACAG---GTCAGACAA---TTATTG---TCTGGCATAGTGACAGCAGCAAAGC---  
 AATTTG---CTGAGG---GCTATTGAGGCGCAACAGCATCTGTTGCAACTCACAGTCTGGGGCATC  
 >KF384799  
 TTCTACTGTAATACAGCACAACTGTTTAATAGTATTTGGAATGGTACTGAGCCTAATGCTGAATGGGCAACTA  
 AC-----  
 -----  
 AATAAAGCAAATATCACACTCCCATGCAGAATAAAACAAATTATAAACATGTGGCAGGAAGTAGGAAAAGCAA  
 TGTATGCCCCCTCCCATCGAAGGACTAATTAGATGTACATCAAAT---

ATTACAGGACTATTACTAACAAGAGATGGTGGTAATAGCGGGAAAAATGATAGT-----  
-----  
-----  
AATAATAACACTGAGATCTTCAGACCTGGAGGGGGAGATATGAGAGACAATTGGAGAAGTGAATTATATAAAT  
ATAAAGTAGTAAAAGTTGAACCATTA---GGAGTAGCACCCACCAGGGCAAAGAGAAGAGTGGTG-----  
-----CAGAGAGAAAAAAGAGCA---ATAGGC---CTAGGAGCT---  
-----GTGTTTCATTGGGTTCTTGGGAGCA---GCAGGAAGCACTATG---GGCGCAGCGTCA---  
GTGACGCTGACGGTACAA---GCCAGACAA---TTATTG---TCTGGTATAGTGCAACAGCAGAAT---  
AATCTG---CTGAGG---GCTATTGAGGCGCAGCAGCACCTGTTACAACCTCACAGTCTGGGGCATC  
>KF384805  
TTCTACTGTAATACAACAACCACTGTTTAATAGTACTTGGTTGTCAAATAGTACTTGGATGTCAAATAACACTG  
GAGGA-----  
-----  
AATGACACAACAATCATACTACCATGCAGAATAAAACAAATTATAAACATGTGGCAGGAAGTAGGAAAAGCAA  
TGTATGCCCCCTCCCATTCAGGACAAATTAGCTGTTTATCAAAC---  
ATTACAGGGCTACTATTAACAAGAGATGGTGGGAATGTGAGCAACAGC-----  
-----  
-----  
AACACCACCGAGATCTTCAGACCTGTAGGAGGAGATATGAGGGACAATTGGAGAAGTGAATTATATAAATATA  
AAGTAGTAAAAATTGAACCATTA---GGAGTAGCACCTCCCAAGGCAAAAAGAAGAGTGGTG-----  
-----CAGAGAGAAAAAAGAGGA---GCG-----GGACTG-----  
---GTGTTCCCTTGGGTTCTTGGCAACA---GCAGGAAGCACTATG---GGCGCGGCGTCA---  
CTGACGCTGACGGTACAG---GCCAGACAA---TTATTG---TCTGGTATAGTGCAACAGCAGAAC---  
AATCTG---CTGAGA---GCTATTGAGGCGCAACAACATCTGTTGCAACTCACAGTCTGGGGCATT  
>KF384806  
TTCTACTGTAATACATCACAATTGTTTAATAGTACTTGGTTTGGGAATACTACTAAACAGTCAAATGAC----  
-----  
-----  
ACTACAGAATATATCAGACTCCCATGCAGAATAAAACAAATTGTAAACCTGTGGCAGGAAGTAGGAAAAGCAA  
TGTATGCCCCCTCCCATCAGCGGAGAAATTAACTGTACATCAAAT---  
ATTACAGGGCTGCTACTAACAAGAGATGGTGGTAATGATAATAACACA-----  
-----  
-----  
AATGGGACTGAGACCTTTAGACCTGGAGGAGGAGATATGAGGGACAATTGGAGAAGTGAATTATACAAGTATA  
AGGTAGTACAAATTGAACCCCTTA---GGGGTAGCGCCCAAGGCAAAGAGAAGAGTGGTG-----  
-----CAGAGAGAAAAAAGAGCA---ATAGGA---CTAGGAGCT-----  
---TTATTCCTTGGGTTCTTGGGAGCA---GCAGGAAGCACAAATG---GGCGCAGCGTCA---  
ATGACGCTGACGGTACAG---GCCAGACTA---TTATTG---ACTGGTATAGTGCAACAGCAAAAC---  
AACTTG---CTGAGG---GCTATTGAGGCGCAACAGCATCTGTTGCAACTCACAGTCTGGGGCATC  
>KC473831  
TTCTACTGTAATTCAACACAACCTGTTTAATAGTAAATGGGAGGGTAATAGTACTTGAATAGTACTGGAGAGT  
CAAATAAC-----  
-----  
ACTGCAGAAAACATCATACTCCCATGCAGAATAAAGCAAATTGTAAACATGTGGCAGGAAGTAGGAAAAGCCA  
TATATGCCCCCTCCCATCAGCGGACCAATTAGATGCTCAACAAAT---  
ATTACAGGGCTGCTATTAAACAAGAGATGGGGGAAAGGATGAGAAC-----  
-----  
-----  
CAAACAGAGATCTTTAGACCTGGAGGAGGAGATATGAGGGACAATTGGAGAAGTGAATTATACAAATATAAAG  
TAGTAAAAATTGAACCATTA---GGAGTAGCACCCACCAAGGCAAAGAGAAGAGTGGTG-----  
-----CAGAGAGAAAAAAGAGCA---GTGGGA---ATGGGAGCT-----  
CTGTTCCCTTGGTTTCTTGGGAGCA---GCAGGAAGCACTATG---GGCGCAGCGTCA---  
ATAACGCTGACGGCACAG---GCTAGACAA---TTATTG---TCTGGTATAGTGCAACAGCAGAGC---  
AATTTG---CTGAGG---GCTATTGAGGCGCAGCAACATCTGCTGCAACTCACAGTCTGGGGCATC  
>KC473833  
TTCTACTGCAATACATCAGCACTGTTTAATAGTACTTGGGAATAGTACTATAAATACAAGT-----  
-----  
-----  
GAAAAATGACACAATCATACTCCCATGCAGAATAAAACAAATTATAAATCTGTGGCAGGAAGTAGGAAGAGCAA  
TGTATGCTCCTCCCATCAGGGGAAACATTAGCTGTACATCAAAT---

ATTACGGGGGTGCTATTAACAAGAGATGGTGGCGATGACCCTAACGGG-----  
-----  
-----  
ACCAACGACACCGAGACCTTCAGACCTGGAGGAGGAGATATGAGGGACAATTGGAGAAATGAATTGTATAAAT  
ACAAAGTAGTAAAAATTGAACCATTTG---GGAATAGCACCCACCAGGGCAAAGAGAAGAGTGGTG-----  
-----CAAAGAGAAAAAAGAGCA---GTGGGA---ATAGGAGCA---  
-----TTGTTTCCTTGGGTTCTTGGGAGCA---GCAGGAAGCACTATG---GGCGCAGCGTCA---  
GTGACGCTGACGGTACAA---GCCAGGCTA---TTATTG---TCTGGTATAGTGCAACAGCAGAAC---  
AATTTG---CTGAGA---GCTATTGAGGCGCAACAGCATCTGTTGCAACTCACAGTCTGGGGCATC  
>KC473834  
TTCTACTGTAATACAACAAAACCTGTTTAATGGTAATTTGACTAATACTTGGGAATGGAAATTGGTCTGAT----  
-----  
-----  
ACTAATGGTACTATCATACTCCAGTGCAGAATAAAACAGATTGTAAACATGTGGCAGGAAGTAGGAAAAGCAA  
TGTATGCTCCTCCCATCAAAGGACAGATTAACTGCACATCAAAT---  
ATTACAGGATTGCTATTAACAAGAGATGGTGGCACAGGCAATGACAGT-----  
-----  
-----  
GACAGCAAGGAGACCTTCAGACCTGGAGGAGGAGATATGAGAGACAATTGGAGAAGTGAATTATATAAATATA  
AAGTAGTAAAAGTTGAACCATTA---GGAATAGCACCCACCAAGGCAAAGAGAAGAGTGGTG-----  
-----CAGAGAGAAAAAAGAGCA---GTGGGA---ATAGGAGCT-----  
---GTGTTTCCTTGGGTTCTTGGGAGCA---GCAGGAAGCACTATG---GGCGCAGCGTCA---  
ATAACGCTGACGGTACAG---GCCAGGCTA---TTATTG---TCTGGTATAGTGCAACAGCAGAAC---  
AATCTG---CTGAGG---GCTATTGAGGCGCAACAGCATCTGTTGCAACTCACAGTCTGGGGCATT  
>JN397362  
TTCTACTGTAATACAACAAAACCTGTTTAACAGTACTTGGGAAAAAACAAATGATACTTGGAGTGGTAATGAAA  
CGTTA-----  
-----AAT---  
GGCACAATCACACCAATCACACTCCCATGCAGAATAAAACAAATAATAAACATGTGGCAGAAAATAGGAAAAG  
CAATGTATGCCCCCTCCTATTCCAGGACCAATTAAGTGTTCATCAAAT---  
ATTACAGGGCTGATATTAACAAGAGATGGTGGAGGTGATAGGAGTAAT-----  
-----  
-----  
GCCACCAACGAGACCTTCAGACCTGGAGGAGGAGATATGAGGGACAATTGGAGAAGTGAATTATATAAATATA  
AAGTAGTAAAAATTGAACCATTA---GGGTAGCACCCACCAAGGCACAGAGAAGAGTGGTG-----  
-----CAGAGAGAAAAAAGAGCT---GTGGGA---TTTGGAGCG-----  
---CTGTTTCCTTGGGTTCTTGGGAGCA---GCAGGAAGCACTATG---GGCGCAGCGTCA---  
GTGACGCTGACGGTACAG---GCCAGACAA---TTATTG---TCTGGTATAGTGCAACAGCAGAAC---  
AATTTG---CTGAGA---GCTATTGAGGCGCAACAGCACCTGTTGCAACTCACAGTCTGGGGCATC  
>KF384810  
TTCTACTGTAATACAACACAGCTGTTTAATAGTACTTGGGAATGGAATAGTACCAATTGGAGTAATAACACT-  
-----  
-----  
AGCAATGAAAATATCATACTCCCGTGCAGAATAAGACAAATTGTAAACAGGTGGCAGGAAGTAGGAAAAGCAA  
TGTATGCCCCCTCCCATCAGTGGACGGATTAGTTGTTCTTCAAAT---  
ATTACAGGACTGCTACTAACAAGAGATGGTGGTGATAGTAATGATACA-----  
-----  
-----  
AATAAATACTGAGATCTTCAGACCAGGAGGAGGAGATATGAGGGACAATTGGAGAAGTGAATTATATAAATATA  
AAGTAGTAGAGATTGAACCATTA---GGAATAGCACCCACCAAGGCAAAGGAGAGTGGTG-----  
-----CAGAGAGAAAAAAGAGCA---ATAACG---CTGGGAGCT-----  
---TTATTCCTCGGGTTCTTGGGAACA---GCAGGAAGCACTATG---GGCGCAGCGTCA---  
ATGACGCTGACGGTACAG---GCCAGGCAA---TTATTG---TCTGGTATAGTGCAACAGCAGAAT---  
AATCTG---CTGAGA---GCTGTTGAGGCGCAACAGCATATGTTGCAACTCACAGTCTGGGGCATC  
>KM516891  
TTCTACTGTAATACAACACAACCTGTTTGATAATACTTGGGAACAGCAGCTAAG-----  
-----  
-----  
GATGCGACTGGTACT-----  
GAAAGAAATGATACTATTACACTTCCATGTAGAATAAAACAAATTATCAATATGTGGCAAAGAGTAGGAAAAG  
CAATATATGCCCCCTCCCATCAGAGGACAAATTAATTGTACATCAAAT---

ATTACAGGGCTGTTATTAACAAGAGATGGTGGT-----  
 -----  
 GTGAACGTGACAACCAAC---  
 AACACTGAGACCTTCAGACCAGGAGGAGAGATATGAGGGATAATTGGAGAAGTGAATTATATAAATATAAAG  
 TAGTAAGAATTGAACCATTA---GGAATAGCGCCACCAAGGCAAAGAGAAGAGTGGTG-----  
 -----CAAAGAGAGAGAAGAGCA--GTA-----CTGGGAGCT-----  
 ATGTTTCCTTGGGTTCTTGGGAGCA--GCAGGAAGCACTATG--GGCGCAGCGGCA---  
 GTGACGCTGACGGTACAG---GCCAGACAA--TTATTG--TCTGGTATAGTGCAACAGCAGAGC---  
 AATTTG---CTGAGG---GCTATTGAGGCGCAACAGCATCTGTTGCAACTCACAGTCTGGGGCATT  
 >KU901848  
 TTCTACTGTAATACAACAAAACCTGTTTAATAGTACTTGGGAATAGTACTGAAGAGTCAAATAACACTACTGCA-  
 -----  
 -----  
 GGAAATGATATAATCAAACCTCCCATGCAGAATAAAACAAATTGTAAACATGTGGCAGGAGGTAGGAAAAGCAA  
 TGTATGCCAATCCCAACAGAGAACTAATTAGATGTTTCATCAAAT---  
 ATTACGGGGCTGCTATTAACAAGAGATGGTGGTGTCCCAACACCACCAATGAG-----  
 -----  
 -----  
 GCCAAAATTGAGACCTTCAGACCAGGAGGAGAGATATGAGGGACAATTGGAGAAGTGAATTATATAAATATA  
 AAGTAGTACAAATTGAACCATTA---GGAGTAGCACCCACCAGGGCAAAGAGAAGAGTGGTG-----  
 -----CAAAGAGAAAAAAGAGCA--GTGGGA--ATAGGAGCT-----  
 ---TTGTTTCCTTGGGTTCTTGGGAGCA--GCAGGAAGCACTATG--GGCGCAGCGGCA---  
 GTGACGCTGACGGTACAG---GCCAGACAA--TTATTG--TCTGGTATAGTGCAACAGCAAAAC---  
 AACTTG---CTGAGG---GCTATTGAGGCGCAACAGCATCTGTTGCAACTCACAGTCTGGGGCATC  
 >KF384812  
 TTCTATTGTAATACAACAGAACTGTTTAATAGTACTTGGAAATGATACTGAAGGGTCAAATAACACTGGGGGGT  
 CAGAAAAC-----  
 -----  
 ACTGACAACACAATCACACTCCCATGTAGAATAAAACAATTTATAAACATGTGGCAGGAAGTAGGAAAAGCAA  
 TGTATGCCCCCTCCCATCAGAGGACAGATTAGTTGTGTATCAAAC---  
 ATCACAGGGCTGCTATTACTAAGAGATGGTGGTAAAAAGAATGAGACTGAC-----  
 -----  
 -----  
 GGAACGAGACTGAGACCTTCAGACCTGGAGGAGGAGATATGAGGGACAATTGGAGAAGTGAGTTATATAAAT  
 ATAAAGTAGTGAAAATTGAACCATTA---GGAGTAGCACCCACCAGGGCAAAGAGAAGAGTGGTG-----  
 -----CAGAGAGAAAAAAGAGCA--GTGGGA--ATAGGAGCT---  
 -----GTGTTTCCTTGGATTCTTGGGAGCA--GCAGGAAGCACTATG--GGCGCAGCGTCA---  
 ATGACGCTGACGGTACAG---GCCAGACTA--TTATTG--TCTGGTATAGTGCAACAGCAGAAC---  
 AATCTG---CTGAGA--GCTATTGAGGCGCAACAGCATCTGTTGCAACTCACAGTCTGGGGCATT  
 >KF384813  
 TTCTACTGTAATTCAACACAACCTGTTTAATAGTACTTGGACTGGTAATGAGTCAGATAGTACTAAC-----  
 -----  
 -----  
 AAAAGTGTCACAATCACACTCCCATGCAGAATAAAACAAATTATAAACATGTGGCAGGAAGTAGGAAAAGCAA  
 TGTATGCCCCCTCCCATTAGAGGACAAATTAGATGTTTCATCAAAC---  
 ATTACAGGGCTGCTCTTAACAAGAGATGGTGGTATAGACAACAAGACAGAC-----  
 -----  
 -----  
 AAGAACGAGACCGAGATCTTTAGGCCTGCAGGAGGAGATATGAGGGACAATTGGAGAAGTGAATTATATAAAT  
 ATAAAGTAGTAAAAATTGAACCGTTA---GGAGTAGCACCCACCAGGGCAAAGAGAAGAGTGGTG-----  
 -----CAGAGAGAAAAAAGAGCA--GTGGGA--ATAGGAGCT---  
 -----ATGCTCCTTGGGTTCTTGGGAGCA--GCAGGAAGCACTATG--GGCGCAGCGTCA---  
 ATGACGCTGACGGTACAG---GCCAGACTA--TTATTG--TCTGGTATAGTGCAACAGCAGAAC---  
 AATTTG---CTGAGG---GCTATTGAGGCGCAACAGCATCTGTTGCAACTCACAGTCTGGGGCATC  
 >MK383400  
 TTCTACTGTAATTCAACACCACTGTTTAATAGTACCTGGAATTGGAATGATACTAAAGGGTCAAATAGCACTG  
 GAGAA-----  
 -----  
 AATAGCACACTCATCACACTCCAATGCAGAATAAAACAAATTATAAACATGTGGCAGGAAGTAGGAAGAGCAA  
 TGTATGCCCCCTCCCATTAGAGGAAACATTAGCTGTTTCATCAAAT---

ATTACAGGGCTGCTATTAACAAGAGATGGTGGTAACCAGACTAAC-----  
-----  
-----  
AACACCGAGATCTTCAGGCCTGAAGGAGGAAATATGAAGGATAATTGGAGAAGTGAATTATATAAATATAAAG  
TAGTAAGAATTGAACCATTA---GGAGTAGCACCCACCAAGGCAAGGAGAAGAGTGGTG-----  
-----CAGAGAGAAAAGAGAGCA--GTGGGA--ATAGGAGCT-----  
TTGTTTCCTTGGGTTCTTGGGAGCA--GCAGGAAGCACTATG--GGCGCAGCGTCG---  
ATGACGCTGACGGTACAG---GCCAGACTA---TTACTG---TCTGGTATAGTGCAACAGCAGAAC---  
AATTTG---CTGAGG---GCTATTGAGGCGCAACAGCGTCTGTTGCAACTCACAGTCTGGGGCATC  
>KY778473  
TTCTACTGTAATTTAACACAGTTGTTTAATAGTACTTGGGGGCATAATAATTCAATACAATTGGATAATAGTA  
CTTGGGAT-----  
-----  
ACTAATAATACTATCACACTCCCATGTAAGATAAAAACAAATTATAAACATGTGGCAAGAAGTAGGAAAAGCAA  
TGTATGCCCCCTCCCATCAGAGGACAAATTAAATGTATATCAAAT---  
ATTACAGGGCTGTTATTAACAAGAGATGGTGGTAGCAATACCACC-----  
-----  
-----  
AACGAAACCTTCAGACCTGGAGGAGGAGATATGAGGGACAATTGGAGAAGTGAATTATATAAATATAAAGTAG  
TAAAAATTGAGCCATTA---GGAATAGCACCCACCAAGGCAAAGAGAAGAGTGGTG-----  
-----CAGAGAGAAAAAGAGCA--GTGGGA--GTGGGAGCT-----  
CTGCTCATTGGGTTCTTGGGAGCA--GCAGGAAGCACTATG--GGCGCAGCGTCA---  
ATAACGCTGACGGTACAA---GCCAGACAA---TTGTTG---TCTGGTATAGTGCAACAGCAGAGC---  
AATCTG---CTGAAA---GCTATTGAGGCGCAACAGCATCTGTTGCAACTCACAGTCTGGGGCATT  
>KT124756  
TTCTACTGCAATACAACACAACCTGTTTAATAGCAGTTGGACAGATGGGCAAGAGCTAAATAACACTGGGCAAG  
AG-----  
-----  
CTAAATAGCACTATCACGCTCCCGTGCAGAATAAAAACAAATTATAAACAGGTGGCAGGAAGTAGGAAAAGCAA  
TGTATGCTCCTCCCATTAGTGGACCAATTAAATGTACATCCAAT---  
ATTACAGGGCTGTTATTAACAAGAGATGGTGGTAACTCTAACTCTAGTGGGAAG-----  
-----  
-----  
AACGACACTGAGACTTTCAGACCTGGAGGAGGAGATATGAGGGACAATTGGAGAAGTGAATTATATAAATATA  
AGGTAGTAAAAATTGAACCATTA---GGAGTAGCACCCACCAAGGCAAGGAGAAGAGTGGTG-----  
-----CAGAGAGAGAAAAGAGCA--GTGGGA--ATAGGAGCT-----  
---GTGTTCCCTTGGATTCTTGGGAGCA--GCAGGAAGCACTATG--GGCGCAGCGTCA---  
TTAACGCTGACGGTACAG---GCCAGACAA---TTATTG---TCTGGTATAGTGCAACAGCAGAAC---  
AATTTG---CTGAGG---GCTATTGAGGCGCAACAGCATCTGTTGCAACTCACAGTCTGGGGCATC  
>MH897911  
TTCTACTGTAATACATCAAACTATTTAATAGTACTTGGCAGACTGATAATAGTACTTGGCAGCCTGAAGCT-  
-----  
-----  
GAGAATAACACTATCACACTCCAATGCAGAATAAGACAAATTATAAACATGTGGCAAGAAGTAGGAAAAGCAA  
TGTATGCCCCCTCCCATCAGTGGACAAATTAGATGTTTCATCAAAT---  
ATTACAGGACTGCTACTAACAAGAGATGGTGACAATGAGAACAAC-----  
-----  
-----  
AGCACTGAGGTCTTCAGACCTGCAGGAGGAGATATGAGGGACAATTGGAGAAGTGAATTATACAAATATAAAG  
TAGTAAAAATTGAACCATTA---GGAATAGCACCCACCAAGGCAAAGAGAAGAGTGGTG-----  
-----CAAAGAGAGAAAAGGGCT--GTGACG---CTGGGAGCC-----  
TTGTTTCCTTGGGTTCTTGGGAGCA--GCAGGAAGCACTATG--GGCGCAACGTCA---  
ATGACGTTGACGGTACAG---GCCAGACAG---TTATTG---TCTGGTATAGTGCAACAGCAGAGC---  
AATCTG---CTGAGA---GCTATTGAGGCGCAACAGCATCTGTTGCAACTCACAGTCTGGGGCATC  
>MH897913  
TTCTACTGTAATACAACAAAACTATTTAATAGTACTTGGACAAATGGTACTGAAGAGGCAAATAACACTGGAG  
GA-----  
-----  
AATGACACACATATCACACTCCCATGCAGAATAAAAACAAATTATAAACATGTGGCAGGGAGTAGGAAAAGCAA  
TGTATGCCCCCTCCCATCAAAGGACAAATCAGATGTTTCATCAAAT---

ATTACAGGGCTGCTATTAACAAGAGATGGTGGTAATAACAATAACGGG-----  
-----  
-----  
ACGACCGAGATCTTCAGACCTGGGGGAGGAGATATGAGGGACAATTGGAGAAGTGAATTATATAAATATAAAG  
TAGTAAAAATAGAACCATTA---GGAGTAGCTCCCACCAAGGCAAAGAGAAGAGTGGTG-----  
-----CAAAGAGAAAAAAGAGCA--GTGGGAACAATAGGAGCT-----  
ATGTTTCCTTGGGTTCTTAGGAGCA--GCAGGAAGCACTATG--GGCGCAGCGTCA---  
ATGACACTGACGGTACAG---GCCAGACAA--TTATTG---TCTGGTATAGTGCAACAGCAAAAC---  
AATTTG---CTGAGG---GCTGTTGAGGCGCAACAGCATCTGTTGCAACTCACAGTCTGGGGCATC  
>MH897916  
TTCTACTGTAATACAACACAACCTATTTAATAGTACTTTTAATAGTCCTTGGAATGATACTAAAATGTCAAATG  
GCACTGAA-----  
-----  
GGATATAACACAACCATCACACTCCAATGCAGAATAAAAACAAATTATAAACAGGTGGCAGGAAGTGGGAAAAAG  
CAATATATGCCCCCTCCCATCCAAGGACAAATTAATTGTTTCATCAAAT---  
ATTACAGGGCTGCTCTTAGTGAGAGATGGTGGTATTGATAATGCCACA-----  
-----  
-----  
AACAAATATTGAAACCTTCAGACCTGGAGGAGGAGATATGAGGGACAATTGGAGAAGTGAATTATATAGATATA  
AAGTAGTAAAAATTGAACCATTA---GGAGTAGCACCCACTAAGGCAAGGAGAAGAGTGGTG-----  
-----CAGAGAGAAAAAAGAGCA--ATTGGA---CTAGGAGCT-----  
---ATGTTTCCTTGGGTTCTTGGGAGCA--GCAGGAAGCACTATG--GGCGCAGCATCA---  
ATAACGCTGACGGTACAG---GCCAGACAA--TTATTG---TCTGGTATAGTGCAACAGCAAAAC---  
AACTTG---CTGAGG---GCTATTGAGGCGCAACAACATCTGTTGCAACTCACAGTCTGGGGCATC  
>MH897917  
TTCTACTGCAATACAACACCACTGTTTGATAATGTTTGGAATGGCACTAAGTTTACAAAGAATTTTACAAAGA  
ATAAA-----  
-----  
GGAGAGAATATCACTACTCTCTCATGCAGAATAAAACAATTTATAAACCTGTGGCAGGAAGTAGGGAAAGCAA  
TGTATGCCCCCTCCCATCAGAGGAGAAATTAAGTGTTCATCCAAT---  
ATTACAGGACTGATACTAACAAGGGAGGGTGGTGTAAACAGGACT-----  
-----  
-----  
GACAATGACACCTTCAGACCTATAGGAGGAAATATGAAGGACAATTGGAGAAGTGAATTGTACAAATATAAAG  
TAGTAAGAATTGAACCATTA---GGAGTAGCACCCGACAAGGCAAAGAGAAGAGTGGTG-----  
-----CAGAGAGAAAAAAGAGCA--GTGGGA---CTAGGAGCG-----  
TTGATCCTTGGGTTCTTAGGAACA--GCAGGAAGCACTATG--GGCGCAGCGTCA---  
CTGACGCTGACGGTACAA--GCCAGACAA--TTATTG---TCTGGTATAGTGCAACAGCAGAGC---  
AATTTG---CTGAGG---GCTATTGAGGCGCAACAACATCTGTTGCAACTCACAGTCTGGGGCATC  
>MG196702  
TTCTACTGTAATACAACACAACCTGTTTAATAGTACTTGGCCTTTGAATGATACTGAAGGGACAAAT-----  
-----  
-----  
AGAACTGAAAATATCACGCTCCCATGCAGAATAAGACAAATTGTAAACATGTGGCAGGAAGTAGGAAAAGCAA  
TGTATGCCCCCTCCCATCAAAGGACAAATTAATTGTGTATCAAAT---  
ATTACAGGGCTGTTATTAACAAGAGATGGTGGTATTAACCTCTACA-----  
-----  
-----  
AAGAATGAGACCTTTAGACCTGGAGGAGGAGATATGAGGGACAATTGGAGAAGTGAATTATATAAATATAAAG  
TAGTAAGAATTGAACCATTA---GGAGTAGCACCCACCAAGCAAGGAGAAGAGTGGTG-----  
-----CAGAGAGAAAAAAGAGCA--GTGGGA---CTAGGAGCT-----  
TTGTTTCCTTGGGTTCTTGGGAGCA--GCAGGAAGCACTATG--GGCGCAGCGTCA---  
ATAACGCTGACGGCACAA--GCCAGGCAA--TTATTG---TCTGGTATAGTGCAACAGCAGAAC---  
AATCTG---CTGAGG---GCTATTGAGGCGCAACAGCATCTGTTGCAACTCACAGTCTGGGGCATC  
>MG196732  
TTCTACTGTAATACAACACAATTGTTTGAAGAGTCAAATAACACTGAAAACAACACTAAAAGAGAAAATATCA  
CACTT-----  
-----  
GAAAGAGAAAATATCACACTCCCATGCAGAATAAGACAAATTGTAAACCTGTGGCAGAAAGTAGGCAAAAGCAA  
TGTATGCCCCCTCCCATCAGAGGACAAATTAGCTGTTTCATCAAAC---

ATTACAGGACTGTTATTAACAAGAGATGGTGGCAATAATAATAACT-----  
-----  
-----  
GATGATCCGGAGATCTTCAGACCTGGAGGAGGAGATATGAGGGACAATTGGAGAAGTGAATTATACAAATATA  
AAGTAGTAAAAATTGAACCATTA---GGAATAGCACCCACCAAGGCAAAGAGAAGAGTGGTG-----  
-----CAGAGAGAAAAAAGAGCA---ATAGGGGGACTAGGAGCT-----  
---TTGTTCCCTTGATTCTTGGGGGCA---GCAGGAAGCACTATG---GGCGCAGCGTCA---  
GTGACGCTGACGGTACAG---GCCAGACAA---TTACTG---TCTGGTATAGTGCAACAGCAAAAC---  
AATTTG---CTGAGA---GCTATTGAGGCGCAGCAACATATGTTGCAACTCACAGTCTGGGGCATC  
>MG196767  
TTCTATTGTAATATAACACAGTTATTTAATAGTACTTGGCTGGGTAATGGTACTGGGAATAGT-----  
-----  
-----  
ACTACAGGCAATATCACACTCCCATGCAGAATAAAACAAATTATAAATAGGTGGCAGGAAGTAGGAAAAGCAA  
TGTATGCCCCCTCCCATCAGCGGAGAGATCAGCTGTAGTTCAAAT---  
ATTACAGGGCTATTATTAACAAGAGATGGTGGTAAGCCCGGAAACGCCGCC-----  
-----  
-----  
GAGAGCATCAATGAGACCTTCAGACCTGGAGGAGGAAATATGAAGGACAATTGGAGAAGTGAATTATATAAAT  
ATAAAGTAGTAAAGATTGAACCATTA---GGAGTAGCACCCACCAAGGCAAAGAGAAGAGTGGTG-----  
-----CAAGGAGAAAAAAGAGCA---GTGGGAACATTTGGAGCT---  
-----CTGTTCCCTTGGGTTCTTGAGTGCA---GCGGGAAGCACTATG---GGCGCAGCGTCA---  
ATGACGCTGACGGTACAG---GCCAGACAA---TTATTG---TCCGGTATAGTGCAACAGCAGAAC---  
AACTTG---CTGAGA---GCTATTGAGGCGCAACAGCATATGTTGCAACTCACAGTCTGGGGCATC  
>MG196819  
TTCTACTGTGATTCAACAAAACTGTTTAATAGTACTTGGAAATGCTAATAGTACTTGGAAATAATACTGAA----  
-----  
-----  
GAGCCAGAGAACATCACCTCCCATGTAGAATAAAACAATTTATCAACATGTGGCAGGAAGTAGGAAAAGCAA  
TGTATGCCCCCTCCCATCAGAGGACCAATTAAATGTTTCATCAAAT---  
ATTACAGGGATACTATTGACTAGAGATGGTGGTAATGGTAGCAGCACCGAG-----  
-----  
-----  
AACAAATACCGAGACCTTCAGACCTGGAGGAGGAGACATGAGGGATAATTGGAGAAGTGAATTATATAAATACA  
AAGTGGTAAAAATTGAACCATTA---GGAGTAGCACCCACCAGGGCAAAGAGAAGAGTGGTG-----  
-----CAGAGAGAAAAGAGAGCA---GTGACA---CTGGGAGCT-----  
---TTGTTCCCTTGGGTTCTTGGGAGCA---GCAGGAAGCACTATG---GGCGCAGCGTCA---  
ATGACGCTGACGGTACAA---GCCAGACAA---TTATTG---TCTGGTATAGTGCAACAGCAAAAC---  
AATTTG---CTGAGG---GCTATTGAGGCGCAGCAGCATCTGTTGCAACTCACAGTCTGGGGCATC  
>MG196866  
TTCTACTGTAATTCAACACCACTGTTTAATAGTAGTTGGCATAGTACTACTAAGTATAGTACTAACAGGACAA  
CTGAA-----  
-----  
-----  
GGAAATGACACAATCACACTCCAATGTAGAATAAAACAAATTATAAACATGTGGCAGGAAGTAGGAAAAGCAA  
TGTACGCCCCCTCCCATCAGCGGACCAATTGGATGTTTATCAAAT---  
ATTACAGGGCTGCTATTAACAAGAGATGGTGGTACTAACATGAGC-----  
-----  
-----  
GATAACGAAACTTTTCAGACCTGGAGGAGGAGATATGAGGGACAATTGGAGAAGTGAATTATATAAATATAAAG  
TAGTGAAAATTGAACCATTA---GGAGTAGCACCCACTCGGGCAAGGAGAAGAGTGGTG-----  
-----CAGAGAGAAAAAAGAGCA-----GGA---CTAGGAGCT-----  
CTGCTCCTTGGGTTCTTGGGAGCA---GCAGGAAGCACTATG---GGCGCAGCGTCA---  
ATAACGCTGACGGCACAG---GCCAGAAAA---TTATTG---TCTGGTATAGTGCAACAGCAGAAC---  
AATCTG---CTGAGG---GCTATTGAGGCGCAACAGCATCTGTTGCAACTCACAGTCTGGGGCATC  
>MG196902  
TTCTACTGTAATACAACACAGCTGTTTAATAGTACTTGGCTGTTTAATGATACTATGAATAATGCTACAGGAT  
CA-----  
-----  
AACAGCAGTGATATCATACTCCCATGCAGAATAAAACAAATTATAAACAGGTGGCAGGAAGTAGGAAAAGCAA  
TGTATGCCCCCTCCCATAGCAGGAATAATTAAATGTTTCATCAAAT---

ATTACAGGGCTACTATTAACAAGAGATGGTGGTAATAGTAACAAC-----  
-----  
-----  
ACCAAGGAGACCTTCAGACCTGGAGGAGGAGATATGAGGGACAATTGGAGAAGTGAATTATATAAATATAAAG  
TAGTAAAAATTAAGCCATTA---GGAGTAGCACCCACCAAGGCCAAGAGAAGAGTGGTG-----  
-----CAGAGAGAAAAAAGAGCA--GTAACA--ATAGGAGCC-----  
TTTTTCCTTGCGTTCTTGGGAGCA--GCAGGAAGCACTATG--GGCGCAGCGTCG---  
GTGACGCTGACGGTACAG---GCCAGACAA--CTATTG---TCTGGTATAGTGCAACAGCAGAGC---  
AATCTG---CTGAGA---GCTATTGAGGCGCAACAGCATATGTTGCAACTCACAGTCTGGGGCATA  
>MG196921  
TTCTACTGTAACCAACACCACTGTTTGATAGTACTTGGGAATAGTAATAGTACAGGGTTAAATAGCACCAAA-  
-----  
-----  
ACCAATAACACAATCACACTCCAATGCAGAATAAAACAAATTATAAACATGTGGCAGGAAGTAGGAAGAGCAA  
TGTACGCCCCCTCCCATCAGTGGACACATTAAGTGTTCATCAAAT---  
ATCACAGGGCTGCTGTTAAACAAGAGATGGTGGTGGTGACAAGAAT-----  
-----  
-----  
GGCAGTGAGACCTTTAGACCTGGAGGAGGAGATATGAGGGACAATTGGAGAAGTGAATTGTATAAATATAAAG  
TAGTAAAAATGAACCATTA---GGAGTAGCACCCACCAAGGCCAAGAGAAGAGTGGTG-----  
-----CAGAGAGAAAAAAGAGCA--GTGGGA--TTAGGAGCT-----  
ATGTTCCCTTGCGTTCTTGGGAGCA--GCAGGAAGCACTATG--GGCGCAGCGTCA---  
CTGACGCTGACGGTACAG---GCCAGACAA--TTACTG---TCTGGTATAGTGCAACAGCAGAAC---  
AATTTG---CTGAGG---GCCATTGAGGCGCAACAGCATCTGTTGCAACTCACAGTCTGGGGCATC  
>MG196922  
TTCTACTGTAATACAACAAAACTGTTTAATGGGACTGCAGAACAGATAGAAAATAACACTAAAGCTGAA----  
-----  
-----  
AATATCACAACAATCATACTCCCATGCAGAATAAAACAAATTGTAAACAGGTGGCAGGAAGTAGGAAAAGCAA  
TGTATGCCCCCTCCCATCCAAGGACGAATTAGCTGTTTCATCAAAT---  
ATTACAGGGCTGCTATTAACAAGAGATGGTGGGAACAATACTAGT-----  
-----  
-----  
AACACGAGACCTTCAGACCTGCAGGAGGAGATATGAGGGACAATTGGAGAAGTGAATTATATAAATATAAAG  
TAGTGAGAATTGAGCCATTA---GGAGTAGCACCCACCAAGGCCAAAAGAAGAGTGGTG-----  
-----CAGAGAGAAAAAAGAGCA--GTGGGAGCACTAGGAGCT-----  
ATGTTCCCTTGCGTTTCTGGGAACA--GCAGGAAGCACTATG--GGCGCAGCGGCA---  
GTGACGCTGACGGTACAG---GCCAGGCAA--TTATTG---TCTGGTATAGTGCAACAGCAGAAC---  
AACCTG---CTGAGA--GCTATTGAGGCGCAACAACACCTGTTGCAACTCACAGTCTGGGGCATT  
>MG196952  
TTCTACTGCAATACAACACCACTGTTTAATACATTACTGTTCAATGAAACAAGTGGT-----  
-----  
-----  
GATAATAAGACTATTACACTCCAATGCAGAATAAAACAAATTATAAACATGTGGCAGCAAGTAGGCAAAGCAA  
TGTATGCCCCCTCCCATCAGGGGACAAATTAAGTGTTCATCAACT---  
ATCACAGGGCTGCTATTAACAAGAGATGGTGGTAACCCAAACGCCAGC-----  
-----  
-----  
AACAGCAACGAGACCTTCAGACCTGCAGGAGGAAATATGAGGGACAATTGGAGAAGTGAAGTATATAAATATA  
AAGTAGTAAAAATTGAACCATTA---GGGATAGCACCCACCAAGGCCAAGAGAAGAGTGGTG-----  
-----CAAAGAGAAAAAAGAGCA--GTGGGAGTAATCGGAGCT-----  
---ATGTTCCCTTGCGTTCTTGGGAACA--GCAGGAAGCACTATG--GGCGCAGCGTCA---  
ATAGCGCTGACGGTACAG---ACCAGACAA--TTATTG---TCTGGTATAGTGCAACAGCAGAAC---  
AATTTG---CTGAGA---GCTATTGAGGCGCAACAACATCTGTTGCAACTCACGGTCTGGGGCATC  
>MG196979  
TTCTACTGTAATACAACACCATTTGTTTAATAGTAATTGGACTTGGGAATAATAATACAGGGTTAAAT-----  
-----  
-----  
AACAGTGGTACTATCACACTCCAATGTAGAATAAAACAAATTATAAACCTGTGGCAGGAAGTAGGAAAAGCAA  
TGTATGCCCCCTCCTATCGCAGGACAAATTAAGTGTTCATCAAAT---

ATTACAGGGCTAATATTAACAAGAGATGGTGGTAACAGTAACCCA-----  
-----  
-----  
AATAATACTGAGATCTTCAGACCTGGAGGAGGAGATATGAGGGACAATTGGAAAAGTGAATTATATAAATATA  
AAGTAGTAAAAATTGAACCATTA---GGAGTAGCACCCACTAAGGCAAAGAGAAGAGTGGTG-----  
-----CAGAGAGAAAAAAGAGCA---GTGGGA---ATAGGAGCT-----  
---GTGTTCCCTTGGGTTCTTGGGAGCA---GCAGGAAGCACTATG---GGCGCAGCGTCA---  
ATAACGCTGACGGCACAG---GCTAGACAA---TTATTG---TCTGGTATAGTGCAACAGCAGAGT---  
AATCTG---CTAAGG---GCTATCGAGGCGCAACAACATCTGTTGCAACTCACAGTCTGGGGCATC  
>MG197083  
TTCTACTGTAATACAACACCCCTGTTTAAATAGTAGCTGGAGTAATAGTAATAGTACCAATGCAACAAGTGGTC  
CTGAA-----  
-----  
AAAGATGACACAATCATACTCCACTGCAGAATAAAGCAAATTATAAACATGTGGCAAAAAGTAGGGAAAGCAA  
TGTATGCCCCCTCCCATTAGAGGACAAATTAGATGCTCATCAAAC---  
ATCACAGGTCTGCTATTAACAAGAGACGGTGGTAACACAACCTGGG-----  
-----  
-----  
ACCGAGACCTTCAGACCTGGAGGAGGAGATATGAGGAACAATTGGAGAAGTGAATTATATAAATATAAAGTAG  
TAAAAATTGAACCATTA---GGAGTAGCACCCACCAAGGCAAAGAGAAGAGTGGTG-----  
-----CAGAGAGAAAAAAGAGCA---CTAGGA---TTCGGAGCA-----  
ATGTTCCCTTGGGTTCTTGGCAGCA---GCAGGAAGCACTATG---GGCGCAGCGTCA---  
ATGACGCTGACGGTACAG---GCCAGGCAA---TTGTTG---TCTGGTATAGTGCAACAGCAGAAC---  
AATCTG---CTGAGG---GCTATTGAGGCGCAACAACATCTGTTGCAACTCACAGTCTGGGGCATC  
>MG197164  
TTTTACTGTAATACAACACAACCTGTTTAAATAGTACTTGGCCTTTAAATAGTAGTACTTGGTGGATAATGATA  
CTGTG-----  
-----  
AATAATGGAAGCATCACACTCCCATGCAGAATAAAACAAATTATAAACAGGTGGCAGGAAGTAGGAAAAGCAA  
TGTATGCCCCCTCCCATCAGGGGACAAATTAAATGTACATCAAAT---  
ATTACAGGGATACTACTAACAAGAGATGGTGGTGCTAACAATACA-----  
-----  
-----  
CAGAACGAGACCTTCAGACCTACAGGAGGAAATATGAAGGACAATTGGAGAAGTGAATTATATAAATATAAAG  
TAGTAGAAATTGAGCCATTA---GGAATAGCACCCACCAGGGCAAAGAAGAGTGGTG-----  
-----CAGAGAGAAAAAAGAGCA---GTGGGA---CTGGGAGCT-----  
GTCTTCCTTGGGTTCTTGGGAGCA---GCAGGCAGCACTATG---GGCGCAGCGTCA---  
ATAACGCTGACGGCACAA---GCCAGACAA---TTAATG---TCTGGTATAGTGCAACAGCAGAAC---  
AATTTG---CTGAGG---GCTATTGAGGCGCAACAGCATCTGTTGCAACTCACAGTCTGGGGCATC  
>MG197187  
TTCTACTGTAATACATCACAACCTGTTTAAATAGTACTTGGGGTTCAACACAGTTGTCTAATAGTAGTTGGGATA  
AGACT-----  
-----AAA-----  
GGACCAAATGACACACTCACACTCCTATGCAGAATAAAACAAGTCGTCAACATGTGGCAGGGAGTAGGAAAAG  
CAATGTATGCTAATCCCATCAAAGGACAAATTCTATGTAGATCAAAT---  
ATTACAGGGATAATATTAACAAGAGATGGTGGTGAGAGTAATAACGGAAGTGAG-----  
-----  
-----  
AACACGAGACCTTCAGACCTGGAGGAGGAGATATGAGGGATAATTGGAGAAGTGAATTATATAAATATAAAG  
TAGTAAAAATTGAGCCATTA---GGAGTAGCACCCACCAAGGCAAAGAGAAGAGTGGTG-----  
-----CAGAGAGAAAAAAGAGCA---GTGGGAACACTAGGAGCT-----  
ATGTTCCCTTGGGTTCTTGGGAGCA---GCAGGAAGCACTATG---GGCGCAGCGTCA---  
ATGACGCTGACGGTACAG---GCCAGACTA---TTATTG---TCTGGTATAGTGCAGCAGCAAAAC---  
AATTTG---CTGAGG---GCTATTGAGGCGCAACAGCATATGTTGCAACTCACAGTCTGGGGCATC  
>KT124785  
TTCTATTGTAATACAACAAAACCTGTTTAAATAGTACTTGGGAATGAAACTGAAATAGTGAATGGCACTGGA----  
-----  
-----  
ACAAATGAAACAATCACACTCCCATGTAGAATAAAACAAATTATAAACAGATGGCAGGAAGTAGGAAAAGCAA  
TATATGCCCCCTCCCATTCGCGGGCCAATTAACCTGTTTCATCAAAT---

ATTACAGGACTGTTATTAACAAGGGATGGTGGTAATAATAAAACC-----  
-----  
-----  
ACTGAGACCTTCAGACCTGGAGGAGGAAACATGAAGGACAATTGGAGAAGTGAATTATATAAAATACAAAGTAG  
TAAAAATTGAACCATTA---GGAATAGCACCCACCAGGGCAAAGAGAAGGGTGGTG-----  
-----CAGAAAGAAAAAAGAGCA---GTGGGA---CTAGGAGCT-----  
ATGTTCCCTTGGGTTCTTGGGAGCA---GCAGGAAGCACTATG---GGCGCAGCGTCG---  
ATAACGCTGACGGTACAG---GCCAGACAA---TTATTG---TCTGGTATTGTGCAGCAGCAGAAC---  
AATCTG---CTGAGG---GCTATTGAGGCGCAACAGCATCTGTTGCAACTCACGGTCTGGGGCATC  
>KT124790  
TTCTATTGTAATACAACACAACCTGTTTAATAGTATTTGGAATGGGACAAATGTTACTGGAGAG-----  
-----  
-----  
TTAAATGGTACAATTACACTCCCATGTAGAATAAAACAAATTATAAACATGTGGCAGGAAGTAGGAAAAGCAA  
TGTATGCCCCCTCCCATCAAAGGACCAATTACGTGCTTATCAAAT---  
ATTACAGGGATACTGTTAGTAAGAGATGGAGGTAATAATAATAAT-----  
-----  
-----  
ACTGCGAACGAGACCTTCAGACCTGGAGGGGGAGATATGAGGGACAATTGGAGAAGTGAATTATATAAAATATA  
AGGTAGTAAAAATTGAACCATTA---GGAATAGCACCCACCAAGGCAAAGCGAAGGGTGGTG-----  
-----CAGAGAGAAAAAAGAGCA---GTGGGA---ATAGGAGCT-----  
---GTGTTCCCTTGGGTTCTTATCAGCA---GCAGGAAGCACTATG---GGCGCAGCGTCA---  
GTGACGCTGACGGTACAG---GCCAGGCTA---TTATTG---TCTGGTATAGTGCAACAGCAAAAC---  
AATTTG---CTGAGG---GCTATTGAGGCGCAACAGCATCTGTTGCAACTCACAGTCTGGGGCATC  
>KM355085  
TTCTACTGTAATACAACACAACCTGTTTAATAGTACTTGGGAAAATGGTACT-----  
-----  
-----TCAACTAATACT-----  
ACAGGGAATGAACTATCACACTCCCATGCAGAATAAAGCAAATTATAAACATGTGGCAGGAAGTAGGGAAAG  
CAATGTATGCCCCCTCCCATCAGAGGACAAATTAGATGTTTCATCAAAT---  
ATTACAGGGTTGCTATTAACAAGAGATGGGGGG-----  
-----  
-  
AACAACCTCCAGCAATAATGACACCTTCAGACCTGGAGGAGGGAATATGAAGGACAATTGGAGAAGTGAATTAT  
ACAAATATAAAGTAGTAAGCATAGAACCAATA---GGAGTGGCACCCACCAAGGCAAAGAGAAGAGTGGTG--  
-----CAGAGAGAAAAAAGAGCA---  
GTGGGAACAATAGGAGCT-----ATGTTCCCTTGGGTTCTTGGGAGCA---GCAGGAAGCACTATG---  
GGCGCAGCGTCA---GTGACGCTGACGGTACAG---GCCAGACAA---TTATTG---  
TCTGGTATAGTGCAACAGCAGAAC---AATCTG---CTGAGA---  
GCTATTGATGTGCAACAGCATATGTTGCAGCTCACAGTCTGGGGCATC  
>KX587079  
TTTTACTGTAATTCATCAATATTATTTAATAGTACTTGGTATACTAATAGCACTTGAATAGTACTTGAATG  
AAACTGGA-----  
-----  
AATAAAAATGACACACTCACACTCCAGTGCAGAATAAAACAAATTATAAACATGTGGCAGGGAGTAGGAAAAG  
CAATATATGCCCCCTCCCATCCAAGGACAAATTAATTGCTCATCAAAT---  
ATTACAGGACTACTATTAGTAAGAGATGGTGGTAATAGTAATGACACA-----  
-----  
-----  
AAAAACAATGAGACTTTCAGACCTCTAGGAGGAAATATGATGGACAATTGGAGAAGTGAATTATATAAAATACA  
AAGTAGTACAAATTGAACCATTA---GGAGTAGCACCCACCAAGGCAAAAAGGAGAGTGGTG-----  
-----CAGAGAGAAAAAAGAGCA---CTAGGAGGAATGGGAGCT-----  
---ATGTTCCCTTGGGTTCTTAAGTGCA---GCAGGAAGCACTATG---GGCGCAGCGTCA---  
CTAACGCTGACGGTACAG---GCCAGACAA---TTGTTG---TCTGGTATAGTGCAACAGCAGAGC---  
AATCTG---CTGAGG---GCTATTGAGGTGCAACAGCATCTGCTGCAACTCACAGTCTGGGGCATC  
>KU901792  
TTCTACTGTAATACAACAAAGCTGTTTAATAGTACCTGGGATAGTAATAGTACCTGGAATAGTAATAGTACCA  
CAGGGGTA-----  
-----  
AATAGCACTGTTATCACACTGCCATGCAGAATAAAACAAATTATAAACATGTGGCAGGAAGTAGGAAAAGCAA

TGTATGCCCCCTCCCATCAGAGGAGAAATTAAATGTACATCAAAT ---  
 ATTACAGGGCTGTTACTGGTAAGAGATGGTGGTAATAACAGCAGC-----  
 -----  
 -----  
 CAAAATGAGACCTTCAGACCTGAAGGAGGAGATATGAGGGACAATTGGAGAAGTGAATTATATAAAATATAAAG  
 TAGTAAAAAATTGAACCATTA---GGAGTAGCACCCACCAAGGCAAAGAGAAGGGTGGTG-----  
 -----CAGAGAGAAAAAAGAGCA---GCA-----TTCGGAGCT-----  
 ATGTTTCCTTGGGTTCTTGGGAGCA---GCAGGAAGCACTATG---GGCGCAGCGTCA---  
 ATAACGCTGACGGTACAA---GCCAGACAA---TTATTG---TCTGGTATAGTGCAACAGCAGAAC---  
 AATTTG---CTGAAA---GCTATTGATGCGCAACAACATATGTTGCAACTCACAGTCTGGGGCATC  
 >KU901816  
 TTCTACTGTAATACAACAAAGCTGTTTAATAGTACTTGGTATACTAATAGTACTGGAAATGGTACTGAAGGG-  
 -----  
 -----  
 TCAAAATGACACAATCACACTCCCATGCCGAATAAGACAAATTATAAACAAATGGCAGAGAGTAGGAAAAGCAA  
 TGTATGCCCCCTCCCATTAAGGACACATTAAGTGTACATCAAAT ---  
 ATTACAGGGCTGCTATTAACAAGAGATGGTGGTGATAACAGCAGT-----  
 -----  
 -----  
 ACGAACGAGACCTTCAGACCTGGAGGAGGAGATATGAGGGACAATTGGAGAAGTGAATTATATAAAATATAAAG  
 TAGTAAGAATTGAGCCAGTA---GGAATAGCTCCCACCAAGGCAAGAAGAAGAGTGGTA-----  
 -----CAGAGAGAAAAAAGAGCA---GCC-----TTAGGAGCT-----  
 GTGTTTCCTTGGGTTCTTGGGAGCA---GCAGGAAGCACTATG---GGCGCAGCGTCA---  
 CTAACGCTGACGGTACAA---GCCAGACTA---TTATTG---TCTGGTATAGTGCAACAGCAAAGC---  
 AATTTG---CTGAAG---GCTATTGAGGCGCAACAGCGTCTGTTGCAACTCACAGTCTGGGGCATC  
 >KM986883  
 TTCTACTGTAACCTCATCAAACTGTTTAATAGTACTTGGAAATAGTACTGGGAGTGAAAATAATAACACTGAAG  
 GG-----  
 -----  
 TCAACTGGCACTATCACACTCCAATGCAGGATAAAACAAATTATAAATATGTGGCAGGAAGTAGGAAAAGCAA  
 TGTATGCCCCCTCCCATCAGAGGACAAATTAGCTGTAATTCAACT ---  
 ATTACAGGGCTGCTACTAACAAGAGATGGGGGTGATACGGACAAT-----  
 -----  
 -----  
 ACCTCCGAGGTCTTCAGACCTGGAGGAGGAGATATGAGGGACAATTGGAGAAATGAATTATACAAATATAAAG  
 TAGTAAAAGTAGAACCATTA---GGAATAGCACCCACTAAAGCAAAGAAGAGTGGTG-----  
 -----CAGAGAGAAAAAAGAGCA---GTAGGA---CTAGGAGCT-----  
 GTGTTTCCTTGGGTTTTTGTACAGCA---GCAGGAAGCACTATG---GGCGCAGCGTCG---  
 GTGACGCTGACGGTACAG---GCCAGACAA---TTACTG---TCTGGTATAGTGCAACAGCAGAAC---  
 AATCTG---CTGAGG---GCTGTTGAGGCGCAACAACACCTGTTGCAACTCACAGTCTGGGGCATC  
 >KU901976  
 TTCTACTGTAGTACAACACAACCTGTTTGATAGTACTTGGGCAACTAATAGTACTGGGAATATT-----  
 -----  
 -----  
 ACTAACGGAACCTATCACACTCCCATGTAGAATAAAACAAATTATAAACATGTGGCAGGGAGTAGGAAAAGCAA  
 TGTATGCCCCCTCCCATTAAGGACAAATTAGATGTTTCATCAAAT ---  
 ATTACAGGGCTGCTATTAACAAGGGATGGTGGTAATAATGACACG-----  
 -----  
 -----  
 AACGAGAACGAGACCTTCAGACCTGGAGGAGGAGATATGAGGGACAACCTGGAGAAGTGAATTATATAAAATATA  
 AAGTAGTAAAAAATTGAACCATTA---GGAGTAGCACCCACCAAGGCAAAGAGAAGAGTGGTG-----  
 -----CAGAGAGAAAAAAGAGCA---GTGGGA---ATAGGAGCT-----  
 ---TTGTTTCCTTGGGTTCTTGGGAGCA---GCAGGAAGCACTATG---GGCGCAGCGTCA---  
 ATGACGCTGACGGTACAA---GCCAGGCAA---TTATTG---TCTGGTATAGTGCAACAGCAGAAC---  
 AACTTG---CTGAGA---GCTATTGAGGCGCAACAGCATCTGTTGCAACTCACAGTCTGGGGCATC  
 >KY766175  
 TTCTACTGTAATACAATACAGCTGTTTAATAGTACTTGGGATAATAATACTTGGAAATAGGTATAATAGTACTA  
 CTGGG-----  
 -----  
 TCAAAATGAAATTATCAGGCTCCCATGCAGAATAAGACAAATTGTAAACAGGTGGCAGGAAGTAGGAAAAGCAA

TGTATGCCCCCTCCCATCGAAGGACAAATTAGATGTTTCATCAAAT ---  
 ATTACAGGGCTGATATTAACAAGAGATGGTGGTGGTAATGGCAGC-----  
 -----  
 -----  
 AAAGGAAACGAGACCTTCAGACCTGGAGGAGGAGATATGAAGGACAATTGGAGAAGTGAATTATATAAAATATA  
 AAGTAGTAAAAATTGAGCCATTA---GGAATAGCACCCACCGCGGCAAAGAGAAGAGTGGTG-----  
 -----CAGAGAGAAAAAAGAGCA---ATAGGAATGCTAGGAGCT-----  
 ---ATGTTCCCTTGGGTTCTTGGGAGCA---GCAGGAAGCACTATG---GGCGCAGCGTCA---  
 ATGACGCTGACGGTACAG---GCCAGACAA---TTATTG---TCTGGTATAGTGCAACAGCAGAAC---  
 AATTTG---CTGAGG---GCTATTGAGGCGCAACAGCATCTGTTGCAACTCACAGTCTGGGGCATT  
 >KY778395  
 TTCTACTGTAATACAACACAACCTGTTTAATGGTACTTGGGAGAATAGTACTAGGAATGATAATAACACTGCA-  
 -----  
 -----  
 AAAAAATGGCACAATCACACTCCCATGCAGAATAAAACAAATTATAAACATGTGGCAAAAAGTAGGAAAAGCAA  
 TATATGCCCCCTCCCATCAGAGGAGAAATTAGGTGTTTCATCTAAC---  
 ATTACAGGGCTGCTACTAACTAGAGATGGTGGTAATGGGAACAGCACC-----  
 -----  
 -----  
 AAGGACAACGAGACCTTCAGACCTGGGGGAGGAGATATGAGGGACAATTGGAGAAGTGAATTATATAAAATACA  
 AAGTAGTAAAAATTGAACCATTA---GGAATAGCACCCACTAAGGCAAAGAGAAGAGTGGTG-----  
 -----CAGAGAGAAAAAAGAGCA---GTGGGA---CTAGGAGCT-----  
 ---GTGTTCCCTTGGGTTCTTGGGAGCA---GCAGGAAGCACTATG---GGCGCAGCGTCA---  
 ATGACGCTGACGGTACAG---GCCAGACTA---TTATTG---TCTGGTATAGTGCAACAGCAAAAC---  
 AATCTG---CTGAGA---GCTATTGAGGCGCAACAGCATCTGTTGCAACTCACAGTCTGGGGCATC  
 >MH897918  
 TTCTACTGTGATTCATCACAACCTGTTTAATAGTACTTGGAGTAATGATACTAATACTGGGAAT-----  
 -----  
 -----  
 GATAATGGGAATATCACACTCCTATGCAGAATAAAACAAATTTATAAACATGTGGCAGCAAGTAGGAAAAGCGA  
 TGTATGCCCCCTCCCATCAGAGGACAAATTAAATGTTTCATCAAAT---  
 ATTACAGGGCTACTGTTAACAAGAGATGGTGGTAATAATAACAATACTGGA-----  
 -----  
 -----  
 AACCGTACTGAGACCTTCAGACCTGGAGGAGGAGATATGAGGGACAATTGGAGAAGTGAATTATATAAAATATA  
 AAGTAGTAAGAATTGAACCATTA---GGATTAGCACCCACCAAGGCAAAGAGAAGAGTGGTG-----  
 -----CAGAGAGAAAAAAGAGCA---GTGGGA---ATAGGAGCT-----  
 ---ATGTTCCCTTGGGTTCTTGGGAGCA---GCAGGAAGCACTATG---GGCGCAGCGTCA---  
 CTGACGCTGACGGTACAG---GCCAGACAA---TTATTG---TCTGGTATAGTGCAACAGCAGAAC---  
 AATTTG---CTGAGG---GCTATTGAGGCGCAACAGCATTTGTTGCAACTCACAGTCTGGGGCATT  
 >MG196711  
 TTCTACTGTAATACAACACAGTTGTTTAATAGTACTTGGCAGCCGGTTAATAGTACTACTTGGAGTAATTTTCG  
 GTCCGGGG-----  
 -----  
 -----  
 CCAAATGAAAATATCACACTCCCATGTAGAATAAAACAAATTATAAACAGATGGCAGGAAGTAGGAAAATCAA  
 TGTATGCCCCCTCCCATTAGAGGAGTCATTAGCTGTTTCATCAAAT---  
 ATTACAGGGTTGATATTAACAAGAGATGGTGGTGGGACCAATAAT-----  
 -----  
 -----  
 ACTAACGAAACCTTCAGACCTGGGGGAGGAGATATGAGGGACAATTGGAGAAGTGAATTGTATAAATACAAAG  
 TAGTAAAAATTGAGCCATTA---GGAATAGCACCCACCAGGGCAAAGAGAAGAGTGGTG-----  
 -----CAGAGAGAAAAAAGAGCA---GTAACA---ATAGGAGCT-----  
 ATGTTCCCTTGGGTTCTTGGGAGCA---GCAGGAAGCACTATG---GGCGCAGCATCA---  
 CTGACGCTGACGGTACAG---GCCAGACTA---TTATTG---TCTGGTATAGTGCAACAGCAAAAC---  
 AATTTG---CTGAGA---GCTATTGAGGCGCAACAGCATCTGTTGCAGCTCACAGTCTGGGGCATC  
 >MG197127  
 TTCTACTGTAATACAACACCACTGTTTAATAGTACTTGGAAATAAAACAAATAGTACTTGGACTTGGGAATAGCA  
 CTAGAAAA-----  
 -----AACTTT-----  
 ACAGAAAATGGCAATATCACACTACAGTGTAGAATCAGACAAATTGTAAACAGGTGGCAAGAAGTAGGAAAAG

CAATGTATGCTCCTCCCATCAGGGGACTAATTAGATGTTTCATCAAAT---  
 ATTACTGGGCTATTGTTAACAAGAGATGGTGGTAATAATAAACT-----  
 -----  
 -----  
 AATGGGAGTGAGATCTTCAGACCTGGAGGAGGAAATATGAGGGACAATTGGAGAAGTGAATTATATAAAATATA  
 AAGTGGTAAAAATTGAACCATTA---GGAGTAGCACCCACCAGGGCAAAGAGAAGAGTGGTG-----  
 -----CAGAGAGAAAAAAGAGCA---GTAGGA---TTGGGAGCT-----  
 ---TTGTTCCCTCGGGTTCTTGGGAGCA---GCAGGAAGCACTATG---GGCGCAGCATCA---  
 CTAACGCTGACGGTACAG---GCCAGACAA---TTATTG---TCTGGTATAGTGCAACAGCAAAAC---  
 AATTTG---CTGAGG---GCTATTGAGGCGCAACAACATATGTTGCAACTCACAGTCTGGGGCATC  
 >KT124796  
 TTCTACTGTAATTTAACA AAACTGTTTAATAGTACTTGG AATGAAACAGGGTCAAATAACACT-----  
 -----  
 -----  
 TTAAATGGCACAGTCATACTCCCATGCAGAATAAAACAAATTGTAAATATGTGGCAGGAAGTAGGAAAAGCAA  
 TGTATGCCCCCTCCCATCGCAGGGCTAATTA ACTGTGTATCAAAT---  
 ATTACAGGGCTGATATTAACAAGAGATGGTGGT-----  
 -----  
 -----  
 ACTAATGACACTGAGACCTTCAGACCTGGAGGAGGGGATATGAGGGACAATTGGAGAAGTGAATTATATAAAAT  
 AATAAGTAGTAAAAGTTGAACCATTA---GGAGTAGCACCCACCAGGGCAAAGAGGAGAACGGTG-----  
 -----CAAAGAGAAAAAAGAGCA---GTGGGA---CTAGGAGCT---  
 -----GTGTTCCCTTGGGTTCTTGGGAGCA---GCAGGAAGCACTATG---GGCGCAGCATCA---  
 ATGACGCTGACGGTACAG---GCCAGACAA---TTATTG---TCTGGTATAGTGCAACAGCAGAAC---  
 AATCTG---CTGAGG---GCTATTGAGGCGCAACAGCACCTGTTGCAACTCACAGTCTGGGGCATC  
 >KX505648  
 TTCTACTGTAATACAGCACA ACTGTTTAATAGTACTTGG AATGGTACTGAAGGGTCAAATAACATTGAAGGAA  
 ATAACAAT-----  
 -----  
 GAAGAAAATGACACAATCACACTCCAATGCAGAATAAAACAAATTATAAACATGTGGCAGGAAGTAGGAAAAG  
 CAATGTATGCCCCCTCCCATCAATGGGCAAATTAGATGTACATCAAAT---  
 ATTACAGGGCTGCTATTAGTAAGAGATGGAGGGGTAAAAAATGGTACTGAGGAT-----  
 -----  
 -----  
 GAAAAACAAGACCGAGATTTTCAGACCTGGAGGAGGAGATATGAGGGACAATTGGAGAAGTGAATTATATAAAAT  
 AATAAGTAGTAAAAATTGAACCGTTA---GGAATAGCACCCACCAGGGCAAAGAGAAGAGTGGTG-----  
 -----CAAAGAGAGAAAAGAGCA---GTGGGATTAGTAGGAGCT---  
 -----ATGTTCCCTTGGGTTCTTGGGAGCA---GCAGGAAGCACTATG---GGCGCAGCGGCA---  
 ATAACGCTGACGGTACAG---GTCAGACAA---ATGTTG---TCTGGTATAGTGCAACAGCAGAAC---  
 AATCTG---CTGAGG---GCTATTGAGGCGCAACAGCATCTGTTGCAACTCACAGTCTGGGGCATC  
 >KX505652  
 TTCTACTGTAATACAACACA ACTGTTTAATAGTACTTGG AATGATACCGAAGGGTTAAGTAACACTGAA---  
 -----  
 -----  
 GGAGATGACACACTCACACTCCCATGCAGAATAAAACAAATTGTAAACATGTGGCAGGAAGTAGGAAAAGCAA  
 TGTATGCCCCCTCCCATCAAAGGACAAATTAATTGTACATCAAAT---  
 ATTACAGGGCTGCTATTAACAAGAGATGGTGGGAATAATGAGAGC-----  
 -----  
 -----  
 AGCACCACCGAGACCTTCAGACCTGGAGGAGGAGATATGAGGGACAATTGGAGAAAATGAATTATATAAAATATA  
 AAGTAGTAAAGGTTGAACCATTA---GGAGTAGCACCCACCAAGGCAAGGAGAAGAGTGGTG-----  
 -----CAGAGAGAAAAAAGAGCA---GTGGGA---ATAGGAGCT-----  
 ---ATGTTCCCTTGGGTTCTTGGGAGCA---GCCGGAAGCACTATG---GGCGCAGCGTCA---  
 ATGACGCTGACGGTACAG---GCCAGACAA---TTATTG---TCTGGTATAGTGCAACAGCAAAAC---  
 AATTTG---CTGAGG---GCTATTGAGGCGCAACAGCATATGTTGCAACTCACAGTCTGGGGCATC  
 >KX505686  
 TTCTACTGTAATTC AACACA ACTGTTTAATAAGACATGGAATGATACTGAACTATCTGATAAACTTGGAAAAG  
 TTGATAAA-----  
 -----AAT---  
 AATGCTAGTGACATCATCACACTCCCATGTAAAATAAAACAAATCATAAACCTGTGGCAGGAAGTAGGAAAAG

CAATGTATGCCCCCTCCTATCAGAGGATCAATTACATGTTTCATCAAAT---  
ATTACAGGGCTGGTATTAACAAGAGATGGTGGTACGAACAATACC-----  
-----  
-----  
ATGAATGAAACCTTCAGACCTGGAGGAGGAGATATGAGGGATAATTGGAGAAGTGAATTATATAAATATAAAG  
TAGTAAGAATTGAACCATTA---GGAGTAGCACCCACCAAGGCAAGGAGAAGAGTGGTG-----  
-----CAGAGAGAAAAAAGAGCA--GTGGGA---CTAGGAGCT-----  
CTGTTCTTTGGGTTCTTATCAGCA---GCAGGAACCACTATG---GGCGCAGCGTCA---  
ATGACGTTGACGGTACAG---GCCAGACAG---TTACTG---TCTGGTATAGTGCAACAGCAGAAC---  
AATATG---CTGAGA---GCTATTGAGGCGCAACAGCATCTGTTGCAACTCACAGTCTGGGGCATT  
>KX505707  
TTTTACTGTAATACATCAAACTGTTTAATAGTATTTGGAATGATAATAGTACTTGGAAATAACTAGAGAGT  
TTAATAAC-----  
-----  
ACTGACAGAAATATCACACTCCCATGCAGAATAAAACAAATTGTAAACAGGTGGCAGGAAGTAGGAAAAGCAA  
TGTATGCCCCCTCCCATCAGTGGAAAAATTAGTTGTTTCATCAAAT---  
ATTACAGGACTGCTATTAACAAGAGATGGTGGTAAGGGTAACAAGACAAAT-----  
-----  
-----  
AACACCACCGAGATCTTCAGACCAGGGGGAGGAAATATGAGGGACAATTGGAGAAGTGAATTATACAAATATA  
AAGTAGTAAAAATTGAACCATTA---GGAATAGCACCCACCAAGGCAAAGAGAAGAGTGGTG-----  
-----CAGAGAGAAAAAAGAGCA--GTGGGA---ATAGGAGCT-----  
---ATGTTCTTTGGGTTCTTGGGAGCA--GCAGGAAGCACTATG---GGCGCAGCGTCA---  
GTGACGCTGACGGTACAG---GCCAGACAA---TTATTG---TCTGGTATAGTGCAACAGCAGAAC---  
AATCTG---CTGAAG---GCTATTGAGGCGCAACAGCGTATGTTGCAACTCACAGTCTGGGGCATT  
>KY057587  
TTCTACTGTAATACAACACCACTGTTTAATAGTATTTGGAATACAAGTGATACTTGGAAATAGTACTAATGAAG  
AATCAAAT-----  
-----AACACT-----  
GCAGGAAATGACACAATCATACTTCGATGCAGAATAAAACAAATTATAAACATGTGGCAAGAAGTAGGAAAAG  
CAATGTATGCCCCCTCCCATCAGAGGAAATATTACATGTTTATCAAAT---  
ATTACAGGACTGCTGTTAACAAGAGATGGAGGCAATAGCAGTAAT-----  
-----  
-----  
AATGGGACTGAGATCTTCAGACCTGGAGGAGGGGATATGAGGGACAATTGGAGAAGTGAATTATATAAATATA  
AAGTAGTAAAAATTGAACCATTA---GGAGTAGCACCCACTAAGGCAAAGAGAAGAGTGGTG-----  
-----CAGAGAGAAAAAAGAGCA--GTGGGG---TTAGGAGCT-----  
---ATGTTCTTTGGGTTCTTGGGAGCA--GCAGGAAGCACTATG---GGCGCAGCGTCA---  
CTGACGCTGACGGTACAG---GCCAGACAA---TTATTG---TCTGGTATAGTGCAACAGCAGAAT---  
AATTTG---CTGAGA---GCTATTGAGGCGCAACAGCATCTGTTGCAACTCACAGTCTGGGGCATC  
>KY748513  
TTCTACTGTAACACAACAAGGCTGTTTAATAGTACTTGGAAATGGTACGGATACAATAAATAAAGTCA----  
-----  
-----  
GAAAACAGTACACTTACACTCCCATGCAGAATAAAACAAATTATAAATAGGTGGCAGGAAGTAGGAAAAGCAA  
TATATGCCCCCTCCCATCAGGGGACAAATTAGATGTAAATCAAAT---  
ATTACAGGGTTGCTATTAACAAGAGATGGTGGTCCCGAAGGGAATAAGACC-----  
-----  
-----  
ACCTTCAGACCTGGAGGAGGAGATATGAGGGACAATTGGAGAAGTGAATTATATAAATATAAAGTAGTAAAAA  
TTGAGCCATTA---GGGATAGCACCCACCAAGGCAAAGAGAAGAGTGGTG-----  
-----CAGAGAGAAAAAAGAGCA---GTGGGC---ATAGGAGCT-----  
ATGTTCTTTGGGTTCTTGGGAGCA---GCAGGAAGCACTATG---GGCGCAGCGTCA---  
ATGACGCTGACGGTACAG---GCCAGACAA---TTATTG---TCTGGTATAGTGCAACAGCAGAAC---  
AATTTG---CTGAGG---GCTATTGAGGCGCAACAGCATCTGTTGCAACTCACAGTCTGGGGCATC  
>KY748576  
TTCTACTGTGATTCAACAAAACTGTTTAATAGCACTTGGAAATGATACTTGGGATGTGAATATCACTGAAAGG-  
-----  
-----  
ACAAATGACACTATCATACTCCCATGCAGAATAAAACAAATTGTAAACATGTGGCAGGAAGTAGGAAAAGCAA

TGTATGCCCCCTCCCATCAAAGGACCAATTAGCTGTTTCATCAAAC ---  
 ATTACAGGACTACTATTAACAAGAGATGGTGGTAGTGGCAACGAGACCACT-----  
 -----  
 -----  
 AACACCACCGAGATCTTCAGACCTGGAGGAGGAGATATGAGGGACAAGTGGAGAAGTGAATTATACAAATATA  
 AAGTAGTAAAAATTGAACCATTA---GGAGTAGCACCCACCAAGGCAAAGAGAAGAGTGGTG-----  
 -----CAGAGAGAAAAAAGAGCA---GTGGGA---ATAGGAGCT-----  
 ---TTGTTCCCTTGGGTTCTTGGGAACA---GCAGGAAGCACTATG---GGCGCAGCGGCA---  
 GTGACGCTGACGGTACAG---GCCAGACAA---TTATTG---TCTGGTATAGTGCAACAGCAGAAC---  
 AATCTG---CTGAGG---GCTATTGAGGCGCAACAACATCTGTTGCAACTCACAGTCTGGGGCATC  
 >KT284371  
 TTCTACTGTAATACAACAAAACTGTTTAATAGTACATGGTATGTAAATAATACTGAAGAGTTAAATAAG----  
 -----  
 -----  
 GAAGGAGACACGATCACACTCCCATGCAGAATAAAACAAATTGTAAACATGTGGCAGGAAGTAGGAAAAGCAA  
 TGTATGCCCCCTCCCATCAGAGGACAAATTAGCTGCTCATCAAAT---  
 ATTACAGGGCTACTATTAACGAGAGATGGTGGTACCGACAACAGCACG-----  
 -----  
 -----  
 AACAAATACCGAGACCTTCAGACCTGGAGGGGGAGATATGAGGGACAATTGGAGAAGTGAATTATATAAAATATA  
 AAGTAGTAAAAATTGAACCATTA---GGAGTAGCACCCACCAAGGCAAAGAGAGTAGTGGTG-----  
 -----CGAAGAGAAAAAAGAGCA---GCGGGA---ATAGGAGCT-----  
 ---TTGTTCCCTTGGGTTCTTGGGAGCA---GCAGGAGGCACTATG---GGCGCAGCGTCA---  
 CTGACGCTGACGGTACAG---GCCAGACAA---TTATTG---TCTAGTATAGTGCAACAGCAGAAT---  
 AACTTG---CTGAGA---GCTATAGAGGCGCAACAGCATCTGTTGCAGCTCACAGTCTGGGGCATC  
 >KR182173  
 TTCTACTGTAATACAACAAAACTGTTTAATAGTACTTGAATAAGACGGGTGAGATTTGGAATAGTACTATGG  
 AGAATAATAAT-----  
 -----  
 GACACTGAACCAATCACACTCCCATGCAGAATAAAACAAATTGTAAACATGTGGCAGGAAGTAGGAAAAGCAA  
 TGTATGCCCCCTCCCATCAGTGGACCAATTAGATGTGTATCAAAT---  
 ATCACAGGGCTGCTATTAACAAGAGATGGTGGAAATGATGGTAATACC-----  
 -----  
 -----  
 AACACCAGGAATGAGACTTTCAGACCTGGAGGAGGAGATATGAGGGACAATTGGAGAAGTGAATTATATAAAT  
 ATAAAGTAGTAAGAATTGAACCAATA---GGACTAGCACCTACCAGGGCAAAGAGAAGAGTGGTG-----  
 -----CAGAGAGAAAAAAGAGCA---ATAGGA---ATAGGAGCT---  
 -----GTGTTCCCTTGGGTTCTTGGGAGCA---GCAGGAAGCACTATG---GGCGCAGCGTCA---  
 CTGACGCTGACGGTACAA---GCCAGACAA---TTATTG---TCTGGTATAGTGCAACAGCAGAGC---  
 AACTTG---CTGAGG---GCTATTGAGGCGCAACAACATCTGTTGCAACTCACAGTCTGGGGCATC  
 >KR182183  
 TTCTACTGTAATACAACACAGCTGTTTGATAGTATTTGGGAGCGTAATAGAACTTTGAATGATACAGAAAATA  
 CA-----  
 -----  
 AATGACCGTAACATCACACTCCCATGCAGAATAAAACAAATTATAAACAGATGGCAGGGAGTAGGAAAAGCAA  
 TGTATGCCCCCTCCCATAAAAGGAGAAATTAGATGCACATCAAAT---  
 ATTACAGGGCTAATATTAACAAGAGATGGTGGTATGATACTAACAGG-----  
 -----  
 GATAATAACACGACA---  
 GGAATGAGACCTTCAGACCTGGAGGAGGAGATATGAGGGACAATTGGAGAAGTGAATTATATAAATATAAAG  
 TAGTAAAAATTGAGCCATTA---GGAGTAGCACCCACCAAGGCAAAGAGAAGAGTGGTG-----  
 -----CAGAGAGAAAAAAGAGCA---GTGACA---ATGGGAGCT-----  
 ATGCTCCTTGGGTTCTTGGGAGCA---GCAGGAAGCACTATG---GGCGCAGCATCG---  
 ATAACGCTGACGGTACAA---GCCAGACAA---TTATTG---TCTGGTATAGTGCAACAGCAGAGC---  
 AATTTG---CTGAAG---GCTATTGACGCGCAACAGCACCTGTTGCAACTCACAGTCTGGGGCATT  
 >KR182187  
 TTCTACTGTAATACAACACAGCTGTTTAATAGTACTTGGTCGCTGTTTAATAGTACTTGGTCGCATAATGAAA  
 CTAGG-----  
 -----AATGCT-----  
 ACAAATGACCGTAACATCACACTTCCATGCAGAATAAAACAAATTATAAACAGATGGCAGGGAGTAGGAAAAG

CAATGTATGCCCCCTCCCATCAAGGGAGAAATTAGATGCACATCAAAT---  
ATTACAGGGCTAATATTAACAAGAGATGGTGGTAGTGATACTAACAAT-----  
-----  
GATACTAACAAGACA---  
GGGAATGAGACCTTCAGACCTGGAGGAGGAGATATGAGGGACAATTGGAGAAGTGAATTATATAAATATAAAG  
TAGTAAAAAATTGAGCCATTA---GGGGTAGCACCCACCAAGGCAAAGAGAAGAGTGGTG-----  
-----CAGAGAGAAAAAAGAGCA---GCGGGAACGATGGGAGCT-----  
ATGTTCTTGGGTTCTTGGGAGCA---GCAGGAAGCACTATG---GGCGCAGCATCG---  
ATAACGCTGACGGTACAA---GCCAGACAA---TTATTG---TCTGGTATAGTGCAACAGCAGAGC---  
AATTTG---CTGAAG---GCTATTGACGCGCAACAGCACCTGTTGCAACTCACAGTCTGGGGCATT  
>KR182191  
TTCTACTGTAATACAACACAGCTGTTTAATAGTACTTGGAAATAGTACTTGGCCGCTTAATGAACTTGGGATG  
GTATCGAAGGA-----  
-----  
AATAACACTAACATCACACTTCCATGCAGAATAAAACAAATTATAAACAGATGGCAGGGAGTAGGAAAAGCAA  
TGTATGCCCCCTCCCATCAAGGGACAAATTAGCTGTTTCATCAAAT---  
ATTACAGGGCTAATATTAACAAGAGATGGTGGTAATAACACGAGT-----  
-----  
GGGAGTGAGACCTTCAGACCGGGAGGAGGAGATATGAGGGACAATTGGAGAAGTGAATTATATAAATATAAAG  
TAGTAAAAAATTGAGCCATTA---GGGGTAGCACCCACCAAGGCAAAGAGAAGAGTGGTG-----  
-----CAGAGAGAAAAAAGAGCA---GTGACG---ATGGGAGCT-----  
ATGCTCCTTGGGTTCTTGGGAGCA---GCAGGAAGCACTATG---GGCGCAGCGTCG---  
ATAACGCTGACGGTACAG---GCCAGACTA---TTGTTG---TCTGGTATAGTGCAACAGCAGAGC---  
AATTTG---CTGAAG---GCTATTGAGGCGCAACAGCACCTGTTGCAACTCACAGTCTGGGGCATC  
>KR182196  
TTCTACTGTAACACAACACAACCTGTTTAATAGTACTTGGAAATGCTAATAGTACTTGGAAATGATACTAGTTCTA  
ATATTGGA-----  
-----  
GAGTCAAATGACACAATCACACTCCCATGCAAAATAAGACAGATTGTAAATATGTGGCAGGAAGTAGGAAAAG  
CAATGTATGCTCCTCCCATTCAGGACAACCTTAATTGCTCATCAAAT---  
ATTACAGGAATATTACTAACAAGAGATGGTGGTGAGAGTAATACCACG-----  
-----  
AATAGTAACGAGACTTTCAGACCTGGAGGAGGAAATATGAGGGACAATTGGAGGAGTAAATTATATAAATATA  
AAGTAATAAAAATTGAACCATTA---GGACTGGCACCCACCAAGGCAAAGAGAAGAGTGGTG-----  
-----CAGAGAAAAGCAAGAGCA---GCAGGA---TTAGGAGCT-----  
---GTGATCTTTGGGTTCTTGGGAGCA---GCAGGAAGCACTATG---GGCGCAGCGTCA---  
GTAGCGCTGACGGTACAG---GCCAGACAA---TTATTG---TCTGGTATAGTGCAACAGCAAAAC---  
AATTTG---CTGAGG---GCTATTGAGGCGCAACAGCATATGTTGCAACTCACAGTCTGGGGCATC  
>KR182341  
TTCTATTGTAATACAACACAACCTGTTTAATAGTACTTGGTTTAATGGTACTTGGAAATAGTACTAATGACAATA  
GT-----  
-----  
ACAAATGGCACTATCACGCTCCCATGCAAAATAAAACAAATTATAAACATGTGGCAGAAAGTAGGAAAAGCAA  
TGTATGCCCCCTCCCATCAGAGGAAACATTAGCTGTTTCATCAAAT---  
ATAACGGGGTTGCTATTAATAAGAGATGGTGGTATTAATAGTACA-----  
-----  
GAGAATAGCACAGAAACCTTCAGACCGGGAGGAGGAGATATGAGGGACAATTGGAGAAGTGAATTATATAAAT  
ATAAAGTAGTACAAATTGAACCAATA---GGACTAGCACCCACAAAGGCAAAGAGAAGAGTGGTG-----  
-----CAGAGAGAAAAAAGAGCA---GTGGGAACATTAGGAGCT---  
-----GTGTTCTTGGGTTCTTGGGAGCA---GCAGGAAGCACTATG---GGCGCAGCGTCA---  
ATAACGCTGACGGTACAG---GCCAGACAA---TTATTG---TCTGGTATAGTGCAACAGCAGAAT---  
AATCTG---CTGAAG---GCTATTGATGCGCAACAACATCTGTTGCAGCTCACAGTCTGGGGCATC  
>KR182409  
TTCTACTGTGAGTCAACACCACTGTTTAATAGCACTTGGAAATAGTAATGACTTGACTCCTACTATAGAGTCAA  
ATAGC-----  
-----  
AATGGAGAAAACATTACACTAACATGCAGAATAAAACAAATTATAAACATGTGGCAGGAAGTAGGAAAAGCAA

TGTATGCCCCCTCCCATCAGTGGACCAATTGAATGTACATCAAAT ---  
 ATTACAGGGCTACTATTAACAAGAGATGGTGGTGATAACAATAATATG-----  
 -----  
 AGCAGCGAGACTTTTCAGACCTGGAGGAGGAAATATGAAAGATAATTGGAGAAATGAATTATATAAATATAAAG  
 TAGTAAAAATTAAACCATTA---GGAATAGCACCCACCAAGGCGAGAAGAAGAGTGGTG-----  
 -----CAAAGAGAAAAAAGAGCA--GTGGGA--ATAGGAGCA-----  
 TTATTCCTTGGGTTCTTGGGAGCA--GCAGGAAGCACTATG--GGCGCAGCGTCA---  
 TTGACGCTGACGGTACAG---GCCAGACAA---TTATTG---ACTGGTATAGTGCAACAGCAGAAC---  
 AATCTG---CTGAGG---GCTATTGAAGCGCAACAGCATCTGTTGCAACTCACAGTCTGGGGCATC  
 >KR182465  
 TTCTACTGTAATACAACACAACCTGTTTAATAGTACCTGGATCAATGGTACTAAAAAGTCAAATACC-----  
 -----  
 -----  
 ACTGAAGACACAATCATACTCCCATGCAGAATAAGACAAATTATAAACATGTGGCAGGAAACAGGAAAAGCAA  
 TGTATGCCCCCTCCCATAGAGGACAACCTTAGATGTTTCATCAAAT ---  
 ATTACAGGATTACTATTAACAAGAGATGGTGGGAATGATAATAAT-----  
 -----  
 -----  
 GAGACTGAGACCTTCAGACCTGGGGGAGGAAATATGAAAGACAATTGGAGAAGTGAACTATATAAATACAAAAG  
 TAGTAAAAGTTAAACCATTA---GGAATAGCACCCACCAGGGCAAAGAGAAGAGTGGTG-----  
 -----CAGAGAGAAAAAAGAGCA--GTGGGA--ATAGGAGCT-----  
 GTGTTCCCTTGGGTTCTTGGGAGCA--GCAGGAAGCACTATG--GGCGCAGCGTCA---  
 CTGACGCTGACGGTACAG---GCCAGACAA---TTATTG---TCTGGTATAGTGCAACAGCAGAAC---  
 AATCTG---CTGAGA---GCTATTGAGGCGCAACAGCATATGTTGCAACTCACAGTCTGGGGCATC  
 >MG171201  
 TTCTACTGTAATTCAACAAAACTGTTTAATAGTACTTGGAGTGTTAATAGTACTCGGAGTGGTAATAGTACAG  
 GGTCAAAT-----AAC---  
 -----  
 ACTGGAACTCAACAATCACACTCCCATGCAGAATAAAACAAGTTATAAACATGTGGCAGGCAGTAGGAAAAG  
 CAATGTATGCCCCCTCCCATCAGCGGACAAATTAGATGTTTCATCAAAT ---  
 ATTACAGGGCTGATATTAACAAGAGATGGTGGTGATAACGCTAGC-----  
 -----  
 -----  
 ACTACTGAGACTTTTCAGACCTGGAGGAGGGGATATGAGGGACAATTGGAGAAGTGAATTATATAAATATAAAA  
 TAGTAAAAATTGAACCATTA---GGAGTAGCACCCACCAAGGCAAAGAGAAGAGTGGTG-----  
 -----CAGAGAGAAAAAAGAGCA--GTGGGA--ATAGGAGCT-----  
 GTGTTCCCTTGGGTTCTTGGGAGCA--GCAGGAAGCACTATG--GGCGCAGCGTCA---  
 ATGACGCTGACGGTACAG--GCTAGACTA--TTATTG--TCTGGTATAGTGCAACAGCAGAAC---  
 AATTG---CTGAGG--GCTATTGAGGCGCAACAGCATCTGTTGCAACTCACAGTCTGGGGCATC  
 >KY778299  
 TTCTACTGTAATACAACACAACCTGTTTAATAGTACTTGGCAGGGTAATACTTGAATGGT-----  
 -----  
 -----  
 ACTAAAGAAAATATCACACTCCCATGCAAAATAAGACAAATTGTAAACATGTGGCAAGAAGTAGGAAAAGCAA  
 TGTATGCCCCCTCCTATCAGAGGACAAATTACATGCTCATCAAAT ---  
 ATTACAGGGCTGTTATTAACAAGAGATGGTGGTAATACCACAAAC-----  
 -----  
 -----  
 AATACCGAGGTCTTCAGACCTGGAGGAGGAGATATGAAGGACAATTGGAGAAGTGAATTATACAAATATAAAG  
 TAATAAAAATTGAACCATTG---GGAGTAGCACCCACTAAGGCAAAAAGAAGAGTGGTG-----  
 -----CAGAGAGAAAAAAGAGCA--GTGGGA--TTAGGAGCT-----  
 GTGTTCCCTTGGGTTCTTGGGAGCA--GCAGGAAGCACTATG--GGCGCAGCGTCA---  
 ATCACGCTGACGGTACAG---GCCAGACAA---TTATTG---TCTGGTATAGTGCAACAGCAGAAC---  
 AACTTG---CTGAGA---GCTATTGAGGCGCAACAGCATCTGTTGCAACTCACAGTCTGGGGCATC  
 >MK384347  
 TTCTACTGTAATACAACAAAACTGTTTAATAGTACCTGGACCTGGAATAGTACTGAAGGGTCAGGGAATGACA  
 CTGAGAGGAAT-----  
 -----  
 ATCACTGAGAGGAATATCACACTCCCATGCAGAATAAAACAATTTGTAAACATGTGGCAGGAAGTGGGAAAAG

CAATGTATGCCCCCTCCCATCAGTGGACAAATTAAATGTTTCATCAAAT---  
ATTACAGGTCTGCTTTTAAACAAGAGATGGTGGTGGAAAAATAAC-----  
-----  
-----  
AGTGACAACGAGACCTTCAGACCTGGAGGAGGAGATATGAGGGACAATTGGAGAAGCGAATTATATAAATATA  
AAGTAGTAAAAATTGAACCATTA---GGAGTCGCACCCACCAAGGCAAAGAGAAGAGTGGTG-----  
-----CAGAGAGAGAAAAAGAGCA--GTGACA--TTTGGAGCT-----  
---ATGTTCCCTTGGGTTCTTGGGAGCA--GCAGGAAGCACTATG--GGCGCAGCGTCA---  
ATAACGCTGACGGTACAG---GCCAGACAA---TTATTG---TCTGGTATAGTGCAACAGCAGAGC---  
AATTTG---CTGAGA---GCTATTGAGGCGCAACAGCATCTGTTGCAACTCACGGTCTGGGGCATC  
>KX505396  
TTCTACTGTGATACAACAAAACTATTTAATAGTACTTGGAAATGAACTAACACTGTAGTAAACCAA-----  
-----  
-----  
ACTACAGAAAATATCACACTCTCATGCAGAATAAAACAAATTATAAACAGGTGGCAGGAAGTAGGAAAGGCCAA  
TGTATGCCCCCTCCCATCGAAGGACAAATTAGGTGTTTCATCAAAC---  
ATTACAGGGCTGTTATTAACAAGAGATGGTGGTATTAATAATGAGACT-----  
-----  
-----  
AACACGACCGAGATCTTCAGACCTGGAGGAGGAGATATGAGGGACAATTGGAGAAGTGAATTATATAAATATA  
AAGTAGTAAGAATTGAACCATTA---GGAGTAGCACCCACCAAGGCAAAGAGAAGAGTGGTG-----  
-----CAGAGAGAAAAAAGAGCA--GTGGGA--TTAGGAGCT-----  
---GTGTTCCCTTGGGTTCTTAGGAGCA--GCAGGAAGCACTATG--GGCGCAGCGTCA---  
ATAACGCTGACGGTACAG---GCCAGGCAA---TTATTG---TCTGGTATAGTGCAACAGCAGAAC---  
AACTTG---CTGAAA---GCTATTGAGGCGCAACAGCATCTGTTGCAGCTCACAGTCTGGGGCATC  
>KX505419  
TTCTACTGTAATACAACAAACCTGTTTAATAGTACTTGGAAATGTTAGTGATACTACTGGTAGGGGA-----  
-----  
-----  
GTGTCAGACAACATCACACTCCCATGCAGAATAAAACAAGTTATAAACATGTGGCAGGAAGTAGGAAAAGCAA  
TGTATGCTCCTCCCATCCAGGACAAATTAGATGCTCATCAAAT---  
ATTACAGGGTTACTATTAACAAGAGATGGTGGTAACACCTCTGAG-----  
-----  
-----  
TCTGAGACCTTCAGACCTGGAGGAGGAGATATGAGAGACAATTGGAGAAGTGAAGTATATAAATATAAAGTAG  
TAAAGATTGAACCATTA---GGAGTAGCACCCACTAAGGCAAAGAGAAGAGTGGTG-----  
-----CAGAGAGAAAAAAGAGCA--GTGGGA--ATAGGAGCT-----  
GTGTTCCCTTGGGTTCTTGGGAGCA--GCAGGAAGCACTATG--GGCGCAGCGTCA---  
ATAACGCTGACGGTACAG---GCCAGACAA---TTATTG---TCTGGTATAGTGCAACAGCAGAAC---  
AATCTG---CTGAGA---GCTATTGAGACGCAACAGCATCTGTTGCAGCTCACAGTCTGGGGCATC  
>KX505435  
TTCTACTGTAATACATCAAAGCTGTTTAACAGTACTTGGAAATGATACAAGTACTGGGGAGTGGGAGTCAAAT-----  
-----  
-----  
GATAATGAAACAATCATACTCCCGTGCAAAATAAGACAAATTATAAACAGATGGCAGAAAGTAGGAAGAGCCA  
TGTATGCCCCCTCCCATCAGAGGACAAATTAGATGTTTCATCAAAT---  
ATTACAGGGTTACTATTAACAAGAGATGGTGGTATAAATAGGACC-----  
-----  
-----  
GAGAAATGAGACCGAGATCTTCAGACCTGGAGGAGGAGATATGAGGGACAATTGGAGAAGTGAATTGTATAAAT  
ATAAAGTAGTAAAAATTGAGCCATTA---GGAATAGCACCCACCAGGGCAAGGAGAAGAGTGGTG-----  
-----CAGAGAGAAAAAAGAGCA---GTGGGAACGATAGGAGCT---  
-----ATGTTCCCTTGGGTTCTTGGGAGCA---GCAGGAAGCACTATG---GGCGCAGCGTCA---  
GTGACGCTGACGGTACAG---GCCAGACTA---TTATTG---TCTGGTATAGTGCAACAGCAGAAC---  
AATCTG---CTAAGA---GCTATTGAGGCGCAACAGCATCTGTTGCAACTCACAGTCTGGGGCATC  
>KX505475  
TTCTACTGTAATACAACAAAACTGTTTAATAGTACTTGGAAATAGTACTTGGAAATAGTACTTGGAAATAGTGAGG  
AACAGTCA-----  
-----  
GGTGTGATAACATTATCACAAATCCAATGCAGAATAAAACAAATTGTACACATGTGGCAGAGAGTAGGAAGGG

CAATGTATGCCCCCTCCCATCAGTGGACCAATTAGATGTTTCATCAAAT---  
ATTACAGGGTTGCTATTAGTAAGAGATGGTGGTAGTTCCAACGATACC-----  
-----  
----  
AAGGAGACTTTCAAGGAGACTTTTCAGACCAGGAGGAGGAAATATGAAGGACAATTGGAGAAGTGAATTATATA  
AATACAAAGTAGTAAAAATTGAACCATTA---GGAATAGCACCCACTAAGGCAAAGAGAAGAGTGGTG-----  
-----CAGAGAGAAAAAAGAGCA---GTGGGA---  
CTAGGAGCT-----ATGTTCCCTTGGGTTCTTAGGAGCA---GCAGGAAGCACTATG---  
GGCGCAGCGTCG---ATGGCGCTGACGGTACAA---GCCAGACAA---TTATTG---  
TCTGGCATAGTGCAGCAGCAGAAC---AATCTG---CTGAGG---  
GCTATTGAGGCGCAACAGCACATGTTGCAACTCACAGTCTGGGGCATC  
>KX028091  
TTCTACTGTAATACAACAAAACTATTTAATAGTTCTTGGAAATAGTACAGAAAGGTCACAATACAAAAACATAA  
CA-----  
-----  
CAAAACGGAACCATAACACTCCAGTGCAGAATAAAACAAATTATAAACATGTGGCAGGAAGTAGGAAAAGCAA  
TGTATGCCCCCTCCCATCCGAGGAGAAATTAGATGTTTCATCAAAC---  
ATTACAGGGTTGCTACTAACAAGAGATGGTGGTGGTGGTAATAGCACAGGGGAC-----  
-----  
-----  
AACGAAACCGAAACCTTCAGACCTGCAGGAGGAGATATGAGGGACAATTGGAGAAGTGAATTATATAAAATATA  
AAGTAGTAAAAATTGAACCATTA---GGAGTAGCACCCACCCCGCAAGGAGAAGAGTGGTG-----  
-----CAGAGAGAAAAAAGAGCA---GTGGGA---ATAGGAGCT-----  
---CTGTTCCCTTGGGTTCTTGGGAGCA---GCAGGAAGCACTATG---GGCGCAGCGTCA---  
GTGACGTTGACGGTACAG---GCCAGACAA---TTATTG---TCTGGTATAGTGCAACAGCAAAAC---  
AACTTG---CTGAGG---GCTATTGAGATGCAACAAAATCTGTTGCAACTCACAGTCTGGGGCATC  
>KX028321  
TTCTACTGTAATACAACAGCACTGTTTAATAGTACTTGGAAATAGTACTTGGAAATGGTACTACAGAGACAAGTG  
GCACTGAA-----  
-----  
GAAATGGAAACATCACACTCCCATGCAGAATAAAACAAATCATAAACATGTGGCAGACAGTAGGAAAAGCAA  
TGTATGCCCCCTCCCATCAGAGGACAAATTAGATGTTTCATCAAAT---  
ATTACAGGGCTACTATTAAACAAGAGATGGTGGGAGTAGCACTAAT-----  
-----  
-----  
GGGACGGAAATCTTCAGACCTGGAGGAGGAGATATGAGGGATAATTGGAGAAGTGAATTGTATAAAATATAAAG  
TAGTGAAGATTGAACCATTA---GGAGTAGCACCCACTAAGGCAAAGAGAAGAGTGGTG-----  
-----CAGAGAGAAAAAAGAGCA---GTGGGA---TTAGGAGCT-----  
TTGTTCCCTTGGGTTCTTGGGAGCA---GCAGGAAGCACTATG---GGCGCAGCGTCA---  
CTGACGCTGACGGTACAG---GCCAGACAA---TTGTTG---TCTGGTATAGTGCAACAGCAGAAC---  
AACTTG---CTGAGA---GCTATTGAGGCGCAACAACATCTGTTGCAACTCACAGTCTGGGGCATC  
>KX028508  
TTCTACTGTAATACAACACAACCTGTTCAATAGTACTTGGAAATAACTGGAAATAATTGGACTGATACTGGAG  
AGTCA-----  
-----  
GACAATATCACACTTATACTCCCATGCAGAATAAAACAAATTGTAAACCTGTGGCAGAGAGTAGGAAAAGCAA  
TGTATGCCCCCTCCAGCAGGGGACCAATTAGATGCTCATCAAAT---  
ATTACAGGGATATTATTAACAAGAGATGGTGGTAGTGGTGTGAAC-----  
-----  
-----  
GTGAGCAGCACAACCTGAACTTTTAGACCCGAGGAGGAAATATGAGGGATAATTGGAGAAGTGAATTATATA  
AATATAAAATAGTACAAATTGAACCAATA---GGAATAGCACCCACCAGGGCAAAGAGAAGAGTGGTG-----  
-----CAGAGAGAAAAAAGAGCA---ATAGGA---  
CTAGGAGCT-----ATGTTCCCTTGGGTTCTTGGGAGCA---GCAGGAAGCACTATG---  
GGCGCAGCGTCA---ATGACGCTGACGGTACAG---GCCAGGCAA---CTATTG---  
TCTGGTATAGTGCAACAGCAGAAC---AATTTG---CTGAGG---  
GCTATTGAGGCGCAACAGCATATGTTGCAACTCACAGTCTGGGGCATC  
>KX505739  
TTCTACTGTAATTCAACAAAACTGTTTAATAGTACTTGGGAGGCAGGTATTACTGAAAAGTCAGAA-----  
-----

-----  
TCAAATGACACTATTACACTCCCATGTCAGGATAAAAACAAATTATAAACATGTGGCAGAAAGTAGGAAAAGCAA  
TGTATGCTCCTCCCATCAGTGGAAATAATTAAATGTAAATCAAAT---  
ATTACAGGGCTACTATTAACAAGAGATGGTGGTAATAGTAGCGAG-----  
-----  
-----  
AATAAGAGTGAGATCTTCAGACCTGCAGGAGGAGATATGAGGGACAATTGGAGAAGTGAATTATATAAATATA  
AAGTAGTAAAAATTGAACCATTA---GGAGTAGCACCCACCAAGGCAAAGAGAAGAGTGGTG-----  
-----CAGAGAGAAAAAAGAGCA---GTGGGA---ATAGGAGCT-----  
---GTGTTCCCTTGGGTTCTTGGGAGCA---GCAGGAAGCACTATG---GGCGCAGCGTCA---  
ATGACGCTGACGGTACAG---GCCAGGCAA---TTATTG---TCTGGTATAGTGCAACAGCAGAAC---  
AATCTG---CTGAGA---GCCATTGAGGCGCAACAGCATCTGTTGCAACTCACAGTCTGGGGCATC  
>KU678060  
TTCTACTGTAATACATCACAACCTGTTTAAACAGTACTTGGTATGGTAATTCAACACAGGATAATACTACTGGG-  
-----  
-----  
GATAGTACTGTTATCACACTCCCATGTAGAATAAAAACAAATTATAAACATGTGGCAGGGAGTAGGAAAAGCAA  
TGTATGCCCCCTCCCATCAGTGGATAACATTAATTGTTTCATCAAAC---  
ATTACAGGGCTACTATTAACAAGAGATGGTATTGTGGCTAACAAATACCGAT-----  
-----  
-----  
AACGATACCGAGACATTTCAGACCTGAAGGAGGAAAACATGAAGGACAATTGGAGAAGTGAATTATATAAATATA  
AAGTAGTACAAATTGAACCATTA---GGAATAGCACCCACCAAGGCAAGGAGAAGAGTGGTG-----  
-----CAGAGAGAAAAAAGAGCA---GTGGGAGTGCTGGGAGCT-----  
---ATGTTCCCTTGGGTTCTTGGGAGCA---GCAGGAAGCACTATG---GGCGCAGCGTCA---  
ATAACGCTGACGGTACAG---GCCAGACTA---TTATTG---TCTGGTATAGTGCAAGCAGCAGAAC---  
AATCTG---CTGCGG---GCTATTGAGGCGCAACAGCATCTGCTGCAACTCACAGTCTGGGGCATC  
>KX595124  
TTCTACTGTAATACAACACCACTGTTTAAATAGTACTTGGCCTTGGGAATGGTAACAAGACACATGATACA----  
-----  
-----  
AATAGAAACAATATCACACTCTCATGCAGAATAAAAACAAATTATAAACAGATGGCAGGAAGTAGGAAAAGCAA  
TGTATGCTCCTCCCATTCAGGACGAATTAGCTGTTTATCAAAT---  
ATTACAGGGATGATATTAACAAGAGATGGTGGTAACAATATCGGA-----  
-----  
-----  
GGGGAAAATAACACTGAGATCTTCAGACCTGCAGGAGGAGATATGAGGGACAATTGGAGAAGTGAATTATATA  
AATATAAAGTAGTAAAAGTTGAACCATTA---GGAGTAGCACCCACCAGGGCAAGGAGAAGAGTGGTG-----  
-----CAAAGAGAGAAAAGAGCA---GCGGGA---  
ATAGGAGCG-----TTACTCCTTGGGTTCTTGGGAGCG---GCAGGAAGCACTATG---  
GGCGCAGCGTCA---CTGACGCTGACGGTACAA---GCCAGACAA---TTATTG---  
TCTGGTATAGTGCAACAGCAGAAC---AACCTG---CTGAGG---  
GCTATTGAGGCGCAACAGCATATGTTGCAACTCACAGTCTGGGGCATC  
>KY323732  
TTCTATTGTAATTCAACACGACTGTTTAAATAGTACCTGGGAGAGCCCTGATGGCCCTAGGAATGATAGTGGGG  
AG-----  
-----  
CTCAATGACAATATCACACTCCCATGCAGAATAAAAACAAATTATAAACATGTGGCAGGAAGTAGGAAAAGCAA  
TGTATGCCCCCTCCCATCAAAGGTATAATTAAATGCTCATCAAAC---  
ATTACAGGGCTGCTATTAACAAGAGATGGGGGGAATGAGAATGTACAGGCAAC-----  
-----  
-----  
AATAAGACTGAGACCTTCAGACCTGGGGGAGGAGATATGAGGGACAATTGGAGAAGTGAATTATACAAATATA  
AAGTAGTGCAAGTTGAACCACTA---GGAGTAGCGCCACCAGGGCAAAAAGAAGAGTGGTG-----  
-----CAGAGAGAAAAAAGAGCA---GTGACA---ATGGGAGCT-----  
---ATGTTCCCTTGGGTTCTTGGGAGCA---GCAGGAAGCACTATG---GGCGCAGCATCA---  
ATGATGCTGACGGTACAA---GCCAGACAA---TTGTTG---TCTGGTATAGTGCAAGCAGCAGAGC---  
AATTTG---CTGAAG---GCTATTGAGGCGCAACAACATCTGTTGCAACTAACAGTCTGGGGCATC  
>KY323909

TTCTACTGTAATACAACACGACTGTTCAATAGTACTTGGAAATAATAATAATGGTACTTGGAGTGATAATAGTA  
CTGGGAAT-----  
-----AATACT-----  
GGAGAAAATGACACACTCACACTCCCATGCAAAATAAAACAAATTATAAACATGTGGCAGAAAGTAGGAAAAG  
CAATGTATGCCCCCTCCTATCAGAGGGCAAATTAGATGTTTCATCAAAC---  
ATTACAGGGTTATTATTGACAAGAGACGGGGGAGTTAATAATACAACC-----  
-----  
AACAACTGAGACCTTCAGACCTGGAGGGGGAGATATGAGGGACAATTGGAGAAGTGAATTATATAAAATATA  
AGGTAGTAAAAATTGAACCATTA---GGAGTAGCACCCACCAAGGCAAAGAGAAGAGTGGTG-----  
-----CAGAGAGGAAAAAGAGCA---GTAGGC---ATAGGAGCT-----  
---GTGTTCCCTTGGTTTCTTGGGAGCA---GCAGGAAGCACGATG---GGCGCAGCGTCA---  
CTGACGCTGACGGTACAG---GCCAGACTA---TTATTG---TCTGGTATAGTGCAACAGCAGAAC---  
AATTTG---CTGAGA---GCTATTGAGGCGCAACAGCATCTGTTGCAACTCACAGTCTGGGGCATC  
>KY324122  
TTCTACTGTAATACATCCCACTGTTTAATAGTACTTGGAAATAGTACTTGGGATAATACTGGAGAGTCAAATA  
GCACTGAA-----  
-----  
GGAAATGACACAATCACACTCCCATGTAGAATAAAACAAATTTATAAATTTATGGCAGCAAGTAGGAAAAGCAA  
TGTATGCCCCCTCCCATCAGGGGAAACATTACCTGTTTCATCAAAT---  
ATTACAGGGCTGATATTAACAAGAGATGGTGGTAATGATAACGGG-----  
-----  
AGTAACGAGACCTTCAGACCTGCAGGGGGAGATATGAGGGACAATTGGAGAAGTGAATTATATAAAATATAAAG  
TAGTAAAAATTGAACCATTA---GGAGTAGCACCCACCAAGGCAAAGAGAAGAGTGGTG-----  
-----CAGAGAGAAAAAGAGCA---GTGGGC---ATAGGAGCT-----  
TTGTTCCCTTGGGTTCTTGGGAGCA---GCAGGAAGCACTATG---GGCGCAGCGTCA---  
ATGACGCTGACGGTACAG---GCCAGACAA---TTGTTG---TCTGGTATAGTGCAACAGCAAAAC---  
AACCTG---CTGAGA---GCTATTGAGGCGCAACAGCATATGTTGCAACTCACAGTCTGGGGCATC  
>KX028240  
TTCTATTGTAATACAACACAATTGTTTAATAGTACTTGGGATGCTAATACTACTGTACAAAATACTGGAGAAA  
ATGACACT-----  
-----  
GGAGAAAATGACACTATTATACTCCAATGCAAAATAAAACAAATTATAAACATGTGGCAGCGAACAGGAAAAG  
CAATGTATGCCCCCTCCCATCAGAGGACAAATTAGATGTTTCATCAAAT---  
ATTACAGGGCTGCTTTTAGCAAGAGATGGTGGCAACATGACCGAG-----  
-----  
AGCACGGAGGTCTTCAGACCTACAGGAGGAAATATGAAGGACAATTGGAGAAGTGAATTATATAAAATACAAAG  
TAGTTGAACTTGAACCATTA---GGAATAGCACCCACCAAGGCAAAGAGAAGAGTGGTG-----  
-----CAGAGAGAGAAAAAGAGGA-----ATAGGAGCT-----  
GTGTTCCCTTGGGTTCTTGGGAGCA---GCAGGAAGCACTATG---GGCGCAGCGTCA---  
GTGACGCTGACGGTACAG---GCCAGACAA---TTATTG---TCTGGTATAGTGCAACAGCAGAGC---  
AATTTG---CTGAAG---GCTATTGAGGCGCAACACATTTGTTGCAACTCACAGTCTGGGGCATC  
>KX505555  
TTCTACTGTAACACTGACAACTGTTTAATAGTACTTGGAAATAGTAATGGTAGTGGTACCTGGAATAGGGATG  
ATACTGAA-----  
-----  
GAGTCAAATGACACAATCACACTCCAATGCAGAATAAAACAAATCATAAACATGTGGCAGGAAGTAGGAAAAG  
CAATGTATGCCCCCTCCCATCGAGGGACAAATTAAATGTTTCATCAAAT---  
ATTACAGGGCTGCTATTAACAAGAGATGGTGGTAATTCTAGCAGCACG-----  
-----  
AACGACGAGATATTTAGACCTGGAGGAGGAGATATGAAGGACAATTGGAGAAGTGAATTATACAAATATAAAG  
TAGTAAAAATTGAACCAATA---GGGATAGCACCTGAAAAGGCACAGAGAAGAGTGGTG-----  
-----CAGAGAGAAAAAGAGCA---GTGGGAGCATTAGGAGCT-----  
TTGTTCCCTTGGGTTCTTAGGAGCA---GCAGGAAGCACTATG---GGCGCAGCGTCA---  
GTGACGCTGACGGTACAG---GCCAGACAA---TTATTG---TCTGGTATAGTGCAACAGCAAAAC---  
AATTTG---CTGAGA---GCTATTGAGGCGCAACAGCATCTGTTGCAACTCACGGTCTGGGGCATC  
>MH897920

TTCTACTGTAATACATCAGAACTGTTTAAAGGTACTTGGAATGGTACTGAAAGGCCAAATGACACTGAAAAG-  
 -----  
 -----  
 TTAAATGATACAATTACACTCCAATGCAGAATAAAACAATTTATAAACATGTGGCAGGAAGTAGGAAAAGCAA  
 TGTATGCCCCCTCCAATCAGAGGACAAATTAAGTGTTCATCAAAT---  
 ATTACAGGGCTGCTACTAACAAGAGATGGTGGAAATGGAATGAGACG-----  
 -----  
 -----  
 AAAGAGACTGAGGTCTTCAGACCTGGAGGAGGAGATATGAGGGACAATTGGAGAAGTGAATTATATAAAATATA  
 AAGTAGTAAAAATTGAACCATTA---GGAATAGCACCCACCAAGGCAAGGAGAAGAGTGGTG-----  
 -----CAGAGAGAAAAAAGAGCA---GTGGGA---ATAGGAGCT-----  
 ---CTGTTCCCTTGGGTTCTTGGGAGCA---GCAGGAAGCACTATG---GGCGCAGCGTCA---  
 GTGACGCTGACGGTACAG---GCCAGACAA---TTATTG---TCTGGTATAGTGCAACAGCAGAGC---  
 AATTTG---CTGAGA---GCTATTGAGGCGCAGCAGCATATGTTGCAACTCACAGTCTGGGGCATC  
 >KX587137  
 TTCTACTGTAATACATCAAACTGTTTAATAGTACTTGGTTTAATAATGGGACTAATAGTGAAGAGTCG----  
 -----  
 -----  
 TCAAAATGACACTATCACACTTCCATGCAGGATAAAACAAATTGTAAATATGTGGCAGGAGGTAGGAAAAGCAA  
 TGTATGCCCCCTCCCATTAGAGGACAAATTAGATGTAAGTCAAGT---  
 ATTACAGGGATACTATTAGTAAGAGATGGTGGTAAGACCAACAGTACCAATGAG-----AGC-----  
 -----  
 AGTACCAATGAGAGC---  
 GAGATCGAAATCTTCAGACCTGGAGGAGGAGACATGAGGGACAATTGGAGAAGTGAATTATATAAAATATAAAG  
 TAGTACAAATTGAACCATTA---GGAGTAGCACCCACCAAGGCAAAAAGAAGAGTGGTG-----  
 -----CAGAGAGAAAAAAGAGCA---ATAGGA---ATGGGAGCT-----  
 TTGTTCCCTTGGGTTCTTAAGCGCA---GCAGGAAGCACTATG---GGCGCAGCGTCA---  
 GTGACGCTGACGGTACAA---GCCAGACAA---TTACTG---TCTGGTATAGTGCAACAGCAGAAC---  
 AACCTG---CTGAGG---GCTATTGAGGCGCAGCAGCATCTGCTGCAACTCACAGTCTGGGGCATC  
 >KX587284  
 TTCTACTGCAATACAACAAAACTGTTTAATAGCACTTGGAAATCAACACATAGTTGGAACGATACAGGG----  
 -----  
 -----  
 CCAAAATGACAATGTCACACTTCCATGCAGGATAAAACAAATCATAAACATGTGGCAGGAAGTAGGAAAAGCAA  
 TGTATGCCCCCTCCTATTAAGGGAGAAATTAAATGTTTCATCAAAT---  
 ATTACAGGGCTGATATTAAGTAGAGATGGTGGGACAGGTAATGAGACT-----  
 -----  
 -----  
 GACAACAACACTGAGACCTTCAGACCAGGAGGAGGAGATATGAGAAACAATTGGAGAAGTGAATTATATAAAT  
 ATAAAGTAATAAGAATTGAACCAATA---GGATTAGCACCCACCAAGGCAAAGAGAAGAGTGGTG-----  
 -----CAGAGAGAAAAAAGAGCA---ATACCA---ATAGGAGCT---  
 -----GTGTTCTTTGGGTTCTTGGGAGCA---GCAGGAAGCACTATG---GGCGCAGCGTCA---  
 ATAGCGCTGACGGCACAG---GCCAGACAA---TTACTG---TCTGGTATAGTGCAACAGCAAAAC---  
 AATTTG---CTGAGG---GCTATTGAGGCGCAACAACATCTGTTGCAACTCACAGTCTGGGGCATC  
 >KY113738  
 TTCTACTGTAATTCAACACAACCTGTTTAATAGTACTTGGAAATAGTAATAGTACTCGGAATGGTACTGAAGGGT  
 CAAATATCACT-----  
 -----  
 GTAGAAAATGACACAATCATACTTACTTGCAGAATAAAACAAATTATAAACATGTGGCAGGAAGTAGGAAAAG  
 CAATGTATGCCCCCTCCCATCAGTGGAAATAATTAGATGTTTCATCAAAT---  
 ATTACAGGGCTGCTATTAAACAAGAGATGGTGGTAACAGTAGCAAC-----  
 -----  
 -----  
 GGGACAGAGGTCTTCAGACCTGGAGGAGGAAATATGAAAGACAATTGGAGGAGTGAATTATATAAAATATAAAG  
 TAGTAAAAATTGAACCATTA---GGAATAGCACCCACCAAGGCGAAGAGAAGAGTGGTG-----  
 -----CAGAAAGAAAAAAGAGCA---GCA-----CTAGGAGCC-----  
 TTGTTCCCTTGGGTTCTTGGGAGCA---GCAGGAAGCACTATG---GGCGCAGCGTCA---  
 ATGACGCTGACGGTACAG---GCCAGACTA---TTATTG---TCTGGTATAGTGCAACAGCAAAAT---  
 AATTTG---CTGAGG---GCTATTGAGGCGCAACAGCATCTGTTGCAACTCACAGTCTGGGGCATT  
 >KY113566

TTCTACTGTAATACATCAAACTGTTTAAATAGTACTTGGAATAATAATAGTACTTGGAATAGTACTACTACTG  
 AAAGAAAT-----  
 -----  
 GAGACAGAAGGAAATATCACACTCCCATGTAGAATAAAACAAATTATAAACATGTGGCAGGAAGTAGGAAAAG  
 CAATGTATGCCCCCTCCCATTAGGGGAATAATTAAATGTTTCATCAAAT---  
 ATTACAGGATTGCTATTGACAAGAGATGGTGGTAAGACAATACC-----  
 -----  
 ACAAATAATAATGGG---  
 ACTGAGGAGGTCTTCAGACCAGGAGGAGGAGATATGAGGGACAATTGGAGAAGTGAATTGTATAAATATAAAG  
 TAGTAAGAATTGAACCATTA---GGAGTAGCACCCACCAAGGCAAAGAGAAGAGTGGTG-----  
 -----CAGAGAGAAAAAAGAGCA---GTGACA---CTAGGAGCT-----  
 ATGTTCCCTTGGGTTCTTGGGAGCA---GCAGGAAGCACTATG---GGCGCAGCGTCA---  
 ATAACGCTGACGGCACAG---GCCAGACAA---TTATTG---TCTGGTATAGTGCAACAGCAGAAT---  
 AATCTG---CTGAGA---GCTATTGAGGCGCAACAGCATCTGTTGCAACTCACAGTCTGGGGCATC  
 >KY113379  
 TTCTATTGTAATTCAACACAACCTGTTTAAATAGTACTTGGAATAATACTGATTGGAATAATACTGAAGAGGCCAA  
 ATAAA-----  
 -----ACTAGA-----  
 GGAGGAAATGACACAATTATACTCCCATGTAGAATAAAACAAATTATAAACATGTGGCAGGAAGTAGGAAAAG  
 CAATGTATGCCCCCTCCCATCAGAGGAAACATTAGTTGTTTTTCAAAG---  
 ATTACAGGGCTGTTACTCACAAGAGATGGTGGTAATAGTAATATTACT-----  
 -----  
 -----  
 AGTGAGAGCGAGACCTTCAGACCTGCAGGAGGAGATATGAGGGACAATTGGAGAAGTGAGTTATATAAATATA  
 AAGTAGTAAAAATTGAACCCCTTA---GGAGTAGCACCCACCAAGGCAAAGAGAAGAGTGGTG-----  
 -----CAGAGGGAAAAAAGAGCA---GTTGGA---ATTGGAGCT-----  
 ---TTGTTCCCTTGGGTTCTTGGGAGCA---GCAGGAAGCACTATG---GGCGCAGCATCA---  
 TTAACGCTGACGGTACAG---GCCAGACAA---TTATTG---TCTGGTATAGTGCAACAGCAGAAC---  
 AATTTG---CTGAGA---GCTATTGAGGCGCAACAGCATCTGTTGCAACTCACAGTCTGGGGCATC  
 >KY057390  
 TTCTACTGTAACACATCAAACTATTTAAATGGAACCTGGAATGGTACTGATGGAACCTGGAATGATATT---  
 -----  
 -----  
 ACTGATGAAATTATCACAATCCCATGCAGAATAAAACAAATTTATAAACCTGTGGCAAGAAGTAGGAAAAGCAA  
 TGTATGCCCCCTCCCATCGCAGGACCAATTAGCTGTTTCATCAAAC---  
 ATTACAGGACTGATATTAACAAGAGATGGTGGTAATACTAATAGCACT-----  
 -----  
 -----  
 AAGGGGAAGGAGACCTTCAGACCGGGAGGAGGAGATATGAGGGACAATTGGAGAAGTGAATTATATAAATATA  
 AAGTAGTAAAAATTGAACCATTA---GGAATAGCACCCACCAGGGCAAGGAGAAGAGTGGTG-----  
 -----CAGAGAGAAAAAAGAGCA---GCA-----ATAGGAGCT-----  
 ---CTGTTCCCTTGGGTTCTTGGGAGCA---GCAGGAAGCACGATG---GGCGCAGCATCA---  
 GTGACGCTGACGGTACAG---GCCAGACTA---CTATTG---TCTGGTATAGTGCAACAGCAGAAC---  
 AACCTG---CTGAGA---GCTATTGAGGCGCAACAGCATATGTTGCAACTCACAGTCTGGGGCATC  
 >KY748402  
 TTCTACTGTAATTCAACACAACCTGTTTAAATAGTACTTGGAATAGTACTTTGAATACTACTTGGGAGGTTAAT-  
 -----  
 -----  
 GAGACTGACATTATCACACTCCCATGCAGAATAAAACAAATTATAAACATGTGGCAGGAAGTAGGAAAAGCAA  
 TGTATGCCCCCTCCCATCCAAGGAAGAATTAAATGCTCATCGAAT---  
 ATTACAGGGCTGTTACTAATAAGAGATGGTGGTAATAACAATGGTAGCGAA-----  
 -----  
 -----  
 ACAACAGAAATCTTCAGACCTGGAGGAGGAGACATGAGGGACAATTGGAGAAGTGAATTATATAAATATAAGG  
 TAGTAAAAATTGAGCCATTA---GGAATAGCACCCACCAAGGCAAAGAGAAGAGTGGTG-----  
 -----CAAAGAGAAAAAAGAGCA---GTGGGAGTATTTGGAGCT-----  
 ATGTTCCCTCGGGTTCTTGGGAACA---GCAGGAAGCACTATG---GGCGCAGCGTCA---  
 ATAACGCTGACGGTACAG---GCCAGACAA---TTATTA---TCTGGTATAGTGCAACAGCAAAAC---  
 AATTTG---CTGAGA---GCTATTGAGGCGCAACAGCATCTGTTGCAACTCACAGTCTGGGGCATT  
 >KY057518

TTCTACTGTAATACAACAACAACTGTTTAAATAGTGCTTGGAATAATACAGGGTCAAATGGAGCT-----  
 -----  
 -----  
 ACCAGTGACAACATCACGCTCCCATGCAGAATAAAGCAAATTATAAACATGTGGCAGGAAGTAGGAAAAGCAA  
 TGTATGCCCCGCCCATCAGTGGACTAATTAAGTGTACATCAAAT---  
 ATTACAGGGCTACTATTAACAAGAGATGGGGGAAATGGAAATGACACAAAT-----  
 -----  
 -----  
 AAAACCGATGAGATCTTCAGACCTGGAGGAGGAAATATGAGGGACAATTGGAGAAATAAATTATATAAAATATA  
 AAGTAGTGAAAATTGAACCATTA---GGAGTAGCACCCACCAAGGCAAAGAGAAGAGTAGTG-----  
 -----  
 -----CAGAGAAAAAAAAGAGCA---TTGGGA---ATAGGAGCT-----  
 ---GTGTTCCCTTGGGTTCTTGGGAGCA---GCAGGAAGCACTATG---GGCGCAGCGTCA---  
 ATGACGCTGACGGTACAG---GCCAGACAA---TTATTG---TCTGGTATAGTGCAGCAGCAGAAC---  
 AATTTG---CTGAGA---GCTATTGAGGCGCAACAGCATGTGTTGCAACTCACAGTCTGGGGCATC  
 >KY324010  
 TTCTACTGTGATACAACAAAAATTGTTTAAATAGTACTTGGAAGCTTAATAGTACTTGGAATAGTATGGAAGAAG  
 TGACAAAT-----  
 -----AGCACT-----  
 AAAGGAGATGCCAACATCACACTCCCCTGCAGAATAAAACAAATTGTAAACATGTGGCAGAGAGTAGGAAGAG  
 CAATGTATGCCCCCTCCCATCCAAGGACGAATTAGCTGTTTCATCAGAT---  
 ATTACAGGGCTGCTATTACTAAGAGATGGTGGTAGTGGTAATAATACCACG-----  
 -----  
 -----  
 AATGATACTGAGATCTTCAGACCTGGAGGAGGAAATATGAAGGATAATTGGAGAAAGTGAATTATATAAAATATA  
 AAGTAGTAAAAATTGAACCATTA---GGAGTAGCACCCACCAAGGCAAAGAGAAGAGTGGTG-----  
 -----  
 -----CAGAGAGAAAAAAGAGCA---GCGGGA---ATAGGAGCT-----  
 ---GTGCTCCTTGGGTTCTTGGGAGCA---GCAGGAAGCACTATG---GGCGCAGCGGCA---  
 GTGACGCTGACGGTACAG---GCCAGACAA---TTATTG---TCTGGTATAGTGCAGCAGCAGAAAT---  
 AATTTG---CTGAAG---GCTATTGAGGCGCAACAACATCTGTTGCAACTCACAGTCTGGGGCATC  
 >KY324473  
 TTCTACTGTAATACAACATCATGTGTTTAAATAGTACTTGGTATGCTAATAATACTACTGAAGGGACAAATAGC-  
 -----  
 -----  
 -----  
 ACTGGAAGAAATATCACACTCCAATGCAGAATAAGACAAATTATAAACATGTGGCAGAAAGTAGGAAAAGCAA  
 TGTATGCCCCCTCCCATCAGTGGAGTAATTAAGTGTAAATCAAAT---  
 ATTACAGGGCTGATATTAACGAGAGATGGTGGTAACAATAATGGTAACAAT-----  
 -----  
 -----  
 -----  
 AATAATACCAACGAAACCGAGACCTTCAGACCAGGAGGAGGAGATATGAGGGACAATTGGAGAAGTGAATTAT  
 AATAATATAAAGTAGTAAAAATTGAACCATTA---GGAATAGCACCCACCAGGGCACAAAGAAGAGTGGTG--  
 -----  
 -----CAGAGAGAAAAAAGAGCA---GTGGGA---  
 TTAGGAGCT-----TTGTTCCCTTGGGTTCTTGGGAGCA---GCAGGAAGCACTATG---  
 GGCGCAGCATCA---ATGACGCTGACGGTACAG---GCCAGACAA---TTATTG---  
 TCTGGTATAGTGCAGCAGCAAAGC---AATTTG---CTGAGA---  
 GCTATTGAGACGCAACAGCATCTGTTGCAACTCACAGTCTGGGGCATT  
 >MK148554  
 TTCTACTGTAATACAACAACAACTGTTTAAATAGTACTTGGAATGGTACTACTGAAGGGTTAAATAAAGTGA-  
 -----  
 -----  
 -----  
 GGAAATGGCACAATCACACTTCCATGCAGAATAAAACAAATTATAAACATGTGGCAGGAAGTAGGAAAAGCAA  
 TGTATGCCCCCTCCCATCAGAGGACTAATTAGATGTTTCATCAAAT---  
 ATTACAGGGCTGCTATTAAACAAGGGATGGTGGTGATGGTAATAGC-----  
 -----  
 -----  
 -----  
 AACGAGACCGAGGTTTTTCAGACCTGGAGGAGGAGATATGAGGGACAATTGGAGAAAGTGAATTATATAAAATATA  
 AAGTAGTAAAAATTGAACCATTA---GGAGTAGCACCCACCAAGGCAAAGAGAAGAGTGGTG-----  
 -----  
 -----CAAAGAGAAAAAAGAGCA---GTGGGA---ATAGGAGCT-----  
 ---ATGTTCCCTTGGGTTCTTGGGAGCA---GCAGGAAGCACTATG---GGCGCAGCGTCA---  
 ATGACGCTGACGGTACAG---GCCAGACTA---TTATTG---TCTGGTATAGTGCAACAGCAGAAC---  
 AATTTG---CTGAGG---GCTATTGAGGCGCAACAACATCTGTTGCAACTCACAGTCTGGGGCATC

>MK114705

TTCTACTGTAATACAACAAAACCTATTTAATAGTACTTGGCCACGTAATAGTACTTGGAAATAATACTGAAGGGT  
CAAAT-----

-----  
GACACTGAAATAATCACACTCCCGTGCAGAATAAAACAAATTGTAAACAGGTGGCAGGAAGTAGGCAAAGCAA  
TGTATGCCCCCTCCCATCCAAGGACAAATTAGTTGTTTCATCAAAT---  
ATTACAGGGCTGCTACTAGTTAGAGATGGTGGAAATTAACACCAGT-----

-----  
GAGAGCAACGAGACCTTCAGACCTGGAGGAGGAGATATGAGGGACAATTGGAGAAGTGAATTATATAAAATATA  
AGGTAGTAAAAATTGAACCATTA---GGAGTAGCACCCACCAAGGCAAAGAGAAGAGTGGTG-----  
-----CAGAGAGAAAAAAGAGCA---GTGGGAATGCTGGGAGCT-----  
---ATGTTCCCTTGGGCTCTTGGGAGCA---GCAGGAAGCACTATG---GGCGCAGCGTCA---  
GTGACGTTGACGGTACAG---ACCAGACTA---TTATTG---TCTGGTATAGTGCAACAGCAGAAC---  
AATCTG---CTGAGG---GCTATTGAGGCGCAGCAGCATCTGTTGCAACTCACAGTCTGGGGCATC

>MK114983

TTCTACTGTAACACAACACGACTGTTTAATAGTACTTGGAGTGTTAATGGAAGTAGCATAAACGAAACT----

-----  
AACAAATAAAAATATCACACTCCCGTGCAGAATAAAACAAATTATAAACAGGTGGCAGGAAGTAGGAAAAGCAA  
TGTATGCCCCCTCCTATCAGTGGGATAATTAGGTGCTCATCAAAT---  
ATTACAGGACTAATATTAACAAGAGATGGTGGTACAACCTGATGGTGGTACA-----

-----  
ACTAATAGTACAAAGGAGACCTTCAGACCTGGAGGGGGAAATATGAAGGACAATTGGAGAAGTGAATTATATA  
AATACAAAGTAGTAAAAATTGAGCCATTA--GGAGTAGCACCCACCAAGGCACAGAGAAGAGTGGTG-----  
-----CAAAGAGAAAAAAGAGCA---  
ATAGGAACGTTAGGAGCT-----ATGTTCCCTCGGGTCTTGGGAGCA---GCAGGAAGCACTATG---  
GGCGCAGCGTCA---CTGACGCTGACGGTACAA---GCCAGACAA---TTATTG---  
TCTGGTATAGTGCAACAGCAGAAC---AATCTG---CTGAGG---  
GCTATTGAGGCGCAACAGCATATGTTGCAACTCACAGTCTGGGGCATC

>MK115065

TTCTACTGTAATACAACACAGCTGTTTAATAGTACTTGGAAATAATAGTACTTGGAAATGGTACTGACAATTGGA  
AT-----

-----GGTACT-----  
GAATCAAATAGCACTATCACACTCCCATGCAGAATAAAACAAATTATAAACTTGTGGCAGGAAGTAGGAAGAG  
CAATGTATGCCCCCTCCCATCCAAGGGCAAATTAGATGTTTCATCAAAT---  
ATTACAGGGCTGCTGCTAGTAAGAGATGGTGGGAGCAACAATAGTAGT-----

-----  
AATGATACAGAGACCTTCAGGCCTGGAGGAGGAGATATGAGGGACAATTGGAGAAGTGAATTATATAAAATATA  
AAGTAGTCAAAATTGAACCATTA---GGAATAGCACCCACCCATGCAAAGAGAAGAGTGGTG-----  
-----CAAAGGGAAAAAAGAGCA---ATAGGA---CTTGGAGCT-----  
---TTCTTCCTTGGGTTCTTGGGAGCA---GCAGGAAGCACTATG---GGCGCAGCGTCA---  
GTGACGCTGACGGTACAG---GCCAGACAA---TTATTG---TCTGGTATAGTGACAGCAGCAAAAC---  
AATTTG---CTGAGA---GCTATTGAGGCGCAACAGCATCTGTTGCAACTCACAGTCTGGGGCATC

>MK115195

TTCTACTGTAATACAACACAACCTGTTTAATAGTACTTGGTATAGTACTACAGGAGTAAATGGTACAGGAGCAA  
ATAACACA-----

-----  
GAAGTAAATATTATCACACTCCCATGCAGGATAAGGCAAATTGTAAACATGTGGCAGGAAGTAGGAAAAGCAA  
TGTATGCCCCCTCCCATCAGTGGACAAATTAGTTGTTTCATCAAAT---  
ATTACAGGGCTACTACTACTAAGAGATGGTGGTAATAGCAATAAC-----

-----  
ACGAATAACATGACTGAAATCTTCAGACCTGGAGGAGGAGATATGAGAGACAATTGGAGAAGTGAATTATATA  
AATATAAAGTAGTACAAATTGAACCATTA---GGAATAGCACCCACCAAGGCAAAGAGAAGAGTGGTG-----  
-----CAGAGAGAAAAAAGAGCA---GTGGGA---  
ATAGGAGCT-----CTGTTCCCTTGGGTTCTTGGGAGCA---GCAGGAAGCACTATG---  
GGCGCAGCATCA---ATAACGCTGACGGTACAA---GCCAGACAC---TTATTG---

TCTGGTATAGTGCAACAGCAGAAC --- AATTTG --- CTGAGA ---  
GCTATTGAGGCGCAACAGCATATGTTGCAGCTCACAGTCTGGGGCATC  
>MK115360  
TTCTACTGTAATACAACACAACCTGTTCAATAGTACCTGGCCCAATAATAGTACTGGGAATGATACGGGAGGA-  
-----  
-----  
CCAAATGGTACTATCACACTCCCATGCAAAATAAAACAGATTGTAACTTATGGCAGGAAGTAGGAAAAGCAA  
TGTATGCCCCCTCCCATCAAAGGACAAATTAGATGTTTCATCAAAT ---  
ATTACAGGGATGATATTAATAAGAGATGGTGGATCAGGTAATGAAAGTAATACC-----  
-----  
-----  
AATAGTGAGACCTTCAGACCTGGAGGAGGAAATATGAAGGACAATTGGAGAAGTGAATTATACAAATATAAAG  
TAGTAAAAATTGAACCATTA --- GGAATAGCACCCACCAGGGCAAAGAGAAGAGTGGTG-----  
-----  
-----CAGAGAGAAAAGAGCA --- GTGGGA --- ATAGGAGCT-----  
TTGTTTCCTTGGGTTCTTGGGAGCG --- GCAGGAAGCACTATG --- GGCGCAGCGTCG ---  
ATGACGCTGACGGTACAG --- GCCAGACAA --- TTATTG --- TCTGGTATAGTGCAACAGCAGAAC ---  
AACCTG --- CTGAGG --- GCTATTGAGGCACAACAGCATCTGTTGCAACTCACAGTCTGGGGCATT  
>MK115488  
TTCTATTGTAATACAACACAGCTGTTTAATAGTACTTGGAAATAGTACTTGGACTGGGAATGCTACCGAA ---  
-----  
-----  
TTAGATGGAAACATCACACTCCCATGCAGAATAAAACAGATTATAAACAGGTGGCAAGAAGTAGGAAAAGCAA  
TGTATGCCCCCTCCCATTAGAGGAAAAATTAGATGTTTCATCAAAT ---  
ATTACAGGGTTACTATTAGTAAGAGATGGTGGTAACACGAGCGGG-----  
-----  
-----  
ACTGAGACCTTCAGACCTGGAGGAGGAGATATGAAGGACAATTGGAGGAGTGAATTATATAAATATAAAGTAG  
TAAAAATTGAGCCATTA --- GGAGTAGCACCCACCAGGGCAAAGAGAAGAGTGGTG-----  
-----  
-----CAGAGAGAAAAAGAGCA --- GTGGGA --- ATAGGAGCT-----  
GTGTTTCCTTGGGTTCTTGGGAGCA --- GCAGGAAGCACTATG --- GGCGCAGCGTCA ---  
GTGACGCTGACGGTACAA --- GCCAGGCTG --- TTATTG --- TCTGGTATAGTGCAACAGCAAAAC ---  
AATTTG --- CTAAGA --- GCTATTGAGGCGCAACAACATCTGTTGCAACTCACAGTCTGGGGCATC  
>MK115745  
TTCTACTGTAATACAACAAAACCTGTTT-----ACTTGGAAATGCTACAGAT-----  
-----  
-----  
AGCAATGGAACCATCATACTCCCATGTAGAATAAAACAAATTATAAACATGTGGCAAGAGGTAGGAAAAGCAA  
TGTATGCCCCCTCCCATTCGTGGACAAATTAGATGTTTCATCAAAT ---  
ATTACAGGACTGCTATTAAACAAGAGATGGTGGGACTAACAGGACA-----  
-----  
-----  
GAGAACAGGACTGAGATCTTCAGACCTGGAGGGGGAAATATGAAGGACAATTGGAGAAGTGAATTATATAAAT  
ACAAAGTAGTAGAAATTAAACCATTA --- GGAGTAGCACCCACCAGGCAAAGAGAAGAGTGGTG-----  
-----  
-----CAGAGAGAAAAAGAGCA --- GTGACC --- ATAGGAGCT---  
-----ATGTTTCCTTGGGTTCTTGGGAGCA --- GCAGGAAGCACTATG --- GGCGCAGCATCA ---  
CTGACGCTGACGGTACAG --- GCCAGACAA --- TTATTG --- TCTGGTATAGTGCAACAGCAGAAC ---  
AATCTG --- CTGAGG --- GCGATTGAGGCGCAGCAGCATCTGTTGCAACTCACAGTCTGGGGCATA  
>KX587450  
TTCTACTGTAATACAACACCACTGTTTAGCAGCTCTTGGAAATGTTACTACAGGGGCAAATATCACTGGAGGAA  
ATAGC-----  
-----  
-----  
ACACAAAATAATATCACACTCCGATGCAGAATAAGACAATTTATAAACATGTGGCAGGAAGTAGGAAAAGCAA  
TGTATGCCCCCTCCCATCAAAGGACCCATTAAATGCTCATCGAAT ---  
ATTACAGGGCTGCTATTAGTAAGAGATGGTGGTATAAATGTGACA-----  
-----  
-----  
GACACAGACAACAACACAGAGACCTTCAGACCTGGAGGAGGAAATATGAAAGACAATTGGAGAAGTGAATTAT  
ATAAATATAAAGTAGTAAAAATTGAACCATTA --- GGAGTAGCACCTACCAAGGCAAAGAGAAGAGTGGTG--  
-----  
-----CAGAGAGAAAAAGAGCA --- GTGGGA ---  
CTAGGAGCT-----ATGTTTCCTTGGGTTCTTAGGAGCA --- GCAGGAAGCACTATG ---

GGCGCAGCGTCG---CTGACGCTGACGGTACAG---GCCAGACAG---TTACTG---  
 TCTGGTATAGTGACGAGCAGAAC---AATCTG---CTGAGG---  
 GCTATTGAGGCGCAACAACATCTGTTGCAACTCACAGTCTGGGGCATC  
 >MK499378  
 TTCTACTGTGATACAACAACAACTGTTTAATAGTACTTGGTCAAATGATACCTGGTTGAATAGTACTTGAAT-  
 -----  
 -GGAAATGAAGGGTCAAAT-----  
 AGCAATGGAGAACCTATCACACTCCAATGCAGAATAAAACAGATTATAAACATGTGGCAGGAAGTAGGAAAAG  
 CAATGTATGCCCCTCCCATCAGAGGAGAAATTAAGTTCATCAAAT---  
 ATTACAGGGCTGCTCTTAACAAGAGATGGTGGTAATAATAATACC-----  
 -----  
 ATGAACGAGACCTTCAGACCAGGAGGAGGAGATATGAGGGACAATTGGAGAAGTGAATTATATAAATATAAAG  
 TAGTAAAAGTTGAACCATTA---GGAGTAGCACCCACCAAGGCAAAGAGAAGAGTGGTG-----  
 -----CAAAGAGAAAAAAGAGCA---GTGGGA---ATAGGAGCT-----  
 GTGTTCCCTTGGGTTCTTGGGAGCA---GCAGGGAGCACTATG---GGCGCAGCGTCA---  
 ATGACGCTGACGGTACAA---GCCAGACTA---TTATTG---TCTGGTATAGTGCAACAGCAGAAC---  
 AATTTG---CTGAGG---GCTATTGAGGCGCAACAGCATATGTTGCAACTCACAGTCTGGGGCATC  
 >MK169493  
 TTCTACTGTAACACAACAAAACTGTTTAATAGCTCTTGGCCTGAGAATAATACTAAAAATAATACTAGTAATA  
 AC-----  
 -----  
 ACTGGAGAAATAATAACACTCCCATGTAAAATAAAACAAATTATAAACATGTGGCAGGAAGTAGGAAGAGCAA  
 TGTATGCCTCTCCCATCAGTGGACAAATTAAGTGAAGTCAAGT---  
 ATTACAGGGCTGTTGTTAACAAGAGATGGTGGTAAAAAGACTGAT-----  
 -----  
 -----  
 AATGAGACCTTCAGACCTGCAGGGGGAGATATGAGGGACAATTGGAGAAGTGAATTATATAAATATAAAGTAG  
 TAAAAGTTGAACCATTA---GGAATAGCACCCACCAAGGCAAAGAGAAGAGTGGTG-----  
 -----CAGAGAGAAAAAAGAGCA---GTGGGA---ATAGGAGCT-----  
 GTGTTCCCTTGGGTTCTTGGGAGCA---GCAGGAAGCACTATG---GGCGCAGCGTCA---  
 ATAACGCTGACGGTACAG---GCCAGACAG---TTATTG---TCTGGTATAGTGCAACAGCAGAGC---  
 AATCTG---CTGAGA---GCTATTGAGGCGCAACAGCATATGTTGCAACTCACAGTCTGGGGCATT  
 >MK169546  
 TTCTACTGTAATACAACAGCATTGTTTAATAGTACTTGGTTTAATGGTACTTGGTCTAATAGCACTGTGGAAT  
 GG-----  
 -----  
 CCAAATGATACTATCACACTCCCATGCAGAATAAAACAAATTATAAACATGTGGCAGGAAGTAGGAAAAGCAA  
 TGTACGCCCCTCCCATCAGAGGACAAATTAATTGTTTCATCAAAT---  
 ATTACAGGGCTATTATTACACCGAGATGGTGGTAATAATGTTAGT-----  
 -----  
 -----  
 AATAATGAGACCTTTAGACCTATAGGAGGAGATATGAAAAACAATTGGAGAAGTGAATTATACAAATATAAAG  
 TAGTAAGAATTGAACCAATA---GGAGTAGCACCCACCAAGGCAAAGAGAAGGGTGGTG-----  
 -----CAGAGAGAAAAAAGAGCA---ATAACA---CTAGGAGCT-----  
 ATGTTCCCTTGGGTTCTTGGGAGCA---GCAGGAAGCACTATG---GGCGCAGCGTCA---  
 CTGACGCTGACGGTACAG---GCCAGACAA---TTATTG---TCTGGTATAGTGCAACAGCAAAAC---  
 AATTTG---CTGAGA---GCTATTGAGGCGCAACAACATCTGTTGCAACTCACAGTCTGGGGCATC  
 >MK169551  
 TTCTACTGTAATACAACAGCATTGTTTAATAGTACTTGGTGGTCTAATAGTACTTGGCCTAATAGTACTGTGG  
 AAGAG-----  
 -----  
 TCAAATAGAACTATCACACTCCCATGCAGAATAAAACAAATTATAAACATGTGGCAGGAAGTAGGAAAAGCAA  
 TGTATGCCCCTCCCATCAGCGGACAAATTAATTGTGTATCAAAT---  
 ATTACAGGGCTGTTATTACACCGAGATGGTGGTGAAAATAGTAATAATAATACT-----  
 -----  
 -  
 GAGGTTAGTAATAGTACTGAGACCTTTAGACCCATAGGAGGAGATATGAAGAACAATTGGAGAAGTGAATTAT  
 ACAAATATAAAGTAGTAAGAATTGAACCAATA---GGAGTAGCACCCACCAAGGCAAAGAGAAGGGTGGTG--  
 -----CAGAGAGAAAAAAGAGCA---GTAACA---

CTAGGAGCT-----ATGTTCCCTTGGGTTCTTGGGAGCA--GCAGGAAGCACTATG---  
GGCGCAGCGTCA---CTGACGCTGACGGTACAG---GCCAGACAA---TTATTG---  
TCTGGTATAGTGCAACAGCAAAAC---AATTTG---CTGAGA---  
GCTATTGAGGCGCAACAACATCTGTTGCAACTCACAGTCTGGGGCATC  
>MK169676  
TTCTACTGTAATACAACACTATTGTTTAATAGTACTTGGTCTAATAGTACTGTGGAAGGGTCAAATAACACTG  
AA-----  
-----  
GAAAAATAGCACACTCACACTCCCATGCAGAATAAAACAAATTATAAACATGTGGCAGGGAGTAGGAAAAGCAA  
TGTATGCCCCCTCCCATCAGAGGACAAATTAGATGTTTCATCAAAT---  
ATTACAGGACTGTTATTGACACGAGATGGTGGTAATAATAGTGCT-----  
-----  
-----  
AATAATGAGACCTTTAGACCTGGAGGAGGAAATATGAGGGACAATTGGAGAAGTGAATTATATAAATATAAAG  
TAGTAAGAATTGAACCATTA---GGAGTAGCACCCACCAAGGCAAAGAGAAGAGTGGTG-----  
-----CAGAGAGAAAAAAGAGCA--GTAACA---CTAGGAGCT-----  
ATGTTCCCTTGGGTTCTTGGGAGCA--GCAGGAAGCACTATG---GGCGCAGCGTCA---  
CTGACGCTGACGGTACAG---GCCAGACAA---TTGTTG---TCTGGTATAGTGCAACAGCAAAAC---  
AATTTG---CTGAGA---GCTATTGAGGCGCAACAACATCTGTTGCAACTCACAGTCTGGGGCATC  
>MK169581  
TTCTACTGTAATACAACAGCATTGTTTAATAGTACTTGGTTTAATGGTACTTGGTCTAATAGTACTGTGAAAAG  
GG-----  
-----  
TCAAATAATACTATCACACTCCCATGCAGAATAAAACAAATTATAAACATGTGGCAGGAAGTAGGAAAAGCAA  
TGTATGCCCCCTCCCATCAGAGGACAAATTAATTGTGTATCAAAT---  
ATTACAGGGCTGTTATTACACCGAGATGGTGGTAAAAAGTTAGT-----  
-----  
-----  
AATGATACTGAGACCTTTAGACCTATAGGAGGAAATATGAAGGACAATTGGAGAAGTGAATTATACAAATATA  
AAGTAGTAAGAATTGAACCAATA---GGAGTAGCACCCACCAAGGCAAAGAGAAGGGTGGTG-----  
-----CAGAGAGAAAAAAGAGCA--GTAACA---CTAGGAGCT-----  
---ATGTTCCCTTGGGTTCTTGGGAGCA--GCAGGAAGCACTATG---GGCGCAGCGTCA---  
CTGACGCTGACGGTACAG---GCCAGACAA---TTATTG---TCTGGTATAGTGCAACAGCAAAAC---  
AATTTG---CTGAGA---GCTATTGAGGCGCAACAACATCTGTTGCAACTCACAGTCTGGGGCATC  
>MK169545  
TTCTACTGTAATACAACACTATTGTTTAATAGTACTTGGTCTAATAGTACTGTGGAAGGGTCAAATAAC---  
-----  
-----  
ACTGAAGAAAATATCACACTCCCATGCAGAATAAAACAAATTATAAACATGTGGCAGGGAGTAGGAAAAGCAA  
TGTATGCCCCCTCCCATCAGAGGACAAATTAGATGTTTCATCAAAT---  
ATTACAGGGCTGTTATTAAACACGAGATGGTGGTAATAATAGTGCT-----  
-----  
-----  
GATACTGAGATCTTTAGACCTGGAGGAGGAGATATGAGGGACAATTGGAGAAGTGAATTATATAAATATAAAG  
TAGTAAAAATTGAACCATTA---GGAGTAGCACCCACCAAGGCAAAGAGAAGAGTGGTG-----  
-----CAGAGAGAAAAAAGAGCA--GTGGGAACACTAGGAGCT-----  
ATGTTCCCTTGGGTTCTTGGGAGCA--GCAGGAAGCACTATG---GGCGCAGCGTCA---  
CTGACGCTGACGGTACAG---GCCAGACTA---TTATTG---TCTGGTATAGTGCAACAGCAAAAC---  
AATTTG---CTGAGG---GCTATTGAGGCGCAACAACATCTGTTGCAACTCACAGTCTGGGGCATC  
>MK169677  
TTCTACTGTAATACAACATCACTGTTTAATAGTACTTGGGATAATAGTACAAATAGTACTGGA-----  
-----  
-----  
GAGGGAGAAGATATCACACTCCCATGCAGACTAAAACAGTTTATAAACATGTGGCAGAAAGTAGGAAAAGCAA  
TGTATGCCCCCTCCCATCAGAGGACAAATTAAATGTTTCATCAAAT---  
ATTACAGGGCTGCTATTAAACAAGAGATGGTGGTGGAGGTAATAGCACT-----  
-----  
-----  
ACCACAAACGAGACCTTCAGACCAGGAGGGGGAGATATGAGAGATAATTGGAGAAGTGAATTATATAAATATA  
AAGTAGTAAAAATTGAACCATTA---GGAATAGCACCCACCAAGGCAAAGAGGAGAGTGGTG-----

-----CAGAGAGAAAAAGAGCA---GTGGGA---ATAGGAGCT-----  
---TTGTTCCCTTGGGTTCTTGGGAGCA---GCAGGAAGCACTATG---GGCGCAGCGTCA---  
GTAACGCTGACGGTACAG---GCCAGACTA---TTATTG---TCTGGTATAGTGCAACAGCAGAAC---  
AATTTG---CTGAGG---GCTATTGAGGCGCAACAGCATCTGTTGCAACTCACAGTCTGGGGCATC  
>MN090376  
TTCTACTGTAATACAACACAACACTGTTTAATAGTACTTGGAAATAGTACTACAGGAGTAAATGGTACAGGAGCAA  
ATAACACA-----  
-----  
GAAGTAAATATTATCACACTCCCATGCAAGATAAGGCAAATTGTAAACATGTGGCAGGAAGTAGGAAAAGCAA  
TGTATGCCCCCTCCCATCAGTGGACAAATTAGTTGTTTCATCAAAT---  
ATTACAGGGCTACTACTACTAAGAGATGGTGGTAATAGCAATGAC-----  
-----  
-----  
ACGGATAACACGACTGAAATCTTCAGACCTGGAGGAGGAGATATGAGGGACAATTGGAGAAGTGAATTATATA  
AATATAAAGTAGTACAAATTGAACCATTA---GGAGTAGCACCCACCAAGGCAAGGAGAAGAGTGGTG-----  
-----CAGAGAGAAAAAGAGCA---GTGGGA---  
ATAGGAGCT-----CTGTTCCCTTGGGTTCTTGGGAGCA---GCAGGAAGCACTATG---  
GGCGCAGCATCA---ATAACGCTGACGGTACAA---GCCAGACAT---TTATTG---  
TCTGGTATAGTGCAACAGCAGAAC---AATTTG---CTGAGA---  
GCTATTGAGGCGCAACAGCATATGTTGCAGCTCACAGTCTGGGGCATC  
>MN090399  
TTCTACTGTAATACAACACAACACTGTTTAATAGTACTTGGAAATAGTACTACAGGAGTAAATGGTACAGGAGCAA  
ATAACACA-----  
-----  
GAAGTAAATATTATCACACTCCCATGCAAGATAAGGCAAATTGTAAACATGTGGCAGGAAGTAGGAAAAGCAA  
TGTATGCCCCCTCCCATCAGTGGACAGATTAGTTGTTTCATCAAAT---  
ATTACAGGGCTACTACTACTAAGAGATGGTGGTAATAGCAATGAC-----  
-----  
-----  
ACGAATGACACGGCTGAAATCTTCAGACCTGGAGGAGGAGATATGAGGGACAATTGGAGAAGTGAATTATATA  
AATATAAAGTAGTACAAATTGAACCATTA---GGAGTAGCACCCACCAAGGCAAGGAGAAGAGTGGTG-----  
-----CAGAGAGAAAAAGAGCA---GTGGGA---  
ATAGGAGCT-----CTGTTCCCTTGGGTTCTTGGGAGCA---GCAGGAAGCACTATG---  
GGCGCAGCATCA---ATAACGCTGACGGTACAA---GCCAGACAC---TTATTG---  
TCTGGTATAGTGCAACAGCAGAAC---AATTTG---CTGAGA---  
GCTATTGAGGCGCAACAGCATATGTTGCAGCTCACAGTCTGGGGCATC  
>AY835781  
TTCTACTGTAATTCATCACAACTGTTTAATAGTACTTGGAAATGATAGTACTTGGAAATGATACTAAAGGGTTAA  
AT-----  
-----  
AACACTGAAGGAATTATCACACTCCCATGCAGAATAAAACAATTTATAAACATGTGGCAGGAAGTAGGAAAAG  
CAATGTATGCCCCCTCCCATCAGAGGACAAATTAGATGTTTCATCAAAT---  
ATTACAGGGCTGCTCTTAACAAGAGATGGTGGTAATAGCGAGAAC-----  
-----  
-----  
GATACCACCGAGATCTTCAGACCTGGAGGAGGAGATATGAGGGACAATTGGAGAAGTGAATTATATAAATATA  
AAGTAATAAAAATTGAACCATTA---GGAGTAGCACCCACCAAGGCAAGGAGAAGAGTGGTG-----  
-----CAGAGAGAAAAAGAGCA---GTGGGAACGCTAGGAGCT-----  
---GTGTTCCCTTGGGTTCTTGGGAGCA---GCAGGAAGCACCATG---GGCGCAGCGTCA---  
ATGACGCTGACGGTACAG---GCCAGACAA---TTATTG---TCTGGTATAGTGCAACAGCAGAAC---  
AATTTG---CTGAGG---GCTATTGAGGCGCAACAGCATCTGTTGCAACTCACAGTCTGGGGCATC  
>M17451  
TTCTACTGTAATACAACACAACACTGTTTAATAGTACTTGGAAATAGTACTGAAGGGTCAAATAACACTGGA-----  
-----  
-----  
GGAAATGACACAATCACACTCCCATGCAGAATAAAACAAATTGTAAACATGTGGCAGGAAGTAGGAAAAGCAA  
TGTATGCCCCCTCCCATCAGTGGACAAATTAAATGTATATCAAAT---  
ATTACAGGGCTACTATTAACAAGAGATGGGGGTGAAGATACAACACT-----  
-----  
-----

AATACTACAGAGATCTTCAGACTTGGAGGAGGAAATATGAGGGACAATTGGAGAAGTGAATTATATAAAATATA  
AAGTGGTAAGAATTGAGCCATTA---GGAGTGGCACCCACTAGGGCAAAGAGAAGAGTGGTG-----  
-----CAAAGAGAAAAAAGAGCA---GTGGGAACAATAGGAGCT-----  
---ATGTTCCCTTGGGTTCTTGGGAGCA---GCAGGAAGCACTATG---GGCGCAGGCTCA---  
ATAACGCTAACGGTACAG---GCCAGACAC---TTATTG---TCTGGTATAGTGCAACAGCAAAAC---  
AATTTG---CTGAGG---GCTATTGAGGCGCAACAGCATCTGTTGCAACTCACGGTCTGGGGCATC  
>AY835779  
TTCTACTGTAATTCAACACAACCTGTTTAATAGTACTTGGAAATGTTACTGGAGGGACAAATGGCACTGAAGGA-  
-----  
-----  
AGTAACCCAAATATCACACTCCCATGCAGAATAAAACAAATTATAAACATGTGGCAGGAAGTAGGAAAAGCAA  
TGTATGCCCCCTCCCATCAGTGGACAAATTAGATGTTTCATCAAAT---  
ATTACAGGACTGCTATTAACAAGAGATGGTGGTAGTAACAAGAGC-----  
-----  
-----  
GATACCGAGATCTTCAGACCTGGAGGAGGAGATATGAGGGACAATTGGAGAAGTGAATTATATAAAATATAAAG  
TAGTAAAAATTGAACCATTA---GGAGTAGCACCCACCAAGGCAAAGAGAAGAGTGGTG-----  
-----CAGAGAGAAAAAAGAGCA---GCGGGA---CTAGGAGCT-----  
TTGTTCCCTTGGGTTCTTGGGAGCA---GCAGGAAGCACTATG---GGCGCAGCGGCA---  
GTAACGCTGACGGTACAG---GCCAGACTA---TTATTG---TCTGGTATAGTGCAACAGCAGAAC---  
AATTTG---CTGAGG---GCTATTGAGGCGCAACAGCATCTGTTGCAACTAACAGTCTGGGGCATC  
>M38431  
TTCTACTGTAAGACAACACAGCTGTTTAATAGTACTTGGCTGTTTAATAGTACTTGGAAATGATACTGAAAGGT  
CA-----  
-----  
GATAACAATGAACTATCATACTCCCATGCAGAATAAAACAAATTATAAACAGGTGGCAGGAAGTAGGAAAAG  
CAATGTATGCCCCCTCCCATCAGTGGACAAATTAGATGCTCATCAAAT---  
ATTACAGGGCTGCTATTAACAAGAGATGGTGGTGATAAAGAGAAC-----  
-----  
-----  
AGTACCACCGAGATCTTCAGACCTGGAGGAGGAGATATGAGGGACAATTGGAGAAGTGAATTATATAAAATATA  
AAGTAGTAAAAATTGAGCCATTA---GGAGTAGCACCCACCAAGGCAAAGAGAAGAGTGGTG-----  
-----CAGAGAGAAAAAAGAGCA---GTGGGAGCGCTAGGAGCT-----  
---CTGTTCCCTTGGGTTCTTGGGAGCA---GCAGGAAGCACTATG---GGCGCAGCGTCA---  
ATGGCGCTGACGGTACAG---ACCAGACAA---TTAATG---TCTGGTATAGTGCAACAGCAGAAC---  
AATTTG---CTGAAG---GCTATTGAGGCGCAACAGCATCTGTTGCAACTCACAGTCTGGGGCATC  
>U90935  
TTCTACTGTAATACAACAAAACCTGTTTAATAGTACTTGGATGTTTAATAATACTTGGAAATGATACTGAAGACA  
CT-----  
-----  
GAAGGAAATGGCGCAATCACACTCCCATGCAGAATAAAACAGATTATAAACAGGTGGCAGGAAGTAGAAAAAG  
CAATGTATGCCCCCTCCCATCAGAGGACAAATTAGATGTTTCATCAAAC---  
ATTACAGGGATACTATTAACAAGAGATGGTGGTACTAACAATAGT-----  
-----  
-----  
ACCAACGAGACCTTCAGACCTGGAGGAGGAGATATGAGGGACAATTGGAGAAGTGAATTATATAAAATATAAAG  
TAGTAAAAATTGAACCATTA---GGAGTAGCACCCACCAAGGCAAAGAGAAGAGTGGTG-----  
-----CAGAGAGAAAAAAGAGCA---GTGGGA---ATAGGAGCT-----  
TTGTTCCCTTGGGTTCTTGGGAGCA---GCAGGAAGCACTATG---GGCGCAGCGGCA---  
GTGACGCTGACGGTACAG---GCCAGACAA---TTATTG---TCTGGTATAGTGCAACAGCAGAAC---  
AACTTG---CTGAGG---GCTATTGAGGCGCAACAGCATCTGTTGCAACTCACAGTCTGGGGCATC  
>M17450  
TTCTACTGTAATTCAACACAACCTGTTTAGTAGTACTTGGAAATGGTACTGAAGGGTCAAATAACACTGGA----  
-----  
-----  
GGAAATGACACAATCACCTCCCATGCAGAATAAAAGAAATTATAAACATGTGGCAGGAAGTAGGAAAAGCAA  
TGTATGCCCCCTCCCATCAAAGGACAAGTTAAATGTTTCATCAAAT---  
ATTACAGGGCTGCTATTAACAAGAGATGGTGGTAATAGCAAGAATGGTAGC-----  
-----  
-----

AAGAATGAGAACACAGAGATCTTTAGACCGGGAGGAGGAGATATGAGGGACAATTGGAGAAGTGAATTATATA  
AATATAAAGTAGTAAAAATTGAACCATTA---GGAGTAGCACCCACCAAGGCAAAGAGAAGAGTGGTG-----  
-----CAGAGAGAAAAAAGAGCA---  
GTGGGAACGATAGGAGCT-----ATGTTTCCTTGGGTTCTTGGGAGCA---GCAGGAAGCACTATG---  
GGCGCTACGTCA---ATGACGCTGACGGTACAG---GCCAGACTA---TTATTG---  
TCTGGTATAGTGCAACAGCAGAAC---AATTTG---CTGAGG---  
GCTATTGAGGCGCAACAGCATCTGTTGCAACTCACAGTCTGGGGCATC  
>AY352275  
TTCTACTGTAATACAACAAAACCTGTTTAATAGTACTTGGAAATGAAAATAGTACTTGGAAATGCTACT-----  
-----  
-----  
GGAAATGACACTATCACACTCCCATGTAGAATAAAAACAAATTATAAACATGTGGCAGGAAGTAGGAAAAGCAA  
TGTATGCCCCCTCCCATCGAAGGACAAATTAGATGTTTCATCAAAT---  
ATTACAGGGCTGCTATTAACAAGAGATGGTGGTGGTGACAAGAAC-----  
-----  
-----  
AGTACCACCGAGATCTTTAGACCTGCAGGAGGAAATATGAAGGACAATTGGAGAAGTGAATTATATAAAATATA  
AAGTAGTAAAAATTGAACCATTA---GGAGTAGCACCCACCAAGGCAAAGAGAAGAGTGGTG-----  
-----CAAAGAGAAAAAAGAGCA---GTGGGAGTGATAGGAGCT-----  
---ATGTTTCCTTGGGTTCTTGGGAGCA---GCAGGAAGCACTATG---GGCGCAGCGTCA---  
ATAACGCTGACGGTACAG---GCCAGAAAA---CTATTG---TCTGGTATAGTGCAACAGCAGAAC---  
AATCTG---CTGAGA---GCTATTGAGGCGCAACAGCATCTGTTGCAACTCACAGTCTGGGGCATC  
>AY835769  
TTCTACTGTGATTCAACACAACCTGTTTAACAGTACTTGGCATGGTAATGGTACTTGGAAATGGTACTGAA----  
-----  
-----  
GGAAATGGCACACTCACACTCCCATGCAGAATAAAAACAAATTATAAACATGTGGCAGGAAGTAGGAAAAGCAA  
TGTATGCCCCCTCCCATCAGAGGACAAATTAGATGTTTCATCAAAT---  
ATTACAGGGCTGCTATTAACAAGAGATGGTGGTAGGAACGAGAGC-----  
-----  
-----  
AATATCACCCCTCAGACCTGGAGGAGGGGATATGAGGGACAATTGGAGAAGTGAATTATATAAAATATAAAGTAG  
TAAAAATTGAACCATTA---GGAGTAGCACCCACTAAGGCAAAGAGAAGAGTGGTG-----  
-----CAGAGAGAAAAAAGAGCA---GCGGGA---TTAGGAGCT-----  
ATGTTTCCTTGGGTTCTTGGGAGCA---GCAGGAAGCACTATG---GGCGCAGCGTCA---  
ATAACGCTGACGGTACAG---GCCAGACTA---TTATTG---TCTGGTATAGTGCAACAGCAGAAT---  
AATTTG---CTGAGG---GCTATTGAGGCGCAACAGCATATGTTGAAACTCACAGTCTGGGGCATC  
>M38430  
TTCTACTGTAATTCAACACAACCTATTTAATAGTACTTGGAAATAGTACTGAAGGGCCTAAAGGGTCAAATAAC-  
-----  
-----  
ACTGAAGAAAATATCACACTCCCATGCAGAATAAAAACAAATTGTAAACATGTGGCAGGAAGTAGGAAAAGCAA  
TGTATGCCCCCTCCCATCGAAGGACAAATTAGATGCTCATCAAAT---  
ATTACAGGGCTGCTATTAACAAGAGATGGTGGTAATAGCAGCAAC-----  
-----  
-----  
AACACCGAGATCTTCAGACCTGGAGGAGGAGATATGAGGGACAATTGGAGAAGTGAATTATATAAAATATAAAG  
TAGTAAAAATTGAACCATTA---GGAGTAGCACCCACCAGGGCAAAGAGAAGAGTGGTG-----  
-----CAGAGAGAAAAAAGAGCA---GTGGGA---CTAGGAGCT-----  
TTGTTTCCTTGGGTTCTTGGGAGCA---GCAGGAAGCACTATG---GGCGCACGGTCA---  
ATGACGCTGACGGTACAG---GCCAGACAA---TTATTG---TCTGGTATAGTGCAACAGCAGAAC---  
AATTTG---CTGAGG---GCTATTGAGGCGCAACAGCATCTGTTGCAACTCACAGTCTGGGGCATC  
>AB221005  
TTCTACTGTAATTCAACACAACCTGTTTAATAGTACTTGGAAATGTTACTGAAGAGTCAAATAACACTGTA----  
-----  
-----  
GAAAAATAACACAATCACACTCCCATGCAGAATAAAAACAAATTATAAACATGTGGCAGGAAGTAGGAAGAGCAA  
TGTATGCCCCCTCCCATCAGAGGACAAATTAGATGTTTCATCAAAT---  
ATTACAGGGCTGCTATTAACAAGAGATGGTGGTCTGAGGACAAC-----  
-----  
-----

-----  
 AAGACCGAGGTCTTCAGACCTGGAGGAGGAGATATGAGGGATAATTGGAGAAGTGAATTATATAAATATAAAG  
 TAGTAAAAATTGAACCATTA---GGAGTAGCACCCACCAAGGCAAAGAGAAGAGTGGTG-----  
 -----CAGAGAGAAAAAAGAGCA---GTGGGA---ATAGGAGCT-----  
 GTGTTTCCTTGGGTTCTTGGGAGCA---GCAGGAAGCACTATG---GGCGCAGCGTCA---  
 ATGACGCTGACGGTACAG---GCCAGACTA---TTATTG---TCTGGTATAGTGCAACAGCAGAAC---  
 AATCTG---CTGAGA---GCTATTGAGGCGCAACAGCATCTGTTGCAACTCACAGTCTGGGGCATC  
 >AY357406  
 TTCTACTGTAAGTCAACAAAACCTGTTTAATAGTACTTGGACTAGGAATAATGGTACTTGGACTCGGAATGATA  
 CTGAAAGG-----  
 -----TCAAAT-----  
 AGCACTGAAGAACATATCACACTCCCATGCAGAATAAAAACAAATTATAAACATGTGGCAGGAAGTAGGAAAAG  
 CAATGTATGCCCCCTCCCATCAGAGGACAAATTAGATGTTTCATCAAAT---  
 ATTACAGGGCTGCTATTAAACAAGAGATGGTGGTAATGACACGAGC-----  
 -----  
 -----  
 GGGACTGAGACCTTCAGACCTGGAGGAGGAGATATGAGGGACAATTGGAGAAGTGAATTATATAAATATAAAG  
 TAGTAAGAATTGTACCATTA---GGAGTAGCACCCACCGAGGCAAAGAGAAGAGTGGTG-----  
 -----CAGAGAGAAAAAAGAGCA---GTGGGA---ATAGGAGCT-----  
 GTGTTTCCTTGGGTTCTTGGGAGCA---GCAGGAAGCACTATG---GGCGCAGCGGCA---  
 GTGACGCTGACGGTACAG---GCCAGACTA---TTATTG---TCTGGTATAGTGCAACAGCAGAAC---  
 AATTTG---CTGAGG---GCTATTGAGGCGCAACAGCATCTGTTGCAACTCACAGTCTGGGGCATC  
 >AF025758  
 CTCTACTGTAATACAACACAACCTGTTTAATAGTACTTGGAAATGCTAATGGGACTTGGAAATGATACAGGAGGGT  
 CAAAT-----  
 -----  
 AGCACTGAAGGAATTATCTCACTCCCATGCAGAATAAAAACAAATTATAAACATGTGGCAGGAAGTAGGAAAAG  
 CAATGTATGCCCCCTCCCATCGAAGGACAAATTAGATGTTTCATCAAAT---  
 ATTACAGGGCTATTATTAAACAAGAGATGGTGGTAGTAGCCAAAACAAG-----  
 -----  
 -----  
 AGCGAGACCGAGATCTTCAGACCTGGAGGAGGAGATATGAGGGACAATTGGAGAAGTGCATTATATAAATACA  
 AAGTAGTAAAAATTGAGCCATTA---GGAGTAGCACCCACTAAGGCAAAGAGAAGAGTGGTG-----  
 -----CAGAGAGAAAAAAGAGCA---GTGGGA---ATAGGAGCT-----  
 ---GTACTCCTTGGGTTCTTGGGAGCA---GCAGGAAGCACTATG---GGCGCAGCGTCA---  
 TTGACGCTGACGGTACAG---GCCAGACTA---TTATTG---TCTGGTATAGTGCAACAGCAGAAC---  
 AATTTG---CTGAGG---GCTATTGAGGCGCAACAGCATCTGTTGCAACTCACAGTCTGGGGCATC  
 >AF025764  
 TTCTACTGTAATTCAACACAACCTGTTTAATAGTACTTGGCCATTTAATAGTACTTTGAATGATACTAGCACTG  
 AA-----  
 -----  
 GGAAATGCCACAATCACACTCCCATGCCGAATAAAAACAAGTTGTAAACACGTGGCAGGAAGTAGGAAAAGCAA  
 TGTATGCCCCCTCCCATCAGAGGACAAATTAGATGTTTCATCAAAT---  
 ATTACAGGGCTGCTATTAAACAAGAGATGGAGGGACTAGCGAGAACGGG-----  
 -----  
 -----  
 ACGAACGAGATTGAGATCTTCAGACCTGGAGGAGGAGATATGAGGGACAATTGGAGAAGTGAATTATATAAAT  
 ATAAAGTAGTAAAAATTGAACCATTA---GGAGTAGCACCCACCAAGGCAAAGAGAAGAGTGGTC-----  
 -----CAAAGAGAAAAAAGAGCA---GTGGGAACAATAGGAGCT---  
 -----ATGTTTCCTTGGGTTCTTGGGAGCA---GCAGGAAGCACTATG---GGCGCAGCGTCA---  
 ATAACGCTGACGGTACAG---GCCAGACTA---TTATTG---TCTGGTATAGTGCAACAGCAGAAC---  
 AATCTG---CTGAGG---GCTATTGAGGCGCAACAGCATCTGTTGCAACTCACAGTCTGGGGCATC  
 >AF025751  
 TTCTACTGTAATTCAACACAACCTGTTTAATAGTACTTGGAAATGTTACTAGAGAGTCAAATAACAGTACTGAA-  
 -----  
 -----  
 GGAAATGGGACTATCACACTCCCATGCAGAATAAAAACAAATTATAAACATGTGGCAGGGAGTAGGAAAAGCAA  
 TGTACGCCCCCTCCCATCAGAGGACAAATTAGATGTTTCATCAAAT---  
 ATTACAGGGCTGCTATTAAACAAGGGATGGTGGTAATAACGAGAGC-----  
 -----  
 -----

-----  
AATGAGACCGAGACCTTCAGACCTGGAGGAGGAGATATGAGGGACAATTGGAGAAGTGAATTATATAAAATATA  
AAGTAGTAAAAATTGAACCATTA---GGAGTAGCACCCACCAAGGCCAAAAGAAGAGTGGTG-----  
-----CAGAGAGAAAAAAGAGCA---GTGGGA---ATAGGAGCT-----  
---GTGTTCCCTTGGGTTCTTGGGAGCA---GCAGGAAGCACTATG---GGCGCAGCGTCA---  
ATGACGCTGACGGTACAG---GCCAGACTA---TTATTG---TCTGGTATAGTGCAACAGCAGAAC---  
AATTTG---CTGAGG---GCTATTGAGGCGCAACAGCATCTGTTGCAACTCACAGTCTGGGGCATC  
>U69584  
TTCTACTGTAATACATCACAACCTGTTTAATAGTACTTGGGAATAGTACTGGGAATAATATTAGCGAGTCAGATA  
AC-----  
-----  
ACTGAAAGAAATATCACACTCCCATGCAGAATAAAACAAATTATAAACCTGTGGCAGGAAGTAGGAAAAGCAA  
TGTATGCCCCCTCCCATCAGAGGACAAATTAGATGTTTCATCAAAT---  
ATTACAGGGCTGCTATTAACAAGAGATGGTGGTAGTAACACGGACGAG-----  
-----  
-----  
AACAGGACCGAGATCTTCAGACCTGGAGGAGGAGATATGAGGGACAATTGGAGAAGTGAATTATATAAAATATA  
AAGTAGTAAAAATTGAACCATTA---GGAGTAGCACCCACCAAGGCCAAAGAGAAGAGTGGTG-----  
-----CAGAGAGAAAAAAGAGCA---GTGGGAACAATAGGAGCT-----  
---ATGTTCCCTTGGGTTCTTGGGAGCA---GCAGGAAGCACTATG---GGCGCAGCGTCG---  
ATGACGCTGACGGTACAG---GCCAGACTA---TTATTG---TCTGGTATAGTGCAACAGCAGAAC---  
AATTTG---CTGAGG---GCTATTGAGGCGCAACAGCATCTGTTGCAACTCACAGTCTGGGGCATC  
>AY835778  
TTCTACTGTAATTCAAGAGAGCTGTTTAATAGTACTTGGGAATGATACTGAAGGGTGGGAATAATACTGACAGG-  
-----  
-----  
TCAAATAAACTATCACACTCCCATGCAAAATAAAACAAATTATAAACAGATGGCAGGAAGTAGGAAAAGCAA  
TGTATGCCCCCTCCCATCAGAGGACAAATTAGATGTACATCAAAT---  
ATTACAGGGCTGCTACTAACAAGAGATGGTGGTAGGAACAATAGC-----  
-----  
-----  
GAAAACGAGACCTTCAGACCTGGAGGAGACGATATGAGGGACAATTGGAGAAGTGAATTATATAAAATATAAAG  
TAGTAAAAATTGGACCATTG---GGAGTAGCACCCACCAAGGCCAAAGAGAAGAGTGGTG-----  
-----CAGAGAGAAAAAAGAGCA---GTGGGAGTAATAGGAGCT-----  
ATGTTCCCTTGGGTTCTTGGGAGCA---GCAGGAAGCACTATG---GGCGCAGCGTCA---  
ATGACGCTGACGGTACAA---GCCAGACAA---TTATTG---TCTGGTATAGTGCAACAGCAGAAC---  
AATCTG---CTGAGG---GCTATTGAGGCGCAACAGCATCTGTTGCGACTCACAGTCTGGGGCATC  
>AY835775  
TTCTACTGTAATTCAACACAACCTATTTAATAGTACTTGGGAATGGTACTGAGAGGTCATATAACACTTCA---  
-----  
-----  
GAAAATATCAATATCACACTCCCATGCAGAATAAAACAAATTGTAAACATGTGGCAGGAAGTAGGAAAAGCAA  
TGTATGCTCCTCCCATCAGTGGACAAATTAGATGTTTCATCAAAT---  
ATTACAGGGCTGCTATTAACAAGAGATGGTGGTAAGAAACAGAACGAGACC-----  
-----  
-----  
AAGAACGAGACCGAGATCTTTAGACCTGGAGGAGGAGATATGAGGGACAATTGGAGAAGTGAATTATATAGAT  
ATAAAGTAGTAAAAATTGAACCATTA---GGAGTAGCACCCATCAAGGCCAAAGAGAAGAGTGGTG-----  
-----CAGAGAGAAAAAAGAGCA---GCGGGA---ATAGGAGCT---  
-----TTGTTCCCTTGGGTTCTTGGGAGCA---GCAGGAAGCACTATG---GGCGCAGCGTCA---  
ATAACGCTGACGGTACAG---GCCAGACTA---TTATTG---TCTGGTATAGTGCAACAGCAGAAC---  
AATTTG---CTGAGG---GCTATTGAGGCGCAACAGCATCTGTTGCAACTCACAGTCTGGGGCATC  
>AY835749  
TTCTACTGTAATACAACACAACCTATTTAATAGTACTTGGGAATGTTAATAGTACTTGGAGTAGTACTGAAGGGT  
CAAATAAC-----  
-----ACT---  
GAAAGAAATGACACACTCACACTCCCATGCAGAATAAAACAAATTATAAACATGTGGCAGGAAGTAGGAAAAG  
CAATGTATGCCCCCTCCCATCAGCGGACAAATTAGTGTTCATCAAAT---  
ATTACAGGGCTGATATTAACAAGAGATGGTGATAAAAAACAACAT-----  
-----

-----  
GAGACCGAGATCTTCAGACCTGTAGGAGGAGATATGAGGGACAATTGGAGAAGTGAATTATATAAATATAAAG  
TAGTAAAGATTGAACCATTA---GGAGTAGCACCCACTAGGGCAAAGAGAAGAGTGGTG-----  
-----CAGAGAGAAAAAAGAGTAGCAGTGGGA---CTAGGAGCT-----  
GTGTTTCCTTGGGTTCTTGGGAGCA---GCAGGAAGCACTATG---GGCGCAGCGGCA---  
GTGACGCTGACGGTACAG---GCCAGACTA---TTATTG---TCTGGTATAGTGCAACAGCAGAAC---  
AATTTG---CTGAGA---GCTATTGAGGCGCAACAGCATCTGTTGCAACTCACAGTCTGGGGCATC  
>AY426119  
TTCTACTGTAATTCAACACAACCTGTTTAATAGTACTTGGAAATTTTAATGGTACTTGGAAATTTAACACAATCGA  
ATGGT-----  
-----ACT---  
GAAGGAAATGACACTATCACACTCCCATGTAGAATAAAAACAAATTATAAATATGTGGCAGGAAGTAGGAAAAG  
CAATGTATGCCCCCTCCCATCAGAGGACAAATTAGATGCTCATCAAAT---  
ATTACAGGGCTAATATTAACAAGAGATGGTGGAACTAACAGTAGT-----  
-----  
-----  
GGGTCCGAGATCTTCAGACCTGGGGGAGGAGATATGAGGGACAATTGGAGAAGTGAATTATATAAATATAAAG  
TAGTAAAAATTGAACCATTA---GGAGTAGCACCCACCAAGGCAAAAAGAAGAGTGGTG-----  
-----CAGAGAGAAAAAAGAGCA---GTGGGAACGATAGGAGCT-----  
ATGTTTCCTTGGGTTCTTGGGAGCA---GCAGGAAGCACTATG---GGCGCAGCGTCA---  
ATAACGCTGACGGTACAG---GCCAGACTA---TTATTG---TCTGGTATAGTGCAACAGCAGAAC---  
AATTTG---CTGAGG---GCTATTGAGGCGCAACAGCATCTGTTGCAACTCACAGTCTGGGGCATC  
>AY426125  
TTCTACTGTAATTCAACACAACCTGTTTAATAGTACTTGGAAATGATACTGAAAAGTCAAGTGGCACTGAA----  
-----  
-----  
GGAAATGACACCATCATACTCCCATGCAGAATAAAAACAAATTATAAACATGTGGCAGGAAGTGGGAAAAGCAA  
TGTATGCTCCTCCCATTAAGGACAAATTAGATGTTTCATCAAAT---  
ATTACAGGGCTGCTATTAACAAGAGATGGTGGTAAAAATGAGAGT-----  
-----  
-----  
GAGATCGAGATCTTCAGACCTGGAGGAGGAGACATGAGGGACAATTGGAGAAGTGAATTATATAAATATAAAG  
TAGTAAAAATTGAACCATTA---GGAGTAGCACCCACCAAGGCAAAGAGAAGAGTGGTG-----  
-----CAAAGAGAAAAAAGAGCA---GTGGGA---ATAGGAGCT-----  
TTGTTTCCTTGGGTTCTTGGGAGCA---GCAGGAAGCACTATG---GGCGCAGCGTCA---  
ATGACACTGACGGTACAG---GCCAGACAA---TTATTG---TCTGGTATAGTGCAACAGCAAAAC---  
AATTTG---CTGAGG---GCTATTGAGGCGCAACAGCATATGTTGCAACTCACAGTCTGGGGCATC  
>AF025759  
TTCTACTGTAATTCAACACAGCTATTTAATAGTACTTGGCTGTTTAATAGTACTGGGAATGATACTACAGGGT  
CA-----  
-----  
AATAACACGGAACCTATCACACTCCCATGCAGAATAAAAACAAATTATAAATATGTGGCAAAAAGTAGGAAAAG  
CAATGTATGCCCCCTCCCATCAGAGGACAAATTAGATGTTTCATCAAAT---  
ATTACAGGGCTGCTATTAACAAGAGATGGTGGTCTATTAACAAGAAATGACATC-----  
-----  
-----  
AAAGAGAACGAGACTGAGATCTTCAGACCTGGAGGAGGAGATATGAGGGACAATTGGAGAAGTGAATTATATA  
AATATAAAGTAGTAAAAATTGAGCCATTA---GGAGTAGCACCCACCAAGGCAATGAGAAGAGTGGTG-----  
-----CAGAGAGAAAAAAGAGCA---  
GTGGGAACGATAGGAGCT-----ATGTTTCCTTGGGTTCTTGGGAGCA---GCAGGAAGCACTATG---  
GGCGCAGCGTCG---ATGACGCTGACGGTACAG---GCCAGACTA---TTATTG---  
TCTGGTATAGTGCAACAGCAGAAC---AATTTG---CTGAGG---  
GCTATTGAGGCGCAACAGCATCTGTTGCAACTCACAGTCTGGGGCATC  
>AF025761  
TTCTACTGTAATACAACACAACCTGTTTAATAGTACTTGGAAATAGTACTGGGGATGAAGGGTCAAATAACACTG  
AAGGA-----  
-----  
AATAACACACTCCCAATCATACTTCCATGCAGAATAAAAACAAATTATAAACATGTGGCAGGGAGTAGGAAAAG  
CAATGTATGCCCCCTCCCATCGGAGGACAAATTAGATGTTTCATCAAAT---  
ATTACAGGGCTGCTATTAACAAGAGATGGTGGTAAGAGTCCAAAC-----

-----  
-----  
GATACCGAGACCTTCAGACCTGCAGGAGGAGATATGAGGGACAATTGGAGAAGTGAATTATATAAATATAAAG  
TAGTAAAAATTGAACCATTA---GAAGTAGCACCCACTAGGGCAAAGAGAAGAGTGGTG-----  
-----CAAAGAGAAAAAAGAGCA--GTAGGA--ATAGGAGCT-----  
ATGTTTCCTTGGGTTCTTGGGAGCA--GCAGGAAGCACTATG--GGCGCAGCGTCG---  
ATAACGCTGACGGTACAG---GCCAGACTA---TTATTG---TCTGGTATAGTGCAACAGCAGAAC---  
AATCTG---CTGAGG---GCTATTGAGGCGCAACAGCATCTGTTGCAACTCACAGTCTGGGGCATC  
>AF025749  
TTCTACTGTAATACAGCAAACTATTTAATAGTACTTGGGAATAGTACTTGGAGTTCAAATAATACTGAAGGAA  
AT-----  
-----  
AGCACTGAAGAAATTATCATACTCCCATGTAGAATAAAACAAATTATAAACAGGTGGCAGGAAGTAGGAAAAG  
CAATGTATGCCCCCTCCCATCAGAGGACAAATCAGATGTTTCATCAAAT---  
ATTACAGGGCTGCTATTAAACAAGAGATGGTGGTACTAATGGGAAGAAC-----  
-----  
-----  
GAGACCCCCGAGATCTTCAGACCTGGAGGAGGAGATATGAGGGACAATTGGAGAAGTGAATTATATAAATATA  
AAGTAGTAGAAATTGAACCATTA---GGAGTAGCACCCACCAGGGCAAGGAGAAGAGTGGTG-----  
-----CAGAGAGAAAAAAGAGCA--GTGGGAACAATAGGAGCT-----  
---ATGTTTCCTTGGGTTCTTGGGAGCA--GCAGGAAGCACTATG--GGCGCAGCGTCA---  
ATGACGCTGACGGTACAG---GCCAGACTA---TTATTG---TCTGGTATAGTGCAACAGCAGAAC---  
AATTTG---CTGAGG---GCTATTGAGGCGCAACAGCATCTGTTGCAACTCACAGTCTGGGGCATC  
>AF025750  
TTCTACTGTAATTCAGCACAACTGTTTAAACAGTACTTGGGAATGATACTGAAAGGTCAAATAACACTAGAGAA-  
-----  
-----  
AATGACACAACAATCACACTCCCATGCAGAATAAAACAAATTATAAACATGTGGCAGGAAGTAGGAAAAGCAA  
TGTATGCCCCCTCCTATCAGAGGACAAATTAAATGTGCATCAAAT---  
ATCACAGGGCTGCTATTAAACAAGAGATGGTGGTAATAACAATACT-----  
-----  
-----  
GGGACCACCGAGACCTTCAGACCTGGAGGAGGAGATATGAGGGACAATTGGAGAAGTGAATTATATAAATATA  
AAGTAGTAAAAATTGAACCATTA---GGAATAGCACCCACTAAGGCAAAGAGAAGAGTGGTG-----  
-----CAGAGAGAAAAAAGAGCA--GTGGGA--ATAGGAGCT-----  
---GTGTTTCCTTGGGTTCTTGGGAGCA--GCAGGAAGCACTATG--GGCGCAGCGTCA---  
GTGACGCTGACGGTACAA--GCCAGACTA--TTATTG---TCTGGTATAGTGCAACAGCAAAAC---  
AATCTG---CTGAGG---GCTATTGAGGCGCAACAGCATCTGTTGCAACTCACAGTCTGGGGCATC  
>AF025752  
CTCTACTGTAATTCAACACAATTGTTTAAATAGTACTTGGAGTTTAAATAGTACTTGGGAATGATACTGAAGGGT  
CAAAT-----  
-----  
AACACTGAAGGAAATATCACACTCCCATGCAGAATAAAACAAATTATAAACATGTGGCAGGAAGTAGGAAAAG  
CAATGTATGCCCCCTCCCATCAGAGGACAAATTAGATGTTTCATCAAAG---  
ATTACAGGGCTGTTATTAAACAAGAGATGGTGGTACTACCAAAAACGGGAAC-----  
-----  
-----  
AACACGATACTGAGATCTTTGGACCTGGAGGAGAAGATATGAAGGACAATTGGAGAAGTGAATTATATAAAT  
ATAAGTAGTAAAAATTGAACCATTA---GGAGTAGCACCCACTAAGGCAAAGAGAAGAGTGGTG-----  
-----CAGAGAGAAAAAAGAGCA--GTGGGA--CTAGGAGCT---  
-----ATGTTTCCTTGGGTTCTTGGGAGCA--GCAGGAAGCACTATG--GGCGCAGCGTCA---  
ATGACGCTGACGGTACAG---GCCAGACAA--TTATTG---TCTGGTATAGTGCAACAGCAAAAC---  
AATTTG---CTGAGG---GCTATTGATGCGCAACAGCATATGTTGCAACTCACAGTCTGGGGCATC  
>AF025756  
TTCTACTGTAATTCACAAAACTGTTTAAATAGAACTTGGAGTGTTAATAGTACTTGGGAATGATACTGAAGGGG  
TAAAT-----  
-----  
AACACTGGAGAAAATATCACACTCCCATGCAGAATAAAACAAATTATAAACATGTGGCAGGAAGTAGGAAAAG  
CAATGTATGCCCCCTCCCATCAAAGGACAAATTAGATGTTTCATCAAAT---  
ATTACAGGGCTGCTATTAAACAAGAGATGGTGGTAATAGCAACAAC-----

-----  
-----  
GAGACCGAGACTTTTCAGACCTGGAGGAGGAGATATGAGGGACAATTGGAGAAGTGAATTATATAAATATAAAG  
TAGTAAAAAATTGAACCATTA---GGAGTAGCACCTACTAAGGCAAAGAGAAGAGTGGTG-----  
-----CAAAGAGAAAAAAGAGCA--GTAGGA--ATAGGAGCT-----  
GTGTTCCCTTGGGTTCTTGGGAGCA--GCAGGAAGCACTATG--GGCGCAGCGTCA---  
ATGACGCTGACGGTACAG---GCCAGACTA--TTATTG---TCTGGTATAGTGCAACAGCAGAAC---  
AATTTG---CTGAGG---GCTATTGAGGCGCAACAGCATCTGTTGCAACTCACAGTCTGGGGCATC  
>M93258  
TTCTACTGTAATTCAACACAACCTGTTTACTTGGGAATGATACTAGAAAGTTAAATAAC-----  
-----  
-----

ACTGGAAGAAATATCACACTCCCATGTAGAATAAAAACAAATTATAAATATGTGGCAGGAAGTAGGAAAAGCAA  
TGTATGCCCCCTCCCATCAGAGGACAAATTAGATGTTTCATCAAAT---  
ATTACAGGGCTGCTATTAAACAAGAGATGGTGGTAAGGACACGAAC-----  
-----  
-----

GGGACTGAGATCTTCAGACCTGGAGGAGGAGATATGAGGGACAATTGGAGAAGTGAATTATATAAATATAAAG  
TAGTAAAAAATTGAACCATTA---GGAGTAGCACCCACCAAGGCAAAGAGAAGAGTGGTG-----  
-----CAGAGAGAAAAAAGAGCA--GTGGGA--CTAGGAGCT-----  
TTGTTCCCTTGGGTTCTTGGGAGCA--GCAGGAAGCACTATG--GGCGCAGCGTCA---  
ATAACGCTGACGGTACAG---GCCAGACAA--TTATTG---TCTGGTATAGTGCAACAGCAGAAC---  
AATCTG---CTGAGG---GCTATTGAGGCGCAACAGCACCTGTTGCAACTCACAGTCTGGGGCATC  
>AY835758  
TTCTACTGTAACACAACAAAACCTGTTTAATAGTACTTGGGAATAATAGTACTTGGGAATGCTACTGCAGGCCAAG  
AATTA-----  
-----AAT---

AGCACTGAAGACACCATCACACTCCCATGCAAAATAAAAACAAATTATAAACATGTGGCAGGAAGTAGGAAAAG  
CAATGTATGCCCCCTCCCATCAAAGGACTACTTAGATGTTTCATCAAAT---  
ATTACAGGGCTGCTATTAAACAAGAGATGGTGGTAATAGCAATAACACG-----  
-----  
-----

AACACGACCGAGATCTTCAGACCTGGGGGAGGAGATATGAGGGACAATTGGAGAAGTGAATTATATAAATATA  
AAGTAGTAAAAAATTGAACCACTA---GGAATAGCACCCACTAAGGCAAAGAGAAGAGTGGTG-----  
-----CAGAGAGAAAAAAGAGCA--GTGGGA--ATAGGAGCT-----  
---TTGTTCCCTTGGGTTCTTGGGAGCA--GCAGGAAGCACTATG--GGCGCAGCGTCA---  
ATGACGCTGACGGTACAG---GCCAGACTA--TTATTG---TCTGGTATAGTGCAACAGCAGAAC---  
AATTTG---CTGAGG---GCTATTGAGGCGCAACAGCACCTGTTGCAACTCACAGTCTGGGGCATC  
>L02317  
TTCTACTGTAAGTCAACACAACCTGTTTAATAGTACTTGGGCTGGGAATAATACTTGGGAATAGTAGTGCTGAAA  
GGTCA-----  
-----GAT---

GCACTGGAGGAAATATCACACTCCCATGCAGAATAAAAACAAATTATAAACATGTGGCAGGAAGTAGGAAAAG  
CAATGTATGCCCCCTCCCATCAGCGGACAAATTAGATGTACATCAAAT---  
ATTACAGGGCTGCTATTAAACAAGAGATGGTGGTACGAGCGATACC-----  
-----  
-----

AATACCACCGAGACCTTCAGACCTGGAGGAGGAGATATGAGGGACAATTGGAGAAGTGAATTATATAAATATA  
AAGTAGTAAAAAATTGAACCATTA---GGAGTAGCACCCACCACGGCAAAGAGAAGAGTGGTG-----  
-----CAAAGAGAAAAAAGAGCA--GTGGGA--ATAGGAGCT-----  
---CTGTTCCCTTGGGTTCTTGGGAGCA--GCAGGAAGCACTATG--GGCGCAGCGTCA---  
ATGACGTTGACGGTACAG---GCCAGACAA--TTATTG---TCTGGTATAGTGCAACAGCAGAAC---  
AATTTG---CTGAGG---GCTATTGAGGCGCAACAGCATCTGTTGCAACTCACAGTCTGGGGCATC  
>AF025755

TTCTACTGTAATTCAACAAAACCTGTTTAATAGTACTTGGAGTTTAATAATACTTGGGAATATTACTGAAAGGT  
CA-----  
-----  
AATAACACTGACACAATCACACTCCCATGTAGAATAAAAACAAATTATAAACATGTGGCAGGGAGTAGGAAAAG  
CAATGTATGCCCCCTCCCATCAGTGGACTAATTAGCTGTTTCATCAAAT---  
ATTACAGGGCTGCTATTAAACAAGAGATGGGGTAATAACAATGGGACCGAGGGT-----  
-----

-----  
 -  
 GATAATAACAACGAGACTGAGATTTTTCAGACCTGGAGGAGGGAATATGAAGGACAATTGGAGAAGTGAATTAT  
 ATAAATATAAAGTAGTAAAAGTTGAACCATTA---GGAATAGCACCCACTAAGGCAAAGAGAAGAGTGGTG--  
 -----CAAAGAGAAAAAGGAGCA---GTGGGA---  
 ATAGGAGCT-----GTGTTCCCTTGGGTTCTTGGGAGCA---GCAGGAAGCACTATG---  
 GGCGCAGCGTCA---ATAACGCTGACGGTACAG---GCCAGACAA---TTATTG---  
 TCTGGTATAGTGCAACAGCAGAAC---AATTTG---CTGAGG---  
 GCTATTGAAGCGCAACAGCATCTCTTGCAACTCACAGTCTGGGGCATC  
 >AF025757  
 TTCTACTGTAATTCAACACCGCTGTTTAATAGTACTTGGGAATAATAATAATTGGAGTGATCCTAAT-----  
 -----  
 -----  
 AACGATGTAAATATCACACTCCCATGCAGAATAAAACAAATTATAAACAGGTGGCAGGAAGTAGGAAAAGCAA  
 TGTATGCCCCCTCCCATCAGTGGCCAAATTAGATGTTTCATCAAAT---  
 ATTACAGGGCTGCTATTAAACAAGAGATGGTGGTAATACCACGGAG-----  
 -----  
 -----  
 GAGATCTTCAGACCTGGAGGAGGAGATATGAGGGACAATTGGAGAAGTGAATTATGTAAATATAAAGTAGTAA  
 AAATTGAGCCATTA---GGAGTAGCACCCACCAAGGCAAAGAGAAGAGTGGTG-----  
 -----CAGAGAGAAAAAGAGCA---GTGGGAACGATAGGAGCT-----  
 ATGTTCCCTTGGGTTCTTGGGAGCA---GCAGGAAGCACTATG---GGCGCAGCGTCA---  
 ATAACGCTGACGGTACAG---GCCAGACTA---TTATTG---TCCGGTATAGTGCAACAGCAGAAC---  
 AATTTG---CTGAGG---GCTATTGAGGCGCAACAGCATCTGTTGCAACTCACAGTCTGGGGCATC  
 >AY835763  
 TTCTACTGTAATTCAACAAAACTGTTTAATAGTACTTGGAAGTTTAATGGTACTACTTGGAAATTGGACTACAG  
 GGTTA-----  
 -----AAT---  
 AAAACTGAAGTAAATGTCACACTCCCATGCAGAATAAAACAAATTATAAACATGTGGCAGGAAGTAGGAAAAG  
 CAATGTATGCCCCCTCCCATCAAAGGAGTAATTAGATGTTTCATCAAAT---  
 ATTACAGGGCTGCTATTAAACAAGAGATGGTGGTAGTAACAATGGTAGTAACAAT-----GGG-----  
 -----  
 ACCGGGATTAACAAT---  
 GAGACCGAGATCTTCAGACCTGGAGGAGGAAATATGAAGGACAATTGGAGAAGTGAATTATATAAATATAAAG  
 TAGTAAGAATTGAACCATTA---GGAATAGCACCCACCAAGGCAAAGAGAAGAGTGGTG-----  
 -----CAGAGAGAGAAAAAGAACAA---GTGGGA---TTAGGAGCC-----  
 TTGTTCCCTTGGGTTCTTGGGAGCA---GCAGGAAGCACTATG---GGCGCAGCGTCA---  
 CTGACGCTGACGGTACAG---GCCAGACTA---TTATTG---TCTGGTATAGTGCAACAGCAGAAC---  
 AATTTG---CTGAGG---GCTATTGAGGCGCAACAGCGTATGTTGCAACTTACAGTCTGGGGCATC  
 >AF025762  
 TTCTACTGTAATTCAACACAACCTGTTTAATAGTACTTGGACTGAATGGTCAAATAACACTGAAGGAAATATC-  
 -----  
 -----  
 ACTAAAGAAAATATTACACTCCCATGCAGAATAAAACAAATTATGAACATGTGCCAGGAAGTAGGAAGAGCAA  
 TGTATGCCCCCTCCCATCAAAGGACAAATTAGATGTTTCATCAAAA---  
 ATTACAGGGCTGCTATTAAACAAGAGATGGTGGTACTGGCGGGAAC-----  
 -----  
 -----  
 GGGTCCGAGTTCTTCAGACCTGGAGGAGGAGATATAAGGGACAATTGGAGAAGTGAATTATATAAATATAAAG  
 TAGTAAAAATTGAACCATTA---GGAGTAGCACCCACCAGGGCAAAGAGAAGAGTGGTG-----  
 -----CAAAGAGAAAAAGAGCA---GTGGGA---ATAGGAGCT-----  
 GTGTTCCCTTGGGTTCTTGGGAGCA---GCAGGAAGCACTATG---GGCGCAGCGTCA---  
 CTGACGCTGACGGTACAG---GCCAGACTA---TTATTG---TCTGGTATAGTGCAACAGCAGAAC---  
 AATTTG---CTGAGG---GCTATTGAGGCGCAACAGCATCTGTTGCAACTCACAGTCTGGGGCATC  
 >AF025754  
 TTCTACTGTAATTCAACACAACCTGTTTAGTAGTACTTGGGAATAATACTGAATCTGAAGGGGTAAATAACACTG  
 AA-----  
 -----  
 GGAAATGACACAATCATACTCCTATGCAGAATAAAACAAATTGTAAACATGTGGCAGGAAGTAGGAAAAGCAA  
 TGTATGCCCCCTCCCATCAGAGGACAAATTAGATGCTCATCAAAT---

ATTACAGGGCTGCTATTAACAAGAGATGGTGGTAATAGTAATGGCAGC-----  
-----  
-----  
AACAAAGCCGAGGTCTTCAGACCTGGAGGAGGAGATATGAGGGACAATTGGAGAAGTGAATTATATAAAATATA  
AAATAGTAAAAATTGAACCATTA---GAAGTAGCACCCACTAAGGCAAAGAGAAGAGTGGTG-----  
-----CAGAGAGAAAAAAGAGCA---GCGGGA---CTAGGAGTT-----  
---ATGTTCCCTTGGGTTCTTGGGAGCA---GCAGGAAGCACTATG---GGCGCAGCGTCA---  
ATGACGCTGACGGTACAG---GCCAGACAA---TTATTG---TCTGGTATAGTGCAACAGCAGAAC---  
AATTTG---CTGAGG---GCTATTGAGGCGCAACAGCATCTGTTGCAACTCACAGTCTGGGGCATC  
>AF286365  
TTCTACTGTAATTCAACACAACCTGTTTAATAGTACTTGGGAATAGTACTGAAGGAAATAGTACTTGG-----  
-----  
-----  
TCAGATAAAATTATCAGACTCCCATGCAGAATAAAACAAATTATAAACATGTGGCAGGAAGTAGGAAAGGCAA  
TGTATGCCCCCTCCCATCGATGGACAAATTAGATGTTTCATCAAAT---  
ATTACAGGGCTGCTATTAACAAGAGATGGTGGGAATAGCAACGAG-----  
-----  
-----  
ACCACCGAGATCTTCAGACCTGGGGGAGGAGATATGAGGGACAATTGGAGAAGTGAATTATACAAATATAAAG  
TAGTAAAAATTGAACCATTA---GGAGTAGCACCCACCAAGGCAAAGAGAAGAGTGGTG-----  
-----CAAAGAGAAAAAAGAGCA---GTGGGAGTAATAGGAGCT-----  
ATGTTCCCTTGGGTTCTTGGGAGCA---GCAGGAAGCACTATG---GGCGCAGCGTCA---  
ATGGCGCTGACGGTACAA---GCCAGACAA---TTATTG---TCTGGTATAGTGCAAGCAGCAGAAC---  
AATCTG---CTGAGA---GCTATTGAGGCGCAACAACATATGTTGCAGCTCACAGTCTGGGGCATC  
>U39362  
TTCTACTGTAATACAGCACAACTGTTTAATAGTACTTGGGAATGTTACTGGAGGGACAAATGGCACTGAA----  
-----  
-----  
GGAAATGACATAATCACACTCCAATGCAGAATAAAACAAATTATAAATATGTGGCAGAAAGTAGGAAAAGCAA  
TGTATGCCCCCTCCCATCACAGGACAAATTAGATGTTTCATCAAAT---  
ATTACAGGGCTGCTACTAACAAGAGATGGAGGTAATAGTACTGAG-----  
-----  
-----  
ACTGAGACTGAGATCTTCAGACCTGGAGGAGGAGATATGAGGGACAATTGGAGAAGTGAATTATATAAAATATA  
AAGTAGTAAGAATTGAACCAATA---GGAGTAGCACCCACCAGGGCAAAGAGAAGAACAGTG-----  
-----CAAAGAGAAAAAAGAGCA---GTGGGA---ATAGGAGCT-----  
---GTGTTCCCTTGGGTTCTTGGGAGCA---GCAGGAAGCACTATG---GGCGCAGCGTCA---  
GTGACGCTGACGGTACAG---GCCAGGCTA---TTATTG---TCTGGTATAGTGCAAGCAGCAGAAC---  
AATCTG---CTGAGG---GCTATTGAGGCGCAACAGCATATGTTGCAACTCACAGTCTGGGGCATC  
>AF128126  
TTCTACTGTAATACAACACAACCTGTTTGATAGTATTTGGAATAGTGAGAATGGTACTTGGGAATATTACTAGGG  
GGTTAAAT-----  
-----AACACT-----  
GGAAGAAATGACACAATCACACTCCCATGCAGGATAAAACAAATTATAAACAGGTGGCAGGAAGTAGGAAAAG  
CAATGTATGCCCCCTCCCATCAAAGGAAACATTAGCTGTTTCATCAAAT---  
ATTACAGGGCTGCTATTAACAAGAGATGGTGGTAAGGATGATAATAGC-----  
-----  
-----  
AGGGACGGGAACGAGACCTTCAGACCTGGAGGAGGAGATATGAGGGACAATTGGAGAAGTGAATTATATAAAT  
ATAAAGTAGTAAAAATTGAACCATTA---GGAGTAGCACCCACCAAGGCAAAGAGAAGAGTGGTG-----  
-----CAAAGAGAAAGAGAGCA---GTGGGA---CTAGGAGCT---  
-----ATGTTTCATTGGGTTCTTGGGAGCA---GCAGGAAGCACTATG---GGCGCAGCGTCA---  
GTGACGCTGACGGTACAG---GCCAGGCAA---TTATTG---TCTGGTATAGTGCAACAGCAGAGC---  
AATTTG---CTGAGA---GCTATTGAGGCGCAACAGCATCTGTTGCAACTCACAGTCTGGGGCATC  
>AF025763  
TTCTACTGTAATACAACACAACCTATTTAATAGTACTTGGGAATGTTGCTGAAGGGTCAAATAGCACTGAAGGA-  
-----  
-----  
AATAGCACACTAATCGAACTCCCATGCAGAATAAAACAAATTATAAATCTGTGGCAGGAAGTAGGAAAAGCAA  
TGTATGCCCCCTCCCATCAGAGGACAAATTAGATGTTTCGTCAAAT---

ATTACGGGGCTGCTATTAACAAGAGATGGTGGTAATAATAGCGAG-----  
-----  
-----  
AGCGCCCCCGAGATCTTCAGACCTGGAGGAGGAGATATGAGGGACAATTGGAGAAGTGAATTATATAAATATA  
AAGTAGTACAAATTGAACCATTA---GGAGTAGCACCCACTAGGGCGAAGAGAAGAGTGGTG-----  
-----CAAAGAGAAAAAAGAGCG-----GCA---ATAGGAGCT-----  
---CTGTTCCCTTGGGTTCTTGGGAGCA---GCAGGAAGCACTATG---GGCGCAGCGTCA---  
ATAACGCTGACGGTACAG---GCCAGACTA---TTATTG---TCTGGTATAGTGCAACAGCAGAAC---  
AATTTG---CTGAGA---GCTATTGAGGCGCAACAGCATCTGTTGCAACTCACAGTCTGGGGCATC  
>MH012793  
TTCTACTGCAATACAACACAACCTGTTTAATAGTACTTGGGGGAATGGTACTGAGAGGTCAAATGAA-----  
-----  
-----  
ACGGAAGATACTATCACACTCCCATGCAGAATAAAACAAATTGTAAACATGTGGCAGCAAGTAGGAAAAGCAA  
TGTATGCCCCCTCCCATCAGAGGACAAATTAGATGTTTCATCAAAT---  
ATTACAGGGCTGCTATTAACAAGGGATGGTGGTGATAAAATTAACAAGGGATGGT-----  
-----  
-  
GGTGATAATGAGACCACCGAGATCTTCAGACCTGGAGGAGGAGATATGAAGGACAATTGGAGAAGTGAATTAT  
ATAAAATATAAAGTAGTAAAAATTGAACCATTA---GGAGTAGCACCCACCAGGGCAAAAAGAAGAGTGGTG--  
-----CAGAGAGAAAAAAGAGCA---  
GTGGGAACGATAGGAGCT-----ATGTTCCCTTGGGTTCTTGGGAGCA---GCAGGAAGCACTATG---  
GGCGCAGCGTCA---CTGACGCTGACGGTACAG---GCCAGACTA---TTGTTG---  
TCTGGTATAGTGCAACAGCAGAAC---AATTTG---CTGAGA---  
GCTATTGAGGCGCAACAGCATCTGTTGCAACTCACAGTCTGGGGCATC  
>EU576292  
TTCTACTGTAATTCAACACAACCTGTTTAATAGTACTTGGAGTTTTAATAGTACTTGAATAAGAATTTTAATA  
GTACTTGGAAT-----  
-----ATTACTGAAGGG-----  
ACAAATAACACTGAAATCACACTCCCATGTAGAATAAAACAAATTATAAACATGTGGCAGGAAGTAGGAAAAG  
CAATGTATGCCCCCTCCCATCAGAGGACAAATTAAATGTTTCATCTAAC---  
ATTACAGGGCTGCTATTAACAAGAGATGGTGGGGGTAAATGGGAGC-----  
-----  
-----  
GGGACCACTGAGGTCTTCAGACCTGGAGGGGGAGATATGAGGGACAATTGGAGAAGTGAATTATACAAATATA  
AAGTAGTAAAAATTGAACCATTA---GGAGTAGCACCTACCAAGGCAAAGAGAAGAGTGGTG-----  
-----CAAGGAGAAAAAAGAGCA---GTGGGAGCAATAGGAGCT-----  
---ATGTTCCCTTGGGTTCTTGGGAGCA---GCAGGAAGCACTATG---GGCGCAGCGTCA---  
GTGGCGCTGACGGTACAG---GCCAGACAA---TTATTG---TCTGGTATAGTGCAACAGCAGAAC---  
AATTTG---CTGAGG---GCTATTGAGGCGCAACAGCATCTGTTGCAACTCACAGTCTGGGGCATC  
>KT283697  
TTCTACTGTGATTCAACACAATTGTTTAATAGTACTTGAATAGTACTTGGCTGAATGATACCGAAGGGTTAA  
ATAAACT-----  
-----  
GAAGGAGACCCTATTATACTCCAATGCAGAATAAAACAAATTATAAACATGTGGCAGGAAGTAGGAAAAGCAA  
TGTATGCCCCCTCCCATTCAGGACCAATTAATTGTTTCATCAAAT---  
ATTACAGGACTGCTATTAACAAGAGATGGTGGCAATAACAATGACACT-----  
-----  
-----  
AGCAACACCGAGATTTTTAGACCTGGAGGAGGAGATATGAGGGACAATTGGAGAAGTGAATTATATAAATATA  
AAGTAGTAAAAATTGAACCATTA---GGACTAGCACCTACCAAGGCAAAGAGAAGAGTGGTG-----  
-----CAGAGAGAAAAAAGAGCA---GTGGGA---ATAGGAGCT-----  
---ATGTTCCCTTGGGTTCTTGGGAGCA---GCAGGAAGCACTATG---GGCGCAGCGTCA---  
GTGACGCTGACGGTACAG---GCCAGACTA---TTATTG---TCTGGTATAGTGCAACAGCAGAAC---  
AATTTG---CTGAGG---GCTATTGAGGCGCAACAGCATCTGTTGCAACTCACAGTCTGGGGCATC  
>AY173952  
TTCTACTGTAATTCAACACAACCTGTTTAATAGTACTTGGGGGGCTAATGATACTTGGACTGAGTCAAAT----  
-----  
-----  
AACAAATGAAACAATCACACTCCCATGCAGAATAAAACAAATTATAAACATGTGGCAGGAAGTAGGAAAAGCAA

TGTATGCCCCCTCCCATCGCAGGACAAATTAGATGTTTCATCAAAT ---  
 ATTACAGGGCTGCTACTAACAAGAGATGGTGGTAATAAAAAACGATAGC-----  
 -----  
 -----  
 AACGGGACCGAGATCTTCAGACCTGGAGGAGGAGATATGAGGGACAATTGGAGAAGTGAATTATATAAAATATA  
 AAGTAGTAAAAATTGAACCATTA --- GGAATAGCACCCACCAAGGCAAAGAGAAGAGTGGTG-----  
 -----  
 -----CAGAGAGAAAAAAGAGCA --- GTAGGC --- CTAGGAGCT-----  
 ---ATGTTCCCTTGGGTTCTTGGGAGCA --- GCAGGAAGCACTATG --- GGCGCAGCGTCA ---  
 ATAACGCTGACGGTACAG --- GCCAGACAA --- TTATTG --- TCTGGTATAGTGCAACAGCAGAAC ---  
 AATTTG --- CTGAGG --- GCTATTGAGGCGCAACAGCATCTGTTGCAACTCACAGTCTGGGGCATC  
 >AY173953  
 TTCTACTGTAATACAACAAATCTGTTTAATAGTACTTGGAAATGGTACTGAAGAGTTTGATAGTACTTTGAGT-  
 -----  
 -----  
 GATGCTGAAAACATCACACTCCCATGCAGAATAAAACAAATTATAAACATGTGGCAGGAAGTAGGAAAAGCAA  
 TGTATGCCCCCTCCCATCAGAGGACACATTAGATGTGTATCAAAC ---  
 ATTACAGGGCTGTTATTAACAAGAGATGGGGGTATGAACAACGGGACCAAG-----  
 -----  
 -----  
 GACAACGAGACCGAGGTCTTCAGACCTGGAGGAGGAGATATGAGGGACAATTGGAGAAGTGAATTATATAAAAT  
 AATAAGTAGTAAAAATTGAACCATTA --- GGAGTAGCACCCACCAAGGCAAAGAGAAGAGTGGTG-----  
 -----  
 -----CAGAGAGAAAAAAGAGCA --- GTGGGA --- ATAGGAGCT---  
 -----ATGTTCCCTTGGGTTCTTGGGAGCA --- GCAGGAAGCACTATG --- GGCGCAGCGTCA ---  
 CTGACGCTGACGGTACAG --- GCCAGACAA --- TTATTG --- TCTGGTATAGTGCAACAGCAGAAC ---  
 AATTTG --- CTGAGG --- GCTATTGAGGCGCAACAGCATCTGTTGCAACTCACAGTCTGGGGCATC  
 >AY173954  
 TTCTACTGTAATTCAACACAGCTGTTTAATAGTACTTGGATTAATAATAATGGTACTTGGAAATAGTACTTGGGA  
 GTAGTAATAAT-----  
 -----AATACT-----  
 GATAACAATGGAATATCACACTCCCATGCAGAATAAGACAAATTATAAACAGGTGGCAGGAAGTAGGAAAAG  
 CAATGTATGCCCCCTCCCATCAGAGGACAAATTAGATGTTTCATCAAAT ---  
 ATTACAGGGCTGCTATTAACAAGAGATGGTGGTAATAACAATAACACG-----  
 -----  
 -----  
 AACAGGACCGAGACCTTCAGACCTGGAGGAGGAGATATGAGGGACAATTGGAGAAGTGAATTATATAAGTATA  
 AAGTAGTACAAATTGAGCCATTA --- GGAGTAGCACCCACCAGGGCAAAGAGAAGAGTGGTG-----  
 -----  
 -----CAGAGAGAAAAAAGAGCA --- GTGGGAACGATAGGAGCT-----  
 ---ATGTTCCCTTGGGTTCTTGGGAGCA --- GCAGGAAGCACTATG --- GGCGCAGCGTCA ---  
 ATGACGCTGACGGTACAG --- GCCAGGCTA --- TTATTG --- TCTGGTATAGTGCAACAGCAGAAC ---  
 AATTTG --- CTGAGG --- GCTATTGAGGCACAACAGCATATGTTGCAACTCACAGTCTGGGGCATC  
 >U21135  
 TTCTACTGTAATTCAACACAGCTGTTTAATAGTACTTGGCATGCTAATGGTACTTGAAGAATACTGAAGGG-  
 -----  
 -----  
 GCAGATAACAATATCACACTCCCATGCAGAATAAAACAAATTATAAACAGGTGGCAGGAAGTAGGAAAAGCAA  
 TGTATGCCCCCACCATCGAAGGACAAATTAGATGTTTATCAAAT ---  
 ATTACAGGGTTACTATTAACAAGAGATGGTGGTAGTAGTGAAGAG-----  
 -----  
 -----  
 AACCAGACCGAGATCTTCAGACCTGGAGGAGGAAATATGAAGGATAATTGGAGAAGTGAATTATATAAAATATA  
 AAGTAGTAAAAATTGAACCATTA --- GGAGTAGCACCCACCAAGGCAAAGAGAAGAGTGGTG-----  
 -----  
 -----CAGAGAGAAAAAAGAGCA --- GTGGGAATGCTAGGAGCT-----  
 ---ATGTTCCCTTGGGTTCTTGGGAGCA --- GCAGGAAGCACTATG --- GGCGCAGCGTCA ---  
 ATGACGCTGACGGTACAG --- GCCAGACTA --- TTATTG --- TCTGGTATAGTGCAACAGCAGAAC ---  
 AATCTG --- CTGAGG --- GCTATTGAGGCGCAACAGCATCTGTTGCAACTCACAGTCTGGGGCATC  
 >MH012589  
 TTCTACTGTAATACATCAAACTGTTTAATAGTACTTGGAAATGGTACTACAGAGTCAAATAAC-----  
 -----  
 -----  
 ATTGGAGAAAATATCACACTCCCATGCAGAATAAAACAAATTATAAACATGTGGCAGGAAGTAGGAAAAGCAA

TGTATGCTCCTCCCATCAGTGGACAAATTAGATGTTTCATCAAAT ---  
 ATTACAGGGCTGCTATTAACAAGAGATGGTGGTAATAACACAAAT -----  
 -----  
 -----  
 AATATCGAGACCTTCAGACCTGGAGGAGGAGATATGAGGGACAATTGGAGAAGTGAATTATATAAATACAAAG  
 TAGTAAGAGTTGAACCATTA --- GGACTAGCACCCACCAAGGCAAGGAGAAGAGTGGTG -----  
 ----- CAGAGAGAAAAAAGAGCA --- GTGGGA --- ATAGGAGCT -----  
 GTGTTCCCTGGGGTTCTTGGGAGCA --- GCAGGAAGCACTATG --- GGCGCAGCGTCA ---  
 GTGACGCTGACGGTACAG --- GCCAGACAA --- TTATTG --- TCTGGTATAGTGCAACAGCAGAAT ---  
 AATCTG --- CTGAGG --- GCTATTGAGGCGCAACAGCATATGTTGCAACTCACAGTCTGGGGCATC  
 >MH012650  
 TTCTACTGTAATACAACACAACCTGTTTAATAGTACTTGGAAATAGTACTGAAACGTCAAATATCACT -----  
 -----  
 -----  
 GGAGAAGATATCATCACACTCCCATGCAGAATAAAACAAATTATAAACATGTGGCAGGAAGTAGGAAAAGCAA  
 TGTATGCCCCCTCCCATCGCAGGACCAATTAGATGTACATCAAAT ---  
 ATTACAGGGATGATACTAACAAGAGATGGAGGTAAAAACAACGGG -----  
 -----  
 -----  
 AGCGATGAGGTCCTCAGACCTGGAGGAGGAGATATGAGGGACAATTGGAGAAGTGAATTATATAAATATAAAG  
 TAGTAAGAATTGAACCATTA --- GGAGTAGCACCCCTCCAGGGCAAAGAGAAGAGTGGTG -----  
 ----- CAAAGAGAAAAAAGAGCA --- GTGGGAGCGATAGGAGCT -----  
 ATGTTCCCTTGGGGTTCTTAGGAGCA --- GCAGGAAGCACTATG --- GGCGCAGCGGCA ---  
 GTGACGCTGACGGTACAG --- GCCAGACAG --- CTA CTG --- TCTGGTATAGTGCAACAGCAGAAC ---  
 AATTTG --- CTGAGG --- GCTATTGAGGCGCAACAGCATCTGTTGCAACTCACAGTCTGGGGCATC  
 >MH012866  
 TTCTACTGTAATTCAACACAACCTGTTTAATAGTACTTGGGTAAATGGTACTTTGAATAGTACT -----  
 -----  
 -----  
 GGAGGAGAAAATATCACAATCCCATGCAGAATAAAACAAATTATAAACATGTGGCAGACAGTAGGAAAAGCAA  
 TGTATGCCCCCTCCCATCAGAGGACAAATTAAATGTTTCATCAAAT ---  
 ATTACAGGGCTACTATTAACAAGAGATGGTGGTGAAAACGGGAGC -----  
 -----  
 -----  
 AATACTGAGATCTTCAGACCTGGAGGAGGAGATATGAGGGACAATTGGAGAAGTGAATTATATAAATATAAAG  
 TAGTAAAAATTGAACCATTA --- GGAGTAGCACCCACCAAGGCAAAGAGAAGAGTGGTG -----  
 ----- CAAAGAGAAAAAAGAGCA --- GTGGGA --- ATAGGAGCT -----  
 TTGTTCCCTTGGGGTTCTTGGGAGCA --- GCAGGAAGCACTATG --- GGCGCAGCGTCA ---  
 ATGACGCTGACGGTACAG --- GCCAGACAA --- TTATTG --- TCTGGAATAGTGCAACAGCAAAAC ---  
 AATTTG --- CTGAGG --- GCTATTGAGGCGCAACAGCATATATTGCAACTCACAGTCTGGGGCATC  
 >MH012925  
 TTCTACTGTAATACAACAAAACCTGTTTAATAGTACTTGGACTTGGAAATGGTACTGCTTGGACTTGGAAATAGTA  
 CTGAAGGGTCA -----  
 -----  
 -----  
 CCTGACAATGACACAATCATACTCCCATGCAGAATAAAACAAATTATAAACATGTGGCAGGAAGTAGGAAAAG  
 CAATGTATGCCCCCTCCCATCAGGGGACAAATTAAATGTTTCATCAAAT ---  
 ATTACAGGGTTGCTATTAACAAGAGATGGTGGTGATAACAGGAAC -----  
 -----  
 -----  
 AACACCACTGAGATCTTCAGACCAGGAGGAGGAGATATGAGGGACAATTGGAGAAGTGAATTATATAAATATA  
 AAGTAGTAAAAATTGAACCATTA --- GGAGTAGCACCCACCAAGGCAAAGAGAAGAGTGGTG -----  
 ----- CAGAGAGAAAAAAGAGCA --- GTGGGA --- ATAGGAGCT -----  
 --- TTGTTCCCTTGGGGTTCTTGGGAGCA --- GCAGGAAGCACTATG --- GGCGCAGCGTCA ---  
 ATGACGCTGACGGTACAG --- GCCAGACAA --- TTATTG --- TCTGGTATAGTGCAACAGCAGAAC ---  
 AATCTG --- CTGAGG --- GCTATTGAGGCGCAACAACATCTGTTGCAACTCACAGTCTGGGGCATC  
 >AY835761  
 TTCTACTGTAATACAACAGCACTGTTTAATAGGACATTTAATAGGACTGAGAATGATAATGGTACCTGGAAT-  
 -----  
 -----  
 -----  
 AGTACTGACCCTATCATACTCCAATGCAGGATAAAACAAATTGTAAACATGTGGCAGGAAGTAGGAAAAGCAA

TGTATGCCCCCTCCCATCAAAGGACAAATTAGATGCTCATCAAAT ---  
 ATTACAGGGCTGCTATTAACAAGAGATGGTGGTAATGGCAATGATACT-----  
 -----  
 -----  
 AAAAAATGATACCGAGATCTTCAGACCTGGAGGAGGAGATATGAGGGACAATTGGAGAAGTGAATTATATAAAT  
 ATAAAGTAGTAAGAATTGAACCATTA --- GGAATAGCACCCACCAAGGCAAAGAGAAGAGTGGTG-----  
 -----  
 -----CAGAGAGAAAAAAGAGCA---GTGGGA---ATAGGAGCT---  
 -----GTGTTCCCTTGGGTTCTTGGGAGCA---GCAGGAAGCACTATG---GGCGCAGCGTCA---  
 ATAACGCTGACGGTACAA---GCCAGACTA---TTATTG---TCTGGTATAGTGCAACAGCAGAAC---  
 AATTTG---CTGAGG---GCTATTGAGGCGCAACAGCATCTGTTGCAACTCACAGTCTGGGGCATC  
 >AF069140  
 TTCTACTGTAATACAAAAAACTGTTTAATAGTACTTGGAAATGGTACTGAAGGGTCATATAACATTGAA----  
 -----  
 -----  
 GGAAATGACACTATCACACTCCCATGCAGAATAAAACAAATTATAAACATGTGGCAGGAAGTAGGAAAAGCAA  
 TGTATGCCCCCTCCCATCAGTGGACAAATTTGGTGTCTCATCAAAT ---  
 ATTACAGGGCTGCTACTAACAAGAGATGGTGGTAAGAACAGCAGC-----  
 -----  
 -----  
 ACCGAAATCTTCAGACCTGGAGGAGGAGATATGAGGGACAATTGGAGAAGTGAATTATATAAATATAAAGTAG  
 TAAGAGTTGAACCATTA --- GGAATAGCACCCACCAAGGCAAAGAGAAGAGTGGTG-----  
 -----  
 -----CAGAGAGAAAAAAGAGCA---GTGGGA---ATAGGAGCT-----  
 GTGTTCCCTTGGGTTCTTGGGAGCA---GCAGGAAGCACTATG---GGCGCAGCGTCA---  
 ATAACGCTGACGGTACAG---GCCAGACAA---TTATTG---TCTGGTATAGTGCAACAGCAGAAC---  
 AATTTG---CTGAGG---GCTATTGAAGCGCAACAGCATATGTTGCAACTCACAGTCTGGGGCATC  
 >GU331649  
 TTCTACTGTAATACAACACAGCTGTTTAATAGTACTTGGCCTTTTAATAGTACTTGGAAATGATACTAACACTG  
 AA-----  
 -----  
 -----  
 GGAAATGACACAATCACACTCCCATGTAGAATAAAACAAATTTATAAACATGTGGCAGGAAGTAGGAAAAGCAA  
 TGTATGCCCCCTCCCATCAGTGGACAAATTAGATGTTTCATCAAAT ---  
 ATTACAGGGCTGTTATTAACAAGAGATGGTGGTATAAACCAGAGC-----  
 -----  
 -----  
 AGGACGAACGAGACCTTCAGACCTGGAGGAGGAAATATGAAGGACAATTGGAGAAGTGAATTGTACAAATATA  
 AAGTAGTAAAAATTAAACCATTA --- GGAATAGCACCCACTAAGGCAAAGAGAAGAGTGGTG-----  
 -----  
 -----CAGAGAGAAAAAAGAGCA---GTGGGA---ATAGGAGCT-----  
 ---CTGTTCCCTTGGGTTCTTGGGAGCA---GCAGGAAGCACTATG---GGCGCAGCGTCA---  
 GTGACGCTGACGGTACAG---GCCAGACTA---TTATTG---TCTGGTATAGTGCAACAGCAGAAC---  
 AATTTG---CTGAGA---GCTATTGAGGCGCAACAGCATCTGTTGCAACTCACAGTCTGGGGCATC  
 >AY608577  
 TTCTACTGCAATTCAACACAACCTGTTTAATGGTACTTGGAAATGGTACTTGGTTAGATGTCAAACAA-----  
 -----  
 -----  
 GGAAATGGCACAATCACACTCCCATGCAGAATAAAACAAATTATAAACCTGTGGCAGGAAGTAGGAAAAGCAA  
 TGTATGCCCCCTCCCATCAGCGGACAAATTAGATGTTTCATCAAAT ---  
 ATTACAGGGCTGTTATTAACAAGAGATGGTGGTACAAGCAATGAGACC-----  
 -----  
 -----  
 ACCACCACCGAGACCTTCAGACCTGGAGGAGGAAATATGAAGGACAATTGGAGAAGTGAATTATATAGATATA  
 AAGTAATAAAAATTGAACCATTA --- GGAGTAGCACCCACCAAGGCAAAGAGAAGAGTGGTG-----  
 -----  
 -----CAGAGAGAAAAAAGAGCA---GTGGGA---ATAGGAGCT-----  
 ---GTGTTCCCTTGGGTTCTTGGGAGCA---GCAGGAAGCACTATG---GGCGCAGCGTCA---  
 ATGACGCTGACGGTACAG---GCCAGACAA---TTATTG---TCTGGTATAGTGCAACAGCAGAAC---  
 AATTTG---CTGAGG---GCTATTGAGGCGCAACAGCAACTGTTGAAACTCACAGTCTGGGGCATC  
 >JN944928  
 TTCTATTGTAATACAACACAACCTGTTTAATAGTACTTGGTATATTAATAATACTGGGAATGGTGCTAAAGGGT  
 CAGAT-----  
 -----  
 -----  
 AACACTGACACTATCAAACCTCCCATGCAGAATAAAACAAATTATAAACATGTGGCAGGAGGTAGGAAAAGCAA

TGTATGCCCCCTCCCATCAGAGGACAAATTAGATGTTCCCTCAAAT ---  
 ATTACAGGACTGATATTAACAAGAGATGGGGGTAATAACAATGATACC-----  
 -----  
 -----  
 AACAAATGATACCGAGGTCTTCAGACCTGGAGGAGGAGATATGAGAGACAATTGGAGAAGTGAATTATATAAAT  
 ATAAAGTAGTAAAAATTGAACCATTA --- GGAGTAGCACCCACTAAGGCAAAGAGAAGAGTGGTG-----  
 ----- CAGAGAGAAAAAAGAGCA --- GTGGGA --- ATAGGAGCC ---  
 ----- TTGTTCCCTTGGGTTCTTGGGAGCA --- GCAGGAAGCACTATG --- GGCGCAGCGTCA ---  
 GTGACGCTGACGGTACAG --- GCCAGACAA --- TTGTTG --- TCTGGTATAGTGCAACAGCAGAAC ---  
 AATTTG --- CTGAAG --- GCTATTGAGGCGCAACAGCATCTGTTGCAACTCACAGTCTGGGGCATC  
 >MH013129  
 TTCTACTGTAATTCAACACAACCTATTTAATAGTACTTGGGAGAGGGAAGAGTCAAATGACACTCGA-----  
 -----  
 -----  
 GGGAAATGACACAATCACACTCCCATGCAGAATAAAACAAATTATAAACATGTGGCAGGAAGTAGGAAAAGCAA  
 TGTATGCCCCCTCCCATCAGAGGACAAATTAGCTGTTTCATCAAAT ---  
 ATTACAGGGCTGCTATTAACAAGAGATGGTGGTAATGTGAGCGAC-----  
 -----  
 -----  
 CCCGAGACCTTCAGACCTGGAGGAGGAGATATGAGGGACAATTGGAGAAGTGAATTATATAAATATAAAGTAG  
 TAAAAATTGAACCATTA --- GGAGTAGCACCCACCAAGGCAAAGAGAAGAGTGGTG-----  
 ----- CAGAGAGAGAGAAGAGCA --- GTGGGC --- CTAGGAGCT-----  
 ATGTTCCCTTGGGTTCTTGGGAGCA --- GCAGGAAGCACTATG --- GGCGCAGCGTCA ---  
 ATAACGCTGACGGTACAG --- GCCAGACAA --- TTATTG --- TCTGGTATAGTGCAACAGCAGAAC ---  
 AATCTG --- CTGAGG --- GCTATTGAGGCGCAACAGCATCTGTTGCAACTCACAGTCTGGGGCATC  
 >U04908  
 TTCTACTGTAATACAACACAGTTATTCAATAGTACTTGGTATCGGAATGGTACTTGGTATTGGAATGGTACTA  
 GGATTGAGAAT-----  
 -----GGTACTGAAGGG-----  
 TTAAATGACACAATTATCACCTCCCATGCAGAATAAAACAAATTATAAACATGTGGCAGGAAGTAGGAAAAG  
 CAATGTATGCTCCTCCCATCAAAGGACAAATTAGCTGTTTCATCAAAT ---  
 ATTACAGGGCTGCTATTAACAAGAGATGGTGGTAATACTAATAAGACCGGG-----  
 -----  
 ----  
 ACCGAGAACGAGACCGAGATCTTTAGACCTGGAGGAGGAGATATGAGGGACAATTGGAGAAGTGAATTATATA  
 AATATAAAGTAGTAAAAATTGAACCATTA --- GGAGTAGCACCCACCAGGGCAAAGAGAAGAGTGGTG-----  
 ----- CAGAGAGAAAAAAGAGCA --- GTGGGA ---  
 ATAGGAGCT-----ATGCTCTTTGGGTTCTTGGGAGCA --- GCAGGAAGCACTATG ---  
 GGCGCAGCGTCA --- ATAACGCTGACGGTACAA --- GCCAGACAA --- TTGTTG ---  
 TCTGGTATAGTGCAACAGCAGAGT --- AATCTG --- CTGAGG ---  
 GCTATTGAGGCGCAACAACATCTGTTGCAACTCACAGTCTGGGGCATC  
 >KT283706  
 TTCTACTGTAATACAACACAACCTGTTTAATAGTACTTGGAAATAGTACTGGAGGACTAAATAACACTGGA----  
 -----  
 -----  
 GGAAATGACACAATCACACTCCCATGCAGAATAAAACAAATTATAAACATGTGGCAGGAAGTAGGAAAAGCAA  
 TGTATGCCCCCTCCCATCAGAGGACAAATTAGATGTTTCATCAAAT ---  
 ATTACAGGGCTGCTATTAACAAGAGATGGTGGTAATAATGGGACC-----  
 -----  
 -----  
 AGCGGGGCCGAGGTCTTCAGACCTGGAGGAGGAGATATGAGGGACAATTGGAGAAGTGAATTATATAAATATA  
 AAGTAGTACAAATTGAACCATTA --- GGAGTAGCACCCACCAAGGCAAAGAGAAGAGTGGTG-----  
 ----- CAGAGAGAAAAAAGAGCA --- GTGGGA --- ATAGGAGCT-----  
 ---GTGTTCCCTTGGGTTCTTGGGAGCA --- GCAGGAAGCACTATG --- GGCGCAGCGTCA ---  
 ATGACGCTGACGGTACAG --- GCCAGACTA --- TTATTG --- TCTGGTATAGTGCAACAGCAGAAC ---  
 AATTTG --- CTGAGA --- GCTATTGAGGCGCAACAGCATCTGTTGCAACTCACAGTCTGGGGCATC  
 >MH012332  
 TTCTACTGTAATTCAACACAACCTGTTTAATAGTACTTGGAAATGGTACGGAAGGGTCAAATAACCCTGTA----  
 -----  
 -----

GACAATGGCACAATCACGCTCCCATGCAGAATAAAACAAATTGTAAACATGTGGCAGGAAGTAGGAAAAGCAA  
TGTATGCCCCCTCCCATTAGAGGACAAATTAAGTGTATCAAAT ---  
ATTACAGGGCTGCTATTAACAAGAGATGGTGGTGATAACGGGAGC-----  
-----  
-----  
AATACCACCGAGACCTTCAGACCTGGAGGAGGAGATATGAGGGACAATTGGAGAAGTGAATTATATAAATATA  
AAGTAGTAAAAATTGAACCATTA---GGAGTAGCACCTACCAAGGCAAAGAGAAGAGTGGTA-----  
-----CAGAGAGAAAAAAGAGCA---GTGGGA---ATAGGAGCT-----  
---CTGTTCTTGGGTTCTTGGGAGCA---GCAGGAAGCACTATG---GGCGCAGCGTCA---  
TTGACGCTGACGGTACAG---GCCAGACTA---TTATTG---TCTGGTATAGTGCAACAGCAGAAC---  
AATTTG---CTGAGG---GCTATTGAGGCGCAACAGCGTGTGTTGCAACTCACAGTCTGGGGCATC  
>MH012400  
TTCTATTGCAATACAACAACCACTGTTT-----  
ACTTGGAATAGTAGTAGTCCTTGGAATATTACTGAAGGGGTAAATAGCACT-----  
-----  
ATGGGAAATGACACACTCACACTCCCCTGCAAAATAAAACAAATTATAAACATGTGGCAGGAAGTAGGAAAAG  
CAATGTATGCCCCCTCCCATCAGAGGACAAATTAGATGTTTCATCAAAT---  
ATTACAGGGCTGCTATTAACAAGAGATGGTGGTAATGGAAACGAGAGC-----  
-----  
-----  
CAGGTCAATAATGAGACCTTCAGACCTGCAGGAGGAGATATGAGAGACAATTGGAGAAGTGAATTATATAAAAT  
ATAAAGTAGTAAAAATTGAACCATTA---GGAGTAGCACCCACCAGGGCAAAGAGAAGAGTGGTG-----  
-----CAGAGAGAAAGAAGAGCA---GTGGGA---GTAGGAGCT---  
-----ATGTTCTTGGGTTCTTGGGAGCA---GCAGGAAGCACTATG---GGCGCAGCGTCA---  
CTGACGCTGACGGTACAA---GCCAGACTA---TTATTG---TCTGGTATAGTGCAACAGCAGAGC---  
AATCTG---CTGAGG---GCTATTGAGGCGCAACAGCATCTGTTGCGACTCACAGTCTGGGGCATC  
>MH012257  
TTCTACTGTAATTCAACACAACCTGTTTAATAGTACTTGGAATGGTACTGAAGGGTCAAATAACACTGAA----  
-----  
-----  
GGAAATGATACAATCATACTCCCATGCAGAATAAAACAAATTATAAACATGTGGCAGGAAGTAGGAAAAGCAA  
TGTATGCCCCCTCCCATCAAAGGACAAATTAGATGTTTCATCAAAT---  
ATCACAGGGCTGCTATTAACAAGAGATGGTGGTAATAGCAGCGGG-----  
-----  
-----  
ACCACCGAGTTCTTCAGACCTGGGGGAGGAGATATGAGGGACAATTGGAGAAGTGAATTATATAAATATAAGG  
TAGTAAAAATTGAACCATTA---GGAGTAGCACCCACCAGGGCAAAGAAGAGTGGTG-----  
-----CAGAGAGAAAGGAGAGCA---GTGGGA---CTAGGAGCT-----  
GTGTTCTTGGGTTCTTAGGAGCA---GCAGGAAGCACTATG---GGCGCAGCGTCA---  
GTGACGCTGACGGTACAG---GCCAGACAA---TTATTG---TCTGGTATAGTGCAACAGCAGAAC---  
AATTTG---CTGAAG---GCTATTGAGGCGCAACACCATCTGTTGCAACTCACAGTCTGGGGCATC  
>MH012478  
TTCTACTGTAATACAACAAAACCTGTTTAATAGTACTTGATGGGAATGGTACTAAAGTGTCAACTAACACGG  
AA-----  
-----  
GGAAATGGCACAATCATACTCCCATGCAGAATAAAACAACTTATAAACATGTGGCAGGAAACAGGAAAAGCAA  
TGTATGCCCCCTCCCATTAGAGGACAAATTAGATGTTTCATCAAAT---  
ATTACAGGGGTGCTATTAACAAGAGATGGGGGTAACAATGATGGGACT-----  
-----  
-----  
GGGACTGAAACCTTCAGACCTGGAGGAGGAGATATGAGGGATAATTGGAGAAGTGAATTATATAAATATAAAG  
TAGTAAAAATTGAACCATTA---GGAGTAGCACCCACCAAGGCAAAGAGGAGAGTGGTG-----  
-----CAGAGAGAAAAAAGAGCA---GTGGGA---ATAGGAGCT-----  
GTGTTCTTGGGTTCTTGGGAGCA---GCAGGAAGCACTATG---GGCGCAGCGTCA---  
GTGACGCTGACGGTACAG---GCCAGACTA---TTATTG---TCTGGTATAGTGCAACAGCAGAAT---  
AATTTG---CTGAGG---GCTATTGAGGCGCAACAGCATCTGTTGCAACTCACAGTCTGGGGCATC  
>MH013027  
TTCTACTGTAATACAACAGACCTGTTTAGTAGTACTTGGAATGACACACAACCTGAATAATACTGGGAGTGAAG  
GGTCAAAT-----  
-----AGTACT-----

GGAAAAAATGACACAATCACACTCCGATGCAGAATAAAACAAATTATAAACATGTGGCAAGAAGTAGGAAAAG  
CAATGTATGCCCCCTCCCATCAAAGGACAAATTAGATGTGTATCAAAT---  
ATTACAGGGCTGCTATTAACAAGAGATGGTGGTAGTAGTAACGAGACT-----  
-----  
-----  
AACGGGACCGAGATCTTCAGACCTGGAGGAGGAGATATGAGAGACAATTGGAGAAGTGAATTATATAAATATA  
AAGTAGTACAAATTGAACCATTA---GGAATAGCACCCACCAAGGCAAGGAGAAGAGTGGTG-----  
-----CAGAGAGAAAAAAGAGCA---GTGGGA---ATAGGAGCT-----  
---CTGTTCCCTTGGGTTCTTGGGAGCA---GCAGGAAGCACTATG---GGCGCAGCGTCA---  
GTGACGCTGACGGTACAA---GCCAGACAA---TTATTG---TCTGGTATAGTGCAACAGCAGAAC---  
AATCTG---CTAAGG---GCTATTGAGGCGCAACAGCATCTGTTGCAACTCACAGTCTGGGGCATC  
>MH013075  
TTCTACTGTAATACAACAAAACTGTTTAATAGTACTTGGAAATTCAACACAACCTTAGTAGTACTGAGAATAGTA  
CCGAA-----  
-----  
GGGTCAGAGAACATCACACTCCCATGCAGCATAAAACAAATTATAAACATGTGGCAGAAAGTAGGAAAAGCAA  
TGTATGCCCCGCCCATCGAAGGACAAATTAGATGTTTCATCAAAT---  
ATTACAGGGCTGCTATTAACAAGAGATGGTGGTGGTGGGAATGCGAGCAATGAG-----  
-----  
-----  
ACCACCGAGACTTTTCAGGCCTGGAGGAGGAGATATGAGAGAAAATTGGAGAAGTGAATTATATAAATATAAAG  
TAGTAAGAATTGAACCATTA---GGAGTAGCACCCCTCCACGGCAAAGAGAAGAGTGGTG-----  
-----CAGAGAGAAAAAAGAGCA---GTGGGA---ATAGGAGCA-----  
TTGTTGTTCCCTTGGGTTCTTGGGAGCA---GCAGGAAGCACTATG---GGCGCAGCGTCA---  
ATGATGCTGACGGTACAG---GCCAGACTA---TTATTG---TCTGGTATAGTGCAACAGCAGAAC---  
AATATG---CTGAGG---GCTATTGAGGCGCAACAGCATCTGTTGCAACTCACAGTCTGGGGCATC  
>DQ487188  
TTCTACTGTGATACAACACGACTGTTTAATAGTACTTGGAAATAACTTGGACTGGGAATGATACTTGGTCAA  
ATAAC-----  
-----ACT---  
AGAAGAAATGATACAATCACACTCCCATGCAGAATAAAACAAATTATAAACATGTGGCAGGAAGTAGGAAAAG  
CAATGTATGCCCCCTCCCATCAGAGGAAACATTACCTGTTTCATCAAAT---  
ATTACAGGGCTAATATTAACAAGAGATGGTGGTGATAACAATAGCACG-----  
-----  
-----  
AACGGGACTGAGACCTTCAGACCTGGAGGAGGAGATATGAGGGACAATTGGAGAAGTGAATTATATAAATATA  
AAGTAGTACAAATTGAACCATTA---GGAGTAGCACCCACCAAGGCAAAGAGAAGAGTGGTG-----  
-----CAAAGAGAAAAAAGAGCA---GTGGGC---ATAGGAGCT-----  
---GTGTTCCCTTGGGTTCTTGGGAGCA---GCAGGAAGCACTATG---GGCGCAGCGTCA---  
ATAACGCTGACGGTACAG---GCCAGACAA---TTATTG---TCTGGTATAGTGCAACAGCAGAAC---  
AATTTG---CTGAGG---GCTATTGAGGCGCAACAACATCTGTTGCAACTCACAGTCTGGGGCATC  
>DQ487190  
TTCTACTGTGATGCAACACAACCTGTTTAATAGTACTTGGAAATAGTACTGAAGATTGGAATAGTACTGAAGATT  
CAACTAAC-----  
-----GCT---  
GATGGAAATAACACAATCATACTCCCATGCAGAATAAAACAGATTGTAACATGTGGCAGGAAGTAGGAAAAG  
CAATGTATGCCCCCTCCCATCAGAGGACAGATTAGATGTTTCATCAAAT---  
ATTACAGGGCTGCTATTAACAAGAGATGGTGGTAACGGCACCAAT-----  
-----  
-----  
AACGACAATGAGACCTTCAGACCTGGGGGAGGAGATATGAGGGACAATTGGAGAAGTGAATTATATAAATATA  
AAGTAGTAAAAATTGAACCATTA---GGAGTAGCACCCACCAAGGCAAAGAGAAGAGTGGTG-----  
-----CAGAGAGAGAAAAAGAGCG-----GGC---ATAGGAGCT-----  
---TTGTTCCCTTGGGTTCTTGGGAGCA---GCAGGAAGCACTATG---GGCGCAGCGTCC---  
ATGACGCTGACGGTACAG---GCCAGACAA---TTATTG---TCTGGTATAGTGCAACAGCAGAAT---  
AATTTG---CTGAGG---GCTATTGAGGCGCAACAGCATCTGTTGCAACTCACAGTCTGGGGCATC  
>AY612855  
TTCTACTGTAATACAACACAGCTGTTTAATAGTACTTGGAAATGAGAATGATACTACCTGGAATAATACAGCAG  
GGTCA-----  
-----

AATAACAATGAACTATCACACTCCCATGTAGAATAAAACAAATTATAAACAGGTGGCAGGAAGTAGGAAAAG  
CAATGTATGCCCCCTCCCATCAGTGGACCAATTAATTGTTTATCAAAT---  
ATCACAGGGCTATTATTAACAAGAGATGGTGGTGACAACAATAAT-----  
-----  
-----  
ACAATAGAGACCTTCAGACCTGGAGGAGGAGATATGAGGGACAATTGGAGAAGTGAATTATATAAATATAAAG  
TAGTAAGAATTGAGCCATTA---GGAATAGCACCCACCAAGGCAAAGAGAAGAGTGGTG-----  
-----CAAAGAGAAAAAAGAGCA---GTGGGA---ATAGGAGCT-----  
ATGTTCCCTTGGGTTCTTGGGAGCA---GCAGGAAGCACTATG---GGCGCAGCGTCA---  
GTGACGCTGACGGTACAG---GCCAGACTA---TTATTG---TCTGGTATAGTGCAACAGCAAAAC---  
AATTTG---CTGAGA---GCTATCGAGGCGCAACAGCATCTGTTGCAACTCACAGTCTGGGGCATC  
>AY835437  
TTCTACTGTAATTCAACACAGCTGTTTAATAGTACTTGGACGCGGCCCGCTAATGGTACTTGGCGGTCTAATG  
GTACTTGAAT-----  
-----AGTACTGAA-----  
GGGACAAATGACACTATCACACTCCCATGTAGAATAAAACAAATTATAAACATGTGGCAGGGAGTAGGAAAAG  
CAATGTATGCCCCCTCCCATCAGTGGACAAATTAGATGTACATCAAAT---  
ATCACAGGGCTGCTATTAACAAGAGATGGTGGTGAGAACAGGACAGAT-----  
-----  
-----  
AACGGGACAGAGATATTTCAGACCTGGAGGAGGAAATATGAGGGACAACCTGGAGAAGTGAATTATATAAATATA  
AAGTAGTAAAAATTGAGCCATTA---GGAGTAGCACCCACCAAGGCAAAGAGAAGAGTGGTG-----  
-----CAAAGAGAAAAAAGAGCA---GTGGGAACGATAGGAGCT-----  
---ATGTTCCCTTGGGTTCTTGGGAGCA---GCAGGAAGCACTATG---GGCGCAGCGTCA---  
ATAACGCTGACGGTACAG---GCCAGACTA---TTATTG---TCTGGTATAGTGCAACAGCAGAAC---  
AATTTG---CTGAGG---GCTATTGAGGCGCAACAGCATATGTTGCAACTCACAGTCTGGGGCATC  
>KT283729  
TTCTACTGTAATACAACACAACCTGTTTAATAGTACTTGGGCTTGAATAGTACTGAAGGGTCAAATAGCACTG  
GA-----  
-----  
GAAAAATGGCACTATCACACTCCAATGCAGAATAAAACAAATTATAAATATGTGGCAGGAAGTAGGGAAAGCAA  
TGTATGCCCCCTCCCATCAGAGGACAAATTAAATGTTTCATCAAAT---  
ATTACAGGGCTGATATTAACAAGAGATGGAGGTAATAATAATGGT-----  
-----  
-----  
ACGAACAATACCATAGAGATCTTCAGACCTGGAGGAGGAGATATGAGAGAAAATTGGAGAAGTGAATTATATA  
AATATAAAGTAGTAAAAATTGAACCATTA---GGAGTAGCACCCACCAGGGCAAAGAGAAGAGTGGTG-----  
-----CAGAGAGAAAAAAGAGCA---  
GTGGGAACAATAGGAGCT-----ATGTTCCCTTGGGTTCTTGGGAGCA---GCAGGAAGCACTATG---  
GGCGCAGCGTCA---ATGACGCTGACGGTACAG---GCCAGACAA---TTATTG---  
TCTGGTATAGTGCAACAGCAGAAC---AAGTTG---CTGAAA---  
GCTATTGAGGCGCAACAGCACCTGTTGCAACTCACGGTCTGGGGCATC  
>DQ313246  
TTCTACTGTAATTCATCACAACTGTTTAATAGTACTTGAATACTAATAGTACTTGGAGTGATACTAGAGGG-  
-----  
-----  
TCAAATGACACTATCACACTCCCATGTAGAATAAAACAAATTATAAACATGTGGCAGGAAGTGGGAAAAGCAA  
TGTATGCCCCCTCCCATCAGAGGACAAATTAGCTGTTTCATCAAAT---  
ATTACAGGGCTGCTATTAACAAGAGATGGTGGGAACGAGAGCAAG-----  
-----  
-----  
CCCGACACCGAGACCTTCAGACCTGGAGGAGGAGATATGAGGGACAATTGGAGAAGTGAATTATATAAATATA  
AAGTAGTAAAGGTTGAACCATTA---GGAGTAGCACCCACCAGGGCAAAGAGAAGAGTGGTG-----  
-----CAAAGAGAAAAAAGAGCA---GTGGGAACGTTAGGAGCT-----  
---GTGTTCCCTTGGGTTCTTGGGAGCA---GCAGGAAGCACTATG---GGCGCAGCGTCA---  
ATGACGCTGACGGTACAG---GCCAGACAA---TTGTTG---TCTGGTATAGTGCAACAGCAGAAC---  
AATTTG---CTGAGA---GCTATTGAGGCGCAACAGCATATGTTGCAACTCACAGTCTGGGGCATC  
>EU289197  
TTCTACTGTGATTCATCACCACTGTTTAATAGTACTTGGGAGAATGATACAGAAGTGTTAAATAACACTGTG-  
-----

-----  
GGAAATGAAACAATCACGCTCCCATGCAAAATAAAACAAATTATAAACTTGTGGCAGGAAGTAGGGAAAGCAA  
TGTATGCCCCCTCCCATCAGAGGACAAATTAAATGTTTCATCAAAT---  
ATTACAGGGCTACTATTAACAAGAGATGGTGGTACTAACGGGGAC-----  
-----  
-----  
AATACCACTGAGACCTTCAGACCTGGAGGAGGAGATATGAGGGACAATTGGAGAAGTGAATTATATAAAATATA  
AAGTAGTAAAGATTGAACCATTA---GGAGTAGCACCCACCAAGGCAAAGAGAAGAGTGGTG-----  
-----CAAAGAGAAAAAAGAGCA---GTGGGA---TTAGGAGCT-----  
---CTGTTCCCTTGGGTTCTTGGGAGCA---GCAGGAAGCACTATG---GGCGCAGCGTCA---  
GTGACGCTGACGGTACAG---GCCAGACAA---TTACTG---TCTGGTATAGTGCAACAGCAGAAC---  
AATCTG---CTGAGG---GCTATTGAAGCGCAACAGCATCTGTTGCAACTCACAGTCTGGGGCATC  
>JQ609870  
TTCTACTGCAATACATCACAACCTGTTTAATAGTACTTGGCTTAATAAACTTGGACTGGGTCAAAT-----  
-----  
-----  
GACACTGAAAATATCACACTCCCATGCAGAATAAAACAAATTATAAACATGTGGCAGGAAGTAGGAAAAGCAA  
TGTATGCCCCCTCCCATCAGCGGACAAATTAGATGTTTCATCAAAT---  
ATTACAGGGCTGCTATTAATAAGAGATGGTGGTAAGACAAACCAGAGT-----  
-----  
-----  
AACACGACCGAGACCTTCAGACCTGGAGGAGGAGATATGAGGGACAACCTGGAGAAGTGAATTATATAAAATATA  
AAGTAGTAAGAATTGAACCAATA---GGAGTAGCACCCACCAAGGCAAAGAGAAGAGTGGTG-----  
-----CAGAGAGAAAAAGA-----GTAGCA---CTAGGAGCT-----  
---ATGTTCCCTTGGGTTCTTGGGAGCA---GCAGGAAGCACTATG---GGCGCAGCGTCA---  
GTGACGCTGACGGTACAG---GCCAGACTA---TTATTG---TCTGGTATAGTGCAACAGCAGAAC---  
AATTTG---CTGAGG---GCTATTGAGGCGCAACAGCGTCTGTTGCAACTCACAGTCTGGGGCATC  
>AY835436  
TTCTACTGTAATTCAACACAGCTGTTTAATAGTACTTGGAGTGTTAATAGTACTGGGAATGATACTACT-----  
-----  
-----  
GAAGAGCCGAATATCACATTCCCATGCAGAATAAAACAAATTATAAACATGTGGCAGGAAGTAGGAAAAGCAA  
TGTATAACCCTCCCATTAAGGAATAATTAGTTGTAGATCAAAT---  
ATTACAGGGCTGTTATTAACAAGAGATGGTGGTAATAACAACAACACC-----  
-----  
-----  
AACACCACCGAAACCTTCAGACCTGAAGGAGGAAATATGAAGGACAATTGGAGAAGTGAATTATATAAAATATA  
AAGTAGTAAAAATTGAACCATTA---GGAGTAGCACCCACCAAGGCAAAGAGAAGAGTGGTG-----  
-----CAAAGAGAGAAAAAGAGCA---GTAGGA---ATAGGAGCT-----  
---GTGTTCCCTTGGGTTCTTGGGAGCA---GCAGGAAGCACTATG---GGCGCAGCGTCA---  
GTGACGCTGACGGTACAA---GCCAGACAA---TTATTG---TCTGGTATAGTGCAACAGCAGAAC---  
AATCTG---CTGAGG---GCTATTGAGGCGCAACAGCATATGTTGCAACTCACAGTCTGGGGCATC  
>AY835768  
TTCTACTGTAATACAACAAAACCTGTTTAATAGTACTTGGATGAATAATGGTACTTGGATTGGTACTAACGAG-----  
-----  
-----  
TCAGATAGCAACATCACGCTCCCATGCAGAATAAAACAAATTATAAACATGTGGCAGGAAGTAGGAAAAGCAA  
TGTATGCCCCCTCCCATCGAAGACAAATTAGTTGTTTATCAAAC---  
ATTACAGGGCTGCTATTAACAAGGGATGGTGGTGGGAACGAGAGCAAG-----  
-----  
-----  
AACGGGAGCGAGACCTTCAGACCTGGAGGAGGAGATATGAGGGACAATTGGAGAAGTGAATTATATAAAATATA  
AAGTAGTAAAAATTGAACCATTA---GGAGTAGCACCCACTGAGGCAAAGAGAAGAGTGGTG-----  
-----CAGAGAGAAAAAAGAGCA---GTGGGA---ATAGGAGCT-----  
---TTGTTCCCTTGGGTTCTTGGGAGCA---GCAGGAAGCACTATG---GGCGCAGCGGCA---  
ATGACGCTGACGGTACAG---GCCAGACAA---TTATTG---ACTGGTATAGTGCAACAGCAGAAC---  
AATTTG---CTGAGG---GCTATTGAGGCGCAACAGCATCTGTTGCAACTCACAGTCTGGGGCATC  
>EU289190  
TTCTACTGTGATACAACACAGCTGTTTAATAGTACTTGGTCGTCTAATGATACTTGGAAATAGTACTGGAGTG-----  
-----

-----  
CAAGATAACAATATCACACTCCCATGCAGAATAAAACAAATTATAAACATGTGGCAGGAAGTAGGAAAAGCAA  
TGTATGCCCCCTCCCATCCAAGGACTAATTAGCTGTTTCATCAAAT---  
ATTACAGGGCTGCTATTAACAAGAGATGGTGGTACTAACAATACC-----  
-----  
-----  
AATGCCACCGAGATCTTCAGACCAGGAGGAGGAGATATGAGGGACAATTGGAGAAGTGAATTATATAAATATA  
AAGTAGTAAAAATTGAACCATTA---GGAATAGCACCCACCAAGGCAAAGAGAAGAGTGGTG-----  
-----CAAAGAGAAAAAAGAGCA---GTGGGA---CTAGGAGCT-----  
---GTGTTTCATTGGGTTCTTGGGAGCA---GCCGGAAGCACTATG---GGCGCAGCGTCC---  
GTGACGCTGACGGTACAG---GCCAGACAA---TTACTG---TCTGGTATAGTGCAACAGCAGAAC---  
AATCTG---CTGAGA---GCTATTGAGGCGCAACAACATATGTTGCAACTCACAGTCTGGGGCATC  
>AY835438  
TTTTACTGTGATACATCACAACCTGTTTAATAGTACTTGGAAATTCTAATAGTACTTGGAAATGATACTAACAATA  
AT-----  
-----  
AATAGCACTGAAAAGATTATACTCTCATGTAGAATAAGACAAATTATAAACAGGTGGCAGGAAGTAGGAAAAG  
CAATGTATGCCCCCTCCCATCAGCGGACCAATTAAGTGTTCATCAAAT---  
ATTACAGGGCTGCTATTAGCAAGAGATGGTGGAAATGAGACTAAT-----  
-----  
-----  
GTGACCGAGACCTTCAGACCTGCAGGAGGAGATATGAGGGACAATTGGAGAAGTGAATTATATAAATATAAAG  
TAGTACAAATTGAACCATTA---GGAATAGCACCCACCAAGGCAAAGAGAAGAGTGGTG-----  
-----CAGAGAGAAAAAAGAGCA---GTGGGAATGCTAGGAGCT-----  
ATGTTCTTGGGTTCTTGGGAGCA---GCAGGAAGCACTATA---GGCGCAGCGTCA---  
ATGACGCTGACGGTACAG---GCCAGACAA---TTATTG---TCTGGCATAGTGCAACAGCAAAAC---  
AATTTG---CTGAGG---GCTATTGAGGCGCAACAACATATGTTGCAACTCACAGTCTGGGGCATC  
>KT283753  
TTCTACTGTAATACAACACAACCTGTTTAACAGTACTTGGAAATGTTACTGATACTGAAGTGTCAAATAACACTA  
AT-----  
-----  
-----  
GGAAATGACACAATCACACTCCCATGCAGAATAAAACAAATTATAAACATGTGGCAGGAAGTAGGAAAAGCAA  
TGTATGCCCCCTCCAGAGAAGGGCAAATTAAATGTTTCATCAAAT---  
ATTACAGGGCTACTATTAACAAGAGATGGTGGTAATAGTAATAATACT-----  
-----  
-----  
GACAAATGGAACCGAGGTCTTCAGACCTGGAGGAGGAAACATGAAGGACAATTGGAGAAGTGAATTATATAAAT  
ATAAGTAGTAAGAATTGAACCATTA---GGGATAGCACCCACCAAGGCAAAGAGAAGAGTGGTG-----  
-----CAGAGAGAAAAAAGAGCA---GTGGGA---TTCGGAGCT---  
-----GTGTTCTTGGGTTCTTGGGAGCA---GCAGGAAGCACTATG---GGCGCAGCGTCA---  
ATAACGCTGACGGTACAG---GCCAGACAA---TTATTG---TCTGGTATAGTGCAACAGCAAAAC---  
AATTTG---CTGAGG---GCTATTGAGGCGCAACAGCATCTGTTGCAACTCACAGTCTGGGGCATC  
>EU289198  
TTCTACTGTAATACAACACAACCTGTTTAATAGTACTTGGCCTTGGAAATGTTACTGAAGAGTCAAAT-----  
-----  
-----  
AGCACTGACAATATCACACTCCCATGCAGAATAAAACAAATTGTAAACATGTGGCAGGAAGTAGGAAAAGCAA  
TGTATGCCCCCTCCCATCAGAGGACCAATTAGATGTTTCATCAAAT---  
ATTACAGGTCTGCTATTAACAAGGGATGGTGGGAATACCATAAAC-----  
-----  
-----  
GGAACCTGAGATCTTCAGACCTGGAGGAGGAGATATGAGGGACAATTGGAGAAGTGAATTATATAAATATAAAG  
TAGTAAAAATTGAACCATTA---GGAGTAGCACCCACCAAGGCAAAGAGAAGAGTGGTG-----  
-----CAGAGAGAAAAAAGAGCA---GTGGGA---ATAGGAGCT-----  
ATGTTCTTGGGTTCTTGGGAGCA---GCAGGAAGCACTATG---GGCGCAGCGTCA---  
ATAACGCTGACGGTACAG---GCCAGACAA---TTATTG---TCTGGTATAGTGCAACAGCAGAAC---  
AATTTG---CTGAAG---GCTATTGAGGCGCAACAGCATCTGTTGCAACTCACAGTCTGGGGCATC  
>KU678164  
TTCTATTGTAATACAACACAACCTGTTTAATAGTACTTGGTATGCTAATAGTACTTGGAAATAGCACTGAAGGAA  
ATAAC-----

-----  
ACTGACATACCTATCACACTTCCATGCAGAATAAAGCAAATTATAAACATGTGGCAAGAAGTAGGAAAAGCAA  
TGTATGCCCCCTCCAATCTCAGGAAAGATTAGATGTTTCATCAAAT---  
ATTACAGGGATGCTATTAACAAGAGATGGTGGTAATAATAGGAACAGT-----  
-----  
-----  
AGTAATCCCGAGATCTTCAGACCTGGAGGAGGAGATATGAGGGACAATTGGAGAAGTGAATTATATAAATATA  
AAGTAGTAAAAATTGAACCATTA---GGAGTAGCACCCACCAAGGCAAAAAGAAGGGTGGTG-----  
-----CAGAGAGAAAAAAGAGCA---GTGGGA---ATAGGAGCT-----  
---TTGTTCCCTTGGGTTCTTGGGAGCA---GCAGGAAGCACTATG---GGCGCAGCGTCA---  
ATGACGCTGACGGTACAG---GCCAGACAA---TTATTG---TCTGGTATAGTGCAACAGCAGAAC---  
AATTTG---CTGAGA---GCTATTGAGGTGCAACAGCACCTGTTGCAACTCACAGTCTGGGGCATC  
>JN024303  
TTCTACTGTAATACAACAAGGCTGTTTAATTGGAGTGATACTGAAAGTGGGAATGGTACTGAAGGG-----  
-----  
-----  
AAAAATGACACAATTATACTCCCATGCAAAATAAAACAAATTATAAACCTGTGGCAAGAAGTAGGAAAAGCAA  
TGTATGCCCCCTCCCATCAGCGGACCAATTAGATGCTCATCAAAT---  
ATTACAGGGCTACTATTAACAAGAGATGGTGGTAGTAGTAATACG-----  
-----  
-----  
ACCACCGAGATCTTCAGACCTGGAGGAGGAGATATGAGGGACAATTGGAGAAGTGAATTATATAAATATAAAG  
TAGTAAAAATTGAACCATTA---GGAGTAGCACCCACCGAGGCAAAGAGAAGAGTGGTG-----  
-----CAGAGAGAAAAAAGAGCA---GTGGGA---TTTGGAGCT-----  
TTCTTCCTTGGGTTCTTGGGAGCA---GCAGGAAGCACTATG---GGCGCAGCGTCA---  
ATAACGCTGACGGCACAG---GCCAGACTA---TTATTG---ACTGGTATAGTGCAACAGCAGAAC---  
AATCTG---CTGAGG---GCTATTGAGGCGCAACAGCATCTGTTGCAACTCACAGTCTGGGGCATC  
>AY332237  
TTCTATTGTAATACAACAAAACCTGTTTAATAGTACTTGGAACTGACTAGTGCTGAAGGGTTAAATGACACTG  
AA-----  
-----  
GGAAATGACACACTCACACTCCCATGCAGAATAAAACAAATTATAAACATGTGGCAGGAAGTAGGAAAAGCAA  
TGTATGCCCCCTCCCATCAGAGGACAAATTAGATGTTTCATCAAAT---  
ATTACAGGGCTGCTATTAACAAGAGATGGTGGTAGAGAGAATGGG-----  
-----  
-----  
GACACTGAGACCTTCAGACCTGGAGGAGGAGATATGAGGGACAATTGGAGAAGTGAATTATATAAATATAAAG  
TAGTAAAAATTAAACCATTA---GGAATAGCACCCACCAGGGCAAAGAGAAGAGTGGTG-----  
-----CAGAGAGAAAAAAGAACA---GTGGGA---CTAGGAGCT-----  
TTGTTCCCTTGGGTTCTTGGGAGCA---GCAGGAAGCACTATG---GGCGCAGCGTCG---  
TTGACGCTGACGGTACAG---GCCAGACAA---TTACTG---TCTGGTATAGTGCAACAGCAGAAC---  
AATTTG---CTGAGA---GCTATTGAGGCGCAACACCAGCTGTTGCAACTCACAGTCTGGGGCATC  
>AY308762  
TTCTACTGTAATACAACATAAAGCTGTTTAATAGTACTTGGGGGGTTAATGGTACTTGGAAATGGGACTGAAGGGA  
AT-----  
-----  
AATGGGAATAACACTATCATACTCCCATGCAGAATAAAACAAATTATAAACATGTGGCAGCAAGTAGGAAAAG  
CAATGTATGCCCCCTCCCATCAGCGGATTAATTAGATGTTTCATCAAAT---  
ATTACAGGGTTGATGTTAACAAGAGATGGTGGTGGTGGTAATAGC-----  
-----  
-----  
AGCACAAACGAGACCTTCAGACCTGGAGGAGGAGATATGAGGGACAATTGGAGAAGTGAATTATATAAATATA  
AAGTAGTACAAATTAAACCATTA---GGAGTAGCACCCACCAAGGCAAAGAGAAGAGTGGTG-----  
-----CAGAGAGAAAAAAGAGCA---GTGGGA---ATAGGAGCT-----  
---GTGTTCCCTTGGGTTCTTGGGAGCA---GCAGGAAGCACTATG---GGCGCAGCGTCA---  
ATAACGCTGACGGTACAG---GCCAGACAA---TTATTG---TCTGGTATAGTGCAACAGCAGAAC---  
AATTTG---CTGAGG---GCTATTGAGGCGCAACAGCATCTGTTGCAACTCACAGTCTGGGGCATT  
>AY835753  
TTCTACTGTGAGACAACACAACCTGTTTAATAGCACTTGGATTAGGGATAATGGTAATTGGACTAGGGCTGAGA  
ATATT-----

-----  
ACTGAAGGGAATAATATCACACTCCCATGCAGAATAAGACAAATTGTAAACCTGTGGCAGCAAGTAGGAAAAG  
CAATGTATGCCCCCTCCCATCAGTGGACCAATTAAGTGTATTATCAAAT---  
ATTACAGGACTGCTATTAACATGGGATGGTGGTAATAATAGCACTAGT-----  
-----  
-----  
AATAACAACACCGAGATCTTCAGACCTGGAGGAGGAGATATGAGGGACAACCTGGAGAAGTGAATTATATAAAT  
ATAAAGTAGTAAAAATTGAACCATTA---GGAGTAGCACCCACCAAGGCAAAGAGAAGAGTGGTG-----  
-----CAGAGGGAAAAAAGAGCA---GTGGGA---CTAGGAGCT---  
-----TTGTTTCCTTGGGTTCTTGGGAACA---GCAGGAAGCACTATG---GGCGCAGCATCA---  
TTGACGCTGACGGTACAG---GCCAGACAA---TTATTG---TCTGGTATAGTGCAACAGCAGAAC---  
AATTTG---CTGAGG---GCTATTGAGGCGCAACAACATCTGTTGCAGCTTACAGTCTGGGGCATC  
>EU575474  
TTCTACTGTAGTACAACACAACCTGTTTAATAGTACTTGGATTGCAAATAAGACTGGGAATGATACTGGAGGA-  
-----  
-----  
TCAAAATGGAAC TATTACACTTCCATGCAGAATAAAACAAATTGTAAACATGTGGCAGGAAGTAGGAAAAGCAA  
TGTATGCCCCCTCCCATCGAAGGACAAATTAGATGTTTCATCAAAC---  
ATTACAGGACTGCTATTATTAAGAGATGGTGGTAAGAATAACGGGACA-----  
-----  
-----  
GGAAACATGACAGAAATCTTCAGACCTGGAGGAGGAGATATGAGGGACAATTGGAGAAGTGAATTATATAAAT  
ATAAAGTAGTAAAAATTGAACCATTA---GGAGTAGCACCCACCAAGGCAAAGAGAAGAGTGGTG-----  
-----CAGAGAGAAAAAAGAGCG---GTGGGAACACTAGGAGCC---  
-----TTGTTTCCTTGGGTTCTTGGGAACA---GCAGGAAGCACTATG---GGCGCAGCATCA---  
CTAACGCTGACGGTACAG---GCCAGACTA---TTATTG---TCTGGTATAGTGCAACAGCAAAAC---  
AATTTG---CTGAGA---GCTATTGAGGCGCAACAGCATTTGTTGCAACTCACAGTCTGGGGCATC  
>JN024428  
TTCTACTGTAATACAACACAGCTGTTTAATAGTATTTGGTATAATACTACAAATAGTTCTTGAATAATAAGA  
CATGG-----  
-----  
-----  
TCAATAACACGATCACACTCCCATGTAGAATAAAACAAATTATAAACATGTGGCAGCAAGTAGGAAAAGCAA  
TATATGCCCCCTCCCATCAAAGGAAAAATTAAATGTATATCAAAT---  
ATTACAGGGCTGCTATTAAACAAGAGATGGTGGTGATACCAATAGT-----  
-----  
-----  
GGGACAGAGATCTTCAGACCTGGAGGAGGAGATATGAGGGATAATTGGAGAAGTGAATTATATAAATATAAAG  
TAGTACAAATTGAACCATTA---GGAGTAGCACCCACCAAGGCAAAGAGAAGAGTGGTG-----  
-----CAAAGAGAAAAAAGAGCA---GTGGGA---TTAGGAGCT-----  
ATGTTCCCTTGGGTTCTTGGGAGCA---GCAGGAAGCACTGTG---GGCGCAGCGTCA---  
ATAACGCTGACGGTACAG---GCCAGACAA---TTGTTG---TCTGGTATAGTGCAACAGCAGAAC---  
AATCTG---CTGAGA---GCTATTGAGGCGCAACAGCGTCTGTTGCAACTCACAGTCTGGGGCATC  
>AY331284  
TTCTACTGTAATACAACACAACCTGTTTAATAGTACTTGAATGCTAATGTTACTGCAAATAGCACGGAA----  
-----  
-----  
GGAAATGACACCCTCATACTCCCATGCAAAATAAAACAAATTATAAACATGTGGCAAGAGGTAGGAAAAGCAA  
TGTATGCCCCCTCCCATCCAAGGGATAATTAGCTGTTTCATCAAAT---  
ATCACAGGGCTATTATTAACAAGAGATGGTGGGAAGTGAAAACAGG-----  
-----  
-----  
CCTAACGAGACCTTCAGACCTGGAGGAGGAGATATGAGGGACAATTGGAGAAGTGAATTATATAAATATAAAG  
TAGTACAAATTGAACCACTA---GGAGTAGCACCCACCAAGGCAAAAAGAAGAGTGGTG-----  
-----CAGAGAGAAAAAAGAGCA---ATAGGA---ATGGGAGCG-----  
TTGTTCCCTTGGGTTCTTGGGAGCA---GCAGGAAGCACTATG---GGCGCAGCGTCA---  
GTGACGCTGACGGTACAG---GCCAGACAA---TTATTG---TCTGGTATAGTGCAACAGCAAAAC---  
AATTTG---CTGAAG---GCTATTGAGGCGCAACAGCATCTGTTGCAACTCACAGTCTGGGGCATC  
>AY331285  
TTCTACTGTAATACAACAAAACCTGTTTAATAGTACTTGGATTAGGGAGGGTAATAATGGTACTTGAATGGTA  
CTATAGGGTTA-----

-----AATGACACT-----  
GCAGGAAATGACACAATCATACTCCCATGTAAAATAAAACAAATTATAAACATGTGGCAGGAAGTGGGAAAAG  
CAATGTATGCCCCCTCCCATCAGAGGACAAATTAGATGTTTCATCAAAT---  
ATTACAGGGCTGATATTAACAAGAGATGGCGGTAAGGACGATAGTAATGGG-----  
-----  
-----  
AGTGAGATCCTCGAGATCTTCAGACCTGGAGGAGGAGATATGAGGGACAATTGGAGAAGTGAATTATATAAAT  
ATAAAGTAGTAAGAATTGAACCATTA---GGAGTAGCACCCACCAGGGCAAGGAGGAGAGTGGTG-----  
-----CAAAAAGAAAAAGAGCA---GTGGGA---TTAGGAGCT---  
-----ATGTTCTTGGGTTCTTAGGAGCA---GCAGGAAGCGCTATG---GGCGCAGCGTCA---  
ATGACGCTGACGGTACAG---GCCAGACAA---TTACTG---TCTGGTATAGTGCAACAGCAGAAT---  
AATTTG---CTGAGG---GCTATTGAGGCGCAACAGCATATGTTGCAACTCACAGTCTGGGGCATC  
>KT124745  
TTCTACTGTAATACAACAACACTGTTTAAATAGTACTTGGGCTTGAATAATACTGAAGAGTCAAATAACACTG  
AA-----  
-----  
GGAAATAGCACAACAATCACACTGCAATGCAGAATAAAACAAATTGTAAACATGTGGCAGGAAGTAGGAAAAG  
CAATGTATGCCCCCTCCCATTAGAGGACAAATTAAATGTTTATCAAAT---  
GTTACAGGGCTGCTATTAACAAGAGATGGGGGTAATAACAATGAC-----  
-----  
-----  
ACTGAAACCTTCAGACCTGGAGGAGGAAATATAAAGGACAATTGGAGAAGTGAATTATATAAATATAAAGTAA  
TAAAAATTAAACCATTA---GGAATAGCACCCACCAAGGCAAAGAGAAGAGTGGTG-----  
-----CAAAGAGAAAAAGAGCA---GTGGGAACATTAGGAGCT-----  
ATGTTCTTGGGTTCTTGGGAGCA---GCAGGAAGCACTATG---GGCGCAGCGTCA---  
TTGACACTGACGGTACAG---GCCAGACTA---TTGTTG---TCTGGTATAGTGCAACAGCAAAAC---  
AATTTG---CTGAGG---GCTATTGAGGCGCAACAACATCTGTTGCAACTCACGGTCTGGGGCATC  
>JN562755  
TTCTACTGTGATACAACAACACTGTTTAAATAGTACTTGAATGGTACTGAAGAGTCAAATGACACTGAA-----  
-----  
-----  
AGTAATATCACACTCACACTCCCATGCAGAATAAAACAAATTGTAAACATGTGGCAGGAAGTAGGAAAAGCAA  
TGTATGCCCCCTCCCATCAGAGGAATAATTAGCTGCTCATCAAAT---  
ATTACAGGGCTGCTATTAGTAAGAGATGGTGGTAAGCCCAATAATGAGACT-----  
-----  
-----  
AATAATGGTACTGAGGTCTTCAGACCTGGAGGAGGAAATATGAAGGACAATTGGAGAAGTGAATTATATAAAT  
ATAAAGTAGTAAAAATTGAACCATTA---GGAGTAGCACCCACTAAGGCAAAAAGAAGAGTGGTG-----  
-----CAGAGAGAGAAAAGAGCA---GTGGGA---TTAGGAGCT---  
-----ATGTTCTTGGGTTCTTGGGAGCA---GCAGGAAGCACTATG---GGCGCAGCGTCA---  
ATAACGCTGACGGTACAG---GCCAGACAC---TTATTG---TCTGGTATAGTGCAACAGCAAAAC---  
AATTTG---CTGAAG---GCTATTGAGGCGCAACAGCATCTGTTGCAACTCACAGTCTGGGGCATC  
>JN562794  
TTCTACTGTAATACAACAACACTATTGTTTAAATAGTAATTGGACTTGAATGATACTGGAGGATATTTTACTAAAG  
GGTCAAATAAC-----  
ACAAATGATACTGAAGGG-----  
TCAAATAGCACACATATCACACTCCCATGCAGAATAAAACAAATTATAAACATGTGGCAGGGAGTAGGAAAAG  
CAATGTATGCCCCCTCCTATCAGTGGACTAATTAGATGTTTCATCAAAT---  
ATCACAGGGCTGCTACTAACAAGGGATGGTGGTATGACGAATGATACC-----  
-----  
-----  
AATACCACCGAGACCTTCAGACCTCTAGGAGGAAATATGAAGGACAATTGGAGAAGTGAATTATATAAATATA  
AAGTAGTAGAAATTGAACCATTA---GGAGTAGCACCCACCAAGGCAAAGAGAAGAGTGGTG-----  
-----CAGAGAGAAAAAGAGCA---GTGGGA---ATAGGAGCT-----  
---TTGTTCTTGGGTTCTTGGGAGCA---GCAGGAAGCACTATG---GGCGCAGCGTCA---  
CTAACGCTGACGGTACAG---GCCAGACAA---TTATTG---TCTGGTATAGTGCAACAGCAGAAT---  
AATCTG---CTGAGG---GCTATTGAGGCGCAGCAGCATCTGTTGCAACTCACAGTCTGGGGCATC  
>JN562786  
TTCTACTGTAATACAACAAAATTGTTTAAATAGTACTTGAATATTAATGGTACTTGAAGGGTACA-----  
-----

-----  
GGAGAGCCAAATATCACACTCCCATGCAGAATAAAACAAATTGTACACATGTGGCAGGAAGTAGGAAAAGCAA  
TGTATGCCCCCTCCCATCAGAGGACAAATTAAGTCTCATCACAT---  
ATTACAGGGCTGCTATTAACAAGAGATGGTGGGCATACTAACAATAATGGG-----  
-----  
-----  
AGCAATGAGACAGAGATCTTCAGACCTGGAGGAGGAGATATGAGGGACAATTGGAGAAGTGAATTATACAAAT  
ATAAAGTAGTAAGAATTGAACCATTA---GGAGTAGCACCCACCAAGGCAAAGAGGAGAGTGGTG-----  
-----CAGAGAGAAAAAAGAGCA---GTGGGA---ATAGGAGCT---  
-----GTGTTCTTGGGTTCTTGGGAGCA---GCAGGAAGCACTATG---GGCGCAGCATCA---  
ATAACGCTGACGGTACAG---GCCAGACAA---TTATTG---TCTGGCATAGTGCAACAGCAGAAC---  
AATTTG---CTGAAG---GCTATTGAGGCGCAACAGCATCTGTTGCAACTCACAGTCTGGGGCATC  
>JN562773  
TTCTACTGTAATTTAACACAACCTGTTTAATAGTACTTGGAAATGGTACAGAGTCAAATAACACTGAA-----  
-----  
-----  
GAAGATAACACAATCACACTCCCATGCAGAATAAAACAAATCATAAACATGTGGCAGGAAGTAGGGAAAAGCAA  
TGTATGCCCCCTCCCATCAGAGGAAATATTAGCTGTTTCATCAAAT---  
ATTACAGGGCTACTATTAACAAGAGATGGTGGTATTAACCAGACC-----  
-----  
-----  
AAAGACACTGAGATCTTCAGACCTGGAGGAGGAGATATGAGGGACAATTGGAGAAGTGAAGTATATAAATATA  
AAGTAGTAAAGGTTGAACCATTA---GGAATAGCACCCACCAAGGCAAAGAGAAGAGTGGTG-----  
-----CAGAGAGAAAAAAGAGCA---GTAGGA---ATAGGAGCT-----  
---GTGTTCTTGGGTTCTTGGGAGCA---GCAGGAAGCACTATG---GGCGCAGCGTCA---  
GTGACGCTGACGGTACAG---GCCAGACTA---TTGTTG---TCTGGTATAGTGCAACAGCAGAAC---  
AATCTG---CTGAGG---GCTATTGAGGCGCAGCAGCATCTGTTGCAACTCACAGTCTGGGGCATC  
>EU289189  
TTCTACTGTAATACAACAAAACCTGTTTAATAATACTTGGAAATAGTAATGATACTTGGACTAATACTGAAGAGT  
CA-----  
-----  
AATGAACTGAAATCAGGCTCCCATGCAGAATAAAACAAATTATAAACATGTGGCAGGAAGTAGGAAAGGCAA  
TGTATGCCCCCTCCCATCCAAGGACAAATAAGATGTTTCATCAAAT---  
ATTACAGGGCTGCTACTAACAAGAGATGGGGGTAACAACACGAAC-----  
-----  
-----  
AATACCGAGGTCTTCAGACCTGGAGGAGGAGATATGAGAGATAATTGGAGAAGTGAATTATATAAATATAAGG  
TAGTAAAAATTGAACCATTA---GGAGTAGCACCCACTAAGGCTAAGAGAAGAGTGGTG-----  
-----CAGAGAGAAAAAAGAGCA---GTGGGA---CTAGGAGCT-----  
TTGTTCTTGGGTTCTTGGGAGCA---GCAGGAAGCACTATG---GGCGCAGCGTCA---  
GTGACGCTGACGGTACAG---GCCAGACAA---TTATTG---TCTGGTATAGTGCAACAGCAGAGC---  
AATTTG---CTGAGG---GCTATTGAGGCGCAACAGCATCTGTTGCAACTCACAGTCTGGGGCATC  
>EF593200  
TTCTACTGTAATACAACACAACCTGTTTAATAGTACTTGGGAGAATTCAACACAACCTGTTTAATAGTACTGGG-  
-----  
-----  
GAGAAATGATACTATCACACTCCCATGCAGAATAAAACAAATTATAAACATGTGGCAGGCAGTGGGAAAAGCAA  
TGTATGCCCCCTCCTATCAGAGGACCAATTACATGTAAATCAAAT---  
ATCACAGGGCTGATACTAACAAGAGATGGTGGGAACAGCAGCAGC-----  
-----  
-----  
AACAACGAGACCTTCAGACCTGGAGGAGGAGATATGAGGGACAATTGGAGAAGTGAATTATATAAATATAAAG  
TAGTAAAAATTGAACCATTA---GGAGTAGCACCCACCAAGGCAAAGAGAAGAGTGGTG-----  
-----CAGAGAGAAAAAAGAGCA---GTGGGAGTGATAGGAGCT-----  
ATGTTCTTGGGTTCTTGGGAGCA---GCAGGAAGCACTATG---GGCGCAGCGTCA---  
GTGGCGCTGACGGTACAG---GCCAGACAA---TTATTG---TCTGGTATAGTGCAAGCAGCAGAAC---  
AATTTG---CTGAGG---GCTATTGAGGCGCAACAACATCTGTTGCAACTCACAGTCTGGGGCATC  
>EF593201  
TTCTACTGTAATACAACAAGACTGTTTAATAGTACGTGGAATGCCACTAGGGAGGAGAATGGTACTAAAGAGA  
CAAGT-----

-----  
GACAATACCACACTTATCACACTCCCATGCAGAATAAAACAATTTATAAACATGTGGCAGGAAGTAGGAAAAG  
CAATGTATGCCCCCTCCAATCAGTGGACAAATTAGTTGTTTCATCAAAT---  
ATTACAGGGCTGCTATTAACAAGAGATGGTGGTAATGACAAATGGTTCT-----  
-----  
-----  
AACAACACCGAGATCTTCAGACCTGGAGGAGGAAATATGAGGGACAATTGGAGAAGTGAATTATATAGATATA  
AAGTAGTAAAAATTGAACCATTA---GGAGTAGCACCCACCAAGGCAAAGAGAAGAGTGGTG-----  
-----CAGAGGGAAAAAAGAGCA---ATAGGA---CTAGGAGCT-----  
---TTGTTTCTTGGGTTCTTGGGAGCA---GCAGGAAGCACTATG---GGCGCAGCGTCA---  
CTGATGCTGACGGTACAG---GCCAGACAC---TTATTG---TCTGGTATAGTGCAACAGCAGAAC---  
AATCTG---CTGAGG---GCTATTGAGGCGCAACAGCATATGTTGCAACTCACAGTCTGGGGCATT  
>EU289192  
TTCTACTGTAATACAACAATGTTTAAATAGTACTTGGGAATACAACAACCTTAATAGTACTTGGGATGTTA  
CAGGAGGG-----TCA---  
-----  
AATACTACAGAGAATATCACACTCCAATGTAGAATAAAACAATTATAAACATGTGGCAGGAAGTAGGCAAAG  
CAATGTATGCCCCCTCCCATCAGTGGAAATAATTAAATGTACATCAAAT---  
ATTACAGGGCTACTATTAACAAGAGATGGTGGTACAAACAATACA-----  
-----  
-----  
AACGGTAGCGAGATTTTCAGACCTGGAGGAGGAGATATGAAGGACAATTGGAGAAGTGAATTATATAAATACA  
AAGTAGTAAAAATTGAACCATTA---GGAGTAGCACCCACCAAGGCAAAGAGAAGAGTGGTG-----  
-----CAAAGAGAAAAAAGAGCA---GTAACA---CTAGGAGCT-----  
---ATGTTCCCTTGGGTTCTTGGGAGCA---GCAGGAAGCACGATG---GGCGCAGCGTCA---  
ATGACGCTGACGGTACAG---GCCAGGCAA---TTATTG---TCTGGTATAGTGCAACAGCAGAAC---  
AATCTG---CTGCGG---GCTATTGAGGCGCAACAACATCTGTTGCAACTCACAGTCTGGGGCATC  
>EF593204  
TTCTACTGTAATACAACAAAACCTGTTTAAATAGTACTTGGTCGCTTAATAGTACTGGGCTTAATAGTACTGGG-  
-----  
-----  
AATGGTACTGAGATCATACTCCCATGTAGAATAAAACAATTATAAACATGTGGCAGGAAGTAGGAAAAGCAA  
TGTATGCCCCCTCCCATCAGAGGACAAATTAGATGCTCATCAAAT---  
ATTACAGGACTACTATTAACAAGAGATGGAGGGAGCAATGACACC-----  
-----  
-----  
CGCCAGGAGACTTTTCAGACCTGGAGGAGGAGATATGAGAGACAATTGGAGAAGTGAATTATATAAATATAAAG  
TAGTACAAATTGAACCATTA---GGATTAGCACCCACCAAGGCAAAGAGAAGAGTGGTG-----  
-----CAGAGAGAAAGAAGAGCA---ATAGGA---CTAGGAGCT-----  
ATGTTCCCTTGGGTTCTTGGGAGCA---GCAGGAAGCACTATG---GGCGCAGCGTCA---  
CTGACGCTGACGGTACAG---GCCAAACAA---TTATTG---TCTGGTATAGTGCAACAGCAGAAC---  
AATCTG---CTGAGG---GCTATTGAGGCGCAACAGCATCTGTTGCAACTCACAGTCTGGGGCATC  
>EU289195  
TTCTACTGTAATACAACAAAGCTGTTTAAATAGTACTTGGAAATAACTAATGGTGATTGGAATCTTGCTAGTG  
AAGGATCAAAT-----AACACT-----  
GCAGTAAATGGCAGTATCATACTTCCATGCAGAATTAAACAATTATAAACATGTGGCAGGAAGTAGGAAAAG  
CAATGTATGCCCCCTCCCATCAAAGGACAAATTAGATGTTTCATCAAAT---  
ATTACAGGGCTGATATTAACAAGAGATGGTGGTGTAAATGCGACC-----  
-----  
-----  
AATGCCACTGAGATCTTCAGACCAGGAGGAGGAGATATGAGGGACAATTGGAGAAGTGAATTATACAAATATA  
AAGTAGTACAAATTGAACCATTA---GGAGTAGCACCTACCAAGGCAAAGAGAAGAGTGGTG-----  
-----CAGAGAGAAAAAAGAGCA---GCATTGGGAATAGGAGCT-----  
---CTGTTCCCTTGGGTTCTTGGGAGCA---GCAGGAAGCACTATG---GGCGCAGCGTCG---  
ATAACGCTGACGGTACAG---GCCAGACAA---TTATTG---TCTGGTATAGTGCAACAGCAGAAC---  
AACTTG---CTGAGA---GCTATTGAGGCGCAACAGCATCTGTTGCAGCTCACAGTCTGGGGCATC  
>EU575815  
TTCTACTGTAATTCAACACCACTGTTTAAATAGTACCTGGGCTATGAATAGAACCTGGAATGATACTGAAGGGT  
CA-----

-----  
AATAACAATAAACTATCACACTCCAATGCAAAATAAAACAAATTATAAACATGTGGCAGGAAGTAGGAAAAG  
CAATGTATGCCCCCTCCCATCAGAGGACAAATTAGATGTTTCATCAAAT---  
ATTACAGGGCTGCTATTAACAAGAGATGGTGGTAATAGTGAAAATGCG-----  
-----  
-----  
AACAGACCGAGATCTTCAGACCTGGAGGAGGAGATATGAGGGATAATTGGAGAAGTGAATTATATAAATATA  
AAGTAGTAAAAATAGAACCATTA---GGAGTAGCACCCACCAAGGCAAAGAGAAGAGTGGTG-----  
-----CAGAGAGAAAAAAGAGCA---GTGGGA---CTAGGAGCT-----  
---TTGTTCCCTTGGGTTCTTGGGAACA---GCAGGAAGCACTATG---GGCGCAGCATCA---  
ATAACGCTGACGGTACAG---GCCAGGCAA---TTATTG---TCTGGTATAGTGCAACAGCAGAGC---  
AATCTG---CTGAGG---GCTATTGAGGCGCAACAGCATCTGTTGCAACTCACAGTCTGGGGCATC  
>EU575850  
TTCTACTGCAATACAACAGCACTGTTTAATAGTACTTGGAAATAATACTGAATGGTCAAATGACACTAGGTCAA  
ATGAC-----  
-----ACT---  
AGGTCAAATGCCACTATCACACTCCCATGCAGAATAAAACAAATTATAAACATGTGGCAGGAAGTAGGAAAAG  
CAATGTATGCCCCCTCCCATCAAAGGACAAATTAGCTGTTTCATCAAAT---  
ATTACAGGGCTGTTATTAACAAGAGATGGTGGCAGTAGCAATGATAGCAGC-----  
-----  
-----  
AACGGGACCACCGAGATCTTCAGACCTGGAGGAGGAGATATGAGGGACAATTGGAGAAGTGAATTATATAAAT  
ATAAAGTAGTACAAATTGAACCATTA---GGAGTAGCACCCAGCAGGGCAAAGAGAAGAGTGGTG-----  
-----CAGAGAGAAAAAAGAGCA---ATAGGA---CTAGGAGCT---  
-----ATGTTCCCTTGGGTTCTTGGGAGCA---GCAGGAAGCACTATG---GGCGCAGCGTCA---  
CTAACGCTGACGGTACAG---GCCAGACTA---TTATTG---TCTGGTATAGTGCAACAGCAGAGC---  
AATCTG---CTGAGG---GCTATTGAGGCGCAACAGCATCTGTTGCAACTCACAGTCTGGGGCATT  
>EF593232  
TTCTACTGTAAGTCAACAGAACTGTTCAATAGTACTTGGAACTACTAATAGTACTTGGAACTACTACTAGTACTT  
GGAATACTACT-----  
-----AGAGGG-----  
CCTAACAATAGAACAAATCACACTCCCATGCAGAATAAAACAAATTATAAACATGTGGCAGGAAGTAGGAAAAG  
CAATGTATGCCCCCTCCCATCAGAGGACAAATTAGGTGTTTCATCAAAT---  
ATTACAGGGCTGCTATTAACAAGAGATGGTGGGAACAATGGGACC-----  
-----  
-----  
ACCGAGACCTTCAGACCTGGAGGAGGAAATATGAAAGACAATTGGAGAAGTGAATTATATAAATATAAAGTAG  
TAAAAATTGAACCATTA---GGAGTAGCACCCACCAAGGCAAGGAGAAGAGTGGTG-----  
-----CAAAGAGAAAAAAGAGCA---GTGGGAGCAATAGGAGCT-----  
ATGTTCCCTTGGGTTCTTGGGAGCA---GCAGGAAGCACTATG---GGCGCAGCGTCA---  
GTGACGCTGACGGTACAG---GCCAGACTA---CTATTG---TCTGGTATAGTGCAACAGCAGAAC---  
AATCTA---CTGAGG---GCTATTGAGGCGCAACAGCATATGTTGCAACTCACAGTCTGGGGCATC  
>JN400469  
TTCTACTGTAATACAACAAAACCTGTTTAATAGTACTTGGAACTACTGAAGGGTCAAATAAAGTGAAGGGT  
CAAAT-----  
-----  
AACACTGAAGAACTTATCACACTCCCATGCAGAATAAAACAAATTATAAACATGTGGCAGAGAGTAGGAAAAG  
CAATGTATGCCCCCTCCCATCCGTGGACAAATTAAATGTTTCATCAAAT---  
ATTACAGGGCTGTTATTAACAAGAGATGGTGGTAATAGTAGCAGC-----  
-----  
-----  
AACGGGTCAGAAATCTTCAGACCTGGAGGAGGAGATATGAGGGACAATTGGAGAAGTGAATTATATAAATATA  
AAGTAGTAAAAATTGAACCATTA---GGAGTAGCGCCACCAAGGCAAAAAGAAGAGTGGTG-----  
-----CAAAGAGAAAAAAGAGCA---GTGGGA---TTAGGAGCT-----  
---TTGTTCCCTTGGGTTCTTGGGAGCA---GCAGGAAGCACTATG---GGCGCAGCGTCA---  
ATGACGCTGACGGTACAG---GCCAGACAA---TTATTG---TCTGGTATAGTGCAACAGCAGAAC---  
AATTTG---CTGAGA---GCTATTGAGGCGCAACAGCATATGTTGCAACTCACAGTCTGGGGCATC  
>EF593304  
TTCTACTGCAATACAACAATACTGTTTAATAGTACTTGGAAATGAACTAACCTGTTTAATGCCACTGAAGGAA  
AT-----

-----  
AACACAGAAGTTATTACACTCCAATGCAGAATAAAACAAATTATAAACATGTGGCAGGAAGTAGGAAAAGCAA  
TGTATGCCCCCTCCCATCAGTGGACAAATTAAGTGTTCATCAAAC---  
ATTACAGGGCTGCTATTAACAAGAGATGGCGGTATTGGGAACAATATC-----  
-----  
-----  
ACCAATACCTCCGAGATCTTCAGACCTATAGGAGGAAATATGAGGGACAATTGGAGAAGTGAATTATATAAAT  
ATAAAGTAGTCAAATTTGAACCAATA---GGAATAGCACCCACCAAGGCAAAGAGAAGAGTGGTG-----  
-----CAGAGAGAAAAAAGAGCA---GTGGGA---ATAGGAGCT---  
-----ATGTTCTTGGGTTCTTGGGAGCA---GCAGGAAGCACTATG---GGCGCAGCGTCA---  
GTGACGCTGACGGTACAG---GCCAGACTA---TTATTG---TCTGGTATAGTGCAACAGCAGAAC---  
AATCTG---CTGAGA---GCTATTGAGGCGCAACAACATCTGTTGCAACTCACAGTCTGGGGCATC  
>AY331294  
TTCTATTGCAACTCAACCAAACTATTTAATAGCATTGTGGGATAATAATAAAGATAGCACTAAAACAAATGAAC  
CA-----  
-----  
AATGATGGAAAAATATCACACTCCCATGCAGAATAAAACAAATTATAAACATGTGGCAGGGAGTAGGAAAAG  
CAATGTATGCCCCCTCCCATCAGAGGACAAATTAGATGTACATCAAAT---  
ATTACAGGGCTACTATTAACAAGAGATGGTGGCAAGAACAATGGCACT-----  
-----  
-----  
AATGGGACCGAGGTCTTCAGACCTGGAGGAGAAAAATATGAAGGACAATTGGAAAAGTGAATTATATAAATATA  
AAGTAGTAAAAATTGAACCATTA---GGAGTAGCACCCACCACGGCAAAGAGACGAGTGGTG-----  
-----CAGAGAGAAAAAAGAGCA---GTGACA---CTAGGAGCT-----  
---CTGTTCTTGGGTTCTTGGGAGCA---GCAGGAAGCACTATG---GGCGCAGCGTCA---  
ATGACGCTGACGGTACAG---GCCAGACTA---TTATTG---TCTGGTATAGTGCAACAGCAGAAC---  
AACTTG---CTGAGG---GCTATTGAGGCGCAACAACATCTGTTGCAACTCACGGTCTGGGGCATC  
>KT124746  
TTCTACTGTAATACAACACAACCTGTTTAATAGTACTTGAATGGAAATGATACTGGAGAGTTTAATAACACTG  
GAAAA-----  
-----  
AATATCACATATATCACACTCCCATGCAGGATAAAACAAATTATAAACATGTGGCAGGAAGTAGGAAAAGCAA  
TGTATGCCCCCTCCCATCGCAGGACAAATTAGATGTTTCATCAAAT---  
ATTACAGGGATACTATTAACAAGAGATGGTGGTAATAGTAGCGAG-----  
-----  
-----  
GACAAGGAGATCTTCAGACCTGAAGGAGGAAATATGAGGGATAATTGGAGGAGTGAATTATACAAATATAAAG  
TAGTAAAAATTGAACCATTA---GGAGTAGCACCCACCAAGGCAAAGAGAAGAGTGGTG-----  
-----CAGAGAGAAAAAAGAGCA---GTGGGA---ATAGGAGCT-----  
GTGTTCTTGGGTTCTTGGGAGCA---GCAGGAAGCACTATG---GGCGCAGCGTCA---  
ATGACGCTGACGGTACAG---GCCAGACTA---TTATTG---TCTGGTATAGTGCAACAGCAGAAC---  
AATTTG---CTGAGG---GCTATTGAGGCGCAACAGCATCTGTTGCAACTCACAGTCTGGGGCATC  
>KT124747  
TTCTACTGTAATACAACACAGCTGTTTAATAGTACCTGGCCATGGCCGGATAATGATACTAATGATAACGGTA  
CA-----  
-----  
-----  
GGCAATAGCACAATCACACTTCCATGCAAAATAAAACAAATTATAAACAGGTGGCAAGAAGTAGGAAAAGCAA  
TGTATGCCCCCTCCCATCAGTGGACAAATTAGATGTACATCAAAT---  
ATTACAGGACTGATATTAACAAGAGATGGTGGTCCCACAAATGATACC-----  
-----  
-----  
AACAAACCCGAGGTCTTCAGACCTGGAGGAGGAGATATGAGGGACAATTGGAGAAGTGAATTATATAAATATA  
AAGTAGTAAAAATTGACCCATTA---GGAGTAGCACCCACCAAGGCAAAGAGAAGAGTGGTG-----  
-----CAAAGAGGAAAAAAGAGCA---GTGGGG---ATAGGAGCT-----  
---ATGTTCTTGGGTTCTTGGGAGCA---GCAGGAAGCACTATG---GGCGCAGCGTCA---  
CTAACGCTGACGGTACAA---GCCAGACTA---CTATTG---TCTGGTATAGTGCAACAGCAGAAC---  
AATCTG---CTGAGG---GCTATTGAGGCGCAACAGCATATGTTGCAACTCACAGTCTGGGGCATT  
>EF593208  
TTCTACTGTAACCTTAACAAGGCTGTTTAATAATACTTGGTATAATGAGAGCAGTAGTACTTGAAT-----  
-----

-----  
GTAAATGGCACCATCACACTCCCATGTCAGGATAAAACAAATTATAAACATGTGGCAGGAAGTAGGAAAAGCAA  
TGTATGCCCCCTCCCATCATGGGATCAATTAAGTGTTCATCAAAT---  
ATTACAGGGCTACTATTAACAAGAGATGGTGGTAACCATAACAAT-----  
-----  
-----  
GACAGCAACGAGACCTTCAGACCTGGAGGAGGAGATATGAGGGACAATTGGAGAAGTGAATTATATAAATATA  
AAGTAGTAAAAATTGAACCATTA---GGAGTAGCACCCACCAAGGCAAAGAGAAGAGTGGTG-----  
-----CAAAGAGAAAAAAGAGGA---GTGACA---CTAGGAGCT-----  
---ATGTTCTTGGGTTCTTGGGAGCA---GCAGGAAGCACTATG---GGCGCAGCGTCA---  
ATGGCGCTGACGGTACAG---GCCAGACAA---TTATTG---TCTGGTATAGTGCAACAGCAGGAC---  
AATTTG---CTGAGG---GCTATTGAGGCGCAACAGCATATGTTGCAACTCACAGTCTGGGGCATC  
>AY560107  
TTCTACTGTAATACAGCAAACTGTTTAATAGCATTGGAATAATAGCAGTTGGAGTGGTACTGAAAGGTCAA  
GT-----  
-----  
AACGAGACAAGGAACATCATACTCCCATGTAAAATAAGACAAATTGTAAACCTGTGGCAGGAAGTAGGAAAAG  
CAATGTATGCCCCCTCCCATCAGAGGACAAATTAGATGTTTCATCAAAT---  
ATTACAGGGATACTATTAACAAGAGATGGTGGTAATAACACAGAA-----  
-----  
-----  
GGGAACGAGACCTTCAGACCTGGAGGAGGAGATATGAGGGACAATTGGAGAAGTGAATTATATAAATATAAAG  
TAGTAAAAATTGAACCATTA---GGAGTAGCACCCACCAAGGCAAAGAGAAGAGTGGTG-----  
-----CAGAGAGAAAAAAGAGCA---GTGGGA---TTAGGAGCT-----  
TTGTTCTTGGGTTCTTGGGAGCA---GCAGGAAGCACTATG---GGCGCAGCGTCA---  
GTAACGCTGACGGTACAG---GCCAGACAA---TTATTG---TCTGGTATAGTGCAAGCAGCAAAAC---  
AATTTG---CTGAGG---GCTATTGAGGCGCAACAGCACCTGTTGCAACTCACAGTCTGGGGCATC  
>AY560108  
TTTTACTGTAATACAACACCACTGTTTAATAGTACTTGGGTAAATGGTACTAGGAATGATACTGCAAGGCCAA  
AT-----  
-----  
GACACTGACACAATTAACTTCCATGCAGAATAAAACAAATTATAAACCTGTGGCAGGAAGTAGGAAAAGCAA  
TGTATGCTCCTCCCATCGAAGGACAAATTAGCTGTTTCATCAAAT---  
ATTACAGGGCTACTATTAACAAGAGATGGTGGTATTAAACAGCAGCAAT-----  
-----  
-----  
ACCAATACCACCGAGACCTTCAGACCTGGAGGAGGAGATATGAGGGACAATTGGAGAAATGAATTATATAAAT  
ATAAGTAGTAAGAATTGAGCCATTA---GGAGTAGCACCCACCAAGGCAAAGAGAAGAGTGGTG-----  
-----CAGAGAGAAAAAAGAGCA---GTGGGA---ATAGGAGCT---  
-----ATGTTCTTGGGATCTTGGGAACA---GCAGGAAGCGCTATG---GGCGCAGCGTCA---  
ATGACGCTGACGGTACAG---GCCAGACAA---TTATTG---TCTGGTATAGTGCAACAGCAGAAC---  
AATATG---CTGAGG---GCTATTGGGGCGCAACAGCACCTGTTGCAACTCACAGTCTGGGGCATC  
>AY560109  
TTCTACTGTAATACAACACAACCTGTTTAATAGCACTTGGTATAGTAATAGTACTGGGAATAGTACTGGAGGG-  
-----  
-----  
TCAAATGACACTATCACACTCCCATGTAGAATAAAACAAATTATAAACATGTGGCAGGAAGTAGGAAGAGCAA  
TGTACGCCCCCTCCCATCAGTGGAATAATTAGTTGTTTCATCAAAT---  
ATTACAGGGCTACTGTTAACAAGAGATGGTGGTATTAAACATGACC-----  
-----  
-----  
AATACCACCGAGACCTTCAGACCTGGAGGAGGAGATATGAGGGACAATTGGAGAAGTGAATTATATAAATATA  
AAGTAGTACAAATTGAACCATTA---GGAATAGCACCCACCAAGGCAAAGAGAAGAGTGGTG-----  
-----CAGAGAGAAAAAAGAGCA---GTGGGA---ATAGGAGCT-----  
---CTGTTCTTGGGTTCTTAGGAGCA---GCAGGAAGCACTATG---GGCGCAGCGTCA---  
GTGACGCTGACGGTACAG---GCCAGGCAC---TTATTG---CCTGGTATAGTGCAAGCAGCAGAAC---  
AATCTG---CTGAAG---GCTATTGAGGCGCAACAGCATCTGTTGCAACTCACAGTCTGGGGCATT  
>AY560110  
TTCTACTGTGATTCAACACCACTGTTTAATAGTACTTGGGAATAGTACTACTTGGGAATGATACTACTGACACTG  
AA-----

-----  
GGAAATGAAACAATCACACTCAAATGTAGAATAAAACAAATTATAAACATGTGGCAGGAAGTAGGAAAAGCAA  
TGTATGCCCCCTCCTATCGAGGGAGTAATTAATGTTTATCAAAT---  
ATTACAGGGCTGCTATTAGTAAGAGATGGT---ATAAGCAACAGT-----  
-----  
-----  
AGTGACGAGACCTTCAGACCTGGAGGAGGAAATATGAAGGACAATTGGAGAAGTGAATTATATAAATATAAAG  
TAGTAAAAATTGAACCATTA---GGAGTAGCACCCACCAAGGCAAGGAGAAGAGTGGTG-----  
-----CAAAGAGAAAAAAGAGCA---GTGGGAACACTGGGAGCT-----  
ATGTTTCCTTGGGTTCTTGGGAGCA---GCAGGAAGCGCTATG---GGCGCAGCGTCA---  
GCGACGCTGACGGTACAG---GCCAGACAA---TTATTG---TCTGGTATAGTGCAACAGCAAAAC---  
AACTTG---CTGAGA---GCTATTGAGGCGCAACAGCATATGTTGCAACTCACAGTCTGGGGCATC  
>EF175212  
TTCTACTGTAATACAACAAAACTGTTTAATAGTAATTGGACTTTGGAGGGTAATGTGACATATAACCACAAATA  
AC-----  
-----  
ACAAATGGCACAAATATCATACTCCCATGCAGAATAAAACAAATTATAAACATGTGGCAGGGAGTAGGAAAAG  
CAATGTATGCCAATCCCATCAGTGGACTAATTAAGTGTACATCAAAG---  
ATTACAGGGCTGCTATTAAACAAGAGATGGGGGTACAGAGGGTAATGGCAGCAACGGGACCGGGACAGAGATCG  
AGAAC-----  
-----  
AGGACCGAGATCTTCAGACCTGGGGGAGGAAATATGAAGGACAATTGGAGAAGTGAATTATATAAATATAAAG  
TAGTAAGAATTGAACCAATA---GGGATAGCACCCACCAAGGCAAAGAGAAGAGTGGTG-----  
-----CAGAGAGAAAAAAGAGCA---GTGGGGGTGCTGGGAGCT-----  
ATGTTTCCTTGGGTTCTTGGGAACA---GCAGGAAGCACTATG---GGCGCAGCATCA---  
GTAACGCTGACGGTACAG---GCCAGACAA---TTATTG---TCTGGTATAGTGCAACAGCAGAAC---  
AATCTG---CTGCAG---GCTATTGAGGCGCAACAGCATCTGTTGCAGCTCACAGTCTGGGGCATC  
>EU577426  
TTCTACTGTAATTCAACAGAACTGTTTAATAGTACTTGAATAATACTAATACTTGAATGATACTGGAGAG-  
-----  
-----  
TCAAATGAACTATCATACTTCCATGTAGAATAAAACAAATTTATAAACATGTGGCAGGGAGTAGGAAAAGCAA  
TGTATGCCCCCTCCCATCAGAGGAGAAATTAAGTGTCTCATCAAA---  
ATTACAGGGCTGCTATTAAACAAGAGATGGTGGTAATGATAATACCACT-----  
-----  
-----  
AACATGATTGAGGTCTTCAGACCTGGAGGAGGAAATATGAAGGACAATTGGAGAAGTGAATTATCTAAATATA  
AAGTAGTAAAAATTGAGCCATTA---GGAGTAGCACCCACTAAGGCAAAGAGAAGAGTGGTG-----  
-----CAGAGAGAAAAAAGGGGA-----ATAGGAGCT-----  
---GTGTTTCCTTGGGTTCTTGGGAGCA---GCAGGAAGCACTATG---GGCGCAGCGTCA---  
GTGGCGCTGACGGTACAG---GCCAGACAA---TTATTG---TCTGGTATAGTGCAACAGCAGAAC---  
AATCTG---CTGAAG---GCTATTGAGGCGCAACAGCATCTGTTGCAACTCACAGTCTGGGGCATC  
>EF593284  
TTCTACTGTAATTCAACACAATTGTTTAATAGTACTTGGTATGGTAATGAGACTATTGAAGGGTTAAATGAC-  
-----  
-----  
ACTACAGAAAATATCACACTCCCATGCAAAATAAAACAAATTATAAACATGTGGCAGGAAGTAGGAAAAGCAA  
TGTATGCCCCCTCCCATCAGTGGACAAATTAGATGTTTCATCAAAT---  
ATTACAGGGCTGATATTAAACAAGAGATGGTGGTTTTAGCAACAATACCCAG-----  
-----  
-----  
GAGAAGAACAAGACCGAGATCTTCAGACCTGGGGGAGGAGATATGAGGGACAATTGGAGAAGTGAATTATATA  
AATATAAAGTAGTGCAAGTTGAACCATTA---GGACTAGCACCCACCAAGGCAAAGAGAAGAGTGGTG-----  
-----CAGAGAGAAAAAAGAGCA---GTGGGT---  
TTAGGAGCT-----TTGTTTCCTTGGGTTCTTGGGAGCA---GCAGGAAGCACTATG---  
GGCGCAGCGTCA---GTGACGCTGACGGTACAA---GCCAGACAA---TTATTG---  
TCTGGTATAGTGCAACAGCAGAAC---AACTTG---CTGAGA---  
GCTATTGAGGCGCAACAGCATCTGTTGCAACTCACAGTCTGGGGCATC  
>EF593310

TTCTACTGTAATTCAACACCACTGTTTGATAGTATTTGGAATAGTACTGGGAATGATACTGAAGGGTCAAATA  
 GT-----  
 -----  
 ACTGAAAAAGATATCATACTCCAATGCAGAATAAAACAAGTTATAAATATGTGGCAGCAAGTAGGAAAAGCAA  
 TGTATGCCCCCTCCCATCAAAGGACAAATTAAGTGTACATCAAAT---  
 ATTACAGGGCTGCTATTAACAAGAGATGGTGGTAACAGGGGCGAG-----  
 -----  
 -----  
 TCTGAGACCTTCAGACCTGGAGGAGGAGATATGAAGGACAATTGGAGAAGTGAATTATATAAATATAAAGTAG  
 TAAAAATTAAACCATTA---GGAATAGCACCCACCAAGGCAAAGAGAAGAGTGGTG-----  
 -----CAGAGAGAAAAGAGATCA---GTGACA---TTAGGAGCT-----  
 ATGTTCCCTTGGGTTCTTGGGAGCA---GCAGGAAGCACTATG---GGCGCAGCGTCA---  
 ATGGCGCTGACGGTACAA---GCCAGACAA---TTATTG---TCTGGTATAGTGCAACAGCAGAAC---  
 AATTTG---CTGAAA---GCTATTGAGGCGCAACAGCATCTGTTGCAACTCACAGTCTGGGGCATC  
 >EF593312  
 TTCTACTGTAATTCAACACAACCTGTTTAATAGTACTTGGTATGGTAATGAGACTGAGACTGGAGGGACAAATG  
 AC-----  
 -----  
 ACTATAGGAAATATCACACTCCCATGCAGAATAAGACAAATTATAAACATGTGGCAGGAAGTAGGAAAAGCAA  
 TGTATGCCCCCTCCCATCAGAGGACAAATTAGTTGTTTCATCAAAA---  
 ATTACAGGGCTGCTATTAACAAGGGATGGTGGTAACAACAATGAGACC-----  
 -----  
 -----  
 AATACCACCGAGACATTTCAGACCAGGAGGAGGAGATATGAGGGATAATTGGAGAAGTGAATTATATAAATATA  
 AAGTAGTCAAAATTGAGCCACTA---GGAATAGCACCCACCAAGGCAAAGAGAAGAGTGGTG-----  
 -----CAAAGAGAAAAAAGAGCA---GTGGGAACAATAGGAGCT-----  
 ---ATGTTCCCTTGGGTTCTTGGGAGCA---GCAGGAAGCACTATG---GGCGCAGCGTCA---  
 ATGACGCTGACGGTACAG---GCCAGACTA---TTATTG---TCTGGTATAGTGCAACAGCAGAAC---  
 AATTTG---CTGAGA---GCTATTGAGGCGCAACAGCATATGTTGCAACTCACAGTCTGGGGCATC  
 >EF593314  
 TTCTACTGTGATTCAACACAACCTATTTAATAGTACTTGGACTGAAGGGGCGACTAACAATACA-----  
 -----  
 -----  
 GGAAATGACACAATCATACTCCCATGCAGAATAAGACAAATTATAAACATGTGGCAGGAGGTAGGAAAAGCAA  
 TGTATGCCCCCTCCCATCAGAGGACAAATTAGATGTTTCATCAAAT---  
 ATTACAGGGCTGCTATTAACAAGAGATGGTGGTAATAGCAGCAAA-----  
 -----  
 -----  
 ACAACCCCTGAGATCTTCAGACCTGGAGGAGGAGATATGAGGGACAATTGGAGAAGTGAATTATATAAATATA  
 AAGTAGTAAAGATTGAACCATTA---GGAATAGCACCCACCAAGGCAAAGAGAAGAGTGGTG-----  
 -----CAAAGAGAAAAAAGAGCA---GTGGGG---ATAGGAGCT-----  
 ---GTGTTCCCTTGGGTTCTTGGGAACA---GCAGGAAGCACTATG---GGCGCAGCGGCA---  
 GTAACGCTGACGGTACAA---GCCAGACTA---TTATTG---TCTGGTATAGTGCAACAGCAAAAC---  
 AACTTG---CTGAGG---GCTATTGAGGCGCAACAGCATCTGTTGCAACTCACAGTCTGGGGCATC  
 >EF593316  
 TTCTATTGTAATTCAACACAACCTGTTTAATAGTACTTGGCCTACTAATAGTACTTGAATGCTACAGAAGGG-  
 -----  
 -----  
 TCAAATAGCACTATCACACTCCCATGTAAATAAAACAAATTATAAACATGTGGCATGAAGTAGGAAAAGCAA  
 TGTATGCCCCCTCCCATCAGAGGACAAATTAGATGTTTCATCAAAT---  
 ATTACAGGGATATTTTTAACTAGAGATGGTGGTAAGAGAAGAAC-----  
 -----  
 -----  
 AACACCGAGATCTTCAGACCTGGAGGAGGAGATATGAGGGACAATTGGAGAAGTGAATTATATAAATATAAAG  
 TAGTAAAAATTGAACCATTA---GGAATAGCACCCACCAAGGCAAAGAGAAGAGTGGTG-----  
 -----CAGAGAGAAAAAAGAGCG---GGA-----ATAGGAGCA-----  
 CTGTTCCCTTGGGTTCTTGGGAGCA---GCAGGAAGCACTATG---GGCGCAGCGTCA---  
 ATGACGCTGACGGTACAG---GCCAGACTC---TTATTG---TCTGGTATAGTGCAACAGCAGAAC---  
 AATCTG---CTGAGA---GCTATTGATGCGCAACAGCATCTGTTGCAACTCACAGTCTGGGGCATC  
 >EF593318

TTCTACTGTGATACAACAAAACCTGTTTAAATAGTACTTGGCCTTGGGAATGGTACTGAAGGGCCAAATATCACTG  
 GAGGAGAT-----ACT---  
 AACATTAACATTAACATTACACTCCCATGCAGAATAAGACAAATTGTAAACATGTGGCAGGAAGTAGGAAAAG  
 CAATGTATGCCCCCTCCCATCAGAGGACAAATTAGATGTTTCATCAAAT---  
 ATCACAGGGTTGTTGTTAACAAGAGATGGAGGTAACAATAGTACA-----  
 -----  
 AACGAGACCTTCAGACCTGGAGGAGGAAATATGAAGGACAATTGGAGAAGTGAATTATATAAATATAAAGTAG  
 TAAGAATTGAACCATTA---GGAGTAGCACCCACCGAGGCAAGGAGAAGAGTGGTG-----  
 -----CAGAGAGAAAAAAGAGCA---GTAACA---CTAGGAGCT-----  
 ATGTTCCCTTGGGTTCTTGGGAGCA---GCAGGAAGCACTATG---GGCGCAGCGTCA---  
 ATGGCGCTGACGGTACAG---GCCAGACAA---TTATTG---TCTGGTATAGTGCAACAGCAGAAC---  
 AATTTG---CTGAGA---GCTATTGAGGCGCAACAACATCTGTTGCAACTCACAGTCTGGGGCATC  
 >JN786786  
 TTCTACTGTAATACAACAGAACTGTTTAAATAGCACTTGGTATACTAATGGGTCAAGTAATAATATTGAAGGA-  
 -----  
 -----  
 AATGACACAATAATCACACTCCCATGCAGAATAAAACAAATTGTACGCATGTGGCAGGGAGTAGGAAAAGCAA  
 TGTATGCCCCCTCCCATCGATGGAATAATTAGATGTACCTCAAAT---  
 ATTACAGGGCTGCTATTAACAAGGGATGGTGGTATTGATAATAACACG-----  
 -----  
 -----  
 ACCGATCCCCGAGATCTTCAGACCTGAAGGAGGAGATATGAAAAACAATTGGAGAAGTGAATTATATAGATATA  
 AAGTAATAAAAATTGAACCATTA---GGAGTAGCACCCACCAAGGCAAGGAGAAGAGTGGTG-----  
 -----CAGAGAGAAAAAAGAGCA---GCA-----CTAGGAGCT-----  
 ---GTGTTCCCTTGGGTTCTTGGGAGCA---GCAGGAAGCACTATG---GGCGCAGCGTCA---  
 ATAACGCTGACGGTACAG---GCCAGACTA---TTATTG---TCTGGTATAGTGCAACAGCAGAGT---  
 AATTTG---CTGAGA---GCTATTGAGGCGCAACAGCATCTGTTGAAACTCCCAGTCTGGGGCATT  
 >JN599165  
 TTCTACTGTAATACAGCAGGACTGTTTAAATAGTACTTGGGAATAGTACTTGGAGTTTAAATGACACTAAAAGAA  
 AT-----  
 -----  
 GGAAATGAAAATATCACACTCCCATGCAGAATAAAACAAATTATAAACATGTGGCAGGGAGTAGGAAAAGCAA  
 TGTATGCCCCCTCCCATCAGTGGACAAATTAGATGCTCATCAAAT---  
 ATTACAGGGTTGCTATTAACAAGAGATGGTGGGAACGGGAACATCACC-----  
 -----  
 -----  
 AACACCACCGAGACCTTCAGACCTGGAGGAGGAGATATGAGGGACAATTGGAGAAGTGAATTATATAAATATA  
 AAGTAGTAAAAATTGAACCATTA---GGAATAGCACCCACCAAGGCAAAGAGAAGAGTGGTG-----  
 -----CAGAGAGAAAAAAGAGCA---GTGGGA---ATAGGAGCT-----  
 ---GTGCTCCTTGGGTTCTTGGGAGCA---GCAGGAAGCACTATG---GGCGCAGCGTCA---  
 GTGACGCTGACGGTACAG---GCCAGACTA---TTATTG---TCTGGTATAGTGCAACAGCAGAAC---  
 AATTTG---CTGAGA---GCTATTGAGGCGCAACAGCATTTGTTGCAGCTCACAGTCTGGGGCATC  
 >KT124759  
 TTCTACTGTAATACAACAGACCTGTTTAAATAGAACTGTGGAAAAAATATTACTTGGCCTAGGGCAAACGACA  
 CAGAAGGA-----  
 -----  
 AATGAAAATGAAACAATCACACTCCAATGCAGAATAAAACAAATTATAAACATGTGGCAGGAAGTAGGAAAAG  
 CAATGTATGCCCCCTCCTATCAGAGGACAAATTAAATGTACATCAAAC---  
 ATTACAGGACTACTATTAACAAGAGATGGTGGGAATAGTAATGATACT-----  
 -----  
 -----  
 AATGATACCGAGACCTTTAGACCTGGAGGAGGAGATATGAGGGACAATTGGAGAAGTGAATTATATAAATATA  
 AAGTAGTAAAAATTGAACCATTA---GGAATAGCACCCACCAAGGCAAAGAGAAGAGTGGTG-----  
 -----CAGAGAGAAAAAAGAGCA---GTGGGA---CTAGGAGCA-----  
 ---CTGTTCCCTTGGGTTCTTGGGAGCA---GCAGGAAGCACTATG---GGCGCAGCGTCA---  
 TTGACGTTGACGGTACAG---GCCAGACAA---TTATTG---TCTGGTATAGTGCAACAGCAGAAC---  
 AATCTG---CTGAGG---GCTATTGAGGCGCAACAGCATATGTTGCAACTCACAGTCTGGGGCATT  
 >JN562762

TTCTACTGTAATTCAACACAACCTGTTTGTAGTAGCAGTTGGAATAGTACTAGTACTTGGAAATAGTACTACAGTGT  
 CAAAT-----  
 -----  
 GATACTGACAAAAATATTACACTCCCATGTAGAATAAAACAATTTATAAACATGTGGCAGGGAGTAGGAAAAG  
 CAATGTATGCCCCCTCCCATCAGCGGAATAATCAGCTGTTTCATCAAAT---  
 ATTACAGGGCTGCTATTAACAAGAGATGGGGGTAATAGCAAGAATGGGAGTACT-----AACAGTAGC---  
 AGT-----  
 GATGGGAGTAATAACAGTAAC-----  
 AAGAGCGAGATCTTCAGACCTGGAGGAGGAGATATGAGGGACAATTGGAGAAGTGAATTATATAAATATAAAAG  
 TAGTACAAATTGAACCATTA---GGAGTAGCACCCACCAGGGCAAAGAGAAGAGTGGTG-----  
 -----CAAAGAGAAAAAAGAGCA---GTGGGA---ATAGGAGCT-----  
 TTGTTCCCTTGGGTTCTTGGGAGCA---GCAGGAAGCACTATG---GGCGCAGCATCA---  
 ATAACGCTGACGGTACAG---GCCAGACAG---TTATTG---TCTGGTATAGTGCAACAGCAGAAC---  
 AATTTG---CTGAGG---GCTATTGAGGCGCAACAACATATGTTGCAACTCACAGTCTGGGGCATC  
 >KT124776  
 TTCTACTGTAATACAACACAACCTGTTTAATAGTATCTGGAGTAGTAATGGTACCAGGAATAGTACAAATAGCA  
 CTAGG-----  
 -----  
 ACAAATAGTACTATCATCACACTCCCATGCAAAATAAAACAATTTATAAACATGTGGCAGGAAGTAGGAAAAA  
 CAATGTATGCCCCCTCCCATCAGAGGACAAATTAGCTGTGTATCAAAT---  
 ATTACAGGGCTATTGTTAACAAGAGATGGTGGTACAAATATCACC-----  
 -----  
 -----  
 AACGAAACCTTCAGACCTGGAGGAGGAGACATGAGGGACAATTGGAGAAGTGAATTATATAAATATAAAGTAG  
 TAAAAATTGAACCATTA---GGAGTAGCACCTACCAAGGCAAAGAGAAGGGTGGTG-----  
 -----CAAAGAGAAAAAAGAGCA---GCGGA---CTAGGAGCT-----  
 CTGTTCCCTTGGGTTCTTGGGAGCA---GCAGGAAGCACTATG---GGCGCAGCGTCA---  
 ATAACGCTGACGGTACAG---GCCAGACAA---TTACTG---TCTGGTATAGTGCAACAGCAAAAT---  
 AATTTG---CTGAGG---GCTATTGAGGCGCAACAACATATGTTGCAACTCACAGTCTGGGGCATC  
 >KT124798  
 TTCTACTGTAATACAACACCACTGTTTAATAGTACTTGGAAAGCGTACTTGGAAATAATGTTAAAGGGAACAATG  
 AT-----  
 -----  
 ACTAATAAAAATATCACACTCCGATGTAGGATAAAACAATTTATAAACATGTGGCAGAAAGTAGGAAAAGCAA  
 TGTATGCCCCCTCCCATCCAAGGAGAAATTAGATGTTTCATCAAAT---  
 ATTACAGGGCTGCTATTAACAAGGGATGGTGGTATTAGCAACAGCACGAAT-----  
 -----  
 -----  
 GACACCACCGAGATCTTCAGACCTGAAGGAGGAGATATGAGGGATAATTGGAGAAGTGAATTATATAAATATA  
 AAGTAGTAAGAATTGAACCAATA---GGAGTAGCACCCACCAAGGCAAAGAGAAGAGTGGTG-----  
 -----CAGAGAGAAAAAAGAGCA---GTGGGC---TTCGGAGCT-----  
 ---ATGTTCCCTTGGGTTCTTGGGAGCA---GCAGGAAGCACTATG---GGCGCAGCATCA---  
 TTAACGCTGACGGTACAG---GCCAGACAA---TTATTG---TCTGGTATAGTGCAACAGCAGAAC---  
 AATTTG---CTGAGA---GCTATTGAGGCGCAACAGCATCTGTTGCAGCTCACAGTCTGGGGCATC  
 >GU331247  
 TTCTACTGTAATACAACAGAACTGTTTAATAGTACTTGGAAATGGTACTGAAGTGGTAAATATCAATGAA----  
 -----  
 -----  
 GGAAATGACAATATCACTCTTCCATGCAGAATAAAACAATTTATAAACATGTGGCAGGAAGTAGGAAAAGCAA  
 TGTATGCCCCCTCCCATCAGAGGACCAATTAAATGTTTCATCGAAT---  
 ATTACAGGGCTAATATTAACAAGAGATGGTGGTACTAATGACACC-----  
 -----  
 -----  
 ACCGAGGTCTTCAGACCTGCAGGAGGAGATATGATGGACAATTGGAGAAGTGAAGTATATAAATATAAAGTGG  
 TGAATAATTGAACCATTA---GGAGTAGCACCCACCAAGGCAAAGAGAAGAGTGGTG-----  
 -----CAGAGAGAAAAAAGAGCA---ATAACA---ATAGGAGCG-----  
 GTGTTCCCTTGGGTTCTTGGGAACA---GCAGGAAGCACTATG---GGCGCAGCGTCC---  
 GTGGCGCTGACGGTACAG---GCCAGACAA---TTATTG---TCTGGTATAGTGCAACAGCAAAGC---  
 AACTTG---TTGAGA---GCTATTGAGGCGCAACAGCATATGTTGCAACTCACAGTCTGGGGCATC  
 >JN786831

TTCTACTGCAATACTTCACCACTGTTTAATAGTATTTGGAATAGTAGTACTTGGAATGACACAAATAATACTG  
 AA-----  
 -----GGG---  
 GCAAAATGACACTGTTATCACACTTCGATGCAGGATAAAACAAATTATAAACATGTGGCAGGCAGTGGGAAAAG  
 CAATGTATGCCCCCTCCCATTTGAAGGACAAATTAGGTGTTTCATCAAAT---  
 ATTACAGGGCTGATATTAACAAGAGATGGTGGTAAAGAAAACGCTACC-----  
 -----  
 AGGAACAACGAGACCTTCAGACCTGCAGGAGGAGATATGAGGGACAATTGGAGAAGTGAATTATATAAAATATA  
 AAATAGTACAAATTGAACCATTA---GGAGTAGCACCCACCAAGGCAAAGAGAAGAGTGGTG-----  
 -----CAGAGAGAAAAAAGAGCA--GTGGGA--ATGGGAGCT-----  
 ---TTGTTCCCTTGGGTTCTTGGGAGCA--GCAGGAAGCACTATG--GGCGCAGCGTCA---  
 CTGACGCTGACGGTACAG---GCCAGACAA---TTATTG---TCTGGTATAGTGCAACAGCAGAAC---  
 AATTTG---CTGAGG---GCTATTGAGGCGCAACAACATCTGTTGCAACTCACAGTCTGGGGCATC  
 >JQ403100  
 TTCTACTGTAAGACAGCACAACTGTTTAATAGTACTTGGAATGTGTTTAATAGTACTTGGAATGGTATTAAAA  
 GGGTAAAT-----  
 -----AGCACT-----  
 GAAGGAAATGACACTATCACACTCCAATGCAGAATAAAACAAATTATAAACATGTGGCAGGAAGTAGGAAAAG  
 CAATGTATGCCCCCTCCCATCAGAGGACAGATTAGATGCTCATCAAAT---  
 ATTACAGGGCTGCTGTTAACAAGAGATGGTGGCAATAACGAGAACGGA-----  
 -----  
 ACCCCCGAGGTCTTCAGACCTGGAGGAGGAGATATGAGGGACAATTGGAGAAGTGAATTATATAAAATATAAAG  
 TAGTAAAAATTGAACCATTA---GGAATAGCACCCACCAAGGCAAAGAGAAGAGTGGTG-----  
 -----CAGAGAGAAAAAAGAGCA--GTGGGA--CTGGGAGCT-----  
 ATGTTCCCTTGGGTTCTTGGGAGCA--GCAGGAAGCACTATG--GGCGCAGCGTCA---  
 GTAACGCTGACGGTACAG---GCCAGACAA---TTATTG---TCTGGTATAGTGCAACAGCAGAAC---  
 AATTTG---CTGAGA---GCTATTGAGGCGCAACAGCATATGTTGCAACTCACAGTCTGGGGCATT  
 >EU576617  
 TTCTACTGTAATACATCACCCTGTTTAATAGTACTTGGAATAGTACTACTAATGGGAATGAGACTGAAGGGT  
 CA-----  
 -----  
 AATAACGGAACCTATCACACTCCAATGCAAAATAAAACAAATTATAAACATGTGGCAGGAAGTAGGGAAAGCAA  
 TGTATGCCCCCTCCCATCAGAGGACAAATTAGATGTATATCAAAT---  
 ATTACAGGGCTGCTAATAACAAGAGATGGTGGTAATAACGAGACC-----  
 -----  
 GACAGCACAGAGAGCTTCAGACCTGGAGGAGGAGATATGAGGGACAATTGGAGAAGTGAATTATATAAAATATA  
 AAGTAGTAAAAATTGAACCATTA---GGAGTAGCACCCACCAAGGCAAAGAGGAGAGTGGTG-----  
 -----CAGAGAGAAAAAAGAGCA--GTGGGA--TTAGGAGCT-----  
 ---CTGTTCCCTTGGGTTCTTGGGAGCA--GCAGGAAGCACTATG--GGCGCAGCGTCA---  
 ATGACGCTGACGGTACAG---GCCAGACAA---TTGCTG---TCTGGTATAGTGCAACAGCAGAAC---  
 AATCTG---CTGAGG---GCTATTGAGGCGCAACAGCACCTGTTGCAACTCACAGTCTGGGGCATC  
 >AY331296  
 TTCTACTGTAATACAACAACCACTGTTTAATAGTACTTGGAATGGTACCGAAGAGTTAAATAGTACA-----  
 -----  
 -----  
 AATGACAAAATTATCACACTCCCATGCAGAATAAAACAAATTATAAACATGTGGCAGGAAGTAGGAAAAGCAA  
 TGTATGCCCCCTCCTATCAGAGGACAAATTAGATGTTTCATCAAAT---  
 ATTACAGGGCTGCTATTAACAAGAGATGGTGGTAATAATAACAACAGC-----  
 -----  
 -----  
 GATACTCCTGAGACCTTCAGACCTGGAGGAGGAGATATGAGGGATAATTGGAGAAGTGAATTATATAAAATATA  
 AAGTAGTAAAAGTTGAACCATTA---GGAATAGCACCCACCAAGGCAAAGAGAAGAACGGTG-----  
 -----CAGAGAGAAAAAAGAGCA--GTGGGA--ATAGGAGCT-----  
 ---GTGTTCCCTTGGGTTCTTGGGAGCA--GCAGGAAGCACTATG--GGCGCAGCGTCA---  
 ATAACGCTGACGGTACAG---GCCAGACTA---TTATTG---TCTGGTATAGTGCAACAGCAGAAC---  
 AATCTG---CTGAGG---GCTATTGAGGCGCAACAGCACATGTTGCAACTCACAGTCTGGGGCATC  
 >EF593286

TTCTACTGTAATACAACAGAACTGTTTAATAGTACTTGGTATGGTAATGATACT-----  
-----  
-----  
AGGAATGATACTATCACACTCTCATGCAGAATAAAACAAATAATAAACATGTGGCAGGAAGTAGGAAAAGCAA  
TGTATGCCCCCTCCCATCAAAGGACAAATTAGATGCTCATCAAAT---  
ATTACAGGGCTACTATTAACAAGGGATGGTGGTAATGACACGGAC-----  
-----  
-----  
GGGAAAGAGACCTTCAGACCTGTAGGAGGAAATATGAAGGACAATTGGAGAAGTGAATTATATAAATATAAAG  
TAGTAAGAATTGAACCATTA---GGGTTAGCACCCACCAAGGCAAAGAGAAGAGTGGTG-----  
-----CAGAGAGAAAAAAGAGCA---GTGGGA---TTCGGAGCT-----  
TTGTTTCCTTGGGTTCTTGGGAGCA---GCAGGAAGCACTATG---GGCGCAGCGTCA---  
CTAACGCTGACGGTACAA---GCCAGACAG---TTACTG---TCTGGTATAGTGCAACAGCAAAAC---  
AATCTG---CTGAGG---GCTATTGAGGCGCAACAGCATCTGTTGCAACTCACAGTCTGGGGCATT  
>EU577525  
TTTTACTGTAATACAACAAACCTGTTTAGTAGTACTTGGTATGGGAATGAAACTGAAGAGCCAAATAATACTA  
CA-----  
-----  
GGAAATAGCACACAATCACACTCCCATGCAGAATAAAACAAATTATAAACATGTGGCAGCAAGTAGGAAAAG  
CAATGTATGCCCCCTCCCATCAGTGGGCCAATTAGCTGTTTCATCAAAT---  
ATTACAGGGCTGATATTAACAAGAGATGGTGGTAACACGAACGAG-----  
-----  
-----  
ACCACCGAAACCTTCAGACCTGGAGGAGGAAATATGAGAGATAATTGGAGAAGTGAATTATATAAATATAAGG  
TGGTAAAAAATTGAACCACTA---GGAGTAGCGCCCACCAGAGCAAGGAGAAGAGTGGTG-----  
-----CAAAGAGAAAAAAGAGCA---GTGGGA---ATAGGAGCT-----  
GTGCTCCTTGGGTTCTTGGGAGCA---GCAGGAAGCACTATG---GGCGCAGCGTCA---  
GTGACGCTGACGGTACAA---GCCAGACAG---CTATTG---TCTGGTATAGTGCAACAGCAGAGC---  
AATCTG---CTGAGG---GCTATTGATGCACAACAGCATATGTTGCAGCTCACAGTCTGGGGCATC  
>JQ085297  
TTCTACTGCGATTCAACAAAACCTGTTTAATAGTACTTGGGAATGGTACTGAAGATGATTCTGGA-----  
-----  
-----  
AAAAATAGAACAATCACACTCCCATGCAGAATAAAGCAATTTATAAACATGTGGCAGGAAGTAGGAAAAGCAA  
TGTATGCCCCCTCCTATCAAGGGACAAATTAGCTGTTTATCAAAT---  
ATTACAGGGCTGCTATTAACAAGAGATGGTGGTAACAATGTGAGC-----  
-----  
-----  
AACACCACCGAGGTCTTCAGACCTGGAGGAGGAAATATGAGGGACAATTGGAGAAGTGAATTATATAAATATA  
AAGTAGTAGAAATTGAACCATTA---GGATTAGCACCCACCAAGGCAAAGAGGAGAGTGGTG-----  
-----CAGAGAGAAAAAAGAGCA---GTGGGA---ATAGGAGCT-----  
---TTGTTTCCTTGGATTCTTGGGAGCA---GCAGGAAGCACTATG---GGCGCAGCGTCA---  
ATGACGCTGACGGTACAG---GCCAGACAA---TTATTG---TCTGGTATAGTGCAACAGCAGAAC---  
AATCTG---CTGAGA---GCTATTGAGGCGCAACAGCACCTGTTGCAACTCACAGTCTGGGGCATC  
>JQ085295  
TTCTACTGTAATACAACACCACTATTCAATAGTATTTGGAAGGATGGACAGTTAAATAACACATACACT----  
-----  
-----  
AAAGAGAAAAATATCACACTCCAATGTAAATAAAACAAATTGTAAACAGGTGGCAGGAAGTAGGAAAAGCAA  
TGTATGCCCCCTCCCATCAGAGGACAAATTACATGTATATCAAAT---  
ATTACAGGGCTACTATTAACAAGAGATGGTGGTATTGGCAATAATGAACTGGC-----  
-----  
-----  
AATAACAATACTGAGATCTTCAGACCTGGAGGAGGAGATATAAGGGACAATTGGAGAAGTGAATTATATAAAT  
ATAAAGTAGTAAAAATTGAACCATTA---GGAGTAGCACCCACCAAGGCAAAAAGAAGAGTGGTG-----  
-----CAGAGAGACAAAAGAGCA---ATAGGAACACTAGGGGCT---  
-----ATGTTTCCTTGGGTTCTTGGGAGCA---GCAGGAAGCACTATG---GGCGCAGCGTCA---  
TTGACGCTGACGGTACAA---GCCAGATTA---CTATTA---TCTGGTATAGTGCAACAGCAGAAC---  
AATCTG---CTGAGA---GCTATTGAGGCGCAACAGCATATGTTGCAACTCACAGTCTGGGGCATT  
>FJ798397

TTCTATTGTAATACAACAAAACCTGTTTAAACAGTACTTGGAATGGTACTGAAGGACTAAACAACCTCTACAGGAA  
 AT-----  
 -----  
 AGCACAGGAAGTATCACACTCCCATGCAAAATAAAACAAATTATAAACATGTGGCAAGAAGTAGGAAAAGCAA  
 TGTATGCCCCCTCCCATCAGAGGACAAATTAGCTGTTTCATCAATT---  
 ATTACAGGGCTGATATTAACAAGAGATGGTGGTATTGACAATAAAAAATGCCACT-----  
 -----  
 ----  
 AACACAAACAACACAGAGACCTTTAGACCAGGAGGAGGAAATATGAAGGATAATTGGAGAAGTGAATTATATA  
 AATATAAAGTAGTAAAAATTGAACCATTA---GGAATAGCACCCACCAAGGCAAAGAGGAGAGTGGTG-----  
 -----CAGAGAGAAAAAAGAGCA---GTGGGA---  
 CTAGGAGCT-----GTGTTCTTGGGTTCTTGGCAACA---GCAGGGAGCACTATG---  
 GGCGCAGCGTCA---GTGACGCTGACGGTACAG---GCCAGACAA---TTATTG---  
 TCTGGTATAGTGCAACAGCAAAAC---AATCTG---CTGAAG---  
 GCTATTGAGGCGCAACAACGTATGTTGCAACTCACAGTCTGGGGCATC  
 >FJ469685  
 TTCTACTGTAATACAACACAACCTGTTTAAATAGTACTTGGAACATTACAGGAAATAACACCATCGCACCA----  
 -----  
 -----  
 GGAAATGACACAATCACACTCCCATGCAGAATAAAACAAATTATAAACATGTGGCAGGAAGTAGGAAAAGCAA  
 TGTATGCCCCCTCCCATCAGAGGACCAATTAGATGTTTCATCAAAAT---  
 ATTACAGGGCTGCTATTAACAAGAGATGGTGGTAGTGACAAAAAT-----  
 -----  
 -----  
 GATACTGAGGTCTTCAGACCTGCAGGAGGAAATATGAAGGACAATTGGAGAAGTGAATTATATAAATATAAAG  
 TAGTAAGAATTGAACCATTA---GGAATAGCACCCACCAAGGCAAAGAGAAGAGTGGTG-----  
 -----CAAAGAGAAAAAAGAGCA---GTGGGA---ATAGGAGCT-----  
 ATGTTCTTGGGTTCTTGGGAGCA---GCAGGAAGCACTATG---GGCGCAGCGTCA---  
 GTGGCGCTGACGGTACAG---GCCAGACTA---TTATTG---TCTGGTATAGTGCAACAGCAGAAC---  
 AATCTG---CTGAGG---GCTATTGAGGCGCAACAGCATATGTTGCAACTCACAGTCTGGGGCATC  
 >FJ798416  
 TTCTACTGTAATACAACAGGACTGTTTAAAGTACTTGGTATATGAATACAACAAGGAATGAT-----  
 -----  
 -----  
 AGTGCTGAAAATATAACACTCCCATGCAGGATAAAACAAATTATAAACATGTGGCAGGAAGTAGGAAAAGCAA  
 TGTATGCCCCCTCCCATCAGTGGACCAATTAGTTGTTTCATCAAAAT---  
 ATTACAGGGTTGATATTAACAAGGGATGGTGGTATAGGAACGAT-----  
 -----  
 -----  
 ACTGAGACCTTCAGACCTGGAGGAGGAGATATGAGGGACAATTGGAGAAGTGAGTTATATAAATATAAAGTAG  
 TAACAATTGAACCATTA---GGAATAGCACCCACCAAGGCGAGGAGAAGAGTGGTG-----  
 -----CAGAGAGAAAAAAGAGCA---ATAGGC---CTGGGAGCT-----  
 TTGTTCAATTGGGTTCTTGGGAGCA---GCAGGAAGCACTATG---GGCGCAGCGTCA---  
 ATAACGCTGACGGTACAA---GCCAGACAA---TTATTG---TCTGGTATAGTGCAACAGCAGAAAT---  
 AATCTG---CTGAGG---GCTATTGAGGCGCAACAACATCTGTTGCAACTCACAGTCTGGGGCATC  
 >JQ085289  
 TTCTACTGTAATACAACATCACTGTTTAAATAGTACCTGGAATGGGAATGAGACCATAGAGTCAAATAAC----  
 -----  
 -----  
 AGCACTGAAAATATTATACTCCAATGCAGAATAAAACAAACTATAAACATGTGGCAGGAAGTAGGAAAAGCAA  
 TGTATGCCCCCTCCCATCAGTGGACAAATTAGATGCTCATCAAAAT---  
 ATTACAGGGCTAATATTAACAAGAGATGGTGGTAATAATGCTAGC-----  
 -----  
 -----  
 CAGACAGAGATCTTCAGACCTGGAGGAGGAGATATGAGGGACAATTGGAGAAGTGAATTATATAAATATAAAG  
 TAGTAGAGATTGAACCATTA---GGAGTAGCACCCACCAAGGCAAAGAGAAGAGTGGTG-----  
 -----CAGAGAGAAAAAAGAGCA---GTGGGAACACTAGGAGTT-----  
 ATGTTCTTGGGTTCTTGGGAGCA---GCAGGAAGCACTATG---GGCGCAGCGTCG---  
 ATGGCGCTGACGGTACAG---GCCAGACAA---TTATTG---TCTGGTATAGTGCAACAGCAGAAC---  
 AATCTG---CTGAAG---GCTATTGAGGCGCAACAGCATCTGTTGCAACTCACGGTCTGGGGCATC

>JQ085293

TTCTACTGTGATACATCACTACTGTTTAAATAGTACTTGGAATGAACTACTTGGAACAAAACACTACTGGGAATA  
GTACTAAC-----

-----GAT---

GCAAATAACACAGTAATTACACTCCCATGCAGAATAAAACAAATTATAAACATGTGGCAGGGAGTAGGAAGAG  
CAATGTATGCCCCCTCCCATCAGCGGAAATATTAGCTGTTTCATCAAAT---

ATTACAGGGCTGATATTGACAAGAGATGGTGGTAATGAAAGTAAGAAT-----  
-----

AACAGCGCTGAGATTTTCAGACCTGCAGGAGGAGATATGAGGGACAATTGGAGAAAGTGAATTATATAAAATATA  
AAGTAGTAAAAATTGAACCATTA---GGAATAGCCCCCACCAGGGCAAAAAGAAGAGTGGTG-----

-----CAGAGAGAAAAAAGAGCA---GTGGGA---TTCGGAGCT-----

---CTGTTTCCTTGGGTTCTTGGGAGCA---GCAGGAAGCACTATG---GGCGCAGCGTCA---

CTGACGTTGACGGTACAG---GCCAGACAA---TTATTG---TCTGGTATAGTGCAACAGCAGAGC---

AATATG---CTGAGA---GCTATTGAGGCGCAACAGCATATGTTGCAACTCACAGTCTGGGGCATC

>AF217150

TTCTACTGTAATTCAACACCATTGTTTAAATAGTATTTGGAATATTACTGGGAATATTACTGAAGAGTCAAATA  
ACACT-----

AAAGGAAATGACACAATCATACTCACATGCAGAATAAAACAAATTATAAACATGTGGCAGGAAGTAGGAAAAG  
CAATGTATGCCCCCTCCCATCAGAGGACAAATTAAATGTGTATCAAAT---

ATTACAGGGCTACTATTAACAAGAGATGGTGGTAAGGATGAAGGTAAA-----  
-----

GAGAACGATACCGAGACCTTCAGACCACAAGGAGGAAATATGAGGGATAATTGGAGAAAGTGAATTGTATAAAAT  
ATAAAGTAGTAAAAATTGAACCATTA---GGAGTAGCACCCACCAAGGCAAAGAGAAGAGTGGTG-----

-----CAGAGAGAAAAAAGAGCA---GTGGGA---ATAGGAGCT---

-----ATGTTTCCTTGGGTTCTTAGGAGCA---GCAGGAAGCACTATG---GGCGCAGCGTCA---

ATAACGCTGACGGTACAG---GCCAGACAA---TTATTG---TCTGGTATAGTGCAACAGCAGAGC---

AATTTG---CTGAGG---GCTATTGAGGCGCAACAGCATCTGTTGCAACTCACAGTCTGGGGCATC

>MH262735

TTCTACTGTAATACAACACAGCTGTTTAAACAGTACTTGAGGGTGGTCAATGGTACTTGGAATGATACTATAG  
AA-----

TCAAATAAACTATCACACTCCCATGCAGAATAAAACAAATTATAAATAGGTGGCAGGAAGTAGGAAAAGCAA  
TGTATGCCCCCTCCCATGAAGGACAAATTAACTGTTTCATCACAG---

ATTACAGGGCTACTATTAACAAGAGATGGTGGTAATGACACAAACGGG-----  
-----

ACGACAGAGACCTTCAGACCTGGAGGAGGAAATATGAAAGACAATTGGAGAAATGAATTATATAAAATATAAAG  
TAGTAAAAATTGAGCCATTA---GGAATAGCACCCACCAAGGCAAAGAGAAGAGTGGTG-----

-----CAGAGAGAAAAAAGAGCA---ATA-----ATAGGAGCT-----

GTGTTTCCTTGGGTTCTTGGGGGCA---GCAGGAATCACTATG---GGCGCAGCGTCG---

ATGACGCTGACGGTACAG---GCCAGACAA---TTATTG---TCTGGTATAGTGCAACAGCAAAAC---

AATTTG---CTGAGG---GCTATTGAGGCGCAACAGCATCTGTTGCAACTCACAGTCTGGGGCATT

>MH263144

TTCTACTGTAATACAACACCACTGTTTAAATAGCTCATGGAATGGTACTGAAGGATTCAAAAAGTTCAATGAGA  
CT-----

GAAGACAAAACATTACACTCCAATGTAGAATAAAACAAATTATAAACATGTGGCAGGGAGTAGGAAAAGCAA  
TGTATGCCCCCTCCCATCAGCGGAATAATTAAATGTTTCATCAAAT---

ATTACAGGGCTGATACTAACAAGAGATGGTGGTAGAGATGATGGTACTAATACC-----  
-----

ACAACAAACGATACCGAGATCTTCAGACCTATAGGAGGAGATATGAAGGATAATTGGAGAAAGTGAATTATATA  
AATATAAAGTAGTAAGAATTGAACCAGTA---GGAATAGCACCCACCAGGGCAAAAGAGAAGAGTGGTG-----

-----CAGAGAGAAAAAAGAGCA---GCA-----

CTAGGAGCA-----GTGTTTCCTTGGGTTCTTGGGAGCA---GCAGGAAGCACTATG---

GGCGCAGCGTCA---ATAACGCTGACGGTACAG---GCCAGGCTA---TTATTG---

TCTGGTATAGTGCAGCAGCAGAAC---AATTTG---CTGAGG---  
GCTATTGACGCGCAACAACACCTGTTGCAACTCACAGTCTGGGGCATC  
>MH263362  
TTTTACTGTAATTCAACACCACTGTTTAATAGTACTTGGAAGAGGAATGATACTAATAGTACTTGGAATGTAA  
CACAATGGAAT-----  
-----GAT---  
AGTACTAATGGTACAATCACACTCCAATGCAGAATAAAACAAATTATAAACATGTGGCAAGAAGTAGGAAAAG  
CAATGTATGCCCCCTCCTATTAGAGGAAACATTAGCTGCTCATCAAAT---  
ATTACAGGGCTCATATTAACAAGAGATGGTGGTGAGAAAAATGAG-----  
-----  
ACCGATGAGATCTTCAGACCTGCAGGAGGAGATATGAGGGACAATTGGAGAAGTGAACTATATAAGTATAAAG  
TAGTACAACCTTGAGCCATTA---GGAGTAGCCCCCACCAGGCAAAGAGAAGAGTGGTG-----  
-----CAGAGAGAAAAAAGAGCA---GTGGGAATGATAGGAGCT-----  
ATGTTTCCTTGGGTTCTTGGGAACA---GCAGGAAGCACTATG---GGCGCAGCGTCA---  
ATAGCGCTGACGGCACAG---GCCAGACAA---TTATTG---TCTGGTATAGTGCAACAGCAGAAT---  
AATCTG---CTGAGG---GCTATTGAGGCGCAACAGCATCTGTTGCAACTCACAGTCTGGGGCATC  
>MH263630  
TTCTACTGTAATACAACGAAACTGTTT-----ACTTGGAATAGTACTCGGGATGGGAATAGCACTAAAGAG-  
-----  
-----  
GCAAAATGACACACTCATTCTCCCATGTAGAATAAAACAAATTATAAACATGTGGCAGGAAGTAGGAAAAGCAA  
TGTATGCCCCCTCCCATCAGAGGACCCATTAATTGTGTATCAAAC---  
ATTACAGGGTTGATATTAACAAGAGATGGTGGTACTGGAAAAAATACC-----  
-----  
-----  
ACAGACAACAACACTGAGGTCTTCAGACCTACAGGAGGAAATATGAAGGACAATTGGAGAAGTGAATTATATA  
AATATAAAGTAGTAAGAATTGAACCATTA---GGAGTAGCACCCACCAAGGCAAAGAGAAGAGTGGTG-----  
-----CAGAGAGAAAAAAGAGCA---GTGGGA---  
ATAGGAGCT-----GTGTTTCCTTGGGTTCTTGGGAGCA---GCAGGAAGCACTATG---  
GGCGCAGCGTCA---GTGACGCTGACGGTACAG---GCCAGACAA---TTATTG---  
TCTGGTATAGTGCAACAGCAGAAC---AATTG---CTGAGG---  
GCCATTGAGGCGCAACAACATCTGTTGCAACTCACGGTCTGGGGCATC  
>KX984368  
TTCTACTGTAATACAACACAACCTGTTTAATAGTACTTGGGAGAATGAGACTACAGGGATAAATACCACTGAA-  
-----  
-----  
GGAAATGGCACATTTCACACTCCAATGCAGAATAAAACAAATTATAAACATGTGGCAGGAAGTAGGAAAAGCAA  
TGTATGCCCCCTCCCATTAGAGGACAGATTAGATGTTTCATCAAAT---  
ATTACAGGGCTGCTATTAACAAGAGATGGTGGTAATAGAGATGGT-----  
-----  
GGTAATGACACAAAC---  
AGGAATGAGACCTTTAGACCTGGAGGAGGAGATATGAGGGACAATTGGAGAAGTGAATTATATAAATATAAAG  
TAGTAAAAAATTGAACCATTA---GGAGTAGCACCCACCAAGGCAAAGAGAAGAGTGGTG-----  
-----CAGAGAGAAAAAAGAGCA---GTGGGA---ATAGGAGCT-----  
CTGTTTCCTTGGGTTCTTGGGAGCA---GCAGGAAGCACTATG---GGCGCAGCGTCA---  
CTGACGCTGACGGTACAG---GCCAGACTA---TTATTG---TCTGGTATAGTGCAACAGCAGAAC---  
AATTTG---CTGAGA---GCTATTGAGGCGCAACAGCATCTGTTGCAACTCACAGTCTGGGGCATT  
>KX984537  
TTCTACTGTAATACAACACAACCTGTTTAATAGTACCTGGGATAATAGTACCTGGGATACTAACTGGACTAGTC  
CTGAA-----  
-----AAT---  
TCTACCAATACCAATATCACACTCCCATGCAGAATAAAACAAATTATAAACATGTGGCAGGAAGTAGGAAAAG  
CAATGTATGCCCCCTCCCATCAGAGGACAAATTAAGTGTTCATCAAAT---  
ATTACAGGACTGCTGTTAACAAGAGATGGTGGTAATAGCACAGATGGA-----  
-----  
-----  
AACAACTCTGAGATCTTCAGACCTGGAGGAGGAGATATGAGGGACAATTGGAGAAGTGAATTATACAAATATA  
AAGTAGTGCAAAATTGAACCATTA---GGAGTAGCACCTACCAAGGCAAAGAGAAGAGTGGTG-----  
-----CAGAGAGAAAAAAGAGCA---GTGGGA---ATAGGAGCT-----

---TTATTCCTTGGGTTCTTGGGAGCA---GCAGGAAGCACTATG---GGCGCAGCATCA---  
 ATAACGCTGACGGTACAG---GCCAGACAA---TTATTA---TCTGGTATAGTGCAACAGCAGAAC---  
 AATCTG---CTGAGG---GCTATTGAGGCGCAACAGCATCTGTTGCAACTCACAGTCTGGGGCATC  
 >KX984588  
 TTCTACTGTAACACAACACAACCTGTTTAATAGTACTTGGTATGCTAATGGTTCTGGGAATAATACTAAGTGG-  
 -----  
 -----  
 ACAAATGACACCATTACACTCCCATGTAGAATAAAACAAATTATAAACATGTGGCAGGAAGTAGGAAAAGCAA  
 TGTATGCCCCCTCCCATTCAGAGAGTGATTAAGTGTGTATCAAGT---  
 ATTACAGGGCTACTATTAACAAGAGATGGTGGTAGTGGAATAACACC-----  
 -----  
 -----  
 AACACCACTGAGGTCTTCAGACCTGGAGGAGGAGATATGAGGGACAAGTGGAGAAGTGAATTATATAAATATA  
 AAGTAGTACAAATTGAACCATTA---GGAATAGCTCCCAAGGCAAAGAGAAGAGTGGTG-----  
 -----CAGAGAGAAAAAAGAGCA---GTAACA---TTAGGAGCT-----  
 ---ATGTTCCCTTGGGTTCTTGGGAGCA---GCAGGAAGCACTATG---GGCGCAGCGTCA---  
 GTGACGCTGACGGTACAG---GCCAGACAA---TTATTG---TCTGGTATAGTGCAACAGCAGAAC---  
 AATCTG---CTGAGA---GCTATTGAGGCGCAACAACATATGTTGCAACTCACAGTCTGGGGCATC  
 >AY842786  
 TTCTACTGTAATTCAACACAACCTGTTTAATAGTACTTGGGTAAATGGTACCAGGAATGATACTAAAGGGTCAA  
 AT-----  
 -----  
 AGCACTGAAATCATCACACTCCCATGCAGAATAAAACAAATTATAAACAGGTGGCAGGGAGTAGGAAAAGCAA  
 TGTATGCCCCCTCCCATCCAAGGACTAATTAAATGTTTCATCAAAT---  
 ATTACAGGGTTGTTATTAACAAGAGATGGGGGTAACGAGGATAAC-----  
 -----  
 -----  
 AAGACCGAGACCTTCAGACCTGCAGGAGGAGAGATGAGGGACAATTGGAGAAGTGAATTATATAAATATAAAG  
 TAGTAAAAAATTGAACCATTA---GGAGTAGCACCCACCAAGGCAAAGAGAAGGGTGGTG-----  
 -----CAGAGAGAAAAAAGAGCA---GTGGGA---ATAGGAGCT-----  
 GTGTTCCCTTGGGTTCTTGGGAGCA---GCAGGAAGCACTATG---GGCGCAGCATCA---  
 ATGACGCTGACGGTACAG---GCCAGACGA---TTATTG---TCTGGTATAGTGCAACAGCAGAAC---  
 AATTTG---CTGAGG---GCTATTGAGGCGCAACAGCATCTGTTGCAACTCACAGTCTGGGGCATC  
 >AY842808  
 TTCTACTGTAACACAACACAACCTGTTTAATAGTACTTGGAACGATACTACTATTAATAGAACTGAAGGGTCA-  
 -----  
 -----  
 AATACAAGAAATATCACACTCCCATGCAGAATAAAACAAATTATAAACAAAGTGGCAGGAAGTAGGGAAAGCAA  
 TGTATGCCCCCTCCCATCAGAGGACAAATTAGATGTTTCATCAAAT---  
 ATTACAGGGCTGTTATTAACAAGAGATGGTGGTGCTGATACTAAC-----  
 -----  
 -----  
 ACCACCGAAATCTTCAGACCTGGAGGAGGAGATATGAGGGACAATTGGAGAAGTGAATTATATAAATATAAAG  
 TAGTAAGAATTGAACCAATA---GGAGTAGCACCCACTAAGGCAAAGAGAAGAGTGGTG-----  
 -----CAGAGAGAAAAAAGAGCA---GTGGGA---ATAGGAGCT-----  
 TTGCTCCTTGGGTTCTTGGGAGCA---GCAGGAAGCACTATG---GGCGCAGCGTCA---  
 TTGACGCTGACGGTACAG---GCCAGACAA---TTATTG---TCTGGTATAGTGCAACAGCAGAAC---  
 AACCTG---CTGAGG---GCTATTGAGGCGCAACAGCACCTGTTGCAACTCACAGTCTGGGGCATC  
 >KX984877  
 TTCTACTGTAATACAACAAAATTGTTTGATAATAATATTGCTAACAGGTCA-----  
 -----  
 -----  
 GCTAATAGCACAATCATACTCTCATGCAGAATAAAACAAATTATAAACATGTGGCAGGAAGTAGGGAAAGCAA  
 TGTATGCCCCCTCCCATCGAAGGACAGATTAGCTGTTTCATCAAAT---  
 ATTACAGGGCTGTTATTAACAAGAGATGGTGGTAGTAGTAATGAGAAT-----  
 -----  
 -----  
 AATGGGAGTGAGATTTTCAGACCTGGAGGAGGAGATATGAGGGACAATTGGAGAAGTGAATTATATAAGTACA  
 AAGTAATAAAAAATTGAACCATTA---GGAGTAGCACCCACCAAGGCAAAGAGAAGAGTGGTG-----  
 -----CAGAGAGAAAAAAGAGCA---GTGGGA---ATGGCAGCA-----

---GTGTTCCCTTGGGTTCTTGGGAGCA---GCAGGAAGCGCTATG---GGCGCAGCGTCA---  
ATGACGCTGACGGTACAG---GCCAGACAA---TTATTG---TCTGGTATAGTGCAACAGCAAAAC---  
AATTTG---CTGAGA---GCTATTGAGGCGCAGCAGCATCTGCTGCAACTCACAGTCTGGGGCATC  
>AY842824  
TTCTACTGTAATACAGACCAGCTGTTTAATAGTACTTGGCAGTTTAATAGTACTTGGCCGCCTAATAGTACTG  
AGTATAATACT-----  
-----ACAGGGTCA-----  
GATAACAATGGAACGATCACACTCCAGTGTAGAATAAAACAAATTATAAATAGATGGCAGGAAGTAGGAAAAG  
CAATGTATGCCCCCTCCCATCGAAGGACCAATTAAGTTCATCAAAT---  
ATTACAGGGCTGCTATTAACAAGAGATGGTGGTGAGAACAGGAACAAT-----  
-----  
AGCAGTACAGAGATCTTCAGACCTGGAGGAGGAAATATGAGGGACAATTGGAGAAAGTGAATTATATAAATATA  
AAGTAGTAAAAATTGAACCACTA---GGAGTAGCACCCACCAAGGCAAAGAGAAGAGTGGTG-----  
-----CATAAAGAAAAAAGAGCA---GTGGGA---CTTGGAGCT-----  
---ATGTTCCCTTGGGTTCTTGGGAGCA---GCAGGAAGCACTATG---GGCGCAGCGTCA---  
ATAACGCTGACGGTACAG---GCCAGACAA---TTATTG---TCTGGTATAGTGCAACAGCAGAAC---  
AATCTG---CTGAGA---GCTATTGAGGCGCAACAACATATGTTGCAACTCACAGTCTGGGGCATC  
>MH632949  
TTCTACTGTAATACAACAACACTGTTTAATAGTAGTAATATTTGGATAAATGGGACGACA-----  
-----  
AATAACACTAATATTACACTCCCATGCAGAATAAAACAAATCATAAATAGGTGGCAGGAAGTAGGAAGAGCAA  
TGTATGCCCCCTCCCATCGAGGGACGAATTAATTGTGTGTCCAAT---  
ATAACAGGACTGATATTAACAAGAGATGGTGGTAACAAGACCAACACC-----  
-----  
CCTGAGACCTTCGAGACCTTCAGACCTATAGGAGGAGATATGAGGGACAATTGGAGAAAGTGAATTATATAAAT  
ATAAAGTAGTAAAAATTGAGCCGTTA---GGAGTAGCACCCACCAAGGCAAAAGAAGAGTGGTG-----  
-----CAAAGAGACAAAAGAGCA---GTGGGA---ATAGGAGCT---  
-----GTGTTCCCTCGGGTTCTTGGGAGCA---GCAGGAAGCACTATG---GGCGCAGCGTCA---  
ATAACGCTGACGGTACAA---GCCAGGCAA---TTACTG---TCTGGGATAGTGCAACAGCAGAAC---  
AATCTG---CTGAGA---GCTATTGAGGCGCAACAGCATATATTGCAACTCACAGTCTGGGGCATC  
>MH632956  
TTCTACTGTAACACAACACAGTTGTTTAATAGTACTTGGCCTCCTGAGAATGGGACAACAAAT-----  
-----  
GATACAGGAAATATAATACTCCCATGTAGAATAAAACAAATTATAAACAGATGGCAGGAAGTAGGAAAAGCAA  
TGTATGCCCCCTCCCATCAGAGGACAAATTAGCTGTGAATCAAAT---  
ATTACAGGGTTGCTATTGACAAGAGATGGTGGTACTCCTGTGAAC-----  
-----  
CAGACCGAGACTTTTCAGACCTGGAGGAGGAGATATGAGAGACAATTGGAGAAAGTGAATTATACAAATATAAAG  
TAGTAAAAAATTGAACCATTA---GGAATAGCACCCACCAGGGCAAAGAGAAGAGTGGTG-----  
-----CAGAGAGAAAAAAGAGCA---GTGGGAAGTATGGGAGCT-----  
CTGTTCCCTTGGGTTCTTGGGAACA---GCAGGAAGCACTATG---GGCGCAGCATCA---  
TTAACGCTGACGGTACAG---GCCAGACTA---CTATTG---TCTGGTATAGTGCAACAGCAAAGC---  
AATTTG---CTGAAG---GCTATTGAGGCGCAACAACATCTGTTGCAACTCACAGTCTGGGGCATC  
>MH632822  
TTCTACTGTAATACATCACAACACTGTTTAATACTACTTGGAGGACTAATAATACTGATAACAGGTCAAAT---  
-----  
-----  
AGAACTAATACAATCACCTCCTCATGTAGAATAAAACAAATTGTAAACATGTGGCAGGAAGTAGGAAGAGCAA  
TGTACGCCCCCTCCCATCAGTGGACCACTTAGTTGCTTATCAAAT---  
ATTACAGGGCTGCTATTAACAAGAGATGGTGGCAACGCCAAAAATGACAGCGAC-----  
-----  
AACAAACACAGAGACCTTCAGACCTGGAGGAGGAGATATGAGGGACAATTGGAGAAAGTGAATTATATAAATATA  
AAGTAGTAAAAAATTGAACCATTA---GGAATAGCACCCACCAAGGCAAAGAGAAGAGTGGTG-----  
-----CAGAGAGAAAAAAGAGCA---GTGGGAGTAATGGGAGCT-----

---ATGTTCTTGGGTTCTTGGGAGCA---GCAGGAAGCACTATG---GGCGCAGCGTCA---  
GTGACGCTGACGGTACAG---GCCAGACAA---TTATTG---TCTGGTATAGTGCAACAGCAGAAC---  
AATCTG---CTGAAG---GCTATTGAGGCGCAGCAGCATATGTTGCAACTCACAGTCTGGGGCATT  
>MH575991  
TTCTACTGTAATACAACAAAACCTATTTAATAGTACTTGGCTACTTAATAGTACTTGGAAATAATACTGAAAGGA  
CAAAT-----  
-----  
GACACTGAAATAATCACACTCCCATGCAGAATAAAACAAATTGTAAACAGGTGGCAGGAAGTAGGCAAAGCAA  
TGTATGCCCCCTCCCATCCAAGGACAAATTAGTTGCTCATCAGAT---  
ATTACAGGGCTGCTACTAGTTAGAGATGGTGGAATTAATACCAGCAACAACAGC-----  
-----  
-----  
AGCAACGAGACCGAGACCTTCAGACCTGGAGGAGGAGATATGAGGGACAATTGGAGAAGTGAATTATATAAAAT  
ATAAGGTGGTAAAAATTGAACCATTA---GGAGTAGCACCCACCAAGGCAAAGAGAAGAGTGGTG-----  
-----CAGAGAGAAAAAAGAGCA---GTGGGAATGCTGGGAGCT---  
-----ATGTTCTTGGGCTCTTGGGAGCA---GCAGGAAGCACTATG---GGCGCAGCGTCA---  
ATGACGTTGACGGTACAG---ACCAGACAA---TTATTG---TCTGGTATAGTGCAACAGCAGAAC---  
AATCTG---CTGAGG---GCTATTGAGGCGCAGCAGCATCTGTTGCAACTCACAGTCTGGGGCATC  
>MH576349  
TTCTACTGTAACACAACACGACTGTTTAATAGTACTTGGAGTGTTAATGGAAGTAGCATAAACGAAACT---  
-----  
-----  
AACAAATAAAATATCACACTCCCGTGCAGAATAAAACAAATTATAAACAGGTGGCAGGAAGTAGGAAAAGCAA  
TGTATGCCCCCTCCTATCAGTGGGATAATTAGGTGCTCATCAAAT---  
ATTACAGGACTAATATTAACAAGAGATGGTGGTACAACCTGATGGTGGTACAAC-----  
-----  
-----  
AATAGTACAAAGGAGACCTTCAGACCTGGAGGGGGAAATATGAAGGACAATTGGAGAAGTGAATTATATAAAAT  
ACAAAGTAGTAAAAATTGAGCCATTA---GGAGTAGCACCCACCAAGGCACAGAGAAGAGTGGTG-----  
-----CAAAGAGAAAAAAGAGCA---ATAGGAACGTTAGGAGCT---  
-----ATGTTCTCGGGTTCTTGGGAGCA---GCAGGAAGCACTATG---GGCGCAGCGTCA---  
CTGACGCTGACGGTACAA---GCCAGACAA---TTATTG---TCTGGTATAGTGCAACAGCAGAAC---  
AATCTG---CTGAGG---GCTATTGAGGCGCAACAGCATATGTTGCAACTCACAGTCTGGGGCATC  
>MH576262  
TTCTACTGTAATACAACACAGCTGTTTAATAGTACTTGGAAATAATAGTACTTGGAAATGGTACTGATAATTGGG  
AT-----  
-----GGTACT-----  
GAATCAAATAGCACTATCACACTCCCATGCAGAATAAAACAAATTATAAACTTGTGGCAGGAAGTAGGAAGAG  
CAATGTATGCCCCCTCCCATCCAAGGGCAAATTAGATGTTCAATCAAAT---  
ATTACAGGGCTGCTGCTAGTAAGAGATGGTGAGCAACAATAGTAGT-----  
-----  
-----  
AATGATACAGAGACCTTCAGGCCTGGAGGAGGAGATATGAGGGACAATTGGAGAAGTGAATTATATAAAATATA  
AAGTAGTCAAATTTGAACCATTA---GGAATAGCACCCACCCATGCAAGAGAAGAGTGGTG-----  
-----CAAAGGGAAAAAAGAGCA---ATAGGA---CTTGGAGCT-----  
---TTCTTCCTTGGGTTCTTGGGAGCA---GCAGGAAGCACTATG---GGCGCAGCGTCA---  
GTGACGCTGACGGTACAG---GCCAGACAA---TTATTG---TCTGGTATAGTGACAGCAGCAAAAC---  
AATTTG---CTGAGA---GCTATTGAGGCGCAACAGCATCTGTTGCAACTCACAGTCTGGGGCATC  
>MH576152  
TTCTACTGTAATACAACACAACCTGTTTAATAGTACTTGGAAATGGTACTACAGGAGTAAATGGTACAGGAGCAA  
ATAACACA-----  
-----  
GAAGTAAATATTATCACACTCCCATGCAAGATAAGGCAAATTGTAAACATGTGGCAGGAAGTAGGAAAAGCAA  
TGTATGCCCCCTCCCATCAGTGGACAAATTAGTTGTTTCATCAAAT---  
ATTACAGGGCTACTACTACTAAGAGATGGTGGAATAGCAATGACACGGAT-----  
-----  
-----  
AACACGACTGAAATCTTCAGACCTGGAGGAGGAGATATGAGGGACAATTGGAGAAGTGAATTATATAAAATATA  
AAGTAGTACAAATTTGAACCATTA---GGAATAGCACCCACCAAGGCAAAGGAGAAGAGTGGTG-----  
-----CAGAGAGAAAAAAGAGCA---GTGGGA---ATAGGAGCT-----

---CTGTTCCCTTGGGTTCTTGGGAGCA---GCAGGAAGCACTATG---GGCGCAGCATCA---  
 ATAACGCTGACGGTACAA---GCCAGACAC---TTATTG---TCTGGTATAGTGCAACAGCAGAAC---  
 AATTTG---CTGAGA---GCTATTGAGGCGCAACAGCATATGTTGCAGCTCACAGTCTGGGGCATC  
 >MH576039  
 TTCTATTGTAATACAACACAGCTGTTTAATAGTACTTGGGAATAGTACTTGGACTGGGAATGCTACCGAA-----  
 -----  
 -----  
 TTAGATGGAAACATCACACTCCCATGCAGAATAAAACAGATTATAAACAGGTGGCAAGAAGTAGGAAAAGCAA  
 TGTATGCCCCCTCCATTAGAGGAAAAATTAGATGTTTCATCAAAT---  
 ATTACAGGGTTACTATTAGTAAGAGATGGTGGTAACACGAGCGGG-----  
 -----  
 -----  
 ACTGAGACCTTCAGACCTGGAGGAGGAGATATGAAGGACAATTGGAGGAGTGAATTATATAAATATAAAGTAG  
 TAAAAATTGAGCCATTA---GGAGTAGCACCCACCAGGGCAAAGAGAAGAGTGGTG-----  
 -----CAAAGAGAAAAAAGAGCA---GTGGGA---ATAGGAGCT-----  
 GTGTTCCCTTGGGTTCTTGGGAGCA---GCAGGAAGCACTATG---GGCGCAGCGTCA---  
 GTGACGCTGACGGTACAA---GCCAGGCTG---TTATTG---TCTGGTATAGTGCAACAGCAAAAC---  
 AATTTG---CTGAGA---GCTATTGAGGCGCAACAACATCTATTGCAACTCACAGTCTGGGGCATC  
 >MH575857  
 TTCTACTGTAATACAACAAAACCTGTTTAATAGTACTTGGAAACAAAATAATACTAATTGGACTATTACTGAAG  
 GGTGAGAT-----AACACT-----  
 -----AACACT-----  
 GCAGAGAATGACACACTCATGCTCCCATGCAGAATAAAACAAATTATAAACATGTGGCAGGAAGTAGGAAAAG  
 CAATGTATGCTCCTCCCATTAGAGGAGTAATCAAATGTTTCATCAAAT---  
 ATTACAGGGTTGCTATTAACAAGGGATGGTGGTAGAAACCAGAGTAATAAC-----  
 -----  
 -----  
 CAGAATGAGACAGAGATCTTCAGACCTGGAGGAGGAGATATGAGGGACAATTGGAGAAGTGAATTATATAAAT  
 ATAAAGTAGTAAGAATTGAACCATTA---GGAGTAGCACCCACCAAGGCAAAGAGAAGAGTGGTG-----  
 -----CAAAGAGAAAAAAGAGCA---GTGGGA---ATAGGAGCT---  
 -----GTGTTCCCTTGGGTTCTTAGGAGCA---GCAGGAAGCACTATG---GGCGCAGCGTCG---  
 GTGACGCTGACGGTACAG---GCCAGACAA---TTATTG---TCTGGTATAGTGCAAGCAGCAGAAC---  
 AACTTG---CTGAGA---GCTATTGAGGCGCAGCACCATCTGTTGCAACTCACGGTCTGGGGCATC  
 >MH575796  
 TTCTACTGTGATTCAACGCAACTGTTTAATAGTACCTGGCTGCCTAATAATGAGAGTATTTGGTATAATAATA  
 GGAATAACT-----ACAGGGTCAAAC-----  
 ---ACAGGGTCAAAC-----  
 AGCAGTGCACTCAATATCACACTCCCATGTAGAATAAAACAAATTATAAACCTATGGCAAGAAGTAGGAAAAG  
 CAATGTATGCCCCCTCCCATCAGAGGAGCAATCAACTGCACGTCAAAT---  
 ATTACAGGGTTGATATTAACAAGAGATGGTGGGAATAATCCTAAC-----  
 -----  
 -----  
 GGGACTAACACCTCTGAGACTTTCAGACCTGGAGGAGGAAATATGAGGGACAATTGGAGAAGTGAATTATATA  
 GATATAAAGTAGTAAAAATTGAACCATTA---GGAGTAGCACCCACCACGGCAAAGAGAAGAGTGGTG-----  
 -----CAGAGAGAAAAAAGAGCA---GTGGGT---  
 CTCGGAGCC-----TTGTTCCCTTGGGTTCTTGGGAGCA---GCAGGAAGCACTATG---  
 GGCGCAGCGTCA---GTAACGCTGACGGTACAG---GCCAGACAA---CTATTG---  
 TCTGGTATAGTGCAAGCAGCAGAAC---AATCTG---CTGAGG---  
 GCTATTGAGGCGCAACAGCATCTGTTGCAACTCACAGTCTGGGGCATC  
 >MH575728  
 TTCTACTGTAATTCAACAAAACCTGTTTAATAGTACTTGGAGTAGTAATGGGAGTAGTACTTGGAAATAGTACTG  
 AG-----  
 -----  
 ACGAATGAAATTATCACACTCCCATGCAGAATAAAACAAATTATAAACATGTGGCAGGAAGTAGGAAAAGCAA  
 TGTATGCCCCCTCCTATCAGAGGACAAATTAGATGTTTCATCAAAC---  
 ATTACAGGGCTGCTGTTAACAAGAGATGGTGGTAACAATAGCAACGACACTAGC-----  
 -----  
 -----  
 AACGACACTGAGATCTTTAGACCTGGAGGAGGAAATATGAAGGATAATTGGAGAAGTGAATTATATAAATACA  
 AAGTAGTAAAAATTGAACCAATA---GGAGTAGCACCCACCAAGGCAAAGAGAAGGGTGGTG-----

-----CAGAGAGAGAAAAGAGCA---GTAGGA---CTAGGAGCT-----  
 ---GTGTTCCCTTGGGTTCTTGGGAGCA---GCCGGAAGCACTATG---GGCGCAGCGTCA---  
 ATGACGCTGACGGTACAG---GCCAGACAA---TTGTTG---TCTGGTATAGTGCAACAGCAGAAC---  
 AACCTG---CTGAAG---GCTATTGAGGCGCAGCAGCATCTGTTGCAACTCACAGTCTGGGGCATC  
 >MH575694  
 TTCTACTGTAACACATCAAATCTGTTTAATAGTACTTGAATAGTACTACTTGAATAGTTGGAATAGTAGTA  
 CTCGGGGTAAT-----  
 -----  
 ACTACAGGAAATATCACACTCCAATGCAGAATAAAACAAATTGTAAACATGTGGCAGGAAGTAGGAAAAGCAA  
 TGTATGCCCCCTCCTATCAAAGGACCAATTAAATGTTTCATCAAAT---  
 ATCACAGGGCTGCTACTAACAAGAGATGGGGGTGAGGAGAGTGAGAAT-----  
 -----  
 -----  
 AACAAACGATTCCGAGATCTTCAGACCTGGAGGGGGAGATATGAGGGATAATTGGAGAAGTGAATTATATAAAAT  
 ATAAAGTAGTAAAAATTGAACCATTA---GGTCTAGCACCCACCAAGGCAAAGAGAAGAGTGGTG-----  
 -----CAGAGAGAAAAAAGAGCA---GTGGGAACATTAGGAGCT---  
 -----TTGTTTCTTGGGTTCTTGGGAACA---GCGGGAAGCACTATG---GGCGCAGCGTCA---  
 ATGACGCTGACGGTACAG---GCCAGGCTA---TTATTG---TCTGGTATAGTGCAACAGCAGAAC---  
 AATTTG---CTGAGA---GCTATTGAGGCGCAACAGCATATGTTGCAACTCACAGTATGGGGCATC  
 >MH575680  
 TTCTACTGTAATACAACAAAACTGTTT-----  
 ACTTGGAATGCTACAACAAAACTGTTTACGTGGAATGCTACAAAT-----  
 -----  
 AGCAATGGAACCATCATACTCCCATGTAGAATAAAACAAATTATAAACATGTGGCAAGAGGTAGGAAAAGCAA  
 TGTATGCCCCCTCCCATTTCGTGGACAAATTAGATGTTTCATCAAAT---  
 ATTACAGGACTGCTATTAAACAAGAGATGGTGGGACTAACAAGACA-----  
 -----  
 -----  
 GGGAACAGGACTGAGATCTTCAGACCTGGAGGGGGAAATATGAAGGACAATTGGAGAAGTGAATTATATAAAAT  
 ACAAAGTAGTAGAAATTAAACCATTA---GGAGTAGCACCCACCAAGGCAAAGAGAAGAGTGGTG-----  
 -----CAGAGAGAAAAAAGAGCA---GTGACC---ATAGGAGCT---  
 -----ATGTTCCCTTGGGTTCTTGGGAGCA---GCAGGAAGCACTATG---GGCGCAGCATCA---  
 CTGACGCTGACGGTACAG---GCCAGACAA---TTATTG---TCTGGTATAGTGCAACAGCAGAAC---  
 AATCTG---CTGAGG---GCGATTGAGGCGCAGCAGCATCTGTTGCAACTCACAGTCTGGGGCATA  
 >MH575478  
 TTCTATTGTAATACAACACAATTGTTTAATAGCACTTGGGATAATGGTACTGAAAAGTCAAGTAACCTTGGAG  
 GA-----  
 -----  
 AATGATACAACCATCATTCTCCCATGCAGAATAAAACAAATTATAAACATGTGGCAGGAAGTAGGAAAAGCAA  
 TGTATGCCCCCTCCCATCAAAGGAATAATTAGATGTTTCATCAAAT---  
 ATTACAGGGCTGCTATTGACAAGAGATGGAGGTAATAGTACTGACACA-----  
 -----  
 -----  
 AATGGGAGCGAGATCTTCAGACCTGGAGGAGGAGATATGAGGGACAATTGGAGAAGTGAATTATATAAGTATA  
 AAGTAGTAAAAATTGAACCATTA---GGAGTAGCACCTACCAAGGCAAAGAGAAGAGTGGTG-----  
 -----CAGAGAGAAAAAAGAGCA---GTGGGA---CTAGGAGCT-----  
 ---TTGTTCCCTTGGGTTCTTGGGAGCA---GCAGGAAGCACTATG---GGCGCAGCGTCT---  
 CTGACGCTGACGGTACAG---GCCAGACAA---TTGTTG---TCTGGTATAGTGCAACAGCAGAAC---  
 AATTTG---CTGAGG---GCAATTGAGGCGCAACAGCATCTGTTGCAACTCACAGTCTGGGGCATC  
 >MH575379  
 TTTTACTGTAATTCAACACAACCTGTTTAATAGTACTTGAATAGTGATGGTACTCTGAATAGTACTTGAAT-  
 -----  
 -----  
 AGTCCAGGTAACATCACACTCCCATGTAAATAAAGGCAAATTGTAAACATGTGGCAGAAAGTAGGAAAAGCAA  
 TGTATGCTCCTCCCATCCGTGGACAAATTAAATGTTTCATCAAAT---  
 ATTACAGGGCTGCTATTAAACAAGAGATGGTGGTAACGAGAGTGGG-----  
 -----  
 -----  
 AACAGCGAAACCTTCAGACCTGGCGGAGGAGATATGAGGGACAATTGGAGAAGTGAATTATACAAATATAAAG  
 TAGTAAGAATTGAACCATTA---GGACTAGCACCCACTAAGGCAAAGAGAAGAGTGGTG-----

-----CAGAGAGAAAAAAGAGCA---ATAGGAACACTGGGAGCT-----  
GTGTTCTTGGGTTCTTGGGAACA---GCAGGAAGCACTATG---GGCGCAGCGTCA---  
ATGACGCTGACGGTACAG---GCCAGGCAA---TTATTG---TCTGGTATAGTGCAGCAGCAGAAC---  
AATCTG---CTGAAG---GCTATTGAGGCGCAACAGCATCTGTTGCAACTCACAGTCTGGGGCATT  
>MH633031  
TTCTACTGTAATACAACAGTACTGTTCAATAGTACTTGGAAATTTTAATGATAGTGATACTGGTATTGGG-----  
-----  
AATAATACTAATATCACACTCCCATGCAGAATAAGACAAGTTATAAACATGTGGCAGGAAGTAGGAAAGGCAA  
TGTATGCCCCCTCCCATAGAGGACAGATTAGATGTTTCATCAAAT---  
ATTACAGGGCTGATATTAACAAGAGATGGTGGTGATACTAATGTTACCAAT-----  
-----  
AACAAAGACTGAAACCTTCAGACCTGCAGGAGGAAATATGAAGGATAATTGGAGAAGTGAACATATATAAATATA  
AAGTAGTACAAATTGAACCATTA---GGAGTAGCACCCACCAAGGCAAAGAGAAGAGTGGTG-----  
-----CAAAGAGAAAAAAGAGCT---GTGGGA---TTTGGAGCT-----  
---ATGTTCTTGGGTTCTTGGGAGCA---GCAGGAAGCACTATG---GGCGCAGCGTCA---  
GTGGCGCTGACGGTACAG---GCCAGACAA---TTATTG---TCTGGTATAGTGCAACAGCAAAAC---  
AATTTG---CTGAGG---GCTATTGAGGCGCAACAGCATCTGTTGCAACTCACAGTCTGGGGCATT  
>MH633155  
TTCTATTGCAATACAACAGAATTATTTGACAGTACTTGGATTAATGGTACTGACATTACTACTAATGCTACTG  
GAGGGAACAAT-----  
-----  
AGCACAAAAAATATCACCTTCACATGCAGAATAAAACAAATTATAAATATGTGGCAGAAAGTAGGAAAAGCAA  
TGTATGCCCCCTCCCATCAGAGGACAAATTAGCTGTTTCATCAAAT---  
ATTACAGGGCTGCTATTAAC TAGAGATGGGGGTGGTAATAGCACA-----  
-----  
AACACAATGAAACCTTCAGACCTACTGGAGGAGATATGAGGGACAATTGGAGGAGTGAATTATATAAATATA  
AAGTAGTAAGAATTGAACCATTA---GGGGTAGCACCCAACAAGGCAAAGAGAAGAGTGGTG-----  
-----CAGAGAGAAAAAAGAGCA---GTGGGAGTAATAGGAGCT-----  
---ATGTTCTTGGGTTCTTGGGAGCA---GCAGGAAGCACTATG---GGCGCAGCGTCA---  
ATAACGCTGACGGTACAG---GCCAGACAA---TTATTG---TCTGGTATAGTGCAACAGCAGAAT---  
AACTTG---CTGAGG---GCTATTGAGGCGCAACAGCATCTGTTGCAACTCACAGTCTGGGGCATT  
>DQ127534  
TTCTACTGTAATACAACAAACCTGTTTAATAGTACCTGGAATGCAACAAACCTGGTTAATGGTACCGGGAATA  
GTACT-----  
-----  
GAAGGGAATGACACAATCAAACCTCCCATGCAGAATAAGACAATTTATAAACATGTGGCAGACAGTGGGAAAAG  
CAATGTATGCCCCCTCCCATCGAAGGACAAATTAAATGTACATCAAAT---  
ATTACAGGGCTGCTATTAACAAGAGATGGTGGTAATTCGACGGAA-----  
-----  
CAGTCCGAGACCTTCAGACCGGGAGGAGATATGAGGGACAATTGGAGAAGTGAATTATATAAATATAAAG  
TAGTAGGAATTGAACCATTA---GGAATAGCACCCACCAGGCAAAGAGAAGAGTGGTG-----  
-----CAGAGAGAAAAAAGAGCA---GTGGGAGCACTAGGAGCT-----  
ATGTTCTTGGGTTCTTGGGAGCA---GCAGGAAGCACTATG---GGCGCAGCGTCA---  
CTGACGCTGACGGTACAG---GCCAGACTA---TTATTG---TCTGGTATAGTGCAACAGCAGAAC---  
AATTTG---CTGAGG---GCTATTGAGGCGCAGCAGCATATGTTGCAACTCACGGTCTGGGGCATC  
>DQ127537  
TTCTACTGTGACTCAACACAACCTGTTTAATAGTACTTGGAAATGAGACTGATTGGAATAATAAACTGAT-----  
-----  
GGAGATGAAACTATCACACTCCCATGCAGAATAAAACAAGTTATAAACAGGTGGCAGGAAGTAGGAAAAGCAA  
TGTATGCCCCCTCCTATCAGAGGAAACATTAGCTGTTTCATCAAAT---  
ATTACAGGGCTGATACTAACAAGAGATGGTGGTAATAGTAATAACACT-----  
-----  
AACAAATCGAGATCTTTAGACCTGGGGGAGGAAATATGAAGGACAATTGGAGAAGTGAATTATATAAATATA  
AAGTAGTACAAATTGAACCATTA---GGAGTAGCACCCACCAGGGCAAAGAGAAGAGTGGTG-----

-----CAGAGAGAAAAAAGAGCA---GTGGGAATGATAGGAGCT-----  
 ---ATGTTCCCTTGGGTTCTTGGGAGCA---GCAGGAAGCACTATG---GGCGCAGCGTCA---  
 ATAACGCTGACGGTACAG---GCCAGACAA---TTATTG---TCTGGTATAGTGCAGCAGCAGAAC---  
 AATCTG---CTGAGG---GCTATTGAGGCGCAACAGCATCTGTTGCAACTCACAGTCTGGGGCATT  
 >DQ127548  
 TTCTACTGTAATTCAACACAATTGTTTAATAGTATTTGGAAGTATAATAATGGCACTTGGAAGTATAATGATA  
 GTATTTGGAAT-----  
 -AGTACTGAAAGTTCA-----  
 AATAACACTGAAAACATCATGCTCCCGTGCAGAATAAGACAAATTATAAACATGTGGCAGGAAGTAGGAAAAG  
 CAATGTATGCCCCCTCCCATCAGAGGACCAATTAGATGTACATCAAAT---  
 ATTACAGGGCTAATATTAACAAGAGATGGTGGCACAACAACAAC-----  
 -----  
 -----  
 ACGAAGGAGGTCTTCAGACCTGGAGGAGGAGATATGAGGGACAATTGGAGAAGTGAACCTATATAAATATAAAG  
 TAGTACAAATTGAACCATTA---GGAATAGCACCCACCAGGGCAAAAAGAAGAGTGGTG-----  
 -----CAGAGAGAAAAAAGAGCA---GTGGGA---ATAGGAGCT-----  
 TTGTTCCCTTGGGTTCTTGGGAGCA---GCAGGAAGCACTATG---GGCGCAGTGTCA---  
 ATGACGCTGACGGTACAG---GCCAGACAA---TTGTTG---TCTGGTATAGTGCAACAGCAGAAC---  
 AATCTG---CTGCGG---GCTATTGAGGCGCAACAGCATATGTTGCAACTCACAGTCTGGGGCATC  
 >AF219627  
 TTTTACTGTAATACAACAACACTGTTTAATAGTACTTGGATTCTGGAATGGTACTGATTGGACTCGAAATGATA  
 CTGAAGGA-----  
 -----TCAGAC-----  
 ATCACTAACGAAAATATCACGCTCCCATGTAGAATAAAACAAATTATAAACATGTGGCAGAAAGTAGGGAAAAG  
 CAATGTATGCCCCCTCCCATCAGTGGACAAATTAGCTGTTCCCTCAAAT---  
 ATTACAGGGCTGCTATTAACACACGATGGTGTGTTGGTCTGTACACG-----  
 -----  
 -----  
 GACGCGAACCAACGTGACCTTCAGACCGGGAGGAGGAAATATGAGGGACAATTGGAGAAGTGAATTATATAAAT  
 AATAAGTAATAAAAGTTGAACCAATA---GGAATAGCACCCACCAAGGCAAAGAGAAGAGTGGTG-----  
 -----CAGAGAGAAAAAAGAGCA---GTGGGA---ATAGGAGCT---  
 -----ATGTTCCCTTGGGTTCTTGGGAACA---GCAGGAAGCGCTATG---GGCGCAGCGTCA---  
 GTGACGCTGACGGTACAA---GCCAGACAA---TTATTG---TCTGGTATAGTGCAACAGCAGAAC---  
 AATCTG---CTGAGG---GCTATTGAGGCGCAACAGCATATGTTGCAACTCACAGTCTGGGGCATC  
 >GU728244  
 TTCTATTGTAATACAACATCACTGTTTAATAGTACTAATAGTACTTGAATATTGAAAGGTCAAATAACTCTA  
 AA-----  
 -----  
 GTTAATGACACACTCACACTCCCATGCAGAATAAAACAAATTATAAACATGTGGCAGGAAGTAGGAAAAGCAA  
 TGTATGCTCCTCCCATCAAAGGGAACATTAGCTGTTTCATCAAAT---  
 ATTACAGGGCTACTATTAGTAAGAGATGGTGGTGAAAACCAGAAC-----  
 -----  
 -----  
 AGCAGCACCGAGACTTTCAGACCTGGAGGAGGAGATATGAGAGACAATTGGAGAAGTGAATTATATAAATATA  
 AAGTAGTAAAACCTTGAACCGTTA---GGAATAGCACCCACCAAGGCAAAGAGAAGAGTGGTG-----  
 -----CAGAGAGAAAAAAGAGCA---TTGGGA---TTCGGAGCT-----  
 ---ATGTTCCCTTGGGTTCTTGGGAGCA---GCAGGAAGCACTATG---GGCGCAGCGTCA---  
 ATAGCGCTGACGGTACAG---GCCAGACAA---TTATTG---TCTGGTATAGTGCAACAGCAGAAC---  
 AATCTG---CTGAGA---GCTATTGAAGCGCAACAGCATCTGTTGCAGCTCACAGTCTGGGGCATC  
 >GU728216  
 TTCTACTGTAATACATCAGAGCTGTTTAATAGTGCTTGGCATGCTAATGATACTGGGAATGGCACAAT---  
 -----  
 -----  
 GGGACAGAATATATCACACTCCAATGTAGAATAAAACAAATTATAAACATGTGGCAGAAAGTAGGAAAAGCAA  
 TGTATGCCCCCTCCCATCAGAGGACCAATTAAATGTTTCATCAAAT---  
 ATTACAGGGCTGCTATTAGTAAGAGATGGTGGCAATAATAACGAG-----  
 -----  
 -----  
 AGCAACAATGAGACCTTCAGACCTGGAGGAGGAGATATGAGGGACAATTGGAGAAGTGAATTATATAAATATA  
 AAGTAGTAAAATTTGAACCATTA---GGAATGGCACCCACCAAGGCAAAGAGAAGAGTGGTG-----

-----CAGAGAGAAAAAGAGCA---GTGGGA---CTAGGAGCA-----  
 ---TTTTTCCTTGGGTTCTTGGGAGCA---GCAGGAAGCACTATG---GGCGCAGCGTCA---  
 ATGGCGCTGACGGTACAG---GCCAGACAA---TTATTG---TCTGGTATAGTGACAGCAGCAGAAC---  
 AACCTG---CTGAGG---GCTATTGAGGCGCAACAGCATCTGTTGCAACTCACAGTCTGGGGCATC  
 >GU728376  
 TTCTACTGTAACCAACCACTGTTTAATAGTACTTGGAAATATTCGGAATAGTACTGAAGAG-----  
 -----  
 -----  
 TTAAATGATACTATCATACTCAAATGCAGAATAAAACAAATTATAAACATGTGGCAGGAAGTAGGAAAGGCAA  
 TGTACGCCCCCTCCCATCAGAGGACAAATTAGATGTTTCATCAAAT---  
 ATTACAGGGCTGCTATTAACAAGAGATGGTGGTGACACTAAAAAGAATGGG-----  
 -----  
 -----  
 ACCGATGATACAGAGACCTTCAGACCTGGAGGAGGAAATATGAGGGACAATTGGAGAAGTGAATTATATAAAT  
 ATAAAGTAGTAAAAATTAACCATTA---GGAATAGCACCCACCAAGGCAAAGAGAAGAGTGGTG-----  
 -----CAGAGAGAAAAAGAGCA---GTGGGA---TTAGGAGCT---  
 -----ATGTTTCCTTGGGTTCTTGGGAGCA---GCAGGAAGCACTATG---GGCGCAGCGTCA---  
 GTGACGCTGACGGTACAG---GCCAGACAA---TTATTG---TCTGGTATAGTGCAACAGCAAAAC---  
 AATTTG---CTGAGG---GCTATTGAGGCGCAACAGCATATGTTGCAACTCACAGTCTGGGGCATC  
 >FJ469690  
 TTCTACTGTAATTTAACACAACCTGTTTAATAGTACTTGGAAATGAAACAGGGTCAAATAACACTGAG-----  
 -----  
 -----  
 GGAAATGGCACCTTCATACTCCCATGCAGAATAAAACAAATTATAAATATGTGGCAGGAAGTAGGAAAAGCAA  
 TGTATGCCCCCTCCCATCGAAGGGCTAATTAACCTGTTTATCAAAT---  
 ATTACAGGGCTGATATTAACAAGAGATGGTGGTAGTAGTAATAAC-----  
 -----  
 -----  
 ACCACCGAGATCTTCAGACCTGGAGGAGGGGATATGAGGGACAATTGGAGAAGTGAATTATATAAATATAAAG  
 TAGTAAAAGTTGAACCATTA---GGAGTAGCACCCACCAGGGCAAAGAGGAGAACGGTG-----  
 -----CAAAGAGAAAAAGAGCA---GTGGGA---ATAGGAGCT-----  
 TTGTTCCCTTGGGTTCTTGGGAGCA---GCAGGAAGCACTATG---GGCGCAGCGTCA---  
 ATGACGCTGACGGTACAG---GCCAGACAA---TTATTG---TCTGGTATAGTGCAACAGCAGAAC---  
 AATCTG---CTGAGG---GCTATTGAGGCGCAACAGCACCTGTTGCAACTCACAGTCTGGGGCATC  
 >FJ469692  
 TTCTACTGTACTACAACCACTGTTTAATAGTACTTGGGATAATAATAGTACTGGGAATATTAACAGT---  
 -----  
 -----  
 ACTAACAAAAATATCACACTCCAATGCAGAATAAAACAAATTATAAACATGTGGCAGGAAGTAGGAAAAGCAA  
 TGTATGCCCCCTCCTATCGAGGGAACAATTAGGTGTTTCATCAAAT---  
 ATTACAGGGTTGATATTAACAAGAGATGGCGGTATTAACAATACT-----  
 -----  
 -----  
 GACAACAAGGAGGTCTTCAGACCAGGAGGAGGAGACATGAGGGACAATTGGAGAAGTGAATTATACAAATATA  
 AAGTAGTAAAAATTGAACCATTA---GGATTAGCACCCACCAAGGCAAAGAGAAGAGTGGTG-----  
 -----CAAAGAGAAAAAGAGCA---GTGACA---CTGGGAGCT-----  
 ---ATGTTCCCTTGGGTTCTTAGGAGCA---GCAGGAAGCACTATG---GGCGCAGCATCA---  
 ATGACGCTGACGGTACAG---GCCAGACTA---TTATTG---TCTGGTATAGTGCAACAGCAGAAC---  
 AATCTG---CTGAGG---GCTATTGAGGCGCAACAGCATCTGTTGCAACTCACAGTCTGGGGCATC  
 >FJ469694  
 TTCTACTGTAATTCACACAACCTGTTTAATAGTACTTGGAAGTATAATGATACTAATGACACTGAAAGACACG  
 AA-----  
 -----  
 AAAGGCAATGACAATATTACACTCCCATGCAGAATAAGACAAATTGTAAACCTGTGGCAAGAAGTAGGGAAAG  
 CAATGTATGCCCCCTCCCATCCAAGGACTAATTAAATGTTTCATCAAAT---  
 ATTACAGGGCTGCTATTAACAAGGGATGGTGGTAATAATGACACC-----  
 -----  
 -----  
 TCCCAGACCGAGACCTTCAGACCTGCAGGAGGAGATATGAGGGACAATTGGAGAAGTGAATTATATAAATATA  
 AAGTAGTACGAATTGAACCATTA---GGAATAGCACCCACCAAGGCAAAGAGAAGAGTGGTGCAG---AGA--

-----GAGGTGCAGAGAGAAAAAGAGCA---ATAGGAATGGGAGCAGTT-----  
 ---TTGTTCCCTTGGGTTCTTGGGAGCA---GCAGGAAGCACTATG---GGCGCAGCGTCA---  
 ATGGCGCTGACGGTACAG---GCCAGACAA---TTATTG---TCTGGTATAGTGCAACAGCAAAAC---  
 AATTTG---CTGAGG---GCTATTGAGGCGCAACAGCATATGTTGCAACTCACAGTCTGGGGCATC  
 >FJ469699  
 TTCTACTGTAATACAACACAACCTGTTTAAAGGTACTTGGAAATGGTACTACTTTGATAAATACAACAGGA----  
 -----  
 -----  
 GGAAATGAAACAATCACACTCCCATGCAGAATAAAACAATTTATAAACATGTGGCAGAGAGTAGGAAAAGCAA  
 TATATGCCCCCTCCTATCAGAGGACATATTAAGTGTACATCAAAT---  
 ATTACAGGGCTGCTATTAACAAGAGATGGTGGTAATAATAACGGGACC-----  
 -----  
 -----  
 AACACCACCGAAATCTTTAGACCTGGAGGGGGAGATATGAGGGACAATTGGAGAAGTGAATTATATAAATATA  
 AAGTAGTAAAAATTGAACCATTA---GGAATAGCACCCACCAAGGCAAAGAGAAGAGTGGTG-----  
 -----CAGAGAGAAAAAGAGCA---GTGGGA---ATAGGAGCT-----  
 ---CTGTTCCCTTGGGTTCTTGGGAGCA---GCAGGAAGCACTATG---GGCGCAGCGTCA---  
 TTAACGCTGACGGTACAG---GCCAGACAA---TTATTG---TCTGGTATAGTGCAACAGCAGAAC---  
 AATCTG---TTGAAG---GCTATTGAGGCGCAACAGCATCTGTTGCAACTCACAGTCTGGGGCATC  
 >FJ469702  
 TTCTACTGTGACACAACACAACCTGTTTAATAGTACCTGGAATGATACTACCTTGAATGATACTAGTAATTGGA  
 GTAAT-----  
 -----  
 GATACTACTGAAGTTATCACACTCCCATGCAGAATAAAACAGATTATAAACTTGTGGCAGGAAGTAGGAAAAG  
 CAATGTATGCCCCCTCCCATCAGTGGACAAATTAATTGTTTCATCTAAT---  
 ATTACAGGGCTGCTATTAACAAGAGATGGTGGTAATAATAATAGC-----  
 -----  
 -----  
 AACACAGCGAGACCTTCAGACCTGCAGGAGGAAATATGAAGGACAATTGGAGAAGTGAATTATATAAATACA  
 AAGTAGTAAAAATTGAACCATTA---GGAATAGCACCCACCAAGGCAAAGAGAAGAGTGGTG-----  
 -----CAAAGAGAAAAAGAGCA---GTGGGA---CTAGGAGCT-----  
 ---ATGTTCCCTTGGGTTCTTGGGAGCA---GCAGGAAGCACTATG---GGCGCAGCGTCA---  
 ATAACGCTGACGGTACAG---GCCAGACAA---TTATTG---TCTGGTATAGTGCAACAGCAAAAC---  
 AATTTG---CTGAGA---GCTATTGAGGCGCAACACCATTTGTTGCAACTCACAGTCTGGGGCATC  
 >FJ469705  
 TTCTACTGTAATACAACAAAACCTGTTTAATAGTACTTGGAAATAGTACTTGGAAATAATAGTACTTGGAAATGGTA  
 CTGGA-----  
 -----  
 ACTGAAAATGACACAATCACACTCCCATGCAGAATAAAACAATTTATAAACCTGTGGCAGCAAGTAGGAAAAG  
 CAATGTATGCCCCCTCCTATCCCAGGAAATATTAGCTGTTTCATCAAAT---  
 ATTACAGGGCTGCTATTAACAAGAGATGGTGGTAATAGTAACAAC-----  
 -----  
 -----  
 AGCAACAACGAGACCTTCAGACCTGGAGGAGGAGATATGAGGGACAATTGGAGAAGTGAATTATACAAATATA  
 AAGTAGTAAAAGTTGAACCATTA---GGAGTAGCACCCACTAAGGCAAAGAGAAGAGTGGTG-----  
 -----CAGAGAGAAAAAGAGCA---GCAGGA---ATAGGAGCT-----  
 ---CTGCTCCTTGGGTTCTTGTTCAGCA---GCAGGAAGCACTATG---GGCGCAGCGTCA---  
 GTGACGCTGACGGTACAG---GCCAGACAA---TTATTG---TCTGGTATAGTGCAACAGCAAAAC---  
 AATTTG---CTGAGA---GCTATTGAGGCGCAACAGCATCTGTTGCAACTCACGGTCTGGGGCATT  
 >FJ469711  
 TTCTACTGTAATTCAACACAACCTGTTTAATAGTACTTGGCATAAGAATGGTACTAATAGTACTGGGGGG----  
 -----  
 -----  
 GCAAAATGACACTATCACACTCCCATGTAAATAAAACAATTTATAAACATGTGGCAGGAAGTAGGAAAAGCAA  
 TGTATGCCCCCTCCCATCGAAGGACAAATTAAGTGTTCATCAAAA---  
 ATTACAGGGCTGCTATTAACAAGAGATGGTGGTAATAACAGCACTGCC-----  
 -----  
 -----  
 AATGACACCGAGACCTTCAGACCTGGAGGAGGAGATATGAGGGACAATTGGAGAAGTGAATTGTATAAATATA  
 AAGTAGTAAAAATTGAACCCTA---GGATTAGCACCCACCAGGGCAAAGAGAAGAGTGGTG-----

-----CAGAGAGAAAAAGAGCA---GTGGGA---CTAGGAGCT-----  
---GTGTTCCCTTGGGTTCTTGGGAGCA---GCAGGAAGCACTATG---GGCGCAGCGTCA---  
ATAACGCTGACGGTACAG---GCCAGGCGA---TTAATG---TCTGGTATAGTGCAACAGCAGAAC---  
AATTTG---CTGAGA---GCTATTGAGGCGCAACAGCATCTGTTGCAACTCACAGTCTGGGGCATT  
>FJ469712  
TTCTATTGTAATTCAACACAACCTGTTTAATAGTACCTGGTATGCTAATGATACTAACAGTATTAGGAATAGTA  
GCAGG-----  
-----  
GAAGGAAACGATACAATTATACTCCAATGTAGAATAAAACAAATTATAAACATGTGGCATGAAGTAGGAAAAG  
CAATGTATGCCCCCTCCCATCAAAGGAAACATTAGCTGTTTCATCAAAC---  
ATTACAGGGATACTATTAACAAGAGATGGTGGTAATAAGAATAACGAG-----  
-----  
-----  
ACTAACAACTGAGATCTTCAGACCTGGAGGAGGAGATATGAGGGACAATTGGAGAAGTGAAGTATATAAAAT  
ATAAAGTAGTAAAAATTGAACCATTA---GGAATAGCACCCACCACGGCAAGGAGAAGAGTGGTG-----  
-----CAGAGAGAAAAAGAGCA---GTGGGA---CTAGGAGCA---  
-----CTGTTCCCTTGGGTTCTTGGGAGCA---GCAGGAAGCACTATG---GGCGCAGCGTCA---  
TTGACGCTGACGGTACAG---GCCAGACTC---TTATTG---TCTGGTATAGTGCAACAGCAGAAC---  
AATCTG---CTGAGA---GCTATTGATGCGCAACAACATCTGTTGCAACTCACAGTCTGGGGCATT  
>FJ469719  
TTCTACTGTAATACAACAACCTGTTTAATACTACTTGGTATAACAATGAAACTGTGGATAATAAACTTGG  
CTGAAGATGAT-----  
-----ACTAGAACTTA-----  
ACTGACAAAGACATTATCATACTCCCATGCAGAATAAAACAAATTATAAACATGTGGCAGAAAGTAGGAAAAG  
CAATGTATGCCCCCTCCTATCCAAGGAATGATTAGCTGTTTCATCAAAT---  
ATTACAGGGCTACTCTTAACAAGAGATGGTGGTAATGATACAGATACAGAT-----  
-----  
-----  
CCGAATGGGACAGAGACCTTCAGACCTATAGGAGGAGATATGAGGGACAATTGGAGAAGTGAATTATATAAAAT  
ATAAAGTAGTAAGAATTGAACCATTA---GGGATAGCACCCCTCCAAGGCAAAGAGAAGAGTGGTG-----  
-----CAGAGAGAAAAAGAGCA---GCA-----CTAGGAGCT---  
-----GTGTTCCCTTGGGTTCTTGGGAGCA---GCAGGAAGCACTATG---GGCGCAGCGTCA---  
ATAACGCTGACGGTACAG---GCCAGACAA---TTATTG---TCTGGTATAGTGCAACAGCAGAGC---  
AGATTG---CTGAGA---GCTATTGAGGCGCAACAACATATGTTGCAACTCACAGTCTGGGGCATT  
>FJ469726  
TTCTACTGTAATTCAACACCACTATTTAATAGTATTTGGCATGCTAATGGTACCTGGAATGGTACTGAAAAGT  
CAAAT-----  
-----  
AACACTGAAAGAAATATCACACTCCAATGCAGAATAAAACAAATTATAAATATGTGGCAGGGAGTAGGAAAAG  
CAATGTATGCCCCCTCCCATCAGAGGACAAATTAGATGTTTCATCAAAC---  
ATTACAGGGCTGTTATTAAACAAGAGATGGGGGTCCAGAGAACGAG-----  
-----  
-----  
ACTAAGCCTGAGATCTTCAGACCTGGAGGAGGAGATATGAGGAATAATTGGAGAAGTGAATTATACAAATATA  
AAGTAGTAAAAATTGAACCATTA---GGAGTAGCACCCACCAAGGCAAAGAAAAGAGTGGTG-----  
-----CAGAGAGAAAAAGAGCA---ATAGGGGGATTAGGAGCT-----  
---TTGTTCCCTTGGGTTCTTAAGAGCA---GCAGGAAGCACTATG---GGCGCAGCGTCA---  
ATAACGCTGACGGTACAA---GCCAGACAA---TTATTG---ACTGGTATAGTGCAACAGCAGAAC---  
AATTTG---CTGAGA---GCTATTGAGGCGCAACAACACCTGTTGCAACTCACAGTCTGGGGCATT  
>GU728225  
TTCTACTGTAATTCATCACAACCTGTTTAATAGCACTTGGAGCAGGAATGGGACGTGGAGTAGTACTTGGAA  
CAAC-----  
-----  
ACGGGAGAAAATATCACACTCCCATGCAAAATAAAACAAATTATAAACATGTGGCAAGAAGTAGGAAAAGCGA  
TGTATGCCCCCTCCCATGAAAGGACTAATTAGATGTGTATCAAAT---  
ATCACAGGGCTGCTATTAACAAGAGATGGTGGGAACACCACCGAC-----  
-----  
-----  
AACGACACCGAGACCTTCAGACCTTTAGGAGGAAATATGAAGGACAATTGGAGAAGTGAATTATATAAATATA  
AAGTAGTAAGAATTGAACCATTA---GGGTAGCACCCACCAAGGCAAAGAGAAGAGTGGTG-----

-----CAGAGGGAAAAAGAGCA---GTGGGA---ATGGGAGCT-----  
 ---CTGTTCCCTTGGGTTCTTGGGAGCA---GCAGGGAGCACTATG---GGCGCAGCGGCA---  
 ATGACGCTGACGGTACAA---GCCAGACAA---TTATTG---TCTGGTATAGTGCAGCAGCAGAAC---  
 AATCTG---CTGAGA---GCTATTGAGGCGCAACAGAGTATGTTGCAACTCACAGTCTGGGGCATT  
 >MN515912  
 TTCTACTGTAATTCAACACAACCTGTTTAATAGTACTTGGAGTGTTAATGAAGGGTCAAATAACACTGAAGGA-  
 -----  
 -----  
 AACCAATGGCACAATCACACTCCCATGTAGAATAAAACAAATTATAAACATGTGGCAGGAAGTAGGAAAAGCAA  
 TGTATGCCCCCTCCCATCAGAGGACAGATTAAATGTTTCATCAAAT---  
 ATTACAGGGCTGTTGTTAACAAGAGATGGTGGCAATAACAACAGC-----  
 -----  
 -----  
 AATACAGAGATCTTCAGACCTACAGGAGGAAATATGAAGGACAATTGGAGGAGTGAATTATATAAATATAAAG  
 TAGTAAAAATTGAACCATTA---GGAGTAGCACCCACCCGGCAAAGAGAAGAGTGGTG-----  
 -----CAGAGAGAAAAAGAGCA---GTGGGA---TTAGGAGCT-----  
 TTGTTCCCTTGGGTTCTTGGGAGCA---GCAGGAAGCACTATG---GGCGCAGCGTCA---  
 GTGACGCTGACGGTACAG---GCCAGACAA---TTATTG---TCTGGTATAGTGCAACAGCAGAAC---  
 AATCTG---CTGAGG---GCTATTGAGGCGCAACAGCATCTGTTGCAACTCACAGTCTGGGGCATA  
 >MN515943  
 TTCTACTGTAATTCAACACAACCTGTTTAATAGTACTTGGGCTGTTAATACTACTTGAATAATACTGAAAAACA  
 ATGAA-----  
 -----  
 GGAAATGACACAATCACCTTCCATGCAGAATAAAACAAATTATAAACATGTGGCAGGAAGTAGGAAAAGCAA  
 TGTATGCCCCCTCCCATTAGAGGACAAATAAGATGTTTCATCAAAT---  
 ATTACAGGGCTGCTATTAACAAGAGATGGTGGTAATAGTAATGACACT-----  
 -----  
 -----  
 ACCAGGCCCCGAGACCTTCAGACCTGGAGGAGGAGATATGAGGGACAATTGGAGAAGTGAATTATATAAATATA  
 AAGTAGTAAAAATTGAACCATTA---GGAATAGCACCCACCAAGGCAAAGAGAAGAGTGGTG-----  
 -----CAGAGAGAAAAAGAGCA---GTGGGA---ATAGGAGCT-----  
 ---ATGTTCCCTTGGGTTCTTGGGAGCA---GCAGGAAGCACTATG---GGCGCAGCGTCA---  
 ATAACGCTGACGGTACAG---GCCAGACTA---TTATTA---TCTGGTATAGTGCAACAGCAGAAC---  
 AATTTG---CTGAGG---GCTATTGAGGCGCAACAGCATCTGTTGCAACTCACAGTCTGGGGCATT  
 >MN515956  
 TTCTACTGTAATACAACAAAACCTGTTTAGTAGCACTTGAATGCTACTGAAAAGATCACTTGAATAATACTG  
 AAAG-----  
 -----  
 TCAATGACACTATCATACTCCCATGCAGAATAAAACAAATTATAAACATGTGGCAGGAAGTAGGAAAAGCAA  
 TGTATGCCCCCTCCCATCCAGGACTAATTAGATGTTTCATCAAAT---  
 ATTACAGGGCTGCTATTAACAAGAGATGGTGGTAATGAAAGTGACACA-----  
 -----  
 -----  
 AATAGGTCTGAGACCTTCAGACCTGGAGGAGGAGATATGAAGGACAATTGGAGAAGTGAATTATATAAATATA  
 AAGTAATAAACTTGAACCATTA---GGACTAGCACCCACTAAGGCAAAGAGAAGAGTGGTG-----  
 -----CAGAGAGAAAAAGAGCA---CTGGGA---TTCGGAGCT-----  
 ---TTGTTCCCTTGGGTTCTTGGGAGCA---GCAGGAAGCACTATG---GGCGCAGCGTCA---  
 ATAACGCTGACGGTACAG---GCCAGACAG---TTACTG---TCTGGTATAGTGCAACAGCAGAAC---  
 AATCTG---CTGATG---GCTATTGAGGCGCAACAGCATATGTTGCAACTCACAGTCTGGGGCATT  
 >MN515787  
 TTCTATTGTAATACAACAAAGCTGTTTAATAGCACCTTTCCTTTAATAGTACTTCAAATAATACTAATGGGG  
 CAAAT-----  
 -----  
 AACACTGAAATAATCACACTCCCATGTAAATAAAACAAATTATAAACAGGTGGCAGGAAGTAGGAAAAGCAA  
 TGTATGCCCCCTCCCATCAGAGGAGAAATTAAATGTTTATCAAAA---  
 ATTACAGGGCTGCTATTAACAAGAGATGGTGGTAATAACACAAAT-----  
 -----  
 -----  
 AACACATATGAGACCTTCAGACCTGGAGGAGGAAATATGAAGGACAATTGGAGAAGTGAATTATATAAATATA  
 AAGTAGTACAAATTGAGCCATTA---GGAATAGCACCCACCACGGCAAAGAGAAGAGTGGTG-----

-----CAGAGAGAAGAAAGAGCA---GTGGGG---TTTGGAGCT-----  
 ---ATGTTCCCTTGGGTTCTTGGGAGCA---GCAGGAAGCACTATG---GGCGCAGCGTCA---  
 GTGACGCTGACGGTACAG---GCCAGACAA---TTATTG---TCTGGTATAGTGCAACAGCAGAAC---  
 AATTTG---CTGAGA---GCTATTGAGGCGCAACAGCATCTGTTGCAGCTCACAGTCTGGGGCATC  
 >EU850430  
 TTCTACTGTAATTCTACACAACCTGTTTAATAGTACTTGAATAGTACTGAAGGATCAAATAGCACTGAA----  
 -----  
 -----  
 AGAAATACCACACTCACACTCCCATGCAGAATAAAACAAATTGTAAACATGTGGCAGGAAGTAGGAAAAGCAA  
 TGTATGCCCCCTCCCATCAGAGGACAAATTAGATGTTTCATCAAAT---  
 ATTACAGGGCTGATATTAACAAGAGATGGT---AATAGTAACGAG-----  
 -----  
 -----  
 ACCGAGATCTTCAGACCTGGAGGAGGAGATATGAGGGACAATTGGAGAAGTGAATTATATAAATATAAAGTAG  
 TAAAAATTGAACCATTA---GGAGTAGCACCCACCAAGGCAAAGAGAAGAGTGGTG-----  
 -----CAGAGAGAAAAAAGAGCA---GTGGGA---ATAGGAGCT-----  
 TTGTTCCCTTGGGTTCTTGGGAGCA---GCAGGAAGCACTATG---GGCGCAGCGTCG---  
 ATGACGCTGACGGTACAG---GCCAGACTA---TTATTG---TCTGGTATAGTGCAACAGCAGAAC---  
 AATTTG---CTGAGG---GCTATTGAGGCGCAACAACATATGTTGCAACTCACAGTCTGGGGCATC  
 >GU728304  
 TTCTATTGTAATACAACACAACCTGTTTAATAGTACTTGAATGAGACTAACATAAATAGCACTGGA-----  
 -----  
 -----  
 GGAAATGGCACAATCACACTCCCATGCAGAATAAAACAGATTATAAATATGTGGCAGCAAGTAGGAAAAGCAA  
 TGTACGCCCCCTCCCATCAGGGGACAAATTAAGTGTACATCAAAT---  
 ATTACAGGGCTGCTATTAACAAGAGATGGTGGGATAAAACACGACC-----  
 -----  
 -----  
 AACACCACTGAGATCTTTAGACCTGCAGGAGGAGATATGAGGGACAATTGGAGAAGTGAATTATATAAATATA  
 AAGTAGTAAAAATTGAACCATTA---GGAATAGCACCCACCAAGGCAAAGAGAAGAGTGGTG-----  
 -----CAGAGAGAAAAAAGAGCA---GTGGGG---ATAGGAGCT-----  
 ---CTGTTCCCTTGGGTTCTTGGGAGCA---GCAGGAAGCACTATG---GGCGCAGCATCA---  
 ATAACGCTGACGGTACAG---GCCAGAAAC---TTATTG---TCTGGTATAGTGCAACAGCAGAAC---  
 AATATG---CTGAGG---GCTATTGAGGCGCAACAACATATATTGCAACTCACGGTCTGGGGCATC  
 >GU728410  
 TTCTACTGTAACACATCACGGCTGTTTAATAGCACATGGTATGTAAATGGAAGTAGTACTGGAGAG-----  
 -----  
 -----  
 TCAAATAGCACTATCACCTCCCATGTAGGATAAAACAAATTATAAACATGTGGCAGAAAGTAGGAAAGGCAA  
 TGTATGCCCCCTCCTATCAAAGGACAAATTAAATGTACATCAAAC---  
 ATTACAGGGCTGCTATTAACAAGAGATGGTGGTAATAATAGCCAG-----  
 -----  
 -----  
 CCCGAAGAAATCTTCAGACCTGCAGGGGAGATATGAGGGACAATTGGAGAAGTGAATTATATAAATATAAAG  
 TAGTAAAAATTGAACCATTA---GGAATAGCACCCACCAAGGCACAGAGAAGAGTGGTG-----  
 -----CAGAGAGCAAGAAGAGCA---GTGGGA---CTAGGAGCT-----  
 TTGTTCCCTTGGGTTCTTGGGAGCA---GCAGGAAGCACTATG---GGCGCAGCGTCA---  
 GTGACGCTGACGGTACAA---GCCAGACAA---TTATTG---ACTGGTATAGTGCAACAGCAGAGC---  
 AATTTG---CTGAGA---GCTATTGAGGCGCAACAGCATCTGTTGCAACTCACAGTCTGGGGCATC  
 >GU728295  
 TTCTACTGTAATACAACAAAACCTGTTTAATAGTACATGGAATGAGACTGATAGTAACAATACTAAA-----  
 -----  
 -----  
 GGAGAAGACACTATCACACTCCCATGCAGAATAAAACAAATTATAAACCTGTGGCAGGAAGTAGGAAAAGCAA  
 TATATGCCCCCTCCCATCAGAGGACAAATTAAGTGTTCATCAAAT---  
 ATTACAGGACTGTTATTAACAAGTGTATGGGGGTGGGGGTGGCAAC-----  
 -----  
 -----  
 AGGACGGACGAGACCTTCAGACCTATAGGAGGAGATATGAGGGACAATTGGAGAAGTGAATTATATAAATATA  
 AAGTAGTAAGAATTGAACCATTA---GGAGTAGCACCCACCAAGGCAAAGAGAAGAGCGGTG-----

-----CAGAGAGAAAAAAGAGCA---ATAGGGGGACTAGGAGCT-----  
 ---TTTTTCCTTGGGTTCTTGGGAGCA---GCAGGAAGCACTATG---GGCGCAGCGTCA---  
 CTGACGCTGACGGTACAG---GCCAGACTA---TTATTG---TCTGGTATAGTGCAACAGCAGAGC---  
 AACTTG---CTGAGA---GCTATTGAGGCGCAACAGCATCTGTTGCAACTCACTGTCTGGGGCATC  
 >GU728383  
 TTCTATTGTGATACAACATCACTGTTTAAACAGTACTTGGGAATAACAGTACTTGGGAGAATAATACTAAAGGAA  
 TC-----  
 -----  
 CTCCCAAACGCAACCATCACACTCCCATGCAGAATAAAGCAAATTATAAACATGTGGCAAGGAGTAGGAAGAG  
 CAATGTATGCCCCCTCCTATTAGAGGACAAATTAGATGTTTCATCAAAT---  
 ATTACAGGGCTACTGTTAACAAGAGATGGTGGTATTGGTAATAATATC-----  
 -----  
 -----  
 ACCAATGGGTCCGAGACCTTCAGACCTGGAGGAGGGAATATGAAGGACAATTGGAGAAGTGAATTATATAAAAT  
 ATAAAGTAGTACAACCTTGAACCAGTA---GGAATAGCACCCACCAAGGCAAGGAGAAGAGTGGTG-----  
 -----CAGAGAGAAAAAAGAGCA---ATAGGA---CTAGGAGCT---  
 -----ATGTTTCCTTGGGTTCTTGGGAGCA---GCAGGAAGCACTATG---GGCGCAGCGTCA---  
 CTAACGCTGACGGTACAG---GCCAGACAA---TTATTG---TCTGGTATAGTGCAACAGCAGAAC---  
 AATTTG---CTGAGA---GCTATTGAGGCGCAACAGCATATGTTGCAACTCACAGTCTGGGGCATC  
 >FJ469729  
 TTCTACTGTGATTTCATCAGGACTGTTTAAATAGTACTTGGAAATGGAACACACCTGGATACTTGGAAATGGT---  
 -----  
 -----  
 ACTGGAGAAAATATCACACTCCAATGCAGGATAAGACAAATTATAAACATGTGGCAGGAGGTAGGAAAAGCAA  
 TGTATGCCCCCTCCCATCAAGGGAATAATTAAATGTTTCATCAAAC---  
 ATTACAGGATTGCTATTAACAAGAGATGGTGGTCTGGTAATAGC-----  
 -----  
 -----  
 ACCAATGAGACCTTCAGACCTGAAGGAGGAGATATGAGGAACAATTGGAGAAGTGAATTATATAAATACAAAG  
 TAGTACAAATTGAGCCATTA---GGAGTAGCACCCACCAAGGCAAGGAGAAGAGTGGTG-----  
 -----CAGAGAGAAAAAAGAGCA---GTGGGA---ATAGGAGCT-----  
 GTGCTCCTTGGGTTCTTGGGAGCA---GCAGGAAGCACTATG---GGCGCAGCGTCA---  
 ATGGCGCTGACGGTACAA---GCCAGACAA---TTATTG---TCTGGTATAGTGCAACAGCAGAAC---  
 AATTTG---CTGAGA---GCTATTGAGGCGCAACAACATCTGTTGCAACTCACAGTCTGGGGCATT  
 >DQ886033  
 TTCTACTGTAATACAACAAAACCTTTTTAATAGTACTTGGATGTGGAATACTACTACTAGTAATTGGACTCTAA  
 ATAGCACTACA-----  
 -----GGGGCA-----  
 GATGACAATGACATAATCATACTCCCATGCAGAATAAAACAAATTATAAACATGTGGCAGGAAGTAGGAAAAG  
 CAATGTATGCCCCCTCCCATCCAAGGACAAATTAGCTGTTTCATCAAAT---  
 ATCACAGGGTTGCTGTTAACAAGAGATGGTGGTATTAACAATGACACG-----  
 -----  
 -----  
 AATGGGACTGAGATCTTCAGACCTGGAGGGGGAGATATGAGGGACAATTGGAGAAGTGAATTATATAAATATA  
 AAGTAGTAAAAATTAAACCATTA---GGAATAGCACCCACCAGGGCAAAAAGAAGAGTGGTG-----  
 -----CAGAGAGAGAAAAGAGCA---GTGGGA---CTAGGAGCT-----  
 ---TTGTTCCCTTGGGTTCTTGGGAGCA---GCAGGAAGCACTATG---GGCGCAGCGTCA---  
 GTGACGCTGACGGTACAG---GCCAGACAA---TTATTG---TCTGGTATAGTGCAACAGCAGAAC---  
 AATTTG---CTGAGA---GCTATTGAGGCGCAACAGCATATGTTGCAACTCACAGTCTGGGGCATC  
 >GU728280  
 TTCTACTGTAATACAACAAAACCTGTTTACTTGGAAATAGTACTTGGGATAATATTGAAAAAGCAAATAAC---  
 -----  
 -----  
 ACTGACTCAAATATCACACTCCCATGCAGAATAAAACAAATTATAAACATGTGGCAGGAAGTAGGAAAAGCAA  
 TGTATGCCCCCTCCCATCAAAGGAAGCATTATGTGTTTCATCAAAC---  
 ATTACAGGGTTACTATTAACAAGAGATGGTGGTAACAACGGGACA-----  
 -----  
 -----  
 AACGATACTGAAATCTTCAGACCTGGAGGAGGAGATATGAGGGACAATTGGAGAAGTGAATTATATAAATATA  
 AAATAGTACAAATTGAACCATTA---GGAATAGCACCCACTAGGGCAAGGAGAAGAGTGGTG-----

-----CAGAGAGAAAAAGAGCA---ATAGGA---ATAGGAGCT-----  
---TTGTTCCCTTGGGTTCTTGGGAGCA---GCAGGAAGCACTATG---GGCGCAGCGTCA---  
ATGACGCTGACGGTACAG---GCCAGACAA---GTATTG---TCTGGTATAGTGACAGCAGCAGAAC---  
AATCTG---CTGAAG---GCTATTGAGGCGCAACAGCATCTGTTGCAACTCACAGTTTGGGGCATC  
>GU728339  
TTTTACTGTAATACAACACAACCTGTTTAATAGTACTTGGAAATGGTACTGAGAATGGTACTGAGAATGATACTA  
CA-----  
-----  
GGAGAAGAACTATCATACTCCCATGACAGGATAAAACAAATTATAAACAGGTGGCAGGAAGTAGGAAAGGCAA  
TGTATGCCCCCTCCCATCAGTGGACAAATTAAATGTTTCATCAAAT---  
ATTACAGGGCTGCTATTAACAAGGGATGGC---AATACCAACGGT-----  
-----  
-----  
ACTGAGATCTTCAGACCTGGAGGAGGAGATATGAGGGACAATTGGAGAAGTGAATTATACAAATATAAAGTAG  
TAAAAGTTGAACCAGTA---GGAGTAGCACCCACCCAGGCAAAGAGAAGAGTGGTG-----  
-----CAAAGAGAGAAAAGAGCA---GTGGGA---ATAGGAGCT-----  
TTGTTCCCTTGGGTTCTTGGGAGCA---GCAGGAAGCACTATG---GGCGCAGCGTCA---  
ATGACGCTGACGGTACAG---GCCAGACAA---TTATTG---TCTGGTATAGTGCAACAGCAGAAT---  
AATCTG---CTGAGG---GCTATTGAGGCGCAGCAGCATATGTTGCAACTCACAGTCTGGGGCATC  
>DQ222211  
TTCTACTGTAATTCAACACAACCTGTTTAATAGTACTTGGAGAGGGTTTAAGAGCTCTAATAGTACTACTTGGGA  
ATAAAACCGGA-----  
-----GGGTCA-----  
AATAACACCGGACTAATCACACTCCCATGCAGAATAAAACAAATTATAAACATGTGGCAGGAAGTAGGAAAAG  
CAATGTATGCCCCCTCCCATCAGAGGACAAATTAGATGTTTCGTCAAAT---  
ATTACAGGGCTGCTATTAACAAGAGATGGTGGTAATGATAATGACCCG-----  
-----  
-----  
AACAGGACTGAGATCTTCAGACCTGGAGGAGGAGATATGAGGGACAATTGGAGAAGTGAATTATATAAATATA  
AAGTAGTAAAAATTGAGCCATTA---GGAGTAGCACCCACCAAGGCAAAAAGAAGAGTGGTG-----  
-----CAGAGAGAAAAAGAGCA---GTGGGA---CTAGGAGCT-----  
---ATGTTCCCTTGGGTTCTTGGGGGCA---GCAGGAAGCACTATG---GGCGCAGCGTCA---  
GTGACGCTGACGGTACAG---GCCAGACAA---TTATTG---TCTGGTATAGTGCAACAGCAGAAC---  
AATTTG---CTGAGG---GCTATTGAGGCGCAACAGCATCTGTTGCAACTCACAGTCTGGGGCATC  
>GU367407  
TTCTACTGTGATACAACACAACCTGTTTAATAGTACTTGGGTAAATAGTACATGGAATAATACTGAAGAG---  
-----  
-----  
GTGAATGGCACAATCACACTCCCATGCAAAATAAAACAGATTATAAACATGTGGCAGGGAGTAGGAAAAGCAA  
TGTATGCCCCCTCCCATCAGTGGAAAAATTAGATGTTTCATCAAAT---  
ATTACAGGGCTGCTATTAACAAGAGATGGTGGTGACAGTAGTAACAGT-----  
-----  
-----  
AATAGCAATGAAACCTTCAGACCTATAGGAGGAGATATGAAGGACAATTGGAGAAGTGAATTATATCCATATA  
AAGTAGTAAGAATTGAACCATTA---GGAATAGCACCCACCAAGGCAAAGAGAAGAGTGGTG-----  
-----CAGAAAGAAAAAGAGCA---TTGGGTGGTTTAGGAGCT-----  
---TTGTTCCCTTGGGTTCTTGGGAACA---GCAGGAAGCACTATG---GGCGCAGCGTCA---  
CTGACGCTGACGGTACAG---GCCAGACAA---TTATTG---TCTGGTATAGTGCAACAGCAGAAT---  
AATTTG---CTGAGG---GCTATTGAGGCGCAACAGCATCTGTTGCAACTCACAGTCTGGGGCATC  
>GU367408  
TTCTACTGTAATACAACACAACCTGTTTAATAGTACTTGGAAATAGTACTACTTGGAAATGGAATAATACAGATA  
AC-----  
-----  
ACTGACAAAAACATCACACTCCAATGCAAAATAAAACAAAGTTATAAACATGTGGCAGACAGTGGGAAAAGCAA  
TGTATGCCCCCTCCCATCCAGGACAAATTAGATGTTTCATCAAAT---  
ATTACAGGGCTGCTATTAACAAGAGATGGTGGTAACGAGACCTGG-----  
-----  
-----  
GAGACCTTCAGACCTGGGGGAGGAAATATGAGGGACAATTGGAGAAGTGAATTATATAAATATAAAGTGGTGA  
AAATTGAACCATTA---GGAATAGCACCCACCAAGGCAAAGAGAAGAGTGGTG-----

-----CAGAGAGAAAAAAGAGCA---GTGGGA---ATAGGAGCT-----  
 GTGTTCCCTTGGGTTCTTGGGAGCA---GCAGGAAGCACTATG---GGCGCAGCGTCA---  
 TTGACGCTGACGGTACAG---GCCAGACTA---TTATTG---TCTGGTATAGTGCAACAGCAGAAT---  
 AATCTG---CTGAGG---GCTATTGAGGCGCAACAGCATATGTTGCAGCTCACAGTCTGGGGCATC  
 >KP754463  
 TTCTACTGTGATACAACACAATTGTTTAATAGTACTTGGAAATGGGACTAATACTGAGAATAAACTAAAGAGT  
 CA-----  
 -----  
 GATGACACTACTATCACACTCCCATGTAGGATAAAAACAAATTATAAACATGTGGCAGGAAGTAGGAAGAGCAA  
 TGTATGCCCCCTCCCATCAGCGGGCAAATTAAGTGTTCATCAAAT---  
 ATTACAGGGCTGATATTAATAAGAGATGGTGGAGACAAGAATACT-----  
 -----  
 -----  
 ACCGAGACCTTCAGACCTGGAGGAGGAGATATGAGGGACAATTGGAGAAGTGAATTATATAAATACAAAGTAG  
 TGAGCCTTGAGCCAATA---GGAATAGCACCAACAAAGGCAAAGAGAAGAGTGGTG-----  
 -----CAGAGAGAAAAAAGAGCA---GTGACC---CTGGGAGCT-----  
 ATGTTCCCTTGGATTCTTGGGAGCA---GCAGGAAGCACTATG---GGCGCAGCATCA---  
 ATAACGCTGACGGTACAG---GCCAGACAA---TTATTG---TCTGGTATAGTGCAACAGCAGAAT---  
 AATCTG---CTGAGA---GCTATTGAGGCGCAACAGCATATGTTGCAACTCACAGTCTGGGGCATC  
 >KP754465  
 TTCTACTGTAATACAACAAAACTGTTTGAGGGTACTTGGAAATGGTAATAATTGGACTACAGAGTCAAATAAAA  
 CTGAAGAC-----  
 -----  
 AATAACACAACAATCACAATTCCATGCAGAATAAAACAAGTTATAAACCTGTGGCAGACAGTAGGAAAAGCAA  
 TGTATGCCCCCTCCTATTGCAGGACTAATTAAGTGTTCATCAAAT---  
 ATTACAGGACTGTTATTAATAAGAGATGGGGGTAAAAATAGCACT-----  
 -----  
 -----  
 AATGAAACCTTCAGACCTGGAGGAGGAGATATGAGAGACAATTGGAGAAGTGAATTATACAAATATAAAGTAG  
 TAAAAATTGAACCATTA---GGAATAGCACCCACTAAGGCAAAGAGAAGAGTGGTG-----  
 -----CAGAGAGAAAAAAGAGCA---GTGGGA---ATAGGAGCT-----  
 GTGTTCCCTTGGGTTCTTAGGAGCA---GCAGGAAGCACTATG---GGCGCAGCGTCA---  
 ATGACGCTGACGGTACAG---GCCAGACAA---TTATTG---TCTGGTATAGTGCAAGCAGCAGAAC---  
 AATCTG---CTGAGG---GCTATTGAGGCGCAACAACATCTGTTGCAACTCACAGTCTGGGGCATC  
 >KP754466  
 TTCTACTGTAATACATCACAACCTGTTTAATAGTACTTGGAAATAGTACTACTGACCATACTAACCTTACA---  
 -----  
 -----  
 GGAGATGCAATTATCACGCTCCCATGCAGAATAAAACAAATTATAAACATGTGGCAAGGAGTAGGAAGAGCAA  
 TGTATGCCCCCTCCCATCAGAGGACAAATTAAGTGTTCATCAAAT---  
 ATTACAGGGCTGCTATTAACAAGAGATGGTGGTGTAAACAATACCACCGAT-----  
 -----  
 -----  
 AATAATACCGAGATCTTCAGACCAGGAGGAGGAGATATGAGGGACAATTGGAGAAGTGAATTATATAAATATA  
 AAGTGGTAAAAATTGAACCATTA---GGAATAGCACCCACCAAGGCAAAGAGAAGAGTGGTG-----  
 -----CATAGAGAAAGAAGAGCG---GCA-----CTAGGAGCT-----  
 ---ATGTTCCCTTGGGTTCTTGGGAGCA---GCAGGAAGCACTATG---GGCGCAGCGTCA---  
 GTGACGCTGACGGTACAG---GCCAGACTA---TTATTG---TCTGGTATAGTGCAAGCAGCAGAAC---  
 AATTTG---CTGAGG---GCTATTGAGGCGCAACAGCATATGTTGCAACTCACAGTCTGGGGCATC  
 >KP754468  
 TTCTACTGTAATACAGCGAACTGTTTAACAGTACTTGGTTCAATAACACTGAAGGCATAAATACCACTGAAG  
 GAAATGGCAAT-----  
 -----  
 ATCACACGCAATATCACACTCCAATGCAGAATAAAACAATTTATAAACATGTGGCAGGAAGTAGGAAAAGCAA  
 TGTATGCCCCCTCCCATCAGTGGACCGATTAGCTGTAAATCAAAT---  
 ATTACAGGGTTGATATTAACAAGAGATGGTGGTGAGGATAACAAC-----  
 -----  
 -----  
 ACCGAGACCGAGATTTTTAGACCTGGAGGAGGAGATATGAGGGACAATTGGAGAAGTGAATTATATAAATATA  
 AAGTAGTAAGAATTGAACCATTA---GGAGTAGCACCCACCAAGGCAAAGAGAAGAGTGGTG-----

-----CAGAGAGAAAAAAGAGCA---GTGGGG---CTGGGAGCT-----  
 ---TTGTTCCCTTGGGTTCTTGGGAGCA---GCAGGAAGCACTATG---GGCGCAGCGTCA---  
 TTGACGCTGACGGTACAA---GCCAGACAA---TTATTG---TCTGGTATAGTGACAGCAGACAAC---  
 AATCTG---CTGAGG---GCTATTGAGGCGCAACAGCATCTGTTGCAACTCACTGTCTGGGGCATC  
 >KP754470  
 TTCTACTGTAACACAGCGAGACTGTTTAATAGTACTTGGGGGGTTAATAGCACGGGAAAATCAAATAAC-----  
 -----  
 -----  
 AATGAAACACATATCATACTCCCATGCAGAATAAAACAAATTATAAACATGTGGCAAAGAGTAGGAAAAGCAA  
 TGTATAACCCTCCCATCAGTGGACCAATTAGTTGTACATCAAAT---  
 ATTACAGGAATAATATTAACAAGAGATGGTGGACAGACCAATGAC-----  
 -----  
 -----  
 AGTAGCACTGAGATCTTCAGACCTGGAGGAGGAGACATGAGGGATAATTGGAGAAGTGAATTATACAAATATA  
 AAGTAGTAAAAATTGAACCATTA---GGAGTAGCACCAACCAAGGCAAGGAGAAGAGTGGTG-----  
 -----CAGAGAGAAAAAAGAGCA---ATAGGA---CTAGGAGCT-----  
 ---CTGTTCCCTTGGGTTCTTGGGAGCA---GCAGGAAGCACTATG---GGCGCAGCGTCA---  
 TTGACGCTGACGGTACAG---GCCAGACAA---TTATTG---TCTGGTATAGTGCAACAGCAGAAC---  
 AATTTG---CTGAGA---GCTATTGAGGCGCAACAGCATCTGTTGCAACTCACAGTCTGGGGCATT  
 >KP754472  
 TTCTACTGTAATTCAACACAACCTGTTTAATAGTACTTGGATAAATGGTACTTGGACAAATGGTACTACAAATA  
 CCACT-----  
 -----  
 GGAGAAGATAAGATTATACTCCCATGCAGGATAAAACAAATTATAAACTTGTGGCAGGAAGTAGGAAAGGCAA  
 TGTACGCCCCCTCCCATCAGAGGACAAATTACCTGTTTCATCAAAT---  
 ATTACAGGGTTACTATTAACAAGAGATGGGGGTAATAAGAACGGGAGTAATGAG-----  
 -----  
 -----  
 GCCGTTGAGACCTTCAGACCTGCAGGAGGAGATATGAGGGACAATTGGAGAAGTGAATTATACAAATATAAAG  
 TAGTAAAAATTGAACCATTA---GGAGTAGCACCCACCAAGGCAAAGAGAAGAGTGGTG-----  
 -----CAGAGAGAAAAAAGAGCA---GTGGGA---TTAGGAGCT-----  
 TTGTTCAATTGGGTTCTTGGGAGCC---GCAGGAAGCACTATG---GGCGCAGCGTCA---  
 GTGACGCTGACGGTACAG---GCCAGACAA---TTATTG---TCTGGTATAGTGCAACAGCAGAGC---  
 AATCTG---CTGAGG---GCTATTGAGGCGCAACAGCATCTGTTGCAACTCACAGTCTGGGGCATC  
 >KP754473  
 TTCTACTGTAATACTACACCACTGTTTAATAAAATTTGGTTTAATAGGACTGACTGGTCTAATAATACTGCAG  
 GGTCA-----  
 -----AAT---  
 ACCACTAACGGCATAATTACACTCCAATGCAGGATAAAACAAATTATAAACATGTGGCAGGGAATAGGAAAAG  
 CAATGTATGCCCCCTCCCATCAGAGGACAGATTAAATGTACATCAAAC---  
 ATTACAGGGCTGCTATTAACAAGAGATGGTGGTAATCCTTCAAACGCA-----  
 -----  
 -----  
 ACCGATGAGATCTTCAGACCCATAGGGGGAATATGAAGGACAATTGGAGAAGTGAATTATATAAATATAAAG  
 TAGTAAACTTGAACCAATA---GGACTGGCACCCACCAAGGCGCAGAGAAGAGTGGTG-----  
 -----CAGAGAGAAAAAAGAGCA---GTGGGA---CTAGGAGCT-----  
 GTGTTCCCTTGGGTTCTTGGGAGCA---GCAGGAAGCACTATG---GGCGCAGTGTCA---  
 ATGACGCTGACGGTACAG---GCCAGACAA---TTATTG---TCTGGTATAGTGCAACAGCAAAGC---  
 AATTTG---CTGAGG---GCTATTGAGGCGCAACAACATATGTTGCAACTCACAGTCTGGGGCATC  
 >DQ444258  
 TTCTACTGTAATACAACAAAACCTGTTTAACAGTACTTGAATGATAACAGTACTTGAATGTTAACGGTACTG  
 GG-----  
 -----  
 AATGATAATGACACCATCATACTCCCATGCAGAATTAAACAAATTGTAAACATGTGGCAGGAAGTAGGAAAAG  
 CAATGTATGCCCCCTCCCATCAGAGGACTAATTAAATGTTTCATCAAAT---  
 ATCACAGGGCTGATATTAACAAGAGATGGTGGTAATAACATCACT-----  
 -----  
 -----  
 AACGAGACCGAGATCTTCAGACCTGCAGGAGGAGATATGAAGGACAATTGGAGAAGTGAATTATATAAATATA  
 AAGTAGTACAAATTGAACCATTA---GGAGTAGCACCCACTAAGGCAAAGAGAAGAGTGGTG-----

-----CAGAGAGAAAAAGAGCA---GTGGGA---ATAGGAGCT-----  
---TTGTTCCCTTGGGTTCTTGGGAGCA---GCAGGAAGCACTATG---GGCGCAGCGTCA---  
ATAACGCTGACGGTACAG---GCCAGGCAA---TTATTG---TCTGGTATAGTGCAACAGCAAAAC---  
AACTTG---CTGAGG---GCTATTGAGGCGCAACAGCACCTGTTGCAACTCACAGTCTGGGGCATC  
>GU728371  
TTCTACTGTAACCAACAAAACCTGTTTAATAGTACTTGGTCTAATAATGATACTTGGAAATAGTAGTGATGCTA  
CA-----  
-----  
AGGTCAAATGAACTATCACACTCCCATGCAGAATAAAACAAATTATAAACATGTGGCAGAAAGTAGGAAAAG  
CGATGTACGCCCTCCCATCAGAGGACAAATTAAATGTTTCATCAAAT---  
ATTACAGGGCTGCTGTTAGTAAGAGATGGTGGTACGAATAAGAGC-----  
-----  
-----  
GAGTCCGAGACATTTCAGACCTGGAGGAGGAGATATGAGGGACAATTGGAGAAGTGAATTATACAAATATAAAG  
TAGTAAAAATTGAACCATTA---GGAGTAGCACCCACCAAGGCAAAGAGAAGAGTGGTG-----  
-----CAGAGAGAAAAAGAGCA---CTGGGA---CTAGGAGCT-----  
ATGTTTCATTGGGTTCTTGGGAGCA---GCAGGAAGCACTATG---GGCGCAGCGTCA---  
GTAACGCTGACGGTACAA---GCCAGACAA---TTATTG---TCTGGCATAGTGCAACAGCAGAAC---  
AATCTG---CTGAGA---GCTATTGAGGCGCAACAGCATTTGTTGCAACTCACAGTCTGGGGCATC  
>GU728322  
TTCTACTGTAATACAACAAAACCTGTTTAATAGTACTTGGCTTAATGGTACTTGGAAATAGTAATGATACTGGA-  
-----  
-----  
TTGTCAGAAAATATCACACTCCCATGCAGAATAAAACAAATTGTAAACATGTGGCAGGAAGTAGGAAAAGCAA  
TGTATGCCCCACCCATCAGGGGACAAATTAGGTGTTTCATCAAAT---  
ATTACAGGGCTACTATTAGAAAAGAGATGGTGGTGAGAAACAACAGG-----  
-----  
-----  
TCCAATGAGACCTTCAGACCTATAGGAGGAAATATGAAGGACAATTGGAGAAGTGAATTATATAAATATAAAG  
TAATAAAAATTGAACCATTA---GGAATAGCACCCACCAAGGCAAAGAGAAGAGTGGTG-----  
-----CAAAGAGAAAAAGAGCA---GTGGGA---ATAGGAGCT-----  
ATGCTCTTTGGGTTCTTGGGAGCA---GCAGGAAGCACTATG---GGCGCAGCGTCA---  
ATGACGCTGACGGTACAG---GCCAGGCTA---TTATTG---ACTGGTATAGTGCAACAGCAGAAC---  
AATCTG---CTGAGG---GCTATTGAGGCGCAACAGCATCTGTTGCAGCTCACAGTCTGGGGCATC  
>EF440778  
TTCTACTGTAATTCAACAAAACCTGTTTAATAGTACTTGGAAATAGTGATGGTACTAGAAATAGTAGTGAAACGT  
CA-----  
-----  
TCTGAAACAGTTATCACACTCCCATGTAGAATAAAACAAATTGTAAACATGTGGCAGGAAGTAGGAAAAGCAA  
TGTATGCCCCCTCCCATCAGTGGACAGATTAGGTGCTCATCAAAT---  
ATTACAGGGCTAATATTAAACAAGAGATGGTGGCAAAGGTGACAACATC-----  
-----  
-----  
ACCAACAACACCGAGATTTTCAGACCTGGAGGAGGAAATATGCAGGACAATTGGAGAAGTGAATTATATAAAT  
ATAAGGTAGTACAAATTGAACCATTA---GGAATAGCACCCACCAAGGCAAAGAGAAGAGTGGTG-----  
-----CAAAGAGAAAAAGAGCA---GTGGG---ATAGGAGCT---  
-----GTGTTCCCTTGGGTTCTTGGGAGCA---GCAGGAAGCACTATG---GGCGCAGCGTCA---  
ATAGCGCTGACGGCACAG---GCCAGACAA---TTGTTG---TCTGGTATAGTGCAACAGCAGAAC---  
AATCTG---CTGAGG---GCTATTGAGGCGCAACAGCATCTGTTGCAACTCACAGTCTGGGGCATC  
>GU728392  
TTCTACTGCAACACATCACAACCTGTTTAATAGTACTTGGAAATGGTACTGAAGGGACAAATAACAATAAA---  
-----  
-----  
GGAAATGAAACAATCACACTGCCATGCAGAATAAAACAGATTATAAACATGTGGCAGGAAGTAGGAAAAGCAA  
TGTATGCTCCTCCCATCAGAGGACAAATTAGATGTTTCATCAAAT---  
ATTACAGGGTTGCTATTGACAAGAGATGGTGGTAATAGGACAAAC-----  
-----  
-----  
AATACAGAGACTTTTCAGACCTGGAGGAGGAAATATGAAGGACAATTGGAGAAGTGAGCTATATAAATATAAAG  
TAGTAAAAATTGAACCAATA---GGAATAGCACCCACCAAGGCAAAGAGAAGAGTGGTG-----

-----CAGAGAGAAAAAAGAGCA---GTGGGA---GTAGGAGCG-----  
TTTATCATTGGATTCTTGGGAGCA---GCAGGAAGCACTATG---GGCGCAGCATCA---  
ATGACGCTGACGGTACAG---GCCAGACTA---TTGTTG---TCTGGTATAGTGCAACAGCAAAGC---  
AATTTG---CTGAAG---GCTATTGAGGCGCAACAACGTCTGTTGCAACTCACAGTCTGGGGCATC  
>DQ886034  
TTCTACTGTAACACAACAAAACGTGTTCAATAGTACTTGGACTTGGAATAGTACTGAAGGGTCAGAA-----  
-----  
-----  
GGAAATGAAACAATCACACTCCCATGCAGAATAAAACAAATTATAAACATGTGGCAGGAAGTAGGAAAAGCAA  
TGTATGCCCCCTCCCATCAGAGGACAAATTAAATGTTTCATCAAAT---  
ATTACAGGACTGCTATTAACAAGAGATGGTGGTGACCAAAAATACC-----  
-----  
-----  
ACCACCGAGGTCTTCAGACCTGGAGGAGGAGATATGAGGGACAATTGGAGAAGTGAATTATATAAATATAAAG  
TAGTGAAAATTGAGCCATTA---GGCATAGCACCCACCAAGGCAAAGAGAAGAGTGGTG-----  
-----CAGAGAGAAAAAAGAGCA---GTGGGA---CTAGGAGCT-----  
ATGTTTCCTTGGGTTCTTGGGAGCA---GCAGGAAGCACTATG---GGCGCAGCGTCC---  
ATAACGCTGACGGTACAG---GCCAGACTA---TTATTG---TCTGGTATAGTGCAACAGCAGAAC---  
AATTTG---CTGAGG---GCTATTGAGGCGCAACAGCATCTGTTGCAACTCACAGTCTGGGGCATC  
>DQ886035  
TTCTACTGTGATTCAACACAACGTGTTCAATAATACTTGGGATGGTACTAATATGTCAAATGCAAGA-----  
-----  
-----  
AATGACACAAACATTACACTCCCATGCAGAATAAAACAAATTTATAAACATGTGGCAGAGAGTAGGAAAAGCAA  
TGTATGCCCCCTCCCATCAGAGGAAACATTAGCTGTTTCATCAAAT---  
ATTACAGGGCTGATATTAACAAGAGATGGTGGTCCCAACGCGACC-----  
-----  
-----  
AACGAGACTTTCAGACCTGGAGGAGGAGATATGAGGGACAATTGGAGAAGTGAATTATATAAATATAAAGTAG  
TAAGAATTGAACCATTA---GGAGTAGCACCCACCAAGGCAAAGAGAAGAGTGGTG-----  
-----CAGAGAGAGAAAAAGAGCA---GTGGGA---ATAGGAGCT-----  
ATGTTTCCTTGGGATCTTGGGAGCA---GCAGGAAGCACTATG---GGCGCAGCGTCA---  
ATAACGCTGACGGTACAG---GCCAGACAA---TTATTG---TCTGGTATAGTGCAACAGCAGAGC---  
AATTTG---CTGAGG---GCTATTGAGGCGCAACAGCATCTGTTGCAACTCACAGTCTGGGGCATC  
>DQ886036  
TTCTACTGTAATACAACACAACGTGTTTAATAGTACTTGGTATGAGAATGAGACTATTGAATGGTCAAATAACA  
CT-----  
-----  
GTAGGAAATGACATTATCACACTCCCATGCAGAATAAAACAAATTGTAAACATGTGGCAAGAGGTAGGAAAAG  
CAATGTATGCCCCCTCCCATCAGCGGACAAATTAGATGCTCATCAAAT---  
ATTACAGGGTTACTATTAACAAGAGATGGTGGTAATAACACAAAT-----  
-----  
-----  
GAGACCGAGATTTTCAGACCTGTAGGAGGAAACATGAGGGACAATTGGAGAAGTGAATTATATAAATATAAAG  
TAGTAAGAATTGAACCATTA---GGAGTAGCACCCACCAAGGCAAAGAGAAGAGTGGTG-----  
-----CAGAGAGAGAAAAAGAGCA---GTGGGA---CTAGGAGCT-----  
ATGTTTCCTTGGGTTCTTGGGAGCA---GCAGGAAGCACTATG---GGCGCAGCGTCA---  
GTGACGCTGACGGTACAG---GCCAGACAA---TTATTG---TCTGGTATAGTGCAACAGCAGAAC---  
AATCTG---CTGAGG---GCTATTGAGGCGCAACAGCATCTGTTGCAACTCACAGTCTGGGGCATC  
>FJ469750  
TTCTACTGCGATTCAACACCACTGTTTAATAGTACTTGGAACTACTGAAGGAAATGACACAATCACACGC-  
-----  
-----  
GGAAATGAAACAATCACACTCCCATGCAGAATAAAACAAATTATAAACATGTGGCAAGAAGTAGGAAAAGCAA  
TGTATGCCCCCTCCCATCAAAGGACAAATTAGCTGTTTCATCAAAT---  
ATTACAGGGCTGATATTAACAAGAGATGGTGGTAATAATAATGGGACC-----  
-----  
-----  
AATAACAATACTGAGATCTTCAGACCTGCAGGAGGAGATATGAGGGACAATTGGAGAAGTGAATTATATAAAT  
ATAAAGTAGTAAAAATTGAACCATTA---GGAATAGCACCCACCACGGCAAAAAGAAGAGTGGTG-----

-----CAGAGAGAAAAAGAGCA---GTAGGA---CTAGGAGCT---  
 -----ATGTTTCCTTGGGTTCTTGGGAGCA---GCAGGAAGCACTATG---GGCGCAGCGTCA---  
 CTGACACTGACGGTACAG---GCCAGACTA---TTATTG---TCTGGTATAGTGCAACAGCAGAAC---  
 AATTTG---CTGAGG---GCTATTGAGGCGCAACAGCATCTGTTGCAACTCACAGTCTGGGGCATC  
 >GU728413  
 TTCTACTGTAATACAACAAAACCTATTTAATAGTACTTGAATGATACTAAGGGGTCAAATGACACTGTA-----  
 -----  
 -----  
 GGAAATGACACAATCATACTCCCATGCAGAATAAAACAAATTATAAACCTGTGGCAGGAAGTAGGAAAAGCAA  
 TGTACGCCCCCTCCCATCAGAGGACAAATTAGGTGTTTCATCAAAT---  
 ATTACAGGGCTGCTATTAACAAGAGATGGTGGTAACGAGAGCAGC-----  
 -----  
 -----  
 ACCACCGAGACCTTTAGACCTGGAGGAGGAAATATGAAGGATAATTGGAGAAGTGAATTATATAAATATAAAG  
 TAGTAAGAGTTGAACCATTA---GGAATAGCACCCACCATGGCAAGGAGAAGAGTGGTG-----  
 -----CAGAGAGAAAAAGAGCA---GTGGGA---ATGGGAGCT-----  
 CTGTTTCCTAGGGTTCTTAGGAGCA---GCAGGAAGCACTATG---GGCGCAGCGTCC---  
 GTAACGCTGACGGTACAG---GCCAGACAA---TTATTG---TCTGGTATAGTGCAACAGCAGAAC---  
 AATCTG---CTGAGA---GCTATTGATGCGCAACAGCATCTGTTGCAGCTCACTGTCTGGGGCATC  
 >GU728313  
 TTCTACTGTAATACAACACGACTGTTTAATAGTACCTGGAATAATACTACCTGGAGTAATTCTAATGTAGCAA  
 AT-----  
 -----  
 GGCCTGAAAGAATTATCACACTTCCATGCAGAATAAAACAAATTATAAACATGTGGCAGGAAGTAGGAAAAG  
 CAATGTATGCCCCCTCCCATTAGAGGACAAATTAGTTGCTCATCAAAT---  
 ATTACAGGGCTACTGATAACAAGAGATGGTGGGAAGAATGTGACT-----  
 -----  
 -----  
 AGGGGGACTGAGATCTTCAGACCTGGAGGAGGAGATATGAGGGACAATTGGAGAAGTGTATTATATAAATATA  
 AAGTAGTACAAATTGAACCATTA---GGAGTAGCACCCACCAAGGCAAAGAGAAGAGTGGTG-----  
 -----CAAAGAGAAAAAGAGCA---GTGGGA---ATAGGAGCT-----  
 ---GTGTTTCCTTGGGTTCTTGGGAGCA---GCAGGAAGCACTATG---GGCGCAGCGTCA---  
 ATGACGCTGACGGTACAG---GCCAGACAA---TTATTG---TCTGGTATAGTGCAACAGCAGAAC---  
 AATCTG---CTGAGA---GCTATTGAGGCGCAACAGCATCTGTTGCAACTCACAGTCTGGGGCATC  
 >GU728179  
 TTCTACTGTAATACAACACAACCTGTTTAATAGTACTTGGCTTAACAGTACTTGAATAATAGTGGAAATGATA  
 CTGCA-----  
 -----  
 GAATCAAATGACACTATCACACTCCCATGTAGAATAAGACAAATTATAAACATGTGGCAGCGAGTAGGAAAAG  
 CAATGTATGCCCCCTCCCATCAGCGGAAAGATAAAGTGTATATCAAAT---  
 ATTACAGGGCTACTATTAACAAGAGATGGTGTCTAGGAACAACAGC-----  
 -----  
 -----  
 GAGAAATGAGACCTTCAGACCCGAAGGAGGGAATATGAGGGACAATTGGAGAAGTGAATTATATAAATATAAAG  
 TAGTACAAATTGAACCATTA---GGAGTAGCACCCACTAAGGCAAAGAGGAGAGTGGTG-----  
 -----CAGAGAGAAAAAGAGCA---GTGGGA---CTAGGAGCT-----  
 GTGTTTCCTTGGGTTCTTGGGAGCA---GCAGGAAGCACTATG---GGCGCAGCGTCA---  
 CTGACGCTGACGGTACAG---GCCAGACAA---TTATTG---TCTGGTATAGTGCAACAGCAGAAC---  
 AATCTG---CTGAGA---GCTATTGAGGCGCAACAACATATGTTGCAACTCACAGTCTGGGGCATC  
 >GU728409  
 TTCTATTGCAGTACAACAGAACTATTTAATAGTACTTGAATGTTACTGAAAAGTTAAATAAACTAAAGAAA  
 AT-----  
 -----  
 -----  
 GGAAGTGACACAATCACACTCCCATGCAGAATAAAACAAATTATAAACCTGTGGCAGGAAGTAGGAAAAGCAA  
 TGTATGCCCCCTCCCATCAGCGGACAAATTAGATGTTCTCAAAT---  
 ATTACAGGGCTGATATTAACAAGAGATGGTGGTAATGAAAACAAG-----  
 -----  
 -----  
 ACCACCGAGACCTTCAGACCTGAAGGAGGAAATATGAGGGACAATTGGAGAAGTGAATTATATAAATATAAAG  
 TAGTACAAATTGAACCATTA---GGAGTAGCACCCACCAAGGCAAAGAAGAGTGGTG-----

-----CAGAGAGAAAAAAGAGCG---GGAATA-----GGAGCT-----  
CTGCTCCTTGGGTTCTTGGGAGCA---GCAGGAAGCACTATG---GGCGCAGCGTCA---  
ATGGCGCTGACGGTACAG---GCCAGGCAA---TTATTG---TCTGGTATAGTGCAACAGCAGAAC---  
AATCTG---CTGAGG---GCTATTGAGGCGCAACAGCATCTGTTGCAACTCACAGTCTGGGGCATT  
>AF491737  
TTCTACTGTGATACAACAAAACCTGTTTAATAGTACTTGGAGTAGTAATAGTACTTGGGAATGATACTACAGGGT  
TAAATAAC-----  
-----ACT---  
GGGGAGGATGATACAATCACACTCCCATGCAGAATAAAACAAATTATAGATATGTGGCAGGAAGTAGGAAAAG  
CAATGTATGCCCCCTCCAGCAGTGGACAAATTAGATGTTTCATCAAAT---  
ATTACAGGGCTGTTATTAACAAGAGATGGTGGTATTAACGGGAGC-----  
-----  
GAAGGGAATGAGACCTTCAGACCTGGAGGAGGAGATATGAGGGACAATTGGAGAAGTGAATTATACAAATATA  
AAGTAGTAAGAATTGAACCATTA---GGAGTAGCACCCACCAAGGCAAAGAGAAGAGTGGTG-----  
-----CGGAGAGAAAAAAGAGCA---GTGGGA---TTAGGAGCT-----  
---ATGTTCCCTTGGGTTCTTGGGAGCA---GCAGGAAGCACTATG---GGCGCAGCGTCA---  
ATAGCGCTGACGGTACAG---GCCAGACAA---TTGTTG---TCTGGTATAGTGCAACAGCAGAAC---  
AATTTG---CTGAGG---GCTATTGAGGCGCAACAACATTTGTTGCAACTCACAATCTGGGGCATC  
>JN002043  
TTCTACTGTGATTTCATCACAACCTGTTTAATAGTACTTGGATGTTTAATAGTACTTGGGAATGATACTGACGGGG  
CAAATAGC-----  
-----ACT---  
AGGAAAAATGATACAATCACACTCCAATGCAGAATAAAACAAATTATAAACATGTGGCAGCAAGTAGGAAAAG  
CAATGTATGCCCCCTCCCATCAGAGGACAGATTAGATGTACATCAAAC---  
ATTACAGGGCTGATATTAACAAGAGATGGTGGTGATACCCAAAACAAG-----  
-----  
AGCGACCCCGAGATCTTTAGACCTGGAGGAGGAGATATGAGGGACAATTGGAGAAGTGAATTATATAAATATA  
AAGTAGTAAAAATTGAACCACTA---GGAATAGCACCCACCAGGGCAAAGAGAAGAGTGGTG-----  
-----CAGAGAGAAAAAAGAGCA---GTGGGAATGCTAGGAGCT-----  
---ATGTTCCCTTGGGTTCTTGGGAGCA---GCAGGAAGCACTATG---GGCGCAGCGTCA---  
CTGACGCTGACGGTACAG---GCCAGACAA---TTATTG---TCTGGTATAGTGCAACAGCAAAAC---  
AATTTG---CTGAGA---GCTATTGAGGCGCAACAGCATCTGTTGCAACTCACAGTCTGGGGCATT  
>AF049495  
TTCTACTGTAATACAACAAAACCTGTTTAATAGTACTTGGGAATGAGACTACAGAGTCAAATGGC-----  
-----  
AAGGGAGAAAATATCACACTCCCATGCAGAATAAGACAATTTGTAAACATGTGGCAGAAAGTAGGAAAAGCAA  
TGTATGCCCCCTCCAGCGATGGACAAATTAGGTGTACATCAAAT---  
ATTACTGGGCTACTATTAACAAGAGATGGGGGTGGTCTTAGTGATAAC-----  
-----  
AAAACCGACAAGACCTTCAGACCAGGAGGAGGAGATATGAGGGACAATTGGAGAAGTGAATTATATAAATATA  
AAGTAATAAAAATTGAACCATTA---GGAGTAGCACCCACCAAGGCAAAGAGAAGAGTGGTG-----  
-----CAAAGAGAAAAAAGAGCA---GTGGGAATGGTAGGAGCT-----  
---ATGTTCCCTTGGGTTCTTGGGAGCA---GCAGGAAGCACTATG---GGCGCAGCGTCA---  
TTGACGCTGACGGTACAG---GCCAGACAA---TTATTG---TCTGGTATAGTGACAGCAGCAGAAC---  
AATCTG---CTGAGA---GCTATTGAGGCGCAACAACATCTGTTGCAACTCACAGTCTGGGGCATC  
>FJ469752  
TTCTACTGTAATACAACAAAACCTGTTTAATAGCACTTGGGAATGACACTTGGGTTGATACTAGAAATACC-----  
-----  
ACTGAAGAAAATATCACACTCACATGCAGAATAAAACAAATTATAAACATGTGGCAGGAAGTAGGAAGAGCAA  
TGTATGCCCCCTCCCATCAGTGGATGGATTAAGTGTACATCAAAT---  
ATTACAGGGCTGCTATTGACAAGGGATGGTGGGAATAAAACAGGC-----  
-----  
GAAAACGAGACCTTCAGACCTGGAGGAGGAAATATGATGGACAATTGGAGAAGTGAAGTATACAAATATAAAG  
TAGTAAAAATTGAACCATTA---GGAATAGCACCCACCAGGGCAAAGAGAAGAGTGGTG-----

-----CAGAGAGAAAAAAGAGCA---GTGGGAGCACTAGGAGCT-----  
ATGTTCTTGGGTTCTTGGGAACA---GCAGGAAGCACTATG---GGCGCAGCGTCA---  
ATGGCGCTGACGGTACAA---GCCAGACAA---GTATTG---TCTGGTATAGTGCAGCAGCAGAAT---  
AATCTG---CTGAGG---GCTATTGAGGCGCAACAGCATATGTTGCAACTCACAGTCTGGGGCATT  
>GU728189  
TTCTACTGTAACACAACACAGCTGTTTAATAGTACTTGGCTGTTTAATAGTACTTGGATTGATAATACTACA-  
-----  
GGGTCAGAGAGACTCATACTCCCTGCAAAATAAAACAAATTATAAACAGGTGGCAGGGAGTAGGGAAAGCAA  
TGTATGCCCCCTCCCATAGAGGACTAATTAAATGCACATCAAAT---  
ATCACAGGGCTAATATTAACAAGAGATGGCGGTCCCAACAACGAG-----  
-----  
AGCGAGACCTTCAGACCTGGAGGAGGAGATATGAGGGACAATTGGAGAAGTGAATTATATAAATATAAAGTAG  
TAAAAATTGAGCCATTA---GGAGTAGCACCCACCAGGGCAAAGAGAAGAGTGGTG-----  
-----CAAAGAGAAAAAAGAGCA---GTGGGAACAATAGGAGCT-----  
ATGTTCTTGGGTTCTTGGGAACA---GCAGGAAGCACTATG---GGCGCAGCGTCA---  
ATGGCGCTGACGGTACAG---GTCAGACAA---TTATTG---TCTGGTATAGTGCAACAGCAGAAC---  
AATTTG---CTGAGG---GCTATTGAGGCGCAACAGCATCTGTTGCAACTCACAGTCTGGGGCATC  
>KU252650  
TTCTACTGTAATACAACACAACCTGTTTAAGAGTACTTGGTATGCTAATGGTTCTAGGAAAGGGTTAGATGAC-  
-----  
CCTGGAGAAAATATCACACTCCCATGCAGGATAAAACAAATTATAAACATGTGGCAGGAAGTAGGAAAAGCAA  
TGTATGCCCCCTCCCATAGTGGACCAATTAAGTGTATCAAAT---  
ATTACAGGGCTACTATTAACAAGAGATGGTGGGACAAACAATGAGACC-----  
-----  
AACAAATACCGAGGTCTTCAGACCTGTAGGAGGGGATATGAGGGACAATTGGAGAAGTGAATTATATAAATATA  
AAGTAGTAAGAATTGAACCATTA---GGAATAGCACCCACCAAGGCAAAAAGAAGAGTGGTG-----  
-----CAGAGAGAAAGAAGAGCA---ATAGGA---ATAGGAGCT-----  
---GTGTTCTTGGGTTCTTGGGAGCA---GCAGGAAGCACTATG---GGCGCAGCGTCA---  
GTGGCGCTGACGGTACAA---GCCAGACAA---TTATTG---TCTGGTATAGTGCAACAGCAGAAC---  
AATTTG---CTGAGA---GCTATTGAGGCGCAACAGCATCTGTTGCAACTCACAGTCTGGGGCATT  
>GU728294  
TTCTACTGTAACCAACACAACCTATTTAATAGTACTTGGCATAGAAATGGCACTGTAGTAGGGTTAAATACC-  
-----  
ACTGAAGAAAATATCATACTCCCATGCAGGATAAAACAAATTATAAACATGTGGCAGAAAGTAGGAAAAGCAA  
TGTATGCCCCCTCCCATCAAGGGACCAATTAAGTGTACATCAAAT---  
ATCACAGGGCTGATATTAACAAGAGATGGTGGTAGTGAGGATATCACA-----  
-----  
AATAACACCGAGACCTTCAGACCTGGAGGAGGAAATATGAGGACAATTGGAGAAGTGAATTATATAAATATA  
AAGTAGTAAAAATTGAACCATTA---GGAGTAGCACCCACCAAGGCAAGAGGAGAGTGGTG-----  
-----CAAAGAGAAAAAAGAGCG---GGAATA---GGAGCT-----  
---GTGTTCTTGGGTTCTTGGGAGCA---GCAGGAAGCACTATG---GGCGCAGCGTCA---  
ATGACGCTGACGGTACAG---GCCAGACTA---TTATTG---TCTGGTATAGTGCAACAGCAGAGC---  
AATCTG---CTGAGG---GCTATTGAGGCGCAGCAGCATCTGTTGCAACTCACAGTCTGGGGCATC  
>FJ469756  
TTCTACTGTGAGTCATTAGCATTGTTTAATAGTACCTGGCATGCTAATGGTACTATGGAAAGGACAAAT---  
-----  
AGCAGTGAAAATATCACACTCCCATGCAGAATAAAACAAATTATAAACATGTGGCAGGGAGTAGGAAAAGCAA  
TGTATGCCCCCTCCCATCAGAGGACCAATTAATGTTTCATCAAAT---  
ATTACAGGGCTAATATTAACAAGAGATGGTGGTAATATTAATGCCACAAATGGA-----  
-----  
AATGGGAATGAGACCTTCAGACCTGGAGGAGGAAATATGAGGGACAATTGGAGAAGTGAATATATAAAATAC  
AAAGTAGTACAAAATTGAACCAATTA---GGAATAGCACCCACCAAGGCAAGGAGAAGAGTGGTG-----

-----CAGAGAGAAAAAGAGCA---GTGGGA---CTAGGAGCT---  
 -----TTGTTTCCTTGGGTTCTTGGGAGCA---GCAGGAAGCACTATG---GGCGCAGTGTCA---  
 ATGACGCTGACGGTACAG---GCCAGGCAA---TTATTG---ACTGGTATAGTGCAACAGCAGAAC---  
 AATTTG---CTGAAG---GCTATTGAGGCGCAACAGCATCTGTTGCAACTCACAGTCTGGGGCATC  
 >FJ469761  
 TTCTACTGTAACCAACAAAAGTGTTTAATAGTACTTGGAGTGCTAATGGTACTGGGGAAGAGTCAAATAGCA  
 CT-----  
 -----  
 GGAGATAATGATAATATCACACTCCCATGCAGAATAAAACAAATTATAAACATGTGGCAGGAAGTAGGAAGAG  
 CAATGTATGCCCCCTCCCATCGGAGGACAAATTAGATGTTTCATCAAAT---  
 ATTACAGGGCTGATATTAACAAGAGATGGTGGTAATAACACGAATGAG-----  
 -----  
 -----  
 ACTGAGCCCGAGATCTTCAGACCTGGAGGAGGAAATATGAAGGACAATTGGAGAAAGTGAATTATATAAATACA  
 AAGTAGTAAAGATTGAACCGTTA---GGAGTAGCACCCACCAAGGCAAAGAGAAGAGTGGTG-----  
 -----CAGAGAGAAAAAGAGCA---GTGGGATTAGTAGGAGCT-----  
 ---ATGTTTCCTTGGGTTCTTGGGAGCA---GCAGGAAGCACTATG---GGCGCAGCGGCA---  
 ATGACGCTGACGGTACAA---GCCAGACAA---TTATTG---TCTGGTATAGTGCAACAGCAGAAC---  
 AATTTG---CTGAGG---GCTATTGAGGCGCAACAACATTTGTTGCAACTCACAGTCTGGGGCATC  
 >FJ469763  
 TTCTACTGTAATACAACATCACTGTTCAATAGTACTTGGGATAGTAATGGTACTAGACAACCTGTTCAATGGTA  
 CTGGG-----  
 -----  
 GATAATAACATCACAATCACACTCCCATGCAGAATAAAACAAATTATAAACTTGTGGCAGGAAGTAGGAAAAG  
 CAATGTATGCCCCCTCCCATCAGCGGACCAATTAAATGTTTCATCAAAT---  
 ATTACAGGACTTCTATTAACAAGAGATGGTGGTAACACGAACGAGACC-----  
 -----  
 -----  
 ACCAACAAGACCGAGGTCTTCAGACCTGCAGGAGGAGATATGAGGGATAATTGGAGAAGTGAATTATATAAAT  
 ATAAAGTAGTAAAAATTGAACCATTA---GGAGTAGCACCCACCAAGGCAAAGAGAAGAGTGGTG-----  
 -----CAGAGAGAAAAAGAGCA---ACA-----ATAGGAGCT---  
 -----TTGTTTCCTTGGGTTCTTGGGAGCA---GCAGGAAGCACTATG---GGCGCAGCGTCA---  
 ATAACGCTGACGGTACAG---GCCAGACTA---TTATTG---TCTGGTATAGTGCAACAGCAGAAC---  
 AATCTG---CTGAGG---GCTATTGAGGCGCAACAACATCTGTTGCAACTCACAGTCTGGGGCATC  
 >FJ469766  
 TTCTACTGTAATTCAACACAACCTGTTCAATAGTACTTGGCTTAGGAATAATACTGCAGAGTCAAATAGCACTG  
 AA-----  
 -----  
 AGAAATAACACAATCACACTCCCATGCAGAATAAAACAAATTATAAACATGTGGCAGGAGGTAGGAAAAGCAA  
 TGTATGCCCCCTCCCATCAGAGGACAAATTAGATGTTTCATCAAAG---  
 ATTACAGGGCTGCTATTAACAAGAGATGGTGGCAATAACGAGACT-----  
 -----  
 -----  
 ACTGAGGAGGTCTTCAGACCTGGAGGAGGAGATATGAGGGATAATTGGAGAAGTGAATTATATAAATACAAAG  
 TGGTAAAAATTGAACCATTA---GGAGTAGCACCCACCAAGGCAAAGAGAAGAGTGGTG-----  
 -----CAGAGAGAAAAAGAGCA---GCGGGA---CTAGGAGCT-----  
 ATGTTTCCTTGGGTTCTTGGGAGCA---GCAGGAAGCACTATG---GGCGCAGCATCA---  
 ATGGTGCTGACGGTACAG---GCCAGACAA---TTATTG---TCTGGTATAGTGCAACAGCAGAAC---  
 AATTTG---CTGAGG---GCTATTGAGGCGCAACAGCATCTGTTGCAACTCACAGTCTGGGGCATC  
 >GU728073  
 TTCTACTGCAATTCAACACAACCTGTTTAATAGTACTTGGATTACGAATGGTACTGAATGGTCACCTAACACTA  
 CTTTA-----  
 -----  
 GGAGATACAGAAAATATCACACTCATATGCAGGATAAAACAAATTATAAACATGTGGCAGGAAGTAGGAAAAG  
 CCATGTATGCCCCCTCCCATCGAAGGACAAATTAAATGCTCATCAAAT---  
 ATTACAGGGCTACTATTAACAAGAGATGGTGGTAATGGGAATGAGACC-----  
 -----  
 -----  
 AGGAACAATGAGACCTTCAGACCTACAGGAGGAAACATGAGGGACAATTGGAGAAGTGAATTATATAAATATA  
 AAGTAGTAAAAATTGAGCCATTA---GGAAGTAGCACCCACCAGGGCAAAGAGAAGAGTGGTG-----

-----CAGAGAGAAAAAGAGCA---GTGGGA---ATAGGAGCT-----  
---ATGTTCCCTTGGGTTCTTGGGAGCA---GCAGGAAGCACTATG---GGCGCAGCGTCA---  
ATAACGCTGACGGCACAA---GCCAGACAA---TTACTG---TCTGGTATAGTGACAGCAGCAGAAC---  
AATTTG---CTGAGG---GCTATTGAGGCGCAACAGCATCTGTTGCAACTCACAGTCTGGGGCATC  
>GU727875  
TTCTACTGTAATACAACACAGCTGTTTAATAGTACTTGGAAATTCTGATAGTACTCGGAATTGGACTGTACAGG  
CAAAC-----  
-----  
AACAGTGGAGACAATATCACACTCCCATGCAGAATAAAACAAATTGTAAACATGTGGCAGGAAGTGGGAAAAG  
CAATGTATGCCCCCTCCCATTAAGGACCAATTGGATGTTTATCAAAT---  
ATTACAGGGCTGCTACTAACAAGAGATGGTGGGAATGGGAATGACACA-----  
-----  
-----  
AACACCACTGAGATCTTCAGACCTGGAGGAGGAAATATGAGGGACAATTGGAGAAGTGAATTATATAAATATA  
AAGTAGTAAAAATTGAGCCATTA---GGAGTAGCACCCACCAAGGCAAAGAGAAGAGTGGTG-----  
-----CAGAGAGAAAAAGAGCA---ATAGGAACACTGGGAGCT-----  
---GTGTTCCCTTGGGTTCTTGGGAGCA---GCAGGAAGCACTATG---GGCGCAGCGTCA---  
ATAACGCTGACGGTACAA---GCCAGACAA---TTATTG---TCTGGTATAGTGCAACAGCAGAAC---  
AATCTG---CTGAAA---GCTATTGATGCGCAACAGCGTATGTTGCAACTCACAGTCTGGGGCATC  
>GU728234  
TTCTACTGTAATTCAACACAACTGTTTAATAGTACTTGGAAATTCAACACAAATATATAATAGTACTTGGGATA  
CAAAG-----  
-----  
AACACAACAGAAAGAATCATACTTCCATGCAGAATAAAACAAATTATAAACATGTGGCAGGAAGTAGGAAAAG  
CAATGTATGCCCCCTCCCATCCAAGGAATAATTAGCTGTGTATCAAAT---  
ATTACAGGGCTGATATTAACAAGAGATGGTGGTGTGAACAGTAGC-----  
-----  
-----  
AATACCACCGAGACCTTCAGACCTGCAGGAGGAGATATGAGGGACAATTGGAGAAGTGAATTATATAAATATA  
AAGTAGTAAAAATTGAGCCATTA---GGAGTAGCACCCACCAAGGCAAAGAGAAGAGTGGTG-----  
-----CAGAGAGAAAAAGAACA---ATA-----GCGGGAGCT-----  
---GTGTTCCCTTGCGTTCTTGGGAGCA---GCAGGAAGCACTATG---GGCGCAGCGTCA---  
ATAACGCTGACGGTACAG---GCCAGACAA---TTATTG---TCTGGTATAGTGCAACAGCAGAAC---  
AATTTG---CTGAGA---GCTATTGAGGCGCAACAGCATATGTTGCAACTCACAGTCTGGGGCATC  
>M95292  
TTCTACTGTAATACAACAAAACCTGTTTAATAGTACTTGGAAATGATACTAGACTGTTTAATAGTACTTGGAAAT  
ATACTATAGGG-----  
-----TCAAAT-----  
AACACTGAAGGAAATATCACACTCCCATGTAGAATAAAACAAATTATAAACATGTGGCAGGAAGTAGGAAAAG  
CAATGTATGCCCCCTCCCATCAGAGGACAAATTAGATGTTTATCAAAT---  
ATTACAGGGCTGCTATTAAACAAGAGATGGTGGTGAAACTAATGAG-----  
-----  
-----  
ACCACCGAGGTCTTCAGACCTGGAGGAGGAGATATGAGGGACAATTGGAGAAGTGAATTATATAAATATAAAG  
TAGTAAAAATTGAACCATTA---GGAGTAGCACCCACCAAGGCAAAGAGAAGAGTGGTG-----  
-----CAGAGAGAAAAAGAGCA---GTGGGA---ATAGGAGCT-----  
GTGTTCCCTTGGGTTCTTGGGAGCA---GCAGGAAGCACTATG---GGCGCAGCGTCA---  
GTGGCCTGACGGTACAG---GCCAGACAA---TTATTG---TCTGGTATAGTGCAACAGCAGAAC---  
AATTTG---CTGAGG---GCTATTGAGGCGCAACAGCACCTGTTGCAACTCACAGTCTGGGGCATC  
>FJ469767  
TTCTACTGTAATACAACACAGCTGTTTAATAGTACTTGGAAATCAACTACTCTGGATAATTGGAATGAAACTA  
CTTG-----  
-----  
AATACTACTAAAATTATCACACTCCCATGCAGAATAAAACAAATTATAAACAGGTGGCAGGAAGTAGGAAAAG  
CAATGTATGCCCCCTCCCATCAGTGGACCAATTAGATGTGCATCATAT---  
ATTACAGGGCTGCTATTAAACAAGAGATGGGGGTAATAATGATAATTCT-----  
-----  
-----  
ACAAACGGGACTGAGGTCTTCAGACCTGGAGGAGGAGATATGAGGGACAATTGGAGAAGTGAATTATATAAAT  
ACAAAGTAGTAAAAATTGAACCATTA---GGAATAGCACCCACCAAGGCAAAGAGAAGAGTGGTG-----

-----CAGAGAGAAAAAGAGCA---GTGGGA---ATAGGAGCT---  
 -----GTGTTTCCTTGGGTTCTTGGGAGCA---GCAGGAAGCACTATG---GGCGCAGCGTCA---  
 ATGACGCTGACGGTACAG---GCCAGACTA---TTATTG---TCTGGTATAGTGCAACAGCAGAAC---  
 AATTTG---CTGAGA---GCTATTGAGGCGCAACAGCATATGTTGCAACTCACAGTCTGGGGCATT  
 >FJ469768  
 TTCTACTGTAATTCAACACAACCTGTTTAATAGTACTTGGGATTGAGCACAACCTATTTAATAGTACTTGAATG  
 GCACG-----  
 -----AAA---  
 GAAAAATGACACGACAATCGTACTCCCATGCAGAATAAAACAAATTATAAACATGTGGCAGGAAGTAGGAAAAG  
 CAATGTATGCCCCCTCCCATTAGAGGACAAATTAGATGTTTATCAAAT---  
 ATTACAGGGCTGATATTAACAAGAGATGGTGGTAATAACACTAGC-----  
 -----  
 -----  
 AGGATTGAGACCTTCAGACCTGGAGGAGGAGATATGAGGGACAATTGGAGAAGTGAATTATATAAATATAAAG  
 TAGTTAAAATTGAACCATTA---GGAATAGCACCCACCAAGGCAAAGAGAAGAGTGGTG-----  
 -----CAGAGAGAAAAAGAGCA---GTGGGA---CTAGGAGCT-----  
 ATGTTTCCTTGGGTTCTTGGGAGCA---GCAGGAAGCACTATG---GGCGCAGCGTCA---  
 ATGACGCTGACGGTACAG---GCCAGACAA---CTGTTG---TCTGGTATAGTGCAACAGCAGAAC---  
 AATTTG---CTGAAG---GCTATTGAGGCGCAACAGCGTATGTTGCAACTCACAGTCTGGGGCATC  
 >FJ469769  
 TTCTACTGTAATACAACACAATTGTTTAACAGTACGTGGAATGCTACTGATATGTGGAACATTACTGAAGGGT  
 CAGGA-----  
 -----  
 AATACCACAACCAAAATCACACTCCCATGCAGAATAAAACAAGTTATAAACTTGTGGCAGGAAGTAGGGAAAAG  
 CAATGTATGCCCCCTCCCATCCAAGGACGAATTAGATGCTCATCAAAT---  
 ATTACAGGGCTGTTATTAACAAGAGATGGTGGTAAGGGCATTGAAACT-----  
 -----  
 -----  
 AAAAAATGACACTGAGACCTTCAGACCAGGAGGAGGAGACATGAGGGACAATTGGAGAAGTGAATTATATAAAT  
 ATAAAGTAGTAAAAATTGAACCATTA---GGAGTAGCACCCACCAGGGCAAAGAGAAGAGTGGTG-----  
 -----CAGAGAGACAAAAGAGCA---GTGGGA---ATAGGAGCT---  
 -----GTACTCCTTGGGTTCTTGGGAGCA---GCAGGAAGCACTATG---GGCGCAGCGTCA---  
 ATAGCGCTGACGGCACAG---GCCAGACAA---TTACTG---TCTGGTATAGTGCAACAGCAGAAC---  
 AACTTG---CTGAGG---GCTATTGAGGCGCAACAGCATCTGTTGCAACTCACAGTCTGGGGCATC  
 >FJ469771  
 TTCTACTGTAATACAACACAATTGTTTAATAGTACTTGAATAAAAATAGTACTTGAATAATACTGAAAAGA  
 CAAAT-----  
 -----  
 AGCACTGAAAACATTATCACACTCCCATGCAGGATAAAACAAATTATAAACATGTGGCAGAAAGTAGGAAAAG  
 CAATGTATGCCCCCTCCCATCCAAGGACAAATTAAATGTTTATCAAAT---  
 ATTACAGGGATGATATTAACAAGAGATGGGGGTAATGAAAACAAC-----  
 -----  
 -----  
 AACACCGAGATCTTCAGACCTGGAGGAGGAGATATGAGGGACAATTGGAGAAGTGAATTATATAAATATAAAG  
 TAGTAAAAATTGAACCATTA---GGAGTAGCACCCACCAAGGCAAAAGGAGAGTGGTG-----  
 -----CAAAGAGAAAAAGAGCA---GTGGGA---CTAGGAGCT-----  
 GTGTTTCCTTGGGTTCTTGGGAACA---GCAGGAAGCACTATG---GGCGCAGCGGCA---  
 GTGACGCTGACGGTACAG---GCCAGACTA---TTATTG---TCTGGAATAGTGACAGCAGCAGAAC---  
 AATTTG---CTGAGA---GCTATTGAGGCACAACAGCATCTGTTGCAACTCACAGTCTGGGGCATC  
 >GU728204  
 TTCTACTGCAATACAACACAACCTGTTTAATAGTACTTGAATAGTAGTACTTGAATAGTAATGATACTGAAG  
 GG-----  
 -----  
 TCAAAATATCACAATCACACTCCCATGCAGAATAAAACAAATTATAAACATGTGGCAGGAAGTAGGAAAAGCAA  
 TGTATGCCCCCTCCCATCAGGGGAAACATTAGCTGTTTATCAAAT---  
 ATTACAGGGCTGATATTAACAAGAGATGGTGGGAACAATACCACCAATAGTAAT-----  
 -----  
 -  
 ACCACCAATACGACCACCGAGATCTTCAGACCTGGAGGGGAGATATGAGGGATAATTGGAGAAGTGAATTAT  
 ATAAATATAAAGTAGTAAAAATTGAGCCATTA---GGAGTAGCACCCACCAAGGCAAAGAGAAGAGTGGTG--

-----CAGAGAGAAAAAGAGCA---TTGGGA---  
 ATGGGAGCT-----TTGTTCCCTTGGGTTCTTGGGAGCA---GCAGGAAGCACTATG---  
 GGCGCAGCGTCA---GTGACGCTGACGGTACAG---GCCAGACAA---TTATTG---  
 TCTGGTATAGTGCAACAGCAGAAC---AATCTG---CTGAGA---  
 GCTATTGAGGCGCAACAGCATTTGTTGCAACTCACAGTCTGGGGCATC  
 >GU728223  
 TTCTACTGTAATTCAACAAATCTATTTAATAGTACTTGGACTTGAATGGTACTTGGATTAATGGTACTGAAG  
 GA-----  
 -----  
 TCAAAATGACACAATCACACTCCCATGCAGAATAAAGCAAATTATAAACATGTGGCAGGGAGTAGGACAAGCAA  
 TGTATGCCCCCTCCCATTAAGGACAAATTAGATGTTTCATCGAAT---  
 ATTACAGGGTTGATATTAACAAGAGATGGTGGTAGTGATACCAATGAT-----  
 -----  
 -----  
 ACCAGTAATGAGGTCTTCAGACCTGCAGGAGGAAATATGAAAGACAATTGGAGAAGTGAATTATATAAAATATA  
 AAGTAGTAAGAATTGAACCATTA---GGAGTAGCACCCACCAGGGCAAGGAGAAGAGTGGTG-----  
 -----CAAAGAGAAAAAGAGCA---GTGGGA---TTAGGAACT-----  
 ---GTGCTCTTTGGGTTCTTGAGTGCA---GCAGGAAGCACTATG---GGCGCAGCGTCA---  
 ATGACGCTGACGGTACAG---GCCAGACAG---TTATTG---TCTGGTATAGTGCAACAGCAGAAC---  
 AACCTG---CTGAGA---GCTATTGAGGCGCAACAGCATATGTTGCAACTCACAGTCTGGGGCATT  
 >GU728030  
 TTCTACTGTAATACAACAAAGCTGTTTAATAGTACTTGGCCGTCTAATGATACTAAAGGGTCAGAT-----  
 -----  
 -----  
 GGCAATGAACTATCATACTCCCGTGCAGAATAAAACAAATTATAAACAGATGGCAGGAAGTAGGAAAAGCAA  
 TGTATGCCCCCTCCCATCAGCGGAATAATTAGTTGTTTCATCAAAT---  
 ATTACAGGGCTAATATTAACAAGAGATGGTGGTGACAATAACCAC-----  
 -----  
 -----  
 AGCGAGACCTTTAGACCTGGGGGAGGAAATATGAGGGACAATTGGAGAAGTGAATTATATAAAATATAAAATAG  
 TAAGGATTGAACCATTA---GGAGTAGCGCCACCAGGTCAAGGAGACTAGTGGTG-----  
 -----CAGAGAGAAAAAGAGCA---GTGGGAACGATAGGAGCT-----  
 ATGTTCCCTTGGGTTCTTGGGAGCA---GCAGGAAGCACTATG---GGCGCAGCGTCG---  
 GTGACGCTGACGGTACAG---GCCAGACAA---TTATTG---TCTGGTATAGTGCAACAGCAGAAC---  
 AATTTG---CTGAAG---GCTATTGAGGCGCAACAGCATATGTTGCAACTCACAGTCTGGGGCATC  
 >GU728229  
 TTCTACTGTAATTCAACACCACTGTTTAATAGTACATGGGAAAGGAAGGGGGATGGTACTTGAACAAGAGTG  
 AAACAAATAGC-----  
 ACTAAAGGAAGGTCAAAC-----  
 AGCACTGAAGAAAAGATCATACTCCGATGCAGAATAAAACAAATTATGAACATGTGGCAGGAAGTAGGAATAG  
 CAATGTATGCCCCCTCCCATTAACGGACTAATTAGATGTTTCATCAAAT---  
 ATTACAGGGTTACTATTAACAAGGGATGGTGGTGAGACTAACGAGACT-----  
 -----  
 -----  
 ACCAAAACCTGAGACCTTCAGACCGGGAGGAGGAGATATGAGGGACAATTGGAGAAGTGAATTATATAAAATATA  
 AAGTAGTAAAAATTGAACCATTA---GGTGTAGCACCCACCAAGGCAAGAGAAGAGTGGTA-----  
 -----CAGAGAGAAAAAGAGCA---ATAGGA---ATAGGAGCG-----  
 ---TTGTTCCCTTGGGTTCTTGGGAGCA---GCAGGAAGCACTATG---GGCGCAGCGTCA---  
 CTAACGCTGACGGTACAA---GCCAGACAA---TTGTTG---TCTGGTATAGTGCAACAGCAGAAC---  
 AATTTG---CTGAGA---GCTATTGAGGCGCAACAACATCTGTTGCAACTCACAGTCTGGGGCATC  
 >AY189526  
 TTCTACTGTAATACATCACAAATGTTTAATGTTACTGAAGTGTCAAGGAATGACCCTAGA-----  
 -----  
 -----  
 GCAAAATGACACTATCACACTCCAATGCAGAATAAAACAAATTGTAAACATGTGGCAGAGAGTAGGAAGAGCAA  
 TGTATGCCCCCTCCCATCAGTGGACTAATTAGATGTTTCATCAAAT---  
 ATTACTGGGATAATGTTAACAAGAGATGGAGGTAAAAATTGATAACGGA-----  
 -----  
 -----  
 ACCAACAACTGAGATCTTCAGACCTGGAGGAGGGGATATGAAGGACAATTGGAGAAGTGAATTATATAAAAT

ATAAAGTAGTAAAAATTGAACCATTA---GGACTAGCACCCACCAAGGCAAAGAGAAGAGTGGTG-----  
 -----CAGAGAGAAAAAAGAGCA---GTGGGA---TTCGGAGCT---  
 -----ATGTTTCCTTGGGTTCTTGGGAGCA---GCAGGAAGCACTATG---GGCGCAGCATCA---  
 ATAACGCTGACGGTACAG---GCCAGAAAA---TTATTG---TCTGGTATAGTGCAACAGCAGAGC---  
 AATTTG---CTGAGG---GCTATTGAGGCGCAACAACGTATGTTGCAACTCACAGTCTGGGGCATC  
 >GU728370  
 TTCTACTGTAATACAACACAACCTGTTTAATAGTACTTGGGAATTCAACACAAACAGCTAATAGTAATAGTACTG  
 AC-----  
 -----  
 AATGGTACTGTAATCACACTCCCATGTAAAATAAAACAAATTATAAACATGTGGCAAGGAGTAGGAAAAGCAA  
 TGTATGCCCCCTCCTATCAGAGGACAAATTAAGTCTCATCAAAT---  
 ATTACAGGGCTAATATTAACAAGAGATGGTGGTAATAACAATGAGAGC-----  
 -----  
 -----  
 ACCGAGATCGAGATCTTCAGACCTGCAGGAGGAAATATGGAGGACAATTGGAGAAGTGAATTATACAAATACA  
 AAGTAGTAGAGATTAAACCATTA---GGAATAGCACCCACCAAGGCAAAAAGAAGAGTGGTG-----  
 -----CAGAGAGAAAAAAGAGCA---GTAGGAACGATAGGAGCT-----  
 ---ATGTTTCCTTGGGTTCTTGGGAGCA---GCAGGAAGCACTATG---GGCGCAGCGTCA---  
 GTGACGCTGACGGTACAG---GCCAGACTA---TTATTG---TCTGGTATAGTGCAACAGCAAAAC---  
 AATTTG---CTGAAG---GCTATTGATGCGCAACAGCATCTGTTGCAACTCACAGTCTGGGGCATC  
 >GU728321  
 TTCTACTGCAATACAACAAAACTGTTTAATGGCACTTTGCATACAAATGGCACTTGGTATTTTAATGGCACTT  
 GGAATTTTACT-----  
 -----GGAGAGTCA-----  
 AATAGCACTGAAAATATCATACTCACATGCAGAATAAAACAAATTATAAACATGTGGCAGGAAGTAGGAAAAG  
 CAATGTATGCCCCCTCCCATCAGTGGACAAATTAGATGTTTCATCAAAT---  
 ATTACAGGGCTGCTATTAACAAGAGATGGTGGTAATAACAGTACCACA-----  
 -----  
 -----  
 AACGAAAGTGAGACTTTTCAGACCTGAAGGAGGAAATATGAAGGACAATTGGAGAAGTGAATTATATAAATATA  
 AAGTAGTGCAAATTGAACCATTA---GGAGTAGCACCCACCAAGGCAAAGAGAAGAGTGGTG-----  
 -----CAGAGAGAAAAAAGAGCA---ATAGGA---ATAGGAGCT-----  
 ---ATGTTTCCTTGGGTTCTTGGGAGCA---GCAGGAAGCACTATG---GGCGCAGCGTCA---  
 ATGACACTGACGGTACAG---GCCAGACAA---TTATTG---TCTGGTATAGTGCAACAGCAAAAC---  
 AATTTG---CTGAGG---GCTATTGAGGCGCAACAGCATCTGTTGCAACTCACAGTCTGGGGCATC  
 >GU727980  
 TTCTACTGTAATTCAACACCACTGTTTAATAATATTGTGCGTACGGATGGGACTATAGAGAAAATTAATAATG  
 ACACG-----  
 -----  
 GAAACAAATGACACAATCACACTCCAATGTAGAATAAAACAAATTATAAACATGTGGCAGGAAGTAGGAAAAG  
 CAATGTATGCCCCCTCCCATCAGTGGACAAATTAGATGTTTCATCAAAT---  
 ATAACAGGACTATTATTAACAAGAGATGGTGGTAATGGTGTAACTTAACAGGA-----  
 AATGGGGGTAACGTAACA---GGA-----  
 AATAGTAGTACACACGGAAAT-----  
 GGGACCGAGATCTTCAGACCTGGAGGAGGAGATATGAGGGACAATTGGAGAAGTGAATTATATAAATATAAAG  
 TAGTAAGAATTGAACCATTA---GGAGTAGCACCCACCAGGGCAAAGAGAAGAGTGGTG-----  
 -----CAGAGAGAAAAAAGAGCA---GTAACA---CTAGGAGCT-----  
 ATGTTTCCTTGGGTTCTTGGGAGCA---GCAGGAAGCACTATG---GGCGCAGCGTCA---  
 ATAACGCTGACGGTACAG---GCCAGACTA---TTATTG---TCTGGTATAGTGCAACAGCAGAAC---  
 AATTTG---CTGAGG---GCTATTGAGGCGCAACAACATCTGTTGCAACTCACAGTCTGGGGCATC  
 >GU728054  
 TTCTACTGTAATACAACACAACCTGTTTAATAGTACTTGGACTTGGGAATGATACTAACTGGAATGATACTAGAG  
 GGTCA-----  
 -----  
 -----  
 AACAACTCTGAAAATATCACACTGCCATGCAGAATAAAACAAATCATAAACATGTGGCAGAGAGTAGGAAAAG  
 CAATGTATGCCCCCTCCCATTAAGGACAGATTAGCTGTTTATCAAAT---  
 ATTACAGGGCTGCTATTAACAAGAGATGGTGGTAATACTACCGAG-----  
 -----  
 -----  
 ACCGAGACCTTCAGGCCTGCAGGAGGAGATATGAGGGACAATTGGAGAAGTGAATTATATAAATACAAAGTAG

TAAAAATTGAACCATTA---GGAATAGCGCCCAACCAAGGCAAAAAGAAGAGTGGTG-----  
-----CAGAGAGAAAAAAGAGCA---GTGGGA---CTAGGAGCT-----  
ATGTTCTTGGGTTCTTGGGAGCA---GCAGGAAGCACTATG---GGCGCAGCGTCC---  
GTGACGCTGACGGTACAG---GCCAGACAA---TTGCTG---TCTGGTATAGTGCAACAGCAGAAC---  
AATCTG---CTGCAA---GCTATTGAGGCGCAACAGCATCTGTTGCAACTCACAGTCTGGGGCATC  
>GU728181  
TTCTACTGTGATTCAACACCACTGTTTAATAGCACTTGGCATACTAATAATACTTTGGAGAGTACTAACGGG-  
-----  
-----  
ACAAATGAAAATATCACACTCACATGCAGAATAAAACAAATTATAAACATGTGGCAGGAAGTAGGAAAAGCAA  
TGTATGCCCCCTCCCATCAGAGGACAAATTAGATGTATATCAGAT---  
ATTACAGGGATGCTACTAACAAGAGATGGTGGTATTAACAACACCAATGGG-----  
-----  
-----  
GAGAACCAACACCGAGATATTCAGACCTGGAGGAGGAAAATATGAGAGACAATTGGAGAAATGAATTATATAAAT  
ATAAAGTAGTAAACTTGAACCAATA---GGGTTAGCACCTACCAAGGCAAAGAGAAGAGTGGTA-----  
-----CAGAGAGAAAAAAGAGCA---GTAACA---CTGGGAGCT---  
-----ATGTTCTTGGGTTCTTGGGAGCA---GCAGGAAGCACTATG---GGCGCAGCGTCA---  
CTGACGCTGACGGTACAG---GCCAGACTA---TTGTTG---TCTGGTATAGTGCAACAGCAGAGC---  
AATCTG---CTGAGG---GCTATTGAGGCGCAACAGCATATGTTGCAACTCACAGTCTGGGGCATC  
>EU604556  
TTCTACTGTAATTCAACACAACCTGTTTAATAGTACTTGGGATTCAACACAACCTGTTTAATAGTACTTGGTATA  
ACGAT-----  
-----  
ACAGGAAATGACACAATCATACTCCAATGCAGAATAAAACAATTTATAAACATGTGGCAGGAAGTAGGAAAAG  
CAATGTATGCCCCCTCCTATCAAAGGACAAATTAGCTGTTTGTCAAAT---  
ATTACAGGGATACTATTAACAAGAGATGGTGGTAGTAACACCAGC-----  
-----  
-----  
AACACAACCTGAGACCTTCAGACCTGGAGGAGGAGATATGAAGGATAATTGGAGAAGTGAATTATATAAATATA  
AAGTAGTACAAATTGAACCATTA---GGAATAGCACCCACCAAGGCAAAGAGAAGAGTGGTG-----  
-----CAGAGAGAAAAAAGAGCA---GTGGGA---ATAGGAGCT-----  
---TTATTCCTTGGGTTCTTGGGAGCA---GCAGGAAGCACTATG---GGCGCAGCGTCA---  
ATGACGCTGACGGTACAG---GCCAGACAA---TTATTG---TCTGGTATAGTGCAACAGCAGAAC---  
AATTTG---CTGAGA---GCTATTGAGATGCAACAGCATCTGTTGCAACTCACAGTCTGGGGCATC  
>JX503075  
TTCTATTGTAATACAACACAACCTGTTTAATAGTACCTGGGATGTTAATAGTACCTGGAATGGAGGGTCAGAGA  
ACACT-----  
-----ACA---  
GGAGGAAATGATACAATCACACTCCCATGTAGAATAAAACAAATTATAAATATGTGGCAGGAAGTAGGCAAAG  
CAATGTATGCCCCCTCCCATCAAAGGACAAATTAGATGTTTCATCAAAT---  
ATTACAGGGCTACTACTAGTAAGAGATGGTGGAAATGATAATGAAACT-----  
-----  
-----  
AACGACACCGAGATCTTCAGACCTGGAGGAGGAGATATGAGGGACAATTGGAGAAGTGAATTGTATAAATATA  
AAGTAGTAAGAATTGAACCATTA---GGAGTAGCACCCACCAAGGCAAAGAGAAGAGTGGTG-----  
-----CAGAAGGAAAAAAGAGCA---ATAACA---TTAGGAGCT-----  
---ATGTTCTTGGGTTCTTGGGAACA---GCAGGAAGCACGATG---GGCGCAGCGTCA---  
ATAACGCTGACGGTACAG---GCCAGACAA---TTATTG---TCTGGTATAGTGACAGCAGCAGAAC---  
AATCTG---CTGAGG---GCTATTGAGGCGCAACAACATTTGTTGCAACTCACAGTCTGGGGCATT  
>AY781127  
TTCTACTGTAATACAACAGAATTGTTTAATAGTACTTGGCCGTTTAATAGTACTGAAAATAAGGCTAACGAGT  
CAGG-----  
-----  
-----  
ACAAGTGAAAGAAATATCACACTCCCATGCAGAATAAAACAAATTATAAACAGGTGGCAGGAAGTAGGAAAAG  
CAATGTATGCCCCCTCCCATCCAAGGACGAATTAGCTGTTTCATCAAAA---  
ATTACAGGGATGCTATTAACAAGAGATGGTGGTAAAGGGAACGAGACA-----  
-----  
-----  
AGGAACGATACCGAGACCTTCAGACCTGCAGGAGGAGATATGAAGGACAATTGGAGAAGTGAATTATATAAAT

ATAAAGTAGTAAAAATTGAGCCATTA---GGAATAGCACCCACCAGGGCACAGAGAAGAGTGGTG-----  
 -----CAGAGAGAAAAAAGAGCA---GTGGGAATGATAGGAGCT---  
 -----ATGTTTCCTTGGGTTCTTGGGAGCA---GCAGGAAGCACTATG---GGCGCAGCGTCA---  
 GTGACGCTGACGGTACAG---GCCAGACAA---TTATTG---TCTGGTATAGTGCAAGCAGCAGAAC---  
 AATCTG---CTGAGG---GCTATTGAGGCGCAACAGCATCTGTTGCAACTCACAGTCTGGGGCATC  
 >JN235958  
 TTCTACTGTAATACAACACAGCTGTTTAATAGTACCTGGAATGATAGTACCTGGAATGGTACTGCAGGA----  
 -----  
 -----  
 CGGAATGATACTATTACACTCCCATGCAGAATAAGACAAATTATAAACAGGTGGCAGGAAGTAGGAAGAGCAA  
 TGTATGCCCCCTCCCATCAGCGGAATGATTAGCTGTTTCATCAAAT---  
 ATCACAGGCCTGCTATTAACAAGAGATGGGGGTAACAATAGTAAC-----  
 -----  
 -----  
 AGCAACAACGAGACCTTCAGACCAGCAGGAGGAGATATGAGGGACAATTGGAGAAGTGAATTATATAAATATA  
 AAGTAGTAAAAATTGAGCCATTA---GGAATAGCACCCACCAAGGCAAAGAGAAGAGTGGTG-----  
 -----CAGAGAGAAAAAAGAGCA---GTAACG---CTAGGAGCT-----  
 ---ATGTTTCCTTGGGTTCTTGGGAGCA---GCAGGAAGCACTATG---GGCGCAGCGTCA---  
 CTGACGCTGACGGTACAG---GCCAGACAA---TTATTG---TCTGGTATAGTGCAACAGCAGAAC---  
 AATTTG---CTGAGG---GCTATTGAGGCGCAACAGCATATGTTGCAACTCACAGTCTGGGGCATC  
 >AY795905  
 TTCTACTGTGAAACAGGAAGACTGTTTAATAGTACTTGGAAATTTAACACAACCTGACTTGGAAATGATACTAAAG  
 AG-----  
 -----  
 TTAAATAACACGATCACACTCCCATGCAAAATAAAACAAATTATAAACATGTGGCAGGAAGTAGGAAAAGCAA  
 TGTATGCCCCCTCCCATCGCAGGACAAATTAAGTGTATCAAAT---  
 ATTACAGGGCTGATTTTAACAAGGGATGGTGGTAATAAGGGTAATGGGACC-----  
 -----  
 -----  
 GATGACACCACCGAGATCTTCAGACCTGGAGGAGGAGATATGAGGGACAATTGGAGAAGTGAATTATATAAGT  
 ATAAAGTAGTAAAAATTGAACCATTA---GGAATAGCACCCACCAAGGCAAAGAGAAGAGTGGTG-----  
 -----CAGAGAGAAAGAAGAGCA---GTAGGA---TTGGGAGCT---  
 -----TTGCTCTTTGGGTTCTTGGGAGCA---GCAGGAAGCACTATG---GGCGCAGCGTCA---  
 ATAACGCTGACGGTACAG---GCCAGACAA---TTATTG---TCTGGTATAGTGCAAGCAGCAAAAT---  
 AATTTG---CTGAGA---GCTGTGGAGGCGCAACAACATCTGTTGCAACTCACAGTCTGGGGCATC  
 >KJ948657  
 TTCTACTGTAATACAACACAACCTGTTTAATAGTACTTGGCATGTTAATATGACTGGGAAT-----  
 -----GAT---  
 ACTGAGGCTGCTAAAAATATT-----  
 ACAGGAAATGACACAATCACACTCCCATGCAGAATAAAACAAATTATAAACATGTGGCAGGAAGTAGGAAAAG  
 CAATGTATGCCCCCTCCCATCAGAGGAATAATTAGATGTTTCATCAAAT---  
 ATTACAGGGCTGCTATTAACAAGAGATGGGGGT-----  
 -----  
 -  
 AAAGAGAACAATGAGACTGAGATCTTCAGACCTGGAGGAGGAGATATGAGGGATAATTGGAGAAGTGAATTAT  
 ATAAATATAAAGTAGTACAAATTGAACCATTA---GGAGTAGCACCCACCAAGGCAAAGAGAAGAGTGGTG--  
 -----CAAAGAGAAAAAAGAGCAATAACGGGA---  
 TTAGGAGTT-----ATGTTTCCTTGGGTTCTTGGGAGCA---GCAGGAAGCACTATG---  
 GGCGCAGCGTCA---ATAACGCTGACGGTACAG---GCCAGACAA---TTATTG---  
 TCTGGTATAGTGCAACAGCAGAAC---AATCTG---CTGAGG---  
 GCTATTGAGGCGCAACAGCATCTGTTGCAACTCACAGTCTGGGGCATC  
 >KJ948660  
 TTCTACTGTAATACAACACAACCTGTTTAATAATACTGGTATGGCGGGTGATAATTGG-----  
 -----  
 ACTACTAGTTGGAATAATACT-----  
 ACACGAAATGTCAATATCACACTCCCATGCAGAATAAAACAAATTATAAACATGTGGCAGGAAGTAGGAAAAG  
 CAATGTATGCCCCCTCCCATCAATGGACACATTATATGTGCATCAAAT---  
 ATTACAGGGCTGCTATTAACAAGAGATGGTGGTATC-----  
 -----  
 GAGGATAATGGGACTACTATT-----

AGGAATGAGACCTTCAGACCTGGAGGAGGAGATATGAAGGATAACTGGAGAAGTGAATTATATAAATATAAAG  
TAGTAAAAATTGAACCATTA---GGAATAGCACCCACCAAGGCAAAGAGAAGAGTGGTG-----  
-----CAGAGAGAAAAAAGAGCA---TTGGGA---ATAGGAGCT-----  
TTGTTTCCTTGGGTTCTTGGGAGCA---GCAGGAAGCACTATG---GGCGCAGCGGCA---  
CTGACGCTGACGGTACAG---GCCAGACCA---TTATTG---TCTGGTATAGTGGAACAGCAAAAC---  
AATTTG---CTGAGG---GCTATTGAGGCGCAACAGCATCTGTTGCAACTCACAGTCTGGGGCATC  
>HQ595755  
TTCTACTGTAATACAACACAACCTGTTCAATAATACTTGGAAATGGTACTACCTGGTCAAATAACAGGGCAACTA  
AC-----  
-----  
AGCAGCAAAAATATCATCACACTCCCATGCAAAATAAAACAAATTATAAACATGTGGCAGCAGGTAGGAAAAG  
CAATGTATGCCCCCTCCCATCAGAGGACAAATCAGATGTTTCATCAAAT---  
ATTACAGGGCTGCTATTAACAAGAGATGGTGGTAATGATAATAATAAT-----  
-----  
-----  
ACAAATGGGTCCGAGATCTTCAGACCTGGGGGAGGAGATATGAGGGACAATTGGAGAAGTGAATTATATAAAT  
ATAAAGTAGTAACAATTGAACCAGTA---GGAATAGCACCCACCAAGGCAAAGAGAAGAGTGGTG-----  
-----CAGAGAGAAAAAAGAGCA---ATAGGA---ATAGGAGCT---  
-----GTGTTTCCTTGGGTTCTTGGGAGCA---GCAGGAAGCACTATG---GGCGCAGCATCA---  
ATAACGCTGACGGTACAG---GCCAGACAA---TTATTG---TCTGGTATAGTGCAACAGCAGAAC---  
AATTTG---CTGAGG---GCTATTGAGGCGCAACAGCATATGTTGCAACTCACAGTCTGGGGCATC  
>KP109515  
TTCTACTGTAATACAACACAACCTGTTCAATAATACTTGGAAATGGTACTACCTGGTCAAATAACAGGGCAACTA  
ACAGC-----  
-----  
AGCAAAAATATCATCACACTCCCATGCAAAATAAAACAAATTATAAACATGTGGCAGCAGGTAGGAAAAGCAA  
TGTATGCCCCCTCCCATCAGAGGACAAATCAGATGTTTCATCAAAT---  
ATTACAGGGCTGCTATTAACAAGAGATGGTGGTAATGATAATAATAAT-----  
-----  
-----  
ACAAATGGGTCCGAGATCTTCAGACCTGGGGGAGGAGATATGAGGGACAATTGGAGAAGTGAATTATATAAAT  
ATAAAGTAGTAACAATTGAACCAGTA---GGAATAGCACCCACCAAGGCAAAGAGAAGAGTGGTG-----  
-----CAGAGAGAAAAAAGAGCA---ATAGGA---ATAGGAGCT---  
-----GTGTTTCCTTGGGTTCTTGGGAGCA---GCAGGAAGCACTATG---GGCGCAGCATCA---  
ATAACGCTGACGGTACAG---GCCAGACAA---TTATTG---TCTGGTATAGTGCAACAGCAGAAC---  
AATTTG---CTGAGG---GCTATTGAGGCGCAACAGCATATGTTGCAACTCACAGTCTGGGGCATC  
>KF725915  
TTCTACTGTAATTTAACACAGCTGTTTAATAGTACTTGGCGGAAAAGTAATAGTACTAGGCAGATGAATAACA  
CT-----  
-----GGAACA-----  
AGGTTAAATGGAACCATCATACTCCCATGCAGAATAAAACAAATTATAAACAGGTGGCAAGGAGTAGGAAGAG  
CAATGTATGCCCCCTCCCATCAGAGGACCAATTAATTGTTTCATCAAAG---  
ATTACAGGGCTACTATTAATAAGAGATGGTGGTAAACCAATAAT-----  
-----  
-----  
TCTACAGAGATCTTCAGGCCTGGAGGGGAAATATGAAGGACAATTGGAGAAGTGAATTATATAAATATAAAG  
TAGTAAAAATTGAGCCATTA---GGAATAGCACCCACCAAGGCAAAGAGAAGAGTGGTG-----  
-----CAGAGAGAAAAAAGAGCA---GTTGGAGTAATAGGAGCT-----  
ATGTTTCCTTGGGTTCTTGGGAGCA---GCAGGAAGCGCTATG---GGCGCAGCGTCA---  
CTGACGCTGACGGTACAG---GCCAGACAA---TTATTG---TCTGGTATAGTGCAACAGCAGAAC---  
AATCTG---CTGAGA---GCTATTGAGGCGCAACAGCATATGTTGCAACTCACAGTCTGGGGCATC  
>KF725918  
TTCTACTGTGATTCATCAAACTGTTTAATAGTACTTGGCATGTTAATAGCACTGAAGGAAATAGC-----  
-----  
-----  
ACTAATGAAGAAATCATACTCCCATGTAAATAAAGCAAATTATAAACATGTGGCAGAAAGTAGGAAAAGCAA  
TGTATGCTCCTCCCATCAAAGGGGAAATTAAGTGTATCAAAAC---  
ATTACAGGACTGCTATTAACAAGGGATGGTGGTAATAATAGGACC-----  
-----  
-----

AACGAGACCTTTAGACCTGTGGGAGGAGATATGAGGGACAATTGGAGAAGTGAATTATATAAAATATAAAGTAG  
TAAAAATTGAACCATTA---GGAGTAGCACCCACCAAGGCAAAGAGAAGAGTGGTG-----  
-----CAGAGAGAAAAAGAGCA---GTGGGAACGATGGGAGCT-----  
ATGTTCTTGGGTTCTTGGGAGCA---GCAGGAAGCACTATG---GGCGCAGCGTCA---  
ATAACGCTGACGGTACAG---GCCAGACAA---TTATTG---ACTGGTATAGTGCAACAGCAGAAC---  
AATTTG---CTGAAG---GCTATTGAGGCGCAACAGCATCTGTTGCAACTCACAGTCTGGGGCATC  
>KF725946  
TTCTACTGTAACACAACAAAACCTGTTTAATAGTATGTGGAATAGTAGTACTTGGAGTAACAATAGTATTGAAG  
ACTCA-----  
-----AAT---  
AACACTGAGAACAATATCACACTCCCATGCAGGATAAAAACAAATTATAAACATGTGGCAGAAGGTAGGAAAGG  
CAATGTATGCCCTCCCATCAGTGGACAAATTAGGTGTTTCATCAAAT---  
ATTACAGGGCTACTATTAACAAGAGATGGTGGTAATGATAGTAACACC-----  
-----  
-----  
AATAGCAAGGAGACCTTCAGACCTGGAGGAGGAGATATGAGGGACAATTGGAGAAGTGAGTTATATAAAATATA  
AAGTAGTAAAAATTGAACCATTA---GGAATAGCACCCACCAAGGCAAAGAGAAGAGTGGTG-----  
-----CAGAGAGAAAAAGAGAGCA---GTGGGA---ATAGGAGCG-----  
---TTGTTCTTGGGTTCTTGGGAGCA---GCAGGAAGCACTATG---GGCGCAGCGTCA---  
ATAACGCTGACGGTACAG---GCCAGACTA---TTATTG---TCTGGTATAGTGCAAGCAGCAAAAC---  
AATTTG---CTGAGG---GCTATTGAGGCGCAACAACACTTGTGCAACTCACAGTCTGGGGCATC  
>KF725977  
TTCTACTGTAATACAACACAACCTATTTAAGGGGTCTTGGAAATGGTACTGAGTCTTGGAAATGATACTGAGTCTT  
GGAATGGT-----  
-----  
AATGACACCATTCTCGAAATCCCATGCAGAATAAAAACAAATTGTAAACATGTGGCAGGAAGTAGGAAAAGCAA  
TGTATGCCCCCTCCCATCAGAGGACAAATTAGCTGTTCTTCAAAAT---  
ATTACAGGATTACTATTAACAAGAGATGGTGGTAACACCAATAGA-----  
-----  
-----  
ACCGACGAGACTTTTAGACCTGGAGGAGGAGATATGAGGGACAATTGGAGGAGTGAATTATATAAAATATAAAG  
TAGTAAAAATTGAACCATTA---GGAATAGCACCCACCAAGGCAAAGAGAAGAGTGGTG-----  
-----CAGAGAGAAAAAGAGAGCA---GTGGGA---CTAGGAGCT-----  
ATGTTCTTGGGTTCTTGGGAGCA---GCAGGAAGCACTATG---GGCGCAGCGTCA---  
CTGACGCTGACGGTACAG---GCCAGACTA---TTATTG---TCTGGTATAGTGCAACAGCAGAAC---  
AATTTG---CTGAGA---GCTATTGAGGCGCAACAACATTTGTTGCAACTCACAGTCTGGGGCATC  
>KF726002  
TTCTACTGTAATACAGCACAACCTGTTTAATAGTACTTGGAAATACAACACAACCTTAATAATAATAACTGGAG  
GGGGC-----  
-----  
GACAAATGAACTATCACACTCCAATGTAAATAAAAACAAATTATCAACATGTGGCAGGGAGTAGGAAAAGCAA  
TGTATGCCCCCTCCCATTAAGGACAAATTAGATGCACATCAAAT---  
ATTACAGGGCTACTATTAACAAGAGATGGTGGTGGGAACGAGAGC-----  
-----  
-----  
ACGAACGAGACCTTCAGACCTGGAGGAGGAGATATGAGGGATAATTGGAGAAGTGAATTATACAAATATAAAG  
TAGTGAAAATTGAACCATTA---GGAGTAGCACCCACCAAGGCAAAGAGAAGAGTGGTG-----  
-----CAGAGAGAGAAAAGAACA---GTGGGA---CTAGGAGCT-----  
CTGTTCTTGGGTTCTTGGGAGCA---GCAGGAAGCACTATG---GGCGCAGCGTCA---  
GTAACGCTGACGGTACAG---GCCAGACTA---TTATTG---ACTGGTATAGTGCAACAGCAGAAAT---  
AATTTG---CTGAGG---GCTATTGAGGCGCAACAACATCTGTTGCAACTCACAGTCTGGGGCATC  
>KF726004  
TTCTACTGTAATACAACAGGACTGTTTGATAGTACTTGGAAATAACTGAAAAAGTAAATGGCACT-----  
-----  
-----  
AACAAATGACACCATCACACTCCCATGCAGAATAAGGCAATTTATAAACATGTGGCAGAAAGTAGGAAAAGCAA  
TGTATGCCCCCTCCCATTAAGGACAAATTAAATGTTTCATCAAAT---  
ATTACAGGACTGATATTAACAAGAGATGGTGGTAATAATAACAGTACC-----  
-----  
-----

AACGAGACCGAGACCTTCAGACCTGCAGGAGGAAATATGAGGGACAATTGGAGAAGTGAATTATATAAAATACA  
AAGTAGTAAAAATTGAACCATTA---GGATTAGCACCCACCAAGGCAAAGAGAAGAGTGGTG-----  
-----CAGAGAGAAAAAAGAGCA---GTGGGA---TTAGGAGCT-----  
---ATGTTCCCTTGGGTTCTTGGGAGCA---GCAGGAAGCACTATG---GGCGCAGCGTCA---  
CTGACGCTGACGGTACAA---GCCAGACAA---TTATTG---TCTGGTATAGTGCAAGCAGCAAAAC---  
AATTTG---CTGAGA---GCTATTGAGGCGCAACAACATATGTTGCAACTCACAGTCTGGGGCATC  
>KF726016  
TTCTACTGTAATACAACACAACACTGTTTAATAGTACTTGGATTAATGATACTAGGAATGATACA-----  
-----  
-----  
GGAAATGAAACAATCACACTCCCATGCAGAATAAAACAAATTATAAACATGTGGCAGGAGGTAGGAAAAGCAA  
TGTATGCCCCCTCCCATCAGTGGACAAATTAGATGTTTCATCAAAT---  
ATTACAGGGCTGATATTAACAAGAGATGGTGGGCAGAATAAACA---  
-----  
-----  
AATGACACTGAGATCTTCAGACCTGGAGGAGGAAATATGAAAGACAACCTGGAGAAGTGAATTATATAAAATATA  
AAGTAGTAAGAATTGAACCATTA---GGAGTAGCACCCACCAAGGCAAAGAGAAGAGTGGTG-----  
-----CAAAGAGAAAAAAGAGCA---GTGGGA---ATAGGAGCT-----  
---TTGTTCCCTTGGGTTCTTGGGAACA---GCAGGAAGCGCTATG---GGCGCAGCGTCA---  
CTGACGCTGACGGTACAG---GCCAGGCAA---TTATTG---TCTGGTATAGTGCAACAGCAAAAC---  
AATTTG---CTGAGG---GCTATTGAGGCGCAACAGCATCTGTTGCAACTCACAGTCTGGGGCATC  
>KF726018  
TTCTACTGTAATACAACACAACACTGTTTAATAGTACTTGGAAATAATACAAATAACAATGAG-----  
-----  
-----  
GGAAATGGCACAATCACACTCCAATGTAGAATAAAACAAATTATAAACATGTGGCAGGAAGTAGGAAAAGCAA  
TGTATGCCCCCTCCCATCAGTGGACAAATTAAGTGTTCATCAAAT---  
ATTACAGGACTTCTATTAACAAGGGATGGTGGTAGTACTAATGAGACG-----  
-----  
-----  
ACCACCGAGACCTTCAGACCTGGAGGGGGAAATATGAAGGACAATTGGAGAAGTGAATTATATAAAATACAAAG  
TAGTAAAAATTGAACCATTA---GGAGTAGCACCCACCAAGGCAAAGAGAAGAGTGGTG-----  
-----CAGAGAGAAAAAAGAGCA---GTGGGAGCACTAGGAGCT-----  
ATGTTCCCTTGGGTTCTTGGGAGCA---GCAGGAAGCACAATG---GGCGCGGCGTCA---  
CTGACGCTGACGGTACAG---GCCAGACAA---TTATTG---TCTGGTATAGTGCAACAGCAGAAC---  
AATCTG---CTGCAA---GCTATTGAGGCGCAACAGCATCTGTTGCAACTCACAGTCTGGGGCATT  
>KF726021  
TTCTACTGTAATTCATCAGCACTGTTTAATAGTACTTGGGATGTTAATAGCACTGGATTAAATAGC-----  
-----  
-----  
ACTGGGGGAAATATCACACTCCCATGTAGAATAAAACAAATTATAAACATGTGGCAGACAGTAGGAAAAGCAA  
TGTATGCCCCCTCCCATCAGCGGGATAATTAAGTGTACATCAAAC---  
ATTACAGGACTGCTATTAACGAGAGATGGTGGTGGTAATAATAGCACC-----  
-----  
-----  
AACGAGAACGAGACCTTCAGACCTGCAGGAGGAGATATGAGGGACAATTGGAGAAGTGAATTATATAAAATATA  
AAGTAGTAAAAATTGAACCATTA---GGAGTAGCACCCACCAAGGCAAAGAGAAGAGTGGTG-----  
-----CAGAGAGAAAAAAGAGCA---GTGGGAACACTAGGAGCT-----  
---ATGTTCCCTTGGGTTCTTGGGAGCA---GCAGGAAGCACTATG---GGCGCAGCGTCA---  
ATGACGCTGACGGTACAG---GCCAGACAA---TTATTG---ACTGGTATAGTGCAACAGCAGAAC---  
AATTTG---CTGAAG---GCTATTGAGGCGCAACAGCATCTGTTGCAACTCACAGTCTGGGGCATC  
>MH234643  
TTCTACTGTAATTCACAAAACACTGTTTAATAGTACTTGGAAATGGGAATGATACTGAAGGGTCAAATAACACTG  
AA-----  
-----  
-----  
GGAAATGACACACTCACACTCCCATGCAGAATAAAACAAATTATAAACATGTGGCAGGAAGTAGGAAAAGCAA  
TGTATGCCCCCTCCCATCCAAGGACAAATTAGATGTTTCATCAAAT---  
ATTACAGGGCTGCTATTAACAAGAGATGGTGGTAATGGCAGCGAG-----  
-----  
-----

ACCACCGAGATCTTCAGACCTGGAGGAGGAGATATGAGGGATAATTGGAGAAGTGAATTATATAAATATAAAG  
TAGTAAAAATTGAACCATTA---GGAGTAGCACCCACCAAGGCCAAAAGAAGAGTGGTG-----  
-----CAGAGAGAGAAAAGAGCA---GTGGGA---ATAGGAGCT-----  
TTGTTCTTGGGTTCTTGGGAGCA---GCAGGAAGCACTATG---GGCGCAGCGTCA---  
ATGACGCTGACGGTACAG---GCCAGACAA---TTATTG---TCTGGTATAGTGCAACAGCAGAAC---  
AATTTG---CTGAGG---GCTATTGAGGCGCAACAGCATCTGTTGCAACTCACAGTCTGGGGCATT  
>FJ647145  
TTCTACTGTAACCTTAACACAACCTGTTTAATAGTACTTGGAAATGTAAATGGTACTGAAGGGTCAAATAAC----  
-----  
-----  
ACTGACAAAAATATCACACTCCCATGCAGGATAAAAACAAATTATAAACATGTGGCAGACAGTAGGAAAAGCAA  
TGTATGCCCCCTCCCATCAGAGGACAAATTAGATGTTTCATCAAAT---  
ATTACAGGGCTGCTATTAAACAAGAGATGGTGGTAATAACGAGAAC-----  
-----  
-----GATCCCGAAAAAT---  
TCACCCGGAGGAGGAGATATGAGGGACAATTGGAGAAGTGAATTATATAAATATAAAGTATTAAAAATTAAAG  
CATTA---GGAGTAGCACCCCCCAAGGCCAAGAGAAGAGTGGTG-----  
-----CAAAGAGTAAAAAGAGCA---GTGGGA---ATAGGAGCT-----  
GTGTTCTTTGGGTTCTTGGGAGCA---GCAGGAAGCACTATG---GGCGCAGCGTCA---  
ATGACGCTGACGGTACAG---GCCAGACTA---TTATTG---TCTGGTATAGTGCAACAGCAAAAC---  
AATTTG---CTGAAG---GCTATTGAGGCGCAACAGCACCTGTTGCAACTCACAGTCTGGGGCATC  
>MH234640  
TTCTACTGTAATACAACACAACCTGTTTAATAGTACTTGGGATAATAGTACTTTGAGTACTGGGAATGATGATA  
AT-----  
-----  
AACACTGGGATTATCACACTCCCATGTAAAATAAAAACAAATTATAAACATGTGGCAGGAAGTAGGAAAAGCAA  
TGTATGCCCCCTCCCATCAGAGGACAAATTAACTGCTTATCAAAC---  
ATTACAGGGCTGCTATTAAACAAGAGATGGTGGTAATAACACAAACGGG-----  
-----  
-----  
ACCACCGAGATCTTCAGACCTGGAGGAGGAAATATGAGGGACAATTGGAGAAGTGAATTATATAAATATAAAG  
TAGTAAAAATTGAACCATTA---GGAGTAGCACCCACCAGGGCAAAGAGAAGAGTGGTG-----  
-----CAGAGAGAAAAAAGAGCA---GTGGGA---ATAGGAGCT-----  
GTGTTCTTGGGTTCTTGGGAGCA---GCAGGAAGCACTATG---GGCGCAGCGTCA---  
ATAACGCTGACGGTACAG---GCCAGACTA---TTATTG---TCTGGTATAGTGCAACAGCAGAAC---  
AATCTG---CTGAGG---GCTATTGAGGCGCAACAGCATCTGTTGCAACTCACAGTCTGGGGCATC  
>AY505010  
TTCTACTGTAATACAACACAACCTGTTTAATAGTACTTGGAAATAACACTGAAGAGTCAGATAACACGGAA----  
-----  
-----  
GGAAATGGCACAATCACACTCCCATGTAGAATAAAAACAAATTATAAACATGTGGCAGGAAGTAGGAAAAGCAA  
TGTATGCCCCCTCCCATCGCAGGACAAATTAGATGTTTCATCAAAT---  
ATTACAGGGCTTCTATTAAACAAGAGATGGTGGTAATAGTACTAAT-----  
-----  
-----  
GGGAGTAGGGAGGTCTTCAGACCTGGAGGAGGAGATATGAGGGACAATTGGAGAAGTGAATTATATAAATACA  
AAGTAGTAAAAATTGAGCCATTA---GGAGTAGCACCCACCAAGGCCAAGAGAAGAGTGGTG-----  
-----CAGAGAGAAAAAAGAGCA---GCA-----ATAGGAGCT-----  
---ATGTTCTTGGGTTCTTGGGAGCA---GCAGGAAGCACTATG---GGCGCAGCGGCA---  
GTGACGCTGACGGTACAG---GCCAGGCTA---TTATTG---TCTGGTATAGTGCAACAGCAAAAC---  
AATTTG---CTGAGG---GCTATTGAGGCGCAACAGCATATGTTGCAACTCACAGTCTGGGGCATC  
>KU168257  
TTCTACTGTAATACATCAGGGCTGTTTAATAGTACTTGGTATAAGAATGATACTACTTGGAAATGGTACAGAAA  
AA-----  
-----  
TCAAAATGGCACTATCACACTCCCATGCAGAATAAAAACAAATTATAAACAGATGGCAGGAAGTAGGAAAAGCAA  
TGTATGCCCCCTCCTATCAGTGGATCAATTAATTGTTTCATCACAT---  
ATTACAGGGCTGCTATTAGTAAGAGATGGCGGCAATACCAGTAGT-----  
-----  
-----

AATAACGAGACTTTTCAGACCTGGAGGAGGAGATATGAGGGACAATTGGAGAAGTGAATTATATAAATATAAAG  
TAGTAAGAATTGAGCCATTA---GGAGTAGCACCCACCAAGGCAAAGAGAAGAGTGGTG-----  
-----CAGAGAGAAAAAAGAGCA---GTGGGAACGCTAGGAGCT-----  
ATGTTCCCTTGGGTTCTTGGGAGCA---GCAGGAAGCACTATG---GGCGCAGCATCA---  
CTAACGCTGACGGTACAG---GCCAGACTA---TTATTG---TCTGGTATAGTGCAACAGCAGAAC---  
AATCTG---CTAAGA---GCTATTGAGGCGCAACAGCATCTGTTGCAACTCACAGTCTGGGGCATC  
>KU168258  
TTCTACTGTAATACAACACAACCTGTTTAATAGTACTTGGGTAAATGGTACTTGAATGATACTGAAGCA----  
-----  
-----  
CGAAAAGAAAATATCACACTCCCATGCAGAATAAAACAAATTATAAACATGTGGCAGGAAGTAGGAAAAGCAA  
TGTATGCCCCCTCCCATTGCAGGAAAAATTAGCTGTTTCATCAAAT---  
ATTACAGGGCTGCTATTAACAAGAGATGGTGGTATTGATAATAAC-----  
-----  
-----  
AACAAGAATGAGACCTTCAGACCTGGAGGAGGAGATATGAGGGACAATTGGAGAAGTGAATTATATAAATATA  
AAGTAGTAAAAATTGAACCATTA---GGAGTAGCACCCACCAAGGCAAAGAGAAGAGTGGTG-----  
-----CAGAGAGAAAAAAGAGCA---CCAGTA---CTAGGAGCT-----  
---TTGTTCCCTTGGGTTCTTAGGAGCA---GCAGGAAGCGCTATG---GGCGCAGCGGCA---  
TTAACGCTGACGGTACAG---GCCAGACTA---TACTG---TCTGGTATAGTGCAACAGCAGAAT---  
AATCTG---CTGAGG---GCTATTGAGGCGCAACAGCACCTGTTGCAACTCACAGTCTGGGGCATC  
>KU168259  
TTCTATTGTAATTCAACACAACCTGTTTAGTAGCACTTGAATACGACTAAAATTTGGAATGATACTGACACTA  
AAGGA-----  
-----AATAGC-----  
ACCACCAATGACACCATCATACTCCCATGTAAAATAAGACAAATTATAAACATGTGGCAGGAAGTAGGAAAAG  
CAATGTATGCCCCCTCCCATCGAAGGACTAATTAGTTGTTTCATCAAAT---  
ATTACAGGGCTGTTATTAACAAGAGATGGAGGTAATAATAGCACT-----  
-----  
-----  
AATGAGTCTGAGATCTTCAGACCTGGAGGGGGAGATATGAGGGACAATTGGAGAAGTGAATTATATAAATATA  
AAGTAGTAACAATTGAACCATTA---GGAGTAGCACCCACCAAGGCAAAGAGAAGAGTGGTG-----  
-----CAGAGAGAAAAAAGAGCA---GTGGGAATGTTAGGAGCC-----  
---ATGTTCCCTTGGGTTCTTGGGAGCA---GCAGGAAGCACTATG---GGCGCAGCGTCA---  
ATAACGCTGACGGTACAG---GCCAGGCAA---TTATTG---ACTGGTATAGTGCAACAGCAGAAC---  
AATCTG---CTGAGG---GCTATTGAGGCGCAACAGCACATGTTGCAACTCACGGTCTGGGGCATT  
>JF680931  
TTCTACTGTAACACAACAGGATTGTTTAATAGTACTTGGCCAGTTAATAGTAATTGGACAGAACTAATGGTA  
CT-----  
-----  
AACAGGTCAGAGGTCATCACTCTCCCATGCAGGATAAAACAAATTATAAACATGTGGCAGGAAGTAGGAAAAG  
CAATGTATGCTCCTCCCATCCAAGGGCCAATTAGCTGTTCTCTCAAAT---  
ATTACAGGGCTACTATTAACAAGAGATGGTGGTGGGGGTAACGAAACC-----  
-----  
-----  
AACACCACCACTGAGATCTTCAGACCTGGAGGAGGAGACATGAGGGACAATTGGAGAAATGAATTATATAAAT  
ATAAAGTAGTACAAATTGAACCATTA---GGAGTAGCACCCACCATGGCAAAGAGAAGAGTGGTG-----  
-----CAGAGAGAAAAAAGAGCA---GTGGGA---ATAGGAGCT---  
-----CTGTTCCCTTGGGTTCTTGGGAGCA---GCAGGAAGCACTATG---GGCGCAGCGTCA---  
TTGACGCTGACGGTACAG---GCCAGACAA---TTGCTG---TCTGGTATAGTGCAACAGCAGAAC---  
AACTTG---CTGAGG---GCTATTGAGGCGCAACAGCACCTGTTGCAACTCACAGTCTGGGGCATT  
>KC834604  
TTCTACTGTAATACAACACAACCTGTTTAACAGTACTTGAATTTTTCTAATTCAACACACCTGTTTAATTGGA  
CTGGGTCAAAT-----  
-----  
AACACTGAGCCTATCACACTCCCATGCAGAATAAAACAAATTATAAACATGTGGCAGGAAGTAGGAAAAGCAA  
TGTATGCCCCGCCCATCAGAGGAGAAATTAAGTGTTCATCAAAT---  
ATTACAGGGGTGCTGCTAGTAAGAGATGGTGGTAAAGAAAACAGC-----  
-----  
-----

ACTAGCGAGATCTTCAGACCTGGAGGAGGAGATATGAGGGACAATTGGAGAAGTGAATTATATAAATATAAAG  
TAGTACAAATTGAACCATTA---GGAGTAGCACCCACCAAGGCAAAGCGAAGAGTGGTG-----  
-----CAAAGAGAAAAAAGAGCA--GTGGGA--ATAGGAGCT-----  
GTGCTCCTTGGGTTCTTGGGAGCA---GCAGGAAGCACTATG---GGCGCAGCGTCA---  
CTGACGCTGACGGTACAG---GCCAGACTA---TTATTG---TCTGGTATAGCGCAACAGCAGAGC---  
AATTTG---CTGAGA---GCTATTGAGGCGCAACAACATCTGTTGCAACTCACAGTCTGGGGCATT  
>KC834602  
TTCTACTGTAATACAACACAGCTGTTTAATAGTACTTGGCTGTCTAATGGCACTAGGAATGATACTGAAAAA-  
-----  
-----  
TTAAATGACATTATCACACTCCCATGCAGAATAAAACAAATTGTAAACAGGTGGCAAGAAGTGGGAAAAGCAA  
TGTATGCCCCCTCCCATCAGCGGACAAATTAGGTGTTTCATCAAAT---  
ATTACAGGGTTGCTATTAACAAGAGATGGTGGTAGCAATGTCACC-----  
-----  
-----  
ACCGAGACCTTCAGACCTGAAGGAGGAAATATGAAGGACAATTGGAGAAGTGAATTATATAAATATAAAGTAG  
TAAAACTTGAGCCATTA---GGAATAGCACCCACCAAGGCAAAGAGGCGAGTGGTG-----  
-----CAGAGAGAAAAAGA-----GTGGCA---CTAGGAGCT-----  
TTGTTCCCTTGGGTTCTTGGGAGCA---GCAGGAAGCACTATG---GGCGCAGCGTCA---  
ATAACGCTGACGGTACAA---GCCAGACTA---CTATTG---GCTGGTATAGAGCAACAGCAGAAC---  
AATCTG---CTGAGA---GCTATTGAGGCGCAACAACATCTGTTGCAACTCACTGTCTGGGGCATC  
>KT452273  
TTCTACTGTAATACAACAAAACTGTTTAATAGTACTTGGCCAGTTAATAGTACTGGGAATAGTACTGAA----  
-----  
-----  
GAAAAAGAAAATATCACACTCCCATGCAGAATAAAACAAATTATAAACATGTGGCAGGAAGTAGGAAAAGCAA  
TGTATGCCCCCTCCCATCAAAGGACAAATTAGATGTTTCATCAAAC---  
ATTACAGGGCTGCTATTAACAAGAGACGGTGGTGTCTACCAACAAT-----  
-----  
-----  
ACCACCGAGATCTTCAGACCTGGAGGAGGAAATATGAAAGACAATTGGAGAAGTGAATTATATAAATATAAAG  
TAGTGAAAATTGAACCATTA---GGGGTAGCACCCACCAAGGCAAAGAGGAGAGTGGTG-----  
-----CAAAGAGAAAAAAGAGCA--GTGGGA---TTTGGAGCT-----  
CTGTTCCCTTGGGTTCTTGGGAGCA---GCAGGAAGCACTATG---GGCGCAGCGTCA---  
GTGACGCTGACGGTACAA---GCCAGACAA---TTATTG---TCTGGTATAGTGCAGCAGCAAAAC---  
GATTTG---CTGAGA---GCTATTGAGGCGCAACAACATCTGTTGCAACTCACAGTCTGGGGCATC  
>KT452314  
TTCTACTGTAATACAACAAAACTGTTTAATAGTACTTGGAGTAATAGTTCTGAACTGATTAATGGTACTGAAC  
TG-----  
-ACGATGAATGGTACT-----  
GGGGAACATGAAAATATCACCTTCCATGCAGGATAAAACAAATTGTAAACATGTGGCAGGAAGTAGGAAAAG  
CAATGTATGCCCCCTCCCATAGAGGACAAATTTTATGTACATCAAAC---  
ATTACAGGGCTGATATTAACAAGAGATGGTGGAAATGTTAGTGAGAGC-----  
-----  
-----  
AATGGCACGGAGATCTTCAGACCTGGAGGAGGAGACATGAGGGACAATTGGAGAAGTGAATTATATAAATATA  
AAGTAATAAGAATTGAACCATTA---GGAATAGCACCCACCAAGGCAAAGAGAAGAGTGGTG-----  
-----CAGAGAGAAAAAAGAGCA--GTGGGT---TTTGGAGCT-----  
---ATGTTCCCTTGGGTTCTTGGGAGCA---GCCGGAAGCACTATG---GGCGCAGCGTCA---  
GTGACGCTGACGGTACAG---GCCAGACTA---TTATTG---TCTGGTATAGTGCAACAGCAGAAC---  
AATTTG---CTGAGG---GCTATTGAGGCGCAACAGCATCTGTTGCAACTCACGGTCTGGGGCATC  
>KT452341  
TTCTACTGTAATACAACAAGGTTGTTTAATAGTATTTGGAATAAACTGAGATTGACAGTAATGCTACAGAAT  
CAAAT-----  
-----  
AGCAATGACACTATCACACTCCCATGCAGAATAAAACAAATTATAAACAGATGGCAAGAAGTAGGAAAAGCAA  
TGTATGCCCCCTCCCATCAGTGGACAGATTAGGTGTTTATCAAAT---  
ATTACAGGGCTGATATTAACAAGAGATGGAGGTAATAAAACGAAC-----  
-----  
-----

GAGACCAACATCGAAGTCTTCAGACCTGAAGGAGGAGATATGAGACACAATTGGAGAAGTGAATTATATAAGT  
ATAAAGTAGTAAGAATTGAGCCATTA---GGGATAGCACCCACCAGGGCAAAGAGAAGAGTGGTG-----  
-----GGAAGAGAAAAAAGAGCG---GTCACA---CTAGGAGCT---  
-----ATGTTCCCTTGGGTTCTTAGGAGCA---GCAGGAAGCACTATG---GGCGCAGCGTCA---  
ATGACGCTGACGGTACAG---GCCAGACAA---TTATTG---TCTGGTATAGTGCAGCAGCAAAAT---  
AATTTG---CTGAGA---GCTATTGAGGCGCAACAGCATATGTTGCAACTCACAGTCTGGGGCATC  
>KT452551  
TTTTACTGTAATTCAACACCATTGTTTAATAGTATTTGGTATGATAATGGAACAAGCATCGCTACAGGAAATG  
GGACA-----  
-----  
GTAAATAATACTATCATACTCCAATGCAGAATAAAACAAATTATAAACATGTGGCAAAAAGTAGGAAAAGCAA  
TGTATGCTCCTCCCATTAAAGGACTAATTAAATGTTTCATCAAAT---  
ATTACGGGACTGCTATTAACAAGAGATGGTGGTAAAAACCAAACC-----  
-----  
-----  
AATGACAGTGAGACCTTCAGGCCGGGAGGAGGAGATATGAGGGACAATTGGAGAAGTGAAC TATACAAATATA  
AAGTAGTAAAAATTGAACCATTA---GGAGTAGCACCCACCAAGGCAAAAAGAAGAGTGGTG-----  
-----CAGAGAGAAAAAAGAGCA---ATAACA---CTGGGAGCT-----  
---ATGTTCCCTTGGGTTCTTGGGAGCA---GCAGGAAGCACTATG---GGCGCAGCGTCA---  
ATGACGCTGACGGTACAG---GCCAGACAA---TTATTG---TCTGGTATAGTGCAACAGCAAAAC---  
AATTTG---CTGAGA---GCTATTGAGGCGCAACAGCATCTGTTGCAACTCACAGTCTGGGGCATC  
>KT452612  
TTCTACTGTAATACAACACCGCTGTTTAATAGTACTTGGAAGTGGAATAATGGTACTGGAGGGTCAAGTATCA  
CTGAAGGAAAT-----  
-----  
CTCACAGAACCTATCACACTCCAATGCAAAATAAAACAAATTATAAACATGTGGCAGGAAGTAGGAAAAGCAA  
TGTATGCCCCCCCCCATCCAGGGACAAATTAACTGTTCCCTCAAAT---  
ATTACAGGGCTGATATTGACAAGAGATGGAGGTGACGATAATACG-----  
-----  
-----  
CAAAATGACACCTTCAGACCTGCAGGAGGAGATATGAGGGACAATTGGAGAAGTGAATTATATAAAATATAAAG  
TAGTAAGAATTGAACCATTA---GGAATAGCACCTTCAGGGCAAAGAGAAGAGTGGTG-----  
-----CAGAGAGAAAAAAGAGCA---GTGGGA---TTTGGAGCT-----  
TTGTTCCCTTGGGTTCTTGGGAGCA---GCAGGAAGCACTATG---GGCGCAGCGTCA---  
GTGGCGCTGACGGTACAG---GCCAGATCA---TTATTG---TCTGGTATAATGCAGCAGCAAAAC---  
AACTTG---CTGAGG---GCTGTTGAGGCGCAACAGCATCTGTTGCAACTCACAGTCTGGGGCATC  
>KT452359  
TTCTACTGTAATTCAACACAACCTGTTTAATAGTACTTGGAACTACTACTGAAGGGTTAAATAGCACTGAAGGA-  
-----  
-----  
GATGACACAACAATCACACTCCCATGCAGAATAAAACAAATTATAAACATGTGGCACAAAGTAGGCAGAGCAA  
TGTATGCCCTCCCATCCAAGGACAAATTAGATGTTTCATCAAAT---  
ATTACAGGGCTGCTATTAACAAGAGATGGTGGTAAGAATGTGAGC-----  
-----  
-----  
AATATCAGCGAGACCTTCAGACCTGGAGGAGGAAATATGAAGGACAATTGGAGAAGTGAATTATATAAAATATA  
AAGTAGTAAGAATTGAACCTTTA---GGAATAGCACCCACCAAGGCAAAGAGAAGAGTGGTG-----  
-----CAAAGAGAGAAAAAGAGCA---GTGGGA---ATGGGAGCT-----  
---CTGTTCCCTTGGGTTCTTGGGAACA---GCAGGAAGCACTATG---GGCGCAGCGTCA---  
TTGACGCTGACGGTACAG---GCCAGACAA---TTATTG---TCTGGTATAGTGCAGCAGCAGAAT---  
GATATG---CTGAGA---GCTATTGAGGCGCAACAGCACCTGTTGCAACTCACAGTCTGGGGCATC  
>KT452109  
TTCTACTGTAATACAACACAACCTGTTCACTAGTACTTGGAAAAATTCTAGTGATGGGAACGTTACAAGAAGT-  
-----  
-----  
GAAAAATGACACAATCACACTCCCATGCAGAATAAAACAAATTATAAACATGTGGCAGGAAGTAGGAAAAGCAA  
TGTATGCCCCCTCCCATCAGAGGACACATTA ACTGTTTCATCAAAT---  
ATTACAGGGCTGCTATTAACAAGAGATGGTGGGGGCAACGAGAGCAGA-----  
-----  
-----

GAAAATGAAACCTTCAGACCTGGAGGGGGAGATATGAAGGATAATTGGAGAAGTGAACCTATATAAATATAAAG  
TAGTAAAAATTGAACCATTA---GGAATAGCACCCACCGAGGCACAGAGAAGAGTGGTG-----  
-----CAGAGAGAAAAAAGAGCA---GTGGGA---CTAGGAGCT-----  
ATGCTCTTTGGGTTCTTGGGAGCA---GCAGGAAGCACTATG---GGCGCAGCGTCA---  
TTGACGTTGACGGTACAA---GCCAACTA---TTATTG---TCTGGTATAGTGCAACAGCAGAAT---  
AATTTG---CTGAGA---GCTATTGAGGCGCAACAGCATATGTTGCAACTCACAGTCTGGGGCATC  
>KT452090  
TTCTACTGTAACCTCATCACAATTGTTTAATAGTACTTGGAAATCTTAATGATACTTGGAAATGGTACTAGTGAC-  
-----  
-----  
ACCAATGAAAATATTACACTCCCATGCAGAATAAAACAAATCATAAACCTGTGGCAGAAAGTAGGAAAAGCAA  
TGTATGCCCCCTCCCATCAGTGGATGGATTAAGTGTTCATCAAAT---  
ATTACAGGGCTGCTATTAAACAAGAGATGGTGGTGGTAATAATGAG-----  
-----  
-----  
AATACTAGTGAGACCTTCAGACCTGGAGGAGGAAATATGAAGGACAATTGGAGAAGTGAATTGTACAAATACA  
AAGTAGTAAAAATTGAACCATTA---GGAGTAGCACCCACCAGGGCAAAGAGAAGAGTGGTG-----  
-----CAGAGAGAAAAAAGAGCA---GTGGGAACACTGGGAGCT-----  
---ATATTCCTTGGGTTCTTGGGAACA---GCAGGAAGCACTATG---GGCGCAGCGTCA---  
GTGACGCTGACGGTACAA---GCCAGACAA---TTATTG---TCTGGTATAGTGCAAGCAGCAAAAC---  
AATTTG---CTGAGG---GCTATTGAGGCGCAGCAGCATCTGTTGCAACTCACAGTCTGGGGCATC  
>KT452407  
TTCTACTGTGACACAACACAACCTGTTTAATAGCACTTGGCATCCTAATGGCACCAATAGTACTTGGCCTACTA  
ATAGTACT-----  
-----AATGGA-----  
AGAGAAAATGATACAATCATACTCCCATGCAGAATAAAACAAATTATAAACATGTGGCAGGAAGTAGGAAAAG  
CAATGTATGCCCCCTCCCATCAGTGGAGTAATTAAATGTTTCATCAAAT---  
ATTACAGGGCTGTTATTAAACAAGAGATGGTGGTAGGGATAATGGCACG-----  
-----  
-----  
AATGGTACCGAGACCTTCAGACCTGGAGGGGGAGATATGAGGGACAATTGGAGAAGTGAATTATACAAATATA  
AAGTAGTAAGAATTGAACCATTA---GGAATAGCACCCACTAAGGCAAAGAGAAGAGTGGTG-----  
-----CCGAGAGAAAAAAGAGCA---ATCGGA---ATAGGAGCT-----  
---ATGTTTCATTGGGTTCTTGGGAGCA---GCAGGAAGCACTATG---GGCGCAGCGTCA---  
GTGACGCTGACGGTACAG---GCCAGACAA---TTAATG---TCTGAGATAGTGCAACAGCAAAAC---  
AATTTG---CTGAGA---GCTATTGAGGCGCAACAGCATATGTTGCAACTCACAGTCTGGGGCATC  
>KT452194  
TTCTACTGTGATACAACAAGTCTGTTTAATAGTAATTGGACGAAAGATAATAATGAGTCTTGGAGTAATACTA  
CTGACTGG-----  
-----  
TCAAATGGAATATCACACTCCAATGCAGAATAAAACAAATTATAAACCTGTGGCAGCAAGTAGGAAAGGCAA  
TGTATGCCCCCTCCCATCAGCGGAAACATTAGCTGTTTCATCAAAT---  
ATTACAGGGGTGATATTAAACAAGAGATGGTGGGGGGGGTAATAACACGGAA-----  
-----  
-----  
AACAACTACTGAGATCTTCAGACCAGGAGGAGGAGATATGAAGGACAATTGGAGAAGTGAATTATATAAATATA  
AAGTAGTACAAATTGAGCCACTA---GGAATAGCACCCACCAGGGCAAAGAGAAGAGTGGTG-----  
-----CAGAGAGAAAAAAGAGCA---GTTGGC---ATAGGAGCG-----  
---GTGTTCTTGGGTTCTTGTCTGCA---GCAGGAAGCACTATG---GGCGCAGCGGCA---  
GTAACGCTGACGGTACAG---GCCAGACAA---TTATTG---TCTGGTATAGTGCAACAGCAGACC---  
GCTCTG---CTGAGG---GCTATTGAGGCGCAACAGCATATGTTGCAACTCACAGTCTGGGGCATC  
>KT452218  
TTCTACTGTAATTCAACACAACCTGTTTAATAGTACTTGGAAATATTACTGGAGAACCAAATAGCACTGCA----  
-----  
-----  
GGAAGTGACACAATCATACTGCCATGCAGAATAAAACAAATTATAAACATGTGGCAAGAAGTAGGAAAGGCAA  
CGTATGCCCCCTCCCATTAAGGACAAATTAGATGCTCATCAAAT---  
ATTACAGGGCTGCTATTAAACAAGAGACGGTGGTACTAACAGTAGC-----  
-----  
-----

AACAGTAGTGAGATCTTCAGACCTGGAGGAGGAAATATGAAGGACAATTGGAGAAGTGAACCTATATAAAATATA  
AAGTAGTAAAAATTGAACCATTA---GGAATAGCACCCACCAAGGCAAAGAGAAGAGTGGTG-----  
-----CAGAGAGAAAAAAGAGCA---GTGGGAGTAATAGGAGCT-----  
---ATGTTCCCTTGGGTTCTTGGGAGCA---GCAGGAAGCACTATG---GGCGCAGCGTCA---  
GTGACGCTGACGGTACAG---GCTAGACAA---TTATTG---TCTAGTATAGTGCAACAGCAGAAC---  
GATTTG---CTGAGA---GCTATTGAGGCGCAACAGCATCTGTTGCAGCTCACAGTCTGGGGCATC  
>KT452245  
TTCTACTGTAATACATCACAACCTGTTTAATAGTACTTGGAAATGTTACTGAAGGGACAACCTAACACTGAAGGGT  
CAAATAACACT-----  
-----  
GGAGGAAGTGACCCTATCACACTCCCCTGCAGAATAAAACAAATTATAAACCTATGGCAGGAAGTAGGAAAAG  
CAATGTATGCCCTCCCATCAGAGGACAACCTTAGTTGCTCATCAAAT---  
ATTACAGGGCTGCTATTAACAAGAGATGGTGGTAATAACAGCGGA-----  
-----  
-----  
AGCGAGGTCGAGACCTTTAGACCAGGAGGAGGAGATATGAGGGACAATTGGAGAAATGAATTATATAAAATATA  
AAGTAGTAAAAGTTGAACCATTA---GGAATAGCACCCACCAGGGCAAAGAGAAGAGTGGTG-----  
-----CAGAGAGAAAAAAGAGCG---GTAACG---CTAGGAGCT-----  
---GTGTTCCCTTGGGTTCTTGGGAGCA---GCAGGAAGCACTATG---GGCGCAGCATCA---  
GTAACGCTGACGGTACAG---GCCAGACAA---TTATTG---TCTGGTATAGTGCAACAGCAGAAC---  
AATCTG---CTGAGG---GCTATTGAGGCGCAACAACATATGTTGCAACTCACAGTCTGGGGCATT  
>MN486011  
TTCTATTGCAATACATCACGCTTGTTTAATAGTACACATAATGTTACAGAAAATGCATATAATATTACAGGAA  
ATGCT-----  
-----  
TCGATTCAACCATCATCCTCCCATGCAGAATAAAACAAATTATAAATATGTGGCAGGAGGTAGGACGAGCAA  
TGTATGCCCCCTCCCATTCAGGAAACATAACATGCCACTCAAAT---  
ATCACAGGACTATTATTGACACGTGATGGAGGTGAAAATAACAGT-----  
-----  
-----  
ACATCAGAAACATTTAGACCTGCAGGAGGAGATATGAGGGACAATTGGAGAAGTGAATTATATAAAATATAAAG  
TGGTAGAAATTAAACCATTA---GGAATAGCACCCACTGGCGCAAAAAGGAGAGTGGTG-----  
-----GAGAGAGAAAAAAGAGCA---GTGGGA---ATAGGAGCT-----  
GTGCTCCTTGGGTTCTTGGGAGCA---GCAGGAAGCACTATG---GGCGCAGCGTCA---  
ATAACGCTGACGGTACAG---GCCAGACAA---CTGTTG---TCTGGTATAGTGCAACAGCAAAGC---  
AATTTG---CTGAGA---GCTATAGAGGCGCAACAGCATATGTTGCAACTCACGGTCTGGGGCATT  
>HQ912708  
TTCTATTGCAACACATCAAACTGTTTAATGAGACAGAACTGCTTAAAAGT-----  
-----  
-----  
ACAGACAGTACTTTAACCATCCCATGCAGAATAAAACAAATTATAAACATGTGGCAGGGGGTAGGACGAGCAA  
TATATGCCCCCTCCCATTAAGGAAAAATAACATGTAAATCAAAT---  
ATTACAGGACTACTACTAACACGTGATGGAGGAGTAAATAACGAT-----  
-----  
-----  
AGCACAGAAACATTTCAGACCTGTAGGAGGAAACATGAAGGACAATTGGAGAAGTGAATTATATAAAATATAAAG  
TGGTAGAAATTAAACCATTA---GGAGTAGCACCCACTAAGGCAAAAAGGAGAGTGGTG-----  
-----GAGAGAGAAAAAAGAGCA---GTGGGA---ATAGGAGCT-----  
GTGTTCCCTTGGGTTCTTGGGAGCA---GCAGGAAGCACTATG---GGCGCAGCATCA---  
ATAACGCTGACGGTACAG---GCCAGACAA---TTATTG---TCGGGCATAGTGCAACAGCAAAGC---  
AATTTG---CTGAGG---GCCATAGAAGCGCAACAGCATATGTTGCAACTCACGGTCTGGGGCATT  
>EU191613  
TTCTATTGCAATACATCAGGATTGTTTAATGGTACATACATGAATAGTACATACATGAATAGT-----  
-----  
-----  
ACAGATAAAATCATCAGACTCCCATGCAGAATAAAACAAATTATAAACATGTGGCAGGAAGTAGGACGAGCAA  
TGTATGCCTCTCCCATTAAGGACAAATAAAATGTGAATCAAAT---  
ATCACAGGATTATTATTGACACGTGATGGAGGAAATGAAAATAAT-----  
-----  
-----

GTGACAGAGATCTTCAGACCTGGAGGAGGAAATATGAAGGACAATTGGAGAAGTGAATTATATAAATATAAAG  
TGGTGGAATTAACCATTA---GGAATAGCACCCACTACAGCAAAAAGGAGAGTGGTG-----  
-----GAGAGAGAAAAAAGAGCA---GCGGGA---CTAGGAGCT-----  
GTGTTCTTTGGGTTCTTGGGAGCA---GCAGGAAGCACTATG---GGCGCAGCATCA---  
ATAACGCTGACGGTACAG---GCCAGACAA---TTATTG---TCTGGTATAGTGCAACAGCAAAGC---  
AATTTG---CTGAGA---GCCATAGAGGCGCAACAGCACATGTTGCAACTCACGGTCTGGGGCATT  
>MH746230  
TTTTATTGTAACACATCAAATCTGTTTAATAGTACACACAGGGCAGATGATACAAATTCAACCATCACAAATG  
ATACAGAT-----  
-----  
TCAAAATAGGACCATCACACTCCAATGCAGAATAAAACAAATCATAAACATGTGGCAGAGGGTAGGACGAGCAA  
TGTATGCCCCCTCCCATTAAGGAAACATAACATGTATATCAAAT---  
ATCACAGGACTACTACTAACAAGGATGGAGGAGTAAAGAATGAAACAGGGAAG-----  
AATGAAACAGGGAAGGACTCAGAT---GGG-----  
-----  
AACAAACAGAGATATTTCAGACCTGGAGGAGGAGATATGAGGGACAATTGGAGAAGTGAATTATATAAATATA  
AAGTGGTAGAAATTAAGCCATTA---GGAGTAGCACCCACTGAGGCAAAAAGGAGAGTGGTG-----  
-----GAGAGAGAAAAAAGAGCA---GTGGGA---ATAGGAGCT-----  
---ATGTTCTTTGGGTTCTTGGGAGCA---GCAGGAAGCACTATG---GGCGCAGCATCA---  
ATAACGCTGACGGTACAG---GCCAGACAA---TTGTTG---TCTGGTATAGTGCAACAGCAAAGC---  
AATTTG---CTGAAA---GCTATAGAGGCGCAACAGCATATGTTGCAACTCACGGTCTGGGGCATT  
>MH746248  
TTCTATTGCAATACATCAAGCCTGTTTAATAGTAATAGTACAAGCCTAGGTAATAGTAGTAATAGTACAGAAA  
CA-----  
-----  
GAAAAATGCAAACATCACACTCCCATGCAGAATAAAACAAATCATAAACATGTGGCAGGGGGTAGGACAAGCAA  
TGTATGCTCCTCCCATTAAGGAATAATAACATGTAGATCAAAT---  
ATCACAGGACTACTACTAACACGTGATGGAGGAGACAACAACAAA-----  
-----  
ACAGAGACATTCAGGCCTGGAGGAGGAGATATGAGGGACAATTGGAGAAGTGAATTATATAAATATAAAGTGG  
TAGAAATTAACCATTA---GGAATAGCACCCACTAAGGCAAAAAGGAGAGTGGTG-----  
-----GAGAGAGAAAAAAGAGCA---GTGGGA---ATAGGAGCT-----  
GTGTTCTTTGGGTTCTTGGGAGCA---GCAGGAAGCACTATG---GGCGCAGCATCA---  
ATAACGCTGACGGTACAG---GCCAGACAA---TTATTG---TCTGGGATAGTGCAACAGCAAAGC---  
AATTTG---CTGAGG---GCTATAGAGGCGCAACAGCATATGTTGCAACTCACGGTCTGGGGCATT  
>U39233  
TTCTATTGTAATACATCAAACTGTTTAATAGTACAGACAGGTCTAGCAGTACA-----  
-----  
-----  
GAAAGTGCAAACATAACCATCCCATGCAGAATAAAACAAATTATAAACATGTGGCAGGGGGTAGGACGAGCAA  
TGTATGCCCCCTCCCATTAAGGAAAAATAACATGTAAATCAAAT---  
ATCACAGGACTACTACTGACACGTGATGGAGGAACAACAATGAT-----  
-----  
AGCACAGAGGCGTTTCAGGCCTGCAGGAGGAGATATGAAGGACAATTGGAGAAGTGAATTATATAAGTATAAAG  
TAGTAGAAATTAACCATTG---GGAGTAGCACCCACCAAGGCAAAGAGGAGAGTGGTG-----  
-----GAGAGAGAAAAAAGAGCA---GTGGGA---ATAGGAGCT-----  
GTGTTCTTTAGGTTCTTGGGAGCA---GCAGGAAGCACTATG---GGCGCAGCATCG---  
ATAACGCTGACGGTACAA---GCCAGACAA---TTATTG---TCGGGTATAGTGCAACAGCAAAGC---  
AATTTG---CTGAGG---GCTATAGAGACGCAACAGCATATGTTGCAACTCACGGTCTGGGGCATT  
>U39237  
TTCTATTGCAATACATCAGGCCTGTTTAATAGTACATACAATAGTAATAGTACAGACAATGCTAATAGCACA-  
-----  
-----  
GACAAATTCAACCATCACGCTTCCATGTAGAATAAAACAAATTATAAACATGTGGCAGGGGGTAGGACAAGCAA  
TATATGCCCCCTCCCATTAGAGGAAACATAACATGTAAATCAAAT---  
ATCACAGGAATATTACTGACACGTGATGGAGGATCAGATGCAAAT-----  
-----  
-----

GAAACAGAGACATTTCAGGCCTGGAGGAGGAGATATGAGGGACAATTGGAGAAGTGAATTATATAAATATAAAG  
TGGTAGAAGTTAAACCATTA---GGATTAGCACCCACTAAGGCAAAAAGAAGAGTGGTG-----  
-----GAGAGAGAAAAAAGAGCA---GTGGGA---CTAGGAGCT-----  
GTGTTTCCTTGGGTTCTTGGGAGCA---GCAGGAAGCACTATG---GGCGCAGCGTCA---  
ATAACGCTGATGGTACAG---GCCAGACAA---TTGTTG---TCCGGTATAGTGCAACAGCAAAGC---  
AATTTG---CTGAGG---GCTATAGAGGCGCAACAGCATATGTTGCAACTCACGGTCTGGGGCATT  
>U39239  
TTCTATTGCAATACATCAGGACTGTTTAATAGTACATACTGGCCTAACAGTACAAGAGAGGAGATTACAACA-  
-----  
-----  
GACAAATTCAAACATCACACTCCAATGCAGAATAAAACAAATTGTAAACATGTGGCAGGGGGTAGGACGAGCAA  
CATATGCCCCCTCCCATTGCAGGAAAAATAACATGTAACTCAAAC---  
ATCACAGGACTGTTACTGACACGTGATGGAGGGATAAATGGGACA-----  
-----  
-----  
AATAGCACAGAGACATTTCAGGCCTGGAGGAGGAAATATGAAGGACAATTGGAGAAGTGAATTATATAAATATA  
AAGTGGTAGAAGTTAATCCATTA---GGAGTAGCACCCACTGGGGCGAAAAGGAGAGTGGTG-----  
-----GAGAGAGAAAAAAGAGCA---GTGGGA---ATAGGAGCT-----  
---GTGTTTCCTTGGGTTCTTGGGAGCA---GCAGGAAGCACTATG---GGCGCAGCGTCA---  
ATAACGCTGACGGTACAG---GCCAGACAA---TTATTG---TCAGGTATAGTGCAACAGCAAAGC---  
AATTTG---CTGAGG---GCTATCGAGGCGCAACAGCATATGTTGCAACTCACGGTCTGGGGCATT  
>U39246  
TTCTATTGTAATACATCAAAACTGTTTAATGGTGCATACAATAATGGTACATACAATAGTACAGAGAATATA-  
-----  
-----  
GAAAAATTCAACTATCACACTCCCATGCAGAATAAAACAAATTATAAACATGTGGCAGGGGGTAGGGCAAGCAA  
TGTATGCCCCCTCCCATCAAAGGAAACATAACATGTAAATCAAAT---  
ATCACAGGACTACTACTGACACGTGATGGAGGAAGCAGCGAGGCAAAT-----  
-----  
-----  
AAAACAGGGGAGACATTTCAGGCCTGGAGGAGGAGATATGAAGGACAATTGGAGAAGTGAATTATATAAATATA  
AAGTGGTAGAAATTAAACCATTA---GGAATAGCACCCACTAAGGCAAAAAGGAGAGTGGTG-----  
-----GAGAGAGAAAAAAGAGCA---GCA-----ATAGGAGCT-----  
--ATGTTTCCTTGGGTTCTTGGGAGCA---GCTGGAAGCACTATG---GGCGCAGCATCA---  
ATAACGCTGACGGTACAG---GCCAGACAA---TTATTG---TCGGGCATAGTGCAACAGCAAAGC---  
AATTTG---CTGAGG---GCTATAGAGGCGCAACAGCATATGTTGCAACTCACGGTCTGGGGCATT  
>U39245  
TTCTATTGCAATACATCAAAATTGTTTAAGACATCAGTTAAC-----  
-----  
-----  
CCAAACATCACACTCACACTCCCATGCAGAATAAAACAAATTATAAACATGTGGCAGGAGGTAGGGCGAGCAA  
TGTATGCCCCCTCCCATTTCAGGAATAATAACATGTAAATCAAAT---  
ATCACAGGACTACTACTAACACGTGATGGAGGGGGGCAGAATAAT-----  
-----  
-----  
GGACCAGAGACATTTCAGACCTGGAGGAGGAAATATGAGAGACAATTGGAGAAGTGAATTATATAAATATAAAG  
TGGTAGAAATTAAGCCATTA---GGAATAGCACCCCTCTAAGGCAAAAAGGAGAGTGGTG-----  
-----GAGAGAGAAAAAAGAGCA---GTGGGA---ATAGGAGCT-----  
GTGTTTCCTTGGGTTCTTGGGAGCA---GCAGGAAGCACTATG---GGCGCAGCATCA---  
ATAACGCTGACGGTACAG---GCCAGACAA---TTATTG---TCTGGTATAGTGCAACAGCAAAGC---  
AATTTG---CTGAGA---GCTATAGAGGCGCAACAGCACATGTTGCAACTCACAGTCTGGGGCATT  
>U39251  
TTCTATTGCAATACATCACAACGTTTTAATAGTACATACTGGTTTAATAGTACACACTGGTTTAACAGTACAG  
AAAGCGCT-----  
-----AATGGA-----  
ACAGAAAATGACACTATCACACTCCCATGCAGAATAAAACAAATTATAAACATGTGGCAGGGGGTAGGACAAG  
CAATGTATGCCCCCTCCCATTAAGGAAACATAACATGTAAATCAAAT---  
ATCACAGGAATACTCCTAACACGTGATGGAGGAAATTTAACTAAT-----  
-----  
-----

GGCACAGAGACATTCAGGCCTGGAGGAGGAGATATGAGGGACAATTGGAGAAATGAATTATATAAATATAAAG  
TGGTAGAAATTAAACCATTA---GGAGTAGCACCCACTGCGGCAAAAAGGAGAGTGGTG-----  
-----GAGAGAGAAAAAAGAGCA---GCA-----CTAGGAGCT-----  
GTGTTTCCTTGGGTTCTTGGGAGCA---GCAGGAAGCACTATG---GGCGCAGCGTCA---  
ATAACGCTGACGGTACAG---GCCAGACAA---TTATTG---TCCGGCATAGTGCAACAGCAAAGC---  
AATTTG---CTGAGG---GCCATAGAGGCGCAACAGCATATGTTGCAACTCACGGTCTGGGGCATT  
>JN692434  
TTCTATTGCAATACAGCAAGCCTGTTTAATAGTACATACAATAGTACAGGAAACATTACTGAGACAGAAAAGT  
CA-----  
-----  
AACAGCACAGTCATCACAATCCCATGCAGAATAAAAACAAATTATAAACATGTGGCAGGAGGTAGGACGAGCAA  
TGTATGCCTCCCCTATAAAAAGGAGAAATAACATGTAACTCAAGT---  
ATCACAGGATTACTACTGACACGGGATGGAGGCCTGAATAGAACA-----  
-----  
-----  
AATGAGACATTCAGGCCTGGAGGAGGAGATATGAGAGACAATTGGAGAAGTGAATTATATAAATATAAAGTGG  
TAGAAATTAAACCATTA---GGAATAGCACCCACTAGAGCAAAAAGGAGAGTGGTG-----  
-----GGGAGAGAAAAAAGAGCA---GTGGGA---ATAGGAGCT-----  
GTGTTTCCTTGGGTTCTTGGGAGCA---GCAGGAAGCACTATG---GGCGCAGCATCA---  
ATAACGCTGACGGTACAG---GCCAGACAA---TTGTTG---TCTGGGATAGTGCAACAGCAAAGC---  
AATTTG---CTGAGA---GCTATAGAGGCGCAACAGCATATGTTGCAACTCACGGTCTGGGGCATT  
>AY727522  
TTCTATTGCAATACATCAGGCTTGTTTAATGGTACATACAATGGTACAGAAAGCAATAATGAAACAGAAAAAT-  
-----  
-----  
GCAAAACGCAAACATCACACTCCCATGCAAAATAAAAACAAATTGTACGCATGTGGCAGGAAGTAGGACAAGCAA  
TGTATGCCCCCTCCCGTTAAGGGAATGATAACATGTAGATCAAAT---  
ATCACAGGATTACTATTGACACGGGATGGAGGCTCTAACACCACG-----  
-----  
-----  
AATAACACAGAAACATTCAGGCCTGGAGGAGGAGATATGAGGGACAATTGGAGAAGTGAAGTATATAAATATA  
AAGTGGTAGAAATTAAACCATTA---GGAATAGCACCCACTGAGGCAAAAAGGAGAGTGGTG-----  
-----CAGAGAGAAAAAAGAGCA---GTGGGA---ATAGGAGCT-----  
---GTGTTTCCTTGGGTTCTTGGGAGCA---GCAGGAAGCACTATG---GGCGCAGCATCA---  
ATAACGCTGACGGTACAG---GCCAGACAA---TTATTG---TCTGGAATAGTGCAACAGCAAAGC---  
AATTTG---CTGAGG---GCTATAGAGGCGCAACAGCATATGTTGCAACTCACGGTCTGGGGCATT  
>AY727523  
TTCTATTGTAATACAACAGGCCTGTTTAATGGTACATACATAAAAAATTCTAATGCAACAGGAAAC-----  
-----  
-----  
ATTACTAGAAACATCACAATCCCATGCAGAATAAAAACAAATTATAAACATGTGGCAGAAGGTAGGACGAGCAA  
TGTATGCCCCCTCCCATTCGAGGAATAATAACCTGTAGGTCAAAT---  
ATCACAGGACTACTACTGACACGTGATGGAGGAGAGAATGATACA-----  
-----  
-----  
GAGACAGTCAGGCCTGGAGGAGGAGATATGAGGGACAATTGGAGAAGTGAATTATATAAATATAAAGTGGTAG  
AAATTAAACCATTA---GGAATAGCACCCACTAAGGCAAAAAGGAGAGTGGTG-----  
-----GAGAGAGAAAAAAGAGCA---GTGGGA---ATAGGAGCT-----  
GTGTTTCCTTGGGTTCTTGGGAGCA---GCAGGAAGCACTATG---GGCGCAGCATCA---  
ATAACGCTGACGGTACAG---GCCAGACAA---TTGTTG---TCTGGGATAGTGCAACAGCAAAGC---  
AATTTG---CTGAGG---GCTATAGAGGCGCAACAGCATATGTTGCAACTCACAGTCTGGGGCATT  
>AY727524  
TTCTATTGCAATACATCAAGCCTGTTCAATGGTACATACAATGGTACATACAATAGTACAGGAAACATTAATG  
GA-----  
-----  
ACAGACACAAACATCACAATACCATGCAGAATAAAAACAAATTTATAAACATGTGGCAGGAGGTAGGACGAGCAA  
TGTATGCCCCCTCCCATTAGAGGAATAATAATGTGTAGATCAAAT---  
ATCACAGGACTACTACTGACACGTGATGGGGGAATTAGCAGAGATAACAAC-----  
-----  
-----

ACAGATAACACCACAGAGATATTCAGACCTGGAGGAGGAGATATGAGGGACAATTGGAGAAGTGAATTATATA  
AATATAAAGTGGTAGAAATTAAACCATTA---GGACTAGCACCCACTAAGGCAAAAAGGAGAGTGGTG-----  
-----GAGAGAGAAAAAAGAGCA---GCA-----  
CTAGGAGCT-----ATGTTTCCTTGGGTTCTTGGGAGCA---GCCGGAAGCACTATG---  
GGCGCAGCATCA---ATAACGCTGACGGTACAG---GCCAGACAA---TTATTG---  
TCTGGGATAGTGCAACAGCAAAGC---AATTTG---CTGAGG---  
GCTATAGAGGCGCAACAGCATATGTTGCAACTCACGGTCTGGGGCATT  
>AY727525  
TTCTATTGCAATACAGCAAACCTGTTTAATGGTACATACAATGATACAGGAAACATTAAT-----  
-----  
-----  
GAAACAGAAACCATTACAATCCCATGCAGAATAAAACAAATTATAAACATGTGGCAGAAGGTAGGACGAGCAA  
TGTATACCCCTCCCATTAACGGAATAATAACATGTAGATCAAAT---  
ATCACAGGGTTACTACTGACACGGGATGGAGGCAATAATAATGGC-----  
-----  
-----  
ACGAATGAGACATTTCAGGCCTGAAGGAGGAGATATGAAGGACAATTGGAGAAGTGAATTATATAAATATAAAG  
TGGTGGAATTAACCATTA---GGAATAGCACCCACTAAGGCAAAAAGGAGAGTGGTG-----  
-----GAGAGAGAAAAAAGAGCA---GCAGGA---ATAGGAGCT-----  
GTGTTTCCTTGGGTTCTTGGGAGCA---GCCGGAAGCACTATG---GGCGCAGCATCA---  
ATAACGCTGACGGTACAG---GCCAGACAA---TTATTG---TCTGGTATAGTGCAACAGCAAAGT---  
AATTTG---CTGAGG---GCTATAGAGGCGCAACAGCATATGTTGCAACTCACGGTTTGGGGCATT  
>JX140663  
TTCTATTGCAATACATCAAGCCTGTTTAATAGTGAATTAGACAGTAATGGTACATTCAAAATTAATGGGACAG  
AAAATGGAAT-----  
-----GGA---  
ACAGAAAATTCAAACATCACACTCCAATGCAGAATAAAACAAATTATAAACATGTGGCAGGAGGTAGGACGAG  
CAATGTATGCCCCCTCCCATTCAGGAGAAATAACATGTAGATCAAAT---  
ATCACAGGATTACTACTAACAAGGATGGAGGAGACACGAGTGAC-----  
-----  
-----  
GAGATATTCAGGCCTGGAGGAGGAGATATGAGGGACAATTGGAGAAGTGAATTATATAAATATAAAGTGGTAG  
AAGTTAAACCATTA---GGAGTAGCACCCACCGAGGCAAAAAGGAGAGTGGTG-----  
-----GAGAGAGAAAAAAGAGCA---GTGGGA---ATAGGAGCT-----  
GTGTTTCCTTGGGATCTTGGGAGCA---GCAGGAAGCACTATG---GGCGCAGCATCA---  
ATGACGCTGACGGTACAG---GCCAGACAA---TTATTG---TCTGGGATAGTGCAACAGCAAAGT---  
AATTTG---CTGAGG---GCTATAGAGGCGCAACAGCATATGTTGCAACTCACGGTCTGGGGCATT  
>KX181929  
TTCTACTGCAATACATCAGGCCTGTTTAATAGTACATACTGGCCTAATGCTACATATAATGCAACAGAAAATT  
CA-----  
-----  
-----  
GAAAAATTCAACCATCACAATCCCATGCAGAATAAAACAAATTTGTAAACATGTGGCAGGAGGTAGGACGAGCAA  
TGTATGCCCCCTCCCATTAGAGGACCAATAAACTGTACATCAAAT---  
ATAACAGGACTATTGATAACACGTGATGGAGGAATCAACTCAAGT-----  
-----  
-----  
GACACAGAGATATTCAGACCTGGAGGAGGAGATATGAGGGACAATTGGAGAAGTGAATTATATAAATACAAAG  
TGGTAGAAATTAACCATTA---GGAATAGCACCCACCGAGGCAAAAAGGAGAGTGGTG-----  
-----GAGAGAGAAAAAAGAGCA---GTGGGA---ATAGGAGCT-----  
GTGTTTCCTTGGGTTCTTGGGAGCC---GCAGGAAGCATTATG---GGCGCAGCGTCA---  
CTAACGCTGACGGTACAG---GCCCGGCAA---TTATTG---TTTGGGATAGTGCAACAGCAAACC---  
AATTTG---TTGAGG---GCTATAGAGGCGCAACAGCATATGTTGCAACTCACAGTCTGGGGCATT  
>KX181930  
TTCTATTGTAATACATCAAGCCTGTTTAATAGGAATATTACAGAAAAATTAATGAT-----  
-----  
-----  
AATAATTCAAGCATCACTATCACATGCAGAATAAAACAAATTTGTAAACATGTGGCAGGGGTAGGACGAGCAA  
TATATGCCCCCTCCCATTTGAAGGAGTAATAACTTTGTAGATCAAAT---  
ATCACAGGATTGCTACTGACACGGGATGGAGGCAACACAAATAAC-----  
-----

-----  
ACAACAGAGACATTTCAGGCCTGGAGGAGGAGATATGAGGGACAATTGGAGAAGTGAATTATATAAATATAAAG  
TGGTAGAAATTAAACCATTA---GGAATAGCACCCACTAAGGCCAAAAGGAGAGTGGTG-----  
-----GAGAGAGAAAAAAGAGCA---GTGGGA---ATAGGAGCT-----  
GTGTTTCCTTGGGTTCTTGGGAGCA---GCAGGAAGCACTATG---GGCGCAGCATCA---  
ATAACGCTGACGGTACAG---GCCAGACAA---TTGTTG---TCTGGGATAGTGCAACAGCAAAGC---  
AATTTG---CTGAGA---GCTATAGAGGCGCAACAGCATATGTTGCAACTCACGGTCTGGGGCATT  
>KX181931  
TTTTATTGCAATACATCAAACCTGTTTAATAATATATATACCCGAAATGGAACATGTTTGACTGGAGCAATGCAA  
ACAAA-----  
-----ACA---  
AACACTACAACAAACATCACACTCCGATGCAGAATAAGACAATTTATAAACATGTGGCAGGAGGTAGGACGAG  
CAATGTATGCCCCCTCCCATTTGAAGGAATAATAACATGTAGATCAAAT---  
ATCACAGGATTACTACTGACCCGGGATGGAGGCAGGGGAGACACAAATGGCACA-----  
-----  
----  
GAGACAAATAAAACAGAGACATTTCAGGCCCGGAGGGGGAGATATGAGGGACAATTGGAGAAGTGAATTATATA  
AATATAAAGTGGTAGAAATTAAACCATTA---GGAGTAGCACCACCTAAGGCCAAAAGGAGAGTGGTG-----  
-----GAGAGAGAAAAAAGAGCA---GTGGGA---  
ATAGGAGCT-----GTGTTTCCTTGGGTTCTTGGGAGCA---GCAGGAAGCACTATG---  
GGCGCAGCATCA---ATAACGCTGACGGTACAG---GCCAGACAA---TTATTG---  
TCTGGAATAGTGCAACAGCAAAGC---AATTTG---CTGAGG---  
GCTATAGAGGCGCAACAGCATATGTTGCAACTCACGGTCTGGGGCATT  
>KX181932  
TTCTATTGCAATACATCAATCCTGTTTAATGATACATACTGGGTTAATGGGACAGGAAGCACTAAT-----  
-----  
-----  
GGAACAGAAAACATCACACTCCCATGCAGAATAAAACAAATTATAAACATGTGGCAGGGAGTAGGACAAGCAA  
TATATGCCCCCTCCCATTAAGGAAGAATAACATGTAAATCAAAT---  
ATCACAGGAATACTACTGACACGTGATGGAGGAGAACTAATGAAACT-----  
-----  
-----  
AATGCCACAGAGGTATTTAGGCCTGGAGGAGGAGACATGAGGGACAACCTGGAGAAGTGAATATATAAATATA  
AAGTGGTAGAAATTAAACCATTA---GGAATAGCACCCACTAGGGCAAAAAGGAGAGTGGTG-----  
-----GAGAGAGAAAAAAGAGCA---GCA-----CTAGGAGCT-----  
---ATGTTTCCTTGGGTTCTTGGGAGCA---GCAGGAAGCACTATG---GGCGCAGCGTCA---  
ATAGCGCTGACGGTACAG---GCCAGACAA---TTATTG---TCTGGGATAGTGCAACAGCAAAGC---  
AATTTG---CTGAGG---GCTATAGAGGCGCAACAGCATATGTTGCAACTCACGGTCTGGGGCATT  
>KX181933  
TTCTATTGCGATACAACAGGACTGTTTACAGAAAACAGTACTGAGATAGACAACGGTACA-----  
-----  
-----  
GAAAATTCAACCATCATAATCCCATGCAGAATAAGACAATTTGTAAACATGTGGCAAGAGGTAGGACGAGCAA  
TATATGCCCCCTCCCATTTGCAGGAAACATAACATGTAGATCAAAT---  
ATCACAGGACTACTACTGACACGTGATGGAGGAGAAGGAAATGAGACA-----  
-----  
-----  
CAAAATGATACAGAAACATTTCAGGCCTGGAGGGGGAAATATGAAGGACAATTGGAGAAGTGAATTATATAAAT  
ATAAGGTGGTAGAAATTAAGCCCTTA---GGAATAGCCCCCCCCCAAGGCCAAAAGGAGAGTGGTG-----  
-----GAGAGAGAAAAAAGAGCG---GCA-----TTAGGAGGT---  
-----GTGTTTCCTTGGGTTTCTTGGGAGCA---GCAGGAAGCACTATG---GGCGCAGCATCA---  
ATGATGCTGACGGCACAG---GCCCCAGAA---TTATTG---TTTGGGATAGTGCAACAGCAAAGC---  
AATTTG---TTGAGA---GCTATAGGGGCGCAACAGCACATGTTGCAACCCCCGTTTGGGGCATT  
>KX181934  
TTCTATTGCAATACATCAAACCTGTTTAATAGTACATACAATAGTAACTGCACATCTAATAGGACA-----  
-----  
-----  
GGAACCTGAAAACATAACAATCCCATGCAGAATAAAACAAATTATAAACATGTGGCAGGGGGTGGGACGAGCAA  
TGTATGCCCCCTCCCATTAAGGACAAATAACATGTAGATCAAAT---  
ATCACAGGATTAGTACTAGAAAAGGGATGGAGGCACAAATAAGACA-----

-----  
-----  
GAAGAGACATTCTGGCCTACAGGAGGAGATATGAGGGACAATTGGAGAAGTGAATTATATAAAATATAAAAGTGG  
TAGAAGTTAGACCATTA---GGAATAGCACCCACTAGAGCAAAAAGGAGAGTGGTG-----  
-----GAGAGAGAAAAAAGAGAT---TTGGGA---CTAGGAGCT-----  
GTGTTTCCTTGGGTTCTTGGGAGCA---GCAGGAAGCACTATG---GGCGCAGCATCA---  
ATAACGCTGACGGTACAG---GCCAGACAA---TTGTTG---TCTGGGATAGTGCAACAGCAAAGC---  
AATTTG---CTGAGG---GCTATAGAGGCGCAACAGCATATGTTGCAACTCACTGTCTGGGGCATT  
>KX181935  
TTCTATTGCAATACATCAAACTGTTTAATAGTACATACTGGCCTAATGGTACAGAAAAC-----  
-----  
-----  
ACAAACATCACCATCACAATTCCATGCAGAATAAAACAAATTATAAACATGTGGCAGGAGGTAGGACGAGCAA  
TGTATGCCCCCTCCCATTAAGGAATAATAACATGTAGATCAAAT---  
ATCACAGGGCTACTACTGACACGTGATGGAGGAAATGGAGATTTTCACAGAT-----  
-----  
-----  
AGCCCAGAAACATTTCAGGCCTGGAGGAGGAGATATGAGGGACAATTGGAGAAGTGAATTATATAAAATATAAAAG  
TGGTAGAAATTAAACCATTA---GGAATAGCACCCACTAAGGCAAAAAGGAGAGTGGTG-----  
-----GAGAGAGAAAAAAGAGCA---GTGGGA---ATAGGAGCT-----  
GTGTTTCCTTGGGTTCTTGGGAGCA---GCAGGAAGCACTATG---GGCGCAGCATCA---  
ATAACGCTGACGGTACAG---GCCAGACAA---TTATTG---TCTGGGATAGTGCAACAGCAAAGC---  
AATTTG---CTGAGG---GCTATAGAGGCGCAACAGCATATGTTGCAACTCACGGTCTGGGGCATT  
>KX181938  
TTCTATTGCAATACATCAGGCCTGTTTAATGGTACATATACACCTAATAGTAATAGTACTGAAACA-----  
-----  
-----  
GGAAATTCAACAATCACCATCCCATGCAGAATAAAACAAATTATAAATATGTGGCAAGGGGTAGGGCGAGCAA  
TGTATGCCCCCTCCCATTAGTGGAATAATAACATGTAGATCAAAT---  
ATCACAGGGATACTACTGACACGGGATGGAGGCGATAGCAACAAT-----  
-----  
-----  
GATACAGAGATATTCAGGCCTACAGGAGGAGATATGAGGGACAATTGGAGAAGTGAATTATATAAAATATAAAAG  
TGGTAGAGATTAAACCCGTA---GGGATAGCCCCCCCCAAGGCAAAGAGAAGAGTGGTG-----  
-----GAGAGAGAAAAAAGGGGA---ATAGGA---ATAGGAGCT-----  
GTGTTTCCTTGGGTTTTTGGGAGCA---GCAGGAAGCACTATG---GGCGCAGCATCA---  
ATAACGCTGACGGTACAG---GCCCGACAA---TTATTG---TTTGGGAATAGTGCAACAGCAAAGC---  
AATTTG---CTGAGA---GCTATAGAGGCGCAACAGCATATGTTGCAACTCACTGTCTGGGGCATC  
>KX181939  
TTCTATTGCAATACATCAGGACTGTTTAATAGTACATATTTTAATGGTACATATAATAGTACAGGA-----  
-----  
-----  
AACAGTCCAAACATCACACTCCCATGCAGAATAAAACAAATTGTAAGAATGTGGCAGAGGGTAGGACAAGCAA  
TGTATGCCCCCTCCCATTCAGGAATAATAACATGTAGATCAAAT---  
ATCACAGGATTGTTACTGACACGGGATGGAGGCCCGGATAATAAT-----  
-----  
-----  
CGGACAGAGACATTTCAGGCCTGGAGGAGGAGATATGAGGGACAATTGGAGAAGTGAATTATATAAAATATAAAAG  
TGGTAGAAATTAAACCATTA---GGAATAGCACCCACTAAGGCAAAAAGGAGAGTGGTG-----  
-----GAGAGAGAAAAAAGAGCA---GTAGGA---CTAGGAGCC-----  
ATGTTTCCTTGGGTTCTTGGGAGCA---GCAGGAAGCACTATG---GGCGCAGCATCA---  
ATAACGCTGACGGTACAT---GCCAGACAA---TTACTG---TCTGGGATAGTGCAACAGCAAAGC---  
AATTTG---CTGAGG---GCTATAGAGGCGCAACAGCATATGTTGCAACTCACGGTCTGGGGCATT  
>KX181940  
TTCTATTGTAATACATCAAGCCTGTTTAATAGGACATACCCAGCTAATAGTACAGGATACAATAATGAAACA-----  
-----  
-----  
GGAAATTCAACCATTACAATCCCATGCAGAATAAAACAAATTATAAATAGATGGCAGGAGGTGGGACAAGCAA  
TGTATGCCCCCTCCCATTCAGGAATAATAACATGTAGATCAAAT---  
ATCACAGGATTACTACTGACACGGGATGGAGGCAACACAACAAT-----

-----  
-----  
AAACTGAGATATTCAGGCCTGAAGGAGGGAATATGAGGGACAATTGGAGAAGTGAATTATATAAATATAAAG  
TGGTAGAAATTAACCATTA---GGAATAGCACCCACTAAGGCAAAAAGGAGAGTGGTG-----  
-----GAGAGAGAAAAAAGAGCA--GTGGGA--ATAGGAGCT-----  
GTGTTTCCTTGGGTTCTTGGGAGCA--GCAGGAAGCACTATG--GGCGCAGCATCA---  
ATAACGCTGACGGTACAA---GCCAGACAA--TTATTG---TCTGGGATAGTGCAACAGCAAAGC---  
AATTTG---CTGAGG---GCTATAGAGGCGCAACAGCATATGTTGCAACTCACGGTCTGGGGCATT  
>KU749391  
TTCTATTGCAATACATCAAGCCTGTTTAACCATACATACCACAACCTGAATAGTAGTAGTACAAACACA----  
-----  
-----  
ACAGCAAATATCACAAGAATACCATGCAGAATAAAACAAATTATAAATATGTGGCAGGGGGTAGGACGAGCAA  
TGTATGCCCCCTCCCATTAAGGAAAAATAACATGTAGATCAAAC---  
ATCACAGGATTAGTACTGACACGGGATGGAGGTAATACAGGAGGG-----  
-----  
-----  
ACAGAGATATTCAGGCCTGGAGGAGGAGATATGAGGGACAATTGGAGAAGTGAAGTATATAAATATAAGGTGG  
TAGAAATTAACCATTA---GGAATAGCACCCACTAAGGCAAAAAGGAGAGTGGTG-----  
-----GAGAGAGAAAAAAGAGCA--GTGGGA--ATAGGAGCT-----  
GTGTTTCCTTGGGTTCTTGGGAGCA--GCAGGAAGCACTATG--GGCGCAGCATCA---  
CTAACGCTGACGGTACAG---GCCAGACAA--TTATTG---TCTGGGATAGTGCAACAGCAAAGC---  
AATTTG---CTGAGG---GCTATAGAGGCGCAACAGCATATGTTGCAACTCACGGTCTGGGGCATT  
>KT427678  
TTCTATTGCAATACGTCAGGGCTGTTTAATAATACATGGCTTAACGTGACTAATAAAACA-----  
-----  
-----  
GAAATCCAACCATCACAATCCCATGTAGAATAAAACAAATTATAAACATGTGGCAGGAAGTAGGAAAAGCAA  
TGTATGCCCCCTCCCATTCAGGAAAGATAACATGTAGATCAAAT---  
ATCACAGGACTACTACTGACACGTGATGGAGGTGACAATATCACA-----  
-----  
-----  
GAAGAAATATTCAGGCCTGCAGGAGGAGACATGAGGGACAATTGGAGAAGTGAATTATATAAATATAAAGTGG  
TAGAAATTAACCATTA---GGAATAGCACCCACCAAGGCAAAAAGGAGAGTGGTG-----  
-----GAGAGAGAAAAAAGAGCAGTAGTGGGA--ATAGGAGCT-----  
GTGTTTCCTTGGGTTCTTGGGAGCA--GCAGGAAGCACTATG--GGCGCAGCATCA---  
ATAACGCTGACGGTACAG---GCCAGACAA--TTATTG---TCTGGAATAGTGCAACAGCAAAGC---  
AATTTG---CTGAGA--GCTATAGAGGCGCAACAGCATATGTTGCAACTCACGGTCTGGGGCATT  
>KT427736  
TTCTATTGCGATACATCAGGCCTGTTTAATAGTACATTTAATAAGACAGGAAACAGTAATAGTACA-----  
-----  
-----  
GTAAACAGCACAATCACAATCCAATGCAGAATAAAACAAATTATAAACATGTGGCAGGAGGTAGGACGAGCAA  
TGTATGCCCCCTCCCATTAAGGAAACATAACATGTAGAACAAAT---  
ATCACAGGAATACTACTGACACGTGATGGAGGAAACGAACTAAC-----  
-----  
-----  
ACAGAAGAGATATTCAGACCTGGAGGAGGAGATATGAGGGACAATTGGAGAAGTGAATTATATAAATATAAAG  
TGGTAGAAATTAACCATTA---GGAATAGCACCCACTGAGGCAAGAAGGAGAGTGGTG-----  
-----GAGAGAGAAAAAAGAGCA--ATAGGGGAATAGGAGCT-----  
GTGTTTCCTTGGGTTCTTGGGAGCA--GCAGGAAGCACTATG--GGCGCAGCATCA---  
ATAACGCTGACGGTACAG---GCCAGACAA--TTATTG---TCTGGGATAGTGCAAGAGCAAAGC---  
AATTTG---CTGAGG---GCTATAGAGGCGCAACAGCATATGTTGCAACTCACGGTCTGGGGCATT  
>KT427800  
TTCTATTGCAATACATCAGGGCTGTTTAATGCTACATTTAATGCTACACACTGGTCTAATATGACAGAAAGTA  
CTAATGAA-----  
-----  
ACAGACAATACAACCATCATAATCCCATGTAAAATAAAACAAATTGTAAACCTGTGGCAGGAGGTAGGAAAAG  
CAATGTATGCCCCCTCCCATTCAGGAATGATAACATGTAGGTCAAAT---  
ATCACAGGACTACTACTGACACGTGATGGAGGTAATACAGATAAC-----

-----  
 -----  
 AGTAGCACAGAAATATTTCAGGCCTGGAGGAGGAGACATGAGGGACAATTGGAGAAGTGAATTATATAAAATATA  
 AAGTGGTAGAAATTAAACCATTA---GGAATAGCACCCACCGAGGCCAAAAGGAGAGTGGTG-----  
 -----GAGAGAGAAAAAAGAGCA--GTGGGA--ATAGGAGCT-----  
 ---TTGTTCTTGGGGTTCTTGGGAGCA--GCAGGAAGCACTATG--GGCGCAGCATCA---  
 ATAACGCTGACGGTACAG---GCCAGACAA--TTATTG---TCTGGAATAGTGCAACAGCAAAGC---  
 AATTTG---CTGAGA---GCTATAGAGGCGCAACAGCATATGTTGCAACTCACGGTCTGGGGCATT  
 >KU749392  
 TTCTATTGCAATACATCAAGCCTGTTTAATAAGACATACCTGTTTAATAATACATACCTGGTTAAGAATGGCA  
 CG-----  
 GTTACAGAAAACAATAAT-----  
 GGAACAAACATCACAGTCACAATCCCATGCAGAATAAAAACAATTTATAAACATGTGGCAGGAGGTAGGACGAG  
 CAATGTATGCCCTCCCATTCAGGACCAATAACATGTATATCAAAT---  
 ATCACAGGGTTACTACTGACACGGGATGGAGGCCTTAACACAACG-----  
 -----  
 -----  
 AACGAGACATTCAGGCCTGGAGGAGGAGATATGAGGGACAATTGGAGAAATGAATTATACAAATATAAAGTGG  
 TAGAAATTAAACCATTA---GGAATAGCGCCCACTAAGGCCAAAAGAAGAGTGGTG-----  
 -----GAGAGAGAAAAAAGAGCA--GTGGGA--ATAGGAGCT-----  
 GTGTTCTTGGGGTTCTTGGGAGCA--GCAGGAAGCACTATG--GGCGCAGCGTCA---  
 ATAACGCTGACGGTACAG---GCCAGACAA--TTACTG---TTTGGGATAGTGCAACAGCAAAGT---  
 AATTTG---CTGAGA---GCTATAGAGGCGCAACAACATATGTTGCAACTCACGGTCTGGGGCATT  
 >KU749393  
 TTCTATTGCAATACATCAGATCTGTTTAATGATATAGACACATCTAAT-----  
 -----  
 -----  
 AACACTGAGAACATCACAATCCCATGCAGGATAAAACAGATTATAAACATGTGGCAGGAAGTAGGACGAGCAA  
 TGTATGCCCTCTCCCATTAAGGACCAATAACATGTAGATCAAAT---  
 ATCACAGGATTATTACTGACACGGGATGGAGGCACGGACGGGGGA-----  
 -----  
 GGCGAAAAGGACAAC---  
 AACACGGAGACATTCAGGCCTGGAGGAGGAGATATGAGGGACAATTGGAGAAGTGAATTATATAAAATATAAAG  
 TGGTAGAAATTAAACCATTA---GGAATAGCACCAACTAGGGCAAAAGGAGAGTGGTG-----  
 -----GAGAGAGAAAAAAGAGCG--GCA-----ATAGGAGCT-----  
 ATGTTCTTGGGGTTCTTAGGAGCA--GCAGGAAGCACTATG--GGCGCAGCATCA---  
 ATAACGCTGACGGTACAG---GCCAGACAA--TTGTTG---TCTGGGATAGTGCAACAGCAAAGC---  
 AATTTG---CTGAGA---GCTATAGAGGCGCAACAACATATGTTGCAACTCACGGTCTGGGGCATT  
 >MK041570  
 TTCTATTGCAATACAACAAAGCTATTTAAT--AATTGCACAGGAAACAGTAGTTGCAACACAGAAAACAGT-  
 -----  
 -----  
 GATGGAGAAGAGATCACAATCCCATGCAGAATAAGGCAAATTGTAAGAATGTGGCAGGGGGTAGGACAAGCAA  
 TGTATGCCCCCTCCTATAGCGGGATACGTAACATGTAACCTCAAAT---  
 ATCACAGGATTATTACTGACAAGGGATGGAGGGGATACAGGGAAT-----  
 -----  
 -----  
 GAGAGTGAGACATTCAGGCCTGGAGGAGGAGATATGAGGGACAATTGGAGAAGTGAATTATATAAAATATAAAG  
 TGGTAGAAATTAAACCATTA---GGAATAGCACCCACTGAGGCAAAAGGAGAGTGGTG-----  
 -----GAGAGAGAAAAAAGAGCA--GTGGGA--ATAGGAGCT-----  
 ATGTTCTTGGGGTTCTTGGGAATA--GCAGGAAGCACTATG--GGCGCAGCGTCA---  
 ATAACGCTGGCGGTACAG---GCCAGACAA--TTATTG---TCTGGAATAGTGCAACAGCAAAGT---  
 AATTTG---CTGAGG---GCTATAGAGGCGCAACAGCATATGTTGCAACTCACGGTCTGGGGCATT  
 >MK041576  
 TTCTATTGCAATACATCAAGGCTGTTTAATAGTACATATGCACCTAATGGTACAGAAAACAGTACTGAAACA-  
 -----  
 -----  
 AACAAATTCAACCATCACAATCCCATGCAGAATAAAAACAATTTGTAAGAATGTGGCAGGGGGTAGGACAAGCAA  
 TGTATGCCCCCTCCCATTAAGGAAACATAACATGTAGATCAAAT---  
 ATCACAGGACTACTACTAACACGTGATGGAGGTGATGGAGGAAAT-----

-----  
 ----  
 AATACAAATAATACAGAAACATTTCAGGCCTGAAGGAGGAGATATGAGGGACAATTGGAGAAGTGAATTATATA  
 AATATAAAGTGGTAGAAATCAAACCATTA---GGAATAGCACCCACTGAGGCCAAAAGGAGAGTGGTG-----  
 -----GGGAGAGAAAAAAGAGCA---GTGGGA---  
 ATAGGAGCT-----GTGTTCCCTTGGGTTCTTGGGAGCA--GCAGGAAGCACTATG---  
 GGCGCAGCATCA--ATAACGCTGACGGTACAG--GCCAGACAA--TTATTG---  
 TCTGGGATAGTGCAACAGCAAAGC--AATTTG---CTGAGG---  
 GCTATAGAGGCGCAACAGCATATGTTGCAACTCACGGTCTGGGGCATT  
 >MK041550  
 TTCTATTGCAACACATCAACACTATTTAATAGTACACACAATGGTACATACAATGGTACAGAAAACATTACAA  
 TCCCATACAAT-----  
 -----  
 GGTACAGAAAACATTACAATCCCATGCAAAATAAAACAAATTATAAACATGTGGCAGAAAAGTGGGAAGCGCAA  
 TGTATGCCCCCTCCCATTAAGGAGTAATAACATGTCTATCAAAT---  
 ATCACAGGATTACTACTGACACGTGATGGAGGGGACACAGAGGAA-----  
 -----  
 -----  
 AATGAGACAGAGACATTTCAGGCCTGGAGGAGGAGATATGAGGGACAATTGGAGAAGTGAGTTATATAAATATA  
 AAGTGGTAGAAATTAAACCATTG---GGAGTAGCACCCACTAGGGCAAAAAGGAGAGTGGTG-----  
 -----GAGAGAGAAAAAAGAGCA--GTGGGA---TTAGGAGCT-----  
 ---GTGTTCCCTTGGGTTCTTGGGAGCA--GCAGGAAGCACTATG--GGCGCAGCATCA---  
 ATAACGCTGACGGTACAG--GCCAGACAA--TTATTG---TCTGGGATAGTGCAACAGCAGAGC---  
 AATTTG---CTGAGG---GCTATAGAGGCGCAACAGCACATGTTGCAACTCACGGTCTGGGGCATT  
 >MK041553  
 TTTTATTGCAATACATCAGGCCTGTTTAATGGTACATATCCACCTAATAGTACAGGAAATGGTAATGGAACA-  
 -----  
 -----  
 GATGAGGAAAACATTACCCTCCCATGCAGAATAAAACAAATTATAAATATGTGGCAGGGGGTAGGACGAGCAA  
 TGTATGCCCCCTCCCATTAAGGACCGATAACATGTAGATCAAAC---  
 ATCACAGGATTACTGTTGACACGGGATGGAGGGGTAAACAGCAAC-----  
 -----  
 -----  
 AACAGCACCGAGACATTTCAGGCCTGAAGGAGGAGATATGAGGGACAATTGGAGAAGTGAATTATACAAATATA  
 AAGTGGTAGAAATCAAACCATTA---GGAATAGCACCCACTAAGGCCAAAAGAAGAGTGGTG-----  
 -----GAGAGAGAAAAAAGAGCA--GTGGGA---ATAGGAGCT-----  
 ---GTGTTCCCTTGGGTTCTTGGGAGCA--GCCGGAAGCACTATG--GGCGCAGCATCA---  
 ATAACGCTGACGGTACAG--GCCAGACAA--TTATTG---TCTGGGATAGTGCAAGCAGCAAAGC---  
 AATTTG---CTGAGG---GCTATAGAGGCGCAACAGCATATGTTGCAACTCACGGTCTGGGGCATT  
 >MK041561  
 TTCTATTGCAATACATCAAGATTGTTTAATGGTACATATAATACTACAGGAAACAGTAATGAAACA-----  
 -----  
 -----  
 AACAAATGCAACATCACAATCCCATGTAGAATAAAACAAATTGTAAACATGTGGCAGGAGGTAGGACGAGCAA  
 TGTATGCCCCCTCCCATTCAGGAGCAATAACATGTGAATCAAAT---  
 ATCACAGGATTGCTACTGACATGGGATGGCGGCAAGGGGAATGACACG-----  
 -----  
 -----  
 AACAAACACAGAGACATTTCAGGCCTGGAGGAGGAGATATGAAGGACAATTGGAGAAGTGAATTATATAAATATA  
 AAGTGGTAGAGATTAAACCATTA---GGAATAGCACCCACTGGAGCAAAAAGGAGAGTGGTG-----  
 -----GAGAGAGAAAAAAGAGCA--GTGGGA---ATAGGAGCT-----  
 ---GTATTCCCTTGGGTTCTTGGGAGCA--GCCGGAAGCACTATG--GGCGCAGCATCA---  
 ATAACGCTGACGGTACAG--GCCAGACAA--CTATTG---TCTGGTATAGTGCAACAGCAAAGC---  
 AATTTG---CTGAGA---GCTATAGAGGCGCAACAGCATATATTGCAACTCACGGTCTGGGGCATT  
 >MK041563  
 TTCTATTGCAATACATCAAGACTATTTAATGGTACATACAACCTCTACTACTACAGGAAACAGTACT-----  
 -----  
 -----  
 GAAAAATGAAATCATCACAATCCAATGCAGAATAAAACAAATTATAAACATGTGGCAGGGGGTAGGACGAGCAA  
 TGTATGCCCCCTCCCATTCAGGAAACATAACATGTAGATCAAAT---

ATCACAGGATTACTACTGACACGGGATGGAGGGAATAGCAGCAGC-----  
 -----  
 -----  
 CCAGAGGAGATATTCAGGCTTGGAGGAGGAGATATGAAGGACAATTGGAGAAGTGAATTGTATAAATATAAAG  
 TGGTAGAAATTAACCATTA---GGAATAGCACCCACTAAGGCAAAGAGAAGAGTGGTG-----  
 -----GAGAGAGAAAAAAGAGCA--GTGGGA--ATAGGAGCT-----  
 GTGTTCTTTGGGTTCTTGGGAGCC---GCAGGAAGCACTATG---GGCGCAGCATCA---  
 ATAACGCTGACGGTACAG---GCCAGACAA---TTATTG---TCTGGGATAGTGCAACAGCAAAGC---  
 AATTTG---CTGAGG---GCTATAGAGGCGCAACAGCATATGTTGCAACTCACAGTCTGGGGCATT  
 >MK041564  
 TTCTATTGCAATACAACAACACTGTTTAAATAGAACATATTGGTTTAAATAGTACAACCTAATGACACAGGCACTA  
 ATGACACA-----  
 -----  
 GAAGATAAAAACATCACAATCCCATGCAGAATAAAGCAAATTATAAACCTGTGGCAGGAGGTAGGACGAGCAA  
 TGTATGCCCCCTCCCATTTGAGGGAGCCATAACATGTAACTCAAAT---  
 ATCACAGGATTACTACTGACACGTGATGGAGGCACAGGAAATGATACCACA-----  
 -----  
 -----  
 AATGCCACAGAGACATTCAAGCCTGGAGGAGGAGATATGAGGGACAATTGGAGAAGTGAATTATATAAATATA  
 AAGTGGTAGAAATTAAGCCATTA---GGAATAGCACCCACTAAGGCAAAGAGAAGAGTGGTG-----  
 -----GAGAGAGAAAAAAGAGCA--GCGGGA--CTAGGAGCT-----  
 ---GTGTTCTTTGGGTTCTTGGGAATA---GCAGGAAGCACTATG---GGCGCAGCGTCC---  
 ATAACGCTGACGGCACAG---GCCAGACAA---TTACTG---TCTGGGATAGTGCAACAGCAAAGC---  
 AATTTG---CTGAGG---GCTATAGAGGCGCAACAGCATATGTTGCAACTCACGGTCTGGGGCATC  
 >U52953  
 TTCTATTGCAATACATCAAGCCTGTTTAAATAGTACATACACACCTAATAGTACAGAAAACATTACTGGAACA-  
 -----  
 -----  
 GAAAAATTCATCATCACAATCCCATGCAGAATAAACAATTTATAAATATGTGGCAGGGGGTCGGACGAGCAA  
 TGTATGCCCCCTCCCATTTGAAGGAATATTAACATGTAGATCAAAT---  
 ATCACAGGATTACTACTGACACGGGATGGAGGTACAGGTATGCAT-----  
 -----  
 -----  
 GACACAGAGATATTCAGGCCTGAAGGAGGAGATATGAGGGACAATTGGAGAAGTGAATTATATAAATATAAAG  
 TGGTAGAAATTAACCATTA---GGAATAGCACCCACTAAGGCGAAAAGGAGAGTGGTG-----  
 -----GAGAGAGAAAAAAGAGCA--GTGGGA--ATAGGAGCT-----  
 GTGTTCTTTGGGTTCTTGGGAGCA---GCAGGAAGCACTATG---GGCGCAGCATCA---  
 ATAACGCTGACGGTACAG---GTCAGACAA---TTATTG---TCTGGGATAGTGCAACAGCAAAGC---  
 AATTTG---CTGAGA---GCTATAGAGGCGCAACAGCATATGTTGCAACTCACGGTCTGGGGCATT  
 >AF443088  
 TTCTATTGCAATACAACAAGACTGTTTAAATGGTACATATAAATAGTACAGGAAATGATACAAATTCA-----  
 -----  
 -----  
 ACAAATTCACCATCACACTCCAATGCAGAATAAACAATTTATAAACATGTGGCAGGGGGTAGGAAAAGCAA  
 TGTATGCCCCGCCCATTGCAGGAAACATAATATGTAAATCAAAC---  
 ATTACAGGACTACTATTGACACGTGATGGAGGTGAAGGTGAAAAT-----  
 -----  
 -----  
 ACAACAGAGACATTCAAGCCTGCAGGAGGAGATATGAGGGACAATTGGAGAAGTGAATTATATAAATATAAAG  
 TGGTAGAAATTAAGCCATTA---GGAATAGCACCCACTAGCGCAAAAAGGAGAGTGGTG-----  
 -----GAGAGAGAAAAAAGAGCA--GTAGTGGGAATAGGAGCT-----  
 GTGTTCTTTGGATTCTTGGGAGCA---GCAGGAAGCACTATG---GGCGCAGCATCA---  
 ATAACGCTGATGGTACAG---GCCAGACAA---CTGTTG---TCTGGTATAGTGCAACAGCAAAAC---  
 AATTTG---CTGAGA---GCTATAGAGGCGCAACAGCATATGTTGCAACTCACGGTCTGGGGCATT  
 >AF443089  
 TTCTATTGCGATACATCAAACCTGTTTAAATAAGACACGCAGGGATAAT-----  
 -----  
 -----  
 GCTAATGAACTATCACACTCCCATGCAGAATAAACAATTTATAAACATGTGGCAGGAGGTAGGACGAGCAA  
 TGTATGCCCCCTCCCATTTGAAGGAAACATAACATGTAAATCAAAT---

ATCACAGGACTACTCTTGGTACGTGATGGAGGAAAAACAGAGGAT-----  
 -----  
 -----  
 AACAAAAGTGAGATATTCAGACCTGGAGGAGGAGATATGAGGGACAATTGGAGAAGTGAATTATATAAAATATA  
 AAGTGGTAGAAATAAAGCCATTG---GGAGTAGCACCCACTGAGGCAAAAAGGAGAGTGGTG-----  
 -----GAGAGAGAAAAAAGAGCA---GTGGGA---ATAGGAGCT-----  
 ---GTGCTCCTTGGGTTCTTAGGAGCA---GCAGGAAGCACTATG---GGCGCAGCGTCA---  
 ATAACGCTGACGGTACAG---GCCAGACAA---GTGCTG---TCTGGAATAGTGCAACAGCAAAGT---  
 AATTTG---CTGAGG---GCTATAGAGGCGCAACAGCATATGTTGCAACTCACGGTCTGGGGCATT  
 >AF443092  
 TTCTATTGCAATACATCAAACTGTTTAATGGTACATATAATAATACAAATTCTAATAAT-----  
 -----  
 -----  
 AATACAGCAGACATCACACTCCAATGCAGAATAAAACAAATTATAAACTTGTGGCAGGGGGTAGGACGAGCAA  
 TGTATGCCCCCTCCCATTGCAGGAAACATAACATGTAAATCAAAT---  
 ATCACAGGACTACTATTGACACGTGATGGAGGAGGAGGAGAGAAC-----  
 -----  
 -----  
 AACTCAACAGAGACATTTCAGACCTGCAGGAGGAGAAATGAGGGACAATTGGAGGAGTGAATTATATAAAATATA  
 AAGTGGTAGAAGTTAAGCCATTA---GGAATAGCACCCACTGAGGCAAAAAGAAGGGTGGTG-----  
 -----CAGAGAGAAAAAAGAGCA---GTAGGA---ATAGGAGCT-----  
 ---GTGTTCTTGGGTTCTTGGGAGCA---GCAGGAAGCACTATG---GGCGCGGCGTCC---  
 ATAACGCTGACGGTACAG---GCCAGACAA---TTATTG---TCTGGTATAGTGCAACAGCAGAAC---  
 AACTTG---CTGAGA---GCTATAGAGGCGCAACAGCATATGTTGCAACTCACGGTCTGGGGCATT  
 >AF443093  
 TTCTATTGCAATACATCAAATCTGTCTAATGAGACATACCTGGCAAACCTGACACGGATGTCTAATGTAACA-  
 -----  
 -----  
 AAAAACGCCACAATCACACTCCCATGCAGAATAAAACAAATTATAAACATGTGGCAGGAGGTAGGACGGGGCAA  
 TATATGCCCCCTCCTATTGCAGGAAAAATAACATGTATATCAAAT---  
 ATCACAGGAACACTATTGACGCGTGATGGAGGAGTGTCAAATACAACA-----  
 -----  
 -----  
 GAGGGCAATGAGACATTTCAGACCTGGAGGAGGAGATATGAGGAACAATTGGAGAAGTGAATTATACAAATACA  
 AAGTGGTAGAAATCAGGCCATTG---GGAGTAGCACCCACTGAGGCAAGAAGGCGAGTGGTG-----  
 -----GAGAGAGAAAAAAGAGCA---GTAGGAGCAATAGGAGCT-----  
 ---GTGCTCCTTGGGTTCTTGGGAGCA---GCCGGAAGCACTATG---GGCGCAGCATCA---  
 ATGACGCTGACGGTACAG---GCCAGACAA---TTGCTG---TCTGGTATAGTGCAACAGCAAAGT---  
 AATTTG---CTGAGG---GCTATAGAGGCGCAACAGCATATGTTGCAACTCACGGTCTGGGGCATT  
 >AF443094  
 TTCTATTGCAATACATCAAATCTGTCTAATAATACATACAGGGCTGATAGTACATCCAATAATATAACAAAT-  
 -----  
 -----  
 GATAATTCAAATATCACACTCCAATGCAGGATAAAACAAATTATAAACATGTGGCAGGAAGTAGGACGAGCAA  
 TGTATGCCCCCTCCCATTGAAGGAAACATAACATGTAACTCAAGT---  
 ATCACAGGACTACTATTGACACGTGATGGAGGAAAAAGAAGAGAACAATAGC-----  
 -----  
 -----  
 ACAACAATGGCACAGAGATATTCAGACCTGGAGGAGGAGATATGAGGGACAATTGGAGAAGTGAATTATATA  
 AATATAAAGTGGTAAAAATTAAGCCATTA---GGAATAGCACCCACCAAGGCACAAAGGAGAGTGGTG-----  
 -----AAAAGAGAAAAAAGAGCA---GTGGGA---  
 ATAGGAGCT-----GTGTTCTTGGGTTCTTGGGAGCA---GCCGGAAGCACTATG---  
 GGCGCAGCATCA---ATAACGCTGACGGTACAG---GCCAGACAA---TTGCTG---  
 TCTGGTATAGTGCAACAGCAAAGC---AATTTG---CTGAGG---  
 GCTATAGAGGCGCAACAGCATATGTTGCAACTCACGGTCTGGGGCATT  
 >AF443095  
 TTCTATTGCAACACATCAGCACTGTTTAATAGTACATATAATAGTACATACAATACAAGCGGGCATAAT----  
 -----  
 -----  
 GATACAAGAATCATCACACTCCCATGCAGAATAAAACAAATTATAAACATGTGGCAGAAGGTAGGACGAGCAA

TGTATGCCCCCTCCCATTCAGAGAAACATAACATGTAAATCCAAT ---  
 ATCACAGGACTACTCTTGACACGTGATGGAGGAAATACAAGTAGC -----  
 -----  
 -----  
 ACAGAAGAGATATTCAGACCTGAAGGAGGGGATATGAGGGATAACTGGAGGAGTGAATTATATAAATATAAAG  
 TGGTAGAAATTAACCATTG --- GGAGTAGCACCCACTAAGGCAAAAAGGAGAGTGGTG -----  
 -----GAGAGAGAAAAAAGAGCA --- GTGGGA --- ATAGGAGCT -----  
 ATGTTTCCTTGGGTTCTTGGGAGCA --- GCAGGAAGCACTATG --- GGCGCGGCGTCA ---  
 ATAACGCTGACGGTACAG --- GCCAGACAA --- TTGCTG --- TCTGGTATAGTGCAGCAGCAAAGC ---  
 AATTTG --- CTGAGG --- GCTATAGAGGCGCAACAGCATCTGTTGCAACTCACGGTCTGGGGCATT  
 >AF443096  
 TTCTATTGTAATACATCAAACTGTTTAATGGTACATACAATGGTACATCCATCAGTACGGAC -----  
 -----  
 -----  
 AGTAACTCAAGCATCACACTCCAATGCAGAATAAAACAAATTATAAACATGTGGCAGGGGGTAGGACAAGCAA  
 TATATGCCCCCTCCCATTCAGAGAAACATAACATGTAAATCAAAT ---  
 ATCACAGGACTACTATTGACACGTGATGGAGGGAATAACACAGAG -----  
 -----  
 -----  
 AACACAGAGACATTCAGACCTGGAGGAGGAGACATGAGGGATAATTGGAGAAATGAATTATATAAATATAAAG  
 TAGTAGAAATTAAGCCATTA --- GGAATAGCACCCACTAGTGCAAAAAGGAGAGTGGTG -----  
 -----GAGAGAGAAAAAAGAGCA --- GTAGGG --- ATAGGAGCT -----  
 GTGTTTCCTTGGGTTCTTGGGGGCA --- GCAGGAAGCACTATG --- GGCGCGGCGTCA ---  
 ATAACGCTGACGGTACAG --- GTCAGACAA --- TTGTTG --- TCTGGTATAGTGCAACAGCAAAC ---  
 AATTTG --- CTGAGG --- GCTATAGAGGCGCAACAGCATATGTTGCAACTCACAGTCTGGGGCATT  
 >AF443098  
 TTCTACTGCAATACATCACAACCTGTTTAATGGTACATACATGCCTAATAGTACATACATGTCTAATAGTTCA -  
 -----  
 -----  
 GACAATAGAAACATCACAATCCCATGCAGAATAAAACAAATTATAAACCTATGGCAGGAGGTAGGACGAGCAA  
 TGTATGCCCCCTCCCATTCAGAGAAACATAACATGTAAATCAAAT ---  
 ATCACAGGGCTACTATTGACACGTGATGGAGGAGGAGAAAGTAACACA -----  
 -----  
 -----  
 ACAAATGCAACAGAGACATTCAGACCTGGAGGAGGGGACATGAGGGACAATTGGAGAAGTGAATTATACAAAT  
 ATAAAGTGGTAGAAGTTAAACCATTG --- GGATTAGCACCCACTGAGGCAAAAAGGAGAGTGGTG -----  
 -----GAGAGAGAAAAAAGAGCA --- GTGGGA --- ATAGGAGCT ---  
 -----GTGTTTCCTTGGGTTCTTGGGAGCA --- GCAGGAAGCACTATG --- GGCGCGGCGTCA ---  
 ATGACGCTGACGGTACAA --- GCCAGACAA --- CTATTG --- TCTGGTATAGTGCAACAGCAAAGC ---  
 AATTTG --- CTGAAG --- GCTATAGAGGCGCAACAGCATCTGTTGCAACTCACGGTCTGGGGCATT  
 >AF443101  
 TTCTATTGCAATACATCACAACCTGTTCAATGGTACATACAATGATACATACAATGGTACAGAAAGTAATTCA -  
 -----  
 -----  
 GGTAATTCAACTATCACACTCCCATGCAGAATAAAACAAATTATAAACATGTGGCAGGGGGTAGGACGAGCAA  
 TATATGCCCCCTCCCATTTGAAGGAAACATAACATGTAAATCAAAT ---  
 ATCACAGGACTACTATTGACGCGGGATGGAGGGAAAGGGAATGAT -----  
 -----  
 -----  
 ACCGCAGAGATATTCAGACCTGAAGGAGGAGATATGAAGAACAATTGGAGAAGTGAATTATATAAATATAAAG  
 TAGTAGAAATTAGGCCATTG --- GGAGTAGCACCCACTAAAGCAAAAAGGAGAGTGGTG -----  
 -----GAGAGAGAAAAAAGAGCA --- GCA --- CTAGGAGCT -----  
 GTGCTCCTTGGGTTCTTGGGAGCA --- GCAGGAAGCACTATG --- GGCGCAGCATCA ---  
 ATAACGCTGACGGTACAG --- GCCAGACAA --- TTGCTG --- TCTGGAATAGTGCAACAGCAAAGC ---  
 AATTTG --- CTGAAG --- GCTATAGAGGCGCAACAGCATCTGTTGCAACTCACGGTCTGGGGCATT  
 >AF443104  
 TTCTATTGCAATACATCAGGCCTGTTTAATGGAACGTTTAATGGAACACACCTAAACATATCT -----  
 -----  
 -----  
 ACTAATACTAACATCACACTCCCATGCAGAATAAAACAAATTATAAACATGTGGCAAGAGGTAGGACGAGCAA

TGTATGCCCCCTCCCATTCAGAGAAACATAACATGTAAATCAAAT ---  
ATCACAGGAATACTATTGACACGAGATGGAGGACCAGAAGATACAAAG-----  
-----  
AATAAGACAGAGACATTTCAGACCTGGAGGAGGAGATATGAGGGACAATTGGAGAAGTGAATTATATAAAATATA  
AAGTGGTAGAAATTAAGCCATTG---GGAGTAGCACCCACTAAAGCAAAAAGGAGAGTGGTG-----  
-----GAGAGAGAAAAAAGAGCA---GTGGGA---ATAGGAGCT-----  
---GTGTTCCCTTGGGTTCTTGGGAGCA---GCAGGAAGCACTATG---GGCGCGGCGTCA---  
ATAACGCTGACGGTACAG---ACCAAACAA---TTGTTG---TCTGGTATAGTGCAACAGCAAAGC---  
AATTTG---CTGAAG---GCTATAGAGGCGCAACAGCATCTGTTGCAACTCACAGTCTGGGGCATT  
>AF443110  
TTCTATTGTAATACATCAATTCTGTTTAAATGATACATATTGGTTTAAATGGGACAGACATGGCTAATGATACA-  
-----  
-----  
GGAAGTAATAACATCACAATCCCATGCAGGATAAAACAAATTATAAACATGTGGCAGGAGGTAGGACGAGCAA  
TATATGCCCCCTCCCATTCAGAGGAATCATAACATGTACATCAAAT ---  
ATCACAGGACTGTTATTGACACGTGATGGAGGAAACACAGGAGGA-----  
-----  
AACACAACAGAGATATTTCAGACCTGAAGGAGGAGATATGAGGAACAATTGGAGAAAATGAATTATATAAAATATA  
AAGTGGTAGAAATTAAGCCATTG---GGAATAGCACCCACTGGGGCAAAAAGGAGAGTGGTG-----  
-----GAGAGAGAAAAAAGAGCA---GTGGGA---ATAGGAGCT-----  
---GTGTTCCCTTGGGTTCTTGGGAGCA---GCAGGAAGCACTATG---GGCGCAGCGTCA---  
ATAACGCTGACGGCACAG---GCCAGACAA---TTGCTG---TCTGGAATAGTGCAACAGCAAAGC---  
AATTTG---CTGAGG---GCTATAGAGGCGCAACAACATATGTTGCAACTCACGGTCTGGGGCATT  
>AF443111  
TTCTATTGTAATACATCAGGCCTGTTTAAATAATAACCTGATTAATAATGGG-----  
-----  
-----  
GCAGAAGATACTATCAGACTCCCATGCCGAATAAAACAAATTATAAACATGTGGCAGGAGGTAGGACGAGCAA  
TGTATGCCCCCTCCCATTCGCGGAAACATAACATGCACATCAAAT ---  
ATCACAGGACTGTTGCTGACACGGGATGGGGGAAACGGAGGAAAT-----  
-----  
AATACAGAGACATTTCAGACCTGGAGGAGGAAATATGAAGGACAATTGGAGAAGTGAATTATATAAAATATAAAG  
TAGTAGAAATTAAGCCATTG---GGAGTAGCACCCACTGAGGCAAAAAGGAGAGTGGTG-----  
-----GAGAGAGAAAAAAGAGCA---GTGGAA---ATAGGAGCT-----  
GTGTTCCCTTGGGTTCTTGGGAGCA---GCAGGAAGCACTATG---GGCGCGGCGTCA---  
ATAACGCTGACGGTACAG---GCCAGACAA---TTGCTG---TCTGGTATAGTGCAACAGCAAAGC---  
AATTTG---CTGAGG---GCTATAGAGGCGCAACAACATCTGTTGCAACTCACGGTCTGGGGCATT  
>AF443112  
TTCTATTGTAATACATCAAACTGTTTAAATAGTACAAATAATAATACAGAAAGTGAG-----  
-----  
-----  
TCAAATGCAACCATCACACTCCCATGCAGAATAAAACAAATTATAAGAATGTGGCAGAGGGTAGGACAAGCAA  
TGTATGCCCCCTCCCATTCAGGAAACATAACATGTAGATCAAAT ---  
ATCACAGGGCTACTATTGACAAGGGATGGA---AGCAAAAATGAT-----  
-----  
ACAGAGACATTTCAGACCTGGAGGAGGAAATATGAGAGATAATTGGAGAAATGAATTATATAAAATATAAAGTGG  
TAGAAATTAAGCCATTG---GGAATAGCACCCACTGAGGCAAAAAGGAGAGCGGTG-----  
-----GAGAGAGAAAAAAGAGCA---GTGGGA---ATAGGAGCT-----  
GTGATCCTTGGGTTCTTGGGAGCT---GCAGGAAGCACTATG---GGCGCAGCGTCA---  
ATAACGCTGACGGCACAG---GCCAGACAA---CTGCTG---TCTGGAATAGTGCAACAGCAAAGC---  
AATTTG---CTGAGA---GCTATAGAGGCGCAACAACACCTGTTGCAACTCACAGTCTGGGGCATT  
>AF443113  
TTTTATTGCAATATATCAAGATTGTTTAAATAGGCCAAACATGACTAAAGAGACAAACATGACTAGTGATATAA  
AA-----  
-----  
AATAATTCAACAATCACACTCCCATGCAGAATAAAACAAATTATAAACATGTGGCAGGGGTAGGACGAGCAA

TGTATGCCCCCTCCCATTCAGAGGAAGAATAATATGTAAATCAAAT ---  
 ATCACAGGACTATTATTGGTACGTGATGGAGGACAGGGAGATAATGTC-----  
 -----  
 ATGAATGCCACCGAGACATTCAGACCTGGAGGAGGAGATATGAGAGATAATTGGAGAAGTGAATTATACAAAT  
 ATAAAGTGGTAGAAATTAAGCCATTG---GGAGTAGCACCCACTAGTGCAAAAAGGAGAGTGGTG-----  
 -----GAGAGAGAAAAAAGAGCA---GCA-----ATAGGAGCT---  
 -----ATGTTTCCTTGGGTTCTTGGGAGCA---GCAGGAAGCACTATG---GGCGCGGCGTCA---  
 ATAACGCTGACGGTACAG---GCCAGAAAA---TTGTTG---TCTGGTATAGTGCAACAGCAAAGC---  
 AATTTG---CTGAGG---GCTATAGAGGCGCAACAGCATATGTTGCAACTCACGGTCTGGGGCATT  
 >AF443115  
 TTCTATTGCAATACATCACAACCTGTTTAATAGTACATACAGGGCCAATAGTACAAATAGTACT-----  
 -----  
 -----  
 TCAAAATTCGAACATCACAACCTCCCATGCAGAATAAAACAAATTATAAACATGTGGCAGGGGGTAGGACGAGCAA  
 TGTATGCCCCCCCCCATTCAGAGAAACATAATATGTAAATCAAAT ---  
 ATCACAGGAGTACTATTGACATATGATGGAGGAGAAGGGGTAAAG-----  
 -----  
 -----  
 GAAAAATGAGACATTCAGACCTGCAGGAGGAAATATGAAGGACAATTGGAGAAGTGAATTATATAAATATAAAG  
 TGGTAGAAATTAAACCATTA---GGAATAGCACCCACTAAGGCAAAAAGGAGAGTGGTG-----  
 -----GAGAGAGAAAAAAGAGCA---GCA-----CTAGGAGCT-----  
 GTGTTTCCTTGGGTTCTTGGGAGCA---GCAGGAAGCACTATG---GGCGCAGCATCA---  
 ATAACGCTGACGGTACAG---GCCAGACAA---TTGCTG---TCTGGTATAGTGCAACAGCAAAGC---  
 AATTTG---CTGAGA---GCTATCGAGGCGCAACAGCATATGTTACAACCTCACAGTCTGGGGCATT  
 >KY658704  
 TTTTATTGCAATACAACACAACCTGTTTAATGGTACATACAATGGCACATACATTAATGATACAGAA-----  
 -----  
 -----  
 AGTAATTCAACCTTCACAACCTCCCATGCAGAATAAAACAAATTATAAACATGTGGCAGGAAGTAGGACGAGCAA  
 TGTATGCACCTCCAATTGCAGGAAACATAACATGTAAATCAAGT ---  
 ATCACAGGACTACTATTGACACGGGATGGAGGTGACAAAAACGAC-----  
 -----  
 -----  
 AACAAACAGTGAAATATTTCAGACCTGGAGGAGGAGATATGAGGAACAATTGGAGAAGTGAATTATATAAATATA  
 AAGTGGTAGAAATTAAGCCATTG---GGAATAGCACCCACTGGGGCAAAAAGGAGAGTGGTG-----  
 -----GAGAGAGAAAAAAGAGCA---GTGGGA---ATAGGAGCT-----  
 ---GTGTTTCCTTGGGTTCTTGGGAGCA---GCTGGAAGCACTATG---GGCGCAGCGTCA---  
 ATAACGCTGACGGCACAG---GCCAGACAA---GTATTG---TCTGGTATAGTGCAACAGCAAAGC---  
 AATTTG---CTGAGG---GCTATAGAGGCGCAACAGCATATGTTGCAACTCACAGTCTGGGGCATT  
 >KY658705  
 TTCTATTGCAATACATCAGGCCTGTTTAATGGTACATATAATGGTACATACCTTGATGAGACAAATTCA----  
 -----  
 -----  
 ACAAATTCACCATCACAACCTCCAATGCAGAATAAAACAAATTATAAACATGTGGCAGGGGGTAGGACGAGCAA  
 TGTATGCCCCCCCCTATTGCAGGAAACATAACATGTAAATCAAAT ---  
 ATCACAGGAATACTGTTGACACGTGATGGAGGAAAAGGAGAAAAT-----  
 -----  
 -----  
 AATAGTACAGAGATATTTCAGACCTGGAGGAGGAGATATGAGGGACAATTGGAGAAGTGAATTATATAAATATA  
 AAGTGGTTGAAATTAAACCATTA---GGAATAGCACCCACTAAGGCAAGAAGGAGAGTGGTG-----  
 -----GAGAGAGAGAAGAGAGCA---GTGGGA---ATAGGAGCT-----  
 ---GTGTTTCCTTGGGTTCTTGGGAGCA---GCAGGAAGCACTATG---GGCGCGGCATCG---  
 ATAACGCTGACGGTACAG---GCCAGACAA---TTATTG---TCTGGTATAGTGCAACAGCAAAGC---  
 AATTTG---CTGAGA---GCTATAGAGACGCAACAACGTCTGTTGCAACTCACAGTCTGGGGCATT  
 >KY658706  
 TTCTATTGCAATACATCAGGCCTGTTTAATGGTACATATAATGGTACACATAATAATGCGACAGACTCA----  
 -----  
 -----  
 AAAAAATCCAACCATCACCCCTCCAATGCAGAATAAAACAAATTATAAACATGTGGCAGAAGGTAGGACAAGCAA

TGTATGCCCCCCCCATTGCAGGAAACATAACATGTACATCAAAT ---  
 ATCACAGGACTACTATTGACACGTGATGGAGGTAATGAAAATGAAAATGAAACC-----  
 -----  
 -----  
 AACAAAAATGAGACATTTCAGACCTGCAGGAGGAGATATGAGGGACAATTGGAGAAGTGAATTATATAAAATATA  
 AAGTGGTGGAGATTAAGCCATTA---GGAATAGCACCCACTGAGGCAAAAAGGAGAGTGGTG-----  
 -----GAGAGAGAGAAAAAGAGCA---GTAGGA---ATAGGAGCT-----  
 ---GTGTTCTTTGGGTTCTTGGGAGCA---GCAGGAAGCACTATG---GGCGCGGCGTCA---  
 ATAACGCTGACGGTACAG---GCCAGACAA---TTATTG---TCTGGTATAGTGCAACAGCAAAGC---  
 AATTTG---CTGAGA---GCTATAGAGGCGCAACAACATATGTTGCAACTCACAGTCTGGGGCATT  
 >KC154013  
 TTCTATTGCAATACATCAAACTGTTTAATGAAACATACCTTAATGATACA-----  
 -----  
 -----  
 AAGAGTGAACAATCATACTCCCATGCAGAATAAAACAGATTATAAACATGTGGCAGGAGGTAGGACGAGCAA  
 TGTATGCCCCCTCCCATTCAGGAAACATAACATGTAACCTCAAGT---  
 ATCACAGGACTACTGTTGACACGGGATGGAGGAGAGACAAATGGCACA-----  
 -----  
 -----  
 AATGGCACAGAAACGTTTCAGACCTGGAGGAGGAGATATGAGGGACAATTGGAGAAGTGAATTATATAAAATATA  
 AAGTGGTAGAAATTAATCCATTG---GGAATAGCACCCACTAAGGCAAAAAGGAGAGTGGTG-----  
 -----GAGAGAGAAAAAAGAGCA---GTGGGA---ATGGGAGCT-----  
 ---GTGTTCTTTGGGTTCTTGGGAGCA---GCAGGAAGCACTATG---GGCGCAGCGTCA---  
 CTAACGCTGACGGCACAG---GCCAGACAA---TTGTTG---TCTGGAATAGTGCAACAGCAAAGC---  
 AATTTG---CTGAGG---GCTATAGAGGCGCAACAGCATATGTTGCAACTCACGGTCTGGGGCATA  
 >KC154015  
 TTTTATTGTAATACATCAGGACTGTTTAATAGTACATACTGGGGTAGGACTAATAGTACTGATATTCTT---  
 -----  
 -----  
 TCAAAATCAACTATCACACTCCAATGCAGAATAAAACAAATTATAAACATGTGGCAGGAGGTAGGACGAGCAA  
 TGTATGCCCCCTCCCATTCAGGAAACATAACATGTAATTCAAGT---  
 ATCACAGGATTACTATTGACGCGTGATGGAGGAACATGGGAAAAC-----  
 -----  
 -----  
 AAGACAGAAGAGATATTTCAGACCTGGAGGAGGAGATATGAGGGACAATTGGAGAAGTGAATTATACAAATATA  
 AAGTGGTAGAAATTAAGCCATTA---GGAGTAGCACCCACTAAGGCAAAAAGGAGAGTGGTGGAG-----  
 -----AAACAAATAGAAAAAAGAGCA---GTGGGA---CTAGGAGCT-----  
 ---GTGTTCTTTGGGTTCTTGGGAGCA---GCAGGAAGCACTATG---GGCGCAGCGTCA---  
 ATAACGCTGACGGTACAG---GCCAGAAAC---TTATTG---TCTGGCATAGTGCAACAGCAAAGC---  
 AATTTG---CTGAGA---GCTATAGAGGCGCAACAGCATATGTTGCAACTCACAGTCTGGGGCATT  
 >KF114882  
 TTCTATTGCAATACATCAAAGCTGTTTAATGAAATAGACACAAATAAAACAGGAAAC-----  
 -----  
 -----  
 GAAAGTGAAAACATCACACTCCCATGCAGAATAAAACAAATTATAAACATGTGGCAGGAGGTAGGACGAGCAA  
 TGTATGCCCCCTCCCATTCAGGAAGCATAACATGTAAATCAAAT---  
 ATCACAGGACTACTATTGCTACGTGATGGAGGCACAAATACAAGC-----  
 -----  
 -----  
 GACAACAACAGTGAGATATTTCAGACCTGGAGGAGGAAATATGAAGGATAATTGGAGAAGTGAATTATATAAAT  
 ATAAAGTGGTAGAAATTAAGCCATTG---GGAATAGCACCAACTGAGGCAAAAAGGAGAGTGGTG-----  
 -----GAAAGAGAAAAAAGAGCA---GTGGGA---ATAGGAGCT---  
 -----GTACTCCTTGGGTTCTTGGGAGCA---GCAGGAAGCACTATG---GGCGCAGCGTCA---  
 ATAACGCTGACGGTACAG---GCCAGACAG---CTGTTG---TCTGGTATAGTGCAAGCAGCAAAGC---  
 AATTTG---CTGAGA---GCTATAGAGGCGCAACAGCATATGTTGCAACTCACAGTCTGGGGCATT  
 >KR861313  
 TTCTATTGCGATACATCAAACTGTTTAATGACTCGTCTAATAGTACA-----  
 -----  
 -----  
 AGCAAGGAGCCAATCACACTCCCATGCAGAATAAAACAAATTATAAACATGTGGCAGGAGGTAGGACGAGCAA

TATATGCCCCCTCCCATTCAGAGAAACATAACATGCAGATCTAAT ---  
ATCACAGGACTACTATTGACACGTGATGGAGGGAGGGTCAATGACACA-----  
-----  
ACAGAGGAGATATTCAGACCTGGAGGAGGAGATATGAGGGACAATTGGAGAAGTGAATTATATAAATATAAAG  
TAGTAGAAATTACACCATTG---GGAGTAGCACCCACTGGGGCAAAAAGGAGAGTGGTG-----  
-----GAGAGAGAAAAAAGAGCA--GTTGGA--ATAGGAGCT-----  
GTA CTCTTGGGTTCTTGGGAGCA--GCAGGAAGCACTATG--GGCGCAGCGTCG---  
ATGACGCTGACGGTACAG---GCCAGACAA---TTGTTG---TCTGGAATAGTGCAACAGCAAAGC---  
AATTTG---CTGAGA---GCTATAGAGGCGCAACAGCATATGTTGCAACTCACGGTCTGGGGCATT  
>KR861315  
TTCTATTGCAATACAACAAAATTGTTTAAACAGTACATACAATTCTAATGGTACATACAGTAAT-----  
-----  
-----  
AGTACTTCAAATATCACACTCCAATGCAGAATAAAACAAATTATAAACATGCGGCAGGAGGTAGGACGAGCAA  
TGTATGCCCCCTCCCATTCAGAGAAACATAACATGCGAATCAAAT ---  
ATCACAGGACTACTATTGACACGTGATGGAGGAAATGGGTCCAGT-----  
-----  
-----  
GATGCCCCAGAGATATTCAGACCAGGAGGAGGAAATATGAAGGACAATTGGAGAAGTGAAC TATATAAATATA  
AAGTGGTAGAAATTAAACCATT A---GGAGTAGCACCCACTACGGCAAAAAGAAGAGTGGTG-----  
-----GAGAGAGAAAAAAGAGCA--GTGGGA--ATAGGAGCT-----  
---GTGTTCTTGGGTTCTTGGGAGCA--GCAGGAAGCACTATG--GGCGCAGCATCA---  
ATAACGCTGACGGTACAG---GCCAGACAA---TTGTTG---TCTGGGATAGTGCAACAGCAAAGC---  
AATTTG---CTGAAG---GCTATAGAGGCGCAACAGCATCTGCTGCAACTCACGGTCTGGGGCATT  
>KR861316  
TTCTATTGCAATACATCACAAC TGTTTAATAAGACAATGAACAATATTAATGGTACAGAAAACAGTACAGACA  
CA-----  
-----  
GAAAACAGGACCATCACAATCCCATGCAGAATAAAACAAATTATAAACATGTGGCAGAGGGTGGGACGAGCAA  
TGTATGCTCCTCCCATTCAGAGAAACATAACATGTGAATCAAAT ---  
ATCACAGGAATACTATTGACACGTGATGGAGGAGAATCAAATAAC-----  
-----  
-----  
ACCAATGAGACATT CAGACCTGGAGGAGGAGATATGAGGGATAACTGGAGAAGTGAATTATATAAATATAAAG  
TGGTAGAAATTAAGCCATTG---GGAGTAGCACCCACTGAGGCAAGAAGGAGAGTGGTG-----  
-----GAGAGAGAAAAAAGAGCA--GTGGGA--ATGGGAGCT-----  
GTGTTACTTGGGTTCTTGGCAACA--GCAGGAAGCACTATG--GGCGCGGCGTCA---  
GTGACGCTGACGGTACAG---GCCAGACAA---TTGTTG---TCTGGTATAGTGCAACAGCAAAGC---  
AATTTG---CTGAAG---GCTATAGAGGCGCAACAGCATCTGTTGCAACTCACAGTCTGGGGCATT  
>KR861325  
TTCTATTGCAATACATCAAGTCTGTTTAAATGAGACATACCTATATAATGGTACAGCAGAC-----  
-----  
-----  
AATACAGTAAACATTACACTCCCATGCAAAATAAAACAAATTATAAACATGTGGCAGGGGGTAGGACGAGCGA  
TGTATGCCCCCCCCATTG CAGGAAACATAACATGTAAATCAAAT ---  
ATCACAGGATTACTATTGGTACGTGATGGGGGGAAAGGAAATAAT-----  
-----  
-----  
GACACTGAGACATT CAGACCTGGAGGAGGAAATATGAAGGACAATTGGAGAAGTGAATTATATAAATATAAGG  
TAGTAGAAATTAACCATT A---GGAGTAGCACCCACCAAGGCAAAAAGGAGAGTGGTG-----  
-----GAGAGAGAAAAACGAGCA--GCGGGA--CTAGGAGCT-----  
GTGTTCTTGGGTTCTTGGGAGCG---GCAGGAAGCACTATG--GGCGCAGCATCA---  
ATAGTGCTGACGGTACAG---GCCAGACAA---TTGTTG---TCTGGTATAGTGCAACAGCAAAAC---  
AATTTG---CTGAGA---GCTATAGAGGCGCAACAACATCTGTTGCAACTCACAGTCTGGGGCATT  
>KR861326  
TTCTATTGCGATACATCACAAC TGTTTAATGAGTCCCTGTTTAAATAGTACA-----  
-----  
-----  
AACAA TGATACAATCATAGTTCCATGCAAAATAAAACAAATTATAAACATGTGGCAGGGGGTAGGACGAGCAA

TGTATGCCCCCTCCCATTCAGAGGAACATTACATGTAACCTCTAGT ---  
 ATCACAGGACTACTATTGACATGGGATGGAGGGATAAATAATAGG-----  
 -----  
 -----  
 ACTACAGAGATATTCAGACCTGGAGGAGGAAATATGAAGGATAATTGGAGAAATGAATTATATAAATATAAAG  
 TGGTAGAAATTAGGCCATTG---GGAATAGCACCCACTGGAGCAAAAAGGAGAGTGGTG-----  
 -----GAGAGAGAAAAAAGAGCAGTAATGGGA---TTAGGAGCT-----  
 GTGTTTCCTTGGGATCTTGGGAGCA---GCAGGAAGCACTATG---GGCGCAGCGTCA---  
 ATAACGCTGACGGTACAG---GCCAGGCAA---TTGTTG---TCTGGAATAGTGCAGCAGCAAAAC---  
 AATTTG---CTGAGA---GCTATAGAGGCGCAACAGCATATGTTGCAACTCACAGTCTGGGGCATT  
 >KR861337  
 TTCTATTGTAATACATCAGACCTGTTTAATGGTACATACAATGGTACATACAATGATATAGATCTG-----  
 -----  
 -----  
 AATAATGATACACTCACACTCACATGCAGAATAAAACAAATTATAAACATGTGGCAGGAGGTAGGACGAGCAA  
 TGTATGCCCCCTCCCATTCAGAGGAACATAACATGCACATCAAAT---  
 ATCACAGGACTACTGCTACTGCGGGATGGAGGAATTGGAAATGAG-----  
 -----  
 -----  
 ACAGAAGAGATATTCAGACCTGGAGGAGGAGATATGAGAGACAATTGGAGAAGTGAATTATATAAATATAAAG  
 TAGTAGAAATTAAGCCATTG---GGAGTAGCACCCACTAAGGCAAAAAGGAGAGTGGTG-----  
 -----GAGAGAGAAAAAAGAGCA---GTGGGA---ATTGGAGCT-----  
 GTACTCCTTGGGTTCTTGGGAGCA---GCAGGAAGCACTATG---GGCGCGGCGTCA---  
 ATAACGCTGACGGTACAA---GCCAGACAA---TTGTTG---TCTGGTATAGTGCAACAGCAAAGC---  
 AATTTG---CTGAGG---GCTATAGAGGCGCAACAGCATCTGTTGCAACTCACGGTCTGGGGCATT  
 >KR861345  
 TTCTATTGCAATACAACAAAACTGTTTGACACAGCAACACTGGTTAATGGTACATACATGAACAGTACAGAA-  
 -----  
 -----  
 AGTAATTCAACCATCACAATCAAATGCAGAATAAAACAATTTATAAACATGTGGCAGGGGGTAGGACGAGCAA  
 TGTATGCCCCCTCCCATTCAGAGGAATATAACATGTATATCAAAT---  
 ATCACAGGATTAATATTGACACGTGATGGAGGACCAAATAGTAGTGATAAT-----  
 -----  
 GTGACTACAACCTGGAAATAATACTAAT-----  
 ATTACTGAGATATTCAGACCTGCAGGAGGAGACATGAGGGACAATTGGAGAAGTGAACATATAAATATAAAG  
 TAGTAGAAATTAAGCCATTA---GGACTAGCACCCACCAAGGCAAAAAGGAGAGTGGTG-----  
 -----GAGAGAGAAAAAAGAGCG---GTGGGA---ATAGGAGCT-----  
 GTGTTTCCTTGGGTTCTTGGGAGCA---GCAGGAAGCACTATG---GGCGCGGCGTCA---  
 ATAACGCTGACGGTACAG---ACCAGACAA---CTGTTG---TCTGGTATAGTGCAACAGCAAAGT---  
 AATTTG---CTGAGA---GCTATAGAGGCGCAACAGCATATGTTGCAACTCACGGTCTGGGGCATT  
 >KR861312  
 TTCTATTGCAATACATCAAACTGTTTAATGGTACATACCCGCAGCTTAATAGGACAGAAGAT-----  
 -----  
 -----  
 GTAAATCGAACCATCACACTTAAATGCAGAATAAAACAAATTATAAACATGTGGCAGGGGGTAGGACGAGCAA  
 TGTATGCCCCCTCCCATTCAGAGGAATATAACATGTATATCAAAT---  
 ATCACAGGATTAATATTGACACGTGATGGAAAATATGAAAGTAGT-----  
 -----  
 -----  
 AAGAATGAAAGTAGT---  
 AAGAATGAGACATTAGACCTGCAGGAGGAGATATGAGGGACAATTGGAGGAGTGAATTATATAAATATAAAG  
 TAGTAGAAATTAAGCCATTA---GGACTAGCACCCACCAAGGCAAAAAGGAGAGTGGTG-----  
 -----GAGAGAGAAAAAAGAGCA---GTGGGA---ATAGGAGCT-----  
 GTGTTTCCTTGGGTTCTTGGGAGCA---GCAGGAAGCACTATG---GGCGCAGCGTCA---  
 ATAACGCTGACGGTACAG---GCCAGACAA---CTGTTG---TCTGGTATAGTGCAACAGCAAAGC---  
 AATTTG---CTGAGG---GCTATAGAGGCGCAACAGCATATGTTGCAACTCACAGTCTGGGGCATT  
 >KR861322  
 TTTTATTGTAATACATCAAAATTGTTTAATGAGAGCCATGTGTATAATAAT-----  
 -----  
 -----  
 ACAAATGGAACCATCACACTCCCATGCAGAATAAAACAAATTATAAACATGTGGCAAGGGGTAGGAAGAGCAA

TGTATGCCCCCTCCCATTCAGAGAAACATAACATGTATATCAAAT ---  
 ATCACAGGACTGCTATTGACACGTGATGGAGGAGAGAATAATGGG-----  
 -----  
 TCAGAAGAAGTATTTCAGACCTGGAGGAGGAGATATGAGAGACAATTGGAGAAGTGAATTATATAAATATAAAG  
 TGGTAGAAGTTAAACCATTA---GGAATAGCACCCACTGAGGCAAGAAGGAGAGTGGTG-----  
 -----GAGAGAGAAAAAAGAGCA--GTGGGA--ATAGGAGCT-----  
 GTGTTTCCTTGGGTTCTTGGGAGCA--GCAGGAAGCACTATG--GGCGCGGCGTCA---  
 ATAACGCTGACGGTACAG---GCCAGACAG---TTATTG---TCTGGTATAGTGCAACAGCAAAGC---  
 AATTTG---CTGAGG---GCTATAGAGGCGCAACAGCATATGTTGCAACTCACGGTCTGGGGCATT  
 >KR861324  
 TTCTATTGTAACACATCAGGCCTGTTTAAATAGCACCATCCGGCCTAATGGCACTATCCAGTTTAAATAGCACTA  
 ATGCA-----  
 -----  
 ACAGCCCCAAACATCACACTTCCATGCAGAATAAAACAATTTATAAACATGTGGCAAGGGGTAGGACGAGCAA  
 TGTATGCCCCCCCCATTGAGGAAATATAATGTGTAGATCAAAT ---  
 ATCACAGGACTACTATTGACACGTGATGGAGGTGGCAATGAGACT-----  
 -----  
 GATACTGAGATATTCAGACCTGAGGGAGGAGATATGAGGAACAATTGGAGAAGTGAATTATATAAATATAAAG  
 TGGTGGAGATCCAGCCATTA---GGAGTAGCACCCACTGAGGCAAAAAGGAGAGTGGTG-----  
 -----GAGAGAGAGAAAAAGAGCA--GTGGGA--ATAGGAGCT-----  
 GTGTTTCCTTGGGTTCTTAGGAGCA--GCAGGAAGCACTATG--GGCGCAGCATCA---  
 ATAACGCTGACGGTACAA---GCCAGACAA---TTATTG---TCTGGTATAGTGCAACAGCAAAGC---  
 AATTTG---CTGAGG---GCTATAGAGGCGCAACAACATATGTTGCAACTCACAGTCTGGGGCATT  
 >KR861330  
 TTCTATTGCAATACATCAAATCTGTTTAAATAAGACATACTGTCCTAATGATACAAAGAGTAATGAGACAAAG-  
 -----  
 -----  
 AGTAATGAAACCATCACACTGCAATGCAGAATAAAACAATTTATAAACAGGTGGCAGGAGGTAGGACGAGCAA  
 TGTATGCCCCCTCCTATTGAAGGAAACATAACATGTAAATCAAAT ---  
 ATCACAGGACTACTGTTGGTACGTGATGGAGTTAACACAACCTGAG-----  
 -----  
 -----  
 GAGATATTCAGACCTGGAGGAGGAAATATGAAAGACAATTGGAGAAGTGAATTATATAAATACAAAGTAGTAG  
 AAATTAAGCCATTG--GGAATAGCACCCACTGCAGCAAAAAGGAGAGTGGTG-----  
 -----GAGAGAGAAAAAAGAGCA--GCA-----CTGGGAGCT-----  
 ATGTTTCCTTGGGTTCTTGGGATTA--GCAGGAAGCACTATG--GGCGCAGCGTCA---  
 GTGACGCTGACGGTACAG--GCCAGACAA--CTGTTG--TCTGGTATAGTGCAACAGCAAAAC---  
 AATTTG---CTGAGA--GCTATAGAGGCGCAACAGCATATGTTGCAACTCACGGTCTGGGGCATT  
 >KR861335  
 TTCTATTGCAATACAACAAAACCTGTTCAATACAACAATACCGCCTAATGAGACATACAGGAGTACAAAC----  
 -----  
 -----  
 AATTCAAGTACCATCACACTCAAATGCAGAATAAAACAATTTATAAATATGTGGCAGGGGGTAGGACGAGCAA  
 TGTATGCCCCCTCCCATTCAGGAAACATAACATGTATATCAAAT ---  
 ATCACAGGATTAATATTGACACGTGATGGAGGAAACAATAATAAT-----  
 -----  
 -----  
 GAGACTGAGACATTTCAGACCTGCAGGAGGAAATATGAAGGACAATTGGAGAAGTGAATTATATAAATATAAAG  
 TAGTAGAAATTAAGCCATTA---GGACTAGCACCCAACAAGGCAAAAAGGAGAGTGGTG-----  
 -----GAGAGAGAAAAAAGAGCA--GTGGGA--ATAGGAGCT-----  
 GTGTTTCCTTGGGTTCTTGGGAGCA--GCAGGAAGCACTATG--GGCGCGGCGTCA---  
 ATAACGCTGACGGTACAG---GCCAGACAA---CTGTTG---TCTGGTATAGTGCAACAGCAAAGT---  
 AATTTG---CTGAGA---GCTATAGAGGCGCAACAGCATATGTTGCAACTCACGGTCTGGGGCATT  
 >KR861336  
 TTTTATTGCGATACATCAAGATTGTTTAAATGATACACACTGGAATGACACAGAAGATAATATA-----  
 -----  
 -----  
 GCTAATAGTAACACCATCATACCATGCAAAATAAGACAAATTTATAAACATGTGGCAGGAAGTAGGACGAGCAA

TATATGCCCCCTCCCATTTGAAGGAAACATAACATGTAAATCACGT ---  
ATCACAGGATTACTATTGGAACGTGATGGAGGAAAAAAAAAATGAC -----  
-----  
-----  
CCAAAAAATAGAAATATTCAGACCTGGAGGAGGAGATATGAGGAACAATTGGAGAAATGAATTATATAAAT  
ATAAAGTGGTAGAAATTAAGCCATTG --- GGAGTAGCACCCACTGAGGCAAAAAGGAGAGTGGTG -----  
----- GAGAGAGAAAAAAGAGCA --- GTGGGC --- ATAGGAGCT ---  
----- GTGCTCCTTGGGTTCTTGGGAGCA --- GCAGGAAGCACTATG --- GGCGCAGCATCA ---  
ATAACGCTGACGGTACAG --- GCCAGACAA --- TTGTTG --- TCTGGAATAGTGCAACAGCAAAAC ---  
AATTTG --- CTGAGG --- GCTATAGAGGCGCAACAGCATATGTTGCAACTCACAGTCTGGGGCATT  
>KR861343  
TTCTATTGCAATACATCAAACCTATTTCCAGGAAATGAGACGCAAGGCACAGGG -----  
-----  
-----  
ACAAACAGCACATAACAATACAATGCAGAATAAAACAAATTATAAACATGTGGCAGGAGGTAGGACGAGCAA  
TATATGCCCCCTCCCATTTGAAGGAAACATAACATGTATATCAAAG ---  
ATCACAGGACTAATACTGACACGTGATGGAGGAAACAGTGGAACAAT -----  
-----  
-----  
ACAAAGCAGCCAGAGATATTCAGACCTGGAGGAGGAGATATGAGAGACAATTGGAGAAGTGAAGTATATAAAT  
ATAAAGTGGTAGAAATTAAGCCATTG --- GGAGTAGCACCCACTGGGGCAAAAAGGAGAGTGGTG -----  
----- GAGAGAGAAAAAAGAGCA --- GTGGGA --- ATAGGAGCT ---  
----- GTGCTCCTTGGGTTCTTGGGAGCA --- GCAGGAAGCACTATG --- GGCGCAGCATCA ---  
ATAACGCTGACGGTACAG --- GCCAGACAA --- TTGTTG --- TCTGGAATAGTGCAACAGCAAAGC ---  
AATTTG --- CTGAGG --- GCTATAGAGGCGCAACAACATATGTTGCAACTCACGGTCTGGGGCATT  
>KR861311  
TTCTATTGTAATACATCAAACTGTTTAATAGGACATATGAGGTTAATGATACAGGTAGGACTAATGATACTA  
GT -----  
-----  
GATAATTCAACCATCATACTCCCATGCAGAATAAAACAAATTATAAACTTGTGGCAGGGAGTAGGACGAGCAA  
TATATGCCCCGCCCATTGCAGGAAACATAACATGTACTTCAAAT ---  
ATCACAGGAATGCTATTGACACGGGATGGAGGAAACAAAAACAATACA -----  
-----  
-----  
GAGCCAGAGACATTTCAGACCTGGAGGAGGAGATATGAGGGACAATTGGAGAAATGAATTATATAAATATAAGG  
TGGTAGAAATTAAGCCATTA --- GGAATAGCACCCACTAGGGCAAAAAGAAGAGTGGTG -----  
----- GAGAGAGAAAAAAGAGGA ----- ATAGGAGCT -----  
GTGTTCTTGGGTTCTTGGGAGCA --- GCAGGAAGCACTATG --- GGCGCGGCATCA ---  
GTGATGCTGACGGTACAA --- GCCAGACAA --- TTATTG --- TCTGGTATAGTGCAACAGCAAAGC ---  
AATTTG --- CTGAGG --- GCTATAGAGGCGCAACAGCATATGTTGCAACTCACAGTCTGGGGCATT  
>KR861327  
TTCTATTGCAATACAACAAAGCTGTTTAATAGTACTGATAAAAGT -----  
-----  
-----  
GATAATGGTACCATCACACTCCCATGCAAAATAAAACAAATTATAAACATGTGGCAGGGGGTAGGAAGAGCAA  
TGTATGCCCCCTCCCATTTGCAGGAAACATAACATGTAACTCAAGT ---  
ATCACAGGACTAATATTGACACGGGATGGAGGAAACGATACAAACACT -----  
-----  
-----  
AATAACACAGAGATATTCAGACCTGGAGGAGGAAATATGAAGGACAATTGGAGAAATGAATTATATAAATATA  
AAGTGGTAGAAATTAAGCCATTG --- GGAATAGCACCCACCAGGCAAAAAGGAGAGTGGTG -----  
----- GAGAGAGAGAAAAAGAGCA --- GTGGGA --- ATAGGAGCT -----  
--- GTGTTCTTGGGTTCTTGAGTGCA --- GCAGGAAGCACTATG --- GGCGCGGCGTCA ---  
ATAACGCTGACGGTACAG --- GCCAGACAA --- CTGTTG --- TCTGGTATAGTGCAACAGCAAAGT ---  
AATTTG --- CTGAGG --- GCTATAGAGGCGCAACAGCATATGTTGCAACTCACGGTCTGGGGCATT  
>KR861344  
TTCTATTGCAATACAACAAAACCTATTTAGTGGGGTTAATGATACA -----  
-----  
-----  
GACAAATAGGACAATAATACTCCCATGCAGAATAAAACAAATTATAAACATGTGGCAGGGGGTAGGACGAGCAA

TATATGCCCCCTCCCATTCAGGAAACATAACATGTAAATCTAAT ---  
ATCACAGGACTACTATTGGTACGAGATGGAGGTGATACCAATGCAACA-----  
-----  
GAGATAGAGATATTCAGGCCTGGAGGAGGAGATATGAGAGACAATTGGAGAAGTGAATTATATAAATATAAGG  
TGGTAGAAATCAAGCCATTG---GGAATAGCACCCACTGAGTCAAAAAGGAGAGTGGTG-----  
-----GAGAGAGAAAAGAGAGCAGTATTGGGAGGAATAGGAGCT-----  
GTGTTTCCTTGGGTTCTTGGGAGCA---GCAGGAAGCACTATG---GGCGCGGCGTCA---  
CTGACGCTGACGGTACAG---GCCAGGCAA---CTGTTG---TCTGGTATAGTGCAGCAGCAAAGC---  
AATTTG---CTGAAG---GCTATAGAGGCGCAACAGCATCTGTTGCAACTCACAGTCTGGGGCATT  
>KR861279  
TTCTATTGCAATACATCAAATCTGTTTAATGGAAAGCTATTTAATGATACATACAACAAGACAGGA-----  
-----  
-----  
GATACTTCAAACATCACACTCTCATGCAGAATAAAACAAATTATAAACATGTGGCAGGAGGTAGGACGAGCAA  
TGTATGCCCCCTCCCATTCAGGAAACATAACATGTATATCAAAT---  
ATCACAGGAATAATATTGACACGTGATGGAGGAATTAATAACACTACTAAC-----  
-----  
AACACTGAGAAAAAT---  
GGCGCAGAGACATTCAGACCTGGAGGAGGAAATATGAAGGACAATTGGAGAAGTGAATTATATAAATATAAAG  
TGGTAGAAATTAAGCCATTA---GGACTAGCACCCACTGCGGCAAAAAGGAGAGTGGTG-----  
-----GAGAGAGAAAAAAGAGCA---GTGGGA---ATAGGAGCT-----  
GTTTTCTTGGGTTCTTGGGAGCA---GCAGGAAGCACTATG---GGCGCGGCGTCA---  
ATAACGCTGACGGTACAG---GCCAGACAA---CTGTTG---TCTGGTATAGTGCAACAGCAAAGT---  
AATTTG---CTGAGA---GCTATAGAGGCGCAACAGCATATGTTGCAACTCACGGTCTGGGGCATT  
>KR861271  
TTCTATTGCAATACAACAAACCTGTTTAATGGAACATATGGGGATAAAGATACAAAC-----  
-----  
-----  
AGTACTTCAAACATCACACTCTCATGCAAAATAAAACAAATTATAAACACATGGCAGGAGGTAGGAAAGGCAA  
TATACGCCCCCTCCCATTCAGGAAGCATAACTGCACATCACAG---  
ATCACAGGACTACTCTTGGTACGTGATGGAGGGGAAATAGCACA-----  
-----  
-----  
GATAATGACACATTCAGACCTGAAGGGGGAGATATGAGAGACAATTGGAGAAGTGAATTATATAAATATAAAG  
TGGTAGAAATTAACCATTG---GGAATAGCACCCACCAAGGCAAAAAGGAGAGTGGTG-----  
-----GAGAAAGAAAAAAGAGCA---GTCGGA---ATGGGAGCT-----  
GTGATTCTTGGGTTCTTGGGAGCA---GCTGGAAGCACTATG---GGCGCGGCGTCA---  
ATAACGCTGACGGCACAG---GCCAGACAA---GTATTG---TCTGGTATAGTGCAACAGCAAAGC---  
AATTTG---CTGAAG---GCTATAGAGGCGCAACAGCGTATGTTGCAACTCACGGTCTGGGGCATT  
>KR861282  
TTCTATTGCGACACATCAAACTGTTTAATAGTACATACAACGATCTATTTAATAAAACATACAATGATACAG  
CT-----  
-----  
AATAGATTAAACATCACAATTCATGCAGAATAAAACAAATTATAAACATGTGGCAGAAGGTAGGACGAGCAA  
TGTATGCTCCTCCCATTCAGGAAACATAACATGTGAATCCAAT---  
ATCACAGGACTGCTACTGGTACGTGATGGAGGTAGAAGTAACAAT-----  
-----  
-----  
AACAAATGGCACAGAGACATTTAGGCCTGGAGGAGGAAATATGAAGGACAATTGGAGAAGTGAATTATATAAAT  
ATAAAGTGGTAGAAATTAACCATTA---GGAATAGCACCCACTGAAGCAAAAAGGAGAGTGGTG-----  
-----GAGAGAGAAAAAAGAGCA---GTGGGA---ATGGGAGCT---  
-----GTGTTTCCTTGGGTTCTTGGGAGCA---GCAGGAAGCACTATG---GGCGCGGCGTCA---  
GTGGCGCTGACGGTACAG---GTCAGACAA---TTGTTG---TCTGGTATAGTGCAACAGCAAAAC---  
AATTTG---CTGAGG---GCTATAGAGGCGCAACAGCATATGTTGCAACTCACAGTCTGGGGCATT  
>KR861304  
TTCTATTGCAATACATCATGCCTGTTTAATGATAGTTGTACAAAAAATGAATCAGTC-----  
-----  
-----  
ATCACACTCCCATGCAGAATAAAACAAATTACAAACATGTGGCAGGAAGTAGGACGAGCAATATATGCCCCCTC

CCATTGCAGGAAACATAACATGTAATTCAAGT---  
ATCACAGGACTACTCTTAACACGTGATGGAGGACGGTCAAGTGAA-----  
-----  
CCAAATAACACAAAT---  
AACAAATGAGACATTTCAGACCTGCAGGAGGTGATATGAGGGACAATTGGAGAAGTGAATTATATAAAATATAAAG  
TGGTAGAAGTTAAGCCATTG---GGAATAGCACCCACTAACGCAAAAAGGAGAGTGGTG-----  
-----GAGAGAGAAAAAAGAGCA--GTGGGA--ATAGGAGCT-----  
GTGTTTCCTTGGGTTCTTGGGAGCA--GCAGGAAGCACTATG--GGCGCAGCATCA---  
ATAACGCTGACGGTACAA---GCCAGACAA---CTGTTG---TCTGGTATAGTGCAACAGCAAAGC---  
AATTTG---CTGAGA---GCTATAGAGGCGCAACAACATATGTTGCAACTCACAGTCTGGGGCATT  
>AF110959  
TTTTATTGCGATACATCAGAACTGTTTAAATAGTACATACATGTCTAATGGTACAGAAGGTAATATAAGC----  
-----  
-----  
CCAAGTACAATCATCATGCTCCCATGCAGAATAAAACAAATTATAAACATGTGGCAGGGGGTGGGACGAGCAA  
TGTATGCCCCCTCCCATTAAGGAAGTATAACATGTAGATCAAAT---  
ATTACAGGGTTACTATTGACACGTGATGGAGGGCTAAATAGGAGCACA-----  
-----  
-----  
GAGGAGCCAGAGATATTTCAGACCTGGAGGAGGAGATATGAGGAACAATTGGAGAAGTGAATTATATAAAATATA  
AAGTGGTAGGAATTAAGCCATTA---GGAGTAGCACCCACTGGGGCAAAAAGGAGAGTGGTG-----  
-----GAGAGAGAAAAAAGAGCA--GTGGGA--ATAGGAGCT-----  
---GTGTTTCCTTGGGTCTTGGGAGCA--GCAGGAAGCACTATG--GGCGCGGCGTCA---  
ATCACGCTGACGGTACAG---GCCAGACAA---TTATTG---TCTGGTATAGTGCAACAGCAAAGC---  
AATTTG---CTGAGG---GCCATAGAGGCGCAACAGCACATGTTGCAACTCACGGTCTGGGGCATT  
>AF290028  
TTTTATTGCAATACATCAAGACTGTTTGATGAGACATACCTGTCTAATGGGACAGACGAG-----  
-----  
-----  
GATAATGGTACAATCACACTCCCATGCAAAATAAAACAAATTATAAACATGTGGCAAGAGGTAGGACGAGCAA  
TATATGCCCCCTCCCATTCAGGAAACATAACATGTAAATCAAAT---  
ATCACAGGACTATTATTGACACGTGATGGAGGGTTAAGCCCTAAT-----  
-----  
-----  
AATGACAGTGAGACATTTCAGACCTATAGGAGGAGAGATGAGGAACAATTGGAGAAGTGAATTATATAAAATATA  
AAGTGGTAGAAATTAAGCCATTG---GGAATAGCACCCACTAAGGCAAAAAGGAGAGTGGTG-----  
-----GAGAGAGAAAAAAGAGCA--GTGGGA--ATAGGAGCT-----  
---GTGTTTCCTTGGGTTCTTGGGAGCA--GCAGGAAGCACTATG--GGCGCAGCATCA---  
ATAACGCTGACGGTACAG---GCCAAACAA---TTGTTG---TCTGGAATAGTGCAACAGCAAAGC---  
AATTTG---CTGAAA---GCTATAGAGGCGCAACAGCATATGTTGCAACTCACGGTCTGGGGCATT  
>AF443075  
TTCTATTGCAATACATCAGAACTGTTTAAATGGAACATATAATGGAACAGACAACAAT-----  
-----  
-----  
AGCAATAAAACCATCACACTCCTATGCAGGATAAAACAAATTATAAACACATGGCAGGAGGTAGGACGGGCAA  
TATACGCCCCCTCCCATTCAGGAAACATAATATGTATATCAAAC---  
ATCACAGGACTACTCTTGACACGTGATGGAGGAAAAACAAATGACACA-----  
-----  
-----  
AATGACACAGAAATATTTCAGACCTGGAGGAGGAAATATGAAGGACAATTGGAGAAGTGAATTATATAAAATATA  
AAGTGGTAGAAATTAAACCATTG---GGAGTAGCACCCACCAAGGCAAAAAGGCGAGTGGTG-----  
-----GAGAGAGAAAAAAGAGCA--GTCGGA--ATAGGAGCT-----  
---GTGCTCCTTGGGTTCTTGGGAACA--GCAGGAAGCACTATG--GGCGCGGCGTCA---  
ATAACGCTGACGGTACAG---GCCAGACAA---GTATTG---TCTGGTATAGTGCAACAGCAAAGC---  
AATTTG---CTGAGG---GCTATAGAGGCGCAACAGCATATGTTGCAACTCACGGTCTGGGGCATT  
>AF443074  
ATCTATTGTAATACATCAAAGCTGTTTAAATGGTACATACAACAGTACAGGAGGTACT-----  
-----  
-----  
TCAAAATTCAACAATCACACTCTCATGCAGAATAAAACAAATTATAAACATGTGGCAGGGGGTAGGACGAGCAA

TGTATGCCTCTCCCATTCAGAGAAACATAACATGTAAATCAAAT ---  
 ATCACAGGACTACTATTGACACGTGATGGAGGAAATGAGACAAGT-----  
 -----  
 -----  
 GGGATTGAGATATTCAGACCTGCAGGAGGAGATATGAGGGACAATTGGAGAAGTGAATTATATAAAATATAAAG  
 TGGTAGAAATTAAGCCATTA---GGATTAGCACCCACTAAGTCAAAACGGAGAGTGGTG-----  
 -----GGGAGAGAAAAAAGAGCA--GTGACA---TTCGGAGCT-----  
 ATGTTTCCTTGGGTTCTTGGGAGCA--GCAGGAAGCACTATG--GGCGCGGCGTCC---  
 ATGACGCTGACGGTACAG---GCCAGACAA---CTGTTG---TCTGGTATAGTGCAACAGCAAAGC---  
 AATTTG---CTGAGG---GCTATAGAGGCGCAACAGCATATGTTGCAACTCACGATCTGGGGCATT  
 >KY658709  
 TTCTATTGCAATACATCAAACTGTTTAATGGTACATATAACAGTACAGGAAGTACT-----  
 -----  
 -----  
 TCAAAATTC AACCATCACACTCCCATGCAGAATAAAACAAATTTATAAACTTGTGGCAGGAGGTAGGACGAGCAA  
 TGTATGCCCCCTCCCATTCAGAGAAACATAACATGTAGATCAAAT ---  
 ATCACAGGACTAATATTGACACGTGATGGAGGAGTTGGTAATGAC-----  
 -----  
 -----  
 TCAGAGACATTCAGACCTGAAGGAGGAGATATGAGGAACAATTGGAGAAGTGAATTATATAAAATACAAAGTGG  
 TAGAAATTAAGCCATTA---GGACTAGCACCCACTAAGGCCAAAAGGAGAGTGGTG-----  
 -----GAGAGAGAAAAAAGAGCA--GTGGGA---ATAGGAGCT-----  
 GTGTTTCCTTGGGTTCTTGGGAGCA--GCAGGAAGCACTATG--GGCGCGGCGTCA---  
 ATAACGCTGACGGTACAG---GCTAGACAA---CTGTTG---TCTGGTATAGTGCAACAGCAAAGC---  
 AATTTG---CTGAGG---GCTATAGAGGCGCAACAACATATGTTGCAACTCACGGTCTGGGGCATT  
 >KY658711  
 TTCTATTGCAATACATCAAACTGTTTAATAGTACATACAATAGTACAGACAGGTCTAAT-----  
 -----  
 -----  
 AATACAGACAACATCATAATCCAATGCAGAATAAAACAAATTTATAAACATGTGGCAGGGGGTAGGACGAGCAA  
 TGTATGCCCCCTCCCATTCAGAGAAACATAACATGTAAATCAAAT ---  
 ATCACAGGACTACTATTGGTACGTGATGGAGGGAAAGAAGAGAATAACACA-----  
 -----  
 -----  
 GGGACAGAGATATTCAGACCTGAAGGAGGAGATATGAGGGATAACTGGAGAAGTGAATTATATAAAATATAAAG  
 TGGTAGAAATTAAGCCATTG---GGAATAGCACCCACTAAGGCCAAAAGGAGAGTGGTG-----  
 -----GAGAGAGAAAAAAGAGCA--GTGGGA---ATAGGAGCT-----  
 GTGTTTCCTTGGGTTCTTGGGAGCA--GCAGGAAGCACTATG--GGCGCGGCGTCA---  
 ATAACGCTGACGGTACAG---GCCAGACAA---TTGTTG---TCTGGTATAGTGCAACAGCAAAGC---  
 AATTTG---CTGAAA---GCTATAGAGGCGCAACAACATCTGTTGCAACTCACGGTCTGGGGCATT  
 >AF443076  
 TTCTATTGCAATACATCAGGCTTGTTTAATAGTACATACAATCCTAATAGTACATACAATCTTAATAGTACAG  
 AAAGT-----  
 -----  
 -----  
 AAGGCAAATTC AACATCACACTCCACTGCAGAATAAAACAAATTTATAAACATGTGGCAGGAGGTAGGACGAG  
 CAATGTATGCCCCCTCCCATTCAGAGAAACATAACATGTAGATCAAAT ---  
 ATCACAGGATTACTATTGACACGTGATGGAGGAAATACAACAGAG-----  
 -----  
 -----  
 ACAAAGAGACATTCAGACCTGGAGGAGGGGATATGAGGGACAATTGGAGAAGTGAATTATATAAAATATAAAG  
 TGGTAGAAATTAAGCCATTG---GGAGTAGCACCCACTGAGGCGAAAAGGAGAGTGGTG-----  
 -----GAGAGAGGAAAAAAGAGCA--GCGGGA---CTAGGAGCT-----  
 GTGCTCTTTGGGTTCTTGGGAGCA--GCAGGAAGCACTATG--GGCGCAGCGTCA---  
 ATAACGCTGACGGTACAG---GCCAGACAA---CTGTTG---TCTGGTATAGTGCAACAGCAAAGC---  
 AATTTG---CTGAGG---GCCATAGAGGCGCAACAGCATATGTTGCAACTCACGGTCTGGGGCATT  
 >AF443078  
 TTCTATTGCAATACATCACAACCTGTTTAATAGTACATACAATGGTACAGAAAGAAATTCACA-----  
 -----  
 -----  
 ACAAATGCAACCATTACACTCCCATGCAGAATAAAACAAATCATAAACATGTGGCAGGAGGTAGGACGAGCAA

TATATGCCCCCTCCCATTAAGGAAACATAACATGTGAATCAAAT ---  
ATCACAGGACTACTATTGACACGTGATGGAGGGTCGAATGATACA -----  
-----  
-----  
ACAGAAACATTTAGACCTGAGGGAGGAGATATGAGGAACAATTGGAGAAGTGAATTGTATAAATATAAAGTAG  
TAGAAATTAGGCCATTA --- GGGATAGCACCCACTGGGGCAAAAAGGAGAGTGGTG -----  
-----  
----- AATAGAGAAAAAAGAGCA --- GTGGGA --- GTAGCAGCT -----  
GTGTTCCCTTGGGTTCTTATCAGCA --- GCAGGAAGCACTATG --- GGCGCAGCATCA ---  
ATAACGCTGACGGTACAG --- GCCAGACAA --- TCGTTG --- TCTGGTATAGTGCAACAGCAAAGC ---  
AATTTG --- CTGAGA --- GCTATAGAGGCGCAACAGCATCTGTTGCAACTCACGGTCTGGGGCATT  
>AF443079  
TTCTATTGCAATACATCAAACTGTTTAATAGTACATACAATGCTACATACAATAGTACATACAATGATACA-  
-----  
-----  
TCAAAATTCAACCATCACAATCCCATGCAGAATAAAACAAATTATAAACATGTGGCAGGGGGTAGGACAAGCAA  
TGTATGCCCCCTCCCATTCAGGAAACATAACATGTAAATCAAAT ---  
ATCACAGGAATACTGTTGACACGTGATGGAGGCATAAAATAACACA -----  
-----  
-----  
AATGGCACAGAGACATTCAGACCTGGAGGAGGAGATATGAGGGACAATTGGAGAAGTGAATTATATAAATATA  
AAGTGGTAGAAGTTAAACCATTA --- GGGATAGCACCCACCAAGGCACAAAGGAGAGTGGTG -----  
-----  
----- GAGAGAGAAAAAAGAGCA --- GTGGGA --- ATAGGAGCT -----  
--- GTGTTCCCTTGGGTTCTTGGGAGCA --- GCAGGAAGCACTATG --- GGCGCAGCGTCA ---  
ATAACGCTGACGGTACAG --- GCCAGACAA --- TTGTTG --- TCTGGTATAGTGCAACAGCAAAGC ---  
AATTTG --- CTGAGA --- GCTATAGAGGCGCAACAGCATATGTTGCAACTCACAGTCTGGGGCATA  
>AF443080  
TTCTATTGTAATACATCAGGCCTGTTTAATAGTGCATTTAATGATAAT -----  
-----  
-----  
AGTGGTGGGACCATCACCTCCAATGCAGAATAGAACAAATTATAAACATGTGGCAGAAGGTAGGACGAGCAA  
TATATGCACCTCCCATTCAGGAAACATAACATGTAGTTCAAGG ---  
ATCACAGGACTACTATTGACACGGGATGGTGGAAAAAATGATACA -----  
-----  
-----  
CATGAGACATTCAGACCTGCAGGAGGAGATATGAGGGACAATTGGAGAAGTGAATTATATAAATATAAAGTGG  
TGGAGATTAAGCCATTA --- GGAGTAGCACCCAGTGAGGCACAAAAGAAGAGTGGTG -----  
-----  
----- GAGAGAGAGAAAAGAGCG --- GCA --- CTGGGAGCT -----  
GTGTTCCCTTGGGTTCTTGGGAGCA --- GCAGGAAGCACTATG --- GGCGCGGCATCA ---  
ATAACGCTGACGGTACAG --- ACCAGAAAA --- TTATTG --- TCTGGTATAGTGCAACAGCAAAGT ---  
AATTTG --- CTGAAA --- GCTATAGAGGCGCAACAACATATGTTGCAACTCACAGTCTGGGGCATT  
>AF443082  
TTCTATTGCAATACATCAAAGCTGTTTAATACATCATGGCTGGATTCTATACATATCTAATAATACAGGA ---  
-----  
-----  
AATAATTCAATCATCACACTTCCATGCAGAATAAAACAAATTATAAACATGTGGCAGAAGGTAGGACGAGCAA  
TGTATGCCAACCCCATTTGAAGGAAATATAACATGTAGGTCAAAT ---  
ATCACAGGATTACTATTAGAAAATGATGGA --- AACATG -----  
-----  
-----  
ACATTAGACCTGGAGGAGGAGATATGAAGGACAATTGGAGAAGTGAATTATATAAATATAAAGTAGTAGAAA  
TTAAGCCATTG --- GGAATAGCACCCACTGAAGCAAAAAGGAGAGTGGTG -----  
-----  
----- GAGAGAGAAAAAAGAGCA --- GTGGGA --- ATAGGAGCT -----  
GTGTTCCCTTGGGTTCTTGGGAGCA --- GCAGGAAGCACTATG --- GGCGCGGCGTCA ---  
ATAACGCTGATGGTACAG --- GCCAGACAA --- TTGTTG --- TCTGGTATAGTGCAACAGCAAAGC ---  
AATTTG --- CTGAGA --- GCTATAGAGGCGCAACAGCATCTGTTGCAACTCACAGTCTGGGGCATT  
>AF443083  
TTCTATTGCAATACATCACGCCTGTTTAATAGTACATACAATCCTAATAGTACAAAAAGCAAT -----  
-----  
-----  
ACAGGCTCATGGATCATACTCCCATGCAGAATAAAACAAATTATAAACATGTGGCAGAAGGTAGGACGAGCAA

TGTATGCTCCTCCCATTCAGAGAAACATAACATGTAAATCAAAT ---  
 ATCACAGGATTACTATTGGTGC GCGATGGAGGAACAACAAATGCC -----  
 -----  
 -----  
 ACGGACGAGATATTCAGACCTGGAGGAGGAGATATGAGGGACAATTGGAGAAGTGAAC TATATAAAATATAAAG  
 TGGTAGAAATTAAGCCATTG --- GGAATAGCACCCACTGAGGCAAAAAGGAGAGTGGTG -----  
 -----GAGAGAGAAAAAAGAGCA --- GTAGGA --- CTAGGAGCT -----  
 GTGTTCTTGGGTTCTTGGGAGCA --- GCAGGAAGCACTATG --- GGCGCGGCGTCA ---  
 ATAACGCTGACGGTACAG --- GCCAGACAA --- CTGCTG --- TCTGGTATAGTGCAACAGCAAAT ---  
 AATTTG --- CTGAGA --- GCTATAGAGGCGCAACAACATCTGTTGCAACTCACGGTCTGGGGCATT  
 >AF443085  
 TTCTATTGCAATACATCAGAACTGTTTAAACAGTACGTACAATGCAAATATGACATATAATACAAGCATGACTA  
 ATGCTACA -----  
 -----GGA ---  
 AATAACTCAACAACAATCATACTCCCATGCAGAATAAAACAAATTATAAACATGTGGCAGGAGGTAGGACGAG  
 CAATGTATGCCCCGCCCATTGAAGGGAACATAACATGTAAATCAAAT ---  
 ATCACAGGACTACTATTGGTACGTGATGGAGGAGGAGGAAAGAATGCC -----  
 -----  
 -----  
 ACAAATGACACAGAGATATTCAGACCTGAAGGAGGAGACATGAGAAACAATTGGAGAAGTGAATTATATAAAAT  
 ATAAAGTGGTAGAAATTAAGCCATTG --- GGAGTAGCACCCACTAAGGCAAAGAGAAGAGTGGTG -----  
 -----GACAAAGAAAAAAGAGCA --- ATA -----GCAGGAGCT ---  
 -----GTGTTCTTGGGTTCTTGGGAGTA --- GCAGGAAGCACTATG --- GGCGCGGCGTCA ---  
 GTGGCGCTGACGGTACAG --- GCCAGACAA --- TTGTTG --- TCTGGTATAGTGCAACAGCAAAGC ---  
 AATTTG --- CTGAGA --- GCTATAGAGGCGCAACAGCATATGTTGCAACTCACGGTCTGGGGCATT  
 >AF443086  
 TTCTATTGCAATACATCAAACTGTTTAAACAGTACGTTTAATAGCAATGGTTCATACATATGGCATGACAGTA  
 CA -----  
 -----  
 GGAAATGATCCACTAACCATCCCATGTAGAATAAAACAAATTATAAACATGTGGCAGGAGGTAGGACGAGCAA  
 TGTATGCCCCCTCCCATTCAGAGGAAGAATAATATGTAAC TCACT ---  
 ATCACAGGGTTAATATTGACACGTGATGGAGGAAATAATACTAAT -----  
 -----  
 -----  
 AATACAGAGATATTCAGACCTATAGGAGGAAATATGAGGGACAATTGGAGAAGTGAATTATATAAAATATAAAG  
 TGGTAGAAATTAAGCCATTA --- GGAATAGCACCCACTAAGGCAAAAAGGAGAGTGGTG -----  
 -----GAGAGAGAAAAAAGAGCA --- GTGGGA --- ATAGGAGCT -----  
 GTGTTCTTGGGTTCTTGGGAGCA --- GCAGGAAGCACTATG --- GGCGCAGCATCA ---  
 ATAACGCTGACGGTACAG --- GCCAGACAA --- CTGTTG --- TCTGGTATAGTGCAACAGCAAAGC ---  
 AATTTG --- CTGAGG --- GCTATAGAGGCGCAACAGCATATGTTGCAACTCACGGTCTGGGGCATT  
 >HM215421  
 TTCTATTGTAATACATCAAGCCTGTTTAAATAGCACATACATGTCTAATGGCACATACATGTTTAAATGACATGT  
 CTAATGGTACA -----  
 -----GAAAGG -----  
 AATTCAAGCTCAATCATCGCAATTCCATGCAGAATAAAGCAAGTTATAAACATGTGGCAGGAGGTAGGACGAG  
 CGATGTATGCCCCCTCCCATTCAGGAAAAATTAACATGTAGATCAAAT ---  
 ATCACAGGACTACTATTGGTACGTGATGGAGGAACAATAATGCT -----  
 -----  
 -----  
 ACAACAGAGACATTTCAGACCTGGAGGAGGAGATATGAGGAACAATTGGAGAAGTGAATTATACAAATATAAAG  
 TGGTAGAAATTAAGCCATTG --- GGAGTAGCACCCACTGAGGCAAAAAGGAGAGTGGTG -----  
 -----GAGAGAGAAAAAAGAGCA --- GTGGGA --- ATAGGAGCT -----  
 GTGTTCTTGGGTTCTTGGGTGCA --- GCCGGAAGCACTATG --- GGCGCGGCGTCA ---  
 ATAACGCTGACGGTACAG --- GCCAGACAA --- TTGCTG --- TCTGGTATAGTGCAACAGCAAAGC ---  
 AATTTG --- CTGAGG --- GCTATAGAGGCGCAACAGCATATGTTGCAACTCACGGTCTGGGGCATT  
 >HQ699992  
 TTCTATTGTAATACATCAGGCCTGTTTAAATAGTACATACATGACTAATGGTACATACATGTTTAAATGGTACAT  
 ACAGGCTTAAT -----  
 -----AATATA -----  
 ACAAGTAATTCAAACATCACAATTCCATGCAGAATAAAGCAAATTATAAACACGTGGCAGGAGGTAGGGCGAG

CAATGTATGCCAATCCCATTGCAGGAAACATAACATGTAAATCAAAT---  
ATCACAGGACTACTATTGGTACGTGATGGAGGAACAAATAATGCT-----  
-----  
-----  
ACAACAGAGACATTTCAGACCTGGAGGAGGAAATATGAGGGACAATTGGAGAAGTGAATTATATAAATATAAGG  
TGGTAGAAATTAAGCCATTG---GGAATAGCACCCACTGAAGCAAAAAGGCGAGTGGTG-----  
-----GAGAGAGAAAAAAGAGCA--GTGGGA--ATAGGAGCT-----  
GTGTTCCCTTGGGTTCTTGGGTGCA---GCCGGAAGCACTATG---GGCGCAGCGTCA---  
ATAACGCTGACGGTACAG---GCCAGACAA---TTGCTG---TCTGGTATAGTGCAACAGCAAAGC---  
AATTTG---CTGAGG---GCTATAGAGGCGCAACAGCATATGTTGCAACTCACGGTCTGGGGCATT  
>KF835515  
TTCTATTGTGATACATCAGGCCTGTTTAATAGTACATACAATAGTACATACGTGCCTAATGGTACAGAA----  
-----  
-----  
AGTAAGCCAAACATCACAATCCAATGCAGAATAAAGCAAATTATAAACATGTGGCAGGAGGTAGGACGAGCAA  
TGTACGCCCCCTCCCATTAAGGAAGCATAACATGTAAATCAAAT---  
ATCACAGGACTACTATTGGTACGTGATGGAGGAGCAAAATACTACA-----  
-----  
-----  
GAAGAGATATTTCAGACCTGGAGGAGGAGATATGAGGGACAATTGGAGAAGTGAATTATATAAATATAAAGTGG  
TAGAAATCAAGCCATTG---GGAATAGCACCCACTGAAGCAAAAAGGAGAGTGGTG-----  
-----GAGAGAGAAAAAAGAGCA--GTGGGA--CTAGGAGCT-----  
GTGTTCCCTTGGGTTCTTGGGCGCA---GCAGGAAGCACTATG---GGCGCGGCGTCA---  
ATAACGCTGACGGTACAG---GCCAGACAA---TTGCTG---TCTGGTATAGTGCAACAGCAAAAC---  
AATTTG---CTGAAG---GCTATAGAGGCGCAACAGCATATGTTGCAACTCACGGTCTGGGGCATT  
>HQ699985  
TTCTATTGTAATACATCAAACTGTTTAATGGTACATACATGCCTAATGGTACAAACAGTAATTCAGCAGTA  
AT-----  
-----  
CCAAACTCAACCATCACAATCCCATGCAGTATAAAGCAAATTATAAATATGTGGCAGGAGGTAGGACGAGCAA  
TGTATGCCCCCTCCTATTGCAGGAAACATAACATGTAAATCAAAC---  
ATCACGGGACTACTATTGGTACGTGATGGAGGAAATGTTACAGGGAGA-----  
-----  
-----  
AATGGTACAGAGATATTTCAGACCTGAAGGAGGAAATATGAGGGACAATTGGAGAAGTGAATTATATAAATATA  
AAGTGGTAGAAATTAAGCCATTG---GGAGTAGCACCCACTGGAGCAAAAAGGAGAGTGGTG-----  
-----GAGAGAGAAAAAAGAGCA--GTGGGA--ATAGGAGCT-----  
---ATGTTCCCTTGGGTTCTTGGGAGCA--GCAGGAAGCACTATG---GGCGCGGCGTCA---  
ATAACGCTGACGGTACAG---GCCAGACAA---TTGCTG---TCTGGTATAGTGCAACAGCAAAAC---  
AATTTG---CTGAGA---GCTATAGAGGCGCAACAACATCTGTTGCAACTCACGGTCTGGGGCATT  
>HM215411  
TTCTATTGTAACACATCAGACCTGTTTAATTCTACATACATGTCTAATGGTACATTCAGGTTTAATGGTACAG  
TGTTTAATGGT-----  
-----ACAGGAGGT-----  
GATTCAAGCATAAACATCACAATCCCATGCAGAATAAAGCAAATTATAAACATGTGGCAGGAAGTAGGACGAG  
CAATGTATGCCCCCTCCCATTCAGGAAATATAACATGTAAATCAAAT---  
ATCACAGGACTACTATTGGTACGTGATGGAGGAACAACAAATAATACA-----  
-----  
-----  
AATAATACAGAGATATTTCAGACCTGGAGGAGGAGATATGAGGGACAATTGGAGAAGTGAATTATATAAATATA  
AAGTGGTAGAAGTTAAACCATTG---GGAATAGCACCCACTACAGCAAAAAGGAGAGTGGTA-----  
-----GAGAGAGAAAAAAGAGCA--GTGGGA--CTAGGAGCT-----  
---GTGTTCCCTTGGGTTCTTGGGAGCA---GCAGGAAGCACTATG---GGCGCAGCGTCA---  
ATAACGCTGACGGTACAG---GCCAGACAA---TTGCTG---TCTGGTATAGTGCAACAGCAAAGC---  
AATTTG---CTGAAA---GCTATAGAGGCGCAACAGCATCTGTTGCAACTCACGGTCTGGGGCATT  
>KC898995  
TTCTATTGTAATACATCAAGACTGTTTAATAGTACATATATGGATAATAGTACAGAAAGTAAT-----  
-----  
-----  
TCAAACTCAACCATCACAATCCCATGTAGAATAAAGCAAATTTATAAACATGTGGCAGCAGGTAGGACGAGCAA

TGTATGCCCCCTCCCATTTGAAGGAAATATAACATGTAAATCAAAT ---  
 ATCACAGGACTACTATTGGTACGTGATGGAGGAAAAACAAATGAT -----  
 -----  
 -----  
 ACAACAGAGACATTCAGACCTGGAGGAGGAGATATGAGGGACAATTGGAGAAGTGAATTATATAAAATATAAAG  
 TGGTAGAAATTAACCATTG --- GGAATAGCACCCACTGAAGCAAAAAGGAGAGTGGTG -----  
 -----GAGAGAGAAAAAAGAGCA --- GTGGGA --- ATAGGAGCT -----  
 GTGTTTCCTTGGGTTCTTGGGAGCA --- GCAGGAAGCACTATG --- GGCGCGGCGTCA ---  
 ATAACGCTGACGGTACAG --- GCCAGACAA --- TTATTG --- TCTGGTATAGTGCAACAGCAAAGC ---  
 AATTTG --- CTGAGG --- GCTATAGAGGCGCAACAGCATATGCTGCAACTCACGGTCTGGGGCATT  
 >KC898996  
 TTCTATTGTAATACATCAGGCCTGTTTAATAGTACATACACGTCTAAGGGTACATACAGGTTTAATGGTACAG  
 AAAGTAATGGT -----  
 -----ACAGAAAGT -----  
 AATTCAAGCTCAATCATCACAATCCCATGCAGAATAAAGCAAATTATAAACATGTGGCAGGAGGTAGGACGAG  
 CAATGTATGCCCCCTCCCATTTGAAGGAAACATAACATGTAAATCAAAT ---  
 ATCACAGGACTATTATTGGTACGTGATGGAGGAAAAGGAGACACAGG -----  
 -----  
 -----  
 CTAAATGATACAGAGACATTCAGACCTGGAGGAGGAGATATGAGAGACAATTGGAGAAATGAATTATATAAAAT  
 ATAAAGTGGTAGAAATTAAGCCATTG --- GGAATAGCACCCACTGCAGCAAAAAGGAGAGTGGTG -----  
 -----GAGAGAGGAAAAAGAGCA --- GTGGGA --- ATAGGAGCT ---  
 -----GTGTTTCCTTGGGTTCTTGGGAGCA --- GCAGGAAGCACTATG --- GGCGCGGCGTCA ---  
 ATAACGCTGACGGTACAG --- GCCAGACAA --- TTATTG --- TCTGGTATAGTGCAACAGCAAAGC ---  
 AATTTG --- CTGAAG --- GCTATAGAGGCGCAACAGCATCTGTTGCAACTCACGGTCTGGGGCATT  
 >KF250403  
 TTCTATTGCAATACATCAGGCCTGTTTAATAGTACATACACGCCTTTTAATAGTACATACATGCCTAATGGTA  
 CAGAAAGTAAT -----  
 -----  
 TCAAGCTTAACCATCACACTCCCATGCAGAATAAAGCAAATTATAAACATGTGGCAGGAGGTAGGACGAGCAA  
 TGTATGCCCCCTCCCGTTGCAGGAAACATAACATGTAAATCAAAT ---  
 ATCACAGGACTACTATTGGTACGTGATGGAGGCATAAATAATACA -----  
 -----  
 -----  
 AGAGAGGAGACATTCAGACCTGGAGGAGGAGAAATGAGGGACAATTGGAGAAGTGAATTATATAAAATATAAAG  
 TGGTAGAAATTAAGCCATTG --- GGAATAGCACCCACTGCAGCAAAAAGGAGAGTAGTG -----  
 -----GAGAGAGAAAAAAGAGCA --- GTGGGA --- ATAGGAGCT -----  
 GTGTTTCCTTGGGTTCTTGGGAGTA --- GCCGGAAGCACTATG --- GGCGCGGCGTCA ---  
 ATGACGCTGACGGTACAG --- GCCAGACAA --- TTATTG --- TCTGGTATAGTGCAACAGCAAAGC ---  
 AATTTG --- CTGAAG --- GCTATAGAGGCGCAACAGCATCTGTTGCAACTCACAGTCTGGGGCATT  
 >KF250404  
 TTCTATTGTAATACATCAGATCTGTTTAATAGTACATACATGCCTAATAGTACAGAAAGTAATTCAAACTCCT  
 CC -----  
 -----  
 -----  
 TCAAATTTAACCATCACACTCCAATGCAGAATAAAGCAAATTATAAACATGTGGCAGGAGGTAGGACGAGCAA  
 TGTATGCCCCCTCCCATTTGCAGGAAACATAACATGTAGATCAAAT ---  
 ATTACAGGACTACTATTGGTACGTGATGGAGGT -----  
 -----  
 -----  
 TCGAATGATACAGAGACATTCAGACCTGGAGGAGGAGATATGAGGGACAATTGGAGAAGTGAATTATATAAAAT  
 ATAAAGTGGTAGAAATTAAGCCATTG --- GGAATAGCACCAACTGGAGCAAAAAGGAGAGTGGTG -----  
 -----GAGAGAGAAAAAAGAGCA --- GTGGGA --- ATAGGAGCT ---  
 -----GTGTTTCCTTGGGTTCTTGGGAGTA --- GCAGGAAGCACTATG --- GGCGCGGCGTCA ---  
 ATAACGCTGACGGCACAG --- GCCAGAAAA --- TTATTG --- TCTGGTATAGTGCAACAGCAAAGC ---  
 AATTTG --- CTGAGA --- GCTATAGAGGCGCAACAGCATATGTTGCAACTCACGGTCTGGGGCATT  
 >KC807921  
 TTCTATTGTAATACATCAAACTGTTTAATAGTACATACATACATAATGGTACATACATGAGTGGTACAAAAA  
 AT -----  
 -----  
 AATTCAAGCTTCATCAGAATACCATGCAAAATAAAGCAAATTATAAACATGTGGCAGGAGGTAGGACGAGCAA

TGTATGCCCCCTCCCATTTGAAGGAAACATAACATGTAACCTCAAGT---  
 ATCACAGGACTACTATTGGTACGTGATGGAGTATCAGACACAAAT-----  
 -----  
 -----  
 GAGACATTCAGACCTGGAGGAGGAGATATGAGAGACAATTGGAGAAATGAATTATATAAAATATAAAGTGGTAG  
 AAATTAAGCCATTA---GGACTAGCACCCACTGCAGCAAAAAGGAGAGTGGTG-----  
 -----GAGAGAGAAAAAAGAGCA---GTGGGA---CTAGGAGCT-----  
 GTGTTCCCTTGGGTTCTTGGGAATG---GCAGGAAGCACTATG---GGCGCGGCGTCA---  
 ATAACGCTGACGGTACAG---GCCAGACAA---TTATTG---TCTGGTATAGTGCAACAGCAAAAC---  
 AATTTG---CTGAGA---GCTATAGAGGCGCAACAGCATATGTTGCAACTCACGGTCTGGGGCATT  
 >KC870038  
 TTCTATTGTAATACATCACAACCTGTTTAATGGTACATACAATGGTACATAC-----  
 -----  
 -ATGTCTAATGGTACA-----  
 GAAAGTAATGCAACCATCACAATTCCATGCAGAATAAAGCAAATTATAAACATGTGGCAGGAGGTAGGACGAG  
 CAATGTATGCCAATCCCATTTGCAGGAAACATAACATGTAAATCAAAT---  
 ATTACAGGACTACTATTGGTACGTGATGGAGGA-----  
 -----  
 GAAGGTACAAATGCT---  
 ACAAAATGAGACATTCAGACCTGGAGGAGGAGATATGAGGGACAATTGGAGAAGTGAATTATATAAAATATAAAG  
 TGGTAGAAATTAAGCCATTG---GGGTTAGCACCCACTGAAGCAAAAAGGAGAGTGGTG-----  
 -----GAGAGAGAAAAAAGAGCA---GTGGGA---ATAGGAGCT-----  
 GTGTTCCCTTGGGTTCTTGGGAGCA---GCCGGAAGCACTATG---GGCGCGGCGTCA---  
 ATAACGCTGACGGTACAG---GCCAGACAG---TTATTG---TCTGGTATAGTGCAACAGCAAAGC---  
 AATTTG---CTGAGG---GCTATAGAGGCGCAACAGCATCTGTTGCAACTCACGGTCTGGGGCATT  
 >FJ388913  
 TTCTATTGCAATACATCAAACCTGTTTAATAGTACATACATGACTAATGGTACATTCATACTTAATGGTACAG  
 GCATG-----  
 -----AAT---  
 ACAGGTAATGAAACCATCATACTCCCATCCAGGATAAGACAATTTGTAATCCTGTGGCAGGAGGTAGGGCGAG  
 CAACGTATGCTCCTCCCATCGCAGGAAACATCACATGTAAATCAAAT---  
 ATTACAGGAGTACTAGTGGTACGTGATGGAGGCACAGGCAACGGGACA-----  
 -----  
 -----  
 GAAAAATAACACAGAGATATTCAGACCTGGAGGAGGGAATATGAAGGACAATTGGAGAAGTGAATTATATAAAAT  
 ATAAAGTGGTAGAAATTAAGCCATTG---GGAATAGCACCCACTGGAGCAAAGAGGAGAGTGGTG-----  
 -----GAGAGAGAGAAAAGAGCA---GTGGGA---CTGGGAGCT---  
 -----GTGATCTTTGGGTTCTTGGGAGCA---GCAGGAAGCACTATG---GGCGCGGCGTCA---  
 ATGGCGCTGACGGTACAG---GCCAGACAA---GTATTG---GCTGGTATAGTGCAACAGCAAAAC---  
 AATTTG---CTGAGA---GCCATAGAGGCGCAACAGCATATGTTGCAACTCACGGTCTGGGGCATT  
 >FJ388948  
 TTCTATTGCAATACATCAAACTGTTTGACAGTACACTATTGGATAATAGTACAAATTTAACTTGACTGGCA  
 ATATC-----  
 -----  
 AATTTAACTGGCAATATCACGCTTCCATGCAGAATAAAACAAATTATAAACATGTGGCAGGAGGTAGGACGAG  
 CAATGTATGCCTCTCCCATAGCAGGAAACATAACATGTAAATCAAAT---  
 ATCACAGGACTACTGTAAACACGTGATGGAGGAAAAGACAACAAT-----  
 -----  
 -----  
 GGCACAGAAACATTCAGACCTGGAGGAGGAAATATGAAAGACAATTGGAGAAGTGAATTATATAAAATATAAAG  
 TAGTAGAAATTAAGCCATTA---GGAATAGCACCCACTACAGCAAAAAGGAGAGTGGTG-----  
 -----GAGAGAGAAAAAAGAGCA---GTAGGA---ATAGGAGCT-----  
 GTGTTCCCTTGGGTTCTTGGGAGCA---GCAGGAAGCACTATG---GGCGCGGCGTCT---  
 GTAACGCTGACGGTACAG---GCCAGACAA---CTGTTG---TCTGGTATAGTGCAACAAAGC---  
 AATTTG---CTGAAG---GCTATAGAGGCGCAACAACATCTGTTGCAACTCACGGTCTGGGGCATA  
 >FJ388952  
 TTCTATTGCAATACATCAAAGCTGTTTAATAGTACGTACATGTCTAATGGTACATACATGGTTAATGGTTCTA  
 ATGGT-----  
 -----GCA---  
 ACTCCAAATTC AACCATCACACTCCAATGTAGAATAAAACAAATTATAAACATGTGGCAGGGGGTAGGACAAG

CAATGTATGCCCCCTCCCATTTGCAGGAAACATAACCTGTAACTCAAGT---  
ATCACAGGAATACTATTGACACGTGATGGAGGAATTAATAATGACACA-----  
-----  
-----  
AATAACATAGAGACTTTCAGACCTGGAGGAGGAGACATGAGGGACAATTGGAGAAGTGAATTGTATAAATATA  
AAGTGGTAGAAATTAAACCATTA---GGAATAGCACCCACTAAGGCAAAAAGGAGAGTGGTG-----  
-----GAGAGAGAAAAAAGAGCA---GCAACA---TTAGGAGCT-----  
---GTGTTCCCTTGGGTTCTTGGGAGCA---GCTGGAAGCACTATG---GGCGCAGCATCA---  
ATAACGCTGACGGTACAG---GCCAGACAA---TTATTG---TCGGGTATAGTGCAACAGCAAAGC---  
AATTTG---CTGAGG---GCTATAGAGGCGCAACAGCATATGTTGCAACTCACGGTTTGGGGCATT  
>JF683740  
TTCTATTGCAATACATCAAACTGTTTTAATAGGAAATACACATTTAATGGCACAAATGGCACAAAC-----  
-----  
-----  
ACTAATATCACTATCACATTCCCGAGCAAGATAAAAAAAACATAAACCTGGGGCAGGGGGGAGCAAGATCAA  
CCTCTGCCCCCTGCCGGAACCGTAACCATAACA-----TCAAGT---  
TTAACAGGAACAGGATTGTTACGGGAAGGAGAAGGGAGAAAGAGCAAA-----  
-----  
-----  
CACACTAATGAGACATTTCAGACCTGGAGGAGGAAATATGAAGGATAATTGGAGGAGTGAATTATATAAATATA  
AAGTAGTAGAAATTAAACCATTA---GGAATAGCTCCCACTGAAGCAGAAAGGAGAGCGGTG-----  
-----AAGAGAGAAAAAAGAGCA---GTGGGA---ATAGGAGCT-----  
---GTGTTCCCTTGGGTTCTTGGGAGCA---GCAGGAAGCACTATG---GGCGCGGCGTCA---  
ATAACGCTGACGGCACAG---GCCAGACAA---CTGTTG---TCTGGTATAGTGCAACAGCAAAGC---  
AATTTG---CTGAGA---GCTATAGAAGCACAAACAGCATCTGTTGCAGCTCACGGTCTGGGGCATT  
>JF683755  
TTCTATTGCAATACATCAGGACTGTTTAATGGCACAAATAGCACAGATAGCAC-----  
-----  
-----  
AACAGCACAGTCATCACACTCCCATGCAGAATAAAACAAATTATAAGGATGTGGCAGGGAGTAGGACAAGCAA  
TGTATGCTCCTCCCATTAGAGCAAACATAACATGTAGATCAAAT---  
ATCACAGGACTACTATTAAACACGTGATGGAGGACATAATTTTACT-----  
-----  
-----  
AATGAGACCTTCAGACCTGGAGGAGGAGATATGAGGGACAATTGGAGAAGTGAATTATATAAATATAAAGTGG  
TAGAAATTAAACCATTA---GGAATAGCCCCCACTACAGCAAAAAGGAGAGTGGTGGAT---GGA-----  
-----GAAAAAATACCAAGAGAAAAAAGAGCA---ATAGGGGGACTAGGAGCT-----  
GTGTTCCCTTGGGTTCTTAGGAGTA---GCAGGAAGCACTATG---GGCGCGGCGTCA---  
ATAACGCTGACGGTACAG---GCCAGAGAA---TTATTG---TCTGGTATAGTGCAACAGCAAAGC---  
AATTTG---CTGAAG---GCTATAGAGGCGCAACAGCATATGTTGCAACTCACGGTCTGGGGCATT  
>JF683768  
TTCTATTGCAATACATCGAGCCTGTTTAATGGTACATACAATAGTACAGACAATAGTAGTTCATCTGAAACCA  
TC-----  
-----  
AGTTCATCTGAAACCATCACACTTCCATGCAGAATAAAACAAATTATAAACATGTGGCAGGAGGTAGGACGAG  
CAATGTATGCCCCCTCCCATTTGCAGGAAATATAACATGTAGATCAAAT---  
ATCACAGGAATACTATTAAACACGTGATGGAGGTAATGGAGGAAACAACACAAAC-----  
-----  
-  
GGAACTGAAGAGACATCAGAGATATTTCAGACCTGGAGGAGGAGATATGAGGGACAATTGGAGAAGTGAATTAT  
ATAAATATAAAGTGGTAGAAATTAAACCATTA---GGAGTAGCACCCGAGGAAGCAAAAAGAAGAGTGGTA---  
-----GAGAGAGAAAAAAGGGCA---GTGGGA---  
CTAGGAGTT-----TTGTTCTTTGGGTTCTTGGGAGCA---GCAGGAAGCACTATG---  
GGCGCGGCGTCA---TTAACGCTGACGGTACAG---GCCAGACAA---TTGTTG---  
TCTGGTATAGTGCAACAGCAAAGC---AATTTG---CTGAGA---  
GCTATAGAGGCGCAACAGCATATGTTGCAACTCACAGTCTGGGGCATT  
>KT124786  
TTCTATTGTAATACATCAAACTATTTAACAGTACATTTAATAGTACACACTTAGAAGATAATGCTACAAATA  
ATAAT-----  
-----

GATACAACATCCATTACACTTGCATGCAGAATAAAACAATTTGTGAATATGTGGCAGGAAGTAGGAAGAGCAA  
TGTATGCCCCCTCCCATTGCAGGAAACATAACATGTAAATCAAAT---  
ATCACAGGAATACTGTTAGTACGCGATGGAGTC-----  
-----  
GGCAATGAGACAGAGATATTCAGACCTGGAGGAGGAAATATGAAGGACAATTGGAGAAGTGAATTATATAAAT  
ATAAAGTGGTAGAAATTAAACCATTG---GGAATAGCACCCACTAAAGCAAAAAGGAGAGTGGTG-----  
-----GAGAGAGAAAAAAGAGCA---GCA-----CTAGGAGCT---  
-----GTGTTCTTGGGTTCTTGGGAGCA---GCCGGAAGCACTATG---GGCGCGGCGTCA---  
CTAACGCTGACGGTACAG---GTCAGACAA---CTGTTG---TCTGGTATAGTGCAACAGCAAAGC---  
AATTTG---CTGAGG---GCTATAGAGGCGCAACAGCATATGTTGCAACTCACGGTCTGGGGCATT  
>KC473844  
TTCTATTGCAATACATCAAACTATTTAATAGTACAATTAATAGTACAGTCATGGTTAATGATACA-----  
-----  
-----  
GACAACAGCACAATCACACTCCCATGCAGGATAAAACAAATTATAAACATGTGGCAAGGGGTAGGACGAGCAA  
TGTATGCCCCCTCCCATTGCAGGAAATATAACATGTAACCTCAAGT---  
ATCACAGGACTAATATTGACACGTGATGGAGGAATAGGAAATGGAAC-----  
-----  
-----  
GATAAGACAGAGATATTTAGACCAGCAGGAGGAGATATGAGGGACAATTGGAGAAGTGAATTATATAAATATA  
AAGTGGTAGAAATTAAACCATTA---GGGATAGCACCCACTGAGGCAAAAAGGAGAGTGGTG-----  
-----GAGAGAGAGAAAAAGAGCA--GTGGGA---ATAGGAGCT-----  
---GTGTTCTTGGGTTCTTGGGAGTA--GCAGGAAGCACTATG---GGCGCGGCGTCA---  
ATGGCGCTGACGGTACAA---GCCAGACAA---TTATTG---TCTGGTATAGTGCAACAGCAAAGC---  
AATTTG---CTGAGG---GCTATAGAGGCGCAACAGCATATGTTGCAACTCACAGTCTGGGGCATT  
>HQ236594  
TTTTATTGCAATACATCACCCCTGTTTAAATAGTACATACAATAAGACAGAAAGCATAATTGAGGAA-----  
-----  
-----  
GACAATTCAACCATCACCATCCAATGCAGAATAAAACAAATTATAAACATGTGGCAGGAGGTAGGACAAGCAA  
TGTATGCCCCCCCCATAAAAGGAATAATAAAATGTAGGTCAAAC---  
ATCACAGGATTACTACTAACACGGGATGGAGGTACGGGTAACGAAACA-----  
-----  
-----  
GATAATGGAACAGAGACATTCAGGCCTGGAGGAGGAGATATGAGAGACAATTGGAGAAGTGAATTATATAAAT  
ATAAAGTGGTAGAAATTAAACCATTA---GGAATAGCACCCACTAAGGCAAAAAGGAGAGTGGTG-----  
-----GAGAGAGAGAAAAAGAGCA--GTGGGA---ATTGGAGCT---  
-----GTGCTCCTTGGGTTCTTGGGAGCA--GCAGGAAGCACTATG---GGCGCAGCATCA---  
ATAATGCTGACGGTACAG---GCCAGACAA---TTATTG---TCTGGGATAGTGCAACAGCAAAGC---  
AATTTG---CTGAGA---GCTATAGAGGCGCAACAGCATATGTTGCAACTCACGGTCTGGGGCATT  
>HQ236601  
TTCTATTGCAATACATCAAACTGTTTAAATAGTACATACAATAGTGCATACAATAGTACATACAACAGAACTG  
AAAAA-----  
-----  
GGAGATGCAAACATCACACCATCCAGTGCAGAATAAGGCAAATTATAAACATGTGGCAAGGGGTAGGACGAG  
CAATGTATGCCCCCTCCCATTAAGGAAACATAACATGTAGATCAAAT---  
ATCACAGGACTACTATTGACACGTGATGGAGGAGTAAATAATAGT-----  
-----  
-----  
GAAACAACAGAGACATTTAGGCCTGGAGGAGGAGATATGAGGGACAATTGGAGAAGTGAATTATATAAATATA  
AAGTGGTAGAAATTAAACCATTA---GGAATAGCACCTACTAGAGCAAAAAGGAGAGTGGTG-----  
-----CAGAGAGAGAAAAAGAGCA---GTAACCT---CTGGGAGCT-----  
---ATGTTCTTGGTTTCTTGGGAGCA---GCAGGAAGCACTATG---GGCGCAGCATCA---  
ATAACGCTGACGGTACAG---GCCAGACAA---TTATTG---TCTGGGATAGTGCAACAGCAAAGC---  
AATTTG---CTGAGG---GCTATAGAGGCGCAACAGCATATGTTGCAACTCACAGTCTGGGGCATT  
>KY496624  
TTCTATTGCAATACAACAAGCCTGTTTAAATGGTACATACAATAATAGTACAGGAGATCTTACA-----  
-----  
-----

GAAGGAGGAACCATCACGATCCCATGCAAAATAAAACAATTTATAAACATGTGGCAGGAGGTAGGGCGAGCAA  
TGTATGCCCCCTCCCATTTGAAGGAATGATAACATGTAACCTCAAAT ---  
ATTACAGGATTACTACTGACACGGGATGGAGGCAGCGAAGGCAAC -----  
-----  
-----  
AATACAGAGATATTCAGGCCTGGAGGAGGAGATATGAGGGACAATTGGAGAAGTGAATTATATAAATATAAAG  
TAGTAGAAATTAAACCATTA --- GGAATAGCACCCACCAAAGCAAAAAGGAGAGTGGTG -----  
-----GAGAGAGAAAAAAGAGCA --- GTGGGA --- ATAGGAGCT -----  
GTGTTTCCTTGGGTTCTTGGGAGTA --- GCAGGAAGCACTATG --- GGCGCGGCGTCG ---  
CTGACGTTGACGGTACAG --- GCCAGACAA --- TTATTG --- TCTGGTATAGTGCAACAGCAAAGC ---  
AATTTG --- CTGAGA --- GCTATAGAGGCGCAACAACATATGTTGCAACTCACAGTCTGGGGCATT  
>AY713417  
TTCTATTGCAATACATCAAACTGTTTAAATACAACAGGACTGTCT -----  
-----  
-----  
GATAATGCAACTTTAACCATCCCATGCAGAATAAAGCAAATTATAAACATGTGGCAGGAGGTAGGACGAGCAA  
TGTATGCCCCCTCCCATTTAAAGGAATAATAACATGTAGATCAAAT ---  
ATCACAGGATTATTACTGACACGTGATGGGGGGATGAACAACACA -----  
-----  
-----  
AACAAACACAGAGACATTCAGACCTGGAGGAGGAGATATGAGGGACAATTGGAGAAGTGAATTATATAAGTATA  
AAGTGGTAGAAATTAAGCCATTA --- GGAGTAGCACCCACTGGGGCAAAAAGGGCAGTGGTG -----  
-----GGGAGAGAAAAAAGAGCA --- GCA --- CTAGGAGCT -----  
--- TTGTTTCCTTGGGTTCTTGGGAGCG --- GCAGGAAGCACTATG --- GGCGCAGCGTCA ---  
ATAACGCTGACGGTACAG --- GCCAGACAA --- TTATTG --- TCGGGTATAGTGCAACAGCAAAGC ---  
AATTTG --- CTGAGA --- GCTATAGAGGCGCAACAGCATATGTTGCAACTCACGGTCTGGGGCATT  
>KU319531  
TTCTACTGCAATCCATCAGGACTGTTTAAATAGGACATACATGTTTAAATAGTACAGACGTGTTTAAATAGTAATA  
GTACAGACAGG --- TCT --- AAT -----  
-----AGT ---  
ACTAATAGTACTTCCATCACACTCCAATGCAGAATAAAGCAAATTATAAACCTGTGGCAGGGGGTAGGAAAAG  
CAATATATGCCCCCTCCCATTTGCAGGGAAAATAACATGTAAATCAAAC ---  
ATTACAGGAATACTACTGACACGAGATGGAGGAAGTAATAACAGT -----  
-----  
-----  
AGCACAGAGACATTCAGACCTGGAGGAGGAGATATGAGGGACAATTGGAGAAGTGAACATATATAAATATAAAG  
TGGTAGAAATTAAACCATTA --- GGAATAGTACCCACCGAGGCACAAAGAAGAGTGGTG -----  
-----GGGAGAGAAAAAAGAGCA --- ATAGGA --- ATAGGAGCT -----  
ATGTTTCCTTGGGTTCTTGGGAGCA --- GCAGGAAGCACTATG --- GGCGCAGCGTCA ---  
ATAGCGCTGACGGTACAG --- GCCAGACAA --- TTATTG --- TCGGGTATAGTGCAACAGCAAAT ---  
AACTTG --- CTGAGG --- GCTATAGAGGCGCAACAGCATATGTTGCAACTCACAGTCTGGGGCATC  
>KU319532  
TTTTACTGTGATACAACAAACCTGTTTAAATAGTACATACAATGGTACTAGTACTAATAGTACT -----  
-----  
-----TCCAGT -----  
GGTACCATCACCTCTCATGCAGTATAAAACAAATTATACAGATGTGGCAAGGATTACGAAAAGTATTGAATG  
CCCCTGTCTGCGCTCCCCTTGACGGAAACATAAAATGTACATCAAAT ---  
TTCACAGGACTACTATTGCCACGTGCTGGAGGAAGTGGACTTAAT -----  
-----  
-----  
GATACTGACGCAGAAGTATTCAGACCAGCAGGAGGAGACATGAGGGACAATTGGAGAAGTGAATTATATAAAT  
ATAAAGTGGTAGAAATTAAACCATTA --- GGAGTAGCACCAACTACAGCAAAAAGGAGAGTGGTG -----  
-----GAGAGAGAAAAAAGAGCA --- GTGGGA --- ATAGGAGCT ---  
-----GTGTTTCCTTGGGTTCTTGGGAGCA --- GCAGGAAGCACTATG --- GGCGCAGCATCA ---  
ATAACGCTGACGGTACAG --- GCCAGACAA --- TTATTG --- TCTGGTATAGTGCAACAGCAAAGC ---  
AATTTG --- CTGAGG --- GCTATAGAGGCGCAACAGCATCTGTTGCAACTCACAGTCTGGGGCATT  
>KU319534  
TTCTATTGGGATACAACAAAACTGTTTAAATGAGACATATAATAATACAGAT -----  
-----  
-----

GCAAAATGGCACCATCATAATGCCATGCAGAATAAAACAAATTATAAACATGTGGCAGAAGGTAGGAAGAGCAA  
TGTATGCCCCCTCCCATTTGAAGGACCAATAACATGTATATCAAAC---  
ATCACAGGACTACTACTAACACATGATGGAGAGGAA-----  
-----  
AATGACACAGAGACATTCAGACCTTGGGGAGGAGATATGAGGGACAATTGGAGAAGTGAATTATATAAATACA  
AAGTGGTAGAAATTAAGCCATTA---GGAATAGCACCCACTAAGGCAAAAAGGAGAGTGGTG-----  
-----CAGAGAGAAAAAAGAGCA---GCA-----CTAGGAGCT-----  
---ATGTTCTTGGGTTCTTGGGAGCA---GCAGGAAGCACTATG---GGCGCAGCATCA---  
ATAACGCTGACGGTACAG---GCCAGACAA---TTATTG---TCTGGTATAGTGCAACAGCAAAGC---  
AATTTG---CTGAGA---GCTATAGAGGCGCAACAGCATCTGTTGCAACTCACGGTCTGGGGCATT  
>KU319537  
TTTTATTGCAATACATCACACTTGTTTAAGGATAATATTAGT-----  
-----  
-----  
AGCACGGGAAACATCACAATCCCATGCAGAATAAGACAAATTATAAACTTGTGGCAGGAAGTAGGACGAGCAA  
TGTATGCTCCTCCCATTTGAAGGACTAATAAAATGTAGATCAAAT---  
ATCACAGGACTATTGCTGACACGTGATGGAGGCAATAGACAAAAT-----  
-----  
-----  
GGCACAGAGATATTCAGACCAGGAGGAGGAGATATGAGGGACAATTGGAGAAGTGAATTATATAAATATAAAG  
TAGTAGAAATTAACCATTA---GGAATAGCACCCACTAAAGCAAAAAGGAAAGTGGTG-----  
-----AAGAGAGAAAAAAGAGCA---GCA-----ATAGGAGCT-----  
GTGTTCTTGGGTTCTTGGGAGCA---GCTGGAAGCACTATG---GGCGCAGCATCA---  
ATAACGCTGACGGTACAG---GCCAGACAA---TTGTTG---TCTGGTATAGTGCAACAGCAAAGC---  
AATTTG---CTGAGG---GCTATAGAGGCGCAACAGCATATGTTGCAACTCACAGTCTGGGGCATT  
>KU319541  
TTCTATTGCAATACATCAGGCCTGTTTAATAATAGTATG-----  
-----  
-ACAAATGGCACCCCTC-----  
AGACTCCCATGCAGAATAAAACAAATTATAAACATGTGGCAGGGAGTAGGACGAGCAATGTATGCTCCTCCCA  
TTAGCGGAGCAATAAGTAGGAAGGCCATAGTATCATGCTTATCAAAT---  
ATCACAGGGATACTCTTAACATGTGATGGAGGCATTAATAGGCACAGA-----  
-----  
-----  
CATAACACAGAGACATTCAGACCTGTAGGAGGAGACATGAAGGACAATTGTAGAAGTGAATTATATAAATATA  
AGGTGGTAGAAGTTAAAGCCATA---GGAATAGCACCCACACAGGCAAAAAGGAGAGTGGTG-----  
-----CAGAGAGAAAAAAGAGCA---GCA-----TTAGGAGTT-----  
---TTATTCTTTGGGTTCTTGGGAGCA---GCCGGAAGCATTATG---GGCGCAGCATCA---  
ATATTTTTTTTGGTACAG---GCCAGACAA---TTATTG---TCTGGTATAGTGCAACAGCAGAGC---  
AATTTG---CTGAGG---GCTATAGAGGCGCAGCAGCATCTGTTGCAACTCACGGTCTGGGGCATT  
>KU319544  
TTCTATTGCAATACAACAGGACTGTTTAACAGTACGTACAATAGTACACACATATTTAATAATACT-----  
-----  
-----  
TCAAATGCAACCATCACACTCCCCTGCAGAATAAAACAAATTATCAACATGTGGCAGGGGGTAGGACGAGCAA  
TGTATGCCCCCTCCCACTGCAGGAAACATAACATGTAGATCAAAT---  
ATCACAGGGCTACTATTAACACGTGATGGAGGAAGCGACAGCGACACG-----  
-----  
-----  
ACTGAGGAGACATTCAGACCTGGAGGAGGAAATATGAGAGACAATTGGAGAAGTGAATTATATAAATATAAAG  
TGGTAGAAATTAACCATTA---GGAGTAGTACCCACTACTGCAAAAAGGAGAGTGGTG-----  
-----GAAAGAGAAAAAAGAGCA---GTGGGA---ATAGGAGCT-----  
GTGTTCTTGGGTTCTTGGGAGCA---GCAGGAAGCACTATG---GGCGCAGCATCA---  
ATAACGCTGACGGTACAG---GCCAGACAA---TTGCTG---TCTGGTATAGTGCAACAGCAAAGC---  
AATTTG---CTGAGG---GCTATAGAGGCGCAACAGCATATGTTGCAACTCACGGTTTGGGGCATT  
>KU319546  
TTCTATTGCAATACATCAAACTGTTTAATGGTACATACAACCTCTAATAGTACTAATAGTACT-----  
-----  
-----

TCAAATTCAAGCATCACAATCCAATGCAGAATAAAACAAATTATAAACATGTGGCAGGAGGTAGGACGAGCAA  
TGTATGCCCCCTCCCATTTGCAGGAAACATAACATGTAGATCAAAT ---  
ATCACAGGAATACTATTGACATGGGATGGAGGAAACCAAAACGGAACC-----  
-----  
-----  
AACAAATACAGAGACATTTCAGACCTGGAGGAGGAGATATGAGGGACAATTGGAGAAGTGAATTATATAAAATATA  
AAGTGGTAGAAATTAAACCATTA---GGAGTAGCACCCACTAAGGCAAAGAGGACAGTGGTG-----  
-----GAAAGAGAAAAAAGAGCA---GTGGGA---ATAGGAGCT-----  
---GTGTTCCCTTGGGTTCTTGGGAGCA---GCAGGAAGCACTATG---GGCGCAGCATCA---  
ATAACGCTGACGGTACAG---GCCAAACTA---TTGTTG---GCTGGTATAGTGCAGCAGCAAAAT---  
AATTTG---CTGAGG---GCTATAGAGGCGCAACAACATATGTTGCAACTCACGGTCTGGGGCATT  
>KU319551  
TTCTACTGTAGTACTACACCCTTGTTTACTAGTACTAGTACTACTGGGGGTACTACTGATTCAAATTCA----  
-----  
-----  
TACATCACAGTCATCACTCCCCATGCAGTATACTACTATGTCGTAACATGTGGCAGGAGGTAGGACGAGCCA  
TATATGCTCCTCCTATTAAAGGAGTAATAACATGTAGATCAAAT ---  
ATCACAGGACTACTGCTGACACGGGATGGCGGCCATAGCACAAAT-----  
-----  
-----  
GACACAGAGATATTTCAGACCTATAGGAGGAAATATGAAGGACAATTGGAGAAGTGAATTATATAAAATATAAAG  
TGGTAGAAGTTAAGCCATTA---GGAGTAGCACCCACTGAGGCAAGAAGGAGAGTGGTG-----  
-----GAGAGAGAAAAAAGAGCA---GCA-----CTAGGAGCT-----  
TTGTTCCCTTGGGTTCTTGGGAGCA---GCAGGAAGCACTATG---GGCGCAGCGTCA---  
ATAACGCTGACGGTACAG---GCCAGACAA---TTACTG---TCGGGTATAGTGCAACAGCAAAGC---  
AATTTG---CTGAGA---GCTATTGAGGCGCAACAACATATGTTGCAGCTCACGGTCTGGGGCATT  
>U46016  
TTCTATTGCAATACATCAAACCTGTTTAATAGCACAAAACCTAGAACTGTTTAATAGCAGT-----  
-----  
-----  
ACAAATTTAAACATCACACTCCAATGCAGAATAAAACAAATTATAAACATGTGGCAGGGAGTAGGACGAGCAA  
TGTATGCCCCCTCCCATTTGAAGGAATAATAATGTGTAGATCAAAT ---  
ATCACAGGACTACTACTGACACGTGATGGAGCCAAAGAGCCACAT-----  
-----  
-----  
AGCACAAAAGAGATATTTCAGACCTGAAGGAGGAGATATGAGGGACAATTGGAGAAGTGAATTATATAAAATATA  
AAGTGGTAGAAATTAAGCCACTA---GGAGTAGCACCCACTAAGCCAAAAGGAGAGTGGTG-----  
-----GAGAGAGAAAAAAGAGCA---GCA-----CTAGGAGCT-----  
---TTGTTCCCTTGGGTTCTTGGGAGCA---GCAGGAAGCACTATG---GGCGCAGCATCA---  
ATAACGCTGACGGTACAG---GCCAGACAA---TTATTG---TCGGGTATAGTGCAACAGCAAAGC---  
AATTTG---CTGAAA---GCTATAGAGGCGCAACAGCATATGTTGCAGCTCACGGTCTGGGGCATT  
>AF219262  
TTCTATTGCAATACAACAGACCTATTTAATAGCACAAAACCTGTTTAATAGCAGTAGT-----  
-----  
-----  
ACAAATTCAACCATCACACTTCCATGCAGAATAAAACAAATTATAAACATGTGGCAGGGGGTAGGACGAGCAA  
TGTATGCCCCCTCCCATTTAAAGGAATAATAACATGTAGATCAAAT ---  
ATCACAGGAATACTACTGACACGTGATGGAGGGAATGACAAATAGCACA-----  
-----  
-----  
AATGGCACAGAGACATTTCAGACCTGGAGGAGGAGATATGAGAGACAATTGGAGAAGTGAATTATATAAAATATA  
AAGTGGTAGAGATTAAGCCATTA---GGAATAGCACCCACTGGGGCAAAAAGGCGAGTGGTG-----  
-----GAGAGAGAAAAAAGAGCA---GCA-----CTAGGAGCT-----  
---ATGTTCCCTTGGGTTCTTGGGAGCA---GCTGGAAGCACTATG---GGCGCAGCATCA---  
ATAACGCTGACGGTACAG---GCCAGACAA---TTATTG---TCGGGTATAGTGCAACAGCAAAAT---  
AATTTG---CTGAGG---GCTATAGAGGCGCAACAGCATATGTTGCAACTCACGGTCTGGGGCATT  
>AF219263  
TTCTATTGCAATACATCAAAATTGTCTAATAGGACATACAATGCATCAGACCTGGTTAATAGTACA-----  
-----  
-----

AGTAATTCAACCATCACACTCCCATGCAGAATAAAGCAAATTGTAAACATGTGGCAGGAAGTGGGACGAGCAA  
 TGTATGCCCCCTCCCATTCAGGAAACATAACATGTAACCTCAAAT ---  
 ATCACAGGACTACTATTGACACGTGATGGAGGAAATAATGCAAATAAT-----  
 -----  
 -----  
 GCAAGTACCAACGAGACATTCAGACCTGGAGGAGGAGATATGAGGGACAATTGGAGAAGTGAATTGTATAAAT  
 ATAAAGTGGTAGAAATTAAGCCATTG --- GGAGTAGCACCCACCAAGGCAAAAAGGAGAGTGGTG-----  
 -----  
 -----GGGAGAGAGAAAAAGAGCA---GTGGGA---CTAGGAGCT---  
 -----GCGTTCCTTGGGTTCTTAGGAGCA---GCAGGAAGCACTATG---GGCGCGCGTCA---  
 ATAACGCTGACGGCACAG---GCCAGGCAA---GTGTTG---TCTGGTACAGTGCAACAGCAAAGC---  
 AATTTG---CTGAGG---GCTATAGAGGCGCAACAGCATATGTTGCAACTCACAGTCTGGGGCATT  
 >AF219269  
 TTCTATTGCAATACATCAAACTGTTTAAGGGTACATACATGTATAATGATACAGAT-----  
 -----  
 -----  
 ACAAACATCACACTCACACTCCCATGCAGAATAAAACAGATTATAAACATGTGGCAGGGGGTAGGACGAGCAA  
 TATATGCCCCCTCCCATTCGAGGAAGCATAAAGTGTACATCGAAT ---  
 ATCACAGGACTACTATTGACACGTGATGGA---GACAAAAATGAT-----  
 -----  
 -----  
 ACAGAGACCTTCAGACCTGGAGGAGGAGATATGAGGGACAATTGGAGAAGTGAATTATATAAATATAAAGTGG  
 TAGAAATTAAGCCATTA---GGAATAGCACCCGCTAAGGCAAAAAGGAGAGTGGTG-----  
 -----GAGAGAGAAAAAAGAGCA---GTAGGA---ATGGGAGCT-----  
 GTGCTCCTTGGGTTCTTGGGAGCA---GCAGGAAGCACTATG---GGCGCAGCGTCA---  
 ATAACGCTGACGGTACAG---GCCAGGCAA---TTGTTG---TCTGGTATAGTGCAACAGCAAAGC---  
 AATTTG---CTGAGA---GCTATAGAGGCGCAACAGCATATGTTGCAACTCATGGTCTGGGGCATT  
 >AF219274  
 TTCTATTGCAATACATCAAACTGTTTAATAGTACATATATGTTTAATAGTACATATACGTCTAATAATACAG  
 GAAGT-----  
 -----  
 -----  
 AATTCCAACCTCAACCATCACACTCCCATGCAGAATAAGACAATTTATAAACATGTGGCAGGAGGTAGGACGAG  
 CAATGTATGCCCCCTCCCATTCGAGGAACATAACATGTAAATCAAAT ---  
 ATCACAGGACTACTATTGACACGGGATGGAGGCGTGGAGACACAAGATAACCACA-----  
 -----  
 -----  
 GAGACACAAAATAACACAGAGACATTCAGACCTGGGGGAGGAGATATGAGGAACAATTGGAGAAGTGAATTAT  
 ATAAATATAAAGTGGTAGAAATTAAGCCATTG --- GGAGTAGCACCTACTACGGCAAAAAGGAGAGTGGTG--  
 -----GAGAGAGAAAAAAGAGCA---GTGGGA---  
 ATAGGAGCT-----GTGACCCTTGGGTTCTTGGGAGCA---GCAGGAAGCACTATG---  
 GGCGCGCGGTCA---GCAGCGCTGACGGTACAG---GCCAGACAA---TTGTTG---  
 TCTGGTATAGTGCAACAGCAAAGC---AATTTG---CTGAGG---  
 GCTATAGAGGCGCAACAGCATATGTTGCAACTCACAGTCTGGGGCATT  
 >FJ977094  
 TTCTATTGCAATACATCAGGCCTGTTTAATGGTACATTCAAGTTTAATGATACAGACATGACTAAT-----  
 -----  
 -----  
 GATACAGGAAACATCACACTTCCATGCAGAATAAAACAAATTATAAACATGTGGCAGGAGGTAGGACGAGCAA  
 TGTATGCCCCCTCCCATTCAGGAAACATAACATGTAAATCAAAT ---  
 ATCACAGGACTACTATTGCTACGGGATGGAGGGACAAATGTAACA-----  
 -----  
 -----  
 AATGAAACAGAAATATTTCAGACCTGGAGGAGGAGATATGAGGGACAATTGGAGAAGTGAATTATATAAATATA  
 AAGTGGTTGAAATTAAGCCATTG --- GGAATAGCACCCACTAAGGCAAAAAGGAGAGTGGTG-----  
 -----GAAAGACAAAAAAGAGCA---GCA-----ATAGGAGCT-----  
 ---ATGATCATTGGGTTCTTGGGAGCA---GCAGGAAGCACTATG---GGCGCAGCGTCA---  
 ATAGCGCTGACGGCACAG---GCCAGACAA---GTATTG---TCTGGTATAGTGCAACAGCAAAGC---  
 AATTTG---CTGAGA---GCTATAGAGGCGCAACAGCATATGTTGCAACTCACAGTCTGGGGCATT  
 >HQ595789  
 TTCTATTGCAATACATCAGGCCTGTTTAACAGTAAATACATGCATAACATGACAATCAATGGGACAGACATGA  
 CAAGCAATGGG-----

-----ACAGAC-----  
AGTAATGCAACAATCATCAGACTTCCATGCAGAATAAAACAAATTATAAACATGTGGCAGGAGGTAGGACGAG  
CAATGTATGCCCCCTCCCATTTGCAGGAAACATAACATGTAACCTCAAGC---  
ATTACAGGACTACTATTAGTACGTGATGGAGGCACTGGAGACAGCAGC-----  
-----  
AGCAATGACACAGAGACTTTTCAGACCTGGAGGAGGAAATATGAAGGACAATTGGAGAAGTGAATTATATAAAT  
ATAAAGTGGTAGAAATCAAGCCATTA---GGAATAGCACCCACTGGAGCAAAAAGGAGAGTGGTG-----  
-----GAGAGAGAAAAAGAGCA---GTGGGA---ATGGGAGCT---  
-----TTGTTTCCTTGGGTTCTTGGGAGCA---GCAGGAAGCACTATG---GGCGCAGCGTCA---  
CTAACGCTGACGGTACAG---GCCAGACAA---GTATTG---TCTGGTATAGTGCAACAGCAAAGC---  
AATTTG---CTGAAG---GCTATAGAGGCGCAACAGCATATGTTGCAACTCACGGTCTGGGGCATT  
>JF680927  
TTCTATTGCAATACATCAGGGATATTTAATAGTACACAGCTGTTTAATGATACATTAAATAATAGTACAGGA-  
-----  
-----  
AATAATGAGACCATCAGACTCCCATGCAGAATAAAACAAATTGTAAACATGTGGCAGCAGGTAGGACGAGCAA  
TGTATGCCCCGCCCATTGCAGGAAACCTAACATGTAACCTCAAAC---  
ATCACAGGACTGCTATTGACACGTGATGGAGGAAAAGATAACACAACA-----  
-----  
GATAACAATACAGAGATATTCAGACCTGCAGGAGGAGATATGAGGGATAATTGGAGAAGTGAATTATATAAAT  
ATAAAGTGGTAGAAATTAAGCCATTG---GGAATAGCTCCCCTGGGGCAAAAAGGAGAGTGGTG-----  
-----GAGAGACCAAAAAGAGCA---GTGGGA---ATGGGAGCT---  
-----GTGTTTCCTTGGGTTCTTGTTCAGCT---GCAGGAAGCACTATG---GGCGCAGCGTCG---  
ATGACGCTGACGGTACAA---GCCAGACAA---TTGCTG---TCTGGTATAGTGCAACAGCAAAGC---  
AATTTG---CTGAGA---GCTATAGAGGCGCAACAACATTTGTTGCAACTCACAGTCTGGGGCATA  
>HQ385458  
TTCTATTGCAATACATCAAACTGTTTAATAATAGTACAAATAGTACAGAA-----  
-----  
-----  
GGAAATTCAACCATCAGACTCCCATGCAGAATAAAACAAATTATAAACCTGTGGCAGGAGGTAGGAAAAGCAA  
TATATGCCCCCTCCCATTTGCAGGAAACATAACATGTGAATCAAAT---  
ATCACAGGACTACTCTTGGTACGAGATGGAGGCAATAGTACAAATAAT-----  
-----  
-----  
GATACAACAGAGATATTCAGACCAGGAGGAGGAAATATGAAGGACAATTGGAGAAGTGAAGTATATAAATATA  
AAGTAGTAGAAATTAGGCCATTG---GGGGTAGCACCCACCAAGGCAAAAAGGAGAGTGGTG-----  
-----GAGAGAGAAAAAGAGCA---GTGGGA---ATAGGAGCT-----  
---GTGTTTCCTTGGGTTCTTGGGAGCA---GCAGGAAGCACTATG---GGCGCAGCGTCA---  
ATAACGCTGACGGTACAG---GCCAGACAA---TTGTTG---TCTGGTATAGTGCAACAGCAAAGC---  
AATTTG---CTGAGA---GCTATAGAGGCGCAACAGCATATGTTGCAACTCACGGTCTGGGGCATT  
>AF286233  
TTCTATTGCAATACATCAAACTGTTTAATAGTACATACCTGTCTAATAGTACATCATATAATAGTACT---  
-----  
-----  
TCAAATTCAACCATCATACTCCAATGCAGAATAAAACAAATTATAAACATGTGGCAGGAGGTAGGACGAGCAA  
TGTATGCCCCCTCCCATTTGAGGGAAACATAACATGTAAATCAGAT---  
ATCACAGGACTGCTACTGATACGTGATGGAGGCATAAATAATGACACA-----  
-----  
-----  
AACGAGACAGAGACATTTCAGACCGGGGGGAGGAGATATGAGGGACAATTGGAGAAGTGAATTATATAAATACA  
AAGTGGTAGAGATTAAGCCATTA---GGAATAGCACCCACTAAGGCAAAAAGGAGAGTGGTG-----  
-----GAGAGAGAAAAAGAGCA---GCA-----CTAGGAGCT-----  
---ATGTTTCCTTGGGTTCTTGGGAGCA---GCCGGAAGCACTATG---GGCGCAGCGTCA---  
ATAACGCTGACGGTACAG---GCCAGGCAA---TTGTTG---TCTGGTATAGTGCAACAGCAAAC---  
AATTTG---CTGAGG---GCTATAGAGGCGCAACAGCATATGTTGCAACTCACGGTCTGGGGCATT  
>AY255824  
TTCTACTGCAATACATCAAACTGTTTAATAGTACATACAGGTCTAATAGTACTAATAGTACT-----  
-----

-----  
TCAGATACATCCATCATACTCCCATGCAGAATAAAACAAATTATAAACATGTGGCAGGGGGTAGGACGAGCAA  
TGTATGCCCCCTCCCATTGAAGGAAACATAACATGTAAATCAAAT---  
ATTACAGGACTACTATTGACACGTGATGGAGGAACGGACAATGAA-----  
-----  
-----  
ACAATAGAGACATTTCAGACCTGGAGGAGGAGATATGAGGGATAATTGGAGAAGTGAATTATACAAATATAAAA  
TAGTAGAAATTAAGCCATTA---GGAGTAGCTCCAACGCGGCAAAAAGGAGAGTGGTG-----  
-----GAGAGAGAAAAAAGAGCA---GCGGGA---ATAGGAGCT-----  
TTGTTTCCTTGGGCTCTTGGGAGCA---GCAGGAAGCACTATG---GGCGCAGCGTCA---  
ATAACGCTGACGGTACAG---GCCAGGCAA---TTGTTG---TCTGGTATAGTGCAACAGCAAAGC---  
AATTTG---CTGAGG---GCTATAGAGGCGCAACAGCATATGTTGCAACTCACAGTCTGGGGCATT  
>KP109481  
TTCTATTGCAATACATCAGGCCTGTTTAAATAGTACATATATGCCTAATGGTACATATATGCCTAATGGTACAA  
ATAAT-----  
-----  
TCAAACTCAACCATCATCCTCCCATGCAGAATAAAACAAATTATAAACATGTGGCAGGAGGTAGGACGAGCAA  
TGTATGCCCCCTCCCATTGCAGGAAACATAACATGTAACTCAAAT---  
ATCACAGGACTACTATTGGTACGAGATGGAGGAAAGAACAATAAT-----  
-----  
-----  
ACAGAGATATTCAGACCTGGAGGAGGAGATATGAGGGACAATTGGAGAAGTGAATTATATAAATATAAAGTAG  
TGGAGATTAAGCCATTG---GGAGTAGCACCCACTAGAGCAAAAAGGAGAGTGGTG-----  
-----GAGAGAGAAAAAAGAGCA---GTGGGA---CTGGGAGCT-----  
GTGTTTCCTTGGGTTCTTGGGAGCA---GCAGGAAGCACTATG---GGCGCGGCGTCA---  
ATAACGCTGACGGTACAG---GCCAGACAA---TTGTTG---TCTGGTATAGTGCAACAGCAAAGC---  
AATTTG---CTGCAG---GCTATAGAGGCGCAACAGCATCTGTTGCAACTCACGGTCTGGGGCATT  
>KP109482  
TTCTATTGTAATACATCAGGCCTGTTTAAATGGTACATATATGCCTACATACATGCCTAATAGTACAAACAGTA  
AT-----  
-----  
TCAAGCTCAAACATCACAATCCCATGCAGAATAAAGCAAGTTATAAACATGTGGCAGGAGGTAGGAAGAGCAA  
TGTATGCCCCCTCCCATTGAAGGAGAAATAACATGTAAATCAAAT---  
ATCACAGGACTACTATTGGTACGTGATGGAGGAAATGGAAATGATACA-----  
-----  
-----  
AATAAAACAGAGATATTCAGACCTGAAGGAGGAGATATGAGGGACAATTGGAGAAGTGAATTATATAAATATA  
AAGTGGTAGAAATTAAGCCATTG---GGAATAGCACCCACTGAAGCAAAAAGGAGAGTGGTG-----  
-----GAGAGAGAAAAAAGAGCA---GTGGGA---ATAGGAGCT-----  
---GTGATCCTTGGGTTCTTGGGAGCA---GCAGGAAGCACTATG---GGCGCGGCGTCA---  
ATAACGCTGACGGCACAG---GCCAGACAA---TTGTTG---TCTGGTATAGTGCAACAGCAAAGC---  
AATTTG---CTGAAG---GCTATAGATGCGCAACAGCATCTGTTGCAACTCACAGTCTGGGGCATT  
>KP109484  
TTCTATTGCAATACATCAAACTGTTTAAATGGTATATACAATGGTACACAAAGTAATTCAAGTAAT-----  
-----  
-----  
TCAAACTCAACCATCATAATCCCATGCAAAATAAAACAAATTGTAAACATGTGGCAGAAGGTAGGACGGGCAA  
TGTATGCCCCCTCCCATTGCAGGAAACATAACATGTACATCAAAT---  
ATCACAGGACTACTACTGGTACGTGATGGAGGACCAGATAATGTT-----  
-----  
-----  
ACAGAGATATTCAGACCTGGAGGAGGAGATATGAGGGACAATTGGAGAAGTGAATTATATAAATATAAAGTGG  
TAGAAATTAAGCCATTG---GGAATAGCACCCACTGGGGCAAAAAGGAGAGTGGTG-----  
-----GAGAGAGAAAAAAGAGCA---GTGGGA---TTAGGAGCT-----  
GTGTTTCCTTGGGTTCTTGGGAGCA---GCCGGAAGCACTATG---GGCGCAGCGTCA---  
ATAACGCTGACGGTACAG---GCCAGACAA---TTGTTG---TCTGGTATAGTGCAACAGCAAAGC---  
AATTTG---CTGAGG---GCTATCGAGGCGCAACAGCATATGTTGCAACTCACGGTCTGGGGCATT  
>EU521729  
TTCTATTGTAATACATCACGCTTGTTTAAGGGTACATACACGCCTAATGGTACAGGAAGTATATCAGAAAGTA  
ATTCAAAT-----

-----TCA---  
ACCTCAAACATCAGCATCACAATCCCATGCAGAATAAAGCAAATTATAAACATGTGGCAGGAGGTAGGACGAG  
CAATGTATGCCCCCTCCCATTTGAAGGAAGCATAAAATGTAACCTCAACT---  
ATCACAGGACTACTATTGGTACGTGATGGAGGACTAGGTAATGAGACA-----  
-----  
-----  
AAGACAGAAGAGAGATTTCAGACCTGGAGGAGGAGATATGAGGGACAATTGGAGAAGTGAATTATATAAAATATA  
AAGTGGTAGAGATTAGGCCATTG---GGATTAGCACCCACTAAAGCAAAAAGGAGAGTGGTG-----  
-----GAGAGAGAAAAAAGAGCA---GTAGTGGGAATAGGAGCT-----  
---ATGTTCCCTTGGGCTCTTGAGTGCA---GCTGGAAGCACTATG---GGCGCGGCGGCA---  
ATAACGCTGACGGTACAG---ACCAGACAA---TTGTTG---TCTGGTATAGTGCAACAGCAAAGC---  
AATTTG---CTGATG---GCTATAGAGGCGCAACAGCATTGTTGCAACTCACGGTCTGGGGCATT  
>EF469243  
TTCTATTGCAATACATCAGTACTGTTTAATAGTACATACAACCATACAACAAAGCAGTTTGTAGTAGTCCATACA  
AT-----  
-----  
GATACAAACTCAACCATCACAATCCACTGCAAAATAAAGCAAATTATAAACATGTGGCAGGAGGTGGGGCGAG  
CAATATATGCCCCCTCCCATTTGCAGGAAACATAACATGTAAATCCAAT---  
ATCACAGGATTACTATTGGTACGAGATGGAGGAAATACTGAGTCA-----  
-----  
-----  
AATAATACAGAAATATTTCAGACCTGGAGGAGGAGATATGAGGGACAATTGGAGAAGTGAATTGTACAAATATA  
AAGTGGTAGAAGTTAAGCCATTG---GGAATAGCACCAACTGCAGCAAAAAGGAGAGTGGTG-----  
-----GAAAGAGAAAAAAGAGCAGTATTGGGTGGAATAGGAGCT-----  
---GTGTTCCCTTGGGTTCTTGAGGAGCG---GCAGGAAGCACTATG---GGCGCGGCGTCA---  
ATAACGCTGACGGTACAG---GCCAGACAA---TTATTG---TCTGGTATAGTGCAACAGCAGAGC---  
AATCTG---CTGAGA---GCTATAGAGGCGCAACAACATATATTGCAACTCACGGTCTGGGGCATT  
>KF766537  
TTCTATTGTAATACATCAGGCCTGTTTAATAGTACATACAATGTGACAGACAATGGTACAGAAAGTACTTCA-  
-----  
-----  
AACTCAACCACCATCACAATCACATGCAGAATAAAGCAAATTATAAATATGTGGCAGGGGGTAGGACGAGCAA  
TATATGCCCCCTCCCATTTGCAGGAAACATAACATGTAAATCAAGC---  
ATCACAGGATTACTATTGGAACGTGATGGAGGAGACGAGACAAAA-----  
-----  
-----  
AACGGTACAGAGATATTTCAGACCTGGAGGAGGAGATATGAAGCACAATTGGAGAAGTGAATTATATAAAATATA  
AAGTAGTAGAAATTAAGCCATTG---GGAATAGCACCCACTGCAGCAAAAAGGAGAGTGGTG-----  
-----GAGAGAGAAAAAAGAGCA---GTGGGA---CTAGGAGCT-----  
---GTGTTCCCTTGGGTTCTTGAGGAGCA---GCAGGAAGCACTATG---GGCGCAGCGTCA---  
ATAACGCTGACGGTACAG---GCCAGACAA---TTGTTG---TCTGGTATAGTGCAACAGCAAAGC---  
AATTTG---CTGAAG---GCTATAGAGGCGCAACAGCATCTGTTGCAACTCACGGTCTGGGGCATT  
>KF766540  
TTCTATTGCAATACAACACAACCTGTTTAATAGTACATACATACCTAACATGTCTGATAATACAACAAGTAAT-  
-----  
-----  
GAAAGCTCAGACATCACAATCCCATGTAGCATAAGACAATTTATAAACATGTGGCAGAGGGTAGGACGAGCAA  
TGTATGCCCCCTCCCATTTTCAGGAAACATAACATGTAAATCAAAT---  
ATAACAGGGCTACTATTGGAACGTGATGGAGGGGATGATAATAAG-----  
-----  
-----  
ACAGAGACATTTCAGACCTGGAGGAGGAGATATGAGGGACAATTGGAGAAGTGAATTATATAAAATGTAAAGTGG  
TAGAAATTAAGCCATTA---GGAGTTGCACCCACTGGAGCAAAGAGGAGAGTGGTG-----  
-----GAGAGAGAAAAAAGAGCA---GTGGGA---ATAGGAGCC-----  
ATGTTCCCTTGGGTTCTTGAGGAGCA---GCAGGAAGCACTATG---GGCGCAGCGTCA---  
ATAACGCTGACGGTACAG---GCCAGACAA---TTGTTG---TCTGGTATAGTGCAACAGCAAAGC---  
AATTTG---CTGAGG---GCTATAGAGGCGCAACAACATCTGTTGCAACTCACAGTCTGGGGCATT  
>EU908218  
TTCTATTGTAATACGTCAGGCCTGTTTAATAGTACATACATGACTAATGGTACATTTACATACAAGCCT----

-----  
AATGGTACAAACATCACAATCCCATGTCAGAATAAAGCAAATTATAAACATGTGGCAGGAGGTAGGACGAGCAA  
TGTATGCCCCCTCCCATTCGAGGAAACATAACATGTAAATCAAAT---  
ATCACAGGAGTGATATTGGTACGTGATGGAGGGGAAAATGAAAAT-----  
-----  
-----  
ATTACAGAAGAGACATTTAGACCTGGAGGAGGAAACATGAGGGACAATTGGAGAAGTGAATTATATAAATATA  
AAGTAGTAGAAATTAAGCCATTG---GGAGTAGCACCCACTAAAGCAAAAAGGAGAGTAGTG-----  
-----GAGAGAGAAAAAAGAGCA---GTAGGA---CTAGGAGCT-----  
---ATGTTCCCTTGGGTTCTTGGGAGCA---GCAGGAAGCACTATG---GGCGCGGCGTCA---  
ATAACGCTGACGGTACAA---GCCAGACAA---TTGTTG---TCTGGTATAGTGCAACAGCAAAGA---  
ATTTTG---CTGCAG---GCTATAGAGGCGCAACAGCATCTGTTGCAACTCACGGTCTGGGGCATT  
>EU521727  
TTCTATTGCAACACATCAATCCTGTTTAATGGTACATACAACCCTAATGGTACAAAAAGTAAT-----  
-----  
-----  
TCAAGTAATCCCATCACAGTCCCATGCCGCATAAAACAAATTATAAACATGTGGCAGGAGGTAGGACGAGCAA  
TGTATGCTCCTCCCATTCGAAGGAAACATAACATGCAAAATCAAAT---  
ATCACAGGACTGCTATTGGTACGTGATGGAGGAGAAGAGTCAAATAAA-----  
-----  
-----  
ACTAATACAGAGACATTCAGACCTGGAGGAGGAGATATGAGGGACAATTGGAGAAGTGAATTATATAAATACA  
AAGTAGTAGAAATTAAGCCATTA---GGAATAGCACCCACTGAAGCAAAAAGGAGAGTGGTG-----  
-----GAGAGAGAAAAAAGAGCA---GTGGGA---ATAGGAGCT-----  
---GTGTTCCCTTGGATTCTTGGGAGCA---GCAGGAAGCACTATG---GGCGCGGCGTCA---  
ATAACGCTGACGGTACAG---GCCAGACAA---TTGCTG---TCTGGTATAGTGCAACAGCAAAGC---  
AATTTG---CTGAGG---GCTATAGAGGCGCAACAGCATATGTTGCAACTCACGGTCTGGGGCATT  
>KC156210  
TTCTATTGTAATACATCAGGCCTGTTTAATAGGACATATACAACAGACCTGTTTAATAAGACATATAATGATA  
ATGATACA-----  
-----GAAGAT-----  
AATTCAGGCCCAGTCATCATAATCCCATGTAGAATAAAGCAAATTATAAACATGTGGCAGGAGGTAGGACGAG  
CAATGTATGCCCCCTCCCATTCGAGGAAACATAACATGTAACCTCAAGC---  
ATCACAGGTCTGCTATTGACACGGGATGGAGGCAATGACAATAAAACGTCA-----  
-----  
-----  
ACGAATGAGACATTCAGACCTCTAGGAGGAAATATGAGGGACAATTGGAGAAATGAATTATATAAGTATAAAG  
TGGTAGAAATTAAGCCACTA---GGAATAGCACCCACTACAGCAAAAAGGAGAGTGGTG-----  
-----GAGAGAGAAAAAAGAGCA---GTGGGAATGATGGGAGCT-----  
ATGTTCCCTTGGGTTCTTGGGAGCT---GCAGGAAGCACTATG---GGCGCGGCGTCA---  
ATAACGCTGACGGTACAG---GCCAGGCAA---TTGTTG---TCTGGTATAGTGCAACAGCAAAGC---  
AATTTG---CTGAGG---GCTATAGAGGCGCAACAGCATCTGTTGCAACTCACGGTCTGGGGCATT  
>KY929361  
TTCTATTGCAATACATCAAGTCTATTTAATAGCACATACATTAATGGCACATACATTAATGGCACAGTAAGTA  
ATTCAGGC-----  
-----  
-----  
TCAGACTCAAACATCACAATCCCATGTAGAATAAAACAAATTGTAAGAATGTGGCAGCAGGTAGGACAAGCAA  
TATATGCCCCCTCCTATTGAAGGAAACATAACATGTAAATCAAAT---  
ATCACAGGACTACTCTTAGTACGTGATGGAACAATTACAGGTGAGGCA-----  
-----  
-----  
AATGATACAGAGACATTCAGACCTGGAGGAGGAGAGATGAGGGATAATTGGAGAAGTGAATTATATAAATATA  
AAGTGGTAGAAATTAACCATTAA---GGAATAGCACCCACTGGATCAAAAAGGAGAGTGGTG-----  
-----GAGAGAGAGAAAAAGAGCA---GCA-----GTGTCAGCT-----  
---ATGCTCTTTGGGTTCTTGGGATTG---GCAGGAAGCACTATG---GGCGCGGCGTCA---  
ATATCGCTGACGGTACAG---GCCAGACAA---TTGTTG---TCTGGTATAGTGCAACAGCAAAGC---  
AATTTG---CTGAGA---GCTATAGAGGCGCAACAGCATCTGTTGCAACTCACAGTCTGGGGCATT  
>KY929362  
TTCTATTGCAATACATCAAACTGTTTAATAGAAAATACCTGCCTGATGGTACAGACAACACTACGGATACAG  
ATGCA-----

-----  
AACAAATACAGACATTACAATCCCATGTAGGCTAAAACAATTTATAAACATGTGGCAGGGGGTAGGGAGAGCGA  
TGTATGCCCCCTCCCATTCAGAGAAACATAACGTGTATATCAAAT ---  
ATCACAGGGATACTATTGACACGTGATGGAGGAAATAATAATAAT -----  
-----  
AGTAATAATGAGACATTTCAGACCGGGAGGAGGAGATATGAGGGACAATTGGAGAAGTGAATTATATAAAATATA  
AAGTGGTAGAAATTAAACCATTG --- GGAATAGCACCCACTACAGCAAAAAGGAGAGTGGTG -----  
-----GAGAGAGAAAAAAGAGCA --- GTGGGA --- CTAGGAGCT -----  
---ATGTTCTTGGGTTCTTGGGAGCA --- GCAGGAAGCACTATG --- GGCGCGGCGTCA ---  
ATAACGCTGACGGTACAG --- GCCAGACAA --- TTGTTG --- TCTGGTATAGTGCAACAGCAAAGC ---  
AATTTG --- CTGAGA --- GCTATAGAGGCGCAACAGCATCTGTTGCAACTCACAGTCTGGGGCATT  
>KY929366  
TTCTATTGCAATACATCAAGCCTGTTTAATGCTACATACAAAAATGGTACATTCATTAATAATACCACC ----  
-----  
-----  
CTCAAATCAAACATGACCATCCCCCTGCAGAATAAGACAATTTATAAACCTGTGGCAGGAGGTAGGAAAAGCAA  
TGTATGCCCCCTCCCATTCAGAGGAACATAACATGTAGATCAAAT ---  
ATCACAGGAATACTATTGACAAGTGATGGAGGAATAAGAAATGACACA -----  
-----  
-----  
AATAATAATGAGACATTTCAGACCTGCAGGAGGAGATATGAGGGACAATTGGAGAAGTGAATTATACAAATATA  
AAGTGGTAGAAATTCGGCCATTG --- GGAGTAGCACCCACTACAGCAAAAAGGAGAGTGGTG -----  
-----GAGAGAGAAAAAAGAGCA --- GTGGGA --- CTAGGAGCT -----  
---ATGTTCTTGGGTTCTTGGGAACA --- GCCGGAAGCACTATG --- GGCGCAGCGTCA ---  
ATGGCGCTGACGGTACAG --- GCCAGACAA --- TTGTTG --- TCTGGTATAGTGCAACAGCAAAGC ---  
AATTTG --- CTGAGG --- GCTATAGAGGCGCAACAACACATGTTGCAACTCACGGTCTGGGGCATT  
>KY929368  
TTCTATTGTAATACATCAGGCCTGTTTAATAGTACATACATTACATACATTAATGGTAACATGTCTATATACA  
ATGGTAGT -----  
-----GGAAAC-----  
TCCAATAACACAAACATCACACTCCCATGCCGCCTAAAGCAAATTATAAACATGTGGCAGAGGGTAGGACGAG  
CAATGTATGCCCCCTCCCATTCAGGAAACATAACATGTAACCTCACT ---  
ATCACAGGACTACTATTGGTACGTGATGGAGGAAACGATAATAGAACA -----  
-----  
-----  
AATGGGACAGAGATATTTAGACCTGGAGGAGGAGATATGAGGGACAATTGGAGAAGTGAAGTATATAAAATATA  
AAGTGGTAGAAATTAAACCATTG --- GGACTAGCACCCACTAAAGCAAAAAGGAGAGTGGTG -----  
-----GAGAGAGAAAAAAGAGCA --- GTGGGA --- ATAGGAGCT -----  
---TTGCTCTTTGGGTTCTTGGGAATG --- GCAGGAAGCACTATG --- GGCGCGGCGTCA ---  
ATAACGCTGACGGTACAG --- GCCAGAGAC --- ATATTG --- TCTGGTATAGTGCAACAGCAAAGT ---  
AATTTG --- CTGAGA --- GCTATAGAGGCGCAACAGCATCTGTTGCAACTCACGGTCTGGGGCATT  
>KX069227  
TTCTATTGCAATACATCAGGTCTATTTAATGGTACATACAATGGTACAGAAAGTGAT -----  
-----  
-----  
TTAAACTCAACCATCACAATCCCATGCAAAATAAAACAAATTTATAAACATGTGGCAGGAGGTAGGAAGAGCAA  
TGTATGCCCCCTCCTATTGAAGGAAACATAACATGTAAATCAAAT ---  
ATCACAGGACTACTATTAGAACGTGATGGAGGACAGGGAAATGGGGCAGAA -----  
-----  
-----  
AATGATACAGAGATATTCAGACCTGGAGGAGGAGACATGAGGGATAATTGGAGAAGTGAATTATATAAAATATA  
AAGTGGTAGAAATTAAACCATTA --- GGAGTAGCACCCACTGGATCAAAAAGGAGAGTGGTG -----  
-----GAGAGAGAAAAAAGAGCA --- GCA --- GTGTCAGCT -----  
---ATGCTCTTTGGGTTCTTGGGATTG --- GCAGGAAGCACTATG --- GGCGCGGCGTCA ---  
ATATCGCTGACGGTACAG --- GCCAGACAA --- TTGTTG --- TCTGGTATAGTGCAACAGCAAAGC ---  
AATTTG --- CTGAGA --- GCTATAGAGGCGCAACAGCATCTGTTGCAACTCACAGTCTGGGGCATT  
>KX069228  
TTCTATTGCAATACAACAAAGTTGTTTAATAGTACATACAGTACATACAATGATACAAAAAATTCA -----  
-----

-----  
ACAAACTCAACCATCACAATCCCATGCAGAATAAAACAAATTATAAACATGTGGCAGGAGGTAGGACGAGCAA  
TGTATGCCCCCTCCCATTGCAGGATACTTAACATGTAAGTCAAAT---  
ATCACAGGACTACTATTGACACGTGATGGAGGAATAGAGGATAAGAATACT-----  
-----  
AGTACAGGTAGTAATGACACA-----  
AAGACAGAGACATTTCAGACCTATAGGAGGAGATATGAGGGACAATTGGAGAAGTGAATTATATAAATACAAAG  
TAGTAGAAGTTAAGCCATTG---GGAATAGCACCCACTGAAGCAAAAAGGAGAGTGGTG-----  
-----GAGAGAGGAAAAAGAGCA---GTAACA---ATGGGAGCT-----  
ATGTTTCCTTGGGTTCTTGGGAGCA---GCAGGAAGCACTATG---GGCGTGGCGTCA---  
ATGGCGCTGACGGTACAG---GCCAGACAA---TTGTTG---TCTGGTATAGTGCAACAGCAAAGC---  
AATTTG---CTGAGA---GCTATAGAGGCGCAACAGCATCTGTTGCAACTCACAGTCTGGGGCATT  
>KX069222  
TTCTATTGTAATACATCAAAACTGTTTAAATAGTACATACCTGTCTAATGGCACATACATGCCTAATGAGGCAC  
TA-----  
-----  
AATAGTACTTCCATCACGATCCCATGCAGAATAAAGCAAATTATAAACATGTGGCAGGAGATAGGACGAGCAA  
TGTATGCCCCCTCCCATTGCAGGAAACATAACATGTACATCAAAT---  
ATCACAGGACTACTATTGGTACGTGATGGGGGAAAAAGAGAAAAAT-----  
-----  
GAAACAGAAATATTCAGACCGGGAGGAGGAAACATGAAGGACAATTGGAGAAGTGAATTATATAAATATAAAG  
TGGTAGAGATTAAACCATTG---GGAGTAGCACCCACTGGAGCAACAAGGAGAGTGGTG-----  
-----AAGAGAGAGAAAAAGAGCA---GCC-----ATAGGAGCT-----  
GTGTTTCCTTGGGTTCTTGGGAGCA---GCAGGAAGCACTATG---GGCGCGGCGTCA---  
ATGGCGCTGACGGTACAG---GCCAGACAA---TTGTTG---TCTGGTATAGTGCAACAGCAAAGC---  
AATTTG---CTGAGG---GCTATAGAGGCGCAACAGCATCTGTTGCAACTCACGGTCTGGGGCATT  
>KX756601  
TTCTATTGTAATACATCAAGCCTGTTTAAATAGGACATACATATTTAATGAGACAACAAGTAATTCAAGCTCA-  
-----  
-----  
AATAGTTCACACATCACAATCCAATGCAGAATAAAGCAAATTATAAACATGTGGCAGGAGGTAGGACGAGCAA  
TGTATGCCCCCTCCCATTGAAGGAACCATAACATGTAAATCAAAC---  
ATCACAGGGATACTATTGACAAGGGATGGTGGAAACACATAATGGA-----  
-----  
ACAGAGACATTTCAGACCGGGAGGAGGAAATATGAAGGACAATTGGAGAAATGAATTATATAAGTATAAAGTGG  
TAGAAATCAAGCCACTG---GGAGTAGCACCCACTGGAGCAAAAAGGAGAGTGGTG-----  
-----GAGAGAGAAAAAGAGCA---GTGGGA---CTAGGAGCT-----  
ATGTTTCCTTGGGATCTTAGGAGCA---GCAGGAAGCACTATG---GGCGCGGCGTCA---  
ATAACGCTGACGGTACAG---GCCAGACAA---TTGTTG---TCTGGTATAGTGCAACAGCAAAGC---  
AATTTG---CTGAGA---GCCATAGAGGCGCAACAGCATATGTTGCAACTCACAGTCTGGGGCATT  
>KX069219  
TTCTATTGCAATACATCAAGCCTATTTAATAGTACATACATGTCCAATGGTACATACATGTTTAAATGGGACAA  
TAAGTAAT-----  
-----GGGACA-----  
ATAAGTAATGATAGCATCACAATCCCATGCAGGATAAAACAAATTGTAAACATGTGGCAGCAGGTAGGACGAG  
CAATGTATGCCCCCTCCCATTGCAGGAAACATAACGTGTAACCTCAAAC---  
ATTACAGGAATATTATTGGAACGTGATGGAGGGTTAAGTAATAGG-----  
-----  
-----  
TCAGAGGAGACATTTCAGACCTGTAGGGGGAGATATGAAGAACAATTGGAGAAGTGAATTATATAAATATAAAG  
TGGTAGAAATTAAACCATTG---GGAGTAGCACCCACTGCAGCAAAAAGGAGAGTGGTG-----  
-----GAGAGAGAAAAAGAGCA---GTGGGC---CTAGGAGTT-----  
ATGTTTCCTTGGGTTCTTGGGAGCA---GCAGGAAGCACTATG---GGCGCGGCGTCA---  
ATAACGCTGACGGTACAG---GCCAGACAA---TTGCTG---TCTGGTATAGTGCAAGCAGCAAAGC---  
AATTTG---CTGAGG---GCTATAGAGGCGCAACAGCATTTGTTGCAACTCACAGTCTGGGGCATT  
>KX069221  
TTCTATTGTAATACATCAAAACTGTTTAAAGGGTAATGGTACAAGCACAGACACAGGA-----  
-----

-----  
AATAATTCAAGCATCACAATCCCATGCAGAATAAAGCAAATTATAAATATGTGGCAGGGGGTAGGACGAGCAA  
TGTATGCCCCCTCCCATTTGAAGGACACATAACATGTGAATCAAAT---  
ATCACAGGACTACTATTGGTACGTGATGGGGGAGCATCAAATGAGACAAGT-----  
-----  
-----  
AATGATACAGAGACATTCAGACCTGGAGGAGGAAATATGAAGGACAATTGGAGAAGTGAATTATATAAATATA  
AAGTGGTAGAAATTAACCATTG---GGAGTAGCACCCACTGAAGCAAAAAGGAGAGTGGTG-----  
-----GAGAGAGAAAAAAGAGCA---GTG-----TTGGGAGCT-----  
---GCGATCCTTGGGTTCTTGGGAGCA---GCAGGAAGCACTATG---GGCGCGGCGTCA---  
ATAACGCTGACGGTACAG---GCCAGACAA---TTGCTG---TCTGGTATAGTGCAACAGCAAAGC---  
AATTTG---CTGAGA---GCTATAGAGGCGCAACAGCATCTGTTGCAACTCACAGTCTGGGGCATT  
>KX069223  
TTCTATTGCAATACATCAAGACTGTTTAATGGAACATATGATGGAACATATAATGGTACAGCAAGTAAC----  
-----  
-----  
AATACAGGAAACATCACCTCCCATGCAGAATAAAACAAATTATAAACATGTGGCAGGGGGTAGGACGAGCAA  
TATATGCCCCCTCCCATTTGCAGGAAACATAACATGTGTATCAAAT---  
ATCACAGGACTATTATTGGTACGTGATGGAGGAACAGAGAATGGCACA-----  
-----  
-----  
AATGGCACAGAAACATTCAGACCTACAGGAGGAAATATGAGGGACAATTGGAGAAGTGAATTATATAAATATA  
AAGTGGTAGAAATTAAGCCATTG---GGAATAGCACCCACTGCAGCAAGAAGGAGAGTGGTG-----  
-----GAGAGAGGAAAAAAGAGCA---GTGGGA---ATAGGAGCT-----  
---GTGTTCCCTTGGGTTCTTGGGAGCA---GCAGGAAGCACTATG---GGCGCGGCGTCA---  
ATAACGCTGACGGTACAG---GCCAGACAA---TTGTTG---TCTGGTATAGTGCAACAGCAAAGC---  
AATTTG---CTGAGA---GCTATAGAGGCGCAACAGCATCTGTTGCAACTCACGGTCTGGGGCATT  
>KX069224  
TTCTATTGCAATACATCAAACTGTTTAATAGTACATATAATGGTACAGACAATGGTAACTCAAGCAGCTCAA  
AC-----  
-----  
-----  
TCAAGCTCAATCATCACAATCGCATGCAGACTAAAAACAAATTGTAAACTGTGGCAGGAGGTAGGACGAGCAA  
TGTATGCCCCCCCCATTGCAGGAAACATAACGTGCAAATCAAAT---  
ATCACAGGAATACTATTGGTGCGTGATGGAGGGACAAATGGGACA-----  
-----  
-----  
GAGGAGACCGAGACATTTAGACCTGGAGGAGGAAATATGAGGGATAATTGGAGAAGTGAATTGTATAAATATA  
AAGTGGTAGAAATTAAGCCATTG---GGAATAGCACCCACTACAGCAAAAAGGAGAGTGGTG-----  
-----GAGAGAGAAAAAAGAGCA---GTGGGA---ATAGGAGCT-----  
---GTGTTCCCTTGGGTTCTTGGGAGCA---GCAGGAAGCACTATG---GGCGCGGCGTCA---  
ATGGCGCTGACGGTACAG---GCCAGACAA---TTGTTG---TCTGGTATAGTGCAACAGCAAAGC---  
AATTTG---CTGAGG---GCTATAGAGGCGCAACAGCATCTGTTGCAACTCACGGTCTGGGGCATT  
>KX069226  
TTCTACTGCAACACAACAAACCTGTTTAATAGTACATACCTAGCGAATAGTACATTA-----  
-----  
-----  
AGTAATTCAACCATCACAATCCCATGCAGCATAAAAACAAAGTGATAAACATGTGGCAGGAGGTAGGACGAGCAA  
TGTATGCCCCCTCCCATTTGCAGGAAACATAACCTGTAAATCAAAT---  
ATCACAGGGCTACTATTGGTACGTGATGGGGGAACAAACAATAGC-----  
-----  
-----  
ACTACAGAGGTATTTCAGACCTGGAGGAGGAGATATGAGGGACAATTGGAGAAGTGAATTATATAAATATAAAG  
TGGTAGAAATTAAGCCATTA---GGAATAGCACCCACTGAAGCAAAAAGGAGAGTGGTG-----  
-----GAGAGAGAAAAAAGAGCA---GTGGGA---ATAGGAGCT-----  
GTGTTCCCTTGGGTTCTTGGGAGCA---GCAGGAAGCACTATG---GGCGCGGCGTCA---  
ATAACGCTGACGGTACAG---GCCAGACAA---TTGTTG---TCTGGTATAGTGCAACAGCAAAGC---  
AATTTG---CTGAGG---GCTATAGAGGCGCAACAGCATCTGTTGCAACTCACGGTCTGGGGCATT  
>KY713230  
TTCTATTGCAATACATCAGGCCTGTTTAATGGTACATATAATAGTACATACAATGGTACATCCATG-----  
-----

-----  
TCTAATGATACCATCACACTCCCATGCGAGAATAAAACAAATTATAAACATGTGGCAGGAGGTAGGAAGAGCAA  
TGTATGCCCCCTCCCATTTGCAGGAAACATAACATGTAAATCAAAT---  
ATCACAGGAATACTATTGGTACGTGATGGAGGACCAAATAGGACA-----  
-----  
-----  
AATGAGACATTCAGACCTGGAGGAGGAGATATGAGAGACAATTGGAGAAGTGAATTATATAAATACAAAGTGG  
TAGAAGTTAAGCCATTG---GGAATAGCACCCACTACAGCAAAAAGGAGAGTGGTG-----  
-----GAGAGAGAAAAAAGAGCA---GTGGGA---CTAGGAGCT-----  
GTGTTTCCTTGGGTTCTTGGGCGCA---GCAGGAAGCACTATG---GGCGCGGCGTCA---  
ATAACGCTGACGGTACAG---GCCAGACAA---TTGTTG---TCTGGTATAGTGCAACAGCAAAAC---  
AATTTG---CTGAAA---GCTATAGAGGCGCAACAACATCTGTTGCAACTCACGGTCTGGGGCATT  
>KY713236  
TTCTATTGTAATACATCAGACCTGTTTTATTGGTACATATAAGTTTATTAATGGTACATATGAGTTTAATGATA  
CAACAAGTAAT-----  
-----  
TCAAGCAGATCAGACATCACAATCCAATGCAGAATAAAGCAATTTATAAACATGTGGCAGGAGGTAGGAAAAAG  
CAATGTATGCCCCCTCCCATTTGAAGGAAACATAACATGTAAATCAAAC---  
ATCACAGGACTAATATTGGTACGTGATGGAGGGCTAAATACCAAT-----  
-----  
-----  
GAGACAAATAATACAGAGATATTCAGACCTGGAGGAGGAGATATGAGGGACAATTGGAGAAGTGAATTATATA  
AATATAAAGTGGTAGAAATTAAGCCATTA--GGAATAGCACCCACTGCAGCAAAAAGGAGAGTGGTG-----  
-----GAGAGACCAAGAAGAGCA---GTGGGA---  
CTAGGAGCT-----GTGTTTCCTTGGGTTCTTGGGAGCA---GCCGGAAGCACTATG---  
GGCGCGGCGTCA---ATAACGCTGACGGTACAG---GCCAGACAA---TTGTTG---  
TCTGGTATAGTGCAACAGCAAAGC---AATTTG---CTGAGG---  
GCTATAGAGGCGCAACACCATCTGTTGCAACTCACAGTCTGGGGCATT  
>MN703367  
TTCTATTGCAATACATCAAACTGTTTAGTGGTGTATATAATGGTACATATAATGTTACAACAGGTAATTCAA  
CAGGA-----  
-----  
GATAATTCAACTATCACAATCCCATGCGAGAATAAGGCAAGTTATAAACCTGTGGCAGGAGGTAGGAAGAGCAA  
TATATGCCCCCTCCCATTTGCAGGAAACATAACATGTAAATCAAAT---  
ATCACAGGAATACTGTTAACGCGTGATGGAGGGCAAGGGGCAAAC-----  
-----  
-----  
ATTACAAATGATACAGAGACATTTAGACCTGCAGGAGGAGATATGAGGGACAATTGGAGAAGTGAAGTATATA  
AATATAAAGTGGTAGAAATTAGGCCATTA--GGAATAGCACCCACTCCAGCAAAAAGGAGAGTAGTG-----  
-----GAGAGAGAGAAAAAGAGCA---GCGGGA---  
TTAGGAGCT-----GTGCTCCTTGGGTTCTTGGGAGCA---GCCGGAAGCACTATG---  
GGCGCAGCGTCA---ATAACGCTGACGGTACAG---GCCAGACAA---TTGTTG---  
TCTGGTATAGTGCAACAGCAAAGC---AATTTG---CTGAAG---  
GCTATAGAGGCGCAACAACACATGTTGCAACTCACTGTCTGGGGCATC  
>MN703351  
TTCTATTGTAATACATCAAACTGTTTAATGGTACATATAAAGTGATTCAAACCTCAACC-----  
-----  
-----  
TCAGACAAAAACATCACAATCCCATGCGAGAATAAAGCAAATTTATAAACATGTGGCAGGAGGTAGGACGAGCAA  
TGTATGCCCCCTCCCATTTGCAGGAAGCATAATATGTAAATCACAA---  
ATCACAGGACTCCTATTGGTACGTGATGGAGGAGTAACAAATGACACAGAAAAT-----  
-----  
-----  
AATGATACAGAGATATTCAGACCTGGAGGAGGAGATATGAAGAACAATTGGAGAAGTGAATTATATAAATATA  
AAGTAGTAGAGATTAAGCCATTG---GGAGTAGCACCCACTGGAGCAAAAGGGAGAGTAGTG-----  
-----GAGAGAGAAAAAAGAGCA---GTGGGA---CTGGGAGCT-----  
---GTGTTCCCTCGGGTTTCTGGGAGCA---GCAGGAAGCACTATG---GGCGCGGCGTCA---  
ATGACGCCGACGGTACAG---GCCAGACAA---TTGTTA---TCTGGTATAGTGCAACAGCAAAAC---  
AATTTG---CTAAAA---GCTATAGAGGCGCAACAGCATCTGTTGCAACTCACAGTCTGGGGCATT  
>MN703360

TTCTATTGTAATACATCAGGCCTGTTTAAATAGTATATATAATAACAAGTAATTCAAGCTCCAAT-----  
 -----  
 -----TCAAATGAA---  
 ACCAGAATCCCATGCAGAATAAAGCAAATTATAAACATGTGGCAGGGGGTAGGACGAGCAATGTATGCCCCCTC  
 CCATTGCAGGAAACATAACATGTAAATCAAAT---  
 ATCACAGGACTACTATTGGCACGAGATGGAGGAAAAGAGACAAAT-----  
 -----  
 ----  
 GAGACAAGCGCGACAGAGATATTCAGACCTGGGGGAGGAAATATGAAGGACAACTGGAGAAGTGAATTATATA  
 AATATAAAGTGGTAGAAATTAACCATTAA--GGAATAGCACCCACTAAAGCAAAAAGGAGAGTGGTG-----  
 -----GAGAAAGGAAAAAGAGCA---GCGGGA---  
 ATGGCAGCT-----GTGTTTCCTTGGGTTCTTGGGAGCA--GCCGGAAGCACTATG---  
 GGCGCGGCGTCA--ATAGCGCTGACGGTACAG--GCCAGACAA--TTGTTG---  
 TCTGGTATAGTGCAACAGCAAAAGC--AATTTG--CTGAGG---  
 GCTATAGAGGCGCAACAGCATCTGTTGCAACTCACGGTCTGGGGCATT  
 >MN703391  
 TTCTATTGTAATACATCAGGCCTGTTTAAATGATACATATGATACAACAGTTAATTCAAGCCCCACT-----  
 -----  
 -----  
 TCAAACGAAACCATCACAATCCTATGCAGAATAAAGCAAATTATAAACATGTGGCAGAAGGTAGGACGAGCAA  
 TGTATGCCCCCTCCCATTCAGGAAACATAACATGTAGATCAAAT---  
 ATCACAGGGCTACTATTGGTACGTGATGGAGGGATAAATGTGACAAGCAACACA-----  
 -----  
 ----  
 ACAGACAACATGACAGAGACATTCAGACCTGGAGGAGGAGATATGAGGGACAATTGGAGAAGTGAATTATACA  
 AATATAAAGTGGTAGAAATTAAGCCATTG--GGAATAGCACCCACTAAAGCAAAAAGGAGAGTGGTG-----  
 -----GAGAGAGAAAAAAGAGCA--GTGGGA---  
 ATGGCAGCT-----GTGTTTCCTTGGGTTCTTGGGAGCA--GCCGGAAGCACTATG---  
 GGCGCGGCGTCA--ATAGCGCTGACGGTACAG--GCCAGACAA--TTGTTG---  
 TCTGGTATAGTGCAACAGCAAAAC--AATTTG--CTGAGA---  
 GCTATAGAGGCGCAACAGCATTTGTTGCAACTCACAGTCTGGGGCATC  
 >AF067154  
 TTCTATTGCAATACATCAAGCCTGTTTGATAGCCTGTTTAAATCCTAATGGTACAAGAAATGAT-----  
 -----  
 -----  
 ACAAACCTTAACCATTACAATCCCATGCAGAATAAAACAAATTATAAACATGTGGCAGGAGGTAGGACGAGCAA  
 TGTATGCCCCCTCCCATTCAGGAAACATAACATGTAAATCAAAC---  
 ATCACAGGACTACTATTGGTGCGTGATGGAGGAAGAGGTAATGATACA-----  
 -----  
 -----  
 GAGAATAATACAGAGATATTCAGACCTGGAGGAGGAGATATGAGGAACAATTGGAGAAGTGAATTATATAAAT  
 ATAAAGTGGTAGAAATTAAGCCATTG--GGAGTAGCACCCACTAAAGCAAAAAGGAGAGTGGTG-----  
 -----GAGAGAGAAAAAAGAGCA--GTAGTGGGACTAGGAGCT---  
 -----GTGTTTCCTTGGGTTCTTGGGAGCA--GCAGGAAGCACTATG--GGCGCGGCGTCA---  
 ATAACGCTGACGGTACAG--GCCAGACAA--TTGTTG--TCTGGTATAGTGCAACAGCAAAGC---  
 AATTTG--CTGAGG--GCTATAGAGGCGCAACAGCATCTGTTGCAACTCACGGTCTGGGGCATT  
 >JQ715368  
 TTCTATTGTAATACATCAGGCCTGTTTAAATGGTACATACATGTCTAATGGTACAGAAAGTAAT-----  
 -----  
 -----  
 TCAAGCTCAATCATCACAATCCCATGCAGAATAAAGCAAATTATAAACATGTGGCAGGAGGTAGGACGAACCA  
 TGTATGCCCCCTCCCATTAAGGAAACATAGCATGTAAATCAAAT---  
 ATCACCGGACTACTATTGGTACGTGATGGAGGAACAGAGCCAAAT-----  
 -----  
 -----  
 GATACAGAGACATTCAGACCTGGAGGAGGAGATATGAGGAACAATTGGAGAAGTGAATTATATAAATATAAAG  
 TGGTAGAAATTAAGCCATTG--GGAATAGCACCCACTGCAGCAAAAAGAAGAGTGGTG-----  
 -----GAGAGAGAAAAAAGAGCA--GTGGGA--CTGGGAGCT-----  
 GTGTTTCCTTGGGTTCTTGGGAGCA--GCAGGAAGCACTATG--GGCGCGGCGTCA---

ATAACGCTGACGGCACAG---GCCAGACAA---TTGTTG---TCTGGTATAGTGCAACAGCAAAGC---  
 AATTTG---CTGAGG---GCTATAGAGGCGCAACAGCATCTGTTGCAACTCACGGTCTGGGGCATT  
 >AF286223  
 TTTTATTGTAATACATCAAGACTGTTTAACGGTACATACAATGGTACAGACATGCCTACATACAATGGTACAA  
 AT-----  
 -----  
 TCCAGTTCAGACATCATCATGCTTCCATGCAGAATAAGGCAATTTATAAACATTTGGCAGAAGGTAGGACGAG  
 CAATGTATGCCCCCTCCCATTTGAAGGAAACATAACATGTGAATCAAAT---  
 ATCACAGGACTACTATTAGTACGTGATGGAGGCGACACAAATAGT-----  
 -----  
 -----  
 AGCACAGAGATATTCAGACCTGGAGGAGGAGATATGAGGGACAATTGGAGAAGTGAATTATATAAATATAAAG  
 TGGTAGAAATTAAGCCATTA---GGAATAGCACCTACTGAAGCAAAAAGGAGAGTGGTG-----  
 -----GAGAGAGAAAAAAGAGCA---GTGGGA---ATAGGAGCT-----  
 GTGTTTCCTTGGGTTCTTGGGAGTA---GCAGGAAGCACTATG---GGCGCGGCGTCA---  
 ATGACGCTGACGGTACAG---GCCAGACAA---TTGTTG---TCTGGTATAGTGCAACAGCAAAGC---  
 AATTTG---CTGAAG---GCTATAGAGGCGCAACAGCATATGTTGCAACTCACAGTCTGGGGCATT  
 >AF067155  
 TTCTATTGCAATACATCAGGCCTGTTTAATAGGACATACATGCCTAATGATACAAAAGAGTAATTCAAGCAGTA  
 AT-----  
 -----  
 CCAAACGCAAACATCACAATCCCATGCAGAATAAAGCAAATTATAAACATGTGGCAGGAGGTAGGACGAGCAA  
 TGTATGCCCCCTCCCATTTGAAGGAAAAATAACATGTAGATCAAAT---  
 ATCACAGGACTACTATTGGTACGTGATGGAGGAGAAGACAAAATAATACA-----  
 -----  
 ----  
 GAGACAAATAAGACGGAGACATTCAGACCTGGAGGAGGAGATATGAGGGACAATTGGAGAAGTGAATTATATA  
 AATACAAAGTGGTAGAAGTTAAGCCATTG---GGAGTAGCACCCACTACAGCAAAAAGGAGAGTGGTG-----  
 -----GAGAGAGAAAAAAGAGCA---GTGGGA---  
 ATAGGAGCT-----GTGTTTCCTTGGGTTCTTGGGAGCA---GCAGGAAGCACTATG---  
 GGCGCGGCGTCA---ATAACGCTGACGGTACAG---GCCAGACAA---TTGTTG---  
 TCTGGTATAGTGCAACAGCAAAGC---AATTTG---CTGAGG---  
 GCTATAGAGGCGCAACAGCATCTGTTGCAACTCACGGTCTGGGGCATT  
 >AF286231  
 TTCTATTGCAGCACATCAAGACTGTTTAATAGTACATACATGCCTAATGATACAAAAAGTAAG-----  
 -----  
 -----  
 TCAAACAAAACCATCACAATCCCATGCAGCATAAAACAAATTGTAAACATGTGGCAGGAGGTAGGACGAGCAA  
 TGTATGCCCCCTCCCATTTGAAGGAAACATAACCTGTAGATCAAAT---  
 ATCACAGGAATACTATTGGTACGTGATGGAGGAGTAGATTGAGAAGATCCA-----  
 -----  
 ----  
 GAAAATAATAAGACAGAGACATTCGACCTGGAGGAGGAGATATGAGGAACAATTGGAGAAGTGAATTATATA  
 AATATAAAGCGGCAGAAATTAAGCCATTG---GGAGTAGCACCCACTCCAGCAAAAAGGAGAGTGGTG-----  
 -----GAGAGAGAAAAAAGAGCA---GTAGGA---  
 TTAGGAGCT-----GTGTTTCCTTGGATTCTTGGGAGCA---GCAGGAAGCACTATG---  
 GGCGCAGCGTCA---ATAACGCTGACGGTACAG---GCCAGACAA---TTGTTG---  
 TCTGGTATAGTGCAACAGCAAAGC---AATTTG---CTGAGG---  
 GCTATCGAGGCGCAACAGCATCTGTTGCAACTCACGGTCTGGGGCATT  
 >AF286232  
 TTCTATTGTAACACATCAGGTCTGTTTAATGGTACATACAATCCTAATGTTACAGAAAGTAATTCAAACTCA-  
 -----  
 -----  
 ACAAATGCAACCATCACACTCCCATGCAGAATAAAGCAAATTATAAATTTGTGGCAGGAGGTGGGACGAGCAA  
 TGTATGCCCCCTCCCATTTGCAGGAAACATAACATGTAAATCAAAT---  
 ATCACAGGACTATTATTGACACGTGATGGAGGAACAAATGATACA-----  
 -----  
 -----  
 AGTAAGACAGAGATATTCAGACCTGGAGGAGGAGATATGAGGGACAATTGGAGAAGTGAATTATACAAATATA  
 AAGTGGTAGAAGTTAAGCCATTG---GGAGTAGCACCCACTGGAGCAAAAAGGAGAGTGGTG-----

-----GAGAGAGAAAAAGAGCA---GTGGGA---ATAGGAGCT-----  
 ---GTGTTCCCTTGGGATCTTGGGAGCA---GCAGGAAGCACTATG---GGCGCGGCGTCA---  
 ATAACGCTGACGGTACAG---GCCAGACAA---TTGTTG---TCTGGTATAGTGCAACAGCAAAGC---  
 AATTTG---CTGAGA---GCTATAGAGGCGCAACAGCATCTGTTGCAACTCACAGTCTGGGGCATT  
 >KP109486  
 TTCTATTGCAATACATCAAGCCTGTTTAAACAGTACATACAATCCTAATGATACAAACAGTAATTCAAGCTCAA  
 GTAAT-----  
 -----  
 TCAAGCTTAGACATCACAATCCCATGCAGAATAAAACAAATTATAAACATGTGGCAGGAGGTAGGACGAGCAA  
 TGTATGCCCCCTCCTATTGAAGGAAACATAACATGTAAATCAAAT---  
 ATCACAGGACTACTATTGGTACGTAATGGAGGAATAGAGTCAAAT-----  
 -----  
 -----  
 GAAACAGAGATATTGACACCTGGAGGGGGAGATATGAGGAACAATTGGAGAAGTGAATTATATAAATATAAGG  
 TGGTGGAATTAAGCCATTG---GGAATAGCACCCACTGCAGCAAAAAGGAGAGTGGTG-----  
 -----GAGAGAGAAAAAGAGCA---GTGGGA---CTGGGAGCT-----  
 GTGATCTTTGGGTTCTTGGGAGCG---GCAGGAAGCACTATG---GGCGCGGCGTCA---  
 ATAACGCTGACGGTACAG---GCCAGACAA---TTGTTG---TCTGGTATAGTGCAACAGCAAAGC---  
 AATTTG---CTGAAG---GCTATAGAAGCGCAACAACATTTGTTGCAGCTCACGGTCTGGGGCATT  
 >KP109487  
 TTCTATTGTAATACATCAGGCCTGTTTAAATGGTACATTTAATGGTACATACGTGTCACCTAATAGTACAGACA  
 GTAAT-----  
 -----  
 TCAAGTTCAATCATCACGATCCCCCTGCAGAATAAAGCAAATTATAAACATGTGGCAGGAGGTAGGACGAGCAA  
 TGTATGCCCCCTCCCATTCGAGGAAACATAACATGCAAATCAAAT---  
 ATCACAGGACTACTATTGGTACGCGATGGGGGAACAGGGTCAGAGTCA-----  
 -----  
 -----  
 AATAAGACAGAGATATTGACACCTGGAGGAGGAGATATGAGGGACAATTGGAGAAGTGAATTATATAAATATA  
 AAGTGGTAGAAATTAAGCCATTG---GGAGTAGCACCCACTAAAGCAAAAAGGAGAGTGGTG-----  
 -----GAGAGAGAAAAAGAGCA---GTGGGA---ATAGGAGCT-----  
 ---GTGTTCCCTTGGGTTCTTGGGAGCA---GCAGGAAGCACTATG---GGCGCGGCGTCA---  
 ATAACGCTGACGGTACAG---GCCAGACAA---TTGTTG---TCTGGTATAGTGCAACAGCAAAGC---  
 AATTTG---CTGAGG---GCTATAGAAGCGCAACAGCATCTGTTGCAACTCACGGTCTGGGGCATT  
 >KP109488  
 TTCTATTGTAATACATCAGGCCTGTTTAAATGGTACATACATGAATAATGATACAAAAAGTAATGATACAAAA  
 GTAAT-----  
 -----  
 TCAAGCTCCATCATCACAATCCCATGCAGAATAAAGCAAATTATAAACATGTGGCAAGAGGTAGGACGAGCAA  
 TGTATGCCCCCTCCCATTCGAGGAAACATAACATGTAAATCAAAT---  
 ATCACAGGAATACTATTGACACGAGATGGAGGACGAGGAGAAGAG-----  
 -----  
 -----  
 GTAAAAAATGATACAGAGACATTGACACCTGGAGGAGGAAATATGAAGGACAATTGGAGAAGTGAATTATATA  
 AATACAAAGTAGTAGAAATTAAGCCATTA---GGAGTAGCACCAACTGCAGCAAAAAGGAGAGTGGTG-----  
 -----GAGAGAGAAAAAGAGCA---GTGGGA---  
 CTAGGAGCT-----GTACTCCTTGGGTTCTTGGGAGCA---GCAGGAAGCACTATG---  
 GGCGCGGCGTCA---ATAACGCTGACGGTACAG---GCCAGACAA---TTGTTG---  
 TCTGGAATAGTGCAACAGCAAAGC---AATTTG---CTGAGA---  
 GCTATAGAGGCGCAACAGCATATGTTGCAACTCACAGTCTGGGGCATT  
 >KP109489  
 TTCTATTGTAATACATCAAACTGTTTAAATAGTACATACATACCTACATACAGGCCTAATAATACACAAGGTA  
 AT-----  
 -----  
 TCAAGCTCAACCATCACAATCCCATGTAGAATAAAGCAAATTATAAACATGTGGCAGGAGGTAGGACGAGCAA  
 TGTATGCCCCCTCCCATTCGAGGAAACATAACATGTAAATCACAT---  
 ATCACAGGACTACTATTGGTACGGGATGGAGGAACAGGGCTAAAT-----  
 -----  
 -----  
 AGTAGTACAGAGACATTTAGACCTGGAGGAGGGGATATGAGGGACAATTGGAGAAGTGAATTATATAAATATA

AAGTAGTAGAAATTAAGCCATTG---GGAGTAGCACCAACTGCAGCAAAAAGAAGAGTGGTG-----  
 -----CAGAGAGAAAAACGAGCA---GTGGGA---TTAGGAGCT-----  
 ---GTGTTCCCTTGGGTTCTTGGGAACA---GCAGGAAGCACTATG---GGCGCAGCGTCA---  
 ATAACGCTGACGGTACAG---GCCAGACAA---TTGTTG---TCTGGTATAGTGCAACAGCAGAGC---  
 AATCTG---CTGAGG---GCTATAGAGGCGCAACAGCATATGTTGCAACTCACAGTCTGGGGCATT  
 >AJ276221  
 TTCTATTGTAATACAACAGGCCTGTTTAATGGTACATTTAATGGTACATACATGAATAATACAGGA-----  
 -----  
 -----  
 AGTAATTCAAGCATCACAATCCCATGCAGAATAAAGCAAATTATAAACATGTGGCAGAAGGTAGGACAAGCAA  
 TGTATGCCCCCTCCCATTCGAGGAAACATAACCTGTAGGTCAAAT---  
 ATTACAGGACTACTATTGGGTACGCGATGGAGGATTGGGGACAAAT-----  
 -----  
 -----  
 GACACAGAGACATTTAGACCTGGAGGAGGAGATATGAGGGACGATTGGAGAAGCGAATTATATAAATATAAAG  
 TGGTAGAAATTAAGCCATTG---GGAGTAGCACCCACAGGAGCAAAAAGGAGAGTGGTG-----  
 -----GAGAGAGGAAAAAGAGCA---GTGGGA---CTAGGAGCT-----  
 GTGTTCCAAGGGTTCTTGGGAGCA---GCAGGAAGCACTATG---GGCGCGGCGTCA---  
 ATAACGCTGACGGTACAG---GCCAGACAA---TTGTTGCTGGTATAGTGCAACAACAAAGCAGC---  
 AATTTG---CTGAGG---GCTATAGAGGCGCAACAGCATCTGTTGCAACTCACGGTCTGGGGCATT  
 >EU521728  
 TTCTATTGCAACACATCAACACTGTTTAATAGTACGTACATGTACATGAATAGTACGTACATGTTTAATGGTA  
 CAGAAAGTAAT-----  
 -----GGTACAGAAAGT-----  
 AATTCAAACCTCAACCATCACAATCCAATGCAGAATAAAACAAATTATAAACATGTGGCAGAAGGTAGGAAGAG  
 CAATGTATGCCCCCTCCCATTCGAGGAAACATAACATGTAAATCAGGT---  
 ATCACAGGACTATTATTGGGTACGTGATGGAGGAAATCCAAATAATACA-----  
 -----  
 -----  
 AATAATACAGAGATCTTCAGACCTGGAGGAGGAGATATGAGGGACAATTGGAGAAGTGAATTATATAAATATA  
 AAGTGGTAGAAATTAAGCCATTG---GGAATAGCACCCACTGCAGCAAAAAGGAGAGTGGTG-----  
 -----GAGAGAGAGAAAAAGAGCA---GTGGGA---CTAGGAGCT-----  
 ---ATGTTCTTTGGGTTCTTAGGAGCA---GCAGGAAGCACTATG---GGCGCGGCGTCA---  
 GTGACGCTGACGGTACAG---GCCAGACAA---TTGTTG---TCTGGTATAGTGCAACAGCAAAGC---  
 AATTTG---CTGAGG---GCTATAGAGGCGCAACAGCAGTTGTTGCAACTCACAGTCTGGGGCATT  
 >EF694033  
 TTCTATTGCAATACATCACAACCTGTTTAATAGTACATATGATCCTGCATACAGGCCTAATAATACAGAA---  
 -----  
 -----  
 AACAAATCAACCATCATACTCCCATGCAGAATAAGACAAGTTGTAAACCTGTGGCAGGAGGTAGGACGAGCAA  
 TGTATGCCCCCTCCCATTCGAAGGAAACATAACGTGTAAATCAAAT---  
 ATCACAGGAATACTATTGGTACGTGATGGAGGGACAGAATTAAATAATACA-----  
 -----  
 -----  
 GAATTTAATAATACAGAAATATTAGACCGGGAGGAGGAGATATGAGAGACAATTGGAGAAGTGAATTATATA  
 AATATAAAGTGGTAGAAATTAAGCCATTG---GGAGTAGCACCCACTACGGCAAAAAGGAGAGTGGTG-----  
 -----GAGAGAGAAAAAGAGCA---  
 GTAGTGGGAATAGGAGCT-----GTGTTTCCTTGGGATCTTGGGAGCA---GCAGGAAGCACTATG---  
 GGCGCGGCATCA---ATAACGCTGACGGTACAG---GCCAGACAA---CTGCTG---  
 TCTGGTGTAGTGCAACAGCAAAGC---AATTTG---CTGAGG---  
 GCTATAGAGGCGCAACAGCATATGTTGCAACTCACGGTCTGGGGCATT  
 >AF457054  
 TTCTATTGTAATACATCAGGCCTGTTTAATGAACTCTAACTCGGTTGAATGATACATACAGTTCT-----  
 -----  
 -----  
 AATGGGACAAACATCACACTCCCATGTAGAATAAAACAAATTATAAACATGTGGCAGAAGGTAGGACGAGCAA  
 TGTATGCCCCCTCCCATTCGAGGAAACATAACATGTACATCAAAA---  
 ATCACAGGACTATTATTGCAACGTGATGGAGGGAACAGTACAAAT-----  
 -----  
 -----

AAAAC TGAGACATTCAGGCCTGGAGGAGGAAATATGAAGGACAAC TGAGAGAAGTGAATTATACAAATATAAAG  
TGGTGGAAATTAAGCCATTG---GGAATAGCACCCACTGAGGCAAAAAGGAGAGTGGTG-----  
-----GAGAGAGAAAAAAGAGCA---GTGGGA---ATAGGAGCT-----  
GTA CTCTTGGGTTCTTGGGAGCA---GCAGGAAGCACTATG---GGCGCGGCGTCA---  
ATAACGCTGACGGTACAG---GCCAGACAA---CTGTTG---TCTGGTATAGTGCAACAGCAAAGC---  
AATTTG---CTGAGG---GCTATAGAAGCGCAACAGCATATGTTGCAGCTCACGGTCTGGGGCATT  
>FJ396028  
TTCTATTGCAATACATCAGATTTGTTTAACTTTCCTAATGGTAGTAAGGCTATTAAT-----  
-----  
-----  
GGTAATTCAACCATTACACTCCAATGCAGAATAAAACAAATTATAAACATGTGGCAGGGGGTAGGACAAGCAA  
TGTATGCTCCTCCCATTAGAGGGAACATAACATGTAGATCAAAT---  
ATCACAGGACTATTACTGACACGCGATGGAGGAGAAGGACGAAATGGCACA-----  
-----  
-----  
GAGAATGTCACAGAGATATTCAGACCTGGAGGAGGAGATATGAGGGACAATTGGAGAAGTGAATTATACAAAT  
ATAAAGTGGTAGAAATTAAGCCATTA---GGAGTAGCACCCACTAAGGCAAAAAGGAGAGTGGTG-----  
-----GAGAGAGAAAAAAGAGCA---GTGGGA---ATAGGAGCT---  
-----GTGTTCTTGGGTTCTTGGGAGCA---GCAGGAAGCACTATG---GGCGCAGCGTCA---  
ATAACGCTGACGGTACAG---GCCAGACAA---TTATTG---TCAGGCATAGTGCAACAGCAAAAC---  
AATTTG---CTGAGA---GCTATAGAGGCGCAACAACATCTGTTGCAACTCACGGTCTGGGGCATT  
>KT022366  
TTCTATTGCAATACAACAATCCTGTTTAAATGAGACATACAGGGAATACATGGCTAATAAAACACAA-----  
-----  
-----  
GATAATACGACACTCACACTCCAATGCAGAATAAAACAGATTATAAGGATGTGGCAGGGGGTAGGACAAGCGA  
TGTATGCCCCCTCCCATTGCAGGCAACATAACATGTAGATCAAAT---  
ATCACAGGACTACTATTGATACGTGATGGAGGAACAAACAATAGT-----  
-----  
-----  
GAGACATTCAGACCTGGAGGAGGAGATATGAGGGACAATTGGAGAAGTGAATTATATAAATATAAAGTGGTAG  
AAATTAAACCATTA---GGAATAGCACCCACCAAGGCAAAAAGGAGAGTGGTG-----  
-----GAGAGAGAAAAAAGAGCA---GCA-----CTAGGAGCT-----  
TTGTTCTTGGGTTCTTGGGAGTA---GCAGGAAGCACTATG---GGCGCGGCGTCA---  
ATGACGCTGACGGTACAA---GCCAGACAA---TTGCTG---TCTGGTATAGTGCTACAGCAAAGC---  
AATTTG---CTGAGA---GCCATAGAGGCGCAACAGCATATGTTGCAACTCACGGTCTGGGGCATT  
>KT022371  
TTCTATTGCAATACATCAAACTGTTTAAAGGATATTGTTATAAATGATACTGAT-----  
-----  
-----  
ACAAATACAACCATCATGCTCCCATGCAGAATAAAACAAATTATAAACATGTGGCAGCAGGTAGGACGAGCAA  
TGTATGCCCCCTCCCATCCGAGGGCAAATAACATGTAAC TCAACT---  
ATCACAGGATTAATACTGACACGTGATGGAGGAAATACTAATAACAATAACACC-----  
-----  
-----  
AATGACACAGAGATAGAGATATTCAGACCTGCAGGAGGAGATATGAGGGACAATTGGAGAAGTGAATTATATA  
AATATAAAGTGGTAGAAGTTAAGCCATTA---GGAATAGCACCCACTGAGGCAAAAAGGAGAGTGGTG-----  
-----  
-----  
GAGAGAGAAAAAAGAGCAGTAGTAGGGGACTAGGAGTT-----GTGTTCTTGGGTTCTTGGGAGCA-  
---GCCGGAAGCACTATG---GGCGCAGCGTCA---ATGGCGCTGACGGTACAG---GCCAGACAA---  
TTACTG---TCGGGTATAGTGCAACAGCAAAAC---AATTTG---CTGAGG---  
GCTATAGAGGCGCAACAGCATATGTTGCAACTCACGGTCTGGGGCATT  
>KU921723  
TTCTATTGCAATACAACAATCCTGTTTAAATAGTAGTAGGATTTTTTAAAGAAAT-----  
-----  
-----  
TTTACAGAAAATATCACACTCCCATGCAGAATAAAACAAATTTATAAACATGTGGCAGAGAGTAGGACAAGCAA  
TGTATGCTCCTCCCATTGCAGGAAACATAATATGTAAC TCAAC---  
ATCACAGGACTAATATTGACACGTGATGGAGGTAATGATAATGATACA-----  
-----  
-----

-----  
TCAACAACAATGAGACATTCAGACCTGCAGGAGGAGATATGAGGGACAATTGGAGAAGTGAATTATATAAAT  
ATAAGTGGTAGAAATTAACCATTA---GGAATAGCACCCACAAAGGCAAAAAGGAGAGTGGTG-----  
-----GAGAGAGAAAAAAGAGCA---GTGGGA---ATAGGAGCT---  
-----ATGATCCTTGGGTTCTTGGGAACA---GCAGGAAGCACTATG---GGCGCGGCGTCA---  
ATAACGCTGACGGTACAA---GCCAGACAA---TTGTTG---TCAGGCATAGTGCAACAGCAAAGT---  
AATTTG---CTGAGA---GCTATAGAGGCGCAACAGCACATGTTGCAACTCACAGTCTGGGGCATT  
>KU921743  
TTCTATTGCAATACATCAAGCCTGTTTAATAGTATATACAATCCTAATATTACATACAATGCTAGTGATGAGT  
CAAGCTCA-----  
-----  
AACATCACACGAAACATCACACTCCCATGCAGAATAAGACAAATTATAAACATGTGGCAGACGGTAGGACGAG  
CAGTATATGCTCCTCCCATTAGAGGAAACATAACATGTATATCAAAC---  
ATCACAGGACTATTATTGGTACGTGATGGAGGGGACAATAATAACACA-----  
-----  
-----  
AATAATACAGAGACATTCAGACCTGGAGGAGGAGATATGAGGGACAATTGGAGAAGTGAATTATATAAATATA  
AGGTGGTAGAAATTAAGCCATTG---GGAGTAGCACCAACTGGAGCAAAAAGGAGAGTGGTG-----  
-----GACAGAGGAAAAAGAGCA---GTGGGA---CTAGGAGCT-----  
---ATGTTCCCTTGGGTTCTTGGGAGCA---GCAGGAAGCACTATG---GGCGCGGCGTCA---  
ATAACGCTGACGGTACAG---GCCAGACAA---CTGTTG---TCTGGTATAGTGCAACAGCAAAAC---  
AATTTG---CTGAGG---GCTATAGAAGCGCAACAGCATATGTTGCAACTCACGGTCTGGGGCATT  
>KU921790  
TTCTATTGCGAGACAGACAACCTGTTTAATAGTACATACATGGAGGCATACAATAGTACAGATAATAGT----  
-----  
-----  
ACCAATTCAACCATCACACTCCCATGCAGAATAAAACAAATTATAAACATGTGGCAGGAAGTAGGACGAGCAA  
TGTATGCCCCCTCCCATTCAGGAAACATAACATGTATATCAAAT---  
ATCACAGGACTATTATTGACACGTGATGGAGGACAGGGAACCTGAT-----  
-----  
-----  
AATGAAACAGAGATATTCAGACCAGCAGGAGGAGATATGAGGGACAATTGGAGAAGTGAATTATATAAATATA  
AGGTGGTAGAAATTAACCATTA---GGTATAGCACCCACTTCAGCAAAAAGGAACGTGGTG-----  
-----AAGAGAGAAAAAAGAGCA---GTGGGA---CTAGGAGCT-----  
---GTGTTCCCTTGGGTTCTTGGGAGCA---GCAGGAAGCACTATG---GGCGCAGCGTCA---  
GTGACGCTGACGGTACAG---GCCAGGCAA---TTGCTG---TCTGGTATAGTGCAACAGCAAAAC---  
AATTTG---CTGAGG---GCTATAGAGGCGCAACAGCATCTGTTGCAACTCACAGTCTGGGGCATT  
>KU921807  
TTCTATTGCAATACATCCAACTGTTTAATAGTACATACATGGAGAAATACAATAGTACAGGCAATAGT----  
-----  
-----  
ACCAATTCAACCATCACACTCCCATGTAGAATAAAACAAATTATAAACATGTGGCAGGGGGTAGGACGAGCAA  
TGTATGCCCCCTCCCATTTGAAGGAAACATAACATGTAAATCAAAT---  
ATCACAGGAATAATATTGACACGTGATGGAGGAGGGGTAGATAAT-----  
-----  
-----  
ACAACAGAGATATTCAGACCAGGAGGAGGAGATATGAGGGACAATTGGAGAAGTGAATTATATAAATATAAGG  
TAGTAGAAATTAACCATTA---GGAATAGCACCCACTAAGGCAAAAAGGAACGTGGTG-----  
-----CAGAGAGAAAAAAGAGCAGTAATGGGA---ATAGGAGCT-----  
GTGTTCCCTTGGGTTCTTGGGAGCA---GCAGGAAGCACTATG---GGCGCAGCATCA---  
ATAACGCTGACGGTACAG---GCCAGGCAA---TTGCTG---TCTGGTATAGTGCAACAGCAAAGC---  
AATTTG---CTGAGG---GCTATAGAGGCGCAACAGCATCTGTTGCAACTCACGGTCTGGGGCATT  
>FJ866132  
TTCTATTGTAATACATCAGGCCTGTTTAATAGGGTAATTAATGATACATACATGACTAATGATACT-----  
-----  
-----  
TCAAAATTCAACCATCACACTCCGCTGCAGAATAAAACAAATTATAAACACGTGGCAGGGGGTAGGACGAGCAA  
TGTATGCCCCACCCATTGAAGGAAACATAACATGTATATCAAAC---  
ATCACAGGACTACTATTGACACGTGATGGAGGACAAGAAAATAGA-----  
-----

-----  
ACAGAGGTATTTAGGCCTGGAGGAGGAGATATGAGGGACAATTGGAGAAGTGAATTATATAAAATATAAGGTGG  
TAGAAATTAAACCATTA---GGAATAGCACCCACTACTGCAAAAAGGAGAGTGGTG-----  
-----GAGAGAGAAAAAGAGCA---GTGGGA---CTAGGAGCT-----  
GTGTTCCCTTGGGTTCTTGGGAGCA---GCGGGAAGCACTATG---GGCGCAGCGTCA---  
ATAACGCTGACGGTACAG---GCCAGACAA---TTATTG---TCTGGTATAGTGCAACAGCAAAGC---  
AATTTG---CTGAGA---GCTATAGAGGCGCAACAGCATATGTTGCAACTCACGGTCTGGGGCATT  
>JN983803  
TTCTATTGCAATACATCAGGTCTGTTTAATGGTACATATGGATCTAATAATACAAAAGGTGAT-----  
-----  
-----  
TCAAAATGCAACTATCACACTCCCATGCAGAATAAAACAAATTATAAACATGTGGCAGGGGGTAGGACGAGCAA  
TATATGCCCCCTCCCATTGCAGGAAACATAACATGTACATCAAAAT---  
ATCACAGGATTAATATTGACACGTGATGGAGGGTCAGAGGATAAT-----  
-----  
-----  
ACCACAGAGATATTCAGACCTGCAGGAGGAGATATGAGGGACAATTGGAGAAGTGAATATACAAATATAAAG  
TGGTAGAAATTAAACCATTG---GGAATAGCACCCACTGGGGCAAAAAGGAGAGTGGTG-----  
-----GAGAGAGAGAAAAAGAGCA---GTGGGA---ATAGGAGCT-----  
GTGTTCCCTTGGGTTCTTGGGAGCA---GCAGGAAGCACTATG---GGCGCGGCGTCA---  
ATAACGCTGACGGTACAG---GCCAGACAA---CTGTTG---TCTGGTATAGTGCAACAGCAAAGC---  
AATTTG---CTGAGA---GCTATAGAGGCGCAACAACATTTGTTGCAACTCACAGTCTGGGGCATT  
>JN983804  
TTCTATTGTGATACATCAAAACTGTTTAATAGAACATACATGGCTAATAGTACAGAA-----  
-----  
-----  
AATAATTCATCCATCACGCTGCCCTGCAAAATAAAACAAATTATAAACCTGTGGCAGGGAGTAGGACGAGCAA  
TGTATGCCCCCTCCCATTAAAGGAAAAATAACATGTAACCTCAACG---  
ATCACAGGACTACTATTGACACGTGATGGAGGGAATGAGAGTGAA-----  
-----  
-----  
GAGACGTTTCAGACCTGGAGGAGGAGATATGAGAGACAATTGGAGAAGTGAATTATATAAAATATAAAGTGGTAG  
AAATTAAGCCATTA---GGAATAGCACCCACTGAGGCAAAAAGGAGAGTGGTG-----  
-----GAGAGAGAGAAAAAGAGCA---GTGGGA---ATAGGAGCT-----  
GTGTTCCCTTGGGTTCTTGGGAGCA---GCAGGAAGCACTATG---GGCGCGGCGTCA---  
ATAACGCTGACGGTACAG---GCCAGACAA---TTGCTG---TCTGGTATAGTGCAACAGCAAAGC---  
AATTTG---CTGAGG---GCTATAGAGGCGCAACAGCATATGTTGCAACTCACAGTCTGGGGCATT  
>JN983805  
TTCTATTGCAATACATCAGAATTGTTTACAGAAAAAATTTC-----  
-----  
-----  
AATGAGACAAACATCACGCTTTCATGCAGAATAAAACAGATTATAAATATGTGGCAGGGGGTAGGACGGGCAA  
TGTATGCCCCCTCCCATTGAAGGAAACATAACATGTACATCAAAAT---  
ATCACAGGACTACTCATGACATATGATGGAGGACAAACACACAGAA-----  
-----  
-----  
AATAAAACAGAGACCTTCAGACCTGGAGGAGGAGATATGAGGGACAATTGGAGAAGTGAATTATATAAAATATA  
AAGTGGTAGAAATTAGGCCATTA---GGAATAGCACCCACTAAGGCAAAAAGGAGAGTGGTG-----  
-----GAGAGAGAAAAAAGAGCA---GTGGGA---ATGGGAGCT-----  
---GTGCTCCTTGGGTTCTTGGGAGCA---GCAGGAAGCACTATG---GGCGCAGCATCA---  
ATAACGCTGACGGTACAG---GCCAGACAA---CTGTTG---TCTGGTATAGTGCAACAGCAAAGC---  
AATTTG---CTGAGA---GCTATAGATGCGCAACAGCATATGTTGCAACTCACGGTCTGGGGCATT  
>HM215360  
TTCTATTGCAATACATCAAGATTGTTTACATACACAGAAGAG-----  
-----  
-----  
ACAGGAAATATTACCCTCCCATGCAGAATAAAACAAATTATAAACATGTGGCAGGAGGTAGGACGAGCAATGT  
ACGCCCCCTCCCATTGCAGGAAACATAATATGTAGATCAAAAT---  
ATCACAGGATTACTATTGACACGTGATGGAGGAAAAAATAATAGT-----  
-----

-----  
GGACCTGAGACATTCAGACCTGGAGGAGGAGATATGAGGGACAATTGGAGAAGTGAATTATATAAATATAAAG  
TAGTAGAAATTAACCATTA---GGAATAGCACCCACTAAGGCAAAAAGGAGAGTGGTG-----  
-----GAGAGAGAGAAAAAGAGCA---GTGGGA---CTAGGAGCT-----  
GTGTTTCCTTGGGTTCTTGGGAGCA---GCAGGAAGCACTATG---GGCGCGGCGTCA---  
ATCACGCTGACGGTACAG---GCCAGACAA---TTATTG---TCTGGTATAGTGCAACAGCAAAGC---  
AATTTG---CTGAGA---GCCATAGAGGCGCAACAGCATATGTTGCAACTCACGGTCTGGGGCATT  
>KC894075  
TTCTATTGCAATACATCAAAACTGTTCAATGGTACATACAATAGTACATACAAGACTAATACTACAGAA----  
-----  
-----  
AGTAATGACACCATCACCATCCCATGCAGAATAAAACAAATTATAAACATGTGGCAGGGGGTAGGACGAGCAA  
TGTATGCCCCCTCCCATTCAGGAAACATAACATGTAGATCAAAT---  
ATCACAGGACTACTATTGACACGTGATGGAGGAAAAAGTAAATAGC-----  
-----  
-----  
ACAAATGAGACATTCAGACCTGAAGGAGGAAATATGAAAAGACAATTGGAGAAGTGAATTGTATAAATATAAAG  
TGGTAGAAATTAAGCCATTA---GGAGTAGCACCCACGGAGGCAAAAAGGACAGCGGTG-----  
-----GGGAGAGGAAAAAGAGCA---GTGGGA---ATAGGAGCT-----  
GTGCTCCTTGGGTTCTTGGGAGCA---GCAGGAAGCACTATG---GGCGCGGCGTCA---  
ATAACGCTGACGGCACAG---GCCAGACAA---GTATTG---TCTGGTATAGTGCAACAGCAAAGC---  
AATTTG---CTGAGA---GCCATAGAGGCGCAACAGCATATGTTGCAACTCACGGTCTGGGGCATT  
>KC894077  
TTCTATTGCGATACATCAAAATTATTTAATAGTACACACAGG-----  
-----  
-----  
GCTGATGATTCACCCATCACACTCCAATGCAGAATAAAACAAATTATAAACATGTGGCAGGGGGTAGGAAGAG  
CAATGTATGCCCCCTCCCATTCAGGAAACATAGTATGTAACCTCAAGT---  
ATCACAGGACTACTATTAACACGTGATGGAGGAGGGAATGGTACA-----  
-----  
-----  
GAGACATTCAGACCTGGAGGAGGAGATATGAGGGACAATTGGAGAAGTGAATTATATAAATATAAAGTGGTAG  
AAATTAAGCCATTA---GGAATAGCACCCACTAAGGCAAAAAGGAGAGTGGTG-----  
-----GAGAGAGAAAAAGAGCA---GCT-----CTGGGAGCT-----  
ATGTTTCCTTGGGTTCTTGGGAATG---GCAGGAAGCACTATG---GGCGCAGCATCA---  
ATAACGCTGACGGTACAG---GCCAGGCAA---TTGTTG---TCTGGTATAGTGCAACAGCAGAAC---  
AATTTG---CTGAGA---GCTATAGAGGCGCAACAGCATATGTTGCAACTCACAGTCTGGGGCATT  
>FJ444184  
TTCTATTGCAATACAACAAAACTGTTTAAACAGTACACACCAGGTTAATAGTACCCGGGATAATAGTACAGAA-  
-----  
-----  
AGTAATTCAACCATCACACTCCAATGCAGAATAAAACAAATTATAAACATGTGGCAGGGGGTAGGACGAGCAA  
TGTATGCCCCCTCCCATTCAGGAGATATAAGATGTGAATCAAAT---  
ATCACAGGACTACTATTGACACGTGATGGAGGAATAGGTAACAATGAC-----  
-----  
-----  
ACAGAGAAAACAGAGATATTCAGACCTGGAGGAGGAAATATGAGGGACAATTGGAGAAGTGAATTATATAAAT  
ATAAAGTGATAGAAATTAACCATTA---GGAATAGCACCCACTAAGGCAAAAAGGAGAGTGGTG-----  
-----GAGAGAGAAAAAGAGCA---GTGGGA---ATAGGAGCT---  
-----GTGTTTCCTTGGGTTCTTGGGAGCA---GCAGGAAGCACTATG---GGCGCAGCATCA---  
ATAACGCTGACGGTACAG---GCCAGACAA---TTGTTG---TCTGGTATAGTGCAACAGCAAAC---  
AATTTG---CTGAGG---GCTATAGAAGCGCAACAGCATATGTTGCAGCTCACGGTCTGGGGCATT  
>FJ444251  
TTCTATTGCAATACATCAGGTCTGTTTAAATGGTACATACCCGTCTAATGATAATAGTACATACATG-----  
-----  
-----  
TCTAATGATACAATAACCCTCCCATGCAGAATAAAACAAATTATAAACATGTGGCAGGGGGTAGGACGAGCAA  
TGTATGCTCCTCCCATTAAGGAAATATAACATGTGAATCAAAC---  
ATCACAGGATTACTATTGACGCGTGATGGAGGAGAACTAATACCACT-----  
-----

-----  
AATAACACAGAGATATTGAGACCTGGAGGAGGAGATATGAGGGACAATTGGAGAAATGAACTATATAAGTATA  
AAGTGGTAGAAATTAAGCCATTG---GGAATAGCACCCACTAAGGCCAAAAGGAGAGTGGTG-----  
-----GAGAGAGAAAAAAGAGCA---GTGGGA---ATAGGAGCT-----  
---GTGTTCCCTTGGGTTCTTGGGAGCA---GCAGGAAGCACTATG---GGCGCGGCATCA---  
ATAACGCTGACGGTACAG---GCCAGACAA---TTGTTG---TCTGGTATAGTGCAACAGCAAAGC---  
AATTTG---CTGAGG---GCTATAGAGGCGCAACAGCATATGTTGCAACTCACGGTCTGGGGCATT  
>FJ444277  
TTCTATTGCAATACATCAGGACTGTTTAATGAGACATACACATACAAATTTAATGAAAGTAATTCGACAAATG  
GA-----  
-----  
ACTAACTCAACAATCAAACCTCTATGCAGAATAAAGCAAATTATAAACATGTGGCAGGGGGTAGGACGAGCAA  
TGTATGCCCCCTCCCATTTGAAGGAAACATAACATGCAAATCAAGT---  
ATCACAGGATTACTATTGACACGTGATGGAGGAAATACTAATGAG-----  
-----  
-----  
ACAGAGATATTGAGACCTGCAGGAGGAGATATGAGGGACAATTGGAGAAGTGAATTATACAAATATAAAGTGG  
TAGAAATTAAGCCATTA---GGAATAGCACCCACTGAAGCAAAAAGGAGAGTGGTG-----  
-----GAGAGGGAGAAAAGAGCA---GTGGGA---ATAGGAGCT-----  
GTGTTCCCTTGGGTTCTTGGGAGCA---GCAGGAAGCACTATG---GGCGCGGCGTCA---  
ATAACGCTGACGGTACAG---GCCAGACAA---TTGTTG---TCTGGTATAGTGCAACAGCAAAGC---  
AATTTG---CTGAGG---GCTATAGAGGCGCAACAGCATATGTTGCAACTCACGGTCTGGGGCATT  
>FJ444476  
TTCTATTGCGATACATCAAACTGTTTAATGGTAATGGTACCAACAGTAATGGTACTGGTACCAACAGTACT-  
-----  
-----  
ACAACTCAACAATCATGATCCCATGCAGAATAAAACAATTTATAAACATGTGGCAGGAGGTAGGACAAGCAA  
TGTATGCCCCCTCCCATTTGAAGGAAAGATAACCTGTAAATCAAAT---  
ATCACAGGACTGCTATTGACACGTGATGGAGGAAATAGTACTGGAAGTAAT-----  
-----  
-----  
AAAAGTGACACAGAAACATTCAGACCTATAGGAGGAGATATGAGGGACAATTGGAGAAGTGAATTATATAAAT  
ATAAAGTGGTAGAAATTAAGCCATTA---GGAATAGCACCCACTAAGGCCAAAAGGAGAGTGGTG-----  
-----GAGAGAGAGAAAAGAGCA---GTGGGA---ATAGGAGCT---  
-----ATGTTCCCTTGGGTTCTTGGGGGCA---GCAGGAAGCACTATG---GGCGCAGCGTCA---  
ATAACGCTGACGGTACAT---GCCAAACAA---TTATTG---TCTGGTATAGTGCAACAGCAAAGC---  
AATTTG---CTGAGG---GCTATAGAGGCGCAACAGCATATGTTGCAACTCACGGTCTGGGGCATT  
>KC894083  
TTCTATTGCAATACATCAAACTGTTTAATAGTACATATCCTAATAATAGTACAGACAAC-----  
-----  
-----  
ACTTCAGATACCATCACACTCCAATGCAGAATAAAACAAATTATAAACATGTGGCAGGAGGTAGGACGAGCAA  
TGTATGCCCCCTCCCATTTGAGGAAACATAACATGTAGATCAAAT---  
ATCACAGGACTGCTATTGACACGTGATGGAGGAGGAAAACTAAC-----  
-----  
-----  
AGCACAAATGAGACATTGAGACCTTTGGGAGGAGATATGAGGGACAATTGGAGAAGTGAATTATATAAATACA  
AAGTGGTAGAAATTAAGCCATTA---GGATTAGCACCTACTAAGGCCAAAAGGAGAGTAGTG-----  
-----GACAGAGAAAAAAGAGCA---GTAGGA---ATGGGAGCT-----  
---TTGTTCCCTTGGGTTCTTGGGAGTA---GCCGAAGCACTATG---GGCGCAGCATCA---  
ATGACGCTGACGGTACAA---ACCAGACAA---TTGCTG---TCTGGTATAGTGCAACAGCAAAGC---  
AATTTG---CTGAGG---GCCATAGAGGCGCAACAACATATGTTGCAACTCACGGTCTGGGGCATT  
>KC894085  
TTTTATTGCAATACAACAAAACCTGTTTAATAGTACAGATAATAGCACAGGTACAAATAATAGCACAGAA----  
-----  
-----  
ATCATACTCCCATGCAGAATAAAACAGATTATAAACATGTGGCAAGAGGTAGGGCGAGCAATGTATGCCCCCTC  
CCATTGAGGAAACATAACATGTAAATCAAAT---  
ATCACAGGGCTAATATTGACACGCGATGGAGGAGATAACAATAAC-----  
-----

-----  
AATGACATAGAGACATTTCAGACCTGGAGGAGGAGATATGAGGGATAATTGGAGAAGTGAATTATATAAAATATA  
AAGTGGTAGAAATTAAGCCATTG---GGAATAGCACCCACTGAGGCCAAAAGGAGAGTGGTG-----  
-----CAGAGAGAAAAAAGAGCA---GTGGGA---ATAGGAGCT-----  
---ATGTTCCCTTGGGTTCTTGGGATTC---GCAGGAAGCACTATG---GGCGCGGCGTCA---  
ATAACGCTGACGGTACAG---GCCAGACTA---CTGTTG---TCTGGTATAGTGCAACAGCAAAAC---  
AATTTG---CTGAGA---GCTATAGAGGCGCAACAGCATATGTTGCAACTCACAGTCTGGGGCATT  
>KC894087  
TTCTACTGCAATACATCAAAACTGTTTAATGGTATATATAAATAGTACATATAAATAGTACAGGCAACATTACA-  
-----  
-----  
GAGGGTAAGAACATCACACTCCAATGCAGAATAAAACAAATTATAAATATGTGGCAGGGGGTGGGACAGGCCAA  
TGTATGCCCCGCCCATTCGAGGAAACATAACATGTAAGTCAAAT---  
ATCACAGGAATACTATTGACACGTGATGGAGGAAATAATAGTACAAGA-----  
-----  
-----  
ACAGAAGAGATATTCAGACCTGGAGGAGGAAACATGAAGGACAATTGGAGAAGTGAATTATATAAAATATAAAG  
TAGTAGAAATTAAGCCATTA---GGAGTAGCACCCACTGAGGCCAAAAGGAGAGTGGTG-----  
-----GAGAGAGAAAAAAGAGCA---GTGGGA---CTGGGAGCG-----  
TTGTTCCCTTGGGTTCTTGGGAGCA---GCAGGAAGCACTATG---GGCGCAGCATCA---  
ATAACGCTGACGGTACAG---GCCAGACAA---TTGTTG---TCTGGTATAGTGCAACAGCAAAGC---  
AATTTG---CTGAGA---GCTATAGAGGCGCAACAGCATATGTTGCAACTCACAGTCTGGGGCATT  
>KC894088  
TTCTATTGCAATACATCAAGCCTGTTTAATGATGCATTTAATGATACAAACAGTACAGAA-----  
-----  
-----  
TCAAATTCAACCATCACACTCCCATGCAGAATAAAACAAATTGTAAACATGTGGCAGAGGGTAGGACGAGCAA  
TGTATGCCTCTCCCATTAAGGAAACATTACATGTAAATCAAAT---  
ATCACAGGACTAATATTGACACGTGATGGAGGAAACGAAAATAAT-----  
-----  
-----  
GGAACAGACATATTCAGACCTATAGGAGGAAATATGAAGGACAATTGGAGAAGTGAATTATATAAAATATAAAG  
TAGTAGAAATTAAGCCATTA---GGAGTAGCACCCACTACTGCAAAAAGGAGAGTGGTG-----  
-----GAGAGAGAAAAAAGAGCA---GTGACA---CTAGGAGCT-----  
GTGTTCTGTTGGGTTCTTGGGAGCA---GCAGGAAGCACCATG---GGCGCAGCATCC---  
GTAATGCTGACGGTACAG---GCCAGACAA---TTATTG---TCTGGTATAGTGCAACAGCAAAGC---  
AATTTG---CTGAGG---GCTATAGAGGCGCAACAGCATATGTTGCAACTCACGGTCTGGGGCATT  
>KC894090  
TTCTATTGTAACACATCAAGACTGTTTAATAATACATATAAGTTTAATGATACAAACATAGTTAATAGTACAA  
ATAGTACA-----  
-----  
-----  
ACAAATTCAACCATCACACTCCAATGCAGAATAAAACAAATTATAAATATGTGGCAGGGGGTAGGACGGGCAA  
TGTATGCCCCCTCCTATTGCAGGAAACATAACATGTAAATCAAAT---  
ATCACAGGACTACTATTGACACGTGATGGAGGTGGAATAATAAAACA-----  
-----  
-----  
GAGACAGAGACATTTCAGACCTGGAGGAGGAGATATGAGAGACAATTGGAGAAGTGAATTATATAAAATATAAAG  
TGATAGAAATTAACCATTA---GGAATAGCACCCACTAGGGCAAAAAGGAGAGTGGTG-----  
-----GAGAGAGAAAAAAGAGCA---GTGGGA---CTAGGAGCT-----  
ATGATCCTTGGGTTCTTGGGAGCA---GCTGGAAGCACTATG---GGCGCAGCATCA---  
ATAACGCTGACGGTACAG---GCCAGACAA---TTGTTG---TTTGGTATAGTGCAACAGCAAAAC---  
AATTTG---CTGAGG---GCTATAGAGGCGCAACAGCATATGTTGCAACTCACAGTCTGGGGCATT  
>KC894091  
TTCTATTGCAATACAACACAACCTGTTTAATGAAACAGATATA-----  
-----  
-----  
GAAAGTAATTCAACTATAACAATCCCATGCAGATTAAAACAAATCATAAACATGTGGCAGGAGGTAGGACGAG  
CAATGTATGCCCCCTCCCATTCGAGGAAACATAACATGTAAATCAAAT---  
ATCACAGGATTACTATTGACACGTGATGGAGGAAGAAATACAACA-----  
-----

-----  
AATGACACAGAGATATTCAGACCTGCAGGAGGAGATATGAGGGACAATTGGAGAAGTGAATTATATAAAATATA  
AAGTGGTAGAAATTAACCATTG---GGAATAGCACCCACTAAGGCCAAAAGGAGAGTGGTG-----  
-----GAGAGAGAAAAAAGAGCA---GCA-----ATAGGAGCT-----  
---ATGTTCCCTTGGGTTCTTGGGAGCA---GCAGGAAGCACTATG---GGCGCAGCATCA---  
ATAACGCTGACGGTACAG---GCCAGACAA---TTGCTG---TCTGGTATAGTGCAACAGCAAAGC---  
AATTTG---CTGAGG---GCTATAGAGGCACAACAACATATGTTGCAACTCACAGTCTGGGGCATT  
>KC894093  
TTCTATTGCAATACATCAAATCTGTTTAATAGTACACCAGAACTGTTTAATAGTGAGGGTACAGAAAGTAATT  
CAACC-----  
-----  
AGCAACAAAAACATCACCTCCCATGCAGAATAAAACAGATTATAAACATGTGGCAGGAGGTAGGACGAGCAA  
TGTATGCCCCCTCCCATTTGAAGGAAACATAACATGTATATCAAAT---  
ATCACAGGACTACTATTGACACGTGATGGAGGAATTGACCCCAAT-----  
-----  
-----  
AGCACAGATGAGACATTCAGGCCTGGAGGAGGAGAAATGAGAGACAATTGGAGGAGTGAATTATATAAAATATA  
AGGTGGTAGAAATTAAGCCATTG---GGAATAGCACCCACTGAGGCCAAAAGGAGAGTGGTG-----  
-----GAGAGAGAAAAAAGAGCA---GTGGGA---ATAGGAGCT-----  
---GTGTTCCCTTGGGTTCTTGGGAGCA---GCAGGAAGCACTATG---GGCGCGGCGTCA---  
ATAACGCTGACGGTACAG---GCCAGACAA---CTGTTG---TCTGGTATAGTGCAACAGCAAAGC---  
AATTTG---CTGAAG---GCTATAGAGGCGCAACAGCATCTGTTGCAACTCACGGTCTGGGGCATA  
>KC894094  
TTCTATTGCGATACATCAGGCCTGTTTAATAGCACATACAATAGCACATACAATGATACAGATAACAGTACA-  
-----  
-----  
GAAAACGACACGATCACGCTCCAATGTAGAATAAAACAAATTATAAGAATGTGGCAGGGGGTAGGACAAGCAA  
TGTATGCCCCCTCCCATTTGCAGGAAACATAACATGTATATCAAAG---  
ATCACAGGACTACTATTGACACGTGATGGAGGTATAAATAATGCT-----  
-----  
-----  
ACTAATGAGACATTCAGGCCTGCAGGAGGAGATATGAGGGACAATTGGAGAAGTGAATTATATAAATACAAAG  
TGATAGAAATTAAGCCATTA---GGAATAGCACCCACTAAGGCCAAAAGGAGAGTGGTG-----  
-----GAGAGAGAAAAAAGAGCA---GCA-----CTAGGAGCT-----  
ATGTTCCCTTGGGTTCTTGGGAGCA---GCAGGAAGCACTATG---GGCGCAGCATCA---  
ATAACGCTGACGGTACAG---GCCAGACAA---TTGTTG---GCTGGTATAGTGCAACAGCAAAC---  
AATTTG---CTGAGG---GCTATAGAGGCGCAACAGCATCTGTTGCAACTCACGGTCTGGGGCATT  
>KC894095  
TTCTACTGCAATACAACAAACTTGTTTAATAAAACATATGATAGTACG-----  
-----  
-----  
TCTAACAAGACAATCATACTCACATGCAAAATAAAACAAATTATAAACATGTGGCAGGAGGTAGGACGAGCAA  
TGTATGCCCCCTCCTATTGCAGGAAACATAACATGTGAATCAGAT---  
ATCACAGGAATACTATTGGTACGTGATGGAGGAAGTGAAATGGCACA-----  
-----  
-----  
GAAAGTAACACTGAGATATTCAGACCTGAAGGAGGAAATATGAAGGACAATTGGAGAAGTGAATTATACAAAT  
ATAAAGTGGTAGAAATTAAGCCATTG---GGAGTAGCACCCACTGAGGCCAAAAGGAGAGTGGTG-----  
-----GAGAGAGAAAAAAGAGCA---GTGGGA---ATAGGAGCT---  
-----GTGTTCCCTTGGGTTCTTGGGAGCA---GCAGGAAGCACTATG---GGCGCGGCGTCA---  
ATAACGCTGACGGTACAG---GCCAGACAA---GTGCTG---TCTGGTATAGTGCAACAGCAAAGC---  
AATTTG---CTGAGG---GCTATAGAGGCGCAACAGCACTTGTGCAACTCACGGTCTGGGGCATT  
>KC862818  
TTCTATTGCAATACATCAAACCTGTTTAATAAGACATATAACTTTAATGAGACT-----  
-----  
-----  
AAGAATGGAGCAATCACACTCCCATGCAAAATAAAACAAATTATAAGAATGTGGCAAAAAGTAGGACAAGCAA  
TGTATGCTCCTCCCATTTGCAGGAAACATAACATGTAAGTCTAAT---  
ATCACAGGGTTACTATTGACGCGTGATGGAGGGAACACAACCTGGGAATGAGACA-----TTC----

-----  
 GAGACATTCAGACCTGGAGGAGGAGATATGAGGGACAATTGGAGAAATGAATTATATAAAATATAAAGTGGTAG  
 AAATTAAGCCATTA---GGAGTAGCACCCACCAAGGCAAAAAGGAGAGTGGTG-----  
 -----GAGAGAGAAAAAAGAGCA---GTGGGA---ATAGGAGCT-----  
 GTGTTTCCTTGGGTTCTTGGGAGCA---GCAGGAAGCACTATG---GGCGCAGCATCA---  
 ATAACGCTGACGGTACAG---GCCAGACAA---TTGCTG---TCTGGTATAGTGCAACAGCAGAGC---  
 AATTTG---CTGAGA---GCTATAGAGGCGCAACAGCATATGTTGCAACTCACAGTCTGGGGCATT  
 >KC894098  
 TTCTATTGCAATACATCAAACTGTTTAATAGTACATACAATGGTACACACATGATTAATAGTACT-----  
 -----  
 -----  
 TCAAACTCAACCATCACACTCCCATGCAGAATAAAACAAATTATAAACATGTGGCAGGAGGTAGGACGAGCAA  
 TGTATGCCCCCTCCCATTAAGGGAAACATAACATGTACATCAAAT---  
 ATCACAGGACTACTGTTGACACGGGATGGGGGAGTTAATTTGACAGGGGGTGAG-----  
 -----  
 ----  
 GGAGTTAATGACACAGAAACATTCAGACCTGAAGGAGGAAATATGAAGGACAATTGGAGAAGTGAATTATATA  
 AATATAAAGTGGTAGAAATTAAGCCATTA---GGAGTAGCACCCACTAAGGCAAAAAGGAGAGTGGTG-----  
 -----GAGAGAGAAAAAAGAGCA---GCA-----  
 ATAGGAGCT-----ATGTTTCCTTGGGTTCTTGGGAGCA---GCAGGAAGCACTATG---  
 GGCGCAGCATCA---ATAACGCTGACGGTACAA---GCCAGACAA---TTGCTG---  
 TCTGGTATAGTGCAACAGCAAAGC---AATTTG---CTGAGA---  
 GCTATAGAGGCGCAACAGCATCTGTTGCAACTCACAGTCTGGGGCATT  
 >KC862876  
 TTCTATTGCAATACATCAAACTGTTTAATTTTACATACCTGCCTAATGGAAGTAGTATAAACAGCGCTAACA  
 TT-----  
 -----  
 TTAAATGGGACCATCACACTCCCATGCAGAATAAAACAAATTATAAACATGTGGCAGGAGGTAGGAAAAGCAA  
 TGTATGCCCCCTCCAGTTGCAGGAAAAATAACATGTAAATCAAAT---  
 ATCACAGGAATACTATTGACACGTGATGGAGGCAAAGATAACAAT-----  
 -----  
 -----  
 GAGACAGAGACATTCAGACCTGGAGGAGGAGATATGAGGGACAATTGGAGAAGTGAATTATATAAAATATAAAG  
 TGGTAGAAATTAAGCCATTA---GGAATAGCACCCACTGATGCAAAAAGGAGAGTGGTG-----  
 -----GAGAGAGAAAAAAGAGCA---GTGGGA---ATAGGAGCT-----  
 GTGTTTCCTTGGGTTCTTGGGAGCA---GCAGGAAGCACTATG---GGCGCGGCGTCT---  
 ATAACGCTGACGGTACAG---GCCAGACAA---TTATTG---TCTGGTATAGTGCAACAGCAAAGC---  
 AATTTG---CTGAGG---GCTATAGAGGCGCAGCAGCATATGTTGCAACTCACGGTCTGGGGCATT  
 >KC894100  
 TTCTATTGCAATACATCAGGCCTGTTTAAAGGCCTGTTTAATGGTAGCAGAGAATGGGTTAATGGTACAGACA  
 ATAGT-----  
 -----ACAAATAGT-----  
 ACTCTAGATTTCAGTCATCACACTCCCATGCAGAATAAAACAAATTATAAGAATGTGGCAGGGGGTAGGACAAG  
 CAATGTATGCCCCCTCCCATTCAGGAAACATAACATGTAAATCAAAT---  
 ATCACAGGAATACTATTGACACGTGATGGAGGAATACGTGAGGGA---GGAAAT-----  
 ACAAGTGAGGGAGGAAAT-----  
 -----  
 GACACAGAGGTATTTCAGACCTGGAGGAGGAGACATGAGGGACAATTGGAGAAGTGAATTATATAAAATATAAAG  
 TGGTAGAAATTAAGCCATTA---GGAGTAGCACCCACTCCTGCAAAAAGGAGAGTGGTG-----  
 -----GAGAAACAGAAAAGAGCA---GTGGGA---ATGGGAGCT-----  
 GTGATCTTTGGGTTCTTGGGAGCA---GCAGGAAGCACTATG---GGCGCGGCGTCA---  
 ATAGCGCTGACGGCACAG---GCCAGACAA---TTATTG---TCTGGTATAGTGCAACAGCAAAGC---  
 AATTTG---CTGAGG---GCTATAGAGGCGCAACAGCATATGTTGCAACTCACAGTCTGGGGCATT  
 >KC862949  
 TTCTATTGCAATACATCAAACTGTTTAATATTACAACTTGAATAAAACAGAC-----  
 -----  
 -----  
 AGTAATTCAACAATCACACTCCCATGCAGAATAAAACAAATCATAAACATGTGGCAGGGGGTAGGACGAGCAA  
 TATATGCTCCTCCCATTCAGGAAACATAACATGTAACTCTAGC---  
 ATCACAGGATTACTATTGACACGTGATGGAGGATCCAATGGTAAC-----

-----  
-----  
GACACTGAGGTATTCAGACCTGGAGGAGGAGATATGAGGGACAATTGGAGAAGTGAATTATATAAATATAAAG  
TGGTAGAAATTAAGCCATTG---GGAATAGCACCCACGGCGTCAAAAAGGAGAGTGGTG-----  
-----GAGAGAGAAAAAAGAGCA--GTGGGA---ATAGGAGCT-----  
GTGTTTCCTTGGGTTCTTGGGAGCA--GCAGGAAGCACTATG--GGCGCAGCGTCA---  
ATAACGCTGACGGTACAG---GCCAGACAA--TTGCTG---TCTGGTATAGTGCAGCAGCAAAAC---  
AACTTG---CTGAGG---GCTATAGAGGCGCAACAGCATCTGTTGCAACTCACGGTCTGGGGCATT  
>KC863009  
TTCTATTGCAATACATCACGACTGTTCAATGGTACATACAGTACTAATAATACAAATAGTACT-----  
-----  
-----  
TCAAAATTCAACCATCACAATTCCATGCAGAATAAAACAAATTATAAACATGTGGCAGGGGGTAGGACAAGCAA  
TGTATGCCCCCTCCCATTGAAGGAAACATAACATGCAGGTCAAAT---  
ATCACAGGACTATTACTGACACGTGATGGAGGAAAAGGAAATGACACA-----  
-----  
-----  
AATGACACACAGACATTTCAGACCTGGAGGAGGAGATATGAGGGACAATTGGAGAAGTGAATTATATAAATATA  
AAGTAGTAGAAATTAAGCCATTA---GGAATAGCACCCACTAAGGCAAAAAGGAGAGTGGTG-----  
-----GAGAGAGAAAAAAGAGCA--GCG-----CTAGGAGCT-----  
---GTGTTTCCTTGGGTTCTTGGGAGCG--GCAGGAAGCACTATG--GGCGCAGCGTCA---  
ATAACGCTGACGGTACAA---GCCAGACAA---CTGCTG---TCTGGTATAGTGCAACAGCAAAGC---  
AATTTG---CTGAGG---GCTATAGAGGCGCAACAGCATATGTTGCAACTCACGGTCTGGGGCATT  
>KC894385  
TTTTATTGCAATACATCAAACCTGTTTAAATAGGATATATAATATTACAGACAATAGTACAGGAAGTGAT----  
-----  
-----  
GACAATTCAACCATCACACTCCAATGCAGAATAAAACAAATTATAAACATGTGGCAGAAGGTAGGAAAAGCAA  
TATATGCCCCCTCCCATTGCAGGGAACATAACATGTGAATCAAAT---  
ATCACAGGACTACTATTGACACGTGATGGAGGAAACAATGATAGT-----  
-----  
-----  
ATCACACAGAGACATTTCAGACCTGGAGGGGGAGATATGAAGGACAATTGGAGAAGTGAATTATATAAATATA  
AAGTGGTAGAAATTAAGCCATTA---GGAATAGCACCCACCAGGGCAAAAAGGAGAGTGGTG-----  
-----GAGAGAGAAAAAAGAGCA--GTGGGA---ATAGGAGCT-----  
---GTGTTTCATTGGGTTCTTGAGTGCA--GCAGGAAGCACTATG--GGCGCAGCGTCA---  
ATAACGCTGACGGTACAG--GCCAGACAA--CTGTTG---TCTGGTATAGTGCAACAGCAAAGC---  
AATTTG---CTGAGG---GCTATAGAGGCGCAACAGCATATGTTGAAACTCACGGTCTGGGGCATT  
>KC156212  
TTCTATTGCAATACATCAAGATTGTTTAGTAGTAATAGTACAGAAATTAATAGTACAGAAAGT-----  
-----  
-----  
TCCAATTCAACAATCATACTCCCATGCAGAATAAAACAAATTATAAATATGTGGCAGGGGGTGGGACGGGCAA  
TATATGCAGCTCCTATTGCAGGAAAAATAACATGTAAATCAAAT---  
ATCACAGGACTAATATTGACACGTGATGGAGGAGAGGGCAATAATACA-----  
-----  
-----  
GAAAACAGAAGTGAGATATTTCAGACCTACAGGAGGAGATATGAGGGACAATTGGAGAAGTGAATTATACAAAT  
ACAAAGTAGTAGAAATTAAGCCATTA---GGAGTAGCACCCACTAATGCAAAAAGGAGAGTGGTG-----  
-----GAGAGAGAAAAAAGAGCA--GTGGGA---TTAGGAGCT---  
-----ATGTTTCCTTGGGTTCTTGGGAATG---GCCGGAAGCACTATG--GGCGCAGCATCA---  
ATAACGCTGACGGTACAG---GCCAGACAA---GTATTG---TCTGGTATAGTGCAACAGCAAAGC---  
AATTTG---CTGAGG---GCTATAGAGGCGCAACAGCATATGTTGCAACTCACGGTCTGGGGCATT  
>KC156211  
TTCTATTGCAATACATCAGGTCTATTTAATGGGACATACAATAGTACAAGAACTAATTCAACTAAT-----  
-----  
-----  
TCAACTTCAATCATCACACTCCAATGCAGAATAAAACAAATTGTAAACCTATGGCAGGGGGTAGGAAAAGCAA  
TGTATGCCCCCTCCCATTGCAGGAAACATAACATGCAGATCAGAT---  
ATCACAGGACTACTATTGACACGTGATGGAGGAAACGGAAATAATAGT-----

-----  
-----  
ACAGAGACAGAGACATTTCAGGCCTGGAGGAGGAGATATGAGGGACAATTGGAGAAGTGAATTATACAAATACA  
AAGTGGTAGAAATTAAGCCATTA---GGATTAGCACCCACTGAGGCCAAAAGGAGAGTGGTG-----  
-----GAGAGAGAAAAAAGAGCA---GTGGGA---CTGGGAGCG-----  
---ATGTTCCCTTGGGTTCTTAGGAGCA---GCAGGAAGCACTATG---GGCGCAGCATCA---  
ATAACGCTGACGGTACAG---GCCAGACAA---TTATTG---TCTGGTATAGTGCAACAGCAAAGC---  
AATTTG---CTGAGA---GCTATAGAGGCGCAACAGCATATGTTGCAACTCACAGTCTGGGGCATT  
>KC156213

TTCTATTGTAATACATCAGGACTGTTCAATAGTACATACAATAGTACATACAATGGTCCATACAAT-----  
-----  
-----  
GGTACAGCAATAATCACACTCCCATGCAGGATAAAAACAAATTATAAACATGTGGCAGGAGGTAGGCAGAGCAA  
TGTACGCCCCCTCCCATTGAAGGAAACATAACATGTAACTCAAGC---  
ATCACGGGACTACTCTTGGTACGTGATGGAGGCGAAAACAAATAGTTCC-----  
-----  
-----

CAAGAGGAGATATTCAGACCTGGAGGAGGAGATATGAGAGACAATTGGAGAAGTGAATTATATAAATATAAAG  
TGGTAGAAATTAACCATTA---GGAATAGCACCTACTGAGGCCAAAAGGAGAGTGGTG-----  
-----GAGAGAGAAAAAAGAGCA---GTGGGA---ATAGGAGCT-----  
GTGTTCCCTTGGGTTCTTGGGAGCA---GCAGGAAGCACTATG---GGCGCAGCATCA---  
ATAACGCTGACGGTACAG---GCCAGACAA---TTGTTG---TCTGGTATAGTGCAAGCAGCAAAGT---  
AATTTG---CTGAGA---GCCATAGAGGCGCAACAGCATATGTTGCAACTCACAGTCTGGGGCATT  
>KC156119

TTCTATTGCAATACATCAAACTGTTTAATAGTACATATAATTTTAATTTTAATGGTACAGAAGATAAC----  
-----  
-----  
TCAAGCTCAGTCATCACTCTCTCATGCAGAATAAAAACAAATTATAAACATGTGGCAAGAGGTAGGACGAGCAA  
TGTATGCCCCCTCCCATTGAAGGAAAAATAACATGTAGGTCAGAT---  
ATCACAGGACTACTATTGACACGTGATGGAGGAAACAATAATACA-----  
-----  
-----

GAGGAAATATTTAGACCTGGGGGGGGAAATATGAAAGACAATTGGAGAAGTGAAGTTATATAAATACAAGGTGG  
TAGAAATAAAGCCATTA---GGAGTAGCACCCACTAAGGCCAAAAGAAGAGTGGTG-----  
-----GAGAGAGAGAAAAGAGCA---GTAGGA---ATAGGAGCT-----  
GTGTTCCCTTGGGTTCTTGGGAGCA---GCAGGAAGCACTATG---GGCGCGGCGTCA---  
ATAACGCTGACGGTACAG---GCCAGACAA---TTATTG---TCTGGTATAGTGCAACAGCAAAGT---  
AATTTG---CTGAAG---GCTATAGAGGCGCAACAGCATATGTTGCGACTCACAGTCTGGGGCATT  
>KC894109

TTCTATTGCGATACATCAGAACTGTTTAATGGTACATACAATAATAGTACATACAAT-----  
-----  
-----  
AGTAGTAATAATATCACACTCCAATGCAAAATAAAAACAAATCATAAACATGTGGCAGGGAGTAGGACGAGCAA  
TGTATGCCCCCTCCCATTGCAGGAAACATAACATGTGAATCAAAT---  
ATCACAGGACTATTATTGACACGGGATGGAGGTAATAATAAGAGC-----  
-----  
-----

ACTCCTGAAACATTTCAGACCTGGAGGAGGAGATATGAGGGACAATTGGAGAAGTGAATTATATAAATATAAAG  
TGGTAGAAATTAAGCCATTA---GGAATAGCACCCACTAAGGCCAAAAGGAGAGTGGTG-----  
-----GAGAGAGAGAAAAAAGAGCA---GTGGGA---ATGGGAGCT-----  
GTGTTCCCTTGGGTTCTTGGGAGCA---GCCGGAAGCACTATG---GGCGCAGCATCA---  
TTAACGCTGACGGTACAG---GCCAGACAA---TTGCTG---TCTGGTATAGTGCAACAGCAAAAC---  
AATTTG---CTGAGA---GCTATAGAGGCGCAACAGCATATGTTGCAACTCACGGTCTGGGGCATT  
>KC148599

TTCTATTGCAATACATCAGGACTGTTTAATGCTACAAGCAATTTTACAAGAGAT-----  
-----  
-----  
TCAAAATCAACTATCACAATCCCATGCAGAATAAAGCAAATTATAAACATGTGGCAGGAGGTAGGAAAAGCAA  
TGTATGCCCCCTCCCATAGAAGGAAACATAACATGTGTATCAAAT---  
ATCACAGGACTACTATTGGTACGTGATGGAGGTGGGACAAATAACTCAACCTCA-----  
-----

-----  
-----  
ACAAATGAGACATTTCAGACCTGGAGGAGGAGATATGAGGGACAATTGGAGAAGTGAACCTATATAAATATAAAG  
TGGTAGAAATTAAGCCATTG---GGAATAGCACCCACTAAGGC AAAAAGGAGAGTGGTG-----  
-----GAGAGAGAAAAAAGAGCA--GTAACA---ATAGGAGCT-----  
GTATTCCTTGGGTTCTTGGGAGCA--GCAGGAAGCACTATG--GGCGCGGCGTCA---  
ATGACGCTGACGGTACAG---GCCAGACAA--CTGTTG---TCTGGTATAGTGCAACAGCAAAGC---  
AATTTG---CTGCGG---GCTATAGAGGCGCAACAACATATGTTGCAACTCACAGTCTGGGGCATT  
>KC148663  
TTCTATTGCAATACAACAAGTCTGTTTAACGGTCTGTTTAACGGTACATATATGTCTAATAGTACAGATAGTA  
CT-----  
-----  
GAAAAATGGAACCATCACACTCCCATGCAGAATAAAACAAATCATAAACATGTGGCAGAAGGTAGGACGAGCCA  
TATATGCCCCCTCCCATTCAGAGAAACATAACATGTATATCAGAT---  
ATCACAGGATTACTATTGACACGTGATGGAGGAATAAATAACACA-----  
-----  
-----  
GAGGATGAGACGTTTCAGACCTGGCGGAGGAGATATGAGGGACAATTGGAGAAGTGAATTATACAAATATAAAG  
TGATAGAAATTAAGCCACTA---GGAATAGCACCCACTACTGCAAAAAGGAGAGTGGTG-----  
-----GAAAAAGAAAAAAGAGCA--TTGGGA---GTAGGAGCT-----  
GTGCTCCTTGGGTTCTTGGGAGCA--GCAGGAAGCACTATG--GGCGCAGCATCA---  
ATAACGCTGACGGTACAG---GCCAGACAA--TTGCTG---TCTGGTATAGTGCAACAGCAAAAC---  
AATTTG---CTGAAA---GCTATAGAGGCGCAACAGCATTTGTTGCAACTCACGGTCTGGGGCATT  
>HM204583  
TTCTATTGTAATACATCAGGCCTATTTAATAGAACAGCAAACATGACTAGAACGGCAAACATGACT-----  
-----  
-----  
ACAAATTCAACCATTATACTCCGATGCAGAATAAAACAAATTGTAAACATGTGGCAAGGGGTAGGACGAGCAA  
TGTATGCTCCTCCCATTCAGAGAAACATAACATGTGCATCTAAT---  
ATCACAGGACTACTGTTGACACGTGATGGAGGAGAAAAATAACACC-----  
-----  
-----  
GAAAAATAAGGAGATATTTCAGACCAGGAGGAGGAGACATGAGGGACAATTGGAGAAGTGAATTATATAAATATA  
AAGTAGTAGAAATTAAGCCATTA---GGAATAGCACCCACTACGGCAAAAAGGAGAGTGGTG-----  
-----GAGAGAGAAAAAAGAGCA--GTGGGA---ATAGGAGCT-----  
---GTGCTCCTTGGGTTCTTGGGAGCA--GCAGGAAGCACTATG--GGCGCGGCGTCA---  
CTGACGCTGACGGTACAG---GCCAGACAA--TTGTTG---TCTGGTATAGTGCAACAGCAAAGC---  
AATTTG---CTGAGA---GCTGTAGAGGCGCAACAGCACATGTTGCAACTCACGGTCTGGGGCATT  
>HM204591  
TTCTATTGCAATACATCAAACCTGTTTCGATAAATTAAATAGTACT-----  
-----  
-----  
AATGGTACAAACATCACACTCCCATGCAGAATAAAACAAATTATAAACACGTGGCAGGGGGTAGGACGGGCAA  
TATATGCAGCTCCTATTGCAGGAAAAATACAATGTATATCAAAT---  
ATCACAGGACTACTATTGACACGTGATGGAGGAAAGGACAATAATAATAATACA-----  
-----  
-----  
AATAACAGTATTACTGAGACAATCAGACCTGGAGGAGGAGATATGAGGGACAATTGGAGAAGTGAACCTATATA  
AATATAAAGTAGTAGAAATTAAGCCATTA---GGAATAGCACCCACTAATGCAAAAAGGAGAGTGGTG-----  
-----GAGAGAGAAAAAAGAGCA---GTGGGA---  
TTAGGAGCT-----ATGTTCTTGGGTTCTTGGGAATG---GCCGGAAGCACTATG---  
GGCGCAGCATCA---ATAACGCTGACGGTACAG---GCCAGACAA---GTATTG---  
TCTGGTATAGTGCAACAGCAAAGC---AATTTG---CTGAGG---  
GCTATAGAGGCGCAACAGCATATGTTGCAACTCACGGTCTGGGGCATT  
>FJ443615  
TTCTACTGCAATACATCACCATTGTTTAATAGTACATACGATCTTAATGGT-----  
-----  
-----  
ACTGCTTCAACCATCACACTCCAATGTAAAATAAAACAAATCATAAACATGTGGCAAGGGGTAGGAAAAGCAA  
TGTATGCTCCTCCCATTCAGAGAAACATAACATGTAACCTCAAGT---

ATTACAGGATTACTATTGACACGTGATGGAGGAACACGAGATCGA-----  
-----  
-----  
AATGACACAGAAACATTTAGACCTGGAGGAGGAGATATGAGGGACAATTGGAGAAGTGAGTTATACAAATATA  
AAGTGGTGGAAATTAAGCCATTG---GGAATAGCACCCACTGAGGCAAAAAGGAGAGTGGTG-----  
-----GAAAGAGAAAAAAGAGCA---GTAGGA---ATAGGAGCT-----  
---GTGTTCCCTTGGGATCTTGGGAGCA---GCAGGAAGCACTATG---GGCGCGGCGTCA---  
ATAACGCTGACGGTACAG---GCCAGACAA---CTGTTG---TCTGGTATAGTGCAACAGCAAAAC---  
AATTTG---CTGAGA---GCTATAGAGGCGCAACAGCATATGTTGCAACTCACGGTCTGGGGCATT  
>KP109520  
TTCTATTGCAATACATCAAACCTATTTAATAGTACGTTGTCTAATAGTACTAACAAT-----  
-----  
-----  
AGTACTTCAACCATCACACTCCAATGTAAAATAAAACAAATAATAAACATGTGGCAGGGGGTAGGACGGGGCCA  
TGTATGCCCCCTCCCATTGCAGGAAACATAACATGTAAATCAAAT---  
ATCACAGGAATACTTTTGTACGTTGATGGAGGCAAGGCTGAAAATGGT-----  
-----  
-----  
ACAAAGATAGAGATATTGACACCTGGAGGAGGAGATATGAGAGACAATTGGAGAAGTGAACATACAAATATA  
AGGTGATAGAAATAAAACCATTA---GGAATAGCACCCACTAAGGCAAAGAGGAGAGTGGTG-----  
-----GAGAGAAAAAAGAGCA---GTAGGA---ATAGGAGCT-----  
---GTGTTCCCTTGGGTTCTTGGGAGCA---GCCGGAAGCACTATG---GGCGCAGCATCA---  
ATAACGCTGACGGTACAA---GCCAGACAA---TTGTTG---TCTGGTATAGTGCAACAGCAAAGC---  
AATTTG---CTGAAG---GCTATAGAAGCGCAACAACATATGTTGCAACTCACAGTCTGGGGCATT  
>HM070539  
TTCTACTGCAATACCTCAGCACTGTTTAATAGTACATGGAGGTGTGATAATACTTCATGTTACGTTGTGTCTA  
ATAAT-----ACA---  
GATAATTCTCCAAACATCACACTCCAATGCAGAATAAAACAAATTATAAACATGTGGCAGGGGGTAGGAAGAG  
CAATGTATGCCTCTCCCATTCAGGAAACATAACATGTAGATCAAAC---  
ATTACAGGACTACTATTGACATGGGATGGAGATAATAGTAGTAAT-----  
-----  
-----  
ACAACAGAGACATTGACACCTGGAGGAGGAAATATGAAAGACAATTGGAGAAGTGAATTATATAAATATAAAG  
TGGTAGAAATTAAGCCATTA---GGAATAGCACCTACTGGGGCAAAAAGGAGAGTGGTG-----  
-----GAGAGAGGGAAAAGAGCA---GTGACA---CTAGGAGCT-----  
GTGTTCCCTTGGGTTCTTGGGAGCA---GCAGGAAGCACTATG---GGCGCGGCGTCA---  
ATAACGCTGACGGTACAG---GCCAGACAA---TTATTG---TCTGGTATAGTGCAACAGCAGAGC---  
AATCTG---CTGAGA---GCTATAGAGGCGCAGCAGCATCTGTTGCAACTCACGGTCTGGGGCATT  
>HQ595984  
TTCTATTGCGATACATCAACATTGTTTAATAGTACATACATGCCTAATATTACTTCAAATTCAAGTACTTCAA  
AT-----  
-----  
TCAAGTTCACTCATCACACTCCAATGCAAAATAAAACAAATTATAAATATGTGGCAGGAGGTAGGACGAGCAA  
TGTATGCCCCCTCCCATTAAAGGGAACATAACATGCAACTCAACT---  
ATCACAGGATTAATATTGACACGTGATGGAGGAACTGGAAATAACACT-----  
-----  
-----  
AACGATACAGAGATATTGACACCTGGAGGAGGAGATATGAGAGACAATTGGAGAAGTGAATTATATAAATATA  
AAGTGGTAGAAATTAAGCCATTA---GGAGTGGCACCCACTAAGGCAAAAAGGAGAGTGGTG-----  
-----GAGAGAGAAAAAAGAGCA---GTGGGA---ATAGGAGCT-----  
---GTGCTCCTTGGGTTCTTGGGAGCA---GCAGGAAGCACTATG---GGCGCAGCATCA---  
ATAACGCTGACGGTACAG---GCCAGACAA---TTATTG---TCTGGTATAGTGCAACAGCAAAGC---  
AATTTG---CTGAGA---GCTATAGAGGCGCAACAGCACCTGTTGCAACTCACAGTCTGGGGCATT  
>HQ596030  
TTCTATTGCAATACATCAGGCCCTGTTTAATGGGACATATGATCCTAGATATAAATAGTACATATAATAGTACAG  
AAAAT-----AAT---  
AGTACAACCCATAACATCACACTCCAATGCAGAATAAAGCAAATTATAAACATGTGGCAGGAGGTAGGAAAAG  
CAATATATGCCCCCTCCTATTGCAGGAAGTCTAACATGTACATCAAAC---

ATCACAGGACTACTATTGGTACGTGATGGAGGTAAAAGAAACAATACC-----  
 -----  
 -----  
 AATGACCCAGAGATATTCAGACCTGGAGGAGGAAATATGAAGGACAATTGGAGAAGTGAATTATATAAATATA  
 AAGTAGTAGAAATTAAGCCCTTA---GGAGTAGCACCCACTGAGGCAAAAAGGAGAGTGGTG-----  
 -----GAGAGAGAAAAAAGAGCA-----ATAGGAGCT-----  
 ---GTGTTCCCTTGGGTTCTTGGGAGCA---GCAGGAAGCACTATG---GGCGCGGCGTCA---  
 GTGGCGCTGACGGTACAC---ACCAGAAAA---CTGTTG---TCTGGTATAGTGCAACAGCAAAGC---  
 AATTTG---CTGAGA---GCTATAGAGGCGCAACAGCATATGTTGCAACTCACGGTCTGGGGCATT  
 >HM070639  
 TTCTATTGCAATACATCAAACCTGTTTAATAAGACATATTGGATTAATAGTACAGAAGGTAATACAGAAGATG  
 ATACA-----  
 -----  
 AGCTCAAACCTCAACGATCACACTCCCATGCAGAATAAAAACAAATTATAAATATGTGGCAGGGGGTAGGACGAG  
 CAATATATGCCCCCTCCCATTCAGGAAACATAACATGTAAATCAAAT---  
 ATCACAGGACTACTATTGACACGTGATGGAGGAAATGATAATAGA-----  
 -----  
 -----  
 AGTACAAATGAAACATTTCAGACCTGGAGGAGGAGATATGAGGGACAATTGGAGAAGTGAATTATACAAATATA  
 AAGTGGTAGAAATTAAGCCATTA---GGAATAGCACCAACTGCTGCCAAGAGAAGAGTGGTG-----  
 -----GAGAGAGAAAAAAGAGCA---GTGGGA---ATAGGAGCT-----  
 ---GTGTTCCCTTGGGTTCTTGGGAGCA---GCAGGAAGCACTATG---GGCGCAGCGTCA---  
 ATAACGCTGACGGTACAG---GCCAGACAA---TTATTG---TTTGGTATAGTGCAACAGCAAAGC---  
 AATTTG---CTGAGG---GCCATAGAGGCGCAACAGCATATGTTGCAACTCACGGTCTGGGGCATT  
 >KF527172  
 TTCTATTGCGATACATCAGGATTGTTTAATGGCACATACAATCCTAATGATACAACAAGTAATTCAAGCTCAC  
 TT-----  
 -----  
 AACAAATCACACTCACACTCCCATGCAAAATAAAGCAAGTTATAAACATGTGGCAGGGGGTAGGAAAAGCGA  
 TATATGCCCCCTCCCATTCAGGAAACATAACATGTAGATCAAAT---  
 ATCACAGGACTACTATTGCTACGTGATGGAGGAACTACAAATGAC-----  
 -----  
 -----  
 ACAGAAGAGATATTCAGACCTGGAGGAGGAGATATGAGGGACAATTGGAGAAGTGAATTATATAAATACAAAG  
 TGGTAGAAATTAAGCCATTG---GGAGTAGCACCCACTAAGGCAAAAAGGAGAGTGGTG-----  
 -----GAGAGAGAAAAAAGAGCA---GTGGGA---ATAGGAGCT-----  
 GTACTCCTTGGGTTCTTAGGAGCG---GCAGGAAGCACTATG---GGCGCGGCGTCA---  
 ATAACGCTGACGGTACAG---GCCAGACAA---CTGTTG---TCTGGTATAGTGCAACAGCAAAGC---  
 AATTTG---CTGAGG---GCTATAGAGGCGCAACAGCATATGTTGCAACTCACGGTCTGGGGCATT  
 >HM070807  
 TTCTATTGCAATACATCACGCCTGTTTAATGGTACATATAATAGTACAAGATATAATACAACAGAA-----  
 -----  
 -----  
 GCAAATTCAACCATCACACTCCAATGCAGAATAAAAACAAATTATAAACATGTGGCAGGAGGTAGGACGGGCGA  
 TGTATGCCCCCTCCCATTCAGGAAACATAACATGTAAATCAAAT---  
 ATCACAGGACTACTATTGACACGTGATGGAGGACACGGAAATGGGACA-----  
 -----  
 -----  
 GACAATAAGACAGAAACATTTAGACCAGGAGGAGGAGATATGAGGGACAATTGGAGGAGTGAATTATATAAAT  
 ATAAAGTGGTAGAAGTTAAGCCATTA---GGAATAGCACCCACTAAGGCAAAAAGAAGAGTGGTG-----  
 -----GAGAGAGAGAAAAGAGCA---GTGGGA---GTAGGAGCT---  
 -----ATGTTCCCTTGGGTTCTTGGGAGCG---GCCGGAAGCACTATG---GGCGCAGCATCA---  
 ATAACGCTGACGGTACAG---GCCAGACAA---TTATTG---TCTGGTATAGTGCAACAGCAAAGC---  
 AATTTG---CTGAGG---GCTATAGAGGCGCAACAGCATATGTTGCAACTCACGGTCTGGGGCATC  
 >HQ596147  
 TTCTATTGTAATACATCAAACTGTTTAATAGTACATACATGCCTAATAGTACTTCAAATTCAACACACATG-  
 -----  
 -----  
 TCTAATGGTACCATCACACTCCAATGCAGAATAAAAACAAATTATAAACATGTGGCAGGAGGTAGGACGAGCGA  
 TGTATGCCCCCTCCTATCGAAGGAAACATAATATGTAAATCAAAT---

ATCACAGGAATACTATTGACACGTGATGGAGGTAAGAATGAGACT-----  
 -----  
 -----  
 ACAGAGACATTTCAGACCTGGAGGAGGAGATATGAGGGACAATTGGAGAAGTGAGTTATATAAATATAAAGTGG  
 TAGAAGTTAAGCCATTA---GGGATAGCACCTACTACTGCAAAAAGGAGAGTGTTG-----  
 -----GAGAGAGAAAAAGAGCA--GTGGGA--ATAGGAGCT-----  
 GTGTTTCCTTGGGTTCTTGGGTGCA--GCAGGAAGCACTATG--GGCGCGGCGTCA---  
 ATAACGCTGACGGTACAG---GCCAGACAA--TTATTG---TCTGGTATAGTGCAACAACAAAGC---  
 AATTTG---TTGAGG---GCCATAGAGGCGCAACAACACATGTTGCAACTCACGGTCTGGGGCATT  
 >KC156218  
 TTCTATTGTGATACATCAAACTGTTTAATAGGACATACACGGTTAATGACACACACGAGACTAATAGTACTG  
 AT-----  
 -----  
 ACAAACAGTACCATCACACTCCCATGCAGAATAAAACAAATTATAAACATGTGGCAGAGAGTAGGACAAGCAA  
 TGTATGCTTCTCCCATTGCAGGAAACATAACATGTAACTCAAGT---  
 ATCACAGGATTGCTACTGACGAGTGTGAAGGAGGAAATAACAAC-----  
 -----  
 -----  
 GAAAAAGAGACATTTCAGGCCTGGAGGAGGAGATATGAGGGACAATTGGAGAAGTGAATTATATAAATATAAAG  
 TGGTAGAAGTTAAGCCATTG---GGAATAGCACCCACCAAGGCAAAAAGGAGAGTGTTG-----  
 -----GAGAGAGAGAAAAAGAGCA--GTAGGA--ATAGGAGCT-----  
 TTGTTTCCTTGGGTTCTTGGGAGCA--GCAGGAAGCACTATG--GGCGCGGCGTCA---  
 ATGACGCTGACGGTACAG---GCCAGACAA--TTGTTG---TCTGGTATAGTGCAACAGCAAAGC---  
 AATTTG---CTGAGG---GCTATAGAGGCGCAACAACATATGTTGCAACTCACAGTCTGGGGCATT  
 >KC156215  
 TTCTATTGTAATACATCACGCCTGTTTAATAGTACATACAATGGTACAGACGGGTCTAAT-----  
 -----  
 -----  
 AGCACAACAAACATCACACTCCCATGCAGAATAAAACAAATTATAAACATGTGGCAGGAGGTAGGACGAGCAA  
 TGTATGCCCCCTCCCATTGCAGGAAACATAACATGTAAATCAAAT---  
 ATCACAGGAATACTATTGACACGTGATGGAGGAGGGAACAGCACA-----  
 -----  
 -----  
 GACCCAGAGATATTTCAGACCTGGAGGAGGAGATATGAGGGACAATTGGAGAAGTGAATTATACAAATATAAAG  
 TGGTAGAAATTAAGCCATTA---GGAATAGCACCCACTACTGCAAAAAGGAGAGTGTTG-----  
 -----GAGAGAGAGAAAAAGAGCA--GTGGGA--ATAGGAGCT-----  
 GTGTTTCCTTGGGTTCTTGGGAGCA--GCAGGAAGCACTATG--GGCGCGGCGTCA---  
 ATAACGCTGACGGTACAG---GCCAGACAA--TTATTG---TCTGGTATAGTGCAACAGCAAAAC---  
 AATTTG---CTGAGA---GCTATAGAGGCGCAACAGCATATGTTGCAACTCACAGTCTGGGGCATT  
 >HQ615962  
 TTCTATTGCGATACATCAAACTGTTTAATAGGACATACACCAATGACACACACTTCAAAGAGACAGATCCAA  
 GT-----  
 -----  
 -----  
 ATAAATGGCACAATCACAATCACATGCAAAATAAAACAATTTATAAACATGTGGCAGGAGGTAGGAAAAGCAA  
 TGTATGCCCCCTCCCATTGCAGGAAACATAACATGTAAAGTCAAAT---  
 ATCACAGGAATACTATTGGTACGCGATGGGGGTAAAACCAATAGT-----  
 -----  
 -----  
 ACAAATGAGACATTTCAGACCTGGAGGGGGAGACATGAGGGACAATTGGAGAAGTGAATTATATAAATATAAAG  
 TGGTAAGAATTGAGCCATTG---GGAGTAGCACCCACTACGGCAAAAAGGAGAGTGTTG-----  
 -----GAGAGAGAGAAAAAGAGCA--GTGGGA--CTAGGAGCT-----  
 GTGTTTCCTTGGGTTCTTGGGGGCA---GCCGGAAGCACTATG--GGCGCGGCGTCA---  
 ATAACGCTGACGGTACAG---GCCAGACAA--CTGTTG---TCTGGCATAGTGCAGCAGCAAAGC---  
 AATTTG---CTGATG---GCTATAGAGGCGCAACAACATATGTTGCAACTCACAGTCTGGGGCATT  
 >KY112213  
 TTCTATTGTAATACATCAGGTCTGTTTAATAGGACATACTCGCTTAATAATGATACAGAACAGAATAATAGT-  
 -----  
 -----  
 ACAAACAAAACCATCACACTCCCATGCAGAATAAAACAAATTATAAACATGTGGCAGGAGGTAGGACGAGCCA  
 TGTATGCCCCCTCCCATTGCAGGAAACATAACATGTAACTCAAAT---

ATTACAGGACTACTATTGACACGTGATGGAGGAGAAGGAAAATGAT-----  
-----  
-----  
AGTGATGAGATTTTCAGACCTGGAGGAGGAGATATGAGAGACAATTGGAGAAGTGAATTATATAAATACAAAG  
TAGTAGAAATAAAACCATTA---GGAATAGCACCCACTAAGGCAAGAAGGAGAGTGGTG-----  
-----GAGAGAGAGAAAAAGAGCA--GTGGGA--ATAGGAGCT-----  
GTGTTCTTGGGTTCTTGGGAGCA--GCAGGAAGCACTATG--GGCGCAGCGTCA---  
ATAACGCTGACGGTACAG---GCCAGACAA--TTATTG---TCTGGAATAGTGCAACAGCAAAGC---  
AATTTG---CTGAGG---GCAATCGAGGCGCAACAGCATATGTTGCAACTCACGGTCTGGGGCATT  
>KP109521  
TTCTATTGCAATACATCAAAATTGTTTAATAGTACATTTAATAGTACACACATGGGTAATGACACACACAGGA  
ATAATGAT-----  
-----  
ACAGACAGTACCATCACGATCCCATGCAGAATAAAACAAATTATAAACATGTGGCAGAGGGTAGGACAAGCAA  
TGTATGCTTCTCCCATTCAGGAAACATAACATGTAACCTCAAGT---  
ATCACAGGACTGCTATTAACACGTGATGGAGGTAACGAGACAGGC-----  
-----  
-----  
GAGGAAGAGACATTCAGGCCTGGAGGAGGAGATATGAGGGACAATTGGAGAAGTGAATTATATAAATATAAAG  
TGGTAGAAGTTAAGCCATTG---GGAATAGCACCCACCAAGGCAAAAAGGAGAGTGGTG-----  
-----GAGAGAGAGAAAAAGAGCA--GTGGGA--ATAGGAGCG-----  
TTGTTCTTGGGTTCTTGGGAGCA--GCAGGAAGCACTATG--GGCGCGGCGTCA---  
ATGACGCTGACGGTACAG---GCCAGACAA--TTGTTG---TCTGGTATAGTGCAACAGCAAAGC---  
AATTTG---CTGAGG---GCTATAGAGGCGCAACAACATATGTTGCAACTCACGGTCTGGGGCATT  
>KP109522  
TTCTATTGTAATACATCAAGATTGTTTACATACAATGGTACAGAAAGTAAGAATTCAACAAACAAAAGTAAG-  
-----  
-----  
AATTCAACAGACATCATACTCCCATGCAGAATAAAGCAGATTATAAACATGTGGCAAGAGGTAGGACGAGCAA  
TGTATGCTCCTCCCATTCAGGAAACATAACATGTACGTCAAAT---  
ATCACAGGACTACTATTGACACGAGATGGAGGAGGTAAAAATAACACA-----  
-----  
-----  
AAAGAAGAGATATTCAGACCTGGAGGAGGAGATATGAGGGACAATTGGAGAAGTGAATTATACAAGTATAAAG  
TGATAGAAATTAAGCCATTA---GGAATAGCTCCAACCTACGGCAAAAAGGAGAGTGGTG-----  
-----GAGAGAGAAAAAAGAGCA--GTGGGA--ATAGGAGCT-----  
GTGCTCCTTGGGTTCTTGGGAGCA--GCCGGAAGCACTATG--GGCGCAGCATCA---  
ATAACGCTGACGGTACAG---GCCAGACAA--TTGCTG---TCTGGTATAGTGCAACAGCAAAGC---  
AATTTG---TTGAGG---GCTATAGAGGCGCAACAGCATATGTTGCAACTCACAGTCTGGGGCATT  
>KC634164  
TTCTATTGCAATACATCAAACTTGTTTAATAGTAGTATACCA-----  
-----  
-----  
AATTCAACTATCACACTCCAGTGCAGAATAAAACAGATTATAAACATGTGGCAGGAGGTAGGACGAGCAATGT  
ATGCCCCCTCCCATTCAGGAAACATAACATGTAAGTCAAAT---  
ATCACAGGACTATTATTGACACGTGATGGAGGGACAGATAATAACAATACAAAT-----  
-----  
-----  
ACTAACAATACAGAGACATTCAGACCTGGAGGAGGAGATATGAGAGACAATTGGAGAAGTGAAGTATATAAAT  
ATAAAGTAGTAGAAATTAAGCCCTTA---GGAATAGCACCTACTAAGGCAAAAAGGAGAGTGGTG-----  
-----GAGAGAGAAAAAAGAGCA--GTGGGA--ATAGGAGCT---  
-----GTACTCCTTGGGTTCTTGGGAGCA--GCAGGAAGCACTATG--GGCGCGGCGTCA---  
ATAACGCTGACGGTACAG---GCCAGACAA--TTATTG---TCTGGTATAGTGCAACAGCAAAAC---  
AATTTG---CTGAGG---GCTATAGAGGCGCAACAGCATATGTTGCAACTCACGGTCTGGGGCATT  
>KC187352  
TTCTATTGTAACACATCAAACCTGTTTAATAGGACATACTCGTCTAATAGTACAAATAGTGCCTCAAATGCTA  
CC-----  
-----  
TCAAATGCAACCATCACACTCCCATGCAGAATAAAGCAAATTATAAATATGTGGCAGGGAGTAGGACAAGCAA  
TATATGCCCCCTCCCGTTGAGGAAACATAACATGTAACCTCAAGC---

ATCACAGGACTACTATTGACACGTGATGGAGGAAATACTAATGGAGAAAAT-----  
-----  
-----  
AATGATACAGAGACATTTCAGACCTGGAGGAGGAGATATGAGGGACAATTGGAGAAGTGAATTATATAAAATATA  
AAGTGGTAGAAATTAAACCATTA---GGAATAGCACCCACTAAGGCCAAAAGGAGAGTGGTG-----  
-----GAGAAAGAAAAAAGAGCA---GTGGGA---ATAGGAGCT-----  
---GTGTTCTTGGGTTCTTGGGAGCA---GCAGGAAGCACTATG---GGCGCAGCATCG---  
ATAACGCTGACGGTACAG---GCCAGACAA---TTGTTG---TCTGGTATAGTGCAACAGCAAAGT---  
AATTTG---CTGAGG---GCTATAGAGGCGCAACAGCATATGTTGCAACTCACAGTCTGGGGCATT  
>KC186723  
TTCTATTGCAATACATCACAATTGTTTAAATATTACAAACACAAGTAATATTACAAACACA-----  
-----  
-----  
AGTACTGGGAATATAATTCTCCAATGTAGAATAAAACAAATTATAAACATGTGGCAGGAGGTAGGAAGAGCAA  
TGTATGCCCCCTCCCATTGAAGGAAACATAACATGTAAATCAAAT---  
ATCACAGGACTACTATTGACACGGGATGGAGGAAACACAGATAAT-----  
-----  
-----  
ACAACTGAGAAATTTAGGCCTGGAGGAGGAGATATGAGGGACAATTGGAGAAGTGAACCTATATAAAATACAAAG  
TGGTAGAAATTAAGCCATTA---GGAGTAGCACCCACTGAGGCCAAAAGGAGAGTGGTG-----  
-----GAGAGAGAAAAAAGAGGA-----ATAGGAGCT-----  
GTGTTCTTGGGTTCTTGGGAGCA---GCAGGAAGCACTATG---GGCGCAGCGTCA---  
ATAACGCTGACGGTACAG---GTCAGACAA---TTATTG---TCTGGCATAGTGCAACAGCAAAGC---  
AATTTG---CTGAGG---GCTATAGAGGCGCAACAGCATATGTTGCAACTCACAGTCTGGGGCATT  
>KC186899  
TTCTATTGCAACACATCAAGGCTGTTCAATAGCACATTTAATAGTACATTTAATAGTACACTGGATAACAGTA  
CAAAT-----  
-----  
-----  
AGTACAGGAAACATCACACTCCAATGCAGAATAAAACAAATTATAAACATGTGGCAGGGGGTAGGAAAAGCAA  
TATATGCCCCCTCCCGTTGCAGGAGACATAATGTGTGAATCAAAT---  
ATCACAGGATTACTATTAAACAAGGGATGGAGGAAATGAAAAATAAT-----  
-----  
-----  
AAAACAGAGACATTTCAGACCTGCAGGAGGAAATATGAGGGACAATTGGAGAAGTGAATTATATAAAATATAAAG  
TGGTAGAAATTAAGCCATTA---GGAATAGCACCCACTAAGGCCAAAAGGAGAGTGGTG-----  
-----GAGAGAGAAAAAAGAGCA---GTGGGA---ATAGGAGCT-----  
GTGTTCTTGGGTTCTTGGGAGCA---GCAGGAAGCACTATG---GGCGCAGCATCG---  
ATAACGCTGACGGTACAG---GCCAGACAA---TTGCTG---TCTGGTATAGTGCAACAGCAAAGT---  
AACTTG---CTGAGG---GCTATAGAGGCGCAACAGCAAATGTTGCAACTCACGGTCTGGGGCATT  
>KC186242  
TTCTATTGCAATACATCAGGTCTGTTTAGAGATACAAACATATCT-----  
-----  
-----  
ACTACGCTCCAATGCAGGATAAAACAAATTATAAATATGTGGCAGGGGGTAGGGCGAGCAATGTACGCCCCCTC  
CCATTGCAGGAATCATAAAGTGTAATCAAAG---  
ATCACAGGAATACTATTGACAAGGGATGGAGGGGCAGATAATACC-----  
-----  
-----  
ACAGAGACATTTCAGACCTGCAGGAGGAGATATGAGGGACAATTGGAGAAGTGAATTATATAAAATATAAAGTAG  
TAGAAATTAAGCCATTA---GGAATAGCACCAACTGAGTCAAAAAGGAGAGTGGTG-----  
-----GAGAGAGAAAAAAGAGCA---GTGGGAGTAGTAGGAGCT-----  
ATGTTCTTGGGTTCTTGGGAGCA---GCCGGAAGCACTATG---GGCGCAGCGGCA---  
GTGACGCTGACGGCACAG---GCCAGACAA---TTATTG---TCTGGTATAGTGCAACAGCAAAGC---  
AATTTG---CTGAGG---GCTATAGAGGCGCAACAGCATATGTTGCAACTCACAGTCTGGGGCATT  
>KC187207  
TTCTACTGCAATACATCAAACTGTTTAAATAGTACAATGTTTAGTACTACAGAGCATTCAAGTGAT-----  
-----  
-----  
TCAAGCGAAAACATCACACTCCCATGCAGATTAAAGCAAATTATAAACATGTGGCAGGAGGTAGGAAGAGCAA  
TATATGCCCCCTCCCATTGCAGGAAACATAACATGTAAATCAAAT---

ATCACAGGGCTACTATTGCTACGTGATGGAGGTAATGATGGTAAAAAT-----  
-----  
-----  
AACACAAATGAAACATTTCAGACCTGGAGGAGGAGATATGAGGGACAATTGGAGAAGTGAATTATACAAATACA  
AAGTGGTAGAAATCAAGCCATTA---GGAGTGGCACCCACTAATGCAAAAAGGAGAGTGGTG-----  
-----GAGAGAGAAAAAAGAGCA---GTGGGA---CTAGGAGCT-----  
---GTGTTCCCTTGGGTTCTTGGGAGCA---GCAGGAAGCACTATG---GGCGCAGCGTCA---  
ATAACGCTGACGGTACAA---GCCAGACAA---CTGTTG---ACTGGTATAGTGCAACAGCAAAGC---  
AATTTG---CTGAGG---GCTATAGAGGCGCAACAGCATATGTTGCAACTCACGGTCTGGGGCATT  
>KC186306  
TTCTATTGCAATACATCAGGGCTGTTTAATAGCACATACATGTCTGGTGACACCCCCATGAATGATACAGACA  
GTAATAAT-----  
-----ACA---  
GACAGTAATAGTACAATCACACTCCAATGCAGAATAAAACAAATTATAAACATGTGGCAACAGGTAGGACGAG  
CAATGTATGCTTCTCCCATTTGAAGGAAACATAACATGTAAATCAAAT---  
ATCACAGGGTTACTATTGACACGTGATGGAGGAAAAAATAACCAA-----  
-----  
-----  
AGTGAAAATGAGACATTTCAGACCTGGAGGAGGAGATATGAGGGACAATTGGAGAAGTGAATTATACAAATATA  
AAGTGGTAGAAATTAAGCCATTA---GGAATAGCACCCACTAAGGCAAAAAGGAGAGTGGTG-----  
-----GAGAGAGAAAAAAGAGCA---ATAACAGGAATAGGAGCT-----  
---GTGTTCCCTTGGGTTCTTGGGAGCA---GCAGGAAGCACTATG---GGCGCGGCGTCA---  
ATAACGCTGACGGTACAG---GCCAGACAA---TTATTG---TCTGGTATAGTGCAACAGCAAAGC---  
AATTTG---CTGAGG---GCTATAGAGGCGCAACAGCATATGTTGCAACTCACAGTCTGGGGCATT  
>KC187437  
TTCTATTGCAATACATCAGGACTGTTTAATGGTACAAACACA-----  
-----  
-----  
AGGAATGGCTCCATCACACTCCCATGCAGAATAAAACAAATTATAAACATGTGGCAGGGGGTAGGACGAGCAA  
TATATGCCCCCTCCCATTTGAAGGAAACATAACATGTAAATCAAAT---  
ATCACAGGACTACTATTGTACGTGATGGAGGAAATGGAAATAACACA-----  
-----  
-----  
AGTACCACAGAGACATTTCAGACCTGGAGGAGGAGATATGAGGGACAACCTGGAGAAGTGAATTATACAAATATA  
AAGTGGTAGAAATTAAGCCATTA---GGAGTAGCACCCACTGGGGCAAAAAGGAAAGTGGTG-----  
-----GAGAGAGAAAAAAGAGCA---GTGGGA---ATAGGAGCT-----  
---GTGTTCCCTTGGGTTCTTGGGAGCA---GCAGGAAGCACTATG---GGCGCGGCGTCA---  
ATAACGCTGACGGTACAG---GCCAGACAA---CTGTTG---ACTGGTATAGTGCAACAGCAAAGC---  
AATTTG---CTGAGG---GCTATAGAGGTGCAACAGCATATGTTGCAACTCACGGTCTGGGGCATT  
>KC186647  
TTCTATTGCAACACATCAATATTGTTTAATGGTACATACCTGACTAATAATACAAACAGTACTTCAAATACT-  
-----  
-----  
TCAAATTCAACCATTACACTCCAATGCAAAATAAAACAAATTATAAACATGTGGCAGGGGGTAGGACAAGCAA  
TGTATGCCCCCTCCCATTTTCAGGAAACATAACCTGTGAATCAAAT---  
ATCACAGGACTATTATTGACACGTGATGGAGGAAATAACACAGAG-----  
-----  
-----  
AACACTGAGATATTTCAGACCTGGAGGAGGGGACATGAGGGACAATTGGAGAAGTGAATTATATAAATATAAAG  
TGGTAGAGATCAAGCCATTA---GGAGTAGCACCCAATAAGGCAAAAAGACGAGTGGTG-----  
-----GAGAGAGAAAAAAGAGCA---GTAGGA---ATAGGAGCT-----  
GTA CTCTTGGGTTCTTGGGAGCA---GCAGGAAGCACTATG---GGCGCGGCGTCA---  
ATGACGCTGACGGTACAG---GCCAGACAA---TTATTG---TCTGGTATAGTGCAACAGCAAAAC---  
AATTTG---CTGAGA---GCTATAGAGGCGCAACAGCATATGTTGCAACTCACGGTCTGGGGCATT  
>KC187550  
TTCTATTGCAATACATCAAACTGTTTAATAGTACAAAACCTGTTTAATAGTACTAATAAT-----  
-----  
-----  
AATAGTGCAATAATCACACTCCCATGTAAATAAAACAAATTATAAATATGTGGCAGAAGGTAGGACGAGCAA  
TGTATGCTCCTCCCATTTGAAGGAAACATAACATGTAACTCAAGT---

ATCACAGGATTACTATTGACGCGTGATGGAGCAGGAGGGGGGGGC-----  
 -----  
 -----  
 AATGAGACATTTCAGACCTGGAGGAGGAGATATGAGGGACAATTGGAGAAGTGAATTATATAAATATAAAGTGG  
 TAGAAATTAAGCCATTA---GGAATAGCACCAACTGGAGCAAAAAGGAGAGTGTTG-----  
 -----GAGAGAGGAAAACGAGCA--GTGGGA--CTAGGAGCT-----  
 GTGTTTCCTTGGGTTCTTGGGAGCA--GCAGGAAGCACTATG--GGCGCGGCGGCA---  
 GTAACGCTGACGGCACAG---ACCAGACAA--TTGTTG---TCTGGTATAGTGCAACAGCAAAGT---  
 AATTTG---CTGAAG---GCTATAGAGGCGCAACAACATATGTTGCAACTCACGGTCTGGGGCATT  
 >KC187376  
 TTCTATTGCAATACATCAGGCCTGTTTAGTGGAACATACAATAGTACAGGCAATACTAAT-----  
 -----  
 -----  
 AGTACAACAAACATCACACTCCCATGCAGAATAAGACAAATTATAAGAATGTGGCAGGGAGTAGGACAAGCAA  
 TGTATGCCCCCTCCCATTCAGGAAACATAATATGTATTTCAAAT---  
 ATCACAGGGCTACTATTGACACGTGATGGAGGACAAAATAATGGGACAAAT-----  
 -----  
 -----  
 AATAATACAGAGACATTTCAGACCTGGAGGGGGAGACATGAGGGACAATTGGAGAAGTGAATTATATAAATATA  
 AAGTGGTAGAAATTAAGCCATTG---GGAATAGCACCCACTAAGGCAAAAAGGAGAGTGTTG-----  
 -----GAGAGAGAAAAAGAGCA--GTGGGA--ATAGGAGCT-----  
 ---GTGTTTCCTTGGGTTCTTGGGAGCA--GCAGGAAGCACTATG--GGCGCAGCGTCA---  
 ATAACGCTGACGGTACAG---GCCAGACAA--TTGTTG---TCTGGTATAGTGCAACAGCAAAGC---  
 AATTTG---CTGAAG---GCTATAGAGGCGCAACAGCATATGTTGCAACTCACGGTCTGGGGCATT  
 >KC187723  
 TTCTATTGCAATACATCAGCATTGTTTAACACAACACTGGGTAACACAACACTGGGTAACATAACCATACAAA  
 ATGAT-----  
 -----  
 -----  
 TCAAACGCAACCATCACACTCCCATGCAGAATAAAGCAGATTATAAACATGTGGCAGGAGGTAGGACGAGCAA  
 TGTATGCTCCTCCCATTAAGGAAATATAACCTGTAAATCAAAC---  
 ATCACAGGACTACTATTGTTACGTGATGGAGGAGTGAACACAAC-----  
 -----  
 -----  
 AACGAGACATTTCAGACCTGGAGGAGGAGATATGAGGGACAATTGGAGAAGTGAATTATATAAATATAAAGTGG  
 TAGAAATTAAGCCATTG---GGAGTAGCACCCACTAAAGCAAAAAGGAGAGTGTTG-----  
 -----GAGAGAGAAAAAGAGCA--GTGGGA--ATAGGAGCT-----  
 GTGTTTCCTTGGGTTCTTGGGAGCA--GCAGGAAGCACTATG--GGCGCGGCGTCA---  
 ATAACGCTGACGGTACAG---GCCAGACAA--CTGTTG---TCTGGTATAGTGCAACAGCAAAGC---  
 AATTTG---CTGAGG---GCTATTGAGGCGCAACAGCATATGTTGCAACTCACGGTCTGGGGCATT  
 >KC186458  
 TTCTATTGCAATACATCAGGACTGTTTAATAACTCACTACTGACAGAAAATGGTACAGAA-----  
 -----  
 -----  
 AGTAACGAAACAATAACAATCCCATGCAAAATAAAACAATTTTAAACATGTGGCAGCAGGTAGGACGAGCAA  
 TGTATGCCCCCTCCCATTCAGGAAACATAACATGTAAATCAAAC---  
 ATCACAGGACTACTATTGACACGGGATGGAGGAACTACTAATGGGACA-----  
 -----  
 -----  
 GGAATGAGACATTTCAGACCTGGAGGAGGAAATATGAGGGACAATTGGAGAAGTGAATTATATAAATATAAAG  
 TGGTAGAAATTAAGCCATTA---GGAATAGCACCCACTGGAGCAAAAAGGAGAGTGTTG-----  
 -----GAGAGAGAAAAAGAGCA--GTGGGA--ATAGGAGCT-----  
 TTGTTTCCTTGGGTTCTTGGGAGCA--GCAGGAAGCACTATG--GGCGCGGCGTCA---  
 ATAACGCTGACGGTACAG---GCCAGACAA--TTATTG---TCTGGTATAGTGCAACAGCAAAGC---  
 AATTTG---CTGAGA---GCTATAGAGGTGCAACAGCACATGTTGCAACTCACAGTCTGGGGCATT  
 >KC187049  
 TTCTATTGCAATACATCAAAGCTGTTCAATGGTACATATGTGAATAGTACATACGTGAATAGT-----  
 -----  
 -----  
 ACAGATTCAAACATCAACATCACATGCAGAATAAAACAAATTATTAACATGTGGCAGGGAGTAGGACGAGCAA  
 TGTATGCCCCCTCCCATTCAGGAGTCATAACATGTAAATCAAAT---

ATCACGGGACTACTATTGACAAGAGATGGAGGAAAAAATAATACT-----  
-----  
-----  
AATACAGAGACATTTCAGACCTGGAGGGGGAGATATGAGGGACAATTGGAGAAGTGAATTATATAAATATAAAG  
TGGTAGAAATTAAGCCATTA---GGAATAGCACCAACTGCGGCAAAAAGACGAGTGGTG-----  
-----GAGAGAGAAAAAAGAGCA--GTGGGA---CTAGGAGCT-----  
GTGTTCCCTTGGGTTCTTGGGAGCA---GCAGGAAGCACTATG---GGCGCGGCATCA---  
ATAACGCTGACGGTACAA---GCCAGACAA---TTGTTG---TCTGGTATAGTGCAACAGCAAAGC---  
AATTTG---CTGAGG---GCTATAGAGGCGCAACAGCATATGTTGCAACTCACAGTCTGGGGCATT  
>KC186320  
TTCTATTGTAATACATCAGGACTGTTTAATGGTACATATTGGCCTAATGGTACAAATACATGGGGGAATGCAA  
GCAAT-----  
-----GAAAC-----  
ATCACACTCCAAAACATCACACTCCCATGCAAAATAAAAACAAATTATAAACATGTGGCAGGGAGTAGGACGAG  
CAATATATGCCCCCTCCCATTCAGGAAACATAACATGTACATCAAAT---  
ATCACAGGACTACTATTGGTACGTGATGGAGGGACAAATGAAAGTGCT-----  
-----  
-----  
ACAAATGAGACATTTCAGACCTGGAGGAGGAGATATGAGGGACAACCTGGAGAAGTGAATTATATAAATATAAAG  
TGGTAGAAATTAACCATTA---GGAGTAGCACCCACTGCTGCAAAAAGAAGAGTGGTG-----  
-----GAGAGAGAAAAAAGAGCA--GTAACA---ATGGGAGCT-----  
TTGTTCCCTTGGGTTCTTGGGAGCA---GCAGGAAGCACTATG---GGCGCGGCGTCA---  
ATAACGCTGACGGTACAG---GCCAGACAA---CTGTTG---TCTGGTATAGTGCAACAGCAAAGC---  
AATTTG---CTGAGA---GCTATAGAGGCGCAACAGCATATGTTGCAACTCACGGTCTGGGGCATT  
>KC187482  
TTTTATTGCAATACATCAGATCTGTTCAATGATACATTT-----  
-----  
-----  
ACAAACTCAACCATCACGCTTCCATGTAGGATAAAAACAAATTATAAACATGTGGCAGGGGGTAGGACGAGCAA  
TGTACGCCCCCTCCCATTCAGGAAACATAACATGTAAATCAAAT---  
ATTACAGGACTACTATTGACACGTGATGGAGGAAACAGTAATAAT-----  
-----  
-----  
GGAACAGAGATATTTCAGACCTGGAGGAGGAGATATGAGAGACAATTGGAGAAGTGAATTATATAAATATAAAG  
TGGTAGAAATTAAGCCATTG---GGAATAGCACCCACTGAGGCAAAAAGGAGAGTGGTG-----  
-----GAGAGAGAAAAAAGAGCA--GTGGGG---ATAGGAGCT-----  
GTGTTCCCTTGGGTTCTTGGGAGCA---GCAGGAAGCACTATG---GGCGCGGCGTCA---  
ATAACGCTGACGGTACAG---GCCAGACAA---CTGTTG---TCTGGTATAGTGCAACAGCAAAGC---  
AATTTG---CTGAGA---GCTATAGAGGCGCAACAACATCTGTTGCAACTCACAGTCTGGGGCATT  
>KC186143  
TTCTATTGCAATACATCAGGACTGTTTAATACATCAGGACAGTCTACAAAT-----  
-----  
-----  
TCAAGTTCAAACATCACACTCCCATGCAAAATAAAAACAAATTATAAACATGTGGCAGAAAGTAGGACGAGCAA  
TATATGCCCCCTCCCACTAAAGGAATCATAACATGTAGCTCAAAT---  
ATCACAGGACTACTATTAAACACGTGATGGAGGAAGCAACAAAAACAAT-----  
-----  
-----  
AACACTACAGAGATATTTCAGACCTGGAGGAGGAGATATGAGGGACAATTGGAGAAGTGAATTATATAAATATA  
AAGTGGTAGAAATTAACCATTA---GGAATAGCACCCACTGAGGCAAAAAGGAGAGTGGTG-----  
-----GAGAGAGAGAAAAAGAGCA--GTGGGA---ATAGGAGCT-----  
---GTGTTCCCTTGGGTTCTTGGGAGCG---GCAGGAAGCACTATG---GGCGCGGCGTCA---  
ATAACGCTGACGGTACAG---GCCAGACAA---TTATTG---TCTGGTATAGTGCAACAGCAAAGC---  
AATTTG---CTGAGA---GCTATAGAGGCGCAACAGCATATGTTGCAACTCACGGTCTGGGGCATT  
>KC156214  
TTCTATTGCAATACATCAAAAAATATTTGATAGTGACAATGCAAACAA-----  
-----  
-----  
ACTTCAGGAAATATCACACTCCCATGCAAAATAAAAACAAATCATAAACATGTGGCAGGGGGTAGGAAGAGCAA  
TGTATGCCCCCTCCCATTCAGGAAACATAACATGTACATCAAAT---

ATCACAGGACTACTATTGACACGTGATGGAGGCAATGTTACAAAT-----  
 -----  
 -----  
 GACACAGAGATATTCAGACCTGGAGGAGGAAATATGAGGGACAATTGGAGAAGTGAATTATACAAATATAAAG  
 TGGTAGAAATTAAGCCATTA---GGGATAGCACCCACCAAGGCAAAAAGGCGAGTGGTG-----  
 -----GAGAGAGAAAAAAGAGCA--GTGGGA--ATAGGAGCT-----  
 GTATTCCTTGGGTTCTTGGGAGCA--GCAGGAAGCACTATG--GGCGCAGCGTCA---  
 ATAGCGCTGACGGTACAG---GCCAGACAA--TTGTTG--TCTGGTATAGTGCAACAGCAAAAC---  
 AATTTG--CTGAGA--GCTATAGAGGCGCAACAGCATATGTTGCAACTCACGGTCTGGGGCATT  
 >KP109523  
 TTCTACTGCAATACATCAAGTCTGTTTAATAGTAATAGT-----  
 -----  
 -----  
 ACAGAAGATCCCATCACACTCAAATGCAGAATAAAACAAATCATAAACATGTGGCAGGAGGTAGGAAGAGCAA  
 TGTATGCCCCCTCCCATTGCAGGAGAAATCACGTGTAACCTCAAGT---  
 ATCACAGGACTATTACTGCTACGTGATGGAGGTAACCTCAAATGAC-----  
 -----  
 -----  
 TCCAAAGAGAAAGAGACATTTCAGACCTGGAGGAGGAAATATGAAGGACAATTGGAGGAGTGAATTATATAAAT  
 ATAAGGTGGTAGAAATTAAGCCATTA---GGAGTAGCACCCACTGAGGCAAAAAGGAGAGTGGTG-----  
 -----GAGAGAGAAAAAAGAGCA--GTGGGA--ATAGGAGCT---  
 -----GTGATCTTTGGGTTCTTGGGAGCA--GCAGGAAGCACTATG--GGCGCGGCGTCA---  
 ATAACGCTGACGGTACAA---GCCAGACAA--CTGCTG--TCTGGTATAGTGCAACAGCAAAAC---  
 AATTTG--CTGAGG--GCTATAGAGGCGCAACAGCATATGTTGCAACTCACAGTCTGGGGCATT  
 >KP109524  
 TTTTATTGCAATACAACAAACCTGTTTAATGGTATTAATGAGACAGAAAAT-----  
 -----  
 -----  
 ACCAATTCAACCATCATACTTCGTTGCAGAATAAAACAAATAATAAACATGTGGCAGGGGGTAGGACGAGCAA  
 TGTATGCCCCCTCCCATTGAAGGAAACATAACATGTAGATCAAAT---  
 ATCACAGGGCTACTATTGACACGTGATGGAGGAGTAAATGCGACA-----  
 -----  
 -----  
 AAAGAGACATTTCAGACCTGGAGGAGGAGATATGAGGGACAATTGGAGAAGTGAAGTATATAAATATAAAGTGG  
 TAGAAATTAAGCCATTA---GGAGTAGCACCCACTAGTGCAAAAAGGAGAGTGGTA-----  
 -----AGAGAGAAAAGAGCA--GTGGGA--CTAGGAGCT-----  
 GTGTTCTTGGGTTCTTGGGAGCA--GCAGGAAGCACTATG--GGCGCGGCATCA---  
 GTAATGCTGACGGTACAG---GCCAGACAA--TTATTG--TCTGGTATAGTGCAACAGCAAAGC---  
 AATTTG--CTGAAG--GCCATCGAGGCGCAACAGCATATGTTGCAACTCACAGTCTGGGGCATT  
 >KP109527  
 TTCTATTGCGATACATCAGGTCTGTTTAATGGTACATACAACGCTACAGACATGTCTAATAGT-----  
 -----  
 -----ACAAACGAAACCATCATA-----  
 AAACAGATTATAACATGTGGCAGGGGGTAGGACGAGCAATGTATGCCCCCTCCCATTGCAGGAAACATAACAT  
 GTAAATCCAAT---ATCACAGGACTATTATTGACACGTGATGGAGGTAATGATAAAAAAT-----  
 -----  
 -----  
 AACACAGAAATATTCAGACCTGGAGGAGGAGATATGAGGGACAATTGGAGAAGTGAATTATATAAATACAAAG  
 TGGTAGAAATTAAGCCATTG---GGAGTAGCACCCACTGAGGCAAAAAGGAGAGTGGTG-----  
 -----AAGAAAGAAAAAAGAGCA--GTGGGA--CTAGGAGCT-----  
 ATGTTCTTGGGTTCTTGACAGCA--GCAGGAAGCACTATG--GGCGCGGCGTCA---  
 ATAACGCTGACGGTACAG---GCCAGACAA--TTGTTG--TCTGGTATAGTGCAACAGCAAAAC---  
 AATTTG--CTGAGA--GCTATAGAGGCGCAACAGCATATGTTGCAACTCACGGTCTGGGGCATT  
 >KC634109  
 TTCTATTGTAATACATCAGGGCTGTTTAATGGTACATACCCGGCTAATGATACAGAAAGTAAC-----  
 -----  
 -----  
 TCAAGCTCACCAATCACACTCCCATGCAGAATAAAACAAATTATAAACATGTGGCAGGAAGTAGGACGAGCAA  
 TGTATGCTCCTCCCATTGCAGGAAATATAACATGTACATCAAAT---  
 ATCACGGGATTACTCTTGACACGTGATGGAGGCACAGGAAATGGCACAGAATCA-----

-----  
-----  
AATAGCACAGAAACATTTCAGACCTGGAGGAGGAGATATGAGGGACAATTGGAGAAGTGAATTATATAAAATACA  
AAGTGGTAGAAATTAAGCCATTG---GGAATAGCACCCACTACGGCAAAAAGGAGAGTGGTG-----  
-----GAGAGAGAAAAAAGAGCA---GTAGGA---ATAGGAGCT-----  
---GTGTTCTTGGGTTCTTGGGAGCA---GCAGGAAGCACTATG---GGCGCGGCGTCA---  
ATCACGCTGACGGTACAT---GCCAGACAA---TTGTTG---TCTGGTATAGTGCAACAGCAAAGC---  
AATTTG---CTGAAG---GCTATAGAGGCGCAACAACATTTGTTGCAACTCACAGTCTGGGGCATT  
>KC187500  
TTCTATTGCAATACATCAGAACTGTTTAATAGTACACTGTTTAATAGTACACACATGTCTAGTACAAATGCAA  
CT-----  
-----  
AAAAACAAAACCATCACACTTTTCATGCAGAATAAAACAAATCATAAACATGTGGCAGGGGGTAGGACGAGCAA  
TGTATGCCCCCTCCCATTCAGAGAAACATAACATGTAGGTCAAAC---  
ATCACAGGACTAATAATAACACGTGATGGGGGAACCGGAGAGAATACAACAGGG-----  
-----  
-----  
GATAGAACAGAGGAAACATTTCAGACCTGCAGGAGGAGATATGAGGGACAATTGGAGAAGTGAATTATATAAAAT  
ATAAAGTGGTAGAAATTAAGCCATTA---GGAATAGCACCCACTAGAGCAAAAAGGAGAGTGGTG-----  
-----GAGAGAGAAAAAAGAGCA---GTGGGA---ATAGGAGCT---  
-----GTGTTCTTGGGTTCTTGGGAGCA---GCAGGAAGCACTATG---GGCGCGGCGTCA---  
ATAACGCTGACGGTACAG---GCCAGACAA---TTGCTG---TCTGGTATAGTGCAACAGCAAAGC---  
AATTTG---CTGAGG---GCTATAGAGGCGCAACAGCATATGTTGCAACTCACAGTCTGGGGCATT  
>KC187630  
TTCTATTGCAATACATCAAACCTGTTTAATATGACATACATATGGAAAAATGGGTCATACGTGCTTAATAATA  
CAGACAAT-----  
-----  
AATGATACAACAATCACACTCCAATGCAGAATAAAACAATTTATAAACATGTGGCAGAGGGTAGGAAGAGCCA  
TGTATGCTCCTCCCATTCAGAGAAACATAACATGTGTATCAAAT---  
ATCACAGGATTACTATTGACACATGATGGGATAAAGACAAATAGATCAAGTGAC-----  
-----  
-----  
TCAAAATTGGACATGGACATTTCAGACCTGGGGGAGGAAATATGAAGGACAATTGGAGTAATGAATTATACAAAT  
ATAAAGTGGTAGAAATTAACCATTG---GGAATAGCACCCACTAAGGCAAAAAGGAGAGTGGTG-----  
-----GAGAGAGAAAAAAGAGCA---GTGGGA---ATAGGAGCT---  
-----GTGATCTTTGGGTTCTTGGGAGCA---GCAGGAAGCACTATG---GGCGCAGCGTCA---  
ATAACGCTGACGGTACAG---GCCAGACAA---TTGCTG---TCTGGTATAGTGCAACAGCAAAGC---  
AATTTG---CTGAAA---GCTATAGAGGCGCAACAACATATGTTGCAACTCACGGTCTGGGGCATT  
>KC186203  
TTCTATTGCAATACATCAGGACTATTTAATAGTACATTTAATAAGGCATACCAGCCTAATAGTACAGAAGAT-  
-----  
-----  
GACTCAAAAAACATCACACTCCAATGCAGAATAAAGCAAATTATAAACATGTGGCAGGGGGTAGGACAAGCAA  
TGTATGCTCCTCCCATAGCAGGAAACATAACATGTAGATCAAAT---  
ATAACAGGACTGCTATTAAACACGTGATGGAGGAGATAACAATAGCACA-----  
-----  
-----  
AATGGCACAGAGATATTTCAGACCTGGAGGAGGAGATATGAAGGACAATTGGAGAAGTGAATTATATAAAATATA  
AAGTGGTAGAAGTTATGCCATTG---GGATTAGCACCCACTAAGGCCAAAAGGAGAGTGGTGGAGAGA-----  
-----GAGGCCAAAACGAGAGTGGTGGAGAGAAAGAAAAGAGCA---GTGGGA---ATAGGAGCT-----  
---GTGTTCTTGGGTTCTTAGGAGCA---GCAGGAAGCACTATG---GGCGCAGCGTCA---  
GTGACGCTGACGGTACAG---GCTAGACAA---TTATTG---TCTGGTATAGTGCAACAGCAAAGC---  
AATCTG---CTGAAG---GCTATAGAGGCGCAACAGCATATGTTGCAACTCACAGTCTGGGGCATT  
>KC186594  
TTCTATTGCAATACATCAGGCCTGTTCAATGGCACATACAATGGCACATACAATGGCACATACAATGGCATAT  
ACAAT-----  
-----  
AGTACAGACAATATCACACTCCCATGTAGAATAAAACAAATTATAAACATGTGGCAGAGGGTAGGACGAGCAA  
TATATGCCCCCTCCCATTCAGAGAAATATAACATGTAAATCAAAT---  
ATCACAGGACTATTATTGACACGTGATGGAGGAAAAAATAATACA-----

-----  
-----  
ACAGATGAAGTATTTCAGACCTGGAGGAGGAGATATGAGGGACAATTGGAGAAGTGAATTATATAAATATAAAG  
TGGTAGAAATTAAGCCATTA---GGAATAGCACCCACTAATGCAAAAAGGAGAGTGGTG-----  
-----GAGAAAGAAAAAAGAGCA--GTGGGA---CTGGGAGCT-----  
GTGTTTCCTTGGGTTCTTGGGAGCA--GCAGGAAGCACTATG--GGCGCGGCGTCG---  
ATAACGCTGACGGTACAG---GCCAGACAA--TTGTTG---TCTGGTATAGTGCAACAGCAAAGC---  
AATTTG---CTGAGG---GCTATAGAGGCGCAACAGCATATGTTGCAACTCACGGTCTGGGGCATT  
>KC186169  
TTCTATTGCAATACATCAAACTGTTTAATACTACAGGCAATAGTACA-----  
-----  
-----  
GCAAAATACAACCATCACACTCCCATGCCAAATAAAACAAATTATAAACATGTGGCAGGGGGTAGGACGAGCGA  
TGTATGCCCCCTCCCATTCGAGGAAACATAACATGTGAATCAAAT---  
ATCACAGGGCTACTATTGACACGGGATGGAGGAAAAGGTAAAGAT-----  
-----  
-----  
AATGGAACAGAGACATTTCAGACCTGAAGGAGGAGATATGAGGGACAATTGGAGGAGTGAATTATATAAATATA  
AAGTGGTAGAAATTAGGCCATTG---GGAATAGCACCCACTACGGCAAAAAGGAGAGTGGTG-----  
-----GAGAGAGAAAAAAGAGCA--GTGGGA---CTAGGAGCT-----  
---GTGTTTCCTTGGGTTCTTAGGAGCA--GCAGGAAGCACTATG--GGCGCAGCGTCA---  
ATAACGCTGACGGTACAG---GCCAGACAA--CTGTTG---TCTGGTATAGTGCAACAGCAAAGC---  
AATTTG---CTGAGA---GCTATAGAGGCGCAACAGCATATGTTGCAACTCACGGTCTGGGGCATT  
>KC186446  
TTCTATTGCAATACAACAGACCTGTTTAATGGGACAGGAAATGGTACAAAG-----  
-----  
-----  
GCAAAATGACACAATCAAAATCCCATGCAAAATAAAACAAATTATAAACATGTGGCAGGGAGTAGGAAGAGCAA  
TATATGCTCCTCCCATTAAGGAAACATAACATGTAAATCAAAT---  
ATCACAGGAATACTATTGACACGTGATGGAGGAAGAGATGGAGGAGAAGAT-----  
-----  
-----  
AACGAGACAGAGATATTTCAGACCTGGAGGAGGAGATATGAGGGACAATTGGAGGAGTGAATTATATAAATATA  
AAGTGGTAGAAATCAAGCCATTG---GGAATAGCACCCACTGCGGCAAAACGGAGAGTGGTG-----  
-----GAGAAAGAAAAAAGAGCA--GTGGGA---ATAGGAGCT-----  
---GTGTTTCCTTGGGTTCTTGGGAGCA--GCAGGAAGCACTATG--GGCGCGGCATCA---  
ATAACGCTGACGGTACAG---GCCAGACAA--TTATTG---TTTGGTATAGTGCAACAGCAAAGC---  
AATTTG---CTGAGA---GCTATAGAGGCGCAGCAGCATATGTTGCAACTCACAGTCTGGGGCATT  
>KT896551  
TTCTATTGTAATACATCAAACTGTTTAATGGTGCATATAATAATTCAAATTCAGTACAGAAGATACT---  
-----  
-----  
TCAAACCTCAACAATCACACTCCCATGCAAAATAAAACAAATTATAAACATGTGGCAGGAGGTAGGACGAGCAA  
TGTATGCTCCTCCCATTAGAGGAAACATAACATGTGAATCGAAT---  
ATCACAGGATTACTATTGGTGCGTGATGGAGGAAATACTACGAATAATGAGACA-----  
-----  
-----  
GAGACAGAGACATTTCAGACCTGGAGGAGGAGACATGAGGGACAATTGGAGAAGTGAATTATACAAGTATAAAG  
TGGTAGAAATTAAGCCATTG---GGAATAGCACCCACTAAGGCAAGAAGAATAGTGGTG-----  
-----GAGAGAGAAAAAAGAGCA--GTAGGA---CTAGGAGCT-----  
GTGATCTTTGGGTTCTTGGGAGCA--GCAGGAAGCACTATG--GGCGCGGCGTCA---  
ATAGCGCTGACGGTACAG---GCCAGGCAA--GTGTTG---TCTGGTATAGTGCAACAGCAAAGC---  
AATTTG---CTGAAA---GCCATAGAGGCGCAACAGCATCTGTTGCAACTCACAGTCTGGGGCATT  
>MG898649  
TTCTACTGCAATACATCAGGCCTATTTAATAGGACATACGATGCAAATGAAACAGCAAAGTATGGTAACAGT-  
-----  
-----  
ACAAATGGTAACATCACACTCCAATGCAGAATAAAACAAATTTATAAACATGTGGCAGAGGGTAGGACGAGCAA  
TGTATGCCCCCTCCCATTCGAGGAATCATAACATGTAGATCAAAT---  
ATCACAGGACTACTATTGACACGAGATGGAGGAGATGGAGGAGAAAATGGAACA-----

-----  
-----  
GAGACAGAGACATTTCAGACCTGGAGGAGGAGATATGAGGGACAATTGGAGGAGTGAATTATATAAATATAAAG  
TGGTAGAAATTAAGCCATTA---GGAATAGCACCCACCGAGGCAAAAAGGAGAGTGGTG-----  
-----GAGAGAGAAAAAAGAGCA--GTGGGG--CTAGGAGCT-----  
GTGCTCCTTGGGTTCTTGGGAGCA--GCAGGAAGCACTATG--GGCGCGGCGTCA---  
ATAACGCTGACGGTACAG---GCCAGACAA--TTGTTG---TCTGGTATAGTGCAACAGCAAAGC---  
AATTTG---CTGAAG---GCTATAGAGGCGCAACACCATCTGTTGCAACTCACGGTCTGGGGCATT  
>MG899863  
TTTTATTGCAATACATCACAACCTGTTTAATAGGACATACAACCCTACAGAAAATAGTACAGAA-----  
-----  
-----  
AGTAATAAAACCATCACAATCCCATGCAGAATAAAACAGATTATAAATATGTGGCAGAAAGTAGGAAAAGCAA  
TGTATGCCCCCTCCCATTGCAGGATACATAACATGTAGATCAAAC---  
ATCACAGGACTACTATTGTACGTGATGGAGGCAACGATAACACAACAGAA-----  
-----  
-----  
AGAACAGAAACCTTCAGACCTGCAGGAGGAGATATGAGGGACAATTGGAGAAGTGAATTATATAAATATAAAG  
TGGTAGAAATTAAGCCATTG---GGAATAGCACCCACCGAGGCAAAAAGGAGAGTGGTG-----  
-----GAGAGACAAAAAAGAGCA--GTGGGA--ATAGGAGCT-----  
GTGCTCCTTGGGTTCTTGGTAGCA--GCAGGAAGCACTATG--GGCGCGGCGTCA---  
ATAACGCTGACGGTACAG---GCCAGACAA--CTGTTG---TCTGGTATAGTGCAACAGCAAAGC---  
AATTTG---CTGAGA---GCTATAGAGGCGCAACAGCATATGTTGCAACTCACGGTCTGGGGCATT  
>AY713413  
TTCTATTGTAATACATCAAACCTGTTTACATCAAACCTGTTTACTAACAATCTAACA-----  
-----  
-----  
AATACTACAAACATCACAACCTCCCATGCAGAATAAAACAAATTATAAACATGTGGCAGGGGGTAGGACGAGCAA  
TGTATGCCCCCTCCCATTGCAGGAAACATAACATGTAAATCGAAT---  
ATCACAGGACTACTACTGACACGTGATGGAGGAGAAAAATAATAGG-----  
-----  
-----  
ACTGAGACATTTCAGACCTGGAGGAGGAGATATGAAGGACAATTGGAGAAGTGAATTATATAAATATAAGGTGG  
TAGAAATTAAGCCATTA---GGAGTAGCACCCACTGGTGCAAAAAGGAGAGTGGTG-----  
-----GAGAGAGAGAAAAAGAGCA--GTGGGA--ATAGGAGCT-----  
GTGTTCTTGGGTTCTTAGGAGCA--GCAGGAAGCACTATG--GGCGCGGCGTCA---  
ATAACGCTGACGGTACAG---GCCAGACAA--TTATTG---TCTGGTATAGTGCAACAGCAAAGC---  
AATTTG---CTGAGG---GCTATAGAGGCGCAACAGCATATGTTGCAACTCACGGTCTGGGGCATT  
>HM638662  
TTCTATTGTAATACATCAAACCTGTTTAATAGTACATACATGCATAATGGTACAACAGGTAAC-----  
-----  
-----  
TCAAGCGGAGTCATCACAACCTCCCATGCAAAATAAAACAAATTATAAACATGTGGCAGGAGGTAGGACGAGCAA  
TGTATGCTCCTCCCATTGCAGGAAACATAACATGCAAATCAAAT---  
ATCACAGGACTACTATTGACACGTGATGGAGGGTCTGACCCAAACACA-----  
-----  
-----  
AATAATGACACAGAGACATTTCAGACCTGGAGGAGGAGATATGAGGGACAATTGGAGAAGTGAATTATATAAAT  
ATAAAGTGGTAGAAATTAAGCCATTA---GGAGTAGCACCCACTGGAGCAAAAAGGAGAGTGGTG-----  
-----GAGAGAGAAAAAAGAGCA--GTTGGA--ATAGGAGCT---  
-----GTGCTCCTTGGGTTCTTGGGAACA--GCAGGAAGCACTATG--GGCGCGGCGTCA---  
ATAACGCTGACGGTACAG---GCCAGACAA--GTATTG---TCTGGTATAGTGCAACAGCAAAGC---  
AATTTG---CTGAGG---GCTATAGAGGCGCAACAGCATATGTTGCAACTCACGGTCTGGGGCATT  
>HM638713  
TTCTATTGCAATACATCAAACCTGTTTAATAGTACATACATGACAAACATGACTAATAGTACTTCAGATTCTA  
AT-----  
-----  
AGTACTTCAAACATTACACTCCAATGCAGAATAAAACAAATTGTAAACATGTGGCAGGAGGTAGGACGAGCAA  
TGTATGCCCCCTCCCATTGCAGGAAACATAACATGTGAATCAAAT---  
ATCACAGGACTACTATTGACACGTGATGGAGGAACAACCTAATAACACAGGAACA-----AAT----

-----  
GGAACAGAAAATAAT---  
AACACAGAAACATTTCAGACCTGGAGGAGGAGATATGAGGGACAATTGGAGAAATGAATTATACAAATATAAAG  
TAGTAGAAATTAAGCCATTG---GGAATAGCACCCACTAAGGCAAAAAGGAGAGTGGTG-----  
-----GAGAGAGAAAAAAGAGCA--GTGGGA---CTAGGAGCT-----  
GCGTTCCTTGGGTTCTTGGGAGCA--GCCGGAAGCACTATG--GGCGCAGCATCA---  
ATAACGCTGACGGTACAG---GCCAGACAA--TTGTTG---TCTGGTATAGTGCAACAGCAAAGC---  
AATTTG---CTGAGG---GCTATAGAGGCGCAACAGCATATGTTGCAACTCACGGTCTGGGGCATT  
>HM638770  
TTCTATTGCAATACATCAAACTGTTTAATGGGACATACAATGCGACAGACATGCCTAATGGGACATACAATT  
CT-----  
-----  
AATAGTACAAAAGTCATCACACTCCCATGCAGAATAAAAGCAAATTATAAACATGTGGCAGGAGGTAGGACGAG  
CAATGTATGCAAATCCCATTTGAAGGAAACATAACATGTAAATCAAAT---  
ATCACAGGAATACTATTGGTACGTGATGGAGGCAAAAGAGGACAATAAA-----  
-----  
-----  
ACAGACCCAAAAGAGACATTTCAGACCTGGAGGAGGAGATATGAGGGACAATTGGAGAAAGTGAATTATATAAAT  
ATAAAGTGGTAGAAATTAACCATTA---GGAATAGCACCCACTAAGGCAAAAAGGAGAGTGGTG-----  
-----GAGAGAGAAAAAAGAGCA--GTGGGA---ATAGGAGCT---  
-----GTGTTTCCTTGGGTTCTTGGGAGCA--GCAGGAAGCACTATG--GGCGCGGCGTCA---  
ATAACGCTGACGGTACAG---GCCAGACAA--CTGTTG---TCTGGTATAGTGCAACAGCAGAGT---  
AATTTG---CTGAGG---GCTATAGAGGCGCAACAGCATATGTTGCAACTCACGGTCTGGGGCATT  
>HM638848  
TTCTATTGCAATACATCAGGACTGTTTAATAGTACATACAATAGTACATACATGCCTAATGGTACAGAG----  
-----  
-----  
AGTAATTCAACAATCACACTCCCATGCAGAATAAAACAAATTATAAACATGTGGCAGGAGGTAGGACGAGCAG  
TGTATGCTCCTCCCATTTGAAGGACACATAACATGTAACTCAACA--  
ATCACAGGATTACTATTGACACGCGATGGAGGCAATAACACAAAT-----  
-----  
-----  
GGAACCTGAGACATTTCAGACCTGGAGGAGGAGATATGAGGGACAATTGGAGAAATGAATTATACAAATATAAAG  
TAGTAGAAATTAAGCCATTA---GGAATAGCACCCACTGGAGCAAAAAGGAGAGTGGTG-----  
-----GAGAGAGAAAAAAGAGCA--GTGGGA---ATAGGAGCC-----  
TTGTTTCCTTGGGTTCTTAGGAGCA--GCAGGAAGCACTATG--GGCGCAGCGTCA---  
ATAACGCTGACGGTACAG---GCCAGACAA--CTGCTG---TCTGGTATAGTGCAACAGCAAAGC---  
AATTTG---CTGAGA--GCTATAGAGGCGCAACAGCATATGTTGCAACTCACGGTCTGGGGCATT  
>HM638911  
TTCTATTGCAATACATCAGGCCTGTTTAATAGTACATACAATATAACAAATTCTTCAGATTTCAGAAAATTCT-  
-----  
-----  
TCAAATTCAACCATCACACTCCAATGCAGAATAAAACAAATTATAAACATGTGGCAGGAGGTAGGACGAGCAA  
TGTATGCTCCTCCCATTTGAAGGAAGCATAACCTGTAACTCAAGT---  
ATCACAGGATTACTATTGACCCGTGATGGAGGCACATCTCCAGGAGAT-----  
-----  
-----  
GCTAATAACACAGAGACATTTCAGACCTGGAGGAGGAGATATGAGGAACAATTGGAGAAAGTGAATTATATAAAT  
ATAAAGTGGTAGAAATTAAGCCATTA---GGAATAGCACCCACTAAGGCAAAAAGGAGAGTGGTG-----  
-----GAGAGAGAGAAAAGAGCA--GTGGGA---ATAGGAGCT---  
-----GTACTCCTTGGGTTCTTGGGAGCA--GCAGGAAGCACTATG--GGCGCGGCGTCA---  
ATAACGCTGACGGTACAG---GCCAGACAA--TTGTTG---TCTGGTATAGTGCAACAGCAAAGC---  
AATTTG---CTGAGA---GCTATAGAGGCGCAACAGCATATGTTGCAACTCACGGTCTGGGGCATT  
>KC894126  
TTCTATTGCAATACATCAAACTGTTTAATGGCACATACATGTCTAATAGTACGTCTAATAGTACAGGA----  
-----  
-----  
AACATCACAATCATCACAATCCCATGCAGAATAAAACAAATTATAAACATGTGGCAGGAGGTAGGACGAGCAA  
TGTATGCCCCCTCCCATTTGCAGGAAACATAACATGTAAATCAAAT---  
ATCACAGGACTACTATTGACTCGTGATGGAGGAGTCGATAATGGAAATGGA-----

-----  
-----  
ACAGAGGAGATATTCAGACCTGGAGGAGGAGATATGAGGGACAATTGGAGAAGTGAATTATATAAATATAAAG  
TGGTAGAAATTAAGCCATTA---GGAATAGCACCCACTACTGCAAAAAGGAGAGTGGTG-----  
-----GAGAGAGAGAAAAAGAGCA--GTGGGA---ATAGGAGCT-----  
GTGTTTCCTTGGGTTCTTGGGAGCA--GCAGGAAGCACTATG--GGCGCAGCGTCA---  
ATAACGCTGACGGTACAG---GCCAGACAA---TTATTG---TCTGGTATAGTGCAACAGCAAAGC---  
AATTTG---CTGAGG---GCTATAGAGGCGCAACAGCATATGTTGCAACTCACGGTCTGGGGCATT  
>HM638986  
TTCTATTGTAATACATCAAACCTATTTAATAGTACATACATGATTAATGGTACATACATGGCTAATGGTACAG  
CAAAT-----  
-----  
ATTCCAAATTCAACCATCACACTCCAATGCAGAATAAAACAAATTGTAAACATGTGGCAAGGGGTAGGACGAG  
CAATGTATGCCCCCTCCCATTCAGGAAACATAACATGTGTATCAAAT---  
ATCACAGGACTACTATTGACACGTGATGGAGGATATGGAAATAACACC-----  
-----  
-----  
AATAACACAGAAGAAATATTCAGACCTGGAGGAGGAAACATGAAGGACAATTGGAGAAGTGAATTATATAAAT  
ATAAAGTAGTAGAAATCCAGCCATTA---GGAATAGCACCCACTGAGGCAAAAAGGAGAGTGGTG-----  
-----GAGAGAGAAAAAAGAGCA--GTGGGA---CTAGGAGCT---  
-----GTGTTTCCTTGGGTTCTTGGGAGCA--GCAGGAAGCACTATG--GGCGCAGCATCA---  
ATAACGCTGACGGTACAG---GCCAGACAA---TTGTTG---TCTGGTATAGTGCAACAGCAAAGC---  
AATTTG---CTGAGG---GCTATAGAGGCGCAACAGCATATGTTGCAACTCACGGTCTGGGGCATT  
>KC894128  
TTCTATTGTAATACATCAAACCTATTTAATAGTACATATAGTACAAACATGACTAATGATACAGAAAATACT-  
-----  
-----  
TTAAATTCAACCATCATACTCCAATGCAGAATAAAACAAATTGTAAACATGTGGCAAGGAGTAGGACGAGCAA  
TGTATGCCCCCTCCCATTCAGGAAAGCATAACATGTATATCAAAT---  
ATCACAGGACTACTATTGACACGTGATGGAGGAAATGGAAATAACACCAAT-----  
-----  
-----  
AACACAGAAGAAATATTCAGGCCTGGAGGAGGAAACATGAAGGACAATTGGAGAAGTGAATTATATAAATATA  
AAGTAGTAGAAATTAAGCCATTA---GGAATAGCACCCACTGAGGCAAAAAGGAGAGTGGTG-----  
-----GAGAGAGAAAAAAGAGCA--GTGGGA---CTAGGAGCT-----  
---GTGTTTCCTTGGGTTCTTGGGAGCA--GCAGGAAGCACTATG--GGCGCAGCATCA---  
ATAACGCTGACGGTACAG---GCCAGACAA---TTGTTG---TCTGGTATAGTGCAACAGCAAAGC---  
AATTTG---CTGAGG---GCTATAGAGGCGCAACAGCACATGTTGCAACTCACGGTCTGGGGCATT  
>KC863127  
TTCTATTGCAATACATCAAACCTGTTTAATAAAACAAACCTGTTTAATAGTACAGATAATAGTACAGAAGGGG  
AAAAAGGAGTT-----  
-----  
TCAAATGCAACCATCACACTCCAATGCAGAATAAAACAAATTATAAATATGTGGCAGGGGGTAGGACGAGCAA  
TGTATGCCCCCTCCCATTCAGGAAACATAACATGTAAATCAAAT---  
ATTACAGGACTACTGTTAACACGGGATGGAGGAGATGATAATAAA-----  
-----  
-----  
ACAGAGACATTCAGACCTGGAGGAGGAGATATGAGGGACAATTGGAGAAGTGAATTATATAAATATAAAGTGG  
TAGAAATTAAGCCATTA---GGAGTAGCACCCACTAAGGCAAAAAGGAGAGTGGTG-----  
-----GAGAGAGAAAAAAGAGCA--GTGGGA---ATAGGAGCT-----  
GTGTTTCCTTGGGTTCTTGGGAGCA--GCAGGAAGCACTATG--GGCGCAGCATCA---  
ATAACGCTGACGGTACAG---GCCAGACAA---TTGTTG---TCTGGTATAGTGCAACAGCAAAGC---  
AATTTG---CTGAGG---GCTATAGAGGCGCAACAGCATATGTTGCAACTCACGGTCTGGGGCATT  
>KC894129  
TTCTATTGCAATACATCAGGCCTGTTTAATGGTACCCTTAATGGTACATATATGCCTAATAATACAGGCAGTA  
AT-----  
-----  
TCAAGTTCAACCATCACACTCCAATGCAGGATAAAACAAATTATAAACATGTGGCAGGAGGTAGGACGAGCAA  
TGTATGCCCCCTCCCATTCAGGAAACATAACATGTAGATCAAAT---  
ATCACAGGACTACTATTAACACGCGATGGAGGAAATACTACTAAT-----

-----  
-----  
AATACAGAAATATTCAGGCCTGGAGGAGGAAATATGAAGGACAATTGGAGAAGTGAATTATATAAATATAAAG  
TGGTAGAAATTAAGCCATTA---GGAATAGCACCCACTGAGGCAAAAAGGAGAGTGGTG-----  
-----GAGAGAGAGAAAAAGAGCA--GTGGGA--ATAGGAGCT-----  
GTGTTCTTTGGGTTCTTGGGAACA--GCAGGAAGCACTATG--GGCGCGGCGTCA---  
ATAACGCTGACGGTACAG---GCCAGACAA--TTGTTG---TCTGGTATAGTGCAACAGCAAAGC---  
AATTTG---CTGAGG---GCTATAGAGGCGCAACAGCATATGTTGCAACTCACGGTCTGGGGCATT  
>HM639015  
TTCTATTGCAATACATCAGGACTGTTTAATAGTATATACACATTTAATAGTACATACAATAGTAATAGTACAT  
ACAATAGTAAT-----  
TCAAGTTCATACAATAGT-----  
AATTCAAGTTCATTATCACACTCCAATGCAGAATCAAAACAAATTATAAACATGTGGCAGGGGGTAGGGCGAG  
CAATGTATGCTCCTCCCATTCAGGAAACATAACATGTATATCAAAT---  
ATCACAGGACTACTATTGGTGCGTGATGGAGGCAATGTGACAGAC-----  
-----  
-----  
ACAGAGATATTCAGACCTGGAGGAGGAGATATGAAGGACAATTGGAGAAGTGAATTATATAAATATAAAGTGG  
TAGAAATTAAGCCATTA---GGAATAGCACCCACTGGGGCAAAAAGGAGAGTGGTG-----  
-----AAGATAGAAAAAGAGCA--GTGGGA--ATAGGAGCT-----  
GTGCTCCTTGGGTTCTTGGGAGCA--GCAGGAAGCACTATG--GGCGCGGCGTCC---  
ATAACGCTGACGGTACAG---GCCAGACAA--TTGTTG---TCTGGTATAGTGCAACAGCAAAGC---  
AATTTG---CTGAGG---GCTATAGAGGCGCAACAACATATGTTGCAACTCACGGTCTGGGGCATT  
>HM639196  
TTCTATTGCAATACATCAAGACTGTTTAATAGGACATACAATTTAATGGTACAGAGAATCCTAATGGTACAG  
AG-----  
-----  
AGTAATTCAAGCTTCATCGAACTCCCATGCAGAATAAAACAAATTATAAACATGTGGCAGGAGGTAGGACGAG  
CAATGTATGCCCCCTCCCATTCAGGAAACATAACATGTAAATCAAAT---  
ATCACAGGACTACTATTGCTACGTGATGGAGGAACAGGAAGTGAGGTA-----  
-----  
-----  
CCAAATGACACAGAGATATTCAGACCTGGAGGAGGAAATATGAGGGACAACCTGGAGAAGTGAATTATATAAAT  
ATAAAGTGGTAGAAATTAACCATTG---GGAGTAGCACCCACTAAGGCAAAAAGGAGAGTGGTG-----  
-----GAGAGAGAGAAAAAGAGCA--GTG-----GGAGCTGCT---  
-----ATGTTCTTTGGGTTCTTGGGAGCA--GCAGGAAGCACTATG--GGCGCGGCGTCA---  
ATAACGCTGACGGTACAG---GCCAGACAA--CTGCTG---TCTGGTATAGTGCAACAGCAAAGT---  
AATTTG---CTGAGG---GCTATAGAGGCGCAACAGCATATGTTGCAACTCACGGTCTGGGGCATT  
>KC894132  
TTCTATTGCAATACATCAGGACTGTTTAATAGTACATACAATCCTGATCTTAATAATGCAAAGAATGAT---  
-----  
-----  
TCAAATGCAACCATCACGCTCCCATGCAGAATAAAACAAATTATAAACATGTGGCAGGAGGTAGGACGAGCAA  
TGATGCCCCCTCCCATTCAGGAAACATAACATGTAGATCAAAT---  
ATCACAGGACTACTGTTGCTACGTGATGGAGGAAAAGATCCAAAC-----  
-----  
-----  
AACACAGAGATATTCAGGCCTGGAGGAGGAAATATGAGGGACAACCTGGAGAAGTGAATTATATAAATATAAAG  
TGGTAGAAATTAAGCCATTG---GGAGTAGCACCCACTAAGGCAAAAAGGAGAGTGGTG-----  
-----GAGAGAGAGAAAAAGAGCA--GTAGGA-----GCTGCT-----  
ATGTTCTTTGGGTTCTTGGGAGCA--GCAGGAAGCACTATG--GGCGCGGCGTCA---  
ATAACGCTGACGGTACAG---GCCAGACAA--CTGCTG---TCTGGTATAGTGCAACAGCAAAGT---  
AATTTG---CTGAGA---GCTATAGAGGCGCAACAGCATATGTTGCAACTCACAGTCTGGGGCATT  
>HM215361  
TTCTATTGCAATACATCAGGCCTGTTTAATAATAATCTTACAGAAAATAAT-----  
-----  
-----  
CTTACAGGCATCATCACACTCCCATGCAGAATAAAACAAATTATAAACATGTGGCAGGGGGTAGGAAGAGCAA  
TATATGCCCCCTCCCATTCAGGAAACATAACATGTAAATCAAAT---  
ATCACAGGACTACTATTGACACGTGATGGAGGCGATAACACAAC-----

-----  
-----  
GAGACATTCAGACCTGGAGGAGGAGATATGAGGGACAATTGGAGAAGTGAATTATATAAAATATAAGGTGGTAG  
AAATTAAGCCATTA---GGAATAGCACCCACTGAGGCCAAAAGAAGAGTGGCG-----  
-----GAGAGAGAAAGAAGAGCA---GTGGGA---ATAGGAGCT-----  
GTGTTTCCTTGGGTTCTTGGGAGCA---GCAGGAAGCACTATG---GGCGCGGCGTCA---  
ATAACGCTGACGGTACAG---GCCAGACAA---CTGTTG---TCTGGTATAGTGCAACAGCAAGAC---  
AATTTG---CTGAGG---GCTATAGAGGCGCAACAGCATCTGTTGCAACTCACGGTCTGGGGCATT  
>HM215362  
TTCTATTGCAATACATCAGGACTGTTTAATAGTACATACAATGATACATACATTCCTAATGGTACAAGAAATG  
GA-----  
-----  
AATGATTCAATCATCAGACTCCCATGCAGAATAAAACAAATTATAAACATGTGGCAGGGGGTAGGACGAGCAA  
TGTATGCCCCCTCCCATTCGAGGAAACATAACATGTAGATCAAAT---  
ATCACAGGAATACTATTGACACGTGATGGAGGAGAAAAATAATGGT-----  
-----  
-----  
ACAGAGATATTCAGACCTGGAGGAGGAAATATGAAGGACAATTGGAGAAGTGAGTTATATAAAATATAAAGTGG  
TAGAAATCAAGCCATTG---GGAATAGCACCCACTGGGGCAAAAAGGAGAGTGGTG-----  
-----GAGAGAGAAAAAGAGCA---GTGGGA---ATAGGAGCT-----  
GTGTTTCCTTGGGTTCTTGGGAGCA---GCAGGAAGCACTATG---GGCGCGGCGTCA---  
ATAACGCTGACGGTACAG---GCCAGACAA---CTGTTG---TCTGGTATAGTGCAACAGCAAAGC---  
AATTTG---CTGAGA---GCTATAGAGGCGCAACAGCATATGTTGCAACTCACGGTCTGGGGCATT  
>KU341731  
TTCTATTGTAATACATCAGGACTGTTTAATAGTACATACATGCCTACATACATGCCTAATGGTACAGAAAGTA  
ATGAT-----  
-----  
TCAAAACACAACATATCATAATCCCATGCAGAATAAAGCAAATTGTAAACATGTGGCAGGAGGTAGGACGAGCAA  
TGTATGCCCCCTCCCATTCGAGGGAACATAACATGTACATCAAAT---  
ATCACAGGATTACTATTGGTACGTGATGGAGGAATAAAGGAAAAT-----  
-----  
-  
GATACAGAGAATAAGACAGAGACATTCAGACCTGAAGGAGGAAATATGAGGGACAATTGGAGAAGTGAATTAT  
ACAAATATAAAGTAGTAGAAATCAAGCCATTG---GGAATAGCACCCACTACAGCAAAAAGGAGAGTGGTG--  
-----GAGAGAGAAAAAGAGCA---GTGGGA---  
TTAGGAGCT-----GTGTTTCCTTGGGTTCTTGGGAGCA---GCCGGAAGCACTATG---  
GGCGCAGCGTCA---ATAACGCTGACGGTACAG---GCCAGACAA---TTGTTG---  
TCTGGTATAGTGCAACAGCAAAGC---AATTTG---CTGAGA---  
GCTATTGAGGCACAACAGCATCTGTTGAAACTCACGGTCTGGGGCATT  
>KU341730  
TTCTATTGTAATACATCAGGCCTGTTTAATGGTACATACATGCCTACATACATGCCTAATGGTACAGAAAGTA  
AT-----  
-----  
TCAAACCTCCACCATCACAATCCCATGCCGCATAAAACAAATTATAAACATGTGGCAAGAGGTAGGACGAGCAA  
TGTATGCCCCCTCCCATTCGAGGAAACATCACATGTACATCAAAT---  
ATTACAGGACTATTATTGGTACGTGATGGAGGAATAAAGGAAAAT-----  
-----  
-  
GATACAGAGAATAAGACAGAGATATTCAGACCTGAAGGAGGAGATATGAGGGACAATTGGAGAAGTGAATTAT  
ATAAATACAAAGTAGTAGAAATTAAGCCATTG---GGAGTAGCACCCACTGAAGCGAAAAGGAGAGTGGTG--  
-----GAGAGAGAAAAAGAGCA---GTGGGA---  
ATAGGAGCC-----GTGTTTCCTTGGGTTCTTGGGAGCA---GCAGGAAGCACTATG---  
GGCGCGGCGTCA---ATGACGCTGACGGTACAG---GCCAGACAA---TTATTG---  
TCTGGTATAGTGCAACAGCAAAGC---AATTTG---CTGAGA---  
GCTATAGAGGCGCAACAGCATCTGTTGCAACTCACGGTCTGGGGCATT  
>KU341726  
TTCTATTGCAACACATCAGGACTGTTTAATGGTACATACATGCCTACATACATGCCTAATGGTACAGAAAGTA  
AT-----  
-----  
TCAAACCTCAACTATCACAATCCCATGCAGAATAAAACAAATTGTAAACATGTGGCAGAAGGTAGGACGAGCAA

TGTATGCCCCCTCCCATTTGAAGGAAACATAACATGTAGATCAAAC ---  
 ATCACAGGAATACTCTTGGTACGTGATGGAGGAATAAAGGAAAAT -----  
 -----  
 -  
 GATACAGAGAATAAGACAGAAATATTCAGACCTGAAGGAGGAGATATGAGGGATAATTGGAGAAGTGAATTAT  
 ATAAATATAAAGTGGTAGAAATTAAGCCATTG --- GGAGTAGCACCCACTGGAGCAAGAAGGAGAGTGGTG --  
 -----GAGAGAGAAAAAAGAGCA --- ATAGGA ---  
 ATGGGAGCT -----GTGTTTCCTTGGGTTCTTGGGAGCA --- GCAGGAAGCACTATG ---  
 GGCGCGGCGTCA --- ATAACGCTGACGGTACAG --- GCCAGACAA --- CTGTTG ---  
 TCTGGTATAGTGCAACAGCAAAGC --- AATTTG --- CTGAGG ---  
 GCTATAGAGGCGCAACAACATATGTTGCAGCTCACGGTTTGGGGCATT  
 >KU341725  
 TTCTATTGTAATACAGCAGGCATGTTTAAATAGGACATACATGCCTACATACATGCCTAATGGTACAGAAAGTA  
 AT -----  
 -----  
 TCAAACCTCAACTATCACAATCCCATGCAGAATAAAGCAAATTATTAATATGTGGCAGGAGATAGGAAGGGCAA  
 TGTATGCCCCCTCCCATTTGCAGGAGAAATAACATGTAAATCAAAC ---  
 ATTACAGGAATACTATTGGTACGTGATGGAGGAATACAGGCAAAT -----  
 -----  
 -  
 GATACAGAGAATAAGACAGAGATATTCAGACCTGGAGGAGGAGATATGAGAGATAATTGGAGAAGTGAATTAT  
 ATAAATATAAAGTGGTAGAAATTAAGCCATTG --- GGAATAGCACCCACTGCAGCAAAAAGGAGAGTGGTG --  
 -----GAGAGAGAAAAAAGAGCA --- GTGGGA ---  
 CTAGGAGCT -----GTGTTTCCTTGGGTTCTTAGGAGCA --- GCAGGAAGCACTATG ---  
 GGCGCGGCGTCA --- ATAGCGCTGACGGTACAG --- GCCAGACAA --- TTGTTG ---  
 TCTGGTATAGTGCAACAGCAAAGT --- AATTTG --- CTGAGG ---  
 GCTATAGAGGCGCAACAGCATATGTTGCAACTCACGGTCTGGGGCATT  
 >KU341723  
 TTCTATTGTAATACATCAGGCCTGTTTAAATGGTACATACATGCCTACATACATGCCTAATGGTACAGAAAGTA  
 AT -----  
 -----  
 TCAAACCTCAACTATCACAATCCCATGTAGAATAAAGCAAATTATAAACATGTGGCAGGAGGTAGGACGAGCAA  
 TGTATGCCCCCTCCCATTTGCAGGAGAAATAACATGTATATCAAAT ---  
 ATCACAGGATTGCTATTGGTACATGATGGAGGAATAAAGGAAAAT -----  
 -----  
 -  
 GATACAGAGAATAAGCCAGAGATATTCAGACCTGGAGGAGGAGATATGAGGGACAATTGGAGAAGTGAATTAT  
 ACAAATATAAAGTGGTAGAAATTAGGCCATTA --- GGAATAGCACCCACTGCTGCAAAAAGAAGAGTGGTG --  
 -----GAAAGACAAAAAAGAGCA --- GTGGGA ---  
 ATGGGAGCT -----GTGATCTTTGGGTTCTTGGGAGCA --- GCAGGAAGCACTATG ---  
 GGCGCAGCGTCG --- ATAGCGCTGACGGCACAG --- GCCAGACAA --- TTGTTG ---  
 TCTGGTATAGTGCAACAGCAAAC --- AATTTG --- CTGAGG ---  
 GCTATAGAGGCGCAACAGCATCTGTTGCAACTCACGGTCTGGGGCATT  
 >KU341724  
 TTCTATTGTAATACAACAGGCTTGTTTAAATGGTACATACATGCCTACAGAAAGGCCTAATGGTACAGAAAGTA  
 AT -----  
 -----  
 ACAAACCTCAACTATCACAATCCCATGCAGAATAAAACAAATTGTAAACATGTGGCAGGAGATAGGACGAGCAA  
 TGTATGCCCCCTCCCATTTGCAGGAAACATAACATGTAGATCAAAT ---  
 ATCACAGGATTACTATTGGTACGTGATGGAGGAAAAAAGGCAAATAAT -----  
 -----  
 -----  
 ACAAATGATACAGAGACATTCAGACCTGGAGGAGGGGATATGAGGGACAATTGGAGAAGTGAATTATATAAAT  
 ACAAAGTGGTAGAAATTAAGCCATTG --- GGAGTAGCACCCACTGCAGCAAAAAGGAGAGTGGTG -----  
 -----GAGAGAGAAAAAAGAGCA --- GTGGGA --- CTGGGAGCT ---  
 -----GTGTTTCCTTGGGTTCTTGGGAGCA --- GCAGGAAGCACTATG --- GGCGCGGCGTCA ---  
 ATAACGCTGACGGTACAG --- GCCAGACAA --- TTGTTG --- TCTGGTATAGTGCAACAGCAAAGC ---  
 AATTTG --- CTGATG --- GCTATTGAGGCGCAACAGCATCTGTTGCAACTCACGGTCTGGGGCATT  
 >KJ158430

TTCTATTGTGATACAAAAAACTGTTTAATGCTACATACATGAATGATGATAC-----  
 -----  
 GCAAATAATTCAAGAAGC-----  
 AACGGCAATGACACCGTCACTCTCCCATGCAAGATAAAGCAAATTATAAACATGTGGCAGGAGGTAGGGCGAG  
 CAATGTATGCCCCCTCCCATTCGAGGAAACATAACATGTAAATCAAAT---  
 ATCACAGGACTACTATTGGTACGTGATGGAGGAAAA-----  
 -----  
 ATGAACCAAATATAGAGACAAAT-----  
 AAGACGGAGACATTCAGACCTGAAGGAGGAAATATGAAGGACAATTGGAGAAGTGAATTGTATAAATATAAAG  
 TGGTAGAAATTAACCATTG---GGAATAGCACCCACTAAAGCAAAAAGGAGAGTGGTG-----  
 -----GAGAGAGAAAAAAGAGCA---GTGGGA---CTAGGAGCT-----  
 GTGTTCCCTTGATTCTTGGGAGTA---GCAGGGAGCACTATG---GGCGCGGCGTCA---  
 ATAACGCTGACGGCACAG---GCCAGACAA---TTGCTG---TCTGGTATAGTGCAACAGCAAAGC---  
 AATTTG---CTGAAG---GCTATAGAGGCGCAACAGCATCTGTTGCAACTCACGGTCTGGGGCATT  
 >KJ158433  
 TTCTATTGTGGGGTCCTTTGCCTGTTTAATAGGACATACATGATTCCGCCCAAAAAAG-----  
 -----  
 AGTAATTCAAGCAGTAATCCA-----  
 AAATACAATAAATCAATCACAATGCACTGCAGAATAATACTAATTATCATCATGAGGGGGGAGGTGGAATTAG  
 CAACGTATTTTCTCCCATCGCAGGATGCATTACATCAGAATCAAAT---  
 ATCACAGGAATAATGTTAACCCGAAATGGGGAC-----  
 -----  
 AAAAAAAGGAATAAGGCAACA-----  
 GGGACAGAGACATTCAGACCTGGAGGAGGAGATATGAGGAACAATTGGAGAAGTGAATTATATAAATATAAAG  
 TGGTAGAAATTAAGCCATTG---GGGGTAGCACCCACTACAGCAAAAAGGAGAGTGGTG-----  
 -----GAGAGAGAAAAAAGAGCA---ATGGGA---CTAGGAGCT-----  
 TTGTTCCCTTGGGTTCTTGGGAACA---GCAGGAAGCACTATG---GGCGCGGCGTCA---  
 ATAACGCTGACGGTACAG---GCCAGACAA---TTGTTG---TCTGGTATAGTGCAACAGCAAAGT---  
 AATTTG---CTGAAA---GCTATAGAGGCGCAACAGCATCTGTTGCAACTCACGGTCTGGGGCATT  
 >KJ541840  
 TTCTATTGTAATACATCAGGCCTGTTTATTGATGCTACCAATGGTAATTCCAGG-----  
 -----  
 GAAATGGTACAAACAGT-----  
 AATTCAAGTTTAAACATCACAATCCCATGCAGAATAAAGCAAATTATAAATATGTGGCAGGAGGTAGGACGAG  
 CAATGTATGCTCCTCCCATTAAGGAAACATAACATGTAAATCAAAT---  
 ATCACAGGAATACTATTGGCACGAGATGGTGGACAA-----  
 -----  
 GAAGCAAATAGCACCGAGGGGGGG-----  
 GACACAGATACATTCAGACCTGGAGGAGGAAATATGAAGGACAATTGGAGAAGTGAATTATATAAATATAAAG  
 TAGTAGAGATTAAGCCATTG---GGAATAGCACCCACTAAAGCAAAAAGGAGAGTGGTG-----  
 -----GAGAGAGAAAAAAGAGCA---GTGGGA---ATAGGAGCT-----  
 GTGTTCCCTTGGGTTCTTGGGAGCA---GCAGGAAGCACTATG---GGCGCGGCGTCA---  
 ATAACGCTGACGGTACAG---GCCAGACAA---TTGTTG---TCTGGTATAGTGCAACAGCAAAGC---  
 AATTTG---CTGCAG---GCTATAGAGGCGCAACAGCATCTGTTGCAACTCACAGTCTGGGGCATT  
 >KJ158435  
 TTCTATTGCAATACATCAAACTGTTTAATAGCACATACATGAGTAATGGTACA-----  
 -----  
 AATAGGGGTTTAATTATT-----  
 ACTAATGATAAAAACATCACAATCCCATGCAGAATAAAACAAATTATAAACATGTGGCAGGAGGTAGGAAGAG  
 CAATGTATGCCCCCTCCCATTCGAGGAAACATAACATGCAGATCAAAT---  
 ATCACAGGAATACTATTGGTACGTGATGGAGGAGAA-----  
 -----  
 GACAAAAATGGAGACACAAATGAT-----  
 ACGACCGAGACATTTAGACCTGGAGGAGGAAATATGAGGGACAATTGGAGAAGTGAATTATATAAATATAAAG  
 TGGTAGAAATTAAGCCATTG---GGAATAGCGCCCACTGGAGCAAAAAGGAGAGTGGTG-----  
 -----GAGAGAGAAAAAAGAGCA---GTGGGA---ATAGGAGCT-----  
 GTGTTCCCTTGGGTTCTTGGGAGCA---GCAGGAAGCACTATG---GGCGCGGCGTCA---  
 ATAACGCTGACGGTACAG---GCCAGACAA---TTGTTG---TCTGGTATAGTGCAACAGCAAAGC---  
 AATTTG---CTGAGG---GCTATAGAGGCGCAACAGCATATGTTGCAACTCACAGTCTGGGGCATT  
 >KJ541849

TTCTATTGTAATACATCAAGCCTGTTTAATGGGTCTAATGATACTGCCAATATT-----  
 -----  
 GGTACCGACAATTTTACA-----  
 AACAGTAATGATAACATCACAATCCCATGCAGAATAAAGCAAATTATAAACATGTGGCAGGAGGTAGGACGAG  
 CAATGTATGCCCCCTCCCATTTGAAGGAAGTATAACATGTAACCTCAAAT---  
 ATCACAGGACTACTATTGGTGCGTGATGGAGGAGGA-----  
 -----  
 GACAATAATGATACTAATACACAC-----  
 AAACCAGAGATATTCAGACCTGGAGGAGGAAATATGAGGGACAATTGGAGAAGTGAATTATATAAATATAAAG  
 TGGTAGAAATTAAGCCATTA---GGAGTAGCACCCACTGGGGCAAAAAGGAGAGTAGTG-----  
 -----GAGAGAGGAAAAAGAGCA---GTGGGA---ATAGGAGCT-----  
 GTGTTCCCTTGGGTTCTTGGGAGCA---GCAGGAAGCACTATG---GGCGCGGCGTCA---  
 ATAACGCTGACGGCACAG---GCCAGACAA---TTGTTG---TCTGGTATAGTGCAACAGCAAAAT---  
 AATTTG---CTGAGG---GCTATAGAGGCGCAACAGCATCTGTTGCAACTCACGGTCTGGGGCATT  
 >MF373126  
 TTCTACTGCAATACATCAAACCTGATTAATAATAATATAAACATTGCTTCAGCG-----  
 -----  
 -----  
 AGCACAATACAACGCAGAATAAAACAAATTATAAACATGTGGCAGGGGGTAGGACGAGCAATGTATGCCCCCTC  
 CCATTGCAGGAAACATAACATGTAAATCGAAT---  
 ATCACAGGACTACTACTGACACGTGATGGAGGAGAAAAATAATAGG-----  
 -----  
 -----  
 ACTGAGACATTCAGACCTGGAGGAGGAGATATGAAGGACAATTGGAGAAGTGAATTATATAAATATAAGGTGG  
 TAGAAAGTAAGCCATTA---GGAATAGCACCCACAAAGGCAAAAAGGAGAGTGGTG-----  
 -----GAGAGAGAGAAACGAGCA---GTGGGA---CTAGGAGCT-----  
 GTGTTCCCTTGGGTTCTTAGGAGCA---GCAGGAAGCACTATG---GGCGCAGCATCA---  
 ATAACGCTGACGGTACAG---GCCAGACAA---TTATTG---TCTGGTATAGTGCAACAGCAAAGT---  
 AATTTG---CTGAAG---GCCATAGAGGCGCAACAGCATATGTTGCAACTCACAGTCTGGGGCATT  
 >MF373131  
 TTCTATTGCAATACATCACAACCTGTTTAATGCATCAGATATTTTTAATGATACAACT-----  
 -----  
 -----  
 AATAATACTACCAGCACAAATTCCTGCACTATATACAGGATAATGGACATAAGGCAAGAGATGTGGCCAGCAC  
 CGTATGCACCTATGATTGCCCGCACGATTACAAGAACGTCAACA---  
 ATCACTTCAATTCTCCCAAGACTTCTTCTAAGGAATGAGACAGGTAATGAGAAT-----  
 GAGACACACCTGTATGAG---ACATATGAACAA-----  
 -----  
 -----  
 CCTGGCAGAGACAATAGGAGAAATAATTGGAGGAAAGATTTACAGGCATATGAAGTGGCATCACTTGGAGCAA  
 TA---ACAATAGCGCCG---AAGAGAGATAAGAGAACAGTG-----  
 -----GAGAAAGCAGAAGGAGCA---CTAGGC---ATTTCGAGCT-----  
 GTTCTCCGTGCATTTCGTGAGACTT---CCAGGGAGCACTATG---GGCGCAGCATCA---  
 ATAACGCTGACGGTACAG---GCCAGACAA---TTACTG---TCTGGTATAGTGCAACAGCAAAAC---  
 AATTTG---GTGAGA---GCTATAGAGGCGCAACAGCACATGTTGCAACTCACAGTCTGGGGCATT  
 >MF373136  
 TTCTATTGTAATACATCAGGCCTGTTTAATGGTACATACATGCCTACATACATGCCTAATGGTACAGAAAGTA  
 AT-----  
 -----  
 TCAAACCTCAACTATCACAATCCCATGCAGAATAAAGCAAATTATAAACATGTGGCAGGAGGTAGGACGAGCAA  
 TGTATGCCCCCTCCCATTCGAGGAAACATAACATGTATATCAAAT---  
 ATCACAGGACTACTACTAGTACGTGATGGAGGACATGATGGAGAAAAAT-----  
 -----  
 -----  
 AATGACACGGAGACATTTCAGACCTGGAGGAGGAAATATGAAGGACAATTGGAGAAGTGAATTATATAAATATA  
 AAGTGGTAGAAGTTAAACCATTG---GGGATAGCACCCACTAAAGCAAAAAGGAGAGTGGTG-----  
 -----GAGAGAGAAAAAGAGCA---GTGGGA---ATAGGAGCT-----  
 ---GTGTTCCCTTGGTTTCTTGGGAGCT---GCAGGAAGCACTATG---GGCGCGGCGTCA---  
 ATGACGCTGACGGTACAG---GCCAGACAA---TTGTTG---TCTGGTATAGTGCAACAGCAAAGC---  
 AATTTG---CTGAAG---GCTATAGAGGCGCAACAGCATCTGTTGCAACTCACGGTCTGGGGCATT  
 >KP411832

TTCTATTGCGACACATCACAACCTGTTTAAATGGTACATACAAGGCTACTAGTACTACTACTACT-----  
 -----  
 -----  
 TCACATTCCACCATCACACTCCAATGCAGAAGAAAACAAATTATAAATCTGTGGCAGGAGGTAGGACGAGCAA  
 TGTATGCCCCCTCCCTTGCAGGAAATATAACATGCGAATCAGGT---  
 ATCTCAGGATTACTAGTGACACGTGATGGAGGTAATGGTAATGAACTGAT-----  
 -----  
 -----  
 AATAAGACAGAGACATTACAGACCTACAGGAGGAGATATGAGGGACAATTGGAGAAGTGAATTATATAAATATA  
 AAGTGGTAGAAATTAAACCATTA---GGAGTAGCACCAACTGGGGCAAAAAGGAGAGTGGTG-----  
 -----GAGAGAGAAAAAAGAGCA---GTGGGA---ATGGGAGCT-----  
 ---GTGATCCTTGGGTTCTTAGGAGCA---GCAGGAAGCACTATG---GGCGCAGCATCA---  
 ATAACGCTGACGGTACAG---GCCAGACAA---TTGTTG---TCTGGTATAGTGCAACAGCAAAGC---  
 AATTTG---CTGAGG---GCTATAGAGGCGCAACAGCATATGTTGCAACTCACAGTCTGGGGCATA  
 >KP411833  
 TTCTATTGCGATACATCAAAATTGTTTAAATATTACATTTAATGGTAGCCTGTCTAATAATGTT-----  
 -----  
 -----  
 CCAAAATTCAACCATCACACTCCAATGCAAAATAAAACAATTTATAAACATGTGGCAGGAGGTAGGACAAGCAA  
 TGTATGCCCCCTCCTATTGCAGGAAACATAACATGTACATCAAAT---  
 ATCACAGGACTACTATTGACACGTGATGGAGGAACAGGGAAAAATAGT-----  
 -----  
 -----  
 AAAAAATGACACAGAGACATTACACCTGGAGGAGGAGATATGAGGGACAATTGGAGAAGTGAATTATATAAAT  
 ATAAAGTGGTAGAAATTAAACCATTA---GGAATAGCACCCACTACGGCAAAAAGGAGAGTGGTG-----  
 -----GAGAAAGAAAAAAGAGCA---GTAACA---CTAGGAGCC---  
 -----TTGTTTCCTTGGGTTCTTGGGAGCA---GCCGGAAGCACTATG---GGCGCAGCATCA---  
 ATAACGCTGACGGTACAG---GCCAGACAA---TTATTG---TCTGGTATAGTGCAACAGCAGAAC---  
 AACCTG---CTGAGG---GCTATAGAGGCGCAACAGCATATGTTGCAACTCACGGTCTGGGGCATT  
 >MF373145  
 TTTTATTGCAATACAACAAACCTGTTTAAATGGCAGTTTAGAAACACCAGTTATTACATGCAGACAAAATGTTC  
 CAATGCACCAT---CTA-----CTT-----  
 -----AATGCCAAT-----  
 AAACAATTTATAAACATGTGGCAGGAGGTAGGACGAGCAATGTATGCCCCCTCCTATTAAAGGAAACATAACAT  
 GTAGATCAAAT---ATCACAGGACTGCTACTGACAAGGGATGGGGGCAACAACAGCAAC-----  
 -----  
 -----  
 GATAGCGAGACATTCAGACCTGCAGGAGGAGATATGAGGGACAATTGGAGAAGTGAATTATATAAATATAAAG  
 TGGTAGAAATTAAGCCATTA---GGAATAGCACCCACTTCTGCAAAAAGGAGAGTGGTG-----  
 -----GAGAGAGAAAAAAGAGCA---GCA-----CTAGGAGCT-----  
 ATGTTTCCTTGGGTTCTTGGGAGCA---GCTGGAAGCACTATG---GGCGCAGCATCA---  
 ATAATGCTGACGGTACAG---GCCAGACAA---TTATTG---TCTGGTATAGTGCAACAGCAAAGC---  
 AATTTG---CTGAAA---GCTATAGAGGCGCAACAGCATATGTTGCAACTCACGGTCTGGGGCATT  
 >MF373146  
 TTTTATTGTAATACATCAGCCCTGTTCAATACATCAATCCCGTTCAATAGTACTATTACTAATAGTAGT----  
 -----  
 -----  
 ACAGATTCAAACATCACACTCCCATGCAGGATAAAAACAAATTATAAACATGTGGCAAGGGGTAGGACAAGCAA  
 TGTATGCCCCCTCCCATTTGAAGGAAAAATAACATGTAGCTCAAAT---  
 ATCACAGGACTACTACTGACACGAGATGGAGGAGGAAATGAACT-----  
 -----  
 -----  
 GAAACTGAGACATTACAGCCTGTAGGAGGAGATATGAGGAACAATTGGAGGAGTGAATTATATAAATATAAAG  
 TGGTAGAAATCAAGCCATTA---GGAATAGCACCCACTGGAGCAAAAAGGAGAGTGGTG-----  
 -----GAGAGAGAAAAAAGAGCG---GCA-----CTAGGAGCT-----  
 CTGTTTCCTTGGGTTCTTGGGAGCA---GCTGGAAGCACTATG---GGCGCAGCATCA---  
 CTAACGCTGACGGTACAG---GCCAGACAA---TTGTTG---TCGGGTATAGTGCAACAGCAAAAT---  
 AATTTG---CTGAGG---GCTATAGAGGCGCAACAGCATATGTTGCAACTCACGGTCTGGGGCATT  
 >MF373154

TTCTATTGCAATCCAACAAAATTGTTTAATGGTAATAGTACTTCA-----  
-----  
-----  
ACTTCAGACCCCCATCATACTCCCATGCAGAATAAAACAAATTATAAACATGTGGCAGGGGGTAGGCCGAGCAA  
TGTATGCCCCCTCCCATTGCAGGAAAGATAACATGTAAATCAAAC---  
ATCACAGGACTACTATTGACACGTGATGGAGGACACAACAATAAC-----  
-----  
-----  
GAGACAGAAACATTTCAGACCTGAAGGAGGAAATATGAGGGACAATTGGAGAAGTGAATTATACAAATATAAAG  
TGGTGGAATTAATCCATTA---GGAATAGCACCCACTAAGGCAAAAAGGAGAGTGGTG-----  
-----GAGAGAGAAAAAAGAGCA---GTGGGA---ATAGGAGCT-----  
GTGTTCCCTTGGGTTCTTGGGAGTA---GCAGGAAGCACTATG---GGCGCAGCGTCA---  
TTGACGCTGACGGTACAG---GCCAGACAA---TTGCTG---TCTGGTATAGTGCAACAGCAAAAC---  
AATTTG---CTGAGG---GCTATAGAGGCGCAACAGCATATGTTGCAACTCACAGTCTGGGGCATT  
>KP411837  
TTCTATTGCAACACATCAAACCTATTTAATAGAAATTTTTCAGAACTGGTTAATAACAGTACTAATAGTACTA  
AT-----  
-----  
AGTACTTCAATCATCACACTCCGATGTAGAATAAAACAAATCATAAACATGTGGCAGGGGGTAGGACGAGCAA  
TGTATGCCCCCTCCCATTGAAGGAGACATAACATGTAAAGTCAAAT---  
ATCACAGGAATACTACTGACACGTGAGGGAGGAAAAAGACAGCAC-----  
-----  
-----  
CAGACAGAGATATTTCAGACCTGGAGGAGGAGATATGAGGGACAATTGGAGAAGTGAATTATATAAATACAAAG  
TGGTAGAGATTAAGCCACTA---GGAATAGCACCCACTAGAGCAAAAAGGAGAGTGGTG-----  
-----GAGAGAGAAAAAAGAGCA---GTGGGA---ATAGGAGCT-----  
GTGATCTTTGGGTTCTTGGGAGCA---GCCGGAAGCACTATG---GGCGCAGCATCA---  
ATAGTGCTGACGGCACAG---GCCAGACAA---TTATTG---TCTGGTATAGTGCAACAGCAAAAC---  
AATTTG---CTGAGG---GCCATAGAGGCGCAACAGCATATGTTGCAACTCACGGTCTGGGGCATT  
>MF373156  
TTCTATTGTGATACAACAAAATTGTTTAATGGTACATATGAGCATGAGAGTAATGCTACTTCAAATTCAAGT-  
-----  
-----  
TCAAATTCAACCATCACACTCCAATGCAGAATAAAACAAATTATAAATATGTGGCAGGGGGTAGGACGAGCAA  
TGTATGCCCCCTCCCATTGAAGGAATCATACAATGTGCATCAAAT---  
ATCACAGGACTATTATTGACACGTGATGGAGGAGAGAATAATAAT-----  
-----  
-----  
AATGACACAGAGACATTTCAGACCTGGAGGAGGAGATATGAGGGACAATTGGAGAAGTGAATTATATAAATATA  
AAGTGGTAGAAATTAAACCATTA---GGAATTGCACCCACTACTGCAAAAAGGAGAGTGGTG-----  
-----GAGAGAGAAAAAAGAGCA---GTGGGA---ATAGGAGCT-----  
---GTGTTCCCTTGGGTTCTTGGGGGCA---GCAGGAAGCACTATG---GGCGCAGCGTCA---  
ATAACGCTGACGGTACAG---GCCAGACAA---TTGTTG---TCTGGCATAGTGCAACAGCAAAGC---  
AATTTG---CTGAGG---GCTATAGAGGCGCAACAGCATATGTTGCAACTCACGGTCTGGGGCATT  
>MF373157  
TTCTATTGCAATACATCACAGCTGTTTGATTCAACACAGCTGGTTAATAGTAGTGGT-----  
-----  
-----  
AGTAATGCACACATCACAATCCCATGCAGAATAAAACAAATTATAAACCTGTGGCAAGAGGTAGGACGAGCAA  
TGTATGCCCCCTCCCATTGCAGGAAACATAACATGTAAATCAAAT---  
ATCACAGGAATACTATTGACACGTGATGGAGGAAATACCAATGAAACA-----  
-----  
-----  
AATAGCACAGAGACATTTCAGACCTGGAGGAGGAGATATGAGGGACAATTGGAGAAGTGAATTATACAAATATA  
AAGTGGTAGAAGTTAAACCATTA---GGAGTAGCACCCACTAAGGCAAAAAGGAGAGTGGTG-----  
-----GAGAAACAAAAAAGAGCA---GTGGGA---CTAGGAGCT-----  
---ATGTTCCCTTGGGATCTTGGGAGCA---GCAGGAAGCACTATG---GGCGCAGCATCA---  
ATAACGCTGACGGTACAG---GCCAGGCAA---TTGTTG---TCTGGTATAGTGCAACAGCAAAGC---  
AATTTG---CTGAGG---GCTATAGAGGCGCAACAGCATATGTTGCAACTCACAGTCTGGGGCATT  
>MF373170

TTCTACTGCAATACATCAGGCCTGTTTAAATGGTACATACATGGGTAATATGACTAATAGTACTACAAAT-----  
 -----  
 -----  
 GAAAAATGACACCATCACCCCTCCAATGCAGAATAAAACAAATGATAAACATGTGGCAGGAGGTAGGACGAGCAA  
 TGTATGCTCCTCCCATTGCAGGAAACATAGCATGTAGATCAGAA---  
 ATCACAGGACTACTATTGACACGTGATGGGGGAAATGGAAATGAAACAGAT-----  
 -----  
 -----  
 AATAACACAGAGATATTTAGACCTGGAGGAGGAGATATGAGAAACAACTGGAGAAGTGAATTATATAAAATATA  
 AAGTAGTAGAAATCAAGCCATTA---GGATTAGCACCCACTAGAGCAAGAAGGCAAGTGGTG-----  
 -----CCGAGACAAAAAAGAGCA---GCA-----ATAGGAGCT-----  
 ---ATATTCCTTGGGTTCTTGGGAGCA---GCTGGAAGCACTATG---GGCGCAGCGTCA---  
 ATGACGCTGACGGTACAG---GCCAGACAA---TTATTG---TCGGGTATAGTGCAACAGCAGAGC---  
 AATCTG---CTGAGA---GCTATAGAGGCGCAACAACATATGTTGCAACTCACAGTCTGGGGCATT  
 >MF373171  
 TTCTACTGCAATACATCAGGTCTGTTTAAATGGTACATACATGGGTAATATGACTAATGGTAATATAAAATGGA-  
 -----  
 -----  
 ACAAATGAAACCATCATCCTCCCATGCAGAATAAAACAAATGATAAACATGTGGCAGGAGGTAGGACGAGCAA  
 TGTATGCTCCTCCCATTGCAGGAAACATAGCATGTAACCTCAACA---  
 ATCACAGGATTACTATTGACACGTGATGGAGGATCTGGAAATGAT-----  
 -----  
 -----  
 AGTACCACAGAGATATTCAGACCTGGAGGAGGAGATATGAGAAACAACTGGAGAAGTGAATTATATAAAATATA  
 AAGTAGTAGAAATCAAGCCATTA---GGATTAGCACCCACTACAGCAAGAAGGAGAGTGGTG-----  
 -----CAGAGAGAAAAAAGAGCA---GCA-----ATAGGAGCT-----  
 ---ATGCTCCTTGGGTTCTTGGGAGCA---GCTGGAAGCACTATG---GGCGCAGCGTCA---  
 ATAACGCTGACGGTACAG---GCCAGACAA---TTATTG---TCGGGTATAGTGCAACAGCAGAGC---  
 AATCTG---CTGAGG---GCTATAGAGGCGCAACAACATATGTTGCAACTCACAGTCTGGGGCATT  
 >MF373177  
 TTCTATTGCGATACATCCAACCTGTTTAAATGAAACAGCATTTAATAATAGT-----  
 -----  
 -----  
 GATGGTACAAACATCACACTCCCATGCAGAATAAAACAAATTATAAACATGTGGCAGAAGGTAGGACGGGGCAA  
 TGTATGCCCCCTCCCATTAAGGACCAATAAAGTGTGACTCAAAT---  
 ATCACAGGATTACTACTAACACGAGATGGAGGCAATAGAGGCAAT-----  
 -----  
 -----  
 GGGGGAAATGACACAGAAATATTCAGACCTGCAGGAGGAGATATGAGGGACAATTGGAGAAGTGAATTATATA  
 AATATAAGGTGGTAGAAATTAAGCCATTA---GGAATAGCACCCACTGCTGCAAAAAGGAGAGTGGTG-----  
 -----GGGAGAGAAAAAAGAGCA---GCA-----  
 CTAGGAGCT-----ATGTTTCCTTGGGTTCTTGGGAGCA---GCAGGAAGCACTATG---  
 GGCGCAGCATCA---ATAACGCTGACGGTACAG---GCCAGACAA---TTATTG---  
 TCTGGTATAGTGCAACAGCAAAGC---AATTTG---CTGAGA---  
 GCTATAGAGGCGCAACAACATATGTTGCAGCTCACAGTCTGGGGCATT  
 >MF373187  
 TTCTATTGCAATACATCAGGCCTGTTCAATGATACATACTGGAACAATAATACGAAAAATAATACAAAA-----  
 -----  
 -----  
 GGAAATTCAAACCTTCACAATCCAATGCAGAATAAAACAAATTATAAACATGTGGCAGGGAGTAGGAAGAGCAA  
 TGTATGCTCCTCCCATTGCAGGAGAAATAACATGTAGATCAAAT---  
 ATCACAGGACTACTACTGACACGGGATGGAGGAAATAAGACAGGAAATGGT-----  
 -----  
 -----  
 AATGAGACAGAGACATTGAGGCCGGGAGGAGGAGATATGAAGGACAATTGGAGAAGTGAATTATATAAAATATA  
 AAGTGGTAGAAATTAGACCATTA---GGAATAGCACCCACCATGGCAAAAAGGAGAGTGGTG-----  
 -----GAGAGAGAAAAAAGAGCA---GTGGGA---ATAGGAGCT-----  
 ---GTGCTCTTTGGGTTCTTGGGAGCA---GCAGGAAGCACTATG---GGCGCAGCGTCA---  
 ATAGCGCTGACGGTACAG---GCCAGACAA---TTATTG---TCGGGCATAGTGCAACAGCAAAGC---  
 AATTTG---CTGAGG---GCTATAGAGGCGCAACAGCATATGTTGCAACTCACGGTCTGGGGCATT

>MF373193

TTCTATTGCAATACATCAGGCCTGTTTAAATAGTATATACTGGCCTAATGGTACATTTCGCATTCAATGGTAGTA  
CAAACAGT-----

-----AAC---

TCAACCAACAGCACAATCACAATCCCATGCAGAATAAAACAAATTATAAATATGTGGCAGGAGGTAGGACGAG  
CAATGTATGCCCCCTCCCATTAGGGGAAACATAACATGTACCTCAAAT---

ATCACAGGACTACTAATAATACGTGATGGAGGAAACAACGAGACA-----

-----  
AATGAGACAGAGATATTGAGACCAGGGGGAGGAAATATGAAGGACAACCTGGAGAAGTGAATTATACAAATATA  
AGGTGGTAGAAATTAAGCCATTA---GGAGTAGCACCCACTGAAGCAAAAAGGAGAGTGGTG-----

-----GGGAGAGAAAAAAGAGCA---GTGGGA---ATAGGAGCT-----  
---GTGTTCCCTTGGGTTCTTGGGATTA---GCAGGAAGCACTATG---GGCGCGGCGTCA---

ATGACGCTGACGGTACAA---GCCAGACAA---TTGCTG---TCTGGTATAGTGCAACAGCAAAGC---  
AATTTG---CTGAGG---GCTATAGAGGCGCAACAGCATATGTTGCAACTCACGGTCTGGGGCATT

>MF373199

TTCTATTGCAATACGTCTAGACTGATTAATAGTACATACAGGTCTAATAGTACTAATAGTACT-----  
-----

-----  
TCGATACATCCATCATACTCCCATGCAGAATAAAACAAATTATAAACATGTGGCAGGGGGTAGGACGAGCAA  
TGTATGCCCCCTCCCATTTGAAGGAAACATAACATGTAAATCAAAT---

ATTACAGGACTACTATTGACACGTGATGGAGGAACGGACAATGAA-----  
-----

-----  
ACAATAGAGACATTGAGACCTGGAGGAGGAGATATGAGGGACAATTGGAGAAGTGAATTATATAAAATATAAAG  
TGGTAGAAATTAACCATTA---GGAATAGCACCCACTAAGGCAAAAAGGAGAGTGGTG-----

-----GAGAGAGAAAAAAGAGCA---GTGGGA---ATAGGAGCT-----  
GTGTTCCCTTGGGTTCTTGGGAGCA---GCAGGAAGCACTATG---GGCGCAGCATCA---

CTGACGCTGACGGTACAG---GCCAGGCAA---TTGCTG---TCTGGTATAGTGCAACAGCAAAGC---  
AATTTG---CTGAGG---GCTATAGAGGCGCAACAGCATATGTTGCAACTCACGGTCTGGGGCATT

>MF373202

TTCTATTGCAATACATCAAACCTGTTTAAATAGATCAATCCTGAATGTAAGTGAACAAATGTA-----  
-----

-----  
AATGAAGCAAACATCACCCCTCCCATGCAGAATAAAACCAATTTTTAAACATGTGGCAAGGGGTAGGACGAGCAA  
TGTATGCCCCCTCCCATTTGAAGGAGAAATAACATGTAAATCAAAT---

ATCACAGGACTACTCCTGACACGTGATGGGGGTAATGGGAGAGAT-----  
-----

-----  
AAGCAAAATGAAACATTTAGACCTGCAGGAGGAGATATGAGGGACAATTGGAGAAGTGAATTATACAAATATA  
AAGTGGTAGAACTTAAGCCATTA---GGACTAGCACCCACTACGGCAAAAAGGAGAGTGGTG-----

-----GAGAGAGAAAAAAGAGCA---GTGGGA---TTTGGAGCT-----  
---CTGTTCTTTGGGTTCTTAGGAGCA---GCAGGAAGCACTATG---GGCGCAGCATCA---

ATAACGCTGACGGTACAG---GCCAGACAA---TTACTG---TTTGGTATAGTGCAACAGCAAAT---

AATTTG---CTGAAA---GCTATAGAGGCGCAACAGCATATGTTGCAACTCACAGTCTGGGGCATT

>MH705137

TTTTATTGCAATACATCACAACCTGTTTAAATGGTACAATTACA-----  
-----

-----  
ACAGATGGTTTAAACATCACAATCCCATGCAGAATAAAACAAATTATAAACATGTGGCAGGAGGTAGGACGAG  
CAATGTATGCTCCTCCCATTTGCGGAAATATAATATGTAACCTCAAGT---

ATCACAGGAATACTACTGACACGCGATGGAGGA-----  
-----

-----  
GAGAATACTACAGAGACATTCAGACCTGGAGGAGGAGATATGAGGGACAATTGGAGAAGTGAATTATATAAAT  
ATAAAGTAGTAGAAATTAAGCCATTA---GGAATAGCACCCACCAAGGCAAAAAGGAGAGTGGTG-----

-----GAGAGAGAAAAAAGAGCA---GTGACA---CTAGGAGCT---  
-----TTGTTCCCTTGGGTTCTTGGGAGCA---GCAGGAAGCACTATG---GGCGCAGCGTCA---

ATAACGCTGACGGTACAG---GCCAGACAA---TTGTTG---TCTGGTATAGTGCAACAGCAAAGC---

AATTTG---CTGAGA---GCTATAGAGGCGCAACAGCATATGTTGCAACTCACAGTCTGGGGCATT

>MG989567

TTCTATTGTAACACAGCAGGACTGTTCAATGCAACATACAATAGTACAGAAGGAGATACA-----

-----  
-----

AACATTACAAACATCACACTCCCATGCAGAATAAGACAAATTATAAATATGTGGCAGGAAGTAGGAAGAGCAA  
TATATGCCTCTCCCATTTGAAGGAAATATAGCTTGTAACCTCAAGT---

ATCACAGGACTACTATTGGTACGAGATGGAGGAAAT-----

-----  
-----

AGCTCAAATGAGACATTTAGACCTATAGGAGGAGATATGAAGAACAATTGGAGAAATGAATTATATAAATATA  
AAGTGGTAGAAATTAAGCCATTG---GGAGTAGCCCCCACTGAAGCAAGAAGGAGAGTGGTG-----

-----GAGAGAGAAAAAAGAGCA---GTAGGA---CTGGGAGCT-----

---GTGTTCCCTTGGGTTCTTGGGAGCA---GCAGGAAGCACTATG---GGCGCGGCGTCA---

ATAACGCTGACGGTACAG---GCCAGACAA---TTACTG---TCTGGTATAGTGCAACAGCAAAGT---

AATTTG---CTGAGA---GCTATAGAGGCGCAACAGCATTTGTTGCAACTCACAGTCTGGGGCATT

>HM215433

TTCTATTGCAATACATCAAACTGTTTAAATAGTACATACAATCCTAATGGAACAAAAAATGATACAAAC----

-----  
-----

TCAAGTGCATACATCATCCTTCCATGCAGAATAAAACAGATTATAAACATGTGGCAGGAGGTAGGACGAGCAA  
TGTATGCCAATCCCATTGAAGGATACATAACATGTAGATCAAAT---

ATCACAGGACTACTATTAGTACGTGATGGAAGCACAAATAGTAGT-----

-----  
-----

AACGAGACATTCAGACCTGGAGGAGGAAATATGAAGGATAATTGGAGAAGTGAATTATATAAATATAAAGTGG  
TAGAAATTAAGCCATTG---GGAATAGCACCCACTGAAGCAAAAAGGAGAGTGGTG-----

-----GAGAGAGAAAAAAGAGCA---GTGGGA---ATAGGAGCT-----

GTGTTCCCTTGGGTTCTTGGGAGCA---GCAGGAAGCACTATG---GGCGCGGCGTCA---

ATGACGCTGACGGTACAG---GCCAGACAA---TTGTTG---TCTGGTATAGTGCAACAGCAAAGC---

AATTTG---CTGAGG---GCTATAGAGGCGCAACAGCATTTGTTGCAACTCACGGTCTGGGGCATT

>HQ659585

TTCTATTGCAATACATCAGGGCTGTTTGGTAGTACATACAGGAATACA-----

-----  
-----

GAAAAATGGTACAATCATACTCCAATGCAGAATAAAGCAAATTATAAACATGTGGCAGGAGGTAGGAAGAGCAA  
TGTATGCTCCTCCCATTGCAGGAAACATAACATGTAAAGTCAAAT---

ATCACAGGATTACTATTGACGCGTGATGGAGGAACAAAT-----

-----  
-----

GAAACAGAAATATTTCAGACCTGGAGGAGGAGATATGAGGGACAATTGGAGAAGTGAATTATACAAATATAAAG  
TGGTAGAAATTAAGCCATTA---GGAATAGCACCCACTGGGGCAAAAAGGAGAGTGGTG-----

-----GAGAGAGGAAAAAAGAGCA---GTGGGA---ATAGGAGCT-----

GTGTTCCCTTGGGTTCTTGGGAGCA---GCAGGAAGCACTATG---GGCGCGGCGTCA---

ATAACGCTGACGGTACAG---GCCAGACAA---TTATTG---TCTGGCATAGTGCAACAGCAAAAC---

AATTTG---CTGAGG---GCTATAGAGGCGCAACAGCATATGTTGCAACTCACGGTCTGGGGCATT

>HQ697934

TTCTATTGCAATACATCAAACTGTTTAAATGGTATATACAACCTCTAATAATACAAGAAATGAT-----

-----  
-----

TCAAATTCAACCATCATACTCCCATGCAGAATAAAACAAATTGTAAACATGTGGCAGGAGGTAGGACGAGCAA  
TGTATGCCCCCTCCCATTGCAGGAAACATAACATGTAAATCACAA---

ATCACAGGGCTACTATTGACATGGGATGGAGGCAAAGACAATAACTCAACA-----

-----  
-----

GAGGATAACAATACAGAGATATTTCAGACCTGGAGGAGGAGATATGAGGGACAATTGGAGAAGTGAATTATATA  
AATATAAAGTGGTAGAAATTAAGCCATTA---GGAGTAGCACCCACTGGGGCAAAAAGGAGAGTGGTG-----

-----GAGAGAGAAAAAAGAGCA---GTGGGA---

ATAGGAGCT-----GTGTTCCCTTGGGTTCTTGGGAGCA---GCAGGAAGCACTATG---

GGCGCGGCGTCA---ATCACGCTGACGGTACAG---ACCAGACAA---TTATTG---

TCTGGTATAGTGCAACAGCAAAGC---AATTTG---CTGAAG---  
GCTATAGAGGCGCAACAGCATATGTTGCAGCTCACAGTCTGGGGCATT  
>HQ697983  
TTCTATTGCAATACATCAAACCTGTTTAAATAATAACATAACT-----  
-----  
-----  
TTAAACGGCACACTCACACTCCCATGCAGGATAAAACAAATTGTAAACATGTGGCAGGGGGTAGGACAAGCAA  
TGTATGCCCCCTCCCATTGAAGGAAACATAACATGTAAATCAAAC---  
ATCACAGGAATATTATTGACACGGGATGGAGGGACAAATAGGACTGAA-----  
-----  
-----  
GGGAATAATAATGAGACATTCAGACCTGGAGGAGGAGACATGAGGGACAATTGGAGAAGTGAATTATATAAAAT  
ATAAAGTAGTAGAAATTAAGCCACTA---GGATTAGCACCCACCGAGGCAAAAAGGAGAGTGGTG-----  
-----GAGAGAGAAAAAAGAGCA---GTGGGA---ATAGGAGCT---  
-----GTGTTCCCTTGGGTTCTTGGGAGCA---GCAGGAAGCACTATG---GGCGCGGCGTCA---  
ATAACGCTGACGGTACAG---GCCAGACAA---TTGTTG---TCTGGTATAGTGCAACAGCAAAGC---  
AATTTG---CTGAGG---GCTATAGAGGCGCAACAGCATATGTTGCAACTCACGGTCTGGGGCATT  
>HQ698009  
TTCTATTGCAATACATCAGGACTGTTTCTGTTTAAACAAATCAAGACCATTTACA-----  
-----  
-----  
AAAAATGGGACAATCATACTCCCATGCAGAATAAAACAAATTATAAACATGTGGCAGGGGGTAGGACGAGCAA  
TGTATGCCCCCTCCCATTGCAGGAAACATAACATGTAACTCAAAT---  
ATCACAGGACTATTATTGACACGTGATGGGGGAGGAAAAAGGTAAT-----  
-----  
-----  
AACACAGAAACATTTAGACCTGGAGGAGGAGATATGAGGGACAATTGGAGAAGTGAATTATATAAAATATAAAG  
TAGTAGAAATTAACCATTA---GGAATAGCACCCACTAAGGCAAAAAGGAGAGTGGTG-----  
-----GAGAGAGAAAAAAGAGCA---GCA-----ATAGGAGCT-----  
GTGTTCCCTTGGGTTCTTGGGAGCA---GCAGGAAGCACTATG---GGCGCGGCGTCA---  
ATAACGCTGACGGTACAG---GCCAGACAA---CTGTTG---TCTGGTATAGTGCAACAGCAAAGC---  
AATTTG---CTGAGA---GCTATAGAAGCGCAACAGCATCTGTTGCAGCTCACGGTCTGGGGCATT  
>HM215286  
TTCTATTGCAATACATTAGACCTGTTTAAATAGTACATATGATAGTACATACGGGTCTAATAGTACA-----  
-----  
-----  
GATAATTCAACCATCACACTCCACTGCAGAATAAAACAAATTATAAACATGTGGCAGGAGGTAGGACGAGCAA  
TGTATGCCCCCTCCCATTGAAGGAAACATAACATGTATATCAAAT---  
ATTACAGGACTACTATTAAACACGTGATGGAGGAGATAGAAATGATACA-----  
-----  
-----  
AATGACACAGAGACATTGACACCTGGAGGAGGAGACATGAGGGATAATTGGAGAAGTGAATTATATAAAATATA  
AAGTAGTAGAAATTAACCATTA---GGAATAGCACCCACACAGGCAAGAAGGAGAGTGGTG-----  
-----GAGAGAGAAAAAAGAGCA---GTGGGA---ATAGGAGCT-----  
---GTGTTCCCTTGGGTTCTTGGGAGCA---GCAGGAAGCACTATG---GGCGCGGCGTCA---  
ATAACGCTGACGGTACAG---GCCAGACAA---TTGTTG---TCTGGTATAGTGCAACAGCAAAGC---  
AATTTG---CTGAGG---GCCATAGAGGCGCAACAGCATATGTTGCAACTCACGGTCTGGGGCATT  
>HM215302  
TTCTATTGCAATACATCAAACCTGTTTAAATGAAAGTTTATTTAATAGTACAGAAAATAGTAGT-----  
-----  
-----  
AACAAACCCATCATCACCTCCCATGCAGAATAAAACAAATTATAAACATGTGGCAGGAGGTAGGACGAGCCA  
TATATGCCCCCTCCCATCGCAGGAAACATAACATGTAAATCAAAT---  
ATTACAGGACTAATTTTGACACGTGATGGAGGAACTCAAGTGAAACC-----  
-----  
-----  
AACCACACAGAGACATTGACACCTGGAGGAGGAAATATGAGGGACAATTGGAGAAGTGAATTATATAAAATATA  
AAGTGGTAGAAATTAAGCCATTG---GGAATAGCACCTACCAAGGCAAAAAGGAGAGTGGTG-----  
-----GAGAGAGAAAAAAGAGCA---GTGGGA---ATGGGAGCT-----  
---ATGTTCCCTTGGTCTCTTGAGTGCA---GCAGGAAGCACTATG---GGCGCGGCGTCA---

ATAACGCTGACGGTACAG---GCCAGACAA---CTGTTG---TCTGGTATAGTGCAGCAGCAAAGC---  
 AATTTG---CTGCGG---GCTATAGAGGCGCAACAGCATATGTTGCAACTCACAGTCTGGGGCATT  
 >AY253304  
 TTCTATTGCAATACATCAAACTGTTTACAGGTGAATATAATGGTACTGAGTATAATGATACAGAATCAAATT  
 CA-----  
 -----  
 ACTTCATCAATCATCACACTCCCATGTAGAATAAAACAAATTATAAACATGTGGCAGAAGGTAGGACGAGCAA  
 TGTATGCCCCCTCCTATTGAAGGAAACATAACGTGTAACCTCAAGT---  
 ATCACAGGACTACTATTGACACGTGATGGAGGAAACAATACTAAT-----  
 -----  
 -----  
 AACACAGAGACATTTCAGACCTGGAGGAGGAGATATGAGGGATAATTGGAGAAGTGAATTATATAAAATATAAAG  
 TGGTAGAAATTAACCATTA---GGAATAGCACCCACTAGTGCAAAAAGGAGAGTGGTG-----  
 -----GAGAGAGAGAAAAAGAGCA--GTGGGA--ATAGGAGCT-----  
 TTGTTCTTGGGTTCTTAGGAGCA--GCAGGAAGCACTATG--GGCGCAGCATCA---  
 ATAACGCTGACGGTACAG---GCCAGACAA---TTATTG---TCTGGTATAGTGC AACAGCAGAGC---  
 AATTTG---CTGAGG---GCCATAGAGGCGCAACAGCATATGTTGCAACTCACAGTCTGGGGCATT  
 >AY253308  
 TTCTATTGCGATACATCAGACCTGTTCAATAGAACATACGTGATGCCTAATGATACAGAAAATACAGAAGGTA  
 CG-----  
 -----  
 GCAAAATACAACCATCAGACTCCAATGCAGAATAAAACAAATTGTAAATATGTGGCAGGGGGTAGGACGAGCAA  
 TGTATGCCCCCTCCCATTTGAAGGAAATATAGAATGTATATCAAAC---  
 ATCACAGGACTACTATTGACATGGGATGGAGGAAATGAAGCTAAT-----  
 -----  
 -----  
 GACACAGAAGAGACATTTCAGACCTGGAGGAGGAGACATGAGGGATAATTGGAGAAGTGAATTATATAAAATATA  
 AAGTGGTAGAAATTAAGCCATTA---GGAATAGCACCCAGTATGGCAAAAAGGAGAGTGGTG-----  
 -----GAGAGAGAAAAAGAGCA--GTGGGA--ATAGGAGCT-----  
 ---GTGCTCCTTGGGTTCTTGGGAGCA--GCAGGAAGCACTATG--GGCGTGGCGTCA---  
 ATGACGCTGACGGTACAG---GCCAGACAA---TTGTTG---TCTGGTATAGTGC AACAGCAAAGC---  
 AATTTG---CTGAGG---GCTATAGAGGCGCAACAGCATATGTTGCAACTCACAGTCTGGGGCATT  
 >AY253310  
 TTCTATTGCAATACATCACAACCTATTTAATAGTATATATAATAATAGTACATTTAATAGTAATAGTACATCTA  
 ATAGT-----  
 -----ACA---  
 AATAAATACTGAATACATCACACTCCAATGTAGAATAAAACAAATTATAAACATGTGGCAGGAGGTAGGACGAG  
 CAATGTATGCCCCCTCCCGTTGCAGGAAACATAACATGTATATCAAAT---  
 ATTACAGGACTACTATTGACACGTGATGGAGGAAGCAGTGGAGGAAACAAT-----  
 -----  
 ----  
 AGCGAAGAGACAGAGGAGACATTTCAGACCTGGAGGAGGAGATATGAGGGACAATTGGAGAAGTGAATTATACA  
 AGTATAAAGTGGTAGAAATTAAGCCATTG--GGAATAGCGCCCACTACAGCAAAAAGGAGAGTGGTG-----  
 -----GAGAGAGAAAAAGAGCA---GTTGGA---  
 ATAGGAGCT-----GTGCTCTTTGGGTTCTTGGGAGCA---GCAGGAAGCACTATG---  
 GGCGCGGCGTCA---ATAACGCTGACGGTACAG---GCCAGACAA---GTGTTG---  
 TCTGGTATAGTGCAACAACAAAGC---AATCTG---CTGAGG---  
 GCTATAGAGGCGCAACAGCATATGTTGCAACTCACGGTCTGGGGCATT  
 >AY253312  
 TTCTATTGCAATACATCAGGGCTGTTCAATGGTACATACAATGGCACATACAATGGTACA-----  
 -----  
 -----  
 ACAAATTCAACCATCACACTCCAATGCAGAATAAAACAAATTATAAACATGTGGCAGAAGGTAGGACGAGCAA  
 TGTATGCCCCCTCCCATTTGCAGGAAACATAACATGTAACCTCAACT---  
 ATCACAGGACTAATATTGACACGGGATGGAGGAAACGGAAACGTT-----  
 -----  
 -----  
 ACAGGAAACGAAACATTTCAGACCTGCAGGAGGAGATATGAAAGACAATTGGAGAAGTGAATTATATAAAATATA  
 AAGTGGTAGAAGTTAAGCCATTA---GGAATAGCACCCACTAAGGCACAAAGAAAAGTGGTG-----  
 -----CAGAGAGAGAAAAAGAGCA--GTGGGA--ATAGGAGCT-----

---GTGTTCCCTTGGGTTCTTGGGAGCA---GCAGGAAGCACTATG---GGCGCGGCATCA---  
 ATAACGCTGACGGTACAG---GCCAGACAA---TTATTG---TCTGGTATAGTGCAACAGCAAAGC---  
 AATTTG---CTGAGA---GCTATAGAGGCGCAACAGCATATGTTGCAACTCACGGTCTGGGGCATT  
 >AY253303  
 TTCTATTGCAATACATCAAACCTTGTTTAATAAGACAATTTTGGCTAATATAACGGGTAATGGT-----  
 -----  
 -----  
 ACAAATGCAAACATCACACTCCCATGCAGGATAAAACAAATTATAAACATGTGGCAGGGGGTAGGACGAGCAA  
 TGTATGCCCCCTCCCATCGCAGGAGAAATAACATGTAAATCAAAT---  
 ATCACAGGATTACTATTGACACGTGATGGAGGAAATAATAAGACA-----  
 -----  
 -----  
 AACGAATCAGAGATATTTAGACCTATAGGAGGAGATATGAGGGACAATTGGAGAAATGAATTATATAAATATA  
 AAGTGGTAGAAATTAAACCATTA---GGAGTAGCACCCACTGGTGCAAAAAGGAGAGTGGTG-----  
 -----GAGAGAGAAAAAAGAGCA-----GCGGGAGTT-----  
 ---GTGCTCCTTGGGTTCTTGGGAGCA---GCAGGAAGCACTATG---GGCGCAGCATCA---  
 ATGTGGCTGACGGTACAG---GCCAGACAA---TTACTG---TCTGGTATAGTGCAACAGCAAAGT---  
 AATTTG---CTGAGG---GCTATAGAGGCGCAACAGCATCTGTTGCAACTCACAGTCTGGGGCATT  
 >AY253313  
 TTCTATTGCAATACATCAATACTGTTTAATAATAGCATGCTTAATGGTACAGAAGGTACTCCAAAT-----  
 -----  
 -----  
 TCAACTGAAGATATCACAATCCCATGTAGAATAAAACAAATTATAAACATGTGGCAGGGGGTAGGACGAGCAA  
 TGTATGCCCCCTCCCATTCAGGAAGCATAACATGTAAGTCAAAT---  
 ATCACAGGACTATTATTGACACGTGATGGAGGAATAAATGAGGAT-----  
 -----  
 -----  
 AATACAACAGAGATATTCAGGCCTGGAGGAGGAGATATGAGGGATAATTGGAGAAGTGAATTATATAAATATA  
 AAGTGGTAGAAATTAAAGCCATTA---GGAGTAGTACCCACTAATGCAAAAAGGAGAGTGGTG-----  
 -----GAGAGAGAAAAAAGAGCA---GTGGGA---ATAGGAGCT-----  
 ---GTGTTCCCTTGGGTTCTTAGGAGCA---GCAGGAAGCACTATG---GGCGCAGCATCA---  
 ATAACGCTGACGGTACAG---GCCAGACAA---TTATTG---TCTGGTATAGTGCAACAGCAAAGC---  
 AATTTG---CTGAGG---GCTATAGAGGCGCAACAGCATATGTTGCAACTCACAGTCTGGGGCATT  
 >AY253322  
 TTCTATTGCAACACATCAGGTCTGTTTAATAGTACATACAACCTCTAATGGTACCAATAGTACA-----  
 -----  
 -----  
 ACAAACCTCAACCATCACACTTCCATGCAGAATAAAACAAATTATAAACATGTGGCAGGGGGTAGGACGAGCAA  
 TGTATGCCAATCCCATTCAGGAAACATAACATGTAAATCAAAT---  
 ATCACAGGACTATTATTGGTACGTGATGGAGGTACAGATAATGAA-----  
 -----  
 -----  
 ACAGAAACATTTCAGACCTGGAGGAGGAAATATGAGGGACAATTGGAGAAGTGAATTATATAAATATAAAGTGG  
 TAGAAATTAGGCCATTG---GGAATAGCACCCACTAAGGCAAAAAGGAGAGTGGTG-----  
 -----GAGAGAGAAAAAAGAGCA---GTGGGA---ATAGGAGCT-----  
 GTGCTCCTTGGGTTCTTGGGAGCA---GCAGGAAGCACTATG---GGCGCGGCGTCA---  
 ATGACGCTGACGGTACAG---GCCAGACAA---CTGTTG---TCTGGTATAGTGCAACAGCAAAGC---  
 AATTTG---CTGAGA---GCTATAGAGGCGCAACAGCATCTGTTGCAACTCACGGTCTGGGGCATT  
 >MK501601  
 TTCTATTGCAACACATCAGGTCTGTTTAATAGTACATACAACCTCTGCATACAAGTCTAATGATACA-----  
 -----  
 -----  
 ACAAACCTCAACCATCACACTTCCATGCAGAATAAAACAAATTGTAAACATGTGGCAGGAGGTAGGACGAGCAA  
 TGTATGCCCCCTCCCATTCAGGAAACATAACATGTAAATCAAAT---  
 ATCACAGGATTATTATTAGTGCGTGATGGAGGAGGTGAAAGTAAT-----  
 -----  
 -----  
 GAAACAGAAATATTCAGACCTGGAGGAGGAGATATGAGGGACAATTGGAGAAGTGAATTATATAAATACAAAG  
 TGGTAGAAGTTAAACCATTG---GGAATAGCACCCACTGAAGCAAAAAGGAGAGTGGTG-----  
 -----AAGAGAGATAAAAAGAGCA---GTAGGA---ATAGGAGCT-----

ATGTTTCCTTGGGTTCTTGGGAGCA---GCAGGAAGCACTATG---GGCGCGGCGTCA---  
 ATGACGCTGACGGTACAG---GCCAGACAA---GTGCTG---TCTGGTATAGTGCAACAGCAAAGC---  
 AATTTG---CTGAGG---GCTATAGAGGCGCAACAGCATATGTTGCAACTCACAGTCTGGGGCATT  
 >AY734550  
 TTCTATTGCAATACATCAAGCCTGTTTAATGATAGCCTGGTTAATGATACAGAAAGTGAGAATAACACAAAAA  
 GT-----  
 -----  
 GATAATGGTACAATCACACTCCCATGCAGAATAAAACAAATTATAAACCTGTGGCAGGAAGTAGGACGAGCAA  
 TGTATGCCCCCTCCCATTCAGGAAACATAACATGTAAATCAAAT---  
 ATCACAGGATTACTCTTGACACGTGATGGAGGAGACAAAAATAACACA-----  
 -----  
 -----  
 AACAAATACCGCAGAGATATTCAGACCTGGAGGAGGAAAATATGAGGGACAACCTGGAGAAGTGAATTATATAAAAT  
 ATAAAGTGGTAGAAATTAACCATTG---GGAATAGCACCCACTGCGGCAAAAAGGAGAGTGGTG-----  
 -----  
 -----GAGAGAGAAAAAGAGCA---GTAGGA---ATAGGAGCT---  
 -----GTGTTTCCTTGGGTTCTTGGGAGCA---GCTGGAAGCACTATG---GGCGCAGCGTCG---  
 ATAACGCTGACGGTACAG---GCCAGACAA---CTGTTG---TCTGGTATAGTGCAACAGCAAAGC---  
 AATTTG---CTGAGG---GCTATAGAGGCGCAACAGCATATGTTGCAACTCACGGTCTGGGGCATT  
 >AY734551  
 TTCTATTGCAATACAACAATACTGTTTAATAGGACATACAGCCCTAATGGCACAGACAATAATGGCACATACA  
 AT-----  
 -----  
 AATAGTGATTGACCATCACAAATCCCATGCAGAATAAAGCAAATTATAAACATGTGGCAGGAGGTAGGACGAG  
 CAATGTATGCCCCCTCCCATTCAGGAAACATAACATGTAAATCAAGT---  
 ATCACAGGACTAATATTGACACGTGATGGTGGTAATAAAAAATGATACA-----  
 -----  
 -----  
 AATGATACAGAGATATTTAGACCTGAAGGAGGAAAATATGAAAGACAATTGGAGAAGTGAATTGTATAAATATA  
 AGGTGGTAGAAATTAAGCCATTA---GGAATAGCACCCACTAATGCAAAAAGGAGAGTGGTG-----  
 -----  
 -----GAGAGAGAGAAAAAGAGCA--GTGGGA---ATAGGAGCT-----  
 ---GTGTTTCCTTGGGTTCTTGGGAGCA--GCAGGAAGCACTATG---GGCGCAGCATCA---  
 ATAACGCTGACGGTACAG---GCCAGACAA---TTATTG---TCTGGTATAGTGCAACAGCAAAGC---  
 AATTTG---CTGAGG---GCTATAGAGGCGCAACAACATATGTTGCAACTCACGGTCTGGGGCATT  
 >AY734558  
 TTCTACTGCAATACATCAAAGCTGTTTAATAGTCTTAATGATACAGAC-----  
 -----  
 -----  
 AATAGTACAGACATCACACTCCCATGCAGAATAAAACAAATTATAAACATGTGGCAGGGGGTAGGACGAGCAA  
 TGTATGCCCCCTCCCATTCAGGAAACATAACATGTAAATCAAAT---  
 ATCACAGGACTACTATTGACACGAGATGGAGGAACAAACAATACA-----  
 -----  
 -----  
 GATACAGAGATATTCAGGCCTGGAGGAGGAGATATGAGGGACAATTGGAGAAGTGAATTATATAAATATAAAG  
 TGGTAGAAATTAAGCCATTA---GGAATAGCACCAACCACGGGCAAAAAGGAGAGTGGTG-----  
 -----  
 -----GAGAGAGAGAAAAAGAGCA---GTGGGA---GTAGGAGCT-----  
 GTGTTTCCTTGGGTTTTTATAGGAGCA---GCCGGAAGCACTATG---GGCGCAGCATCA---  
 ATAACGCTGACGGTACAG---GCCAGACAA---TTATTG---TCTGGTATAGTGCAACAGCAAAGC---  
 AATTTG---CTGAGG---GCTATAGAGGCGCAACAGCATATGTTGCAACTCACAGTCTGGGGCATT  
 >AY734559  
 TTCTATTGCAATACATCAGGCCTGTTCAATAGTACGTTTAATGAGGGATATAATAATACAAGAAATACTTCAG  
 AAAAAACA-----  
 -----AAT---  
 AATACTTCAGAAACCATCACACTCCAATGCAGAATAAAACAAATTTATAAACATGTGGCAGGGGGTAGGACGAG  
 CAATGTATGCCCCCTCCCATTCAGGAAACATAACATGTAAATCAAAT---  
 ATCACAGGATTATTATTAACACGTGATGGAGGAGAAGGAAACGGTACAGAT-----  
 -----  
 -----  
 ACAAATACAACAGAGATATTCAGACCACAAGGAGGAAAATATGAAGGACAATTGGAGAAGTGAATTATATAAAAT  
 ATAAAGTAGTAGAAATTAGACCATTA---GGAATAGCACCTACTAATTCAAAAAGGAGAGTGGTG-----  
 -----  
 -----CAGAGAGAGAAAAAGAGCA---GTGGGAGTAATGGGAGCT---

-----ATGTTTCCTTGGGTTCTTGGGAGCT---GCAGGAAGCACTATG---GGCGCGGCATCA---  
 ATAACGCTGACGGTACAG---GCCAGACAA---TTATTG---TCTGGTATAGTGCAACAGCAAAAT---  
 AATTTG---CTGAAA---GCTATAGAAGCGCAACAGCATATGTTGCAACTCACGGTCTGGGGCATT  
 >AY734560  
 TTCTATTGTAATACATCAAACCTGTTTAATAATTCACTGTTTAATGATACTTCA-----  
 -----  
 -----  
 AATGATACAGTCATCACACTCCCCTGCAGAATAAAACAAATTATAAACATGTGGCAGGAGGTAGGACGAGCCA  
 TATATGCCCCCTCCATTGCTGGAAATATAACATGTAGATCAAAT---  
 ATCACAGGACTATTGTTGACACGTGATGGAGGAGTTAATGCCAGT-----  
 -----  
 -----  
 AAAGAAACATTTCAGACCTGGAGGAGGAGATATGAGGGATAATTGGAGAAGTGAATTATATAAATATAAAGTAG  
 TAGAAATTAATCCATTA---GGAGTAGCACCAACTAAGGCCAAAAGGAGAGTGGTG-----  
 -----GAGAGAGAGAAAAGAGCA---GCGGGA---ATAGGAGCT-----  
 TTGATCCTTGGGTTCTTAGGAGCA---GCAGGAAGCACTATG---GGCGCAGCATCA---  
 ATAACGCTGACGGTACAG---GCCAGACAA---TTGTTG---TCTGGTATAGTGCAACAGCAGAGC---  
 AATTTG---CTGAGG---GCTATAGAGGCGCAACAGCATATGTTGCAACTCACAGTCTGGGGCATT  
 >KX907356  
 TTCTATTGTAATACAACACAACCTATTTAATAATATTAGTATAGGAAGATTCAATACTAGTATAGAA-----  
 -----  
 -----  
 AATGATACAAACATCATACTCCCATGCAGAATAAAACAAATTATAAATATGTGGCAGGAGGTAGGACGAGCAA  
 TGTATGCCCCCTCCTATTGAAGGGAACATAACATGCAGATCAAAC---  
 ATCACAGGAATACTATTAACACGTGATGGAGGCAATGGAGGCGCT-----  
 -----  
 -----  
 GACAATTCAACAGAGACATTTCAGACCTGGAGGAGGAAATATGAAGGACAATTGGAGAAGTGAATTATATAAAT  
 ATAAAGTGGTAGAAATCAAGCCATTA---GGAATAGCACCCACTAGGGCAAAAAGGAGAGTGGTG-----  
 -----GAGAGAGAAAAAAGAGCA---GTGGGA---ATAGGAGCT---  
 -----GTGTTTCCTTGGGTTCTTGGGAGCA---GCTGGAAGCACTATG---GGCGCGGCGTCA---  
 ATAACGCTGACGGTACAG---GCCAGACAA---CTGTTG---TCTGGTATAGTGCAACAGCAAAGC---  
 AATTTG---CTGAGG---GCTATAGAGGCACAGCAACATATGTTGCAGCTCACTGTCTGGGGCATT  
 >KX907388  
 TTCTATTGCAATACATCAAACTGTTTAATGATACATACAATGGGACAGAA-----  
 -----  
 -----  
 AGTAACTCAACCATCACACTCCCATGCAGAATAAAACAAATTATAAACATGTGGCAGGGGGTAGGACGAGCAA  
 TGTATGCCCCCTCCATTGCAGGAAACATAACATGTAAATCAATG---  
 ATCACAGGACTACTATTGGTACGGGATGGGGGCACGGGTAAAAAT-----  
 -----  
 -  
 GACACAGAAAATGCCACAGAAACATTTCAGACCTGAAGGAGGAGATATGAGGGATAATTGGAGAAGTGAATTAT  
 ATAAATATAAAGTGGTAGAAATTAAGCCATTG---GGAATAGCACCCACTGAGGCAAAAAGGAGAGTGGTG--  
 -----GAGAGAGAAAAAAGAGCA---GTGGGA---  
 ATAGGAGCT-----GTGTTTCCTTGGGTTCTTGGGAGCA---GCAGGAAGCACTATG---  
 GGCGCAGCGTCA---ATAACGCTGACGGTACAG---GCCAGACAA---CTGTTG---  
 TCTGGTATAGTGCAACAGCAAAAC---AATTTG---CTGAGG---  
 GCTATAGAGGCGCAACAGCATATGTTGCAACTCACAGTCTGGGGCATT  
 >KX907407  
 TTCTATTGCAACACATCAAACTGTTTAATAGTACATACATGCCTGGGTACTGGCCTAATGCTACAGAAAGAA  
 AT-----  
 -----  
 TCAACCTCAAATATCACACTCCATTGCAGAATAAAACAAATTATAAACATGTGGCAGGGAGTAGGACGGGCAA  
 TGTATGCCCCCTCCATTAGAGGAAACATAACATGTATATCAAAT---  
 ATCACAGGACTACTATTGACATGGGATGGAGATAAAACAAGCAAT-----  
 -----  
 -----  
 GACCCAGACACAGACGTATTCAGACCTGGAGGAGGAAATATGAAGGATAATTGGAGAAGTGAATTATATAAAT  
 ATAAAGTGGTAGAAATTAAGCCATTA---GGAATAGCACCCACCAGGGCAAAAAGGAGAGTGGTG-----

-----GAGAGAGAAAAAGAGCA---GTGGGA---ATAGGAGCT---  
 -----GTGCTCCTTGGGTTCTTGGGAGCA---GCCGGAAGCACTATG---GGCGTCGCGTCA---  
 ATAACGCTGACGGTACAG---GCCAGACAA---TTATTG---TCCGGTATAGTGCAACAGCAAAGT---  
 AATTTG---CTGAGG---GCTATAGAGGCGCAACAGCATATGTTGCAACTCACAGTCTGGGGCATT  
 >KX907424  
 TTCTATTGCAATACATCAAAATTGTTTAATAATAATGATACAGAA-----  
 -----  
 -----  
 AATAATTTAACCATCACACTCCCATGCAGAATAAAGCAAATTGTAAACATGTGGCAGGGGGTAGGACGAGCAA  
 TGTATGCCCCCTCCCATTTGAAGGAAACATAACATGTAAATCAAAT---  
 ATCACAGGATTATTATTGACACGTGATGGAGGCAATGGCACGGAG-----  
 -----  
 -----  
 AGGAATGAGACATTTCAGACCTGGAGGAGGAGATATGAGGAACAATTGGAGAAGTGAATTATATAAATATAAAG  
 TGGTAGAAATTAACCATTG---GGAATAGCACCCACTGGGGCAAAAAGGAGAGTGGTG-----  
 -----GAGAGAGAAAAAGAGAGCA---GTGGGC---ATGGGAGCT-----  
 GTGTTTCCTTGGGTTCTTGGGAGCA---GCAGGAAGCACTATG---GGCGCGGCGTCA---  
 CTAACGCTGACGGTACAA---GCCAGACAA---GTGTTG---TCTGGTATAGTGCAACAGCAAAGC---  
 AATTTG---CTGAGA---GCTATAGAGGCGCAACAACATATGTTGCAACTCACAGTTTGGGGCATT  
 >KX907426  
 TTTTATTGCAATACATCAAGCCTGTTTAAGGGTACATTTAATGGTACGGTTACAGATACCTCAAATTTAACAG  
 AA-----  
 -----  
 ATCACACTCCACTGTAGAATAAAACAAATTGTAAACATGTGGCAAGGAGTAGGACGAGCAATGTATGCCCCCTC  
 CCATTGCAGGAAATATAACTTGTAAATCAAAT---  
 ATCACAGGATTACTATTGACACGTGATGGAGGATGTGATAACAAC-----  
 -----  
 -----  
 GGTACAGAGATATTCAGGCCTGGAGGAGGAGATATGAGGGATAATTGGAGAAGTGAGTTATACAAATATAAAG  
 TAGTAGAAATTAAGCCATTA---GGAATAGCACCCACTAAGGCAAAAAGGAGAGTGGTG-----  
 -----GAGAGAGAAAAAGAGAGCA---GTGGGA---ATAGGAGCT-----  
 GTGTTTCCTTGGGTTCTTAGGAGCA---GCAGGAAGCACTATG---GGCGCAGCATCA---  
 ATAACGCTGACGGTACAG---GCCAGACAA---TTATTG---TCTGGTATAGTGCAACAGCAAAAC---  
 AATTTG---CTGAGG---GCTATAGAGGCGCAACAGCATATGTTGCAACTCACAGTCTGGGGCATT  
 >KX907345  
 TTCTATTGCAATACATCAAACTGGTTAATGAGAATGAGACAGACCCTAATAGAGCTAAT-----  
 -----  
 -----  
 AGTAGTGAGCCAATCACACTCCAATGCAGAATAAAACAAATTATAAACATGTGGCAGGGGGTAGGACGAGCAA  
 TGTATGCCCCCTCCCATTTGAAGGAAACATAACATGTAGGTCAAAT---  
 ATCACAGGACTGCTATTGACACGCGACGGAGGTGCCAATAGTACC-----  
 -----  
 -----  
 ACAAATGAAACATTTCAGATTTGAAGGAGGAAATATGAAGGACAATTGGAGAAGTGAATTATATAAATATAAGG  
 TGGTAGAGATTAAGCCATTA---GGAATAGCACCCACTAAGGCAAAAAGGAGAGTGGTG-----  
 -----GAGAGAGAAAAAGAGAGCA---GTGGGA---ATAGGAGCT-----  
 GTGTTTCCTTGGGTTCTTGGGAGCA---GCAGGAAGCACTATG---GGCGCAGCATCA---  
 ATAACGCTGACGGTACAG---GCCAGACAA---TTGTTG---TCTGGTATAGTGCAACAGCAAAGC---  
 AATTTG---CTGAGG---GCCATAGAGGCGCAACAGCACATGTTGCAACTCACGGTCTGGGGCATT  
 >KX907384  
 TTCTATTGTAACACATCACAACATTTAATGGTACCAGTACAGGATTTAGTAATAAGAGTACA-----  
 -----  
 -----  
 GGAAATGAAACCTTCACACTCCCATGCAGAATAAAACAAATTATAAACATGTGGCAGGAGGTAGGACGAGCAA  
 TGTATGCCCCCTCCCATTTGCAGGAAACATAACATGTGTATCAAAT---  
 ATCACAGGACTACTATTGACACGCGATGGAGGAGATAATAATACT-----  
 -----  
 -----  
 AGAACTGAGACATTTCAGACCTGGAGGAGGAGATATGAGGGACAATTGGAGAAGTGAATTATATAAATATAAAG  
 TAGTAGAAGTTAAACCACTA---GGAGTAGCACCCCTCTGAGGCAAGAAGGAGAGTGGTG-----

-----GAGAGAGAAAAAAGAGCA---GTGGGA---CTAGGAGCT-----  
GTGTTTCCTTGGGTTCTTGGGAGCA---GCCGGAAGCACTATG---GGCGCGGCGTCG---  
ATAACGCTGACGGTACAG---GCCAGACAA---CTGTTG---TCTGGTATAGTGCAACAGCAAAGC---  
AATTTG---CTGAGA---GCTATAGAAGCACAGCAGCATATGTTGCAGCTCACGGTCTGGGGCATT  
>KX907392  
TTCTATTGCAATACATCAAAACTGTTTAATGATACAACTTCACCACGTCT-----  
-----  
-----  
GATGATGAAAACATCACACTCCCATGCAGAATAAAACAAATTATAAACATGTGGCAGGAGGTAGGACGAGCAA  
TGTATGCCCCCTCCCATTCAGGAAACATAACATGCACATCAAAA---  
ATCACAGGACTACTATTGACACGTGATGGGGGAACCACTGGCCCC-----  
-----  
-----  
AATAATACCGAGACATTTCAGACCTATAGGAGGAAATATGAAGGACAATTGGAGAAGTGAATTATACAAATATA  
AGGTGGTGGAAATTAAGCCATTA---GGAGTAGCACCCACTAAGGCAAAAAGGAGAGTGGTG-----  
-----GAGAGAGAAAAAAGAGCA---GTGGGA---ATAGGAGCT-----  
---ATGTTTCCTTGGGTTCTTGGGGGCA---GCAGGAAGCACTATG---GGCGCGGCGTCA---  
ATAACGCTGACGGTACAG---GCCAGACAA---GTGTTG---TCTGGTATAGTGCAACAGCAAAGC---  
AATTTG---CTGAGG---GCTATAGAGGCGCAACAGAATATGTTGCAACTCACGGTCTGGGGCATT  
>KX907394  
TTCTATTGCAATACATCAAAACTGTTTAATGGTACATACAGGTCTAATAGTACAGAAAAGAAT-----  
-----  
-----  
TCAAATGCAAACATCACACTCCCATGCAGAATAAAACAAATTGTAAACATGTGGCAGGAGGTAGGGCGAGCAA  
TGTATGCCCCCTCCCATTCAGGAAACATAACATGTAAATCAAAT---  
ATCACAGGACTACTATTGACACGTGATGGGGGAAGGATAATAATACT-----  
-----  
-----  
AATACCACAGAGACATTTCAGACCAGGAGGAGGAGATATGAGGGACAATTGGAGAAGTGAATTATATAAATATA  
AAGTAGTAGAAGTTAATCCACTA---GGAATAGCACCCACTACTGCAAAAAGGAGAGTGGTG-----  
-----GAGAGAGAGAAAAAGAGCA---GTGGGA---ATAGGAGCT-----  
---TTGTTTCCTTGGGTTCTTGGGAGCA---GCAGGAAGCACTATG---GGCGCGGCGTCA---  
ATGGCGCTGACGGTACAG---GCCAGACAA---TTATTG---TCTGGTATAGTGCAACAGCAAAGC---  
AATTTG---CTGAGA---GCTATAGAGGCGCAACAACATATGTTGCAACTCACAGTCTGGGGCATT  
>KX907395  
TTCTATTGCAATACATCAAAACTGTTTAATGGTACAGAAAAG-----  
-----  
-----  
AATTCAAATGCAAACATCACACTCCCATGCAGAATAAAACAAATTGTAAACATGTGGCAGGGGGTAGGGCGAG  
CAATGTATGCCCCCTCCCATTCAGGAAACCTAACATGTAAATCAAAA---  
ATCACAGGACTACTATTGACACGTGATGGGGGACCAAATGAGAAT-----  
-----  
-----  
GACACAGAGATATTTCAGACCTGGAGGAGGAGACATGAGGGACAATTGGAGAAGTGAATTATATAAATATAAAG  
TAGTAGAAATTAATCCATTA---GGAGTAGCACCCACTACTGCAAAAAGGAGAGTGGTG-----  
-----GAGAGAGAGAAAAAGAGCA---GTGGGA---GTAGGAGCT-----  
ATGTTTCCTTGGGTTCTTGGGAGCA---GCAGGAAGCACTATG---GGCGCGGCGTCA---  
CTAACGCTGACGGTACAG---GCCAGACAA---TTATTG---TCTGGTATAGTGCAACAGCAAAGC---  
AATTTG---CTGAGG---GCCATAGAGGCGCAACAACATATGTTGCAACTCACAGTCTGGGGCATT  
>KX907405  
TTCTATTGCAATACATCACAACCTGTTTAATGAGACACACACTAATGGT-----  
-----  
-----  
ACCAATAGTACCATCATACTCCCATGCAGAATAAAACAAATTATAAACATGTGGCAGGAGGTAGGACGAGCAA  
TGTATGCCCCCTCCCATTCAGGGAACATAACATGTACATCAAAT---  
ATTACAGGACTATTATTGGAACGGGATGGAGGCAAGGACAATAAT-----  
-----  
-----  
ATGACTGAGATATTTCAGACCTGGAGGAGGAGATATGAGGGATAATTGGAGAAGTGAACCTATATAAATATAAAG  
TGGTAGAAATTAACCATTG---GGAGTAGCACCCACTAAGGCAAAAAGGAGAGTGGTG-----

-----GAGAGAGAAAAAGAGCA---GCA-----CTAGGAGCT-----  
GTGTTCTTGGGTTCTTGGGGGCA---GCAGGAAGCACTATG---GGCGCGGCGTCA---  
ATAACGCTGACGGTACAG---GCCAGACAG---TTGTTG---TCTGGTATAGTGCAGCAGCAAAGC---  
AATTTG---CTAAGA---GCTATAGAGGCGCAACAACATCTGTTGCAACTCACGGTTTGGGGCATT  
>KX907413  
TTCTATTGCAATACATCAGCACTGTTTAATAGTACATATAATGAAACATATAGATATAATGCTACAAACGAT-  
-----  
-----  
ACAAATCCAACCATCACACTCAAATGCAGAATAAAGCAAATTATAAACATGTGGCAGGAGGTAGGACGAGCAA  
TGTATGCCCCCTCCATTGCAGGAAACATAACGTGTAGATCAAAT---  
ATCACAGGGATACTATTGACACGTGATGGAGGACCTAACAGTACT-----  
-----  
-----  
AATGAAACATTGAGACCTGAAGGAGGAGATATGAGGAATAATTGGAGAAGTGAAGTATATAAATATAAAGTGG  
TAGAAATTAAACCATTG---GGAATAGCACCCACCAAGGCAAAAAGGAGAGTGGTG-----  
-----GAGAGAGAAAAAGAGCA---GTCGGA---ATAGGAGCC-----  
TTGTTCTTGGTTTCTTGGGAGCA---GCAGGAAGCACTATG---GGCGCAGCGTCA---  
ATAACGCTGACGGTACAG---GCCAGACAA---TTGTTG---TCTGGTATAGTGCAACAGCAAAGC---  
AATTTG---CTGAGG---GCTATAGAGGCGCAACAGCATATGTTGCAACTCACTGTCTGGGGCATT  
>KX907422  
TTCTATTGCAACACATCACAACCTGTTTAATAAACTGTTTAATGGTACTAATGATACAGAAAGTACTAAT----  
-----  
-----  
TCAACTAAGAATATCACACTCCAATGTAAATAAAACAAATTATAAATATGTGGCAGGGGGTAGGACGAGCAA  
TATATGCTCCTCCATTGAAGGAAACATCACATGTAAATCAAAC---  
ATCACAGGACTAATATTAACACGAGATGGAGGAAGAAATAATAACACT-----  
-----  
-----  
AACATAACAGAGATATTGAGACCTGGAGGAGGAGATATGAGGGACAATTGGAGAAGTGAATTATATAAATATA  
AAGTAGTAGAAATTAAGCCATTA---GGAATAGCACCCACTGGAGCAAAAAGGAGAGTGGTG-----  
-----GAGAGAGAAAAAGAGCA---GTGGGA---ATGGGAGCT-----  
---GTGCTCCTTGGGTTCTTAGGAGCA---GCAGGAAGCACTATG---GGCGCGGCGTCA---  
ATAACGCTGACGGTACAG---GCCAGACAA---CTGCTG---TCTGGTATAGTGCAACAGCAAGAC---  
AACTTG---CTGAGG---GCTATAGAGGCGCAACAGCATATGTTGCAACTCACAGTCTGGGGCATT  
>KX907338  
TTCTATTGCAATACATCAGGTCTGTTTAATGGTACAAATTCAACTAAT-----  
-----  
-----  
CCAAATGCAACTATCATACTCCCATGCAGAATAAAACAAATTATTAATATGTGGCAGGAAGTAGGACGAGCAA  
TATATGCCCCCTCCATTGCAGGAAGCATATCATGCACATCAAAT---  
ATTACAGGACTACTATTGACACGTGATGGAGGAAATAACACAAAC-----  
-----  
-----  
AATGAGACATTGAGACCCGAGGAGGAGATATGAGAAATAATTGGAGAAGTGAATTATATAAATATAAAGTGG  
TAGAAATTAAACCATTA---GGACTAGCACCCACTAAGGCAAAAAGGAGAGTGGTG-----  
-----GAGAGAGAAAAAGAGGA-----ATAGGAGCT-----  
GTAATCCTTGGGTTCTTGGGAGCT---GCAGGAAGCACTATG---GGCGCGGCGTCA---  
ATAGCGCTGACGGTACAG---GCCAGACAG---CTATTG---TCTGGTATAGTGCAACAGCAAAGC---  
AATTTG---CTGAGG---GCTATAGAGGCGCAACAGCATATGTTGCAACTCACAGTCTGGGGCATT  
>KX907363  
TTCTATTGCAATACAACAAAACCTGTTTACTGGTATTAGATACATTAATGGTACATACATAACTAATGATACAG  
AAATAGCT-----  
-----AATGATACA-----  
GAGAATAATTCAACCATCACACTCCAATGCAGAATAAAACAGATTATAAACATGTGGCAGGGGGTAGGAAAAG  
CAATGTATGCCCCCTCCATTGCAGGAAACATAATATGTAAATCAAAG---  
ATCACAGGACTACTATTGACACGTGATGGAGAAGGGGAAAATGGAACA-----  
-----  
-----  
AATGAGACTGAGACATTGAGACCTGGAGGAGGAGATATGAGGGACAATTGGAGAAGTGAATTGTATAAATATA  
AAGTGGTAGAAATTAAGCCATTA---GGAATAGCACCCGCTGAGGCAAAAAGGAGAGTGGTG-----

-----GAGAGAGAAAAAGAGCA--GTGGGA--ATGGGAGCT-----  
 ---GTGCTCTTTGGGTTCTTGGGAGCA--GCAGGAAGCACTATG--GGCGCAGCATCA--  
 GTGATGCTGACGGTACAG--GCCAGACAA--TTGTTG--TCTGGTATAGTGCAACAGCAAAGC--  
 AATTTG--CTGAGA--GCTATAGAGGCGCAACAGCATATGTTGCAACTCACAGTCTGGGGCATT  
 >KX907374  
 TTCTATTGCAACACATCAGCACTGTTTAATAAACTGTTTAATAATACTAATGATACAGAAAGTAATACT-----  
 -----  
 TCAGATACAACCTATCACACTCCAGTGCAAAATAAAACAAATTATAAACATGTGGCAGGGGGTAGGACGAGCAA  
 TATATGCTCCTCCCATTGAAGGAATCATCAATTGTACCTCAAAC--  
 ATCACAGGACTACTGTTGACACGTGATGGTGGGAATAACAGTGATGGGAATAAC-----  
 -----  
 AATAACACAGAAACATTGAGACCTGGAGGAGGAGATATGAGGGACAATTGGAGAAGTGAATTATATAAAATATA  
 AAGTGGTAGAAATTAAACCATTG--GGAATAGCACCCACTAAGGCAAAAAGGAGAGTGGTG-----  
 -----GAGAGAGAAAAAGAGCA--GTGAGC--CTAGGAGCT-----  
 ---GTGTTCTTTGGGTTCTTGGGAGCA--GCAGGAAGCACTATG--GGCGCGGCGTCA--  
 GTGACGCTGACGGTACAG--GCCAGACAA--TTGTTG--TCTGGTATAGTGCAACAGCAAAGC--  
 AATTTG--CTAAGA--GCTATAGAGGCGCAACAGCATCTGTTGCAACTCACGGTCTGGGGCATT  
 >KX907380  
 TTTTATTGCAATACATCAGGCCTGTTTAATAATACTGCTTAATGATACATTGACAATAGAC-----  
 -----  
 AATAATGAAACCATCACACTCCCATGCAGAATAAAACAAATTATAAACATGTGGCAGGAGGTAGGACGAGCAA  
 TGTATGCCCCCTCCCATTGCAGGAAACATAACATGTAAATCAAAT--  
 ATCACAGGACTATTATTGGTACGGGATGGAGGCATATCAAATGGGACAGAT-----  
 -----  
 AACAAAAATGAGACATTGAGACCTGGAGGAGGAGATATGAGGAATAATTGGAGAAGTGAATTATACAAATATA  
 AAGTGGTAGAAATTAAACCATTG--GGAGTGGCACCCACCAGGGCAAGAAGGAGAGTGGTG-----  
 -----GAGAGAGAAAAAGAGCA--GTGGGA--ATAGGAGCT-----  
 ---GTGATCTTTGGGTTCTTAGGAGCA--GCAGGAAGCACTATG--GGCGCAGCGTCA--  
 ATAGCGCTGACGGTACAG--GCCAGACAA--CTGTTG--TCTGGTATAGTGCAACAGCAGGGC--  
 AACCTG--CTGAGG--GCTATAGAGGCGCAACAGCATCTGTTGCAACTCACGGTCTGGGGCATT  
 >KX907416  
 TTCTATTGCGATACATCAAATCTGTTTAATAGTACATACAGCCCTAACAGTACAGATGATGGAGCGCAAGATG  
 TA-----  
 -----  
 AATGACACAATAATCACACTCACATGCAAAATAAAACAAATTGTAAACATGTGGCAGGGAGTAGGAAAAGCAA  
 TGTATGCCCCCTCCCATTAGAGGAAACATAACATGCAGATCAAAT--  
 ATTACAGGACTACTACTGACAAGGGATGGAGGAGACTCAGAGGGG-----  
 -----  
 ACAGAAACATTTAGGCCTGGAGGGGGAGATATGAAGGACAATTGGAGAAGTGAATTATATAAAATATAAAGTGG  
 TAGAAGTTAAACCATTG--GGAGTAGCACCACTACTGCAAAAAGGAGAGTGGTG-----  
 -----GAGAGAGAAAAAGAGCA--GTGGGA--ATAGGAGCT-----  
 GTGTTCTTTGGGTTCTTGGGAGCA--GCAGGAAGCACTATG--GGCGCAGCGTCA--  
 ATAACGCTGACGGTACAG--GCCAGACAA--TTATTG--TCTGGTATAGTGCAACAACAAAAC--  
 AATTTG--CTAAGA--GCTATAGAGGCGCAACAGCATATGTTGCAACTCACGGTCTGGGGCATT  
 >KX907375  
 TTCTATTGCAATACAACAAAACCTGTTTAATGATAGCATGTCAAATGAAAGCTCAAACATC-----  
 -----  
 -----  
 ACAAACAGCACACTCACACTCCCATGCAGAATAAAACAAATTATAAATATGTGGCAGGAGGTAGGAAGAGCAA  
 TGTATGCCCCCTCCCGTTGAAGGAAATATAACATGTAAATCAAAT--  
 ATTACAGGACTACTATTGGTACGGGATGGGGGT-----  
 -----  
 GTGTCAAATGATACAAAT---  
 GGGACAGAGACATTGAGACCTGGAGGAGGAGATATGAGGGATAATTGGAGAAGTGAATTATATAAAATATAAAG  
 TAGTAGAAATTAAGCCATTG--GGAGTAGCACCAACTGGGGCAAAAAGGAGAGTGGTG-----

-----GAGAGAGAAAAAAGAGCA---GTGGGA---ATAGGAGCT-----  
 GTGTTCTTGGGTTCTTGGGAGCG---GCAGGAAGCACTATG---GGCGCGGCGTCA---  
 ATAGCGCTGACGGCACAG---GCCAGACAA---GTGTTG---TCTGGTATAGTGCAACAGCAAAAC---  
 AATTTG---CTGAGA---GCTATAGAGGCGCAACAGCATCTGTTGCAACTCACAGTCTGGGGCATT  
 >KX907390  
 TTCTATTGCAATACATCAAACTGTTTAATACTACATACCTGTATAATGATACAGAAGGTAAC-----  
 -----  
 -----  
 TCAACCATCACACTCACACTCCCATGCAGAATAAAACAAATTATAAACTTGTGGCAGGAGGTAGGACGAGCAA  
 TGTATGCCCCCTCCCATTAAGGAGACATAATATGTAACCTCAAGT---  
 ATCACAGGGCTATTATTGACACGTGATGGAGGAGACAATAGAACA-----  
 -----  
 -----  
 AAGGAGACATTTCAGACCTGGAGGAGGAGATATGAGGGACAATTGGAGAAGTGAATTATACAAATATAAGGTAA  
 TACAAATTAAGCCACTA---GGAATAGCACCCACTGCGGCAAGAAGGAGAGTGGTG-----  
 -----GAGAGAGAAAAAAGAGCA---ATTGGA---CTAGGAGCC-----  
 ATGTTCTTGGGTTCTTGGGAGCA---GCAGGAAGCACTATG---GGCGCGGCGTCA---  
 ATAACGCTGACGGGACAG---GCCAGACAA---TTGTTG---TCTGGTATAGTGCAACAGCAAAGC---  
 AATTTG---CTGAGA---GCTATAGAGGCGCAACAGCATATGTTGCAACTCACAGTCTGGGGCATT  
 >KX907391  
 TTCTATTGCAATACATCAAACTTATTCAATGGTACCAATTCT-----  
 -----  
 -----  
 TCAGGCAGTAACATCACACTCCCATGTAGAATAAAACAAATTATAAACATGTGGCAGGGAGTAGGAAGAGCAA  
 TGTATGCTCCTCCCATTTGCAGGAGAAATAAAATGTGCATCAAAAT---  
 ATCACAGGGCTAATATTAACATGGGATGGAGGAAAGAAACAATAAT-----  
 -----  
 -----  
 ACCACAGAGACATTTCAGACCTGGAGGAGGGGATATGAGGGATAATTGGAGAAGTGAATTATATAAATATAAAG  
 TGGTAGAAATTAAGCCATTA---GGAATAGCACCCACTGAGGCAAAAAGGAGAGTGGTG-----  
 -----GAGAGAGGAAAAAAGAGCA---GTGGGA---ATAGGAGCC-----  
 GTGTTCTTGGGTTCTTGGGAGCA---GCAGGAAGCACTATG---GGCGCAGCGTCA---  
 ATAACGCTGACGGTACAG---GCCAGACAA---CTGTTG---TCTGGTATAGTGCAACAGCAAAGC---  
 AATTTG---CTGAGG---GCTATAGAGGCGCAACAGCATATGTTGCAACTCACAATCTGGGGCATT  
 >KX907399  
 TTCTATTGCGATACAACAAAACCTGTTTAATAGTACTAATGGTACTAATAGTTTAAAC-----  
 -----  
 -----  
 TCAAATGAACTATCATACTCCAATGTAGAATAAAACAAATTATAAATATGTGGCAGGGGGTAGGACGAGCAA  
 TATATGCTCCTCCCATTTGAAGGAAACGTCACATGTACATCAAAAC---  
 ATCACAGGACTACTATTGACACGTGATGGAGGAAATGTAACCTGAC-----  
 -----  
 -----  
 ACAGAAAAATTTCAGACCTGGAGGAGGAGATATGAGGGACAATTGGAGAAGTGAATTATACAAATATAAAGTGG  
 TAGAAATTAAGCCATTA---GGAATAGCACCCACTGGGGCAAAAAGGAGAGTGGTG-----  
 -----GAGAGAGAAAAAAGAGCA---GTGGGA---ATAGGAGCT-----  
 GTGTTCTTGGGTTCTTGGGAGCA---GCAGGAAGCACTATG---GGCGCGGCGTCA---  
 ATAACGCTGACGGTACAG---GCCAGACAA---CTATTG---TCTGGCATAGTGCAACAGCAAAGT---  
 AATATG---CTGAGA---GCTATAGAGGCGCAACAGCATATGTTGCAACTTACAGTCTGGGGCATA  
 >KC156220  
 TTCTATTGTAATACATCAAACTGTTTAATAATAATATAACAAGCGAT-----  
 -----  
 -----  
 AATTCAAGCAACATCACAATCCCATGCAAAATAAAACAAATTATAAACATGTGGCAGAAGGTAGGAAAAGCAA  
 TGTATGCCCCCTCCCATTTGCAGGGAACATAACATGTACCTCGAAT---  
 ATCACAGGAATACTATTAAACACGTGATGGAGGAAATAATAGTGAC-----  
 -----  
 -----  
 AGTGATCCAGAGACATTTCAGACCTACAGGAGGAGATATGAGGGACAATTGGAGAAGTGAATTATATAAATATA  
 AAGTAGTAGAAGTAGAACCATTA---GGAATAGCACCCACTGGAGCAAAAAGGAGAGTGGTG-----

-----GAGAGACAGAAAAGAGCA---GTGGGA---ATGGGAGCT-----  
 ---ATGTTCTTGGGTTCTTGGGAGCA---GCAGGAAGCACTATG---GGCGCAGCGTCA---  
 ATAACGCTGACGGTACAG---GCCAGACAA---TTATTG---TCTGGTATAGTGCAACAGCAAAGC---  
 AATTTG---CTGAGG---GCTATAGAGGCGCAACAGCATATATTGCAACTCACAGTCTGGGGCATT  
 >AF361874  
 TTCTATTGCGATACATCAAGGCTATTTAATGAAAGTCTTAATGAAAGACTGTTTAATGAAAGTAGTGAG----  
 -----  
 -----  
 TCAAAATGACACCATCACACTCCAATGTAGAATAAAACAAATTATAAACATGTGGCAGAAGGTAGGACAAGCAA  
 TATATGCCCCCTCCCATAAAAAGGAAACATATCATGTACATCAAAC---  
 ATCACAGGACTACTATTGACACGTGATGGAGGAAATGATGATGGAGGAAATGAT-----  
 -----  
 ----  
 ACAGGGTCAAGGCCAGAGACATTCAGACCTGGAGGAGGAGATATGAGGGACAATTGGAGAAGTGAATTATATA  
 AATATAAAGTGGTAGAAATTAAGCCATTA---GGAATAGCACCCACTGCGGCAAAAAGAAGAGTGGTG-----  
 -----GAGAGAGAAAAAAGAGCA---GTGGGA---  
 ATAGGAGCT-----GTGTTCTTGGGTTCTTGGGAGCA---GCAGGAAGCACTATG---  
 GGCGCGGCGTCA---ATAACGCTGACGGTACAG---GCCAGACAA---CTATTG---  
 TCTGGTATAGTGCAACAGCAAAGC---AATTTG---CTGAGA---  
 GCTATAGAGGCGCAACAGCATATGTTGCAACTCACGGTCTGGGGCATT  
 >AF286234  
 TTCTATTGCAATACATCAAATCTGTTTACATCAAACTGTTTAATAGTACTAATACTACAGAGAATGCCACAC  
 AA-----  
 -----  
 AGAAACGAAACCCTCACACTCCAATGCAGAATAAAACAGATTATAAACATGTGGCAGGAGGTAGGACGAGCAA  
 TATATGCCCCCTCCCATTCAGGGAGCATAACATGTACATCAAAT---  
 ATCACAGGAATACTATTGACACGAGATGGAGAAAATGCAGGAAATAAC-----  
 -----  
 -----  
 ACAGGGAATGAGACATTCAGACCTGGAGGAAGAAATATGAGGGATAATTGGAGAAGTGAATTATATAAATATA  
 AAGTGGTAGAAATTAAGCCATTG---GGAATAGCACCCACTGAGGCAAAAAGGAGAGTGGTG-----  
 -----GAGAGAGAAAAAAGAGCA---GTGGGA---CTAGGAGCT-----  
 ---GTGTTCTTGGGTTCTTGGGAGCA---GCCGGAAGCACTATG---GGCGCGGCGTCA---  
 ATAACGCTGACGGTACAG---GCCAGACAA---TTATTG---TCTGGTATAGTGCAACAGCAAAGC---  
 AATCTG---CTGAGG---GCTATAGAGGCGCAACAGCATCTGTTGCAACTCACGGTCTGGGGCATT  
 >AF286235  
 TTCTATTGCAATACATCAGGCCTGTTTAATGAAAGTCTGGTTAAAAGTAATAAT-----  
 -----  
 -----  
 TCAAAATGGAATATCGAACTCCAATGTAGAATAAAACAAATTATAAACATGTGGCAGGAGGTAGGACGAGCAA  
 TATATGCCCCCTCCCATTAGAGGAAACATAACATGTATATCAAAC---  
 ATCACAGGACTATTATTGACACGTGATGGAGGAAATAATGGCACT-----  
 -----  
 -----  
 AACGCAACGGAGATATTTCAGACCTGGAGGAGGGGATATGAGGGACAATTGGAGAAGTGAATTATACAAATATA  
 AAGTGGTAGAAATTAACCATTAA---GGAATAGCACCCACTGGGGCAAAAAGAAGAGTGGTG-----  
 -----GAGAGAGAAAAAAGAGCA---GTGGGA---ATGGGAGCT-----  
 ---GTGCTCCTTGGGTTCTTGGGAGCG---GCAGGAAGCACTATG---GGCGCGGCGTCG---  
 ATGGCGCTGACGGTACAG---GCCAGACAA---CTATTG---TCTGGTATAGTGCAACAGCAAAGC---  
 AATTTG---CTGAGG---GCTATAGAGGCGCAACAGCATATGTTGCAACTCACGGTCTGGGGCATT  
 >L22948  
 TTCTATTGCAATACATCAAGCCTGTTTAATAGTAGTGATAATAAT-----  
 -----  
 -----  
 AATAGTACCATCATCACACTCCCATGCAGAATAAAACAAATTATAAACATGTGGCAGGGGGTAGGACGAGCAA  
 TGTATGCCCCCTCCCATTAAGGAAAAATAACATGTAGATCAAAT---  
 ATCACAGGACTACTACTGACACGTGATGGAGGGGAGACAAGTGAGACA-----  
 -----  
 -----  
 AATAGCACAGAGACATTCAGACCTGGAGGAGGAGATATGAGGGACAATTGGAGAAGTGAATTATATAAATATA

AAGTGGTAGAAGTTAAGCCACTA---GGAGTAGCACCCACTAAGGCCAAAAGGAGAGTGGTG-----  
-----GAGAGAGAAAAAGAGCA---GTGGGA---ATAGGAGCT-----  
---GTGTTCCCTTGGGTTCTTGGGAGCC---GCAGGAAGCACTATG---GGCGCAGCATCA---  
ATAACGCTGACGGTACAG---GCCAGACAA---TTATTG---TCTGGTATAGTGCAACAGCAAAAC---  
AATTTG---CTGAGG---GCTATAGAGGCGCAACAGCATATGTTGCAACTCACGGTCTGGGGCATT  
>EU663619  
TTCTATTGCGATACATCAGGACTGTTCAATAGGACATACTTGCTAGCAAATGTTACAGGAAATATTTTCAGACA  
CAGACCGC-----  
-----AAC---  
GTCACAGACCGCAACATCACACTTTTCATGCAGAATAAAACAAATTATAAACACGTGGCAGGAGGTAGGAAAAG  
CAATGTATGCTCCTCCCATTTGCAGGAAACATAACATGTACATCAAAC---  
ATCACAGGACTACTATTGACACGTGATGGAGGTATAAGTAATGACACC-----  
-----  
-----  
AATAACACAGAGACATTTCAGACCTGGAGGAGGAGATATGAAGAACAATTGGAGAAAGTGAATTATATAAATATA  
AAGTGGTAGAAATTAAGCCATTA---GGATTAGCACCCACTGCAGCAAAAAGGAGAGTGGTG-----  
-----GAGAGAGAAAAAGAGCA---GTAGGA---ATAGGAGCT-----  
---GTACTCCTTGGGTTCTTGGGAGCA---GCAGGAAGCACTATG---GGCGCGGCGTCA---  
ATAACGCTGACGGTACAA---GCCAGACAA---GTATTG---TCTGATATAGTGCAACAGCAAAGC---  
AATTTG---CTGAAG---GCTATAGATGCGCAACAGCATATGTTGCAACTCACAGTCTGGGGCATT  
>AY444800  
TTCTATTGCAATACATCAGGGCTGTTTAATGGTACGTATAATGATACAAGGGGTGAG-----  
-----  
-----  
CCAAATGGAACCATCACACTCCCATGCAGAATAAAACAAATTATAGACATGTGGCAGAAGGTAGGACGAGCAA  
TGTATGCTCCTCCCATTTGAAGGAAATATAACATGTAAATCAAAT---  
ATCACAGGACTATTATTGACACGTGATGGAGGCCTGTTAGATAAT-----  
-----  
-----  
AGTAGCACAGAGACATTTCAGACCTGCAGGAGGAGATATGAGGGACAATTGGAGAAAGTGAATTATATAAATATA  
AAGTGGTGGAAATTAAGCCATTA---GGAGTAGCACCCACTGCTGCAAAAAGGAGAGTGGTG-----  
-----GAGAGAGAAAAAGAGCA---GTGGGA---ATAGGAGCT-----  
---GTGTTCCCTTGGGTTCTTGGGAGCA---GCAGGAAGCACTATG---GGCGCGGCGTCA---  
ATAACGCTGACGGTACAG---GCCAAACAA---TTGTTG---TCTGGTATAGTGCAAGCAGCAAAGC---  
AATTTG---CTGAGA---GCTATAGAGGCGCAACAGCATATGTTGCAACTCACGGTCTGGGGCATT  
>AY444801  
TTCTATTGCAATACATCAGTCCTGTTTAATAGGTCATATAATCTTACTGATACAAATAGTAATAATATAAATA  
GC-----  
-----  
ACTTCAACCGACACACTCACACTCCCATGCAGAATAAAACAAATTATAAACATGTGGCAGGAGGTAGGACGGG  
CAATGTATGCCCCTCCCATTTGCAGGAAACATAACATGTAACTCAAGC---  
ATCACAGGACTACTATTGACATGGGATGGAGGCGAAGAGAAAAACAACACA-----  
-----  
-----  
GAGAAAAACAACACAGAGATATTTCAGACCTGGAGGAGGAGATATGAGGGACAATTGGAGAAAGTGAAGTATATA  
AATATAAAGTGGTAGAAATTAAGCCATTA---GGAATAGCACCCACCAAGGCCAAAAGGAGAGTGGTG-----  
-----GAGAGAGAAAAAGAGCA---GTGGGA---  
ATAGGAGCT-----GTGCTCCTTGGGTTCTTGGGAGCA---GCAGGAAGCACTATG---  
GGCGCGGCGTCA---ATAACGCTGACGGCACAG---GCCAGACAA---GTGTTG---  
TCTGGTATAGTGCAACAGCAAAGT---AATTTG---CTGAGA---  
GCTATAGAGGCGCAACAGCAAATGTTGCAACTCACAGTCTGGGGCATT  
>AY563169  
TTCTATTGCAATACATCAAGCCTGTTTAATAGTACATACAATACAACAGGGACAGAAAGCAGTAATGGGACAG  
AAAGC-----  
-----AGT---  
AATGAAACAGGAAGCATTACAATCCCATGCAGAATAAAACAAAGTTATAAACATGTGGCAAGGGGTAGGACGAG  
CAATGTATGCCCCTCCCATTTGAAGGAAACATAACATGTAGTCAAAT---  
ATCACAGGATTACTACTGACACGGGATGGAGGAGACGGGAATGGC-----  
-----  
-----

ACAACAGAGACATTTCAGACCTGGAGGAGGAGATATGAGGGACAATTGGAGAAGTGAATTATACAAATATAAAG  
TGGTAGAAATTAAACCATTA---GGAATAGCACCCACTACTGCAAAAAGGAGAGTGGTG-----  
-----GAGAGAGAAAAAAGAGCA---GCG-----CTAGGAGCT-----  
ATGTTTCCTTGGGTTCTTGGGAGCA---GCAGGAAGCACTATG---GGCGCAGCGTCA---  
ATAACGCTGACGGTACAG---GCCAGACAA---TTATTG---TCTGGGATAGTGCAACAGCAAAGC---  
AATTTG---CTGAAG---GCTATAGAGGCGCAACAGCATATGTTGCAACTCACGGTCTGGGGCATT  
>AY795906  
TTCTATTGCAACACATCAAAATTGTTTAATAGGACATACATGTTTAATAGTACATACATGCCTAATAGTACTA  
ATAGT-----  
-----  
ACTTCAAATTCAACCATCACACTCCCTTGCAGAATAAAACAAATTATAAACATGTGGCAGGGGGTAGGACGAG  
CAATGTATGCCCCCTCCTATTGCAGGAAACATAACATGTACATCAAAC---  
ATCACAGGACTACTATTGACACGTGATGGAGGAGGAAAAAGACAAC-----  
-----  
-----  
GAGTCAGAGACATTTCAGACCTGGAGGAGGAGATATGAGGGATAATTGGAGAAGTGAATTATATAAAATATAAAG  
TGGTAGAAATTAAACCATTA---GGAATAGCACCCACTGCAGCAAAGAGGAGAGTGGTG-----  
-----GAGAGAGAAAAAAGAGCA---GCAGGA---ATGGGAGCT-----  
TTGTTTCCTTGGGTTCTTGTGAGCA---GCAGGAAGCACTATG---GGCGCAGCATCA---  
ATAACGCTGACGGTACAG---GCCAGGCAA---TTGTTG---TCTGGTATAGTGCAACAGCAAAGC---  
AATTTG---CTGAGG---GCTATAGAGGCGCAACAGCATCTGTTGCAACTCACGGTCTGGGGCATT  
>AY529667  
TTCTATTGCAATACATCAAACCTGTTTAATGAGAGTAATATAGAAAGG-----  
-----  
-----  
AATGATTCAATCATCACACTCCCATGCAGAATAAAACAAATTATAAACATGTGGCAGGAGGTAGGACGAGCAA  
TATATGCTCCTCCCATTGCAGGAAACATAACATGTAGATCAAAT---  
ATCACAGGACTACTATTGACACGTGATGGAGGGTCAAATAATGGGGTG-----  
-----  
-----  
CCAAATGACACAGAGACATTTCAGACCTGGAGGAGGCGATATGAGGAACAATTGGAGAAGTGAATTATATAAAAT  
ATAAAGTGGTAGAAGTTAAACCATTG---GGAGTAGCACCCACTGAGGCAAAAAGGCGAGTGGTG-----  
-----GAGAGAGAAAAAAGAGCA---GTAGGA---ATAGGAGCT---  
-----GTGTTTCCTTGGGATCTTGGGAGCA---GCCGGAAGCACTATG---GGCGCAGCATCA---  
ATAACGCTGACGGTACAG---GCCAGACAA---TTGCTG---TCTGGTATAGTGCAACAGCAAAGC---  
AATTTG---CTGAGG---GCTATAGAGGCGCAACAGCATATGTTGCAACTCACAGTCTGGGGCATT  
>AY463217  
TTCTATTGCAATACAACACAACCTGTTTGAAAATATTACTAAT-----  
-----  
-----  
AATGTAAGTAACATCATACTCCCATGCAGAATAAAACAAATTATAAACATGTGGCAGGAGGTAGGACGAGCAA  
TGTATGCCCCCTCCCATTGCAGGAAACATAACATGTACCTCAAAT---  
ATCACAGGACTGCTATTGGTACGTGATGGTGGAAACACAAATGGGCACA-----  
-----  
-----  
AATAACTCAGAAATATTTCAGACCTGCAGGAGGAAATATGAAGGACAATTGGAGAAGTGAATTATATAAAATATA  
AAGTGATAGAACTTAAGCCATTG---GGAGTAGCACCCACTGAGGCAAGAAGGAGAGTGGTG-----  
-----GAGAGAGAAAAAAGAGCA---GTGGGA---ATAGGAGCT-----  
---GTGTTTCCTTGGGTTCTTGGGAGCA---GCAGGAAGCACTATG---GGCGCGGCGTCA---  
ATAACGCTGACGGTACAG---GCCAGACAA---CTGTTG---TCTGGTATAGTGCAACAGCAAAGC---  
AATTTG---CTGAGA---GCTATAGAGGCGCAACAGCATATGTTGCAACTCACGGTCTGGGGCATT  
>AY463230  
TTCTATTGCAATACATCACAACCTGTTTAATGGCACATACAATGGCACATATAGTAAT-----  
-----  
-----  
ATCACAGACCTCATCACCTCCCATGCAAGATAAAACAAATTATAAACCTGTGGCAGGGGGTAGGACGAGCAA  
TGTATGCCCCCTCCCATTGCAGGAAACATAACATGTAACCTCAAAT---  
ATCACAGGAATACTATTGACACGTGATGGAGGACACGAAAGGAATAACACA-----  
-----  
-----

AAGAATGACACAGAGATATTCAGACCTGGAGGAGGAAATATGAAGGACAATTGGAGAAGTGCATTATATAAAT  
ATAAAGTGGTAGAAGTTAAGCCATTA---GGAATAGCACCAACTGAGGCAAAAAGGAGAGTGGTG-----  
-----GAGAGAGAAAAAAGAGCA---GTGGGA---ATGGGAGCT---  
-----GTACTCCTTGGGTTCTTGGGAGCA---GCAGGAAGCACTATG---GGCGCAGCGTCA---  
ATAACGCTGACGGTACAG---GCCAGGCAA---CTGTTG---TCTGGTATAGTGCAACAGCAAAAT---  
AATTTG---CTGAGA---GCTATAGAGGCGCAACAGCATATGTTGCAACTCACGGTCTGGGGCATT  
>AY463231  
TTCTATTGTAATACATCAAACCTGTTTAATGATAATGGTACAGAAAGT-----  
-----  
-----  
AATTCAACACACATTACACTTCCATGCAGAATAAAACAAATTATAAACATGTGGCAGGGGGTAGGGCGAGCAA  
TGTATGCCCCCTCCCATTGAAGGAAATATAACATGTAACTCAAGT---  
ATCACAGGACTACTACTGACACGTGATGGAGGAGACATAATAAATGGCACA-----  
-----  
-----  
GACAAATGAAACAGAGACATTCAGACCTGGAGGAGGAAATATGAAGGACAATTGGAGAAGTGAATTATATAAAT  
ATAAAGTGGTAGAAATTAAGCCATTA---GGGATAGCACCCACTAAGGCAAAAAGGAGAGTGGTG-----  
-----GAGAGAGAAAAAAGAGCA---GTAGGA---T'TAGGAGCT---  
-----GTGATCTTTGGGTTCTTGGGAGCA---GCAGGAAGCACTATG---GGCGCGGCGTCA---  
ATAACGCTGACGGTACAG---GCCAGACAA---CTGTTG---TCTGGTATAGTGCAACAGCAAAGC---  
AATTTG---CTGAGA---GCTATAGAGGCGCAACAGCATATGTTGCAACTCACGGTCTGGGGCATT  
>AY463225  
TTCTATTGCAATACGTCAGACTTGTTTAATAGTAATAATAAGACAGAA-----  
-----  
-----  
AGCAATTCAACTATCACACTTCCATGCAGAATAAAACAAATTATAAACATGTGGCAGGGGGTAGGACGAACAA  
TGTATGCCCCCTCCCATTGCAGGAAACATAACATGTAACTCAAAT---  
ATCACAGGACTACTATTGACACGTGATGGAGGGAATAATGACACA-----  
-----  
-----  
GGGGAGGAGATATTCAGACCTGGAGGAGGAAATATGAAGGACAATTGGAGAAATGAATTATATAAATATAAAG  
TGGTAGAAATTAAGCCATTG---GGAGTAGCACCCACTGAGGCAAAAAGGAGAGTGGTG-----  
-----GAGAGAGAAAAAAGAGCA---GTGGGA---ATAGGAGCT-----  
GTGATCCTTGGGTTCTTGGGAGCA---GCAGGAAGCACTATG---GGCGCGGCGTCA---  
ATAACGCTGACGGTACAG---GCCAGACAA---CTGTTG---TCTGGTATAGTGCAACAGCAAAAT---  
AATTTG---CTGAGA---GCTATAGAGGCGCAACAGCATATGTTGCAACTCACGGTCTGGGGCATT  
>AY463232  
TTCTATTGCAATACATCAAACCTGTTTAATAGTACATTGCTTAATAGTACATTGTCTAATAGTACAAATAAT-  
-----  
-----  
ACTAATGGTATCATCATACTCCCATGCAGAATAAAACAAATTATAAATATGTGGCAGGGGGTAGGACGGGCAA  
TGTATGCCCCCTCCCATTGCAGGAAATATAACATGTAAATCAAAT---  
ATCACAGGACTAATATTGACACGTGATGGAGGAGAAACCTAATATA-----  
-----  
-----  
ACGGAGGAGACATTCAGACCTGGAGGAGGAGATATGAGAGACAATTGGAGAAGTGAATTATATAAATACAAAG  
TGGTAGAAATTAATCCATTA---GGAGTAGCTCCCACTAGAGCAAAAAGGAGAGTGGTG-----  
-----GAGAGAGAGAAAAAGAGCA---GTGGGA---ATAGGAGCT-----  
GTATTCCTTGGGTTCTTAGGAGCA---GCAGGAAGCACTATG---GGCGCAGCATCA---  
ATAACGCTGACGGTACAG---GCCAGACAA---TTATTG---TCTGGTATAGTGCAACAGCAAAGC---  
AATTTG---CTGAGG---GCTATAGAGGCGCAACAGCATATGTTGCAACTCACAGTCTGGGGCATT  
>AY463218  
TTCTATTGCAATACAACAAAACCTGTTCACTAGTACTAATATG-----  
-----  
-----  
ACAAACACAACCATCATGATCCCATGCAGAATAAGGCAAAATCGTACGCCTGTGGCAGGAGGTAGGACGAGCAA  
TGTATGCCCCCTCCCATTGAAGGAAACATAACATGTAGCTCAAAT---  
ATCACGGGACTACTATTGGTACGTGATGGAGGAAAAAGGAAACGAAACA-----  
-----  
-----

CAGAATAACACAGAAATATTCAGACCTGGAGGAGGAAATATGAAGGACAATTGGAGAAGTGAATTATATAAAAT  
ATAAGGTGGTAGAGCTTAAGCCATTG---GGAATAGCACCCACTGATGCAAAAAGGAGAGTGGTG-----  
-----GAGAGAGAAAAAAGAGCA---GTGGGAGTAATAGGAGCT---  
-----GTGCTCCTTGGGTTCTTGGGAGCA---GCAGGAAGCACTATG---GGCGCGGCGTCA---  
ATAACGCTGACGGTACAG---GCCAGACAA---CTGTTG---TCTGGTATAGTGCAACAGCAAAGC---  
AATTTG---CTGAGA---GCTATTGAGGCGCAACAGCATTTGTTGCAACTCACGGTCTGGGGCATT  
>AY463233  
TTCTATTGCAATACATCAAACTGTTTAATAGTACATACAATAGTACATACAATAGTACATACAATAGTAGTA  
CA-----  
-----  
GGAAATTCAACCATTACACTCCAATGCAGAATAAAACAAATTATAAAATATGTGGCAGGGGGTAGGACGAGCAA  
TGTATGCCCCCTCCCATTCAGGAAATATAACATGTAAATCAAAT---  
ATCACAGGACTACTATTGACAAGCGATGGAGGGGGGAATAATGAA-----  
-----  
-----  
ACAGAGACATTTAGACCTGGAGGAGGAAATATGAGGGACAATTGGAGAAGTGAATTGTATAAAATATAAAGTGG  
TAGAAATTAAGCCATTA---GGAGTAGCACCCACTGAGGCAAAAAGGAGAGTGGTG-----  
-----GAGAGAGAAAAAAGAGCA---GTGGGA---ATAGGAGCT-----  
GTACTCCTTGGATTCTTGGGAGCC---GCAGGAAGCACTATG---GGCGCAGCATCA---  
ATAACGCTGACGGTACAG---GCCAGACAA---TTGTTG---TCTGGTATAGTGCAACAGCAAAGC---  
AATTTG---CTGAGG---GCTATAGAGGCGCAACAGCATATGTTGCAACTCACGGTCTGGGGCATT  
>AY463219  
TTCTATTGCAATACAACAGGACTGTTTAATAACAATGCAGCT-----  
-----  
-----  
AACACAACAACCATCAACATCCCATGCAGAATAAAACAAATTGTAAACATGTGGCAAGAGGTAGGACGAGCAA  
TGTATGCCCCCTCCTATTGCAGGAAACATAACATGTAAATCAAAC---  
ATCACAGGATTACTATTGCTACGTGATGGAGGAAACAATAGTAAC-----  
-----  
-----  
ACAGAGATATTTAGACCTGGAGGAGGAAATACGAAGGACAATTGGAGAAGTGAATTATATAAAATACAAAGTAG  
TAGAAATTAAGCCATTG---GGAGTAGCACCCACTAAGGCAAAAAGGAGAGTGGTG-----  
-----GAGAGAGAAAAAAGAGCA---GTGGGA---ATAGGAGCT-----  
GTGCTCCTTGGGTTCTTGGGAGCA---GCAGGAAGCACTATG---GGCGCGGCGTCA---  
ATAACGCTGACGGTACAG---GCCAGACAA---TTGTTG---TCTGGTATAGTGCAACAGCAAAGC---  
AATTTG---CTGAGA---GCTATAGAGGCGCAACAGCATATGTTGCAACTCACTGTCTGGGGCATT  
>AY463220  
TTCTATTGCAATACATCAAAGCTGTTTAATATATCTACTAGTGAAAATGTAACT-----  
-----  
-----  
AGTGAAAATGTAACTACACTCCCATGCAGAATAAAACAAATTATAAGGATGTGGCAGGGAGTAGGACAAGCAA  
TGTATGCCCCCTCCCATTTGAAGGAAACATAACATGTAACTCAAGT---  
ATCACAGGACTACTACTGACACGGGATGGAGGAAACAACACGACT-----  
-----  
-----  
AATGGCACGGAGATATTCAGACCTGGAGGAGGAAATATGAAAGACAATTGGAGAAGTGAATTATATAAAATATA  
AAGTGGTAGAAATTAAGCCATTG---GGAGTAGCACCCACAAAGGCAAAAAGGAGAGTGGTG-----  
-----GAGAAAGAAAAAAGAGCA---GTGGGA---ATAGGAGCT-----  
---GTGTTCTCGGGTTCTTGGGAGCA---GCAGGAAGCACTATG---GGCGCGGCGTCA---  
ATAACGCTGACGGTACAG---GCCAGACAA---CTGTTG---TTTGGTATAGTGCAACAGCAAAGC---  
AATTTG---CTGAGA---GCTATAGAGGCGCAACAGCATATGTTGCAACTCACAGTCTGGGGCATT  
>AY463234  
TTCTATTGCAATACAACAGAACTGTTTAATGATAATAACAGTGAT-----  
-----  
-----  
GACAACGCAACCATCACACTCCCATGCAGAATAAAACAAATCATAAACATGTGGCAAGGGGTAGGACGAGCAA  
TGTATGCCCCCTCCCATTTGAAGGAAGCATAACATGTAACTCAAAT---  
ATCACAGGACTACTATTGACACGTGATGGAGGAACAAACAACACA-----  
-----  
-----

GATGAGACATTCAGACCTGGAGGAGGAAATATGAAGGACAATTGGAGAAGTGAATTATATAAAATATAAAGTGG  
TAGAAATTAAACCATTG---GGAATAGCACCCACAGGGGCAAAAAGGAGAGTGTTG-----  
-----GAGAGAGAAAAAGAGCA---GTGGGA---CTAGGAGCT-----  
GTGTTCTTGGGTTCTTGGGAGCA---GCAGGAAGCACTATG---GGCGCGGCGTCA---  
ATAACGCTGACGGTACAG---GCCAGACAA---CTGTTG---TCTGGTATAGTGCAACAGCAAAGC---  
AATTTG---CTGAGA---GCTATAGAGGCGCAACAGCATATGTTGCAACTCACGGTCTGGGGCATT  
>AY463221  
TTCTATTGCAATACAACAAACCTGTTTAATGAAAGTCTGGTTAATACA-----  
-----  
-----  
AGCACAGGAGACATCACGCTCCCATGCAAAATAAAACAAATTATAAACATGTGGCAGGAAGTAGGGCGAGCAA  
TGTATGCCCCCTCCCATTTGAAGGAAGCATAACATGTAAATCAAAT---  
ATCACAGGACTACTATTGCTACGTGATGGAGGAAAGAATAACACA-----  
-----  
-----  
AATGAGACATTCAGGCCTGGAGGAGGAAATATGAAAGACAATTGGAGAAGTGAATTATATAAAATATAAAGTGG  
TAGGACTTAAGCCATTG---GGAATAGCACCCACTGATTCAAAAAGGAGAGTGTTG-----  
-----GAGAGAGAAAAAGAGCA---GTGGGA---ATAGGAGCT-----  
ATGTTCTTGGGTTCTTGGGAGCA---GCAGGAAGCACTATG---GGCGCGGCGTCG---  
ATAACGCTGACGGTACAG---GCCAGACAA---CTGCTG---TCTGGTATAGTGCAACAGCAAAGC---  
AATTTG---CTGAGA---GCTATAGAGGCGCAACAGCATTTGTTGCAACTCACGGTCTGGGGCATT  
>AY463236  
TTCTATTGCGATACAGCAGCCCTGTTTAATGGCACATATAATGGCACATATGGTAAT-----  
-----  
-----  
GAGACTTCAAACATCACACTCCAATGCAGAATAAAACAGATGATAAACATGTGGCAGGGGGTAGGACGAGCAA  
TGTATGCTCCTCCCATTTGCAGGAAACATAACATGTAGATCGAAT---  
ATCACAGGACTACTATTGACACGTGATGGAAGTAACGATACTGGG-----  
-----  
-----  
CCAGAGATATTCAGACCTGGAGGAGGAAATATGAAGGACAATTGGAGAAGTGAATTATATAAAATACAAAGTGG  
TAGAAATTAAAGCCATTA---GGAATAGCACCCACTAAAGCAAAAAGGAGAGTGTTG-----  
-----GAGAGAGAGAAAAAGAGCA---GTGGGA---ATAGGAGCT-----  
GTGTTCTTGGGTTCTTAGGAGCA---GCAGGAAGCACTATG---GGCGCAGCATCA---  
ATAACGCTGACGGTACAG---GCCAGACAA---TTATTG---TCTGGTATAGTGCAACAGCAAAGC---  
AATTTG---CTGAGA---GCTATAGAGGCGCAACAGCATATGTTGCAACTCACAGTCTGGGGCATT  
>AY463226  
TTCTATTGCAATACCACAAACCTGTTTGCCACAGAACTGGGTTCTAATAGAAGTGAGTCAAACATCACA---  
-----  
-----  
AAGGAGTCAAACATCACACTCCCATGTAGGATAAAACAAATTATAAACATGTGGCAGGGGGTAGGACGAGCAA  
TGTATGCCCCCTCCCATTTGAAGGAAACATAATGTGTAACCTCAAGT---  
ATCACAGGAATACTATTAAACACGTGATGGAGGAGGAGGAGGAGAC-----  
-----  
-----  
AATCTCACAGAGATATTCAGACCTGGAGGAGGAAATATGAAGGACAATTGGAGAAATGAATTATATAAAATATA  
AAGTGGTAGAAATTAAGCCATTG---GGAGTGGCACCCACTGAATCAAAAAGGAGAGTGTTG-----  
-----GAGAGAGAAAAAGAGCA---GTGGGA---ATAGGAGCT-----  
---GTACTCCTTGGGTTCTTGGGAGCA---GCAGGAAGCACTATG---GGCGCGGCGTCA---  
ATAACGCTGACGGTACAG---GCCAGACAA---TTGTTG---TCTGGTATAGTGCAACAGCAAAGC---  
AATTTG---CTGAGA---GTCATAGAGGCGCAACAGCATATGTTGCAACTCACGGTCTGGGGCATT  
>AY463222  
TTCTATTGCAATACAACAATACTGTTTAATGAAACAAAACCT-----  
-----  
-----  
TGTGAAAACACAACCATCCCATGCAGAATAAAACAAATTATAAACATATGGCAGGAGGTAGGAAGAGCAATGT  
ATGCCCCCTCCCATTTGCAGGACACATAACATGTAACTCAACT---  
ATCACAGGACTACTATTGTCCCGCGATGGAGGAGCCACAAACGAT-----  
-----  
-----

ACCGAGATATTCAGGCCTGGAGGAGGAAATATGAAGGATAATTGGAGAAGTGAATTATATAAGTATAAAGTGG  
 TAGAAATTAAGCCATTA---GGAATAGCACCCACTACGGCAAAGAGGAGAGTGGTG-----  
 -----GAGAGAGAAAAAAGAGCA---GTGGGA---ATAGGAGCT-----  
 GTGTTCTTGGGTTCTTGGGAGCA---GCAGGAAGCACTATG---GGCGCGGCGTCA---  
 ATAACGCTGACGGTACAG---GCCAGACAA---CTGCTG---TCTGGTATAGTGCAACAGCAAAGC---  
 AATTTG---CTGAGG---GCTATAGAGGCGCAACAGCATATGTTGCAACTCACGGTCTGGGGCATT  
 >JX845606  
 TTCTATTGCAATACAACAAACCTGTTTAAACGAAAATATAACACAACCTGTTTAATAAAAAGTGAA-----  
 -----  
 -----  
 GCAAAACGGAACCATCACACTCCCATGCAGGATAAAAACAAATTATAAACATGTGGCAGAAGGTAGGACGAGCAA  
 TGTATGCCCCCTCCTATTGCAGGAAATATAACATGTAAATCAAAT---  
 ATCACAGGACTACTATTGACACGCGATGGAGAAGGATACAACACA-----  
 -----  
 -----  
 CCGAATGAGACATTCAGACCTACAGGAGGAAATATGAAAAGATAATTGGAGAAGTGAATTATATAAATATAAAG  
 TGGTAGAAATTAAGCCATTA---GGAATAGCACCCACTGAGTCAAAAAGGAGAGTGGTG-----  
 -----GAGAGAGAAAAAAGAGCA---GTGGGA---CTAGGAGCT-----  
 GTACTCCTTGGGTTCTTGGGAGCA---GCAGGAAGCACTATG---GGCGCGGCGTCA---  
 ATAACGCTGACGGTACAG---GCCAGACAA---CTGTTG---TCTGGTATAGTGCAACAGCAAAGC---  
 AATTTG---CTGAGA---GCTATAGAGGCGCAACAGCATATGTTGCAACTCACAGTCTGGGGCATT  
 >KF146947  
 TTCTATTGCAATACATCAAAACTGTTTAAATAGTACATTGAATAGTACATATATGCCTAATGGTACAGAA---  
 -----  
 -----  
 AGTAATTCAAACATCACACTCCCATGCAGAATAAGACAATTTGTAAACATGTGGCAGGAAGTAGGACGAGCAA  
 TGTATGCCCCCTCCCATTTGAAGGAAAGATAACATGTAACTCAAAT---  
 ATTACAGGACTACTATTGTTACGTGATGGAGGAATAAATAATGACAGC-----  
 -----  
 -----  
 AGTGAGAATGAGACATTCAGACCGGGAGGAGGAGATATGAGGGACAATTGGAGAAGTGAATTATATAAATATA  
 AAGTGATAGAAATTAAGCCATTG---GGAATAGCACCCACTGGAGCAAAAAGGAGAGTGGTG-----  
 -----GAGAAAGAAAAAAGAGCA---GTGGGA---ATAGCAGCT-----  
 ---GTGTTCTTGGGTTCTTGGGAGCA---GCAGGAAGCACTATG---GGCGCGGCGTCA---  
 TTAACGCTGACGGTACAG---GCCAGACAA---TTGTTG---TCTGGTATAGTGCAAGCAGCAAAGC---  
 AATTTG---CTGAGG---GCTATAGAGGCGCAACAGCATATGTTGCAACTCACGGTCTGGGGCATT  
 >AY838568  
 TTCTATTGCAATACATCAAAACTATTTAAATTTAATAGTTCGGAACCATTTAATAGTACAGAAAGTAATAGTA  
 CA-----  
 -----  
 -----  
 GAAAGTAATAAAAATATCACAAATTCATGCAGAATAAAAACAAATTATAAACATGTGGCAGGAGGTAGGACGAG  
 CAATGTATGCCCCCTCCCATTTGCAGGGAACATAACATGTACATCAAAC---  
 ATCACAGGACTACTATTAGTACGTGATGGGGGCAAAGAAAATGACCAC-----  
 -----  
 -----  
 AATAACACAGAAATATTCAGACCTGGAGGAGGAAATATGAAGGACAATTGGAGAAGTGAATTATATAAATATA  
 AAGTGGTAGAAATTAAGCCATTA---GGAATAGCACCCACTGGAGCAAAAAGGAGAGTGGTG-----  
 -----CAGAGAGAGAAAAAGAGCA---GTGGGA---ATAGGAGCT-----  
 ---ATACTCCTTGGGTTCTTGGGAGCA---GCAGGAAGCACTATG---GGCGCAGCGTCA---  
 ATAGCGCTGACGGCACAG---GCCAGACAA---GTGTTG---TCTGGTATAGTGCAACAGCAAAC---  
 AATCTG---CTGAGA---GCTATAGAGGCGCAACAGCATATGTTGCAACTCACGGTCTGGGGCATT  
 >AY463228  
 TTCTATTGCAATACAACAAAATTGTTCTGTTTAAATGAAAGTGATGGAAGTGCT-----  
 -----  
 -----  
 CTAACAAAACCATCACACTCCCATGCAGAATAAAAACAGATTATAAACATGTGGCAGGAGGTAGGACGAGCAA  
 TGTATGCCCCCTCCCATTTGCAGGAAACATAACATGTAACTCAAGT---  
 ACCACAGGATTACTATTGCTACGTGATGGCGGAAACCAAAACAAT-----  
 -----  
 -----

GAGACAGAGATATTCAGACCTGGAGGAGGAAATATGAAGGACAATTGGAGAAGTGAATTATATAAATATAAAG  
TGGTAGAACTTAAGCCATTA---GGAGTAGCACCCACTGAGGCAAAAAGGAGAGTGGTG-----  
-----GAGAGAGAAAAAAGAGCA---GTGGGA---ATAGGAGCT-----  
GTGTTTCCTTGGGTTCTTGGGAGCA---GCAGGAAGCACTATG---GGCGCGGCGTCA---  
ATAACGCTGACGGTACAG---GCCAGACAA---CTGCTG---TCTGGTATAGTGCAACAGCAAAGC---  
AATTTG---CTGAGA---GCTATAGAGGCGCAACAGCATATGTTGCAACTCACGGTCTGGGGCATT  
>EU161645  
TTCTATTGCAATACATCAGGACTGTTTAATAGCATTTCAAATGAAACTACCACAAATGGAACC-----  
-----  
-----  
ACAAATGGAACCATCACAATTCCATGCAGAATAAAACAAATTATAAACATGTGGCAGGAGGTAGGACGAGCAA  
TGTATGCCCCCTCCCATTGCAGGAAACATAACATGTAAATCAAAT---  
ATCACAGGACTACTATTATCAAGTGATGGAGGCACAGATAATAGCACA-----  
-----  
-----  
AAGCCAGAGACAGAGACCTTCAGACCTGGAGGAGGAGATATGAGGGATAACTGGAGAAGTGAATTATATAAAT  
ATAAAGTGGTAGAAATTAAGCCATTA---GGAATAGCACCCACTGAGGCAAAAAGGAGAGTGGTG-----  
-----GAGAGAGAAAAAAGAGCA---GTGGGA---ATAGGAGCT---  
-----GTACTCCTTGGGTTCTTGGGAGCA---GCCGGAAGCACTATG---GGCGCGGCGTCA---  
ATAACGCTGACGGTACAG---GCCAGACAA---TTGTTG---TCTGGTATAGTGCAACAGCAAAGC---  
AATTTG---CTGAAG---GCTATAGAGGCGCAACAGCATATGTTGCAACTCACAGTCTGGGGCATT  
>FJ846632  
TTCTATTGCAATACAACAAATCTGTTTAATATAAGCATGACCAATGAC-----  
-----  
-----  
ACAGACACATTCATCACACTCCCATGTAGAATAAAACAAATTATAAATATGTGGCAGAGGGTAGGACGAGCAA  
TGTATGCCCCCTCCCATTACAGGAAACATAACATGTAACTCAAGT---  
ATCACAGGACTACTATTGACACGTGATGGAGGAACAACAAATGGCACAGAG-----  
-----  
-----  
AATAATAACACAGAGATATTCAGACCTGCAGGAGGAAATATGAAGGATAATTGGAGAAGTGAATTATATAAAT  
ATAAAGTGGTAGAGATTAAGCCATTA---GGAGTAGCACCCACTGGAGCAAAAAGGAGAGTGGTG-----  
-----GAGAGAGAAAAAAGAGCA---GTGGGA---ATAGGAGCT---  
-----GTGTTTCCTTGGGTTCTTGGGAGCA---GCAGGAAGCACTATG---GGCGCGGCGTCA---  
ATCACGCTGACGGTACAG---GCCAGACAA---CTGTTG---TCTGGTATAGTGCAACAGCAAAGC---  
AATTTG---CTGAGA---GCTATAGAGGCGCAACAGCATATGTTGCAACTCACGGTCTGGGGCATT  
>AY529672  
TTCTATTGTGATACATCAAGATTATTTAATAGAACATATAATGGTACAGAAGATAACTCAGGA-----  
-----  
-----  
GATAACACAACACTATTACAATTCCATGCAGAATAAGACAAATTATAAACATGTGGCAGGAGGTAGGACGAGCAA  
TGTATGCCCCCTCCCATTGCAGGAAACATAACATGTAAATCAAAT---  
ATCACAGGACTACTATTGGTGAGTGATGGAGGCAACAGAAGCAGC-----  
-----  
-----  
TCAAATGAAACATTTAGACCTGGAGGGGGAACATGAAGGACAATTGGAGAAGTGAATTATATAAATATAAAG  
TGGTAGAAATTAGGCCATTG---GGAATAGCACCCACTAAAGCAAAAAGGAGAGTGGTG-----  
-----GAGAAAGAAAAAAGAGCA---GTGGGAATAATAGGAGCT-----  
GTGTTTCCTTGGGATCTTGGGAATA---GCAGGAAGCACTATG---GGCGCAGCGTCA---  
ATAACGCTGACGGCACAG---GCCAGACAA---GTGATG---TCTGGTATAGTGCAACAGCAAAGC---  
AATTTG---CTGAGG---GCTATAGAGGCGCAACAGCATATGTTGCAACTCACAGTCTGGGGCATT  
>AY463237  
TTCTATTGCAATACATCAAACTGTTTAATAGTACAAGTAATGATACACAA-----  
-----  
-----  
AGTAACACAACCATCACACTCCCATGCAGAATAAAACAAATTATAAACATATGGCAGGAGGTAGGACGAGCAA  
TGTATGCCCCCTCCCATTGCAGGAAACATAACATGTAACTCAAGC---  
ATCACAGGACTGCTGTTGCTACGTGATGGAGGAGAGGGGAACAAC-----  
-----  
-----

AGCACAGAGATATTCAGACCTGGAGGAGGGAATATGAAGGACAATTGGAGAAGTGAATTATATAAATATAAAG  
 TGGTAGAAATTGAGCCATTG---GGAATAGCACCCACTACGGCAAAAAGGAGAGTGGTG-----  
 -----GAGAGAGAAAAAAGAGCA---GTGGGA---ATAGGAGCT-----  
 GTGCTCCTTGGGTTCTTGGGAGCA---GCAGGAAGCACTATG---GGCGCGGCGTCA---  
 ATAACGCTGACGGTACAG---GCCAGACAA---CTGTTG---TCTGGTATAGTGCAACAGCGAAGC---  
 AATTTG---CTGAGA---GCTATAGAGGCGCAACAGCATATGTTGCAACTCACGGTCTGGGGCATT  
 >KC863203  
 TTCTATTGCAATACATCAAACTATTTAATAATACATACAGTCCTACATACAGTCCTAATGGTACAGGA----  
 -----  
 -----  
 GGAAATTCAACCATCAAAATTCATGCAGAATAAAACAAATTATAAACATGTGGCAGGGGGTAGGACGAGCAA  
 TGTATGCCAATCCCATTGCAGGGAACATAACATGTAAATCAAAT---  
 ATCACAGGACTACTATTAGTACGTGATGGAGGCACAAACAACAGC-----  
 -----  
 -----  
 ATGGAAATATTCAGACCTGGAGGAGGAAATATGAAGGACAATTGGAGAAGTGAATTATATAAATATAAAGTGG  
 TAGAAATTAAGCCATTG---GGAATAGCACCCACTGGAGCAAAAAGGAGAGTGGTG-----  
 -----GAGAGAGAAAAAGAACA---GCGGGA---ATAGGAGCT-----  
 GTGTTTCCTTGGGTTCTTGGGAGCA---GCAGGAAGCACTATG---GGCGCGGCGTCA---  
 TTGACGCTGACGGTACAG---GCTAGACAA---ATATTG---TCTGGTATAGTGCAACAGCAAAGC---  
 AATTTG---CTGAGG---GCTATAGAGGCGCAACAGCATATGTTGCAACTCACGGTCTGGGGCATT  
 >AY463223  
 TTCTACTGCAATACAACAGAACTGTTTAATTCAACAAAACCTGTTCAATGTAACTAAGGTAACATAAT-----  
 -----  
 -----  
 GCAACTGAAAATATCACTCTCCCATGCAGAATAAAACAAATTGTAAACATGTGGCAGGAGGTGGGACGAGCAA  
 TGTATGCCCCCTCCCATTGCAGGAAAAATAACATGTAGGTCAAAT---  
 ATCACAGGACTACTATTGTACGTGATGGAGGCATGGATAATAACACGAAT-----  
 -----  
 -----  
 AGCACAAAAGAGGAGATATTCAGACCTGGAGGAGGAAATATGAAGGACAATTGGAGAAGTGAATTATATAAAT  
 ATAAAGTGGTAGAAGTTAAGCCATTG---GGAGTAGCACCCACGGAGGCAAAAAGGCGAGTGGTG-----  
 -----GAGAGAGAAAAAAGAGCA---GTGGGA---ATAGGAGCT---  
 -----GTGTTTCCTTGGGTTCTTGGGAGCA---GCAGGAAGCACTATG---GGCGCAGCGTCA---  
 ATAACGCTGACGGCACAG---GCCAGGCAA---CTGTTG---TCTGGTATAGTGCAACAGCAAAGC---  
 AATTTG---CTGAGA---GCTATAGAGGCGCAACAGCATATGTTGCAACTCACGGTCTGGGGCATT  
 >DQ351235  
 TTCTATTGCAATACATCAGGCCTGTTTAATGGTACGTACAATGGTACAGACATGTCTAATAGT-----  
 -----  
 -----  
 ACAGAAAGTACCATCACACTCCCATGCAGAATAAAACAAATTATAAACATGTGGCAGGGGGTAGGACGAGCAA  
 TGTATGCCCCCTCCCATTGCAGGAAACATAACCTGTAAATCAAAC---  
 ATTACAGGATTACTATTGACACATGATGGAGGAAGAGAGGGTAAT-----  
 -----  
 -----  
 AGCACTGAAACATTTCAGACCTGGAGGAGGAAATATGAGGGATAATTGGAGAAGTGAATTATATAAATATAAAG  
 TAGTAGAAATCAAACCACTA---GGAATAGCACCCACAGAGGCAAAAAGGAGAGTGGTG-----  
 -----GAGAGAGAAAAAAGAGCA---GTGGGA---CTGGGAGCT-----  
 GTGTTTCCTTGGGTTCTTGGGAGCA---GCAGGAAGCACTATG---GGCGCAGCGTCA---  
 ATAACGCTGACGGTACAG---GCCAGACAG---TTATTG---TCTGGTATAGTGCAACAGCAAAGC---  
 AATTTG---CTGAAG---GCTATAGAGGCGCAACAGCATATGTTGCAACTCACGGTCTGGGGCATT  
 >DQ351222  
 TTCTATTGCGATACAACAAGACTGTTTAATAGCAGTACATTTGGT-----  
 -----  
 -----  
 GAAGGTGAAATCATCACACTCCCGTGCAAAATAAAACAAATTATAAACATGTGGCAGGGGGTAGGACGAGCAA  
 TGTATGCCCCCTCCCGTTGAAGGAAATATAACATGTAACTCAAGT---  
 ACCACAGGAATACTATTGACACGTGATGGAGGAGACCAGGACAAT-----  
 -----  
 -----

ACCACAGAGAAATTCAGACCTGGAGGAGGGAATATGAAGGACAATTGGAGAAGTGAATTATATAAATATAAAG  
TGGTAGAAATTAATCCAGTG---GGAGTAGCACCCACGGAGGCAAAGAGGAGCGTGGTG-----  
-----GCAAGAGAAAAAAGAACA---GTA-----ATAGGAGCT-----  
ATGATCCTTGGGTTCTTGGGAGCA---GCAGGAAGCACTATG---GGCGCGGCGTCA---  
ATAACGCTGACGGTACAG---GCCAGACAA---CTGCTG---TCTGGTATAGTGCAACAGCAAAGC---  
AATTTG---CTGAGA---GCTATAGAGGCGCAACAGCATCTGTTGCAACCCACGGTCTGGGGCATT  
>DQ351218  
TTCTATTGCAATACAACAAACCTGTTTCAGTACAACAATCCTGGTCAACAACCTCTACT-----  
-----  
-----  
GAAAAGGAAAACATCACACTCCCATGCAGAATAAAACAAATTATAAACATGTGGCAGGAGGTAGGACGAGCAA  
TGTATGCCCCCTCCCATTGAAGGAAACATAACATGTACATCAAAG---  
ATCACAGGAATACTACTGACACGTGATGGAGGAGACAACACAACAACA-----  
-----  
-----  
AGAAATAACGGGACATTTCAGACCTGGAGGAGGAAATATGAAGGACAATTGGAGAAATGAATTATATAAATATA  
AAGTAGTAGAAATTAAACCATTG---GGAGTAGCACCCACTAAGGCAAAAAGGAGAGTGGTG-----  
-----GAGAGAGAAAAAAGAGCA---GTGGGA---ATAGGAGCT-----  
---GTACTCCTTGGGTTCTTGGGAGCA---GCAGGAAGCACTATG---GGCGCAGCGTCA---  
CTAACGCTGACGGTACAG---GCCAGACAA---CTGTTG---TCTGGTATAGTGCAACAGCAAAGC---  
AATTTG---CTGAGG---GCTATAGAGGCGCAACAGCATATGTTGCAACTCACGGTCTGGGGCATT  
>DQ447269  
TTCTATTGCGATACCTCAAACCTGTTTAAATAGGACATACCCATTGAATAATAGTAGTGCAAGGAAATGACAATA  
GT-----  
-----  
AGCAGTGATTCAACCATCACACTCCAATGCAGGATAAAACAAATTATAAACATGTGGCAGGGGGTAGGACGAG  
CAATGTATGCCCCCTCCCATTGAAGGAAACATAACATGTAAGTCAAAT---  
ATCACAGGACTACTATTGACACGTGATGGAGGACCAAGTAATGAA-----  
-----  
-----  
AGTGAGACATTTCAGACCTGCAGGAGGGGATATGAGGGACAATTGGAGAAGTGAATTATATAAATACAAAGTGG  
TGGAAGTGAATCCATTA---GGAATAGCACCCACCAAGGCAAAAAGGAGAGTGGTG-----  
-----GAGAGAGAGAAAAAGAGCA---GTGGGA---ATAGGAGCT-----  
GTGTTCTTGGGTTCTTGGGAGCA---GCAGGAAGCACTATG---GGCGCAGCATCA---  
ATAACGCTGACGGTACAG---GCCAGACAA---TTATTG---TCTGGTATAGTGCAACAGCAAAGC---  
AATTTG---CTGAGG---GCTATAGAGGCGCAACAGCATATGTTGCAACTCACAGTCTGGGGCATT  
>DQ369978  
TTCTATTGCAATACAACACCACTGTTTAAATATGTCTGCTGACAATAACAGCACC-----  
-----  
-----  
AATAATGGCACCATCACACTCCAATGCAAGATAAAACAAATTATAAACATGTGGCAGGGGGTAGGACGAGCAA  
TGTATGCCCCCTCCCATTGCAGGAAACATAACATGTGCGTCAAAT---  
ATCACAGGACTACTATTGACACATGACGGAGGCATAAAAAATGAC-----  
-----  
-----  
ACAGTCCCAGAGGTATTTAGACCTGGAGGAGGAAATATGAAGGACAATTGGAGAAGTGAATTATATGAATATA  
AAGTGGTAGAAATTAAGCCATTG---GGAATAGCCCCCACTGAGTCAAGAAGGATAGTGGTG-----  
-----GAGAGAGAGAAAAAGAGCA---GTGGGA---ATGGGAGCT-----  
---GTGATCTTTGGGTTCTTAGGAGCA---GCAGGAAGCACTATG---GGCGCGGCGTCA---  
ACGGCGCTGACGGTACAG---GCCAGACAA---CTGTTG---TCTGGTATAGTGCAACAGCAAAGC---  
AATTTG---CTGAGA---GCTATAGAGGCGCAACAGCATATGTTGCAACTCACAGTCTGGGGCATT  
>DQ351225  
TTCTATTGCAATACATCAAACTGTTTAAACGGTACATACAGCCATAATGTCAGTACAAATAAC-----  
-----  
-----  
AGTACAGAACCCATCACAAATTCATGCAGGATAAAACAAATTATAAACATGTGGCAAGAGGTAGGACGAGCAA  
TGTATGCCCCCTCCCATTGCAGGAAACATAACATGTAAATCAAAT---  
ATCACAGGACTACTATTAACACGTGATGGAGGGAACACAAACACAAGC-----  
-----  
-----

AATAACACAGAGACATTTCAGACCTGGAGGAGGAAATATGAAGGACAATTGGAGAAATGAATTATATAAATATA  
AAGTGGTAGAAATTAAGCCATTG---GGAGTAGCACCCACTAAGGCCAAAAGGAGAGTGGTG-----  
-----GAGAGAGAAAAAAGAGCA---GTGGGA---ATAGGAGCT-----  
---GTGCTCCTTGGGTTCTTGGGAGCA---GCAGGAAGCACTATG---GGCGCGGCGTCA---  
ATAACGCTGACGGTACAG---GCCAGACAA---CTGCTG---TCTGGTATAGTGCAACAGCAAAGC---  
AATTTG---CTGAGA---GCCATAGAGGCGCAACAGCATATGTTGCAACTCACGGTCTGGGGCATT  
>DQ396367  
TTCTATTGCAATACAACATACCTGTTTTCTAATAAGACAGGCAACACAACC-----  
-----  
-----  
GACAAACGCAACCATCACGCTCCCATGCAGGATAAAAACAATTTATAAACATGTGGCAGGAGGTAGGACGAGCAA  
TATATGCCCCCTCCCATTGCAGGAAAAATAACATGTAACCTCAAAT---  
ATCACAGGACTACTATTGACACGTGATGGAGGTGTGAATACTACGAATAATTCTG-----AGT-----  
-----  
AATACAAGTAAAACA---  
GAGACAGAGATATTCAGACCTGGAGGAGGAAATATGAAAAGACAATTGGAGAAGTGAATTATATAAATACAAAAG  
TGGTAGAAATTAATCCATTG---GGAGTAGCACCCACTAATGCAAAAAGGAGAGTGGTG-----  
-----GAGAGAGAAAAAAGAGCA---GTGGGG---ATAGGAGCT-----  
GTACTCCTTGGGTTCTTGGGAGCC---GCAGGAAGCACTATG---GGCGCGGCGTCA---  
ATAACGCTGACGGTACAG---GCCAGACAA---TTGTTG---TCTGGTATAGTGCAACAGCAAAGC---  
AATTTG---CTGAGA---GCTATAGAGGCGCAACAGCATATGTTGCAACTCACAGTCTGGGGCATT  
>DQ351226  
TTCTATTGTAATACAACAAACCTGTTTAACATAAACCTGACTAACTGGAGGTCTGATAGTAAGGGA-----  
-----  
-----  
AATTCCACAATTATCACACTCCCATGTAGAATAAGACAATTTGTAAACCTGTGGCAGGGGGTAGGAAGGGCAA  
TGTATGCCCCCTCCCATTGAAGGTAATATAACATGTAAGTCAAAT---  
ATCACAGGACTACTATTGACACGTGATGGAGGCAATGTCACAAAT-----  
-----  
-----  
AATGGCACAGAGATATTCAGACCTGGAGGAGGAGATATGAGGGACAATTGGAGAAGTGAATTATATAAATATA  
AAGTGGTAGAAATTAAGCCATTG---GGAGTAGCACCCACAGAGGCCAAAAGGAGAGTGGTG-----  
-----GAGAGAGGAAAAAGAGCA---GTGGGA---ATGGGAGCT-----  
---GTGATCCTTGGTTTCTTGGGAGCA---GCAGGAAGCACTATG---GGCGCGGCGTCA---  
ATAACGCTGACGGTACAG---GCCAGACAA---CTGTTG---TCTGGTATAGTGCAACAGCAAAGC---  
AATTTG---CTGAGA---GCTATAGAGGCGCAACAGCACATGTTGAAACTCACAGTCTGGGGCATT  
>DQ369985  
TTCTATTGCAATACATCAAACCTGTTTAATAGTACAGTTAATGGTAATAGTACAGTTAATGGTACACACCTGG  
GTAATAGT-----  
-----AAT---  
AGTACAAATAACAACATCACACTCCAATGCAGAATAAAACAAATTATAAACATGTGGCAGGGGGTAGGACGAG  
CAATGTATGCCCCCTCCTATTGCAGGAAACATAACCTGTGTATCAAAT---  
ATCACAGGACTACTATTGACACGTGATGGTGGCAGGGAGAAATGGCACA-----  
-----  
-----  
AATAACACAGAGATATTCAGACCTGCAGGAGGAAACATGAAGGACAATTGGAGAAGTGAATTATATAAATATA  
AAGTGGTAGAAATTAATCCATTG---GGAGTAGCACCCACTGAGGCCAAAAGGAGAGTGGTG-----  
-----GAGAGAGAAAGAAGAGCA---GTGGGA---ATAGGAGCT-----  
---GTGTTCTTGGGTTCTTGGGAGCA---GCAGGAAGCACTATG---GGCGCAGCGTCA---  
ATAACGCTGACGGTACAG---GCCAGACAA---CTGTTG---TCTGGTATAGTGCAACAGCAAAGC---  
AATTTG---CTGAGG---GCTATAGAGGCGCAACAGCATATGTTGCAACCCACGGTCTGGGGCATT  
>DQ369996  
TTCTATTGCAATACATCAAACTGTTTAATAGTACATACAGTAGTACATACAATAATACATCTGATAATACT-  
-----  
-----  
TCACATCCAAACATCACACTCCCATGCAGAATAAAACAAATTATAAACCTGTGGCGGGAGGTAGGACGGGCAA  
TGTATGCCCCCTCCCATTGCAGGAAACATAACATGTAACCTCAAGT---  
ATCACAGGACTACTATCGACACGTGATGGGGGAGAAAAATAACTCA-----  
-----  
-----

ACAACAGAGACATTTCAGACCTGGAGGAGGAGATATGAGGGACAATTGGAGAAGTGAATTATATAAATATAAAG  
TGGTAGGAATTGAGCCATTA---GGAGTAGCACCCACCAAGGCAAAAAGGAGAGTGGTGGAG-----  
-----AGGGAGAGAGAAAAAAGAGCA---ATGGGA---ATAGGAGCT-----  
GTGTTCCCTTGGGTTCTTGGGAGCA---GCAGGAAGCACTATG---GGCGCGGCGTCA---  
ATAACGCTGACGGTACAG---GCCAGACAA---CTGTTG---TCTGGTATAGTGCAACAGCAAAGC---  
AATTTG---CTGAAG---GCTATAGAGGCGCAACAGCATCTGTTGCAACTCACAGTCTGGGGCATT  
>DQ445633  
TTCTATTGCAATACAACAAACTTGTTTAATAATATAAAAAATGATGAGGATACAAAAAT-----  
-----  
-----  
GGTAGTGATCCAATCATACTCCCATGCAGAATAAAACAAATTATAAACATGTGGCAGGGGGTAGGACGAGCAA  
TGTATGCCCCCTCCCATTGCAGGAAACATAACATGTAACCTCAAGT---  
ATCACAGGACTACTATTGACACGTGATGGAGGGAATGGTACTAAT-----  
-----  
-----  
AATACTGAGATATTCAGACCTGGAGGAGGAAATATGAAGGACAACCTGGAGAAATGAATTATACAAATATAAAG  
TGGTAGAAATTAAACCATTA---GGAATAGCACCCACCAAGGCAAAAAGGAGAGTGGT-----  
-----GAGAGAGAAAAAAGAGCA---GTGGGA---ATAGGAGCT-----  
GTGTTCCCTTGGGTTCTTGGGAGCA---GCAGGAAGCACTATG---GGCGCGGCGTCT---  
ATCACGCTGACGGTACAG---GCCAGACAA---CAGTTG---TCTGGTATAGTGCAACAGCAAAGC---  
AATTTG---CTGAGA---GCTATAGAGGCGCAACAGCATATGTTGCAACTCACGGTCTGGGGCATT  
>DQ369979  
TTCTATTGCAATACAACAAGACTGTTCAACACAACCTAGCACAAAGAGAG-----  
-----  
-----  
TCAAAACAAAACCATCACACTCCCATGCAGAATAAAACAAATTATAAACATGTGGCAGGGGGTAGGACGAGCAA  
TGTATGCCCCCTCCCATTGCAGGAAACATAACATGTAACCTCAAGT---  
ATCACAGGAATACTATTGCAACGTGATGGAGGAAACACGAGTGAG-----  
-----  
-----  
CCCACAGAGATATTCAGACCTGGAGGAGGAAATATGAAGGACAATTGGAGAAGCGAATTATATAAATATAAAG  
TGGTAGAAATTAAAGCCATTG---GGAATAGCACCCACGAAGGCAAAAAGGAGAGTGGT-----  
-----GAGAGAGAAAAAAGAGCA---GTGGGA---ATAGGAGCT-----  
GTGTTCCCTTGGGTTCTTGGGAGCA---GCAGGAAGCACTATG---GGCGCGGCGTCA---  
ATAACGCTGACGGTACAG---GCCAGACAA---CTGTTG---TCTGGTATAGTGCAACAGCAAAGC---  
AATTTG---CTGAGA---GCTATAGAGGCGCAACAGCATCTGTTGCAACTCACGGTCTGGGGCATT  
>DQ369984  
TTCTACTGCAATACAACAAAACCTGTTTAATACAACAAGACTGTTAAAAGAAAGTGATTCA-----  
-----  
-----  
AACACAAACACCACCACACTCCCATGCAGGATAAAACAGATTGTAAACATGTGGCAGGAGGTAGGACGAGCAA  
TGTATGCCCCCTCCCATTGCAGGAAACATAACATGTAAATCAAAT---  
ATCACAGGACTACTATTGACACGTGATGGAGGGAATAACACTGACACAGAT-----  
-----  
-----  
GGCGATAACACAGAAACATTTCAGACCTGGAGGAGGAAATATGAAGGACAATTGGAGAAGTGAATTATATAAGT  
ATAAGGTGATAAAAATTAAGCCATTA---GGAATAGCACCCACTGAGGCAAAAAGAAGAGTGGTG-----  
-----AAGAGAGAAAAAAGAGCA---GTGGGA---ATAGGAGCT---  
-----ATGATCTTTGGGTTCTTGGGAGCA---GCAGGAAGCACTATG---GGCGCGGCGTCA---  
ATAACGCTGACGGTACAG---GCCAGACAA---CTGTTG---TCTGGTATAGTGCAACAGCAAAGC---  
AATTTG---CTGAGA---GCTATAGAGGCGCAACAGCATATGTTGCAACTCACGGTCTGGGGCATT  
>DQ396364  
TTCTATTGCGATAACAACAGGACTGTTTAATAGTACATACATGCCTGAATACTGGCCTAATAGTACAGAAAGTA  
AT-----  
-----  
-----  
TCAAGCTCAGTAATCACACTCCCATGCAGAATAAAACAAATTATAAACATGTGGCAGGAGGTAGGAAGAGCAA  
TGTATGCTCCTCCCATTGCAGGAAACATAACATGTAGATCAAAT---  
ATCACAGGATTACTATTGGTGCGTGATGGAGGAACAAATAACACA-----  
-----  
-----

AATAACACAGAGACCTTCAGACCTGGAGGAGGAGATATGAGGGACAATTGGAGAAGTGAATTATACAAATATA  
AAGTGGTAGAAATTAAGCCATTG---GGAATAGCACCTACTGGGGCAAAAAGGAGAGTGGTG-----  
-----GAGAGAGAAAAAAGAGCA---GTTGGA---ATAGGAGCT-----  
---GTGTTCCCTTGGGTTCTTGGGAGCA---GCAGGAAGCACTATG---GGCGCAGCGTCA---  
ATAACGCTGACGGTACAG---GCCAGACAA---TTGTTG---TCTGGTATAGTGCAACAGCAAAGT---  
AATTTG---CTGAGG---GCCATAGAGGCGCAACAGCATATGTTGCAACTCACGGTCTGGGGCATC  
>DQ369986  
TTCTATTGCAACACATCAGGACTATTTAATGGTACATACACGAGTAACATGACAGGAAATGGAAATGAT----  
-----  
-----  
TCAAACTCAAACATCACACTTCCATGCAGAATAAAACAAATTATAAACATGTGGCAAGAGGTAGGACGAGCAA  
TGTATGCCCCCTCCCATTAAGGAAACATAACATGTAGATCAAAT---  
ATCACAGGACTACTATTAGTACGTGATGGAGGCAACCACAACAACAGC-----  
-----  
-----  
AACAAACACAGAGACATTTCAGACCTGGAGGAGGAAATATGAAGGACAATTGGAGAAGTGAATTGTATAAATATA  
AAGTGGTAGAAATTAACCATTG---GGAATAGCACCCACTACTGCAAAAAGGAGAGTGGTG-----  
-----GAGAGAGAAAAAAGAGCA---GTGGGA---ATAGGAGCT-----  
---GTATTCCTTGGGTTCTTGGGAACA---GCAGGAAGCACTATG---GGCGCAGCGTCA---  
ATAACGCTGACGGTACAG---GCCAGACAA---CTGTTG---TCTGGTATAGTGCAACAGCAAAGC---  
AATTTG---CTGAGA---GCTATAGAGGCGCAACAGCATCTGTTGCAACTCACGGTCTGGGGCATT  
>DQ369980  
TTCTATTGCAATACATCAAACCTGTTTAATAGTACATACAAGCCTAATGGTACAAGAAGTACT-----  
-----  
-----  
TCAAATTTAACCATCACACTCCAGTGCAGAATAAAACAAATTATAAACATGTGGCAGGAGGTGGGACGAGCAA  
TGTATGCCCCCTCCCATTCAGGAAACATAACATGTAAATCAAAT---  
ATCACAGGGCTACTATTGACACGTGACGGAGGAAAAGGAAATGAT-----  
-----  
-----  
ACGTCTGAAACATTTCAGACCTGGAGGAGGAGATATGAGGGACAATTGGAGAAGTGAATTATATAAATATAAGG  
TGGTAGAAATTAAGCCATTG---GGATTAGCACCCACTAAGGCAAAAAGGAGAGTGGTG-----  
-----CAGAGAGAGAAAAGAGCA---GTGGGA---ATAGGAGCT-----  
GTGTTCCCTTGGGTTCTTGGGGGCA---GCAGGAAGCACTATG---GGCGCGGCGTCA---  
ATAACGCTGACGGTACAG---GCCAGACAA---TTATTG---TCTGGCATAGTGCAACAGCAAAGC---  
AATTTG---CTGAAG---GCTATAGAGGCGCAACAACATCTGTTGCAACTCACAGTCTGGGGCATT  
>DQ396385  
TTCTATTGTAATACAACAAAGCTGTTTAATGGTACATACAGGCCTGCATACAATAATGGTACAGGA-----  
-----  
-----  
AGTAATTCAAGCATCACACTCCAATGCAGGATAAAACAAATTATAAACATGTGGCAGCAGGTAGGACGAGCAA  
TGTATGCTCCTCCCATTCGAAGGAAACATAACATGTAAATCAACT---  
ATCACAGGACTACTATTGACACGTGATGGAGGGGAAAATGGCACA-----  
-----  
-----  
GAAAATGAGACATTTCAGACCTGGAGGAGGAAATATGAGGGACAATTGGAGAAGTGAATTATACAAATATAAAG  
TGGTAGAAGTTAAACCATTG---GGAATAGCACCTACTGGGGCAAAAAGGAGAGTGGTG-----  
-----GAGAGAGAAAAAAGAGCA---GTGGGA---ATAGGAGCT-----  
GTGTTCCCTTGGGTTCTTGGGGGCA---GCAGGAAGCACTATG---GGCGCGGCGTCA---  
CTGACGCTGACGGTACAG---GCCAGACAA---CTATTG---TCTGGTATAGTGCAACAGCAAAGC---  
AATTTG---CTGAGG---GCCATAGAGGCGCAACAGCATATGTTGCAACTCACGGTCTGGGGCATT  
>DQ369987  
TTCTATTGCAATACATCAAGACTGTTTAATAGCACATTTAATAGTACATACATGCCTAATGCTACAGAAAGTA  
AT-----  
-----  
-----  
TCAAGTTCAGTCATCACGATTCCCTGCAGAATAAAACAAATTATAAACATGTGGCAGGAGATAGGACGGGCAA  
TGTATGCCCCCTCCTATTGCAGGAAACATAACATGTAAATCAAAT---  
ATCACAGGACTACTATTAGTACGTGATGGAGGCAACAGTAACAAT-----  
-----  
-----

GACACAGAGATATTCAGACCTGGAGGAGGAAATATGAAGGACAATTGGAGAAGTGAATTATACAAATATAAAG  
TGGTAGAAATTAAGCCATTG---GGAATAGCACCCACGAAGGCAAAAAGGAGAGTGGTG-----  
-----GAGAGAGAAAAAAGAGCA---GTAGGA---ATAGGAGCT-----  
GTGTTCTTGGGTTCTTGGGAGCA---GCAGGAAGCACTATG---GGCGCGGCGTCA---  
ATAACGCTGACGGCACAG---GCCAGACAA---TTGTTG---TCTGGTATAGTGCAACAGCAAAGC---  
AATTTG---CTGAGG---GCTATAGAGGCGCAACAGCATATGTTGCAACTCACGGTCTGGGGCATT  
>DQ369988  
TTCTATTGCGAAACAACAAGACTGTTTAATACAACACAACCTTAATACAACA-----  
-----  
-----  
CAAAATGGAACAATCATACTCCCATGTAGAATAAAAGCAAATTATAAACATGTGGCAGGGGGTAGGACGAGCAA  
TGTATGCCCCCTCCCATTCAGGAATGATAACATGTAACCTCAAGT---  
ATCACAGGACTACTATTGGTACGCGATGGAGGCACGAATGACACA-----  
-----  
-----  
GAGATATTCAGACCTGGAGGAGGAAATATGAAGGACAATTGGAGAAGTGAATTATATAAAATATAAAGTGGTAG  
AAATTAAGCCATTG---GGAATAGCACCCACTGGGGCAAAAAGGAGAGTGGTG-----  
-----GAGAGAGAAAAAAGAGCA---GTGGGA---ATAGGAGCT-----  
GTAATCCTTGGGTTCTTGGGAGCA---GCAGGAAGCACTATG---GGCGCAGCATCA---  
ATAACGCTGACGGTACAG---GCCAGACAA---CTGTTG---TCTGGTATAGTGCAACAGCAAAGC---  
AATTTG---CTGAGG---GCTATAGAGGCGCAACAGCATATGTTGCAACTCACGGTCTGGGGCATT  
>DQ396373  
TTCTATTGCAATACATCACAACCTGTTTAATAGTACATACAACAACCATACATACACGAATAATGGGACA----  
-----  
-----  
GGAAATTCAAACATCACACTTCCATGCAAAATAAAACAGATTATAAATATGTGGCAGGGGGTAGGACGAGCAA  
TGTATGCCCCCTCCCATTCAGGAAACATAACATGTATCTCAAAT---  
ATCACAGGACTAATATTGACACGTGATGGAGGAGAAGAAGGAAACAAC-----  
-----  
-----  
AACAAAACAGAGATATTCAGACCTGGAGGAGGAAATATGAAGGATAATTGGAGAAATGAATTATATAAAATATA  
AAGTGGTAGAAATTAAGCCATTG---GGAATAGCACCCACTAAGGCAAAAAGAAGAGTGGTG-----  
-----GAGAGAGAAAAAAGAGCA---GTGGGA---CTAGGAGCT-----  
---GTGTTCTTGGGTTCTTGGGAGCA---GCAGGAAGCACTATG---GGCGCGGCGTCA---  
ATAACGCTGACGGTACAA---GCCAGACAA---CTGTTA---GCTGGTATAGTGCAACAGCAAAT---  
AATTTG---CTGAGG---GCTATAGAGGCGCAACAGCATATGTTGCAACTCACGGTCTGGGGCATT  
>DQ396374  
TTCTATTGCAATACATCAAACTGTTTAATACAACAGTTAATGGAACAGAGTTAGAGTTTAACACAACAGGAA  
GG-----  
-----  
-----  
TCTAATAAAACCATCACTCTCCAATGCAAGATAAAACAAATTATAAACATGTGGCAAGAGGTAGGACGAGCAA  
TGTATGCCCCCTCCCATTCAGGAAACATAACATGTAGATCAAAT---  
ATCACAGGATTACTATTGACATGGGATGGACCAACAAACAATGGC-----  
-----  
-----  
ACAGACATATTTAGACCTGGAGGAGGAAATATGAAAGACAATTGGAGAAGTGAATTATATAAAATATAAAGTGG  
TAGAAATTAAGCCATTA---GGAATAGCACCCACTGAATCAAAAAGGAGAGTGGTG-----  
-----GAAAGAGAAAAAAGAGCA---GTGGGA---CTAGGAGCT-----  
TTGATCCTTGGGTTCTTGGGAACA---GCAGGAAGCACTATG---GGCGCGGCGTCA---  
ATAGCGCTGACGGTACAG---GCCAGACAA---CTGTTG---TCTGGTATAGTGACAGCAGCAAAC---  
AATTTG---CTGAGA---GCTATAGAGGCGCAACAGCATATGTTGCAACTCACAGTCTGGGGCATT  
>DQ369989  
TTCTATTGCAATACATCAGAACTATTTAACAGTACATACAATAAGGATACAAAGAGTAATGGTACAAAG----  
-----  
-----  
AGTAATTTAACCATCACAATTCATGCAGGATAAAACAAATTATAAACATGTGGCAGCAGGTGGGACGAGCAA  
TGTATGCTCCTCCCATTCAGGAAACATAACATGTAAATCAAAT---  
ATCACAGGACTACTATTGGTGCGTGATGGAGGAACAAATAACATA-----  
-----  
-----

AATAACACAGAGACATTTCAGACCTGGAGGAGGAGATATGAGGGATAATTGGAGAAGTGAATTATACAAATATA  
AAGTGGTAGAAATTAACCATTTG---GGAATGGCACCAACTAAGGCCAAAACGGAGAGTGGTG-----  
-----GAGAGAGAAAAAAGAGCA---GTGGGA---ATAGGAGCT-----  
---GTGCTCTTTGGGTTCTTGGGAGCA---GCAGGAAGCACTATG---GGCGTGGCGTCA---  
ATAACGCTGACGGTACAG---GCCAGACAA---TTGTTG---TCTGGTATAGTGCAACAGCAAAGC---  
AATTTG---CTGAGA---GCCATAGAGGCGCAACAGCGTATGTTGCAACTCACGGTCTGGGGCATT  
>DQ396375  
TTCTATTGCAATACAACAGAACTGTTTAATAATAGTGAAGTAAACATAACTGCAGCTACTGCA-----  
-----  
-----  
ACAAATGAAACCTTCACACTCCCATGCAAAATAAAACAAATTATAAACATGTGGCAGGGGGTAGGACGAGCAA  
TGTATGCCCCCTCCCATTAAGGAAACATAACATGTAAATCAAAC---  
ATCACAGGAATACTATTGACATGGGATGGAGGAAATGAAACTAGGACAGATAAT-----  
-----  
-  
AGGACAAATAATAAAACAGAGATATTTCAGACCTGGAGGAGGAAATATGAAGGACAATTGGAGAAATGAATTAT  
ATAAATATAAAGTGGTAGAAATTAAGCCATTG---GGAGTAGCACCCACTACGGCAAAAAGGAGAGTGGTG--  
-----GAGAGAGAAAAAAGAGCA---GTAGGA---  
ATAGGAGCT-----GTGCTCCTTGGGTTCTTGGGAGCA---GCAGGAAGCACTATG---  
GGCGCGGCGTCA---ATAACGCTGACGGTACAG---GCCAGACAA---CTGTTG---  
TCTGGTATAGTGCAACAGCAAAGC---AATTTG---CTGAGA---  
GCTATAGAGGCGCAACAGCATATGTTGCAACTCACAGTCTGGGGCATT  
>DQ396389  
TTCTATTGCAATACATCAAGACTGTTTAATGGTACATACAACAGCACAGAAAACAGCACAGAAAAT-----  
-----  
-----  
GCAAATAGTACCATCACACTCCCATGTAGAATAAAACAAATTGTAAACATGTGGCAGGGAGTAGGACAAGCAA  
TGTATGCCCCCTCCCATTTGACAGGAAACATAACATGTAACTCAAAT---  
ATCACAGGACTACTATTGACACGTGATGGGGGGAACAACAATAAC-----  
-----  
-  
GGGACAGAGACATTTCAGACCTGGAGGAGGAGATATGAGGGACAATTGGAGAAGTGAATTATATAAATATAAAG  
TGGTAGAAATTAAGCCATTA---GGAATAGCACCCACTAAGGCACAAAGGAGAGTGGTG-----  
-----CAGAGAGAAAAAAGAGCA---GTAGGA---ATAGGAGCT-----  
GTACTCCTTGGGTTCTTGTACAGCA---GCAGGAAGCACTATG---GGCGCGGCGTCA---  
ATAACGCTGACGGTACAG---GCCAGACAA---GTGCTG---TCTGGTATAGTGCAACAGCAGAGC---  
AATCTG---CTGAGG---GCTATAGAGGCGCAACAGCATATGTTGCAACTCACGGTCTGGGGCATT  
>DQ396376  
TTCTATTGCAATACAACAAAACATTTTAATGACAATGAGACA-----  
-----  
-----  
AACGAATACATCATACTCCCATGCAGAATAAAACAAATTATAAACATGTGGCAGGGGGTAGGACGAGCCATGT  
ATGCCCCCTCCCATTTGAAGGAAACATAACATGTAAATCAAAT---  
ATCACAGGACTATTATTGACACGTGATGGAGGAGGCGAAAATGAA-----  
-----  
-----  
ACCAAAATCGAGATATTTCAGACCTGGAGGAGGAAATATGAAGGACAATTGGAGAAGTGAATTATATAAATATA  
AAGTGGTAGAACTTAAGCCATTG---GGCATAGCACCCACTGAGGCCAAAAGGAGAGTGGTG-----  
-----GAGAGAGAAAAAAGAGCA---GTGGGA---ATGGGAGCT-----  
---GTGCTCCTTGGGTTCTTGGGAGCA---GCGGGAAGCACTATG---GGCGGCGCGTCA---  
ATAACGCTGACGGTACAG---GCCAGACAA---CTGTTG---TCTGGTATAGTGCAACAGCAAAGC---  
AATTTG---CTGAGG---GCTATAGAGGCGCAACAACATATGTTGCAACTCACGGTCTGGGGCATT  
>DQ093591  
TTCTACTGCAATACAAGCGGACTGTTCAATGCAACTTTCAATACAATAATA-----  
-----  
-----  
ACTGATGCAAACATCACACTCCCATGCAGAATAAAACAAATTATAAACATGTGGCAGGAGGTAGGACGAGCAA  
TGTATGCCCCCTCCCATTTGAAGGAAACATAATATGTAGATCAAAC---  
ATCACAGGACTGCTATTGCAACGTGATGGAGGCAAGGGCAATGGCACT-----  
-----

-----  
GACAACGAAACAGAGATATTCAGACCTGGAGGAGGAAATATGAAAGACAATTGGAGAAGTGAATTATATAAAAT  
ATAAGGTGGTAGCAATTAAGCCATTA---GGAGTAGCACCCACGGATGCACAAAGGAGAGTGGTG-----  
-----GAGAGAGAAAAAAGAGCA---GTGGGA---ATAGGAGCT---  
-----ATGCTCTTTGGGTTCTTAGGAGCA---GCAGGAAGCACTATG---GGCGCAGCGTCA---  
ATAACGCTGACGGTACAG---GCCAGACAA---CTGTTG---TCTGGTATAGTGCAACAGCAAAGC---  
AATTTG---CTGAGA---GCTATAGAGGCGCAACAGCATCTGTTGCAACTCACAGTCTGGGGCATT  
>DQ351219  
TTCTATTGTAATACAACAGGACTGTTTTCTAATAATGGAAGTGCAGGA-----  
-----  
-----  
AACGCAACCACCATCACACTCCCATGCAGAATAAAACAAATTATAAACATGTGGCAGGGGGTAGGACGAGCGA  
TGTATGCCCCCTCCCATTCAGAGAAACATAACATGTACCTCAAAT---  
ATCACAGGACTACTATTGACACGGGATGGAGGAATAAAGGATAACACA-----  
-----  
-----  
ACAGACATAACAGAGACATTCAGACCTGGAGGAGGAAATATGAAGGACAATTGGAGAAATGAATTATATAAAAT  
ATAAAGTGGTAGAAATTAACCATTG---GGAGTAGCACCCACTGAGGCAAAAAGGAGAGTGGTG-----  
-----GATAGAGAAAAAAGAGCA---GTA-----CTAGGAGCT---  
-----ATGTTTCCTTGGGTTCTTGGGAGTA---GCAGGAAGCACTATG---GGCGCAGCGTCA---  
GTAACGCTGACGGTACAG---GCTAGACAA---TTATTG---TCTGGTATAGTGCAACAGCAAAGC---  
AATTTG---CTGAGG---GCTATAGAGGCGCAACAGCATATGCCGCAACTCACAGTCTGGGGCATT  
>DQ351229  
TTCTATTGCAATACATCAAACTGTTTAATAGTACATTTAATAGTACATATATGCATAATGATACAGGAAGTA  
AT-----  
-----  
ACAAGCTCAACAATCACAATCCCATGCAAAATAAAACAAATTATAAACATGTGGCAGGAGGTAGGAAGAGCAA  
TGTATGCTCCTCCCATTCAGAGAAACATAACATGTAAATCAAAT---  
ATCACAGGACTACTATTGACACGTGATGGGGGAAATTCAACTGAT-----  
-----  
-----  
AATGAAACAGAAACATTCAGACCTGAAGGAGGAGACATGAGGGACAATTGGAGAAATGAATTATACAAATATA  
AAGTGGTAGAAATTAAGCCATTG---GGAATAGCACCCACTGAGGCAAAAGAGGAGAGTGGTG-----  
-----GAGAGAGAAAAAAGAGCA---GTGGGA---ATAGGAGCT-----  
---GTGCTCCTTGGGTTCTTGGGAGCA---GCAGGAAGCACTATG---GGCGCGGCGTCA---  
ATAACGCTGACGGTACAA---GCCAGACAA---CTGTTG---TCTGGTATAGTGCAACAGCAAAGC---  
AATTTG---CTGAGA---GCTATAGAGGCGCAACAGCATATGTTGCAACTCACGGTCTGGGGCATT  
>DQ275654  
TTCTATTGCAATACATCACAACATTTAATGATAGTAATACAGAATTTAATATTAGTAGTACAGAA-----  
-----  
-----  
AATAATAAAACCATCACAATTCTATGCAGAATAAAACAAATTTATAAACATGTGGCAGAAGGTAGGACAAGCAA  
TGTATGCCCCCTCCCATAGCAGGAAACATAACATGTAACTCAAGC---  
ATCACAGGATTATTACTGACACGTGATGGTGGAAATGAAAGTATCACA-----  
-----  
-----  
AATAACACAGAGATATTCAGACCTGGAGGAGGAAATATGAAGGACAATTGGAGAAGTGAATTATATAAAATATA  
AAGTGGTAGAAATTATGCCATTG---GGAATAGCACCCACTACTGCAAAAAGGAGAGTGGTG-----  
-----GAGAGAGAAAAAAGAGCA---GTGGGA---ATAGGAGCT-----  
---GTGATCTTTGGGTTCTTGGGAGCA---GCAGGAAGCACTATG---GGCGCGGCGTCA---  
ATAACGCTGACGGTACAG---GCCAGACAA---CTGCTG---TCTGGTATAGTGCAACAGCAAAGT---  
AATTTG---CTGAGA---GCTATAGAGGCGCAACAACATATGTTGCAACTCACGGTCTGGGGCATT  
>DQ351216  
TTTTATTGCGATACATCGCGGCTGTTTACTAATGTAAGCAATGAAAATGACACAATCACCAATGTAAGCAAT-  
-----  
-----  
AAAAATGACACAATCACACTCCCATGCAGAATAAAACAAATTGTAAACATGTGGCAGGGGGTAGGACGAGCAA  
TGTATGCCCCCTCCCATTCAGAGACAAATAACATGTAGCTCAAAT---  
ATCACAGGACTACTATTGACACGTGATGGAGGAAACACAACCTGTT-----  
-----

-----  
 ACTAACACAGAGGTATTTCAGACCTGAAGGAGGAAATATGAAGGACAATTGGAGAAGTGAACATATATAAATATA  
 AAGTGGTAGAAATTAAACCATTG---GGAGTAGCACCCACTAAGGCAAAAAGGAGAGTGGTG-----  
 -----GAGAGAGAAAAAAGAGCA---GTGGGA---ATAGGAGCT-----  
 ---GTACTCCTTGGGTTCTTGGGAGCA---GCAGGAAGCACTATG---GGCGCGGCGTCT---  
 ATAACGCTGACGGTACAG---GCCAGACAA---CTGTTG---TCTGGTATAGTGCAACAGCAAAAC---  
 AATTTG---CTGAGA---GCTATAGAGGCGCAACAGCATATGTTGCAACTCACGGTCTGGGGCATT  
 >DQ275645  
 TTCTACTGCAATACAACAGAACTGTTTAATGTAAACAATGATCCA-----  
 -----  
 -----  
 AACGATTCAAACATCACGCTCCCATGCAGAATAAAGCAAATTATAAACATGTGGCAGGGGGTAGGACGAGCAA  
 TGTATGCCCCCTCCCATTTGAAGGAGAGATAACATGTAAATCAAAC---  
 ATTACAGGACTACTATTGGAGCGTGATGGAGGAAAAACAATGAC-----  
 -----  
 -----  
 ACGAAAGAGACATTTAGACCTGGGGGAGGAAATATGAAGGACAATTGGAGAAGTGAATTATATAAATATAAAG  
 TGGTAGAAATTAAACCATTG---GGAGTAGCACCCACAGAGGCAAAAAGGAGAGTGGTG-----  
 -----GAGAGAGAAAAAAGAGCA---GTAACA---ATAGGAGCT-----  
 ATGTTTCCTTGGGTTCTTGGGAGCA---GCAGGAAGCACTATG---GGCGCGGCGTCA---  
 ATAACGCTGACGGTACAG---GCCAGACAA---CTGTTG---TCTGGTATAGTGCAACAGCAAAGC---  
 AATTTG---CTGAGA---GCTATAGAGGCGCAACAGCATATGTTGCAACTCACAGTCTGGGGCATT  
 >DQ351230  
 TTCTATTGCAATACAACAAGACTGTTTAATAATGATACAGGCGAACTGAATGATAATAAT-----  
 -----  
 -----  
 AAAACAACAACATCACTCTCCCATGCAGAATAAACAATTTATAAACATGTGGCAAGAGGTAGGACGAGCAA  
 TGTATGCCCCCTCCCATTTGAAGGAAACATAACATGTATATCAAAT---  
 ATCACAGGACTACTATTGCTACGAGATGGAGGAACAACAATAACACAATTAAT-----  
 -----  
 -  
 GGCACAGGGAAAAAGAATGATACAGTCAGACCTGGAGGAGGAAATATGAAAGACAATTGGAGAAGTGAATTAT  
 ATAAATATAAAGTGATAGAACTTAAACCATTG---GGAATAGCACCCACTGAGGCAAGAAGGAGAGTGGTG--  
 -----GAGAGAGAAAAAAGAGCA---GTGGGA---  
 ATAGGAGCT-----GTGTTTCCTTGGGTTCTTGGGAGCA---GCAGGAAGCACTATG---  
 GGCACGCGGTCA---ATAACGCTGACGGTACAG---GCCAGACAA---CTGCTG---  
 TCTGGTGTAGTGCAACAGCAAAGC---AATTTG---CTGAGA---  
 GCTATAGAGGCGCAACAACATCTGTTGCAACTCACAGTCTGGGGCATA  
 >DQ275656  
 TTCTATTGCAATACATCACAATTGTTTAATAGTACATACACACATAATAGTACATATAATAGTACAGAA---  
 -----  
 -----  
 ACTAATGGAACCATCACACTTTCATGCAGAATAAAGCAATTTATAAACATGTGGCAGAGGGTAGGACGAGCAA  
 TGTATGCCCCCTCCCATTTGCAGGAAACATAACATGTAACTCAAGT---  
 ATCACAGGACTACTATTAGTACGTGATGGAGGCGATACAAATAAA-----  
 -----  
 -----  
 AGTAACACAGAGACATTTCAGACCTGAAGGAGGAAATATGAAGGACAATTGGAGAAGTGAATTATATAAATATA  
 AAGTAGTAGAAATTAAGCCATTG---GGAATAGCACCCACTAATGCAAAAAGGAGAGTGGTG-----  
 -----GAGAGAGAAAAAAGAGCA---GTGGGA---ATAGGAGCT-----  
 ---GTGTTCCCTTGGGTTCTTGGGAGCA---GCAGGAAGCACTATG---GGCGCAGCGTCA---  
 ATAACGCTGACGGTACAG---GCCAGACAA---TTGTTG---TCCGGTATAGTGCAACAGCAAAGC---  
 AATTTG---CTGAGA---GCTATAGAGGCGCAACAACATCTGTTGCAACTCATGGTCTGGGGCATT  
 >DQ445632  
 TTCTATTGCAATACATCAAGTCTGTTTAATGGTACATACAAGGCTAATAGTAATAGTACAAACAGTACTTCAA  
 AA-----  
 -----  
 GTAATGAAACCATCACACTCCCATGCAGAATAAACAATTTATAAACATGTGGCAGGGGGTAGGACGCGCAA  
 TGTATGCCCCCTCCAATTGCAGGAACCATAACATGTAAATCAAAT---  
 ATCACAGGAATACTATTGACACGTGATGGAGGCAGTGGCGATAAT-----

-----  
-----  
GAAACAGAAGAGATATTGACACCTGCAGGAGGAGATATGAGGGACAATTGGAGAAGTGAATTATATAAAATATA  
AAGTGGTAGAAATTAAGCCATTG---GGACCAGCTCCTACTGAGGCCAAAAGGAGAGTAGTG-----  
-----GAGAGAGAAAAAGAGCA--GTGGGA--ATAGGAGCT-----  
---GTGTTCTTGGGTTCTTGGGAGCA--GCAGGAAGCACTATG--GGCGCAGCATCA---  
ATAACGCTGACGGTACAG---ACCAGACAA---TTGTTG---TCTGGTATAGTGCAACAGCAAAGC---  
AATTTG---CTGAAG---GCTATAGAGGCGCAACAACATCTGTTGCAGCTCACGGTCTGGGGCATT  
>DQ396378  
TTCTATTGCAATACAACAAACCTGTTTCAGCACAAGTGTTAACATAACAAATAGT-----  
-----  
-----

ACAAATAGTAGCATCACACTCCCATGCAGAATAAAACAAGTTATAAACATGTGGCAGGGGGTAGGTTCGAGCAA  
TGTATGCCCCCTCCCATTGTCAGGAAACATAACATGTAACCTCTACT---  
ATCACAGGACTACTACTGACACGAGATGGAGGACAGGGAAACAGAAACC-----  
-----  
-----

AATGACACAGAGATATTGAGGCCTGGAGGAGGAGATATGAGGGACAATTGGAGAAGTGAATTATATAAAATACA  
AAGTGGTAGAAATTAAGCCATTG---GGACTAGCACCCACTGAGGCCAAAAGGAGAGTGGTG-----  
-----GAGAGAGAAAAAGAGCA--GTAGGA--ATAGGAGCT-----  
---GTACTCCTTGGGTTCTTGGGAGCA--GCAGGAAGCACTATG--GGCGCGGCGTCA---  
ATAACGCTGACGGTACAG---GCCAGACAA---CTGTTG---TCTGGTATAGTGCAACAGCAAAGC---  
AATTTG---CTGAGA---GCTATAGAGGCGCAACAGCATATGTTGCAACTCACGGTCTGGGGCATT  
>DQ396386  
TTCTATTGCAACACATCATCCCTGTTTAAATAGAACATACCCGCTCAATAGTGCAGGAAACAGTTCAACAGGG-  
-----  
-----

AATAATTCAATCATCACACTCCAATGCAGAATAAAACAATTTATAAACATGTGGCAGGAGGTAGGACGAGCAA  
TGTATGCCCCCTCCCATTGTCAGGAAACATAACATGTAAATCAAAT---  
ATCACAGGACTACTATTGGTACGTGATGGAGGAACCAAAATGACTCA-----  
-----  
-----

AATAACAAAGAGACATTGACACCTGGAGGAGGAGATATGAGGGACAATTGGAGAAGTGAATTATATAAAATATA  
AAGTGGTAGAAATTAAGCCATTG---GGAATAGCACCCACTAAGGCCAAAAGGAGAGTGGTG-----  
-----GAGAGAGAAAAAGAGCA--GTGGGA--ATAGGAGCT-----  
---GTGTTCTTGGGTTCTTGGGAGCA--GCAGGAAGCACTATG--GGCGCAGCATCA---  
ATAACGCTGACGGTACAG---GCCAGACAA---TTGCTG---TCTGGAATAGTGCAACAGCAAAGC---  
AATTTG---CTGAGG---GCTATAGAGGCGCAACAGCATATGTTGCAACTCACGGTCTGGGGCATT  
>DQ396365  
TTCTATTGTGATACATCACAACCTGTTTAAATGATACATTTAATAATACAGGA-----  
-----  
-----

TCTAATGCTACACTTACACTCCCCTGTAGAATAAAACAATTTATAAACATGTGGCAGGGGGTAGGACGAGCAA  
TGTATGCCCCCTCCCATTGTCAGGAAATATAACATGTAAATCGAAG---  
ATCACAGGACTACTATTGACAAGTGTGAGGAGAAAAGACTCAAAT-----  
-----  
-----

GCCACAGAGACGTTTCAGACCTGGGGGAGGAAATATGAGAGACAATTGGAGAAGTGAATTATATAAAATATAAAG  
TGGTAGAAATTAATCCATTG---GGAGTAGCTCCCCTGGAGCAAAAAGGAGAGTGGTG-----  
-----GAGAGAGAAAGAAGAGCA--GTGGGA--ATAGGAGCT-----  
GTGTTCTTGGGTTCTTAGGAGCA--GCAGGAAGCACTATG--GGCGCAGCATCA---  
ATAACGCTGACGGTACAG---GCCAGACAA---TTATTG---TCTGGTATAGTGCAACAGCAAAGC---  
AATTTG---CTGAGG---GCTATAGAGGCGCAACAGCATATGTTGCAACTCACAGTCTGGGGCATT  
>DQ445635  
TTCTATTGCAATACAACAAAACCTATTTTCTAATGAGAGTGAG-----  
-----  
-----

TCAAAACAAAACCTATCACACTCCCATGCAGGGTAAAAACAATTTATAAACATGTGGCAGGGAGTAGGACGAGCAA  
TGTATGCCCCCTCCTATTGTCAGGAAATATAACATGTAAATCAAAT---  
ATCACAGGACTACTATTGACACGAGATGGAGGAAACACAGGAGAA-----  
-----

-----  
-----  
AACATAACAGAGATATTCAGACCGGGGGGAGGAAACATGAAAGACAATTGGAGAAATGAGTTATATAAATACA  
AAGTGGTAGAAATTAAGCCATTG---GGAATAGCACCCACTGAAGCAAAAAGGAGAGTGGTG-----  
-----GAGAGAGAAAAAAGAGCA--GTGGGA--ATAGGAGCT-----  
---GTGTTTCTTGGGTTCTTGGGAGCA--GCAGGAAGCACTATG--GGCGCAGCGTCA---  
GTGGCGCTGACGGTACAG---GCCAGACAA---CTGCTG---TCTGGTATAGTGCAACAGCAAAGC---  
AATTTG---CTGAGA---GCTATAGAGGCGCAACAGCATATGTTGCAACTCACAGTCTGGGGCATT  
>DQ396368  
TTCTATTGCAATACAACAAATCTGTTCAATGAACTGGATAATAAT-----  
-----  
-----  
AGTAGTGGAACATCACACTCCCATGCAAGATAAAGCAATTTATAAACATGTGGCAACAAGTGGGACGAGCAA  
TGTATGCCCCCTCCCATTTGAAGGAAAAATTACATGTAACCTCAAAT---  
ATCACAGGAATTCTATTGACAAGGATGGAGGGATTAATGGTACA-----  
-----  
-----  
GAAACATTCAGACCTACAGGAGGAAATATGAAGGACAATTGGAGAAATGAATTATATAAATATAAAGTAGTAG  
AAATTAAGCCATTG---GGAATAGCACCCACTGAAGCAAAAAGGAGAGTGGTG-----  
-----GAGAGAGAAAAAAGAGCA--GTGGGA--ATAGGAGCT-----  
GTATTCTTTGGGTTCTTGGGAGCA--GCAGGAAGCACTATG--GGCGCGGCGTCA---  
ATAACGCTGACGGTACAG---GCCAGACAA---CTGTTG---TCTGGTATAGTGCAACAGCAAAGC---  
AATTTG---CTGAGA---GCTATAGAGGCGCAACAGCATCTGTTGCAACTCACGGTCTGGGGCATT  
>DQ396370  
TTCTATTGCAATACGACAAGACTGTTTAATGAAAGTAATTCAGATATA-----  
-----  
-----  
ACAAATACCACCATCACACTCCCATGCAGAATAAAACAAATTATAAATATGTGGCAGGGAGTAGGACGAGCAA  
TGTATGCCCCCTCCCATTTGAAGGAAACATAACATGTAACCTCAAGT---  
ATCACAGGATTACTATTGCTACGTGATGGAGGAAACAAGAATGATACA-----  
-----  
-----  
AATGATACAAACGAGATATTCAGACCTGGAGGAGGAAATATGAAGGACAATTGGAGAAGTGAATTATATAAAT  
ATAAAGTGATAGAAATTAAGCCATTG---GGGGTAGCCCCACCGAGGCAAAAAGAAGAGTGGTG-----  
-----GAGAGAGAAAAAAGAGCA--GTGGGA--ATAGGAGCT---  
-----GTACTCCTTGGGTTCTTGGGAGCA--GCAGGAAGCACTATG--GGCGCGGCGTCA---  
ATAACGCTGACGGTACAG---GCCAGACAA---CTGTTG---TCTGGTATAGTGCAACAGCAAAGC---  
AATTTG---CTGAGA---GCTATAGAGGCGCAACAGCATATGTTGCAACTCACGGTCTGGGGCATT  
>DQ396369  
TTCTATTGTAATACAACAAAACCTGTTTAATAACACACAGTGGTTGAACCTGACA-----  
-----  
-----  
AACAAATGACACAATCACACTCCAATGCAGAATAAAACAAATTATAAACATGTGGCAGGAGGTAGGACGAGCAA  
TGTATGCCCCCTCCCATTTGACGGTAACATAACGTGTAACCTCAAGT---  
ATCACAGGATTACTATTGACACGTGATGGAGGCAATAACGACACA-----  
-----  
-----  
AAGAATGAGACATTTCAGGCCTGCAGGAGGAAATATGAAGGACAATTGGAGAAGTGAATTATATAAATATAAAG  
TGGTAGAAATTAACCATTG---GGAGTAGCACCCACGAGGCAAAAAGGAGAGTGGTG-----  
-----GAGAGAGAAAAAAGAGCA--GTGGGA--ATGGGAGCT-----  
GTGATCCTTGGGTTCTTGGGAGCA--GCAGGAAGCACTATG--GGCGCGGCGTCA---  
ATAACGCTGACGGTACAG---GCCAGACAA---CTGTTG---TCTGGTATAGTGCAACAGCAAAGC---  
AATTTG---CTGAAA---GCTATAGAAGCGCAACAGCATATGTTGCAACTCACGGTCTGGGGCATT  
>DQ369976  
TTTTATTGCAGTACATCACGACTGTTTAATAGTACAGAAAGTGCAAATAGC-----  
-----  
-----  
ACTAATGGTACCATCACACTTCCATGCAGAATAAAGCAAATTATAAACATGTGGCAGAAGGTAGGGCGAGCAA  
TATATGCCCCCTCCCATTTGACGGAAACATAACATGTAATTCAAGT---  
ATCACAGGACTAATATTGGTACGTGATGGAGGAACAAATACAACAAAT-----

-----  
-----  
AATAATAATGAGATATTTCAGACCTGAAGGAGGAGACATGAGAGATAATTGGAGAAGTGAATTATATAAAATATA  
AAGTGGTAGAAATTGAGCCATTA---GGAATAGCACCCACTGGGGCAAAAAGGAGAGTGGTG-----  
-----GAGAGAGAAAAAAGAGCA--GTGGGA--ATAGGAGCT-----  
---ATGTTCCCTTGGGTTCTTGGGAGCA--GCAGGAAGCACTATG--GGCGCGCGTCA---  
ATGACGCTGACGGTACAG---GCCAGACAA---CTGTTG---TCTGGTATAGTGCAGCAGCAAAGC---  
AATTTG---CTGAGG---GCTATAGAGGCGCAACAGCATATGTTGCAACTCACAGTCTGGGGCATT  
>DQ396390  
TTCTATTGCAATACAACAAAACCTATTTAATAGTACAGAACTATTTAATAGTACAATCAATAACACAAACAGA-  
-----  
-----  
AACATCACAAACATCACAATTCCATGCAGAATAAAACAAATCATAAACATGTGGCAAAAGGTAGGGCGAGCAA  
TGTATGCCAATCCCATTGCAGGAAACATAATATGTAGATCAAAT---  
ATCACAGGACTACTATTAGTACGTGATGGAGGCAGTAACAGTAAC-----  
-----  
-----  
ACAACAGAAATATTCAGACCTGGAGGAGGAAATATGAAGGACAATTGGAGAAGTGAATTATATAAAATATAAAG  
TGGTAGAAATTAAGCCATTG---GGAATAGCACCCACTGGAGCAAAAAGGAGAGTGGTG-----  
-----GAGAGAGAAAAAAGAGCA--GTGGGA--ATAGGAGCT-----  
GTACTCCTTGGGTTCTTGGGAGCA---GCAGGAAGCACTATG--GGCGCAGCGTCA---  
ATAGCGCTGACGGCACAG---GCCAGACAA---GTGCTG---TCTGGTATAGTGCAACAGCAAAGC---  
AATTTG---CTGAGG---GCTATAGAGGCGCAACAGCATCTGTTGCAACTCACGGTCTGGGGCATT  
>DQ275657  
TTCTATTGCAATACAACAAACCTGTTCAATACAACAAACCTGTTCAATACAACAAACCTGTTCAATGCCACTA  
CT-----  
-----  
AATGAAAATGATAACATCACACTCCAATGCAAAATAAAACAAATTATAAACATGTGGCAGGGAGTAGGACGAG  
CAATGTATGCCCCCTCCCATTTGAAGGAAACATAACATGTAACCTCTAAT---  
ATCACAGGACTACTATTGACACGTGATGGAGGAACAAACGCAACC-----  
-----  
-----  
AATAACACAGAGATATTTCAGACCTGGAGGAGGAAATATGAAGGACAATTGGAGAAATGAATTATATAAAATATA  
AAGTAGTAGAAGTTAAGCCATTG---GGAGTAGCACCCACCAAGGCAAAAAGGAGAGTGGTG-----  
-----GAGAGAGAAAAAAGAGCA--GTGGGA--CTAGGAGCT-----  
---GTGTTCCCTTGGGTTCTTGGGAGCA--GCAGGAAGCACTATG--GGCGCGCGTCA---  
ATAACGCTGACGGTACAG---GCCAGACAA---CTATTG---TCTGGTATAGTGCAACAGCAAAT---  
AATTTG---CTGAGG---GCTATAGAGGAGCAACAGCATATGTTGCAACTCACGGTCTGGGGCATT  
>DQ275643  
TTCTATTGCAATACAACAAATCTGTTCAATACAACAAATCTGTTTGGAAATACTTCAACCGCAAACATCACA-  
-----  
-----  
AATACAACAAAAATCACACTCCCATGCAGGATAAAACAAATTATAAACATGTGGCAGGGGGTAGGACGAGCAA  
TGTATGCCCCCTCCCGTTGAAGGAAACATAACATGTGAGTCAAAT---  
ATCACAGGACTACTATTGACACGTGATGGAGGAAAAAACACAACA-----  
-----  
-----  
GAGGAAACAGAGACTTTTACCTGGAGGAGGAAATATGAAGGACAATTGGAGAAGTGAATTATATAAAATATA  
AAGTGGTAGAAATTAAACCATTG---GGAATAGCACCCACTGAGGCAAAAAGGATAGTGGTG-----  
-----GAGAGAGAAAAAAGAGCA--GTGGGA--ATAGGAGCT-----  
---GTGCTCCTTGGGTTCTTGGGAGCA--GCAGGAAGCACTATG--GGCGCAGCGTCA---  
ATAACGCTGACGGTACAG---GCCAGACAA---CTGTTG---TCTGGTATAGTGCAAGCAGCAAAGC---  
AATTTG---CTGAGA---GCTATAGAGGCGCAACAGCATATGTTGCAACTCACAGTCTGGGGCATT  
>DQ396380  
TTCTATTGCAATACATCAGGCCTGTTTAATAGTTCCAACAATACAGCAGTTACTGAT-----  
-----  
-----  
AATAATGGCACTATTACACTCCAATGCAGAATAAAACAAATTATAAACATGTGGCAGAAGGTAGGACGAGCAA  
TGTATGCCCCCTCCCATTTGCAGGAAACATAACATGTAGATCAAAC---  
ATCACAGGACTACTATTGACACGTGATGGAGGAAATAATAGTGAA-----

-----  
-----  
AATGCAGAGATATTCAGACCTGGAGGAGGAGATATGAGGGACAATTGGAGAAGTGAATTATATAAGTATAAAG  
TGGTAGAAATTAAGCCATTA---GGAGTAGCACCCACTACTGCAAAGAGGAGAGTGGTG-----  
-----GAGAGACAGAAAAGAGCA--GTGGGA---CTAGGAGCT-----  
GCGTTCTTCGGGTTCTTGGGAGCA--GCAGGAAGCACTATG--GGCGCGGCATCG---  
ATAACGCTGACGGTACAG---GCCAGACGA--TTATTG---TCTGGTATAGTGCAACAGCAAAGC---  
AATTTG---CTGAAA---GCCATAGAGGCGCAACAGCATATGTTGCAACTCACGGTCTGGGGCATT  
>DQ275646  
TTCTATTGTAATACAACAAACCTGTTTACAGAAGTGTCTAATACAACAAAGGGGGAAGCTACAAATAAA-----  
-----  
-----  
AGTGATGAAAACATCACACTCCAGTGCAGAATAAAACAAATTATAAACATGTGGCAGGGGGTAGGACGAGCAA  
TGTATGCCCCCTCCCATTGAAGGAAACATAACATGTAACCTCGAGT---  
ATCACAGGACTGCTATTGACACGTGATGGAGGAAGAAATGACACA-----  
-----  
-----  
GAGACATTCAGACCTGGAGGAGGAAATATGAAAGACAATTGGAGAAGTGAATTATATAAATATAAAGTGGTAG  
AAATTAAGCCATTG---GGAATAGCACCCACTACGGCAAAAAGGAGAGTGGTG-----  
-----GAGAGAGAAAAAAGAGCA--GTAGTAGGAATAGGAGCT-----  
GTACTCCTTGGGTTCTTGGGAGCA--GCAGGAAGCACTATG--GGCGCGGCGTCA---  
ATAACGCTGACGGTACAG---GCCAGACAA--CTGTTG---TCTGGTATAGTGCAACAGCAAAGT---  
AATTTG---CTGAGG---GCTATAGAGGCGCAACAGCATATGTTGCAACTCACGGTCTGGGGCATT  
>DQ351231  
TTCTATTGCAATACATCACAACCTGTTTAAGGGTACATACAATGGTACATACAATGGTACAGAA-----  
-----  
-----  
AGTAATTCAACCATCACACTTCCATGCAGAATAAAACAAATTATAAACATGTGGCAGGAGGTAGGACGAGCAA  
TGTATGCCCCCTCCCATTGAAGGAAATATAACATGTAACCTCAAGT---  
ATCACAGGACTACTATTAGTACGTGATGGAGGCAACAATAACACA-----  
-----  
-----  
AACGAGACATTCAGACCTATAGGAGGAGATATGAAGGACAATTGGAGAAGTGAATTATATAAATACAAAGTGG  
TAGAAATTAAGCCATTG---GGACTAGCACCCACTGGAGCAAAAAGGAGAGTGGTG-----  
-----GAGAGAGAAAAAAGAGCA--GTAGGA--ATAGGAGCT-----  
GTGTTCTTGGGTTCTTGGGAGCA--GCAGGAAGCACTATG--GGCGCGGCATCA---  
ATAACGCTGACGGTACAG---GCCAGACAA--CTGTTG---TCTGGTATAGTGCAACAGCAAAT---  
AATTTG---CTGAGG---GCTATAGAGGCGCAACAGCATATGTTGCAACTCACGGTCTGGGGCATT  
>DQ369981  
TTCTATTGCAACACATCAGGACTGTTCAATAGTATATACAGTCCTACATACAGGCCTAATGGGACA-----  
-----  
-----  
AGTGATTCAACCATCACACTCCCATGCAGAATAAAACAGATTATAAACATGCGGCAGGGGGTAGGACGAGCAA  
TGTATGCCCCCTCCCATTGAAGGAAGCATAACATGTAACCTCAACC---  
ATCACAGGACTACTATTGACACGTGATGGAGGAAAAGCAATGAAT-----  
-----  
-----  
AACACAGAGATATTCAGACCTGGAGGAGGAAATATGAAGGACAATTGGAGAAGTGAATTATACAAATATAAAG  
TGGTAGAAATTAAGCCATTG---GGGGTAGCACCCACTGGGGCAAAAGGGAGAGTGGTG-----  
-----GAGAAAGAAAAAAGAGCA--GTGGGA---ATAGGAGCT-----  
GTGCTCCTTGGGTTCTTGGGAGCA--GCAGGAAGCACTATG--GGCGCGGCGTCA---  
ATAACGCTGACGGTACAG---GCCAGACAA--CTGTTG---TCTGGTATAGTGCAACAGCAAAT---  
AATTTG---CTGAGA---GCTATAGAGGCGCAACAGCATATGTTGCAACTCACGGTCTGGGGCATT  
>DQ396392  
TTCTATTGCAATACATCAGGCCTGTTTAATGGTACATATAATAGTACAAATACATATAATAGTACAAATAGTA  
CT-----  
-----  
GAAAAATTCAAACATCACACTCCCTTGCAGAATAAAACAAATTGTAAACATGTGGCAGGAGGTAGGACAAGCAA  
TGTATGCCCCCTCCCATTGCAGGAAACATAACATGTAAATCAAAT---  
ATCACAGGATTACTCTTGACACGTGATGGCGGAAACAATACAAAT-----

-----  
-----  
GGGACAGAGACATTCAGACCTGGAGGAGGAGATATGAAGAACAATTGGAGAAGTGAATTATATAAATATAAAG  
TGGTAGAAATTAAGCCATTA---GGAGTAGCACCCACTAAGGCAAGAAGGATGGTGGTG-----  
-----GAGAGAGAGAAAAAGAGCA--GTAGGA--ATAGGAGCT-----  
GTGTTTCCTTGGGTTCTTGGGAGCA--GCAGGAAGCACTATG--GGCGCGGCGTCA---  
ATAACGCTGACGGTACAA---GCCAGACAA---TTATTG---TCTGGTATAGTGCAACAGCAAAGC---  
AATTTG---CTGAGG---GCTATAGAGGCGCAGCAGCATATGTTGCAACTCACGGTCTGGGGCATT  
>DQ396399  
TTTTATTGCAATACATCAGGCCTGTTTAATAGTACACTGTTTAATAGTACTTCAAACAGTACTTCA-----  
-----  
-----  
AACAGTACTGATATCATACTCCCATGCAGAATAAAACAAATTATAAACATGTGGCAGGAGGTAGGACGAGCAA  
TGTATGCCCCCTCCCATTCAGGAAACATAACATGTAAATCAAAT---  
ATCACAGGACTATTATTGACACGAGATGGAGGAAAAAACATAAGC-----  
-----  
-----  
AAAACCGAGACATTCAGACCTGGAGGAGGAAATATGAAGGACAATTGGAGAAGTGAATTATATAAATATAAAG  
TAGTAGAAATTAAGCCATTA---GGAATAGCACCCACATCGGCAAAAAGGAGAGTGGTG-----  
-----GAGAGAGAGAAAAAGAGCA--GCA-----ATAGGAGCT-----  
ATGCTCCTTGGGTTCTTGGGAGCA---GCCGGAAGCACTATG--GGCGCAGCGTCA---  
ATAGCGCTGACGGTACAG---GCCAGACAA---CTGCTG---TCTGGTATAGTGCAACAGCAAAGC---  
AATTTG---CTGAGA---GCTATAGAGGCGCAACAGCATATGTTGCAACTCACGGTCTGGGGCATT  
>AY901965  
TTCTATTGCAATACATCAAAGCTATTTAATAATACATACAATGGTACATACTGGATATTTAATAATAATACAT  
ACTGGAAT-----  
-----AGC---  
AGCACAAACGAGAACATTACAATTCATGCAGAATAAAACAAATTATAAACATGTGGCAGGAGGTAGGACGAG  
CAATGTATGCCCCCTCCCATTCAGGAAACATAACATGTAACCTCAAGT---  
ATCACAGGATTACTATTGACACGTGATGGAGGAGACGAAACAAAC-----  
-----  
-----  
AATACAGAAACATTCAGACCTGGAGGAGGAAATATGAAGGACAATTGGAGAAGTGAATTATATAAATATAAAG  
TGGTAGAAATTAAGCCATTG---GGAATAGCACCCACTGGAGCAAAAAGGAGAGTGGTG-----  
-----GAGAGAGAAAAAAGAGCA--GTGGGA--ATAGGAGCT-----  
GTACTCCTTGGGTTCTTGGGAGCA---GCAGGAAGCACTATG--GGCGCGGCGTCA---  
ATAACGCTGACGGTACAG---GCCAGACAA---CTGTTG---TCTGGTATAGTGCAACAGCAAAGC---  
AATTTG---CTGAGA---GCTATAGAGGCGCAACAGCATATGTTGCAACTCACAGTCTGGGGCATT  
>DQ275660  
TTCTATTGCAATACAACAGGCCTGTTTAACACAACACTGATTACTAATAGTAGTGAGGAG-----  
-----  
-----  
TCAAACGAAACCATCACACTCCCATGCAGAATAAAACAAATTGTAAACATGTGGCAGGAGGTAGGACGAGCAA  
TGTATGCCCCGCCCATTGCAGGAAACATAACATGTATATCAAAT---  
ATCACAGGAATACTATTGACATGGGATGGAGGAAATCTTAGTGAAACA-----  
-----  
-----  
AGCAATAGGAGTGAAATATTCAGACCTGCAGGAGGAAATATGAAGGATAATTGGAGAAGTGAATTATATAAAT  
ATAAAGTAGTAGAAATTAACCATTG---GGAGTAGCACCCACTGGGGCAAAAAGGAGAGTGGTG-----  
-----GAGAGAGAAAAAAGAGCA--GTGGGA--CTAGGAGCT---  
-----GTGTTTCCTTGGGTTCTTGGGAGCA---GCAGGAAGCACTATG--GGCGCGGCGTCA---  
ATCACGCTGACGGTACAG---GCCAGACAA---CTGCTG---TCTGGTATAGTGCAACAGCAAAGC---  
AATTTG---CTGAGA---GCTATAGAGGCGCAACAGCATATGTTGCAACTCACGGTCTGGGGCATT  
>DQ351233  
TTCTATTGTAATACATCACAACCTGTTTAATAATACACACTGGTTTAATAATACACACGGGATTAATAGCACAA  
AA-----  
-----  
GGTAATGAAAACATCACACTCCCATGTAGAATAAAACAAATTATAAACATGTGGCAGAAGGTAGGACAAGCAA  
TGTATGCCCCCTCCCATTCAGGAAACATAACATGTGCCTCAAAT---  
ATCACAGGACTACTATTGGTACATGATGGAGGAAATGAAACAAAA-----

-----  
-----  
GAGATATTCAGACCTGGAGGAGGAGATATGAGAGACAATTGGAGAAGTGAAGTATATAAATATAAGGTGGTAG  
AAGTTAAGCCATTG---GGAGTAGCACCAACCAAGGCAAGAAGGAGAGTGGTG-----  
-----GAGAGAGAAAAAAGAGCAGTAGCAGGAGGACTGGGAGCT-----  
TTGTTTCCTTGGGTTCTTGGGAGCA---GCAGGAAGCACTATG---GGCGCAGCATCA---  
ATAACGCTGACGGTACAG---GCCAGACAA---TTGTTG---TCCGGCATAGTGCAACAGCAAAGC---  
AATTTG---TTGAAG---GCTATAGAGGCGCAACAGCATTTGTTGCAACTCACGGTCTGGGGCATT  
>AY878063

TTCTATTGCAATACATCAAACTGTTTAAATATAACAAGTGAGTCAATCAATATAAGTAATGAC-----  
-----  
-----  
AGTAATGTAAACATCACACTCCCATGCAGAATAAAACAAATTATAAACATGTGGCAAGGGGTAGGAAAAGCAA  
TGTATGCCCCCTCCCATTAAGGAAACATAACATGTAAATCAAAT---  
ATCACAGGACTACTATTGACATGGGATGGAGGACACAAAGGGAATGACACA-----  
-----  
-----

GATAAGAACACAGAAACATTCAGACCTGGAGGAGGAAAATATGAAGGACAATTGGAGAAGTGAATTATATAAAT  
ATAAAGTAGTAGAAATTAAGCCATTG---GGGGTAGCACCCACCAAGGCAAAAAGGAGAGTGGTG-----  
-----GAGAGAGAAAAAAGAGCA---GTGGGA---ATAGGAGCT---  
-----GTACTCCTTGGGTTCTTGGGAGCA---GCCGGAAGCACTATG---GGCGCGGCGTCA---  
ATAACGCTGACGGTACAG---GCCAGACAA---CTGTTG---TCTGGTATAGTGCAACAGCAAAGC---  
AATTTG---CTGAGA---GCTATAGAGGCGCAACAGCATATGTTGCAACTCACAGTCTGGGGCATT  
>AY878064

TTCTACTGCAATACAACAAATCTGTTTAAATACAACAGATTTGGTTAGTGCAACAAAGAAGGCTGGT-----  
-----  
-----  
CCGAATGATAACATCACACTTCCATGCAGAATAAAACAAATTATAAACATGTGGCAGGAGGTAGGACGAGCAA  
TGTATGCCCCCTCCCATTAAGGAAACATAACATGTAAATCAAAT---  
ATCACAGGACTATTATTGACACGTGATGGAGGAATCACAAATGAT-----  
-----  
-----

AATAAACAGAGATATTCAGACCTGGAGGAGGAAAATATGAAAGACAATTGGGGAAATGAATTATATAAATATA  
AAGTGGTAGAGATTAAGCCATTG---GGAGTAGCACCCACTAAGGCAAAAAGGAGAGTGGTG-----  
-----GAGAGAGAAAAAAGAGCA---GTGGGA---ATAGGAGCT-----  
---GTGCTCCTTGGGTTCTTGGGAGCA---GCAGGAAGCACTATG---GGCGCGGCGTCA---  
ATGGCGCTGACGGTACAG---GCCAGACAG---TTGTTG---TCTGGTATAGTGCAACAGCAAAGC---  
AATTTG---CTGAGG---GCTATAGAGGCGCAACAGCATATGTTGCAACTCACGGTCTGGGGCATT  
>AY878065

TTCTATTGCAATACAACAACTTGTTTAATAGGACATACACGCCTGAATACGTGTTTAAATGGTACAAATAGC-----  
-----  
-----  
AATTCAAGCGTAATCACCTCCCATGCAGGATAAAACAAATTATAAATATGTGGCAGCAGGTAGGACGAGCAA  
TGTATGCTCCTCCCATTCAGGAAACATAACATGTAACCTCAACA---  
ATCACAGGATTACTATTGATGCGTGATGGAGGAATAAGTAATAACACA-----  
-----  
-----

AATAAACAGAGACATTCAGACCTGGAGGAGGAGATATGAGGGACAATTGGAGAAGTGAATTATACAAATATA  
AAGTGGTAGAAATTAAGCCATTA---GGAATAGCACCTACTGGGGCAAAAAGGAGAGTGGTG-----  
-----GAGAGAGAAAAAAGAGCA---GTGGGA---ATAGGAGCT-----  
---GTGTTCCCTTGGGTTCTTAGGAGCA---GCAGGAAGCACTATG---GGCGCGGCATCA---  
ATAACGCTGACGGTACAG---GCCAGACAA---TTGTTG---TCTGGTATAGTGCAACAGCAAAGC---  
AATTTG---CTGAGG---GCCATAGAGGCGCAACAGCATATGTTGCAACTCACGGTCTGGGGCATT  
>AY878068

TTCTATTGCAATACATCAGGACTGTTTAAATAGTACATACCGTCCTACATACAGGCAGAATGGGACAGAC-----  
-----  
-----  
AATAATTCAACCATCACACTGCCATGCAGAATAAAACAAATTATAAACATGTGGCAGGAGGTAGGACGAGCAA  
TGTATGCCCCCTCCTATTGCAGGAAAAATAACATGTAACCTCAAGT---  
ATCACAGGACTACTATTGACACGTGATGGAGGAACCAATAACACAGAG-----  
-----

-----  
-----  
AATAACACAGAGATATTCAGACCTGGAGGAGGAAATATGAAGGACAATTGGAGAAGTGAATTATATAAAATATA  
AAGTGGTAGAAATTAAGCCACTA---GGAATAGCACCCACTACGGCAAAAAGGAGAGTGGTG-----  
-----GAGAGAGAAAAAAGAGCA---GTGGGA---CTAGGAGCT-----  
---TTGTTCCCTTGGGTTCTTGGGAGTA---GCAGGAAGCACTATG---GGCGCGGCGTCA---  
ATAACGCTGACGGTACAG---GCCAGACAA---CTGTTG---TCTGGTATAGTGCAACAGCAAAAT---  
AATTTG---CTGAGA---GCTATAGAGGCGCAACAGCATATGTTGCAACTCACGGTCGGGGGCATT  
>AY878069  
TTCTATTGTAATACATCAAAGCTGTTTAATAGTACAGAGCTGTTTAATAGTACAGAA-----  
-----  
-----  
AATAATTCAACAATCACACTCCCATGCAGGATAAAAACAGATTATAAACATGTGGCAACAGGTAGGACGAGCAA  
TGTATGCTCCTCCCATTGCAGGAAACATAACATGTAACCTCAAGT---  
ATCACAGGATTACTATTAGTGCGTGATGGAGGAACAAATGCCACA-----  
-----  
-----  
AATGAGACATTCAGACCTGGAGGAGGAGATATGAGGGACAATTGGAGAAGTGAATTATACAAGTATAAAAGTGG  
TAGAAATTAACCATTG---GGAATAGCTCCAAGTATGCAAGAAGGAGAGTGGTG-----  
-----GAGAGAGAAAAAAGAGCA---GTGGGC---TTTGGAGCT-----  
TTGATCATTGGGTTCTTGGGAGCA---GCAGGAAGCACTATG---GGCGCGGCGTCA---  
ATAACGCTGACGGTACAG---GCCAGACAA---CTGTTG---TCTGGTATAGTGCAACAGCAAAGC---  
AATTTG---CTGAGG---GCCATAGAGGCGCAACAGCATATGTTGCAACTCACGGTCTGGGGGCATT  
>AY901967  
TTCTATTGCGATACAACAAACCTGTTTAATCTGACTAAAAAAGACAGAACCATCAAGGATGGA-----  
-----  
-----  
AATGAAACCATCATCACACTCCCATGCAGAATAAAAACAAATTGTAAGGATGTGGCAGGGGGTAGGACAAGCAA  
TGTATGCCCCCTCCCATTGCAGGAAACATAACATGTAGATCAAAT---  
ATCACAGGACTACTATTGACACGTGATGGAGGAAAAACAAATGGCACAGGGAAC-----  
-----  
-----  
AATAAAACAGAGACAGAGATATTCAGACCTGCAGGAGGGAATATGAAGGACAATTGGAGAAGTGAATTATACA  
AATATAAAGTGGTAGAAATTAAGCCATTG---GGAATAGCACCCGCCAAGGCAAAAAGGAGAGTGGTG-----  
-----GAGAGAGAAAAAAGAGCA---GTGGGA---  
ATGGGAGCT-----GTACTCCTTGGGTTCTTGGGAGCA---GCTGGAAGCACTATG---  
GGCGCGGCGTCA---ATCACGCTGACGGTACAG---GCCAGACAA---GTGCTG---  
TCTGGTATAGTGCAACAGCAAAGT---AATTTG---CTGAGA---  
GCTATAGAGGCGCAACAGCATATGTTGCAACTCACGGTCTGGGGGCATT  
>AY901968  
TTCTATTGCAATACAACACAACCTGTTTAATGATAGTGTGGCAAAAGACAAC-----  
-----  
-----  
AACACTAACATCACTACTATCCCATGCAAGATAAAAACAAATTGTAAACATGTGGCAGGGGGTAGGACAAGCAA  
TGTATGCCCCCTCCCATTGCAGGAAACATAACATGTGAGTCAAAT---  
ATCACAGGACTATTATTGACACGTGATGGAGGAAATGCAGGAAAAAATACT-----  
-----  
-----  
ACAGATAATACAGAGATATTCAGACCTGGAGGAGGAAATATGAAGGACAATTGGAGAAGTGAATTATATAAAT  
ATAAAGTGGTAGAAATTAATCCATTG---GGAGTAGCACCCACTGAGGCAAAAAGGAGAGTGGTG-----  
-----GAGAGAGAAAAAAGAGCA---GTGGGA---CTAGGAGCT---  
-----GTGTTCCCTTGGGTTCTTGGGAGCA---GCAGGAAGCACTATG---GGCGCGGCGTCA---  
ATAACGCTGACGGTACAG---GCCAGACAA---CTGTTG---TCTGGTATAGTGCAACAGCAAAGC---  
AATTTG---CTGAGA---GCTATAGAGGCGCAACAGCATATGTTGCAACTCACAGTCTGGGGGCATT  
>DQ164113  
TTCTATTGCAATACAACATACCTGTTTAATAATACAAGTGAT-----  
-----  
-----  
CTAAATAACACCATCACACTCCCATGCAGAATAAAAACAAATTATAAACATGTGGCGGGAGGTAGGGAGAGCAA  
TGTATGCCCCCTCCCATTGCAGGAAACATAACATGTAACCTCAAGT---

ATCACAGGACTACTATTGACACGTGATGGAGGAAGCACAAACGACACGAAT-----  
-----  
-----  
AATACAAACCCAGAGATATTCAGACCTGGAGGAGGAAACATGAAAGACAATTGGAGAAGTGAATTATATAAAT  
ATAAAGTGGTAGAAATTAAGCCATTG---GGAGTAGCACCCACGAAAGCAAAAAGGAGAGTGGTG-----  
-----CAGAGAGAAAAAAGAGCA---GTGGGA---ATGGGAGCT---  
-----GTGCTCCTTGGGTTCTTGGGAGCA---GCAGGAAGCACTATG---GGCGCGGCGTCA---  
ATAACGCTGACGGTACAG---GCCAGACAA---CTGTTG---TCTGGTATAGTGCAACAGCAAAGC---  
AATTTG---CTGAGA---GCTATAGAGGCGCAACAACATATGTTGCAACTCACGGTCTGGGGCATT  
>AY901969  
TTCTATTGCAATACATCAAACTGTTTAAATAGTACATATAATAGTACATATAATAGTAACAGTACAAATAGTA  
AT-----  
-----  
TCAAACTCAACCATCACACTCCAATGCGGAATAAAACAAATTATAAACATGTGGCAGGGGGTAGGACAAGCAA  
TGTACGCCCCCTCCTATTGCAGGAAACATAACCTGTATATCAAAT---  
ATCACAGGACTACTATTGACACGTGATGGAGGAGAAAAACAGGTCA-----  
-----  
-----  
GAGGAGACATTGACACCTGGAGGAGGAGATATGAGGGACAATTGGAGAAGTGAATTATATAAATATAAAGTGG  
TGGAAATTAACCATTA---GGAATAGCACCCACTAAGGCAAAAAGAAGAGTGGTG-----  
-----GAGAGAGAAAAAAGAGCA---GTGGGA---ATAGGAGCT-----  
GTGTTCCCTTGGGTTCTTGGGAGCA---GCAGGAAGCACTATG---GGCGCGGCATCA---  
CTGACGCTGACGGTACAG---GCCAGACAA---TTATTG---TCTGGTATAGTGCAACAGCAAAGC---  
AATTTG---CTGAGA---GCTATAGAGGCGCAACAGCATATGTTGCAGCTCACAGTCTGGGGCATT  
>DQ093593  
TTCTATTGCAATACATCACAACCTGTTTAAACAGTACAGATAACAGTACACACATTGAAACAGGTAAGGCAAAACA  
TCACA-----  
-----  
GAAAGTGATGCAAACATCACACTGCCATGCAGAATAAAGCAAATTATAAACATGTGGCAGGAGGTAGGACGAG  
CAATGTACGCCCCCTCCCATTCGAGGAAACATAATATGTAACCTCAAGT---  
ATCACAGGACTCCTATTGACACGAGATGGAGGAAAGGGAGAAAAACACA-----  
-----  
-----  
ACTAACATGACAGAGACATTGACACCTGGAGGAGGAAATATGAAGGACAATTGGAGAAATGAATTATATAAAT  
ATAAAGTGGTAGAAATTAACCATTG---GGAATAGCACCCACTAAAGCAAAAAGGAGAGTGGTG-----  
-----GAGAGAGAAAAAAGAGCA---GTGGGA---ATAGGAGCT---  
-----GTGCTCTTTGGGTTCTTGGGAGCA---GCAGGAAGCACTATG---GGCGCGGCGTCA---  
ATAACGCTGACGGTACAG---GCCAGACAA---CTGTTG---TCTGGTATAGTGCAACAGCAAAGT---  
AATTTG---CTGAGG---GCTATAGAGGCGCAACAGCATATGTTGCAACTCACGGTCTGGGGCATT  
>AY901970  
TTCTATTGTGATACAACAAAACCTATTTAATGAAACATTATTTAATGATACAACAGAACTAGTTAATGGCACAA  
CA-----  
-----  
AGTAATTCAAGCAACATCACACTCCCCTGCAGGATAAAACAAATTATAAACATGTGGCAGCAGGTAGGACGAG  
CAATGTATGCTCCTCCCATTCGAGGAAACATAACATGTAACCTCAAAT---  
ATCACAGGATTACTATTGGTGCGTGATGGAGGAACACATAACAAAACAGAGACA-----AAT---  
-----  
-----  
ACCACAGAAAATGAAACAGAGACATTGACACCTGGAGGAGGAGATATGAGGGACAATTGGAGAAGTGAATTAT  
ACAAATATAAAGTGGTAGAAATTAACCATTA---GGAATAGCACCTACCAAGGCAAAACGGAGAGTGGTG---  
-----GAGAGAGAAAAAAGA-----GGA---  
CTAGGAGCT-----GTGATCTTTGGGTTCTTGGGAGCA---GCAGGAAGCACTATG---  
GGCGCAGCGTCA---ATAGCGCTGACGGCACAG---GCCAGACAA---GTGTTG---  
TCTGGTATAGTGCAACAGCAAAGC---AATTTG---CTGAGG---  
GCCATAGAGGCGCAACAGCATATGTTGCAACTCACGGTCTGGGGCATT  
>AY901981  
TTCTATTGTAATACAACAAAACCTGTTTGATGATAGTGAAAGGATAAACACG-----  
-----  
-----  
ACAACCACAACCATCATACTCCCATGCAGAATAAAACAAATTGTAAACATGTGGCAGGGGGTAGGACGAGCAA

TGTATGCCCCGCCCATTTGAAGGAAACATAACATGTAAATCAAAT ---  
ATCACAGGATTACTATTGACACGTGATGGAGGAAACAATGGAACA -----  
-----  
-----  
AATGAGACATTCAGACCTGAAGGAGGAAATATGAAGGACAATTGGAGAAGTGAATTATATAAAATATAAAGTAG  
TGGAAATTAAGCCATTG --- GGAGTAGCACCCACTGAGTCAAAAAGAAGAGTGGTG -----  
----- GAGAGAGAAAAAAGAGCA --- TTGGGA --- ATAGGAGCC -----  
GTGTTTCCTTGGGTTCTTAGGAGCA --- GCAGGAAGCACTATG --- GGCGCGGCGTCA ---  
ATCACGCTGACGGTACAG --- GCCAGACAA --- GTGTTG --- TCTGGTATAGTGCAACAGCAAAGT ---  
AATTTG --- CTGAGA --- GCTATAGAGGCGCAACAGCATATGTTGCAACTCACGGTCTGGGGCATT  
>AY878057  
TTCTATTGCAATACAACAAACCTGTTTAAACATTAATGGAAGTGAAGT -----  
-----  
-----  
AGTGGTAACAGCACAACACTCCCATGCAGGATAAAAACAAATTATAAACATGTGGCAGGGGGTAGGACGAGCAA  
TGTATGCCCCCTCCCATAGAAGGAAACATAACATGTATATCAAAT ---  
ATCACAGGACTACTATTGACACGTGATGGAGGATACAATGTAACAGGAGAG -----  
-----  
-----  
AATAATAAATCAACAGAGATATTCAGACCAGGAGGAGGAAATATGAAGGACAATTGGAGAAATGAATTATATA  
AATATAAAGTGGTAGAAATTAAGCCATTG --- GGAGTAGCACCCACTGAGGCAAAAAGGAGAGTGGTG -----  
----- GAGAGAGAAAAAAGAGCA --- GTGGGA ---  
ATAGGAGCT ----- GTGTTTCCTTGGGTTCTTGGGAGCG --- GCAGGAAGCACTATG ---  
GGCGCGGCGTCA --- ATAACGCTGACGGTACAG --- GCCAGACAA --- CTATTG ---  
TCTGGTATAGTGCAACAGCAAAGC --- AATTTG --- CTAAGA ---  
GCTATAGAGGCGCAACAGCACATGTTGCAACTCACGGTCTGGGGCATT  
>AY878060  
TTCTATTGCAATACACCAGGACTGTTTAAATGGGACATACAATGAGAGTAGTGAAATA -----  
-----  
-----  
AGTAATGATACCATCAGACTCCCATGCAGAATAAAAACAAATTATAAACATGTGGCAAGGGGTAGGACGAGCAA  
TGTATGCCCCCTCCCATTCAGGGAACATAACTTGTAGCTCAAGT ---  
ATCACAGGACTACTATTGACACGGGATGGAGGAAAGGATAATGATAAT -----  
-----  
-----  
AATGGGAATGAGACATTCAGACCTGGAGGAGGAAATATGAAGGACAATTGGAGAAGTGAATTATATAAAATATA  
AAGTGGTAGAAATTAAGCCATTG --- GGAATAGCACCCACTGGGGCAAAAAGGAGAGTGGTG -----  
----- GAAAGAGAAAAAAGAGCA --- GTGGGA --- ATAGGAGCT -----  
--- GTGTTTCCTTGGGTTCTTGGGAGCT --- GCAGGAAGCACTATG --- GGCGCGGCGTCA ---  
ATAACGCTGACGGTACAG --- GCCAGACAA --- CTGTTG --- TCTGGTATAGTGCAACAGCAAAGC ---  
AATTTG --- CTGAGA --- GCTATAGAGGCGCAACAGCATATGTTGCAACTCACGGTCTGGGGCATT  
>AY878061  
TTCTATTGCAATACATCAGAGCTGTTTAAATAATAGTACAAGTAATGCAACTACA -----  
-----  
-----  
AGTAATGCAACTATTACACTCCCATGCAGAATAAAAACAAATTATAAACATGTGGCAGGGGGTAGGACGAGCAA  
TGTATGCCCCCTCCCATTCAGGAAACATAACATGTAAGTCAAGT ---  
ATCACAGGACTACTATTGACACGTGATGGAGCAATTAACAATACA -----  
-----  
-----  
GAGACATTCAGACCTGGAGGAGGAGATATGAGGGACAATTGGAGAAGTGAATTATATAAAATATAAAGTGGTAG  
AAATTAAACCATTA --- GGAGTAGCACCCACTGATGCAAAAAGGAGAGTGGTG -----  
----- GAGAGAGGAAAAAGAACA --- GTGGGA --- ATAGGAGCT -----  
GTGTTTCCTTGGGTTCTTGGGAGCA --- GCAGGAAGCACTATG --- GGCGCGGCGGCA ---  
GTAACGCTGACGGTACAG --- GCCAGACAA --- CTATTG --- TCTGGTATAGTGCAACAGCAAAGC ---  
AATTTG --- CTGAGA --- GCTATAGAGGCGCAACAGCACATGTTGCAACTCACGGTCTGGGGCATT  
>DQ396395  
TTCTATTGCAATACAACAAAACCTGTTTTCTTCTGAGTGGTAAACAACACCAAGGAA -----  
-----  
-----

AACATCACAACCATCACACTCCAATGCAGGATAAAACAATTTATAAACATGTGGCAGAAGGTAGGAAGAGCAA  
TGTATAACCCTCCTATTGAAGGAAACATAACATGTAAATCAAAT---  
ATCACAGGGCTATTATTGACAAGGGATGGAGGCGAAGGAGACAATACA-----  
-----  
-----  
AGAACAACAGAGATATTCAGACCTACAGGAGGAAATATGAAGGATAATTGGAGAAGTGAATTATATAAATATA  
AGGTGGTAGAAATTAAGCCATTG---GGAGTAGCTCCCACTGAATCAAAAAGGAGAGTGGTG-----  
-----GAGAGAGAAAAAAGAGCA---GTGGGA---ATAGGAGCT-----  
---GTACTCCTTGGGTTCTTGGGAGCA---GCAGGAAGCACTATG---GGCGCGGCGTCA---  
ATAACGCTGACGGTACAG---GCCAGACAA---CTGTTG---TCTGGTATAGTGCAACAGCAAAGC---  
AATTTG---CTGAGA---GCCATAGAGGCGCAACAGCATATGTTGCAACTCACAGTCTGGGGCATT  
>DQ056410  
TTCTATTGCAATACATCAGGACTATTTAATGGTACATACAATAGTACAGAAAGTAATTCA-----  
-----  
-----  
ACAGATAAAAACACCACAATGCAATGCAGAATAAAACAAATTATAAACATGTGGCAGGGGGTAGGACGAGCAA  
TGTATGCCCCCTCCCATTCAGGAAACATAACATGTAAATCAAAC---  
ATCACAGGACTACTATTAGTACGTGATGGAGGCAACGACAACAAAAC-----  
-----  
-----  
AATGACACAGAAACATTTCAGACCTGGAGGAGGAGATATGAGGGACAATTGGAGAAGTGAATTATATAAATATA  
AAGTGGTAGAAATTAAGCCATTG---GGAATAGCTCCAACCTGAAGCAAGAAGGAGAGTGGTG-----  
-----GAGAGAGAGAAAAAGAGCA---GTAGGA---ATAGGAGCG-----  
---TTGATCCTTGGGTTCTTGGGAGCA---GCAGGAAGCACTATG---GGCGCGGCGTCA---  
ATAGCGCTGACGGCACAG---GCCAGACAA---GTGCTG---TCTGGTATAGTGCAACAGCAAAC---  
AATTTG---CTGAGA---GCTATAGAGGCACAACAGCATCTGTTGCAACTCACAGTCTGGGGCATT  
>DQ056411  
TTCTACTGTAATACAACAGAACTGTTTACAAACAATATCACAACAAATGGCACCAACACA-----  
-----  
-----  
ACAAATGGCAACATCACCATCCCATGCAGGATAAAACAAATTGTAAACATGTGGCAGCAGGTAGGACGAGCAA  
TGTATGCCCCCTCCCATTCAGGAAACATAACATGTAGATCAAAT---  
ATTACAGGACTACTATTGACACGTGATGGTGGTATCACAATGGC-----  
-----  
-----  
ACAGAGACATTTCAGACCTGAAGGAGGAAATATGAAGGACAATTGGAGAAGTGAATTATATAAATATAAAGTGG  
TAGAACTTAAGCCATTG---GGAATAGCACCCACCAAGGCAAAAAGGAGAGTGGTG-----  
-----GAGAGAGGAAAGAGAGCA---GTGGGA---ATAGGAGCC-----  
TTGTTCTTGGGCTCTTGGGAGTA---GCAGGAAGCACTATG---GGCGCGGCGTCA---  
GTGACGCTGACGGCACAG---GCCAGACAA---CTGTTG---TCTGGTATAGTGCAACAGCAAAC---  
AATTTG---CTGAGA---GCTATAGAGGCGCAACAACATATGTTGCAACTCACGGTCTGGGGCATT  
>DQ056404  
TTCTATTGCAATGCATCACAACCTGTTTAACGAGACACTGCTTAACGAGACTATGACTAATGGTACA-----  
-----  
-----  
ACCAATGCAACCATCACACTCCCATGCAGAATAAAACAAATTATAAACATGTGGCAGGAGGTAGGACGAGCAA  
TATATGCCCCCTCCCATTTGAAGGAAACATAACATGTACATCAAAT---  
ATCACAGGACTACTATTGGTACGTGATGGAGGAAATGATGGAGGAAAT-----  
-----  
-----  
AACACACAGACCGAGACATTTCAGACCTGGAGGAGGAGATATGAGGAACAATTGGAGAAGTGAATTATATAAAT  
ATAAAGTGGTAGAAATTAAGCCACTG---GGAGTAGCACCCACTGAGGCAAAAAGGAGAGTGGTG-----  
-----GAGAGAGAAAAAAGAGCA---GCA-----CTAGGAGCT---  
-----ATGCTCTTTGGGTTCTTGGGAGCA---GCCGGAAGCACTATG---GGCGCAGCATCA---  
ATAACGCTGACGGTACAG---GCCAGACAA---TTGTTG---TCTGGAATAGTGCAACAGCAAAGC---  
AATTTG---CTGAGG---GCTATAGAGGCGCAACAGCATATGTTGCAACTGACGGTCTGGGGCATT  
>DQ351237  
TTCTATTGCAATACATCAGGCCTGTTTAATGTTAATAGTAGTACACTTAAAAACAGTACAGGT-----  
-----  
-----

GCTAATGGTACAATCACACTCCAATGCAGAATAAAACAAATTATAAACATGTGGCAGAAGGTAGGACGAGCAA  
TGTATGCCCCCTCCCATTGCGGGAAATATAACATGTAACCTCAACT---  
ATCACAGGACTCCTATTGACACGCGATGGAGGAACAGGAGAAGAA-----  
-----  
-----  
AATACTACAGAGACATTTCAGACCTGGAGGAGGAGATATGAGGGACAATTGGAGAAGTGAATTATATAAAATATA  
AAGTGGTAGAAGTTAAGCCATTA---GGAATAGCACCCACTACTGCAAAAAGGAGAGTGGTG-----  
-----GAGAGAGAGAAAAAGAGCA---GTGGGA---ATAGGAGCT-----  
---ATGTTCTTGGGATCTTGGGAGCA---GCAGGAAGCACTATG---GGCGCAGCATCA---  
ATAACGCTGACGGTACAG---GCCAGACAA---TTATTG---TCTGGTATAGTGCAACAGCAAAGC---  
AATTTG---CTGAGA---GCTATAGAGGCGCAACAGCATATGTTGCAACTCACGGTCTGGGGCATA  
>DQ056408  
TTCTATTGTAATACAACAAAGCTGTTTAAATAGTACATACATGCCTAATGGTACATACATGTACATGCCTAATG  
ATACAGAA-----  
-----AGT---  
AATTCAAGTGAAGTAATCACACTCCCATGCAGGATAAAACAAATTATAAACATGTGGCAGCAGGTAGGACGAG  
CAATGTATGCTCCTCCCATTGCAGGGAACATAACATGCATATCAAAT---  
ATCACAGGATTACTATTGGTGAGAGATGGAGGAAAAGGAAATAGCACAGATAAT-----  
-----  
-  
AAAGAGGCAGAAAAACCAGAGATATTCAGACCTGAAGGAGGAGATATGAGAAACAATTGGAGAAGTGAATTAT  
ACAAATATAAAGTAGTAGAAGTTAAACCATTG---GGAATAGCACCTACTAAGGCAAAAAGAAGAGTGGTG--  
-----GAGAGAGAAAAAGAGCA---GTGGGA---  
CTAGGAGCT-----GTGTTCTTGGGTTCTTGGGAGCA---GCAGGAAGCACTATG---  
GGCGCGGCGTCA---ATAACGCTGACGGTACAG---GCCAGACAA---TTGTTG---  
TCTGGTATAGTGCAACAGCAAAGC---AATTTG---CTGAGG---  
GCCATAGAGGCGCAACAGCATATGTTGCAACTCGCGGTCTGGGGCATT  
>DQ011169  
TTCTATTGCAATACAACAGGTCTGTTTAGTAATAATGGAAGTACC-----  
-----  
-----  
CAAAATGAGACCATCACACTCCCATGCAGAATAAAACAAATTGTAAACATGTGGCAGGGGGTAGGACGAGCAA  
TGTATGCCCCCTCCCATTGCAGGAACCATAACATGTAAATCAAAT---  
ATCACAGGATTATTATTGCTACGTGATGGAGGAGACACCAGCAGC-----  
-----  
-----  
AATGGCACAGAGATATTCAGACCTGGAGGAGGAAATATGAAAGACAATTGGAGAAGTGAATTATATAAAATATA  
AAGTGGTAGAAATTAAGCCATTA---GGAGTAGCACCCACGACGGCAAAAAGGAGAGTGGTG-----  
-----GAGAGAGAAAAAGAGCA---GTGGGA---ATAGGAGCT-----  
---GTGCTCTTGGGTTCTTGGGAGCA---GCAGGAAGCACTATG---GGCGCGGCGTCA---  
ATAACGCTGACGGTACAG---GCCAGACAA---CTGTTG---TCTGGTATAGTGCAACAGCAAAGC---  
AATTTG---CTGAGA---GCTATAGAGGCGCAACAGCATATGTTGCAACTCACGGTCTGGGGCATT  
>DQ011176  
TTCTATTGCAATACAACAAAACCTGTTTAAATGCAACAGACAAAGACAATATAACACAATGGGCCAACACAACAA  
AC-----  
-----  
AGTACTGAAACCATCACAAATCCCATGCAGAATAAAACAAATTGTAAACATGTGGCAGGGGGTAGGACGAGCAA  
TGTATGCCCCCTCCCATTGCAGGAAACATAACATGTAAATCAAAT---  
ATCACAGGACTACTACTGACATGGGATGGTCCGTATAACAAAAGC-----  
-----  
-----  
AGTACGAATGAGACATTTCAGACCTGGAGGAGGAAATATGAAGGACAATTGGAGAAGTGAATTATATAAAATATA  
AAGTGGTAGAAATTAAGCCATTG---GGAGTAGCACCCACTGAGGCAAAAAGGAGAGTGGTG-----  
-----GGGAGAGAAAAAGAGCA---GCA-----CTAGGAGCT-----  
---TTGCTCCTTGGGTTCTTGGGAGCA---GCAGGAAGCACTATG---GGCGCGGCGTCA---  
ATAACGCTGACGGTACAT---GCCAAACAA---CTGATG---GCTGGTATAGTGCAACAGCAAAGC---  
AATTTG---CTGAGA---GCTATAGAGGCGCAACAGCATATGTTGCAACTCACAGTTTGGGGCATT  
>DQ093601  
TTCTATTGCAATACAACAAAACCTGTTTTCTAATTCTAATGACAGTGGTTCAAAC-----  
-----

-----  
ACAACTACCATAACCACCATCCCATGTAGGATAAAAACAAATTGTAACTTGTGGCAGGGGGTAGGAAGAGCAA  
TGTATGCCCCCTCCCATTTGAAGGGAACATAACATGTAACCTCAAGT---  
ATCACAGGATTACTATTGACACGTGATGGTGGCTTCAACAACACA-----  
-----  
-----  
ACAGAGATATTCAGACCTGAAGGAGGAAATATGAAGGACAATTGGAGAAGTGAATTATATAAATATAAAGTGG  
TAGAAATTAAGCCATTG---GGAGTAGCACCCACTAAGGCAAAAAGGAGAGTGGTG-----  
-----GAGAGAGAAAAGAGAGCA---GTGGGG---ATAGGAGCT-----  
TTGTTTCCTTGGGTTCTTGGGAGCA---GCAGGAAGCACTATG---GGCGCGGCGTCA---  
ATGACGCTGACGGTACAG---GCCAGACAA---CTGTTG---TCCGGTATAGTGCAACAGCAAAAC---  
CATTTG---CTGAGA---GCCATAGAGGCGCAACAGCATATGTTGCAACTCACGGTCTGGGGCATT  
>DQ093596  
TTCTATTGCAATACATCAAACCTGTTTGTAGTGACATGTATAAT-----  
-----  
-----  
GATACCATCACACTCCCATGCAAAATAAAGCAAATCATAAACATGTGGCAGGAGGTAGGACGAGCAATGTATG  
CCCCCTCCCATTTGACAGGAAACATAACATGTAATTCAAGT---  
ATCACAGGATTACTACTGACACGTGATGGAGGCACGAATGGAGGCACG-----  
-----  
-----  
AATGACACCACAGAAACATTCAGACTTGGAGGAGGAAATATGAAGGACAACCTGGAGAAGTGAATTATATAAGT  
ACAAGGTGGTAGAAATTAAGCCATTA---GGAGTAGCACCCACTGGAGCAAAAAGGAGAGTGGTG-----  
-----GAGAGAGAAAAAGAGCA---GTGGGA---ATGGGAGCT---  
-----GTGCTCCTTGGGTTCTTGGGAGCA---GCAGGAAGCACTATG---GGCGCGGCGTCA---  
ATAACGCTGACGGTACAG---GCCAGACAA---CTGTTG---TCTGGTATAGTGCAACAGCAAAGC---  
AATTTG---CTGAGA---GCTATAGAGGCGCAACAGCATCTGTTGCAACTCACGGTCTGGGGCATT  
>DQ093607  
TTCTATTGTGACACATTAAACTGTTTAATAATAGTCTGGTTAATGATAGTGCT-----  
-----  
-----  
ACAAACGACTCAATCACCATCCCATGCAGAATAAAGCAAATTATAAATATGTGGCAAAAGGTAGGACGAGCAA  
TGTATGCCCCCTCCCATTTGACAGGAAACATAACATGTAGATCAAAT---  
ATCACAGGACTACTATTGACACGTGATGGAGGAACAATTAATGCAACT-----  
-----  
-----  
GAAAAATAATATAGAGACATTCAGACCTGGAGGAGGAGATGTGAGGGACAATTGGAGAAGTGAATTATATAAAT  
ATAAGTGGTAGAAATTAAGCCATTA---GGAATAGCACCCACTGAAGCAAAAAGGAGAGTGGTG-----  
-----GAGAGAGAAAAAGAGCA---GTGGGA---ATAGGAGCC---  
-----GTGTTTCCTTGGGTTCTTGGGAGCA---GCAGGAAGCACTATG---GGCGCAGCGTCA---  
ATAACGCTGACGGTACAG---GCCAGACAA---CTATTG---TCTGGTATAGTGCAACAGCAAAGC---  
AATTTG---CTGAGG---GCTATAGAGGCGCAACAGCATATGTTGCAACTCACGGTCTGGGACATT  
>DQ164108  
TTCTATTGCAATACATCAGCACTGTTTAATGGTACATACAATGGGACAGAAAGTAATTCA-----  
-----  
-----  
ACTGAGTCAAACATCACACTTCCATGCAGAATAAAAACAAATTGTAAACATGTGGCAGGAGGTAGGACGAGCAA  
TGTATGCCCCCTCCCATTTGAAGGAATAATAACATGTAACCTCAAGT---  
ATCACAGGACTACTATTGACACGTGATGGAGGACAAACAAACAAAACA-----  
-----  
-----  
AATGGCACAGAGATATTCAGACCTGGAGGAGGAAATATGAAGGACAATTGGAGAAATGAATTGTATAAATATA  
AAGTGGTAGAAATTAAGCCATTG---GGAATAGCACCCCTCTAAGGCAAAAAGGAGAGTGGTG-----  
-----GAGAGAGAAAAAGAGCA---GCAGGA---ATGGGAGCT-----  
---GTGCTCCTTGGGTTCTTGGGAGCA---GCAGGAAGCACTATG---GGCGCGGCGTCA---  
ATAACGCTGACGGTACAG---GCCAGACAA---CTGTTG---TCTGGTATAGTGCAACAGCAAAAT---  
AATTTG---CTGAGG---GCTATTGAAGCGCAACAGCATATGTTGCAACTCACGGTCTGGGGCATT  
>DQ351234  
TTCTATTGCAACACATCAAACTGTTTAATAGTACCATGTCTAATGGTACCATGTTTAATAGTACAGGA-----  
-----

-----  
AATAATTTCAGTCATCACACTCCAATGTAGAAATAAAACAAATTATAAATATGTGGCAGGAGGTAGGACGAGCAA  
TGTATGCCCCCTCCCATTCAGGAACCATCACATGTAACCTCTAAT---  
ATCACAGGACTACTATTGACACGTGATGGTGAAATAATGAGACA-----  
-----  
-----  
GAAACGTTTCAGACCTGAAGGAGGAGATATGAGGGATAATTGGAGAAGTGAATTATATAAATATAAAGTGGTAG  
AAATTAAGCCATTA---GGAGTAGCACCCACTGAGGCCAAAAGGAGAGTGGTG-----  
-----GAGAGAGAAAAAAGAGCA---GTGGGA---ATGGGAGCT-----  
GTGTTTCCTTGGGTTCTTGGGAGCA---GCAGGAAGCACTATG---GGCGCAGCGGCA---  
GTGACGCTGACGGTACAG---GCCAGACAA---TTGCTG---TCTGGAATAGTGCAACAGCAAAGC---  
AATTTG---CTGAGA---GCTATAGAGGCGCAACAGCATATGTTGAAACTCACGGTCTGGGGCATT  
>DQ275650  
TTTTATTGCAATACATCAGCACTATTTAATAGTTCGTTTAAATGGTACATACATGAACAGTACAGAA-----  
-----  
-----  
GGTAATTCAAACATCACAATCCCACGCAGAATAAAACAAATTATAAACATGTGGCAGGAGGTGGGAAAAGCAA  
TGTATGCCCCCTCCCATTCAGGAAACATAACATGTAAATCAAAT---  
ATCACAGGACTACTATTGATACGTGATGGAGGAACAGGCAATGAAATA-----  
-----  
-----  
GACAATACAACAGAGACATTTCAGACCTGGAGGAGGAGATATGAGGGACAATTGGAGAAGTGAATTATATAAAT  
ATAAAGTGGTAGAAATTAAGCCATTA---GGAATAGCACCCACTGAGGCCAAAAGGAGAGTGGTG-----  
-----CAGAGGGAGAAAAAGAGCA---GTGGGA---ATAGGAGCT---  
-----GTGCTCCTTGGGTTCTTGGGAGCA---GCAGGAAGCACTATG---GGCGCAGCATCA---  
ATAACGCTGACGGTACAG---GCCAGACAA---TTATTG---TCTGGTATAGTGCAACAGCAAAGC---  
AATTTG---CTGAGA---GCTATAGAGGCGCAACAACATATGTTGCAACTCACAGTCTGGGGCATT  
>KT183301  
TTCTATTGTAATACATCAAGACTATTTAATGGTAATGGTACACACACACAAGATAATAGTACAAAAGAG----  
-----  
-----  
ACCAACAAGACCATCACAATTACATGCAAAATAAAACAAATAATAAATATGTGGCAAGAGGTAGGACGAGCAA  
TGTATGCCCCCTCCCATTCAGGAAACATAACATGTAAATCAAAT---  
ATCACAGGACTACTGTTGACACGTGATGGAGGAGGAAATAGTACT-----  
-----  
-----  
GATGAGATCTTCAGACCTGGAGGAGGAGATATGAGAGACAATTGGAGAAGTGAATTATATAAATATAAAGTGG  
TAGAAATTAACCATTA---GGAATAGCACCCACTAGTGCAAAAAGGAGAGTGGTG-----  
-----GAGAGAGAAAAAAGAGCA---GTGGGA---ATAGGAGCT-----  
GTGTTTCCTTGGGTTCTTGGGAACA---GCAGGAAGCACTATG---GGCGCGGCGTCA---  
ATAACGCTGACGGTACAG---GCCAGACAA---TTATTG---TCTGGTATAGTGCAACAGCAAAGC---  
AATTTG---CTGAGA---GCCATAGAGGCGCAACAGCATCTGTTGCAACTCACGGTCTGGGGCATT  
>KC863229  
TTCTATTGCAATACATCAAACTGTTTAAATAAGAATGGTACA-----  
-----  
-----  
GAAAAGAATACAACCATCACACTCCCATGCAGAATAAAACAAATTATAAACATGTGGCAGGAGGTAGGACGAG  
CAATATATGCCCCCTCCCATTAAGGAAACATAACATGTAGCTCAAAC---  
ATCACAGGACTACTATTGACACGGGATGGAGGAGAAACAAACATAAAAAACACA-----  
-----  
-----  
GAGACAGACAATACCACAGAGACATTTCAGACCTGAAGGAGGAGATATGAGAAATAATTGGAGAAGTGAATTGT  
ATAAATATAAAGTGGTAGAAGTTAAGCCACTA---GGAGTAGCACCTACTGAGGCCAAAAGGAGAGTGGTG---  
-----GAGAGAGAAAAAAGAGCA---GTGGGA---  
ATAGGAGCT-----GTGTTTCCTTGGGTTCTTGGGAGCA---GCAGGAAGCACTATG---  
GGCGCGGCGTCA---ATAACGCTGACGGTACAG---GCCAGACAA---TTGTTG---  
TCTGGAATAGTGCAACAGCAAAGC---AATTTG---CTGAAG---  
GCTATAGAGGCGCAACAGCATATGTTGCAACTCACGGTCTGGGGCATT  
>AY772690

TTCTATTGTGATACAACAAAACCTATTTTAATGAAAGTGAGTTT-----  
-----  
-----  
AATGAGGACGCAATCACGCTTCCATGCAAGATAAAACAATTTATAAACATGTGGCAGGGGGTGGGACGGGCAA  
TGTACGCCCCCTCCCATTTGAAGGAAACATAACATGTAACCTCAAGT---  
ATCACAGGATTACTATTGACACGTGATGGAGGCAATACCAGTAGC-----  
-----  
-----  
CGAGGAGAGATATTCAGACCTGGAGGAGGAAATATGAAGGACAATTGGAGAAATGAATTATATAAATATAAAG  
TGGTAGAAATTAAGCCATTG---GGAGTAGCACCCACTGATGCAAAAAGGAGAGTGGTG-----  
-----GAGAGAGAAAAAAGAGCA---GTGGGA---ATAGGAGCT-----  
GTGTTTCCTTGGGTTCTTGGGAGCA---GCAGGAAGCACTATG---GGCGCGGCGTCA---  
ATAACGCTGACGGTACAG---GCCAGACAA---CTGTTG---TCTGGTATAGTGCAACAGCAAAGC---  
AATTTG---CTGAGA---GCTATAGAGGCGCAACAGCATATGTTGCAACTCACAGTCTGGGGCATT  
>AY772691  
TTCTATTGCAATACATCAGGCCTGTTTAATGGTACATATGATGTTAATAATACAAACAGTACTTCAAATACAA  
GC-----  
-----  
AGTAATTCATCCATCATACTTAAATGCCGAATAAAACAAATTATAAACATGTGGCAGGGGGTAGGACGAGCGA  
TGTATGCCCCCTCCCATTTGCAGGAAACATAACATGTAAATCAAAT---  
ATTACAGGATTACTATTGACACGTGATGGAGGAACGGGAAATGACACT-----  
-----  
-----  
GACACAGAAACAGAAACATTCAGACCTGGAGGAGGAAATATGAGGGACAATTGGAGAAGTGAATTATATAAAT  
ATAAGGTAGTAGAAATTAACCACCTA---GGAATAGCACCCACTGAGGCAAAAAGGAGAGTGGTG-----  
-----GAGAGAGAAAAAAGAGCA---GTGGGA---CTAGGAGCT---  
-----GTGTTTCCTTGGGTTCTTAGGAGCA---GCAGGAAGCACTATG---GGCGCAGCATCA---  
ATAACGCTGACGGTACAG---GCCAGACAA---CTATTA---TCTGGTATAGTGCAACAGCAAAAC---  
AATCTG---CTGAGA---GCTATAGAGGCGCAACAACATATGTTGCAACTCACAGTCTGGGGCATT  
>AY703908  
TTCTATTGCAATACAGCAGACCTGTTTACTAATGTAAGTAGA-----  
-----  
-----  
AATGGGACCATCACACTCCCATGCAGAATAAAACAAATTGTAAACATGTGGCAGGGGGTAGGACGAGCAATGT  
ATGCCCCCTCCCATTTGAAGGAAACATAACATGTAAATCAAAT---  
ATCACAGGATTATTATTGCTACGTGATGGAGGAAACATGGGAGGAGACACCAGT-----  
-----  
-  
ACGAATGGCATAAAGAACGAGACATTCAGACCTGGGGGAGGAAATATGAAAGACAATTGGAGAAGTGAACCTAT  
ATAAATATAAAGTGGTAGAAATTAAGCCATTG---GGAGTGGCACCCACAGGGGCAAAAAGGACAGTGGTG--  
-----GAGAGAGAAAAAAGAGCA---GTGGGG---  
ATAGGAGCT-----GTGCTCTTTGGGTTCTTGGGAGCA---GCAGGAAGCACTATG---  
GGCGCGGCGTCA---ATAACGCTGACGGTACAG---GCCAGACAA---TTGTTG---  
TCTGGTATAGTGCAACAGCAAAGC---AATTTG---CTGAGA---  
GCTATAGAGGCGCAACAGCATATGTTGCAACTCACAGTCTGGGGCATT  
>AY772693  
TTCTATTGCGATACAACAAACCTGTTTAATGAAAGTATAGTTTCTAGTAAAAGTGAG-----  
-----  
-----  
TTAAACGAAACCATCATACTCCCATGCAGGATAAAACAAATTATAAACATGTGGCAGGGGGTAGGACGAGCAA  
TGTATGCCCCCTCCCATTTGCAGGAAACATAACATGTAAATCAAAT---  
ATCACAGGACTACTATTGACACGTGATGGAGGAAAAACACAACA-----  
-----  
-----  
AAAGAGATATTCAGACCTGGAGGAGGAAATATGAAAGACAATTGGAGAAGTGAATTATATAAATATAAAGTAG  
TAGAAATTAAGCCATTG---GGAATAGCACCCACTGGGGCAAAAAGGAGAGTGGTG-----  
-----GAGAGAGAAAAAAGAGCA---GTGGGA---ATAGGAGCT-----  
GTGTTTCCTTGGGTTCTTGGGAGCG---GCAGGAAGCACTATG---GGCGCGGCGTCG---  
ATAACGCTGACGGTACAG---GCCAGACAA---CTGTTG---TCTGGTATAGTGCAACAGCAAAGT---  
AATTTG---CTGAGA---GCTATAGAGGCGCAACAACATATGTTGCAACTCACAGTCTGGGGCATT

>AY772700

TTCTATTGTAATACAACAAACCTGTTTAAATCCTAATGGTACAGAGGGAAGT-----

-----  
-----

CCAAACTCAACCATCACACTCCAATGCAGAATAAAACAAATTATAAACATGTGGCAGGAGGTAGGACGAGCAA  
TGTATGCTCCGCCCATTCGAGGAAACATAACATGTAAATCAAAC---

ATCACAGGAATACTATTGACACGTGATGGAGGAAACAATGATAATAATACA-----

-----  
-----

GATAATAATACAGAGACATTCAGACCTGGAGGAGGAAATATGAAGGATAATTGGAGAAGTGAATTATATAAAT  
ATAAAGTGGTAGAAATTAACCATTG---GGAGTAGCACCAACTGAAGCAAAAAGGAGAGTGGTG-----

-----GAGAGAGAAAAAAGAGCA---GTGGGA---ATAGGAGCT---

-----GTGTTCTTGGGTTCTTGGGAGCA---GCAGGAAGCACTATG---GGCGCGGCGTCA---

ATAACGCTGACGGTACAG---GCCAGACAA---CTGTTG---TCTGGTATAGTGCAACAGCAAAGC---

AATTTG---CTGAGA---GCTATAGAGGCGCAACAACATATGTTGCAACTCACGGTCTGGGGCATT

>AY772694

TTCTATTGCAATACATCAGGACTGTTTAAATAGTACACACAATTCTACATTCTGGAATGAGACACATTGGCCAT  
ACTGGGAG-----

-----AATACA-----

ACAGATAATTTAAACATCACACTCCCATGCAGAATAAAACAAATTATAAACATGTGGCAGGAGGTAGGACGAG  
CAATGTATGCTCCTCCCATTCGAGGAAACATAACATGTAAATCAAAT---

ATCACAGGACTACTATTAGTACGTGATGGAGGCAACACAACAACACA-----

-----  
-----

AACGAGACAGAGATATTCAGACCTGCAGGAGGAGATATGAAGGACAATTGGAGAAGTGAATTATATAAATATA  
AAGTGGTAGAAGTCAAGCCATTG---GGGATAGCACCCACTGGAGCAAAAAGGAGAGTGGTA-----

-----AAGAGAGAAAAAAGAGCA---GTGGGA---ATAGGAGCT-----

---GTGCTCCTTGGTTTCTTGGGAGCA---GCCGGAAGCACTATG---GGCGCGGCGTCA---

ATAACGCTGACGGTACAG---GCCAGACAG---CTGCTG---TCTGGTATAGTGCAACAGCAAAT---

AATTTG---CTGAGG---GCTATAGAGGCGCAACAGCATATGTTGCAACTCACAGTCTGGGGCATT

>AY772701

TTCTATTGTAATACAACAGAACTATTTGATACAACAAAAATATTTAATGGCACAGAA-----

-----  
-----

GGTAATTCAAACATCACACTCCCCTGCAGGATAAAACAAGTTATAAACATGTGGCAGCAGGTAGGACGAGCAA  
TGTATGCTCCTCCCATTCGAGGAAATATAACATGTAACTCAAGT---

ATCACAGGATTACTATTGGTGCGTGATGGAGGAACAAGTAACACAATAAC-----

-----  
----

ACAGAGAATAACACAGAGACATTCAGACCTGGAGGAGGAGATATGAGGGACAATTGGAGAAGTGAGTTATACA  
AATATAAAGTGGTAGAAATTAACCATTA---GGAATAGCACCTACCAAGGCAAAAAGGAGAGTGGTG-----

-----GAGAGAGAAAAAAGAGCA---GCGGGA---

ATAGGGGCT-----GTGATCCTTGGGTTCTTGGGAGCA---GCAGGAAGCACTATG---

GGCGCAGCGTCA---ATAGCGCTGACGGCACAG---GCCAGACAA---TTGTTG---

TCTGGTATAGTGCAACAGCAAAGC---AATTTG---CTGAGG---

GCCATAGAGGCGCAACAGCATATGTTGCAACTCACGGTTTGGGGCATC

>AY772695

TTCTATTGTAATACAACAAACCTGTTTCAGTAAGAATGTAAGT-----

-----  
-----

AATGATAACATCATACTCCCATGCAGAATAAAACAAATTATAAATATGTGGCAGAAGGTGGGACGAGCAATGT  
ATGCCCCCTCCCATTCGAGGAAACATAACATGTAACTCAAAT---

ATCACAGGACTACTACTGACACGTGATGGAGGCACAAATAACACA-----

-----  
-----

GAGATATTCAGACCTGGAGGAGGAAATATGAAGGACAATTGGAGAAATGAATTATATAAATATAAAGTGGTAG  
AAATTAAGCCATTG---GGAGTAGCACCCACTGAGGCAAAAAGAATAGTGGTG-----

-----GAGAGAGAAAAAAGAGCA---GTAGGA---ATAGGAGCT-----

GTACTCCTTGGGTTCTTGGGAGCA---GCAGGAAGCACTATG---GGCGCGGCGTCA---

GTGACGCTGACGGTACAG---GCCAGACAA---CTGTTG---TCTGGTATAGTGCAACAGCAAAGC---  
AATTTG---CTGAGA---GCTATAGAGGCGCAACAGCATATGTTGCAACTCACAGTCTGGGGCATT  
>AY772696  
TTTTATTGCGATACAACAAACCTGTTCAATCGTTCTAAGGATAAT-----  
-----  
-----  
GAAAATGATACCATCATACTCCCATGCAGAATAAAACAATTTATAAACATGTGGCAGGGGGTAGGACGAGCAA  
TGTATGCCCCCTCCCATTTGAAGGATACATAACATGTAACCTCAAGT---  
ATCACAGGACTACTACTGACACGTGATGGAGGTGGTAATGAGACA-----  
-----  
-----  
AGGAAAAATGAGACATTTCAGACCTGGAGGAGGAAATATGAAGGACAATTGGAGAAAGTGAATTATATAAAATATA  
AAGTGGTAGAAATTAAGCCATTG---GGAATAGCACCCACTGAGGCAAAAAGGAGAGTGGTG-----  
-----GAGAGAGAAAAAAGAGCA---GTTGGA---ATAGGAGCT-----  
---GTGCTCCTTGGGTTCTTGGGAGCA---GCAGGGAGCACTATG---GGCGCAGCGTCA---  
GTAACGCTGACGGTACAT---GCCAGAAAA---CTGTTG---GCTGGTATAGTGCAACAGCAAAGC---  
AATTTG---CTGAGA---GCTATAGAGGCGCAACAGCACATGTTGCAACTCACAGCCTGGGGCATT  
>DQ164115  
TTCTATTGCAATACATCAAATCTGTTCAATACAACCACTAAT-----  
-----  
-----  
AACATTACAAACATCACACTCCCATGCAGAATAAAACAATTTATAAACATGTGGCAGGAGGTAGGACGAGCAA  
TGTATGCCCCGCCCATTGAAGGAAACATAACATGTAGGTCAAAT---  
ATCACAGGACTACTATTGGTACGTGATGGAGGAAAAAGGAATAACACGAAT-----  
-----  
-----  
GACAATGCCACAGAGATATTTCAGACCTGGAGGAGGAAATATGAAGGACAATTGGAGAAAGTGAATTATATAAAAT  
ATAAAGTAGTAGAAATTAACCATTG---GGAATAGCACCCACAAAAGCAAAAAGGAGAGTGGTG-----  
-----GAGAGAGAAAAAAGAGCA---GTGGGA---ATAGGAGCT---  
-----GTACTCCTTGGGTTCTTGGGAGCA---GCAGGAAGCACTATG---GGCGCGGCGTCA---  
ATAACGCTGACGGTACAG---GCCAGACAA---CTGTTG---TCTGGTATAGTGCAACAGCAAAGC---  
AATTTG---CTGAGA---GCTATAGAGGCGCAACAGCATATGTTGCAACTCACGGTCTGGGGCATT  
>DQ351221  
TTCTATTGTGATACAGCACAACTGTTTAACGAAAGTGAGGCAAACATAACCAGT-----  
-----  
-----  
GAGGCAAACATAACCACTCTCCAATGCAGGATAAAACAAATTTATAAACATGTGGCAGGGGGTAGGACGAGCAA  
TGTATGCCCCCTCCCATTTGCAGGAAACATAACATGTAAATCAAAT---  
ATCACAGGACTATTGTTGACACGTGATGGAGGAAACGCAGAAAAC-----  
-----  
-----  
ACAACGGAGACATTTCAGACCTGGAGGAGGAAATATGAAGGACAATTGGAGAAAGTGAATTATATAAAATATAAAG  
TGGTAGAAATTAAGCCATTG---GGAGTAGCACCCACTGAGGCAAAAAGGAGAGTGGTG-----  
-----GAGAGAGAAAAAAGAGCA---GTGGGA---CTAGGAGCT-----  
GTGTTCCCTTGGGTTCTTGGGAGCA---GCAGGAAGCACTATG---GGCGCGGCGTCA---  
ATAACGCTGACGGTACAG---GCCAGACAG---CTGTTG---TCTGGTATAGTGCAACAGCAAAGC---  
AATTTG---CTGAGA---GCTATAGAGGCGCAACAGCATATGTTGCAACTCACGGTCTGGGGCATT  
>DQ164121  
TTCTATTGCAATACGTCAAATCTGTTTAATAGTACATATACTAGCAACATTACA-----  
-----  
-----  
GGAATTTCAAGCATCACACTCCCATGCAGAATAAAACAAATTTATAAACATGTGGCAGGAGGTAGGACAAGCAA  
TGTATGCCCCCTCCCATTTAGAGGAAACATAACATGTATCTCAAAG---  
ATCACAGGACTACTATTGACACGTGATGGAGGAAACAATAGGACT-----  
-----  
-----  
AATGAGACCTTCAGACCTGGAGGAGGAGATATGAGGGACAATTGGAGAAATGAATTATATAAAATATAAAGTGG  
TAGAAATTAAGCCATTG---GGAATAGCACCCACTGAGGCAAAAAGGACAGTGGTG-----  
-----GAGAGAGAAAAAAGAGCA---GTGGGA---ATAGGAGCT-----  
GTGTTCCCTTGGGTTCTTAGGAGCA---GCAGGAAGCACTATG---GGCGCGGCGTCA---

ATAACGCTGACGGTACAG---GCCAGACAA---CTGTTG---TCTGGTATAGTGCAACAGCAAAGC---  
 AATTTG---CTGAGA---GCTATAGAGGCGCAACAGCATATGTTGCAACTCACAGTCTGGGGCATT  
 >DQ396393  
 TTCTATTGCAATACATCACTACTGTTTAAATAGTATAGCAAGTAATAGTACAGAAAGTAATAGTACAAAAGCA  
 GT-----  
 -----  
 AGTACAGAAAAGAAGATCACACTTCTATGCAGAATAAAACAAATTATAAACATGTGGCAGGAGGTGGGACGAG  
 CAATGTATGCCCCCTCCCATTTGCCGGAACATAACATGTATATCAAAT---  
 ATAACAGGGATAATATTAACACGTGATGGAGGAGAACAGACAAAT-----  
 -----  
 -----  
 GACACAGAGACATTTCAGACCTGGAGGAGGAGATATGAGGGACAATTGGAGAAGTGAATTATATAAATATAAAG  
 TGGTAGAAATTAAGCCATTG---GGAGTAGCACCAACTGCGGCAAAAAGGAGAGTGGTG-----  
 -----AAGAGAGAAAAAAGAGCA---GTGGGA---ATAGGAGCT-----  
 GTGTTCTTGGGTTCTTGGGAGCA---GCAGGAAGCACTATG---GGCGCGGCGTCA---  
 ATAACGCTGACGGTACAG---GCCAGACAA---CTGTTG---TCTGGTATAGTGCAACAGCAAAGC---  
 AATTTG---CTGAGG---GCTATAGAGGCGCAACAGCATATGTTGCAACTCACTGTCTGGGGCATT  
 >DQ396394  
 TTCTATTGCAATACATCAGGCTTGTTTAAATAATGCTACAGGAAATGCATCAGGCTTGGTTAATAATGCTACAG  
 GA-----  
 -----  
 GATGGGTCAGTCATCACACTGCCATGCAAAATAAAACAAATAATAAACATGTGGCAGGAGGTAGGACGAGCAA  
 TGTATGCCCCCTCCCATTTGCAGGAAACATAACATGTAACTCAAGT---  
 ATCACAGGACTACTATTGACACGGGATGGAGGAAATACCAATGGC-----  
 -----  
 -----  
 ACTGAAATATTCAGACCTGGAGGAGGAAATATGAAGGACAATTGGAGAAGTGAATTATATAAATATAAAGTAG  
 TAGAAATCAAGCCATTA---GGAGTAGCACCCACCGAGGCAAAAAGGAGAGTGGTG-----  
 -----GAGAGAGAAAAAAGAGCA---GTGGGA---ATAGGAGCT-----  
 GTTCTCCTTGGGTTCTTGGGAGCA---GCAGGAAGCACTATG---GGCGCGGCGTCA---  
 ATAACGCTGACGGTACAG---GCCAGACAA---CTGTTG---TCTGGTATAGTGCAACAGCAAAGC---  
 AATTTG---CTGAGA---GCTATAGAGGCGCAACAGCATATGTTGCAACTCACAGTCTGGGGCATT  
 >DQ164122  
 TTCTATTGCAGTACATCAAAGCTGTTTAAATGCTACAATGGGTAATGATAAGTTGCTTAATGATACTTCA---  
 -----  
 -----  
 GATAACTCAACCATCACACTCCCATGCAGAATAAAACAAATTTATAAACATGTGGCAGGGGGTTGGACGAGCAA  
 TGTATGCCCCGCCCATTGCAGGAAACATAACATGTAGATCAAAT---  
 ATCACAGGACTACTATTGACACGTGATGGAGGAGTAGGTAATGGGACA-----  
 -----  
 -----  
 GAGAATAATACAGAGATATTCAGACCTGGAGGAGGAGATATGAAGGACAATTGGAGAAGTGAATTATATAAAT  
 ACAAGTGGTAGAAGTGATGCCATTG---GGAATAGCACCCACTGGAGCAAAAAGGAGAGTGGTG-----  
 -----GAGAGAGAAAAAAGAGCA---GTGGGA---ATAGGAGCT---  
 -----GTGTTCTTGGGTTCTTGGGAGCA---GCAGGAAGCACTATG---GGCGCAGCGTCA---  
 ATAACGCTGACGGTACAG---GCCAGACAA---TTGTTG---TCTGGTATAGTGCAACAGCAAAC---  
 AATTTG---CTGAGG---GCTATAGAGGCGCAACAGCATATGTTGCAACTCACGGTCTGGGGCATT  
 >DQ164117  
 TTCTATTGCAATACATCAGGACTATTTAATGGGACATTTGATGGTACAGAAAGTAATTCAACA-----  
 -----  
 -----  
 AGTAATGCAACCATCACAATTCATGCAGAATAAAACAAATTATAAACATGTGGCAGGGGGTAGGACGAGCAA  
 TGTATGCCCCCTCCCATTTGCAGGAAACATAACATGTAAATCAAAT---  
 ATCACAGGACTACTATTAGTACGTGATGGAGGCAACACAGACAACACA-----  
 -----  
 -----  
 AATGGCACAGAAATATTCAGACCTGGAGGAGGAGATATGAAGGACAATTGGAGAAGTGAATTATATAAATATA  
 AAGTGGTAGAAATTAAGCCATTG---GGAATAGCACCCACTGGAGCAAAAAGGAGAGTGGTG-----  
 -----AAGAGAGAAAAAAGAGCA---GTGGGA---ATAGGAGCT-----  
 ---GTGCTCTTTGGGTTCTTGGGAGCA---GCAGGAAGCACTATG---GGCGCAGCGTCA---

ATAGCGCTGACGGCACAA---GCCAGACAA---GTATTG---TCTGGTATAGTGCAACAGCAAAAC---  
 AATTTG---CTGAGG---GCTATAGAGGCGCAACAGCATATGTTGCAACTCACGGTCTGGGGCATT  
 >DQ164118  
 TTCTATTGTAATACATCAGACCTGTTTAATAGGCCTATAAATGAGTCTAATGGTACAGAG-----  
 -----  
 -----  
 GATAATTCAACCATCACACTTCCATGCAGAATAAAACAAATTATAAACCTGTGGCAGGAGGTAGGACGAGCAA  
 TGTATGCCCCCTCCCATTTGAAGGAAACATAACATGTAAATCAAAT---  
 ATCACAGGACTACTATTGGTACGTGATGGAGGCAACACAACCTGAA-----  
 -----  
 -----  
 AACACACCTGAGATATTCAGACCTGGAGGAGGAGATATGAGGGACAATTGGAGAAAATGAATTATACAAATATA  
 AAGTAGTAGAAATTGAGCCATTG---GGAATAGCACCCACTAAAGCAAAAAGGAGAGTGGTG-----  
 -----GAGAGAGAAAAAAGAGCA---GTGGGA---ATAGGAGCT-----  
 ---GTGTTCTTGGGTTCTTGGGAGCA---GCAGGAAGCACTATG---GGCGCGGCGTCA---  
 CTAACGCTGACGGTACAG---GCCAGACAA---CTGTTG---TCTGGTATAGTGCAACAGCAAAGC---  
 AATTTG---CTGAGA---GCCATAGAGGCGCAACAGCATATGTTGCAACTCACGGTATGGGGCATT  
 >DQ445637  
 TTCTACTGCAATACGACAGAACTGTTCAACATCACTAGCAAT-----  
 -----  
 -----  
 ACAACTACCATCACACTCCCATGCAGAATAAAACAAATTATAAACATGTGGCAGGAGGTAGGACGAGCAATGT  
 ATGCCCCCTCCCATTTGCAGGAAACATAACATGTAACTCAAGT---  
 ATCACAGGATTACTATTAACACGTGATGGAGGCGGCACCCCCAAATAACAAA-----  
 -----  
 -----  
 TCAGAGGGTAACGAAACATTCAGACCTGGAGGAGGAAATATGAAGGATAATTGGAGAAGTGAATTATATAAAT  
 ATAAAGTGGTAGAAATTAAGCCATTG---GGGATAGCACCCACTAATGCAAAAAGGAGAGTGGTG-----  
 -----GCGAGAGAAAAAAGAGCA---GTGGGA---GTAGGAGTT---  
 -----ATGTTCTTGGGTTCTTGGGAGCA---GCAGGAAGCACTATG---GGCGCAGCGGCA---  
 GTGACGCTGACGGTACAG---GCCAGACAA---CTGTTG---TCTGGTATAGTGCAACAGCAAAAC---  
 AATTTG---CTGAGA---GCTATAGAGGCGCAACAGCATCTGTTGCAGCTCACGGTCTGGGGCATT  
 >DQ164110  
 TTCTATTGCAATACAACAGAACTGTTTTCTAATAAAAGTAATTCAGGCAACACAACA-----  
 -----  
 -----  
 GACAAAGCAACCATCACACTCCCATGCAGAATAAAACAAATTGTAAACATGTGGCAGGAGGTAGGACGAGCAA  
 TGTATGCCCCCTCCCATTTGAAGGAAAAATAACATGCAATTCAAGT---  
 ATCACAGGACTACTATTGACACGTGATGGGGGAGAAGGAGGAAACACA-----  
 -----  
 -----  
 ACCAACGAAACAGAGATATTTAGACCTGCAGGAGGAAATATGAAGGACAATTGGGGAAGTGAATTATATAAAT  
 ATAAAGTGGTAGAAATCAAGCCATTG---GGAATAGCTCCCACTGAGGCAAGAAGGAGAGTAGTG-----  
 -----GAGAGAGAAAAAAGAGCA---GCA-----CTAGGAGCT---  
 -----GTGTTCTTGGGTTCTTGGGAGCA---GCAGGAAGCACTATG---GGCGCGGCGTCA---  
 ATAACGCTGACGGTACAG---GCCAGACAA---CTGTTG---TCTGGTATAGTGCGACAGCAAAGC---  
 AATTTG---CTGAGA---GCTATAGAGGCGCAACAGCACCTGTTGCAACTCACGGTCTGGGGCATT  
 >DQ093598  
 TTTTATTGCAATACATCAGGCCTGTTTAATACATCAGGTCTGTCTAGGAATGGTACAGAA-----  
 -----  
 -----  
 AATAATGCAAGCATCACACTCCCATGTAAATAAAACAAATTATAAACATGTGGCAGGAGGTAGGACGAGCAA  
 TGTATGCCCCCTCCCATTTGCAGGGAACATAACATGCTCCTCAAAT---  
 ATCACAGGACTACTATTGGTACGTGATGGAGGCGGAGATAATAAC-----  
 -----  
 -----  
 ACAGAAACATTGACCTGGAGGAGGGAATATGAAGGACAATTGGAGAAGTGAATTATATAAATATAAAGTGG  
 TAGAAATTAGGCCATTG---GGAGTAGCACCCACCAAGGCAAAAAGGAGAGTGGTG-----  
 -----GAGAGAGAAAAAAGAGCA---GTGGGA---CTGGGAGCT-----  
 GTGCTCTTTGGGTTCTTGGGAGCA---GCAGGAAGCACTATG---GGCGCGGCGTCA---

ATGACGTTGACGGTACAG---GCCAGACAA---TTGTTG---TCTGGTATAGTGCAACAGCAAAGC---  
 AATTTG---CTGAAG---GCTATAGAGGCGCAACAGCATCTGTTGCAACTCACGGTCTGGGGCATT  
 >DQ093599  
 TTCTATTGTGATACAACAAAGCTATTTAATAGTACATATAATCCTAATGTTACAACAAATGCAGCA-----  
 -----  
 -----  
 AATGGGTCAGTAATCACACTCCCATGCAGGATAAAACAATTTATAAATATGTGGCAGCAGGTAGGACGAGCAA  
 TGTATGCTCCTCCCATTGCAGGAAACATAACATGTAAATCAAAC---  
 ATCACAGGATTACTATTGGTGCGTGATGGAGGAAATCGCACAGAAACA-----  
 -----  
 -----  
 GATAACACAGAGATATTCAGACCTGGAGGAGGAGATATGAGGGACAATTGGAGAAAGTGAATTATACAAATATA  
 AAGTGGTAGAACTTAAACCATTG---GGAATAGCACCTACTAAGGCCAAAAGGAGAGTGGTG-----  
 -----GAGAGAGAAAAAGAGCA---GTGGGA---ATAGGAGCT-----  
 ---GTGTTCTTGGGTTCTTGGGATTA---GCAGGAAGCACTATG---GGCGCGGCGTCA---  
 ATAACGCTGACGGTACAG---GCCAGACAA---TTGTTG---TCTGGTATAGTGCAACAGCAAAGC---  
 AATTTG---CTGAGG---GCCATAGAGGCGCAACAGCATATGTTGCAACTCACGGTCTGGGGCATT  
 >DQ164126  
 TTCTATTGCAATACATCAGCACTGTTTAATAGTACATACAATGGTACATACATTAATGAGACAAAA-----  
 -----  
 -----  
 AGTAATGGGACCATCACACTTCCATGCAGAATAAAGCAAATTATAAACATGTGGCAGGGGGTAGGACGAGCAA  
 TGTATGCTAATCCCATTGAAGGAAATATAACATGTAAATCAAAT---  
 ATCACAGGAATACTATTAGTACGTGATGGAGGAAATGAAGACAGT-----  
 -----  
 -----  
 ACAAACGAGACATTTCAGACCTATAGGAGGAAATATGAAGGACAATTGGAGAAAGTGAATTATATAAATATAAAG  
 TGGTAGAAATTAAGCCATTG---GGAATAGCACCCACTAGAGCAAAAAGGAGAGTGGTG-----  
 -----GACAGAGCAAAAAGAGCA---GTGGGA---CTAGGAGCT-----  
 GTGATCGTTGGGTTCTTGGGAGCA---GCAGGAAGCACTATG---GGCGCGGCGTCA---  
 ATAACGCTGACGGCACAG---GCCAGACAA---CTGTTG---TCAGGTATAGTGCAACAGCAGAAT---  
 AATCTG---CTGAGA---GCTATAGAGGCGCAACAACATCTGCTGCAACTCACGGTCTGGGGCATT  
 >DQ093588  
 TTCTATTGCAATACAACAGATCTGTTTAATGAAAGGTTTAATGAA-----  
 -----  
 -----  
 AGTAATCCAAACATCACACTCCTATGCAGAATAAAACAGATTATAAACATGTGGCAGGGGGTAGGACGAGCAA  
 TGTATGCCCCCTCCCATTAAGGAAACATAACATGTACCTCAAAT---  
 ATCACAGGACTACTATTGACACATGATAGAGAAAGAAATGGCACA-----  
 -----  
 -----  
 GAGACATTTCAGACCTGGAGGAGGAAATATGAAGGACAATTGGAGAAATGAATTATATAAATATAAGGTGGTAG  
 AAGTTAAGCCATTG---GGAGTAGCACCCACTGAGGCAAAAAGGAGAGTGGTG-----  
 -----GAGAGAGAAAAAGAGCA---GTGGGA---ATAGGAGCT-----  
 GTA CTCTTGGGTTCTTGGGAGCA---GCAGGAAGCACTATG---GGCGCGGCGTCA---  
 ATAACGCTGACGGTACAG---GCCAGACAA---CTGTTG---TCTGGTATAGTGCAACAGCAAAGC---  
 AATTTG---CTGAGA---GCTATAGAGGCGCAACAGCATATGTTGCAACTCACGGTCTGGGGCATT  
 >DQ164119  
 TTCTATTGTGATACAACAGAACTGTTTAATTCAACAGAACAGTCTAGTACAACAGAAGAGGAGAATAAG----  
 -----  
 -----  
 AATAATAATACAATCACACTCCAATGCAGAATAAAACAAATTGTAAACATGTGGCAGGGGGTAGGAAGAGCAA  
 TGTATGCCCCCTCCCATTCAGGAAATATAACATGTAACTCAACC---  
 ATCACAGGATTACTATTGACACGTGATGGTGGAATAATCAATAACACAGAA-----  
 -----  
 -----  
 GGTAACAAAACAGAGACATTCAGACCAGGAGGAGGAGATATGAGGGACAATTGGAGAGGTGAATTATATAAAT  
 ATAAAGTGGTAGAAATTAGACCATTG---GGAATAGCACCCACTGAGGCAAAAAGGAGAGTGGTG-----  
 -----GAGAGAGGAAAAAGAGCA---GTGGGA---ATAGGAGCT---  
 -----GTGCTCTTTGGGTTCTTGGGAGCA---GCAGGAAGCACTATG---GGCGCGGCGTCA---

GTGGCGCTGACGGTACAG---GCCAGACAA---CTGTTG---ACTGGCATAGTGCAACAGCAAAGT---  
 AATTTG---CTGAGG---GCTATAGAGGCGCAACAGCATATGTTGCAACTCACGGTCTGGGGCATT  
 >DQ093585  
 TTCTATTGTAACACATCAACACTGTTTAATAATACAAATATC-----  
 -----  
 -----  
 ACAGGCATAGCCACAATCCCATGCAGAATAAAACAAATTATAAACATGTGGCAGGAGGTAGGACGAGCAACAT  
 ATGCCCCCTCCCATTCAGGAAACATAACATGTATCTCAAAT---  
 ATCACAGGACTACTATTGCAACGTGATGGAGGAAACATCACAGATGAAAAG-----  
 -----  
 -----  
 AACAGGTCCATAGAGACATTCAGACCTATAGGAGGAAATATGAAGGACAATTGGAGAAGTGAATTATATAAAAT  
 ATAAAGTAGTAGAAATTAAGCCATTG---GGAATAGCACCCACGGGGTCAAAAAGGAGAGTGGTG-----  
 -----GAGAGAGAAAAAGAGCA---GTGGGA---GTAGGAGCT---  
 -----GTACTCCTTGGGTTCTTGGGAGCA---GCAGGAAGCACTATG---GGCGCGGCGGCA---  
 GTGACGCTGACGGTACAG---GCCAGACAA---CTGCTG---TCTGGTATAGTGCAACAGCAAAGC---  
 AATTTG---CTGAGA---GCTATAGAGGCGCAACAGCATATGTTGCAGCTCACGGTCTGGGGCATT  
 >DQ056412  
 TTCTATTGCAATACATCAAACCTGTTCCAGGTCAATAACTCTACA-----  
 -----  
 -----  
 ACTAATGATACCATCACACTTCCATGCAGAATAAAACAAATTATCAACATGTGGCAGGGGGTAGGACGAGCAA  
 TGTATGCCCCCTCCCATTCAGGAAACATAACATGTAACCTCAAGC---  
 ATCACAGGACTACTACTGACACGTGATGGAGGAGACAAAAATAGC-----  
 -----  
 -----  
 ACAGACCCAGAGACATTCAGACCTGGAGGAGGAAATATGAAGGACAATTGGAGAAGTGAATTATATAAAATATA  
 AAGTGGTAGAAATTAAGCCATTA---GGAATAGCCCCCACTAAGGCAAAAAGGAGAGTGGTG-----  
 -----GAGAGAGAAAAAGAGCA--GTGGGA---CTAGGAGCT-----  
 ---GTACTCCTTGGGTTCTTGGGAGCG--GCAGGAAGCACTATG--GGCGCAGCGTCA---  
 ATAACGCTGACGGTACAG---GCCAGACAA---TTGCTG---TCTGGTATAGTGCAACAGCAAAGC---  
 AATTTG---CTGAGA---GCTATAGAGGCGCAACAGCATATGTTGCAACTCACAGTCTGGGGCATT  
 >AY878072  
 TTCTATTGCAATACAACACAACCTGTTTAATGAAAGTCTGTTCAAT-----  
 -----  
 -----  
 AACACAACAAACATCACACTCCCATGCAGAATAAAACAAATTATAAACATGTGGCAGGAAGTAGGACGAGCAA  
 TGTATGCCCCCTCCCATTCAGGAAACATAACATGTAACCTCAAGT---  
 ATCACAGGACTACTATTGCTACGTGATGGAGGAACAGAGAATAAT-----  
 -----  
 -----  
 GACACAGAGACATTCAGGCCTGGAGGAGGAAATATGAAAGACAATTGGAGAAGTGAATTGTATAAATATAAAG  
 TGGTAGGACTTAAGCCATTG---GGAGTAGCACCCACTGAGGCAAAAAGGAGAGTGGTG-----  
 -----GAGAGAGAAAAAGAGCA---GTGGGA---CCGGGAGCT-----  
 GTGCTCTTTGGGTTCTTGGGAGCA---GCAGGAAGCACTATG---GGCGCGGCGTCA---  
 ATATCGCTGACGGTACAG---GCCAGACAA---TTGCTG---TCTGGTATAGTGACAGCAGCAAAGC---  
 AATTTG---CTGAGA---GCTATAGAGGCGCAACAGCATATGTTGCAGCTCACGGTCTGGGGCATT  
 >AY772699  
 TTCTATTGCAATACATCAAATCTGTTTAATATAAAGTCAAGTAATGCAAGTGATGCA-----  
 -----  
 -----  
 AACACAACACCATCACACTCCCATGCAAAATAAAACAAATTATAAACATGTGGCAGGAGGTAGGACGAGCAA  
 TGTATGCCCCCTCCCATTCAGGAAACATAACATGTAACCTCAAGT---  
 ATCACAGGACTACTATTGACACGTGATGGAGGCAATAACAATGACACAGGC-----  
 -----  
 -----  
 AATAACAATGACACAGAGATATTCAGACCTGGAGGAGGAAATATGAAGGACAATTGGAGAAGTGAGTTATATA  
 AATATAAAGTGGTAGAAATTAAGCCATTA---GGAATAGCACCCACTAAGGCAAAAAGGAGAGTGGTG-----  
 -----GAGAGAGAGAAAAAGAGCA---GTGGGA---  
 CTAGGAGCT-----GTACTCCTTGGGTTCTTAGGAACA---GCAGGAAGCACTATG---

GGCGCGGCGTCA---ATAACGCTGACGGTACAG---GCCAGGCAA---CTGTTG---  
 TCTGGTATAGTGCAACAGCAAAGC---AATTTG---CTGAGG---  
 GCTATAGAGGCGCAACAGCACATGTTGCAACTCACGGTCTGGGGCATT  
 >DQ164114  
 TTTTATTGCAATACAACAACCACTGTTTAATGAAGATGTTTAAACACCACACTGTTTAATAAA-----  
 -----  
 -----  
 ACAGACACCAACATCACACTCCCATGCCGAATAAAACAAATTATAAACATGTGGCAGGGAGTAGGAAAAGCAA  
 TGTATGCCCCCCCCATTGAAGGACAAATAATATGTAACCTCAAGT---  
 ATCACAGGAATACTACTGACACGGGATGGAGGAGCAGTAACGAATGGC-----  
 -----  
 -----  
 ACGAATGTCACAGAGACATTCAGACCTGGGGGAGGAAATATGAAGGACAATTGGAGAAGTGAATTATATAAAAT  
 ATAAAGTGGTAGAAATTAAGCCATTA---GGGGTAGCACCCACTGGGGCAAAAAGGAGAGTGGTG-----  
 -----  
 -----GAGAGAGAAAAAAGAGCA---GTAGGA---ATAGGAGCT---  
 -----GTGTTCTTGGGTTCTTGGGAGCC---GCAGGAAGCACTATG---GGCGCGGCGTCA---  
 ATGACGCTGACGGTACAG---GCCAGACAA---CTGTTG---TCCGGTATAGTGCAACAGCAAAGC---  
 AATTTG---CTGAGA---GCCATAGAGGCGCAACAACATATGTTGCAACTCACGGTCTGGGGCATT  
 >AY901977  
 TTCTATTGTAATACAACAAACCTGTTTAATGAAAGTACGTCA-----  
 -----  
 -----  
 AACACAACCATCGGATTCCCATGCAGAATAAAACAAATTATAAACATGTGGCAGGGGGTAGGGCGAGCAATGT  
 ATGCCCCCTCCCATTTGAAGGAAACATAACATGTAAATCAAGT---  
 ATCACAGGGTTACTATTGGTACGTGATGGAGGAATAAATGACACA-----  
 -----  
 -----  
 AAAGAGATATTCAGACCTGGAGGAGGAAATATGAAGGACAATTGGCGAAGTGAATTATATAAATATAAAGTGG  
 TAGAAATTAAGCCATTG---GGAGTAGCACCCACTGAGGCAAAAAGGAGAGTGGTG-----  
 -----  
 -----GAGAGAGAAAAAAGAGCA---GTGGGA---ATAGGAGCT-----  
 GTGATCCTTGGGTTCTTGGGAGCA---GCAGGAAGCACTATG---GGCGCAGCGTCA---  
 ATAACGCTGACGGTACAG---GCCAGACAA---CTGTTG---TCTGGTATAGTGCAACAGCAAAGC---  
 AATTTG---CTGAGA---GCTGTAGAGACGCAACAGCATATGCTGCAACTCACGGTCTGGGGCATT  
 >AY901978  
 TTCTATTGCAATACAACAAAACCTGTTTTCTAATGAAAGTGATGCT-----  
 -----  
 -----  
 GACAACGGAACAATCACAATCCCATGCAGGATAAAACAAATCATAAGAATGTGGCAGGGGGTAGGACAAGCAA  
 TGTATGCCCCCTCCCATTTGTAGGAAACATAACATGTAACCTCAAT---  
 ATCACAGGACTACTCTTGGTACGTGATGGAGGAAAAAGCAATAAT-----  
 -----  
 -----  
 AACACAGAGATATTTAGACCTGGAGGAGGAAATATGAAGGACAATTGGAGAAGTGAATTATATAAATATAAAG  
 TGGTAGAAGTTAAGCCATTG---GGAATAGCACCCACTAGAGCAAAAAGGAGAGTGGTG-----  
 -----  
 -----GAGAGAGAAAAAAGAGCA---GTGGGA---ATAGGAGCT-----  
 GTGTTCTTGGGTTCTTGGGAGCA---GCAGGAAGCACTATG---GGCGCGGCGTCA---  
 ATAACGCTGACGGTACAG---GCCAGACAA---CTGTTG---TCTGGTATAGTGCAACAGCAAAGC---  
 AATTTG---CTGAGA---GCCATAGAGGCGCAACAGCATATGTTGCAACTCACAGTCTGGGGCATT  
 >DQ011171  
 TTCTATTGCAATACATCAAACCTGTTTAATAAACTATAACAGCAAATTCAACAAATTCAAATTCACAAAT-  
 -----  
 -----  
 -----  
 TCAAGTATGCCCATCACACTCCAATGTAGAATAAAACAGATTATAAACATGTGGCAGGGGGTAGGACAAGCAA  
 TGTATGCCCCCTCCCATTAAGGAAACATAACATGTAACCTCAAGC---  
 ATCACAGGACTACTATTGACACGTGATGGAGGAGCAAACAACGGT-----  
 -----  
 -----  
 AGCGAAACATTTCAGACCTGAAGGAGGAAATATGAAGGACAATTGGAGAAGTGAATTATATAAATATAAAGTGG  
 TAGAAATTAGGCCATTA---GGAATAGCACCCACTAAGGCAAAAAGGAGAGTGGTG-----  
 -----  
 -----GAGAGAGAAAAAAGAGCA---GTGGGA---ATGGGAGCT-----

GTGCTCTTTGGGTTCTTAGGAGCA---GCAGGAAGCACTATG---GGCGCGGCGTCA---  
 ATAACGCTGACGGTACAG---GCCAGACAA---TTGTTG---TCTGGTATAGTGCAACAGCAAAGT---  
 AATTTG---CTGAGA---GCTATAGAGGCGCAACAGCATTTGTTGCAACTTACAGTCTGGGGCATT  
 >DQ011179  
 TTCTATTGCAATACATCACAACGTGTTTAACGAAAGTAGGTGGTCAAACAACACA-----  
 -----  
 -----  
 AGCGACACAAACATCACAATCCCATGCAGGATAAAACAAATTATAAACATGTGGCAGGGGGTAGGAAGAGCAA  
 TGTATGCCCCCTCCCATTCAGGAAACATAACATGTAAATCAAAT---  
 ATCACAGGACTACTATTGACAAGGGATGGAGGAGTAAGCAATGGCACA-----  
 -----  
 -----  
 AACAAATAACGAGACATTTCAGACCTGCAGGAGGAGATATGAAGGACAATTGGAGAAAGTAAATTATATAAAATATA  
 AAGTGGTAGAAATTAAGCCATTG---GGAATAGCACCCACTGGAGCAAAAAGGAGAGTGGTG-----  
 -----GGAAGAGAAAAAGAGCA---GCA-----ATAGGAGCT-----  
 ---ATGCTCCTTGGGTTCTTGGGAGCA---GCAGGAAGCACTATG---GGCGCGGCGTTA---  
 ATAACGCTGACGGTACAG---GCCAGACAA---CTGTTG---TCTGGTATAGTGCAACAGCAAAGC---  
 AATTTG---CTGAGA---GCTATAGAGGCGCAACAACATATGTTGCAACTCACGGTCTGGGGCATT  
 >DQ011173  
 TTCTATTGTAATACATCAGGACTATTTAATGGTACATACACAAAC-----  
 -----  
 -----  
 GAGGATTCAACCATCACAATTCCATGCAGAATAAAACAAATTATAAACATGTGGCAGGGGGTAGGACGAGCAA  
 TGTATGCCCCCTCCCATTCAGGAAACATAATATGTAACTCAAAT---  
 ATCACAGGATTACTGTTAACACGTGATGGTGGTGGTGGTAATGAATCA-----  
 -----  
 -----  
 TTAAATAACACAGAGATATTTAGACCTGGAGGAGGAAATATGAAGGACAATTGGAGAAGTGAATTATATAAAAT  
 ATAAAGTGGTAGAAATTAACCATTG---GGAATAGCACCCACTGAGGCAAAAAGGAGAGTGGTG-----  
 -----GAGAGAGAAAAAGAGCA---GCGGGA---ATAGGAGCT---  
 -----TTGTTCTTGGGTTCTTGGGAACA---GCAGGAAGCACTATG---GGCGCGGCGTCA---  
 ATAACGCTGACGGTACAG---GCCAGACAA---CTGTTG---TCTGGTATAGTGCAACAGCAAAGC---  
 AATTTG---CTGAAA---GCTATAGAGGCACAACAGCATATGTTGCAACTCACGGTCTGGGGCATT  
 >DQ011170  
 TTCTATTGCAATACAACAAAACGTGTTTAATGAAAGCGGGTTAAACGAAACAAATATCAATGAAAGCGGGTCA-  
 -----  
 -----  
 AACAAAACAAACATCACACTCCCGTGCAGGATAAAACAAATTATAAACATGTGGCAGGAGGTAGGAAGAGCAA  
 TGTACGCCCCCTCCTATTGCAGGAAACATAACATGTAGATCAAAT---  
 ATCACAGGACTACTATTGACACGTGATGGGGGAACAAACAACACA-----  
 -----  
 -----  
 GAGATATTCAGACCTGGAGGAGGAAATATGAAGGACAATTGGAGAAGTGAATTATATAAGTACAAAGTGGTAG  
 AAATTAAGCCATTG---GGAGTAGCTCCCACTAAATCAAAAAGGAGAGTGGTG-----  
 -----GAGAGAGAAAAAGAGCA---GTGGGA---ATGGGAGCT-----  
 GTACTCCTTGGGTTCTTGGGAGCA---GCAGGAAGCACTATG---GGCGCGGCGTCA---  
 ATAACGCTGACGGTACAG---GCCAGACAA---CTGTTG---TCTGGTATAGTGCAACAGCAAAGC---  
 AATTTG---CTGAGA---GCTATAGAGGCGCAACAGCATATGTTGCAACTCACGGTCTGGGGCATT  
 >AY901979  
 TTCTATTGTAATACAACAAATCTGTTTAATAGTACATACATGCCTGAATACCCGCATAATGGTACAGAAAGTA  
 AT-----  
 -----  
 -----  
 TCAAGCACAGAAATCACACTCCCATGCAGGATAAAGCAAATTATAAACATGTGGCAGCAGGTAGGACGAGCAA  
 TGTATGCTCCTCCCATTCAGGGAGCATAACATGTAACTCAAAT---  
 ATCACAGGAATACTATTGATGCGTGATGGAGGAAATAACTCAAATAAC-----  
 -----  
 -----  
 ACAACTAAGATAGAGATATTCAGACCTGGAGGAGGAGATATGAGGGACAATTGGAGAAGTGAATTATACAAAT  
 ATAAAGTGGTAGAAATTAAGCCATTG---GGAATAGCACCTACCAAGGCAAAAAGGAGAGTGGTG-----  
 -----GAGAGAGAAAAAGAGAGCA---GTGGGA---ATAGGAGCT---

-----GTGTTTCCTTGGGTTCTTGGGAGCA---GCCGGAAGCACTATG---GGCGCGGCGTCA---  
 ATAACGCTGACGGTACAG---GCCAGACAA---TTGTTG---TCTGGTATAGTGCAACAGCAAAGC---  
 AATTTG---CTGAGG---GCCATAGAGGCGCAACAGCATATGTTGCAACTCACGGTCTGGGGCATT  
 >DQ396387  
 TTCTATTGCAATACATCAGAGCTGTTTAATACATCAAAGCTGTTAGATGCTAATGAAACAGAA-----  
 -----  
 -----  
 AGTAATTCAACAATCATACTCCCATGCAGAATAAAACAAATTATAAACATGTGGCAAGAGGTAGGACGAGCAA  
 TATATGCCCCCTCCATTGCAGGAAACATAACATGTAGATCAAAT---  
 ATCACAGGACTATTATTGACACGTGATGGAGGGACAAATGGGACA-----  
 -----  
 -----  
 GATAAGACAGAGATATTAGACCTGGAGGAGGAGATATGAGGGACAATTGGAGAAAGTGAATTATATAAATATA  
 AAGTGGTAGAAATTAAGCCATTG---GGAGTAGCACCCACTGAGGCAAAAAGGAGAGTGGTG-----  
 -----GAGAGAGAAAAAAGAGCA---GTGGGA---ATAGGAGCT-----  
 ---GTGTTTCCTTGGGTTCTTGGGAGCA---GCAGGAAGCACTATG---GGCGCAGCATCA---  
 ATAACGCTGACGGTACAG---GCCAGACAA---TTGTTG---TCTGGAATAGTGCAACAGCAAAGC---  
 AATTTG---CTGAGG---GCTATAGAGGCGCAACAGCATCTGTTGCAACTCACGGTCTGGGGCATT  
 >DQ164127  
 TTCTATTGTGATACATCAAACCTGTTTAATAGAACATACCCGTCTAACCACACAGATAATAGTACAAAA---  
 -----  
 -----  
 GGGAAATGAAACCATTACACTTCCATGCAGAATAAAACAAATTGTAAACATGTGGCAGGGGGTAGGACAAGCAA  
 TATATGCCCCCTCCATTGCAGGAAACATAACATGTAACTCAAGC---  
 ATCACAGGACTACTATTAGTACGTGATGGAGGGAATGTGAGTGCC-----  
 -----  
 -----  
 ACAAACGAGACATTTCAGGCCTGGAGGAGGAAATATGAAGGACAATTGGAGAAGTGAATTATATAAATATAAAG  
 TGGTAGAAATTAAGCCATTG---GGAGTAGCACCCACTGAGGCAAAAAGGAGAGTGGTG-----  
 -----GAGAGAGAAAAAAGAGCA---GTGGGC---ATAGGAGCT-----  
 GTACTCCTTGGGTTCTTGGGCGCA---GCAGGAAGCACTATG---GGCGCGGCGTCA---  
 ATAACGCTGACGGTACAG---GCCAGACAA---CTGTTG---TCTGGTATAGTGCAACAGCAAAGC---  
 AATTTG---CTGAGA---GCTATAGAGGCGCAACAACACATGTTGCAACTCACAGTCTGGGGCATT  
 >AY878058  
 TTCTATTGTAATACAACAGCATTGTTTGATGAAAGTATTTTAAATAAAAGTGAT-----  
 -----  
 -----  
 TCAAACAGCACCATCACCTCCCATGCAGAATAAAGCAAATTATAAACATGTGGCGGAAAGTAGGACGAGCAA  
 TGTATGCCCCCTCCATTGAAGGAAACATAACATGTAAATCAAAT---  
 ATCACGGGACTATTATTGGAACGTGATGGAGGAAAGGTAAATAAT-----  
 -----  
 -----  
 AAAACCGAGATATTTCAGACCTGGAGGAGGAAATATGAAGGACAATTGGAGAAGTGAATTATATAAATATAAAG  
 TGGTAGAACTTAAGCCATTG---GGAGTAGCACCCACTAAGGCAAAAAGGATAGTGGTG-----  
 -----GAGAGAGAAAAAAGAGCA---GTGGGA---CTAGGAGCT-----  
 GTGTTCTTTGGGTTCTTGGGAGCA---GCAGGAAGCACTATG---GGCGCGGCGTCA---  
 ATAACGCTGACGGTACAG---GCCAGACAA---TTGTTG---TCTGGTATAGTGACAGCAAAGC---  
 AATTTG---CTGAGA---GCTATAGAGGCGCAACAGCATATGTTGCAACTCACGGTCTGGGGCATT  
 >DQ396381  
 TTCTATTGCAATACATCACGACTATTTAATAGTACATACACACAGAATAATACAGAA-----  
 -----  
 -----  
 GATAATTCAAACATCGCACTTTCATGCAAAATAAAACAAATTATAAACATGTGGCAGAGGGTAGGGCGAGCAA  
 TGTATGCCCCCTCCATTGCAGGAAACATAACATGTAGATCAAAT---  
 ATCACAGGACTACTATTAGTACGTGATGGAGGCACAGAAGACGAA-----  
 -----  
 -----  
 AATAAGACAGAAACATTTCAGACCTGGAGGAGGAAATATGAAGGACAATTGGAGAAGTGAATTATATAAATATA  
 AAGTGGTAGAAATTAAGCCATTG---GGAATAGCACCCACTGAAGCAAAAAGGAGAGTGGTG-----  
 -----GAGAGAGAAAAAAGAGCA---GTGGGA---ATAGGAGCT-----

---GTGTTCCCTTGGGTTCTTGGGAGCA---GCAGGAAGCACTATG---GGCGTGGCGTCA---  
 ATGACGCTGACGGTACGA---GCCAGACAG---TTGTTG---TCTGGTATAGTGCAACAGCAAAGC---  
 AATTTG---CTGAGG---GCTATAGAGGCGCAACAGCATATGTTGCAACTCACGGTCTGGGGCATT  
 >DQ093595  
 TTCTATTGTAATACATCACATCTATTTAATACATCACAGCTATTTAATAGTACATTGGCTAATAGTACAGGAG  
 AT-----  
 -----  
 TCTAATGGCAACATCACACTCCAATGCAGAATAAAACAAATTATAAACATGTGGCAGGGGGTAGGACGAGCAA  
 TGTATGCCCCCTCCATTGCAGGAAATATAACATGCAGATCAAAT---  
 ATCACAGGGCTACTATTGACACGTGATGGAGGAAAACTAACACAAGC-----  
 -----  
 -----  
 AATGAGACAGAGACATTGAGACCTGGAGGAGGAGACATGAGAGACAATTGGAGAAAGTGAATTATATAAAATATA  
 AAGTGGTAGAAATTAATCCATTA---GGAGTAGCTCCCCTGGAGCAAAAAGGAGAGTGGTG-----  
 -----GAGAGAGAGAAAAAGAGCA---GTGGGA---ATAGGAGCT-----  
 ---GTGTTCCCTTGGGTTCTTAGGAACA---GCAGGAAGCACTATG---GGCGCAGCATCA---  
 ATAACGCTGACGGTACAG---GCCAGACAA---TTATTG---TCTGGTATAGTGCAACAGCAAAGC---  
 AATTTG---CTGAGA---GCTATAGAGGCGCAACAGCATATGTTGCAGCTCACAGTCTGGGGCATT  
 >DQ164129  
 TTTTATTGTGATACATCAAAGCTGTTTAAGAGGACATACATGGATAATGGTACAGAAAATAATTCAACCACA-  
 -----  
 -----  
 AACAGTAATTCAACCATCATTCATGCAGAATAAAACAAATTATAAACATGTGGCAGGAGGTAGGACGAGCAA  
 TGTATGCACCTCCATTGCAGGAAAAATAACATGTAAATCAAAT---  
 ATCACAGGACTACTATTGACACGTGATGGAGGGTTAGATGATTCAAATAAG-----  
 -----  
 -----  
 CCAAATGATAGTGAGATATTCAGACCTGGAGGAGGAGATATGAGGAACAATTGGAGAAAGTGAATTATATAAAAT  
 ATAAAGTGGTAGAAATTAAGCCATTG---GGAGTAGCACCCACCAAGGCACAAAGGGAAGTGGTG-----  
 -----GGGAGAGAAAAAAGAGCA---CTGGGAATAGTAGGAGCT---  
 -----ATGTTCCCTTGGGTTCTTGGGAGCA---GCAGGAAGCACTATG---GGCGCAGCGTCA---  
 ATAACGCTGACGGCACAG---GCCAGACAA---GTGTTG---TCTGGTATAGTGCAACAGCAAAGC---  
 AATTTG---CTGAGG---GCTATAGAGGCGCAACAGCATATGTTGCAACTCACGATCTGGGGCATT  
 >DQ056416  
 TTCTATTGCAATACATCAGGATTGTTTAATGGTATATACAACGGTACAAAAAGTAATTCAAGTACAAAA---  
 -----  
 -----  
 AGTAATTTAACCATCACACTCCCATGCAGAATAAAACAAATTGTAAACATGTGGCAGAAGGTAGGACAAGCAA  
 TATATGCCCCCTCCTATTGCAGGAAACATAACATGTACATCAAAG---  
 ATCACAGGACTACTATTGACACGTGATGGAGGCATACATAACCCA-----  
 -----  
 -----  
 ACTAATGAGACATTGAGACCTGGAGGAGGAGATATGAGGGATAATTGGAGAAAGTGAATTATATAAAATATAAAG  
 TGGTAGAAATTAAGCCATTA---GGAATAGCACCCACTAATGCAAAAAGAAGAGTGGTG-----  
 -----GAGAGAGAAAAAAGAGCA---GTGGGA---ATAGGAGCT-----  
 GTGTTCCCTTGGGTTCTTGGGAGCA---GCAGGAAGCACTATG---GGCGCGGCGTCA---  
 ATATCGCTGACGGTACAG---GCCAGACAA---TTGTTG---TCTGGTATAGTGCAACAGCAAAGC---  
 AATTTG---CTGAGG---GCTATAGAGGCGCAACAGCATATGTTGCAACTCACAGTCTGGGGCATT  
 >AY878062  
 TTCTATTGTAATACATCAGACCTGTTTAATGAATCCATAACTAATAGGACAGGAAATAATAGTACAGGA---  
 -----  
 -----  
 AATAGTTCAGTCATCACACTCCCATGCAGAATAAAACAAATTATAAACATGTGGCAGAAGGTAGGACGAGCAA  
 TGTATGCCCCCTCCATTGCAGGAAACATAACATGTAAATCAAAT---  
 ATCACAGGACTACTATTGACACGTGATGGAGGAATAAATGGGACT-----  
 -----  
 -----  
 AATAACATAGGGACATTGAGACCTGGAGGAGGAGATATGAGGGACAATTGGAGAAAGTGAATTATATAAAATATA  
 AAGTGGTAGAGATTAGGCCATTG---GGAATAGCACCCACTGGAGCAAAGAGGAGAGTGGTG-----  
 -----GAGAGAGAAAAAAGAGCA---GTGGGA---ATAGGAGCT-----

---GTGTTCCCTTGGGTTCTTGGGAGCA---GCAGGAAGCACTATG---GGCGCAGCATCA---  
 ATAACGCTGACGGTACAA---GCCAGACAA---TTGTTG---TCTGGGATAGTGCAACAGCAAAGC---  
 AATTTG---CTGAGA---GCGATAGAGGCGCAACAGCATATGTTGCAACTCACGGTCTGGGGCATT  
 >DQ056409  
 TTCTATTGCAATACATCAAACTGTTTAATGGTACATACAATGGTAATGGTACATACAATGGTACAGGTACAG  
 AC-----  
 -----  
 ACTAATTCAACCATCACCATCCCATGCAAGATAAAACAAATAGTAAACATGTGGCAGGGGGTAGGACGAGCAA  
 TGTATGCCCCCTCCCATTCAGAGAAACATAACATGTAAATCAAAT---  
 ATCACAGGACTACTATTGACACGTGATGGAGGAGAAAAATAGTACA-----  
 -----  
 -----  
 GAGACATTCAGACCTGGAGGAGGAAATATGAAGGACAATTGGAGAAGTGAATTATATAAATATAAAGTAGTAG  
 AAATTAAGCCATTG---GGAATAGCACCCACTGGAGCAAAAAGGAGAGTGGTG-----  
 -----GAGAGAGAAAAAAGAGCA---GTGGGA---ATAGGAGCT-----  
 GTGTTCCCTTGGGTTCTTGGGAGCA---GCAGGAAGCACTATG---GGCGCGGCGTCG---  
 ATAACGCTGACGGTACAA---GCCAGACAA---CTGTTG---TCTGGTATAGTGCAACAGCAAAGC---  
 AATTTG---CTGAGA---GCTATAGAGGCGCAACAGCATATGTTGCAACTCACAGTCTGGGGCATT  
 >DQ369993  
 TTTTATTGCAACACATCAAACCTGTTTAATGGTACATACAATAGTACATACAATAGTACATACAATAGT----  
 -----  
 -----  
 ACATCCAGAAACATCACACTCCAATGCAGAATAAAACAAATTATAAACATGTGGCAGGGAGTAGGGCAAGCAA  
 TGTATGCCCCCTCCCATTAAGGAAACATAACATGTAAATCAAAT---  
 ATCACAGGAATACTATTGACACGTGATGGAGGACATGAAAATGAC-----  
 -----  
 -----  
 AACAAACACAGAGACATTCAGACCTGGAAGAGGAAATATGAAGGACAATTGGAGAAGTGAATTATATAAATATA  
 AAGTGGTAGAAATTAAGCCATTG---GGAATTGCCCCCACTGAAGCAAAAAGGAGAGTGGTG-----  
 -----GAGAGAGAAAAAAGAGCA---GTGGGA---ATAGGAGCT-----  
 ---GTGTTCCCTGGGTTCTTGGGAGCA---GCAGGAAGCACTATG---GGCGCGGCGTCA---  
 ATAACGCTGACGGTACAG---GCCAGACAA---CTGTTG---TCTGGTATAGTGCAACAGCAAAT---  
 AATTTG---CTGAGA---GCTATAGAGGCGCAACAACATATGTTGCAACTCACAGTCTGGGGCATT  
 >DQ396382  
 TTCTATTGCAACACAACAGGACTGTTTAATATCAGTAACAGTAAA-----  
 -----  
 -----  
 GATGATTCAAACATCACACTCCCATGCAGAATAAAACAAATTATAAACATGTGGCAGGGGGTAGGACGAGCAA  
 TGTATGCTCCTCCCATTCAGAGAAAGATAACATGTACCTCAAAT---  
 ATCACAGGAATACTATTGACACGTGATGGAGGCCAGAGAATAAC-----  
 -----  
 -----  
 ACAAAGATATTAGACCTGGAGGAGGAGATACGAGGGACAATTGGAGAAGTGAATTATATAAATATAAAGTGG  
 TAGAAGTTAAGCCATTG---GGAGTAGCACCCACTGAGGCAAGAAGGAGAGTGGTG-----  
 -----GAGAGAGAAAAAAGAGCA---GTGGGA---ATAGGAGCT-----  
 GTGTTCCCTTGGGTTCTTGGGAGCA---GCAGGAAGCACTATG---GGCGCAGCGTCA---  
 ATAACGCTGACGGTACAG---GCCAGACAA---CTATTG---TCTGGTATAGTGCAACAGCAAAGT---  
 AATTTG---CTGAGA---GCTATAGAGGCGCAACAACATATGTTGCAACTCACGGTCTGGGGCATT  
 >DQ396396  
 TTCTATTGCAATACAACAAATCTGTTCAATACAACAGATCTGTTTAATAATAGCAATGATTTA-----  
 -----  
 -----  
 AACACAAGTACCATCACACTCCCATGCAGAATAAAGCAAATTATAAACATGTGGCAGGGGGTAGGACGAGCCA  
 TGTACGCCCCCTCCCGTAGCAGGAAACATAACATGTAACTCAAGT---  
 ATCACAGGACTACTATTGGTACGTGATGGAGGAAGGAATAATAAT-----  
 -----  
 -----  
 ACAAATGAGACATTCAGACCTGGGGGAGGAAATATGAAGGACAATTGGAGAAGTGAATTATATAAATATAAAG  
 TGGTAGAAATTAAGCCATTG---GGAGTGGCACCCACTGAGGCAAAAAGAAGAGTGGTG-----  
 -----GAGAGAGAAAAAAGAGCA---GTGGGA---ATAGGAGCT-----

GTATTCCTCGGGTTCTTGGGAGCA---GCCGGAAGCACTATG---GGCGCAGCGTCA---  
 ATAACGCTGACGGTACAG---GCCAGACAA---CTGTTG---TCTGGTATAGTGCAACAGCAAAGC---  
 AATTTG---CTGAGA---GCTATAGAGGCGCAACAGCATATGTTGCAACTCACGGTCTGGGGCATT  
 >DQ056413  
 TTCTATTGCAATACATCAAACTATTTAATAGCACATATGTTAATAGGACAGACATGAATGATGATACAGGA-  
 -----  
 -----  
 AATAATTCAACCATCACACTTCCATGCAGAATAAAACAAATTATAAACATGTGGCAGGAGGTAGGACGAGCAA  
 TGTATGCCCCCTCCATTGAAGGAAACATAACATGTAAATCAAAT---  
 ATCACAGGAATACTATTAGTACGTGATGGAGGAATAAATAAGACA-----  
 -----  
 -----  
 AATAACACAGAGACATTGAGACCAGGAGGAGGAAATATGAAGGACAATTGGAGAAAGTGAATTATATAAAATATA  
 AAGTGGTAGAAATTAAGCCATTA---GGAATAGCACCCACTGAAGCAAAAAGGAGAGTGGTG-----  
 -----GAGAGAGAAAAAAGAGCA---GTAGGA---ATGGGAGCT-----  
 ---GTGTTCCCTTGGGTTCTTGGGAGTA---GCAGGAAGCACTATG---GGCGCAGCGTCA---  
 ATAGCGCTGACGGCACAG---GCCAGACAA---GTGTTG---TCTGGTATAGTGCAACAGCAAAGC---  
 AATTTG---CTGAGG---GCTATAGAGGCGCAACAGCATATGTTGCAACTCACGGTCTGGGGCATT  
 >DQ396383  
 TTCTATTGCAATACAACAAAACTGTTTGATAACAGAACGTTTAAT-----  
 -----  
 -----  
 GATGGAAGCACAATCACAATCCCATGTAGAATAAAACAAATTATAAATATGTGGCAGGGGGTAGGACGAGCAA  
 TGTATGCCCCCTCCATTGAGGGCAGCATAACATGTAACTCAAAT---  
 ATCACAGGGCTACTATTGCTACGTGATGGAGGAAACGTGGATAGC-----  
 -----  
 -----  
 TCAGAGGAGGTATTGAGACCTGGAGGAGGAAATATGAAGGACAATTGGAGAAAGTGAATTATATAAAATATAAAG  
 TGGTAGCAATTAAGCCCTTG---GGAATAGCACCCACGACGGCAAAAAGAAGGGTGGTG-----  
 -----GAGAGAGAAAAAAGAGCG---GGA-----ATAGGAGCT-----  
 GTGTTCCCTTGGGTTCTTGGGAGCA---GCAGGAAGCACTATG---GGCGCGGCGTCA---  
 ATAACGCTGACGGTACAG---GCCAGAAAA---CTGTTG---TCTGGTATAGTGCAACAGCAAAGC---  
 AATTTG---CTGAGA---GCTATAGAGGCGCAACAGCATATGTTGCAACTCACGGTCTGGGGCATT  
 >DQ396397  
 TTCTATTGTAATACATCAGAACTGTTTAAGAGTACATTAGATAATTTAACAGCAAATAGTTCAATAGAA---  
 -----  
 -----  
 GATAATACAATCATCACAATTCATGCAGAATAAAACAAATTATAAACATGTGGCAGGGGGTAGGAAGAGCAA  
 TGTATGCCCCCTCCATTGAGGAAACATAACATGTAAATCAAGC---  
 ATCACAGGACTACTATTAGTACGTGATGGTGGCGATACAAATGAC-----  
 -----  
 -----  
 ACAGAAGAAATATTGAGACCTGAAGGAGGAAATATGAAGGACAATTGGAGAAAGTGAATTATATAAAATATAAAG  
 TGGTAGAAATTAAGCCATTA---GGAATAGCACCCACTAAAGCAAAAAGGAGAGTGGTG-----  
 -----GAGAGAGAAAAAAGAGCA---GTGGGA---TTAGGAGCT-----  
 TTGTTCCCTTGGGTTCTTGGGAGCA---GCAGGAAGCACTATG---GGCGCGGCGTCA---  
 ATAACGCTGACGGTACAA---GCCAGACAA---GTATTG---TCTGGTATAGTGCAACAGCAAAC---  
 AATTTG---CTGAGG---GCTATAGAGGCGCAACAGCATATGTTGCAACTCACAGTCTGGGGCATT  
 >DQ011180  
 TTCTATTGTAATACATCAGGCCTGTTTAATAGTACATACAATACATCAGACCTGTTTAATGATACATACAACA  
 CA-----  
 -----  
 -----  
 GAAAGTAATTCCATTATCACACTCCCATGCAGAATAAAACAAATCATAAACATGTGGCAGGAGGTAGGACGAG  
 CAATGTATGCTCCTCCATTGAGGACCATTAACATGTAAATCAAAC---  
 ATCACAGGATTACTATTGGAGCGTGATGGAGGAAGGGAAAGTAAT-----  
 -----  
 -----  
 GGCAGCGAGATATTGAGACCTGGAGGAGGAGATATGAAGAACAATTGGAGAAAGTGAATTATATAAAATATAAAG  
 TGGTAGAAATTAAGCCATTG---GGAGTTGCACCCACTGAGGCAAAAAGGGCAGTGGTG-----  
 -----AAGAGAGAAAAAAGAGCA---GTAGTGGGACTAGGAGCT-----

ATGATCTTTGGGTTCTTGGGAGCA---GCAGGAAGCACTATG---GGCGCGGCATCA---  
 ATAACGCTGACGGTACAG---GCCAGACAA---CTACTG---TCTGGTATAGTGCAACAGCAAAGC---  
 AATTTG---CTGAGG---GCTATAGAGGCGCAACAGCATATGTTGCAACTCACGGTCTGGGGCATT  
 >DQ056414  
 TTCTATTGCAATACATCAAGCCTGTTTAATGGTATATATAATGGTACATATAATGATACG-----  
 -----  
 -----  
 TCTGATAAAACCATCACATTCTCATGCAGAATAAAACAAATTATAAACATGTGGCAGAAGGTAGGACGAGCAA  
 TATATGCCCCCTCCATTGCAGGAAACATAACATGTAAATCAAAT---  
 ATCACAGGACTACTATTGACACGTGATGGAGGAGGTAGAAATAAT-----  
 -----  
 -----  
 AATATAACAGAGACATTGAGACCTGGAGGAGGAGAGATGAGGGATAATTGGAGAAGTGAATTATATAAAATACA  
 AGGTGGTAGAAATTAAGCCATTA---GGAGTAGCACCCACCAAGGCAAAAAGGAGAGTGGTG-----  
 -----GAGAGAGGAAAAAGAGCA---GTAGGA---ATAGGAGCT-----  
 ---ATGATCTTTGGGTTCTTGGGAGCA---GCAGGAAGCACTATG---GGCGCAGCATCA---  
 ATAACGCTGACGGTACAG---GCCAGACAA---TTGTTG---TCTGGTATAGTGCAACAGCAAAGC---  
 AATTTG---CTGAGG---GCTATAGAGGCGCAACAGCATATGTTGCAACTCACGGTCTGGGGCATT  
 >DQ056415  
 TTCTATTGCAATACATCAAGACTGTTTAATAGTACATACAATCCTAATGGTACATACAACCTCTACATACACAT  
 CATACAATTTT-----  
 -----AGTGGT-----  
 ACATCTAATGATACCATCACACTCCCATGCAGAATAAAACAAATTATAAACATGTGGCAGGAAGTAGGGAGAG  
 CAATGTATGCCCCCTCCATTACAGGAAACATAACATGTAAATCAAAT---  
 ATCACAGGACTACTATTGTTACGTGATGGAGGAAACAGCTCTAAT-----  
 -----  
 -----  
 GAGACATTCAGACCTGGAGGAGGAGATATGAGGGATAATTGGAGAAGTGAAGTATATAAATATAAGGTAGTAG  
 AAATTAAGCCATTA---GGAATAGCACCCACTACAGTAAAAAGGAGAGTGGTG-----  
 -----GAGAAAGAAAAAGAGCA---GTGGGA---ATAGGAGCT-----  
 GTGTTCCCTTGGGTTCTTGGGAGCA---GCAGGAAGCACTATG---GGCGCGGCGTCA---  
 ATAACGCTGACGGTACAG---GCCAGACAA---TTGTTG---TCTGGTATAGTGCAACAGCAAAGC---  
 AATTTG---CTGAGG---GCTATAGAGGCGCAACAGCATATGTTGCAACTCACAGTCTGGGGCATT  
 >DQ056406  
 TTCTATTGCAATACAACAGAACTGTTTAATAATAACAAATAACAGTACA-----  
 -----  
 -----  
 AATATAACAGACATCATACTCCCATGCAGAATAAAACAGATTATAAACATGTGGCAGGGGGTAGGACGAGCAA  
 TGTATGCCCCCTCCATTGCAGGAAACATAACATGTACCTCAAAG---  
 ATCACAGGACTACTATTGACACGTGATGGAGGAGGAAACGAAACA-----  
 -----  
 -----  
 AATAACACAGAAATATTGAGACCTGGAGGAGGAAATATGAAGGACAATTGGAGAAGTGAATTATATAAATATA  
 AAGTGGTAGAAATTAAGCCATTG---GGAATAGCACCCACTGAGGCAAAAAGGAGAACGGTG-----  
 -----AAGAAAGAAAAAGAGCA---GTGGGA---ATAGGAGCT-----  
 ---GTACTCCTTGGGTTCTTGGGAGCA---GCAGGAAGCACTATG---GGCGCGGCGTCA---  
 ATAACGCTGACGGTACAG---GCCAGACAA---CTATTG---TCTGGTATAGTGCAACAGCAAAAC---  
 AATTTG---CTGAGA---GCTATAGAGGCGCAACAGAGTATGTTGCAACTCACGGTCTGGGGCATT  
 >DQ056417  
 TTCTATTGCAATACATCAGGCCTATTTAATGGTACATACAATCCAGCATACACGTATAATGCGACA-----  
 -----  
 -----  
 AATAACTCAACCATCACACTCCAATGCAGAATAAGACAAATTATAAACATGTGGCAGAAGGTGGGAAGAGCAA  
 TGTATGCCCCCTCCATTGCAGGAAACATAACATGTAAATTCGAGC---  
 ATCACAGGACTACTGTTGGTACGTGATGGAGGCAAAAACACAAGT-----  
 -----  
 -----  
 GGAATAGAAACATTGAGACCCGGAGGAGGAAACATGAAGGACAATTGGAGAAGTGAATTATATAAATATAAAG  
 TGGTAGAAATTAAGCCATTG---GGAGTAGCACCCACGAGTGCAAAAAGGAGAGTGGTG-----  
 -----GAGAGAGAAAAAGAGCA---GTGGGA---CTAGGAGCT-----

GTGTTCCCTTGGGTTCTTGGGAGCA---GCAGGAAGCACTATG---GGCGCGGCGTCA---  
 ATAACGCTGACGGTACAG---GCCAGACAA---TTATTG---TCTGGTATAGTGCAAGCAGCAAAGT---  
 AATTTG---CTGAGA---GCTATAGAGGCGCAACAACATATGTTGCAACTCACAGTCTGGGGCATT  
 >DQ093605  
 TTCTATTGTAATACATCAGGACTGTTTAATGGTACAGTAGGTAACCTCAACTTCAAATAATTCAACT-----  
 -----  
 -----  
 TTAAGCGGCACAATCACACTCCCATGCAGAATAAAACAGATTATAAACATGTGGCAGACGGTAGGGCGAGCAA  
 TGTATAACCCCTCCCATTGCAGGAAACATAACATGTAAATCAAAT---  
 ATCACAGGACTACTGTTGACACGGGATGGAGGGAACGACAATGAAACA-----  
 -----  
 -----  
 AAAGAAACAGAGACATTACAGACCTGGAGGAGGAGATATGAGAGACAATTGGAGAAAGTGAATTATACAAATATA  
 AAGTGGTAGAAATTAAGCCATTA---GGAATAGCACCCACTAAGGCACGAAGGAGAGTGGTG-----  
 -----  
 -----GAGAGAGAGAAAAAGAGCA---GTAGGA---ATAGGAGCT-----  
 ---GTGTTCCCTTGGGTTCTTGGGAGCA---GCTGGAAGCACTATG---GGCGCAGCATCA---  
 ATAACGCTGACGGTACAG---GCCAGACAA---TTGTTG---TCTGGTATAGTGCAACAGCAAAGT---  
 AATTTG---CTGAGG---GCTATAGAGGCGCAACAGCATTTGTTGCAACTCACGGTCTGGGGCATT  
 >GQ999973  
 TTCTATTGCAATACAACAAAACTGTTTAACAGTACAGATAATGAGACAAAAAGTACAGAAAGTAATAATGAGA  
 TA-----  
 -----  
 GGAAATAATTCAATCATCACACTTCCATGCAGAATAAAACAAATTATAAACATGTGGCAGGAGGTAGGACGAG  
 CAATGTATGCCCCCTCCCATTGCAGGAAACATAACATGTAGATCAGAG---  
 ATCACAGGATTATTATTGACACGTGATGGAGGGAGAAAACACTACA-----  
 -----  
 -----  
 GAGGAGACATTACAGACCTGGAGGAGGAAATATGAAGGACAATTGGAGAAGTGAATTATATAAATATAAAGTGG  
 TAGAAATTAACCATTG---GGAATAGCACCCACCAAGGCAAAAAGGAGAGTGGTG-----  
 -----  
 -----GAGAGAGAAAAAGAGCA---GTGGGA---ATAGGAGCT-----  
 TTGTTCCCTTGGGTTCTTGGGAGCA---GCAGGAAGCACTATG---GGCGCGGCGTCA---  
 ATAACGCTGACGGTACAG---GCCAGACAA---TTGTTG---TCTGGTATAGTGCAACAGCAAAT---  
 AATTTG---CTGAGA---GCTATAGAGGCGCAACAGCATATGTTGCAACTCACGGTCTGGGGCATT  
 >GQ999975  
 TTTTATTGCAATACATCAGGCCTGTTTAATGGTACATTTAATGGTACAGACATGTCTAATGAG-----  
 -----  
 -----  
 ACAAATTCAACCATCACACTTCCATGCAAAATAAAACAAATTATAAACATGTGGCAAAAGGTAGGACGGGCAA  
 TGTATGCCCCCTCCCATTGCAGGAAATATAACATGTACAGCAAAT---  
 ATCACAGGACTGCTATTGACACGTGATGGAGGGGACAGTAGCAGT-----  
 -----  
 -----  
 ACAAACGAGACATTACAGACCTGGAGGAGGAAATATGAAGGACAATTGGAGAAGTGAATTATATAAATATAAAG  
 TGGTAGAAATCAAGCCATTG---GGGATAGCACCAACTGAAGCAAAAAGGAGAGTGGTG-----  
 -----  
 -----GAGAGAGAAAAAGAGCA---GTGGGA---ATAGGAGCT-----  
 TTGTTCCCTTGGGTTCTTGGGAGCA---GCAGGAAGCACTATG---GGCGCGGCGTCA---  
 ATAACGCTGACGGCACAG---GCCAGACAA---CTGTTG---TCTGGTATAGTGCAACAGCAAAC---  
 AATTTG---CTGAGA---GCTATAGAGGCGCAACAGCATATGTTGCAACTCACGGTCTGGGGCATT  
 >AY703909  
 TTCTATTGCAATACATCAAACTGTTTAATAATAATAAGACAGAA-----  
 -----  
 -----  
 TGGAAATTCAACCATCATACTGCCATGCAGAATAAAACAAATTATAAACATGTGGCAGGAGGTAGGAAGAGCAA  
 TATATGCCCCCTCCCATTGCAGGAAACATAACATGTATATCAAAT---  
 ATCACAGGACTACTATTGGAACGGGATGGAGGAGATAATTCAACAGAG-----  
 -----  
 -----  
 AATGGCACAGAGATATTACAGACCTATAGGAGGAGATATGAGGAACAATTGGAGAAGTGAATTATATAAATATA  
 AAGTGGTAGAAATTAAGCCACTG---GGAGTAGCACCCACTAAGGCAAAAAGGAGAGTGGTG-----  
 -----  
 -----GAGAGAGAAAAAGAGCA---GTGGGA---CTAGGAGCT-----

---TTGTTCCCTTGGGTTCTTGGGAGCA---GCAGGAAGCACTATG---GGCGCAGCATCA---  
 ATAACGCTGACGGTACAG---GCCAGACAA---GTGCTG---TCTGGAATAGTGCAACAGCAAAGC---  
 AATTTG---CTGAGA---GCTGTAGAGGCGCAACAGCATATGTTGCAACTCACTGTCTGGGGCATT  
 >AY703910  
 TTCTATTGTAATACATCAAACTGTTTAATAATAATAGCACAAACAGCACT-----  
 -----  
 -----  
 TCAAATGGAACCATCACACTCCCATGCAGAATAAGACAAATTATAAACATGTGGCAGGGAGTAGGACGGGCAA  
 TGTATGCCCCGCCATTGCAGGAAACATAACATGTACGTCAAAT---  
 ATTACAGGACTACTACTGACACGTGATGGAGGAAATAACGAAACA-----  
 -----  
 -----  
 GAGACAGAAACATTTCAGACCTGGAGGAGGAGATATGAGGGACAATTGGAGAAGTGAGTTATATAAATACAAAG  
 TGGTAGAAATTAAGCCATTA---GGAATAGCACCTACTAGGGCAAAAAGGAGAGTGGTG-----  
 -----GAGAGAGAAAAAAGAGCA---GCA-----ATAGGAGCT-----  
 GTGTTCCCTTGGGTTCTTGGGAGCA---GCAGGAAGCACTATG---GGCGCAGCATCA---  
 ATAACGCTGACGGTACAG---GCCAGACAA---TTGTTG---TCTGGTATAGTGCAACAGCAAAGC---  
 AATTTG---CTGAGG---GCTATAGAGGCGCAACAGCATATGTTGCAACTCACGGTCTGGGGCATT  
 >AY703911  
 TTCTATTGCAATACATCAGATCTGTTTACAGAATTTAATGGTACAACAGAATATGATAATGCAACCATAGAT-  
 -----  
 -----  
 GATAATGCAACCATCACACTCCAATGTAGAATAAAACAGATTATAAACATGTGGCAGGGGGTAGGACAAGCAA  
 TGTATGCCCCCTCCCATTTGAAGGAAACATAACATGTAACCTCAAAT---  
 ATCACAGGACTACTATTGACACGTGATGGAGGACCAGATAATAGA-----  
 -----  
 -----  
 ACGGAGACATTTCAGACCTGGAGGAGGAAATATGAAGGACAATTGGAGAAGTGAATTATATAAATATAAAGTGG  
 TAGAAATTAAGCCATTA---GGAATAGCACCCACTAAGGCACAAAGGAGAGTGGTG-----  
 -----GAAAGAGAAAAAAGAGGA---GCAGCA---CTGGGAGCT-----  
 ATGTTCCCTTGGGTTCTTGGGAGCA---GCAGGAAGCACTATG---GGCGCGGCATCA---  
 ATAACGCTGACGGTACAG---GCCAGACGA---TTGTTG---TCTGGTATAGTGCAACAGCAAAGC---  
 AATTTG---CTGAGA---GCTATAGAGGCGCAACAGCATATGTTGCAACTCACAGTCTGGGGCATT  
 >DQ382369  
 TTCTATTGTAACACAACAGAACTGTTTAAAAATGATTCAAGCACAAAA-----  
 -----  
 -----  
 AATGATACATACATCACACTCCCATGCAGAATAAAACAAATTATAAACATGTGGCAAGAGGTAGGACGAGCAA  
 TGTATGCTCCTCCCATTTGCAGGAAACATAACATGTAGATCAAAT---  
 ATCACAGGATTGCTATTGGTACGTGATGGAGGAAACGAGAATAAC-----  
 -----  
 -----  
 ATCACAGAGATATTTCAGACCTGGAGGAGGAAATATGAAGGACAATTGGAGAAGTGAAGTATATAAATACAAAG  
 TGGTAGAAATTAACCATTA---GGAATAGCACCCACAACGGGCAAAAAGGAGAGTGGTG-----  
 -----CAGAGAGAAAAAAGAGCA---GTAGGA---ATGGGAGCT-----  
 GTACTCCTTGGGTTCTTGGGAGCA---GCAGGAAGCACTATG---GGCGCGGCGTCA---  
 ATGACGCTGACGGTACAG---GCCAGACAA---CTGTTG---TCTGGTATAGTGCAACAGCAAAGC---  
 AATTTG---CTGAGA---GCTATAGAGGCGCAACAGCATCTGTTGCAACTCACAGTCTGGGGCATT  
 >DQ382370  
 TTCTATTGCAATACAACAAAACCTGTTTAAGGAAAATAGTACAAAT-----  
 -----  
 -----  
 GAAAAATGATACAATCACACTCCCATGCAGGATAAAACAAATTGTAAACATGTGGCAGACAGTAGGACAAGCAA  
 TGTATGCCCCCTCCCATTTGCAGGAAACATAACATGTAACCTCAAGT---  
 ATCACAGGGTTACTATTGACACGTGATGGAGGAAATGGGAATAGT-----  
 -----  
 -----  
 ACTAATGAGACATTTCAGACCTACAGGAGGAGATATGAAAAGACAATTGGAGAAGTGAATTATATAAATATAAAG  
 TGGTAGAAATTAAGCCATTG---GGAGTAGCACCCACAGAGTCAAAAAGGAGAGTGGTG-----  
 -----GAGAGAGAAAAAAGAGCA---GCGGGA---ATAGGAGCT-----

GTACTCCTTGGGTTCTTGGGAGCA---GCAGGAAGCACTATG---GGCGCAGCGTCA---  
 ATAACGCTGACGGTACAG---GCCAGACAA---CTGTTG---TCTGGTATAGTGCAACAGCAAAGC---  
 AATTTG---CTGAGA---GCTATAGAGGCGCAACAGCATATGTTGCAACTCACGGTCTGGGGCATT  
 >DQ382371  
 TTCTATTGCAATACATCAAACTGTTTAATAATAGTGAAGACAAGGATAGTCCTTTTAATTCAACC-----  
 -----  
 -----  
 AGAAATGCAACCATTATAATCCAATGCAGAATAAGACAATTTATAAACATGTGGCAGGAGGTAGGACGAGCAA  
 TGTATGCCCCCTCCCATTCAGGAAACATAACATGTAAATCAAAC---  
 ATCACAGGACTACTATTGACACGTGATGGAGGAGAGAATGACACA-----  
 -----  
 -----  
 AACCCAGAGATATTCAGACCTGGAGGAGGAGATATGAGGGACAATTGGAGAAGTGAATTATATAAATACAAAG  
 TGGTAGAAATTAAGCCATTA---GGAATAGCACCCACTGGAGCAAAAAGGAGAGTGGTG-----  
 -----GAGAGAGAAAAAAGAGCA---GTGGGA---ATAGGAGCT-----  
 GTGCTCCTTGGGTTCTTGGGAACA---GCAGGAAGCACTATG---GGCGCGGCGTCA---  
 TTAGCGCTGACGGTACAG---GCCAGACAA---CTGTTG---TCTGGTATAGTGCAACAGCAAAGC---  
 AATTTG---CTGAGG---GCTATAGAGGCGCAACAGCATATGTTGCAACTCACGGTCTGGGGCATT  
 >DQ382372  
 TTCTATTGCAACACATCAAACCTGTTTAATAGGACATACAATAGTACAGATAAGTCAGATAGGTTTAATAGTA  
 CA-----  
 -----  
 GATAATTCAACCATCACAATCCAATGCAGAATAAGACAATTTATAAACATGTGGCAGAGGGTAGGACGAGCAA  
 TGTATGCCCCCTCCCATTTGAAGGAAACATAACATGTAAATCAAAA---  
 ATCACAGGACTACTATTGACACGTGATGGAGGCGAGGGGAATAAGAATGAC-----  
 -----  
 -----  
 ACAAATGACACAGAGATATTCAGACCTGGAGGAGGAGATATGAGGGACAATTGGAGAAGTGAATTATATAAAT  
 ATAAAGTGGTAGAAATTAAGCCATTA---GGACTAGCACCCACTAAAGCAAAAAGGAGAGTGGTG-----  
 -----GAGAGAGAAAAAAGAGCA---GTGGGA---ATAGGAGCG---  
 -----TTGTTCTTGGGGTCTTGGGAGTA---GCAGGAAGCACTATG---GGCGCAGCATCA---  
 ATAACGTTGACGGTACAG---GCCAGACAA---TTGTTG---TCTGGTATAGTGCAACAGCAAAC---  
 AATTTG---CTGAGG---GCTATAGAGGCGCAACAGCATATGTTGCAACTCACGGTCTGGGGCATT  
 >DQ382375  
 TTCTATTGCAATACAGCAGGCCTGTTTAATACAAGTCTGATTAATAGTACTAAGAGTACAAGTACAAAGAAT-  
 -----  
 -----  
 ACACAAGACCCCATCACACTCACATGCAGAATAAAGCAATTTATAAACATGTGGCAGCAGGTAGGACGAGCAA  
 TGTATGCTCCTCCCATTCAGGAAACATAACATGTAAATCAAAT---  
 ATCACAGGATTGCTATTGATGTATGATGGAGGAAGGAATGAGACA-----  
 -----  
 -----  
 AATGCGACCTTCAGACCTGGAGGAGGAGATATGAGAGACAATTGGAGAAGTGAATTATACAAATATAAAGTGG  
 TAGAAATTAAGCCATTG---GGAATAGCACCCACCAAGGCAAAAAGGAGAGTGGTG-----  
 -----GAGAGAGAAAAAAGAGCA---GTGGGA---ATAGGAGCT-----  
 GTGCTCTTTGGGTTCTTGGGAGCA---GCAGGAAGCACTATG---GGCGCGGCGTCA---  
 ATAACGCTGACGGTACAG---GCCAGACAA---TTGTTG---TCTGGTATAGTGCAACAGCAAAGC---  
 AATTTG---CTGAGA---GCTATAGAGGCGCAACAGCATATGTTGCAACTCACGGTCTGGGGCATT  
 >DQ382377  
 TTCTATTGTAATACATCAAACTGTTTAATGGTACATACAATGGTACATACAATGCTACAGAAAGAAACATT-  
 -----  
 -----  
 GGTCCCGGAACCCTCTGCCTCCAATGCCGAATAAAACAAATTATAAACATGTGGCAACAGGTGGGACGAGCAA  
 TGTATGCTCCTCCCATTCAGGAAACATAACATGTACATCAAAT---  
 ATCACAGGACTACTATTGGTACGTGATGGAGGAACTCAAGTAAC-----  
 -----  
 -----  
 CTAAGATAGAGATATTCAGACCTAACAGAGGAGAGATGAGGGACAACCTGGAGAAGTAAATTATATGAGTATA  
 AGGTGGTAAAAATTAAACCATTA---GGAGTAGCTCCCACTGAAGCAAAAAGGAGAGTGGTG-----  
 -----GAGAGACAAAAAAGAGCA---GCAGGA---ATAGGAGCT-----

---GTGTTCCCTTGGGTTCTTGGGAGTA---GCAGGAAGCACTATG---GGCGCGGCGTCA---  
 ATGACGCTGACGGTACAG---GCCAGACAA---CTGTTG---TCTGGTATAGTGCAACAGCAAAGC---  
 AATTTG---CTGAGG---GCTATAGAGGCGCAACAGCATATGTTGCAACTCACGGTCTGGGGCATT  
 >DQ382378  
 TTCTATTGCGATACAACAAACCTGTTTAATATTTCTAATATTAAC-----  
 -----  
 -----  
 AGTACAAGCAACATTACACTCCAATGCAGATAAAAACAAATTATAAACATGTGGCAAAAGGTAGGACGAGCAA  
 TGTATGCCCCCTCCCATTTGAAGGAACCATAACATGTATATCAAAC---  
 ATCACAGGACTATTATTGACACGTGATGGAGGTAGTAGTAATGAGACTAGT-----  
 -----  
 ----  
 AGTATTAATAAGACAGAGATTTTTAGACCTGGAGGAGGAAATATGAAAGACAATTGGAGAAGTGAATTGTATA  
 AATATAAGGTGGTAGAAATTAAGCCATTG---GGAATAGCACCCACTGGAGCAAAAAGGAGAGTGGTG-----  
 -----GAGAGAGAAAAAAGAGCA---GTGGGA---  
 ATAGGAGCT-----GTGTTCCCTTGGGTTCTTGGGAGCA---GCAGGAAGCACTATG---  
 GGCGCGGCGTCA---ATAACGCTGACGGTACAG---GCCAGACAA---CTGCTG---  
 TCTGGTATAGTGCAACAGCAAAGC---AATTTG---CTGAGA---  
 GCTATAGAGGCGCAACAGCATATGTTGCAACTCACAGTCTGGGGCATT  
 >DQ382361  
 TTCTACTGCAATACATCAAGACTGTTTAATAGTACATGGCTTAATAGTACAGAGCCTACAGACCAGGCTAAT-  
 -----  
 -----  
 GATACAAGTGTAATAACACTCCCATGCAGAATAAAAACAAATTATAAACATGTGGCAGGAGGTAGGACGGGCAA  
 TGTATGCTCCTCCCATTTGACAGGAAACATAACATGTAGGTCAAAT---  
 ATCACAGGATTACTATTGGTGAGGGATGGAGGAAAGGGCAATAGCACA-----  
 -----  
 -----  
 GACAATAAATCTGAGATATTCAGACCTGGAGGAGGAGATATGAGGGACAATTGGAGAAGTGAATTATACAAAT  
 ATAAAGTGGTAGAAGTTAAGCCATTG---GGAATAGCACCCACCCAGGCAAAAAGGAGAGTGGTG-----  
 -----GAGAGAGAAAAAAGAGCA---GTGGGA---ATAGGAGCT---  
 -----GTGTTCCCTTGGGTTCTTGGGAGCC---GCAGGAAGCACTATG---GGCGTGCGCTCA---  
 ATGGCGCTGACGGTACAG---GCCAGAAAT---TTATTG---TCTGGTATAGTGCAACAGCAAAGT---  
 AATTTG---CTGAGG---GCTATAGAGGCGCAACAGCATATGTTGCAACTCACGGTCTGGGGCATT  
 >DQ382362  
 TTCTATTGCAATACATCAGACCTGTTTAAGGATAATATTACTATAACTAATAGTACT-----  
 -----  
 -----  
 AACAAATACAGTTATTACACTCCAATGCAGAATAAAAACAAATTATAAACATGTGGCAAAGGGCAGGACAGGCAA  
 TATATGCCCCCTCCCATTTAGAGGAAACATAACATGTAATTCAAAT---  
 ATCACAGGACTACTATTGACACGTGATGGAGGAAAAGATAATAAAACAAAT-----  
 -----  
 ----  
 AATGAGAATAAAAACAGAGATATTCAGACCTGGAGGAGGAGATATGAGGGACAATTGGAGAAGTGAATTATATA  
 AATACAAAGTAGTAGAAATTAAGCCATTA---GGAATAGCACCCACTACTGCAAAAAGGAGAGTGGTG-----  
 -----GAGAGAGAGAAAAAGAGCA---GTGGGA---  
 ATAGGAGCT-----GTGCTCCTTGGGTTCTTGGGAGCA---GCAGGAAGCACTATG---  
 GGCGCAGCGTCA---ATAACGCTGACGGCACAG---GCCAGACAA---GTATTG---  
 TCTGGTATAGTGCAACAGCAAAGT---AATTTG---CTGAGA---  
 GCTATAGAGGCGCAACAGCATATGTTGAGCTCACAGTCTGGGGCATT  
 >DQ382364  
 TTCTATTGCAATACATCAAACTGTTTAATGGTACATACAATGGTACAGACATGTCTAATAATACAGAA----  
 -----  
 -----  
 AGTAATTCAACCATCACACTCCAATGCAGAATAAAAACAAATTATAAACATGTGGCAGGAGGTAGGACGAGCAA  
 TGTATGCCCCCTCCCATTTGACAGGAAACATAACATGTAGATCAAAT---  
 ATCACAGGGCTACTATTGCTACGTGATGGAGGTTTCTGCCAAAAT-----  
 -----  
 -----  
 AATACCACAGAGACATTACAGGCCGGGAGGGGGAGATATGAGGAACAATTGGAGAAGTGAATTATATAAGTATA

AAGTGGTAGAAATTAAGCCATTG---GGAGTAGCACCCACTAAGGCCAAAAGGAGAGTGGTG-----  
-----GAGAGAGAAAAAGAGCA---GTGGGA---ATAGGAGCT-----  
---GTGTTCCCTTGGGTTCTTGGGAGCA---GCAGGAAGCACTATG---GGCGCGGCGTCA---  
ATAACGCTGACGGTACAG---GCCAGACAA---CTGTTG---TCTGGCATAGTGCAACAGCAGAGC---  
AATTTG---CTGAGA---GCTATAGAGGCGCAACAGCATCTGTTGCAACTCACAGTCTGGGGCATT  
>DQ382365  
TTCTATTGCAATACATCAAGCCTGTTTAATGGGACATACAATAGTACACGCAATAGT-----  
-----  
-----  
ACAGGAAGGACTATCACACTCCAATGCAGAATAAAACAAATTATAAACATGTGGCAGGAGGTGGGACGAGCAA  
TGTATGCCCCCTCCCATTCGAGGGAACATAACATGTAATTCAAAT---  
ATCACAGGACTAATATTGACACGTGATGGAGGATATGATAATAATAATGCCACT-----  
AAAGAAAATAAGACTACTAATAATACT-----  
-----  
AATAGTAATAAAACAGAGAAATTCAGACCTGTAGGAGGAGAGATGAGGGATAATTGGAGAAGTGAATTATATA  
AATATAAAGTGGTAGAAATTAAGCCATTA---GGAATAGCACCCACTAAGGCCAAAAGGAGAGTGGTG-----  
-----GAAAGGGAGAAAAGAGCA---GTGGGA---  
CTAGGAGCT-----GTGTTCCCTTGGGTTCTTGGGAGCA---GCAGGAAGCACTATG---  
GGCGCGGCGTCA---ATAACGCTGACGGTACAG---GCCAGACAA---TTATTG---  
TCTGGTATAGTGCAACAGCAAAGC---AATTTG---CTGAGA---  
GCTATAGAGGCGCAACAGCATCTGTTGCAACTCACGGTCTGGGGCATT  
>DQ382366  
TTCTATTGCGATACATCAAAATTGTTTAATAGGACATTTAATAGTACTAATACAAAAGGTAATAGTACAGATG  
CTAGA-----  
-----GGT---  
AATAGTAATGCAACAATCACACTCCCATGCAGGATAAAACAATTTATACACATGTGGCAGCCAGTAGGAAGGG  
CAATGTATGCTCCGCCCATTGCAGGAAAAATAACATGTAAATCAAAT---  
ATCACAGGATTACTATTGGCGAGAGATGGAGGAAACACAAATAAC-----  
-----  
-----  
TCAGAGACATTTCAGACCTGGAGGAGGAAATATGAAGGACAATTGGAGAAGTGAATTATACAAATATAAAGTGG  
TAGAAGTTAAGCCATTG---GGAATAGCACCCACTGGAGCAAAAAGGAGAGTGGTG-----  
-----GAGAGAGAAAAAGAGCA---GTGGGA---ATAGGAGCT-----  
GTGTTCCCTTGGGTTCTTGGGAGCA---GCAGGAAGCACTATG---GGCGCGGCGTCA---  
ATAACGCTGACGGTACAG---GCCAGACAA---CTGTTG---TCTGGTATAGTGCAACAGCAAGGC---  
AATTTG---CTGAGA---GCTATAGAGGCGCAACAGCATATGTTGCAACTCACGGTCTGGGGCATT  
>DQ382367  
TTCTATTGTAATACATCACAACCTGTTCAATAGCACATACAATAGCAATGAGACAACAAGTGAT-----  
-----  
-----  
TCAAAATCAACCATCACACTCCCATGTACAATAAAACAAATTATAAATATGTGGCAGGAGGTGGGACGAGCAA  
TGTATGCCCCCTCCCATTCGAGGAAACATAACATGTGTATCAAAC---  
ATCACAGGAATACTATTGACACGTGATGGAGGACAAAATGGAGGAAACAAC-----  
-----  
-----  
ACAAATGTCCAGAGATATTTCAGACCTGCAGGAGGAGATATGAGGCTCAATTGGAGAAGTGAATTATTTAAAT  
ATAAAGTAGTAGAAATTAAGCCATTG---GGAATAGCACCCACTGAGGCAAAAAGGAGAGTGGTG-----  
-----GAGAGGGAAAAAGAGCA---GTGGGA---ATAGGAGCT---  
-----GTGTTCCCTTGGGTTCTTGGGAGCA---GCAGGAAGCACTATG---GGCGCGGCGTCA---  
GTGACGCTGACGGTACAG---GCCAGACAA---TTGTTG---TCTGGTATAGTGCAACAGCAAAGC---  
AATTTG---CTGAGG---GCTATAGAGGCGCAACAGCACATGTTGCAACTCACGGTCTGGGGCATT  
>DQ396372  
TTCTATTGCAATACAACAAAACCTGTTTAATGAAACGCTTTTTTTCGAAGGAA-----  
-----  
-----  
ACTAATGAAACCATAACCATCCAATGCAGGATAAAACAAATTATAAACATGTGGCAGGGGGTAGGACGAGCAA  
TGTATGCCCCCTCCCGTTGCAGGAAACATAACATGTAACCTCAAGT---  
ATCACAGGAATACTATTAACACGTGATGGCGGTTTAAAAACGACACC-----  
-----  
-----

AATGACACAGAGACATTTCAGACCTGGAGGAGGAAATATGAAGGACAATTGGAGAAGTGAATTATATAAAATATA  
AAGTGGTAGAAATTAAGCCTTTG---GGAATGGCACCCACTAGGGCAAAAAGGAGAGTGGTG-----  
-----GAGAGAGAAAAAAGAGCA---GTGGGA---ATAGGAGCT-----  
---GTGTTCCCTTGGGTTCTTGGGAGCA---GCAGGAAGCACTATG---GGCGCAGCGTCA---  
ATAACGCTGACGGTACAG---GCCAGACAA---CTGTTG---TCTGGTATAGTGCAACAGCAGAGC---  
AATCTG---CTGAGA---GCTATAGAGGCGCAACAGCATATGTTGCAACTCACAGTCTGGGGCATT  
>DQ369992  
TTCTATTGCAATACATCAAAGCTGTTTACTGAATCGCTTAATAGTACA-----  
-----  
-----  
GACAAATGAAACAATCACAATCCCATGTAAACTAAAAACAGATTATAAACCTGTGGCAGGAAGTAGGGCGAGCAA  
TGTATGCCCCCTCCCATTGAAGGAAACATAACATGTAACTCAAGT---  
ATCACAGGACTACTATTGACACGTGATGGAGGAAACACGAATGACACA-----  
-----  
-----  
AATGGCCCAGAGATATTTCAGACCTGGAGGAGGGAATATGAAGGACAATTGGAGAAGTGAATTATATAAAATATA  
AAGTGGTAGAAATTAAGCCATTG---GGAATAGCACCCACTGGAGCAAAAAGGAGAGTGGTG-----  
-----GAGAGAGAAAAAAGAGCA---GTGGGA---ATAGGAGCT-----  
---ATGATCCTTGGGTTCTTGGGAGCA---GCAGGAAGCACTATG---GGCGCGGCGTCA---  
ATAACGCTGACGGTACAG---GCCAGACAA---TTGTTG---TCTGGTATAGTGCAACAGCAAAAT---  
AATTTG---CTGAGG---GCTATAGAGGCGCAACAGCATATGTTGCAACTAACGGTCTGGGGCATT  
>DQ369982  
TTCTATTGTAATACATCAGGACTATTTAATGGTACATATAATAGTACAGGATCTAATAGTACAGGA-----  
-----  
-----  
AATGGTTCAGTCATTACACTTCCATGCAGAATAAAACAAATTATAAACATGTGGCAGGAAGTAGGACGAGCAA  
TGTATGCCCCCTCCCATTGCAGGAAACATAACATGTGAGTCAAAT---  
ATCACAGGACTACTATTAGTACGTGATGGTGGCAACACAAGTACA-----  
-----  
-----  
GAAGAAATATTTCAGACCTGGGGGAGGAAATATGAAGGACAATTGGAGAAGTGAATTATATAAAATATAAAGTGG  
TAGAGGTTAAGCCATTG---GGAATAGCACCCACTAGAGCAAAAAGGAGAGTGGTG-----  
-----GAGAGAGAGAAAAGAGCA---GTGGGA---ATAGGAGCT-----  
GTGTTCCCTTGGGTTCTTGGGAGCA---GCAGGAAGCACTATG---GGCGCAGCGTCA---  
ATAGCGCTGACGGCACAG---GCCAGACAA---GTGCTG---TCTGGTATAGTGCAACAGCAAAGC---  
AATTTG---CTGAGG---GCTATAGAGGCGCAACAGCATATGTTGCAACTCACAGTCTGGGGCATT  
>DQ369983  
TTCTACTGCAATACAACACAACCTGTTCAATACAACAAAACCTGTTCAATAGCACA-----  
-----  
-----  
ACTAATGAACTATCATACTCCCATGCAGAATAAAACAAATTATAAATATGTGGCAGGAGGTAGGACGAGCAA  
TGTACGCCCCCTCCCATTAGAGGAAACATAACATGTAACTCAAGT---  
ATCACAGGGCTGCTATTGGAACGTGATGGAGGAAATGTAAACAGCAGC-----  
-----  
-----  
AATAGCACAGAGACATTTCAGACCTGGAGGAGGAAATATGAAGGACAATTGGCGTAGTGAATTATATAAAATATA  
AAGTGGTAGAACTTAAGCCATTG---GGAATAGCACCCACGGATGCAAAAAGGAGAGCGGTG-----  
-----GAGAGAGAAAAAAGAGCA---GTGGGA---ATAGGAGCT-----  
---GTGCTCCTTGGGTTCTTGGGAGCA---GCAGGAAGCACTATG---GGCGCGGCGTCA---  
ATAACGCTGACGGTACAG---GCCAGGCAA---TTATTG---TCTGGTATAGTGCAACAGCAAAGC---  
AGTTTG---CTGAGA---GCTATAGAGGCGCAACAGCATATGTCGCAACTCACGGTCTGGGGCATT  
>DQ369994  
TTCTATTGCAATACATCAAGACTGTTTACATCAAACCTGTCTAGTAAT-----  
-----  
-----  
ACAGAAGACATCATCACAATCCCATGCAGAATAAAACAGGTTATAAACATGTGGCAGAAGGTAGGACGAGCAA  
TGTATGCCCCCTCCCATTGCAGGAAACATAACATGTAGATCCAAC---  
ATCACAGGACTACTATTGACACGTGATGGAGGATCAGATAACCATACC-----  
-----  
-----

AATAACACAGAGACTTTTCAGACCTGGAGGAGGAGACATGAGGGATAATTGGAGAAGTGAATTATATAAAATATA  
AAGTAGTAGAAATTAAGCCATTG---GGAATAGCACCCACCAAGGCCAAAAGGAGAGTGGTG-----  
-----GAGAGAGAAAAAAGAGCA---GCGGGA---ATAGGAGCT-----  
---GTGTTCCCTTGGGTTCTTGGGAGCA---GCAGGAAGCACTATG---GGCGCGGCGTCA---  
ATAACGCTGACGGTACAG---GCCAGACAA---TTGTTG---TCTGGTATAGTGCAACAGCAAAGC---  
AATTTG---CTGAAG---GCTATAGAGGCGCAACAGCATCTGTTGCAACTCACGGTCTGGGGCATT  
>HQ615948  
TTCTATTGCAATACATCAGGCCTATTTAATAGAAAATACTCCTTTAATGATACATACAATAGTACAGAA----  
-----  
-----  
AATAGTTCAAACATCACACTCCAATGCAGAATAAAACAAATTATAAACATGTGGCAGGGGGTAGGACGAGCAA  
TGTATGCCCCCTCCCATTGAAGGAAATATAACATGTAAATCAAAG---  
ATCACAGGACTACTATTAGTACGTGATGGAGGCAACCCCTGACAATAGC-----  
-----  
-----  
AGTGGCACAGAGACATTTCAGACCTGGAGGAGGAAACATGAAGGACAATTGGAGAAGTGAATTATATAAAATATA  
AAGTGGTAGAAATTAACCATTG---GGAATAGCACCAACTAATGCAAAAAGGAGAGTGGTG-----  
-----GAGAGAGAAAAAAGAGCA---GTGGGA---ATAGGAGCT-----  
---GTGTTCCCTTGGGTTCTTGGGAGCA---GCAGGAAGCACTATG---GGCGCGGCGTCA---  
GTGACGCTGACGGTACAG---GCCAGACAA---TACTG---TCTGGTATAGTGCAACAGCAAAGC---  
AATTTG---CTAAGG---GCTATAGAGGCGCAACAACATATGTTGCAACTCACGGTCTGGGGCATT  
>JQ754193  
TTCTATTGCAATACATCAAACTGTTCAATAGTACATACATGGCTAATAATACAGACGTGTCTAATAGTACTT  
TAAATAGTACT-----  
-----  
TCAAAATGCAACCATCACACTCCCATGCAGAATAAAACAAATTATAAACATGTGGCAGGGGGTAGGACGGGCAA  
TGTATGCCCCCTCCCATTGCAGGAAACATAACATGTAAAGTCAAAT---  
ATCACAGGAGTACTATTGACACGTGATGGGGGAGAAAGCAATGGG-----  
-----  
-----  
ACAGAAGAAGTCTTCAGACCTGGAGGAGGAGATATGAGGGACAATTGGAGAAGTGAATTATATAAGTATAAAG  
TGGTAGAAATTAAGCCATTG---GGAATAGCACCCACTGGGGCAAAAGGAGAGTGGTG-----  
-----GAGAGAGAAAAAAGAGCA---GTAGGA---ATAGGAGCT-----  
GTGTTCCCTTGGGTTCTTGGGAGCA---GCAGGAAGCACTATG---GGCGCAGCATCA---  
ATAACGCTGACGGTACAG---GCCAGACAA---TTGTTG---TCTGGTATAGTGCAACAGCAAAGC---  
AATTTG---CTGAGG---GCCATAGAGGCGCAACAACATTTGTTGCAACTCACGGTCTGGGGCATT  
>GQ999981  
TTCTATTGTAATACAGCAAACTATTTAACAACAACACAGTTTAATAACAAT-----  
-----  
-----  
GATGCAAACACAACCACCATCCCATGCAGGATAAAACAAATTATAAACATGTGGCAGGGGGTAGGACGAGCAA  
TGTATGCCCCCTCCCATTGAAGGAAACATAACATGTAACTCAAGT---  
ATCGCAGGACTACTATTGACACGTGATGGCGGCCAGCAGAATACA-----  
-----  
-----  
AATGAGACATTTCAGACCTGGAGGAGGAAATATGAAGGACAATTGGAGAGGTGAATTATATAAAATATAAAGTGG  
TAGAAATTAAGCCATTG---GGGGTAGCACCCACTGAGGCAAAAAGGAGAGTGGTG-----  
-----GAGAGAGAAAAAAGAGCA---GTGGGA---ATAGGAGCT-----  
GTGCTCCTTGGGTTCTTGGGAGCA---GCAGGAAGCACTATG---GGCGCGGCGTCA---  
ATAACGCTGACGGTACAG---GCCAGACAA---CTGTTG---TCTGGTATAGTACAACAGCAAAGC---  
AATTTG---CTGAGA---GCTATAGAGGCGCAACAGCATATGTTGCAACTCACAGTCTGGGGCATC  
>KC894135  
TTCTATTGCGACACAACAACACTGTTTAATGACACACTGTTTAATAACACACTGTCTGATAAT-----  
-----  
-----  
GAAAAATGAGACAATCACACTCCCATGCAGAATAAAACAAATTATAAACATGTGGCAGGGGGTAGGACGAGCAA  
TATATGCCCCCTCCCATTGAAGGAAAAATAACATGTAACTCAACT---  
ATCACAGGACTACTATTGACACGTGATGGAGGAGTAAATGCTAGT-----  
-----  
-----

AACAAAGCAGAGACATTTCAGACCTGGAGGAGGAAATATGAAGGACAATTGGAGAAGTGAATTATATAAGTATA  
AAGTGGTAGAAATTAAGCCATTG---GGAGTAGCACCCACTGGGGCAAAAAGGAGAGTGGTG-----  
-----GAGAGAGAAAAAGAGCA---GTGGGA---ATGGGAGCT-----  
---GTGCTCCTTGGGTTCTTGGGAGCA---GCAGGAAGCACTATG---GGCGCAGCGTCA---  
ATAACGCTGACGGTACAG---GCCAGACAA---CTGTTG---TCTGGTATAGTGCAACAGCAAAGC---  
AATTTG---CTGAGA---GCTATAGAGGCGCAACAGCATATGTTGCAACTCACGGTCTGGGGCATT  
>GQ999983  
TTCTATTGCAATACCACAAAACCTGTTTAATAGTACACATAATAGTACTGATAGTACAGTAAATAGTACTGATA  
GTACAGCAGAA-----  
-----ACAGGAAAT-----  
TCAACAAATACAAACATCACGCTCCCATGCAGAATAAGGCAAATTATAAACATGTGGCAGGAGGTAGGACGAG  
CAATGTATGCTCCTCCCGAGTAAAGGGAACATAACATGTATATCAAAC---  
ATCACAGGACTATTACTGACGCGTGATGGAGGAGAAAAACAAACAGAG-----  
-----  
-----  
AATAATGACACAGAGATATTCAGGCCTGGAGGAGGAGATATGAAGGACAATTGGAGAAGTGAATTATATAAAT  
ATAAAGTAGTAGAAATTAACCATTA---GGAGTAGCACCCACTAGAGCAAAAAGGAGAGTGGTG-----  
-----GAGAGAGAAAAAGAGCA---GTGGGA---ATAGGAGCT---  
-----GTGTTTCCTTGGGTTCTTGGGAGCA---GCAGGAAGCACTATG---GGCGCAGCATCC---  
ATAACGCTGACGGTACAA---GCCAGACAA---TTATTG---TCTGGTATAGTGCAAGCAGCAAAGT---  
AATTTG---CTGAGA---GCTATAGAGGCGCAACAACATATGTTGCAACTCACAGTCTGGGGCATT  
>GQ999984  
TTCTATTGCAATACAACAAAACCTGTTTAATGAAAATGATACAAAATTGTTTAATGAAAGTGCTACAATTAAAA  
ATGAA-----  
-----AGT---  
AATACAAATGAAAACATCACAAATCCCATGCAGAATAAAAACAAATTATAAACATGTGGCAGGGGGTAGGACGAG  
CAATGTATGCCCTCCCATTCAGGAAACATAACATGTAAATCAAAT---  
ATCACAGGACTACTATTGCTACGTGATGGAGGAAACAGCAGTGAGGGAGGAAAC-----  
-----  
-----  
AGCAGTGATAAAATGAGATATTCAGACCTGGAGGAGGAAATATGAAGAACAATTGGAGAAGTGAATTATATA  
GATATAAAGTGATAGAACTTAAACCATTG---GGAATAGCACCCACCGAGGCAAGAAGGAGAGTGGTG-----  
-----GAGAGAGAAAAAGAGCA---GTGGGA---  
CTAGGAGCT-----GCACTCATTGGGTTCTTGGGAGCA---GCAGGAAGCACTATG---  
GGCGCGGCGTCA---ATAACGCTGACGGTACAG---GCCAGACAA---CTGTTG---  
TCTGGTATAGTGCAACAGCAAAGC---AAGTTG---CTGAGA---  
GCTATAGAGGCGCAACAGCATATGTTGCAACTCACGGTCTGGGGCATT  
>GQ999985  
TTCTATTGCAATACATCAAAACCTGTTTTCTAATAATTTTACTAGT-----  
-----  
-----  
TCAACCAACATAACCACCATCCCATGTAGGATAAAAACAAATTATAAACATGTGGCAGGGGGTAGGACGAGCAA  
TGTATGCCCTCCCATTCAGGAAACATAACATGTAACCTCAAGT---  
ATCACAGGACTACTATTGGTACGTGATGGTGGTAATGATAATAATAAA-----  
-----  
-----  
ACGAATGTCATAGAGACATTTCAGACCTGAAGGAGGAAATATGAAGGACAATTGGAGAAGTGAATTATATAAAT  
ATAAAGTAGTAGAAATTAAGCCATTG---GGAATAGCACCCACTACGGCAAAAAGGAGAGTGGTG-----  
-----GAGAGAGAAAAGAGGGCA---GTGGGA---ATAGGAGCT---  
-----GTGTTTCCTTGGGTTCTTGGGAGCA---GCAGGAAGCACTATG---GGCGCGGCGTCA---  
GTGGCGCTGACGGTACAG---GCCAGACAA---TTGTTG---TCTGGAATAGTGCAACAGCAAAGC---  
AATTTG---CTAAAA---GCTATAGAGGCGCAGCAGCATATGTTGCAGCTCACGGTCTGGGGCATT  
>GQ999989  
TTCTATTGCAATACGTCAGACCTGTTTAATGGTACATACAATAACATTAGTGTCAGTACTTTCAGATTCA-  
-----  
-----  
AGTACACCACACATCACACTCCAATGCAGAATAAAAACAAATTATAGACATGTGGCAGGAGGTGGGACGAGCAA  
TGTATGCCCTCCCATTCAGGAAATATAACATGTAACCTCAAAT---  
ATCACAGGACTACTATTGACACGTGATGGAGGAAGAGAAAGTAAT-----  
-----

-----  
GAGACAGAGACATTTCAGACCTGGAGGAGGAGATATGAGGAACAATTGGAGAAGTGAATTATATAAATATAAAG  
TAGTAGAAATTAACCATTA---GGAATAGCACCCACTGAAGCAAAAAGGAGAGTGGTG-----  
-----GAGAGAGAGAAAACGAGCA---GTAGGA---ATGGGAGCT-----  
GTGATCTTTGGGTTCTTGGGAGCA---GCAGGAAGCACTATG---GGCGCGGCGTCA---  
ATGGCGCTGACGGTACAG---GCCAGACAA---CTGCTG---TCTGGTATAGTGCAACAGCAAAGC---  
AATTTG---CTGAGA---GCTATAGAGGCGCAACAGCATATGTTGCAACTCACAGTCTGGGGCATC  
>GQ999990  
TTCTATTGCAATACAACAAACCTGTTTAATACAAATAATAGTGATTCA-----  
-----  
-----  
GGCAACACAACCATCACACTTCCATGCAGAATAAAAACAAATTGTAAACCTGTGGCAGGGAGTAGGACGAGCAA  
TGTATGCCCCCTCCTATTGCAGGAAACATAACATGTAACTCAACT---  
ATCACAGGACTACTATTGACACGTGATGGAGGAATAAATGCATCA-----  
-----  
-----  
AAGACAGAGACATTTCAGACCTGGAGGAGGAGATATGAGGGACAATTGGAGAAGTGAATTATATAAGTATAAAG  
TGGTAGAAATTAAGCCATTG---GGAATAGCTCCCACTACGTCAAAAGGGAGAGTGGTG-----  
-----GAGAGAGAAAAAAGAGCA---GTAGGG---ATAGGAGCT-----  
GTGTTCCCTTGGGTTCTTGGGAGCA---GCAGGAAGCACTATG---GGCGCAGCGTCA---  
CTAACGCTGACGGTACAG---GCCAGACAA---CTGTTG---TCTGGTATAGTGCAACAGCAAAGC---  
AATTTG---CTGAGA---GCTATAGAGGCGCAACAACATATGTTGCAACTCACGGTCTGGGGCATT  
>JN681227  
TTCTATTGCAATACAACAAATCTGTTTGAAGTTAACAGCACA-----  
-----  
-----  
AACATTACACTCCCATGTAAAGATAAAAACAAATTGTAAACATGTGGCAAGAGGTAGGACGAGCAATGTATGCCC  
CTCCCATTGCAGGAAACATAACATGTAAATCAAAT---  
ATCACAGGACTACTATTGACAAGGGATGGAGGAGTCAACAACGGAACA-----  
-----  
-----  
AAGAATAATGAAACATTTAGACCTACAGGAGGAAATATGAAAGACAATTGGAGAAGTGAATTATATAAGTATA  
AAGTGGTAGAAATTAAGCCATTA---GGAATAGCACCCACTGGATCAAAAAGGAGAGTGGTG-----  
-----GAGAGAGAGAAAAAGAGCA---GTGGGA---ATAGGAGCT-----  
---GTGTTCCCTTGGGTTCTTGGGAGCA---GCAGGAAGCACTATG---GGCGCGGCGTCA---  
ATAACGCTGACGGTACAG---GCCAGACAA---CTGCTG---TCTGGTATAGTGCAACAGCAAAGC---  
AATTTG---CTGAGA---GCTATAGAGGCGCAACAGCATATGTTGCAACTCACAGTCTGGGGCATT  
>GQ999974  
TTCTATTGCAATACAACACGACTGTTTAAGTGGTCTAGTAATGTC-----  
-----  
-----  
ACAAACGACACAATCACAATCCCATGCAGAATAAAAACAAATTTATAAACATGTGGCAAGGGGTAGGACGAGCAA  
TGTATGCCCCCTCCCATTTGAAGGAAACATAACACGTAACTCAAGT---  
ATCACAGGACTCCTATTGACACGTGATGGAGGGAAAAACAGACAGG-----  
-----  
-----  
AATGACACAGAGATATTTCAGACCTGGAGGAGGAAATATGAAGGACAATTGGAGAAATGAATTATATAAATATA  
AAGTGGTAGAAATTAAGCCATTG---GGAGTAGCACCCACTGAGGCAAGAAGGAGAGTGGTG-----  
-----GAGAGAGAAAAAAGAGCA---GTGGGA---ATAGGAGCT-----  
---GTACTCCTTGGGTTCTTGGGAGCA---GCAGGAAGCACTATG---GGCGCGGCGTCA---  
ATAACGCTGACGGTACAG---GCCAGGCAA---CTGTTG---TCTGGTATAGTGCAACAGCAAAGC---  
AATTTG---CTGAGA---GCTATAGAGGCGCAACAGCACATGTTGCAACTCACGGTCTGGGGCATT  
>GQ999976  
TTCTATTGCAATACATCAGGACTGTTTAACAGTACATACATGTCTAATGGTATACACATACCAAATGGT----  
-----  
-----  
GCAAGCGAAGTCATCACACTCCCATGCAGAATAAAAACAAATTTATAAACATGTGGCAGGAGGTAGGACGAGCAA  
TGTACGCCCCCTCCCATTTGAAGGAAACATAACATGTAGCTCAAAT---  
ATCACAGGACTACTATTGACACGTGATGGAGGAAACAATAGCACA-----  
-----

-----  
 AACGGAACAGAGACATTTCAGACCTGGAGGAGGAAATATGAAGGACAATTGGAGAAGTGAATTATATAAAATATA  
 AAGTGGTAGAAATTAAGCCATTA---GGAATAGCACCCACCAAGGCCAAAAGGAGAGTGGTG-----  
 -----GGGAGAGAAAAAAGAGCA---GTGGGA---CTGGGAGCT-----  
 ---GTGTTCCCTTGGGTTCTTGGGAGCA---GCAGGAAGCACTATG---GGCGCGGCGTCA---  
 CTAACGCTGACGGCACAG---GCCAGACAA---TTGTTG---TCTGGTATAGTGCAACAGCAAAAC---  
 AATTTG---CTGAGA---GCTATAGAGGCGCAACAGCATATGTTGCAACTCACAGTCTGGGGCATT  
 >GQ999978  
 TTCTATTGCAATACAACAAATCTGTTCAATCTGAACAGTACTGATGGAAGT-----  
 -----  
 -----  
 AACATCACTAACATCACAATCCCATGCAGAATAAAACAAATTATAAACATGTGGCAGAAGGTAGGACGAGCAA  
 TGTATGCCCCCTCCTATTGAAGGAATAATAACATGTAACCTCAAGT---  
 ATCACAGGACTACTGCTGACACGTGATGGAGGTGGAAATGAAAGT-----  
 -----  
 -----  
 GAAACAGAGACATTTCAGACCTGCAGGAGGAGATATGAAGGACAATTGGAGAAGTGAATTATATAAAATATAAAG  
 TGGTACAAATTAAGCCATTA---GGAATAGCACCCACTACGGCAAAAAGGAGAGTGGTG-----  
 -----GAGAGAGAAAAAAGAGCA---GTGGGA---ATAGGAGCT-----  
 GTATTCCTTGGGTTCTTGGGAGCA---GCAGGAAGCACTATG---GGCGCGGCGTCA---  
 ATAACGCTGACGGTACAG---GCCAGACAA---CTGTTG---TCTGGTATAGTGCAACAGCAAAGC---  
 AATTTG---CTGAGA---GCTATAGAGGTGCAACAGCATATGTTGCAACTCACGGTCTGGGGCATT  
 >GQ999979  
 TTCTACTGCAATACATCACAACCTGTTTAATAGTACAGTGAATGGTACAGAAGGAAGTTCAACCACCACAAAC-  
 -----  
 -----  
 GGGAGTTCACCCATCACACTCCCATGCAGAATAAAACAAATTATAAACATGTGGCAGGGGGTAGGAAGAGCAG  
 TGTATGCCAACCCCATTCAGGAAACATAACATGTATATCAAAC---  
 ATCACAGGACTACTATTGACACGTGATGGAGGCATGGCAGCTAACATG-----  
 -----  
 -----  
 ACAAATAACACAGAGATATTCAGACCTGGAGGAGGAAATATGAAGAATAATTGGAGAAGTGAATTATATAAGT  
 ATAAAGTGGTAGAAATTAAGCCATTG---GGAATAGCACCCAATAAGGCCAAAAGGAGAGTGGTG-----  
 -----GAGAGAGAAAAAAGAGCA---GTGGGA---ATAGGAGCT---  
 -----GTGTTCCCTTGGGTTCTTGGGAGCA---GCAGGAAGCACTATG---GGCGCAGCGTCA---  
 ATAACGCTGACGGCACAG---GCCAGACAA---TTGTTG---TCTGGTATAGTGCAACAGCAAAGC---  
 AATCTG---CTGAAG---GCTATCGAGGCGCAACAGCATCTGTTGCAACTCACGGTCTGGGGCATT  
 >GQ999980  
 TTCTATTGCAATACGTCGAAACTGTTTAATGAGAATGAGACAGAA-----  
 -----  
 -----  
 ACAAACACAACCATCACACTCCCATGCAGAATAAAACAAATTATAAACATGTGGCAGGAGGTAGGACGAGCAA  
 TGTATGCCCCCTCCCATTCAGGGAACATAACATGTAACCTCAAGT---  
 ATCACAGGACTACTATTACTACGTGATGGAGGAAACGAAAACATAACA-----  
 -----  
 -----  
 AATGGCACAGAGATATTTAGACCTGGAGGAGGAAATATGAAGGACAATTGGAGAAGTGAATTATATAAAATATA  
 AAGTAGTAGAAATTAGACCATTG---GGAGTAGCACCCACCGAGGCCAAAAGGAGAGTGGTG-----  
 -----GAGAGAGAAAAAAGAGCA---GCGGGA---ATAGGAGCT-----  
 ---GTGCTCCTTGGGTTCTTGGGAGCA---GCAGGAAGCACTATG---GGCGCGGCGTCA---  
 ATAACGCTGACGGTACAG---GCCAGACAA---CTGTTG---TCTGGTATAGTGCAACAGCAAAAC---  
 AATTTG---CTGAGA---GCTATAGAGGCGCAACAGCATATGTTGCAACGCACGGTCTGGGGCATT  
 >FJ443982  
 TTCTATTGCAATACCACAAAACCTATTTAATAATAATGAGACAGGAAGT-----  
 -----  
 -----  
 AATTCAACCAACATCACAATTCATGTAGAATAAAACAAATTATAAACATGTGGCAGGGGGTAGGACGAGCAA  
 TGTATGCCCCCTCCCATTCAGGAAACATAACATGTAACCTCAAAT---  
 ATTACAGGACTACTATTGACACGTGATGGAGGATATGATAACAAAACC-----  
 -----

-----  
AATAACACAGAGACATTTCAGGCCTGGAGGAGGAGATATGAGGGACAATTGGAGAAGTGAATTATATAAAATATA  
AAGTGGTAGAAATCAAGCCATTG---GGAATAGCACCCACGAAGGCAAAAAGGAGAGTGGTG-----  
-----GAGAGAGAAAAAAGAGCA---GTGGGC---ATGGGAGCT-----  
---GTGATCTTTGGGTTCTTGGGAGCA---GCAGGAAGCACTATG---GGCGCAGCGTCA---  
ATAGCGCTGACGGCACAG---GCCAGACAA---CTGCTG---TCTGGTATAGTGCAACAGCAAAAC---  
AATTTG---CTGAGA---GCTATAGAGGCGCAACAGCATATGTTGCAACTCACGGTCTGGGGCATT  
>HQ595744  
TTCTATTGCAATACATCAAAACTGTTTTCTAATGATTCAATTAAT-----  
-----  
-----  
TCAGACGACAACATCACAATCCCATGCAGGATAAAAACAAATTATAAACATGTGGCAGGGGGTAGGACGAGCAA  
TGTATGCCCCCTCCCATTGAAGGAATAATAACATGTAACTCAAAT---  
ATCACAGGACTACTATTGACACGCGATGGAGGAGACTCAAATGGC-----  
-----  
-----  
ACAGAGATATTCAGACCTGCAGGAGGAAATATGAAGGACAATTGGAGAAGTGAATTATATAAAATATAAAGTGG  
TAGAAATTAAGCCATTA---GGAGTAGCACCCACTGGATCAAAAAGGAGAGTGGTG-----  
-----GAGAGAGAAAAAAGAGCA---GTGGGA---ATAGGAGCT-----  
GTTCTCCTTGGGTTCTTGGGAGCA---GCAGGAAGCACTATG---GGCGCGGCGTCA---  
ATAACGCTGACGGTACAG---GCCAGACAA---CTGTTG---TCTGGTATAGTGCAACAGCAAAAT---  
AATTTG---CTGAGA---GCAATAGAGGCGCAACAACATATGTTGCAACTCACAGTCTGGGGCATT  
>HQ595745  
TTTTATTGCAATACATCAAAGCTGTTTACCTTCAACAGTACT-----  
-----  
-----  
TCAAATGAAACCATTACAATCCCATGCAGAATAAAAACAAATTATAAACATGTGGCAGGAGGTAGGACGAGCAA  
TATATGCCCCCTCCCATTGCAGGAAACATAACATGTACATCAAAT---  
ATCACAGGACTACTATTGACACGTGATGGAGGAACTAATGGAAC-----  
-----  
-----  
AATAACACAGAGATATTCAGACCTGCAGGAGGAGATATGAGGGACAATTGGAGAAGTGAATTATATAAAATATA  
AAGTGGTAGAAGTTAAGCCATTA---GGAATAGCACCCACCATGGCAAGAAGGAGAGTGGTG-----  
-----GAGAGAGAAAAAAGAGCA---GTGGGA---ATAGGAGCT-----  
---GTGTTCTTGGGTTCTTGAGTGCA---GCAGGAAGCACTATG---GGCGCAGCATCA---  
ATAACGCTGACGGTACAG---GCCAGACAA---TTGTTG---TCTGGTATAGTGCAACAGCAAAGC---  
AATTTG---CTGAGG---GCTATAGAGGCGCAACAGCATATGTTGCAACTCACGGTCTGGGGCATT  
>HQ615959  
TTCTATTGCAATACAACAAAACCTGTTTAAAAAAGAAAATGAAACAGAGGGAAAA-----  
-----  
-----  
AATGAAACAATCATCACACTCCCATGCAAAATAAAAACAAATTATAAACATGTGGCAGGAGGTAGGACGAGCAA  
TGTATGCCCCCTCCCATTAGAGGAAACATAACATGTAACTCAAGT---  
ATCACAGGACTACTATTAAACACGTGATGGAGGTGATGGAGGAAATACAACA-----  
-----  
-----  
GATAATAACACAGAGACATTTCAGACCTGGAGGAGGAAATATGAAAGACAATTGGAGAAGTGAATTATATAAAT  
ATAAAGTGGTAGAAATTAAGCCATTG---GGAGTAGCACCCACTGAGGCAAAAAGGAGAGTGGTG-----  
-----GAGAGAGAAAAAAGAGCA---ATGGGA---ATAGGAGCT---  
-----GTACTCCTTGGGTTCTTGGGAGCA---GCAGGAAGCACTATG---GGCGCGGCGTCG---  
ATAACGCTGACGGTACAG---GCCAGACAA---TTGTTG---TCTGGTATAGTGCAACAGCAAAGC---  
AATTTG---CTGAGA---GCTATAGAGGCGCAACAGCATATGTTGCAACTCACAGTCTGGGGCATT  
>HQ595757  
TTCTATTGCAATACATCAGGCCTGTTCAATAGTACATACCATATTAATGGTACTTTAAATTCAAGTACTGCA-  
-----  
-----  
AATGATTCCCTCCATCATACTCCAGTGCAAAATAAAAACAAATTATAAACATGTGGCAGGGGGTAGGGCGAGCAA  
TGTATGCCCCCTCCCATTGAAGGAAACATAACATGTAAATCAAAT---  
ATCACAGGGCTACTATTGCTACGTGATGGAGGTACAAATGATACA-----  
-----

-----  
GGGACAACAGAGACATTTAGACCTGGAGGAGGAGATATGAGGGACAATTGGAGAAGTGAATTGTATAAATATA  
AAGTGGTAGAAATTAAGCCACTA---GGAGTAGCACCCACTAAGGCAAGAAGGAGAGTGGTG-----  
-----GAGAGAGAAAAAAGAGCA---GTGGGA---ATAGGAGCT-----  
---GTGTTCCCTTGGGTTCTTGGGAGCA---GCAGGAAGCACTATG---GGCGCAGCATCA---  
ATAACGCTGACGGTACAG---GCCAGACAA---TTGTTG---TCTGGTATAGTGCAACAGCAAAGC---  
AATTTG---CTGAGG---GCTATAGAGGCGCAACAGCATATGTTGCAACTCACGGTCTGGGGCATT  
>KC894111  
TTCTATTGCAACACATCAGAACTGTTTAATAGTCCTAATGATACAAGCAGTACAAATGCAACCAGTCCT----  
-----  
-----  
TCAAAATGCAACCATCACACTCCAATGCAAAATAAAACAAATTATAAACATGTGGCAAGGGGTAGGACGGGGCAA  
TGTACGCCCCCTCCCATTGCAGGAAAAATAACATGTAGGTCAAAC---  
ATCACAGGACTACTATTGACACGTGATGGGGGAAATAGCGAAAAAT-----  
-----  
-----  
AATACAAAGGAAACCTTCAGACCTGGAGGAGGAGATATGAGGGACAATTGGAGGAGTGAATTATATAAATACA  
AAGTAGTAGAAATTAAGCCATTA---GGAATAGCACCCACTAAGGCAAAAAGGAGAGTGGTG-----  
-----GAGAGAGAAAAAAGAGCA---GTAGGA---CTAGGAGCT-----  
---GTGCTCCTTGGGTTCTTGGGAGCA---GCCGGAAGCACTATG---GGCGCAGCATCA---  
ATAACGCTGACGGTACAG---GCCAGACAA---TTGTTG---TCTGGTATAGTGCAACAGCAAAGC---  
AATTTG---CTGAGG---GCTATAGAGGCGCAACAGCGTATGTTGCAACTCACGGTCTGGGGCATT  
>KC863324  
TTCTATTGCAATACAACAAATCTGTTTACAATTAGTAATGCAACAAAACCGGATATC-----  
-----  
-----  
ACTAATGGTTCCATCATACTCCCGTGCAGAATAAAACAAATTATAAACATGTGGCAGGGGTTAGGACGAGCAA  
TGTATGCCCCCTCCCATTGCAGGAAACATAACATGTAAATCAAAT---  
ATCACAGGACTACTATTGACACGTGATGGAGGGAATAACATAAAT-----  
-----  
-----  
AATACAGAGACATTTCAGACCTGGAGGAGGAAATATGAAGGACAATTGGAGAAGTGAATTATATAAATATAAAG  
TGGTAGAAATTAAGCCATTG---GGAGTAGCACCCACCGCATCAAAAAGGAGAATAGTG-----  
-----GAGAGAGAAAAAAGAGCA---GTGGGA---ATAGGAGCT-----  
GTGTTCCCTTGGGTTCTTGGGAGCA---GCAGGAAGCACTATG---GGCGCGGCGTCC---  
ATAACGCTGACGGTACAG---GCCAGACAA---CTGTTG---TCTGGTATAGTGCAACAGCAAAGC---  
AATTTA---CTGAGA---GCTATAGAGGCGCAACAGAATCTGTTGCAACTCACGGTTTGGGGCATT  
>KC863361  
TTCTATTGCGATACAACAAACCTGTTTAATAACAACAGTAGT-----  
-----  
-----  
GCAGACAACATCACACTCACACTCCCGTGCAGGATAAAACAAATTATAAACATGTGGCAGGGGGTAGGAAAAG  
CAATGTATGCCCCCTCCCATTGAAGGAAAAATAACATGTAACTCAAGT---  
ATCACAGGACTACTATTGATACATGATGGAGTACACAACAACACA-----  
-----  
-----  
AACAAATGACATTTCAGACCTGGAGGAGGAAATATGAAGGACAATTGGAGAAGTGAATTATATAAGTATAAAG  
TGGTAGAAATTAAGCCATTG---GGAGTAGCTCCCACTGAGGCAAAAAGGAGAGTGGTG-----  
-----GAGAGAGAAAAAAGAGCA---GTGGGA---ATAGGAGCT-----  
GTAATCCTTGGGTTCTTGGGAGCA---GCAGGAAGCACTATG---GGCGCGGCGTCA---  
ATAACGCTGACGGTACAG---GCCAGACAA---CTGTTG---TCTGGTATAGTGCAACAGCAAAGC---  
AATTTG---CTGAGA---GCTATAGAGGCACAACAACATATGTTGCAACTCACGGTCTGGGGCATT  
>KC894133  
TTCTATTGCAATACAACAAAACCTATTACAAACCAAAAC-----  
-----  
-----  
AGTACTGAGAACATTACACTCCCATGCAGAATAAAACAAATTATAAACATGTGGCAGGAGGTAGGACGGGGCAA  
TGTATGCCCCCTCCCATTGAAGGAAGCATAACATGTGACTCAAAT---  
ATCACAGGACTACTACTGACACGTGATGGAGGAGACATGAATGGCACA-----  
-----

-----  
AATGGCACAGAAACATTTCAGACCTGGAGGAGGAAATATGAAAGACAATTGGAGAAGTGAATTATATAAAATATA  
AAGTGGTAGAAATTAGGCCATTG---GGAGTAGCACCCACTAAGGCCAAAAGGAGAGTGGTG-----  
-----GAGAGAGGAAAAAGAGCA---GTGGGA---ATAGGAGCT-----  
---GTATTCCTTGGGTTCTTGGGAGCA---GCAGGAAGCACTATG---GGCGCGGCGTCA---  
ATAACGCTGACGGTACAG---GCCAGACAA---CTGTTG---TCTGGTATAGTGCAACAGCAAAGC---  
AATTTG---CTGAGA---GCTATAGAGGCGCAACAGCATATGTTGCAACTCACAGTCTGGGGCATA  
>FJ443300  
TTCTATTGTAATACATCAGAACTGTTTAATAGTACATACAATAGTACATACAATGGTACATCCAGT-----  
-----  
-----  
GAAAACAGCACACTCACACTCCCATGCAAAATAAAACAAATTATAAGAATGTGGCAGGGGGTAGGACAGGCCAA  
TGTATGCCCCCTCCCATTCGAGGAAACATAACATGTAAATCAAAT---  
ATCACAGGACTGCTATTGACATGGGATGGCGGAGATAACAAGGAAAAAT-----  
-----  
-----  
AACAATACAGAGATATTTCAGACCTGGAGGAGGAGACATGAGGGACAATTGGAGAAGTGAGTTATATAAAATACA  
AAGTGGTAGAAATTAAGCCACTA---GGAATAGCACCCACTGAGGCCAAAAGGAGAGTGGTG-----  
-----GAGAGAGAAAAAGAGCA---GCAGGA---CTAGGAGCT-----  
---GTGTTCTTGGGTTCTTGGGAGCA---GCAGGAAGCACTATG---GGCGCAGCGTCG---  
ATAACGCTGACGGTACAG---GCCAGACAA---TTATTG---TCTGGTATAGTGCAACAGCAAAGC---  
AATTTG---CTGAAG---GCTATAGAGGCGCAACAGAATATGTTGCGACTCACGGTCTGGGGCATT  
>FJ443417  
TTCTATTGCAATACATCACAACCTATTTAATAGTACATACAACAATACATATAACTCTAGTGGTATAGAA----  
-----  
-----  
AGTAGTGCAACCATCACACTTCCATGCAGAATAAAACAAATCATAAACATGTGGCAGGAGGTAGGAAGAGCAA  
TGTATGCTCCTCCCATTCGAGGAAACATAGCATGCAACTCAAAT---  
ATCACAGGACTACTATTGGTACGTGATGGAGGTAAATTAACAAT-----  
-----  
-----  
ACCGAACCAGAAATATTTCAGACCTGGAGGAGGAAATGTTAAGGACAATTGGAGAAGTGAATTATATAAAATATA  
AAGTGGTAGAAATCAAGCCATTG---GGAATAGCACCCACTGGAGCAAAAAGGAGAGTGGTG-----  
-----GAGAGAGAAAAAGAGCA---GTGGGA---ATAGGAGCT-----  
---TTGTTCTTGGGTTCTTGGGAGCA---GCAGGAAGCACTATG---GGCGCGGCGTCA---  
ATAACGCTGACGGTACAA---GCCAGACAA---TTGTTG---TCTGGTATAGTGCAACAGCAAAT---  
AATTTG---CTGAGG---GCTATAGAGGCGCAACAACATATGTTGCAACTCACAGTCTGGGGCATT  
>FJ443426  
TTCTATTGCAATACAACAAAACCTGTTTAGTAGTGATTCAAAC-----  
-----  
-----  
AATGGCACAATTACACTCCCATGCAGAATAAAACAAATTATAAACATGTGGCAGGGGGTAGGACGAGCAATGT  
ATGCCCCCTCCCATTCGAAGGAAGCATAACATGTAACTCAAAT---  
ATCACAGGACTACTATTGACACGGGATGGAGGTATGAACAACACA-----  
-----  
-----  
GAAAAGAGATATTTCAGGCCTGGAGGAGGAAATATGAAGGACAATTGGAGAAGTGAGTTATATAAAATATAAAG  
TGGTAGAAATTAACCATTG---GGAATAGCACCCACAGAGGCCAAAGAGGAGAGTGGTG-----  
-----GAGAGAGAAAAAGAGCA---GTGGGA---ATAGGAGCT-----  
GTGCTCCTTGGGTTCTTGGGAGCA---GCAGGAAGCACTATG---GGCGCAGCGTCA---  
ATAACGCTGACGGTACAG---GCCAGGCAA---TTGCTG---TCTGGTATAGTGCAACAGCAAAC---  
AATTTG---CTGAGA---GCTATAGAGGCGCAACAGCATATGTTGCAACTCACGGTCTGGGGCATT  
>FJ443473  
TTCTATTGCAATACATCAGGCCTGTTTAAAAACAACCTTACTGCTAGTAATACAGAA-----  
-----  
-----  
AGTAACCAGACCATCACACTCCCATGCAGAATAAAACAAATTGTAAACATGTGGCAGGAGGTAGGAAGAGCAA  
TGTATGCCCCCTCCCATTCGAGGAAACATAACATGTACATCAAAT---  
ATCACGGGACTATTATTATTACGTGATGGTGGTAACCTAAATAACTCAAGTAGC-----TCA-----  
-----

-

AATAGCACAAATATCACAGAGATATTTAGGCCTGGAGGAGGAGACATGAGGGACAATTGGAGAAGTGAATTAT  
ATAAGTACAAAGTGGTAGAAATCAAGCCATTG---GGAATAGCACCCACTGAGGCAAAAAGGAGAGTGGTG--  
-----GAGAGAGAA---AAAAGA---GGA-----  
ATAGGAGCT-----TTGCTCGTTGGATTCTTGGGAGCA---GCAGGAAGCACTATG---  
GGCGCGGCGTCA---ATAACGCTGACGGTACAG---GCCAGACAA---TTGTTG---  
TCTGGTATAGTGCAACAGCAAAGC---AATTTG---CTGAGA---  
GCTATAGAGGCGCAACAGCATCTGTTGCAACTCACGGTCTGGGGCATT  
>FJ443488  
TTCTATTGCAATACAACACCACTGTTTAATACAACACTGTTTAATACAACACATCCA-----  
-----  
-----  
CATAATGATACCATCACACTCCAATGTAGGATAAAAACAGATTATAAACATGTGGCAAGGGGTAGGACGAGCAA  
TGTATGCCCCCTCCAATTGCAGGAAACATAACATGTAACCTCAAGT---  
ATCACAGGAATACTATTGACACGTGATGGAGGCCAAACAAATGGCACA-----  
-----  
-----  
AATGGCACAGAGACATTGAGACCTGGAGGAGGAAATATGAAGGACAATTGGAGAAGTGAATTATACAAATATA  
AAGTAGTAGAAATTAAGCCATTG---GGTTTAGCACCCACTGGAGCAAAAAGGAGAGTGGTG-----  
-----GAGAGAGAAAAAAGAGCA---GTGGGA---ATAGGAGCT-----  
---GTACTCCTTGGGTTCTTGGGAGCA---GCAGGAAGCACTATG---GGCGCGGCGTCA---  
ATAACGCTGACGGCACAG---GCCAGACAA---CTGTTG---TCTGGTATAGTGCAACAGCAAAGC---  
AATTTG---CTGAGA---GCTATAGAGGCGCAACAGCATATGTTGCAACTCACAGTCTGGGGCATT  
>FJ443498  
TTCTATTGCGATACATCAGAACTATTTAATAAAACATTTGGTAATCTAACAGAAAAGC-----  
-----  
-----  
AATTCACCAAACATCACACTTCCATGCAGAATAAAACAAATTATAAACATGTGGCAGGGGGTAGGACGAGCAA  
TGTATGCCCCCTCCCATTGCAGGAAACATAACATGTAACCTCAAAT---  
ATCACAGGGCTACTATTAAACACGTGATGGAGGCACCAACCAAACA-----  
-----  
-----  
GGAGAAAAAGAAATATTGAGACCTGGAGGAGGAGATATGAAGGACAATTGGAGAAGTGAATTATATAAATATA  
AAGTGGTAGAAATTAAGCCATTG---GGAATAGCACCCACTGAAGCAAAAAGGAGAGCGGTG-----  
-----GAGAGAGAAAAAAGAGCA---GTGGGA---ATAGGAGCT-----  
---TTGTTCTTGGGTTCTTGGGAGCA---GCAGGAAGCACTATG---GGCGCAGCGTCA---  
ATAACGCTGACGGTACAG---ACCAGACAA---CTGTTG---TCTGGTATAGTGCAACAGCAAAGC---  
AATTTG---CTGAGG---GCTATAGAGGCGCAGCAGCATATGTTGCAACTCACAGTCTGGGGCATT  
>FJ443515  
TTCTATTGTAATACATCAAACTGTTTAATAGTAATAGTAGTGAACCTATTTAATAGTAGT-----  
-----  
-----  
GAAACAGAAAACATCACACTTCCATGCAAAATAAAACAAATTATAAACATGTGGCAGGGGGTAGGACGAGCAA  
TGTACGCCCCCTCCCATTGAAGGAAACATAACATGTAGCTCAAAT---  
ATCACAGGATTGCTATTGACACGTGATGGAGAAAAAAATAGAACA-----  
-----  
-----  
AAAGAGACATTTAGGCCTGGAGGAGGAAATATGAAAGACAATTGGAGAAGTGAATTATATAAATATAAAGTGG  
TAGAAATTAAGCCATTG---GGAATAGCACCAACTGGGGCAAAAAGGAGAGTGGTG-----  
-----GAGAAAGAAAAAAGAGCA---GTGGGA---ATAGGAGCT-----  
GTGATCCTTGGGTTCTTGGGAGCA---GCAGGAAGCACTATG---GGCGCGGCGTCA---  
ATAACGCTGACGGTACAG---GCCAGACAA---CTGTTG---TCTGGTATAGTGCAACAGCAAAT---  
AATTTG---CTGAGG---GCTATAGAGGCGCAACAACATATGTTGCAACTCACAGTCTGGGGCATT  
>HQ615950  
TTCTATTGCAATACATCACAACCTGTTTAATGGGACATACTCTAATAGTACATACTCTAATAGTACA-----  
-----  
-----  
GGAAATGAAACCATCACAATTCATGTAGAATAAAACAAATTATAAACATGTGGCAGGAGGTAGGACGAGCAA  
TGTATGCCCCCTCCCATTGCAGGAAACATAACATGTAGATCAAGT---  
ATCACAGGACTACTATTGACATGGGATGGTAATGGTGATGATGGGAAT-----

-----  
-----  
GATACTGAAACTGAAACATTCAGACCTGGAGGAGGAGATATGAGGGACAATTGGAGAAGTGAATTATATAAGT  
ATAAGGTAGTAGAAATTAAGCCATTA---GGAATAGCACCAACCCAGGCAAAAAGGATAGTGGTG-----  
-----GAGAGAGAAAAAAGAGCA---GTA-----ATAGGAGCT---  
-----GTGCTCCTTGGGTTCTTGGGAGCA---GCAGGAAGCACTATG---GGCGCGGCGTCA---  
ATAACGCTGACGGTACAG---GCCAGACAA---CTGTTG---TCTGGTATAGTGCAACAGCAAAGC---  
AATTTG---CTGAGA---GCTATAGAGGCGCAACAGCATATGTTGCAACTCACAGTCTGGGGCATT  
>HQ615944  
TTCTATTGCAATACATCAAACCTTGTTTAATGGTACGTTTAATGGTACATACACTAATAGTACAGGCATGCCT-  
-----  
-----  
GAAAAATGTTAGCATCACACTCCAATGCAGAATAAAGCAAATTATAAATATGTGGCAGGGGGTAGGACGAGCAA  
TATATGCCCCCTCCCATTGCAGGAAACATAACATGTAACCTCAAGT---  
ATCACAGGACTACTATTGACACGTGATGGAGGAATCACTAATGAG-----  
-----  
-----  
ACTATAGAGAGATTGAGACCTGGAGGAGGAAATATGAGGGACAATTGGAGAAGTGAATTATATAAATATAAAG  
TGGTAGAAATTAAGCCCTTA---GGGGTAGCACCAACTGATGCAAGGAGGAGAGTGGTG-----  
-----CAGAAAGAGAAAAAGAACAA---GTA-----ATAGGAGCC-----  
ATGATCCTTGGGTTCTTGGGAGCA---GCAGGAAGCACTATG---GGCGCGGCATCA---  
GTGGTGCTGACGGTACAG---GCCAGACAG---TTATTG---TCTGGTATAGTGCAACAGCAAAAC---  
AATTTG---CTAAGG---GCTATAGAGGCGCAACAGCATATGTTGCAACTCACGGTCTGGGGCATT  
>HQ595746  
TTCTATTGCAATACATCAAAGCTGTTTAATAGTACAGAAAGTTTTAATATTACAGAA-----  
-----  
-----  
AGTAACTCAACCATCACACTGCCATGCAGGATAAAACAAATTATAAACATGTGGCAGGAGGTAGGACGAGCAA  
TGTATGCCCCCTCCCATTGCAGGAAACATAACATGTAACCTCAAAT---  
ATCACAGGATTACTATTGGTACGGGATGGAGCACATAATGAAACA-----  
-----  
-----  
GAGACATTTAGACCTGAAGGAGGAGATATGAGGAACAATTGGAGAAGTGAATTATATAAATATAAAGTGGTAG  
AAATTAAGCCATTA---GGAGTAGCACCCACTGAGGCAAAAAGGAGAGTGGTG-----  
-----GAGAGAGAAAAAAGAGCA---GTGGGA---ATAGGAGCT-----  
GTGTTCCCTTGGGTTCTTGGGAGCA---GCAGGAAGCACTATG---GGCGCGGCGTCA---  
GTAACGCTGACGGTACAA---GCCAGACTT---CTACTG---TCTGGTATAGTGCAACAGCAAAAC---  
AATTTG---CTGAGG---GCTATAGAGGCGCAACAGCATCTGTTGCAACTCACGGTCTGGGGCATT  
>HQ615955  
TTCTATTGCAATACATCAGGACTGTTTAATGGTACATACAATGAGACATCAGAA-----  
-----  
-----  
ACTAATGCAACCATCACACTTCCATGCAGACTAAAAACAAATTATAAACATGTGGCAGGAGGTAGGACGAGCAA  
TGTATGCTCCTCCCATTGAAGGCAACATAACATGTAAATCAAAT---  
ATCACAGGACTAATATTAGAACGTGATGGAGGCAACACAGATAACACA-----  
-----  
-----  
ACAAGGACAGAGACATTGAGACCTGCAGGAGGAAATATGAAGGACAATTGGAGAAGTGAATTATATAAATATA  
AAGTGGTAGAAATTAAGCCATTG---GGAATAGCACCCACTAGAGCAAAAAGGAGAGTGGTG-----  
-----GAGAGACAAAAAAGAGCA---GTGGGA---ATAGGAGCT-----  
---GTATTCCTTGGGTTCTTGGGAGCA---GCAGGAAGCACTATG---GGCGCGGCGTCA---  
ATAACGCTGACGGTACAG---GCCAGACAA---CTGTTG---TCTGGTATAGTGCAACAGCAAAAT---  
AATTTG---CTGAGG---GCTATAGAGGCGCAACAGTATATGTTGCAACTCACGGTCTGGGGCATT  
>HQ595766  
TTCTACTGCAATACCACACATCTGTTTTCAAATGTAACACAACCTCAATGATGGTATG-----  
-----  
-----  
GCTAATGAGACCATCACACTCCCATGCAAAATAAAACAAATTATAAACATGTGGCAAGAGGTAGGACGAGCAA  
TGTATGCCCCCTCCCATTGCAGGAAACATAACATGTAACCTCAAAT---  
ATCACAGGAATACTATTGACACGTGATGGAGGAATAGTAAACAACAGC-----

-----  
-----  
ACAGACACAGAGACATTTCAGACCTGCAGGAGGAAATATGAAAGACAATTGGAGAAGTGAATTATATAAAATATA  
AAGTGGTAGAGATTAAACCATTG---GGAATAGCACCCACTGGATCAAAAAGGAGAGTGGTG-----  
-----GAGAGAGAGAAAAGAGCA--GTAGGA--ATAGGAGCT-----  
---GTGTTCCCTTGGGTTCTTGGGAGCA--GCAGGAAGCACTATG--GGCGCGGCGTCA---  
ATAACGCTGACGGTACAG---GCCAGACAA---CTGTTG---TCTGGTATAGTGCAACAGCAAAGC---  
AATTTG---CTGAGA---GCTATAGAGGCGCAACAACACATGTTGCAACTCACAGTCTGGGGCATT  
>KC894386

TTCTATTGCAATACAACAGAACTGTTTAATAGTACATACAATAGTACATACATGTCTAATAGTACAGGAAATA  
AT-----  
-----

TCAAGCTCAAATATCACACTCCCATGCAGAATAAAACAATTTGTAAACATGTGGCAGAAGGTAGGACGAGCAA  
TATATGCTCCTCCCATTGCAGGAAACATAACATGTACATCAAAC---  
ATCACAGGATTAATATTGGTGCGTGATGGAGGAACAAATAATGACACA-----  
-----  
-----

AATGACACAGAGATCTTCAGACCTGGAGGAGGAGATATGAGGGACAATTGGAGAAGTGAATTATACAAATATA  
AAGTGGTAGAAATTAAGCCATTA---GGAATAGCACCCACTGGAGCAAAAAGGAGAGTGGTG-----  
-----GAGAGAGAAAAAGAGCA--GTAGGA--ATAGGAGCT-----  
---GTGTTCCCTTGGGTTCTTGGGAGCA--GCAGGAAGCACTATG--GGCGCGGCGTCA---  
ATAACGCTGACGGTACAG---GCCAGACAA---TTGTTG---TCTGGTATAGTGCAACAGCAAAGC---  
AATTTG---CTGAGG---GCCATAGAGGCGCAGCAGCATATGTTGCAACTCACTGTCTGGGGCATT  
>HQ595759

TTCTATTGCAATACATCAAACTGTTTAATAGCACAGAAAATAAT-----  
-----  
-----

GCAAGTGAAATCATCACACTCAGATGTAGAATAAAACAATTTATAAATATGTGGCAGGAGGTAGGACGAGCAA  
TGTATGCTCCTCCCATTGAAGGAAACATAACATGTAAATCAAAT---  
ATCACAGGGCTACTATTGACACGTGATGGAGGCAATGGCACTGGG-----  
-----  
-----

AACAGCACAGAGACATTTCAGGCCTGGAGGAGGAGATATGAGGGACAATTGGAGAAATGAATTATATAAAATATA  
AAGTAGTAGAAATCAAGCCATTG---GGAATAGCACCCACTGAGGCAAAAAGGAGAGTGGTGGAG-----  
-----AGGAGAGAAAAAGAGCA--GTGGGA--ATAGGAGCT-----  
---GTGTTCCCTTGGGTTTTTGGGAGCA--GCAGGAAGCACTATG--GGCGCGGCGTCA---  
ATAGCGCTGACGGTACAG---GCCAGACAA---CTGTTG---TCTGGTATAGTGCAACAGCAAAGC---  
AATTTG---CTGAGA---GCTATAGAGGCGCAACAGCATATGTTGCAACTCACGGTCTGGGGCATT  
>HQ615942

TTCTATTGCAATACAACAAACCTGTTTCCTAGCAATACAACAAACCTAAATGTTACC-----  
-----  
-----

CTAAATGATACCATCACACTCCCATGCAGGATAAAACAATTTGTAAACATGTGGCAGGGGGTAGGACGAGCAA  
TGTATGCCCCCTCCCATTGAAGGAAGCATAACATGTAATTCAAGT---  
ATCACAGGACTACTATTGACACGGGATGGAGGACACACGAATGACACGAAT-----  
-----  
-----

AACACAGAACCAGAGACATTTCAGACCTGGAGGAGGAAATATGAAGGACAATTGGAGAAGTGAATTATACAAAT  
ATAAAGTGGTAGAAATTAAGCCATTG---GGAGTAGCACCCACTGCATCAAAAAGGAGAGTGGTG-----  
-----GAGAGAGAAAAAGAGCA--GTGGGA--ATAGGAGCT---  
-----GTACTCCTTGGGTTCTTGGGAGCA--GCAGGAAGCACTATG--GGCGCAGCGTCA---  
ATAACGCTGACGGTACAG---GCCAGACAA---CTGTTG---TCTGGTATAGTGCAACAGCAAAGC---  
AATTTG---CTGAGA---GCTATAGAGGCGCAACAGCATATGTTGCAACTCACAGTCTGGGGCATT  
>KT183087

TTCTATTGCAACACATCAGGCCTGTTTAATGGAACATACAACAATGGAACATACAATGATGGAACAGACAAT-  
-----  
-----

TCCAATGACACCATTACACTCTTATGCAGAATAAAACAATTTATAAATATGTGGCAGGGGGTAGGAAAAGCAA  
TATATGCCCCCTCCTATTAAAGGAAACATAACATGCAACTCAAGT---  
ATCACAGGACTACTATTGACACGAGATGGAGGAAAAGGAGATAATAAC-----  
-----

-----  
 -----  
 ACTAATAACACAGAGACATTTAGACCTGGAGGAGGAGATATGAGGGACAATTGGAGAAATGAATTATATAAAT  
 ATAAAGTGGTAGAAATCAAGCCATTA---GGAGTAGCACCCACTACTGCAAAAAGGAGAGTGGTG-----  
 -----GAGAGAGAAAAAAGAGCA---GTAGGA---ATAGGAGCT---  
 -----GTGTTTCCTTGGGTTCTTGGGAGCA---GCAGGAAGCACTATG---GGCGCGGCGTCA---  
 ATAACGCTGACGGTACAG---GCCAGACAA---CTGTTG---TCTGGTATAGTGCAACAGCAAAGC---  
 AATTTG---CTGAGG---GCTATAGAGGCGCAACAGCACATGTTGCAACTCACGGTCTGGGGCATT  
 >KT183090  
 TTCTATTGCGATACAACAAATCTGTTTAATAGGACATATCCTAATGGTACAGAGGGTAATTCAACCCAGAAT-  
 -----  
 -----  
 AGTTCAAGCTCAATCACCCCTCCCATGCAGAATAAGACAGATTATAAACATGTGGCAGGGGGTAGGACGAGCAA  
 TGTATGCCCCCTCCCATTGCAGGAAACATAACATGTAAATCAAAT---  
 ATCACAGGACTGCTATTGACACGTGATGGTGGAAAAAATGCCACC-----  
 -----  
 -----  
 AATGAAACATTCAGACCTGGAGGAGGAGATATGAGGGACAATTGGAGAAGTGAAGTATATAAATATAAAGTGG  
 TAGAAATTAACCATTG---GGAGTAGCACCCACTGAGGCAAAAAGAAGAGTGGTG-----  
 -----GAGAGAGAGAAAAAGAGCA---GTGGGA---ATAGGAGCT-----  
 GTGTTTCCTTGGGTTCTTGGGAGCA---GCAGGAAGCACTATG---GGCGCAGCATCA---  
 ATAACGCTGACGGTACAG---GCCAGACAA---CTATTG---TCTGGTATAGTGCAACAGCAAAGC---  
 AATTTG---CTAAGG---GCTATAGAGGCGCAACAGCATATGTTGCAACTCACGGTCTGGGGCATT  
 >KT183211  
 TTCTATTGCAATACAACAATTCTGTTCAATAAAAGTAGTTGGGACAACACAACCAATGAAAACAACACA----  
 -----  
 -----  
 ACCAGTGGAACCTTCACACTCCCATGCAGGATAAAACAAATTGTAAACATGTGGCAGGGGGTAGGACGAGCAA  
 TGTATGCCCCCTCCCATTGCAGGAAATATAAACTGTAGCTCAAAT---  
 ATCACAGGACTATTATTGACAAGGGACGGAGGAATAAAAAACGAAACA-----  
 -----  
 -----  
 AATGACACAGAAATATTTCAGACCTGGAGGGGGAAATATGAAGGACAATTGGAGAAGTGAATTATATAAATATA  
 AAGTGGTAGAAATTAACCATTG---GGAATAGCACCTACTGCTGCAAAAAGGAGAGTGGTG-----  
 -----GAGAGAGAGAAAAAGAGCA---GTGGGA---CTAGGAGCT-----  
 ---TTACTCCTTGGGTTCTTGGGAGCA---GCAGGAAGCACTATG---GGCGCGGCGTCA---  
 ATAACGCTGACGGTACAT---GCCAGACAA---CTGTTG---TCTGGTATAGTGCAACAGCAAAGC---  
 AATTTG---CTGAGA---GCTATTGAGGCGCAACAGCATATGTTGCAACTCACGGTCTGGGGCATT  
 >KT183216  
 TTCTATTGCAACACATCAAGACTGTTTAATGGTACATATGATAGTACATATAATAATACAGGA-----  
 -----  
 -----  
 AATAATACCATACTCACAATCCCATGTAGAATAAAACAAATTATAAACATGTGGCAAAAGGTAGGACGAGCAA  
 TGTATGCTCCTCCCATTGCAGGAAACATAACTTGTAACCTCAAGT---  
 ATCACAGGACTACTACTAACACGTGATGGAGGAACAGGAACAAAT-----  
 -----  
 -----  
 GGAAGTGAATATTCAGACCTGGAGGAGGAGATATGAGAGACAATTGGAGAAGTGAATTATATAAATATAAAG  
 TGGTAGAAATTAAGCCATTA---GGAATAGCACCCACTGCCGCAAGAAGAAGAGTGGTG-----  
 -----GAGAGAGAGAAAAAGAGCA---GTAACA---CTAGGAGCT-----  
 ATGTTTCCTTGGGTTCTTGGGAGCA---GCAGGAAGCACTATG---GGCGCGGCGTCA---  
 ATAACGCTGACGGCACAA---GCCAGACAA---TTGTTG---TCTGGTATAGTGCAACAGCAAAGC---  
 AATTTG---CTGAGG---GCTATAGAGGCGCAACAGCATATGTTGCAACTCACGGTCTGGGGCATT  
 >KT183229  
 TTCTATTGCAATACAACAAATCTGTTTAATGAAACAATAACTAATGGAAGTGATTCA-----  
 -----  
 -----  
 GACAACACAAACATCACACTCAAATGCAGAATAAAACAAATTATAAACATGTGGCAGAAGGTAGGACAAGCAA  
 TATATGCCCCCTCCCATTAGAGGAAACATAACATGTAACTCAAAC---  
 ATCACGGGGCTACTATTGACACGTGATGGAGGAAGAGAAAAAGAAAT-----

-----  
-----  
GAGACAGAGACATTTCAGACCTGGAGGAGGAGATATGAGGGACAATTGGAGAAGTGAATTATATAAATATAAGG  
TGATAGAAATTAACCATTA---GGAATAGCACCCACTGGAGCAAAAAGGAGAGTGGTG-----  
-----GAGAGAGAAAAAAGAGCA--ATAGGAGGAATGGGAGCT-----  
TTGTTTCCTTGGGTTCTTGGGGGCA--GCAGGAAGCACTATG--GGCGCAGCATCA---  
ATAACGCTGACGGTACAG---GCCAGACAA--TTATTG---TCTGGTATAGTGCAACAGCAAAGC---  
AATTTG---CTGAGG---GCTATAGAGGCGCAACAGCATATGTTGCAACTCACAGTCTGGGGCATT  
>KT183253  
TTTTATTGCAATACATCAGGTCTGTTTAATAGAACATACTCTCGTAATAATGATACAAATAGTGCAGACAGTA  
CT-----  
-----  
TCAAAATTCAACCATTACAATCCCATGCAAAATAAAACAAATTGTAAACATGTGGCAGGAGGTAGGACGGGCGA  
TGTATGCTCCTCCCATTAAGGAAGTATCACATGTAATTCAACT---  
ATCACAGGACTACTATTGACAAGGGATGGTGGTAATACAACAGGTAAT-----  
-----  
-----  
ACAACAGAGACAGAGACATTTCAGGCCTGGAGGAGGAAATATGAGGGACAATTGGAGAAGTGAATTATACAAAT  
ATAAAGTGGTAGAAATTAAGCCATTG---GGAATAGCACCCACCGAGGCAAAAAGGAGAGTGGTG-----  
-----GAGAGAGAAAAAAGAGCA--GTGGGG---CTAGGAGCT---  
-----GTGTTTCCTTGGGTTCTTGGGAGCA--GCAGGAAGCACTATG--GGCGCAGCATCA---  
ATAACGCTGACGGTACAA---GCCAGACAA--TTGTTG---TCTGGTATAGTGCAACAGCAAAGC---  
AATTTG---CTGAGG---GCTATAGAGGCGCAACAGCATATGTTGCAACTCACAGTCTGGGGCATT  
>KT183271  
TTCTATTGCAATACATCAGGCCTGTTTAATAGAGACATATCTAATAGCACAGGAAGTAAT-----  
-----  
-----  
TCAAGTGCACCCATCATACTCCCATGCAGAATAAAACAAATTATAAACATGTGGCAGGAAGTGGGAAGAGCAA  
TGTATGCCCCCTCCCATTCAGGGAACATAACATGTAAATCAAAT---  
ATCACAGGACTACTACTAACACGTGATGGAGGAAGTGGAGCAGTG-----  
-----  
-----  
AACGAGACATTTCAGACCTGGAGGAGGAAATATGAAGGACAATTGGAGAAGTGAATTATATAAATATAAAGTGG  
TAGAAATTAAGCCATTA---GGAGTAGCACCCACTGAGGCAAAAAGGAGAGTGGTG-----  
-----GAGAGAGAAAAAAGAGCA--GTAGGA--ATAGGAGCT-----  
GTGCTCCTTGGGTTCTTGGGAGCA--GCAGGAAGCACTATG--GGCGCAGCGTCA---  
ATAACGCTGACGGTACAG---GCCAGACAA--CTGTTG---TCTGGTATAGTGCAACAGCAAAGC---  
AATTTG---CTGAGA--GCCATAGAGGCGCAACAGCATATGTTGCAACTCACGGTCTGGGGCATT  
>KT183279  
TTCTATTGCAATACAACACTACTGTTTGATAGTACACAAGGGGATAAT-----  
-----  
-----  
AGTACAACAATCACCCCTTCCCTGTAAAATAAAACAAATTATAAACATGTGGCAGAAGGTAGGAAAAGCAATGT  
ATGCCCCCTCCCATTCAGGGAATATAACATGTGAATCAAAC---  
ATCACAGGACTACTATTGACACGTGATGGAGGAACAAATAATGAAACAAATGTC-----  
-----  
-----  
ACAGAAGAGATATTTCAGGCCTGGAGGAGGAAATATGAAGGACAATTGGAGAAGTGAATTATATAAATATAAAG  
TCGTAGAAATTAAGCCACTG---GGAGTAGCACCCACTAAATCAAAAAGGAGAGTGGTG-----  
-----GAGAGAGAAAAAAGAGCA--GTGGGA--ATAGGAGCT-----  
GTA CTCTTGGGTTCTTGGGAGCA--GCAGGAAGCACTATG--GGCGCGGCGTCA---  
ATAACGCTGACGGTACAG---GCCAGACAA--GTGTTG---TCTGGTATAGTGCAACAGCAAAGC---  
AATTTG---CTGAGA---GCTATAGAGGCGCAACAGCATCTGTTGCAACTCACAGTCTGGGGCATT  
>HQ595761  
TTCTATTGCAATACAAATATCCTGTTTAATGAAAGTACTTCAGAC-----  
-----  
-----  
ACAAACATCACAATCACAATCCCATGCAAAATAAAACAGATTATAAACATGTGGCAAGAGGTAGGAAGAGCAA  
TGTATGCCCCCTCCCATTCAGGAAACATAACATGTAGCTCAAAC---  
ATCACAGGTCTACTATTGACACGTGATGGAGGAATAAGAAATAAT-----

-----  
-----  
ACAGAAGAAATATTCAGACCTGGAGGAGGAGATATGAGAGACAATTGGAGAAGTGAATTATATAAATATAAAG  
TGGTAGAAGTGAAGCCATTA---GGAGTAGCTCCCCTGAGGCAAAAAGAAGAGTGGTG-----  
-----GAGAGAGAAAAAAGAGCA--GTAGGA--GTAGGAGCT-----  
ATGTTTCCTTGGGTTCTTGGCAGCA--GCAGGAAGCACTATG--GGCGCAGCGTCA---  
ATAACGCTGACGGTACAG---GCCAGACAA--CTGTTG---TCTGGTATAGTGCAACAGCAAAGC---  
AATTTG---CTGAGA---GCTATAGAGGCGCAACAGCATATGTTGCAACTCACAGTCTGGGGCATT  
>KC894116  
TTCTATTGTAATACAACAGAACTGTTTAATCCTAATGTAGCAAAATGGAATGGAAGTAGT-----  
-----  
-----  
CCAAATGAAACCATCACCATCCTATGCAGAATAAAACAAATTATAAACATGTGGCAGGGAGTAGGACAAGCGA  
TGTATGCCCCCTCCCATTGCAGGCAACATAACATGTGTCTCAAAT---  
ATCACAGGATTACTATTGACACGTGATGGAGGAAACATCAATAATACT-----  
-----  
-----  
AATGGTACTGAGACATTCAGACCTGGAGGAGGAAATATGAAGGACAATTGGAGAAGTGAATTATATAAATATA  
AAGTGGTAGAAATTAAGCCATTG---GGAATAGCCCCCTAAGGCAAAAAGGAGAGTGGTG-----  
-----GAGAGAGAAAAAAGAGCA--GTGGGA--ATAGGAGCT-----  
---GTGTTCCCTTGGGTTCTTGGGAGCA--GCAGGAAGCACTATG--GGCGCGGCGTCA---  
CTGACGCTGACGGTACAG---GCCAGACAA--CTGTTG---TCTGGTATAGTGCAACAGCAAAGC---  
AATTTG---CTGAGA---GCTATAGAGGCGCAACAGCACATGTTGCAACTCACGGTCTGGGGCATT  
>KC894119  
TTCTATTGCAACACATCACAATTGTTTAATAGTACATACAATGGTACACACCATGGAACCATC-----  
-----  
-----  
AAAAATGGAACCATCACACTTCCATGCAGAATAAAACAAATCATAAACATGTGGCAGGAGGTAGGACGAGCAA  
TGTATGCCCCCTCCCGTTGCAGGAGCCATAACATGTAACCTCAACT---  
ATCACAGGACTACTATTAAACACGTGATGGAGACAATGAGACTAAG-----  
-----  
-----  
GAGACATTCAGACCTGGAGGAGGAAATATGAAGGACAATTGGAGAAGTGAATTGTATAAATATAAAGTGGTAG  
AAGTTAAGCCATTG--GGATTAGCACCCCTAGAGCAAAAAGGAGAGTGGTG-----  
-----GAAAGAGAAAAAAGAGCA--GTGGGA--ATAGGAGCC-----  
GTGTTCCCTTGGGTTCTTGGGAGCA--GCAGGAAGCACTATG--GGCGCAGCGTCA---  
ATAACGCTGACGGTACAG---GCCAGACAA--CTGTTG---TCTGGTATAGTGCAACAGCAAGGC---  
AACTTG---CTAAGA--GCTATAGAGGCGCAACAGCATATGTTGCAACTCACAGTCTGGGGCATT  
>KC156130  
TTCTATTGTAATACATCAAACTGTTTAATGGGAATGATAAT-----  
-----  
-----  
TCAAGCGAAGTAATCACACTCCCATGTAGAATAAAACAGATTATAAACATGTGGCAGAAGGTAGGACGAGCAA  
TGTATGCCCCCTCCCATTGAAGGAAACATAACATGTAGGTCAAAT---  
ATCACAGGACTACTATTGACACGTGATGGAGGGACAGGGAATGAC-----  
-----  
-----  
ACAGAGATATTCAGACCTGGAGGAGGAAATATGAAGGACAACCTGGAGAAGTGAAGTATATAAATATAAAGTGG  
TAGAAGTTAAGCCATTA---GGAATAGCACCCCTGGAGCAAAAAGGAGAGTGGTG-----  
-----GAGAGAGAAAAAAGAGCA--GTGGGA--CTAGGAGCT-----  
GTGTTCCCTTGGGTTCTTAGGAGCA--GCAGGAAGCACTATG--GGCGCGGCGTCA---  
ATAACGCTGACGGTACAG---GCCAGACAA--CTGTTG---TCTGGTATAGTGACAGCAGCAAAGC---  
AATTTG---CTGAGA---GCTATAGAAGCGCAACAGCATATGTTGCAACTCACAGTCTGGGGCATT  
>KC894115  
TTCTATTGTGATACAGCTAAGCTATTTAATAAAAGTGAGTCA-----  
-----  
-----  
AACGAAACCATCACACTCACACTCCCATGCAGGATAAAACAAATTATAAATATGTGGCAGGGGGTAGGACGAG  
CAATGTATGCCCCCTCCCATTGAAGGAAACATAACATGTAACCTCAAGT---  
ATTACAGGACTAATATTAACACGTGATGGAGGACCAGATAACCAA-----

-----  
-----  
ACAGAGACATTTCAGACCTGGAGGAGGAGATATGAAGGACAATTGGAGAAGTGAATTATATAAAATATAAGGTGG  
TAGAAATTAAACCATTG---GGAATAGCACCCACTGGGGCAAAAAGGAGAGTGTTG-----  
-----GAGAGAGAAAAAAGAGCA---GCG-----ATAGGAGCT-----  
GTGTTCTTGGGTTCTTGGGAGCA---GCAGGAAGCACTATG---GGCGCGGCGTCA---  
ATAACGCTGACGGTACAG---GCCAGACAA---CTGTTG---TCTGGTATAGTGCAACAGCAAAGC---  
AATTTG---CTGAGA---GCTATAGAGGCGCAACAGCATATGTTGCAACTCACGGTCTGGGGCATT  
>JN687704  
TTCTATTGCAATACAACAAACCTGTTTAATAGTACATACAATCCTAATGGTACAAGGGATGGC-----  
-----  
-----  
TCAGACTCAATCATCACACTCCCATGCAGAATAAAACAAATTATAAATATGTGGCAGGGGGTAGGACGAGCAA  
TGTATGCCCCCTCCCATTCAGGAATCATAACATGTAGATCAAAT---  
ATCACAGGACTACTATTGACACGTGATGGAGGAAGCGATGAGGGA-----  
-----  
-----  
AACAGTACAGAGATATTTCAGACCTGGAGGAGGAGAGATGAGGGACAATTGGAGAAATGAATTATATAAAATATA  
AAGTGGTAGAAATTAAGCCATTA---GGAGTAGCACCCACTGAGGCAAAAAGAAGAGTGTTG-----  
-----GAGAGAGAAAAAAGAGCA---GTGGGG---ATAGGAGCT-----  
---GTGTTCTCGGGTTCTTGGGAGCA---GCAGGAAGCACTATG---GGCGCAGCGTCA---  
ATGACGCTGACGGTACAG---GCCAGACAA---CTGTTG---TCTGGTATAGTGCAACAGCAAAGC---  
AATTTG---CTGAAG---GCTATAGAGGCGCAACAACATATGTTGCAACTCACGGTTTGGGGCATT  
>JN687706  
TTCTATTGCAATACATCAAAATTGTTTAATAGTACACACAGTCCTAATGGTAATGGTAATGATACAGAAAGTG  
AT-----  
-----  
ACAAACTCAACAATAATCACACTTCCATGCAGAATAAAACAAATTATAAATATGTGGCAGGGGGTGGGACGAG  
CAATGTATGCCCCCTCCCATTCAGGAAACATAACATGCAAAATCAAAT---  
ATCACAGGACTACTATTGACACGTGATGGAGGAACAAGTGAAGAAACA-----  
-----  
-----  
AACGGGACAGAGATATTTCAGACCTGGAGGAGGAAATATGAGGGACAATTGGAGAAGTGAATTATATAAAATATA  
AAGTGGTAGAAATTAAGCCATTA---GGAATAGCACCCACTGAGGCAAAAAGGAGAGTGTTG-----  
-----GAGAGAGAGAAAAAGAGCA---GTGGGA---ATAGGAGCT-----  
---GTGTTCTTGGGTTCTTGGGAGCA---GCAGGAAGCACTATG---GGCGCAGCATCA---  
ATAACGCTGACGGTACAG---GCCAGACAA---TTGTTG---TCTGGTATAGTGCAACAGCAAAGC---  
AATTTG---CTGAGG---GCTATAGAGGCGCAACAACATATGTTGCAACTCACGGTCTGGGGCATT  
>JN687718  
TTCTATTGCAATACATCAAGCCTGTTTAATGGTACATACAATAATGGTACATACAATAACAACAGGA-----  
-----  
-----  
ACAAACGAAACCATCACACTCCCATGCAGAATAAAACAAATTATAAACATGTGGCAGAGTGTAGGACGGGCTA  
TATATGCCTCGCCCGTTGCAGGAAACATAACATGTAAATCAAAT---  
ATCACAGGACTAATATTAGTACGTGATGGAGGCAACACAAATGACACA-----  
-----  
-----  
AATGGCACAGAGATATTTCAGACCTGGAGGAGGAAATATGAAGGACAATTGGAGAAGTGAATTATATAAAATATA  
AAGTGGTAGAGATTAAGCCATTG---GGAATAGCACCCACTGAAGCAAAAAGGCGAGTGTTG-----  
-----GAGAGAGAGAAAAAGAGCA---GTAGGA---ATAGGAGCT-----  
---GTGTTCTTGGGTTCTTGGGAGCA---GCAGGAAGCACTATG---GGCGCAGCATCA---  
ATAACGCTGACGGTACAG---GCCAGACAG---TTGTTG---TCTGGTATAGTGCAACAGCAAAGT---  
AATTTG---CTAAGG---GCTATAGAGGCGCAACAGCATATGTTGCAACTCACAGTCTGGGGCATT  
>JN687735  
TTCTATTGCGATACAACAAAGCTGTTTAATGACAGTGAGTCAAGTAATTCAACCCAAAGTAATTCA-----  
-----  
-----  
GCCACGCAAAACATCACACTCCCATGCAAGATAAAACAAATTATAAACATGTGGCAGGGGGTAGGAAGAGCGA  
TGTATGCCCCCTCCTATTAAAGGAAACATAGTATGTAACTCAAAT---  
ATCACAGGACTACTATTGACACGTGATGGAGGCAGAAATAAAACA-----

-----  
-----  
GAACCAGAGATATTCAGACCAATAGGAGGAAATATGAAGGACAATTGGAGAAGTGAATTATATAAATATAAGG  
TGGTAGAAATTAAGCCATTG---GGAGTAGCACCCACTGCATCAAAAAGGCGAGTGGTG-----  
-----GAGAGAGAAAAAAGAGCA--GTGGGA--ATAGGAGCT-----  
GTGCTCCTTGGGTTCTTGGGAGCG--GCAGGAAGCACTATG--GGCGCGGCGTCA---  
GTGACGCTGACGGTACAG---GCCAGACAA--CTGTTG--TCTGGTATAGTGCAACAGCAAAGC---  
AATTTG--CTGAGA--GCTATAGAGGCGCAACAGCATATGTTGCAACTCACAGTCTGGGGCATT  
>JN687736  
TTCTATTGCAATACATCAGGACTGTTTTCTAAGGGTACAAATAATACT-----  
-----  
-----  
TCTAAAAGGAACATCACACTCCCATGCAGAATAAAACAAATAATAAACATGTGGCAGGGGGTAGGACGAGCAA  
TGTATGCCCCCTCCCATTGAAGGAGACATAACATGTAAATCAAAT---  
ATCACAGGACTACTATTGCTACGTGATGGAGGTTTCTTAAATATAACT-----  
-----  
-----  
AATGGCACAGAGACATTTAGACCTGGAGGAGGAGATATGAGGGACAATTGGAGAAGTGAATTGTATAAATATA  
AAGTGGTAGAAATTAAGCCATTA---GGAGTAGCACCCACTAAGGCAAAAAGGAGAGTGGTG-----  
-----GAGAGAGAAAAAAGAGCA--GTGGGA--CTGGGAGCT-----  
---GTGTCCCTTGGGTTCTTGGGAGCC--GCAGGAAGCACTATG--GGCGCAGCATCA---  
ATAACGCTGACGGTACAG---GCCAGACAA--TTGTTG--TCTGGTATAGTGCAACAGCAAAGC---  
AATTTG--CTGAGA--GCTATAGAGGCGCAACAGCATATGTTGCAACTCACGGTCTGGGGCATT  
>JX976681  
TTCTATTGCAATACATCAGGCCTGTTTAATGGTACATTTAATGGTACATTTAATGGTACAGATACAAATAGTA  
CAAATAGTACT-----  
-----  
-----  
TCAAATGCAACCATCACACTCCAATGCAGAATAAAACAAATTATAAACATGTGGCAGGAGGTAGGAAGAGCAA  
TGTATGCCCCCTCCCATTGCAGGAAACATAACATGTAAATCAAAT---  
ATCACAGGATTGCTCTTGACAAGGGATGGTGGAGACAGTAATGTGACA-----  
-----  
-----  
AGGCATAATGAGACATTCAGACCTGGAGGAGGAGATATGAGAGATAATTGGAGAAGTGAATTATATAAATATA  
AAGTGGTAGAAATTAAGCCATTA---GGAGTAGCACCCACTGATGCAAAAAGGAGAGTGGTG-----  
-----GAGAGAGAGAAAAAGAGCA--GTGGGA--CTAGGAGCT-----  
---GTGTTCCCTTGGGTTCTTGGGAGCG--GCAGGAAGCACTATG--GGCGCGGCGTCA---  
ATAACGCTGACGGTACAG---GCCAGACAA--TTATTG--TCTGGTATAGTGCAACAGCAAAGC---  
AATTTG--CTGAGG--GCTATAGAGGCGCAACAGCATATGTTGCAACTCACAGTCTGGGGCATT  
>KC863573  
TTCTATTGTAATACAACAGACTTGTTTAATAAGAGTATAATT-----  
-----  
-----  
GAGAGAAACGCGACCATCACACTCCCATGCAGAATAAAACAAATTATAAACATGTGGCAGGAGGTGGGACGAG  
CTATGTATGCCCCCTCCCATTGCAGGAAACATAACATGTAATTCAAGT---  
ATCACAGGACTACTATTGACTCGTGATGGAGGAAATGGGGAAAATAACACA-----  
-----  
-----  
GAGGCAAATAACACAGAGATATTCAGACCTGGAGGAGGAAATATGAAGGACAATTGGAGAAGTGAATTATATA  
AATATAAAGTAGTAGAAGTTAAGCCATTA---GGAATAGCACCCACTGGAGCAAAAAGGAGAGTGGTG-----  
-----GGGAGAGACAAAAGAGCA---GCAGGC---  
ATAGGAGCT-----GTACTCCTTGGGTTCTTGGGAGCA--GCAGGCAGCACTATG---  
GGCGCGGCGGCA---GTGACGCTGACGGTACAG---GCCAGGCAA---CTGTTG---  
TCTGGTATAGTGCAACAGCAAAGT---AATTTG---CTGAGA---  
GCTATAGAGGCGCAACAACATATGTTGCAACTCACAGTCTGGGGCATT  
>KC863587  
TTCTACTGCAATACAACAAACTTGTTCAACAACTTGTTCAACAAACT-----  
-----  
-----  
GTTAACGAGCACATCACACTCTCGTGCAAAATAAAACAAATCATAAACATGTGGCAGGGGGTAGGGCGAGCAA  
TGTATGCCCCCTCCCATTGCAGGAAACATAACATGTAAATCAAAT---

ATCACAGGACTACTATTGACCCGTGATGGAGGTGGTGGAGATAACAAC-----  
-----  
-----  
ACAGATAACACCACAGAGATATTCAGACCTGGAGGAGGAAAATATGAAGGACAATTGGAGAAGTGAATTATATA  
AATACAAAGTGGTAGAAATTAAGCCATTG--GGAATAGCACCCACGGAGGCAAAAAGGAGAGTGGTG-----  
-----GAGAGAGAAAAAAGAGCA---GTGGGA---  
ATAGGAGCT-----GTGCTCCTTGGGTTCTTAGGAGCA--GCAGGAAGCACTATG---  
GGCGCGGCGTCA--ATAACGCTGACGGTACAG--GCCAGACAA--CTGTTG---  
TCTGGTATAGTGCAACAGCAAAAC--AATTTG--CTGAGA---  
GCTATAGAGGCGCAACAGCATCTGTTGCAACTCACAGTCTGGGGCATT  
>KC863599  
TTCTATTGTAATACATCAGGACTGTTTAATGGTACATACGCAGCAAATATGACAGACAATGCT-----  
-----  
-----  
ACACATCCTAACATCACACTCCAATGCAGAATAAAACAAATTATAAACATGTGGCAGGAGGTAGGACGAGCAA  
TGTATGCCCCCTCCCATCGCAGGAAACATAACATGTAACCTCAAGT---  
ATTACAGGACTACTGTTGACACGTGATGGAGGAACAGGGAAGAAT-----  
-----  
-----  
GAGACAAATGACACAGAGACATTCAGACCTACAGGAGGAAAATATGAGGGATAATTGGAGAAGTGAATTATATA  
AATATAAAGTAATAGAAATTAGACCATTA--GGAATAGCACCCACTGGAGCAAAAAGGAGAGTGGTG-----  
-----GAGAGAGAAAAAAGAGCA---GTGGGA---  
ATAGGAGCT-----GTGTTCCCTTGGGTTCTTGGGAGCA--GCAGGAAGCACTATG---  
GGCGCAGCATCA--ATAACGCTGACGGTACAG--GCCAGACAA--TTGTTG---  
TCTGGTATAGTGCAACAGCAAAAGC--AATTTG--CTGAGG---  
GCTATAGAGGCGCAACAGCACATGTTGCAACTCACGGTCTGGGGCATT  
>HM204585  
TTCTACTGCAATACATCACAGCTGTTTAATTCTACAGACAATCCTGATGTTACAGAAAGTTTTTCA-----  
-----  
-----  
AACTCTTCAATAATCACACTCCCATGCAGAATAAAACAAATTGTAAACATGTGGCAGGAAGTAGGACGAGCAA  
TGTATGCTCCTCCCATTCAGGGAACATAACATGTAACCTCAAAT---  
ATCACAGGATTACTCTTGACACGGGATGGAGGAAATACTAGCAGTTCAGAA-----  
-----  
-----  
GGAAATAATTCAACAGAGATATTCAGACCTGGGGGAGGAGATATGAGGGACAATTGGAGAAGTGAATTATACA  
AATATAAGGTGGTAGAAATTAAGCCATTG--GGAATAGTACCCACTAAGGCAAAAAGGACAGTGGTG-----  
-----GAGAGAGAAAAAAGAGCA---GTAGGA---  
ATAGGAGCT-----GTGTTCCCTTGGGTTCTTGGGAGCA--GCAGGAAGCACTATG---  
GGCGCGGCGTCA--CTGACGCTGACGGCACAG--GCCAGGCAG--TTATTG---  
TCTGGTATAGTGCAACAGCAAAAGC--AATTTG--CTGAAG---  
GCTATAGAAGCGCAACAGCATATGTTGCAACTCACGGTCTGGGGCATT  
>HM204594  
TTCTATTGTAATACAACAAAACCTGTTTAATGATACAAGCAATGGCACATACTCATAC-----  
-----  
-----  
ACAAATACCACACTCACACTCCCATGCAGAATAAAACAAATTATAAACATGTGGCAGGAGGTAGGACGAGCAA  
TGTATGCCCCCTCCCATTCAGGGAATATAAAATGTAAATCAAAT---  
ATCACAGGATTACTATTAGTACGTGATGGAGGAAGCGAAGAAAACACA-----  
-----  
-----  
ACTGATCCCAAAGAAATATTCAGACCTGGAGGAGGAAAATATGAGGGACAATTGGAGAAGTGAATTATATAAGT  
ATAAAGTGGTAGAAATTAAGCCATTG--GGAGTAGCACCCACTAATGCAAAAAGGAGAGTGGTG-----  
-----GATAGAGGAAAAAGAGCA---GTGGGA---CTAGGAGCT---  
-----GTGTTCTTGGGGTTCTTAGGAGCA--GCAGGAAGCACTATG--GGCGCGGCGTCA---  
ATAGCGCTGACGGGACAG--GCCAGACAA--TTAATG--TCTGGTATAGTGCAACAGCAAAAC---  
AATTTG--CTGAAA--GCTATAGAGGCGCAACAACATATGTTGCAACTCACAGTCTGGGGCATA  
>HM204595  
TTCTATTGCAATACAACAAATTTGTTTAATAAAACAAAAGTGTTTAATAGCAGT-----  
-----

-----  
TCAACAGAAGACATCACCCCTCCCATGCAGAATAAAACAAATTATAAATATGTGGCAGGAGGTGGGAAGAGCAA  
TGTACGCCCCCTCCCATTCAGGAAATATAACATGTACTTCAAAT---  
ATCACAGGATTACTGTTGGTACGTGATGGAGGCCCAAACAATACA-----  
-----  
-----  
AACGAGACATTCAGACCTGGGGGTGGAAATATGAAGGACAACTGGAGAAGTGAATTATATAAATATAAAGTGG  
TAGAAGTTAAGCCATTA---GGAATAGCACCCACTAAGGCAAAAAGGAGAGTGGTG-----  
-----GAGAGAGAAAAAAGAGCA---ATAGGA---ATGGGAGCT-----  
GTGTTCCCTTGGGTTCTTGGGGGCA---GCAGGAAGCACTATG---GGCGCGGCGTCA---  
ATAACGCTGACGGTACAG---GCCAGACAA---CTATTG---TCTGGTATAGTGCAACAGCAAAGC---  
AATTTG---CTGAGA---GCTATAGAGGCGCAACAGCATATGTTGCAACTCACGGTCTGGGGCATT  
>HM204600  
TTCTATTGTGATACAACACTGTTGTTTAATAGTACATACAATAGTACATACACGCCTAATGGTAATGGTACAG  
AAAGT-----  
-----  
AATTCAGGCAAAATATCACACTCCAATGCAAGATAAAACAAATTATAAACATGTGGCAGCAGGTAGGACGAG  
CAATGTATGCTCCTCCCATTCAGGAAATATAATATGTATCTCAAAT---  
ATAACAGGATTACTATTGGTGCGTGATGGAGGAAAAACCACAAAT-----  
-----  
-----  
AGAACAGAGATATTCAGACCTGGAGGAGGAGATATGAGGGACAATTGGAGAAATGAATTATACAAATATAAAG  
TGGTAGAAATTAAACCATTG---GGAATAGCACCTACTGGAGCAAGAAGGAGAGTGGTG-----  
-----GAGAGAGAAAAAAGAGCA---GTGGGA---ATAGGAGCT-----  
TTTGTCCCTTGGGTTCTTGGGAGCA---GCAGGAAGCACTATG---GGCGCGGCGTCA---  
ATGACGCTGACGGTACAG---GCCAGACAA---TTGTTG---TCTGGTATAGTGCAACAGCAAAGC---  
AATTTG---CTGAGA---GCCATAGAGGCGCAACAGCATCTGTTGCAACTCACGGTCTGGGGCATT  
>HM204602  
TTCTATTGCAACACATCAGACCTGTTTAATAATACAGAAAT-----  
-----  
-----  
AATGGGACAAACATCACACTCTCATGCAGAATAAAACAAATCATAAACATGTGGCAGGAGGTAGGACGAGCAA  
TGTATGCCCCCTCCTATTGAAGGAAACATAACATGTAAATCAAAT---  
ATCACAGGACTACTATTGACACGTGATGGAGGAGAAAAATGGAACA-----  
-----  
-----  
GAGATATTCAGACCTGGAGGAGGAGATATGAGGGACAATTGGAGAAGTGAATTATATAAATATAAAGTGGTAG  
AAATTAAGCCATTA--GGAGTAGCACCCACTCCAGCAAGAAGGGTAGTGGTGGAG-----  
-----GGACCAAAAAGACCAAGAGAGCA---GTGGGA---ATAGGAGCT-----  
GTGTTCCCTTGGGTTCTTGGGGGCT--GCAGGAAGCACTATG---GGCGCGGCGTCA---  
ATAACGCTGACGGTACAG--ACCAGACAA--CTGTTG--TCTGGTATAGTGCAACAGCAAAGC--  
AATTTG--CTGAGA--GCTATAGAGGCGCAACAGCATATGTTGCAACTCACGGTCTGGGGCATT  
>HM204604  
TTCTATTGTAACACATCAAACTGTTTAATAGCTCATACTGGGCTAATGAAACA-----  
-----  
-----  
GAAGAAAATTCCACCACAATCCCATGCAAAATAAAACAAATTATAAACATGTGGCAGAAGGTGGGACGAGCGA  
TGTATGCCCCCTCCCATTCAGGAAACCTAACATGTAAGTCAAAT---  
ATCACAGGGCTACTATTGACACGTGATGGAGGAAATGACAAATGGGGGAAATAAT-----  
-----  
-----  
AACACAAATAGCACAAATTGAGATATTTAGACCTGCAGGAGGAGATATGAGAGATAATTGGAGAAGTAAATTAT  
ATAAATATAAAGTGGTGGAAATTAAGCCATTG---GGAATAGCTCCAAGTGCAGCAAAAAGGAGAGTGGTG--  
-----GAGAGAGAAAAAAGAGCA---GTGGGA---  
ATAGGAGCT-----GTGTTCCCTTGGGTTCTTGGGAGCA---GCAGGAAGCACTATG---  
GGCGCGGCGTCA---ATAACGCTGACGGTACAG---GCCAGACAA---TTGTTG---  
TCTGGTATAGTGCAACAGCAAAGC---AATTTG---CTGAAG---  
GCTATAGAGGCGCAACAGCACCTGTTGCAACTCACGGTCTGGGGCATT  
>HM204606

TTCTATTGCAACACTTCAAACCTGTTTAAATGCAAGCATACTTAATACAAGCACACCAATA-----  
-----  
-----  
TTAAATACAACCATCACACTCCAATGTAGAATAAAACAAATTATAAACATGTGGCAGGAGGTAGGACGAGCAA  
TGTATGCCCCCTCCCATTCGAGGAAACATAACATGTAAATCAAAC---  
ATCACAGGACTACTATTGACACGTGATGGAGGAGGAAATGGAACA-----  
-----  
AATGAAACAGAGATATTCAGGCCTGGAGGAGGAGATATGAGAGACAATTGGAGAAGTGAATTATATAAAATATA  
AAGTGGTAGAAATTAAGCCATTA---GGAGTAGCACCCACTGCGGCAAGAAGGAGAGTGGTG-----  
-----GGGAGAGAAAAAAGAGGA-----ATAGGAGCT-----  
---GTGTTCCCTTGGGTTCTTGGGAGCA---GCAGGAAGCACTATG---GGCGCGGCGTCA---  
GTGGCGCTGACGGTACAG---GTCAGACAA---TTGCTG---TCTGGTATAGTGCAACAGCAAAGC---  
AATTTG---CTGAGG---GCTATAGAGGCGCAACAGCATATGTTGCAACTTACGGTCTGGGGCATT  
>HM204607  
TTCTATTGTAATACATCACTACTGTTTACATACAATGGGACTAACAGTACAAGAAAATAATGGGACTAACAGTA  
CA-----  
-----  
AGAAATAATACAATCACAATCCCCTGCAAAATAAAACAAATCATAAATATGTGGCAGGAGGTAGGACGAGCAA  
TGTATGCTCCTCCCATTCGAGGAAACATAACATGCAAAATCAAAT---  
ATCACAGGACTACTATTGACACGGGATGGAGGAGACAATAATAGT-----  
-----  
AGTGAGACATTCAGACCTGGAGGAGGAGATATGAGGGACAATTGGAGAAGCGAATTATATAAAATATAAAGTGG  
TAGAAATTAACCATTTG---GGATTAGCACCCACTGGGGCAAAAAGGAGAGTGGTG-----  
-----GAGAGAGAAAAAAGAGCA---GTTGGA---ATAGGAGCT-----  
GTGTTCCCTTGGGTTCTTGGGAGCA---GCAGGAAGCACTATG---GGCGCGGCGTCA---  
ATAACGCTGACGGTACAG---GCCAGACAA---CTGTTG---TCCGGTATAGTGCAACAGCAAAGC---  
AATTTG---CTGAAG---GCTATAGAGGCGCAACAGCATATGTTGCAACTCACGGTCTGGGGCATT  
>HM204608  
TTCTATTGCAATACATCAAATCTGTTTAAATAATACATTGTTTAAATGGTACAAAAAGTAATTCAAGTTCAAGTA  
AT-----  
-----  
TCAAGTGAAGTAATCACACTCCCATGCAGAATAAAACAGATTATAAACATGTGGCAGGAGGTAGGACGAGCAA  
TGTATGCCCTCTCCCATTCGAGGAAACATAACATGTAAATCAAAT---  
ATCACAGGATTACTATTAACACGAGATGGAGGAAAAAGTGGAAATAAGACAAAT-----  
-----  
GATACCCTAACAGAGGAGACATTCAGACCTGGAGGAGGAGATATGAGGGACAATTGGAGAAGTGAATTATATA  
AATATAAAGTGGTAGAAATAAATCCATTA---GGAGTAGCACCCACTGAGGCAAAAAGGAGAGTGGTG-----  
-----GAGAGAACAAAAAGAGCA---GTAGGA---  
ATAGGAGCT-----GTGTTCCCTTGGGTTCTTGGGAGCA---GCAGGAAGCACTATG---  
GGCGCAGCGTCA---ATGACGCTGACGGTACAG---GCCAGACAA---TTATTG---  
TCTGGTATAGTGCAACAGCAAAGT---AATTTG---CTGAAG---  
GCCATAGAGGTGCAACAACATATGTTGCAACTCACGGTCTGGGGCATT  
>HM204609  
TTCTATTGCAACACATCAGGACTATTTAATAGTACACACACGCTTAATGATACAGTAGTAAGTGATTCAAAT-  
-----  
-----  
TCAACTGCAAACATCACACTCCAATGCAGAATAAAGCAAATCATAAATATGTGGCAGAGTGTAGGACAAGCCA  
TGTATGCCCCCTCCCATTCGAGGAAACATAACATGTGTATCAAAT---  
ATCACAGGAATAATCCTGACACGAGATGGAGGAAGGGAAGACAATACT-----  
-----  
ACAAGTGCACCTGAGATATTCAGGCCTGGAGGAGGAAATATGAAAGACAATTGGAGAAGTGAATTATATAAAT  
ATAAAGTGGTAGAAATTAGGCCATTA---GGAGTAGCACCCACTAAGGCAAGAAGGAGAGTGGTG-----  
-----GAGAGAGAAAAAAGAGCA---GTGGGA---ATAGGAGCT---  
-----TTGATCCTTGGGTTCTTGGGAGCA---GCAGGAAGCACTATG---GGCGCAGCGTCG---  
ATAACGCTGACGGTACAG---GCCAGACAA---CTGTTG---TCTGGTATAGTGCAACAGCAAAGT---  
AATTTG---CTGAGA---GCTATAGAGGCGCAACAGCATATGTTGCAACTCACAGTCTGGGGCATT

>HM204611

TTCTATTGCAATACATCAGGCCTGTTTAAATAATAGCCTGCTTAATAATAGTACTAATAAT-----

-----  
-----

AGTAGTGAAGTTATCACACTCCCATGCAGAATAAAACAAATTATAAACATGTGGCAAAAGGTAGGACGAGCAA  
TGTATGCCCCCTCCCGTTGCAGGAGAAATAACATGTAACCTCAAAT---

ATCACAGGAATGCTATTGACACGTGATGGAGGAGGAAGTAATAAT-----

-----  
-----

GTGAGTAGTGAGATATTCAGACCTGGAGGAGGAGATATGAGGGACAATTGGAGAAGTGAATTATACAAATATA  
AAGTGGTAGAAATTAAGCCATTA---GGAGTAGCACCCACTAGTGCAAAAAGGAGAGTGGTG-----

-----GAGAGAGAGAAAAGAGCA---GTGGGA---TTAGGAGCT-----

---GTGCTCTTTGGGTTCTTGGGAGCA---GCAGGAAGCACTATG---GGCGCGGCGTCA---

ATAACGCTGACGGTACAG---GCCAGACAA---TTATTG---TCTGGTATAGTGCAACAGCAAAGC---

AATTTG---CTGAGA---GCTATAGAGGCGCAACAGCATATGTTGCAACTCACAGTCTGGGGCATT

>HM204616

TTCTATTGCAACACATCAAACTGTTTAAATGGTACATTAAACTGTTTAAATGGTACATTAGAACAGTTTAAATA  
GTACAAGA-----

-----AAT---

GATTCAAATAATACCATCACACTCCCATGCAGAATAAAACAAATTGTAAACATGTGGCAGGGGGTAGGACGGG  
CAATGTATGCCCCCTCCCATTCAGGAAACATAACATGTAAATCAAAT---

ATCACAGGACTACTATTGACACGTGATGGAGGGAATGACAGTACAAGTAGCAAT-----

-----  
----

GGAAGTGAAATATTTGAAATATTCAGACCTGGAGGAGGAGATATGAGGGACAATTGGAGAAGTGAATTATATA  
AATATAAAGTAGTAGAAATTAGGCCATTA---GGAATAGCACCCAATAAGGCAAGAAGGAGAGTGGTG-----

-----GAGAGAGAAAAAAGAGCA---GCA-----

ATAGGAGCT-----TTGATCTTTGGGTTCTTGGGAGCA---GCAGGAAGCACTATG---

GGCGCGGCGTCA---CTAACGCTGACGGTACAG---GCCAGACAA---TTGTTG---

TCTGGTATAGTGCAAGCAGCAAAGC---AATTTG---CTGAGA---

GCTATAGAGGCGCAACAGCATCTGTTGCAACTCACGGTCTGGGGCATT

>FJ443732

TTCTATTGCAATACATCAGGACTATTTAAATGGTACATATAATAATAACAGGAAATGCT-----

-----  
-----

TCAAATCCAACCATCACAATCCCATGCAAAATAAAACAAGTTATAAACATGTGGCAGGAGGTAGGACGAGCAA  
TGTATGCCCCCTCCCATTCAGGACTCATAACATGTAACCTCAAGT---

ATCACAGGACTACTATTGACACGTGATGGT---ACAGGGGATGGTACA-----

-----  
-----

GGGAATGGTACAGAAACATTCAGACCAGGAGGAGGAAATATGAGGGACAATTGGAGAAGTGAATTATATAAAT  
ATAAAGTGGTAGAAATTAAGCCATTA---GGAATAGCACCCACTAAAGCAAAAAGGAGAGTGGTG-----

-----GAGAGAGAGAAAAGAGCA---GTGGGA---ATAGGAGCT---

-----GTGTTCTTTGGGTTCTTGGGAGCA---GCAGGAAGCACTATG---GGCGCGGCGTCA---

ATCACGCTGACGGTACAG---GCCAGACAA---CTATTG---TCTGGTGTAGTGCAACAGCAAAGT---

AATTTG---CTGAGA---GCTATAGAGGCGCAACAGCGTATGTTGCAACTCACGGTCTGGGGCATT

>FJ443905

TTCTATTGCAATACATCAAAATTGTTTAAATGGTACATACAATGGTACAGAGAGTACAAGTTCAAATTCTACC-

-----  
-----

ACTGATTCTACCATCACACTCCAATGCAGGATAAAACAAATTATAAACATGTGGCAGGAGGTGGGACGAGCAA  
TGTATGCCCCCTCCCATTCAGGAAACATAACATGTAGATCAAAT---

ATCACAGGATTACTCTTGACACGTGATGGGGGAGTAGAAAATTCA-----

-----  
-----

AATGAGACAGAAACATTTAGACCTGGAGGAGGAGATATGAGGAACAATTGGAGAAGTGAATTATATAAATATA  
AAGTGGTAGAAATTAAGCCATTA---GGAATAGCACCCACTGAGGCAAAAAGGAGAGTGGTG-----

-----CAGAGAGAGAAACGAGCA---GTGGGA---ATAGGAGCT-----

---GTGTTCTTTGGGTTCTTGGGAGCA---GCAGGAAGCACTATG---GGCGCGGCATCA---

ATAACGCTGACGGTACAG---GCCAGACAA---TTATTG---TCTGGTATAGTGCAACAGCAAAAC---  
 AATTTG---CTGAGG---GCTATAGAGGCACAACAGCATATGTTGCAACTCACGGTCTGGGGCATT  
 >FJ443988  
 TTCTATTGCGATACAACACAACCTGTTTAAATGAACTGAGTTA-----  
 -----  
 -----  
 ACAAACAACGTAACCTACACTCCCATGCAGAATAAAACAAATTATAAACATGTGGCAAGGGGCAGGACGAGCAA  
 TGTATGCCCCCTCCCATTCAGAGAAACATAACATGTAAATCAAAT---  
 ATCACAGGACTACTATTGACACATGATGGAGGAACAAACATAACA-----  
 -----  
 -----  
 AACCATACATTTCAGACCAGGAGGAGGAAATATGAAAGACAATTGGAGAAGTGAATTATATAAATATAAAGTGG  
 TAGAAATTAAACCATTG---GGAATAGCACCCACTAAGTCAAAAAGGAGAGTGGTG-----  
 -----GAGAGAGAAAAAGAGCA---GTAGGA---ATAGGAGCT-----  
 GTACTCTTTGGGTTCTTGGGGGCT---GCAGGAAGCACTATG---GGCGCGGCGTCG---  
 GTGACGCTGACGGTACAG---GCCAGACAA---CTGTTG---TCTGGTATAGTGCAACAGCAAAGT---  
 AATTTG---CTGAGA---GCTATAGAGGCGCAACAGCATATGTTGCAACTCACAGTCTGGGGCATT  
 >MN202471  
 TTCTATTGCAATACAACAAAACCTGTTTAAATAGTAGTGAGTCAAACAATAACAGTGAGTCAAGC-----  
 -----  
 -----  
 AATAGCAGTAACATCATACTCCCATGTAGAATAAAACAAATTATAAATATGTGGCAGGGGGTAGGACGAGCAA  
 TGTATGCCCCCTCCTATTGAAGGAAATATAACATGTTCCCTCAAAT---  
 ATCACAGGACTACTATTGACCCGTGATGGAGGGGACAATAACAGA-----  
 -----  
 -----  
 ACAACTGAGACATTTCAGACCTGGAGGAGGAAATATGAAGGACAATTGGAGAAGTGAATTGTATAAATATAAAG  
 TGGTAGAAATCAAGCCATTG---GGAATAGCACCCACTGAGGCAAAAAGGAGAGTGGTG-----  
 -----GAGAGAGAAAAAGAGCA---GTAGGA---ATAGGAGCT-----  
 GTACTCCTTGGGTTCTTGGGAGCA---GCAGGAAGCACTATG---GGCGCGGCGTCA---  
 ATAACGCTGACGGTACAG---GCCAGACAA---CTGCTG---TCTGGTATAGTGCAACAGCAAAGC---  
 AATTTG---CTGAGA---GCTATAGAGGCGCAACAGCATATGTTGCAACTCACAGTCTGGGGCATT  
 >HQ595742  
 TTCTATTGCAATACATCAAATCTGTTCAATAGTGAATACATGGCTAATGGTACATACAATTTCAATGGTGAGG  
 AA-----  
 -----  
 -----  
 TCAAAATTCAAGCATCACACTCCAATGCAGAATAAAACAAATTATAAACATGTGGCAGGAGGTGGGACGAGCAA  
 TGTATGCCCCCTCCCATTCGCGGAAACATAACATGTAGATCAAAT---  
 ATTACAGGACTACTGGTGACACGTGATGGAGGAGAAAAAGGAGAAAA-----  
 -----  
 -----  
 AATGATACAGAGACATTTCAGACCTGGAGGAGGAGATATGAGGGATAATTGGAGAAGTGAATTATATAAATATA  
 AAGTGGTAGAAATTAAGCCATTG---GGAATAGCACCCACTAAGGCAAAAAGGAGAGTGGTG-----  
 -----CAGAGAGAAAAAGAGCA---GCA-----CTAGGAGCT-----  
 ---GTGTTCTTGGGTTCTTGGGGGCA---GCAGGAAGCACTATG---GGCGCGGCGTCA---  
 CTAACGCTGACGGTACAG---GCCAGACAA---TTATTG---TCTGGTATAGTGCAACAGCAAAGC---  
 AATTTG---CTGAGG---GCTATAGAGGCGCAACAGCATATGTTGCAACTCACGGTCTGGGGCATT  
 >HQ595747  
 TTCTATTGCAATACATCAAACCTGTTTAAATGTAACATACTTTCCTAATGGTACAACCTAGTAATTCAACTTTA  
 AG-----  
 -----  
 -----  
 GATAACTCAACAATCACAATCCAATGCAGAATAAAACAAATTATAAACATGTGGCAGAGGGTAGGACGAGCAA  
 TGTATGCTCCTCCCATTCAGAGAAATATAACATGTACAACAAAT---  
 ATCACAGGATTACTATTGACACGTGATGGAGGAAACAACAACACAAAA-----  
 -----  
 -----  
 AACAAACACAGAAACATTTCAGACCTGAAGGAGGAGATATGAGGGACAATTGGAGAAGTGAATTATACAAATATA  
 AAGTGGTAGAAATTAAGCCATTG---GGAATAGCACCCACTACTGCAAAAAGGAGAGTGGTG-----  
 -----GAGAGACAAAAAGAGCA---GTAACC---ATAGGAGCT-----  
 ---ATGTTCTTGGGTTCTTGGGAGCA---GCAGGAAGCACTATG---GGCGCGGCGTCA---

ATAGCGCTGACGGTACAG---GCCAGACAA---TTATTG---TCTGGTATAGTGCAACAGCAAAGC---  
 AATTTG---CTGAGA---GCTATAGAGGCGCAACAACACATGTTGCAACTCACAGTCTGGGGCATT  
 >HQ615943  
 TTCTATTGCAATACAACAAAACCTGTTTAAATATTACTGTTAGTGAAAGCATAGAGATTAATAATAAT-----  
 -----  
 -----  
 ACAAACACAACCATCACACTCCCATGCAGAATAAAACAAATTATAAACATGTGGCAGGAGGTAGGACGAGCAA  
 TGTATGCCCCCTCCCATTCAGGAAGCCTAACATGTAGATCAAAT---  
 ATCACAGGACTACTATTAACACGTGATGGAGGGAATGAGAATGGTACA-----  
 -----  
 -----  
 AGTCGGGAGAATGATACAGTCAGACCTGGAGGAGGAAAATATGAAGGACAATTGGAGAAGTGAATTATATAAAAT  
 ATAAAGTGGTAGAACTTAAGCCATTG---GGAATAGCACCCACTGAGGCAAAAAGGAGAGCGGCA-----  
 -----GATAGAGAAAAAAGAGCA---GTGGGA---ATAGGAGCT---  
 -----ATGCTCTTTGGGTTCTTGGGAGCA---GCCGGAAGCACTATG---GGCGCGGCGTCA---  
 ATAACGCTGACGGTACAG---GCCAGACAA---CTGTTG---TCTGGTATAGTGCAACAGCAAAGC---  
 AATTTG---CTGAGG---GCTATAGAGGCGCAACAGCATATGTTGCAACTCACAGTCTGGGGCATT  
 >HQ595749  
 TTCTATTGCAATACATCAAAACCTGTTTAAATGGCACGTATAATGGTACA-----  
 -----  
 -----  
 GGAAATGCAACCATTACACTCCCATGTAGGATAAAACAAATCATAAACATGTGGCAGGAGGTAGGACGAGCAA  
 TGTATGCCCCGCCCATTGCAGGAAATATAACATGTGAATCAATT---  
 ATCACAGGAATACTGTTGACACATGATGGAGGTGAAAATGAG-----  
 -----  
 -----  
 ACATTCAGACCTGGAGGAGGAGATATGAGGGACAATTGGAGAAGTGAATTATACAAATATAAAGTAGTAGAAA  
 TTAAGCCATTA---GGAATAGCACCCACTAATGCAAAAAGGAGAGTGGTG-----  
 -----GAGAGAGAAAAAAGAGCA---GTGGGA---ATAGGAGCT-----  
 GTGTTCCCTTGGGTTCTTGGGAGCA---GCAGGAAGCACTATG---GGCGCAGCATCA---  
 ATAACGCTGACGGTACAG---GCCAGACAA---TTATTG---TCTGGTATAGTGCAACAGCAAAGT---  
 AATTTG---CTGAGG---GCTATAGAGGCGCAACAGCATATGTTGCAACTCACGGTCTGGGGCATT  
 >HQ595750  
 TTCTATTGCAATACATCAAAACCTGTTTAAAAATACATACTTAACAAATAATACATTAAATGATACATTCTGGGA  
 ATGAG-----  
 -----ACA---  
 GGAAGTAATTCAACCATCATACTTCCATGCAGAATAAAACAAATTATAAACATGTGGCAGGGGGTAGGACGAG  
 CAATGTACGCCCTCCCATTCAGGATACATAACATGTAACCTCACT---  
 ATCACAGGATTATTATTGACACGTGATGGAGGAATACCAAATCCAAATAAATCA-----GAT---  
 -----  
 -  
 ACACCACCAAATAACACAGAGATATTAGACCTGGAGGAGGAGATATGAAGGACAATTGGAGAAGTGAATTAT  
 ATAAATATAAAGTAGTAGAAATCAAACCATTG---GGAGTAGCACCCACTAGGGCAAAAAGGCGAGTGGTG--  
 -----GAGAGAGAAAAAAGAGCA---GTGGGA---  
 ATGGCAGCT-----GTGATCCTTGGGTTCTTGGGAACA---GCAGGAACCGCTATG---  
 GGCGCGGCGTCA---CTGACGCTGACGGTACAG---GCCAGACAA---CTGTTG---  
 TCTGGTATAGTGCAACAGCAAAAT---AATTTG---CTGAGG---  
 GCTATTGAGGCGCAACAGCATATGTTGCAACTCACAGTCTGGGGCATT  
 >HQ615946  
 TTCTATTGCAATACATCAGGACTGTTTAAATAACACACTGCTTAATAGCACACTGGTTAAT-----  
 -----  
 -----  
 AGCAGTGCAAGTCATTACACTCAAATGCAGAATAAAACAAATTATAAACATGTGGCAGAAGGTAGGAAAAGCAA  
 TATATGCCCCCTCCCATTCAGGAAATTTAACATGTAATTCAAGT---  
 ATCACAGGACTACTCTTGGTACGTGATGGAGGCAACAGCTCAGACAGCAGT-----  
 -----  
 ----  
 AGTCCTCCTCCTCCGGAGATATTAGACACAGGAGGAGGAGATATGAGGGACAATTGGAGAAGTGAAGTATATA  
 AATATAAAGTGGTAGAAATTAATCCATTG---GGAATAGCACCCACTGAAGCAAAAAGGAGAGTGGTG-----  
 -----GAGAGAGAAAAAAGAGCA---ATAGGA---

ATAGGAGCG-----TTGTTCCCTTGGGTTCTTGGGAGCA---GCAGGAAGCACTATG---  
 GGCGCAGCGTCA---ATAACGCTGACGGTACAG---GCCAGACAA---TTATTG---  
 TCTGGAATAGTGCAACAGCAAAGC---AATTTG---CTGAGG---  
 GCTATAGAGGCGCAACAGCATATGTTGCAACTCACAGTCTGGGGCATT  
 >JQ777160  
 TTCTATTGCAATACATCAAAATTGTGGAGGTCTAATAACACAGAAAATTCAACCACA-----  
 -----  
 -----  
 GAAAAATTCAACCATCACACTCCCATGCAGAATAAAACAAATTATAAACATGTGGCAAGGGGTAGGACGAGCAA  
 TGTATGCCCCCTCCCATTCGAGGAAATATAACATGTGTATCAAAT---  
 ATCACAGGACTGCTATTAACACGTGATGGAGGAGTTAACACTACT-----  
 -----  
 -----  
 AATAATACAGAGATATTTAGACCTGGAGGAGGAAATATGAAGGACAATTGGAGAAGTGAGTTATATAAATATA  
 AAGTGGTAGAAATTAAACCATTA---GGAATAGCACCCACTGAGGCAAAAAGGAGAGTGGTG-----  
 -----GAGAGAGAAAAAGAGCA---GTGGGA---ATAGGAGCT-----  
 ---GTGTTCCCTTGGGTTCTTGGGAGCA---GCAGGAAGCACTATG---GGCGCGGCGTCA---  
 ATAACGCTGACGGTACAG---GCCAGAAAA---CTATTG---TCTGGTATAGTGCAACAGCAAAGC---  
 AATTTG---CTGAGG---GCTATAGAGGCGCAACAGCATATGTTGCAACTCACGGTCTGGGGCATT  
 >KT183053  
 TTCTATTGTAATACATCAAGTCTGTTTAAATAGTGCATATATGCCTAATGGTACATATATATTTAATGGTACTG  
 TCATAGCTAAT-----GGT---  
 ACTGAAATGAATAATAGTAGT-----  
 AATTCAAATTCAGCATCACAATCCAATGTAAAATAAAACAAATTGTAAACATGTGGCAGGAGGTAGGACGAG  
 CAATGTATGCCCCCTCCCATTCGAGGAAATATAACATGTAAATCAAAT---  
 ATCACAGGATTACTATTGGTATGGGATGGAGGCGAGGGAAATGAGACAGTC-----  
 -----  
 -----  
 AATAATACTGAGACATTGAGACCTGGAGGAGGGAATATGAAGGACAATTGGAGAAGTGAGTTATATAAATACA  
 AAGTGGTAGAAATTAAGCCATTA---GGAGTAGCACCCACTAAGGCAAAAAGGAGAGTGGTG-----  
 -----GGGAGAGAGAAAAAGAGCA---GTGGGA---ATAGGAGCT-----  
 ---GTGTTCCCTTGGGTTCTTAGGAGCA---GCAGGAAGCACTATG---GGCGCAGCAGCA---  
 GTAACGCTGACGGTACAG---GCCAGACAA---TTATTG---TCTGGTATAGTGCAACAGCAAAGC---  
 AATTTG---CTGAGA---GCTATAGAGGCGCAACAGCATATGTTGCAACTCACAGTCTGGGGCATT  
 >KT183056  
 TTCTATTGCAATACATCAGGGCTGTTTAAATGAGACACTGTCT-----  
 -----  
 -----  
 ACAGATGACATCATCACACTTCCATGCAGAATAAAACAGATTATAAACATGTGGCAGGAGGTAGGACGAGCAA  
 TGTATGCCTCTCCCATTCGAGGAAACATAACATGTAAATCAAAT---  
 ATCACAGGACTACTGTTAGTACGTGATGGAGGC-----  
 -----  
 -----  
 AGCAATGAGACTGAGACATTGAGACCTGGAGGAGGAAATATGAAGGACAATTGGAGAAGTGAATTATATAAAT  
 ATAAAGTGGTAGAAATTAAGCCATTG---GGAATAGCACCCACTGGGGCAAAAAGGAGAGTGGTG-----  
 -----GAGAGAGAAAAAGAGCA---GTGGGA---ATAGGAGCT---  
 -----GTGTTCCCTTGGGTTCTTGGGAGCA---GCAGGAAGCACTATG---GGCGCGGCGTCA---  
 CTAACGCTGACGGTACAG---GCCAGACAG---CTACTG---TCTGGTATAGTGCAACAGCAAAGC---  
 AATTTG---CTGAGG---GCTATAGAGGCGCAACAGCGTATGTTGCAACTCACGGTCTGGGGCATT  
 >KT183125  
 TTCTATTGCAATACAACACATCTGTTTGAAAACACAACATAC-----  
 -----  
 -----  
 ACAAACAGTTCAAACATCACACTGCCATGTAGAATAAAACAAATTATAAACATGTGGCAAGGGGTAGGACGAG  
 CAATGTATGCCCCCTCCCATTCGAGGAAACATAACATGTATATCAAAT---  
 ATCACAGGAATACTATTGACACGTGATGGAGGAAATAATGGAACA-----  
 -----  
 -----  
 AACGAGACATTTAGACCTGGAGGAGGAGATATGAGGGACAATTGGAGAAGTGAATTATATAAATATAAAGTGG  
 TAGAAATTAAACCATTA---GGAATAGCACCTACCAAGGCAAAAAGGAGAGTGGTG-----

-----GAGAGAGAAAAAGAGCA---GTGGGA---CTGGGAGCT-----  
 CTGTTCTTGGGTTCTTGGGAGCA---GCAGGAAGCACTATG---GGCGCGGCGTCA---  
 ATGACGTTGACGGTACAG---GCCAGACAA---TTACTG---TCTGGTATAGTGCAAGCAGCAAAGC---  
 AATTTG---CTGAGA---GCTATAGAGGCGCAACAACATATGTTGCAACTCACGGTCTGGGGCATT  
 >KT183128  
 TTCTATTGCAATACATCAGGGCTGTTTAATGATACAATA-----  
 -----  
 -----  
 AGCAATGCAACCATCATGCTCCCATGCAGAATAAAACAAATTATAAACATGTGGCAGGAGGTAGGAAAAGCAA  
 TATATGCCCCCTCCCATTAAGGAAACATAACATGCAAAATCAGAT---  
 ATCACAGGACTACTACTACTACGTGATGGAGGTAACACCACAAAT-----  
 -----  
 -----  
 AACACAGAGATATTCAGGCCTGGAGGAGGAGATATGAGGGACAATTGGAGGAGTGAACCTATATAAATACAAAAG  
 TGGTAGAAATTAAGCCATTG---GGAGTAGCACCCACTGATGCAAAAAGGAGAGTGGTG-----  
 -----GAGAGAAACAAAAGAGCA---GTGGGA---ATAGGAGCT-----  
 GTGTTCTTGGGTTCTTGGGAGCA---GCCGGAAGCACTATG---GGCGCGGCGTCA---  
 ATAACGCTGACGGTACAG---GCCAGACAA---CTGTTG---TCTGGTATAGTGCAACAGCAAAGC---  
 AATCTG---CTGAGG---GCTATAGAGGCGCAACAGCATATGTTGCAGCTCACGGTCTGGGGCATC  
 >KT183153  
 TTCTATTGCAATACATCAAGACTGTTTAATAGCCTTAATAACAAAACAGAGAATAGTTCAACCACAGAG----  
 -----  
 -----  
 GATAGTTCAATCATCACACTTCCATGCAGAATAAAACAAATTATAAATATGTGGCAGGAGGTAGGACGGGCAA  
 TGTATGCCCCCTCCTATTGCAGGAAGTATAACATGTATATCAAAT---  
 ATCACAGGATTACTATTAACACGTGATGGAGGGAATAATAACAGC-----  
 -----  
 -----  
 ACAGAAGAAATATTCAGACCTATAGGAGGAGATATGAAGAACAATTGGAGAAGTGAATTATATAAATATAAAG  
 TGGTAGAAATTAACCATTG---GGAATAGCACCCACTGGAGCAAAAAGGAGAGTGGTG-----  
 -----GAGAGAGAAAAAGAGCA---GTGGGA---ATGGGAGCT-----  
 TTGCTCCTTGGGTTCTTGGGAGCA---GCAGGAAGCACTATG---GGCGCAGCGTCA---  
 ATGGCGCTGACGGTACAG---GCCAGACAA---CTGTTG---TCTGGTATAGTGCAACAGCAAAGT---  
 AATTTG---CTGAGA---GCTATAGAGGCGCAACAGCATATGTTGCAACTCACAGTCTGGGGCATT  
 >KT183172  
 TTCTATTGCAATACAGCGAACCTGTTTAATAGTACAGGAAATAGTACAGGAATATCTAACAGTACAGACAGG-  
 -----  
 -----  
 TCTAATGAGACTATCACACTCCAATGCAGAATAAAACAAATTATAAACATGTGGCAGACGGTAGGACGAGCAA  
 TGTATGCCCCCTCCATTGCAGGAAACATAACATGTACATCAAAT---  
 ATCACAGGATTACTCTTGACACGTGATGGAGGGAAACATAACGATACT-----  
 -----  
 -----  
 AATAACACAGAGATATTCAGACCTGGAGGAGGAGATATGAGGGACAATTGGAGAAGTGAATTATATAAATATA  
 AGGTGGTAGAAATTAAGCCATTA---GGAATAGCACCCACTGGGGCAAAAAGGAGAGTGGTG-----  
 -----GAGAGAGGGAAAAGAGCA---GTGGGA---ATAGGAGCT-----  
 ---GTGTTCTTGGGTTCTTGGGAGCA---GCAGGAAGCACTATG---GGCGCGGCATCA---  
 ATGACGCTGACGGTACAG---GCCAGACAA---TTGTTG---TCTGGTATAGTGCAACAGCAAAGC---  
 AATTTG---CTGAGG---GCTATAGAGGCGCAACAGCATATGTTGCAACTCACGGTCTGGGGCATT  
 >KT183183  
 TTCTATTGCAATACATCAGAGCTGTTTAATGATAATACGTTCCAAAACAAGACACCCAAC-----  
 -----  
 -----  
 CCCAATGAACCCATCACACTCCAATGCAGAATAAAACAAATTATAAACTTGTGGCAGGAGGTGGGAAAAGCAA  
 TATATGCCCCCTCCATTGAAGGAAATATAACATGTAAATCAAAT---  
 ATCACAGGACTACTACTGCTACGTGATGGAGGTTGTAACAACAACAGC-----  
 -----  
 -----  
 ATAAATCGTGATGGAAGTTGTAAT-----  
 GAAACAGAGACATTTCAGGCCTGGAGGAGGAGATATGAGGGACAATTGGAGAAGTGAATTATATAAATATAAAG  
 TGGTAGAAATTAACCATTG---GGAGTAGCACCCACTAAGGCAAAAAGGACAGTGGTG-----

-----AAGAGAGAAAAAAGAGCA---GTGGGA---ATAGGAGCT-----  
GTGTTCTTGGGTTCTTGGGAGCA---GCAGGAAGCACTATG---GGCGCGGCGTCA---  
ATAACGCTGACGGTACAG---GCCAGACAA---CTGTTG---TCTGGTATAGTGCAACAGCAGAGC---  
AATTTG---CTGAGA---GCTATAGAGGCGCAACAGCATATGTTGCAGCTCACAGTCTGGGGCATT  
>KT183201  
TTCTACTGCAATACAACAAGCTTGTTTAATGGTACATACAATGGTACATACAATGGTACAGACACTAATGAT-  
-----  
-----  
ACAGATAGTACCATCACACTCCAATGCAGAATAAAACAAATTATAAACATGTGGCAGGGGGTAGGACGAGCAA  
TGTATGCCCCCTCCCATTTGAAGGAAACATAACATGTAAGTCAAAT---  
ATCACAGGACTACTATTGACACGTGATGGAGGAAATGAAGGAAAC-----  
-----  
-----  
ACCACAGAGACATTTCAGACCTGGAGGAGGAGACATAAGGGACAATTGGAGAAGTGAATTATATAAATATAAAG  
TGGTAGAAATCAAACCATTG---GGCTTGGCTCCCCTGGAGCAAAAAGGAGAGTGGTG-----  
-----GAGAGAGAAAAAAGAGCA---GTGGGA---ATAGGAGCT-----  
GTGCTCCTTGGGTTCTTGGGAACA---GCAGGAAGCACTATG---GGCGCAGCGTCA---  
ATAACGCTGACGGTACAG---GCCAGACAA---CTGTTG---TCTGGTATAGTGCAACAGCAAAGC---  
AATTTG---CTGAGA---GCTATAGAGGCGCAACAGCATATGTTGCAACTCACGGTCTGGGGCATT  
>KT183243  
TTCTATTGCAATACATCAGCATTGTTTAATAGTACATACAGGAATAATAGTACAGGA-----  
-----  
-----  
GATAATAGTACAATCACACTCCAATGCAGAATAAAGCAAATTATAAACATGTGGCAGGAGGTAGGACGAGCAA  
TGTATGCTTCTCCAGTTGCAGGAAACATATCATGTAACCTCAACT---  
ATCACAGGATTACTATTGACGCGTGATGGAGGACCAAAAAACGAC-----  
-----  
-----  
ACAGAGATATTTCAGACCTGGAGGAGGAGATATGAGGGACAATTGGAGAAGTGAATTATACAAATATAAAGTGG  
TAGAAGTTAAGCCATTG---GGCATAGCACCCACCAAGGCAAAAAGGAGAGTGGTG-----  
-----GAGAGAGAAAAAAGATCA---GTGACA---ATAGGAGCT-----  
GTGTTCTTGGGTTCTTGGGAGCA---GCAGGAAGCACTATG---GGCGCGGCGTCA---  
ATAACGCTGACGGTACAG---GCCAGACAA---TTGTTG---TCTGGTATAGTGCAACAGCAAAGC---  
AATTTG---CTGAGG---GCTATAGAGGCGCAACAGCATATGTTGCAACTCACAGTCTGGGGCATT  
>KT183245  
TTCTATTGCAACACAATAAATCTGTTTAATATAACAACCTAATGATAGTAAT-----  
-----  
-----  
ATCGTACTCCCCTGCAAAATAAAACAAATTATAAACATGTGGCAGGGGGTAGGACGAGCAATGTATGCCCCCTC  
CTATTGCAGGAAGCATAACATGTAACCTCAAGT---  
ATCACAGGACTATTATTGACACGTGATGGAGGCAAAAAGAAAGACAAC-----  
-----  
-----  
ACAACAGAAGGAGAGATATTTCAGACCTGGAGGAGGAAACATGAAAGACAATTGGAGAAATGAATTATATAAAT  
ATAAAGTGGTAGAAATTAAGCCATTG---GGAGTAGCACCCCTGAGGCAAAAAGGAGAGTGGTG-----  
-----GAGAGAGAAAAGAGAGCA---GTGGGA---ATAGGAGCT---  
-----GTGTTCTTGGGTTCTTGGGGCA---GCAGGAAGCACTATG---GGCGCAGCGTCC---  
ATAACGCTGACGGTACAG---GCCAGACAA---CTGTTG---TCTGGTATAGTGCAACAGCAAGAT---  
AATTTG---CTGAGA---GCTATAGAGGCGCAACAGCATATGTTGCAACTCACGGTCTGGGGCATT  
>KT183250  
TTCTATTGCAATACATCAATACTGTTTAATAGGCCTAATGGTACAGAAAATACGACAGGAAGTACTAGT----  
-----  
-----  
AATAATACAAACATCACAATCCCATGCAGAATAAAACAAATTTATAAACATGTGGCAGAGGGTAGGACGAGCAA  
TGTATGCCCCCTCCCATTTGCAGGAAACATAACATGTAAATCAAAT---  
ATCACAGGACTTCTATTGACACGTGATGGAGGAGAAAAATAATAGG-----  
-----  
-----  
ACAAATGAGACATTTCAGACCTGAAGGAGGAAATATGCAGGATAACTGGAGAAGTGAACCTATATAAATATAAAG  
TGGTAGAAATTAAGCCATTG---GGAGTAGCACCCCTAAGGCAAGAAGGAGAGTGGTG-----

-----CAGAGAGAAAAAAGAGCA---GTGGGA---GTAGGAGCT-----  
ATGATCCTTGGGTTCTTAGGAGCA---GCAGGAAGCACTATG---GGCGCGGCGTCA---  
ATAACGCTGACGGTACAG---GCCAGACAA---CTGTTG---TCTGGTATAGTGCAACAGCAAAAC---  
AATTTG---CTGAGG---GCTATAGAGGCACAACAGCATCTGTTGCAACTCACCGTCTGGGGCATT  
>KT183258  
TTCTATTGTAACACAACAACTTGTTTAATGGTACATATAATGGTACATATGCTAATACATCTGATAATAATA  
CA-----  
-----  
GGAAATGATACCATTACACTCCAATGCAGAATAAAACAAATTATAAACATGTGGCAGGGGGTAGGACAAGCAA  
TGTATGCCCCGCCAATTGCAGGAAATATAACATGTATATCAAAT---  
ATCACAGGACTACTATTGACACGTGATGGAGGCATTAATGCTAGTACT-----  
-----  
-----  
AATAATAAGAGACATTACAGACCTGGAGGAGGAAATATGAAGGACAATTGGAGAAGTGAAGTGTACAAATATA  
AAGTGGTAGAAATTAAGCCATTG---GGAATAGCACCCACGAGGTCAAAAAGGAGAGTGGTG-----  
-----GAGAGAGAAAAAAGAGCA---GTAGGA---CTAGGAGCT-----  
---GTGATCTTTGGGTTCTTGGGAGCA---GCAGGAAGCACTATG---GGCGCAGCATCA---  
ATAACGCTGACGGTACAG---GCCAGACAA---TTATTG---TCTGGTATAGTGCAACAGCAAAGC---  
AATTTG---CTGAGG---GCTATAGAGGCGCAACAGCACATGTTGCAACTCACAGTCTGGGGCATT  
>KT183274  
TTCTATTGCAATACAACAAAACTGTTTAATAGTAGCCATACAAATGCAAACCATACAAATGCAACCGACACA-  
-----  
-----  
ACAAATGCAACAATCACACTCCCATGCAGAATAAAACAGTATATAAACATGTGGCAAGAGGTAGGACGAGCAA  
TGTATGCCAATCCCATTGCAGGAAACATAACATGTAAATCAAAT---  
ATCACAGGAATACTATTGACACGTGATGGAGGCAACGGTACTGGCACAAT-----  
-----  
-----  
GATACTATTGAGACATTACAGACCTGGAGGAGGAGATATAAGGGACAATTGGAGAAGTGAATTATATAAAATATA  
AAGTAGTAGAAATTAAGCCATTA---GGAATAGCTCCAAGTACGAGGCACGAAGGAGAGTGGTG-----  
-----GAGAGAGAAAAAAGAGCA---GTAGGA---ATAGGAGCT-----  
---TTGTTCTTGGGTTCTTGGGAGCA---GCAGGAAGCACTATG---GGCGCGGCGTCA---  
ATAACGCTGACGGTACAG---GCCAGACAA---TTGTTG---TCTGGTATAGTGCAACAGCAAAGT---  
AATTTG---CTGAGA---GCTATAGAGGCGCAACAACATATGTTGCAGCTCACAGTTTGGGGCATT  
>HQ615983  
TTCTATTGCAACACATCACAACCTGTTTAATGACAGTGCTTCA-----  
-----  
-----  
AACGGAACCATCAGTATCCCATGCAGAATAAAGCAAATTATAAACATGTGGCAAAAGGTAGGACGAGCAATGT  
ATGCCCCCTCCCATTTGAAGGAAACATAACATGCAGCTCAAAT---  
ATCACAGGACTACTATTGGTACGTGATGGAGGAAATGACAACAGTACAGAG-----  
-----  
-----  
AACACAGTACAGAGATATTACAGACCTGGAGGAGGAAATATGAAGGACAATTGGAGAAGTGAATTATATAAAT  
ATAAAGTGGTAGAAATTAAGCCATTG---GGATTAGCACCCACTGAGGCAAAAAGGAGAGTGGTG-----  
-----GAGAGAAGAAAAAGAGCA---GTGGGA---ATAGGAGCT---  
-----GTGCTCTTTGGGTTCTTGGGAGCA---GCAGGAAGCACTATG---GGCGCGGCGTCA---  
CTAACGCTGACGGTACAG---GCCAGACAA---CTGTTG---TCTGGTATAGTGCAACAGCAAAGC---  
AATTTG---CTGAAA---GCTATAGAGGCGCAACAGCATCTGTTGCAACTCACAGTCTGGGGCATT  
>HQ615966  
TTCTATTGTAATACAACAAAGCTATTTAATAGCACATACAACCCCAATAGCACATACAACCACAATAAT---  
-----  
-----  
ACAGACAAAGTAATCACACTCCCCTGCAGGATAAAACAAATTATAAACATGTGGCAGCAGGTAGGACGAGCAA  
TGTATGCCCCCTCCCATTTGAAGGAAACATAACATGTAACCTCAAGT---  
ATCACAGGACTACTATTGACACGTGATGGTGGTAACGGGACAAAC-----  
-----  
-----  
GGCACAGAGATATTTAGACCTGCAGGAGGAAATATGAAGGACAATTGGAGAAGTGAATTATATAAATATAAAG  
TGGTAGAAATTAACCATTG---GGAGTAGCACCCACTAAGGCAAAAAGGAGAGTGGTG-----

-----GAGAGAGAAAAAGAGCA---GTGGGA---ATAGGAGCT-----  
GTGTTCCCTTGGGTTCTTGGGAGCA---GCAGGAAGCACTATG---GGCGCAGCGTCA---  
ATAACGCTGACGGTACAG---GCCAGACAA---CTGTTG---TCTGGAATAGTGCAACAGCAAAGC---  
AATTTG---CTGAGG---GCTATAGAGGCGCAACAGCATATGTTGCAACTCACGGTCTGGGGCATT  
>KC156221  
TTCTATTGCAATACATCAAGACTATTTAATGGTACATACATGTCTATGTCTAATAATAACAAAGAATGAT-----  
-----  
-----  
ACAAACGCAACCATCACACTCCCATGCAGAATAAAACAAATTATAAACATGTGGCAGGGGGTAGGACGAGCAA  
TGTATGCCCCCTCCCATTCAGAGAGACATAACATGTAAATCAACT---  
ATAACAGGACTAATATTGACACGTGATGGAGGGGAAGAAAGCAAACT-----  
-----  
-----  
AATAATACAGAGATATTTAGACCTGCAGGAGGAGACATGAGGGACAATTGGAGGAGTGAATTATATAAATATA  
AAGTGGTAGAAATTAAGCCATTA---GGAGTAGCACCCACTGAGGCAAAAAGGAGAGTGGTG-----  
-----GAGAGAGAGAAAAAGAGCA---GTGGGA---ATAGGAGCT-----  
---TTGTTCCCTTGGGTTCTTGGGAACA---GCAGGAAGCACTATG---GGCGCGGCGTCA---  
ATAACGCTGACGGTACAG---GCCAGACAA---TTATTG---TCTGGTATAGTGCAACAGCAAAAC---  
AATTTG---CTGAAG---GCTATAGAGGCGCAACAGCATATGTTGCAACTCACGGTCTGGGGCATT  
>HQ615967  
TTCTATTGCAATACAACAAACCTGTTTGATACAACAAATATAACTAAT-----  
-----  
-----  
ACAAGTGATCCCATCACACTCCAATGCAGAATAAAACAAATTATAAACATGTGGCAAGGGGTAGGACGAGCAA  
TGTATGCCCCCTCCCATTCAGGAAACATAACATGTAACTCAAAT---  
ATCACAGGACTACTGTTGTCACGTGATGGAGGAGTAAACACAACG-----  
-----  
-----  
AATGAGACAGAGATATTCAGACCTGGAGGAGGAGATATGAGGGACAATTGGAGAAGTGAATTATACAAATATA  
AAGTGGTAGAAGTTAAGCCATTG---GGAGTAGCACCCACTGAGGCAAAAAGGAGAGTGGTG-----  
-----GAGAGAGAGAAAAAGAGCA---GTGACA---ATAGGAGCT-----  
---GTGTTCCCTTGGGTTCTTGGGAGCA---GCAGGAAGCACTATG---GGCGCGGCGTCA---  
ATGACGCTGACGGTACAG---GCCAGACAA---CTGTTG---TCTGGTATAGTGCAACAGCAAAGC---  
AATTTG---CTGAGA---GCTATAGAGGCGCAACAGCATATGTTGCAACTCACGGTCTGGGGCATA  
>HM623551  
TTCTATTGCAATACATCAAAATTATTCAATAGTAGTTTATTCAACAGTAGTTCAATAGGAGAC-----  
-----  
-----  
AATTCAACAGTCATCACAATTCCATGCAGAATAAAACAATTTATAAATATGTGGCAGGAGGTAGGACGAGCGA  
TGTACGCCCCCTCCCATTCAGGAAACATAACATGTAAATCAAAT---  
ATCACAGGACTACTATTAGTACGTGATGGAGGAAACAGCAATGAGACT-----  
-----  
-----  
AATAACACAGAAACATTTCAGACCTGGAGGAGGAAATATGAAGGACAATTGGAGAAGTGAATTATATAAATATA  
AAGTGGTAGAAATTAATCCATTG---GGAATAGCACCCACTAAGGCAAAAAGGAGAGTGGTG-----  
-----GAGAGAGAGAAAAAGAGCA---GTGGGA---CTAGGAGCT-----  
---GTGTTCCCTTGGGTTCTTGGGAGCT---GCAGGAAGCACTATG---GGCGCAGCGTCA---  
GTGGCGCTGACGGTACAG---GCCAGACAA---CTGCTG---TCTGGTATAGTGCAACAGCAAAGC---  
AATTTG---CTGAGA---GCTATAGAGGCGCAACAGCATATGTTGCAACTCACGGTCTGGGGCATT  
>HM623553  
TTCTATTGCAATACATCAGGACTATTTAATAGTACATACAATGTTACATACAGTCCTAATAGCACAGCTGAT-----  
-----  
-----  
AATTCAAGCGACATCACAATTCGATGCAGAATAAAACAAATTATAAATATGTGGCAGGGGGTAGGACGAGCAA  
TGTATGCCCCCTCCCATTCAGGAAACATAACATGTAGATCAAAT---  
ATCACAGGGCTACTACTATTACGTGATGGAGGCATAGGAAACAAC-----  
-----  
-----  
GAAACAGAAACATTTCAGACCTGGAGGAGGAGATATGAAGGACAATTGGAGAAGTGAATTATATAAATATAAAG  
TGGTAGAGATTAAGCCATTA---GGAATAGCACCCACCGAGGCAAAAAGGAGAGTGGTG-----

-----GAGAGAGAAAAAAGAGCA---GTGGGA---ATAGGAGCT-----  
GTGTTCTTGGGTTCTTGGGAGCA---GCAGGAAGCACTATG---GGCGCAGCGTCA---  
ATGACGCTGACGGTACAG---GCCAGACAA---GTGTTG---TCTGGTATAGTGCAGCAGCAAAGC---  
AATTTG---CTGAAG---GCTATAGAGGCGCAACAGCATATGTTGCAACTCACAGTCTGGGGCATT  
>HM623554  
CTCTATTGCAATACATCAAACTGTTTGATAATAAAATGCTTAATAATACATCCTGGACAAAAAATGGT-----  
-----  
TCAGACTCAAACATTACACTTCCATGCAGAATAAAGCAAATTATAAACATGTGGCAGGGGGTAGGACGAGCAA  
TGTATGCCCCCTCCCATTCAGAGAAACATAACATGTAGCTCAAAT---  
ATCACAGGGCTACTATTGACACGTGATGGAGGCACAAATAGCACAAAT-----  
-----  
AATGGCACAGAGATATTCAGACCTGGAGGAGGAAATATGAAGGATAATTGGAGAAGTGAATTATATAAATATA  
AAGTGGTAGAAATTAACCATTG---GGAATAGCACCCACCGAAGCAAAAAGGAGAGTGGTG-----  
-----CAGAGAGAAAAAAGAGCA---ATAGGA---ATAGGAGCT-----  
---GTGTTCTTGGGTTCTTGGGAGCA---GCAGGAAGCACTATG---GGCGCGGCGTCA---  
ATAACGCTGACGGTACAG---GCCAGACAA---CTGCTG---TCTGGTATAGTGCAACAGCAAAT---  
AATTTG---CTGAGG---GCTATAGAGGCGCAACAGCACATGTTGCAACTCACGGTCTGGGGCATT  
>HM623556  
TTCTATTGTAATACATCAAAATTGTTTAATGGAAGTGATCCA-----  
-----  
AACAAACGAAACAATCACACTCCCATGCAGGATAAAACAAATTATAAACATGTGGCAGGAGGTAGGACGAGCAA  
TGTATGCCCCCCCCATTGAAGGAAAAATAACATGTAACTCAAGC---  
ATCACGGGACTACTATTGACACGTGATGGAGGAATTACTAATGATACA-----  
-----  
AAGAATGATACAGAGACATTCAGACCTGGAGGAGGAAATATGAAAGACAATTGGAGAAATGAATTATATAAAT  
ATAAGGTGGTAGAAATTAAGCCATTG---GGAGTAGCACCCACTAAATCAAAAAGGAGAGTGGTG-----  
-----GAGAGAGAAAAAAGAGCA---GTAGGA---ATGGGAGCT---  
-----GTACTCCTTGGGTTCTTGGGAGCC---GCAGGAAGCACTATG---GGCGCGGCGTCA---  
ATAACGCTGACGGTACAG---GCCAGACAA---CTGTTG---TCTGGTATAGTGCAACAGCAAAGC---  
AATTTG---CTGAGA---GCCATAGAGGCGCAACAGCATATGTTGCAACTCACGGTCTGGGGCATT  
>HM623557  
TTCTATTGCAATACAACAAAGCTGTTTTCTAATTTTTCTAATTCTAACAGTAGTAGC-----  
-----  
TCAAACATGACCATCATCCCATGCAGGATAAAACAAATTGTAAACATGTGGCAGGAGGTAGGACGAGCAATGT  
ATGCCCCCTCCCATTCAGAGAAACATAACATGTAACTCAAGT---  
ATCACAGGACTACTATTAAACACGTGATGGTGGTAACACAACAAAT-----  
-----  
AGCACAGAGATATTCAGACCCGGAGGAGGAAATATGAAGGACAATTGGAGAAGTGAAGTATATAAATATAAAG  
TGGTAGAAATCAAACCATTG---GGAATAGCACCCACTAAGGCAAAAAGGAGAGTGGTG-----  
-----GAGAGAGAGAAGAGAGCA---GCT-----ATAGGAGCT-----  
ATGATCGTTGGGTTCTTGGGAGCA---GCAGGAAGCACTATG---GGCGCGGCGTCA---  
ATAGCGCTGACGGTACAG---GCCAGACAA---CTGTTG---TCTGGTATAGTGCAACAGCAAAGC---  
AATTTG---CTGAGA---GCTATAGAGGCGCAACAGCATATGTTGCAACTCACGGTCTGGGGCATT  
>HM623559  
TTCTATTGTGATACAACACAACCTGTTTAATGAAAGTGATAAA-----  
-----  
AACACAAATATCACACTCCCATGCAGGATAAAACAAATTATACGCATGTGGCAGGGGGTAGGACGAGCAATGT  
ATGCCCCCTCCCATTCAGAGAAACATAACATGTACCTCAAAT---  
ATCACGGGGCTACTATTGACTCGTGATGGAGGAGAGAATAGCACAA-----  
-----  
GAGACATTTCAGACCTGGAGGAGAGAAAATATGAAGGACAATTGGAGAAGTGAATTATACAAATATAAAGTGGTAG  
AACTTAAGCCATTG---GGAATAGCACCCACTGAGGCAAAAAGGAGAGTGGTG-----

-----GAGAGAGAAAAAGAACA---GTGGGA---ATAGGAGTT-----  
 GTGTTCTTGGGTTCTTGGGAGCA---GCAGGAAGCACTATG---GGCGCGGCGTCA---  
 ATAACGCTGACGGTACAG---GCCAGACAA---CTGTTG---TCTGGTATAGTGCAACAGCAAAGC---  
 AATTTG---CTGAGA---GCTATAGAGGCGCAACAGCATATGTTGCAACTCACGGTCTGGGGCATT  
 >HM623563  
 TTCTATTGCAATACAACAAAACCTGTTTAATGGAAGTGCAGGCAACATAAGTGCAGACAACATAAGT-----  
 -----  
 -----  
 GCGGACAATAACATCACACTCCCATGCAGGATAAAAACAAATTATAAACATGTGGCAGAAGGTAGGACAAGCAA  
 TGTATGCCCCCTCCCATCAAAGGAAACATAACATGTAACCTCAACT---  
 ATCACAGGACTACTATTGATACGTGATGGAGGAGGTTCCAACAAC-----  
 -----  
 -----  
 ACAGAGACATTTAGACCTGGAGGAGGAAATATGAGGGACAATTGGAGAAGTGAGTTATATAAATATAAAGTAG  
 TAGAAATTAAGCCATTG---GGAATAGCACCCACTGAAGCAAAAAGGCGAGTGGTG-----  
 -----GAGAGAGAAAAAGAGCA---GTGGGA---ATAGGAGCT-----  
 TTAATCCTTGGGTTCTTGGGAGCA---GCCGGAAGCACTATG---GGCGCAGCGTCA---  
 ATAACGCTGACGGTACAG---GCCAGACAA---CTGTTG---TCTGGTATAGTGCAACAGCAAAGC---  
 AATTTG---CTAAGA---GCTATAGAGGCGCAACAGCATATGTTGCAACTCACAGTCTGGGGCATT  
 >HM623564  
 TTCTATTGTAATACATCAAACCTGTTTAATAGAACAGACAATAGTACAGAAAGTAAT-----  
 -----  
 -----  
 TCAAGCAACGTAATCATACTCCCATGCAGGATAAAAACAAATTTATAAACATGTGGCAACGGGTAGGACAAGCAA  
 TGTATGCTCCTCCCATTCAGGAAACATAACATGTAACCTCAAGT---  
 ATCACAGGATTACTATTGGTGCGGGATGGAGGAATAAATAGCACA-----  
 -----  
 -----  
 AATAATACAGAGATATTCAGACCTGGAGGAGGAGATATGAGGGACAATTGGAGAAGTGAATTATACAAGTATA  
 AAATAGTAGAAATTAACCATTG---GGAGTAGCTCCAAGTGAAGGCAAGGAGGAGAGTGGTG-----  
 -----GAGAGAGAAAAAGAGCA---GTGGGC---TTTGGAGCT-----  
 ---GTGATCCTTGGGTTCTTGGGAGCA---GCAGGAGGCACTATG---GGCGCGGCGTCA---  
 ATAACGCTGACGGTACAG---GCCAGACAA---TTGTTA---TCTGGTATAGTGCAACAGCAAAGC---  
 AATTTG---CTGAGG---GCCATAGAGGCGCAACAGCATATGTTGCAACTCACGGTCTGGGGCATT  
 >HM623566  
 TTCTATTGCGATACAACAAAACCTGTTTAATGAGACTCTGTTTAATGAGACTAAT-----  
 -----  
 -----  
 AAAAAATGGCACCATCACAATCCCATGCAGAATAAAAACAAATTATAAGAATGTGGCAGGGGGTAGGACAAGCAA  
 TGTATGCCCCCTCCCATGGAAGGAAACATAACATGTAACCTCAAGT---  
 ATCACAGGACTACTACTGACATGGGATGGGGGACAGAGAAAGGATAAC-----  
 -----  
 -----  
 AACGAGACAGAGACATTTCAGACCTGGAGGAGGAAATATGAAGGACAATTGGAGAAGTGAATTATATAAATATA  
 AAGTGGTAGAAATTAAGCCATTG---GGAGTAGCACCCACAGAGGCAAAACGGAGAGTGGTG-----  
 -----GAGAGAGAAAAAGAGCA---GTGGGA---ATAGGAGCT-----  
 ---GTACTCCTTGGGTTCTTGGGAGTA---GCAGGAAGCACTATG---GGCGCGGCGTCA---  
 ATAACGCTGACGGTACAG---GCCAGACAA---CTGTTG---TCTGGTATAGTGCAACAGCAAAC---  
 AATTTG---CTGAGA---GCTATAGAGGCGCAACAGCATCTGTTGCAGCTCACAGTCTGGGGCATT  
 >HM623569  
 TTCTATTGCAATACAACAAACCTGTTTAATACAACATATCTGAACATTACAAAGGAA-----  
 -----  
 -----  
 AGTAATGAAACCATTACACTCCCATGCAGAATAAAAACAAATTGTAAACATGTGGCAGGGGGTAGGAAGAGCAA  
 TGTATGCCCCCTCCCATTCAGGAAACATAACATGTAACCTCCAGT---  
 ATCACAGGACTACTATTGGTCCGTGATGGAGGGCAAGACAATGGCACA-----  
 -----  
 -----  
 AATACCACAGAGACATTTCAGGCCTGGAGGAGGAAATATGAAGGACAAGTGAAGTGAATTATATAAATATA  
 AAGTGGTAGAAGTTAAGCCATTG---GGAATAGCACCCACAGAGGCAAAAAGGAGAGTGGTG-----

-----GAGAGAGAAAAAGAGCA--GTAGGA--ATAGGAGCT-----  
---TGGTTCCTTGGGTTCTTAGGAGCA--GCAGGAAGCACTATG--GGCGCGGCGTCA---  
CTAACGCTGACGGTACAG--GCCAGACAA--CTATTG--TCTGGTATAGTGCAACAGCAAAGC---  
AATTTG--CTGAGA--GCTATAGAGGCGCAACAGCATATGTTGCAACTCACGGTCTGGGGCATT  
>HM623570  
TTCTATTGCAATACATCGAAACTGTTTAATACAACGTACCTAGACCTGGCTAAAAATGAGACA-----  
-----  
-----  
GATAACGACACAATCATACTCCCATGCAGGATAAAACAAATTATAAACATGTGGCAAGAGGTAGGACGAGCAA  
TGTATGCCCCCTCCAATTAAAGGAAAACCTAACATGTAACCTCAAGT---  
ATCACAGGACTACTATTGGTACGAGATGGGGGAATCATAAATAGCACGAATAGC-----  
ACAAATAACACTAACACT---ACA-----  
-----  
GAGACAGAGATATTCAGACCTGGAGGAGGAGATATGAGGGACAATTGGAGAAGTGAATTATATAAATATAAAG  
TAGTAGAAATTAAGCCATTA--GGAATAGCACCCACAGCATCAAAAAGGAGAGTGGTG-----  
-----GAGAGAGAAAAAGAGCA--GTGGGA--ATAGGAGCT-----  
GTGTTTCCTTGGGTTCTTGGGAGCG--GCAGGAAGCACTATG--GGCGCGGCGTCA---  
ATAACGCTGACGGTACAG--GCCAGACAA--CTGTTG--TCTGGTATAGTGCAACAGCAAAGT---  
AATTTG--CTGAGA--GCTATAGAGGCGCAACAGCATATGTTGCAACTCACGGTCTGGGGCATT  
>HM623572  
TTTTATTGCAATACAACAAAACCTGTTTAATATCACAGTAAATGGTAACATGACA-----  
-----  
-----  
GAAAAATGATACCATAACACTCCCATGTAGAATAAAACAAGTTATAAACATGTGGCAAGAGGTAGGACGAGCAA  
TGTATGCCCCCTCCCATTGCAGGGAACCTAACATGTACATCAAAT---  
ATCACAGGAATACTATTACACGTGATGGAGGCATAAATATCACAAAT-----  
-----  
-----  
GGCACAAAGCCAGAGATATTCAGACCAGGAGGAGGAAATATGAAGGACAATTGGAGAAATGAATTATATAAAT  
ATAAAGTGGTAGAAATTAAGCCACTG--GGAATAGCACCCACTGAGGCAAAAAGGAGAGTGGTG-----  
-----GAGAGAGGAAAAAGAGCAGTAGTGGGA--ATGGGAGCT---  
-----TTGCTCTTTGGGTTCTTGGGAGCA--GCAGGAAGCACTATG--GGCGCAGCGGCA---  
GTGACGCTGACGGTACAG--GCCAGACAA--CTGTTG--TCTGGTATAGTGCAACAGCAAAGC---  
AATTTG--CTGAGA--GCTATAGAGGCGCAACAGCATATGTTGCAACTCACAGTCTGGGGCATT  
>HM623574  
TTCTATTGCGATACAACAGGGATATTTAATGAAAGTGCAACAGGGATATTTAATGAAAGTAAT-----  
-----  
-----  
ACAAACGAAACCATCACACTCCCATGTAGAATAAAACAGATTATAAACATGTGGCAGGGGGTAGGACGAGCAA  
TGTATGCTCCTCCCGTTGCAGGAAACATAACATGTAATTCAAAT---  
ATCACAGGATTATTATTGACACGTGATGGTGGTGATAAAAGTAAC-----  
-----  
-----  
AACACCACAGAAATATTCAGACCAGAAGGAGGGAATATGAAGGACAACCTGGAGAAGTGAATTATACAAATATA  
AAGTGGTAGAGATTAAGCCATTG--GGAGTAGCACCCACTGGAGCAAAAAGGAGAGTGGTG-----  
-----GAGAGAGAAAAAGAGCA--GTGGGA--ATAGGAGCT-----  
---GTGCTCCTTGGGTTCTTGGGAGCA--GCAGGAAGCACTATG--GGCGCGGCGTCA---  
GTGACGCTGACGGTACAG--GCCAGACAA--CTGTTG--TCTGGTATAGTGCAACAGCAAAGC---  
AATTTG--CTGAGA--GCTATAGAGGCGCAACAGCATATGTTGCAACTCACAGTCTGGGGCATT  
>HM623575  
TTCTATTGCAACACAACAAAGTTGTTTAATGAGACAATATTGAACAATGAGACAGACAAT-----  
-----  
-----  
AACACAACATCACCAGAATCCCATGCAGAATAAAACAAATTATAAACATGTGGCAGCAGGTAGGACGAGCAA  
TGTATGCCCCCTCCCATTGCAGGAAACATAACATGTATGTCAAAT---  
ATCACAGGACTACTATTGGTACGTGATGGAGGAAACTCAAGTAAT-----  
-----  
-----  
GACTCAGAGATATTCAGACCTGGAGGAGGAAATATGAAGGACAATTGGAGAAGTGAATTATATAAATATAAAG  
TGGTAGAAGTTAAGCCATTG--GGAATAGCACCCACTAAGGCAAAAAGAAGAGTGGTG-----

-----GAGAGAGAAAAAAGAGCA---GTGCAC---ATAGGAGCT-----  
GTGTTCTTGGGTTCTTGGGAATG---GCAGGAAGCACTATG---GGCGCGGCGGCA---  
GTGACGCTGACGGTACAG---GCCAGACAA---CTGTTG---TCTGGTATAGTGCAACAGCAAAGT---  
AATTTG---CTGAGG---GCTATAGAGGCGCAACAACATATGTTGCAACTCACGGTCTGGGGCATT  
>HM623576  
TTCTACTGCAACACAACAACTTGT'TTGATGAAAGACAGTTTAATGGAAGTAAT-----  
-----  
-----  
GCAAAACACAACCATCACACTCCCATGCAGAATAAAACAAATTATAAACATGTGGCAGGAGGTAGGAAGAGCAA  
TGTATGCTCCTCCCATTGCAGGAAGCATAACATGTAACCTCAAGT---  
ATCACAGGGTTACTATTGCTACGTGATGGAGGAAACAAAACAGGCACAGAG-----  
-----  
-----  
TATAATGAAACAGAGATATTCAGACCTGGAGGAGGAAAATATGAAGGATAATTGGAGAAGTGAATTATATAAAAT  
ATAAAGTGGTAGAAATTAAGCCATTA---GGAATAGCACCCACTGGAGCAAGAAGGAGAGTGGTG-----  
-----GAGAGAGAAAAAAGAGCA---GTGGGA---ATAGGAGCT---  
-----GTACTCCTTGGGTTCTTGGGAGCA---GCAGGAAGCACTATG---GGCGCGGCGTCA---  
ATAACGCTGACGGTACAG---GCCAGACAA---CTGTTG---TCTGGTATAGTGCAACAGCAAAGC---  
AATTTG---CTGAGA---GCCATAGAGGCGCAACAGCATATGTTGCAACTCACGGTCTGGGGCATT  
>HM623579  
TTCTATTGCAACACATCAAACTGT'TTAATAGTACACACGGGAATATTAGTACACCCATGAATGGTAGTAAT-  
-----  
-----  
CCAAATTCAACCATCATACTCCCATGCAGAATAAAACAAATTATAAACATGTGGCAGGGGGTAGGACGAGCAA  
TGTATGCCCCCTCCCATTGCAGGAAACATAACATGTGTATCAAAC---  
ATCACAGGAATACTATTGACACGTGATGGAGGAAACACCAAAGACAAT-----  
-----  
-----  
GATACTAAAGAGACATTTCAGACCTGGAGGAGGAGATATGAGAGACAACTGGAGAAGTGAATTATATAAAATATA  
AAGTGGTAGAAATTAAGCCATTA---GGAATAGCACCCACTAGTGCAAAAAGGAGAGTGGTG-----  
-----GAGAGACAAAAAAGAGCA---GTGGGA---ATAGGAGCT-----  
---TTGTTCTTGGGTTCTTGGGAGCA---GCAGGAAGCACTATG---GGCGCAGCGTCA---  
ATAACGCTGACGGTACAG---GCCAGACAA---TTGTTG---TCTGGTATAGTGCAACAGCAAAGC---  
AATTTG---CTGAGG---GCTATAGAGGCGCAACAACATATGTTGCAACTCACGGTCTGGGGCATT  
>HM623580  
TTTTATTGCAATACAACAAGACTGT'TTAATATCAACCTGAATAATATAAGTAATATAAAA-----  
-----  
-----  
ATAAATGAACTATCATACTCCCATGCAGAATAAAACAAATTGTAAACATGTGGCAGGGGGTAGGAAGAGCAA  
TGTATGCCCCCTCCCATTGCAGGAAACATAACATGTGTCTCAAAT---  
ATCACAGGACTACTATTGACACGTGATGGAGGCAAAACACAATAAATCA-----  
-----  
-----  
AATAATACAGAGACATTTCAGACCAGGAGGAGGAAATATGAAAGACAATTGGAGAAGTGAATTATACAAATATA  
AAGTGATAGAAATTAAGCCATTG---GGAGTGGCACCCACTGGAGCAAGAAGGAGAGTGGTG-----  
-----CAGAGAGAAAAAAGAGCA---GTGGGA---ATAGGAGCT-----  
---GTACTCCTTGGGTTCTTGGGAGCA---GCAGGAAGCACTATG---GGCGCGGCGTCA---  
ATAACGCTGACGGTACAG---GCCAGACAA---CTGTTG---TCTGGTATAGTGCAACAGCAAAGC---  
AATTTG---CTGAGA---GCTATAGAGGCGCAACAGCATATGTTGCAACTCACAGTCTGGGGCATT  
>HM623581  
TTCTATTGTAATACAACAACAACTGT'TTAATAGTACATACACGCCTGGATACGTGCCTACAGAAAGT-----  
-----  
-----  
AATTCAACAAACATCACACTCCCATGCAGAATAAGACAAATTATAAACATGTGGCAACAGGTAGGACGAGCAA  
TGTATGCTCCTCCCATTGCAGGAAACATAACATGTAACCTCAAGT---  
ATCACAGGATTACTATTGGTGCGTGATGGAGGAAAAAATAGCACA-----  
-----  
-----  
AATGAGACCTTCAGGCCTGGAGGAGGAGATATGAGGGACAATTGGAGAAGTGAATTATACAAATATAAAGTGG  
TAGAAATTAAGCCATTG---GGAATAGCACCTACTGGAGCAAAAAGGAGAGTGGTG-----

-----GAGAGAGAAAAAGAGCA---GTGGGA---ATAGGAGCT-----  
 TTGTTCTTGGATTCTTGGGAGCA---GCAGGAAGCACTATG---GGCGCGGCGTCA---  
 ATAACGCTGACGGTACAG---GCCAGACAA---TTGTTG---TCTGGTATAGTGCAACAGCAAAGC---  
 AATTTG---CTGAGG---GCCATAGAGGCGCAACAGCATATGTTGCAACTCACGGTCTGGGGCATT  
 >HM623582  
 TTCTATTGCAATACATCAAGACTGTTTAATAATACATACTGGTTCAATAGTACAGACGGGCATAATGAGACAA  
 AT-----  
 -----  
 GAGAAATGAAACCATCACACTTCCATGCAAAATAAAACAATTTATAAACATGTGGCAGGAGGTAGGACGAGCAA  
 TGTACGCCCCCCCCATTGCAGGAAACATAACATGTAACCTCAAAT---  
 ATCACAGGATTACTATTGACACGTGATGGAGGAAACATGAATGAT-----  
 -----  
 -----  
 ACAGAAATATTGAGACCTGGAGGAGGAAATATGAAAGACAATTGGAGAAATGAACTATATAAATACAAAGTGG  
 TAGAAATTAAACCATTG---GGAATAGCACCCACTGGAGCAAAAAGGAGAGTGGTG-----  
 -----GAGAGAGAAAAAGAGCA---GCCGGA---ATAGGAGCT-----  
 GTGCTCCTTGGGTTCTTGGGAGCA---GCAGGAAGCACTATG---GGCGCGGCGTCA---  
 ATAACGCTGACGGTACAG---GCCAGACAA---CTGTTG---TCTGGTATAGTGCAACAGCAGAAT---  
 AATCTG---CTGAGG---GCTATAGAGGCGCAACAGCATATGTTGCAACTCACGGTCTGGGGCATT  
 >JN687728  
 TTCTATTGCAATACATCAGGGCTATTTAATAGTACATATAATCTTAATAATACATGCAATGCTACTGGAACAG  
 AAAGTAAG-----  
 -----GCAACA-----  
 GGAAATGTAGACATCATCACACTCCCATGCAGAATAAAACAATTTATAAACATGTGGCAAAAGGTAGGACGAG  
 CAATGTATGCCCTCCCATTCAGGAAACATAACATGTAGATCAAAT---  
 ATTACAGGACTACTATTGACACGTGATGGAGGAAATGATAGAGGACGAGAAGAG-----  
 -----  
 -  
 TCTAACCACACAAAAAATGAGACATTCAGACCTGGAGGAGGAAATATGAGGGACAATTGGAGAAGTGAATTAT  
 AATAATATAAAGTGGTAGAAATTAAGCCATTG---GGAATAGCACCCACTAAGGCAAAAAGGAGAGTGGTG--  
 -----GAGAGAGAAAAAGAGCA---GTAACA---  
 CTAGGAGCT-----ATGTTCTTGGGTTCTTGGGAACA---GCAGGAAGCACTATG---  
 GGCGCGGCGTCA---ATGGCGCTGACGGTACAA---GCCAGACAA---TTGTTG---  
 TCTGGTATAGTGCAACAGCAAAGC---AATTTG---CTGAGG---  
 GCTATAGAGGCGCAACAGCATCTGTTGCAACTCACAGTCTGGGGCATT  
 >JN687730  
 TTTTATTGCAATACATCAAGCCTGTTCAATAACTCCCTGCTTAATGGTACAAATACTTCA-----  
 -----  
 -----  
 AATACCACAAACATCACACTCCCATGCAGAATAAAACAATTTATAAACATGTGGCAGGAGGTGGGGCGGGCAA  
 TGTATGCCCTCCCATTCAGGAAATATAACATGTATATCAAAT---  
 ATCACAGGAATACTATTAAACACGTGATGGAGGACAGAACACAAAT-----  
 -----  
 -----  
 GACTCTACAGAGACATTCAGACCTGCAGGAGGAAATATGAAGGATAATTGGAGAAGTGAATTATATAAATACA  
 AAGTGGTAGAAATTAAGCCATTG---GGAATAGCACCCACTGAGGCAAAAAGGAGAGTGGTG-----  
 -----GAGAGAGAAAAAGAGCA---GTGGGA---GTAGGAGCT-----  
 ---ATGTTCTTGGGTTCTTGGGTTA---GCAGGAAGCACTATG---GGCGCGGCGTCA---  
 ATGACGCTGACGGTACAG---GCCAGACAA---TTGTTG---TCTGGTATAGTGCAACAGCAAAGC---  
 AATTTG---CTGAGG---GCCATAGAGGCGCAACAGCATATGTTGCAACTCACGGTCTGGGGCATT  
 >JN687731  
 TTCTATTGCAATACAACAAAGCTGTTCAATATAACAAATCCGGCTAATATAACAAGTAAA-----  
 -----  
 -----  
 GGTGATGATACCATCATACTCCCATGCAGAATAAAACAATTTATAAACATGTGGCAGGAGGTAGGACGAGCCA  
 TGTACGCCCCCTCCCATTCAGGAAACATAACATGTAACCTCAAGT---  
 ATTACAGGACTACTATTGGTACGTGATGGAGGAAATGATACTAATACT-----  
 -----  
 -----  
 ACTGAGACAGAGACATTCAGACCTGGAGGAGGAAATATGAAGGACAATTGGAGAAGTGAATTATATAAATATA

AAGTGGTAGAAGTTAAGCCATTG---GGAATAGCACCCACGGGGGCAAAAAGGAGAGTGGTG-----  
-----GAGAGAGAAAAAAGAGCA---GTGGGA---ATAGGAGCT-----  
---GTGTTCCCTTGGGTTCTTGGGAGCA---GCAGGAAGCACTATG---GGCGCGGCGTCA---  
ATAACGCTGACGGTACAG---GCCAGACAA---CTGTTG---TCTGGTATAGTGCAACAGCAAAGC---  
AATTTG---CTGAGA---GCTATAGAGGCGCAACAGCATATGTTGCAACTCACGGTCTGGGGCATT  
>KF114884  
TTCTATTGTAATACATCAAACCTGTTTAATCTGTCTGTTACTGCACTTAATGGCACAGGAAATGATACCACAA  
AC-----  
-----  
GATGCCACAAACATCACACTCCCATGCAGAATAAAGCAAATTGTAAACATGTGGCAGGAGGTAGGACGAGCAA  
TGTATGCCCCCTCCCATTCAGGTTAGAATAACATGTATATCAAAT---  
ATCACAGGACTACTATTAGTACGTGATGGGGGGGACAATAACAGA-----  
-----  
-----  
ACTAATGAGACATTCAGACCTGGAGGAGGAAATATGAAAAGACAATTGGAGAAGTGAATTATATACATATAAAG  
TGGTAGAAATTAAGCCATTA---GGAATAGCACCCACTGAGGCAAGAAGGAGAGTGGTG-----  
-----GAGAGAGAAAAAAGAGCA---GTGGGA---ATGGGAGCT-----  
GTGATCCTTGGGTTCTTGGGAGCA---GCAGGAAGCACTATG---GGCGCGGCGTCA---  
ATAACGCTGACGGTACAG---GCCAGACAA---CTGTTG---TCTGGTATAGTGCAACAGCAAAGC---  
AATTTG---CTGAGA---GCTATAGAGGCGCAACAACATATGTTGCAACTCACAGTCTGGGGCATC  
>KC154018  
TTCTATTGCAATACATCAAACCTGTTTAATGGTCCTAATGGAACAAGCAATGGTTTA-----  
-----  
-----  
GATTCAGAAAACATCATCCTCCCATGCAGAATAAAACAAATTATAAATCTGTGGCAGGAGGTGGGACGAGCAA  
TGTATGCCCCCTCCCATTCAGGAAAGCATAATATGTGAATCAGAT---  
ATTACAGGATTACTATTGACACGTGATGGAGGATGGACAGATGAC-----  
-----  
-----  
AATGGGACAGAGAAATTCAGACCTGGAGGAGGAGATATGAGGGACAATTGGAGAAGTGAATTATATAAATACA  
AAGTAGTAGAAATAAAGCCATTA---GGAATAGCACCCACTAAGGCAAAAAGGAGAGTGGTG-----  
-----GAGAGAGAAAAAAGAGCA---GTAGGA---ATAGGAGCT-----  
---GTGTTCCCTTGGGTTCTTGGGAGCA---GCAGGAAGCACTATG---GGCGCAGCGTCA---  
ATAACGCTGACGGTACAG---GCCAGACAA---TTGTTG---TCTGGTATAGTGCAACAGCAAAGT---  
AATTTG---CTGAGG---GCTATAGAGGCGCAACAGCATATGTTGCAACTCACAGTCTGGGGCATT  
>KC154021  
TTCTACTGCAATACATCAGGCCTGTTTAATAGCACAGTTACTCCTAACAATACACAGGGGGGCAAATACCACTG  
CA-----  
-----  
AATAATGGCACTATAACTATCCCATGCAGAATAAAACAGATTATAAATATGTGGCAAAGAGTGGGACAAGCAA  
TGTACGCCCCCTCCCATTCAGGAGTAATAAAATGTGAATCAAAC---  
ATTACTGGAATGTTATTAACAAGGGATGGTGGGTCTGATAATAAC-----  
-----  
-----  
AATACAGAGGTCTTCAGACCTGGAGGAGGAAATATGAAGGACAATTGGAGAAGTGAATTATATAAATATAAAG  
TGGTAGAAGTTAAGCCATTG---GGAATAGCACCCACTAAAGCAAAAAGGAGAGTGGTG-----  
-----AAGAGAGAAAAAAGAGCA---GTGGGA---ATAGGAGCT-----  
GTGTTCCCTTGGGTTCTTGGGAGCT---GCAGGAAGCACTATG---GGCGCAGCGTCG---  
ATGACGCTGACGGTACAG---GCCAGACAA---TTGTTG---TCTGGTATAGTGCAACAGCAAAC---  
AATTTG---CTGAGG---GCTATAGAGGCGCAACAGCATATGTTGCAACTTACGGTCTGGGGCATT  
>KC154022  
TTCTATTGCAATACAACAAACCTGTTTAATGAAACAAACCTTAATGAAACACTG-----  
-----  
-----  
TCAAAACGGAACCATCATACTCCCATGCAAAATAAAACAAATTGTAAACATGTGGCAAGGGGTAGGACGAGCAA  
TATTTGCCCCCTCCCATTCAGGAAATATAACATGTAATTCAAAT---  
ATCACAGGACTACTATTGACACGTGATGGAGGAAACAACAGCTGCAATAGTACA-----  
-----  
-----  
TGCACAGAGATATTCAGACCTGAAGGAGGAAACATGAAGGACAACCTGGAGAAGTGAATTATACAAATATAAAG

TGGTAGAAATTAAGCCATTG---GGAGTAGCACCCACCGAGGCAAAAAGGAGAGTGGTG-----  
-----GAGAGAGAAAAAAGAGCA---GTAGGA---ATAGGAGCT-----  
GTGCTCCTTGGGTTCTTGGGAGCA---GCAGGAAGCACTATG---GGCGCAGCGTCA---  
ATAACGCTGACGGTACAG---GCCAGACAA---CTGTTG---TCTGGTATAGTGCAGCAGCAAAGC---  
AATTTG---CTGAGA---GCTATAGAGGCGCAACAGCAGTTGTTGCAACTCACGGTCTGGGGCATT  
>KC154024  
TTCTATTGCAACACAACAAACCTGTTTTCAAACACAACCAAT-----  
-----  
-----  
GACAACACAACCATCACACTCCCATGCAGGATAAAAACAATTTATAAACATGTGGCAGGGGGTAGGACGAGCAA  
TGTATGCCCCCTCCCATTCGAGGACACATAACATGTAACCTCAACT---  
ATCACAGGATTACTATTGACACGTGATGGAGGAAACAACAACAGCACA-----  
-----  
-----  
AACGAAACAGAAACATTTCAGACCTGGAGGAGGAAATATGAAGGACAATTGGAGAAGTGAATTATACAAATATA  
AAGTGGTAGAAATTAATCCATTA---GGAGTAGCACCCACTAAGGCAAAAAGGAGAGTGGTG-----  
-----GAGAGAGAAAAAAGAGCA---GTGGGA---ATAGGAGCT-----  
---GTGTTCCCTTGGGTTCTTGGGAGCA---GCAGGAAGCACTATG---GGCGCGGCGTCA---  
ATAACGCTGACGGTACAG---GCCAGACAA---TTGCTG---TCTGGTATAGTGCAACAGCAAAGC---  
AATTTG---CTGAGA---GCTATAGAGGCGCAACAGCATATGTTGCAACTCACAGTCTGGGGCATT  
>KF114885  
TTCTATTGCAATACAACAGAACTGTTTAATACAACACTGTTGAATGTTAGTGAAAAGTGAG-----  
-----  
-----  
TTAAATAAAACCATAACCATCCCATGCAAAATAAAACAAATCATAAACATGTGGCAGGAAGTAGGACGAGCAA  
TGTATGCCCCCTCCCATTCGAGGCAACATTACATGTGTCTCAAAAT---  
ATCACAGGACTACTATTGTACAGTGTGATGGAGGAAACAACAATAAT-----  
-----  
-----  
ACTGCTAATGAGACATTTCAGACCTGGAGGAGGAAATATGAAAGACAATTGGAGAAGTGAATTATATAAATATA  
AAGTAGTAGAAGTTAAGCCATTA---GGGATAGCACCCACCCAGGCAAGAAGGAGAGTGGTG-----  
-----GAGAGAGGAAAAAGAGCA---GTGGGA---ATAGGAGCT-----  
---GTGTTCCCTTGGGTTCTTGGGAGCA---GCAGGAAGCACTATG---GGCGCGGCGTCA---  
ATAACGCTGACGGTACAG---GCCAGACAA---CTGTTG---TCTGGTATAGTGCAACAGCAAAGC---  
AATTTG---CTGAGA---GCTATAGAGGCGCAACAGCATATGTTGCAACTCACGGTCTGGGGCATT  
>KC154025  
TTCTATTGCAATACATCAAAACTGTTTAATGGTACATACAATGGTACATACAATGGTGCATATAATAGTACT-  
-----  
-----  
-----  
TCAAATGCAACCATCAAACTCCCATGCAAAATAAAACAAATTTATAAACATGTGGCAGGAGGTAGGACGAGCAA  
TGTATGCCCCCTCCCATTCGAGGAAACATAACATGTGACTCAAAAT---  
ATCACAGGACTACTATTGACATGGGATGGAGAGAGTAGCACAGATAAAAAT-----  
-----  
-----  
AATAGCACATCTACATTTCAGACCTGGAGGAGGAGATATGAGGGACAATTGGAGAAGTGAATTATATAAATATA  
AAGTGGTAGAGATTAAGCCATTA---GGAATAGCACCCACTGATGCAAAAAGGAGAGTGGTG-----  
-----GAGAGAGAAAAAAGAGCAGTCCTGGGA---CTAGGAGCT-----  
---GTGTTCCCTTGGGTTCTTGGGAGCA---GCAGGAAGCACTATG---GGCGCGGCGTCA---  
CTAACGCTGACGGTACAG---GCCAGGCAA---TTATTG---TCTGGTATAGTGCAACAGCAAAGC---  
AATTTG---CTGAGG---GCTATAGAGGCGCAACAGCATATGTTGCAACTCACGGTCTGGGGCATC  
>KC149008  
TTCTATTGCAGTACATCAAACCTGTTTAATGATAATAGTACAGGCGATTCTAAT-----  
-----  
-----  
AACATCACACTCATCACACTCCCATGCAGAATAAAACAAATTTATAAACATGTGGCAGGGGGTAGGACAAGCAA  
TGTATGCCCCCTCCCATTCGAGGAACTATAACATGTACATCAAAAT---  
ATCACAGGATTACTATTGACACGTGATGGAGGAAACACATCAGGA-----  
-----  
-----  
ACAGAAATATTTAGACCTGGAGGAGGAAATATGAAAGACAATTGGAGAAGTGAATTATATAAATATAAAGTAG

TAGAAATTAAGCCATTA---GGAATAGCACCGACTGAGGC AAAAAGGAGAGTGGTG-----  
-----GAGAGAGAAAAAGAGCA---GTGGGA---ATAGGAGCT-----  
GTA CTCTTGGGTTCTTGGGAGCA---GCAGGAAGCACTATG---GGCGGGCGTCA---  
ATAGCGCTGACGGTACAG---GCCAGACAA---CTGTTG---TCTGGTATAGTGCAACAGCAAAGC---  
AATTTG---CTGAGG---GCCATAGAGGCGCAACAGCATATGTTGCAACTCACAGTCTGGGGCATT  
>HM204624  
TTCTATTGCAATACATCAAACTATTTAATGGTACATACATATATAATGATACAAAGAATAGTAAT-----  
-----  
-----  
TCAAGTGCAAACATCACACTCCCATGTAGAATAAAACAAATTATAAACATGTGGCAGGAGGTAGGACGAGCAA  
TGTATGCCCCCTCCCATTCGAGGATACATAACATGTAAC TCAAAT---  
ATCACAGGACTACTATTGACACGTGATGGAGGGGCAGGAGGCGATAATACA-----  
-----  
-----  
GAAAAATAACAGAGATATTTAGACCTGCAGGAGGAGACATGAGGGACAATTGGAGGAGTGAATTATATAAAAT  
ATAAAGTGGTAGAAATTA AACCATTA---GGAGTAGCACCCACTGATGCAAAAAGGAGAGTGGTG-----  
-----GAGAGAGAGAAAAAGAGCA---GTGGGA---ATAGGAGCG---  
-----TTGTTCTTGGGTTCTTGGGAGCC---GCAGGAAGCACTATG---GGCGGGCGTCA---  
ATGACGCTGACGGTACAG---GCCAGACAA---TTATTG---TCTGGTATAGTGCAACAGCAAAGC---  
AATTTG---CTGAGG---GCTATAGAGGCGCAACAGCATATATTGCAACTCACGGTCTGGGGCATT  
>JN681254  
TTCTATTGCAATACATCAAACTCTTTCTGTTTAATGAGACA-----  
-----  
-----  
TCAAAATCCACCATCACACTCCAATGCAAAATAAAACAAATTATAAGAATGTGGCAGAAGGTAGGACAAGCAA  
TGTATGCCCCCTCCCATTCGAGGAAACATAACATGTAAATCAAAT---  
ATCACAGGACTACTATTAACACGTGATGGAGGTAGAGAGAATAAT-----  
-----  
-----  
GGGACAGAGATATTCAGACCTGGAGGTGGAATATGAGGGACAATTGGAGAAGTGAATTATATAAAATATAAAG  
TGGTAGAAATCAAGCCATTA---GGAATAGCACCCACAAATGCAAAAAGGAGAGTGGTG-----  
-----GAGAGAGAGAAAAAGAGCA---GTGGGA---ATAGGAGCT-----  
GTATTCCTTGGGTTCTTGGGAGCA---GCAGGAAGTACTATG---GGCGGGCGTCA---  
ATAACGCTGACGGTACAA---GCCAGACAA---TTGCTG---TCTGGAATAGTGCAACAGCAAAGC---  
AATTTG---CTGAGG---GCTATAGAGGCGCAACAACATATGTTGCAACTCACAGTTTGGGGCATT  
>JN681256  
TTCTATTGCAATACAACAAAAC TATTCAACATTAATACAACCAATACAACA-----  
-----  
-----  
GACAAATGGAACCATCACACTCCCATGCAGAATAAAACAGATAATAAACATGTGGCAGGGGGTAGGACGAGCAA  
TGTATGCCCCCTCCCATTCGAAGGAAACATAACATGTGCATCAAAT---  
ATCACAGGACTACTACTGACACGTGATGGAGGAAACACAACCACC-----  
-----  
-----  
AACACAGCAGAAACATTTCAGACCTGGAGGAGGAAATATGAAGGACAATTGGAGAAGTGAATTATATAAAATATA  
AAGTAGTAGAAATTA AACCATTA---GGAATAGCACCTACCCAGGCAAAAAGGAGAGTGGTG-----  
-----GAGAGAGAAAAAGAGCA---GTGACA---CTAGGAGCT-----  
---ATGTTCTTGGGTTCTTGGGAGCA---GCAGGAAGCACTATG---GGCGGGCGTCG---  
ATAACGCTGACGGTACAG---GCTAGACAA---CTGTTG---TCTGGTATAGTGCAACAGCAAAGC---  
AATTTG---CTGAGA---GCCATAGAGGCGCAACAGCATATGTTGCAACTCACAGTCTGGGGCATT  
>HQ615960  
TTCTATTGCAATACAACAGGACTGTTTGATGAAAGTGATTCA-----  
-----  
-----  
AACACAACAATCCCATGCAGGATAAAACAAATTATAAACATGTGGCAGAAGGTAGGACGGGCCATGTATGCCC  
CTCCCATTCGAGGAAACATAACATGCAAA TCAAAT---  
ATCACAGGACTACTATTGACACGTGATGGAGGAGGCCAGATAATAGGACAAAG-----ACAGATAAT-----  
-----  
-----  
AGGACAGAGACATATAAT---  
AGGACAGAGACATTCAGACCTACAGGAGGAAATATGAAAAGACAATTGGAGAAGTGAGTTATATAAAATATAAAG

TGGTAGAAATTAACCATTG---GGAATAGCACCCACTGATTCAAAAAGGAGAGTGGTG-----  
 -----GAAAGAGAAAAAAGAGCA---GTGGGA---ATAGGAGCT-----  
 GTGTTCTTGGGTTCTTGGGAGCA---GCAGGAAGCACTATG---GGCGCGGCGTCA---  
 ATGACGCTGACGGTACAG---GCCAGACAA---CTGTTG---TCTGGTATAGTGCAACAGCAAAGC---  
 AATTTG---CTGAGA---GCTATAGAGGCGCAACAGCATATGTTGCAACTCACAGTCTGGGGCATT  
 >HQ595751  
 TTCTATTGTGATACATCAAACTATTTAATGGTACACTTGATGGTACAGAATGGAGAGGAGGTAATGAT----  
 -----  
 -----  
 ACAAATGGTACCTTCACAATTCATGCAGAATAAAACAATTTATAAACATGTGGCAGGAGGTAGGACGAGCAA  
 TGTATGCCCCCTCCCATTCAGGAAGAATAAACTGTACATCAAAT---  
 ATCACAGGACTACTATTAGTACGTGATGGGGGCAAAACAAATAGC-----  
 -----  
 -----  
 ACAAGTGAAACATTTCAGACCTGGAGGAGGAAATATGAAGGACAATTGGAGAAGTGAATTATACAAATATAAAG  
 TAGTAGAAATTAAGCCATTA---GGAATAGCTCCCACTGGAGCAAAAAGGAGAGTGGTG-----  
 -----GAGAGAGAAAAAAGAGCA---GTAGGA---ATAGGAGCT-----  
 GTAATCCTTGGGTTCTTGGGAGCA---GCAGGAAGCACTATG---GGCGCAGCGTCA---  
 ATAGCGCTGACGGCACAG---GCCAGACAA---GTGTTG---TCTGGTATAGTGCAACAGCAAAAC---  
 AATTTG---CTGAGA---GCTATAGAGGCGCAACAGCATATGTTGCAACTCACAGTCTGGGGCATT  
 >JQ754244  
 TTCTATTGTAATACATCAAGGCTGTTTAATGGCACATATAATGAGACAAACACATACAATGGAACTTCAAATG  
 AT-----  
 -----  
 ACAGAAAGTACAATCACAATCCAATGCAGGATAAAACAAATTATAAACATGTGGCAGGAGGTGGGACGAGCAA  
 TGTATGCCCCCTCCCATTCAGGAACATAACATGTAGATCAAAT---  
 ATCACAGGATTACTATTGACACGTGATGGAGGAACCACTAATGACAGTGAAACT-----  
 -----  
 -----  
 AATGAGATAGAGACATTTCAGACCTGAAGGAGGAGATATGAAGAACAATTGGAGAAGCGAATTATATAAATATA  
 AAGTAGTAGAAATTAAGCCATTA---GGAATAGCACCCACTGAGGCAAAAAGGAGAGTGGTG-----  
 -----CAGAAAGAAAAAAGAGCA---GTGGGA---ATAGGAGCT-----  
 ---GTGTTCTTGGGTTCTTGGGAGCA---GCAGGAAGCACTATG---GGCGCGGCATCA---  
 ATAACGCTGACGGTACAG---GCCAGACAA---TTATTG---TCTGGTATAGTGCAACAGCAAAGC---  
 AATTTG---CTGAGG---GCCATAGATGCGCAACAGCATATGTTGCAACTCACAGTCTGGGGCATT  
 >HQ595765  
 TTCTATTGTAATACATCAAGCCTGTTTAATAGTACATACTGGCCTAATGGTACATATTGGCCTAATGATACAG  
 AAAG-----  
 -----AAT---  
 TCAACCAATGCAAGTATCACACTCCAATGTAGAATAAAACAAATTATAAACATGTGGCAGAAGGTAGGACGAG  
 CAATGTATGCTCCTCCCATTCAGGAATCATAACATGTAAATCAAAT---  
 ATCACAGGACTACTATTGACACGTGATGGAGGAAGAAATGAAACA-----  
 -----  
 -----  
 GAGGAGACATTTCAGACCTGGAGGAGGAGATATGAGGGACAATTGGAGAAGCGAATTATATAAATATAAAGTGG  
 TAGAAATTAAGCCATTA---GGAATAGCACCCACTAAGGCAAAAAGGAGAGTGGTG-----  
 -----GAGAGAGAAAAAAGAGCA---GTGGGA---CTAGGAGCT-----  
 TTGTTCTTGGGTTCTTGGGAGCA---GCAGGAAGCACTATG---GGCGCAGCATCA---  
 ATAACGCTGACGGTACAG---GCCAGACAA---TTATTG---TCTGGTATAGTGCAACAGCAAAAC---  
 AATTTG---CTGAGA---GCTATAGAGGCGCAACAGCATCTGTTGCAACTCACGGTCTGGGGCATT  
 >HQ615956  
 TTCTATTGTAATACATCACAGCTGTTTAATACCACTGGCAAC-----  
 -----  
 -----  
 AACCAACACAAACCTCACCTCCCATGTAGAATAAAACAGATTGTAAATATGTGGCAGGGGTAGGAAGGGCAA  
 TGTATGCTGCTCCTGTTGCAGGAACATAACATGTAAATCAAAT---  
 ATCACAGGATTACTATTGACACGTGATGGAGGTAAGAATACCAGT-----  
 -----  
 -----  
 GGTACCTCTGAGATCTTCAGGCCTGAAGGAGGGAATATGAAAGATAATTGGAGAAGTGAATTATATAAATATA

AAGTAATAAAAATTGAATCGATA---GGAGTAGCACCTACTAAGGCAAAGAGGAGAGTGGTG-----  
-----GAGAGAGAAAAAAGAGCA---GTGGGA---CTGGGAGCT-----  
---GCATTCATTGGGTTCTTGGGAGCA---GCAGGAAGCACTATG---GGCGCGGCGTCA---  
ATGGCGCTGACGGTACAG---GCCAGACAA---CTGTTG---TCTGGTATAGTGCAACAGCAAAAC---  
AACTTG---CTGAGA---GCTATAGAGGCGCACCAGCATATGTTGCAACTCACTGTCTGGGGCATT  
>HQ615947  
TTCTATTGCAACACATCAAGACTGTTTAATAGAAACAGTACAGAAAGTAAGTCAACT-----  
-----  
-----  
TCAAATTCAACCATCACACTCCCATGCAGAATAAAACAAATTATAAACATGTGGCAGACGGTAGGGCGAGCAA  
TGTATGCCCCCTCCCATTTGAAGGAAACATAACATGTAAATCAAAT---  
ATCACAGGACTACTATTGACACGTGATGGAGGGATGGATAATAAT-----  
-----  
-----  
AATACAGAAGAGATATTTAGACCTGGAGGAGGAGATATGAGGGACAATTGGAGAAGTGAATTATATAAAATATA  
AAGTAGTAGAAATTAAGCCATTA---GGAATAGCACCCACTAGGGCAAAAAGGAGAGTGGTG-----  
-----GAGAGAGAGAAAAAGAGCA---GTGGGA---CTAGGAGCT-----  
---GTGTTCTTGGGTTCTTGGGAGCA---GCAGGAAGCACTATG---GGCGCGGCGTCA---  
ATAACGCTGACGGTACAG---GCCAGACAA---TTATTG---TCTGGTATAGTGCAACAGCAAAGC---  
AATTTG---CTGAGG---GCTATAGAGGCGCAACAACATATGTTGCAACTCACGGTCTGGGGCATT  
>KT183068  
TTCTATTGTAATACATCAAAACTGTTTAATAGGACATACCTGAGTGATGGAACAAACACATCAGAAACA---  
-----  
-----  
AACAGTACAAACATTACACTTCCATGCAAAATAAAACAAATTATAAACATGTGGCAGGAGGTAGGACGAGCAA  
TGTATGCCCCCTCCCATTTGCAGGAAACATAACATGTAAATCAAAT---  
ATCACAGGACTACTATTGCTACGTGATGGAGGAACAGGAAATGATACAGAA-----  
-----  
-----  
AAAAATACAGAGACATTACAGACCTGGAGGAGGAAATATGAAGGACAATTGGAGAAGTGAATTATACAAATATA  
AAGTGGTAGAAATTAACCATTG---GGAATAGCACCCACCGAGGCAAAAAGGAGAGTGGTG-----  
-----GAGAGAGAGAAAAAGAGCA---GTGGGA---ATAGGAGCT-----  
---GTGATCTTTGGGTTCTTGGGAGCA---GCAGGAAGCACTATG---GGCGCAGCGTCA---  
CTGACGCTGACGGTACAG---GCCAGACAA---CTGCTG---TCTGGTATAGTGCAACAGCAAAGC---  
AATTTG---CTGAGA---GCTATAGAGGCGCAACAGCATATGTTGCAACTCACGGTCTGGGGCATT  
>KT183114  
TTCTATTGCAATACATCAAGCCTGTTTAATAGAACATACAATAGTACAGACATGCTTAATGATACAAAAAGTA  
TAAAT-----  
-----  
-----  
TCAAGTGGTGTCAATTATGCTTCCATGCAGAATAAAACAAATTATAAACATGTGGCAGGAGGTAGGGCGAGCAA  
TGTATGCCCCCTCCCATTTGAAGGAAATATAACATGCAACTCAAGT---  
ATCACAGGGCTACTATTAGTACGTGATGGAGGAATAAACAGCAGC-----  
-----  
-----  
AGCACAGAGATATTCAGACCTGCAGGAGGAAATATGAAGGACAACCTGGAGAAGTGAATTATATAAATATAAAG  
TGGTAGAAATTAAGCCATTA---GGAATAGCACCCACTGAAGCAAAAAGGAGAGTGGTG-----  
-----GAGAGAGAGAAAAAGAGCA---GCA-----ATAGGAGCT-----  
TTGTTCTTGGGTTCTTGGGAACA---GCAGGAAGCACTATG---GGCGCAGCGTCA---  
ATAACGCTGACGGTACAG---GCCAGACAA---TTGTTG---TCTGGTATAGTGCAACAGCAAAGC---  
AATTTG---CTGAAG---GCTATAGAGGCGCAACAACATATGTTGCAGCTCACGGTCTGGGGCATT  
>KT183141  
TTCTATTGCAATACAACAGGACTGTTTTCAAATAAGAGTGTTCCAAACAAC-----  
-----  
-----  
GAAACCATCACAATCACAATCCCATGCAAGATAAAACAGATTATAAACATGTGGCAGGAAGTAGGACGAGCAA  
TGTATGCCCCCTCCCATTTGCAGGAAACATAACATGTAACTCAAAT---  
ATCACAGGACTACTATTGACATGGGATGGAGGAAAAAACACCACA-----  
-----  
-----  
GAGAAATGACACAGAGATCTTCAGACCTGGAGGAGGAAATATGAAAGACAATTGGAGAAGTGAATTATATAAAT

ATAAAGTAGTAGAAATCAAACCATTG---GGAGTAGCTCCCACCTGGAGCAAAAAGGAGAGTGGTG-----  
 -----GAGAGAGAAAAAAGAGCA---GTGGGA---ATAGGAGCT---  
 -----GTACTCTTTGGGTTCTTGGGAACA---GCAGGAGGCACTATG---GGCGCGGCGTCA---  
 ATGGCGCTGACGGTACAG---GCCAGACAA---CTGTTG---TCTGGTATAGTGCAACAGCAAAGC---  
 AATTTG---CTAAGA---GCTATAGAGGCGCAACAGCATATGTTGCAACTCACAGTCTGGGGCATT  
 >GU080161  
 TTCTATTGTAATACATCAGGACTATTCAATGGCACATTCAATGGTACATACACTAATAGCACGCAG-----  
 -----  
 -----  
 AACGAAACAACCATCACACTTCCATGCAGAATAAAACAAATTATAAACATGTGGCAGGGGGTAGGACGAGCAA  
 TGTATGCCCCCTCCCATTGCAGGAAACATAACATGTACCTCAAAT---  
 ATCACAGGACTATTATTATTACGTGATGGAGGCAACACAACCTA--  
 -----  
 -----  
 AAGGAAGAGGAAATATTGAGACCTGGAGGGGGAAATATGAGGGATAATTGGAGAAGTGAATTATACAAATATA  
 AAGTGGTAGAAGTTAAGCCATTG---GGAGTAGCACCCACTGGAGCAAAAAGGAGAGTGGTG-----  
 -----GAGAGAGAAAAAAGAGCA---GTA-----ATAGGAGCT-----  
 ---GTGGTCCTTGGATTCTTGGGAGCA---GCAGGAAGCACTATG---GGCGCAGCGTCA---  
 ATAGCGCTGACGGCACAG---GCCAGAAAA---GTGTTG---TCTGGTATAGTGCAACAGCAAAGC---  
 AATTTG---CTAAGG---GCTATAGAGGCGCAACAGCATCTGTTGCAACTCACGGTCTGGGGCATT  
 >GU080162  
 TTCTACTGCAATACAACAACCACTGTTCAATGGCAGTATAAGTAATAACATA-----  
 -----  
 -----  
 ACCAATGCAACCATCACAATCCCATGCAGAATAAAACAAATTATAAACATGTGGCAGGAGGTGGGACGAGCAA  
 TGTATGCTCCTCCCATTGAAGGAAACATAACATGTAACCTCAAGT---  
 ATCACAGGACTACTATTGGTACATGATGGA---GACAACAACACC-----  
 -----  
 -----  
 ATAGAGACATTGAGACCTGGAGGAGGAAATATGAAAGACAATTGGAGAAGTGAATTATATAAATATAAAGTGG  
 TAGCAATTAAGCCATTG---GGAGTAGCACCCACAAAGGCAAAAAGGAGAGTGGTG-----  
 -----GAGAGAGAAAAAAGAGCA---GTGGGA---ATAGGAGCT-----  
 ATGTTCTTTGGGTTCTTGGGAGCT---GCAGGAAGCACTATG---GGCGCGGCGTCA---  
 ATAACGCTGACGGTACAG---GCCAGACAA---CTGCTG---TCTGGTATAGTGCAACAGCAAAGT---  
 AATTTG---CTGAGA---GCCATAGAGGCGCAACAGCATTTGTTGCAACTCACAGTCTGGGGCATT  
 >GU080164  
 TTCTATTGCAACACATCAAGACTGTTTAAATAGCGCATACAGTCCTACATACCAGCAGAATAGTACAAAAAGT-  
 -----  
 -----  
 AATTCAACCGTCATCACACTTCCATGCAGAATAAAACAAATTATAAACATGTGGCAGGAGGTAGGAAGGGCAA  
 TGTATGCCCCCTCCTATTGCAGGAAATATAACATGTAACCTCAAAT---  
 ATCACAGGACTACTATTGACACGTGATGGAGGCATAACAAACAACACAACCT-----  
 -----  
 -----  
 GATAACACAACAGAGACATTGAGACCTGGAGGAGGAAATATGAAGGACAATTGGAGAAGTGAATTATATAAGT  
 ATAAAGTGGTAGAAATTAAGCCATTG---GGAATAGCTCCCACCTAATGCAAAAAGGAGAGTGGTG-----  
 -----GAGAGAGAAAAAAGAGCA---GTGGGA---ATAGGAGCT---  
 -----GTACTCCTTGGGTTCTTGGGAGCA---GCAGGAAGCACTATG---GGCGCAGCGTCA---  
 ATAACGCTGACGGTACAG---GCCAGACAA---CTGTTG---TCTGGTATAGTGCAACAGCAAAT---  
 AATTTG---CTGAGG---GCTATAGAGGCGCAACAGCATATGTTGCAACTCACGGTCTGGGGCATT  
 >GU080165  
 TTCTATTGCAATACAACAATACTGTTTTTCAGACAAAGGTACAGATAAC-----  
 -----  
 -----  
 ACAAACATCACACTGACACTCCCATGCAGGATAAAACAAATTGTAAATATGTGGCAGGGAGTAGGACGAGCAA  
 TGTATGCCCCCTCCCATTGCAGGAAACATAACATGTAACCTCAAAT---  
 ATCACAGGACTACTATTGACACGTGATGGAGGAGGAGGAGCAAACAGCACA-----  
 -----  
 -----  
 AGTGCAAATGCTACAGAGACATTGAGACCTGGAGGAGGAAATATAAAGGACAATTGGAGAAGTGAATTATATA

AATATAAAGTGGTAGAAATTAAGCCATTA--GGAATAGCACCCACTAATGCAAAAAGGAGAGTGGTG-----  
-----GAGAGAGGAAAAAGAGCA---GTGGGA---  
CTAGGAGCT-----GTACTCCTTGGGTTCTTGGGAGCA---GCAGGAAGCACTATG---  
GGCGCGGCGTCA---ATAACGCTGACGGTACAG---GCCAGACAA---CTGTTG---  
TCTGGTATAGTGCAACAGCAAAGC---AATTTG---CTGAGA---  
GCCATAGAGGCGCAACAGCATATGTTGCAACTCACGGTCTGGGGCATT  
>GU080166  
TTCTATTGTAATACAACCTAACTGTTTAATAATGACAGTTTACAGGAGAAT-----  
-----  
-----  
AGTTCAGGATTTATCACACTCCCATGCAGAATAAAACAAATTATAAACATGTGGCAGGGGGTAGGACGAGCAA  
TGTATGCCCCCTCCCATTTGAAGGAAACATAACATGTAAATCAAAT---  
ATCACAGGACTACTGTTAACACGTGATGGAGGAAAAGGAAACAAC-----  
-----  
-----  
AGCAACATAGAGATATTCAGACCTGGAGGAGGAGATATGAAGGACAATTGGAGAAAGTGAATTATATAAATATA  
AAGTGGTAGAAATTAAGCCATTA--GGAATAGCACCCACTAAGGCAAAAAGGAGAGTGGTG-----  
-----GAGAGAGAAAAAGAGCA---GTGGGA---ATAGGAGCT-----  
---GTGTTCCCTTGGGTTCTTGGGAGCA---GCAGGAAGCACTATG---GGCGCGGCGTCA---  
ATAGCGCTGACGGTACAG---GCCAGACAA---CTGTTG---TCTGGTATAGTGCAACAGCAAAGC---  
AATTTG---CTGAGA---GCTATAGAGGCGCAACAGCATATGTTGCAACTCACGGTCTGGGGCATT  
>GU080168  
TTCTATTGCAATACATCAGCACTGTTTACAGAAGGTGCTACAAATAAAAGT-----  
-----  
-----  
AATACAAGCAATATAGAACTCAAATGTAGAATAAAACAAATTGTAAACATGTGGCAGGGGGTAGGACGAGCAA  
TGTATGCCCCCTCCCATTTGAAGGAAATATCACATGTATCTCAAAT---  
ATCACAGGACTACTATTGACACGTGATGGAGGAAATGTCACAGGGGTAAAT-----  
-----  
-----  
GACACTCGCTTTGAGGTATTCAGACCTGGAGGGGGAAATATGAAGGATAATTGGAGAAAGTGAATTATATAAAT  
ATAAAGTGGTAGAAGTTAAACCATTG---GGCATAGCTCCCACTGAAGCACATAGGATGGTGGTA-----  
-----AAGAGAGAAAAAGAGCA---GTA-----CTAGGAGCT---  
-----GTACTCCTTGGGTTCTTGGGAGCA---GCAGGAAGCACTATG---GGCGCAGCGGCA---  
ATAACGCTGACGGCACAG---GCCAGACAA---CTGTTG---TCTGGTATAGTGCAACAGCAAAT---  
AATTTG---CTGAGA---GCTATAGAGGCGCAACAGCACATGTTGCAACTCACAGTCTGGGGCATT  
>GU080171  
TTCTATTGCAATACATCAAACTGTTTAATAGTACATTTAATGGTACAGAACTGTTTAACAGTACAAGTACA-  
-----  
-----  
AACAATAAGAGCATCACACTCTCATGCAGAATAAAACAAATTGTAAACATGTGGCAGCAGGTAGGACGAGCAA  
TGTATGCCCCCTCCTGTTGAAGGAAACATAACATGTAGATCAAAT---  
ATCACAGGACTACTATTGCTAAGGGATGGAGGAAAAGATAATAAT-----  
-----  
-----  
AGAACAAACGAGACATTTAGACCTGGAGGAGGAGATATGAGAGATAACTGGAGAAAGTGAATTATATAAATATA  
AAGTGGTAGAAATTAACCATTAA--GGAATAGCTCCCACTGAAACAAAAAGGATAGTGGTG-----  
-----AAGAGAGAAAAAGAGCA---ATAGGA---ATAGGAGCT-----  
---GTACTCCTTGGGTTCTTGGGAGCA---GCAGGAAGCACTATG---GGCGCGGCGTCA---  
CTAACGCTGACGGTACAG---GCCAGACAA---CTGATG---TCTGGTATAGTGCAACAGCAAAGC---  
AATTTG---CTGAGA---GCTATAGAGGCGCAACACCATATGTTGCAACTCACGGTCTGGGGCATT  
>GU080173  
TTCTATTGCAATACAACAAACCTGTTTAATAGGACAAACATC-----  
-----  
-----  
AATGAAACAATCACCTCCCATGCAGAATAAAACAAATTATAAATATGTGGCAGGAGGTAGGAAAAGCAATGT  
ATGCCCCCTCCCATTTGCAGGAAACATAACATGTAGCTCAGAT---  
ATCACAGGACTACTATTGCTACGTGATGGAGGCAGATGCAACAGCACAGATAAC-----AGCACA-----  
-----  
AATGACACAGAATGCAAT---

ACAACAGAGATATTCAGACCTGGAGGAGGAGATATGAAGGACAATTGGAGAAGTGAATTATATAAATATAAAG  
 TGATAGAACTTAAACCATTG---GGAATAGCACCCACTGGAGCAAAAAGGAGAGTGGTG-----  
 -----GAGAGAGAAAAAAGAGCA---ATAGGA---ATGGGAGCG-----  
 TTGCTCATTGGGTTCTTGGGAGCA---GCAGGAAGCACTATG---GGCGCGGCGTCA---  
 GTGACGCTGACGGTACAG---GCCAGACAG---CTGTTG---TCTGGTATAGTGCAACAGCAAAGT---  
 AATTTG---CTGAGA---GCTATAGAGGCGCAACAGCATATGTTGCAACTCACAGTCTGGGGCATT  
 >GU080176  
 TTTTATTGCAATACATCAGGCCTGTTTAATAGTACATACAATAATGGTACATACAATAACACAAACGAGGTTA  
 ATGAG-----  
 -----  
 ACAAGCAAGGTTAACATCACACTCCCATGCAGAATAAAACAAATCATAAACATGTGGCAGCAGGTAGGACGAG  
 CAATGTATGCCCTCCCATTAAGGAAACATAACATGTAAATCAAAT---  
 ATCACAGGACTAATATTGACACGTGATGGAGGAAAAAGGAATAACAGC-----  
 -----  
 -----  
 TCAAAGGAAGAGATATTCAGACCTGGAGGAGGAAATATGAAGGATAATTGGAGAAGTGAATTATATAAATATA  
 AAGTGGTAGAAATTAAGCCATTA---GGAGTAGCACCCACTGAAGCAAAAAGGAGAGTGGTG-----  
 -----GAGAGAGAAAAAAGAGCA---GTGGGA---ATAGGAGCT-----  
 ---GTGTTCTTGGGTTCTTGGGGGCA---GCAGGAAGCACTATG---GGCGCGGCGTCA---  
 ATAACGCTGACGGTACAG---GCCAGACAA---CTGTTG---TCTGGTATAGTGCAACAGCAAAGT---  
 AATTTG---CTGAGA---GCTATAGAGGCGCAACAGCATATGTTGCAACTCACAGTCTGGGGCATT  
 >GU080178  
 TTCTATTGTAATACAACAAATCTGTTTGATAAGTTTAATAGCAGT-----  
 -----  
 -----  
 GGTCCAAACATAACCACTATCCCATGCAGGATAAAACAAATTATAAACATGTGGCAAGAGGTAGGACGAGCAA  
 TGTATGCTCCTCCCATTCAGGAAACATAACATGTAACTCAAAT---ATCACAGGACTACTGTTGACA---  
 CATGATGGCATAAATATCACATATAATGGC-----  
 -----  
 -----  
 ACAGGTAATACCACAATAATATTTAGGCCTGGAGGAGGAAATATGAAGGACAATTGGAGAAGTGAATTATATA  
 AATATAAAGTAGTAGAAATTAAGCCATTG---GGAGTAGCACCCACTAAGGCAAAAAGGAGAGTGGTG-----  
 -----GAGAGAGAAAAAAGGGCA---GTGGGG---  
 CTAGGAGCT-----ATGATCCTTGGGTTCTTGGGAACA---GCAGGAAGCACTATG---  
 GGCGCGGCGTCA---ATAACGCTGACGGTACAG---GCCAGACAA---CTGTTG---  
 TCTGGTATAGTGCAACAGCAAAGC---AATTTG---CTGAGA---  
 GCCATAGAGGCGCAACAGCATATGTTGCAACTCACGGTCTGGGGCATT  
 >GU080179  
 TTCTATTGCAATACATCACAACCTGTTTAATAGTACATACATGGCTAATAGTACAAGCATGGAAAAGAATAAA-  
 -----  
 -----  
 GACAAAGTAGTACTATCACACTCCAATGCAGAATAAAACAAATCATAAACATGTGGCAGGGGGTAGGAAGAGCAA  
 TGTATGCCCCCTCCCATTCAGGAAACATAACATGTAGATCAAAC---  
 ATCACAGGACTACTATTGACAAGTGATGATGGAGGAAAAAATAGC-----  
 -----  
 -----  
 ACAGAGACATTTCAGACCTGGAGGAGGAAATATGAGGGACAATTGGAGAAGTGAATTATATAAATACAAAGTGG  
 TGGAAATTAAGCCATTG---GGAGTAGCTCCCACTGAAGCAAAAAGGAGAGTGGTG-----  
 -----GAGAGAGAAAAAAGAGCA---GTGGGA---ATAGGAGCT-----  
 GTAATCCTTGGGTTCTTGGGAGCA---GCTGGAAGCACTATG---GGCGCAGCGTCA---  
 ATAACGCTGACGGTACAG---GCCAGACAA---CTGTTG---TCTGGTATAGTGCAACAGCAAAGC---  
 AATTTG---CCGAGA---GCTATAGAGGCGCAACAGCATTTGTTGCAACTCACGGTCTGGGGCATT  
 >GU080180  
 TTCTATTGCAATACAACAAAACCTGTTTAATAACAGTAGGGAT-----  
 -----  
 -----  
 GAAAAACACCACACTCCCATGCAGGCTAAAACAAATTGTACGCATGTGGCAAGAGGTAGGACGGGCAATGTATG  
 CCCCTCCCATTTGAAGGAGAAAATAAAATGTACCTCAAAT---  
 ATCACAGGAATACTATTGACACGTGATGGAGGAAACCAGAATGGCACA-----  
 -----  
 -----

AATGACACAACAGAGATATTCAGACCTGGAGGAGGAAATATGAAGGACAATTGGAGAAGTGAATTATATAAAT  
ATAAAGTGGTAGAAATTAAGCCATTA---GGAATAGCACCCACGAGTGCAAGGAGGAGAGTGGTG-----  
-----GAGAGAGAAAAAAGAGCA---GTGGGA---ATAGGAGCA---  
-----GTGTTTCCTTGGGTTCTTGGGAGCA---GCAGGAAGCACTATG---GGCGCGCGTCA---  
ATAACGCTGACGGTACAG---GCCAGACAA---CTGTTG---TCTGGTATAGTGCAAGCAGCAAAGC---  
AATTTG---CTGAGA---GCTATAGAGGCGCAACAGCATATGTTGCAACTCACAGTCTGGGGCATT  
>GU080181  
TTCTATTGTAATACATCAGAACTGTTTAATGGTACATACATAAATAATGGTACATACAATGGTACATACACGC  
CTGGTAGT-----  
-----ACA---  
TCAAAATTCAACCAACATCACACTCCCATGCAGAATAAGACAAATTATAAACATGTGGCAGGGGGTAGGACAAG  
CAATGTATGCCCTCCCATTCAGGAAACATAACATGTATATCAAAC---  
ATCACAGGACTACTATTAGTACGTGATGGAGGCAACACAAACGATACA-----  
-----  
-----  
AATAAACAGAAGTGTTTCAGACCTGGAGGAGGAGATATGAGGGACAATTGGAGAAGTGAATTATATAAATATA  
AAGTGGTAGAAATTAACCATTCG---GGAATAGCACCCACTGAGGCAAAAAGAAGAGTGGTG-----  
-----GAGAGAGAAAAAAGAGCA---GCA-----CTAGGAGCT-----  
---GTGCTCCTTGGGTTCTTGGGAGCA---GCAGGAAGCACTATG---GGCGCAGCGTCA---  
ATGGCGCTGACGGTACGG---GCCAGACAA---GTATTG---TCTGGTATAGTGCAACAGCAAAGC---  
AATTTG---CTGAGA---GCTATAGAGGCGCAACAGCATATGTTGCAACTCACAGTCTGGGGCATT  
>GU080182  
TTCTATTGCAATACAACAAGACTGTTTAATGAAACAAAACCTGGCTAAGGAA-----  
-----  
-----  
AATAGCAGTACCATCACACTCCCATGCAAAATAAAACAAATTATAAACATGTGGCAGGGGGTAGGACGAGCAA  
TGTATGCCCCCTCCCATTCAGGATAACATGTACCTCAAAT---  
ATCACAGGAATATTATTGACACGTGATGGAGGAAACATCACAGACACAAACAAT-----  
-----  
-----  
ACAACAGGAAAAAATGAAACATTCAGACCTGGAGGAGGAGATATGAAGGACAATTGGAGAAGTGAATTATATA  
AATATAAAGTGGTAGAAATTAAGCCATTA--GGAGTAGCACCCACTGGAGCAAAAAGGAGAGTGGTG-----  
-----GAGAGAGAAAAAAGAGCA---  
GTAATTGGAATAGGAGCT-----GCACTCCTTGGGTTCTTGGGAGCA---GCAGGAAGCACTATG---  
GGCGCGCGTCA---ATAACGCTGACGGTACAG---GCCAGACAA---CTATTG---  
TCTGGTATAGTGCAACAGCAAAGC---AATTTG---CTGAGA---  
GCTATAGAGGCGCAACAGCATATGTTGCAACTCACGGTCTGGGGCATA  
>GU080184  
TTCTATTGCAATACAACAACCTGTTTAATAACAGTATTTTAAACATCAGTGTTCAT-----  
-----  
-----  
AATACAGAGGTCATAAACATCATGCAAAATAAAACAAATTGTAAATATGTGGCAGGAGGTAGGAAAAGCGA  
TGTACGCCCTCCCATTCAGGAAACATAACATGTGCATCAAAT---  
ATCACAGGACTACTATTGACAAGGGATGGAGGAATGAATAGTAGT-----  
-----  
-----  
AATGAGACATTCAGACCCACTGGAGGAAATATGAAGGACAACCTGGAGAAGTGAATTATATAAATATAAAGTGG  
TAGAAGTTACTCCATTG---GGAGTGGCACCCACGGAGGCAAAAAGGAGAGTGGTG-----  
-----GAGAGAGAAAAAAGAGCA---GTGGGA---ATAGGAGCT-----  
GTGTTTCCTTGGGTTCTTGGGAGCA---GCAGGAAGCACTATG---GGCGCGCGTCA---  
GTGACGCTGACGGTACAG---GCCAGACAA---CTGTTG---TCTGGTATAGTGCAACAGCAAAGC---  
AATTTG---CTGAGA---GCTATAGAGGCGCAACAGCATCTGTTGCAACTCACGGTCTGGGGCATT  
>GU080185  
TTTTATTGTAATACAACAGGACTGTTCAATAACACAGACATAACTAAT-----  
-----  
-----  
GGCACAAACATAACCACCATCCCGTGCAGAATAAAACAGATTATAAACATGTGGCAGGGGGTAGGACGAGCAA  
TGTATGCCCCCTCCCATTCAGGAAACATAACATGTAAATCAAAT---  
ATCACAGGGCTACTATTGACACGTGATGGTGGCAGCAGCAATGCAACT-----  
-----

-----  
AGTAACACAGAGATATTCAGACCTGGAGGAGGAGATATGAAAGACAATTGGAGAAATGAATTATATAAAATATA  
AAGTGGTAGAAATTAAGCCATTG---GGAATAGCACCCACTGAGGCCAAAAGGAGAGTGGTG-----  
-----GAGAGAGAAAAGAAGAGCAATAGCGGGA---CTTGGAGCT-----  
---GTGATCTTTGGGTTCTTGGGAGCA---GCCGGAAGCACTATG---GGCGCAGCGTCA---  
ATAACGCTGACGGTACAG---GCCAGACAA---CTGTTG---TTTGGTATAGTGCAACAGCAAAGC---  
AATTTG---CTGAGA---GCTATAGAGGCACAACAGCATATGTTGCAACTCACGGTCTGGGGCATT  
>GU080186  
TTCTATTGCAATACATCAAGACTGTTTAATAGAAATAGTACAGACCTGTCAACTAATACAGGA-----  
-----  
-----  
AATAATTCAACCATCACACTCCCATGCGAATAAAAACAAATTATAAACATGTGGCAGGGGGTAGGACGAGCAA  
TGTATGCCCCCTCCCATTTGAAGGAAACATAACATGTAAGTCAATT---  
ATCACAGGACTACTATTGGTGCGTGATGGAGGCCCAAATAATAGCACAGAAACA-----  
-----  
TCAGACCGGAACCTGGGA---  
GGGAGGGAAAATATGAAAGGGAACAAATTTGGAAGGAAAAGTGAAATTATTATTAAATATAAAGTGATAGAAA  
ATTTAAGCCCATTGGGGGAA---ATAAGCACCCCACTAAGGCCAAAAGAGGAGAGCGGTG-----  
-----GAGAGAGAGAAAAGAGCAGTGGTGGGA---ATAGGAGCT-----  
ATGATCCTTGGGTTCTTGGGAGCA---GCAGGAAGCACTATG---GGCGCGGCGTCA---  
ATAACGCTGACGGTACAC---GCTAGACAA---TTGTTG---TCTGGTATAGTGCAACAGCAAAGT---  
AATTTG---CTGAGG---GCTATAGAGGCGCAACAGCATATGTTGCAACTCACGGTCTGGGGCATT  
>GU080190  
TTCTACTGCAATACAACAGAACTGTTTTCTAATGAAACAGAT-----  
-----  
-----  
CCAACTAAAAACATTACACTCCCATGCAAGATAAAAACAAATTGTAAACATGTGGCAGGAGGTAGGAAAAGCAA  
TGTATAACCCTCCTATTGCAGGAATCATAAAATGCACGTCAAAT---  
ATCACAGGACTACTATTGACACGTGATGGGGGAACAAACAATATAACA-----  
-----  
-----  
GAGAATAAAACAGAAACATTCAGACCTGGAGGAGGAAATATGAAGGACAATTGGAGAAGTGAATTATATAAGT  
ATAAAGTGGTAGAAATTAAGCCATTG---GGAGTAGCTCCCACTGAAGCAAAAAGGAGAGTGGTG-----  
-----GAGAGAGAAAAAAGAGCA---GTGGGA---ATAGGAGCT---  
-----GTACTCCTTGGGTTCTTGGGAGCA---GCAGGAAGCACTATG---GGCGCGGCGTCA---  
ATAACGCTGACGGTACAG---GCCAGACAA---CTGTTG---TCTGGTATAGTGCAACAGCAAAGC---  
AATTTG---CTGAGA---GCCATAGAGGCGCAACAACATATGTTGCAACTCACTGTCTGGGGCATT  
>GU080191  
TTCTATTGCAATACATCGGGCCTGTTTGGTAATATAACAAAACTAATAGT-----  
-----  
-----  
ACAAATTCAACCATCACACTCCAATGTAGAATAAAAACAGATTATAAACATGTGGCAGGGGGTAGGACGAGCAA  
TGTATGCCCCCTCCCATTTGCAGGAAATATAACATGTAACCTCAAGT---  
ATCACAGGATTACTATTGACACGTGATGGAGGGCCACCGAATACC-----  
-----  
-----  
ACAGAGATATTCAGACCTGCAGGAGGAAATATGAAGGACAATTGGAGAAGTGAATTATATAAAATATAAAGTGG  
TAGAAATTAAGCCATTA---GGAATAGCACCTACTAAGGCCAAAAGGAGAGTGGTG-----  
-----GAGAGAGAAAAAAGAGCA---GTGGGA---ATGGGAGCT-----  
GTGATCCTTGGGTTCTTGGGAGCA---GCAGGAAGCACTATG---GGCGCAGCATCA---  
CTAACGCTGACGGTACAG---GCTAGACAA---TTGTTG---TCTGGTATAGTGCAACAGCAAAGC---  
AATTTG---CTGAGA---GCTATAGAGGCGCAACAGCATATGTTGCAACTCACGGTCTGGGGCATT  
>GU080192  
TTCTATTGCAATACATCAGCACTGTTTAATAGAACATACAGTACATCAGAACTGTTTAATGGTACATACAATG  
ACAGT-----  
-----ACA---  
AATGGTAATTTAACCATTACACTTCCATGCAAGATAAAAACAAATAATAAACTTATGGCAGGAGGTAGGACGAG  
CGATGTATGCCCCCTCCCATTTAGAGGAAATATAACATGTAGATCAAAT---  
ATCACAGGACTACTATTAGTACGTGATGGAGGCCAAAGAAAACAAC-----  
-----

-----  
 AAAACAGAAATATTCAGACCAGGAGGAGGAAATATGAAGGACAATTGGAGAAGTGAACCTATATAAATATAAAG  
 TGGTAGAAGTTAAGCCATTG---GGAATAGCACCAACTGAAGCAAAAAGGCAAGTGGTG-----  
 -----GAGAGAGAAAAAAGAGCA---GTGGGA---ATAGGAGCT-----  
 GTGTTTCCTTGGGTTCTTGGGAGCA---GCCGGAAGCACTATG---GGCGCAGCGTCA---  
 ATAGCGCTGACGGCACAG---GCCAGACAA---GTATTG---TCTGGTATAGTGCAACAGCAGAAT---  
 AATCTG---CTGAGA---GCTATAGAGGCGCAACAGCATATGTTGCAACTCACAGTCTGGGGCATT  
 >GU080197  
 TTTTATTGCAATACATCAAATCTGTTTAATAAGACATACAATCCTAATGGTACAGAGGGTAAT-----  
 -----  
 -----  
 TCAAGCTCAAACATCATACTCCCATGCAGAATAAAGCAAATTATAAACATGTGGCAGGGGGTAGGACGAGCAA  
 TGTATGCCCCCCCCATTGTCAGGAAACATAACATGTAAATCAGAC---  
 ATCACAGGGCTAATCCTGACACGTGATGGAGGAGAAAAAGATGGCACA-----  
 -----  
 -----  
 GAGAATCGCACAGAGATATTTAGACCTGCAGGAGGGGATATGAGGGACAACCTGGAGAAATGAATTATATAAAT  
 ATAAAGTGGTAGAAATCAAGCCATTA---GGAATAGCACCCACTGGGGCAAAAAGGAGAGTGGTG-----  
 -----GAGAGAGAAAAAAGAGCA---GTGGGA---ATAGGAGCT---  
 -----ATGTTTCCTTGGGTTCTTGGGAGCA---GCAGGAAGCACTATG---GGCGCGGCGTCA---  
 ATAACGCTGACGGTACAG---GCCAGACAA---TTATTG---TCTGGTATAGTGCAACAGCAAAGC---  
 AATTTG---CTGAGA---GCTATAGAGGCGCAACAGCATATGTTGCAACTCACGGTCTGGGGCATT  
 >GU080198  
 TTCTATTGTAATACAACAAACCTGTTTAACACAAGCCTGTTTAACACAAGTGTGGCAAAC-----  
 -----  
 -----  
 GTCACAAACGTCACAATACTCCCATGCAAGATAAAACAAATCATAAACATGTGGCAGGAGGTAGGACGAGCAA  
 TGTATGCCCCCTCCCATTGTCAGGAAACATAACATGTAAATCAAAT---  
 ATCACAGGACTATTATTGACACGTGATGGAGGAAATGGAAACATAACAGAAAAAC-----  
 -----  
 -  
 AACACAACAAAGACCACAGAGATATTCAGACCTGCAGGAGGAGATATGAGGGACAATTGGAGAAGTGAATTAT  
 ATAAATACAAAGTGGTAGAAGTTAAGCCATTG---GGAGTAGCACCCACTGAGGCAAAAAGGAGAGTGGTG--  
 -----GAGAGAGAAAAAAGAGCA---GTGGGA---  
 ATAGGAGCT-----GTGTTTCCTTGGGTTCTTGGGAGCA---GCAGGAAGCACTATG---  
 GGCGCGGCGTCA---ATAACGCTGACGGTACAG---GCCAGACAA---CTGTTG---  
 TCTGGCATAGTGCAACAGCAAAGC---AATTTG---CTGAGA---  
 GCTATAGAGGCGCAACAGCATATGTTGCAACTCACAGTCTGGGGCATT  
 >GU080193  
 TTCTATTGCAATACAACAGAACTGTTCACTAACAATATAACTGATAGA-----  
 -----  
 -----  
 AATGATACCAACATCACACTCCCATGCAGAATAAAACAAATTATAAACATGTGGCAGGAGGTAGGACGAGCAA  
 TGTATGCCCCCTCCCATTGTCAGGAAACATAACATGTAACTCAAGT---  
 ATCACAGGACTACTATTGCTACGAGATGGAGGGATTAATAACACAGAG-----  
 -----  
 -----  
 CAAAATAACACAGAGATATTCAGACCTGGAGGAGGAAATATGAAGGACAATTGGAGAAGTGAATTATATAAAT  
 ATAAAGTGGTAGAAATTAAGCCATTA---GGAATAGCTCCACGCAGGCAAAAAGGAGAGTGGTG-----  
 -----GAGAGAGAAAAACGAGCA---GTGGGA---ATAGGAGCT---  
 -----GTGTTTCCTTGGGTTCTTAGGAGCA---GCAGGAAGCACGATG---GGCGCGGCGTCA---  
 ATAACGCTGACGGTACAG---GCCAGACAA---CTGTTG---TCTGGTATAGTGCAACAGCAAAGC---  
 AATTTG---CTGAGA---GCTATAGAGGCGCAACAGCATATGTTGCAACTCACGGTCTGGGGCATT  
 >HM623591  
 TTCTATTGTAATACAACATCACTGTTTAACAACAGTGATGGA-----  
 -----  
 -----  
 AAAAACATCACAACACTTCCCTGCAGGATAAAACAAATTATAAACATGTGGCAGGGGGTGGGACGAGCAATGT  
 ATGCCCTCCTGTTGCAGGAGAAATAACATGTAACTCAAGC---  
 ATCACAGGATTACTATTGACACGTGATGGAGGAAGCAATGAAAAC-----

-----  
-----  
AATAAGACTGAGACATTTAGACCTGCAGGAGGAGATATGAGGGACAATTGGAGAAGTGAATTATATAAGTATA  
AAGTGGTAGAAATTAAGCCATTA---GAAGTAGCTCCTACTGATTCAAAAAGGAGAGTGGTG-----  
-----GAGAGAGAAAAAAGAGCA---GTGGGA---ATAGGAGCT-----  
---GTACTCCTTGGGTTCTTGGGAGCA---GCAGGAAGCACTATG---GGCGCGCGTCA---  
ATAACGCTGACGGTACAG---GCCAGACAA---CTGTTG---TCTGGTATAGTGCAACAGCAAAGC---  
AATTTG---CTGAGA---GCTATAGAGGCGCAACAGCATATGTTGCAACTCACAGTCTGGGGCATT  
>HM623592  
TTCTATTGCGATACATCACAATTGTTTAAACAGTACATATAAGCCTACATATAATATTACACAT-----  
-----  
-----  
GAGAATACAAACATCACACTCCCATGCAGAATAAGGCAATTTATAAATATGTGGCAGAGGGTAGGACGAGCAA  
TGTATGCCCCCTCCCATTGCAGGACAATTAACATGCATATCAAAT---  
ATCACAGGACTACTATTAGTACGTGATGGAGGCACAAATATCACA-----  
-----  
-----  
GAAGAGACATTCAGACCTGCAGGAGGAGATATGAAGGACAATTGGAGAAGTGAATTATATAAATATAAAGTGG  
TAGAGATTAAGCCATTG---GGAATAGCACCCACTAAGGCAAAAAGGAGAGTGGTG-----  
-----GAGAGAGAAAAAAGAGCA---GTAGGA---ATAGGAGCT-----  
GTGTTCCCTTGGGTTCTTGGGAGCT---GCAGGAAGCACTATG---GGCGCAGCGTCA---  
ATAACGCTGACGGTACAG---GCCAGACAA---TTGTTG---TCTGGTATAGTGCAACAGCAAAGC---  
AATTTG---CTGAGA---GCTATAGAGGCGCAACAACATCTGTTGCAACTCACAGTCTGGGGCATT  
>HM623593  
TTCTATTGCAATACATCACAACCTGTTTAAATGGTACATATAATGAGAAAGGTAAT-----  
-----  
-----  
AATAATGACACCATCACACTCCCATGCAGAATAAAACAGATTATAAACATGTGGCAGGAGGTAGGACGAGCAA  
TGTACGCCCCCTCCCATTGCAGGAAACATAACATGTATATCAAAC---  
ATCACAGGACTATTATTGACACGTGATGGGGGAATGAGACAAAT-----  
-----  
-----  
GGCAATGAGACCTTCAGACCTAGTGGAGGAAATATGAGAGACAATTGGAGAAGTGAATTATATAAATATAAAG  
TGGTAGAAATTAACCATTA---GGAATAGCACCCACTACGGCAAAAAGAAGAGTGGTG-----  
-----GAGAGAGAAAAAAGAGCA---GTGGGA---ATAGGAGCT-----  
GTACTCCTTGGGTTCTTGGGAGCA---GCAGGAAGCACTATG---GGCGCAGCGTCA---  
ATAACGCTGACGGTACAA---GCCAGGCAA---TTGTTG---TCTGGTATAGTGCAACAGCAAAGT---  
AATTTG---CTGAGA---GCTATAGAGGCGCAACAGCATATGTTGCAACTCACAGTCTGGGGCATT  
>HM623595  
TTCTATTGCAATACATCAAAGCTATTTAATGGTACATACAAACCAGGAGATAACATTACAGAAAGTAAT---  
-----  
-----  
TCAACCAAACCCATCATAATTCCATGCAGAATAAAACAAATTATAAACATGTGGCAGGGGGTAGGACGAGCAA  
TGTATGCCCCCTCCCATTGCAGGAAACATAACATGTAATTCAAGC---  
ATCACGGGACTACTATCAGTACGTGATGGAGGTAAAGACCAAAAT-----  
-----  
-----  
GACACAGAAACATTCAGACCTGAAGGAGGAAATATGAAGGACAATTGGCGAAGTGAATTATATAAATATAAAG  
TGGTAGAAATTAAGCCATTA---GGAATAGCACCAACTGAAGCAAAAAGGAGAGTGGTG-----  
-----GAGAGAGAAAAAAGAGCA---GTGGGA---ATAGGAGCT-----  
GTGCTCCTTGGGTTCTTGGGAGCA---GCTGGAAGCACTATG---GGCGCAGCGTCA---  
ATAACGCTGACGGTACAG---GCCAGACAA---TTGCTG---TCTGGTATAGTGCAACAGCAAAGC---  
AATTTG---CTGAGG---GCTATAGAGGCGCAACAGCATATGTTGCAACTCACGGTCTGGGGCATT  
>HM623596  
TTCTATTGCAATACATCAGGCCTGTTTAAATAGTACATTTAATGGTACCCAGATGGTGAATAGT-----  
-----  
-----  
ACAAATAGTACAATTACACTCCCATGCAAAATAAAACAAATTATAAACATGTGGCAGGAGGTAGGACGAGCAA  
TGTATGCCCCCTCCCATTGAAGGAAACATAACATGTAAATCAAAT---  
ATCACAGGACTACTATTAGTACGTGATGGAGGCAACACAAATGATACA-----

-----  
-----  
AACGGGACAGAGATATTCAGACCTGGAGGAGGAAATATGAAGGACAATTGGAGAAGTGAATTATATAAAATATA  
AGGTAGTAGAAATTAAGCCATTA---GGAGTAGCACCCACTGATGCAAAAAGGAGAGTGGTG-----  
-----GAGAGAGAGAAAAAGAGCA--GTGGGA--ATAGGAGCT-----  
---ATGTTCCCTTGGGTTCTTGGGAGCG--GCAGGAAGCACTATG--GGCGCGGCGTCA---  
ATAACGCTGACGGTACAG---GCTAGACAA---TTATTG---TCTGGTATAGTGCAACAGCAAAGC---  
AATTTG---CTGAAG---GCTATAGAGGTGCAACAGCATATGTTGCAACTCACTGTCTGGGGCATT  
>HM623597  
TTCTATTGCAATACAACAAACCTGTTTTCTAATAACAGTAAATCAAATACAGCCAATAAT-----  
-----  
-----  
ACAAACGATACCATCACACTCCCATGCAGGATAAAAACAAATTATAAACATGTGGCAGGGGGTAGGACGAGCAA  
TGTATGCCCCCTCCTATTGAAGGAAACATAACATGTAACCTCAAGT---  
ATCACAGGACTACTATTGACACGTGATGGAGGAGAATCAAACACA-----  
-----  
-----  
AAAAATGAGATATTCAGACCTGAAGGAGGAAATATGAAGGACAATTGGAGAAGTGAATTATATAAGTATAAAG  
TGGTAGAAATTAAGCCATTG---GGAGTAGCTCCCACTAAAGCAAAAAGGAGAGTGGTG-----  
-----GAGAGAGAAAAAAGAGCA--GTGGGA--ATAGGAGCT-----  
GTACTCCTTGGGTTCTTGGGAGCA---GCAGGAAGCACTATG--GGCGCGGCGTCA---  
ATAACGCTGACGGTACAG---GCCAGACAA---TTGTTG---TCTGGTATAGTGCAACAGCAAAGC---  
AATTTG---CTGAGA---GCTATAGAGGCGCAACAGCATATGTTGCAACTCACAGTCTGGGGCATT  
>HM623599  
TTCTATTGCAATACATCAAAACTGTTTAATGGTACATACGGGGATAATAGAACAAAAAAGT-----  
-----  
-----  
GAAAAATGAAACCATCACACTCCCATGCAGGATAAAAACAAATTATAAACATGTGGCAGGGGGTAGGACGAGCAA  
TGTATGCCCCCTCCCATTCAGGAAACATAACATGTACATCAAAT---  
ATCACAGGACTACTATTAGTACGCGATGGGGGCAACAGCAGCAGT-----  
-----  
-----  
GAATCAGAGATATTCAGACCTGGAGGTGGAAATATGAAAGACAATTGGAGAAGTGAATTATATAAAATATAAAG  
TGGTAGAAATTAAGCCATTG---GGAATAGCACCCACTAAAGCAAAAAGGAGAGTGGTG-----  
-----GAGAGAGAAAAAAGAGCA--GTGGGA--ATAGGAGCT-----  
GTGTTCCCTTGGGTTCTTGGGAGCA---GCCGGAAGCACTATG--GGCGCGGCGTCA---  
ATAACGCTGACGGTACAG---GCCAGACAA---TTGTTG---TCTGGTATAGTGCAACAGCAAAGC---  
AATTTG---CTGAGA---GCTATAGAGGCGCAACAGCATATGTTGCAACTCACAGTCTGGGGCATT  
>HM623600  
TTCTATTGCAATACAACAAAACTATTTTCTAATGAAAGTAAGTCTAATGAAAGTATT-----  
-----  
-----  
GCAAAATGACACTATCACACTCCCATGCAAGATAAAAACAAATTATAAACATGTGGCAGGGGGTAGGACGAGCAA  
TGTATGCCCCCTCCTATTGCAGGAAAAATAACATGTAACCTCAAGT---  
ATCACAGGACTACTATTGACACGTGATGGAGGAGACACAAACACAACA-----  
-----  
-----  
ACCAACACAGAGACATTTCAGACCGGGAGGAGGAAATATGGAGGACAATTGGAGAAGTGAATTATATAAAATATA  
AGGTGGTAGAAATTAAACCATTG---GGAGTAGCACCCACTGAATCAAAAAGGAGAGTGGTG-----  
-----GAGAGAGAAAAAAGAGCA--GCAGGA--ATAGGAGCT-----  
---GTACTCCTTGGGTTCTTGGGAGCA---GCAGGAAGCACTATG--GGCGCGGCGTCA---  
ATAGCGCTGACGGTACAG---GCCAGACAA---TTGTTG---TCTGGTATAGTGCAACAGCAAAAC---  
AATTTG---CTGAGG---GCTATAGAGGCGCAACAACATATGTTGCAACTCACAGTCTGGGGCATT  
>HM623601  
TTCTATTGTAATACAACAAAACTGTTTAATAGTACATACATGCCTAATGCTACAGAAAGTAAT-----  
-----  
-----  
TCAAGTGAAGTAATCACACTCCCATGCAAGATAAAAACAAAGTTATAAACATGTGGCAGCAAGTAGGACGGGCAA  
TGTATGCCCCCTCCCATTCAGGGAACATAACATGTAAATCAAAT---  
GTCACAGGATTGCTATTGGTGCGTGATGGAGGAACAAATACTAAT-----

-----  
 -----  
 AACACGGAGATATTCAGACCTGGAGGAGGAGATATGAGGGACAATTGGAGAAGTGAATTATACAAATATAAAG  
 TGGTAGAAATTAAACCATTA---GGACTAGCACCTACTGAGGCAAAAAGGAGAGTGGTG-----  
 -----GAGAGAGAAAAAAGAGCA--GTGGGA--ATAGGAGCT-----  
 GTGTTTCCTTGGGTTCTTGGGAGCA--GCAGGAAGCACTATG--GGCGCGGCGTCA---  
 ATAACGCTGACGGTACAG---GCCAGACAA--TTGTTG---TCTGGTATAGTGCAACAGCAAAGC---  
 AATTTG---CTGAGG---GCCATAGAGGCGCAACAGCATATGTTGCAACTCACGGTCTGGGGCATT  
 >HM623602  
 TTCTATTGCAATACTGATGGACTGTTTAATGCTACTAATGGTACAAACAGTTTTTAATAATACTTCA-----  
 -----  
 -----  
 GAAAACGGTACCATCACCTCCCATGCAAAATAAAACAAATTATAAACATGTGGCAGGGGGTAGGACGAGCAA  
 TGTATGCCCCGCCCATTTGAAGGAAACATAACATGCAGATCACTA---  
 ATCACAGGACTACTATTAAACACGTGATGGAGGACTGGGAAATGATAAT-----  
 -----  
 -----  
 GATAATACAACAGAGATATTCAGACCTGGAGGAGGGGATATGAGAGACAATTGGAGAAGTGAATTATATAAAT  
 ATAAAGTGGTAGAAATTAGGCCATTA---GGAATAGCACCCACTAGTGCAAAAAGGAGAGTGGTG-----  
 -----CAGAGAGAAAAAAGAGCA--GTAGGT--ATTGGAGCT---  
 -----GTGTTTCCTTGGGTTCTTGGGAGCA--GCAGGAAGCACTATG--GGCGCGGCGTCA---  
 ATAACGCTGACGGTACAG---GCCAGACAA--TTGTTG---TCTGGTATAGTGCAACAGCAAAGC---  
 AATTTG---CTGAGG---GCCATAGAGGCGCAACAGCATCTGTTGCAACTCACGGTCTGGGGCATT  
 >HM623605  
 TTCTATTGCAATACAATAAGCTGTTTAATGAAAGTCTGGCTAAT-----  
 -----  
 -----  
 GAAAAATGATACAATACATATCCCATGTAGAATAAAACAAATCATAAACATGTGGCAGAAGGTAGGACGAGCAA  
 TGTATGCCCCCTCCCATTTGCAGGAAAAATAACATGTAACCTCACT---  
 ATCACAGGACTACTATTAAACACGAGATGGAGGAGAAAAATAGCACC-----  
 -----  
 -----  
 AATGGCACAGAGACATTCAGACCTGGAGGAGGAAATATGAAAGACAATTGGAGAAGTGAATTATATAAATATA  
 AAGTGGTAGAAGTTAAGCCATTG---GGAATAGCACCCACGAAGGCAAAAAGGAGAGTGGTG-----  
 -----GAGAGAGAAAAAAGAGCA--GTGGGA--CTAGGAGCT-----  
 ---GTGTTTCCTTGGGTTCTTGGGAGCA--GCAGGAAGCACTATG--GGCGCGGCGTCA---  
 GTGACGCTGACGGTACAG---GCCAGACAA--CTGTTG---TCTGGTATAGTGCAACAGCAAAGT---  
 AATTTG---CTGAGA--GCCATAGAGGCGCAACAGCATATGTTGCAACTCACAGTCTGGGGCATT  
 >HM623607  
 TTCTATTGCAATACATCAGGACTGTTTAATGGTACATATAATAGTACAGAAATTAATGATACTGAAACA---  
 -----  
 -----  
 GAAAACTCAAACATCACACTCCCATGCAAAATAAAACAAATTATAAACTTGTGGCAGGAGGTAGGAAAAGCAA  
 TATATGCCCCCTCCCATTTGCAGGAAACATAACATGTAGATCAAAT---  
 ATCACAGGACTATTATTGGTACGTGATGGAGGAAATACTGACAAC-----  
 -----  
 -----  
 AACACACAGAGACATTCAGACCTGGGGGAGGAGATATGAGGGACAATTGGAGAAGTGAATTATATAAATATA  
 AAGTGGTAGAAATTAAACCATTG---GGAGTAGCGCCCACTATGGCAAAAAGGAGAGTGGTG-----  
 -----GAGAAAGAAAAAAGAACA--GTGGGA--ATGGGAGCT-----  
 ---GTGCTCCTTGGGTTCTTGGGAGCA--GCAGGAAGCACTATG--GGCGCGGCGTCA---  
 ATAACGCTGACGGTACAG---GCCAGACAA--CTGCTG---TCTGGTATAGTGCAACAGCAAAGC---  
 AATTTG---CTGAGG---GCTATAGAGGCGCAACAGCATATGTTGCAACTCACGGTCTGGGGCATT  
 >HM623608  
 TTCTATTGCAATACATCAAACCTGTTTAATATAAGTAACTCA-----  
 -----  
 -----  
 AACGACACAGACATCACACTCCCGTGTAAGATAAAGCAAATTGTAAACATGTGGCAGAGGATAGGACGAGCAA  
 TGTATGCCCCCTCCCATTTGCAGGAAGCATAACATGTAACCTCAAGT---  
 ATCACAGGACTACTATTGACACGTGATGGAGGACACACAAACAATATTACA-----

-----  
-----  
AACAACTACTATAGAGACATTCAGACCTGCAGGAGGAAATATGAAGGACAATTGGAGAAGTGAATTATATAAAT  
ATAAAGTGGTAGAGATCCAGCCATTG---GGAGTAGCTCCCCTGGAGCAAAAAGGAGAGTGGTG-----  
-----GAGAGAGAAAAAAGAGCA---GTGGGA---ATAGGAGCT---  
-----GTGCTCCTTGGGTTCTTGGGAGCA---GCAGGAAGCACTATG---GGCGCAGCGTCA---  
ATAACGCTGACGGTACAG---GCCAGACAA---CTGTTG---TCTGGTATAGTGCAACAGCAAAGC---  
AATTTG---CTGAGA---GCTATAGAGGCGCAACAGCATATGTTGCAACTCACGGTCTGGGGCATT  
>HM623609  
TTCTATTGCAACACATCAGGGCTGTTTAAGGGAACTAATGGTACT-----  
-----  
-----

TCAAATAAACTATCACACTCCCATGTAGAATAAAACAAATTATAAACTTGTGGCAGGGGGTAGGACGGGGCAA  
TATATGCCCCCTCCCATTGCAGGAAACATAACATGTAAATCAAAC---  
ATCACAGGACTACTGTTAACACGTGATGGAGGAAACACAACAAAT-----  
-----  
-----

AGGACAGAGAAATTCAGACCTGGAGGAGGAGATATGAGGGACAATTGGAGAAGTGAACATACAAATATAAAG  
TGGTAGAAATTAACCCATTG---GGAGTGGCACCCCTGGGGCAAAAAGGAGAGTGGTG-----  
-----GAGAGAGAAAAAAGAGCA---GTGGGA---ATAGGAGCT-----  
GTGTTCCCTTGGGTTCTTGGGAGCA---GCAGGAAGCACTATG---GGCGCAGCATCA---  
ATGACGCTGACGGTACAG---GCCAGACAA---TTACTG---TCTGGTATAGTGCAACAGCAAAAC---  
AATTTG---CTGAGA---GCTATAGAGGCGCAACAACATATGTTGCAACTCACGGTCTGGGGCATT  
>HM623610  
TTCTATTGCAATACAACACAACCTGTTTAATAATGCAGCCGGC-----  
-----  
-----

GAGAACATCACAATTCATGCAGAATAAAGCAAATTATAAACATGTGGCAGGAGGTAGGACAAGCAATGTATG  
CCCCTCCCATTGCAGGAAATATAACATGTATATCAAAT---ATTACAGGACTACTGTTGTCATATGATACA--  
-ATGAATGGCACA-----  
-----  
-----

AATGGCACAGTGACAGTCAGACCTGGAGGAGGAAACATGAAGGACAATTGGAAAAGTGAATTATATAAATACA  
AAGTGGTAGAAATTAACCATTG---GGAATAGCACCCCTAAGGCAAAAAGGAGAGTGGTG-----  
-----GAGAGAGAAAAAAGAGCA---GTGGGA---ATAGGAGCT-----  
---GTGTTCCCTTGGGTTCTTGGGAGCA---GCAGGAAGCACTATG---GGCGCAGCGTCA---  
CTAACGCTGACGGTACAG---GCCAGACAA---TTGTTG---TCTGGTATAGTGCAACAGCAAAGC---  
AATTTG---CTGAGA---GCTATAGAGGCGCAACAACACATGTTGCAACTCACGGTTTGGGGCATT  
>HM623583  
TTCTATTGCAATACAACAAAATTATTTAATGGTACAAAGAATAACAGTACA-----  
-----  
-----

GACAGTAAAAACATCACGATCCCATGCAGAATAAAACAAATTGTAAACATGTGGCAGGAGGTAGGACGAGCAA  
TGTATGCTCCTCCTATTGAAGGAAACATAACATGTAAATCAAAC---  
ATCACGGGATTACTACTGGTGCGTGATGGAGGAAAAACAAATGACACA-----  
-----  
-----

AATAACACAGAGACCTTCAGACCTGGAGGAGGAGATATGAGGGACAATTGGAGAAGTGAATTATACAAATATA  
AAGTAGTAGAGATTAAGCCATTA---GGGATAGCACCTACTGAGGCAAAAAGGAGAGTGGTG-----  
-----GAGAGAGAAAAAAGAGCA---GTGGGA---ATGGGAGCT-----  
---GTGTTCCCTTGGGTTCTTGGGAGCA---GCCGGAAGCACTATG---GGCGCAGCGTCA---  
ATAACGCTGACGGTACAG---GCCAGACAA---TTGCTG---TCTGGTATAGTGCAACAGCAAAGC---  
AATTTG---CTGAGG---GCCATAGAGGCGCAGCAGCATATGTTGCAACTCACGGTCTGGGGCATT  
>HM623586  
TTCTACTGCAATACAACACAACCTGTTCAATCGCAATGCAACAACCTAAG-----  
-----  
-----

GACAAATTTAAACATCACACTCCCATGCAGAATAAAACAAATTGTAAATATGTGGCAGGAGGTAGGAAAAGCAA  
TGTATGCCCCCTCCCATTGAAGGAATCATACAATGTAACTCAAGT---  
ATCACAGGACTACTATTGCAGCGTGATGGAGGCAATGGAGGCAATGGCACC-----  
-----  
-----

-----  
 CAGAATAACACAGAGATATTCAGACCTGCAGGAGGAAATATGAAGGATAATTGGAGAAGTGAATTATATAAAAT  
 ATAAGGTAGTGGAAATTAAGCCATTA---GGAATAGCACCCACACCGGCAAAAAGGAGAGTGGTG-----  
 -----GAGAGAGAAAAGAGAGCA---GTGGGA---ATAGGAGCT---  
 -----GTGAACCTTGGGTTCTTGGGAGCA---GCAGGAAGCACTATG---GGCGCGGCGTCA---  
 ATAACGCTGACGGTACAG---GCCAGACAA---CTGTTG---TCTGGTATAGTGCAACAGCAAAGC---  
 AATTTG---CTGAGA---GCTATAGAGGCGCAACACCATATGTTGCAACTCACGGTCTGGGGCATT  
 >KC154026  
 TTCTATTGCAATACAACACACCTGTTTAATAACAGTGCTAAG-----  
 -----  
 -----  
 GGGAAATGGTACCATCACACTCCCATGCAGAATAAAACAAATTATAAACATGTGGCAGGGGGTAGGACGAGCAA  
 TGTATGCTCCTCCCATTGAAGGAAATATAACATGTAAATCAAAT---  
 ATCACAGGACTGCTATTGACACGTGATGGAGGAAACAATGGAGTA-----  
 -----  
 -----  
 AATAACACAGAAATATTCAGACCTGGAGGAGGAAATATGAAGGACAATTGGAGAAGTGAATTATATAAAATATA  
 AAGTGGTAGAAATTAAGCCATTG---GGAATAGCACCCACTACGGCAAAAAGAAGAGTGGTG-----  
 -----GAGAGAGAAAAAGAGCA---GTGGGA---ATAGGAGCT-----  
 ---GTACTCCTTGGGTTCTTGGGAGCA---GCAGGAAGCACTATG---GGCGCGGCGTCA---  
 ATAACGCTGACGGCACAG---GCCAGACAA---CTGTTG---TCTGGTATAGTGCAACAGCAAAGC---  
 AATTTG---CTGAGG---GCTATAGAGGCACAACAGCATATGTTGCAACTCACAGTCTGGGGCATT  
 >KC154027  
 TTCTATTGCAATACATCAAACTATTCAATAGTACATACAAGTACAATGATACAAACAGGACAGAAAAT---  
 -----  
 -----  
 ATTAATGGTACTATCACAATTCCATGCAGAATAAAACAAATTATAAACATGTGGCAGGAGGTAGGACGAGCAA  
 TATATGCCCCCTCCCATTGCAGGAAACATAACATGTATATCAAAT---  
 ATCACAGGATTACTATTGACACGTGATGGAGGAAACAATACAAAC-----  
 -----  
 -----  
 AGTAACGAGACATTTAGACCTGGAGGAGGAAATATGAAGGACAATTGGAGAAGTGAATTATATAAAATATAAAG  
 TGGTAGAAATTAACCATTG---GGAATAGCACCCACTGATGCAAAAAGGAGAGTGGTG-----  
 -----GAGAGAGAAAAAGAGCA---GTGGGA---CTAGGAGCT-----  
 TTGTTCTTGGGTTCTTGGGAGCA---GCAGGAAGCACTATG---GGCGCAGCGTCA---  
 ATAGCGCTGACGGAACAG---GCCAGAAAA---CTAATG---TCTGGTATAGTGCAACAGCAGAGC---  
 AATCTG---CTGAGG---GCTATAGAGGCGCAACAGCATATGTTGCAACTCACAGTCTGGGGCATT  
 >MF284922  
 TTCTATTGTAATACATCAAATCTGTTTTCTAATGTAACAAATATAACT-----  
 -----  
 -----  
 GATTCAAGCAACATCACACTCCCATGCAGGATAAAACAATTTATAAACATGTGGCAGGAGGTGGGACGAGCAA  
 TGTATGCCCCCTCCCATTGAAGGAAACATAACATGTAGATCAAAT---  
 ATCACAGGACTACTATTGACACGTGATGGAGGAATACCAGGGAATAGC-----  
 -----  
 -----  
 ACAGGGAATGGCATAGCAAAT-----  
 GACACAGAAATATTCAGACCTGGAGGAGGAAATATGAAGGACAATTGGAGAAATGAATTATATAAAATATAAAG  
 TGGTAGAAATTAAGCCATTG---GGAATAGCACCCACTGAGGCAAAAAGGAGAGTGGTG-----  
 -----GAGAGAGAAAGAAGAGCA---GTGGGA---CTAGGAGCT-----  
 GTGATCTTTGGGTTCTTGGGAGCA---GCAGGAAGCACTATG---GGCGCGGCGTCA---  
 ATAACGCTGACGGTACAG---GCTAGACAA---TTGCTG---TCTGGTATAGTGCAACAGCAAAGC---  
 AATTTG---CTGAGA---GCTATAGAGGCGCAACAGCATATGTTGCAGCTCACAGTCTGGGGCATT  
 >MF284952  
 TTCTATTGTAATACATCAAACCTGTTTAATACATCAAACCCAAACCTGTTTAGTAATGGAAGTGAT-----  
 -----  
 -----  
 CCAAAACAAACCATCACAATCCCATGCAGAATAAAACAAATTATAAACATGTGGCAGGGGGTAGGACGAGCAA  
 TGTATGCCCCCTCCCATTGCAGGAACCATAACATGTAACCTCAAAT---  
 ATCACAGGACTACTATTGCTACGTGATGGCGGTATCCATAATGATACTGGAACC-----  
 -----

-----  
AATAAAACAGAGACATTTCAGACCTGGAGGAGGAAATATGAAGGACAATTGGAGGAGTGAATTATATAAAATATA  
AAGTGGTAGAAATTAACCATTG---GGAGTAGCACCCACGAACGCAAAAAGGCGAGTGGTG-----  
-----GAGAGAGAAAAAAGAGCA---GTGGGA---ATAGGAGCT-----  
---GTACTCCTTGGGTTCTTGGGAGCA---GCAGGAAGCACTATG---GGCGCAGCGTCA---  
ATAACGCTGACGGTACAG---GCCAGACAA---CTGTTG---TCTGGTATAGTGCAGCAGCAAAGC---  
AATTTG---CTGAGA---GCTATAGAGGCGCAACAGCATATGTTGCAACTCACAGTCTGGGGCATT  
>MF284958  
TTCTATTGCAATACAACAGAGCTGTTTAAATTTAGTAATATCAGTGCAAACAAAACCATTGCA-----  
-----  
-----  
AACGACACAAATATAACCATCCCATGCAGGATAAAAACAATTTATAAATATGTGGCAGGAGGTAGGACGAGCAA  
TGTATGCCCCCTCCCATTCAGGAAACATAACATGTATCTCAAAT---  
ATCACAGGATTATTATTGACACGTGATGGGGGAATAAAATACCACAGATAATAAT-----  
-----  
-----  
AATAACACAGAAGATACATTTCAGACCTGGAGGAGGAAATATGAAGGACAATTGGAGAAGTGAATTATATAAAAT  
ATAAAGTGGTAGAAATTAAGCCATTA---GGAGTAGCACCCACTGGAGCAAAAAGGAGAGTGGTG-----  
-----GAGAGAGAAAAAAGAGCA---GTAGGA---CTGGGAGCT---  
-----TTGTTTCCTTGGGTTCTTGGGAGCA---GCAGGAAGCACTATG---GGCGTGCGCTCA---  
ATAACGCTGACGGTACAG---GCCAGACAA---CTGCTG---TCTGGTATAGTGCAGCAGCAAAGC---  
AATTTG---CTGAGA---GCTATAGAGGCGCAACAGCATCTGTTGCAACTCACGGTCTGGGGCATT  
>MF284962  
TTCTATTGCAATACAACAAATCTGTTTAATAATACAGGCACAAACAGC-----  
-----  
-----  
ACAAATGCAACTATCACACTCCCATGCAGGATAAAAACAATTTGTAAACATGTGGCAGGGGGTAGGACGAGCAA  
TGTATGCCCCCTCCCATTCAGGAAACATAACATGTAACCTCAAAT---  
ATCACAGGACTATTATTGACACGTGATGGAGGAACTAATAGCACA-----  
-----  
-----  
GAGAATGACACAGAAACATTTCAGACCTGCAGGAGGAAATATGAAGGACAATTGGAGAAGTGAATTATACAAAT  
ATAAAGTGGTAGAAATTAAGCCATTA---GGAATAGCTCCCACTGAGGCAAAAAGGAGAGTGGTG-----  
-----GAGAGAGAAAAAAGAGCA---GTGGGA---ATAGGAGCT---  
-----GTGCTCCTTGGGTTCTTGGGAGCA---GCAGGAAGCACTATG---GGCGCGGCGTCA---  
GTGACGCTGACGGTACAG---GCCAGACAA---CTGTTG---TCTGGTATAGTGCAACAGCAAAGC---  
AATTTG---CTGAGA---GCTATAGAGGCGCAACAGCATATGTTGCAACTCACGGTCTGGGGCATT  
>MF284977  
TTCTATTGTAATACAACAAAACCTGTTTAATGGAAACACAACCAATAGCACAACCGAG-----  
-----  
-----  
GGAAACAAAACCATCACACTCCCATGCAGGATAAAAACAATTTATAAATATGTGGCAGGAGGTAGGACGAGCAA  
TGTATGCCCCCTCCCATTCAGGGAAACATAACATGTAAGTCAAAT---  
ATCACAGGACTACTATTGGTACGTGATGGAGGAAACACAAACACAACAGATGGC-----  
ACAAAGATATTCTAGTAGGTGGAGGAAAC-----  
-----  
-----  
ACAAACACAACAAATGGCACAGAGATATTTCAGACCTGGAGGAGGAAATATGAAGGACAATTGGAGAAGTGAAT  
TATATAAATATAAAGTGGTAGAAATTAACCATTA---  
GGAATAGCACCCACCAAGGCACATAGGAGAGTGGTG-----  
---GAGAGAGAAAAAAGAGCA---GTGGGA---ATAGGAGCT-----  
GTGCTCTTTGGGTTCTTGGGAGCA---GCAGGAAGCACTATG---GGCGCGGCGTCA---  
ATAACGCTGACGGTACAG---GCCAGACAA---CTGTTG---TCTGGTATAGTGCAACAGCAAAGC---  
AATTTG---CTGAGA---GCTATAGAGGCGCAACAGCACATGTTGCAACTCACGGTCTGGGGCATT  
>MF285022  
TTTTATTGCGATACATCATGCCTGTTTAATGATACATGTTTAAATGACAAT-----  
-----  
-----  
TCTAGTGATCCCATCACACTCCAATGCAGAATAAAAACAATTTATAAATATGTGGCAGGGGGTAGGACGAGCAA  
TATATGCCCCCTCCCATTCAGGAAATATAACATGTAATTTCAAAT---  
ATCACAGGACTACTATTGACACGTGATGGAGGAGCACCAATAAAAATGAAACA-----

-----  
-----  
AATGGAACAGAGATATTCAGACCTGGAGGAGGAGATATGAGAGACAATTGGAGAAGTGAATTATATAAAATATA  
AAGTGGTAGAAGTTAATCCATTA---GGAGTAGCTCCAACCTGAAGCAAGAAGGAGAGTGGTG-----  
-----GACAGAGAAAAAAGAGCA---GTGGGA---ATGGGAGCT-----  
---TTGTTCCCTTGGGTTCTTAAGCGCA---GCAGGAAGCACTATG---GGCGCAGCGTCA---  
GTGACGCTGACGGTACAA---GCCAGACAA---CTGTTG---TCTGGTATAGTGCAACAGCAAAGC---  
AATTTG---CTGAGA---GCTATAGAAGCGCAACAGCATATGTTGCAACTCACAGTCTGGGGCATT  
>MF285058  
TTCTATTGCAATACATCAAACTGTTTAATACAAGTGAGTCAAAC-----  
-----  
-----  
ACAGACAACATAACCACCATCCCATGCAAGATAAAACAAATTATAAACATGTGGCAGGAGGTAGGACGAGCGA  
TGTATGCCCCCTCCCATTGCAGGATATATAACATGTAAATCAAAT---  
ATCACAGGACTACTATTAACACGTGATGGCGGTAACCACAATGTCAGC-----  
-----  
----  
CAGGAGAATCGGAACGAGACATTCAGACCTGGAGGAGGAAATATGAAAGACAATTGGAGAAGTGAATTATATA  
AATACAAAGTGGTAGAAATTAAGCCATTG---GGAATAGCACCCACTGGGGCAAAAAGGAGAGTGGTG-----  
-----GAGAGAGAAAAAAGAGCA---GTAGGA---  
ATAGGAGCT-----GTGTTCCCTTGGGTTCTTGGGAGCA---GCAGGAAGCACTATG---  
GGCGCGGCGTCA---ATAACGCTGACGGTACAG---GCCAGACAA---CTGCTG---  
TCTGGTATAGTGCAACAGCAAAGC---AATTTG---CTGAGA---  
GCTATAGAGGCGCAACAGCATATGTTGCAACTCACGGTCTGGGGCATT  
>JX140667  
TTCTATTGCAATACAACACCACTGTTTAATGAGAGTAATGGGAACAAT-----  
-----  
-----  
ATCACATACAATATCACAATCCCATGCAGAATAAAACAAATTATAAACATGTGGCAGGGGGTAGGACGAGCAA  
TATATGCCCCCTCCCATTGAAGGAAACATAACATGTAGATCCAAT---  
ATCACAGGACTACTATTGGTACGTGATGGAGGAGAGGAAAAATAGG-----  
-----  
-----  
ATAAATGAGACATTCAGACCTGGAGGAGGAAATATGAAGGACAATTGGAGAAGTGAATTATACAAATATAAAG  
TGGTAGAAATTAAGCCATTG---GGAGTAGCACCCACTGAGGCAAAAAGGAGAGTGGTG-----  
-----GAGAGAGAAAAAAGAGCA---GTGGGA---ATAGGAGCG-----  
TTGTTCCCTTGGGTTCTTGGGAGCA---GCAGGAAGCACTATG---GGCGCGGCGTCA---  
ATAACGCTGACGGTACAG---GCCAGACAA---TTGTTG---TCTGGTATAGTGCAACAGCAAAGC---  
AATTTG---CTGAGA---GCTATAGAGGCGCAACAACATCTGTTGCAGCTCACAGTCTGGGGCATT  
>JX140668  
TTCTATTGCAATACAACAAGACTGTTTTCTAATGATTTAAATGACGCAGGG-----  
-----  
-----  
TCAGATGACAACATTACACTCCCATGCAGGATAAAGCAAATAGTAAACATGTGGCAGGGGGTAGGACGAGCAA  
TGTATAGCCCCCTCCCATTGAAGGAAGAATAATATGTATCTCAAAC---  
ATCACAGGACTACTATTAACACGTGATGGAGGAGATGGAAAAGACAAGGGA-----  
-----  
-----  
AAAAATGATACAGAGATATTCAGACCTGGAGGAGGAAATATGAAAGACAATTGGAGAAGTGAATTATATAAAT  
ATAAAGTGGTAGAGATTAAGCCATTG---GGAATAGCACCCACTAGATCACAAGGAGAGTGGTG-----  
-----GAGAGAGAAAAAAGAGCA---GTGGGA---ATAGGAGCT---  
-----GTACTCCTTGGGTTCTTGGGAGCA---GCAGGAAGCACTATG---GGCGCGGCGTCA---  
ATAACGCTGACGGTACAG---GCCAGACAA---CTATTG---TCTGGTATAGTGCAACAGCAAAGC---  
AATTTG---CTGAGA---GCTATAGAGGCGCAACAGCATATGTTGCAACTCACGGTCTGGGGCATT  
>KF114892  
TTCTATTGCGATACATCAAGAATATTTAATAGGACATACAATAGTAATAGTACACACAATGAGACATACAGTA  
AC-----  
-----  
AGTACAGAAACAATTACACTCCCATGCAGAATAAAACAAATTATAAACATGTGGCAGGGGGTAGGACAAGCAA  
TGTATGCCCCCTCCCATTGCAGGACAAATAACATGTAACTCAAAT---

ATCACAGGATTAATATTGACAAGGGATGGAGGTAATAATGCTACA-----  
 -----  
 -----  
 CATAATAAAGAGATATTCAGACCTATAGGAGGAGACATGAGGGACAACCTGGAGGAGTGAATTATATAAATATA  
 AGGTGGTAGAAATTAAGCCATTA---GGGATAGCACCTACTGAGGCCAAAAGGAGAGTGGTG-----  
 -----GAGAGAGAAAAAAGAGCA---GTGGGA---CTAGGAGCC-----  
 ---ATGTTCCCTTGGGTTCTTGGGAGCA---GCCGGAAGCACTATG---GGCGCAGCATCA---  
 ATAACGCTGACGGTACAG---GCCAGACAA---TTGATG---TCTGGTATAGTGCAACAGCAAAGC---  
 AATTTG---CTGAAG---GCTATAGAGGCGCAACAACATATGTTGCAACTCACAGTCTGGGGCATT  
 >KF725883  
 TTCTATTGCAATACAACAAAACCTGTTTAATAGTACAATTAATGGTACAAAT-----  
 -----  
 -----  
 AGTAATTCAACCATCACACTTCCATGCAGAATAAAACAAATTATAAATATGTGGCAGGAGATAGGAAGAGCCA  
 TGTATGCTCCTCCCATTGAAGGAAACATAACATGTACATCAAAC---  
 ATTACAGGACTACTATTGACACGTGATGGAGGCAACAATAGCACA-----  
 -----  
 -----  
 GAAACAGAAACATTTAGACCTGGAGGAGGAGATATGAGGGACAATTGGAGAAGTGAATTATACAAATATAAAG  
 TGGTAGAAATTAAGCCATTG---GGAATAGCACCCACTGGGGCAAAAGGAGAGTGGTG-----  
 -----GAGAGAGAAAAAAGAGCA---GTGGGA---ATAGGAGCT-----  
 GTGATCTTTGGGTTCTTGGGAGCA---GCTGGAAGCACTATG---GGCGCGGCGTCA---  
 ATAACGCTGACGGTACAG---GCCAGACAA---TTGTTG---TCTGGTATAGTGCAACAGCAAAGC---  
 AATTTG---CTGAGA---GCTATAGAGGCGCAACAGCATATGTTGCAACTCACAGTCTGGGGCATT  
 >KF725884  
 TTCTATTGCAATACATCAAGCCTGTTTAATAACAGTCTTCTTAATAATACAGAAAAGA-----  
 -----  
 -----  
 ACTGATTCAAACATCACACTCCAATGTAAATAAAACAAATTATAAACATGTGGCAAGGAGTAGGAAAAGCAA  
 TGTATGCTCCTCCCATTGAAGGAAACATAACATGTATATCAAAC---  
 ATCACAGGGCTGTTATTGCTACGTGATGGAGGTGATAGTAATGAT-----  
 -----  
 -----  
 AGCATAGAGATATTCAGACCTGGAGGAGGAGATATGAGGGATAATTGGAGAAGTGAATTATATAAATATAAAG  
 TGGTAGAAATTAAGCCATTA---GGGGTAGCACCCAGCAAGGCCAAAAGGAGAGTGGTG-----  
 -----GAGAGAGAAAAAAGAGCA---GTGGGA---ATAGGAGCT-----  
 GTGTTCCCTTGGGTTCTTGGGAGCA---GCAGGAAGCACTATG---GGCGCAGCGTCA---  
 ATAACGCTGACGGTACAA---GCCAGACAA---TTGTTG---TCTGGTATAGTGCAACAGCAAAGC---  
 AATTTG---CTGAGG---GCTATAGAGGCGCAACAGCATATGTTGCAACTCACGGTCTGGGGCATT  
 >KF725885  
 TTCTATTGCAATACATCACAACCTGTTTAATAGTACATACATGGGTAATGGTACAAACAGGACTATTAGT---  
 -----  
 -----  
 TCAAATTCAACCATCACACTCCAATGCAGAATAAAACAAATTATAAACATGTGGCAGGGGGTAGGACGAGCAA  
 TGTATAACCCTCCCATTGAAGGAAACATAACATGTAAATCAAAT---  
 ATCACAGGACTACTATTGACACGTGATGGAGGCAAAACCAGAATCA-----  
 -----  
 -----  
 GAAAACCAAGCAGAGATATTTAGACCGGGAGGAGGAGATATGAGGGACAATTGGAGAAGTGAAGTATATAAAT  
 ATAAAGTGGTAAAAATTAAGCCATTA---GGAATAGCACCCACTAAGGCCAAAAGGAGAGTGGTG-----  
 -----GAGAGAGAAAAAAGAGCA---GTGGGA---CTAGGAGCT---  
 -----GTATTCCTTGGGTTCTTGGGAGCA---GCCGGAAGCACTATG---GGCGCAGCATCA---  
 ATAACGCTGACGGTACAG---GCCAAACAA---TTGTTG---TCTGGTATAGTGCAACAGCAAAGC---  
 AATTTG---CTGAGG---GCCATAGAGGCGCAACAGCACATGTTGCAACTCACGGTCTGGGGCATT  
 >KF725889  
 TTCTATTGCGATACATCAAAACCTGTTTAATGAAACTAATTCAAACACAACCTGAT-----  
 -----  
 -----  
 TCAAAACACAACCATAATCCTCCCATGCAAAATAAAACAAATTATAAACATGTGGCAGGGGGTGGGACGAGCAA  
 TGTATGCTCCTCCCATTGCAGGAAACATAACATGTAACTCAAGT---

ATTACAGGAATCCTATTGACACGTGATGGAGGCAATGAAAGTAGTACA-----  
-----  
-----  
AATGAAACAAAAATATTGAGACCTGGAGGAGGAAATATGAAGGACAATTGGAGAAATGAGTTATATAAATATA  
AGGTGGTAGAAATTAAGCCATTA---GGAATAGCACCCACTGAGGCAAAAAGGAGAGTGGTGGGG-----  
-----ATGGGGAGAGAAAGAAGAGCA---GCA-----CTAGGAGCT-----  
---ATGTTCCCTTGGGTTCTTGGGAGCA---GCAGGAAGCACTATG---GGCGCAGCGTCA---  
ATAGCGCTGACGGTACAA---GCCAGACAA---GTGTTG---TCTGGTATAGTGCAACAGCAAAGA---  
AATTTG---CTGAGA---GCTATAGAGGCGCAACAGCATATGTTGCAACTCACAGTCTGGGGCATT  
>KF725890  
TTCTATTGCAATACATCAAACTGTTTAATGAATCA-----  
-----  
-----  
ATCACGCTCCCATGCAAGATAAAACAAATTATAAACATGTGGCAGAAGGTGGGACGGGCAATGTATGCCTCTC  
CCATTGCAGGAAACATAACATGTGCATCAAAT---  
ATCACAGGACTACTATTGACACGTGATGGAGGAAATACAACAAAT-----  
-----  
-----  
GATACAGAAATATTGAGACCTGGAGGAGGAGATATGAGGGACAATTGGAGAAGTGAATTATATAAATATAAAG  
TGGTAGAAATTAAGCCATTA---GGAGTAGCACCCACTAAGGCAAAAAGGAGAGTGGTG-----  
-----GAGAGAGAAAAAAGAGCA---GCGGGA---ATAGGAGCT-----  
GTGATCCTTGGGTTCTTGGGAGCA---GCAGGAAGCACTATG---GGCGCGGCGTCA---  
ATAACGCTGACGGTACAG---GCCAGACAG---TTGTTG---TCTGGTATAGTGCAACAGCAAAGC---  
AATTTG---CTGAGG---GCCATAGAGGCGCAACAGCATATGTTGCAACTCACGGTCTGGGGCATT  
>KF725891  
TTCTATTGCAATACATCAAAATTGTTTAATGGTACATACAATGATACGGGGACAGGAAATAATTCAACTACC-  
-----  
-----  
ATCACACTCCCATGCAGAATAAAACAAATTATAAACATGTGGCAAGGGGTGGGACGAGCAATGTATGCCCCCTC  
CCATTGCAGGAAACATAACATGTAAATCAAAT---  
ATCACAGGATTGCTATTGACATACGATGGCCATGATGACAGTAGT-----  
-----  
-----  
AACACAGAGACATTGAGACCTACAGGAGGAAATATGAAGGACAATTGGAGAAGTGAATTATATAAATATAAAG  
TGGTAGAAATTAAGCCATTA---GGAATAGCACCAACTACAGCAAGAAGGAGAGTGGTG-----  
-----GAGAGAGAAAAAAGAGCA---GTGGGA---ATAGGAGCT-----  
GTGTTCCCTTGGGTTCTTGGGAGCA---GCAGGAAGCACTATG---GGCGCAGCGTCA---  
ATAACGCTGACGGTACAG---GCCAGACAA---TTATTG---TCTGGTATAGTGCAAGCAGCAAAGT---  
AATTTG---CTGAGG---GCTATAGAGGCGCAACAGCATATGTTGCAACTCACAGTCTGGGGCATT  
>KF725892  
TTCTATTGCGATACATCAAGCCTATTTAATGGTACATATGAAAACACCACATTT-----  
-----  
-----  
ACAAATGAAACCATCACACTCCAATGCAGAATAAAACAAATTATAAACATGTGGCAGAGGGTAGGACGGGCAA  
TGTATGCCCCCTCCCATTCAGGAAACATAACATGTATCTCAGAT---  
ATCACAGGACTGCTGTTGACACGTGATGGAGGCAACAACAGCAGC-----  
-----  
-----  
CCAAACGAGACATTGAGACCTGAAGGAGGAAATATGAGGGACAATTGGAGAAGTGAATTATATAAATATAAAG  
TGGTAGAAGTTAAACCATTA---GGAATAGCACCTACTAAGGCAAAAAGGAGAGTGGTG-----  
-----GAGAGAGAAAAAAGAGCA---GTGGGA---ATAGGAGCT-----  
GTGTTCCCTTGGGTTCTTGAGCGCA---GCAGGAAGCACTATG---GGCGCGGCGTCA---  
ATAACGCTGACGGTACAG---GCCAGACAA---TTATTA---TCTGGTATAGTGCAACAGCAAAGC---  
AATTTG---CTGAGA---GCTATAGAGGCGCAACAGCATATGTTGCAACTCACGGTCTGGGGCATT  
>KF725895  
TTCTATTGCAATACATCACAACTGTTTAATAGTACATGGAGTAATAGTGCATTGCTTAATAGTACAGACAAT-  
-----  
-----  
TCTAATGAAACCATCACACTCCCATGCAGAATAAAACAAATTATAAACATGTGGCAGGAGGTAGGACGAGCAA  
TGTATGCCCCCTCCCATTCAGGAAATATAACATGTAAATCGAAT---

ATCACAGGACTACTATTGACACGTGATGGAGGACTAAATGAAAAGAAT-----  
-----  
-----  
ACAAGTAATACAGAGACATTCAGACCTGGAGGAGGAAATATGAGAGACAATTGGAGAAGTGAATTATATAAAT  
ATAAAGTGGTAGAAATTAATCCATTA---GGAGTAGCTCCAACCTAAGGCAAAAAGGAGAGTGGTG-----  
-----GAGAGAGAGAAAAAGAGCA---GTGGGA---ATAGGAGCT---  
-----GTGTTTCCTTGGGTTCTTAGGAGCA---GCAGGAAGCACTATG---GGCGCAGCATCA---  
TTAACGCTGACGGTACAG---GCCAGACAA---TTATTG---TCTGGTATAGTGCAACAGCAAAGC---  
AATTTG---CTAAGG---GCTATAGAGGCGCAACAGCATATGTTGCAACTCACAGTCTGGGGCATT  
>KF725896  
TTCTATTGTAATACAACAACTTGTTTAATATAACAACTTGTCTGATAAAAAATAATTCATCCACAGAGA  
AC-----  
-----  
ACCACAGAGATCATCACACTCCCATGCAAGATAAAACAAATTATAAACATGTGGCAGGGGGTAGGACGAGCAA  
TGTACGCCCCCTCCCATTTGAAGGGCTTATAACATGTAAATCAAAT---  
ATCACAGGACTACTATTGACATGGGATGGA---AATGGAGACCCAAGCAATAGC-----  
-----  
-----  
ACAGAGAACACAACAATATTCAGACCTGGGGGAGGAAATATGAAGGATAATTGGAGAAATGAATTATATAAAT  
ATAAAGTGGTAGAAATTAACCATTG---GGAATAGCTCCCCTAAGGCAAAAAGGAGAGTGGTG-----  
-----GAGAGAGAAAAAAGAGCA---GTGGGA---ATAGGAGCT---  
-----GTGTTTCCTTGGGTTCTTGGGAGCA---GCAGGAAGCACTATA---GGCGCAGCGTCA---  
ATAACGCTGACGGTACAG---GCCAGACAA---CTATTG---TCTGGTATAGTGCAACAGCAAAC---  
AATTTG---CTAAGA---GCTATAGAGGCGCAACAGCATATGTTGCAACTCACAGTCTGGGGCATC  
>KF725908  
TTCTATTGTAATACATCAATATTGTTTAATGGTACATACAATGGTACATACCCAGGGACAGGA-----  
-----  
-----  
AATGGTTCAGATATCACACTCCAATGCAAAATAAAACAGATTATAAACATGTGGCAAGGGGTGGGACGAGCAA  
TGTATGCCCCCTCCCATTTGACAGGAAACATAACCTGTAAATCAAAT---  
ATCACAGGATTATTATTGACACGTGATGGCAGCAATAGCAATGTAACA-----  
-----  
-----  
AATGGAACAGAGACATTCAGACCTATAGGAGGAAATATGAAGGACAATTGGAGAAGTGAATTATATAAATATA  
AAGTGGTAGAAATTAAGCCATTA---GGAGTAGCACCAACTACAGCAAGGAGGAGAGTGGTG-----  
-----GAGAGAGAAAAAAGAGCA---GTGGGA---ATAGGAGCT-----  
---GTGTTTCCTTGGGTTCTTGGGAGCA---GCAGGAAGCACTATG---GGCGCGGCGTCA---  
ATAACGCTGACGGTACAG---GCCAGACAA---CTGTTG---TCTGGTATAGTGCAAGCAGCAAAGT---  
AATTTG---CTGAGG---GCTATAGAGGCGCAACAGCATATGTTGCAACTCACGGTCTGGGGCATT  
>KF725912  
TTTTATTGCAATACATCAGGACTGTTTAACGGTACATACAATAATGAGACAAATCCAAACATC-----  
-----  
-----  
ACAAAGTCAAACATCACACTTCCATGCAGGATAAAACAAATTATAAACATGTGGCAGAGGGTAGGACAAGCAA  
TGTATGCTCCTCCTATTAGAGGAAACATAACATGTAAATCAAAT---  
ATCACAGGAATACTATTAGTACGTGATGGAGGCAACACAACCGCA-----  
-----  
-----  
AACGAGACATTCAGACCAGGAGGAGGAGATATGAAGGATAATTGGAGAAGTGAATTATATAAATATAAAGTGG  
TAGAAATTAAGCCATTG---GGAATAGCACCCACTGAAGCAAAAAGGAGAGTGGTG-----  
-----GAGAGAGAAAAAAGAGCA---GTAGGA---ATAGGAGCT-----  
GTGTTTCCTTGGGTTCTTGGGAATG---GCAGGAAGCACTATG---GGCGCGGCGTCA---  
ATAACGCTGACGGTACAG---GCCAGGCAA---CTGTTG---TCTGGTATAGTGCAACAGCAAAT---  
AACTTG---CTGAGG---GCCATAGAGGCGCAACAGCATCTGTTGCAACTCACGGTCTGGGGCATT  
>KF725914  
TTCTATTGCAATACATCAAGACTGTTTAATGGTACATACAACAGTACAGAAAGTAATTCAAGTACAGGA----  
-----  
-----  
AGTAATTTAACCATCACACTTCCATGCAGAATAAAACAAATTATAAACATGTGGCAGGAGGTAGGACGAGCAA  
TGTATGCCCCCTCCCATTTGAAGGAAACATAACATGTAAATCAAAT---

ATCACAGGACTACTATTGACACGTGATGGAGGGAACACTAACACTAGC-----  
-----  
-----  
AATAGCTCAGAGACATTGAGACCTGGAGGAGGAGATATGAGGGATAATTGGAGAAGTGAATTATATAAATATA  
AAGTAGTAGAAATTAAACCACTA---GGAATAGCACCCGAGAGGGCAAAAAGGAGAGTGGTG-----  
-----GAGAGAGAAAAAAGAGCA---GTGGGA---CTGGGAGCT-----  
---GTGTTCTTGGGGTTCTTAGGAGCA---GCAGGAAGCACTATG---GGCGCAGCGTCA---  
GTAGCGCTGACGGTACAA---GCCAAGCAA---TTATTG---TCTGGTATAGTGCAACAGCAAAAT---  
AATTTG---CTGAGA---GCTATAGAGGCGCAACAACATATGTTGCAACTCACAGTCTGGGGCATT  
>KF725916  
TTCTATTGCAATACATCAGGACTGTTTAAATGGAACATACAATGAGACAAGAAGTAATTCAAGTAAT-----  
-----  
-----  
TCAAAACAGCACAATCACACTCCCATGCGAGAATAAAACAAATTATAAACATGTGGCAGGGAGTAGGACGAGCAA  
TGTATGCTCCCCCTATTGCAGGAAACATAACATGCAACTCAAGC---  
ATCACAGGACTACTACTGGTGCGTGATGGAGGACATGGGAATAAT-----  
-----  
-----  
ACAACAGAGATCTTCAGACCTGGAGGAGGAGATATGAGGGACAATTGGAGAAGTGAATTATACAAATATAAAG  
TGGTAGAGATTAAGCCATTG---GGAATAGCACCTACTGGAGCAAAAAGGCGAGTGGTG-----  
-----GAGAGAGAAAAAAGAGCA---GTGGGA---ATAGGAGCT-----  
GTGTTCTTGGGGTTCTTGGGAGCA---GCAGAAAGCACTATG---GGCGCGGCGTCA---  
ATAACGCTGACGGTACAG---GCCAGACAA---TTGTTG---TCTGGTATAGTGCAACAGCAAAGC---  
AATTTG---CTGAGA---GCCATAGAGGCGCAACAACATATGTTGCAACTCACGGTCTGGGGCATT  
>KF725922  
TTCTATTGCAATACATCAAAGCTATTTAATAGTAATAGTACACATGATCCTAAT-----  
-----  
-----  
AGTACAGCACCCATCACACTCCCATGTAGAATAAAACAAATTATAAACATGTGGCAGGAGGTAGGACGAGCAA  
TGTATGCCCCCTCCCATTCAGGAAACATAACATGTAAATCAAAT---  
ATCACAGGACTACTATTGACACGTGATGGAGGAAAAAATAATGGG-----  
-----  
-----  
ACAGAGATATTGAGACCTGGAGGAGGAGATATGAGGGACAATTGGAGAAGTGAAGTTGTATAAATACAAAGTAG  
TAGAAGTTGAGCCATTA---GGAGTAGCACCCACTACGGCAAGAAGGAGAGTGGTG-----  
-----GAGAGAGAAAAAAGAGCA---GTGGGA---CTAGGAGCT-----  
GTGTTCTTGGGGTTCTTGGGAGCA---GCCGGAAGCACTATG---GGCGCAGCATCA---  
ATAACGCTGACGGTACAG---GCCAGACAA---TTGTTG---TCTGGCATAGTGCAACAGCAAAGC---  
AATTTG---CTGAGG---GCTATAGAGGCGCAACAACATATGTTGCAACTCACAGTCTGGGGCATT  
>JN681258  
TTCTATTGCAATACATCAGAACTGTTTAAAGTTTAAAGTTTAAATGGTACAGAAAATAGTACAGAAAGTAGTGCAG  
AGAGT-----  
-----  
AATTCAAGCAAAATCATCACAATCCCATGCAAAATAAAACAAATTATAAACATGTGGCAGAGGGTAGGGCAAG  
CAATGTATGCCCCCTCCCATCAAAGGAAACATAACATGTAACCTCAAAT---  
ATCACAGGAATACTATTGACACGTGATGGGGGAAATAATAATGAG-----  
-----  
-----  
AGCGAGAGTGAGACATTGAGACCTGGAGGAGGAGATATGAGAGATAATTGGAGAAGTGAATTGTATAAATATA  
AAGTGGTAGAAGTTAAGCCATTA---GGAATAGCACCCACTGAGTCAAAAAGGAGAGTGGTG-----  
-----GAGAGAGAAAAAAGAGCA---GTGGGA---ATAGGAGCC-----  
---TTGTTCTTGGGGTTCTTGGGAGCA---GCAGGAAGCACTATG---GGCGCAGCGTCA---  
ATAACGCTGACGGTACAG---GCCAGACAA---CTGTTG---TCTGGTATAGTGACAGCAGCAAAGC---  
AATTTG---CTGAGG---GCTATAGAGGCGCAACAGCATATGTTGCAACTCACGGTCTGGGGCATA  
>KF114888  
TTCTATTGTGATACAACAAAACCTGTTTAGCAGGAATGAAAGTACTCTAAATTTAACAGGAAATTCAACAGAAG  
GT-----  
-----  
TCAGATAAGACCATCACACTCAACTGCCACATAAAACAAATTATAAACATGTGGCAGGGGGTAGGACGAGCAA  
TGTATGCCCCCTCCCATTCAGGAAACATAACATGTAAATCAAAT---

ATCACAGGAATACTACTGACACGTGATGGAGAAAGAAATAGTACA-----  
 -----  
 -----  
 GAAGAGATATTTAGACCTGGAGGAGGAGATATGAGGGACAATTGGAGAAGTGAATTATATAAATATAAGGTGG  
 TAGAAATTAAACCACTA---GGAGTAGCACCAACTATTGCAAAAAGGAGAGTGGTG-----  
 -----GAGAGAGAAAAAAGAGCA---GTGGGA---ATAGGAGCT-----  
 GCGTTCCTTGGGTTCTTGGCAATG---GCCGGAAGCACTATG---GGCGCAGCATCA---  
 ATGACGCTGACGGTACAG---GCCAGACAA---TTGTTG---TCTGGTATAGTGCAACAGCAAAGC---  
 AATTTG---CTGCAG---GCTATAGAGGCGCAACAGCATCTGTTGCAACTCACAGTCTGGGGCATT  
 >KF725927  
 TTCTATTGTGATACATCAGGCCTGTTTAATGTTACATACTGGGTTAATGGTACAAACAGTAGTACAGGAAGCA  
 CC-----  
 -----  
 ACAAATTCAATCATCACACTCCCATGCAGAATAAAACAAATTATAAACTTGTGGCAGGGGGTAGGACGAGCAA  
 TGTATGCCCCCTACCATTGCAGGAAACATAACATGTAAGTCACAA---  
 ATCACAGGACTACTATTGACACGGGATGGAGGAGAAGAACAAAAT-----  
 -----  
 -----  
 ACTACAGAGACATTGAGACCTGGAGGAGGAGATATGAGAGACAATTGGAGAAGTGAATTATATAAATATAAAG  
 TAGTAGAAGTCAAGCCAGTA---GGAATAGCACCCACTAGGGCAAAAAGGAGAGTGGTG-----  
 -----CAGAGAGAAGAAAAGAGCA---GTGGGA---ATGGGAGCT-----  
 GTGATCCTTGGGTTCTTGGGAGCA---GCAGGAAGCACTATG---GGCGCGGCGTCA---  
 ATAACGCTGACGGTACAG---GCCAGACAG---TTATTG---TCTGGTATAGTGCAACAGCAGAGC---  
 AATTTG---CTGAGG---GCTATAGAGGCGCAACAGCATCTGTTGCAACTCACGGTCTGGGGCATT  
 >KF725928  
 TTCTATTGCAATACATCAAACTTGTTTAATAGTACACTGGTTAAT-----  
 -----  
 -----  
 AGTAATTCAACCATCACACTCCAATGTAGAATAAAACAAATTGTAAACATGTGGCAGGGGGTAGGACGAGCAA  
 TGTATGCCCCCTCCCATTGAAGGAAACATAACATGTAAGTCAAAG---  
 ATCACGGGACTACTATTGACACGTGATGGAGGAAATAATACAAAT-----  
 -----  
 -----  
 AATGAGACATTGAGACCTGGAGGAGGAGATATGAGGGACAATTGGAGAAGTGAATTATATAAATATAAAGTGG  
 TAGAAATTAAACCATTG---GGAATAGCACCCACTGAGGCAAAAAGGAGAGTGGTG-----  
 -----GAGAGAGAAAAAAGAGCA---GCAGGA---CTAGGAGTT-----  
 GTGCTCCTTGGGTTCTTGGGAGCA---GCAGGAAGCACTATG---GGCGCAGCGTCA---  
 TTAACGCTGACGGTACAG---GCCAGACAA---TTGTTG---TCTGGTATAGTGCAACAGCAAAAC---  
 AATTTG---CTGAGG---GCTATAGAGGCGCAACAGCATATGTTGCAACTCACAGTCTGGGGCATC  
 >KF725929  
 TTCTATTGCAATACAACAAGATTGTTTAATGAAAGTACAGGATTGTTTAATGTAAGTATGTCA-----  
 -----  
 -----  
 AATAATACAAACATCACACTCCCATGCAGGATAAAACAAATTATAAATATGTGGCAGGAGGTAGGACGAGCAA  
 TGTATGCCCCCTCCCATTGCAGGAACCATAACATGTATATCAAAC---  
 ATCACAGGATTACTATTGACACGGGATGGAGGTAACACAAGTGACTCA-----  
 -----  
 -----  
 AACACAAAGAGACATTGAGACCTGGAGGAGGAAATATGAAGGACAATTGGAGAAATGAATTATATAAATATA  
 AAGTGGTAGAAATTAAGCCATTG---GGAGTGGCTCCAAGTGGGGCAAAAAGGAGAGTGGTG-----  
 -----GAGAGAGAAAAAAGAGCA---GTGGGA---ATAGGAGCT-----  
 ---GTGTTCCCTTGGGTTCTTGGGAGCA---GCAGGAAGCACTATG---GGCGCAGCGTCA---  
 ATAACGCTGACGGTACAG---GCCAGACAA---CTGTTG---TCTGGTATAGTGCAACAGCAAAAC---  
 AATTTG---CTGAGA---GCTATAGAGGCGCAACAGCATATGTTGCAACTCACAGTCTGGGGCATT  
 >KF725933  
 TTCTATTGCAATACATCAAGCCTGTTTAATGGTACATACAACAGTACAAAAAATAGTACA-----  
 -----  
 -----  
 GACAATGAAGAAGTAACAATCCCATGCAGAATAAAACAAATTATAAATATGTGGCAGGGGGTAGGACGAGCAA  
 TGTATGCCCCCTCCCATTGCAGGAAACATAACATGTAAGTCAAAT---

ATCACAGGACTACTATTGACACGTGATGGAGGAACAGAAAATGAT-----  
 -----  
 -----  
 ACTAGTACAGAGACATTTCAGACCTGAAGGAGAAGATATGAGGAATAATTGGAGAAGTGAATTATATAAAATATA  
 AAGTGGTAGAAATTAAGCCATTA---GGAATAGCACCCACTAAGGCAAAAAGGAGAGTGGTG-----  
 -----  
 -----CAGAGAGAGAAAAGAGCA---GTGGGA---ATAGGAGCT-----  
 ---GTGTTCCCTTGGGTTCTTGGGAGCA---GCAGGAAGCACTATG---GGCGCGGCGTCA---  
 ATAACGCTGACGGTACAG---GCTAGACAA---TTATTG---TCTGGTATAGTGCAACAGCAAAGC---  
 AATTTG---CTGAGG---GCTATAGAGGCGCAACAGCACATGTTGCAACTCACGGTCTGGGGCATT  
 >KF725935  
 TTCTATTGCAATACATCAAACCTGTTTAATAGCACGTACCATCCTAATGGTACATTCACATTCAATGGTACTA  
 ATATTAATAGT-----  
 -----ACAGAAAGCACA-----  
 AATAGTACAGAAGTTATCACAAATTCATGCAGAATAAAACAATTCATAAACATGTGGCAGGAGGTAGGACGAG  
 CAATGTATGCTCCTCCCATTCAGGGAACATAACATGTAACCTCAACC---  
 ATCTCAGGACTACTATTGACACGGGATGGAGGATTAGAGAACGGA-----  
 -----  
 -----  
 ACAGAGACATTCAGACCTGGAGGAGGAGATATGAGGGATAATTGGAGAAGTGAATTATATAAAATATAAAGTGA  
 TAGAAATTAGGCCATTG---GGAATAGCACCCACTGAGGCAAGAAGGAGAGTGGTG-----  
 -----GAGAAAGAAAAAGAGCA---GTAGGA---ATAGGAGCT-----  
 GTGATCTTTGGGTTCTTGGGAGCA---GCAGGAAGCACTATG---GGCGCGGCGTCA---  
 ATAACGCTGACGGTACAG---GCCAGACAA---TTGTTG---TCTGGTATAGTGCAACAGCAAAGC---  
 AATTTG---CTGAGA---GCTATAGAGGCGCAACAGCATATGTTGCAACTCACGGTCTGGGGCATT  
 >KF725936  
 TTCTATTGTAATACATCAAACTGTTTAATAGTACATACAACAGTACATACAATAGTGAGAATAATACT----  
 -----  
 -----  
 TCAGATAAAGACATCACACTCCCATGCAGAATAAAACAGATAATAAACATGTGGCAGAAGGTAGGACGAGCAA  
 TGTATGCCCCCTCCCATTCAGGAAACATAACATGTAAATCAAAT---  
 ATCACAGGAATACTATTGACACGTGATGGAGGCAAAAATAACACA-----  
 -----  
 -----  
 GACAAAGAGATATTTCAGACCTACAGGAGGAAATATGAGGGACAATTGGAGAAGTGAATTATATAAAATATAAAG  
 TGGTAGAAATTAAGCCATTG---GGAATAGCACCCACTAAGGCAAGAAGGAGAGTGGTG-----  
 -----GAGAGAGAAAAAGAGCA---GTGGGA---ATAGGAGCT-----  
 GTGTTCCCTTGGGTTCTTGGGAGCA---GCAGGAAGCACTATG---GGCGCGGCGTCA---  
 ATGACGCTGACGGTACAG---GCCAGACAA---TTGTTG---TCTGGTATAGTGCAACAGCAAAGC---  
 AATTTG---CTGAGG---GCCATAGAGGCGCAACAGCATATGTTGCAACTCACGGTCTGGGGCATT  
 >KF725938  
 TTCTATTGCAATACATCAAGCCTGTTTAATGGTACATACAATGGTACATACACAAATGGG-----  
 -----  
 -----  
 ACAAATTCAACCATCACACTCCAATGCAGAATAAAACAAATTATAAACATGTGGCAGGGGGTAGGACGAGCAA  
 TGTATGCCCCGCCCATTCAGGAAACATAACATGTAAATCAAAT---  
 ATCACAGGACTACTATTGACACGTGATGGAGGGAACAACAACAT-----  
 -----  
 -----  
 GGCTCAGAGATATTTCAGACCTGGAGGAGGAGATATGAGGGACAATTGGAGAAGTGAATTATATAAAATATAAAG  
 TGGTGGAAGTTAAACCATTG---GGAGTAGCACCCACTGAGGCAAAAAGAAGAGTGGTGAAG-----  
 -----AACGAGAGAGAAAAAGAGCA---GTGGGA---ATAGGAGCT-----  
 GTGTTCCCTTGGGTTCTTGGGAGCA---GCAGGAAGCACTATG---GGCGCGGCGTCA---  
 ATAACGCTGACGGTACAG---GCCAGACAG---TTGTTG---TCTGGTATAGTGCAACAGCAAAGC---  
 AATTTG---CTGAGG---GCTATAGAGGCGCAACAGCATATGTTGCAACTCACGGTCTGGGGCATT  
 >KF725944  
 TTCTATTGCAATACATCAAGCCTGTTTAATAGTACATATAATGGTACATATAATGGTACAGATAATGAT----  
 -----  
 -----  
 ACAAATCAACCATCACAAATCCCATGCAGAATAAAACAAATTATAAACATGTGGCAGACGGTAGGACAAGCAA  
 TGTATGCCCCCTCCTATTGCAGGAAACATAACATGTAAGTCAAAT---

ATCACAGGACTATTATTAGTACGTGATGGAGGCAATACAAGTAAC-----  
 -----  
 -----  
 ACAGAAGAGACATTCAGACCTGGAGGAGGAGATATGAAGGACAATTGGAGAAGTGAATTATATAAATATAAAG  
 TGGTAGAAATTAACCATTG---GGAATAGCACCCACTACAGCAAAAAGGAGAGTGGTG-----  
 -----GAGAGAGAAAAAAGAGCA--GTGGGA--GTAGGAGCT-----  
 GTGTTCTTGGGTTCTTGTCTAGCA--GCAGGAAGCACTATG--GGCGCGGCGTCA---  
 GTGACGCTGACGGTACAG---GCCAGACAA--TTGTTG--TCTGGTATAGTGCAACAGCAAAGC---  
 AATTTG---CTGAGA---GCTATAGAGGCGCAACAGCATCTGTTGCAACTCACGGTCTGGGGCATT  
 >KF725948  
 TTCTATTGCAATACATCACAACCTGTTTAATGGAACATACAATAGTACTACTAATGTTACAAAT-----  
 -----  
 -----  
 AATAATGCAACCATCACAATCCCATGCAAAATAAGACAAATTGTAAACATGTGGCAGAAGGTAGGAAGAGCAA  
 TGTATGCTCCTCCCATTGCAGGAAACATAACATGTAAATCAAAT---  
 ATTACAGGGCTACTATTGGTACGTGATGGAGGCGATGATAATAAAACA-----  
 -----  
 -----  
 AAAGATGAAGAAATATTCAAGCCTGAAGGAGGAGATATGAAGGACAATTGGAGAAGTGAATTATATAAATATA  
 AAGTGGTAGAAATTAAGCCATTA---GGAATAGCACCCACTGGAGCAAAAAGGAGAGTGGTG-----  
 -----GAGAGACCAAAAAGAGCA--GTGGGA--ATAGGAGCT-----  
 ---GTGCTCTTGGGTTCTTGGGAGTA--GCCGGAAGCACTATG--GGCGCAGTGCTCA---  
 ATGACGCTGACGGTACAG---GCCAGACAA--GTGTTG--TCTGGTATAGTGCAACAGCAAAGC---  
 AATTTG---CTGAGG---GCTATAGAGGCGCAACAGCATATGTTGCAACTCACGGTCTGGGGCATT  
 >KF725954  
 TTCTATTGCAATACATCAAACTGTTTAATAGTACATACAAGCCTAGATCCAATGATTCAGAG-----  
 -----  
 -----  
 TCAATGCAACCATCTCACTGCCATGCAGAATAAAACAGGTTATAAACATGTGGCAACAGGTGGGACGAGCAA  
 TGTATGCCCCCTCCCATTGCAGGAAACATAACATGTGTATCAAAT---  
 ATCACAGGACTGCTATTAGTACGTGATGGAGGCACAAATACCACA-----  
 -----  
 -----  
 AATGAGACATTCAGACCTGTAGGAGGAAATATGAAGGACAATTGGAGAAGTGAATTATATAAATACAAAGTGG  
 TAGAAATTAAGCCATTG--GGAATAGCACCCACTGGAGCAAAAAGGAGAGTGGTGAA-----  
 -----AAGGTGGGAAGAGAAAAAAGAGCA--GTGGGA--ATAGGAGCT-----  
 GTGTTCTTGGGTTCTTGGGAGCA--GCAGGAAGCACTATG--GGCGCGGCGTCA---  
 ATAACGCTGACGGTACAG---GCCAGACAA--TTGTTG--TCTGGTATAGTGCAACAGCAAAGC---  
 AATTTG---CTGAGA--GCTATAGAGGCGCAACAGCATATGTTGCAACTCACGGTCTGGGGCATT  
 >KF725955  
 TTTTATTGCAACACATCAGACCTGTTCAATGGAACATACACTCCTAATGCTAATAAGACAAAC-----  
 -----  
 -----  
 AGTTCTGAGGTCATCACACTCCCATGCAAAATAAAACAAATTATAAACATGTGGCAGGAGGTAGGACGAGCAA  
 TGTATGCCCCCTCCCATTGAAGGAAACATAACATGTAAGTCAAAC---  
 ATCACAGGACTACTATTGACACGTGATGGAGGAATAGGTGGCAAGGGCGAT-----  
 -----  
 -----  
 AATACCACAGAGATATTCAAGCCTGAGGGAGGAGATATGAGGAACAATTGGAGAAGTGAATTATATAAGTATA  
 AAGTGGTAGAAGTTAAGCCATTG---GGAATAGCACCCACAGAAGCAAAAAGGAGAGTGGTG-----  
 -----GAGAGAGAAAAAAGAGCA--GTAGGA--ATAGGAGCT-----  
 ---GTGTTCTTGGGTTCTTGGGAGCA--GCAGGAAGCACTATG--GGCGCGGCGTCA---  
 ATAACGCTGACGGTACAG---GCCAGACAA--TTGTTG--TCTGGTATAGTGCAACAGCAAAGC---  
 AATTTG---CTGAGA---GCTATAGAGGCGCAACAACACATGTTGCAACTCACGGTCTGGGGCATT  
 >KF725957  
 TTCTATTGCAACACATCAGGCCTGTTTAAGGGAACATATAATGGAACATACAATGAAACAGACAACAATGGAA  
 CA-----  
 -----  
 CAGAAATGATACCATCATCCTCCCATGCAGAATAAAACAAATTATAAACATGTGGCAGGAGGTAGGAAAAGCAA  
 TGTATGCCCCCTCCCATTGCAGGAAACATAACATGTAACCTCAAAT---

ATCACAGGACTACTATTGACACGTGATGGAGGACATGGCAAAAATAAT-----  
 -----  
 ----  
 ACAGAAAATAAGACAGAGGTATTTCAGACCTGGAGGAGGAGATATGAGAGACAATTGGAGAAGTGAATTATACA  
 AATATAAAGTGGTAGAAATTAAGCCATTA--GGAATAGCACCCACTGGGGCAAAAAGGAGAGTGGTG-----  
 -----GAGAAACAAAAAAGAGCA--GTAGGA---  
 ATAGGAGCT-----GTGTTCTTGGGTTCTTAGGAGCA--GCAGGAAGCACTATG---  
 GGCGCAGCGTCA--ATAACGCTGACGGTACAG--GCCAGACAA--CTGTTG---  
 TCTGGTATAGTGCAACAGCAGAGC--AATTTG--CTGAGA---  
 GCTATAGAGGCGCAACAGCATATGTTGCAACTCACGGTCTGGGGCATT  
 >KF725959  
 TTCTATTGCAATACCTCACAACTATTTAATGGTAGTGTAATACTTAATAGTAGTGATATAGAAAGTAATACTA  
 CA-----  
 -----  
 GGGGGTGAAAACATCACACTCCCATGCAGAATAAAACAAGTTATAAACATGTGGCAGGAGGTAGGACGAGCAA  
 TGTATGCTCCTCCCATTGCAGGAAACATAACATGTATATCAAAC---  
 ATCACAGGTTTACTATTGACATGGGATGGGGGAGATGAGACAAAAATAAC-----  
 -----  
 CCAGACAAAGAGAAAAAT---  
 AACACAGAGATATTTAGACCTGGAGGAGGAGATATGAGGGACAATTGGAGAAGTGAATTATATAAGTACAAAG  
 TGGTAGAAATTAAGCCATTA--GGAATAGCACCCACTGGGGCAAAAAGGAGAGTGGTG-----  
 -----GAGAGAGAAAAAAGAGCA--GTGGGA--ATAGGAGCT-----  
 GTGCTCCTTGGGTTCTTGGGAGCA--GCAGGAAGCACTATG--GGCGCGGCATCA---  
 ATAACGCTGACGGTACAG--GCCAGACAA--TTGCTG--TCTGGTATAGTGCAACAGCAAAGT---  
 AATTTG--CTGAGA--GCTATAGAGGCGCAACAGCATATGTTGCAACTCACGGTCTGGGGCATT  
 >KF725968  
 TTCTATTGCAATACATCACAATTGTTTAATAGCACATACCTGTCATTGCTTAATAACACA-----  
 -----  
 -----  
 GACAATGAGACCATCACACTCCAATGCAAGATAAAACAATTATAAACATGTGGCAGGGAGTAGGACGAGCAA  
 TGTATGCCCCCTCCCATTGCAGGAAACATAACATGTAGATCAAAT---  
 ATCACAGGACTACTATTGACACGTGATGGAGGAAACAACATAAAT-----  
 -----  
 -----  
 AATAACACAGAGAAATTTAGGCCTTCAGGAGGAAATATGAAGGACAATTGGAGAAGTGAATTATACAAATATA  
 AAGTGGTAGAAATTAAGCCATTG--GGAATAGCACCCACCAAGGCAAAAAGGAGAGTGGTG-----  
 -----GAGAGAGAAAAAAGAGCA--GTGGGA--ATAGGAGCT-----  
 ---GTGTTCTTGGGTTCTTAGGAGCA--GCAGGAAGCACTATG--GGCGCAGCGTCA---  
 ATAACGCTGACGGTACAG--GCCAGACAA--CTGTTG--TCTGGTATAGTGCAACAGCAAAGC---  
 AATTTG--CTGAGA--GCTATAGAGGCGCAACAGCATTTGTTGCAACTCACAGTCTGGGGCATT  
 >KF725970  
 TTCTATTGCGATACAACAAAACCTGTTCAATGAAACAATACTGTTTAGTAATAGTAGTGAA-----  
 -----  
 -----  
 ACAAATGACACCATCATACTCCCATGCAAAATAAAACAATTATAAACATGTGGCAGGAAATAGGACGAGCAA  
 TGTATGCCCCCTCCCATTGCAGGAAACATAACATGTAGATCAAAT---  
 ATCACAGGAATACTATTGACATGGGATGGAGGCAATAATAATGGAACAAATGGA-----  
 -----  
 -----  
 ACAAATGGACCAGAGATATTTCAGACCGGGAGGAGGAAATATGAAGGACAATTGGAGAAATGAATTATATAAAT  
 ATAAAGTAGTAGAAATTAACCATTG--GGAGTAGCACCCACTAAATCAAAAAGGAGAGTGGTG-----  
 -----GAGAGAGAAAAAAGAGCA--GCGGGA--ATAGGAGCT---  
 -----TTGCTCTTTGGGTTCTTGGGAGCA--GCAGGAAGCACTATG--GGCGCGGCGTCA---  
 ATAACGCTGACGGTACAG--GCCAGACAA--TTATTG--TCTGGTATAGTGCAACAGCAAAGC---  
 AATTTG--CTGAGA--GCTATAGAGGCGCAACAGCACATGTTGCAACTCACGGTCTGGGGCATT  
 >KF725972  
 TTCTATTGCGATACATCACAGCTGTTTAATAGTACATTTAATAGTACAGAAAATAATTCAAGTGTC-----  
 -----  
 -----  
 ATCACACTCCGATGCAGGATAAGACAAATTATAAACATGTGGCAGACAGTAGGACAAGCAATGTATAACCCCTC

CCATTGCAGGAAATATAACATGTAACCTCAAGT---  
 ATCACAGGACTACTATTGACACGTGATGGAGGAGTAAATAATGAAACA-----  
 -----  
 -----  
 AAAGATACAGAAACATTTCAGACCTGCAGGAGGAGATATGAGGGACAATTGGAGAAGTGAATTATATAAAATATA  
 AAGTGGTAGAGGTTAAGCCATTA---GGAATAGCACCCACTGGTGCAAAAAGGAGAGTGGTG-----  
 -----GACAGAGAAAAAAGAGCA---GTGGGA---ATAGGAGCT-----  
 ---GTGCTCCTTGGAATTCTTGGGAGCA---GCTGGAAGCACTATG---GGCGCGGCATCA---  
 ATAACGCTGACGGTACAG---GCCAGACAA---TTATTG---TCTGGTATAGTGCAACAGCAAGAA---  
 AACTTG---CTGAGA---GCTATAGAGGCGCAACAGCATTGTGTTGCAACTCACGGTCTGGGGCATT  
 >KF725975  
 TTCTATTGCAATACATCAAACCTGTTTAAATGAAGACCTGTAAATAAAAAGCCTGGTTAAT-----  
 -----  
 -----  
 ACAACATCAGATATTATACTCAGTTGCAGAATAAAACAGATTATAAACATGTGGCAGGGGGTAGGGCGAGCAA  
 TATATGCCCCCTCCCATTCAGGAAACATAACATGTGTATCAAAT---  
 ATCACAGGACTACTATTGGTACGGGATGGAGGAAACACAGGAGAG-----  
 -----  
 -----  
 AATATGACAGAGATATTTCAGACCTGCAGGAGGAGATATGAGGGACAATTGGAGAAGTGAATTATATAAAATATA  
 AAGTGGTAGAAATTAAGCCATTG---GGAATAGCACCCACTGAGGCAAAAAGGAGAGTGGTG-----  
 -----GAGAGAGAAAAAAGAGCA---GCGGGA---CTAGGAGCT-----  
 ---GTGTTCTTGCGTTCTTGGGAGCA---GCAGGAAGCACTATG---GGCGCAGCATCA---  
 ATAACGCTGACGGTACAG---GCCAGACAA---TTGCTG---TCTGGAATAGTGCAACAGCAAAGC---  
 AATTTG---CTGAGG---GCTATAGAGGCACAACAGCATATGTTGCAACTCACAGTCTGGGGCATT  
 >KF725976  
 TTCTATTGCAATACATCACAACCTGTTCAATACATCACAACCGTTTAAATAGTAGTACT-----  
 -----  
 -----  
 GGAATGAACTATCACACTCCCATGCAGAATAAAACAAATTATAAACATGTGGCAGGGGGTAGGACAAGCAA  
 TGTATGCTCCTCCCATTCAGGAAACATAACATGCAAGTCAAAT---  
 ATCACAGGACTACTATTGACACGAGATGGAGGCAATGGAGAAAACCAA-----  
 -----  
 ----  
 ACAGAGAATAAAACAGAGATATTTCAGACCTGGAGGAGGAGATATGAGGGACAATTGGAGAAGTGAATTATATA  
 AATATAAAGTGATAGAAATTAAGCCATTA---GGAATAGCACCCACTGAGGCAAAAAGGAGAGTGGTG-----  
 -----GAGAGAGAAAAAAGAGCA---GTGGGA---  
 TTAGGGGCT-----GTGATCTTTGGGTTCTTGGGAGCA---GCAGGAAGCACTATG---  
 GGCGCGGCGTCA---ATAACGCTGACGGTACAG---GCCAGACAA---CTGTTG---  
 TCTGGTATAGTGCAACAGCAAAGC---AATTTG---CTGAAG---  
 GCTATAGAGGCGCAACAACATATGTTGCAACTCACGGTCTGGGGCATT  
 >KF725983  
 TTCTATTGCAATACAACAAAACCTGTTTAAATGAAACACTGTTTGCTAAG-----  
 -----  
 -----  
 GAAAATGAAACAATTACAATCCCCTGCAAAATAAAGCAAATTATAAACATGTGGCAGGGGGTAGGACGAGCAA  
 TGTATGCCCCCTCCCATTAGAGGAAACATAACATGTAATTCAAGT---  
 ATCACAGGACTACTATTGACACGTGATGGAGGTAAGTGTAAAGGAGACAAATGGT-----  
 -----  
 -----  
 ACGAACTGTAGTGAGATATTTCAGACCTGGAGGAGGAAATATGAAGGACAATTGGAGAAGTGAATTATATAAAT  
 ATAAAGTGGTAGAAATTAAGCCATTG---GGGATAGCACCCACTGCGGCAAGAAGGAGAGTGGTA-----  
 -----ACGAGAGAAAAAAGAGCA---GTAGGA---TTAGGAGCT---  
 -----GTGATCTTTGGGTTCTTGGGAGCA---GCAGGAAGCACTATG---GGCGCGGCGTCA---  
 ATAACGCTGACGGTACAA---GCCAGACAA---GTGTTG---TCTGGTATAGTGCAACAGCAAAGC---  
 AATTTG---CTGAGA---GCTATAGAGGCGCAACAGCATATGTTGCAACTCACAGTCTGGGGCATT  
 >KF725987  
 TTCTATTGCAACACATCACAACCTGTTTAAATACATCAGGTATTATAATAAGTAAAAATGAG-----  
 -----  
 -----

ACAGATAAAAATATCACACTCCCTTGCAGAATAAAACAAATTATAAATCTGTGGCAAAAGGTAGGAAGGGCCA  
TATATGCCCCCTCCCATTAAGGAAACATAACCTGTACATCAAAT---  
ATTACAGGACTACTATTGACACGTGATGGAGGGGCAGGTAATAACACA-----  
-----  
-----  
GATGGCAATGAAACCTTCAGACCTGGAGGAGGAGATATGAGGGACAATTGGAGAAGTGAATTATATAAATATA  
AAGTAGTAGAAATCAAGCCATTA---GGAATAGCACCCACTGAGGCAAAAAGGAGAGTGGTG-----  
-----GAGAGAGAAAAAAGAGCA---GTGGGG---ATGGGAGCT-----  
---ATGATCCTTGGGTTCTTGGGAGCA---GCAGGAAGCACTATG---GGCGCGGCGTCA---  
ATGGCGCTGACGGTACAG---GCCAGACAA---TTGTTG---TCTGGTATAGTGCAACAGCAAGGC---  
AATTTG---CTGAGA---GCCATAGAGGCGCAACAGCATCTGTTGCAACTCACGGTCTGGGGCATT  
>KF725990  
TTCTATTGCAATACATCAAGACTGTTTAATAGTACATACATTAATAGTATAGGAAATGATTCAAGCGAC----  
-----  
-----  
ATCACACTCCCATGCAGAATAAAACAAATTATAAACATGTGGCAGGGGGTAGGACGAGCAATGTATGCCCCCTC  
CCATTGCAGGAAACATAACATGTAGATCAAAT---  
ATCACAGGATTGCTACTGACACGCGATGGAGGAAACATTACCAAT-----  
-----  
-----  
AATACAGAGACATTTCAGACCTGCAGGAGGAGATATGAGGGACAATTGGAGAAGTGAATTATATAAATATAAAG  
TGATAGAAATTGAACCATTG---GGAGTAGCACCCACCAAGGCAAAAAGAAGAGTGGTG-----  
-----GAGAGAGAAAAAAGAGCA---GTGGGA---ATAGGAGCT-----  
GTGTTCCCTTGGGTTCTTGGGAGCG---GCTGGAAGCACTATG---GGCGCAGCGTCA---  
ATAACGCTGACGGCACAG---GCCAGACAA---TTGTTG---TCTGGTATAGTGCAACAGCAAAGC---  
AATTTG---CTGAGG---GCCATAGAGGCGCAACAGCATATGTTGCAACTCACAGTTTGGGGCATT  
>KF725995  
TTCTATTGCAATACATCAGGCCTGTTTAATAGTACAAGCCTGGGCCTGGATGGTAATAGTACAGGCAATGGTA  
CAGGCCTGAAT-----  
-----  
AGTAATAGTACAATCACACTCCCATGTAGAATAAAACAAATTTATAAATATGTGGCAAGGGGTGGGACGAGCAA  
TGTATGCCCCCTCCCATTTGAAGGAAACATAACATGTGAATCAAAA---  
ATCACAGGACTTCTATTGACACGTGATGGAGGAGGGGACGACAGGAGT-----  
-----  
-----  
CGCACTGAAGAAAAATTTCAGACCTGCAGGAGGAGATATGAGGGACAATTGGAGAAGTGAATTATACAAATATA  
AAGTGGTAGAGATTAAGCCATTA---GGAGTAGCACCCACCAAGGCAAAAAGGAGAGTGGTG-----  
-----GAGAGAGAAAAAAGAGCA---GTGGGA---ATAGGAGCT-----  
---GTGTTCCCTTGGGTTCTTGGGAGCA---GCAGGAAGCACTATG---GGCGCGGCGTCA---  
ATAACGCTGACGGTACAG---GCCAGACAA---CTGTTG---TCTGGTATAGTGCAACAGCAAAGC---  
AATTTG---CTGAGA---GCTATAGAGGCGCAACAGCATTTGTTGCAACTCACAGTCTGGGGCATT  
>KF725996  
TTCTATTGTAATACATCAGGCCTGTTTAACCTCAAGCCTGCTTAACTCATCAGATAGTACAAACAGCAGTACA-  
-----  
-----  
GACAACGATACTCTCACACTCCAATGCAGAATAAAACAAATTATAAACATGTGGCAGGAGGTAGGACGAGCAA  
TGTATGCCCCCTCCCATTTGCAGGAAACATAACATGTACATCAAAT---  
ATCACAGGGCTACTATTGACACGTGATGGAGGCACTACTGATAATAAT-----  
-----  
-----  
ACAGAGACAGAGACATTTAGACCTGCAGGAGGAGATATGAGGGACAATTGGAGAAGTGAATTATATAAATATA  
AAGTGGTAGAAATTAAGCCATTA---GGAATAGCACCCACTGGAGCAAAAAGGATGGTGGTG-----  
-----GAGAGAGAAAAAAGAGCA---GTGGGA---CTGGGAGCT-----  
---GTGTTCCCTTGGGTTCTTGGGAGCA---GCAGGAAGCACTATG---GGCGCGGCGTCA---  
ATGGCGCTGACGGCACAG---GCCAAACAT---CTGTTG---TCTGGCATAGTGCAACAGCAAAGC---  
AATTTG---CTGAGG---GCTATAGAGGCGCAACAGCATATGTTGCAACTCACAGTCTGGGGCATT  
>KF725997  
TTCTATTGCAATACATCACAACCTGTTTAATACTACAGAACAT-----  
-----  
-----ACA---

ACGAACACCACAAATATCACACTCCCATGTAGAATAAAACAAATTATAAACATGTGGCAGAAGGTAGGACGAG  
CAATGTATGCCCCCTCCCATTCAGGGAAAATAACATGTAAGTCAAAT ---  
ATCACAGGACTACTTTTGACAAGGGATGGAGGAGACAGAAATGGCACAGAT-----  
-----  
AATAACACAGAGACATTTCAGACCTGGAGGAGGAGATATGAGGGACAATTGGAGAAGTGAATTATATAAATATA  
AAGTGGTAGAAATTAAACCATTATA---GGAATAGCACCCACTAAGGCCAAAAGGAGAGTGGTG-----  
-----GAGAGAGAAAAGAAGAGCA---GTGGGA---ATAGGAGCT-----  
---GTGTTCCCTTGGGTTCTTGGGAGCT---GCAGGAAGCACTATG---GGCGCAGCGTCA---  
ATAACGCTGACGGTACAG---GCCAGACAA---TTGTTG---TCTGGTATAGTGCAACAGCAAAGC---  
AATTTG---CTGAGG---GCTATAGAGGCGCAACAGCACATGTTGCAACTCACAGTCTGGGGCATT  
>KF725999  
TTCTATTGCAATACATCAAACTGTTTGGCAATGAGAAATAGTACA-----  
-----  
-----  
GAAAAATGATACCATAAAAAATCCCATGTAGAATAAAACAAATTTATAAACATGTGGCAGAAGGTAGGACGTGCAA  
TGTATGCCCCCTCCCGTTGAAGGAAATATAACATGTAAATCAAAC---  
ATCACAGGGCTACTACTGACACGTGATGGAGGTACAAATGGTACT-----  
-----  
-----  
ACACCAGAAATATTCAGACCTACAGGAGGAGATATGAGGGATAATTGGAGAAGTGAATTATATAAATATAAAAG  
TAGTAGAAATTAAGCCATTATA---GGAATAGCACCCACTGAGGCCAAAAGGAGAGTGGTG-----  
-----GAGAGAGAAAAAAGAGCA---GTGGGA---ATAGGAGCT-----  
GTGTTCCCTTGGGTTCTTGGGAGCA---GCAGGAAGCACTATG---GGCGCGGCGTCA---  
ATAACGCTGACGGTACAG---GCCAGACAG---CTGTTG---TCTGGTATAGTGCAACAGCAAAGC---  
AATTTG---CTGAGA---GCTATAGAGGCGCAACAGCATATGTTGCAACTCACGGTCTGGGGCATT  
>KF726000  
TTCTATTGCAATACATCAAACTGTTTAATAGTAGCCTGTTTAATAGCACAGAGAATGATACAGAT-----  
-----  
-----  
ATCATACTCCCATGCAGAATAAAACAAATTATAAACATGTGGCAGGGGGTAGGAAAAGCAATGTATGCTCCTC  
CCGTTGCAGGAAACATAACATGCAGATCAAAT---  
ATCACAGGGCTGCTATTGACACGAGATGGAGGTAATAAAGAAGGCAACCAAACA-----  
-----  
----  
GGGAATAATGACACAGAGATATTCAGACCTGGAGGAGGAGATATGAGGGACAATTGGAGAAGTGAATTATATA  
AGTATAAAGTGATAGAAATTAAGCCATTATA---GGAATAGCACCCACTAAGGCCAAAAGGAGAGTGGTG-----  
-----GAGAGAGAAAAAAGAGCA---GTGGGA---  
ATAGGAGCT-----GTGTTCCCTTGGGTTCTTGGGAGCA---GCAGGAAGCACTATG---  
GGCGCGGCGTCA---ATAACGCTGACGGTACAG---GCCAGACAA---TTGTTG---  
TCTGGTATAGTGCAACAGCAAAGC---AATTTG---CTGAGG---  
GCTATAGAGGCGCAACAACATATGTTGCAACTCACAGTCTGGGGCATT  
>KF726001  
TTCTATTGCAATACTTCAGGACTGTTCAATGGGACATACAATGATACAAATACATACAATGGTACATACAATA  
ATACAGGA-----  
-----  
AGTAACTCAACCATCACAAATCCCATGCAGAATAAAACAAATTATAAACATGTGGCAGCAGGTAGGGCGAGCAA  
TGTATGCCCCCTCCCATTCAGGGAAACATAACGTGTAAGTCAAGT---  
ATCACAGGATTACTATTGACACGAGATGGAGGATTAAATAGAACA-----  
-----  
-----  
GAAGAGAAATTCAGACCTGGGGGAGGAGACATGAGGGATAACTGGAGAAATGAATTATATAAATATAAAGTGG  
TAGAAATTAAGCCATTATA---GGAGTAGCACCCACTGAGGCACAAAGGAGAGTGGTG-----  
-----AAAAAAGAAAAAGAGCA---GTGGGA---CTAGGAGCT-----  
GTACTCTTTGGGTTCTTGGGAGCA---GCAGGAAGCACTATG---GGCGCAGCGTCA---  
ATAACGCTGACGGTACAG---GCCAGACAA---TTGTTG---TCTGGCATAGTGCAACAGCAAAGC---  
AATTTG---CTGAGG---GCTATAGAGGCGCAACAACACATGTTGCAACTCACGGTCTGGGGCATC  
>KF726011  
TTCTATTGCAATACAACAGGACTATTTGGAGATAATACAAACAAGAGCATCACA-----  
-----

-----  
GGCAATGGGACCATCACACTCCCATGCAAGATAAAACAAATTGTGAACCTGTGGCAGGAGGTAGGACGAGCAA  
TGTATGCCCCCTCCCATTCAGAGAAACATAACATGTAAATCAAAT---  
ATCACAGGACTACTATTGACACGTGATGGAGGAAACACAACAAAT-----  
-----  
-----  
AACACAGAGATATTTAGACCTATAGGAGGAAATATGAAGGACAATTGGAGAAGTGAATTATATAAATATAAAG  
TGGTAGAAATTAAGCCATTG---GGAGTAGCACCCACTGGAGCAAAAAGGAGAGTGGTG-----  
-----AAGAGAGAAAAAAGAGCA---GTGGGA---ATGGGAGCT-----  
ATGTTTCATTGGGTTCTTGGGAGCA---GCAGGAAGCACTATG---GGCGCGGCGTCA---  
ATAACGCTGACGGTACAG---GCCAGACAA---CTGTTG---TCTGGTATAGTGCAACAGCAAAAT---  
AATTTG---CTGAGA---GCTATAGAGGCGCAACAACATATGTTGCAACTCACAGTCTGGGGCATT  
>KF726014  
TTCTATTGCAATACATCAGGACTGTTTAATGGCACATACAATACCTCAAATACAGGCAACAGTACT-----  
-----  
-----  
TCAAATACAAGCATCACACTCCCATGCAGAATAAAACAAATTATAAACATGTGGCAGGCAGTAGGACGAGCAA  
TGTATGCCCCACCCATTGAAGGAAATATAACATGTAAATCAAAC---  
ATTACAGGACTACTATTGACACGTGATGGAGACAAT-----  
-----  
-----  
AACGCGACAGAAACATTTCAGACCTGGAGGAGGAGATATGAGAGATAATTGGAGAAGTGAATTATATAAATATA  
AAGTGGTAGAAATTAAGCCATTA---GGAATAGCACCCACTACTGCAAAAAGGAGAGTGGTG-----  
-----CAAAGGGAGAAAAGAGCA---GTGGGA---ATAGGAGCT-----  
---GTGTTCCCTTGGGGTCTTGGGAATA---GCAGGAAGCACTATG---GGCGCAGCATCA---  
ATAACGCTGACGGTACAG---GCCAGACAA---TTATTG---TCTGGTATAGTGCAACAGCAAAGC---  
AATTTG---CTGAGA---GCTATAGAAGCGCAACAGCATATGTTGCAACTCACGGTCTGGGGCATT  
>KF726020  
TTCTATTGCAATACAACAAACCTGTTTAACAATTACACCTGTTTAACAGTTCAAAA-----  
-----  
-----  
GACAATGGAACCATCACACTCCCATGCAGGATAAAGCAAATTATAAACATGTGGCAGGGGGTAGGGCAAGCAA  
TATATGCCCCCTCCCATTCAGAGAAAGATAGTATGTAACTCAAAT---  
ATCACAGGACTACTATTGACATGGGATGGAGGAAAAACCAACAGCACA-----  
-----  
-----  
AACAGAACAGAGATATTTCAGACCTGGAGGAGGAAATATGAAGGACAATTGGAGAAATGAATTATATAAGTATA  
AAGTGGTAGAAATTAACCATTCG---GGAGTAGCTCCTACTGAAGCAAAAAGGAGAGTGGTG-----  
-----GAGAGAGAGAAAAGAGCA---GTGGGA---ATAGGAGCT-----  
---GTACTCCTTGGGTTCTTGGGAGCA---GCAGGAAGCACTATG---GGCGCAGCGTCA---  
ATAACGCTGACGGTACAA---GCCAGACAA---CTGTTG---TCTGGTATAGTGCAAGCAGCAAAGC---  
AATTTG---CTGAGA---GCTATAGAGGCGCAACAGCATATGTTGCAACTCACAGTCTGGGGCATT  
>KF726022  
TTCTATTGCAATACAACAAAGCTGTTTAATGAAAGTGAAACAAGCATAAACACAACAAACACAACAGACACA-----  
-----  
-----  
CCTAACACACCTATTGTACTCCCTTGCAGAATAAAACAGATTATAAACATGTGGCAGGAGGTAGGCCGAGCAA  
TGTATAACCCTCCCATTCGCCGAAACATAACATGTAACTCAAAT---  
ATCACAGGACTACTATTGACACGTGATGGAGGAAAAACAACACA-----  
-----  
-----  
AGAAACGAGACATTTCAGACCGGGAGGAGGAAATATGAAGGACAATTGGAGAAGTGAATTATATAAATACAAAG  
TGGTAGAAATTAAGCCATTG---GGAATAGCACCCACTACAGCAAAAAGGAGAGTGGTG-----  
-----GAGAGACAAAAAAGAGCA---GTAGGA---CTAGGAGCT-----  
TTGTTCCCTTGGGTTCTTGGGAGCA---GCAGGAAGCACTATG---GGCGTGCGTCA---  
ATGACGCTGACGGTACAG---GCCAGGCAA---CTGCTG---TCTGGCATAGTGCAACAGCAAAAC---  
AATTTG---CTGAGA---GCTATAGAGGCGCAACACCATCTGTTGCAACTCACAGTCTGGGGCATT  
>KF726025  
TTCTACTGCAATACAACAAAACCTGTTTAGTGATGCAAAACAACAGTGATTTCAGGGGTC-----  
-----

-----  
ATCACACTCCCATGCAGGATAAAACAAATTGTAAACCTGTGGCAGAGGGTAGGACGAGCAATGTATGCCCCCTC  
CTATTAAAGGAATCATAACATGTAAATCAAGT---  
ATCACAGGACTACTATTGACACGTGATGGAGGCACAAGCAATAAT-----  
-----  
-----  
ACAACAGAGACCTTTAGACCTGTAGGAGAAAATATGAAGGACAATTGGAAAAATAAATTATATAAATATAAAG  
TGGTAGAAATTAACCATTG---GGAGTAGCACCCACTGAGGC AAAAAGGAAAGTGGTG-----  
-----GAGAGAGAAAAAAGAGCA---GTGGGA---ATAGGAGCT-----  
GTGCTCTTTGGGTTCTTGGGAGCA---GCAGGAAGCACTATG---GGCGCAGCGTCA---  
ATGACGCTGACGGTACAG---GCCAGACAA---CTGTTG---TCTGGTATAGTGCAACAGCAAAGC---  
AATTTG---CTAAGA---GCTATAGAGGCGCAACAGCATATGTTGCAACTCACAGTCTGGGGCATT  
>KU749416  
TTCTATTGCAATACATCACAACCTGTTCAATAGTACATACAATAGTAAATACAATGATACAAATAGTACACAT-  
-----  
-----  
GAGAACAAAACCATCACACTCCCATGCAGAATAAAACAAATTATAAACATGTGGCAGGAGGTAGGACGAGCAA  
TGTATGCCCCCTCCCATGTAGGAAACATAACATGTACATCAAAC---  
ATTACAGGAATACTATTGACACGTGATGGAGGAGGATCAAAATAGA-----  
-----  
-----  
ACAAATGAAACATTTCAGACCTGGAGGAGGAGATATGAGGGACAATTGGAGAAGTGAATTATATAAATACAAAG  
TGGTAGAAATTAAGCCATTG---GGAGTAGCACCCACTACAGCAAGAAGGAGAGTGGTG-----  
-----GAAAGAGAAAAAAGAGCA---GTGGGA---ATAGGAGCT-----  
GTGTTCTTGGGTTCTTGGGAGTA---GCAGGAAGCACTATG---GGCGCAGCGTCA---  
ATGGCGCTGACGGTACAA---GCCAAGCAA---TTGCTG---TCTGGTATAGTGCAACAGCAAAGC---  
AATTTG---CTGAGA---GCTATAGAGGCGCAACAGCATCTGTTGCAACTCACAGTCTGGGGCATT  
>MH933705  
TTCTATTGTGATACAACAAAACCTGTTTAATAATACGATAGAAAAT-----  
-----  
-----  
GAGTCAGACCCCATCATACTCCCATGCAGAATAAAACAAATTGTAAACATGTGGCAGGGGGTAGGACGAGCAA  
TGTATGCCCCCTCCTATTGCAGGAAACATAACATGTAACTCAAGT---  
ATCACCGGAATACTATTGACACGTGATGGAGGAACAAATAATACA-----  
-----  
-----  
AATAATACAGAGATATTTCAGGCCTGGGGGAGGAAATATGAAAGACAATTGGAGAAGTGAAGTATATAAATATA  
AAGTGGTAGAAGTTAAACCATTG---GGAATAGCACCCACTGAGGC AAAAAGGAGAGTGGTG-----  
-----GAGAGAGAAAAAAGAGCA---GTGGGA---CTAGGAGCT-----  
---GCGATCATTGGGTTCTTGGGAGCG---GCAGGAAGCACTATG---GGCGCAGCGTCA---  
ATAGCGCTGACGGCACAG---GCCAGACAA---CTGCTG---TCTGGTATAGTGCAACAGCAAAC---  
AATTTG---CTGAGA---GCTATAGAGGCGCAACAACATATGTTGCAACTCACGGTCTGGGGCATT  
>MH933704  
TTCTATTGCAATACAACAAACCTGTTTAATGAAACAGAACTTAATAGAACAAAGACA-----  
-----  
-----  
AAAGAAAACATAACCATACTCCCATGCAGAATAAAACAAATTATAAATATGTGGCAGAGGGTAGGACGAGCAA  
TGTATGCCCCCTCCCATAGCAGGAAACATAACATGTAACTCAAGT---  
ATCACAGGGCTACTATTAACACGTGATGGAGGGATTAACAAAACAGAG-----  
-----  
-----  
CCCGACAACAACACAGAGATATTTCAGACCTGGAGGAGGAAATATGAAGGATAATTGGAGAAGTGAATTATATA  
AATATAAAGTAATAGAAATTAAGCCATTG---GGAATAGCACCCACTAATGCAAAAAGGAGAGTGGTG-----  
-----GAGAGAGAAAAAAGAGCA---GTGGGA---  
ATGGGAGCC-----TTGATCCTTGGGTTCTTGGGAGCA---GCAGGAAGCACTATG---  
GGCGCAGCGTCA---ATAACGCTGACGGTACAA---GCCAGACAA---CTGTTG---  
TCTGGTATAGTGCAACAGCAGAGC---AATCTG---CTGAGA---  
GCTATAGAGGCGCAACAGCATATGTTGCAACTCACGGTCTGGGGCATT  
>MK643564

TTCTATTGCAATACAACAGCACTGTTTAAATACAACAGCACAGGGAAAGGAT-----  
 -----  
 -----  
 ACAAACGAAACCATCACACTCCCATGCAGAATAAAACAAATTATAAACATGTGGCAGGGGGTAGGACGAGCAA  
 TGTATGCCCCCTCCCATTTGAAGGAAACATAACATGTAGATCAAAT---  
 ATCACAGGACTACTATTGACACGTGATGGAGGAAAAGGAAATGAA-----  
 -----  
 ----  
 ACAGACAACAGAACAGAGACATTCAGACCAGCAGGAGGAGATATGAGGGACAATTGGAGAAGTGAATTATATA  
 AATATAAAGTGGTAGAAATTAAGCCATTA--GGAATAGCACCAAATGGGGCAAAAAGGAGAGTGGTG-----  
 -----GAGAGAGAAAAACGAGCA---GTGGGA---  
 ATAGGAGCT-----GTACTCCTTGGGTTCTTGGGAGCG--GCAGGAAGCACTATG---  
 GGCGCGGCGTCA--ATAACGCTGACGGTACAG--GCCAGACAA--CTGTTG---  
 TCTGGTATAGTGCAACAGCAAAGC--AATTTG--CTGAGG---  
 GCTATAGAGGCGCAACAGCATATGTTGCAACTCACGGTCTGGGGCATT  
 >MK643538  
 TTCTATTGCAATACAACAAAATTGTTT-----AATGAAAATACAACAAAAGTTAATGAAAGTACA-  
 -----  
 -----  
 ACAAATGATACAATCACACTCCCATGTAGAATAAAACAAATTATAAACATGTGGCAAGGGGTAGGACGAGCAA  
 TGTATGCCCCCTCCCATTTGCAGGAAACATAACATGTAACCTCAAGT---  
 ATCACAGGACTGCTATTGACACGTGATGGAGGAAACGGAAACACGAGTACA-----  
 -----  
 -----  
 GAGATAGAGACATTCAGACCTGGAGGAGGAAATATGAAAGACAATTGGAGAAATGAATTATATAAATATAAGG  
 TGGTAGAAATTAACCATTG--GGAATAGCACCCACTAAGGCAAAAAGGAGAGTGGTG-----  
 -----GAGAGAGAAAAAAGAGCA--GTGGGA--ATAGGAGCT-----  
 GTGTTCTTGGATTCTTAGGAGCA--GCAGGAAGCACTATG--GGCGCAGCATCA---  
 ATAACGCTGACGGTACAT--GCCAGACAA--CTGTTG--TCTGGTATAGTGCAACAGCAAAGC---  
 AATTTG--CTGAGA--GCTATAGAGGTGCAACAGCATATGTTGCAGCTCACGGTCTGGGGCATT  
 >MK643537  
 TTCTATTGCAATACATCAAACTGTTCAATGGTACATATAATGGTACAGATACATCTAAT-----  
 -----  
 -----  
 GATACAGATAAAATCACCTCCAATGCAGAATAAAGCAAATTATAAACATGTGGCAGGGGGTAGGAAGAGCAA  
 TGTATGCCCCCTCCCATTTGCAGGAGAAATAACATGTAAATCAAAC---  
 ATCACAGGAATATTATTGACACGTGATGGAGGAGGAACAAATGGGACA-----  
 -----  
 -----  
 TCCAATGAGACATTCAGACCGGGAGGAGGAGATATGAGGGACAATTGGAGAAGTGAATTATATAAATATAAAG  
 TGGTAGAAATTAACCCATTA--GGAGTAGCACCCACTAAGGCAAAAAGGAGAGTGGTG-----  
 -----GAGAGAGAAAAAAGAGCA--GTGGGA--ATAGGAGCT-----  
 GTGTTCTTGGGTTCTTGGGAGCA--GCAGGAAGCACTATG--GGCGCAGCATCA---  
 CTAACGCTGACGGTACAG--GCCAGACAA--TTGTTG--TCTGGTATAGTGCAACAGCAAAGC---  
 AATTTG--CTGAGG--GCTATAGAGGCGCAACAGCATATGTTGCAACTCACAGTCTGGGGCATT  
 >MN097551  
 TTCTATTGTAATACATCAAACTGTTTAAATAATACTGATTAATAATAAAAACATGTCT-----  
 -----  
 -----  
 ACTGATCCAAACATCACACTCCCATGCAAAATAAAACAAATTGTAAACATGTGGCAGAAGGTAGGACGAGCAA  
 TGTATGCTCCTCCCATTTGCAGGAAACATAACATGTAAATCAAAT---  
 ATCACAGGATTGATATTGGTACGTGATGGAGGGAAAGACACAAACACACA-----  
 -----  
 -----  
 AACACAGAGACATTCAGACCTGGAGGAGGAAATATGAAGGACAATTGGAGAAGTGAATTATATAGATATAAAG  
 TGATAGAACTTAGACCATTG--GGAGTAGCACCCACTGGGGCAAAAAGGAGAGTGGTG-----  
 -----GAGAGAGAAAAAAGAGCA--GTGGGA--ATAGGAGCT-----  
 GTGCTCTTTGGGTTCTTGGGAGCA--GCAGGAAGCACTATG--GGCGCGGCGTCA---  
 ATAGCGCTGACGGTACAG--GCCAGACAA--CTGCTG--TCTGGTATAGTGCAACAGCAAAC---  
 AATTTG--CTGAGA--GCTATAGAGGCGCAACAGCATATGTTGCAACTCACAGTCTGGGGCATT

>MN097661

TTCTATTGTAATACATCACAATTGTTTAATAAT-----  
-----  
-----GAG---  
ACAACACATAGCAACATCACTCTCCCATGCAGAATAAAACAAATTATAAACATGTGGCAGGAGGTAGGACGAG  
CAATATATGCCCCCTCCAATAAAGGAAACATAACATGTAAATCAAAT---  
ATCACAGGACTCCTATTGACACGTGATGGAGGAAACAATAACATTACT-----  
-----  
AATAATACAGAGATATTGAGACCGGGAGGAGGAGACATGAGGGACAATTGGAGAAGTGAATTATATAAAATATA  
AAGTAGTAGAAATTAAGCCATTA---GGAATAGCACCCACTGAAGCAAAAAGGAGAGTGGTG-----  
-----GAGAGAGAAAAAAGAGCA---GTAGGA---ATAGGAGCT-----  
---GTGTTCTTGGGTTCTTGGGAGCA---GCAGGAAGCACTATG---GGCGCAGCGTCA---  
ATAACGCTGACGGTACAG---GCCAGGCAA---CTGTTG---TCTGGTATAGTGCAACAGCAAAGC---  
AATTTG---CTGAGG---GCTATAGAGGCGCAACAACATATGTTGCAACTCACAGTCTGGGGCATT

>MN097648

TTTTATTGCAATACATCAAGACTGTTTAATGGTACATTTAATGGCACATACATTAATGGCACATACATGTCTA  
ATGTG-----  
-----  
ACAAATCCAAACATCACACTTCTATGCAGAATAAAACAAATTATAAACATGTGGCAAAGGGTAGGACGGGCAA  
TGTATGCCCCCTCCCATTCAGGAAATATAACATGTACATCAAAT---  
ATCACAGGACTGCTATTGACACGTGATGGAGGGAACGACAGTAACGGG-----  
-----  
ACACACGAGACATTCAGACCTACAGGAGGAGATATGAGGGACAATTGGAGAAGTGAATTATATAAAATATAAAG  
TGGTAGAAATCAAGCCATTG---GGGATAGCACCAACTGAAGCAAAAAGGAGAGTGGTG-----  
-----GAGAGAGAAAAAAGAGCA---GTAGGAATGCTAGGAGCT-----  
ATGTTCTTGGGTTCTTGGGAGCA---GCAGGAAGCACTATG---GGCGCGGCGTCA---  
ATAACGCTGACGGTACAG---GCCAGACAA---CTGTTG---TCTGGTATAGTGCAACAGCAAAC---  
AATTTG---CTGAGA---GCTATAGAGGCGCAACAGCACTTGTGCAACTCACGGTCTGGGGCATT

>MN097654

TTTTATTGTAATACTACAAAACCTGTTT-----ACAGAACCGTTTTTCAAATACATCA-----  
-----  
-----  
ACCAATGATTCCCTCACAATCCCATGCAGGATAAAACAAATTATAAACATGTGGCAGGGGGTAGGACGAGCAA  
TGTATGCCCCCTCCCATTCAGGATACATAACATGTGCCTCAGAT---  
ATCACAGGACTACTATTGACACGTGATGGAGGAAGAGGGAATGGAACAGGG-----  
-----  
AATAACACAGAGACATTCAGACCTGGGGGAGGAAATATGAAGGACAATTGGAGAAGTGAATTATATAAAATATA  
AAGTAGTAGAAATTAAGCCATTG---GGAGTAGCACCCACTACGGCAAAAAGGAGAGTGGTG-----  
-----GAGAGAGAAAAAAGAGCA---GTGGGA---ATAGGAGCT-----  
---ATGATCTTTGGGTTCTTGGGAGCA---GCAGGAAGCACTATG---GGCGCGGCGTCA---  
ATAACGCTGACGGTACAA---GCTAGACAA---TTGTTG---TCTGGTATAGTGCAACAGCAAAGC---  
AATTTG---CTGAGA---GCTATAGAGGCGCAACAGCATATGTTGCAACTCACAGTCTGGGGCATT

>JN188292

TTCTATTGCAATACATCAAGCCTGTTTAATGGTACATACATGCGGCCTAACAGTACAGGAAATACT-----  
-----  
-----  
TCAAATTCAACCATCACACTCCACTGCAAAATAAAACAAATTATAAACATGTGGCAGGGGGTAGGACAAGCAA  
TGTATGCCCCCTCCCATTCAGGAAACATAACATGTAAATCAAAT---  
ATCACAGGACTAATATTGACACGTGATGGAGGACAGACAAATAAT-----  
-----  
-----  
ACTAATGAGACATTCAGACCTGCAGGAGGAGATATGAGGGACAATTGGAGAAGTGAATTATATAAAATATAAGG  
TGGTAGAAGTTAAGCCATTA---GGACTAGCACCCACTACGGCAAAAAGGAGAGTGGTG-----  
-----GAGAGAGAAAAAAGAGCA---GTGGGA---ATAGGAGCT-----  
GTGTTCTTGGGTTCTTGGGAGCA---GCTGGAAGCACTATG---GGCGCGGCATCA---  
ATAACGCTGACGGTACAG---GCCAGACAA---CTGTTG---TCTGGTATAGTGCAACAGCAAAGC---  
AATTTG---CTGAGG---GCTATAGAGGCGCAACAGCATATGTTGCAACTCACGGTCTGGGGCATT

>AY118165

TTCTATTGCAATACATCAAACTGTTTAAATAGTACATACATGCCTAATAGTACATACATGCATAATGCTACAG  
AA-----

-----  
AGTAATGCAAACATCACAATCCCATGCAGAATAAAACAAATTATAAACATGTGGCAGGAGGTAGGACGAGCAA  
TGTATGCCCCCTCCCATTTGTAGGAAACATAATGTGTAAATCAAAT---  
ATCACAGGAGTACTATTAGTACGTGATGGAGGAAACACAAACGGG-----

-----  
ACAGAGACATTCAGACCTGGAGGAGGAAATATGAAGGACAATTGGAGAAGTGAATTATATAAATATAAAGTGG  
TAGAAATTAAGCCATTG---GGAGTAGCACCCACTAAGGCAAAAAGGAAAGTGGTG-----  
-----GAGAGAGAAAAAAGAGCA---GTGGGA---ATAGGAGCT-----  
GTGCTCCTTGGGTTCTTGGGAACA---GCAGGAAGCACTATG---GGCGCGGCGTCA---  
ATAACGCTGACGGTACAG---GCCAGACAA---CTGTTG---TCTGGTATAGTGCAACAGCAAAGC---  
AATTTG---CTGAGA---GCTATAGAGGCGCAACAGCATATGTTGCAACTCACAGTCTGGGGCATT

>AY118166

TTCTATTGCAATACAACAAGCCTGTTCAATGGTACATACCCATCTACAGGAAATAATACAAC-----

-----  
TCAAAATGGCACCACCACACTTCCTTGCAGAATAAAACAAATTATAAACATGTGGCAGGAAGTAGGACGAGCAA  
TGTATGCCCCCTCCCATTTGAAGGAAACATAACATGTAAATCAAAT---  
ATCACAGGACTACTGTTAGTACGTGATGGAGGCATAAACAGTACT-----

-----  
GGCCCAGAAACATTTCAGACCTGGAGGAGGAAATATGAAGGACAATTGGAGAAGTGAATTATATAAATATAAAG  
TAGTAGAAATTAAGCCATTA---GGAATAGCACCCACTAAGGCAAAAAGGAGAGTGGTG-----  
-----GAGAGAGAAAAAAGAGCA---GTGGGA---ATAGGAGCT-----  
GTGTTCTTGGGTTCTTGGGAGCA---GCAGGAAGCACTATG---GGCGCGGCGTCA---  
ATAACGCTGACGGTACAG---GCCAGACAA---CTGCTG---TCTGGTATAGTGCAACAGCAAAGC---  
AATTTG---CTGAAG---GCTATAGAGGCGCAACAGCATATGTTGCAACTCACGGTCTGGGGCATT

>AF286227

TTCTATTGCAATACAACAAGACTGTTTAAATAATAATGCTACA-----

-----  
GAAGATGAAACCATCACACTCCCATGCAGAATAAAACAAATTATAAACATGTGGCAGGGGGTAGGACGAGCAA  
TGTATGCCCCCTCCCATTTGCAGGAAACATAACATGTAAATCAAAT---  
ATCACAGGACTACTATTGGTACGTGATGGAGGAGAGGACAATAAA-----

-----  
ACAGAGGAGATATTTCAGACCTGGAGGAGGAAATATGAAGGACAATTGGAGAAGTGAATTATATAAATATAAAG  
TGATAGAACTTAAGCCATTG---GGAATAGCACCCACTGGGGCAAAAAGGAGAGTGGTG-----  
-----GAGAGAGAAAAAAGAGCA---GTGGGA---ATAGGAGCT-----  
GTGTTCTTGGGTTCTTGGGAGCA---GCAGGAAGCACTATG---GGCGCAGCGTCA---  
CTAACGCTGACGGTACAG---GCCAGACAA---TTGCTG---TCTAGTATAGTGCAACAGCAAAGC---  
AATTTG---CTGAGA---GCTATCGAGGCGCAACAGCATATGTTGCAACTCACGGTCTGGGGCATT

>AY158533

TTCTATTGCAATACATCAGGCCTGTTTAAATGGTACGTACAATAGTACAGGAAGTTCTTCAAATCA-----

-----  
ACAAAGTCAACCATCACACTCCAATGCAGAATAAGACAAATTGTAAACATGTGGCAGGAGGTGGGACGAGCAA  
TGTATGCCCCCTCCCATTTGCAGGAAACATAACATGTAAATCAAAT---  
ATCACAGGACTACTATTAACACGTGATGGAGGAAAAAATAGTTCA-----

-----  
AAGGAGATAGAGGTATTTCAGACCTGGAGGAGGAGATATGAGGGACAATTGGAGAAGTGAATTATATAAATATA  
AAGTGGTAGAAGTTAAGCCATTA---GGAGTAGCACCCACTGAGGCAAAAAGGAGAGTGGTG-----  
-----GAAGGAGAGAAAAAGAGCA---GTGGGA---ATAGGAGCT-----  
---GTGTTCTTGGGTTCTTGGGAGCA---GCAGGAAGCACTATG---GGCGCGGCGTCA---  
ATGACGCTGACGGTACAG---GCCAGACAG---TTATTG---TCTGGTATAGTGCAACAGCAAAGC---  
AATTTG---CTGAGG---GCCATAGAGGCGCAACAGCACATGTTGCAACTCACGGTCTGGGGCATT

>AY158534

TTCTATTGCAATACATCAGTATTGTTTAAATAGTACATACAATCCTAATGGTAATTCAACTTCAGGTAAT----

-----  
-----

TCAACTTCAACCATTACCCTCCAATGCAGAATAAAACAAGTTGTAAACATGTGGCAGACAGTAGGACGAGCAA  
TGTATGCCCCCTCCCATTTGAGGGAAACATAACATGTAGATCAAAC---

ATCACAGGACTACTATTGGTACGTGATGGAGGGAGCAATGATACA-----

-----  
-----

GAGCCAGAGAAATTCAGACCTGGAGGAGGAGATATGAGGGATAATTGGAGAAGTGAATTATATAAATATAAAG  
TGGTAGAAATTAAGCCATTA---GGAATAGCACCCACTAAGGCAAAAAGGAGAGTGGTG-----

-----GAGAGAGAAAAAAGAGCA---GTGGGA---ATAGGAGCT-----

GTGTTCCCTTGGGTTCTTGGGAGCA---GCCGGAAGCACTATG---GGCGCGGCGTCA---

ATAACGCTGACGGTACAG---GCCAGACAA---TTGTTG---TCTGGTATAGTGCAACAGCAAAGC---

AATTTG---CTGAGA---GCTATAGAGGCGCAACAGCATATGTTGCAACTCACGGTCTGGGGCATT

>AY158535

TTTTATTGCAATACATCACAACCTGTTTAAATAGTACATACAATAGTACATACATGTCTAATAATACAGGAGAGA  
AT-----

-----  
-----

TCAAAACGAAACCATCACACTCCCATGCAGAATAAAACAAATTATAAACATGTGGCAGCAGGTAGGACGAGCAA  
TGTATGCTCCCCCATTGTCAGGAAACATAACATGTCTATCAAAT---

ATCACAGGATTACTATTGACAAGGGATGGAGGAAATGAGAGCAAC-----

-----  
-----

ACAGAGGAGACATTTCAGACCTGGAGGAGGAGATATGAGGGACAACCTGGAGAAGTGAATTATATAAATATAAAG  
TGGTAGAAATTAAGCCATTG---GGAATAGCACCCACTAAGGCAAAAAGGAGAGTGGTG-----

-----GAGAGAGAGAAAAAGAGCA---GTGGGA---ATAGGAGCT-----

GTGTTCCCTTGGGTTCTTGGGAGCA---GCAGGAAGCACTATG---GGCGCGGCGTCA---

ATAACGCTGACGGTACAG---GCCAGACAG---TTGTTG---TCTGGTATAGTGCAACAGCAAAGC---

AATTTG---CTGAGG---GCCATAGAGGCGCAACAGCATATGTTGCAACTCACTGTCTGGGGCATT

>AY529659

TTCTATTGCAATACATCAGGACTGTTTAAATAGCACATATTCTAATGGTACAGAAGGTAATTCAAATTCAAGTG  
CT-----

-----  
-----

TCAAACCTCAACCATCACACTCCCATGCAGAATAAAACAGATTATAAACATGTGGCAAGGGGTAGGACGAGCAA  
TGTATGCCCCCTCCCATTTGTCAGGAAACATAACATGTAAATCAAAT---

ATCACAGGACTACTATTGCTAAGGGATGGAGGTACCACAAATGAT-----

-----  
-----

AGCACAGAGACATTTCAGACCTGGAGGAGGAGATATGAGGGACAATTGGAGAAGTGAATTGTATAAATACAAAG  
TGGTAGAAATTAATCCATTA---GGAGTAGCACCCACTGAGGCAAAAAGGAGAGTGGTG-----

-----GAGAGAGAAAAAAGAGCA---GTGGGA---ATAGGAGCT-----

GTGCTCCTCGGGTTCTTGGGAGCA---GCAGGAAGCCCTATG---GGCGCACGTTCA---

ATAACGCTGGCGGTACAG---GCCAGACAA---TTGTTG---TCTGGTATAGTGCAACAGCAAAGC---

AATTTG---CTGAAG---GCTATAGAGGCGCAACAACATATGTTGCAACTCACGGTCTGGGGCATT

>AY043176

TTCTATTGTAATACATCAAACCTGTTTAAATAGTACATACAATAGTACATACAATAGTACCCAGCCT-----

-----  
-----

GGAAATAAAACCATCACCCCTCCAATGCAGAATAAAACAATTTATAAACATGTGGCAGGAGGTAGGACGAGCAA  
TGTATGCCCCCTCCCATTTGTCAGGAAACATAACATGTAAATCAAAC---

ATCACAGGACTACTATTGACACGTGATGGCGGCATAAACAGCTCA-----

-----  
-----

GAGAACACAGAGACATTTCAGACCTGGAGGAGGAGATATGAGAGACAATTGGAGGAGTGAATTATATAAATACA  
AAGTGGTAGAAATTAAGCCATTG---GGAATAGCACCCACTAAGGCAAAAAGAAGAGTGGTA-----

-----GAGAGAGAAAAAAGAGCA---GTAGGGACAATAGGAGCT-----

---ATGTTCCCTTGGGTTCTTGGGAGCA---GCCGGAAGCACTATG---GGCGCGGCGTCA---

ATGGCGCTGACGGTACAG---GCCAGACAA---GTATTG---TCTGGTATAGTGCAACAGCAAAGC---

AATTTG---CTGAGG---GCCATAGAGGCGCAACAGCATATGTTGCAACTCACGGTCTGGGGCATT

>DQ411850

TTCTATTGCGATACAACAAAACCTGTTTAAATGAAAGTAATTTAAACACAACC-----

-----  
-----

AACACAACCACCCTCACACTCCCATGCAGAATAAAACAAATTGTAAACATGTGGCAGGGGGTAGGACGAGCAA  
TGTACGCCCCCTCCCGTTGAAGGAAACATAACATGTAACCTCAAGT---  
ATCACGGGACTACTATTGGTACGTGATGGAGGAAACACGAGTAAC-----

-----  
-----

TCCACACCAGAGATATTTAGACCTGGAGGAGGAAATATGAAGGACAACCTGGAGAAGTGAATTATATAAAATATA  
AAGTGGTAGAAATTAACCATTG---GGAGTAGCACCCACAAAGGCAAAAAGGAGAGTGGTG-----  
-----GAGAGAGAAAAAAGAGCA---GTGGGA---ATAGGAGCT-----  
---GTGCTCTTTGGGTTCTTGGGAGCA---GCAGGAAGCACTATG---GGCGCGGCGTCA---  
ATAACGCTGACGGTACAG---GCCAGACAA---CTGTTG---TCTGGTATAGTGCAACAGCAAAGC---  
AATTTG---CTGAGA---GCTATAGAGGCGCAACAGCATATGTTGCAACTCACGGTCTGGGGCATT

>AY529661

TTCTATTGCAATACGACAAAACCTGTTTACTGGAAATGATTCATACATAAATAAT-----

-----  
-----

AATACAATCACACTCACACTCCCATGCAGAATAAAACAAATTATAAACATGTGGCAGGGGGTAGGACGAGCAA  
TGTATGCCCCCTCCCATTTGAAGGAAACATAACATGTAACCTCAAGT---  
ATCACAGGATTACTATTGACACGTGATGGAGGAGACACAAATGAC-----

-----  
-----

ACAGAGATATTCAGACCTGGAGGAGGAAATATGAAGGACAATTGGAGAAGTGAATTATATAAAATATAAAGTGG  
TAGAAATTAAGCCATTA---GGAATAGCACCCACTGGGGCAAAAAGGAGAGTGGTG-----  
-----GAGAGAAAAAAGAGCA---GTGGGA---ATAGGAGCT-----  
GTGCTCCTTGGGTTCTTGGGAGCA---GCAGGAAGCACTATG---GGCGCGGCGTCA---  
ATAACGCTGACGGTACAA---GCCAGACAA---CTGTTG---TCTGGTATAGTGCAACAGCAAAGC---  
AATTTG---CTGAGG---GCTATAGAGGCGCAGCAGCATATGTTGCAACTCACGGTCTGGGGCATT

>AY529662

TTCTATTGCAATACAACAAAGCTGTTTAAATGAAAGTGATTCAAACAATGGCACAAGTGATTCA-----

-----  
-----

AACAATGGCACAATCACACTCCCATGCAGAATAAAACAAATTATAAACATGTGGCAGGGGGTAGGACGAGCAA  
TGTATGCCCCCTCCCATTTGAAGGAAACATAACATGTAAATCAAAT---  
ATCACAGGACTACTATTGACACGTGATGGAGGAAACACGAGTGGC-----

-----  
-----

GATAACACAGAGACATTCAGACCTGGAGGAGGAAATATGAAAGACAATTGGAGAAATGAATTATATAAAATATA  
AAGTGGTAGAAATTAAGCCATTA---GGAGTAGCACCCACTGGCGCAAAAAGGATAGTGGTG-----  
-----AAGAGAGAAAAAAGAGCA---GTAGGA---ATAGGAGCT-----  
---GTGTTCAATTGGGTTCTTGGGAGCA---GCAGGAAGCACTATG---GGCGCGGCGTCA---  
ATAACGCTGACGGTACAG---GCCAGACAA---CTGTTG---TCTGGTATAGTGCAACAGCAAAGC---  
AATTTG---CTGAGA---GCTATAGAGGCGCAACAGCATATGTTGCAACTCACGGTCTGGGGCATT

>AY162224

TTCTATTGCAATACAACAGACCTGTTTAAATAGTACATACAGTAATGGTACATGCACTAATGGTACATGCATGT  
CT-----

-----  
-----

AATAATACAGAGCGCATCACACTCCAATGCAGAATAAAACAAATTATAAACATGTGGCAGGAGGTAGGACGAG  
CAATGTATGCCCCCTCCCATTTGCAGGAAACATAACATGTAGATCAAAT---  
ATTACAGGACTACTATTAACACGTGATGGAGGAGATAATAATACT-----

-----  
-----

GAAACAGAGACATTCAGACCTGGAGGAGGAGACATGAGGGACAATTGGAGAAGTGAATTATATAAAATACAAGG  
TGGTAGAAATTAACCATTA---GGAGTAGCACCCACTGCTGCAAAAAGGAGAGTGGTG-----  
-----GAGAGAGAAAAAAGAGCA---GTAGGA---ATAGGAGCT-----  
GTGTTCTTGGGTTCTTGGGAGCA---GCAGGAAGCACTATG---GGCGCAGCATCA---  
ATAACGCTGACGGTACAG---GCCAGACAA---TTATTG---TCTGGTATAGTGCAACAGCAAAGT---  
AATTTG---CTGAGG---GCTATAGAGGCGCAACAGCATATGTTGCAACTCACGGTCTGGGGCATT

>AF391234

TTTTATTGCAATACATCAGGCCTATTTTAATAGAACATTTAATAGTACATACATGCATAATAGTACAAAC----

-----  
-----

AATGACTCAATCATCACAATCCCATGCAGAATAAAACAAATTATAAACATGTGGCAGGAGGTAGGAAGAGCAA  
TGTATGCCCCCTCCCGTTGCAGGAAACATAACATGTAAATCAAAT---  
ATCACAGGACTACTATTGGTACGGGATGGAGGCGAAAATGGCACA-----

-----  
-----

AATAACACAGAGGTATTCAGACCTGGAGGAGGAAATATGAGGGACAATTGGAGAAAGTGAGTTATATAAAATATA  
AAGTGGTAGAAATTAACCATTG---GGAGTAGCACCCAATAAGGCAAAAAGGAGAGTGGTG-----  
-----GAGAGAGAAAAAAGAGCA---GTGGGA---ATAGGAGCT-----  
---GTGTTCCCTTGGGTTCTTGGGAGCA---GCAGGAAGCACTATG---GGCGCGGCGTCA---  
ATAGCGCTGACGGCACAA---GCCAGACAA---GTATTG---TCTGGTATAGTGCAACAGCAAAGC---  
AATTTG---CTGAAG---GCTATAGAGGCGCAGCAGCATCTGTTGCAACTCACAGTCTGGGGCATT

>AF391238

TTCTATTGCAATACATCAAACTGTTTAATAGTACATACATGCCTAATGTTACAGAAAGTAATGGTACAGAAA  
GT-----

-----  
-----

AATGTAACGATGATCACACTCCCATGCAGAATAAAGCAAATTATAAACATGTGGCAGGAGGTAGGACGAGCAA  
TGTATGCCCCCTCCCATTCAGGCAACATAACATGTACATCAAAC---  
ATCACAGGACTACTATTGGTACGTGATGGAGGCACAGAGGATAAT-----

-----  
-----

ACCACAGAGATATTCAGACCTGGAGGAGGAGATATGAGAGATAATTGGAGAAATGAACTATACAAATATAAAG  
TGGTAGAAATTAAGCCATTG---GGAATAGCACCCACTACAGCAAAAAGGAGAGTGGCG-----  
-----GAGAGAGAAAAAAGAGCA---GCAGGA---CTAGGAGCT-----  
GTACTCCTTGGATTCTTGGGAGCA---GCAGGAAGCACTATG---GGCGCGGCGTCA---  
ATAACGCTGACGGTACAG---GCCAGACAA---TTGTTG---TCTGGTATAGTGCAACAGCAAAGC---  
AATTTG---CTGAAA---GCTATAGAGGCGCAACAGCATGTGTTGCAGCTCACGGTCTGGGGCATT

>AF391242

TTCTATTGTAATACATCAGGCCTGTTTAATGGTACATACATGCCCAATGGTACAGACAAGTCTAAT-----

-----  
-----

GATACATCACCCATCACACTCCCATGCAGAATAAAACAAATTATAAACATGTGGCAGGGGGTAGGACGAGCAA  
TGTATGCCCCGCCCATTGCAGGAAACATAACATGTAAATCAAAT---  
ATCACAGGACTACTATTGACACGTGATGGAGGAGAAAAATAATAGA-----

-----  
-----

ACTAATGAGACATTCAGACCTGGAGGAGGAGATATGAGGGACAATTGGAGAAGTGAATTATATAAAATATAAAG  
TGGTAGAAATTAACCATTG---GGAATAGCACCCACTACTGCAAAAAGGAGAGTGGTG-----  
-----GAGAGAGAAAAAAGAGCA---GTGGGA---ATAGGAGCT-----  
ATGTTCCCTTGGGTTCTTGGGAATG---GCAGGAAGCACTATG---GGCGCGGCGTCA---  
ATAACGCTGACGGTACAG---GCCAGACAA---TTGTTG---TCTGGTATAGTGCAACAGCAAAGC---  
AAATTG---CTGAGG---GCCATAGAGGCGCAACAGCATATGTTGCAACTCACGGTCTGGGGCATT

>AF391246

TTCTATTGCAATACAACAAAACCTGTTTAATATAACAGAAGTGCAGAGGAATGTAAATGAT-----

-----  
-----

ACAAATGGCACACTCACACTCCCATGCAGGATAAAACAAATTATAAACATGTGGCAGGAGGTAGGACGGGCAA  
TGTATGCCCCCTCCCATTCAGGAAACATAACATGTAGATCAAAT---  
ATCACAGGACTACTATTGACACGTGATGGAGGAAACATAACGAAC-----

-----  
-----

GAGACAGAGACATTTAGACCTGGAGGAGGAAATATGAAAAGACAATTGGAGAAGTGAATTATATAAAATATAAAG  
TGGTAGAAATTAGGCCATTG---GGAATAGCACCCACTGAGGCAAAAAGGAGAGTGGTG-----  
-----GAGAGAGAAAAAAGAGCA---GTGGGA---ATAGGAGCT-----  
GTGTTCCCTTGGGTTCTTGGGAGCA---GCAGGAAGCACTATG---GGCGCGGCGTCA---  
ATAACGCTGACGGTACAG---GCCAGACAA---CTGTTG---TCTGGTATAGTGCAACAGCAAAGC---  
AATTTG---CTGAGA---GCTATAGAGGCGCAACAGCATCTGTTGCAACTCACAGTCTGGGGCATT

>AF391247

TTCTATTGCAATACATCACAACCTATTTTAATAGTACATACAATTCTACACAAATGCATAATGATACAGGA----

-----  
-----

AGTAATTCAACCATCACACTCCCATGCAAAATAAAGCAAATTATAAACATGTGGCAGGGGGTAGGACGGGCAA  
TGTATGCCCCCTCCCATTCGAGGAAACATAACATGTAAATCAAAT---  
ATTACAGGAATACTATTAGTACGTGATGGAGGCAACACAAATGACACA-----

-----  
-----

AATGGCACAGGAATATTCAGACCTGGAGGAGGAGATATGAAGGACAATTGGAGAAGTGAATTATATAAAATATA  
AAGTGGTAGAAATTAAGCCATTG---GGAATAGCACCCACTGAAGCAAAAAGGAGAGTGGTG-----  
-----GAGAGAGAAAAAGGAGCA---GTAGGA---ATAGGAGCT-----  
---GTACTCCTTGGGTTCTTGGGAGCA---GCAGGAAGCACTATG---GGCGCAGCGTCA---  
ATAACGCTGACGGTACAG---GCCAGGCAA---TTGTTG---TCTGGCATAGTGCAACAGCAAAGC---  
AATTTG---CTGAGA---GCTATAGAGGCGCAACAGCATATGTTGCAACTCACGGTCTGGGGCATT

>AF391250

TTCTATTGCAATACAACACAACCTGTTTAATAGGACATACAATACAACACAACCTGTTTAATGGTACATACAGCT  
CTAAC-----

-----  
-----

GATACAGAAAGTAATTTCACTCCCATGCAGAATAAAAACAAATTATAAACATGTGGCAGGAGGTAGGACGAG  
CAATGTATGCTCCTCCTATAAAAAGGAAACATAACATGTAACCTCAAAT---  
ATCACAGGATTACTGTTGGTGCGTGATGGAGGAGAAGACAATAACACA-----

-----  
-----

GAAAAATGACACAGAGACCTTCAGACCTGGAGGAGGAGATATGAGGGACAATTGGAGAAGTGAATTATACAAAT  
ATAAAGTGGTAGAAATTAAGCCATTG---GGAATAGCACCTACTGGGGCAAAAAGGAGAGTGGTG-----  
-----GAGAGAGAAAAAGAGCA---GTGGGA---ATAGGAGCT---  
-----GTGTTCTTGGGTTCTTGGGAGCA---GCAGGAAGCACTATG---GGCGCGGCGTCA---  
ATAACGCTGACGGTACAG---GCCAGACAA---TTATTG---TCTGGTATAGTGCAACAGCAAAGC---  
AATTTG---CTGAGG---GCCATAGAGGCGCAACAACATATGTTGCAACTCACAGTCTGGGGCATT

>AY529664

TTCTATTGCAATACAACACAACCTGTTTAGTAATGAAAGTATA-----

-----  
-----

ACAAACGAAACCATCACACTCCCATGCAAGATAAAAACAAATTATAAACATGTGGCAGGGGGTAGGACGAGCAA  
TGTATAGCCCTCCCATTCGAGGAAACATAACGTGTAACTCAAAA---  
ATCACAGGACTACTATTGACACGGGATGGAGGAGAAAAACACAACA-----

-----  
-----

GAGAACACAGAGACATTCAGACCTGGAGGAGGAAATATGAAAGACAATTGGAGAAATGAATTATATAAAATATA  
AAGTGGTAGAAATTAAGCCATTG---GGAGTAGCACCCACTGAAGCAAAAAGGAGAGTGGTG-----  
-----GAGAGAGAAAAAGAGCA---GTGGGA---ATAGGAGCT-----  
---GTACTCCTTGGGTTCTTGGGAGCA---GCAGGAAGCACTATG---GGCGCGGCGTCA---  
ATAACGCTGACGGTACAG---GCCAGACAA---CTGTTG---TCTGGTATAGTGCAACAGCAAAGC---  
AATTTG---CTGAGA---GCTATAGAGGCGCAACAGCATATGTTGCAACTCACAGTCTGGGGCATT

>AY529665

TTCTATTGCAATACAACAGAACTGTTTACTAATACAAGTAAG-----

-----  
-----

GCAGACACAAACATCACACTCCCATGCAGAATAAAAACAAATTATAAACATGTGGCAGGAGGTAGGAAAAGCAA  
TGTATGCCCCCTCCCATTCGAGGAAACATAAAATGTACCTCAAAT---  
ATCACAGGATTACTATTGACACGGGATGGAGGAGGAGATAACACA-----

-----  
-----

ACAGAGACATTCAGACCTGGAGGAGGAAATATGAAGGACAATTGGAGAAGTGAATTATATAAAATATAAAGTGG  
TAGAAATTAACCATTCG---GGAGTAGCACCAACTGAGGCAAAAAGGAGAGTGGTG-----  
-----GAGAGAGAAAAAGAGCA---GTGGGA---ATAGGAGCT-----  
ATGCTCCTTGGGTTTCTTGGGAAGCAGCCAGGAAGCACTATG---GGCGCGGCGTCA---  
ATAACGCTGACGGTACAG---GCCAGACAA---CTGTTG---TCTGGTATAGTGCAACAGCAAAGC---  
AATTTG---CTGAGA---GCTATAGAGGCGCAACAGCATATGTTGCAGCTCACGGTCTGGGGCATT

>AF411967

TTCTATTGCAATACATCAAACTGTTTAAATAGGCCTAATGGTACAGAGAGTAATTCAAACCAAACCACAGAGA  
GT-----

-----  
AATTCAAACAGAACCATCACACTCCAATGCAGAATAAGACAAATTATAAACATGTGGCAGGAGGTAGGACAAG  
CAATGTATGCCCCCTCCCATTAAGGAAACATAACATGTACCTCAAAT---  
ATCACAGGACTACTATTGACACGAGATGGAGGAGAGAAAAATACAACA-----

-----  
AATGAAAAAGAGATATTCAGACCTGGAGGAGGAGATATGAGGGACAATTGGAGAAAGTGAATTATACAAATATA  
AAGTGGTAGAAATTAAGCCATTG---GGAATAGCACCCACTGGGGCAAAAAGGAGAGTGGTG-----  
-----GAGAGAGAGAAAAAGAGCT---GTGGGACTACTAGGAGCT-----  
---GTGTTCCCTTGGGTTCTTGGGAGCA---GCAGGAAGCACTATG---GGCGCGGCGTCA---  
ATAGCGCTGACGGTACAG---ACTAGACAA---TTGTTG---TCTGGTATAGTGCAACAGCAAAGT---  
AATTTG---CTGAGG---GCTATAGAGGCGCAACAGCATATGTTGCAACTCACGGTCTGGGGCATT

>EU293450

TTCTATTGCAACACATCAGGACTGTTTAAATGGTACATACAATAGTACATACAATAGTACTAATGCTACAGAGG  
GGAGT-----

-----  
AGTTCAAATGGAACAATCACACTCCCATGCAGAATAAAACAAATTATAAACATGTGGCAGGAGGTAGGACGAG  
CAATATATGCCCCCTCCCATTAAGGAAACATAACATGTAAATCAAAT---  
ATCACAGGACTACTATTGGTACGTGATGGAGGAGAAAAAACAGATAATAGC-----

-----  
ACAGACAACAACACAGAGATATTCAGACCTGGAGGAGGAGATATGAGGGACAATTGGAGAAGTGAATTATACA  
AATATAAAGTGGTAGAAATTAAGCCATTG---GGAATAGCACCCACTGAGGCAAAAAGGAGAGTGGTG-----  
-----GAGAGAGAGAAAAGAGCA---GTGGGA---  
ATAGGAGCT-----GTGTTCCCTTGGGTTCTTGGGAGCA---GCAGGAAGCACTATG---  
GGCGCGGCGTCA---ATAACGCTGACGGTACAA---GCCAGACAA---CTATTG---  
GCTGGTATAGTGCAACAGCAAAGC---AATTTG---CTGAGA---  
GCTATAGAGGCGCAACAGCATATGTTGCAGCTCACAGTCTGGGGCATT

>AY529673

TTCTACTGCAATACATCACAACCTGTTTAAACAGTACGTTTAAATGATACAAGGGAAGATTCAAACAGCACAGATA  
ATTCA-----

-----  
AACAGCACAGCAAACATCACACTCTCATGCAGAATAAAGCAATTTGTACACATGTGGCAGGAGGTAGGACGGG  
CAATGTATGCCCCCTCCCATTAAGGAAACATAAACTGTACATCAAAT---  
ATCACAGGACTACTATTGACACGTGATGGAGGAAAAAATAACAAC-----

-----  
AACACTGAGACATTCAGACCTGGAGGAGGAGACATGAGGGACAATTGGAGAAGTGAATTATATAAATATAAAG  
TGGTAGAAATTAACCATTA---GGAGTAGCACCCACTGATGCAAGAAGGAGAGTGGTG-----  
-----CAGAGAGAGAAAAGAGCA---GTGGGA---ATAGGAGCT-----  
GTGCTCCTTGGGTTCTTGGGAGCA---GCAGGAAGCACTATG---GGCGCGGCATCA---  
ATAACGCTGACGGTACAG---GCCAGACTG---TTATTG---TCTGGTATAGTGCAACAGCAGAGC---  
AATCTG---CTGAGG---GCTATAGAGGCGCAACAGCATCTGTTGCAACTCACGGTCTGGGGCATT

>AY529675

TTCTATTGCAATACATCAAGCTTGTTTAAATAGTGCATACGTGTTTAAATAATGGTACATACATGTATAATAGTA  
CAAAT-----

-----AGT---

ATTTTCAGACTCAGACATCACACTCCAGTGCAGAATAAAACAAATTATAAACATGTGGCAGGGGGTAGGGCAAG  
CAATGTATGCCCCCTCCCATTAAGGAAACATAACATGTATATCAAAT---  
ATCACAGGACTACTATTGACACGTGATGGAGGAGGAACCAATGACAGT-----

-----  
AGGGAAAATGAGACATTCAGACCTGGAGGAGGAAATATGAAGGACAATTGGAGAAGTGAATTATATAAATATA  
AAGTGGTAGAAATTAACCATTA---GGGATAGCACCCACTAATGCAAAAAGGAGAGTGGTG-----  
-----GAGAGAGAGAAAAGAGCAGTAGTGGGA---CTAGGAGCT-----  
---ATGTTCCCTTGGGTTCTTGGGAGCA---GCAGGAAGCACTATG---GGCGCGGCGTCA---

ATAACGCTGACGGTACAG---GCCAGACAA---ATATTG---TCTGGTATAGTGCAACAGCAAAGC---  
 AATTTG---CTGAGG---GCTATAGAGGCGCAACAGCATATGTTGCAACTCACGGTCTGGGGCATT  
 >AY228556  
 TTCTATTGCAATACATCAAGACTGTTTAATGATACATTGCTTAAAAATAATACTAATGAT-----  
 -----  
 -----  
 ACAAACCTCAACCATCACACTCCCATGCAGAATAAAACAAATTATAAACATGTGGCAGGAGGTAGGACGAGCCA  
 TGTATGCCCCCTCCCATTTGAAGGAAACATAACATGTAAATCAAAT---  
 ATCACAGGATTACTATTAACACGGGATGGAGGGAGTAGTAACACA-----  
 -----  
 -----  
 AATGAGACTGAGATATTTAGACCGGGAGGAGGAGACATGAGGGACAATTGGAGAAGTGAATTATATAAAATATA  
 AAGTGGTAGAAATTAAGCCATTG---GGAGTAGCACCCACTACGGCAAAAAGGAGAGTGGTG-----  
 -----GAGAGAGAAAAAGAGCA---TTGGGGGGCATAGGAGCT-----  
 ---GTGTTCCCTTGGGTTCTTGGGAGCA---GCAGGAAGCACTATG---GGCGCGGCGTCA---  
 ATAACGCTGACGGTACAG---GCCAGACAA---TTGTTG---TCTGGTATAGTGCAACAGCAAAGC---  
 AATTTG---CTGAGG---GCTATAGAGGCGCAACAGCATCTGTTGCAACTCACAGTCTGGGGCATT  
 >AY529676  
 TTCTATTGCAATACATCAGAACTATTTAATATTAATATTACAGGAAATGATAGTAGTAGTATAAAC-----  
 -----  
 -----  
 AATACTACAAACATCACACTTCCATGCAGACTAAAACAATTTATAAACATGTGGCAGAGGGTAGGACGAGCAA  
 TGTATGCCAATCCCATTGCAGGAAAATTAACATGTAAATCAAAT---  
 ATCACAGGACTACTATTAGTACGTGATGGAGGAGCCTCCACCAACAGCACC-----  
 -----  
 -----  
 ACCACCAACACAGAGATATTCAGACCTGAAGGAGGAAATATGAAGGACAATTGGAGAAGTGAATTATATAAAAT  
 ATAAAGTGGTAGAAATTAAGCCATTG---GGAATAGCACCCACTGGAGCAAAAAGGAGAGTGGTG-----  
 -----GAGAGAGAAAAAGAGCAGCATTGGGA---ATAGGAGCT---  
 -----GTGTTCCCTTGGGTTCTTGGGAGTA---GCAGGAAGCACTATG---GGCGCGGCGTCA---  
 ATAACGCTGACGGTACAG---GCCAGACAA---TTGTTG---TCTGGTATAGTGCAACAGCAAAGC---  
 AATTTG---CTGAGG---GCTATAGAGGCGCAACAACATCTGTTGCAACTCACGGTCTGGGGCATT  
 >AY529677  
 TGCTATTGCAGCACATCAGGCCTGTTTAATTTTACGTTTAATGGTGCAGCAATAATAGATAATAATAAT---  
 -----  
 -----  
 AGTACAGATAATATCACACTCCAATGCAGAATAAGACTAATTATAAACATGTGGCAGAAGGTAGGACGAGCAA  
 TGTATAACCCTCCCCCAGTGCAGGAAGCATAACATGTAAATCAAAT---  
 ATCACAGGACTACTATTAAACACGTGATGGAGGAAAGAATGTAACA-----  
 -----  
 -----  
 AACAAACAGAAACATTTCAGACCGGGAGGAGGAGATATGAGGGACAATTGGAGAAGTGAATTATATAAAATATA  
 AAGTAATAGAAATTAAGCCATTG---GGAATAGCACCCACTAATGCAAAAAGGAGAGTGGTG-----  
 -----GAGAGAGAAAAAGAGCA---GTGGGA---ATAGGAGCT-----  
 ---GTGTTCCCTTGGGTTCTTGGGAGCA---GCAGGAAGCACTATG---GGCGCAGCGTCA---  
 ATAACGCTGACGGTACAG---GCCAGACAA---TTATTG---TCTGGTATAGTGCAACAGCAAAGC---  
 AATTTG---CTGAGA---GCTATAGAGGCGCAACAGCATATGTTGCAACTCACGGTCTGGGGCATC  
 >AY529678  
 TTCTATTGCAATACAACAAAACCTGTTTAATAACAGCTTGCTGAATAATACAGCAGATAAT-----  
 -----  
 -----  
 TCAACTTCAACAATCACACTCCAATGCAGAATAAAACAAATTATAAACATGTGGCAGGGGGTAGGACGAGCAG  
 TATATGCCCCCTCCCATTTAGAGGAAACATAACATGTACATCAAAT---  
 ATCACAGGACTATTGTTGACACGTGATGGAGCAGGAAATGAG-----  
 -----  
 -----  
 ACATTTCAGACCTCTAGGAGGAGATATGAGAGACAATTGGAGAAGTGAATTATATAAAATATAAAGTGGTAGAAA  
 TTAAACCATTA---GGAATAGCACCCACTAGAGCAAAAAGGAGAGTGGTG-----  
 -----GAGAGAGAAAAAGAGCA---GTTGGA---ATTGGAGCT-----  
 GTGCTCTTGGGGTTCTTGGGAGCT---GCAGGAAGCACTATG---GGCGCGGCGTCA---

ATAACGCTGACGGTACAG---GCCAGACAA---TTACTG---TCTGGTATAGTGCAACAGCAAGAC---  
 AATTTG---CTGAGG---GCTATAGAGGCGCAACAGCATATGTTGCAACTCACTGTCTGGGGCATT  
 >DQ447266  
 TTCTATTGCAATACATCACAACCTGTTCAATACATCACTGTTTAATGATAGTTCAATT-----  
 -----  
 -----  
 TCAAATAGAACCATCACACTTCCGTGCAGAATAAAACAAATTATAAACATGTGGCAGAAAGTAGGACGAGCAA  
 TGTATGCCCCCTCCCATTCAGAGAAACATAACATGTAACCTCAAGT---  
 ATCACAGGACTACTATTAGTACGTGATGGAGGCACAAACAACACA-----  
 -----  
 -----  
 AATAACATAGAGACCTTCAGACCTGGAGGAGGAGATATGAGGGACAACCTGGAGAAAGTGAATTATATAAAATATA  
 AGGTGGTAGAAATTAAACCATTAA---GGATTAGCACCCACTGAAGCAAAAAGGAGAGTGGTG-----  
 -----GAGAGAGAAAAAAGAGCA---GTGGGA---ATAGGAGCT-----  
 ---GTGATCTTTGGGTTCTTGGGAGCA---GCAGGAAGCACTATG---GGCGCGGCGTCA---  
 TTAACGCTGACGGTACAG---GCCAGACAA---TTGTTG---TCTGGTATAGTGCAACAGCAAAAC---  
 AATTTG---CTGAAG---GCTATAGAGGCGCAACAGCATATGTTGCAACTCACTGTCTGGGGCATT  
 >AY043174  
 TTCTATTGCAATACATCAAAACTATTTAATGATAGTCTAGTAAATGATACAGAA-----  
 -----  
 -----  
 AGTAATTCAACCATCACTATTCCATGCAGAATAAAACAAATTATAAACATGTGGCAGGAGGTAGGACGAGCAA  
 TGTATGCCCCCTCCCATTCAGAGAAACATAACATGTAAATCAAAT---  
 ATCACAGGACTACTATTGACACGTGATGGAGGAACAGATAACACA-----  
 -----  
 -----  
 ACAGAGATATTCAGACCTGGAGGAGGAAATATGAAGGACAATTGGAGAAAGTGAATTATATAAAATATAAAGTAG  
 TAGAAATTAAGCCATTG---GGAATAGCACCCACTGAAGCAAAAAGGAGAGTGGTG-----  
 -----GAGAGAGAAAAAAGAGCA---GTGGGA---ATAGGAGCT-----  
 GTGCTCCTTGGGTTCTTGGGAGCA---GCAGGAAGCACTATG---GGCGCGGCGTCA---  
 ATAACGCTGACGGTACAG---GCCAGACAA---CTGTTG---TCTGGTATAGTGCAACAGCAAAGC---  
 AATTTG---CTGAGA---GCTATAGAGGCGCAACAGCATATGTTGCAACTCACAGTCTGGGGCATT  
 >AY043175  
 TTCTATTGTGATCCACCAAACTGTTTAATGAACCAAACTGTTTAATGAAAGTGAATATGTA-----  
 -----  
 -----  
 GACAACAAAACCATCATACTCCCATGCAGGATAAAACAAATTATAAACATGTGGCAGGAGGTAGGACGAGCAA  
 TGTATGCCCCCTCCCATTCAGAGAAACATAACATGTAAATCAAAT---  
 ATCACAGGACTACTATTGACATGGGATGGAGGAGAGAATAGCACA-----  
 -----  
 -----  
 GAAGGGGTATTTCAGACCAGGAGGAGGAAATATGAAGGACAATTGGAGAAAGTGAATTATATAAAATATAAAGTGG  
 TAGAAATTAAGCCATTG---GGAGTAGCACCCACTAAATCAAAAAGGAAAGTGGTG-----  
 -----GGGAGAGAAAAAAGAGCA---GTGGGA---CTAGGAGCT-----  
 GTGCTCCTTGGGTTCTTGGGAGCA---GCAGGAAGCACTATG---GGCGCGGCATCA---  
 ATAACGCTGACGGTACAG---GCCAGACAA---CTGTTG---TCTGGTATAGTGCAACAGCAAAGC---  
 AATTTG---CTGAGA---GCTATAGAGGCGCAACAGCATCTGTTGCAACTCACGGTCTGGGGCATT  
 >DQ411852  
 TTCTATTGCAATACAGCAGACCTGTTTACTAATGCAACAAAACCTGGTTAATGATACTGAA-----  
 -----  
 -----  
 AATAAGGCAGTCATCACAATCCCATGCAGAATAAAGCAAATTATAAACATGTGGCAGGGGGTAGGACGAGCAA  
 TGTATGCCCCCTCCCATTCAGAGAAACATAACATGTAACCTCAAAT---  
 ATCACAGGACTACTATTGACACGTGATGGAGGAGGTAATGTTACAGAA-----  
 -----  
 -----  
 ATTAATAGAACAGAGATATTCAGACCTGGAGGAGGAAACATGAAGGACAATTGGAGAAATGAATTATATAAAAT  
 ATAAAGTGGTAGAAATTAAGCCATTG---GGAGTAGCACCCACTGGGGCAAAAAGGAAGTGGTG-----  
 -----AAGAGAGAAAAAAGAGCA---GTGGGA---CTAGGAGCT---  
 -----GTGCTCTTTGGGTTCTTGGGAGCA---GCAGGAAGCACTATG---GGCGCGGCGTCA---

ATAACGCTGACGGCACAG---GCCAGACAA---CTGTTG---TCTGGTATAGTGCAACAGCAAAGC---  
 AATTTG---CTGAGA---GCTATAGAGGCGCAACAGCATATGTTGCAACTCACGGTCTGGGGCATT  
 >AY522722  
 TTCTACTGCAATACAACAACACTGTTTAATAGTACATACAATCCTAATGCTACAGGAAGTGTC-----  
 -----  
 -----  
 ATAAACGAAAACATCACACTACCATGCAGAATAAAACAATTTATAAATACGTGGCAGGGGGTAGGACGAGCAA  
 TATATGCCCCCTCCCATTTGAAGGAAAAATAACATGTAAATCAAAT---  
 ATCACAGGACTACTATTAGTACGTGATGGAGGAAATACAAATGGCACA-----  
 -----  
 -----  
 GATAACACAGAGACATTTAGACCTGGAGGAGGAGATATGAGGAACAATTGGAGAAAGTGAATTATATAAGTATA  
 AAGTGGTAGAAATTAAGCCATTG---GGAATAGCACCCACTGAAGCAAAGAGGAGAGTGGTG-----  
 -----GAGAGAGGAAAAAGAGCA---GTGGGA---ATAGGAGCT-----  
 ---GTGTTCCCTTGGGTTCTTGGCAGCA---GCAGGAAGCACTATG---GGCGCGGCGTCA---  
 ATAACGCTGACGGTACAG---GCCAGACAA---GTGTTA---TCTGGTATAGTGCAACAGCAAAGC---  
 AATTTG---CTGCAG---GCTATAGAAGCGCAACAGCATCTGTTGCAGCTCACGGTCTGGGGCATT  
 >AY522723  
 TTCTATTGCAACACATCAAGACTGTTTAATAGGACATACATGTTTAATAGTACATACAATGATACAGGAACAA  
 AC-----  
 -----TCAAACCTCCATACTCCCATTTCCCATGC-----  
 AAACAAATAATAAACATGTGGCAGAGGGTAGGGCGAGCGATGTATGCGAATCCCATTGCCAGTGACATAACAT  
 GTAAATCAACT---ATCACAGGACTACTGTCTGACGCGGGATGGTGGAAACAGAAACGAA-----  
 -----  
 -----  
 ACTAATGGCGAGATATTTAGACCTGGTGCAGGAGATATGAGGGAGAATTGGAGAAAGTGAATTATATAAGTATA  
 AGGTGGTAGAAATTAAGCCATTG---GGTGTAGCACCCACGGCGGCAATAAGGAGAGTGGTG-----  
 -----GAGAGAGAAAAAGAGAGCA---GCG-----ATAGGAGCT-----  
 ---TTGTTCCCTTGGGTTCTTGGGAGGA---GCCGGAAGCACTATG---GGAGCGGCGTCA---  
 ATAACGCTGACGGCACAG---GCCACACGA---TGGCTG---TCTGGTATAGTGACAGCAGCAAAGC---  
 AATTTG---CTGAGG---GCTATAGAGGCGCAACAGCATATGTGGCAAGTCACGGTCTGGGGCATC  
 >AY522724  
 TTCTATTGCAATACATCAAACTGTTTAATAGTATATACAATAGTACAAACAGTACTAGTACAAACAGTACT-  
 -----  
 -----  
 TCAAATGCAACCATCACACTCCAATGCAGAATAAAACAAATTATAAACATGTGGCAGGGGGTAGGACGGGGCAA  
 TGTATGCCCCCTCCCATTTGCAGGAAACATAACATGTAAAGTCAAAT---  
 ATCACAGGACTACTATTGACACGTGATGGGGGAGATGATAGTAAC-----  
 -----  
 -----  
 AAAACAGAAACCTTCAGACCTGAAGGAGGAGATATGAAGAACAATTGGAGAAAGTGAATTATATAAATATAAAG  
 TGGTAGAAATTAAGCCATTA---GGAATAGCACCCACTAAGGCAAAAAGGAGAGTGGTG-----  
 -----GAGAGAGAAAAAGAGCA---GTAGGA---ATAGGAGCC-----  
 TTGTTCCCTTGGGTTCTTGGGAGCA---GCAGGAAGCACTATG---GGCGCAGCATCA---  
 ATAACGCTGACGGTACAG---GCCAGACAA---TTGTTG---TCTGGTATAGTGCAACAGCAAAGC---  
 AATTTG---CTGAGG---GCTATAGAGGCGCAACAGCATATGTTGCAACTCACGGTCTGGGGCATT  
 >AY522725  
 TTCTATTGCAATACAACAGGACTGTTTAATGGAAGTAAGGCA-----  
 -----  
 -----  
 AATGAAACCATCATACTCCCATGCAAGATAAAGCAAATTATAAACATGTGGCAGGGGGTAGGACGAGCAATGT  
 ATGCCCCCTCCCATTTGAAGGAAACATAACATGTAAATCAAAT---  
 ATCACAGGACTACTATTGACACGTGATGGAGGAATTGGGAAAAACAGT-----  
 -----  
 -----  
 ACCAATGGCACAGAAACATTCAGGCCTGGAGGAGGAAATATGAAGGACAATTGGAGAAATGAATTATATAAAT  
 ATAAAGTGGTAGAAATTAAGCCATTG---GGAATAGCACCCACTAAGGCAAAAAGGAGAGTGGTG-----  
 -----GAGAGAGAAAAAGAGCA---GTGGGA---ATAGGAGCT---  
 -----GTGCTCTTTGGGTTCTTGGGAGCA---GCAGGAAGCACTATG---GGCGCAGCGTCA---

ATAACGCTGACGGTACAG---GCCAGACAA---CTGTTG---TCTGGTATAGTGCAACAGCAAAGC---  
 AATTTG---CTAAGA---GCTATAGAGGCGCAACAGCATATGTTGCAACTCACCGTCTGGGGCATT  
 >AY522727  
 TTCTATTGCAATACAACATCCCTGTTTAATAATATATACTCGAACAAAGACAGGCTCGCCTAAT-----  
 -----  
 -----  
 GAGAAAGAAATCATCACACTCCCATGCAGAATAAAACAATTTATAAACATGTGGCAGAAGGTAGGACGAGCAA  
 TGTATGCCCCCTCCCATTCAGAGAAACATAACATGTAAATCAAAT---  
 ATCACAGGACTATTATTGTTACGGGATGGAGGAAACTTCAGCCGC-----  
 -----  
 -----  
 GACAACGAGACATTTCAGACCTGGAGGAGGAGATATGAGGGACAATTGGAGAAGTGAATTATATAAAATACAAAG  
 TGGTAGAAATTAAGCCATTG---GGAGTAGCACCCACTAAGGCAAAAAGGAGAGTGGTG-----  
 -----GAGAGAGAAAAAAGAGCA---GCA-----CTAGGAGCT-----  
 GTGCTCATTGGGTTCTTGGGAGCT---GCAGGAAGCACTATG---GGCGCGGCGTCA---  
 ATGGCGCTGACGGTACAA---GCCAGACAA---TTGTTG---TCTGGTATAGTGCAACAGCAAAGC---  
 AATTTG---CTGAAA---GCTATAGAGGCGCAACAACATCTGTTGCAACTCACAGTCTGGGGCATT  
 >AY522729  
 TTCTATTGCAATACATCAGGCCTGTTTAATGGTACATATAATAGTACAGGAAACAATGGTACA-----  
 -----  
 -----  
 GGAAACAAGAACATCACACTCCAATGCAGAATAAAACAAATTATAAACATGTGGCAGGGGGTAGGACGAGCAA  
 TGTATGCCCCCTCCCATTCAGAGAAACATAACATGTACATCAAAT---  
 ATCACAGGACTACTATTGACACGTGATGGAGGAAGAAATAAAAATAATACA-----  
 -----  
 -----  
 GAGAATAATACAGAGATATTTCAGACCTGGAGGAGGAGATATGAGGGACAATTGGAGAAGTGAATTGTATAAAT  
 ATAAAGTGGTAGAAATTAAGCCATTA---GGAATAGCACCCACTAGTGCAAAAAGGAGAGTGGTG-----  
 -----GAGAGGCAAAAAAGAGCA---GTGGGA---GTAGGAGCT---  
 -----ATGATCCTTGGGTTCTTGGGAGCA---GCAGGAAGCACTATG---GGCGCGGCGTCA---  
 ATAACGCTGACGGTACAG---GCCAGACAA---CTATTG---TCTGGTATAGTGCAACAGCAAAGC---  
 AATTTG---CTGAGA---GCTATAGACGCGCAACAGCATATGTTGCAACTCACGGTCTGGGGCATT  
 >AY522730  
 TTCTATTGCAATACATCAAACCTGTTTAATGGGATATACAATCCTAATGGTACTGCAATTTCA-----  
 -----  
 -----  
 ACCAATTCAACCATTACACTCCAATGTAGAATAATACAAATTATAAACATGTGGCAAGGGGTAGGACAAGCAA  
 TGTATGCTCCTCCCATTCAGAGAAACATAACATGTAAATCAAAT---  
 ATCACAGGACTACTATTGCTACGTGATGGAGGAGGTTCTAGTGAGAAT-----  
 -----  
 -----  
 AATAAACAGAGATATTTCAGACCTGGAGGAGGAGATATGAGGGACAATTGGAGAAGTGAATTATATAAATATA  
 AAGTGGTAGAAGTTAAGCCATTA---GGGATAGCACCCACTAAGGCAAAAAGGAGAGTGGTG-----  
 -----GAGAGAGAAAAAAGAGCA---GTGGGA---ATAGGAGCT-----  
 ---GTGTTCCCTTGGGTTCTTGGGAGCA---GCCGGAAGCACTATG---GGCGCGGCGTCA---  
 ATAACGCTGACGGTACAA---GCCAGACAA---CTGTTG---TCTGGCATAGTGCAACAGCAAAGC---  
 AATTTG---CTGAAG---GCTATAGAGGCGCAACAGCATATGTTGCAACTCACGGTCTGGGGCATT  
 >AY522736  
 TTCTATTGCAATACATCAGGCTTGTTTAATAACAAAGAGTCTAATAATACAGAAGGAAATTCAAAT-----  
 -----  
 -----  
 TCAACTTCAACCATCACGCTCCCATGTAGAATAAAACAAATTATAAACATGTGGCAGGAGGTAGGACGAGCAA  
 TGTATGCCCCCTCCCATTCAGAGAAACATAACATGTAAATCAAAT---  
 ATCACAGGACTACTATTGACACGTGATGGAGGAAATACAAATATCACA-----  
 -----  
 -----  
 AACGCAACAGAGACATTTCAGACCTGGAGGAGGAGATATGAAGGACAATTGGAGGAGTGAATTATATAAATATA  
 AAGTGGTAGAATTAAGCCATTA---GGAATAGCACCCACTAAGGCAAAAAGGAGAGTGGTG-----  
 -----GAGAGAGAAAAAAGAGCA---GTGGGA---ATAGGAGCT-----  
 ---GTGTTCCCTTGGGTTCTTAGGATTT---GCAGGAAGCACTATG---GGCGCAGCATCA---

GTAACGCTGACGGTACAG---GCCAGACAA---TTATTG---TTTGGTATAGTGCAACAGCAAAGC---  
 AATTTG---CTGAGA---GCTATAGAGGCGCAACAGCATATGTTGCAACTCACGGTCTGGGGCATT  
 >KU168308  
 TTCTATTGCAATACATCAAACTGTTTAATACATCAGAACCGAACTGTTTAATGGCACAGCAAACAGTACT-  
 -----  
 -----  
 TCAACTACAGACATCACACTCCAATGCAGAATAAAACAAATTATAAACATGTGGCAGGAGGTAGGACGAGCAA  
 TGTATGCCCCCTCCCATTCAGAGAAACATAACATGTAAATCAAAC---  
 ATCACAGGACTAATATTGACATGGGATGGAGGGAATAGGAATGACACA-----  
 -----  
 -----  
 AATAACACAGAGACATTTAGACCTGGAGGAGGAGATATGAGGGACAATTGGAGAAAGTGAATTATACAAATATA  
 AAGTGGTAGAAATTAAGCCATTA---GGAGTAGCACCCACTAAGGCCAAAAGGAGAGTGGTG-----  
 -----GAGAGAGAAAAAGAGCA---GTGGGA---ATAGGAGCT-----  
 ---GTGTTCCCTTGGGTTCTTGGGAACA---GCAGGAAGCACTATG---GGCGCGGCATCA---  
 ATAACGCTGACGGTACAG---GCCAGACAA---CTGTTG---TCTGGTATAGTGCAACAGCAAAGT---  
 AATTTG---CTGAGA---GCTATAGAGGCGCAACAGCATATGTTGCAACTCACGGTCTGGGGCATT  
 >AF411966  
 TTCTATTGTAACACATCAAAATTGTTTAATAGGACAAACCCGTTTAATAGT-----  
 -----  
 -----  
 ACAGATTCAAACATCACAATCCCATGCAGAATAAAACAAATTATAAACATGTGGCAGGGGGTAGGACAAGCAA  
 TGTATGCCCCCTCCCATTTGAAGGAAACATAACATGTAACTCAAGT---  
 ATCACAGGATTACTATTGACACGTGATGGAGGAATTAGCAAAAGGAATAAC-----  
 -----  
 ----  
 ACAGAGAATAACATAGAAATATTCAGACCTGGAGGAGGAAACATGAAGGACAATTGGAGAAGTGAAGTATATA  
 AATATAAAGTGATAGAAATTAGGCCATTG---GGAGTAGCACCCACTGAGGCCAAAAGGAGAGTGGTG-----  
 -----GAGAGAGAAAAAGAGCA---GTGCCA---  
 ATAGGAGCT-----GTGTTCCCTTGGGTTCTTGGGAGCA---GCAGGAAGCACTATG---  
 GGCGCAGCGTCA---ATAACGCTGACGGTACAG---GCCAGACAA---CTGTTG---  
 TCTGGTGTAGTGCAACAGCAAAGC---AATTTG---CTGAGA---  
 GCTATAGAGGCGCAACAGCATATGTTGCAACTCACAGTCTGGGGCATT  
 >GU216805  
 TTCTATTGCAATACAACACAACACTGTTTAATGAAAATATTACA-----  
 -----  
 -----  
 AACGAAAACATCACACTCCCATGCAGAATAAAACAAATTATAAACATGTGGCAGGAGGTAGGACGAGCAATGT  
 ATGCCCCCTCCCATTCAGAGAAAGATAACATGTATTTCAAAT---  
 ATCACAGGACTAATATTAGAAAGGGATGGAGGAAACAACAGGACG-----  
 -----  
 -----  
 AATGAGACATTCAGGCCTGGAGGAGGAAATATGAAAGACAATTGGAGAAGTGAATTATATAAATATAAGGTGG  
 TAGAAATTAAGCCATTG---GGAATAGCACCCACGGGGGCAAAAAGGAGAGTGGTG-----  
 -----AATAGAGGAAAAAGAGCAGTAGTAGGA---ATAGGAGCT-----  
 GTGTTCCCTTGGGTTCTTGGGAACA---GCAGGAAGCACTATG---GGCGCGGCGGCA---  
 CTGACGCTGACGGTACAG---GCCAAACAA---CTGTTG---TCTGGCATAGTGCAACAGCAAAGC---  
 AATTTG---CTGAGA---GCTATAGAGGCGCAACAGCATATGTTGCAACTCACGGTCTGGGGCATT  
 >HQ625593  
 TTCTATTGCAACACATCAAACTGTTTAATAGTACATACATGACTAACAGGACTAGTAATATAACAGGA----  
 -----  
 -----  
 AGTAATTCAACCATCATACTCCCATGCAGAATAAAACAAATTATAAACATGTGGCAGGGAGTAGGACGAGCAA  
 TGTATGCCCCCCCCATTAAAGGAAACATAACATGTGAATCAAAT---  
 ATCACAGGACTACTATTGACACGTGATGGAGGCAAGACTAATGATAGC-----  
 -----  
 -----  
 GATAGCACAGAGACATTTAGACCTGGAGGAGGAGATATGAGGGACAATTGGAGAAAGTGAATTATATAAATATA  
 AAGTGGTAGAAATTAATCCATTG---GGAAGTAGCACCCCTCTAAGGCCAAAAGGAGAGTGGTG-----  
 -----GAGAGAGAAAAAGAGCA---GTGGGA---TTAGGAGCT-----

---GTGTTCCCTTGGGTTCTTAGGAGCA---GCAGGAAGCACTATG---GGCGCAGCATCA---  
ATAACGCTGACGGTACAG---GCCAGACAA---TTGCTG---TCTGGTATAGTGCAACAGCAAAAC---  
AATTTG---CTGAAA---GCTATAGAGGCGCAACAGCATATGTTGCAACTCACGGTCTGGGGCATT  
>HQ625570  
TTCTATTGCAATACAACAAAGCTGTTTAAATGAAAGTGAAACAGCATGGGATAAAACAGGGAATAAAAGTAAT-  
-----  
-----  
CCAAATAGCACAAATTATACTCCCATGCAAAATAAAACAAATAATAAACATGTGGCAGAAGGTAGGACGAGCAA  
TGTATGCCCCCTCCCATTCGCGGAAAAATAACATGTAGATCAAAT---  
ATCACAGGACTACTATTGGTACGTGATGGAGGAACGAATAATACA-----  
-----  
-----  
GAGATATTCAGACCTGCAGGAGGAGATATGAGGGACAATTGGAGAAGTGAATTATATAAATATAAAGTGGTAG  
AAATTAAGCCATTG---GGAATAGCACCCACTGAGGCAAAAAGGAGAGTGGTG-----  
-----GAGAGAGAAAAAAGAGCA---GTGGGA---ATAGGAGCT-----  
GTGTTCCCTTGGGTTCTTGGGAGCA---GCAGGAAGCACTATG---GGCGCAGCGTCA---  
ATAACGCTGACGGTACAG---GCCAGACAA---CTGCTG---TCTGGTATAGTGCAACAGCAGAGC---  
AACCTG---CTGAGA---GCCATAGAGGCGCAGCAGCATATGTTGCAACTCACGGTCTGGGGCATT  
>HQ625595  
TTCTATTGCAATACATCAAAGTTGTTTAAATGGTACTTTAAATTCAACCATAGTTAATAATGAT-----  
-----  
-----  
CCAAATGCAACCATCATAATCCCATGCAGAATAAAACAGATTATAAACATGTGGCAGGGGGTAGGACAAGCAA  
TGTATGCCCCCTCCCATTCGAGGAAGCATAACATGTAACTCAACC---  
ATCACAGGACTACTATTGACACGTGATGGAGGAAATGCAATGGCTCAGGA-----  
-----  
-----  
GGAGAGGAGATCTTCAGATTGGCAGGAGGAGACATGAGGGATAATTGGAGAAGTGAATTATATAAATATAAAG  
TAGTAGAAATTAAGCCATTA---GGAATAGCACCCACCAAGGCAAAAAGGAGAGTGGTG-----  
-----GAGAGAGAAAAAAGAGCA---GTGGGA---ATAGGAGCT-----  
GTGTTCCCTTGGGTTCTTGGGAGCA---GCCGGAAGCACTATG---GGCGCGGCGTCA---  
ATAACGCTGACGGTACAG---GCCAGACAA---TTGCTG---TCTGGTATAGTGCAACAGCAAAGC---  
AATTTG---CTGAGG---GCTATAGAGGCGCAACAGCATATGTTGCAACTCACAGTCTGGGGCATT  
>HQ625590  
TTCTATTGTAATACATCAAGCCTATTTAAATGGAACATACGATGAAACATCCCATAACAATACCCGGTAT---  
-----  
-----  
GGAAATGGAACCATTACACTCCACTGCAGAATAAAACAAATTATAAACATGTGGCAGACGGTAGGGCGAGCGA  
TGTATGCCCCCTCCCATTCGAGGAAACATAACATGTAAATCAAAC---  
ATCACAGGATTACTATTGACACGTGATGGAGGTAAGACTGGGAAA-----  
-----  
-----  
AATGGAACAGAGATATTCAGACCTGGAGGAGGAGATATGAGAGACAATTGGAGAAGTGAATTATATAAATATA  
AAGTGGTAGAAATTAAGCCATTG---GGAATAGCACCCACTAAGGCAAAAAGGAGAGTGGTG-----  
-----GAGAGAGAAAAAAGAGCA---GCAGGA---ATAGGAGCT-----  
---ATGTTCCCTTGGGTTCTTGGGAGCA---GCAGGAAGCACTATG---GGCGCGGCGTCG---  
ATAACGCTGACGGTACAG---GCCAGACAA---CTACTG---TCTGGTATAGTGCAACAGCAAAGC---  
AATTTG---CTGAGG---GCCATAGAGGCGCAACAGCATATGTTGCAACTCACGGTCTGGGGCATT  
>HQ625589  
TTCTATTGCAACACAACAAAGTTATTTAAATAGCACATACAATTTTACAGCTGGGTTTACTAGTACAAATAATT  
CAGAC-----  
-----  
-----  
AATACTTCAACCATCACACTTCCATGCAGGATAAAGCAAATCATAAACATGTGGCAGCAGGTAGGACGAGCAA  
TGTATGCTCCCCCATTCGAGGAAACATAACATGTAACTCAACT---  
ATCACAGGATTACTATTAGTACGTGATGGAGGCAATAATAAGAATGGC-----  
-----  
-----  
ACAAAGACAGAAGAGACATTTAGACCTGAAGGAGGAAATATGAAGGATAATTGGAGAAGTGAATTATATAAAT  
ATAAAGTGGTAGAAGTTAAACCATTG---GGAATAGCACCCACTGAAGCAAAAAGGCGAGTGGTG-----  
-----GAGAGAGAAAAAAGAGCA---GTAGGA---ATAGGAGCT---

-----GTGTTTCCTTGGGTTCTTGGGAGCA---GCAGGAAGCACTATG---GGCGCAACGTCA---  
 GTGGCGTTGACGGTACAG---GCCAGACAA---TTGTTG---TCTGGTATAGTGCAACAGCAAAAC---  
 AATTTG---CTGAGA---GCTATAGAGGCGCAACAGCATATGTTGCAACTCACGGTCTGGGGCATT  
 >HQ625572  
 TTCTATTGTAATACATCAAACTGTTTAAACAGTACATACAGTACTAATGGTACATACAAGTTTAAATGGTACAG  
 AAAGTAATTTT-----  
 -----AATGATACA-----  
 GGAGATAATTCAACCATCACAAATCCCATGCAGAATAAAGCAAATTATAAACATGTGGCAAAGGTGGGGCGAG  
 CAATGTATGCCCCCTCCCATTCAGGAAACATAACATGTAAATCAAAC---  
 ATCACAGGACTGCTATTGGAAGGGGATGGGGGAAATGATACCACA-----  
 -----  
 -----  
 AAAACATTTAGACCTATAGGAGGAGAAATGAGGAATAATTGGAGAAGTGAATTATATAAATATAAAGTAGTAG  
 AAATTAAACCATTG---GGAGTAGCACCCACAAGGGCAAAAAGGAGAGTGGTG-----  
 -----GAGAGAGAAAAAGAGCA---GTGGGA---ATAGGAGCT-----  
 GTGTTTCCTTGGGTTCTTGGGAGCA---GCAGGAAGCACTATG---GGCGCGGCGTCA---  
 ATAACGCTGACGGTACAA---GCCAGACAA---TTGTTG---TCTGGTATAGTGCAACAGCAAAGC---  
 AATTTG---CTGAGG---GCCATAGAGGCGCAACAGCATCTGTTGCAACTCACGGTCTGGGGCATT  
 >HQ625566  
 TTCTATTGCAATACAACAAAACCTGTTTAAATGGCAGTGCCAGT-----  
 -----  
 -----  
 GATAACATCACAACACTCCCATGCAGAATAAAACAAATTATAAACATGTGGCAGGAGGTAGGAAAAGCAATGT  
 ATGCCCCCTCCCATTTGAAGGAAATATAACATGTAAATCAAAT---  
 ATCACAGGACTACTATTGACAAGGGATGGAGGAAATGAGAATAACAAA-----  
 -----  
 -----  
 AATGATACAGAGACATTGAGACCTGGAGGAGGAAATATGAAGGACAATTGGAGAAGTGAATTATATAAATATA  
 AAGTGGTAGAAATTAAGCCATTG---GGAGTTGCACCCACGAAGGCAAAAAGGAGAGTGGTG-----  
 -----GAGAGAGAAAAAGAGCA---GTGGGA---ATAGGAGCT-----  
 ---GTACTCCTTGGGTTCTTGGGAGCA---GCAGGAAGCACTATG---GGCGCGGCGTCA---  
 ATAACGCTGACGGTACAG---GCCAGACAA---CTATTG---TCTGGTATAGTGCAACAGCAAAGC---  
 AATTTG---CTGAGA---GCTATAGAGGCGCAACAGCATATGTTGCAACTCACAGTCTGGGGCATT  
 >HQ625573  
 TTCTATTGCAATACATCAGGACTGTTTAAATGGTACATATAATGGTACAGACACATTTAATAGTACTAAT---  
 -----  
 -----  
 AGTACAGAAATCATCACACTCCAATGCAGAATAAAACAAATTATAAACCTGTGGCAGAGGGTAGGAAAAGCAA  
 TGTATGCCCCCTCCCATTCAGGAAACATAACATGTAAATCAAGT---  
 ATCACAGGACTACTATTGACACGTGATGGAGGAAATGGTACTAGT-----  
 -----  
 -----  
 ACAACAGAGACATTGAGACCTGGAGGAGGAGAGATGAGGGACAATTGGAGAAGTGAATTATATAAATACAAGG  
 TGGTAGAAATTAAGCCATTA---GGAATAGCACCCACTGAGGCAAAGAGGAGAGTGGTG-----  
 -----GAGAGAGAAAAAGAGCA---GCA-----ATAGGAGCT-----  
 GTGATCTTTGGGTTCTTGGGAGCA---GCAGGAAGCACTATG---GGCGCAGCATCA---  
 GTAATGCTGACGGTACAG---GCTAGACAA---TTATTG---TCTGGTATAGTGCAACAGCAAAGC---  
 AATTTG---CTGAGG---GCTATAGAGGCGCAACAGCATATGTTGCAACTCACGGTCTGGGGCATT  
 >HQ625587  
 TTCTATTGCAATACGACAAAACCTGTTTGATGAGAGTGAGTCAAACGCAACCATAACCAAAAATGAGAAA---  
 -----  
 -----  
 AATGAGTCAGTCATAACCATCCCATGCAAAATAAAACAAATCGTAAACATGTGGCAGGGGTAGGACGAGCAA  
 TGTATGCCCCCTCCCATTTGAAGGAAACATAACATGTACATCAAAT---  
 ATCACAGGACTACTATTGGAACGTGATGGAGGAGACACGAATAAG-----  
 -----  
 -----  
 ACAGAGAAATTCAGACCAGGAGGAGGAAATATGAAGGACAATTGGAGAAGTGAATTATATAAATATAAAGTGA  
 TAGAAATTAAGCCATTG---GGAATAGCACCCACTGGGGCAAAAAGGAGAGTGGTG-----  
 -----GAGAGAGAAAAAGAGCA---GTGGGA---ATAGGAGCT-----

GTGTTCCCTTGGGTTCTTGGGAGCA---GCAGGAAGCACTATG---GGCGCGGCGTCA---  
 ATAACGCTGACGGTACAG---GCCAGACAA---CTGTTG---TCTGGTATAGTGCAACAGCAAAGC---  
 AATTTG---CTGAGA---GCCATAGAGGCGCAACAGCACATGTTGCAACTCACAGTCTGGGGCATT  
 >HQ625574  
 TTCTATTGCAATACAACAAAACCTGTTTAATAATAGTCTGAGGAATGAAAGTGTCTCTGGTAAT-----  
 -----  
 -----  
 GAAAACGAGACCATCACACTCCCATGCAGAATAAAACAAATTATAAACATGTGGCAGGAGGTGGGAAAAGCAA  
 TATATGCCCCCTCCCATTCAGAGAAACATAACATGTAAATCAAAT---  
 ATCACAGGACTACTCTTAACACGTGATGGAGGAAACGGAAACTCAACG-----  
 -----  
 -----  
 AATGAAACTGAAACATTGAGACCTGGAGGGGGGAAATATGAAGGACAATTGGAGAAAGTGAATTATATAAATATA  
 AAGTGGTAGAAATTAAGCCATTG---GGAGTAGCACCCACTAAGGCACAAAGGAGAGTGGTG-----  
 -----  
 -----GGGAGAGAAAAAAGAGCA---GTGGGA---ATGGGAGCT-----  
 ---GTGTTCCCTTGGGTTCTTGGGAGCA---GCAGGAAGCACTATG---GGCGCGGCGTCA---  
 ATAACGCTGACGGCACAG---GCCAGACAA---CTGTTG---TCTGGTATAGTGCAACAGCAAAGC---  
 AATTTG---CTGAGA---GCTATAGAGGCGCAACAGCATATGTTGCAACTCACGGTCTGGGGCATT  
 >HQ625586  
 TTCTATTGCAATACATCAGACCTGTTTAATACAAGCATCACAGCAAACACC-----  
 -----  
 -----  
 ACAAATTTAACATCACACTCCAATGCAGAATAAAACAAATTATAAACATGTGGCAGGAGGTAGGACGAGCAA  
 TATATGCCCCCTCCCATTCAGAGAAACATAACATGTAAATCAAGT---  
 ATCACAGGACTACTATTGACACGTGATGGAGGAAATATAAATGCC-----  
 -----  
 -----  
 ACAAACGACACATTGAGACCTGGAGGAGGAGATATGAGGGACAATTGGAGAAGTGAATTATATAAATATAAAG  
 TAGTAGAAATTAAGCCAGTA---GGGATAGCACCCCTCTACGGCAAAAAGGAGAGTGGTG-----  
 -----  
 -----GAGAGAGAAAAAAGAGCA---GTGGGA---ATAGGAGCT-----  
 GTGTTCCCTTGGGTTCTTAGGAGCA---GCGGGAAGCACTATG---GGCGCAGCATCA---  
 GTAACGCTGACGGTACAG---GCCAGACAA---TTGTTG---TCTGGTATAGTGCAACAGCAAAGC---  
 AATTTG---CTGAGG---GCTATAGAGGCGCAACAGCATATGTTGCAACTCACAGTCTGGGGCATT  
 >HQ625575  
 TTCTATTGCAATACATCAAATCTGTTTAATAGTACTAATAGT-----  
 -----  
 -----  
 AAAAAAGTTCAAACATCACCATCCCATGCAGAATAAAACAATTTATAAACATGTGGCAAAAGGTAGGAAAAG  
 CAATGTATGCCCCCTCCCATTCAGAGAAACATAACATGCAGATCAAAT---  
 ATCACAGGAATACTATTGACACGTGATGGAGGAAAGGGAAAGAACAAGT-----  
 -----  
 -----  
 AACACCACAGAGATCTTCAGACCTGGAGGAGGAGATATGAGGGATAATTGGAGAAGTGAATTATACAAATATA  
 AAGTGGTAGAAATTAAGCCATTA---GGATTAGCACCCACTGAGGCAAGAAGGAGAGTGGTG-----  
 -----  
 -----GAGAGAGAAAAAAGAGCA---GTGGGA---CTAGGAGCT-----  
 ---ATGTTCCCTTGGGATCTTGGGAGCA---GCAGGAAGCACTATG---GGCGCGGCGTCG---  
 ATGACGCTGACGGTACAG---GCCAGACAA---TTGTTG---TCTGGTATAGTGCAACAGCAAAGT---  
 AATTTG---CTGAGA---GCCATAGAGGCGCAACAACATCTGTTGCAACTCACTGTCTGGGGCATT  
 >HQ625585  
 TTCTACTGCAATACATCAAACCTGTTTAATGAGACATTGTTTAATGAGACACGGGCTAATAATACAAA---  
 -----  
 -----  
 AATGATTGAGTATCACACTCCCATGCAGAATAAAACAAATTATAAACATGTGGCATGAGGTAGGACGAGCAA  
 TATATGCCCCCTCCCATTCAGAGAAACATAACATGTAACTCAAGT---  
 ATCACAGGACTACTATTGACACGTGATGGAGGAAACAAGAGCAGCACAGAG-----  
 -----  
 -----  
 GAGATATTGAGGCTGGAGGAGGAGATATGAGAGACAATTGGAGAAGTGAATTATATAAATATAAAGTGGTAG  
 AAATTAAGCCATTG---GGAATAGCACCCACTGAGGCAAAAAGGAGAGTGGTG-----  
 -----  
 -----CAGAGAGAAAAAAGAGCA---GTGGGA---ATGGGAGCT-----

GTACTCCTAGGGTTCTTGGGAGCA---GCAGGAAGCACTATG---GGCGCAGCAGCA---  
 GTAACGCTGACGGTACAG---GCCAGACAA---TTGTTG---TCTGGAATAGTGCAACAGCAAAGC---  
 AATTTG---CTGAGA---GCTATTGAGGCGCAACAGCATATGTTGCAACTCACGGTCTGGGGCATT  
 >HQ625576  
 TTCTATTGCAATACATCAAAGCTGTTTTTTTGGTACATACAATTCTACATCCAGTTCTACACACAATAAGACTA  
 AT-----  
 -----  
 AGTGCAGAAACCATCATACTCCCATGCAGAATAAAACAAATTGTGAACATGTGGCAGAGTGTAGGAAGAGCAA  
 TGTATGCCCCCTCCCATTCAGGAAGTATAACATGTAAATCAAAT---  
 ATCACAGGACTACTATTGGTACGTGATGGAGGAACTAACAGCAGT-----  
 -----  
 -----  
 GAGGAGACATTCAGACCTGGAGGAGGAGATATGAGAGATAATTGGAGAAGTGAATTGTATAAATACAAAGTGG  
 TAGAAATTAAGCCATTA---GGAATAGCACCCACCAAGGCAAGAAGGAGAGTGGTG-----  
 -----GAGAGAGAAAAAAGAGCA---GTGGGA---ATAGGAGCT-----  
 GTGTTTCCTTGGGTTCTTGGGAGCA---GCAGGAAGCACTATG---GGCGCGGCGTCA---  
 ATAACGCTGACGGTACAG---GCCAGACAA---TTGTTG---TCTGGTATAGTGCAACAGCAAAGC---  
 AATTTG---CTGAGG---GCTATAGAGGCGCAACAGCATATGTTGCAACTCACAGTCTGGGGCATT  
 >HQ625584  
 TTCTATTGCAATACAACACAACCTGTTTAATAATAGTAATCCA-----  
 -----  
 -----  
 GACAACGGAACCATCACACTCCCATGCAGGATAAAGCAAATTATAAACATGTGGCAGGAGGTAGGACGAGCAA  
 TGTATGCCCCCTCCCATTCGAAGGAATAATAACATGTAACTCAAAT---  
 ATCACAGGACTATTACTGACACGTGATGGAGGGAATACAACCTAAT-----  
 -----  
 -----  
 AATACAGAGATATTCAGACCTGGAGGAGGAGATATAAAGGACAATTGGAGAAGTGAATTATATAAATATAAAG  
 TGGTAGAGATTAAACCATTG---GGAGTAGCTCCCACTACATCAAGAAGGAGAGTGGTG-----  
 -----GAGAGAGAAAAAAGAGCA---GCAGGA---ATAGGAGCT-----  
 GTACTCCTTGGGTTCTTGGGAGCT---GCAGGAAGCACTATG---GGCGCGGCGTCA---  
 ATAACGCTGACGGTACAG---GCCAGACAA---CTGTTG---TCTGGTATAGTGCAACAGCAAAGC---  
 AATTTG---CTGAGA---GCTATAGAGGCGCAACAACATATGTTGCAACTCACGGTCTGGGGCATT  
 >HQ625565  
 TTCTATTGTAATACATCTAAACTGTTTAATGGTACATACATGCCTAATAGTACTAACAATAATTCAGATAAC-  
 -----  
 -----  
 CTCAACAGTACCATCATACTCCAATGCAGAATAAAACAAATTATAAACATGTGGCAGGGGGTAGGACGGGGCAA  
 TGTATGCCCCCTCCCATTCAGGAAACATAACATGTAGGTCAAAT---  
 ATCACAGGATTGCTATTGACACGCGATGGAGGAAAAAATAGCACAGGA-----  
 -----  
 -----  
 GGAAATAACACAGAGACATTTAGACCTGAAGGAGGAGATATGAAAAATAATTGGAGAAGTGAGTTATATAAAT  
 ACAAGTGGTGGAATTAAGCCATTG---GGAATAGCACCCACTGAGGCAAAAAGGCAAGTGGTG-----  
 -----GAGAGAGAAAAAAGAGCA---GTAGGA---ATAGGAGCT---  
 -----GTGTTTCCTTGGGTTCTTGGGAGCA---GCAGGAAGCACTATG---GGCGCAGCATCA---  
 ATAACGCTGACGGTACAG---GCCAGACAA---TTGTTG---TCTGGTATAGTGCAACAGCAAAGC---  
 AATTTG---CTGAGA---GCTATAGAGGCGCAACAGCATATGTTGCAACTCACGGTCTGGGGCATT  
 >HQ625583  
 TTCTATTGCAATACATCAAACTGTTTAATGGTACATACAAGCAGGCTAACAGTACAGAAGAT-----  
 -----  
 -----  
 AAGAACAAGACCATCATACTCCAATGCAGAATAAAACAGATTATAAACATGTGGCAGGGGGTAGGACAAGCAA  
 TATATGCCCCCTCCCATTCAGGAAACATAACATGTAAATCAAAT---  
 ATTACAGGACTAATATTGACACGTGATGGAGGAAACACTAATGATACA-----  
 -----  
 -----  
 AATAATACAGAGATATTCAGACCTGCAGGAGGAGATATGAAGGACAATTGGAGAAGTGAATTATATAAATATA  
 AAGTGGTAGAAATTAAGCCATTA---GGAGTAGCACCCAGTGAGGCAAAAAGGAGAGTGGTG-----  
 -----AAGAGAGAAAAAAGAGGA---GTGGGA---CTAGGAGCT-----

---GTGCTCTTTGGGTTCTTGGGAGCA---GCAGGAAGCACTATG---GGCGCGGCGTCA---  
ATAACGCTGACGGTACAG---GCCAGACAA---CTGTTG---TCTGGCATAGTGCAACAGCAAAGC---  
AATTTG---CTGAGA---GCTATAGAGGCGCAACAACATATGTTGCAACTCACAGTCTGGGGCATT  
>HQ625578  
TTCTATTGCAATACATCAGGACTATTTAATGGTACATACAATGGTACTAAGGTTAATAGTACAAACAGT-----  
-----  
-----  
ACTAATGGTATTATCACACTCCAATGCAGAATAAAACAATTTATAAACATGTGGCAGGGGGTAGGACGAGCAA  
TGTATGCCCCCTCCCATTTGAAGGAAACATAACATGCAACTCAAGT---  
ATCACAGGACTACTATTGGTTTCGTGATGGAGGTAACGATAGCACC-----  
-----  
-----  
ACGGAGACATTTAGACCTGGAGGAGGAGATATGAGGGACAATTGGAGAAGTGAATTGTATAAATATAAAGTGG  
TAGAAATTAGGCCATTA---GGAGTAGCACCCACTAAGGC AAAAAGGAGAGTGGTG-----  
-----GAGAGAGAAAAAGAGCA---GTGGGA---ATAGGAGCT-----  
GTGTTCTTGGGTTCTTGGGAGCA---GCCGGAAGCACTATG---GGCGCAGCATCA---  
ATAACGCTGACGGTACAG---GCCAGACAA---TTGTTG---TCTGGTATAGTGCGACAGCAAAGC---  
AATTTG---CTGAGG---GCTATAGAGGCGCAACAGCATATGTTGCAACTCACAGTCTGGGGCATT  
>HQ625594  
TTCTATTGCAATACAACAAAGCTGTTTAATATGACATATAATGGTACAGCAAGCTCACATAATGAT-----  
-----  
-----  
ACAAATGAATACATTACACTCTCATGCAAAATAAAACAAATTGTAAACATGTGGCAAGAGGTGGGACGAGCAA  
TGTATGCCCCCTCCCATTTGCAGGAAACATAACATGTGCTTCAAAT---  
ATCACAGGACTACTCTTGACACGTGATGGAGGAACTAATAACACA-----  
-----  
-----  
AATAACACAGAAATATTAGACCTATAGGAGGAAACATAAAGGACAATTGGAGAAGTGAATTATACAAATATA  
AAGTGGTAGAAATTAAGCCATTG---GGAATAGCACCCACTGAGGCAAAAAGGAGAGTGGTG-----  
-----GAGAGAGAGAAAAAGAGCA---GTGGGA---ATAGGAGCT-----  
---GTGTTCTTGGATTCTTGGGAGCA---GCAGGAAGCACTATG---GGCGCGGCGTCA---  
GTGACGCTGACGGTACAG---GCCAGACAA---CTGTTG---TCTGGTATAGTGCAACAGCAAAGC---  
AATTTG---CTGAGG---GCTATAGAGGCGCAACAGCATATGTTGCAACTCACGGTCTGGGGCATT  
>HQ625579  
TTTTATTGCAACACATCAAGCCTGTTTAATAGTACATACAATAGTGCATACAATCCTAATGATACAAGA-----  
-----  
-----  
AGTAATGACACCATCACAATCCAATGCAGAATAAAACAGATTATAAACATGTGGCAACAGGTAGGGCGAGCAA  
TGTATGCCCCCTCCCATTTAAAGGAAACATAACATGTAACCTCAAAC---  
ATCACAGGATTACTATTGATGCGTGATGGAGGAAACAGGAAATGAGACTAAT-----  
-----  
-----  
AATGACACAGAGATATTTAGACCTGGAGGAGGAGATATGAGGGATAATTGGAGAAGTGAATTATATAAATATA  
AAGTAGTAGAAATTAAGCCATTG---GGAGTAGCACCACTGATGCAAAAAGGAGAGTGGTG-----  
-----GAGAGAGAGAAAAAGAGCA---GTGGGA---CTAGGAGCT-----  
---GTGCTCCTTGGGTTCTTGGGAGCA---GCCGGAAGCACTATG---GGCGCAGCGTCA---  
GTAGCGCTGACGGTACAG---GCCAGACAA---TTGTTG---TCTGGTATAGTGCAACAGCAAAGC---  
AATTTG---CTGAGA---GCTATAGAGGCGCAACAGCACCTGTTGCAACTCACGGTCTGGGGCATT  
>HQ625567  
TTCTATTGCAACACATCAGGACTGTTTAATGGTACAGACATGTATAATACTACAAAC-----  
-----  
-----  
AGTACTTCAAGCATCACACTCCAATGCAGAATAAAACAATTTATAAACATGTGGCAGGGGGTAGGACGGGCAA  
TGTATGCCCCCTCCCATTTGAAGGAAACATAACATGTAAGTCAAAC---  
ATCACAGGAATACTCTTGACACGTGATGGGGGAATTAGCAAACT-----  
-----  
-----  
AACACAGAGATATTAGACCTGGAGGAGGAGATATGAGGGACAATTGGAGAAGTGAAGTTATACAAATACAAAG  
TGGTAGAGATTAAGCCATTA---GGAATAGCACCCACTGAGGCAAAAAGGAGAGTGGTG-----  
-----GAGAGAGAGAAAAAGAGCA---GTAGGGATAATGGGAGCT-----

ATGTTCTTGGGTTCTTGGGAGCA---GCAGGAAGCACTATG---GGCGCAGCATCA---  
 GTGACGCTGACGGTACAG---GCCAGACAA---TTATTG---TCTGGTATAGTGCAACAGCAAAGC---  
 AATTTG---CTGAAG---GCTATAGAGGCGCAACAGCATATGTTGCAACTCACGGTCTGGGGCATT  
 >KC894134  
 TTCTATTGTGATACATCAGATCTGTTTAATAATACAGACATGTCTAATGATACAGCAGAA-----  
 -----  
 -----  
 GGCAATTCAACCATCACACTCCCATGCAAAATAAAACAAATTGTAAACATGTGGCAGAAGGTAGGACGAGCAA  
 TGTATGCTCCTCCCATTGCAGGAAACATAACATGTAAATCAAAT---  
 ATCACAGGATTGCTATTGGTACGTGATGGAGGAACAAACACAAGT-----  
 -----  
 -----  
 AACGGGACAGAGATATTGAGACCTGGAGGAGGAAATATGAAGGACAATTGGAGAAAGTGAATTATATAGATATA  
 AAGTGATAGAAGTTAGACCATTG---GGAGTAGCACCCACTGGGGCAAAAAGGAGAGTGGTG-----  
 -----GAGAGAGAAAAAAGAGCA---GTGGGA---ATAGGAGCT-----  
 ---GTGCTCTTTGGGTTCTTGGGAGCA---GCAGGAAGCACTATG---GGCGCGGCGTCA---  
 ATAACGCTGACGGTACAG---GCCAGACAA---CTGCTG---TCTGGTATAGTGCAACAGCAAAAC---  
 AATTTG---CTGAGA---GCTATAGAGGCGCAACAGCATATGTTGCAACTCACAGTCTGGGGCATT  
 >HQ625592  
 TTCTATTGCAATACATCACAAGTGTTTAATAGTATATACAGTCCAGGCAATAGTACAAACAGTTCAGAC----  
 -----  
 -----  
 AAGAATGCAAACATCACGCTCCAATGCAGAATAAAACAAATTATAAACATGTGGCAGGGGGTAGGACAAGCAA  
 TGTATGCCCCCTCCCATTGCAGGAAATATAACATGTAAATCAAAG---  
 ATCACAGGACTACTATTGACAAGTGATAAAGGAGGAGATGGAAAT-----  
 -----  
 -----  
 GGCACAGAGACATTGAGACCTGGAGGAGGAGATATGAGGGACAATTGGAGAAGTGAATTATATAAATATAAAG  
 TAGTAAAAATCAAGCCATTA---GGAATAGCACCCACCGAGGCAAAGAGGAGAGTGGTG-----  
 -----GAGAGAGAAAAAAGAGCA---GTGGGA---ATAGGAGCT-----  
 GTATTCCTTGGGTTCTTGGGAGCA---GCAGGAAGCACTATG---GGCGCAGCATCA---  
 ATAACGCTGACGGTACAG---GCCAGACAA---TTGTTG---TCTGGTATAGTGCAACAGCAAAGC---  
 AATTTG---CTGAGG---GCTATAGAGGCGCAACAGCATATGTTGCAACTCACGGTCTGGGGCATT  
 >HQ625571  
 TTCTATTGCAATACATCAAGCCTATTTAATGGGACCTTCAATGGTACAGAAAGCAAGATAAACTCA-----  
 -----  
 -----  
 ACAAACTCAACCATCACAATCCCATGCAGAATAAGACAGATAATAAACATGTGGCAAAGGGTAGGACAAGCAA  
 TGTATGCTCCTCCCATAGCAGGAAACATAACATGTAGATCAAAT---  
 ATCACAGGACTACTATTGACAAGGGATGGAGGACATGGTAATGAAACA-----  
 -----  
 -----  
 AGAGGGAACGAGACCTTCAGACCTGGAGGCGGAGACATGAAGGATAATTGGAGAAGTGAATTATATAAGTATA  
 AGGTGGTAGAAATTAAACCATTG---GGAATAGCACCCACCGAGGCAAAAAGGAGAGTGGTG-----  
 -----GAGAGACAAAAAAGAGCG---GCA-----CTAGGAGCT-----  
 ---GTGTTCAATTGGGTTCTTGGGAGCA---GCAGGAAGCACTATG---GGCGCAGCGTCA---  
 GTGACGCTGACGGTACAA---GCCAGACAA---TTGTTG---TCTGGTATAGTGCAACAGCAAAGC---  
 AATTTG---CTGAAG---GCTATAGAGGCGCAACAGCATCTGTTGCAACTCACAGTCTGGGGCATT  
 >GU939100  
 TTCTATTGCAACACATCAAGGCTGTTTAATAATACAGAAAAAATAGTACAGGAAATGATACAAAAGGGAGAG  
 AAGGT-----  
 -----  
 GATTTAAACTCAACCATCACACTCCAATGCAGAATAAAACAAATTATAAACATGTGGCAGGAGGTAGGACGAG  
 CAATGTATGCCCCCCCATTGCAGGAAACATAACATGTAGATCAAAT---  
 ATAACAGGGCTACTATTGACACGTGATGGAGGCAATCCTAATAACAAAACCTCA-----  
 -----  
 -----  
 GCAAAACAACGACACAGAGATATTGAGACCAGAAGGAGGAGATATGAGGGACAATTGGAGAAATGAATTATATA  
 AATATAAAGTGGTAGAAATTAAGCCATTG---GGAATAGCTCCACTAAGGCAAAAAGGAGAGTGGTG-----  
 -----GAGAGAGAAAAAAGAGCA---GTAGGA---

ATGGGAGCT-----GTACTCCTTGGGTTCTTGGGAGCA---GCAGGAAGCACTATG---  
 GGCGCGGCGTCA---ATAACGCTGACGGTACAG---GCCAGACAA---TTGCTG---  
 TCTGGTATAGTGACAGCAGCAAAGC---AATTTG---CTGCAG---  
 GCTATAGAGGCGCAACAGCATCTGTTGCAACTCACGGTCTGGGGCATT  
 >HM036825  
 TTCTATTGCAATACATCAAACTGTTCAATGGTATATATAGGAGGCCTAACAGTACAGGAAAACT-----  
 -----  
 -----  
 TCAAAATTCAAACATCACAAATCCCATGCAGAATAAAACAAATTATAAGAATGTGGCAGGGGGTAGGACAAGCAA  
 TGTATGCCCCCTCCTATTGCAGGGAACATAACATGTAAATCAAAT---  
 ATCACAGGACTACTATTGACACGTGATGGAGGTGGTGACAGTGTTAGCAGAAAC-----AACTCAGAC---  
 GGA-----  
 AACGAGTCAGAAACAAAC---  
 AAGTCAGAAATATTCAGACCTGCAGGAGGAGACATGAGGGACAATTGGAGAAGTGAATTATATAAATATAAAG  
 TGATAGAAATTAAGCCATTA---GGACTGGCACCCACTAAGGCAAAAAGGCGAGTGGTG-----  
 -----GAGAGAGAAAAAAGAGCA--GTGGGA---ATGGGAGCT-----  
 ATGTTTCCTTGGGTTCTTGGGAGTA---GCAGGAAGCACTATG---GGCGCAGCATCA---  
 ATGACGCTGACGGTACAG---GCCAGACAA---CTGTTG---TTTGGCATAGTGCAACAGCAAAAC---  
 AATTTG---CTGAGG---GCTATAGAGGCGCAACAGCATATGTTGCAACTCACGGTCTGGGGCATT  
 >KY229391  
 TTCTATTGCAATACATCACAAATGTTTAAATAAGACATACATGGCTAATGGTACAGAGATGCATAATAATGATA  
 CA-----  
 -----  
 GGAAATGATTCAAACATCACACTCCAGTGCAGAATAAAACAAATCATAAACATGTGGCAAGGGGTAGGAAGAG  
 CAATGTATGCCCCCTCCCATTCAGGAGTAATAAAGTGTAACCTCAAGC---  
 ATTACAGGAATAATATTGACAAGAGGTGGTGGGGCTAACATGATACC-----  
 -----  
 -----  
 TCTGATACCTCTGAGACCTTCAGACCTGGAGGAGGAGATATGAGGGACAATTGGAGAAGTGAATTATATAAAT  
 ATAAAGTGGTAGAAATTAGGCCATTG---GGAATAGCACCCACTGCTGCAAAAAGGAGAATGGTG-----  
 -----GAGAGAGAAAAAAGAGCA--GTCGGA---ATAGGAGCT---  
 -----GTACTCCTTGGGTTCTTGGGAGCA--GCAGGAAGCACTATG---GGCGCAGCGTCA---  
 ATAGCGCTGACGGCACAG---GCCAGACAA---GTATTG---TCTGGTATAGTGCAACAGCAAAGC---  
 AATTTG---CTGAGA---GCTATAGAGGCGCAACAGCATATGTTGCAACTCACGGTCTGGGGCATT  
 >AB254142  
 TTCTATTGCAATACATCAAAATTGTTTAAATAGTACACACGATCCTAATGATACAGAAAATAATTCAACAACAA  
 AC-----  
 -----  
 AGTAGTGACGTAATTACACTCCCATGTAGAATAAAACAAATTATAAACATGTGGCAGGGAGTAGGAAAAGCAA  
 TATATGCCCCCTCCGTTAGAGGGAAAATAACATGTAATTCAAGT---  
 ATCACAGGACTACTATTGACATGGGATGGAGGAAGGACAAATTCT-----  
 -----  
 -----  
 AGCAATGAGACATTTCAGACCTGGAGGAGGAGATATGAGGGACAATTGGAGAAGTGAATTATATAAATATAAAG  
 TGGTAGAAATTAAGCCATTA---GGAGTGGCACCCACTGAGGCAAGAAGGAGAGTGGTG-----  
 -----CAGAGAGACAAAAGAGCAGTAGTGGA---CTAGGAGCT-----  
 ATGTTTCCTTGGGTTCTTGGGAGTA---GCCGGAAGCACTATG---GGCGCGGCGTCA---  
 CTAACGCTGACGGTACAG---GCCAGACAG---TTGTTG---TCTGGTATAGTGACAGCAAAGC---  
 AATTTG---CTGAAG---GCTATAGAGGCGCAACAGCATCTGTTGCAACTCACAGTCTGGGGCATT  
 >AB254149  
 TTCTATTGCAATACATCAAGACTGTTCAATAGGACATACATGCATAATGGTACAGAAAATAGTTCAAATTCAA  
 CCACT-----  
 -----  
 AGTTCAAATTCAACCATCATACTTCCATGCAAAATAAAACAAATTATAAACATGTGGCAGGGGGTAGGAAAAG  
 CAATATATGCCCCGCCCATTCAGGAAAAATAACATGTAACCTCAAGT---  
 ATCACAGGACTACTATTGACACGTGATGGAGGAAATAACAATGGAAGAGGAAGT-----AAC----  
 -----  
 GATAGTACAGAAACA---  
 GAAACAGAAACATTTCAGGCCTGGAGGAGGAAATATGAAGGATAATTGGAGAAGTGAATTATACAAATATAAAG  
 TGGTAGAAATAAAACCATTA---GGAATAGCACCCACTGAGGCAAAAAGGAGAGTGGTG-----

-----GAGAGAGAAAAAAGAGCA---GCC-----CTAGGAGTT-----  
ATGTTCTTGGGTTCTTGGGAGCA---GCAGGAAGCACTATG---GGCGCGGCGTCA---  
ATAGCGCTGACGGTACAG---GCCAGACAA---TTATTG---TCTGGTATAGTGCAACAGCAAAGC---  
AATTTG---CTGAGG---GCTATAGAGGCGCAACAGCATATGTTGCAACTCACGGTCTGGGGCATT  
>AB254153  
TTCTATTGCAATACATCAAACTGTTTAAACAATACACTGGTTAATAGTACTAAT-----  
-----  
-----  
GATACAGAACCCATCACAATCCCATGCAGAATAAAACAAATTGTAAACATGTGGCAGAGGGTGGGACGAGCAA  
TGTATGCCTCTCCCATTCAGGAAACATAACATGTGAATCAAAT---  
ATCACAGGATTACTACTGACAAGTGATGGAGGAGGACAAACAAAC-----  
-----  
-----  
AGCACCAACGAGACAGTCAGACCTGCAGGAGGAGATATGAGGGATAACTGGAGAAGTGAATTATATAAATATA  
AAGTGGTAGAAGTTAAGCCATTA---GGAGTAGCACCCACTGAGGCAAAGAGGAGAGTGGTG-----  
-----GAGAAACAAAAAAGAGCA---GTGGGA---ATAGGAGCT-----  
---GTGTTCTTGGGTTCTTGGGAGCA---GCAGGAAGCACTATG---GGCGCGGCGTCA---  
ATAACGCTGACGGTACAG---GCCAGACAA---TTGTTG---TCTGGTATAGTGCAACAGCAAAT---  
AATTTG---CTGAGA---GCTATAGAGGCGCAACAGCATCTGTTGCAACTCACGGTCTGGGGCATA  
>KY229251  
TTCTATTGCAATACCTCAGGACTGTTTAAATAGTACATACATGCCTACATACAATGGTACAGCA-----  
-----  
-----  
AATGAATCAATCATCACACTCCCATGCAGAATAAAACAAATTGTAAACCTGTGGCAGGAGGTAGGACGAGCAA  
TGTATGCCCCCTCCCATTCAGGAAACATAACATGTAACTCAACT---  
ATCACAGGACTACTATTGGTACGCGATGGGGGAATATCTCAACT-----  
-----  
-----  
TCAAATGAGACATTTAGACCTGGAGGAGGAGATATGAGGGACAATTGGAGAAGTGAATTATATAAATATAAAG  
TGGTAGAAATTAAGCCATTA---GGAATAGCACCCACTGCTGCAAAAAGGAGAGTGGTG-----  
-----GAGAGAGAAAAAAGAGCA---GTGGGA---CTAGGAGCT-----  
GTATTCCTTGGGTTCTTGGGAGCA---GCAGGAAGCACTATG---GGCGCAGCGTCA---  
ATAACGCTGACGGCACAG---GCCAGACAA---GTGCTG---TCTGGCATAGTGCAACAGCAAAGC---  
AATTTG---CTGAGG---GCTATAGAGGCGCAACAGCATATGTTGCAACTCACGGTCTGGGGCATT  
>HM036760  
TTCTATTGCAATACATCAAGCCTGTTTAAATAGTACATACAATGGTACAGATAGTGATACAAACAGTTCT---  
-----  
-----  
TCAAATTCAACCATCACACTCCAATGCAGAATAAAACAAATTATAAACATGTGGCAGGAGGTAGGAAGAGCAA  
TGTATGCCCCCTCCCATTTGAAGGAAACATAACATGTAAATCAAAT---  
ATCACAGGACTGCTATTGACACGTGATGGAGGAAATGAAAGTAAC-----  
-----  
-----  
CCAATGGAGACATTTCAGACCTGCAGGAGGAGATATGAGGGACAATTGGAGAAGTGAATTATATAAATATAAGG  
TAGTAGAAATTAACCACTA---GGATTAGCACCAACTAAGGCAAAAAGGAGAGTGGTGGAG-----  
-----AAGAGACAAAGAAGAGCA---GTGGGA---ATAGGAGCT-----  
GTGTTCTTGGGTTCTTGGGAACA---GCAGGAAGCGCTATG---GGCGCAGCGTCA---  
ATGACGCTGACGGTACAG---GCCAGACAA---TTGTTG---TCTGGTATAGTGACAGCAGCAAAC---  
AATTTG---CTGAAG---GCTATAGAGGCGCAACAGCATATGTTGCAACTCACAGTCTGGGGCATT  
>KY229414  
TTCTATTGTAATACATCAGGCCTGTTTAAATAACAGAAAGTAGTAATAATACAGTAGATACAAAC-----  
-----  
-----  
AGTACTCTAAATTTACACTCCCATGCAGAATAAAACAAATTATAAACATGTGGCAGGGGGTAGGACGAGCAA  
TGTATGCCCCCTCCCATTCAGGAAACATAACATGTAGATCAAAT---  
ATCACAGGACTACTATTGACACGTGATGGAGGACAAGAAAAAGGA-----  
-----  
-----  
CAAAAAAATGACACAGAGAAATTCAGACCTGAAGGAGGAAATATGAAGGACAATTGGAGAAGTGAATTGTATA  
AATATAAAGTGGTAGAAATTAAGCCATTA---GGAATAGCACCCACTAAGGCAAAAAGGAGAGTGGTG-----

-----GAGAGAGAAAAAGAGCA---GTGACA---  
 ATAGGAGCT-----GTGTTCTTGGGTTCTTGGGAGCA---GCAGGAAGCACTATG---  
 GGCGCAGCATCA---ATAACGCTGACGGTACAA---GCCAGACAA---TTGTTG---  
 TCTGGTATAGTGCAACAGCAAAGC---AATTTG---CTGAGG---  
 GCTATAGAGGCGCAACAGCATATGTTGCAACTCACGGTCTGGGGCATT  
 >KY229678  
 TTCTATTGCAATACATCAAACTGTTTAATAATAGAATATACAATGGTACATTCTCTAATAATACT-----  
 -----  
 -----  
 GCAAAATTCAAGCATCATACTTCCATGCAGAATAAAACAAATTATAAACATGTGGCAGGAGGTAGGACGAGCAA  
 TGTATGCCCCCTCCCATTCAGGAAACATAACATGTACATCAAAT---  
 ATCACAGGACTCCTATTAATACGTGATGGAGGGTATGATAATAACAAAACAAAC-----TCA-----  
 ACAGAA-----  
 -----  
 ACAAAAGAAATATTGACCTGAAGGAGGAGATATGAGAAACAATTGGAGAAGTGAATTATATAAATATAAAG  
 TGGTAGAAATTAAGCCATTA---GGAATAGCACCCACTAAGGCAAAAGGAGAGTGGTG-----  
 -----GAGAGAGAAAAAGAGCA---GTGGGA---ATAGGAGCT-----  
 GTGTTCTTGGGTTCTTGGGAGCA---GCAGGAAGCACTATG---GGCGCAGCATCA---  
 ATAACGCTGACGGTACAG---GCCAGACAA---TTGCTG---TCTGGTATAGTGCAACAGCAAAGC---  
 AATTTG---CTGAGG---GCCATAGAGGCGCAACAGCATATGTTGCAACTCACGGTCTGGGGCATT  
 >KY229337  
 TTTTATTGCAATACATCAAGACTGTTTGAGAATGAAAATAACACAGATGAT-----  
 -----  
 -----  
 AGTAATGACACCATCATACTCCCATGTAGAATAAAACAAATTATAAATATGTGGCAGGAGGTAGGACGAGCAA  
 TGTATGCACCTCCCATTCAGGACACATATCATGTAACCTCAAGT---  
 ATCACAGGACTACTGTTAACACGCGATGGAGGAGGGAAAAACAAAT-----  
 -----  
 -----  
 AGCACAGAGATATTGACCTGCAGGAGGAAATATGAAGGACAATTGGAGAAGTGAATTATATAAATATAAAG  
 TGGTAGAAATTAAGCCATTG---GGAATAGCACCCACTGGGGCAAAAGGAGAGTGGTG-----  
 -----GAGAGAAGAAAAAGAGCA---GTGGGA---ATGGGAGCT-----  
 GTGCTCCTTGGGTTCTTGGGAGCA---GCAGGAAGCACTATG---GGCGCAGCGTCA---  
 ATAGCGCTGACGGCACAG---GCCAGACAA---GTGTTG---TCTGGTATAGTGCAACAGCAAAAC---  
 AATTTG---CTGAGG---GCTATAGAGGCGCAACAGCATATGTTGCAACTCACAGTCTGGGGCATT  
 >KY229352  
 TTTTATTGCGATACATCAAACTGTTTACAAATAGGACATTCAATGATAGC-----  
 -----  
 -----  
 AATGAGGCACCCATCACACTCCCATGCAGAATAAAACAAATTATAAACATGTGGCAGGAGGTAGGACGAGCAA  
 TGTATGCACCTCCCATTCAGGAAACATAACATGTAACCTCAAGT---  
 ATCACAGGACTACTGTTGACACGTGATGGAGGAAGGGATAACACAACA-----  
 -----  
 -----  
 AATAACACAGAGACATTGACCTGCAGGAGGAGATATGAGGGACAATTGGAGAAGTGAATTATATAAATATA  
 AGGTGGTAGAAATTAAGCCATTG---GGAATAGCACCCACTGAGGCAAAAGGAGAGTGGTG-----  
 -----GAGAGAGAAAAAGAGCA---GTAGGA---ATAGGAGCT-----  
 ---GTACTCCTTGGGTTCTTGGGAGCA---GCAGGAAGCACTATG---GGCGCAGCGTCA---  
 ATAGCGCTGACGGCACAG---GCCAGACAA---GTGTTG---TCTGGTATAGTGCAACAGCAAAGC---  
 AATTTG---CTGAGG---GCAATAGAGGCGCAACAGCATATGTTGCAACTCACAGTCTGGGGCATT  
 >KY229356  
 TTCTATTGCAACACATCAGGCCTGTTTAATGGAACATACAATGATGCAAGAAATAATTCA-----  
 -----  
 -----  
 GGCTCAAAACACTCACACTCCCATGCAGAATAAAACAAATTATAAACATGTGGCAGGAGGTGGGACGAGCAA  
 TGTATGCCCCCTCCCATTCAGGAAACATAACATGTAGATCAAAT---  
 ATCACAGGACTCCTATTGACACGGGATGGAGGAGGAAAAGGTAGTAGTACAGAG-----  
 -----  
 -----  
 AACAGGACAGAAATATTGACCTGGAGGAGGAGATATGAGGGACAATTGGAGAAGTGAATTATATAAATATA

AAGTGGTAGAAATTAAGCCATTG---GGAATAGCACCCACTGAGGCCAAAAGGAGAGTGGTG-----  
-----GAGAGAGAAAAAAGAGCA---GTAGGA---ATGGGAGCT-----  
---GTGTTCCCTTGGGTTCTTGGGAGCA---GCAGGAAGCACTATG---GGCGCGGCGTCA---  
ATAACGCTGACGGTACAG---GCCAGACAA---TTACTG---TCTGGTATAGTGCAACAGCAAAGT---  
AATTTG---CTGAGG---GCCATAGAGGCGCAACAGCATATGTTGCAGCTCACAGTCTGGGGCATT  
>KY229374  
TTCTATTGCAATACAACAAGCTTGTTTAATGGTACATACATGTCTAATAGTACATCAGAAAGTAAT-----  
-----  
-----  
ACAAACTCAACCATCACAAATCCCATGCAAGATAAAACAAATTATAAACATGTGGCAGGAGGTAGGACGAGCAA  
TGTATGCCCCCTCCCATTCGAGGAAACATAACATGTAACCTCAAGT---  
ATTACAGGACTTCTATCAACACGAGATGGAGGAATAAATGGAACA-----  
-----  
-----  
AATGACACAGAGATATTCAGACCTGGAGGAGGAGATATGAGGGACAATTGGAGAAGTGAATTATATAAATATA  
AAGTAGTAGAAGTTAAACCATTG---GGAATAGCACCCGCTACGGCAAAAAGGCGAGTGGTG-----  
-----GAGAGAGAAAAAAGAGCA---GTAGGA---ATGGGAGCT-----  
---GTGTTCCCTTGGGTTCTTGGGAGCA---GCTGGAAGCACTATG---GGCGCGGCGTCA---  
ATAACGCTGACGGTACAG---GCCAGACAA---TTGTTG---TCTGGTATAGTGCAACAGCAAAGC---  
AATTTG---CTGAAA---GCCATAGAGGCGCAACAGCATATGTTGCAACTCACAGTCTGGGGCATT  
>KY229434  
TTCTATTGCAATACATCAAACCTATTTAATAGTACCACAAAT-----  
-----  
-----  
AATAGTACAATCACACTCCCATGCAGAATAAAACAGATTATAAACGTGTGGCAGGGGGTAGGACGAGCAATAT  
ATGCCCCCTCCCATTTGAAGGAAAACATAACATGTAGATCAGAA---  
ATCACAGGACTACTATTGACACGTGATGGGGGAACCAACACAACCT-----  
-----  
-----  
GGCGAAACATTTCAGACCTGGAGGAGGAGATATGAGGGACAATTGGAGAAGTGAATTATATAAATATAAAGTAG  
TAGAGATTAAGCTATTA---GGAATAGCACCCACTACGGCAAAAAGGAGAGTGGTG-----  
-----GAGAGAGAAAAAAGAGCA---GTGGGA---ATGGGAGCT-----  
GTGTTCCCTTGGGTTCTTGGGAGCA---GCAGGAAGCACTATG---GACGCGGCGTCA---  
ATAACGCTGACGGTACAG---GCCAGACAA---TTGCTG---TCTGGTATAGTGCAACAGCAAAT---  
AATTTG---CTGAGA---GCTATAGAGGCGCAACAGCATATGTTGCAACTCACGGTCTGGGGCATT  
>KY229472  
TTCTATTGCAATACATCAATCCTGTTTAATAATGGATACAAAATGTG-----  
-----  
-----  
ACTAATGATACGATCACTCTCCCATGCAGAATAAAACAAATTATAAACATGTGGCAGGAGGTAGGGCGAGCAA  
TGTATGCCCCCTCCCATTCGAGGAAACATAACATGTATATCAAAAT---  
ATCACAGGACTACTATTGGTAAGGGATGGAGGCGGCGACGAAAAATATGGG-----  
-----  
-----  
AGTGCTGGGAATGAGACATTTCAGACCTGGAGGAGGAGATATGAGGGACAATTGGAGAAGTGAATTATATAAAT  
ATAAAGTGGTAGAAATTAACCATTA---GGAGTAGCACCCACTGGAGCAAAAAGGAGAGTGGTG-----  
-----GAGAGAGAAAAAAGAGCA---GTGGGA---TTAGGAGCT---  
-----GTGTTCCCTTGGGTTCTTGGGAGCA---GCAGGAAGCACTATG---GGCGCGGCGTCA---  
ATAACGCTGACGGCACAG---GCCAGACAA---GTGCTG---TCTGGTATAGTGCAACAGCAAAGC---  
AATTTG---CTGAGG---GCTATAGAGGCGCAACAGCATCTGTTGCAACTCACGGTCTGGGGCATT  
>HM037006  
TTCTATTGCAATACATCAGGCCTGTTTACATACAATATAACAAATAATACATACAATATAACA-----  
-----  
-----  
GATAATTCAACCATCACACCCCAATGCAGAATAAAACAAATTGTAAACATGTGGCAGGGGGTAGGACGAGCAA  
TGTATGCCCCCTCCCATTCGAGGAAACATACAATGCAACTCAAGC---  
ATCACAGGACTACTATTGACACGTGATGGAGGGGACAATACTAGC-----  
-----  
-----  
ACAGAGACATTTCAGACCTGGAGGAGGAAATATGAGGGATAATTGGAGAAGTGAATTATATAAATATAAAGTGG

TAGAAATTAAGCCATTA---GGAATAGCACCCACTAGTGCAAAAAGGAGAGTGGTG-----  
 -----GAGAGAGGAAAAAGAGCA---GTGGGG---ATAGGAGCT-----  
 GTGTTTCCTTGGGTTCTTGGGGGCA---GCAGGTAGCACTATG---GGCGGGCGTCA---  
 ATAACGCTGACGGTACAG---GCCAGACAA---TTGTTG---TCTGGTATAGTGCAACAGCAAAGC---  
 AATTTG---CTGAGA---GCTATAGAGGCGCAACAGCATATGTTGCAACTCACAGTCTGGGGCATT  
 >EU166385  
 TTCTATTGCAATACATCAAACCTGTTTAATAGGCCTAATGGTACAGAAAGTAATTCAAGCTCAAGTAAT----  
 -----  
 -----  
 TCAAGCGCAGTCATCAGACTACCATGCAGAATAAAACAAATTATAAACATGTGGCAGAAGGTAGGACGGGCAA  
 TGTATGCCCCCTCCCATTGCAGGAAACATAACATGTAAATCAAAT---  
 ATCACAGGACTATTATTGACACGTGATGGAGGAGGAGGACAAAAT-----  
 -----  
 -----  
 GCAACTAATGAGACATTGAGACCTGGAGGAGGAGATATGAGGGACAATTGGAGAAGTGAATTATATAAATATA  
 AAGTGGTAGAAATTAAGCCATTG---GGAGTAGCACCCACTGAGGCAAAAAGGAGAGTGGTG-----  
 -----GAGAGAGAAAAAGAGCA---GTGGGA---ATGGGAGCT-----  
 ---ATGTTTCCTTGGTTTCTTGGGAGTA---GCAGGAAGCACTATG---GGCGGGCGTCA---  
 ATAACGCTGACGGTACAG---GCCAGACAA---TTATTG---TCTGGTATAGTGCAACAGCAAAGC---  
 AATTTG---CTGAGG---GCTATAGAGGCGCAACAGCATATGTTGCAACTCACGGTCTGGGGCATT  
 >DQ388515  
 TTCTATTGCAATACATCAGGCCTGTTTAATAGTAGCCTGCTTAATGATACAGATGGAACTTCAAATTCAACC-  
 -----  
 -----  
 TCAAATGCAACCATCACACTTCCATGCAGAATAAAACAAATTATAAACATGTGGCAGGAGGTAGGACGAGCAA  
 TGTATGCCCTCTCCCATTGCAGGAATAATAACATGTAAATCAAAT---  
 ATCACAGGACTACTATTGACACGTGATGGGGGAAACAAGAGTGCT-----  
 -----  
 -----  
 GGTATTGAGACATTGAGACCTGGAGGAGGAAATATGAAGGATAATTGGAGAAGTGAATTATATAAATATAAAG  
 TGGTAGAAATTAAGCCATTA---GGAATAGCACCAACTAGTGCAAAAAGGAGAGTGGTG-----  
 -----GAGAGAGAGAAAAAGAGCA---GCGGGA---ATAGGAGCT-----  
 GTGATCTTGGGGTTCTTAGGAGCA---GCAGGAAGCACTATG---GGCGCAGCATCA---  
 GTAATGCTGACGGTACAG---GCCAGGCAA---TTGCTG---TCTGGTATAGTGCAACAGCAGAGT---  
 AATTTG---CTGAGA---GCCATCGAGGCGCAACAGCATATGTTGCAACTCACAGTCTGGGGCATC  
 >EU166449  
 TTCTATTGTAATACATCAAACTGTTTAATAATACTACATCT-----  
 -----  
 -----  
 AATGAAACCATCACACTCCCATGCAAAATAAAACAATTTATAAACATGTGGCAGGGAGTAGGACGGGCAATGT  
 ATGCCCCCTCCCATTGCAGGGAGCATAACATGTAACTCAAGT---  
 ATCACAGGAATACTATTGACACGTGATGGAGGCAACAACAGCAGT-----  
 -----  
 -----  
 GGGACAGAGACATTGAGACCTGGAGGAGGAGATATGAGGGACAATTGGAGAAGTGAACTATATAAATATAAAG  
 TGGTAGAAATTAAGCCATTA---GGAATAGCACCCACTGATGCAAAAAGGAGAGTGGTG-----  
 -----GAGAGAGAAAAAGAGCA---GTGGGA---CTAGGAGCT-----  
 GTGTTTCCTTGGGTTCTTGGGAGCA---GCAGGGAGCACTATG---GGCGGGCGTCA---  
 ATAGCGCTGACGGTACAG---GCCAGACAA---TTATTG---TCTGGTATAGTGCAACAGCAAAGC---  
 AATTTG---CTGAGA---GCCATAGAGGCGCAACAGCATATGTTGCAACTCACGGTCTGGGGCATT  
 >JX239298  
 TTCTATTGCAATACATCAGGCCTGTTTAATACATCAGGCCTGTTTAATGATACAGAAGGGTGGATAAATCCAA  
 TAAAT-----  
 -----  
 -----  
 AAAACGTCAAACATCACAATCCAATGCAGAATAAAGCAATTTATAAACATGTGGCAGGAGGTAGGACGAGCAA  
 TGTATGCCCCCTCCCATTGCAGGAAACATAACATGTACATCGAAT---  
 ATCACAGGACTACTATTGACACGTGATGGAGGAAATAGTAGTAGT-----  
 -----  
 -----  
 AATACCGAGATATTGAGACCTGGAGGAGGAGATATGAGGGACAATTGGAGAAGTGAATTATATAAGTATAAAG

TGGTAGAAATTAAGCCATTA---GGAATAGCACCAACAACCTGCAAAAAGGAGAGTGGTG-----  
 -----GAGAGAGAAAAAAGAGCA---GCA-----CTAGGAGCT-----  
 ATGTTCTTGGGTTCTTGGGAGCA---GCAGGAAGCACTATG---GGCGCGGCGTCA---  
 GTAACGCTGACGGTACAG---GCCAGACAA---CTGTTG---TCTGGTATAGTGCAACAGCAAAGC---  
 AATTTG---CTGAGG---GCTATAGAGGCGCAACAGCATTTGTTGCAGCTCACAGTCTGGGGCATT  
 >EU166594  
 TTTTATTGCAATACATCAGGCCTGTTTAATAGAACATTTAATGGTACAGATGATAGAGAAAGTACTCCAAATT  
 CAGGT-----  
 -----  
 AATCCAAATTCAACCATCACACTCCAATGCAGAATAAAACAAATTATAAACATGTGGCAGGAGGTAGGGAGAG  
 CAATGTATGCCCCCTCCATTGCAGGAAACATAACATGTAATTCAGT---  
 ATCACAGGAATACTATTGACACGTGATGGAGGACATAATACTACTGAT-----  
 -----  
 -----  
 ACTAATAACTGAGATATTCAGACCTGGAGGAGGAAATATGAAGGACAATTGGAGAAGTGAATTATACAAAT  
 ATAAAGTGGTAGAAATTAACCATTA---GGAATAGCACCCACTAATGCAAAAAGGAGAGTGGTG-----  
 -----GAGAGAGAAAAAAGAGCA---GTAGGA---ATAGGAGCT---  
 -----GTGTTCTTGGGTTCTTAGGAGCA---GCAGGAAGCACTATG---GGCGCAGCATCA---  
 ATAACGCTGACGGTACAG---GCCAGACAA---TTATTG---TCTGGTATAGTGCAACAGCAAAGC---  
 AATTTG---CTGAAG---GCTATAGAGGCGCAACACCATTTGTTGCAACTCACAGTCTGGGGCATT  
 >DQ388517  
 TTCTATTGCAATACATCAGGCCTGTTTAATAGTGCGATTAATGGCACG-----  
 -----  
 -----  
 CTTACATCTAATGTCACGCTTCCATGCAGAATAAAACAAATTATAAACATGTGGCAGGAAGTAGGACGAGCAA  
 TGTATGCCCCCTCCATTGCAGGAAACATAACATGTAAATCAAAT---  
 ATCACAGGACTACTATTGACACGTGATGGAGGAGAAAACTCAAGT-----  
 -----  
 -----  
 AGTACCACCGAGACCTTTAGGCCTACAGGAGGAGATATGAAGAACAATTGGAGAAGTGAATTATATAAATATA  
 AAGTGGTAGAAATTAACCATTG---GGAATAGCACCTACTGAGGCAAAAAGGAGAGTGGTG-----  
 -----GAGAGAGAGAAAAAGAGCA---GTAGGA---ATAGGAGCT-----  
 ---GTGTTCTTGGGTTCTTGGGAGCA---GCAGGAAGCACTATG---GGCGCAGCGTCA---  
 ATGACACTGACGGTACAG---GCCAGACAA---CTGTTG---TCTGGTATAGTGCAACAGCAAAGC---  
 AATTTG---CTGAAG---GCCATAGAGGCGCAACAGCATATGTTGCAACTCACGGTCTGGGGCATT  
 >HM036903  
 TTCTATTGCAATACATCAGACCTGTTTACAGAAAGTAATTCA-----  
 -----  
 -----  
 ACCAATTCAACCATCACACTCCAATGCAGAATAAAACAAATTATAAATATGTGGCAGGAGGTAGGACGAGCAA  
 TGTATGCCCCCTCCATTGCAGGAAACATAACATGTAACTCAAAT---  
 ATCACAGGATTACTATTGACACGGGATGGAGGCGGGAATAAAACA-----  
 -----  
 -----  
 GAGACATTGACACCTGGAGGAGGAAATATGAAAGATAATTGGAGAAGTGAATTATATAAATATAAAGTAGTAG  
 AAATTAAGCCATTG---GGAGTAGCACCCACTGACGCAAAAAGGAGAGTGGTG-----  
 -----GACAGACAAAGAAGAGCA---GTGGGA---ATAGGAGCT-----  
 ATGATCCTTGGGTTCTTAGGAGCA---GCAGGAAGCACTATG---GGCGCAGCATCA---  
 CTATCGCTGACGGTACAG---GCCAGACAA---GTGTTG---TCTGGTATAGTGCAACAGCAAAGC---  
 AATTTG---CTGAGA---GCTATAGAGGCGCAACAGCATATGTTGCAGCTCACAGTCTGGGGCATT  
 >KY229542  
 TTCTATTGCAATACATCACAACATTTTAGTGGGACATACAATGAGACATACAAGCCTAATGCTACAGAAGGAA  
 GT-----  
 -----  
 -----  
 TCAACGCAACAGTCAACTTCCATGCAGAATAAAACAAATTATAAACATGTGGCAAGAGGTAGGACGAGCAA  
 TGTATGCCCCCTCCATTGCAGGAAACATAACATGTAGCTCAAAT---  
 ATAACAGGACTACTATTGAGTCGGGATGGGGGAAATACTAGCTCAACA-----  
 -----  
 -----  
 AATGAGACTGAGATATTCAGACCTGGAGGAGGAGATATAAGGAACAATTGGAGAAGTGAATTATATAAATATA

AAGTGGTAGAAATAAAGCCATTG---GGAGTAGCACCCACTAAGGCCAAAAGGAGAGTGGTG-----  
-----GAGAGAGAAAAAAGAGCA---GTGGGA---ATAGGAGCT-----  
---GTGTTCTTGGGTTCTTGGGAGCA---GCAGGAAGCACTATG---GGCGCGCGTCA---  
ATCACGCTGACGGTACAG---GCCAGACAA---TTGTTG---TCTGGTATAGTGCAACAGCAAAGC---  
AATTTG---CTGAGA---GCTATAGAGGCGCAACAGCATCTGTTGCAACTCACGGTCTGGGGCATT  
>GQ485357  
TTCTATTGCAATACATCAAAATTGTTTAATAGCACATACATGGCTAATAGCACAAACAGTACT-----  
-----  
-----  
TTAAATGGAACCATCACACTCCCATGCAGGATAAAAACAAATTATAAACTTGTGGCAGAAGGTAGGACGAGCAG  
TGTATGCCCCCCCCATTGCAGGAAACATAACATGTAAATCAAAT--ATCACAGGACTACTATTGACA---  
CATGATGGGATATATGCAAAATAGCAATAAG-----ACA-----  
-----  
AATAGCAATAAGACAACATTAATATTTCAGACCTGGAGGAGGAGATATGAGGGACAATTGGAGAAGTGAATTAT  
ATAAAATATAAAGTAGTAGAAATTAGGCCATTA---GGAGTAGCACCAACTAAGGCCAAAAGGAGAGTGGTG--  
-----GAGAGAGAAAAAAGAGCA---GTGGGA---  
ATAGGAGCT-----GTGTTCTTGGGTTCTTGGGAGCT---GCAGGAAGCACTATG---  
GGCGCAGCATCA---ATAACGCTGACGGTACAG---GCCAGACAA---TTGTTG---  
TCTGGTATAGTGCAACAGCAAAGT---AATTTG---CTGAGG---  
GCTATAGAGGCGCAACAGCATATGTTGCAACTCACGGTCTGGGGCATT  
>HM068598  
TTCTATTGCGATACATCACAACCTGTTTAATAGTACATACCCGGCTAATAGTACAGACATAAGAGATGGT----  
-----  
-----  
AATAATACACCCATCACACTCCCATGCAGAATAAAAACAAATTATAAACATGTGGCAGGAGGTAGGACGAGCGA  
TGTATGCCCCCTCCCATTCAGGAAACATAACATGTAAATCAAAC---  
ATCACAGGATTACTGTTGGTACGTGATGGAGGCATCAATGGAAC-----  
-----  
-----  
AACCACACAGAGACATTTCAGACCTGGAGGAGGAGATATGAGGGACAATTGGAGAAGTGAATTATATAAATATA  
AAGTGGTAGAAATTAAGCCATTG---GGAATAGCACCCACCAAGGCCAAAAGGAGAGTGGTG-----  
-----GGGAGAGAAAAAAGAGCA---GTGGGA---ATAGGAGCT-----  
---GTACTCCTTGGGTTCTTGGGAGCA---GCAGGAAGCACTATG---GGCGCAGCGTCA---  
CTGACGCTGACGGTACAG---GCCAGACAA---GTGTTG---TCTGGTATAGTGCAACAGCAAAT---  
AATTTG---CTGAGG---GCTATAGAGGCGCAGCAGCATATGTTGCAACTCACAGTCTGGGGCATT  
>EU166715  
TTTTATTGCGATACATCAAGACTGTTTAATGGTACATACAACCATGAGACATACAAAAAT-----  
-----  
-----  
GATACAGACACTATCACACTCCCATGTAAATAAAAACAAATTATAAACATGTGGCAGAAGGTAGGACGAGCAA  
TGTATGCCCCCTCCCATTCAGGAAACATAACATGTGCATCAAAT---  
ATCACAGGACTATTATTGACACGTGATGGAGGACCCCTGAATAACACA-----  
-----  
-----  
AATAACACAGAGATATTTCAGACCTGGAGGAGGAAACATGAGGGACAATTGGAGAAGTGAATTATATAAATATA  
AAGTGGTAGAAATTAAGCCATTG---GGAATAGCACCCACTAAGGCCAAAAGGAGAGTGGTG-----  
-----GAGAGAGAAAAAAGAGCA---GTGGGA---CTAGGAGCT-----  
---ATGCTTCTTGGGTTCTTGGGAGCA---GCCGGAAGCACTATG---GGCGCAGCGTCA---  
ATAACGCTGACGGTACAA---GCCAGACAA---TTATTG---TCTGGTATAGTGCAACAGCAAAC---  
AATTTG---CTGAGA---GCTATAGAGGCGCAACAGCATATGTTGCAACTCACAGTCTGGGGCATT  
>FJ496194  
TTCTACTGCAATACATCACAACCTGTTTAATAGTACATACAATGAAACAGGAAGTATTAATGGAACA-----  
-----  
-----  
GGCAATTCAACCATCAAACTCCCATGCAGAATAAAAACAAATTATAAACATGTGGCAAGGGGTAGGACAAGCAA  
TGTATGCCCCCCCCATTGCAGGAAACATAATATGTAGATCAAAG---  
ATCACAGGGCTACTATTGACACGTGATGGAGGAATTAATAAAAGT-----  
-----  
-----  
GAGGAGATATTTCAGGCCTGGAGGAGGAAATATGAAGGACAATTGGAGAAGTGAATTATATAAATATAAAGTGG

TAGAAATTAAACCATTA---GGAGTAGCACCCACTAAGGCAAAAAGGAGAGTGGTG-----  
 -----GAGAGAGAAAAAGAGCAGTGGTGGGA---CTAGGAGCT-----  
 GTGTTCTTGGGGTTCTTGGGAGCA---GCAGGAAGCACTATG---GGCGCAGCGTCA---  
 ATAACGCTGACGGTACAA---GCCAGACAA---TTATTG---TCTGGTATAGTGCAACAGCAAAAC---  
 AATTTG---CTGAGA---GCTATAGAGGCGCAACAGCATATGTTGCAACTCACAGTCTGGGGCATT  
 >EU166769  
 TTCTATTGCAATACATCAAACCTGTTTAATAGTATATACAATGAGACATACAATGCTACAGCCAACAATAGCA  
 CAGGC-----  
 -----  
 ATAAAAAATGAAAATATCACACTCCAATGCAGAATAAAACAAATTATAAACATGTGGCAGACGGTAGGACGAG  
 CAATGTATGCCTCTCCCATTCAGGAAACATAACATGTAAATCAAAT---  
 ATCACAGGTCTGTTATTGACACGAGATGGAGGGAACGAGAATAGCACAGAG-----  
 -----  
 -----  
 AGTAATAGCACAGAGACATTCAGGCCTGGAGGAGGAGATATGAGGGACAATTGGAGAAGTGAATTATATAAAT  
 ATAAAGTGGTAGAAATTAAGCCATTG---GGAATAGCACCCACTGAGGCAAAAAGGAGAGTGGTG-----  
 -----GAGAGAGAAAAAGAGCA---GTGGGA---CTAGGAGCT---  
 -----CTGCTTCTTGGGGTTCTTGGGAGCA---GCCGGAAGCACTATG---GGCGCGGCGTCA---  
 ATAACGCTGACGGTACAG---GCCAGACAA---GTATTG---TCTGGTATAGTGCAACAGCAAAGT---  
 AATTTG---CTGAGA---GCTATAGAGGCGCAACAGCATATGTTGCAACTCACAGTCTGGGGCATT  
 >JX239338  
 TTCTATTGCAATACATCAGGCCTGTTTAATAGTACATCAGACTTGTTTAATAGTACATCAGACTTGTCTAATA  
 GTACATCA-----  
 -----GACTCG-----  
 TCTAATGGTACAGACATCATACTCCCATGCAGAATAAAACAAATTATAAACATGTGGCAGGAGGTAGGACGAG  
 CAATGTATGCCCCCTCCCATTCGAAGGAAACATAACATGTAGATCAAAT---  
 ATCACAGGACTACTATTGGCACGCGATGGAGGAAACGGGAAAGAGACA-----  
 -----  
 -----  
 AAAAAATGATACAGAGATATTCAGACCTGGAGGAGGAGATATGAGGAACAATTGGAGAAGTGAATTATATAAAT  
 ATAAAGTGGTAGAGATTAAGCCATTG---GGAATAGCACCCACTGAGGCAAAAAGGAGAGTGGTG-----  
 -----GGAAGAGAAAAAGAGCA---GTGGGA---ATAGGAGCT---  
 -----GTGTTCTTGGGGTTCTTGGGAGCA---GCAGGAAGCACTATG---GGCGCGGCGTCA---  
 ATCACGCTGACGGTACAG---GCCAGACAA---TTGTTG---TCTGGTATAGTGCAACAGCAAAGC---  
 AATTTG---CTGAGG---GCTATAGAGGCGCAACAGCATCTGTTGCAACTCACGGTCTGGGGCATT  
 >FJ496214  
 TTCTATTGCACTACATCGAAACTGTTTAATAGTACATACAATCCTAATGACACAGAAAGTAATTCAAACAAT-  
 -----  
 -----  
 TCAAACGAGACACTCACACTCACATGCAAAATAAAACAGATTATAAACATGTGGCAGGGGGTAGGACGAGCAA  
 TGTATGCTCCCCCATTGAAGGAAGCATAACATGTAACTCAACT---  
 ATTACAGGATTGCTATTGACACGTGATGGAGGCAGCAAAAATAAC-----  
 -----  
 -----  
 ACAGAAGAGATATTCAGACCTGGGGGAGGAAATATGAAGGACAATTGGAGAAGTGAATTATATAAATACAAAG  
 TGGTAGAAATCAAGCCACTA---GGAGTAGCGCCCACTGAGGCAAAAAGGAGAGTGGTG-----  
 -----GAGAGAGAAAAAGAGCA---GTGGGA---CTGGGAGCT-----  
 GTGTTCTTGGGGTTCTTAGGAGCA---GCAGGAAGCACTATG---GGCGCGGCGTCA---  
 ATAACGCTGACGGTACAG---GCCAGACAA---TTATTG---TCTGGTATAGTGCAACAGCAAAAT---  
 AATTTG---CTGAGA---GCTATAGAGGCGCAACAACATATGTTGCAACTCACAGTCTGGGGCATT  
 >KY229633  
 TTCTATTGCAATACAACAGGCCTGTTTAATGAACTATTTTCAATAAAACA-----  
 -----  
 -----  
 AATTCAGAAGAAATCACACTCCAATGCAGAATAAAACAAATTATAAACATGTGGCAGGGGGTAGGACGAGCAA  
 TGTATGCCCCCTCCCATTCAGGAAACATAACATGTAAATCAAAT---  
 ATCACAGGACTACTATTGACACGTGATGGAGGGAACAATAACAAC-----  
 -----  
 -----  
 AATACAAATGAGATATTTAGACCTGGAGGAGGAGATATGAGGGACAATTGGAGAAGTGAATTATATAAATATA

AAGTGGTAGAAATAAAACCACTA---GGAATAGCACCCACTACTGCAAAAAGGAGAGTGGTG-----  
-----GAGAGAGAGAAAAGAGCA---GTGGGA---ATTGGAGCT-----  
---ATGTTCCCTTGGGTTCTTGGGAGCA---GCAGGAAGCACTATG---GGCGCAGCATCA---  
ATAACGCTGACGGTACAG---GCCAGACAA---TTATTG---TCTGGTATAGTGCAACAGCAAAGC---  
AATTTG---CTGAGA---GCTATAGAGGCGCAACAGCATATGTTGCAACTCACAGTCTGGGGCATT  
>KY229641  
TTCTATTGCAATACATCAGGCCTGTTTAATGAAGATATTTTAAAGAATAAAACAGCAAAT-----  
-----  
-----  
ACAACAAAAGAAATCACACTCCAATGTAGAATAAAACAGATTATAAACATGTGGCAGGGGGTAGGAAGAGCAA  
TGTATGCCCCCTCCCATTCAGGAAACATTACATGTAAATCAAAT---  
ATCACAGGACTACTATTGACACGTGATGGAGGAAACAAAGGAAATACA-----  
-----  
-----  
AGCAACAATATTGAGATATTTAGGCCTGGAGGAGGAGATATGAGGGACAATTGGAGAAGTGAATTATATAAAT  
ATAAAGTGGTAGAAATAAAACCACTA---GGAATAGCACCCACTACTGCAAAAAGGAGAGTGGTG-----  
-----GAGAGAGAGAAAAGAGCA---GTGGGA---ATTGGAGCC---  
-----ATGTTCCCTTGGGTTCTTAGGAGCA---GCAGGAAGCACTATG---GGCGCAGCATCA---  
ATAACGCTGACGGTACAG---GCCAGACAA---TTATTG---TCTGGTATAGTGCAAGCAGCAAAGC---  
AATTTG---CTGAGA---GCTATAGAGGCGCAACAGCATATGTTGCAACTCACAGTCTGGGGCATT  
>KY229379  
TTCTATTGCGATACATCAGGACTGTTTAATAGTACATACGTGCCTGCATACTGGCCTAATGGTACAGAG----  
-----  
-----  
AGTAATGAAACCATCACACTCCCATGCAGAATAAAGCAAATTATAAACATGTGGCAGGAGATAGGACGAGCTA  
TGTATGCCCCCTCCCATTCAGGAGAGATAACATGTAACTCAAGT---  
ATCACAGGACTACTATTGGTACGGGATGGAGGCAAAGATAATAGA-----  
-----  
-----  
ACTAATGAGACATTTCAGACCGGAAGGAGGAGACATGAGGGATAATTGGAGAAGTGAATTATACAAATATAAAG  
TGGTAGAAATTAAGCCATTG---GGAATAGCACCCACTGGGGCAAAAAGGAGAGTGGTGGAG-----  
-----AGGAGAGAAAAAAGAGCA---GTGGGA---ATAGGAGCT-----  
GTGTTCCCTTGGGTTCTTGGGAGCA---GCAGGAAGTACTATG---GGCGCGGCGTCA---  
ATAACGCTGACGGCACAG---GCCAGACAA---GTGTTG---TCTGGTATAGTACAACAGCAAAGC---  
AATTTG---CTAAG---GCCATAGAGGCGCAACAGCATCTGTTGCAACTCACGGTCTGGGGCATT  
>HM036792  
TTCTATTGCAACACATCAGACCTATTTAATGGTACATATAATAGTACATATAATGGTACATCTACTACA----  
-----  
-----  
AATACAACACTACTATTAAACTCCCATGCAGAATAAAACAAATTATAAACATGTGGCAGGAGGTGGGACGAGCAA  
TGTATGCCCCCTCCCATTAAGGAATCATAACATGTAAATCAAAC---  
ATCACAGGATTACTATTAAACACGTGATGGAGGAAATGAAGTACCT-----  
-----  
-----  
AACTCAACAGAGATATTTCAGACCTGGAGGAGGGGATATGAGGGACAATTGGAGAAGTGAATTATATAAATATA  
AAGTAGTAGAAATTAAGCCATTG---GGAATAGCACCCACTGAAGCAAAAAGGAGAGTGGTG-----  
-----GAGAGAGAAAAAAGAGCA---GTAGGA---ATAGGAGCT-----  
---GTGCTCTTTGGGTTCTTGGGAGCA---GCCGGAAGCACTATG---GGCGCAGCGTCA---  
ATAACGCTGACGGTACAG---GCCAGACAA---TTGTTG---TCTGGCATAGTGCAACAGCAAAGT---  
AATTTG---CTGAGG---GCTATAGAGGCGCAACAGCATATGTTGCAACTCACAGTCTGGGGCATT  
>KY229650  
TTTTATTGTAATACGTCAAACTGTTTAATGACACCCAGCTT-----  
-----  
-----  
AATGGTAATGCAACCATCACACTCCCATGCAAAATAAAACAAATTATAAATATGTGGCAGGGGGTAGGACAAG  
CAATGTATGCCCCCTCCCATTCAGGAAATATAACATGTACGTCAAAC---  
ATTACAGGACTACTATTGACGCGTGATGGAGGAAAGGGAGGAAATATAAGT-----  
-----  
-----  
ATTACAAAAGAGATATTTCAGACCTGCAGGAGGAGATATGAGAGACAATTGGAGAAGTGAATTATATAAATATA

AAGTGGTAGAAATTAAGCCATTA---GGACTAGCACCCACCAAGGCAAAAAGGAGAGTGGTG-----  
-----GAGAGAGAAAAAAGAGCA---GTGGGT---ATAGGAGCT-----  
---GTGTTCCCTTGGGTTCTTGGGAGCA---GCAGGAAGCACTATG---GGCGCAGCATCA---  
GTAACGCTGACGGTACAG---GCCAGACAA---TTGTTG---TCTGGTATAGTGCAACAGCAAAGC---  
AATTTG---CTGAGG---GCTATAGAGGCGCAACAGCATCTGTTGCAACTCACGGTCTGGGGCATT  
>GQ485436  
TTCTATTGCAATACATCAGAACTATTTAATATTTCAAGACTAAATAGT-----  
-----  
-----  
ACAAGCCCAATCATCACACTCCCATGCAGAATAAAACAATTTATAAACATGTGGCAGAAGGTAGGACGAGCAA  
TGTATGCCCCCTCCCATTTGAAGGAAAAATAACATGTAACCTCAAGT---  
ATCACAGGACTACTATTGACACGTGATGGAGGAAACAACACTAGC-----  
-----  
-----  
ACCACAGAGACATTCAGACCGGGAGGAGGAGATATGAGGGACAATTGGAGAAGTGAGTTATATAAATATAAAG  
TGGTAGAAATTAACCATTG---GGAATAGCACCCACTGGGTCAAAAAGGGCAGTGGTG-----  
-----CAGAGAGAAAAAAGAGCA---GTGGGA---CTAGGAGCT-----  
GTGTTCCCTTGGGTTCTTGGGAGCA---GCAGGAAGCACTATG---GGCGCGGCGTCA---  
ATAACGCTGACGGTACAG---GCCAGACAA---GTATTG---GCTGGTATAGTGCAACAGCAAAGC---  
AATTTG---CTGAGA---GCTATAGAGGCGCAACAGCATATGTTGCAACTCACGGTCTGGGGCATT  
>JX239272  
TTCTATTGCAATACATCAGAACTGTTTAATAGTACACTGGATAATGGTACACTGGTTAAAAATACAAGTCTT-  
-----  
-----  
AATAGTAGCATAATCACACTCCAATGCAGAATAAAACAAATAATAAACATGTGGCAGGGGGTGGGACGAGCAA  
TGTATGCCCCCTCCCATTTGAAGGAAACATAACATGTAGCTCAAAT---  
ATCACAGGACTAATATTGACACGTGATGGTGGAGAGGAAAAATAAG-----  
-----  
-----  
ACAGAGATATTAGACCTGGAGGAGGAGATATGAGGGATAATTGGAGAAGTGAATTATATAAATACAAAGTGG  
TAGAAGTTAAACCATTA---GGAATAGCACCCACTAAGGCAAAAAGGAGAGTGGTGGCA-----  
-----AAAGGAAAAGAAAAAGAGCA---GCAGGA---ATAGGAGCT-----  
GTGTTCCCTTGGGTTCTTGGGAGCA---GCAGGAAGCACTATG---GGCGCAGCGTCA---  
ATAACGCTGACGGTACAG---GCCAGACAA---TTATTG---TCTGGTATAGTGCAACAGCAAAGC---  
AATTTG---CTGAGG---GCTATAGAGGCGCAACAGCATATGTTGCAACTCACGGTCTGGGGCATT  
>JX239362  
TTCTATTGTAATACATCAGGCTTGTTTAATAGTACATATTGGCCTAATGCTACAGAAAGTACTGGAAGT---  
-----  
-----  
AATTCAACCAACATCACACTCCAATGCAGGATAAAACAAATCATTAACATGTGGCAGGGGGTAGGACGAGCAA  
TATATGCCCCCTCCCATTTAAAGGAAACATAACATGTAAGTCAAAT---  
ATCACAGGACTACTATTAAACACGGGATGGAGGGGAAAAACAACCAC-----  
-----  
-----  
CCGAACGACACGGAGATATTAGACCTGAAGGAGGAGATATGAAGAACAATTGGAGAAGTGAATTATATAAAT  
ATAAAGTGGTAGAAATTAAGCCATTG---GGAGTAGCACCCACCAAGGCAAAAAGGAGAGTGGTG-----  
-----GAGAGAGAAAAAAGAGCA---GTGGGA---ATAGGAGCT---  
-----GTGTTCCCTTGGGTTCTTGGGAGCA---GCAGGAAGCACTATG---GGCGCAGTGTCA---  
ATGACGCTGACGGCACAG---GCCAGACAC---TTATTG---TCTGGTATAGTGCAACAGCAAAGC---  
AATTTG---CTGAGA---GCTATAGAGGCGCAACAGCATCTGTTGCAACTCACGGTCTGGGGCATT  
>GU329057  
TTCTATTGCAATACCTCAAACTGTTTAATGGTACAAGATTGTTTAATGGTAATGGTACAGAAAATGAT---  
-----  
-----  
ACAAACTCAGTCATCACACTCCCATGCAGAATAAAACAATTTATAAACATGTGGCAGGAGGTAGGACGAGCAA  
TGTATGCCTCTCCCATTTTCAGGAAACATAACATGTAATTCGATT---  
ATCACAGGATTACTATTGACACGTGATGGAGGAAATACTACTAAT-----  
-----  
-----  
AATACAGAGACATTCAGACCTATAGGAGGAAATATGAAGGACAATTGGAGAAGTGAATTATATAAATATAAAG

TGGTAGAAGTTAAACCATTA---GGAGTAGCACCCACTGGAGCAAAAAGGAGAGTGGTG-----  
 -----GAGAGAGAGAAAAAGAGCAGTACTGGGAGGACTAGGAGCT-----  
 GTGTTTCCTTGGGTTCTTAGGAGCA---GCAGGAAGCACTATG---GGCGCAGCATCA---  
 ATAACGCTGACGGTACAG---GCCAGACAA---TTATTG---TCTGGTATAGTGCAACAGCAAAAC---  
 AATTTG---CTGAGA---GCTATAGAGGCGCAACAGCATATGTTGCAACTCACAGTCTGGGGCATT  
 >GU329069  
 TTTTATTGCAATACATCAAGCCTGTTTAATAGTACATACAATAATACATCATAACATGTTTAATGGTTCAACAA  
 TTAATGAT-----  
 -----ACTGAAAGT-----  
 CTTGTAAACGGCACAATCACAATCCCATGCAGAATAAAACAAATTATAAACATGTGGCAGGGAGTAGGACGGG  
 CAATGTATGCACCTCCCATTCAGGAAACATAACATGTAAATCAAAT---  
 ATTACAGGACTACTATTGGTACGTGATGGAGGAAGTGGAACGATACG-----  
 -----  
 -----  
 CAGAATAACACAGAGACATTTAGACCTGGAGGAGGGAATATGAGGGACAATTGGAGAAGTGAATTATATAAAAT  
 ATAAAGTGGTAGAAATTAAGCCATTA---GGAATAGCACCCACTAAGGCAAGAAGGAGAGTGGTG-----  
 -----GAGAGAGAAAAAAGAGCA---GTGGGA---CTAGGAGCT---  
 -----GTGTTTCCTTGGGTTCTTGGGAGCA---GCAGGAAGCACTATG---GGCGCAGCGTCA---  
 ATAACGCTGACGGTACAG---GCCAGGCAA---GTATTG---ACTGGTATAGTGCAACAGCAAAGC---  
 AATTTG---CTGAGG---GCTATAGAGGCGCAACAGCATATGTTGCAACTCACGGTCTGGGGCATT  
 >GU329080  
 TTCTATTGCAACACATCAGGCCTGTTTGATAATTCACACCTTAACAACACAAAAC-----  
 -----  
 -----  
 AATACAGGACCAATTACACTCCAATGCAGAATAAAACAAATTATAAACATGTGGCAGGAAGTAGGACGAGCAA  
 TGTATGCCCCCTCCCATTCAGGAAATCTAACATGTAATTCAAAT---  
 ATCACAGGACTACTATTGACACGTGATGGAGGGGAGGAAAATGTGAGCGAC-----  
 -----  
 -----  
 CCAAGTAGGAACGAGACATTCAGACCAGGAGGAGGAGATATGAGGGACAATTGGAGAAGTGAATTATATAAAAT  
 ATAAAGTGGTAGAAGTTAAGCCATTA---GGAATAGCACCAACTAGTGCAAAAAGGAGAGTGGTG-----  
 -----GAGAGAGAAAAAAGAGCA---GTGGGA---ATAGGAGCT---  
 -----ATGTTTCCTTGGGATCTTGGGAGCA---GCCGGAAGCACTATG---GGCGCGGCATCA---  
 ATAACGCTGACGGTACAG---GCCAGACAA---TTGTTG---TCTGGTATAGTGCAACAGCAAAGC---  
 AATTTG---CTGAGG---GCTATAGAGGCGCAACAGCATATGTTGCAACTCACAGTCTGGGGCATT  
 >GU329131  
 TTCTATTGTAATACATCAAGGCTGTTTAATAGGACATACACGCTTAATGATACAGTAAGTAATAGTACAGAC-  
 -----  
 -----  
 AACAGCAAAAATATCACAGTCCCATGCAGAATAAAACAAATAATAAACATGTGGCAGAAGGTAGGACGAGCAA  
 TGTACGCTCCTCCCATTCAGGAAACATAACATGCATCTCAAAT---  
 ATCACAGGACTACTATTGACACGTGATGGAGGAAATACAACAGGAACAGGT-----  
 -----  
 -----  
 AACATAACACAGAGATATTCAGACCTGCAGGAGGAGATATGAGAGACAATTGGAGAAGTGAATTATATAAAAT  
 ATAAAGTGGTAGAAATTAAGCCATTG---GGAGTAGCACCCACTAAGGCAAAAAGGAGAGTGGTG-----  
 -----GAGAGAGAAAAAAGAGCA---GTGGGA---ATAGGAGCT---  
 -----GTGTTTCCTTGGGTTCTTGGGAGCA---GCAGGAAGCACTATG---GGCGCGGCGTCA---  
 ATAACGCTGACGGTACAG---GCCAGACAA---TTGCTG---TCTGGTATAGTGCAACAGCAAAGC---  
 AATTTG---CTGAGA---GCTATAGAGGCGCAACAGCATCTGTTGCAACTCACAGTCTGGGGCATT  
 >GU329145  
 TTCTATTGCAATACATCAAATCTGTTTAATACATCAAACTGTTTTCAAACCTGACAGAACATAATAAAACAG  
 AA-----  
 -----  
 AGTAATGACACTATCATACTCCCATGTAGAATAAAACAAATTATAAACATGTGGCAGAAGGTAGGACGAGCAA  
 TGTATGCTCCTCCCATTCAGGAAACATAACATGTAAATCAAAT---  
 ATCACAGGAATAATATTGACACGTGATGGGGGAAGAACTAACTCA-----  
 -----  
 -----  
 ACTAATGAAACATTACAGACCTACAGGAGGAGAAATGAGGAACAATTGGAGAAGTGAATTATATAAAATATAAAG

TGGTAGAAATTAAGCCATTG---GGAATAGCACCCACTAAGGCAAAAAGGAGAGTGGTG-----  
-----GAGAGAGAAAAAAGAGCA--GTGGGA--ATGGGAGCT-----  
GTATTCCTTGGGTTCTTGGGAGCA--GCAGGAAGCACTATG--GGCGCGGCGTCA--  
ATAACGCTGACGGTACAG---GCCAGACAA--CTGTTG---TCTGGTATAGTGCAACAGCAAAGT---  
AATTTG---CTGAGG---GCCATAGAGGCGCAGCAGCATATGTTGCAACTCACAGTCTGGGGCATT  
>GU329161  
TTCTATTGCAATACCACAAACCTGTTTAATACAACCCGGCTTGATAACTTTAATAGTACAGGAAATAGTACA-  
-----  
-----  
GGAAATAGTACCATCACACTCCAATGCAGAATAAAACAATTTATAAATATGTGGCAGGAGGTAGGAAAAGCAA  
TGTATGCCCCCTCCCATTCGAGGGAACATAACATGTATCTCAAAT---  
ATCACAGGACTGCTATTGACACGAGATGGAGGAGACAACAATAAA-----  
-----  
-----  
ACAGAAGAAACATTTCAGACCTGGAGGAGGAAATATGAAGGACAATTGGAGAAGTGAATTATATAAATATAAAG  
TAGTAGAAATTAAGCCATTA--GGAATAGCACCCACTGATGCAAAAAGGAGAGTGGTG-----  
-----GAGAGAGAGAAAAAGAGCA--GTGGGA--ATAGGAGCT-----  
GTGTTTCCTTGGGTTCTTGGGAGCG--GCAGGAAGCACTATG--GGCGCGGCGTCA--  
ATAACGCTGACGGTACAA--GCCAGACAA--TTATTG---TCTGGTATAGTGCAACAGCAAAGT---  
AATTTG---CTGAGG---GCTATAGAGGCGCAACAGCATATGTTGCAACTCACAGTCTGGGGCATT  
>GU329185  
TTCTATTGCAATACATCAGAACTGTTTAATGGTACATACAATGGTACATACAATGGTACA-----  
-----  
-----  
AATTCTGATACCATCATACTCCCATGCAGAATAAAACAATTTATAAACATGTGGCAGAGGGTAGGACAAGCAA  
TGTATGCCCCCTCCTATTAGAGGAAACATAACATGCAACTCAACA---  
ATCACAGGATTACTCTTAGTACGTGATGGAGGAGCAACAAACGAGAGTGAA-----  
-----  
-----  
AATGAAACAAAACCAGAAACATTTAGACCTGGAGGAGGAGATATGAGGGACAATTGGAGAAGTGAATTATATA  
AATATAAAGTGGTAGAAATTAAACCATTA--GGAATAGCACCCACTGAGGCAAAAAGGCAAGTGGTG----  
-----AAGAGAGAGAAAAAGAGCA--GTGGGA--  
ATAGGAGCT-----GTGTTTCCTTGGGTTCTTGGGAATG--GCAGGAAGCACTATG--  
GGCGCGGCGTCA--ATAACGCTGACGGTACAG--GCCAGACAA--TTATTG---  
TCTGGTATAGTGCAACAGCAAAGT--AATTTG--CTGAGA--  
GCTATAGAGGCGCAACAGCATATGTTGCAACTCACAGTCTGGGGCATT  
>GU329269  
TTCTATTGCAATACAACATACCTGTTTGATAACAACTCCTTAATGAGAGTACAAATGCA-----  
-----  
-----  
ACAACAAACATAACCACCATCCCATGCAGAATAAAACAATTTATAAACATGTGGCAGGAGGTGGGACGAGCAA  
TGTATGCCCCCTCCCATTCGAGGAAACATAACATGTATATCAAAT---  
ATCACAGGACTACTATTGACACGTGATGGAGGAAAAGACAATACAACA-----  
-----  
-----  
AATGATACAGAGATATTCAGACCTATAGGAGGAGATATGAGGAACAATTGGAGAAGTGAATTATATAAATATA  
AAGTAGTAGAAATTAAGCCATTA--GGAGTAGCACCCACCAGGGCAAAAAGGAGAGTGGTG-----  
-----GAGAGAGAAAAAAGAGCA--GTGGGA--ATAGGAGCT-----  
---GTACTCTTTGGGTTCTTGGGAGCA--GCAGGAAGCACTATG--GGCGCAGCGTCA--  
ATAGCGCTGACGGTACAG---GCCAGACAA--TTGTTG---TCTGGAATAGTGCAACAGCAAAC---  
AATTTG---CTGAGG---GCTATAGAGGCGCAACAGCATATGTTGCAACTCACAGTCTGGGGCATT  
>GU329303  
TTCTATTGCAATACGTCACGCCTGTTCAACAAGTCTGGTGCT-----  
-----  
-----  
GCAGAAGCAAACATCACAATCCCATGCAGAATAAAACAATTTATAAACATGTGGCAAGGGGTAGGACGAGCAA  
TGTATGCCCCCTCCCATTCGAGGAAGCATAACATGTAACCTCAAAC---  
ATCACAGGACTACTACTGACACGTGATGGA--AACGAAAGTGGA-----  
-----  
-----

ATAGAGACAGTCAGACCTGGAGGGGGGGATATGAGGGACAATTGGAGAAGTGAATTATATAAAATATAAAGTAG  
 TAGAGATTAAAGCCATTG---GGAGTAGCACCCACTGAGGCAAAAAGGAGAGTGGTG-----  
 -----GAGAGAGAAAAAAGAGCA---GTGGGA---ATGGGAGCT-----  
 GTGCTCCTTGGGTTCTTGGGAGCA---GCCGGAAGCACTATG---GGCGCGGCGTCA---  
 ATCACGCTGACGGCACAG---GCCAGACAA---CTGTTG---TCTGGTATAGTGCAACAGCAAAGC---  
 AATTTG---CTGAAG---GCTATAGAGGCGCAACAGCATATGTTGCAACTCACGGTCTGGGGCATT  
 >GU329320  
 TTCTATTGCAATACATCAAACTGTTTAATAGTACACACATGCTTAATGGTACACACAACATGCCTAATGATA  
 CAGAA-----  
 -----  
 AGTAAGAACACAAACATCACACTCCAATGCAGAATAAAACAAATTATAAACACATGGCAGAAGGTAGGACAAG  
 CAATGTATGCCCTCCCATTCAGGAGAAATAACATGTAGATCAAAT---  
 ATCACAGGGTTACTATTGGTACGTGATGGAGGCAACAACAATGGCACAAT-----  
 -----  
 ----  
 AATGACACAATTACAGAGATATTCAGACCTGGAGGAGGAGATATGAGGGACAATTGGAGAAGTGAATTATATA  
 AATATAAAGTGGTAGAAATTAAGCCATTG---GGAATAGCACCCACCAAGGCAAGAAGGAGAGTGGTG-----  
 -----GAGAGAGAAAAAAGAGCA---GTGGGA---  
 CTAGGAGCT-----ATGTTCTTGGGATCTTGGGAGCA---GCAGGAAGCACTATG---  
 GGCGCAGCGTCA---GTAACGCTGACGGTACAG---ACCAGACAA---TTGATG---  
 GCTGGTATAGTGCAACAGCAAAGC---AATTTG---CTGAAG---  
 GCTATAGAGGCGCAACAGCATCTGTTGCAACTCACGGTCTGGGGCATT  
 >GU329359  
 TTCTATTGCGATACATCAAACTGTTTAATAGTACATACAATGGTGAACCTCATGTATGATGAA-----  
 -----  
 -----  
 AGTAATTCAACCATCACCATCCAATGCAGAATAAAACAAATTATAAACATGTGGCAGCAGGTAGGACAAGCAA  
 TGTATGCCCCCTCCCATTCAGGGAACATAACATGTAACCTCAACT---  
 ATCACAGGATTACTCTTGAACGTGATGGAGGCAACACAAATGGCACAAGTAGC-----  
 ACAAGTGGCACAATAAC---ACAACCTGAA-----  
 -----  
 AATACAGAGATATTCAGACCTATAGGGGGAGATATGAGGAACAATTGGAGAAGTGAATTATATAAAATATAAAG  
 TGGTAGAAATTAAGCCATTG---GGAGTAGCACCCACTGGGGCCAAAAGGAGAGTGGTG-----  
 -----GAGAGAGAAAGAAGAGCA---GTGGGA---ATAGGAGCT-----  
 GTGTTCTTGGGTTCTTGGGAGCA---GCAGGAAGCACTATG---GGCGCAGCGTCA---  
 ATAACGCTGACGGTACAG---GCCAGACAA---GTGCTG---TCTGGAATAGTGCAACAGCAAAGC---  
 AATTTG---CTGAGA---GCTATAGAGGCGCAACAGCATATGTTGCAACTCACGGTCTGGGGCATT  
 >GU329387  
 TTCTATTGCAATACATCAAAGCTGTTTAATACTACATACAATCCTAATGGTACAGTAAATAGTACAAGTGTG-  
 -----  
 -----  
 AATAGCAGTACACTCATACTCCCATGCAGAATAAAGCAAATTATAAACATGTGGCAGGGAGTAGGAAAAGCAA  
 TATATGCCCCCTCCCATTCAGGAAACATAAACTGTAGATCAAAT---  
 ATCACAGGACTACTATTGACACGTGATGGAGGAGACGAGAGTAGA-----  
 -----  
 -----  
 ACAAATGAGACATTCAAACCTGAAGGAGGAAATATGAAGGACAATTGGAGAAGTGAATTATATAAAATATAAAG  
 TGGTAGAAATTAAGCCATTG---GGACTAGCACCCACCAAGGCAAAAAGGAGAGTGGTG-----  
 -----GAGAGAGAAAAAAGAGCA---GTTGGA---ATAGGAGCT-----  
 GTGCTCCTTGGGTTCTTGGGAGCA---GCAGGAAGCACTATG---GGCGCGGCGTCA---  
 ATAGCGCTGACGGCACAG---GCCAGACTA---TTGTTG---ACTGGTATAGTGCAACAGCAAAGC---  
 AATTTG---CTGCAA---GCTATAGAGGCGCAACAGCATTTGTTGCAACTCACGGTCTGGGGCATT  
 >GU329394  
 TTTTACTGCAATACATCACAATTGTTCAATGGTACACACAACCTCTACATACTCTACATATAATGATACAGGAA  
 AT-----  
 -----  
 AGTAATTTAAACATTACACTCCCATGCAGAATAAAACAAATTATAAACATGTGGCAGGGGTAGGAAAAGCAA  
 TATATGCCCCCTCCCATTTTCAAGGATACGTAACATGCACATCAAAT---  
 ATCACAGGACTACTATTGGTACGGGATGGAGGCAATAACAGAACA-----  
 -----

-----  
AATGAGACATTCAGACCTGAAGGAGGAAATATGAAGGACAATTGGAGAAGTGAATTATATAAAATATAAAGTGG  
TAGAAATTAAACCATTG---GGAATAGCACCCACTGACGCAAAAAGGAGAGTGGTG-----  
-----GAGAGAGAAAAAGAGCA---GTGGGA---ATAGGAGCT-----  
GTGCTCCTTGGGTTCTTGGGAGTA---GCAGGAAGCACTATG---GGCGCGGCGTCA---  
ATGGCGCTGACGGTACAG---GCCAGACAA---TTGTTG---TCTGGTATAGTGCAACAGCAAAGT---  
AATTTG---CTGAGG---GCTATAGAGGCGCAACAGCATATGTTGCAACTCACGGTCTGGGGCATT  
>GU329411  
TTCTATTGCAATACATCACAACTGTTTAATAGTACATATATGTTTAATAATACAGGTATACATAATAGTACA-  
-----  
-----  
GATAATGAAACAATCACACTCCCATGCAGAATAAAACAAATTGTAACTTGTGGCAGGAGGTAGGGCGAGCAA  
TATATGCCCCCTCCCATTCAGGAAACATAACATGTGCCTCAAAT---  
ATCACAGGAATACTATTGACACGTGATGGAGGTAAGGGGAGAGAACAA-----  
-----  
-----  
AAAGATGACATAGAAGTATTCAGACCTGCAGGAGGAGACATGAGGGACAATTGGAGAAGTGAATTATATAAAAT  
ATAAAGTGGTAGAAATTAAGCCATTA---GGAATAGCACCAACTACGGCAAAAAGGAGAGTGGTG-----  
-----GAGAGAGAAAAAGAGCA---GTGGGA---ATAGGAGCT---  
-----ATGATCTTTGGGTTCTTGGGAGCA---GCAGGAAGCACTATG---GGCGCGGCGTCA---  
ATAACGCTGACGGTACAG---GCCAGACAA---CTATTG---TCTGGTATAGTGCAAGCAGCAAAGC---  
AATTTG---CTGAAG---GCTATAGAGGCGCAACAGCATATGTTGCAACTCACAGTCTGGGGCATC  
>GU329428  
TTCTATTGCAATACATCAAGCCTGTTTAATAGTACAGACGTGCACAAGTATAACAGTACAAAAAAT-----  
-----  
-----  
AATAGTTCAGACATCATACTCCCATGCAGAATAAAACAAATTATAAATATGTGGCAGAAGGTAGGACGAGCAA  
TGTATGCCCCCTCCCATTCAGGAAACATAACATGTATATCAAAT---  
ATTACAGGACTACTGTTAACACATGATGGAGGAAATACTAATGAGACT-----  
-----  
-----  
AACAAACAGAGACATTCAGACCCGGAGGAGGAGATATGAGGGACAATTGGAGAAGTGAATTATATAAAATATA  
AAGTGGTAGAAATTAAGCCATTA---GGAATAGCACCCACTGAGGCACGAAGGAGAGTGGTG-----  
-----ACGAGAGAAAAAGAGCA---GTGGGA---ATAGGAGCT-----  
---GTGTTCTTGGGTTCTTGGGAGCA---GCAGGAAGCACTATG---GGCGCAGCGTCA---  
ATGGCGCTGACGGTACAG---GCCAGACAA---TTGCTG---TCTGGTATAGTGCAACAGCAAAGC---  
AATTTG---CTGAGA---GCTATAGAGGCGCAACAGCATATGTTGCAACTCACGGTCTGGGGCATT  
>GU329473  
TTCTACTGCAACACAACAACACTGTTCAACACAACAAGACTGTTCAACACAACAAGACCGTTCAACGCAACA-  
-----  
-----  
GCTAGGGAGAACATCACACTCCCATGCAGAATAAAACAAATTATAAACATGTGGCAGGAAGTAGGAAAAGCAA  
TATATGCCCCCTCCCATTCGCGGAAACATAACATGTATATCAAAT---  
ATCACAGGGCTACTCTTGACACGTGATGGAGGGAACGAGGATAAA-----  
-----  
-----  
AATAGAACAGAGATATTCAGACCTGGAGGAGGAGATATGAGGGACAATTGGAGAAGTGAATTATATAAAATATA  
AAGTGGTAGAAATTAAGCCATTG---GGAATAGCACCCACCAAGGCAAAAAGGAGAGTGGTG-----  
-----GAGAAACAAAAAGAGCA---GTAGGC---ATGGGAGCT-----  
---GTACTCCTTGGGTTCTTGGGAGCA---GCAGGAAGCACTATG---GGCGCGGCGTCA---  
GTGGCGCTGACGGTACAG---GCCAGACAA---TTACTG---TCTGGTATAGTGCAACAGCAAAGC---  
AATTTG---CTGATG---GCTATAGAGGCGCAACAGCATATGTTGCAGCTCACAGTCTGGGGCATT  
>GU329489  
TTTTATTGCAATACATCACAGCTGTTTAATGGTACATTCAATGGTACATTCAACAAGGAATTTCACAAATACAA  
GCAGT-----  
-----  
AACAGTAACTTAACCATCACACTCCCATGCAGAATAAAACAAATTATAAACATGTGGCAGGAGGTAGGACGAG  
CAATGTATGCACCTCCCAATGCAGGAAACATAACGTGTAGTTCAAAT---  
ATCACAGGACTACTATTGACACGTGATGGAGGCACAAATACAAATAGC-----  
-----

-----  
TCAGAAGAAGAGATATTCAGACCTGGAGGAGGAGATATGAGGGACAATTGGAGAAGTGAATTATATAAAATATA  
AAGTGGTAGAAATTAAGCCATTG---GGAGTAGCACCCACTGAGGCCAAAAGGAGAGTGGTG-----  
-----GAGAGAGGAAAAAGAGCA---GTGGGA---CTAGGAGCT-----  
---GTGATCCTTGGGTTCTTGGGAGCA---GCAGGAAGCACTATG---GGCGCAGCGTCA---  
ATAACGCTGACGGCACAG---GCCAGACAA---GTGTTG---TCTGGTATAGTGCAACAGCAAAAC---  
AATTTG---CTGAGG---GCTATAGAGGCGCAACAGCATATGTTGCAACTCACAGTCTGGGGCATT  
>GU329494  
TTCTATTGCAATACATCAGGACTATTTAATAGGCCTAATGTTACAAATTTAGCCAATGGTACAAAGTCAACC-  
-----  
-----  
AATGAAACCATCATCAGGCTCCCATGCAGAATAAAACAAATCATAAACATGTGGCAGGGGGTAGGACGAGCAA  
TGTATGCCCCCTCCCATTGCAGGAAACATAACATGTAAATCAAAT---  
ATCACAGGACTACTATTGACACGTGATGGGGGAAGTGGAAACGGAAAC-----  
-----  
-----  
AACGATACAGAGACATTTAGACCTGGAGGAGGAAATATGAGGGACAATTGGAGAAGTGAATTATATAAAATATA  
AAGTGGTAGAAATTAAGCCATTA---GGAATAGCACCCACTAAGGCCAAAAGAAGAGTGGTG-----  
-----GAGAGAGAAAAAGAGCA---GTAGTGGGAATAGGAGCT-----  
---GCACTCCTTGGGTTCTTGTCTGTA---GCAGGAAGCACTATG---GGCGCAGCATCA---  
CTAACGCTGACGGTACAG---GCCAGACAA---TTGCTG---TCTGGTATAGTGCAACAGCAAAGC---  
AATTTG---CTGAGG---GCTATAGAGGCGCAACAACATATGTTGCAACTCACAGTCTGGGGCATT  
>GU329501  
TTCTATTGCAATACATCACAACGTGTTTAACGAAACAGACAGGAACAAAACATAC-----  
-----  
-----  
GAGAACAATACAATTACACTCCCATGTAGAATAAAACAAATTATAAACATGTGGCAGGGGGTAGGACAAGCAA  
TGTATGCCCCCTCCCATTAGAGGGAACATAACATGTAGATCAAAT---  
ATCACAGGACTACTATTGACACGTGATGGAGGTACAGAGAACAAAT-----  
-----  
-----  
AGCACAGAGATATTCAGACCTGCAGGAGGAAATATGAAGGACAATTGGAGAAGTGAATTATATAAAATATAAAG  
TGGTAGAAATTAAGCCATTA---GGTATAGCACCCACCGAGGCCAAAAGGCGAGTGGTG-----  
-----GAGAGAGAAAAAGAGCA---GTGGGA---ATAGGAGCT-----  
GTGTTCTTGGGTTCTTGGGAGCA---GCAGGAAGCACTATG---GGCGCGGCGTCA---  
ATGGCGCTGACGGTACAG---GCCAGACTA---TTGTTG---TCTGGTATAGTGCAACAGCAAAAC---  
AATTTG---CTGAGA---GCTATAGAGGCGCAACAGCATCTGTTGCAACTCACGGTCTGGGGCATT  
>KX983797  
TTCTATTGTAATACATCTAGTCTGTTTAATAGGACATACAATGGTACTGAAAGTAATAATAACTACTGAA-  
-----  
-----  
GGTAATTCAACCATCACAATCCACTGCAGAATAAAACAAATCATAAACATGTGGCAGCAGGTAGGACGAGCAA  
TGTATGCCCCCTCCCATTAAAGGAAACATAACATGTAACTCAAGT---  
ATTACAGGACTGCTATTGACACGGGATGGAGGCGATGAAAGCCGA-----  
-----  
-----  
ACAAATGAGACATTTCAGACCTGGAGGAGGAGATATGAGGGACAATTGGAGAAGTGAATTATACAAATATAAAG  
TGGTAGAAATTAAGCCATTG---GGAATAGCACCCACTGATGCAAGAAGGCGAGTGGTG-----  
-----GAGAGAGAAAAAGAGCA---GTAGGA---ATAGGAGCT-----  
GTGATCCTTGGGTTCTTGGGAGCA---GCAGGAAGCACTATG---GGCGCGGCGTCA---  
ATAACGCTGACGGCACAG---GCCAGACAA---GTATTG---TCTGGTATAGTGCAACAGCAAAGT---  
AATTTG---CTGAGG---GCTATAGAGGCGCAACAGCATATGTTGCAACTCACGGTCTGGGGCATT  
>JX213352  
TTCTATTGCAATACATCAGGTCTGTTTAATGCATCGATCCTGGACCTTAATGAGACACAA-----  
-----  
-----  
GCAAAAGGAACCATCACACTTCCATGCAGAATAAAACAAATTATAAACATGTGGCAGGAGGTAGGACGAGCAA  
TGTATGCCTCTCCCATTGAAGGAAATATAACATGTAAATCAAAT---  
ATCACAGGACTACTATTAAACACGTGATGGAGACACAAGTAACAAC-----  
-----

-----  
ATAACTGAGACATTTCAGACCTGGAGGAGGAGATATGAGAGACAATTGGAGAAGTGAATTATATAAATATAAAG  
TGGTAGAAATACAGCCATTG---GGAATAGCACCCACTAAGGCACAAAGAAGAGTGGCG-----  
-----CAGAAAGAAAAAAGAGCA---GTGGGA---CTAGGAGCT-----  
ATGTTCTTGGGGTTCTTGGGAGTA---GCAGGAAGCACTATG---GGCGCAGCGTCA---  
ATCACGCTGACGGTACAG---GCCAGACAA---TTGTTG---TCTGGTATAGTGCAACAGCAAAGC---  
AATTTG---CTGAGG---GCTATAGAGGCACAACAGCACATGTTGCAACTCACAGTCTGGGGCATT  
>JX239395  
TTCTATTGCAATACATCAAACCTGTTTAATAGTACATACAATAGTACATACAATGATACAGGAAAC-----  
-----  
-----  
TCAACCTCAAACATCACACTCCAATGCAGAATAAAACAAATTATAAATATGTGGCAGGGGGTAGGACAAGCAA  
TATATGCCCCCTCCCATTCAGGAAACATAACATGTATATCAAAT---  
ATCACAGGACTAATATTGACACGTGATGGAGGAAAAAATGCTAGC-----  
-----  
-----  
AACGAGACATTTCAGACCTGGAGGAGGAGATATGAGGGACAATTGGAGAAGTGAATTATATAAATATAAAGTGG  
TAGAAATTAAACCATTA---GGAATAGCACCCACTAAGGCACAAAAGGAGAGTGGTG-----  
-----GAGAGAGAAAAAAGAGCA---GTGGGA---ATAGGAGCT-----  
GTGCTCCTTGGGGTTCTTGGGAGCA---GCAGGAAGCACTATG---GGCGCAGCATCA---  
ATAACGCTGACGGTACAG---GCCAGACAA---TTGTTG---TCTGGTATAGTGCAACAGCAAAGC---  
AATTTG---CTGAGG---GCTATAGAGGCGCAACAACATATGTTGCAACTCACAGTCTGGGGCATT  
>JN977604  
TTCTATTGCAATACATCAAACCTGTTTAATGGTATATTTAATGGTACATGGATTAATGATACTAATGAG----  
-----  
-----  
GCTAATGATATTATCACACTCCAATGTAACATAAAACAAATTATAAACATGTGGCAGGAGGTGGGACGAGCAA  
TGTATGCCCCACCCATTGACAGGAAACATAACATGTAAATCAAAT---  
ATCACAGGAATACTATTGACACGTGATGGAGGAGATGGAACAAAT-----  
-----  
-----  
GAAACAGAAACAGAGATATTTCAGACCTGCAGGAGGAAATATGAGAGACAATTGGAGAAGCGAATTATATAAGT  
ATAAGGTGGTAGAAATTAAGCCATTA---GGAATAGCACCCACCAAGGCACAAAAGGAGAGTGGTG-----  
-----GAGAGAGAAAAAAGAGCA---GCA-----CTAGGAGCT---  
-----GTGTTCTTGGGGTTCTTGGGAGCA---GCAGGAAGCACTATG---GGCGCAGCGTCA---  
ATAGCGCTGACGGCACAG---GCCAGACAA---TTATTG---TCTGGTATAGTGCAACAGCAAAAC---  
AATTTG---CTGAGA---GCTATAGAGGCGCAACAGCATATGTTGCAACTCACAGTCTGGGGCATT  
>KT252545  
TTCTATTGCAATACATCAAACTGTTTATCCGGCCCAACATAACAGGGCCTAACATAACAACAAATGTTTCAA  
GC-----  
-----  
TCCAATGACAGCATCACAATCCCCTGCAGGATAAAACAATTTATAAACATGTGGCAGGGGGTAGGACGGGCAA  
TGTATGCCTCGCCCATTCAGGAAACATAACATGTGCCTCAAAC---  
ATCACAGGACTACTATTAAACACGTGATGGAGGAATAAGGAATGACACC-----  
-----  
-----  
AATAAAACAGAGATATTTCAGGCCTGGAGGAGGAAATATGAAAGACAATTGGAGAAGTGAATTATACAAATATA  
AAGTGGTAGAAATTAAGCCATTA---GGAGTAGCACCTACCAGGGCACAAAGGAGAATGGTG-----  
-----AATAGAGAAAAAAGAGCA---GTGGGA---CTAGGAGCT-----  
---ATGTTCTTGGGGTTCTTGGGAGCA---ACAGGAAGCACTATG---GGCGCGGCGTCA---  
ATAACGCTGACGGTACAG---GCCAGACAA---TTGTTG---TCTGGTATAGTGCAACAGCAAGGC---  
AATTTG---CTGAGA---GCTATAGAGGCGCAACAGCATATGTTGCAACTCACGGTCTGGGGCATT  
>KX983777  
TTTTATTGCAATACATCAAACTGTTTAGGGGCACATACAATAATGGTACATACAATGATACAGACATGTCT-  
-----  
-----  
AATAGTACACGCATCATACTCCAATGCAGAATAAAACAATTTATAAACATGTGGCAAAAGGTAGGGCGAGCAA  
TGTATGCAAATCCCATTGACAGGAAACATAACATGTAACTCAACC---  
ATCACAGGACTACTATTAAACAAGTATGGAGGAAGAGGTAATGATAGC-----  
-----

-----  
 AACACCACCGAGATCGTCAGACCTGGAGGAGGAAATATGAGGGACAATTGGAGAAGTGAATTATATAAAATACA  
 AAGTGGTAGAAGTTAAACCATTA---GGAATAGCACCCACTGGCGCAAAAAGGAGAGTGGTG-----  
 -----GAGAGAGAAAAAAGAGCA---GTGGGA---ATGGGAGCT-----  
 ---TTGTTCCCTTGGGTTCTTGGGAGCA---GCAGGAAGCACTATG---GGCGCAGCGTCA---  
 ATAACGCTGACGGCACAG---GCCAGACAA---GTATTG---TTTGGTATAGTGCAACAGCAAAGC---  
 AATTTG---CTGAAG---GCTATAGAGGCGCAACAGCATATGTTGCAACTCACAGTCTGGGGCATT  
 >KX983831  
 TTCTATTGCAATACATCCAAATTGTTTAATGGTAATGGATCAGACTCAACA-----  
 -----  
 -----  
 TCAAATTCAAACATCACACTCCAATGTAGGATAAAAACAAATTATAAATATGTGGCAAGGGGTAGGACGAGCAA  
 TGTATGCCCCCTCCCATTTGCAGGAAGCATAACATGTAACCTCAAGT---  
 ATCACAGGACTACTATTGACACGAGATGGAGGGAATGGTGGAAT-----  
 -----  
 -----  
 AACAAAGACAGAAATATTCAGACCAGGAGGAGGAGATATGAGAGATAATTGGAGAAGTGAATTATATAAAATATA  
 AAGTGGTAGAAATTGAACCATTA---GGAATAGCACCCACTAAGGCAAAAAGGAGAGTGGTG-----  
 -----GAGAGGAAAAAAGAGCA---GTGGGA---ATTGGAGCT-----  
 ---GTGTTCCCTTGGGATCTTGGGAGCA---GCAGGAAGCACTATG---GGCGCGGCATCA---  
 ATAACGCTGACGGTACAG---GCCAGACAA---TACTG---TCTGGTATAGTGCAACAGCAGAGC---  
 AATCTG---CTGAGG---GCTATAGAGGCGCAACAGCATATGTTGCAACTCACGGTCTGGGGCATT  
 >JX213464  
 TTTTATTGCGATACATCAAATCTGTTTAATAATAATTCAACAAACAGC-----  
 -----  
 -----  
 AGTAATGTAAACATCACACTCCAATGCAGAATAAAAACAAGTTATAAACATGTGGCAGGAGGTAGGACGAGCAA  
 TGTATGCACCTCCCATTTGCAGGAAACATAACATGCACATCAAAT---  
 ATCACAGGATTATTATTGGTACGTGATGGAGGAACAACCTGAAGAA-----  
 -----  
 -----  
 AATGACACAGAGATATTCAGACCTGGAGGAGGGAATATGAAGGACAATTGGAGAAGTGAATTATATAAAATATA  
 AAGTAGTAGAAATTAAGCCACTG---GGAATAGCACCCACTGAAGCAAGAAGGAGAGTGGTG-----  
 -----GAGAGAGAAAAAAGAGCA---GTGGGA---ATAGGAGCT-----  
 ---ATGTTCCCTTGGGTTCTTGGGAGCA---GCAGGAAGCACTATG---GGCGCAGCGTCA---  
 ATAACGCTGACGGTACAG---GCCAGACAA---GTGTTG---TCTGGTATAGTGCAACAGCAAAGC---  
 AGTTTG---CTGAGG---GCTATAGAGGCGCAACAGCATCTGTTGCAACTCACAGTCTGGGGCATT  
 >KX983851  
 TTCTATTGCAATACATCAAGCCTGTTTAATAGCACGTTCAACTTCACTGAAACAGGAAATAGCACGAACCAGA  
 ATAGCACA-----  
 -----  
 GATAACTCTACCACCATCAAGATCCCATGCCGAATAAAACAGATTATAAATATGTGGCAGGAGGTAGGACGAG  
 CAATGTATGCCCCCTCCCATTTGCAGGAAACATAACATGTAAATCAAAT---  
 ATCACAGGACTACTATTGACAAGGGATGGAGGCAGCCACTCAAATGAAGGCAAC-----  
 -----  
 -----  
 CACTCAGAAGAAATATTCAGACCTGGAGGAGGAGATATGAGGGACAATTGGAGAAGTGAACCTATATAAAATATA  
 AAGTGGTAGAAATAAAGCCATTA---GGAATAGCGCCCACTAAGGCAAAAAGGAGAGTGGTG-----  
 -----CAGAGAGAAAAAAGAGCA---GTAGGA---CTGGGAGCT-----  
 ---GTGCTCTTTGGGTTCTTGGGAGCT---GCAGGAAGCACTATG---GGCGCGGCGTCA---  
 ATAACGCTGACGGTACAG---GTCAGACAA---TTATTG---TCTGGTATAGTGCAACAGCAAAGC---  
 AATTTG---CTGAGA---GCTATAGAGGCGCAACAACATATGTTGCAACTCACAGTCTGGGGCATT  
 >KF716466  
 TTCTATTGTAATACATCAAGCCTGTTTAATAATAACAAATAATACAGAT-----  
 -----  
 -----  
 ATCACACTCCCATGCAGAATAAAAACAAATTATAAACATGTGGCAGGAGGTAGGAAGAGCAATGTATGCCTCTC  
 CCATTGAAGGAAATATAACATGTAAATCAAAT---  
 ATCACAGGACTATTATTGGTACATGATGGAGTAATGAATAAAACA-----  
 -----

-----  
GTAACATTTCAGACCTGGAGGAGGAGATATGAGGGACAATTGGAGAAGTGAATTATATAAAATATAAAGTGGTAG  
AAATTAGGCCATTG---GGAGTAGCACCCACTGAGGCCAAAAGGAGAGTGGTG-----  
-----GAGAGAGAAAAAAGAGCA---GTGGGA---CTAGGAGCT-----  
GTGATCTTTGGGTTCTTGGGAGCA---GCAGGAAGCACTATG---GGCGCGGCGTCA---  
TTGACGCTGACGGTACAA---GCCAAGCAA---TTGTTG---TCTGGTATAGTGCAACAGCAAAGC---  
AATTTG---CTGAGA---GCTATAGAGGCGCAACAGCATATGTTGCAACTCACAGTCTGGGGCATT  
>KR820304  
TTCTATTGCAATACATCACAACCTGTTTAATGAGTCACTGCTTAATGTGACTAATAGTACAGGAGAAGCAAAT-  
-----  
-----  
GAATCAGAAAACATCACACTCCCATGCAGAATAAAACAAATTATAAACATGTGGCAGGGGGTAGGACGAGCTA  
TATATGCCCCGCCCATTCAGGACTCATAACATGTACATCAAAT---  
ATCACAGGACTGCTGTTGACACGTGATGGAGGAACAAGTAACAGCAGT-----  
-----  
CTTAATGAGACCAGCGGT---  
CGTAATGAGACATTTAGACCTGGAGGAGGAGATATGAGGGACAATTGGAGAAGTGAATTATATAAAATATAAGG  
TGGTTGAAATTAAGCCATTA---GGGATAGCACCCACTACTGCAAAAAGGAGAGTGGTG-----  
-----GAGAGAGAAAAAAGAGCA---GTGGGA---ATAGGAGCT-----  
GTGTTCCCTTGGGTTCTTGGGAGCA---GCAGGAAGCACTATG---GGCGCGGCGTCA---  
ATAACGCTGACGGTACAG---GCCAGACAA---TTGTTG---TCTGGTATAGTGCAACAGCAAAGC---  
AATTTG---CTGAGG---GCCATAGAGGCGCAACAACATATGTTGCAACTCACGGTCTGGGGCATT  
>KR820314  
TTTTATTGCAATACATCAAACTGTTTAATGGGACTAATAGTACGGGAGCA-----  
-----  
-----  
GTAAACGAAACCATCACACTCCCATGCAGAATAAAACAAATTATAAACATGTGGCAGGGGGTGGGGCGAGCAA  
TATATGCCCCGCCCATTTGAAGGACTCATAACATGTACATCAAAT---  
ATCACAGGACTGTTGTTGACACGTGATGGAGGAAATAGCAGCGAT-----  
-----  
-----  
ACTAATGAGACATTTAGACCTGGAGGAGGAGATATGAGGGACAATTGGAGAAGTGAATTATATAAAATATAAGG  
TGGTAGAAATTAAGCCATTA---GGAATAGCACCCACTACTGCAAAAAGGAGAGTGGTG-----  
-----GAGAGAGAAAAAAGAGCA---GTGGGA---ATAGGAGCT-----  
GTGTTCCCTTGGGTTCTTGGGAGCA---GCAGGAAGCACTATG---GGCGCGGCGTCA---  
ATAACGCTGACGGTACAG---GCCAGACAA---TTGTTG---TCTGGTATAGTGCAACAGCAAAGC---  
AATTTG---CTGAGA---GCTATAGAGGCGCAACAACATATGTTGCAACTCACAGTCTGGGGCATT  
>KR820324  
TTCTATTGCAATACATCAGATCTATTTAAGAAC-----  
-----  
-----  
GACCCAGAGTCAGAAATCACACTCCAATGCAGAATAAAACAAATTATAAACATGTGGCAGGGAGTAGGACGAG  
CAATGTATGCCCCCTCCCATTCAGGAAGCATAACATGTAACCTCAACC---  
ATCACAGGACTAATATTGACACGTGATGGTGGACCA-----  
-----  
-----  
GCAAAATGAGACAGAGATATTTCAGACCTGGAGGAGGAGATATGAGAGACAACCTGGAGAAGTGAATTATATAAAAT  
ATAAAGTAGTAGAAGTTAAACCTTTA---GGACTAGCACCCACTAAGGCAAAAAGGAGAGTGGTG-----  
-----GAGAAACAAAAAAGAGCA---GTGGGA---ATAGGAGCT---  
-----GTGTTCCCTTGGGTTCTTGGGAGTA---GCAGGAAGCACTATG---GGCGCGGCGTCA---  
ATAACGCTGACGGTACAG---GCCAGACAA---TTATTG---TCTGGTATAGTGCAACAGCAAAC---  
AATTTG---CTGAGG---GCTATAGAGGCGCAACAACATATGTTGCAACTCACGGTTTGGGGCATT  
>KR820326  
TTCTATTGCAATACATCAAATCTATTTGCTGAGTCAAGCTTAAATTCAACCAAC-----  
-----  
-----  
AGCACAAACAACGTACAATCCCATGCAGAATAAAACAAATTATAAACATGTGGCAGGGAGTAGGACGAGCAA  
TGTATGCCCCCTCCCATTCAGGAAACATAACATGCAAAATCAAAC---  
ATCACAGGACTAATATTGACACGTGATGGGGGAGAACTTAACAATACA-----  
-----

-----  
CAGAACGAGACATTTCAGGCCTGGAGGAGGAGATATGAGGGACAACCTGGAGAAGTGAATTATATAAATATAAAG  
TAGTAGAAGTTAAGCCTTTA---GGACTAGCACCCACTAAGGCAAAAAGGAGAGTGTTG-----  
-----GAGAAACAAAAAAGAGCA---GTGGGA---ATAGGAGCT-----  
GTGTTCCCTTGGGTTCTTGGGAGTA---GCAGGAAGCACTATG---GGCGCGGCGTCA---  
ATAACGCTGACGGTACAG---GCCAGACAA---TTATTG---TCTGGTATAGTGCAACAGCAAAAT---  
AATTTG---CTGAGG---GCTATAGAGGCGCAACAACACATGTTGCAACTCACGGTTTGGGGCATT  
>KR820342  
TTTTATTGCAATACATCAAACCTTGTTTAATAGGACATTTAATGGTACAAATTGGATTGTTAATAAAACA-----  
-----  
-----  
TCAAAGGCAAACATCACACTCCAATGCAGGATAAAAACAAATTATAAACATGTGGCAGGAGGTAGGACGAGCAA  
TGTATGCCTCTCCCATTGCAGGAAGCATAGTATGTAATTCAAAC---  
ATCACAGGACTACTACTAACACGTGATGGGGGAAACTCAGGCAAG-----  
-----  
-----  
AATGATACAGAGACATTTCAGACCTGGAGGAGGAGATATGAGGAACAATTGGAGAAGTGAATTATATAAATATA  
AAGTAGTAGAAATTAAACCATTG---GGAATAGCACCCACTGACGCAAAAAGGAGAGTGTTG-----  
-----GAGAGAGAAAAAAGAGCA---GTAGGA---ATAGGAGCT-----  
---GTGCTCCTTGGGTTCTTGGGAGCA---GCAGGAAGCACTATG---GGCGCGGCGTCA---  
ATAACGCTGACGGTACAG---GCCAGACAA---TTACTG---TCTGGTATAGTGCAAGCAGCAAAAC---  
AACTTG---CTGAGA---GCTATAGAGGCGCAACAGCATATGTTGCAACTCACGGTCTGGGGCATT  
>KR820376  
TTCTATTGTAATACATCAAGCCTGTTTGATGGTACGTATATAAATTCAACCAAGGATAACACAACAGAT-----  
-----  
-----  
GCCAATAATACCATCATACTCCCATGCAGACTAAAACAGATTATAAACATGTGGCAGGAGGTAGGAAGAGCAA  
TGTATTCCAATCCCATTGCAGGAAATATAAGATGTAACTCAAGT---  
ATCACAGGAATACTATTGACACGTGATGGAGGAAGTGGAAGTGATAGAGAAGAC-----  
-----  
-----  
AGTAATAAGACACAAACATTTCAGACCAGCAGGAGGAGATATGAGAGACAATTGGAGAAGTGAATTATATAAAT  
ATAAAGTGGTGGAAGTTAAACCATTA---GGAATAGCACCCACTGGGGCAAAAAGAAGAGTGTTG-----  
-----GAGAGAGAGAAAAGAGCA---GTGGGA---ATAGGAGCT---  
-----GTGTTCCCTTGGGTTCTTGGGAGCA---GCAGGAAGCACTATG---GGCGCGGCGTCA---  
ATAACGCTGACGGTACAG---GCCAGACAA---TTACTG---TCTGGTATAGTGCAACAGCAAAGC---  
AATTTG---CTGAGG---GCTATAGAGGCGCAACAACATATGTTGCAACTCACAGTCTGGGGCATT  
>KR820415  
TTCTATTGCAATACATCAAACCTGTTTAATGTTCTTAATGGTACAGCAAATAGTTCAGAT-----  
-----  
-----  
CCAAATGGAACCATCACACTCCCATGCAGAATAAAAACAGATTATAAACATGTGGCAGGGGGTAGGACGAGCAA  
TGTATGCCCCCTCCCATTGCAGGGAACATAACATGTAAATCAAAC---  
ATCACCGGAATACTATTAAACACGTGATGGAGGAAGTGACCCAAAGAGCAAT-----  
-----  
-----  
AATGGCACAGAGATATTTAGACCTGGAGGAGGAGATATGAGGGATAATTGGAGAAGTGAATTATATAAATATA  
AAGTGGTAGAAATTAAGCCATTA---GGAATAGCACCCACTGGAGCAAAAAGGAGAGTGTTG-----  
-----GAGAGAGAGAAAAGAGCA---GCGGGA---ATAGGAGCC-----  
---CTGTTCCCTTGGGTTCTTGGGAGCA---GCAGGAAGCACTATG---GGCGCAGCGTCA---  
ATAACGCTGACGGTACAG---GCCAGACAA---TTGTTG---TCTGGTATAGTGCAACAGCAAAGC---  
AATTTG---CTGAGA---GCTATAGAGGCGCAACAGCATCTGTTGCAACTCACGGTCTGGGGCATT  
>KP109494  
TTCTATTGCAATACATCAGAACTGTTTACAAACAAAACGTTAAACTCAAACCTCA-----  
-----  
-----  
ACAAACACCACACTCATACTCCCATGCCGAATAAAAACAAATTATAAACATGTGGCAGGAGGTAGGACGAGCAA  
TGTACGCCCCCTCCCATAGCAGGAAACATAACATGTAAATCAAAT---  
ATCACAGGACTACTATTGGTACGGGATGGAGGAGTCACAAATGACACA-----  
-----  
-----

-----  
AAGAACACAGAAGTATTTCAGACCTGGGGGAGGAGATATGAGGGATAATTGGAGAAGTGAATTATACAAATATA  
AAGTGGTAGAAATTAAACCATTG---GGAATAGCACCCACTGGTGCAAAAAGGAGAGTGGTGGAG-----  
-----AGGAGAGAAAAAAGAGCA---GTAGGA---CTAGGAGCT-----  
---GTGCTCCTTGGGTTCTTGGGAGCA---GCAGGAAGCACTATG---GGCGGGCGTCA---  
GTGGCGCTGACGGTACAG---GCCAGACAA---TTGTTG---TCTGGTATAGTGCAACAGCAAAGC---  
AATTTG---CTGAGG---GCTATAGAGGCGCAACAGCATATGTTGCAACTCACGGTCTGGGGCATT  
>KP109495  
TTCTATTGCAATACATCAAGACTGTTTAATGGTACTAATGATACT-----  
-----  
-----  
TCAAAATGGAACATAACACTCCCATGTAGGATAAAAGCAAATAATAAACATGTGGCAGGGGGTAGGAAGGGCAA  
TGTATGCCCCCTCCCATTGCAGGAAACATAACATGTATATCAAAC---  
ATCACAGGACTGCTATTGACACGTGATGGAGGAGATGATAATACT-----  
-----  
-----  
ACAGAGATATTTCAGACCTGGAGGAGGAGATATGAGGGACAATTGGAGAAGTGAATTATATAAATATAAAGTGG  
TAGAAATTAAACCATTG---GGAGTAGCACCCACTACGGCAAAAAGGAGAGTGGTG-----  
-----GAGAGAGAAAAAAGAGCA---GTGGGA---ATAGGAGCT-----  
GTGTTCCCTTGGGTTCTTGGGAGCA---GCAGGAAGCACTATG---GGCGGGCGTCA---  
ATAACGCTGACGGTACAG---GCCAGACAA---TTATTG---TCTGGTATAGTGCAACAGCAAAAC---  
AATTTG---CTGCAG---GCTATCGAGGCGCAACAGCATCTGTTGCAACTCACGGTCTGGGGCATT  
>KF716467  
TTCTATTGTGATACATCAGGACTGTTTGAGAATAGGACATACACGCTTAATGATACAGGAAGCACTTCAAACA  
AC-----  
-----  
ACTAATTCAACCATCACAATACAATGCAGAATAAAACAAATTATAAACATGTGGCAGAGGGTAGGACAAGCAA  
TGTATGCCCCCTCCCATTGCAGGAAACATAACATGTAAATCAAAT---  
ATCACAGGACTGCTATTGACACGTGATGGAGGAGCAAAAAAGAAT-----  
-----  
-----  
GAGAGTGACCCCCCAGAGACATTTCAGACCTGGAGGAGGAGATATGAGGGACAACCTGGAGAAGTGAATTATATA  
AATATAAAGTGGTAGAAGTTAAACCATTG---GGATTAGCACCCACCAAGGCACAAAGAAGAGTGGTG-----  
-----GGAAGAGAAAAAAGAGCA---GTGGGA---  
ATAGGAGCT-----GTGTTCCCTTGGGTTCTTGGGAGCA---GCAGGAAGCACTATG---  
GGCGCGGCGTCA---ATCACGCTGACGGTACAG---GCCAGACAA---TTGCTA---  
TCTGGCATAGTGCAACAGCAAAGC---AATTTG---CTGAGG---  
GCTATAGAGGCGCAACAGCATCTGTTGCAACTCACAGTCTGGGGCATT  
>KP109496  
TTCTACTGCAATACATCAACACTGTTTACATACAATCCTAATGATACAGAAAGT-----  
-----  
-----  
AGTAACACAAACATCACAATCCCATGCAGAATAAAACAAATTATAAACATGTGGCAGGAGGTGGGAAGAGCAC  
TGTATGCCCCCTCCCATTGCAGGAAACATAACATGTAAATCAAAC---ATCACAGGACTACTATTGACA-----  
-----TATGATAGCGAAAATGACACA-----  
-----  
ACATTTCAGACCTGGAGGAGGAGATATGAGGGACAATTGGAGAAGTGAATTATATAAATATAAAGTGGTAGAAA  
TTAAGCCATTG---GGAGTAGCACCCACTGAGGCAAAAAGGAGAGTGGTG-----  
-----GAGAGAGAAAAAAGAGCA---GTGGGA---CTCGGAGCT-----  
GTGTTCCCTTGGGTTCTTGGGAGCA---GCCGGAAGCACTATG---GGCGCAGCATCA---  
ATAACGCTGACGGTACAG---GCCAGACAA---TTGTTG---TCTGGTATAGTGCAACAGCAAAGT---  
AATTTG---CTGAGG---GCTATAGAGGCGCAGCAGCATATGCTGCAACTTACAGTCTGGGGCATT  
>AB485647  
TTCTATTGCAATACATCAAACCTGTTTAATAGTACATATAAGCCTAATGATACAAATAGTACATATAAT---  
-----  
-----  
CCTAATGATACAATCACACTCCCATGCAGAATAAAACAAATTATAAACATGTGGCAGGGGGTAGGACAAGCAA  
TGTATGCCCCCTCCCATTGCAGGAAACATAACATGTAAATCAAAT---  
ATCACAGGACTACTATTGACACGGGATGGAGGGTTAAATGATAAC-----  
-----

-----  
ACAAACACAGAGACATTTCAGACCTGGAGGAGGAGATATGAGGGACAATTGGAGAAGTGAACCTATATAAATATA  
AAGTGGTAGAAATTAAACCATTG---GGCATAGCACCCACTGCGGCAAAAAGGAGAGTGGTGGAG-----  
-----ACGAGAGAAAAAAGAGCA---GTGGGA---ATAGGAGCT-----  
---GTGTTCCCTTGGGTTCTTGGGAGCA---GCAGGAAGCACTATG---GGCGGGCGTCA---  
ATAACGCTGACGGCACAG---GTCAGACAA---GTGTTG---TCTGGTATAGTGCAACAGCAAAGC---  
AATTTG---CTGAGA---GCCATAGAGGCGCAACAGCATCTGTTGCAACTCACGGTCTGGGGCATT  
>AY805330  
TTCTATTGCAATACATCAAAATTGTTTAATGGTACATCAGAG-----  
-----  
-----  
TCAAATTCAACCATCACACTCCCATGCAAGATAAAAACAAATTATAAACATGTGGCAAGGGGTAGGACGAGCAA  
TGTATGCCCCCTCCCATTCAGAGAAACATAACATGCAAAATCAAAT---  
ATCACAGGACTACTATTAAACACGTGATGGAGGAAATGGAAATGGT-----  
-----  
-----  
ACAGAGATATTTCAGACCGGGAGGAGGAGATATGAGGGACAATTGGAGAAGTGAATTATATAAATATAAAGTGG  
TGAAAAATTGAACCATTA---GGAATAGCACCCACTAAGGCAAAAAGGAGAGTGGTG-----  
-----GAGAGAGGAAAAAGAGCA---GTGGGA---ATAGGAGCT-----  
CTGTTCCCTTGGGTTCTTGGGAGCA---GCAGGAAGCACTATG---GGCGGGCGTCA---  
CTAACGCTGACGGTACAG---GCCAGACAA---TTATTG---TCTGGTATAGTGCAACAGCAAAAC---  
AATTTG---CTGAGG---GCTATAGAGGCGCAACAGCATATGTTGCAACTCACGGTCTGGGGCATT  
>AY494971  
TTCTATTGCAATACATCAAACTATTTAATAATAATACAGAG-----  
-----  
-----  
TCAAACACCACAATCCAATGCAGAATAAAAACAAATTATAAACATGTGGCAGGAAGTAGGACGGGCAATGTACG  
CCCCTCCCATTCGAAGGAAACATAACATGTAAATCAAAT---  
ATCACAGGACTACTATTGACGCGTGATGGAGGAGGCAATAACACA-----  
-----  
-----  
AATAAGAATGAGACATTTCAGACCTGGAGGAGGAGATATGAGAGACAATTGGAGAAGTGAATTATATAAATATA  
AAGTGGTAGAGATTAAGCCATTG---GGAGTAGCACCCACTGCGTCTAAAAGGAGAGTGGTG-----  
-----GAGAGAGAAAAAAGAGCA---GTGGGG---ATAGGAGTT-----  
---GTACTCCTTGGGCTCTTGGGAGCA---GCAGGAAGCACTATG---GGCGTGGCGTCA---  
ATGACGCTGGCGGTACAG---GCCAGACAA---GTATTG---TCTGGTGTAGTGCAACAGCAAAGC---  
AATTTG---CTGAAG---GCTATAGAGGCGCAACAGCATCTGTTGCAACTCACGGTCTGGGGCATT  
>KU200938  
TTCTATTGTAATACATCAAAGCTGTTTAATGGGACATACTGGCATAATGATACACACTGGCCTAATAGTACTA  
AT-----  
-----  
AGCTCCTCCATCATCATACTCCCATGCAGAATAAAAACAAATTATAAACATGTGGCAGGAGGTAGGGCGAGCAA  
TGTATGCCCCCTCCCATTCAGGGGAACTAACATGTAATTCAAAT---  
ATCACAGGACTACTATTAGTACGTGATGGAGGAAGAGGAAACAACACAAACAAC-----  
-----  
-----  
ACAGACACAGAGACATTTCAGACCTGGAGGAGGAAATATGAAGGATAATTGGAGAAGTGAATTATACAAATATA  
AAGTGGTAGAAATTAAAGCCATTG---GGAGTAGCACCCACCGAGGCACGGAGGATGGTGGTG-----  
-----ACGAGAGAAAAAAGAGCA---GTAGGA---ATAGGAGCT-----  
---GTACTCCTTGGGTTCTTGGGAGCT---GCAGGAAGCACTATG---GGCGGGCGTCA---  
ATAACGCTGACGGCACAG---GCCAGACAA---GTATTG---TCTGGTATAGTGCAACAGCAAAGC---  
AATTTG---CTGAGA---GCTATAGAGGCGCAACAACATCTGTTGCGACTCACAGTCTGGGGCATT  
>JF680908  
TTCTATTGCAATACAACAAACCTGTTCCATAATCGTATATATAATAGGACATATAATCCTAATGATACAAAA-  
-----  
-----  
TCAAACCTCAACCATCACACTCCCATGCAGAATAAAAACAAATTATAAACATGTGGCAGGAGGTAGGACGAGCAC  
TATATGCCCCCTCCCATTCGAAGGGGAAATAACATGTAATTCAACA---  
ATCACCGGATTACTATTAAACACGTGATGGAGGGCCAAATAATGAC-----  
-----

-----  
ACAGAGAAATTCAGACCTGGAGGAGGAGATATGAGGGACAATTGGAGAAGTGAATTATATAAAATATAAAGTGG  
TAGAAATTAAGCCATTG---GGAGTAGCACCCACTGGGGCAAAAAGGAGAGTGGTG-----  
-----GAGAGAGAAAAAGAGCA---GTAGGA---ATGGGAGCG-----  
TTGTTTCCTTGGGTTCTTGGGAGCA---GCAGGAAGCACTATG---GGCGCGGCGTCA---  
ATAACGCTGACGGTACAG---GCCAGACAA---CTGTTG---TCTGGTATAGTGCAACAGCAAAGC---  
AATTTG---CTGAGG---GCTATAGAGGCGCAACAGCATCTGTTGCAACTCACGGTCTGGGGCATT  
>JF680918  
TTCTATTGCAATACATCAAACTGTTTAATAGTACAGACAACAATAATAGTACAGTCAATAATAGGACAAATG  
AT-----  
-----  
TCAAATTCAACCATCACACTCCAATGCAAAATAAAACAAATTATAAACATGTGGCAGGAGGTAGGACGAGCAA  
TGTATGCCCCCTCCCATTTGAAGGAAACATAACATGTGTATCAAAT---  
ATCACAGGACTACTATTGACACGTGATGGAGGAAAAACTAATACTACTAATGGG-----  
ACAGATAATGGGATAAAT---AAT-----  
-----  
GATACAGAAACATTCAGACCTGGAGGAGGAGATATGAGGGACAATTGGAGAAGTGAATTATATAAAATATAAAG  
TGGTAGAAATTAAGCCATTA---GGAGTAGCACCCACTAGAGCAAAAAGGAGAGTGGTG-----  
-----GAGAGAGAGAAAAAGAGCA---GTGGGA---ATGGGAGCT-----  
TTGTTTCCTTGGGTTCTTGGGAATG---GCAGGAAGCACTATG---GGCGCAGCATCA---  
ATAACGCTGACGGTACAG---GCCAGACAA---TTATTG---TCTGGTATAGTGCAACAGCAAAAC---  
AATTTG---CTGAGG---GCTATAGAGGCGCAACAACATATGTTGCAACTCACGGTCTGGGGCATT  
>KC894102  
TTCTATTGCAATACATCACAACCTGTTTAATAGAACATACAATGAGACAGAAAGAAAATAGTACAGGAAGTAATT  
CAAATAGTACA-----  
-----GGAAGT-----  
AAGTCAAACCTCAACAATCACAATCCCATGCAGAATAAAACAAATTATAAACATGTGGCAGGAGGTGGGACGAG  
CAATGTATGCCCCCTCCCATTTGCAGGAAATATAACATGTAAATCAAAT---  
ATCACAGGACTACTATTGACACGTGATGGAGGAAGCAATAATGAT-----  
-----  
GAAAGAAGCAATAATGAAACAAAT-----  
GATACAGAGACATTCAGACCTGCAGGAGGAGATATGAGGGACAATTGGAGAAGTGAATTATACAAATATAAAG  
TGGTAGAAATTAAGCCATTG---GGAATAGCACCCACTAAGGCAAAAAGGAGAGTGGTG-----  
-----GAGAGAGAGAAAAAGAGCA---GTGGGA---ATAGGAGCT-----  
GTGTTTCCTTGGGTTCTTGGGAGCA---GCAGGAAGCACTATG---GGCGCAGCGTCA---  
ATAACGCTGACGGTACAG---GCCAGACAA---TTGTTG---TTTGGTATAGTGCAACAGCAAAAC---  
AATTTG---CTGAGG---GCTATAGAGGCGCAGCAGCATATGTTGCAACTCACAGTCTGGGGCATT  
>HQ912709  
TTCTACTGCAATACATCAAGACTGTTTAATAGTACATGGAGTGCTAATAGTACATGGAGTACATGGAATAATA  
CATCA-----  
-----  
AATAGTACAGATACAATCACACTCCCATGCAGAATAAAACAAATTATAAACATGTGGCAGGGAGTAGGAAAAG  
CAATGTATGCCCCCTCCCATTTGCAGGACTAATCAACTGTTCTCAAAT---  
ATTACAGGACTATTGTTGACAAGAGATGGTGGTGTAATAATACT-----  
-----  
AGTAGTGAAACCTTCAGACCTGGAGGAGGAGATATGAGAGACAATTGGAGAAGTGAATTATACAAATATAAAG  
TAGTAAGAATTGAACCAATA---GGTCTAGCACCCACCGAGGCAAAGAGAAGAGTGGTG-----  
-----GAAAGAGAAAAAAGAGCA---ATAGGA---CTAGGAGCT-----  
ATGTTTCCTTGGGTTCTTGAGAGCA---GCAGGAAGCACGATG---GGCGCAGCGTCA---  
CTGACGCTGACGGTACAG---GCCAGACAA---TTATTG---TCTGGTATAGTGCAACAGCAAAAC---  
AATTTG---CTGAGG---GCTATAGAGACGCAACAGCATCTGTTGCAACTCACAGTCTGGGGCATT  
>KJ787683  
TTCTACTGTAATACATCAAACTGTTTAATAGCACATGGAAGAATATTAATAGCACATGGAAT-----  
-----AATAGT---  
AAATGGGGTAATAGTACTAAT-----  
AATAGTAATAGTACAATCCAACCTCCCATGCAGAATAAAACAGATTATAAACATGTGGCAGGGAGTAGGAAAAG  
CAATGTATGCCCCCTCCCATAGAAGGACTAATTAGATGCTCATCAAAT---  
ATTACAGGGCTAATATTAACAAGGGATGGTGAT-----  
-----

-  
GGGATTTCTAAGGATAATGAGACTGTCAGACCTGGAGGAGGAAATATGAGAGACAATTGGAGAAGTGAATTAT  
ATAAATACAAAGTAGTACAAATTGAACCAATA---GGGATAGCACCCACCAGGGCAAAGAGAAGAGTGGTG--  
-----GAAAGGGAAAAAGAGCA---ATAGGA---  
CTAGGAGCT-----ATGTTCCCTTGGGTTCTTGGGAGCA---GCAGGAAGCACAAATG---  
GGCGCAGCGTCA---GTGACGCTGACGGTACAG---GCCAGACAG---GTATTG---  
TTTGGTATAGTGCAACAGCAAAAT---AATTTG---CTGAGG---  
GCTATAGAGGCGCAACAGCATCTGTTGCAACTCACGGTCTGGGGCATT  
>DQ141204  
TTCTACTGTAATACATCAGGACTGTTTAATAGCACATGGGATAATAATACTGATAATAGTAATAGTACAAGG-  
-----  
-----  
TTCAATAAGACAGTCAAAATCCCATGCAAAATTAACCGATTATTAACATGTGGCAGGAAGTTAGGAAAGCAA  
TGTATGCCCCCTCCCATAGAAAGGACTAATTAGATGCTCATCAAAT---  
ATTACAGGGCTAATATTGACAAGAGATGGTAGTAGCAATAGTTCT-----  
-----  
AATGAGACCGTCAGACCTGGAGGAGGGGATATGAGAGACAATTGGAGAAGTGAATTATATAAATACAAAGTAG  
TACAAATTGAACCAATA---GGAATAGCACCCACCAGGGCAAAGAGAAGAGTGGTG-----  
-----GAAAGGGAAAAAGAGCA---ATAGGA---CTAGGAGCT-----  
ATGTTCCCTTGGGTTCTTGGGAGCA---GCAGGAAGCACGATG---GGCGCAGCGTCA---  
GTGACGCTGACGGTACAG---GCCAGACAG---GTATTG---TCTGGTATAGTGCAACAGCAAAAC---  
AATTTG---CTGAGG---GCTATAGAGGCGCAACAGCATCTGTTGCAACTCACGGTCTGGGGCATT  
>GU191441  
TTCTACTGCAATACATCAGGACTGTTTAATGGAACATGGATTAACAATACATGGACATGGCTTAACAGTACAA  
AGAAT-----  
-----AAT---  
GAAACTAATACAAGTGTAACCATCCAATGTAGAATAAAACAAATTATAAACATGTGGCAGGGAGTAGGAAAAG  
CAATGTATGCCCCCTCCCATCAAAGGAGTAATTAAGTGACATCAAAT---  
ATTACAGGGATAATATTGACAAGAGATGGTGGTAAGAATGCTACT-----  
-----  
AATGAGACCTTCAGGCCTGGAGGAGGAAACATGAAGGACAATTGGAGAAGTGAATTATATAAATATAAAGTAG  
TAAGAATTGAACCATTA---GGAGTAGCACCTACCAGGGCAAAGAGAAGAGTGGTG-----  
-----GAAAGAGAAAAAGAGCA---ATAGGA---CTAGGAGCT-----  
GTGTTCCCTTGGTTTCTTGGGAGCA---GCAGGAAGCACGATG---GGCGCAGCGTCA---  
TTGACGCTGACGGTACAG---GCCAGACAA---TTATTG---TCTGGTATAGTGCAACAGCAAAAT---  
AATTTG---CTGAGG---GCTATAGAGGCGCAACAACATCTGTTGCAACTCACGGTCTGGGGCATT  
>KY392769  
TTCTACTGCAATACAACAGACCTGTTTAAAGAACATGGAATGGTACACTGAATAATAGTACA-----  
-----  
-----  
GGGTCAGAGAATATCACTCTCCAATGTAGAATAAAACAAATTATAAACATGTGGCAGGAAGTAGGAAAAGCAA  
TGTATGCCCCCTCCCATCGAGGGAAAAATCAAATGTTTCATCAAAT---  
ATTACAGGGCTAATATTGACAAGAGATGGTGGAAACAATAGTAGC-----  
-----  
-----  
ACCAACGAGACCCTCAGACCTGGAGGAGGAGATATGAGGGACAATTGGAGAAGTGAATTATATAAATATAAAG  
TAGTAAAAATTGAACCACTA---GGAGTAGCACCCACTAAGGCAAAAAGAAGAGTGGTG-----  
-----CAAAGAGAAAAAGAGCA---ATAGGA---TTAGGAGCT-----  
ATGTTCCCTTGGGTTCTTGGGAGCA---GCAGGAAGCACAAATG---GGCGCAGCGTCA---  
ATAACGCTGACGGTACAG---GCCAGACTG---TTATTG---TCTGGTATAGTGCAACAGCAAAAT---  
AATTTG---CTGAGA---GCTATAGAGGCGCAACAGCATATGTTGCAACTCACGGTCTGGGGCATT  
>KU168272  
TTCTACTGCAATACATCAAAATTGTTTAATAGTACATGGAATATAACAGCAGGGAAAAACGATACAACAACA-  
-----  
-----  
GGGAATAGCTCAATCACACTTCCATGCAGAATAAAACAAATTGTAAACATGTGGCAGAGAGTAGGACAAGCAA  
TGTATGCCCCCTCCCATCGAAGGACGGATTAATTGTATATCAAAT---  
ATTACAGGGCTAATATTGACAAGAGATGGTGGTAATGTAAGTGATACT-----

-----  
-----  
AACAAACACCCAGACCTTCAGACCTCTTGGAGGAGATATGAGGGACAATTGGAGAAGTGAATTATATAAAATATA  
AAGTAGTAAGAATTGAACCACTG---GGACTAGCGCCCAACAAAGCAAAGAGAAGAGTGGTG-----  
-----GACAGAGAAAAGAGAGCA--ATAGGA---CTAGGAGTT-----  
---ATGTTCCCTTGGGTTCTTGGGAGCA--GCAGGAAGCACGATG---GGCGCAGCGTCA---  
TTGACGCTGACGGTACAG---GCCAGAAAT---TTATTG---TCTGGTATAGTGCAACAGCAAAAC---  
AATTTG---CTGAGA---GCTATAGAGGCGCAACAGCATCTGTTGCAACTCACGGTCTGGGGCATT  
>KU168271  
TTCTACTGCAACACCTCAAAATTGTTTAATAGCACATGGGAGTGGGTAAATGGCACATTGACAACTTTAGTA  
TAGAG-----  
-----  
TCAAAATAATACAATAATAACCATCCCATGTAGAATAAAAACAAATTATAAACATGTGGCAGGGAGTAGGAAAAG  
CAATGTATGCCCCCTCCCATAGCAGGGCTAATTAAGTGTACATCAAAT---  
ATTACAGGACTACTATTGACAAAAGATGGAGGGAAAAATAATAGT-----  
-----  
-----  
AATAATGAGACCTTCAGGCCTGGAGGAGGAGATATGAGAGACAATTGGAGAAGTGAATTATATAAAATATAAAG  
TAGTAACAATTGAACCACTA---GGAGTAGCACCCACCAAGGCAAAGAGAAGAGTGGTG-----  
-----GAAAGAGAAAAAAGAGCA--ATAGGA---TTAGGAGCT-----  
CTGTTCCCTTGGGTTCTTGGGAGCA---GCAGGAAGCACTATG---GGCGCAGCGTCA---  
ATAACGCTGACGGCACAG---GCCAGACAA---TTATTG---TCTGGTATAGTGCAACAGCAAAAT---  
AATTTG---CTGAGA---GCTATAGAGGCGCAACAGCATATGTTGCAACTCACGGTCTGGGGCATT  
>M22639  
TTCTACTGTAATACATCAGGACTGTTTAATAGTACATGGGATATTAGTAAATCAGAATGGGCTAATAGTACAG  
AG-----  
-----  
TCAGATGATAAACCAATCACACTCCAATGCAGAATAAAAACAAATTATAAACATGTGGCAGGGAGTAGGAAAAG  
CAATGTATGCCCCCTCCCATCGAAGGACAAATTAATTGTTTCATCAAAT---  
ATTACAGGGCTATTATTGACAAGAGATGGTGGTACAAATAATAGT-----  
-----  
-----  
TCTAACGAGACCTTCAGACCTGGAGGAGGAGATATGAGGGACAATTGGAGAAGTGAATTATATAAAATATAAGG  
TAGTAAAAATTGAGCCACTA---GGAGTAGCACCTACCAGGGCAAAGAGAAGAGTGGTG-----  
-----GAAAGAGAAAAAAGAGCA--ATAGGA---CTAGGAGCT-----  
ATGTTCCCTTGGGTTCTTGGGAGCA---GCAGGAAGCACGATG---GGCGCACGGTCA---  
TTGACGCTGACGGTACAG---GCCAGACAG---TTATTG---TCTGGTATAGTGCAACAGCAAAAC---  
AATTTG---CTGAGG---GCTATAGAGGCGCAACAGCATCTGTTGCAACTCACGGTCTGGGGCATT  
>MH705152  
TTCTACTGCAATACATCAGCACTGTTTAATAGTAGTTTGTGATAACAAGTAATAGTACAGAGTCA-----  
-----  
-----  
AATGATAGTACAATCACACTCCCATGCAGAATAAAAACAAATTATAAACATGTGGCAGGGAGTAGGAAAAGCAA  
TGTATGCCCCCTCCCATTCAGGAAAGATCGAGTGTTTCATCAAAC---  
ATTACAGGGCTACTATTGACAAGAGATGGTGGTGCAAATAATAAT-----  
-----  
-----  
AGTAATGAGACCTTCAGACCTGGAGGAGGAGATATGAGAGACAATTGGAGAAGTGAATTATATAAAATATAAAG  
TAGTAAGAATTGAACCACTA---GGAGTAGCACCCACCAAGGCAAAGAGAAGAGTGGTG-----  
-----GAAAGAGAAAGAAGAGCA--ATAGGA---TTAGGAGCT-----  
ATGTTCCCTTGGGTTCTTGGGAGCA---GCAGGAAGCACGATG---GGCGCAGCGTCA---  
ATGACGCTGACGGTACAG---GCCAGACAG---TTATTG---TCTGGTATAGTGCAACAGCAAAAC---  
AACTTG---CTGAGG---GCTATAGAGGCGCAACAGCATCTGTTGCAACTCACGGTCTGGGGCATT  
>J03653  
TTCTACTGCAATACATCAAGACTGTTTAATAGTACATGGAATAGTAGTACATGGAATAATGATACATTAAAT-  
-----  
-----  
AGTGAAGGAACAATCAAACCTCCCATGCAGAATAAAAACAAATTATAAACATGTGGCAGGGAGTAGGAAAAGCAA  
TGTATGCCCCCTCCTATCGAAGGACTAATCAAATGCACATCAAAT---  
ATTACAGGGCTATTATTGACAAGAGACGGTGGTGTAAATAATAGT-----

-----  
-----  
ACTAATGAGACCTTCAGACCTGGAGGAGGAGATATGAAAGACAATTGGAGAAATGAATTATACAAATATAAAG  
TAGTAAGAATTGAACCACTA---GGAATAGCACCCACCAGGGCAAAGAGAAGAGTGGTG-----  
-----GAAAGAGAAAAAAGAGCA--ATAGGA---CTTGAGCT-----  
GTGTTTCCTTGGGTTCTTGGGAGCA--GCAGGAAGCACGATG--GGCGCAGTGTCA---  
GTGGCACTGACGGGACAG---GCCAGACAA--TTATTG---TCTGGTATAGTGCAACAGCAAAAC---  
AATTTG---CTGAGG---GCTATAGAGGCGCAACAGCATATGTTGCAACTCACAGTCTGGGGCATT  
>HM068555  
TTCTACTGCAATACATCAGGACTGTTTAATAGCACATGGAATAAGGATAATAGCACATGGAATAATAATGGTT  
CCCTAGGG-----  
-----GAG---  
GATACAAATCCAAACATCACACTCCCATGCAGAATTAAACAAATCATAAACATGTGGCAGGGAGTAGGAATAG  
CAATGTATGCCCCCTCCCATCAAAGGCCAATCAATTGTACATCAAAT---  
ATTACAGGGCTACTATTGACAAGAGATGATGAAGGTTTGGTGGTGTCAAAATT-----AAA-----  
-----  
-  
AATGAGACCAAAATTAATGAGACCTTCAGACCTGGAGGAGGAGATATGAGGGATAATTGGAGAAGTGAATTAT  
ATAAAATATAAAGTAGTAAGACTTGAACCACTA---GGAGTAGCACCCACCAAGGCAAAAAGAAGAGTGGTG--  
-----GAAAGAGAAAAAAGAGCA---GTAGGA---  
TTAGGAGCT-----ATGTTTCCTTGGGTTCTTGGGAGCA--GCAGGAAGCACAAATG---  
GGCGCAGCGTCA--GTGACGCTGACGGTACAG---GCCAGACTA---TTATTG---  
TCTGGTATAGTGCAACAGCAAAAGC---AATTTG---CTGAGG---  
GCTATAGAGGCGCAACAGCATCTGTTGCAACTCACGGTCTGGGGCATT  
>AY371155  
TTCTACTGTAATACATCAAACTGTTTAATAGAACATGGAGTATTGGTACATGGGAGGATAGTACAGGGAATG  
ATAATAAT-----  
-----ACT---  
GCATTAAATGATACAATAACCTCCCATGTAGAATAAAACAAATTATAAACATGTGGCAGGAAGTAGGAAAAG  
CAATGTATGCCCCCTCCCATCGCAGGACAAATTAAATGTACATCAAAT---  
ATTACAGGGCTATTATTGACAAGAGATGGTGGTAATAATAATTCTGGTAATAAT-----  
-----  
----  
TCTGGAAATTCTACAGAGATCTTCAGGCCTGGAGGAGGAAATATGAAGGACAATTGGAGAAGTGAATTATATA  
AATATAAAATAGTAAGAATTGAACCACTA--GGAGTAGCACCCACCAGGGCAAAGAGAAGAGTGGTG-----  
-----GAAAGAGAAAAAAGAGCA--ATAGGA---  
TTAGGAGCT-----ATGTTTCCTTGGGTTCTTGGGAGCA--GCAGGAAGCACGATG---  
GGCGCAGCGTCA--ATGACGCTGACGGTACAG--GCCAGACTA---TTATTG---  
TCTGGTATAGTGCAACAGCAAAAT---AATTTG---CTGAGA---  
GCTATAGAGGCGCAACAACATCTGTTGCAACTCACAGTCTGGGGCATT  
>AY371157  
TTCTACTGCAATACATCAGGATTGTTTAATGGAACATGGGATAATGGAACATGGACATGGAATACTAGTGCAG  
TA-----  
-----  
CCAAATGAAACAATCACAATCCCATGTAGAATAAAACAAATTATAAACATGTGGCAGGGAGTAGGAAGAGCAA  
TGATATGCCCCCTCCCATTTGAAGGACTAATTAAATGTTTCATCAAAT---  
ATTACAGGGTTACTGTTGACAAGAGATGGTGGCAATACTAGTGAT-----  
-----  
-----  
AGTGCAGAGACTTTTAGGCCTGGAGGGGGAGATATGAGGGACAATTGGAGAAGTGAATTATATAAATATAAAG  
TAGTAAAAATTGAACCACTA---GGAGTAGCACCCACCAGGGCAAAGAGAAGAGTGGTG-----  
-----GAAAGAGAAAAAAGAGCA--ATAGGA---TTAGGAGCT-----  
ATGTTTCCTTGGGTTCTTGGGAGCA--GCAGGAAGCACGATG--GGCGCAGCGTCA---  
GTGACGCTGACGGTACAG---GCCAGACAA--TTATTG---TCTGGTATAGTGCAACAGCAAAAT---  
AATTTG---CTGAGG---GCTATAGAGGCGCAACAGCATCTGTTGCAACTCACGGTCTGGGGCATT  
>JX140670  
TTCTACTGTAACACATCATACCTGTTTAATGGCACATGGATTAATGGCACAAGGAATGACACAAGGACTAAT-  
-----  
-----  
GGAACAGGGGATACAATAATCCCATGTAGAATAAAACAAATTATAAACATGTGGCAGGGAGTAGGAAAAGCAA

TGTATGCCCCCTCCTATTAAAGGACAAATTAAATGTTTCATCAACT ---  
GTGACAGGGCTAATACTGACAGTAGATGAAGTTAATAATTCGAGT-----  
-----  
-----  
CCTGAGGCGACCTTCAGGCCTGGAGGAGGAGATATGAGGGACAATTGGAGAAGTGAATTATATAAAATATAAAG  
TGGTGAGAATTGAACCATTA---GGAATAGCACCAACCAAGGCAAAGAGAAGAGTGGTG-----  
-----GAAAGAGAAAAAGAGAGCA--ATAGGA---CTGGGAGCT-----  
ATGTTCCCTTGGGTTCTTGGGAGCA---GCAGGAAGCACGATG---GGCGCAGCGTCA---  
ATAACGCTGACGGTACAG---GCCAGACAA---TTATTG---TCTGGTATAGTGCAACAGCAAAAT---  
AATTTG---CTGAGG---GCTATAGAGGCGCAACAGCATCTGTTGCAACTCACAGTCTGGGGCATT  
>HM068556  
TTCTACTGTAATACATCAGGACTGTTTAAATAGTACATGGAACAATACCGCATCAAATAATACAAGGGTA----  
-----  
-----  
AATAATGAAACAATCACAATCCCATGCAGAATAAAACAAATTATAAACATGTGGCAGGGAGTAGGAAAAGCAA  
TGTATGCCCCCCCCATTAGCGGACTAGTCAAATGTTTCATCAAAT---  
ATTACAGGACTATTGTTGACAAGAGATGGTGGCTCTAATAATGATAGT-----  
-----  
-----  
GAGAGTAGTGAGACCTTCAGACCTGCAGGGGGAAATATGAGAGACAATTGGAGAAGTGAATTATATAAAATATA  
AAGTAGTAAGAATTGAACCATTA---GGGATAGCCCCCACCAGGCAAGAAGAAGAGTGGTG-----  
-----GAAAGAGAAAAAGAGCA--ATAGGA---CTAGGAGCT-----  
---ATGTTCCCTTGGGTTCTTGGGAGCA---GCAGGAAGCACGATG---GGCGCAGCGTCC---  
CTGACGCTGACGGTACAG---GCCAGACAA---TTATTG---TCTGGTATAGTGCAACAGCAAAAC---  
AATTTG---CTGAGA---GCTATAGAAGCGCAACAACATTTATTGCAGCTCACAGTCTGGGGCATT  
>JN054274  
TTCTACTGCAATACATCAGGACTGTTTAAATAAGACATGGACAGGTAATGAGACAGGGACTAATAACAAC----  
-----  
-----  
ACAGATAGGAATATCACACTCCCATGCAGAATAAAGCAAATTATAAACATGTGGCAGGAAGTGGGAAAAGCAA  
TGTATGCCCCCTCCCATTGCAGGATTAATTAAATGTTTCATCAAAT---  
ATTACAGGGCTATTACTGACAAGAGATGGTGGTAGTAGTAATAATGCT-----  
-----  
-----  
TCTAATAATGAGACCATCAGACCTGGAGGAGGAAATATGAAGGATAATTGGAGAAGTGAATTATATAAAATATA  
AAGTAGTAAGAATTGAACCAATA---GGAATAGCACCTACCAAGGCAAAGAGAAGAGTGGTG-----  
-----GAAAGAGAAAAAGAGCA--ATAGGA---CTAGGAGCT-----  
---ATGTTCCCTTGGGTTCTTGGGAACA---GCAGGAAGCACAAATG---GGCGCAGCGTCA---  
GTGACGCTGACGGTACAG---GCCAGACAA---TTATTG---TCTGGTATAGTGCAACAGCAAAAC---  
AATTTG---CTGAGG---GCTATAGAGGCGCAACAGCACCTGTTGCAACTCACGGTCTGGGGCATT  
>AF321082  
TTCTATTGCAATACATCAAACTGTTTAAATAGCACTTGGAAGAACAATAGTGCTTGGGAGAGCAATAGCACTA  
CC-----  
-----  
AGCTCAAATGGCAATATAACCCCTCCAATGCAGAATAAAGCAAATTGTAAACATGTGGCAGGGAGTAGGAAAAG  
CCATGTATGCCCCCTCCCATTTGAAGGAAAACCTTAACCTGTTTCATCAAAT---  
ATTACAGGGCTACTATTGGTAAGAGATGGTGGGGGAGATGATAATAAT-----  
-----  
-----  
AGGACAAATGAGACCTTCAGACCTGGAGGAGGAGATATGAGGGACAATTGGAGAAGTGAATTATATAAAATATA  
AAGTAGTAAGACTTGAACCACTA---GGAATAGCACCCACCAAGGCAAAGAGAAGAGTGGTG-----  
-----GAAAGAGAAAAAGAGCA--ATAGGA---CTAGGAGCT-----  
---ATGTTCCCTTGGGTTCTTGGGAGCA---GCAGGAAGCACGATG---GGCGCAGCGTCA---  
ATAACGCTGACGGTACAG---GCCAGACAG---TTATTG---TCTGGTATAGTGACAGCAGCAAAAC---  
AATTTG---CTGAGA---GCTATAGAGGCGCAACAGCATCTGTTGCAACTCACGGTCTGGGGCATT  
>HQ385448  
TTCTACTGTAATACCTCAAACTGTTTAAATAGAACATGGAATATATCAGAACCAAGTAAT-----  
-----  
-----  
GATACAGAGCCAATCATACTCCAATGCAGAATAAAACAAATTATAAATATGTGGCAGGAAGTAGGAAAAGCAA

TGTATGCCCCCTCCCATTCAGAGACCCATCAAATGTTTCATCAAAT ---  
ATTACAGGACTGATATTGACAAGAGATAGTGGGACTGGGAACGAG-----  
-----  
AGCAAGATCTTCAGACCTGGAGGAGGAGATATGAGGGACAATTGGAGAAGTGAATTATACAAATATAAAGTAG  
TAAGAATTGAACCCCTA---GGAATAGCACCCACCAAGGCAAAAAGAAGAGTGGTG-----  
-----GAAAGAGAAAAAAGAGCA---ATAGGA---CTAGGAGCT-----  
GTGTTCCCTTGGGTTCTTGGGAGCA---GCAGGAAGCACAAATG---GGCGCAGCGTCG---  
GTGGCGCTGACGGCACAG---GCCAGACAA---GTATTG---TCTGGTATAGTGCAACAGCAAAAC---  
AATTTG---CTGAGG---GCTATAGAGGCGCAACAGCATCTGTTGCAACTCACGGTCTGGGGCATT  
>AF457090  
TTCTACTGCAATACATCACAACCTGTTTAAATAGTACGTGGGATAATAATAAGTGGAGTGATACAACAAATAGTA  
CAGGG-----  
-----  
GGAAATGCGAGTAAATCATACTCCCATGCAGAATAAAACAAATTATAAACATGTGGCAGGAAGTAGGAAAAG  
CAATGTATGCCCCCTCCCATTAGAGGAGCCATCAACTGTTTATCAAAT---  
GTTACAGGACTATTGTTGACAAGAGATGGAGGGAATATCAATAGT-----  
-----  
ACTAATGAGACCTTCAGGCCTGGAGGAGGGGATATGAGAGACAATTGGAGAAGTGAGTTATACAAATATAAAG  
TAGTAAAGATCGAACCCTA---GGTCTAGCACCCACCGAGGCAAAGAGAAGAGTGGTG-----  
-----GAAAGAGAAAAAAGAGCA---ATAGGA---CTGGGAGCT-----  
TTGTTCCCTTGGATTCTTGGGAGCA---GCAGGAAGCACGATG---GGCGCAGCGTCG---  
ATGACGCTGACGGTACAG---GCCAGACAA---GTATTG---TCTGGTATAGTGCAACAGCAAAAC---  
AATTTG---CTGAAG---GCTATAGAGGCGCAACAGCATATGTTGCAACTCACAGTCTGGGGCATT  
>KU921767  
TTCTATTGTAATACATCAAACCTGTTTAAATAGTATATGGAATACAACACAAGGGACTAATAGTACAGGGTCA-  
-----  
-----  
GAAAATAAAACAATCACGATCCAATGCAGAATAAAGCAAATTATAAATATGTGGCAAGAAGTAGGAAAAGCAA  
TGTATGCCCCCTCCCATCGAAGGATACATTAATTGTTTCATCAAAT---  
ATTACGGGGCTACTATTGACAAGAGATGGTGGTATACAGAATGAT-----  
-----  
TCTGATGAAACCTTCAGACCTGGAGGAGGAAATATGAAGGACAATTGGAGAAGTGAATTATATAAATATAAAG  
TAGTAAAAATTGAACCCTG---GGAGTAGCACCCACCAAGGCAAGGAGAAGAGTAGTG-----  
-----GAAAGAGAAAAAAGAGCA---ATAGGT---CTAGGAGCT-----  
ATGTTCCCTTGGGTTCTTGGGAGCA---GCAGGAAGCACGATG---GGCGCAGCGTCA---  
GTGACGCTGACGGTACAG---GCCAGACAA---TTATTG---TCTGGTATAGTGCAACAGCAAAAC---  
AATTTG---CTGAGG---GCTATAGAGGCGCAACAGCATCTGTTGCAACTCACAGTCTGGGGCATT  
>MH425161  
TTCTACTGCAATACATCAGGACTGTTTAAATAGTACCTGGATGTTTAAATAGTACAGAGGTTAATAGTACAGGGT  
CA-----  
-----  
CATGATAGTACAATCACACTCCAATGCAAAATAAAACAAATTATAAACATGTGGCAAGGAGTAGGAAGAGCAA  
TGTATGCCCCCTCCCATGGAAGGAGAAATCAAATGTTTCATCAAAC---  
ATTACAGGGCTAATATTGACAAGAGATGGTGGTTCAAATAGTAGT-----  
-----  
ACGAATGAGACCCTCAGACCTGGAGGAGGAAATATGAAGGACAATTGGAGAAGTGAATTATATAAATATAAAG  
TAGTAAGAATTGAACCAATA---GGAATAGCACCCACCAAGGCAAAGAGAATAGTAGTG-----  
-----GAAAGAGAAAAAAGGGCA---ATGGGT---TTAGGAGTT-----  
ATTTTCCTTGGGTTCTTGGGAGCA---CCAGAAACCACGATG---GGCCCAGCTTCA---  
GTGACGCTGACGGTACAG---GCCAGACAG---TTATTG---TCTGGTATAGTGCAACAGCAAAAC---  
AATTTG---CTGAGG---CCTATAGAGGCGCAACAGCATCTGTTGCAACTCACGGTCTGGGGCATT  
>L22945  
TTCTACTGCAATACATCAGGACTGTTTAAATAGTACATGGAAAACAAA-----  
-----  
-----  
TCAGGTGATAATATTACACTCCCATGCAGAATAAAACAGATTATAAACCTGTGGCAGAGAGTAGGAAAAGCAA

TGTATGCCCCCTCCCATTTGAGGGAGTGATCAGCTGTTTCATCAAAT ---  
 ATTACAGGGCTACTATTGCTAAGAGATGGTGGGATACATAATACTAGC-----  
 -----  
 -----  
 AATGAGACCGAGACCTTCAGACCTGGAGGAGGAGATATGAGGGACAATTGGAGAAGTGAATTATATAAAATATA  
 AAGTAGTAAGACTCGAACCCTA --- GGAGTAGCACCCACCACAGCAAAGAGAAGAGTGGTG-----  
 -----  
 -----AAAAGAGAAAAAAGAGCA --- ATAGGA --- CTGGGAGTT-----  
 ---ATGTTCCCTTGGGTTCTTGGGAGCA --- GCAGGAAGCACGATG --- GGCGCAGCGTCA ---  
 ATGGCGCTGACGGTACAG --- GCCAGACAG --- CTATTG --- TCTGGTATAGTGCAACAGCAAAAC ---  
 AATTTG --- CTGAGA --- GCTATAGAGGCGCAACAGCATCTGTTGCAACTCACGGTCTGGGGCATT  
 >AJ488926  
 TTTTACTGCAATACATCAAACTGTTTGATAGAGAATTTAACATAACAGGGAATAATAGTACTAACAATAGT-  
 -----  
 -----  
 ACAGATGATACAATAACCATCCCATGCAGAATAAAACAAATTATAAACATGTGGCAGGGAGTAGGAAAAGCAA  
 TGTATGCCCCCTCCCATCGCAGGACAAATTAAATGTTTCATCAAAT ---  
 ATTACAGGGCTACTATTGACAAGAGATGGTGGTAAAAATGCTTCT-----  
 -----  
 -----  
 AATGAGACCTTCAGACCTGGAGGAGGAGATATGAGGGACAATTGGAGAAGTGAATTATATAAAATATAAAGTAG  
 TAAGAATTGAACCCTA --- GGAGTAGCACCCACCAAGGCAAGGAGAAGAGTGGTG-----  
 -----  
 -----GAAAGAGAAAAAAGAGCA --- ATAGGA --- TTAGGAGCT-----  
 ATGTTCCCTTGGGTTCTTGGGAGCA --- GCAGGAAGCACGATG --- GGCGCAGCGTCA ---  
 GTGACGCTGACGGTACAG --- GCCAGACAA --- TTATTG --- TCTGGTATAGTGCAACAGCAAAAC ---  
 AATTTG --- CTGAGG --- GCTATAGAGGCGCAACAGCATCTGTTGCAACTCACGGTCTGGGGCATT  
 >AY253311  
 TTCTACTGCAATACATCACTCCTGTTTAACTACATGGATTAAGGGTACACAAAATAATACAGAGACA ---  
 -----  
 -----  
 AATAATAGTACAATCACAATCCCATGCAGAATAAAACAAATTATAAACATGTGGCAGGGAGTAGGAAAAGCAA  
 TGTATGCCCCCTCCCATCGCAGGACTAATCAGATGTACATCAAAT ---  
 ATTACAGGACTATTACTAACAAGAGATGGTGGTAATGTAAATAAT-----  
 -----  
 -----  
 AGTAGAGAGGAGATCTTCAGACCTGGAGGAGGAGATATGAGAGACAATTGGAGAAGTGAATTATACAAATATA  
 AAGTAGTAAGAATAGAACCAATA --- GGAGTAGCACCCACCAGGGCAAAGAGAAGAGTGGTG-----  
 -----  
 -----GAAAGAGAAAAAAGAGCA --- ATAGGA --- CTAGGAGCT-----  
 ---ATGTTCCCTTGGGTTCTTGGGAGCA --- GCAGGAAGCACGATG --- GGCGCAGCGTCA ---  
 TTGACGCTGACGGTACAG --- GCCAGACAG --- TTATTG --- TCTGGTATAGTGCAACAGCAAAAC ---  
 AATTTG --- CTGAGG --- GCTATAGAGGCGCAACAGCATTTGTTGCAACTCACAGTCTGGGGCATT  
 >U65075  
 TTCTACTGCAATACATCAGAACTGTTTAAATATAACAAATAGTACAGGGGTAAAT-----  
 -----  
 -----  
 GAGAGTAGTATAATCAGACTCCCATGCAGAATAAAACAAATTATAAACATGTGGCAGGGAGTAGGAAAAGCAA  
 TGTATGCCCCCTCCCATTTGCAGGACAAATCAACTGTTTCATCAAAT ---  
 ATTACAGGATTATTGTTGACAAGAGATGGTGGTGCAAATAGTAGT-----  
 -----  
 -----  
 GATGAGACCTTCAGACCTGGAGGAGGAGATATGAGAGACAATTGGAGAAGTGAATTATACAAATATAAAGTAG  
 TAAGACTTGAACCAATA --- GTCTAGCACCCACCAAGGCAAAGAGAAGAGTGGTG-----  
 -----  
 -----GAAAGAGAAAAAAGAGCA --- ATAGGA --- CTAGGAGCT-----  
 GTGTTCCCTTGGGTTCTTGGGAGCA --- GCAGGAAGCACAAATG --- GGCGCAGCGTCA ---  
 CTGACGCTGACGGTACAG --- ACCAGAAAG --- TTATTG --- TCTGGGATAGTGCAACAGCAAGAC ---  
 AATTTA --- CTGAGG --- GCTATAGAGGCGCAACAGCATCTGTTGCAACTCACAGTCTGGGGCATT  
 >EU853116  
 TTCTACTGCAATACATCAGGACTGTTTAAATAGTACATGGAATGAGACTACACCAAATAGTACAAATACAAAT-  
 -----  
 -----  
 AAGAATGACACAATCACACTCCAATGCAGAATAAAACAAATTTGTAAACATGTGGCAGGGAGTAGGAAGAGCAA

TATATGCCCCCTCCCATTTGAAGGAGTACTCAACTGTTTCATCAAAT ---  
ATTACAGGGCTATTGTTGACAAGAGATGGTGGTGTAGGGAATGAGACA-----  
-----  
AATGGAACAAATGAGACTTTCAGACCAGGAGGAGAGATATGGGAGACAATTGGAGAAGTGAATTATACAAAT  
ATAAAGTAGTAAGAATTGAACCACTA --- GGTCTAGCACCCACCAGGGCAAAGAGAAGAGTGGTG-----  
-----GAAAGAGAAAAAAGAGCA --- ATAGGA --- CTAGGAGCT ---  
-----GTGTTTCCTTGGGTTCTTGGGAGCA --- GCAGGAAGCACGATG --- GGCGCAGCGTCA ---  
CTGACGCTGACGGTACAG --- TCCAGACAG --- TTATTG --- TCTGGTATAGTGCAACAGCAAGAC ---  
AATTTG --- CTGAGG --- GCTACAGAGGCGCAACAGCACCTGTTGCAACTCACGGTCTGGGGCATT  
>KF986131  
TTCTACTGCAATACGTCAGGCCTGTTTAATAGTACATGGAACAATAAACT-----  
-----  
-ACATCTAATGACATG-----  
GGGGTAAATGGGACAATCACACTCCAATGCAGAATAAAACAAATTATAAACATGTGGCAGGGAGTAGGAAAAG  
CAATATATGCTCCTCCCATTTGAAGGAATAATTAAATGTTCTCCTCAAAT ---  
ATTACAGGACTATTGCTGACAAGGGATGGTGGT-----  
-----  
----  
GTAAATTCTAGTAATGAGACCTTCAGACCTGGAGGAGGAGATATGAGAGACAATTGGAGAAGTGAATTATACA  
AATATAAAGTAGTAAGAATTGAACCAATA --- GGTCTAGCACCCACCAAGGCAAAGAGAAGAGTGGTG-----  
-----GAAAGAGAAAAAAGAGCA --- ATAGGA ---  
CTGGGAGCG-----ATGTTTCCTTGGGTTCTTGGGAGCA --- GCAGGAAGCACGATG ---  
GGCGCAGCGTCA --- ATAACGCTGACGGTACAG --- GCCAGACAG --- CTATTG ---  
TCTGGTATAGTGACAGCAGCAAAAC --- AATTTG --- CTGAGG ---  
GCTATAGAGGCGCAACAGCATCTGTTGCAACTCACAGTCTGGGGCATT  
>JX658588  
TTCTACTGCAATACAACAGAACTGTTCAATAGTACATGGAATAATACGTCAACTAGTACAGGGGGA-----  
-----  
-----  
AATGAAAGTACAATCACACTCCAATGCAGAATAAAACAAATTATAAATATGTGGCAGGGAGTAGGAAAAGCAA  
TGTATGCCCCCTCCCATTTGAAGGATTAATCAAATGTTTCATCAAAT ---  
ATTACAGGATTATTGTTGACAAGAGATAGT --- ATAGGTAAGAAT-----  
-----  
-----  
AAGTCGAATGAGACCTTCAGACCTGGAGGAGGAGATATGAGAGAAAATTGGAGAAGTGAATTATATAAATATA  
AAGTAGTAAGAATTGAACCACTA --- GGTCTAGCACCCACTAAGGCAAAGAGAAGAGTGGTG-----  
-----GAGAGAGAAAAAAGAGCA --- ATAGGA --- CTAGGAGCT-----  
---ATGTTTCCTTGGGTTCTTGGGAGCA --- GCAGGAAGCACGATG --- GGCGCAGCGTCA ---  
ATGACGCTGACGGTACAG --- GCCAGACAG --- TTATTG --- TCTGGTATAGTGCAACAGCAAAAC ---  
AATTTG --- CTGAGG --- GCTATAGAGGCGCAACAGCATCTGTTGCAACTCACAGTCTGGGGCATT  
>JX236668  
TTCTACTGTGATACATCAGAACTATTTAATAAGACATCAAACAGTACAGGGGGA-----  
-----  
-----  
CCTAGGGATACAATTACACTCCCATGCAGAATAAAACAAATCATAAACATGTGGCAGGGAGTAGGAAAAGCAA  
TGTATGCCCCCTCCCATTTGAAGGACTAATCAAATGTTTCATCAAAT ---  
ATTACAGGACTATTGTTGACAAGAGATGGGGGTACAAATAATAGT-----  
-----  
-----  
AAGGAGGAGACTTTCAGACCTGGAGGAGGAGATATGAGAGACAATTGGAGAAGTGAATTATACAAATATAAAG  
TAGTAAGAGTTGAACCACTA --- GGTCTAGCACCCACCAGGGCAAAGAGAAGAGTGGTG-----  
-----GAAAGAGAAAAAAGAGCG --- ATAGGA --- CTAGGAGCT-----  
GTGTTTCCTTGGGTTCTTGGGAGCA --- GCAGGAAGCACGATG --- GGCGCAGCGTCA ---  
CTGACACTGACGGTACAG --- GCCAGACAG --- TTATTG --- TCTGGAATAGTGCAACAGCAAAAT ---  
AATTTG --- CTGATG --- GCTATAGAGGCGCAACAGCATCTGTTGCAACTCACAGTCTGGGGCATT  
>HM215351  
TTCTACTGCAATACATCAGATCTGTTTAATAGGACATGGACATCAAATAGTACATGGGGATCAAATAGTACAG  
GG-----  
-----

GGAAATGATACAATCAAACCTCCAGTGCAGAATAAAACAAATTATAAACATGTGGCAGGGAGTAGGAAGAGCAA  
TGTATGCCCCCTCCCATTGCAGGGAACATCAGCTGTTTCATCAAAT---  
ATTACAGGAATATTGTTGACAAGAGATGGTGGTGCAGATAATAAT-----  
-----  
GGTACAAATGAGACCTTCAGACCTGGAGGAGGAGATATGAGAGACAATTGGAGAAGTGAATTATACAAATATA  
AAGTAGTAAGACTTGAGCCATTA---GGTCTAGCACCCACTAAAGCAAAAAGAAGAGTGGTG-----  
-----GAAAGAGAAAAAAGAGCA---ATAGGA---CTGGGAGCT-----  
---ATGTTCCCTTGGGTTCTTGGGAGCA---GCAGGAAGCACGATG---GGCGCAGTGTC---  
TTGACGCTGACGGTACAG---ACCAGACAG---TTATTG---TCTGGTATAGTGCAACAGCAAAAC---  
AATTTG---CTGAGG---GCTATAGAGGCGCAACAGCATTTGTTGCAACTCACAGTCTGGGGCATT  
>JX236673  
TTCTACTGCGATACATCAAACTGTTTAATAGCACATGGATACGGCATAACAACACATGGAATAGCACATGGA  
AAGTCGAGGAT-----  
-GAAAATAGTACAGAG-----  
ATAAGGAATGATACAATCGTGATCTCATGCAGAATAAAACAAATTATAAACATGTGGCAGGAAGTAGGAAAAG  
CAATGTATGCCCCCTTATTAGAGGAGTAATCAATTGTACATCAAAT---  
ATTACAGGGCTCTTACTACTAAGGGATGGAGGTACAAATAGGACT-----  
-----  
AATGAGACCTTCAGACCTGGAGGAGGAGATATGAGAGACAATTGGAGAAGTGAAGTATACAAATATAAAGTAG  
TAAGAATTGAACCACTA---GGAATAGCACCCACCAGGGCAAAAAGAAGAGTGGTG-----  
-----GAAAGAGAAAAAAGAGCA---ATAGGA---TTAGGAGCT-----  
ATGTTCCCTTGGGTTCTTGGGAGCA---GCAGGAAGCACAAATG---GGCGCAGCGTCA---  
CTAACGCTGACGGTACAG---GCCAGACAG---TTATTG---TCTGGTATAGTGCAACAGCAAAAC---  
AATTTG---CTGAGG---GCTATAGAGGTGCAACAACGACTGTTGCAACTCACAGTCTGGGGCATT  
>JX236679  
TTCTACTGCAATACATCAGGACTGTTTAATAGTAAATGGGGGAATGATACAGATACAGGTAATAATAGTACA-  
-----  
-----  
AGTGACAAACCAATCACACTCCAGTGCAAAATAAAACAAATTATAAACATGTGGCAGGGAGTAGGCAGGGCAA  
TGTATGCCCCCTCCCATTGAAGGACAAATTAAATGTTTCATCAAAT---  
ATTACAGGATTATTATTGACAAGAGATGGTGGTATTGGTGGTAAT-----  
-----  
GAGAATGAGACCTTCAGGCCGGGAGGAGGAGATATGAGAGATAATTGGAGAAGTGAATTATACAAATATAAAG  
TAGTAAAAATTGAACCATTA---GGTCTAGCGCCCACCAGGGCAAAGAGAAGAGTGGTG-----  
-----GAAAGAGAAAAAAGAGCA---ATAGGA---CTAGGAGCT-----  
GTGTTCCCTTGGGTTCTTGGGAGCA---GCAGGAAGCACGATG---GGCGCAGCGTCA---  
CTGACGCTGACGGTACAG---GCCAGACAG---GTATTG---TCTGGTATAGTGCAACAGCAAAAC---  
AATTTG---CTGAGG---GCTATAGAGGCGCAACAGCATCTGTTGCAACTCACAGTCTGGGGCATT  
>JX236672  
TTCTACTGCAATACATCAAGACTGTTTAATAGCACATGGACAAAAAATAACACATGGGCAAATAATAGTACAA  
TAAAT-----  
-----  
GAGACAGAGGTTATCACACTCCCATGCAGAATAAAACAAATTATAAACATGTGGCAGGGAGTAGGAAAAGCAA  
TGTATGCCCCCTCCCATTGCAGGAAAAATCCACTGTTTCATCAAAC---  
ATTACAGGACTACTGTTGACAAGAGATGGTGGTAGTCCAAATAATGGG-----  
-----  
ACTAATGACACCTTCAGACCTGGAGGGGGAGATATGAGAGACAATTGGAGAAGTGAATTATATAAATATAAAG  
TAGTAAGAATTGAACCACTG---GGTCTAGCACCCACCAAGGCAAAGAGAAGAGTGGTG-----  
-----GAAAGAGAAAAAAGAGCA---ATAGGA---CTAGGAGCC-----  
CTGTTCCCTTGGGTTCTTGGGAACA---GCAGGAAGCACGATG---GGCGCAGCGTCA---  
CTGACGCTGACGGTACAG---GCCAGACAG---TTATTG---TCTGGTATAGTGCAACAGCAAAAC---  
AATTTG---CTGAGA---GCTATAGAGGCGCAACAGCATCTGTTGCAACTCACAGTCTGGGGCATT  
>U88824  
TTCTACTGCAATACAACAAGACTGTTTAATAGTACATGGAAAAGGAATAATAGTGAATGGAGGAGTGATAATA  
CA-----  
-----

CCAGATGAGACAATCACACTCCAATGCAGAATAAAACAAATTATAAACATGTGGCAGGAAGTAGGAAAAGCAA  
 TGTATGCCCCCTCCCATTGAAGGATTCATCAACTGTTTCATCAAAT---  
 ATTACAGGACTATTGTTGACAAGAGATGGTGGTGCAATTAATAGT-----  
 -----  
 -----  
 AGCCAGAATGAGACCTTCAGACCTGGAGGAGGAGATATGAGAAACAATTGGAGAAGTGAATTATACAAATATA  
 AAGTAGTAAAACTTGAACCAATA---GGTCTAGCGCCACCACGCGCAAAGAGAAGAGTGGTA-----  
 -----GAAAGAGAAAAAAGAGCA---ATAGGA---CTGGGAGCT-----  
 ---CTGTTCCCTTGGGTTCTTGGGAACA---GCAGGAAGCACGATG---GGCGCAGTGTCA---  
 CTGACGCTGACGGTACAG---GCCAGACAG---GTATTG---TCTGGTATAGTGCAACAGCAAAAC---  
 AATTTG---CTGAGG---GCTATAGAGGCGCAACAGCATCTGTTGCAACTCACAGTCTGGGGCATT  
 >KF986082  
 TTCTACTGCAATACATCAGGACTGTTTAATAATAATACGCTGAAAAATGGTACG-----  
 -----  
 TGGACAGGGGTAAATGGT-----  
 ACGGTAAATGGTACCATCATACTCCCATGTAGAATAAAACAAATTATAAACATGTGGCAGGAAGTAGGAAAAG  
 CAATGTATGCCCCCTCCCATTGAAGGACTAATCCATTGTTTCATCAAAC---  
 ATTACAGGATTATTGTTGACAAGAGATGGAGGT-----  
 -----  
 ----  
 AATAATAATACAACCTTCAGGCCTGGAGGAGGAGATATGAGGAACAATTGGAGAAGTGAATTGTACA  
 AATATAAAGTAGTAAGAATCGAACCCTA---GGTCTAGCACCCACCAGGGCAAGGAGAAGAGTGGTG-----  
 -----GAAAGAGAAAAAAGAGCA---ATAGGA---  
 CTGGGAGCT-----ATGTTCCCTTGGGTTCTTGGGAGCA---GCAGGAAGCACGATG---  
 GGCGCAGCGTCA---TTGACGCTGACGGTACAT---GCCAGACAG---TTATTG---  
 TCTGGTATAGTGCAACAGCAAAAC---AATTTG---CTGAGG---  
 GCTATAGAGGCGCAACAGCATCTGTTGCAACTCACAGTCTGGGGCATT  
 >EU853078  
 TTCTACTGCAATACATCACAACCTGTTTAATGGGACATTTAATACTACATTAAATAGTACAGAGAAAAGAGGGA  
 TA-----  
 -----  
 TCAATGATAACATCACACTCCCGTGCAGAATAAAACAAATTATAAACATGTGGCAGGAAGTAGGAAGAGCAA  
 TGTATGCCCCCTCCCATTGAAGGAAAAATCCAATGTATATCAAAT---  
 ATTACAGGACTATTGTTGACAAGAGATGGTGGTATACATAATGAGAGT-----  
 -----  
 -----  
 TGTCTGGAATGAGACCTTCAGACCTGGAGGAGGGGATATGAGAGACAATTGGAGAAGTGAATTATACAAATATA  
 AAGTAGTAAGAATTGAACCGTTA---GGCATAGCACCCACCAAGGCAAGGAGAAGAGTGGTG-----  
 -----GAAAGAGAAAAAAGAGCA---GTAGGA---CTAGGAGCT-----  
 ---CTGTTCCCTTGGGTTCTTGGGAGCG---GCAGGAAGCACGATG---GGCGCAGCGTCG---  
 CTGACGCTGACGGTACAG---GCCAGAAGC---TTATTG---TCTGGTATAGTGCAACAGCAAAAC---  
 AATTTG---CTGAGG---GCTATAGAGGCGCAACAGCATCTGTTGCAACTCACAGTCTGGGGCATT  
 >EU853094  
 TTCTACTGCAATACATCAAGCCTGTTTAATACATCAAATAATACAGGAGAAAATAATAGTACAATCACAGGAG  
 AA-----  
 -----  
 AATAATAGTACAATCACACTCAAATGTAGAATAAAACAAATTATAAACATGTGGCAAGGAGTAGGAACAGCAA  
 TGTATGCTCCTCCCATTGCAGGACCAATCAGTTGTTTCATCAAAT---  
 ATTACAGGACTATTGTTAACAAGAGATGGTGGTATAAATAGTAATAAG-----  
 -----  
 -----  
 AGTAGAAATGAAACCTTCAGACCTGGAGGAGGAGATATGAGAGACAATTGGAGAAGTGAATTATACAAATATA  
 AAGTAGTAAGACTTGAACCACTA---GGACTAGCACCCACCAATGCAAAAAGAAGAGTGGTG-----  
 -----CAAAGAGAAAAAAGAGCA---ATAGGA---CTAGGAGCT-----  
 ---ATGTTCCCTTGGGTTCTTGGGAGCA---GCAGGAAGCACGATG---GGCGCAGCGTCA---  
 ATGACGCTGACGGTACAG---GCCAGACAG---TTATTG---TCTGGTATAGTGCAACAGCAAAAC---  
 AATTTG---CTGAGG---GCTATAGAGGCGCAACAGCATCTGTTGCAACTCACAGTCTGGGGCATT  
 >AF484511  
 TTCTACTGCAATACATCAGGATTGTTTAATAATAGTGTATGGAGCAATGATACATCAAGTAGTAATGATACAT  
 CAAGT-----

-----  
AGTTCAAATAGTACAATCACACTCCCATGCAGAATAAAACAAATTATAAACCTGTGGCAGGAAGTAGGAAAAG  
CAATGTACGCCCTCCCATTCAGGAATAATCAAGTGTTCATCAAAT---  
ATTACAGGACTATTGTTGCAAAGGGATGGTGGGAATAATGATAGCCGC-----  
-----  
-----  
ACGAATACAAATGAGATCTTCAGACCTGGAGGAGGAGATATGAGAGACAATTGGAGAAGTGAATTATATAAGT  
ATAAAGTAGTAAGACTTGAACCACTA---GGTATAGCACCTACCAGGGCAAAGAGAAGAGTGGTG-----  
-----GAAAGAGAAAAAGAGCA---ATAGGA---CTAGGAGCT---  
-----ATGTTCTTGGGTTCTTGGGAGCA---GCAGGAAGCACGATG---GGCGCAGCGTCA---  
ATGACGCTGACGGTACAG---GCCAGACTG---TTATTG---TCTGGTATAGTGCAACAGCAAAAC---  
AATTTG---CTGAGG---GCTATAGAGGCGCAACAGCATCTGTTGCAACTCACAGTCTGGGGCATT  
>AF484514  
TTCTACTGCAATACATCAAACTGTTTAATAGTACCTGGAATAATGGTACAGTAAATAGTACAGATACA----  
-----  
-----  
GTAAATAGTATAATCACAATCCCATGCAGAATAAAACAAATTATAAACATGTGGCAGGAAGTAGGAAAAGCAA  
TGTATGCCCCCTCCCATAGAAGGACTAATCATGTGTAATTCAAAT---  
ATTACAGGGCTATTACTGACAAGAGATGGTGGTATAAAATACTAGT-----  
-----  
-----  
GATGAGAATGAGACTTTCAGACCTGGAGGAGGGAATATGAAAGATAATTGGAGAAGTGAATTATACAAATATA  
AGGTGGTAAGAATTGAACCACTA---GGAATAGCACCCACCACGGCGAAGAGGAGAGTGGTG-----  
-----GAAAGAGAAAAAGAGCA---ATAGGA---TTAGGAGCT-----  
---TTGTTCTTGGGTTCTTGGGAGCA---GCAGGAAGCACGATG---GGCGCAGCGTCA---  
TTGACGCTGACGGTACAG---GCCAGACAA---TTATTG---TCTGGTATAGTGCAACAGCAAAAC---  
AATTTG---CTGAGG---GCTATAGAGGCGCAACAGCATCTGTTGCAACTCACAGTCTGGGGCATT  
>AF484483  
TTCTACTGCAATACATCAAACTGTTTAATAGTACATGGAATAATGGTACATTAGAAAGTAATATCACA----  
-----  
-----  
CTCGGGGAAAATATCACACTCCCATGCAGAATAAAACAAATTATAAACATGTGGCAGGAAGTAGGAAAAGCAA  
TGTATGCCCCCTCCCATAGAAGGAATAATCAAATGTTTCATCAAAC---  
ATCACAGGACTATTATTGACAAGAGATGGTGGTGCAAATAATAAT-----  
-----  
-----  
AGTACAAATGAAACCTTCAGACCTGGAGGAGGAGATATGAGAGACAATTGGAGAAGTGAATTATACAAATATA  
AAGTAGTAAAAATTGAACCACTA---GGTCTAGCACCCACCAAGGCAAAGAGAAGAGTGGTG-----  
-----GAAAGAGAAAGAAGAGCA---ATAGGA---CTGGGAGCT-----  
---ATGTTCTTGGGTTCTTGGGAGCA---GCAGGAAGCACGATG---GGCGCAGCGTCA---  
CTGACGCTGACGGTACAG---GCCAGACAA---GTATTG---TCTGGTATAGTGCAACAGCAAAAC---  
AATTTG---CTGAGG---GCTATAGAGGCGCAACAGCATCTGTTGCAGCTCACAGTCTGGGGCATT  
>AF484515  
TTCTACTGCAATACATCAGGACTGTTTAATAGTGAATGGAATGATACTACATGGAACGATAATAGTACAAGG-  
-----  
-----  
ACAGATGAGACAATCAAACCTCCAGTGCAAAATAAAACAAATTATAAACATGTGGCAGGGAGTAGGAACAGCAA  
TGTATGCTCCTCCCATGAAGGACTAATCCAATGTAGATCAAAT---  
ATTACAGGACTATTGTTGACAAGAGATGGTGGTGCAGATGAGAAT-----  
-----  
-----  
AAGACTGAGACCTTCAGACCTGGAGGAGGAGATATGAGAGACAATTGGAGAAGTGAATTATACAAATATAAAG  
TAGTAAGAATTGAACCACTA---GGTCTAGCACCCACCAGGGCAAAGAGAAGAGTGGTG-----  
-----GAAAGAGAAAAAGAGCA---ATAGGA---CTAGGAGCT-----  
GTGTTCTTGGGTTCTTGGGAGCA---GCAGGAAGCACGATG---GGCGCAGCGTCA---  
CTGACGCTGACGGTACAG---GCCAGACAG---TTATTG---TCTGGTATAGTGCAACAGCAAAAC---  
AATTTG---CTGAGG---GCTATAGAGGCGCAACAGCATCTGTTGCAACTCACAGTCTGGGGCATT  
>EF575388  
TTCTACTGCAATACATCAAACTGTTTAATAGTACATGGAGGAATAATAGTACATCCAATAGTACATTAAAT-  
-----

-----  
AGTACAGATCTAATCACACTCCAATGCAGAATAAAACAAATTATCAACATGTGGCAGGGAGTAGGAAAAGCAA  
TGTATGCCCCCTCCCATTTGAAGGACTAATCAAGTGTTTCATCAAAT---  
ATTACAGGACTATTGTTGACAAGAGATGGTGGTGATGGTGGTGCAACT-----  
-----  
-----  
AATAATATTAGTGAGATCTTTAGACCTGGAGGAGGAGATATGAGAGACAATTGGAGAAGTGAACATACAAAT  
ATAAAGTAGTAAGAATTGAGCCACTA---GGTCTAGCACCCACCAAGGCAAAGAGAAGAGTGGTG-----  
-----GAAAGGGAGAAAAGAGCG---ATAGGA---CTGGGAGCT---  
-----GTGTTCTTGGGTTCTTGGGAGCA---GCAGGAAGCACGATG---GGCGCGGCATCA---  
ATAACGCTGACGGTACAG---GCCAGACAA---TTATTG---TCTGGTATAGTGCAACAGCAAAGC---  
AATTTG---CTGAGG---GCTATAGAGGCGCAACAGCATATGTTGCAACTCACAGTCTGGGGCATT  
>EF575400  
TTCTACTGCAATACATCACAATTGTTTAAATAGTACATGGGGGAATAATAGTGAGTCTAATACAACAAGT-----  
-----  
-----  
AAGGAAAATGTGATCACACTCCCATGCAGAATAAAACAAATTGTAAATCTGTGGCAGGAGGTAGGAAAAGCAA  
TGTATGCCCCCTCCCATTTGAAGGAATAATCAACTGTGCATCAAAT---  
ATTACAGGATTATTGTTAACAAGAGATGGTGGTGCAAATAGGCAGAATGAG-----  
-----  
-----  
ACTAGGCAGAATGAGACCTTCAGACCTGGAGGAGGAGATATGAGAGACAATTGGAGAAGTGAATTATACAAAT  
ATAAAGTAGTAAGAATTGAACCACTA---GGTCTAGCACCCACCACGGCAAGGAGAAGAGTGGTG-----  
-----GAAAAAGAAAAAAGAGCA---ATAGGAATAATGGGAGCT---  
-----ATGTTCTTGGGTTCTTGGGAGCA---GCAGGAAGCACGATG---GGCGCAGCGTCA---  
GTGACGCTGACGGTACAG---GCCAGACAA---TTATTG---TCTGGTATAGTGCAACAGCAAAAC---  
AATTTG---CTGAAG---GCTATAGAGGCGCAACAGCATCTGTTGCAGCTCACAGTCTGGGGCATT  
>EF575417  
TTCTACTGCAATACATCACAATTGTTTGATAGCGTGTTTAAATAACTACATTAAATGCTACAGAGAAA-----  
-----  
-----  
AATGAGAGTACAATCACACTTCCATGCAAAATAAGACAAATTATAAACATGTGGCAGAGAGTAGGAAAAGCAG  
TGTATGCCCCCTCCCATTTGAAGGAAATATCAGCTGTTTCATCAAAT---  
ATTACAGGACTATTGTTGACTAGGGATGGTGGTGCAATTAATGGTAGT-----  
-----  
-----  
AAGAATGAGAATGAGACCTTCAGGCCTGGAGGAGGAGATATGAGAGACAATTGGAGAAGTGAATTATACAAAT  
ATAAAGTAGTAAGAATTGAACCACTA---GGACTAGCACCCACCGAGGCAAAGAGAAGAGTGGTG-----  
-----GAAAGAGAAAAAAGAGCA---ATAGGA---CTGGGAGCT---  
-----CTGTTCTTGGGTTCTTGGGAACA---GCAGGAAGCATGATG---GGCGCAGCGTCA---  
TTGACGCTGACGGTACAG---ACCAGACAA---TTATTG---TCTGGGATAGTGCAACAGCAAAAT---  
AATTTG---CTGAGG---GCTATAGAGGCGCAACAGCATATGTTGCAACTCACAGTCTGGGGCATT  
>EF575447  
TTCTACTGCAACACATCACAACCTGTTTAAATAGTACATGGTATAATAATACATTCAATAGTACAGGG-----  
-----  
-----  
TCAAATGGAACATATCACAATCCCATGCAGAATAAAACAAGTTATAAACATGTGGCAGGGAGTGGGAAAAGCAA  
TGTATGCCCCCTCCCATCGAAGGACAAATCAATTGTACATCAAAT---  
ATTACAGGGCTTTTGTGACAAGGGATGGTGGTGGTGCAAATAAT-----  
-----  
-----  
AGTTGTAATGAGACCTTCAGACCTGGAGGAGGAGATATGAGAGACAATTGGAGGAGTGAATTATACAAATATA  
AAGTAGTAAGAATTGAACCACTA---GGAATAGCGCCACCACAGCAAAAAGAAGAGTGGTG-----  
-----GAAAGAGAAAAAAGAGCA---ATAGGA---TTAGGAGCT-----  
---ATGTTCTTGGGTTCTTGGGAGCA---GCAGGAAGCACGATG---GGCGCAGCGTCA---  
TTGACGCTGACGGTACAG---GCCAGACAG---TTATTG---TCTGGTATAGTGCAACAGCAAAAC---  
AATTTG---CTGAGA---GCTATAGAGGCGCAACAGCATCTGTTGCAACTCACTGTCTGGGGCATT  
>U36886  
TTCTACTGCAATACATCAAACTGTTTAAATAGTACATGGGTTGATGGTACAGCAAATGGTACAAGG-----  
-----

-----  
CCAGATAATAATATCACAATCCCATGCAGAATAAAACAAATTATAAACATGTGGCAGGAAGTAGGAAAAGCAA  
TGTATGCCCCCTCCCATCGAAGGACTAATCAAGTGTACATCAAAT---  
ATTACAGGACTCTTACTAATAAGGGATGGTGGTGCAAATAATGGT-----  
-----  
-----  
AGTAATAACGAAACCTTCAGACCTGGAGGAGGAGATATGAGGGACAATTGGAGAAGTGAATTATACAAATATA  
AAGTAGTAAAAATTGAACCACTA---GGAATAGCACCCACCACGGCAAAGAGAAGAGTGGTG-----  
-----GAGAGAGAAAAAAGAGCA---ATAGGA---TTAGGAGCT-----  
---ATGTTCTTGGGTTCTTGGGAGCA---GCAGGAAGCACGATG---GGCGCAGCGTCA---  
TTGACGCTGACGGTACAG---GCCAGACAA---TTATTG---TCTGGTATAGTGCAACAGCAAAAC---  
AATTTG---CTGAGG---GCTATAGAGGCGCAACAGCATCTGTTGCAACTCACAGTCTGGGGCATT  
>AY795907  
TTCTACTGCAATACATCAACACTGTTTACTAGAACAAATTAACACAACAAATGATAATACTGTAAATAGTACTG  
GAAAT-----  
-----  
AATACAAATGATACAATAACCATCCCATGTAGAATAAAACAAATTATAAATATGTGGCAGGGAGTAGGAAGAG  
CAATGTATGCCCCCTCCCATCGCAGGAATAATTAAATGTTTCATCAAAT---  
ATTACAGGGCTACTATTGACAAGAGATGGTGGTAGTAACAATACT-----  
-----  
-----  
AACAGTACTGAGACCTTCAGACCTGGAGGAGGAGATATGAGGGATAATTGGAGAAGTGAATTGTATAAATATA  
AAGTAGTAAGAATTGAACCACTA---GGAGTAGCACCCACCAAGGCAAAAAGAAGAGTGGTG-----  
-----GAAAGAGAAAAAAGAGCA---ATAGGA---CTAGGAGCT-----  
---ATGTTCTTGGGTTCTTGGGAGCA---GCAGGAAGCACGATG---GGCGCAGCGTCA---  
GTGACGCTGACGGTACAG---GCCAGACAA---TTATTG---TCTGGTATAGTGCAACAGCAAAAT---  
AATTTG---CTGAGG---GCTATAGAGGCGCAACAACATCTGTTGCAACTCACGGTCTGGGGCATT  
>AY773339  
TTCTACTGTAATACATCTAGGCTGTTTAATAATACATGGAATGGTACACATGTCAATAAGACAGAC-----  
-----  
-----  
ACCAATGGGGCAGTCACACTCCCATGCAGAATAAAACAAATTATAAACATGTGGCAGGGAGTGGGAAAAGCAA  
TGTATGCCCCCTCCCATAGAAGGACTAATTAGATGTTTCATCAAAT---  
ATTACAGGGCTAATATTGACAAGAGATGGGGGTAATAGTAGTTCT-----  
-----  
-----  
GACAACGAGACCTTCAGACCTGGTGGAGGAAATATGAGGGACAATTGGAGAAGTGAATTATATAAATACAAAG  
TAGTACAAATTGAACCAATA---GGAGTAGTGCCCACCAGGGCAAAGAGAAGAGTGGTG-----  
-----GAAAGGGAAAAAAGAGCA---ATAGGA---CTAGGAGCC-----  
ATGTTCTTGGGTTCTTGGGAGCA---GCAGGAAGCACGATG---GGC---GAGTCA---  
TTGACGCTGACGGTACAG---GCCAGACAG---GTATTG---TCTGGTATAGTGCAACAGCAAAGC---  
AATTTG---CTGAGG---GCTATAGAGGCGCAACAGCATCTGTTGCAACTCACGGTCTGGGGCATT  
>GU329179  
TTCTACTGCAATACAACAAACCTGTTTAATAGCACATGGAAAAAGAATAGTACTACTGGTACATGGGGGACTA  
ATGAT-----  
-----  
ACAGGGACAGGAAACATCACACTCCAATGCAGAATAAAACAAATTATAAACATGTGGCAGGGAGTAGGAAAAG  
CAATATATGCCCCCTCCCATAGCAGGACAAATTAAATGTATATCAAAT---  
ATTACAGGGATACTATTGACAAGAGATGGTGGTGTAAATACTAGC-----  
-----  
-----  
ACTAACGAAACCTTCAGACCTGGAGGAGGAGATATGAGGGACAATTGGAGAAGTGAATTATATAAATATAAAG  
TAGTAAGAATTGAACCAATA---GGAATAGCACCCACCACGGCAAAGAGAAGAGTGGTG-----  
-----GAAAGAGAAAAAAGAGCA---ATAGGA---CTAGGAGCT-----  
ATGTTCTTGGGTTCTTGGGAGCA---GCAGGAAGCACGATG---GGCGCAGCGTCA---  
GTGACGCTGACGGTACAG---GCCAGACAG---TTACTG---TCTGGTATAGTGCAACAGCAAAAT---  
AATTTG---CTGAGG---GCTATAGAGGCGCAACAGCATCTGTTGCAACTTACGGTCTGGGGCATT  
>JF680926  
TTCTACTGCAATACAACAGGACTGTTTAATAGTAAATGGATAAATGGGACTAAATGGATAAATGGGACTATAG  
GAGATAAT-----

-----AGTACAGAG-----  
GAAAAATAATAACAATCACACTCCCATGCAGAATAAAACAAATTATAAACATGTGGCAGGGAGTAGGAAAAG  
CAATGTACGCTCCCCCATTTGAAGGACAGATCACCTGTGTATCAAAT---  
ATTACAGGACTATTGTTGACAAGAGATGGTGGTGGAAATAATACT-----  
-----  
-----  
AGTACTGATGAGACCTTCAGACCTGGAGGAGGAGATATGAGAGATAATTGGAGAAGTGAATTATATAAATATA  
AAATAGTAAGAGTTAAACCAATA---GGCCTAGCACCCACCAGGGCAAAGAGAAGAGTGGTG-----  
-----CAAAGAGAAAAAAGAGCA---ATAGGA---CTGGGAGCT-----  
---ATGTTCCCTTGGGTTCTTGGGAGCA---GCAGGAAGCACGATG---GGCGCAGCGTCC---  
TTGACGCTGACGGTACAT---GCCAGACAG---TTACTG---TCTGGTATAGTGCAACAGCAAAAC---  
AATTTG---CTGAGG---GCTATAGAGGCGCAACAGCATTTGTTGCAACTCACAGTCTGGGGCATC  
>FJ900268  
TTCTACTGCGATACATCAAAATTGTTTAATAACACAGTAACC-----  
-----  
-----  
AATGAACTATCACTCTCCCATGTAAAATAAAACAAATTATAAACATGTGGCAGGGAGTAGGGCAAGCAATGT  
ATGCCGCTCCTGTGGCAGGAAATATTACCTGTAACCTCAAAT---  
ATTACAGGCTTACTATTGACAAGAGATGGTGGTAAGGAAGATAATAGT-----  
-----  
-----  
ACTGATGATACTGAGATCTTCAGACCTGGGGGAGGAGATATGAGAGACAATTGGAGAAGTGAATTATATAAAT  
ATAAAGTAGTAGAAATTGAACCACTG---GGAGTAGCACCCACCAAGGCAAGAAGACGAGTGGTGGAG-----  
-----AGAGAGAGAAACAAAAAGAGCA---GTGGGA---ATAGGAGCT---  
-----TTGTTCCCTTGGGTTCTTGGGAGCA---GCAGGAAGCACTATG---GGCGCAGCGTCA---  
ATAACGCTGACGGTACAG---GCCAGACAA---TTATTG---TCTGGAATAGTGCAACAGCAGAAC---  
AACCTG---CTGAGG---GCTATTGAAGCGCAGCAGCATCTGTTGCAGCTCACAGTCTGGGGCATT  
>AF077336  
TTCTACTGCGATACATCAGGACTGTTTAATGACACAGGCTCC-----  
-----  
-----  
AATAATGGCACTATCACTCTCCCATGTCCGATAAAACAAATTGTAAACATGTGGCAGGGAGTAGGACGAGCAA  
TGTATACCTCTCCCATTTGCAGGAAACATTACCTGTAACCTCAAAT---  
ATTACAGGTTTACTATTGACAAGAGATGGTGGTAATGAGAGTAAC-----  
-----  
-----  
ATTGAGACCTTCAGACCTGAGGGAGGAAATATGAAAGACAATTGGAGAAGTGAACCTATATAAGTATAAAGTAG  
TAGAAATTGAACCATTA---GGAGTAGCACCCACCAAGGCAAAAAGACAAGTGGTG-----  
-----CAGAGAGAAAAAAGAGCA---GCGGGACTAGGAGCTTTG-----  
TTCTTGGGTTTCTTGGGGACAGCAGGGAGCAT-----ATG---GGCGCGGCGTGC---  
ATAACGCTGACGGTACAG---GCCAGACAA---TTATTG---TCTGGAATAGTGCAACAGCAAAAC---  
AATTTG---CTGAGG---GCTATTGAAGCGCAACAGCATCTGTTGCAGCTCACAGTCTGGGGCATT  
>DQ313239  
TTCTACTGCAATACATCAGGACTGTTTAATACTAATACATCAGGACAGTTTAATACCACAGGA-----  
-----  
-----  
TCCAATGAACTATAGTTCTCCCATGTAAAATAAAACAAATTGTAGAATGTGGCAGGGAGTAGGACAAGCAA  
TGTATGCTCCTCCCATTTGCAGGAAATATTACCTGTAACCTCAAAT---  
ATTACAGGCCTACTGTTAACAAGAGATGGTGGTAATAGTAGTAATGCT-----  
-----  
-----  
AATGCTAATGAGACCTTCAGACCTGGGGGAGGAGATATGAGAGACAATTGGAGAAGTGAACCTATATAAATATA  
AAGTAGTAGAAATTGAACCACTA---GGAGTAGCACCCACCGGGCAAAGACAAGTGGTG-----  
-----AAGAGAGAAAAAAGAGCA---GTGGGA---ATGGGAGCT-----  
---TTGTTCCCTTGGGTTCTTGGGAGCA---GCAGGAAGCACTATG---GGCGCGGCGTCA---  
ATAACGCTGACGGTACAG---GCCAGACAA---TTATTG---TCTGGAATAGTGCAACAGCAAAAC---  
AATTTG---CTGAGG---GCTATTGAAGCGCAACAGCATCTGTTGCAGCTCACAGTCTGGGGCATT  
>MH746241  
TTCTACTGCAATACATCAGGACTGTTT-----  
-----

-AAGGACGTAGTATCCAAT-----  
 AGCACCAATGAACTATCACTCTCCCATGCAAAATAAAACAAATTATAAACATGTGGCAGGGAGTAGGACAAG  
 CAATGTATGCCCCCTCCCATTTGCAGGAAACATTACCTGTAATTCAAAT---  
 ATTACAGGCCTACTATTGACAAGAGATGGTGGTAGAAATGAACTACTGGT-----  
 -----  
 ----  
 AATGGAAGTGAAGGAGGAGACCTTCAGACCTGAGGGAGGAAATATGAAAGACAATTGGAGAAGTGAAGTATATA  
 AGTATAAAGTAGTAGAAATTGAGCCACTA---GGAATAGCACCCACTAGAGCAAAAAGACAAGTGGTG-----  
 -----ACGAGACAAAAAGAGCA---GTGGGA---  
 ATAGGAGCC-----TTGTTCCCTTGGGTTCTTGGGAGCA---GCAGGAAGCACTATG---  
 GGCGCAGCGTCA---ATAACGCTGACGGCACAG---GCCAGACAA---GTATTG---  
 TCTGGAATAGTGCAACAGCAAAAC---AATTTG---CTGAGA---  
 GCTATTGAAGCGCAACAGCATCTGTTGCAGCTCACAGTCTGGGGCATT  
 >MG365763  
 TTCTACTGCAATACATCATGGCTGTTTAGTGACACAGAATTC-----  
 -----  
 -----  
 AATGATAGCACTATTACTCTCCCATGTGCAATAAAACAAATAGTAAACATGTGGCAGGGAGTAGGACGAGCAA  
 TGTATGCCGCTCCCATTTGCAGGAAACATTACCTGTAAGTCAAAAT---  
 ATTACAGGTCTGCTACTGACAAGGGATGGTGGCCAGAATAATACCAAC-----  
 -----  
 ----  
 CAGACTAATACTAATGAGACCTTCAGACCTGGGGGAGGAGAGATGAGAGACAATTGGAGAAGTGAGTTATATA  
 AATATAAAGTAGTAGAAATTGAACCATTA---GGAGTAGCACCCACCAAGGCAAAAAGGCGAGTGGTG-----  
 -----CAGAGAGAAAAAGAGCA---GTGGGA---  
 ATAGGAGCT-----GTGTTCCCTTGGATTCTTAGGAGCA---GCAGGAAGCACTATG---  
 GGCGCAGCATCA---ATGACGCTGACGGTACAG---GCCAGACAA---TTGTTG---  
 TCTGGAATAGTGCAACAGCAGAAC---AATCTG---CTGAGG---  
 GCTATTGAAGCGCAACAGCATCTGTTGCAGCTCACAGTCTGGGGCATT  
 >FJ771009  
 TTCTACTGCAATACATCAGGACTGTTTAATAACACAGGAACCAGT-----  
 -----  
 -----  
 ACCAATGCCACTATCGTTCTCCCATGTAGAATAAAACAAATTGTAAACATGTGGCAGGAAGTAGGACGAGCAA  
 TGTATGCCGCTCCCATTTGCAGGAAATATAGTCTGTAAGTCAACT---  
 ATTACAGGTCTACTATTGACAAGAGATGGTGGTAAAGATAACCAG-----  
 -----  
 -----  
 AATAAGACTGAGATCTTCAGACCGGGGGGAGGAAATATGAAAGACAATTGGAGAAGTGAATTATATAAATATA  
 AAGTAGTGCAAAATTGAACCACTA---GGAATAGCACCTCCAGGGCAAAAAGACAAGTGGTG-----  
 -----AGAAGAGAAAAAGAGCA---GTGGGA---CTAGGAGCC-----  
 ---TTGTTCCCTTGGGTTCTTGAGCGCA---GCAGGAAGCACTATG---GGCGCAGCGTCA---  
 ATAACGCTGACGGTACAG---GCCAGACAG---CTATTG---TCTGGAATAGTGCAACAGCAGAAC---  
 AATCTG---CTGAGG---GCTATTGAAGCGCAACAGCATCTGTTGCAGCTCACAGTCTGGGGCATT  
 >HQ236573  
 TTCTACTGTAATACAACAAAGCTGTTTAATGACACAGTACCC-----  
 -----  
 -----  
 AATAACACTACCATCATTCTCCCGTGTGCAATAAAGCAAATTATAAACATGTGGCAGGAAGTAGGAAGAGCAA  
 TGTATGCCGCTCCCATTTGCAGGAAACATTAGTTGCAGCTCAAAT---  
 ATTACAGGACTTCTATTGACAAGAGATGGTGGTACTGATAAGGTT-----  
 -----  
 -----  
 AATGAGACTGAGACCTTCACACCTAGAGGAGGAAATATGAAAGACAATTGGAGAAGTGAAGTATATATATATA  
 AAGTAGTAGAAATTGAACCATTA---GGAGTAGCACCCACCAAGGCAAAAAGACCAGTGGTG-----  
 -----CAGAGAGAGAAAAAGAGCA---ATAGGA---ATAGGAGCT-----  
 ---TGGTTCCCTTGGGTTCTTGGGAGCA---GCAGGAAGCACTATG---GGCGCGGCGTCA---  
 ATGACGCTGACGGTACAG---GCCAGACAA---TTATTG---TCTGGAATAGTGCAACAGCAGAGC---  
 AATCTG---CTGAGG---GCTATTGAAGCGCAACAGCATATGTTGCAGCTCACAGTTTGGGGCATT  
 >FJ771010

TTTTACTGTAATACATCAAACTGTTTAATGACACAGACCCC-----  
-----  
-----  
TTCAATGAAACTATCACTCTCCCATGTCTGAATAAGACAAATTATAGGGATGGGGCGGGAAGAAGGACGAGCAA  
CGTATGCCCCCTCCTACTGATGGAAACATTACCTGTAGTTCTGAAT---  
ATTACAGGTTTACTATGGACAAGAGGTGGTGGTAATGCTAATAAT-----  
-----  
-----  
AGTATTAATGAGACCTTCAGACCTGGGGGAGGAAATATGAAAGACAATTGGAGGAGTGAATTATATAAAATATA  
AAGTAGTAGAAATTGAGCCACTA---GGAGTTACACCTACCAAGGCAAAGAGACAAGTGGTG-----  
-----AAGAGAGAAAAAAGAGCA---ATACTGGGCATGGGAGCT-----  
---GTGTTCCCTCGGGTTCTTGAGTGCA---GCAGGAAGCACTATG---GGCGCAGCGTCA---  
ATAACGCTGACGGTACAG---ACCAGACAA---CTATTG---GCTGGAATAGTGCAACAGCAGAGC---  
AATCTG---CTGAGG---GCTATTGAAGCGCAACAACATCTGTTGCAGCTCACAGTCTGGGGCATT  
>KT427868  
TTCTACTGCAATACATCAGGGCTGTTTAATGATACACTGTTT-----  
-----  
-----  
GATGACAATATTCACTCCCATGTCTGAATAAAACAAATTATAAACATGTGGCAGGAAGTAGGAAGAGCAATGT  
ATGCCCTCTCCTATTGAAGGAAGCATTACCTGTAGCTCAAAT---  
ATTACAGGTCTATTATTGACAAGAGATGGTGGAAATGTTGATAGTACT-----  
-----  
-----  
AATAATATTGAGATCTTCAGACCTTGGGGAGGCAATATGAAAGACAATTGGAGAAGTGAATTATATAAAATATA  
AGGTAGTAGAAATTGAACCACTA---GGAATAGCACCCACCAAGGCAAAAAGACAAGTGGTG-----  
-----AAGAGAGAAAGAAGAGCA---GTGGGA---ATAGGAGCT-----  
---CTTTTCCTTGGGTTCTTGAGGAGCA---GCAGGAAGCACTATG---GGCGCGGCGTCA---  
ATAACGCTGACGGTACAG---GCCAGACAA---TTATTG---TCTGGAATAGTGCAACAGCAAAGC---  
AATTTG---CTGAGG---GCTATTGAAGCGCAACAGCATATGTTGCAGCTCACAGTCTGGGGCATT  
>MG365766  
TTCTACTGCAATACAACACAACACTATTTAATAACACAAAA-----  
-----  
-----  
GTCAATGGCACCATCACTCTCCCATGTCTGGATAAAACAAATTATAAACATGTGGCAGGAAGTGGGACGAGCAA  
TGTATGCCGCTCCCATTGAAGGAAGCATTACCTGTAAATCAAAT---  
ATTACAGGTCTACTATTGACAAGAGATGGTGGTGGGAATAATGGTGGTGAGAAT-----  
-----  
-----  
AAAGGTATTGAGATCTTCAGACCTGGGGGAGGAAATATGAGAGACAATTGGAGAAGTGAATTATATAAAATATA  
AAGTAGTGAACTTGAACCACTA---GGAATAGCACCCACCAAGGCAAAAAGACAAGTGGTG-----  
-----AAAAGAGAAAAAAGAGCA---GTGGGA---ATAGGAGTT-----  
---TTGTTCCCTTGGGTTCTTGAGGAGCA---GCAGGAAGCACTATG---GGCGCAGCGTCA---  
ATGACGCTGACGGTACAG---GCCAGACAA---TTATTG---TCTGGAATAGTGCAACAGCAGAGC---  
AATCTG---CTGAGG---GCTATTGAAGCGCAACAACACCTGTTGCAGCTCACAGTCTGGGGCATT  
>MG365762  
TTCTACTGCAATACATCAAATCTGTTTAATGACACAGCATTAATGACACAATA-----  
-----  
-----  
CTCAATGACAATATCACTCTCCCATGTCTGAATAAAACAAATAGTAAACATGTGGCAGGAAGTAGGACGAGCAA  
TGTATGCCAATCCCATTGAAGGAAAGATTACCTGTATCTCAAAT---  
ATTACAGGTCTACTATTAACAAGAGATGGAGGTAATGATAATAAGACTGAGAAT-----  
-----  
-----  
AATAATACTGAGACCTTCAGACCTGGGGGAGGAAATATGAAAGACAATTGGAGAAGTGAATTATATAAAATATA  
AAGTAGTAGAAATTGAACCACTA---GGAGTAGCACCCACCAGAGCAAAAAGACAAGTGGTG-----  
-----AAGAGAGAAAAAAGAGCA---GTGGGA---ATGGGAGCT-----  
---TTGTTCCCTTGGGTTCTTAGGAGCA---GCAGGAAGCACTATG---GGCGCGGCGTCA---  
ATGACGCTGACGGTACAG---GCCAGACAA---TTATTG---TCTGGAATAGTGCAACAGCAGAAC---  
AATTTG---CTGAGG---GCTATTGAAGCGCAACAGCATCTGTTGCAGCTCACAGTCTGGGGCATT  
>KX181918

TTCTACTGCAATACATCATGGCTGTTTAAATAACACAGAATTC-----  
-----  
-----  
AATGATAGCACTATCACTCTCCCATGTCTGAATAAAACAAATAGTAAACATGTGGCAGGGAGTAGGACGAGCAA  
TGTATGCCGCTCCCATTGCAGGAAACATCACCTGTAACCTCAAAT---  
ATTACAGGTCTGCTACTGACAAGGGATGGTGGCCAGAATAATACT-----  
-----  
-----  
AATGAGACTTTCAGACCTGGGGGAGGAGAGATGAGAGACAATTGGAGAAGTGAGCTATATAAATATAAAGTAG  
TAGAAATTGAACCACTA---GGAGTAGCACCCACCGAGGCAAAAAGGCGAGTGGTG-----  
-----AAGAGAGAAAAAGAGCA---GTGGGA---ATAGGAGCT-----  
GTGTTCTTGGATTCTTAGGAGCA---GCAGGAAGCACTATG---GGCGCAGCGTCA---  
ATGACGCTGACGGTACAG---GCCAGACAA---TTGTTG---TCTGGAATAGTGCAACAGCAGAAC---  
AATCTG---CTGAGG---GCTATTGAAGCGCAACAGCATCTGTTGCAGCTCACAGTCTGGGGCATT  
>KX181921  
TTCTACTGCAATACAACAAGACTGTTTAAATATCACTGATAAGAATATCATTGAT-----  
-----  
-----  
AAGAATAGCACTATCACTCTCCCATGTCTGAATAAAACAGATCATAAACATGTGGCAGGAAGTGGGACGAGCAA  
TGTATGCCGCTCCCATTGCAGGAAGCATTACCTGTAACCTCAAAT---  
ATTACAGGTCTGATATTGACAAGAGATGGGGGCAGTTGCAATGATACT-----  
-----  
-----  
AATGGCACTGAGATCTTCAGACCTGGGGGAGGAAATATGAAAGACAATTGGAGAAGTGAATTGTATAAATATA  
AAGTAGTAGAAATTGAACCATTA---GGAATAGCACCAACCACGGCAAAAAGACAAGTGGTG-----  
-----AAGAGAGACAAAAGAGCA---GTCCGA---ATAGGAGCT-----  
---GTGCTCCTTGGATTCTTGGGAGCA---GCAGGAAGCACTATG---GGCGCGGCGTCA---  
GTGGCGCTGACGGTACAG---GCCAGACAA---TTATTG---TCTGGAATAGTGCAACAGCAGAAC---  
AATTTG---CTGAGG---GCCATTGAAGCGCAACAGCATATGTTGCAGCTCACAGTCTGGGGCATT  
>KX181922  
TTTTACTGCAATACATCAAACTGTTTAAATGACACAGTG-----  
-----  
-----  
TCCAACGACACTATCATTTTCCCATGTAAAATAAAACAAATTATAAACATGTGGCAGGAAGTAGGACGAGCAA  
TGTATGCTGCTCCCCTTGCAGGAAACCTTACATGTAGGTCAAAT---  
ATTACAGGTCTACTATTAACAAGAGAAGGGGGCAATAAAGAGAAT-----  
-----  
-----  
GAGACCTTCAGACCTGGGGGGGGGAATATGAAAGACAATTGGGGAAGTGAATTATATAAATATAAAGTAGTAG  
AAAATGAACCCCTA---GGAATAGCCCCCCCCAAGGCAAAAAGACAAGTGGGG-----  
-----ACGAGAGAAAAAGAGCA---GTGGGA---AAGGCAGCT-----  
GTGATTTTTGGGTTTTTGGGAGCA---GCCGGAAGCACTATG---GGCGCGGGGTCA---  
TTAACGCTGACGGTACAG---GCCCGACAA---ATATTG---TTTGGTATAGTGCAACAGCAAAAC---  
AATTTG---CTGAAG---GCTATTGAGGCGCAACAGCACCTGTTGCAACTCACAGTCTGGGGCATT  
>KX181919  
TTTTACTGCAATACATCAGGAATGTTCAATGACACAGAA-----  
-----  
-----  
TCCAATGAAAATATTACTTTCCAATGTTGCATAAAACAAATTGTAAACATGTGGCAGGAAGTAGGGCGAGCAA  
AGTATGCCAATCCCGTTGCAGGAAACATTACCTGTAACCTCAAAT---  
ATTACAGGTTTGATATTGACAAGAGATGGTGGAAATAATAGTACT-----  
-----  
-----  
GGCAATGAGACCTTTAGACCCGGGGGGGGAAATATGAGGGACAATTGGGGAAGTGAATTATATAAATATAAAG  
TAGTAGAAATTGAACCCCTA---GGAATAGCCCCCCCCCAGGCAAAAAGACAAGTGGTG-----  
-----GCGAGGGAAAAAGAGCA---GGGGGA---AAGGGAGCT-----  
TTCTTCCTTGGGTTCTTGTACAGCA---GCAGGAAGCACTATG---GGCGCAGCGTCA---  
ATAACGCTGACGGTACAG---GCCAGACAA---TTATTG---TCTGGAATAGTGCAACAGCAGAAC---  
AATTTG---CTGAAG---GTTATTGAAGCGCAACACCATTGTTGCAGCTCACATTCTGGGGCATT  
>AF005494

TTCTACTGTAATACAGATGAACTGTTTAAATGACACAAAATTCAATGACACAGGA-----  
-----  
-----  
TTCAATGGCACTATCACTCTCCCATGTCTGAATAAAACAAATTGTAAACATGTGGCAGGAAGTGGGACGAGCAA  
TGTATGCCAATCCCATTGCAGGAAACATTACCTGTAACCTCAAAT---  
ATTACAGGTCTGCTATTGACAAGAGATGGTGGTCTGAATAGTACT-----  
-----  
-----  
AATGAGACCTTCAGACCTGGGGGAGGAAATATGAAAGACAATTGGAGAAGTGAATTATATAAATATAAAGTAG  
TAGAAATTGAACCACTA---GGAGTAGCACCCACCAAGGCAAAAAGACAAGTGGTG-----  
-----AAGAGAGAAAGAAGAGCA---GTGGGA---CTAGGAGCT-----  
CTGTTTCCTTGGGTTCTTGGGAGCA---GCTGGAAGCACTATG---GGCGCGGCGTCA---  
ATAACGCTGACGGTACAG---GCCAGACAA---TTATTG---TCTGGAATAGTGCAACAGCAGAGC---  
AATCTG---CTGAGG---GCTATTGAAGCGCAACAGCATCTGTTGCAGCTCACAGTCTGGGGCATT  
>EU446022  
TTCTATTGCAATACATCAGAACTGTTTAAAGAATGCCATCACA-----  
-----  
-----  
CCCAATGTCACCTATCATTCTCCAATGTAGAATAAAACAAATTATCAACATGTGGCAGGGAGTAGGACAAGCAA  
TGTATGCTTCTCCCATTGCAGGAAGCATTACCTGTAACCTCAAGT---  
ATTACAGGCCTACTATTAACGAGAGATGGTGGTAACGATAATGTA-----  
-----  
-----  
AGCACAGAAGAGATCTTCAGACCTGGGGGAGGGAATATGAAAGACAATTGGAGAAGTGAAGTGTATAAATATA  
AAGTAGTAAAAATTGAACCATTA---GGAGTAGCACCCACCAGAGCAAAAAGACAAGTGGTG-----  
-----AAGAGAGACAAAAGAGCA---GTGGGA---TTAGGAGCT-----  
---GTGTTTCCTTGGGTTCTTGGGAGCA---GCAGGAAGCACTATG---GGCGCTGCGTCA---  
ATAACGCTGATGGTACAG---GCCAGACAA---TTACTG---TCTGGGATAGTGCAACAGCAAAAT---  
AATTTG---CTGAGG---GCTATTGAAGCGCAACAGCATATGTTGCAGCTCACAGTCTGGGGCATT  
>HQ236616  
TTCTACTGTAATACATCAGGATTGTTTAAATGACACAGCAGTTAATGACACAGCACTC-----  
-----  
-----  
AGTAATGACACTATCACTCTCCCATGTCTGAATAAAACAAATTGTAAACATGTGGCAGAGAGTAGGACGAGCAA  
TGTATGCCGCTCCCATTGCAGGAAACATTGTCTGTAGCTCAAAT---  
ATTACAGGAATGCTATTGACAAGAGATGGTGGCACTAATGACACT-----  
-----  
-----  
ACTGAGACCTTCAGACCTGGGGGAGGAGATATGAAAGACAATTGGAGAAGTGAATTATATAAATATAAAGTAG  
TAAGAATTGAACCACTA---GGAGTAGCACCCACCAGGGCAAAAAGACCAGTGGTG-----  
-----CAGAGAGAAAAAAGAGCA---GTGGGA---ATGGGAGCT-----  
GTGCTCCTTGGGTTCTTGGGAGCA---GCAGGAAGCACTATG---GGCGCAGCATCA---  
ATAACGCTGACGGTACAG---GCCAGACAA---TTGCTG---TCTGGAATAGTGCAACAGCAGAAC---  
AATTTG---CTGAGG---GCTATTGAAGCGCAACAGCATCTGTTGCAGCTCACAGTCTGGGGCATT  
>MF381271  
TTCTACTGCAATACATCAAACTGTTTAAACAATAACATAAGC-----  
-----  
-----  
TCCAGTGAGAATATCACTCTCCCATGTAGAATAAGACAGATTGTAAGGATGTGGCAGGGAGTAGGACAAGCAA  
TGTATGCCGCTCCCATTGCAGGGGCCATTACCTGTATCTCAAAC---  
ATTACAGGCATACTATTGACAAGAGACGGTGGTCCAGTCAGCAATAGT-----  
-----  
-----  
ACAAACCATACTGAGATCTTCAGACCTGGGGGAGGAGATATGAGAGACAATTGGAGAAGTGAAGTATATAAAT  
ATAAAGTAGTAGAAATTGAACCACTA---GGATTAGCACCCACCAGGGCAAGAAGACAAGTGGTG-----  
-----CAGAGGGAAAAAAGAGCA---GCA-----CTGGGACTG---  
-----TTCTTCCTTGGTTTCTTGGGAGCA---GCAGGAGGCACTATG---GGCGCAGCGTCA---  
ATAACGCTGACGGTACAG---GCCAGACAA---TTATTG---TCTGGGATAGTGCAACAGCAAAGC---  
AATTTG---CTGAAG---GCTATTGATGCGCAACAACATATGTTGCAGCTCACAGTCTGGGGCATT  
>MK177827

TTCTACTGCAATACATCAGGATTGTTTAAATGACTCAGCTACTGAAAAT-----  
-----  
-----  
AATGAACTACTATCACCTCCCATGTAGAAATAAAACAAATTGTAAAAATGTGGCAGGGAGTAGGACAAGCAA  
TATATGCTCCTCCCATTCAGGAAACATTACCTGTAATTCAAAT---  
ATTACAGGTCTACTATTGACCAGAGATGGTGGTAATAATACTAAT-----  
-----  
-----  
GATAATGATACCTTTAGACCTGGGGGAGGAGATATGAGAGACAATTGGAGAAGTGAACTATATAAATATAAAG  
TAGTAGAAGTTGAACCACTA---GGAATAGCACCCACCAGGGCAAAAAGACAAGTGGTG-----  
-----AGAAGAGAAAGAAGAGCA---GCAGGA---ATAGGAGCT-----  
TTGTTTCCTTGGGTTCTTGGGAGCA---GCAGGAAGCACTATG---GGCGCAGCGTCA---  
ATAACGCTGACGGTACAG---GCCAGGCAA---TTATTG---TCTGGAATAGTGCAACAGCAGAGC---  
AATCTG---CTGAAA---GCTATTGAAGCACACAACATCTGTTGAAGCTCACAGTCTGGGGCATT  
>MF381284  
TTCTACTGCAATACATCAGGATTGTTTAAATGACTCAGCTACTGAAAAT-----  
-----  
-----  
AATGAACTACTATCACCTCCCATGTAGAGTAAAAACAAATTGTAAACATGTGGCAGGGAGTAGGACAAGCAA  
TATATGCTCCTCCCATTCAGGAAACATTACCTGTAATTCAAAT---  
ATTACAGGTCTACTATTGACCAGAGATGGTAGTAATAATACTAAT-----  
-----  
-----  
GATAATGATACCTTTAGACCTGGGGGAGGAGATATGAGAGACAATTGGAGAAGTGAACTATATAAATATAAAG  
TAGTAGAAGTTGAACCACTA---GGAATAGCACCCACCAGGGCAAAAAGACAAGTGGTG-----  
-----AGAAGAGAAAGAAGAGCA---GCAGGA---ATAGGAGCT-----  
TTGTTTCCTTGGGTTCTTGGGAGCA---GCAGGAAGCACTATG---GGCGCAGCGTCA---  
ATAACGCTGACGGTACAG---GCCAGGCAA---TTATTG---TCTGGAATAGTGCAACAGCAGAGC---  
AATCTG---CTGAAA---GCTATTGAAGCACACAACATCTGTTGAAGCTCACAGTCTGGGGCATT  
>DQ979025  
TTCTACTGCAATACATCAGAACTGTTTAAATGACACAGGATCCAATGGCACTATC-----  
-----  
-----  
ACTAATGACACTATTACTCTCCCATGTAAATAAAACAAATTGTAGAATGTGGCAGGGAGTAGGACAAGCAA  
TGTATGCTGCTCCTATTGCAGGAAACATTACCTGTAACCTCAAAT---  
ATTACAGGCCTAATGTTGACAAGAGATGGTGGTAAAGATAATAGT-----  
-----  
-----  
TCGACCGAGATCTTCAGACCTGGGGGAGGAAATATGAAAGACAACCTGGAGAAGTGAACTATATAAATATAAAG  
TAGTAGAAATTGAACCACTA---GGAATAGCACCCACCAAGGCAAGAAGACGAGTGGTGGGG-----  
-----AGAGAGAGAGAAAAGAGAGCA---GTGGGA---ATAGGAGCT-----  
TTGTTTCCTTGGGTTCTTGGGAGCA---GCAGGAAGCACTATG---GGCGCAGCGTCA---  
CTAACGCTGACGGTACAG---GCCAGACAA---TTATTG---TCTGGAATAGTGCAACAGCAGAAC---  
AATCTG---CTGAAG---GCTATTGAAGCGCAACAGCATCTGTTGCAGCTCACAGTCTGGGGCATT  
>AF321084  
TTCTACTGCAATACATCAGAACTGTTTAAATGATACAGTATCTAATAAACTAATGAAGTAAATAATACAACA-  
-----  
-----  
TCTAGCGGTAATATCACTCTCCCATGTAGAAATAAAACAAATTGTAAACATGTGGCAGGAAGTGGGACGAGCAA  
TGTATGCCGCTCCCATTCAGGACAAATTACCTGTAATTCTAAT---  
ATTACAGGCCTACTATTAACAAGAGATGGTGGTATTAAGACTAATGATACTAAT-----  
-----  
-----  
GGTGATAATAAGACCGAGATCTTCAGACCTGGGGGAGGAGATATGAGAGACAATTGGAGAAGTGAACTATATA  
AATATAAAGTAGTAGAAATTGAACCACTA---GGAGTAGCACCCACCAGGGCAAAAAGACGAGCGGTG-----  
-----CAGAGAGAAAAAAGAGCA---GTGGGA---  
GTAGGAGCT-----TTGTTTCCTTGGGTTCTTGGAGCGCA---GCAGGAAGCACTATG---  
GGCGCAGCGTCA---ATAACGCTGACGGTACAG---GCCAGGCAA---TTATTG---  
TCTGGTATAGTGCAACAGCAGAAC---AATCTG---CTGATG---  
GCTATTGAAGCGCAACAGCATCTGTTGCAGCTCACAGTCTGGGGCATT

>AF084936

TTCTATTGTAATACATCAGGACTATTTTAATAATAGTATATTAAAGAGTAATATATCAGAA-----

-----  
-----

AATAATGATACTATCACACTTAATTGTAAGATAAAACAAATTGTGAGAATGTGGCAGAGAGTGGGACAAGCAA  
TGTATGCCCCCTCCCATTCGAGGAAACATTACATGTAGATCAAAC---

ATTACAGGACTAATATTAACAAGAGATGGTGGGGATAACAATAGC-----

-----  
-----

ACTAGTGAGATCTTCAGACCTGGAGGAGGAGATATGAAAAACAATTGGAGAAGTGAATTATATAAGTATAAAA  
CAGTAAAAATCAAATCACTA---GGAATAGCACCCACCAGGGCAAGGAGAAGAGTGGTG-----

-----GAGAGAGAAAAAAGAGCA---GTTGGA---GTAGGAGCT-----

ATCTTCCTTGCGTTCTTAGGAACA---GCAGGAAGCACTATG---GGCGCAGCGTCA---

ATAACGCTGACGGTACAG---GTCAGACAA---TTATTG---TCTGGCATAGTGCAACAGCAAAGC---

AATTTG---CTGAGA---GCTATAGAGGCGCAGCAGCATCTGTTGCAACTCACAGTCTGGGGCATT

>MH746255

TTCTATTGTAATACATCAAAGCTGTTTAATAGCTCAGAGCTGGGTAATCTGTCTAATAAT-----

-----  
-----

ACTAATGATACTATCACACTTCCATGTAGGATAAAACAGATTGTGAGAATGTGGCAGAGAGTGGGACAAGCAA  
TGTATGCCCCCTCCCATTTGAAGGAAACATTACATGTAAATCAGAA---

ATTACAGGACTACTATTAATAAGAGATGGTGGAGAGACTAATAGG-----

-----  
-----

ACAAATGAGACTTTTCAGACCTGCAGGAGGAGACATGAGGGACAATTGGAGAAGTGAATTATATAAGTATAAAG  
TAGTAAAAATTAACCACTA---GGAGTAGCACCCACCAGGGCAAGGAGAAGAGTGGTG-----

-----GGGAGAGAAAAAAGAGCA---GTTGGA---CTGGGAGCT-----

GTCTTCCTTGCGTTCTTGGAACA---GCAGGAAGCACTATG---GGCGCGGCGTCA---

ATAACGCTGACGGTACAG---GTCAGACAA---TTATTG---TCTGGCATAGTGCAACAGCAAAGC---

AATTTG---CTGAGG---GCTATAGAGGCGCAGCAGCATCTGTTGCAACTCACAGTCTGGGGCATT

>KU168277

TTCTATTGTAATACATCAGGATTGTTTAATATGTCATTGTTTAATAGTAGTAGTAGTGAGAAT-----

-----  
-----

GGGACGACCAATATCACACTCCCATGTAAGATAAAACAAATTGTAAGAATGTGGCAGAGAGTGGGGCAAGCAA  
TGTATGCCCCCTCCCATCGCAGGACAAATTACATGTATATCAAAC---

ATTACAGGGCTACTATTAACAAGAGATGGTGGGAATAGTGGTGGGAAT-----

-----  
-----

AGTAGCAATGAGACCTTCAGACCTGGAGGAGGAGATATGAGGGACAATTGGAGAAGTGAATTATATAAATATA  
AAGTAGTAAAAATTAACCACTA---GGAGTAGCACCCACCAGGGCAAGGAGAAGAGTGGTG-----

-----GGAAGAGAAAAACGAGCA---GTTGGA---CTGGGAGCT-----

---GTTTTCCTTGCGTTCTTAGGAGCA---GCAGGAAGCACTATG---GGCGCAGCGTCA---

ATAACGCTGACGGTACAG---GTCAGACAA---TTATTG---TCTGGCATAGTGCAACAGCAAAC---

AATTTG---CTGAGA---GCTATAGAGGCGCAGCAGCATCTGTTGCAACTCACAGTCTGGGGCATT

>MH705162

TTCTATTGTAATACATCAGGACTGTTTAATATGTCAAATATTAATGCTAATGCATCAGATAGTAAT-----

-----  
-----

GGAAATGACACTATCACACTCACATGTAAGATAAAACAAATTGTGAGAATGTGGCAGAGAGTGGGACAAGCAA  
TGTATGCCCCCTCCCATAGAAGGAAACATTGAATGTAAATCAAAC---

ATTACAGGACTAATATTAACAAGAGATGGTGGGGGTAACATTGAC-----

-----  
-----

AATGAAAGTGAGACCTTCAGACCTGGAGGAGGAGACATGAGGGACAATTGGAGAAGTGAATTATTTAAGTATA  
AAACAGTAAAAATCAAATCACTA---GGAATAGCACCCACCAAGGCAAGGAGAAGAGTGGTG-----

-----GAGAGAGAAAAAAGAGCA---GTTGGA---CTGGGAGCT-----

---GTCTTCCTTGCGTTCTTAGGAGCA---GCAGGAAGCACTATG---GGCGCGGCGTCA---

ATAACGCTGACGGTACAG---GTCAGACAA---TTATTG---TCTGGCATAGTGCAACAGCAAAGC---

AATTTG---CTGAGA---GCTATAGAGGCGCAGCAGCATCTGTTGCAACTCACAGTCTGGGGCATT

>MH705155

TTCTATTGTAATACATCAGGACTGTTTAAACAGTATAGAACAGTATAATAATACA-----

-----  
-----

TCAAATAATAGTATCATACTCCCATGTAAGATAAAACAAATTGTGAGAATGTGGCAGAGAGTGGGACAAGCAA  
TGTATGCCCCCTCCCATCGAGGGACACATTACATGTGTATCAAAC---

ATTACAGGACTACTATTAACAAGAGATGGTGGTGGTAATGAAAGT-----

-----  
-----

AACAGTGGAAATGAGACCTTCAGACCTGGAGGAGGAGATATGAGGGACAATTGGAGAAATGAATTATATAAGT  
ATAAAGTAGTAAACTTAAACCAATA---GGAGTAGCACCCACCAGGGCAAAGAGAAGAGTGGTG-----

-----GAGAGAGAAAAAAGGGCAGTTGTTGGA---CTGGGAGCT---

-----GTCTTCCTTGGGTTCTTAGGAGCA---GCAGGAAGCACTATG---GGCGCGGCGTCA---

ATAACGCTGACGGTACAG---GTCAGACAA---TTATTG---TCTGGCATAGTGCAACAGCAAAGC---

AATTTG---CTGAGG---GCCATAGAGGCGCAGCAACATCTGTTGCAACTCACAGTCTGGGGCATT

>MH705134

TTCTATTGTAATACATCAAACTATTTAATAATAGTTGGCTTAATAATAGTAGT-----

-----  
-----

AATGAAGCCAATATCACACTCCCATGTAAGATAAAACAAATTGTGAGAATGTGGCAGAGAGTGGGACAAGCAA  
TATATGCCCCCTCCCATCGCAGGAAACATTGTGTGTAGATCAAAC---

ATTACAGGACTAATATTAACAAGAGATGGTGGGAATAACAATACA-----

-----  
-----

AATGAGACCTTCAGACCTGGAGGAGGAGATATGAGGGACAATTGGAGAAGTGAATTATATAAGTATAAAGTAG  
TAAAGATCAAATCACTA---GGAGTAGCACCCACCAGGGCAAGGAGAAGAGTGGTG-----

-----GGGAGAGAAAAAAGAGCAGTAGTTGGA---CTAGGAGCT-----

TTCTTCCTTGGGTTCTTAGGAGCA---GCAGGAAGCACTATG---GGCGCGGCGTCA---

ATAGCGCTGACGGTACAG---GCCAGACAA---TTATTG---TCTGGCATAGTGCAACAGCAAAGC---

AATTTG---CTGAGG---GCTATAGAGGCGCAACAGCATCTGTTGCAACTCACAGTCTGGGGCATT

>FJ389364

TTCTACTGTAACACATCAGGACTGTTTAAATTGGTCTAGTAGTGGGAATGGGACCTCA-----

-----  
-----

GGGAATGGGAGCATTACACTCCCATGTAGAATAAAACAAATTGTGAGAATGTGGCAGAGAGTGGGACAAGCAA  
TGTATGCCCCCTCCCATCGCAGGAAATATTACATGTAAATCGAAC---

ATTACAGGACTCCTATTAACAAGAGATGGGGGGAATGAACTGAA-----

-----  
-----

CCTACTGAGACCTTCAGACCTACAGGAGGAGATATGAGGGACAATTGGAGAAGTGAACCTATATAAGTATAAAG  
TAGTAAAAATTAAACCACTA---GGAGTAGCACCCACCAGGGCAAGGAGAAGAGTGGTG-----

-----GGAAGAGGAAAAAGAGCA---GTTGGA---CTGGGAGCT-----

TTCTTCCTTGGGTTCTTAGGAACA---GCAGGAAGCACTATG---GGCGCAGCATCA---

ATAACGCTGACGGTACAG---GTCAGACAA---TTATTG---TCTGGCATAGTGCAACAGCAAAGT---

AATTTG---CTGAGA---GCTATAGAAGCGCAGCAGCATCTGTTGCAGCTCACAGTCTGGGGCATT

>MH705145

TTCTATTGCAACACATCAGGACTGTTTAAACACATCACTGCTTAATAATAGTAGTAATAATAATAGTAGT----

-----  
-----

AATAATGATACCATAACACTCCAATGTAGGATAAAACAAATTGTAAGAATGTGGCAGAGAGTAGGACAAGCAA  
TGTATGCCCCCTCCCATTCAGGAAACATTACATGTAAATCAAAC---

ATCACAGGACTAATATTAACAAGAGATGGAGGGAATAATGACAACACG-----

-----  
-----

ACAGAAGAAATCTTCAGACCTGGAGGAGGAGATATGAGGGACAATTGGAGAAATGAATTATATAAGTACAAAG  
TAGTAAAAATTAAACCACTA---GGAGTAGCACCCACCAGGGCAAGAAGAAGAGTGGTG-----

-----GGACGAGAAAAAAGAGCA---GTTGGA---ATAGGAGCT-----

GTTCTCCTTGGGTTCTTAGGAGCA---GCTGGAAGCACTATG---GGCGCGGCGTCA---

ATAACGCTGACGGTACAG---GTCAGGCAA---TTATTG---TCTGGCATAGTGCAACAGCAAAGC---

AATTTG---CTGAGA---GCTATAGAGGCGCAGCAGCATCTGTTGCAACTCACAGTCTGGGGCATT

>KP718915

TTCTATTGCAATACATCAAGACTATTTTAATACATCAGATATTAATAACAGT-----

-----  
-----

AACAGTACAGACATAATACTCCCATGTAAGATAAAAACAAATTGTAAGAATGTGGCAGAGAGTGGGACAAGCAA  
TGTATGCCCCCTCCCATTCGAGGAAACATTACATGTACATCAAAC---

ATTACAGGACTACTATTAACAAGAGATGGTGGGTCTGATTCGTCT-----

-----  
-----

GTGGAAGTCTTCAGACCTGGAGGAGGAGATATGAGGGACAATTGGAGAAGTGAAGTATATAAGTATAAAGTAG  
TAAAAATTAAACCACTA---GGAATAGCACCCCTCCAAGGCAAGAAGGAGAGTGGTG-----

-----GGGAGAGAAAAAAGAGCA---GTTGGA---CTGGGAGCT-----

GTTTTCTTTGGGTTCTTAGGAGCA---GCAGGAAGCACTATG---GGCGCGGCGTCA---

ATAACGCTGACGGTACAG---GTCAGACAA---TTATTG---TCTGGCATAGTGCAACAGCAAAGC---

AATTTG---CTGAAA---GCTATAGAGGCGCAGCAGCATCTGTTGCAACTCACAGTCTGGGGCATT

>KP718923

TTCTATTGTAATACATCAGGATTGTTTAATACACTTAATAATAGTACATCA-----

-----  
-----

AATACTAGTATTATCAGTCTCCCATGTAAGATAAAAACAAATTGTGAGAATGTGGCAGAGAGGGGGACAAGCAA  
TGTATGCCCCCTCCTATAGCAGGAAACATTACATGTACATCAAAT---

ATTACAGGGCTACTATTAACAAGAGATGGGGGCGAA-----

-----  
-----

AACGGAAGTGAACCTTCAGACCTGGAGGAGGAGATATGAGGGACAATTGGAGAAGTGAATTATATAAGTATA  
AAATAGTAAAAATTAAACCACTA---GGAATAGCACCCACCAGGGCAAGGAGAAGAGTGGTG-----

-----CAGAGAGAAAAAAGGGCA---GTTGGA---CTGGGAGCT-----

---GCTCTCCTTGGGTTCTTAGGAATG---GCAGGAAGCACTATG---GGCGCAGCGTCA---

ATAACGCTGACGGTACAG---GTCAGACAA---TTATTG---TCTGGCATAGTGCAACAGCAAAGC---

AATTTG---CTGAGA---GCTATAGAGATGCAGCAACATCTGTTGCAACTCACAGTCTGGGGCATT

>KR051438

TTCTATTGTAATACATCAGGACTATTTAATAATAGTATGTTGTATAATAATAGTACT-----

-----  
-----

AGTAATGACACTATCACACTCCCATGTAAGATAAAAACAAATTGTGAGAATGTGGCAAAGAGTGGGGCAAGCAA  
TGTATGCCCCCTCCCATTAAGGAAACATTACATGTAAATCAAGC---

ATTACAGGGCTAATTTTAACAAGAGATGGTGGGAATGCTGATAGA-----

-----  
-----

AATGCTACCGAGACCTTCAGACCTTCAGGAGGAGATATGAGGGACAAGTGGAGAAGTGAATTATATAAGTATA  
AAGTAGTAAAAATTAAACCATTA---GGAATAGCACCCACCAAGGCAAGGAGAAGAGTGGTG-----

-----CAGAGAGAAAAAAGAGCA---GTTGGA---CTGGGAGCT-----

---TTCCTCCTTGGGTTCTTAGGAACA---GCAGGAAGCACTATG---GGCGCGGCGTCA---

ATAACGCTGACGGTACAG---GTCAGACAA---TTATTG---TCTGGCATAGTGCAACAGCAAAGC---

AATTTG---CTGAGG---GCTATAGAAGCGCAGCAGCATCTGTTGCAGCTCACAGTCTGGGGCATT

>KR051448

TTCTATTGTAATACATCACGATTATTTAACATATCAGATATATCAAATACA-----

-----  
-----

TCAGAACTAACATCACACTCCCATGTAAGATAAGACAAATTGTGAGAATGTGGCAGAAAGTGGGACAAGCAA  
TGTATGCCCCCTCCCATCGAGGAGAAATTACATGTAGATCAAAT---

ATTACAGGACTACTATTAACAAGAGATGGTGGGACTAATGAAAAT-----

-----  
-----

GGGAATGAGACCTTCAGACCTGGAGGAGGAGATATGAGGGACAATTGGAGAAGTGAAGTATATAGGTATAAAA  
TAGTAAAAATTAAACCACTA---GGAGTAGCACCCACCAAGGCAAGGAGAATAGTGGTG-----

-----ACGAGAGAAAAAAGAGCA---GTTGGA---CTAGGAGCT-----

GTTCTCTTTGGGTTCTTAGGAGCA---GCCGGAAGCACTATG---GGCGCGGCGTCA---

ATAACGCTGACGGTACAG---GTCAGACAA---TTATTG---TCTGGCATAGTGCAACAGCAAAC---

AATTTG---CTGAGG---GCTATAGAGGCGCAACAACATCTGTTGCAACTCACAGTCTGGGGCATT

>KR017776

TTCTATTGTGATACATCACCCTATTTTAATCCTACAAGTAATAGCACAC-----

-----  
-----

AGTAATAAAAAATATTACACTCCCATGTAAGATAAAACAAATTGTGAGAATGTGGCAGAGAGGGGGACAAGCAA  
TGTATGCCCCCTCCCATCGAAGGAGAAATTACATGTAGATCAAAC---

ATTACAGGGATATTATTAACAAGAGATGGTGGTGAAACTAATAAA-----

-----  
-----

AGTAGTGAGACCTTCAGACCTGGAGGAGGAGATATGAGGGACAATTGGAGAAGTGAGTTATACAAGTACAAAA  
TAGTAAAAATTAAACCACTA---GGAGTAGCACCCACCAGGGCAAGAAGAAGAGTGGTG-----

-----CAGAGAGAGAAAAAGAGCA---GTCGGG---ATAGGAGCT-----

GTCCCTCCTTGGGTTCTTAGGAGCA---GCAGGAAGCACTATG---GGCGCGGCGTCA---

ATAACGCTGACGGTACAG---GTCAGGCAA---TTATTG---TCTGGCATAGTGCAACAGCAAAGC---

AATTTG---CTGAGG---GCTATAGAGGCACAGCAACATCTATTGCAACTCACAGTCTGGGGCATT

>KR051461

TTCTATTGTAATATATCAAAGTTGTTTAATAGCACAGCAGGTAATAGCACATCAAATAATAGCACATCA----

-----  
-----

AATAATTCCACTATCACGATTCCATGTAGGATAAAACAAATTGTAAGACTGTGGCAGAGAGCGGGACAAGCAA  
TGTATGCCCCCTCCCATTCAGAGAGAAATTACATGTAGATCAAAT---

ATTACAGGGATACTATTAACAAGAGATGGTGGTAGGAATAATAACACAGAG-----

-----  
-----

GGAACGGAAATCTTTAGACCTGGAGGAGGAGATATGAGGGACAACCTGGAGAAGTGAATTATATAAGTACAAAA  
TAGTAAAAATTAAACCACTA---GGAGTAGCACCCACCAAGGCAAGAAGAAGAGTGGTG-----

-----GAAAGAGAAAAAAGGGCA---GTCGGA---CTGGGAGCT-----

GTTTTCTTGGGTTCTTAGGAACA---GCAGGAAGCACTATG---GGCGCAGCGTCA---

ATAACGCTGACGGTACAG---GTCAGACAA---TTATTG---TCTGGCATAGTGCAACAGCAAAGC---

AATTTG---CTGAGG---GCTATTGAGGCGCAACAACACCTGTTGCAACTCACAGTCTGGGGCATT

>KP718925

TTCTATTGTAATACATCAGGCCTGTTTGATAGACCAGAAAATAAT-----

-----  
-----

ACAGCAGAAAATATAACACTCGGATGTAGGATAAAGCAAATTGTCAGGATGTGGCAGAGAGTGGGACAAGGAA  
TGTATGCCCCCTCCCATCGCAGGAAACATTACATGTATCTCAAAC---

ATCACAGGACTACTATTAACAAGGGATGGTGGTAATAATATCACT-----

-----  
-----

GAGGAAATTTTCAGACCTGGAAGAGGAGATATGAGGGACAATTGGAGAAGTGAATTATATAAGTATAAAGTAG  
TAAAAATTAAACCACTA---GGAGTAGCACCCACCAAGGCAAGAAGAAGAGTGGTG-----

-----GGGAGAGAAAAAAGAGCA---GTTGGA---ATAGGAGCT-----

GTTTTCTTGGGTTCTTAGGAACA---GCAGGAAGCACTATG---GGCGCGGCGTCA---

ATAACGCTGACGGTACAG---GTCAGACAA---TTATTG---TCTGGCATAGTGCAACAGCAAAGC---

AATTTG---CTGAGA---GCTATAGAGGCGCAGCAGCATCTGTTGCAACTCACAGTCTGGGGCATT

>KR051421

TTCTATTGTAATACATCAAACTGTTTAATACATCAGAACTGTTTAATACATCAACAAAGTTTAATATATCAA  
CAGAGTCTAAT-----

AATAGTAATAGTGAAAAG-----

AATGAGACTGATATTATCGTGCTCCCATGTAGAATAAAACAAATTGTGAGAATGTGGCAGAGAGTAGAACAAG  
CAATGTATGCCCCCTCCCATCGAAGGAGTCATTACATGTAGGTCAAAC---

ATTACAGGACTGATATTAATAAGAGATGGTGGTAATAGTAATGAAACT-----

-----  
-----

AATGGTACTGAGACCTTCAGACCTGCAGGAGGAGACATGAGGGACAATTGGAGAAGTGAATTATATAGGTATA  
AAGTAGTAAAAATAAAACCATTAA---GGAATAGCACCAACCAAGGCAAGGAGAAGAGTGGTG-----

-----GGAAGAGAAAAAAGAGCA---GTTGGA---CTGGGAGCT-----

---GTTTTCTTGGGTTCTTAGGGGCA---GCAGGAAGCACTATG---GGCGCGGCGTCA---

ATAACGCTGACGGTACAG---GTCAGACAA---TTATTG---TCTGGCATAGTGCAACAGCAAAGC---

AATTTG---CTGAGG---GCTATAGAGGCACAGCACCATCTGTTGCAACTCACAGTCTGGGGCATT

>KR051428

TTCTATTGTAATACATCAAATCTGTTTGACACATCACTACTGTCTAATAGTAGTGAAGAAAATAATAATGGA-

-----  
-----

AAAAATGAACTATCACGATCCCATGTAAATAAAGCAAATTGTGAGAATGTGGCAGAGAGTAGGACAAGCAA  
TGTATGCCCCCTCCCATCAGAGGAAACATTACATGTGAATCAAAT ---  
ATTACAGGACTAATATTAACAAGAGATGGTGGTGGAAATAATAGC-----

-----  
-----

AGTGACCCTGAGGTCTTCAGACCTGGAGGAGGAGACATGAGGGACAATTGGAGAAGTGAATTATATAAGTATA  
AAGTAGTAAAAATAAAACCATTA --- GGAATAGCACCAACCAGGGCAAGGAGAAGAGTGGTG-----  
-----GAGAGAGAAAAAAGAGCA --- GTTGGA --- CTGGGAGCT-----  
---GTTTTCTTTGGGTTCTTAGGAACA --- GCAGGAAGCACTATG --- GGCGCGGCGTCA ---  
ATAACGCTGACGGTACAG --- GTCAGACAA --- TTACTG --- TCTGGCATAGTGCAACAGCAAAGC ---  
AATTTG --- CTGAGA --- GCTATAGAGGCGCAGCAGCATCTGTTGCAACTCACAGTCTGGGGCATT

>JX140676

TTCTACTGTAATACATCAAGACTGTTTTTACCATTAAATAGTACAAAT-----

-----  
-----

AGTACTGGGAATATAACACTCCCATGTAGGATAAAACAAATTGTAAGAATGTGGCAAAGAGTAGGACAAGCAA  
TGTATGCTCCTCCCATTGCAGGAAAGATTACATGCATATCAAAC ---  
ATTACAGGACTACTATTAACAAGGGATGGTGGGAACAACAATAGT-----

-----  
-----

ATTGAAACCTTCAGACCTGCAGGAGGAGATATGAAGGACAATTGGAGAAGTGAATTATACAAGTATAAAGTAG  
TAAAAATTAAACCACTA --- GGAATAGCACCCACCAGGGCACGAAGAAGAGTGGTG-----  
-----GGAAGAGAAAAAAGAGCA --- GTTGGA --- CTGGGAGCT-----  
GTTTTCTTTGGGTTCTTAGGAGCA --- GCAGGAAGCACTATG --- GGCGCGGCGTCA ---  
ATAACGCTGACGGTACAG --- GTCAGACAA --- TTATTG --- TCTGGCATAGTGCAACAGCAAAAC ---  
AATTTG --- CTGAGA --- GCTATAGAGGCGCAACAGCATCTGTTGCAACTCACAGTCTGGGGCATT

>KP109502

TTCTATTGTAACACAACAGGACTGTTTAATGATACATTATTGTCTGACAACAGTACCTCA-----

-----  
-----

GAAAACGATACTATCACACTCCAATGTAGAATAAAACAAATTGTGAGAATGTGGCAGAGGGTAGGACAAGCAA  
TGTACGCCCCCTCCCATCGCGGGAGAAATTATATGTAGATCAAAC ---  
ATTACAGGGCTACTCTTAACAAGAGATGGTGGGAATATTACAAAT-----

-----  
-----

GGTACTGACACCTTCAGACCGGGAGGAGGAGATATGAGAGACAATTGGAGAAGTGAATTATACAAGTACAAAA  
TAGTAAAAATTAAACCACTA --- GGAGTAGCACCCACCAGGGCAAGAAGAAGAGTGGTG-----  
-----GGAAGAGAAAAAAGGGCA --- GTTGGA --- CTGGGAGCG-----  
TTCTTCCTTTGGGTTCTTAGGAACA --- GCAGGAAGCACTATG --- GGCGCAGCGTCA ---  
ATAGCGCTGACGGTACAG --- GTCAGACAA --- TTATTG --- TCTGGCATAGTGCAACAGCAAAGC ---  
AATTTG --- CTGAGG --- GCTATAGAGGCGCAGCAGCATTTGCTGCAACTCACAGTCTGGGGCATT

>AM279365

TTCTATTGTAATACATCAAACTGTTTGAACCATCTAATAGTACAGAGAGTATTGAACCATCAGAGAAT----

-----  
-----

AATAGGACTAATATCACACTCCCATGTAGAATAAAACAAATTGTGAGAATGTGGCAGAGAGTGGGACAAGCAA  
TGTATGCCCCCTCCCATCGAAGGAAATATTACATGCAGATCAAAC ---  
ATTACAGGACTATTATTAACAAGAGATGGTGGAAATGGTGGGAGT-----

-----  
-----

AATGACAGTGAGGTCGTTAGACCTGCAGGAGGAGACATGAGGGACATTTGGAGAAGTGAATTATATAGATATA  
AAGTAGTAAAAATAAAACCATTA --- GGAATAGCACCCACCAGGGCAAGGAGAAGAGTGGTG-----  
-----GGGAGAGAAAAAAGAGCA --- GTTGGA --- CTGGGAGCT-----  
---GTTTTCTTTGGGTTCTTAGGAGCA --- GCAGGAAGCACTATG --- GGCGCGGCGTCA ---  
ATAACGCTGACGGTACAG --- GTCAGACAA --- TTATTG --- TCTGGCATAGTGCAACAGCAAAGC ---  
AATTTG --- CTGAGG --- GCTATAGAGGCGCAGCAGCATCTGTTGCAACTCACAGTCTGGGGCATT

>AM279350

TTCTATTGTAAAACATCAGGACTGTTTAAATAGTAGTCTGTTTAAATAGTAGTCTGAATAATAGTAGT-----

-----  
-----

AAAAATGAGAATATCACACTTCCATGTAAAATAAAACAAATTGTGAGAATGTGGCAGAGAGTGGGACAAGCAA  
TGTATGCCCCCTCCCATCGCAGGAGATATTACATGTGTATCAAAC---

ATTACAGGACTACTATTAACAAGAGATGGTGGGAGCAATAGAACA-----

-----  
-----

AATGAGACCTTCAGACCTTCAGGAGGAGACATGAGGGACAACCTGGAGAAGTGAATTATATAAGTATAAAGTAG  
TAAAAATTAACCCACTA---GGGGTAGCACCCACCAAGGCAAGAAGAAGAGTGGTG-----

-----CAGAGAGAAAAAGAGCA---GTTGGA---CTGGGAGTT-----

GTCTTCCTTGGGTTCTTAGGAGCA---GCAGGAAGCACTATG---GGCGCGGCGTCA---

ATAACGCTGACGGTACAG---GTCAGACAA---TTATTG---TCTGGCATAGTGCAACAGCAAAGC---

AATTTG---CTGAGG---GCTATAGAGGCGCAACAACATCTGTTGCAACTCACAGTCTGGGGCATT

>JN106043

TTCTATTGTAATACATCAGGACTGTTTAAATAATAGTAAATTAAATAGTACCACTACA-----

-----  
-----

AATAATACCACTATCACACTCCCATGTAGGATAAAACAAATTGTGAGAATGTGGCAGAGAGTGGGACAAGCAA  
TGTATGCTCCCCCTATTGCAGGAAATATTACATGTAGATCTAAC---

ATTACAGGGCTATTATTAACAAGAGATGGTGCAAATAACTGGA-----

-----  
-----

AATGAGACCTTCAGACCTGGAGGAGGAGATATGAGGGACAATTGGAGAAGTGAATTATATAAGTATAAAATAG  
TAAAAATTAACCCTA---GGGATAGCACCCACCAAGGCAAGGAGAAGAGTGGTG-----

-----CAGAGAGAGAAAAAGAGCA---GTTGGAACGATGGGAGCT-----

CTCTTCCTTGGGTTCTTAGGAACA---GCAGGAAGCACTATG---GGCGCGGCGTCA---

CTAACGCTGACGGTACAG---GTCAGACAA---TTATTG---TCTGGCATAGTGCAACAGCAAAGC---

AATTTG---CTGAGA---GCTATAGAGGCGCAACAACATCTGTTGCAACTCACAGTCTGGGGCATT

>MH431770

TTCTATTGTAATACATCAAAATTGTTTAAATAATAGCTTGCTTAATAATAACTGTTGAT-----

-----  
-----

ACCAACAACACAATCATACTCCCATGTAAAGATAAAACAAATTGTGAGACTGTGGCAGAGAGTGGGACAAGCAA  
TGTATGCCCCCTCCCATTCAGGAGAAATAACATGTATTTCAAAT---

ATTACAGGGCTACTGTTAACAAGAGATGGTGTATGGGAATAATAACACG-----

-----  
-----

AATAATGACACCGTCAGACCTTGGGGAGGAGATATGAGGGACAATTGGAGAAGTGAATTATATAAATATAAAA  
TAGTAAGAATTAAACCTA---GGAGTGGCACCCACCAAGCAAGGAGAAGAGTGGTG-----

-----CAGAGAGAAAAAGAGCA---GTTGGA---CTTGAGCT-----

TTCTTCCTTGGGTTCTTAGGAACA---GCAGGAAGCACTATG---GGCGCAGCGTCA---

ATAACGCTGACGGTACAG---GTCAGACAA---TTATTG---TCTGGCATAGTGCAACAGCAAGGC---

AATTTG---CTGAGA---GCTATAGAGGCGCAGCAGCATCTGCTGCAACTCACAGTCTGGGGCATT

>KY275364

TTCTATTGTAATACATCAGGACTGTTTAAATAATAGTCTATTAAATACCACTCTAACTGACACCACTCTA----

-----  
-----

GAGAATACCAATCTCACACTCCCATGTAAAGATAAAACAAATTGTAAGAATGTGGCAGAGAGTGGGACAAGCAA  
TGTATGCCCCCCCCATCGCAGGAAATATTACATGCAATTCTAAT---

ATTACAGGGCTATTATTAACAAAAGATAGTGAAGGTAATAGCAGT-----

-----  
-----

ACAAATGAGACCTTCAGACCTGGAGGAGGAGATATGAGGGACAATTGGAGAAGTGAATTATATAAGTATAAAA  
TAGTAAAAATTAACCTA---GGGATAGCACCCACCAAGGCAAGGAGAAGAGTGGTG-----

-----CAGAGAGAGAAAAAGAGCA---GTGGGA---ATAGGAGCT-----

GTCTTCCTTGGGTTCTTAGGAGCA---GCAGGAAGCACTATG---GGCGCGGCGTCA---

ATAACGCTGACGGTACAG---GTCAGACAA---TTATTG---TCTGGCATAGTGCAACAGCAGAGC---

AATCTG---CTGAGG---GCTATAGAGGCGCAGCAACATATGTTGCAACTCACAGTCTGGGGCATT

>MK254639

TTCTATTGTAATACTTCAAACTGTTCAATGAATCATTTATTAATGGGAATGATAGTAAAGACACTGAA-----

-----  
-----

AGTAATGACACTATCACACTCCCATGTAAGATAAAACAAATTGTGAGAATGTGGCAGAGAGTGGGACAAGCAA  
TGTATGCCCCCTCCCATTCGAGGAAATATTACATGTAGCTCAAAC---

ATTACAGGACTATTATTAACAAGAGATGGTGGACTG-----

-----  
-----

AATAATGAGACCTTCAGACCTGGAGGAGGAGATATGAGGGACAATTGGAGAAGTGAATTATATAAGTATAAAG  
TGGTAAAAAATTAAACCACTA---GGAATAGCACCCACCAGGGCAAGGAGAAGAGTGGTG-----

-----CAGAGAGAAAAAAGGGCA---GTTGGA---CTGGGAGCT-----

CTCTTCCTTGGGTTCTTAGGAGCA---GCAGGAAGCACTATG---GGCGCAGCGTCA---

GTGACGCTGACGGTACAG---GCCAGACAA---TTGCTG---TCTGGCATAGTGCAGCAGCAAAGC---

AATTTG---CTGACG---GCTATAGAGGCGCAGCAACGCCTACTGCAACTCACAGTCTGGGGCATT

>EU885759

TTTTATTGTGACACATCAGATCTGTTTAATAGTAGTAGGTTTAATAATAGTAGTAATGAC-----

-----  
-----

ACTAATGACACTATCACGCTTCCATGTAAGATAAAACAAATTGTGAGAATGTGGCAGAGAGTGGGACAAGCAA  
TGTATGCCCCCTCCTATCGCAGGAAACATCACATGTAGGTCAAAT---

ATTACAGGACTACTATTAACAAGAGATGGTGGAGGAAATAATACA-----

-----  
-----

AATGAGACTGAGACTTTCAGACCTGCAGGAGGAGACATGAGGGACAATTGGAGAAGTGAATTATATAAGTATA  
AAGTAGTAAAAATTAAACCACTA---GGAGTAGCACCCACCAGGGCAAGGAGAAGAGTGGTG-----

-----GGGAGAGAAAAAAGAGCA---ATTGGA---ATGGGAGCT-----

---GTCCTCCTTGGGTTCTTAGGAACA---GCAGGAAGCACTATG---GGCGCGGCGTCA---

ATAACGCTGACGGTACAG---GTCAGACAA---TTATTG---TCTGGCATAGTGCAACAGCAAAGC---

AATTTG---CTGAGG---GCTATAGAGGCGCAACAGCATCTGTTGCAACTCACAGTCTGGGGCATT

>EU885761

TTCTATTGTAATACATCAGGTCTGTTTAATACATCAGGTCTGTTTAATAATAACAGTAATGAT-----

-----  
-----

AGTAGTGGGAATATCACACTTCCATGTAAGATAAAGCAAATTGTGAGAATGTGGCAGAGAGTTGGACAAGCAA  
TGTATGCCCCCTCCCATCGCAGGAAACATTACATGCAGGTCAAGG---

ATTACAGGACTACTATTAGTAAGAGATGGTGGAAAAAGTAATGAGACA-----

-----  
-----

AATGGAAGTGAAGTGAATTATATAAGTATA  
AAGTAGTAAAAATTAAACCACTG---GGAGTAGCACCCACCAGGGCAAGGAGAAGAGTGGTG-----

-----GGGAGAGAAAAAAGAGCA---GTTGGA---ATGGGAGCT-----

---GTCCTCCTTGGGTTCTTAGGAGCA---GCAGGAAGCACTATG---GGCGCGGCGTCA---

ATAACGCTGACGGTACAG---GTCAGACAA---TTATTG---TCTGGCATAGTGCAACAGCAAAGC---

AATTTG---CTGAGG---GCTATAGAGGCGCAGCAGCATCTGTTGCAACTCACAGTCTGGGGCATT

>EU885762

TTCTATTGTAATACATCAAAGCTGTTTAATAGTAGTCTGTTTAATAGTAGTACTAATAGT-----

-----  
-----

AATAATGAAACTATCACAAATTCATGTAATAAATAAAACAAATTGTGAGAATGTGGCAGAGAGTGGGACAAGCAA  
TGTATGCCCCCTCCCATTCGAGGAAATATTACATGTAGTTCAAAC---

ATTACAGGACTAATATTGGTAAGAGATGGTGGAAACAAATAATAAT-----

-----  
-----

ACAAATGAGACTGTCAGACCTGCAGGAGGAGACATGAGGGACAATTGGAGAAGTGAATTATATAAGTATAAAA  
TAGTAAAAAATTAAACCACTA---GGAATAGCACCCACCAGGGCAAGGAGAAGAGTGGTG-----

-----GAGAGAGAAAAAAGAGCA---GTTGGA---CTGGGAGCG-----

TTCTCCTTGGGTTCTTAGGAACA---GCAGGAAGCACTATG---GGCGCGGCGTCA---

CTAACGCTGACGGTACAG---GTCAGACAA---TTATTG---TCTGGCATAGTGCAACAGCAAAGC---

AATTTG---CTGAGG---GCTATAGAGGCGCAGCAGCATCTGTTGCAACTCACAGTCTGGGGCATT

>EU885763

TTCTATTGTAATACATCAAGGCTGTTTAAACAGTAGTGCTAATGCTACTAGT-----  
-----  
-----

ATTAATGATACTATCACACTTCCATGTAAGATAAAACAAATTGTGAGAATGTGGCAGAGAGTAGGACAAGCAA  
TGTATGCCCCCTCCCATCGCAGGAAACATTACATGTAGCTCAAAC---  
ATTACAGGACTACTATTAGTGAGAGATGGTGGAGTGAGAGGTGGTGAAGGAAAT-----  
-----  
-

AATACTGATAATAACACTGAGACTTTTAGACCTGCAGGAGGAGACATGAGGGACAATTGGAGAAGTGAATTAT  
ATAAGTATAAAGTAGTAAGAATTAACCCTA---GGAATAGCACCCACCAAGGCAAGGAGAAGAGTGGTG--  
-----GGAAGAGAAAAAAGAGCA---GTTGGA---  
CTAGGAGCT-----GCCTTCCTTGGGTTCTTAGGAGCA---GCAGGAAGCACTATG---  
GGCGCAGCGTCA---ATAACGCTGACGGTACAG---GTCAGACAA---TTATTG---  
TCTGGCATAGTGCAACAGCAAAGC---AATTTG---CTGAGG---  
GCTATAGAGGCGCAGCAGCATCTGTTGCAACTCACAGTCTGGGGCATT

>JN054265

TTCTATTGTAATACATCGGCTCTGTTTAAATAGTAGTCTGTTGAATAGTAGTAATAGT-----  
-----  
-----

ACTAATAGTACTATCACACTTCCATGTAGGATAAAACAGATTGTGAGAATGTGGCAGAGAGTGGGACAAGCAA  
TGTATGCCCCCTCCCATCGAAGGAAACATTACATGTAGATCAAGC---  
ATTACAGGACTACTATTAATAAGAGATGGTGGAGATACTTCAAAT-----  
-----  
-----

GGAAC TGAGATTTTCAGACCTACAGGGGGAGACATGAGGGATAATTGGAGAAGTGAATTATATAAGTATAAAG  
TAGTAAAAATTAAACCCTA---GGAGTAGCACCCACCAGGGCAAGGAGAAGAGTGGTG-----  
-----GGAAGAGAAAAAAGAGCA---GTTGGA---CTGGGAGCT-----  
GTCCTCCTTGGGTTCTTAGGAACA---GCAGGAAGCACTATG---GGCGCGGCGTCA---  
ATAACGCTGACGGTACAG---GTCAGACAA---TTATTG---TCTGGCATAGTGCAACAGCAAAGC---  
AATTTG---CTGAGG---GCTATAGAGGCACAGCAACATCTGTTGCAGCTCACAGTCTGGGGCATT

>GQ222685

TTCTATTGTAATACATCAAGTCTGTTTAAATAGTAGCAGTAATGATAATACCACACAT-----  
-----  
-----

AATGGTGGTACTATCACACTTCCATGTAAGATAAAACAAATTGTGAGAATGTGGCAGAGAGTGGGACAAGCAA  
TGTATGCTCCTCCCATCGCAGGAAACATTACATGTAGTTCAAGA---  
ATTACAGGACTACTATTAGTAAGAGATGGTGGGACACATAATAACACA-----  
-----  
-----

AATGGAAC TGAGACTTTTCAGACCTGCAGGAGGAGACATGAGGGACAATTGGAGAAGTGAATTATATAAGTATA  
AAGTAGTAAAAATTAAACCCTA---GGAGTAGCACCCACCAGGGCAAGGAGAAGAGTGGTG-----  
-----GGGAGAGAAAAAAGAGCA---GTTGGA---CTGGGAGCT-----  
---GTCCTCCTTGGGTTCTTAGGAACA---GCAGGAAGCACTATG---GGCGCGGCGTCA---  
ATAACGCTGACGGTACAG---GTCAGACAG---TTATTG---TCTGGCATAGTGCAACAGCAAAGC---  
AATTTG---CTGAGG---GCTATAGAGGCGCAGCAGCATCTGTTGCAACTCACAGTCTGGGGCATT

>GQ862781

TTCTATTGTAATACATCACAGCTGTTTAAATAGTAGTATCTGGTTTAAATAGTAGTAGTAAC TGGACTAATGGT-  
-----  
-----

ACTAATGACACTATCATACTTCCATGTAGAATAAAACAGATTGTGAGAATGTGGCAGAGAGTGGGACAAGCAA  
TGTATGCCCCCTCCCATCGCAGGAAATATTACATGTAGGTCAAAA---  
ATTACAGGACTACTATTGGTAAGAGATGGTGGAGGAAATAATACA-----  
-----  
-----

AATGAGACTTTTCAGACCTGCAGGAGGAGACATGAGGGACAATTGGAGAAGTGAATTATATAAGTATAAAGTAG  
TAAAAATTAAACCCTA---GGAGTAGCACCCACCAGGGCAAGGAGAAGAGTGGTG-----  
-----GAGAGAGAAAAAAGAGCA---GTTGGA---CTGGGAGCG-----  
GTCCTCCTTGGGTTCTTAGGAACA---GCAGGAAGCACTATG---GGCGCAGCGTCA---

ATAACGCTGACGGTACAG---GTCAGACAA---TTATTG---TCTGGCATAGTGCAACAGCAAAGC---  
 AATTTG---CTGAGG---GCTATAGAGGCGCAGCAGCATATGTTGCAACTCACAGTCTGGGGCATT  
 >JF327808  
 TTCTATTGTAATACATCAGGCCTGTTTAATACATCAGACCTGTCTAATAATAACACACAATAATAGT-----  
 -----  
 -----  
 ACAAATGATACTATCACACTTCCATGTAAGATAAAACAAATAGTGAGAATGTGGCAGAGAGTGGGACAAGCAA  
 TGTATGCCCCCTCCCATTCAGGAAACATTACATGTAGTTCAAAT---  
 ATTACAGGACTACTATTAGTAAGAGATGGTGGAAACGATAATGAGACA-----  
 -----  
 -----  
 AATGGAAGTGAAGTCTTTCAGACCTGCAGGAGGAGACATGAGGGATAATTGGAGAAGTGAATTATATAAGTATA  
 AGGTAGTAAAAATTAAACCTCTG---GGAGTAGCACCCACCAGGGCAAGGAGAAGAGTGGTG-----  
 -----GGGAGGGAAAAAAGAGCA---GTTGGA---CTGGGAGCT-----  
 ---GTCCTCCTTGGGTTCTTAGGAGCA---GCAGGAAGCACTATG---GGCGCGGCGTCA---  
 ATAACGCTGACGGTACAA---GTCAGACAA---TTATTG---TCTGGCATAGTGCAACAGCAAAGT---  
 AATTTG---CTGAGG---GCTCTAGAGGCGCAGCAGCATCTGTTGCAACTCACAGTCTGGGGCATT  
 >JN054287  
 TTCTATTGTAATACATCAGGGCTGTTTAATAGTAGTCTGTCTGGAGATGGTAACTGGACTAGTGGTAACTGGA  
 GT-----  
 -----  
 AATAGTGGTAATATCACAATTCCATGTAGAATAAAACAAATTGTGAGAATGTGGCAGAGAGTGGGACAAGCAA  
 TGTATGCCCCCTCCCATTCAGGAAATATTGCATGTAGGTCAAAC---  
 ATTACAGGACTACTATTGGCAAGAGATGGTGGTAATAACAATAGTACA-----  
 -----  
 -----  
 AATGAGACTGAGATTTTCAGACCTGCAGGAGGAGACATGAAGGACAATTGGAGAAGTGAAGTATATAAATATA  
 AAATAATAAAAAATTAAACCATTA---GGAATAGCACCCACCAGGGCAAGGAGAAGAGTGGTG-----  
 -----GAGAGAGAAAAAAGAGCA---GTTGGA---ATGGGAGCG-----  
 ---ATCCTCCTTGGGTTCTTAGGAACA---GCAGGAAGCACTATG---GGCGCGGCGTCA---  
 ATAACGCTGACGGTACAG---GTCAGACAA---TTATTG---TCTGGCATAGTGCAACAGCAAAGC---  
 AATTTG---CTGAGA---GCTATAGAGGCGCAGCAGCATCTGCTGCAACTCACAGTCTGGGGCATT  
 >JN054296  
 TTCTATTGTAATACATCACAGCTGTTTGATAGTAGTAATAAAGATAAC-----  
 -----  
 -----  
 TGGACTAATACTATCACACTTCCATGTAGAATAAAACAAATTGTGAGAATGTGGCAGAGAGTGGGACAAGCAA  
 TGTATGCTCCTCCCATTCAGGAAATATTACATGTAAAGTCAAAC---  
 ATTACAGGATTACTATTGGTAAGAGATGGTAGTGGAATAATAAAA-----  
 -----  
 -----  
 ACAAATGAGACTTTTCAGACCTGCAGGAGGAAACATGAGGGACAATTGGAGAAGTGAATTATATAGGTATAAAG  
 TAGTAAAAATTAAACCACTA---GGAGTAGCACCCACCAAGGCAAGGAGAAGAGTGGTG-----  
 -----GAGAGAGAAAAAAGAGCA---GTTGGA---CTGGGAGCG-----  
 GTCCTCCTTGGGTTCTTAGGAACA---GCAGGAAGCACTATG---GGCGCGGCGTCA---  
 ATAACGCTGACGGTACAG---GTCAGACAA---TTATTG---TCTGGCATAGTGCAACAGCAAAGT---  
 AACTTG---CTGAGG---GCTATAGAGGCGCAGCAGCATCTGTTGCAACTCACAGTCTGGGGCATT  
 >KU685592  
 TTCTATTGTAATACATCAGAGCTGTTTAATAGCAGTCTGTTTAATAATAGTAGTAAT-----  
 -----  
 -----  
 AATAGTGAAGTTCATCACACTTCCATGTAGGATAAAACAAATTGTGAGAATGTGGCAGAGAGTAGGACAAGCAA  
 TGTATGCCCCCTCCCATTCAGGAAACATTACATGTGTATCAAAC---  
 ATTACAGGACTACTATTAGTAAGAGATGGTGGAAATAACTCAACT-----  
 -----  
 -----  
 AATGGAAGTGAAGTCTTTCAGACCTGCAGGAGGAGACATGAGGGACAATTGGAGAAGTGAATTATATAAGTATA  
 AAGTAGTAAAAATTAAACCACTA---GGAGTAGCACCCACCAGGGCAAGGAGAAGAGTGGTG-----  
 -----GGGAGAGAAAAAAGAGCA---GTTGGA---CTGGGAGCT-----  
 ---GTCCTCCTTGGGTTCTTGGGAGCA---GCAGGAAGCACTATG---GGCGCGGCGTCA---

ATAACGCTGACGGTACAG---GTCAGACAA---TTATTG---TCTGGCATAGTGCAACAGCAAAAC---  
 AATTTG---CTGAGG---GCTATAGAGGCGCAGCAGCATATGTTGCAACTCACAGTCTGGGGCATT  
 >U09664  
 TTCTATTGTAATACATCAGGACTGTTTAATAGTAGTATATTATCTAACAATAATGCACCATCTAAT-----  
 -----  
 -----  
 AGCAGTAAGAATATCACACTCCCATGTAGAATAAAACAAATTGTAAGAATGTGGCAGAGGGTGGGACAAGCAA  
 TGTATGCCCCCTCCCATTGCAGGAAACATTACATGTAAATCAAAC---  
 ATTACAGGACTAATATTAACAAGAGATGGTGGAATAGTACCAAT-----  
 -----  
 -----  
 GGAAATGAGACCTTCAGACCTGCAGGAGGAGACATGAGGGACAATTGGAGAAGTGAATTATATAAGTATAAAG  
 TAATAAAAATTAACCACTA---GGAGTAGCACCCACCAAGGCAAGGAGAAGAGTGGTG-----  
 -----GGGAGAGAAAAAAGAGCA---ATT-----ACTGGAGCT-----  
 GTCTTCCTTGGGTTCTTAGGAGCA---GCTGGGAGCACTATG---GGCGCGGCGTCA---  
 CTAGCGCTGACGGTACAG---GTCAGACAA---TTATTG---TCTGGCATAGTGCAACAGCAAAAC---  
 AATTTG---CTGAGG---GCTATAGAGGCGCAACAACATCTGTTGCAACTCACAGTCTGGGGCATT  
 >AB287004  
 TTCTATTGTAATACATCAAGGCTGTTTAATAATGAAACTGGGAATAGC-----  
 -----  
 -----  
 ACAAACACAAATATCACACTCCCATGTAAAATAAAACAAATTGTAAGAATGTGGCAGAGAGTGGGACAAGCAA  
 TGTATGCCCCCTCCCATCGAAGGAGAAATTAGATGTGACTCAACA---  
 ATTACAGGACTAATATTAACAAGAGATGGTGGAACAGTAACAATACT-----  
 -----  
 -----  
 AATAATACAGAGACCTTCAGACCTGGAGGAGGAGATATGAGGGACAATTGGAGAAGTGAATTATATAAGTACA  
 AAACAGTAAAAATCAAATCACTA---GGAATAGCACCCACCAGGGCAAGGAGACGAGTGGTG-----  
 -----GAGAGAGAAAAAAGAGCA---GTTGGA---CTGGGAGCT-----  
 ---GTCTTCCTTGGGTTCTTAGGAGCA---GCAGGAAGCACTATG---GGCGCGGCGTCA---  
 ATAACGCTGACGGTACAG---GTCAGGCAA---TTATTG---TCTGGCATAGTGCAACAGCAAAGC---  
 AATTTG---CTGAGG---GCTATAGAGGCGCAACAGCATATGTTGCAACTCACAGTCTGGGGCATT  
 >KU168300  
 TTCTATTGTAATACATCAAATCTGTTTAATAGTAGTAAGTTTAATAATAGTAGTGAT-----  
 -----  
 -----  
 AATGAACTACTATTACACTTCCATGTAAAGATAAAACAAATTGTAAGAATGTGGCAGAGAGTAGGACAAGCAA  
 TGTATGCCCCCTCCCATCGCAGGAAATATTACATGTAAAGTCAAAC---  
 ATTACAGGACTAATATTGATAAGAGATGGTGGAACAAGGTAATGATACA-----  
 -----  
 -----  
 AATAGGACTGAGACTTTCAGACCTGCAGGAGGAGACATGAGGGACAATTGGAGAAGTGAATTATATAAATATA  
 AAGTAGTAAAAATTAAACCACTA---GGAATCGCACCCACCAGGGCAAGAAGAAGAGTGGTG-----  
 -----GGGAGAGAAAAAAGAGCA---GCTGGA---CTGGGAGCT-----  
 ---GTCTTCCTTGGGTTCTTAGGAGCA---GCAGGAAGCACTATG---GGCGCGGCGTCA---  
 ATAACGCTGACGGTACAG---GTCAGACAA---TTATTG---TCTGGCATAGTGCAACAGCAAAAC---  
 AATTTG---CTGAGG---GCTATAGAGGCGCAGCAGCATATGTTGCAACTCACAGTCTGGGGCATT  
 >KF716477  
 TTCTATTGTAATACATCAAGACTATTTAATATGACAGAATTAGACAAATCA-----  
 -----  
 -----  
 GGCAATGAAACAATCACACTCCCATGCAAGATAAAACAAATTGTGAGAATGTGGCAGAGAGTAGGACAAGCAA  
 TGTATGCCCCCTCCCATCGAGGGAAAAATTACATGTAACTCAAAC---  
 ATCACAGGATTACTGTTAACAAGAGATGGGGGTGAAAATAATAGC-----  
 -----  
 -----  
 ACTAACGAGACCTTCAGACCTGCAGGTGGAGATATGAGAGACAATTGGAGAAGTGAATTATATAAGTATAAAG  
 TAATAAGAATCAAACCACTA---GGAGTAGCACCCACCAAGGCAAGGAGAAGAGTGGTG-----  
 -----GGAAGAGAAAAAAGGGCAGTAGTTGGA---GTGGGAGCT-----  
 GTCTTCCTTGGAATTCCTATCAGCA---GCAGGAAGCACTATG---GGCGCGGCGTCA---

ATAACGCTGACGGTACAG---GTCAGACAA---TTATTG---TCTGGCATAGTGCAACAGCAAAGC---  
 AATTTG---CTGAGA---GCTATAGAAGCGCAGCAGCATCTGTTGCAGCTCACAGTCTGGGGCATT  
 >DQ168576  
 TTCTATTGTAATACATCAGACTTGTTTAATAATACATCAGAG-----  
 -----  
 -----  
 TATAAGGGCAATATCACACTCCCATGTAGGATAAAACAAATTGTGAGAATGTGGCAGAGAGTAGGACAAGCAA  
 TGTATGCCCCCTCCCATTCAGAGAGACATTACATGTAGATCAAAT---  
 ATTACAGGGCTACTATTAGTGAGAGATGGTGGCATAAATAGCACA-----  
 -----  
 -----  
 AATGAAACCTTCAGACCTGGAGGAGGAGATATGAAGGACAATTGGAGAAGTGAATTATATAAGTATAAAACAG  
 TAAAAATCAAACCATTA---GGAGTAGCACCCACCAAGGCAAAGAGAAGAGTGGTG-----  
 -----CAGAGAGAAAAAAGGGCA---GTTGGA---ATGGGAGCT-----  
 GTCTTCCTTGGGTTCTTGGGAGCA---GCAGGAAGCACTATG---GGCGCGGCGTCA---  
 ATAACGCTGACGGTACAG---GTCAGACAA---TTATTG---TCTGGCATAGTGCAACAGCAAAGC---  
 AATTTG---CTGAGG---GCTATAGAGGCGCAACAACATCTGTTGCAACTCACAGTCTGGGGCATT  
 >DQ168575  
 TTCTATTGTAATACATCAGGACTGTTTAATGCATCACTGCTTAATGATACCACA-----  
 -----  
 -----  
 GAATCGCCTAATATCACACTCCCATGTAGGATAAAACAAATTGTAAGAATGTGGCAGAGAGTAGGACAAGCAA  
 TGTATGCCAATCCCATCGCAGGAGATCTTACATGTAGATCAAAC---  
 ATTACAGGGCTATTATTAACAAGAGATGGAGGGGATAACACAAGT-----  
 -----  
 -----  
 GATAGTGAGACCTTCAGACCTGGAGGAGGAGATATGAGGAACAATTGGAGAAGTGAATTATATAAGTATAAAA  
 TAGTAAAAATTAAACCACTA---GGAATAGCACCCACCAAGGCAAGGAGAAGAGTGGTG-----  
 -----CAGAGAGAAAAAAGGACA---GTTGGA---CTGGGAGCT-----  
 GTCTTCCTTGTTTCTTAGGAGCA---GCAGGAAGCACTATG---GGCGCGGCGTCA---  
 ATAACGCTGACGGTACAG---GTCAGACAA---TTATTG---TCTGGCATAGTGCAACAGCAAAGT---  
 AATTTG---CTGAGG---GCTATAGAGGCGCAGCAACATCTATTGCAACTCACAGTCTGGGGCATT  
 >DQ168579  
 TTCTATTGTAATACATCAGGATTGTTTAACAATAGCTTGTTTACCAACAATAGTAGTAATACCAACAATAGC-  
 -----  
 -----  
 AGTAATGACACTATCACGCTCCCATGTAGGATAAAGCAAATTGTGAGAATGTGGCAGAAGGTGGGACAAGCAA  
 TGTATGCCCCCTCCCATCGCAGGAGATATTACATGTAGATCAAAT---  
 ATTACAGGGCTACTATTAAACAAGAGATGGTGGGAGAGATGGTGGGAAT-----  
 -----  
 -----  
 ACTAGCACAAATGAAACCTTCAGACCTGGAGGAGGAGATATGAGGGACAATTGGAGAAGTGAATTATATAAGT  
 AAAAAATAGTAAAAATTAAACCACTA---GGAATAGCACCCACCAGGGCAAGGAGAAGAGTGGTG-----  
 -----GAGAGAGAAAAAAGGGCA---GTTGGA---CTGGGAGCT---  
 -----GTCTTCCTTGTTTCTTAGGAACA---GCAGGAAGCACTATG---GGCGCAGCGTCA---  
 ATAACGCTGACGGTACAG---GCCAGACAA---TTATTG---TCTGGCATAGTGCAACAGCAAAGC---  
 AATTTG---CTGAGG---GCTATAGAGGCACAGCAACATCTGTTGCAACTCACAGTCTGGGGCATT  
 >DQ168573  
 TTCTATTGCAATACATCAGGATTGTTTAATAATATATCAGGATGGTTTAATAGTACATCAAATAGTACATCAA  
 AC-----  
 -----  
 -----  
 AGTAATGATACTATCAGGCTCCCATGCAAGATAAAACAAATTGTGAGAATGTGGCAGAGAGTGGGACAAGCAA  
 TGTACGCCCCCTCCCATCGCCGGAGACATTATATGTAGATCAAAT---  
 ATTACAGGGCTACTAGTAACAAGAGATGGTGGGCCTAATAGCACA-----  
 -----  
 -----  
 GAGGAAATCTTCAGACCTGGAGGAGGAGATATGAGGGACAATTGGAGGAGTGAATTATATAAGTATAAAATAG  
 TAAAAATTAAACCACTA---GGGATAGCACCCACCAAGGCAAGGAGAAGAGTGGTG-----  
 -----CAGAGAGAAAAAAGAGCA---GTAGGA---CTGGGAGCT-----  
 TTCTTCCTTGTTTCTTAGGAACA---GCAGGAAGCACTATG---GGCGCGGCGTCA---

CTAACGCTGACGGTACAG---GCCAGACAA---TTATTG---TCTGGCATAGTGCAACAGCAAAGC---  
AATTTG---CTGAGG---GCTATAGAGGCGCAGCAACATCTGCTGCAACTCACAGTCTGGGGCATT  
>HQ236584  
TTCTATTGTAATACATCAGGACTGTTTAATGGTAGTGAGTTCAATACTAGTACTAGTAATAGTACTGGTAAG-  
-----  
-----  
GACAATGACACTATCACACTCCCATGTAAGATAAAACAAATTGTGAGAATGTGGCAGAGAGTGGGACAAGCAA  
TGTATGCCCCCTCCCATTTGAAGGAGAGCTTACATGTAACCTCATCC---  
ATTACAGGGCTATTATTAACAAGAGATGGTGGGAATGAGACTACT-----  
-----  
-----  
AATGATACTTTTCAGACCTGGAGGAGGAGACATGAGGGACAATTGGAGAAGTGAATTATATAAGTATAAAATAG  
TAAAAATTAAACCACTA---GGAATAGCACCCACCAAGGCAAGGAGAAGAGTGGTG-----  
-----CAGAGAGAAAAAAGGGCT--GTTACA---CTGGGAGCT-----  
ATGTTTCCTTGGGTTCTTAGGAACA---GCAGGAAGCACTATG---GGCGCGGCGTCA---  
ATAACGCTGACGGTACAG---GCCAGACAA---TTATTG---TCTGGTATAGTGCAAGCAGCAAAGC---  
AATTTG---CTGAGA---GCTATAGATGCGCAGCAACATCTATTGCAACTCACAGTCTGGGGCATT  
>GQ324613  
TTCTATTGCAACACATCAGGATTGTTTAATGATAGTATGATTAATGAGAGAAATACA-----  
-----  
-----  
ACAGATAGAAACATCACACTCCCATGTAGGATAAGACAAATTGTGAGAATGTGGCAAAGAGTGGGACGAGCAA  
TATATGCCCCCTCCCATTTGCAGGAGAAATTACATGTAGATCAAAT---  
ATTACAGGGCTACTATTAACAAGAGATGGTGGGCGTAATAACACA-----  
-----  
-----  
CATGACAATGAAACCTTCAGACCTGGAGGAGGAGACATGAGGGACAATTGGAGAAGTGAATTATATAAAATATA  
AAATAGTAAGAATTAAATCACTA---GGAGTAGCACCCACCAAGGCAAGGAGGAGAGTGGTG-----  
-----GAGAGAGAAAAAAGGGCA--GTTGGC---CTGGGAGCT-----  
---GTTTTCCTTGGGTTCTTAGGAGCA--GCAGGAAGCACTATG---GGCGCAGCATCA---  
ATAACGCTGACGGTACGG---GCCAGACAA---TTATTG---TCTGGTATAGTGCAACAGCAAAGC---  
AATTTG---CTGAGA---GCTATAGAGGCGCAGCAACATCTGCTGCAACTCACAGTCTGGGGCATT  
>KX389635  
TTCTATTGTAATACATCAGGGTTGTTTAATAGTAGTATTACATTACCTGATAGAAATAGTACA-----  
-----  
-----  
CCAAATGAGAATATCACCTCCAATGTAAATAAAACAAATTGTGAGAATGTGGCAGAGAGTGGGACAAGCAA  
TGTATGCCCCCTCCCATTTGCAGGAAACATTGAATGTAGATCAAAC---  
ATTACAGGGCTACTTTTAAACAAGAGATGGTGGGAATAACACGAAT-----  
-----  
-----  
AATGAAACCTTCAGACCTGGAGGAGGAGATATGAGGGACAATTGGAGAAGTGAATTATATAAGTATAAGGTAG  
TAAAAATTAAACCACTA---GGAATAGCACCCACCAAGGCAAAGAGAAGAGTGGTG-----  
-----GAGAGAGAAAAGAGCA---GTTGGC---CTGGGAGCT-----  
GTCTTCCTTGGGTTCTTAGGAACA---GCAGGAAGCACTATG---GGCGCAGCGTCA---  
ATAACGCTGACGGTACAG---GTCAGACAA---TTATTG---TCTGGCATAGTGCAACAGCAAAGC---  
AATTTG---CTGAGG---GCTATAGAGGCGCAACAACATCTGTTGCAACTCACGGTCTGGGGCATT  
>KX389631  
TTCTATTGTAGTACATCAAACTGTTTAACACATCAGAATGGAATAATGATACTAGT-----  
-----  
-----  
GACAATGCCACACTCATACTCCCATGTAGAATAAAACAAATTGTAAGAATGTGGCAGAAAGTGGGACAAGCAA  
TGTATGCCCCCTCCCATTTGCAGGAAACATTACATGTAACCTCAAAC---  
ATCACAGGGCTATTATTAACAAGAGATGGTGGGAATAATAATAATAAT-----  
-----  
-----  
ACTGCAAATGAGACCTTCAGACCTGCAGGAGGAGACATGAGGGACAATTGGAGAAGTGAATTATATAAGTACA  
AAGTAGTGAAAATTAAACCACTA---GGAATAGCACCCACCAAGGCAAGGAGAAGAGTGGTG-----  
-----CAGAGAGAAAAAAGGGCA--GTCGGA---CTGGGAGCT-----  
---CTCTTCCTTGGGTTCTTAGGAGCA--GCAGGAAGCACTATG---GGCGCGGCGTCA---

ATAACGCTGACGGTACAG---GCCAGACAA---TTATTG---TCTGGCATAGTGCAACAGCAAAGC---  
 AATTTG---CTGAGG---GCTATAGAGGCACAGCAGCATCTATTGCAACTCACAGTCTGGGGCATT  
 >KX389628  
 TTTTATTGCAATACATCAGGACTGTTTAATTTTAATAGAAGTGAAATA-----  
 -----  
 -----  
 GGGAAGGAGAATATCACACTCCCATGTAAATAAAAACAAATTGTAAGAATGTGGCAAAAAGTGGGACAAGCAA  
 TGTATGCCCCCTCCCATCGCAGGAGAGATCACATGTAGATCAAAC---  
 ATCACAGGGCTATTATTAACAAGAGATGGTGGGACTAATAGGACA-----  
 -----  
 -----  
 GATGAGACCTTCAGACCTGGAGGAGGAGATATGAGGGACAATTGGAGAAGTGAGTTATATAAATATAAAGTAG  
 TAAAAATTAAACCAATA---GGAATAGCACCCACCAATGCAAGGAGGAGAGTGGTG-----  
 -----CAGAGAGAAAAAAGGGCA---GTTGGA---CTAGGAGCT-----  
 GTCTTCCTTGATTCTTAGGAGCA---GCAGGAAGCACTATG---GGCGCAGCGTCA---  
 ATAACGCTGACGGTACAG---GTCAGACAA---TTATTG---TCTGGCATAGTGCAACAGCAAAGC---  
 AATTTG---CTGAGA---GCTATAGAGGCGCAACAGCATCTGTTGCAACTCACAGTCTGGGGCATT  
 >JN248584  
 TTCTATTGTAATACATCAAGATTGTTTAATGAGAAGGAATTAAATAGT-----  
 -----  
 -----  
 ACTAATGGAACATCATATTGCCATGTAAATAAAAACAAATTGTAAGGATGTGGCAAAGAGCGGGACAAGCAA  
 TGTATGCCCCCTCCCATCGCAGGAGAAATCAGGTGTGTATCAAAC---  
 ATTACAGGACTACTATTAACAAGAGATGGTGGGACAAACAGCTCT-----  
 -----  
 -----  
 AATGAGACCTTCAGACCTGGAGGAGGAGATATGAGGGACAATTGGAGAAGTGAATTATACAAGTATAAAACAG  
 TAAGAATCAAATCACTA---GGAATAGCACCCCTCCAAGGCAAGGAGAAGAGTGGTG-----  
 -----GAGAGAGAAAAAAGAGCAGTTGTTGGA---CTGGGAGCT-----  
 GTATTCCTTGCGTTCTTAGGAACA---GCTGGGAGCACTATG---GGCGCGGCGTCA---  
 CTAACGCTGACGGTACAG---GTCAGACAA---TTATTG---TCTGGCATAGTGCAACAGCAAAGC---  
 AATTTG---CTGAGG---GCTATTGAGGCGCAGCAGCATCTGTTGCAACTCACAGTCTGGGGCATT  
 >JN248586  
 TTCTATTGTAATACATCAGGACTGTTTAATGAAGCTAATGAATCTGATAGC-----  
 -----  
 -----  
 AATAACACACTCATCACACTCCCATGTAAAGATAAAAACAAATTGTGAGAATGTGGCAGAGAGTGGGACAAGCAA  
 TGTATGCCCCCTCCCATCGCAGGAAATATTACATGTAGATCAAAC---  
 ATTACAGGGCTATTATTAACAAGAGATGGGAGGAGTGGGAACAGTAATGAG-----  
 -----  
 -----  
 AGTGGTAGAAATGAGACCTTTAGACCTGGAGGAGGAGATATGAAGGACAACCTGGAGAAGTGAGTTATATAAGT  
 ATAAAAATAGTAAAAATTAAACCACTA---GGAATAGCACCCACCAAGGCAAGGAGAAGAGTGGTG-----  
 -----CAGAGAGAGAAAAAGGGCA---GTTGGA---CTGGGAGCT---  
 -----TTTTTCCTTGCGTTCTTAGGAGCA---GCAGGAAGCACTATG---GGCGCGGCGTCA---  
 CTAACGCTGACGGTACAG---GTCAGACAA---TTATTG---TCTGGCATAGTGCAACAGCAAAGC---  
 AATTTG---CTGAGG---GCTATAGAGGCACAGCAACATCTGTTGCAACTCACAGTCTGGGGCATT  
 >JN248593  
 TTCTATTGTAATACAACAGGATTGTTTAACACATCAGGATTCAATGACACCATC-----  
 -----  
 -----  
 ACAAATGACACCATCATGCTCCCATGTAGGATAAAAACAAATTGTGAGAATGTGGCAGAAAGTAGGACAAGCAA  
 TGTATGCCCCCTCCTATCGAAGGAAGTATTACATGTAGATCAAAC---  
 ATTACAGGGCTATTACTAATGAGAGATGGTGGAAATAATAATACA-----  
 -----  
 -----  
 AATAAGACCGAGACCTTCAGACCTTCAGGAGGAGATATGAGGGACAATTGGAGAAGTGAATTATATAAGTATA  
 AAATAGTAAAAATTAAACCATTA---GAAATAGCACCCGGCAAGGCAAGGAGAAGAGTGGTG-----  
 -----CAGAGAGAGAAAAAGAGCAGCTGTTGGA---ATGGGAGCT-----  
 ---CTCTTCCTTGCGTTCTTATCAGCA---GCAGGAAGCACTATG---GGCGCGGCGTCA---

TTAACGCTGACGGTACAG---GCCAGACAA---TTATTG---TCTGGCATAGTGCAACAGCAAAAT---  
AATTTG---CTGAGG---GCTATAGAGGCGCAGCAACATCTACTGCAACTCACAGTCTGGGGCATT  
>KX389619  
TTCTATTGTGACACATCAAAGCTGTTTAATAATAGTTTGTAAATAGTACATCTAATGAT-----  
-----  
-----  
ACTGAGGATATATTACACTCCCATGTAGAATAAAACAAATTGTAAGAATGTGGCAGAGAGTGGGACAAGCAA  
TGTATGCCCCCTCCCATCGCAGGAAACCTTGTATGTGAATCAAAC---  
ATTACAGGATTACTATTAACAAGTGATGGTGGGATGAATAATGAT-----  
-----  
-----  
AGCAGCGAGACCTTCAGACCTGAAGGAGGAAATATGAAGGACAATTGGAGAAGTGAATTATATAAGTATAAAA  
TAGTAAAAATCAAAGCACTA---GGAATAGCACCCACCAAGGCAAGGAGAAGAGTGGTG-----  
-----GAGAGAGAAAAAAGAGCA---GTTACT---CTGGGAGCT-----  
GTCTTCCTTGGGTTCTTAGGAGCA---GCAGGGAGCACTATG---GGCGCGGCGTCA---  
ATAACGCTGACGGTACAG---GTCAGACAA---TTATTG---TCTGGCATAGTGCAAGCAGCAAAGC---  
AATTTG---CTGAGG---GCTATAGAGGCGCAGCAGCACCTGTTGCAACTCACAGTCTGGGGCATT  
>KX389645  
TTCTATTGTAATACATCAGGCTTGTTTAATATGAGCTTGTTTAATACAACAAATAATGAGACTACATCA----  
-----  
-----  
GATAATGGGAATATCACACTCCCATGTAAAGATAAAACAAATTGTGAGAATGTGGCAGAGAGTGGGACAAGCAA  
TGTATGCCCCCTCCCATCGCAGGAAACATTACATGCAGATCAAAT---  
ATTACAGGGCTACTATTAACAAGAGATGGTGGAGGTGGAACAAATAAA-----  
-----  
-----  
ACAAATGAAACAGAAACCTTCAAT-----  
GGAACAGAAATCTTCAGACCTGGAGGAGGAGATATGAGGGACAATTGGAGAAGTGAATTATATAAGTATAAAA  
TAGTAAAAATTAACCACTA---GGAGTAGCACCCACCCCGCAAAGAGAAGAGTGGTG-----  
-----CAGAGAGAAAAAAGGGCA---GTTGGA---CTAGGAGCT-----  
GTCTCTTCGGGTTCTTAGGAGCA---GCAGGAAGCACTATG---GGCGCAGCGTCA---  
ATAACGCTGACGGTACAG---GCCAGACAA---TTATTG---TCTGGCATAGTGCAACAGCAAAGC---  
AATTTG---CTGAGG---GCTATAGAGGCGCAACAACACCTGTTGCAACTCACAGTCTGGGGCATT  
>KY953200  
TTCTATTGTGATACATCAGAACTGTTTAATGATACAAGAAATAGTACAAATACCAGTGAT-----  
-----  
-----  
ATCACACTCCCATGTAGGATAAAACAAATTGTGAGAATGTGGCAAAGAGTGGGACAAGCAATGTATGCCCCCTC  
CCATCGCAGGAAATATTACATGTAGATCAAAC---  
ATTACAGGGCTAATATTAACCAGAGATGGTGGAGAGGAAAATGAA-----  
-----  
-----  
ACTGAGATCTTCAGACCTGGAGGAGGAGATATGAGGGACAATTGGAGAAGTGAATTATATAAATATAAAGTAG  
TAAAAATTAACCACTA---GGAATAGCGCCCACTAAGGCAAGAAGAAGAGTGGTG-----  
-----CAGAGAGAAAAAAGGGCAATAATCGGAGGAATGGGAGCT-----  
GTTTTCTTCCTTGGGTTCTTAGGAGCA---GCAGGAAGCACTATG---GGCGCGGCGTCA---  
CTAACGCTGACGGTACAG---GTCAGACAA---TTATTG---TCTGGCATAGTGCAACAGCAAAGC---  
AATTTG---CTGAGG---GCTATAGAGGCGCAACAGCATCTGTTGCAACTCACAGTCTGGGGCATT  
>KY953201  
TTCTATTGTAATACATCAGGACTGTTTAATCTGTCTGATAGTAATCCGTATAATGCATCTGAT-----  
-----  
-----  
AGGAATATCACAATCACACTCCCATGTAGGATAAAACAAATTGTGAGAATGTGGCAGAGAGTGGGACAAGCAA  
TGTACGCCCCCTCCCATCGCAGGAAATATTACATGTAGATCAAAC---  
ATTACAGGGATATTATTAACAAGAGATGGTGGTGGGAACAATACT-----  
-----  
-----  
AACAAATGAGATCTTCAGACCTGGAGGAGGAGATATGAGGGACAATTGGAGAAGTGAAGTTATATAAGTATAAAA  
TAGTAAAAATTAACCACTA---GGAATAGCACCCACCAAGGCAAGGAGAAGAGTGGTG-----  
-----CAGAGAGAGAAAAAGAGCAGTTATTGGA---CTGGGAGCT-----  
GTCTTCCTTGGGTTCTTAGGAGCA---GCAGGAAGCACTATG---GGCGCGGCGTCA---

ATAACGCTGACGGTACAG---GTCAGACAA---TTATTG---TCTGGCATAGTGCAACAGCAAAGC---  
 AATTTG---CTGAGG---GCTATAGAGGCACAACAACATATGTTGCAACTCACAGTCTGGGGCATT  
 >KX389648  
 TTCTATTGTAATACATCAGGACTGTTTAATGAATCACTGTTTACAACAAATAGTAACACCAGT-----  
 -----  
 -----  
 AGTAGTGACAATATCATTCTCCCATGTAGGATAAAAACAAATTGTGAGAATGTGGCAGAGAGTGGGACAAGCAA  
 TGTATGCCCCCTCCCATTCAGGAAATATTAGCTGTACATCAAAC---  
 ATTACAGGGCTATTATTAACAAGAGATGGTGGAGGTAATGATACC-----  
 -----  
 -----  
 AGTGGGAATGAGACCTTCAGACCTGGAGGAGGAGATATGAGGGACAATTGGAGAAGCGAATTATATAAGTATA  
 AAATAGTAAAAATTAGACCATTA---GGAATAGCACCCACCAGGGCAAGGAGAAGAGTGGTG-----  
 -----GAGAGAGAAAAAAGAGCA---GTTGGA---GTAGGAGCT-----  
 ---GTCCTCTTTGGATTCTTAGGAGCA---GCAGGAAGCACTATG---GGCGCAGCGTCA---  
 ATAACGCTGACGGTACAG---GTCAGACAC---TTATTG---TCTGGCATAGTGCAACAGCAAAGC---  
 AATTTG---CTGAGA---GCTATAGAGGCGCAGCAACATTTGCTGCAACTCACAGTCTGGGGCATT  
 >U88826  
 TTCTATTGCAATACATCAGGACTGTTTAATAATAATATTAGTAATATT-----  
 -----  
 -----  
 AATAATGAGACTATCACACTCCCATGTAAAATAAAAACAAATTGTGAGGATGTGGCAGAAAGTGGGACAAGCAA  
 TGTATGCCCCCTCCCATCGCAGGAAACCTTGTATGTAAATCAAAC---  
 ATTACAGGATTAATATTAACAAGAGATGGTGGGAATAACAATGAC-----  
 -----  
 -----  
 AGTACAGAGGAGACCTTCAGACCTGGAGGAGGAGATATGAGGGACAATTGGAGAAGTGAATTATATAAGTATA  
 AAACAGTAAAAATCAAATCACTA---GGAGTAGCACCCACCAGGGCAAGGAGAAGAGTGGTG-----  
 -----GAGAGAGAAAAAAGAGCA---GTTGGA---CTGGGAGCT-----  
 ---GTCTTCCTTGGGTTCTTAGGAGCA---GCAGGGAGCACTATG---GGCGCGGCGTCA---  
 ATAACGCTGACGGCACAG---GTCAGACAA---TTATTG---TCTGGCATAGTGCAACAGCAAAGC---  
 AATTTG---CTGAGG---GCTATAGAGGCGCAGCAGCATCTGTTGCAACTCACAGTCTGGGGCATT  
 >AF069943  
 TTCTATTGTAATACATCAGGATTGTTTAATGATAGTAATACA-----  
 -----  
 -----  
 TCAAAATGCCACTATCACGATCCCATGTAAAGATAAAAACAAATTGTGAGAATGTGGCAGAAAGTGGGACAAGCAA  
 TGTATGCCCCCTCCCATCGCAGGAGACATTACATGTAGATCAAAT---  
 ATTACAGGGCTACTATTAACAAGAGATGGTGGGAATAATGATAATAGC-----  
 -----  
 -----  
 ACAAATGGAACCTGAAACCTTCAGACCTGGAGGAGGAGATATGAGGGACAATTGGAGAAGTGAATTATATAAGT  
 ATAAATAGTAAAAATTAAACCACTA---GGAATAGCACCCACCAGGGCAAGGAGAAGAGTGGTG-----  
 -----GAGAGAGAAAAAAGGGCA---GTTGGA---CTGGGAGCT---  
 -----GTCCTCCTTGGGTTCTTGGAACA---GCAGGAAGCACTATG---GGCGCGGCGTCA---  
 ATAACGCTGACGGTACAG---GTCAGACAA---TTATTG---TCTGGCATAGTGCAACAGCAAAGC---  
 AATTTG---CTGAGG---GCTATAGAGGCGCAGCAACATCTGTTGCAACTCACAGTCCGGGGCATT  
 >AF069937  
 TTCTATTGTAGCACATCAGGACTGTTTAATACATCACTGCTTAATACATCAGGATCAGATAATAGTAGTACAA  
 CA-----  
 -----  
 -----  
 AATGATAGCACCCCTATCACACTCCCATGTAAAATAAAAACAAATTGTGAGAATGTGGCAGAGAGTGGGACAAG  
 CAATGTATGCTCCTCCCATTCAGGAGAAATTACATGTAGATCAAAC---  
 ATTACAGGACTATTATTAACAAGAGATGGTGGGACTAATAAGACT-----  
 -----  
 -----  
 AATGAGACCTTCAGACCTGCAGGAGGAGATATGAGGGACAATTGGAGAAGTGAATTATATAAGTATAAAGTAG  
 TAAGAATTAAACCACTA---GGAATAGCACCCACTAAGGCAAGGAGAAGAGTGGTG-----  
 -----GAAAGAGAAAAAAGAGCA---GTTGGA---ATAGGAGCT-----  
 GTCCTCTTTGGATTCTTAGGAGCA---GCAGGAAGCACTATG---GGCGCGGCGTCA---

ATAACGCTGACGGTACAG---GTCAGACAA---TTATTG---TCTGGCATAGTGCAACAGCAAAGC---  
 AATTTG---CTGAGG---GCTATAGAGGTGCAGCAACATCTGTTGCAACTCACAGTCTGGGGCATT  
 >AF069935  
 TTCTATTGTAATACATCAGGATTGTTTAATAATAGTGCATCA-----  
 -----  
 -----  
 AATGACACTATCGAGCTCCCATGTAAGATAAAACAAATTGTGAGAATGTGGCAGAGAGTAGGACAAGCAATGT  
 ATGCCCCCTCCCATTTGAAGGAAACATTACATGTAGATCAAAT---  
 ATTACAGGGCTACTATTAACAAGAGATGGTGGTAATATCACAGAG-----  
 -----  
 -----  
 GAAACCTTCAGACCTGGAGGAGGAGACATGAGGGACAATTGGAGAAGTGAATTATACAAGTATAAAATAGTAA  
 AAATTAAACCACTA---GGAGTAGCACCCACCAGGGCAAGGAGAAGAGTGGTG-----  
 -----GAGAGGGAGAAAAGGGCA---GTTGGA---CTGGGAGCT-----  
 GTCCTCCTTGGGTTCTTAGGAACA---GCAGGAAGCACTATG---GGCGCGGCGTCA---  
 ATAACGCTGACGGTACAG---GTCAGACAA---TTATTG---TCTGGCATAGTGCAACAGCAAAGC---  
 AATTTG---CTGAGG---GCTATAGAGGCGCAGCAACATCTGTTGCAACTCACAGTCTGGGGCATT  
 >AY612637  
 TTTTATTGTAATACATCAGCACTGTTTAATAGTAGTAGTCTGTCTAATAGTAATAGT-----  
 -----  
 -----  
 AGTAATGACACCATCACACTTCCATGTAGGATAAAACAAATTGTGAGAATGTGGCAGAGAGTGGGACAAGCAA  
 TGTATGCCCCCTCCCATCGAAGGAAACATTACATGTATGTCAAAT---  
 ATTACAGGACTACTATTAACAAGAGATGGTGGAGAAAAATAATGGTACA-----  
 -----  
 -----  
 AATGAGACTGAGATTTTCAGACCTGTAGGAGGAGACATGAGGGACAATTGGAGAAGTGAATTATATAAGTATA  
 AAGTAGTAAAAATTAAACCACTA---GGAGTAACACCCACCAGGGCAAGGAGAAGAGTGGTG-----  
 -----GGGAGAGAAAAAAGAGCA---GTTGGA---CTGGGAGCT-----  
 ---GTCCTCCTTGGGTTCTTAGGAACA---GCAGGAAGCACTATG---GGCGCGGCGTCA---  
 ATAACGCTGACGGTACAG---GTCAGACAA---TTATTG---TCTGGCATAGTGCAACAGCAAAGC---  
 AACTTG---CTGAGG---GCTATAGAGGCGCAGCAGCATCTGTTGCAACTCACAGTCTGGGGCATT  
 >FR846408  
 TTCTATTGTAATACATCAGAACTGTTTAATAGTAGTAGTCTGGCTAGTAACAAT-----  
 -----  
 -----  
 AGTAATGAAAATATCACACTTCCATGTAAGATAAAACAAATTGTGAGAATGTGGCAGAGAGTGGGACAAGCAA  
 TGTATGTCCCTCCCATCAGGGGAGAAATTACATGTAAGTCAAAC---  
 ATTACAGGACTACTATTAACAAGAGATGGTGGGAAAAATAATACA-----  
 -----  
 -----  
 AATGAGACTTTTCAGACCTGCAGGAGGAGACATGAGGGACAATTGGAGAAGTGAATTATATAAGTATAAAGTAG  
 TAAAAATTAAACCACTA---GGAATAGCACCCACCAAGGCACGGAGAAGAGTGGTG-----  
 -----GGGAGAGAAAAAAGAGCAGCTGTGGGA---CTGGGAGCT-----  
 GTCCTCCTTGGGTTCTTAAGCACA---GCAGGAAGCACTATG---GGCGCGGCGTCA---  
 ATAACGCTGACGGTACAG---GTCAGACAA---TTATTG---TCTGGCATAGTGCAACAGCAAAGC---  
 AATTTG---CTGAGG---GCTATAGAGGCGCAGCAGCATCTGTTGCAACTCACAGTCTGGGGCATT  
 >FR846410  
 TTTTATTGTAATACATCAGGACTGTTTAATAGTAGTAGTCTGCTTGATAATAGTAGTAGT-----  
 -----  
 -----  
 AGTAATGACAATATCACACTTCCATGTAGGATAAAACAAATTGTGAGAATGTGGCAGAGAGTAGGACAAGCAA  
 TGTATGCCCCCTCCCATCGAAGGAAATATTACATGTAGGTCAAAT---  
 ATTACAGGACTAATATTAACAAGAGATGGTGGAGGAAGTAATGATACA-----  
 -----  
 -----  
 AATGGGACTGAGATTTTCAGACCTGCAGGAGGAGACATGAGGGACAATTGGAGAAGTGAATTATATAAATATA  
 AAATAGTAAAAATTAAACCACTA---GGAGTAGCACCCACCAGGGCAAGGAGAAGAGTGGTG-----  
 -----GGGAGAGAAAAAAGAGCA---GTTGGA---ATAGGAGCT-----  
 ---GTCCTCCTTGGGTTCTTAGGAACA---GCAGGAAGCACTATG---GGCGCGGCGTCA---

ATAACGCTGACGGTACAG---GTCAGACAA---TTATTG---TCTGGCATAGTGCAACAGCAAAGC---  
 AATTTG---TTGAGG---GCTATAGAGGCGCAGCAGCATCTGTTGCAACTCACAGTCTGGGGCATT  
 >MF614605  
 TTCTATTGTAATACATCAGGACTGTTTAGGAATAATAGTAAG-----  
 -----  
 -----  
 AATAACTCCACTATCACACTCCCATGTAGGATAAAACAAATTGTAAGAATGTGGCAGAGAGTGGGGCAAGCAA  
 TGTATGCCCCCTCCCATCGCAGGAAACATTACATGTAGTTCAAAC---  
 ATTACAGGACTACTATTAACAAGAGATGGTGGGAATAATAATAAG-----  
 -----  
 -----  
 AGCACAAATGAGACCTTCAGACCTGGAGGAGGAGATATGAGGGACAATTGGAGAAGTGAATTATATAAGTATA  
 AAGTAGTAAGAATTAAACCACTA---GGAGTAGCACCCACCAGGGCAAGGAGAAGAGTGATG-----  
 -----GGGAGAGAAAAAAGAGCA---GTTGGA---CTGGGAGCT-----  
 ---GTTTTCTTGGGTTCTTAGGAGCA---GCAGGAAGCACTATG---GGCGCAGCGTCA---  
 ATAACGCTGACGGTACAG---GTCAGACAA---TTGTTG---TCTGGCATAGTGCAACAGCAAAGC---  
 AATTTG---CTGAGA---GCTATAGAGGCGCAGCAGCATCTGTTGCAACTCACAGTCTGGGGCATT  
 >EF367231  
 TTCTATTGTAATACATCAAATCTGTTTAGGAATAATAGTAAG-----  
 -----  
 -----  
 GGTGACCCCACTATCACACTCCCATGTAGGATAAAACAAATTGTAAGAATGTGGCAGAGAGTGGGGCAAGCAA  
 TGTATGCCCCCTCCCATAGCAGGAAAAATTATATGTAAGTCAAAC---  
 ATTACAGGACTACTATTAACAAGAGATGGTGGGAATAATAATACA-----  
 -----  
 -----  
 AATGAGACCTTCAGACCTGGAGGAGGAGATATGAGGGACAATTGGAGAAGTGAATTATATAAATATAAAGTAG  
 TAAGAATTAAACCACTA---GGAGTAGCACCCACCAGGGCAAGGAGAAGAGTGGTG-----  
 -----GGGAGAGAAAAAAGAGCA---GTTGGA---CTGGGAGCT-----  
 GTTTTCTTGGGTTCTTAGGTGCA---GCAGGAAGCACTATG---GGCGCAGCGTCA---  
 ATAACGCTGACGGTACAG---GTCAAAAA---TTGTTG---TTTGGCATAGTGCAACAGCAAAGC---  
 AATTTG---CTGAGA---GCTATAGAGGCGCAGCAGCATCTGTTGCAACTCACAGTCTGGGGCATT  
 >AF061642  
 TTCTATTGTAATACATCAGGCCTGTTTAATTCAAGCCTGTTGAGATCAAATAGTAGT-----  
 -----  
 -----  
 GAGAAATGGGACTATCACACTCCCATGTAAAGATAAAACAAATTGTGAGAATGTGGCAGAGGGTGGGACAAGCAA  
 TGTATGCCCCCTCCCATCGCAGGAAACATTGAATGTAAGTCAAGC---  
 ATTACAGGACTAATATTAACAAGAGATGGTGGGAATAATAACAATACAAAT-----  
 -----  
 -----  
 ACAAGTGAGAGTGAGATCTTCAGACCTGGAGGAGGAGATATGAGGGACAATTGGAGAAGTGAATTATATAAGT  
 ATAAACAGTAAAAATCAAATCACTA---GGAGTAGCACCCACCAGGGCAAGGAGAAGAGTGGTG-----  
 -----GAGAGAGAAAAAAGAGCA---GTTGGA---CTGGGAGCT---  
 -----GTCTTCCTTGGGTTCTTAGGAGCA---GCAGGAAGCACTATG---GGCGCGCGTCA---  
 ATAACGCTGACGGTACAG---GTCAGACAA---TTATTG---TCTGGCATAGTGCAACAGCAAGGC---  
 AACTTG---CTGAGG---GCTATAGAGGCGCAGCAGCATCTGTTGCAACTCACAGTCTGGGGCATT  
 >KU168278  
 TTCTATTGTAATACATCAGGACTGTTTAATAATAATTTATTAAATACAAATACTACTGGGAATGGGAATACTA  
 TT-----  
 -----  
 -----  
 GAGAGTGGGAATATCACACTCCCATGTAAATAAAACAAATTGTAAGAATGTGGCAGAGAGTGGGGCAAGCAA  
 TGTATGCCCCCTCCCATGCGAGGAATGATTACATGTGAATCAAAC---  
 ATTACAGGACTAATATTAACAAGAGATGGTGGAAATAAACTAATAACAAT-----  
 -----  
 -----  
 AATAGTAATGAGACCTTCAGACCTGCAGGAGGAGATATGAGGGACAATTGGAGAAATGAATTATATAAGTATA  
 AAACAGTAAAAATCAAATCACTA---GGAGTAGCACCCACCAGAGCAAGGAGAAGAGTGGTG-----  
 -----GGGAGAGAAAAAAGAGCA---ACA-----CTAGGAGCT-----  
 ---GTCTTCCTTGGGTTCTTAGGAGCA---GCAGGAAGCACTATG---GGCGCGCGTCA---

ATAACGCTGACGGTACAG---GTCAGACAA---TTATTG---TCTGGCATAGTGCAACAGCAAAGC---  
 AATTTG---CTGAGG---GCTATAGAGGCGCAGCAGCATCTGTTGCAACTCACAGTCTGGGGCATT  
 >HQ236614  
 TTCTATTGTAATACATCAGGTCTGTTTAATTTTAATAGTAGCAGTAATAATAACTAGT-----  
 -----  
 -----  
 AGTAAGGGTAATATCACACTTCCATGTAGGATAAAACAAATAGTGAGAATGTGGCAGAGAGTGGGACAAGCAA  
 TGTATGCCCCCTCCCATCGAAGGAAACATCACATGTAGTTCAAAA---  
 ATTACAGGACTACTATTAGTAAGAGATGGTGGAATAAGAATGATACA-----  
 -----  
 -----  
 AATGGAAGTGAGATTTTCAGACCTGCAGGAGGAGACATGAGGGACAATTGGAGAAGTGAATTATATAAGTATA  
 AAGTAGTAAAAATTAAACCACTT---GGAGTAGCACCCACCAGGGCAAGGAGAAGAGTGTGG-----  
 -----GGAGAGAAAAAGAGCA---GTTGGA---CTGGGAGCT-----  
 ---GTCCTCCTTGGGTTCTTAGGAGCA---GCAGGAAGCACTATG---GGCGCGGCGTCA---  
 ATAACGCTGACGGTACAG---GTCAGACAA---TTATTG---TCTGGCATAGTGCAACAGCAAAGC---  
 AATTTG---CTGAGG---GCTATAGAGGCGCAGCAGCATATGTTGCAACTCACAGTCTGGGGCATT  
 >HQ236606  
 TTCTATTGTAATACATCAGAGCTGTTTAATAGTAGTCTGGTTAATAGTAGCCTGTCTAATGGTGGTAACGGG-  
 -----  
 -----  
 ACTAATGGCACTATCACACTTCCTTGTAGAATAAGACAAATTGTGAGAATGTGGCAGAGAGTGGGACAAGCAA  
 TGTATGCCCCCTCCCATCGCAGGAAATATTACATGTAGGTCAAAC---  
 ATTACAGGACTAATATTGGTAAGAGATGGTGGAATAAATAATACA-----  
 -----  
 -----  
 AATGAGACCTTCAGACCTGCAGGAGGAGACATGAAGGACAACCTGGAGAAGTGAATTATATAAGTATAAAATAG  
 TAAAAATTAAACCACTA---GGAGTAGCACCCACCAGGGCAAGGAGAAGAGTGGTG-----  
 -----GAGAGAGAAAAAGAGCA---GTTGGA---CTGGGAGCG-----  
 GTCCTCCTTGGGTTCTTAGGAACA---GCAGGAAGCACTATG---GGCGCGGCGTCA---  
 ATAACGCTGACGGTACAG---GTCAGACAA---TTATTG---TCTGGCATAGTGCAACAGCAAAGC---  
 AATTTG---CTGAGG---GCTATAGAGGCGCACCAGCATCTCTTGCCACTCCCAGTGTGGGGCATT  
 >EF614151  
 TTCTACTGTAATACATCAATACTGTTCAATAGTAGTTGGGATGAGAATAGCACTGTGACT-----  
 -----  
 -----  
 ATAAATGAAACAGTCACACTCCCATGTAAATAAGACAAATTGTGAGAATGTGGCAGAGAGTAGGACAAGCAA  
 TATATGCCCCCTCCCATCGCAGGAAACATCACATGCACATCAAAT---  
 ATTACAGGGTTACTATTGACACGTGATGGGGGAAATACCAAGGAGAGT-----  
 -----  
 -----  
 AATAGTAGTGAGACCTTCAGACCTACAGGAGGAGATATGAAGGACAATTGGAGAAATGAGTTATATAAATATA  
 AAATAGTGAAGGTTGAGCCATTA---GGAGTAGCACCCACCAGGGCAAAAAGAAGAGTGGTG-----  
 -----GAGAGAGAAAAAGAGCA---ATAGTGGGAATGGGAGCT-----  
 ---GTGTTCCCTTGGGTTCTTGGAACA---GCAGGAAGCACTATG---GGCGCAGCGTCA---  
 ATAGCGCTGACGGTACAG---GCCAGACAG---TTGTTG---TCTGGCATAGTGCAACAGCAAAGC---  
 AATTTG---CTGAAG---GCTATAGAGGCGCAACAGCATCTGTTGAGACTCACTGTCTGGGGCATT  
 >MH705156  
 TTCTACTGCAATACAACATTACTGTTTAATGATACAACCTAAGAATGATACAACCT-----  
 -----  
 -----  
 GAGAAATGATACTATCACAATCCCATGTAGGATAAAACAGATTATAAACATGTGGCAGGAAGTGGGGCGAGCAA  
 TATATGCCCCCTCCCATTCAGGAAATATTAGCTGTAGATCAAAT---  
 ATTACAGGAATGATATTGACAAGAGATGGTGGCAGGAGTAATAAT-----  
 -----  
 -----  
 ACAACTGAAATCTTCAGACCTGGAGGAGGAGACATGAGGGACAATTGGAGAAGTGAACCTATATAAATATAAAG  
 TAGTAAAGATTGAACCACTA---GGGATAGCACCCACTAAGGCAAGAAGACGAGTGGTG-----  
 -----CAGAGAGAAAAACGAGCA---GTGGGA---ATGGGAGCT-----  
 TTGTTCCCTTGGGTTCTTGGAACA---GCAGGAAGCACTATG---GGCGCGGCGTCA---

ATAACGCTGACGGTACAG---GCCAGACAA---TTATTG---TCTGGTATAGTGCAACAGCAAAGC---  
 AATTTG---CTGAGA---GCTATAGAAGCGCAACAGCATCTGTTGCAGCTCACGGTCTGGGGCATT  
 >AJ249235  
 TCCTACTGTGATACTACAGACACGGTTGATGACACAGAGGAGGAA-----  
 -----  
 -----  
 GAGGATACCACAATCACAATCCCATGTAGGATAAAACAGATAATAAACATGTGGCAGAAAGTGGGGCAAGCAA  
 TATATGCCCCCTCCACCGCAGGAAACATTACCTGTAGATCAAAT---  
 ATTACAGGAATGATATTGACAAGAGATGGTGGTAATGACAATAATACT-----  
 -----  
 -----  
 AGGACTGAGGAGACCTTCAGACCTGGAGGAGGAGACATGAGAGACAATTGGAGAAGTGAACATATATAAATATA  
 AAGTAGTACAGATTGAACCACTA---GGAATAGCACCCACCAGGGCAAGGAGAAGAGTGGTG-----  
 -----CAGAGAGAAAAAGAGAGCA---GTAGGA---ATAGGAGCG-----  
 ---TTGTTCTTGGGTTCTTGGGAGCA---GCAGGAAGCACTATG---GGCGCGGCGTCA---  
 ATAACGCTGACGGTACAG---GCCAGACAA---TTATTG---TCTGGTATAGTGCAACAGCAAAAC---  
 AATTTG---CTGAGA---GCTATAGAAGCGCAACAACAAATGTTACAGCTTACGGTCTGGGGCATT  
 >GQ477441  
 TTCTATTGCAATACAACACGACTGTTTAAACAATACTTGCATAAAAAATGCAACCGTGAGGGGA-----  
 -----  
 -----  
 TGTAATGACACTATCATACTTCCATGCAGGATAAAGCAAATTATAAACATGTGGCAGGAAGCAGGACAAGCAA  
 TGTATGCTCCTCCCATCAGTGGAAATAATAAATTGTGTATCAAAT---  
 ATTACAGGAATACTATTGACAAGAGATGGTGGGAATAGTAGTACT-----  
 -----  
 -----  
 AACGAGACCTTCAGACCTGAAGGAGGAAATATAAAAGACAATTGGAGAAGTGAATTATATAAATATAAAGTAG  
 TACAAATTGAACCACTA---GGAATAGCACCCACCAGGGCAAAGAGAAGAGTGGTG-----  
 -----GAGCGACAAAAAGAGCA---GTGGGA---ATAGGAGCT-----  
 ATGATCTTTGGGTTCTTAGGAGCA---GCAGGAAGCACTATG---GGCGCAGCGTCA---  
 ATAACGCTGACGGTACAG---GCCAGACAA---TTATTA---TCTGGTATAGTGCAACAGCAAAGC---  
 AATTTG---CTGAGG---GCTATAGAGGCGCAGCAGCATATGTTGCAACTCACAGTCTGGGGCATT  
 >EU191617  
 TTCTATTGCAGCACAAACAAAACCTGTTTAAATAGTACTTGGACAGCAAATGAGACTATAGAGAAGTATAATGAG-  
 -----  
 -----  
 CATAATAGCACTATCATACTTCCATGCAAGATAAAGCAAATTATAAACATGTGGCAGGGAGTAGGACAAGCAA  
 TGTATGCTCCTCCCATCAGAGGAAACATTAGTTGTGTATCAAAT---  
 ATTACAGGAATAATACTGACAAGAGATGGTGGTGGTGCTGATAGT-----  
 -----  
 -----  
 GGTAACGAGACTTTTCAGACCTGGAGGAGGAAATATGAAGGACAATTGGAGAAGTGAATTATATAAATATAAAG  
 TAGTACAAATTGAACCACTA---GGAATAGCACCCACCAGGGCAAAAAGAAGAGTGGTG-----  
 -----GAGAGAGAAAAAGAGCA---GTGGGA---ATAGGAGCT-----  
 ATGATCTTTGGGTTCTTAGGAGCA---GCAGGAAGCACTATG---GGCGCAGCGTCA---  
 ATAACGCTGACGGTACAG---GCCAGACAA---TTATTG---TCTGGTATAGTGCAACAGCAAAGC---  
 AATTTG---CTGAGG---GCTATAGAGGCGCAGCAGCATCTGTTGCAACTCACAGTCTGGGGCATT  
 >MH746232  
 TTCTATTGCAATACAACAAAACCTGTTTAAATAGTACTTGGGAAGGAAATGAGGGTAATGGCACT-----  
 -----  
 -----  
 ACCAATGGCACTATCATACTTCCATGCAGGATAAAGCAAATTATAAACATGTGGCAAGGAGTAGGACAAGCAA  
 TGTATGCTCCTCCCATCAAGGGAAAAATTAATTGTGCATCAAAT---  
 ATTACAGGATTACTGATAACAAGAGATGGTGGTGGTGGTAATACTACT-----  
 -----  
 -----  
 AGAAAACGAGACCTTCAGACCTGGAGGAGGAAATATAAAAGACAATTGGAGAAGTGAATTATATAAATATAAAG  
 TAGTACAAATTGAACCACTA---GGAATAGCACCCACCAAGGCAAGAGAAGAGTGGTG-----  
 -----GAGAGAGAAAAAGAGCA---GTTGGA---CTAGGAGTC-----  
 ATGATCTTTGGGTTCTTGGGAGCA---GCAGGAAGCACTATG---GGCGCGGCGTCA---

ATAACGCTGACGGTACAG---GCCAGAAAA---TTATTG---TCTGGTATAGTGCAACAGCAAAGC---  
 AATTTG---CTGAGG---GCTATAGAGGCGCAGCAGCATCTGTTGCAACTCACAGTCTGGGGCATT  
 >MH746236  
 TTCTATTGCAATACAACACGCTTGTTT-----  
 -----  
 -ACAAATTGCACGAAG-----  
 AATTGTACTGGCTCTATCATACTTCCATGCAGGATAAAACAAATTATAAACATGTGGCAAGGAGTAGGACAAG  
 CAATGTATGCTCCTCCCGTCAATGGAATAATTAATTGTGCATCAAAC---  
 ATTACAGGAATACTATTGACAAGGATGGTGGTGTTAATGCTACA-----  
 -----  
 -----  
 CAGAAATGAGACCTTCAGACCTGGAGGAGGAAATATAAAGGACAATTGGAGAAGTGAATTATATAAATATAAAG  
 TAGTACAAATTGAACCACTA---GGAATAGCACCCACCAGGGCAAAGAGAAGAGTGGTG-----  
 -----GAGAGGGAAAAAAGAGCA--GTGGGA--ATAGGAATG-----  
 ATGATCTTTGGGTTCTTGGGAGCA---GCAGGAAGCACTATG---GGCGCAGCGTCA---  
 ATAACGCTGACGGTACAG---GCCAGACAA---TTATTG---TCTGGTATAGTGCAACAGCAAAGC---  
 AATTTG---CTGAGA---GCTATAGAGGCGCAGCAGCATATGCTGCAACTCACAGTCTGGGGCATT  
 >MH746237  
 TTCTATTGCAATACAACACCCCTATTT-----ACAGGAAATTGT-----  
 -----  
 -----  
 AGTAATGACACTATCAGACTTCCATGCAGGATAAAACAGATTATAAACATGTGGCAAGGAGTAGGACAAGCAA  
 TGTATGCTCCTCCCATCGATGGACACATTAATTGTCTATCAAAT---  
 ATTACAGGAATACTATTGACAAGAGATGGTGGTAACAGTAACAATACG-----  
 -----  
 -----  
 AATGGTACTGAGACCTTCAGACCTGGAGGAGGCAATATAAAGACAATTGGAGAAGTGAATTATATAAATATA  
 AAGTAGTACAAATTGACCCACTA---GGAATAGCACCCACCAGGGCAAAGAGAAGAGTGGTA-----  
 -----GAGAGAGAAAAAAGAGCA--GTGGGA--ATAGGAGCT-----  
 ---ATGATCTTTGGGTTCTTAGGAGCA--GCCGGAAGCACTATG---GGCGCGGCGTCA---  
 ATAACGCTGACGGTACAG---GCCAGACAA---TTGTTG---TCTGGTATAGTGCAACAGCAAAGC---  
 AATTTG---CTGAGG---GCTATAGAGGCGCAGCAGCATATGTTGCAACTCACAGTCTGGGGCATT  
 >MH746238  
 TTCTATTGCAATACAACACCACTGTTTAATACAACAAGCCTGTTTAATTGCACAAGCAAT-----  
 -----  
 -----  
 TGTACTAAACCTATCATACTTCCATGCAAGATAAAACAAATTATAAACATGTGGCAAGGAGTAGGACAAGCAA  
 TGTATGCTCCTCCCATCCGTGGAGTTATTAATTGTGTATCAAAT---  
 ATTACAGGAATACTATTGACAAGAGATGGTGGTGCTAAGGATTTG-----  
 -----  
 -----  
 GCAAATGAGACCTTCAGACCTGGAGGAGGAAATATAAAGGACAATTGGAGAAGTGAATTATATAAATATAAAG  
 TAGTGCAAATTGAACCACTA---GGAATAGCACCCACCAGGGCAAAGAGAAGAGCGGTG-----  
 -----GACAGAGAAAAAAGAGCA--GTGGGA--ATAGGAGCT-----  
 ATGATCTTTGGGTTCTTAGGAGCA---GCAGGAAGCACTATG---GGCGCGGCGTCA---  
 ATAACGCTGACGGTACAG---GCCAGACAA---TTATTG---TCTGGTATAGTGCAACAGCAAAGC---  
 AATTTG---CTGAGG---GCTATAGAGGCGCAGCAGCATCTGCTGCAACTCACAGTCTGGGGCATT  
 >MH746239  
 TTCTATTGCAATACATCACAACCTGTTTAATACAACACTG-----  
 -----  
 -----  
 TTTAATGACACTATCATACTTCCATGCAGGATAAAACAAATTATAAACATGTGGCAAGGAGTAGGACAAGCAA  
 TGTATGCTCCTCCCATCAATGGAAAAATTAATTGTGTATCAAAC---  
 ATCACAGGACTACTATTGACAAGAGATGGTGGTAATGACACCAAT-----  
 -----  
 -----  
 GTTACTGAGACCTTCAGACCTGGAGGAGGAAATATGAAGGACAATTGGAGAAGTGAATTATATAAATATAAAG  
 TAGTACAAATTGAACCACTA---GGACTAGCACCCACCAGGGCAAAGAGAAGAGTGGTG-----  
 -----GAGAGACAAAAAAGAGCA--GTGGGA--ATAGGAGCT-----  
 ATGATCTTTGGGTTCTTAGGAGCA---GCAGGAAGCACTATG---GGCGCGGCGTCA---

ATAACGCTGACGGTACAG---GCCAGACAG---CTATTG---TCTGGTATAGTGCAACAGCAAAGC---  
 AATTTG---CTGAGG---GCTATAGAGGCGCAACAGCATATGTTGCAACTCACCGTCTGGGGCATT  
 >MH746252  
 TTCTATTGCAATACAACACAACCTGTTTGAGTCTAATTGCACAAAT-----  
 -----  
 -----  
 TGTAATGCTACTATCATACTCCCATGCAAGATAAAACAAATTATAAACATGTGGCAAAGAGTAGGACAAGCAA  
 TGTATGCTCCTCCCATCAGTGGAATAATTAATTGTGTATCAAAT---  
 ATCACAGGACTACTATTGACAAGAGATGGTGGTGGTAATGATAGC-----  
 -----  
 -----  
 AGGACTAACGAGACCTTCAGACCTGAAGGAGGAAATATGAAGGACAATTGGAGAAATGAATTATATAAATATA  
 AAGTAGTACAAATTGAACCACTA---GGAATAGCACCCACCAGGGCAAGGAGAAGAGTGGTG-----  
 -----GAGAGAGAAAAAAGAGCA---GTGGGA---ATAGGAGCT-----  
 ---ATGATCTTTGGGTTCTTAGGAGCA---GCAGGAAGCACTATG---GGCGCGGCGTCA---  
 ATAACGCTGACGGTACAG---GCCAGACAA---TTATTG---TCTGGTATAGTGCAACAGCAAAGC---  
 AATTTG---CTGAGG---GCTATAGAGGCGCAACAGCATATGTTGCAACTCACCGTCTGGGGCATT  
 >AF197340  
 TTCTATTGCAATACAACAAAACTGTTTAATAGTACTTGGACAACAAATGAAATTATGGAGGAGTTTAAGGGCA  
 CA-----  
 -----  
 AACTCAAGCACTATCACACTTCCATGCAGGATAAAGCAAGTTGTAAACATGTGGCAGGAAGTAGGAAAAGCAA  
 TGTATGCTCCTCCCATCAGTGAAGCAGTTAATTGTGTATCAAAT---  
 ATTACAGGAATAATATTAACAAGAGATGGTGGTAATGCGACTAAT-----  
 -----  
 -----  
 GAGACCTTCAGACCTGGAGGAGGAAATATGAAGGACAATTGGAGAAGTGAATTATATAAATATAAAGTAGTAC  
 AAATTGAACCACTA---GGAATAGCACCCACCAGGGCACGGAGAAGAGTGGTG-----  
 -----GAGAGAGAAAAAAGAGCA---GTGGGA---ATAGGAGCT-----  
 ATGATCTTTGGGTTCTTAGGAGCA---GCAGGAAGCACTATG---GGCGCGGCGTCA---  
 CTAACGCTGACGGTACAG---GCCAGACAA---TTATTG---TCTGGTATAGTGCAACAGCAAAGC---  
 AATTTG---CTGAGG---GCTATAGAGGCGCAGCAGCATCTGTTGCAACTCACAGTCTGGGGCATT  
 >AF197341  
 TTCTATTGCAATACAACAAGACTGTTTAATATTAGCACAAATGGAACC-----  
 -----  
 -----  
 ACAAATGGCACTATCACACTTCCATGCAGGATAAAGCAAGTTATAAAGATGTGGCAGGAAGTAGGACAAGCAA  
 TGTATGCTCCTCCCATCGATGAAGCAATTAATTGTGTATCAAAT---  
 ATTACAGGAATACTATTGGTAAGAGATGGTGGTAAATGAAAAT-----  
 -----  
 -----  
 GAGACCATCGAAACCTTCAGACCTGGAGGAGGAAATATGAAGGACAATTGGAGAAGTGAAGTATATAAATATA  
 AAGTAGTACAAATTGAACCACTA---GGAGTAGCACCCACCAGGGCAAAGAGAAGAGTGGTG-----  
 -----GAGAGAGAAAAAAGAGCA---GTAGGA---ATAGGAGCT-----  
 ---ATGATCTTTGGGTTCTTAGGAGCA---GCAGGAAGCACTATG---GGCGCGGCGTCA---  
 ATAACGCTGACGGTACAG---GCCAGACAA---TTATTG---TCTGGAATAGTGCAACAGCAAAGC---  
 AATTTG---CTGAGG---ACTATAGAGGCGCAGCAGCATCTGTTGCAACTCACAGTCTGGGGCATT  
 >KU600816  
 TTCTATTGCAATACAACAGGATTATTAAATAAAAATTGCATAGGAAATACATCCAAGGGGGGG-----  
 -----  
 -----  
 TGTAATGGCACTATCACACTTCCATGCAGGATAAAGCAAATTATAAACATGTGGCAGGGAGTAGGACAAGCAA  
 TGTATGCTCCTCCCATCAGGGGAAAAATTAAATGTGTATCAAAT---  
 ATTACAGGAATACTATTGACAAGAGATGGTGGTGAGAATGAGAGC-----  
 -----  
 -----  
 GAGATCTTCAGACCTGGAGGAGGAAATATGAAGGACAATTGGAGAAGTGAAGTATATAAATATAAAGTAGTAG  
 AAATTGAACCACTA---GGAATTGCACCCACCAGGGCAAAGAGAAGAGTGGTG-----  
 -----ACGAGAGAAAAAAGAGCA---GTGGGA---ATAGGAGCT-----  
 ATGATCTTTGGGTTCTTGGGAGCA---GCAGGAAGCACTATG---GGCGCGGCGTCA---

ATAACGCTGACGGTACAG---GCCAGGCAA---TTATTG---TCTGGTATAGTGCAACAACAAAGC---  
 AATTTG---CTGAGA---GCTATAGAGGCGCAGCAGCATATGTTGCAACTCACAGTCTGGGGCATT  
 >KP718930  
 TTCTATTGTAATACAACAGACCTGTTTAATAGTACTTGGTACATAAATGGAACATCTAATAGCACAAACTCAA  
 GTGAG-----  
 -----  
 ATCATACTTCCATGCAGGATAAAGCAAATTGTAAATATGTGGCAAAGAGCAGGACAAGCAATGTATGCTCCTC  
 CCATCAGGGGAGTAATTAATTGCACATCAAAC---  
 ATTACAGGAATACTATTAACAAGAGACTTTGTTAATGCAACTACA-----  
 -----  
 -----  
 GATGTGACCTTCAGACCAACAGGAGGAAATATGAGGAAACAATTGGAGAAGTGAATTATATAAATATAAAGTAG  
 TACAAATTGAACCACTA---GGAATAGCACCCACCACTTCAAGGAGAAGAGTGGTG-----  
 -----GAGAGAGGAAAAAGAGCA---GTAGGA---ATAGGAGCT-----  
 ATGATCTTTGGGTTCTTAGGAGCA---GCAGGAAGCACTATG---GGCGCGGCGTCA---  
 ATAACGCTGACGGTACAG---GCCAGACAA---TTGTTG---TCTGGTATAGTGCAAGCAGCAAAGC---  
 AATTTG---CTGAGG---GCTATAGAGGCGCAGCAGCATCTGTTGCAACTCACAGTCTGGGGCATT  
 >EU191614  
 TTCTATTGCAATACAACAAAACTGTTTAATAGTACTTGGAGAATAAATAAACTGAAACCATGGAGGAG----  
 -----  
 -----  
 GTTAAAGACACTATCATGCTTCCATGCAAGATAAAGCAAATTGTAAACATGTGGCAGAGAGTAGGACAAGCAA  
 TGTATGCTCCTCCCATCAGTGGGGTAATTAATTGTGTATCAAAT---  
 ATTACAGGACTACTATTAACAAGAGATGGTGGTGGTAATAGTACT-----  
 -----  
 -----  
 GACACAGAGACCTTCAGACCTGGAGGAGGAAATATGAAGGACAATTGGAGAAGTGAATTATATAAATATAAAG  
 TAATACAAATTGAACCACTA---GGAATAGCACCCACCAAGGCAAGGAGAAGAGTGGTG-----  
 -----GAGAGAGAAAAAGAGCA---GTGGGA---ATAGGAGCT-----  
 CTGATCTTTGGGTTCTTAGGAGCA---GCAGGAAGCACTATG---GGCGCGGCGTCA---  
 TTAACGCTGACGGTACAG---GCCAGACAA---TTAATG---TCTGGTATAGTGCAACAGCAAAGC---  
 AATTTG---CTGAGG---GCTATAGAGGCGCAGCAGCATCTGCTGCAACTCACAGTCTGGGGCATT  
 >JX112860  
 TTCTATTGCAATACAACAAAACTGTTTAATAGTACTTGGCCAGGAAATACAACCATA-----  
 -----  
 -----  
 GAGAATAGCACTATCATACTTCCATGCAGGATAAAGCAAATTGTAAACATGTGGCAGGGAGCAGGACAAGCAA  
 TGTATGCTCCTCCCATCAGTGGGAATAATTAATTGTGTATCAAAT---  
 ATTACAGGAATACTATTGACAAGAGATGGTGGTCCTAATGCTACT-----  
 -----  
 -----  
 AATGAGACCTTCAGACCTGGAGGAGGAAATATAAAGGACAATTGGAGAAGTGAATTATATAAATATAAAGTAG  
 TACAAATTGAACCACTA---GGAGTGGCACCCACCAAGGCAAGGAGAAGAGTGGTG-----  
 -----GAAAGAGAAAAAGAGCA---GTGGGA---ATAGGAGCT-----  
 ATGATCTTTGGGTTCTTAGGAGCA---GCAGGAAGCACTATG---GGCGCGGCGTCA---  
 ATAACGCTGACGGTACAG---GCCAGACAA---TTATTG---TCTGGTATAGTGCAACAGCAAAGC---  
 AATTTG---CTGAGG---GCTATAGAGGCGCAGCAGCATCTGTTGCAACTCACAGTCTGGGGCATT  
 >JX112861  
 TTCTATTGCAATACAACAAATCTGTTTCGGCTTAATGAACTTGCAGCAAAAATGACACCATGGAAGGG----  
 -----  
 -----  
 TGTAATAAAACTATCATACTTCCATGCAGGATAAAGCAAATTATAAACATGTGGCAGGGAGTAGGACAAGCAA  
 TGTATGCTCCTCCCATCAGAGGAAGTATTAAGTGTGTATCAGAT---  
 ATTACAGGAATACTGTTAACAAGTGATAGTGGTAATAACACTAAT-----  
 -----  
 -----  
 GGCAACGAGACCTTTAGACCTGCAGGAGGAAATATGAAGGACAATTGGAGAAGTGAATTATATAAATATAAAG  
 TAGTAGAAATTGAACCACTA---GGAATAGCACCCACCAAGGCAAGGAGAAGAGTGGTG-----  
 -----GAGAGACAAAAAGAGCA---GTGGGA---ATAGGAGCC-----  
 ATGATCTTTGGGTTCTTAGGAGCA---GCAGGAAGCACTATG---GGCGCGGCGTCA---

ATAACGCTGACGGTACAG---GCCAGACAA---TTATTG---TCTGGTATAGTGCAACAGCAAAGC---  
 AATTTG---CTGAGG---GCTATAGAGGCGCAGCAGCATCTGTTGCAACTCACAGTCTGGGGCATT  
 >GQ845125  
 TTCTATTGCAATACAACAAATCTGTTTAATGATACTTGCATAGGAAATACAAGCAAGCAGGGG-----  
 -----  
 -----  
 TGTAATGAAACTATCATACTTCCATGCAAGATAAAACAAATTATAAACATGTGGCAAGGAGTAGGACAAGCAA  
 TGTATGCTCCTCCCATCAGGGGAATAATTAATTGCCTATCAAAT---  
 ATTACAGGAATACTATTGACAAGAGATGGTGGTAATAATAACATAACT-----  
 -----  
 -----  
 AATGGGAGTGAGATCTTCAGACCTGGAGGAGGAAATATAAAAGACAATTGGAGAAAGTGAATTATATAAAATATA  
 AAGTAGTAGAAATTGAACCACTA---GGAATAGCACCCACCAAGGCAAAGAGAAGAGTGGTG-----  
 -----GACAAAGTAAAAAGAGCA---GTGGGA---ATAGGAGCT-----  
 ---ATGATCTTTGGGTTCTTGGGAGCA---GCAGGAAGCACTATG---GGCGCAGCGTCA---  
 ATAACGCTGACGGTACAG---GCCAGACAA---TTATTG---TCTGGTATAGTGCAACAGCAAAAC---  
 AATTTG---CTGAGG---GCTATAGAGGCGCAGCAGCATCTGTTGCAACTCACAGTCTGGGGCATT  
 >DQ859178  
 TTCTATTGCAATACAACAAATCTGTTTAATAGTACTTGAATGGAACCATGGAGGGTAATGGCACT-----  
 -----  
 -----  
 GATAATGGCACTATCATACTTCCATGCAGGATAAAGCAAATAATAAACATGTGGCAGGAAGTAGGACAAGCAA  
 TGTATGCTCCTCCCATCAGTGGAGCATTAATTGTGTATCAAAT---  
 ATTACAGGAATACTATTGACAAGAGATGGTGGTGGTAATACTACA-----  
 -----  
 -----  
 GGTAACGAGACCTTCAGACCTGGAGGAGGAAATGTAAAAGACAATTGGAGAAATGAATTATATAAAATATAAAG  
 TAGTACAAATAGAACCACTA---GGAATAGCACCCACCAAGGCAAAGAGAAGAGTGGTG-----  
 -----GAAAGGGAAAAAAGAGCA---GTGGGA---ATAGGAGCT-----  
 ATGATCTTTGGGTTCTTAGGAGCA---GCAGGAAGCACTATG---GGCGCAGCATCA---  
 ATAACGCTGACGGTACAG---GCCAGACAA---TTATTG---TCTGGTATAGTGCAACAGCAAAGC---  
 AATTTG---CTGAGA---GCTATAGAGGCGCAGCAGCATCTGTTGCAACTCACAGTCTGGGGCATT  
 >DQ859179  
 TTCTATTGCAATACAACAAAACCTGTTTAATGATACTTGCATAAGAAATAAAACCCAGAAGGAG-----  
 -----  
 -----  
 TGTAATAACGCTATCATACTTCCCTGCAAGATAAAGCAAATTGTAAACATGTGGCAGGGAGTAGGACAAGCAA  
 TGTATGCTCCTCCCATCAGTGGAAACAATTAATTGTGTATCAAAT---  
 ATTACAGGACTACTATTGACAAGAGATGGTGGTGTAAAAATGGAAC-----  
 -----  
 -----  
 AACAGCAATACCGAGATCTTCAGACCGGAAGGAGGAAATATAAAGGACAATTGGAGAAAGTGAATTATATAAAT  
 ATAAGTAGTACAAATTGAACCACTA---GGAATAGCACCCACCAAGGCAAAGAGAAGAGTGGTG-----  
 -----GAGAGAGAAAAAAGAGCA---GTGGGA---ATAGGAGCT---  
 -----ATGATCTTTGGGTCCTTAGGAGCA---GCAGGAAGCACTATG---GGCGCGCGTCA---  
 ATAACGCTGACGGTACAG---GCCAGACAA---TTATTG---TCTGGTATAGTGCAACAGCAAAGC---  
 AATTTG---CTGAGG---GCTATAGAGGCGCAGCAGCATATGTTGCAACTCACAGTCTGGGGCATT  
 >EF036527  
 TTCTATTGCAATACAACAAAACCTATTTAATAGCACTCTGTATAATAGC-----  
 -----  
 -----  
 AATACAACAAACATTATCATTCCATGCAGGATAAAGCAAATTGTAAACATGTGGCAGGGAGTAGGACAAGCAA  
 TGTATGCTCCTCCCATCAGAGGAAGCATTAATTGTACATCAAAT---  
 ATTACAGGAATACTATTAACAAGAGATGGTGGTAATAATAATAATGATACT-----  
 -----  
 -----  
 AATAATGATACTGAGACCTTCAGACCTGGAGGAGGAAAGTATGAGGGACAATTGGAGAAAGTGAATTATATAAAT  
 ATAAGGTAGTAGAAATTGAACCACTA---GGAGTAGCACCCACCAAGGCAAAGAGAAGAGTGGTG-----  
 -----GAGAGAGAAAAAAGAGCA---GTGGGA---ATAGGAACT---  
 -----ATGATCCTTGGGTTCTTAGGAGCA---GCCGGAAGCACTATG---GGCGCGGCGTCA---

ATAACGCTGACGGTACAG---GCCAGACAA---TTATTG---TCTGGTATAGTGCAACAGCAAAGC---  
 AATTTG---CTGAGG---GCTATAGAGGCGCAACAGCATATGTTGCAACTCACAGCCTGGGGCATT  
 >EF036529  
 TCCTATTGCAATACAACAAAACCTGTTTAAACAGAACAATGCTGGAGAACGAAACC-----  
 -----  
 -----  
 ATACTTCCATGCAGGATAATTCCATGCCGATAAGGCAAATTATAAACATGTGGCAGGGAGTAGGACAAGCAA  
 TGTATGCTCCTCCCATCAGGGGAAGCATTAAGTGTGTATCAAAT---  
 ATTACAGGAATACTATTGACAAGAGATGGTGGTAATAATAATACA-----  
 -----  
 -----  
 AATGAGACCTTCAGGCCTGGAGGAGGAAATATAAAGGACAATTGGAGAAGTGAATTATATAAATATAAAGTAG  
 TAGAAATTGAACCACTA---GGAATAGCACCCACCAAGGCAAAAAGAAGAGTGGTG-----  
 -----GAGAGAGAAAAAAGAGCA---GTGGAA---ATAGGAGCT-----  
 ATGATCTTTGGGTTCTTAGGTGCA---GCAGGAAGCACTATG---GGCGCGGCGTCA---  
 ATAACGCTGGCGGTACAG---GCCAGACAA---TTATTG---TCTGGTATAGTGCAACAGCAAAGC---  
 AATTTG---CTGATG---GCTATAGAGGCGCAACAACATATGTTGCAACTCACAGTCTGGGGCATT  
 >EF036530  
 TTCTATTGCAATACAACAAAACCTGTTTAAATTGGGCTAGTGGCTCTGGCAAT-----  
 -----  
 -----  
 ATCACTGGCAATATCACACTTCCATGTAAGATAAAGCAAATTGTAAACATGTGGCAGGGAGTAGGACAAACAA  
 TGTATGCTCCCCCATCAGTGGAGCATTAATTGTTTATCAAAT---  
 ATTACAGGAATACTATTGACAAGAGATGGTGGTGATAATAATAAT-----  
 -----  
 -----  
 ACATCTAATGAGACCTTCAGACCTGGAGGAGGAAATATAAAGGACAATTGGAGAAGTGAATTATATAAATATA  
 AGGTAGTAGAAATTGAACCACTA---GGAATAGCACCCACCAGGGCAAGGAGAAGAGTGGTG-----  
 -----GAGAGAGAAAAAAGAGCA---GTGGGA---ATAGGAGCT-----  
 ---ATGATCTTTGGGTTCTTAGGAGCA---GCAGGAAGCACTATG---GGCGCGGCGTCA---  
 ATAACGCTGACGGTACAA---GCCAGACAA---TTATTG---TCTGGTATAGTGCAACAGCAAAGC---  
 AATTTG---CTGAGA---GCTATAGAGGCGCAACAGCATCTGTTGCAACTCACAGTCTGGGGCATT  
 >EF036534  
 TTCTATTGCAATACAACAAAACCTGTTTAAATAATGCCAAGGAG-----  
 -----  
 -----  
 AATGACACTATCATACTTCCATGTAGGATAAAACAAATTATAAACATGTGGCAGGGAGCAGGACAAGCAATGT  
 ATGCTCCGCCCATCGATGGAATAATTAAGTGTGAATCAAAT---  
 ATTACAGGAATACTATTGACAAGAGATGGTGGTACTAATAAGACT-----  
 -----  
 -----  
 AATGAACTGAAACCTTCAGACCTGGAGGAGGAAATATAAAGGACAATTGGAGAAGTGAATTATATAAATATA  
 AAGTAGTACAAATTGAACCACTA---GGAATAGCACCCACCAGGGCAAGAGAAGAGTGGTG-----  
 -----GAGAGACAAAAAAGAGCA---GTGGGA---ATAGGAATT-----  
 ---ATGATCTTTGGGTTCTTAGGAGCA---GCAGGAAGCACTATG---GGCGCAGCGTCA---  
 ATAACGCTGACGGTACAG---GCCAGACAA---TTATTG---TCTGGTATAGTGCGACAGCAAAGC---  
 AATTTG---CTGAGG---GCTATAGAGGCGCAGCAGCATATGTTGCAACTCACAGTCTGGGGCATT  
 >EF036535  
 TTCTATTGCGATACAACAAAACCTGTTTAAATGGAAGTGGCATAGTAAATGCAACC-----  
 -----  
 -----  
 ATAAATGACACTATCATACTTCCATGCAAGATAAAGCAAATTATAAACATGTGGCAGGGAGCAGGACAAGCAA  
 TGTATGCTCCTCCCATCAGGGGAAGAATTAATTGTGTATCAAAC---  
 ATTACAGGAATACTATTGACGAGAGATGGTGGTGATAATAATAGTACTAAC-----  
 -----  
 -----  
 ACTACCGGGACCGAGACCTTCAGACCTGGAGGAGGAAATGTGAAGGACAATTGGAGAAGTGAATTATATAAAT  
 ATAAAGTAGTACAAATTGAACCACTA---GGAATAGCACCCACCAAGGCAAGAGAAGAGTGGTG-----  
 -----GAGAGAGAAAAAAGAGCA---GTGGGA---ATAGGAGCT---  
 -----ATGATCTTTGGGTTCTTAGGAGCA---GCAGGAAGCACTATG---GGCGCGGCGTCA---

ATAACGCTGACGGTACAG---GCCAGACAA---TTATTG---TCTGGTATAGTGCAACAGCAAAGC---  
 AATTTG---CTGAGG---GCTATAGAGGCGCAGCAGCATCTGTTGCAACTCACAGTCTGGGGCATT  
 >EU363850  
 TTCTATTGCAACACAACAACAACTGTTTAATAATACTTGCATAGGAAATACAAGCATGGAGGGG-----  
 -----  
 -----  
 TGTAATAAAACTATCATACTTCCATGCAAGATAAAACAAATTATAAACATGTGGCAAGGAGTAGGACAAGCAA  
 TGTATGCTCCTCCCATCAGAGGAAGAATTAATTGTGTATCAAAT---  
 ATTACAGGAATATTCTTGACAAGAGATGGTGGTAATAACAGGACT-----  
 -----  
 -----  
 AATGAGACCTTCAGACCTGGAGGAGGAAATATAAAGGACAATTGGAGAAGTGAATTATATAAATATAAAGTAG  
 TAGAAATTGAACCACTA---GGAATAGCACCCACCAGGGCAAAGAGAAGAGTGGTG-----  
 -----GAGAGAGAAAAAAGAGCA---GTGGGA---ATAGGAACT-----  
 ATGATCTTTGGGTTCTTAGGAGCA---GCAGGAAGCACTATG---GGCGCGGCGTCA---  
 ATAACGCTGACGGTACAA---GCCAGACAA---TTATTG---TCTGGTATAGTGCAACAGCAAAGC---  
 AATTTG---CTGAGG---GCTATAGAGGCGCAGCAGCATCTGTTGCAACTCACAGTCTGGGGCATT  
 >HM215410  
 TTCTATTGCAATACAACAGAACTGTTTAATAGCACTTGGGAAGAAAATAGTAATTGGACTAGTACA-----  
 -----  
 -----  
 AAAATTGACACTATCAAACCTCCATGCAAGATAAAGCAAATTATAAACATGTGGCAGGGAGTAGGACAAGCAA  
 TGTATGCTCCTCCCATCAGTGGAGTAATTAAGTGTATCAAAC---  
 ATTACAGGAATACTATTGACAAGAGATGGTGGTAATAATAGTAAT-----  
 -----  
 -----  
 GCAAAATGAGACCTTCAGACCTGGAGGAGGAGATATAAAGGACAATTGGAGAAGTGAATTATATAAATATAAAG  
 TAGTACAAATTGAACCATTA---GGAGTAGCACCCACCAGGGCAAAGAAGAGTGGTG-----  
 -----GAGAGAGAAAAAAGAGCA---GTGGGA---ATAGGAACT-----  
 ATGATCTTTGGGTTCTTAGGAGCA---GCAGGAAGCACTATG---GGCGCGGCGTCA---  
 ATAACGCTGACGGTACAG---GCCAGACAA---TTATTG---TCTGGTATAGTGCAACAGCAAAGT---  
 AATTTG---CTGAGG---GCTATAAATGCGCAGCAGCATCTGTTGCAGCTCACAGTCTGGGGCATT  
 >HM215422  
 TTCTATTGCAATACATCACAATTGTTTAATAGTACTTGGGAATAATACTGGGGAAAATAATACCATGGAGAGGG  
 GT-----  
 -----  
 AATGGCACTGACACTATCATACTTCCCTGCAAGATAAAGCAGATTATAAACATGTGGCAGGGAGTAGGACAAG  
 CAATGTATGCTCCTCCCATCAGTGGAAATATTAGTTGTGTATCAAAT---  
 ATTACAGGAATACTATTGACAAGAGATGGTGGTAATAATATGACT-----  
 -----  
 -----  
 AATGAGACCTTCAGACCTGGAGGAGGAAATATAAAGGACAATTGGAGAAGTGAATTATATAAATATAAGGTAG  
 TACAAATTGAGCCACTA---GGAGTAGCACCCACCAAGGCAAGGAGAAGAGTGGTG-----  
 -----GAAAGAGAAAAAAGAGCA---GTGGGA---ATAGGAGCT-----  
 TTGCTCTTTGGGTTCTTAGGAGCA---GCCGGAAGCACTATG---GGCGCGGCGTCA---  
 ATAACGCTGACGGTACAG---GCCAGACAA---TTATTG---TCTGGTATAGTGCAACAGCAAAGC---  
 AATTTG---CTGAGG---GCTATAGAGGCGCAGCAGCATTTGTTGCAACTCACTGTCTGGGGCATT  
 >HM215427  
 TTCTATTGCAATACAACAAAACCTGTTTAATAGTACTTGGGGAGAAAATACAACCATGGAGGGG-----  
 -----  
 -----  
 CATAATGACACTATCGTACTTCCATGCAGGATAAAGCAAATCGTAAACATGTGGCAGGGAGTAGGACAAGCAA  
 TGTATGCTCCTCCCATCAGGGGAAGCATTAATTGTGTATCAAAT---  
 ATTACAGGGATACTATTGACAAGAGATGGTGGTACTAATATGTCT-----  
 -----  
 -----  
 AATGAGACCTTCAGACCAGGAGGAGGAAATATAAAGGACAATTGGAGAAGTGAATTATATAAATATAAAGTAG  
 TAGAAATTGAACCACTA---GGAATAGCACCCACCAAGGCAAAGAGAAGAGTGGTG-----  
 -----GAAAGAGAAAAAAGAGCA---GTGGGA---ATAGGAGCT-----  
 ATGATCTTTGGGTTCTTAGGAGCA---GCAGGAAGCACTATG---GGCGCGGCGTCA---

ATAACGCTGACGGTACAG---GCCAGACAA---TTATTG---TCTGGTATAGTGCAACAGCAAAGC---  
 AATTTG---CTGAGG---GCTATAGAGGCGCAGCAGCATCTGTTGCAACTCACAGTCTGGGGCATT  
 >DQ859180  
 TTCTATTGCAATACATCAAACTGTTTAAATGAAACCAGAGGT-----  
 -----  
 -----AATGGC-----  
 ACTATCATACTTCCATGCAGGATAAAGCAAATTATAAACATGTGGCAGGGAGTGGGACAAGCAATGTATGCTC  
 CTAATGTATGCTCCTCCCATCGGGGAATAATTAATTGTGTATCAAAC---  
 ATTACAGGAATACTATTGACAAGAGATGGTGGTACTAATACTAGT-----  
 -----  
 -----  
 GGGACGAATGAGACCTTCAGACCTGGAGGAGGAAATATGAAGGACAATTGGAGAAGTGAATTATATAAAATATA  
 AAGTAGTACAACCTTGAACCACTA---GGACTAGCACCCACCAAGGCAAAGAGAAGAGTGGTG-----  
 -----GAGAGAGAAAAAAGAGCA---GTGGGA---ATAGGAGCT-----  
 ---ATGATCTTTGGGTTCTTAGGAGCA---GCAGGAAGCACTATG---GGCGCGGCGTCA---  
 ATAACGCTGACGGTACAG---GCCAGACAA---TTATTG---TCTGGTATAGTGCGACAGCAAAGC---  
 AATTTG---CTGCAG---GCTATAGAGGCGCAACAGCATCTGTTGCAACTCACAGTCTGGGGCATT  
 >EF036533  
 TTCTATTGCAATACAACAAAATTGTTTAAATGGTACAGAGAATGGAACCATGGAGGGG-----  
 -----  
 -----  
 CTTAATACCACTATCATACTTCCATGCAGGATAAAGCAAATTGTAAGGATGTGGCAGGAAGTAGGACAAGCAA  
 TGTATAATCCTCCCATCAGTGGAAACATTACTTGTATATCAAGT---  
 ATTACAGGAATACTATTAACAAGAGATGGTGGTAATAATGCAACT-----  
 -----  
 -----  
 AATGAAACCTTCAGACCAGGAGGAGGAAATATAAAGGACAATTGGAGAAGTGAATTATATAAAATATAAAGTAG  
 TACAAATTGAACCACTA---GGAATAGCACCCACCAGGGCAAAAAGAAGAGTGGTG-----  
 -----GATAGAGAAAAAAGAGCA---GTGGGA---CTAGGAGCT-----  
 ATGATCTTTGGGTTCTTAGGAGCA---GCAGGAGGCACTATG---GGCGCAGCGTCA---  
 ATAACGCTGACGGTACAG---GCCAGACAA---TTATTG---TCTGGTATAGTGCAACAGCAAAAC---  
 GATTTG---CTGAGA---GCTATAGAGGCGCAACAGCATATGTTGCAACTCACAGTCTGGGGCATT  
 >GU475046  
 TTCTATTGCAATACAACAAACTTGTTTAAATAACACTTGCATAAATAAGACG-----  
 -----  
 -----  
 TGTGATGACAATATCATACTCCCATGCAAAATAAAGCAAATTATAAACATGTGGCAAGAAGTAGGACAAGCAA  
 TGTATGCCCCCTCCCATCAGGGGAATAATTAATTGTGCATCAAAT---  
 ATTACAGGAATACTATTGACAAGAGATGGTGGTACTAATAATACC-----  
 -----  
 -----  
 GAAAACGAAACCTTCAGACCTGGGGGAGGAAATATAAAGGACAATTGGAGAAGTGAATTATATAAAATATAAAG  
 TAGTACAAATTGAACCACTA---GGAATAGCACCTACCAGGGCAAAGAGAAGAGTGGTG-----  
 -----GAGAGAGAGAAAAAGAGCA---GTGGGA---ATAGGAGCT-----  
 ATGATCTTTGGGTTCTTAGGAGCA---GCAGGAAGCACTATG---GGCGCAGCGTCA---  
 ATAACGCTGACGGTACAG---GCCAGACAA---TTATTG---TCTGGTATAGTGCAACAGCAAAGC---  
 AATTTG---CTGAGA---GCTATAGAGGCGCAGCAGCACCTGTTGCAACTCACAGTCTGGGGCATT  
 >KF835502  
 TTCTATTGCGATACAACAAGATTGTTTAAATGATACTGACATA-----  
 -----  
 -----  
 AAAAAATAGTAGCAATATCACAATTCCATGCAGGATAAAAACAAATTATAAACATGTGGCAGAGAGTAGGACAAG  
 CAATGTATGCTCCTCCCATCAGTGGAAAGTATTAATTGTGTATCAAAA---  
 ATTACAGGAATACTGTTGACAAGAGATGGTGATAATAATGATACT-----  
 -----  
 -----  
 GAAACCTTCAGACCTATAGGAGGGAATATAAAGGATAATTGGAAGAGTGAATTATATAAAATATAAAGTAGTAC  
 AAATTGAACCACTA---GGAATAGCACCCACCAGGGCACAGAGAAGAGTGGTG-----  
 -----GAGAGAGAAAAAAGAGCA---GTGGGA---ATAGGAGCT-----  
 ATGATCTTTGGGTTCTTAGGAGCA---GCAGGAAGCACTATG---GGCGCGGCGTCA---

ATAACGCTGACGGTACAC---GCCAGACAA---TTATTG---TCTGGTATAGTGCAACAGCAAAGC---  
 AATTTG---CTGAGG---GCTATTGAGGCGCAGCAGCATCTGTTGCAACTCACAGTCTGGGGCATT  
 >KF835504  
 TTCTATTGCAATACAACAAATCTGTTTAATAATAGTTGCATAGGAAATGAAACCAAGGAAGG-----  
 -----  
 -----  
 TGTAATGAAACTATCACACTTCCATGCAAGATAAAGCAAATTATAAACATGTGGCAGGGAGTAGGACAAGCAA  
 TGTATGCTCCTCCCATCAAAGGAAATATTAGTTGTTTCATCAAAT---  
 ATTACAGGAATACTATTGACAAGAGATGGTGGTAATGATAAGACT-----  
 -----  
 -----  
 AATAATAATGAGACTTTCAGACCTGCAGGAGGAAATATAAAGGATAATTGGAGAAGTGAATTATATAAATATA  
 AAGTAGTAGAAATTGAACCACTA---GGAATAGCACCCACCAGGGCAAAGAGAAGAGTGGTG-----  
 -----GAGAGAGAAAAAAGAGCA---GTGGGA---ATAGGAGCT-----  
 ---ATGATCTTTGGGTTCTTAGGAGCA---GCAGGAAGCACTATG---GGCGCGGCGTCA---  
 ATAACGCTGACGGTACAG---GCCAGACAA---TTATTG---TCTGGTATAGTGCAACAGCAAAGC---  
 AATTTG---CTGAGG---GCTATAGAGGCGCAGCAGCATCTGTTGCAACTCACAGTCTGGGGCATT  
 >KF835513  
 TTCTATTGCAATACAACAAAATCTGTTTAATGATACTTGCATAAATGAAACCAGG-----  
 -----  
 -----  
 TGCAATGAGAACATCACACTTCCATGCAGGATAAAGCAAGTTATAAACATGTGGCAGAGAGTAGGACAAGCAA  
 TGTATGCTCCTCCCATCAGCGGAAGCATTAATTGTACATCAAAT---  
 ATCACAGGAATACTATTGACAAGAGACGGTGGTGGTAATAGGAGT-----  
 -----  
 -----  
 AATGAGACCTTCAGACCTATAGGAGGAAATATGAAGGACAATTGGAGAAGTGAATTATATAAATATAAAATAG  
 TAGAAATTGAACCATTA---GGAATAGCACCCACCAGGGCAAGGAGAAGAGTGGTG-----  
 -----GAGAGACAAAAAAGAGCA---GTAGGA---ATCGGAGCT-----  
 ATGATCTTTGGGTTCTTAGGAGCA---GCAGGAAGCACTATG---GGCGCGGCGTCA---  
 ATAACGCTGACGGTACAG---GCCAGACAA---TTATTG---TCTGGTATAGTGCAACAGCAAAGC---  
 AATTTG---CTGAGG---GCTATAGAGGCGCAGCAGCATCTGTTGCAACTCACAGTCTGGGGCATT  
 >KF835514  
 TTCTATTGTGATACAACAAAATGTTTAATGGTACAGAAAATGGAACCATAGCAGGTAATGACACT-----  
 -----  
 -----  
 GTTAATGGCACTATCATACTTCCGTGCAGGATAAAGCAAGTTGTAAACATGTGGCAGGAAACAGGACAAGCAA  
 TGTATAATCCTCCCATCAGTGGAACATTACGTGTAGATCTGAA---  
 ATTACAGGAATACTATTAAACAAGAGATGGTGGTGCTAATGATAGT-----  
 -----  
 -----  
 AGTACAAATGAAACCTTCAGACCTGGAGGAGGAAATATAAAGGACAATTGGAGAAATGAATTATATAAATATA  
 AAGTAGTACAAATTGAACCACTA---GGAATAGCACCCACCAGGGCAAAGAGAAGAGTGGTG-----  
 -----GAGAGAGAAAAAAGAGCA---GTGGGA---ATAGGAGCT-----  
 ---ATGATCTTTGGGTTCTTGGGAGCA---GCAGGAAGCACTATG---GGCGCAGCGTCA---  
 ATAACGCTGACGGTACAG---GCCAGACAA---TTATTG---TCTGGTATAGTGCAACAGCAAAGC---  
 AATTTG---CTGAGG---GCTATTGAGGCGCAGCAGCATATGTTGCAACTCACAGTCTGGGGCATT  
 >KF835516  
 TTCTATTGCAATACAACACAACCTGTTTAATAGTACTTGGAACAGAAATGGAACCCAGAAGGGTGAGAGGGGT-  
 -----  
 -----  
 AATGACACTAGCATCATCCTTCCATGTAAGATAAAGCAAATTGTAAGAATGTGGCAGGAAACAGGACAAGCAA  
 TGTATGCTCCTCCCGTCAATGGAATAATTAATTGTGTATCAAAT---  
 ATTACAGGGTTACTATTGACAAGAGATGGTGGTACTAATATGACT-----  
 -----  
 -----  
 AATGAGACCTTCAGACCTGGAGGAGGAAATATAAAGGACAATTGGAGAAATGAATTATATAAATATAAAGTAG  
 TACAAATTGAACCACTA---GGAATAGCACCCACCAGGGCAAAGAGAAGAGTGGTG-----  
 -----GAAAGAGAAAAAAGAGCA---GTGGGA---ATAGGAGCT-----  
 ATGATCTTTGGGTTCTTAGGAGCA---GCAGGAAGCACTATG---GGCGCGGCGTCA---

ATAACGCTGACGGTACAT---GCCAGACAA---TTATTG---TCTGGTATAGTGCAACAGCAAAGC---  
 AATTTG---CTGAGG---GCTATAGAGGCGCAGCAGCATCTGTTGCAACTCACTGTCTGGGGCATT  
 >KF835518  
 TTCTATTGTAATACAACAACAACTGTTTATAGTGGG-----  
 -----  
 -----  
 GATAATAACACTATCATACTTCCATGCAAGATAAAGCAAATTATAAACATGTGGCAGGGAGTAGGACAAGCAA  
 TGTATGCTCCTCCCATCAGTGGAAGAATTAATTGTGTATCAAAT---  
 ATTACAGGAATACTACTGACAAGAGACGGTGGTAGTAATGCGACT-----  
 -----  
 -----  
 AACGAGACCTTCAGACCTGGAGGAGGAAATATAAAGGACAATTGGAGAAGTGAATTATATAAATATAAAGTAG  
 TACAAATTGAACCACTA---GGAATAGCACCCACCAAGGCAAAGAGAAGAGTGGTG-----  
 -----GATAGAGAGAAAAGAGCA---GTGGGA---ATAGGAGCT-----  
 ATGATCTTTGGGTTCTTAGGAGCA---GCCGGAAGCACTATG---GGCGCGGCGTCA---  
 ATAACGCTGACGGTACAG---GCCAGACAA---TTATTG---TCTGGCATAGTGCAACAGCAAAGC---  
 AATTTG---CTGAGG---GCTATAGAGGCGCAGCAGCACCTGTTGCAACTCACAGTCTGGGGCATT  
 >KF835519  
 TTCTATTGCAATACAACAAAACCTGTTTAATAGTACTTGGGAACAAAATGGAAGTGTGCAAGGACTTAATGAC-  
 -----  
 -----  
 ACTAATGGCACTATCATACTTCCATGCAGGATAAAGCAAATTATAAACATGTGGCAGAGAGTAGGACAAGCAA  
 TATATGCTCCTCCCATCAGTGGAAGTATTAAGTGTGTATCAAAT---  
 ATTACAGGAATACTACTAACAAGAGATGGTGGAAATTAATAAACTAACGAG-----  
 -----  
 -----  
 ACAGAGAAAGAGGTCTTCAGACCTGGAGGAGGAAACATAAAGGACAATTGGAGAAGTGAAGTATATAAATATA  
 AAGTAGTACAAATTGAACCACTA---GGAATAGCACCCACCAGGGCAAAGAGAAGAGTGGTG-----  
 -----GAGAGAGAAAAAGAGCA---GTAGGA---ATAGGAGCT-----  
 ---CTGATCTTTGGGTTCTTAGGAGCA---GCAGGAAGCACTATG---GGCGCGGCGTCA---  
 ATAACGCTGACGGTACAG---GCCAGACAA---TTATTG---TCTGGTATAGTGCAAGCAGCAAAAC---  
 AATTTG---CTGAGA---GCTATAGAGGCGCAGCAGCATATGTTGCAACTCACAGTCTGGGGCATT  
 >KF835528  
 TTCTATTGTAATACAACAAACCTGTTTAATACAACAAACCTGTTTGATAATAGCACA-----  
 -----  
 -----  
 AAAAAATGACCCTATCATACTTCCATGCAGGATAAAGCAAATTGTAAACATGTGGCAGGGAGTAGGACAAGCAA  
 TGTATGCTCCTCCCATCAATGGGATAATTAAGTGTGTATCAAAT---  
 ATTACAGGAATAATATTGACAAGAGATGGTGGTGGTAATACTACA-----  
 -----  
 -----  
 AGGGGGAATGAGACCTTCAGACCTGGAGGAGGAAATATGAAGGACAATTGGAGAAGTGAATTATATAAATATA  
 AAGTAGTACAAATTGAACCACTA---GGAGTAGCACCCACCAGGGCAAAGAGAAGAGTGGTG-----  
 -----GATAGAGAAAAAGAGCA---GTGGGA---ATAGGAGCT-----  
 ---ATGATCTTTGGATTCTTAGGAGCA---GAAGGAAGCACTATG---GGCGCGGCGTCA---  
 ATAACGCTGACGGTACAG---GCCAGACAA---TTATTG---TCTGGTATAGTGCAACAGCAAAGC---  
 AATTTG---CTGAGG---GCTATAGAGGCGCAACAGCATTTGTTGCAACTCACAGTCTGGGGCATC  
 >KF835533  
 TTCTATTGCAATACAACAAAACCTGTTTAATAATAATTGCACAAAAAATGCTACCACGGAGAATGAG-----  
 -----  
 -----  
 TGTACTGACAATATCACACTTCCATGCAGGATAAAGCAAATTATAAACATGTGGCAGGGAACAGGACAAGCAA  
 TGTATGCTCCTCCCATCGATGGAAAAATTAATTGTGTATCAAAT---  
 ATTACAGGAATACTATTGACAAGAAATGGTGGTGCTAATAAAGCTAAAAAT-----  
 -----  
 -----  
 GAAACTAAAGATAACGAGACCTTCAGACCTGAAGGAGGAAATATGAAGGACAATTGGAGGAGTGAATTATATA  
 AATATAAAGTAGTACAAATTGAACCACTA---GGAATAGCACCCACCAGGGCACAGAGAAGAGCAGTG-----  
 -----GATAGAGAGAAAAGAGCA---GTGGGC---  
 ATAGGAGCT-----ATGATCTTTGGGTTCTTAGGAGCA---GCAGGAAGCACTATG---

GGCGCGGCGTCA---ATAACGCTGACGGTACAG---GCCAGACAA---TTATTG---  
 TCTGGTATAGTGCAACAGCAAAGC---AATTTG---CTGAGG---  
 GCTATAGAGGCGCAACAGCATCTGTTGCAACTCACAGTCTGGGGCATT  
 >KF835536  
 TTCTATTGCAATACAACAACACTGTTTAATAGTACTTGGACAGAACATGAGACCATGGGGGGT-----  
 -----  
 -----  
 AATAATACTACTATCATACTTCCATGCAGGATAAAAGCAAATTGTAAACATGTGGCAGGGAGTAGGACAAGCGA  
 TGTATGCTTCTCCCATTTGAGGAAAAAATTAATTGTGTATCAAAT---  
 ATTACAGGGATACTATTGACAAGAGATGGTGGTGGTAATAACAGA-----  
 -----  
 -----  
 ACTAATGAGACCTTCAGACCTGGAGGAGGAAATATAAAAGGACAATTGGAGAAGTGAATTATATAAATATAAAAG  
 TAGTACAAATTGAACCACTA---GGACTAGCACCCACCAAGGCAAAGCGGAGAGTGGTG-----  
 -----GAGAGAGAAAAAAGAGCA---GTGGGA---ATAGGAGCT-----  
 ATGATCTTTGGGTTCTTAGGAGCA---GCCGGAAGCACTATG---GGCGCGGCGTCA---  
 CTAACGCTGACGGTACAG---GCCAGACAA---TTATTG---TCTGGTATAGTGCAACAGCAAAGC---  
 AATTTG---CTGAGG---GCTATAGAGGCGCAGCAGCATATGCTGCAACTCACTGTCTGGGGCATT  
 >KF835538  
 TTCTATTGCAATACAACAACACTGTTTAATAGTACTTGGGAGAAAAATAAAACCACGGAGGGA-----  
 -----  
 -----  
 CATAATGGTACTATCATACTTCCATGCAAGATAAAACAAATCATACGCATGTGGCAAGGAGCAGGGCAAGCAA  
 TGTATGCTCCTCCCATCGGGGGAAATATTAGTTGTTTTTCAAAT---  
 ATTACAGGGATACTATTGACAAGAGATGGTGGTGGTAATAACT-----  
 -----  
 -----  
 AATGAGACCTTCAGACCTGGAGGAGGAAATATAAGGGACAATTGGAGAAGTGAATTATATAAATATAAAGTAG  
 TACAAATTGAACCATTA---GGAATAGCACCCACCAGGGCAAAAAGAAGAGTGGTG-----  
 -----GAAAGAGAAAAAAGAGCA---GTGGGA---ATAGGAGCT-----  
 ATGATCTTTGGGTTCTTAGGAGCA---GCAGGAAGCACTATG---GGCGCGGCGTCA---  
 ATAACGCTGACGGTACAG---GCCAGACAA---TTGTTG---TCTGGTATAGTGCAACAGCAAAGC---  
 AATTTG---CTGAGG---GCTATAGAGGCGCAGCAGCATCTGTTGCAACTCACAGTCTGGGGCATT  
 >KF835542  
 TTCTATTGCAATACAACAAAGTTGTTCAATATAAATGAAACCAGGAAG-----  
 -----  
 -----  
 GATAATGGCACTATCATACTTCCATGCAAGATAAAGCAAATTATAAACATGTGGCAGGGAGCAGGACAAGCAA  
 TGTATGCTCCTCCCATCAGTGAATAATTAATTGTATATCAAAT---  
 ATTACAGGAATACTATTAAACAAGAGATGGTGGTAATAATGAATCTGGA-----  
 -----  
 -----  
 GAGACCTTCAGACCAGGAGGAGGAAATATAAAGGACAATTGGAGAAGTGAATTATATAAATATAAAGTAGTAC  
 AAATTGAACCACTA---GGAATAGCACCCACCAGGGCAAAGAGAAGAGTGGTG-----  
 -----GAGAGAGAAAAAAGAGCA---GTGGGA---ATAGGAGCC-----  
 ATGATCTTTGGGTTCTTAGGAGCA---GCAGGAAGCACTATG---GGCGCAGCGTCA---  
 ATAACGCTGACGGTACAG---GCCAGACAA---TTATTG---TCTGGTATAGTGCAACAGCAAAGC---  
 AATTTG---CTGAGA---GCTATTGAGGCGCAGCAGCATATGTTGCAACTCACAGTCTGGGGCATT  
 >KF835543  
 TTCTATTGCAATACATCACAACACTGTTTAATAGTACTTGGAGTGTAACCATGGAGGGGAGTAATGACAAT----  
 -----  
 -----  
 ACAACAAGCAATATAACACTTCCATGCAGGATAAAAGCAAATTATAAATATGTGGCAGGGAGCAGGACAAGCAA  
 TGTATGCTCCTCCCATCAGTGAAGCATTAATTGTGTGTCAAAT---  
 ATTACAGGAATACTATTAAACAAGAGATGGTGGTGTTAATGCAAGC-----  
 -----  
 -----  
 AATGAAACCTTCAGACCTGGAGGAGGAAATATAAAGGACAATTGGAGAAGTGAATTATATAAATATAAAGTAG  
 TAGAAATTGAACCACTA---GGAATAGCACCCACCAAGGCAAAGAGAAGAGTGGTG-----  
 -----GAAAGAGAAAAAAGAGCA---GTGGGA---ATAGGAGCT-----

ATGATCTTTGGGTTCTTAGGAGCA---GCCGGAAGCACTATG---GGCGCGGCGTCA---  
 CTGACGCTGACGGTACAG---GACAGACAA---TTATTG---TCTGGTATAGTGCAACAGCAAAGC---  
 AATTTG---CTGAGG---GCTAAAGAGGCGCAGCAGCATATGTTGCAACTCACAGTCTGGGGCATT  
 >FJ441290  
 TTCTATTGCAATACAACAAAATTGTTTAATAGCACAGAAAATGGAACCATGGAGGGG-----  
 -----  
 -----  
 CTCAATGGCACTATCGTACTTCCATGCAGGATAAAGCAAATTATAAACATGTGGCAGGGAGTAGGACAAGCAA  
 TGTATGCTCCTCCCATCAGTGGAATAATTAATTGTATATCAAAT---  
 ATTACAGGAATACTATTAAACAAGAGATGGTGGTAGTAATACTA---  
 -----  
 -----  
 AACGAGATCTTCAGACCGGGAGGAGGAAATATAAAGGACAATTGGAGAAGTGAATTATATAAATATAAAGTAG  
 TACAAATTGAACCACTA---GGAATAGCACCCACCAGGGCAAAGAGAAGAGTGGTG-----  
 -----GATAGAGAAAAAAGAGCA---GTGGGA---ATAGGAGCT-----  
 ATGATCTTTGGGTTCTTAGGAGCA---GCAGGAAGCACTATG---GGCGCGGCGTCA---  
 ATAACGCTGACGGTACAG---GCCAGACAA---TTATTG---TCTGGTATAGTGCAACAGCAAAGC---  
 AATTTG---CTGAGA---GCTATAGAGGCGCAGCAGCATATGTTGCAACTCACAGTCTGGGGCATT  
 >GU475028  
 TTCTATTGCAATACAACAAAATTGTTTAATAGGACAGAAAATGGAACCATG-----  
 -----  
 -----  
 TCTAATGCCACTATCATACTTCCATGCAGGATAAAGCAAATTGTAAACATGTGGCAGGGAGTAGGACAAGCAA  
 TGTATGCTCCTCCCATCAGTGGAATAATTAATTGTATATCAAAT---  
 ATTACAGGAATACTATTAAACAAGAGATGGTGGTGAGGGTAGTAAT-----  
 -----  
 -----  
 GCAAATAATGAAACCTTCAGACCAATAGGAGGAAATATAAAGGACAATTGGAGAAGTGAATTATATAAATATA  
 AAGTAGTAGAAATTGAACCACTA---GGAATAGCACCCACCAGGGCAAAGAGAAGAGTGGTG-----  
 -----GAGAGAGAAAAAAGAGCA---GTGGGA---ATAGGAGCT-----  
 ---ATGATCTTTGGGTTCTTAGGAGCA---GCAGGAAGCACTATG---GGCGCAGCGTCA---  
 ATAACGCTGACGGTACAG---GCCAGACAA---TTATTG---TCTGGTATAGTGCAACAGCAAAGC---  
 AATTTG---CTGAGA---GCTATAGAGGCGCAGCAGCATCTGTTGCAACTCACAGTCTGGGGCATT  
 >GU475040  
 TTCTACTGCAATACAACAAAGCTGTTCAATAGTACTTGGATAGGAAACGAAACCATGAAGAAAGGTAAT---  
 -----  
 -----  
 GATAATGACACTATCATACTTCCATGCAGGATAAAGCAATTTATAAACATGTGGCAAGGAGTGGGACAAACAA  
 TGTATGCTCCTCCCATCAGTGGAATAATTAGATGTGTATCAAAT---  
 ATTACAGGAATACTATTGACAAGAGATGGTGGTAATGATAGTGCA-----  
 -----  
 -----  
 CCTAGTGAGATCTTCAGACCTGGAGGAGGAAATATAAAGGACAATTGGAGAAGTGAATTATATAAATATAAAG  
 TAGTACAAATAGAGCCACTA---GGAGTAGCACCCACCAAGGCAAAGAGAAGAGTAGTG-----  
 -----GATAGAGAAAAAAGAGCA---GTGGGA---ATAGGAGCT-----  
 ATGATCTTTGGGTTCTTAGGAGCA---GCAGGAAGCACTATG---GGCGCGGCGTCA---  
 ATAACGCTGACGGTACAG---GCCAGACAA---TTATTG---TCCGGTATAGTGCAACAGCAAAGC---  
 AATTTG---CTGAGG---GCTATAGAGGCGCAGCAGCATATGTTGCAACTCACAGTCTGGGGCATT  
 >KM218078  
 TTCTATTGCAATACAACAAAGCTGTTCAATAGTACTTGGATAGGAAATGAGACCTGGATAGGAAATGAGACCA  
 TAAAGGGA-----  
 -----AGT---  
 ACAGATAATGACACTATCATACTTCCATGCAGGATAAAGCAAATTATAAACATGTGGCAAGGAGCAGGACAAG  
 CAATGTATGCTCCTCCCATCAATGGAATAATTAAATGTGTATCAAAT---  
 ATTACAGGAATACTATTGACAAGAGATGGTGGTGATGATAATGGG-----  
 -----  
 -----  
 ACTGAGATTTTCAGACCTGGAGGAGGAAATATAAAGGACAATTGGAGAAGTGAATTATATAAATATAAAGTAG  
 TACAAATAGAACCATTA---GGAGTAGCACCCACCAGGGCAAAGAGAAGAGTGGTG-----  
 -----GAGAGAGAAAAAAGAGCA---GTGGGA---ATAGGAACT-----

ATGATCTTTGGGTTCTTGGGAGCA---GCAGGAAGCACTATG---GGCGCGGCGTCA---  
 ATAACGCTGACGGTACAG---GCCAGACAA---CTATTG---TCTGGTATAGTGCAACAGCAAAGC---  
 AATTTG---CTGAGG---GCTATAGAGGCGCAGCAGCATATGTTGCAACTCACAGTCTGGGGCATT  
 >HM215409  
 TTCTATTGCAATACTTCAAACTGTTTAATTGCACAGGAAATAGCACCCACGGGG-----  
 -----  
 -----  
 TGTAATGGCACTATCATACTTCCATGCAAAATAAAGCAAATTATAAACATGTGGCAGGAAGTAGGACAAGCAA  
 TGTATGCTCCTCCCATCAGTGGAATAATTAATTGTGTATCAAAT---  
 ATTACAGGAATATTATTGACAAGAGATGGTGCTAACAGTAGCCAG-----  
 -----  
 -----  
 AGTAATGAGATCTTCAGACCTGGAGGGGGAAATATGAAGGACAATTGGAGAAGTGAATTATATAAATATAAAG  
 TAGTACAAATTGAACCACTA---GGAGTAGCACCCACCAGGGCAAAGAGAAGAGTGGTG-----  
 -----GAAAGACAAAAAAGAGCA---GTGGGA---ATAGGAGCT-----  
 ATGATCTTTGGGTTCTTGGGAGCA---GCAGGAAGCACTATG---GGCGCAGCGTCA---  
 ATAACGCTGACGGTACAG---GCCAGACGA---TTATTG---TCTGGTATAGTGCAACAGCAAAGC---  
 AATTTG---CTGAGG---GCTATAGAGGCGCAGCAGCATATGTTGCAACTCACAGTCTGGGGCATT  
 >HM215418  
 TTCTATTGTAATACAACAACCACTGTTTAATAATAGTGTAGGT-----  
 -----  
 -----  
 AATAGCACTATCAAACCTTCCATGTAGGATAAAGCAAATCATAAACATGTGGCAAGGAGTAGGACAAGCAATGT  
 ATGCTCCTCCCATCAGTGAGCAATTAATTGTTTATCAAAT---  
 ATTACAGGAATATTATTAACAAGAGATGGTGGTGGTAATAATAGG-----  
 -----  
 -----  
 AGTAACGAGACCTTCAGACCTGGAGGAGGAAATATAAAAGACAATTGGAGAAGTGAACCTATATAAATATAAAG  
 TAGTAGAAATTGAACCATTA---GGAATAGCACCCACCAAGGCAAAAGAAGAGTGGTG-----  
 -----GAGAGGGAAAAAAGAGCA---GTGGGA---ATAGGAGCT-----  
 ATGATCTTTGGGTTCTTAGGAGCA---GCCGGAAGCACAATG---GGCGCGGCGTCA---  
 ATAACGCTGACGGTACAG---GCCAGACAA---TTATTG---TCTGGTATAGTGCAACAGCAAAGC---  
 AATTTG---CTGAGG---GCTATAGAGGCGCAGCAGCATATGTTGCAACTCACAGTCTGGGGCATT  
 >HM215419  
 TTCTATTGCAATACAACAAAATTGTTTAATAGTACTTGGAAGGGAAATGAGACCATGGAG-----  
 -----  
 -----  
 GGAATAATAACACTATAATCCCATGCAGGATAAAGCAAATTGTAAACATGTGGCAGAGAGTAGGACAAGCAA  
 TGTATAATCCTCCCATCAATGGAACAATTAATTGTGTATCAAAT---  
 ATTACAGGAATACTATTAAACAAGAGATGGTGGTGATAATACTACA-----  
 -----  
 -----  
 GATAGCGAGACCTTCAGACCCGGAGGAGGAGATATAAAGGACAATTGGAGAAGTGAATTATATAAATATAAAG  
 TAGTAGAAATTGAACCACTA---GGAATAGCACCCACCAAGGCAAGAGAAGAGTGGTG-----  
 -----GAGAGAGAAAAAAGAGCA---GTGGGA---ATAGGAGCT-----  
 ATGATCTTTGGGTTCTTAGGAGCA---GCCGGAAGCACTATG---GGCGCGGCGTCA---  
 ATAACGCTGACGGTACAG---GCCAGACAA---TTATTG---TCTGGTATAGTGCAACAGCAAAGC---  
 AATTTG---CTGAGG---GCTATAGAGGCGCAGCAGCATCTGTTGCAACTCACAGTCTGGGGCATT  
 >JX112810  
 TTCTATTGCAATACAACAACCACTGTTTAATGGCACAAATAATACT-----  
 -----  
 -----  
 AGTAATAAAACCATCATACTTCCATGCAAGATAAAACAAATAATAAACATGTGGCAGGGAGTAGGACAAGCTA  
 TGTATGCTCCTCCCATCAGTGGAAGAATTAATTGTATATCAAAT---  
 ATCACAGGAATATTATTGACAAGAGATGGTGGTGCTACTAATGAGACT-----  
 -----  
 -----  
 AAAAACAATACTGAAATCTTCAGACCTGCAGGAGGAAATATAAAGGACAATTGGAGAAGTGAATTATATAAAT  
 ATAAAGTAGTAGAAATTGAACCACTA---GGAATAGCACCCACCAGGGCAAAGAGAAGAGTGGTG-----  
 -----GAGAGAGAAAAAAGAGCA---GTGGGA---ATAGGAGCT---

-----ATGATCTTTGGGTTCTTAGGAGCA---GCAGGAAGCACTATG---GGCGCAGCGTCA---  
 ATAACGCTGACGGTACAG---GCCAGACAA---TTATTG---TCTGGTATAGTGCAACAGCAAAGC---  
 AATTTG---CTGAGG---GCTATAGAGGCGCAGCAGCATCTGTTGCAACTCACAGTCTGGGGCATT  
 >JX112818  
 TTCTATTGCAATACAACAAAACCTGTTTAGCAGTGCAGCAGAAAAT-----  
 -----  
 -----  
 AACACTGACCCTATCATACTTCCATGCAGGATAAAACAAATTGTAAACATGTGGCAGGGAGTAGGACAAGCAA  
 TGTATGCTCCTCCCATCAGTGGAAGCATTAAATTGTACATCAAAT---  
 ATTACAGGAATACTATTGACGAGAGATGGTGGTGTAAATAATAATAGT-----  
 -----  
 -----  
 ACAAATAATACTGAGACCTTCAGACCTGCAGGAGGAAAATATGAAGGACAATTGGAGAAGTGAATTATATAAAAT  
 ATAAGGTAGTAGAAATTGAACCACTA---GGAATAGCACCCACCAGGGCAAAGAGAAGGGTGGTG-----  
 -----GAGAGAGAAAAAAGAGCA---GTGGGA---ATAGGAGCT---  
 -----CTGATCTTTGGGTTCTTAGGAGCA---GCCGGAAGCACTATG---GGCGCGGCGTCA---  
 CTAACGCTGACGGTACAG---GCCAGACAA---TTATTG---TCTGGTATAGTGCAACAGCAAAGC---  
 AATTTG---CTGAGA---GCTATAGAGGCGCAACAGCATATGTTGCAACTCACAGTCTGGGGCATT  
 >JX112821  
 TTCTATTGCAATACATCAAAACCTGTTTAATAGTATAAAATGGCACTATCACACATAATGGTACA-----  
 -----  
 -----  
 CATAATGGCACTATCATACTTCCATGCAGAATAAAGCAAATTGTAAACATGTGGCAGGGAGCTGGACAAGCAA  
 TGTATGCTCCTCCCGTCAGAGGAAACATTAGTTGTGTATCAAAT---  
 ATTACAGGGATACTATTGACAAGAGATGGTGGTAATGATAATTTCGTCT-----  
 -----  
 -----  
 AAGAATGAGACCTTCAGACCTGGAGGAGGAGATATAAAGGACAATTGGAGAAGTGAATTATATAAAATATAAAG  
 TAGTACAAATTGAACCACTA---GGAATAGCACCCACCAGGGCAAAGAAGAGTGGTG-----  
 -----GAGAGACAAAAAAGAGCA---GTGGGA---ATAGGAGCT-----  
 ATGATCTTTGGGTTCTTGGGAGCA---GCAGGAAGCACTATG---GGCGCAGCGTCA---  
 ATAACGCTGACGGTACAG---GCCAGACAA---TTATTG---TCTGGTATAGTGCAACAGCAAAGC---  
 AATTTG---CTGAGG---GCTATAGAGGCGCAGCAGCATCTGTTGCAACTCACTGTCTGGGGCATT  
 >JX112827  
 TTCTATTGCAATACAACAAAATTGTTTAATAATACTTGCATAAATGACACCACCACAGAGGGG-----  
 -----  
 -----  
 TGTAATAATACCATCATACTTCCATGTAAGATAAAGCAAATTATAAGAATGTGGCAGGAAATAGGACAAGCAA  
 TGTATGCTCCTCCCATCAGGGGAAGCATTAAATTGTGTATCAAAT---  
 ATTACAGGAATACTATTGACAAGAGATGGTGGTAATAATACGGGT-----  
 -----  
 -----  
 AATGAAACTTTTCAGACCTGGAGGGGAAATATGAAGGACAATTGGAGAAGTGAATTATATAAAATATAAAGTAG  
 TACAAATTGAACCACTA---GGAATAGCACCCACCAGGGCAAAGAGAAGAGTGGTG-----  
 -----GAGAGAGAAAAAAGAGCA---GTGGGA---ATAGGAGCT-----  
 ATGATCTTTGGGTTCTTAGGAGCA---GCAGGAAGCACTATG---GGCGCGGCGTCA---  
 ATAACGCTGACGGTACAG---GCCAGACAA---TTATTG---TCTGGTATAGTGCAACAGCAAAGC---  
 AATTTG---CTGAGG---GCTATAGAGGCGCAACAACATTTGTTGCAACTCACAGTCTGGGGCATT  
 >JX112829  
 TTCTATTGCAATACAAGCCAACCTGTTTAACTTTACTAGAAATTTAAATGGTAGTACCATAGGGGGG-----  
 -----  
 -----  
 GAGAATGACACTATCACACTTCCATGCAGGATAAAGCAGATTATAAACATGTGGCAGGGAGTAGGACAAGCAA  
 TGTATGCTCCTCCCGTCAGTGGAAGAATTAAGTGTGTATCAAAT---  
 ATTACAGGAATACTATTAACAAGAGATGGTGGTGTAAATAATGCT-----  
 -----  
 -----  
 ACCGAGACCTTCAGACCTGAAGGAGGAAATATGAAAGACAATTGGAGAAGTGAATTATATAAAATATAAAGTAG  
 TACAAATTGAACCACTA---GGAATAGCACCTACCAAGGCAAAGAGAAGAGTGGTG-----  
 -----GAGAGAGAAAAAAGAGCA---GTGGGA---ATAGGAGCT-----

ATGATCTTTGGGTTCTTAGGAGCA---GCAGGAAGCACTATG---GGCGCGGCGTCA---  
 ATAACGCTGACGGTACAG---GCCAGACAA---TTATTG---TCTGGTATAGTGCAACAGCAAAGC---  
 AATTTG---CTGAGG---GCTATAGAGGCGCAGCAGCATCTGTTGCAACTCACAGTCTGGGGCATT  
 >JX112830  
 TTCTATTGCAATACAACAAATCTGTTTAATAATACTTGCATAAAAAATACAAGCATAGAG-----  
 -----  
 -----  
 GGGTGTAACAATATCACACTTCCATGCAGGATAAAACAAATTATAAACATGTGGCAAGGAGTAGGACAAGCAA  
 TGTATGCTCCTCCCATCAGTGGAAGAATTAATTGTGTATCAAAT---  
 ATTACAGGAATACTATTGACAAGAGATGGTGGTGCTAAAAATAACACT-----  
 -----  
 -----  
 AATGAGACTGAGACCTTTAGACCTGGAGGAGGAAATATAAAGGACAATTGGAGAAGTGAATTATATAAATATA  
 AAGTAGTAGAAATTGAACCACTA---GGCATAGCACCCACCAGGGCAAAGAGAAGAGTGGTG-----  
 -----GAGAGAGAAAAAAGAGCA---GTGGGA---ATAGGAGCT-----  
 ---ATGATCTTTGGGTTCTTAGGAGCA---GCAGGAAGCACTATG---GGCGCAGCGTCA---  
 ATAACGCTGACGGTACAG---GCCAGACAA---TTATTG---TCTGGTATAGTGCAACAGCAAAGC---  
 AATTTG---CTGAGG---GCTATTGAGGCGCAGCAGCATATGTTGCAACTCACAGTCTGGGGCATT  
 >JX112832  
 TTCTATTGCAATACAAGCAAGCTGTTTACTGACAAAGGAAAT-----  
 -----  
 -----  
 AAAACCAATGGCACTATCATACTTCCATGCAGGATAAAGCAAATTATAAACATGTGGCAGGGAGTGGGACAAG  
 CAATGTATGCTCCTCCCATCAGTGGAAGAATTAATTGTGTTTCAAAT---  
 ATTACAGGAATACTATTAACAAGAGATGGTGGTACTAATAATACT-----  
 -----  
 -----  
 AACGAGACCTTCAGACCTGGGGGAGGAAATATAAAGGACAATTGGAGAAGTGAATTATATAAATATAAAGTAG  
 TACAAATTGAACCACTA---GGAATAGCACCCACCAGGGCAAAGAGAAGAGTGGTG-----  
 -----GAGAGAGAAAAAAGAGCA---GTGGGA---ATAGGAGCT-----  
 ATGATCTTTGGGTTCTTAGGAGCA---GCAGGAAGCACTATG---GGCGCGGCGTCA---  
 ATAACGCTGACGGTACAG---GCCAGACAA---TTATTG---TCTGGTATAGTGCAACAGCAAAGC---  
 AATTTG---CTGAGG---GCTATAGAGGCGCAACAGCATCTGTTGCAACTCACAGTCTGGGGCATT  
 >JX112833  
 TTCTATTGCAATACAACAAAATCTGTTTAATAATACTTGCATAAATAGTACAAGCATGGAGGGG-----  
 -----  
 -----  
 TGTAATAACACTATCATACTTCCATGCAAGATAAAACAAATTATAAACATGTGGCAAGGAGTAGGACAAGCAA  
 TGTATGCTCCTCCCATCAGTGGAAGAAATTAATTGTGTATCAAAT---  
 ATTACAGGAATAATATTGACAAGAGATGGTGGTATTAATAATGCCACG-----  
 -----  
 -----  
 AATAATGAGACCTTCAGACCTGGAGGAGGAAATATAAAGGACAATTGGAGAAGTGAATTATATAAATATAAAG  
 TAGTAGAAATTGAACCACTA---GGAATAGCACCCACCAGGGCAAAGAGAAGAGTGGTG-----  
 -----GAGAGAGAAAAAAGAGCA---GTGGGA---ATAGGAGCT-----  
 ATGATCTTTGGGTTCTTAGGAGCA---GCAGGAAGCACTATG---GGCGCGGCGTCA---  
 ATAACGCTGACGGTACAG---GCCAGACAA---TTGTTG---TCTGGTATAGTGCAACAGCAAAGC---  
 AATTTG---CTGAGG---GCTATAGAGGCGCAGCAGCATATGTTGCAACTCACAGTCTGGGGCATT  
 >JX112834  
 TTCTATTGCAATACAAGCCAATTGTTTAATTTTACTGAAAAAGAAAATGCAACCGAAAAGGGG-----  
 -----  
 -----  
 AATAATAGCAATATCATACTTCCATGCAGGATAAAGCAAATTATAAACATGTGGCAGGGAGTAGGCCAAGCAA  
 TGTATGCTCCTCCCATCAGTGGAAGAATTAATTGTGTATCAAAT---  
 ATTACAGGAATACTATTAACAAGAGATGGTGGTAACAGTAGTACT-----  
 -----  
 -----  
 AATGAGACCTTCAGACCTGGAGGAGGAAATATAAAGGACAATTGGAGAAGTGAATTATATAAATATAAAGTGG  
 TACAAATTGAACCACTA---GGAGTAGCACCCACCAGGGCAAAGAGAAGAGTGGTG-----  
 -----GAGATACAAAAAAGAGCA---GTGGGA---ATAGGAACT-----

TTGATCTTTGGGTTCTTAGGAGCA---GCAGGAAGCACTATG---GGCGCGGCGTCA---  
ATAACGCTGACGGTACAG---GCCAGACAA---TTATTG---TCTGGTATAGTGCAACAGCAAAGC---  
AATTTG---CTGAGG---GCTATAGAGGCGCAGCAGCATATGTTGCAACTCACAGTCTGGGGCATT  
>GU475042  
TTTTATTGCAATACAACAGGATTGTTTAATAATACTTGCATAGGAAATGAACTATAAAG-----  
-----  
-----  
GGGTGTAATAAAACCATAATTCCATGTAGGATAAAACAAATTATAAACATGTGGCAGGGAGCAGGACAAGCAA  
TGTATGCTCCTCCCATCAGGGGAAGCATTAAATTGTGTATCAAAT---  
ATTACAGGAATACTATTGACAAGAGATGGGGGTAAAAATGCTACG-----  
-----  
-----  
GAGCCTGAGATATTCAGACCTGGAGGAGGAAATATAAAGGACAATTGGAGAAGTGAATTATATAAATATAAAG  
TAGTACAAATTGAACCACTA---GGAATAGCACCCACCAGGGCAAAGAGAAGAGTGGTG-----  
-----GAGAGAGAAAAAAGAGCA---GTGGGA---ATAGGAGCT-----  
ATGATCTTTGGGTTCTTAGGAGCA---GCAGGAAGCACTATG---GGCGCGGCGTCA---  
ATAACGCTGACGGTACAG---GCCAGACAA---TTATTG---TTTGGTATAGTGCAACAGCAAAGC---  
AATTTG---CTGAGG---GCTATAGAGGCGCAGCAGCATGTGTTGCAACTCACGGTCTGGGGCATT  
>GU475043  
TTCTATTGCAATACAACAAAACCTGTTTAATAATAATTGCACAGGAAGCATAGCAAATACAAGCATGGAGGGG-  
-----  
-----  
TGTAATAACACTATCATACTTCCATGCAGGATAAAACAAATTATAAACATGTGGCAAGGAGTAGGACAAGCAA  
TGTATGCTCCTCCCATCAGTGGAGCATTAATTGTGTATCAAAT---  
ATTACAGGAATACTATTGACAAGAGATGGTGGTATTAATAATAAACG-----  
-----  
-----  
AATGGGACTGAGATCTTCAGACCTGAAGGAGGAAATATAAAGGACAATTGGAGAAGTGAATTATATAAATATA  
AAGTAGTAGAAATTGAACCACTA---GGAATAGCACCCACCAAGGCAAAGAGAAGAGTGGTG-----  
-----GAGAGAGAAAAAAGAGCA---GTGGGA---ATAGGAGCT-----  
---ATGATCTTTGGGTTCTTGGGAGCA---GCAGGAAGCACTATG---GGCGCAGCGTCA---  
ATAACGCTGACGGTACAG---GCCAGACAA---TTATTG---TCTGGTATAGTGCAACAGCAAAGC---  
AATTTG---CTGAGG---GCTATAGAGGCGCAGCAGCATCTGTTGCAACTCACAGTCTGGGGCATT  
>GU475015  
TTCTATTGCAATACATCAAAACCTGTTTAATAATACTTGCACAAATAATACAAGCATGGAGGGG-----  
-----  
-----  
TGTAATAACACTATCATACTTCCATGCAGGATAAAACAAATTATAAACATGTGGCAAGGAGTAGGACAAGCAA  
TGTATGCTCCTCCCATCAGTGGAGAATTAATTGTGTATCAAAT---  
ATTACAGGAATACTATTGACAAGAGATGGTGGTAATAACAGGACT-----  
-----  
-----  
AATGAGACCTTCAGACCTGAAGGAGGAAATATAAAGGACAATTGGAGAAATGAATTATATAAATATAAAGTAG  
TAGAAATTGAACCATTA---GGAATAGCACCCACCAAGGCAAAGAGAATAGTGGTG-----  
-----GGAAGAGAAAAAAGAGCA---GTGGGA---ATAGGAGCT-----  
ATGATCTTTGGGTTCTTAGGAGCA---GCAGGAAGCACTATG---GGCGCGGCGTCA---  
ATAACGCTGACGGTACAG---GCCAGACAA---TTATTG---TCTGGTATAGTGCAACAGCAAAGC---  
AATTTG---CTGAGG---GCTATAGAGGCGCAGCAGCATCTGTTGCAACTCACAGTCTGGGGCATT  
>JX112843  
TTCTATTGCAATACAACAAAATTGTTTAATGATACTTGCATAAAAAATGCATCCGCAGAGGGGTGTAAGAAC-  
-----  
-----  
-----  
ATCACACTTCCATGTAGGATAAAACAAATTGTAAGAATGTGGCAGGGAGTAGGACAAGCAATGTATGCTCCTC  
CCGTCAGTGGAAACAATTAATTGTGTATCAAAT---  
ATTACAGGAATACTATTGACAAGAGATGGTGGTAGTAATACTACGGGT-----  
-----  
-----  
AATGGTACTGAGGTCTTCAGACCTGGAGGAGGAGATATAAAGGACAATTGGAGAAGTGAATTATACAAATATA  
AAGTAGTACAAATTGAACCACTA---GGAATAGCACCCACTAGGGCAAAGAGAAGAGTGGTG-----  
-----GAGAGAGAAAAAAGAGCA---GTGGGA---ATAGGAGCT-----

---ATGATCTTTGGGTTCTTAGGAGCA---GCAGGAAGCACTATG---GGCGCGGCGTCA---  
 ATAACGCTGACGGTACAG---GCCAGACAG---TTATTG---TCTGGTATAGTGCAACAGCAAAGC---  
 AATTTG---CTGAGA---GCTATAGAGGCGCAACAGCATTTGTTGCAACTCACAGTCTGGGGCATT  
 >JX112850  
 TTCTATTGCAATACATCAAAGCTGTTTAATAGTAATTGCACAGGAAATACAAGCATAAAAGAGTGTAATAACA  
 CT-----  
 -----  
 ATTAATGGCACTATTATACTTCCATGCAAGATAAAACAAATTATAAACATGTGGCAAGGAGTAGGACAAGCAA  
 TGTATGCTCCTCCCATCAGTGGAAGAATTAATTGTGTATCAAAT---  
 ATTACAGGAATATTATTGACAAGAGATGGTGGTGATAATAACACAGCT-----  
 -----  
 -----  
 AATACTGAGATCTTCAGACCTGCAGGAGGAAATATAAAGGACAATTGGAGAAGTGAATTATATAAATATAAAG  
 TAGTAGAAATTGAACCACTA---GGAATAGCACCCACCAGGGCAAGGAGAAGAGTGGTG-----  
 -----CAGAGAGAAAAAAGAGCA---ATAGGA---ATAGGAGCT-----  
 ATGATCTTTGGGTTCTTAGGAGCA---GCAGGAAGCACTATG---GGCGCGGCGTCA---  
 ATAACGCTGACGGTACAG---GCCAGACAA---TTATTG---TCTGGTATAGTGCAACAGCAAAGC---  
 AATTTG---CTGAGA---GCTATAGAGGCGCAACAGCATCTGTTGCAACTCACAGTCTGGGGCATT  
 >JX112853  
 TTCTATTGCAATACAACAAAATTGTTTAATAGTACAGAAAATGAAACCAGGGAGGGG-----  
 -----  
 -----  
 CTTAATGGCACTATCATACTTCCATGCAGGATAAAGCAAATTGTAAACATGTGGCAGGGAGCAGGACAAGCAA  
 TGTATGCTCCTCCCATCAGTGGAACATTAATTGTCTATCAAAT---  
 ATTACAGGGATATTATTAACAAGAGATGGTGGTAATAATACAAAT-----  
 -----  
 -----  
 AACGAAACCTTCAGACCGGGAGGAGGAAATATAAAGGACAATTGGAGAAGTGAATTATATAAATATAAAGTAA  
 TACAAATTGAGCCACTA---GGAATAGCACCCACCAGGGCAAAGAGAAGAGTGGTG-----  
 -----GATAGGGAAAAAAGAGCA---GTGGGA---ATAGGAGCT-----  
 ATGATCTTTGGGTTCTTAGGAGCA---GCAGGAAGCACTATG---GGCGCAGCGTCA---  
 ATAACGCTGACGGTACAG---GCCAGACAA---TTATTG---TCTGGTATAGTGCAACAGCAAAGC---  
 AATTTG---CTGAGA---GCTATACAGGCGCAGCAGCATCTGTTGCAGCTCACAGTCTGGGGCATT  
 >JX112854  
 TTCTATTGCAATACAGCAAAGCTGTTCAATAGTACTTGAATAGTACTAGGATAGAAAATGAGACCAGGCAGG  
 GAGGT-----  
 -----  
 AAGGACACTGCCATCCTACTTCCATGCAGGATAAGGCAAATTATAAACATGTGGCAAGGAGCAGGACAAGCAA  
 TGTATGCTCCTCCCATCAGTGGAATAATTAATTGTGTATCAAAT---  
 ATTACAGGAATACTATTGACAAGAGATGGTGGTAAACTAATAAT-----  
 -----  
 -----  
 ACTAACAGCGAGATTTTCAGACCTGGGGGAGGAAATATAAAGGACAATTGGAGAAGTGAATTATATAAATATA  
 AAGTAGTACAAATAGAACCACTA---GGAGTAGCACCCACCAAGGCAAAGAGAAGAGTGGTG-----  
 -----GATAGAGAAAAAAGAGCA---GTGGGA---ATAGGAGCT-----  
 ---ATGATCTTTGGGTTCTTGGGAGCA---GCAGGAAGCACTATG---GGCGCGGCGTCA---  
 ATAACGCTGACGGTACAG---GCCAGACAA---TTATTG---TCCGGTATAGTGCAACAGCAAAGC---  
 AATTTG---CTGAGG---GCTATAGAGGCGCAGCAGCATATGTTGCAACTCACAGTCTGGGGCATT  
 >JX112856  
 TTCTATTGCAATACAACAAAACCTGTTCAATAGCACTTGGCCAGGAAATGAAACCATGGAACGGGTAAT----  
 -----  
 -----
[truncated: 2,883,321 more chars]
