# Supplementary material for: Extending the Coding Potential of Viral Genomes with Overlapping Antisense ORFs: A Case for the De Novo Creation of the Gene Encoding the Antisense Protein ASP of HIV-1
Source: Viruses. 2022 Jan 14;14(1):146. doi: 10.3390/v14010146 (PMC8781085; doi:10.3390/v14010146)
Supplement: Supplementary file 1 [file viruses-14-00146-s001.zip › Supplementary File S2A.pdf]

## Supplementary File S2A.

Supplementary file S2A contains a control set of 1753 *env/asp* overlapping regions. They are delimited, in the reverse frame, by a *start* codon (ATG) at canonical nucleotide positions (triplet CAT at the end of the sequence) and a *stop* codon at canonical nucleotide positions (triplet CTA at the beginning of the sequence). All overlaps, however, have lost the ability to encode a full-length overlapping ASP protein, because of the presence of internal stop codons. The number of internal stop codons is added at the end of the accession number after two dots. In detail, 1231 *env* sequences have an *asp* ORF interrupted by 1 internal stop codon (e.g. MH705158..1), 403 *env* sequences have an *asp* ORF interrupted by 2 internal stop codons (e.g. FM165645..2), 102 *env* sequences have an *asp* ORF interrupted by 3 internal stop codons (e.g. AF457086..3), 11 *env* sequences have an *asp* ORF interrupted by 4 internal stop codons (e.g. KT022381..4), and 6 *env* sequences have an *asp* ORF interrupted by 5 internal stop codons (e.g. KP411836..5). All sequences belong to the group M of HIV-1. Each nucleotide sequence is reported both in the alignment format with gaps and in the format without gaps.

```
>MH705158..1
TTCTATTGCAATACATCAGGCCTGTTTAATAGTAGTTGGAACGAAAGTGACACT-----
-----
GCAAAATGACACTATAACGCTCCCGTGCAAAATAAAACAAATTGTAAGGATGTGGCAGAGAGTAGGACAAGCAA
TGTATGCCCCCTCCCATCCAAGGGGTAATGAGGTGTGAATCTAAC---
ATTACAGGACTACTATTAAACAAGAGATGGTGGGAATGAGGGCAAT-----
-----
GAAAGTAGTGAGACGTGCAGACCTGGAGGAGGAGATATGAGGGATAATTGGAGAAGTGAAGTATATAAATATA
AAGTAGTAAAAATTGAACCACTA---GGAGTAGCACCCACCAGGGCAAAGAGAAGAGTGGTG-----
-----GAGAGAGAAAAAAGAGCA--GTTGGA---CTGGGAGCT-----
--GTCTTCATTGGGTTCTTAGGAGCA--GCAGGAAGCACTATG--GGCGCGGCGTCA---
GTGACGCTGACGGTACAG--GCCAGACAA--TTATTG--TCTGGCATAGTGCAACAGCAAAAC---
AATTG---CTGAGG--GCTATAGAGGCTCAACAGCATCTGTTGAAACTCACGGTCTGGGGCATT
>MH705151..1
TTCTATTGCAATACATCAGACCTGTTTAATAGCACTTGGCGGAAACTGGCAAATGGCACTTGGAGCAACATAA
ATAATGCAACG-----
-----
TCAAATGACACTATAACTCTCCAATGCAAAATAAAGCAAATTGTAAACATGTGGCAGAGAGTAGGACAAGCAA
TGTATGCCCCCTCCCATCCAAGGAGTAATACAGTGTGTATCAAAC---
ATTACAGGACTACTCTTAACAAGAGATGGTGGGAGTAGTAACAGG-----
-----
GCAAATGAGACCTTCAGACCTGGAGGAGGAGATATGAGGGACAATTGGAGAAGTGAATTATATAAGTATAAAG
TAGTAAAAATTGAACCACTA---GGAGTAGCACCCACCAGGGCAAGGAGAAGAGTGGTG-----
-----GAGAGAGAAAAAAGAGCA--ATTGGA---ATGGGAGCT-----
CTTTTCCTTGGGTTCTTAGGAACA--GCAGGAAGTACTATG--GGCGCGGCGTCA---
ATAACGCTGACGGTACAG--GCCAGACAA--TTATTG--TCTGGTATAGTACAACAGCAGAGC---
AATCTG--CTGAGG--GCTATAGAGGCTCAACAGCATCTGTTGAAACTCACAGTCTGGGGCATT
>MH705157..1
TTCTATTGTAATACATCAAGCCTGTTTAATAGCACTTGGAAAGAGGAGAATGGCACTGTGAGCATGCAGAATG
ACACGGAG-----
-----
TCAACTGACCCTATAACTCTCCAATGTAGAATAAAGCAAGTTATAAACATGTGGCAGAGAGTAGGACAAGCAA
TATATGCCCCCTCCCATCCAAGGAGTAATAAGATGTGTATCAAAC---
ATTACAGGACTACTATTAAACAAGAGATGGTGGGAGTAATAATAATACT-----
-----
TCAAATGAAACCTTCAGACCTGGAGGAGGAGATATGAGGGACAATTGGAGAAGTGAATTATATAAGTATAAAG
TAGTAAAAATTGAACCACTA---GGAGTAGCACCCACCAAGGCAAAGAGAAGAGTGGTG-----
-----GAGAGAGAAAAAAGAGCA--GTTGGA---CTGGGAGCT-----
```

GTCTTCCTTGGGTTCTTAGGAGCA---GCAGGAAGTACGATG---GGCGCGGCGTCA---  
 ATAACGCTGACGGTACAG---GCCAGACAA---TTATTG---TCTGGCATAGTGCAACAGCAGAGC---  
 AATCTG---CTGAGG---GCTATAGAGGCTCAACAGCAACTGTTGAGACTCACGGTCTGGGGCATT  
 >MH705153..2  
 TTCTATTGCGATACATCAGGCCTGTTTAATGGCACTTGGAGCAATACATCAGGCCTGATTAATAGCACTTGGAGC-----  
 -----  
 GAGAATGACACTATAACTCTCCCATGTAGAATAAAGCAAATTGTAAATATGTGGCAGAGAGTAGGACAAGCAA  
 TGTATGCCCCCTCCCATCCAAGGAATAATAAATTGTACATCAAAC---  
 ATTACAGGACTACTGTTAACAAGAGATGGTGGGAATAATAACAGTATA-----  
 -----  
 AATGAGCCTGAGACCTTCAGACCTGGAGGAGGAGATATGAGGGACAATTGGAGAAAGTGAACCTATATAAGTATA  
 AAGTAGTAAAAATTCAACCACTA---GGAGTAGCACCCACCAGGGCAAAGAGAAGAGTGGTG-----  
 -----GAGAGAGAAAAAAGAGCA---GTTGGC---ATGGGAGCT-----  
 ---CTTCTCCTTGGGTTCTTAGGAGCA---GCAGGAAGCACGATG---GGCGCGGCGTCA---  
 ATAACGCTGACGGTACAG---GCCAGACAA---TTATTG---TCTGGTATAGTGCAACAGCAGAGC---  
 AATCTG---CTGAGG---GCTATAGAGGCTCAACAGCATCTGTTGAAACTCACGGTCTGGGGCATT  
 >MH705133..1  
 TTCTATTGCAATACGTCAGGCCTGTTTAATAGCACTTGGAGAATGGCACTAAAGAGGGGAAATGACACTGCAA  
 AG-----  
 -----  
 TTAAGTGACACTATAACTCTCCCATGCAGAATAAAGCAAATTGTAAAGGATGTGGCAGAGAACAGGACAAGCAA  
 TGTATGCCCCCTCCCATCCCAGGAGTAATAAATTGTGTCTCTAAC---  
 ATTACAGGGATACTATTAACAAGGGATGGTGGGAATAGTAGTAAT-----  
 -----  
 GCCAATGAAACCTTCAGACCTGGAGGAGGAAATATGAAGGACAATTGGAGAAGTGAACCTATATAAGTATAAAG  
 TAGTAAAAATTGAACCAATA---GGAGTAGCACCCACCAGGGCAAAGAAAAGAGTGGTG-----  
 -----GAGAGAGAAAAAAGAGCA---GTTGGA---CTGGGAGCT-----  
 GTCTTCCTTGGGTTCTTAGGAGCA---GCAGGAAGTACTATG---GGCGCGGCGTCA---  
 ATAACGCTGACGGTACAG---GCCAGACAA---TTATTG---TCTGGCATAGTACAACAGCAAAGC---  
 AATTTG---CTGAGG---GCTATAGAGGCTCAACAGCATATGTTGAGACTCACAGTCTGGGGCATT  
 >JQ403028..1  
 TTCTACTGCAATACAACAGAACTGTTTAATAGCACGTGGAATGACACGAGCAACACATCGCAGGGGACAAAT-----  
 -----  
 -----  
 AACAAAGTAGTACTATTACTCTCCCATGCAGAATAAAGCAATTTGTAAATATGTGGCAGAGAGTAGGACAAGCAA  
 TGTATGCCCCCTCCCATCAAAGGAAAAATACAGTGCATATCAAAT---  
 ATTACAGGTCTACTATTAACAAGAGATGGGGGTAAGGGTAAAAGC-----  
 -----  
 -----  
 AATATTACAGAGATCTTCAGACCTGAAGGAGGAAATATGAAGGACAACCTGGAGAAGTGAATTATATAAATATA  
 AAGTAGTAAAAATTGAACCACTA---GGAGTAGCACCCACCAAGGCAAAGAGAAGAGTGGTG-----  
 -----GAGAGAGAAAAAAGAGCA---GTTGGA---CTGGGAGCT-----  
 ---GTGTTCTTGGGTTCTTAGGAGCA---GCCGGAAGTACTATG---GGCGCGGCGTCA---  
 ATAACGCTGACGGCACAG---GCCAGGCAA---TTATTG---TCTGGTATAGTACAACAGCAGAGC---  
 AATCTG---CTGAGG---GCTATAGAGGCTCAACAGCATCTGTTGAAACTCACGGTCTGGGGCATT  
 >KX389622..1  
 TTCTATTGCAATACATCAGACTTGTTTAATAGCAATTGGACAAATGGGAATTGGACAAATGGGATAGGCAGCA  
 CGGAG-----  
 -----  
 ACTAATGACACTATAACTCTTCCATGCAGAATAAAGCAGATTATAAGAATGTGGCAGAGAGTAGGACAAGCAA  
 TGTATGCCCCCTCCCATCAAAGGGGTAATAGAGTGTAATCAAAT---  
 ATTACAGGAATAATATTAGTAAGAGATGGTGGTAAGAATAACACA-----  
 -----  
 -----  
 GACAAGGAGACATTTAGACCTGGAGGAGGAGATATGAGGGACAATTGGAGAAGTGAACCTATACAAATATAAAG  
 TAGTAAAAATTGAACCATTA---GGAGTAGCACCCACCAGGGCAAAGAGAAGAGTGGTG-----  
 -----GAGAGAGAAAAAAGAGCA---GTTGGA---ATAGGAGCT-----

GTCTTCCTTGGGTTCTTAGGAGCG---GCAGGAAGCACTATG---GGCGCAGCGTCA---  
 ATAACGCTGACGGTACAG---GCCAGACAA---TTATTG---TCTGGCATAGTGCAACAGCAGAGC---  
 AATCTG---CTGAGG---GCTATAGAGGCTCAACAACATCTGTTGAAACTCACAGTCTGGGGCATT  
 >DQ396400..1  
 TTCTATTGCAATACATCAGGCCTGTTTAACAGAACTTGGAATGACACCGCTTGGAATGAAACAACCTTGGAATA  
 ACATA-----  
 -----  
 AATTCAAATGGAAGTATAACTCTCCAATGTAGAATAAAGCAAATTTTAAATATGTGGCAGAGAGTAGGACAGG  
 CGATGTATGCCCCTCCCATCCCAGGAGAAATAAGGTGTGAATCAAAC---  
 ATTACAGGACTAATCTTAACAAGAGACGGGGGGCTTGAGCTTAACAAT-----  
 -----  
 -----  
 ACGAATAATGAGACCTTCAGGCCTGGAGGAGGAGATATGAGGGACAATTGGAGAAAGTGAATTGTATAAAATACA  
 AAGTAATAAAAATTGAACCACTA---GGAGTAGCACCCACCAGGGCAAAAAGAAGAGTGGTG-----  
 -----GAGAGAGAAAAAGAGCA---GTTGGA---CTGGGAGCT-----  
 ---GTTTTCCTTGGGTTCTTAGGGGCA---GCAGGAAGCACTATG---GGCGCAGCGTCA---  
 ATAACGCTGACGGTACAG---GCTAGGCAA---TTATTG---TCTGGCATAGTGCAACAGCAAAGC---  
 AATTTG---CTGAGG---GCTATAGAGGCTCAACAACATTTGTTGAAACTCACAGTCTGGGGCATT  
 >FM165645..2  
 TTCTACTGTAACACATCAGGCCTGTTTAATAGCAGTTGGGAAAATGACACTGGCAGCACGCAGGAGTCAAATA  
 GAACA-----  
 -----  
 AAGTCAAATGACACTATAACTCTCCCATGCAGAATAAAGCAAATTATAAATATGTGGCAGAGGGCAGGACAAG  
 CAATATATGCCCCTCCCATCCCAGGGGTAATACAGTGTCAAGTCAAAC---  
 ATTACAGGACTACTATTAACAAGAGATGGTGGGAATAACAATACA-----  
 -----  
 -----  
 ACTAATGAAACCTTCAGACCTGGAGGAGGAAATATGAGGGATAATTGGAGAAGTGAAGTATATAAATATAAAG  
 TAGTAAAAATTGAACCACTA---GGAGTAGCACCCACCACGGCAAGGAGAAGAGTGGTG-----  
 -----GAGAGAGAAAAAGAGCA---GTGGGA---CTGGGAGCT-----  
 CTGTTCAATTGGGTTCTTAGGAGCC---GCAGGAAGCACTATG---GGCGCGGCGTCA---  
 GTGACGCTGACGGTACAG---GCCAGACAA---TTATTG---TCTGGCATAGTGCAACAGCAAAAC---  
 AATTTG---CTGAGG---GCTATTGAGGCTCAACAGCATCTGTTGAAACTCACGGTCTGGGGCATT  
 >FM165628..2  
 TTCTACTGCAACACATCAAGACTGTTTAATAGCAGTTGGGAACCATTAGGCCAGTATGATGACAGTCAGAGC-  
 -----  
 -----  
 AATGACACAAATATAACTCTCCCATGCAGAATAAAGCAAATTATAAGGATGTGGCAGAGGACAGGACAAGCAA  
 TATATGCCCCTCCCATCCAAGGGGAAATAACGTGTAGATCAAAT---  
 ATTACAGGACTACTATTAACAAGAGATGGTGGAAATAAACTAAT-----  
 -----  
 -----  
 GAAACCTCCGAAACCTTCAGACCTGGAGGAGGAGATATGAGAGATAATTGGAGAAGTGAAGTATATAAATATA  
 AAGTAGTAAAAATTGAACCACTA---GGAGTAGCACCCACCAAGGCAAAAAGAAGAGTGGTG-----  
 -----GAGAGAGAAAAAGAGCA---GTGGGA---CTGGGAGCT-----  
 ---GTTCTCAATTGGGTTCTTAGGAACA---GCAGGAAGCACTATG---GGCGCGGCGTCA---  
 GTGACGCTGACGGTACAG---GCCAGACAA---TTATTG---TCTGGCATAGTGCAACAGCAAAAC---  
 AATTTG---CTGAGG---GCTATAGAGGCTCAACAGCATCTGTTGAAACTCACGGTCTGGGGCATT  
 >EU191615..1  
 TTCTACTGCAACACATCAACACTGTTTAATAGCAGTTGGCCATTAAACCAGTCTAACAGTTGGAGCAATGGCG  
 GA-----  
 -----  
 AATGACACAAATATAACTCTCCCATGCAGAATAAAGCAAATTATAAGGATGTGGCAGAGGACAGGACAAGCAA  
 TATATGCCCCTCCCATCGAAGGGGTAATAATGTGTAGGTCAAAT---  
 ATTACAGGACTCCTATTAACAAGAGATGGTGGAAATGAAGCTAATAAACT-----  
 -----  
 -----  
 AATGAAACTGCTGAAATCTTCAGACCTGGAGGAGGGGATATGAGAGATAATTGGAGAAGTGAAGTATATAAAT  
 ATAAAGTAGTAAAAATTGAACCACTA---GGAGTAGCACCCACCAGGGCAAAAAGAAGAGTGGTG-----  
 -----GAGAGAGAAAAAGAGCA---GTGGGA---CTGGGAGCT---

-----GTTCTCATTGGGTTCTTAGGAACA---GCAGGAAGCACTATG---GGCGCGGCGTCA---  
 GTGACGCTGACGGTACAG---GCCAGACAA---TTATTG---TCTGGCATAGTGCAACAGCAAAAC---  
 AATTTG---CTGAGG---GCTATAGAGGCTCAACAGCATCTGTTGAAACTCACGGTCTGGGGCATT  
 >MH746258..1  
 TTCTATTGTAACACATCAGGCCTGTTTAATAGCACATGGTCTAAAAATGGCACACAGCAGGTAGACAAC-----  
 -----  
 -----  
 ATAACCAATCCTATAATTCTCCAATGCAGAATAAAGCAGATTATAAATATGTGGCAGAGAGCAGGACAAGCAA  
 TATATGCCCCCTCCCATCCAAGGACTAATAAGGTGTGAATCAAAC---  
 ATTACAGGACTAATATTAACAAGAGATGGTGGAAATGGGAATACA-----  
 -----  
 -----  
 ACAAACAATGAAACCGAAACCTTCAGACCTGGAGGAGGAGATATGAGGGACAATTGGAGAAGTGAATTATATA  
 AGTATAAGGTAGTACAAGTTGAACCACTA---GGAGTAGCACCCACCAAGGCAAAAAGAAGAGTGGTG-----  
 -----GAGAGAGAAAAAGAGCA---GTTGGA---  
 CTAGGAGCT-----GTATTCATTGGATTCTTAGGAGCA---GCAGGAAGCACTATG---  
 GGCGCGGCGTCT---GTGACGCTGACGGTACAG---GCCAGGCAA---TTATTG---  
 TCTGGTATAGTGCAACAGCAAAAGC---AATTTG---CTGAGG---  
 GCTATAGAGGCTCAACAGCATTTGTTGAAACTCACAGTCTGGGGCATT  
 >MH746253..1  
 TTCTATTGTAATACATCAGCCTTATTTAATAGCACTTGGAAATGATACCAATAATACGGGATCAAATACTGACA  
 ATAACACCACG-----  
 -----  
 GGGTCAAATGAAGTTATAACTCTCCCTTGCAGAATAAAACAAATTATACGTATGTGGCAGAGAACAGGACAAG  
 CAATGTATGCCCCCTCCCATTTTCAGGAATAATAAATTGTACATCAAAC---  
 ATTACAGGACTAATATTGACAAGAGATGGTAGTAATGGTGATAAT-----  
 -----  
 -----  
 AACAGTGAAACCTTCAGACCTGGAGGAGGAGATATGAGGGACAATTGGAGAAGTGAATTATATAAGTATAAAG  
 TAGTAAAAATTGAACCATTA---GGGGTAGCACCCACCAGGGCAAGGAGAAGAGTGGTG-----  
 -----CAGAGAGAAAAAGAGCA---GTTGGA---ATAGGAGCT-----  
 GTCTTCCTTGGGTTCTTAGGAGCA---GCAGGAAGCACTATG---GGCGCAGCGTCA---  
 ATAACGCTGACGGTACAG---GCCAGACAA---TTATTG---TCTGGCATAGTGCAACAGCAAAAC---  
 AATTTG---CTGAGG---GCTATAGAGGCTCAACAACAGCTGTTGAAACTCACAGTCTGGGGCATT  
 >MH746251..1  
 TTCTATTGCAATACATCAGCCCTGTTCAATAGTACTTGGAAATGGCACTGTCACAAATGGCACACAA-----  
 -----  
 -----  
 GCAAAATGGAACCTATAATTCTACCATGCAGAATAAAGCAAATTATAAGAATGTGGCAGAGAGTAGGACAAGCAA  
 TGTATGCCCCCTCCTATCAGAGGAGTGATAAGGTGTGAATCAAAC---  
 ATTACAGGACTAATACTAACAAGAGATGGTGGAGGTGGAACATAAT-----  
 -----  
 -----  
 AGCAGCAATGAGACCTTCAGGCCTACAGGAGGAGATATGAGGGACAATTGGAGAAGTGAACCTATATAAGTATA  
 AAGTAGTAAAAATTGAACCAATA---GGATTAGCACCTACCGAGGCAAGGAGGAGAGTGGTG-----  
 -----GAGAGAGAAAAAGAGCA---ATTGGA---CTGGGAGTT-----  
 ---GCCTTCCTTGGGTTCTTAGGAGCA---GCAGGAAGTACTATG---GGCGCGGCGTCA---  
 TTGACGCTGACGGCACAA---GCCAGACAA---TTATTG---TCTGGTATAGTGCAACAGCAAAGC---  
 AATTTG---CTGAGG---GCTATAGAGGCTCAGCAGCATCTGCTGAAACTCACAGTCTGGGGCATT  
 >KU168256..1  
 TTCTATTGCAATACATCAGGCCTGTTTAATAGCACTTGGCATGTCAATAATACATCAAGCCTGGTTAAT-----  
 -----  
 -----  
 AGCACTGGGAACATAACTCTCCCATGCAGAATAAAGCAAATTATAAATATGTGGCAGAGAGTAGGACAAGCAA  
 TGTATGCCCCCTCCTATTCCAGGAATAATAAAGTGTGAGTCAAAC---  
 ATTACAGGACTACTATTGATAAGAGATGGTGGAAATTAATAATAAC-----  
 -----  
 -----  
 AGTATGAATGAGACCTTCAGACCTGGAGGAGGAGATATGAGAGACAATTGGAGAAGTGAATTATATAAATATA  
 AAGTAGTACAAATTGAACCACTA---GGAGTAGCACCTACCAAGGCAAGAGAAGAGTGGTG-----

-----GAGAGAGAAAAAGAGCA---GTTGGA---TTTGGAGCT-----  
---GTCTTCCTTGGGTTCTTAGGAGCA---GCAGGAAGCACTATG---GGCGCGCGTCA---  
ATAACGCTGACGGCACAG---GCCAGACAA---TTATTG---TTTGGCATAGTGCAACAGCAAAGC---  
AATTTG---CTGAGG---GCTATAGAGGCTCAACAGCATCTGTTGAAACTCACAGTCTGGGGCATT  
>KU168305..1  
TTCTATTGTAATACATCAGGCCTGTTTAATAGCACTTGGAAAGACTAATGGCACTAGCACTTGGAAAGGAGACTA  
ATGGCACT-----  
-----GGGAGCCAGGAA-----  
AATAGCAATGACAATATAACTCTCCCATGCAGAATAAAGCAAATTATAAATATGTGGCAGAGAGCAGGACAAG  
CAATGTATGCCCCCTCCCATCGCAGGAGTAATAAAGTGTAACCTCAAAC---  
ATTACAGGACTACTATTAACAAGAGATGGGGGAAGTAATAACAAT-----  
-----  
AGCCAAGAGGAGACTTTTCAGACCTGGAGGAGGAAATATGAAGGATAACTGGAGAAGTGAATTATATAGGTACA  
AAGTAGTACAAATTGAACCCCTA---GGAATAGCACCCACCAGGGCAAGGAGAAGAGTGGTG-----  
-----GGGAGAGAAAAAGAGCA---GTTGGA---CTGGGAGCT-----  
---GTCTTCATTGGGTTCTTAGGAGCA---GCTGGAAGCACTATG---GGCGCAGCGTCA---  
ATAACGCTGACGGCACAG---GCCAGACAA---TTATTG---TCTGGCATAGTGCAACAGCAAAGC---  
AATTTG---CTGAGG---GCTATAGAGGCTCAACAGCATATGTTGAAACTCACGGTCTGGGGCATT  
>KP718918..2  
TTCTATTGTAATACATCAGGCCTGTTTAATAGCACTTGGTTTAGTAATGGGAGCAGGGGCAATGAGAGCATGG  
AAGATGACACC-----  
-----  
AATATAACTCATATAACTCTCCCATGCAGAATAAGGCAAATTGTGAATATGTGGCAGAGAGCAGGACAAGCAA  
TGTATGCCCCCTCCCATCCAAGGAGTAATAAAGTGTAATCAAT---  
ATTACAGGAATACTATTAACAAGAGATGGTGGATATAATATTAGCAAT-----  
-----  
AACGACACCGAGATTTTCAGACCTGGAGGAGGAAATATGAAGGACAATTGGAGAAGTGAATTATATAAATATA  
AAGTAGTAAAAGTTGAACCACTA---GGAATAGCACCCACTAGGGCAAAGAGAAGAGTGGTG-----  
-----GAGAGAGAAAAAGAGCA---GTTGGA---ATAGGAGCT-----  
---GTGTTTCATTGGGTTCTTAGGAGCA---GCAGGAAGCACTATG---GGCGCAGCGTCA---  
ATAACGCTGACGGCACAG---GCCAGACAG---TTATTG---TCTGGAATAGTGCAACAGCAAAGC---  
AATTTG---CTGAGG---GCTATAGAGGCTCAACAGCATTTGTTGAAACTCACGGTCTGGGGCATT  
>KP718928..1  
TTCTATTGTAATACATCAGGCCTGTTTAATAGCACTTGGCATAGTAATGGCACTGCAAATGGCACT-----  
-----  
-----  
GAAAATGCCACTATAACTCTCCCATGCAGGATAAAGCAGATTATAAATCTATGGCAGAGAGTAGGGCAAGCAA  
TGTATGCCCCCTCCTATCCAGGAATAATAAATTGTACATCAAAC---  
ATTACAGGACTACTATTAACAAGAGATGGTGGGAATGCTAGTGAG-----  
-----  
GAAACTGAGACCTTCAGACCTGGAGGAGGAAATATGAAGGACAATTGGAGGAGTGAATTATATAAATATAAAG  
TAGTAAAGATTGAACCACTA---GGAGTAGCACCCACCAGGGCAAAGAGAAGAGTGGTG-----  
-----GAGAGAGAAAAAGAGCA---GTCGGA---ATAGGAGCT-----  
GTGTTTCATTGGGTTCTTAGGAGCA---GCAGGAAGCACTATG---GGCGCAGCGTCA---  
ATAACGCTGACGGCACAG---GCCAGACAG---TTACTG---TCTGGTATAGTGCAACAGCAAAGC---  
AATTTG---CTGAGG---GCTATAGAGGCTCAACAGCACATGTTGAAACTCACAGTCTGGGGCATT  
>AM279343..1  
TTCTATTGTAATACATCAGGCCTGTTTAATAGCACTTGGTTTAATAGCACTTGGAAATGACACTATCAGCAATA  
ATAAC-----  
-----ACA---  
GGGTCAAATGACACCATATATCTCCCATGCAGAATAAAGCAAATTATAAATATGTGGCAAAGGACAGGACAAG  
CAATGTATGCCCCCTCCCATCCGAGGAATAATACAGTGTAATTCAACC---  
ATTACAGGACTACTATTAACAAGAGATGGTGGGATTAACAACAAC-----  
-----  
AGTACAAATGAAACCTTCAGACCTGGAGGAGGAAATATGAGGGATAATTGGAGAAGTGAACCTATATAAATATA  
AAGTAGTAAAAATTGAACCACTA---GGAGTAGCACCCACCAAGGCAAGGAGAAGAGTGGTG-----

-----GAGAGAGAAAAAGAGCA---GTTGGA---CTGGGAGCT-----  
 ---GTATTCATTGGGTTCTTAGGAGCA---GCAGGAAGCACTATG---GGCGCGGCGTCA---  
 ATAACGCTGACGGTACAG---GCCAGACAA---TTATTG---TCTGGCATAGTGCAACAGCAAAAC---  
 AATTTG---CTGAGG---GCTATAGAGGCTCAACAGCATCTGTTGAAACTCACGGTCTGGGGCATT  
 >AM279348..2  
 TTCTATTGCAATACATCAGGCCTGTTTGCTCAGGAGTTAAAAAATGACACAAAT-----  
 -----  
 -----  
 GACAATAACACAATAATTCTCCTATGCAAAATAAAGCAAATTATAAATATGTGGCAGAGAGTAGGACAAGCAA  
 TGTATGCCCCCTCCAGAGCAGGAGTAATAAGGTGTGTATCAAAC---  
 ATTACAGGACTACTGTTAACAAGAGATGGTGGAAAAAATGACAATGGA-----  
 -----  
 -----  
 ACTAATGGAAGTGAATGAGATATTCAGGCCTGGAGGAGGAGATATGAGGGACAATTGGAGAAGTGAATTATATAAGT  
 ATAAAGTAGTAAGAATTGAACCAAGTA---GGGGTAGCACCCACCAGGGCAAAGAGAAGAGTGGTG-----  
 -----GAGAGAGAGAAAAAGAGCA---GTTGGA---CTGGGAGCT---  
 -----GTCTTCCTTGGGTTCTTAGGAGCA---GCAGGAAGCACTATG---GGCGCGGCGTCA---  
 CTGACGCTGACGGTACAG---GCCAGGCAA---TTATTG---TCTGGCATAGTGCAACAGCAGAGC---  
 AATTTG---CTGAGG---GCTATAGAGGCTCAACAACATATGTTGAGACTCACAGTCTGGGGCATC  
 >FJ388894..1  
 TTCTATTGTAACACATCAAGCCTGTTTAATAGCACCTGGAATATTAATACTATTTGGAATAACACTATGTCAA  
 ACAGC-----  
 -----ACT---  
 GAGTCAAACGGCACTATAGTGCTCCCATGCAGAATAAAGCAAATTGTAAATGTGTGGCAGAGAGCAGGACAAG  
 CAATATACGCCCCCTCCCATCCAAGGAATAATACAGTGTGTCTCAAAC---  
 ATTACAGGACTAATATTAACAAGAGATGGTGGGAATAATAATAACACA-----  
 -----  
 -----  
 AATAATACTGAAATCTTCAGACCTGGAGGAGGAGATATGAGGGACAATTGGAGAAGTGAATTATATAAATATA  
 AGGTAGTAAAAATTGAACCATTA---GGAGTAGCACCCACCAAGGCAAGGAGAAGAGTGGTG-----  
 -----GGGAGAGAAAAAGAGCA---GTTGGA---CTGGGAGCT-----  
 ---GTCTTCCTTGGGTTCTTAGGAACA---GCAGGAAGCACTATG---GGCGCGGCGTCA---  
 ATAACGCTGACGGTACAG---GCCAGGCAA---TTATTG---TCTGGCATAGTGCAACAGCAAAGC---  
 AATTTG---CTGAGG---GCTATAGAGGCTCAACAACATCTGTTGAAACTCACTGTCTGGGGCATT  
 >FJ388903..3  
 TTCTATTGTAACACATCGGGCCTGTTTAATAGCCAATATAACACATCAGGCCTGGTTAATAACACGCAGGAGT  
 CAGGAAGCACA-----  
 GAGTCAAATGACACTGAGTCA-----  
 ATTGTCACAGACAATATAACTCTCCAAATCAGAATAAAGCAAATTATAAATCAGTGGCAAAGAGTAGCTCAAG  
 CAACATATGCCCCCTCCCATCCCAGGAGTAATAAAATGTGTATCAAAC---  
 ATTACAGGACTAATATTAAGTAGAGATGGTGGGAGTAGTAGCGGA-----  
 -----  
 -----  
 AATGAAACCTTCAGACCTGGAGGAGGAGATATGAGGGACAATTGGAGAAGTGAATTATATAAGTATAAAGTAG  
 TAAAAATTGAACCACTA---GGAGTAGCACCCACCAGGGCAAAGAGAAGAGTGGTG-----  
 -----GAGAGAGAAAAAGAGCA---GTTGGA---ATAGGAGCT-----  
 GTCTTCATTGGGTTCTTAGGAGCA---GCAGGAAGCACTATG---GGCGCGGCGTCA---  
 ATGACGCTGACGGTACAG---GCCAGGCAA---TTATTG---TCTGGCATAGTGCAACAGCAAAGT---  
 AATTTG---CTGAGG---GCTATAGAGGCTCAACAGCATCTGTTGAAACTCACGGTTTGGGGCATT  
 >FJ388909..1  
 TTCTATTGTAATACATCAGGCCTGTTTAATAGCACTTGGAATAATGACACCTGGAATGGCAATGACACACAAG  
 AGTCAAAT-----  
 -----GAAACC-----  
 TCGTCAAATGGCACCATAATTCCACCATGCAAAATAAAACAAATTGTAAATATGTGGCAGAGAGTACAACAAG  
 CAATGTATCCCCCTCTCGTCGAAGGAGTAATAAGGTGTGAATCCATC---  
 ATTACAGGACTACTATCAACAAGAGATGGTGGGATTAACAGCAGG-----  
 -----  
 -----  
 ACAAATGAAACCTTCAGACCTGGGGGAGGAGATATGAGGGACAATTGGAGAAGTGAACCTATATAAATATAAGG  
 TAGTAAAAATTGAACCACTA---GGAGTAGCACCCACCAGGCAAAGAGAAGAGTGGTG-----

-----GAGAGAGAAAAAAGAGCA---GCTGGA---CTGGGAGTT-----  
ATGTTCTTGGGTTCTTAGGAGCA---GCCGGAAGCACTATG---GGCGCGGCGTCA---  
ATAACGCTGACGGTACAG---GCCAGACAG---TTATTA---TCTGGTATAGTGCAACAGCAAAGC---  
AATTTG---CTGAAG---GCTATAGAGGCTCAACAGCACCTGTTGAGACTCACGGTCTGGGGCATT  
>FJ388925..1  
TTCTATTGTAACACATCAGGCTTGTTTAATAGCACTTGGAATGCCACTGCCAGCATGCAGGAGTCAAATAGCA  
CAGAG-----  
-----  
TCAAACGACACTACTATAACTCTCCCATGCAGAATAAAGCAAATTATAAATATGTGGCAGAGAGCAGGACAAG  
CAATATATGCCCCCTCCCATCCGAGGAGTAATAAGGTGTGAATCAAAC---  
ATTACAGGACTAATATTAACAAGAGATGGAGGGAATAGTAACAGC-----  
-----  
-----  
ACAAATGAAACCTTCAGACCTGGAGGAGGAGATATGAGGGATAATTGGAGAAGTGAATTATATAAGTATAAAG  
TAGTAAAAATTGAACCACTA---GGAGTAGCACCCACCAGGGCAAGGAGAAGAGTGGTG-----  
-----GAGAGAGAAAAAAGAGCA---GTTGGA---ATAGGAGCT-----  
GTCTTCATTGGGTTCTTAGGAGCA---GCAGGAAGCACTATG---GGCGCGGCGTCA---  
ATAGCGCTGACGGTACAG---GCCAGGCAA---TTATTG---TCTGGCATAGTGCAACAGCAAAGC---  
AATTTG---CTGAGG---GCTATAGAGGCTCAACAGCATATGTTGAAACTCACGGTCTGGGGCATT  
>FJ388932..1  
CTCTATTGTAACACATCAGGCCTGTTTAATAGCACTTGCCCTGCCAATAACAGTACGCAGGGGTCAAATAGCA  
CA-----  
-----  
GAGTCAAACGACACCGTAATTCTCCAATGCAGAATAAAGCAAATTATAAATATGTGGCAAAGAGTAGGACAAG  
CAATATATGCCCCCTCCCATACCAGGAGAAATAAAGTGTGTATCAAAC---  
ATTACAGGACTAATATTAACAAGAGATGGTGGGAGTAGCAATAAT-----  
-----  
-----  
ACAGAAAATGAAACCTTCAGACCAGGAGGAGGAGATATGAGGGACAATTGGAGAAGTGAATTATATAAGTATA  
AAGTAGTAAAAATTGAACCACTA---GGAGTAGCACCCACCAGGGCAAAGAGAAGAGTGGTG-----  
-----CAGAGAGAAAAAAGAGCAGTATTAGGTGGACTGGGAGCT-----  
---GTCTTCGTTGGGTTCTTGGGAGCA---GCAGGAAGCACTATG---GGCGCGGCGTCA---  
GTGACGCTGACGGTACAG---GCCAGGAAA---TTATTG---ACTGGCATAGTGCAACAGCAAAGT---  
AATTTG---CTGAGG---GCTATCGAGGCTCAACAGCATCTGTTGAAACTCACGGTCTGGGGCATT  
>FJ388938..1  
TTCTATTGTAACACATCAGGCCTGTTTAATAGCACTTGGAATGGCACTACCATGCAGGAGTCAAATAACACAG  
AGTCAAAC-----  
-----GACACT-----  
GAGTCAAACGACATTATAACTCTCCGATGCAGAATAAGGCAAATTATAAGAATGTGGCAGAGAGCAGGACAAG  
CAATGTATGCCCCACCCATCCAAGGAATAATAAAGTGTGAATCAAAC---  
ATTACAGGACTAATATTAGCAAGAGATGGTGGGAATAGAAATGAA-----  
-----  
-----  
ACTGAAACCTTCAGACCTGGAGGAGGAGACATGAGGGACAATTGGAGAAGTGAATTATATAAGTATAAAGTAG  
TAAAAATTGAACCATTA---GGAGTAGCACCCACCAAGGCAAGGAGAAGAGTGGTG-----  
-----CAGAGAGAAAAAAGAGCA---GTTGGA---ATAGGAGCT-----  
GTCTTCATTGGGTTCTTAGGAGCA---GCAGGAAGCACTATG---GGCGCGGCGTCA---  
ATAACGCTGACGGTACAG---GCCAGGCAA---CTATTG---TCTGGCATAGTGCAACAGCAAAGT---  
AATTTG---CTGAAG---GCTATAGAGGCTCAACAACATCTGTTGAAACTCACGGTTTGGGGCATT  
>FJ388942..1  
TTCTATTGTAACACATCAGGCCTGTTTAATAGCTCTTGGCTGAAGTCAAATAGAACAGGGCCTAGCACAGAGC  
CAAACAAC-----  
-----ACTGAG-----  
CCAAACAACACTATTATAACTCTCCCATGCAAAATAAAGCAAATTATAAATATGTGGCAGAGAACAGGACAAG  
CAATGTATGCCCCCTCCCATCCCAGGAGTAATAAGGTGTGAATCAAAC---  
ATTACAGGACTAATATTAACAAGAGATGGTGGGAATAGTAGCAAT-----  
-----  
-----  
AGCAATGAAACCTTCAGACCTGGAGGAGGAAATATGAGGGACAATTGGAGAAGTGAATTATATAAGTATAAAG  
TAGTAAAAATTGAACCACTA---GGAGTAGCACCCACCAGGGCAAGGAGAAGAGTGGTG-----

-----GAGAGAGAAAAAAGAGCA---GTTGGA---ATAGGAGCT-----  
GTCTTCATTGGGTTCTTAGGAGCA---GCAGGAAGCACTATG---GGCGCGGCGTCA---  
ATGACGCTGACGGTACAG---GCCAGGCAA---TTATTG---TCTGGCATAGTGCAACAGCAAAGC---  
AATTTG---CTGAGG---GCTATAGAGGCTCAACAGCATATGTTGAAACTCACGGTCTGGGGCATT  
>FJ388946..2  
TTTTATTGTAATACATCAGGCCTGTTTAATAGAACTTGGTCTACCAATACCAGCATGCAGGTGTCAAATAGCA  
CA-----  
-----  
GAGTTAAATGGCCCTATAATTCTCCAATGCAGAATAAAGCAAATTATAAATATGTGGCAAAGAGTAGGACAAG  
CAATATATGCCCCCTCCCATCCCAGGAGTAATAAGGTGTGAATCAAAC---  
ATTACAGGACTAATATTAACAAGAGATGGTGGAAATAATAATACC-----  
-----  
-----  
GGAATCAAACCTTCAGACCTGTAGGAGGAGATATGAAGGACAATTGGAGAAGTGAATTATATAAGTATAAAG  
TAGTAAAAATTGAACCACTA---GGAGTAGCACCCCTCCAAGGCAAAGAGAAGAGTGGTG-----  
-----GAGAGAGAAAAAAGAGCA---ATTGGA---ATAGGAGCT-----  
GTCTTCATTGGGTTCTTAGGAGCA---GCAGGAAGCACTATG---GGCGCGGCGTCA---  
GTGACGCTGACGGTACAG---GCCAGGCAA---TTATTG---TCTGGCATAGTGCAACAGCAAAGT---  
AATTTG---CTGAGG---GCTATAGAGGCTCAACAGCATCTGTTGAACCTCACGGTCTGGGGCATT  
>JF683737..1  
TTCTATTGTAACACATCAGGCCTGTTTAATAGCACGTGGAATGCTAGTGACATCACGCAGGGG-----  
-----  
-----  
TTAAATGACACAATAACTCTCCAATGCAGAATAAAGCAAATTATAAATATGTGGCAGAGAGTAGGGCAGGCAA  
TGTATGCCCCCTCCCATCCAGGGAGAAATAAGGTGTGAATCAAAC---  
ATTACAGGACTAATATTAACAAGAGATGGTGGGAATGGGAATGGA-----  
-----  
-----  
ACAAATGAAACCTTCAGACCTGGAGGAGGAGATATGAGGGACAATTGGAGAAGTGAATTATATAAGTATAAAG  
TAGTAAAAATTGAACCACTA---GGAGTAGCACCCACCAGGGCAAAGAGAAGAGTGGTG-----  
-----GAGAGAGAAAAAAGAGCA---GTTGGA---CTGGGAGCT-----  
GTATTCATTGGGTTCTTAGGAGCA---GCAGGAAGCACTATG---GGCGCGGCGTCA---  
GTGACGCTGACGGTACAG---GCCAGGCAA---TTATTG---TCTGGCATAGTGCAACAGCAAAGC---  
AATTTG---CTGAGG---GCTATAGAGGCTCAACAGCATTTGTTGAAACTCACAGTCTGGGGCATT  
>JF683759..1  
TTCTATTGTGACACATCAGGCCTGTTTAATAGCACTTGGAAATACCACTGACACCATGCACGAGGAGACTAATA  
CA-----  
-----  
GAGGCAAATAGTACTATTACTCTCCCATGCAGAATAAAGCAAATTATAAATATGTGGCAGAGAGCAGGACAAG  
CAATATATGCCCCCTCCCATCCCAGGAGTAATACAGTGTAATCAAAC---  
ATTACAGGACTAATATTAACAAGAGATGGTGGGAGTAATAGCAGC-----  
-----  
-----  
ACAAATGAAACCTTCAGACCTGGAGGAGGAGATATGAGGGACAATTGGAGAAGTGAATTATATAAGTATAAAG  
TAGTAAAAATTGAACCACTA---GGAGTAGCACCCACCAAGGCAAGGAGAAGAGTGGTG-----  
-----CAGAGAGAAAAAAGAGCA---GTAGGA---CTGGGAGCG-----  
GTATTCATTGGGTTCTTAGGAGCA---GCTGGAAGCACCATG---GGCGCGGCGTCA---  
ATAACGCTGACGGTACAG---GCCAGGCAA---TTATTG---TCTGGTATAGTGCAACAGCAAAGC---  
AATTTG---CTGAGG---GCTATAGAGGCTCAACAGCATCTGTTGAAACTCACAGTCTGGGGCATT  
>JF683760..1  
TTCTATTGTAACACCTCAAAGTTGTTTAATAGCACTTGGGATCCTAATAATACCAGCACGCAGGAGTCAAATA  
GC-----  
-----  
ACAAATGATAATATAATTCTCCCATGCAGAATAAAGCAAATTATAAATATGTGGCAGAGAGCAGGACAAGCAA  
TATATGCCCCCTCCCATCCAAGGAATAATAAACTGTGTATCAAAC---  
ATTACAGGATTAATATTAACAAGAGATGGGGGTGTAGGTAACAAC-----  
-----  
-----  
GCAAAGGAAGTCTTCAGACCTGGAGGAGGAGATATGAGGGACAATTGGAGAAGTGAATTATATAAGTATAAAG  
TAGTAAAAATTGAGCCACTA---GGAGTAGCACCCACTGGGGCAAGGAGAAGAGTGGTG-----

-----CAGAGAGAAAAAAGAGCA---GTTGGA---CTGGGAGCT-----  
GTTTTTCATTGGGTTCTTGGGAGCA---GCAGGAAGCACTATG---GGCGGGCGTCA---  
ATGACGCTGACGGTACAG---GCCAGACAA---TTATTG---TCTGGCATAGTGCAACAGCAAAGC---  
AATTTG---CTGAGG---GCTATAGAGGCTCAACAGCATATGTTGAGACTCACGGTCTGGGGCATT  
>JF683761..1  
TTCTATTGTAACACCTCAAAGCTGTTTAATAGCACTTGGGAATAATACCAGCACGCAGGAGTCAAATAGCACTA  
AT-----  
-----  
CCAAATGATAATATAACTCTCCCATGCAGAATAAAGCAAATTATAAATATGTGGCAAAGAGCAGGACAAGCAA  
TATATGCCCCCTCCCATCCAAGGAAAAATAAAGTGTGTATCAAAC---  
ATTACAGGATTAATATTAACAAGAGATGGGGGGGGTAACAGCACA-----  
-----  
-----  
GAGGAAGTCTTCAGACCTGGAGGAGGAGATATGAGGGACAATTGGAGAAGTGAATTATATAAGTATAAAGTAG  
TAAAAATTGAGCCAATA---GGAGTAGCACCCACTGAGGCAAGGAGAAGAGTGGTG-----  
-----CAGAGAGAAAAAAGAGCG---GTTGGA---CTGGGAGCT-----  
GTTTTTCATTGGGTTCTTGGGAGCA---GCAGGAAGCACTATG---GGCGGGCGTCA---  
ATGACGCGGACGGTACAG---GCCAGACAA---TTATTG---TCTGGCATAGTGCAACAGCAAAGC---  
AATTTG---CTGAGG---GCTATAGAGGCTCAACAGCATATGTTGAGACTCACGGTCTGGGGCATT  
>JF683767..1  
TTCTATTGTAATACATCAGGTCTGTTCAATAGCTCTTGGGAATATCAATGGCAGCAGGTCAAATAGCACAAGG-  
-----  
-----  
TCAAATGGCAATATAACTCTCCCATGCAGAATAAAGCAAATTATAAATATGTGGCAAAGAACAGGACAGGCAA  
TGTATGCCCCCTCCCATCCAAGGAGTAATAAGGTGTGTATCAAAC---  
ATTACAGGACTACTGTTAACAAGAGATGGAGGGGGTAACAATACA-----  
-----  
-----  
AATGAACTGAAATTTTCAGACCTGGAGGAGGAGATATGAGGGGCAATTGGAGAAGTGAATTATATAAGTATA  
AAGTAGTAAAAATTGACCCACCA---GGAGTAGCACCCAACACAGCAAGGAGAAGAGTGGTG-----  
-----GGGAGAGAAAAAAGAGCA---GCTGGAATAATAGGAGCT-----  
---GTCTTCCTTGGGTTCTTAGGAGCA---GCAGGAAGCACTATG---GGCGGGCGTCA---  
GTGACGCTGACGGTACAG---GCCAGACAA---TTATTG---TCTGGTATAGTGCAACAGCAAAGC---  
AATTTG---CTGAGG---GCTATAGAGGCTCAACAACACCTGTTGAACTCACGGTCTGGGGCATT  
>JF683779..2  
TTCTACTGTAACACATCAGGCCTGTTTAATAGCACTTGGTATACCAATAACAGCATGCAGCCAAAT-----  
-----  
-----  
TACACAAAACTATAACTTTGCCATGCAGAATAAAGCAAGTTATAAATATGTGGCAAAGAGTAGGACAAGCAA  
TGTATGCCCCCTCCCATCCAGGAATAATACAATGTGTATCAAAC---  
ATTACAGGACTAATATTAACAAGAGATGGTGGGCATAATAATAGT-----  
-----  
-----  
GCAAATGAGACCTTCAGACCTGGAGGAGGAGATATGAGGGACAATTGGAGAAGTGAATTATATAAGTATAAAG  
TAGTGAAAGTTGAACCATTA---GGAGTAGCACCCACCAGGGCAAGGAGAAGAGTGGTG-----  
-----GAGAGAGAAAAAAGAGCA---GTTGGA---ATAGGAGCT-----  
GTCTTCCTTGGGTTCTTAGGAGCA---GCAGGAAGCACTATG---GGCGGGCGTCA---  
GTGACGCTGACGGTACAG---GCCAGGCAA---TTATTG---TCTGGCATAGTGCAACAGCAAAGC---  
AATTTG---CTGAGG---GCTATAGAGGCTCAACAACATATGTTGAACTCACGGTCTGGGGCATT  
>JF683782..1  
TTCTATTGTAATACATCAAAATTGTTTAATACAACCTTGGGAATGCCAATGGCAGCGTACAGGAGTCAGTCAACA  
CT-----  
-----  
GCAGGCAACACTACTATATTTCTCCCATGCAGAATAAAGCAAATTATAAGGATGTGGCAGAGAGCAGGACAAG  
CAATATATGCCCCCTCCCATCCAGGAAGAATAAGGTGTGAATCAAAC---  
ATTACAGGACTACTGTTAACAAGAGATGGTGGAGGTAATGCAAAC-----  
-----  
-----  
AACACAGAAATCTTTAGACCTGGAGGAGGAGATATGAGGGACAATTGGAGAAGTGAATTATATAAGTACAAGG  
TAGTAAAAATTGAACCACTA---GGAGTAGCACCCACCAAGGCAAGGAGAAGAGTGGTG-----

-----CAGAGAGAAAAAAGAGCA---GTTGGA---CTAGGAGCT-----  
 GTCTTCCTTGGGTTCTTAGGAGCA---GCAGGAAGCACTATG---GGCGCGGCGTCA---  
 ATAACGCTGACGGTACAG---GCCAGGCAA---TTATTG---TCTGGCATAGTGCAACAGCAAAGC---  
 AATTTG---CTGAGG---GCTATTGAGGCTCAACAGCAGATGTTGAGACTCACGGTCTGGGGCATT  
 >JF683783..1  
 TTCTATTGTAATACATCAAAATTGTTTAATACAACCTTGAATGTCACTGACAGCATAGAAGAGTCA-----  
 -----  
 -----  
 GGCAACACTATTATAGTCCTCCCATGCAAAATAAAGCAAATTATAAATATGTGGCAGAGAGCAGGACAAGCAA  
 TATATCCCCCTCCCATCCGGGAATAATAAGGTGTGAATCCAAC---  
 ATTACAGGACTATTATTAACAAGAGATGGTGGAGATACTGAAAAC-----  
 -----  
 -----  
 ACCACAGAAATCTTTAGACCTGGAGGAGGAGATATGAGGGACAATTGGAGAAGTGAATTATATAAGTATAAAAG  
 TAGTAAAAATTGAACCACTA---GGAGTAGCACCCACCGAGGCAAGGAGAAGAGTGGTG-----  
 -----CAGAGAGAAAAAAGAGCA---GTTGGA---ATAGGAGCT-----  
 GTCTTCCTTGGGTTCTTAGGAGCA---GCAGGAAGCACTATG---GGCGCGGCGTCA---  
 ATAACGCTGACGGTACAG---GCCAGGCAA---TTATTG---TCTGGCATAGTGCAACAGCAAAGC---  
 AATTTG---CTGAGG---GCTATAGAGGCTCAACAGCAGATGTTGAGACTCACGGTCTGGGGCATT  
 >JF683789..1  
 TTCTATTGTAACACCTCAAAGCTGTTTAATAGCATTGTCATCCTAATGATACCATGCAGGAGGAGACTAATA  
 CA-----  
 -----  
 AATCCAAATGCTAATATAACTCTCCCATGCAGAATAAAGCAAATTATAAATCTGTGGCAAAGAGTAGGGAAAAG  
 CAATATATGCCCCCTCCCATCCGAGGAAGAATAGAGTGTGTATCAAAC---  
 ATTACAGGATTAATAATAACAAGAGATGGTGGAAATAACACAAAT-----  
 -----  
 -----  
 AACACTGAAATCTTCAGACCTGCAGGAGGAGACATGAGGGACAATTGGAGAAGTGAATTATATAAATATAAAG  
 TAGTACAAATTGAGCCACTA---GGAATAGCACCCACTGAGGCAAGGAGAAGAGTGGTG-----  
 -----CAGAGAGAAAAAAGAGCA---ATTGGA---CTAGGAGCT-----  
 ATGTTCAATTGGGTTCTTAGGAGCA---GCAGGAAGCACTATG---GGCGCGGCGTCA---  
 GTGACGCTGACGGTACAG---GCCAGGCAA---TTATTG---TCTGGCATAGTGCAACAGCAAAGC---  
 AATTTG---CTGATG---GCTATAGAGGCTCAACAGCATCTGTTGAAACTCACAGTCTGGGGCATT  
 >FJ670523..1  
 TTCTATTGTAACACATCAGGCCTGTTTAATAGCACTTGGCCTAATAGCACTTGAATGCCAATACCAGCATAC  
 AGGAG-----  
 -----TCA---  
 AATAGCACAGACAATATAACTCTCCAATGCAGAATAAAGCAAATTATAAATCTGTGGCAGAGAGCAGGAAAAG  
 CAATATATGCCCCCTCCCATCCAAGGAGCAATACAGTGTATATCAAAC---  
 ATTACAGGACTAATATTAACAAGAGATGGAGGTAATAATGGAAC-----  
 -----  
 -----  
 AATAACACTGAGATCTTCAGACCTGGAGGAGGAGATATGAGAGATAATTGGAGAAGTGAATTATATAAGTATA  
 AGGTAGTAAAAATTGAACCATTA---GGAGTAGCACCCCTCCAGGGCAAAGAGAAGAGTAGTG-----  
 -----GGGAGAGAAAAAAGAGCA---GTTACA---ATAGGAGCT-----  
 ---GTCTTCCTTGGGTTCTTAGGAGCA---GCAGGAAGCACTATG---GGCGCGGCGTCA---  
 CTGACGCTGACGGTACAG---GCCAGGCAA---TTATTG---TCTGGCATAGTGCAACAGCAAAGC---  
 AATTTG---CTGCAG---GCTATAGAGGCTCAACAGCATCTGTTGAAACTCACGGTCTGGGGCATT  
 >AF219261..2  
 TTCTATTGTAATACATCAGGCCTGTTTAATAGCACTTGGGTGTCAAACAACACTGGGAAATATTATAGTAATA  
 GCACT-----  
 -----  
 AGGGAAAATCCAAATATAACTCTCCCATGCAGAATAAAACAAATTATAAATATGTGGCAGAGAGCAGGACAAG  
 CAATATATGCCCCCTCCCATCGAAGGAGTAATAAGGTGTGAATCAAAC---  
 ATTACAGGACTACTATTAACAAGAGATGGTGGGGATAAGAACAAC-----  
 -----  
 -----  
 ACAAGTGAAATCTTCAGACCTGGAGGAGGAAATATGAAGGACAACCTGGAGAAGTGAATTATATAAGTATAAAAG  
 TAGTAAAAATTGAACCATTA---GGAGTAGCACCCACCCCGGCAAGGAGAAGAGTGGTG-----

-----CAGAGAGAAAAAAGAGCA---GTATTTGGGCTGGGAGCT-----  
GTCTTTCTTGGGTTCTTAGGAGCA---GCAGGAAGCACTATG---GGCGCGGCGTCG---  
ATAACGCTGACGGTACAG---GCCAGACAA---TTATTG---TCTGGCATAGTGCAACAGCAAAGT---  
AATTTG---CTGAGG---GCTATAGAGGCTCAACAGCATTTGTTGAAACTCACGGTCTGGGGCATT  
>AF219265..2  
TTCTATTGTAATACATCAGGCCTGTTTAATAGCACTTGGAGTAATAGCACTTGGAGTTC CAATGCCAGCACGC  
AGGGG-----  
-----  
TCAGAAAATGACACTATAACTCTCCCATGCAGAATAAAACAAATTATAAATATGTGGCAGAGAGCAGGACAAG  
CAATGTATGCCCCCTCCCATTC AAGGAGTAATAAGGTGTGATTCAAAT---  
ATTACAGGACTAATATTAACAAGAGATGGTGGGGTTACAAATGAA-----  
-----  
-----  
ACCGAAACCTCCAGACCTGGAGGAGGAGATATGGGGGACAATTGGAGAAGTGAATTATATAAATATAAAGTAG  
TGAAAAATTGAACCACTA---GGAGTAGCACCCACCAGGGCAAAAAGAGTAGTGGTG-----  
-----GGGAGAGAAAAAAGAGCA---ATTGGA---ATAGGAGCT-----  
GTTTTTCATTGGGTTCTTAGGAGCA---GCAGGAAGCACTATG---GGCGCGGCGTCA---  
ATGACGCTGACGGTACAG---GCCAGACAA---TTATTG---TCTGGCATAGTGCAACAGCAAAGC---  
AATTTG---CTGAGG---GCTATAGAGGCTCAACAACATCTGTTGAAACTCACGGTCTGGGGCATT  
>HM204635..1  
TTCTATTGTAATACATCACACCTGTTTAATAGCGCTTGGTCTGTCAATGACACCGTGCAGGAGTCAAATAGCA  
CG-----  
-----  
GAGTCAAATGACACTATAACTCTCCAATGCAGAATAAAGCAAATTATAAATATGTGGCAGAGAACAGGACAAG  
CAATGTATGCCCCCTCCCATCCCAGGAGTAATAAGATGTAAC TCAAAC---  
ATTACAGGACTAATATTAACAAGAGATGGTGGGAATAATAATAGTTCA-----  
-----  
-----  
AATGAAAATGAAACCTTCAGACCTGGAGGAGGAGATATGAGAGACAATTGGAGAAGTGAATTATATAAGTATA  
AAGTAGTAAAAATTGAACCACTA---GGAGTAGCACCCACCAAGGCAAGGAGAAGAGTGGTG-----  
-----CAGAGAGAAAAAAGAGCA---GTTGGA---CTGGGAGCT-----  
---GTCTTCATTGGGTTCTTAGGAGCA---GCAGGAAGCACTATG---GGCGCGGCGTCA---  
GTGACGCTGACGGTACAG---GCCAGACAA---TTATTG---TCTGGCATAGTGCAACAGCAAAGC---  
AATTTG---CTGAGG---GCTATAGAGGCTCAACAACATCTGTTGAAACTCACAGTCTGGGGCATT  
>HM204648..2  
TTTTATTGTAACACATCAGGCCTGTTTACTGGCACTTGG AATCAGACTAATAGTACTTGG AATAGTGGCACTT  
GGACT-----  
-----  
AACACTACTGGCAATATAACTCTCCAATGCAGAATAAAGCAGGTCATAAGAATGTGGCAGAGAGTAGGACAAG  
CAATGTATGCCCCCTCCCATCCCAGGAGTAATAAGGTGTGAATCAAAC---  
ATTACAGGACTAATATTAACAAGAGATGGGGAAGGTAACAGTAGC-----  
-----  
-----  
ATAAAAGATGAAACCTTCAGACCTGGAGGAGGGAATATGAAGGACAATTGGAGAAGTGAATTATATAAATATA  
AAGTAGTAAAAATTGAACCAATA---GGAGTAGCACCCACCAGGGCAAGAGAAGAGTGGTG-----  
-----GAGAGAGAAAAAAGAGCA---GTTGGA---CTAGGAGCT-----  
---GTCTTCATTGGGTTCTTAGGAGCA---GCAGGAAGCACTATG---GGCGCAGCGTCA---  
ATAACGCTGACGGTACAG---GCCAGGCAA---TTGTTG---TCTGGCATAGTG CAGCAGCAAAGC---  
AATTTG---CTGAAG---GCTATTGAGGCTCAACAACAGTTGTTGAGACTCACGGTCTGGGGCATT  
>HQ595782..1  
TTCTATTGCAATACGTCTAAACTGTTTAATAGCACGTGGAAAAATGAAAGCAGGCAGGGG-----  
-----  
-----  
TCAAATGACATTATAACTCTCCCATGCAGAATAAAGCAAATTATAAGGATGTGGCAAAGAGTAGGGCAAAGCAA  
TGTATGCCCCCTCCCATCCCAGGAGTAATAGAGTGT AATTCAAAC---  
ATTACAGGGCTACTATTGACAAGAGATGGTGGTAATAGAACCGAA-----  
-----  
-----  
AATGAGACCTTCAGACCTGAGGGAGGAGATATGAGAAA CAATTGGAGAAGTGAATTATATAAGTATAAAGTAG  
TAAGAATTGAACCATTG---GGAGTAGCACCCACCAGGGCAAAAAGAAGAGTGGTG-----

-----GAGAGAGAAAAAGAGCA---GCTGGA---TTGGGAGCT-----  
 GTCTTCCTTGGGTTCTTAGCAGCA---GCAGGAAGTACTATG---GGCGCAGCGTCA---  
 ATAACGCTGACGGCACAG---GCCAGACAA---TTATTG---TCTGGCATAGTACAACAGCAAAGC---  
 AATTTG---CTGAGG---GCTATAGAGGCTCAACAGCAACTGTTGAGGCTCACGGTCTGGGGCATT  
 >HQ595784..2  
 TTCTATTGCAACACAGCAGGTCTGTTTAATAGCAGCTGGGGGAACAATGACACTGACAGCAACCAGACA-----  
 -----  
 -----  
 GCAAAGATAAATATAACTCTCCAATGCAGAATAAAGCAAATTGTAAGGATGTGGCAGAGAGTAGGACAAGCAA  
 TGTATGCCCCCTCCCATCGCAGGAACGATAAACTGTTTATCAAAT---  
 ATTACAGGACTACTATTAAACAAGAGATGGGGGGACAAATAAGACGTGG-----  
 -----  
 -----  
 TCTCACAATGAGACCTTCAGACCTGAAGGAGGAAATATGAAGGACAATTGGAGAAGTGAATTATATAGGTATA  
 AAGTAGTAAAAATTGAACCACTA---GGAGTAGCACCCACCGAGGCAAGGAGAAGAGTGGTG-----  
 -----GAGAGAGGAAAAAGAGCA---GTTGGA---ATAGGAGCT-----  
 ---GTTCTCTTTGGGTTCTTAGGAGCA---GCAGGAAGCACTATG---GGCGCGGCGTCA---  
 CTAACGCTGACGGTACAG---GCCAGACAA---TTACTG---TCTGGCATAGTGCAACAGCAGAGC---  
 AATCTG---CTGAGG---GCTATAGAGGCTCAACAGCATCTGTTGAAGCTCACAGTCTGGGGCATT  
 >Y13718..1  
 TTCTATTGTAACACATCAAGACTGTTTAATAGCACTTGGAAATGACACTACCAGTATGCTAAATGACACGAAG-  
 -----  
 -----  
 CCAAACGACACTATAACTCTCCCATGCAGAATAAAGCAAATTATAAATATGTGGCAAAGAGCAGGACAAGCAA  
 TATATGCCCCCTCCCATCCAAGGAGTAATAAGGTGTGAATCAAAC---  
 ATTACAGGACTAATATTAACAAGAGATGGTGGGGGTAATAGCAGT-----  
 -----  
 -----  
 GTAAGTAGTGAACTTTTCAGACCTGGAGGAGGAGATATGAGAGACAATTGGAGAAGTGAATTATATAAGTATA  
 AAGTAGTAAAAATTGAACCACTA---GGAGTAGCACCCACCAAGGCAAAGAGAAGAGTGGTG-----  
 -----GAGAGAGAAAAAGAGCA---GTTGGA---CTAGGAGCT-----  
 ---GTTTTATTGGGTTCTTAGGAGCA---GCAGGAAGCACTATG---GGCGCGGCGTCA---  
 ATAACGCTGACGGTACAG---GCCAGACAA---TTATTG---TCTGGCATAGTGCAACAGCAAAGC---  
 AATTTG---CTGAGG---GCTATAGAGGCTCAACAGCATCTGTTGAAACTCACGGTCTGGGGCATT  
 >Y13717..1  
 TTCTATTGTAACACATCAGGCCTGTTTAATAGCACTTGGGATAGCAGTGCCAGCATGCAAGAGTCAAAT-----  
 -----  
 -----  
 AGCACGGCCAATATAACTCTCCCATGCAGAATAAAGCAAATTATAAATCTGTGGCAGAGAACAGGACAAGCAA  
 TATATGCCCCCTCCCATCCAAGGAGTAATAAGGTGTGTATCAGAC---  
 ATCACAGGACTAATATTAACAAGAGATGGTGGGGGTAATGGTACTGAA-----  
 -----  
 -----  
 AGTAAAAAGAACTTTTCAGACCTGGAGGAGGAGATATGAGGGACAATTGGAGAAGTGAATTATATAAGTATA  
 AAGTAGTAAAAATTGAACCACTA---GGAGTAGCACCCACCAAGGCAAAGAGAAGAGTGGTG-----  
 -----GAGAGAGAAAAAGAGCA---GTTGGA---ATGGGAGCT-----  
 ---GTCCTCCTGGGTTCTTAGGAGCA---GCAGGAAGCACTATG---GGCGCGGCGTCA---  
 ATAACGCTGACGGTACAA---GCCAGACAA---TTATTG---TCTGGCATAGTGCAACAGCAAAGC---  
 AATTTG---CTGAGG---GCTATAGAGGCTCAACAGCAGGTGTTGAGACTCACGGTCTGGGGCATT  
 >HQ385459..2  
 TTCTATTGCGATACATCAGGCCTGTTTAATAGTATTTGGAATAGCACTGCCATCAGCCAGAATGTCGAGGAG-  
 -----  
 -----  
 TCAAATGATACTATAACTCTCCCATGCAAAATAAGACAAATTGTAAATATGTGGCAGAGAGTAGGACAAGCAA  
 TATATGCCCCGTCCCATTAAGGAATAATAAACTGTACATCAAAC---  
 ATTACAGGGCTACTGCTAACAAGAGATGGTGGGGATAATGATAAT-----  
 -----  
 -----  
 AAAACTGAGACTTTTCAGACCTGGAGGAGGAAATATGAAGGACAATTGGAGAAGTGAAGTTATATAGATATAAAG  
 TAGTAAAAATTGAACCACTA---GGAGTAGCACCCACCAAGGCAAAGAGAAGAGTGGTG-----

-----GAGAGAGAAAAAAGAGCA---GTTGGA---CTAGGAGCT-----  
GTCATCTTTGGGTTCTGGGAGCA---GCCGGAAGTACTATG---GGCGCGGCGTCA---  
ATAACGCTGACGGCACAG---GCCACACAA---TTATTG---TCTGGTATAGTACAACAGCAAAGC---  
AATCTG---CTGAGG---GCTATAGAGGCTCAACAGCACCTGTTGAAACTCACGGTCTGGGGCATT  
>HQ385452..1  
TTCTATTGCAATACATCAGGCCTGTTTTCTGGCTCTTGGTATAATGGCACTTGGGCTAATGACTCTTGGAGTG  
CTGGT-----  
-----CCT---  
GGGACCAATGATAATATAACTCTCCCATGCAAAATAAAGCAAATCATAAGAATGTGGCAGAGAGTGGGACAAG  
CAATGTATGCCCCCTCCCATCCAAGGAGAAATAAATTGTGTATCAAAC---  
ATCACAGGACTATTACTAACAAGAGATGGTGGTAATAGTAGTGAA-----  
-----  
-----  
GAGATCTTCAGACCTGGAGGAGGAGATATAAGAGACAATTGGAGGAGTGAATTATATAAATATAAAGTGGTAA  
AAATTGAACCATTA---GGAGTAGCGCCCACCAGGGCAAGGAGAAGAGTGGTG-----  
-----GGAAGAGAAAAAAGAGCA---GTTGGA---CTGGGAGCT-----  
GTCTTCCTTGGGTTCTTAGGAGCA---GCAGGAAGCACTATG---GGCGCGGCGTCA---  
ATCACGCTGACGGTACAG---GCCAGGCAA---TTATTG---TCTGGCATAGTGCAACAGCAGAGC---  
AATCTG---CTGAGG---GCTATAGAGGCTCAACACCATCTGTTGAAACTCACGGTCTGGGGCATT  
>HQ385453..1  
TTCTACTGCGACACAACAGGCCTGTTTAATAACACAGAGAAA-----  
-----  
-----  
AATGACACTATAATGCTCCCATGCAAAATAAGACAAATTGTACGTATGTGGCAGAGAGTAGGACAAGCAATGT  
ATGCCCCCTCCCATTCAGGAGTAATAAACTGTCTATCAAAC---  
ATTACAGGGCTACTGCTGACAAGAGATGGTGGGGATAGTACTAAT-----  
-----  
-----  
AATACTGAGAAATTCAGACCAGGAGGAGGAGATATAAGGGACAATTGGAGAAGTGAATTATATAAATATAAAG  
TAGTAAAAATTGAACCACTA---GGAGTAGCACCTACCAAGGCAAAGAGAAGAGTGGTG-----  
-----GAGAGAAGAAAAAAGAGCA---GGA-----CTAGCAGCT-----  
GTCTTCCTTGGGTTCTTAGGAGCA---GCAGGAAGCACTATG---GGCGCAGCGTCA---  
ATAACGCTGACGGTACAG---GCCAGACAA---TTATTG---TCTGGTATAGTGCAACAGCAAAAC---  
AATTTG---CTGAAG---GCTATAGAGGCTCAACAACAGATGTTGAGACTCACGGTCTGGGGCATT  
>KT152846..2  
TTCTATTGTAATACATCAAACCTGTTTAATAGCACTTGGACGAAAAATGACAGCATGCAGGGGTAAATCACA  
CGGAG-----  
-----  
TCAAATGACAATATAACTCTCCCATGCAGACTAAGGCAAATTATAAAAATGTGGCAGAGAGTAGGACAAGCAA  
TGTATGCCCCCTCCCATCCAAGGAATAATAAAGTGTGAATCAAAC---  
ATTACAGGGCTAATATTAACAAGAGATGGTGGGAATAACAACAGT-----  
-----  
-----  
GCAGAGGAAACCTTCAGACCTGGAGGAGGAGATATGAGGGACAATTGGAGAAGTGAATTATATAAGTATAAAG  
TAGTACAAATTGAACCACTA---GGGGTAGCACCCACCAAGGCAAGGAGAAGAACGGTG-----  
-----GGGAGAGAAAAAAGAGCA---GTTGGA---ATGGGAGCT-----  
GTTTTCTTGGGTTCTTAGGAGCA---GCAGGAAGCACTATG---GGCGCAGCGTCA---  
ATAACGCTGACGGTACAG---GCCTGGCAA---TTATTG---TCTGGCATAGTGCAACAGCAAAGC---  
AATTTG---CTGAGG---GCTATAGAGGCTCAACAACATCTGTTGAAACTCACGGTCTGGGGCATT  
>KT152841..1  
TTCTATTGTGATACATCAGCCCTGTTTAATGGCACTTGGGAATAATACCAGCATGAAGGAGTCAAATAGCACGG  
AA-----  
-----  
TCAAATGACACTATAACTCTCCCATGCAGAATAAAGCAAATTATAAATATGTGGCAGAGAGTAGGACAAGCAA  
TGTATGCCCCCTCCCATCCAAGGAATAATAAAGTGTGAATCAAAC---  
ATTACAGGACTACTATTAACAAGAGATGGTGGTGGGGATAACAGTACA-----  
-----  
-----  
AATGAGGAAACCTTCAGACCTGGAGGAGGAGATATGAGGGACAATTGGAGAAGTGAATTATATAGGTATAAAG  
TAGTAAAAATTGAACCACTA---GGAGTAGCACCCACCAGGGCAAGGAGAAGAACGGTG-----

-----GGGAGAGAAAAAAGAGCA---GTGGAA---ATAGGAGCT-----  
GTCTTCCTTGGGTTCTTAGGAGCA---GCAGGAAGCACTATG---GGCGCAGCGTCA---  
ATAACGCTGACGGTACAG---GCCAGACAA---TTATTG---TCTGGCATAGTGCAACAGCAAAAC---  
AATTTG---CTGAGG---GAA---GAGGCTCAACAACATTTGTTGAAACTCACGGTCTGGGGCATA  
>KT152842..1  
TTCTATTGTAATACATCAGCTCTGTTTAATGGCACTTGGGGGCAAAATGCCAGCATGGAGTCAAATGGCACT-  
-----  
-----  
ATAAATGACACTATAATTCTCCCATGCAGACTAAAGCAAATTGTAAGGATGTGGCAGAGAGTAGGACAAGCAA  
TGTATGCCCCCTCCCATCCAAGGAGAAATAAATTGTGTATCAAAC---  
ATTACAGGACTAATATTAACAAGAGATGGTGGGAATAATACAGAG-----  
-----  
-----  
GAAATCTTCAGACCTGGAGGAGGAGATATGAGGGACAATTGGAGAAGTGAATTATATAAGTATAAAGTAGTAA  
AAATTGAACCACTA---GGAGTAGCACCCACCAGTGCAAGGAGAAGAACGGTG-----  
-----GGGAGAGAAAAAAGAGCA---GTTGGA---ATAGGAGCT-----  
GTCTTCCTTGGGTTCTTAGGAGCA---GCAGGAAGCACTATG---GGCGCGGCGTCA---  
ATAACGCTGACGGTACAG---GCCAGACAA---TTATTG---TCTGGCATAGTGCAACAGCAAAGC---  
AATTTG---CTGAGG---GCTATAGAGGCTCAACAACATCTGTTGAAACTCACAGTCTGGGGCATT  
>KT152844..1  
TTCTACTGTAATACATCAGCCCTGCTTAATGGCACTTGGCAAAATGCCAGCATGCAGGAGTCAAATAGCACAG  
AG-----  
-----  
TCAAATGACACCATAACTCTCCCATGCAGAATAAAGCAAAGTTATAAATATGTGGCAGAGAGTAGGACAAGCAA  
TGTATGCCCCCTCCCATCCAAGGAATAATAAAGTGCGTATCAAAC---  
ATCACAGGACTAATATTAACAAGAGATGGTGGGAATAGTAACAGT-----  
-----  
-----  
AGTACAGTTGAAACCTTCAGGCCTGGAGGAGGAGATATGAGGGACAATTGGAGAAGTGAATTATATAAGTATA  
AAGTAGTAAAAATTGAACCACTA---GGAGTAGCACCCACCAGGGCAAGGAGAAGAACGGTG-----  
-----GAGAGAGAAAAAAGAGCA---GTTGGA---ATAGGAGCT-----  
---GTCTTCCTTGGGTTCTTAGGAGCA---GCAGGAAGCACTATG---GGCGCAGCGTCA---  
ATAACGCTGACGGTACAG---GCCAGACAA---TTATTG---TCTGGCATAGTGCAACAGCAAAGT---  
AATTTG---CTGAGG---GAAATAGAGGCTCAACAACATCTGTTGAAACTCACGGTCTGGGGCATT  
>AY736809..2  
TTCTATTGTAATACATCAGGCCTGTTCAATAGCACTTGGCCTGTCAATGCCAGTGAGCAGGAGTCAAATAGCA  
CA-----  
-----  
GAGTCAGATGGCATTATAACTCTCCGATGCAGAATAAAGCAAATCATAAATATGTGGCAGAGAACAGGACAAG  
CAATGTATGCCCCCTCCCATCAAGGAATAATAAAGTGTGTATCAAAC---  
ATTACAGGACTACTGTTAAACAAGAGATGGTGGGAATAGTACTGTC-----  
-----  
-----  
AATGAACTTTTCAGACCTGGAGGAGGAGATATGAGGGACAATTGGAGAAGTGAATTATATAAGTATAAAGTAG  
TAAAAATTGAACCACTA---GGAGTAGCACCCACCAAGCAAGGAGAAGAGTGTTG-----  
-----GGGAGAGAAAAAAGAGCA---GTTGGA---ATAGGAGCT-----  
GTTTTTCCTTGGGTTCTTAGGAGCA---GCTGGAAGCACTATG---GGCGCGGCGTCA---  
ATAACGCTGACGGTACAG---GCCAGACAA---TTACTG---TCTGGCATAGTGCAACAGCAAAAC---  
AATTTG---CTGAGG---GCTATAGAGGCTCAACAACAACCTGTTGAAACTCACGGTCTGGGGCATT  
>AY736810..2  
TTTTATTGTAATACATCAGACCTGTTTAATAGTACTTGGAACATTGAAGGCACTGCCAGCATAAATGGCACGG  
AG-----  
-----  
TCAAATGACAATATAACTCTCCCATGCAGAATAAAGCAAATTATAAATATGTGGCAGAGAGTAGGACAAGCAA  
TGTATGCCCCCTCCCATCCAAGGAGTAATAAGGTGTCAATCAAAC---  
ATTACAGGAATACTATTAACAAGAGATGGTGGGAATACTGGGAATAAT-----  
-----  
-----  
AGCAGGACAAATGAAACCTTTAGACCTGGAGGAGGAGATATGAGGGACAATTGGAGAAGTGAATTATATAAGT  
ATAAAGTAGTAAAAATTGAACCACTG---GGAGTAGCACCCACCAAGGCAAAGAGAAGAGTGTTG-----

-----GAGAGAGAAAAAGAGCA---GTTGGA---CTGGGAGCT---  
-----GTATTCATTGGGTTCTTAGGAGCA---GCCGGAAGCACTATG---GGCGCGGCGTCA---  
ATAACGCTGACGGTACAG---GCCAGACAA---TTATTG---TCTGGCATAGTGCAACAGCAAAGC---  
AATTTG---CTGAGG---GCTATAGAGGCTCAACAGCATTTGTTGAAACTCACGGTCTGGGGCATT  
>AY736812..1  
TTCTATTGTAATACATCAGGTCTGTTCAATAGCACCTGGAAGGCCAACAAATGGCACCTGGAAGGCCAACATAT  
CAGAG-----  
-----  
TCAAATAACACGGAGATAACTCTCCAATGCAGAATAAAGCAAATTATAAATATGTGGCAGAGAACAGGACAAG  
CAATATATGCCCCCTCCCATCCAGGGAGTGATAAGGTGTGAATCAAAC---  
ATCACAGGACTACTGTTAACAAGAGATGGTGGGGAGGGGAACAAT-----  
-----  
GAAAGTGAGATCTTCAGACCTGGAGGAGGAGATATGAGGGACAACCTGGAGAAGTGAATTATATAAGTATAAAG  
TAGTAAAAATTGAACCACTA---GGAGTAGCACCCACCAGGGCAAGGAGAAGAGTGGTG-----  
-----GGAAGAGAAAAAGAGCA---GTTGGA---ATAGGAGCT-----  
GTTTTCTTGGGTTCTTAGGAGCA---GCAGGAAGCACTATG---GGCGCGGCGTCA---  
ATAACGCTGACGGTACAG---GCCAGGCAA---TTATTG---TCTGGCATAGTGCAACAGCAAAGC---  
AATTTG---CTGAGG---GCTATAGAGGCTCAACAACATATGTTGAAACTCACGGTCTGGGGCATT  
>AY736815..1  
TTCTATTGTAATACATCAGGTCTGTTTAATAGCACCTGGGACAACAACACCGACCCAACCAACACAACG----  
-----  
-----  
TCAAATGACACTATCACTCTCCAATGCAGAATAAAGCAATTTATAAATATGTGGCAGAGAACAGGGCAAGCAA  
TGTATGCCCCCTCCCATCCAAGGGGTAATAAGGTGTGATTCCAAC---  
ATTACAGGACTACTATTAACAAGAGATGGTGGAGTAGGTAACAAT-----  
-----  
ACAACTGAAACCTTCAGACCTGGAGGAGGAGATATGAGGGACAATTGGAGAAGTGAATTATATAAGTATAAAG  
TAGTAAAAATTGAACCACTA---GGAGTAGCACCCACCAGGGCAAAGAGAAGAGTGGTG-----  
-----GAGAGAGAAAAAGAGCA---GTTGGA---ATAGGAGCT-----  
GTTTTCATTTGGGTTCTTAGGAGCA---GCAGGAAGCACTATG---GGCGCGGCGTCA---  
GTAACGCTGACGGTACAG---GCCAGACAA---TTATTG---TCTGGCATAGTGCAACAGCAAAGC---  
AATTTG---CTGAGG---GCTATAGAGGCTCAACAGCATCTGTTGAAACTCACGGTCTGGGGCATT  
>AY736813..1  
TTCTATTGTGATACATCAGGCCTGTTTAATAGCAGTTGGAATAATAACACTTGAAGGAGTCAAATAGCACGG  
GG-----  
-----  
TCAAATGACACTATAACTCTCCTATGCAGAATAAAACAAATTATAAATATGTGGCAGAGAACAGGACAAGCAA  
TGTATGCCCCCTCCCATCCCAGGGTTAATAAGCTGTAAATCAAAC---  
ATTACAGGTATAATATTGACAAGAGATGGTGGGAATGGTAACAGT-----  
-----  
ACAAATGAAACCTTCAGACCTGGAGGAGGAGATATGAGGGACAATTGGAGAAGTGAATATATAGGTATAAAG  
TAGTACAAATTGAACCACTA---GGAGTAGCACCCACCAGGGCAAGGAGAAGAGTGGTG-----  
-----CAGAGAGAAAAAGAGCA---GTAGGA---ATAGGAGCT-----  
GTCTTCCTTGGGTTCTTAGGAGCA---GCAGGAAGCACTATG---GGCGCAGCGTCA---  
ATAACGCTGACGGTACAG---GCCAGACAA---TTATTG---TCTGGCATAGTGCAACAGCAAAGC---  
AATTTG---CTGAGG---GCTATAGAGGCTCAACAACATCTGTTGAAACTCACGGTCTGGGGCATT  
>AY736816..1  
TTCTATTGTGACACATCAGGCCTGTTTACTTGAATAGCACTTGAATGGCACTGAGTCAAACAACACAAAG-  
-----  
-----  
TCAAACGACACTATAACTCTCCAATGCAGAATAAAGCAAATTATAAATATGTGGCAGAGAGTAGGACAAGCAA  
TATATGCCCCCTCCCATCAAAGGAGTAATAAGGTGTGAATCAGAC---  
ATTACAGGACTTATACTAACAAGAGATGGTGGGAATACTAACAGT-----  
-----  
ACAGAGGAAACCTTCAGACCTGGAGGAGGAGATATGAGGGACAATTGGAGAAGTGAATTATATAAGTATAAAG  
TAGTAAAAATTGAACCACTA---GGAGTAGCACCCACCAAGGCAAAGAGAAGAGTGGTG-----

-----GGGAGAGGAAAAAGAGCA---GTTGGA---ATAGGAGCT-----  
 GTCTTCCTTGGGTTCTTAGGAGCA---GCCGGAAGCACTATG---GGCGCGGCGTCA---  
 ATAACGCTGACGGTACAG---GCCAGACAA---TTATTG---TCTGGCATAGTGCAACAGCAAAGC---  
 AATTTG---CTAAGG---GCTATAGAGGCTCAACAGCATCTGTTGAAACTCACGGTCTGGGGCATT  
 >AF457053..2  
 TTCTATTGTAATACATCAGGCCTGTTTAAACAGCACCTGGCACTATAACAGCAATGGTACTTGGCACAATAACA  
 GCACAAAT-----  
 -----AGCATG-----  
 GACTCAAATGAACTATAACTCTCACATGCAGAATAAAGCAAATTATAAATATGTGGCAGAGAGTAGGAAAAG  
 CAATGTATGCTAATCCCATCCAAGGAATAATAAAGTGTGAATCAAAC---  
 ATTACAGGACTACTCTTAACAAGAGATGGTGGGAATACTAGCAGT-----  
 -----  
 -----  
 ACAAATGAAACCTTCAGACCTGGAGGAGGAGATATGAGGGACAATTGGAGAAGTGAATTATACAAATATAAAG  
 TAGTAAAGATTGAGCCACTA---GGAGTAGCACCCACCAGGGCACAGAGAAGAGTGGTG-----  
 -----GGGAGAGAAAAAAGAGCA---ATTGGA---ATAGGAGCT-----  
 GTCTTCCTTGGGTTCTTAGGAGCA---GCAGGAAGCACTATG---GGCGCGGCGTCA---  
 ATGACGCTGACGGTACAG---GCCAGACAA---TTATTG---TCTGGCATAGTGCAACAGCAAAGC---  
 AATTTG---CTGAGG---GCTATAGAGGCTCAACAACAACCTGTTGAAACTCACGGTCTGGGGCATT  
 >AF457055..1  
 TTCTATTGTAATACAACAAACCTGTTTAAATAGCACCTGGAGAGGAAATAAAACTGTCAGCAATAGCACAGAGT  
 TA-----  
 -----  
 GATGAAAATGGCACTATAACTCTCCCATGCAGAATAAAGCAAATTATAAATATGTGGCAGAGAACAGGACAAG  
 CAATGTATGCCCCCTCCCATCCAAGGAGTAATAAAGTGTGTATCAAAC---  
 ATTACAGGACTACTATTAACAAGAGATGGTGGAAAGTGATAACAAT-----  
 -----  
 -----  
 ATAAGTAGTGAAACCTTCAGACCAGGAGGAGGAGATATGAGGGACAATTGGAGAAGTGAATTATATAAGTATA  
 AAGTAGTGAACTTGAACCACTA---GGAGTAGCACCCAACAAGGCAAGGAGAAGAGTGGTG-----  
 -----GAGAGAGAAAAAAGAGCA---GTTGGA---CTGGGAGCT-----  
 ---GTATTCATTGGGTTCTTAGGAGCA---GCAGGAAGCACTATG---GGCGCGGCGTCA---  
 ATAACGCTGACGGCACAG---GCCAGACAA---TTATTG---TCTGGCATAGTGCAACAGCAAAGC---  
 AATTTG---CTGAAG---GCTATAGAGGCTCAACAGCATCTGTTGAAACTCACGGTCTGGGGCATT  
 >AF457070..1  
 TTCTATTGTAATACATCAGGCCTGTTTAAATAGCACTTGGAAATAGCACTGGGAATGACACTTGGAGTGGCAATG  
 CCAGCACG-----  
 -----CAG---  
 GAGTCAAATGACACTATAACTCTCCCATGCAGAATAAAGCAAATTGTAAATATGTGGCAGAGAATAGGACAAG  
 CAATGTATGCCCCCTCCCATCCAAGGAGTAATAAGGTGTGAATCAAAC---  
 ATTACAGGACTACTATTAACAAGAGATGGTGGGAACAATGAAAGT-----  
 -----  
 -----  
 GAAACCTTCAGACCTGGAGGAGGAAATATGAGGGACAATTGGAGAAGTGAATTATATAGGTACAAAGTAGTGA  
 AAATTGAACCACTA---GGAGTAGCACCCACCAGGGCAAAAAGAAGAGTGGTG-----  
 -----GGGAGAGAAAAAAGAGCA---GTTGGA---ATAGGAGCT-----  
 GTGTTTCCTTGGGTTCTTAGGAGCA---GCAGGAAGCACTATG---GGCGCGGCGTCA---  
 GTAACGCTGACGGTACAG---GCCAGACAA---TTATTG---TCTGGCATAGTGCAACAGCAAAGC---  
 AACTTG---CTGAGG---GCTATAGAGGCTCAACAACATCTGTTGAAACTCACGGTCTGGGGCATT  
 >AF457077..1  
 TTCTATTGTAATACATCAGGCCTGTTTAAATAGCACTTGGTCTTGGAAATGACACTGCAAATGGCACTGCAATGG  
 AG-----  
 -----  
 CCAAATAGCACTATAACTCTCCCATGCAGAATAAAGCAAATTATAAATATGTGGCAGAGAGTAGGACAAGCAA  
 TGTATGCCCCCTCCCATCCAGGAGTAATAAGTTGTGTATCAAAC---  
 ATTACAGGACTAATATTAGTAAGAGATGGAGGGAATAATGTTACA-----  
 -----  
 -----  
 AATGAAACCTTCAGACCTGGAGGAGGAGATATGAGGGACAATTGGAGAAGTGAATTATATAAGTATAAGGTAG  
 TAAAAATTGAACCACTA---GGAGTAGCACCCACCAAGGCAAAGAGAAGAGTGGTG-----

-----GAGAGAGAAAAAGAGCA---GTTGGA---ATAGGAGCT-----  
 GTCTTCCTTGGGTTCTTAGGAGCA---GCAGGAAGCACTATG---GGCGCGGCGTCA---  
 ATAACGCTGACGGTACAG---GCCAGACAA---TTATTG---TCTGGTATAGTGCAACAGCAAAGC---  
 AATTTG---CTGAGG---GCTATAGAGGCTCAACAACATCTGTTGAAACTCACAGTCTGGGGCATT  
 >AF457080..2  
 TTCTATTGTAATACATCGGGCCTGTTTAATAGCACCTACAATGGCACTGACATCGCTGAAAATAGCACGGAG-  
 -----  
 -----  
 TCAAAATGACACTATAGTTCTCCCATGCAGAATAAAGCAAATTATAAGGATGTGGCAGCGAGTAGGACAAGCAA  
 TGTATGCCCCCTCCCATCCAGGAATAATAAGATGTGACTCAAAC---  
 ATTACAGGATTACTATTAACAAGAGATGGTGGGGATGATAATGAA-----  
 -----  
 -----  
 ACTGAAACCTTTAGACCTGGAGGAGGAGATATGAGGGATAATTGGAGAAGTGAATTATATAAGTATAAAGTAG  
 TAAAAATTGAACCACTA---GGAGTAGCACCCACCAGGGCAAAAAGAAGAGTGGTG-----  
 -----GAGAGAGAAAAAGAGCA---GTTGGA---ATAGGGGCT-----  
 TTTGTCCTTGGGTTCTTAGGAGCA---GCAGGAAGCACTATG---GGCGCAGCATCA---  
 ATAACGCTGACGGTACAG---GCCAGACAA---TTATTG---TCTGGCATAGTGCAACAGCAAAGC---  
 AATTTG---CTGAGG---GCTATAGAGGCTCAACAACAAATATTGAGACTCACGGTCTGGGGCATT  
 >AF457081..1  
 TTCTATTGTAATACATCAGGCCTGTTTAATAGCACTTGGACAAATGACAGTATCAGCACAAATAGCACAAAG-  
 -----  
 -----  
 TCAAAATGACACTATAACTCTCCCATGCAGAATAAAGCAAATTATAAATATATGGCAGAGAGTGGGACAAGCAA  
 TGTATGCCCCCTCCCATCCAAGGAGTAATACAGTGTGTATCAAAC---  
 ATTACAGGACTACTATTAACAAGAGATGGTGGGGATAACAGTAGT-----  
 -----  
 -----  
 ACGAATGAAACCTTCAGACCTGGAGGAGGAGATATGAGGGACAATTGGAGAAGTGAATTATATAAGTATAAAG  
 TAGTAAAAATTGAACCACTA---GGAGTAGCACCCACCAGGGCAAGGAGAAGAGTGGTG-----  
 -----GAGAGAGAGAAAAAGAGCA---GTTGGA---CTGGGAGCT-----  
 GTTTTCATTGGGTTCTTGGGAGCA---GCAGGGAGCACTATG---GGCGCAGCGTCA---  
 ATAACGCTGACGGTACAG---GCCAGACAA---TTATTG---TCTGGCATAGTGCAACAGCAAAGC---  
 AATTTG---CTGAGG---GCTATAGAGGCTCAACAACATCTGTTGAAACTCACGGTCTGGGGCATT  
 >AF457083..1  
 TTCTATTGTAATACATCAAGTCTGTTTAATAGTACTTGGGAATAACAGTACTTGGGAATACCAGCAGGCAGGAGG  
 CAAATAAT-----  
 -----AGCCCG-----  
 GGGTCAAACGACACTATAACTCTCAAATGCAGAATAAAGCAAATTATAAATATGTGGCAGAGAGCGGGACAAG  
 CAATATATGCCCCCTCCCATCCAAGGAGTAATAAGGTGTAACCTCAAAC---  
 ATTACAGGACTAATATTAACAAGAGATGGTGGGGGTAATAACAAT-----  
 -----  
 -----  
 ACAAATGAAACCTTCAGACCTGGAGGAGGAGATATGAGGGACAATTGGAGAAGTGAATTATATAAGTACAAAG  
 TAGTAAAAATTGAACCACTA---GGAGTAGCACCCACCAGGGCAAGAGAAGAGTGGTG-----  
 -----GAGAGAGGAAAAAGAGCA---GTTGGA---ATAGGAGCT-----  
 GTCCTCATTGGGTTCTTAGGAGCA---GCAGGAAGCACTATG---GGCGCGGCGTCA---  
 ATAACGCTGACGGCACAG---GCCAGACAA---TTATTG---TCTGGCATAGTGCAACAGCAAAC---  
 AATTTG---CTGAGG---GCTATAGAGGCTCAACAACATCTGTTGAGACTCACGGTCTGGGGCATT  
 >AF457084..1  
 TTCTATTGTGACACATCAGGCCTGTTTAATAGCAGTTGGACTGCTAGCAATGATAGCATGCAGGAGGCACATA  
 GC-----  
 -----  
 ACAGAGTCAAATATAACTCTCCAATGCAGAATAAAGCAAATTATAAATATGTGGCAGAGAGCAGGACAAGCAA  
 TGTATGCCCCCTCCCATCCAGGAATAATAAGGTGTGAATCAAAC---  
 ATTACAGGACTAATATTAACAAGAGATGGTGGTGAGGGTAATAAC-----  
 -----  
 -----  
 AGTACAAATGAAACCTTCAGACCAGTAGGAGGAAATATGAGGGACAATTGGAGAAGTGAATTATATAAGTATA  
 AAGTAGTAAAAGTTGAACCACTA---GGAGTAGCACCCACCAAGTCAAGGAGGAGAGTGGTG-----

-----GAGAGAGAAAAAGAGCA---GTTGGA---CTAGGAGCT-----  
---GTGTTTCATTGGGTTCTTAGGAGCA---GCAGGAAGCACTATG---GGCGCGGCGTCA---  
ATGACGCTGACGGTACAG---GCCAGACAA---TTATTG---TCTGGCATAGTGCAACAGCAAAGC---  
AATTTG---CTGAGG---GCTATAGAGGCTCAACAGCATCTGTTGAAACTCACGGTTTGGGGCATT  
>AF457086..3  
TTCTATTGTAATACAACAAAACCTGTTTAATAGCACTTGGAGTCATAATGACAGCACGCAAGAGTCAAATAGCA  
CA-----  
-----  
AAGTCAAATGACACTATAACTCTCCCATGCAGAATAAAGCAAATTATAAATATGTGGCAGAGAGTAGGACAAG  
CAATATATGCCCCCTCCCATACAAGGAATAATAAGGTGTGAATCAAAT---  
ATTACAGGACTAATATTAACAAGAGATGGAGGTACCAATAGTACA-----  
-----  
-----  
AATGAAACCTTCAGACCTGGAGGAGGAGATATGAGGGACAATTGGAGAAGTGAATTATATCAGTATAAAGTAG  
TAAAAATTGAACCACTA---GGAGTAGCACCTACCAGGGCAAAGAGAAGAGTGGTG-----  
-----GAGAGAGCAAAAAGAGCA---GTTGGA---ATAGGAGCT-----  
GTCTTCCTTGGGTTCTTAGGAGCA---GCAGGAAGCACTATG---GGCGCGGCGTCA---  
ATAACGCTGACGGTACAG---GCCAGACAA---TTATTG---TCTGGCATAGTGCAACAGCAAAGT---  
AATTTG---CTGAGG---GCTATAGAGGCTCAACAGCATCTGTTGAAACTCACGGTCTGGGGCATT  
>AF457089..1  
TTTTATTGCAATACATCAGATCTGTTTAATAGTACTTGGCCTGTCAATGCCAGCATGGAGTCAAATAGCACGG  
AG-----  
-----  
TCAAATGACAATATAACACTCCAATGCAGAATAAAGCAAATTATAAATATGTGGCAGAAAGTAGGACAAGCAA  
TGTATGCCCCCTCCCATACAAGGAGTAATAAGGTGTGAATCAAAC---  
ATTACAGGACTACTATTAACAAGAGATGGTGGATCTAACAGTACA-----  
-----  
-----  
GAAGAAACCTTCAGACCTGGAGGAGGAGATATGAGGGACAATTGGAGAAGTGAATTATATAAGTATAAAGTAG  
TGAAAATTGAGCCATTA---GGGGTAGCACCCACCAGGGCAAAGAGAAGAGTGGTG-----  
-----GAGAGAGAAAAAGAGCG---GTTACA---CTAGGAGCT-----  
GTATTCATTGGGTTCTTAGGAGCA---GCAGGAAGCACTATG---GGCGCAGCGTCA---  
GTAACGCTGACGGTACAG---GCCAGACAA---TTACTG---TCTGGCATAGTGCAACAGCAAAGC---  
AATTTG---CTGAGG---GCTATAGAGGCTCAACAGCATATGTTGAAACTCACGGTCTGGGGCATT  
>EU110088..2  
TTCTATTGTAACACATCACGCCTGTTTAATAGCACCTGGTGGGCCAATGGCACCAGGACGGGCTACAACAGC-  
-----  
-----  
ACTGATGGCAATATAACACTCCCATGCAGAATAAAGCAAATTATAAATATGTGGCAGAGAGTAGGACAAGCAA  
TGTATGCCCCCTCCCATCCAGGAAGAATAAGTTGTGAATCAAAC---  
ATTACAGGACTAATATTAACAAGAGATGGTGGGAGTGATAATACA-----  
-----  
-----  
ACTGAAACCTTCAGACCTGGAGGAGGAGATATGAGGGACAATTGGAGAAGTGAATTATATAAGTATAAAGTAG  
TAGAAGTTGAACCACTA---GGAGTAGCACCCACAGAGGCAAGGAGAAGAGTGGTG-----  
-----CAGAGAGAAAAAGAGCA---GTCGGA---CTGGGAGCT-----  
GTCTTCATTGGGTTCTTGGGAGCA---GCAGGAAGCACTATG---GGCGCGGCGTCA---  
GTGACGCTGACGGTACAG---GCCAGACAA---TTATTG---TCTGGTATAGTGCAACAGCAAAGC---  
AATTTG---CTGAGG---GCTATAGAGGCTCAACAACATCTGTTGAAACTCACGGTCTGGGGCATT  
>EU110092..1  
TTCTATTGTGATACATCAGCTCTGTTCAATAGCACTTGGAAATGCCACTGAGTCAAATGACACAAACTCCACAG  
AATCA-----  
-----  
AACTCAAATGACACTATAACTCTCCCATGCAGAATAAAAACAAATTATAAATATGTGGCAGAGAATAGGACAAG  
CAATGTATAACCCTCCCATCCAAGGAAAAATAAAGTGTGAATCAAAC---  
ATTACAGGACTATTGTTAACAAGAGATGGTGGAGAAAAATAGAGAAAAAT-----  
-----  
-----  
AATGACAGTAGTGAAATCTTCAGACCAGGAGGAGGAGATATGAAGGACAATTGGAGAAGTGAATTGTATAAGT  
ATAAAGTAGTAAAAATTGAACCACTA---GGAGTAGCACCCACCAGGGCAAGGAGAAGAGTGGTG-----

-----GGGAGAGAAAAAGAGCA---GTTGGA---ATAGGAGCT---  
 -----GTCTTCCTTGGGTTCTTAGGAGCA---GCAGGAAGCACTATG---GGCGCGGCGTCA---  
 ATAACGCTGACGGTACAG---GCCAGACAA---TTATTG---TCTGGCATAGTGCAACAGCAAAGC---  
 AATTTG---CTGAGG---GCTATAGAGGCTCAACAACATCTGTTGAAACTCACAGTCTGGGGCATT  
 >EU110094..1  
 TTCTATTGTAATACATCAGGCCTGTTTAGTAGCACTTGGAGTTGGAATGACACTACCAAACAATGGAATCAA  
 ATAGC-----  
 -----ACG---  
 GTGTCAGATGGCACTATAAATCTCCCATGCAGAATAAAGCAAATTATAAATATGTGGCAGAGAGTAGGGCAAG  
 CAATGTATGCCCCCTCCCATCCAAGGAGCAATAAGGTGTACATCAAAC---  
 ATTACAGGACTAATATTAACAAGAGATGGTGGGAAAGATGACAGG-----  
 -----  
 -----  
 AATAATGAAACCTTCAGACCTGGAGGAGGAGATATGAGGGACAATTGGAGAAGTGAATTATATAAATATAAAG  
 TAGTAAAAATTGAACCACTA---GGAGTAGCACCCACCAGGGCAAAGAGAAGAGTGGTG-----  
 -----GAGAGAGAAAAAGAGCA---GTTGGA---ATAGGAGCT-----  
 GTCTTCCTTGGGTTCTTAGGAGCA---GCAGGAAGCACTATG---GGCGCGGCGTCA---  
 ATAACGCTGACGGTACAG---GCCAGACAA---TTATTG---GCTGGCATAGTGCAACAGCAAAGC---  
 AATTTG---CTGAGG---GCTATAGAGGCTCAACAACATCTGTTGAAACTCACGGTCTGGGGCATT  
 >KT022360..2  
 TTCTATTGTAACACATCAGGCTTGTTTAATAACACTTGGGTGTTTAATAGCATTTGGGATAATAGCACTCAGG  
 AGTCCAAT-----  
 -----AGCACA-----  
 GAGTCAAATAAACTATAATTCTCCAATGCAGAATAAAGCAAATTATAAATATGTGGCAGAGAGCAGGACAAG  
 CAATATATGCTCCTCCCATTCAGGAGTAATAAGGTGTGAATCAAAC---  
 ATTACAGGACTAATATTAACAAGAGATGGTGGAAATAATAACACG-----  
 -----  
 -----  
 ATAAATGAAACATTTAGACCTGGAGGAGGAGACATGAGGGACAATTGGAGAAGTGAATTATATAAGTACAAAG  
 TAGTAAAAATTGAACCACTA---GGAGTAGCACCTACCAAGGCACGGAGAAGAGTGGTG-----  
 -----GAGAGAGAAAAAGAGCA---GTTACA---ATAGGAGCT-----  
 ATGTTCAATTGGGTTCTTAGGAGCA---GCAGGAAGCACTATG---GGCGCGGCGTCA---  
 ATGACGCTGACGGTACAG---GCCAGACAA---TTATTG---TCTGGCATAGTGCAACAGCAAAGC---  
 AATTTG---CTGAGG---GCTATAGAGGCTCAACAGCATCTGTTGAAACTCACGGTCTGGGGCATT  
 >KT022361..3  
 TTCTATTGTAATACATCAGGCCTGTTTAATTACAGCTACAGCATGCAGGAGTCAAATGATACGGAG-----  
 -----  
 -----  
 GCAAATGGCACTATAACTCTCCAATGCAAAATAAAACAAATTATAAATATGTGGCAGAGAGTAGGACAAGCAA  
 TGTACGCCCCCTCCCATCCAAGGAGTAATACAGTGTAATCAAAC---  
 ATTACAGGACTAATATTAACAAGAGATGGTGGAAATAGTACTAAT-----  
 -----  
 -----  
 GGTACAGAAATCTTCAGACCTGGAGGAGGAGATATGAGAGACAATTGGAGAAGTGAAGTTATATAAGTATAAAG  
 TAGTACAACTTGAACCACTA---GGAGTAGCACCCACCAAGGCAAAGAGAAGAGTGGTG-----  
 -----GAAAGAGAAAAAGAGCA---GTTGGA---ATAGGAGCT-----  
 GTCTTCCTTGGGTTCTTAGGAACA---GCAGGAAGCACTATG---GGCGCGGCGTCA---  
 CTGACGCTGACGGTACAA---GCCAGACTA---TTATTG---TCTGGCATAGTGCAACAGCAAAGC---  
 AATTTG---CTGAGG---GCTATAGAGGCTCAACAATATCTGTTGAAACTCACGGTCTGGGGCATT  
 >KT022363..1  
 TTCTATTGTGACACCTCGAAGCTGTTTAATAGCTCTTGGAATGAGAGCACTTGGGATGAAAATAGCACGAAGC  
 CTAAC-----  
 -----  
 -----  
 AACAAATGAAACTATAATTCTCCCATGCAGAATAAAGCAAATCATAAATATGTGGCAGAGAACAGGACAAGCAA  
 TATATGCCCCCTCCCATGGAAGGAATAATAAAGTGTGACTCAAAC---  
 ATTACAGGACTAATATTAACAAGAGATGGTGGGAGGATTAACACA-----  
 -----  
 -----  
 ACTAATGAAACTTTTCAGACCTGGAGGAGGAGATATAAGGGACAATTGGAGAAGTGAATTATATAAATATAAAG  
 TAGTAAAAATTGAGCCACTA---GGAGTAGCACCTCCAGGGCAAGGAGAAGAGTGGTG-----

-----GGGAGAGAAAAAAGAGCA---GTTGGA---ATAGGAGCT-----  
 GTCTTCCTTGGGTTCTTAGGAGCA---GCAGGAAGCACTATG---GGCGCGGCGTCA---  
 CTAACGCTGACGGTACAG---GCCAGGCAA---TTATTG---TCTGGCATAGTGCAACAGCAAAGC---  
 AATTTG---CTGAGG---GCTATAGAGGCTCAACAGCATATGTTGAAACTCACGGTCTGGGGCATT  
 >KT022364..1  
 TTTTATTGTGATACCTCAGGCTTGTTTAATAGTACTTGGGAAATTGAAAACAATACTGCCAGAATAAAGCCAA  
 ATAAC-----  
 -----  
 ACGGGGTAAATATAACGCTCCCGTGCAGAATAAAGCAAATTATAAATATGTGGCAAAGGGTAGGACAAGCAA  
 TGTATGCCCCCTCCCATCAAAGGAGTAATAAGGTGTGTATCAAAC---  
 ATCACAGGACTACTGCTAACAAGAGATGGTGGGAGTAAAAATAGA-----  
 -----  
 -----  
 AGTAATGAAACCTTCAGACCTGGAGGAGGAGATATGAGGGACAATTGGAGAAGTGAATTATATAAATATAAAG  
 TAGTAAAAATTGAACCACTA---GGAGTAGCACCCCTCCAGGGCAAAGAGGAGAGTGGTG-----  
 -----GAGAGAGAGAAAAAGAGCA---GTTGGA---ATAGGAGCT-----  
 GTATTCCTTGGGTTCTTAGGAGCA---GCAGGAAGCACTATG---GGCGCGGCGTCA---  
 CTGACGCTGACGGTACAG---GCCAGACAA---TTATTG---TCTGGCATAGTGCAACAGCAAAGC---  
 AATTTG---CTGAGG---GCTATAGAAGCTCAACAGCATCTGTTGAAGCTTACAGTCTGGGGCATT  
 >KT022365..1  
 TTCTATTGTGATACGTACGGCTTATTCAGTAGCACCTGGCAATTCAATGGGAGTACCTGGAACAACACAGATT  
 CAAACAGCACA-----  
 -----  
 GGGTCAGATGACACTATAGAACTCCCATGCAGAATAAAGCAAATTATAAATATGTGGCAGAGAGTAGGACGAG  
 CAATGTATGCCCCCTCCCATCCAAGGAGTAATAAGTTGTGTATCAAAC---  
 ATCACAGGACTAATATTAACAAGAGATAGT---AATAACAGAACT-----  
 -----  
 -----  
 AATGAAACCTTCAGACCTGGAGGAGGAGACATGAGAGACAATTGGAGAAGTGAATTATATAAGTATAAAGTAG  
 TAAAAATTGAACCACTA---GGAGTAGCACCCACCAAGGCAAAAAGAAGAGTGGTG-----  
 -----GAGAGAGAGAAAAAGAGCA---GTTGGA---ATAGGAGCT-----  
 GTCTTCCTTGGGTTCTTAGGAGCA---GCAGGAAGCACTATG---GGCGCGGCGTCA---  
 ATAACGCTGACGGTACAG---GCCAGACAA---TTATTG---TCTGGCATAGTGCAACAGCAAAGC---  
 AATTTG---CTGAGG---GCTATAGAGGCTCAACAACATCTGTTGAAACTCACAGTCTGGGGCATT  
 >KT022367..1  
 TTCTATTGTAATACATCAGGTCTATTTAATAGCAGTTGGAATGATACTGAAATCGGGCGGGAGATAAATAGGA  
 CGGAG-----  
 -----  
 TCAAATGACACTATAATTCTCCCATGCAGAATAAAGCAAATTATAAATATGTGGCAGAGAGTAGGACAAGCAA  
 TATATGCCCCCTCCCATCCAAGGAGTAATAAGGTGTGAATCAAAC---  
 ATTACAGGACTAATATTAACAAGGGATGGTGGGGGTAATAACAGA-----  
 -----  
 -----  
 AAAAAATGAAACCTTCAGACCTGGAGGAGGAGATATGAGGGACAATTGGAGAAGTGAATTATATAAGTATAAAG  
 TAGTAAAAATTGAACCAATA---GGAATAGCACCCACCAGGGCAAAGAGAAGAGTGGTG-----  
 -----GAGAGAGAGAAAAAGAGCA---ATTGGA---ATGGGAGCT-----  
 GTATTTCATTGGGTTCTTAGGAGCA---GCAGGAAGCACTATG---GGCGCGGCGTCA---  
 ATAACGCTGACGGTACAG---GCCAGACAA---TTGTTG---TCTGGCATAGTGCAACAGCAAAC---  
 AATTTG---CTGAGG---GCTATAGAGGCTCAACAACATCTGTTGAAGCTCACGGTCTGGGGCATT  
 >KT022368..2  
 TTCTATTGTAATACAACAGACCTGTTTGATAGCATTTGGCTTTACAATGCCAGCATGCATAAT-----  
 -----  
 -----  
 GCAAATAGCACGATAACTCTCCAATGCAGAATAAAGCAAATTATCAATATGTGGCAGAGAGTAGGACAAGCAA  
 TGTATGCCCCCTCCCGTCAAGGAAAAATACAGTGCAAATCAAAC---  
 ATTACAGGACTAATATTAACAAGAGATGGTGGGGTTAACGATACA-----  
 -----  
 -----  
 AATGGAACCGAAATCTTCAGACCTGGAGGAGGGGATATGAGGGACAATTGGAGAAGTGAATTATATAAGTATA  
 AAGTAGTAAAAATTGAACCACTA---GGAGTAGCACCCACCAGGGCAAAGGAGAAGAGTGGTG-----

-----CAGAGAGAAAAAGAGCA---GTTGGA---ATAGGAGCT-----  
---GTATTCCTTGGGTTCTTAGGAGCA---GCAGGAAGCACTATG---GGCGCAGCGTCA---  
GTGACGCTGACGGTACAG---GCCAGAAGA---TTATTG---TCTGGCATAGTGCAACAGCAAAGC---  
AATTTG---CTGAAG---GCTATAGAAGCTCAACAGCATCTGTTGAAGCTCACGGTCTGGGGCATT  
>KT022369..2  
TTCTATTGTAATACATCAGGCCTGTTTAATAGCACTTGGAAATTATACTAATAGCATGCAGCAGTCAAATAGCA  
CAGAG-----  
-----  
TCAAAACGAAACTATAACTCTCCAATGCAGAATAAAGCAAATTATAAATATGTGGCAGAGAGTGGGGCAAGCAA  
TATATGCCCCCTCCCATCCAGGGGTAATAAGGTGTGAATCAAAC---  
ATTACAGGACTAATATTGACAAGAGATGGTGGGAGTAATAACAGT-----  
-----  
-----  
ACAAATGAAACCTTCAGACCTGGAGGAGGGAATGTGAGGGACAATTGGAGAAGTGAATTATATAAGTATAAAG  
TAGTAAAAATTGAACCACTA---GGAGTAGCACCCACCAGGGCAAAGAGAAGAGTGGTG-----  
-----GAGAGAGAAAAAGAGCA---GTTGGA---CTAGGAGCT-----  
GTCTTCATTGGGTTCTTGGGAACA---GCAGGAAGCACTATG---GGCGCGGCGTCA---  
ATAACGCTGACGGTACAG---GCCAGACAA---TTATTG---TCTGGTATAGTGCAACAGCAAGGC---  
AATTTG---CTGAGA---GCTATAGAAGCTCAACAACAACCTGTTGAGACTCACGGTCTGGGGCATT  
>FJ866117..1  
TTTTATTGTAATACATCAGGCCTGTTTAATAGTACTTGGTCACCTGACAATAGTACTGGGACTAGTACTGGGA  
ATAATGAC-----  
-----ACT---  
GCCAGCAATGGCACTATAACTCTCCCATGTAGAATAAAGCAGATTATAAATATGTGGCAGAGAGTAGGACAAG  
CAATGTATGCCCCCTCCCATCCAAGGAGTAATAAGGTGTGACTCAAAC---  
ATTACAGGACTACTATTAACAAGAGATGGTGGGAGTGGGAATAAT-----  
-----  
-----  
ACCACAGAGATCTTCAGACCTGGAGGAGGAGATATGAGGGACAATTGGAGAAGTGAATTATATAAGTATAAAG  
TAGTAAGAATCGAACCTCTA---GGAGTAGCACCCACCAGGGCAAAGAGAAGAGTGGTG-----  
-----GAGAGAGAAAAAGAGCA---GTTGGA---ATAGGAGCT-----  
GTATTCATTGGGTTCTTAGGAGCA---GCAGGAAGCACTATG---GGCGCAGCGTCA---  
ATAACGCTGACGGTACAG---GCCAGACAA---TTATTG---TCTGGCATAGTGCAACAGCAAAGC---  
AATTTG---CTGAGG---GCTATAGAGGCTCAACAGCATTTGTTGAAGCTCACAGTCTGGGGCATT  
>KT022370..3  
TTCTATTGTAATACATCAGGCCTGTTTAATAGAGCTTACACTAACAGCACTTACAATAACAGCACGCAGGACA  
ATGACAAT-----  
-----AACAGCACG-----  
CAGGACAATGCAACTATAACTCTCCCATGCAGAATAAGGCAAATTATAAATATGTGGCAGAGAGCAGGGAAAG  
CAATGTATGCCCCCTCCCATCCAAGGAGTAATAAACTGTGTATCAAAC---  
ATTACAGGACTAATTTTAAACAAGAGATGGTGGAAAGAGTAACAGTACG-----  
-----  
-----  
GAGGGGGAAATCTTCAGACCTGGGGGAGGAGATATGAGGGATAATTGGAGAAGTGAATTATATAAGTATAAAG  
TAGTAAAAATTGAACCACTA---GGAGTAGCACCTACCAAGGCAAGGAGAAGAGTGGTG-----  
-----GGGAGAGAGAAAAAGAGCA---GTTGGA---CTAGGAGCT-----  
GTCTTCATTGGGTTCTTAGGAGCA---GCCGGAAGCACTATG---GGCGCGGCGTCA---  
GTGACGCTGACGGTACAG---GCCAGGCAA---TTATTG---TCTGGCATAGTGCAACAGCAAAGC---  
AATTTG---CTGAGG---GCTATAGAGGCTCAACAACATCTGTTGAACTCACGGTCTGGGGCATT  
>KT022372..2  
TTCTATTGTGATACAGCAGGCCTGTTTAATAGCACTTGGAGTCACAATGACAGCATACAGGGGACAAATAGCG  
CAGAG-----  
-----  
TCAAAATGAAACTATAACTCTCCCATGCAGAATAAAGCAAATTATAAATATGTGGCAGAGAGCAGGACAAGCAA  
TGTATGCCCCCTCCCATCCAGGAGTAATAAAGTGTGTATCAAAC---  
ATTACAGGACTAATATTAACAAGAGATGGTGGGAAGAACATACA-----  
-----  
-----  
GAGGAAGTCTTCAGACCTGGAGGAGGAGATATGAGGGATAATTGGAGAAGTGAATTATATAAGTATAAAGTAG  
TAAAAATTGAACCACTA---GGAGTAGCACCCACCAAGGCAAGGAGAAGAGTGGTG-----

-----GGGAGAGAGAAAAGAGCA---GTTGGA---GTAGGAGCT-----  
 GTCTTCATTGGGTTCTTAGGAGCA---GCCGGAAGCACTATG---GGCGGGCGTCA---  
 GTGACGCTGACGGTACAG---GCCAGACGA---TTATTG---TCTGGCATAGTGCAACAGCAAAGC---  
 AATTTG---CTGAAG---GCTATAGAGGCTCAACAACACCTGTTGAAACTCACGGTCTGGGGCATT  
 >KT022373..1  
 TTCTATTGTAACACATCAAGCTTGTTTAGGGGCGCTTGGAATAGTACAACACTGCAACACTTAATAGCACTGGGA  
 AT-----  
 -----  
 AGCAATGACACTATAACTCTTCCATGCAGAATAAAGCAAATTATAAATATGTGGCAGAGAGCAGGACAAGCAA  
 TATATGCCCCCTCCCATAAAAGGAGTAATAAGGTGTAACCTCAAAT---  
 ATTACAGGACTAATATTAACAAGAGATGGTGGGGGTAGTGATAAT-----  
 -----  
 -----  
 AGAACTGAAACTTTTAGACCTGGAGGAGGAGATATGAGAGACAATTGGAGAAGTGAATTATATAAGTATAAAG  
 TAGTTAAATGAACCACTA---GGAGTAGCACCCACCAGGGCAAAGAGAAGAGTGGTG-----  
 -----GAGAGAGAAAAAAGAGCA---GTTGGA---ATAGGAGCT-----  
 GTCTTCATTGGGTTCTTAGGAGCA---GCAGGAAGCACTATG---GGCGGGCGTCA---  
 ATAACGCTGACGGTACAG---GCCAGACAA---TTATTG---TCTGGCATAGTGCAACAGCAAAGA---  
 AATTTG---CTGAGG---GCTATAGAGGCTCAACAACATCTGTTGAAACTCACGGTCTGGGGCATT  
 >KT022374..1  
 TTCTATTGTAATACAAAGCTGTTCAATAGCTCTTGGTCTGCCAATGCCAGTGAGTCAAATAGTACAGATG  
 GCAATAGT-----  
 -----  
 ACAGATGGCACTATAACTCTCCCATGCAAAATAAAGCAAATTATAAATATGTGGCAGAGAGTAGGACGAGCAA  
 TGTATGCCAATCCCATCCAAGGAAAAATAGAGTGTGCATCAAAC---  
 ATTACAGGACTAATATTAACAAGAGATGGTGGGAATGTGAGCAGG-----  
 -----  
 -----  
 GAAATGAAACCTTCAGACCTGGAGGAGGAGATATGAGGGACAATTGGAGAAGTGAATTATATAAGTATAAAG  
 TAGTAAAGATTGAACCACTA---GGAGTAGCACCCCATACGGCAAGGAGAAGAGTGGTG-----  
 -----GGGAGAGAAAAAAGAGCA---GTTGGA---ATGGGAGCT-----  
 GTCTTCCTTGGGTTCTTAGGAGCA---GCAGGGAGCACTATG---GGCGCAGCGTCA---  
 CTAACGCTGACGGTACAG---GCCAGACAA---TTATTG---TCTGGCATAGTGCAACAGCAAAGC---  
 AATTTG---CTGAGG---GCTATAGAGGCTCAACAACATCTGTTGAAACTCACAGTCTGGGGCATT  
 >KT022375..1  
 TTCTATTGTAATACATCAAACTGTTTAATAGCACTTGCCACAGTCAAACCACACGGAA-----  
 -----  
 -----  
 GACAAATGGAATCTAACTCTCCCATGCAGAATAAAACAACCTTATAAACCTGTGGCAAAGAGCAGGACAAGCAA  
 TGTATGCCCCCTCCCATACCAGGAAATATAAGTTGTGTATCAAAC---  
 ATTACAGGACTACTATTGACAAGAGATGGTGGGAACACTGGGAAC-----  
 -----  
 -----  
 AATACAGAGGGAAAT---  
 AAACTGAAATCTTCAGACCTGGAGGAGGAAATATGAGGGACAATTGGAGAAGTGAATTATATAAGTATAAAG  
 TAGTGAAATGAACCAATA---GGAATAGCACCCACCAAGGCAAAGAGAAGAGTGGTG-----  
 -----GAGAGAGAAAAAAGAGCAGCACTTGCT-----GGAGCT-----  
 TTCTTTCTTGGGTTCTTAGGAACA---GCAGGAAGCACTATG---GGCGGGCGTCA---  
 ATAGCGCTGACGGTACAG---GCCAGGCAA---TTATTG---TCTGGCATAGTGCAACAGCAAAGC---  
 AATTTG---CTGAGG---GCTATAGAGGCTCAACAGCAATTGTTGAGACTCACAGTCTGGGGCATT  
 >KT022376..1  
 TTCTATTGTAATACATCAGGCCTGTTTGATAGCACTTGGTCGTTTAATAGCACACAGGAGTCAAATAACACGG  
 GG-----  
 -----  
 -----  
 GAAATGATACTATAATTCTCCCATGCAGAATAAAGCAAATTATAAACATGTGGCAGAGAGTAGGACAAGCAA  
 TGTATGCCCCCTCCCATCCAGGAGTAATACAGTGTAACCTCAACC---  
 ATTACAGGGCTAATATTAACAAGAGATGGTGGGGAGGATAATAAT-----  
 -----  
 -----  
 AACACAGAAACCTTCAGACCTGCAGGAGGAGATATGAGGGACAATTGGAGAAGTGAATTATATAAATATAAAG  
 TAGTAAACTTGAACCACTA---GGAGTAGCGCCCAAGGCAAAGAGAAGAGTGGTG-----

-----GAGAGAGAAAAAAGAGCA---GTTGGA---CTAGGAGCT-----  
GTCTTCCTTGGGTTCTTAGGAGCA---GCAGGAAGCACTATG---GGCGCGGCGTCA---  
ATAACGCTGACGGTACAG---GCCAGGCAA---TTATTG---TCTGGCATAGTGCAACAGCAAAGC---  
AATTTG---CTGAGG---GCTATAGAGGCTCAACAACATATGTTGAAACTCACAGTCTGGGGCATT  
>KT022377..1  
TTCTATTGTAATACATCAGGGCTGTTCAATAGTACTTGAATACCACGAAGGTAAATAGCACAGAG-----  
-----  
-----  
TCAAAATGGCACTATAACTCTCCCATGCAGAATAAAGCAAATTATAAATATGTGGCAAAGAACAGGACAAGCAA  
TGTATGCCCCCTCCCATCAAAGGAATAATAAATTGTGCATCAAAT---  
ATTACAGGACTACTATTAACAAGAGATGGTGGGGATAATAACAGT-----  
-----  
-----  
ACAAATGAAACCTTCAGACCTGGAGGAGGAGATATGAGGGACAATTGGAGAAGTGAATTATATAAGTATAAAG  
TAGTAAAAATTGAACCACTA---GGGGTAGCACCCACCGAGGCAAGGAGAAGAGTGGTG-----  
-----GAGAGAGAAAAAAGAGCATTGTTGGA---ATAGGAGCT-----  
GTCTTCCTTGGGTTCTTAGGAGCA---GCCGGCAGCACTATG---GGCGCGGCGTCA---  
TTAACGCTGACGGTACAG---GCCAGACAA---TTATTG---TCTGGTATAGTGCAACAGCAAAAC---  
AATTTG---CTGAGG---GCTATAGAGGCTCAACAACATCTGTTGAAACTCACGGTCTGGGGCATT  
>FJ866116..2  
TTCTACTGTGATACATCAGGACTGTTTAATAGCTCTTGAATAATACATCGGGCCAGTTTAAATAGCACTTGA  
CTGATGGC-----  
-----TACAAT-----  
AGAAAGAGCGAGAATATAACTCTCCAATGCAGAATAAAGCAATTTATAAATATGTGGCAGAGAACAGGGCAAG  
CAATGTATGCCCCCTCCCATCCCAGGAATAATAAATGTGAATCAAAC---  
ATTACAGGACTAATACTAACAAGAGATGGTGGGCAGGCTAACAAA-----  
-----  
-----  
ACAGAGGAAACCTTCAGACCTGGAGGAGGAGATATGAGGGACAATTGGAGAAGTGAATTATTTAGGTATAAAG  
TAGTAAAAATTGAACCACTA---GGAGTAGCACCCACCAAGGCAAAGAGAAGAGTGGTG-----  
-----GAGAGAGAGAAAAAGAGCA---GTAATTGGCATGGGAGCT-----  
GTTTTCTTGGGTTCTTAGGAGCA---GCAGGAAGCACTATG---GGCGCGGCGTCA---  
CTGACGCTGACGGTACAG---GCCAGACAA---TTATTG---TCTGGCATAGTGCAACAGCAAGGC---  
AATTTG---CTGAGG---GCTATAGAGGCTCAACAACATCTGTTGAGACTCACGGTCTGGGGCATT  
>FJ866118..1  
TTCTATTGTAATACAACAGGACTGTTCAATCTCACTTGAATGGCACTGACAGCACAAATAGAAAT-----  
-----  
-----  
GAGTCAGGCAATATAACTCTCCCATGCAGAATAAAGCAAATTATAAATATGTGGCAAAGAGTAGGACGAGCAA  
TATATGCCCCCTCCCATCCCAGGAGTAGTAAAGTGTAATCAAAT---  
ATTACAGGATTAATATTAACAAGGGATGGTGGAGACGACGAGAAT-----  
-----  
-----  
AACACTGAAACCTTCAGACCTGGAGGAGGAAATATGAGGGACAATTGGAGAAGTGAATTATATAAATATAAAG  
TAGTAAAAATTGAACCACTA---GGGGTAGCACCCACCAAGGCAAGGAGGAGAACGGTG-----  
-----GAGAGAGAAAAAAGAGCA---GTTGGA---ATAGGAGCT-----  
GTCTTCCTTGGGTTCTTAGGAGCA---GCAGGAAGCACTATG---GGCGCGGCGTCA---  
ATAACGCTGACGGTACAG---GCCAGACAA---TTATTG---GCTGGCATAGTGCAACAGCAAAGC---  
AATTTG---CTGAGG---GCTATAGAGGCTCAACAACAGATGTTGAGACTCACAGTCTGGGGCATT  
>FJ866120..2  
TTCTATTGTAATACATCACTCCTGTTTGAAAGCATTGTTGGTATGGCAATGAAAGCATAAATGCCACAGAAGAGG  
CA-----  
-----  
AATGACACTATAATAACTCTCCGATGCAGAATAAAGCAAATTTATAAAAATGTGGCAGAGAGTAGGACAAGCAA  
TGTATGCCCCCTCCCATCCCAGGAGCAATCAGGTGTAATTCAAAC---  
ATTACAGGACTAATATTAACAAGAGATGGAGGGCTTAATGACAATGGAGCT-----  
-----  
-----  
GATGGAAGAAATGAAACCTTCAGACCTGGAGGAGGAGATATGAGGGACAATTGGAGAAGTGAATTATATAAGT  
ATAAAGTGGTAGAAATTGAACCACTA---GGAGTAGCCCCCACTCAGGCAAGAAGAAGAGTGGTG-----

-----CAGAGAGAAAAAGAGCA---GTTGGA---ATAGGAGCT---  
-----GTCTTCATTGGGTTCTTAGGAGCA---GCAGGAAGCACTATG---GGCGCAGCGTCA---  
ATAGCGCTGACGGCACAG---GCCAGACAA---TTATTG---TCTGGCATAGTGCAACAGCAAAGC---  
AATTTG---CTGAGG---GCTATAGAGGTTCAACAACAGTTGTTGAAACTCACGGTCTGGGGCATT  
>FJ866121..2  
TTCTACTGTAACACATCAAACTGTTTAATAGTACTTGGCATTACAATAACAGCACTGGGTATAATAATGGCA  
GCCTACAG-----  
-----GAG---  
GAAAAATAACACAGAGATAGTTCTCCTATGCAGAATAAAGCAAATTATAAATCTGTGGCAGAGGGTAGGAAAGG  
CAATGTATGCCCCCTCCCATCCAAGGAAGCATAAAGTGTAACCTCAAAC---  
ATTACAGGACTACTATTAATCAGGGATGGTGGGGTTAATACTACT-----  
-----  
AATGAAACCTTCAGACCTGGAGGAGGAGATATGAGGGACAATTGGAGAAGTGAATTATATAAATATAAAGTAA  
TAAAAATTGAACCACTA---GGAATAGCACCCACCAGGGCAAAGAGAAGAGTGGTG-----  
-----GAGAGAGAAAAAGAGCA---GTTGGA---CTAGGAGCT-----  
GTTTTCTGTTGGGTTCTTAGGAGCA---GCAGGAAGCACTATG---GGCGCAGCGTCA---  
GTGACGCTGACGGTACAG---GCCAGACAG---TTATTG---TCTGGTATAGTGCAACAGCAAAGC---  
AATTTG---CTGAGG---GCTATAGAGGCTCAACAACATATGTTGAAACTCACGGTCTGGGGCATT  
>KT022380..1  
TTCTATTGTAATACATCAGGCTTGTTTAATAGGACTTGGAAAAAGGGGATAATCAAGGGCACTGCCAATAACA  
CG-----  
-----  
GAGTCAGACCCTATAGTGCTCCAATGCAGAATAAAGCAAATTATAAATATGTGGCAGAGAGTAGGACGAGCAA  
TGTATGCCCCCTCCCATCCAGGAATAATAAATGTGTATCAAAC---  
ATTACAGGACTAATATTAACAAGAGATGGTGGGAATAGTAATGGA-----  
-----  
GATAATGAAACCTTCAGACCTGGAGGAGGAGATATGAGGGACAATTGGAGAAGTGAATTATATAAGTATAAAG  
TAGTAAAAGTTGAGCCATTA---GGAGTAGCACCCACCAGGGCAAAGGAGGAGAGTGGTG-----  
-----GCGAGAGAAAAAGAGCAGTAGTTGGA---CTGGGAGCT-----  
GTTTTCATTTGGGTTCTTAGGAGCA---GCAGGAAGCACTATG---GGCGCGGCGTCA---  
ATAACGCTGACGGTACAG---GCCAGACAA---TTATTG---TCTGGCATAGTGCAACAGCAAAGC---  
AATTTG---CTGAGG---GCTATAGAGGCTCAACAACATCTGTTGAAACTCACGGTCTGGGGCATT  
>KT022381..4  
TTCTATTGTAATACATCAGGCCTGTTTAATTACACCTATCCATCAAATCACAGTGATAAGTCAAATAACACT-  
-----  
-----  
ATAAATGAGACTATAACTCTCCCATGCAGAATAAAACAAATTATAAGAATGTGGCAGAGAACAGGACAAGCAA  
TGTATGCCCCCTCCCATCCAGGAATAATTAAGTGTGAATCAAAC---  
ATTACAGGACTAATATTAACAAGAGATGGT---TTAATGGCAGC-----  
-----  
AATGAAACCTTCAGGCCTGTAGGAGGAGATATGAGGGACAATTGGAGAAGTGAATTATATAAGTATAAAGTAG  
TAAGAATTGAACCACTA---GGAGTAGCACCCACCAGGGCAAAGAGAAGAGTGGTG-----  
-----GGAAGAGAGAAAAAGAGCA---GTTGGA---ATGGGAGCT-----  
GTATTCCTTGGGTTCTTAGGAGCA---GCAGGAAGCACTATG---GGCGCGGCGTCA---  
ATAACGCTGACGGTACAG---GCCAGACAA---TTATTG---TCTGGCATAGTGCAACAGCAAAGC---  
AATTTG---CTGAAG---GCAATAGAGGCTCAACAACATCTGCTGAGACTCACGGTCTGGGGCATC  
>KT022382..2  
TTCTATTGTAATACATCAGGCCTGTTCAATAGTAGCTGGGGTCCAAATGACACGAAATCAGATAAC-----  
-----  
-----  
TCAACTACAAATTACACTCTCCCATGCAGAATAAAGCAAATTGTAAGGATGTGGCAGAAAATAGGACAAGCAA  
TGTATGCCCCCTCCAATCGAGGGAGAAATAAATTGTGTATCAAAC---  
ATTACAGGACTATTATTAACAAGAGATGGTGGGCATAACAGTATT-----  
-----  
-----  
AACAAATGAAACTGAAACATTTCAGACCTGGAGGAGGAGATATGAAGGACAATTGGAGAAGTGAATTATATAAGT  
ATAAAGTAGTAAAAATTGAACCACTA---GGAGTAGCACCCACCAGGGCAAAGAGAAGAGTGGTG-----

-----GGGAGAGAAAAAAGAGCA---GTTGGA---ATAGGAGCT---  
 -----GTTTTCTTGGGTTCTTGGGAGCA---GCAGGAAGCACTATG---GGCGCGGCGTCA---  
 ATAACGCTGACGGTACAG---GCCAGACAA---TTATTG---TCTGGCATAGTGCAGCAGCAAAAC---  
 AATTTG---CTGAGG---GCTATAGAGGCTCAACAACATCTGTTGAAACTCACGGTCTGGGGCATT  
 >KT022383..1  
 TTCTATTGTAATACATCAGGCCTGTTTAATAGCACTTGGAACAGCCCTTGGAATAACACTGGGGAA-----  
 -----  
 -----  
 CAAGAAGGCAATATAACTCTCCCATGCAGAATAAAGCAAATTATAAATATGTGGCAGAGAGTAGGACAAGCAA  
 TATATGCCCCCTCCCATCCAGGAGTAATAAAGTGTGAATCGAAC---  
 ATTACAGGGCTACTATTAACAAGAGATGGTGGGAACACTAACAGT-----  
 -----  
 -----  
 AGTACTGAAACCTTCAGACCTGGAGGAGGAGATATGAGGGACAATTGGAGAAGTGAATTATATAAATATAAAG  
 TAGTAAAAGTTGAACCACTA---GGAGTAGCACCCACCAGGGCAAGGAGAAGAGTGGTG-----  
 -----GGGAGAGAAAAAAGAGCA---GTTGGA---ATAGGAGCT-----  
 GTCTTCCTTGGGTTCTTAGGAGCA---GCAGGAAGCACTATG---GGCGCGGCGTCA---  
 ATAACGCTGACGGTACAG---GCCAGACAA---TTATTG---TCTGGCATAGTGC AACAGCAAAGC---  
 AATTTG---CTGAGG---GCTATAGAGGCTCAACAACATATGTTGAAACTCACGGTCTGGGGCATT  
 >FJ623487..1  
 TTCTATTGTAATACATCAAGACTGTTTAATAGCACTTGGAACAATGGCACTTGGAACAATACCAACATGCAGG  
 AGTCAAAATAGC-----  
 -----ACGAAG-----  
 TCAGAAAATGGCACTATAACTCTCCCATGCAGAATAAAGCAAATTATAAATATGTGGCAGAGAACAGGACAAG  
 CAATGTATGCCCCCTCCCATCCGAGGAGTAATAAGATGTGAATCAAAC---  
 ATTACAGGACTAATATTAACAAGAGATAGTGTGAATAATAGCAAA-----  
 -----  
 -----  
 GACAATGAAACCTTCAGACCAGGAGGAGGAGATATGAGGGACAATTGGAGAAGTGAATTATATAAGTATAAAG  
 TAGTAAAAGTTGAACCACTA---GGAGTAGCACCCACCACGGCAAGGAGAAGAGTGGTG-----  
 -----GGAAGAGAAAAAAGAGCA---GTGGGA---ATAGGAGCT-----  
 GTATTCCTTGGGTTCTTGGGAGCA---GCAGGAAGCACGATG---GGCGCGGCGTCA---  
 ATGACGCTGACGGTACAG---GCCAGACAA---TTATTG---TCTGGTATAGTGC AACAGCAAAGC---  
 AATTTG---CTGAGG---GCTATAGAGGCTCAACAACACCTGTTGAAACTCACGGTCTGGGGCATT  
 >FJ623481..2  
 TTTTATTGTAATACATCAGGCCTGTTTAATAGCACTTGGAATCACACTGACATAAAGGGGTCAAATAGCACGG  
 AG-----  
 -----  
 TCAAGTGAAACTATAACTCTCACATGCAGAATAAAGCAAATTATAAATATGTGGCAGAGAGTAGGGCAAGCAA  
 TGTATGCCCCCTCCCATACCAGGAGCAATAAGGTGTGAATCAAAC---  
 ATTACAGGAATACTCTTAACAAGAGATGGTGGGAATAGCAAGAAC-----  
 -----  
 -----  
 AGCACAACAGAAATCTTCAGACCTGGAGGAGGAAACATGCGGGACAATTGGAGAAGTGAATTATATAAGTATA  
 AAGTAGTACAAATTGAACCACTA---GGAGTAGCACCTACCAGGGCAAAGAGAAGAGTGGTG-----  
 -----GAGAGAGAAAAAAGAGCA---ATTGGA---ATAGGAGCT-----  
 ---GTATTCATTGGGTTCTTAGGAGCA---GCAGGAAGCACTATG---GGCGCGGCGTCA---  
 ATAACGCTGACGGTACAG---GCCAGACAA---TTATTG---ACTGGCATAGTGCGACAGCAAAGC---  
 AATTTG---CTGAGG---GCTATAGAGGCTCAACAACATCTGTTGAAACTCACGGTCTGGGGCATT  
 >FJ623475..1  
 TTTTACTGTGATACATCAGGCCTGTTTAATAGCACTTGGGGAGCCACTGACAGCATGCATGGGGCAAATGACA  
 CG-----  
 -----  
 GAGTCAAATGACACTATAACTCTCCCATGTAGGATAAAAACAAATTATAAATAGGTGGCAGAGAGTAGGACAAG  
 CAATGTATGCCCCCTCCCATCCAAGGAGTAATAAAGTGCAAATCAGAC---  
 ATTACAGGAATAATATTAACAAGAGATGGTGGGAATAATAATGAC-----  
 -----  
 -----  
 AGTAGAAATGAAACCTTCAGACCTGGAGGAGGAGATATGAGGGACAATTGGAGAAGTGAATTGTATAAGTATA  
 AGGTGGTAAAGATTGAACCACTA---GGAGTAGCACCCACCAGGGCAAAGAGAAGAGTGGTG-----

-----GAGAGAGGAAAAAGAGCA---GTTGGG---ATAGGAGCT-----  
---GTTTTCCTTGATTCTTAGGAGCA---GCCGGAAGCACTATG---GGCGCGGCGTCA---  
ATAACGCTGACGGTACAG---GCCAGGCAA---TTATTG---TCTGGCATAGTGCAACAGCAAAGC---  
AATTTG---CTGAGG---GCTATAGAGGCTCAACAACATATGTTGAAACTCACGGTCTGGGGCATA  
>FJ623476..2  
TTCTATTGTAATACATCAGGCTTGTTTAATAGCACTTGGAATATCACTGACAATCTCAACATAACTCAG-----  
-----  
-----  
TCAAAATGAGAACATAACTCTCCCATGCAAAATAAAGCAAATTATAAATATGTGGCAGAGAGTAGGACAAGCAA  
TATATGCCCCCTCCCATCCAGGAAGGTAAGTTGTGTCTCAAAC---  
ATTACAGGACTAATATTAACAAGAGATGGTGGGAACAATAACAGT-----  
-----  
-----  
ACAAATGAAACCTTCAGGCCTGGAGGAGGAGATATGAGGGACAATTGGAGAAGTGAATTATATAAGTATAAAG  
TAGTAAGAATTGAACCACTA---GGAGTAGCACCTACCCAGGCAAAGAGAAGAGTGGTG-----  
-----GGAAGAGAAAAAAGAGCA---ATTGGA---ATAGGAGCT-----  
GTCTTCCTTGCGTTCTTAGGAGCA---GCAGGAAGCACTATG---GGCGCGGCGTCA---  
ATAACGCTGACGGTACAG---GCCAGACAG---TTATTG---TCTGGCATAGTGCAACAGCAAAAC---  
AATTTG---CTGAGG---GCTATAGAGGCTCAACAACAACCTGTTGAAACTCACGGTCTGGGGCATT  
>FJ623485..3  
TTTTATTGTAATACATCAGGCCTGTTTAATAGCACTTGGTATCACAATAGCACTTGAATGATCAAACCTGACG  
AG-----  
-----  
AGGTCAAATGACACTATAACTCTCCAATGCAGAATAAAGCAAATTATAAATATGTGGCAGAGAGTAGGACAAG  
CAATATATGCCCCCTCCTATCCAAGGAACAATAAGGTGTGAATCAAAC---  
ATTACAGGACTAATATTAACAAGAGATGGTGGGGAGGATAGCAAT-----  
-----  
-----  
ACAACAACCTGAAACCTTCAGACCTAGCGGAGGAGATATGAAGGACAATTGGAGAAGTGAATTATATAAATATA  
AAGTAGTAAAAATTGAACCACTA---GGAGTAGCACCTCCAGGGCAAGGAGAAGAGTGGTG-----  
-----GGAAGAGAAAAAAGAGCA---GTTGGA---ATAGGAGCT-----  
---GTCTTCCTTGCGTTCTTAGGAGCA---GCAGGAAGCACTATG---GGCGCAGCGTCA---  
ATAACGCTGACGGTACAG---GCCAGACAA---TTACTG---TCTGGCATAGTGCAACAGCAAAGC---  
AATTTG---CTGAGG---GCTATAGAGGCTCAACAACATATGTTGAGACTCACGGTCTGGGGCATT  
>FJ623488..1  
TTCTATTGTAACACATCAGGTCTGTTTAATAGCACTTGGGATAACAATACTGGCAATTGGTCTAGCAATAGCA  
GCAGCATGCAG-----  
-----GGGTCAAAT-----  
AGCACAGATGATACTATAACTCTCCCATGCAGAATAAAGCAAATTATAAATATGTGGCAGAGAACAGGACAAG  
CAATGTATGCCCCCCCCATCCAAGGGATAATAAGGTGTGAATCAAAC---  
ATCACAGGGATAATATTAACAAGAGATGGTGGGGTACTGAGGAT-----  
-----  
-----  
AATACTACAGAAGTCTTCAGACCTGGAGGAGGAGATATGAGGGACAATTGGAGAAGTGAATTATATAAATATA  
AAGTAGTACAAGTTGAACCAGTA---GGAATAGCACCTCCAAGGCAAGGAGAAGAGTGGTG-----  
-----CAGAGAGAAAAAAGAGCA---ATTGGA---ATGGGAGCT-----  
---GTCTTCCTTGCGTTCTTAGGAGCA---GCAGGAAGCACTATG---GGCGCGGCGTCA---  
ATGACGCTGACGGTACAG---GCCAGAAAT---TTATTG---TCTGGCATAGTGCAACAGCAGAGT---  
AATTTG---CTGAGG---GCTGTAGAGGCTCAACAACAACCTGTTGAGACTCACGGTCTGGGGCATT  
>FJ623478..4  
TTCTATTGTAATACATCAGGCCTGTTTAATCACACTTACCTGCCTAAGAGCACTTACCTGCCTAATAGCACTT  
GGAATAAC-----  
-----AGTACG-----  
GGATCAAATGACAGTATAACTCTTCCATGTAGAATAAAGCAAATTATAAATATGTGGCAGAGAGTAGGACAAG  
CAATGTATGCCCCCTCCTATCCAAGGAGTAATAAAGTGTAATCAGAT---  
ATTACAGGACTAATATTGACAAGAGATGGTGGGAATAGTAACAGT-----  
-----  
-----  
GATAATGAAACCTTCAGACCTGGAGGAGGAGATATGAGGGACAATTGGAGAAGTGAATTATATAAGTATAAAG  
TAGTAAAAATTGAACCACTA---GGAGTAGCACCCACCAGGGCAAAGAGAAGAGTGGTG-----

-----GAGAGAGAAAAAGAGCA---GTTGGA---ATAGGAGCT-----  
GTTTTTCATTGGGTTCTTAGGAGCA---GCAGGAAGCACTATG---GGCGCGGCGTCA---  
ATAACGCTGACGGTACAG---GCTAGACAA---TTATTG---TCTGGCATAGTGCAACAGCAAAGC---  
AATTTG---CTGAGG---GCTATAGAGGCTCAACAACATATGTTGAAACTCACGGTCTGGGGCATT  
>FJ623482..1  
TTCTATTGTAATACATCAGACCTGTTTAATGGCAATAGCACTAGGAATGGCACTGGGAATAGCAACAGCACGC  
CG-----  
-----  
GTAACCTGGCAATATAACTCTCCCATGCAGAATAAAGCAAATTATAAATATGTGGCAGAGAGTAGGACAAGCAA  
TGTATGCCCCGCCCATCCAAGGGGTAATAAGGTGTGTATCAAAC---  
ATTACAGGATTAATATTGACAAGAGATGGTGGGAAACAGAATAATAATAGTAAT-----  
-----  
-  
AGTAATAGTAGTGATATTGAAGTCTTCAGACCTGGAGGAGGAGATATGAGGGACAATTGGAGAAGTGAATTAT  
ATAAGTATAAAGTAGTAAAAATTGAACCACTA---GGAATAGCACCTACCAAGGCAAAAAGAAGAGTGGTG--  
-----GAGAGAGAAAAAGAGCA---ATTGGA---  
ATAGGAGCT-----GTCTCCTTGGGTTCTTAGGAACA---GCAGGAAGCACTATG---  
GGCGCGGCGTCA---ATAGCGCTGACGGTACAG---GCCAGACAA---TTAATG---  
TCTGGCATAGTGCAACAGCAAAGC---AATTTG---CTGAGG---  
GCTATAGAGGCTCAACAGCATATGTTGAAACTCACAGTCTGGGGCATT  
>FJ623477..1  
TTCTATTGTGATACATCAGGCCTGTTTAATAGCACCTGGAATAATAGCACCTGGAATAATAATGACACTGCCC  
AG-----  
-----  
TCAAAATGACACAATAACTCTCCCATGCAGAATAAAACAAATTGTAAATATGTGGCAGAGAACAGAACAAGCAA  
TGTATGCCCCCTCCCATCCAAGGAGTAATAAGGTGTGAATCAAAC---  
ATCACAGGACTACTATTAACAAGAGATGGTGGGATTAATAACACA-----  
-----  
-----  
AATGAAACCTTCAGACCTGGAGGAGGAGATATGAGGGACAATTGGAGAAGTGAAGTATATAAGTATAAAGTAG  
TAAAAATTGAACCACTG---GGAGTAGCACCTCCAGGGCAAGGAGAAGAGTGGTG-----  
-----GGGAGAGAAAAAGAGCA---GTTGGA---ATAGGAGCT-----  
TTATTCCTTGGATTCTTGGGCGCA---GCAGGAAGCACTATG---GGCGCGGCGTCA---  
ATGACGCTGACGGTACAG---GCCAGACAA---TTATTG---TCTGGCATAGTGCAACAGCAAAGC---  
AATTTG---CTGAAG---GCTATAGAGGCTCAACAACATCTGTTGAGACTCACGGTCTGGGGCATT  
>FJ623486..3  
TTCTATTGTAATACATCAGAACTATTTAATAGCACTTGAATCTTAATAGCACTTGAATCACACTGGCAGCA  
TACCGGAGTCA-----  
-----AATAGCACG-----  
GAGTCAAATGGCACTATAACCTCAAATGCAGAATAAAGCAAATTATAAATATGTGGCAGAGAGTAGGGCAAG  
CAATGTATGCCCCCTCCCATCAAAGGGACAATAAGGTGTAAATCAAAC---  
ATCACAGGACTAATATTAACAAGAGATGGTGGGGATAATAACAGT-----  
-----  
-----  
ACAAAGGAAACCTTCAGGCCCTGGAGGAGGAGATATGAGGGACAATTGGAGAAGTGAATTATATCAGTATAAAG  
TAGTAAAACCTTGAACCACTA---GGAGTAGCACCCACCAGGGCAAGGAGAAGAGTGGTG-----  
-----GGGAGAGAAAAAGAGCA---GTTGGA---CTAGGAGCT-----  
GTTTTTCATTGGGTTCTTGGGAGCA---GCAGGAAGCACTATG---GGCGCGGCGTCA---  
ATGACGCTGACGGTACAA---GCTAGACAA---TTATTG---TCTGGCATAGTGCAACAGCAAAGC---  
AATTTG---CTGAGG---GCTATAGAGGCTCAACAACATCTGTTGAAACTCACGGTCTGGGGCATT  
>FJ623479..1  
TTCTATTGTAATACATCAGACCTGTTTAATGGTACTTGAATAATAGCACTTTGAATGGCACTGCCAAGCAGG  
AG-----  
-----  
GTAATGACAGCACTATAACGATCTCATGCAGGATAAAGCAATTTATAAATATGTGGCAGAGAACAGGACGAG  
CAATGTATGCCCCCTCCCATTCAGGAGTAATAAGTTGTAACCTCAAGC---  
ATTACAGGATTAATATTAACAAGAGATGGTGGGGATGATAACAAT-----  
-----  
-----  
AATAATGAAACATTCAGACCTGGAGGAGGAGATATGAGGGACAATTGGAGAAGTGAATTATATAAGTATAAAG

TAGTAAAAATTGAACCACTA---GGAGTAGCACCCACCAAGGCAAGGAGAAGAGTGGTG-----  
 -----GAGAGAGAAAAAAGAGCA---GTTGGA---ATAGGAGCT-----  
 GTAATCCTTGGGTTCTTAGGAGCA---GCAGGAAGCACTATG---GGCGCGGCGTCA---  
 ATAACGCTGACGGTACAG---GCCAGACAA---TTATTG---TCTGGCATAGTGCAACAGCAAAGC---  
 AATTTG---CTGAAG---GCTATAGAGGCTCAACAACAACCTGTTGAAACTCACAGTCTGGGGCATT  
 >HM215275..1  
 TTCTATTGTAATACATCAGGTCTGTTCAATAGCACTTGGGAGGCCAATAGTACTGCCAATACC-----  
 -----  
 -----  
 AGCACGACAAATATAACTCTCCCATGCAAAATAAAGCAAATTTGTAAGAATGTGGCAGAGGACAGGACAAGCAT  
 TGTATGCCCCCTCCCATCGAAGGAGTAATAAAATGTGTATCAAAC---  
 ATTACAGGACTAATATTAACAAGAGATGGTGGGGGTAATAACAGT-----  
 -----  
 -----  
 GCAACAAATGAAACCTTCAGACCTGGAGGAGGAGATATGAGGGACAATTGGAGAAGTGAATTATATAAGTATA  
 AAGTAGTACAAATTGAACCACTA---GGAGTTGCACCCACCGAGGCAAGGAGAAGAGTGGTG-----  
 -----AAGAGAGAAAAAAGAGCA---GTTCTT-----GGAAGT-----  
 ---TTTTCTTGGGTTCTTAGCAGCA---GCAGGAAGCACTATG---GGCGCGGCGTCA---  
 ATAACGCTGACGGTACAG---GCCAGACAA---TTATTG---TCTGGCATAGTGCAACAGCAAAGC---  
 AATTTG---CTGAGG---GCTATAGAGGCTCAACAGCATCTGTTGAAACTCACGGTCTGGGGCATT  
 >KT252544..1  
 TTCTATTGTAACACATCAGGCCTGTTTAATAGTACTTGGGATGGGAATAGCACTGAGGCAAACATTACGCAG-  
 -----  
 -----  
 TCAATGAGACTATAACTCTCCCATGCAAAATAAAGCAAATTTGTAATATGTGGCAGAGAGTGGGACGAGCAA  
 TGTATGCCCCCTCCTATCCAGGAGTAATAAAGTGTGAATCAAAC---  
 ATTACAGGGCTAATACTGACAAGAGATGGTGGGAATGAAACAAAT-----  
 -----  
 -----  
 GGAACAGAAATCTTCAGACCTGTAGGAGGAGACATGAGGGACAATTGGAGAAGTGAATTATATAAGTATAAAG  
 TAGTACAAATTAAACCACTA---GGAGTAGCACCCACCAAGGCAAAGAGAAGAGTGGTG-----  
 -----CAGAGAGAAAAAAGAGCA---GTTGGA---ATGGGAGCT-----  
 GTTTTCTTTGGGTTCTTAGGAGCA---GCTGGAAGCACTATG---GGCGCGGCGTCA---  
 ATAACGCTGACGGTACAG---GCCAGACAA---TTATTG---ACTGGCATAGTGCAACAGCAAAGC---  
 AATTTG---CTGAGG---GCTATAGAGGCTCAACAGCATCTGTTGAAACTCACTGTCTGGGGCATT  
 >HQ540689..1  
 TTCTACTGTAATACAACAAACCTGTTTAATAGTAGCATTCCTTCAACGCCAGCGAGAGGGCAAATAACACCA  
 AT-----  
 -----  
 AGCACAGATGACATTATAACTCTCCAATGCAGAATAAAGCAAATTTGTAAGGATGTGGCAAAGAGTAGGACAAG  
 CAATGTATGCCCCCTCCCATCCAGGAGTAATAAGGTGTGAATCAAAC---  
 ATTACAGGACTTATGTTAACATGGGATGGTGGGAGTAAAAATATTACTGAG-----  
 -----  
 -----  
 GGCAATAGAACTGAAACCTTTAGACCTGGAGGAGGAGACATGAGGGACAATTGGAGAAGTGAATTATATAAAT  
 ATAAAGTAGTAAAAATTGAACCACTA---GGAGTTGCACCCACCAAGGCAAGGAGAAGAGTGGTG-----  
 -----GGAAGAGAAAAAAGAGCA---GTTGGA---ATAGGAGCT---  
 -----GTTTTCTTGGGTTCTTAGGAGCA---GCAGGAAGCACTATG---GGCGCGGCGTCA---  
 GTGACGCTGACGGTACAG---GCCAGACAA---TTATTG---TCTGGTATAGTGCAACAGCAAAGC---  
 AATTTG---CTGAGA---GCTATAGAGGCTCAACAACAGTTGTTGAAACTCACGGTCTGGGGCATT  
 >KU921708..2  
 TTCTATTGTAATACAGTAAATCTGTTCAATAGCTCTTGGGGTGCCAACGCCACTGAGTCAAATAGCACAGGGT  
 TA-----  
 -----  
 -----  
 AATAATCAAATATAACATCTCCCATGCAGAATAAAGCAAATTTATAAATATGTGGCAGAGAACAGGACAAGCAA  
 TGTATGCCCCCTCCCGTCGAAGGAATAATAAGTTGTGTATCAGAC---  
 ATTACAGGACTACTGTTAACAAAGAGACGGAGGAGAAAAATACAACA-----  
 -----  
 -----  
 CATGAAATTTTCAGACCTGGAGGAGGAGATATGAGGGACAATTGGAGAAGTGAATTATATAAGTATAAAGTAG

TAAAAATTGAACCCCTA---GGAGTAGCACCCACCAAGGCAAGGAGAAGAGTGGTG-----  
-----CAGAGAGAAAAAAGAGCA---GTTGGA---ATGGGAGCT-----  
GTCTTCCTTGGGTTCTTAGGAGCA---GCAGGAAGCACTATG---GGCGCAGCGTCA---  
ATAACGCTGACGGTACAG---GCCAGACAA---TTATTG---TCTGGTATAGTGCAACAGCAAAGC---  
AATTTG---CTGAGG---GCTATAGAGGCTCAACAGCATCTGTTGAAACTCACTGTCTGGGGCATT  
>KU921712..2  
TTCTATTGTAATACATCAAAGCTGTCTAACAGCACATTTCCACTTAATAACACTCAGAATAACAGCACGCAG-  
-----  
-----  
ACAAACAGTACTATAACTCTCCCATGCAGAATAAAAGCAAATTATAAATATGTGGCAGAGAACAGGAAAAGCAA  
TATATGCCCCCTCCCATCTCAGGACCAATAAAGTGTTACATCAAAC---  
ATTACAGGACTAATATTAACAAGAGATGGTGGAATGATAATAATAATGAT-----  
-----  
-----  
ACCAATGGAAATGAAACCTTCAGACCTGGAGGAGGAGATATGAGGGACAATTGGAGAAGTGAATTATATAAGT  
ATAAAGTAGTAAACTTGAACCACTA---GGAGTAGCACCCACCAGGGCAAGAAGAAGAGTGGTG-----  
-----CAGAGAGAGAAAAAGAGCA---ATTGGA---CTGGGAGCT---  
-----GTATTCATTGGGTTCTTAGGAGCA---GCAGGGAGCACTATG---GGCGCGGCGTCA---  
GTGACGCTGACGGTACAG---GCCAGAGCC---TTATTG---TCTGGCATAGTGCAACAGCAAAGC---  
AATTTG---CTGAGG---GCTATAGAAGCTCAACAACATCTGTTGAAGCTCACGGTCTGGGGCATT  
>KU921727..2  
TTCTATTGTGACACATCAAGCCTGTTTAATAGCACTTGGAAATGAGAATGACAATGTCAGCAGAACAGAGTCAA  
AT-----  
-----  
AGTACAGAAGATATAACTCTCCAATGCAGAATAAAACAAATTGTAAATATGTGGCAGAGAGTAGGACAAGCGA  
TGTATGCCCCCTCCCATCCAAGGAATAATAAAGTGTTGAATCAAAC---  
ATAACAGGACTAATATTAACAAGAGATGGTGGAATCATAATAGT-----  
-----  
ACAAATGAAACCTCC---  
AGAAATGAAACCTTCAGACCTGGAGGAGGAGATATGAGGGACAATTGGAGAAGTGAATTATATAAGTATAAGG  
TAGTAAAAATTGAACCTCTA---GGAGTAGCACCCACCAAGGCAAAGAGAAGAGTGGTG-----  
-----GAGAGAGAAAAAAGAGCA---GTTGGA---ATAGGAGCT-----  
GTCTTCCTTGGATTCTTGGGAGCA---GCAGGAAGCACTATG---GGCGCGGCGTCA---  
ATAACGCTGACGGCACAG---GCCAGACAA---TTATTG---TCTGGTATAGTGCAACAGCAAAGC---  
AATTTG---CTGAGG---GCTATAGAGGCTCAACAGCATCTGTTGAGACTCACAGTCTGGGGCATT  
>KU921732..1  
TTCTATTGTAATACATCAGGCCTTTTTGATGACACTTGGAAATGGCACGAAG-----  
-----  
-----  
TCAAATGACACTATAACACTCCCATGCAGAATAAAAGCAAGTTATAAATATGTGGCAGAGGACAGGACAAGCAA  
TGTATGCCCCCTCCCATCCAAGGAGTAATAAGGTGCGAATCAAAC---  
ATCACAGGACTAATATTAACAAGAGATGGTGGGCATAACATTACA-----  
-----  
-----  
AATGAAACCTTCAGACCTACAGGAGGAAATATGAGGGACAATTGGAGAAGTGAATTATATAAGTATAAAGTAG  
TAAGAATTGAACCACTA---GGAGTAGCACCCACCTCGGCAAAGAGAAGAGTGGTG-----  
-----GAGAGAGAAAAAAGAGCAGTAGTTGGA---ATGGGAGCT-----  
GTCTTCATTGGGTTCTTGGGAGCA---GCAGGAAGCACTATG---GGCGCGGCGTCA---  
ATGACGCTGACGGTACAG---GCCAGACAA---TTATTG---TCTGGCATAGTGCAACAGCAAAGC---  
AATTTG---CTGAGG---GCTATAGAGGCTCAACAGCATTTGTTGAAGCTCACGGTCTGGGGCATT  
>KU921734..1  
TTCTATTGTAACACATCAGGTCTGTTTAATAGCACGTGGAATAAGGATAATAACACCTTGAATGGCGCTGTAA  
ATAAC-----  
-----  
ATAACAGACAATATAACCCTCCAATGCAGAATAAAACAAATTATAAATATGTGGCAGAGAGCAGGACAAGCAA  
TATATGCTCCTCCCATCCAGGAGTAATAAGGTGCACCTCAAAT---  
ATTACAGGATTAATATTAACAAGAGATGGTGGAAGATAGCAATGAA-----  
-----  
-----  
AGTGCTGAAACCTTCAGACCTGGAGGAGGAGATATGGGGGACAACCTGGAGAAGTGAATTATATAAGTATAAGG

TAGTAAAAATTGAACCACTA---GGAATAGCACCCAACAGGGCAAAGAGAAGAGTGGTG-----  
 -----GAGAGAGAAAAAAGAGCAATCTTGGGA---CTGGGAGCT-----  
 GTTTTCGTTGGGTTCTTAGGAGCA---GCAGGAAGCACTATG---GGCGCGGCGTCA---  
 CTGACGCTGACGGTACAG---GCCAGAAAC---TTATTG---TCTGGCATAGTGCAACAGCAAAAC---  
 AATTTG---CTGAAG---GCTATAGAGGCTCAACAGCATCTGTTGAAACTCACGGTCTGGGGCATT  
 >KU921738..2  
 TTCTATTGTAACACATCAGAGCTGTTTAATAGCACTTGGAATAGGACTGACCCTGGCACTTGAATAACACC-  
 -----  
 AGCACGCAGGAGTCAAAT-----  
 AGCACAGATCAAAAAATAACTCTCCAATGCAGCATAAAGCAAATTATAAATATGTGGCAAAGGGTAGGACGAG  
 CAATGTATGCCCCCTCCCATCCCAGGACCAATACAGTGTAGATCAAAC---  
 ATTACAGGACTAATATTAGTGAGAGATGGTGGGAATACGAATACT-----  
 -----  
 -----  
 AGCAAGGAAACCTTTAGACCTGCAGGAGGGGATATGAGGGACAATTGGAGAAGTGAATTATATAAATATAAAG  
 TAGTAAAAATTGAACCACTA---GGAGTAGCACCCACCAAGGCAAAGAGAAGAGTGGTG-----  
 -----GAGAGAGGAAAAAAGAGCA--GTTGGA---CTAGGAGCT-----  
 GTCTTCATTGGGTTCTTAGGAGCA---GCAGGAAGCACTATG---GGCGCAGCGTCA---  
 ATAACGCTGACGGTACAG---GTCAGACAA---TTATTG---TCTGGCATAGTGCGACAGCAAAGC---  
 AATTTG---CTGAGG---GCTATAGAAGCTCAACAACATCTGTTGAAACTCACGGTCTGGGGCATT  
 >KU921746..1  
 TTCTATTGTAACACATCAGGTCTGTTCAACAGCACTTGGGATGATACCGCCATACAGGAAAATATCACGGAGA  
 TCACGGAG-----  
 -----  
 TCAAAATGACACAATAACTCTCCAATGCAGAATAAGGCAATTTATAAGGATGTGGCAGAGGACAGGACAGGCAA  
 TGTATGCCCCCTCCCATACAGGAGTAATAAGGTGTGAATCAAAC---  
 ATTACAGGACTAATATTAACAAGAGATGGTGGGCATAGTAATAGT-----  
 -----  
 -----  
 ACTAGTAATGAAACCTTCAGACCTGGAGGAGGAGATATGAGGGACAATTGGAGAAGTGAATTATATAAGTATA  
 AAGTAGTAAAAATTGAACCACTA---GGAGTAGCACCTCCAGGGCAAGGAGAAGAGTGGTG-----  
 -----GGAAGAGAAAAAAGAGCA--GTTACA---ATAGGAGCC-----  
 ---GTCTTCCTTGGGTTCTTAGGAGCA--GCCGGAAGCACTATG---GGCGCGGCGTCA---  
 ATAACGCTGACGGTACAG---GCCAGGCAA---TTATTG---TCTGGTATAGTGCAACAGCAAAGC---  
 AATTTG---CTGAAG---GCTATAGAGGCTCAACAACATCTGTTGAGACTCACGGTCTGGGGCATT  
 >KU921752..1  
 TTCTATTGTAACACATCAGGCCTGTTTAATAGCACTTGGAATGACACCAGCAATGGGAATGACACCAACATAT  
 CAAATAGC-----  
 -----ACG---  
 GAGAAGAATGAGAATATAACTCTCCAATGCAGAATAAAGCAAATTATAAATATGTGGCAAAGAGTAGGAAAAG  
 CAATGTATGCTCCTCCCATCCCAGGAATAATAAAATGTGAATCAAAC---  
 ATTACAGGACTAATATTAACAAGAGATGGGGGAAAGGAGGAAAAC-----  
 -----  
 -----  
 GAAAGTGAAACCTTCAGACCTGGAGGAGGAGATATGAGGGACAATTGGAGAAGTGAATTATATAAGTATAAAG  
 TAGTAAAAATTGAACCACTA---GGAGTAGCACCCACCAGGGCAAGGAGAAGAGTGGTG-----  
 -----GAGAGAGAAAAAAGAGCA--GTTGGA---ATGGGAGCT-----  
 TTGTTTCATTGGGTTCTTAGGAGCA---GCTGGAAGCACTATG---GGCGCGGCGTCG---  
 ATGACGCTGACGGTACAG---GCTAGACAA---CTATTG---TCTGGCATAGTGCAACAGCAAAGC---  
 AATTTG---CTGAGG---GCTATAGAGGCTCAACAGCATCTGTTGAAACTCACAGTCTGGGGCATT  
 >KU921756..1  
 TTCTATTGTAACACATCAAACCTGTTTAATAGTACTTGGCTTAACAATGGCACATTAGGTAGTGACAATGGCA  
 TATCA-----  
 -----  
 -----  
 GATAGTAAAAACATAACTCTCCCATGCAAAATAAGGCAAATTATCAGAATGTGGCAGAGAGTAGGACAAGCAA  
 TATATGCCCCCTCCCATCCAAGGAGTAATAAGGTGTAAATCAGAC---  
 ATTACAGGACTAATATTAACAAGAGATGGTGGAGTTAATAACAAT-----  
 -----  
 -----  
 ATAACCTGAAACCTTCAGACCTGGAGGAGGAGATATGAGGGACAATTGGAGAAGTGAGTTATATAAATATAAAG

TAGTAAAAATTGAACCACTA---GGAGTAGCACCCACCAGGGCAAGGAGAAGAGTGGTG-----  
-----GGGAGAGAAAAAAGAGCA---GTTGGA---GTAGGAGCT-----  
GTATTCCTTGGGTTCTTAGGAGCA---GCAGGAAGCACTATG---GGCGCGGCGTCA---  
ATAACGCTGACGGTACAG---GCCAGACAA---TTATTG---TCTGGCATAGTGCAACAGCAAAGC---  
AATTTG---CTAAGG---GCTATAGAGGCTCAACAGCATCTGTTGAAACTCACAGTCTGGGGCATT  
>KU921759..1  
TTCTATTGCAGTACAAAAGGCCTGTTTAATAGCACTTGGAATGCTAATGGCACCAGGAATGACTTAGGGAGCT  
CG-----  
-----  
GAATCAGATGGCACTATAACTCTCCAGTGCAGAATAAAACAAATTATAAATATGTGGCAGAGAACAGGACAAG  
CAATGTATGCCCCCTCCCATCGCAGGAGTAATAAGTTGTAATTC AACC---  
ATTACAGGACTACTATTAACAAGAGATGGTGGGAACAATAGTACA-----  
-----  
-----  
AGTGAAACTGAAACCTTTAGACCTGGAGGAGGAGATATGAGGGACAATTGGAGAAAGTGAATTATATAAGTATA  
AAGTAGTAAAAATTGAACCATTA---GGAGTAGCACCCACCAGGGCGCGGAGAAGAGCGGTG-----  
-----GGGAGAGAAAAAAGAGCA---GTTGGA---CTGGGAGCT-----  
---GTTTTCTTGGGTTCTTAGGAGCA---GCAGGAAGCACTATG---GGCGCGGCGGCA---  
GTGACGCTGACGGTACAG---GCCAGACAA---TTATTG---TCTGGCATAGTGCAACAGCAAAGC---  
AATTTG---CTGAGA---GCTATAGAGGCTCAACAACATCTGTTGAAACTCACTGTCTGGGGCATT  
>KU921772..1  
TTCTATTGTAACACATCAGGCTTGTTTAATAGCAGTTGGAATAGCACCAGCAAGGAGCTAAATAGCACCAACA  
GGGAGCTA-----  
-----  
AATAACATGACTGTAACCTCTCCAATGTAGAATAAAACAAATTATAAATATGTGGCAGAGAGTGGGACAAGCAA  
TGTATGCCCCCTCCCATCCAGGAGTAATAAGTGTGTATCAAAC---  
ATTACAGGATTAATATTAACAAGGATGGTGGGCTTAATCCTACA-----  
-----  
-----  
GAGAACGAAACCGAAACCTTCAGACCTGGAGGAGGAGATATGAGAGACAATTGGAGAAAGTGAATTATATATGT  
ATAAAGTAGTGAAAATTGAACCACTA---GGAGTAGCACCCACCAGGGCAAAGAGAAGAGTGGTG-----  
-----GAGAGAGAAAAAAGAGCA---GTTGGA---ATAGGAGCT---  
-----GTTTTCTTGGGTTCTTGGGAGCA---GCAGGAAGCACTATG---GGCGCGGCGTCA---  
ATAACGCTGACGGTACAA---GCCAGACAA---TTATTG---TCTGGCATAGTGCAACAGCAAAGC---  
AATTTG---CTGAGG---GCTATAGAGGCTCAACAGCATCTGTTGAAACTCACAGTCTGGGGCATT  
>KU921780..1  
TTCTATTGTAATACATCAGGCTTATTTAATGGCACTTGGAACCAATGCTAGCATACAAGAAAATAGC-----  
-----  
-----  
ACGGAGTCAAATATAACTCTCCAATGCAGAATAAAACAAATTATAAATATGTGGCAGACAGTAGGACGAGCAA  
TGTATGCTCCTCCCATTTGAAGGAGCAATAAGGTGTGTATCAAAC---  
ATTACAGGACTAATATTAACCAGAGATGGTGGGGATAACACAACCT-----  
-----  
-----  
ACAACTGAAATCTTCAGACCTGGAGGAGGAAATATGAAGGACAATTGGAGAAAGTGAATTATATAAGTATAAAG  
TAGTAAAAATTGAACCATTA---GGAGTAGCACCCACCAAGGCAAAGAGAAGAGTGGTG-----  
-----GAGAGAGAAAAAAGAGCA---GTTGGA---CTGGGAGCT-----  
GTCTTCCTTGGGTTCTTAGGAGCA---GCAGGAAGCACTATG---GGCGCGGCGTCA---  
GTAACGCTGACGGTACAG---GCCAGACAA---TTATTG---TCTGGCATAGTGCAACAGCAAAC---  
AATTTG---CTGAGG---GCTATCGAGGCTCAACAACATCTGTTGAAACTCACGGTCTGGGGCATT  
>KU921783..1  
TTCTATTGTAATACAACAGGCCTGTTTAATAGCACTTGGGGGAATGGCACTTGGAATGCCAGCAGCCAGGGGG  
AG-----  
-----  
TCAAATGACACTATACTCCTCCAATGCAAAATAAAGCAAATTATAAATATGTGGCAGAGAGTAGGACAAGCAA  
TGTATGCTCCTCCCATCCAGGAGTAATAAGGTGTGAATCAAAC---  
ATTACAGGACTAATATTAACAAGAGATGGTGGGGGGGATGACAAT-----  
-----  
-----  
GGAACCGAAACCTTCAGACCTGGAGGAGGAGATATGAGGGATAATTGGAGAAAGTGAATTATATAAGTATAAAG

TAGTAAAAATTGAACCACTA---GGAGTAGCACCCACCAGGGCAAGGAGAAGAGTGGTG-----  
 -----GAGAGAGAGAAAAGAGCA---GTTACA---ATAGGAGCT-----  
 GTTTTCTTGGGTTCTTAGGAACA---GCAGGAAGCACTATG---GGCGCGGCGTCA---  
 ATAGCGCTGACGGCACAG---GCTAGACAA---TTATTG---TCTGGCATAGTGCAACAGCAAAGC---  
 AATTTG---CTGAGG---GCTATAGAGGCTCAACAACATATGTTGAGACTCACGGTCTGGGGCATT  
 >KU921785..1  
 TTCTATTGTAACACATCAGACCTGTTTAATAGCACTTGGTATGGCAATAACACCATGCAGGGATTAAATGGC-  
 -----  
 -----  
 ACAAATGACACTATAATTCTCAAATGCAGAATAAAGCAAATTATAAATATGTGGCAGAGAACAGGACAAGCAA  
 TATATGCCCCCTCCCATCCCAGGAGTAATAGAGTGTGTATCAAAC---  
 ATAACAGGACTAATATTGACAAGAGATGGTGGGGGTAGTGAGAGC-----  
 -----  
 -----  
 AGGACAGAGGAAACATTTAGACCTGGAGGAGGAGATACGAGGGACAATTGGAGAAGTGAATTATATAAGTATA  
 AAGTAGTAAAAATTGAACCACTA---GGAGTAGCACCCACCAGGGCAAAAAGAAGAGTGGTG-----  
 -----GAGAGAGAAAAAAGAGCA--ATTGGA---ATAGGAGCT-----  
 ---GTCTTCATTGGGTTCTTAGGAGCA---GCAGGAAGCACTATG---GGCGCGGCGTCA---  
 ATAACGCTGACGGTACAG---GCCAGACAA---TTATTG---TCTGGTATAGTGCAACAGCAAAGC---  
 AATTTG---CTGAGG---GCTATAGAGGCTCAACAGCATCTGTTGAAACTCACAGTCTGGGGCATT  
 >KU921788..1  
 TTCTATTGTGATACATCAAGCCTGTTTAACAGCACTTGGGAACCAAACAATGTTAGTAGCAAT-----  
 -----  
 -----  
 TTAAATGGCACTATAACTCTCCAATGCAGAATAAAGCAAAGTCATAAATATGTGGCAGAGAGTAGGACAAGCAA  
 TGTATGCCCCCTCCCATCCCAGGAAACATAACATGTAGATCAAAC---  
 ATTACAGGAATAATATTAACAAAAGATAAGGATGGTATAAATAAT-----  
 -----  
 -----  
 TCAGATGAAACCTTGAGGCCAGGAGGAGGAGATATGAGGGACAATTGGAGAAGTGAATTATATAAGTATAAAG  
 TGGTAAAAATTGAACCACTA---GGAGTAGCACCCACCAAGGCAAGGAGAAGAGTGGTG-----  
 -----GAGAGAGAAAAAAGAGCA--GTTGGA---CTAGGAGCT-----  
 GTTTTCCTTGGGTTCTTAGGAGCA---GCAGGAAGCACTATG---GGCGCAGCGCCA---  
 ATAACGCTGACGGTACAG---GCCAGACAA---TTGTTG---TCTGGCATAGTGCAACAGCAAAGC---  
 AATTTG---CTGAGG---GCTATAGAGGCTCAACAACAGCTGTTGAAGCTCACGGTCTGGGGCATT  
 >KU921804..1  
 TTCTATTGTGATACATCAAGCCTGTTTACTGGTACTTGGAAATGGTACTACTTGGATGAATAGCACT-----  
 -----  
 -----  
 GACACTGAAAATATAACTCTTCCATGCAGAATAAAGCAAATTATAAATATGTGGCAGAGGGTAGGGAGAGCAA  
 TGTATGCCCCCTCCCATCCAAGGAAAAATAAATTGTACATCAAAC---  
 ATTACAGGACTACTATTAAACAAGAGATGGTGGGAAAATAATAAT-----  
 -----  
 -----  
 TCATCTGAAACCTTCAGACCAGGAGGAGGAGATATGAGGGACAATTGGAGAAGTGAATTATATAAGTATAAAG  
 TAGTAAAGATTGAACCACTA---GGAGTAGCACCCACCAGGGCAAGAAGGAGAGTGGTG-----  
 -----GAAAGAGAAAAAAGAGCA--GTTGGA---CTGGGAGCT-----  
 GTATTTCATTGGGTTCTTGGGAGCA---GCAGGGAGCACTATG---GGCGCGGCGTCA---  
 GTGACGCTGACGGTACAG---GCCAGACGA---TTACTA---TCTGGCATAGTGACAGCAAAGC---  
 AATTTG---CTGAGG---GCTATAGAGGCTCAACAGCATCTGTTGAAACTCACGGTCTGGGGCATC  
 >KU921831..3  
 TTCTATTGTAATACATCACGCCTGTTTAGTTACAGGTGCACGTTGAAAATGAGACTAATACTTACACCTGCA  
 CTAAC-----  
 -ACCATGCATGAGTTC-----  
 AATAGCACGGCAAATATAACTCTCCAATGCAGACTAAAGCAGATCATAAGGATGTGGCAGAGGACAGGACAAG  
 CAATGTATGCCCCCTCCCATCCCAGGGCAAATAATGTGTAGATCAAAC---  
 ATTACAGGGTTAATATTAACAAGAGATGGTGGGGTTGATAACAATACA-----  
 -----  
 -----  
 GATGCTACCGAAATCTTCAGACCTGGAGGAGGAGATATGAAGGACAATTGGAGAAGTGAATTATATAAGTATA

AAGTAGTAAAAATTGAACCACTA---GGAGTAGCACCCACCAGGGCAAGGAGAAGAGTGGTG-----  
-----GGGAGAGAAAAAAGAGCA---GTTGGA---CTGGGAGCT-----  
---GTTTTCATTGGGTTCTTAGGAGCA---GCAGGAAGCACTATG---GGCGCGGCGTCA---  
GTGACGCTGACGGTACAG---GCCAGACAA---TTATTG---TCTGGTATAGTGCAACAGCAAAGC---  
AATTTG---CTGAAG---GCTATTGAGGCTCAACAACATCTGTTGAGGCTCACGGTCTGGGGCATT  
>KU921835..2  
TTCTATTGTAACACATCAGAACTGTTTAATAGCACTTGGAGTTGGAATAACACTTGGGAATAACACTCATGAG-  
-----  
-----  
CCAAATGGCACTATAACTCTCCAATGCAGAATAAAGCAAATTATAAATATGTGGCAGAGAGTAGGACAAGCAA  
TGTATGCCCCCTCCCATACAAGGAGAAATAAAGTGTGAATCAAAC---  
ATCACAGGACTAATATTAACAAGAGATGGT---ATGGGTAACAATGTA-----  
-----  
-----  
TCAAAATGAAACCTTCAGACCTGGAGGAGGAGATATGAGGGACAACCTGGAGAAGTGAGTTATATAAATATAAAG  
TAGTAAAAATTGAACCATTA---GGAGTAGCACCCACTGGGGCAAGGAGAAGGGTGGTG-----  
-----CAGAGAGAAAAAGAGAGCG---GTTGGA---ATAGGAGCT-----  
GTCTTCCTTGGGTTCTTAGGAGCA---GCAGGAAGCACTATG---GGCGCAGCGTCA---  
TTAACGCTGACGGTACAG---GCCAGACAA---TTACTG---TCTGGCATAGTGCAAGCAGCAAAGC---  
AATTTG---CTGAGG---GCTATAGAGGCTCAACAACATATGTTGAAACTCACGGTCTGGGGCATT  
>KU921841..2  
TTCTATTGCAACACATCAGGCCTGTTTAATAGCACTGACATGAGTTCAAATAACACAGAG-----  
-----  
-----  
TTAAATGACACTATAAGACTCCCATGCAGAATAAAACAAATTATACGTATGTGGCAGAAAGTAGGACAAGCAA  
TGTATGCCCCCTCCCATTAAGGAGTGATAAGATGTAGCTCAAAC---  
ATTACAGGAATACTATTAACAAGAGATGGTGGGATAGAAAATGAA-----  
-----  
-----  
ACAGAAATCTTCAGACCTGGAGGAGGAAACATGAAGGACAATTGGAGAAGTGAATTATATAAGTATAAAGTAG  
TAAAAATTGAACCACTA---GGAGTAGCACCCACCTCGGCAAGGAGAAGAGTGGTG-----  
-----GAGAGAGAAAAAAGAGCA---GTTGGA---CTGGGAGCT-----  
GTATTCATTGGGTTCTTAGGAGCA---GCAGGAAGCACTATG---GGCGCGGCGTCA---  
ATGACGCTGACGGTACAA---GCCAGACAA---TTATTG---TCTGGCATAGTGCAACAGCAAAGC---  
AATTTG---CTGAGG---GCTATAGAGGCTCAACAGCATCTGTTGAAACTCACGGTCTGGGGCATC  
>KU921852..1  
TTCTATTGTAATACATCAGGCTTGTTTAATAGCACTTGGGAATGACACTGTCATGTTTAATAGCACTGGGAATG  
ACACTGTC-----  
-----GGCAGG-----  
GAGTCAAATGAACTATAACACTCCAATGCAGGATAAAACAAATTATAAATATGTGGCAGAGAACAGGACAAG  
CAATATATGCCCCCTCCTATCCAGGAGTAATAAGGTGTGTATCAAAC---  
ATTACAGGACTAATATTAACAAGAGATGGTGGGAATACGGCAGGGACA-----  
-----  
-----  
GGTTCCTGAAACCTTCAGACCTGGAGGAGGAGATATGAGGGACAATTGGAGAAGTGAATTATATAAGTATAAAG  
TAGTAAAAGTTGAACCACTA---GGAGTAGCACCCACCAGGGCACAGAGAAGAGTGGTG-----  
-----CAGAGGGAAAAAAGAGCA---GTTGGA---ATAGGAGCT-----  
GTCTTCATTGGGTTCTTAGGAGCA---GCAGGAAGCACTATG---GGCGCGGCGTCA---  
ATAACGCTGACGGCACAG---GCCAGACAA---TTATTG---TCTGGTATAGTGCAACAGCAAAGC---  
AATTTG---CTGAGG---GCTATAGAGGCTCAACAGCATCTGTTGAAACTCACAGTCTGGGGCATC  
>KF716474..1  
TTCTATTGTGACACATCAGGCCTGTTTAATAGCACTTGGGAATGGTACGGCCAGCAATGTCAGCATACCTGACA  
CGGTG-----  
-----  
-----  
ACAAATGGCACTATAACACTCCCATGCAAAATAAAGCAAATTATAAATATGTGGCAGAGAGTAGGACAAGCAA  
TGTATGCCCCCTCCCATTCAGGAGTAATAAGGTGTGATTCAAAC---  
ATTACAGGGATGATATTAACAAGAGATGGTGGTGAT-----  
-----  
-----  
AACAGGACAGAAACCTTCAGACCTGGAGGAGGAGATATGAGGGACAATTGGAGAAGTGAATTATATAAATATA

AAGTAGTAAAAGTTGAACCACTA---GGAGTAGCACCTACCAGGGCAAGAAGAAGAGTGGTG-----  
-----GAGAGAGAAAAAAGAGCA---GTAGGA---ATAGGAGCT-----  
---GTTTTCCTTGGGTTCTTAGGAGCA---GCAGGAAGCACTATG---GGCGCAGCGTCA---  
ATAACGCTGACGGTACAG---GCCAGACAA---TTATTG---TCTGGTATAGTGCAACAGCAAAGT---  
AATTTG---CTGAGG---GCTATAGAGGCTCAACAACAGCTGTTGAAACTCACAGTCTGGGGCATT  
>KF716475..1  
TTCTACTGTAATACATCAGGCCTGTTTAATAGCACTTGGTCCCTTAACAACACTTGGTCCCTTAACAGCACGC  
AGTCAAAT-----  
-----GACACA-----  
GGGATAAATGATACCATAACTCTCCCATGCAGAATAAAGCAAATTATAAATATGTGGCAGAGAGTAGGACAAG  
CAATGTATGCCCTCCCATCCAAGGAGTAATACAGTGTGTATCAAAC---  
ATTACAGGACTACTGTTAACAAGAGATGGGGGAATGTGAATAGCAGT-----  
-----  
-----  
AATGGCAATGAAATCTTCAGACCTGGAGGAGGAGATATGAGGGACAATTGGAGAAGTGAATTATATAAGTATA  
AAGTAGTAAAAATTGAACCACTA---GGAGTAGCACCCACCAGGGCAAAGAGAAGAGTGGTG-----  
-----GGGAGAGAAAAAAGAGCA---ATTGGTGGGCTAGGAGCT-----  
---GTTTTCCTTGGGTTCTTAGGAATG---GCAGGAAGCACTATG---GGCGCGGCGTCA---  
ATGACGCTGACGGTACAG---GCCAGAAAC---TTATTG---TCTGGCATAGTGCAACAGCAAAGC---  
AATTTG---CTGAGG---GCTATAGAGGCTCAACAACATCTGTTGAAACTCACAGTCTGGGGCATT  
>AY322184..1  
TTCTATTGTAACACATCAGATCTGTTTAATGAGTCAAATAGTACGGAG-----  
-----  
-----  
TTAAACGACACTATAACTCTCCAATGCAGAATAAAGCAAATTATAAATATGTGGCAGAGAGCAGGACAAGCAA  
TATATGCCCCCTCCCATCCCAGGAGTAATAAGGTGTGTATCAAAC---  
ATTACAGGACTATTGTTAACAAGGGATGGTGGGATTAATACCAGT-----  
-----  
-----  
ACAAGTGAAACCTTCAGACCTGGAGGAGGAGATATGAGGGACAATTGGAGAAGTGAATTATATAGGTATAAAG  
TAGTAAAAATTGAACCACTA---GGAGTAGCACCCACCAGGGCAAAGAGAAGAGTGGTG-----  
-----GAGAGAGAAAAAAGAGCA---GTTGGA---ATAGGAGCT-----  
GTTTTCAATTGGGTTCTTAGGAGCA---GCAGGAAGCACTATG---GGCGCGGCGTCA---  
ATAACGCTGACGGTACAG---GCCAGACAA---TTATTG---TCTGGCATAGTGCAACAGCAAAGC---  
AATTTG---CTGAGG---GCTATAGAGGCTCAACAACATCTGTTGAAACTCACGGTCTGGGGCATT  
>AF539405..1  
TTCTATTGTAACACATCAGGCCTGTTTAATAGCACTTGGAAATGGCAGTGAGGCAAATAGCACG-----  
-----  
-----  
CCACACGAGAATATAACTCTCCAATGCAGAATAAAGCAAATTATAAATATGTGGCAGAGAGCAGGACAAGCAA  
TATATGCCCCCTCCCATCCCAGGAGTAATAAAATGTAATTCAAAC---  
ATTACAGGACTAATATTAACAAGAGATGGTGGGGTTAATAGCAGT-----  
-----  
-----  
GCAAATGAAACCTTCAGACCTGGAGGAGGAGATATGAGGGACAATTGGAGAAGTGAATTATATAAGTATAAAG  
TAGTAAAAATTGAACCACTA---GGAGTAGCACCCACCAGGGCAAAGAGAAGAGTGGTG-----  
-----GAGAGAGAAAAAAGAGCA---GTTGGA---ATAGGAGCT-----  
GTCTTCATTGGGTTCTTAGGAGCA---GCAGGAAGCACTATG---GGCGCGGCGTCA---  
ATAACGCTGACGGTACAG---GCCAGACAA---TTATTG---TCTGGCATAGTGCAACAGCAAAGC---  
AATTTG---CTGAGG---GCTATAGAGGCTCAACAACATCTGTTGAAACTCACGGTCTGGGGCATT  
>L22943..1  
TTCTATTGTAATTCATCAGGCCTGTTTAATAGCACTTGGACCAACATGCAGGAGTCAAATAGCACGGAG----  
-----  
-----TCAAATGACACTATAACTCTCCCATGCAGAATA---  
AAAATTATAAACATGTGGCAGAGAGCAGGACAAGCAATGTATGCCCTCCCATCCAAGGAATAATAAAGTGTG  
TATCAAAC---ATTACAGGACTAATATTAACAAGAGATGGTGGGGATAATAACAGT-----  
-----  
-----  
GAAAGTGAAACCTTCAGACCTGGAGGAGGAGATATGAGGGACAATTGGAGAAGTGAATTATATAAGTATAAAG  
TAGTAAAAATTGAACCACTA---GGAGTAGCACCCACCAAGGCAAAGAGAAGAGTGGTG-----

-----GAGAGAGAAAAAAGAGCA---GTTGGA---ATAGGAGCT-----  
 GTCTTCCTTGGGTTCTTAGGAGCA---GCAGGAAGCACTATG---GGCGCGGCGTCA---  
 ATAACGCTGACGGTACAG---GCCAGACAA---TTATTG---TCTGGCATAGTGCAACAGCAAAGC---  
 AATTTG---CTGAGG---GCTATAGAGGCTCAACAACATCTGTTGAAACTCACGGTCTGGGGCATT  
 >KX168075..1  
 TTCTATTGTAACACATCAGGCCTGTTTAATAGCACTTGGGAGTTTAATAGCACTTGGGAGTTTAATAGCACTT  
 GGGAGTTT-----  
 AATAGCACTTGGGAATAATTCA-----  
 AATAGCACAGAGAATATAACTCTCCAATGCAGAATAAAGCAAATTGTAAATATGTGGCAAAGAGCAGGACAAG  
 CAATATATGCCCCCTCCCATACCAGGAGTAATAAGGTGTGAATCAAAT---  
 ATTACAGGACTAATATTAACAAGAGATGGTGGGGATAATAATAGTACAAAT-----  
 -----  
 -----  
 AATACAAGTGAAACCTTCAGACCTGGAGGAGGAGATATGAGGGACAATTGGAGAAGTGAATTATATAAGTATA  
 AAGTAGTAAAAATTGAACCAATA---GGAGTAGCACCCACCAGGGCAAAAAGAAGAGTGGTG-----  
 -----GAGAGAGAAAAAAGAGCA---GTTGGA---ATAGGAGCT-----  
 ---GTCTTCATTGGGTTCTTAGGAGCA---GCAGGAAGCACTATG---GGCGCAGCGTCA---  
 GTAACGCTGACGGTACAG---GCCAGACAG---TTATTG---TCTGGTATAGTGCAACAGCAAAGC---  
 AATTTG---CTGAGG---GCTATAGAGGCTCAACAGCATCTGTTGAAACTCACGGTCTGGGGCATT  
 >AF004885..2  
 TTCTATTGTAATACATCAGGCCTGTTTAATAGCACTTGGTATGTTAATAGCACTTGGGAATGACACTGACAGCA  
 CTCAG-----  
 -----  
 GAGTCAAATGACACTATAACTCTCCCATGCAGAATAAAGCAAATTATAAATATGTGGCAGAGAGCAGGACAAG  
 CAATGTATGCCCCCTCCCATCCCAGGAGTAATAAAGTGTGAATCAAAC---  
 ATTACAGGACTACTATTAACAAGGATGGTGGAAAGGATAACAAT-----  
 -----  
 -----  
 GTAAATGAAACCTTCAGACCTGGAGGAGGAGATATGAGGGACAATTGGAGAAGTGAATTATATAAGTATAAAG  
 TAGTAGAAATTGAACCACTA---GGAGTAGCACCTACCAGGGCAAAGAGAAGAGTGGTG-----  
 -----GAGAGAGAAAAAAGAGCA---GTTGGA---ATAGGAGCT-----  
 GTCTTCCTTGGGTTCTTAGGAGCA---GCAGGAAGCACTATG---GGCGCAACGTCA---  
 ATAACGCTGACGGTACAG---GCCAGACAA---TTATTG---TCTGGCATAGTGCAACAGCAAAAC---  
 AATTTG---CTGAGG---GCTATAGAGGCTCAACAACATCTGTTGAAACTCACGGTCTGGGGCATT  
 >AF407151..2  
 TTCTATTGTAACACATCAGGCCTGTTTAACAGAGCTTATGGCAATGTCAGCAAGCAAGAGCCAAAT-----  
 -----  
 -----  
 AGCTCCGGCAATATAACACTCCAATGCAGAATAAAGCAAGTTATAAATATGTGGCAGAGAGCAGGACAAGCAA  
 TATATGCCCCCTCCCATACAAGGAGTAATAAGATGTGACTCAAAT---  
 ATTACAGGACTAATATTAACAAGAGATGGTGGGAAAGATAGTAAT-----  
 -----  
 -----  
 ATAACCTGAAACATTTCAGACCTGGAGGAGGAGATATGAGGGACAATTGGAGAAGTGAATTATATAAGTATAAAG  
 TAGTAAAAATTGAACCACTA---GGAGTAGCACCCACCAGGGCAAAGAGAAGAGTGGTG-----  
 -----GAGAGAGAAAAAAGAGCA---GTTGGA---ATAGGAGCT-----  
 GTCTTCATTGGGTTCTTAGGAGCA---GCAGGAAGCACTATG---GGCGCGGCGTCA---  
 ATAACGCTGACGGCACAG---GCCAGAAAA---TTATTG---TCTGGCATAGTGCAACAGCAAAGC---  
 AATTTG---CTGAGG---GCTATAGAGGCTCAACAACATCTGTTGAAACTCACGGTCTGGGGCATT  
 >AF407162..2  
 TTCTATTGCAATACAACAAACCTGTTTAATAGCACTTGGGAATCACACTGCCAGCATGAATAGCACAGAG----  
 -----  
 -----  
 TCAAATGACACTATAATTCTCCCATGCAGAATAAAACAAATTATAAATATGTGGCAGAGAGTAGGACAAGCAA  
 TGTATGCCCCCTCCCATTCGAGGAGTAATAAGGTGTGAATCAAAC---  
 ATTACAGGACTAATATTAACAAGAGATGGTGGGAATACTACCGGT-----  
 -----  
 -----  
 ACAAGTGAAATCTTCAGACCTGGAGGTGGAGATATGAGGGACAATTGGAGAAGTGAATTATATAAGTATAAAG  
 TAGTAAAAATTGAACCACTA---GGAGTAGCACCCACCAGGGCAAAGAGAAGAGTGGTG-----

-----GAGAGAGAAAAAAGAGCA---GTTGGA---ATAGGAGCT-----  
 GTCTTCATTGGGTTCTTAGGAGCA---GCAGGAAGCACTATG---GGCGCGGCGTCA---  
 ATAACGCTGACGGTACAG---GCCAGACAA---TTATTG---TCTGGCATAGTGCAACAGCAAAGC---  
 AATTTG---CTGAGG---GCTATAGAGGCTCAACAGCATCTGTTGAAACTCACGGTCTGGGGCATT  
 >AF407156..1  
 TTCTATTGCAATACATCAAACTGTTTAATAGCAGGTGGGAGAACAATGGCACCCGCAACATGTTGAAGAATG  
 ACACA-----  
 -----GGG---  
 TCAAAATGAGACTACTCTGATTCTCCGATGCAGAATAAAACAAATTATAAATATGTGGCAGAGAGTAGGACAAG  
 CGATGTATGCCCCCTCCCATCCAAGGAGTAATAAATTGTACATCAAAC---  
 ATCACAGGACTAATATTAACAAGAGATGGTGGTGGTGAAAACGAT-----  
 -----  
 -----  
 ACAGAGACCTTCAGACCTGGAGGAGGAGATATGAGGGACAATTGGAGAAGTGAATTATATAAGTATAAAGTAG  
 TAAAACTTGAACCACTA---GGAGTAGCACCCACCATGGCAAAGAGAAGAGTGGTG-----  
 -----GAGAGGGAAAAAAGAGCA---GTTGGA---ATGGCAGCT-----  
 GTCTTCCTTGGGTTCTTGGGAACA---GCAGGGAGCACTATG---GGCGCGGCGTCA---  
 CTAACGCTGACGGTACAG---GCCAGACAA---TTATTG---TCTGGCATAGTGCAACAGCAAAGC---  
 AATTTG---CTGAAG---GCTATAGAGGCTCAACAGCATCTGTTGAGACTCACGGTCTGGGGCATT  
 >KT008652..1  
 TTCTATTGTAACACATCAGGCCTGTTTAATAGCACTTGGGGGCACAATGCCAGCAGGCAGGAGAATAGCACGG  
 AG-----  
 -----  
 TCAAGTGACACTATAACTCTCCCATGCAAAATAAAGCAAATTATAAATATGTGGCAGAGAGCAGGGCAAGCAA  
 TATATGCCCCCTCCCATCCCAGGAGTAATAAGGTGTGAATCAAAC---  
 ATTACAGGACTAATATTAACAAGAGATGGTGGGAACAACAACAGT-----  
 -----  
 -----  
 ACAAGTGAAACCTTCAGACCTGGAGGAGGAAATATGAGGGACAATTGGAGAAGCGAATTATATAAGTATAAAG  
 TAGTAAAAATTGAACCACTA---GGAGTAGCACCCACCAGGGCAAAGAGAAGAGTGGTG-----  
 -----GGGAGAGAAAAAAGAGCA---GTTGGA---ATAGGAGCT-----  
 GTTTTCCTTGGGTTCTTAGGCGCA---GCAGGAAGCACTATG---GGCGCAGCGTCA---  
 GTAACGCTGACGGTACAG---GCCAGACAA---TTATTG---TCTGGCATAGTGCAACAGCAAAGC---  
 AATTTG---CTGAGG---GCTATAGAGGCTCAACAACATCTGTTGAAACTCACGGTCTGGGGCATT  
 >AF407157..2  
 TTCTATTGTAACACATCAGGCCTGTTTAATGGCATTGTGAATGGCACGCAGGAGCCAAATAGAACGGAG---  
 -----  
 -----  
 TCAAACGATACTATAAACAATCCAATGCAGAATAAAGCAAATTATAAATATGTGGCAAAGAGTAGGACAAGCAA  
 TATATGCCCCCTCCCATCAAGGAGAAATAAGGTGTGAGTCAAAC---  
 ATTACAGGACTAATATTAACAAGAGATGGTGGGATAATTAACGGT-----  
 -----  
 -----  
 ACAGAGGAGACCTTCAGACCTGGAGGAGGAGATATGAGGGACAATTGGAGAAGTGAATTATATAAGTATAAAG  
 TAGTAAAGATTGAACCATTA---GGAGTAGCACCCACCAAGGCAAAGAGAAGAGTGGTG-----  
 -----GAGAGGGAAAAAAGAGCA---GTTGGA---TTCGGAGCT-----  
 TTCTTCCTTGGGTTCTTAGGAGCA---GCAGGAAGCACTATG---GGCGCGGCGTCA---  
 ATAACGCTGACGGTACAG---GCTAGACAA---TTATTG---TCTGGCATAGTGCAACAGCAAAC---  
 AATTTG---CTGAGG---GCTATAGAGGCTCAACAGCATCTGTTGAAACTCACGGTCTGGGGCATT  
 >FJ866112..1  
 TTCTATTGTAATACATCAGAACTATTTAATAGCACTTGGACTTGGAAAGGCAATAATGACAGCATGCAGGGGT  
 TAAATAGC-----  
 -----ACG---  
 GGGTTAAACAACACTATAACTCTCCACTGCAGCATAAAGCAAATTATAAATATGTGGCAGAGAGTAGGACAAG  
 CAATGTATGCCCCCTCCCATCCAAGGAGTAATAAAGTGTGAATCAAAC---  
 ATTACTGGACTACTATTAACAAGAGATGGTGGGAATAATAACATA-----  
 -----  
 -----  
 AACGAGACCCTCAGACCTGGAGGAGGAGATATGAGGGACAATTGGAGAAGTGAATTATATAAGTATAAAGTAG  
 TAAAAATTGAACCACTA---GGAGTAGCACCCACCAAGGCAAAGAGAAGAGTGGTG-----

-----GAGAGAGAAAAAGAGCA---GTTGGA---ATAGGAGCT-----  
 GTCTTCCTTGGGTTCTTAGGAGCA---GCAGGAAGCACTATG---GGCGCAGCGTCA---  
 ATAACGCTGACGGCACAG---GCCAGAATA---TTATTG---TCTGGCATAGTGCAAGCAAGC---  
 AATTTG---CTGAAG---GCTATAGAGGCTCAACAGCATCTGTTGAGGCTCACGGTCTGGGGCATT  
 >AY322190..2  
 TTCTATTGTAATACATCAGGCCTGTTTAATAGCATTGGAATCACACTAATGGCACTTGGAAATAGCACGGAGT  
 TAAAT-----  
 -----GGC---  
 AATATAACTCTCAATATAACTCTCCCATGCAGAATAAACCAAATTATAAATATGTGGCAGAGAGTAGGACAAG  
 CAATATTTGCCCTCCCATCCAAGGAGTAATACAGTGTGTATCAAAC---  
 ATTACAGGACTAATATTAACAAGAGATGGAGGGAATAATAACACT-----  
 -----  
 -----  
 ACAAATGAAACCTTCAGACCTGGAGGAGGAGATATGAGGGACAATTGGAGAAGTGAATTATATAAGTATAAAG  
 TAGTAAAAATTGAACCACTA---GGAGTAGCACCCACCAGGGCACAGAGAAGAGTGGTG-----  
 -----CAGAGAGAAAAAGAGCA---ATTGGA---ATGGGAGCT-----  
 GTCTTCATTGGGTTCTTAGGAGCA---GCAGGAAGCACTATG---GGCGCGGCGTCA---  
 ATAACGCTGACGGTACAG---GCCAGACAA---TTATTG---TCTGGTATAGTGCAACAGCAAAGC---  
 AATTTG---CTGAGG---GCTATAGAGGCTCAACAGCATCTGTTGAAACTCACGGTCTGGGGCATT  
 >AY322193..1  
 TTCTATTGTAACACATCAAGCCTATTTAATGGCACTTGGACGGGCAATGACAGCAGGCAGGAGTCAAAT---  
 -----  
 -----  
 AGCAGCGACACTATAACTCTTCCATGCAGAATAAAACAAATTATAAATATGTGGCAGAGGGTAGGACAAGCAA  
 TATATGCCCCCTCCCCTACAAGGAGTAATCAGATGTGATTCAAAT---  
 ATTACAGGACTAATCTTAACAAGAGATGGTGGGAGTCCGGATAAT-----  
 -----  
 -----  
 GAAACCTTCAGACCTGTTGGAGGAGATATGAGGGACAATTGGAGAAGTGAATTATATAAGTATAAAGTAGTAA  
 AAATTGAACCATTA---GGAGTAGCACCCACCAGGGCAAAGAGAAGAGTGGTG-----  
 -----GAGAGAGAAAAAGAGCA---GTTGGA---ATAGGAGCT-----  
 GTCCTCATTGGGTTCTTAGGAGCA---GCAGGAAGCACTATG---GGCGCGGCGTCA---  
 ATAACGCTGACGGTACAG---GCCAGACAA---TTATTG---TCTGGCATAGTGCAACAGCAAAGC---  
 AATTTG---CTGAGG---GCTATAGAGGCTCAACAGCATCTGTTGAAACTCACGGTCTGGGGCATT  
 >FJ396018..1  
 TTTTATTGTAATACATCAGGCCTGTTTAATAGTACTTGGGATGACAATAATACTAGGAATAATGAGACTGCC-  
 -----  
 -----  
 AGAAATAATACTATAACTCTCCCATGTAGAATAAAGCAAATTATAAATATGTGGCAGAGGGTAGGACAAGCAA  
 TGTATGCCCCCTCCCATCAAAGGAGTAATAAGGTGTGAATCAAAC---  
 ATTACAGGACTAATATTAACAAGAGATGGTGGACTTAATAACAAT-----  
 -----  
 -----  
 ACAGAGACCTTCAGACCTGGAGGAGGAGATATGAGGGACAATTGGAGAAGTGAATTATATAAGTATAAAGTAG  
 TAAAAATTGAACCACTA---GGAGTAGCACCCACCAGGGCAAGGAGAAGAGTGGTG-----  
 -----GGAAGAGAAAAAGAGCA---GTTGGA---ATAGGAGCT-----  
 GTCTTCCTTGGGTTCTTAGGAGCA---GCAGGAAGCACTATG---GGCGCGGCGTCA---  
 ATAACGCTGACGGTACAG---GCCAGACAA---TTATTG---TCTGGCATAGTGCAACAGCAAAGC---  
 AATTTG---CTGAGG---GCTATAGAGGCTCAACGACATCTGTTGAAACTCACGGTCTGGGGCATT  
 >AY736811..1  
 TTCTATTGTAATACATCAGGCCTGTTTAATAGCACATATAGCGGGAACGAACTGTCAGCAATAGC-----  
 -----  
 -----  
 ACAGAGTACAACATAACTCTCCCATGCAAAATAAAGCAAATTATAAATATGTGGCAGAGAACAGGACAAGCAA  
 TGTATGCCCCCTCCCATCCAAGGAGTAATAAGCTGTGTGTCAAAC---  
 ATTACAGGACTACTATTAACAAGAGATGGTGGTAATGGTGGTAATAAC-----  
 -----  
 -----  
 AATACAACCTGAGACCTTCAGACCTGGAGGAGGAAATATGAAGGACAATTGGAGAAGTGAATTATATAAGTATA  
 AAGTAGTAAAAATTGAACCACTA---GGAGTAGCACCCACCAGGGCAAAGAGAAGAGTGGTG-----

-----GAGAGAGAAAAAGAGCA---GTTGGA---CTGGGAGCT-----  
 ---GTATTCCTTGGGTTCTTAGGAGCA---GCAGGAAGCACTATG---GGCGCGGCGTCC---  
 ATAACGCTGACGGTACAG---GCCAGACAA---TTACTG---TCTGGCATAGTGCAACAGCAAAGC---  
 AATTTG---CTGAGG---GCTATAGAGGCTCAACAGCATCTGTTGAAACTCACGGTCTGGGGCATT  
 >AY736814..1  
 TTCTATTGCAACACATCAGGCCTGTTTAATAGCACTTGGGATGATAACATTAAGAATGATACTAACAGCACAC  
 AGGGG-----  
 -----  
 TCAAAATAGCACGGAGATAATTCTCCCATGCAAAATAAAGCAAATTGTAAGGATGTGGCAGAGAACAGGACAAG  
 CAATGTATGCTCCTCCAATCCCAGGAGTAATAAGGTGTGTATCAAAC---  
 ATTACAGGACTAATACTAACAAGAGATGGTGGGAATACTAGCAGC-----  
 -----  
 -----  
 ATAAATGAAACCTTTAGACCTGGAGGAGGAGATATGAGGGACAACCTGGAGAAGTGAATTATATAAGTATAAAG  
 TAGTAAAAATTGAACCACTA---GGAGTGGCACCCACCAAGGCAAGGAGAAGAGTGGTG-----  
 -----GAGAGAGAAAAAGAGCA---GTTGGA---ATAGGAGCT-----  
 GTCCTCTTTGGTTTCTTAGGAGCA---GCCGGAAGCACTATG---GGCGCGGCGTCA---  
 ATAACGCTGACGGTACAG---GCCAGACAA---TTATTG---GCTGGCATAGTGCAACAGCAAAGC---  
 AATTTG---CTGAGG---GCTATAGAGGCTCAACAGCAAATGTTGAGACTCACGGTCTGGGGCATT  
 >AF457075..1  
 TTCTATTGTGATACATCAAGCCTGTTTAATGGCACTTTAGAGGCCAATGCCACCGTGCAAACTTCAAT----  
 -----  
 -----  
 AGCACAGAGCATATAATTCTCCCATGCAAAATAAAGCAAATTATAAATATGTGGCAGAGAGCAGGACAAGCAA  
 TGTATGCCCCCTCCCATCCAAGGAGTAATAAATTGTGTGTCAAAC---  
 ATTACAGGACTAATATTAACAAGAGATGGTGGGGATAATAATAAT-----  
 -----  
 -----  
 AGTACAAATGAAACATTGAGACCTGGAGGAGGAGATATGAGGGACAATTGGAGAAGTGAATTATATAAGTATA  
 AAGTAGTAAAAATTGAACCACTA---GGAGTAGCACCAACCAAGGCAAAAAGAAGAGTGGTG-----  
 -----GAGAGAGAAAAAGAGCA---GTAATTGGACTGGGAGCT-----  
 ---GTTTTCATTTGGGTTCTTAGGAGCA---GCAGGAAGCACTATG---GGCGCGGCGTCA---  
 ATAACGCTGACGGTACAG---GCCAGACAA---TTATTG---TCTGGTATAGTGCAACAGCAAAGC---  
 AATTTG---CTGAGG---GCTATAGAGGCTCAACAACATCTGTTGAAACTCACGGTCTGGGGCATT  
 >DQ208458..1  
 TTCTATTGTAACACATCAGGCCTGTTCAATAGCACTTGGATTAGCAATACCAGCGTGCAAGGGGTCAAATAGCA  
 CG-----  
 -----  
 GGGTCAAATGACAGTATAACTCTCCCATGCAGAATAAAGCAAATTATAAATATGTGGCAGAGAATAGGACAAG  
 CAATGTATGCCCCCTCCCATCCAAGGAGTAATAAGATGTGTATCAAAC---  
 ATTACAGGGCTAATATTAACAAGAGATGGTGGGAGTACTAATAGT-----  
 -----  
 -----  
 ACAACTGAAACCTTCAGACCTGGAGGAGGAGATATGAGGGACAATTGGAGAAGTGAATTATATAAGTATAAAG  
 TAGTAAAAATTGAACCACTA---GGAGTAGCACCCACCAGGGCAAGAGAAGAGTGGTG-----  
 -----GGGAGAGAAAAAGAGCA---GTTGGA---ATAGGAGCT-----  
 GTCTTCCTTGGGTTCTTAGGAGCA---GCAGGAAGCACTATG---GGCGCGGCGTCA---  
 ATGACGCTGACGGTACAG---GCCAGAAAT---TTATTA---TCTGGCATAGTGCAACAGCAAAGC---  
 AATTTG---CTGAGG---GCTATAGAGGCTCAACAACATCTGTTGAAACTCACGGTCTGGGGCATT  
 >DQ208467..2  
 TTCTATTGTAATACATCAGGCCTGTTTAATAGCAATTGGAATTACACTAACAGCACGCAGGAGTCAAATAGCA  
 CG-----  
 -----  
 GAGTCAAATGGCACTATAACTCTCCAATGCAGAATAAAGCAAATTATAAATATGTGGCAGAGAGTAGGACAAG  
 CAATGTATGCCCCCTCCTATCCCAGGAGTAATAAGGTGTGTATCAAAC---  
 ATTACAGGACTAATATTAACAAGAGATGGCGGGGACAACAACAGT-----  
 -----  
 -----  
 ATAACTGAAACCTTCAGACCTGGAGGAGGAGATATGAGGGACAATTGGAGAAGTGAATTATATAAGTATAAAG  
 TAGTAAAAATTGAACCACTA---GGAGTAGCACCCACCAGGGCAAGGAGAAGAGTGGTG-----

-----GGAAGAGAAAAAAGAGCA---GTTGGA---ATAGGAGCT-----  
GTCTTCATTGGGTTCTTAGGAGCA---GCCGGAAGCACGATG---GGCGCGGCGTCA---  
ATAACGCTGACGGTACAG---GCCAGACAA---TTATTG---TCTGGCATAGTGCAACAGCAAAGC---  
AATTTG---CTGAGG---GCTATAGAGGCTCAACAACATCTGTTGAAACTCACGGTCTGGGGCATT  
>DQ208448..1  
TTCTATTGTAACACATCAGACTTGTTTAATAGCACTTGGTATGGGAATGGGACCAGCATGCGGGAGTCAAATA  
GCACG-----  
-----  
GAGTCAAACGACACTATAATTCTCCGATGCAGAATAAAGCAAATTATAAATATGTGGCAGAGAGTAGGACAAG  
CAATATATGCCCCCTCCCATCCCAGGAGTAATAAACTGTGTATCAAAC---  
ATCACAGGACTAATATTAACAAGAGATGGTGGGAATAATAATAAT-----  
-----  
GAAACTGAAACCTTCAGACCTGGGGGAGGAGATATGAGGGACAATTGGAGAAGTGAATTATATAAGTATAAAG  
TAGTAAAAATTGAACCACTA---GGAGTAGCACCCACCAGGGCAAGGAGAAGAGTGGTG-----  
-----GAGAGAGAAAAAAGAGCA---GTAGTTGGAATAGGAGCT-----  
GTCTTCCTTGGGTTCTTAGGAGCA---GCAGGAAGCACTATG---GGCGCGGCGTCA---  
ATAACGCTGACGGTACAG---GCCAGACAA---TTATTG---TCTGGCATAGTGCAACAGCAAAGC---  
AATTTG---CTGAGG---GCTATAGAGGCTCAACAACATCTGTTGAAACTCACAGTCTGGGGCATT  
>KU749411..1  
TTCTATTGTAATACAACAGGCCTATTTAATAGTACTTGGAAATACAACAGGCCCATTTAATAATACTTGGCCT-  
-----  
-----  
GATGATGTCAATATAGTACTCCCATGCAAAATAAAGCAAATTATAAATGTATGGCAGAGAGTAGGACAAGCAA  
TATATGCCCCCTCCCATCCAAGGACTAATACAATGTAACTCAAAT---  
ATTACGGGGCTACTATTAACAAGAGATGGTGGGAATAATGGCACA-----  
-----  
-----  
CTTAATGAAACCTTCAGACCTGGAGGAGGAAATATGAAGGACAATTGGAGAAGTGAAGTGTATAAATATAAAG  
TAGTAAAAATTGAACCACTA---GGAGTAGCACCCACCAGGGCAAAGAGAAGAGTGGTG-----  
-----GAGAGAGGAAAAAAGAGCA---ATTGGA---ATAGGAGCT-----  
GTGCTCATTGGGTTCTTGGGGGCA---GCCGGAAGCACTATG---GGCGCGGCGTCT---  
GTAACGCTGACGGTACAG---GCCAGACAA---TTATTG---TCTGGCATAGTGCAACAGCAAAGC---  
AATTTG---CTGAGG---GCTATAGAGGCTCAGCAACAGATGCTGAAACTCACAGTCTGGGGCATT  
>KX232594..1  
TTCTATTGTAATACAACAGGACTGTTTAATAGTACTTGGTATAAAAATGGAACGACTGAGGGAACAAATAGCA  
CGGGG-----  
-----  
TCAAATGACACTATAACACTCCCATGCAGAATAAAGCAAGTTATAAATGTATGGCAGAGAGTAGGACAAGCAA  
TATATGCCCCCTCCCATCCCAGGGATAATAAGGTGTGAATCAAAT---  
ATTACGGGGCTACTATTAACAAGAGATGGTGGAAATAATACAAGT-----  
-----  
-----  
AATGAAACCTTCAGACCTGGAGGAGGAAATATGAAGGACAATTGGAGAAGTGAAGTGTATAAGTATAAAGTAG  
TAAAACTTGAACCACTA---GGAGTAGCACCCACCAAAGCAAAGAGAAGAGTGGTG-----  
-----GAGAGAGAAAAAAGAGCA---ATTGGA---TTTGGAGCT-----  
TTCTTCCTTGGGTTCTTGGGAGCA---GCTGGAAGCACTATG---GGCGCGGCGTCC---  
GTAACGCTGACGGTACAG---GCCAGACAA---TTATTG---TCTGGCATAGTGCAACAGCAAAGC---  
AATTTG---CTGAGG---GCTATAGAGGCTCAGCAGCATATGCTGAAACTCACGGTCTGGGGCATT  
>KX232597..1  
TTCTATTGTAATACAACAGGTCTGTTTAATAGTACTTGGCCTAGTAATGAGACTAAGGAAGTAAATAACACGG  
AG-----  
-----  
TCAAATGACATTATCACACTCCCATGCAGAATAAAGCAAATTGTAAATGTATGGCAAAGAGTAGGACAAGCAA  
TATACGCCCCCTCCCATCAAAGGACTAGTACAGTGTAAATTCAAGT---  
ATTACGGGGCTACTATTAACAGAGATGGTGGGAATAATAACACA-----  
-----  
-----  
GATGAAACCTTCAGACCTGGAGGAGGAAATATGAAGGACAATTGGAGAAGTGAAGTATATAAGTATAAAGTAG  
TAAAAATTGAACCACTA---GGAGTAGCACCCACCAGGGCAAGGAGAAGAGTGGTG-----

-----GAGAGAGAAAAAGAGCA---GCTGGA---CTAGGAGCT-----  
 TTATTCATTGGGTTCTTGGGAGCA---GCCGGAAGCACTATG---GGCGCAGCGTCT---  
 GTAACGCTGACGGTACAG---GCCAGACAA---TTATTG---TCTGGCATAGTGCAACAGCAAAGC---  
 AATTTG---CTGAGG---GCTATAGAGGCTCAGCAGCAGATGCTGAGACTCACAGTCTGGGGCATT  
 >KX232609..1  
 TTCTATTGTGATACAACAAACCTGTTTAATAGTACTTGGTTTGATAATGGGACTACTGAAGCAAATAGCACGG  
 GG-----  
 -----  
 TCAAGTGACATTATAACACTCCCATGCAGAATAAAACAAATTGTAAATGTATGGCAGAGAGTAGGACAAGCAA  
 TATATGCCCCCTCCCATCAGAGGACTAATAAAGTGTGAATCAAAT---  
 ATTACGGGGCTACTATTAAACCAGAGATGGTGGGCATAATAGCACAAATGCA-----  
 -----  
 -----  
 AGTAGTGAAACCTTCAGACCTGGAGGAGGAAATATGAAGGACAATTGGAGAAGTGAACTATATAAGTATAAAG  
 TAGTAAAAATTGAACCACTA---GGAGTAGCACCCACCAGAGCAAGGAGAAGAGTGGTG-----  
 -----GAGAGAGAAAAAGAGCA---ATTGGA---ATAGGAGCT-----  
 GTACTCTTTGGGTTCTTGGGAGCA---GCCGGAAGCACTATG---GGCGCGGCGTCC---  
 ATAACGCTGACGGTACAG---GCCAGACAA---TTATTG---TCTGGCATAGTGCAACAGCAAAGC---  
 AATTTG---CTGAGG---GCTATAGAGGCTCAGCAGCATCTGCTGAAACTCACGGTCTGGGGCATT  
 >KX232613..1  
 TTCTATTGTAATACATCAGCCCTGTTTAATAGCACTTGGAGAGACAACCAGACAGATAACCAAACACATACAA  
 AT-----  
 -----  
 GACACTGACATTATAACTCTCCCATGCAGAATAAAGCAAGTTATAAACATGTGGCAGAGGACAGGACAAGCAA  
 TGTATGCCCCCTCCTATCCAAGGAGTAATAAAGTGTACATCAAAT---  
 ATTACAGGACTATTATTAACAAGAGATGGGGGTGCTAACACAACA-----  
 -----  
 -----  
 AATGAAACTTTCAGACCTACAGGAGGAGATATGAAAGACAATTGGAGAAGTGAAATTATACAAGTATAAAGTAG  
 TAAAAATTGAACCACTA---GGAGTAGCACCCACCAGGGCAAAGAGAAGAGTGGTG-----  
 -----GAGAGAGAAAAAGAGCA---GTTGGA---CTGGGAGCT-----  
 GTATTCATTGGGTTCTTGGGAGCA---GCAGGAAGCACTATG---GGCGCGGCGTCA---  
 ATCACGCTGACGGTACAG---GCTAGACAA---TTATTG---TCTGGCATAGTGCAACAGCAAAGC---  
 AATTTG---CTGAGG---GCTATAGAGGCTCAACAACATATGTTGAAGCTCACAGTCTGGGGCATT  
 >KX232614..1  
 TTCTATTGTAATACAACAAACCTGTTTAATAGTACTTGGCCTGAGAATAAAAAATAGCACAGGGTCAAATGACA  
 CAGGG-----  
 -----  
 TCAAATGGCACTATAACTCTCCAGTGCAAAATAAAGCAAATTATAAATGTATGGCAGAGAGTAGGACAAGCAA  
 TATATGCCCCCTCCCATCCAGGAGCAATAAGATGTAACCTCAAAT---  
 ATTACGGGGCTACTATTAAACAAGAGATGGTGGGAATAATAACACA-----  
 -----  
 -----  
 AATGAAACCTTCAGACCTGGAGGGGGAAATATGAAGGACAATTGGAGAAGTGAACTGTATAAATATAAAGTAG  
 TAAACTTGAACCACTA---GGAGTAGCACCCACCAAGGCAAAGAGAAGAGTGGTG-----  
 -----GAGAGAGAAAAAGAGCA---TTCGGA---CTAGGAGCT-----  
 GTATTCATTGGGTTCTTGGGAGCA---GCCGGAAGCACTATG---GGCGCGGCGTCT---  
 GTAACGCTGACGGTACAG---GCCAGACAA---TTATTG---TTTGGCATAGTGCAACAGCAAAGC---  
 AATTTG---CTGAGG---GCTATAGAGGCTCAGCAACACCTGCTGAAACTCACGGTCTGGGGCATT  
 >KX232618..2  
 TTCTATTGTAATACATCAGGCCTGTTTAATAGTACTTGGTCTAATAATGAGACTGAGGGAGCGGGG-----  
 -----  
 -----  
 TCAAATGACACTATAACACTCCCATGCAGAATAAAGCAAATTGTAAATGTATGGCAGAGAGTAGGACAAGCAA  
 TATATGCCCCCTCCCATCGAAGGACTAATAAATGTAACCTCAAAT---  
 ATTACGGGGCTACTATTGACAAGAGATGGTGGGGATTATAACACATCTACA-----  
 -----  
 -----  
 AATAATGAAACCTTCAGACCTGGAGGAGGAAATATGAAGGACAATTGGAGAAGTGAACTGTATAAGTATAAAG  
 TAGTAAGACTTGAACCACTA---GGAGTAGCACCCACCAAGCGAAGAGAAGAGTGGTG-----

-----GAGAGACAAAAAAGAGCA---ATTGGA---ATAGGAGCT-----  
GTGTTTCATTGGGTTCTTGGGAGCA---GCTGGAAGCACTATG---GGCGCGGCGTCC---  
GTAACGCTGACGGTACAG---GCCAGACAA---TTATTG---TCTGGCATAGTGCAACAGCAAAGC---  
AATTTG---CTGCAG---GCTATAGAGGCTCAGCAACATCTGCTGAAACTCACAGTCTGGGGCATT  
>KX232620..2  
TTCTATTGTAATACAACAAGCCTGTTTAATAGTACTTGGCCTCATAATGAGACGAAAATAAATAGCACGGAAT  
CAAAT-----  
-----  
GACAAATGGCACTATAACACTCCCATGCAGAATAAAGCAAATTGTAAATATATGGCAGAGAGTAGGACAAGCAA  
TGTATGCCCCCTCCCATCAAAGGACTAATAAGGTGTAATTCAACT---  
ATTACGGGGCTACTATTAACAAGAGATGGGGGTGAGACTAATGGC-----  
-----  
-----  
ACAAATGAAACCTTTAGACCTGGAGGAGGAGATATGAGGGATAATTGGAGAAGTGAACTGTATAAGTATAAAG  
TAGTAAAAATTGAACCACTA---GGAATAGCACCCACCAAAGCAAGGAGAAGAGTGGTG-----  
-----GAGAGAGAAAAAAGAGCA---ATTGGA---CTAGGAGCT-----  
GTATTCATTGGGTTCTTGGGAGCA---GCCGGAAGCACTATG---GGCGCGGCGTCT---  
GTAACGCTGACGGTACAG---GCCAGACAA---TTATTG---TCTGGCATAGTGCAACAGCAAAGC---  
AATTTG---CTGAAG---GCTATAGAGGCTCAGCAGCAACTGCTGAAACTCACGGTCTGGGGCATT  
>KX232624..1  
TTCTATTGTAATACAACAGGCCTGTTTAATAGTACTTGGTATAATAATGGAAGTGAAGGAAAGCAAATAACACGG  
GG-----  
-----  
TCAAATGACACTATAACACTCCCATGCAGAATAAAACAAATTATAAATGTATGGCAAAGAGTAGGACAAGCAA  
TATATGCCCCCTCCCATCGAAGGACTAATAAGGTGTAATTCAACT---  
ATTACGGGGCTACTATTAACAAGAGATGGGGGTAATAACACAAAT-----  
-----  
-----  
GACACAAGTGAAACCTTCAGACCTGGAGGAGGAGATATGAGGGATAATTGGAGAAGTGAACTGTATAAGTATA  
AAGTAGTAAAAATTGAACCACTA---GGAATAGCACCCACCAAAGCAAGGAGAAGAGTGGTG-----  
-----GAGAGGGAAAAAAGAGCA---GTTGGA---CTAGGAGCT-----  
---GTATTCATTGGGTTCTTGGGAGCA---GCCGGAAGCACTATG---GGCGCGGCGTCC---  
GTGACGCTGACGGTACAG---GCCAGGCAA---TTATTG---TCTGGCATAGTGCAACAGCAAAGC---  
AATTTG---CTGAGG---GCTATAGAGGCTCAGCAACATCTGCTGAAACTCACAGTCTGGGGCATT  
>KX232626..1  
TTCTATTGTGATACAACAGGCCTGTTTAATAGTACTTGGCCTAACAATGAAACTGGGGAAAGTAAATAGCACGG  
GA-----  
-----  
TCAAACGATATTATAACACTCCCATGCAGAATAAAGCAAGTTGTAAATGTATGGCAGAGAGTGGGACAAGCAA  
TATATGCCCCCTCCCATCCAAGGACTAATAAAATGTAACCTCAAAT---  
ATTACGGGGATAATATTAAACAAGAGATGGTGGGAATCTTAATTCT-----  
-----  
-----  
ACAAATGAAACCTTTAGACCTGGAGGAGGAAATATGAAGGACAATTGGAGAAGTGAACTGTATAAGTATAAAG  
TAGTAAACCTTGAACCACTA---GGAGTAGCACCCACCAAGAGCAAAGAGAAGAGTGGTG-----  
-----GAGAGAGAAAAAAGAGCA---ATTACC---ATAGGAGCT-----  
GTGCTCATTGGGTTCTTGGGAGCA---GCCGGAAGCACTATG---GGCGCGGCGTCT---  
GTAACGCTGACGGTACAG---GCCAGACAA---TTATTG---TCTGGCATAGTGCAACAGCAAAGC---  
AATTTG---CTAAGG---GCTATAGAGGCTCAGCAACATCTGCTGAAACTCACAGTCTGGGGCATT  
>KU749423..1  
TTCTATTGTAATACATCAGGCCTGTTCAATAGCACCTGGTATCCCAATGGCACCAACATAACTAACCCA----  
-----  
-----  
GGACCAGAGAATATAACCTTCCCATGCAGAATAAAGCAAATTGTAAATATGTGGCAGAGAGTAGGGAGAGCAA  
TGTATGCTCCTCCCATCAAAGGAGTAATACAATGTGTATCAAAC---  
ATTACAGGACTACTATTAACAAGAGATGGTGGGAATAATAATAAT-----  
-----  
-----  
ACAACTGAAACCTTCAGACCAGGAGGAGGAGATATGAGGGACAATTGGAGAAGTGAAATTATATAAGTATAAAG  
TAGTACAAGTTGAACCACTA---GGAATAGCACCCACTAGGGCAAGGAGAAGAGTGGTG-----

-----GAGAGAGAAAAAAGAGCA---GTTGGA---ATGGGAGCT-----  
CTTTTCATTGGGTTCTTAGGAGCA---GCCGGAAGCACTATG---GGCGCGGCATCA---  
ATGATGCTGACGGTACAG---GCCAGACAA---TTATTG---TCTGGCATAGTGCAACAGCAAAGC---  
AATTTG---CTGAGG---GCTATTGAAGCTCAACAGCATATGTTGAAGCTCACGGTCTGGGGCATT  
>KX983643..1  
TTCTATTGTAATACATCAGAACTGTTTAATAGCACTTGGGGAGAGGAAGGGCGAAAGGACAATATCACGAAG-  
-----  
-----  
TCAAAATGCCACTATAACTCTCCCATGTAGAATAAAGCAAAGTCATCAATATGTGGCAGAGAGCAGGACGAGCAA  
TGTATGCCCCCTCCCATCCAAGGAGTAATAAATTGTGCATCAAAC---  
ATTACAGGACTACTACTAACAAGAGACGGTGGGAATACTAATACTAGC-----  
-----  
-----  
GATCTACCTGAAATCTTCAGACCAGGAGGAGGAGATATGAGGGACAATTGGAGAAGTGAATTATATAAGTATA  
AGGTAGTAAAAATTGAACCACTA---GGAGTAGCACCCACCAAGGCAAGGAGAAGAGTGGTG-----  
-----GAGAGAGAAAAAAGAGCA---GTTGGA---CTGGGAGTT-----  
---GTCTTCCTTGGGTTCTTAGGAGCA---GCAGGAAGCACTATG---GGCGCGGCGTCA---  
ATAACGCTGACGGTACAG---GCCAGACAA---TTATTG---TCTGGCATAGTGCAACAGCAAAGC---  
AATTTG---CTGAAG---GCTATAGAGGCTCAACAGCATCTGTTGAAGCTCACAGTCTGGGGCATT  
>KX983542..2  
TTCTATTGTGATACAACAGGCCTGTTTAATAGCACTTGGAGAATGGCACTCTCAACATGCAGGAATTAAC  
TCACAGTC-----  
ACAAACTACACAAATCTC-----  
ACAGACAGTATAAATATAACTCTTCCATGTAGAATAAAGCAAATTATAAATATGTGGCAGAGAGTAGGACAGG  
CAATGTATGCTCCTCCCATCCAAGGAGTAATAAATGTGTGTCAAAC---  
ATTACGGGACTACTATTAACGAGAGATGGGGGAAT-----  
-----  
-----  
AATGAGACAGAAACCTTCAGACCTGGAGGAGGAAATATGAAGGACAATTGGAGAAGTGAATTATATAAGTATA  
AAGTAGTAAAAGTTGAGCCTATA---GGAGTAGCACCCACCAGGGCAAGGAGAAGAGTGGTG-----  
-----GAGAGAGAAAAAAGAGCA---GTTGGA---ATAGGAGCT-----  
---GTTTTTCATTGGGTTCTTAGGAGCA---GCAGGAAGCACTATG---GGCGCGGCGTCA---  
ATAACGCTGACGGTACAG---GCCAAACAA---TTATTG---TCTGGCATAGTGCAACAGCAAAGC---  
AATTTG---CTGAGG---GCTATAGAGGCTCAACAGCATCTGTTGAAACTCACGGTCTGGGGCATT  
>KX983566..2  
TTCTATTGTAATACATCAAGCCTGTTTAATAGCATTTGGGTAAATGGCACTAGGAATGACACTGTCAGC---  
-----  
-----  
AATGGAACCTTATATAACTCTCCCATGCAGAATAAAGCAAATTATAAATATGTGGCAGAGAGTAGGGCAAGCAA  
TGTATGCCCCCTCCCATTAGAGGAGTAATAAAGTGTGAATCAAAC---  
ATTACAGGACTACTGTTAAACAAGAGATGGTGGGGAGAATAATAGT-----  
-----  
-----  
ACCAATGAAACCTTCAGACCTGGAGGAGGAGATATGAGGGACAATTGGAGAAGTGAATTATATAAGTACAAAG  
TAGTAAAAATTAAACCACTA---GGAGTAGCACCCACCAAGGCAAGGAGAAGAGTGGTG-----  
-----GAGAGAGAAAAAAGAGCAGTAGTTGGA---CTGGGAGCT-----  
GTCTTCCTTGGGTTCTTAGGAGCA---GCAGGAAGCACTATG---GGCGCAGCGTCA---  
ATAACGCTGACGGTACAG---GCCAGACAA---TTATTG---TCTGGCATAGTGCAACAGCAAAGC---  
AATTTG---CTGAGG---GCTATAGAGGCTCAACAACATCTGTTGAAACTCACGGTCTGGGGCATT  
>JX236677..1  
TTCTATTGTAATACATCAGCCCTGTTTGATAGCACTTGGCGGTTTAATGGCATTGGCAGTGGAAATGACACTG  
TCAATGCCACT-----  
-----AGA---  
AGCGAGAATGATACTATAAATCTCCCATGCAGGATAAAGCAAATTATAAATATGTGGCAGAGAGCAGGACAGG  
CAATGTATGCCCCCTCCCATCCAAGGAGTAATAAGGTGTGACTCAAAC---  
ATTACAGGTCTATTATTAACAAGAGATGGTGGGAGGGGAATGAT-----  
-----  
-----  
AATAACACTGAGGTCTTCAGACCTGGAGGAGGAAATATGAAGGACAATTGGAGGAGTGAATTATATAAGTACA  
AAGTAGTAAAAATTGAACCATTA---GGAGTAGCACCCACCAGGGCAAGGAGAAGAGTGGTG-----

-----GAGAGAGGAAAAAGAGCA---GTTGGA---ATAGGAGCT-----  
---GTTTTCATTGGGTTCTTAGGAGCA---GCAGGAAGCACTATG---GGCGCAGCGTCA---  
ATAACGCTGACGGTACAG---GCCAGGCAA---TTATTG---TCTGGCATAGTGCAACAGCAAAGC---  
AATTTG---CTGAGG---GCTATAGAGGCTCAACAGCATCTGTTGAGACTCACAGTCTGGGGCATT  
>JX236678..2  
TTCTATTGTAACACATCAACCCTGTTTAGTAGCACTTGGGAGAACGGTACGGAATAACAGCACGAAG-----  
-----  
-----  
TCAAAATGACACTATAACTCTCCCATGCAGAATAAAGCAAATTATAAATATGTGGCAGAGAGTAGGACAAGCAA  
TATATGCTCCTCCAATCGAAGGAGAAATAAGGTGTCAATCAAAT---  
ATTACAGGACTAATATTAACAAGAGATGGTGGTGAGGATATTAAC-----  
-----  
-----  
AGTACAAAGTGAAACCTTCAGACCTGGAGGAGGAGATATGAGGGACAATTGGAGAAGTGAATTATATAAGTATA  
AGGTAGTAAAAATTGAACCACTA---GGAGTAGCACCCACCAGGGCAAGAAGAAGAGTGGTG-----  
-----GAGAGAGAAAAAAGAGCA---GTTGGA---ATAGGAGCT-----  
---GTCTTCATTGGGTTCTTAGGAGCA---GCAGGAAGCACTATG---GGCGCGGCGTCA---  
ATAACGCTGACGGTACAG---GCCAGACAA---TTATTG---TCTGGCATAGTGCAACAGCAAAGC---  
AATTTG---CTGAGG---GCTATAGAGGCTCAACAACATCTGTTGAAGCTCACGGTCTGGGGCATT  
>KU749424..1  
TTTTATTGTAATACATCAGAACTGTTTAATAGCACTTGGGTATACAATGCATCAGAACTTAATGGCACTTGGG  
TAAACAATGCC-----  
AGCATGCCAGGATCAAAT-----  
AGCACAAAGTGAAATATAACTCTCCACTGCAGAATAAAGCAAATTATAAATATGTGGCAGAGAGCAGGAAAAAG  
CAATGTACGCCCTCCCATCTCAGGAAACATAACGTGTGTTCAAAC---  
ATTACAGGACTCATATTAACAAGAGATGGTGGGAATACCAATACA-----  
-----  
-----  
ACTGAAATCTTCAGACCTGAAGGAGGAGATATGAGAGACAATTGGAGAAGTGAATTATATAAGTATAAAGTAG  
TAAAAATTGAACCACTA---GGAGTAGCACCCACCAAGGCAAGGAGGAGAGTGGTG-----  
-----GAGAGAGAAAAAAGAGCA---ATTGGA---ATAGGAGCT-----  
GTCCTCTTTGGGTTCTTAGGAGCA---GCAGGAAGCACTATG---GGCGCGGCGTCA---  
ATAACGCTGACGGTACAG---GCCAGACAA---TTATTG---TCTGGCATAGTGCAACAGCAAAGC---  
AATTTG---CTGAGG---GCTATAGAGGCTCAACAACATCTGTTGAAACTCACAGTCTGGGGCATT  
>MF565934..1  
TTCTATTGCAATACATCAAGCCTGTTTAATAGTACTTGGGATGGGAATAGCACTACTAACAGCACGCAGAAG-----  
-----  
-----  
CCAAATGGAATATAACTCTCCCATGCAGGATAAAGCAAATTATAAATATGTGGCAGAGAACAGGGCAAGCAA  
TGTATGCCCCTCCCATCCCAGGAAAAATAAGGTGTGACTCAAAC---  
ATCACAGGACTAATATTAACAAGAGATGGTGGAAATAATAACT-----  
-----  
-----  
GAAAGTGAAACCTTTAGACCTGAAGGAGGAGACATGAGGAACAATTGGAGAAGTGAATTATATAAGTATAAAG  
TAGTAAAGATTGACCCACTA---GGAGTAGCACCCACCGGGGCAAGAGAAGAGTGGTG-----  
-----GAGAGAGAAAAAAGAGCA---GTTGGA---ATAGGAGCT-----  
GTCCTCTTTGGGTTCTTAGGAGCA---GCAGGAAGCACTATG---GGCGCAGCGTCT---  
CTAACGCTGACGGTACAG---GCCAGACAA---TTATTG---TCTGGCATAGTGCAACAGCAAAGC---  
AATTTG---CTGAGG---GCTATAGAGGCTCAACAACATCTGTTGAGACTCACGGTCTGGGGCATT  
>KX983624..1  
TTCTACTGTAATACATCAGGCCTGTTTAATAGCCTCTGGATAAATGGCACCATGCTGAATGGTACCCTGAAGA  
ATTCACCC-----  
-----  
AGCACAAATGACACCATAACTCTCCCATGCAGAATAAAGCAAATCATAACATGTGGCAGAAAGTAGGACAAG  
CAATGTATGCCCCTCCCATCCCAGGAAGCATAACGTGTGTATCAAAC---  
ATTACAGGACTAATATTAACAAGAGATGGTGGGAATACTAACAGG-----  
-----  
-----  
ACAGATGAAATCTTCAGACCTGAAGGGGGAAATATGAGGGACAATTGGAGAAGTGAATTATATAAGTATAAAG  
TAGTAAAAATTGAACCACTA---GGAGTAGCACCCACTAGGGCAAGAGAAGAGTGGTG-----

-----GAGAGAGAAAAAGAGCA---GTTGGA---CTGGGAGCT-----  
 GTCTTCATTGGGTTCTTAGGAGCA---GCAGGAAGCACTATG---GGCGCGGCGTCA---  
 ATAACGCTGACGGTACAG---GCCAGAAAC---TTATTG---TCTGGCATAGTGCAACAGCAAAGC---  
 AATTTG---CTGAGG---GCTATTGAGGCTCAACAGCATCTGTTGAAACTCACAGTCTGGGGCATT  
 >KF716472..1  
 TTCTATTGTAACACAACAGGTCTGTTTAATAGCACTTGGAGTCGGAACACAACAGATAATAACACTTGGTTTA  
 GGAACAATGCT-----  
 -----AGCAGTAGCACA-----  
 GGGTTAAATGGCACAATAACTCTCCAATGCAAAATAAAGCAAATTATAAATATGTGGCAGAGAACAGGACGAG  
 CAATGTATGCCCCCTCCCATACCAGGAACAATAATGTGTAACCTCAAGC---  
 ATCACAGGACTGCTATTAACAAGAGATGGTGGGAATAGTGGGAAC-----  
 -----  
 -----  
 AACAGTAATGAAACCTTCAGGCCTGGAGGAGGAGATATGAAAGACAATTGGAGAAGTGAATTATATAAGTATA  
 AGGTAGTAAAAATTGAACCACTA---GGAGTAGCACCCACCAGGGCAAAGAGAAGAGTGGTG-----  
 -----GAGAGAGAAAAAGAGCA---GTTGGA---ATGGGAGCT-----  
 ---CTTTTCATTGGGTTCTTGGGAGCA---GCAGGAAGCACTATG---GGCGCGGCGTCA---  
 GTGACGCTGACGGTACAG---GCCAGACAA---TTATTG---TCTGGTATAGTGCAACAGCAAAGC---  
 AATTTG---CTGAAG---GCTATAGAGGCTCAACAACATCTGTTGAGACTCACAGTCTGGGGCATT  
 >AB253421..1  
 TTTTATTGTGATTTCATCAGGCCTGTTTAATAGCACTTGGGATAACACTAACATCACGCAGCCAAATAGCACAG  
 GG-----  
 -----  
 TCAAAATGACACCATAACTCTCCAATGCAGAATAAAGCAAATTATAAATATGTGGCAGAGAGCAGGACAGGCAA  
 TGTATGCCCCCTCCCATCCAGGAGTAATAAGTTGTGTATCAAAC---  
 ATTACAGGATTACTATTAACAAGAGATGGTGGGATTACCAAGTGCA-----  
 -----  
 -----  
 AATGAAACCTTCAGACCTGGAGGAGGAGATATGAGGGACAATTGGAGAAGTGAATTATATAAGTATAAGGTAG  
 TAAAACTTGAACCACTA---GGAGTAGCACCCACCAGGGCAAGGAGAAGAGTGGTG-----  
 -----GAGAGAGAAAAAGAGCA---GTTGGA---ATAGGAGCT-----  
 GTATTCATTGGTTTCTTAGGAGCA---GCAGGAAGCACTATG---GGCGCGGCGTCA---  
 ATGACGCTGACGGTACAG---GCCAGACAA---TTATTG---TCTGGCATAGTGCAACAGCAAAGC---  
 AATTTG---CTGAGG---GCTATAGAGGCTCAACAACATCTGTTGAAACTCACGGTCTGGGGCATT  
 >AB287377..1  
 TTCTATTGTAATACATCAGGCCTGTTTAATAGCACCTGGAATAATAATAATACCAGGGAGAAGATAAATGGTA  
 CA-----  
 -----  
 GAGTCAAATAGCACTATAACTCTCCATTGCAGAATAAAGCAAATTATAAATAGGTGGCAGGAAGTAGGACAAG  
 CAATGTATGCCCCCTCCCATCCAGGAGTAATAAATTGTAGATCAAAC---  
 ATTACAGGACTAATATTAACAAGAGATGGTGGGGATGGGGATAAC-----  
 -----  
 -----  
 AATACGGAAATCTTCAGACCTGGAGGAGGAAATATGAAGGACAATTGGAGAAGTGAATTATATAAGTATAAAG  
 TAGTAAAAATTGAACCACTG---GGAGTAGCACCCACCAGGGCTAAGAGAAGAGTGGTG-----  
 -----GAGAGAGCAAAAAGAGCA---GTTGGA---ATAGGAGCT-----  
 GTTTTCCTTGGGTTCTTAGGAGCA---GCAGGAAGCACTATG---GGCGCGGCGTCA---  
 ATAACGCTGACGGTACAG---GCCAGACAA---TTATTG---TCTGGCATAGTGCAACAGCAAAGC---  
 AATTTG---CTGAGG---GCTATAGAGGCTCAACAACATCTGTTGAAACTCACGGTCTGGGGCATT  
 >AB287379..1  
 TTCTATTGTAATACATCAGGCCTGTTTAATAGCACTTGGACCAATGAAAGCATGCAAGTAAATAGCACAGAA-  
 -----  
 -----  
 TCAAAATGACACTATAACTCTCCCATGCAGAATAAAGCAAATTATAAATATGTGGCAGAGGGCAGGACAAGCAA  
 TATATGCCCCCTCCCATCGAAGGAGTAATAAGGTGTAGCTCAAAC---  
 ATTACAGGACTACTATTAACAAGAGATGGTGGGGTTAACAATACA-----  
 -----  
 -----  
 GTCAATGAAACCTTCAGACCTGGAGGAGGAAATATGAGGGATAATTGGAGAAGTGAACCTATATAAATATAAAG  
 TAGTAAAAATTGAACCACTA---GGAGTAGCACCCACCAGGGCAAAAAGAAGAGTGGTG-----

-----GAGAGAGAAAAAAGAGCA---GTTGGA---CTGGGAGCT-----  
 GTCTTCATTGGGTTCTTAGGAGCA---GCAGGAAGCACTATG---GGCGCGGCGTCA---  
 ATAACGCTGACGGTACAG---GCCAGACAA---TTATTG---TCTGGCATAGTGCAACAGCAAAAC---  
 AATTTG---CTGAGG---GCTATAGAGGCTCAACAACATCTGTTGAAACTCACGGTCTGGGGCATT  
 >AY713406..1  
 TTCTATTGTAATACATCAAGCCTGTTTAATAGCACTTGAATAACACTGCCAGCATGCAGAAGTCAAATAGCA  
 CG-----  
 -----  
 GGGTCAAATGACACTATAACTCTCCAATGCAGAATAAAGCAAATTATAAGAATGTGGCAAAGAACAGGACAGG  
 CAATGTATGCCCCCTCCCATCAAAGGAGATATAAGGTGTGAATCAAAC---  
 ATTACAGGACTAATATTAACAAGAGATGGTGGGAATGATAGCAGT-----  
 -----  
 -----  
 CCAGATGAAATCTTCAGACCTGGAGGAGGAGATATGAGGGACAATTGGAGAAGTGAATTATATAAGTATAAAG  
 TAGTACAAATTGAACCTCTA---GGAGTAGCACCCACCAAGGCAAGAAGAAGAGTGGTG-----  
 -----CAGAGAGAGAAAAAGAGCA---ATTGGA---ATAGGAGCT-----  
 GTCTTCCTTGGGTTCTTAGGAGCA---GCAGGAAGCACTATG---GGCGCGGCGTCA---  
 ATAACGCTGACGGTACAG---GCCAGACAA---TTATTG---TCTGGCATAGTGCAACAGCAAAGC---  
 AATTTG---CTGAGG---GCTATAGAGGCTCAACAACATCTGTTGAAACTCACGGTCTGGGGCATT  
 >L07082..1  
 TTCTATTGTAATACAACAGGCCTGTTTAATAGCACCTGGAAAAATGTAAATGGCACCATGCAGGAGTCAAGCA  
 GCACA-----  
 -----  
 AAGTTAAATGACACTATAACACTCACATGCAGAATAAAGCAAATTATAAATATGTGGCAGAGAGCAGGACAGG  
 CAATGTATGCCCCCTCCCATCGAAGGAATAATAAGGTGTGACTCAAAC---  
 ATTACAGGACTACTATTAACAAGAGATGGTGGGGTTGGGGATAACAGT-----  
 -----  
 -----  
 ACAAATGGAACCTGAAACATTTCAGACCTGGAGGAGGAAATATGAGGGACAATTGGAGAAGTGAATTATATAAGT  
 ATAAAGTAGTAAAAATTGAACCACTA---GGAGTAGCACCCACCACGGCAAAAAGAAAAGTGGTG-----  
 -----GAGAGAGAAAAAAGAGCA---ATTGGA---ATAGGAGCT---  
 -----GTCTTCCTTGGGTTCTTAGGAGCA---GCAGGAAGCACTATG---GGCGCGGCGTCA---  
 ATAACGCTGACGGTACAG---GCCAGACAA---TTATTG---TCTGGCATAGTGCAACAGCAAAGC---  
 AATTTG---CTGAGG---GCTATAGAGGCTCAACAGCATCTGTTGAAACTCACAGTCTGGGGCATT  
 >MF373167..1  
 TTCTATTGTAATACATCAGGCCTGTTTAATAGCACTTGAATGAAACTACCATGCAGGAGTCAAATGGAACAG  
 AG-----  
 -----  
 TCAAACGACAGCATAACTCTCCCATGCAGAATAAAGCAGATTGTAAATATGTGGCAGAGAACAGGACAAGCAA  
 TGTATGCCCCCTCCCATCCAAGGAGTAATACAGTGTGTATCAAAT---  
 ATTACAGGACTAATATTAATGAGAGATGGTGGGAATAGTAGTAGG-----  
 -----  
 -----  
 GAAAAATGAAACCTTCAGACCTGGAGGAGGAGATATGAGGGACAATTGGAGAAGTGAATTATATAAGTATAAAG  
 TAGTAAAAATTGAACCACTA---GGAGTAGCACCCACCAGGGCAAGGAGAAGAGTGGTG-----  
 -----CAGAGAGAAAAAAGAGCG---GTTGGA---CTGGGAGCT-----  
 GTTTTCATTGGGTTCTTAGGAGCA---GCAGGAAGCACTATG---GGCGCAGCGTCA---  
 GTGACGCTGACGGTACAG---GCCAGGCAA---TTATTG---TCTGGCATAGTGCAACAGCAAAGC---  
 AATTTG---CTGAGG---GCTATAGAGGCTCAACAGCATCTGTTGAGACTCACGGTCTGGGGCATT  
 >MF373168..1  
 TTCTATTGTGATACATCAGACCTGTTTAATAGCATTTGGCCGTTTAATAGCACTCGGGGACACAATGAGACTG  
 AAAGATCA-----  
 -----AATAGCACAGAG-----  
 ACAAATAACACTATTATAAACTTCCATGTAGAATAAAACAAATTATAAATATGTGGCAGAGAGTAGGACAAG  
 CAATATTTGCCCCCTCCCATCCAAGGAGTAATACAGTGTGTATCAAAC---  
 ATTACAGGACTAATATTAACAAGAGATGGAGGGAATAATAACACT-----  
 -----  
 -----  
 ACAAATGAAACCTTCAGACCTGGAGGAGGAGATATGAGGGACAATTGGAGAAGTGAATTATATAAGTATAAAG  
 TAGTAAAAATTGAACCACTA---GGAGTAGCACCCACCAGGGCACAGAGAAGAGTGGTG-----

-----CAGAGAGAAAAAAGAGCA---ATTGGA---ATGGGAGCT-----  
 GTCTTCATTGGGTTCTTAGGAGCA---GCAGGAAGCACTATG---GGCGCGGCGTCA---  
 ATAACGCTGACGGTACAG---GCCAGACAA---TTATTG---TCTGGTATAGTGCAACAGCAAAGC---  
 AATTTG---CTGAGG---GCTATAGAGGCTCAACAGCATCTGTTGAAACTCACGGTCTGGGGCATT  
 >MF373181..2  
 TTCTACTGTAATACATCAGGCCTGTTTAAACAGTAGTTGGGGAAATGGCACTAACAACAGCAGCACT-----  
 -----  
 -----  
 GGGGGGCAAACCTATAACTCTCCCATGCAAAATAAAGCAAATTGTAAATATGTGGCAGAGGACAGGACAAGCAA  
 TGTATGCCCCCTCCTATCGAAGGAGTAATAAGGTGTGTATCAAAC---  
 ATTACAGGAATACTATTAAGTAGAGATGGTGGGCCTAATAATAGT-----  
 -----  
 -----  
 ACAAATGAAACCTTCAGACCGGGAGGAGGAAATATGAAGGACAATTGGAGAAGTGAATTATATAACTATAAAG  
 TAGTACAAATTAACCCATTA---GGAATAGCACCCACCAAGGCAAAGAGAAGAGTGGTG-----  
 -----GAGAGAGAAAAAAGAGCAGTAGTTGGA---CTGGGAGCT-----  
 TTGTTTCATTGGGTTCTTAGGAGCT---GCAGGAAGCACTATG---GGCGCGGCGTCA---  
 ATGACGCTGACGGTACAG---GCCAGACAA---TTATTG---TCTGGCATAGTGCAACAGCAAAGC---  
 AATTTG---CTGAGA---GCTATAGAGGCTCAACAGCATGTGTTGAGACTCACGGTCTGGGGCATT  
 >MF373182..1  
 TTCTATTGTAATACATCAGGCCTGTTTAAATAGCAGTTGGGGAGTAAACAACACTGATGGCAATATA-----  
 -----  
 -----  
 ACTAATGGCACGATAACTCTCCCCTGCAAAATAAAACAATTTATAAATATGTGGCAGAGAGTAGGACAAGCAA  
 TGTATGCCCCCTCCCATCGAAGGGGCAATAAGTTGTAATTC AAC---  
 ATCACAGGACTACTATTAACAAGAGATGGTGGGTACAACAACAGCACT-----  
 -----  
 -----  
 AACCAAATCGACAAAATCTTCAGACCTGCAGGAGGAGATATGCAGGACAACCTGGAGAAGTGAATTATATAAGT  
 ATAAAGTAGTAAAAATTGAACCATTA---GGAGTAGCACCCACCTGGGCAAGGAGAAGAGTGGTG-----  
 -----CAGAGAGAAAAAAGAGCA---GTTGGA---CTGGGAGCT---  
 -----GTCTTTCTTGGGTTCTTAGGAGCA---GCAGGAAGCACTATG---GGCGCGGCGTCG---  
 ATAACGCTGACGGTACAG---GCCAGACAA---TTATTG---TCTGGCATAGTGCAACAGCAAAGC---  
 AATTTG---CTGATG---GCTATAGAGGCTCAACAGCATTTGTTGAAACTCACAGTCTGGGGCATT  
 >AF069670..1  
 TTCTATTGTAATACATCAGGCCTGTTTAAATAGCACTTGGAGCCAAAATGACACTGGGGTATCAAATAGCACGG  
 AG-----  
 -----  
 TCAAATGACACTATAATTCTTCCATGCAGAATAAAACAAATTATAAATATGTGGCAGAGAGCAGGACAAGCAA  
 TATATGCCCCCTCCCATCCCAGGAATAATAAGGTGTGAATCAAAC---  
 ATTACAGGGCTACTGTTAAACAAGAGATGGTGGGGTTGTTAACAGT-----  
 -----  
 -----  
 ACAAATGAAACCTTCAGACCTGGAGGAGGAAATATGAAGGACAATTGGAGAAGTGAATTATATAAGTATAAAG  
 TAGTAAAAATTGAACCACTA---GGAGTAGCACCCACCAAGGCAAGGAGAAGAGTGGTG-----  
 -----CAGAGAGAAAAAAGAGCA---GTTGGA---CTGGGAGCT-----  
 TTATTTCATTGGGTTCTTAGGAGCA---GCAGGAAGCACTATG---GGCGCGGCGTCA---  
 ATAACGCTGACGGTACAG---GCCAGACAA---TTATTA---TCTGGCATAGTGCAACAGCAAAGT---  
 AATTTG---CTGAGG---GCTATAGAGGCTCAACAGCATCTGTTGAAACTCACTGTCTGGGGCATT  
 >AF069671..1  
 TTCTATTGTAATACATCAGGCCTGTTTAAATAGCACTATTTTGAATAGCACTAAGATGAATGACAATGCCAGCA  
 GGGAG-----  
 -----  
 TCGTATGATGACACTATAACCCCTCCAGTGCAGAATAAAGCAAATTATAAATATGTGGCAGAGAGTAGGACAAG  
 CAATGTATGCCCCCTCCCATCCGAGGAGCAATAAGATGTAAATCAAAC---  
 ATTACAGGACTATTATTAACAAGAGATGGTGGAAATAGTAACAGT-----  
 -----  
 -----  
 AGTACAAATGAAACCTTCAGACCTGGAGGAGGAGATATGAGAGATAATTGGAGAAGTGAATTATATAAATATA  
 AAGTAGTAAAAATTGAACCACTA---GGAGTAGCACCCACCAAGGCAAAGAGAAGAGTGGTG-----

-----GAGAGAGAAAAAGAGCA---GTTGGA---ATAGGAGCT-----  
---GTCTTCCTTGGGTTCTTAGGAGCA---GCAGGAAGCACTATG---GGCGCGGCGTCA---  
ATAACGCTGACGGTACAG---GCCAGACAA---TTATTG---TCTGGCATAGTGCAACAGCAAAGC---  
AATTTG---CTGAGG---GCTATAGAGGTTCAACAACATCTGTTGAAACTCACGGTCTGGGGCATT  
>AF069673..1  
TTCTATTGTAATACATCAGGCCTGTTTAATAGTACTTGGAATGGCACTGACAGCATGCAGAAGTTAAAT-----  
-----  
AGCACGGGCAATATAACTCTCCCATGCAGAATAAAACAAATTATAAATATGTGGCAGAGAGCAGGACAAGCAA  
TATATGCCCCCTCCCATCCAAGGAGTAATAAGGTGTGAATCAAAC---  
ATTACAGGACTAATATTAACAAGAGATGGTGGGAATGATAACAAT-----  
-----  
GAAAGTGAAATCTTCAGGCCTGGAGGAGGAGACATGAGGGACAATTGGAGAAGTGAATTATATAAGTATAAGG  
TAGTAAAAATTGAACCACTA---GGAGTAGCACCCACCAAGGCAAAAAGAAGAGTGGTG-----  
-----GAGAGAGAAAAAGAGCA---ATTGGA---ATAGGAGCT-----  
GTCTTCATTGGGTTCTTGGGAGCA---GCAGGAAGCACTATG---GGCGCAGCGTCA---  
ATAACGCTGACGGTACAG---GCCAGGCAA---TTATTG---TCTGGCATAGTGCAACAGCAAAGC---  
AATTTG---CTGATG---GCTATAGAGGCTCAACAGCATCTGTTGAAACTCACGGTCTGGGGCATT  
>AF107771..2  
TTCTATTGTAATACATCAGGTCTGTTTAATAGTAGTTGGAATGAAAATGACACCAAAGTAAATTACAACACTG  
AG-----  
-----  
TCAAATGACACTATAACTCTCCAATGCAGAATAAAGCAAATTATAAATATGTGGCAGAGAACAGGACAAGCAA  
CGTATGCCCCCTCCCATCCCAGGGGTAATACAGTGTAGATCAAAC---  
ATTACAGGACTACTATTAACAAGGGATGGTGGGGTAACATAACAAT-----  
-----  
ACAAATAATGAAACCTTCAGACCTGGAGGAGGAGATATGAGGGACAATTGGAGAAGTGAATTATACAAGTATA  
AAGTAGTAAAACTTGAACCACTA---GGAGTAGCACCCACCAAGGCACAGAGAAGAGTGGTG-----  
-----AAGAGAGAAAAAGAGCA---GTTGGA---CTGGCAGCT-----  
---GTATTCTTTGGGTTCTTAGGAGCA---GCAGGAAGCACTATG---GGCGCGGCGTCA---  
ATAACGCTGACGGTACAG---GCCAGACAA---TTATTG---TCTGGTATAGTGCAACAGCAAAAC---  
AATTTG---CTGAGG---GCTATAGAGGCTCAACAGCATATGTTGAGACTCACGGTCTGGGGCATT  
>HQ659604..1  
TTTTATTGTGATACATCAGGCCTGTTTAATAGCACATGGGGGGGAAATAGCACTGACAGCATAACAGGAGTCAA  
ATAGC-----  
-----ACA---  
GAGTCAAATGACACTATAATTCTCCCATGCAGAATAAAGCAAATTATAAATATGTGGCAGAGAGTAGGACAAG  
CAATGTATGCCCCCTCCCATCCAAGGAGTAATAAAGTGTATATCAAAT---  
ATTACAGGACTTCTATTAACAAGAGATGGTGGGGATAATAACAGT-----  
-----  
GCAAATGAAACCTTCAGACCTACAGGAGGAAATATGAGGGACAATTGGAGAAGTGAATTATATAAGTATAAAG  
TAGTAAAAATTGAACCACTA---GGAGTAGCACCCACCCGGCAAAGAGAAGAGTGGTG-----  
-----CAGAGAGAAAAAGAGCA---GTTGGA---ATAGGAGCT-----  
GTATTCAATTGGGTTCTTAGGAGCA---GCCGGAAGCACTATG---GGCGCGGCGTCA---  
ATAACGCTGACGGTACAG---GCTAGACAA---TTATTG---TCTGGCATAGTGCAACAGCAAAGC---  
AATTTG---CTGAGG---GCTATAGAGGCTCAACAACATCTGTTGAAACTCACGGTCTGGGGCATT  
>HQ659597..1  
TTCTATTGCAACACATCAGAATTGTTTAATAGCACTTGGGATAATAGCACTTGGGATAATAGCACTTGGGATA  
ATAACATG-----  
-----CATGAGTCG-----  
AATAGCACGGAGAATATAACTCTCCAATGTAGGATAAAGCAAATTATAAATATGTGGCAGAGAGCAGGACAAG  
CAATATATGCCCCCTCCCATCAAAGGAGTAATAGGGTGTAAATCAAAC---  
ATTACAGGACTAATATTAACAAGAGATGGTGGGGAGAAGGGTAATAAC-----  
-----  
AGTATCAATGAAACCTTCAGACCTGGAGGAGGAGATATGAGGGACAATTGGAGAAGTGAATTATACAAGTATA  
AAGTAGTAAAAATTGAACCACTA---GGAGTAGCACCCACCAAGGCAAGAGAAGAGTGGTG-----

-----GAGAGAGAAAAAGAGCA---GTTGGA---ATAGGAGCT-----  
---GTCTTCCTTGATTCTTAGGAACA---GCAGGAAGCACTATG---GGCGCGGCGTCA---  
GTAACGCTGACGGTACAG---GCCAGACAA---TTATTG---TCTGGCATAGTGCAACAGCAAAGC---  
AATTTG---CTGAGG---GCTATAGAGGCTCAACAGCATCTGTTGAACTCACAGTCTGGGGCATT  
>HQ697994..3  
TTCTATTGCTACACATCAGGCCTGTTTAATTATACCTTTAATGATACCAGCACAAATAGCACGGAGTCGAAG-  
-----  
-----  
TCAAAATGACACTATAACTCTCCAATGCAGAATAAAGCAAATTATAAATATGTGGCAGAGAGCAGGACAAGCAG  
TATATGCCCCCTCCCATACCAGGGATAATAAGGTGTGAATCAAAC---  
ATTACAGGACTAATATTAACAAGAGATGGTGGGAATAATAATAGT-----  
-----  
-----  
AATACAAATGAAACCTTCAGACCTGGAGGAGGAGATATGAGGGACAATTGGAGAAGTGAATTATATCGGTATA  
AAGTAGTAAAAATTGAACCAATA---GGAGTAGCACCTACCACGGCAAAGAGAAGAGTGGTG-----  
-----GAGAGAGAAAAAGAGCA---GTTGGA---ATAGGAGCT-----  
---GTCTTCCTTGCGTTCTTAGGAGCA---GCAGGAAGCACTATG---GGCGCGGCGTCA---  
ATAACGCTGACGGTACAG---GCCAGACAA---TTATTG---TCTGGCATAGTGCAACAGCAAAGC---  
AATTTG---CTGAGG---GCTATAGAGGCTCAACAGCATCTGTTGAACTCACGGTCTGGGGCATT  
>HQ698029..1  
TTCTATTGCAACACGGCAGGCCTGTTTGATAGCATTGGAATGGTAGCATTGGGAATAACACTGACAATAGTA  
GCATGGAG-----  
-----TTAAAT-----  
GACGATAATGACACTATAACTCTCCCATGCAGAATAAAGCAAATTATAAATATGTGGCAGAGAGTAGGACAAG  
CAATATATGCCCCCTCCCATCCAAGGAGTAATAAGGTGTGACTCAAAT---  
ATTACAGGGTTAATATTAACAAGAGATGGTGGGGATAATAATAGT-----  
-----  
-----  
GCAAAATGAAACCTTCAGACCTGTAGGAGGAGATATGAGGGACAATTGGAGAAGTGAATTATATAAGTATAAAG  
TAGTAAAAATTGAGCCACTA---GGAGTAGCACCCACCAGGGCAAAGAGAAGAGTGGTG-----  
-----GGGAGAGAAAAAGAGCA---GTTGGA---CTAGGAGCT-----  
GTCTTCATTGGGTTCTTAGGAGCA---GCAGGAAGCACTATG---GGCGCAGCGTCA---  
GTAACGCTGACGGTACAG---GCCAGACAA---TTATTG---TCTGGCATAGTGCAACAGCAAAGC---  
AATTTG---CTGAAG---GCTATAGAGGCTCAACAGCATCTGTTGAGACTCACAGTCTGGGGCATT  
>AY253305..2  
TTCTATTGTAACACATCAGGCCTGTTTAATGGCCTGTTTAATGGCACCTGGAATGGCAATCACACAAACAGCA  
CG-----  
-----  
GAGTTAAATAGCACTATAATTCTCCAATGCAAAATAAAGCAAATTATAAATATGTGGCAGAGAGCAGGACAAG  
CAATATATGCCCCCTCCCATCCAAGGAGTAATAAAGTGTGTATCAAAT---  
ATTACAGGACTAATATTAACAAGAGATGGTGAGAGGAACAATAGT-----  
-----  
-----  
CTAAATGAAACCTTCAGACCTGGAGGAGGAGATATGAGGGACAATTGGAGAAGTGAATTATATAAGTATAAAG  
TAGTAAAAATTGAACCACTA---GGAGTAGCACCTACCAGGGCAAAGAGAAGAGTGGTG-----  
-----GAGAGAGAAAAAGAGCA---GTCGGA---CTGGGAGCT-----  
GTCTTCATTGGGTTCTTAGGAGCA---GCAGGAAGCACTATG---GGCGCGGCGTCA---  
GTAACGCTGACGGTACAG---GCCAGACAA---TTATTG---TCTGGCATAGTGCAACAGCAAAGC---  
AATTTG---CTGAGG---GCTATAGAGGCTCAACAGCATCTGTTGAACTCACGGTCTGGGGCATT  
>AY253314..1  
TTCTATTGTAATACATCAGGCCTGTTTAATAGCACTTGGACTACCAACAACATGCAGGAGTCAAATGACACT-  
-----  
-----  
AGCAATGGCACTATAACTCTCCCATGCAGAATAAAGCAAATTATAAGGATGTGGCAGAGAGTAGGACAAGCAA  
TGTATGCCCCCTCCCATGGAAGGAGTAATAAGATGTGAATCAAAC---  
ATTACAGGACTAATACTAACAAGAGATGGCGGGAATAATAACAGT-----  
-----  
-----  
GCAAAATGAAACCTTTAGACCTGGAGGAGGAGATATAAGGGACAATTGGAGAAGTGAATTATATAAGTATAAAG  
TAGTAAAAATTGAACCACTA---GGAGTAGCACCCACCAGGGCAAAGAGAAGAGTGGTG-----

-----GAGAGAGAGAAAAGAGCA---GTTGGA---ATAGGAGCT-----  
GTCTTCCTTGGGTTCTTAGGAGCA---GCAGGAAGCACTATG---GGCGCGGCGTCA---  
ATAACGCTGACGGTACAA---GCCAGACAA---TTATTG---TCTGGCATAGTGCAGCAGCAAAGC---  
AATTTG---CTGAGG---GCTATAGAGGCTCAACAACAGCTGTTGAAACTCACGGTCTGGGGCATT  
>KX907352..1  
TTCTATTGTAATACATCAGGCCTGTTTAATAGCACTTGGCTATTTAACAAGTCAAATGAGAATAAGTCAAATG  
AG-----  
-----  
TCAGATGTCAATATAACACTCCCATGCAGAATAAAGCAAATTATAAATATGTGGCAGAGAGCAGGACAAGCAA  
TGTATGCCCCCTCCCATCCCAGGAGTAATAAAGTGTGAATCAAAC---  
ATTACAGGACTACTATTAAACAAGAGATGGTGGGAATAACAACAAT-----  
-----  
-----  
TCAAAATGAGACCTTCAGACCTGGAGGAGGAGATATGAGGGACAATTGGAGAAGTGAATTATATAAGTATAAAG  
TAGTCAAAATTGAACCACTA---GGAGTAGCACCCACCAGGGCAAGGAGAAGAGTGGTG-----  
-----GGAAGAGAAAAAAGAGCA---GTTGGA---ATAGGAGCT-----  
GTTTTCCTTGGGTTCTTAGGAGCA---GCAGGAAGCACTATG---GGCGCGGCGTCA---  
ATAACGCTGACGGTACAG---GCCAGACAA---TTATTG---TCTGGCATAGTGC AACAGCAAAGC---  
AATTTG---CTGAGG---GCTATAGAGGCTCAACAACATCTGTTGAAACTCACAGTCTGGGGCATT  
>KX907348..1  
TTCTATTGTAACACATCAGGTCTGTTTAATAGCACTTGGTATGGCAATGGCAGCAAGCTGGAGTCAAATAGCA  
CGGGG-----  
-----  
TCAGACGACAATATAACTCTCCACTGTAGAATAAAGCAAATTATAAATATGTGGCAAAGAGCAGGACAAGCAA  
TATATGCCCCCTCCCATCCCAGGAGTAATAAACTGTCTATCAAAC---  
ATTACAGGACTAATATTAACAAGAGATGGTGGGGACAATAACAGT-----  
-----  
-----  
ACAAATGAAACCTTCAGACCTGGAGGAGGAGATATGAGGGACAATTGGAGAAGTGAATTATATAAGTATAAAG  
TAGTAAAAATTGAACCATTA---GGAGTAGCACCCACCAGGGCAAAGAGAAGAGTGGTG-----  
-----GAAAGAGAAAAAAGAGCA---GTTGGA---CTGGGAAT-----  
GTTCTCTTTGGGTTCTTAGGAGCA---GCAGGAAGCACTATG---GGCGCGGCGTCA---  
GTAACGCTGACGGTACAG---GCCAGAAAG---TTACTA---TCTGGCATAGTGC AACAGCAAAGC---  
AATTTG---CTGAGG---GCTATAGAGGCTCAACAGCATCTGTTGAAACTCACAGTCTGGGGCATT  
>KX907336..1  
TTCTATTGTAATACATCAGGCCTGTTTAATAGCACTTGGAACAGCACTGGGTCAAGAAAT-----  
-----  
-----  
GACAGTGGCAATATAACTCTCCCATGCAGAATAAAGCAAATTGTAAATATGTGGCAGAGGACAGGACAAGCAA  
TATACGCCCCCTCCCATCCAAGGAAGAATACAGTGTGTGTCAAAT---  
ATTACAGGACTACTATTGACAAGAGATGGAGGGATTAACAACAGT-----  
-----  
-----  
GAGGAAACCTTCAGACCTGGAGGAGGAAATATGAGAGATAATTGGAGAAGTGA ACTATATAAATATAAAGTAG  
TAAAAATTGAACCACTA---GGAGTAGCACCCACCAGGGCAAAGAGAAGAGTGGTG-----  
-----GAGAGAGAAAAAAGAGCAGTAGTTGGA---CTGGGAGCT-----  
GTCTTCCTTGGGTTCTTAGGAGCA---GCAGGAAGCACTATG---GGCGCGGCGTCA---  
CTGACGCTGACGGTACAG---GCCAGACAT---TTATTG---TCTGGCATAGTGC AACAGCAAAC---  
AATTTG---CTGAGG---GCTATAGAGGCTCAACAGCATCTGTTGAAACTCACGGTCTGGGGCATT  
>KX907372..1  
TTCTATTGTAATACATCAGGCCTGTTTAATAGCAGTTGGAACATTAATGGCAGTCGGGAGTCAAATAAAACAC  
AG-----  
-----  
TCAAAATGGCACTATAACTCTCCCATGCAGAATAAAGCAAATTATAAATATGTGGCAGAGAGCAGGACAAGCAA  
TATATGCTCCTCCCATCCAAGGAGTAATAAAGTGTGTATCAAAC---  
ATTACAGGACTAATATTAACAAGAGATGGTGGGAATAATAATAAC-----  
-----  
-----  
AGTTCAAATGAACTTTTCAGACCTGGAGGAGGAGATATGAGGGACAATTGGAGAAGTGAATTGTATAAGTATA  
AGGTAGTAAAAATTGAACCACTA---GGGGTAGCACCCACCAGGGCAAAGAGAAGAGTGGTG-----

-----GAGAGAGAAAAAGAGCA---GTTGGA---ATAGGAGCT-----  
---GTTTTCCTTGGGTTCTTAGGAGCA---GCAGGAAGCACTATG---GGCGCGGCGTCA---  
ATAACGCTGACGGTACAG---GCCAGACAA---TTACTG---TCTGGCATAGTGCAACAGCAGAGC---  
AATTTG---CTGAGG---GCTATAGAGGCTCAACAACAGTTGTTGAAACTCACGGTCTGGGGCATT  
>KX907383..1  
TTCTATTGTGACACATCAAGCCTGTTTAATATCACTTGGGATAGAAGTAACGTCACGCAGGAGTTAAATAACA  
CAAAG-----  
-----  
TTAAATGACACTATAATTCTCCAATGCAGGATAAAAGCAAATTATAAATATGTGGCAGAGAGCAGGACAAGCAA  
TGTATGCCCCCTCCCATCCAGGAATAATAAAGTGTGAATCAAAC---  
ATTACAGGACTAATATTAACAAGAGATGGGAGT-----  
-----  
-----  
GAGAATGAAACTGAAACCTTCAGACCTGGAGGAGGAGACATGAGGGACAATTGGAGAAGTGAGTTATATAAGT  
ATAAAGTGGTAAAAATTGAACCACTA---GGAGTAGCACCCACCAAGGCAAGGAGAAGAGTGGTG-----  
-----GAGAGAGAGAAAAAGAGCA---GTCGGA---CTAGGAGCT---  
-----GTCTTCCTTGGGTTCTTAGGAGCA---GCAGGAAGCACTATG---GGCGCAGCGTCA---  
ATAACGCTGACGGTACAG---GTCAGACAA---TTGTTG---TCTGGCATAGTGCAACAGCAAAAC---  
AATTTG---CTGAGG---GCTATAGAAGCTCAACAGCATCTGTTGAAGCTCACGGTCTGGGGCATT  
>KX907389..2  
TTCTATTGTAACACATCAATCCTGTTTAATAGCACTTGGAAATAGCACTAGCACTTGGAAATATCTCTGAGAGTG  
TAAATAGC-----  
-----AGCAGTCAG-----  
GAGTCAAATGACACTATAACTCTCCAATGCAGAATAAAAGCAAATTATAAATATGTGGCAGAGAACAGGACAAG  
CAATGTATGCCCCCTCCCATCCAAGGAGTAATAAAGTGCATATCAAAT---  
ATTACAGGACTAATATTAACAAGAGATGGTGGGGGTGATGACAAT-----  
-----  
-----  
ACAACTGAAACCTTCAGACCTGGAGGAGGAGATATGAGGGACAATTGGAGAAGTGAATTATATAAGTATAAAG  
TAGTAAAAGTTGAACCACTA---GGAATAGCACCCACCAGGGCAAGGAGAAGAGTGGTG-----  
-----GAGAGAGAAAAAGAGCA---GTTGGA---ATAGGAGCT-----  
GTTTTCAATTGGGTTCTTAGGAGCA---GCAGGAAGCACTATG---GGCGCGGCGTCA---  
ATAACGCTGACGGCACAG---GCCAGACAA---CTATTG---GCTGGCATAGTGCAACAGCAAAGC---  
AATTTG---CTGAGG---GCTATAGAGGCTCAACAGCATCTGTTGAAACTCACAGTCTGGGGCATT  
>KX907341..2  
TTCTATTGTAATACATCAGGCCTGTTTAATAGTACTTGGGATGACACCTCGAATCATAATACAAGTGGCACGG  
AG-----  
-----  
TCAAATGCCAATATAACTCTCCAGTGTAGAATAAAGCAAATTATAAATATGTGGCAGAGAGCAGGACAAGCAA  
TATATGCCCCCTCCCATCCAAGGAATAATAAAGTGTGAATCAAAC---  
ATTACAGGACTGATATTAACAAGAGATGGTGGAGATAACAATAAC-----  
-----  
-----  
ACTACCACCGAAACCTTCAGACCTGGAGGAGGAGATATGAGGGACAATTGGAGAAGTGAATTATATAAGTATA  
AAGTAGTAAAAATTGAACCACTA---GGAGTAGCACCCACCAAGGCAAGGAGACGAGTGGTG-----  
-----CAGAGAGAAAAAGAGCA---GTTGGA---ATGGCAGCT-----  
---TTATTCTTTGGGTTCTTAGGAGCA---GCAGGAAGCACTATG---GGCGCGGCGTCC---  
ATAACGCTGACGGTACAG---GCCAGACAA---TTATTG---TCTGGCATAGTGCAACAGCAAAGC---  
AATTTG---CTGAGG---GCTATAGAGGCTCAACAGCATATGTTGAGACTCACGGTCTGGGGCATT  
>KX907347..1  
TTCTATTGTAATACATCAGGCCTGTTTAATAGCACTTGGCTGTCTAATAGTACTAACAGCACGGATAACACGG  
GG-----  
-----  
ACAAATGACACTATAACTCTCCAATGCAGAATAAAAGCAAATTATAAATATGTGGCAAAGAGTAGGACAAGCAA  
TGTATGCCCCCTCCCATCCAGGAGTAATAAGGTGTGAATCAAAC---  
ATTACAGGACTAATGTTAACAAGAGATGGTGGGAATAATGCTACC-----  
-----  
-----  
AATGAAACCTTTAGACCTGGAGGAGGAGATATGAGGGACAATTGGAGAAGTGAATTATATAAGTATAAAGTAG  
TAAAAATTGAACCACTA---GGAGTAGCACCCACCAAGGCAAGGAGAAGAGTGGTG-----

-----GAGAGAGAAAAAGAGCA---GTTGGA---ATAGGAGCT-----  
 GTCTTCCTTGGGTTCTTAGGAGCA---GCAGGAAGCACTATG---GGCGCGGCGTCA---  
 ATAACGCTGACGGTACAG---GCCAGACAA---TTATTG---TCTGGCATAGTGCAACAGCAAGGC---  
 AACTTG---CTGAGG---GCTATAGAGGCTCAACAACATCTGTTGAAACTCACAGTCTGGGGCATT  
 >KX907364..2  
 TTCTATTGTAACACATCAGCCCTGTTCAATAGCAGTTGGAGTAGTGTAATGACAGCGGGAACATTAGCCCAG  
 AG-----  
 -----  
 CCAAAACAAAATATAACCCCTCCGATGCAGAATAAAGCAAATTATAAATATGTGGCAGAGAGTAGGACAAGCAA  
 TATATGCCCCCTCCCATCCAAGGAGTAATAAGGTGTGACTCAAAC---  
 ATTACGGGATTAATATTAACAAGCGATTATGGAGGGGACTAACAGT-----  
 -----  
 -----  
 ACACATGAAATCTTCAGACCTGCAGGAGGAAATATGAGGGACAATTGGAGAAGTGAATTATATAAGTATAAAG  
 TAGTACAAATTGAACCAATA---GGAGTAGCACCCATCAGGGCAAAGAGAAGAGTGGTG-----  
 -----GAGAGAGAAAAAAGAGCA---GTCGGA---CTGGGAGCT-----  
 GTCTTCCTTGGTTTCTTAGGAGCA---GCAGGAAGCACTATG---GGCGCGGCGTCA---  
 ATGACGCTGACGGTACAG---GCCAGACAA---TTATTG---TCTGGTATAGTGCAACAGCAAAGC---  
 AATTTG---CTGAGG---GCTATAGAGGCTCAACAGCATCTGTTGAAACTCACGGTCTGGGGCATT  
 >KX907412..3  
 TTCTATTGTAACACATCAGGCCTGTTTCATAGCACTTGGTTTAATAGCACTTGGTTTAATAGCACTTGGGAAG  
 ACAATCAGGCA---AAT-----  
 -----  
 AGCACAAATGACACTATAGTACTCCCATGCAGAATAAAGCAAATTATTAATATGTGGCAGAGAGCAGGACAAG  
 CAATATATGCCCCCTCCCATCCCAGGGGAAATAAGGTGTGAATCAAAC---  
 ATTACAGGGCTAATGTTAACAAGAGATGGTGGGAATAATAACAATAACAGGACA-----  
 -----  
 -----  
 AATGAAACCAAAAATGAAACCTTCAGACCTGGAGGAGGAGATATGAGGGACAATTGGAGAAGTGAATTATATA  
 AGTATAAAGTAGTAAAAATTGAACCACTA---GGACTAGCACCCACCGGGCAAAGAGAAGAGTGGTG-----  
 -----GAGAGAGAAAAAAGAGCA---GTTGGA---  
 ATAGGAGCT-----GTCTTCCTTGGGTTCTTAGGAGCA---GCAGGAAGCACTATG---  
 GGCGCGGCGTCA---ATAACGCTGACGGTACAG---GCCAGACAA---TTATTG---  
 TCTGGCATAGTGCAACAGCAAAGC---AATTTG---CTGAAG---  
 GCTATAGAGGCTCAACAACATCTGTTGAAACTCACGGTCTGGGGCATT  
 >KX907414..1  
 TTCTATTGTAACACATCAGGCCTGTTTAATAGCACTTGGAGTAACACTACCACTTGGGAAAACATTACCGAAA  
 GGCAGGAACCA-----  
 -----AGCAGCAAC-----  
 AAGACAAACGCAACTATAACTCTCCAATGCAGAATAAAGCAAATTATAAATATGTGGCAGAGAACAGGACGAG  
 CAATGTATGCCCCCTCCCATCCCAGGAATAATAAGTTGTAACCTCAAAT---  
 ATTACAGGACTAATATTAACAAGAGATGGTGGAAATAACAGTACA-----  
 -----  
 -----  
 AATGAAACCTTCAGACCTGGAGGAGGAGACATGAGGGACAATTGGAGAAGTGAATTATATAGGTATAAAGTAG  
 TAAAAATTGAACCACTA---GGAGTAGCACCCACTGAGGCAAAGAGAAGAGTGGTG-----  
 -----GAGAGAGGAAAAAGAGCA---ATTGGA---ATAGGAGCT-----  
 GTTTTCATTGGGTTCTTAGGAGCA---GCAGGAAGCACTATG---GGCGCGGCGTCA---  
 ATAACGCTGACGGTACAG---GCCAGACAA---TTATTG---TCTGGCATAGTGCAACAGCAAAC---  
 AATTTG---CTGAGG---GCTATAGAGGCTCAACAGCATCTGTTGAAACTCACGGTCTGGGGCATT  
 >KX907423..2  
 TTCTATTGTAACACATCAGGCCTGTTTAATAGCATTGTTGGTTAAGGGCCAGGAAAGCAATCAGTCAAATAGC-  
 -----  
 -----  
 GCAAAATGACACTATAGTACTCCCATGCAGAATAAAGCAAATTATAAATATGTGGCAGAGAGCAGGACAAGCAA  
 TATATGCCCCCTCCCATCCCAGGGGAAATAAAGGTGTGTATCAAAC---  
 ATTACAGGGCTAATATTAACAAGAGATGGTGGGAATAACGGGATA-----  
 -----  
 -----  
 AATGAAACCTTCAGACCTGGAGGAGGAGATATGAGGGACAATTGGAGAAGTGAATTATATAAGTATAAAGTAG

TAAAAATTGAACCACTA---GGAGTAGCACCCACCAGGGCAAAGAGAAGAGTGGTG-----  
-----GAGAGAGAAAAAAGAGCA---GTTGGA---ATAGGAGCT-----  
GTCTTCCTTGGGTTCTTAGGAGCA---GCAGGAAGCACTATG---GGCGGGCGTCA---  
ATAACGCTGACGGTACAG---GCCAGACAA---TTATTG---TCTGGCATAGTGCAACAGCAAAGC---  
AATTTG---CTGAAG---GCTATAGAGGCTCAACAACATCTGTTGAGACTCACGGTCTGGGGCATT  
>KX907431..1  
TTCTATTGTAACACAACAGACCTGTTTAATAGCACCTGGAATGAGACCAGCATAACAGGAAAATAGCACAGAGA  
CA-----  
-----  
AACAAACGAGACTATAACTCTCCAATGCAGAATAAAGCAAATTATAAATATGTGGCAGAGAGCAGGACAAGCAA  
TATATGCCCCCTCCCGTACCAGGAGTAATAAGGTGTGACTCAAAT---  
ATTACAGGGCTAATATTAACAAGAGATGGTGGGACTAATAATACA-----  
-----  
AATGAAACATTCAGGCCTGTAGGAGGAGATATGAAGGACAATTGGAGAAGTGAATTATATAAGTATAAAGTAG  
TAAAAATTGAACCACTA---GGGGTAGCACCCACCAGGGCAAAGAGAAGAGTGGTG-----  
-----GAGAGAGAAAAAAGAGCA---GTTGGA---ATAGGAGCT-----  
GTCTTCCTTGGGTTCTTAGGAGCA---GCAGGAAGCACTATG---GGCGCAGCATCA---  
ATAACGCTGACGGTACAG---GCCAGACAA---TTATTG---TCTGGCATAGTGCAACAGCAAAGC---  
AATTTG---CTGAGG---GCTATAGAGGCTCAACAACAACCTGTTGAAACTCACAGTCTGGGGCATT  
>HQ615968..1  
TTCTATTGCAACACATCAGACCTATTTAATAGCACTTGGGAAAATAACCCTGTCAGCCAGGAGTCAAATAGCA  
CA-----  
-----  
AGGTCAAACGACACTATAACTCTCCAATGCAAAATAAGGCAAATTATAAGAATGTGGCAGAGAGTAGGACAAG  
CAATGTATGCCCCCTCCCATCCAAGGAGTAATAAACTGTACATCAAAT---  
ATTACAGGACTAATATTAACAAGAGATGGTGGGAATAATAATAAC-----  
-----  
AGTGGAAATGAAACCTTCAGACCTGCAGGAGGAGATATGAGGGACAATTGGAGAAGTGAATTATATAAGTATA  
AAGTAGTAAAAATTGAACCACTA---GGAGTAGCACCCACCAGGGCAAAGAGAAGAGTGGTG-----  
-----GAGAGAGAAAAAAGAGCA---GTTGGA---ATAGGAGCT-----  
---GTCTTCATTGGGTTCTTAGGAGCA---GCAGGAAGCACTATG---GGCGCAGCGTCA---  
ATAACGCTGACGGTACAG---GCCAGACAA---TTATTG---TCTGGCATAGTGCGGCAGCAAAGC---  
AATTTG---CTGCAG---GCTATAGAGGCTCAACAGCATCTGTTGAAACTCACGGTCTGGGGCATT  
>HQ615970..2  
TTCTATTGTAATACATCAAGCCTGTTTAATAGTACTTGGAAATTGGAATCACACAAACAGCTTGCAGGATTCAA  
ATAGC-----  
-----ACA---  
GAGACAAATGGCACTATAATTCTCAAATGCAGAATAAAACAAATTATAAGGATGTGGCAGAGAGTAGGACAAG  
CAATGTATGCCCCCTCCTATCCCAGGAGTAATAAGGTGTGTATCAAAC---  
ATTACAGGATTAATATTAACAAGCGATGGCGGGAATAAGACCACT-----  
-----  
ACAACAGAGACCTTCAGACCTGGGGGAGGAGATATGAGGGACAATTGGAGAAGTGAATTATATAAGTATAAAG  
TAGTCAAAATTGAACCACTA---GGAGTAGCACCCACCAGGGCAAAGAGAAGAGTGGTG-----  
-----GAGAGAGAAAAAAGAGCA---GTTGGA---ATAGGAGCT-----  
GTCTTCCTTGGGTTCTTAGGAGCA---GCAGGAAGCACTATG---GGCGTGGCGTCA---  
ATGACGCTGACGGTACAG---GCCAGGCAA---TTATTG---TCTGGCATAGTGCAACAGCAAAGC---  
AATTTG---CTGAGG---GCTATAGAGGCTCAACAGCATCTGTTGAAACTCACAGTCTGGGGCATT  
>HQ615971..2  
TTTTATTGTAATACATCAAACTGTTTAATAGCAGTATATCCTACAATGGCAGTACAAAGTCAGTAGAGTCAA  
TA-----  
-----  
AACAGTAACGAGACAATAAGTCTCCCATGCAGAATAAAGCAAATTATAAATATGTGGCAGAGAGCAGGACAAG  
CAATATATGCCCCCTCCCATCCGAGGAGTAATAAAGTGTAAGTCAGAC---  
ATTACAGGACTACTATTAACAAGAGATGGTGGGGTTACCAACACA-----  
-----  
AATGAGACCTTTAGACCTGGAGGAGGAAATATGAGGGATAATTGGAAAAGTGAACCTATATAAATATAAAGTAG

TAAAAATTGAACCATTA---GGAGTGGCACCTCTCCTGCAAAGAGAAGAGTGGTG-----  
-----CAGAGAGAAAAAAGAGCA---GTAGGA---CTGGGAGCT-----  
GTTTTTCATTGGGTTCTTAGGAGCA---GCAGGAACCACTATG---GGCGGGCGTCA---  
ATGACGCTGACGGTACAG---GCCAGACAA---TTATTG---TCTGGCATAGTGCAACAGCAAGGC---  
AATTTG---CTGAGG---GCTATAGAGGCTCAACAGCATCTGTTGAAACTCACGGTCTGGGGCATT  
>HM204620..2  
TTCTATTGCAACACATCAGGATTGTTTAATAGCAGATGGGAAAATGACACGCAACCAAATAACACGCAG----  
-----  
-----  
CCAAACGGCACTATAACTCTCCCATGCAGAATAAAGCAAATTATAAATATGTGGCAGAGAACAGGACAAGCAA  
TATATGCCCCCTCCCATCAGAGGAGTAATAAGTTGTCAATCAAAC---  
ATTACAGGACTACTACTAACAAGAGATGGGGGGGGGAAGAATACT-----  
-----  
-----  
AGTGATAATGAAACCTTCAGACCTGGAGGAGGAGATATGAGGGACAATTGGAGAAGTGAATTATATAAGTATA  
AAGTAGTAAAAATTGAACCATTA---GGAGTAGCACCCAACAGGGCAAGGAGAAGAGTGGTG-----  
-----GAGAGAGAAAAAAGAGCA---GTTGGA---ATAGGAGCT-----  
---GTGTTCCCTTGGGTTCTTGGGAGCA---GCAGGAAGCACTATG---GGCGCAGCGTCA---  
ATGACGCTGACGGTACAG---GCTAGACAA---TTATTG---TCTGGTATAGTGCAACAGCAAAGC---  
AATTTG---CTGAGG---GCTATAGAGGCTCAACAGCATCTGTTGAAACTCACAGTCTGGGGCATT  
>HM204621..2  
TTCTATTGTAATACATCAAACCTGTTTAATAGCACTTGGGGTAATGGCAGTTACAGCACCAATGACACAGGGG  
AC-----  
-----  
GCAAAATCAAATATAACTATCCAATGCAGAATAAAGCAAATTGTAAGGATGTGGCAGAGGACAGGACAAGCAA  
TGTATGCCCCCTCCCATCAAAGGAATAATAAGATGTATGTCAAAT---  
ATTACAGGCCTACTATTAACAAGAGATGGTGGGATTAATAGGACG-----  
-----  
-----  
AATGAAACCTTCAGACCTATAGGAGGAGATATGATGGATAATTGGAGAAGTGAGCTATATAAATATAAAGTAG  
TAAGAATTGAACCAATA---GGAGTAGCACCCAACAGGGCAAAGAGAAGAGTGGTG-----  
-----GAGAGAGAAAAAAGAGCA---GTCTTTGGAATGGGAGCT-----  
GTCTTCCTTGGGTTCTTAGGAGCA---GCCGGAAGCACTATG---GGCGCAGCGTCG---  
ATAACGCTGACGTTACAG---GCCAGACAA---TTGTTG---TCTGGTATAGTGCAACAGCAAAGC---  
AATTTG---CTGAGG---GCTATAGAGGCTCAACAGCATCTGTTGAAACTCACGGTCTGGGGCATT  
>KY658695..2  
TTCTATTGTAACACATCAAGTTTGTTTAAAGGCACTTGGGAATAATGGCACTTGGGAATGATAGCATGTCAGAGG  
TAAAT-----  
-----AGCACA-----  
GAGTCAAATGACAACATAACTCTCCCATGCAGAATAAAGCAAATTATAAATATGTGGCAGAAAAGTAGGGCAAG  
CAATGTATGCCCCACCCATCCAGGGAGTAATAAGGTGTGAATCAAAC---  
ATTACTGGACTAATATTAACAAGAGATGGTGGGAATAGTAGCGGT-----  
-----  
-----  
CAGAAATGAAACCTTTAGACCTGGAGGAGGAGATATGAGGGACAATTGGAGAAGTGAATTATATAAGTATAAAG  
TAGTAAAAATTGAACCACTA---GGAGTAGCACCCACCAAGGCAAGAAGAAGAGTGGTG-----  
-----CAGAGAGAAAAAAGAGCA---GTTGGA---ATGGGAGCA-----  
CTTTTCATTGGGTTCTTAGGAGCA---GCAGGAAGCACTATG---GGCGGGCGTCA---  
ATAACGCTGACGGTACAG---GCCAGACAA---TTATTG---TCTGGCATAGTGCAACAGCAAAGC---  
AATTTG---CTGAAG---GCTATAGAGGCTCAACAGCATCTGTTGAGACTCACTGTCTGGGGCATT  
>KY658696..1  
TTCTACTGTAATACATCAGGCCTGTTTAATAGCAATAGCACAGCAAATAGCACAGCAAAGTTTAATAGCAATA  
GCACAGCA-----  
-----  
AATAGCACAGCAAATATAACTCTCCCATGCAGAATAAAACAAATTGTAAATATGTGGCAGAGGCCAGGACAAG  
CAATGTATGCCCCCTCCAATCCAAGGGCCAATAAGTTGTAGGTCAAAC---  
ATTACAGGATTACTAATAACAAGAGATGGTGGAGAAAAAATGGA-----  
-----  
-----  
ACGAATGAAACCTTCAGACCTGGAGGAGGAGAGATGAGGGATATTTGGAGAAGTGAACCTATATAAATATAAAG

TAGTGAAAATTGAACCATTA---GGAGTAGCACCCACCAGGGCAAGGAGAAGAGTGGTG-----  
 -----GAGAGAGAAAAAAGAGCA---GTTGGA---CTGGGAGCT-----  
 GTCTTCATTGGGTTCTTAGGAGCA---GCCGGAAGCACTATG---GGCGTGGCGTCA---  
 ATAACGCTGACGGTACAG---GCCAGACAA---TTATTG---TCTGGTATAGTGCAGCAGCAAAAC---  
 AATTTG---CTGAGG---GCTATAGAGGCTCAACAGCATATGTTGAAACTCACAGTCTGGGGCATT  
 >AF361872..2  
 TTCTATTGTAATACAACAAGCCTGTTTAATAGCACCTGGTATCACAAGAACAGCACGCAGGGGTCAAATGACA  
 CG-----  
 -----  
 GGGTCAGATGACACTATAACTCTCCCATGCAAAATAAAACAAATTGTAAGGATGTGGCAGAGAGCAGGACAAG  
 CAATGTATGCCCTCCCATTCAGGAGTAATAAGGTGTGAATCAAAC---  
 ATTACAGGACTAATATTAACAAGAGATGGGGGGAGTGAGGACAAT-----  
 -----  
 -----  
 ACCACTGAAATCTTCAGACCTGGAGGAGGAAATATGAGGGACAATTGGAGAAGTGAATTATATAAGTATAAAAG  
 TAGTAAAAATTGAACCACTA---GGAGTAGCACCCACCAAGGCAAAGAGAAGAGTGGTG-----  
 -----GGAAGAGAAAAAAGAGCA---GTTGGA---CTGGGAGCT-----  
 GTCTTCCTTGGGTTCTTAGGAGCA---GCCGGAAGCACTATG---GGCGCGGCGTCA---  
 GTAACGCTGACGGTACAG---GCCAGACAA---TTATTG---TCTGGCATAGTGCAACAGCAGAAC---  
 AATTTG---CTGAGG---GCTATAGAGGCTCAACAACATCTGTTGAAACTCACAGTCTGGGGCATC  
 >AF361873..1  
 TTCTATTGTAACACATCAGGCCTGTTTAACAGCACTTGGCATAGCAATGCCAGCATACAAGAGCCAAACAGCA  
 CAGAG-----  
 -----  
 TCAAATGACACTATTATAACTCTCCAATGTAGAATAAAACAAATTATAAATATGTGGCAGAGAACAGGAAAAAG  
 CAATATATGCTCCTCCCATCCAAGGAATAATAAGGTGTGAATCAAAC---  
 ATTACAGGACTAATATTAACAAGAGATGGTGGGAGTAATAATAGC-----  
 -----  
 -----  
 ACCAATGAAACCTTCAGACCTGGAGGAGGAGATATGAGGGACAATTGGAGAAGTGAATTATATAAGTATAAAAG  
 TAGTAAAAATTGAACCACTA---GGAGTAGCACCTCCTGGGCAAGGAGAAGAGTGGTG-----  
 -----CAGAGAAAAAAGAGCA---GTTGGA---ATAGGAGCT-----  
 GTCTTCCTTGGGTTCTTAGGAGCA---GCTGGAAGCACTATG---GGCGCGGCGTCA---  
 ATAACGCTGACGGTACAG---GCCAGACAA---TTATTG---TCTGGCATAGTGCAACAGCAAAGC---  
 AATTTG---CTGAGG---GCTATAGAGGCTCAACAGCATCTGTTGAAACTCACGGTCTGGGGCATT  
 >HM027846..2  
 TTCTATTGTAACACATCAGGTCTGTTTAATAGCACGTGGAATACTACCAACATGTGGGAGCAAAATAGCACGG  
 AG-----  
 -----  
 TCAACAATAATACTATATATCTTCAATGCAGAATAAAGCAAATTATCAATATGTGGCAGAGAGTAGGACAAG  
 CAATATATGCCCTCCCATCCCAGGAATGATAAGGTGTGTCTCAAAT---  
 ATTACAGGACTAATATTAACAAGGGATGGTGGGAATATTAGTGAGAAT-----  
 -----  
 -----  
 AATGCCAGTGAAATCTTCAGACCAGGAGGAGGAGATATGAGGGACAATTGGAGAAGTGAATTATACAAGTATA  
 AAGTAGTAAAAATTGAACCACTA---GGAGTAGCACCAACCCCGGCAAGGAGAAGAGTGGTG-----  
 -----GAGAGAGAAAAAAGAGCA---GTCGGA---ATAGGAGCT-----  
 ---GTCTTCCTTGGGTTCTTAGGAGCA---GCAGGAAGCACTATG---GGCGCGGCGTCA---  
 ATAACGCTGACGGCACAG---GCCAGACAA---TTATTG---TCTGGTATAGTGCAACAGCAAAGC---  
 AATTTG---CTGAGG---GCTATAGAGGCTCAACAGCATCTGTTGAAACTCACGGTCTGGGGCATT  
 >JX877522..1  
 TTCTATTGTGACACATCAGAACTATTTAATAGCACTTGGGAATGACGCTGCCATTATGAGGGAATTAAATAGAA  
 CGGAG-----  
 -----  
 TCAAACGACACCATAACTCTCCAATGCAAAATAAAGCAAATTATAAATATGTGGCAGAGAGCAGGACGAGCAA  
 TGTATGCCCTCCCATCCGAGGAGTAATAAGATGTGAGTCAAAT---  
 ATTACAGGACTAATATTAACAAGAGATGGTGGGAGGGATGATAAC-----  
 -----  
 -----  
 AATACAACCTGAAACCTTCAGACCTGGAGGAGGAGATATGAGGGACAATTGGAGAAGTGAATTATATAAGTATA

AAGTAGTAAAACTTGAGCCACTA---GGAATAGCACCCACCAAGGCAAAGAGAAGAGTGGTG-----  
 -----GAGAGAGAAAAAAGAGCA---GTTGGA---CTGGGAGCT-----  
 ---GTTTTCATTGGGTTCTTAGGAGCA---GCAGGAAGCACTATG---GGCGCGGCGTCA---  
 ATAACGCTGACGGTACAG---GCCAGACAA---TTATTG---TTTGGCATAGTGCAACAGCAAAGC---  
 AATTTG---CTGAGG---GCTATAGAGGCTCAACAGCATATGTTGAAACTCACAGTCTGGGGCATT  
 >HM215272..1  
 TTCTATTGTAATACATCAAGCCTATTTAATAGTACTTGGTGGAGCAACAACAGCAACAACACTGACAGTGAGG  
 AGTCAAAT-----  
 -----AGCATG-----  
 GGGTTAAATGACACTATAACTCTCCAATGCAGAATAAAGCAAATTATAAATATGTGGCAGAGAGTAGGACAAG  
 CAATGTATGCCCCCTCCCATCCAAGGAGTAATAAGGTGTGAGTCAAAC---  
 ATCACAGGAATACTATTAACAAGAGATGGTGGGGATAATAACAAT-----  
 -----  
 -----  
 GAAAGTGAAACCTTCAGACCTGTAGGAGGAGATATGAGGGACAATTGGAGAAGTGAATTATATAAATATAAAG  
 TAGTAAAAATTGAACCATTA---GGAGTAGCACCCACAGAGGCAAGGAGAAGAGTGGTG-----  
 -----GGAAGAGGAAAAAGAGCAGTTGTTGGA---ATGGGAGCT-----  
 ATGTTCTTGGGTTTTTGGGAGCA---GCTGGGAGCACTATG---GGCGCGGCGTCA---  
 ATAACGCTGACGGTACAG---GCCAGACAA---TTATTG---TCTGGCATAGTGCAACAGCAAAGC---  
 AATTTG---CTGAGG---GCTATAGAGGCTCAACAGCATCTGTTGAAACTCACTGTCTGGGGCATT  
 >HM027824..1  
 TTCTATTGTAACACATCAGGTCTGTTTAATAGCACGTGGAATGGTACCCAAATGATGGAGCCAAATAGCACAG  
 AA-----  
 -----  
 AACATTAATGATACTATAACTCTTAAATGCAGAATAAAGCAAATTATACATATGTGGCAGAGAGTAGGACAAG  
 CAATATATGCCCCCTCCCATCAAAGGAGTGATAAGATGTAACCTCAAAC---  
 ATTACAGGACTAATATTAACAAGAGATGGTGGGACTGAAGGGAAT-----  
 -----  
 -----  
 AGCAGTGAAACCTTCAGACCGGGAGGAGGTGATATGAGGGACAATTGGAGAAGTGAATTATATAAGTATAAAG  
 TAGTAAAAATTGAACCACTA---GGAGTAGCACCTACCAAGGCAAGGAGAAGAGTGGTG-----  
 -----GAGAGAGAAAAAAGAGCA---ATCGGA---CTGGGAGCT-----  
 GTCTTCCTTGGGTTCTTAGGAGCA---GCAGGAAGCACTATG---GGCGCGGCGTCA---  
 ATAACGCTGACGGCACAG---GCCAGACAA---TTATTG---TCTGGCATAGTGCAACAGCAAAGC---  
 AATTTG---CTGCAG---GCTATAGAGGCTCAACAGCATCTGTTGAAACTCACAGTCTGGGGCATT  
 >JX236669..1  
 TTCTACTGTAATACATCAGGCCTGTTTAATAGCACTTGGAACATTGCTGGGAACAGGACAAATGACACGAAG-  
 -----  
 -----  
 TCAAATGAAACTATAACTCTCCCATGCAGAATAAAGCAAATTGTAAATGTGTGGCAGAGAGTAGGACAAGCAA  
 TATATGCCCCCTCCCATCGCAGGAGTAATAAGATGTAACCTCAAAC---  
 ATTACAGGATTACTATTAGTAAGAGATGGTGGAGCTACTAACAAT-----  
 -----  
 -----  
 ACTGATGAAACCTTCAGGCCTGGAGGAGGAAATATGAGGGACAATTGGAGAAGTGAATTATATAAGTATAAAG  
 TAGTAAAAATTGAACCACTA---GGAGTAGCACCCACCAGGGCAAGGAGAAGAGTGGTG-----  
 -----GAGAGAGAAAAAAGAGCA---GTTGGA---CTGGGAGCT-----  
 GTATTTCATTGGGTTCTTAGGAGCA---GCAGGAAGCACTATG---GGCGCGGCGTCA---  
 GTGACGCTGACGGTACAG---GCCAGACAA---TTATTG---TCTGGCATAGTGCAACAGCAAAGC---  
 AATTTG---CTGAGG---GCTATAGAGGCTCAACAGCATCTGTTGAAGCTCACGGTCTGGGGCATT  
 >JX236671..2  
 TTCTATTGTAATACAGCAGGTCTGTTCAATAGAAATTGGACTTGGAGTAAGGAGAATGGGACCAGAATGCAGA  
 ATAAAACGGAT-----  
 -----  
 TCAAATGGCACTATAACTCTCCAATGCAGAATAAAGCAAATTATAAATATGTGGCAGAGAACAGGACAGGCAA  
 TGTATGCCCCCTCCCATCCAAGGAGTAATAAAATGTGCATCAAAC---  
 ATTACAGGACTACTGTTAACAAGGGATGGTGGAGATAACAAAAACAATAGTACC-----  
 AATAGTACCAATCAAAAT-----  
 -----  
 AACACTGAAATCTTTAGACCTATAGGAGGAGATATGAGGAATAATTGGAGAAGTGAATTATATAAGTATAAAG

TAGTAAAAATTGAACCACTA---GGAGTAGCACCTACCACGGCAAGGAGAAGAGTGGTG-----  
 -----GGAAGAGAAAAAAGAGCAGTACTAGGTGGACTAGGAGCT-----  
 GTATTCCTTGGGTTCTTAGGAGCA---GCCGGAAGCACTATG---GGCGCAGCGTCA---  
 ATAACGCTGACGGTACAG---GCCAGGCAA---TTATTG---TCTGGCATAGTGCAACAGCAAAGC---  
 AATTTG---CTGAGG---GCTATAGAGGCTCAACAACATCTGTTGAAACTCACGGTCTGGGGCATT  
 >JX236676..1  
 TTCTATTGTAACACATCAAGCCTATTTAATAGCATTGTGAATGGCAGTAAATCAAATAACACGGAG-----  
 -----  
 -----  
 CCAGATAGCACCATAACTCTCCAATGCAGAATAAAGCAAATTATAAATATGTGGCAGAGAGTAGGACAAGCAA  
 TGTATGCCCCCTCCCATCCAAGGAGTAATAAGGTGTGAGTCAAAC---  
 ATTACAGGGCTAATATTAACAAGAGATGGTGGGAGTAATAGCAGT-----  
 -----  
 -----  
 AGTACAAATGAAACCTTCAGACCTGGAGGAGGAGATATGAGAGACAATTGGAGAAAGTGAATTATATAAGTACA  
 AAGTAGTAAAAATTGAACCACTA---GGAGTAGCACCCACCAAGGCAAAGAGAAGAGTGGTG-----  
 -----GAAAGAGAAAAAAGAGCA---GTTGGA---ATAGGAGCT-----  
 ---GTTTTCCTTGGGTTCTTAGGAGCA---GCAGGAAGCACTATG---GGCGCAGCGTCA---  
 ATAACGCTGACGGTACAG---GCCAGACAA---TTATTG---TTTGGCATAGTGCAACAGCAAAGT---  
 AATTTG---CTGAGG---GCTATAGAGGCTCAACAGCATCTGTTGAAACTCACGGTCTGGGGCATT  
 >KF716478..2  
 TTCTATTGTAATACATCAAGCCTGTTTAATAGTACTTGGGTATATGGTAATGGAAGCTGGGGGTCAAATAGCA  
 CGGGGTAAAT-----  
 AGTACAATGATAAATAATACT-----  
 ATTTTCAGTGATACCATAATTCTTCAATGCAGAATAAAGCAAATTATAAATATGTGGCAGAGAGCAGGACAAG  
 CAATATATGCCCCCTCCCATCAAAGGAGTAATAAGCTGTAGATCAAAC---  
 ATCACAGGACTAATATTAACAAGAGATGGTGGGAGTAACAGCAATGCAAGT-----  
 -----  
 -----  
 ACAAATGGAAGTGAACCTTCAGACCTGGAGGAGGAGATATGAGGGACAATTGGAGAAAGTGAATTATATAAGT  
 ATAAAGTAGTAAAGTTGAACCACTA---GGAATAGCACCCCTCAAGGCAAGGAGAAGAGTGGTG-----  
 -----GCGAGAGAAAAAAGAGCA---GTTGGA---ATAGGAGCT---  
 -----GTACTCCTTGGGTTCTTAGGAACA---GCAGGAAGCACTATG---GGCGCAGCGTCA---  
 ATAACGCTGACGGTACAG---GCCAGAAAA---TTATTG---TCTGGCATAGTGCAACAGCAAAGC---  
 AATTTG---CTGAGG---GCTATAGAGGCTCAACAGCATCTGTTGAAACTCACTGTCTGGGGCATT  
 >KP109490..1  
 TTCTACTGTAATACATCAGGCCTGTTCAATAGCACTTGAATAACACCTCGCAGGCAAATAGCTCGGAG---  
 -----  
 -----  
 TTAAAGGGCAATATAACTCTCCCATGCAAAATAAAACAAATTATCAGGATGTGGCAAAGAACAGGACAAGCAA  
 TGTATGCCCCCTCCCATCCAAGGAGTAATAAATTGTGTATCAAAC---  
 ATTACAGGACTACTATTAACAAGAGATGGTGGGAGGAGGACAAT-----  
 -----  
 -----  
 AGTACTGAAACCTTCAGACCTGGAGGAGGAGATATGAGGGATAATTGGAGAAAGTGAATTATATAAGTATAAAG  
 TAGTAAAAATTGAACCACTA---GGAGTAGCACCCACCAAGGCAAGGAGAAGGGTGGTG-----  
 -----GAGAGAGAAAAAAGAGCA---GTTGGA---ATAGGAGCT-----  
 GTCTTCCTTGGATTCTTAGGAGCA---GCAGGAAGCACTATG---GGCGCGGCGTCA---  
 ATAACGCTGACGGTACAG---GCCAGACAG---TTATTG---TCTGGTATAGTGACAGCAAAGC---  
 AATTTG---CTGAGG---GCTATAGAGGCTCAACAACAACCTGTTGAAACTCACGGTCTGGGGCATT  
 >JF680921..1  
 TTCTATTGTAACACATCAGGCCTGTTTAATAGCACTTGGACTAAGAATAGCAGCACTAACACTTGAATAGTA  
 CTGACATCATG-----  
 -----TGGGGGGTAAAT-----  
 AACAGTGACCATAATATAACTCTCCAATGCAAAATAAAGCAAATTATAACCATGTGGCAGAGGACAGGGCAGG  
 CAATGTACGCCCTCCCATCCCAGGAATAATAAACTGTGTGTCAAAC---  
 ATTACAGGACTACTATTAACAAGAGATGGTGGTGAGGAGAGTAACAGT-----  
 -----  
 -----  
 AGAGATAATGAAACCTTCAGACCTATAGGAGGAAATATGAAGGATAATTGGAGAAAGTGAACCTATATAAATATA

AAGTAGTAAAAATTGAACCACTA---GGAGTAGCACCCACCAAGGCAAAGAGAAGAGTGGTG-----  
-----CAGAGAGAAAAAAGAGCA---GTTGGA---CTGGGAGCT-----  
---GTCTTCATTGGGTTCTTAGGAGCA---GCCGGAAGCACTATG---GGCGCGGCGTCA---  
ATAACGCTGACGGTACAG---GCCAGACAA---TTATTG---TCTGGCATAGTGCAACAGCAAAAC---  
AATTTG---CTGAGG---GCTATAGACGCTCAACAGCATCTGTTGAAGCTCACGGTCTGGGGCATT  
>KF859745..2  
TTCTATTGTAACACATCAGGCTTGTTTAATAGCACTTGGAACAATAGCACTCAAGAGTCTAAT-----  
-----  
-----  
AGCACGGAGACTATAACTCTCCCATGCCGAATAAAGCAAATTGTAAATATGTGGCAGAGAGCAGGACAAGCCA  
TATATGCCCCCTCCCATCAAAGGAATAATAAATTGTAGATCAAAC---  
ATTACAGGACTAATATTAACAAGAGATGGTGGACATAATAATACA-----  
-----  
-----  
AATGAAACCTTCAGGCCTGGAGGAGGAGATATGAGGGACAATTGGAGAAGTGAATTATATAAGTATAAAGTAG  
TAAAAAGTTGAACCACTA---GGAGTAGCACCCACCAAGGCAAAGAGAAGAGTGGTG-----  
-----CAGAGAGAAAAAAGAGCAGTATTTGGA---CTGGGAGCT-----  
GTCTTCATTGGGTTCTTAGGAGCA---GCAGGAAGCACTATG---GGCGCGGCGTCA---  
ATAACGCTGACGGTACAG---GCCAGACAA---TTATTG---TCTGGCATAGTGCAACAGCAAAGC---  
AATTTG---CTGAGG---GCTATAGAGGCTCAACAGCATCTGTTGAAACTCACGGTCTGGGGCATT  
>KF716486..2  
TTCTATTGTAATACATCAAGTCTGTTTAATAGTACTTGGGACCTTAATGCTACTAGGGAAGAT-----  
-----  
-----  
AGCACGGAGAACATAACTCTCCCATGCAGAATAAAGCAAATCATAAATATGTGGCAAAGAGTAGGACAAGCAA  
TGTATGCCCCCTCCCATCGAAGGAATAATAAGATGTGACTCAAAC---  
ATTACAGGACTACTCTTAACAAGAGATGGTGGGAATAGTAGTACAAATGAA-----  
-----  
-----  
ACTCAGGAAATCTTCAGACCTATAGGAGGGGATATGAAAGATAATTGGAGAAATGAATTATACAAGTATAAAG  
TAGTAAAAATTGAACCTCTG---GGAGTAGCACCCCTCCTGGGCAAGGAGAAGAGTGGTG-----  
-----GAGAGAGGAAAAAAGAGCA---GTTGGA---ATAGGAGCT-----  
GTATTCCTTGGGTTCTTAGGAGCA---GCAGGGAGCACTATG---GGCGCAGCGTCA---  
ATAACGCTGACGGTACAG---GCCAGGCAA---TTATTG---TCTGGCATAGTGCAACAGCAAAGC---  
AATTTG---CTGAAG---GCTATAGAAGCTCAACAACAACCTGTTGAGACTCACGGTCTGGGGCATT  
>M62320..1  
TTCTATTGCAACACATCAGGCCTGTTTAATAGCATTTGGAATGGCAGCATGTCAAATGACATGGGG-----  
-----  
-----  
CCAAATGGCACTATAACTCTCCAATGTAGAATAAAGCAAATTATAAATATGTGGCAGAGAGTAGGACAAGCAA  
TGTATGCCCCCTCCCATCCAAGGAGTAATAAGGTGTGAATCAAAC---  
ATTACAGGACTACTATTAAACAAGAGATGGGGGTACTAACAATACA-----  
-----  
-----  
AAAAATGAGACCTTCAGACCTGGAGGAGGAGATATGAGGGACAATTGGAAAAGTGAATTATATAAGTATAAAG  
TAGTAAAAATTGAACCACTA---GGAGTAGCACCCACCAAGGCAAAGAGAAGAGTGGTG-----  
-----GAGAGAGAAAAAAGAGCA---GTTGGA---CTAGGAGCT-----  
ATCTTCCTTGGGTTCTTAGGAGCA---GCTGGAAGCACAATG---GGCGCGGCGTCA---  
ATAACGCTGACGGTACAG---GCCAGACAA---TTATTG---TCTGGTATAGTGCAACAGCAGAGC---  
AATCTG---CTGAGG---GCTATAGAGGCTCAACAGCATCTGTTGAAACTCACTGTCTGGGGCATT  
>L22957..2  
TTCTATTGTAATACAGCAGGCCTGTTTAATAGTACTTGAATAAAAATGACAGCATAAAGTCAAATGACACAA  
AG-----  
-----  
-----  
TCAAATGACATTATAACTCTTCAATGCAGAATAAAGCAAATTATAAATATGTGGCAGAGAGTAGGACGAGCAA  
TGTATGCCCCCTCCCATCAAAGGAGTAATAAGGTGTGAATCAAAC---  
ATTACAGGACTACTATTAAACAAGAGATGGTGGAAATGGGAGCAAT-----  
-----  
-----  
ACAAATGAAACCTTCAGACCAGGAGGAGGAGATATGAGGGACAATTGGAGAAATGAATTATATAAGTATAAAG

TAGTACAAATTGAACCATTA---GGAGTAGCACCTACCCAGCAAAGAGAAGAGTGGTG-----  
-----CAGAGAGAAAAAAGAGCA---GTTGGA---CTAGGAGCT-----  
GTATTCATTGGGTTCTTAGGAGCA---GCAGGAAGCACTATG---GGCGGGCGTCA---  
ATAACGCTGACGGTACAG---GCCAGACAA---TTATTG---TCTGGCATAGTGCAACAGCAAAGC---  
AATTTG---CTGAGA---GCTATAGAGGCTCAACAGCATCTGTTGAAACTCACAGTCTGGGGCATT  
>L22951..1  
TTCTATTGTGACACATCAGGCCTGTTTAATAGCACTTGGAATGGCAATACCAGCAAGCAGGAGTCAAGTAGCA  
CA-----  
-----  
GAGTCAAATGGCAATATAACTCTCCAATGCAGAATAAAGCAAATTATAAATATGTGGCAGAGAGCAGGAAAAAG  
CAATATATGCCCCCTCCTATCAAAGGAGTAATAAGGTGTGTATCAAAC---  
ATTACAGGACTAATATTAACAAGAGATGGTGGGGGTAATAACAGT-----  
-----  
-----  
GAAAAATGAAACCTTCAGACCTGGAGGAAGAGATATGAGGGACAATTGGAGAAGTGAATTATATAAGTATAAAG  
TAGTAAAAATTGAACCACTA---GGAGTAGCACCCACCAGGGCAAGGAGGAGAGTGGTG-----  
-----GAGAGAGAAAAAAGAGCA---GTTGGA---GTAGGAGCT-----  
GTCTTCCTTGGGTTCTTAGGAGCA---GCAGGAAGCACTATG---GGCGGGCGTCA---  
ATAACGCTGACGGTACAG---GCCAGACAA---TTATTG---TCTGGCATAGTGCAACAGCAAAGC---  
AATTTG---CTGAAG---GCTATAGAGGCTCAACAGCATCTGTTGAAACTCACGGTCTGGGGCATT  
>AB253429..1  
TTCTATTGTAATACATCAGGCCTGTTTAATAGTACTTGGGTAAATGGCACTACCAGCAGCATG-----  
-----  
-----  
TCAAATGGCACTATAACTCTCCCATGCAGAATAAAGCAAATTATAAATATGTGGCAGAGAGTAGGACAAGCAA  
TGTATGCCCCCTCCCATCCAAGGAGTAATAAAGTGTGAATCAAAC---  
ATTACAGGACTAATATTAACAAGAGATGGTGGGGTTAATAGCAGT-----  
-----  
-----  
GACAGTGAAACCTTCAGACCTGGAGGAGGAGATATGAGGGATAATTGGAGAAGTGAATTATATAAGTATAAGG  
TAGTAAAAATTGAACCACTA---GGAGTAGCACCCACCAAGGCAAGGAGAAGAGTGGTG-----  
-----GAGAGAGAAAAAAGAGCA---GTTACA---CTGGGAGCT-----  
GTATTCATTGGGTTCTTAGGAACA---GCTGGAAGCACAATG---GGCGGGCGTCA---  
ATAACGCTGACGGTACAG---GCCAGAAAA---TTATTG---TCTGGCATAGTGCAACAGCAAAGC---  
AATTTG---CTGAGG---GCTATAGAGGCTCAACAGCATCTGTTGAAACTCACTGTCTGGGGCATT  
>AY494973..1  
TTCTATTGTAATACATCAGGCCTGTTTAATAGCACTTGGCCTTGGAATGAGACAAATAGCGAGACAAATAAC-  
-----  
-----  
ACGAACGCTACTATAGTGCTCCCATGCAGAATAAAACAAATTGTAAGAATGTGGCAGAGAGTAGGACAAGCAA  
TGTATGCCCCCTCCCATCCAAGGAGTAATAAAGTGTACATCAAAC---  
ATTACAGGACTACTATTAATAAGAGATGGTGGGGTTGGTAACAATACA-----  
-----  
-----  
AATGGAACCTGAAACCTTCAGACCTGGAGGAGGAAATATGAGGGACAATTGGAGAAGTGAATTATATAAGTATA  
AAGTAGTAAAAATTGAACCACTA---GGAGTAGCACCCACCGGGGCAAAAAGAAGAGTGGTG-----  
-----GAGAGAGAAAAAAGAGCA---GTTGGA---ATAGGAGCT-----  
---GTGTTCAATTGGGTTCTTAGGAGCA---GCTGGAAGCACTATG---GGCGCAGCATCA---  
GTAACGCTGACGGTACAG---GCCAGACAA---TTGTTG---TCTGGCATAGTGCAACAGCAAAGC---  
AATTTG---CTGAGG---GCTATAGAGGCTCAACAGCATATGTTGAAACTCACGGTCTGGGGCATT  
>EU853062..2  
TTCTATTGTAATACATCAGACCTGTTTAATAGCACTTGGTACTTAAATGGCACTAGCACTTGGTACAATGGCA  
CTGCAAT-----  
-----AACGCA-----  
CCGTTAAATGGTAATATAACTCTCCCATGCAGAATAAAGCAAATCATAAGGATGTGGCAGAGAACAGGACAAG  
CAATGTATGCCCCCTCCCATTCAGGAAAAATAGAATGTGTATCAAAC---  
ATTACAGGACTCCTATTAGTAAGAGATGGTGGGAATGATGAGAATAACAACACA-----AGA-----  
-----  
-----  
AATAACACCCTCAAAGATGAAAAATTTCAGACCTGGAGGAGGAGATATGAAGGACAATTGGAGAAATGAATTAT

ATAGGTATAAAGTAGTAAGAGTTGAACCACTA---GGAGTAGCACCCACCAAGGCAAGGAGAAGAGTGGTG--  
 -----GGGAGAGAAAAAAGAGCA---GTTGGA---  
 ATAGGAGCT-----GTGTTCTTGGGTTCTTAGGAGCA---GCAGGAAGCACTATG---  
 GGCGCGGCGTCA---ATAACGCTGACGGAACAG---GCCAGACAA---TTATTG---  
 TCTGGTATAGTGCAACAGCAAAGC---AATTTG---CTGAGG---  
 GCTATAGAGGCTCAACAGCAACTGTTGAACTCACAGTCTGGGGCATT  
 >EU852958..1  
 TTCTATTGTAATACATCAGGCCTGTTTAATAGCACCTGGGATAAAAATACCACCGTGCAGGAGTCAAATAGCA  
 CG-----  
 -----  
 GGGTCAAATGACACTATAACTCTCCAATGTAGAATAAAGCAAATTATAAATATGTGGCAGGAAGTAGGACGAG  
 CAATGTATGCTCCTCCCATCAAAGGAGTAATAAGGTGTGAATCAAAC---  
 ATTACAGGAATGATATTAACAAGAGATGGGGGTAATACTACCGGG-----  
 -----  
 -----  
 AAAAAATGAGATCTTTAGGCCTGGAGGAGGAGATATGAGGGATAATTGGAGAAGTGAATTGTATAAGTATAAAG  
 TAGTAAAAATTGAACCACTA---GGAGTAGCACCCACCGAGGCAAAGAGAAGAGTGGTG-----  
 -----GAGAGAGAAAAAAGAGCA--ATTGGTGGAATAGGAGCT-----  
 GTCTTCCTTGGGTTCTTAGGAGCA---GCAGGAAGCACTATG---GGCGCAGCGTCA---  
 ATAACGCTGACGGCACAG---GCCAGACAA---TTATTG---TCTGGTATAGTGCAACAGCAAAGC---  
 AATTTG---CTGAGG---GCTATAGAGGCTCAACAGCATCTGTTGAACTCACGGTCTGGGGCATT  
 >EU852954..1  
 TTCTATTGTAACACATCAGGCCTGTTTAATAGCACCTGGTATACAAATAATACCAGCGTGCAGGAGACAAATA  
 GCACG-----  
 -----  
 GGGACAAATGACACTATAATTCTCCAATGTAGAATAAAGCAAATTATAAATATGTGGCAGGAAGTAGGACGAG  
 CCATGTATGCTCCTCCCATCAGGGGAGTAATAAGGTGTGAATCAAAC---  
 ATTACAGGAATGATATTAACAAGAGATGGGGGTGTGAGTGTTAACAAG-----  
 -----  
 -----  
 ACAACTGAGACTGAGGTCTTCAGACCTGGAGGAGGAGATATGAGGGATAATTGGAGAAGTGAATTGTATAAGT  
 ATAAAGTAGTAAAAATTGAACCACTA---GGAGTAGCACCTACCAAGGCAAAGAGAAGAGTGGTG-----  
 -----GAGAGAGAAAAAAGAGCA--ATTACTGGAATAGGAGCT---  
 -----GTCTTCCTTGGGCTCTTAGGAGCA---GCAGGAAGCACTATG---GGCGCAGCGTCA---  
 ATAACGCTGACGGCACAG---GCCAGACAA---TTATTG---TCTGGTATAGTGCAACAGCAAAGC---  
 AATTTG---CTGAGG---GCTATAGAGGCTCAACAACATCTGTTGAACTCACGGTCTGGGGCATT  
 >AF484507..1  
 TTCTATTGTAATACATCACAATTGTTTAATAGCATTTGGAATGTCACTAACAGCACAGAGTCAGAGAATAGCA  
 CG-----  
 -----  
 GGGTCAGATGACACTATAACTCTTCCATGCAGAATAAAGCAAATTATAAAGATGTGGCAGAGAACAGGACAAG  
 CAATATATGCCCCCCCCATCCAAGGAGTAATAAGGTGTGAATCAAAC---  
 ATTACAGGACTATTATTAACAAGAGATGGTGGAATAACAATACA-----  
 -----  
 -----  
 GGTAATGAAACCTTCAGACCTGCAGGAGGAGATATGAAGGACAATTGGAGAAGTGAATTATATAAGTACAAAG  
 TAGTAAAAATTGAACCACTA---GGAGTAGCACCCACCAAGGCAAGAAGGAGAGTGGTG-----  
 -----GAGAGAGAAAAAAGAGCA--GTTGGA---ATAGGAGCT-----  
 GTATTCTTGGGTTCTTAGGAACA---GCAGGAAGCACTATG---GGCGCGGCGTCA---  
 ATAACGCTGACGGTACAG---GTCAGACAA---TTATTG---TCTGGCATAGTGCAACAGCAAGGC---  
 AATTTG---CTGAGG---GCTATAGAGGCTCAACAACAGCTGTTGGAACCTCACGGTCTGGGGCATT  
 >AF484508..2  
 TTCTACTGTAACACATCAAGCCTGTTTAATGGCACTTGGGAATGGCACTGAGAACATAACGGAGTCAAATAGC-  
 -----  
 -----  
 ATGAACGACTCTATAATACTCCAATGCAGAATAAAGCAAATTATAAATATGTGGCAGAGAGCAGGACAAGCAA  
 TATATGCCCCCTCCCATCCAGGAGTAATAAGGTGTCAATCAAAC---  
 ATTACAGGACTAATATTAACAAGAGATGGTGGAATAACAGTACA-----  
 -----  
 -----

AATGAAACCTCCAGACCTGGAGGGGGAGATATGAGGGACAACCTGGAGAAGTGAATTATATAAGTATAAAGTAG  
 TAAACCTTGAACCACTA---GGAGTAGCACCCACCAGGGCAAAGAGAAGAGTGGTG-----  
 -----GAGAGAGAGAAAAGAGCA---GTTGGA---CTAGGAGCT-----  
 GTTTTCTTTGGGTTCTTAGGAGCA---GCAGGAAGCACTATG---GGCGCGGCGTCA---  
 ATAACGCTGACGGTACAG---GCCAGACAA---TTATTG---TCTGGTATAGTGCAACAGCAAAGC---  
 AATTTG---CTGAGG---GCTATAGAGGCTCAACAGCATCTGTTGAAACTCACGGTCTGGGGCATT  
 >AF484509..1  
 TTCTATTGTGACACATCAGGCCTGTTTAATAGCACTTGGTATAATACTTGAATAGCACTGAATCAAAAAGCA  
 CG-----  
 -----  
 GAGTCAAACGACATTACTCTCCAATGCAGAATAAAGCAAATTATAAATATGTGGCAGAGAGCAGGACAAGCAA  
 TATATGCCCCCTCCCATCCAAGGAGTAATAATGTGTAAATCAAAT---  
 ATTACAGGACTAATATTAACAAGAGATGGTGGAGGTAATAGCAGT-----  
 -----  
 -----  
 GAACCTGAAACCTTCAGACCTGGAGGAGGAGACATGAGGGACAATTGGAGAAGTGAATTGTATAAGTATAAAG  
 TAGTAAAAATTGAACCACTA---GGAGTAGCACCCACCAAGGCAAGGAGAAGAGTGGTG-----  
 -----CAGAGAGAAAAAAGAACA---GTTGGA---ATAGGAGCT-----  
 GTGTTCCCTTGGGTTCTTAGGAGCA---GCAGGAAGCACTATG---GGCGCGGCGTCA---  
 ATAACGCTGACGGCACAG---GCCAGAGCA---TACTG---TCTGGCATAGTGCAACAGCAAAGC---  
 AATTTG---CTGAGG---GCTATAGAGGCTCAACAACATCTGTTGAGACTCACGGTCTGGGGCATT  
 >AF484512..2  
 TTCTATTGTGATACAACAGGACTGTTTAATAGCAATTGGACTTGAATGACACTGCCAGCATAATGGAGTCAA  
 ATAGC-----  
 -----ATG---  
 GAGTCAACTCAAAATATAACACTCCAATGCAGAATAAAGCAGATTATAAATATGTGGCAGAGAGCAGGTAAAG  
 CAATGTATGCCCCCTCCCATCCAAGGAACAATAAGGTGTGAATCAAAC---  
 ATTACAGGACTACTGTTAACAAGAGATGGTGGGGATAATAGAGAT-----  
 -----  
 -----  
 AATAGAACTGAAACCTTCAGACCTGGAGGAGGAGATATGAGGGATAATTGGAGAAGTGAATTATATAAGTATA  
 AAGTAGTCAAAATTGAACCACTA---GGAGTAGCACGCACCAGGGCAAAGAGAAGAGTGGTG-----  
 -----GAGAGAGAAAAAAGAGCA---GTTGGA---ATAGGAGCT-----  
 ---GTCTTCCTTGGGTTCTTAGGAGCA---GCAGGAAGCACTATG---GGCGCGGCGTCA---  
 ATAACGCTGACGGTACAG---GCCAGACTA---TTATTG---TCTGGTATAGTGCAACAGCAAAGC---  
 AATTTG---CTGAGG---GCTATAGAGGCTCAACAACATTTGTTGAAGCTCACGGTCTGGGGCATT  
 >EU853030..1  
 CTCTATTGTAATACATCAGGCCTGTTTAATAGCACTTGAATAAAGTGTGTCAGCACGGAGTTAAATAGCAAGG  
 AG-----  
 -----  
 GCAAATAACAATATAACTCTCCCATGCAAAATAAAGCAAATTATAAACATGTGGCAAAGAACAGGACAAGCAA  
 TGTATGCCCCCTCCCATCCGAGGAGTAATAAATTGTGTGTCAAAC---  
 ATTACAGGACTAATATTAACAAGAGATGGTGGGCCTAACGATACA-----  
 -----  
 -----  
 CATGAAAATGAAACCTTCAGACCTGGAGGAGGAAATATGAGGGACAATTGGAGAAGTGAATTATATAAATATA  
 AAGTAGTAAAAATTGAACCATTA---GGAGTAGCACCCACCAGGGCAAAGAGAAGAGTGGTG-----  
 -----GAAAGAGAAAAAGGAGCA---GTTGGA---ATAGGAGCT-----  
 ---GTCTTCCTTGGGTTCTTAGGAGCA---GCAGGAAGCACTATG---GGCGCGGCGTCA---  
 ATAACGCTGACGGTACAG---GCCAGACAA---TTGTTG---TCTGGCATAGTGCAACAGCAAAGC---  
 AATTTG---CTGAGG---GCTATAGAGGCTCAACAACATCTGTTGAAACTCACGGTCTGGGGCATT  
 >AF484478..1  
 TTCTATTGTAACACAACAAACCTGTTTAATAACATTTGGAGTAATGCCAGCATGCAGAAGGCAAATAGC----  
 -----  
 -----  
 ATAAACGACACTATAACTCTCCAATGCAGAATAAAGCAAATTATAAATATGTGGCAGAGAGTAGGACAAGCAA  
 TATATGCCCCCTCCCATCCAAGGAGTGATAAAGTGTGAATCAAAC---  
 ATTACAGGACTAATATTAACAAGAGATGGTGGGGGTAATAACAAT-----  
 -----  
 -----

ACAAATGAAACCTTCAGACCTGGAGGAGGAGATATGAGGGACAATTGGAGAAGTGAATTATATAAGTATAAAG  
 TAGTAAAAATTGAACCACTA---GGAGTAGCACCTACCAGGGCAAAGAGAAGAGTGGTG-----  
 -----GAGAGAGAAAAAAGAGCA---GTTGGA---ATGGGAGCT-----  
 GTCCTCATTGGGTTCTTAGGAGCA---GCAGGAAGCACTATG---GGCGCGGCGTCA---  
 ATAACGCTGACGGTACAG---GCCAGACAA---TTATTG---TCTGGCATAGTGCAACAGCAAAGC---  
 AATTTG---CTGAGG---GCTATAGAGGCTCAACAGCATCTGTTGAAACTCACGGTCTGGGGCATT  
 >AF484493..2  
 TTCTATTGTAATACATCAGGCCTGTTTAATAATACTTACACTACTGACAGCATAGAGTCAAATGACACGGAG-  
 -----  
 -----  
 CCAGATGCAAATATAACTCTTCCATGCAGAATAAAGCAAATTATAAATATGTGGCAGAGAGTAGGACAAGCAA  
 TATATGCCCCCTCCCATCCAAGGAGTAATAAAGTGTGAGTCAAAC---  
 ATCACAGGACTACTATTAAACAAGAGATGGTGGTACTAACAGTACT-----  
 -----  
 -----  
 AAAAGTACTGAAACCTTCAGACCTGGAGGAGGAGATATGAGGGACAATTGGAGAAGTGAATTATATAAGTATA  
 AAGTAGTACAAGTTGAACCAATA---GGAGTAGCACCCACCAGGGCAAAGAGAAGAGTGGTG-----  
 -----GAGAGAGAAAAAAGAGCA---GTTGGA---ATAGGAGCT-----  
 ---GTA CTCTTGGGTTCTTAGGAGCA---GCTGGAAGCACAAATG---GGCGCGGCGTCA---  
 ATAACGCTGACGGTACAG---GCCAGACAG---TTATTG---TCTGGCATAGTGCAAGCAGCAAAGC---  
 AATTTG---CTGAGG---GCTATAGAGGCTCAACAGCAACTGTTGAGACTCACTGTCTGGGGCATT  
 >AB098330..2  
 TTCTATTGTAATACATCAGGCCTGTTCAATGGCACCTGGAAGCCAAACAGCACAGAGTCAAACAACACAACG-  
 -----  
 -----  
 CCAAATGACACTATAACTCTTACATGCAGAATAAAGCAAATTATAAATATGTGGCAGAAAGTAGGACAAGCAA  
 TGTATGCCCCCTCCCATTCAAGGAGTAATAAGGTGTGAATCAAAC---  
 ATTACAGGACTACTATTAAACAAGAGATGGAGGGATTAACAGTATA-----  
 -----  
 -----  
 AATGAAACCTTCAGACCTGGAGGAGGAAATATGAGGGACAATTGGAGAAGTGAATTATATAAGTATAAAGTAG  
 TAAAAATTGAACCACTA---GGAGTAGCACCTCCAGGGCAAAGAGAAGAGTGGTG-----  
 -----GAGAGAGAAAAAAGAGCA---GTTGGA---ATAGGAGCT-----  
 GTCTTCCTTGGGTTCTTAGGAGCA---GCTGGAAGCACTATG---GGCGCGGCGTCA---  
 ATAACGCTGACGGCACAG---GCCAGACAA---TTATTG---TCTGGTATAGTGCAACAGCAAAGC---  
 AATTTG---CTGAGG---GCTATAAAGGCTCAACAGCATATGTTGAAGCTCACGGTCTGGGGCATT  
 >GU367412..5  
 TTCTATTGTGATACATCAGGCCTGTTTAATAGTACTTGAATGACACTGCCACCAATCAGACTTTTGAT---  
 -----  
 -----  
 GCAAATAGCAATATAACTCTTCAATGTAAATAAGACAAATTGTACGTATGTGGCAGAGAATAGGACAAGCAT  
 TGTATGCCCCCTCCCATTCAAGGAGTAATAAGCTGTAAATCAAAC---  
 ATTACAGGGCTGCTACTAACAAGAGATGGT---ATGAATGAGAGT-----  
 -----  
 -----  
 AGTGAGACGTTTCAGACCTCAAGGAGGAAATATGAAGGACAATTGGAGAAGTGAATTATATAAATATAAAGTAG  
 TAAAAATTGAACCACTA---GGAATAGCACCCACCAGGGCAAAGAGAAGAGTGGTG-----  
 -----GAGAGAGAAAAAAGAGCA---GTTGGA---CTGGGAGCT-----  
 GTCTTCTTTGGGTTCTTGGGAGCA---GCAGGAAGTACTATG---GGCGCGGCGTCA---  
 ATAACGCTGACGGCACAG---GCCAGACAA---TTATTG---TCTGGTATAGTACAACAGCAGAGC---  
 AATCTG---CTGAGG---GCTATAGAGGCTCAACAGCAACTGTTGAAACTCACAGTCTGGGGCATT  
 >FJ647148..1  
 TTCTATTGTAATACATCAGGTCTGTTTAGTAGCAGGTGGTTCACTAATGGCACTAACAGCACGGAGTCAAAT-  
 -----  
 -----  
 GGCACAGGCAATATAACTCTCCAATGCAGGATAAAGCAAATTATAAATATGTGGCAGAGAGTAGGACAAGCAA  
 CGTACACCCCCTCCCATCCAAGGAGAAATAAGGTGTAGATCAAAC---  
 ATTACAGGACTACTATTAAACAAGAGATGGTGGGATTAACACAACA-----  
 -----  
 -----

GAGGAAATCTTCAGACCTGGAGGGGAAATATGAAGGACAATTGGAGAAGTGAATTATATAAGTATAAAGTAG  
TAAAAATTGAACCACTA---GGAGTAGCACCATCCAAGGCAAAGAGAAGAGTGGTG-----  
-----GGAAGAGAAAAAAGAGCA---GTTGGA---CTGGGAGCT-----  
GTATTCATTGGGTTCTTGGGAGCA---GCAGGAAGCACTATG---GGCGCGGCGTCA---  
GTGACGCTGACGGTACAG---GCCAGACAA---TTATTG---TCTGGCATAGTGCAGCAGCAAAGC---  
AATTTG---CTGAGG---GCTATAGAGGCTCAACAGCATCTGTTGAAACTCACAGTCTGGGGCATT  
>KT183312..1  
TTCTATTGTGACACATCAGGTCTGTTTAATGGCAGTTGGAGTGAAAATAGCACTTGAATAGCACTATGGAG-  
-----  
-----  
GCAAAATAGCACAATTATACTCCCATGTAGAATAAAGCAAATTATAAATATGTGGCAGAGAACAGGACGAGCAA  
TGTATGCCCCCTCCCATCCAAGGAACAATACAGTGTACATCAAAC---  
ATCACAGGATTAATATTAACAAGAGATGGTGGTGAGAAAAACAAT-----  
-----  
-----  
AGCACTGAAGAAATCTTCAGACCTGGAGGAGGAGATATGAGGGACAATTGGAGGAGTGAATTATATAAATATA  
AAGTAGTAAAAATTGAACCACTA---GGAGTAGCACCCACCAGGGCAAAGAGAAGAGTGGTG-----  
-----GAGAGAGAAAAAAGAGCA---GTTACA---CTAGGAGCT-----  
---GTATTCATTGGGTTCTTAGGAGCA---GCAGGAAGCACTATG---GGCGCGGCGTCA---  
GTGACGCTGACGGTACAG---GCCAGACAA---TTATTG---TCTGGCATAGTGC AACAGCAAAGC---  
AATTTG---CTGAGG---GCTATAGAGGCTCAACAGCATATGTTGAAACTCACGGTCTGGGGCATT  
>KC863311..1  
TTCTATTGTAATACAACAGACCTGTTTAAGGGTACTTGGCATCCTGATAATAAACTTGGAGTGATCCTTGA  
ATGCCAGC-----  
-ATGAAGTCAAATAAC-----  
ACATCAAATGTCAATATAACTATCCTATGCAAGATAAAGCAAATTGTAAGGATGTGGCAGAGAGTAGAACAAG  
CAATGTATGCCCCCTCCCATCCAAGGAGTAATAAGCTGTTTCATCAAAC---  
ATTACAGGACTACTATTAACAAGCGATGGTGGTAGGGATAATAGCAATAATACTGGTAAGGATAATAGCAATA  
AAAAT-----  
-----  
AATACTGAAACCTTCAGACCTGGAGGAGGAAATATGAGGGACAATTGGAGAAGTGAATTATATAAGTATAAAG  
TAGTAAAAATTGAACCACTA---GGAGTAGCACCTACCCCGGCAAGGAGAAGAGTGGTG-----  
-----CAGAGAGAAAAAAGAGCA---GTTGGC---CTAGGAGCT-----  
GTCTTCATTGGGTTCTTAGGAGCA---GCAGGAAGCACTATG---GGCGCGGCGTCA---  
GTGACGCTGACGGTACAG---GCCAGACAA---TTATTG---ACTGGTATAGTGCAGCAGCAAAGC---  
AATTTG---CTGAAG---GCTATAGAGGCTCAACAACATCTGTTGAGACTCACAGTCTGGGGCATT  
>HM623589..3  
TTCTACTGCAACACATCAAGCTTGTTTAATAGGACATTTCCGGCCAACTACACGTATAATAGGACTGCTGACA  
GCACA-----  
-----  
CAGGGGAATACAACATACTATCCCATGCAGAATAAAACAAATTATAAACATGTGGCAGAGAGTAGGACAAG  
CAATGTATGCCCCCTCCCATGAAGGAGTAATAAGATGTGAATCAAAC---  
ATTACAGGAATACTATTGACAAGAGATGGTGGGAATGAGACAAAT-----  
-----  
-----  
GTAGAAGTCTTCAGACCAGAGGGAGGAAATATGAGGGACAATTGGAGAAGTGAATTATATAATTACAAGGTAG  
TAAGAATTGAACCACTA---GGAGTAGCACCCACCAGGGCAAAGGAGGAGAGTGGTG-----  
-----GAGAGAGAAAAAAGAGCA---GTTGGA---CTGGGAGCT-----  
GTCTTCCTTGGGTTCTTAGGAGCA---GCAGGAAGCACTATG---GGCGCGGCGTCA---  
ATAACGCTGACGGTACAG---GCCAGGCAA---TTATTG---GCTGGCATAGTGC AACAGCAAAGC---  
AATTTG---CTGCAA---GCTATAGAGGCTCAACAGCATCTGTTGAAACTCACTGTCTGGGGCATT  
>MH705163..1  
TTCTATTGCAATACAACAGCCCTGTTTAATAGCACGTGGGAGAATGAGAATGACACGGCCAACATACAGAAGA  
AT-----  
-----GGCACG-----  
GAGTCAAATGACACTATAACACTCCCATGCAGAATAAAACAAATTATAAACATGTGGCAGAGAGTAGGACGAG  
CAATGTATGCCCCCTCCCATGTCAGGAGTAATAAAGTGACATCAACC---  
ATTACAGGAATAATATTGACAAGAGATGGTGGGGATAGTGGGAACAAT-----  
-----  
-----

ACCAGGGAGGAGATCTTCAGACCTGGAGGAGGAGATATGAGGGACAATTGGAGAAGTGAATTATATAAGTATA  
 AAGTAGTAAAACCTTGAACCACTA---GGAGTAGCACCCACCAAGGCAAGGAGAAGAGTGGTG-----  
 -----GAGAGAGAAAAAAGAGCA---GTTGGA---CTGGGAGCT-----  
 ---GTCTTCCTTGGGTTCTTGGGAGCA---GCAGGAAGCACTATG---GGCGCAGCGTCA---  
 ATAACGCTGACGGTACAA---GCCAGACAA---TTATTG---TCTGGCATAGTGCAACAGCAAGGC---  
 AATTTG---CTGAAG---GCTATAGAGGCTCAACAGCATCTGTTGAAACTCACGGTCTGGGGCATT  
 >AF286241..1  
 TTCTATTGTAATACAACAAGCCTGTTTAATAGCACATGGAAGAATGGCGCCACCATAACAGGAGAATAGCACGG  
 AG-----  
 -----  
 ACAAATGGAATTATGACTCTCCCATGCAGAATAAAACAAATTGTAGACATGTGGCAGGAAGTAGGACAAGCAA  
 TGTATGCCCCCTCCCATTCAGAGGTAATATATTGTACATCAAAC---  
 ATTACAGGAATAATATTGACAAGAGATGGTGGGAGCAGTAACACC-----  
 -----  
 -----  
 AATAGTGAGATCTTTAGGCCTGGAGGAGGAGATATGAGGGACAATTGGAGAAGTGAATTATATAAGTATAAAG  
 TAGTAAAAATTGAACCACTA---GGAGTAGCACCTCCAGGGCAAAGAGAAGAGTGGTG-----  
 -----GAGAGAGAAAAAAGAGCA---GTGGGA---ATAGGAGCT-----  
 GTTTTCCTTGGGTTCTTGGGAGCT---GCAGGAAGCACTATG---GGCGCGGCGTCA---  
 ATAACGCTGACGGTACAG---GCCAGACAG---TTATTA---TCTGGCATAGTGCAACAGCAAAGC---  
 AATTTG---CTGAAG---GCTATAGAGGCTCAACAGCATCTGTTGAAACTCACAGTCTGGGGCATT  
 >AF286238..2  
 TTCTATTGCAATACAACAGGCCTGTTTAATAGCACATGGGAAAATGGCACTAACAAACAGAATTACACGGAG-  
 -----  
 -----  
 TCAAATGACACTATAACGCTCCAATGCAGAATAAAACAAATTATAAACATGTGGCAGAGAGTAGGCCGAGCAA  
 TGTATGCCCCCTCCCATTCAGAGGTAATAAAGTGTACATCAAAC---  
 ATTACAGGAATGATATTGACAAGAGACGGTGGGAAGAACAGTATT-----  
 -----  
 -----  
 AATGAGACCTTCAGACCTGGAGGAGGAGATATGAGGGACAATTGGAGAAGTGAATTATATAAGTATAAAGTAG  
 TAAAAATTGAACCACTA---GGAATAGCACCCACAGAGGCAAGGAGAAGAGTGGTG-----  
 -----CAGAGAGAAAAAAGAGCA---GTTGGA---TTGGGAGCT-----  
 GTTTTCCTTGGGTTCTTGGGAGCA---GCAGGAAGCACTATG---GGCGCGGCGTCA---  
 ATAACGCTGACGGTACAG---GCCAGACAA---TTATTG---ACTGGCATAGTGCAACAGCAAAGC---  
 AATTTG---CTGAAG---GCTATAGAGGCTCAACAACAGATGTTGAGGCTCACAGTCTGGGGCATT  
 >AF286237..2  
 TTCTATTGCAATACAACAGGCCTGTTTAATGGTACGTGGTGAACAATGGTACGTGGAACGGGGCCCTACACAC  
 CTAAT-----  
 -----  
 AACACCAATGGAAGTATAATCCTCCCATGCAGAATAAAACAAATTATAAACATGTGGCAGAGAGTAGGAAGAG  
 CAATGTATGCCCCCTCCCATTCAGGAATAATAAAGTGTACATCAAAC---  
 ATTACAGGAATAATATTGACAAGAGATGGTGGTAACAATGGGACT-----  
 -----  
 -----  
 AATGAGACCTTCAGACCTGGAGGAGGAGATATGAGGGACAATTGGAGAAGTGAATTATATAAATATAAAGTAG  
 TAAACCTTGAACCACTA---GGAGTAGCACCTACCAGGGCAAAAAGAAGAGTGGTG-----  
 -----GAGAGAGAAAAAAGAGCA---GTTGGA---CTGGGAGCT-----  
 GTCTTCCTTGGGTTCTTGGGAGCA---GCAGGAAGCACTATG---GGCGCGGCGTCA---  
 CTAACGCTGACGGTACAG---GCCAGACAA---TTATTG---TCTGGTATAGTGCAACAGCAAAGC---  
 AATTTG---CTGCAG---GCTATAGAAGCTCAACAGCATCTGTTGAAACTCACAGTCTGGGGCATT  
 >AY521629..3  
 TTCTATTGCAATACATCAGGTCTGTTTAATAGTACTTGGAATGACACGGCCATCAATGACACTATCAACGTGC  
 AG-----  
 -----  
 AATTCAACTTACAATATAACTCTCCCATGCAGAATAAGACAAATTGTACATATGTGGCAGAGAGTAGGACAAG  
 CAATGTATGCCCCCTCCCATTCAGGGGTAATAAACTGTACATCAAAC---  
 ATTACAGGGCTACTGTTAACAAGGGATGGTGGGGATAATAGTAGT-----  
 -----  
 -----

ACAAATGAGACATTTCAGACCTGGAGGAGGAAATATGAAGGACAATTGGAGAAGTGAATTATATAAATATAAAG  
TAGTAAAAATTGAACCACTA---GGAGTAGCACCCACCAAGGCAAAGAGGAGAGTGGTG-----  
-----GAGAGAGAAAAAAGAGCA---GTTGGA---CTAGGAGCT-----  
GTCTTCCTTGGGTTCTTAGGAGCA---GCAGGAAGTACTATG---GGCGCGGCGTCA---  
ATGACGCTGACGGTACAG---GCCAGACAA---TTATTG---TCTGGCATAGTACAACAGCAGAGC---  
AATCTG---CTGAGG---GCTATAGAGGCTCAACAGCACATGTTGAAACTCACAGTCTGGGGCATT  
>AY521631..2  
TTCTATTGCAATACATCAGGCCTGTTTAATAGTACTTGGTATAATAGTACTTGAATAACACTGACAGCACAC  
AGAAA-----  
-----TCA---  
AATGGCACGGAGAAAATAACTCTCCCATGCAGAATAAAACAAGTTATAAAAATGTGGCAAAGAGTAGGACAAG  
CAATGTATGCCCTCCCATTC AAGGAGTAATAAAATGTGTATCAAAC---  
ATTACAGGGATACTGCTAACAAGAGATGGGGGGAACCTTAATAGC-----  
-----  
-----  
TCATTTGAGACGTTTCAGACCTGGAGGAGGAAATATGAAGGACAATTGGAGAAGTGAATTATATAAATATAAAG  
TAGTAAAAATTGAACCACTA---GGAGTAGCACCCACCAAGGCAAAGAGAAGAGTGGTG-----  
-----GAGAGAGAAAAAAGAGCG---GTCGGA---CTGGGAGCT-----  
GTCTTCCTTGGGTTCTTAGGAGCA---GCAGGAAGTACTATG---GGCGCGGCGTCA---  
ATAACGCTGACGGCACAG---GCCAGACAA---TTATTG---TCTGGTATAGTACAACAGCAGAGC---  
AATCTG---CTGAGG---GCTATAGAGGCTCAACAGCAAATGTTGAAACTCACGGTCTGGGGCATT  
>AY521630..1  
TTCTATTGCAATACATCAGGTCTGTTTAATAGTACTTGAATAGCACTACCATCAAGCAGAATTTAACTAACA  
AT-----  
-----  
GACACGGGGGTAATAAATCTCCCATGCAGAATAAGACAAATTGTACATATGTGGCAGAGAGTAGGACAAGCAA  
TGTATGCCCCCTCCCATTAAGGGGTAATAAACTGTACATCAAAC---  
ATTACAGGGCTACTGCTAACAAGGATGGTGGGGATAATAATAGT-----  
-----  
-----  
ACAGATGAGAAGTTTCAGACCTGGAGGAGGAGATATGAGGGACAATTGGAGAAGTGAATTATATAAATATAAAG  
TAGTAAAAATTGAACCACTA---GGAGTAGCACCCACCAGGGCAAAGAGAAGAGTGGTG-----  
-----CAGAGAGAAAAAAGAGCA---GTTGGA---CTAGGAGCT-----  
GTCTTCCTTGGGTTCTTAGGAGCA---GCAGGAAGTACTATG---GGCGCGGCGTCA---  
ATAACGCTGACGGCACAG---GCCAGACAA---TTATTG---TCTGGCATAGTACAACAGCAGAGC---  
AATCTG---CTGAGG---GCTATAGAGGCTCAACAGCACTTGTGAAACTCACAGTCTGGGGCATT  
>AM000053..1  
TTCTATTGCAATACATCAGGCCTATTTAATAGCAGTTGGGCGCCCAACGGCAGTTGGATCAACAACATTGGCA  
GT-----  
-----  
AGGGAAAATGACACTATGACTCTGCCATGCAGAATAAAACAAATTATAAATATGTGGCAGAGAGTAGAACAAG  
CAATGTATGCCCCCTCCTATCAAAGGAAACATAAATTGTGTATCAAAC---  
ATTACAGGACTACTGTTAACAAGAGATGGTGGAACTAATGAACT-----  
-----  
-----  
AGGGAGAATGAGACCTTCAGACCTATAGGAGGAGAGATGAGAGACAATTGGAGAAGTGAATTATATAAGTATA  
AAGTAGTAAAAATTGAACCACTA---GGAGTAGCACCCACCAAGGCAAAGAGAAGAGTGGTGGAG-----  
-----GGGAGAGAAAAAAGAGCA---GTTGGA---ATGGGAGCT-----  
---TTCTTCCTTGGGTTCTTAGGAGCA---GCAGGAAGCACTATG---GGCGCGGCGTCA---  
ATAACGCTGACGGTACAG---GCCAGACAA---TTATTG---GCTGGTATAGTGCAACAGCAAAGC---  
AATTTG---CTGAAG---GCTATAGAGGCTCAACAACATCTGTTGAGACTCACAGTCTGGGGCATT  
>AM000054..2  
TTCTATTGTAATACATCAAGCCTGTTTAATAGCTCTTGGCCCATTAACAGCACTACCAGCAATAACAGCACTG  
CC-----  
-----  
AGTAATGAGACCATAATTCTGCCATGTAGAATAATACAAATTATAAATATGTGGCAGAGACTAGGACAGGCAA  
TGTATGCCCCCTCCCATCAAAGGATTAATAAATTGTGTATCAAAC---  
ATTACAGGACTACTGTTGACAAGGGATGGTGGAGATAGGAACAGT-----  
-----  
-----

AGTTATGAGACCTTCAGACCTATAGGAGGAAATATGAAGGACAATTGGAGAAGTGAACCTGTATAAGTATAAAG  
TAGTAAAAATTGAACCACTA---GGAGTAGCACCTACCAAGGCAAGGAGGAGAGTGGTG-----  
-----GAGAGAGAAAAAAGAGCA---GTTGGA---ATAGGAGCT-----  
TTCTTCCTTGGGATCTTAGGAGCA---GCAGGAAGCACTATG---GGCGCGGCGTCA---  
ATAACGCTGACGGTACAA---GCCAGGCAA---GTATTG---TCTGGTATAGTGCAACAGCAGAGC---  
AATTTG---CTGAAG---GCTATAGAGGCTCAACAACATTTGTTGAAACTCACAGTCTGGGGCATC  
>FJ388892..2  
TTCTATTGCAATACAACAGACCTGTTTAATAGCACTTGGTACACTAATGACACTGGCACAAATAGCACAGGGG  
CCAATGAA-----  
-----AAT---  
GGGGCCAATGAAAATATAAATTTACCATGCAGAATAAAGCAAATTATAAATATGTGGCAGAGAGTAGGGCAAG  
CAATGTATGCCCCCTCCTATCAAAGGAAGTATAAGGTGTGAATCAAAC---  
ATTACAGGACTACTACTAACAAGAGATGGTGGAAGTGGAATGAT-----  
-----  
-----  
AGCTACAATGAGACCTTCAGACCTATAGGAGGAAATATGAGGGATAATTGGAGAAGTGAACCTATATAAGTATA  
AAGTAGTAGAAATTGAACCAATA---GGAGTAGCACCTACCAAGGCAAGGAGAAGAGTGGTG-----  
-----GGGAGAGAAAAAAGAGCA---ATTGGA---CTGGGAGCT-----  
---GCCTTCCTTGGGTTCTTAGGAGCA---GCAGGAAGCACTATG---GGCGCGGCGTCA---  
ATAACGCTGACGGTACAG---GCCAGACAA---TTATTG---TCTGGCATAGTGCAACAGCAAAGC---  
AATTTG---CTGAGG---GCTATAGAGGCTCAGCAGCATCTGCTGAAACTCACAGTCTGGGGCATT  
>JF683763..1  
TTCTATTGCAATACAACAGACCTGTTTCAGTAGCACTTGGGACGAAGATGACACTGACATCACTCTCGCCCAG-  
-----  
-----  
GACAATGGAACTATAACTCTGCCATGCAGAATAAAGCAAATTATAAATATGTGGCAGAGAGTAGGACAAGCAA  
TGTATGCCCCCTCCTATCAAAGGAAGTATAAGGTGTGAATCAAAC---  
ATTACAGGACTACTACTAACAAGAGATGGTGAGCTAATAGCAGT-----  
-----  
-----  
AATGAGACCTTCAGACCTATAGGAGGAGATATGAGAGACAATTGGAGAAGTGAACCTATATAAATATAAAGTGG  
TACAAATTGAACCAATA---GGAATAGCACCTACCAGGGCAAGGAGAAGAGTGGTG-----  
-----GAGAGAGAAAAAAGAGCA---ATTGGA---CTGGGAGCT-----  
GCCTTCCTTGGGTTCTTAGGAGCA---GCAGGAAGTACTATG---GGCGCGGCGTCA---  
CTGACGCTGACGGTACAG---GCCAGAAAA---TTATTG---TCTGGCATAGTGCAACAGCAAAC---  
AATTTG---CTGAGG---GCTATAGAGGCTCAGCAGCATCTGCTGAAACTCACGGTCTGGGGCATT  
>JF683798..1  
TTCTATTGCGATACAACAAACCTGTTCAATAGCACTTGGGACGGAAATAGCACTGTCACAAATATCACACAG-  
-----  
-----  
ACCAATGAAAATATAAATTTACCATGCAAAATAAGGCAAATTATAAGGATGTGGCAGAGAGTAGGACAAGCAA  
TGTATGCCCCCTCCTATCAAAGGAATTATAAGGTGTGAATCAAAC---  
ATTACAGGACTACTGCTAACAAGAGATGGTGGAATAAAACCAAT-----  
-----  
-----  
AGCAACAATGAGACCTTCAGACCTATAGGAGGAGATATGAGGGACAATTGGAGAAGTGAACCTATATAAGTATA  
AAGTAGTAAAAGTGGAAACCAATA---GGAGTAGCACCTACCAGAGCAAGGAGAAGAGTGGTG-----  
-----GAGAGAGAAAAAAGAGCA---ATAATTGGACTGGGAGCT-----  
---GCCTTCATTGGGTTCTTAGGAGCA---GCAGGAAGCACTATG---GGCGCGGCGTCA---  
ATAACGCTGACGGTACAG---GCCAGACAA---TTATTG---TCTGGCATAGTGCAACAGCAAAGC---  
AATTTG---CTGAGG---GCTATAGAGGCTCAGCAGCATCTGCTGAAACTCACGGTCTGGGGCATT  
>EF545108..1  
TTCTATTGCAATACAACAGGCCTGTTCAATAATGCCAGCAACAATGGTACAAAC-----  
-----  
-----  
CGCACAGACCCTATAATTTCTCCCATGCAGAATAAAGCAGATTATAAATATGTGGCAAAGAGTAGGGCAGGCAA  
TGTATGCTCCTCCTATCAAAGGAATCATAAGGTGTGAATCAAAC---  
ATTACAGGACTACTATTAAACAAGAGATGGTGGAATAAAAAATGGAAGC-----  
-----  
-----

AACGGGACCGAGACCTTCAGACCTATAGGAGGAGATATGAGGGACAATTGGAGAAGTGAATTATATAAGTATA  
AAGTAGTAAAAATTGAACCAATA---GGAGTAGCACCTACCAGGGCAAAGAGAAGAGTGGTG-----  
-----GAGAGAGAAAAAGAGAGCA---ATTGGA---CTGGGAGCT-----  
---GCCTTCCTTGGGTTCTTAGGAGCA---GCAGGAAGTACTATG---GGCGCGGCGTCA---  
ATAACGCTGACGGTACAG---GCCAGACAA---TTACTG---TCTGGCATAGTACAACAGCAAAGC---  
AATTTG---CTGAGG---GCTATAGAGGCTCAGCAGCATCTGCTGAAGCTCACGGTCTGGGGCATT  
>GU481566..1  
TTCTATTGCAATACAACAGCCCTGTTCAATAGCACTTGGGATGAAAATAGCACTGTCACAAATAGCACAAACG-  
-----  
-----  
GCCAATGAAAATATAACTCTGCCATGCAGAATAAAGCAAATTATAAATATGTGGCAGAGAGTAGGACAAGCAA  
TGTATGCCCCCTCCTATCGCAGGAATTATAAGGTGTGAATCAAAC---  
ATTACAGGACTACTAATAACAAGAGATGGTGGAACTAATAGCAGC-----  
-----  
-----  
AATGAGACTGAGACCTTCAGACCTACAGGAGGAAATATGAGGGACAATTGGAGAAGTGAACCTATATAAGTATA  
AAGTAGTACAAATTGAACCAATA---GGAGTAGCACCTACCAAGGCAAAGAGAAGAGTGGTG-----  
-----GAGAGAGAAAAAGAGCA---ATTGGA---CTGGGAGCC-----  
---GCCTTCCTTGGGTTCTTAGGAGCA---GCAGGAAGTACTATG---GGCGCGGCGTCA---  
CTGACGCTGACGGTACAG---GCCAGACAA---TTATTG---TCTGGCATAGTACAACAGCAAAGC---  
AATTTG---CTGAGG---GCTATAGAGGCTCAGCAGCATCTGCTGAAACTCACGGTCTGGGGCATT  
>GU481615..1  
TTCTATTGCAATACAACAGAACTGTTCAATAGCACTTGGAAACACAAGCAGCACTGTCACAAATAGCACACAG-  
-----  
-----  
GCCAATGAAACTATAAGTCTACCATGCAAAATAAAGCAAATTATAAGGATGTGGCAGAGAGTAGGACAAGCAA  
TGTATGCCCCCTCCTATCAACGGAAGTATAAGGTGTGAATCAAAC---  
ATTACAGGACTACTACTAACAAGAGATGGTGGAGGTGAAAATAAT-----  
-----  
-----  
AGCAGCAATGAGACCTTCAGACCTGCAGGAGGAGATATGAAGGACAATTGGAGAAGTGAACCTATATAAGTATA  
AAGTAGTAGAAATTGAACCAATA---GGATTAGCACCTACCAAGGCAAGGAGAAGAGTGGTG-----  
-----GAGAGAGAAAAAGAGCA---ATTGGA---CTGGGAGCT-----  
---GCCTTCCTTGGGTTCTTAGGAGCA---GCAGGAAGTACTATG---GGCGCGGCGTCA---  
TTGACGCTGACGGTACAG---GCCAGACAA---TTATTG---TCTGGCATAGTGCAACAGCAAAGC---  
AATTTG---CTGAGG---GCTATAGAGGCTCAGCAGCATCTGCTGAAACTCACAGTCTGGGGCATT  
>HQ896489..1  
TTCTATTGCAATACAACAGACCTGTTTACAAATAGCACTCTCACAGATAACACAGAG-----  
-----  
-----  
ACCAATGAAACTATAACTCTGCCATGCAGAATAAAGCAAATCATAAATATGTGGCAGAGAGTAGGACAAGCAA  
TGTATGCCCCCTCCTATCAGAGGAAGTATAAGGTGTAATTCAAAC---  
ATTACAGGACTACTGCTAATAAGAGATGGTGGAGCTAATAGCAGC-----  
-----  
-----  
AATGAGACCTTCAGACCTATAGGAGGAAATATGAGGGACAATTGGAGAAGTGAACCTATATAAGTATAAAGTAG  
TAAAAATTGAACCAATA---GGAGTAGCACCTACCAAGGCAAAGAGAAGAGTGGTG-----  
-----GAGAGAGAAAAAGAGCA---ATTGGA---CTGGGAGCC-----  
GCCTTCCTTGGGTTCTTAGGAACA---GCAGGAAGCACTATG---GGCGCGGCGTCA---  
CTGACGCTGACGGTACAA---GCCAGACAA---TTATTG---TCTGGCATAGTGCAACAGCAAAGC---  
AATTTG---CTGAGG---GCTATAGAGGCTCAGCAACATCTGCTGAAACTCACGGTCTGGGGCATT  
>JQ292897..1  
TTCTATTGCGATACAACAGCCCTGTTCAATAGCACTTGGGAAAATGGCACTGTTATAAATAGCACACAG----  
-----  
-----  
GCCAATGAGACTATAACTCTACCATGCAGAATAAAGCAAATTATAAATATGTGGCAGAGAGTAGGACGAGCAA  
TGTATGCCCCCTCCTATCAGAGGAATTATAAGGTGTGAATCAAAC---  
ATTACAGGACTACTACTAACAAGAGATGGTGGAGGTGGAAATAAT-----  
-----  
-----

AGCAGCAATGAGACCTTCAGACCTATAGGAGGAAATATGGAGGACAATTGGAGAAGTGAACCTATATAAGTATA  
 AAGTAGTAGAAATTGAACCAATA---GGAGTAGCACCTACCAAGGCAAAGAGAAGAGTGTTG-----  
 -----GAGAGGGAAAAAAGAGCA---ATTGGA---CTGGGAGCT-----  
 ---GCCTTCCTTGGGTTCTTGGGAGCA---GCAGGAAGCACTATG---GGCGCGGCGTCA---  
 CTAACGCTGACGGTACAG---GCCAGACAA---TTATTG---TCTGGCATAGTGCAACAGCAAAGC---  
 AATTTG---CTGAGG---GCTATAGAGGCTCAGCAGCATCTGCTGAAACTCACGGTCTGGGGCATT  
 >JQ292899..1  
 TTCTATTGCAATACAACAGACCTGTTCAATTGGGACGGAAATGGCAATGTTACAAACAGCACACAG-----  
 -----  
 -----  
 GCCGATGGAAATATAACTCTACCATGCAGAATAAAGCAAATTATAAATATGTGGCAGAGAGTAGGACAAGCAA  
 TGTATGCCCCCTCCTATCAAAGGAAATATAACGTGTGTATCAAAC---  
 ATTACAGGACTACTATTAAACAAGAGATGGTGGAGGTGGAATTAAT-----  
 -----  
 -----  
 AGTAGCAATGAGACCTTCAGACCTATAGGAGGAGATATGAGGGACAATTGGAGAAGTGAACCTATATAAGTATA  
 AAGTAGTAAAAATTGAACCAATA---GGAGTAGCACCTACCAAGGCAAAGAGAAGAGTGTTG-----  
 -----GAGAGAGAAAAAAGAGCA---ATTGGA---CTGGGAGCT-----  
 ---GCCTTCCTTGGGTTCTTGGGAGCA---GCAGGAAGTACTATG---GGCGCGGCGTCA---  
 ATAACGCTGACGGTACAG---GCCAGACAA---TTATTG---TCTGGCATAGTGCAACAGCAAAGC---  
 AATTTG---CTGAGG---GCTATAGAGGCTCAGCAGCATATGCTGAAACTCACGGTCTGGGGCATT  
 >HQ385841..2  
 TTCTATTGCTATACAACAAAACTGTTCAATAGCACTTGGAACGGAAATGACACTGTTACAAATAGCACACAG-----  
 -----  
 -----  
 GCCAATGAAAATATAACTATAACCATGCAGAATAAAGCAAATTATAAATATGTGGCAGAGAGTAGGACAAGCAA  
 TGTATGCCCCCTCCTATCAAAGGAAATATAAGCTGTACATCAAAC---  
 ATTACAGGACTATTACTAACAAGAGATGGTGGAACTAATAGCAGT-----  
 -----  
 -----  
 AATGAGACCTTCAGACCTATAGGAGGAGATATGAGGGACAATTGGAGAAGTGAACCTATATAAGTATAAAGTAG  
 TACAAATTGAACCAATA---GGAGTAGCACCTACCAGGGCAAAGAGAAGAGTGTTG-----  
 -----GAGAGAGAAAAAAGAGCA---ATTGGA---CTGGGAGCT-----  
 GCCTTCCTTGGGTTCTTGGGAGCA---GCAGGAAGTACTATG---GGCGCGGCGTCA---  
 ATAACGCTGACGGTACAG---GCCAGACAA---TTATTG---TCTGGCATAGTACAACAGCAAAGC---  
 AATTTG---CTGAGG---GCTATAGAGGCTCAGCAGCATCTGCTGAAACTCACGGTCTGGGGCATT  
 >HQ385843..1  
 TTCTATTGCAATACAACAGCCCTGTTCAATAGTACTTGGCACGAAAATAGCACTGATACAAATAGCACACAG-----  
 -----  
 -----  
 GACAAATGAACTATAACTCTACCATGCAGAATAAAGCAAATTATAAATATGTGGCAGAGAGTAGGACAAGCAA  
 TGTATGCCCCCTCCTATCGAAGGAAATATAAGCTGTACATCAAAC---  
 ATTACAGGACTACTACTAACAAGGGATGGTGGAGCTAATAGCAGC-----  
 -----  
 -----  
 AATGAGACCTTCAGACCTATAGGAGGAGATATGAGGGACAATTGGAGAAGTGAACCTATATAAGTATAAAGTAG  
 TACAAATTGAACCAATA---GGAGTAGCACCTACCAAGGCAAAGAGAAGAGTGTTG-----  
 -----GAGAGAGAAAAAAGAGCA---ATTGGA---CTGGGAGCT-----  
 GCCTTCCTTGGGTTCTTGGGAGCA---GCAGGAAGCACTATG---GGCGCGGCGTCA---  
 ATAACGCTGACGGTACAG---GCCAGACAA---TTATTG---TCTGGCATAGTGCAACAGCAAAGC---  
 AATTTG---CTGAGG---GCTATAGAGGCTCAGCAGCATCTGCTGAAACTCACGGTCTGGGGCATT  
 >HQ385846..1  
 TTCTATTGCAATACAACAGAACTGTTCAATAGCACTTGGGGCAATGGCACTGTACAAATAGCACAGGG-----  
 -----  
 -----  
 GACAAATGAAAATATAATTCTACCATGCAGAATAAAGCAAATCATAAGGATGTGGCAGAGAGTAGGACAAGCAA  
 TGTATGCCCCCTCCTATCAAAGGAATTATAAAGTGTAATCAAAC---  
 ATTACAGGACTACTACTAACAAGAGATGGTGGAGGTGGAATAGCAGC-----  
 -----  
 -----

AATGAGACCAGTGA AACCTTCAGGCCTATAGGAGGAGATATGAGGGACAATTGGAGAAGTGA ACTATACAAGT  
ATAAAGTAGTACAAATTGAACCAATA---GGAGTAGCACCTACCAGGGCAAAGAGAAGAGTGGTG-----  
-----GAGAGAGAAAAAAGAGCA---ATTGGA---CTGGGAGCT---  
-----GCCTTCCTTGGGTTCTTAGGAGCA---GCAGGAAGCACTATG---GGCGCGGCGTCA---  
ATAACGCTGACGGTACAG---GCCAGACAA---TTATTG---TCTGGCATAGTGCAACAGCAAAGC---  
AATTTG---CTGAGA---GCTATAGAGGCTCAGCAGCATCTGCTGAAACTCACGGTCTGGGGCATT  
>GU481434..2  
TTCTATTGCTATACAACAAACCTGTTCAATAGCACTTGGGGCGAAAATAGCACTGATATAAATAGCACACAG-  
-----  
-----  
GCCAATGAAAATATAACTCTACCATGCAGAATAAAGCAAATTATAAATATGTGGCAGAGAGTAGGACAAGCAA  
TGTATGCCCCCTCCTATCAAAGGAAGTATAATGTGTACATCAAAC---  
ATTACAGGGCTATTACTAACAAGAGATGGTGGAGGTGGAGCTAAT-----  
-----  
-----  
AGCAGCAATGAGACCTTCAGACCTATAGGAGGAAAATATGAGGGACAATTGGAGAAGTGA ACTATATAAGTATA  
AAGTAGTAAAAATTGAACCAATA---GGAGTAGCACCTACCACGGCAAGGAGAAGAGTGGTG-----  
-----GAGAGAGAAAAAAGGGCA---ATTGGA---CTGGGAGCT-----  
---GCCTTCCTTGGGTTCTTGGGAGCA---GCAGGAAGCACTATG---GGCGCGGCGTCA---  
CTAACGCTGACGGTACAG---GCCAGACAA---TTATTG---TCTGGCATAGTGCAAGCAGCAAAGC---  
AATTTG---CTGAAG---GCTATAGAGGCTCAGCAGCATCTGCTGAAACTCACGGTCTGGGGCATT  
>GU481486..1  
TTCTATTGCAATACAACAGACCTGTTCAATAGCACTTGGAAACGAAACTGACATTGATGCACAGGCCAATGAA-  
-----  
-----  
GTCAATGAAACTATAACTCTACCATGCAGAATAAAGCAAATTATAAATATGTGGCAGAGAGTAGGGCAAGCAA  
TGTATGCCCCCTCCTATCAAAGGAAGTATAAGGTGTGAATCAAAC---  
ATTACAGGACTACTACTAACAAGAGATGGTGGAAAGACTTAATGGC-----  
-----  
-----  
AGCAATGAGACCTTTAGACCTATAGGAGGAGATATGAGGGACAATTGGAGAAGTGA ACTATATAAGTATAAAG  
TAGTACAAATTGAACCAATA---GGAGTAGCACCTACCAAGGCAAAGAGAAGAGTGGTG-----  
-----GAGAGAGAAAAAAGAGCA---ATTGGA---CTGGGAGCT-----  
GCCTTCCTTGGGTTCTTGGGAGCA---GCAGGAAGTACTATG---GGCGCGGCGTCA---  
ATAACGCTGACGGTACAG---GCCAGACAA---TTATTG---TCTGGCATAGTGCAACAGCAAAGC---  
AATTTG---CTGAGG---GCTATAGAGGCTCAGCAGCATCTGCTGAAACTCACGGTCTGGGGCATT  
>GU481644..1  
TTCTATTGCAATACAACAAACCTGTTCAATAGCACTTGGAAATGAAACAGACATTGTTACAAATATCACACAG-  
-----  
-----  
GGCAATGGA ACTATAACTCTACCATGCAGAATAAAGCAAATTATAAATATGTGGCAGAGAGTAGGACAAGCAA  
TGTATGCCCCCTCCTATCAAAGGAAATATAACGTGTACATCAAAC---  
ATTACAGGACTACTACTAACAAGAGATGGTGGAACTAATAGCAGC-----  
-----  
-----  
AATGAGACCTTCAGACCTATAGGAGGAGATATGAGGGACAATTGGAGAAGTGA ACTATATAAATATAAAGTAG  
TACAAATTGAACCAATA---GGAGTAGCACCTACCAGGGCAAAGAGAAGAGTGGTG-----  
-----GAGAGAGAAAAAAGAGCA---ATTGGA---CTGGGAGCT-----  
GCCTTCCTTGGGTTCTTGGGAGCA---GCAGGAAGCACTATG---GGCGCGGCGTCA---  
CTAACGCTGACGGTACAG---GCCAGACAA---TTACTG---TCTGGCATAGTGCAACAGCAAAGC---  
AATTTG---CTGAGG---GCTATAGAGGCTCAGCAGCATCTGCTGAAACTCACGGTCTGGGGCATT  
>JQ292891..1  
TTCTATTGCAATACAACAGACCTGTTCAATAGCACTTGGGACAATAGCACTGTACAAATAGCACAGGG----  
-----  
-----  
ACCAATGAAACTATAACTCTGCCATGTAGAATAAAGCAAATTATAAATATGCGGCAGAGAGTAGGACAAGCAA  
TGTATGCCCCCTCCTATTAGAGGAAGTATAAGGTGTGAATCAAAC---  
ATTACAGGACTACTACTAATAAGAGATGGTGGAGCTAATAGCAGC-----  
-----  
-----

AATGAGACCTTCAGACCTATAGGAGGAAATATGAGGGACAATTGGAGAAGTGAAGTATATAAGTATAAAGTAG  
 TAAAAATTGAACCAATA---GGAGTAGCACCTACCAAGGCAAGGAGAAGAGTGTTG-----  
 -----GAAAGAGAAAAAAGAGCA---ATTGGA---CTGGGAGCC-----  
 GCCTTCCTTGGGTTCTTAGGAGCA---GCAGGAAGCACTATG---GGCGCGGCGTCA---  
 ATGACGCTGACGGTACAG---GCCAGACAA---TTATTG---TCTGGCATAGTGCAACAGCAAAGC---  
 AATTTG---CTGAGG---GCTATAGAGGCTCAGCAGCATCTGCTGAAACTCACGGTCTGGGGCATT  
 >HQ385820..1  
 TTCTATTGCAATACAACAAACCTGTTCAATAGCACTTGGGACACAAATATCACAGAGGCCAATATCACAGAG-  
 -----  
 -----  
 GCCAATGAAACTATAATTCTACCATGCAAAATAAAGCAAATTATAAATATGTGGCAGAGAGTAGGAAAAGCAA  
 TGTATGCCCCCTCCTATCAAAGGAAGTATAAGGTGTGAATCAAAC---  
 ATTACAGGACTACTACTAACAAGAGATGGTGGAATAATAGCAGC-----  
 -----  
 -----  
 AATAGCAATGAGACCTTCAGACCTATAGGAGGAAATATGAGGGACAATTGGAGAAGTGAAGTATATAAATATA  
 AAGTAGTAAAAATTGAACCAATA---GGAGTAGCACCTACCAAGGCAAAGAGAAGAGTGTTG-----  
 -----GAGAGAGAAAAAAGAGCA---ATTGGG---TTGGGAGCT-----  
 ---GCCTTCCTTGGGTTCTTAGGAGCA---GCAGGAAGCACTATG---GCCGGCGGGTCA---  
 ATAACGCTGACGGTACAG---GCCAGACAA---TTATTG---TCTGGCATAGTGCAACAGCAAAGC---  
 AATTTG---CTGAGG---GCCATAGAGGCTCAGCAACATATGCTGAAACTCACGGTCTGGGGCATT  
 >JF952018..1  
 TTTTATTGCAATACAACAGCCCTGTTCAATAGCACTTGGGACAATAGTAGCATTGCCGAAAATAGCACAGAG-  
 -----  
 -----  
 GACAATGCAACTATAACTCTACCATGCAGAATAAAGCAAATTATAAATATGTGGCAGAGAGTAGGGCAAGCAA  
 TGTATGCCCCCTCCTATCAAAGGAAGTATAAGGTGTGAATCAAAT---  
 ATTACAGGACTATTACTAACAAGAGATGGTGAGATGCCGATGGAAATGGAAT-----  
 -----  
 -----  
 AATAGCAACAATGAAACCTTCAGACCTACAGGAGGAGATATGAGGAACAATTGGAGAAGTGAAGTATATAAAT  
 ATAAAGTAGTACAAATTGAACCAATA---GGGGTAGCACCTACCACGGCAAAGAGAAGAGTGTTG-----  
 -----GAGAGAGAAAAAAGAGCA---ATTGGA---CTGGGAGCT---  
 -----GCCTTCCTTGGGTTCTTAGGAGCA---GCAGGAAGCACTATG---GGCGCGGCGTCA---  
 ATAACGCTGACGGTACAG---GCCAGACAA---TTATTG---TCTGGCATAGTGCAACAGCAAAGC---  
 AATTTG---CTGAGG---GCTATAGAGGCTCAGCAGCATCTGCTGAAACTCACGGTCTGGGGCATT  
 >HQ338112..1  
 TTCTATTGCAATACAACAGAACTGTTCAATAGCACTTGGGACAATAGCACTTGGGACAAAAATGACACTAGCA  
 CA-----  
 -----  
 AATATCACACAGGTCATAACTCTGCCATGCAGAATAAAACAAATTATAAATATGTGGCAGAGAGTAGGACAAG  
 CAATGTATGCCCCCTCCTATTAAAGGAGTTATGAGGTGTGAATCAAAC---  
 ATTACAGGACTACTACTAACAAGAGATGGTGAGCTAATAGCAGC-----  
 -----  
 -----  
 AATGAGACCTTCAGACCTATAGGAGGAGATATGAGGGACAATTGGAGAAGTGAAGTATATAAGTATAAAGTAG  
 TAGAAATTGAACCAATA---GGAGTAGCACCTACCAGGGCAAAGAGAAGAGTGTTG-----  
 -----GAGAGAGAAAAAAGAGCA---ATTACA---CTGGGAGCT-----  
 GCCTTCCTTGGGTTCTTAGGAGCA---GCAGGAAGCACTATG---GGCGCGGCGTCA---  
 TTGACGCTGACGGTACAG---GCCAGACAA---TTATTG---TCTGGCATAGTGCAACAGCAAAGC---  
 AATTTG---CTGAGG---GCTATAGAGGCTCAGCAGCATCTGCTGAAACTCACGGTCTGGGGCATT  
 >GU481277..1  
 TTCTATTGCAATACAGCAGACCTGTTCAATAGCACTTGGGACACAAATAGCACACAGACCAATAGAAATATAA  
 CT-----  
 -----  
 GCCAGTGAAAATATAACTCTACCATGCAGAATAAAGCAAATTATAAATATGTGGCAGAGAGTAGGACAAGCAA  
 TGTATGCCCCCTCCTATCAAAGGAATTATAATGTGTACATCAAAC---  
 ATTACAGGACTACTCCTAACAAGAGATGGTGAGGTGAACTAAT-----  
 -----  
 -----

AGCAGCAATGAGACCTTCAGACCTATAGGAGGAGACATGAGGGACAATTGGAGAAGTGAACCTATATAAATATA  
 AAGTAGTAAAAATTGAACCAATA---GGGGTAGCACCTACCAGGGCAAAGAGAAGAGTGGTG-----  
 -----GAGAGAGAAAAAAGAGCA---ATTGGA---CTGGGAGCT-----  
 ---GCCTTCCTTGGGTTCTTGGGAGCG---GCAGGAAGTACTATG---GGCGCGGCGTCA---  
 ATAACGCTGACGGTACAG---GCCAGACAA---TTATTG---TCTGGCATAGTACAACAGCAAAGC---  
 AATTTG---CTGAGG---GCTATAGAGGCTCAGCAGCATCTGTTGAAGCTCACGGTCTGGGGCATT  
 >GU481544..1  
 TTCTATTGCAATACAACAAAACCTGTTCAATAGCTCTTGGGGCGAAAATGGCACAAATAGCATCGAG-----  
 -----  
 -----  
 ACCAATGAAACTATAATTCTACCATGCAGAATAAAGCAAATTATAAATATGTGGCAGAGAGTAGGACAAGCAA  
 TGTATGCCCCCTCCTATCAAAGGAATTATAAAGTGTGAATCAAAC---  
 ATTACAGGACTACTACTAATCAGAGATGGTGGAACTAACAGCAGT-----  
 -----  
 -----  
 AATGAGACCTTCAGACCTATAGGAGGAGATATGAGGGACAATTGGAGAAGTGAACCTATATAAGTATAAAGTAG  
 TAAAAATTGAACCAATA---GGAGTAGCACCTACCAAGGCAAGGAGAAGAGTGGTG-----  
 -----GAGAGAGAAAAAAGAGCA---ATTGGA---CTGGGAGCT-----  
 GCCTTCCTTGGGTTCTTAGGAGCA---GCAGGAAGCACTATG---GGCGCGGCATCA---  
 ATAACGCTGACGGTACAG---GCCAGACAA---TTATTG---TCTGGCATAGTGCAACAGCAAAGC---  
 AATTTG---CTGAGG---GCTATAGAGGCTCAGCAACATCTGCTGAAACTCACGGTCTGGGGCATT  
 >GU481661..1  
 TTCTATTGCGATACAACAAACCTGTTCAATAGCACTTGGGAAGAAAAAAGCACTGTTACAAATAGC-----  
 -----  
 -----  
 ACCAATGACACTATAACTCTACCATGCAGAATAAAGCAAATTATAAATATGTGGCAGAGAGTAGGACAAGCAA  
 TGTATGCCCCCTCCTATCCAAGGAAATATAAGTTGTGAATCAAAC---  
 ATTACAGGACTACTACTAACAAGAGATGGTGGAAAGTGAATAAT-----  
 -----  
 -----  
 GAGACCTTCAGACCTATAGGAGGAGATATGAGGGACAATTGGAGAAGTGAATTATACAAGTATAAAGTAGTAA  
 AAATTGAACCAATA--GGAGTAGCACCTACCAGGGCAAGGAGAATAGTGGTG-----  
 -----AAGAGAGAAAAAAGAGCA---ATTGGA---CTGGGAGTT-----  
 GCCTTCCTTGGGTTCTTAGGAGCA---GCAGGAAGCACTATG---GGCGCAGCGTCA---  
 CTAACGCTGACGGTACAG---GCCAGACAA---TTATTG---TCTGGCATAGTGCAACAGCAAAGC---  
 AATTTG---CTGAGG---GCTATAGAGGCTCAGCAACATCTGCTGAAACTCACGGTCTGGGGCATT  
 >KF716491..1  
 TTCTATTGCAATACAACAAACCTGTTGATAGCACTTGGAAATGACACTGACACAAATAGCACTGACACAAATA  
 GCACAGGG-----  
 -----  
 -----  
 GCCAATGAAATTATAACTCTACCATGCAGAATAAAGCAAATTATAAATATGTGGCAGAGAGTAGGACAAGCAA  
 TGTATGCCCCCTCCTATCAAAGGAGTTATAAGGTGTGAATCAAAC---  
 ATTACAGGACTACTACTAACAAGAGATGGTGGAACTAATAGCAGC-----  
 -----  
 -----  
 AATGAGAATGAGATCTTCAGACCTATAGGAGGAGATATGAGGGACAATTGGAGAAGTGAACCTATATAAGTATA  
 AAGTAGTAGAAGTTGAACCAATA---GGAGTAGCGCCTACCAAGGCAAGGAGAAGAGTGGTG-----  
 -----GAGAGAGAAAAAAGAGCA---ATTGGA---CTGGGAGCT-----  
 ---GCCTTCCTTGGGTTCTTAGGAGCA---GCAGGAAGTACTATG---GGCGCGGCGTCA---  
 ATAACGCTGACGGTACAG---GCCAGACAA---TTATTG---TCTGGCATAGTGCAACAGCAAAGC---  
 AATTTG---CTGAAA---GCTATAGAGGCTCAGCAGCATCTGCTGAAACTCACGGTCTGGGGCATT  
 >KF716492..1  
 TTCTATTGCAATACAACAGAACTGTTCAATAGCACTTGGAAAGAAAATAGCACTATCACAAATAACACAACA-  
 -----  
 -----  
 -----  
 GCCAATGACACTATAACTCTACCATGCAGAATAAAGCAAATTATAAATATGTGGCAGAGAGTAGGACAAGCAA  
 TGTATGCCCCCTCCTATCAAAGGAAGTATAAGGTGTAAATCAAAC---  
 ATTACAGGACTACTACTAACAAGAGATGGTGGAAAGTGAACCTAAT-----  
 -----  
 -----

AGCAGTGAGGAAATCTTCAGACCTATAGGAGGAAATATGAGGGACAATTGGAGAAGTGAACCTATATAAGTATA  
 AAGTAGTAAAAATTGAACCAATA---GGAGTAGCACCTACCAAGGCAAAGAGAAGAGTGGTG-----  
 -----GAGAGAGAAAAAAGAGCAATAATTGGA---CTGGGAGCT-----  
 ---GCCTTCCTTGGGTTCTTAGGAGCA---GCAGGAAGCACTATG---GGCGCGGCGTCA---  
 CTGACGCTGACGGTACAG---GCCAGACAA---TTATTG---TCTGGCATAGTGCAACAGCAAAGC---  
 AATTTG---CTGAGG---GCTATAGAGGCTCAGCAGCATCTGCTGAAACTCACGGTCTGGGGCATT  
 >FJ864679..1  
 TTCTATTGTAATACAACAGAACTGTTCAATAGCACTTGGTACAAAAATGGCACTAACACAACCTAGCACACAG-  
 -----  
 -----  
 ACCAGTGAAAACATAACTCTGCCATGCAGAATAAAGCAAATTGTAAGGATGTGGCAGAGAGTAGGACAAGCAA  
 TGTATGCCCCCTCCTATCAGTGGAAATTATAAAGTGTGAATCAAAC---  
 ATTACAGGATTAATACTAACAAGAGATGGTGGAGATAATAGTAGC-----  
 -----  
 -----  
 AGCAATGAGACCTTCAGACCTGAAGGAGGAGACATAAGGGACAATTGGAGAAATGAACTATATAAGTATAAAG  
 TAGTAGAAATTGAACCAATA---GGAGTAGCACCTACTGAGGCAAGGAGAAGAGTGGTG-----  
 -----CAGAGAGAAAAAAGAGCA--ATTGGA---CTGGGAGCT-----  
 GCCTTCATTGGGTTCTTAGGAGCA---GCAGGAAGCACTATG---GGCGCAGCGTCA---  
 CTGACGCTGACGGTACAG---GCCAGAAAA---TTATTG---TCTGGCATAGTGCAACAGCAAAGC---  
 AATTTG---CTGAGG---GCTATAGAGGCTCAGCAGCATCTGCTGAAACTCACGGTCTGGGGCATT  
 >JQ292893..1  
 TTCTATTGCAATACCACAGACCTGTTCAATAGCACTTGGGACAAAAATGACACTATCACAAATACCCAGAGG  
 TC-----  
 -----  
 -----  
 AATGGAACCTACTATAACTCTGCCATGCAGAATAAAGCAAATTGTAAATATGTGGCAGAGAGTAGGACAAACAA  
 TGTATGCCCCCTCCTATCAAAGGAAGTATAAGGTGTGAATCAAAC---  
 ATTACAGGACTACTGCTAATAAGAGATGGTGGAGAACTAATAGC-----  
 -----  
 -----  
 AGCAGTGAGACCTTCAGACCTGTAGGAGGAGATATGAGGGATAATTGGAGAAGTGAACCTATATAAGTATAAAG  
 TAGTAAAAATTGAACCAATA---GGAGTAGCACCTACCAGGGCAAAGAGAAGAGTGGTG-----  
 -----GAGAGAGAAAAAAGAGCA--ATTGGA---CTGGGAGCC-----  
 GCCTTCCTTGGGTTCTTAGGAGCA---GCAGGAAGTACTATG---GGCGCGGCGTCA---  
 CTGACGCTGACGGTACAG---GCCAGACAA---TTATTG---TCTGGCATAGTGCAACAGCAAAGC---  
 AATTTG---CTGAGG---GCTATAGAGGCTCAGCAGCATCTGCTGAAACTCACGGTCTGGGGCATT  
 >JF430898..1  
 TTCTATTGCAATACAACAGACCTGTTCAATAGCACTTGGAGGAATGACACTGTGCGAAATATCACG-----  
 -----  
 -----  
 GCCAATGGAACCTATAACTCTGCCATGCAGAATAAAGCAAATTATAAATATGTGGCAGAGAGTAGGACAAGCAA  
 TGTATGCCCCCTCCTATCGAAGGAAATATAAGTTGTGAATCAAAC---  
 ATTACAGGGCTACTACTAATAAGAGATGGTGGAACTGATGACAGC-----  
 -----  
 -----  
 AATGAGACTGAGTCCTTCAGACCCATAGGAGGAGATATGAGGGACAATTGGAGAAGTGAACCTATATAAATATA  
 AAGTGGTACAAATTGAACCAATA---GGAGTAGCACCTACCAAGGCAAGGAGAAGAGTGGTG-----  
 -----GAGAGAGAAAAAAGAGCA--ATTGGA---CTGGGAGCT-----  
 ---GCCTTCCTTGGGTTCTTAGGAGCA---GCAGGAAGCACTATG---GGCGCGGCGTCA---  
 TTGACGCTGACGGTACAG---GCCAGACAA---TTATTG---TCTGGCATAGTGCAACAGCAAAC---  
 AATTTG---CTGAGG---GCTATAGAGGCTCAGCAGCATCTGCTGAAACTCACGGTCTGGGGCATT  
 >HQ834967..1  
 TTTTATTGCAATACAACAGGCCTGTTCAATAGCACTTGGGGCAATAGCACTGACGCAAAT-----  
 -----  
 -----  
 AGCAATGAAAATATAACTCTACCATGCAGAATAAAGCAAATTATAAATATGTGGCAGAGAGTAGGACAAGCAA  
 TGTATGCCCCCTCCTATCAGCGGAAATATAAGTTGTGTATCAAAC---  
 GTTACAGGACTACTACTAGTAAGAGATGGTGGAGGTGGAAATAGT-----  
 -----  
 -----

AGCAACAATGAGACCTTCAGACCTATAGGAGGAGATATGAGGGACAATTGGAAAAGTGAACCTATATAAGTATA  
 AAGTAGTAGAAATTGAACCAATA---GGAGTAGCACCTACCAAGGCAAAGAGAAGGGTGGTG-----  
 -----CAGAGAGAAAAAAGAGCA---ATTGGAGGACTGGGAGCT-----  
 ---GCCCTCCTTGATTCTTAGGAGCA---GCAGGAAGCACTATG---GGCGCGGCGTCA---  
 CTGACGCTGACGGTACAG---GCCAGACAA---TTATTG---TCTGGCATAGTGCAACAGCAAAGC---  
 AATTTG---CTGAGG---GCTATAGAGGCTCAGCAGCATCTGCTGAAACTCACCGTCTGGGGCATT  
 >JX500696..1  
 TTCTATTGTAATACAACAAAACCTGTTCAATAGCACTTGGGACAAAAATAGTACTTGAATGAAAATAGCACT-  
 -----  
 -----  
 GCCAATGAAAATATAACTCTGCCATGCAGGATAAAAGCAAATTATAAATATGTGGCAGAGAGTAGGACAAGCAA  
 TGTATGCCCCCTCCTATCAAAGGAGTTATAATGTGTAAATCAAAC---  
 ATTACAGGTCTACTCCTAACAAGAGATGGTGGAGGTGGAGCTAAT-----  
 -----  
 -----  
 AGCAGCAATGAGACTTTCAGACCTATAGGAGGAAATATGAGGGACAATTGGAGAAAGTGAACCTATATAAGTATA  
 AAGTAGTACAAATTGAACCAATA---GGAGTAGCACCTACCAGGGCAAAGAGAAGAGTGGTG-----  
 -----GAGAGAGAAAAAAGAGCA---ATTGGA---CTGGGAGCC-----  
 ---GCTTTCCTTGCGTTCTTAGGAGCA---GCAGGAAGCACTATG---GGCGCGGCGTCA---  
 CTGACGCTGACGGTACAG---GCCAGACAA---TTATTG---TCTGGCATAGTGCAACAGCAAAGC---  
 AATTTG---CTGAGG---GCTATAGAGGCTCAGCAGCAGCTGCTGAAACTCACGGTCTGGGGCATT  
 >JX500695..1  
 TTCTATTGCAATACAACAGGCCTGTTCAATAGCACTTGGGACACAAATGGCACTGTCACAAGTAGCACAAATG  
 GA-----  
 -----  
 ACAAATAAACTATAACTCTGCCATGCAGAATAAAACAAATTATAAATATGTGGCAGAGAGTAGGACAAGCAA  
 TGTACGCCCCCTCCTATCAAAGGAAGTATAAGGTGTGAATCAAAC---  
 ATTACAGGTCTACTACTAATAAGAGATGGTGAAGGAATAGCAGC-----  
 -----  
 -----  
 AATGAGACCTTTAGACCTATAGGAGGAAATATGAGGGACAATTGGAGGAGTGAACCTATATAAGTATAAAGTAG  
 TACAAATTGAACCAATA---GGACTAGCACCTACCAGGGCAAAGAGAAGAGTGGTG-----  
 -----GAGAGAGAAAAAAGAGCA---ATTGGA---CTGGGAGCC-----  
 GCCCTCCTTGCGTTCTTAGGAGCA---GCAGGAAGCACTATG---GGCGCGGCGTCA---  
 ATGACGCTGACGGTACAG---GCCAGACAA---TTATTG---TCTGGCATAGTGCAACAGCAAAGC---  
 AATTTG---CTGAGG---GCTATAGAGGCTCAGCAGCATCTGCTGAAACTCACGGTCTGGGGCATT  
 >JX500694..1  
 TTCTATTGCAATACAACAGAACTGTTCAATAGCACTTGGGACGGAAATGGCACTGCCACAAATAAC-----  
 -----  
 -----  
 ACAGAGGACAATGTAACCTCTGCCATGCAGAATAAAAGCAAATTATAAATATGTGGCAGAGAGTAGGACAAGCAA  
 TGTATGCCCCCTCCTATCAGAGGAAGTATAAAGTGTGTATCAAAC---  
 ATTACAGGACTACTACTAATAAGAGATGGTGGAGGTGGAAATAAT-----  
 -----  
 -----  
 AGCAACAATGAGACCTTCAGACCTATAGGAGGAAATATGAGGGACAATTGGAGAAAGTGAACCTATATAAGTATA  
 AGGTAGTACAAATTGAACCAATA---GGAATAGCACCTACCACAGCAAAAAGAAGAGTGGTG-----  
 -----GAGAGAGAAAAAAGAGCA---ATTGGA---CTGGGAGCT-----  
 ---GCCTTCCTTGCGTTCTTAGGAGCA---GCAGGAAGTACTATG---GGCGCGGCGTCA---  
 ATAACGCTGACGGTACAG---GCCAGACAA---TTATTG---TCTGGTATAGTACAACAGCAAAGC---  
 AATTTG---CTGAGG---GCTATAGAGGCTCAGCAGCATCTGCTGAAACTCACGGTCTGGGGCATT  
 >MH603967..1  
 TTCTATTGCAATACAACACAACCTGTTGATAGCACGTGGGAAGAGAATGCCAATATCACAATAACAATAATA  
 CACAG-----  
 -----  
 AATAATGAAAATATAACTCTACCATGCAGAATAAAAGCAAATTATAAGGATGTGGCAGGGGGTAGGACAAGCAA  
 TGTATGCCCCCTCCTATAAGAGGAGAAATAAGGTGTGAATCAAAC---  
 ATTACAGGATTACTACTAACAAGAGATGGTGGAGGTACAAATAGC-----  
 -----  
 -----

AGCAACAATGAGACCTTCAGACCTATAGGAGGAGACATGAGGGACAATTGGAGAAGTGAACCTATATAAGTATA  
AAGTAGTACAAATTGAACCCATA---GGAGTAGCACCTACCAAGGCAAAGAGAAGAGTGGTG-----  
-----GAGAGAGAAAAAAGAGCA---ATTGGA---CTGGGAGCT-----  
---GCCTTCCTTGGGTTCTTAGGAGCA---GCAGGAAGCACTATG---GGCGCGGCGTCA---  
ATAACGCTGACGGTACAG---GCCAGACAA---TTATTG---TCTGGCATAGTGCAACAGCAAAGC---  
AATTTG---CTGAGG---GCTATAGAGGCTCAGCAGCATCTGCTGAAACTCACGGTCTGGGGCATT  
>MH604120..1  
TTTTATTGTAATACAACAGACCTGTTCAATAGCGCTTGGGAAAATGGCAATGCTACAAATATCACACAGGCCA  
AT-----  
-----  
GACAAATGAAACTATAATTCTACCATGCAGAATAAGGCAAATTATAAATATGTGGCAAAGAGTAGGACAGGCCAA  
TGTATGCCCCCTCCTATCAGAGGAAATATAACGTGTATATCAAAT---  
ATTACAGGACTACTACTAACAAGAGATGGTGGAGGTGGAAATAAT-----  
-----  
AGCAACAATGAGACCTTCAGACCTATAGGAGGAGATATGAGGGACAATTGGAGAAGTGAACCTATATAAATATA  
AAGTAGTACAAATTGAACCAATA---GGAATAGCACCTAACAGGGCAAAGAGAAGAGTGGTG-----  
-----GAGAGAGAAAAAAGAGCA---ATTGGA---CTGGGAGCT-----  
---GCCTTCCTTGGGTTCTTGGGAGCA---GCAGGAAGTACTATG---GGCGCGGCGTCG---  
CTAACGCTGACGGTACAG---GCCAGAAAA---TTATTG---TCTGGCATAGTGCAACAGCAAAAC---  
AATTTG---CTGAAG---GCTATAGAGGCTCAGCAGCATCTGCTGAGACTCACGGTCTGGGGCATT  
>MH604308..1  
TTCTATTGCAATACAACAGACCTGTTCAATAGCACTTGGGACGGAAATAGCACTAGAGATGAAAATGGCAATG  
ATACAGAT-----  
-----AGCACA-----  
CAGAACAAATAGACCTATAACTCTGCCATGCAGAATAAAGCAAATTATAAATATGTGGCAGAGAGTAGGACAAG  
CAATGTATGCCCCCTCCTATAAAAGGAATTATAAGGTGTACATCAAAC---  
ATTACGGGACTACTACTAATAAGAGATGGTGGAGGCGGAGCTAAT-----  
-----  
AGCAGCAATGAGACCTTCAGACCTATAGGAGGAGATATAAGGGACAATTGGAGAAGTGAACCTATTTAAGTATA  
AAGTAGTACAAATTGAACCAATA---GGAGTAGCACCTACCAGGGCAAAGAGAAGAGTGGTG-----  
-----GAGAGAGAAAAAAGAGCA---ATTGGA---CTGGGAGCT-----  
---GCCTTCCTTGGGTTCTTGGGAGCA---GCAGGAAGTACTATG---GGCGCGGCGTCA---  
ATAACGCTGACGGTACAG---GCCAGACAA---TTATTG---TCTGGCATAGTACAACAGCAAAGC---  
AATTTG---CTGAGG---GCTATAGAGGCTCAGCAGCATCTGCTGAAACTCACGGTCTGGGGCATT  
>MH604056..1  
TTCTATTGCAATACAACAGCCCTGTTCAATTGGAACGGCAATGAAACTGTTACAAATAGCACACAG-----  
-----  
-----  
GCCAATGAAACTATAACTTTACCATGCAGAATAAAGCAAATTATAAATATGTGGCAGAGAGTAGGACAAGCAA  
TGTATGCCCCCTCCTATCAAAGGAAGTATAAGGTGTACATCAAAC---  
ATTACAGGACTGCTGCTAACAAGAGATGGTGGAACTAACAGCAGC-----  
-----  
-----  
AACAGCACTGAGATCTTCAGACCTATAGGAGGAAATATGAAGGACAATTGGAGAAGTGAACCTATATAAATATA  
AAGTAGTAAAAATTGAACCAATA---GGAGTAGCACCTACCAAGGCAAGGAGAAGAGTGGTG-----  
-----GAGAGAGAAAAAAGAGCA---ATTGGA---CTGGGAGCT-----  
---GCCTTCCTTGGGTTCTTGGGAGCA---GCAGGAAGCACTATG---GGCGCGGCGTCA---  
ATAACGCTGACGGTACAG---GCCAGACAA---TTATTG---TCCGGCATAGTGCAACAGCAAAGC---  
AATTTG---CTGAGG---GCTATAGAGGCTCAGCAGCATCTGCTGAAACTCACGGTCTGGGGCATT  
>MH604408..1  
TTCTATTGCAATACAACAAACCTGTTCAATAGCACGTGGAACGAAACTGACAGTGTTACAAATAGCACACAGG  
CC-----  
-----  
AATAATGAAACTATAATTTTACCATGCAGGATAAAGCAAATTATAAGGACGTGGCAGAGAGTAGGACAAGCAA  
TGTATGCCCCCTCCTATCAAAGGAAGGATAAGGTGTGAATCAAAC---  
ATTACAGGACTACTACTAACAAGAGATGGTGGAGGTAAAAGTAATAATGAGACA-----  
-----  
-----

AGTAATAATGAGACCTTCAGACCTATAGGAGGAGATATGAGGGACAATTGGAGAAGTGAACCTATATAAATATA  
 AAGTAGTAGAAATTGAACCAATA---GGAGTAGCACCTACCAAGGCAAGAGAAGAGTGGTG-----  
 -----GAGAGACAAAAAAGAGCA---ATTGGA---CTGGGAGCT-----  
 ---GCCTTCCTTGGGTTCTTAGGAGCA---GCAGGAAGCACTATG---GGCGCGGCGTCA---  
 CTAACGCTGACGGTACAG---GCCAGACAA---TTATTG---TCTGGCATAGTGCAACAGCAAAGC---  
 AATTTG---CTGAGG---GCTATAGAGGCTCAGCAGCATCTGCTGAAACTCACGGTCTGGGGCATT  
 >MH604109..1  
 TTCTACTGCAGTACAGCAGCCCTGTTCAATAGCACTTGGGACGGAAATACCACTATTGCAAATAACACACAG-  
 -----  
 -----  
 AACAAATGAAAATATAACTATAACCATGCAGAATAAAGCAAATTATCAATATGTGGCAGAGAGTAGGACAAGCAA  
 TGTATGCCCCCTCCTATACAAGGAGTTATAACTTGTGAATCAAAC---  
 ATTACAGGACTACTACTAACAAGAGATGGTGGAGTTAATAGCAGC-----  
 -----  
 -----  
 AATGAAACCTTCAGGCCTATAGGAGGAGATATGAGGGACAATTGGAGAAGTGAATTATATAAGTATAAAGTAG  
 TAAAAAGTTGAACCAATA---GGAGTAGCACCTACCACGGCAAGGAGAAGAGTGGTG-----  
 -----GGGAGAGAAAAAAGAGCA---ATTGGA---CTGGGAGCT-----  
 GCCCTCCTTGGGTTCTTGGGAGCA---GCAGGAAGCACTATG---GGCGCGGCGTCA---  
 ATAACGCTGACGGTACAG---GCCAGACAA---TTATTG---TCTGGCATAGTGCAACAGCAAAGC---  
 AATTTG---CTAAGG---GCCATAGAGGCTCAGCAGCATCTGCTGAAACTCACGGTCTGGGGCATT  
 >MH604508..2  
 TTCTATTGCTATACAACAGGGCTGTTCAATAGCACTTGGGACGAAAATAGCACTAGCACAAATATCACACAG-  
 -----  
 -----  
 AAAAAATGAAAATATAACTATAACCATGCAGAATAAAGCAAATTATAAATATGTGGCAGAGAGTAGGACAAGCAA  
 TGTATGCCCCCTCCTATCAGAGGAAATATAAGATGTGTATCAAAC---  
 ATTACAGGACTACTACTAACAAGAGATGGTGGAGATGGAGATAAT-----  
 -----  
 -----  
 AGCAGTGAGACCTTCAGACCTATAGGAGGAGATATGAGGGACAATTGGAGAAGTGAACCTATATAAATATAAAG  
 TAGTACAAATTGAACCCATA---GGAGTAGCACCTACCAAGGCAAGGAGAAGAGTGGTG-----  
 -----GAGAGAGAAAAAAGAGCA---ATTGGA---CTGGGAGCT-----  
 GCCTTCCTTGGGTTCTTAGGAGCG---GCAGGAAGCACTATG---GGCGCGGCGTCA---  
 ATAACGCTGACGGTACAG---GCCAGACAA---TTATTG---TCTGGCATAGTGCAACAGCAAAGC---  
 AATTTG---CTGAGG---GCTATAGAGGCTCAGCAGCATCTGCTGAAACTCACGGTCTGGGGCATT  
 >MH604524..1  
 TTCTATTGCAATACAACAAACCTGTTCAATAGTGCTTGGAAAAATGGCAGTGCTACAAATAGCACACAAGCC-  
 -----  
 -----  
 AATGGAACAACTATAACTCTACCATGCAGAATAAAGCAAATTATAAATATGTGGCAGAGAGTAGGACAAGCAA  
 TGTATGCCCCCTCCTATCAAAGGAAGTATAAGGTGTGAATCAAAC---  
 ATTACAGGACTACTACTAACAAGAGATGGTGGAGGTGAAACTAATAGC-----  
 -----  
 -----  
 AGCGATGAAACCGAAACCTTCAGACCTATAGGAGGAGATATGAGGAATAATTGGAGAAGTGAATTATATAAGT  
 ATAAAGTAGTAAAAATTGAACCAATA---GGAGTAGCACCTACCAGGGCAAGGAGAAGAGTGGTG-----  
 -----GAGAGAGAAAAAAGAGCA---GTTGGA---CTGGGAGCT---  
 -----GCCTTCCTTGGGTTCTTGGGAGCA---GCAGGAAGCACTATG---GGCGCGGCGTCA---  
 ATGACGCTGACGGTACAG---GCCAGAAAA---TTATTG---TCTGGCATAGTGCAACAGCAAAGC---  
 AATTTG---CTGAGG---GCTATAGAGGCTCAGCAGCATCTGCTGAAACTCACGGTCTGGGGCATT  
 >MH604541..1  
 TTCTATTGCAATACAACAAAGCTGTTCAATAGCACTTGGGAAAATAGCACTTGGGAAAATGGCACTGTTGCAA  
 AT-----  
 -----AGCACA-----  
 GGGGACAATGACACTATAACTATAACCATGCAGAATAAAGCAAATTATAAATATGTGGCAAAGAGTAGGACAAG  
 CAATGTATGCCCCCTCCTATCAAAGGAATTATAAGGTGTGAATCAAAC---  
 ATTACAGGACTACTACTAACAAGAGATGGTGGAGGTGGAACCTAAT-----  
 -----  
 -----

AGCAGCAATGAGACCTTCAGACCTATAGGAGGAGACATGAGGGACAATTGGAGAAGTGAACCTATATAAGTATA  
 AAGTAGTAAAAATTGAACCAATA---GGAGTAGCACCTACCAGGGCAAAGAGAAGAGTGGTG-----  
 -----GAGAGAGAAAAAAGGGCA---TTTGGA---CTGGGAGCT-----  
 ---GCCTTCCTTACGTTCTTGGGAGCA---GCAGGAAGCACTATG---GGCGCGGCGTCA---  
 ATAACGCTGACGGTACAG---GCCAGACAA---TTATTG---TCTGGCATAGTGCAACAGCAAAGC---  
 AATTTG---CTGAGG---GCTATAGAGGCTCAGCAGCATCTGCTGAAACTCACGGTCTGGGGCATT  
 >MH330347..1  
 TTCTATTGCAATACCACATACCTGTTCAATAGCACTTGGGATGGAAATAGCACTGTAAATAGCACAGGG----  
 -----  
 -----  
 GGCGATAGAAATATAACTTTACCATGCAGAATAAAGCAAATTATAAATATGTGGCAGAGAGTAGGACAAGCAA  
 TGTATGCCCCCTCCTATCCGAGGAAACATAAGTTGTGAATCAAAC---  
 ATCACAGGACTACTCCTAATAAGAGATGGTGGAGGTGGAAATAAT-----  
 -----  
 -----  
 AAGACTAATGAGACCTTCAGACCTATAGGAGGAGATATGAGGGACAATTGGAGAAGTGAACCTATATAAGTATA  
 AAGTAGTAAAAATTGAACCAATA---GGGGTAGCACCTACCCTGGCCAGGAGAAGAGTGGTG-----  
 -----GAGAGAGAAAAAAGAGCAATAATTGGA---CTGGGAGCT-----  
 ---GCCTTCATTGGGTTCTTAGGAGCA---GCAGGAAGCACTATG---GGCGCGGCGTCA---  
 CTGACGCTGACGGTACAG---GCCAGACAA---TTATTG---TCTGGCATAGTGCAACAGCAAAGC---  
 AATTTG---CTGAGG---GCTATAGAGGCTCAGCAGCATCTGCTGAAACTCACGGTCTGGGGCATT  
 >MH330348..1  
 TTCTATTGCAATACAAACAACTGTTCAACATAAATAGCACTGACACAAATATCACACAG-----  
 -----  
 -----  
 GACAATGAACTATAACTCTACCATGCAGAATAAAGCAAATTATAAATATGTGGCAGAGAGTAGGACAAGCAA  
 TGTATGCCCCCTCCTATCAAAGGAAGTATAATGTGTGAATCAAAC---  
 ATTACAGGACTACTACTAACAAGAGATGGTGGAGGTGACAGAAAT-----  
 -----  
 ----  
 GATACTAATAGTACTGAGACCTTCAGACCTATAGGAGGAGATATGAGGGACAATTGGAGAAGTGAACCTATATA  
 AGTATAAAGTAGTAAAAATTGAACCAATA--GGAGTAGCACCTACCAGGGCAAAGAGAAGAGTGGTG-----  
 -----GGGAGAGAAAAAAGAGCA---ATTGGA---  
 CTGGGAGCC-----GCCTTCCTTGGGTTCTTAGGAGCA---GCAGGAAGCACTATG---  
 GGCGCGGCGTCA---CTGACGCTGACGGTACAG---GCCAGACAA---TTATTG---  
 TCTGGCATAGTGCAACAGCAAAGC---AATTTG---CTGAGG---  
 GCTATAGAGGCTCAGCAGTATATGCTGAAACTCACGGTCTGGGGCATT  
 >MH330349..1  
 TTCTATTGCAATACAAACAGCCCTGTTCAATAGCACTTGGAGTGAAAATGGCACTGCCATAAATAGCACAGAG-  
 -----  
 -----  
 GCCAATGGAACCTATAACTCTGCCATGCAGAATAAGGCAAATTATAAATATGTGGCAGAGAGTAGGACAAGCAA  
 TGTATGCCCCCTCCTATCAGAGGAATTATAAGGTGTGAATCAAAC---  
 ATTACAGGACTACTGCTAACACGAGATGGTGTAGCTAATAGCAGC-----  
 -----  
 -----  
 AATGAGACCTTCAGACCTATAGGAGGAGATATGAGGAACAATTGGAGAAGTGAACCTATATAAGTATAAAGTAG  
 TAAAAATTGAACCAATA---GGAGTAGCACCTACCAGGGCAAAGAGAAGAGTGGTG-----  
 -----GAGAGAGAAAAAAGAGCA---ATTGGA---CTGGGAGCC-----  
 GCCTTCCTTGGGTTCTTAGGAGCA---GCAGGAAGCACTATG---GGCGCGGCGTCA---  
 CTGACGCTGACGGTACAG---GCCAGACAA---CTCTTG---TCTGGCATAGTGCAACAGCAAAGC---  
 AATTTG---CTGAGG---GCTATAGAGGCTCAGCAGCATCTGCTGAAACTCACGGTCTGGGGCATT  
 >MH330350..1  
 TTTTATTGTAATACAAACAGAACTGTTCAATAGTACTTGGGACGGAAATAACACTGTTACAAATAGCACACAG-  
 -----  
 -----  
 GACAATGGCACTATAACTCTACCATGCAGAATAAGGCAAATTATAAATATGTGGCAGAGAGTAGGACAAGCAA  
 TGTATGCCCCCTCCTATCAGAGGAAATATAAGTTGTGAATCAAAC---  
 ATTACAGGACTACTACTAACAAGAGATGGTGGAGTTAATACCAGC-----  
 -----  
 -----

-----  
AATGAGACCTTCAGACCTACAGGAGGAGATATGAGGAACAATTGGAGAAGTGAAGTATATAAGTATAAAGTAG  
TACAAATTGAACCAATA---GGAGTAGCACCTACCAAGGCAAAGAGAAGAGTGGTG-----  
-----GAGAGAGGAAAAAGGGCA---ATTGGA---CTGGGAGCT-----  
GCCTTCCTTGGGTTCTTGGGAGCA---GCAGGAAGTACTATG---GGCGCGGCGTCA---  
ATAACGCTGACGGTACAG---GCCAGACAA---TTATTG---TCTGGCATAGTACAACAGCAAAGC---  
AATTTG---CTGATG---GCTATAGAGGCTCAGCAGCATCTGCTGAAACTCACGGTCTGGGGCATT  
>MH330351..1  
TTCTATTGCAATACAACAAACCTGTTCAATAGCACTTGGGACAAAAATAGTACTGTCACAAATAGCACAAAC-  
-----  
-----  
AGCACAGAAACTATAACTCTACCATGCAGAATAAAGCAAATTATAAATATGTGGCAGAGAGTAGGACAAGCAA  
TGTATGCCCCCTCCTATCAAAGGAAGTATAAGGTGTGAATCAAAC---  
ATTACAGGACTAATATTAATAAGAGATGGTGGAAATAATAGCAGC-----  
-----  
-----  
AATGAGACCTTCAGACCTATAGGAGGAAATATGAGGGACAATTGGAGAAGTGAAGTATATAAATATAAAGTAG  
TAGAGATTGAACCAATA---GGAATAGCACCTACCAAGGCAAGAAGGAGAGTGGTG-----  
-----GAGAGAGAAAAAGAGCA---ATTGGA---CTGGGAGCT-----  
GCCTTCCTTGGGTTCTTAGGAGCA---GCAGGAAGCACTATG---GGCGCGGCGTCA---  
ATAACGCTGACGGTACAG---GCCAGACAA---TTATTG---TCTGGCATAGTGCAACAGCAAAGC---  
AATTTG---CTGAGG---GCTATAGAAGCTCAGCAGCATCTGCTGAAGCTCACGGTCTGGGGCATT  
>MH330352..1  
TTCTATTGCAATACAACACAACCTGTTCAATAGCACTTGGCCTTGGAATGACACTGTCACAAATAGCACAGAG-  
-----  
-----  
ACCAAGTGAATATAACTCTACCATGCAGAATAAAGCAAATTATAAATATGTGGCAGAGAGTAGGACAAGCAA  
TGTATGCCCCCTCCTATCAGAGGAAGTATAAGGTGTGAATCAAAC---  
ATTACAGGACTACTACTAATAAGAGATGGTGGAACTAATAGCACC-----  
-----  
-----  
AATGAGACCTTCAGACCTATAGGAGGAGATATGAGGGACAATTGGAGAAGTGAAGTATATAAGTATAAAGTAG  
TACAAATTGAACCAATA---GGAGTAGCACCTACCAAGGCAAAGAGAAGAGTGGTG-----  
-----GAGAGAGAAAAAGAGCA---ATTGGA---CTGGGAGCT-----  
GCCTTCCTTGGGTTCTTAGGAGCA---GCAGGAAGCACTATG---GGCGCGGCGTCA---  
ATAACGCTGACGGTACAG---GCCAGACAA---TTATTG---TCTGGCATAGTGCAACAGCAAAGC---  
AATTTG---CTGAGG---GCTATAGAGGCTCAGCAGCATCTGCTGAAACTCACGGTCTGGGGCATT  
>MH330353..1  
TTCTATTGCAATACAACAGACCTGTTGATAGCACTTGGGATGGAAATAACACAGATAACACTGTCACAAATA  
TCACG-----  
-----  
GGCAATGGAAGTATGACTCTGCCATGCAGAATAAGGCAAATTGTAAGGATGTGGCAGAGAGTAGGACAAGCAA  
TGTATGCCCCCTCCTATTGAAGGGGAAATAAGGTGTGAATCAAAC---  
ATTACAGGACTACTACTACTAAGAGATGGTGGAAATTAATAGCAGC-----  
-----  
-----  
AATGAGACCTTCAGACCTATAGGAGGAGATATGAGGGACAATTGGAGAAGTGAGCTATATAAGTATAAAGTAG  
TAAAAATTGAACCAATA---GGAGTAGCACCTACCCAGGCAAGGAGAAGAGTGGTG-----  
-----GCGAGAGAAAAAGAGCA---ATTGGA---TTAGGAGCT-----  
GCCTTCCTTGGGTTCTTAGGAGCA---GCAGGAAGCACTATG---GGCGCGGCGTCA---  
ATAACGCTGACGGTACAG---GCCAGACAA---TTATTG---TCTGGCATAGTGCAACAGCAAAGC---  
AATTTG---CTGAAG---GCTATAGAGGCTCAGCAGCATCTGCTGAAACTCACAGTCTGGGGCATT  
>MH330354..1  
TTCTATTGCAATACAACAAGCCTGTTCAATAGCACTTGGGATGAAAATAGCACTGTCACAAACACAGAG----  
-----  
-----  
GCCAATGGAAGTATAAATTCTGCCATGCAGAATAAAGCAAATTATAAATATGTGGCAAAGAGTAGGACAAGCAA  
TGTATGCCCCCTCCTATCAGAGGAAGGATAAGGTGTGAATCAAAC---  
ATTACAGGACTACTAATAACAAGAGATGGTGGAGGTGGAAATAAT-----  
-----  
-----

-----  
AGCACCAATGAAACCTTCAGACCTATAGGAGGAGATATGAGGGACAATTGGAGAAGTGAACCTATATAAGTATA  
AAGTAGTAAAAATTGAACCAATA---GGAGTAGCACCTACCAGGGCAAAGAGAAGAGTGGTG-----  
-----GAGAGAGAAAAAAGAGCA---ATTGGA---CTGGGAGCC-----  
---GCCTTCCTTGGGTTCTTAGGAGCA---GCAGGAAGCACTATG---GGCGCAGCGTCA---  
ATGACGCTGACGGTACAG---GCCAGACAA---TTATTG---TCTGGCATAGTGCAACAGCAAAGC---  
AATTTG---CTGAGG---GCTATAGAGGCTCAGCAGCATCTGCTGAAACTCACGGTCTGGGGCATT  
>MH330355..1  
TTCTATTGCAATACAACAAGGCTGTTCAATAGCTCTTGGGGCGAAAATAGCACTGTCACAAATAGCACAGAT-  
-----  
-----  
GTCAATGGAACCTATAATTCTGCCATGCAGAATAAAACAAATTATAAATATGTGGCAGAGAGTAGGACAAGCAA  
TGTATGCCCCCTCCTATCCCAGGAAATATAACATGTATATCAAAC---  
ATTACAGGACTACTACTAGTAAGAGATGGTGGACAGAACAGTAGT-----  
-----  
-----  
AACACCAGTGAAACCTTCAGACCCATAGGAGGAGATATGAAGCACAATTGGAGAAGTGAACCTATATAAGTATA  
AAGTAGTAGAAATTGAACCAATA---GGAGTAGCACCTACCAAGGCAAAGAGAAGAGTGGTG-----  
-----GAGAGAGAAAAAAGAGCAATTATTGGA---CTGGGAGCT-----  
---GCCTTCATTGGGTTCTTAGGAGCA---GCAGGAAGCACTATG---GGCGCGGCGTCA---  
ATAACGCTGACGGTACAG---GCCAGACAA---TTACTG---TCTGGCATAGTGCAACAGCAAAGC---  
AATTTG---CTGAGG---GCTATAGAGGCTCAGCAGCATCTGCTGAAACTCACGGTCTGGGGCATT  
>MH330356..1  
TTCTATTGCAATACAACAGACCTGTTTAATAGCACTTGGGAGGAAAATAGCACTGTTACAAATAACACAAAT-  
-----  
-----  
GCCAATGAAAATATAACTCTGCCATGCAGGATAAAGCAAATTATAAATTTGTGGCAGAGAGTAGGGCGAGCAA  
TGTATGCCCCCTCCTATCAGAGGAATTATAAGGTGTAACCTCAACT---  
ATTACAGGACTACTACTAACAAGAGATGGTGGAAATGGAAATAGTAGC-----  
-----  
-----  
AACAAATGAGACTGAGACCTTCAGACCTATAGGAGGAAATATGAGGGACAATTGGAGAAGTGAACCTATATAAGT  
ATAAAGTAGTAGAAATTGAACCAATA---GGAGTAGCACCTACCAGGGCAAAGAGAAGAGTGGTG-----  
-----CAGAGAGAAAAAAGAGCA---GTTGGA---CTGGGAGCC---  
-----GCCTTCCTTGGGTTCTTAGGAGCA---GCAGGAAGCACTATG---GGCGCGGCGTCA---  
CTGACGCTGACGGTACAG---GCCAGACAA---TTATTG---TCTGGCATAGTGCAACAGCAAAGT---  
AATTTG---CTGAGG---GCTATAGAGGCTCAGCAGCATCTGCTGAAACTCACGGTCTGGGGCATT  
>MG902950..1  
TTCTATTGCAATACAACAAACCTGTTTCAGTAGCACTTGGAACGACACTATCACAAATTTACAGAG-----  
-----  
-----  
ACCAATGAAACTATAATTCTGCCATGCAGAATAAGGCAATTTATAAAGATGTGGCAGAGAGTAGGACAAGCAA  
TGTATGCCCCCTCCTATCAAAGGGAGCATAAGGTGTGAATCAAAC---  
ATTACAGGACTACTACTAACAAGAGATGGTGGAAATGGAACACT-----  
-----  
-----  
GACAGCAATGAGACCTTCAGACCTATAGGAGGAGATATGAGGGACAATTGGAGAAGTGAACCTATATAAGTATA  
AAGTAGTACAAATTGAACCAATA---GGAATAGCACCTACCAAGGCAAAGAGAAGAGTGGTG-----  
-----GAGAGAGAAAAAAGAGCA---ATTGGA---CTGGGAGCC-----  
---GCTTTCCTTGGGTTCTTAGGAGCA---GCAGGAAGTACTATG---GGCGCGGCGTCA---  
ATAACGCTGACGGCACAG---GCCAGACAA---TTATTG---TCTGGTATAGTACAACAGCAAAGC---  
AATTTG---CTGAGG---GCTATAGAGGCTCAGCAGCATCTGCTGAAACTCACGGTCTGGGGCATT  
>MG902951..1  
TTCTATTGCAATACAACAGACCTGTTCAATAGCACTTGGGGAAATAACACAAATAGCACAGGG-----  
-----  
-----  
ACCAATGAAACTATAACTCTGCCATGCAGAATAAAGCAAATTATAAATATGTGGCAGAGAGTAGGACAAGCAA  
TGTATGCCCCCTCCTATCCGAGGAATTATAAAGTGTGAATCAAAC---  
ATTACAGGACTACTACTAACAAGAGATGGTGGAGGTGAAGCTAATAAT-----  
-----  
-----

-----  
AGCGAGAGCGAGACCTTCAGACCTATAGGAGGAGATATGAGGGACAATTGGAGAAGTGAACCTATATAAGTATA  
AAGTAGTAGAAATTGAACCAATA---GGAGTAGCACCTACCAGGGCAAAGAGAAGAGTGGTG-----  
-----CAGAGAGAAAAAAGAGCA---ATTGGA---CTGGGAGCC-----  
---GCCCTCCTTGGGTTCTTAGGAGCA---GCAGGAAGCACTATG---GGCGGGCGTCA---  
ATAACGCTGACGGTACAG---GCCAGACAA---TTATTG---TCTGGTATAGTGCAACAGCAAAGC---  
AATTTG---CTGGAT---GCTATAGAGGCTCAGCAGCATCTGCTGAGACTCACGGTCTGGGGCATT  
>MH330337..1  
TTCTATTGCAATACAACAGACCTGTTCAATAGCACTTGGGACGAAAATGACACTGTTACAAATAGCACACAG-  
-----  
-----  
GCCAATGAAACTATAATTCTACCATGCAGGATAAAAGCAAATTATAAATATGTGGCAGAGAGTAGGACAAGCAA  
TGTATGCCCCCTCCTATCAAAGGAAGTATAAGGTGTGAATCAAAC---  
ATTACAGGACTAATACTAACAAGAGATGGTGGAATAATAGCAGC-----  
-----  
-----  
AATGAGACCTTCAGACCTATAGGAGGAAATATGAGGGACAATTGGAGAAGTGAACCTATATAAGTATAAAGTAG  
TAAAAATTGAACCAATA---GGAGTAGCACCTACCAAGGCAAAGAGAAGAGTGGTG-----  
-----GAAAGAGAAAAAAGAGCA---ATTGGA---CTGGGAGCT-----  
GCCTTCCTTGGGTTCTTGGGAGCA---GCAGGAAGTACTATG---GGCGGGCGTCA---  
ATAACGCTGACGGTACAG---GTCAGACAA---TTATTG---TCTGGCATAGTGCAACAGCAAAGC---  
AATTTG---CTGAGG---GCTATAGAGGCTCAGCAGCATCTGCTGAAACTCACGGTCTGGGGCATT  
>MH330338..1  
TTCTATTGCGATACAACAAAACTGTTCAATAGCACTTGGAACGAAAATGGCACTAGGACAGATACAGATACCA  
CA-----  
-----  
CAGGATGAAAATATAACTATAACCATGCAGAATAAAGCAAATTATAAATATGTGGCAGAGAGTAGGACAAGCAA  
TGTATGCCCCCTCCCATCAGAGGAACTATAATGTGTATATCAAAC---  
ATTACAGGGCTACTCCTAACAAGAGATGGTGAGCTAATAACAGC-----  
-----  
-----  
AATGAAACCTTCAGACCTATAGGAGGAGATATGAGAGACAATTGGAGAAGTGAACCTATATAAGTATAAAGTAG  
TAGAAATTGAACCAATA---GGGGTAGCACCTACCAAGGCAAAGAGAAGAGTGGTG-----  
-----GAGAGAGAAAAAAGAGCA---GTTGGA---CTGGGAGTT-----  
GCCTTCCTCGGGTTCTTAGGAGCA---GCAGGAAGTACTATG---GGCGGGCGTCA---  
CTGACGCTGACGGTACAG---GCCAGACAA---TTATTG---TCTGGCATAGTGGAACAGCAAAGC---  
AATTTG---CTGAGG---GCTATAGAGGCTCAGCAGCATCTGCTGAAACTCACGGTCTGGGGCATT  
>MH330339..1  
TTCTATTGCAATACAACAGCACTGTTCAATAGCACTTGGGGAGGAAATAACACACAG-----  
-----  
-----  
GGCAATGAAAGTATAACTCTACCATGCAGAATAAAGCAAATTATAAGGATGTGGCAGAGAGTAGGACAAGCAA  
TGTATGCCCCCTCCTATCCAAGGAAGGATAAGGTGTGAATCAAAT---  
ATTACAGGACTACTATTAAACAAGAGATGGTGAGTAATAATAGCAGC-----  
-----  
-----  
AATGGGACTGAGACCTTCAGACCTACAGGAGGAGATATGAGGGACAATTGGAGAAGTGAACCTATATAAGTATA  
AAGTGGTAGAAATTGAACCAATA---GGAATAGCACCTACCAGGGCAAGGAGAAGAGTGGTG-----  
-----CAGAGAGAAAAAAGAGCA---ATTACA---CTGGGAGCT-----  
---GCCTTCCTTGGGTTCTTGGGAGCA---GCAGGAAGTACTATG---GGCGGGCGTCA---  
ATAACGCTGACGGTACAG---GCCAGGCAA---TTATTG---TCTGGTATAGTACAACAGCAAAGC---  
AATTTG---CTAAAG---GCTATAGAGGCTCAGCAGCATCTGCTGAAACTCACGGTCTGGGGCATT  
>MH330340..1  
TTCTATTGCAATACAACAGACCTGTTCAATAGCATTTGGGAAAACGGCAATGTCACAAATAGCACAGAG----  
-----  
-----  
ACCAATGAAACTATAACTCTACAATGCAGAATAAAGCAAATTATAAATATGTGGCAAAGAGTAGGACAAGCAA  
TGTATGCCCCCTCCTATCAGTGGAAGCATAAGGTGTGAATCAAAC---  
ATTACAGGACTAATACTAATAAGAGATGGTGATATAATAGCAGC-----  
-----

```

-----
AATGAGACCTTCAGACCTATAGGAGGAAATATGAAGGACAATTGGAGAAGTGAAGTATATAAGTATAAAGTAG
TAAAAATTGAACCAATA---GGAGTAGCACCTACCAGGGCAAAGAGAAGAGTGGTG-----
-----GAGAGAGAAAAAAGAGCA---ATCGGA---CTGGGAGCT-----
GCCTTCCTTGGGTTCTTAGGAGCA---GCAGGAAGTACTATG---GGCGCGGCGTCA---
CTGACGCTGACGGTACAA---GCCAGACAA---TTATTG---TCTGGCATAGTGCAACAGCAAAGC---
AATTTG---CTGAGG---GCTATAGAGGCTCAGCAACATCTGCTGAAACTCACGGTCTGGGGCATT
>MH330341..1
TTCTATTGCAATACAACAGCCCTGTTCAATAGCACTTGGCACGAAAATGACACTGTTACAAATAGCACACAG-
-----
-----
AACAAATGAAACTATAATTCTACCATGCAGAATAAAGCAAATTATAAATATGTGGCAGAGAGTAGGACAAGCAA
TGTATGCCCCCTCCGATCAGAGGAAGTATAAGGTGTGAATCAAAC---
ATTACAGGACTACTACTAACAAGAGATGGTGGGGCTAATAGCAGC-----
-----
-----
AATGAGACCTTCAGACCTATAGGAGGAGATATGAGGGACAATTGGAGAAGTGAAGTATATAAGTATAAAGTAG
TAAAAATTGAACCAATA---GGAGTAGCACCTACCAGGGCAAAGAGAAGAGTGGTG-----
-----GAAAGAGAAAAAAGAGCA---ATTGGA---CTGGGAGTT-----
GCCTTCCTTGGGTTCTTGGGAGCA---GCAGGAAGCACTATG---GGCGCGGCGTCA---
ATAACGCTGACGGTACAG---GCCAGACAA---TTATTG---TCTGGCATAGTGCAACAGCAAAGC---
AATTTG---CTGAGG---GCTATAGAGGCTCAGCAGCATCTGCTGAAACTCACGGTCTGGGGCATT
>MH330342..1
TTCTATTGCAATACAACAGCCCTGTTCAATAACACTGACACAAATAGCACAGAG-----
-----
-----
ACCAAGTGGAAATATAACTATAACCATGTAGAATAAAGCAAATTATAAGAATGTGGCAGAGAGTAGGACAAGCAA
TGTATGCCCCCTCCTATCGAAGGAAATATAACGTGTGTATCAAAC---
ATTACAGGTCTACTACTAACAAGAGATGGTGGGGTAAATAACACC-----
-----
-----
AATGAGACCTTCAGACCCATAGGAGGAGATATGAGGGACAATTGGAGAAGTGAAGTATATAAGTATAAAGTAG
TAGAAATTGAACCAATA---GGAGTAGCACCTACCAGGGCAAAGAGAAGAGTGGTG-----
-----GAGAGAGAAAAAAGAGCA---ATTGGA---CTGGGAGCT-----
GCCTTCCTTGGGTTCTTAGGAGCA---GCAGGAAGCACTATG---GGCGCGGCGTCA---
ATGACGCTGACGGTACAG---GCCAGACAA---TTATTG---TCTGGCATAGTGCAAGCAGCAAAGC---
AATTTG---CTGCAG---GCTATAGAGGCTCAGCAGCATCTGCTGAGACTCACGGTCTGGGGCATT
>MH330344..1
TTCTATTGTAATACAACAAAACCTGTTCAATAGCACTTGGGACAAAATAGCACAAAGTACAAATATCACACAG-
-----
-----
-----
ACAAATGGAAATATAACTCTACCATGCAGAATAAAGCAAATTATAAATATGTGGCAGAGAGTAGGACAAGCAA
TATATGCCCCCTCCTATCAAAGGAAATATAATGTGTGTATCAAAC---
ATTACAGGACTACTACTAATAAGAGATGGGGGAGGTGGAAATAAT-----
-----
-----
AGCATCAATGAAACTTTCAGACCTATAGGAGGAGATATGAGGGACAATTGGAGAAGTGAAGTATATAAGTATA
AAGTAGTACAAATTGAACCAATA---GGGGTAGCACCTACCAGGGCAAGGAGAAGAGTGGTG-----
-----CAGAGAGAAAAAAGAGCA---ATTGGA---CTGGGAGCC-----
---GCCTTCCTCGGGTTCTTAGGAGCA---GCAGGAAGCACTATG---GGCGCAGCGTCA---
CTGACGCTGACGGTACAG---GCCAGACAA---TTATTG---TCTGGCATAGTGCAACAGCAAAGC---
AATTTG---CTGAGG---GCTATAGAGGCTCAGCAGCATCTGCTGAAACTCACGGTCTGGGGCATT
>MH330345..1
TTCTATTGCAATACAACAGCCCTGTTCAATAGCATTTGGAACGGAAATGACAATGGCACAAATAGTACAGAG-
-----
-----
-----
GACACTGACCCTATAATTCTACCATGCAGAATAAAGCAAATTGTAAATATGTGGCAGAGAGTAGGACAAGCAA
TGTATGCCCCCTCCTATCCCAGGAAATATAAGTTGTACATCAAAC---
ATTACAGGACTACTACTAACAAGAGATGGA---ATTAATGGCAGC-----
-----

```

-----  
AATGAGACCTTCCGACCTATAGGAGGAGACATGAGGGACAATTGGAGAAGTGAAGTATATAAGTATAAAGTAG  
TAAAAATTGAACCAATA---GGAGTAGCACCTACCAAGGCAAAGAGAAGAGTGGTG-----  
-----GAGAGAGAAAAAAGAGCA---ATTGGA---CTGGGAGCT-----  
GCCTTCCTTGGGTTCTTAGGAGCA---GCAGGAAGCACTATG---GGCGCGGCGTCA---  
ATAACGCTGACGGTACAG---GCCAGACAA---TTATTG---TCTGGCATAGTGCAACAGCAAAGC---  
AATTTG---CTGAGG---GCTATAGAGGCTCAGCAGCATCTGCTGAAACTCACGGTCTGGGGCATT  
>MH330346..1  
TTCTATTGCAATACATCAGACCTGTTC-----ACACATAATATCACAGGGGCCAATGAAACAGGG-----  
-----  
-----  
GCCAATGGAAGTATAACTTATACCATGCAAAATAAAACAAATTATAAATATGTGGCAGAGAGTAGGACAAGCAA  
TGTATGCCCCCTCCTATCAGAGGAATTATAAGGTGTGAATCAAAC---  
ATTACAGGACTATTACTAACAAGAGATGGTGGAAAG-----  
-----  
-----  
AGCGAGAATGAGACCTTCAGACCTATAGGGGGAGATATGAGGGACAATTGGAGAAGTGAAGTATATAAGTATA  
AAGTAGTAGAAATTGGACCAATA---GGAGTAGCACCTACCAGGGCACAGAGGAAAAGTGGTG-----  
-----AAGAGAGAAAAAAGAGCAATTATTGGA---CTGGGAGCT-----  
---GCCTTCCTTGGGTTCTTAGGAGCA---GCAGGAAGCACTATG---GGCGCGGCGTCA---  
TTGACGCTGACGGTACAG---GCCAGACAA---TTATTG---TCTGGCATAGTGCAACAGCAAAGC---  
AATTTG---CTGAGG---GCTATAGAGGCTCAGCAGCATCTGCTGAAACTCACGGTCTGGGGCATT  
>HQ616082..1  
TTCTATTGCAATACAACAAACCTGTTCAATGGCACTTGGTCAAAAAGCACAAACGGCCAATGCAACT-----  
-----  
-----  
GCCAATGAAAGTATAACTCTACCGTGCAGAATAAAGCAAATTATAAATATGTGGCAGAGAGTAGGACAAGCAA  
TGTATGCCCCCTCCTATCATAGGCAATATAAGCTGTGAATCAAAC---  
ATTACAGGACTGCTACTGACAAGAGATGGTGGAAACAACTAATAGC-----  
-----  
-----  
AGCGATGAGACCTTCAGACCTATAGGAGGAAATATGAGGGACAATTGGAGAAGTGAAGTATATAAGTATAAAG  
TAGTAATAATTGATCCAATA---GGAGTAGCACCTACCAGGGCAAAGAGAAGAGTGGTG-----  
-----GAGAGGGAAAAAAGAGCA---ATTGGA---CTGGGAGTT-----  
GCCTTCCTTGGGTTCTTAGGAGCA---GCAGGAAGCACTATG---GGCGCGGCGTCA---  
CTGACGCTGACGGTACAG---GCCAGACAA---TTATTG---TCTGGTATAGTGCAACAGCAAAGC---  
AATTTG---CTGAGG---GCTATAGAGGCTCAGCAGCATCTGCTGAAACTCACGGTCTGGGGCATT  
>DQ823357..1  
TTCTATTGCAATACAACAGAACTGTTCAATAGCACTTGGGGCGAAAATGGCACTATCACAAATAGCACAGAG-----  
-----  
-----  
ACCAGTGAAAATATAACTCTACCATGCAGAATAAAGCAAATTATAAATATGTGGCAGAGAGTAGGACAAGCAA  
TGTATGCCCCCTCCTATCAGAGGAAATATAAGTTGTGTATCAAAC---  
ATTACAGGACTACTACTAACAAGAGATGGTGGAACTAATAGCAGC-----  
-----  
-----  
ACTGAGACCTTCAGACCTACAGGAGGAGATATGAGGGACAATTGGAGAAGTGAAGTATATAAGTATAAAGTAG  
TAGAAATTGAACCAATA---GGAGTAGCACCTACCAAGGCAAAGAGAAGAGTGGTG-----  
-----GAGAGAGAAAAAAGAGCA---ATAATTGGACTGGGAGCT-----  
GCCTTCCTTGGGTTCTTAAGTGCA---GCAGGAAGCACTATG---GGCGCAGCGTCA---  
CTGACGCTGACGGTACAG---GCCAGACAA---TTATTG---TCTGGCATAGTGCAACAGCAAAGC---  
AATTTG---CTGAGG---GCTATAGAGGCTCAGCAGCATTTGCTGAGACTCACGGTCTGGGGCATT  
>KU749399..1  
TTCTATTGCAATACAACAGGCCTGTTCAATAGTACTTGGGACAATAGTACTTGGGACAAAAATAGCACTGTCA  
CAAAT-----  
-----  
GGCACCGAGGACAATATAACTCTACAATGCAAAATAAAGCAAATTATAAGGATGTGGCAGAGAGTAGGACAAG  
CAATGTATGCCCCCTCCTATCAGAGGAAATATAAAGTGTACATCAAAC---  
ATTACAGGACTACTACTAATAAGAGATGGTGGAAATGGAAATAAT-----  
-----

-----  
AGCAACAATGAGACCTTCAGACCGACAGGAGGAGATATGAGAAATAATTGGAGAAGTGAACCTATATAAGTATA  
AAGTAGTAGAAGTTGAACCAATA---GGAATAGCACCTACCAAGGCAAAGAGAAGAGTGGTG-----  
-----GAGAGAGAAAAAAGAGCAATAGTTGGA---CTGGGAGCT-----  
---GCCTTCCTTGGGTTCTTAGGAGCA---GCAGGAAGTACTATG---GGCGCGGCGTCA---  
ATAACGCTGACGGTACAG---GCCAGACAA---TTACTA---TCTGGCATAGTACAACAGCAGAGC---  
AATCTG---CTGAGG---GCTATAGAGGCTCAGCAGCATCTGCTGAAACTCACGGTCTGGGGCATT  
>KU749401..1  
TTCTATTGCAATACAACAGACCTGTTCAATAGCACTTGGAACGGCAGCAATAGCACTGCCATGAATAGCTCA-  
-----  
-----  
GGCAATGAAAATATAACCATACACTGCAGAATAAAGCAAATTATAAATATGTGGCAGAGAGTAGGACAAGCAA  
TGTATGCCCCCTCCTATCAGAGGAAATATAACATGTGTATCAAAC---  
ATTACAGGGCTACTACTAATAAGAGATGGGGGAAATGGAAATAAT-----  
-----  
-----  
AGCAACAATGAGACCTTCAGACCTATAGGAGGAGATATGAGGGATAATTGGAGAAGTGAACCTATATAAATATA  
AAGTAGTAAAAATTGAACCAATA---GGAGTAGCACCTACCAAGGCAAGGAGAAGAGTGGTG-----  
-----GGGAGAGAAAAAAGAGCA---ATTGGA---CTGGGAGCT-----  
---GCCTTCCTTGGGTTCTTAGGAGCA---GCAGGAAGCACTATG---GGCGCGGCGTCA---  
CTGACGCTGACGGTACAG---GCCAGAAAA---TTGCTA---TCTGGCATAGTGCAACAGCAAAGC---  
AATTTG---CTGAGG---GCTATAGAGGCTCAGCAGCAACTGCTGAGACTCACAGTCTGGGGCATT  
>KY658681..1  
TTCTATTGCAATACAACAGCCCTGTTCAATAGCACTTGGAACACCACTTGGAACGAAAATAGCACTGTTGAAA  
GTAGTACA-----  
-----  
GGGGACAATGAAAATATAACTATACCATGCAGAATAAAGCAAATTATAAATATGTGGCAGAGAGTAGGACAAG  
CAATGTATGCCCCCTCCTATCAAAGGAATTATAAAGTGTGAATCAAAC---  
ATTACAGGACTACTACTGGTAAGAGATGGTGAAACACTAATAGC-----  
-----  
-----  
AGCAATGAGACCTTCAGACCTATAGGAGGAGATATGAGGGACAATTGGAGAAGTGAACCTATATAAGTATAAGG  
TAGTAAAAATTGAACCAATA---GGAGTAGCACCAACCAAGGCACAGAGAAGAGTGGTG-----  
-----GGGAGAGAAAAAAGAGCA---ATTGGA---CTGGGAGTT-----  
GCCTTCCTTGGGTTCTTAGGAGCA---GCAGGAAGCACTATG---GGCGCAGCGTCA---  
ATAACGCTGACGGTACAG---GCCAGACAA---TTACTG---TCTGGCATAGTGCAACAGCAAAGC---  
AATTTG---CTGAAG---GCTATAGAGGCTCAGCAGCATCTGCTGAAACTCACAGTCTGGGGCATT  
>KU749402..1  
TTCTATTGCAATACATCAAACTGTTCAATAGCACTTGGGACGAAAATAGCACTGCCATAAATAGTACAGAG-  
-----  
-----  
GACAGTGGAATTATAACTATACCATGCAGAATAAGGCAAGTTATAAATATGTGGCAGAGAGTAGGACAAGCAA  
TGTATGCCCCCTCCTATCAGAGGAAGTATAAGGTGTGAATCAAAC---  
ATTACAGGATTAATACTAACAAGAGATGGTGAAATATTAGTAGC-----  
-----  
-----  
ACCAATGAGACCTTCAGACCTACAGGAGGAGATATGAGGGACAATTGGAGAAGTGAACCTATACAAGTATAAAG  
TAGTAAGCATTGAACCAATA---GGAGTAGCACCTACCAAGGCAAGGAGAAGAGTGGTG-----  
-----CAGAGAGAAAAAAGAGCA---GTTGGA---CTGGGAGCT-----  
GCCTTCCTTGGGTTCTTAGGAGCA---GCAGGAAGCACTATG---GGCGCGGCGTCA---  
TTGACGCTGACGGTACAG---GCCAGAAAA---TTATTG---TCTGGCATAGTGCAACAGCAAAC---  
AATTTG---CTGAAG---GCTATAGAGGCTCAGCAGCATCTGCTGAAACTCACAGTCTGGGGCATT  
>KU749403..1  
TTCTATTGTAATACAACAGACCTGTTCAATAGCACTTGGGACAGAAATGCACTGATGCAAATAGTACACAGG  
TTGATAGTACA---CAG-----  
-----  
GTTGATGTAACCTATAACTCTACCATGCAGAATAAAGCAAATTGTAAGGATGTGGCAGAGAGTAGGACAAGCAA  
TGTATGCCCCCTCCTATCGGAGGAGTTATAAGGTGTGAATCAAAC---  
ATTACAGGACTACTACTAACAAGGGATGGTGAGCTAATAATAGC-----  
-----

-----  
ACTAATGAGACCTTTAGACCTCTAGGAGGAGATATGAGGGACAATTGGAGAAGTGAACCTATATAAGTATAAAG  
TAATACAAGTTGAACCAATA---GGAGTAGCACCTACCCAGCAAAGAGAAGAGTGGTG-----  
-----GAGAGACAAAAAAGAGCA---ATTGGA---CTGGGAGCT-----  
GCCTTCCTTGGGTTCTTAGGAGCA---GCAGGAAGTACTATG---GGCGCGGCGTCA---  
ATAACGCTGACGGTACAG---GCCAGACAA---TTATTG---TCTGGCATAGTACAACAGCAAAGT---  
AATTTG---CTGAGA---GCTATAGAGGCTCAGCAGCATCTGCTGAAACTCACAGTCTGGGGCATT  
>KU749404..1  
TTCTATTGCAATACAACAGAGCTGTTCAATAGCACTGAGGACAAAAATGGCACTGTCACAAAT-----  
-----  
-----  
AGCAATGAAAATATAACTCTACCATGCAGGATAAAAGCAAATTATAAATATGTGGCAGAGAGTAGGACAAGCAA  
TGTATGCCCCCTCCTATCAGAGGAAATATAACTTGTGAATCAAAC---  
ATTACAGGACTACTACTAACAAGAGATGGAGATGATAATAGCAGT-----  
-----  
-----  
GAGACCTTCAGACCTATAGGAGGAAATATGAGGGACAATTGGAGAAGTGAACCTATATAAATATAAAGTAGTCC  
AAATTGAACCAATA---GGAGTAGCACCTACCAAGGCAAGGAGAAGAGTGGTG-----  
-----GGGAGAGAAAAAAGAGCA---ATTGGA---CTGGGAGCT-----  
GCCTTCCTTGGGTTCTTAGGAGCA---GCAGGAAGCACTATG---GGCGCGGCGTCA---  
CTGACGCTGACGGTACAG---GCCAGACAA---TTATTG---TCTGGTATAGTGCAACAGCAAAGC---  
AATTTG---TTGAGG---GCTATAGAGGCTCAGCAGCATCTGCTGAAACTCACAGTCTGGGGCATT  
>KU749405..1  
TTCTATTGCAATACAACAGACTTGTTCATTGGGATAGAAATAGCACTGTCCCAAATAAC-----  
-----  
-----  
ACAAGTAGCAATATAACTCTGCCATGCAGAATAAAGCAAATTATAAATATGTGGCAGAGAGTAGGACAATCAA  
TGTATGCCCCCTCCTATCAGCGGAAAGATAAGGTGTGAATCAAAC---  
ATTACAGGACTACTACTAGTAAGAGATGGTGGAGATAATAATAGC-----  
-----  
-----  
ACCAATGAGACCTTCAGACCTATAGGAGGAGAAATGAGGCACAATTGGAGAAGTGAACCTATATAAGTATAAAG  
TAGTAGAAATTGAACCAATA---GGAGTAGCACCTACCAAGGCAAGGAGAAGAGTGGTG-----  
-----GGAAGAGAAAAAAGAGCAGCCTTTGGA---CTGGGAGCT-----  
GTCTTCCTTGGGTTCTTAGGAGCA---GCAGGAAGCACTATG---GGCGCGGCGTCA---  
CTGACGCTGACGGTACAG---GCCAGGCAA---TTATTG---GCTGGCATAGTGCAACAGCAAAGC---  
AATTTG---CTGAGG---GCTATAGAGGCTCAGCAGCATCTGCTGAAACTCACAGTCTGGGGCATT  
>KY658682..1  
TTCTATTGCAATACAACAGAACTGTTCAATAGCACTTGGAAATGGCACTGACACAAACAGCACAGAGGAC---  
-----  
-----  
AATAATGTAAATATAACTATAACCATGCAGAATAAAGCAAATTATAAATATGTGGCAGAGAGTAGGACGAGCAA  
TGTATGCCCCCTCCTATCAGAGGAAATATAACTTGTGAATCAAAC---  
ATTACAGGACTACTACTAACAAGAGATGGTGGTAAAGAGAAAAAT-----  
-----  
-----  
GACAACGAAACCTTTAGACCTATAGGAGGAAATATGAAGGACAATTGGAGAAGTGAACCTATATAAGTATAAAG  
TAGTAGAAATTAACCAATA---GGAGTAGCACCTACCCCGGCAAAGAGAAGAGTGGTG-----  
-----GAGAGAGAAAAAAGAGCA---GTTAGC---CTAGGAGTT-----  
GCCTTCCTTGGGTTCTTAGGAGCA---GCAGGAAGTACTATG---GGCGCGGCGTCA---  
CTGACGCTGACGGTACAG---GCCAGACAA---CTATTG---TCTGGCATAGTACAACAGCAAAGC---  
AATTTG---CTGAGG---GCTATAGAGGCTCAGCAGCAATTGCTGAAACTCACGGTCTGGGGCATT  
>KU749407..1  
TTCTATTGCAATACAACAGAACTGTTCAATAGCACTTGGGACGACAATAGCACTGTTGCAAATATCACAAAG-  
-----  
-----  
ACCAATGAAAATATAACTCTACCATGCAGACTAAGGCAAATCATAAAGATGTGGCAGAGAGTAGGACAAGCAA  
TGTATGCCCCCTCCTATCCAAGGAGTTATAAAGTGTGAATCAAAC---  
ATTACAGGACTACTACTAACAAGAGATGGTGGAGATGGAACCTAAT-----  
-----

-----  
 AACAGCAATAATGAGATTTTCAGACCTATAGGAGGAAATATGAGGGACAATTGGAGAAGTGAAGTATATAAGT  
 ATAAAGTAGTAGAAATTGAACCAATA---GGAGTAGCACCTACCAAGGCAAAGAGAAGAGTGGTG-----  
 -----CAGAGAGAAAAAAGAGCAGTTATTGGA---CTGGGAGCT---  
 -----GCCTTCCTTGGGTTCTTAGGAGCA---GCAGGAAGCACTATG---GGCGCGGCGTCA---  
 ATAACGCTGACGGTACAG---GCCAGACAA---TTACTG---TCTGGCATAGTGCAACAGCAAAGC---  
 AATTTG---CTGAGG---GCTATAGAGGCTCAGCAGCATCTGCTGAAACTCACGGTCTGGGGCATT  
 >AF082486..1  
 TTCTATTGCAATACAACAGACCTGTTCAATAGCACTTGGGACGAACATGGCACTGTCACAAATAGCACAATG-  
 -----  
 -----  
 GCCAATGGAAGTATAACTCTACCATGCAGAATAAAGCAAATTATAAATATGTGGCAGAGAGTAGGACAAGCAA  
 TGTATGCCCCCTCCTATTAAAGGAAGTATAAGGTGTGAATCAAAC---  
 ATTACAGGACTACTATTAAACAAGAGATGGTGGAAAGTGGAACTAAT-----  
 -----  
 -----  
 AGCAGCAATGAGACCTTCAGACCTATAGGAGGAAATATGAGGGATAATTGGAGAAGTGAAGTATATAAGTATA  
 AAGTAGTAAAAATTGAACCCATA---GGATTAGCACGTACCAGGGCAAAGAGAAGAGTGGTG-----  
 -----GAGAGAGAAAAAAGAGCC---ATTGGA---CTGGGAGCT-----  
 ---GCCTTCCTTGGGTTCTTAGGAGCA---GCAGGAAGTACTATG---GGCGCGGCGTCA---  
 ATGACGCTGACGGTACAG---GCCAGACAA---TTATTG---TCTGGCATAGTGCAACAGCAAAGC---  
 AATTTG---CTGAGG---GCTATAAAGGCTCAGCAGCATCTGCTGAAACTCACGGTCTGGGGCATT  
 >KY968402..1  
 TTCTACTGTAACACAACAAAACTGTTTAATAGTACTTGGTCTAATAATGATACTGGGGAGGGTACTGCAGATT  
 CA-----  
 -----  
 AATAACGAACTATCACAATCCCATGCAGAATAAAACAAATTATAAACATGTGGCAACAAGTAGGAAAAGCAA  
 TGTATGCCCCCTCCCATCAGTGGAAACATTAGTTGCTCATCAAAT---  
 ATTACAGGGTTACTGTTAACAAGAGATGGTGGAGATAATGATGAC-----  
 -----  
 -----  
 CTAAACGGGACCGAGACCTTCAGACCTCAAGGAGGAAACATGAAGGACAATTGGAGAAGTGAATTATATAAAT  
 ATAAAGTAGTAAAAATTGAACCATTA---GGAGTAGCACCCACCAAGGCAAAGAGAAGAGTGTTG-----  
 -----CAGAGAGACAAAAGAGCA---GTGGGA---CTAGGAGCT---  
 -----ATGTTTCCTTGGGTTCTTGGGAGCA---GCAGGAAGCACTATG---GGCGCAGCGTCA---  
 ATAGCGCTGACGGTACAG---ACCAGACAA---TTATTG---TCTGGTATAGTGCAACAGCAGAAC---  
 AATATG---CTGAGG---GCTATTGAGGCGCAACAGCATATGTTGCAACTCACTGTCTGGGGCATC  
 >KY968404..2  
 TTCTACTGTAATACAACACAACCTGTTTTATAGTACTTGGTGTCTAATGGTAGTAGTTTGACAAATAACACTG  
 AA-----  
 -----  
 GGAAATGACACTATCACACTCCCATGCAGAATAAAACAGATTATAAATATGTGGCAGCAAGTAGGAAAAGCAA  
 TGTATGCCCCCTCCCATCAAAGGACTAATTAGATGCTCATCGAAT---  
 ATTACAGGACTGCTACTAACAAGAGATGGTGGTAGTCATAACGAGAGC-----  
 -----  
 -----  
 AATGAGACTGAGACATTTCAGACCTGGGGGAGGAGATATGAGGGACAATTGGAGAAGTGAATTATACAAATATA  
 AAGTAGTACAAATTGAACCATTA---GGAATAGCACCCACCAAGGCAAAGAGAAGAGTGGTG-----  
 -----CAGAGAGAAAAAAGAGCA---GTGGGA---CTGGGAGCT-----  
 ---TTGTTTCCTTGGGTTCTTGGGAACA---GCAGGAAGCACTATG---GGCGCAGCGTCA---  
 TTGACGCTGACGGTACAG---GCCAGACAA---TTATTG---TCTGGTATAGTGCAACAGCAGAAAT---  
 AATCTG---CTGAGA---GCTATTGAGGCGCAACAACATCTGTTGCAGCTCACAGTCTGGGGCATC  
 >KY968408..1  
 TTCTACTGTAATACAACAAAACTGTTTAATAAGACTTGGAAATGGTACTTGGCTTAATAATGAGAAT-----  
 -----  
 -----  
 ACTACACAGAATATCACACTCCCATGCAGAATAAAACAAATTATAAACAGGTGGCAGGAAGTAGGAAAAGCAA  
 TGTATGCCCCCTCCCATCAAAGGACAAATTAGCTGCTCATCAAAT---  
 ATTACAGGGCTGCTATTAAACAAGAGATGGTGATAACGAGACTGGG-----  
 -----  
 -----

-----  
TCGGAGACCTTCAGACCTGGAGGAGGAGATATGAGGGACAATTGGAGAAGTGAATTATATAAAATATAAAGTAG  
TAAAAATTCAGCCATTA---GGAGTAGCACCCACCAAGGCAAAGAGAAGAGTGGTG-----  
-----CAAAGAGAAAAAAGAGCA---GTGGGA---ATAGGAGCT-----  
GTGTTCCCTTGGGTTCTTGGGAGCA---GCAGGAAGCACTATG---GGCGCAGCGTCA---  
GTAACGCTGACGGTACAG---GCCAGACAA---TTATTG---TCTGGTATAGTGCAGCAGCAGAAC---  
AATTTG---CTGAGG---GCTATTGAGGCGCAACAGCATCTGTTGCAACTCACAGTCTGGGGCATC  
>DQ383749..1  
TTCTACTGTAATACATCACAACCTGTTTAATAGTACTTGGCCTTGGAATGGGAATGCGACTACAGATAATACT-  
-----  
-----  
ACAGGAGTAAATATCACACTCCCATGCAGAATAAAACAAATTATAAACATGTGGCAGGAAGTAGGAAAAGCAA  
TGTATGCCCCCTCCTATTAAAGGACAAATTAGATGTTTCATCAAAT---  
ATTACAGGGCTGCTATTAAACAAGAGATGGTGGTCATAACGAGACC-----  
-----  
-----  
AACGACACTGAGACCTTCAGACCTGGAGGAGGAAATATGAAGGATAATTGGAGAAGTGAATTATATAAAATATA  
AAGTAGTAAAAATTGAACCATTA---GGAATAGCACCCACCACGGCAAAGAGAAGAGTGGTG-----  
-----CAGAGAGAGAAAAAGAGCA---ATAACA---ATAGGAGCT-----  
---ATGTTACTTGGTTTCTTGGGAACA---GCAGGAAGCACTATG---GGCGCAGCGTCA---  
ATCACGCTGACGGTACAG---GCCAGACAA---TTATTG---TCTGGTATAGTGCAACAGCAGAAC---  
AATCTG---CTGAGG---GCTATTGAGGCGCAACAGCATCTGTTGCAACTCACAGTCTGGGGCATC  
>MH078532..1  
TTCTACTGTAACACATCAAAGCTGTTTAACAGTACTTGGCATAGGAATGGTACTTGAATGGTACTAGTACT-  
-----  
-----  
GAGAATAATACAATCACAATCCCATGCAGAATAAAACAAATTATAAACAGGTGGCAGGAAGTAGGAAAAGCAA  
TGTATGCCCCCTCCCATCAGAGGAAATATTACATGTACATCTAAT---  
ATTACAGGACTGTTATTAATAAGAGATGGTGGTAACATTAACACCACG-----  
-----  
-----  
AATGAGACCGAGATCTTCAGACCTGGAGGAGGAGACATGAGGGATAATTGGAGAAGTGAATTATATAAAATATA  
AAGTAGTAAGAATTCAGCCATTA---GGAATAGCACCCACCAGGCAAAGAGAAGAGTGGTG-----  
-----CAAAGAGAAAAAGAGCG---GTGGGAACACTAGGAGCT-----  
---GTGTTCCCTTGGGTTCTTGGGAGCA---GCAGGAAGCACTATG---GGCGCAGCGGCA---  
ACAACGCTGACGGTACAG---GCCAGACAG---TTACTG---TCTGGCATAGTGCAACAGCAAAAC---  
AATTTG---CTGAGA---GCTATTGAGGCGCAACAGCATACGTTGCAACTCACAGTCTGGGGCATT  
>AF538307..1  
TTCTACTGTGATTCAACACAACCTGTTTAATAGTACTTGGCATAATAGTACTTGAATAATAATAAAGAGTCAA  
AT-----  
-----  
AGCACTGATCCAATCACACTTCCATGCAGAATAAAACAAAATATAAACATGTGGCAGGAAGTAGGAAAAGCAA  
TGTATGCCCCCTCCCATCAGAGGACAAATTAAATGTTTCATCAAAC---  
ATTACAGGGCTAATATTAAACAAGAGATGGTGGTAATAACACAGACAAAT-----  
-----  
-----  
AACAACACCGAAACCTTCAGACCTGGAGGAGGAAATATGAAGGACAATTGGAGAAGTGAATTATATAAAATATA  
AAGTAGTAAAAATTGAACCATTA---GGAGTAGCACCCACCAAGGCAAGGAGAAGAGTGGTG-----  
-----CAGAGAGAGAAAAAGAGAA---GTAGGA---CTAGGAGTT-----  
---ATGTTCCCTTGGGTTCTTGGGAGCA---GCAGGAAGCACTATG---GGCGCAGCGTCA---  
CTGAGGCTGACGGTACAG---GCCAGACAA---TTATTG---TATGATATAGTGCAACAGCAAAAC---  
AATTTG---CTGAGA---GCTATTGAGGCGCAACATCATCTGTTGCAACTCACAGTCTGGGGCATC  
>GU367404..1  
TTCTATTGTAATACAACACAACCTGTTTAACAGTACTTGGAGAAAGGAGTCAAATAACACTGGAGGAAAT----  
-----  
-----  
ATCACACGAAATATCAGCTCCCATGTAGAATAAGACAGATTGTAAACATGTGGCAGGAAGTAGGAAAAGCAA  
TATATGCCCCCTCCCATTTGAAGGACTAATTAGATGTTTATCAAAT---  
ATTACAGGGCTGCTATTAAACAAGAGACGGTGGTAATCAGAATGGGACT-----  
-----

-----  
AATGACACTGAAATCTTCAGACCTGGAGGGGGAGATATGAGGGACAATTGGAGAAGTGAATTATATAAATATA  
AAGTAGTAAAAATTGAACCCCTTA---GGAATAGCACCCACCAAGGCAAAGAGAAGAGTGGTG-----  
-----CAAAGAGAAAAAAGAGCA---GTGGGAGCATTAGGAGCT-----  
---ATGTTCCCTTGGGTTCTTGGGAGCA---GCAGGAAGCACTATG---GGCGCAGCGTCA---  
GTAACGCTGACGGTACAG---GCCAGACAA---TTATTG---TCTGGTATAGTGCAACAGCAGAAT---  
AATCTG---CTGAAG---GCTATTGAGGCGCAACAGCATCTGTTGCAACTCACAGTCTGGGGCATC  
>AF146728..1  
TTCTACTGTAATTCAACACAACCTGTTTAATAGTACTTGGTTTAATAGTACTGGGAATGATACTGAAAGGGCAA  
CT-----  
-----  
AACAAATACAGAAAATATCACACTCCCATGTAGAATAAAAACAAATTATAAACATGTGGCAGAAAGTAGGAAAAG  
CAATGTATGCCCCCTCCCATCAACGGACAGATTAGATGTTTCATCAAAT---  
ATTACAGGGCTGATACTAACAAGAGATGGTGGTAATCAAGAGAAC-----  
-----  
-----  
AAGACCGAGATCTTCAGACCTGGAGGAGGAGATATGAGGGACAATTGGAGAAGTGAATTATATAAATATAAAG  
TAGTAAGAATTGAACCATTA---GGAGTAGCACCCACCAAGGCAAAGAGAAGAGTGGTG-----  
-----CAGAGAGAAAAAAGAGCA---GTGGGAATGATAGGGCA-----  
ATGATCCTTGGGTTCTTGGGAGCA---GCAGGAAGCACTATG---GGCGCAGCGTCA---  
CTGGCGCTGACGGTACAG---ACCAGGCAA---TTGTTG---TCTGGTATAGTGCAACAGCAGAAC---  
AATCTG---CTGAGG---GCTATTGAGGCGCAACAGCATCTGTTGCAACTCACAGTCTGGGGCATC  
>MN485974..1  
TTCTATTGTAATACAACAAAACTGTTTAATGGTACTTGGGAATGGTACTTGGCTATCGGGGAAGTGG-----  
-----  
-----  
CCAAATGAAAATATCACACTCCCATGTAGAATAAAAACAAATTGTAAACATGTGGCAAGAAGTAGGAAAAGCAA  
TGTATGCCCCCTCCCATCCAAGGACAGATTAGATGTGACTCAAAT---  
ATTACAGGGCTGCTATTAACAAGAGATGGTGGTTCCGGGAATGGAAGTGAAG-----  
-----  
-----  
AATAACACTGAGATCTTCAGACCTGGAGGAGGAAATATGAGAGACAATTGGAGAAGTGAATTATATAAATATA  
AAGTAGTAAAAATTGCACCATTA---GGAATAGCACCCACCAAGGCAAAGAGAAGAGTGGTG-----  
-----CAGAGAGAAAAAGA-----ATAGGAACGCTAGGAGCT-----  
---GTGTTCCCTTGGGTTCTTGGGAACA---GCAGGAAGCACTATG---GGCGCAGCGTCA---  
CTGACGCTGACGGTACAG---GCCAGACAA---TTATTG---TCTGGTATAGTGCAACAGCAGAAC---  
AATTTG---CTGAGG---GCTATTGAGGCGCAACATCATCTGTTGCAACTCACAGTCTGGGGCATC  
>MN485990..1  
TTCTACTGTGATTCAACAGAACTATTTAATAGTACTTGGAAATTTTAATAATAACTTGGTATGAGAACTCAA  
ATAACACAAGT-----  
-----  
GACAAAGAAAACATCACACTCCCATGTAGAATAAAAACAAATTAGAACTTGTGGCAGGAAGTAGGAAAAGCAA  
TGTATGCCCCCTCCCATCCAAGGGCTAATTACATGTCAATCAAAT---  
ATTACTGGGGTGCTACTAACAAGAGATGGTGGTATTAATAACACC-----  
-----  
-----  
AGGAACGAGACCTTTAGACCTGGAGGAGGAAATATGAAAGACAATTGGAGAAGTGAAGTATACAAATATAAAG  
TAATAAAAATTGAACCATTA---GGAGTGGCACCCACCAAGGCAAAGAGAAGAGTGGTG-----  
-----CAGAGAGAAAAAAGAGCA---GTGGGAACAATAGGAGCT-----  
GTGTTCCCTTGGTTTCTTGGGAACA---GCAGGAAGCACTATG---GGCGCAGCGTCA---  
ATAGCGCTGACGGCACAG---GCCAGACAA---TTATTG---TCTGGTATAGTGCAACAGCAAAAC---  
AATTTG---CTGAGA---GCTATTGAGGCGCAACAACATCTGTTGCAACTCACAGTCTGGGGCATC  
>MN485995..1  
TTCTACTGTAATACAACACAACCTGTTTAATAGTACTTGGTGGTCTAATAGTACTGGGAATATTACTGGA----  
-----  
-----  
CAGCCAGAAAATATCACTCTCCCATGCAGAATAAAAACAAATCATAACTTGTGGCAAGAGGTAGGAAAAGCAA  
TGTATGCCCCCTCCCATCCAAGGACTAATTAGATGTTTCATCAAAT---  
ATTACAGGGTTACTATTAACAAGAGATGGTGATAATCAAACATAA-----  
-----

-----  
GAGACTGAGATCTTTAGACCGGGAGGAGGAGATATGAGGGACAATTGGAGAAGTGAATTATATAAATATAAAA  
TAGTAAAAAATTGAGCCATTG---GGAATAGCACCCACCAGGGCAAAGAGAAGAGTGGTG-----  
-----CAAAGAGAAAAAAGAGCA---GTGGGA---ATAGGAGCT-----  
CTGTTTCCTTGGGTTCTTGGGAGCT---GCAGGAAGCACTATG---GGCGCAGCGTCG---  
GTGACGCTGACGGTACAG---GCCAGACAA---TTATTG---TCTGGTATAGTGCAACAGCAAAAC---  
AACTTG---CTGAGA---GCTGTTGAGGCGCAACAACATATGTTGCAACTCACAGTCTGGGGCATC  
>MN486034..1  
TTCTACTGTAATACAACAGAGCTATTTAATAGGAATATTACTGAAGAGTCAAACACTAATGGAAATAGCAGT-  
-----  
-----  
AGCGCAGGAAATATCACACTCCAATGCAGAATAAAACAGATTATAAACATGTGGCAGGAAGTAGGAAAAGCAA  
TGTATGCCCCCTCCCATCAGAGGACAAATTC AATGTATATCAAAT---  
ATTACAGGACTAATATTAACAAGAGATGGTGGTAAGACAAATAAT-----  
-----  
-----  
GAGACAAATGGGACTGAGATTTTCAGACCTGGAGGAGGAAATATGAGAGACAATTGGAGAAGTGAATTATATA  
AATATAAGGTAGTAAAAAATTGAACCATTA--GGAGTAGCACCCACCAGGGCAAAGAGAAGAGTGGTG-----  
-----CAGAGAGAAAAAAGAGCA---GTGGGA---  
ATAGGAGCT-----GTGTTTCCTTGGGTTCTTGGGAGCA---GCAGGAAGCACTATG---  
GGCGCAGCGTCA---ATAACGCTGACGGTACAG---GCCAGACAA---TTATTG---  
TCTGGTATAGTGCAACAGCAAAAC---AATTTG---CTGAGA---  
GCTATTGAGGCGCAACAGCATCTGTTGCAACTCACAGTCTGGGGCATC  
>DQ358805..1  
TTCTACTGTAATACAACGAAGCTGTTTACTGGTACTTTGAATAGCACTGGGACTTGGCATAACAGAAAAC-----  
-----  
-----  
CAGACTGATACTATCACACTCCCATGCAAAATAAAACAAATTATAAACAGGTGGCAGGAAGTAGGAAAAGCAA  
TGTATGCCCCCTCCCATTAAGGACAAATTAGCTGTTTCATCAAAT---  
ATTACAGGGATACTATTAACACGAGATGGTGGTGGGAATGGGTCC-----  
-----  
-----  
GACACCACCGCCTCCTTAACACCAGGAGGAGGAGATATGAGGAACAGTTGGAGAAATGAATTATATAATTATG  
AGGTGGTAAAAATTCCACCATTA--GGAGTACCACCCACCGAGGCGAGGAGAAGAGTGGTG-----  
-----CAGAGAGAAAAAAGAGCA--GTGGGGGCACTAGGAGCT-----  
--ATGTTTCCTTGGGTTCTTGGGAACA--GCAGGAAGCACTATG--GGCGCAGCGTCA---  
CTGACGCTGACGGTACAG--GCCAGACAA--TTATTG--TCTGGTATAGTGCAACAGCAGAAT---  
AATTTG--CTGAGA--GCTATTAAGGCGCAACAGCATATGTTGCAACTCACAGTCTGGGGCATC  
>JN692439..3  
TTCTACTGTGATACCTCACAAATATTTAATAGTAATTGGAATAGTTCTTCAAATTTTAGTCATCATGAAAAT-  
-----  
-----  
TCAAATGAAAATATCACACTCCAATGCAGAATAAAACAAATTATAAACAGGTGGCAGGAAGTAGGAAGAGCAA  
TGTATGCCCCCTCCCATCCGAGGACTAATTAGATGTTTCATCAAAT---  
ATTACAGGGCTGCTATTAACAAGAGATGGTGGTAAGAATGATAACAATGGG-----  
-----  
-----  
ACTGAGAATGGGACTGAGACCTTCAGACCTGGAGGGGGAGATATGAGGGACAATTGGAGAAGTGAATTATATA  
AATATAAAGTAGTTCAAATTGAGCCAGTA--GGAATAGCACCCACCAAGGCAAAGAGAAGAGTGGTG-----  
-----CAAAGAGAAAAAAGAGCA---GTAGGA---  
GTAGGAGCT-----GTGTTTCCTTGGGTTCTTGGGAACA--GCAGGAAGCACTATG---  
GGCGCAGCGTCA---CTCACGCTGACGGTACAG---GCCAGACAA---TTGTTG---  
TCTGGTATAGTGCAACAGCAGAAC--AATCTG--CTGAAG--  
GCTATTGATGCGCAACAGCATCTGTTGCAGCTCACAGTCTGGGGCATC  
>JN692462..1  
TTCTACTGTAATACATCACCACTGTTTAAATAGTACTTGGAAAATTGGAAC TAATAAGTCTATA-----  
-----  
-----  
GAAAAATGGA ACTATCACACTCCCATGCAAGAATAAAACAAATTATAAACAGGTGGCAGGAAGTAGGAAAAGCAA  
TGTATGCCCCCTCCCATCGAAGGACCAATTAGATGTTTCATCAAAT---

ATTACAGGGCTGCTATTAACAAGAGATGGTGGTGAAGACAACAATGGGTCC-----  
-----  
-  
GAGACCTCCAATGAGACCTACACCTCTGGACCAGGAGATATGAATATGAATTGCAATTGTGAATTATATTTAT  
ATAAAGATATGGAAATGGAGCCTGTACCATTA---GCACCCACCCCGACCAAGGCAAAGAGAAGAGTGGTG--  
-----CAGAGAGAAAAAAGAGCA---GTGGGA---  
GTAGGAGCT-----GTGTTCTTGGGTTCTTGGGAGCA---GCAGGAAGCACTATG---  
GGCGCAGCGTCA---GTGGCGCTGACGGCACAA---GCCAGACAA---TTATTG---  
TCTGGTATAGTGCAACAGCAGGAC---AATCTG---CTGAGG---  
GCTATTGAGGCGCAACAGCATCTGTTGCAACTCACAGTCTGGGGCATC  
>JN692465..1  
TTCTATTGTAATACAACAGAGCTGTTTAAGGGTACTTGGAATGGTACTTGGAAATGGTACTACTTGGGCTAATA  
GTAATTGGGCT-----  
-----AATGGT-----  
ACTGGGAATATGAACATCACACTCCCATGCAGAATAAGACAAATTATAAACATGTGGCAGGAGGTAGGAAAAG  
CAATGTATGCCCCCTCCCATCAGCGGACCCATTAAGTGTACATCAAAT---  
ATTACAGGGATGATATTAACAAGAGATGGTGGTGTATGGTAACGGG-----  
-----  
-----  
AGTCAGGAGATCTTCAGACCTGGAGGAGGAGATATGAGGGACAATTGGAGAAGTGAATTATATAAATATAAAG  
TAATAAAAATTGAACCATTA---GGAGTAGCACCCACCAGGGCAAAGAGAAGAGTGGTG-----  
-----CAGAGAGAAAAAAGAGCA---GCT-----ATAGGAGCT-----  
GTGCTCATTGGGTTCTTGGGAGCA---GCAGGAAGCACTATG---GGCGCAGCGTCA---  
ATAACGCTGACGGTACAA---GCCAGGCAA---TTATTG---TCTGGTATAGTGCAACAGCAGAGC---  
AATCTG---CTGAGA---GCTATTGAGGCGCAACAACACCTGTTGCAACTCACTGTCTGGGGCATC  
>JN692473..1  
TTCTACTGTAATACATCAAAGCTGTTTAATAGGAATTGGACTGATAATAGTAATAATACTGGAAATGATACT-  
-----  
-----  
GGGAATAATACTATCACACTCCCATGCAGAATAAAACAAATTATAAACAGATGGCAGGAAGTAGGAAAGGCAA  
TGTATGCCCCCTCCCATCAAAGGACAAATTAGATGTTTCATCAAAT---  
ATTACAGGGCTGATATTAACAAGAGATGGTGGTAATCATAACAATAGT-----  
-----  
-----  
AACGGTAGTGAAATCTTCAGACCTGGGGGAGGAGATATGAGGGACAATTGGAGAAGTGAATTATATAAATATA  
AAGTAATAAAAATTGAGCCATTA---GGAATAGCACCCACCAAGGCAAAGAGAAGAGTGGTG-----  
-----CAGAGAGAAAAAAGAGCA---GTGGGAACGATAGGAGCT-----  
---ATGTTCTTGGGTTCTTGGGAGCA---GCAGGAAGCACTATG---GGCGCAGCGGCA---  
GTGACGCTGACGGTACAG---GCCAGACAA---TTATTG---TCTGGTATAGTGCAACAGCAGAAC---  
AATCTG---CTGAGA---GCTATTGAGGCGCAACAGCATATGTTGCAACTCACAGTCTGGGGCATC  
>JN692474..2  
TTTTACTGTAATACAACACAGCTGTTTAATAGCACTTGGCTGTTTAACAGCACTTGGAAATCAAAGTGCTAAT-  
-----  
-----  
GATGCAGACAATATCACACTCCCATGCAGAATAAAACAAATAGTAAACAGATGGCAGGAAGTAGGAAAAGCAA  
TGTATGCCCCCTCCCATCAAAGGACAAATTAGATGTTTCATCAAAT---  
ATTACAGGGCTGCTCTTAACAAGAGATGGTGATAATAACACCAAC-----  
-----  
-----  
AACACGAGACCTTTAGACCTGGAGGAGGAGATATGAGGGACAATTGGAGAAGTGAATTATATAAATATAAAG  
TAGTAAAAATTGAGCCATTA---GGAATAGCACCCACCAAGGCAAAAAGAAGAGTGGTG-----  
-----CAGAGAGAAAAAAGAGCA---GTGGGAACAATAGGAGCT-----  
GTGTTCTTGGGTTCTTGGGAGCA---GCAGGAAGCACTATG---GGCGCAGCGTCA---  
GTGACGCTGACGGTACAG---GCCAGACTA---TTATTG---TCTGGTATAGTGCAACAGCAGAAC---  
AATCTG---CTGAAG---GCTATTGAAGCGCAACATCATCTGTTGCAGCTCACAGTCTGGGGCATC  
>JN692480..1  
TTCTACTGTAACACAGCACAGCTGTTTAATAATACTTGGCTGTCCAATAATACCTGGCTACAGAATAATACTT  
GG-----  
-----  
ATTAATGGCACTATCACACTCCCATGCAGAATAAGACAAATTGTAAACAGGTGGCAGGAAGTAGGGAGAGCGA

TGTATGCTCCTCCCATCGCAGGAATAATCAACTGTGTATCAAAC ---  
 ATTACAGGGCTGATATTAACAAGAGATGGAACATAACAACAAATAGTACCTAC-----  
 -----  
 TCTGAAAACAATACTGAAATCTTCAGACCTGGAGGAGGAGATATGAGGGACAATTGGAGAAGTGAATTATATA  
 AATATAAAGTGGTAACAATTGAGCCAGTG--GGAATAGCACCCACCGAGGCAAGGAGAAGAGTGGTG-----  
 -----CAGAGAGAAAAAAGAGCA---  
 GTGGGAACGATAGGAGCT-----ATGTTTCCTTGGGTTCTTGGGAGCA---GCAGGAAGCACTATG---  
 GGCGCAGCGTCA---CTAACGCTGACGGTACAG---GCCAGAATA---TTATTG---  
 TCTGGTATAGTGCAACAGCAAAAC---AATTTG---CTGAGA---  
 GCTATTGAGGCGCAACAACATATGTTGCAACTCACAGTCTGGGGCATC  
 >HQ377423..2  
 TTCTACTGTGATACAAAACCACTGTTCAATAGTACTTGGAAATGATACTACAGGGTCAATTCAC-----  
 -----  
 ATTAATGGAACCTATCACACTCCGATGCAGAATAAAACAAATTATAAACATGTGGCAGGGAGTAGGAAAAGCAA  
 TGTATGCCCCCTCCCATCAGAGGACTAATTAAGTGTACATCAAAT---  
 ATTACAGGGCTGCTATTAACAAGAGATGGTGGTAAAGAGAACAGG-----  
 -----  
 ACCACCGAGACCTTTAGACCTCAAGGAGGAAATATGAAAAGACAATTGGAGAAGTGAACTATATAAATATAAAG  
 TAGTAAAAAATTGAACCATTA---GGAATAGCACCCACCAAGGCAAAGCGAAGAGTGGTA-----  
 -----CAAAGAGAAAAAAGAGCA--ATAGGGGTAATAGGAGCT-----  
 ATGTTTCCTTGGGTTCTTGGGAACA---GCAGGAAGCACTATG---GGCGCAGCGTCA---  
 CTGACGCTGACGGTACAG---GCCAGACAA---TTATTG---TCTGGTATAGTGCAACAGCAGAAC---  
 AATTTG---CTGAGA---GCTATTGAGGCGCAACAACATCTGTTGCAACTCACAGTCTGGGGCATC  
 >KT427681..1  
 TTCTACTGTAATACATCAACGCTGTTTAATTGGACTGAAAATTCAAATAACAAT-----  
 -----  
 GCAAGTGACAATATGACAATCCCATGCAGAATAAGACAAATTGTAAACAGGTGGCAGGAAGTAGGAAAAGCAA  
 TGTATGCCCCCTCCCATCAGCGGACAGATTAGCTGTTTATCAAAT---  
 ATCACAGGGCTGATATTAACAAGAGATGGTGGTATCAACAGCAGCAGCAGC-----  
 -----  
 AATGAGACCTATGAGACCTTCAGACCTGCAGGAGGAAATATGAAAGATAATTGGAGAAGTGAATTATATAAAT  
 ATAAAGTAGTAAAGTTGAGCCATTA---GGAGTAGCACCCACCAAGGCAAAGAGAAGAGTGGTG-----  
 -----CAGAGAGAAAAAAGAGCA--ATAACA---CTAGGAGCC---  
 -----ATGTTTCCTTGGGTTCTTGGGAGCA---GCAGGAAGCACTATG---GGCGCAGCGTCG---  
 ATGACGCTGACGGTACAG---GCCAGACTA---TTATTG---TCTGGTATAGTGCAACAGCAGAAC---  
 AACCTG---CTGAGA---GCTATTGAGGCGCAACAACATCTGTTGCAACTCACAGTCTGGGGCATT  
 >KT427732..1  
 TTCTACTGTAAGACAACACAGCTGTTTAATAGCACTTGGTTAAATACTAGTATTGAGTATAATAATACTGAAG  
 GGGCT-----  
 GGAGTACCAAATATCACACTCCAATGCAGAATAAAACAAATTATAAACAGATGGCAGGGAGTAGAAAGAGCAA  
 TATATGCCCCCTCCCATCCCGGGACAAATTAGATGTACATCAAAT---  
 ATTACAGGGCTGATATTGACACGGGATGGT---AATGGTAATCAAACAGAT-----  
 -----  
 AGCACTAACGAAACCTTCAGACCAATAGGAGGAAATATGCAGGACAATTGGAGAAGTGAATTATATAAATATA  
 AAGTGGTAAAAATTGAGCCAGTA---GGAATAGCACCCACCAAGGCAAAGAGAAGAGTGGTG-----  
 -----CAGAGAGAAAAAAGAGCA---GTGGGAACACTAGGAGCT-----  
 ---ATGTTTCCTTGGGTTCTTGGGAGCA---GCAGGAAGCACTATG---GGCGCAGCGTCA---  
 GTGACGCTGACGGTACAG---GCCAGACTA---TTATTG---TCTGGTATAGTGCAACAGCAGAAC---  
 AACCTG---CTGAAG---GCTATTGAGGCGCAACAGCATTGTTGCAACTCACAGTCTGGGGCATC  
 >KT427713..1  
 TTCTATTGTAATACAACAAACCTGTTCAACAGTACTTGGAAATGACACTACTGAAGGAAATAACACAGGA----  
 -----  
 -----

AATATAGGAAATATCACACTCCCGTGCAGAATAAAACAAATTATAAACATGTGGCAGCAAGTAGGAAAAGCAA  
TGTATGCCCCCTCCCATCGCAGGACAAATTAGCTGTTTCATCAAAT---  
ATTACAGGGTTGTTACTAACAAGAGATGGTGGTAATAATGATTCT-----  
-----  
-----  
AATAATTATGAAATCTTCAGGCCTGGAGGAGGAGATATGAGGGACAATTGGAGAAGTGAATTATACAAATATA  
AAGTAGTAAAAATTGAACCATTA---GGAGTAGCACCCACTAAGGCAAAGAGAAGAGTGGTG-----  
-----CAGAGAGAAAAAAGAGCG---GCA-----CTAGGAGCT-----  
---TTGTTCCCTTGGGTTCTTGGGAGCA---GCAGGGAGCACTATG---GGCGCAGCGGCA---  
GTAACGCTGACGGTACAG---GCCAGAACA---TTATTG---TCTGGTATAGTGCAGCAGCAAAGG---  
AATTTG---CTGAGA---GCTATTGAGGCGCAACAACATCTGTTGCAACTCACAGTCTGGGGCATC  
>KT427870..2  
TTCTACTGTAATACATCAGGACTGTTTAATAGTACTTGGAAATAGGGATGGTAATTGGTCTCAGGATGATACTA  
AT-----  
-----  
GGGTCAAATGAAACAATCACACTCCCATGCAGAATAAAACAAGTTATAAACAGGTGGCAGGAAGTAGGAAAAG  
CAATGTATGCCCCCTCCCATCAGCGGAAGGATTTTCTGTTTCATCAAAC---  
ATTACAGGGCTACTCTTAGTAAGAGATGGTGGTAACCAGAGCCAC-----  
-----  
-----  
GAGAGTGAGACCTTCCGACCTGGAGGAGGAGATATGAGGGACAATTGGAGAAGTGAATTATATAAATATAAAG  
TAGTAAAAATTGAGCCATTA---GGAATAGCACCCACCAAGGCAAAGAGAAGAGTGGTG-----  
-----CAGAGAGAAAAAAGAGCA---GTGGGAACGCTAGGAGCT-----  
ATGTTCCCTTGGGTTCTTGGGAACA---GCAGGAAGCACTATG---GGCGCAGCGTCA---  
CTGACGCTGACGGTACAG---GCCAGACAA---TTATTG---TCTGGTATAGTGCAACAGCAGAAC---  
AATCTG---CTGAAG---GCTATTGAGGCGCAACATCATCTGTTGCGACTCACAGTCTGGGGCATA  
>KT427707..1  
TTCTACTGTAATACAACAGGGCTGTTTAATAGTAATAATACTTGGAAATAATACTAATAATAATAGTAGG---  
-----  
-----  
AATAATGAAACATATACCATACCATGCAGAATAAAGCAAATTATAAACAGGTGGCAAGAAGTAGGAAAAGCAA  
TGTACGCCCCCTCCCATCAAAGGAATAATTCAGTGTACATCAAAT---  
ATTACAGGGCTGCTATTAAACAAGAGATGGTGGGAATAGTTCAGAA-----  
-----  
-----  
AATGAAACTTTTCAGACCTGCAGGAGGAGATATGAGGGACAATTGGAGAAGCGAATTATATAAATATAAAGTAG  
TAAAAATTGAGCCAATA---GGACTAGCACCTACCAAGGCACAGAGAAGAGTGGTG-----  
-----CAGAGAGAAAAAAGAGCA---GTGACA---CTGGGAGCT-----  
ATGTTCCCTTGGGTTCTTAGGAGCA---GCAGGAAGCACTATG---GGCGCAGCGTCA---  
ATAACGCTGACGGTACAG---GCCAGACAA---TTGCTG---TCTGGTATAGTGCAACAGCAGAGT---  
AATCTG---CTGAGG---GCTATTGAGGCGCAACAGCATATGTTGCAACTCACAGTCTGGGGCATC  
>KT427873..1  
TTCTACTGTAATTCAACACAACCTGTTTAATAGTACCTGGGATACTAATGCAACCTTGAATGCTACAGACAGCC  
AAGATGAA-----  
-----  
CTTAACAAAACCTATCACACTCCCATGTAGAATAAAACAAATTATAAACATGTGGCAGGAAGTAGGAAAAGCAA  
TGTATGCCCCCTCCCATTAGAGGGCTAATTAGATGTACAACAAAT---  
ATTACAGGGCTACTATTAAACAAGAGATGGTGGCACAGGCAATAAGACT-----  
-----  
-----  
CAAAATAACACTGAGGTCTTCAGACCTGGAGGAGGAGATATGAAGGATAATTGGAGGAGTGAGTTATATAAAT  
ATAAAGTAGTAAAAATTGAACCATTA---GGAGTAGCACCTACCAAGGCCAAGAGAAGAGTGGTG-----  
-----CAGAGAGAAAAAAGAGCA---GTGGGAACAATAGGAGCT---  
-----ATGTTCCCTTGGGTTCTTGGGAGCA---GCAGGAAGCACTATG---GGCGCAGCGTCA---  
ATAACGCTGACGGCACAG---GCCAGACAA---TTATTG---TCTGGTATAGTGCAGCAGCAGAAAT---  
AATCTG---CTGAGG---GCTATTGAGGCGCAACAACATCTGTTGCAACTCACAGTCTGGGGCATC  
>KT427695..1  
TTCTACTGCAATACATCGGTGCTGTTTAATGATACTTGGCTGAATAATAATAAGACT-----  
-----  
-----

GAACACCAAATATCACGCTCCCATGCAAAATAAAACAGATTATAAACATGTGGCAGGAAGTAGGAAAAGCAA  
TGTATGCCCCCTCCCATCAGTGGACCAATTAGGTGTTTCATCAAAT---  
ATCACAGGGCTGCTATTAACAAGAGATGGTGGTAATAGCACAAAT-----  
-----  
-----  
AATAACGAGACCTTCAGACCTGGAGGAGGAGATATGAGGGACAATTGGAGAAGTGAATTATATAAATATAAAG  
TAGTAAAACCTTGAGCCATTA---GGATTAGCACCCACCAAGGCAAAAAGGAGAGTGGTG-----  
-----CAGAGAGAAAAAAGAGCA---GTGGGAACGCTAGGAGCT-----  
ATGTTTCCTTGGGTTCTTGGGAACA---GCAGGAAGCACTATG---GGCGCAGCATCA---  
CTAACGCTGACGGTACAG---GCCAGACTA---TTATTG---TCTGGCATAGTGCAACAGCAGAGC---  
AATTTG---CTGAGG---GCTATTGAGGCGCATCAGCATATGTTGCAACTCACAGTCTGGGGCATC  
>KT427785..1  
TTTTACTGTAATACAACAACACTATTTAATAGTACTTGGGTTAATGATACTTTTAGTACTTGGGTTAATAATA  
CTTGGGTT-----AATGGT---  
ACTGTAAAGTCAATTAGTAAT-----  
AAAACAAATATTAATATTACACTTCCATGCAGAATAAAGCAAATTATAAACATGTGGCAGGAAGTAGGAAAAG  
CAATGTATGCCCCCTCCCATCAAGGGACCAATTAGCTGTTTCATCAAAT---  
ATTACAGGACTGCTATTAACAAGAGATGGGGGAAATAGTGATAATAGTAGC-----  
-----  
AAAAATGAGACAAAT---  
GAGACCGAGACTTTTAGACCTGGAGGAGGAAATATGAAAGACAATTGGAGAAGTGAATTATATAAATATAAAG  
TAGTGCAAATTGAACCATTA---GGAATAGCACCCACCAGGGCAAAAAGAAGAGTGGTG-----  
-----CAAAGAGAGAAAAAGAGCA---GTGGGA---ATAGGAGCA-----  
TTGTTTCATTGGGTTCTTGGGAGCA---GCAGGAAGCACTATG---GGCGCAGCGTCA---  
ATGACGCTGACGGTACAG---GCCAGACAA---TTATTG---TCTGGTATAGTGCAACAGCAGAAC---  
AACCTG---CTGAGG---GCTATTCAGGCGCAACAGCATTTGTTGCAGCTCACAGTCTGGGGCATC  
>KJ849814..2  
TTCTACTGCAATACAACACAGCTATTTAATTGGACAATTGGCAAGTCA-----  
-----  
-----AATATAACCCAA-----  
AATGATAGTGAAATTATTACAATCCAATGCAGAATAAAACAGATTATAAATAAGTGGCAGGAAGTAGGAAAAT  
CAATATATGCCCCCTCCTATCAGAGGAAATATTAGCTGTTTCATCAAAT---  
ATTACAGGACTGATATTAACAAGAGATGGTGGTAAT-----  
-----  
CACAATGAACTAAAAACAAGACT-----  
AAGACTGAGACTTTTCAGACCTGGAGGAGGAGATATGAGGGACAATTGGAGAAGTGAATTATATAAATATAAGG  
TAGTGAAAATTGAGCCATTA---GGAATAGCACCCACCAGGGCAAGGCGAAGAGTGGTG-----  
-----CAGAGAGAAAAAAGAGCA---GTGGGAACACTAGGAGCT-----  
ATGTTTCCTTGGGTTCTTGGGAGCA---GCAGGAAGCACTATG---GGCGCAGCGTCA---  
ATAACGCTGACGGTACAG---GCCAGACAA---TTGTTG---TCTGGTATAGTGCAACAGCAGAAC---  
AATCTG---CTGAAA---GCTATTGAGGCGCAACAGCATCTGTTGCAACTCACAGTCTGGGGCATC  
>KT427771..1  
TTCTACTGTAATACAACAACACTGTTTAATAGTACTTGGCAAAGTAATAGTACTGGAAATAGTACTGAGAAT-  
-----  
-----  
AATAGCACAAATAATCACACTCCCCTGTAGGATAAAACAAGTTATAAACATGTGGCAGGAGGTAGGAAAAGCAA  
TGTATGCCCCCTCCCATCAGTGGACTAATTCAATGTACATCAAAT---  
ATTACAGGGCTGCTGTTAACAAGAGATGGTGGGTCTGATGGTGAATCTAATAAA-----  
-----  
-----  
ACAGAGAGTGAGATCTTCAGACCTGGAGGAGGAGATATGAGGGACAATTGGAGAAGTGAATTATATAAATATA  
AAATAGTAAAAATTGAACCATTA---GGAGTAGCGCCCAAGGCAAGAGAAGAGTGGTG-----  
-----CAGAGAGAAAAGAGAGCACTAGGGGGA---CTAGGAGCT-----  
---GTATTCCTTGGGTTCTTGGGAGCA---GCAGGAAGCACTATG---GGCGCAGCGTCA---  
ATAACGCTGACGGTACAG---GCCAGACAA---TTATTG---TCTGGTATAGTGCAACAGCAGAAC---  
AATCTG---CTGAGG---GCTATTGATGCGCAACGGCACATGTTGCAACTCACAGTCTGGGGCATC  
>KT427753..1  
TTCTACTGTAATACAACAAAACCTGTTCAATAGTACTTGGAAAGTGAATAATGGTACTTGGAAATAGGAATGATA  
CT-----  
-----GAAGGACAAGAT-----

AACACTGGAGAACTATTACACTTCCATGCAGAATAAAACAAATCATAAACATGTGGCAGGAAGTAGGAAAAG  
CAATGTATGCCCCCTCCCATCAGAGGACAAATTAATTGCACATCAAAT---  
ATTACAGGACTGCTATTAACAAGGGATGGTGGTAATAATAATAATAGC-----  
-----  
-----  
AAGAATAACGAGACTTTCAGACCTGGAGGAGGAAATATGAAGGACAATTGGAGAAGTGAATTATATAAATATA  
AAGTAGTACAAATTGAACCATTA---GGAATAGCACCCACCAAGGCAAAAAGGAGAACGGTG-----  
-----CAGAGAGAAAAAAGAGCA---GTGGGA---ATAGGAGCT-----  
---GTGCTCTTTGGGTTCTTGGGAGCA---GCAGGAAGCACTATG---GGCGCAGCGTCA---  
GTAACGCTGACGGTACAG---GCCAGACAA---TTGTTG---TCTGGTATAGTGCAACAGCAGAGC---  
AATCTG---CTGAAG---GCTATTCAAGCGCAACAGCATCTGTTGCAGCTCACAGTCTGGGGCATC  
>KT427749..3  
TTCTACTGTAATACAACAGAACTGTTCTATAGTAATTGGACGTGGAATGGTACTTGGAAATAGGAATGATACTG  
AAGGATTA-----  
-----  
CAAAAATAAACTATTATACTTCCATGCAGAATAAAACAAATCATAAACATGTGGCAGGAAGTAGGAAAAGCAA  
TGTATGCCCCCTCCCATCAGAGGACAAATTAATTGCACATCAAAT---  
ATTACAGGACTGCTATTAATAAGAGATGGTGGTAATGATACTGGAAT-----  
-----  
-----  
AGTGGGACTGAAATTTTCAGACCTCAAGGAGGAAACATGAAAGACAATTGGAGAAGTGAATTATATAAATATA  
AAGTAGTACAAATTGAACCATTA---GGAATAGCACCCACCAAGGCAAGAGAAGAACGGTG-----  
-----CAGAGAGAAAAAAGAGCA---GTGGGA---TTTGGAGCT-----  
---GTGATCTTTGGGTTCTTGGGAGCA---GCAGGAAGCACTATG---GGCGCAGCGTCA---  
ATAACGCTGACGGTACAG---GCCAGACAA---TTGTTG---TCTGGTATAGTGCAACAGCAGAGC---  
AATTTG---CTGAAG---GCTATTCAAGCGCAACAGCATCTGTTGCAGCTCACAGTCTGGGGCATC  
>KT427826..1  
TTTTACTGTAATACAACAAAACCTGTTTAATACTACGTGGAATATTACTGGAGAAGGAAACAACAATCTC----  
-----  
-----  
ACTAATGAACTATCACACTCCCATGCAGAATAAAACAGTTCATAAACATGTGGCAGGAAGTAGGAAAAGCAA  
TGTATGCCCCCTCCTATCAGGGGACAAATTCAGTGTCTCATCAAAT---  
ATTACAGGGCTACTATTAACAAGAGATGGTGGTAATAGTAATAAT-----  
-----  
-----  
GAGTCGAGACCTTCAGACCGGGAGGAGGAGATATGAGGGACAATTGGAGGAGTGAATTATATAAATATAAAG  
TAGTAAAAATTGAACCATTA---GGAATAGCACCCACCAAGGCAAGAAGGAGAGTGGTG-----  
-----CAAAGAGAAAAAAGAGCA---ATAGGAGGAATAGGAGTT-----  
GTGATCCTTGGGTTCTTGGGAGCA---GCAGGAAGCACTATG---GGCGCAGCGTCG---  
CTAACGCTGACGGTACAG---GCCAGACAA---TTATTG---TCTGGTATAGTGCAACAGCAAAGC---  
AATTTG---CTGAGA---GCTATTGAGGCGCAACAGCGTTTGTGCAACTCACTGTCTGGGGCATC  
>KJ849821..1  
TTCTACTGTGATACAGCAAAGCTGTTTAACAGTACTTGGGAGAGGCGTAATGACACGAAC-----  
-----  
-----  
ACTTGGGAGTCGAACAATACA-----  
ATACCAAATGAGAATATCACACTCCCATGCAGAATAAAACAAATTATAAACAGGTGGCAGGAAGTAGGAAAAG  
CAATGTATGCCCCCTCCCATTCAGGACGAATTGAATGTACATCAAAT---  
ATTACAGGGCTACTATTAACAAGAGATGGTGGT-----  
-----  
-----  
TCTAACAATAGTAGTAACGATACCTTCAGACCAGGAGGAGGAGATATGAAGGACAATTGGAGAAGTGAATTAT  
ATAAATATAAAGTAGTACAAATTCAGCCATTA---GGAGTAGCACCCACCAGGTCAAGGAGAAGAGTGGTG--  
-----CAGAGAGAAAAAAGAGCA---GTAACA---  
CTGGGAGCT-----ATGTTCTTGGGTTCTTGGGAGCA---GCAGGAAGCACTATG---  
GGCGCAGCGTCA---GTGACGCTGACGGTACAG---GCCAGACAA---TTATTG---  
TCTGGTATAGTGCAACAGCAAAGC---AATTTG---CTGAGG---  
GCTATTGATGCGCAACAGCACATGTTGCAACTCACAGTCTGGGGCATC  
>KT427811..1  
TTTTACTGTAATACATCAAGACTGTTTAACAGTATTTGGAACAGTACCTGGCAGGATAATACAGCTGAAGAGT  
CA-----

-----  
AATAATACTGACATCATACTCCATTGCAGAATAAAACAAATTATAAACAGATGGCAGGAAGTAGGAAAAGCAA  
TGTATGCCCCCTCCCATCAAGGGAAAAATTCAATGTTTCATCAAAT---  
ATTACAGGGCTGCTATTAGTAAGAGATGGTGGTAACGAGAACACT-----  
-----  
-----  
AGTAACACCGAGACCTTCAGACCTGGAGGAGGAGACATGAGGGACAATTGGAGAAGTGAATTATATAAATATA  
AAGTAGTGCAAATTGAGCCAGTA---GGAATAGCACCCACCAAGGCAAGAAGAAGAGTGGTG-----  
-----CAGAGAGAAAAAAGAGCA---GTAACA---ATAGGAGCT-----  
---ATGTTCTTGGGTTCTTGGGAGCA---GCAGGAAGCACTATG---GGCGCAGCGTCA---  
ATCGCGCTGACGGGACAG---GCCAGACAA---TTATTG---TCTGGTATAGTGCAACAGCAGAAT---  
AATCTG---CTGAAG---GCTATTGAGGCGCAACAACATATGTTGCAACTCACAGTCTGGGGCATC  
>KT427796..1  
TTCTATTGTAATACATCACAGCTGTTCAATAGTACTTGGAAATTCCTACTAGTGCTAGGAATGAGACTGAAGAG-  
-----  
-----  
TCAAAATGACACTATCACACTCCCATGTAGGATAAAACAAATTATAAATAAGTGGCAAGAAGTAGGAAAAGCAA  
TATATGCTCCTCCTATCCAAGGACGAATTTACTGTTTCATCAAAC---  
ATTACAGGGTTGCTATTAACAAGAGATGGGGGTGAAAAACAACCTG-----  
-----  
-----  
ACCAATGAGACTTTTAGACCTGGAGGAGGAGATATGAGGGACAATTGGAGAAGTGAACTGTATAAATATAAAG  
TAGTAAAAATTGAGCCATTA---GGACTAGCACCCACCAAGGCAAAGAGAAGAGTGGTG-----  
-----CAGAGAGAAAAAAGAGCA---GTGGGAACGCTGGGAGCA-----  
ATGTTCTTGGGTTCTTGGGAACA---GCAGGAAGCACTATG---GGCGCAGCGTCG---  
CTGACGCTGACGGTACAG---GCCAGACAA---TTATTG---TCTGGTATAGTGCAACAGCAAAAC---  
AATTTG---CTGAAG---GCTATTGAGGCGCAACAGCATCTGTTGCAACTCACAGTCTGGGGCATT  
>KX181909..1  
TTCTACTGTAATACAGCAGAGCTGTTTAGTAATACTTGGTTAAATAAGAGTGGCAAT-----  
-----  
-----  
AACGATGGAACTATCACACTTCCATGCAGAATAAAACAAATTATAAACAGATGGCAGGAAGTAGGAAAAGCAA  
TGTATGCCCCCTCCCATCAGGGGATTAATTGAATGTTTCATCAAAT---  
ATTACAGGGCTGATACTAACAAGAGATGGTGGTAATAATAGTGCA-----  
-----  
-----  
AACAAATGCTAGTGAAACCTTCAGACCCGGAGGGGAAATATGAAGGACAATTGGGGAAGTGAATTATATAAAT  
ATAAAGTAGTAAAAATTAGCCCTTA---GGAATAGCACCCACCAGGGCAAAAAGAAGAGTGGTG-----  
-----CAAAGAGAAAAAAGCA---GTAACG---CTAGGAGCT---  
-----ATGTTCTTGGGTTCTTGGGAACA---GCAGGAAGCACTATG---GGCGCAGCGTCA---  
GTGACGCTGACGGTACAG---GCCAGACAG---TTACTG---TCTGGTATAGTGCAACAGCAGAGC---  
AATCTG---CTGAAG---GCTATTGAGGCGCAACAGCATCTGTTGCAACTCACAGTCTGGGGCATC  
>KX181908..2  
TTTTACTGTGATACAACAAAGCTGTTTAATAGTACTTGGAAATAACTGGAGAGTCAAATTACACGGAG---  
-----  
-----  
GGAAATGCCACTATCATACTTCCATGCAGAATAAAACAAATTATAAACAGATGGCAGGAAGTAGGAAAAGCAA  
TGTATGCCCCCTCCCCTCAGTGGAATATTAGCTGTTTATCAAAT---  
ATTACAGGGGTACTATTAACAAGAGATGGGGGTAAATGAAACAAAT-----  
-----  
-----  
GCCCCTGAGACCTTCAGACCTCAAGGGGAAATATAAAGGATAATTGGGGAAGTGAATTATATAAATATAAAG  
TAGTAAAAATTGAACCCTTA---GGAGTAGCCCCCCCCAAGGCAAAGAGAAGAGTGGGG-----  
-----CAAAGAGAAAAAAGAGCA---GTGGGA---ATAGGAGCT-----  
ATGTTCTTGGGTTCTTGGGAGCA---GCAGGAAGCAATATG---GGCGCAGCATCA---  
CTAACGCTGACGGTACAG---GCCAGACTA---TTATTG---TCTGGTATAGTGCAACAGCAAAAC---  
AATTTG---CTGAGA---GCTATTGAGGCGCAACAGCATCTGTTGCAGCTCACAGTCTGGGGCATC  
>KX181898..2  
TTCTACTGTAATACATCACAGCTGTTTAATTGGACTGAAAGAAATAGAAATAGCTCAGATGGGACAGGGTCAA  
AT-----

```

-----
GAGACTGAGACCATTACACTCCCATGCAGAATAAAACAAATTATAAACAGATGGCAGGAAGTAGGAAAAGCAA
TGTATGCCCCCTCCCATCAAAGGAAATATTAGCTGTTTCATCAAAT---
ATTACTGGGCTGCTATTAACAAGAGATGGTGGTACAAACCTGACT-----
-----
----
GGGTCTAACGGGACCGAGACCTTCAGACCTCAAGGAGGAAATATGAAGGATAATTGGAGAAGTGAATTATATA
AATATAAAGTAGTAAGAATTGAGCCAGTA--GGAATAGCACCCACCGAGGCAAAGAGAAGAGTGGTG-----
-----CAAAGAGAAAAAAGAGCA---
GTGGGAACACTAGGAGCT-----ATGTTCCCTTGGGTTCTTGGGAGCA---GCAGGAAGCACTATG---
GGCGCAGCGTCA--ATGACGCTGACGGTACAG--GCCAGACAA--TTATTG---
TCTGGTATAGTGCAACAGCAAAAC--AATCTG--CTGAAA--
GCTATTGAGGCGCAACATCATCTGTTGCAACTCACAGTCTGGGGCATC
>MK041573..1
TTCTACTGTAATACAACAAAACCTATTTAATAGTACTTGGGATGGGTCAAACATCATAGGAAATGATACA----
-----
-----
AATGACACAGTGATCACACTCCCATGCAGAATAAAACAAATTATAAACATGTGGCAGCGAGTAGGAAAAGCAA
TGTATGCCCCCTCCCATCAGAGGACAAATTAGATGTTTCATCAAAT---
ATTACAGGGCTGCTGTTAACAAGAGATGGTGGAAATCATACAAGT-----
-----
-----
GGGAATGAGACCTTCAGACCAGGAGGAGGAGATATGAGGGACAATTGGAGAAGTGAATTATATAAATATAAAG
TAGTAAAAAATTGAACCATTG--GGAGTAGCACCCACCAGGGCAAAGAGAAGGGTGGTG-----
-----CAGAGAGAAAAAAGAGCA--GTAGGA--CTAGGAGCT-----
TTGTTCCCTTGGGTTCTTGGGAGCA--GCAGGAAGCACTATG--GGCGCAGCGTCA--
CTAACGCTGACGGTACAG--GCCAGACAG--TTATTG--TCTGGTATAGTGCAACAGCAGAAC--
AACTTG--CTGAGG--GCTATTGAGGCGCAACAGCACATGTTGCAACTCACAGTCTGGGGCATC
>MK041575..1
TTCTACTGTAATACAACACAGCTGTTTAATAATACTTGAATGATACTGCTTGAATGATACTAGCTGG----
-----
-----
TCAAATGGCACTATCACACTCCCATGCAGAATAAAACAAATTATAAACAGGTGGCAGGAAGTAGGAAAAGCAA
TGTATGCCCCCTCCCATCAGCGGACAAATTAATTGTTTCATCAAAT---
ATTACAGGACTGTTATTAACAAGAGATGGTGGTAATGACAATGACACGAATACG-----
-----
-----
AATGAGACCGAGATCTTCAGACCTGCAGGAGGAGATATGAGGGACAATTGGAGAAGTGAATTATATAAATATA
AAGTAGTAAAAAATTGAACCATTA--GGAATAGCACCCACCAGGGCAAAGAGAAGAGTGGTG-----
-----CAGAGAGAAAAAAGAGCA--GTGACA--TTAGGAGCT-----
---GTGTTCCCTTGGGTTCTTGGGAGCA--GCAGGAAGCACTATG--GGCGCAGCGTCA--
GTGACGCTGACGGTACAG--GCCAGACTA--TTATTG--TCTGGTATAGTGCAACAGCAGAGC--
AATTTG--CTGAGA--GCCATTGAGGCGCAACAGCATCTGCTGCAACTCACAGTCTGGGGCATC
>MG571983..1
TTCTACGGTAATACATCAAACCTGTTTAATAATAATATTACAGGGATTATA-----
-----
-----
AAGAATGGGACTATCATACTCCCATGCAGAATAAAACAAATTATAAACAGGTGGCAGGAAGTAGGAAGAGCAA
TGTATGCCCCCTCCCATCAGAGGACTAATCAACTGTACATCAAAT---
ATTACAGGGCTGCTATTAACAAGAGATGGTGGTGGTGGTAATGAG-----
-----
-----
AGTCATAACGAGACCTTCAGACCTGGAGGAGGAGATATGAGGGACAATTGGAGAAGTGAATTATATAAATATA
AAGTAGTAAGAATTGAGCCATTA--GGAATAGCACCCACCAAGGCACAGAGAAGAGTGGTG-----
-----CAAAGAGAAAAAAGAGCA--GTGGGAGCACTAGGAGCT-----
---ATGTTCCCTTGGGTTCTTGGGAGCA--GCAGGAAGCACTATG--GGCGCAGCGTCA--
ATAACGCTGACGGCACAG--GCCAGACAA--GTATTG--TCTGGTATAGTGCAACAGCAAAAC--
AATTTG--CTGAGG--GCTATTGAGGCGCAACAGCATTTGTTGCAACTCACAGTCTGGGGCATC
>MG571987..3

```

TTCTACTGTAATACAACATCACTGTTTAAATAGTACTTGGCTGCTTAATGATACTGGAAATGTTACTGTGCCAA  
ACAAA-----  
-----  
ACGGACGAAATTATCATACTCCCATGCAGAATAAAACAAATTATAAATATGTGGCAAAAAGTAGGAAGAGCAA  
TGTATGCCCCCTCCCATCAGAGGTTATATTAAGTGTTCATCAAAT---  
ATTACAGGGCTGCTATTAGTAAGGGATGGTGGTAATAATAATCAGTCT-----  
-----  
AATCAGGCTGAAACCTTCAGACCTGGAGGAGGAGATATGAGGGACAATTGGAGAAGTGAATTATATAAAATATA  
AAGTAGTAAAAATTGAGCCATTA---GGAATAGCACCCACCAAGGCAAAGAGAAGAGTGGTG-----  
-----CAGAGAGAAAAAAGAGCA---GTGGGGACACTAGGAGCT-----  
---GTGTTCCCTTGGGTTCTTGGGAGCA---GCAGGGAGCACTATG---GGCGCAGCGTCA---  
CTAACGCTGACGGTACAG---GCTAGACTA---TTATTG---TCTGGTATAGTGCAACAGCAGAAC---  
AATTTG---CTGAGA---GCTATTGAGGCGCAACAGCATATATTGCAACTCACAGTCTGGGGCATC  
>MG571990..1  
TTCTACTGTAATACAACAAAACTATTTAAATAGTACTTGGGATGGGTCAAACATCATAGGAAATGATACA----  
-----  
-----  
AATGACACAGTGATCACACTCCCATGCAGAATAAAACAAATTATAAACATGTGGCAGCGAGTAGGAAAAGCAA  
TGTATGCCCCCTCCCATCAGAGGACAAATTAGATGTTTCATCAAAT---  
ATTACAGGGCTGCTGTTAACAAGAGATGGTGGAAATCATACAAGT-----  
-----  
-----  
GGGAATGAGACCTTCAGACCAGGAGGAGGAGATATGAGGGACAATTGGAGAAGTGAATTATATAAAATATAAAG  
TAGTAAAAATTGAACCATTG---GGAGTAGCACCCACCAGGGCAAAGAGAAGGGTGGTG-----  
-----CAGAGAGAAAAAAGAGCA---GTAGGA---CTAGGAGCT-----  
TTGTTCCCTTGGGTTCTTGGGAGCA---GCAGGAAGCACTATG---GGCGCAGCGTCA---  
CTAACGCTGACGGTACAG---GCCAGACAG---TTATTG---TCTGGTATAGTGCAACAGCAGAAC---  
AACTTG---CTGAGG---GCTATTGAGGCGCAACAGCACATGTTGCAACTCACAGTCTGGGGCATC  
>MG572002..1  
TTCTATTGTAATTCATCACAGCTGTTTAAATACAACCTTGGATAAATGGCACTACAGGAAATAGAACTAATGAA-  
-----  
-----  
AATGACACACTTATCACACTCCCATGCAGAATAAAACAAATTATAAACAGATGGCAGGAAGTAGGAACAGCAA  
TATATGCCCCCTCCCATTAAGGCATGATTAAATGTTTCATCAAAT---  
ATTACGGGGGTGCTATTAAACAAGAGATGGTGGTTATGATAACAATAGCACG-----  
-----  
-----  
CGCCAGAACGAGACCTTCAGACCTGGAGGGGGAAATATGAAGGACAATTGGAGAAGTGAATTATATAAAATATA  
AAGTAGTAAAAGTTGAGCCATTA---GGACTAGCACCCACCAAGGCAAAGAGAAGAGTGGTG-----  
-----CAAAGAGAAAAAAGAGCG---GTAACA---TTAGGAGCT-----  
---ATGTTCCCTTGGGTTCTTGGGAGCA---GCAGGAAGCACTATG---GGCGCAGCGTCA---  
ATGACGCTGACGGTACAG---GCCAGACAA---TTGTTG---TCTGGTATAGTGCAACAGCAGAAC---  
AATCTG---CTGAGA---GCTATTGAGGCGCAACAGCATATGTTGCAACTCACAGTCTGGGGCATA  
>JF320427..1  
TTCTACTGCAATACAACAGCACTGTTTAAATAGTACATGGAACGGTACAGAGGGGATAAGTAAT-----  
-----  
-----  
GCTACAGGAAATATCACACTCCCATGCAGAATAAAACAAGTTATAAACAGATGGCAGGAAGTAGGAAAAGCAA  
TGTATGCCCCCTCCCATTAAGGAGTAATTAGATGTGTATCAAAT---  
ATCACAGGGATACTATTAAACGAGAGATGGGGGTAATAATAATAACT-----  
-----  
-----  
AATCACACCGAGATATTCAGACCTGGAGGAGGAGATATGAGAGACAATTGGAGAGGTGAATTATATAAAATATA  
AGGTAGTAAAAATTGAACCATTA---GGAGTAGCACCCACCAAGGCAAAGAGAAGAGTGGTG-----  
-----CAGAGAGAAAAAAGAGCA---GTGGGA---ATAGGAGCT-----  
---TTGTTCCCTTGGGTTCTTGGGAGCA---GCAGGAAGCACGATG---GGCGCAGCGTCA---  
GTGACGCTGACGGTACAG---GCCAGACAA---TTATTG---TCTGGTATAGTGCAACAGCAGAGC---  
AATTTG---CTGAGG---GCTATTGAGGCGCAACAACATATGTTGCAACTCACAGTCTGGGGCATC  
>GU562236..3

TTCTACTGCAATACAACGCAGCTGTTTAATAGTACTTGGTATAGTAATGGTACTTGGTCTTGGAAATGGTACTA  
 CTTGGAATGGT-----ACT---  
 AGAGAGACAAATAGTACGGAA-----  
 GGAAACGACACAATGATCACACTCCCATGCAGAATAAAACAATTTATAAACATGTGGCAGGCAGTAGGAAAAG  
 CAATATATGCCCCCTCCCATCAGTGGACTAATCAAATGTACATCAAAT---  
 ATTACAGGGCTGTTAATAACAAGAGATGGGGGTCATGAAAGTAATAAAAGTAAC-----TATGGT-----  
 -----  
 TATGAAAGTAGTAAAAGT---  
 GAGAATGAGACCTTCAGACCTGGAGGAGGAAATATGAGGGATAATTGGAGAAGTGAATTGTATAAATATAAAA  
 TAGTAAGAATTGAACCATTA---GGACTAGCACCCACCAAGGCAAAGAGAAGAGTGGTG-----  
 -----CAGAGAGAAAAGAGAGCC---GCA-----CTAGGAGCC-----  
 ATGTTTCCTTGGGTTCTTGGGAGCA---GCAGGAAGCACTATG---GGCGCAGCGTCA---  
 CTGACGCTGACGGTACAG---GCCAGACAA---TTATTG---TCTGGTATAGTGCAACAGCAGAGC---  
 AATTTG---CTGAGG---GCTATTGAGGCGCAACAGCATATGTTGCAACTCACGGTCTGGGGCATC  
 >JQ403024..1  
 TTCTACTGTAATACAACACAACCTGTTTAATAGAGATTGGAATGATACTAGTACTATTAACAGTACT-----  
 -----  
 -----  
 GAAAAATAGAAATATCACACTCCCATGTAGAATAAAACAAATTATAAACATGTGGCAGGAAGTAGGAAAAGCAA  
 TGTATGCCCCCTCCCATCCAAGGACAAATTAGATGTTTCATCAAAT---  
 ATTACAGGGTTGCTATTAACAAGAGATGGTGGTAATGACAATACCACT-----  
 -----  
 -----  
 AACACCACTGAGATCTTCAGACCTGTAGGAGGAAATATGAGGGACAATTGGAGAAGTGAATTATACAAATATA  
 AAGTAGTACAAATTGAACCATTA---GGATTAGCACCCACCAAGGCAAAGAGAAGAGTGGTG-----  
 -----CAGAGAGAAAAAGAGCA---GTAACG---TTAGGAGCT-----  
 ---ATGTTTCCTTGGGTTCTTGGGAGCA---GCAGGAAGCACTATG---GGCGCAGCGTCA---  
 ATGACGCTGACGGTACAG---GCCAGACAA---TTATTG---TCTGGTATAGTGCAAGCAGCAAAAT---  
 AATTTG---CTGAAG---GCTATTGAGGCGCAACATCATCTGTTGCAACTCACAGTCTGGGGCATC  
 >JQ403041..2  
 TTCTACTGTAATACAACACGACTGTTTAATAGTACTTGGAAATAGTACCGAATCAAATAATACTATA-----  
 -----  
 -----  
 GGAAATGGCACAATCACACTCCCATGCAGAATAAAACAAATTGTAAACATGTGGCAGGAAGTAGGAAAAGCAA  
 TGTATGCCCCCTCCCATCAGAGGACAAATTAGATGTTTCATCAAAT---  
 ATTACAGGGCTGATATTAACAAGAGATGGTGGTCATGGTGGTCATAATAAGAAT-----  
 -----  
 -----  
 ACCACCAACACCACAGAGATCTTCAGACCTGGAGGAGGAGATATGAGGGACAATTGGAGAAGTGAATTATATA  
 AATATAAAGTAGTAAAACTTGAACCATTA---GGAATAGCCCCACCTCGGCAAGGAGAAGAGTGGTG-----  
 -----CAGAGAGAAAAAGAGCA---GTGGGA---  
 ATAGGAGCT-----ATGTTTCCTTGGGTTCTTGGGAGCA---GCAGGAAGCACTATG---  
 GGCGCAGCGTCA---GTGACGCTGACGGTACAA---GCCAGACTA---TTATTG---  
 TCTGGTATAGTGCAACAGCAGAAC---AATTTG---CTGAAG---  
 GCTATTGAGGCGCAACAGCATATGTTGCAACTCACAGTCTGGGGCATC  
 >KC797225..3  
 TTCTACTGTAATACATCACAATTGTTTAATAGTACTTGGAAATGCTACTGGTACTCAGAATACTACTGGTACTC  
 AGAATGAGACT-----  
 -----  
 -----  
 AAAATAGGCAATATCACACTCCCATGTAAATAAAACAAATTATAAACAGGTGGCAAGAAGTAGGAAAAGCAA  
 TGTATGCCCCCTCCCATCAAAGGACTAATTAAGTGTGTATCAAAT---  
 ATTACAGGGATACTATTAACAAGAGATGGTGGTCATTCTAAGAATACAAATAGT-----  
 -----  
 -----  
 ACAGATAATGATACCGAGGTCTTCAGACCTGGAGGAGGAGATATGAGGGACAATTGGAGAAGTGAATTATATA  
 AATATAAAGTGGTAAAAATTGAGCCATTA---GGAGTAGCACCCACCAAGGCAAAGAGAAGAGTGGTG-----  
 -----CAGAGAGAAAAAGAGCA---GTGACG---  
 CTAGGAGCC-----ATGTTTCCTTGGGTTCTTGGGAGCA---GCAGGAAGCACTATG---  
 GGCGCAGCGTCG---CTGACGCTGACGGTACAG---GCCAGACAA---TTATTG---

TCTGGTATAGTGCAACAGCAGAAC --- AACCTG --- CTGAGG ---  
GCTATTGAGGCGCAACAGCATATGTTGCAACTCACAGTCTGGGGCATC  
>HQ699978..2  
TTCTACTGTAATACATCACAACCTGTTTAATAGTACTTATAATGGTACTTGGAGTGGTACTACA-----  
-----  
-----  
GGAAATGATACTATCACGCTCCCTTGCAGAATAAAACAAATTGTAAACAGGTGGCAGGAAGTAGGGAAAGCAA  
TGTATGCCCCCTCCCATTC AAGGAATAATTAGATGTTTCATCAAAT ---  
ATTACAGGGTTGCTATTAACAAGAGATGGTGGTAAGAATGAGAGCGAT-----  
-----  
-----  
AGCAATACCCAGAGACCTTCAGACCTGGAGGAGGAAAATATGAGAGACAATTGGAGGAGTGAATTATATAAAAT  
ATAAAGTAGTAAAAATTGAACCATTA --- GGAGTAGCACCCACCAAGGCAAAAAGAGAGTGGTG-----  
-----  
-----CAGAGAGAAAAAAGAGCA --- GTGGGAACGATAGGAGCT---  
-----ATGTTTCCTTGGGTTCTTGGGAGCA --- GCAGGAAGCACTATG --- GGCGCAGCGTCA ---  
ATAACGCTGACGGTACAG --- GCCAGACAA --- TTGTTG --- TCTGGTATAGTGCAACAGCAGAGA ---  
AATTTG --- CTGAGG --- GCTATTGAGGCGCAACAGCATCTGTTGCAACTCACAGTCTGGGGCATC  
>EU131792..1  
TTCTACTGTAATACATCAGAGCTGTTTAAAGTACTTGAATAATACTAGTACT-----  
-----  
-----  
GGGAATGATCCTATCACGCTCCCTTGCAGAATAAAGCAAATTGTAAACATGTGGCAAGAAGTAGGGAAAGCAA  
TGTATGCTCCTCCCATTC AAGGACAAATTAGATGTTTATCAAAT ---  
ATTACAGGATTGCTATTAACAAGGGATGGTGGTCATAATGGGAGC-----  
-----  
-----  
GAGACCAACGAGACCTTCAGACCTGCAGGAGGAAAATATGAGAGACAATTGGAGAAGTGAATTATATAAAATATA  
AAGTAGTAAAAATTGAACCATTA --- GGAGTAGCACCCACCAAGGCAAGAGAAGAGTGGTG-----  
-----  
-----CAGAGAGAAAAAAGAGCA --- GTGGGAACAATAGGAGCT-----  
---ATGTTTCCTTGGGTTCTTGGGAGCA --- GCAGGAAGCACTATG --- GGCGCAGCGTCA ---  
ATGACGCTGACGGTACAG --- GCCAGACAA --- ATGTTG --- TCTGGTACAGTGCAACAGCAAAGA ---  
AATTTG --- CTGAGG --- GCTATTGAGGCGCAACAGCATCTGTTGCAACTCACAGTCTGGGGCATC  
>EU131803..1  
TTCTACTGTAATACATCAAAATTATTTAATAGTACTTGGTATAATAATGGTACTTGAATAATGCTAGTACT-----  
-----  
-----  
GGGAATGATACTATCACGCTCCCTTGCAGAATAAAACAAATTGTAAACATGTGGCAGGAAGTAGGGAAAGCAA  
TGTATGCCCCCTCCCATTCAGGACAAATTAGATGTTTCATCAAAG ---  
ATTACAGGGTTGCTATTAACAAGAGATGGTGGTAATGAGAACAAGACTAAGGAC-----  
-----  
-----  
AACAAACACCGAGACTGAGACCTTTAGACCTGGGGGAGGAGATATGAGAGACTATTGGAGAAGTGAATTATATA  
AATATAAAGTAGTAAAAATTGAACCATTA --- GGAGTAGCACCCACCAAGGCAAGAGAAGAGTGGTG-----  
-----  
-----CAGAGAGAAAAAAGAGCA ---  
GTGGGAACAATAGGGGCT-----ATGTTTCCTTGGGTTCTTGGGAGCA --- GCAGGAAGCACTATG ---  
GGCGCAGCGTCA --- ATAACGCTGACGGTACAG --- GCCAGACAA --- TTGTTG ---  
TCTGGTATAGTGCAACAGCAGAGA --- AATTTG --- CTGATG ---  
GCTATTGAGGCGCAACAACATTTGTTGCAACTCACAGTCTGGGGCATC  
>EU363829..1  
TTCTACTGTAATACAACAAAACCTGTTTAATAGTATTTGGTATAATAATGGTACTTCGAGTGGTACTACA----  
-----  
-----  
GGAAATGAAACTATCATACTCCCTTGCAGAATAAAACAAATTGTAAACATGTGGCAGAAAGTAGGGAGAGCAA  
TGTATGCCCCCTCCCATTC AAGGAAAAATTAGCTGTGTATCAAAT ---  
ATCACAGGGTTGCTATTAACAAGAGATGGTGGTCAGAATGAGAAC-----  
-----  
-----  
AATACCGAAACCTTCAGACCTGAAGGAGGAAATATGAAAAGACAATTGGAGAAGTGAATTATATAAATATAAAG  
TAGTAAAAATTGAACCATTA --- GGAGTAGCACCCACCAAGGCAAGAGAAGAGTGGTG-----  
-----  
-----CAAAGAGAAAAAAGAGCA --- GTGGGAGCAATAGGAGCT-----

ATGTTTCCTTGGGTTCTTAGGAGCA---GCAGGAAGCACTATG---GGCGCAGCGTCA---  
 ATAACGCTGACGGTACAG---GCCAGACAA---TTGTTG---TCTGGCATTGTGCAACAGCAGAGA---  
 AATTTG---CTAAGG---GCTATTGAGGCGCAACAGCATCTGTTGCAACTCACAGTCTGGGGCATT  
 >HM215413..1  
 TTCTACTGTAATACAGCACAACCTGTTTAATAGTACTTGAATACTACTAAGATTTGGGGGAATACTACAGAAG  
 GT-----  
 -----  
 AACAAATAGCACTATCATGCTCCCTTGCAAAATAAAGCAAATTATAAACCTGTGGCAGGAAGTAGGAAAAGCAA  
 TATATGCCCCCTCCCATCGCAGGGCGAATTAGATGTGTATCAAAT---  
 ATTACAGGGTTGCTATTAACAAGAGATGGTGGTCATAATGGGAACGGG-----  
 -----  
 -----  
 TCCAACGAGACCGAGACCTTCAGACCTGCAGGAGGAGATATGAGGGACAATTGGAGAAGTGAATTATATAAAAT  
 ATAAAGTAGTAAAAATTGAACCAATA---GGATTAGCACCCACCAAGGCAAAGAGAAGAGTGGTG-----  
 -----CAGAGAGAAAAAAGAGCA---ATGGGA---ATAGGAGCT---  
 -----ATGTTTCCTTGGGTTCTTGGGAGCA---GCAGGAAGCACTATG---GGCGCAGCGTCA---  
 ATAACGCTGACGGTGCAG---GCCAGACGA---TTATTG---TCTGGTATAGTGCAACAGCAAAGA---  
 AATTTG---CTGAGG---GCTATTGAGGCGCAACAACATCTGTTGCAACTCACCGTCTGGGGCATC  
 >EU131802..1  
 TTCTACTGTAATACATCACAACCTGTTTAATAGTACTTGAATGATACTAGTACTTGAATGGTAAT-----  
 -----  
 -----  
 ACAGGAACTACTGTACGCTCCCTTGCAAGATAAAACAAATTGTAAACATGTGGCAGAAAGTAGGGAAAGCCA  
 TGTACGCCCCCTCCCATTAAGGACAAATTAGATGTTTCATCAAAT---  
 ATTACAGGGTTGCTATTAACAAGAGATGGTGGTAATAATGAGAGC-----  
 -----  
 -----  
 GAGAATACCGAGACCTTCAGACCTGCAGGAGGAAATATGAGAGATAATTGGAGAAGTGAATTATATAAAATATA  
 AAGTAGTAAAAATTGAACCATTA---GGAGTAGCCCCACCAAGGCAAAGAGAAGAGTGGTG-----  
 -----CAGAGAGAAAAAAGAGCA--GTGGGATTGATAGGAGCT-----  
 ---ATGTTTCCTTGGGTTCTTGGGAGCA--GCAGGAAGCACTATG---GGCGCAGCGTCA---  
 ATAACGCTGACGGTACAG---GCCAGGCAA---TTATTG---TCTGGTATAGTGCAACAGCAGAGA---  
 AATTTG---CTGATG---GCTATTGAGGCGCAACAGAATATGTTGCGACTCACAGTCTGGGGCATC  
 >EU131804..1  
 TTCTACTGTAACACATCACAACCTGTTTAATAGTACTTGGTATAGTAATGGTACTAGGAAGGATCCTACA---  
 -----  
 -----  
 GGAAATGGCACTATCACGCTCCCTTGCAAGATAAAACAAATTATAAACATGTGGCAGCAAGTAGGGAAAGCAA  
 TGTATGCACCTCCCATTAAGGACAAATTAGATGTTTCATCAAAT---  
 ATTACAGGGTCGCTATTAACAAGAGATGGTGGTTATAATGAGAGC-----  
 -----  
 -----  
 AACACCACCGAGACCTTCAGACCTGGAGGAGGAGATATGAGAGACAATTGGAGAAGTGAATTATATAAAATATA  
 AAGTAGTAAAAATTGAACCATTA---GGAGTAGCACCCACCAAGGCAAAGAGAAGAGTGGTG-----  
 -----CAGAGAGAAAAAAGAGCA---GTAGGA---CTAGGAGCT-----  
 ---ATGTTTCCTTGGGTTCTTGGGAGCA---GCAGGAGGCACCATG---GGCGCAGCGTCA---  
 ATAACGCTGACGGTACAG---GCCAGACAA---TTGTTG---TCTGGTATAGTGCAACAGCAGAGA---  
 AATTTG---CTGAGT---GCTATTGAGGCGCAACAACGTTTGTGCAACTCACAGTCTGGGGCATC  
 >JF932472..1  
 TTCTACTGTAATACAGCACAACCTGTTTAATAGTACTTGGACAGGAAATGATACTAGCATTGGAATGATACTA  
 CA-----  
 -----  
 -----  
 GGAAATGACACTATCACACTCCCTTGCAAGATAAAACAAATTATAAACATGTGGCAGGAAGTAGGGAAAGCAA  
 TGTATGCCCCCTCCCATTCAGAGACAAATTAGATGTTTCATCAAAT---  
 ATTACAGGGTTGCTATTAACAAGAGATGGTGGTAATCATGAGAAC-----  
 -----  
 -----  
 AACACTGAGACCTTCAGACCTGGAGGAGGAGATATGAGAGACAATTGGAGAAGTGAATTATATAGATATAAAG  
 TAGTAAAAATTGAACCATTA---GGAGTAGCACCCACCAAGGCAAAGAGAAGAGTGGTG-----  
 -----CAGAGAGAAAAAAGAGCA--GTGGGAACGCTAGGAGCT-----

ATGTTTCCTTGGGTTCTTGGGAGCA---GCAGGAAGCACTATG---GGCGCAGCGTCA---  
 ATAACGCTGACGGTACAG---GCCAGACAA---TTGTTG---TCTGGTATAGTGCAACAGCAGAGA---  
 AATTTG---CTGAGG---GCTATTGAGGCGCAACAGCATCTGTTGCAACTCACAGTCTGGGGCATC  
 >JF932474..3  
 TTCTACTGTAATACATCACAACCTGTTTAATAGTACTTGGCCTTGAATAATGATACTAGTGTTTGGGATGATA  
 CTACA-----  
 -----  
 GAAAAATGACATTATCACGCTCCCTTGCAGAATAAAACAAATTATAAACATGTGGCAGGAAGTAGGGAAAGCAA  
 TGTATGCCCCCTCCCATTCAGGACAACCTTAACTGTTTCATCAAAT---  
 ATTACAGGGTTGCTATTAACAAGAGATGGTGGTTATCATAATGAGAGC-----  
 -----  
 -----  
 AATAACACCGAGACCTTCAGACCTGGAGGAGGAGATATGAGAGACAATTGGAGAAAGTGAATTATATAAAATATA  
 AAGTAGTAAAAATTGAACCATTA---GGAGTAGCACCCACCAAGGCAAAGAGAAGAGTGGTG-----  
 -----CAAAGAGAAAAAAGAGCA---GTGGGAGCGATAGGAGCT-----  
 ---ATGTTTCCTTGGGTTCTTGGGAGCA---GCAGGAAGCACTATG---GGCGCAGCGTCA---  
 ATAACGCTGACGGTACAG---GCCAGACAA---CTGTTG---TCTGGTATAGTGCAACAGCAGAGA---  
 AATTTG---CTGAGG---GCTATTGAGGCGCAACAGCATCTGTTGCAACTCACAGTCTGGGGCATT  
 >HQ215554..1  
 TTCTACTGTAATACAACAGGGCTGTTTAATAGTACTTTGACTAATGATACCTGGAATGATAATCGGTCATATA  
 AC-----  
 -----  
 AATGGAACAGGTAACATCACACTCCACTGCAGAATAAAACAAATTATAAACAGGTGGCAGGAAGTAGGAAAAG  
 CAATGTATGCCCCCTCCCATCAGTGGACCAATTAGCTGTTTATCAAAT---  
 ATTACAGGACTGATATTAACAAGAGATGGAGGTAACAATACCGGGAAT-----  
 -----  
 -----  
 CAATCTGATACTGAAACCTTCAGACCTGGGGGAGGGGATATGAAGGACAATTGGAGAAAGTGAATTATATAAAAT  
 ATAAAGTAGTACAAATTGAGCCAATA---GGATTAGCACCCACCAGGGCAAGGAGAAGAGTGGTG-----  
 -----CAGAGAGAAAAAAGAGCA---GTGGGAACATTAGGAGCT---  
 -----ATGTTTCCTTGGGTTCTTGGGAGCA---GCAGGAAGCACTATG---GGCGCAGCGTCA---  
 GTCACGCTGACGGTACAG---GCCAGACAA---TTACTG---TCTGGTATAGTGCAACAGCAGAAC---  
 AATTTG---CTGAAA---GCTATTGAGGCGCAACAACATATGTTGCAACTCACAGTCTGGGGCATC  
 >JF346917..1  
 TTCTACTGTAATACATCACAACCTGTTTAATAGTACTTGGGATATTAATAGTAATGGGACTAATAATACAAAT-  
 -----  
 -----  
 AGCAATATCAATATCACACTCCCTTGCAAAATAAAACAAATTGTAAACATGTGGCAGGAAGTAGGGAAAGCAA  
 TGTACGCCCCCTCCCATTAGAGGACAAATTAGATGTTTCATCAGAA---  
 ATTACAGGGTTGTTATTAACAAGAGATGGTGGTACTAATAATAAT-----  
 -----  
 -----  
 CATAACCAACGAAACCTTCAGACCTGCAGGGGGAGACATGAGAGACAATTGGAGAAAGTGAATTATATAAAATATA  
 AAGTAGTAAAAATTGAACCATTA---GGAATAGCACCCACCAAGGCAAAGAGAAGAGTGGTG-----  
 -----CAGAGAGAAAAAAGAGCA---GTGGGAACAATAGGAGCT-----  
 ---ATGTTTCCTTGGGTTCTTAGGAGCA---GCAGGAAGCACTATG---GGCGCAGCGTCA---  
 GTAACGCTGACGGTACAG---GCCAGACAA---TTATTG---TCTGGTATAGTGCAACAGCAGAGA---  
 AATCTG---CTGAGG---GCTATTGAGGCGCAACAGCGTGTGTTGCAACTCACAGTCTGGGGCATC  
 >JX960599..1  
 TTCTACTGCAATACAACACAACCTGTTTAATAGTACTTGAATACTTGGGATAATATTACTGGGAATAGTAATG  
 AGAATAAT-----  
 -----  
 ACACAGAACAATATCACACTTCCATGTAGAATAAAACAAATTATAAACATGTGGCAGGGAGTAGGAAAAGCAA  
 TGTACGCCCCCTCCCATCGCAGGACGAATTAAATGTTTCATCAGAT---  
 ATTACAGGACTATTATTAGTGAGAGATGGT---AATAACAATAACAAT-----  
 -----  
 -----  
 ACAGATAACAAGACAGAAACTTTTCAGACCTCAGGGAGGAAACATGAAGGACAATTGGAGAAAGTGAATTATATA  
 AATATAAAGTAGTAAAAATTGAACCAATA---GGAATAGCACCCACTACGGCAAAGGAGAAGAGTGGTG-----  
 -----CAGAGAGAAAAAAGAGCA---GTGACA---

CTAGGAGCT-----ATGTTCCCTTGGGTTCTTAGGAGCA---GCAGGAAGCACAATG---  
GGCGCAGCGTCA---ATAACGCTGACGGTACAG---GCCAGACAA---TTACTG---  
TCTGGTATAGTGCAACAGCAGAAC---AATTTG---CTGAGG---  
GCCATTGAGGCGCAACAGCATATGTTGCAACTCACAGTCTGGGGCATC  
>JF932497..2  
TTCTACTGTAATACATCACGACTGTTTAGTAGTACATGGTATACTAATGATACTCAGAATGGTACTACA-----  
-----  
GGAAATGACACTATCACACTCCCTTGCAGAATAAAACAAATTGTAAACATGTGGCAGGAAGTAGGAAAAGCAA  
TGTATGCCCCCTCCCGTTGAAGGACTAATTAGATGTTTCATCAAAT---  
ATTACAGGGTTGCTATTAACAAGAGATGGTGGTTATAATGTAAGC-----  
-----  
AACAAACACCGAGATCTTCAGACCTGGAGGAGGAGATATGAGGGACAATTGGAGAAAGTGAATTATATAAAATATA  
AAGTAATAAAAATTGAACCATTA---GGAGTAGCACCCACCAAGGCAAAGAGAAGAGTGGTG-----  
-----CAAAGAGAAAAAAGAGCA---GTGGGA---ATAGGAGCT-----  
---ATGTTCCCTTGGGTTCTTGGGAGCA---GCAGGAACCACTATG---GGCGCAGCGTCA---  
ATGACGCTGACGGTACAG---GCCAGACAA---TTGTTG---TCTGGTATAGTGCAACAGCAGGGA---  
AATCTG---CTGAGG---GCTATTGAGGCGCAACAGCATATGTTGCAACTCACAGTCTGGGGCATT  
>KX693642..1  
TTCTACTGTAATACATCACAACCTGTTTAATAGTACTTGGGATGTTAATGACACTAGTAATGATACTACA-----  
-----  
GGAAATGAAACTATCACGCTCCCTTGCAGAATAAAACAAATTATAAACATGTGGCAGGGAGTAGGGAAAGCAA  
TGTATGCCCCCTCCCATTAAGGAAAAATTAGATGTTTCATCAAAT---  
ATTACAGGGTTGATATTAACAAGAGATGGTGGTGTAATGAGAGC-----  
-----  
GAGTTCAATGAGACCTTCAGACCTCAAGGAGGAAATATGAAAGACAATTGGAGAAAGTGAATTGTATAAAATATA  
AAGTAGTAAAAATTGAACCATTA---GGAGTAGCACCCACCAAGGCAAAGAGAAGAGTGGTG-----  
-----CAGAGAGAAAAAAGAGCA-----GGA---ATAGGAGCT-----  
---CTGTTCCCTTGGGTTCTTGGGAGCA---GCAGGAAGCACTATG---GGCGCAGCGTCA---  
ATAACGCTGACGGTACAG---GCCAGACAA---TTGATG---TCTGGTATAGTGCAACAGCAGAGA---  
AATTTG---CTGAGA---GCTATTGAGGCGCAACAGCATCTGTTGCAACTCACAGTCTGGGGCATC  
>KX693171..1  
TTTTACTGTAATACATCACAACCTGTTTGACAGTATTTGGAATGCTACTACTGGTACTTGGAAATGGTACTACA-----  
-----  
GGAGGTGACAATATCACGCTCCCTTGCAGGATAAAACAAATTGTAAACATGTGGCAGGAAGTAGGGAAAGCAA  
TGTATGCCCCCTCCCATTAGAGGACAAATTTATTGTTTCATCAAGT---  
ATTACAGGGTTGCTATTAACAAGAGATGGTGGTACGAGTAAGAAT-----  
-----  
GAGAGCAATACCACCGAGACCTTCAGACCTGGAGGAGGAGATATGAGGGACAATTGGAGAAAGTGAATTATATA  
AATACAAAGTAGTAAACTTGAACCACTA---GGAGTAGCACCCACCGAGGCAAAGAGAAGAGTGGTG-----  
-----CAGAGAGAAAAAAGAGCA---  
GTGGGAGCGATAGGAGCT-----ATGTTCCCTTGGGTTCTTGGGAGCA---GCAGGAAGCACTATG---  
GGCGCAGCGTCA---ATAACGCTGACGGTACAG---GCCAGACAA---TTATTG---  
TCTGGTATAGTGCAACAGCAAAGA---AATTTG---CTGAGG---  
GCTATTGAGGCGCAACAGCATATGTTGCAACTCACAGTCTGGGGCATC  
>KX693309..1  
TTCTACTGTAATACATCAAACTGTTTAATAGTACTTGGAGTAAGACTAGTACTTGGAAATGATACTACA-----  
-----  
GGAAATGACACTATCACGCTCCCTTGCAGAATAAAACAAATTGTAAACATGTGGCAGGAAGTAGGGAAAGCAA  
TGTATGCCCCCTCCCATTAAGGACTAATTAAGTGTTCATCAAAT---  
ATTACCGGGTTGCTATTAACAAGAGATGGTGGTAATAATACTGAGAGC-----  
-----  
AACACCACCGAGACCTTCAGACCTACAGGAGGAAATATGAGAGACAATTGGAGAAAGTGAATTATATAAAATATA

AAGTAGTACAAATTGAACCATTA---GGAGTAGCACCCACCAAGGCAAAGAGAAGAGTGGTG-----  
-----CAGAGAGAAAAAAGAGCA---GTGGGAACAATAGGAGCT-----  
---ATGTTCCCTTGGGTTCTTGGGAGCA---GCAGGAAGCACTATG---GGCGCAGCGTCG---  
GTAACGCTGACGGTACAG---GCCAGACAA---TTGTTG---TCTGGTATAGTGCAACAGCAGAGA---  
AATTTG---CTGAGG---GCTATTGAGGCGCAACAGCATCTGTTGCAACTCACAGTCTGGGGCATT  
>KX693362..1  
TTCTACTGTAATACATCAAACTGTTTAATAGTACTTGGAAATGATAATAGTACTTGGAAATGATAATGATAAGA  
CA-----  
-----  
GGAGATGACAATCTCACGCTCCCTTGTAGAATAAAACAAATTGTAAACATGTGGCAGGAAGTAGGGAAAGCAA  
TGTATGCCCCCTCCCATTAAGGACAAATTAGATGTTTCATCAAAT---  
ATTACAGGGTTGCTATTAACAAGAGATGGTGGTCAGAAATGTGAGC-----  
-----  
-----  
AATACCACCGAGACCTTCAGACCTGCAGGAGGAGATATGAGAGACAATTGGAGAAGTGAATTATATAAATATA  
AAGTAGTAAAAATTGAACCATTA---GGAGTAGCACCTACCAAGGCAAAGAGAAGAGTGGTG-----  
-----CAGAGAGAAAAAAGAGCA---GTGGGAACGATAGGAGCT-----  
---ATGTTCCCTTGGGTTCTTGGGAGCA---GCAGGAAGCACGATG---GGCGCAGCGTCA---  
ATAACGCTGACGGTACAG---GCCAGACAA---TTGTTG---TCTGGTATAGTGCAACAGCAGAGA---  
AATTTG---CTGAGG---GCTATTGAGGCGCAACAGCATCTGTTGCAACTCACAGTCTGGGGCATC  
>KX693411..2  
TTTTACTGTAATACATCAAACTGTTTAATAGTACTTGGAGTAATAATAATCCTTGGAACTACTACTAGTATT-  
-----  
-----  
CAAAATGATACTATCACGCTCCCTTGCAGAATAAAACAAATTGTAAACATGTGGCAGGAAGTAGGGAAAGCAA  
TGTATGCCCCCTCCCATTCAGGACCAATTAATTGTTTCATCAAAT---  
ATTACGGGGTTGCTATTAACAAGAGATGGTGGTAAAGGTGGGGAT-----  
-----  
-----  
GTGAGCAACTACACCGAGACCTTCAGACCTGCAGGGGGAAATATGAGAGACAATTGGAGAAGTGAATTATATA  
GATATAAAGTAGTAAAAATTGAACCATTA--GGAGTAGCACCCACCAAGGCAAAGAGAAGAGTGGTG-----  
-----CAGAGAGAAAAAAGAGCA---  
GTGGGAGCAATAGGAGCT-----ATGTTCCCTTGGGTTCTTGGGAGCA---GCAGGAAGCACTATG---  
GGCGCAGCGTCA---ATAACGCTGACGGTACAG---GCCAGACAA---TTGTTG---  
TCTGGTATAGTGCAACAGCAGAGA---AATTTG---CTGAGG---  
GCTATTGAGGCGCAACAGCATCTGTTGCAACTCACAGTCTGGGGCATC  
>KR914676..3  
TTCTACTGTAACACAACACCACTGTTTAATAGTAGTTGGTACAAGTCAAATTGGAAAAGTCAAAGGACAAAGG  
AGATTGGA-----  
-----  
GGAAGGGAGACAATCACACTCCAATGTAGAATAAAACAAATTGTAAACATGTGGCAGGAAGTAGGACGAGCAA  
TGTATGCCCCCTCCCATCAAAGGACAAATTAGATGTTTCATCAAAT---  
ATTACAGGGGTGCTATTAACAAGAGATGGTGGTAATACCACCAAT-----  
-----  
-----  
CACTCCGAGATCTTCAGACCTGGAGGAGGAAATATGAAGGACAATTGGAGAAGTGAATTATATAAATATAAAG  
TAGTACAAATTGAACCATTA---GGAATAGCACCCACCAAGGCAAAGAGAAGAGTGGTG-----  
-----CAGAGAGAAAAAAGAGCA---ATAGGA---TTCGGAGCT-----  
GTGTTCCCTTGGGTTCTTGGGAGCA---GCAGGAAGCACTATG---GGCGCAGCGTCA---  
GTAACGCTGACGGTACAA---GCCAGACAA---TTATTG---TCTGGTATAGTGCAACAGCAGAGC---  
AATTTG---CTGAAT---GCTATTGAGGCGCAACAGCATCTGTTGCAACTCACAGTCTGGGGCATT  
>FJ388899..1  
TTCTACTGCAATACAACAGAACTGTTTAATAGTACTTGGAAATAGTACTACTTGGAAATAGTAATAGTACTACAA  
ATGCAAAT-----  
-----GCA---  
ACAAATACAGCTAACCTAGTACTCCCATGCAGAATAAAACAGATTGTAAACATGTGGCAGAAAGTAGGAAAAG  
CAATGTATGCCCCCTCCCATCAAAGGAATAATTAGATGTTTCATCAAAT---  
ATTACAGGGGATAATATTAACAAGAGATGGTGGTAATAGTAATCAGACC-----  
-----  
-----

AACACCACAGAGATTTTCAGACCTGTAGGAGGAAATATGAAGGACAATTGGAGAAGTGAATTATATAAAATATA  
AAGTAGTACAAATTGAACCATTA---GGAGTAGCACCCACCAAGGCCAAAAGAAGAGTGGTG-----  
-----CAGAGAGAAAAAAGAGCA---GTGACA---TTAGGAGCT-----  
---ATGTTCCCTTGGGTTCTTGGGAGCA---GCAGGAAGCACTATG---GGCGCAGCGTCA---  
ATAACGCTGACGGTACAG---GCCAGACAA---TTACTG---TCTGGTATAGTGCAACAGCAGAGC---  
AATCTG---CTGAGG---GCTATTGAGGCGCAACAGCACCTGTTGCAACTCACAGTCTGGGGCATC  
>FJ388916..3  
TTCTACTGTAATACAACAGGGCTGTATAATAGTACTTGGCAGTTTAAATAGTACTTGGAACTACTACTTGGAAATC  
ATACTGAC-----  
-----CCT---  
AATCATACTGACCCTATCACACTACCATGCAGAATAAGACAAATTGTAAACAGGTGGCAGGAAGTAGGAAAAG  
CAATGTATGCCCCCTCCCATCAGCGGACAAATTAGCTGTTTCATCAAAC---  
ATTACAGGGCTACTATTAAACAAGAGATGGTGGTAGTAATGAGAGC-----  
-----  
-----  
AGAACCAACGAGACCTTTAGACCTGGAGGAGGAGATATGAGGGACAATTGGAGAAGTGAATTATATAAAATATA  
AAGTAGTAAGAATTCAACCATTA---GGAATAGCACCCACCAAGGCCAAAAGAAGAGTGGTG-----  
-----CAAAGAGAAAAAAGAGCA---GTGGGAACGCTGGGAGCT-----  
---ATGTTCCCTTGGGTTCTTGGGAGCA---GCAGGAAGCACTATG---GGCGCAGCGTCA---  
CTGACGCTGACGGTACAG---GCCAGACAA---TTATTG---ACTGGTATAGTGCAACAGCAGAAC---  
AATCTG---CTGAGA---GCTATTGAGGCGCAACAGCATATGTTGCAACTCACAGTCTGGGGCATC  
>JF683738..2  
TTCTACTGTGATACTACAAAGCTGTTTAAATAGTACTTGGACTGGGAATGAAACTTGGACTGGGAATGAAACTG  
AAGAG-----  
-----  
TCAAATAATAGTACTATCACACTCCCATGCAGAATAAAACAAATTATAAACAGATGGCAGGAAGTAGGAAAAG  
CAATGTATGCCCCCTCCCATCAGAGGAGAAATTAAATGTACATCAAAT---  
ATTACAGGGCTACTATTAAACAAGAGATGGTGGTAATGGTAATGGGACT-----  
-----  
-----  
CAGAATCAGACCGAGATCTTCAGACCTGGAGGAGGAGACATGAAGGACAATTGGAGAAGTGAATTATATAAAAT  
ATAAAGTAGTAAAAATTGAGCCATTA---GGAATAGCACCTACCAAGGCCAAAAGAAGAGTGGTG-----  
-----CAGAGAGAAAAAAGAGCA---ATAGGA---CTGGGAGCT---  
-----GTGTTTCATTGGGTTCTTGGGAGCA---GCAGGAAGCACTATG---GGCGCAGCGTCG---  
GTGACGCTGACGGTACAG---GCCAGACAG---TTATTG---TCTGGTATAGTGCAACAGCAAAAC---  
AATTTG---CTAAAA---GCTATTGAGGCGCAACAGCATCTGTTGCAACTCACAGTCTGGGGCATC  
>JF683756..1  
TTCTACTGTAATACATCAAAGCTGTTTAAATAGTACTTGGACTAATAGTAGTAGTACTTGGAAATAATACTGAAG  
AG-----  
-----  
TCAAATGACACTATCACACTCCCATGTAAATAAAACAAATTATAAACATGTGGCAGGAAGTAGGAAGAGCAA  
TGTATGCCCCCTCCCATCAGTGGGCAAATTAGGTGCTCATCAAAT---  
ATTACAGGGCTACTATTAAACAAGAGATGGTGGTCATAACGGAACCAAT-----  
-----  
-----  
AACGAGACCGAGATCTTCAGACCTGCAGGAGGAAATATGAAGGACAATTGGAGAAGTGAATTATATAAAATATA  
AAGTAGTGAAAATTGAGCCATTA---GGAGTAGCACCCACCAGGGCAAAAGAAGAGTGGTG-----  
-----CAGAGAGAAAAAAGAGCA---GTGGGA---ATGGGAGCT-----  
---TTGCTCCTTGGGTTCTTGGGAGCA---GCAGGAAGCACTATG---GGCGCAGCATCG---  
GTGATGCTGACGGTACAG---GCCAGACAA---TTATTG---TCTGGTATAGTGCAACAGCAGAAC---  
AATCTG---CTGAGA---GCTATTGAGGCGCAACAACATATGTTGCAACTCACAGTCTGGGGCATT  
>JF683764..1  
TTCTACTGTGATACAACACAACCTGTTTAAATAGTACTTGGTTTATGAATGGGACTAATACAACCTACC-----  
-----  
-----  
CTTACCGCAAATGCCACAATCCCAAGCCGAATAAAACAAATTATACACAGGAGGCAGGAAGTAGGAAGAGCAA  
TGTATGTCCCTGCCCTCAGAGGACCAATTACATGTATATCAAAT---  
ATGACAGGGACGTTATTAACAAGAGATGGTGGTCATAACAATGGCATT-----  
-----  
-----

AATGACATTGAGACCTTCAGACCAGGAGGAGGAGATATGAGGGACAATTGGAGAAGTGAATTATATAAATATA  
 AAGTAGTAAGAGTTGAACCATTA---GGAATAGCACCCACCAGGGCAAAGAGAAGAGTGGTG-----  
 -----CAGAGAGAAAAAAGAGCA---GCA-----CTAGGAGCT-----  
 ---ATGTTCCCTTGGGTTCTTGGGAGCA---GCAGGAAGCACTATG---GGCGCAGCGTCA---  
 ATAACGCTGACGGTACAG---GCCAGACAA---TTGTTG---TCTGGTATAGTGCAACAGCAAAAC---  
 AATTTG---CTGAGA---GCTATTGAGGCGCAACAACACATGTTGCAACTCACAGTCTGGGGCATC  
 >JF683773..1  
 TTCTACTGTAATACATCACAACCTGTTTAATAGTACTTGGACACCTAATGGTACTTGGACATTTAATGCTGCTA  
 GTGGGGCT-----  
 -----TCA---  
 GGATTCAAGGGCACTATCACACTCCCATGTAGAATAAAACAAATTATAAACATGTGGCAGGAAGTAGGAAAAG  
 CAATGTATGCCCTCCCATCAGTGGACTAATTAGATGCTCATCAAAT---  
 ATTACAGGACTGCTATTAACAAGAGATGGTGGTATAAAACAATACC-----  
 -----  
 -----  
 AATACCACCGAGATCTTCAGACCTGTAGGAGGAAATATGAAGGACAATTGGAGAAGTGAATTATATAAATATA  
 AAGTAGTACAAGTTGAACCAATA---GGAATTGCACCCACCAAGGCAAAGAGAAGAGTGGTG-----  
 -----CAGAGAGAAAAAAGAGCA---GTTACA---CTAGGAGCT-----  
 ---GTGTTCCCTTGGGTTCTTGGGAGCA---GCAGGAAGCACTATG---GGCGCAGCGTCA---  
 ATGACGCTGACGGTACAG---GCCAGGCAA---TTATTG---TCTGGTATAGTGCAACAGCAGAAC---  
 AATCTG---CTGAGA---GCTATTCAGGCGCAACAGCATCTGTTGCAACTCACAGTCTGGGGCATC  
 >JQ416158..1  
 TTCTACTGTAATACATCACAACCTGTTTAATAGTATTTGGCCTTGGGAATAGTACTGCAAACAACACTGGA----  
 -----  
 -----  
 GGAAATGACACAATCACACTCCCATGCAGGATAAGACAAATTGTAAATAGGTGGCAGGAAGTAGGAAAAGCAA  
 TGTATGCCCCCTCCCATCAGTGGACAAATTAGATGTTTCATCAAAT---  
 ATTACAGGGCTGCTATTAACAAGAGATGGAGGTCAGACTAACAACCAG-----  
 -----  
 ----  
 ACTGGGAACCAGACCGAGATTTTCAGACCTGGAGGAGGAGATATAAAAGATAATTGGAGAAGTGAATTATACA  
 AATATAAAGTAGTACAAATTGAACCATTA--GGAGTAGCTCCCACTAAGGCAAGGAGAAGAGTGGTG-----  
 -----CAGAGAGAAAAAAGAGCA---CTAACA---  
 CTGGGAGCT-----GTGTTCCCTTGGGTTCTTGGGAACA---GCAGGAAGCACTATG---  
 GGCGCAGCGTCA---CTAACGCTGACGGTACAG---GCCAGACAA---TTATTG---  
 TCTGGTATAGTGCAAGCAGCAGAAC---AATCTG---CTGAGA---  
 GCTATTGAGGCGCAACAACATTTGTTGCAACTCACAGTCTGGGGCATC  
 >KT124803..1  
 TTCTACTGTAATACAACAAGCCTGTTTAATAGTACTTGGTATGCAAATGGTACAAATAGCACTTGGTCTGAT-  
 -----  
 -----  
 GAGTCAGATGTTATCACACTTCCATGCAGAATAAGACAAATTGTAAACATGTGGCAGGGGGTAGGAAAAGCAA  
 TGTATGCCCCCTCCCATCAGAGGACAGATTAATTGTACATCAAAT---  
 ATTACAGGGCTAATATTAACAAGAGATGGTGGGAACAAGAATGGCACTAATGAG-----  
 -----  
 -----  
 ACCTATGAGACCTTCAGACCTGCAGGAGGAAATATGAAGGACAATTGGAGAAGTGAATTATATAAATATAAAG  
 TAGTAAAGATTGAACCATTA---GGAATAGCACCCACCAAGGCAAAGAGAAGAGTGGTG-----  
 -----CAAAGAGAAAAAAGAGCA---ATAGGA---ATGGGAGCC-----  
 TTGTTCCCTTGGGTTCTTGGGAGCA---GCAGGAAGCACTATG---GGCGCAGCGTCA---  
 ATGACGCTGACGGTACAG---GCCAGACAG---TTATTG---TCTGGTATAGTGCAACAGCAAAAC---  
 AATTTG---CTGAGA---GCTATTGAGGCGCAACAACACCTGTTGCAACTCACAGTCTGGGGCATC  
 >KT124789..1  
 TTCTACTGTAATACAACAGAGCTGTTTAACGGTACTTGGGAATGGTACTTTCTTGAATGTTACTACA-----  
 -----  
 -----  
 GGGCGAGAGAATATCACACTCCCATGCAGAATAAAACAGATTATAAACAGGTGGCAGGAAGTAGGAAAAGCAA  
 TGTACGCCCCCTCCCATCAGAGGACCAATTAGATGCTCATCAAAT---  
 ATTACAGGGCTGATATTAACAAGAGATGGTGGTCAGAATGCGAGTGCG-----  
 -----  
 -----

```

-----
ACCAACGAAACCTTCAGACCGGGAGGAGGAGATATGAGGGACAATTGGAGAAGTGAATTATATAAATATAAAG
TAGTAAAAATTGAGCCATTA---GGAATAGCACCCACCAAGGCAAGGAGGAGAGTGGTG-----
-----CAGAGAGAAAAAAGAGCA---GTGACA---CTAGGAGCT-----
ATGTTTCCTTGGGTTCTTGGGAGCA---GCAGGAAGCACTATG---GGCGCAGCTTCA---
TTGACGCTGACGGTACAG---GCCAGACTA---TTATTG---TCTGGTATAGTGCAACAGCAAAAC---
AACTTG---CTGAGG---GCTATTGAGGCGCAGCAGCATCTGCTGCAACTCACAGTCTGGGGCATC
>KT124805..1
TTTTACTGTGATACAACACAACCTGTTCAACAGTACGTGGGATACAAATAATACTGGGGGAGTGAATGAT----
-----
-----
ACTGACGAGCCAATTACACTCCCATGCAGGATAAAACAATTTATAAACATGTGGCAGGAAGTAGGGAAAGCAA
TGTATGCCCCCTCCCATCCAAGGAATAATTCACTGTTTCATCAAAT---
ATTACAGGACTACTATTAACAAGAGATGGTGGTAAGACAGAGAACGGGACAGAG-----
-----
-----
AATGTTACTGAGATCTTTAGACCTGGAGGAGGAGACATGAGGGACAATTGGAGAAGTGAATTATATAAATATA
AAGTAGTAAAAATTGAACCATTA---GGAGTAGCACCCACCAGGGCAAAGAGAAGAGTGGTG-----
-----CAGAGAGAAAAAAGAGCA---GTGACA---CTGGGAGCT-----
---GTGTTTCCTTGGGTTCTTGGGAGCA---GCCGGAAGCACTATG---GGCGCAGCGTCA---
CTGACGCTGACGGTACAG---GCCAGACAA---TTATTG---TCTGGTATAGTGCAACAGCAGAAC---
AATTTG---CTGAGA---GCTATTGAGGCGCAACACCATCTGTTGCAACTCACAGTCTGGGGCATT
>KT124763..1
TTCTACTGTAATTCATCGACACTGTTTAATAGTACTTGGAAATGAACTATTGCAGGGATTACCAAT-----
-----
-----
GCAAAATGAACTATCACACTCCCATGCAGAATAAGGCAAATTTATAAACATGTGGCAGGAAGTAGGAAAAGCAA
TGTATGCCCCCTCCCATTAGTGGAATAATTAGATGTTTCATCAAAT---
ATTACAGGGCTGCTATTAACAAGAGATGGTGGTAATAATGGTAAT-----
-----
-----
CATAGCGAGAATAAT---
ACCATTGAGATCTTCAGACCTGGAGGAGGAGATATGAGGGATAATTGGAGAAGTGAATTATATAAATATAAAG
TAGTACAAATTGAACCAGTA---GGAGTAGCACCTACCAAGGCAAAGAGAAGAGTGGTG-----
-----CAGAGAGAAAAAAGAGCA---GTGGGA---CTAGGAGCT-----
TTGTTTCCTTGGGTTCTTGGGAGCA---GCAGGAAGCACTATG---GGCGCAGCGTCA---
ATAACGCTGACGGTACAG---GCCAGACAA---TTATTG---TTTGGTATAGTGCAACAGCAGAAC---
AATCTG---CTGAGA---GCTATTGAGGCGCAACAGCACCTGTTGCAACTCACAGTCTGGGGCATC
>KT124779..1
TTCTACTGTGATACAACACAACCTGTTTAATAGTACTTGGAGTAATGCTACTTGGAAATGAGACTACAGGT----
-----
-----
TCAAATGACACGATTACACTCCAATGTAAATAAAACAAATTTATAAACAGGTGGCAGGAAGTAGGAAAAGCAA
TGTATGCCCCCTCCCATCCGAGGACAAATAAAGTGTTTCATCAAAT---
ATTACAGGGTTGCTATTAACAAGAGATGGTGGTAACGAGACTAAC-----
-----
-----
GGGACCGAGGTCTTCAGACCTATAGGAGGAGATATGAAAGACAATTGGAGAAGTGAATTATATAAATATAAAG
TAGTTCAAATTGAACCATTA---GGAATAGCACCCACCAAGGCAAAGAGAAGAGTGGTG-----
-----CAGAGAGAAAAAAGAGCG---GTGACA---CTGGGAGCT-----
ATGTTTCCTTGGGTTCTTGGGAGCA---GCGGGAAGCACTATG---GGCGCAGCGTCA---
GTGGCGCTGACGGTACAG---GCCAGACAA---TTATTG---TCTGGTATAGTGCAACAGCAGAAC---
AATATG---CTGAGG---GCTATTGAGGCACAACAGCATATGTTGCAACTCACAGTCTGGGGCATC
>KT124787..2
TTCTACTGTGATACAACACAGCTGTTTAATAGCAATAGCACTTGGCTGTTTAATAACACTTGGAAATAGTACTG
AGAATAATAAT---ACT-----
-----
-----
GAGAATAATAATATCACACTCCAGTGCAGAATAAGACAAATTTGTAAACATGTGGCAGAAAGTAGGAAAAGCAA
TGTATGCCCCCTCCCATCAGAGGACAAATTTACTGTGCATCACAA---
ATAACAGGGCTGCTATTAACAAGAGATGGTGGTAGTAGTGATCAG-----
-----

```

-----  
AACACACCGAGATCTTCAGACCTGCAGGAGGAAATATGAGGGACAATTGGAGAAGTGAATTATATAAAATATA  
AAGTAGTAAAAATTAAACCATTA---GGAGTAGCACCCACCAAGGCAAAGAGAAGAGTGGTG-----  
-----CAGAGAGAAAAAAGAGCA---GTAACG---CTAGGAGCT-----  
---ATGTTCCCTTGGGTTCTTGGGAGCA---GCGGGAAGCACTATG---GGCGCAGCGGCA---  
ATGACGCTGACGGTACAG---GCCAGACAA---TTATTG---TCTGGTATAGTGCAACAGCAGAAT---  
AATCTG---CTGAGA---GCTATTGAGGCGCAACAGCATCTGTTGCAACTCACAGTCTGGGGCATC  
>KC596067..1  
TTCTACTGTAATACACACAATTGTTTAAACAGTACTTGAATACTACTGAAGATTTAAATAAAACTAGAACTG  
AA-----  
-----  
GTAAATGACACAATCACACTCCCATGTAGAATAAGACAAATTATAAACAGATGGCAGGAAGTGGGAAAAGCAA  
TGTATGCCCCCTCCCATCAGCGGAAACATTAGTTGTTTCATCAAAC---  
ATCACAGGGCTGCTATTAAACAAGAGATGGTGGTCAGAATAATGTGAGC-----  
-----  
-----  
AACACCACAGAGATCTTCAGACCTGGAGGAGGAGATATGAGGGACAATTGGAGAAGTGAATTATATAAAATATA  
AAATAATAAAAATCGAACCATTA---GGAATAGCACCCACCAAGGCAAAGAGAAGAGTGGTG-----  
-----CAGAGAGAGAAAAAGAGCA---GCA-----CTAGGAGCT-----  
---ATGTTCCCTTGGGTTCTTAGGAGCA---GCAGGAAGCACTATG---GGCGCAGCGTCA---  
GTGACGCTGACGGTACAG---GCCAGACAA---TTATTG---TCTGGTATAGTGCAACAGCAAAGT---  
AACTTG---CTGAAA---GCTATTGAGGCGCAACAGCATCTGTTGCAACTCACAGTCTGGGGCATC  
>EF514700..2  
TTTTACTGTAATACGTCAAACTGTTTGATAGTACCTGGAATGAACTAGTATTTGGAATTATACCACTACTA  
ATGAT-----  
-----ACC---  
ACAAAAAATGACACACTCACACTCCCATGTAAAATAAAACAAATTATAAACATGTGGCAGGAAGTAGGAAAAG  
CAATGTATGCCCCCTCCCATCAGAGGACAAATCAGATGCTCATCAAAT---  
ATTACAGGGCTGTTATTAAACAAGAGATGGTGGTCAGGGTAACGGGACC-----  
-----  
-----  
GATAACACCACCGAGATCTTCAGACCTGCAGGAGGAGATATGAGGGACAATTGGAGAAGTGAATTATATAAAAT  
ATAAAGTAGTAAGAATTGAACCATTA---GGAGTAGCACCCACCAAGGCAAAGAGAAGAGTGGTG-----  
-----CAGAGAGAAAAAAGAGCA---GTGGGA---CTGGGAGCT---  
-----TTGTTCCCTTGGGTTCTTGGGAACA---GCAGGAAGCACTATG---GGCGCAGCATCA---  
CTAACGCTGACGGTACAG---GCCAGACAA---TTGTTG---TCTGGTATAGTGCAACAGCAGAAC---  
AATCTG---CTGAGA---GCTATTGAGGCGCAACAACATCTGTTGCAACTCACAGTCTGGGGCATT  
>EU839598..1  
TTCTACTGTAATACACAAAACTGTTTAAACAATACTGGACAATTAGATAAAGAAGAAGATGAAGGA-----  
-----  
-----  
GAAGAAGGCAATATCACACTTCCATGCAGAATAAGGCAATTCGTAAACAGGTGGCAAGAAGTAGGAAAAGCAA  
TGTATGCCCCCTCCCATCAGTGGACAAATTAGATGTTTCATCAAAT---  
ATTACAGGGCTACTATTAAACAAGAGATGGTGGTGGTAGTGGTAAT-----  
-----  
-----  
AGTGAGAATGAGACCTTCAGACCTGGGGGAGGAGATATGAAAGACAATTGGAGAAGTGAATTATATAAAATATA  
AAGTAGTAAAAATTCAGCCATTA---GGAATAGCACCCAGCAAGGCAAAGAGAAGAGTGGTG-----  
-----CAAAGAGAAAAAAGAGCA---GTGACA---CTAGGAGCT-----  
---ATGTTCCCTTGGGTTCTTAGGAGCA---GCAGGAAGCACTATG---GGCGCAGCGTCA---  
GTAACGCTGACGGTACAG---GCCAGACTA---TTATTG---TCTGGTATAGTGCAACAGCAGAAC---  
AATCTG---CTGAGG---GCTATTGAGGCGCAACAACATCTGTTGCAACTCACGGTCTGGGGCATC  
>KC595194..1  
TTTTACTGTAATTCAACACAACCTGTTTAAACAGTGTTTGAAGGCTAACAGTACTTGAATAGTACTGAAGGGT  
CAAATAAC-----  
-----  
AATGCAGGAAATATCACACTCCCATGCAGAATAAAACAAATTATAAACATGTGGCAGGAAGTAGGAAAAGCAA  
TGTATGCCCCCTCCCATCAGAGGCCAAATTAGCTGTTTCATCAAAT---  
ATTACAGGGCTACTATTAAACAAGAGATGGTGGTAACATCACTAAC-----  
-----

-----  
GGGACCGAGATCTTCAGACCTGGAGGAGGAGATATGAGGGACAATTGGAGAAGTGAATTATATAAATATAAAG  
TAGTAAAAATTGAACCATTA---GGAATAGCACCCACCAAGGCAAAGAGAAGAGTGGTG-----  
-----CAGAGAGAGAAAAAGAGCA---GTGGGA---ATAGGAGCT-----  
ATGTTTCCTTGGGTTCTTGGGAGCA---GCAGGAAGCACTATG---GGCGCGGCGTCA---  
ATGACGTTGACGGTACAG---GCCAGACTA---TTATTG---TCTGGTATAGTGCAACAGCAGAAC---  
AATTTG---CTAAGG---GCTATTGAGGCGCAACATCATCTGTTGCAACTCACAGTCTGGGGCATC  
>KC595151..1  
TTCTACTGTGATACAACAAAATTGTTTAATAGTACTTGGGATATTAATGATACTTGGAAATGGTACTAACGGG-  
-----  
-----  
CCAGATAACACTATCATACTCCCATGCAGAATAAAACAAATTATAAACATGTGGCAGGAAGTAGGAAAAGCAA  
TGTATGCCCCCTCCCATCAGAGGACGAATTAGGTGTGAATCAAAT---  
ATTACAGGGCTGCTATTAACAAGAGATGGTGGTGTATGATAGCAGT-----  
-----  
-----  
AACCAGACCGAGATCTTCAGACCTGGAGGAGGAGATATGAGGGACAATTGGAGAAGTGAATTATATAAATATA  
AAGTAGTAAAAATTCAACCATTA---GGAATAGCACCCAAACAAGGCAAAGAGAAGAGTGGTG-----  
-----CAGAGAGAAAAAAGAGCA---GTGGGA---ATAGGAGCT-----  
---TTGTTTCCTTGGGTTCTTGGGAGCA---GCAGGAAGCACTATG---GGCGCAGCGTCA---  
ATGACGTTGACGGTACAG---GCCAGACAA---TTATTG---TCTGGTATAGTGCAACAGCAGAAC---  
AATCTG---CTGAGG---GCTATTGAGGCGCAACAGCATCTGTTGCAACTCACAGTCTGGGGCATC  
>EU786679..1  
TTCTACTGTAATACAACACAGCTGTTTAATAGTACTTGGGGTATGAATACGACTAAAGGGACAAATACC---  
-----  
-----  
ACTGAAGGAGATATCATACTCCCATGCAGAATAAAACAAATTATAAACATGTGGCAGGAAGTAGGAAAAGCAA  
TGTATGCCCCCTCCCATCAGCGGGCCAATTACATGTACATCAAAT---  
ATTACAGGGCTGCTACTAACAAGAGATGGGGGTGAGAGCAAGAACGAA-----  
-----  
-----  
AGTAACGAGACAGAGATCTTCAGACCAGGAGGAGGAGACATGAAGGACAATTGGAGAAGTGAATTATATAAAT  
ATAAAGTAGTAAAAATTGAACCATTA---GGAATAGCACCCACCAAGGCAAAAAGAAGAGTGGTG-----  
-----CAAAGAGAAAAAAGAGCA---GTGGGA---CTAGGAGCT---  
-----GTGTTTCCTTGGGTTCTTGGGAGCA---GCAGGAAGCACTATG---GGCGCAGCGTCA---  
ATAACGCTGACGGTACAG---GCCAGACAA---TTATTG---TCTGGTATAGTGCAACAGCAGAAC---  
AACTTG---CTGAGG---GCTATTGATGCGCAACAGCATATGTTGCAGCTCACAGTCTGGGGCATC  
>KC473841..1  
TTCTACTGTAATACATCACAACCTGTTTAGTAGTACTTGAATAATACTGTAGGGTTAAATACTACA-----  
-----  
-----  
GGAAATGATACTATCACACTCCACTGCAGAATAAGACAAATTATAAACCTGTGGCAGAGAGTAGGAAAAGCAA  
TGTATGCCCCCTCCCATTAGAGGACAAATTAGTTGTTTCATCAAAC---  
ATTACAGGGTTGCTATTAACAAGAGATGGTGGTAACAACAATCAGAGC-----  
-----  
-----  
AATAACACCGAAATCTTCAGACCTGGAGGAGGAGATATGAGGGACAATTGGAGAAGTGAATTATATAAATATA  
AAGTAGTAAGAATTGAACCACTA---GGAGTAGCACCCACCAAGGCAAAGAGAAGAGTGGTG-----  
-----CAGAGAGAAAAAAGAGCA---GTGGGA---CTAGGAGCT-----  
---GTGCTCTTTGGGTTCTTGGGAGCA---GCAGGAAGCACTATG---GGCGCAGCGTCA---  
GTGACGCTGACGGTACAG---GCCAGACAA---TTATTG---TCTGGTATAGTGCAACAGCAAAAT---  
AATTTG---CTGAAA---GCTATTGAGGCGCAACAGCATCTGTTGCAACTCACAGTCTGGGGCATC  
>KT200357..1  
TTCTACTGTAATACAACACAGCTGTTCAATAGTACTTGGGAGCCAGGGAAGAATACTACTACAGAG-----  
-----  
-----  
GGAAATGACACTATCACGCTCCCATGCAGAATAAAACAGATTATAAACAGGTGGCAGGAAGTAGGAAAAGCAA  
TGTATGCCCCCTCCCATCAGAGGACGAATTAATTGTACATCAAAT---  
ATTACAGGGCTGTTATTAACAAGAGATGGTGGTAACAATAATAAC-----  
-----  
-----

```

-----
CAGACAAATAGGACAGAGACCTTTAGACCTCAAGGAGGGAATATGAAGGACAATTGGAGAAGTGAATTATATA
AATATAAAGTAGTACAAGTTGAGCCATTA---GGAATAGCACCCACCAAGGCAAGGAGAAGAGTGGTG-----
-----CAGAGAGAAAAAAGAGCA---GTGGGA---
CTAGGAGCT-----GTGTTCCCTTGGGTTCTTAGGAGCA---GCAGGAAGCACTATG---
GGCGCAGCGTCA---ATAACGCTGACGGTACAG---GCCAGACAA---TTGTTG---
TCTGGTATAGTGCAACAGCAGAAC---AACCTG---CTGAGG---
GCTATTGAAGCGCAACAACATATGTTGCAGCTCACAGTCTGGGGCATC
>KP109518..1
TTCTACTGTAATACAACAACACTGTTTAATAGTACCTGGAATGATACTAGTATTAGTGAAAGGTCAAAT-----
-----
-----
ACTACTAAAAACATCACGCTTCCATGCAGAATAAAACAAATTATAAACATGTGGCAAGAAGTAGGGAAAGCAA
TGTATGCCCCCTCCCATCCAGGACCAATTCAATGTAGATCAAAT---
ATTACAGGGATATTATTAACAAGAGATGGTGGTAATACTAGTGAT-----
-----
-----
AGCCAGAATGAAACCTTCAGACCTGGAGGAGGAAATATGAAGGACAATTGGAGAAGTGAATTATATAAATATA
AAGTAGTAGAAATTGAACCATTA---GGAGTGGCACCCACCAGGGCAAGGAGAAGAGTGGTG-----
-----CAGAGAGAAAAAAGAGCA---GTGGGAGTAGTAGGAGCT-----
---ATGTTCCCTTGGGTTCTTGGGAGCA---GCAGGAAGCACTATG---GGCGCAGCGTCA---
ATGACGTTGACGGTACAG---GCCAGACTA---TTACTG---TCTGGTATAGTGCAACAGCAGAAC---
AATCTG---CTGAGA---GCTATTGAAGCGCAACAGCATCTGTTGCAGCTCACAGTCTGGGGCATT
>KY465969..2
TTCTACTGTAATACAACACAGCTGTTTAATAGCACTTGGAAATAAACTGTAGTTGAGAATAATAATTATGGTT
CT-----
-----
GAGAATGGTACTATCACACTCCAGTGCAGAATAAGACAAATTGTAAACAGGTGGCAGGAAGTAGGAAAAGCAA
TGTATGCCCCCTCCCATCAGAGGAGTAATTAACTGTTTCATCAAGT---
ATTACAGGGCTGTTATTAACAAGGGATGGTGGTAATAGTAAGAACACC-----
-----
-----
AACAGGTCATCTGAGATCTTCAGACCTGGAGGAGGAGATATGAGGGACAATTGGAGAAGTGAATTATACAAAT
ATAAAGTAGTAAAGATTGAACCATTA---GGAGTAGCACCCACCAAGGCAAAGAGGAGAGTGGTG-----
-----CAGAGAGAAAAAAGAGCA---GTGGGAGCATTAGGAGCT---
-----ATGTTCCCTTGGGTTCTTGGGAACA---GCAGGAAGCACTATG---GGCGCAGCGTCA---
CTGACGCTGACGGTACAA---GCCAGACAA---CTATTG---TCTGGTATAGTGCAACAGCAGAAC---
AATCTG---CTGCAG---GCTATCGAGGCGCAACATCATCTGTTGCAACTCACCGTCTGGGGCATC
>KC595204..2
TTCTACTGTAACCAACACAGCTGTTTAATAGTACTTGGAAATAGTACTGGGAATCAGAATAATATTGAAGGG-
-----
-----
TTAAATGACACAATCACACTCCCATGCAGAATAAAACAAATTATAAACATGTGGCAGGAAGTAGGAAGAGCAA
TGTATGCCCCCTCCCATTAGAGGACAAATTAGATGTTTCATCAAAT---
ATTACAGGGCTGTTATTAACAAGAGATGGTGGTCATAACACGACA-----
-----
-----
GAGACCGAGATCTTCAGACCTGGAGGAGGAGATATGAGGGACAATTGGAGAAGTGAATTATATAAATATAAAG
TAGTAAAAATTGAACCATTA---GGAGTAGCACCCACCAGAGCAAAGAGAAGAGTGGTG-----
-----CAGAGAGAAAAAAGAGCA---GTGGGA---ATAGGAGCT-----
GTGTTCCCTTGGGTTCTTGGGAGCA---GCAGGAAGCACTATG---GGCGCAGCGTCA---
GTGACGCTGACGGTACAG---GCCAGACTA---TTATTG---TCTGGTATAGTGCAACAGCAGAAT---
AATTTG---CTGAAG---GCTATTGAGGCGCAACAGCATCTGTTGCAACTCACAGTCTGGGGCATC
>DQ141342..1
TTCTACTGTAATACAACAACACTGTTTAATAGTACTTGGCCTAAGAATGGTACCAGCGAGTTAAAT-----
-----
-----
ACCACTGACCCATTCTACTCCCATGTAAATAAAACAAATTATAAACATGTGGCAGAAAGTAGGAAAAGCAA
TGTATGCCCCCTCCCATCCGTGGACAGATTAGATGCTCATCAAAT---
ATTACAGGGCTGCTATTACCAAGAGATGGTGGTAACAACAACATGGTAGT-----

```

-----  
-----  
AACAAACCGCAGTCCTGAGATCTTCAGACCTGGAGGAGGAGATATGAGGGATAATTGGAGAAGTGAATTATACA  
AATATAAAGTAGTAAAAATTCAACCATTA---GGAGTAGCACCCACCAAGGCAAAGAGAAGAGCGGTG-----  
-----CATAGAGACAAAAGAGCA---GTGGGA---  
CTCGGAGCT-----GTGTTCCCTTGGATTCTTGGGAGCA---GCAGGAAGCACTATG---  
GGCGCAGCGTCA---CTGACGTTGACGGTACAG---GCCAGACAA---TTATTG---  
TCTGGTATAGTGCAACAGCAAAAC---AACTTG---CTGAGG---  
GCTATTGAGGCGCAACAGCATCTGTTGCAACTCACAGTCTGGGGCATC  
>DQ141343..2  
TTCTACTGTGATACATCACAACCTATTTAATAGTACTTGGAAATAGTAGTACTTTGAATAATTTTACTAACGGGT  
CAAAT-----  
-----  
ATAACTAATGAACTTTTCACTCCCATGCAGAATAAAAACAATTTATAAACATGTGGCAGGAAGTAGGAAAAG  
CAATGTATGCCCCCTCCTATCAGAGGAGTAATTAAGTGTATCAAAAT---  
ATTACAGGGCTGCTATTAAACAAGAGATGGTGGTAATAATCATAGTGAC-----  
-----  
-----  
ACCAATCAGGAGATCTTCAGGCCTGCAGGAGGAGATATGAGGGACAATTGGAGAGGTGAATTATATAAGTATA  
AAGTAGTAAGAGTAGAACCATTA---GGGATAGCACCCACCAAGGCAAAGAGAAGAGTGGTG-----  
-----CAGAGAGAAAAAGAGCA---GTGGGA---CTAGGAGCT-----  
---TTGTTCCCTTGGGTTCTTGGGAGCA---GCAGGAAGCACTATG---GGCGCAGCATCA---  
ATGACGCTGACGGTACAG---GCCAGACAA---TTATTG---TCTGGTATAGTGCAACAGCAGAAC---  
AACCTG---CTGAGG---GCTATTGAGGCGCAACAGCATATGTTGCAACTCACAGTCTGGGGCATC  
>DQ448819..1  
TTCTACTGTAATACAACACAACCTGTTTAATAGTACTTGGTATGCTAGTAATAATACTTGAAGGGTACTAAC-  
-----  
-----  
ATTACAGGCAATATCACACTCCCATGCAAAATAAAACAAATTTATAAACATGTGGCAGGAAGTAGGAAAAGCAA  
TGTATGCCCCCTCCCATCAGAGGACAAATTAGATGCTCATCAAAT---  
ATTACAGGGTTACTATTAAACAAGAGATGGGGGTGAGGAAACAACACC-----  
-----  
-----  
GACAACGACACTGAGATCTTCAGACCTGGAGGAGGAAATATGAGGGACAATTGGAGAAGTGAATTATATAAAT  
ATAAAGTAGTAAGAATTGAACCATTA---GGACTAGCACCCACCAGGGCAAAGAGAAGAGTGGTG-----  
-----CAGAGAGAGAAAAGAGCA---GTGGGA---CTAGGAGCG---  
-----TTGTTCAATTGGGTTCTTGGGAGCA---GCAGGAAGCACTATG---GGCGCAGCGTCA---  
GTGACGTTGACGGTACAG---GCCAGACAA---TTACTG---TCTGGTATAGTGCAACAGCAGAAAT---  
AATTTG---CTGATG---GCTATTGAGGCGCAACAGCATATGTTGAAACTCACGGTCTGGGGCATT  
>EF531331..1  
TTTTACTGTAATACAACACAACCTATTTAATAGTACTTGGAAATAACAAATCTGTTTAATAGTACTTGGAAAT  
GTAAGGG-----  
-----TCAAATAACACT-----  
AAAAGAAATGGCACAATCATAACCCATGCAGAATAAAACAGATTATAAACATGTGGCAGAAAGTAGGAAAAG  
CAATGTATGCCCCCTCCCATCGAAGGAATAATTAGATGTGAATCAAAA---  
ATTACAGGGATGATACTAACAAGAGATGGTGGTCTTGGTCGTAACATT-----  
-----  
-----  
AGCAACGAGACCGAGATCTTCAGACCTGGAGGAGGAGATATGAGGGACAATTGGAGAAGTGAATTGTATAAAT  
ATAAAGTAGTAAAAATAGAACCCTTA---GGAATAGCACCCCTCCAAGGCAAAGAGAAGAGTGGTG-----  
-----CAGAGAGAAAAAGAGCA---ATAGGA---TTCGGAGCT---  
-----ATGTTCCCTTGGGTTCTTGGGAGCA---GCAGGAAGCACTATG---GGCGCAGCGTCA---  
CTAACGCTGACGGTACAG---GCCAGACAA---TTACTG---TCTGGTATAGTGCAACAGCAGAAC---  
AATTTG---CTGAGG---GCTATTGAGGCGCAACATCATCTGTTGCAACTCACAGTCTGGGGCATC  
>MH000288..1  
TTCTATTGTAATACAACACAACCTGTTTGATAGTACTTGGAAATGAT-----  
-----  
-----  
ACTACAGACACAATCACACTCCCATGCAAAATAAGACAAATTGTAACTTGTGGCAGGAAGTAGGAAAAGCAA  
TGTATGCCCCCTCCCATCAGTGGAAATAATTCAGTGTACATCAAAT---

ATTATAGGGTTGCTATTAACAAGAGACGGTGGT-----  
-----  
-----  
ACCGAAATCTTCAGACCAGGAGGAGGAGATATGAGGGACAATTGGAGAAGTGAATTATATAAAATATAAAGTAG  
TACAAGTTGAACCATTA---GGAATAGCACCCACCAAGGCAAAGAGAAGAGTGGTG-----  
-----CAGAGAGAAAAAAGAGCA---GTGGGAACGCTAGGAGCT-----  
GTATTCCTCGGGTTCTTGGGAGCA---GCAGGAAGCACTATG---GGCGCAGCGTCA---  
ACAGCGCTGACGGTACAG---GCCAGACAA---TTATTG---TCTGGTATAGTGCAACAGCAGAAC---  
AATCTG---CTGAAG---GCTATTGAGGCGCAACAGCATTTGTTGCAGCTCACAGTCTGGGGCATC  
>KC699040..1  
TTCTATTGTGATACAGCACAACTGTTTAATAGTACTTGGCCTAAGAATAGCACCAGTAGCACCAATAGCACCG  
GTAAAGGG-----  
-----  
GGGCCAACAACTATCACACTCCCATGCAGAATAAGACAAATTGTAAACATGTGGCAGGAAGTAGGAAAAGCAA  
TGTATGCTCCTCCCATCAGCGGAAACATCACATGTTTCATCAAAT---  
ATTACAGGGCTGCTATTAACAAGAGATGGGGGTAATAAGAATGAG-----  
-----  
-----  
ACGACCAACAGGACTCAGACCTTCAGACCTATAGGAGGAGATATGAGGGACAATTGGAGAAGTGAATTATATA  
AATATAAAGTAGTAAAAATTGAACCATTA---GGAATAGCACCCACCAAGGCAAAGAGAAGAGTGGTG-----  
-----CAGAGAGAAAAAAGAGCA---GTGGGA---  
GTAGGAGCT-----TTGTTCTTGGGTTCTTGGGAGCA---GCAGGAAGCACTATG---  
GGCGCAGCGTCA---GTGACGTTGACGGTACAA---GCCAGACAA---TTATTG---  
TCTGGTATAGTGCAACAGCAGAAC---AATCTG---CTGAGA---  
GCTATTGAGGCGCAACAGCATATGTTGCAACTCACAGTCTGGGGCATC  
>KC699032..1  
TTTTACTGTAATACAACACAGCTGTTTAATAGTACTTGGAAATGCTAATGGTACTAGTCGGGATGGTACTACA-  
-----  
-----  
GGGAATGATACTATCACAATCCAATGCAGAATAAAGCAAATTATAAACAGGTGGCAGGAGGTAGGAAAAGCAA  
TGTATGCCCCCTCCCATCCAAGGACAAATTTACTGTTTCATCAAAT---  
ATTACAGGGCTTCTATTAACAAGAGATGGGGGTAATGACAATAACACT-----  
-----  
-----  
AGCACTAATGAGACCTTCAGACCTGCAGGAGGAAATATGAAGGACAATTGGAGAAGTGAATTATATAAAATATA  
AAGTAGTAAAAATTGAGCCATTA---GGACTGGCACCCACCAGGGCAAGGAGAAGAGTGGTG-----  
-----CAGAGAGAAAAAAGAGCA---GTGGGA---CTAGGAGCT-----  
---ATGTTCTTGGGTTCTTGGGAGCA---GCAGGAAGCACTATG---GGCGCAGCGTCA---  
TTGACGCTGACGGTACAG---GCCAGGCAA---TTATTG---TCTGGTATAGTGCAACAGCAAAAC---  
AATTTG---CTAAGA---GCTATTGAGGCGCAACAGCATATGTTGCAACTCACAGTCTGGGGCATC  
>KC699037..2  
TTTTATTGTAATACATCACAACCTGTTTAATAGTAGTTGGACCAATTACACTAATGGTACTTGGGACAATGACA  
CCATAATA-----  
-----GATAAACT-----  
ACCACTGGAGTAAATATCACACTCCCATGCAGAATAAAACAAATTATAAACATGTGGCAGAAAGTAGGAAAAG  
CCATGTATGCCCCCTCCCATCAGAGGACTAATTCAATGTACATCAAAT---  
ATTACAGGAATACTATTAACAAGAGATGGAGGTAATAGGAATGAGAGCAAT-----  
-----  
-----  
GGCAAAAGCAATGAGACCTTCAGACCTGTAGGGGGAGATATGAGGGACAATTGGAGAAGTGAATTATATAAAT  
ATAAAGTAGTAAAAATTAAACCATTA---GGAATAGCACCCACCAGGGCAAAGAGAAGAGTGGTA-----  
-----CAGAGAGAAAAAAGAGCA---GTGGGAACGTTGGGAGCC---  
-----ATGTTCTTGGGTTCTTGGGAGCA---GCAGGAAGCACTATG---GGCGCAGCGTCA---  
CTAACGCTGACGGTACAA---GCCAGACAA---TTATTG---TCTGGTATAGTGCAACAGCAAAGC---  
AATTTG---CTGAGG---GCTATTGAGGCGCAGCAGCACATGTTGCAACTCACAGTCTGGGGCATT  
>MH000292..1  
TTCTATTGTAACACAACACAGCTATTTAATAGTACTTGGATGCCT-----  
-----  
-----  
AATGGTGGCACTATCACACTCCCATGCAGAATAAAACAAATTATAAACAGGTGGCAGGAAGTAGGAAAAGCAA

TGTATGCCCCCTCCCATTAGTGGACAAATTAAGTCTCATCAAAC ---  
 ATTACAGGGTTACTATTAATAAGAGATGGTGGT-----  
 -----  
 -----  
 AACGAGACCTTCAGACCTGGAGGAGGAAATATGAAAGACAATTGGAGAAGTGAATTATATAAATATAAAGTAG  
 TACAAATTCAGCCATTA---GGAGTAGCACCCACCAAGGCAAAGAGAAGAGTGGTG-----  
 -----CAGAGAGAAAAAAGAGCA---GTGGGAACGCTAGGAGCT-----  
 ATGTTTCCTTGGGTTCTTGGGAGCA---GCAGGAAGCACTATG---GGCGCAGCGTCA---  
 GTGACGCTGACGGTACAG---GCCAGACAA---TTATTG---TCTGGTATAGTGCAACAGCAAAAC---  
 AACTTG---CTGAAA---GCTATTGAGGCGCAACACCATCTGTTGCAACTCACAGTCTGGGGCATT  
 >KC699006..1  
 TTCTACTGTAATACAACAACCACTGTTTAATAGTACTTGGAAATAGTACTTGGGATATTAATAGTACTATAGAGT  
 CAAATAAC-----  
 -----  
 ACTGGAGAATATATCACACTCCCATGTAGAATAAAACAAATTATAAACATGTGGCAGGAAGTAGGAAAAGCAA  
 TGTATGCCCCCTCCCATCAAAGGACAAATTAGATGTTTCATCAAAC---  
 ATTACAGGGCTGCTATTAACAAGAGATGGTGGTAATAACAATAGTAGC-----  
 -----  
 -----  
 AACACCACCGAGACCTTCAGACCTGGAGGAGGAGATATGAGGGACAATTGGAGAAGTGAATTATATAAATATA  
 AAGTAGTAAAAATTGAACCATTA---GGAGTAGCACCCACCAAGGCAAAGAGAAGAGTGGTG-----  
 -----CAGAGAGAAAAAAGAGCA---GTGGGA---ATAGGAGCC-----  
 ---GTGTTTCCTTGGGTTCTTGGGAGCA---GCAGGAAGCACTATG---GGCGCAGCGTCA---  
 ATAACGCTGACGGTACAA---GCCAGACTA---TTATTG---TCTGGTATAGTGCAACAGCAGAAC---  
 AATCTG---CTGAGG---GCCATTGAGGCGCAACATCATCTGTTGCAACTCACAGTCTGGGGCATC  
 >KC699007..1  
 TTCTACTGTAATTCAACACAACCTGTTTAATAGTACTTGGAGTGAAGGGTCAAATAACACTGAAGGAAATAACA  
 CTGAA-----  
 -----  
 GGAAATGACACAATCACACTCCCATGCAGAATAAAACAAATTATAAACATGTGGCAGAACGTAGGAAAAGCAA  
 TGTATGCCCCCTCCCATCAGCGGACAAATTAGATGTTTCATCAAAT---  
 ATTACAGGGCTGATATTAACAAGAGATGGTGGTAATAACCCAAAC-----  
 -----  
 -----  
 GGGACCGAGATCTTCAGACCTGGAGGAGGAGATATGAGGGACAATTGGAGAAGTGAATTATATAAATATAAAG  
 TAGTAAAAATTGAACCATTA---GGAGTAGCACCTACCAAGGCAAAGAGAAGAGTGGTG-----  
 -----CAGAGAGAAAAAAGAGCA---GCGGGA---CTAGGAGCT-----  
 GTGTTTCCTTGGGTTCTTGGGAGCA---GCAGGAAGCACTATG---GGCGCAGCGTCA---  
 ATAACGCTGACGGTACAG---GCCAGACGA---TTATTG---TCTGGTATAGTGCAACAGCAGAAC---  
 AATTTG---CTGAGG---GCTATTGAGGCGCAACATCATCTATTGCAACTCACAGTCTGGGGCATC  
 >KC699025..1  
 TTCTACTGTAATACAACAAAACCTGTTTAATAGTACTTGGAGGAAAATGGCACCATTGAAGACGATGGTACA-  
 -----  
 -----  
 AAGGATACTAACATCACACTCCCATGCAAAATAAAACAAATTATAAACAGGTGGCAGGCAGTAGGAAAAGCAA  
 TGTATGCCCCCTCCCATCAGAGGACAAATTAAATGTACATCAAAT---  
 ATTACAGGGTTGCTGTTAGTAAGAGATGGTGGTCATAACACTGAC-----  
 -----  
 -----  
 AACGAGACCTTCAGACCTGGAGGGGAGACATGAAGGACAATTGGAGAAGTGAAGTATATAAATATAAAGTAG  
 TAAAGTTGAACCATTA---GGAATAGCACCCACCAAGGCAAAGAGAAGAGTGGTG-----  
 -----CAGAGAGACAAAAGAGCA---GTGGGAACACTAGGAGCA-----  
 ATGTTTCCTTGGGTTCTTGGGAACA---GCAGGAAGCACTATG---GGCGCAGCGTCA---  
 GTGGCGCTGACGGTACAG---GCCAGACAA---TTACTG---TCTGGTATAGTGCAACAGCAAAAC---  
 AATTTG---CTGAAG---GCTATTGAGGCGCAACAGCATCTGTTGCAACTCACAGTCTGGGGCATC  
 >JF706474..1  
 TTCTACTGTAATTCAGCACCACTGTTTAATAGTACTTGGAAATAGTATTGAGGGTAGTACTGAGGGTAAGAATG  
 AA-----  
 -----  
 AGCAGTGGAGGAAATATCACACTCCTATGTAGAATAAAACAAATTATAAACATGTGGCAGGAAGTAGGAAAAG

CAATGTATGCCCCCTCCTATCAGAGGAGTAATTCAATGCTCATCAAAT---  
ATTACAGGGCTGCTATTAACAAGAGATGGTGGTAGTGGTAATAGTAGCAAT-----  
-----  
-----  
GAGAACGAGACCGAGACCTTCAGACCTGGGGGGGGGAAATATGAAGGACAATTGGAGAAGTGAATTATATAAAT  
ATAAAGTAGTACAAATTGAACCATTA---GGAATAGCACCCACCAAGGCAAAGAGAAGAGTGGTG-----  
-----CAGAGAGAAAAAAGAGCG---GTGGGAACACTAGGAGCT---  
-----GTGTTTCCTTGGGTTCTTGGGAGCA---GCAGGAAGCACTATG---GGCGCAGCGTCG---  
GTAACGCTGACGGTACAG---GCCAGACAA---TTATTG---TCTGGTATAGTGCAACAGCAGAAC---  
AATTTG---CTGAAG---GCTATTGAGGCGCAACAGCATCTGTTGCAACTCACAGTCTGGGGCATC  
>HM204630..1  
TTCTACTGTAATACAACAAAACCTGTTTAATAGTACTTGGGGGAATAATACTGCAGGACAA-----  
-----  
-----  
GGTAATAACACTATCACACTCCCATGCAGAATAAAACAAATTATAAACTTGTGGCAGGAAGTAGGAAAAGCAA  
TGTATGCCCCCTCCCATTAGTGGACACATTTACTGTTTCATCAAAT---  
ATTACAGGGCTACTATTAACAAGAGATGGTGGTACTACCAACATAACC-----  
-----  
-----  
AATGAACTGAGATCTTCAGACCTGGAGGGGGAGATATGAGGGACAATTGGAGAAGTGAATTATATAAATATA  
AAGTAGTAAAAGTTGAACCATTA---GGAATAGCACCCACCAAGGCGAAGAGAAGAGTGGTG-----  
-----CAGAGAGAAAAAAGAGCA---GTGGGA---ATAGGAGCT-----  
---GTGTTTCCTTGGGTTCTTGGGAGCA---GCAGGAAGCACTATG---GGCGCAGCGTCA---  
CTGACGCTGACGGTACAG---GCCAGACAA---TTATTG---TCTGGTATAGTGCAACAGCAGAAC---  
AATTTG---CTGAGA---GCTATTGAGGCGCAACAGCATCTGTTGCAACTCACAGTCTGGGGCATC  
>HM204631..2  
TTTTACTGTAATTCATCACAACTGTTTAATAGTACTTGGAAATGCCACTAGTACTGGGAATAACAGTATAGGG-  
-----  
-----  
TTAAATGGCACTATCACACTCCCATGTAAAATAAAACAGATTATAAACAGGTGGCAGGAAGTAGGAAGAGCAA  
TGTATGCCCCCTCCCATTCAAGGAATAATTAGATGTGAATCAAAT---  
ATTACAGGGCTACTGTTAACAAGAGATGGTGGTAATATAACTAGT-----  
-----  
-----  
AATGGGAACGAGACCTTCAGACCCATAGGAGGAAATATGAAGGACAATTGGAGAAGTGAAGTCTATAAATATA  
AAGTAGTACAAATTGAACCCTTA---GGAATAGCACCCACCAAGGCAAAGAGAAGAGTGGTG-----  
-----CAGAGAGAAAAAAGAGCA---GTGGGAACAATAGGAGCT-----  
---ATGTTTCCTTGGGTTCTTGGGAGCA---GCAGGAAGCACTATG---GGCGCAGCGTCG---  
GTGGCGCTGACGGTACAG---GCCAGACAA---TTATTG---TCTGGTATAGTGCAACAGCAGAAC---  
AACCTG---CTGAGG---GCTATTGAGGCGCAACAGCACATGTTGCAACTCACAGTCTGGGGCATT  
>HM204636..1  
TTCTATTGTAAAACAACAGAGCTGTTTAATAGTACTTGGCCAGGGAATAGTACTGTGAATAATGCTACAGAAT  
CA-----  
-----  
AATGACAATGACACTATCACACTCCCATGCAGAATAAAACAAATTATAAACAGGTGGCAGGAAGTAGGAAAAG  
CAATGTATGCCCCCTCCCATCCAAGGAAACATTAGCTGTTTCATCAAAC---  
ATTACAGGACTGCTATTAACAAGAGATGGTGGTAAAGATCATAAC-----  
-----  
-----  
TCCACCGAGACCTTTAGACCTGGAGGAGGAGATATGAGAGACAATTGGAGAAGTGAATTATACAAATATAAAG  
TAGTAAGAATTGAGCCATTA---GGAGTAGCACCCACCAAGGCAAAGGAGAAGAGTGGTG-----  
-----CAGAGAGAAAAAAGAGCA---GCACTG-----GGAGCT-----  
GTGTTTCCTTGGATTCTTGGGAGCA---GCAGGAAGCACTATG---GGCGCAGCGTCA---  
GTGGCGCTGACGGTACAG---GCCAGACAA---TTATTG---TCTGGTATAGTGCAACAGCAAAAC---  
AATTTG---CTGAGG---GCTATTGAGGCGCAACAACATCTGTTGCAACTCACAGTCTGGGGCATC  
>HM204637..1  
TTCTACTGTAATACAACACAGTTGTTTAATAATACACAGTGGGTTAATAGTAATAGTACAAAT-----  
-----  
-----  
AGCAATGACACCATCACACTCCCATGCAGAATAAAACAAATTATAAACAGATGGCAGGAAGTAGGAAAAGCAA

TGTATGCCCCCTCCCATCGCGGGACAAATTCACCTGTTTCATCAAAT ---  
 ATTACAGGGCTAATATTAACAAGAGATGGTGGTAATAAAAAATGACACC-----  
 -----  
 -----  
 AACGGGACTGAGACTTTCAGGCCTGGAGGAGGAGATATGAGGGACAATTGGAGAAGTGAATTATATAAAATATA  
 AAGTAGTAAAAATTGAACCATTA --- GGAATAGCACCCACCAAGGCAAGGAGAAGAGTGGTG-----  
 -----CAGAGAGAAAAAAGAGCA --- GTAAC --- TTAGGAGCT-----  
 ---ATGTTCCCTTGGGTTCTTGGGAGCA --- GCAGGAAGCACTATG --- GGCGCAGCGTCA ---  
 ATGACGCTGACGGTACAA --- GCCAGACAA --- TTATTG --- TCTGGTATAGTGCAACAGCAAAAC ---  
 AATTTG --- CTGAGA --- GCTATTGAGGCGCAACAGCACCTGTTGCAACTCACAGTCTGGGGCATC  
 >HM204644..2  
 TTCTACTGCAACACATCAAACTGTTTAATAGTAGTTGGAGTACTAATGGAACATTGTTAAATGGAACGTGGG  
 TAAATGAG-----  
 -----ACT---  
 AGAATAAATGACACAATCATACTCCCATGCAGAAATAAAACAAATTATAAACATGTGGCAGAAAGTAGGAAAAG  
 CAATGTATGCTCCCCCATCCAAGGAATAATTAAGTCTCATCAAAT ---  
 ATTACAGGACTGCTATTAACAAGAGATGGTGGTCATAATCAAAATAGC-----  
 -----  
 -----  
 ACCAATGACACAGAGACCTTCAGACCAGGAGGAGGAGATATGAGGGACAATTGGAGAAGTGAATTATATAAAAT  
 AATAAGTAGTAAGAATTGAACCATTA --- GGAATAGCACCCACCAAGGCAAAGAGAAGAGTGGTG-----  
 -----CAGAGAGAAAAAAGAGCA --- GTGGGA --- TTCGGAGCT---  
 -----ATGTTCCCTTGGGTTCTTGGGAGCA --- GCAGGAAGCACTATG --- GGCGCAGCGTCA ---  
 ATAACGCTGACGGTACAG --- GCCAGACAA --- TTGCTG --- TCTGGTATAGTGCAACAGCAAAAC ---  
 AATTTG --- CTGAGG --- GCTATTGAGGCGCAACAGCATATGTTGCAACTCACAGTCTGGGGCATC  
 >JF680923..1  
 TTCTACTGTAACACAACAAAACTGTTTAATAGTACCTGGGAGAATAATAGTACTTGGGGGAATAAT-----  
 -----  
 -----  
 ACTACAGGTACTATCACACTCCCATGCAGAAATAAAACAAATTGTAAACATGTGGCAAGAAGTAGGAAAAGCAA  
 TGTATGCCCCCTCCCATCCAAGGACAAATTAGATGCTCATCAAAT ---  
 ATTACAGGACTGTTATTAACAAGAGATGGTGGTAATAATAATAGCACA-----  
 -----  
 -----  
 AATCAGAGCGAGACCTTCAGACCTGGAGGAGGAAATATGAAGGACAATTGGAGAAGTGAATTATATAAAATATA  
 AAGTAGTAAAAATTGAGCCATTA --- GGAATAGCACCCACCAGGGCAAAAAGAAGAGTGGTG-----  
 -----CAGAGAGAAAAAAGAGCA --- GCC --- ATAGGAGCT-----  
 ---GTGTTCCCTTGGGTTCTTGGGAGCA --- GCAGGAAGCACTATG --- GGCGCAGCGTCA ---  
 GTGACGCTGACGGTACAG --- GCCAGACAA --- TTATTG --- TCTGGTATAGTGCAACAGCAGAAC ---  
 AATTTG --- CTGAAG --- GCTATTGATGCGCAACAGCATCTGTTGCAGCTCACAGTCTGGGGCATC  
 >JF680924..1  
 TTCTACTGCAATACAACATTACTGTTCAATAGTGATTGGTATCCTAATGATACTAGCACAGGTACTCCAGGGT  
 CA-----  
 -----  
 -----  
 GATGGGAATGACTCACTCATACTCCCATGCAGAAATAAGACAAATTGTAAACATGTGGCAGGAAGTAGGAAAAG  
 CAATGTATGCTCCTCCCATCAAAGGACAAATTAGGTGTCATTCAAAT ---  
 ATTACAGGGATACTACTAACAAGAGATGGTGGGATTGACAACAAC-----  
 -----  
 -----  
 AGGACTAATGAGACCTTTAGACCTGGAGGAGGAGATATGAGGGACAATTGGAGAAGTGAATTATATAAAATATA  
 AAGTAGTAAACTTGAACCATTA --- GGATTAGCACCCACCAAGGCAAAGAGAAGAGTGGTG-----  
 -----CAGAGAGAAAAAAGAGCA --- GTGGGA --- CTAGGAGCT-----  
 ---ATGTTCCCTTGGGTTCTTGGGAGCA --- GCAGGAAGCACTATG --- GGCGCAGCGTCA ---  
 ATGACGCTGACGGTACAG --- GCCAGACAA --- TTATTG --- TCTGGTATAGTGCAACAGCAGAAC ---  
 AATCTG --- CTGAAG --- GCTATTGAGGCGCAACAGCATATGTTGCAACTCACAGTCTGGGGCATC  
 >JF680933..1  
 TTCTATTGCAATACAACACAACCTGTTTAATACTACTTGGGAATATTACTAATAATATTAATGTTACTAGGAATG  
 AT-----  
 -----  
 AGTGACAACAGCATTATCACACTCCCATGCAGAAATAAAACAAATTATAAACATGTGGCAGGAAGTAGGAAAAG

CAATGTACGCCCCCTCCCATCAGAGGACAGATTAGATGTTTCATCAAAA---  
ATTACAGGGCTACTATTAACAAGAGATGGTGGTAATACAAGCATTGCG-----  
-----  
AACGGGTCTGAGATCTTCAGACCTGGAGGAGGAAATATGAAGGACAATTGGAGAAGTGAATTATACAAATATA  
AAGTAGTAAAAGTTCAACCATTA---GGAATAGCACCCACCAAGGCCAAAAGAAGAGTGGTC-----  
-----CAGAGAGAAAAAAGAGCA---ATAACA---CTAGGAGCT-----  
---GTTTTCCTTGGGTTCTTGGGAGCA---GCAGGAAGCACTATG---GGCGCAGCGTCA---  
ATAACGCTGACGGTACAG---GCCAGACAA---TTATTG---TCTGGTATAGTGCAGCAGCAGAGC---  
AACTTG---CTGAGG---GCTATTGAGGCGCAACAACATATGTTGCAACTCACAGTCTGGGGCATC  
>HQ595797..1  
TTCTACTGTAATTCAACACAACCTGTTTAGTAGTACTTGGATGGCTAATGGTACTTCAAATGGTACCGTA----  
-----  
-----  
GGGAATGACACTATCATACTCCCATGTAAAATAAAACAATTTGTAAACATGTGGCAGCGAATAGGACAAGCAG  
TGTATGCCCCCTCCCATTAGAGGATACATTAATTGTTTCATCAAAT---  
ATTACAGGACTGCTATTAACAATAGATGGTGACAGGAATGACACC-----  
-----  
-----  
CAGAGTGAGACCTTCAGACCTGGAGGAGGAGATATGAGGGACAATTGGAGAAGTGAATTATATAAATATAAAG  
TAGTAAAAAATTGAACCATTA---GGAATAGCACCCACTAAGGCCAAAGAGAAGAGTGGTG-----  
-----CAGAGAGAAAAAAGAGCA---GTAACG---CTGGGAGCT-----  
ATGTTCCCTTGGATTCTTGGGAGCA---GCAGGAAGCACTATG---GGCGCAGCGTCA---  
ATGACGCTGACGGTACAG---GCCAGACTA---TTACTG---TCTGGTATAGTGCAACAGCAGAGC---  
AATCTG---CTGAGG---GCTATTCAGGCGCAACAGCATCTGTTGCAACTTACAGTCTGGGGCATC  
>AJ535611..1  
TTCTACTGTAATACAACACAGCTGTTTAATAGTACTTGGAAATATTACACAGCTGTTGAATAGTACTGAGTCAA  
AT-----  
-----  
AACACTGGCAATATCACACTCCCATGCAGAATAAGACAAATTGTAAACAGGTGGCAGGAAGTAGGAAAAGCAA  
TGTATGCCCCCTCCCATCAGCGGACAAATTAGTTGTTTCATCAAAT---  
ATTACAGGGTTGCTATTAACAAGAGATGGAGGTAACAGTAGCTAC-----  
-----  
-----  
AATGAGACCGAGACCTTCAGACCAGGAGGAGGAAATATGAGGGACAATTGGAGAAGTGAATTATATAAATATA  
AAGTAGTAAGAATTGAACCAATA---GGAGTAGCACCCACCAGGGCAAAGAGAAGAGTGGTA-----  
-----CAGAGAGAAAAAAGAGCA---ATAACG---CTGGGAGCT-----  
---GTGCTCCTTGGGTTCTTGGGAGCA---GCAGGAAGCACTATG---GGCGCAGCGTCA---  
ATAACGCTGACGGTACAG---GCCAGACAG---TTATTG---TCTGGTATAGTGCAGCAGCAGAAC---  
AATCTG---CTGAGG---GCTATTGAGGCGCAACAGCACCTGTTGCAACTCACAGTCTGGGGCATC  
>AJ286339..1  
TTCTACTGTAGTACAACAGAACTGTTTAATGACACTTGGGATAAGACTAGGAATAATACTGGAGAGGCA----  
-----  
-----  
GATAACAGCACAAATCACACTCCCCTGCAGAATAAAACAATTTATAAACAAGTGGCAAGAAGTAGGAAAAGCAA  
TGTATGCCCCCTCCCATCAGAGGACAAATTAAGTGTACATCAAAT---  
ATTACAGGGCTAGTCTTAACAAGAGATGGTGGTAATGAGACTCAT-----  
-----  
-----  
AATGAGACTGAGATCTTCAGACCTGGAGGAGGAGATATGAGGGACAATTGGAGAAGTGAATTATACAAATATA  
AAGTAGTAAAATTGAGCCATTA---GGAGTAGCACCCACCAAGGCCAAGGAGAAGAGTGGTG-----  
-----CAGAGAGAAAAAAGAGCA---GTGGGAACAATAGGAGCT-----  
---ATGTTCCCTTGGGTTCTTGGGAGCA---GCAGGAAGCACTATG---GGCGCAGCGCCA---  
ATGACGCTGACGGTACAG---GCCAGACAA---TTATTG---TCTGGTATAGTGCAGCAGCAGAAC---  
AATCTG---CTGAAG---GCTATTGAGGCGCAACAGCATCTGTTGCAACTCACAGTCTGGGGCATC  
>DQ207942..1  
TTCTATTGTAATACAACACAGCTGTTCAATAATACTTGGCTGAATAATGATACTGGGAATAGCACTAAG----  
-----  
-----  
AATAATGCTACAATCACACTCCCGTGCAGAATAAAACAATTTATAAACAGATGGCAGGAAGTAGGAAAAGCAA

TGTATGCCCCCTCCCATCAGAGGACTAATTAGATGTTCCCTCAAAT ---  
 ATTACAGGGCTACTATTAGTAAGAGATGGTGGTAATAGTAGTGCT -----  
 -----  
 -----  
 GATCAGGAGATCTTCAGACCTGGGGGAGGAAATATAAAGGACAATTGGAGAAGTGAACCTATATAAATATAAAG  
 TAGTAAACTTGAGCCATTA --- GGAGTAGCACCCACCAAGGCAAAGAGAAGAGTGGTG -----  
 ----- CAGAGAGAAAAAAGAGCA --- GTGGGAGTGTTTGGAGCC -----  
 ATGTTCCCTTGGGTTCTTGGGAGCA --- GCAGGAAGCACTATG --- GGCGCAGCGTCA ---  
 ATAACGCTGACGGTACAG --- GCCAGACAA --- TTATTG --- TCTGGTATAGTGCAACAGCAGAGC ---  
 AATTTG --- CTGAGA --- GCTATTGAGGCGCAACAGCATCTGTTGCAACTCACAGTCTGGGGCATT  
 >MH078546..1  
 TTCTACTGTGATTCAACACAACCTGTTCAATAGTACTTGGTGGACTAATGGTACTGAGAACGGTACTAGAGGG-  
 -----  
 -----  
 ACAATTGGCACCATCACACTCCAATGCAGAATAAAACAAATTATAAACATGTGGCAGAAAATAGGAAAAGCAA  
 TGTATGCCCCCTCCCATCAAAGGACAAATTTATTGTTTCATCAAAT ---  
 ATTACAGGGATAATATTAACAAGAGATGGTGGTAGGGACAATAATACT -----  
 -----  
 -----  
 AATGGCACTGAGACCTTCAGACCTGGAGGAGGAAATATGAAAGACAATTGGAGAAAATGAATTATATAAAATATA  
 AAGTAGTAAACTTAAAGCCATTA --- GGAATAGCACCCACCAAGGCACGGAGAAGAGTGGTG -----  
 ----- CAAAGAGAAAAAAGAGCA --- GTGGGA --- ATAGGAGCT -----  
 --- CTGTTCCCTTGGGTTCTTGGGAGCA --- GCAGGAAGCACTATG --- GGCGCAGCGTCA ---  
 GTGACGTTGACGGTACAG --- GCCAGACAA --- TTGTTG --- TCTGGTATAGTGCAACAGCAACAC ---  
 AACTTG --- CTGAAT --- GCTATTGAGGCGCAACAACACCTGTTGCAACTCACAGTCTGGGGCATC  
 >EU839600..1  
 TTCTACTGTAATACATCAAAGCTATTTAACAATACTTGAATACTACTAATACTAAGAAT -----  
 -----  
 -----  
 TGGACTGGTTTTATCATACTCCCATGCAGAATAAAACAAATTATAAATATGTGGCAAAAAGTAGGCAAAGCAA  
 TGTATGCCCCCTCCCATCAGGGGACAAATCAAATGTATATCAGCT ---  
 ATTACAGGGATGCTATTAACAAGAGATGGTGGGAACAACAACGAGAATAAGACT -----  
 -----  
 ----  
 GTAGGGAATAGGACCGAGATCTTCAGACCTACAGGAGGAAATATGAAAGATAATTGGAGAAGTGAATTATACA  
 GCTATAAAGTAGTAAAAATTGAACCATTA --- GGATTAGCACCCACCAGGGCGAAAAGAAGAGTGGTG ----  
 ----- CAGAGAGAAAAAAGAGCA ---  
 GTGGGAGCACTGGGAGCT ----- ATGTTCCCTTGGGTTCTTGGGAGCA --- GCAGGAAGCACTATG ---  
 GGCGCAGCGTCA --- TTGACGCTGACGGTACAG --- GCCAGACAA --- TTAGTG ---  
 TCTGGTATAGTGCAACAGCAAAAT --- AATTTG --- CTAAGG ---  
 GCTATTGAGGCGCAACAGCATCTGTTGCAACTCACAGTCTGGGGCATC  
 >MK303349..1  
 TTCTACTGTGATACAACAGAACTGTTTAATAGTACTTGAATAATAGTGTGGAGGGTTAAATAACAGT ----  
 -----  
 -----  
 AACAGTAATACTATCACACTCCCATGTAGAATAAAACAAATGGTAAACATGTGGCAGAGAGTAGGAAGAGCAA  
 TGTATGCCCCCTCCCATCAAAGGACTAATTAGCTGTTTCATCAGAT ---  
 ATTACAGGGCTGCTATTAACAAGAGATGGTGGTAACCTATAGTGATAACAGT -----  
 -----  
 -----  
 AATAACACTGAGACCTTCAGACCAGGAGGAGGAGATATGAAAGACAATTGGAGAAGTGAATTATATAAATATA  
 AAGTAGTAGAAATTAAACCACTA --- GGAGTAGCGCCACCAAGGCAAAGAAGAGTGGTG -----  
 ----- CAAAGAGAAAAAAGAGCA --- GTGGGA --- ATAGGAGCC -----  
 --- TTGTTCCCTTGGGTTCTTGGGAGCA --- GCAGGAAGCACTATG --- GGCGCAGCGTCA ---  
 ATAACGCTGACGGCACAG --- GCCAGACAA --- TTATTG --- TCTGGTATAGTGCAACAGCAGAAC ---  
 AATCTG --- CTGAGG --- GCTATTGAGGCGCAACAGCAGCTATTGCAACTCACAGTCTGGGGCATC  
 >EF694037..1  
 TTCTACTGTATTACAACACAACCTGTTTAATAGTACTTGGTGGAAATGATACTGAAAGGATAAATAACATTGAAG  
 AA -----  
 -----

AACACAGAAAATATCACACTCCCATGCAGAATAAGGCAGATTGTAAACCTGTGGCAGACAGTAGGAAAAGCAA  
TGTATGCCCCCTCCCATCAGAGGACAAATTAGATGTTTCATCAAAT---  
ATTACGGGGCTGCTATTAACAAGAGATGGTGGTAATCCCAATACC-----  
-----  
ACGGAAGAGAGCTTCAGACCTGGAGGAGGAGATATGAGGGACTATTGGAGAAGTGAATTATATAAATATAAAG  
TAGTAAAAATTGAACCATTA---GGAGTAGCACCCACCAAGGCAAAGAGAAGAGTGGTG-----  
-----CAAAGAGAAAAAAGAGCA--GTAGGA---ATAGGAGCT-----  
GTGTTCCCTTGGGTTCTTGGGAGTA---GCAGGAAGCACTATG---GGCGCAGCGTCA---  
ATGACGCTGACGGTACAG---GCCAGACTA---TTATTG---TCTGGTATAGTGCAACAGCAGAAT---  
AACCTG---CTGAGG---GCTATTGAGGCGCAACAGCATCTGTTGCAACTCACAGCCTGGGGCATC  
>JF680930..2  
TTCTATTGTAATACAACGAAACTGTTTAGCAGTAGTTGGAATGAAACTACAAATAGCACTGAAAATGGCACT-  
-----  
-----  
GAAAAATGACACAATCACACTTCAATGCAGAATAAAACAAATTATAAACATGTGGCAGGAAGTAGGAAAAGCAA  
TGTATGCCCCCTCCCATCAAAGGTCCAATTAGATGCTCATCAAAT---  
ATTACAGGGCTAATATTAACAAGAGATGGTGGTCATAACAATAACACG-----  
-----  
-----  
AACGAGACTGAGATATTCAGACCTGGAGGAGGAGATATGAGGGACAATTGGAGAAGTGAATTATACAAATATA  
AAGTAGTAAGAATTGAACCCCTTG---GGAGTAGCACCCACCAAGGCAAAGAGAAGAGTGGTG-----  
-----CAGAGAGATAAAAAGAGCA--GTGGGAGTATTCGGAGCT-----  
---ATGTTCCCTTGGGTTCTTGGGAGCA--GCAGGAAGCACTATG---GGCGCAGCGTCA---  
GTGGCGTTGACGGTACAG---GCCAGACAA---TTATTG---TCTGGTATAGTGCAACAGCAGAAT---  
AATCTG---CTGAGA---GCTATTGAGGCGCAACAACATCTGTTGCAACTCACAGTCTGGGGCATC  
>AB287372..1  
TTCTACTGTAATTCAACACCACTGTTTAGTAGTAATTGGACTAAGAATACTACTACCGGGTCTTGGATTGGCA  
GATATGGA-----  
-----TCAAAT-----  
GAGACTGATGCAAATATTACACTCATATGCAGAATAAAACAAATTATAAACATGTGGCAGGGGGTAGGAAAAG  
CAATGTATGCCCCCTCCCATCAGTGGACCAATCAGATGTTTCATCAAAT---  
ATTACAGGGCTGCTATTAACAAGAGATGGTGGTGAGGATAAGAAC-----  
-----  
-----  
AGCACTAAAGAGACCTTCAGACCCCTAGGAGGAAATATGAAAGACAATTGGAGAAGTGAATTATATCAATATA  
AAGTAGTAGGAATTGAACCATTA---GGAGTAGCACCCACCAAGGCAAAGAGAAGAGTGGTG-----  
-----CAGAGAGAAAAAAGAGCA--GTGGGAACGCTGGGAGCT-----  
---ATGTTCCCTTGGGTTCTTGGGAGCA--GCAGGAAGCACTATG---GGCGCAGCGTCA---  
ATGGCGCTGACGGTACAG---GCCAGACAA---TTATTG---TCTGGTATAGTGCAACAGCAGAAC---  
AATTTG---CTGAGG---GCTATTGAGGCGCAACAACATTTGTTGCAACTCACAGTCTGGGGCATC  
>AB588264..1  
TTCTACTGCAATACATCACAACCTGTTTAATAGTACTTGAATAGTACTGGGAATAGTAGTACTGAGAATAGTA  
TG-----  
-----  
TCAAATGACACTATCACACTCCCATGTAGGATAAAACAAATTATAAATATGTGGCAGGAAGTAGGAAAAGCAA  
TGTATGCCCCCTCCCATCGCAGGACTAATTAGATGTTTCATCAAAT---  
ATTACAGGGCTATTATTAGTGAGAGATGGTGGTGGTAATCAGACT-----  
-----  
-----  
AACGGGACAGAAATCTTCAGACCTGGGGGAGGAAATATGAAGGACAATTGGAGAAGTGAATTATATAAATATA  
AAGTAGTAAAAATTGAACCAGTA---GGAATAGCACCCGACAGGGCAAAGAGAAGAGTGGTG-----  
-----CAGAGAGAAAAAAGGGCA---GTGGGA---ATAGGAGCT-----  
---GTGTTCCCTTGGGTTCTTGGGAGCA--GCAGGAAGCACTATG---GGCGCAGCGTCA---  
ATAACGCTGACGGCACAG---GCCAGACAA---TTATTG---TCTGGTATAGTGCAACAGCAGAAC---  
AATCTG---CTGAGG---GCCATTGAGGCGCAACAGCATATGTTGCAACTCACAGTCTGGGGCATC  
>AB731669..1  
TTCTACTGTAATACATCAGCACTGTTTAATTGGAGTATTACTGGGTCAAATATTACAAAAGAC-----  
-----  
-----

ATTAATAGGTCAAATACTATCCCATGCAGAATAAAACAAATTATCAACATGTGGCAGAAAGTAGGAAAAGCAA  
 TATATGCCCCCTCCCATCAGCGGGCAAATTAATTGTTTCATCAAAT ---  
 ATTACAGGGTTGCTATTAACAAGAGATGGTGGTAAAAGTAATCAGACT-----  
 -----  
 -----  
 AATAACACTGAGGTTTTTCAGACCTACAGGAGGAAATATGAGAGATAATTGGAGGAGTGAATTATATAAATATA  
 AAGTAGTAAGGATTGAACCATTA---GGAGTAGCACCCACCAAGGCAAGGAGAAGAGTGGTG-----  
 -----CAAAGAGAAAAAAGAGCA---GTGGGAACAATAGGAGCT-----  
 ---ATGTTCCCTTGGGTTCTTGGGAGCA---GCAGGAAGCACTATG---GGCGCAGCGTCA---  
 ATAACGCTGACGGTACAA---GCCAGACTA---TTATTG---TCTGGTATAGTGCAACAGCAAAAC---  
 AATTTG---CTGAGA---GCTATTGAGGCGCAACAACATCTGTTGCAACTCACAGTCTGGGGCATC  
 >AB565478..1  
 TTCTACTGTAATACAACAAAGCTGTTTAATAGTACTTGGTATACTAATGGGAATAAGACTGAAGAATCAAAT-  
 -----  
 -----  
 AACAAATGACACTATTACACTCCCATGCAGAATAAAACAAATTATAAACAGATGGCAGGAAGTAGGAAAAGCAA  
 TGTATGCCCCCTCCCATCCAAGGACGAATTTACTGCTCATCAAAT ---  
 ATTACAGGACTGTTATTAATAAGAGATGGTGGTAACAGTACTGAT-----  
 -----  
 -----  
 AACGAGTCTGAGATCTTCAGACCTGGAGGAGGAGATATGAGGGACAATTGGAGAAGTGAATTATATAAATATA  
 AAGTAGTACAAATTGAGCCATTA---GGAGTAGCACCCACCAAGGCAAAGAGAAGGGTGGTG-----  
 -----CAGAGAGAAAAAAGAGCA---GTGGGA---ATAGGAGCT-----  
 ---ATGTTCCCTTGGGTTCTTGGGAGCA---GCAGGAAGCACTATG---GGCGCAGCGTCA---  
 CTAACGCTGACGGTACAG---GCCAGACGA---TTATTG---TCTGGTATAGTGCAACAGCAGAAC---  
 AATCTG---CTGAGA---GCTATTGAGGCGCAACAGCATATGTTGCAACTCACAGTCTGGGGCATC  
 >JQ316131..2  
 TTCTACTGTAATACATCAAAGCTGTTTAATAGTACTTGGGCTGTGAATATGACTAACGGGTCAAATATAACTA  
 AA-----  
 -----  
 GAAGGAAATACCACAACAATCCCATGCAGAATAAAACATATTATAAACAGGTGGCAAGAAGTGGGAAAAGCAA  
 TGTATGCCCCCTCCCATCGAGGGACAAATTAGATGTACATCAAAT ---  
 ATTACGGGGCTACTATTAACAAGAGATGGGGGGACTCAGAAAAAT-----  
 -----  
 GGGAGTAACAATGGGACTCACAACAACACTGAGATCTTCAGACCTGGGGGAGGAAATATGAAGGACAATTGGA  
 GAAGTGAATTATATAAATATAAAGTAGTAAAAATTGAGCCATTA---  
 GGAATAGCACCCACCAAGGCAAGGAGAAGAGTGGTG-----  
 ---CAGAGAGAAAAAAGAGCA---GTGGGAACAATAGGAGCT-----  
 ATGTTCCCTTGGGTTCTTGGGAACA---GCAGGAAGCACTATG---GGCGCAGCGTCA---  
 CTGACGCTGACGGTACAG---GCCAGACTA---TTATTG---TCTGGTATAGTGCAACAGCAAAAT---  
 AATTTG---CTGAGA---GCTATTGAGGCGCAACAGCATCTGTTGCAACTCACAGTCTGGGGCATC  
 >JQ316133..1  
 TTCTACTGTAATACAACAAAACCTGTTTGATAGTACTTGAATGGTACTAAAGAGTGAATGATACTAAAGAG-  
 -----  
 -----  
 TCAGATAAAAACATTACACTCCAATGCAGAATAAAACAAATTATAAACAGGTGGCAGGAAGTAGGACAAGCAA  
 TGTATGCCCCCTCCCATCAGCGGACTAATTAGATGTTGTCGTCAAAT ---  
 ATTACAGGGCTAATATTAACAAGAGACGGGGGGGCTAACGAGACT-----  
 -----  
 -----  
 CACACCAACACTGAAACCTTCAGACCTGCAGGAGGAGATATGAAGGACAATTGGAGAAGTGAATTATATAAAT  
 ATAAAGTAGTAAGAATTGAGCCATTA---GGGATAGCACCCACCAAGGCAAGGAGAAGAGTGGTG-----  
 -----CAGAGAGAAAAAAGAGCA---GTGGGAATATTAGGAGCT---  
 -----ATGTTCCCTTGGGTTCTTGGGAGCA---GCAGGAAGCACTATG---GGCGCAGCGTCA---  
 ATGACGCTGACGGTACAG---GCCAGACAA---TTATTG---TCTGGTATAGTGCAACAGCAGAAAT---  
 AATTTG---CTGAGA---GCTATTGATGCGCAACAACATCTGTTGCGACTCACAGTCTGGGGCATT  
 >DQ295192..1  
 TTCTACTGTGATACAACACAACCTATTTAATAGCACTTGGACATGGAATGGTACTTGGATTAACGGGTCAACTA  
 AA-----  
 -----

GCTGAGAATGACACAATTGTCTCCCATGCAGAATAAAACAAATTATAAACAGATGGCAGGAAGTAGGAAAAG  
CAATGTATGCCCCCTCCCATCAGCGGACACATTAATTGCTCATCAAAG---  
ATTACAGGACTGCTATTAACAAGAGATGGGGGGATTAAAAACAGCACGAAC-----  
-----  
GGGACTCAGACTGAGATCTTCAGACCTGGGGGAGGAGATATGAGGGACAATTGGAGAAGTGAATTATATAAAT  
ATAAAGTAGTAAAAATTGAGCCATTA---GGGATAGCACCCACCAAGGCAAGGAGAAGAGTGGTG-----  
-----CAGAGAGAAAAAAGAGCA---GTGGGAACAATAGGAGCT---  
-----ATGTTCTTGGGTTCTTGGGAGCA---GCAGGAAGCACTATG---GGCGCAGCGTCA---  
CTGACGCTGACGGTACAG---GCCAGACTA---CTATTG---TCTGGTATAGTGCAACAGCAGAAT---  
AATTTG---CTGAGA---GCTATTGAGGCGCAACAGCATCTGTTGCAACTCACAGTCTGGGGCATC  
>KT878039..2  
TTCTACTGTAATACAACAAAACCTGTTTAATAGTACTTGGTATAGTAATGGTACTAGGAAAGATCAAATGAA-  
-----  
-----  
GGAGATGACACAATTACACTCCAGTGCAGGATAAAACAAATTATAAACAGGTGGCAAGAAGTAGGAAGGGCAA  
TGTACGCCCCCTCCCATCAGAGGAATAATTAAATGTTTCATCAAAC---  
ATTACAGGGCTGCTATTAACAAGAGATGGGGGGAACGGGACTAAT-----  
-----  
GGGACTGAGACCTTCAGACCTGGGGGAGGAAATATGAAAAGACAATTGGAGAAGCGAATTATATAAATATAAAG  
TAGTAAAAATTGAGCCATTA---GGGATAGCACCCACCAAGGCAAGGAGAAGAGTGGTG-----  
-----CAGAGAGAAAAAAGAGCA---GTGGGGACGCTAGGAGCT-----  
GTGTTCTTGGGTTCTTGGGAGCA---GCAGGAAGCACTATG---GGCGCAGCGTCA---  
GTGGCGCTGACGGGACAG---GCCAGACAA---TTATTG---TCTGGTATAGTGCAACAGCAGAAT---  
AATTTG---CTGAGA---GCTATTGAGGCGCAACAGCATCTGTTTCAACTCACAGTCTGGGGCATC  
>KT878021..2  
TTCTACTGTAATACAACACAGTTGTTCAATAGTACTTGGTTTCATAATGGTACTTGGAGTGGTGCTAAT----  
-----  
-----  
GGGGATGAGACTATGACACTCCCATGCAGAATAAAACAAATTATAAACAGATGGCAAGAAGTAGGAAAAGCAA  
TGTATGCCCCCTCCCATCGCAGGATCAATTAATTGCTCATCAAAT---  
ATTACAGGACTGTTATTAACAAGAGATGGTGGTATTACCAGCAACAAG-----  
-----  
ACTAAGAACAGCACCGAGACTGAGACCTTTAGACCGGGGGGAGGAGATATGAGGGACAATTGGAGAAGTGAAT  
TATACAAATATAAAGTAGTAAAAATTGAACCACTA---  
GGAGTAGCACCAACCAAGGCAAAGAGAAGAGTGGTG-----  
---CGGAGAGAAAAAAGAGCA---GTAACA---CTGGGAGCT-----  
GTGTTCTTGGGTTCTTGGGAGCA---GCAGGAAGCACTATG---GGCGCAGCGTCA---  
GTGACGCTGACGGTACAG---GCCAGACTA---TTATTG---TCTGGTATAGTGCAACAGCAGAAC---  
AATCTG---CTGAGG---GCTATTCAGGCGCAACAGCATCTGTTGCAGCTCACAGTCTGGGGCATT  
>KT878029..1  
TTCTACTGTAATACAACAAGACTGTTTAATAGTACTTGGCATACTAATACTACAGGGTTAAATGAAACTGAAG  
GA-----  
-----  
AATAGCACAACTATCACACTCCCATGCAGAATAAAACAAATTATAAACAGATGGCAGGAAGTAGGAACAGCAA  
TGTATGCCCCCTCCCATCAGCGGACAAATTAGATGTTTCATCAAAT---  
ATTACAGGGCTGCTATTAACAAGAGATGGGGGGAATAACACTCAT-----  
-----  
-----  
GGGAATGGGACTGAGATCTTCAGACCTCTGGGAGGAGATATGAAGGACAATTGGAGAAGTGAATTATATAAAT  
ATAAAGTAGTGAGAATTGAGCCATTA---GGGATAGCACCCACCAGGGCAAGGAGAAGAGTGGTG-----  
-----CAGAGAGAAAAAAGAGCA---GTGGGAACGATAGGAGCT---  
-----ATGTTCTTGGGTTCTTGGGAGCA---GCAGGAAGCACTATG---GGCGCAGCGTCA---  
TTGACGCTGACGGTACAG---GCCAGACTA---TTATTG---TCTGGTATAGTGCAACAGCAGAAT---  
AATTTG---CTGAGA---GCTATTGAGGCGCAACAGCATCTGTTGCAACTCACAGTCTGGGGCATC  
>KF561441..1  
TTCTACTGTAATACAACACCACTGTTTAATAGTATTTGGTATAGTAATAATACTGAAAAGTCATATAATACTG  
CA-----  
-----

GAAAATGACACAATTACCCTCCAATGCAGAATAAGACAAATTATAAAAAGGTGGCAGGAGGTAGGAAAAGCAA  
GGTATGCCCCCTCTCATCACCTGCCTAATTAGATGCTATTCAAAT ---  
ATTACAGGGCTGTTATTGGCAGGTGATGGAGGTGAGGCAGGGAAGGATAAC-----  
-----  
-----  
GGGAATAAGAATGAGACCTTCAGGCCTGGGGGAGGAGATATGAGGGACAATTGGAGAAGTGAATTGTATAAAT  
ATAAAGTAGTAGAAATTGAACCATTA --- AGGATAGCACCCACCAGGGCAAGGAGAATAGTGGTG-----  
-----CAGAGAGAAAAAAGAGCA---GTGGGAACATTAGGAGCC---  
-----ATGTTTCCTTGGGTTCTTGGGAGCA---GCAGGAAGCACTATG---GGCGCAGCGTCA---  
CTGACGCTGACGGTACAG---GCCAAGCAA---GTATTG---TCTGGTATAGTGCGACAGCAGAAT---  
AATTTG---CTGAGA---GCTATTGAGGCGCAACAGCGTCTGTTGCAACTCACAGTCTGGGGCATC  
>MN043577..1  
TTCTACTGTAATACAACACAACCTGTTTAATAGTACTTGGTATAGTCCTTGGAATAGTACTAACGGGTCAAATA  
TAACT-----  
-----  
GAAAGAAATATCACAACACTCCCATGCAGAATAAAACAAATTATAAACAGATGGCAGGAAGTAGGAAAAGCAA  
TGTATGCCCCCTCCCATCAGTGGACAAATTAGATGTTTCATCAAAT ---  
ATTACAGGGCTGCTATTAACAAGAGATGGGGGGACTCAGAACAAT-----  
-----  
-----  
GGGACTGAGATCTTCAGACCTGGGGGAGGAAATATGAAGGACAATTGGAGAAGTGAATTATATAAATATAAAG  
TAGTAAAAATTGAGCCATTA---GGGATAGCACCCACCGGGGCAAAGAGAAGAGTGGTG-----  
-----CAGAGAGAAAAA---ACA---GTGGGAACGATAGGAGCT-----  
ATGTTTCCTTGGGTTCTTGGGAGCA---GCAGGAAGCACTATG---GGCGTAGCGTCA---  
ATGACGCTGACGGTACAG---GCCAGACTA---TTATTG---TCTGGTATAGTGCAACAGCAGAAT---  
AATTTG---CTGAGA---GCTATTGAGGCGCAACAGCATCTGTTGCAACTCACAGTCTGGGGCATC  
>MN043581..2  
TTCTACTGTAATACAACACAACCTGTTTAATAGTACTTGGATGATTACTAATAATTGCAATAGTACTGAAGGAT  
ACAATAACACT-----  
-----  
GCACGAAATAGCACAATTACCCTCCCATGCAGAATAAAACAAATTATAAACAGGTGGCAGGAAGTAGGAAAAG  
CAATGTATGCCCCCTCCCATCAGAGGACAAATTAGATGTTTCATCAAAT ---  
ATTACAGGGCTACTATCAACAAGAGATGGGGGGACTGGGAACAAC-----  
-----  
-----  
GAGACTGAGATCTTCAGACCTGGGGGAAGAAATATGAGGGACAATTGGAGAAGTGAATTATATATATATAAAG  
TAGTAACAATTGAGCCATTA---GGGATAGCACCCACCGGGGCAAAGAGAAGAATGGTG-----  
-----CAAAGAGAAAAAAGAGCA---GTGGGAACGATGGGAGCT-----  
ATGTTTCCTTGGGTTCTTGGGAGCA---GCAGGAAGCACTATG---GGCGGACATCA---  
ATGACGCTGACGGTACAG---GCCAGACTA---TTATTG---TCTGGTATACTGCATCATCAGAAT---  
AATCTG---CTGAAA---GCTATTGAGGCGCAACAGCATCTGTTGCAACTCACAGTCTGGGGCATC  
>HQ386180..1  
TTCTATTGTAACACAGCACAACCTGTTTAATAGTACTTGAATGCAACAGAAATGCTTAATAGTACAGAATCAA  
ATGAC-----  
-----ACA---  
AATAGCAACATCAACATCACACTCCAATGCAGAATAAGACAAATTATAAACATGTGGCAGGAAGTAGGAAAAG  
CAATGTATGCCCCCTCCCATCGAAGGACAAATTAGATGTTTCATCAAAT ---  
ATTACAGGGATACTATTAACAAGAGATGGTGGTCATAGCACGAACGGGACT-----  
-----  
-----  
GAGAACGGGAACGAGACCTTCAGACCTGGAGGAGGAAACATGAGGGACAATTGGAGAAGTGAATTATATAAAT  
ATAAAGTAGTAAACTTGAACCATTA---GGAATAGCACCCACCAAGGCAAAGAGAAGAGTGGTG-----  
-----CAGAGAGAAAAAAGAGCG---GTGGGAATGCTAGGAGCT---  
-----ATGTTTCCTTGGGTTCTTGGGAGCA---GCAGGAAGCACTATG---GGCGCAGCGTCA---  
CTAACGCTGACGGTACAG---ACCAGACAT---TTATTG---GCTGATATAGTGCAACAGCAGAAC---  
AATTTG---CTGAGA---GCTATTGAGGCGCAGCAGCATCTGTTGCAACTCACAGTCTGGGGCATC  
>EU744081..1  
TTCTACTGTAATACAACACAACCTGTTTAATAGTACTTGGATGTTTAATGGTACTTGGGAGTCAAATAGCACTG  
AGGGA-----  
-----

AATCCACAGAAAATATCACACTCCCATGCAGAATAAAACAAATTATAAACCTGTGGCAGGAAGTAGGAAAGG  
CAATGTATGCCCCCTCCTATCAGGGGACTAATTCAATGTGTATCAAAT---  
ATTACAGGGTTGCTATTAACAAGAGATGGTGGGAACAACACGACTGAG-----  
-----  
-----  
AATGGGACCGAGATTTTCAGACCTGGAGGAGGAGATATGAGGGACAATTGGAGAAGTGAATTATATAAATATA  
AAGTAGTAAAAATTGAACCATTA---GGGGTAGCACCCACCAGGGCAAAGAGAAGAGTGGTG-----  
-----CAGAGAGAAAAAAGAGCA---GTGGGAGTGATAGGAGCT-----  
---ATGTTCCCTTGGGTTCTTGGGAGCA---GCAGGAAGCACTATG---GGCGCAGCGTCA---  
ATGACGCTGACGGTACAG---GCCAGACAA---TTACTG---TCTGGTATAGTGCAACAGCAGAAC---  
AATCTG---CTGAGG---GCTATTGAGGCGCAACAGCATCTGTTGCAACTCACAGTCTGGGGCATC  
>JF320244..3  
TTCTACTGTAATACATCACAACCTGTTTAATGGAAGTTGGCAACCACCGCTTAATGAACTATATTTCAATACA  
ATGCTACA-----  
-----TGGGCA-----  
AAAAATGACACTAATATCACACTCCCATGCAGAATAAAACAAATTTGTAAACATGTGGCAGGAAGTAGGAAAAG  
CAATGTATGCCCCCTCCCATCAGCGGACCAATCAAATGTGTATCAAAT---  
ATTACAGGGTTGCTAATAACAAGAGATGGGGGTTACAACAGTAGTAGC-----  
-----  
-----  
AATGAGACCAATGAGACCTTCAGACCTGCAGGAGGAGAAAATGAGGGACAATTGGAGAAGTGAATTATATAAAT  
ATAAAGTAGTACAAGTTGAACCATTA---GGATTAGCACCCACCAAGGCAAAGAGAAGAGTGGTG-----  
-----CAGAGAGAAAAAAGAGCA---GTGACG---CTGGGAGCT---  
-----ATGTTCCCTTGGGTTCTTGGGAGCA---GCAGGAAGCACTATG---GGCGCAGCGTCA---  
ATAACGCTGACGGTACAG---GCCAGACAG---TTATTG---TCTGGTATAGTGCAACAGCAGAAC---  
AATCTG---CTGAGG---GCTATTGAGGCGCAACATCATCTGTTGCAACTCACAGTCTGGGGCATA  
>JF320226..1  
TTCTACTGTAATACCACACCACTGTTTAATAGTACCTGGAATGCCACACAACCTGGTTAATATTACTGGGAATA  
TCACAGGG-----  
-----CTTAGT-----  
AATAGAACTGAAAATATTACACTCCCATGTAGAATAAAACAAATTATAAACATGTGGCAGGAAGTAGGAAAAG  
CAATGTATGCTCCTCCCATCGCAGGACGAATTAAATGTTTATCAAAT---  
ATTACAGGTTTACTATTAGTAAGAGATGGTGGCAATAGCAATGAC-----  
-----  
-----  
ACGGAGACCTTCAGACCTCAAGGAGGAAATATGAAGGACAATTGGAGAAGTGAATTATATAAATATAAAGTAG  
TAAAAATTGAACCATTA---GGAGTAGCACCCACCAAGGCAAAGAGAAGAGTGGTG-----  
-----CAGAGAGAAAAAAGAGCA---GTGGGAGTACTGGGAGCT-----  
ATGTTCCCTTGGGTTCTTGGGAGCA---GCAGGAAGCACTATG---GGCGCAGCGTCA---  
ATAACGCTGACGGCACAG---GCCAGACAA---TTATTG---TCTGGTATAGTGCAACAGCAGAAC---  
AATCTG---CTGAGG---GCTATTGAGGCGCAACAGCACCTGTTGCAACTCACAGTCTGGGGCATC  
>JF320189..1  
TTCTACTGTAATTATCATCAGAACTGTTTAATAGTACCTGGACCTGGAATGAGACTGAAGGGTCTATTACTGAAG  
GGTCA-----  
-----  
ATTACTAATGGGACAATCACACTCCCATGTAGAATAAGACAAATTATAAACATGTGGCAGAGAGTAGGAAAAG  
CAATGTATGCCCCCTCCCATCCAAGGACAAATTAGATGTTTATCAAAT---  
ATTACGGGGCTGCTATTAACAAGAGATGGTGGTGAAGGTAACACCACC-----  
-----  
-----  
AATAACAACGAAACCTTCAGACCTGGAGGAGGTGATATGAGGGACAATTGGAGAAATGAATTATATAAATATA  
AAGTAGTACAAATTGAACCATTA---GGAATAGCACCCACCAAGGCAAAGAGAAGAGTGGTG-----  
-----CAGAGAGAAAAACGAGCA---GTGGGA---CTAGGAGCT-----  
---GTGTTCCCTTGGGTTCTTGGGAGCA---GCAGGAAGCACTATG---GGCGCAGCGTCA---  
GTGACGCTGACGGTACAG---GCCAGACAA---TTATTG---TCTGGTATAGTGCAACAGCAGAAC---  
AATCTG---CTAAAG---GCTATTGAGGCGCAACATCATCTGTTGCAACTCACAGTCTGGGGCATC  
>EF210727..1  
TTCTACTGTAACCTCTACACAGCTGTTTAATAGTACTTGGAACAGCAGCAATTGGAATTGGAATGATACTGAAA  
AG-----  
-----

ACAAATAAAAGTATCACACTCCCATGCAGAATAAAACAAATTATAAACATGTGGCAGGAAGTAGGAAAAGCAA  
 TGTATGCCCCCTCCCATCAGAGGACAAATTAGATGTTTCATCAAAT ---  
 ATTACAGGGCTGATGCTAACAAGGGATGGTAGTAATGAGAGTCAC -----  
 -----  
 -----  
 AGTGAGATCTTCAGACCAGGAGGAGGAAATATGAGGGATAATTGGAGAAGTGAATTATATAAATATAAAGTAG  
 TAAAAATTGAACCATTA --- GGAGTAGCACCCACCAAGGCAAAGAGAAGAGTGGTG -----  
 ----- CAGAGAGAAAAAAGAGCA --- GTAGTGGGGATAGGAGCT -----  
 GTGTTCTTGGGTTCTTGGGAGCA --- GCAGGAAGCACTATG --- GGCGCAGCGTCA ---  
 ATGATGCTGACGGTACAG --- GCCAGACAA --- TTATTG --- TCTGGTATAGTGCAACAGCAGAAC ---  
 AATTTG --- CTGAGG --- GCTATTGAGGCGCAACAGCATATGTTGCAACTCACAGTCTGGGGCATC  
 >EF210729..2  
 TTTTATTGTAATACAACACGGCTGTTTAATAGTACTTGGAGAATAATACTTGGACTAAGAATCATATTGAGA  
 AC -----  
 -----  
 GAGACTGAAACAATCACACTCCCATGCAAAATAAAACAAATTATAAACAGGTGGCAGGAAGTAGGACAAGCAA  
 TGTATGCCCCCTCCCATCCAGGATGGATTAAGTGTTCATCAAAT ---  
 ATTACAGGGCTACTATTAACAAGAGATGGTGGTGAAAAACGGAACC -----  
 -----  
 -----  
 ACCGAGACCGAGACCTTCAGACCTGGAGGAGGAGATATGAGGGACAATTGGAGAAGTGAATTATATAAATATA  
 AAGTAGTTGAAATTC AACCATTA --- GGAGTAGCACCCACCACAGCAAAGAGAAGAGTGGTG -----  
 ----- CAGAGAGAAAAAAGGGCA --- GTAACA --- CTAGGAGCT -----  
 --- ATGTTCTTGGGTTCTTGGGAACA --- GCAGGAAGCACTATG --- GGCGCAGCGTCG ---  
 CTGACGCTGACGGTACAG --- GCCAGACAA --- TTATTG --- ACTGGTATAGTGCAACAGCAGAAC ---  
 AATCTG --- CTGAGG --- GCTATTGAGGCGCAACAGCATATGTTGCAACTCACAGTCTGGGGCATT  
 >EF210731..2  
 TTCTACTGTAATCTATCAAAATTGTTTAATAGTACATGGAATGATACTACTTGGAACACGACTGATGAGTCA-  
 -----  
 -----  
 AATGACACTTACATCCTGCTCCCATGTAGGATAAAACAAATTATAAACATGTGGCAGACAGTAGGAAAAGCAA  
 TGTACGCCCCCTCCCATCAAAGGAAAAATTAGTTGTTTCATCAAAT ---  
 ATTACAGGGCTGCTATTAACAAGAGATGGAGGGAATGACAACAGGACT -----  
 -----  
 -----  
 CAGGGGGTCGAGATCTTCAGACCTGGAGGAGGAGATATGAGAGATAATTGGAGAAGTGAATTATATAAATATA  
 AAGTAGTAAAAATTGAACCATTA --- GGAATAGCACCCACCGAGGCAAAAAGAAGAGTGGTG -----  
 ----- CAGAGAGAAAAAAGAGCA --- GTGGGA --- ATAGGAGCT -----  
 --- GTGTTCTTGGGTTCTTGGGAGCA --- GCAGGAAGCACTATG --- GGCGCAGCGGCA ---  
 GTGACGCTGACGGTACAG --- GCCAGACAA --- TTATTG --- TCTGGTATAGTGCAACAGCAGAAC ---  
 AATCTG --- CTAAAG --- GCCATTGAGGCGCAACAGCATCTGTTGCAACTCACAGTCTGGGGCATC  
 >EF210735..1  
 TTCTACTGTAACACATCACACCTATTTAATAGTACTTGGAAATGATACTAGTAGTTGGGATAATAGC -----  
 -----  
 -----  
 ACTGAAGGAAATATCACACTCCAATGTAGAATAAAACAAATCATAAACAGGTGGCAGGAAGTAGGAAAAGCAA  
 TGTATGCCCCCTCCCATTCAGGACAAATTAGATGCTCATCAAAT ---  
 ATTACAGGGCTGCTATTAACAAGAGATGGTGGTCAGGGCAGTAAC -----  
 -----  
 -----  
 GAGACCGAGGTCTTTAGACCTGGAGGAGGAAATATGAAGGACAATTGGAGAAGTGAAGTATATAAATATAAAG  
 TAGTAAAAGTTGAACCATTA --- GGAATAGCACCCACCAAGGCAAGGAGAAGAGTGGTG -----  
 ----- CAGAAAGAAAAAAGAGCA --- ATAACA --- CTAGGAGCT -----  
 ATGTTCTTGGTTTCTTGGGAGCA --- GCAGGAAGCACTATG --- GGCGCAGCGTCG ---  
 ATAACGCTGACGGTACAG --- GCCAGACAA --- TTATTG --- TCTGGTATAGTGCAAGCAGCAGAAAT ---  
 AATTTG --- CTGAGG --- GCTATTGAGGCGCAACAGCATATGTTGCAACTCACAGTCTGGGGCATC  
 >MH327746..1  
 TTCTACTGCAATACAACAAAACCTGTTTAACAGTAGTTGGCCAAATAGTACTAGGAATAATACTGAAGAGTCA-  
 -----  
 -----

AATAGCACTGTTATCACACTCCCATGTAGAATAAAACAAATTATAAACATGTGGCAGGAAGTAGGAAAAGCAA  
TGTATGCCCCCTCCCATCAGGGGACGAATTAATTGTACATCAAAC ---  
ATTACAGGGCTACTATTAACAAGAGATGGGGGCAATGGAAATAGC-----  
-----  
-----  
ACGAATGAAACCTTCAGACCTCAAGGAGGAAATATAAGGGACAATTGGAGAAGTGAACTATATAAATATAAAG  
TAGTAAAAAATTGAACCATTA---GGAGTAGCACCTACCAAGGCAAAGAGAAGAGTGGTG-----  
-----CAAAGAGAAAAGAGAGCA---GTGGGA---ATGGGAGCT-----  
TGGTTCCTTGGGTTCTTGGCAGCA---GCAGGAAGCACTATG---GGCGCAGCGTCA---  
GTGACGTTGACGGTACAG---GCCAGACAA---TTATTG---TCTGGTATAGTGCAAGCAGCAAAAT---  
AATTTG---CTGCAA---GCTATTGAGGCGCAACAGCATTTGTTGCAACTCACAGTCTGGGGCATC  
>KY658690..1  
TTCTACTGCAATACAACAAAACCTGTTTAACAGTAGTTGGCCAAATAGTACTAGGAATAATACTGAAGAGTCA-  
-----  
-----  
AATAGCACTGTTATCACACTCCCATGTAGAATAAAACAAATTATAAACATGTGGCAGGAAGTAGGAAAAGCAA  
TGTATGCCCCCTCCCATCAGGGGACGAATTAATTGTACATCAAAC ---  
ATTACAGGGCTACTATTAACAAGAGATGGGGGCAATGGAAATAGC-----  
-----  
-----  
ACGAATGAAACCTTCAGACCTCAAGGAGGAAATATAAGGGACAATTGGAGAAGTGAACTATATAAATATAAAG  
TAGTAAAAAATTGAACCATTA---GGAGTAGCACCTACCAAGGCAAAGAGAAGAGTGGTG-----  
-----CAAAGAGAAAAGAGAGCA---GTGGGA---ATGGGAGCT-----  
TGGTTCCTTGGGTTCTTGGCAGCA---GCAGGAAGCACTATG---GGCGCAGCGTCA---  
GTGACGTTGACGGTACAG---GCCAGACAA---TTATTG---TCTGGTATAGTGCAAGCAGCAAAAT---  
AATTTG---CTGCAA---GCTATTGAGGCGCAACAGCATTTGTTGCAACTCACAGTCTGGGGCATC  
>MF373127..1  
TTCTACTGTAATACAACAAGACTGTTTAATACTACTTGAATAACACTGAGAAATCAAATCCCACTGAA----  
-----  
-----  
GGAAATGGCACAATCACACTCCAATGCAGAATAAAACAAATTATAAACCTGTGGCAGGAAGTAGGAAAAGCAA  
TGTATGCCCCCTCCCATCAGAGGACAAATTAAGTGTTCATCCAAC ---  
ATTACAGGACTGCTATTAACAACAGATGGTGGTATGAACACCAGT-----  
-----  
-----  
AATAACAAGACCTTTATACCTGCAGGAGGAGATATGAGAGACTATTGGAGGAGTGGAGTATTGAAATATGATG  
TAGTAATAGTTGAGCCATTA---GGAATAGCACCAACCACGGATATGAGAAGAGTGGTG-----  
-----CAGATACAAAAAAGAGCA---GAGCTA---CTACGAGCT-----  
CTGTTGCTTGTGTTCTTGGGAGCA---GCAGGAAGGACGATG---AGCGCAGCGTCG---  
ATGACGCTGACGGTACAG---GCCAGACAA---TTATTG---TCTGGTATAGTGCAACAGCAAAAT---  
AATTTG---CTGCAG---GCTATTGAGGCGCAACAGCATATGTTGAAACTCACAGTCTGGGGCATC  
>MF373129..2  
TTCTACTGTAATACAGCAGAACTGTTTAACAGTACTTGGAGGAATGACACTGAAAGGTCAAATACCACTACA-  
-----  
-----  
GGAAATGACACAATCACACTTCAATGCACAATAAAACGAATTGTAAACATGTGGCAGGAAGTAGGAAAAGCAA  
TGTATGCCCCCTCCCATCAGGACAAATTAATTGTTTCATCAAAA ---  
ATTACAGGGCTACTGTTAACAAGAGATGGTGGTGGGAACCAGAAC-----  
-----  
-----  
ACCAGCGAGACTTTTCAGACCTGGAGGGGGAAATATGAAAGACAATTGGAGAAGTGAAATTATATAAATATAAAG  
TAATAAAAAATTGAACCATTA---GGAGTAGCACCCACCAAGGCAAAGAGAAGAGTGGTG-----  
-----CAGAGAGAAAAAAGAGCA---GTGGGA---ATAGGAGCT-----  
GTGTTTCCTTGGGTTCTTGGGAGCA---GCAGGAAGCACTATG---GGCGCAACGTCG---  
ATGACGCTGACGGTACAG---GCCAGACAA---TTATTG---TCTGGTATAGTGCAACAGCAGAAAT---  
AATTTG---CTGAAG---GCTATTGAGGCGCATCAGCATATGTTGCAACTCACAGTCTGGGGCATC  
>KP411829..1  
TGCTATTGCAAAACCATCACTTCTGTTTACTGGCACATACAAGAGTAACATTAATTTCAAATATCACCCAAT  
CCTCACAA-----  
-----TCC---GATGAAAGGTATATTTTAATTCTGGCTTGTATGACG-----

ATCAATGTGTGGCAGGTAGTAGGAAAAGCGATCTATTCCCCTCCCATCAGTGGACAAATTAGATGTTTCATCAA  
 AT---ATTACAGGGCTGCTATTAACAAGAGATGGTGGTAGCAACAGCAGTAACGAG-----  
 -----  
 -----  
 ACCGAGACTGAAATCTTCAGACCTGTGGGAGGAAATATGAGGGACAATTGGAGAAGTGAATTATATAAATATA  
 AAGTAGTACAAATTGAACCATTA---GGAGTAGCACCCACCAAGGCAAAGAGAAGAGTGGTG-----  
 -----CAAAGAGAAAAAAGAGCA---GTGGGA---TTAGGAGCA-----  
 ---ATGTTCCCTTGGGTTCTTGGGAGCA---GCAGGAAGCACTATG---GGCGCAGCGTCA---  
 ATAACGCTGACGGTACAG---GCCAGACAA---TTATTG---TCTGGTATAGTGCAACAGCAGAAT---  
 AATTTG---CTGAGA---GCTATTGAGGCGCAACAGCATCTGTTGCAACTCACAGTCTGGGGCATC  
 >MF373151..2  
 CTCTACTGTAATTCACACAACCTATTTAATAGTACTTGGAATGGTACTGAAAGATCAAACCTATTCCACTGAG-  
 -----  
 -----  
 ACTAATGAACTATCACACTCCCATGCAGAATAAAACAAATTATAAACATGTGGCAGAGAGTAGGAAGAGCAA  
 TGTATGCCCCCTCCCATCCAAGGACTAATTAGATGTTTCATCAAAT---  
 ATTACAGGGCTGCTGCTAACAAGAGATGGAGGTCAGAATAGTAGT-----  
 -----  
 -----  
 AATAGCACTGAGACCTTCAGACCGGGAGGAGGAAACATGAAGGATAATTGGAGAAGTGAATTATATAAATATA  
 AAGTAATAAAGATTGAACCATTA---GGAGTAGCACCCACCAAGGCAAAGAGAAGAGTGGTG-----  
 -----CAAAGAGAAAAAAGAGCA---ATAACA---GTAGGAGCT-----  
 ---ATGTTCCCTTGGGTTCTTGGGAGCA---GCAGGAAGCACTATG---GGCGCAGCGTCA---  
 ATGGCGCTGACGGTACAG---GCCAGACAA---TTGTTG---TCTGGTATAGTGCAACAGCAGAAC---  
 AATCTG---CTGAGG---GCTATTGAGGCGCAACAGCATCTGTTGCAACTCACAGTCTGGGGCATC  
 >KP411823..1  
 TTCTACTGTAATACAACACAACCTGTTTAATAGTACTTGGAATATCACTGGAGGGTTAAATAACACTGAA----  
 -----  
 -----  
 GGAAATGGCACAATCACACTCCAATGCAAAATAAAACAATTTATAAACATGTGGCATGAAGTAGGGAAAGCAA  
 TGTATGCCCCCTCCCATCAGAGGACAGATTACATGTTTCATCAAAC---  
 ATTACAGGGCTGCTATTAAACAAGAGATGGTGGTGAGAACCCGGGC-----  
 -----  
 -----  
 AACGACACTGATACTTTCACACCTGGAGGGGGAGATATGAAAGACAATTGGAGTAGTGAATTAGATAAATATA  
 GAGTAATAGGAATAGCACCCTA---CCAGTAGCACCCACCAAGGCAAAGACAAGATTGTTG-----  
 -----CAGAGAGATAAAAGAGCA---GTTGGA---ATAGGATCT-----  
 ---GTGTTCCCTTGTCTTCTGTTAGCG---GCAGGAAGCACTATG---TCTGCAATGTCA---  
 ATGACGATGACGCTACAA---GCTCAAGAA---TTACTG---TATGTGACCGAGCGAATGCAAAAA---  
 AATTTG---CTGAAG---GCTATTGAGGCGCAACAGCATCTGTTGCAACTCACAGTCTGGGGCATC  
 >MF373162..4  
 TTCTATTGTAATACAACACAGTTATTTAATAGTACTTGGGAGGCTCATCAGCTTAATCAGACTTGGAATGAGC  
 CCTAGGG-----  
 -----  
 -----  
 CCAAATGTTACTAATATCACACTCCCATGCAGAATAAAACAAATTATAAACAGGTGGCAGGAAGTGGGAAAAG  
 CAATGTTTGGCGCTCCCATCAGCGGACGAATTCAATGCAAAATCAAAT---  
 ATTACAGGGTTGTTATTAACAAGAGATGGTGGTACTAACACCAGC-----  
 -----  
 -----  
 GACCCCAACAGAAGTGAAGACCTTCAGACCTGGAGGAGGAGATATGAGAGACAATTGGAGAAGTGAATTATATA  
 AGTATAAAGTAGTACAAATTGAGCCATTA---GGAATAGCACCCACCAAGGCAAAGAGAGTAGTGGTA----  
 -----AAGAGAGAAAAAAGAGCA---  
 GTGGGAGTGCTAGGAGCT-----ATGTTCCCTTGGGTTCTTGGGAACA---GCAGGAAGCGTTATG---  
 GGCGCAGCGTCA---ATGACGCTGACGGTACAG---GCCAGACAA---TTATTG---  
 TCTGGTATAGTGCAACAGCAGAAC---AATCTG---CTGAGA---  
 GCTATTGAGGCGCAACAACATATGTTGCAACTCACAGTCTGGGGCATC  
 >KP411824..3  
 TTCTACTGCAATTCAACACCACTGTTTAATAGCACCTGGGATACTAATGGGACTTGCAAGGGCTCTAATAGT-  
 -----  
 -----

GCTGATTGGAATGTTACTGTCCCATGCATTAGCATCCCAATTACTACAATGGGGCAGAACTAGAACAAAGCAA  
TGGACGTGCGTCCCATTGCAGGAAAAGCAATATGTTTCATCAAGT---  
TTGTCCAAAGGTATCCTTTTAGCCAATTCCCATAATAGCATTATTGTG-----  
-----  
-----  
CCCCGGCTGGTTATGCCTAAAGGTAAAGATAAGAAGTTCAATTGGAACAGGAAAATGTATCAATGTCAAGTAC  
AATGTCAAATTGAACCATTA---GGAGTAGCACCCACCATGGCAAAGAGAAGAGTGGTG-----  
-----CAAAGAGAGAAAAGAGAT---TTGGGA---CTAGGAGCT-----  
CTGTTCTTGGGTTCTTGGGAGCA---GCAGGAAGCACTATG---GGCGCAGCGTCA---  
ATAACGCTGACGGTACAG---GCCAGACAA---TTATTG---TCTGGTATAGTGCAACAGCAGAAC---  
AACTTG---CTGAGG---GCTATTGAGGCGCAACAGCATCTGTTGCAACTCACAGTCTGGGGCATT  
>MF373185..1  
TTCTACTGTAATTCAACACCACTGTTTAATAGTACTTGGTATGTTAATGGAAGTAGGAATAATGATACTGATA  
TT-----  
-----  
GGAAAGATAAACATCACACTCTCATGTAGAATAAAACAAATTATAAACATGTGGCAGGAAGTAGGAAAAGCAA  
TGTATGCCCCCTCCCATCCCAGGAAAAATTCAATGTATATCAAAT---  
ATTACAGGGCTGCTATTAACAAGAGATGGAGGTAATACCAAGTGAGACCAGG-----  
-----  
-----  
AACGGGACCGAGATTTTCAGACCTGGAGGAGGAAATATGAGGGACAATTGGAGAAGTGAATTATATAAATACA  
AAGTAGTACAAGTTGAACCATTA---GGAATAGCACCCACCAAGGCAAGGAGAAGAGTGGTG-----  
-----CAGAGAGAAAAAGAGCT---CTGGGA---CTAGGAGCT-----  
---TTGTTTCTTGGGTTCTTGGGAGCA---GCAGGAAGCACTATG---GGCGCAGCGTCA---  
GTGACGCTGACGGTACAG---GCCAGACAA---TTATTG---TCTGGTATAGTGCAACAGCAGAAC---  
AATCTG---CTGAGA---GCTATTGAGGCGCAACAACACATGTTGCAACTCACAGTCTGGGGCATC  
>MF373186..1  
TTCTACTGCAACACAACAACACTGTTTAATAGTACTTGGAAATGATACACAACCTGTCTGATAGCACTTGAATA  
ATACAAGA-----  
-----  
GGGATAAATGACACTATCACACTCCAATGTAGAATAAGACAAATCATAAACATGTGGCAGAAGGTAGGAAAAG  
CAATGTATGCCCCCTCCCATCAGTGGACAAATTAGATGTACATCAAAT---  
ATTACAGGGCTGATATTAACAAGAGATGGTGGTAATAGTGACAACAAC-----  
-----  
-----  
ACCACCCAGCCCGAGATCTTCAGACCTCAAGGAGGAAATATGAAAGACAATTGGAGAAGTGAATTATATAAAT  
ATAAGGTAGTAGCAATTGAACCATTA---GGACTAGCACCCACCAAGGCAAAGAGAAGAGTGGTG-----  
-----CAGAGAGACAAAAGAGCA---GTAGGA---CTGGGAGCT---  
-----CTGTTCTTGGGTTCTTGGGAGCA---GCAGGAAGCACTATG---GGCGCAGCGTCA---  
ATGGCGCTGACGGTACAA---GCCAGACAA---TTATTG---TCTGGTATAGTGCAACAGCAGAAC---  
AATTTG---CTGAGG---GCTATTGAGGCGCAACAGCATCTGTTGCAGCTCACAGTCTGGGGCATT  
>KY213743..1  
TTTTACTGTAATACATCAAACTGTTTAATAGTACTTGGCTGAATAATAACAGGGTCAAAT-----  
-----  
-----  
GCCACTGAACCTATCATACTCCCATGCAGGATAAAACAAATTGTAAACATGTGGCAGGAAGTAGGAAAAGCAA  
TGTATGCCCCCTCCCATCAGAGGACAAATTAGATGCATATCAAAT---  
ATTACAGGGCTCCTATTAACAAGAGATGGTGGTCAAGAGAACAAAACCGAG-----  
-----  
-----  
AACCACACCGAGGTCTTTAGACCCACGGGAGGAAATATGAAGGACAATTGGAGAAGTGAATTATATAAATATA  
AAGTAGTAAAAATTGAACCATTA---GGAATAGCACCCACCAAGGCAAAAAGAAGAGTGGTG-----  
-----CAGAGAGAAAAAGAGCA---GTGGGA---ATAGGAGCG-----  
---ATGTTCTTGGGTTCTTGGGAGCA---GCAGGAAGCACTATG---GGCGCAGCGTCA---  
ATAACGCTGACGGTACAG---GCCAGACAG---TTACTG---TCTGGTATAGTGCAACAGCAAAAC---  
AATTTG---CTGAGA---GCTATTGAGGCGCAACAACATATGTTGCAACTCACAGTCTGGGGCATC  
>KY213745..1  
TTCTACTGCAATACAACAACACTATTTAATAGTTCTTGGAAATAATAGTAGTTTGAATAGTACTGAGGGTAATG  
GAGGG-----  
-----

TCAAATGACACTATCACACTCCCGTGTAGATAAAACAAATTATAAACATGTGGCAGGAAGTAGGAAAAGCAA  
TGTATGCCCCCTCCCATTCAGGACAAATTAGATGCTCCTCAAAT---  
ATTACAGGACTATTATTAGTAAGAGATGGTGGTAATAACAGGACG-----  
-----  
-----  
GGCGGCAGTGAGACCTTCAGACCTGGAGGAGGAAATATGAAGGACAATTGGAGAAGTGAATTATATAAATATA  
AAGTAGTAAAAATTGAACCATTA---GGAATAGCACCCACCAGGGCAAGGAGAAGAGTGGTG-----  
-----CAGAGAGAAAAAAGAGCA---GTGGGA---CTAGGAGCT-----  
---TTGTTCCCTTGGGTTCTTGGGAGCA---GCAGGAAGCACTATG---GGCGCAGCGTCA---  
ATGACGCTGACGGTACAG---GCCAGACAA---TTATTG---TCTGGTATAGTGCAACAGCAGAAC---  
AATCTG---CTGAAG---GCCATTGAGGCGCAACAGCATATGTTGCAACTCACAGTCTGGGGCATC  
>JN248346..2  
TTCTACTGTGATTCAACACAACCTGTTTAATAGTAGTTGGAATAGTAATTGGTCTAATAATACTGAA-----  
-----  
-----  
GGGTCAGACAACATTACACTTCAATGCAGAATAAAACAAATTATAAACATGTGGCAGCAAACAGGAAAGGCCAA  
TGTATGCCCCCTCCCATCAGTGAATAATTAGCTGTTTCATCAAAT---  
ATTACAGGGCTGTTATTAACAAGAGATGGTGGTAACAATCAGACT-----  
-----  
-----  
AATAATAATGAGACCTTCAGACCTGGAGGAGGAAATATGAAGGACAATTGGAGAAGTGAATTATATAGATATA  
AAGTAGTACAAATTGAACCATTA---GGAGTAGCACCCACCATGGCAAAGAGAAGAGTGGTG-----  
-----CAGAGAGAAAAAAGAGCA---GTGGGA---ATAGGAGCT-----  
---CTATTCCTTGGGTTCTTGGGAGCA---GCAGGAAGCACTATG---GGCGCAGCATCA---  
ATAACGCTGACGGTACAG---GCCAGACAA---TTATTG---TCTGGTATAGTGCAACAGCAGAAC---  
AATTTG---CTGAGA---GCTATTGAGGCGCAACAGCATATGTTGCAACTCACAGTCTGGGGCATA  
>KJ769147..1  
TTCTACTGTAACACATCACAACCTGTTTAATAGTACTTGGTATAGTAATGGT-----  
-----  
-ACTCGAAATGATACT-----  
GTAGGAAATGGCAATATCACGCTCCCTTGCAGAATAAAACAAATTGTAAACATGTGGCAGGAAGTAGGAAAAG  
CAATGTATGCCCCCTCCCATTCAGGAGGACAAATTAGATGTTTCATCAAAT---  
ATTACAGGGTTGCTATTAAACAAGAGATGGTGGT-----  
-----  
-----  
AACCAATCAGAGCAACATC---  
ACCACCGAGACCTTCAGACCAGGAGGAGGAGATATGAGGGACAATTGGAGAAGTGAACATATATAAATATAAAG  
TGGTAAAAATTGAACCATTA---GGAATAGCACCCACCAAGGCAAAGAGAAGAGTGGTG-----  
-----CAGAGAGAAAAAAGAGCA---GTGGGAATGATAGGAGCT-----  
ATGTTCCCTTGGGTTCTTGGGAGCA---GCAGGAAGCACTATG---GGCGCAGCGTCA---  
ATAACGCTGACGGTACAG---GCCAGGCAA---TTGTTG---TCTGGTATAGTGCAACAGCAGAGT---  
AATCTG---CTGAGA---GCTATTGAGGCGCAACAGCATATGTTGCAACTCACAGTCTGGGGCATC  
>KP109514..1  
TTCTACTGTAATACAACACAGCTATTTAATAATACTTGGCTTACTTGAAGGCCAATGCAAGTGATCCTGAAA  
AAAAT-----  
-----  
AACACAAAAAATATCACACTCCCATGCAGAATAAAACAAATTATAAACATGTGGCAGGAAGTAGGAAAAGCAA  
TGTATGCCCCCTCCCATCGCAGGACAAATTAAATGTGTATCAAAT---  
ATTACAGGGTTACTATTAAACAAGAGATGGGGGTGAGGACAATAACACT-----  
-----  
-----  
AACGGTAACGAGACCTTCAGACCTGGAGGAGGAGATATGAGGGACAATTGGAGGAGTGAATTATATAAATATA  
AAGTAGTAAAAATTGAACCATTA---GGAATAGCACCCACTAAGGCAAAGAGAAGAGTGGTG-----  
-----CAGAGAGAAAAAAGAGCA---GCA-----CTAGGAGCT-----  
---ATGTTCCCTTGGGTTCTTGGGAATG---GCAGGAAGCACTATG---GGCGCAGCGTCA---  
ATAACGCTGACGGCACAG---GCCAGACAA---TTGTTG---TCTGGTATAGTGCAACAGCAGAAC---  
AATCTG---CTGAGG---GCTATTGAGGCGCAACAACATTTGTTGCAACTCACAGTCTGGGGCATC  
>EU578539..1  
TTCTACTGTAATGCAACACAACCTGTTTAATAGTACTTGGCCCATTAACGGTACTTGGGAAGGATCA-----  
-----  
-----

AATAATACTAATGTCACACTACCATGCAGAATAAAACAAATTATAAACATGTGGCAGAGAGTAGGCAAAGCAA  
TGTATGCCCCCTCCCATCAGAGGACAAATTAGATGTTTCATCAAAT---  
ATCACAGGGCTGCTATTAACAAGAGATGGTGGTGGTAGTAACCAA-----  
-----  
-----  
AGCAACGAGACCTTTAGACCTGGAGGAGGAGACATGAAAGACAATTGGAGAAGTGAATTATATAAGTATAAAG  
TAGTAAGAATTAAACCATTA---GGAGTAGCCCCCACCAGGCAAAGAGAAGAGTGGTG-----  
-----CAGAGAGAAAAAAGAGCA--GTGGGAACAATAGGAGCT-----  
ATGTTTCCTTGGGTTCTTGGGAGCA---GCAGGAAGCACTATG---GGCGCAGCGTCA---  
GTGACGCTGACGGTACAG---GCCAGACAA---TTATTG---TCTGGTATAGTGCAACAGCAGAAC---  
AATTTG---CTGAGG---GCTATTGAGGCGCAACAGCATCTGTTGCAACTTACGGTCTGGGGCATC  
>HQ217760..1  
TTCTATTGTAATACAACAGAGCTGTTTAATAGTACTTGGGATGTTAATAGTACTTTGAATGTTAATAATACTT  
GGAATAAT-----  
-----ACTGAA-----  
GGAGCAAGTGGCAATATCACACTCCCATGCAGAATAAAACAAATTATAAATATGTGGCAGAAAGTAGGCAAGG  
CAATGTATGCCCCCTCCCATCAGAGGACAAATTAGATGTACATCAAAG---  
ATCACAGGGCTGCTATTAACAAGAGATGGT---TATAATAATAAT-----  
-----  
-----  
AACAACACCGAGACTTTCAGACCTGGAGGAGGAAATATGAAGGACAATTGGAGAAGTGAGTTATATAAGTATA  
AAGTAGTAAAAATTGAACCATTA---GGAGTAGCACCCACCATGGCAAGGAGGAGAGTGGTG-----  
-----CAGAGAGAAAAAAGAGCA--GTGGGAACAATAGGAGCT-----  
---ATGTTTCCTTGGGTTCTTGGGAGCA---GCAGGAAGCACTATG---GGCGCAGCGTCA---  
CTGACGCTGACGGTACAG---GCCAGACTA---TTATTG---TCTGGTATAGTGCAACAGCAGAAC---  
AATCTG---CTGAGG---GCTATTGAGGCGCAACAGCATCTGTTGCAACTCACGGTCTGGGGCATC  
>AF277071..1  
TTCTACTGTAATTCAACACAGCTGTTTAATAGTACTTGGGAATATTAATGATACTAGGAATGAT-----  
-----  
-----  
ACTACAGGGAATATCACACTCCCATGCAGAATAAGACAAATTGTGAACAGGTGGCAGGAAGTAGGCAAAGCAA  
TGTATGCCCCCTCCCATCAGAGGACAAATTAGCTGTTTCATCAAAT---  
ATTACAGGGGTGCTATTAACAAGAGATGGTGGTAATCACACGAGC-----  
-----  
-----  
GAAACTGAGATCTTCAGACCTGGAGGAGGAGATATGAGGGACAATTGGAGAAGTGAATTATATAAATATAAAG  
TAGTAAAAATTGAACCATTA---GGAAAAGCACCCACCAAGGCAAGGAGAAGAGTGGTG-----  
-----CAAAGAGAAAAAAGAGCA--GTGACA--ATGGGAGCT-----  
ATGTTTCCTTGGGTTCTTAGGAGCA---GCAGGAAGCACTATG---GGCGCAGCATCC---  
ATGACGCTGACGGTACAG---GCCAGGCTA---TTATTG---CCTGGTATAGTGCAACAGCAGAGC---  
AATCTG---CTGAGG---GCTATCGAGGCGCAACAACATCTGTTGCAACTCACAGTCTGGGGCATC  
>EF593267..1  
TTCTACTGTAATACAACAAAGCTGTTTAATAGTACTTGGCATGCTAATGGCACTCGGAATGATACTGGAGGG-  
-----  
-----  
TCAAATGACACTATCATACTACCATGCAGAATAAAACAAATTATAAACATGTGGCAGAAAGTAGGCAAAGCAA  
TCTATGCCCCCTCCCATCAGAGGACAAATTAGATGTGAATCAAAG---  
ATCACAGGGCTGCTATTAACAAGAGATGGTGGTGATGATAACAGA-----  
-----  
-----  
ACCACCGAGATCTTCAGACCTGGAGGAGGAGATATGAGGGACAATTGGAGAAGTGAATTATATAAATATAAAG  
TAGTAAAAATTGAACCATTA---GGAATAGCACCCACCAAGGCAAGGAGAAGAGTGGTG-----  
-----CAGAGAGAAAAAAGAGCA--GTGGGA--ATAGGAGCT-----  
GTGTTTCCTTGGGTTCTTGGGAGCA---GCAGGAAGCACTATG---GGCGCAGCGTCA---  
ATGACGCTGACGGTACAG---GCCAGACTA---TTATTG---TCTGGTATAGTGCAACAGCAGAAC---  
AATTTG---CTGCAG---GCTATTGAGGCGCAACAGCATCTGTTGCAACTCACGGTCTGGGGCATC  
>DQ853436..1  
TTCTACTGTAATTCAACACGATTGTTTAGTAGTAAGTGGCATGCTAATGATAGTTGGAGTAGTAGTACTTGGGA  
ACGATACT-----  
-----GGA---

GAGTCAAATGACACTATCACACTCCCATGTAGAATAAAACAAATTATAAACATGTGGCAGGAAGTAGGAAAAG  
CAATGTATGCCCCCTCCCATCAAAGGACAAATTCAATGTTTCATCAAAT---  
ATTACAGGGCTAATATTAACAAGAGATGGTGGTGCAAACACGAAC-----  
-----  
-----  
ACGAGCGAGGAGGTCTTCAGACCTGCAGGAGGAAATATGGGGGACAATTGGAGAAGTGAATTATATAAATATA  
AAGTAGTAAAAATTGAACCAATA---GGAATAGCACCCACCAAGGCAAAAAGAAGAGTGGTG-----  
-----CAGAGAGAAAAAAGAGCA---GTGACA---CTGGGAGCT-----  
---GTGTTCCCTTGGGTTCTTGGGAGCA---GCAGGAAGCACTATG---GGCGCAGCGTCA---  
ATAACGCTGACGGTACAG---GCCAGACAA---TTATTG---TCTGGTATAGTGCAAGCAGCAGAAC---  
AATCTG---CTGAGG---GCTATTGAGGCGCAACAACATCTGTTGCAACTCACAGTCTGGGGCATC  
>KT124806..1  
TTCTACTGTGATACAACAGAACTGTTTAATAGTACTTGGAGTATTAATGGTACTAGGAATACTACTGAAGGGT  
CA-----  
-----  
AATAGCACAGACATCACACTCCAATGTAGAATAAAACAAATTATAAACATGTGGCAGGAAGTAGGGAAAGCAA  
TGTATGCCCCCTCCCATTAGAGGACAAATTAGATGTTTCATCAAAT---  
ATTACAGGGCTGCTATTAACAAGAGATGGTGGTAGCGGGAGTGAGACT-----  
-----  
-----  
AAAAACGAGACTGAAACCTTCAGACCTGGAGGAGGAAATATGAAGGATAATTGGAGAAGTGAATTATATCAAT  
ATAAAGTAGTAAAAATTGAACCATTA---GGAGTAGCACCCACCAGGGCAAAGAGAAGAGTGGTG-----  
-----CAGAGAGAAAAAAGAGCA---GTCACA---CTAGGAGCT---  
-----GTGTTCCCTTGGTTTCTTGGGAGCA---GCAGGAAGCACTATG---GGCGCAGCGTCA---  
ATAACGCTGACGGTACAG---GCCAGACAA---TTATTG---TCTGGAATAGTGCAACAGCAAAGC---  
AATCTG---CTGAGA---GCTATTGAGGCGCAACAGCATCTGTTGCAACTCACAGTCTGGGGCATC  
>EF593290..1  
TTTTACTGTGATACAACAGAGCTGTTTAATAGTACTTGAATAATACTGATAGTACTCGGAATGATACT-----  
-----  
-----  
GAGTCAGACAAAATCACCTCCAATGTAGAATAAAACAAATTATAAACATGTGGCAGGAAGTAGGAAAAGCAA  
TGTATGCCCCCTCCCATCCAAGGACAAATTCAATGTAACCTCAAGT---  
ATTACAGGGCTACTATTAACAAGAGATGGTGGGAACAACTCCACT-----  
-----  
-----  
AATTCACCGAGATATTCAGACCTGGAGGAGGAGACATGAGGGATAATTGGAGAAGTGAATTATATAAATATA  
AAGTAGTAAAAATTGAACCATTA---GGAGTGGCACCCACCAAGGCAAAGCGAAGAGTGGTA-----  
-----CAGAGAGAAAAAAGAGCA---ATAACG---ATGGGAGCT-----  
---ATGTTCCCTTGGGTTCTTGGGAGCA---GCAGGAAGCACTATG---GGCGCAGCGTCA---  
ATAGCGCTGACGGCACAG---GCCAGACTA---TTATTG---TCTGGTATAGTGCAACAGCAGAAC---  
AATCTG---CTGAGA---GCTATTGAGGCGCAACAGCATATGTTGCAACTCACAGTCTGGGGCATC  
>JX863967..2  
TTCTACTGTAATACAACACCACTGTTTAATAGCACTTGAATGAACTCAACTGTTTAATAGTACTTGAATG  
AACTGAG-----  
-----  
GCAAATGGAACAATTACACTCCCATGCAGAATAAAACAAATTATAAACATGTGGCAGGAAGTAGGAAAAGCAA  
TGTATGCCCCCTCCCATCGAAGGACAAATTTACTGTTCTTCAAAC---  
ATTACAGGGCTACTGTTATTAAGGGATGGTGGTAATACCACAAAC-----  
-----  
-----  
GGGACTGAGATCTTCAGACCTGGAGGAGGAGACATGAGGGACAATTGGAGAAGTGAATTATATAAATATAAAG  
TAGTAAAAATTGAACCATTA---GGAGTAGCACCCACTAGGGCAAAGAGAAGAGTGGTG-----  
-----CAGAGAGAAAAAAGAGCA---GTGGGA---ATAGGAGCT-----  
ATGTTCCCTTGGGTTCTTGGGAATG---GCAGGAAGCACTATG---GGCGCAGCGTCA---  
CTAACGCTGACGGTACAG---GCCAGACAA---TTGTTG---TCTGGTATAGTGCAACAGCAGAAAT---  
AATTTG---CTGAGA---GCTATTGAGGCGCAACAGCACCTGTTGCAACTCACAGTCTGGGGCATC  
>KT124764..2  
TTCTACTGTAATACCACACAACTGTTTAATAGTACTTGGTATGCAAACAATACAAATAGTACTGAAGGGGGA-

AACAGTGGGAATATCACACTCCCATGCAGAATAAAACAATTTATAAACATGTGGCAGGAAGTAGGAAAAGCAA  
TGTATGCCCCCTCCCATCAGTGGACAGATTAAATGTACATCAAAT ---  
ATTACAGGGCTGCTATTAACAAGAGATGGTGGTCAAGGCAATCAGACC-----  
-----  
-----  
AACAAACCAGACTGAGATCTTCAGACCTGTAGGAGGAGATATGAAGGACAATTGGAGAAGTGAATTATATAAAT  
ATAAAGTAGTAAGAATTGAACCATTA --- GGAATAGCACCCACCAGGGCAAAAAGGAGAGTGGTG-----  
-----CAGAGAGAAAAAAGAGCA---GTGGGA---ATAGGAGCG---  
-----TTGTTTCCTTGGTTTCTTGGGAGCA---GCAGGAAGCACTATG---GGCGCAGCGTCA---  
ATGACGCTGACGGTACAG---GCCAGACTA---TTATTG---TCTGGTATAGTGCAACAGCAGAAC---  
AATCTG---CTGAGA---GCTATTGAGGCGCAACAGCATCTGTTGCAACTCACAGTCTGGGGCATC  
>KT124814..1  
TTCTACTGTAATACAACACCATTATTTAATAGTACTTGGAAATAATACTAGAAAATATCAGTGGTCTTGAAGGGT  
CAAAG-----  
-----  
GACAAATGGAAATATCACCTCCAATGCAGAATAAAACAAATTATAAACATGTGGCAGGAAGTAGGAAAAGCAA  
TGTATGCCCCCTCCCATCAGAGGACAAATTCATGCTCATCAAAT ---  
ATTACAGGACTCCTATTAACAAGAGATGGTGGTACTAATGTTACT-----  
-----  
-----  
GATAACACCACTGAGATCTTCAGACCTGGAGGAGAAGATATGAGGGACAATTGGAGAAGTGAATTATATAAAT  
ATAAAGTAGTACAAATTGAACCATTA --- GGAGTAGCACCCACCAAGGCAAGGAGAAGAGTGGTG-----  
-----CAGAGAGAAAAAAGAGCA---GTGGGA---ATAGGAGCT---  
-----TTGTTTCCTTGGGTTCTTGGGAGCA---GCAGGAAGCACTATG---GGCGCAGCGTCA---  
GTGACGCTGACGGTACAA---GCCAGACAA---TTATTG---TCTGGTATAGTGCAACAGCAGAAC---  
AATCTG---CTGAGG---GCTATTGAGGCGCAACAGCATATGTTGCAACTCACAGTCTGGGGCATC  
>EU578104..1  
TTCTACTGTAACACAGCACAACTGTTTAATACTATTTGGAATAATACTTGAATAGTAATGGGAATGATACTG  
AA-----  
-----  
GGGGATAATAAAACAATCATACTCCCGTGCAGAATAAAACAAATTGTAAACAGGTGGCAGGAAGTAGGAAAAG  
CAATGTATGCCCCCTCCCATCAGCGGAATCATTAAGTGTATCAAAC ---  
ATTACGGGGCTGCTATTAACAAGAGATGGTGGAAATAACAGTAGT-----  
-----  
-----  
ACCAACGAGACCTTCAGACCTGGAGGAGGAGATATGAGGGACAATTGGAGAAGTGAAGTCTATAAATATAAAG  
TAGTAAAAATTGAGCCATTA --- GGAGTAGCACCCACCAAGGCAAAAAGAAGAGTGGTG-----  
-----CAGAGAGAAAAAAGAGCA---GTGGGAACGTTAGGAGCG-----  
ATGTTCCCTTGGGTTCTTGGGAGCA---GCAGGAAGCACTATG---GGCGCAGCGTCA---  
GTGACGCTGACGGTACAG---GCCAGACAA---TTATTG---TCTGGTATAGTGCAACAGCAGAAT---  
AATCTG---TTGAAG---GCTATTGAGGCGCAACAGCATCTGTTGCAGCTCACAGTCTGGGGCATC  
>JQ403105..1  
TTCTACTGTAATACAACAAAAGTGTTTAATAGTACTTGGTATGAAAATGGTACAAATAGTACTTGGTATGCAA  
ATGGTACAAAT-----  
-----AGTACTGGAGAG-----  
GGAAACAGTGATATTATCACAATCCCATGCAGAATAAAACAATTTATAAACATGTGGCAGGAAGTAGGAAAAG  
CAATGTATGCCCCCTCCCATCAGTGGACAGATTAGATGTTTCATCAAAC ---  
ATTACAGGGCTGCTATTAACAAGAGATGGTGGTGGAGGGCAATCAAACC-----  
-----  
-----  
AACAAACCAGGAGATCTTCAGACCTGTAGGAGGAGATATGAAAAACAATTGGAGAAGTGAATTATATAAATATA  
AAGTAGTAAGAATTGAACCATTA --- GGAATAGCACCCACCAAGGCAAAAAGGAGAGTGGTG-----  
-----CAGAGAGAAAAAAGAGCA---GTGGGA---ATAGGAGCG-----  
---TTGTTCCCTTGGGTTCTTGGGAGCA---GCAGGAAGCACTATG---GGCGCAGCGTCA---  
ATGACGCTGACGGTACAG---GCCAGACTA---TTATTG---TCTGGTATAGTGCAACAGCAGAAC---  
AATCTG---CTGAGA---GCTATTGAGGCGCAACAGCATCTGTTGCAACTCACAGTCTGGGGCATC  
>EU578230..2  
TTCTACTGTAATACATCAGGACTGTTTAATGGTACTTGGAAATGGTACTAGCACTTGGAAATGATACTGCAAAT  
AT-----  
-----

ACTGCAAATGAGAATATCACACTCCCATGCAGAATAAAACAAATTATAAACATGTGGCAGGAAGTAGGAAAAG  
 CAATGTATGCCCCCTCCCATCAGAGGACAAATTAAGTGTTCATCAAAA---  
 ATTACAGGGCTGCTATTAAACAAGAGATGGTGGCCATCACAACGGCAGC-----  
 -----  
 -----  
 AACACGACACAGAAATCTTCAGACCTGGAGGAGGAGATATGAGGGACAATTGGAGAAGTGAATTATATAAAT  
 ATAAAGTAGTAAAAATTGAACCATTA---GGAGTAGCACCCACCAGGGCAAAAAGAAGAGTGGTG-----  
 -----CAGAGAGAAAAAAGAGCA---GTGGGA---ATGGGAGCT---  
 -----TTGTTCCCTTGGGTTCTTGGGAGCA---GCAGGAAGCACTATG---GGCGCAGCGTCA---  
 CTAACGCTGACGGTACAG---GCCAGACAA---TTATTG---TCTGGTATAGTGCAACAGCAGAAC---  
 AATCTG---CTGAGG---GCTATTGATGCGCAACAACATCTGTTGCAACTCACAGTCTGGGGCATT  
 >FJ469754..1  
 TTCTACTGTAATACAACAAGACTGTTTAATAGTAATTGGAATAGCAGTACTTGAATAACACTGAAGGGTTAA  
 ATACCACT-----  
 -----AACCTT-----  
 GGAGAAAATGACACAATCATACTCCCATGCAGAATAAAACAGATTATAAACACGTGGCAGAAAGTAGGAAAAG  
 CAATATATGCCCCCTCCCATCGAAGGACAAATTAAATGTATATCAAAAT---  
 ATTACAGGGCTGCTATTATTAAGAGATGGTGGTATAAAATGTGAGT-----  
 -----  
 -----  
 GAGACCAACGAAACCTTCAGACCTGGAGGAGGAGATATGAAGGATATTTGGAGAAGTGAATTATATAAATATA  
 AAGTAGTAAAAATTGAACCATTA---GGAATAGCACCCAACAAGGCAAAGAGAAGAGTGGTG-----  
 -----CAGAGAGAAAAAAGAGCA---GTGGGA---ATAGGAGCT-----  
 ---GTGTTCCCTTGGGTTCTTGGGAGCA---GCCGGAAGCACTATG---GGCGCAGCGTCA---  
 ATGACGCTGACGGTACAG---GCCAGACAA---TTATTG---TCTGGTATAGTGCAACAGCAAAGC---  
 AATTTG---CTGAGG---GCTATTGAGGCTCAACAACATCTGTTGAAACTCACAGTCTGGGGCATC  
 >FJ469757..2  
 TTCTACTGTAATTCCTCACAACCTGTTTCAGTAGTACTTGAATAGGACTAACGGGACTTGAATGATGTTGAAG  
 GGTAAAT-----  
 -----TAACT-----  
 AATGGAAATGACACAATCACACTCCCATGCAGAATAAAACAATATATAAACATGTGGCAGGAAGTAGGAAAAG  
 CAATGTATGCCCCCTCCCATCAGAGGGCAACTTAATTGTTTCATCAAAG---  
 ATTACAGGGTTGCTATTAAACAAGAGATGGTGTGAACGACACCGAC-----  
 -----  
 -----  
 AAAAAATGAGACTTTTCAGACCTCAAGGAGGGGATATGAAGGACAATTGGAGAAGTGAATTATATAAATATAAAG  
 TAGTAAAAATTGAACCGTTA---GGGATAGCACCCACCAGGGCAAAGAGAAGAGTGGTG-----  
 -----CAAAGAGAAAAAAGAGCA---GTGGGA---TTAGGAGCT-----  
 ATGTTCCCTTGGGTTCTTGGGAGCA---GCAGGAAGCACTATG---GGCGCAGCATCA---  
 ATAACGCTGACGGTACAG---GCCAGACAA---TTACTG---TCTGGTATAGTGCAACAGCAGAAC---  
 AATCTG---CTGAGG---GCTATTGAGGCGCAACACCATCTGTTGCAACTCACAGTCTGGGGCATC  
 >GU330538..2  
 TTCTACTGTAATACAACAAAACCTGTTTTATAGTAATTGGACTATTAATGGGACTATTGTGAGTAATTGGACAT  
 ATGAAAATGAC-----  
 -----ACT-----  
 GGAACAAATGACACTATCATACTCCCATGTAGAATAAAACAAATTATAAACATGTGGCAGGAAGTAGGAAAAG  
 CAATGTATGCCCCCTCCCATCAAAGGACCAATTACATGTAACCTCAAGT---  
 ATTACAGGGTTGCTATTAAACAAGAGATGGTGGTATTAACAGGACCAAT-----  
 -----  
 -----  
 AATGAGACCGAGATCTTCAGACCTGTAGGGGGAGATATGAGGGACAATTGGAGAAGTGAATTATATAAATATA  
 AAGTAGTAGAAATTCAACCATTA---GGAATAGCACCCACCAAGGCAAAGAGAAGAGTGGTG-----  
 -----CAGAGAGAAAAAGAGAGCG---GTAACA---CTAGGAGCT-----  
 ---ATGTTCCCTTGGGTTCTTGGGAGCA---GCAGGAAGCACTATG---GGCGCAGCGTCA---  
 ATGGCGCTGACGGTACAG---GCCAGACAA---TTATTG---TCTGGTATAGTGCAACAGCAGAAC---  
 AATCTG---CTGAGG---GCTATTGAGGCGCAACAGCACATGTTGCAACTCACAGTCTGGGGCATT  
 >GU330550..3  
 TTCTACTGTAATTTAACACAACCTGTTTAATAGTACTTGAATATTACTGACAGATTAAATAATAATGAACTC  
 AA-----  
 -----

GGAAATGACACAACAATTACCTCCCGTGCAGAATAAAACAAATTATAAACATGTGGCAAGAAGTAGGAAAAG  
CAATGTATGCCCCCTCCCATCAGGGGGATAATTAGATGTTTCATCAAAT---  
ATTACAGGGCTGCTATTAACAAGAGATGGTGGTACAAATACCACTGAC-----  
-----  
AATGACACTGAGGTCTTCAGACCTGGAGGAGGAGACATGAGGGACAATTGGAGAAGTGAATTGTATAAATACA  
AAGTAATACAAATTGAACCATTA---GGAGTAGCACCCACTAAGGCAAAGAGAAGAGTGGTG-----  
-----CAGAGAGAAAAAAGAGCA---GTGGGA---ATAGGAGCT-----  
---GTGTTCCCTTGGGTTCTTGGGAGCA---GCAGGAAGCACTATG---GGCGCAGCGTCA---  
GTGACGCTGACGGTACAG---GCCAGACAA---TTATTG---TCTGGTATAGTGCAACAGCAGAGC---  
AATCTG---CTGAGG---GCTATTGAGGCGCATCAACATCTGTTGCAACTCACAGTCTGGGGCATC  
>KT124781..1  
TTCTACTGTAATTCAACACCACTGTTTAATAGTGAATGGTCAGATAATAATACTTGGAAATAGTGCTGAAGAA-  
-----  
-----  
GGAAATGCCACAATCACACTCCAATGCAGAATAAAACAAATTGTAAACATGTGGCAGGAAGTAGGAAGAGCAA  
TGTATGCACCTCCCATCAAAGGAGTAATTAGCTGTACATCAAAT---  
ATTACAGGACTGATATTAACAAGAGATCATAGTAAGGATAATGTA-----  
-----  
ACCTTCACCTTCAGACCTGGAGGAGGAAATATGAAGGACAATTGGAGAAGTGAATTATATAAATATAAAGTAG  
TAAAAATTGAACCATTA---GGAGTAGCACCCACTACAGCCAAGAGAAGAGTGGTG-----  
-----CAGAGAGAAAGAAGAGCA---GTGGGA---ATAGGAGCT-----  
GTGTTCCCTTGGGTTCTTGGGAGCA---GCAGGAAGCACTATG---GGCGCAGCGTCA---  
ATAACGCTGACGGTACAG---GCCAGACTA---TTATTG---TCTGGTATAGTGCAACAGCAGAAC---  
AATCTG---CTGAGA---GCTATTGAGGCGCAACAGCACCTGTTGCAACTCACAGTCTGGGGCATC  
>MH060965..1  
TTCTACTGTAATTCAACACAACCTGTTTAATAGTACTTGGTTTACTGAGGATAATGCGACCGGCACTACC----  
-----  
-----  
GGAAATGAAACAATCATACTCCCATGCAGAATAAAACAAATTATAAACATGTGGCAGGAAGTAGGAAGAGCAA  
TGTATGCCCCCTCCCATCAGAGGACAAATTAAGTGTACATCAAAT---  
ATTACAGGACTGATATTAACAAGAGATGGTGGTAATAACAATCACACT-----  
-----  
AATGAGAACGAAACCTTCAGACCTGGAGGAGGAGATATGAGGGACAATTGGAGAAGTGAATTATATAAATATA  
AAGTAGTAAAAGTTGAACCATTA---GGAATAGCACCCCTCTAAGGCAAGGAGAAGAGTGGTG-----  
-----CAGAGAGAAAAAAGAGCA---GCAGGA---CTAGGAGCT-----  
---TTGCTCCTTGGGTTCTTGGGAGCA---GCAGGAAGCACTATG---GGCGCAGCGTCA---  
CTGACGCTGACGGTACAG---GCCAGGCAA---TTATTG---TCTGGTATAGTGCAACAGCAAAAC---  
AATTTG---CTGAGG---GCTATTGAGGCGCAACAGCATATGTTGCAACTCACAGTCTGGGGCATT  
>FJ469731..1  
TTCTACTGCAATTCAACACCACTGTTTAATAAGACTTGAATAAGAATGATATTAGGAATAATACTACTGGGA  
AT-----  
-----  
GATAATGACACTATCACACTCCAATGCAGAATAAAACAAATTATAAACATGTGGCAGGAAGTAGGAAAAGCAA  
TGTATGCCCCCTCCCATTAGAGGACTAATCAGCTGTTTCATCAAAT---  
ATTACAGGGCTACTATTAACAAGAGATGGAGGTCATAACACAAGT-----  
-----  
AGGGCAAATGAGACCTTCAGGCCTGGAGGAGGAAATATGAAGGACAATTGGAGAAGTGAATTATATAAATATA  
AAGTAGTAAAAATTGAACCATTA---GGAGTAGCACCCACCAGGGCAAAGAGAAGAGTGGTG-----  
-----CAGAGAGAAAAAAGAGCA---GTGGGA---CTAGGAGCT-----  
---TTATTCCTTGGGTTCTTGGGAGCA---GCAGGAAGCACTATG---GGCGCAGCGTCG---  
ATAACGCTGACGGTACAG---GCCAGACAA---TTATTG---TCTGGTATAGTGCAACAGCAGAAC---  
AATTTG---CTGAGA---GCTATTGAGGCGCAACAGCATCTGTTGCAGCTCACAGTCTGGGGCATC  
>HQ216397..1  
TTCTACTGTAATTCAACACTGCTGTTTAATAGTAGTTGGAAGAATGAGACCAATGCTGACGGGACAGAG----  
-----  
-----

GGCAATGATACTATTACACTCCAATGCAGAATAAAACAAATCATAAACAGATGGCAGGAAGTAGGAAAAGCAA  
TGTATGCCCCCTCCCATCGCAGGACAAATTAAGTGTTCATCAAAA---  
ATTACAGGATTGCTATTAACAAGAGATGGTGGTAATCATAACGCC-----  
-----  
-----  
AACACCGAGACCTTCAGACCTGGAGGAGGAGATATGAGAGACAATTGGAGAAGTGAATTATATAAATACAAAG  
TAGTAAAAATTGAGCCATTA---GGAATAGCGCCACCAAGGCAAGGAGAAGAGTGGTG-----  
-----CAAAGAGAAAGAAGAGCA--GTGGGAACATTTGGAGCT-----  
TTGTTTCCTTGGGTTCTTGGGAGCA---GCAGGAAGCACTATG---GGCGCAGCATCA---  
GTGACGCTGACGGTACAA---GCCAGACAA---TTATTG---TCTGGTATAGTGCAACAGCAGAAC---  
AATCTG---CTGAAG---GCTATTGAGGCGCAACAACAGCTGTTGCAACTCACAGTCTGGGGCATC  
>KT124758..1  
TTCTACTGCAACACAACAACACTGTTTAATAGTACTTGGAAATGATACACAACCTGTCTAATAGCACTTGGAAATA  
ATACAAGA-----  
-----  
GGGATAAATGACACTATCACACTCCAATGTAAAATAAAACAAATCATAAACATGTGGCAGAAGGTAGGAAAAG  
CAATGTATGCCCCCTCCCATCAGTGGACAAATTAGATGTTCATCAAAAT---  
ATTACAGGGCTGATATTAACAAGAGATGGTGGTAATACTGACAACACC-----  
-----  
-----  
ACCCAGCCCGAGATCTTCAGACCTCAAGGGGGAAATATGAAGGACAATTGGAGAAGTGAATTATATAAATATA  
AGGTAGTAGCAATTGAACCATTA---GGAATAGCACCCACCAAGGCAAAGAGAAGAGTGGTG-----  
-----CAGAGAGACAAAAGAGCA--GTGGGA---ATGGGAGCT-----  
---CTGTTTCCTTGGGTTCTTGGGAGCA--GCAGGAAGCACTATG---GGCGCAGCGTCA---  
ATAACGCTGACGGCACAG---GCCAGACAA---TTATTG---TCTGGTATAGTGCAACAGCAGAAC---  
AATTTG---CTGAGG---GCTATTGAGGCGCAACAGCATCTGTTGCAGCTCACAGTCTGGGGCATT  
>JX863968..1  
TTCTATTGTAATTCAACATCACTGTTTAATAGTACTTGGAGGACAAATGAAACTGCAGACTTAAAT-----  
-----  
-----  
ACTACAGAAATTATCACACTCCCATGCAGAATAAAACAAATTATAAACATGTGGCAAGAAGTAGGAAAAGCAA  
TATATGCCCCCTCCCATCGAAGGAAACATTACATGTGTATCAAAAT---  
ATTACAGGGCTGCTATTAACAAGAGATGGTGGTAACAATAATCAGAGTAAT-----  
-----  
-----  
GAGACGACTGAGATCTTTAGACCTGGAGGAGGAGATATGAGGGACAATTGGAGAAGTGAATTATATAAATATA  
AAGTAGTAAAAATTGAACCACTA---GGAGTAGCACCCACCAAGGCAAAGAGAAGAGTGGTG-----  
-----CAGAGAGAAAAAGAGCA--GCGGGA---CTAGGAGCT-----  
---GTGTTTCTTGGGTTCTTGGGAGCA--GCAGGAAGCACTATG---GGCGCAGCGTCA---  
ATAACGCTGACGGCACAG---GCCAGGCAA---TTATTG---TCTGGTATAGTGCAACAGCAAAAT---  
AACTTG---CTGAGA---GCTATTGAGGCGCAACAACATCTGTTGCAACTCACAGTCTGGGGCATC  
>EF593190..1  
TTCTACTGTAATACAACACGATTGTTTAATAGTACTTGGGAGGCTAATGGTAATTGGACTGGAAGTGAAGGAA  
AT-----  
-----  
GATAATGGCACAGTCACTTCCATGCAGAATAAAACAAATTATAAACATGTGGCAACAAGTAGGAAAAGCAA  
TGTATGCCCCCTCCCATTCAGGAAAGATTACATGTAAGTCAAGT---  
ATTACAGGAATACTATTAACAAGAGATGGAGGTATCACTAACAACACC-----  
-----  
-----  
GAGACCCACACCGAGACCTTCAGACCTGGAGGAGGAGATATGAGGGACAATTGGAGAAGTGAATTATATAAAT  
ATAAAGTAGTAAAAATTCAACCATTA---GGAGTAGCACCCACCAAGGCAAGAAGAAGAGTGGTG-----  
-----CAGAGAGAAAAAGAGCA---GTGGGA---TTAGGAGCT---  
-----ATGTTTCCTTGGGTTCTTGGGAGCA---GCAGGAAGCACTATG---GGCGCAGCGTCA---  
GTAACGCTGACGGTACAG---GCCAGACAA---TTATTG---TCTGGTATAGTGCAACAGCAGAAC---  
AACTTG---CTGAGG---GCTATTGAGGCGCAACAGCATCTGTTGCAACTCACAGTCTGGGGCATC  
>MH060681..1  
TTCTACTGTAATTCAACACCACTATTTAATAGTACACACAACAGTACTACTACAAGGTCAAAT-----  
-----  
-----

GAAACTGAACCAATCATACTCCAATGTAGAATAAAACAAATTGTAAACATGTGGCAGGAGGTAGGAAAAGCAA  
TGTATGCCCCCTCCCATTCGAGGACAAATTAAGTGTACATCAAAT---  
ATTACAGGGCTACTGTTAACAAGAGATGGTGGCAATAATCAGAGTAGAGAA-----  
-----  
-----  
AATAATACCGAGATCTTCAGACCTGGAGGAGGAAATATGAAGGACAATTGGAGAAGTGAATTATATAAATATA  
AAGTAGTAAAAGTTGAACCATTA---GGAGTAGCACCCACCAAGGCAAAAAGAAGAGTGGTG-----  
-----CAAAGAGAAAAAAGAGCA---GTGGGA---TTCGGAGCT-----  
---TTGTTCCCTTGGGTTCTTAGGAGCA---GCAGGAAGCACTATG---GGCGCAGCGTCA---  
ATGACGCTGACGGTACAG---GCCAGACAA---TTATTG---TCTGGTATAGTGCAACAGCAGAAC---  
AATCTG---CTGAGG---GCTATTGAGGCGCAACAACATCTGTTGCAACTCACAGTCTGGGGCATC  
>MH060990..2  
TTCTACTGTAATACAACAAAAGTGTTTAATAGTACTTGGAAATAGTACTGAGAATTTTGGGGAGGG-----  
-----  
-----  
TCAGATAACAATATCACACTCCCATGCAGGATAAAGCAAATTATAAACATGTGGCAGGAAGTAGGAAAAGCAA  
TGTATGCCCCCTCCCATCGCAGGACAAATTAGATGTTTCATCAAAC---  
ATTACAGGGCTGATATTAACAAGAGATGGTGGTAGTCATAATGGTAGT-----  
-----  
-----  
AATAATAGTGAGACCTTCAGACCTGGAGGAGGAGATATGAGGGACAATTGGAGAAGTGAACTTTATAAATATA  
AAGTAGTAAAAATTGAACCATTA---GGAGTAGCACCCACTAAGGCAAAAAGAAGAGTGGTG-----  
-----CAGAGAGAAAAAAGAGCA---GCA-----ATAGGAGCT-----  
---TTGTTCCCTTGGGTTCTTGGGAGCA---GCAGGAAGCACTATG---GGCGCAGCGTCA---  
GTAACGCTGACGGTACAG---GCCAGACTA---TTGTTG---TCTGGTATAGTGCAACAGCAGAGC---  
AATCTG---CTGAAA---GCTATTGAGGCGCAACAGCATCTGTTGCAACTCACAGTCTGGGGCATC  
>DQ410526..1  
TTCTATTGTAATACAACACCACTGTTTAATAATACTTGGTTTAATAGTACTAATAATTTAAATGAAACAAAGG  
AC-----  
-----  
AACAACAACAACACAATCATACTCCAATGCAGAATAAAACAAATTATAAACATGTGGCAGGAAGTAGGAAAAG  
CAATGTATGCCCCCTCCCATCAGGGGAAACATTAGCTGTTTCATCAAAT---  
ATTACAGGACTATTATTAACAAGAGACGGTGGTCATAATGTGAGC-----  
-----  
-----  
AACACGAACGAGACTTTCAGACCTGGAGGAGGAGATATGAGGGACAATTGGAGAAGTGAATTATATAAATATA  
AAGTAGTAAGAATTGAACCATTA---GGAATAGCACCCACCAAGCAAGAGAAGAGTGGTG-----  
-----CAAAGAGAAAAAAGAGCA---GTGGGA---TTAGGAGCT-----  
---GTGTTCAATTGGGTTTCTGGGAGCA---GCAGGAAGCACTATG---GGCGCAGCGTCA---  
ATGACGCTGACGGTACAG---GCCAGACAA---TTATTG---TCTGGTATAGTGCAACAGCAGAAC---  
AATCTG---CTGAGA---GCTATTGAGGCGCAACAGCATCTGTTGCAACTCACAGTCTGGGGCATT  
>EF363127..1  
TTCTACTGTAATACAACAGACTTGTTTACTTGGAAATGGTACTTGGAAATGGTACTGCAGGGGCA-----  
-----  
-----  
GATAACAATACAATCACACTCCAATGCAGAATAAGACAAATTATAAACATGTGGCAGGAAGTAGGAAAAGCAA  
TGTATGCCCCCTCCCATCCCAGGATACCTTAAGTGTTCATCAAAT---  
ATTACAGGACTGCTATTAACAAGGGATGGTGGTCATAACACGAAT-----  
-----  
-----  
ACTACTGAGATCTTCAGACCTGGAGGAGGAGATATGAGGGACAATTGGAGAAGTGAATTATATAAATATAAAG  
TAGTAAAAATTGAACCATTA---GGAATAGCACCCACCAAGGCAAGGAGAAGAGTGGTG-----  
-----CAGAGAGAAAAAAGAGCA---GTGGGA---ATAGGAGCT-----  
GTGTTCCCTTGGGTTCTTGGGAGCA---GCAGGAAGCACTATG---GGCGCAGCGTCA---  
ATAACGCTGACGGTACAG---GCCAGGCTA---TTATTG---TCTGGTATAGTGCAACAGCAAAAC---  
AACTTG---CTGAGA---GCTATTGAGGCGCAACAGCATCTGTTGCAACTCACAGTCTGGGGCATC  
>DQ410205..1  
TTCTACTGTAATACATCACAACCTGTTTAATAGTAATTGGACTTGGCCTGATACTGAAGGGTCAAATGACACTA  
AC-----  
-----

ACTAACGAAAATATCACACTCCCATGCAGAATAAAACAAATTATAAACATGTGGCAGGAGGTAGGAAAAGCAA  
 TGTATGCCCCCTCCCATCAGAGGACAAATTAGCTGTAAATCAAAT---  
 ATTACAGGACTGCTATTGACAAGAGATGGTGGTCAGGACGAGAAC-----  
 -----  
 -----  
 GGGACCGAGACCTTCAGACCTGGAGGAGGAGATATGAGGGACAATTGGAGAAGTGAATTATATAAATATAAAG  
 TAGTAAAAATTGAACCATTA---GGAGTAGCACCCACCAAGGCAAAGAGAAGAGTGGTG-----  
 -----CAGAGAGAAAAAAGAGCA---TTAGGA---ATAGGAGCC-----  
 GTGTTTCCTTGGGTTCTTGGGAGCA---GCAGGAAGCACTATG---GGCGCAGCGTCA---  
 ATGACGCTGACGGTACAA---GCCAGACTG---CTATTG---TCTGGTATAGTGCAACAGCAGAAC---  
 AATTTG---CTGAGG---GCTATTGAGGCGCAACAGCATCTGTTGCAACTCACAGTCTGGGGCATC  
 >FJ469733..1  
 TTCTACTGTAATTCAACACAACCTGTTTAATAGTACTTGGTATACTAATAATACTATGGAGGGGTACATGGTA  
 AT-----  
 -----  
 GAGACAAATGGCACTATCACTCTCCCATGCAAAATAAGACAAATTGTAAACAAGTGGCAAGAAGTAGGAAAAG  
 CAATGTATGCCCCCTCCCATTAGAGGACTAATTAGATGTTTCATCAAAT---  
 ATTACAGGGCTGCTATTAACAAGAGATGGTGGTCATAATAATAATA-----  
 -----  
 -----  
 AATACTAATGAGACCTTCAGACCTGGAGGAGGAGATATGAGGGACAATTGGAGAAGTGAATTATATAAATACA  
 AAGTAGTAAGAATTGAGCCATTA---GGAGTAGCACCCACCAAGGCACAGAGAAGAGTGGTG-----  
 -----CAAAGAGAAAAAAGAGCA---GTGGGA---CTAGGAGCT-----  
 ---GTGTTTCCTTGGGTTCTTGGGAGCA---GCAGGAAGCACTATG---GGCGCAGCGTCA---  
 ATAACGCTGACGGCACAG---GCCAGACAA---TTATTG---TCTGGTATAGTGCAACAGCAGAAC---  
 AACCTG---CTGAGA---GCTATTGAGGCGCAACAGCATATGTTGCAACTCACAGTCTGGGGCATA  
 >JQ403107..1  
 TTCTACTGTGATACAACACAACCTGTTTAATAGCAGCTGGGAGGGGAATGGTACTAAAGATACTATAGAGTCAA  
 ATGAC-----  
 -----  
 ACTGGAGGAAATATCACACTCCCATGTAGAATAAAACAGATTATAAACATGTGGCAGGAAGTAGGAAAAGCAA  
 TGTATGCCCCCTCCCATCAGTGGACCAATTAGCTGTTTCATCAAAC---  
 ATTACAGGGCTACTATTAACAAGAGATGGGGGTCAATAACAATGACACT-----  
 -----  
 -----  
 AACGGGAACGAGACCTTCAGACCTGGAGGAGGAAATATGAAGGACAATTGGAGAAATGAATTATATAAATATA  
 AAGTAGTAAAAATTGAACCACTA---GGAGTAGCACCCACCAAGGCAAAGAGAAGAGTGGTG-----  
 -----CAGAGAGAAAAAAGAGCA---ATGGGA---CTAGGAGCT-----  
 ---ATGTTTCATTGGGTTCTTGGGAGCA---GCAGGAAGCACTATG---GGCGCAGCGTCA---  
 GTGACGCTGACGGTACAG---GCCAGACAA---TTACTG---TCTGGTATAGTGCGCCAGCAGAAC---  
 AATCTG---CTGAGA---GCTATTGAGGCGCAACAGCATATGTTGCAACTCACAGTCTGGGGCATC  
 >JN024100..1  
 TTCTACTGTAATACAACAAAACCTGTTTAATAGTACTTGAATAGTACTGAGAATGTGGAGGAAGGG-----  
 -----  
 -----  
 CCAGATAACAATATCACACTCCCATGCAGGATAAAGCAAATTATAAACATGTGGCAGGAAGTAGGAAAAGCAA  
 TGTATGCCCCCTCCCATCGCAGGACAAATTAGATGTTTCATCAAAT---  
 ATTACAGGGCTGATATTAACAAGAGATGGTGGTGAGAATAACAAC-----  
 -----  
 -----  
 GAGACCGAGACCTTCAGACCTGGAGGAGGAGATATGAGGGACAATTGGAGAAGTGAACTTTATAAATATAAAG  
 TAGTAAAAATTGAACCATTA---GGAGTAGCACCCACTAAGGCAAAAAGAAGAGTGGTG-----  
 -----CAGAGAGAAAAAAGAGCA---GCA-----ATAGGAGCT-----  
 TTGTTTCCTTGGTTTCTTGGGAGCA---GCAGGAAGCACTATG---GGCGCAGCGTCA---  
 ATAACGCTGACGGTACAG---GCCAGACTA---TTGTTG---TCTGGTATAGTGCAACAGCAGAGC---  
 AATCTG---CTGAAA---GCTATTGAGGCGCAACAGCATCTGTTGCAACTCACAGTCTGGGGCATC  
 >HQ216601..2  
 TTCTACTGTGATACAACACAGCTGTTTAATAGTACTTGAATATTGAGAATGATACGAACAGGTCAAAT----  
 -----  
 -----

GAAAGTGAAACAATTATACTTCCATGCAAAATAAAGCAAATTATAAACCTGTGGCAGGAAGTAGGAAAAGCAA  
TGTATGCCCCCTCCCATCAGAGATCAAATTAGATGCTCATCAAAT---  
ATTACAGGGCTGCTATTAACAAGAGATGGTGGTAATAATACTAGAG-----  
-----  
-----  
AACAATAACGAGACCTTCAGACCTGGAGGAGGAGATATGAGGGACAATTGGAGAAGTGAACCTTTATAAATATA  
AAGTAGTAAAAATTGAACCATTA---GGAATAGCACCCACTACTGCAAAAAGAAGAGTGGTG-----  
-----CAGAGAGAAAAAAGAGCG---GCA-----CTAGGAGCC-----  
---TTGTTCCCTTGGGTTCTTGGGAGCA---GCAGGAAGCACTATG---GGCGCAGCGTCA---  
ATAACGCTGACGGTACAG---GCCAGACTA---TTGTTG---TCTGGTATAGTGCAACAGCAGAAC---  
AATCTG---CTGAAG---GCTATTGAGGCGCAACAGCATCTGTTGCAACTCACAGTCTGGGGCATC  
>HQ216795..1  
TTCTACTGTAACACATCACAGCTGTTTGATAGTACTTGGCTGTTTAATAAGACTGGGGATAATAATACTGAAG  
GG-----  
-----  
TCAAAATGACACTATCATACTTCCATGCAGAATAAAACAAATTATAAACAGGTGGCAGGAAGTAGGAAAGGCCAA  
TGTATGCCCCCTCCCATCGCAGGACAAATTAGATGTCAATCAAAT---  
ATTACAGGGGTGCTACTAACAAGAGATGGGGGTAAGAGTGGGAACGGT-----  
-----  
-----  
ACTAATGAGACCGAAACATTCAGACCTGTTGGAGGAAATATGAAGGACAATTGGAGAAGTGAATTGTATAAAT  
ATAAGGTAGTAAAGATTGAACCATTA---GGAGTAGCACCCACCAAGGCAAAGAGGCTAGTGGTG-----  
-----CAGAGAGAAAAAAGAGCA---GTGACG---CTGGGAGCT---  
-----ATGTTTCATTGGGTTCTTGGGAGCA---GCAGGAAGCACTATG---GGCGCAGCGTCA---  
CTGACGCTGACGGTACAG---GCCAGACAA---TTACTG---TCTGGTATAGTGCAACAGCAGAAC---  
AATCTG---CTGAGA---GCTATTGAGGCGCAACAGCATCTGTTGCAACTCACAGTTTGGGGCATT  
>JX863965..1  
TTCTACTGTAATTACAGCACAACCTGTTTAATAGTACTTGGGATAATACTGCTGGGAATAATACAGCTGGA----  
-----  
-----  
GAAAAATGACACAATCACACTCCCATGCAGAATAAAACAAATTGTAAATAGGTGGCAAGAAGTAGGAAAAGCAA  
TGTACGCCCCCTCCCATCAGCGGACCAATTAAATGTTTCATCAAAT---  
ATTACAGGACTGCTATTAACAAGAGATGGTGGTCAAAATACAACT-----  
-----  
-----  
AATAACACCGAAATTTTCAGACCAGGAGGAGGAGATATGAGGGACAATTGGAGAAGTGAATTATATAAATATA  
AAGTAGTAAAAATTGAACCATTA---GGAGTAGCACCCACTAAGGCAAAGAGAAGAGTGGTG-----  
-----CAGAGAGAAAAAAGAGCA---GTGGGA---ATAGGAGCT-----  
---ATGTTCCCTTGGGTTCTTGGGAGCA---GCAGGAAGCACTATG---GGCGCAGCATCA---  
ATAACGCTGACGGTACAG---GCCAGACAA---TTATTG---TCTGGTATAGTGCAACAGCAGAAC---  
AATCTG---CTGAGA---GCTATTGAGGCGCAACAGCATCTGTTGCAACTCACAGTCTGGGGCATT  
>JF320043..1  
TTTTACTGTAATACAACAAAACCTATTTAATAGCACTTGGGAGCCTAATAATGTAACGTCACTGGT-----  
-----  
-----  
GATAATGACACAATCACACTCCCATGCAGAATAAAACAAATTGTAACTTGTGGCAGGAAGTAGGAAGAGCAA  
TGTATGCCGCTCCCATCAGAGGACTGATCAGATGTTTCATCAAAT---  
ATTACAGGGCTACTATTAACAAGAGATGGTGGTGTGATAACAATCAGACCAAT-----  
-----  
-----  
GTGACTAATAACACAGAAACCTTCAGACCAGGAGGAGGAGATATGAGGGACAATTGGAGAAGTGAATTATATA  
AATATAAAGTAGTAAAAATTGAACCATTA---GGAGTAGCACCCACCAAGGCAAAGAGAAGAGTGGTG-----  
-----CAGAGAGAAAAAAGAGCA---ATGGGA---  
TTCGGAGCT-----TTTTTCCTTGGGTTCTTGGGAGCA---GCAGGAAGCACTATG---  
GGCGCAGCGTCA---ATAACGCTGACGGCACAG---GCCAGACAA---TTATTG---  
TCTGGTATAGTGCAACAGCAAAAC---AATTTG---CTGAGG---  
GCTATTGAGGCGCAACAACACCTGTTGCAACTCACAGTCTGGGGCATC  
>EU577873..1  
TTCTACTGTAATACAACAAAACCTGTTTAATAGTACTTGGAACTACTAGTATTTGGAATAATACTGCAGAGA  
ATAATACTACA-----

-----GGGTCA-----  
AATGAACTGAACCAATCACACTCCCATGCAGAATAAAACAAATTATAAATATGTGGCAGGAAGTAGGAAAAG  
CAATGTATGCCCCCTCCCATTAAGGAAACATTAGCTGTTTCATCAAAT---  
ATTACAGGATTGATATTAACAAGAGATGGTGGTAACGTTAACGGGACC-----  
-----  
-----  
AATGGAAGTGAATCTTTAGACCTGCAGGAGGAAATATGAAGGACAATTGGAGGAGTGAATTATATAAATATA  
AAGTAGTAAAAATTGAGCCATTA---GGAGTAGCACCCACCAAGGCAAAGAGAAGAGTGGTG-----  
-----CAGAGAGAAAAAAGAGCA---GTGGGA---TTCGGAGCT-----  
---GTGTTCCCTTGGGTTCTTGGGAGCA---GCAGGAAGCACTATG---GGCGCAGCGTCG---  
GTGACGCTGACGGTACAG---GCCAGACAA---CTATTG---TCTGGTATAGTGCAACAGCAAAAC---  
AATTTG---CTGAGA---GCTATTGAGGCGCAACATCATCTGTTGCAACTCACCGTTTGGGGCATC  
>KT124778..1  
TTCTACTGTAATACGTCACAACTGTTTAATAGTACTTGGCTGGGGAATGACACTGAAAGGTTAAACAGAACTG  
AAGGGTCA-----  
-----  
GACAGCACTGAAGTAATCACACTCCAGTGTAGAATAAAACAAATTATAAACATGTGGCAGGAAGTAGGAAAAG  
CAATGTATGCCCCCTCCCATCGCAGGACAAATTAAGTGTTCATCAAAT---  
ATTACGGGGCTACTATTAACAAGAGATGGTGGTTACAATGATACT-----  
-----  
-----  
AGCCAGAACGAGACCTTCAGACCTGGGGGAGGAGATATGAGGGACAATTGGAGAAGTGAATTATATAAATATA  
AAGTAGTAAGAATTGAACCATTA---GGAGTAGCCCCCACCAGGCAAAGAGAAGAGTGGTG-----  
-----CAAAGAGAAAGAGAGCA---GTGGGA---TTAGGAGCT-----  
---GTGTTCCCTTGGGTTCTTGGGAGCA---GCAGGAAGCACTATG---GGCGCAGCGTCA---  
GTGACGCTGACGGTACAG---GCCAGACAA---TTATTG---TCTGGTATAGTGCAACAGCAAAAC---  
AATTTG---CTGAAG---GCTATTGAGGCGCAACACCATCTGTTGCAACTCACAGTCTGGGGCATC  
>DQ410562..2  
TTCTACTGTAATACAACACTGCTGTTTGATAGTACTTGGGATGATAATAATAGAAGTTTGAATTTGAATAAT-  
-----  
-----  
ACTAATAGAAACATCACACTCCCATGCAAGATAAAACAAATTATAAACAGGTGGCAGGAAGTGGGAAAAGCAA  
TGTATGCCCCCTCCCATTAAGGAGTAATTCATGTTTCATCAAAT---  
ATTACAGGGCTGTTATTAGTAAGAGATGGTGGCAACACTGCTAACAATACT-----  
-----  
-----  
GCTAACAAAAGTGAACCTTCAGACCTGGAGGAGGAAATATGAAGGACAATTGGAGAAGTGAATTATATAAAT  
ATAAGTAGTAAAAATTGAACCATTA---GGAGTGGCACCCACCAAGGCAAAGAGGAGAGTGGTG-----  
-----CAGAGGGAAAAAAGAGCA---GTGGGA---ATAGGAGCT---  
-----ATGTTCCCTTGGATTCTTAGGAGCA---GCAGGAAGCACTATG---GGCGCAGCGTCA---  
ATAACGCTGACGGTACAG---GCCAGGCAA---TTATTG---TCTGGTATAGTGCAACAGCAGAAC---  
AATCTG---CTGAGA---GCTATTGAGGCGCAACAGCATCTGTTGCAACTCACAGTCTGGGGCATC  
>FJ469717..1  
TTCTACTGTAATACAACACAGCTGTTTAATAGTACTTGGTTTACTAATGGCACTTGGATTAATGGTACTGTGT  
TAAATACA-----  
-----AATGAT-----  
ACTGACAAGGGAAACATCACACTCCCATGTAAAATAAAACAAATTATAAACATGTGGCAGGAAGTAGGAAAAG  
CAATATATGCCCCCTCCCATCAAAGGACCAATTAAGTGTACATCAAAT---  
ATTACAGGGATAATAATAACAAGAGATGGTGGTAATAACACGGGCGAAAATAAA-----  
-----  
-----  
AATAAACTTTTCACTGAACTTTTCAGACCTGGAGGAGGAAATATGAGGGATAATTGGAAAAGTGAAGTATATA  
AATATAAAGTAGTACAGATTCAACCAATA---GAAATAGCACCCACCAGGGCAAAGAGAAGAGTGGTG-----  
-----CAGAGAGAAAAAAGAGCA---  
GTGGGAGCGCTGGGAGCT-----GTGTTCCCTTGGGTTCTTGGGAGCA---GCAGGAAGCACTATG---  
GGCGCAGCGTCA---ATAACGCTGACGGTACAG---GCCAGACAA---TTATTG---  
TCTGGTATAGTGCAACAGCAGAAC---AATCTG---CTGAAG---  
GCTATTGAGGCGCAACAGCATCTGTTGCAACTCACAGTCTGGGGCATC  
>FJ469724..1

TTCTACTGTAATACAACACAACCTGTTTAAATAGTACTTGGAATAATGATACTTGGAATGATAATAAACTGAA-  
 -----  
 -----  
 GGAAATGGCACAATTACACTCCAATGCAGAATAAAACAATTTATAAACCTGTGGCAGAAAGTAGGAAAAGCAA  
 TATATGCCCCTCCCATCCAAGGAAATATTAGCTGTTTCATCAAAT---  
 ATTACAGGGCTGCTATTAACAAGGGATGGTGGTGTTAACGGGAGC-----  
 -----  
 -----  
 GAGCACAACGAGACACTCAGACCTGGAGGAGGAGATATAAAAGACAATTGGAGAAGTGAATTATATCAATATA  
 AAGTAGTAAAAATTGAACCATTA---GGAATAGCACCCACTGCAGCAAAGAGAAGAGTGGTG-----  
 -----CAGAGAGAAAAAAGAGCA---GCAGGA---ATAGGAGCT-----  
 ---CTGCTCCTTGGGTTCTTGTTCAGCA---GCAGGAAGCACTATG---GGCGCAGTGTCA---  
 GTGACGCTGACGGTACAG---GCCAGACAA---TTATTG---TCTGGTATAGTGCAACAGCAAAAC---  
 AATTTG---CTGAGA---GCTATTGAGGCGCAACAGCATCTGTTGCAACTCACGGTCTGGGGCATT  
 >FJ653159..1  
 TTCTATTGTAATACAACACAACCTGTTTAAATAGTAATTGGAATGAGAGTAGTATTAATAGTACTTGGAATAGTA  
 CTTGGAAG-----  
 -----TCAAAT-----  
 GACCCAAATGACACCATCACACTCCCATGCAGAATAAAACAATTTATAAACATGTGGCAAGAAGTGGGAAAAG  
 CAATGTATGCCCCTCCCATCAAAGGTGTAATTCAGTGTTCATCAAAT---  
 ATTACAGGGCTGCTATTAACAAGAGATGGTGGGAGTAATGAGACT-----  
 -----  
 -----  
 AATACCACCGAGACTTTCAGACCTGGGGGAGGAGATATGAGGGACAATTGGAGAAGTGAAGTATACAAATATA  
 AAGTAGTAAAAATTGAACCATTA---GGAGTAGCACCCACCAAGGCAAAAAGAAGAGTGGTG-----  
 -----CAAAGAGAAAAAAGAGCA---GTGGGAACAATAGGAGCT-----  
 ---ATGTTCTTGGGTTCTTGGGAGCA---GCAGGAAGCACTATG---GGCGCAGCGTCA---  
 GTGACGCTGACGGTACAA---GCCAGACAA---TTATTG---TCTGGTATAGTGCAAGCAGCAGAGC---  
 AATTTG---CTGCAG---GCTATTAAATGCACAACAACATTTGCTGCAACTAACAGTCTGGGGCATC  
 >FJ653573..1  
 TTTTACTGTAATACAACACAACCTGTTTAAATAGTACTTGGAATATGACTGGTACCTGGAATGATACCTGGAATG  
 GTAATAA-----  
 -----AGGTCA-----  
 AATGAACTGACAATATCACACTCCCATGCAGAATAAAACAATAGTAAACAGGTGGCAGGAAGTAGGCAAAG  
 CAATGTATGCCCCTCCCATCAGAGGAAGCATTAGATGTTTCATCAAAT---  
 ATTACAGGGCTGCTATTAACAAGAGATGGGGGGATTGATAATAGCACTGAG-----  
 -----  
 -----  
 GCAAATAACACTGAGATTTTCAGACCTGGAGGAGGAGACATGAGGGACAATTGGAGAAGTGAATTATATAAGT  
 ATAAAGTAGTGAAAATTGAACCATTA---GGAGTAGCACCCACCAAGGCAAGGAGAAGAGTGGTG-----  
 -----CAGAGAGAAAAAAGAGCA---GTGGGAGCACTAGGAGCT---  
 -----ATGTTCTTGGGTTCTTGGGAGCA---GCAGGAAGCACTATG---GGCGCAGCGTCA---  
 CTGACGCTGACGGTACAG---GCCAGACAA---TTGTTG---TCTGGTATAGTGCAACAGCAGAAC---  
 AACCTG---CTGAGA---GCTATTGAGGCGCAACAGCATCTGTTGCAACTCACAGTCTGGGGCATC  
 >EU578629..1  
 TTCTACTGCAATACAACAAAACCTGTTTCAGTAGTACTTGGAATAGTACTACTTGGGATAGTTGGAATAGTACTG  
 AAACA-----  
 -----AAT---  
 AGCACTGACAGAAATATCACACTCCCATGCAGAATAAAACAATTTATAAACATGTGGCAGGAAGTAGGAAGAG  
 CAATGTATGCCCCTCCCATCAGAGGACAAATTAGATGCTCATCAAAT---  
 ATTACAGGGCTGATATTAACAAGAGATGGTGGTAACAATACAAAT-----  
 -----  
 -----  
 ACAAACGAGACCTTCAGACCTCAAGGAGGAAACATGAAGGACAATTGGAGAAGTGAATTATATAAATATAAAG  
 TAGTAAAAATTGAACCACTA---GGAATAGCACCCACCAAGGCAAGAGAAGAGTGGTG-----  
 -----CAGAGAGAAAAAAGAGCA---GTGGGA---ATGGGAGCT-----  
 TTGTTCTTGGGTTCTTGGGAGCA---GCAGGAAGCACTATG---GGCGCAGTGTCTG---  
 ATGACGCTGACGGTACAG---GCCAGACAA---TTATTG---TCTGGTATAGTGCAACAGCAGAAT---  
 AATCTG---CTGAGA---GCTATTGAGGCGCAACAGCATCTGTTGCAACTCACAGTCTGGGGCATC  
 >HQ217860..1

TTCTACTGTAATACAACAAAACCTATTTTAATAGTACTTGGGATATAGAAACAATACTTAAGCATACTAAAAATA  
 GTAAT-----  
 -----  
 GACACAAACTCAACTATTACACTCCAATGCAGAATAAAACAAATTGTAAACATGTGGCAGGAAGTAGGAAAAG  
 CAATGTACGCCCTCCCATCAGAGGAATAATTAAGTGTACATCAAAT---  
 ATTACAGGGCTGCTATTAACAAGAGATGGGGGTCATAACAACAGC-----  
 -----  
 -----  
 ACCAACGAGACCTTCAGACCGGGAGGAGGAGATATGAGAGACAATTGGAGAAGTGAATTATACAAATATAAAG  
 TAGTAAAAGTTGAACCATTA---GGAATAGCACCCACCAAGGCAAAAAGAAGAGTGGTG-----  
 -----CAAAGAGAGAAAAAGAGCA---GTGGGA---ATAGGAGCT-----  
 GTGTTCCCTTGGGTTCTTGGGAGCA---GCAGGAAGCACTATG---GGCGCAGCGACA---  
 GTGACGCTGACGGTACAG---GCCAGACAA---TTATTG---TCTGGTATAGTGCAACAGCAGAGC---  
 AATTTG---CTGAGA---GCTATTGAGGCGCAACAGCATCTGTTGCAGCTCACAGTCTGGGGCATC  
 >JF689865..1  
 TTCTACTGTAATACAACAAAACCTGTTTAATAGTACTTGGCCTTGGAATGTTACTGGGTCAAATGTTACTGGG-  
 -----  
 -----  
 TTAAATGACACAATCACAATTCCATGCAGAATAAAACAAATTATAAACATGTGGCAGGAAGTAGGAAAAGCAA  
 TGTATGCCCCCTCCCATCCAAGGACAAATTAGATGTTTCATCAAAT---  
 ATTACAGGGCTACTATTAACCAGAGATGGTGGTAATACAAATGAGAGC-----  
 -----  
 -----  
 AATACCACCGAGACCTTCAGACCTGGAGGAGGAGATATGAGGGACAATTGGAGAAGTGAATTATATAAATATA  
 AAGTAGTAAAAATTGAACCATTA---GGAGTAGCACCCACCAAGGCAAAGAGAAGAGTGGTG-----  
 -----CAGAGAGAAAAAAGAGCA---GTGGGA---CTAGGAGCT-----  
 ---CTGTTCCCTTGGGTTCTTGGGAGCA---GCAGGAAGCACTATG---GGCGCAGCGTCA---  
 ATGACGCTGACGGTACAA---GCCAGGCAA---TTATTG---TCTGGTATAGTGCAACAGCAAAAC---  
 AATTTG---CTGAGG---GCTATTGAAGCGCAACATCACCTGTTGCAACTCACAGTCTGGGGCATT  
 >JF689874..1  
 TTCTACTGTAATACAACAAAGCTGTTTACAAAGCGGTTTGATTGGAATAGGACTGAAGGGTTAAATGACACTG  
 CAGGAAAT-----  
 -----AAC---  
 ACTGGAGGAAATAACATCATAATCCCATGCAGAATAAAACAAATTATAAACATGTGGCAAGAAGTAGGAAAAG  
 CAATATATGCCCCCTCCCATCAGTGGACGAATTAAGTGTACATCAAAC---  
 ATTACTGGGCTGCTATTAATAAGAGATGGTGGGATAGGCCCGGGGACA-----  
 -----  
 -----  
 GACAATACTAGTGAAACCTTCAGACCTCAAGGAGGGAATATAAGAGATAATTGGAGAAGTGAATTATATAAAT  
 ATAAAGTAGTAAAAATTGAACCATTA---GGACTAGCGCCCACCAAGGCAAGGAGAAGAGTGGTG-----  
 -----CAGAGAGAAAAAAGAGCA---ATGGGA---CTAGGAGCT---  
 -----TTGTTCCCTTGGGTTCTTGGGAGCA---GCAGGAAGCACTATG---GGCGCAGCGTCA---  
 CTGACGCTGACGGTACAG---GCCAGACAA---TTATTG---TCTGGTATAGTGCAACAGCAGAAC---  
 AATTTG---CTGAGA---GCTATTGAGGCGCAACAGCATATGTTGCAACTCACAGTCTGGGGCATC  
 >JF689875..1  
 TTCTACTGTAATACAACACAACCTGTTTAATAGTACTTGGAAATGAGAATAGTACTAAAGAAGGAAATGGA----  
 -----  
 -----  
 AATGACACAATAACCACACTCCCATGCAGAATAAAACAAATTATAAACATGTGGCAAGAAGTAGGAAAAGCAA  
 TGTATGCCCCCTCCCATCAGAGGAAACATTAGCTGTACATCAAAT---  
 ATTACAGGGCTGCTATTAACAAGAGATGGTGGGAATAAT-----  
 -----  
 -----  
 GAGACCGAGACCTTCAGACCTGGAGGAGGAAATATGAAGGATAATTGGAGAAGTGAATTATATAAATATAAAG  
 TAGTAAAAATTCAACCATTA---GGAGTAGCACCCACCAAGGCAAGAGAAGAGTGGTG-----  
 -----CAGAGAGAAAAAAGAGCA---GTGGGA---CTAGGAGCT-----  
 GTGTTCCCTTGGGTTCTTGGGAGCA---GCAGGAAGCACTATG---GGCGCAGCGTCA---  
 ATAACGCTGACGGTACAG---GCCAGACAA---TTATTG---TCTGGTATAGTGCAACAGCAGAAC---  
 AATTTG---CTGAGG---GCTATTGAGGCGCAACAGCATCTGTTGCAACTCACAGTCTGGGGCATT  
 >JX863990..1

TTCTACTGTAATACAACAACAACTGTTTAAATAGTACTTGGAATTCTACTACTTTGAATTCTACTAGTACT-----  
-----  
-----  
GGGAATGGGACCATCACACTCTCATGTAGAATAAAACAAATTATAAACAGGTGGCAGGAAGTAGGAAAAGCAA  
TGTATGCTCCTCCCATCAGAGGACAAATTAAAGTGTTCATCAAAT---  
ATTACAGGGCTACTGTTAACAAGAGATGGTGGTCACACAAACAACACC-----  
-----  
-----  
AACAAAACCTGAGACCTTTAGACCTGGAGGAGGAGACATGAGGGACAATTGGAGAAGTGAATTATACAAATATA  
AAGTAGTAAAAATTGAACCATTA---GGAATAGCACCCACCAAGGCAAGGAGAAGAGTGGTG-----  
-----CAGAGAGAAAAAAGAGCA---ATAGGA---ATAGGAGCT-----  
---GTGTTCCCTTGGGTTCTTGGAACA---GCAGGAAGCACTATG---GGCGCAGCGGCA---  
GTGACGCTGACGGTACAA---GCCAGACAA---TTACTG---TCTGGTATAGTGCAACAGCAAAAC---  
AATTTG---CTGAGG---GCTATTGAGGCGCAGCAGCATCTGTTGCAACTCACAGTCTGGGGCATC  
>JF320363..1  
TTCTACTGTAACACAGCAAAACCTGTTTGATACATCACAACCTACAACCTGTCTAATAGCAGCACTGAA-----  
-----  
-----  
GAAAAATGACACACTCACAATTCCATGCAGAATAAAACAAGTTATAAACAGGTGGCAGGAAGTAGGAAAAGCAA  
TGTATGCCCCCTCCCATCAGAGGACAAATTAAATGTGTATCAAAC---  
ATTACAGGGCTGCTATTAACAAGAGATGGTGGAAAGACTGAGGATAATACT-----  
-----  
-----  
ACTAATACTACTGAGGTCTTCAGACCTCAAGGAGGAAATATGAAAGATAATTGGAGAAGTGAATTATATAAAT  
ATAAGGTAGTAAGAACTGAACCATTA---GGAGTAGCACCCACCAAGGCAAAGAGAAGAGTGGTG-----  
-----CAGAGAGAAAAAAGAGCA---ATAGGGGGATTAGGAGCG---  
-----TTGTTCCCTTGGGTTCTTGGGAGCA---GCAGGAAGCACTATG---GGCGCAGCGTCA---  
ATAACGCTGACGGCACAG---GCCAGACAA---ATATTG---TCTGGTATAGTGCAACAGCAGAAT---  
AATTTG---CTGAGA---GCTATTGAGGCGCAACAACATCTGTTGCAACTCACAGTCTGGGGCATC  
>JF320036..1  
TTCTACTGTAATACAACACAGCTGTTTAAATATTAGTAGTACACAACCTGTTTAAATAGTACTTGGAATAGTACCG  
AA-----  
-----GGG---  
CTAAACACAAAAAATATCACACTCCAATGCAGAATAAAACAAATTATAAACATGTGGCAGCAAGTAGGAAAAG  
CAATGTATGCCCCCTCCCATCAGAGGACCAATTAAATGTATATCAAAT---  
ATTACAGGGCTGCTGTTAACAAGAGATGGTGGGAAGATAAATGAGAGTAGG-----  
-----  
-----  
GCAAAATGAGACTGAGACCTTCAGACCTGGAGGAGGAGATATGAGGGACAATTGGAGAAGTGAACCTCTATAAAT  
ATAAGTAGTAAAAATTAAACCATTA---GGAGTAGCACCCACTAAGGCAAAAAGAAGAGTGGTG-----  
-----CAGAGAGAAAAAAGAGCA---GTGGGA---CTAGGAGCA---  
-----TTGTTCCCTTGGGTTCTTGGGAGCA---GCAGGAAGCACTATG---GGCGCAGCGTCA---  
ATAACGCTGACGGTACAG---GCCAGACAA---TTATTG---TCTGGTATAGTGCAACAGCAGAAC---  
AATCTG---CTGAGG---GCTATTGAGGCGCAACAGCACCTGTTGCAACTCACAGTCTGGGGCATC  
>JF320502..1  
TTCTACTGTAATACAACAAAACCTGTTTAAATAGCATTGGAATGAAACACAACCTGTTTAAATAGTACTTGGAATG  
AGACT-----  
-----  
GAAAGAGGAGTCAATATCACACTCCCATGTAGAATAAAACAAATTATAAATATGTGGCAGGAAGTAGGAAAAG  
CAATGTATGCCCCCTCCCATCAGAGGAATAATTCAATGTACATCAAAC---  
ATTACAGGACTGATATTAACAAGAGATGGTGGTAAAAAAATAATGGGAGTGAA-----  
-----  
-----  
ACCTCCAATGGGAATGAAACCTTCAGACCTGGAGGAGGAGATATGAGAGACAATTGGAGAAGTGAATTATATA  
AATATAAAGTAGTAAAAGTTGAACCATTA---GGAATAGCACCCACTAGGGCAAGGAGAAGAGTGGTG-----  
-----CAGAGAGAGAAAAGAGCA---GTGGGA---  
ATAGGAGCT-----GTGTTCCCTTGGGTTCTTGGGAGCA---GCAGGAAGCACTATG---  
GGCGCAGCGTCA---ATAACGCTGACGGTACAG---GCCAGACAA---TTATTG---  
TCTGGTATAGTGCAACAGCAGAAC---AATCTG---CTGAAA---  
GCTATTGATGCGCAACAGCATCTGTTGCAACTCACAGTCTGGGGCATC

>JF320151..2

TTCTACTGTAATACAACAGAGCTGTTTAAATGATACTTGGCTGAGTAATAATACTTGGCTGTCAAATTATACTG  
AGAGTAAT-----

-----AAT---

AATACTGCTAAAAATATCGTACTCCCATGCAGAATAAAACAAATTATAAACAGATGGCAGGAAGTAGGAAAAG  
CAATGTATGCCCCCTCCCATCAGTGGACTAATTAGATGCTCATCAAAT---

ATTACAGGGCTGCTCTTAACAAGAGATGGTGGTAATCATAACACTAGT-----  
-----

AATGACACCGAGACTTTCAGACCAGGAGGAGGAGATATGAGGGATAATTGGAGAAGTGAATTATATAAAATATA  
AAGTAGTAAAAATTGAGCCATTA---GGAGTAGCACCCACCAAGGCAAGGAGAAGAGTGGTG-----

-----CAGAGAGAAAAAAGAGCA---GTGGGA---CTAGGAGCT-----  
---TTGTTCCCTTGGGTTCTTGGGAGCA---GCAGGAAGCACTATG---GGCGCAGCATCA---

GTGACGCTGACGGTACAA---GCCAGACAA---TTATTG---TCTGGTATAGTGCAACAGCAAAAC---

AATTTG---CTGAGG---GCTATTGAGGCGCAACAGCATATGTTGCAACTCACAGTCTGGGGCATT

>JF320145..1

TTCTACTGTAATTCAACAAAACTGTTTAGCAGTGCTTGGTATACTAATAATACTAATAGTAGTAATACTGAAG  
GG-----

-----  
TCAAAATGACACTGTTATCATACTTCCATGCAAAATAAAACAAATTATAAACATGTGGCAGGAAGTAGGAAGAG  
CAATGTATGCCCCCTCCCATCGCAGGAAACATTAGCTGTTTCATCAAAT---

ATTACAGGACTGCTGTTAACAAGAGATGGTGGTCACACGGAAACTGCC-----  
-----

-----  
AACACCACAGAAATCTTCAGACCTGGAGGAGGAGATATGAGGGACAATTGGAGAAGTGAATTATATAAAATATA  
AAGTAGTAAAAATTGAACCATTA---GGAGTAGCACCCACCAAGGCAAGGAGAAGAGTGGTG-----

-----CAGAGAGAAAAAAGAGCA---GTAACA---GTGGGAGCT-----  
---GTGTTCCCTTGGGTTCTTGAGTGCA---GCAGGAAGCACTATG---GGCGCAGCGTCA---

CTGACGCTGACGGTACAG---GCCAGACTA---CTGTTG---TCTGGTATAGTGCAAGCAGCAGAGC---

AATCTG---CTGAGG---GCTATTGAGGCGCAACAACAACACTGTTGCAACTCACAGTCTGGGGCATC

>HQ908232..2

TTCTACTGTAATACAACAAGGCTGTTTAAATAGTACTTGGCAGTCCAATAGTACGGGGAATGATACTGGAGGGT  
CA-----

-----  
AATAACACTGAACCTATCACACTCCTATGCAGAATAAAACAAATTGTAAACAGGTGGCAAGAAGTAGGAAAAG  
CAATGTATGCCCCCTCCCATCAGAGGACAAATTTACTGTAGATCAAAT---

ATTACAGGGCTGCTATTAAACAAGGGATGGTGGTAATGTCCAGAAC-----  
-----

-----  
AACATGACTGAGACCTTCAGACCAGGAGGAGGAGATATGAGGGACAATTGGAGAAGTGAATTATATAAAATATA  
AAGTAGTAAAAATTGAGCCATTA---GGAATAGCACCCACCGGGGCAAGAGAAGAGTGGTG-----

-----CAGAGAGAAAAAAGAGCG---GTGACA---CTGGGAGCT-----  
---ATGTTCCCTTGGGTTCTTGGGAGCA---GCAGGAAGCACTATG---GGCGCAGCGTCA---

ATAACGCTGACGGTACAG---GCCAGACAA---TTACTG---TCTGGTATAGTGCAACAGCAGAAC---

AATCTG---CTGAAG---GCTATTGATGCGCAGCAGCATATGTTGCAACTCACCGTCTGGGGCATC

>KM353665..1

TTCTACTGTAATACAACAAAATTGTTTAAATAGTACTTGGTATAATAATAGT-----  
-----

---ACTTGAATAATACT-----

GGAGGAAATGACACATTCACACTCCCATGTAGAATAAAACAAATTATAAACATGTGGCAGACAGTAGGAAGAG  
CAATGTATACCCCTCCCATCAGAGGATTAATTAAGTGACATCAAAT---

ATTACAGGGCTGATATTAACAAGAGATGGTGGG-----  
-----

GGTGGTAACGAGAGTAATCAT-----

ACCACAGAGGTCTTCAGACCTGCAGGAGGAGATATGAGGGACAATTGGAGGAGTGAATTATATAAAATACAAAG  
TAGTAAAAATTGAACCATTA---GGAATAGCACCCACCAGGGCAAAAAGAAGAGTGGTG-----

-----CAGAGAGAAAAAAGAGCA---GTGGGG---ATGGGAGCT-----  
CTGTTCCCTTGGGTTCTTAGGAGCA---GCAGGAAGCACTATG---GGCGCAGCGTCA---

ATAACGCTGACGGTACAG---GCCAGACAA---TTATTG---TCTGGTATAGTGCAACAGCAGAGC---

AATTTG---CTGAAG---GCTATTGAGGCGCAACAGCATCTGTTGCAACTCACAGTCTGGGGCATC

>JN687750..1

TTCTACTGTGATACAAAAAGCTGTTTAAATAGTACTTGGTGGGTAAATAATACTTGGAAGGCACTAAAGGGG  
ATGAG-----

-----  
ACTAGGAATGGCACAATCGAACTCCCATGCAGAATAAAACAAATTATAAACATGTGGCAGGAAGTAGGAAAAG  
CAATGTATGCCCCCTCCCATCAGAGGACAAATTCAGTGTTCATCAAAT---  
ATTACAGGGCTGCTATTAACAAGAGATGGGGGTAATAATGAAACG-----

-----  
AACGGAACAGAAACCTTCAGACCTGGAGGAGGAGATATGAGGGACAATTGGAGAAGTGAATTATATAAAATATA  
AAGTAGTAAAAATTGAGCCATTA---GGAATAGCACCCGGCAGGGCAAAGAGAAGAGTGGTG-----  
-----CAGAGAGAAAAAAGAGCA---GTGGGA---CTAGGAGCT-----  
---ATGTTCCCTTGGGTTCTTGGGAGCA---GCAGGAAGCACTATG---GGCGCAGCGTCA---  
ATAACGCTGACGGTACAG---GCCAGACAA---TTACTG---TCTGGTATAGTGCAACAGCAGAAC---  
AACTTG---CTGAGA---GCTATTGAGGCGCAGCAGCATATGTTGCAACTCACAGTCTGGGGCATC

>HM204582..1

TTTTATTGTAATACATCAGAACTGTTTAAAAGTACCTGGAATAGTACTGATACCTTCAACAGTACTGGAGAGA  
GA-----

-----  
GGGAATGACACAATCATTCTCCCATGCAAAATAAGGCAAGTTGTAAACATGTGGCAGGAAGTAGGAAAAGCAA  
TGTATGCCCCCTCCTATCAGAGGTCAAATTAAGTGTTCATCAAAT---  
ATTACAGGGCTGCTATTAACAAGAGATGGTGGTGATAAAAAATAGT-----

-----  
ACAAACGAGACCTTCAGACCTGGAGGAGGAGATATGAGGGACAATTGGAGAAGTGAATTATATAAAATATAAGG  
TAGTAAAAATTGAACCATTA---GGAATAGCACCCACCAAGGCAAAGAGAAGAGTGGTG-----  
-----CAAAGAGAAAAAAGAGCA---GTGGGA---ATAGGAGCT-----  
TTGTTCCCTTGGGTTCTTGGGAGCA---GCAGGAAGCACTATG---GGCGCAGCGTCA---  
CTGACGCTGACGGTACAA---GCCAGACTA---TTATTG---TCTGGTATAGTGCAACAGCAGAAC---  
AATTTG---CTGAGG---GCTATTGAGGCGCAACAGCATCTGTTGCAACTCACGGTCTGGGGCATC

>HM204589..1

TTCTACTGTAATTCAACACAATTGTTTAAATAGTACTTGGGATAAGAATGGTAGTAGAATAAATGGAAGTGAAG  
GA-----

-----  
GAAAGTGGTACCATCACACTCCCATGCAGAATAAAACAAATTATAAACATGTGGCAGGAAGTAGGAAAAGCAA  
TGTATGCCCCCTCCCATCAGAGGACAAATTTATTGTTTCATCAAAT---  
ATTACAGGGATGCTATTAACAAGAGATGGTGGTACTAATGATACTGAC-----

-----  
AAAAACGACACCGAGACCTTCAGACCTGGAGGAGGAGATATGAGGGATAATTGGAGAAGTGAATTATATAAAT  
ATAAGTAGTAAAAATTGAGCCATTA---GGAGTAGCACCCACCAAGGCAAAGAGAAGAGTGGTG-----  
-----CAGAGAGAAAAAAGAGCA---GTGGGA---TTGGGAGCT---  
-----CTGTTCCCTTGGGTTCTTGGGAGCA---GCAGGAAGCACTATG---GGCGCAGCGTCA---  
GTGACGCTGACGGTACAG---GCCAGACAA---TTATTG---TCTGGTATAGTGCAACAGCAGAAC---  
AATCTG---CTGAGG---GCTATTGAGGCGCAACAGCATCTGTTGCAACTCACAGTCTGGGGCATC

>KY112061..1

TTCTACTGTAATTCAACACAGCTGTTTAAATAGTGCTTGGCCTTGGAATGATACTGAAGGGTCAAATGACGCT-  
-----

-----  
AAAAAAGATAATATCACACTCCCATGCAAAATAAAACAAATTATAAACATGTGGCAGGGAGTAGGAAAAGCAA  
TGTATGCCCCCTCCCATCGAAGGAAAAATTAAATGCTCATCAAAT---  
ATTACAGGACTGCTATTAACAAGAGATGGTGGTTATGAGAACAAT-----

-----  
GAGACCAAGCCCCGAGATCTTCAGACCTGGAGGAGGAGATATGAGGGACAATTGGAGGAGTGAATTATATAAAT  
ATAAAGTAGTAAAAATTGAACCATTG---GGAGTAGCACCTACCAAGGCAAAGAGAAGAGTGGTG-----  
-----CAGAGAGAAAAAAGAGCA---TTTGGA---CTAGGAGCT---  
-----GTGTTCCCTTGGGTTCTTGGGAGCA---GCAGGAAGCACTATG---GGCGCAGCATCA---  
ATAACGCTGACGGTACAG---GCCAGACAA---TTATTG---TCTGGTATAGTGCAACAGCAGAAC---  
AATTTG---CTGAGG---GCTATTGAGGCGCAACAGCATCTGTTGCAACTCACAGTCTGGGGCATC

>EU576345..1

TTCTACTGTGATACAACAAAACCTGTTTAATAGTACTTGGGGGAATAGTACTTGGGGGTATAAAATGACAAATG  
AC-----

-----  
ACTGCAAAAGACAACATCACACTCCCATGTAGAATAAAACAAATTATAAACATGTGGCAGGAAGTAGGAAAAG  
CAATGTATGCCCCCTCCCATCAAAGGACAAATTAGATGTACATCAAAT---  
ATTACAGGGTTGGTGTTAACAAGAGATGGTGGTGGTGGTAGTGGTACA-----

-----  
AATAACACCACAGAGATCTTCAGACCTGGAGGAGGAGATATGAGGGACAATTGGAGAAGTGAATTATATAAAAT  
ATAAAGTAGTAAGAATTGAACCATTA---GGAATAGCACCCACCAAGGCAAAGAGAAGAGTGGTG-----  
-----CAGAGAGAAAAAAGAGCA---GCA-----ATAGGAGCT---  
-----ATGTTTCCTTGGGTTCTTGGGAGCA---GCAGGAAGCACTATG---GGCGCAGCGTCA---  
ATAACGCTGACGGTACAG---GCCAGACTA---TTATTG---TCTGGTATAGTGCAACAGCAGAAC---  
AATCTG---CTGAGG---GCTATTGAGGCGCAACATCAACTGTTGCAACTCACAGTTTGGGGCATC

>EU576383..1

TTCTACTGTAATTCAACACAACCTGTTTAACAGTACTTGGCATAGTAACAGTACTTGGAAATGATACTGGAAAAGT  
CAGAA-----

-----  
AATAATACAAAAATCATCACACTCCCATGCAGAATAAAACAAATTATAAACATGTGGCAGGAAGTAGGAAAAG  
CAATGTATGCCCCCTCCTATCAGAGGACAAATTAGATGTTTCATCAAAT---  
ATTACAGGGCTGATACTAACAAGGGATGGAGGTCATGGAGGTAATGACAAT-----

-----  
AACCAGACCACCGAGACCTTCAGACCTGGAGGAGGAAATATGAAGGACAATTGGAGAAGTGAATTATATAAAAT  
ATAAAGTAGTAAAAATTGAACCATTA---GGAGTAGCACCCACCCCGCAAAGAGAAGAGTGGTG-----  
-----CAGAGAGAAAAAAGAGCA---TTAGTGGGATTCGGAGCT---  
-----CTGTTTCCTTGGGTTCTTGGGAGCA---GCAGGAAGCACTATG---GGCGCAGCGTCA---  
ATAACGCTGACGGTACAG---GCCAGACAA---TTACTG---TCTGGTATAGTGCAACAGCAAAAC---  
AATTTG---CTGAAG---GCTATTGAGGCGCAACAGCATCTGCTGCAACTCACAGTCTGGGGCATC

>KX129209..1

TTCTACTGTAATTCAACACAACCTGTTTAATAGTACGTGGATTGGGAATAGCACTGAAGAGTCAAAT-----  
-----

-----  
GGCACTGAAAACATCACACTCCCATGTAGAATAAAACAAATTTGTAAATCTGTGGCAGGAAGTAGGAAGAGCAA  
TGTATGCCCCCTCCCATCAGAGGACTAATTAAATGTTTCATCAAAT---  
ATTACTGGGCTGTTGTTAACGAGAGATGGTGGTCAGTCTGACAATACT-----

-----  
ACCAACGGGACCGAGACCTTTAGACCTGGAGGAGGAAATATGAAGGACAATTGGAGAAGTGAATTATATAAAAT  
ATAAAGTAGTACAAATTGAACCATTA---GGAATAGCACCCACCAAGGCAAAGAGAAGAGTGGTG-----  
-----CAGAGAGAAAAAAGAGCA---GTGGGA---CTAGGAGCT---  
-----TTGTTTCCTTGGGTTCTTGGGAGCA---GCAGGAAGCACTATG---GGCGCAGCGTCA---  
GTGACGCTGACGGTACAG---GCCAGACAA---TTATTG---TCTGGTATAGTGCAACAGCAGAAC---  
AACTTG---CTGAGA---GCTATTGAGGCGCAACAACATATGTTGCAACTCACAGTCTGGGGCATC

>KM259534..1

TTCTACTGTAATACAACAAAACCTGTTTAATAGTACTTGGAAATGGGACTAATATT-----  
-----  
-GATATTGGAAACAGT-----

ACGAAAGATGACAATATCACACTCCCATGCAGAATAAAACAAATTATAAATAGGTGGCAAGAGGTAGGAAAAG  
CAATGTATGCCCCCTCCCATCAGAGGACAAATTAGATGTTTCATCAAAC---  
ATTACAGGGCTGCTATTAACAAGAGATGGTGGT-----

-----  
AATAGCAATAACACCAACGAG-----  
ACCACCGAGACCTTCAGACCTACAGGAGGAAATATGGAGGACAATTGGAGAAGTGAATTATATAAAATATAAAG  
TAGTGCAAATTCACCATTAA---GGAGTAGCACCCACCGAGGCAAAGAGAAGAGTGGTG-----  
-----CAGAGAGAAAAAAGAGCA---GTGGGA---TTAGGAGCT-----  
ATGTTTCCTTGGGTTCTTGGGAGCA---GCAGGTAGCACTATG---GGCGCAGCGTCA---  
ATAACGCTGACGGTACAG---GCCAGACAA---TTACTG---TCTGGTATAGTGCAACAGCAGAAC---  
AATTTG---CTGAGG---GCTATTGAGGCGCAACAGCATATGTTGCAACTCACAGTCTGGGGCATC

>HQ217957..1

TTCTACTGTAATACATCAGAACTGTTTAAATAGTACCTGGAATATAACACACTTTAATAGTACCTGGAATGATA  
CT-----

GAAGGATCAAATAACATCACACTCCCATGCAGAATAAAACAAATTATAAATATGTGGCAACAAGTAGGAAAAG  
CAATGTATGCCCCCTCCCATCCAAGGATTAATTCAATGTTTCATCAAAT---  
ATTACAGGGCTGCTATTAACAAGAGATGGAGGTAATAATAGTACT-----

AACGAGATCTTCAGACCTGGAGGAGGGGATATGAGGGACAATTGGAGAAGTGAATTATATAGATATAAAGTAG  
TAAGAATTGAACCATTA---GGAGTAGCACCCACCAAGGCAAGGAGAAGAGTGGTG-----  
-----CAAAGAGAAAAAAGAGCA---GTGGGAACAATAGGAGCT-----  
ATGTTTCCTTGGGTTCTTGGGAGCA---GCAGGAAGCACTATG---GGCGCAGCGTCA---  
GTGACGCTGACGGTACAG---GCCAGACAA---TTATTG---TCTGGAATAGTGCAACAGCAAAAC---  
AATTTG---CTGAAG---GCTATTGAGGCGCAACAACACCTGTTGCAACTCACAGTCTGGGGCATC

>HQ217984..1

TTCTACTGTAATTCAACACAACCTGTTTAAATAGTACTTGGACTAGGGAAAATGGTAGTTGGACTAGGAATGATA  
CCGCT-----

-----GCA---  
AATGAGACTGAGATTATCACACTCCCATGCAGAATAAAACAAATTATAAACATGTGGCAGGAAGTAGGAAAAG  
CAATGTATGCCCCCTCCCATCAAAGGACTTATTCAATGTTTCATCAAAT---  
ATTACAGGATTGTTATTAACAAGAGATGGTGGTAATAATAGCAAC-----

ATCAATGAGATCTTTAGACCTGGAGGAGGAGATATGAGGGACAATTGGAGAAGTGAATTGTACAAATATAAGG  
TAGTAAAAATTGAACCATTA---GGAGTAGCACCCACCAAGGCAAGGAGGAGAGTGGTG-----  
-----CAAAGAGAGAAAAAGAGCA---GTGGGA---CTAGGAGCT-----  
CTGTTTCCTTGGGTTCTTGGGAGCA---GCAGGAAGCACTATG---GGCGCAGCGTCA---  
TTGACGCTGACGGTACAG---GCCAGACAA---TTATTG---TCTGGTATAGTGCAACAGCAGAAC---  
AATATG---CTGAGG---GCTATTGAGGCGCAGCAGCACCTGTTGCAACTCACAGTCTGGGGCATC

>JF689886..1

TTCTACTGTAATTCAACACAACCTGTTTAAATAGTACTTGGACTAAATATGATAATGGAACCTTGGGTTAAGAAGA  
ATGGCACT-----

-----GAA---  
TGGGTGAATGATACAATCACACTCCCATGCAGAATAAAACAAATTATAAACATGTGGCAGGAAGTAGGAAAAG  
CAATGTATGCCCCCTCCCATCAGGGGACTAATTAATTGTATATCAAAT---  
ATTACAGGGATACTGCTAACAAGAGATGGTGGTCAGGTTAATGGT-----

ACCAATGAGACCTTCAGACCAGGAGGAGGAGATATAAAGGATAATTGGAGAAGTGAATTATATAAATATAAAG  
TAGTAAAAATTGAACCATTA---GGAGTAGCACCCACCAAGGCAAGGAGAAGAGTGGTG-----  
-----CAGAGGGAAAAAAGAGCA---ATTGGA---ATAGGAGCT-----  
TTGTTTCCTTGGGTTCTTGGGAGCA---GCAGGAAGCACTATG---GGCGCAGCGTCA---  
GTGACGCTGACGGTACAA---GCCAGACAA---TTATTG---TCTGGTATAGTGCAACAGCAGAAC---  
AATTTG---CTGAGG---GCTATTGAGGCGCAACAACATCTGTTGCAACTCACAGTCTGGGGCATC

>JF320385..1

TTCTACTGTAATACAACACAACCTGTTTAAATAGTACTTGGATTTCGGAATGATACTAAATGGTCAAGTAACTCTA  
CA-----

GGAAATGGCACCATTATACTCCCATGCAGAATAAAACAAATTATAAACATGTGGCAGGAAGTAGGAAAAGCAA  
TGTATGCCCCCTCCTATCAGAGGAAACATTAGCTGTTTCATCAAAT---  
ATTACAGGGCTGCTATTAACAAGAGATGGGGGCAATAGTAATCAAACGACC-----

CAGACCAAAGAAACAGAAACCTTCAGACCTGGAGGAGGAGATATGAGGGACAATTGGAGAAGTGAATTATATA  
AATATAAAGTAGTAAAAATTGAACCATTA---GGAGTAGCACCCACCAAGGCAAGGAGAAGAGTGGTG-----  
-----CAGAGAGAAAAAAGAGCA---GTGGGA---  
ATAGGAGCA-----ATGTTTCCTTGGATTCTTGGGAGCA---GCAGGAAGCACTATG---  
GGCGCAGCGTCA---CTAACGCTGACGGTACAG---GCCAGACAA---TTATTG---

TCTGGTATAGTGCAGCAGCAGAAC---AATCTG---CTGAGA---  
GCTATTGAGGCGCAACAGCATCTGTTGCAACTCACAGTCTGGGGCATC  
>JF320539..1  
TTCTACTGTAATACAACAATTGTTCAATAATACTTGGAAAGGTACTGAAGAAGAGAATAGTACTAGGAAT-  
-----  
-----  
AGTAATGACACCATCACACTCCCATGCAGAATAAAACAAATTGTAAACATGTGGCAGGAAGTAGGAAAAGCAA  
TGTATGCCCCCTCCCATCAGAGGACTAATTCAATGTACATCAAAC---  
ATTACAGGGATAATATTAACAAGAGATGGTGGTAATAACACGAAT-----  
-----  
-----  
ACCACTGAGATCTTCAGACCAGGAGGAGGAGACATGAGGGACAATTGGAGAAGTGAATTATATAAATATAAAG  
TAGTAAAAATTGAACCATTA---GGAATAGCACCCACTAGGGCAAAGAGAAGAGTGGTG-----  
-----CAGAGAGAAAAAAGAGCA---GTGGGA---ATAGGAGCT-----  
TTGTTCTTTGGGTTCTTGGGAGCA---GCAGGAAGCACTATG---GGCGCAGCGTCA---  
ATGACGCTGACGGTACAG---GCCAGACTA---TTATTG---TCTGGTATAGTGCAACAGCAGAAC---  
AATCTG---CTGCAG---GCTATTGAGGCGCAACAGCGTCTGTTGCAACTCACAGTCTGGGGCATC  
>JF320131..1  
TTCTATTGTAATACAACAACACTGTTCAATAGTACTTGGGAGAGCAATATTACTACTGGGAATTGGAGCAAAA  
CTGAA-----  
-----GGA---  
TCAAAATAACACTAACATCACACTCCCATGTAGAATAAGACAAATTGTAAACATGTGGCAGAAAGTAGGAAAAG  
CAATGTATGCCCCCTCCCATCAGGGGACCAATTCAATGTATATCAGAT---  
ATCACAGGGCTGCTATTAACAAGAGATGGAGGTAATAACGGGGACAAT-----  
-----  
-----  
AACAAACACAGAGACCTTCAGACCTGGAGGAGGAGATATGAGGGACAATTGGAGAAGTGAATTATATAAATATA  
AAGTAGTACAAATTGAACCAATA---GGAATAGCACCCACCAAGGCGCAGAGAAGAGTGGTG-----  
-----CAGAGAGAAAAAAGAGCA---GTGGGA---GTAGGAGCT-----  
---TTTCTCTTTGGGTTCTTGGCAACA---GCAGGAAGCACTATG---GGCGCAGCGTCA---  
ATAACGCTGACGGTACAA---GCCAGACAA---TTATTG---TCTGGTATAGTGCAACAGCAGAGC---  
AATTTG---CTGAGG---GCTATTGAGGCGCAACAGCATATGTTGCAACTCACAGTCTGGGGCATC  
>HM638503..2  
TTCTACTGTAATACAACAGGGCTGTTTAGTAGTACTTGGAAATGAGAGTACTACTTGGGAAAGGTCAAAT---  
-----  
-----  
GACACTGAAATAATCACTCTCCCATGCAGAATAAAACAAATTATAAACATGTGGCAGGCAGTAGGAAAAGCAA  
TATATGCCCCCTCCCATCAGTGGACAAATTAATTGTTTCATCAAAT---  
ATTACAGGGCTGCTATTAACAAGAGATGGTGGTTACAATGGTACGAAT-----  
-----  
-----  
GACACCCAGACCGAGACCTTCAGACCTCAGGGAGGAAATATGAAAGACAATTGGAGAAGTGAATTATATAAAT  
ATAAGTAGTAAAAATTGAACCATTA---GGACTAGCACCCACCAAGGCAAAGAGAAGAGTGGTG-----  
-----CAGAGAGAAAAAAGAGCA---GTGGGA---ATAGGAGCT---  
-----ATGTTCTTTGGGCTCTTGGGAGCA---GCAGGAAGCACCATG---GGCGCAGCGTCA---  
GTGACGCTGACGGTACAG---GCCAGAAAG---TTGTTG---TCTGGTATAGTGCAACAGCAGAAC---  
AATCTG---CTGAGG---GCTATTGAGGCGCAACAGCATATGTTGCAACTCACAGTCTGGGGCATC  
>KT124801..1  
TTCTACTGTAATACAACCGAACTGTTTAATAGTACTTGGACTAGGAATAATGGTACCGGGTATGATGGGTCTA  
ATGGCACT-----  
-----  
GAAGGAAATGACACAATCACACTCCCATGCAGAATAAAACAAATTATAAACATGTGGCAGGAAGTAGGAAAAG  
CAATGTATGCCCCCTCTATTAGAGGACAAATTAGATGCTCATCAAAT---  
ATTACAGGACTGATATTAACAAGAGATGGGGGTCAAAGAAACGGG-----  
-----  
-----  
AGTACTAATGAGACCTTCAGACCAGGAGGAGGAAATATGAGGGACAATTGGAGAAGTGAATTATATAAGTATA  
AAGTAATAAAAAATTGAACCACTA---GGAGTAGCACCCACCAGGGCAAAGAGAAGAGTGGTG-----  
-----CAGAGAGAAAAAAGAGCA---GTGGGA---ATAGGAGCT-----  
---GTGTTCTTTGGGTTCTTGGGAGCA---GCAGGAAGCACTATG---GGCGCAGCGTCA---

CTAACGCTGACGGTACAG---GCCAGACAA---TTATTG---TCTGGTATAGTGCAACAGCAAAAC---  
AATTTG---CTGAGA---GCTATTGAGGCGCAACAACATATGTTGCAACTCACAGTCTGGGGCATC  
>JN687763..1  
TTCTACTGCAATACAACAACAACTGTTTAAATAGTACTTGAATACTAATGGTACTTGGACAGGAAGTAATACT-  
-----  
-----  
AATAGCAGTAACATTACACTCCCATGCAGAATAAAACAAATTGTAAACATGTGGCAGGAAGTAGGAAAAGCAA  
TGTATGCCCCCTCCCATCAGCGGACTAATTCAGTGTTCATCAAAT---  
ATTACAGGGCTGATATTAACAAGGGATGGTGGTAGTGGTAATGACACC-----  
-----  
-----  
AACAAACAACACTGAGACCTTCAGACCTGCAGGAGGAGATATGAGGGACAATTGGAGAAGTGAATTATACAAAT  
ATAAAGTAGTAAAAATTGAACCATTA---GGAGTAGCACCCACCAGGGCAAAGAGAAGAGTGGTG-----  
-----CAAAGAGAGAAAAAGAGCA---GTGGGA---ATGGGAGCT---  
-----CTGTTCCCTTGGGTTCTTGGGAGCA---GCAGGAAGCACTATG---GGCGCAGCGTCA---  
ATGACGCTGACGGTACAG---GCCAGACAA---TTATTG---TCTGGTATAGTGCAACAGCAGAGC---  
AATTTG---CTGAGG---GCTATTGAGGCGCAACAGCATCTGTTGCAACTCACAGTCTGGGGCATC  
>JQ403073..1  
TTCTACTGTAATACAACAACAACTGTTTGATGATAATTGGCCTAATGGAACCTGGATGTATAATAGCACT----  
-----  
-----  
AGAAATGACACTATCATACTCCCATGCAGGATAAAACAAATTGTAAACATGTGGCAGGAAGTAGGAAAAGCAA  
TGTATGCCCCCTCCCATCAAAGGACTAATTCAGTGTAAATCAAGT---  
ATTACAGGGCTGCTATTAACAAGAGATGGTGGCACTAATAACACC-----  
-----  
-----  
AACGAGACCTTCAGACCGGGAGGAGGAGACATGAGGGACAATTGGAGAAGTGAATTATATAAATATAAAGTAG  
TAAAAATTGAACCATTA---GGAGTAGCACCCACCAAGGCAAAGAGAAGAGTGGTG-----  
-----CAGAGAGAGAAAAAGAGCA---GTGGGA---CTAGGAGCT-----  
CTGTTCCCTTGGGTTCTTGGGAGCA---GCAGGAAGCACTATG---GGCGCAGCGTCA---  
ATGGCGCTGACGGTACAG---ACCAGACAA---TTATTG---TCTGGTATAGTGCAACAGCAGAAC---  
AATTTG---CTGAGG---GCTATTGAGGCGCAACAGCATCTGTTGCAACTCACAGTCTGGGGCATC  
>JQ403078..1  
TTCTATTGTAATACAACACAGCTGTTTAAATAGTACTTGAATGGTACTGAGACTGAGAATAATACTACAGGGT  
CAAAT-----  
-----  
-----  
AACACTGATAATATCAGACTCCCATGCAGAATAAAACAAATTGTAAACAGGTGGCAGGAAGTAGGAAAAGCAA  
TGTATGCCCCCTCCCATCGAGGGCATAATTAGTTGTTTCATCAAAT---  
ATTACAGGGCTTTTATTAAACCAGAGATGGTGGTAACGGGAGCAGT-----  
-----  
-----  
AACGCCGAGATCTTCAGACCTCAAGGAGGAGATATAAGGGACAATTGGAGAAGTGAATTATATAAATATAAAG  
TAGTAAAAATTGAGCCACTA---GGAGTAGCACCCACCAAGGCAAAGAGAAGAGTGGTG-----  
-----CAGAGAGAAAAAAGAGCA---GTGGGA---ATAGGAGCT-----  
GTGTTCCCTTGGGTTCTTGGGAGCA---GCAGGAAGCACTATG---GGCGCAGCGTCA---  
ATAACGCTGACGGTACAG---GCCAGACAA---TTATTG---TCTGGTATAGTGCAACAGCAGAAC---  
AATCTG---CTGAGG---GCTATTGAGGCGCAACAACATCTGTTGCAACTCACAGTCTGGGGCATC  
>JQ610064..1  
TTCTATTGCAATACAACAGAACTGTTTACTTGAATTTAACACAACCTGTCTGAGAATTCAACTGGG-----  
-----  
-----  
AATGATGCTAATATCACACTCCCATGTAGAATAAAACAAATTATAAACATGTGGCAGGAAGTAGGAAAAGCAA  
TGTATGCCCCCTCCCATCAGCGGACCAATTAATTGCACATCAAAT---  
ATTACAGGACTACTATTAACAAGAGATGGTGGTAATAACAATGACAGGACTAAC-----  
AATGGCAGTGATAGTAAT---AACAGTACT-----  
-----  
-----  
CAGACTGAGATCTTCAGACCTGGAGGAGGAGATATGAAGGACAATTGGAGAAGTGAATTATATAAATATAAAG  
TAGTAAGAATTGAACCATTA---GGAGTAGCACCCACCAAGGCAAAGAGAAGAGTGGTG-----  
-----CAAAGAGAAAAAAGAGCG---GTGGGAACGCTAGGAGCT-----  
TTGTTCCCTTGGGTTCTTGGGAGCA---GCAGGAAGCACTATG---GGCGCAGCGTCA---

ATAACGCTGACGGTACAA---GCCAGACAA---TTATTG---TCTGGTATAGTGCAACAGCAAAGC---  
 AATTTG---CTGAGA---GCTATTGAGGCGCAACAGCATCTGTTGCAACTCACAGTCTGGGGCATC  
 >HQ217713..1  
 TTCTACTGTGATTCAACACCACTGTTTAATAGGACCTGGATGGCTAATGAGACTTTGAATAGTACTACTTTGA  
 ATAGTACT-----  
 -----GGA---  
 GAGTCAAATAAAAATATCACACTCGCATGCAGAATAAAACAAATTATAAACATGTGGCAGCGAGTAGGGAAAG  
 CAATGTATGCCCCCTCCTATCAGAGGACAAATTAGATGTTTCATCAAAT---  
 ATTACAGGGCTGCTGTTAACAAGAGATGGGGGTCAACAACGAGACTGGA-----  
 -----  
 -----  
 GATAACAGGACTGAGATCTTCAGACCGGGAGGAGAGATATGAGGGACAATTGGAGAAGTAAATTATATAAAT  
 ATAAAGTAGTAAAAATTGAACCATTA---GGAGTAGCACCCACCAAGGCAAAGAGAAGAGTGGTG-----  
 -----CAGAGAGAAAAAAGAGTA---GCGGGA---TTCGGAGCT---  
 -----TTGTTTCCTTGGGTTCTTGGGAGCA---GCAGGAAGCACTATG---GGCGCAGCGTCA---  
 GTGACGCTGACGGTACAG---GCCAGACAA---TTACTG---TCTGGTATAGTGCAAGCAGCAGAAC---  
 AATTTG---CTGAGG---GCTATTGAGGCGCAACAGCATCTGTTGCAACTCACAGTCTGGGGCATC  
 >MK383397..2  
 TTCTACTGTAATTCAACACCACTGTTTAATAGTACTTGGAAATGGTACTGACGAGTCAAATCACCATGGAGAA-  
 -----  
 -----  
 AATGACACAATCATCACACTCCGCTGCAGAATAAAACAAATTATAAACATGTGGCAGGAAGTAGGAAGAGCGA  
 TGTATGCCCCCTCCCATTAAGGAAACATTAGCTGTTTCATCAAAT---  
 ATTACAGGGCTGCTATTAACAAGAGATGGTGGTAATGGTAACCGG-----  
 -----  
 -----  
 ACTGACAACAACACCGAGATCTTCAGACCTCAGGGAGGAAATATGAAAGATAATTGGAGAAGTGAATTATATA  
 AATATAAAGTAGTAAGAATTGAACCATTA--GGAATAGCACCCACCAAGGCAAGGAGAAGAGTGGTG-----  
 -----CAGAGAGAAAAAGAGAGTA---GTGGGA---  
 ATGGGAGCT-----TTGTTTCCTTGGGTTCTTGGGAGCA---GCAGGAAGCACTATG---  
 GGCGCAGCGTCA--GTGACGCTGACGGTACAA---GCCAGACTA---TTACTG---  
 TCTGGTATAGTGCAAGCAGCAGAAC---AATTTG---CTGAGG---  
 GCTATTGAGGCGCAACAGCGTCTGTTGCAACTCACAGTCTGGGGCATC  
 >KT124761..1  
 TTCTACTGTAATACAACAAAGCTATTTAATAGTACTTGGGATCGGAATGGAACACAGATAAATGACACTATC-  
 -----  
 -----  
 ACAAATGACACTATCATACTCCCATGTAGAATAAAACAAATTCATAAACAGGTGGCAAGAAGTAGGAAAAGCAA  
 TGTATGCCCCCTCCCATTAGAGGAGACATTAAGTGTTCATCACAG---  
 ATTACAGGGCTGCTATTAACAAGAGATGGTGGTCAGAGCAATGACAGC-----  
 -----  
 -----  
 AGTATGAATGAGATCTTCAGACCTGGAGGAGGAGATATGAGGGACAATTGGAGAAGTGAATTATATAAATATA  
 AAGTAGTAAGAATTGAGCCATTA---GGAGTAGCACCCACCAAGGCAAAAAGAAGGGTGGTG-----  
 -----CAGAGAGAAAAAAGAGCA---GTAACA---CTAGGAGCT-----  
 ---GTGTTCCCTTGGGTTCTTGGGAGCA---GCAGGAAGCACTATG---GGCGCAGCGTCA---  
 ATAACGCTGACGGCACAG---GCCAGACAA---TTATTG---TCTGGTATAGTGCAACAGCAGAGC---  
 AATCTG---CTGAAA---GCTATTGAGGCGCAACAGCGTCTGTTGCAACTCACAGTCTGGGGCATT  
 >KM353846..1  
 TTCTACTGTAATACATCAAAGTTGTTTAACAGTACTTGGAAATGGCACT-----  
 -----  
 -----AAGGAATACCAG-----  
 GGAGTGAATGGCACACTCACACTCCCATGCAGAATAAAACAAATCATAAACATGTGGCAGAAAGTAGGAAAAG  
 CAATGTATGCCCCCTCCCATCCAGGGAATATTAATTGCTCATCAAAT---  
 ATTACAGGGCTGCTATTAATGAGAGATGGTGGTAAC-----  
 -----  
 -----  
 AAGGGGAACGAAACCGATAAT-----  
 ACTACCGAGATCTTTAGACCTGGAGGAGGAAATATGAGGGACAATTGGAGAAGTGAATTATATAAATATAAAG  
 TAGTGAGAATTGAACCATTA---GGAGTAGCACCCACCAAGGCAAAAAGAAGAGTGGTG-----  
 -----CAGAGAGAAAAAAGAGCG---GTAACA---GTGGGAGCT-----

ATGTTTCCTTGGGTTCTTGGGAGCA---GCAGGAACCACTATG---GGCGCAGCATCA---  
 TTGACGCTGACGGTACAG---GCCAGACAA---TTATTG---TCTGGTATAGTGCAACAGCAAAGC---  
 AATTTG---CTGAGG---GCTATTGAGGCGCAACAGCATCTGTTGCAGCTCACAGTCTGGGGCATC  
 >KY112135..1  
 TTCTACTGTAATACAACAGAACTGTTTAATAGTACTTGGGATAAGGATGGGACAAGGCTTAATGACACTGGA-  
 -----  
 -----  
 GGAGATGGCAACATCACACTCCCATGTAGAATAAAACAAATTATAAACATGTGGCAGGAAGTAGGAAAAGCAA  
 TGTATGCCCCCTCCCATCAGAGGACAAATTAGCTGTGTATCAAAT---  
 ATCACAGGGCTACTATTAACAAGAGATGGGGGTGTAGACGATACT-----  
 -----  
 -----  
 CAAAACGAAACCTTCAGACCTGGAGGAGGAGATATGAGGGACAATTGGAGAAGTGAATTATATAAATATAAGG  
 TAGTAAAAATTGAACCATTA---GGAGTAGCACCTAGCAAGGCAAAGAGAAGAGTGGTG-----  
 -----CAAAGAGAAAAAAGAGCA---GTGGGAACGTTAGGAGCC-----  
 ATGTTTCCTTGGGTTCTTGGGAGCA---GCAGGAAGCACTATG---GGCGCAGCGTCA---  
 CTGACGCTGACGGTACAG---GCCAGACAA---TTATTG---TCTGGTATAGTGCAACAGCAGAAC---  
 AATCTG---CTGAGA---GCTATTGAGGCGCAACAGCATCTGTTGCAACTCACAGTCTGGGGCATC  
 >JQ403070..2  
 TTCTACTGTAATACAACACAACCTGTTTAATAGTACTTGGCTGTTTAATGATACTTTGAATGATACTCAAGAGG  
 AGTATGGT-----  
 -----  
 GAGAAACGGGACTATCACACTCCCATGCAGAATAAAACAAATTATAAACAGATGGCAGGAAGTAGGAAAAG  
 CAACATATGCCCCCTCCCATCAGAGGACAAATTAAATGTTTCATCAAAT---  
 ATTACAGGGATACTATTAACAAGAGATGGTAGTCAAGGCAACGGG-----  
 -----  
 -----  
 AGTGAGACCTTCAGACCAGGAGGAGGAGATATGAGGGACAATTGGAGAAGTGAATTATATAAATATAAAGTAG  
 TAAAAATTGAGCCATTA---GGAGTAGCACCCACCAAGGCAAGGAGAAGAGTGGTG-----  
 -----CAAAGGGAAGGAGCA---GTGGGAACGCTAGGAGCC-----  
 ATGTTTCCTTGGGTTCTTGGGAGCA---GCAGGAAGCACTATG---GGCGCAGCGTCA---  
 GTGACGCTGACGGTACAG---GCCAGACAA---CTATTG---TCTGGTATAGTGCAACAGCAGAAC---  
 AACCTG---CTGAGA---GCTATTGAGGCGCAACAGCATCTGTTGCAACTCACAGTCTGGGGCATC  
 >JQ403031..2  
 TTCTACTGCAATACAACAAAACTATTTAATAGTACTTGAATAGTAGTAGTAGTAGTTGGGTATTGAGGGTC  
 AGGAAGAG-----  
 -----  
 TCAATGACAATATCACACTCCCATGTAGAATAAAACAAATTATAAACATGTGGCAGGGAGTAGGAAAAGCAA  
 TGTATGCCCCCTCCCATCCAAGGAAAAATTAGATGTTTCATCAAAC---  
 ATTACAGGGCTATTATTAGTGAGAGATGGTGGTATTAACAAGACG-----  
 -----  
 -----  
 AATGACACTGAAACCTTCAGACCTCAAGGAGGAAATATGATGGACAATTGGAGAAGTGAATTATATAAATATA  
 AAGTAGTAAAAATTGAACCATTA---GGAATAGCACCCACCAAGGCAAAGAGAAGAGTGGTG-----  
 -----CAGAGAGAAAAAAGAGCA---GTGGGA---ATGGGAGCT-----  
 ---TTGTTCCCTTGGGTTCTTGGGAGCA---GCAGGAAGCACTATG---GGCGCAGCGTCA---  
 ATGGCGCTGACGGTACAG---GCCAGACAA---TTATTG---TCTGGTATAGTGCAACAGCAGAAC---  
 AATCTG---CTGAGA---GCCATTGAGGCGCAACAGCATATGTTGCAACTCACAGTCTGGGGCATC  
 >JQ403085..1  
 TTCTACTGTAATACATCACAACCTGTTTAAGGGTACCTGGTTGACTAATGATACCTGGGCTAATGGTACCTGGA  
 CAAAT-----  
 -----GACACT-----  
 AGCAAAAATGACAACATCACACTCCCATGCCGAATAAAACAAATTGTAAACTTGTGGCAGGAAGTAGGAAGAG  
 CAATGTATGCCCCCTCCCATCAGAGGAGAAATTCATTGTATATCAAAT---  
 ATTACAGGGCTGTTATTAACAAGAGATGGTGGCCAGAATGCAACC-----  
 -----  
 -----  
 AACGAGACCTTCAGACCTGTAGGAGGAGATATGAGGGACAATTGGAGAAGTGAATTATATAAATATAAAGTAG  
 TAAAAATTGAACCATTA---GGAGTAGCACCCACCAAGGCAAAGAGAAGAGTGGTG-----  
 -----CAGAGAGAAAAAAGAGCA---GTGGGA---CTAGGAGCT-----

GTGTTTCCTTGGGTTCTTGGGAGCA---GCAGGAAGCACTATG---GGCGCAGCGTCA---  
 CTGACGCTGACGGTACAG---GCCAGGCAA---TTATTG---TCTGGTATAGTGCAACAGCAAAAC---  
 AACTTG---CTGAGA---GCTATTGAGGCGCAACAGCACCTGTTGCAACTCACAGTCTGGGGCATC  
 >JQ403094..1  
 TTCTACTGTAATACATCACGACTATTTAATAGTACTTGAATACTAGTAGTATTTGGAATACTACTGGAAGGC  
 CAAATATT-----  
 -----ACA---  
 GGGAGCACTGACATTATCATACTCCCATGCAGAATAAGACAAATTATAAACATGTGGCAGGAAGTAGGAAAAG  
 CAATGTATGCCCCTCCCATCAGAGGACGAATTCAGTGTAGCTCAAAT---  
 ATTACAGGGCTGCTATTAACAAGAGATGGTGGTAATACTAATAACTCA-----  
 -----  
 -----  
 GACGCACATGAGATCTTCAGACCTGGAGGAGGAGATATGAGGGACAATTGGAGAAAGTGAATTATATAAAATATA  
 AAGTAGTAAAAATTGAACCATTA---GGAATAGCGCCCAAGGCAAAGAGAAGAGTGGTG-----  
 -----CAGAGAGAAAAAAGAGCA---GTGGGA---ATGGGAGCT-----  
 ---CTGTTTCCTTGGGTTCTTGGGAACA---GCAGGAAGCACTATG---GGCGCAGCGTCA---  
 GTGACGCTGACGGTACAG---GCCAGACAA---TTATTG---TCTGGTATAGTGCAACAGCAGAGC---  
 AATCTG---CTGAGG---GCTATTGATGCGCAACAGCATCTGTTGCAGCTCACAGTCTGGGGCATC  
 >KR423482..3  
 TTCTACTGTAATACAACGAAACTGTTTAATAGTAGTTGGAATCAGAATGCTACTAATCAGAATGCTACT----  
 -----  
 -----AACAAAT-----  
 GGAGGAAATGACACAATTACACTCCCATGTAGAATAAAACAGATTATAAACATGTGGCAGGAAGTAGGAAAGG  
 CAATGTATGCCCCTCCCATATAAAAGGATTAATTAGATGTTTCATCAAAT---  
 ATTACAGGGCTGATATTAACAAGAGATGGTGGTAATGACAATAGCACA-----  
 -----  
 -----  
 AACACAACACTGAAATCTTCAGACCGGGAGGAGGAGATATGAGGGACAATTGGAGAAAGTGAATTATATAAAAT  
 ACAAAGTAGTAAGAGTTGAACCATTA---GGGATAGCACCCAACAAGGCAAAGAGGAGAGTGGTG-----  
 -----CAGAGAGAAAAAAGAGCA---GTGGGG---ATAGGAGCT---  
 -----TTGTTTCCTTGGGTTCTTGGGAGCA---GCAGGAAGCACTATG---GGCGCAGCGTCA---  
 GTGACGCTGACGGTACAA---GCCAGACAA---TTATTG---TCTGGTATAGTGCAACAGCAGAAC---  
 AATCTG---CTGAGG---GCTATTGAGGCGCAACAGCAACTGTTGCAGCTCACAGTCTGGGGCATC  
 >GU733713..2  
 TTCTACTGTAATACAACACTAGACTGTTCAATAGTACTTGAATGTTAGTACTTGAATATTAGTCAGACTGAAG  
 GGTCA-----  
 -----TAC---  
 AACACTGAAGAAAATATCACACTCCCATGCAGAATAAAACAGATTGTAAACATGTGGCAGGAAGTAGGAAAAG  
 CAATGTATGCCCCTCCCATCAGAGGAATAATTAGATGTTTCATCAAAT---  
 ATTACAGGGATAATGTTAACAAGAGATGGTGGTAAGAATAGGACAGAG-----  
 -----  
 -----  
 AACACCACTGAGACTTTCAGACCGGGAGGAGGAAATATGATGGACAATTGGAGAAAGTGAAGTATATAACTATA  
 AAGTAGTAAAAATTGAACCATTA---GGGGTAGCACCCACCAAGGCAAAGAGAAGAGTGGTG-----  
 -----CAGAGAGAAAAAAGAGCA---GCGGGA---CTAGGAGCT-----  
 ---TTGTTTCCTTGGGTTCTTGGGAGCA---GCAGGAAGCACTATG---GGCGCAGCGTCA---  
 CTGACGCTGACGGTACAG---GCCAGACAA---TTATTG---TCTGGTATAGTGCAACAGCAGAAC---  
 AATTTG---CTGAGA---GCTATTGAGGCGCAACAGCACCTGTTGCAACTCACAGTCTGGGGCATC  
 >MK164668..1  
 TTCTACTGTAATACAACAGAACTGTTTAATAGTACTTGGGGTAATAGTAATAATACTAACAATAACTGGA-  
 -----  
 -----  
 GGGGAAGAACTATCACTCTCCCATGCAGAATCAAACAAATTATAAACATGTGGCAGGAAGTAGGAAAAGCAA  
 TGTATGCCCCTCCCATCAGAGGACAAATTAGGTGTTTCATCAAAG---  
 ATTACAGGGCTAATATTAACAAGAGATGGTGGCAACGAGAACACGACAGTGAG-----  
 -----  
 -----  
 ATCTTCGAGATCTTCAGACCTACAGGAGGAAATATGAGGGACAATTGGAGAAAGTGAATTATACAAATATAAAG  
 TAGTAAAAATTGAACCATTA---GGAATAGCACCCACCAAGGCAAAAAGAAGAGTGGTG-----  
 -----CAGAGAGAAAAAAGAGCA---GTGGGAATACTAGGAGCT-----

ATGTTTCCTTGGGTTCTTGGGCGCA---GCAGGAAGCACTATG---GGCGCAGCGTCA---  
 CTGACGCTGACGGTACAG---GCCAGACAA---CTCTTG---TCTGGTATAGTGCAACAGCAGAAC---  
 AACCTG---CTGAGG---GCTATTGAGGCGCAACATCATCTGTTGCAACTCACAGTCTGGGGCATC  
 >KC935959..1  
 TTCTACTGTAATACAACAAAACCTGTTTAGTAGTACTTGGAAAGTGGGATAATGGTACTTGGAAATATTAGTGGGT  
 TAGATAACAGT-----  
 -----  
 ACAGAACAAAATATCACACTCCCATGCAGAATAAAACAAATCATAAATATGTGGCAGACAGTAGGAAAAGCAA  
 TGTATGCCCCCTCCCATTAAGGGACAAATTCATGTATATCAAAT---  
 ATTACAGGGCTGCTATTAACAAGAGATGGTGGTAATGAAAGTGATACA-----  
 -----  
 -----  
 ACCAGGAACAACGAGACCTTCAGACCGGGAGGAGAGATATGAGGGACAATTGGAGAAGTGAATTATATAAAAT  
 ATAAAGTAGTAGAAGTTGAACCATTA---GGAATAGCACCCACCAAGGCAAAGAGAAGAGTGGTG-----  
 -----CAGAGAGAAAAAAGAGCA---GTGACA---CTAGGAGCT---  
 -----CTGTTTCCTTGGGTTCTTGGGAGCA---GCAGGAAGCACTATG---GGCGCAGCATCA---  
 ATGACGCTGACGGTACAG---GCCAGACAA---TTATTG---TCTGGTATAGTGCAACAGCAGAAAT---  
 AATCTG---CTGAGG---GCTATTGAGGCGCAACAGCATCTGTTGCAGCTCACAGTCTGGGGCATC  
 >KM082006..2  
 TTCTACTATAACACAACCCAGCTGTTTGATAGTACGTGGTTAACTAATGGTACTAGGATAAGACCAAATACTA  
 CTGATGGA-----  
 -----  
 ACTAATGGAAATATCACACTTCCATGCAGAATAAAACAAATTATAAACAGGTGGCAAGAAGTAGGAAAAGCAA  
 TGTATGCCCCCTCCCATCAGAGGACAAATTAGATGTACATCAAAT---  
 ATTACAGGGTTAATATTAACAAGAGATGGTGGTCATGACGGGAAC-----  
 -----  
 -----  
 GAGACAAATGAGAAGGAGACCTTCAGACCTGGAGGAGGAGATATGAGGGACAATTGGAGAAGTGAATTATATA  
 AATATAAAGTAGTAAAAATTGAGCCAATA--GGAATAGCACCCACCATGGCAAAGAGAAGGTTGGTG-----  
 -----CAGAGAGAAAAAAGAGCA---GTAACG---  
 CTGGGAGCT-----ATGTTTCCTTGGGTTCTTGGGAGCA---GCAGGAAGCACTATG---  
 GGCGCAGCGTCG--ATGACGCTGACGGTACAG---GCCAGACTA---TTATTG---  
 TCTGGTATAGTGCAACAGCAGAGC---AATCTG---CTGAGA---  
 GCTATTGAGGCGCAACAGCAACTGTTGCAACTCACAGTCTGGGGCATC  
 >MG196775..3  
 TTCTATTGTAATACATCAGAACTGTTTAATAGTGAGTGGCATACTAATTATACATGGAATAGTACTTACAGTA  
 CAATAAAT-----GGTACTTGGAATAGTACT---  
 GACATTGAGGGTGTA-----  
 AACGCTACTGAAAAGATCACACTCCCATGTAGAATAAAACAAATTATAAACAGGTGGCAGGAAGTAGGAAAAG  
 CAATGTATGCCCCCTCCCATCGCAGGAACAATTAAATGTGTATCAAAT---  
 ATTACGGGGCTGCTGTTAACCAGAGACGGTGGCAACAATGAAACC-----  
 -----  
 -----  
 AAAGCCACTGAGGTCTTCAGACCTCAAGGAGGAAATATGAAGGACAATTGGAGAAGCGAATTATATAAATATA  
 AAGTAGTACAAATTGAACCATTA---GGAGTAGCACCCAACAAGGCAAAGAGAAGAGTGGTG-----  
 -----CAGAGAGAAAAAAGAGCA---ATAACA---ATAGGAGCT-----  
 ---ATGTTCCCTTGGGTTCTTGGGAGCA---GCAGGAAGCACTATG---GGCGCAGCGTCA---  
 ATGACGCTGACGGTACAG---GCCAGACAA---TTACTG---TCTGGTATAGTGCAACAGCAGAGC---  
 AATTTG---CTGAGA---GCTATTGAGGCGCAACAGCATCTGTTGCAACTCACAGTCTGGGGCATC  
 >JQ182826..2  
 TTCTACTGCAATACATCAGCACTGTTTAATAGTACTTGGAGTACTAAGAATGGTACTCAGGTGTTGAATATAA  
 CTAATGAC-----  
 -----  
 ACCAGCACCAACATCACACTCCCATGCAGAATAAAACAAATTATAAACATGTGGCAGGAAGTAGGAAAAGCAA  
 TGTATGCCCCCTCCCATCAGAGGACTAATTAGGTGTACATCAAAC---  
 ATTACAGGACTACTATTAACAAGAGATGGTGGTAATGGTAATGGCAATACCACG-----  
 -----  
 -----  
 AATGGGACAGAGACCTTCAGACCTGTAGGAGGAGATATGAAGAATAATTGGAGAAGTGAATTATATAAATATA  
 AAGTAGTACAAATTCAACCATTA---GGAGTAGCACCCACCAAGGCAAAGAGAAGAGTGGTG-----

-----CAGAGAGAGAAAAGGGAT---TTGGGA---CTAGGAGCT-----  
---TTGTTTCATTGGGTTCTTGGGAGCA---GCAGGAAGCACTATG---GGCGCAGCGTCA---  
ATAACGCTGACGGCACAG---GCCAGACAA---TTGCTG---TCTGGTATAGTGCAACAGCAGAGC---  
GATCTG---ATGAAG---GCTATTGAGGCGCAGCAGCATCTGTTGCAACTCACAGTCTGGGGCATC  
>KM353922..1  
TTCTATTGCGATACAACACAACCTGTTTAATAGTAGTTGGCCTTGAATGGTACA-----  
-----  
GAAGAGTCAAATAACACT-----  
GAAGGAAATGACACAATCACCTCCCATGCAAAATAAAACAAATTATAAACCTGTGGCAGGAAGTAGGAAAAG  
CAATGTATGCCCCCTCCCATCAGAGGACAAATTAATTGCACATCAAAT---  
ATTACAGGGTTACTATTAACAAGAGATGGTGGT-----  
-----  
-  
AGTACCAGCAATGAGACCGAGATCTTTAGACCTGCAGGAGGAGACATGAGAGATAATTGGAGAAGTGAATTAT  
ATAAATACAAAGTAGTAAAAATTGAACCAATA---GGAGTAGCACCCACCAGGGCAAAGAGAAGAGTGGTG--  
-----CAGAGAGAAAAAAGAGCA---GTGGGA---  
TTAGGAGCT-----ATGTTCCCTTGGGTTCTTGGGAGCA---GCAGGAAGCACTATG---  
GGCGCAGCGTCA---GTGACGCTGACGGTACAG---GCCAGACAA---TTACTG---  
TCTGGTATAGTGCAACAGCAGAAC---AATTTG---CTGAGG---  
GCTATTGAGGCGCAACATCATCTGTTGCAACTCACAGTCTGGGGCATC  
>KM354862..1  
TTCTACTGTAATACAACACAACCTATTTAATAGTAATTGGACTGCTACTGGA-----  
-----  
-AATACAAATAACACT-----  
GGAGGAAATGCCACAATCACACTCCCTTGCAGAATAAAACAACTTATAAACATGTGGCAGGGAGTAGGAAAAG  
CAATGTATGCCCCCTCCAATAAGAGGACTAATTAGATGTTTCATCAAAC---  
ATTACAGGGCTACTGTTAACAAGAGATGGTGGT-----  
-----  
GGTAGCAATGGAACCTAAT---  
GGAAC TGAGGTCTTCAGACCTCATGGAGGGGATATAAGGGACAATTGGAGAAGTGAATTATATAAATACAAAG  
TAGTAAAAATTGAACCATTA---GGAGTAGCACCCAACAAGGCAGAGAGAAGAGTGGTG-----  
-----CAGAGAGAAAAAAGAGCA---GTGACA---ATAGGAGCT-----  
GTGTTCCCTTGGGTTCTTGGGAGCA---GCAGGAAGCACTATG---GGCGCAGCGTCA---  
ATGACGCTGACGGTACAG---GCCAGACAA---CTATTG---TCTGGTATAGTGCAACAGCAAAGC---  
AATTTG---CTGAGG---GCTATTGAGGCGCAACAGCACCTGTTGCAACTCACAGTCTGGGGCATC  
>KX587241..1  
TTCTACTGTAATACGACACAACCTGTTTAATAATACTTGAATGGTACTTGGGGTGAGAATATT-----  
-----  
-----  
ACCGGGAATATTATCACACTCCCATGCAGAATAAAACAAATTATAAACATGTGGCAGGAAGTAGGAAAAGCAA  
TGTATGCCCCCTCCCATCAGAGGAAATATTAGCTGTTTCATCAGAT---  
ATTACAGGGCTAATATTAACAAGAGATGGTGGTCATGACAATGAGACC-----  
-----  
-----  
AACACACAGCGATCTTCAGACCAGGAGGAGGAAATATGAAGGACAATTGGAGAAGTGAATTATATAAATATA  
AAGTAGTAAAAATTGAACCAATA---GGAGTAGCACCCACCAAGGCAAAGAGAAGAGTGGTG-----  
-----CAGAGAGAAAAAAGAGCA---GTGGGA---GTAGGAGCT-----  
---GTGCTCCTTGGGTTCTTGTACAGCA---GCAGGAAGCACTATG---GGCGCAGCGTCA---  
ATAACGCTGACGGCACAG---GCCAGACAA---TTACTG---TCTGGTATAGTGCAACAGCAAAAC---  
AATTTG---CTGAGA---GCTATTGAGGCGCAACAACATATGTTGCAACTCACAGTCTGGGGCATC  
>KX587299..1  
TTCTACTGTAATACAACAAAGCTGTTTAATAGTACTTGGGATAATACAACCTGCAGGGTTAAATACC-----  
-----  
-----  
ACTGAAAAAATTATCACACTCCCATGCAGAATAAGACAAATTATAAATATGTGGCAGCAGGTAGGAAAAGCAA  
TGTATGCCCCCTCCTATCAGAGGAAAAATCCAATGCACATCAAAC---  
ATTACAGGGTTATTATTAACAAGAGATGGTGGTAACGAGAACGAGACC-----  
-----  
-----  
TATAACAATGAGACTTTCAGACCTGGAGGAGGAGATATGAAGGACAATTGGAGAAGTGAATTATATAAATATA

AAGTAGTAAGAATTGAACCATTA---GGAATAGCACCCACCAAGGCAAAAAGAAGAGTGGTG-----  
-----CAGAGAGAAAAAAGAGCA---ATAGGA---ATGGGAGCC-----  
---TTCTTCCTTGGGTTCTTGGGAGCG---GCCGGAAGCACTATG---GGCGCAGCGTCA---  
ATGGCGCTGACGGTACAG---GCCAGACAA---TTATTG---TCTGGTATAGTGCAGCAGCAAAAC---  
AACTTG---CTGAGG---GCTATTGAGGCGCAACAGCATCTGTTGCAACTCACAGTCTGGGGCATC  
>MG900412..2  
TTCTACTGTAATTCAACAAAGCTGTTTAATAGTACTTGGCCTTGGAATGATACTCAAGGGTCACATGAC----  
-----  
-----  
ACTAATGGCACACTCACACTCCCATGCAGAATAAAACAAATTATAAACATGTGGCAGGAAGTAGGAAAAGCAA  
TGTATGCCCCCTCCCATCGAAGGAATAATTAAATGCTCATCAAAC---  
ATTACAGGACTGTTATTAACAAGAGATGGTGGTTACGAGAGCAAT-----  
-----  
-----  
AAGACTGATGAGATCTTCAGACCTGGAGGAGGAGATATGAGGGACAATTGGAGGAGTGAATTATATAAATATA  
AAGTAGTAAAAATTGAACCATTG---GGAGTAGCACCTACCAAGGCAAAGAGGAGAGTGGTG-----  
-----CAGAGGGAAAAAAGAGCA---TTTGGA---CTAGGAGCT-----  
---GTGTTCCCTTGGGTTCTTGGGAGCA---GCAGGAAGCACTATG---GGCGCAGCATCA---  
ATAACGCTGACGGTACAG---GCCAGACAA---TTATTG---TCTGGTATAGTGCAACAGCAGAAC---  
AATTTG---CTGAGG---GCTATTGAGGCGCAACAGCATCTGTTGCAACTCACAGTCTGGGGCATT  
>KC473826..1  
TTCTACTGTAATTCAACACAGCTGTTTAGTAGTAATTGGACTAGGGATAATACGTCTAGTAATTGGACTAGGA  
AGGATAAC-----  
-----GATACAGAG-----  
CCTAATAAGACTGTGATCACACTCCCATGCAGAATAAAACAAATTATAAACATGTGGCAGGAAGTAGGAAAAG  
CAATGTATGCCCCCTCCTATCAAAGGACTTATTCAATGTTTCATCAAAT---  
ATTACAGGATTGTTATTAACAAGAGATGGTGGCGACAACAATAGC-----  
-----  
-----  
AACACTGAAATCTTTAGACCTGGAGGAGGAGATATGAGGGACAATTGGAGAAGTGAATTATACAAATATAAAG  
TAGTAAAAATTGAACCATTA---GGAGTAGCACCCACCAAGGCAAGGAGGAGAGTGGTG-----  
-----CAAAGAGAGAAAAAGAGCA---TTGGGA---ATGGGAGCT-----  
CTGTTCCCTTGGGTTCTTGGGAGCA---GCAGGAAGCACTATG---GGCGCAGCGTCA---  
TTGATGCTGACGGTACAG---GCCAGACAA---TTATTG---TCTGGTATAGTGCAACAGCAGAAC---  
AATATG---CTGAGG---GCTATTGAGGCGCAGCAGCATCTGCTGCAACTCACAGTCTGGGGCATC  
>KC473828..1  
TTCTACTGTAATACAACAAAGCTGTTTAATAGCACTCTTAATGACACTTGGAATTTTGGGAAT-----  
-----  
-----  
GAAACTGGGGATATCATACTCCCGTGCAGAATAAAACAAATTATAAATCTGTGGCAGAAAGTAGGAAAAGCAA  
TGTATGCCCCCTCCCATTAAGGACAGATTAACTGCACATCAAAT---  
ATTACAGGGCTACTCTTAATAAGAGATGGCGGTGATAACGGGACT-----  
-----  
-----  
GCCAGTGAGACCTTCAGACCTCAAGGAGGAAATATGAAGGACAATTGGAGAAGTGAATTATATAAATATAAAG  
TAGCACAAGTTGAGCCAATA---GGAATAGCACCCACCAAGGCAAAGAGAAGAGTGGTG-----  
-----CAGAGAGAAAAAAGAGCA---GTGACT---ATGGGAGCT-----  
TTGTTCCCTTGGGTTCTTGGGAACA---GCAGGAAGCACTATG---GGCGCAGCGTCG---  
ATAACGCTGACGGTACAG---GCCAGACAA---TTACTG---TCTGGTATAGTGCAACAGCAGAGC---  
AATCTG---CTGAGA---GCTATTGAGGCGCAACAGCATCTGTTGCAACTCACAGTCTGGGGCATC  
>KC473829..1  
TTCTACTGTAATACGACAGAACTGTTTAATAGTTCTTGGTATTGGAATGATACGAATGATACTTTAAAGAGC-  
-----  
-----  
AATGAAGAAAATATCACACTTCTGTGCAGAATAAAACAAATTGTAAACATGTGGCAGGAAGTAGGAAAAGCAA  
TGTATGCCCCCTCCCATTAGAGGACCAATTAGCTGTACATCAAAT---  
ATTACAGGGATACTCTTAACAAGAGATGGAGGTCAGGGTAATAATACT-----  
-----  
-----  
AATGATACTGAAATCTTCAGACCAGGAGGAGGAGATATGAGGGACAATTGGAGAAGTGAATTATATAAATATA

AAGTAGTAAAAATTGAACCATTA---GGAGTAGCACCCACCAGGGCAAAAAGAAGAGTGGTA-----  
-----CAGAGAGAAAAAAGAGCA---ATAGGGGGATTAGGAGCG-----  
---TTGTTCCCTTGGGTTCTTGGGAGCA---GCAGGAAGCACTATG---GGCGCAGCGTCA---  
ATGACGCTGACGGTACAA---GCCAGGCTA---TTATTG---ACTGGTATAGTGCAACAGCAAAAT---  
AATTTG---CTGAAG---GCTATTGAGGCGCAACAACATCTGTTGCAACTCACAGTCTGGGGCATT  
>KC473830..1  
TTCTACTGTGATTCAACACAACCTGTTTAGTAGTAATTGGACTAGGAATGATAGTAGTAGTAATTGGACTAGGA  
GTGATAATGAT-----  
-----ACAGAG-----  
TCTAACAATACTGTGATCACACTCCCATGCAGAATAAGACAAATTATAAACATGTGGCAGGAAGTAGGAAAAG  
CAATGTATGCCCCCTCCTATCAAAGGACTTATTCAATGTACATCAAAT---  
ATTACAGGATTATTATTAACAAGAGATGGTGGTAATGGTAATAAA-----  
-----  
-----  
ACGAACGACACTCTGGAGATCTTTAGACCTGGAGGAGGAGATATGAGGGACAATTGGAGAAGTGAATTGTACA  
AATATAAAGTAGTAAAAATTGAACCATTA---GGAGTAGCACCCACCAAGGCAAGGAGGAGAGTGGTG-----  
-----CAAAGAGAGAAAAGAGCA---GTGGGA---  
CTAGGAGCT-----CTGTTCCCTTGGGTTCTTGTCTAGCA---GCAGGAAGCACTATG---  
GGCGCAGCATCA---TTGACGCTGACGGTACAG---GCCAGACAA---TTACTG---  
TCTGGTATAGTGCAACAGCAGAAC---AATATG---CTGAGG---  
GCTATTGAGGCGCAACAGCATCTGTTGCAACTCACAGTCTGGGGCATC  
>KU677990..1  
TTCTACTGTAATACATCAAGACTGTTTAATAGTACTTTGTATAGTAATAATACTTGGAGTAGTAATATTACAG  
AA-----  
-----  
TTAAATGGCATTATCACACTCCCATGCAGAATAAAACAAATTGTAAACATGTGGCAGGAAGTAGGAAAAGCAA  
TGTATGCCCCCTCCCATCAGTGGACAAATTAACTGTTTCATCAAAC---  
ATTACAGGACTATTATTAACAAGAGATGGTGGTGATGAGGAGAAC-----  
-----  
-----  
AAGACTGATGAGATTTTCAGACCTGGAGGAGGAGATATGAGGGACAATTGGAGAAGTGAAGTATATAAATATA  
AAGTAGTAAAAATTGAACCATTA---GGAGTAGCACCCCTCCAGGGCAAAGAGAAGAGTGGTG-----  
-----CAGAGAGAAAAAAGAGCA---GTGGGA---CTAGGAGCT-----  
---TTGTTTCATTGGGTTCTTGGGAGCA---GCAGGAAGCACTATG---GGCGCAGCGTCA---  
GTGACGCTGACGGTACAG---GCCAGACAA---TTATTG---TCTGGTATAGTGCAACAGCAGAAC---  
AATTTG---CTGAGG---GCTATTGAGGCGCAACATCATCTGTTGCAACTCACAGTCTGGGGCATC  
>KF384800..1  
TTCTACTGTAATACAACAGGACTGTTTAATAGTACTTGAATAGTACTAGTACTGAGCTAAATGAC-----  
-----  
-----  
ACTACAGGAAATATCAAACCTCCCATGCAGAATAAAACAAATTATAAACATGTGGCAGAAAGTAGGAAAAGCAA  
TGTATGCCCCCTCCCATAGAAGGAGTAATTCAATGTTTCATCAAAT---  
ATTACAGGGCTAATATTAACAAGAGATGGTGGTGGTGGTAACGATACGATG-----  
-----  
-----  
GGGAACGAGACCTTCAGACCGGGAGGGGAGATATGAGGGACAATTGGAGGAGTGAAGTATATAGATATAAAG  
TAGTAAAAATTGAACCATTA---GGAATAGCACCCACCAAGGCAAAGAGAAGAGTGGTG-----  
-----CAGAGAGAAAAAAGAGCA---GTG-----ATAGGAGCG-----  
ATGTTCCCTTGGGTTCTTGGGAGCA---GCAGGAAGCACTATG---GGCGCAGCGGCA---  
GTGACGCTGACGGTACAG---GCCAGACTA---TTATTG---TCTGGTATAGTGCAACAGCAAAAC---  
AACTTG---CTGAGA---GCTATTGAGGCGCAACAGCATATGTTGCAACTCACAGTCTGGGGCATT  
>KF384801..1  
TTTTACTGTAATACATCACAACCTGTTTAAGAGTACTTGGTGGACAAATAATACTCGGAATATACCA-----  
-----  
-----  
CTACAAGGAAATGTCAACTCCCATGCAAAATAAAGCAAATTATAAACATGTGGCAAGAAGTAGGAAAAGCAA  
TGTATGCCCCCTCCCATCGGAGGACTAATTAATTGTACATCAAAT---  
ATTACAGGGCTGCTATTAACAAGAGATGGTGGTATAACGAATGGG-----  
-----  
-----

ACTGAGACCTTCAGACCTGGAGGGGGAGATATGAGGGACAATTGGAGAAGTGAATTATATAAAATATAAAGTAA  
TAAAAATTCAACCATTA---GGGATAGCACCCACCAAGGCAAAGAGAAGAGTGGTG-----  
-----CAGAGAGAAAAAAGAGCA---GTGGGA---GTGGGAGCT-----  
TTGTTCCCTTGGGTTCTTGGGAGCA---GCAGGAAGCACTATG---GGCGCAGCGTCC---  
GTAACGCTGACGGTACAG---GCCAGACAA---TTATTG---TCTGGTATAGTGCAACAGCAGAGC---  
AATCTG---CTGAGG---GCTATTGAGGCGCAACAACATCTGTTGCAACTCACAGTCTGGGGCATT  
>KF384803..1  
TTCTACTGTAATTCAACACCACTGTTTAATAGTACCTGGGAAAATGGTACTTGGACGAATGAGAGTGGTATTG  
GA-----  
-----  
GGATCAGATAATATCACACTTCCATGCAGAATAAAACAAATTATAAACCTGTGGCAGGAAGTAGGAAAAGCAA  
TGTATGCTCCTCCCATCGAAGGACAAATTAGATGTTTCATCAAAT---  
ATTACAGGGCTGTTATTAACAAGAGATGGTGGTTCTAATCAGACT-----  
-----  
-----  
AACGAGACCTTCAGACCTGGAGGAGGAGATATGAGGGACAATTGGAGAAGTGAATTATATAAAATATAAAGTAG  
TAAAAATTGAACCATTA---GGATTAGCACCCACCAAGGCAAAGAGAAGAGTGGTG-----  
-----CAGAGAGAAAAAAGAGCA---GCAGGA---CTGGGAGCT-----  
CTGTTCCCTTGGGTTCTTGGGAGCA---GCAGGAAGCACTATG---GGCGCAGCGTCA---  
ATGACGCTGACGGTACAG---GCCAGACTA---TTATTG---TCTGGTATAGTGCAACAGCAGAAC---  
AATTTG---CTGAGA---GCTATTGAGGCGCAACAGCATCTGTTGCAACTCACAGTCTGGGGCATT  
>KF384804..1  
TTCTATTGTAATACAACAACACTGTTTAATAGTACTTGGAAATGTTACTGATCCTTGGAAATCTCCTGGAGGGT  
CAAAT-----  
-----  
AACACTGGAGATATCACACTCCCATGCAGAATAAAACAAATTGTGAACAGGTGGCAGGAAGTAGGAAAAGCAA  
TGTATGCCCCCTCCAATCTCAGGATATATTAAGTGTTCATCAAAA---  
ATTACAGGGCTGATATTAACAAGAGATGGTGGTTATAACACCACC-----  
-----  
-----  
AATGAGACTGAGATCTTCAGACCTGGAGGAGGAGATATGAGGGACAATTGGAGAAGTGAATTATATAAAATATA  
AAGTAGTAAGAATTGAACCATTA---GGAATAGCACCTACCACGGCAAAGAGAAGGGTGGTG-----  
-----CAGAGAGAAAAAAGAGCA---GTGGGA---ATGGGAGCG-----  
---TTGTTCCCTTGGGTTCTTGGGAGCA---GCAGGAAGCACTATG---GGCGCAGCGTCA---  
ATGATGCTGACGGTACAG---GCCAGACAA---TTATTG---TCTGGTATAGTGCAACAGCAGAAC---  
AATCTG---CTGAGG---GCTATTGAGGCGCAACAACATCTGTTGCAACTCACAGTCTGGGGCATC  
>KF384807..1  
TTCTACTGTAACACAACAACACTGTTCAATAGTACTTGGGATGGGAATGATACTACTGAAAGGTCAAAGAGTA  
CTGAAGAA-----  
-----  
AATGCAACAATCATCACAATCCCATGCAGAATAAAACAAATTATAAACATGTGGCAGAAAGTAGGAAAAGCAA  
TATATGCCCCCTCCCATCAAAGGAAACATTAGTTGTTTCATCAAAT---  
ATTACAGGGCTGCTATTAACAAGAGATGGTGGGAATAACGAGGAC-----  
-----  
-----  
AGCACCAATGAGACCTTCAGACCTCAAGGAGGAGATATGAGGGACAATTGGAGAAGTGAAGTATATAAATACA  
AAGTAGTAAGAATTGAACCATTA---GGAATAGCACCCACCAAGGCAAGGAGAAGAGTGGTG-----  
-----CAGAGAGAAAAAAGAGCA---GTGGGA---ATAGGAGCT-----  
---TTGTTCCCTTGGGTTCTTGGGAGCA---GCAGGAAGCACTATG---GGCGCAGCGTCG---  
CTGACGCTGACGGTACAG---GCCAGACAA---TTATTG---TCTGGTATAGTGCAACAGCAGAAC---  
AATCTG---CTGAGA---GCTATTGAGGCGCAACAGCATATGTTGCAACTCACAGTCTGGGGCATC  
>KF384811..1  
TTCTACTGTAATTCATCAAACTGTTTAATAATACTTGGAAATGGTACTAACTGGACAGATACATGGTATAATA  
GC-----  
-----  
ACAAATGAAACTATCATACTCCCGTGCAGAATAAAACAAAGTTATAAACATGTGGCAGGAAGTAGGAAAAGCAA  
TGTATGCCCCCTCCCATCAGAGGAAAAATTAAATGTAAATCAAAC---  
ATTACAGGGCTGTTGTTAACAAGAGATGGCGGTGGTGGGAGCAATGAA-----  
-----  
-----

ACCACCGAGACCTTCAGACCTGGAGGAGGAAATATGAGGGACAATTGGAGAAGTGAATTATATAAATATAAAG  
 TAGTAAAAATTCAACCAGTA---GGCTTGGCACCCACCAGGGCAAAAAGAAGAGTGGTG-----  
 -----CAGAGAGAAAAAAGAGCA---GTAACA---CTGGGAGCT-----  
 GTGTTCTTGGGTTCTTGGGAGCA---GCAGGAAGCACTATG---GGCGCAGCGTCA---  
 ATGACGCTGACGGTACAG---GCCAGACAA---TTATTG---TCTGGTATAGTGCAACAGCAGAGC---  
 AATTTG---CTGAAA---GCTATTGAGGCGCAACAGCATCTGTTGCAACTCACAGTCTGGGGCATT  
 >KX156409..2  
 TTTTACTGTAATACAACAAAACCTGTTCAATAGTACTTGGGAATAGTAATAGTACTAGCAACAACACTAAAGGA-  
 -----  
 -----  
 AATGAGACTATTATCGAAATACCATGCAGGATAAGACAAAATTATAAACATGTGGCAGCAAGTAGGAAGAGCAA  
 TGTATGCCCCCTCCCATCAGAGGACTAATTAGATGTTTCATCAAAC---  
 ATTACAGGACTAATATTAACAAGAGATGGTGGTCATAATCAGGCC-----  
 -----  
 -----  
 AATGACAGTGAGATCTTCAGACCTGGAGGAGGAGATATGAGGGACAATTGGAGAAGTGAATTATATAAATATA  
 AAGTAGTAAGAATTGAACCATTA---GGAATAGCACCCACCAAGGCAAAAAGAAGAGTGGTG-----  
 -----CAGAGAGAAAAAAGAGCA---GTGGGA---CTAGGAGCT-----  
 ---ATGTTCTTGGGTTCTTAGGAGCA---GCAGGAAGCACTATG---GGCGCAGCGTCA---  
 GTGACGCTGACGGTACAA---GCCAGACAA---TTATTG---TCTGGTATAGTGCAACAGCAGAAC---  
 AATTTG---CTGAGA---GCTATTGAGGCGCAACAGCATATGTTGCAACTCACAGTCTGGGGCATT  
 >KY778615..1  
 TTCTACTGTAATACATCAAAGTTGTTTAACAGTACTTGGAAATGGCACTGAGGAAAACCAGGGA-----  
 -----  
 -----  
 GTGAATGGCACACTCACACTCCCATGCAGAATAAAACAAATCATAAACATGTGGCAGAAAGTAGGAAAAGCAA  
 TGTATGCCCCCTCCCATCCAGGGAAATATTAATTGCTCATCAAAT---  
 ATTACAGGGCTGCTATTAATGAGAGATGGTGGTAACAAGGGGAACGGAACC-----  
 -----  
 -----  
 GATAATACTACCGAGATCTTTAGACCTGGAGGAGGAAATATGAGGGACAATTGGAGAAGTGAATTATATAAAT  
 ATAAAGTAGTGAGAATTGAACCATTA---GGAGTAGCACCCACCAAGGCAAAAAGAAGAGTGGTG-----  
 -----CAGAGAGAAAAAAGAGCG---GTAACA---GTGGGAGCT---  
 -----ATGTTCTTGGGTTCTTGGGAGCA---GCAGGAAGCACTATG---GGCGCAGCATCA---  
 TTGACGCTGACGGTACAG---GCCAGACAA---TTATTG---TCTGGTATAGTGCAACAGCAAAGC---  
 AATTTG---CTGAAG---GCTATTCAGGCGCAACAGCATCTGTTGCAGCTCACAGTCTGGGGCATT  
 >KT124768..1  
 TTCTACTGTAATACATCAGAACTGTTTAATAGTACTTGGTATAACAGTACATACAATGAGACTGCACCA---  
 -----  
 -----  
 GGCAATGAAACAATCACACTCCCATGCAAAATAAGGCAGTTTGTAAACAGGTGGCAGGAAGTAGGAAAAGCAA  
 TGTATGCCCCCTCCCATCAGAGGAATAATTAGATGTTTATCAAAT---  
 ATTACAGGATTGATATTAACAAGAGATGGGGGTATCTATAATAAC-----  
 -----  
 -----  
 ACGAATGGGACCATT---  
 GGAATGAGACTTTTCAGACCTGGAGGGGGAGATATGAGGGACAATTGGAGAAGTGAATTATATAAATATAAAG  
 TAGTAAAAATTGAACCATTA---GGAGTAGCACCCACCAAGCAAGGAGAAGAGTGGTG-----  
 -----CAGAGAGAAAAAAGAGCA---GTGGGA---TTCGGAGCT-----  
 ATGTTCTTGGGTTCTTGGGAGCA---GCAGGAAGCACTATG---GGCGCAGCGTCA---  
 GTGACGCTGACGGTACAG---GCCAGGCAA---TTATTG---TCTGGTATAGTGACAGCAAAAC---  
 AACTTG---CTGAGG---GCTATTGAGGCGCAACAGCATATGTTGCAACTCACAGTCTGGGGCATT  
 >MG196879..1  
 TTCTACTGTAATACAACGCAACTGTTTAGGGGTAATGGTACTGGTAATGGTACTGGAGAG-----  
 -----  
 -----  
 TCAAGTGACATTGTTCACACTCCCATGCAGAATAAAACAAATTGTAAACATGTGGCAGAAAGTAGGAAAAGCTA  
 TGTATGCCCCCTCCCATCAAAGGACTAATTAGATGTTTCATCAAAT---  
 ATTACAGGGCTAATATTAACAAGAGATGGTAGTAATAAAAGTAAA-----  
 -----  
 -----

AGTGATCCAGAGATCTTCAGACCTGCAGGAGGAGATATGAGGGACAATTGGAGAAGTGAATTATATAAATATA  
 AAGTAGTAAAAATTCAACCATTA---GGAGTAGCACCCACCAAGGCAAAGAGAAGAGTGGTG-----  
 -----CAGAGAGAAAAAAGAGCA---GTGGGA---ATAGGAGCT-----  
 ---GTGTTCCCTTGGGTTCTTAGGAGCA---GCAGGAAGCACTATG---GGCGCAGCGTCA---  
 ATAACGCTGACGGTACAG---GCCAGACAA---TTATTG---TCTGGTATAGTGCAACAGCAGAAC---  
 AATCTG---CTGAGA---GCTATTGAGGCGCAACAGCATCTGTTGCAACTCACAGTCTGGGGCATC  
 >MG197013..1  
 TTCTACTGTAATACAACACAGCTGTTTAATAGCACTTGGAATAGCACGACTAATAATGACACTGAAGGATCA-  
 -----  
 -----  
 AGTAATGCTACGATCACACTCCCATGTAGAATAAGACAAATTATAAACATGTGGCAGACAGTAGGAAAAGCAA  
 TGTATGCCCCCTCCCATCAGAGGAGAGATTAGCTGTTTCATCAAAT---  
 ATTACAGGGCTGCTGTTAAACAAGAGATGGT---AATACCAATCACACT-----  
 -----  
 -----  
 GATGCCACTGAGACCTTTAGACCTGGAGGAGGAGATATGAGGGACAATTGGAGAAGTGAATTATATAAATATA  
 AAGTGATACAACCTTGAACCAATA---GGAGTAGCACCCACCAAGGCAAAGAGAAGAGTGGTG-----  
 -----CAAAGAGAAAAAAGAGCA---GTGGGGGCAATAGGAGCT-----  
 ---ATGTTCCCTTGGGTTCTTGGGAGCA---GCAGGAAGCACTATG---GGCGCAGCGTCA---  
 ATAACGCTGACGGTACAG---GCCAGACTA---TTATTG---TCTGGTATTGTGCAACAGCAAAAC---  
 AATTTG---CTGAGG---GCTATTGAGGCGCAACAGCATCTGTTGCAACTCACAGTCTGGGGCATC  
 >MG197046..2  
 TTCTACTGTAATACCTCAAACTGTTTAACAGTACATGGCCAAATAATACTAAAAATGCTAATATC-----  
 -----  
 -----  
 ACTGAAGGAAGTATCACACTCCCGTGCAGAATAAAACAAATTATAAACATGTGGCAGGAAGTAGGAAAGGCAA  
 TGTATGCCCCCTCCCATCAGAGGACAACCTTAACTGTTTCATCAAAT---  
 ATTACAGGGCTGCTATTAACAAGAGATGGGGGTTATAATCAGGCG-----  
 -----  
 -----  
 AACAAATAGCGAGACCTTCAGACCGGGAGGAGGAGATATGAGGAACAATTGGAGAAGTGAATTATATAAATATA  
 AAGTAGTAAGAGTTGAACCATTA---GGAGTAGCACCCACCAAGGCAAAGAGAAGAGTGGTG-----  
 -----CAAAGAGAAAAGAGAGCA---GTGGGA---ATGGGAGCT-----  
 ---TTGTTCCCTTGGGTTCTTGGGAGCA---GCAGGAAGCACTATG---GGCGCAGCGTCA---  
 CTAACGCTGACGGTACAA---GCCAGACAA---TTATTG---TCTGGTATAGTGCAACAGCAAAAC---  
 AATTTG---CTGAGA---GCTATTGAGGCGCAGCAGCATATGTTGCAACTCACAGTCTGGGGCATC  
 >MG197064..1  
 TTCTACTGTAATACATCAAACTGTTTAACAATACCTGGACTAAGGGTACTTGGAATAGTACATGGTCATGGG  
 CA-----  
 -----  
 AATGAACTAACATCACACTCCCATGCAGAATAAAACAGATTATAAACATGTGGCAGGAAGTAGGAAAAGCAA  
 TGTATGCCCCCTCCCATCGAAGGAATAATTAGATGTGCCTCAAAC---  
 ATTACAGGGCTGCTATTAACAAGAGATGGTGGTAAACATGATAATATTACC-----  
 -----  
 -----  
 ATTAATGGTAATGTCATTGACTATAAC-----  
 ACCACCGAGGTCTTCAGACCTGGAGGGGAGATATGAGGGACAATTGGAGAAGTGAATTATATAAATACAAAG  
 TAGTACAAATTGAACCATTA---GGAGTAGCACCCACTAAGGCAAAAAGAAGAGTGGTG-----  
 -----CAGAGAGAAAAAAGAGCA---GTGGTA---CTAGGAGCT-----  
 TTGTTCCCTTGGGTTCTTGGGAGCA---GCAGGAAGCACTATG---GGCGCAGCGTCA---  
 ATGACGCTGACGGTACAG---GCCAGACTA---TTATTG---TCTGGTATAGTGCAACAGCAGAAC---  
 AATTTG---CTGAGG---GCTATTGAGGCGCAACACATCTGTTGCAACTCACAGTCTGGGGCATT  
 >MG197113..2  
 TTCTACTGTAACACATCAAAGTTGTTTAATAGCACTTGGAATATAATAATGCTACAGGAAACACTGAAGGAA  
 ATAGCACACAA-----  
 -----  
 -----  
 GGAAATATCACACTCATCACACTCCCATGCAGAATAAAACAGATTATAAACAGGTGGCAGGAAGTAGGAAAAG  
 CAATGTATGCCCCCTCCCATCAGCGGACAAATTAAGTGTTCATCAAAT---  
 ATTACAGGACTACTATTAACAAGAGATGGTGGTCATAATAACAAT-----  
 -----  
 -----

AGCACAATTGAGACCTTTAGACCTACAGGAGGAGATATGAGGAACAATTGGAGAAGTGAATTATATAAATATA  
 AAGTAGTAAAAATTGAGCCATTA---GGAATAGCACCCACCAAGGCCAAAAGAAGAGTGGTG-----  
 -----CAGAGAGAAAAAAGAGCA---GTAGGAACGCTGGGAGCT-----  
 ---ATGTTCCCTTGGGTTCTTAGGAGCA---GCAGGAAGCACTATG---GGCGCAGCGTCA---  
 GTGACGTTGACGGTACAG---GCCAGACTA---TTATTG---TCTGGTATAGTGCAGCAGCAGAGC---  
 AAGCTG---CTGAGG---GCTATTGAGGCGCAACAGCATATGTTGCAACTCACAGTCTGGGGCATC  
 >KM355159..1  
 TTCTATTGTAATTTAACAAAACCTGTTTAATAGTACTTGGGAATAAGACTGAAGGGCCTTGG-----  
 -----  
 AATGTTACTGAAGAGTATGGG-----  
 AATATTACTGACCCTATCATACTCCCATGCAGAATAAAACAAATTATAAACATGTGGCAGAGAGTAGGAAGGG  
 CAATGTATGCCCTCCCATCAAAGGCCAACTTCAATGTACATCAAAT---  
 ATTACAGGGCTCCTATTAAACAAGAGATGGTGGT-----  
 -----  
 -  
 AAGGTGAATAATGAGACTGAGATCTTTAGGCCTGCAGGAGGAGATATGAGGGACAATTGGAGAAGCGAATTAT  
 AATAATATAAAGTAGTAAAAATTGAACCATTA---GGAATAGCACCCACCAGGGCGAAGAGAAGAGTGGTG--  
 -----CAGAGAGAAAAAAGAGCA---GTGGGA---  
 TTAGGAGCT-----ATGTTCCCTTGGGTTCTTGGGAGCA---GCAGGAAGCACTATG---  
 GGCGCAGCGGCA---GTGACGCTGACGGTACAG---GCCAGACAA---TTATTG---  
 TCTGGTATAGTGCAGCAGCAGAAC---AATCTG---CTGAAG---  
 GCTATTGAGGCGCAGCAGCATCTGTTGCAACTCACAGTCTGGGGCATC  
 >MG196745..1  
 TTCTACTGTAATTCAACACCACTGTTTAATGGGACTTGGCAGAATATGACGAATATTACT-----  
 -----  
 -----  
 GAAAACTTAAATATCACACTCCCATGCAGAATAAAGCAGATTATAAACATGTGGCAGAAAGTAGGAAAAGCAA  
 TGTATGCCCCCTCCCATCAGTGGAAGTATTCAATGTTTCATCAAAC---  
 ATTACAGGGCTACTGTTAAACAAGAGATGGTGGCATCACTAATAACACTAATAGC-----  
 -----  
 -----  
 AGTAATGATGAGACCTTCAGACCTGGAGGGGGAGATATGAGGGACAATTGGAGAAGTGAATTATATAAATATA  
 AAGTAGTAAAAATTGAACCTTTA---GGATTAGCACCCACCAGGGCAAGGAGACTAGTGGTG-----  
 -----CAAAGAGACAAAAGAGCA---GTGGGA---ATGGGAGCT-----  
 ---ATGTTCCCTTGGGTTCTTGGGAGCA---GCAGGAAGCACTATG---GGCGCGGCGTCA---  
 ATGACGCTGACGGTACAG---GCCAGACAA---TTATTG---TCTGGTATAGTGCAACAGCAAAAC---  
 AACTTG---CTGAAG---GCTATTGAGGCGCAACAGCACCTGTTGCGACTCACAGTCTGGGGCATC  
 >MG196964..1  
 TTCTACTGTAATACAACAAAATTGTTTAATAGTACTTGGACTGAGAATAGTACTGAAGGGTCAAAC-----  
 -----  
 -----  
 AGCACTGAAATAATCACACTCCCATGCAGGATAAAACAAATTATAAACATGTGGCAGAGAGTAGGGAGAGCAA  
 TGTATGCCCCCTCCCATCAAAGGACCAATTAGATGTTTCATCAAAT---  
 ATTACAGGGCTGCTATTAAACAAGAGATGGTGGTCATAATATGACT-----  
 -----  
 -----  
 AATGATAGTGAGACCTTCAGACCTGTGGGAGGAGATATGAAGAACAATTGGAGAAGTGAATTATATAAATATA  
 AAGTAGTAAAAGTCGAACCATTA---GGAGTAGCACCCACCAAGGCAAGGAGAAGAGTGGTG-----  
 -----CAGAGAGAGAAAAAGAGCA---GTGGGA---ATAGGAGCT-----  
 ---GTGTTCCCTTGGGTTCTTGGGAGCA---GCAGGAAGCACTATG---GGCGCAGCGTCA---  
 ATGACGCTGACGGTACAG---GCCAGACAA---CTATTG---TCTGGTATAGTGCAACAGCAGAAC---  
 AACTTG---CTAAGA---GCTATTGAAGCGCAACAGCATCTGTTGCAGCTCACAGTCTGGGGCATT  
 >MG197035..1  
 TTCTACTGTGATACAACACAACCTGTTCAATATTACTTGGGATACTAACAACACTAGTAATAGCAATGGTACT-  
 -----  
 -----  
 GACGGTGATAAAATCACACTCCCATGCAGAATAAAACAAATTATAAATCTGTGGCAGGGAGTAGGAAGAGCAA  
 TGTATGCCCCCTCCCATCAGCGGACTAATTAGCTGTTTCATCAAAT---  
 ATTACAGGTCTGCTGTTAGTAAGTGATAGTGGTAATCAAACCTAAC-----  
 -----

-----  
 GAGACTGAGACCTTCAGACCTATAGGAGGAGAGATGAGGGACATTTGGAGAAGTGAATTATACAAGTATAAAG  
 TAGTACAAATTGAACCATTA---GGAGTAGCACCCACCAAGGCAAAGAGAAGAGTGGTG-----  
 -----CAGAGAGAAAAAAGAGAG---CTGACA---TTAGGAGCT-----  
 TTGTTTCATTGGGTTCTTGGGGGCA---GCAGGAAGCACTATG---GGCGCAGCGTCG---  
 ATGACGCTGACGGTACAG---GCCAGACTA---TTATTG---TCTGGTATAGTGCAACAGCAGAAC---  
 AATCTG---CTGAGA---GCTATTGAGGCGCAACAGCATCTGTTGCAACTCACAGTCTGGGGCATC  
 >MK214316..1  
 TTCTACTGTAATACCGCACAACTGTTTAATAGTAGTTGGACTACTACTGAAAAGACAAATAACACTGAAGGAG  
 GA-----  
 -----  
 AATGACACAATAATCATGCTCCCTTGCAGAATAAAACAATTTATAAACAGGTGGCAGGAAGTAGGAAAAGCAA  
 TGTATGCCCCCTCCAATCAGCGGACTAATTAGATGTTTCATCAAAC---  
 ATTACAGGGCTACTGTTAAACAAGAGATGGTGGTAGCAGCAATAAAACT-----  
 -----  
 -----  
 AATGAACTGAGATCTTCAGACCTCATGGAGGGGATATGAGGGACAATTGGAGAAGTGAATTATATAAATATA  
 AAGTAGTAAAAATTGAACCATTA---GGAATAGCACCTAGCAAGGCAAAGAGAAGAGTGGTG-----  
 -----CAGAGAGAAAAAAGAGCG---GTGACA---ATAGGAGCT-----  
 ---GTGTTCCCTTGGGTTCTTGGGAGCA---GCAGGAAGCACTATG---GGCGCAGCGTCA---  
 CTGACGCTGACGGTACAG---GCCAGACAA---CTATTG---TCTGGTATAGTGCAACAACAAAGC---  
 AATTTG---TTGAGG---GCTATTGAGGCGCAACAGCACCTGTTGCAACTCACAGTCTGGGGCATC  
 >KX505616..1  
 TTCTACTGTAATACAACACAACCTGTTTAATAGTACTTGGGAAGGAAAATAGTACTGGGAATAATACTGAAGAG-  
 -----  
 -----  
 TTAAATGACACTATCACACTCCCATGTAGAATAAAACAATTTATAAACATGTGGCAGGAAGTAGGAAAAGCAA  
 TGTATGCCCCCTCCCATCCAAGGACAAATTAGATGTTTCATCAAAT---  
 ATTACAGGGCTAGTATTAACAAGAGATGGTGGTCATACCAATAAGACTGAG-----  
 -----  
 -----  
 AACAAAGACTGAGGTCTTCAGACCTGTAGGAGGGAATATGAAGGACAATTGGAGAAGTGAATTATATAAATATA  
 AAGTAGTAAAAATTGAACCATTA---GGAGTAGCACCCACTAAGGCAAAGAGAAGAGTGGTG-----  
 -----CAGAGAGAAAAAAGAGCA---GCA-----ATAGGAGCT-----  
 ---GTGTTCCCTTGGGTTCTTGGGAGCA---GCAGGAAGCACTATG---GGCGCAGCGTCG---  
 ATAACGCTGACGGTACAG---GCCAGACTA---TTATTG---TCTGGTATAGTGCAACAGCAGAGC---  
 AATCTG---CTGAGG---GCTATTGAGGCGCAACAGCAGCTGTTGCAGCTTACAGTCTGGGGCATC  
 >KR182192..1  
 TTCTACTGCGATACAACACAGCTGTTTAACAGTACTTGGTGGACTAATGAAACTTGGGAAGGATATCGAAGGGT  
 CA-----  
 -----  
 AATAACACTAACATCACACTTCCATGCAGGATAAAACAATTTATAAACAGGTGGCAGGGAGTAGGAAAAGCAA  
 TGTATGCCCCCTCCCATCAAAGGACAAATTAGCTGTTTCATCAAAT---  
 ATTACAGGGCTAATATTAACAAGAGATGGTGGTACTCACGAGGAC-----  
 -----  
 -----  
 GAGACCCCTGAGATCTTCAGACCTGGAGGAGGAGATATGAGGGACAATTGGAGAAGTGAATTATATAAATATA  
 AAGTAGTAAAAATTGAGCCATTA---GGAGTAGCACCCACCAAGGCAAAGAGGAGAGTGGTG-----  
 -----CAGAGAGAAAGAAGAGCA---GTGGGAACGCTGGGAGCT-----  
 ---ATGTTCCCTTGGGTTCTTGGGAGCA---GCAGGAAGCACTATG---GGCGCAGCATCG---  
 ATAACGCTGACGGTACAA---GCCAGACAA---TTATTG---TCTGGTATAGTGCAACAGCAGAAC---  
 AACTTG---CTGAAG---GCTATTGAGGCGCAACAGCACCTGTTGCAACTCACAGTCTGGGGCATC  
 >KR182242..1  
 TTCTATTGTAATACAACACCACTGTTTAACAGTACTTGGGTGCTTAACAGTACTTTGAATAGTACTGAAGGGT  
 CCAATAGT-----  
 -----  
 ACTGGACAAAATATCACACTCCAATGTAGAATAAAGCAAATTATAAATATGTGGCAGGAGGTAGGAAAAGCAA  
 TGTTTGCCCCCTCCCATCAGAGGATCAATTCATGTTTCATCCAAC---  
 ATTACAGGGCTGCTACTAACAAGAGATGGTGGTAATGACAATAAC-----  
 -----

-----  
 AAGACTGAGATCTTTAGGCCTTGGGGAGGAGATATGAAGGACAATTGGAGAAGTGAATTATATAAATATAAAG  
 TAATAAAAATTGAACCATTA---GGAGTAGCACCCACCAAGGCAAAGAGAAGAGTGGTG-----  
 -----CAGAGAGAAAAAAGAGCG---GCAGGA---CTGGGAGCT-----  
 CTGCTCATTGGGTTCTTGGGAGCA---GCAGGAAGCACAATG---GGCGCAGCGTCA---  
 GTGACGCTGACGGTACAG---GCCAGACTA---TTATTG---TCTGGTATTGTGCAACAGCAGAGC---  
 AATCTG---CTGAGA---GCTATTGAGGCGCAACAGCATATGTTGAAGCTCACAGTCTGGGGCATC  
 >KR182343..1  
 TTCTACTGTGATACAACAAAACCTGTTTAATAGTACTTGGCCTTGGCCTGCTAATAAAACAGATGATGGCACAA  
 ATGCA-----  
 -----ACA---  
 GCATCAGACAAAAATATCACACTCCCATGCAGAATAAAACAAATTATAAACATGTGGCAGAAAGTGGGAAGAG  
 CAATATATGCCCCCTCCCATCAAAGGACCAATTGAATGTGTATCAAAT---  
 ATTACAGGGATAATATTAACAAGGGATGGTGATAAGAAATAATACC-----  
 -----  
 -----  
 TACAATGAGACCTTCAGACCTACAGGAGGAGAAATGAAGGACAATTGGAGAAGTGAATTATATAAATATAAAG  
 TAATAAAAATTGAACCATTA---GGAATAGCACCTACCAGGGCAAAGAGAAGAGTGGTG-----  
 -----CAGAGAGAAAAAAGAGCA---GTGGGA---ATAGGAGCT-----  
 CTGCTTCTTGGGTTCTTGGGAGCA---GCAGGAAGCACTATG---GGCGCAGCGTCA---  
 ATGACGCTGACGGTACAA---GCCAGGCAA---TTACTG---TCTGGCATAGTGCAACAGCAGAAC---  
 AATCTG---CTGAAA---GCTATTGAGGCGCAACAGCAGCTGTTGCAACTCACAGTCTGGGGCATC  
 >KT986555..1  
 TTCTACTGTAATACTACACAACTGTTTAATAGTACTTGGAAATAAGAATAAACTAATAACTTGGGAAAGGA  
 ATGACACA-----  
 -----AAT---  
 AGTAATGAAACAACAATCACAATCCCATGCAGAATAAAACAAATTATAAACATGTGGCAGGGAGTAGGCAAGG  
 CAATGTATGCCCCCTCCCATCAGAGGATTAATCAGATGTTTCATCAAAC---  
 ATTACAGGACTGATATTAACAAGAGATGGTGGTCAGAGTAATGAAACAGGG-----  
 -----  
 -----  
 AACAAACACCGAGATATTCAGACCTGGAGGAGGAGACATGAGGGACAATTGGAGAAGTGAATTATATAGATATA  
 AAGTAGTAGAAATTGAACCATTA---GGAATAGCACCCACCAAGGCGAAGAGAAGAGTGGTG-----  
 -----CAGAGAGAAAAAAGAGCG---GTCACA---CTAGGAGCT-----  
 ---GTGTTCCCTTGGGTTCTTGGGAGCA---GCAGGAAGCACTATG---GGCGCAGCGTCA---  
 ATGACGTTGACGGTACAA---GCCAGACAG---TTATTG---TCTGGTATAGTGCAACAGCAGAAC---  
 AATCTG---CTAAGA---GCTATTGAGGCGCAACAGCACCTGTTGCAACTCACGGTCTGGGGCATC  
 >KX505508..1  
 TTCTATTGTAATTTAACAAAACCTGTTTAATAGTACTTGGAAATAAGACTGAAGGGCCTTGGAAATGTTACTGAAG  
 AGTATGGG-----  
 -----  
 AATATTACTGACCCTATCATACTCCCATGCAGAATAAAACAAATTATAAACATGTGGCAGAGAGTAGGAAGGG  
 CAATGTATGCCCCCTCCCATCAAAGGCAAACCTTCAATGTACATCAAAT---  
 ATTACAGGGCTCCTATTAAACAAGAGATGGTGGTAAGGTGAATAAT-----  
 -----  
 -----  
 GAGACTGAGATCTTTAGGCCTGCAGGAGGAGATATGAGGGACAATTGGAGAAGTGAATTATATAAATATAAAG  
 TAGTAAAAATTGAACCATTA---GGAATAGCACCCACCAGGGCGAAGAGAAGAGTGGTG-----  
 -----CAGAGAGAAAAAAGAGCA---GTGGGA---TTAGGAGCT-----  
 ATGTTCCCTTGGGTTCTTGGGAGCA---GCAGGAAGCACTATG---GGCGCAGCGGCA---  
 GTGACGCTGACGGTACAG---GCCAGACAA---TTATTG---TCTGGTATAGTGCAACAGCAGAAC---  
 AATCTG---CTGAAG---GCTATTGAGGCGCAGCAGCATCTGTTGCAACTCACAGTCTGGGGCATC  
 >KX027971..1  
 TTCTACTGTAATACAACACGACTGTTTCGAAAGTACTTGGCATGGAAATGAGACTTGGTATGGGAATGAG----  
 -----  
 -ACTATAGAGCCAGAG-----  
 GCAAAATGACACAATAATCGAACTCCCATGCAGAATAAAACAAATTATAAACATGTGGCAGGAAGTAGGAAAAG  
 CAATGTACGCCCTCCCATCAGAGGACCAATTAAATGTTTCATCAAAT---  
 ATTACAGGGCTACTATTAACAAGAGATGGTGGTGATGATCAGTACAGTAAGAAT-----  
 GAGACCTCCTGCAATAAT-----

-----  
ACTACTGAGACCTTCAGACCTGGAGGAGGGAATATGAAGGACAATTGGAGAAGTGAATTATATAAATATAAAG  
TAGTAAAAATAGAACCATTA---GGAGTAGCACCCACCAAGGCAAAAAGAAGAGTGGTG-----  
-----CAGAGAGAAAAAAGAGCA---GTAGGA---ATAGGAGCT-----  
ATGTTTCCTTGGGTTCTTGGGAGCA---GCAGGAAGCACTATG---GGCGCAGCATCA---  
ATAACGCTGACGGTACAG---GCCAGACAA---TTATTG---TCTGGTATAGTGCAACAGCAGAAC---  
AATCTG---CTAAGG---GCTATTGAGGCGCAACAACATCTGTTGCAACTCACAGTCTGGGGCATC  
>KX505446..1  
TTCTACTGCAATACAACACAACACTATTTAATAGTACTTGGTCAAAAAATAATACTTGGGAGAAGAATGAAGACA  
ATTCA-----  
-----  
ATTAATAGTACTATCACACTCCCATGCAGAATAAAACAAATTATAAACATGTGGCAGGAAGTAGGAAAAGCAA  
TGTATACCTCCCCAATCAAAGGACAGATTAGCTGTAACTCAAGT---  
ATTACAGGGATACTATTAACAAGAGATGGTGAAGAAAATAATAGT-----  
-----  
-----  
GACAAATGAGACCTTCAGACCTGGAGGAGGAGATATGAGGGACAATTGGAGAAGTGAATTATATAAATATAAAG  
TAGTAAAAATTGTACCATTA---GGAATAGCACCCACTGCGGCAAAAAGAAGAGTGGTG-----  
-----CAGAGAGAAAAAAGAGCA---GCA-----CTAGGAGCT-----  
ATGTTTCCTTGGGTTCTTGGGAGCA---GCAGGAAGCACTATG---GGCGCAGCATCA---  
GTGACGCTGACGGTACAG---GCCAGACTA---TTATTG---TCTGGTATAGTGCAACAGCAGAAC---  
AATCTG---CTGAGG---GCTATTGAGGCGCAACATCATCTGTTGCAACTCACAGTCTGGGGCATC  
>KT986947..1  
TTCTACTGTGATACAACAAAACTATTTAATAGTACTTGGAAATAGTACTTGGGACAATAATAGTACTCGGAATA  
AT-----  
AACAGATCAGAGGACAGATCA-----  
GAGAGCGATGACACAATCACACTACCATGCAGAATAAGACAAATTATAAACAGATGGCAAGAAGTAGGAAAAG  
CAATGTATGCCCTCCCATCAAAGGACTAATTGAATGTAACCTCAACA---  
ATTACAGGGCTGCTCTTAGCAAGAGATGGTGGTATCAACAGCACA-----  
-----  
-----  
GGGAATGAGACCTTCAGACCTCAAGGAGGAAATATGAGGGACAATTGGAGAAGTGAATTATATAAGTATAAAA  
TAGTAAAAATTGAACCATTA---GGAATAGCACCCACTAAGGCAAAAAGAAGAGTGGTG-----  
-----CAGAGAGAAAAAAGAGGA---GCGGGA---CTAGGAGCT-----  
TTGTTTCCTTGGATTCTTGGGAGCA---GCAGGAAGCACTATG---GGCGCAGCGTCA---  
GTGACGCTGACGGTACAA---GCCAGACAA---TTATTG---TCTGGTATAGTGCAACAGCAGAAC---  
AATCTG---CTGAGG---GCTATTGAGGCGCAGCAGCATATGTTGCAACTCACAGTCTGGGGCATC  
>MH264238..1  
TTCTACTGTAATTCAACACAGCTGTTTAATAGTACTTGGTATCTTAATGGTACTTGAATGCAACTGAAGGGT  
TAAATAAC-----  
-----  
ACTGAAGGAAATATCACACTCCCATGCAGAATAAAACAAATTATAAACATGTGGCAGCAGGTAGGAAAAGCAA  
TGTATGCCCTCCTATCAGAGGACTAATTAGATGCACATCAAAC---  
ATTACAGGGATAATATTAACAAGAGATGGTGGTTACGAGAACAAGACCGATAAC-----  
-----  
-----  
AATACTAATACTGAGATCTTCAGACCTGGAGGAGGAGATATGAGGGACAATTGGAGAAGTGAATTATATAAAT  
ATAAAGTAGTAAGAATTGAACCATTA---GGAGTAGCACCCACCAAGGCAAAGAGAAGAGTGGTG-----  
-----CAGAGAGAAAAAAGAGCA---GTGGGA---ATAGGAGCC---  
-----TTGTTTCCTTGGGTTCTTGGGAGCG---GCAGGAAGCACTATG---GGCGCAGCGTCA---  
ATGACGCTGACGGTACAG---GCCAGACAA---TTATTG---TCTGGTATAGTGCAACAGCAAAAC---  
AACTTG---CTGAGG---GCTATTGAGGCGCAACAGCATCTGTTGCAACTCACAGTCTGGGGCATC  
>KX587339..1  
TTCTATTGTAATACAACAAACCTGTTTAATAGTACATGGCATACTAACGGAACAAATAGCACTGACAAT----  
-----  
-----  
GGTACTGACACAATCACAATCCAATGCAGAATAAAACAAATAATAAACACGTGGCAGGAAGTAGGAAAAGCAA  
TGTATGCCCTCCCATCCAAGGACAACCTTAAGTGTTCATCAAAT---  
ATTACAGGGCTGCTATTAACAAGAGATGGTGGTAATGATAGTAATACT-----  
-----

-----  
ACCAATAACACTGAGATCTTCAGACCTCAAGGAGGAAATATGAGAGACAATTGGAGAAGTGAATTATATAAAT  
ATAAAGTAGTAAAAATTGAACCATTA---GGAGTAGCACCCACCGAGGCAAAGAGAAGAGTGGTG-----  
-----CAGAGAGAAAAGAAGAGCA---GTGGGA---CTAGGAGCT---  
-----ATGTTTCCTTGGGTTCTTAGGAGCA---GCAGGAAGCACTATG---GGCGCAGCGTCA---  
TTGACGCTGACGGTACAG---GCCAGACAA---TTATTG---TCTGGTATAGTGCAACAGCAGAAC---  
AATTTG---CTGAGA---GCTATTGAGGCGCAACAGCATCTGTTGCAACTCACAGTCTGGGGCATT  
>KX505536..1  
TTCTACTGTAATACAACACAGCTGTTCAATAGTACATGGGATTGTACTGGAAGTGCATGTACATTGAATGGA-  
-----  
-ACTGTTCTTAATGGG-----  
ATAAAATAACACCAATATTACTCTCCCATGCAGGATAAAAACAAATTATAAACATGTGGCAAAAAGTAGGAAAAG  
CAATGTACAACCCTCCCATCAAAGGAGTAATTCAATGTACATCAAAT---  
ATTACAGGGATAATATTAACAAGCGATAATGGTGGGATTGGAAAT-----  
-----  
-----  
AATGAAAATGAAACCTTCAGACCTGCAGGAGGAGATATGAGGGACAATTGGAGAAGTGAATTATATAAATATA  
AAGTAGTAAGAATTGAGCCATTA---GGAATAGCACCCACCAAGGCAAAAAGGAGAGTGGTG-----  
-----CAGAGAGAAAAAAGAGCA---GTAACA---TTAGGAGCT-----  
---ATGTTTCATTGGGTTCTTGGGAGCA---GCAGGAAGCACTATG---GGCGCAGCGTCA---  
GTGACGCTGACGGTACAG---GCCAGACAA---TTGCTG---TCTGGTATAGTGCAACAGCAGAGC---  
AATCTG---CTGAAG---GCTATTGAGGCGCAACAGCATCTGTTGCAACTCACAGTCTGGGGCATC  
>MG196412..1  
TTCTACTGTAATTCATCAAACTGTTTAATAGTACTTGGGGAAGTACTGACGGGTCAAATAGCACTGAA----  
-----  
-----  
ACAAATGGCACAATCATACTCCCATGCAGAATAAGACAAATTATAAACAAGTGGCAGCAAGTAGGAAAAGCAA  
TATACGCCCCCTCCCATCCAAGGACGAATTAAATGTTTATCAAAT---  
ATTACAGGGCTGCTATTAACAAGAGATGGTGGTCATAACAACAGTAGCAAT-----  
-----  
-----  
GAGAGTAGGAGTGAGATCTTCAGACCTGGAGGAGGAGACATGAGGGACAATTGGAGAAGTGAATTATATAAAT  
ATAAAGTAGTAAGAATTGAACCAGTA---GGAATAGCACCCACCAAGGCAAAGAGAAGAGTGGTG-----  
-----CAGAGAGAAAAAAGAGCA---GTGGGAACAATAGGAGCT---  
-----ATGTTTCCTTGGGTTCTTGGGAGCA---GCAGGAAGCACTATG---GGCGCAGCGTCA---  
TTGACGCTGACGGTACAG---GCCAGACAA---TTATTG---TCTGGTATAGTGCAACAGCAGAAC---  
AATCTG---CTGAAG---GCTATTGAGGCGCAACAGCACCTGTTGCAACTCACAGTCTGGGGCATC  
>MK169417..1  
TTCTACTGTAATACAACACAATTGTTTAATAGTAGTTGGATTTCGGAATGGTACTGATTGGACTTGAATAGTA  
CCACA-----  
-----  
CAAAATGATACTATCATACTCCCATGCAAAATAAAAACAAATTATAAACATGTGGCAGGAAGTAGGAAAAGCGA  
TGTATGCCCCCTCCTATCGAAGGAATAATTAGGTGTGTATCAAAT---  
ATTACTGGGTTGCTATTAACAAGAGATGGTGGTCACAACAGCAGC-----  
-----  
-----  
AACGGTACTGAGACCTTCAGACCTGCAGGAGGAAATATGAAGGACAATTGGAGAAGTGAATTATACAAATATA  
AAGTAGTAAAAGTTGAACCATTA---GGAGTAGCACCCACCAAGGCAAAGAGAAGAGTGGTG-----  
-----CAGAGAGAAAAAAGAGCA---ATAGGAGGACTAGGAGCT-----  
---GTGTTCCCTTGGGTTCTTGGGAGCA---GCAGGAAGCACTATG---GGCGCAGCATCA---  
ATGACGCTGACGGTACAG---GCCAGACAA---TTATTG---TCTGGTATAGTGCAACAGCAGAAC---  
AATCTG---CTGAAG---GCTATTGAGGCGCAACAGCATATGTTGCAACTCACAGTCTGGGGCATC  
>MK169834..1  
TTCTACTGTAATACAACACCACTGTTTAATCCAAATGGAATAAGAAAT-----  
-----  
-----  
GACACTGGAATATCACACTCCAATGCAGAATAAAAACAAATTATAAACATGTGGCAGGAAGTGGGAAAAGCAA  
TGTATGCCCCCTCCCATCCAGGTCAAATTAGGTGTGTATCAAAT---  
ATTACAGGGCTGATATTAACAAGAGATGGTGGTGATAATAACGAG-----  
-----

-----  
ACCGAGGTCTTCAGACCTGGAGGAGGAGATATGAGGGACAATTGGAGAAGTGAATTATATAAATATAAAGTAG  
TACAAATTGAACCATTA---GGAGTAGCACCCACCACGGCAAGAAGAAGAGTGGTG-----  
-----CAGAGAGAAAAAGAGCA---GTAAC---TTTGGAGCT-----  
CTGTTCTTGGGTTCTTGGGAGCA---GCAGGAAGCACTATG---GGCGCAGCGTCA---  
ATGACGCTGACGGTACAG---GCCAGGCAA---TTATTG---TCTGGTATAGTGCAGCAGCAGAAC---  
AATCTG---CTGAGA---GCTATTGAGGCGCAACAACATATGTTGCAACTCACAGTCTGGGGCATT  
>AF025753..1  
TTCTACTGTAATACAACAAAACCTGTTTAATAGTACTTGGGAATAGTACTTGGGAATGATACTGAAGGGTCAATTG  
CCACTGAA-----  
-----GGAAAT-----  
ACCACTGAAGAAAATATCACACTCCCATGCAGAATAAAAACAAATTATAAACATGTGGCAGGAAGTAGGAAAAG  
CAATGTATGCCCTCCCATCGCAGGACAAATTAGATGTTTCATCAAAT---  
ATTACAGGGCTGCTATTAACAAGAGATGGTGGTAATGGTAATAGCAGC-----  
-----  
-----  
AACTACACTTCCGAGATCTTCAGACCGGGAGGAGGAGATATGAGGGACAATTGGAGAAGTGAATTATATAAAT  
ATAAAGTAGTAAAAATTGAACCATTA---GGAGTAGCACCCACCAAGGCAAAGAGAAGAGTGGTG-----  
-----CAGAGAGAAAAGAGAGCA---GTGGGA---ATAGGAGCG---  
-----TTGTTCTTCGGGTTCTTGGGAGCA---GCAGGAAGCACTATG---GGCGCAGCGTCA---  
CTGACGCTGACGGCACAG---GCCAGACTA---TTATTG---TCTGGTATAGTGCAACAGCAGAAC---  
AATCTG---CTGAGG---GCTATTGAGGCGCAACAGCATCTGTTGCAACTCACAGTCTGGGGCATT  
>MH012806..2  
TTCTACTGTAATTCAACACAACCTGTTTAATAGTACTTGGAGTAGTAATAGTACTGGGAGTAATAGCACTGAA-  
-----  
-----  
GAAGAAAGAAATATCACACTCCCATGCAGAATAAAGCAAATTATAAACATGTGGCAGGAAGTAGGAAAAGCAA  
TGTATACCCCTCCCATCGGAGGACAAATTCAATGTTTCATCAAAT---  
ATTACAGGGCTACTATTAACAAGAGATGGTGGTCATAGTGGAACGAGTCC-----  
-----  
-----  
GAGAACAGGCCCGAGATCTTCAGACCAGGAGGAGGAGATATGAGGGATAATTGGAGAAGTGAATTATATAAAT  
ATAAAGTAGTAAAGTTGAACCATTA---GGAATAGCACCCACCAAGGCAAAGAGAAGAGTGGTG-----  
-----CAGAGAGAAAAGAGAGCA---GTGGGA---ATAGGAGCT---  
-----ATGTTCTTGGGTTCTTGGGAGCA---GCAGGAAGCACTATG---GGCGCAGCGTCG---  
GTGACGCTGACGGTACAG---GCCAGACAA---TTATTG---TCTGGTATAGTGCAACAGCAGAAC---  
AATCTG---CTGAAG---GCTATTGAGGCGCAACAGCATCTGTTGCAACTCACAGTCTGGGGCATC  
>MH012971..1  
TTCTACTGTAATTCAACACAACCTGTTTAAGAGTATTTGGCATGGGAATGAAACCACGTGGAATACAAAT---  
-----  
-----  
AACACTGAAAATATCACACTCCCGTGCAGAATAAAACAATTTATAAACATGTGGCAGGAAGTAGGGAAAGCAA  
TGTATGCCCTCCCATCAGTGGACAAATTAGATGTTTCATCAAAT---  
ATTACAGGGCTGCTATTAACAAGAGATGGTGGTGCTAAGGAGAAC-----  
-----  
-----  
GAGACCACCTACAATGAGACCTTCAGACCTGGAGGAGGAGATATGAGGGACAATTGGAGAAGTGAATTATATA  
AATATAAAGTAGTAAGAATTGAACCATTA---GGAGTAGCACCCACCAAGGCAAAGAGAAGAGTGGTG-----  
-----CAGAGAGAAAAAGAGCA---GTGGGA---  
ATAGGAGCT-----CTGTTCTTGGGTTCTTGGGAACA---GCAGGAAGCACTATG---  
GGCGCAGCGTCA---CTGACGCTGACGGTACAG---GCCAGACAA---TTATTG---  
ACTGGTATAGTGCAACAGCAGAAC---AACCTG---CTGAGA---  
GCTATTGAGGCGCAACAGCATCTGTTGCAACTCACAGTCTGGGGCATC  
>MH012542..1  
TTCTACTGTAATACAACACAACCTGTTTAATAGTACTTGGACTTGGGAATGATACTAAAGGGTCAAATGACACTG  
GA-----  
-----  
GGAAATGGCACAATCACACTCCCATGCAGAATAAAAACAAATTATAAACATGTGGCAGGAAGTAGGAAAAGCAA  
TGTATGCCCTCCCATCCAGGACAAATTAGATGTTTCATCAAAT---  
ATTACAGGGCTGCTATTAACAAGAGATGGTGGTAACAATAATCAGAGCAGCGAG-----

-----  
 -----  
 ACCACCGAGGTCTTCAGACCTGGAGGAGGAGATATGAGGGACAATTGGAGAAGTGAATTATATAAATATAAAG  
 TAGTAAAAATTGAACCATTA---GGAGTAGCACCCACCAAGGCAAAGAGAAGAGTGGTG-----  
 -----CAGAGAGAAAAAAGAGCA--GTGGGA--ATAGGAGCT-----  
 GTGTTTCCTTGGGTTCTTGGGAGCA--GCAGGAAGCACTATG--GGCGCAGCGTCA---  
 ATGACGCTGACGGTACAG---GCCAGACTA---TTATTG---TCTGGTATAGTGCAACAGCAGAAC---  
 AATTG---CTGAGG---GCTATTGAGGCGCAACAGCATCTGTTGCAACTCACAGTCTGGGGCATC  
 >AY835435..1  
 TTCTACTGTAATACAACAACACTGTTTAATAGTACTTGGTTTAATAATGCTACTTTGAATGTTAATAGTAATG  
 TTA---  
 -----  
 GAAGGGTCAGAAAATATCACACTCCCATGCAGAATAAGACAAATTGTGAACATGTGGCAAGAAGTAGGAAAAG  
 CAATGTATGCCCCCTCCCATCCAAGGGCAAATTAGATGTTTCATCAAAT---  
 ATTACAGGGCTGCTATTAAACAAGAGATGGTGGTGGTAGTAACAGTAGT-----  
 -----  
 -----  
 AACACGAGCGAGGAGGTCTTCAGACCTGGAGGAGGAAAATATGAGGGACAATTGGAGAAGTGAATTATATAAAT  
 ATAAAGTAGTAAAAATTGAACCATTA---GGAATAGCACCCACCAAGGCAAAGAGAAGAGTGGTG-----  
 -----CAGAGAGAAAAAAGGACA--GTGGGA--ATAGGAGCT---  
 -----TTGTTTCCTTGGGTTCTTGGGAGCA--GCAGGAAGCACTATG--GGCGCAGCGTCA---  
 ATGACGCTGACGGTACAG---GCCAGACAA---TTACTG---TCTGGTATAGTGCAACAGCAGAAC---  
 AATCTG---CTGAGG---GCTATTCAGGCGCAACAGCATCTGTTGCAGCTCACAGTCTGGGGCATT  
 >AY331292..1  
 TTCTACTGTGATACAACAAAACTGTTTAATAGTACTTGGCATGGTAATGAAACATCTTGGAATAATACTGAAA  
 AG-----  
 -----  
 TTAAATGACACTATCATACTCCCATGCAGAATAAAACAAATTATAAACATGTGGCAGGAAGTAGGAAAAGCAA  
 TGTATGCCCCCTCCAATCGAAGGACTAATTAACTGTTTCATCAAGT---  
 ATTACGGGGCTGCTATTAAACAAGAGATGGTGGTAAGAGCAATAAT-----  
 -----  
 -----  
 CAGACTGAGATCTTCAGACCTGGAGGAGGAGATATGAGGGACAATTGGAGAAGTGAACATATATAAATATAAAG  
 TAGTAAAAATTGAACCAGTA---GGAGTAGCACCCACCAAGGCAAAGAGAAGAGTGGTG-----  
 -----CAGAGAGACAAAAGAGCA--GTGGGA--CTAGGAGCG-----  
 TTGTTTCATTGGGTTCTTGGGAGCA--GCAGGAAGCACTATG--GGCGCAGCGTCA---  
 ATGACACTGACGGTACAG---GCCAGACAA---TTATTG---TCTGGTATAGTGCAACAGCAGAAC---  
 AACTTG---CTGAGG---GCTATTGAGGCGCAACAACATCTGTTGCAACTCACAGTCTGGGGCATC  
 >EU289191..1  
 TTCTACTGTAATACATCACAACCTGTTTAATAGTACTTGAATGGTACTGAAGGGTTTAATAGTACT-----  
 -----  
 -----  
 GGGAGTGAAAATATCACACTCCCATGCAGAATAAGACAAGTTGTAAACCTGTGGCAGGAAGTAGGAAAAGCAA  
 TGTATGCCCCCTCCCATCAGGGGAGTAATTAAATGTTTCATCAAAC---  
 ATTACAGGGGTACTATTAAACAAGAGATGGTGGTTATGATGATAATAATACC-----  
 -----  
 -----  
 GCAAACACCAACGAGACCTTCAGACCAGGAGGAGGAGATATGAGGGACAATTGGAGAAGTGAATTATATAAAT  
 ATAAAGTAGTAAGAATTGAACCATTA---GGAGTAGCACCCACCAGGGCAAAGAGAAGAGTGGTG-----  
 -----CAGAGAGAAAAAAGAGCA--GTGACA--CTAGGAGCT---  
 -----TTGTTTCCTTGGGTTCTTGGGAGCA--GCAGGAAGCACTATG--GGCGCAGCGTCA---  
 CTGACGCTGACGGTACAG---GCCAGACTC---TTGTTG---TCTGGTATAGTGACAGCAGCAGAAC---  
 AATCTG---CTGAGG---GCTATTGAGGCGCAACAACATCTGTTGCAACTCACCGTCTGGGGCATC  
 >KT124770..1  
 TTCTACTGTAATACATCAAACTGTTTAATAGTACCTGGGAGTGGAATAATAGTACCAGAGATTGGAATAATA  
 CT-----  
 -----  
 GAAATGTCAAATAACACT-----  
 GAAGGAAATGGAATATCACTCTCCAATGCAGAATAAAACAAATTGTAAATATGTGGCAGGAAGTAGGAAAAG  
 CAATGTATGCCCCCTCCCATCAGAGGACAAATTAGATGTTTCATCAAAT---  
 ATTACCGGGTTGCTATTAAACAAGAGATGGTGGTTACAACATCAGC-----

-----  
-----  
AATAACAACGAGACCTTCAGACCTGGAGGAGGAGATATGAGGGACAATTGGAGAAGTGAATTATACAGATATA  
AAGTAGTAAAAATTGAACCATTA---GGAATAGCACCCACCAAGGCAAGGAGAAGAGTGGTG-----  
-----CAAAGAGAAAAAAGAGCA---GTGGGA---TTAGGAGCT-----  
---ATGTTCCCTTGGGTTCTTGGGAGCA---GCAGGAAGCACTATG---GGCGCAGCATCA---  
ATGATGCTGACGGTACAG---GCCAGACAA---TTATTG---TCTGGTATAGTGCAACAGCAGAGC---  
AATCTG---CTGCAG---GCTATTGAGGCACAACAGCATCTGTTGAAACTCACAGTCTGGGGCATT  
>EU575670..1  
TTCTACTGTAATACAACAAAACCTGTTTAATAGTACTTGGGTAAATGGTACTAGGAATGATACTGAAGAGTCA-  
-----  
-----  
AATAGCACTGAAATCACACTCCCATGCAGAATAAAACAAATCATAAACATGTGGCAGGAAGTAGGAAAAGCAA  
TGTATGCCCCCTCCTATCAGAGGACAAATTAGATGTTTCATCAAAT---  
ATCACAGGGCTGCTATTAACAAGAGATGGGGGTGAGGGAGTTGAGAAA-----  
-----  
-----  
AACGATACCGAGATCTTTAGACCTGAAGGAGGAGATATGAAGAACAATTGGAGAAGTGAATTATATAAAATATA  
AAGTAGTACAAATTGAACCATTA---GGAGTAGCACCCACCAGGGCAAAGAGAAGAGTGGTG-----  
-----CAGAGAGAAAAAAGAGCA---GTGGGA---ATAGGAGCT-----  
---ATGTTCCCTTGGGTTCTTGGGAGCA---GCAGGAAGCACTATG---GGCGCAGCGTCA---  
ATGGCGCTGACGGTACAA---TCCAGACAA---TTATTG---TCTGGTATAGTGCAACAGCAAAAC---  
AACTTG---CTGAGA---GCTATTGAGGCGCAACATCATCTGTTGCAACTCACAGTCTGGGGCATT  
>EU575927..1  
TTCTACTGTAATACCTCACAACTGTTTAATAGCTCTTGGTATTCAAATGGTACTCGGAATGGTACTGAAGAA-  
-----  
-----  
TCAAATGACCTTATCACACTCCCATGCAGAATTAACAAATTTGTAAACATGTGGCAGGAAGTAGGAAAAGCAA  
TGTATGCCCCCTCCCATTAGAGGACACATTAAGTGTACATCAAAT---  
ATTACAGGGCTGTTATTAACAAGAGATGGGGGTGAGAGTAATGAAACC-----  
-----  
-----  
AAGGACGAGGAGATCTTCAGACCTGGAGGAGGAGATATGAGGGACAATTGGAGAAGTGAATTATATAAAATATA  
AAGTAGTAAGAATTGAACCATTA---GGAATAGCACCCACCAGGGCAAAGAGAAGAGTGGTG-----  
-----CAGAGAGAAAAAAGAGCA---GTGGGA---ATAGGAGCT-----  
---CTGTTCCCTTGGGTTCTTGGGAGCA---GCAGGAAGCACTATG---GGCGCAGCGTCA---  
ATAACGCTGACGGTACAG---GCCAGGCTA---TTAATG---TCTGGTATAGTGCAACAGCAAAAC---  
AATCTG---CTGAGA---GCTATTGAGGCGCAACAGCATCTGTTGCAACTCACAGTCTGGGGCATC  
>AY835442..1  
TTCTACTGTAATACAACACAACCTGTTTAATAATACTTGAATGGTACTGGATGGTCAGATAACTCAGAGAACA  
CT-----  
-----  
ACAGGAAACGGAACCTATCACACTCCCATGCAGAATAAAACAAATTTGTTAACTGTGGCAGGAAGTAGGAAAAG  
CAATGTATGCCCCCTCCCATCAGAGGACTAATTAGATGTTTCATCAAAT---  
ATTACAGGGCTGCTATTAACAAGAGATGGAGGTAATAATACCACCACGAAC-----  
-----  
-----  
GGGACTCAGACTGAGATATTTCAGACCTGGAGGAGGAGATATGAGGGACAATTGGAGAAGTGAATTATATAAAT  
ATAAAGTAGTAAAAATTGAACCATTA---GGAGTAGCACCCACTAGGGCAAAGAGAAGAGTGGTG-----  
-----CGGAGAGAAAGAAGAGCA---GCA-----CTAGGAGCT---  
-----TTGTTCCCTTGGGTTCTTGGGAGCA---GCAGGAAGCACTATG---GGCGCAGCGTCA---  
ATGACGCTGACGGTACAG---GCCAGACTA---TTATTG---TCTGGTATAGTGCAACAGCAGAAT---  
AATTTG---CTGAGG---GCTATTGAGGCGCAACAGCATCTGTTGCAACTCACAGTCTGGGGCATC  
>DQ853463..1  
TTCTACTGTAATACAACACAATTGTTTAATGGTATGTGGCATGCTAATGGTACTTGAATAGTACTTGAATG  
ATACT-----  
-----GGA---  
GGGTCAAATGACACTATCAGACTCCCATGTAGAATAAAACAAATTTGTAAACATGTGGCAGGAAGTAGGAAAAG  
CAATGTATGCCCCCTCCCATCAAAGGACAAATTCAATGTTTCATCAAAT---  
ATTACAGGGCTGATATTAACAAGAGATGGTGGTAACAGCACGAAC-----

-----  
-----  
GAGACCGGGGAGGTCTTCAGACCTGGAGGAGGAAATATGAAGGACAATTGGAGAAGTGAATTATATAAAATATA  
AAGTAGTAGAAATTGAACCATTA---GGAGTAGCACCCACCAAGGCAAAGAGAAGAGTGGTG-----  
-----CAGAGGGAAAAAAGAGCA--GTGGGATTAATAGGAGCT-----  
---GTGTTCCCTTGGGTTCTTGGGAGCA--GCAGGAAGCACTATG--GGCGCAGCGTCA---  
ATAGCGCTGACGGTACAG---ACCAGACAC---TTATTG---TCTGGTATAGTGCAACAGCAGAAC---  
AATCTG---CTGAGG---GCTATTGAGGCGCAACAACATCTGTTGCAACTCACAGTCTGGGGCATC  
>KT124769..2  
TTCTACTGTAATACAGCAGAACTGTTTAATAGTACTTGGTATGCAAATGGTACTTGGTATGCAAATGGTACA-  
-----  
-AATAGTACTGGAGGG-----  
GGAAACAAGACTAATATCACACTCCCATGCAGAATAAAACAATTTATAAACATGTGGCAGGAAGTAGGAAAAG  
CAATGTATGCCCTCCCATCAGTGGACAGATTAGATGTGCATCAAAT---  
ATTACAGGACTGCTATTAACAAGAGATGGTGGTCAGGGCAATCAGACC-----  
-----  
-----  
GACAACCAGACTGAGATCTTCAGACCTGTAGGAGGAGATATGAAGAACAATTGGAGAAGTGAATTATATAAAAT  
ATAAAGTAGTAAGAATTGAACCATTA---GGAATAGCACCCACCAGGGCAAAAAGGAGAGTGGTG-----  
-----CAGAGAGAAAAAAGAGCA--GTGGGA--ATAGGAGCT---  
-----TTGTTCCCTTGGGTTCTTGGGAGCA--GCAGGAAGCACTATG--GGCGCAGCGTCA---  
ATGACGCTGACGGTACAG---GCCAGACTA---TTATTG---TCTGGTATAGTGCAACAGCAGAAC---  
AATCTG---CTGAGG---GCTATTGAGGCGCAACAACATCTGTTGCAACTCACAGTCTGGGGCATC  
>EU289196..1  
TTCTACTGTAATACATCAAACTGTTTAATAGTACTTGAATAGTACTGGAGGGTCCATTTCTGAA-----  
-----  
-----  
GACTCAGAAAATATCACACTCCCATGCAGAATAAAACAATTTGTAAACATGTGGCAGGAGGTAGGAAAAGCAA  
TGTATGCCCCCTCCCATCAGAGGACAGATCAGATGTTTCATCAAAT---  
ATTACAGGGCTGCTATTAACAAGAGATGGTGGTATAAATCAGAGC-----  
-----  
-----  
ATCAGCGAGACCTTCAGACCGGGAGGAGGAGATATGAGGGACAATTGGAGAAGTGAATTATACAAATATAAAG  
TAGTAAAAAATTGAACCATTA---GGAATAGCACCCACCAAGGCAAAGAGAAGAGTGGTG-----  
-----CAAAGAGAAAAAAGAGCA--GTGGGA--ATAGGAGCT-----  
GTGTTCCCTTGGGTTCTTGGGAGCA--GCAGGAAGCACTATG--GGCGCAGCGTCA---  
CTGACGCTGACGGTACAG---GCCAGACTA---TTATTG---TCTGGTATAGTGCAACAGCAGAAC---  
AATCTG---CTGAGG---GCTATTGAGGCGCAACAGCATATGTTGCAACTCACAGTCTGGGGCATC  
>EU576141..2  
TTCTACTGTAATACAACACCACTGTTTAATAGTACTTGAATAATACTCGGACTGATGATTATCCTACTGGG-  
-----  
-----  
GGGGAACAAAATATCACACTCCAATGCAGAATAAAACAATTTATAAACATGTGGCAGGGAGTAGGAAAAGCAA  
TGTATGCTCCTCCCATCAGAGGACAAATTAGATGTTTCATCAAAT---  
ATTACAGGGCTGCTATTAACAAGAGATGGTGGTAGAGATCAGAAT-----  
-----  
-----  
GGTACTGAGACCTTCAGACCTGGAGGAGGAAATATGAGGGACAATTGGAGAAGTGAATTATATAAAATATAAAG  
TAGTAAAAAATTGAACCATTA---GGAATAGCACCCACCGCGGCAAAGAGAAGAGTGGTG-----  
-----CAGAGAGAAAAAAGAGCA--GTGGGA---CTAGGAGCT-----  
TTTATCCTTGGGTTCTTGGGAGCA--GCAGGAAGCACTATG--GGCGCAGCGTCA---  
ATGGCGCTGACGGTACAG---GCCAGACTA---TTATTG---TCTGGTATAGTGCAACAGCAAAAC---  
AATTTG---CTGAGA---GCTATTGAGGCGCAACAGCATATGTTGCAACTCACAGTCTGGGGCATC  
>AY835446..1  
TTCTACTGTAATACAGCAGAACTGTTTAATAGTACTTGGTATGCAAATGGCACAATTAGTATTGGAGGGGGA-  
-----  
-----  
AACAAAGACTAATATCATACTCCCATGCAGAATAAAACAATTTATAAACATGTGGCAGGAAGTAGGAAAAGCAA  
TGTATGCCCCCTCCCATCAGTGGACAGATTAGATGTTTCATCAAAT---  
ATTACAGGACTGCTATTAACAAGAGATGGTGGTAGGGCAATCAGACC-----

-----  
-----  
GACAACCAGACTGAGATCTTCAGACCTGTAGGAGGAGATATGAAAAACAATTGGAGAAGTGAATTATATAAAT  
ATAAAGTAGTAAGAATTGAACCATTA---GGAATAGCACCCACCAGGGCAAAAAGGAGAGTGGTG-----  
-----CAGAGAGAAAAAAGAGCA---GTGGGA---ATAGGAGCT---  
-----TTGTTTCCTTGGGTTCTTGGGAGCA---GCAGGAAGCACTATG---GGCGCAGCGTCA---  
ATGACGCTGACGGTACAG---GCCAGACTA---TTATTG---TCTGGTATAGTGCAACAGCAGAAC---  
AATCTG---CTGAGG---GCTATTGAGGCGCAACAGCATCTGTTGCAACTCACAGTCTGGGGCATC  
>EF593282..1  
TTCTACTGTAATTCAACACCACTGTTTAGTAGTACTTGGTATACTGGGAATAGTACCAATAGTACTAAAGGGT  
TAAAT-----  
-----  
AACGCTACAGAAATTATCACACTCCTATGTAGAATAAAAACAAATTATAAACATGTGGCAGGAAGTAGGAAAAG  
CAATGTATGCCCCCTCCCATCAGAGGACAAATTAGATGCTCATCAAAT---  
ATTACAGGGCTGCTATTAACAAGAGATGGTGGTAATAGCAGCAGC-----  
-----  
-----  
AATGAAGAGATTTTCAGACCTGCAGGAGGAGATATGAGGGACAATTGGAGAAGTGAATTATATAAATATAAAG  
TAGTAAAAAATTGAACCATTA---GGAGTAGCACCCACCAAGGCAAAGAGAAGAGTGGTG-----  
-----CAGAGAGAAAAAAGAGCA---GTGGGA---ATAGGAGCT-----  
GTGTTTCCTTGGGTTCTTGGGAGCA---GCAGGAAGCACTATG---GGCGCAGCGTCA---  
GTGACGCTGACGGTACAG---GCCAGACAA---TTATTG---TCTGGAATAGTGACGAGCAGAAC---  
AATCTG---CTGAGG---GCTATTCAGGCGCAACAGCATCTGTTGCAACTCACAGTCTGGGGCATC  
>JQ610043..1  
TTCTATTGTAATACAACACCGCTGTTTAGCAGCAGGTGGGGGCCTGACGGCACTTGAATAGCACTTGGAAACA  
GTACAAGT-----  
-----ACA---  
ACTAACAACGACACTATCACACTCCAATGCAGAATAAAAACAAATTATAAACAGGTGGCAGGAAGTAGGAAGAG  
CAATGTATGCCCCCTCCCATCCAAGGACAAATTAGATGCTCATCAAAT---  
ATTACAGGGCTGCTATTAACAAGAGATGGTGGTCATGGTAATGAC-----  
-----  
-----  
ACGGATAATACCACCGAGACCTTCAGACCTGGAGGAGGAAATATGAGGGACAATTGGAGAAGTGAAGTGTATA  
AATATAAAGTAGTAAAAATTGAGCCATTA---GGATTAGCACCCACCAAGGCAAAGAGAAGAGTGGTG-----  
-----CAAAGAGAAAAAAGAGCA---  
GTGGGAACGCTAGGAGCT-----ATGTTTCCTTGGGTTCTTGGGAGCA---GCAGGAAGCACTATG---  
GGCGCAGCGGCA---GTGACGCTGACGGTACAG---GCCAGACAA---TTATTG---  
TCTGGTATAGTGCAACAGCAGAAC---AATTTG---CTGAAG---  
GCTATTGAGGCGCAACAGCATATGTTGCAACTCACAGTCTGGGGCATC  
>EF593212..2  
TTCTACTGTAATACAACACCACTGTTTAATAGTACTTGAATAATACTAATGAAGGGTCAGGTAAC-----  
-----  
-----  
TATGAAGGAAATATCACACTCCAATGCAGAATAAAAACAAATTATAAATATGTGGCAGCAAGTAGGAAAAGCAA  
TGTATGCCCCCTCCCATCCAAGGACAAATTTACTGTTTCATCAAAT---  
ATTACAGGGCTGCTATTAACAAGAGATGGTGGTGGTAATAACGAG-----  
-----  
-----  
AGCAGCGAGACCTTCAGACCTGGAGGAGGAGATATGAGGGACAATTGGAGAAGTGAATTATATAAATATAAAG  
TAGTAAAACCTGAACCATTA---GGAATAGCACCCACCAGGGCAAAGAGAAGAGTGGTG-----  
-----CAGAGAGAAAGAAGAGCA---GCGGGA---CTAGGAGTT-----  
ATGTTTCCTTGGGTTCTTGGGAGCA---GCAGGAAGCACTATG---GGCGCAGCGTCA---  
ATGGCGCTGACGGTACAA---GCCAGACAA---TTATTG---TCTGGTATAGTGCAACAGCAGAGC---  
AATCTG---CTGAGG---GCTATTGAGGCGCAACAACATATGTTGCAACTCACAGTCTGGGGCATC  
>EF593300..1  
TTCTACTGTAATACAACACAGTTGTTTAATAGTACTTGAATAGTACTGGGAATAATAATAACAGG-----  
-----  
-----  
TCAGGAGAAAATATCACACTCCCATGCAGAATAAAAACAAATTCATAAACCTGTGGCAAGAAGTAGGAAAAGCAA  
TGTATGCTCCTCCCATCAAAGGAGAAATTC AATGCCGATCAAAT---

ATTACAGGGCTAATAATAACAAGAGATGGTGGTAACACTACTGAA-----  
-----  
-----  
GAGATCTTCAGACCTGGAGGAGGAGATATGAGGGACAATTGGAGAAGTGAATTATATAAAATATAAAGTAGTAA  
GAATTGAACCATTA---GGAATAGCACCCACCAAGGCAAAGAGAAGAGTGGTG-----  
-----CAAAGAGAAAAAAGAGCA---GTGGGA---TTCGGAGCT-----  
ATGTTTCCTTGGGTTCTTGGGAGCA---GCAGGAAGCACTATG---GGCGCAGCGTCA---  
ATAGCGCTGACGGCACAG---GCCAGACAA---TTATTG---TCTGGTATAGTGCAACAGCAAAAC---  
AATTTG---CTGAGG---GCTATTGAGGCGCAACAGCATATGTTGCAACTCACAGTCTGGGGCATT  
>GQ153937..2  
TTCTACTGTGATACAACAACACTGTTTAATAGTACTTGGGATAATACTAGTACTTGGGAATAATAGTAACACTC  
AGAAT-----  
-----  
AAAAATGATAGGAATATCACACTCCAATGCAGGATAAAAACAAATTATAAACATGTGGCAGGAAGTAGGAAAAAG  
CAATGTATGCCCCCTCCCATTTATGGGACAAATTAGATGTGTATCAAAT---  
ATTACAGGGCTGCTATTAAACACGGGATGGTGGTAACGGTAGCGAGGCC-----  
-----  
-----  
AAAAACGACACGGAGATCTTCAGACCTGGAGGAGGAGATATGAGGGACAATTGGAGAAGCGAATTATATAAAAT  
ATAAAGTAGTAAAAATTGAACCATTA---GGAGTAGCACCCACCAAGGCAAAGAGAAGAGTGGTG-----  
-----CAGAGAGAAAAAAGAGCA---GTGGGAACGATAGGAGCT---  
-----ATGTTTCCTTGGGTTCTTGGGAGCA---GCAGGAAGCACTATG---GGCGCAGCGTCA---  
TTGACGCTGACGGTACAG---GCCAGACAA---TTGTTG---TCTGGTATAGTGCAAGCAGCAGAAC---  
AATCTG---CTGAGA---GCCATTCAGGCGCAACAGCACCTGTTGCAGCTCACAGTCTGGGGCATT  
>MH263520..1  
TTCTACTGTAATACAGCAAAGCTATTTAATAGTACATGGTATAGTGCAAGGAATAGCACTGATGGGGATAAAG  
GA-----  
-----  
AATAATAACATAATCACACTCCCATGCAGAATAAAAACAAATTGTAAACATGTGGCAGGAAGTAGGAAAAGCAA  
TGTATGCCCCCTCCCATCAGTGGACAAATTAGATGCTCATCAAAT---  
ATTACAGGGCTGCTATTAAACAAGAGATGGTGGTCATGACAATGACACA-----  
-----  
-----  
AACGGGACAGAGATCTTCAGACCTGGAGGAGGGAATATGAAGGACAATTGGAGAAGTGAATTATATAAAATATA  
AAGTAGTAAGAATTGAACCATTA---GGAGTAGCACCCACCAGGGCAAAGAGAAGAGTGGTG-----  
-----CAGAGAGACAAAAGAGCA---GTGGGA---ATAGGAGCT-----  
---CTGTTCCCTTGGGATCTTGGGAGCA---GCAGGAAGCACTATG---GGCGCAGCGTCA---  
ATAACGCTGACGGTACAG---ACCAGACAA---TTATTG---TCTGGTATAGTGCAACAGCAGAAC---  
AATTTG---CTGAGG---GCTATTGAGGCGCAACAGCACATGTTGCAACTCACAGTCTGGGGCATT  
>KX984437..2  
TTCTACTGTAATACATCAAAATTGTTTAGTAGTACTTGGAAATGGTACTACCACACTGCCTAGTAGTACTTGG  
ATACTACT-----  
-----  
CAGAAATGATACTATCACACTCCCATGCAGAATAAAAACAAATTATAAACCTGTGGCAGGAAGTAGGAAAAGCAA  
TGTATGCCCCCTCCCATCAAAGGACAGATTAAATGTTTCATCAAAT---  
ATTACAGGGCTGTTATTAAACAAGAGATGGTGGTATTACCAACAAC-----  
-----  
-----  
AGCATGAATCAGACCTTCAGACCTGGAGGAGGAGATATGAAGGACAATTGGAGAAGTGAATTATATAAAATATA  
AAGTAGTAAAAATTGAACCATTA---GGAATAGCGCCTACCAAGGCAAAGAGAAGAGTGGTG-----  
-----CAGAGAGAAAAAAGAGCA---GTGGGA---ATAGGAGCT-----  
---TTGTTCCCTTGGGTTCTTGGGAGCA---GCAGGAAGCACTATG---GGCGCAGCGTCA---  
ATAACGCTGACGGTACAG---GCCAGACTA---TTATTG---TCTGGTATAGTGCAACAGCAGAAC---  
AATTTG---CTGAGG---GCTATTGAGGCGCAACAGCATATGTTGCAACTCACAGTCTGGGGCATC  
>KX984699..1  
TTCTACTGTAATACAACAAAACCTGTTTAGCAGTACTTGGTATGATAATGGAACGTCAAAAAGCACTGAAAGA-  
-----  
-----  
TTAAATGACACTATCATACTCCCATGCAGGATAAAAAAGATTATAAACATGTGGCAGGAAGTAGGAAAAGCAA  
TGTATGCCCCCTCCCATCAGAGGACAAATTAAGTGTTCATCAAAT---

ATTTCAGGGCTGCTATTAACAAGAGATGGTGGTAATGATAATAACACG-----  
 -----  
 -----  
 AACGACATCGAGACATTTCAGACCGGGAGGAGAGATATGAGGGACAATTGGAGAAGTGAATTATATAATTATA  
 AAGTGGTAAAAATTGAACCATTA---GGAATAGCACCCACTAAGGCAAAGAGAAGAGTGGTG-----  
 -----CAAAGAGAAAAAAGAGCG-----GGA---ATAGGAGCT-----  
 ---TTGTTCTTGGGTTCTTGGGATTA---GCAGGAAGCACTATG---GGCGCAGCGTCA---  
 GTGACGCTGACGGTACAA---GCCAGACTA---TTATTG---TCTGGTATAGTGCAACAGCAGAAC---  
 AATCTG---CTGAGG---GCTATTGAGGCGCAACAGCATCTGTTGCAACTCACGGTCTGGGGCATC  
 >MH632763..1  
 TTCTACTGTGATACAACAAAATTGTTTAATAGTACTTGGAAATGTTAGTAGTATTTGGAATGTTACT-----  
 -----  
 -----  
 GAGGATAAAAATATCACACTCACATGTAGAATAAGACAAATTATAAACAGGTGGCAAGAAGTAGGAAAAGCAA  
 TGTATGCCCCCTCCCATCAGAGGACAAATTAGATGTTTCATCAAAT---  
 ATTACAGGACTGTTATTAACAAGAGATGGTGGTCAGAACACAACA-----  
 -----  
 -----  
 AGCGAGACCTTTAGACCTGGAGGAGGAGATATGAGGGACAATTGGAGAAGTGAATTATATAAATATAAAGTAG  
 TACAAATTAAACCATTA---GGAATAGCACCCACCAGGGCACGGAGAAGAGTGGTG-----  
 -----CAGAGAGAGAAAAGAGCA---GTAGGA---CTGGGAGCA-----  
 ATGTTCTTGGGTTCTTGGGAGCA---GCAGGAAGCACTATG---GGCGCAGCGTCA---  
 GTGACGCTGACGGTACAG---GCCAGACAA---TTACTG---TCTGGTATAGTGCAACAGCAGAAC---  
 AATCTG---CTGAGG---GCTATTGATGCGCAACAGCACCTGTTGCAACTCACAGTCTGGGGCATC  
 >MH576107..1  
 TTCTACTGTAATACAACACAACCTGTTT-----ACTTGGGGGAGTAATAGTACTAACATTACAGGA-----  
 -----  
 -----  
 AGTAATAGCACACTCACACTCCCATGCAGAATAAAACAAATTATAAATATGTGGCAGAGAGTAGGAAGAGCAA  
 TGTATACCCCTCCTATCAGAGGACTAATTCAATGCTCATCAAAT---  
 ATTACAGGACTACTATTAACAAGAGATGGTGGGTATGGCAATAACAAT-----  
 -----  
 -----  
 ACCAATGATACTGAGATCTTCAGACCTGGAGGAGGAGACATGAGGGATAATTGGAGAAGTGAATTATATAAAT  
 ATAAAGTGGTAAAAATTGAACCATTA---GGAGTAGCACCCACCAAGGCAAGGAGAAGAGTGGTG-----  
 -----CAAAGAGAAAAAAGAGCA---GTAGGA---ATAGGAGCT---  
 -----GTGTTCTTGGGTTCTTGGGAGCA---GCAGGAAGCACTATG---GGCGCAGCGTCA---  
 ATAACGCTGACGGTACAG---GCCAGACAA---TTACTG---TCTGGTATAGTGCAACAGCAGAAC---  
 AATTTG---CTGAGG---GCTATTGAGGCGCAACAGCACCTGTTGCAACTCACAGTCTGGGGCATC  
 >EU616649..1  
 TTCTACTGCAATACATCAGGACTGTTTAATAGTTCTTGGGATATTAATGGTTCTTGGTATGGTAATAGAGGG-  
 -----  
 -----  
 TCAAATGACACAATTACACTCCCATGCAGAATAAAACAAATTTATAAACATGTGGCAGGAAGTAGGAAAAGCAA  
 TGTATGCCCCCTCCTATCCAAGGACTAATTAAGTGTATCAAAT---  
 ATTACAGGGCTGCTATTAACAAGAGATGGTGGCAATAGCAGTCATAGT-----  
 -----  
 -----  
 AATGGGACAGAGACCTTTAGACCTGGAGGAGGAGATATGAGAGATAATTGGAGAAGTGAATTATATAAATATA  
 AAGTAGTAAAAATTGAACCATTA---GGAGTAGCACCCACCAAGGCAAAGAGAAGAGTGGTG-----  
 -----CAGAGAGAAAAAAGAGCA---GTGGGA---ATAGGAGCT-----  
 ---TTATTCCTTGGGTTCTTGTTCAGCA---GCAGGAAGCACTATG---GGCGCAGCGTCA---  
 ATGACGCTGACGGTACAG---GCCAGACAA---TTATTG---TCTGGTATAGTGCAACAGCAGAAC---  
 AATTTG---CTGAGA---GCTATTGAGGCGCAACAGCATATGTTGCAACTCACAGTCTGGGGCATC  
 >FJ469704..1  
 TTCTACTGTAACCTTAACAAAACCTGTTTAATAGTACTTGGGCTTGGAAATAGTACTTGGAAATAGTACTGAAGGAA  
 AT-----  
 -----  
 GAAAAATAATACTATCACACTCCCATGTAGAATAAAACAAATTATAAACATGTGGCAGACAGTAGGAAAAGCAA  
 TGTATGCCCCCTCCTATCAGAGGACAAATTACATGCTCATCACAT---

ATTACAGGGATACTATTAACAAGAGATGGTGGTAACAGTGATGACACA-----  
-----  
-----  
AACTATACTGAGATCTTCAGACCTGCAGGAGGAGATATGAGGGACAATTGGAGAAGTGAATTATATAAAATATA  
AAGTAGTAAAAATTGAACCATTA---GGAGTAGCACCTACCAAGGCAAAGAGAAGAGTGGTG-----  
-----CAGAGAGAAAAAAGAGCA---GTGGGA---TTAGGAGCT-----  
---ATGTTCCCTTGGGTTCTTGGGAGCA---GCAGGAAGCACTATG---GGCGCAGCGTCG---  
CTGACGCTGACGGTACAG---GCCAGGCAG---TTATTG---TCTGGTATAGTGCAACAGCAGAAC---  
AATCTG---TTGAGG---GCTATTGAGGCGCAACAGCATCTGTTGCAACTCACAGTCTGGGGCATC  
>MN515543..1  
TTCTACTGTAATTCAACATCACTGTTTAATAGTACTTGGATGTTTAATAGTACTTGGGAATGGCACTGATGGGA  
ATGATGCT-----  
-----  
GACTCTAGAGAAAATATCACACTCCAATGCAGAATAAAACAAATTATAAACATGTGGCAGGAAGTAGGAAAAG  
CAATGTATGCCCTCCCATCCAAGGGCTAATTAGATGTTTCATCAAAT---  
ATTACTGGGCTGCTATTAACAAGAGATGGTGGTAATCACATAACAGT-----  
-----  
-----  
AATGGGACAGAGACCTTTAGACCTGGAGGAGGAGATATGAGGGACAATTGGAGAAGTGAATTATATAAAATATA  
AAGTAGTAAAAATTGAACCATTG---GGAGTAGCACCCACCAAGGCAAAGAGAAGAGTGGTG-----  
-----CAGAGAGAAAAAAGAGCA---CTAGGGGGACTAGGAGCT-----  
---TTGTTCCCTTGGGTTCTTGGGAGCA---GCAGGAAGCACTATG---GGCGCAGCGTCC---  
CTGACGCTGACGGTACAG---GCCAGACTA---TTATTG---TCTGGTATAGTGCAACAGCAGAAC---  
AATCTG---CTGAGA---GCTATTGAGGTGCAACAGCATCTGTTGCAACTCACAGTCTGGGGCATC  
>MN515731..1  
TTCTATTGTAATACCGCAAACTGTTTAGTAGTACTTGGCATGCTAATGGTACGTGGAATGGTACTTGGAAATA  
ATACT-----  
-----  
ACAGAGCAAAATATTACAATTCTATGCAGAATAAAACAAATTATAAACATGTGGCAGGAAGTAGGAAAAGCAA  
TGTATGCCCCCTCCCATCGGAGGAAAAATTAGATGCTCATCAAAT---  
ATCACAGGGCTACTATTAGTGAGAGATGGTGGCAACACCACCATC-----  
-----  
-----  
GGGAACACCACTGAGATTTTCAGACCTCAAGGAGGAAATATGAAGGACAATTGGAGAAGTGAATTATATAAAAT  
ATAAAGTAGTACAAATTGAACCAATA---GGAGTAGCACCCACCAAGGCAAAAGAAGAGTGGTG-----  
-----CAGAGAGAAAAAAGAGCA---GTGGGA---ATAGGAGCT---  
-----CTGCTCCTTGGGTTCTTGGGAGCA---GCAGGAAGCACTATG---GGCGCAGCGTCA---  
ATAACGCTGACGGTACAG---GCCAGACAA---TTATTG---TCTGGTATAGTGCAACAGCAAAAC---  
AATTTG---CTGAGA---GCTATTGAGGCGCAACAGCATCTGTTGCAACTCACAGTCTGGGGCATC  
>GU728412..1  
TTCTACTGTAATACAACACAACCTGTTTAATAGTACTTGGGATATAAAGAGTAATATGACAAGGTCAAAT---  
-----  
-----  
AACACTGAACCAATCACCTCCAATGCAGAATAAAGCAAATTATAAACATGTGGCAGGAAGTAGGAAAAGCAA  
TGTATGCCCCCTCCCATCAGAGGACAAATTAAATGTTTCATCAAAT---  
ATTACAGGGCTGCTATTAACAAGAGATGGTGGTAATGAGACAGGGAAAGAG-----  
-----  
-----  
AATGATACAGAGAAAGAGACCTTCAGACCTGGAGGAGGAGATATGAGGGACAATTGGAGAAGTGAACCTTTATA  
AATATAAAGTAGTAAAAATTAAACCATTA---GGAGTAGCACCCACTGCAGCAAAAAGAAGAGTGGTG-----  
-----CAGAGAGAAAAAAGAGCG---GCACTA-----  
GGAGCC-----TTGTTCCCTTGGGTTCTTGGGAGCA---GCAGGAAGCACTATG---GGCGCAGCGTCA-  
---GTAACGCTGACGGTACAG---GCCAGACTA---TTATTG---TCTGGTATAGTGCAACAGCAGAAC---  
AATCTG---CTGAGA---GCTATTGAGGCGCAACAGCATCTGTTGCAACTCACAGTCTGGGGCATC  
>GU727880..1  
TTCTACTGTAATACAACACAACCTGTTTAATAGTACTTGGGAATGGTACACAACCTGCCTAATCTTACT-----  
-----  
-----  
GGGAATGAAAATATCACACTCCAATGCAGAATAAAGCAAATTATAAATATGTGGCAGGAAGTAGGAAAAGCAA  
TATATAACCCTCCCATCCAAGGACTAATTAGATGTTTCATCAAAT---

ATTACAGGGCTGTTATTAACAAGAGATGGTGGTCATGGGAATAAT-----  
-----  
-----  
GACACCGAGATCTTCAGACCAGGAGGAGAGATATGAGGGACAATTGGAGAAGTGAATTATATAAATATAAAG  
TAGTAAAAATTGAACCATTA---GGACTAGCACCCACCACGGCGAAGAGAAGAGTGGTG-----  
-----CAGAGAGAAAAAAGAGCA--GTGGGA--ATAGGAGCA-----  
TTGTTTCCTTGGGTTCTTGGGAGCA--GCAGGAAGCACTATG--GGCGCAGCGTCA---  
ATGACGCTGACGGTACAA---GCCAGACAA---TTATTG---TCTGGTATAGTGCAACAGCAGAAC---  
AATCTG---CTGAGG---GCTATTGAGGCGCAACAACATGTATTGCAGCTCACAGTCTGGGGCATC  
>DQ886031..1  
TTCTACTGTAATACATCACGGCTGTTTAATAGTACTTGGAATATTACTGAAGGGTCAAATAGCACTGCAGGC-  
-----  
-----  
TCTAAACAAGAATATCACACTCCCATGCAGGATAAAAACAAATTATAAACATGTGGCAGGAAGTAGGAAAAGCAA  
TGTATGCCCCCTCCCATCAGCGGACTAATTAGATGTACATCAAAT---  
ATTACAGGGCTGTTACTAACAAGAGATGGTGGTCATGATAATAAAACA-----  
-----  
-----  
AATGACACCGAGATCTTCAGACCTGGAGGAGGAAACATGAGGGACAATTGGAGAAGTGAATTATATAAATATA  
AAGTAGTAAAAATTGAACCATTA---GGAATAGCACCCACCAAGGCAAGGAGAAGAGTGGTG-----  
-----CAAAGAGACAAAAGAGCA--GTGGGA--ATAGGAGCT-----  
---ATGTTTCCTTGGGATCTTAGGAGCA--GCAGGAAGCACTATG--GGCGCAGCGTCA---  
ATAACGCTGACGGTACAG---GCCAGACAA---CTATTG---TCTGGTATAGTGCAACAGCAGAAC---  
AATTTG---CTGAGG---GCCATTGAGGCGCAACAGCATCTGTTGCAACTCACAGTCTGGGGCATA  
>DQ886032..1  
TTCTACTGTAACACAACAAAACCTTTTAAATAATAATACTGAAGGGTCAAAAAACACTGAA-----  
-----  
-----  
GACAATACCACACTCACACTCCCATGCAGAATAAAACAGATTATAAACATGTGGCAGGAAGTAGGAAGAGCAA  
TGTATGCCCCCTCCTATCAAAGGAATAATTAGATGTACATCAAAT---  
ATTACAGGGCTGATATTAACAAGAGATGGTGGTCATAACATGAATAACACG-----  
-----  
-----  
AATGAGACCACCGAGACCTTCAGACCTGGAGGAGGAGATATGAGGGACAATTGGAGAAGTGAATTATATAAAT  
ATAAAGTAGTAAGAATTGAACCATTA---GGAATAGCACCTTCAGGGCAAAGAGAAGAGTGGTG-----  
-----CAGAGAGAAAAAAGAGCA--GTGGGA--ATAGGAGCT---  
-----GTGTTTCCTTGGGTTCTTGGGAGCA--GCAGGAAGCACTATG--GGCGCAGCGTCA---  
CTGACGCTGACGGTACAG---GCCAGACAA---TTATTG---TCTGGTATAGTGCAACAGCAGAAC---  
AATTTG---CTGAGA--GCTATTGAGGCGCAACAGCATCTGTTGCAGCTCACAGTCTGGGGCATC  
>GU367399..1  
TTCTACTGCAATACAACAGGACTGTTTAATAGTTCTTGGAATAATGATACTATCTGGAATGATACTAGCACTG  
AAGGA-----  
-----  
-----  
AGGAGAAATGACACAATCATACTCCCATGCAGAATAAGACAAATTGTAACATGTGGCAGGAAGTAGGAAAAG  
CAATGTATGCCCCCTCCTATCCAAGGACTAATTAAGTGTTCATCAAAT---  
ATTACAGGGCTGCTATTAACAAGAGATGGTGGTAATAGCAACAAT-----  
-----  
-----  
AGCTATGAGACCTTTAGACCTGGAGGAGGAGATATGAGGGACAATTGGAGAAGTGAACATATAAATATAAAG  
TAGTAAAAATTGAACCAATA---GGAGTAGCACCCACCAAGGCAAAGAGACGAGTGGTG-----  
-----CAGAGAGAAAAAAGAGGG--GTCGGG--ATCGGAGCT-----  
TTGTTTCCTTGGGTTCTTGGGAGCA--GCAGGAAGCACTATG--GGCGCAGCGTCA---  
ATAACGCTGACGGTACAG---GCCAGACAA---CTATTG---TCTGGTATAGTGCAACAGCAAAAC---  
AACTTG---CTGAGG---GCTATTGAGGCGCAACAACATCTGTTGCAACTCACAGTCTGGGGCATC  
>GU367403..1  
TTCTACTGTAATACATCAAAACCTGTTTAAATAGTACTTGGGGGTGGAATGTCACTGAAAATGGCACTGAAGTGT  
CAAAT-----  
-----  
-----  
AACACTGAAGGAAATATCACACTTCCATGCAGAATAAAAACAAATTATAAACATGTGGCAAAAAGTAGGAAAAG  
CTATATATGCCCCCTCCTATCAGAGGACAAATTAGCTGTTTATCAAAT---

ATTACAGGGCTGCTATTAACAAGAGATGGTGGTCATAACGAGGGTAAC-----  
-----  
-----  
GAGACTAAGACTGAGGTCTTCAGACCTGGAGGAGGAGATATGAGGGACAACCTGGAGGAGTGAATTATATAAAT  
ATAAAGTAGTAAAAATTGAACCATTA--GGAGTAGCACCCACCAAGGCCAAAAGAAGAGTGGTG-----  
-----CAAAGAGAAAAAAGAGCA--GTAGGA--ATAGGAGCT---  
-----GTGTTTCCTTGGGTTCTTGTCTAGCA--GCAGGAAGCACTATG--GGCGCAGCGTCA---  
CTGACGCTGACGGTACAG--GCCAGACAA--TTATTG--TCTGGTATAGTGCAACAGCAGAAC---  
AATCTG--CTGAGG--GCTATTGAGGCGCAACAGCATCTGTTGCAACTCACAGTCTGGGGCATC  
>KP754469..1  
TTCTACTGTGATACATCAAACTGTTTAATAGTACTTGGGATAAGGGTAATTGGAGTACAGGGACAATTGCCA  
CTAAC-----  
-----  
GGAAATGACACTATCATACTCCAATGCAGAATAAGACAAATTATAAACATGTGGCAGGAAGTAGGAAAAGCAA  
TCTATGCCCCCTCCTATCAGTGGATACGTTAACTGTACATCAAAT---  
ATTACAGGGTTGATATTAACAAGAGATGGTGGTAATGATAATGGTACA-----  
-----  
AAAAATGGTACAAAC---  
TCCACCGAGACTTTTAGACCTGGAGGAGGAGATATGAGGGACAATTGGAGAAGTGAATTATATAAATATAAAG  
TAGTAAAAAATTGAACCATTA--GGAATAGCACCCACCAAGGCCAAGAGAAGAGTGGTG-----  
-----CAGAGAGAAAAAAGAGCA--GTGGGG--ATGGGAGCT-----  
TTGTTTCCTTGGGTTCTTGGGAGCA--GCAGGAAGCACTATG--GGCGCAGCGTCA---  
ATAACGCTGACGGTACAA--GCCAGACAA--TTGTTG--TCTGGTATAGTGCAACAGCAGAAC---  
AATCTG--CTGAAG--GCTATTGAGGCGCAACAGCATCTGTTGCAACTCACAGTCTGGGGCATC  
>KP754471..1  
TTCTACTGTAACACATCACAACCTGTTTAATAGTACGTGGAATGATACTGAAAGGCCAAATAGCAATGGAGAA-  
-----  
-----  
AATGACCAAAATATTACACTCCCTTGCAGAATAAGACAAATTGTAAACATGTGGCAGGAGGTAGGAAAAGCAA  
TGTATGCCCCCTCCCATCAGAGGACCAATTCAATGCTCATCAAAC---  
ATTACAGGGATGATATTAACAAGAGATGGTGGCAATAACAGTGCC-----  
-----  
-----  
CAGAACGAGACCTTCAGACCTGGAGGAGGAGACATGAGGGACAATTGGAGAAGTGAATTATATAAATATAAAG  
TAGTAAAAAATTGAACCATTA--GGAGTAGCACCCACCAAGGCCAAAAGAAGAGTGGTG-----  
-----CAGAGAGAAAAAAGAGCA--GTGGGA--ATAGGAGCT-----  
TTGTTTCATCGGGTTCTTGGGAGCA--GCAGGAAGCACTATG--GGCGCAGCGTCA---  
ATGACGCTGACGGTACAG--GCCAGACAG--TTACTG--TCAGGTATAGTGCAACAGCAAAAC---  
AATTTG--CTGAGA--GCTATTGAGGCGCAACAGCATATGTTGCAACTCACAGTCTGGGGCATC  
>FJ469744..3  
TTCTACTGTAATTCAACACAACCTGTTTGATAGTACTTGGGATAATGGAACAAAAACAAATACCACTGAGGGAA  
GAAATAGCGAT-----  
-----GGAGGA-----  
AATAGCAGCGAACCCATCATACTCCCATGCAGAATAAAACAAATTATAAACATGTGGCAGGAAGTAGGAAAAG  
CAATGTATGCCCCCTCCCATCAGTGGAACATTACATGTTTCATCCAAT---  
ATTACAGGGTTGCTATTAACAAGAGATGGTGGCAAGGGCAATGAGACTCAGGGC-----  
-----  
-  
TATGGGACTCAGGGCACTGAGATCTTCAGACCTGGAGGAGGAGATATGAGAGACAACCTGGAGAAGTGAATTAT  
ATAAATATAAAGTAGTAAGAATTGAACCATTA--GGAGTAGCACCCACCAAGGCCAAAAGAAGAGTGGTG--  
-----CAGAGAGAAAAAAGAGCA--GTGGGA--  
TTAGGAGCT-----CTGTTTCCTTGGGTTCTTGGGAGCA--GCAGGAAGCACTATG--  
GGCGCAGCGTCA--ATGACGCTGACGGTACAG--GCCAGACTA--TTATTG---  
TCTGGTATAGTGCAACAGCAGAAC--AATCTG--CTGAGG---  
GCTATTGAGGCGCAACAGCATCTGTTGCAACTCACAGTCTGGGGCATC  
>FJ687543..1  
TTCTACTGTGACTCAACAAAACTGTTTAATTTTACTTGGGAATGGTACTGAAACAAATAACACTGGA-----  
-----  
-----  
GGAAAGTGATAAAATCATACTCCCATGCAGAATAAAACAAATTATAAAAATGTGGCAGAAAGTAGGACAAGCAA

TGTATGCCCCCTCCCATCCAAGGAAAAATTTACTGCTCATCAAAT ---  
 ATTACAGGGCTACTATTAACAAGAGATGGTGGCATCAACAATGAACCT -----  
 -----  
 -----  
 AACAACTACTGAGACCTTCAGACCTGGAGGAGGAAATATGAAGGATAATTGGAGAAGTGAATTATATAAAATATA  
 AAGTAGTACAAATTGAACCATTA --- GGAGTAGCACCCACCAAGGCAAAAAGAAGAGTGGTG -----  
 ----- CAGAGAGAAAAAAGAGCA --- GTGGGC --- ATAGGAGCT -----  
 --- TTGTTCCCTTGGGTTCTTGGGAGCA --- GCAGGAAGCACTATG --- GGCGCAGCGTCA ---  
 ATAACGCTGACGGTACAG --- GCCAGACAA --- TTATTG --- TCTGGTATAGTGCAACAGCAGAAC ---  
 AATCTG --- CTGAGG --- GCTATTGAGGCGCAACAGCATATGTTGCAACTCACAGTCTGGGGCATC  
 >KF725982..2  
 TTCTACTGTAACACAACACCACTGTTTAAACAAAACACACCTGGATAGCCTGAATAGCACT -----  
 -----  
 -----  
 ACAGACGGTAATATTACACTTCAATGCAGAATAAAACAAATTATAAACATGTGGCAGGAAGTAGGAAAAGCAA  
 TGTATGCCCCCTCCCATCAGAGGACAAATTAGATGTTTCATCAAAT ---  
 ATTACAGGGCTGTTATTAACAAGAGATGGTGGTAATGGTAATGAGAGC -----  
 -----  
 -----  
 AGCAACCATGAGACCTTCAGACCTGGGGGAGGAGATATGAGGGACAATTGGAGAAGTGAATTATATAAAATATA  
 AAGTAGTACAAATTGAACCATTA --- GGAATAGCACCCACCAAGGCAAAGAGAAGAGTGGTG -----  
 ----- CAGAGAGAAAAAAGAGCA --- GTGGGA --- ATAGGAGCT -----  
 --- TTGTTCCCTTGGGTTCTTGGGAGCA --- GCAGGAAGCACTATG --- GGCGCAGCGTCA ---  
 GTGACGCTGACGGTACAA --- GCCAGACAA --- TTAGTG --- TCTGGTATAGTGCAACAGCAGAAC ---  
 AATTTG --- CTGAGG --- GCTATTCAGGCGCAACAACATTTGTTGCAACTTACAGTCTGGGGCATC  
 >KF725986..1  
 TTCTACTGTAATACAGCACCCTGTTTAAATAGTACTTGAATGATACCAGTGCCTGGAATATAACT -----  
 -----  
 -----  
 GATACTAGCCCACTCACAATCCAGTGCAGAATAAGACAAATTATAAATAGGTGGCAGGAAGTAGGAAAATCGA  
 TGTATGCCCCCTCCCATCAGTGGACAAATTAAGTGTTCATCAAAT ---  
 ATTACAGGGCTGCTATTAACAAGAGATGGTGGTGGAAACAGGTCC -----  
 -----  
 ----  
 CAGGAAAACAGGTCCGAGACCTTCAGACCTGGAGGAGGAGACATGAGGGACAATTGGAGGAGTGAATTATATA  
 AATATAAAGTAGTAAAAATTGAGCCATTA --- GGGATAGCACCCACCAAGGCAAGGAGGAGAGTGGTG ----  
 ----- CAAAGAGAAAAAAGAGCA ---  
 GTGGGAGCGATAGGAGCT ----- ATGTTCCCTTGGAATCTTGGGGACA --- GCAGGAAGCACTATG ---  
 GGCGCAGCGGCA --- TTGACGCTGACGGTACAG --- GCCAGACAA --- TTATTG ---  
 TCTGGTATAGTGCAACAGCAAAAC --- AATTTG --- CTGAGG ---  
 GCTATTGAGGCGCAACATCATCTGTTGCAACTCACAGTCTGGGGCATC  
 >KF725988..2  
 TTCTACTGTGATACAAAAAACTGTTTAAATAGTACATGGAATTTTAAATAACTTGAATTCTACTCAAACA-  
 -----  
 -----  
 GGCAATGACACAATCACACTCCCATGCAGAATAAAACAAATTATAAACATGTGGCAAGGAGTAGGAAAAGCAA  
 TGTATGCCCCCTCCCATTAGTGGACAAATCAACTGTTTATCAAAT ---  
 ATTACAGGGCTGATATTAACAAGAGATGGTGGTCAGAACGATAGC -----  
 -----  
 -----  
 AGTAAGGAGACCTTCAGACCTGCAGGAGGAAATATGAAGGACAATTGGAGAAGTGAATTATATAAAATATAAAG  
 TAGTACAAATTGAACCATTA --- GGAGTAGCACCCACCAAGGCAAAGAGAAGAGTGGTG -----  
 ----- CAAAGAGACAAAAGAGCA --- GTGGGA --- ATAGGAGCA -----  
 TTGTTCCCTTGGGTTCTTGGGAGCA --- GCAGGAAGCACTATG --- GGCGCAGCGTCA ---  
 ATGACGCTGACGGTACAG --- GCCAGGCAA --- TTATTG --- TCTGGTATAGTGCAAGCAGCAGAAC ---  
 AATCTG --- CTGAGG --- GCTATTGAGGCGCAGCAGCACCTGCTGCAACTCACAGTCTGGGGCATC  
 >KU168260..5  
 TTCTACTGTAATACAACACAACCTGTTTAAATAGTATTTGGGAAGGTAATAAGACTCAGACAGGTCATAGTACTC  
 ATAAT -----  
 -----

GCTAGGAATGACACTATCACGCTCCCATGTAGAATAAAACAAATTATAAACATGTGGCAGGAAGTAGGAAAAG  
 CAATGTATGCCCCCTCCCATCCATGGACAAATTAGATGTATATCAAAT---  
 ATCACAGGTCTGCTATTAACAAGAGACGGTGGTATACACAACAAACC-----  
 -----  
 -----  
 CACATGACTGAGGTCTTCAGACCTGGAGGAGGAAATATGAAGGACAATTGGAGAAGTGAATTATACAAATATA  
 AAGTAGTACAAATTGAACCATTA---GGGCTGGCACCCACCAAGGCAAAGAGAAGAGTGGTG-----  
 -----CAGAGAGAAAAAAGAGCA---GTGGGAGCAATAGGAGCT-----  
 ---TTGTTCCCTTGGGTTCTTGGGAGCA---GCAGGAAGCACTATG---GGCGCAGCGTCA---  
 CTGGCGCTGACGGTACAG---ACCAGACAA---TTACTG---TCTGGTATAGTGCAACATCAGAAC---  
 AATCTG---CTGAGG---GCTATTCAAGCGCAACAGCATCTGTTGCAGCTTACAGTCTGGGGCATC  
 >KT452481..1  
 TTCTACTGTAATACAACAAAACTGTTTAACAGTACTTGGATTTGGAATAGTACTGAAGGGTCAAACCTCC----  
 -----  
 -----  
 AGTGAAGGAAACACAACACTCCAATGCAGAATAAAACAAATTGTAAACATGTGGCAGGAAGTAGGAAAAGCAA  
 TGTATGCTCCTCCCATCAAAGGAGTAATCAGATGTTTCATCAAAT---  
 ATTACAGGGCTGTTATTAACAAGAGATGGTGGTAGCAAGAACAGTAGCGAGAAC-----  
 -----  
 -----  
 ACCACCCTAAGGAGACCTTCAGACCTGGAGGAGGAGATATGAGGGATAATTGGAGAAGTGAATTATATAAAAT  
 ATAAAGTAGTAAAAATTGAACCATTA---GGAATAGCACCCACCAAGGCAAGGAGAAGAGTGGTG-----  
 -----CAGAGAGAAAAAAGAGCC---GTGGGA---ATAGGAGCA---  
 -----TTGTTCCCTTGGGTTCTTGGGAGCA---GCAGGAAGCACTATG---GGCGCAGCGTCA---  
 CTAACGCTGACGGTACAG---GCCAGACAA---TTATTG---TCTGGTATAGTGCAAGCAGCAAAAC---  
 GATTTG---CTGAGA---GCTATTGAGGCGCAACATCATCTGTTGCAACTCACAGTCTGGGGCATC  
 >KT452508..1  
 TTCTACTGTGATACAACAAAACTGTTTGATAGCTCTTGGAAATAAACTGGAAGAATAGATAAAAGGAATAATA  
 CAGAAGGG-----  
 -----  
 -----  
 TCAAATGACACAATCACACTCCCATGCAGAATAAAACAAATTATAAACATGTGGCAGGAAGTAGGAAAAGCAA  
 TGTATGCTCCTCCCATCAGTGGACGGATTAACTGTACATCAAAT---  
 ATTACAGGGCTGATATTAACAAGAGATGGTGGTCATAATGTTACA-----  
 -----  
 -----  
 ACTAAAGGGGACACCTTCAGACCTGGAGGAGGAAATATGAAGGACAATTGGAGAAGTGAATTATATAAAATATA  
 AAGTAGTAAAAATTGAACCATTA---GGAATAGCACCCACCAAGCAAGGAGAAGAGTGGTG-----  
 -----CAGAGAGAAAAAAGAGCC---GTGGGA---TTAGGAGCT-----  
 ---TTGTTCCCTTGGGTTCTTGGGAGCA---GCAGGAAGCACTATG---GGCGCAGCGTCA---  
 ATGGCGCTGACGGTACAG---GCCAGACAA---TTATTG---TCTGGTATAGTGCAACAGCAGAAC---  
 AATCTG---CTGAGG---GCCATTGAGGCGCAACAGCATCTGTTGCAACTCACAGTCTGGGGCATC  
 >KT452155..1  
 TTCTACTGCAATACATCACGACTATTTAATAGTACTTGGTTTAAGAATGATAGTACTTGGTTTAGGAATGATA  
 CTGGGAAT-----  
 -----GATACA-----  
 GAAAAGTCAGAAAAGATCATACTTCCATGCAGAATAAAACAAATTATAAATATGTGGCAGGAAGTAGGAAAAG  
 CAATGTATGCCCCCTCCCATCCGAGGACTAATTAGTTGTCCATCAAAT---  
 ATTACAGGACTGTTATTAACAAGAGATGGTGGTGGAGATAATAACAGA-----  
 -----  
 -----  
 ACTAATGAGACTTTTCAGACCTCAAGGAGGAGATATGAGGGACAATTGGAGAAGTGAATTATATAAAATATAAAG  
 TAGTAAGAATTGAACCATTA---GGAATAGCACCCACCAAGGCAAGGAGGAGAGTGGTG-----  
 -----CAAAGAGAAAAAAGAGCA---GTGGGAACATTAGGAGCT-----  
 ATGTTCCCTTGGGTTCTTGGGAACA---GCCGGAAGCACTATG---GGCGCAGCGTCA---  
 ATAACGCTGACGGTACAG---GCCAGACAA---TTATTG---TCTGGTATAGTGCAACAGCAAAAT---  
 AACTTG---CTGAGA---GCTATTGAGGCGCAACAGCATCTGTTGCAACTCACAGTCTGGGGCATC  
 >U39243..1  
 TTCTATTGCAATACAACAAAACTGTTTAGTAGTACATATATAGTTAATAATACACATGACAGTAAT-----  
 -----  
 -----

ACAACAAAAATTTTAAACATCACATGCAGAATAAAACAAATTATAAACATGTGGCAAGGGGTAGGACGAGCAA  
TGTATGCCCCCTCCCATTTGCAGGAAACATAACATGTAAATCAAAT---  
ATCACGGGACTACTACTGACACGTGATGGAGGAAATAAGACAGAAAGC-----  
-----  
-----  
AATGACACAGAGACATTTCAGGCCTCAGGGAGGAGATATGAGGGACAATTGGAGAAATGAATTATATAAATATA  
AAGTGGTAGAAGTTAACCCATTA---GGAATAGCACCCACTAAGGCAAAAAGGAGAGTGGTG-----  
-----GACAGAGAAAAAAGAGCA---GTAGTGGGACTAGGAGCT-----  
---GTGTTCCCTTGGGGTCTTGACACCC---GCAGGAAGCACTATG---GGCGCAGCATCA---  
ATAACGCTGACGGTACAG---GCCAGACAA---TTATTG---TCGGGCATAGTGCAACAGCAAAAC---  
AATTTG---CTGAGG---GCTATAGAGGCGCAACAGCATATGTTGCAACTCACGGTCTGGGGCATT  
>U39240..1  
TTCTATTGCAATACATCAATACTGTTTAATACAACATACCTGGTTAATAATAATTTGACTGAG-----  
-----  
-----  
AAAAATTCAACCATTATGCTCCCATGCAGAATAAAACAAATTATAAACATGTGGCAGGAGGTAGGACGAGCAA  
TGTATGCCCCCTCCCATTTGCAGGACTCATACAATGTAACTCAAGT---  
ATCACAGGACTGCTACTGACACGTGATGGAGGAGTGAGAAATGACACAAAT-----  
-----  
-----  
GAGACAGAGACAGAGACATTTCAGACCTGCAGGAGGAGATATGAGGGACAATTGGAGAAAGTGAATTATATAAAAT  
ATAAAGTGGTAGAAATTTCAGCCATTA---GGAATAGCACCCACTAAGGCAAAAAGGAGAGTGGTG-----  
-----GAGAGAGAAAAAAGAGCA---GCGGGA---ATAGGAGCT---  
-----TTGTTCCCTTGGGGTCTTGAGGAGCA---GCAGGAAGCACTATG---GGCGCAGCGTCG---  
ATAACGCTGACGGTACAG---GCCAGACAA---TTATTG---TCGGGTATAGTGCAACAGCAAAAC---  
AATTTG---CTGAGA---GCTATAGAGGCGCAACAGCATATGTTACAACCTCACAGTCTGGGGCATT  
>AF443090..1  
TTCTATTGCAATACATCACGCCTGTTTAATAGTACATACAATCCTAATAGTACATACAATAATAGTATAGAAG  
GT-----  
-----  
AGGTCAAATGCAACCATTACACTCCAATGCAGAATAAAGCAAATTATAAACCTCTGGCAGGAGGTAGGACGAG  
CAATATATGCCCCCTCCCATTTGCAGGAAACATAACATGTAAATCAAAT---  
ATCACAGGATTACTCTTGACACGTGATGGAGGTAATAATTCAACG-----  
-----  
-----  
ACAGAGATATTTCAGACCTCAAGGAGGGAATATGAAGGACAATTGGAGAAAGTGAATTATATAAATATAAAGTGG  
TAGAAGTTAAGCCATTG---GGGGTAGCACCCACTAAGGCAAAAAGGAGAGTGGTG-----  
-----GAGAGAGAAAAAAGAGCA---GTAGGA---ATAGGAGCT-----  
GTGTTCCCTTGGGGTCTTGAGGAGCA---GCAGGAAGCACTATG---GGCGCAGCGTCA---  
ATGACGCTGACGGTACAA---GCCAGACAA---CTGTTG---TCTGGTATAGTGCAACAGCAAAGC---  
AATTTG---CTGAGG---GCTATAGAGGCGCAACAGCATATGTTGCAACTCACAGTCTGGGGCATT  
>AF443097..1  
TTCTATTGCAATACATCAGAGCTGTTTAATGGTACATACAACAGTACAGGAAATGATTCA-----  
-----  
-----  
AATTCAAACCTCATCACACTCCAATGCAGAATAAAACAAATTATAAACATGTGGCAGAAGGTAGGACGAGCCA  
TGTATGCCCCCCCCCATTGAAGGAAACATAACATGTATATCAAAT---  
ATCACAGGACTATTATTAACACGTGATGGAGGATATGAGGCAAAT-----  
-----  
-----  
CATACTGAGATATTTCAGACCTATAGGAGGAGATATGAGGGACAATTGGAGAAAGTGAATTATATAAATATAAAG  
TGGTAGAAATTAAGCCATTA---GGAATAGCACCCACTGAGTCAAAAAGGAGAGTGGTG-----  
-----GAGAGAGAAAAAAGAGCA---GTGGGA---ATAGGAGCT-----  
GTGTTCCCTTGGGGTCTTGAGGAGCA---GCAGGAAGCACTATG---GGCGCGGCGTCA---  
ATAACGCTGACGGTACAG---GCCAGACAA---CTGTTG---TCTGGTATAGTGCAACAGCAAAGC---  
AATTTG---CTGAGA---GCTATAGAGGCGCAACAACATATGCTGCAACTCACGGTCTGGGGCATT  
>AF443109..3  
TTCTATTGCAATACATCACTACTGTTTAATAGCAGTTATAATGGTAATAGTAGTTATAATGATACAGGA-----  
-----  
-----

AGCAATTCAACCATCACACTCCAATGCAGAATAAAACAAGTTATAAACATGTGGCAGAGGGTAGGACAAGCAA  
 TATATGCCCCCTCCCATTGAAGGAATAATAACATGTAACCTCAAGT---  
 ATCACAGGATTACTCTTAGTGAGGGATGGAGACAATCAAACAAGT-----  
 -----  
 -----  
 GATACAGAGACATTTCAGACCACAAGGAGGAGAAATGAGGGACAATTGGAGAAGTGAGTTATATAAATATAAAG  
 TGGTAGAAATTAAGCCATTG---GGAGTAGCACCCACTACGGCAAAAAGGAGAGTGGTG-----  
 -----GAGAGAGAAAAAAGAGCT--GTGGGA--ATGGGAGCT-----  
 ATGATCCTTGGGTTCTTGAGTGCA---GCAGGAAGCACTATG---GGCGCAGCGTCA---  
 ATAACGCTGACGGTACAG---GCCAGACAA---TTGTTG---TCTGGAATAGTGCAACAGCAAAGC---  
 AATTTG---CTGAGG---GCTATAGAGGCGCAACAGCATATGTTGCAACTCACAGTCTGGGGCATT  
 >AF443114..2  
 TTCTATTGCAACACATCAAGCCTGTTTAATAATACATACCGGCCTACATACTGGCCTAATGGTACAGAA----  
 -----  
 -----  
 AGTAATTCAACCATCACACTTCAATGCAGAATAAAACAAATTATAAACATGTGGCAAAAAGTAGGACGAGCAA  
 TATATGCCCCCTCCCATTGCAGGAAAAATAACATGTAAATCAAAC---  
 ATCACAGGACTACTATTAGTACGTGATGGAGGTAATGGAGGCAACAAT-----  
 -----  
 -----  
 ACCGCAACAGAAATATTTCAGACCTGGAGGAGGAAATATGAAGGACAATTGGAGAAGTGAATTATATAAATATA  
 AAGTGGTAGAAATTAAGCCATTG---GGAATAGCACCCACTGGAGCAAAAAGGAGAGTGGTG-----  
 -----GGGAGAGAAAAAAGAGCA--GTGGGA--ATAGGAGCT-----  
 ---GTGTTCTCGGGTTCTTGAGGAGCA--GCAGGAAGCACTATG---GGCGCGGCGTCA---  
 ATAACGCTGACGGTACAG---GCCAGACAA---CTGTTG---TCTGGTATAGTGCAACAGCAAAGC---  
 AATTTG---CTGAAG---GCTATAGAGGCGCAACATCATCTGTTGCAACTCACGGTCTGGGGCATT  
 >KR861314..2  
 TTCTATTGTAATACATCAAGACTGTTTGATAGTAATGGCACTTATAATAATACAGAA-----  
 -----  
 -----  
 TCAAACAGCACAATCACACTCCCATGCAGAATAAAACAAATTATAAACATGTGGCAGAAAGTGGGACGAGCAA  
 TGTATGCCCCCTCCCATTGAAGGAATGCTAACATGTAAATCAAAT---  
 ATCACTGGACTACTATTGACACGAGATGGAGGAGAAGGAAATCAA-----  
 -----  
 -----  
 GGGTCAGAGATATTTCAGACCTGGAGGAGGAAATATGAGGGACAATTGGAGAAGTGAATTATATAAATATAAAG  
 TGGTAGAGATTAAACCATTG---GGAGTAGCACCCACTGGGGCAAAAAGGAGAGTGGTG-----  
 -----GAGAGAGAAAAAAGAGCA--GTGGGA--ATAGGAGCT-----  
 GTGCTCCTTGGGTTCTTGAGGAGCA--GCAGGAAGCACTATG---GGCGCGGCGTCA---  
 CTCACGCTGACGGTACAG---GCCAGACAA---TTATTG---TCCGGTATAGTGCAACAGCAAAGC---  
 AATTTG---CTGAGG---GCCATAGAGGCGCAACAGCATATGTTGCAACTCACAGTCTGGGGCATT  
 >KR861341..3  
 TTCTATTGCAATACATCAGGACTGTTTAATGGTACATACCATCCTCAATATAAT-----  
 -----  
 -----  
 -GATACACAGAATAAT-----  
 TACACAGACTCAAACATCACACTCCCATGCAGAATAAAACAAATTGTAAATATGTGGCAGGGGGTAGGAAGGG  
 CAATATATGCCGCTCCCATTTGAAGGAAAAATAGTATGTACATCAAAT---  
 ATCACAGGACTAATATTGACAAGGGATGGAGGAGAAAAATAATAGA-----  
 -----  
 -----  
 ACAGAAACATTTAGACCTGAAGGAGGAAATATGAGGGACAATTGGAGAAGTGAATTATATAAATATAAAGTGG  
 TAGAAATTCAGCCATTG---GGAGTGGCACCCACTGAGGCAAAAAGGAGAGTGGTG-----  
 -----GAGAGAGAAAAAAGAGCA--GTGGGA--ATAGGAGCT-----  
 GTGTTCTTGGGTTCTTGAGGAGCA--GCAGGAAGCACTATG---GGCGCGGCGTCA---  
 ATAACGCTGACGGTACAG---GCCAGACAA---CTGTTG---TCTGGTATAGTGCAACAGCAAAGC---  
 AATTTG---CTGAGG---GCTATAGAGGCGCAACAGCATATGTTGCAACTCACAGTCTGGGGCATT  
 >KR861270..1  
 TTCTATTGCAATACATCAAGACTGTTTACAAACATAGATAATAATAATACAGAACTGAT-----  
 -----  
 -----

AATGATACCACCATCACCATCCCATGCAAAATAAAACAAATTATAAACATGTGGCAGAAGGTAGGACGAGCAA  
TGTATGCCCCCCCCATTGAAGGAAACATAACATGTAAATCAAAT---  
ATCACAGGACTACTATTGACACGTGATGGAGGTAATGAAACAAAC-----  
-----  
-----  
TACAACACTGAGATATTCAGACCTGGAGGAGGAGATATGAGGGACAATTGGAGAAGTGAGTTATATAAATATA  
AAGTGGTGGAGGTTAGGCCATTA---GGAATAGCACCCACTAAAGCAAAAAGGAGAGTGGTG-----  
-----GAGAGAGAGAAAAAGAGCA--GTGGGA--ATAGGAGCT-----  
---GTGTTCCCTTGGGTTCTTGGGAGCA--GCAGGAAGCACTATG--GGCGCGGCATCA---  
CTAACGCTGACGGTACAG---GCCAGACAA---TTATTG---TCTGGTATAGTGCAACAGCAAAGC---  
AATTTG---CTGAGG---GCGATAGAGGCGCAACAACATATGTTGCAACTCACAGTCTGGGGCATT  
>KR861273..1  
TTCTATTGCAATACATCTGAGCTGTTTAATAAGCAGTTTAAACAATACAAACAGTACAGAAAGTGAGTCAAAT-  
-----  
-----  
TCAAAATTCAATCATCACACTCCCATGTAGAATAAAACAAATTATAAACATGTGGCAGGAGGTAGGACGAGCGA  
TGTATGCCCCCTCCCATTCGAGGAAACATAACATGTAAATCAAAT---  
ATCACAGGACTACTATTGACACGCGATGGAGGACCTGGAAATAGA-----  
-----  
-----  
AGTAACGAGACATTTCAGACCCTTAGGAGGAGATATGAAGGACAATTGGAGAAGTGAATTATATAAGTATAAAG  
TGGTAGAGATTTCAGCCATTA---GGACTAGCACCCACTAGGGCAAAAAGGAGAGTGGTG-----  
-----GAGAGAGAGAAAAAGAGCA--GTGGGA--ATAGGAGCT-----  
GTGTTCCCTTGGGTTCTTGGGAGCA--GCAGGAAGCACTATG--GGCGCAGCATCA---  
ATAACGCTGACGGTACAG---GCCAGACAA---CTGTTG---TCTGGTATAGTGCAACAGCAAAAC---  
AATTTG---CTGAGG---GCTATAGAGGCGCAACAACATTTGTTGCAACTCACGGTTTGGGGCATT  
>KY658708..1  
TTCTATTGCAACACATCACAACCTGTTTAATAGTACATACAGTCCCAGTTTTAATGGTACAGAAGGTAAA----  
-----  
-----  
TTAAATGGGACCATCACAATCCCATGTAGAATAAAACAAATTATAAACATGTGGCAGAAAGTAGGACAAGCAA  
TGTATGCCCCCTCCCATTCGAGGAAACCTAACATGTGAATCAAAT---  
ATCACAGGATTACTATTGACACGTGATGGAGGAAAAACAGGTTCA-----  
-----  
-----  
AATCACCCAGAGATATTCAGACCTGGAGGAGGGGATATGAGGGATAACTGGAGAAGTGAATTATATAAATATA  
AAGTGGTAGAAATTAAGCCATTG---GGAGTAGCACCCACTGAGGCAAAAAGGAGAGTGGTG-----  
-----GAGAGAGAAAAAGAGCA--GTGGGA--ATAGGAGCT-----  
---GTGTTCCCTTGGGTTCTTGGGAGCA--GCTGGAAGCACTATG--GGCGCAGCGTCA---  
ATAACGCTGACGGTACAG--GCCAGACAA--TTGTTG---TCTGGTATAGTGCAAGCAGCAAAGC---  
AATTTG---CTGAGG---GCTATAGAGGCGCAACAGCATCTGTTGCAACTCACAGTCTGGGGCATT  
>AF443084..1  
TTTTATTGCAATACATCAAACTGTTTACATACCAGTCTAATAGCACATACGTG-----  
-----  
-----  
GCTAATAGTACCATCACGCTCCCATGCAAAATAAAACAAATTATAAACATGTGGCAGGAGGTGGGACGAGCAA  
TGTATGCACCTCCCATTCGAGGAAACATAACATGTCAATCAAAT---  
ATCACAGGACTACTGTTGACACGTGACGGAGGCACAGAGACAGAC-----  
-----  
-----  
AATAAGACAGAGACATTTCAGACCTGGAGGAGGAGATATGAGGGACAGTTGGAGAAGTGAATTATATAAATATA  
AAGTGGTAGAAATTAAGCCATTA---GGAGTAGCACCCACTAAGGCAAAAAGAAGAGTGGTG-----  
-----GAAAGAGAAAAAGAGCA--GTGGGA--ATAGGAGCT-----  
---GTACTCCTTGGGTTCTTGGGAGCA--GCTGGAAGCACTATG--GGCGCAGCGTCA---  
ATAGCGCTGACGGCACAG---GCCAGACAA---GTGTTG---TCTGGTATAGTGCAACAGCAAAGC---  
AATTTG---CTGAGG---GCTATAGAGGCGCAACAGCATATGTTGCAACTCACAGTCTGGGGCATT  
>KC899004..1  
TTCTATTGTAATACATCAGGCCTGTTTAATGGTACATACAGGCCTAATGGTAATAATAATGGTACTAATGATA  
CAATG-----  
-----

AGTAATGCAACCATCACAATCCCATGCAGAATAAAGCAAATTATAAACATGTGGCAGGAGGTAGGACGAGCAA  
 TGTATGCCCCCTCCTATTGCAGGGAACATAACATGTAAATCAAAT---  
 ATCACAGGGATACTATTGGTACGTGATGGAGGAGATAATCAGACA-----  
 -----  
 -----  
 GAAGAGATATTCAGACCTGGAGGAGGAGATATGAGGAACAATTGGAGAAGTGAATTATATAAATATAAAGTGG  
 TAGAAATTAAGCCATTG---GGAATAGCACCCACTGGAGCAAAAAGGAGAGTGGTG-----  
 -----GAGAGAGAAAAAAGAGCAGTAGTGGGA---ATAGGAGCT-----  
 GCGCTCCTTGGGTTCTTGAGTACA---GCCGGAAGCACTATG---GGCGCGGCGTCA---  
 ATAGCGCTGACGGTACAG---GCCAGACAA---TTGCTG---TCTGGTATAGTGCAACAGCAAAGT---  
 AATTTG---CTGAGG---GCTATAGAGGCGCAGCAGCATATGTTGCAACTCACGGTCTGGGGCATT  
 >KF835522..1  
 TTCTATTGTAATACATCAAGACTGTTTAATAGTACATACAATCCTAAGAGTACAGGAAGTAAT-----  
 -----  
 -----  
 TCAAGCTCAATCATCACAATCCCATGCAGAATAAAGCAAATTATAAACATGTGGCAGGAGGTAGGAAGAGCAA  
 TGTATGCCCCCTCCCATTGAAGGAAACATAACATGTAGATCAAAG---  
 ATCACAGGACTACTATTGGTACGTGATGGAGGAAGCCAGTGCCAAACAGT-----  
 -----  
 ----  
 ACAGAGACAGAGACAGAGATATTCAGACCTGGAGGAGGAGATATGAGGGACAATTGGAGAAGTGAATTATATA  
 AATATAAAGTGGTAGAAATTCAGCCATTG---GGAATAGCACCCACTAAAGCAAAAAGGAGAGTGGTG-----  
 -----GAGAGAGAAAAAAGAGCA---GCA-----  
 CTAGGAGCT-----TTGTTCCCTTGGGTTCTTGGGAGCA---GCAGGAAGCACTATG---  
 GGCGCGGCGGCA---GTAACGCTGACGGTACAG---GCCAGACAA---TTATTG---  
 TCTGGTATAGTGCAACAGCAAAGC---AATTTG---CTGAGG---  
 GCTATAGAGGCGCAACAGCATATGTTGCAACTCACGGTCTGGGGCATT  
 >HM215403..1  
 TTCTATTGTAATACATCAAGCCTGTTTAATGGCACATACAATGGCACATACATGACTAATATGGCTAAT----  
 -----  
 -----  
 GATTCATCAGAAATCACAATCCCATGCAGAATAAAGCAAATTGTAAACATGTGGCAGGAGGTAGGACGAGCAA  
 TGTATGCCCCCTCCCATTGCAGGAAACATAACATGTAGATCAAAT---  
 ATCACAGGACTATTATTGGTACGTGATGGAGGACGATCAGAGGTGTCA-----  
 -----  
 -----  
 AATACTACAGAGACATTTCAGACCTCAAGGGGGAGATATGAGGGACAATTGGAGAAGTGAATTATATAAATATA  
 AAGTGGTAGAAATTAAGCCATTA---GGAATAGCACCCACTGGAGCGAAAAGGAGAGTAGTG-----  
 -----GAGAGAGAAAAAAGAGCA---GCGGGA---ATAGGAGCT-----  
 ---GTGTTCCCTTGGGTTCTTGAGTGCA---GCCGGAAGCACTATG---GGCGCGGCGTCA---  
 TTAACGCTGACGGTACAG---GCCAGACAA---TTGCTG---TCTGGTATAGTGCAACAGCAAAGC---  
 AATTTG---CTGAGG---GCTATAGAGGCGCAACAGCATATGTTGCAACTCACAGTCTGGGGCATT  
 >HM215408..1  
 TTCTATTGTAATACATCAAGACTGTTTAATAGTACATACAGCAATGGTACACTCAGGTTTAATGGTACAGACT  
 TTAATGGTACA-----  
 -----ATGGAT-----  
 AATTCAGCTCAACCATCACAATCCCATGCAGAATAAAGCAAATTTATAAACATGTGGCAGGAAGTAGGAAGAG  
 CAATGTATGCCCCCTCCCATTGAAGGAAACATAACATGTAGATCAAAT---  
 ATCACAGGACTACTATTGGTACGTGATGGAGGAACAAATTTAACAGCAGAA-----  
 -----  
 -----  
 TTAATCAGACAGAGATATTTAGACCTGAAGGAGGAAATATGAGGGACAATTGGAAAAATGAATTATATAAAT  
 ATAAAGTGGTAGAAATTAAGCCATTG---GGAATAGCACCCACTGGAGCAAAAAGGAGAGTGGTG-----  
 -----GAGAGACAAAAAAGAGCA---GTGGGA---ATAGGAGCT---  
 -----GTAATCTTTGGGTTCTTGGGAGCA---GCCGGAAGCACTATG---GGCGCGGCGTCA---  
 ATGGCGCTGACGGTACAG---GCCAGACAA---TTGTTG---TCTGGTATAGTGCAACAGCAAAGC---  
 AATTTG---CTGAGG---GCTATAGAGGCGCAACAGCATCTGTTGCAACTCACGGTCTGGGGCATT  
 >HQ699950..2  
 TTCTATTGTAATACATCAGGCCTGTTTAATAGTACATACATGCCTAATGGTACCTACATGTCTAATGGTACCA  
 AT-----

-----  
AGTAATGCAACCATCACAATCCCATGCGAATAAAGCAAATTATAAACATGTGGCAGGAGGTAGGACGAGCAA  
TATATGCCCCCTCCCATTTGCAGGAAACATAACATGTAAATCAAAT---  
ATCACAGGGCTACTATTGGTACGTGATGGAGGACCAGATAATCAG-----  
-----  
-----  
ACAGAGATATTCAGACCTGAAGGAGGAGATATGAGGAACAATTGGAGAAGTGAATTATATAAATATAAAGTGG  
TAGAAATTAAGCCATTG---GGACTAGCACCCACTGGAGCAAAAAGGAGAGTGGTG-----  
-----GAGAGAGAAAAAAGAGCA---GTGGGA---ATAGGAGCT-----  
GTGTTCCCTTGGGTTCTTGAGTGCA---GCCGGAAGCACTATG---GGCGCGGCGTCA---  
ATAACGCTGACGGTACAG---GCCAGACAA---TTGCTG---TCTGGTATAGTGCAACAGCAAAGT---  
AATTTG---CTGAGG---GCTATAGAGGCGCAGCAGCATATGTTGCAACTCACGGTCTGGGGCATT  
>HQ699981..1  
TTCTATTGTAACACATCAGGCCTGTTTAATAGTACATACATGCCTAGTGGTACATACATAACTAATGATACAA  
AT-----  
-----  
AGTAGTTCAGATACAATCACAATCCCATGCAAAATAAAGCAAATTATAAACATGTGGCAGGAGGTAGGACGAG  
CAATGTATGCCTCTCCCATTTGCAGGAAACATAACATGTACATCAAAT---  
ATCACGGGACTACTATTGGTACGTGATGGAGACAAAACAAGTAAT-----  
-----  
-----  
ACTACAGAGACATTCAGACCTCAAGGAGGAGACATGAGGGACAATTGGAGGAGTGAATTATATAAATATAAAG  
TGGTAGAAATTAAGCCATTG---GGAATAGCACCCACTAAAGCAAAAAGGAGAGTGGTG-----  
-----GAGAGAGAAGAAAAGAGCAGCGGGAATAGGAATAGGAGCT-----  
TTGTTCCCTTGGGTTCTTGAGTGCA---GCCGGAAGCACTATG---GGCGCGGCGTCA---  
ATAACGCTGACGGTACAG---GCCAGACAA---TTGTTG---TCCGGTATAGTGCAACAGCAAAGC---  
AATTTG---CTGAGG---GCTATAGAGGCGCAACAGCATATGTTGCAACTCACGGTCTGGGGCATT  
>KC807928..2  
TTCTATTGTAATACAACAAACCTGTTTAATAGTACATACAATAGTACAACAGGCCTGTTTACTTATACATACA  
ATGGTACT-----ACA---  
TACAATGGTAGTGTTACAGAC-----  
AATGATAGCATCCCAATCCAAATCCAATGCAGAATAAAGCAAATTATAAACATGTGGCAGGAGGTAGGACGAG  
CAATGTATGCCCCCTCCCATTTGCAGGGAACATAACATGTAGCTCAAAT---  
ATCACAGGACTACTATTGACACGTGATGGAGGAAATACAACCTGTGACA-----  
-----  
-----  
CAAAAAGAGATATTCAGACCTCAAGGAGGAAATATGAGAGACAATTGGAGAAATGAATTATATAAATATAAAG  
TGGTAGAAGTTAAGCCATTG---GGACTAGCACCCACTAAAGCAAAAAGGAGAGTGGTG-----  
-----GAAAGAGAAAAAAGAGCA---GTGGGA---CTAGGAGCT-----  
GTGTTCCCTTGGGTTCTTGGGAGCA---GCAGGAAGCACTATG---GGCGCGGCGTCA---  
ATGACGCTGACGGTACAG---GCCAGACAA---TTGTTG---TCTGGTATAGTGCAACAGCAAAGC---  
AATTTG---CTGAGA---GCTATAGAGGCGCAACAGCATATGTTGCAACTCACGGTCTGGGGCATT  
>JF683757..3  
TTCTATTGCAACACATCAGTACTGTCTAATAGTACCCATAATAGTGGTACTGGATGGCACCTACAATCAAGTG  
ATATT-----  
-----  
AATTCTTATGCAACCATCGCGTTTCATATAGAATAGGACAAATTATAAACATGTGGCGGCAGGTAGGACGAG  
CAATCTATGGCCCTCCGGTGGCACGAAAAATGTCAGCCCATCCAAGT---  
ACCACAGGCCTATTATTGGTATGTGATGGGGGTGAGAAGAGCTTAAATAGCACA-----  
AATGGCACAGGTATCACA---AAT-----  
-----  
GCCACAGAGATATTTAGACCTCAAGGAGGAGATATGAAGGACAATTGGAGAAGTGAATTATATAAGTATAAAG  
TGGTAGAAATTAAGCCATTG---GGAATAGCACCCACTGAAGCAAGAAGGAGAGTGGTG-----  
-----GAGAGAGAAAAAAGAGCA---GTGGGA---ATAGGAGCT-----  
GTGATCCTTGGGTTCTTGGGAGCA---GCAGGAAGCACTATG---GGCGCGGCGTCA---  
ATAGCGCTGACGGCACAG---GCCAGAACA---GTAATG---GCTGGTATAGTGCAACAGCAAAGC---  
AATTTG---CTGAGG---GCTATAGATGCGCAACAGCATATGTTGCAGCTCACAGTCTGGGGCATT  
>L23065..3  
TTCTATTGTAATACATCAGCCTTGTTTAATGATTCAATTACAAATGCACCCATTAATAATTCGAGT-----  
-----

-----  
ACAGATGCAAACATCACACTTCAATGCAGAATAAAACAAATTATAAACATGTGGCAGGAGGTAGGACGAGCAA  
TGTATGCCCCCTCCCATTTCAAGGAATAATAGCATGTAAATCAAAT---  
ATCACAGGACTGCTACTGACACGTGATGGAGGGACAAATAGCACA-----  
-----  
-----  
GACGAGACATTCAGACCTGGAGGAGGAGATATGAGGGACAATTGGAGAAGTGAATTATATAAATACAAAGTGG  
TAGAAATTAAGCCATTA---GGACTAGCACCCACTAAGGCAAAAAGGAGAGTGGTG-----  
-----GAGAGAGAAAAAAGAGCA---GCA-----CTAGCAGCT-----  
GTGTTTCCTTGGGTTCTTGGGAGCA---GCCGGAAGCACTATG---GGCGCAGCATCA---  
ATAACGCTGACGGTACAG---GCCAGACAA---TTATTG---TCTGGTATAGTGCAACAGCAAAGC---  
AATTTG---CTGAAG---GCTATAGAGGTGCATCAGCATATGTTGCAACTCACAGTCTGGGGCATT  
>EF531335..1  
TTCTATTGCAACACATCAGATCTGTTTAATAGTACATATTTTAATAATACATATTTTAATGGTGTATATAATG  
GTACA-----  
-----  
AGAGATAATGGTACCATCACACTCCCTTGCAGAATAAAACAATTTATAAACATGTGGCAGAGGGTAGGAAGAG  
CAATGTACGCCCTCCCATTTCAAGGACTTATAACATGTAGGTCAAAT---  
ATCACAGGACTACTATTGACACGTGATGGAGGAAACACTATTAACAATACA-----  
-----  
-----  
AATAACAATACAGAGATATTCAGACCTGGAGGAGGAGATATGAGGGACAATTGGAGAAGTGAATTATATAAAT  
ATAAAGTGGTAGAAATTAGGCCATTA---GGAGTAGCACCTACTGATGCAAGAAGGAGAGTGGTG-----  
-----GGGAGAGAAAAAAGAGCA---GTA-----ATGGGAGCT---  
-----TTGTTTCCTTGGGTTCTTGGGAGCA---GCAGGAAGCACTATG---GGCGCAGCGTCA---  
ATGGCGCTGACGGTACAG---ACCAGACAA---TTATTG---TCTGGTATAGTGCAACAGCAAAGC---  
AATTTG---CTGAGG---GCCATAGAGGCGCAACAGCATATGTTGCAACTCACGGTCTGGGGCATC  
>KU319529..3  
TTCTATTGCGATACATCAAATCTGTTTAATATGACATACTTGTTTAATGATTGGAGTTACGAACATAGTACTG  
AC-----  
-----  
-----  
TCAGATTTTCATCATCATGATCCGCTGCAGAATAACACATATAATAAACATGTGGCAGGTAGTGAGAGCAGTAC  
TGTATGCCCCCTGCCCTTTCGACGGCAACAGTTAAGCAAGCAATCCATC---  
TACGCAGTACTACTATGGACTCGTGATGCAGCAAGTAGTTACTGG-----  
-----  
-----  
CGCGAGAAAGAGATATTCAGACCTGCAGGAGGAGATATGAGGGACAATTGGAGAAGTGAATTATATAAATATA  
AAGTGGTAGAGATTAAACCATTA---GGAATAGCACCCACTGAGGCAAAAAGGAGAGTGGTG-----  
-----GAGAGAGAAAAAAGAGCA---GTGGGA---ATAGGAGCT-----  
---GTGTTTCCTTGGGTTCTTGGGAGCA---GCAGGAAGCACTATG---GGCGCAGCGTCA---  
CTGACGCTGACGGTACAG---GCCAGGCAA---TTGCTG---TCTGGTATAGTGCAACAGCAAAC---  
AATTTG---CTGAGA---GCTATAGAGGCGCAACAGCATATGTTGCAACTCACAGTCTGGGGCATA  
>KU319530..1  
TTCTATTGCAATACATCAAGACTGTTTAATGGTGCATACATGTATAACAGTACTAATAGTACT-----  
-----  
-----  
TCAAATGCAACCATCACACTCCAATGCAGAATAAAGCAAATTATAAACATGTGGCAGGGGGTAGGACGAGCAA  
TGTATGCCCCCTCCCATTTGAAGGAAACATTACATGTAAATCAATA---  
TCACAGGATTCTATTGACCCTGATGGAGGATTGGGC-----  
-----  
-----CAAAAACCCAAGGTTTCCAAGTGGGAGAGGAACCTTAGGGACA-----  
-----TTGGAAATGGATCCTTTG---GGTTACCCCTG-----GCCAAAAGGAAGGGGAG-  
-----AAAAGAAAAAAAAGGACA---GGGGTT---  
TTACGAAAA-----AACTGG-----GCGCAGAAGCCTATG---  
GGCGCAGCATCA---ATAACGCTGACGGTACAG---GCCAGACAA---TTGTTG---  
TCTGGTATAGTGCAACAGCAAAGT---AATTTG---CTGAGG---  
GCTATAGAGGCGCAACAGCATATGTTGCAACTCACGGTCTGGGGCATT  
>KU319539..2  
TTCTATTGTAATACATCAAAACTGTTTAATGGTACATACAATAAGAACAATACTAATAGGACTAATACTAAT-

-----  
AGTACTTCAACCATCACACTTCAATGCAGAATAAAACAAATTATAAACATGTGGCAGGGGGTAGGACAAGCAA  
TGTCTGCCCCCTCCCATTC AAGGAAACATAACATGTGAATCAAAT ---  
ATCACAGGACTACTATTGACACGTGATGGAGGAACAATAATAACGAAACAAATAATAACACAGAAGCAA  
ATAAT-----  
-----  
AACACAGAAACATTTCAGACCTGGAGGAGGAGATATGAGGGACAATTGGAGAAATGGAGGTGAGTTATATAAAT  
ATAAAGTGGTAGAAGTTAATCCATTA --- GGAATAGCACGCACTGAGGCAAAAAGGAGAGTGGTG-----  
-----CAGAGAGAAAAAAGAGCA---GTGGGA---ATAGGAGCT---  
-----GTGCTCCTTGGGTTCTTGGGAGCA---GCTGGAAGCACTATG---GGCGCAGCGTCA---  
GTAACGCTGACGGTACAG---GCCAGACAA---TTGCTG---TTTGGTATAGTGCAACAGCAAAGC---  
AATTTG---CTGAAG---GCTATAGAGGCGCAACAGCATATGTTGCAACTCACGGTCTGGGGCATT  
>KU319542..1  
TTCTATTGCAATACAACAAAACCTGTTTAAATAGTACATACAATGCTAATAGTACAAACAGTACT-----  
-----  
-----  
TCAAAATTCAACCATCACAATCCAATGCAGAATAAAACAAATTATAAACATGTGGCAGGAGGTAGGACGAGCAA  
TGTATGCCCCCTCCCATTCAGAGAAACATAACATGTAACCTCAACT ---  
ATTACAGGAATACTATTAACACGTGATGGAGGGTATAATATTACC-----  
-----  
-----  
AACGACACAAAAACATTCTTACCTGGAGGAGGAGATATGATGAACAATTGGAGAAATGAATTATATAATTATA  
AAGTGGTAGAAAATAAACCATTA --- GGAATAGCTCCTACTAGTGCAAAGAGGAGAGTGGTG-----  
-----GAGAAAAAAAAGAGCA--ATATGGGGAATAGGAGCT-----  
---GCGCTCCTTGGTTTCTTACGAGCA--GCAGGAAGCACTATG---GGCGCAGCGTCA---  
TTGACGCTGACGGTACAG---GCCAGGCAA---TTGTTG---TCTGGTATAGTGCAACAGCAAAGC---  
AATTTG---CTGAGG---GCTATAGAGGCGCAACAACATATGTTGCAACTCACGGTCTGGGGCATT  
>KU319543..4  
TTCTACTGCAATACATCAAATTTGTTTAAATAGAACTTACCTGATTAATGGTACCTATAATAATAAAACT-  
-----  
-----  
TCCATAAGCACCATCACACTCCACTGCAAAATAAAACAAATTATAAATATGTGTCAGGGGGTAGGACAAGCAA  
TGTATGCCCCCTGCCACTGCAGGAATCATATCATGTATATCAACT ---  
ATCGCAGTACTACTACTTGCTGGTGTATGGAGGCAATGATACAAGT-----  
-----  
-----  
GATACAGAGACATTCAGACCTGGAGGAGGAGATATGAGGGACAATTGGAGAAGTGAATTATATAAATATAAAG  
TGGTAGAAGTTCACCCATTA --- GGAGTAGCACCCACTAGAGCAAAAAGGAGAGTGGTG-----  
-----GAGAGAGAAAAAAGAGCA--GCA-----CTAGGAGCT-----  
ATGATCATTTGGGTTCTTGGGAGCA--GCAGGAAGCACTATG---GGCGCAGCATCA---  
ATAACGCTGACGGTACAG---GCCAGGCAA---TTGTTG---TCTGGTATAGTGCAACAGCAAAGC---  
AATTTG---CTGAGG---GCTATAGAGGCGCAACAGCATATGTTGCAACTCACAGTCTGGGGCATA  
>KU319548..2  
TTCTATTGCAATACATCACAACCTGTTTAAATAGGACATACATGGAACTACTATTAGCGCTGTGTCA-----  
-----  
-----  
ACAAATACAAAATCACCCCTCCTATGCAAAATAAAACAAATTATTCAAATGCTTCAGGGAGTAGGACGAGCAA  
TGTATGCCCCCTCGCAATGAAAGAAACATAACATGTCTTTCAAAT ---  
ATCACAGGATTACTATTGACACGTGATGGAGGAATTAACAGTAGC-----  
-----  
-----  
ACAACTGAGATATTTCAGACCTGGGGGAGGAGATATGAGGGACAATTGGAGAAGTGAATTATATAAATATAAAG  
TGGTAGAAATCAAACCATTA --- GGAGTAGCACCCACTAAGGCAAAAAGGAGAGTGGTG-----  
-----GAGAGAGAAAAAAGAGCA---GTGGGA---ATAGGAGCT-----  
GTGCTCCTTGGGTTCTTGGGAGCA---GCAGGAAGCACTATG---GGCGCAGCATCA---  
ATAACGCTGACGGTACAG---GCCAGGCAA---TTGTTG---TCTGGTATAGTGCAACAGCAAAGC---  
AATTTG---CTGAGG---GCTATAGAGGCGCAACAGCATATGTTGCAACTCACAGTCTGGGGCATT  
>KU319549..1  
TTCTATTGCAAAACATCAAAACCTGTTTATTAAGACTTGGAAGTTGGAACCATCGGAAT-----  
-----

-----  
GATGGAACCATCATCACGATCCCATGCAGAATAAAACAAATTATACATATGTGGCAGGGAGTAGGACGAGCAA  
TGTATGCCCCCTCCCATCAGTGGACCAATAACATGTAGATCAAAT---  
ATCACAGGACTACTACTGACACGGGATGGAGGCATCAGTGACAATAACAGT-----  
-----  
-----  
ACCAATACCACAGAGATATTCAGACGTCAAGGAGGAGATATGAAAGACAATTGGAGAAGTGAATTATATAAAT  
ATAAAGTGGTAGAAATTAAGCCATTA---GGAATAGCACCCACTAAGGC AAAAAGGAGAATGGTG-----  
-----CAGAGAGAGAGAGGAGAA---AAGAGG---CACGGAGCT---  
-----ATGTTTCCTTGGGTTCTTGGGAGCA---GCCGGAAGCACTATG---GGCGCAGCATCA---  
ATAACGCTGACGGTACAG---GCCAGACAA---TTATTG---TCAGGTATAGTGCAACAGCAAAGC---  
AATTTG---CTGAGG---GCTATAGAGGCGCAACAGCATATGTTGCAACTCACGGTCTGGGGCATT  
>AF219266..3  
TTCTATTGCTATACTTCAAGACTGTTTAAACAGTACATACCTGTTTAATGGTACTTACCTGGTTAATGATATAA  
ATAGT-----  
-----  
ACAGGAAATGCAACCATCATACTCCCATGCAAAATAGAACAAATTATAAACATGTGGCAGGAGGTAGGGCGAG  
CAATGTATGCCCCCTCCCATTTGAAGGAAACATAACATGTAGCTCAAAC---  
ATCACAGGACTATTATTGGTACGTGATGGAGGAAAAGATTCAAAT-----  
-----  
-----  
GGCACAGAGATATTCAGACCTGGAGGAGGAGATATGAGGGACAATTGGAGAAGTGAATTATATAAATATAAAG  
TGGTAGAAATTAAGCCATTG---GGAATAGCACCCACTAAGGC AAAAAGGAGAGTGGTG-----  
-----GAGAGAGAAAAAAGAGCA---GTAGGA---ATAGGAGCT-----  
GTGTTTCCTTGGGTTCTTGGGAGCA---GCAGGAAGCACTATG---GGCGCGGCGTCA---  
ATAACGCTGACGGTACAG---GCCAGACAA---GTGTTG---TCTGGTATAGTGCAACAGCAAAGC---  
AATTTG---CTGAGG---GCTATAGAGGCTCAACAGCATATGTTGCAACTCACGGTCTGGGGCATT  
>FJ977095..1  
TTCTATTGCAATACATCAGAACTGTTTAAGAATGGTACAAATAATGGTACCAATAGTACAGACTCAACA-----  
-----  
-----  
AATTCAACATCCATCACAATCCAATGCAGAATAAAACAAATTATAAATATGTGGCAGGGGGTAGGTTCGAGCAA  
TATATGCCCCCTCCCATTAAGGAAACATAACATGTAACCTCAAAT---  
ATCACAGGACTACTGCTGACACGTGATGGAGGAAAAGGAGAAGAAAGT-----  
-----  
-----  
GATAATAAGACAGAGATATTCAGACCTGCAGGAGGAGATATGAGGGACAATTGGAGAAGTGAATTATATAAAT  
ACAAAGTGGTAGAAATTCAGCCATTA---GGAGTAGCACCCACTGAGGCGAAAAGGAGAGTGGTG-----  
-----GAGAGAGAAAAAAGAGCA---GTGGA---ATAGGAGCT---  
-----GTGTTTCTTGGGTTCTTGGGAGCA---GCAGGAAGCACTATG---GGCGCAGCGTCA---  
ATAACGCTGACGGTACAG---GCCAGACAA---TTATTG---TCAGGCATAGTGCAACAGCAAAGT---  
AATTTG---CTGAGA---GCTATAGAGGCGCAACAGCATATGTTGCAACTCACGGTCTGGGGCATT  
>AY255823..1  
TTCTATTGCAATACATCAGCCCTGTTTACAAATTCAACCATC-----  
-----  
-----  
CCAAATACAACCATCACACTCCCATGCAAAATAAAACAAATTATAAATATGTGGCAGGAGGTAGGACGAGCAA  
TGTATGCCCCCTCCCATTAAGGAGAGATAACATGTAATTCAACT---  
ATCACAGGAATACTACTGACACGTGATGGAGGCAACACCACAAAC-----  
-----  
-----  
GAAATCGAAACATTTCAGACCTGGAGGAGGAGATATGAGGGACAATTGGAGAAGTGAATTATATAAATACAAAG  
TGGTAGAAATTAAGCCATTA---GGAATAGCACCCACGAGGC AAAAAGGAGAGTGGTG-----  
-----GAGAGAGAAAAAAGAGCA---GCA-----CTAGGAGCT-----  
GTGTTTCCTTGGGTTCTTGGGAGCA---GCCGGAAGCACTATG---GGCGCAGCATCA---  
ATGACGCTGACGTTACAG---GCCAGACAA---TTACTG---TCGGGTATAGTGCAACAGCAAAGC---  
AATTTG---CTGAGG---GCTATAGAGGCGCATCAGCATATGCTGCAACTCACAGTCTGGGGCATT  
>KP109480..2  
TTCTATTGCAACACATCAAGCCTGTTTAAAGGTACATATAGGCCTAATGGTACAAGTAATTCCTACT-----  
-----

-----  
TCAGGCTCTATCATCACACTCCCATGCTACATAAAACAAGTTATAAACTTGTGGCAGGAGGTAGGACGAGCAA  
TATATGCCCCCTCCCATTTGAAGGAAACATAACATGTATATCAAAT ---  
ATCACAGGACTACTATTGGTAAGAGATGGAGGAAATCATGAAGAG-----  
-----  
-----  
GCAAAATACGACAGAGACATTCAGACCTGGAGGAGGAAATATGAGAGACAATTGGAGAAGTGAATTATATAAAT  
ATAAAGTAGTAGAAATTAAGCCATTG --- GGAGTAGCACCCACTAAAGCAAGAAGGAGAGTGGTG-----  
-----GAGAGAGAAAAAGAGCA---GTGGGAGTAGGAGCTGTT---  
-----ATGTTTCCTTGGGTTCTTGGGAGCA---GCAGGAAGCACTATG---GGCGCGGCGTCA---  
ATAACGCTGACGGTACAG---GCCAGACAA---TTGCTG---TCTGGTATAGTGCAACAGCAAAGC---  
AATTTG---CTGAAG---GCTATAGAGGCGCAACAGCATCTGTTGCAACTCACGGTCTGGGGCATT  
>KP109483..1  
TTCTATTGTAATACATCAAGCCTGTTTAATAGTACATTTAATAGTACATACATGACTAATGATACAGACATGA  
AT-----  
-----  
TCAAACTCAACCATCTCAATCCCATGCCGCATAAAACAAATTATAAACATGTGGCAGGAGGTAGGACGAGCAA  
TGTATGCCCCCTCCCATTTGCAGGAAACATAACATGTAAATCAAAT ---  
ATCACAGGACTACTATTGGTACGAGATGGAGGAAACTCAATGATACA-----  
-----  
-----  
AATGAGCCAGAGATATTCCGACCTCAAGGAGGAGATATGAGGGACAATTGGAGAAGTGAATTATATAAATATA  
AAGTGGTAGAAATTAAGCCATTG --- GGAGTAGCACCCACTGCAGCAAAAAGGAGAGTGGTG-----  
-----GGAAGAGAAAAAGAGCA---GTGGGA---CTAGGAGCT-----  
---ATGATCCTTGGGTTCTTGGGAGCA---GCCGGAAGCACTATG---GGCGCGGCGTCA---  
ATAACGCTGACGGTACAG---GCCAGACAA---TTGTTG---TCTGGTATAGTGCAACAGCAAAGC---  
AATTTG---CTGAGG---GCTATAGAGGCGCAACAGCATATGTTGCAACTCACGGTCTGGGGCATT  
>KY929363..1  
TTCTATTGCAATACATCAAACTGTTCAACAGTACATACTGGCAGAATGGTACATACTCATACTGGAATAATG  
GG-----  
TCATTCCTAGAATGGAATGATACACAAAGCACT-----  
CCAAATCGAAGCATCACAATTCCATGCAGAATAAAACAAATTATAAACATGTGGCAGGAGGTAGGACGAGCAA  
TGTATGCCCCCTCCCATTTGCAGGAAAAATAATGTGTAAATCCAAT ---  
ATCACAGGAATACTATTGGAACGTGATGGAGGAAATACAAATGAGACA-----  
-----  
-----  
AATAAGACAGAGACATTCAGACCAATAGGAGGAGATATGAGGAATAATTGGAGAAGTGAATTATATAAATATA  
AAGTGGTAGAAATTAAGCCATTG --- GGGGTAGCGCCCACTAAGGCAAGAAGGAGAGTGGTG-----  
-----GAGAGAGAAAAAGAGCA---ATAGGGGGAATAGGAGCT-----  
---GTATTCCTTGGGTTCTTAGGAGCA---GCAGGAAGCACTATG---GGCGCGGCGTCA---  
ATAACGCTGACGGTACAG---GCCAGACAA---TTGTTG---TCTGGTATAGTGCAACAGCAAAGC---  
AATTTG---CTGAAG---GCTATAGAGGCGCAACATCATCTGTTGCAACTCACGGTCTGGGGCATT  
>KY929365..2  
TTCTATTGCAATACATCAGGCCTGTTTAATGCTACATACAATAGTACATCAGGCCTGTTTAATGCTACTAATC  
AC-----  
-----  
ACAAATAACACCATCACCATCCCCTGCAGAATAAAACAAATTATAAACATGTGGCAGGGGGTAGGAAAAGCAA  
TGTATGCCCCCTCCCATTTGCAGGGAACATAACATGTACATCAAAT ---  
ATCACAGGAATACTATTGACATGGGATGGAGGAGAAAATAGAACA-----  
-----  
-----  
GATAATGATACAGAGACATTCAGACCTGCAGGAGGAGATATGAGGGACAATTGGAGAAGTGAATTATACAAAT  
ATAAAGTGGTAGAAATTCAGCCATTG --- GGGGTAGCACCCACTAAAGCAAAAAGGAGAGTGGTG-----  
-----GAGAGAGAAAAAGAGCA---GTGGGA---CTAGGAGCT---  
-----GTGTTTCCTTGGGTTCTTGGGAGCA---GCAGGAAGCACTATG---GGCGCAGCGTCA---  
ATGGCGCTGACGGTACAG---GCCAGACAA---TTGTTG---TCTGGTATAGTGCAACAGCAAAGC---  
AATTTG---CTGAGG---GCTATAGAGGCGCAACAACACATGTTGCAACTCACGGTCTGGGGCATT  
>KY929369..1  
TTCTATTGTAATACATCAGGCCTGTTTAATAGTAATAATGAGACAAACAATAATTCAGCTTA-----  
-----

-----  
ATCACAATTCCATGCAGAATAAAACAAGTTGTAACTTGTGGCAGGGGGTAGGACGAGCAATGTATGCTCCTC  
CCATAGCAGGAAACATAACATGTAATTCAAAT---  
ATCACAGGACTACTATTGGTACGTGATGGAGGAACAGGAAATAAC-----  
-----  
-----  
ACAATAGAGAAATTCAGACCTCAAGGAGGAGATATGAGAGACAATTGGAGGAACGAACTATATAAATATAAAG  
TGGTAGAAATTAAACCATTG---GGAGTAGCACCCACTAAAGCAAAAAGGAGAGTGGTG-----  
-----GAGAGAGAAAAAAGAGCAATAGCGGGA---CTAGGAGCT-----  
GTGTTCTTGGGTTCTTGGGAGCA---GCAGGAAGCACTATG---GGCGCGGCGTCA---  
ATAACGCTGACGGTACAG---GCCAGACAA---TTGTTG---TCTGGTATAGTGCAACAGCAAAGT---  
AATTTG---CTGAGG---GCTATAGAGGCGCAACAGCATCTGTTGCAACTCACGGTCTGGGGCATT  
>KY929370..3  
TTCTATTGTAATACATCAGGCCTGTTTAATGGTACATACATGTCTAATGGTACTTATAATGAGACAAACAATA  
AT-----  
-----  
TCAAGCTCAAACATCACAATTCCATGCAGAATAAAACAAGTTATAAACTTGTGGCAGGGGGTAGGACGAGCAA  
TGTATGCTCCTCCCATTGCAGGAAAAATAACATGTAACCTCAAAT---  
ATCACAGGACTACTATTGGTACGTGATGGAGGAACAGGTAATCAGACA-----  
-----  
-----  
AATGATATAGAGACATTCAAGGAGGAGATATGAGAGACAATTGGAGGAGCGAATTATATAAATATA  
AGGTGGTAGAAATTAAACCATTG---GGAATAGCACCCACTGAAGCAAAAAGGAGAGTGGTG-----  
-----GGAAGAGAAAAAAGAGCA---GTGGGA---CTAGGAGCT-----  
---GTGCTCTTGGGTTCTTGGGAGCA---GCAGGAAGCACTATG---GGCGCGGCGTCA---  
ATAACGCTGACGGTACAG---GCCAGACAA---TTGTTG---TCTGGTATAGTGCAACAGCAAAGC---  
AATTTG---CTGATG---GCTATAGATGCGCAACAGCATCTGTTGCAACTCACAGTCTGGGGCATT  
>KX756609..1  
TTCTATTGCAATACCTCAAACTGTTTAATATATCAAACCTGTCTTCTAATGATACA-----  
-----  
-----  
ACAGATAATGGCACAATCATGATCCCATGCAGAATAAAACAATTATAAACATGTGGCAGGAGGTAGGACGAG  
CAATGTATGCTCCTCCCATTCAGGAAACATAACGTGTAGTTCAAAC---  
ATCACCGGACTACTGTTGGAACGTGATGGAGGAAATTCAACTAATTCAACTAAT-----TCA-----  
-----  
-----  
AATAGGACAGAGACATTCAAGCCTCAAGGAGGAAATATGAGGAACAATTGGAGAAGTGAATTATATAAATATA  
AGGTGGTAGAAATACAACCAGTG---GGAATAGCGCCCACTACAGCAAAAAGGAGAGTGGTG-----  
-----GAGAGAGAAAAAAGAGCA---GTGGGA---ATAGGAGCT-----  
---ATGTTCTTGGGTTCTTGGGAGCA---GCAGGAAGCACTATG---GGCGCAGCGTCG---  
ATAACGCTGACGGTACAG---GCCAGACAA---CTGTTG---TCTGGTATAGTGCAACAGCAAAGC---  
AATTTG---CTGAGA---GCTATAGAGGCGCAACAACATCTGTTGCAACTCACAGTCTGGGGCATT  
>MK076687..2  
TTCTATGGTAATACAGCAGGCCTGTTTAATAATACATACAATATTACAACAGGCACGCTTACATACAATGGTA  
AATCCCTTAAT-----  
-----  
GATTTAACTCAACCATCACACTCCCATGCAGAATAAAGCAGTTTAAAAATATGTGGCAGGGGGTAGGAAGAG  
CAATGTATGCCCCTCCCATTCAGGAAACATAACATGTACATCAAAT---  
ATCACAGGCATAATATTGACACGTGATGGAGGGAATGAGAGTAGTACTGAA-----  
-----  
-----  
GTTCAACAATAATACAGAGACATTCAAGGGGGGAAATATGAGAGATAATTGGAGAAGTGAATTATACA  
AATATAAAGTGGTAGAAATTAAGCCATTG---GGAGTAGCACCCACTGCAGCAAAAAGGAGAGTGGTG-----  
-----GAAAAAGAAAAAAGG-----GGC---  
CTAGGAGCT-----ATACTCATTGGGTTCTTGGGAACA---GCAGGAAGCACTATG---  
GGCGTGCGTCA---ATAACGCTGACGGTACAG---GCCAGACAA---TTGTTG---  
TCTGGTATAGTGCAACAGCAAAGC---AATTTG---CTGAGA---  
GCTGTAGAGGCGCAACAACATCTGTTGCAACTCACGGTCTGGGGCATT  
>KY713231..1

TTCTATTGCAATACCTCAAGCTTGTTTAGCAGTATAAGCCCTAATAGTACA-----  
-----  
-----  
AATAATACTGTAATAACAATCCCATGCAGAATAAAACAAATTATAAACATGTGGCAAGGGGTAGGACGAGCAA  
TATACGCCCCCTCCTATTGAAGGAAACATAACATGTAAATCAAAT---  
ATCACAGGAATACTATTGGTACGTGATGGAGGCACAAATACTACA-----  
-----  
-  
GAAGAAGGAAAAGAAATAGAAATATTTAGACCTCAAGGAGGAAATATGAAGGACAATTGGAGAAGTGAATTAT  
ATAAATATAAAGTGGTAGAAATTAAGCCATTA---GGAGTAGCACCCACTAAAGCAAAAAGGAGAGTGGTG--  
-----GAGAGAGAAAAAAGAGCAGTAGTGGGG---  
CTAGGAGCT-----GCGTTCCTTGGGTTCTTGTCAGCT---GCAGGAAGCACTATG---  
GGCGCGGCGTCA---ATAACGCTGACGGTACAA---GCCAGACAA---TTGTTG---  
TCTGGTATAGTGCAACAGCAAAGC---AATTTG---CTGAGA---  
GCTATAGAGGCGCAACAGCATATGTTGCAACTCACAGTCTGGGGCATT  
>KY713235..2  
TTCTATAGGAGACAGTCAAAATTGTTTAATCACACATACATGCAGAATGGTACACACAATGGTACAATAAAT-  
-----  
-----  
GGTTCAGACCCAATCATAATTCCATGCAGAATAAAGCAAATTATAAACATGTGGCAGGAGGTAGGAAGAGCAA  
TGTATGCCTCTCCCATTCGAGGAAACATAACCTGTAAATCAAAT---  
ATCACAGGACTACTATTGACACGAGATGGAGGACTCAAAATGATAGTAGTAAT-----  
-----  
-----  
GAGACAAAGATAGAGATATTCAGACCTGGAGGAGGAAACATGAAAGACAATTGGAGAAGTGAATTATACAAAT  
ATAAAGTGGTAGAAATTAAGCCATTG---GGAATAGCACCCACTGAAGCAAGAAGAAGAGTAGTG-----  
-----CAGAGAGAAAAAAGAGCA---GTGACA---CTAGGAGCT---  
-----ATGTTTCCTTGGGTTCTTGGGAGCA---GCAGGAAGCACTATG---GGCGCGGCGTCA---  
ATAACGCTGACGGTACAG---GCCAGACAA---TTGTTG---TCTGGTATAGTGCAACAGCAAAGC---  
AATTTG---CTGAGG---GCTATAGAGGCGCAACATCATCTGTTGCAACTCACAGTTTGGGGCATT  
>MN703343..1  
TTCTATTGTAATACATCAAGACTGTTTAATGGTACATATAATACAACAGAGGAG-----  
-----  
-----  
TCAAACTCAACCATCACAATCCAATGCAGAATAAAACAAATTATAAACATGTGGCAGGAGGTAGGACGAGCAA  
TGTATGCCCCCTCCCATTCGAGGAAACATAACATGTGAATCAAAC---  
ATCACAGGACTAATATTGGTACGTGATGGAGGAACTCATGAAAATAGT-----  
-----  
-----  
AATACTACAGAGATATTCAGACCTGGAGGAGGAGATATGAGGGACAATTGGAGAAGTGAAGTATATAAATATA  
AAGTGGTAGAAGTTAGGCCTTG---GGAATAGCACCCACTAAAGCAAAAAGGAGAGTGCTG-----  
-----GAGAGACAAAAAAGAGCA---GTAGGA---ATGGGAGCT-----  
---GTGTTTCCTTGGGATCTTGGGAGCA---GCAGGAAGCACTATG---GGCGCGGCGTCA---  
ATAACGCTGACGGTACAG---GCTAGACAA---TTGTTG---TCTGGTATAGTGCAACAGCAAAC---  
AATTTG---CTGAGG---GCTATAGAGGCGCAACAGCACATGTTGCAACTCGCAGTCTGGGGCATT  
>MN703361..1  
TTCTATTGTAATACATCAGGCCTGTTTAATGAAAGCCGGCTTAACGAAACAGAAGGTGAT-----  
-----  
-----  
TCAAGTAAAAACATCACACTTCCATGTAGAATAAAGCAAATTATAAACATGTGGCAGGCGGTAGGAAAAGCAA  
TATATGCCCCCTCCCATTCGAGGAAACATAACATGTAAATCAAAT---  
ATCACAGGATTACTATTGGAACGTGATGGAGGCAAAGGCAATGCA-----  
-----  
-----  
ACAGAGGAAATATTCAGACCTGGAGGAGGAAATATGGGGGACAATTGGAGAAGTGAATTATATAAATATAAAG  
TGGTAGAAATTCAACCATTG---GGAATAGCACCTACTGGAGCAAAAAGGAGAGTAGTG-----  
-----GAGAGAGAAAAAAGAGCAGTAGTGGGA---ATAGGAGCT-----  
GTGTTTCCTTGGGATCTTGAGTGCA---GCAGGAAGCACTATG---GGCGCGGCGGCA---  
ATAACGCTGACGGTACAA---GCCAGACAA---TTATTG---TCTGGTATAGTGCAACAGCAAAGC---  
AATTTG---CTGAAG---GCTATAGAGGCGCAACAGCATATGTTGCAGCTCACGGTCTGGGGCATT

>AF067159..2

TTCTATTGTAATACATCAGGCCTGTTTAAATAGTACATACATGAGTGGTACATACATGAATTCAAGTGCAGACA  
TG-----

-----  
AATTCAAGCTACATCACAATCCCATGCAGAATAAAGCAAATTATAAACATGTGGCAGGAGGTAGGACGAGCAA  
TGTATGCCCCCTCCCATTCAGGAAACATAACATGTAAATCAAAT---  
ATCACAGGAATACTATTGGAACGTGATGGAGGGTCAGGGTCAAAT-----

-----  
GGCACAGAGACATTTCAGACCTGGAGGAGGAGATATGAGGAACAATTGGAGAAGTGAATTATATAAAATATAAAG  
TGGTAGAAATTCAGCCATTG---GGAGTAGCACCCACGGAAGCAAAAGGAGAGTGGTG-----  
-----GAGAGAGGAAAAAGAGCA---GTGGGA---ATAGGAGCT-----  
GTGTTCCCTTGGGTTCTTGGGAGCA---GCAGGAAGCACTATG---GGCGCGGCGTCA---  
ATAACGCTGACGGTACAG---GCCAGACAA---TTGTTG---TCTGGTATAGTGCAACAGCAAAGC---  
AATTTG---CTGAGG---GCTATAGAGGCGCAACAGCATCTGTTGCAACTCACGGTCTGGGGCATT

>FJ866133..1

TTCTATTGCAATACATCAGGACTGTTTAAATAATAATTACA-----

-----  
AATGCAACCACCACCCTCCCATGCAGAATAAAACAAATTGTAAACATGTGGCAGGGGGTAGGACGAGCAATGT  
ATGCCCCCTCCCATTCAGGAAAAATAACATGTAACTCAAAT---  
ATCACAGGACTGCTCCTGACACGTGATGGAGGGGTGAATAATGAA-----

-----  
ACGACAGAGACATTTCAGACCTGGAGGAGGAGATATGAAGGACAATTGGAGAAATGAATTATATAAAATATAAAG  
TGGTAGAAATTCAGCCATTA---GGAATAGCACCCACTGGAGCAAAAGGAGAGTGGTG-----  
-----GAGAGAGAAAAAGAGCG---GTGGGA---CTAGGAGCT-----  
GTGTTCCCTTGGGTTCTTGGGAGCC---GCAGGAAGCACTATG---GGCGCAGCATCA---  
ATAACGCTGACGGTACAA---GCCAGACAA---TTATTG---TCGGGTATAGTGCAACAGCAAAAC---  
AACTTG---CTGAGA---GCTATAGAGGCGCAACAACATATGTTGCAACTCACAGTCTGGGGCATT

>AB097871..1

TTCTATTGTAATACATCAGGCCTGTTTAAATGGGACATACAATGATACATACAGGTCTAATGATACAGAT---

-----  
AGTAATTCAACCATCACACTCCCATGCAGAATAAAGCAAATTATAAACATGTGGCAGGAGGTAGGACGAGCAA  
TGTATGCCCCCTCCTATTGCAGGAAACATAACATGTAAATCAAAC---  
ATCACAGGACTACTATTGGTACGTGATGGAGGAAATGGTACACAG-----

-----  
ACATTTCAGACCTGGAGGAGGAAATATGAAGGATAATTGGAGAAGTGAATTATATAAAATATAAAGTGGTAGAAA  
TTCAGCCATTA---GGAATAGCACCCACTGGAGCAAAAGGAGAGTGGTG-----  
-----GAGAGAGAAAAAGAGCA---GCA-----ATAGGAGCT-----  
ATGTTCCCTTGGGTTCTTGGGAGCA---GCAGGAAGCACTATG---GGCGCGGCGTCA---  
ATGGCGCTGACGGTACAG---GCCAGACAA---TTGTTG---TCTGGTATAGTGCAACAGCAAAGC---  
AATTTG---CTGAGG---GCTATAGAGGCGCAACAGCATATGTTGCAACTCACAGTCTGGGGCATT

>KC894073..1

TTCTATTGCAATACATCAAACTGTTTAAATGGTACATACAATGGTACATACACAAATAATGAT-----

-----  
ACAAACAGCACAAATCATACTCCCATGCAGAATAAAACAAATTATAAACATGTGGCAGGAGGTAGGACAAGCAA  
TGTATGCCCCCTCCCATTCAGGAAATCATAGCATGTAATTCAACT---  
ATCACAGGATTATTATTGACACGTGATGGAGGAGACAAGAATGGG-----

-----  
AGTAAGCCAGAAATATTTCAGACCTGGAGGAGGAGATATGAGGGACAATTGGAGGAGTGAATTATATAAAATATA  
AAGTGGTAGAAATTAAGCCATTG---GGAATAGCACCCACTAAGGCAAAAGGAGAGTGGTGGAG---AAA---  
-----GAAAAACAATTCAAAAAAGAGCA---GTAGGA---ATAGGAGCT-----  
---GTGTTCCCTTGGGTTCTTGGGAGCA---GCAGGAAGCACTATG---GGCGCGGCGTCA---  
ATAACGCTGACGGTACAG---GCCAGACAA---TTGTTG---TCTGGTATAGTGCAACAGCAAAGC---  
AATTTG---CTGAGG---GCTATAGAGGCGCAACAGCATATGTTGCAACTCACAGTCTGGGGCATT

>FJ444207..1

TTCTATTGCAATACATCAAACTGTTTACAGAAAGTAATTC AACCTCAAACAGCACC-----

-----  
-----

TCAAACACCGTACTCACACTCCCATGCAGAATAAAACAAATTATAAACATGTGGCAGGGGGTAGGACGAGCAA  
TGTATGCCCCCTCCCATTGAGGGAAATATAACATGTGAATCAAAC---

ATCACAGGATTACTATTGACGCGTGATAGA---ACAGACAATAAA-----

-----  
-----

ACAGAGACATTTAGACCTGGAGGAGGAGACATGAGGGACAATTGGAGAAGTGAATTATACAAATATAAAGTGG  
TAGAAATTCAGCCATTA---GGAGTAGCACCCACTAAGGCCAAAAGGAGAGTGGTG-----

-----GAGAGAGAAAAAAGAGCA---GTGGGA---ATAGGAGCT-----

GTGTTTCCTTGGGTTCTTGGGAGCA---GCAGGAAGCACTATG---GGCGCAGCATCA---

ATAACGCTGACGGTACAG---GCCAGACAA---TTGTTG---TCTGGTATAGTGCAACAGCAGAGC---

AATTTG---CTGAGG---GCTATAGAGGCGCAACAGCATATGTTGCAACTCACGGTCTGGGGCATT

>KC894078..1

TTCTATTGTAATACATCAAACCTGTTTAATATTAATATTACAGGAAATATTACAGGAAATATGACA-----

-----  
-----

GGAAATGAAAACATCACACTCCCATGCAGAATAAAACAAATTATAAACATGTGGCAAAGGGTAGGGCAAGCTA  
TATATGCCCCCTCCCATTGCAGGAAACATAACATGTAACCTCAAGT---

ATCACAGGACTACTGTTGACACGTAATGGAGGCAATGATAACAGAACAGGG-----

-----  
-----

AATAATAATACAGAGACATTCAGACCTGGAGGAGGAGATATGAGGGATAATTGGAGAAGTGAATTATATAAAT  
ATAAAGTGGTAGAAGTTCAGCCATTG---GGAGTAGCACCCACTGGAGCAAAAAGGAGAGTGGTG-----

-----GAGAGAGAAAAAAGAGCA---GTA-----ATGGGAGCT---

-----ATGTTTCCTTGGGTTCTTGGGAGCA---GCAGGAAGCACTATG---GGCGCGGCGTCA---

GTGGCGCTGACGGTACAG---GCCAGACAA---CTATTG---TCTGGTATAGTGCAACAGCAAAGC---

AATTTG---CTGAGG---GCTATAGAGGCGCAACAGCATCTGTTGCAACTCACGGTCTGGGGCATT

>KC894079..2

TTCTATTGCAATACATCAGACCTGTTTAATGGTACATACAGAAATGGTACATACAATCATACAGGAAGAAGT-

-----  
-----

TCAAATGGAACCATCACCTCCAATGCAAAATAAAACAAATTATAAACATGTGGCAGGAGGTAGGAAGAGCAA  
TATATGCCCCCTCCCATTGAAGGAGAAATAACATGTAACCTCAAAT---

ATCACAGGACTACTATTGCTACGTGATGGAGGTCAATCAAATGAAACA-----

-----  
-----

AATGACACAGAGACATTCAGACCTGGAGGAGGAGATATGAGGGACAATTGGAGAAGTGAATTATATAAATATA  
AAGTAGTAGAAATTAAACCATTG---GGAGTAGCACCCACTGAGGCAAAAAGGAGAGTGGTG-----

-----GAGAGAGAAAAAAGAGCA---GTGGGA---ATAGGAGCT-----

---GTGTTTCCTTGGGTTCTTGGGAGCA---GCCGGAAGCACTATG---GGCGCAGCATCA---

ATGACGCTGACGGTACAG---GCCAGGCAA---TTATTG---TCTGGTATAGTGCAACAGCAAAGC---

AATTTG---CTGAGG---GCTATAGAGGCGCAACAGCATATGTTGCAACTCACGGTCTGGGGCATT

>KC894081..1

TTCTATTGTAATACATCAGGACTGTTTAATGGTACATACCACCCTAATGGTACATACAATGAGACAGCAGTTA  
AT-----

-----  
-----

TCAAGCGACACAATCACACTCCAATGCAGAATAAAACAAATTATAAACATGTGGCAAGAGGTAGGAAGAGCAA  
TGTATGCTCCTCCCATTGCAGGAAATATAACATGTAATTCAACT---

ATCACAGGACTATTATTGACACGTGATGGAGGAATAAATCAGACA-----

-----  
-----

GGAGAAGAGATATTTCAGACCTGGAGGAGGAGATATGAGGGATAATTGGAGAAATGAATTATATAAATATAAAG  
TGGTGGAGATTAAGCCATTA---GGAATAGCACCCACTAAGGCCAAAAGGAGAGTGGTG-----

-----GAGAGAGAAAAAAGAGCA---GTGGGA---ATAGGAGCT-----

GTGTTTCCTTGGGTTCTTGGGAGCA---GCAGGAAGCACTATG---GGCGCGGCGTCA---

ATAACGCTGACGGTACAG---GCCAGACAA---CTGTTG---TCTGGTATAGTGCAACAGCAAAGC---

AATTTG---CTGAGG---GCCATAGAGGCGCAACAGCATATGTTGCAACTCACGGTCTGGGGCATT

>FJ444522..1

TTCTATTGCAATACATCAGGCCTGTTTAAATAGTACATATAATCCAAATAGTACATATAATAATTCAAGC----

-----  
-----

TCAGACACACCACTTAGACTCTCATGTAGAATAAAACAAATTATAAATATGTGGCAGGGGGTAGGAAGAGCAA  
TATATGCCCCCTCCCATTTGAAGGAAGCATAACATGTAACCTCAAGT---  
ATCACAGGACTACTATTGCTACGTGATGGAGGTCATGACGGTGACTCA-----

-----  
-----

AATAACACAGAGACATTTAGACCGGGAGGAGGAGATATGAGGGACAACCTGGAGAAGTGAATTATATAAAATATA  
AAGTGGTAGAAATTAAGCCATTG---GGAGTAGCACCCACTGACGCAAAAAGAAGAGTGGTG-----  
-----GAAAGAGAAAAAAGAGCA---GTAGTGGAATAGGAGCT-----  
---GTGCTCCTTGGGTTCTTGGGAGCA---GCCGGAAGCACTATG---GGCGCGGCGTCA---  
CTAACGCTGACGGTACAG---GCCAGACAA---CTGCTG---TCTGGTATAGTGCAACAGCAAAAC---  
AATTTG---CTGAGG---GCTATAGAGGCGCAACAGCATATGTTGCAACTCACGGTCTGGGGCATT

>KC894089..1

TTTTATTGCAATACATCAGCACTGTTTAAATGGTACATACAATTCTACATACAATTCTACTAGTAAC-----

-----  
-----

CCAAACATCACAATCACAATCCAATGCAGAATAAAACAAATTATAAACATGTGGCAGGAGGTGGGACGAGCAA  
TGTATGCCGCTCCCATTTGCAGGAGACATAACATGTGAATCAAAC---  
ATCACAGGACTACTATTGACACGTGATGGAGGAAATACTGCAAAC-----

-----  
-----

GGGACAGAGATATTCAGACCTGGAGGAGGAGATATGAGGGATAATTGGAGAAGTGAATTATATAAAATATAAAG  
TGGTAGAAGTTCAGCCATTG---GGAGTAGCACCTACCAAGGCAAAAAGAAGAGTGGTG-----  
-----GGTAGAGAAAAAAGAGCA---GTA-----CTGGGAGCT-----  
GTGTTCTTGGGTTCTTGGGAGCA---GCAGGAAGCACTATG---GGCGCGGCGTCA---  
ATGGCGCTGACGGTACAG---GCCAGACAA---TTGTTG---TCTGGTATAGTGCAACAGCAAAGT---  
AATTTG---CTGAGG---GCTATAGAGGCGCAACAGCATATGTTGCAACTCACAGTCTGGGGCATT

>KC894084..1

TTCTATTGCAATACATCAGAACTGTTTAAATAATACATACTGGCCTAATAGTACTGTTACAAATGGAAC-----

-----  
-----

TTAAATGGAACCTTCACACTCCCATGCAAAATAAAACAAATTATAAACATGTGGCAGGAGATAGGAAGAGCAA  
TATATGCCCCCTCCCATTTGCAGGAAACATAACATGTAAATCAAAT---  
ATCACAGGACTACTATTAACACGTGATGGAGGTCATAACCCAGAG-----

-----  
-----

AAGAATGACACAGAGACATTCAGACCTGGAGGAGGAGATATGAGGGATAATTGGAGAAGTGAATTATACAAAT  
ATAAAGTAGTAGAAGTCAAGCCATTA---GGAATAGCACCCACGGGGGCAAAAAGGAGAGTGGTG-----  
-----GAGAGAGAAAAAAGAGCA---GTGGGA---ATAGGAGCT---  
-----GTGTTCTTGGGTTCTTGGGAGCA---GCAGGAAGCACTATG---GGCGCGGCGTCA---  
ATAACGCTGACGGTACAG---GCCAGACAA---TTATTG---TCTGGTATAGTGCAACAGCAAAGC---  
AATTTG---CTGAGG---GCTATAGAGGCGCAGCAGCATATGCTGCAACTCACGGTCTGGGGCATT

>KC156114..2

TTCTATTGCAACACATCAAGATTGTTTAAATCATACATTTAATGAGACA-----

-----  
-----

TCAGACGAAGACATCACACTCCAATGTAGGATAAAACAAATTATAAACATGTGGCAGGGGGTAGGACGAGCAA  
TATATGCCCCCTCCCATTTGCAGGAAACATAACATGTAACCTCAAAT---  
ATCACAGGACTACTATTGACACGTGATGGAGGGAAGAGTAATAGTAGT-----

-----  
-----

AATCAGACAGAGATATTCAGACCTGCAGGAGGAAATATGAGGGACAATTGGAGAAGTGAATTATATAAAATATA  
AAGTGGTAGAAATTAACCATTA---GGAATAGCACCCACTAAGGCGAAAAGGAGAGTGGTG-----  
-----GAGAGAGAAAAAAGAGCG---GCA-----ATAGGAGCT-----  
---ATGTTCTTGGGTTCTTGGGAGCA---GCAGGAAGCACTATG---GGCGCGGCGTCA---  
ATAACGCTGACGGTACAG---GCCAGACAA---TTATTG---TCTGGTATAGTGCAACAGCAAAGC---  
AATTTG---CTGAGA---GCTATAGAGGCGCAACAGCATATGTTGCAACTCACGGTCTGGGGCATT

>KC156120..1

TTTTATTGCAATACATCAATACTGTGGGATAGTGATAAGAGT-----

-----  
-----

AATGACACAAACATCACACTCCCATGCAGAATAAAACAAATTATAAATATGTGGCAGGAGGTAGGACGAGCAA  
TGTATGCCCCCTCCCATTCGAGGAAGCATAACATGTAAATCAAAA---

ATCACAGGACTACTATTGGTACGTGATGGAGGAATAAATAGCAGC-----

-----  
-----

ACAGAGACATTCAGACCTGGAGGAGGAAATATGAAGGACAATTGGAGAAGTGAATTATATAAATATAAAGTGG  
TAGAAATTCAGCCATTA---GGAGTTGCACCCACTGGAGCAAAAAGGAGAGTGGTG-----

-----GAGAGGGAGAAAAGAGCA---GTGGGA---ATAGGAGCT-----

GTGTTTCCTTGGGTTCTTGGGAGCA---GCTGGAAGCACTATG---GGCGCAGCGTCA---

ATAACGCTGACGGTACAG---GCCAAACAA---CTGTTG---TCTGGTATAGTGCAACAGCAGAGT---

AATTTG---CTGAGA---GCTATAGAGGCGCAACAGCATATGCTGCAACTCACAGTCTGGGGCATA

>HQ615984..1

TTCTATTGCAATACATCAGGCCTGTTTAATGGTACATTTAATGGTACATACATGCCAAATAGTACAGAAAGTA  
CT-----

-----  
TCAAAATACAAACATCACACTCCAATGCAGAATAAAACAAATCATAAACATGTGGCAGCAGGTAGGACGAGCAA  
TGTATGCCCCGCCCATTGAAGGAAACATAACATGTAGATCAAAT---

ATCACAGGACTACTATTGACACGTGACGGAGGCGGAAGAGCAAAT-----

-----  
-----

GATACTGAAGAGATATTCAAGCCTGGAGGAGGAGATATGAGGGACAATTGGAGAAGTGAATTATACAAATATA  
AAGTGGTAGAGGTTAGCCATTG---GGAATAGCACCCACTAAGGCAAAAAGGAGAGTGGTG-----

-----GAGAGAGAAAAAAGAGCA---GTGGGA---ATGGGAGCT-----

---GTGTTTCCTTGGGTTCTTGGGAGCA---GCAGGAAGCACTATG---GGCGCGGCGTCA---

ATAACGCTGACGGTACAG---GCCAGACAA---TTGTTG---TCTGGTATAGTGCAACAGCAAAGC---

AATTTG---CTGAGG---GCCATAGAGGCGCAACAGCATATGTTGCAACTCACGGTCTGGGGCATT

>KC156216..1

TTCTATTGCAATACATCAAACTGTTTAATAGTATACACAATAGTACAGATATGTATAATAGTACAGTT----

-----  
-----

AGTAATTCAACCATCACACTCCAATGCAAAATAAAACAAATTATAAATATGTGGCAGGGGGTAGGACGAGCAA  
TGTATGCCCCCTCCCATAGCAGGAAACATAACATGTAAATCAAAT---

ATCACAGGACTACTATTAAACACGGGATGGAGGAAACGTGAGTGGA-----

-----  
-----

ACAACAGAGACATTCAGACCTGGAGGAGGAAATATGAAGGACAATTGGAGAAGTGAATTATATAAATATAAAG  
TGGTGGAAATTCAGCCATTA---GGAATAGCACCCACTAAGGCAAAAAGGAGAGTGGTG-----

-----GAAAGAGAAAAAAGAGCA---GTGGGA---ATAGGAGCT-----

GTGTTTCCTTGGGTTCTTGGGAGTA---GCCGGAAGCACTATG---GGCGCAGCATCA---

ATGACGCTGACGGTACAG---GCCAGACAA---TTGTTG---TCTGGTATAGTGCAACAGCAAAGC---

AATTTG---CTGAGG---GCTATAGAGGCGCAACAGCATATGTTGCAGCTCACGGTCTGGGGCATT

>KC156219..2

TTCTATTGCTATACATCAGAACTGTTTAATGAGACAGACAACTGCTTAATAAGACAAAAGAGAAA-----

-----  
-----

GACAAATTCACCATCATACTCCCATGCAGAATAAAACAAATTATAAACATGTGGCAGGGGGTAGGACGAGCAA  
TATATGCCCCCTCCCATTCGAGGAAATATAACATGTAAGTCAAAT---

ATCACAGGATTACTATTGACACGTGATGGAGGAGAGGACATTAATGGAAT-----

-----  
-----

AATAGAGAAGAGATATTCAAGCCTGGAGGAGGAGATATGAAGGATAATTGGAGAAGTGAATTATATAAATATA  
AAGTAGTAGAAATTCAGCCATTA---GGAATAGCACCCACTAAGGCAAAAAGGAAAAGTGGTG-----

-----GAGAGAGAAAAAAGAGCA---GCA-----ATAGGAGCT-----

---GTGTTTCCTTGGGTTCTTGGGGGCA---GCAGGAAGCACTATG---GGCGCGGCGTCA---

ATAACGCTGACGGTACAA---GCCAGACAA---TTATTG---TCTGGTATAGTGCAACAGCAAAGC---

AATTTG---CTGAGA---GCTATAGAGGCGCAACAGCATATGTTGCAACTCACGGTCTGGGGCATT

>HQ615963..2

TTCTATTGCAATACATCAAGCCTGTTTAAATAGGACATATAAATAGTACAGATATGGCCAATAGTACAGAA----

-----  
-----

GCTAACAGTACCATCACAATCCACTGCAGAATAAAACAAATTATAAACATGTGGCAGGAGGTGGGACGAGCAA  
TGTATGCCCCCTCCCATTAAGGAAACATAACATGTATATCAAAT---

ATCACAGGACTACTATTAACAAGGGATGGAGGAGATAATAATGAA-----  
-----

-----  
-----

ACGGAGACATTTCAGACCTGGAGGAGGAAATCTGAGGGACAATTGGAGAAGTGAATTATATAAATATAAAGTGG  
TAGAAGTTTCAGCCATTG---GGAGTAGCACCCACTAATTCAAGAAGGAGAGTGGTG-----

-----GAGAGAGAAAAAGAGCA---GTGGGA---CTAGGAGCT-----

GTGTTTCCTTGGGTTCTTGGGGGCA---GCAGGAAGCACTATG---GGCGCAGCATCA---

ATAACGCTGACGGTACAG---GCCAGACAA---TTATTG---TCTGGTATAGTGCAACAGCAAAGC---

AATTTG---CTGAAA---GCTATAGAGGCTCAACAGCATATGTTGAAACTCACGGTCTGGGGCATT

>HQ615964..2

TTCTACTGCAATACATCAAACCTGTTTAAACAGTACATATAACAGTAACAGTACATATAACAGTACAGATACTC  
CT-----  
-----

GAGGATAAAAACATCACACTCCAATGCAGAATAAAACAAATTATAAACATGTGGCAGGGGGTAGGACAAGCAA  
TGTATGCCCCCTCCCATTCAGGAAACATAACATGTAAATCAAAT---

ATCACAGGATTATTATTAACACGTGATGGAGGAACCAACACAAAC-----  
-----

-----  
-----

AACACAACAGAAATATTTCAGACCTGGAGGAGGAGATATGAGGGACAATTGGAGAAGTGAATTATATAAATATA  
AAGTGGTAGAAATTC AACCATTA---GGAGTAGCACCTACTCAGGCAAAAAGGAGAGTGGTG-----

-----GAGAGAGAAAAAGAGG-----GGA---ATAGGAGCT-----

---GTGTTTCCTTGGGTTCTTGGGAGCA---GCAGGAAGCACTATG---GGCGCAGCATCA---

ATGACGCTGACGGTACAG---GCCAGACAA---TTGTTG---TCTGGTATAGTGCAACAGCAAAGC---

AATTTG---CTGAGG---GCTATAGAGGCGCAACAGCATATGTTGCAACTCACGGTCTGGGGCATT

>HM204613..1

TTCTATTGCGATACATCAAACTGTTTAAATAGTACATACCTGGCTAATGGCACACGCTGGATTAATGATAGTA  
CAGAA-----  
-----

-----CAG---

AATACAAGCAAAGTCATCTCACTCCCATGTAGAATAAAACAAATTATAAACATGTGGCAGGAGGTAGGACGAG  
CAATGTATGCTCCTCCCATTCAGGAAACATAAGATGTGAATCAAAT---

ATCACAGGATTGTTATTGACGCGTGATGGAGGAATAGATAACAAC-----  
-----

-----  
-----

AAGAGCGAGATATTTCAGACCTGGAGGAGGAGATATGAGGGACAATTGGAGAAGCGAATTATATAAATATAAAG  
TGGTAGAAATTAAACCATTG---GGAATAGCACCCACTAAGGCAAAAAGGAGAGTGGTG-----

-----GAGAGAGAGAAAAAGAGCA---GTGGGA---ATAGGAGCT-----

CTGTTTCCTTGGGTTCTTGGGAGCA---GCAGGAAGCACTATG---GGCGCGGCGTCA---

ATGACGCTGACGGTTCAG---GCCAGACAA---TTGTTG---TCTGGTATAGTGCAACAGCAAAGC---

AATTTG---CTGAGG---GCTATAGAGGCGCAACAACATATGTTGCAACTCACGGTCTGGGGCATT

>KC187578..1

TTCTATTGCAATACATCAGGACTGTTTAAATAGTACATACAATAATGGTACATACACTAGTGCATACAATATT-  
-----  
-----

-----ACA---

GAAAATAATTCAAGTATTACACTCCCATGCAGAATAAAGCAGATTATTAACATGTGGCAGGGGGTAGGACGAG  
CAATGTATGCCCCCTCCCATTCAGGAAACATAACATGCAGATCAAAT---

ATCACAGGACTACTATTGACACGGGATGGTGGCAATGGAATCAATGTG-----  
-----

-----  
-----

ACCACAGAGATATTTCAGACCTGAAGGGGGAAATATGAAGGACAATTGGAGAAGTGAATTATACAAATACAAAG  
TGGTAGAAATTTCAGCCATTG---GGAATAGCACCCACCAAGGCAAAAAGGAGAGTGGTG-----

-----GAGAGAGAAAAAGAGCA---GTGGGA---ATAGGAGCT-----

GTGTTTCCTTGGGTTCTTGGGAGCA---GCAGGAAGCACTATG---GGCGCGGCGTCA---

ATAACGCTGACGGTACAG---GCCAGACAA---TTATTG---TCTGGTATAGTGCAACAGCAAAGC---

AATTTG---CTGAGA---GCTATAGAGGCGCAACAGCATATGTTGCAACTCACGGTCTGGGGCATT

>KC187323..1

TTCTATTGTAATACATCAAACTGTTTAATAATACATTTGATGGTACAAACATGATGAATAACAAT-----

-----  
-----

ACAGATGAAACCATCACACTCCAATGCAGAATAAAACAAATTATAAACATGTGGCAGGGGGTAGGACGAGCAA  
TGTATGCCCCCCCCATTAAGGGAATCATAACATGTAAATCAAAT---

ATCACAGGACTACTATTGACACGTGATGGAGGAAATCACAATGAGACT-----

-----  
-----

AATAACACAGAGACATTGACACCTGCAGGAGGAAATATGAAGGACAATTGGAGAAGTGAATTATATAAAATATA  
AAGTGGTAGAAATTAAGCCATTA---GGAATAGCACCCACTACGGCAAAAAGGAGAGTGGTG-----

-----GAGAGAGAAAAAGAGCA---GTGGGA---ATAGGAGCT-----

---GTGTTCCCTTGGGTTCTTGGGAGCA---GCAGGAAGCACTATG---GGCGCAGCATCA---

ATAACGCTGACGGTACAG---GCCAGACAA---TTGTTG---TCTGGTATAGTGCAACAGCAAAGC---

AATTTG---TTGAGA---GCTATAGAGGCGCAACAGCATATGTTGCAACTCACAGTCTGGGGCATT

>KC186955..1

TTCTATTGCAATACATCGCAACTGTTTAATAGTACATACCCTAATGAGACATATAATATTAATGTTAATGATA  
CA-----

-----  
-----

AATTCAACAGAGATTGTACTCCCATGCAGGATAAAACAAATTATAAACATGTGGCAGGAGGTAGGACGAGCAA  
TGTATGCTCCTCCCATTCAGGAAACATAACATGTAGATCAAAT---

ATCACAGGATTACTATTGACGCGAGATGGAGGACCTAATCAGACC-----

-----  
-----

ACAGAAACATTGACACCTGCAGGAGGAGATATGAGGGACAATTGGAGAAGTGAATTATACAAATATAAAGTGG  
TAGAAATTAAGCCATTG---GGAATAGCACCCACTGGGGCAAAAAGGAGAGTGGTG-----

-----GAGAGAGAAAAAGAGCA---GTGGGA---ATAGGAGCT-----

GTGTTCCCTTGGGTTCTTGGGAGCA---GCAGGAAGCACTATG---GGCGCGGCGTCA---

CTAACGCTGACGGTACAG---GCCAGACAA---TTGTTG---TCTGGTATAGTGCAACAGCAAAGC---

AATTTG---CTGAGG---GCCATAGAGGCGCAACAGCATCTGTTGCAACTCACAGTCTGGGGCATT

>KC187164..1

TTCTATTGCAATACATCAGGACTGTTTAAAAATAGGATATACAGTAGTACATACAATGATACAGTAAATAATT  
CAAGC-----

-----  
-----

TCAGAGAACATCACAATCACACTCCCATGCAGAATAAAACAAATTATAAACATGTGGCAGAGGGTAGGACGAG  
CAATGTATGCTCCTCCCATTAAGGAAGCTTAACATGTAACTCAAGT---

ATCACAGGGTTACTATTGACGAGGGATGGAGGCAGTGGAGACAACACA-----

-----  
-----

AGTACAGAGATCTTCAGACCTGGAGGAGGAGATATGAGGGACAATTGGAGAAGTGAATTATACAAATATAAAG  
TGGTAGAAGTTCAACCATTA---GGAATAGCACCCACTAAGGCAAAAAGGAGAGTGGTG-----

-----GAGAGAGAAAAAGAGCA---GTGGGA---ATAGGAGCT-----

GTGTTCCCTTGGGTTCTTGGGAGCA---GCCGGAAGCACTATG---GGCGCGGTGTCA---

ATAACGCTGACGGTACAG---GCCAGACAA---TTGCTG---TCTGGTATAGTGCAACAGCAAAGC---

AATTTG---CTGAAG---GCTATAGAGGCGCAACAGCATATGTTGCGACTCACGGTCTGGGGCATT

>KC187620..2

TTCTATTGCAATACATCAGGACTATTTAATGGTACATATACAAACATGAGCAGCACAGGAAAT-----

-----  
-----

GCAAAATGCAAACATCACACTTCAATGCAAAATAAAACAAATTATAAACATGTGGCAACAGGTGGGAAAAGCAA  
TGTATGCTGCTCCCATTCAGGAAACATAACATGTAAATCAAAT---

ATCACAGGACTTCTATTGACACGTGATGGAGGAGTAGGAAACAATGAC-----

-----  
-----

ACAAATGGCACAGAGACATTGACACCTGGAGGAGGAGATATGAGGGACAATTGGAGAAGTGAATTATACAAAT  
ATAAAGTGGTAGAAATTCAGCCATTA---GGAATAGCACCCACTAAGGCAAAAAGGAGAGTGGTG-----

-----GAGAGAGAAAAAGAGCA---GTAGGA---ATAGGAGCT---

-----TTGTTCCCTTGGGTTCTTAGGAGCA---GCCGGAAGCACTATG---GGCGCAGCGTCA---

ATAACGCTGACGGTACAG---GCCAGACAA---TTGTTG---TCTGGTATAGTGCAACAGCAAAGC---

AATTTG---CTGAGA---GCTATAGAGGCGCAACAGCATATGTTGCAACTCACAGTCTGGGGCATT

>KY111994..2

TTCTATTGCAATACATCAAATCTGTTTAAATGGTACATACAAATGGTACATACATAAGTACAAAC-----

-----  
-----

AGTACTTCAAACATCACGCTTCAATGCAGAATAAAACAAATTATAAACATGTGGCAGGGGGTAGGAAGAGCAA  
TGTATGCTCCTCCCATTGCAGGAAACATAACATGTAAATCAAAT---

ATCACAGGGCTACTATTGACACGTGATGGAGGGACCAAAAATAATAGCAACGAA-----

-----  
-----

ACAGAGGAGACATTTCAGGCCTGCAGGAGGAGATATGAGGGATAATTGGAGAAGTGAATTATATAAATATAAAG  
TAGTAGAAATTTCAGCCATTA---GGAATAGCACCAACTGGTGCAAAAAGGAGAGTGGTG-----

-----GAGAGAGAAAAAAGAGCA---GCAGGA---CTAGGAGCT-----

TTGTTTCCTTGGGTTCTTGGGAGCA---GCAGGAAGCACTATG---GGCGCAGCATCA---

ATAACGCTGACGGTACAG---GCCAGACAA---TTGTTG---TCTGGTATAGTGCAACAGCAAAGC---

AATTTG---CTGAGG---GCTATAGAGGCGCAACAGCATATGTTGCAACTCACGGTCTGGGGCATC

>KC187280..1

TTCTATTGTAATACATCACAATTGTTTAAATAGTACACACAAGAGTACAGCCGATCCTACAAGGAGTGAGTCAA  
AT-----

-----  
-----

GAAAAATGAAACCATTATACTCCCATGCAAAATAAAACAAATTATAAACATGTGGCAGGAGGTAGGACGAGCAA  
TGTATGCCCCCTCCCATTGCAGGAAACATAACATGTAAATCAAAT---

ATCACAGGGCTATTATTGACACGTGATGGAGAGTATAATGGGACA-----

-----  
-----

AACAAAAATGAAACATTTCAGACCTGCAGGAGGAGACATGAGGGACAACCTGGAGAAGTGAATTATATAAATATA  
AAGTGGTAGAAATTCAACCATTG---GGAGTGGCACCCACTAAGGCAAAAAGGAGAGTGGTG-----

-----GAGAGAGAAAAAAGAGCA---ATAACA---ATGGGAGCT-----

---GTGTTTCCTTGGGTTCTTAGGAGCA---GCAGGAAGCACTATG---GGCGCAGCGGCA---

GTAACGCTGACGGCACAG---GCCAGACAA---CTGTTG---TCTGGTATAGTGCAACAGCAAAGC---

AATTTG---CTGAGG---GCTATAGAGGCACAACAGCATATGTTGCAACTCACAGTCTGGGGCATT

>KC187249..2

TTCTATTGCAATACATCACAACCTGTTTAAATGGAACATACTATGCAAATGGGACATCCACGTCTAATGATACAG  
CAGGTAAT-----

-----  
-----

TCAAGCGACATCATCATACTCCCATGCAGAATAAAACAAATTATAAATATGTGGCAGAAGGTAGGACGGGCAA  
TGTATGCTCCTCCCATTGCAGGAAACATAACATGTCACTCAAAC---

ATCACAGGATTACTATTGACAAGGGATGGTGGAAACAGGAATGGC-----

-----  
-----

ACAAATGAGACATTTCAGACCTGCAGGAGGAGATATGAGGGACAATTGGAGAAGTGAATTATACAAATACAAAG  
TGGTAGAAGTTAATCCATTG---GGAGTAGCACCCACTAGGGCAAAAAGGAGAGTGGTG-----

-----GAGAGAGAAAAAAGAGCA---GTGGGA---ATAGGAGCT-----

ATGTTTCCTTGGGTTCTTGGGAGCA---GCAGGAAGCACTATG---GGCGCGGCGTCA---

ATAACGCTGACGGTACAG---GCCAGACAG---TTGTTG---TCTGGTATAGTGCAACAGCAAAGC---

AACCTG---CTGAGG---GCCATAGAGGCGCAACAGCATATGTTGCAACTCACGGTCTGGGGCATT

>MF502153..1

TTCTATTGCAATACATCACAACCTGTTCAATAGTAGCAGTAATTCAAGCTCAACCAGCAAT-----

-----  
-----

TCAAACCTCAACCATCACCCCTCCCATGCAGAATAAAACAAATTATAAACATGTGGCAGGGGGTAGGACGGGCAA  
TGTATGCCCCCTCCCATTCAAGGAAAAATAACATGTAATTCAAGT---

ATCACAGGATTACTATTGACACGTGATGGGGGACCTCGGAATGGC-----

-----  
-----

ACAGAGACATTTCAGACCTGGAGGAGGAGATATGAGGGACAATTGGAGAAGTGAATTATATAAATATAAAGTGG  
TAGAAGTTAAACCATTG---GGAATAGCACCCACTGGAGCAAAAAGGAGAGTGGTG-----

-----GAGAGAGAAAAAAGAGCA---GTGGGA---ATGGGAGCT-----

ATGTTTCCTTGGGTTCTTGGCAGCA---GCAGGAAGCACTATG---GGCGTGGCGTCA---

ATAACGCTGACGGTACAG---GCCAGACAA---TTGCTG---TCTGGTATAGTGCAACAGCAAAGT---

AATTTG---CTGAGA---GCCATAGAGGCGCAACAGCATATGTTGCAACTCACAGTCTGGGGCATT

>MF353063..1

TTCTATTGCAATACATCAAGCCTGTTTAAATAGGACATATATGGCTAATAGTACAGATATGGCTAATAGTACAG  
AAACTAAC-----

AGTAACGGAACCATCACAATCCACTGCAGAATAAAACAAATTATAAACATGTGGCAAGGGGTGGGACGAGCAA  
TGTATGCCCCCTCCCATTCAGAGAAACATAACATGTATATCAAAT---  
ATCACAGGACTACTATTGACAAGGGATGGAGGAAACACCAGTATCAGTGAG-----

AAGACAGAGACATTTCAGACCTGAAGGAGGAAATATGAAGGACAATTGGAAAAAGTGAATTATATAAAATATAAAG  
TGGTAGAAGTTAAGCCATTA---GGAGTAGCACCCACTAATGCAAGAAGGAGAGTGGTG-----  
-----GAGAGAGAAAAAAGAGCAGTAGTGGGA---ATGGGAGCT-----  
GTGTTCCCTTGGGTTCTTGGGAGCG---GCAGGAAGCACTATG---GGCGCAGCATCA---  
ATAACGCTGACGGTACAG---GCCAGACAA---TTATTG---TCTGGTATAGTGCAACAGCAAAGC---  
AATTTG---CTGAAG---GCTATAGAGGCTCAACAGCATATGTTGAGACTCACGGTCTGGGGCATT

>HM638803..1

TTCTATTGCAATACTGCAAGCCTGTTTAAATAGTACATACAATCCTAATCCTAATGGTACAGAAGACAATTCAA  
ATTCA-----

ACTTCAAATTCAAGCATCACAATCAAATGCAGAATAAAGCAAATTATAAACATGTGGCAGGAGGTAGGAAAAG  
CAATGTATGCCCCCTCCCGTTGCAGGAAATATAACATGTATATCCAAT---  
ATCACAGGACTACTATTGACACGTGATGGAGGAAAGGGAGGTGGCACA-----

AGTAATGACACAGAGATATTTCAGACCTCAAGGAGGAAATATGAAGGACAATTGGAGAAGTGAATTATATAAAAT  
ATAAAGTGGTAGAAATTAAACCATTA---GGAGTAGCACCAACTAAGGCAAAAAGGAGAGTGGTG-----  
-----GAGAGAGAAAAAAGAGCA---GTGGGA---CTAGGAGCT---  
-----GTGCTCTTTGGGTTCTTGGGAGCA---GCAGGAAGCACTATG---GGCGCAGCATCA---  
ATAACGCTGACGGTACAG---GCCAGACAA---TTGTTG---TCTGGTATAGTGCAACAGCAAAGC---  
AATTTG---CTGAGA---GCTATAGAGGCGCAACAGCATATGTTGCAACTCACGGTCTGGGGCATT

>KC894127..1

TTCTATTGCAATACATCAAGATTGTTTGATCCTAAAGGTACTAATGGTACA-----

GATAATTCAACCATCCAACCTCCCATGCAGAATAAAACAAATTGTAAACATGTGGCAGGGGGTAGGAAGAGCAA  
TGTATGCCCCCTCCCATTCAGAGAAACATAACATGTAGATCAAAT---  
ATCACAGGACTACTATTGGTACGTGATGGAGGCAGAGACGCAAATACC-----

ACAGAGCCAGAGATCTTCAGACCTGGAGGAGGAGATATGAGGGACAATTGGAGAAGTGAATTATATAAAATATA  
AAGTGGTAGAAATTTCAGCCATTG---GGAGTAGCACCCACTAGGGCAAAAAGGAGAGTGGTG-----  
-----GAGAGAGAAAAAAGAGCA---GTGGGA---ATAGGAGCT-----  
---GTGTTCCCTTGGGTTCTTGGGAGCA---GCAGGAAGCACTATG---GGCGCGGCGTCA---  
ATGACGCTGACGGTACAG---GCCAGACAA---CTGCTG---TCTGGTATAGTGCAACAGCAAAGC---  
AATTTG---CTGAGA---GCTATAGAGGCGCAACAGCATATGTTGCAACTCACAGTCTGGGGCATT

>HM639260..1

TTCTATTGCAATACATCAGGACTGTTTAAATGAGACATACAATCCTAATGGTACAGAAAGTAAT-----

TCAAGCGCAGTCATCACACTCCCATGCAGAATAAAACAAATTATAAACATGTGGCAGGAAGTAGGAAAAGCAA  
TATATGCCCCCTCCCATTCAGAGAAACATAACATGTAAATCAAAT---  
ATCACAGGACTACTATTGGTACGTGATGGAGGAAACTCAAATGGCACA-----

AATAACACAGAGATATTTCAGACCTGGAGGAGGAGATATGAGGGACAATTGGAGAAGTGAATTATATAAAATATA  
AAGTGGTAGAAATTAAACCATTG---GGAATAGCACCCACTAGTGCAAAAAGGAGAGTGGTG-----  
-----GAGAGAGAAAAAAGAGCA---GTTGGA---ATAGGAGCT-----  
---GTGTTCCCTTGGGTTCTTGGGAGCA---GCAGGAAGCACTATG---GGCGCGGCGTCA---  
ATAACGCTGACGGTACAG---GCCAGACAA---CTGTTG---TCTGGTATAGTGCAACAGCAAAGC---  
AATTTG---CTGAGA---GCTATAGAGGCGCAACAGCATATGTTGCAACTCACGGTTTGGGGCATT

>KJ541837..2

TTCTATTGTAATACATCAGGCCTGTTTAAATGGTTCATACAATTATAATGCTACAGCA-----  
-----

AGTAATTCCAGCTCAGAC-----

AATTCAGCTCAGTCATCAGAATCCCATGCAGAATAAAGCAAATTATAAACATGTGGCAGGAGGTAGGACGAG  
CAATGTATGCCCCCTCCCATTCAGGAAACATAACATGTAAATCAAAT---

ATCACAGGAATACTATTGTATCACAGGACTACTGTTGGAGGA-----  
-----

AAGGAAAATGATAAATAC---

TGGAAAGAGACATTCAGACCTACAGGAGGAGATATGAGGGACAATTGGAGAAGTGAATTATATAAATATAAAG  
TGGTAGAAATTAAACCATTG---GGGATAGCACCCACTGAAGCAAGAAGGAGAGTGGTG-----

-----GAAAGAGAAAAAAGAGCA---GTGGGA---GTAGGAGCT-----

ATGTTCCCTTGGGTTCTTGGGAGCA---GCAGGAAGCACTATG---GGCGCGGCGTCA---

ATAACGCTGACGGTACAG---GCCAGACAA---TTGTTG---TCTGGTATAGTGCAACAGCAAAGC---

AATTTG---CTGAGG---GCTATAGAGGCGCAACAGCATCTGTTGCAACTCACAGTCTGGGGCATT

>KJ541839..4

TTCTATTGTAATACATCAAACTGTTTAAATGGTACATACATTCCTAATGGTACA-----  
-----

GGAAGTTACTTAAGCAGT-----

AATTCAGCTCAAACATCACAATTCATGCAGAATAAAGCAAATTATAAACATGTGGCAGGAGGTAGGACGAG  
CAATATATGCCCCCTCCCATTTGAAGGAAACATAACATGTAGATCAAAT---

ATCACAGGAATAATATTGACACGTGATGGAGGAAAAATCCAAAATCAA-----  
-----

AATGAGACAGACAAT---ACAACAGAAGACTATTCTAGCGTGGAAGGA---

ATGAAGGACAATTGGAGAAGTGAATTATATAAATATAAAGTGGTAGAAATTCAGCCATTG---

GGAATAGCACCCACTGGAGCAAAAAGGAGAGTGGTG-----

--GAGAGAGAAAAAAGGGAT---GTGACA---CTAGGAGCT-----

TTGTTCCCTTGGGTTCTTGGGAGCG---GCAGGAAGCACTATG---GGCGCGGCGTCA---

ATAACGCTGACGGTACAG---GCCAGACAA---TTGTTG---TCTGGTATAGTGCGACAGCAAAGC---

AATTTG---CTGAGA---GCTATAGAGGCGCAACAGCATCTGTTGCAACTCACAGTCTGGGGCATT

>KJ541841..3

TTCTATTGTAATACATCAAACTGTTTAAATGGTACATACATGCTTAATGGTACA-----  
-----

GGAAGTTATTTAATCAGT-----

AATTCAGCTCAAACATCACAATTCATGCAGAATAAAGCAAATTATAAACATGTGGCAGGAGGTAGGACGAG  
CAATATATGCCCCCTCCCATTTGAAGGAAACATAACATGTAGATCAAAT---

ATCACAGGACTACTATTGACACGTGATGGAGGACAA-----  
-----

TCCAAAATCAAATTAGACAGTCAA-----

TCCACAGAGATATTTAGACCTGGAGGAGGAGATATGAAGGACAATTGGAGAAGTGAATTATATAAATATAAAG  
TGGTAGAAATTCAGCCATTG---GGAATAGCACCCACTGGAGCAAAAAGGAGAGTGGTG-----

-----GAGAGAGAAAAAAGGGAT---GTGACA---CTAGGAGCT-----

TTGTTCCCTTGGGTTCTTGGGAGCG---GCAGGAAGCACTATG---GGCGCGGCGTCA---

ATAACGCTGACGGTACAG---GCCAGACAA---TTGTTG---TCTGGTATAGTGCAACAGCAAAGC---

AATTTG---CTGAGA---GCTATAGAGGCGCAACAGCATCTGTTGCAACTCACAGTCTGGGGCATT

>KJ541848..1

TTCTATTGCAACACATCAAACTGTTTAAATAGTACATACATGCCTAAACATGCA-----  
-----

AAGTGCCATACAATCACA-----

AAGGCACACGCAATCATCACAATTCATGCAGAATAAACAATTATAAATATGTGGCAGGAGGTAGGACGAG  
CAATGTATGCTCCTCCCATTAAGGAAAAATAACATGTAAATCAAGT---

ATCACAGGACTGCTATTGACACGTGACGGAAGGGAA-----  
-----

AACAAAAAGAATTCAAAGGGGGGT-----

GATACAGAACTTTTCAGACCTGAAGGAGGAAATATGAAAAGACAATTGGAGAAGTGAATTATATAAATATAAAG  
TGGTAGAAATTAAGCCATTG---GGAATAGCACCCACTGGAGCAAAAAGGAGAGTGGTG-----

-----GAGAGAGAAAAAAGAGCA---GTGGGA---CTGGGAGCT-----

CTGTTCCCTTGGGTTCTTGGGAGCA---GCAGGAAGCACTATG---GGCGCAGCGTCA---

ATGACGCTGACGGTACAG---GCCAGACAA---TTGTTG---TCTGGTATAGTGCAAGCAGCAAAC---

AATTTG---CTGAGA---GCTATAGAGGCGCAACATCAGTTGTTGCAACTCACGGTCTGGGGCATT

>MF373132..1

TTCTATTGCAATACATCAAACCTGTTTAAATAGTAGTAAACCTAATATAACAGCAAAT-----

-----  
-----

GAAAAATGGAACCATCACACTCCCATGCAGAATAAAACCAATTGAAACCTTGGGGCAGGGGGTAGGAAAAGCAA  
TTATTGCCCCCTCCATTAAAGGAAAATTACCTGGTACTTCCAAA---

TTCCCAGGCTTACCACTGGCCCCGAGTAGGGGTGAAAAAATAGGAACCTAT-----

GGAAATTTGGCA---AAAAGAGAA-----

-----

TTTTCCCCGGGGGGGGGAGATATGAGTGACAATTGGAGAAGTGAATTATATAAAATATAAAGTGGTAGAAATTA  
ATCCATTA---GGAGTAGCACCCACTAAGGCAAAAAGGAGAGTGGTG-----

-----GAGAGAGAAAAAAGAGCA---GTGGGA---ATAGGAGCT-----

GTGTTCCCTTGGGTTCTTGAGTGCA---GCAGGAAGCACTATG---GGCGCAGCGTCA---

ATAACGCTGACGGTACAA---GCCAGACAA---TTGTTG---TCTGGTATAGTGCAACAGCAAAAC---

AATTTG---CTGAGA---GCTATAGAGGCGCAACAACATATGTTGAAACTCACAGTCTGGGGCATT

>MF373137..1

TTCTATTGTAATACATCAGGCTTGTTTAAATACATCAGGCCCATTTAATAATAGTGAAACAAATAACACA----

-----  
-----

GCAAAATGTAAACATCACACTCCCATGCAGAATAAAACAAATTATAAACATGTGGCAGGGGGTAGGACAAGCAA  
TGTATGCCCCCTCCTGTTGCAGGAAACATAACATGTAGATCAAAT---

ATCACAGGAATACTACTGACACGTGATGGAGGAATAAATACCACAACCTAAT-----

-----  
-----

AACACATACGAACTATTCAGGCCTACAAGAAGAGACAATAGGGACAATTGGAGAAGTGAATTATATAAAATATA  
AAGTAGTAGAAATTCAGCCATTA---GGAGTAGCACCCACTGAGGCAAGAAGGAGAGTGGTG-----

-----GAGAGAGAAAAAAGAGCA---GTGGGA---ATAGGAGCT-----

---GTGTTCCCTTGGGTTCTTGAGGAGCA---GCAGGAAGCACTATG---GGCGCAGCATCC---

ATAACGCTGACGGTACAG---GCCAGACAA---TTATTG---TCTGGTATAGTGCAACAGCAGAAC---

AATCTG---CTGCGG---GCTATAGAGGCGCAACAGCATATGTTGCAACTCACAGTCTGGGGCATT

>MF373139..3

TTCTATTGCAATACATCGGGCCTGTTTAGTATAAAATTATACAGAAAATAATACAGATAATATTCAGAGTATGG  
AC-----

-----  
ATCACACTCCCCTGCCCCGATCAGACAAATCATAATCATGTGGCAGGGGCTAGAGGTAGCAATATCTACCCCTC  
CCCCTAACGGTACAGTATCATGTACTTCTAAT---

TTCACTGGCGTAGTCCTGCTACGTGCTGGAGGGCGTCATCGGGGAAATGAA-----

-----  
-----

AGTGGGACAGAGACATTTCAGACCTGCAGGAGGAGATATGAAGGACAATTGGAGAAGTGAATTATATAAAATATA  
AGGTAGTAGAAATTAAGCCATTA---GGAGTAGCACCCACTAAGGCAAAAAGGAGAGTGGTG-----

-----GAGAGAGAAAAAAGAGCA---GTGGGA---CTAGGAGCT-----

---GTGTTCCCTTGGGTTCTTGAGGAGCG---GCAGGAAGCACTATG---GGCGCAGCATCA---

ATAACGCTGACGGTACAG---GCCAGACAA---TTATTG---TCTGGTATAGTGCAACAGCAAAAC---

AATTTG---CTGAGG---GCTATAGAGGCGCAACAGCATATGTTGCAACTCACAGTCTGGGGCATT

>KP411839..2

TTCTACTGCAATACATCAAAGCTGTTTAAATAGTACATACCCGCCTAACAGTACTGATACGTACATGAACAGTG  
CT-----

-----  
-----

AATACTTCAAACATCATACTTCAATGCAGAATAAAACAAATCATAAACATGTGGCAGGGGGTAGGACAAGCAA  
TGTATGCCCCCTCCTATTGCAGGGAACATAACATGTGAATCAAAT---

ATCACAGGACTGCTGTTAACACGTGATGGAGGAAACAATCAAACA-----

-----  
-----

GAGGAGGAGACATTTACACCTGGAGGAGGAGATATGAGAGACAATTGGAGAAGTGAATTATATAAAATACAAAG  
TGGTAGAAATTAAGCCATTA---GGAATAGCACCCACCAAGGCAAAAAGGAGAGTGGTG-----

-----GAGAGAGAAAAAAGAGCA---GTGGGA---ATAGGAGCT-----

GTGTTCCCTTGGGGTCTTGAGGAGCA---GCAGGAAGCACTATG---GGCGCAGCATCA---

ATAACGCTGACGGTACAG---GCCAGACAA---TTGTTG---TCTGGTATAGTGCAAGCAGCAAAAGC---

AATCTG---CTGAGG---GCTATAGAGGCGCAACAGCATATGTTGCAACTCACAGTCTGGGGCATT

>MF373148..1

TTCTATTGCAATACATCAGAACTGTTTAAACGGTACATACAGCAACGGTACATACACGCCTAATAATAATGGGA  
GTGAC-----

-----  
TCAAATTTGACCATCACCATCCCGTGCAGAATAAAACAAGTTGTAAATCTGTGGCAGGGAGTAGGACAAGCAA  
TGGATGCCCCCTCCCATTCAGAGGAGCATATCGTGGGGATCAATAT---CCGAGGACTACTATTGCCCGT---  
GGAGGAGGACCGAACCCAGT-----

-----  
ACCGCGGAGATATTCAGACCTGGAGGAGGAGATATGAGGGACAATTGGAGAAGTGAATTATATAAATATAAAG  
TGGTGGAAGTTAACCCATTA---GGAATAGCACCCACTAGAGCAAAAAGGAGAGTGGTG-----  
-----GAGAGAGAAAAAAGAGCA---GTGGGA---ATAGGAGCT-----  
GTGTTCCCTTGGGTTCTTAGGAGCA---GCAGGAAGCACTATG---GGCGCAGCATCA---  
GTAACGCTGACGGTACAA---GCCAGGCAA---TTGTTG---TCTGGTATAGTGCAACAGCAAAGC---  
AATTTG---CTGAGG---GCTATAGAGGCGCAACAGCATATGTTGCAACTCACAGTCTGGGGCATT

>KP411836..5

TTCTATTGCAATACATCAAACTTGTTTAAATAGTACATACAATAGTACT-----

-----  
AATGATACCATCACACTCCAATGTAAGATAAAACAAATCATAAACATGTGGCAGGGGGTAGGACGAGCAGCAG  
TATTCTCCTCCCCATCGCAGGCAAGACATCACATCTTATACTAC---  
TATTACAGCAGTACTGCTGACGACCTGATGGAGGACGATGAACTAATAAT-----

-----  
ACTGTAGAGACATTTCAGACCTGGAGGAGGGGATATGAGAGACAATTGGAGAAGTGAATTGTATAAATATAAAG  
TGGTAGAAGTTAAACATTA---GGAATAGCTCCATCTCATTCAAAAAGGAGAGTGGTG-----  
-----CAGAGAGAAAAAAGAGCA---GTGGGC---CTGGGAGCT-----  
ATGTTCCCTTGGGTTCTTGGGAGCC---GCAGGAAGCACTATG---GGCGTGGCGTCA---  
TTGACGCTGACGGTACAG---GCCAGACAA---TTATTG---TCTGGTATAGTGCAAGCAAGGC---  
AACTTG---CTGAGG---GCTATAGAGGCGCAACAGCATCTGTTGCAACTCACAGTCTGGGGCATT

>MF373159..1

TTCTATTGCAATACATCAGGGCTGTTTCGAATTAATATTTCTGATGCACATAATGATGCACATAAT-----

-----  
GACACAAATGTAAACATCACAATTCATGCAGAATAAAGCAAATTATAAATATGTGGCAGGGGGTAGGACGAG  
CAATGTATGCTCCTCCCATTAAGGAATAATAACAATGTAGATCAAAT---  
ATCACAGGACTGCTACTGACACGTGATGGTGGTAATGGTGGTAAT-----

-----  
GAAACAAATTCAGAGACGTTTAGACCTTTAGGAGGAGATATGAAGGACAATTGGAGAAGTGAATTATATAAAT  
ACAAAGTAGTAGAAATTCAACAGTA---GGAATAGCACCCACTAGAGCAAGAAGGAGAGTGGTG-----  
-----GAGAGAGAAAAAAGAGCA---GCA-----CTAGGAGCT---  
-----ATGTTCCCTTGGGTTCTTAGGAGCA---GCCGGAAGCACTATG---GGCGCAGCATCA---  
ATAACGCTGACGGTACAG---GCCAGACAA---TTATTG---TCTGGTATAGTGCAACAGCAAAAC---  
AACTTG---CTGAGA---GCTATAGAGGCGCAACAGCATATGTTGCAACTCACGGTCTGGGGCATT

>MF373175..3

TTTTATTGCAATACATCCAACCTGTTTAAATAATAGTATGATA-----

-----  
AATCCAAATGTTACCATCACACTCCCATGCAGAATAAAACAGATTATAAACATGTGGCAGCAGGTAGGAAAGG  
CAATGTATGCCCCCTCCCATTCAGGAAGAATAACATGTAACCTCAAAT---  
ATCACAGGACTGCTACTGACACGTGATGGGGGAACAAATCAGACA-----

-----  
AACAGCACAGAGATATTCAGACCTGGAGGAGGAGACATGAGAGACAATTGGAGAAGTGAATTATATAAATATA  
AGGTGGTAGAAATTCAGCCATTA---GGAGTAGCACCCACTAGGGCAAAAAGGAGAGTAGTG-----  
-----GGCAGAGAGAAAAAGAGCA---GTGGGA---CTAGGAGCT-----  
---ATGTTCCCTTGGGTTCTTGAGTGCA---GCAGGAAGCACTATG---GGCGCAGCATCA---  
CTAACGCTGACGGTACAG---GCCAGACAA---TTGTTG---TCTGGTATAGTGCAACAGCAAAGA---  
AATTTG---CTGAGG---GCTATAGAGGTGCATCAGCATATGTTGCAACTCACGGTCTGGGGCATT

>MF373179..4

GTCTATTGCGATACATCAGACCTGCTCACTACATCAGTTAGTGTTCAAAAAGTACTAGTTATCACT-----  
-----  
-----  
AGTACAGATGCCATCATACTCCGCATGCCAAATACAACACATTATAAGCATGTGGCAGTGAGTACGACGAGCA  
TTGTATGCCCCCTCCTATGAAAGGCATGCGTAGCAGTACATGCACT---  
ATCACAGGTACTACTGACCTCAGGGATGGAAGGACTGACTATCAC-----  
-----  
-----  
AGCATGTACATAGTCAGACCTGGAGGAGGAGATATGAGGGACAATTGGAGAAGTGAATTATATAAATATAAAG  
TGGTAGAAGTTAAGCCAATA---GGAATAGCACCCACTGGGGCAAAAAGGAGAGTGGTG-----  
-----GAGAGAGAAAAAAGAGCG---GCA-----CTAGGAGCT-----  
GTGTTTCCTTGGGTTCTTGGGAGCA---GCCGGAAGCACTATG---GGCGCAGCATCA---  
GTAACGCTGACGGTACAG---GCCAGACAA---TTATTG---TCGGGTATAGTGCAACAGCAGAAC---  
AATTTG---CTGAGG---GCTATAGAGGCGCAACAGCATATGTTGCAACTCACGGTCTGGGGCATT  
>MF373192..2  
TTCTATTGCAATACAACAGCCTTGTTTCATAATAATATT-----  
-----  
-----  
ACAAATTCAACCATCATGCTCCCATGCAGAATAAAACAATTTATAAACCTGTGGCAGGGGGTAGGACGAGCAA  
TGTATGCTCCTCCCATTAAGGACTAATAACATGTAATTCAAGT---  
ATCACAGGAATACTACTGACACGAGATGGAGGAGATGTCAATCAAACA-----  
-----  
-----  
GCAAAATGAAACAGAGACATTGACACCTGGAGGAGGAGACATGAGGGACAATTGGAGAAGTGAATTATATAAAT  
ACAAAGTGGTAGAAATTAACCATTA---GGAATAGCACCTACCCCGGCAAAAAGGAGAGTGGTG-----  
-----GAGAGAGAAAAAAGAGCA---GCA-----CTAGGAGTT---  
-----ATGTTTCCTTGGGTTCTTGGGAGCA---GCTGGAAGCACTATG---GGCGCAGCATCA---  
TTAACGCTGACGGTACAG---GCCAGACAA---TTATTG---TCAGGTATAGTGCAACAGCAAAAC---  
AATTTG---CTGAGA---GCTATAGAGGCGCAACAGCATATGTTGCAACTCACAGTCTGGGGCATT  
>KP411835..1  
TTCTATTGCGATACATCAAACCTGTTTAATGAGACAAAATTTAATAGTAGT-----  
-----  
-----  
ACAAATGAAAACATCACACTCCGATGCAGAATAAAACAAATTATAAACATGTGGCAGAAGGTAGGACGGGGCAA  
TGTATGCCCCCTCCCATTAAGGAACAATAAAATGTGACTCAAAT---  
ATCACAGGATTACTACTAACACGAGATGGAGGCAAAAATGAAAATGAA-----  
-----  
-----  
ACACAAGAGATATTGACACCTGCAGGAGGAGATATGAGGGACAATTGGAGAAGTGAATTATATAAATATAAAG  
TGGTAGAAATTAAGCCATTA---GGAATAGCACCCACTGCTGCAAAAAGGAGAGTGGTG-----  
-----GGGAGAGAGAAAAAGAGCA---GCA-----CTAGGAGCT-----  
ATGTTTCCTTGGGTTCTTGGGAGCA---GCAGGAAGCACTATG---GGCGCAGCATCA---  
ATAACGCTGACGGTACAG---GCCAGACAA---TTATTG---TCTGGTATAGTGCAACAGCAAAGC---  
AATTTG---CTGAGA---GCTATAGAGGCGCAACAACATATGTTGCAACTCACAGTCTGGGGCATT  
>MF373198..2  
TTCTATTGCAATACATCAGGCCTGTTTAATGAGACAAATGGTACATATGCTACA-----  
-----  
-----  
AATGGTACAACCATCACACTTCCATGCAGAATAAAGCAAATTATAAGGATGTGGCAGGGGGTAGGACAAGCAA  
TGTATGCCCCCTCCCATTCAGGAGTAATATCATGTAATTCAAAT---  
ATCACAGGACTGCTACTAACCCGTGATGGAGGTAGTGGTCACAAT-----  
-----  
-----  
AATAACACAGAGATATTGACACCTGAAGGAGGAGATATGAGGGATAATTGGAGAAGTGAATTATATAAATACA  
AAGTGGTAGAAATTAAGCCATTA---GGGATAGCACCCACTAAGGCAAGAAGGATGGTGGTG-----  
-----CAGAGAGAAAAAAGAGCA---GCA-----CTGGGAGCT-----  
---GTATTTCCTTGGGTTCTTGGGAGCA---GCTGGAAGCACTATG---GGCGCAGCATCA---  
ATAACGCTGACGGTACAG---GCCAGACAA---TTATTG---TCTGGCATAGTGCAACAGCAAAGC---  
AATTTG---CTGAAG---GCTATAGAGGCGCATCAGCATATGCTGCAACTCACAGTTTGGGGCATT  
>HM215318..1

TTTTATTGCAATACATCCAACCTGTTTAAATAGTACATACATAAACAGCACA-----  
-----  
-----  
AACATCACATACATCACAATCCCATGCAGAATAAAACAAATAATAAACATGTGGCAGAGGGTAGGACAAGCAA  
TGTATGCCCCCTCCCATTCGAGGAAACATAACATGTAACCTCAAGT---  
ATCACAGGACTAATATTGACACGGGATGGAGGAAAAACAACACA-----  
-----  
-----  
AATGAAACATTTCAGACCTGGAGGAGGAGATATGAGGGACAATTGGAGAAGTGAATTATATAAATATAAGGTGG  
TAGAAATTCAACCATTG---GGAATAGCACCCACCAAGGCAAAAAGGAGAGTGGTG-----  
-----GAGAGAGAAAAAGAGCA---GTTGGA---CTAGGAGCT-----  
TTGTTTCCTTGGGTTCTTGGGAGCA---GCAGGAAGCACTATG---GGCGCGGCGGCA---  
ATAACGCTGACGGCACAG---GCCAGACAA---GTGTTG---TCTGGCATAGTGCAACAGCAGAGC---  
AATTTG---CTGAGA---GCTATAGAGGCGCAACAGCATATGTTGCAACTCACGGTCTGGGGCATT  
>KX907415..1  
TTCTATTGCAATACATCAGGCTTGTTTAAATGAAACAGGCTTGTTTAAATGAAACACACAATAGTACC-----  
-----  
-----  
ATGAATGATAACATCACACTCCCATGCAGAATAAAACAAATTATAAACATGTGGCAGGAGGTAGGACGAGCAA  
TCTATGCCCCCTCCCATTCGAGGAAACATAGCCTGTAACCTCAAAT---  
ATCACAGGACTACTATTGACACGTGATGGAGGCAGCATTAATGGAAGCGAG-----  
-----  
-----  
GATGAGAATAACACAGAAATATTCAGACCTGGAGGAGGAAACATGAAGGACAATTGGAGAAGTGAATTATATA  
AATATAAAGTGGTAGAAATTAAGCCATTG---GGAATAGCACCCACTGCGGCAAAAAGGAGAGTGGTG-----  
-----GAGAGAGAAAAAGAGAGCA---GTGGGA---  
CTAGGAGCT-----GTGTTTCCTTGGGTTCTTGGGAGCA---GCTGGAAGCACTATG---  
GGCGCGGCGTCA---ATAACGCTGACGGCACAA---GCCAGACAA---GTGTTG---  
TCTGGTATAGTGCAACAGCAAAGC---AATTTG---CTGAGG---  
GCTATAGAGGCGCAACAGCATATGTTGCAACTCACGGTTTGGGGCATC  
>KX907398..2  
TTCTATTGCAATACATCAAAGCTGTTTGATAGTAGTCTGTTTAAATAGTACTGAAAGTAATAGTACTGGTAAT-  
-----  
-----  
AATTATACTGACATCAAACCTCCCATGCAGAATAAAACAAATTATAAACATGTGGCAGGGGGTAGGACGAGCAA  
TATATGCCCCCTCCCATTCGAGGAAACATAACATGTAAATCAAAT---  
ATCACAGGAATATTATTAAACACGTGATGGAGGCTATGACAACGCTACA-----  
-----  
-----  
AATGGCACGGAGACCTTCAGACCTGGAGGAGGAGATATGAGGGACAATTGGAGAAGTGAATTATATAAATATA  
AAGTGGTAGAAATTAAGCCATTG---GGAATAGCACCCACTAAGGCAAAAAGGAGAGTGGTG-----  
-----GAGAGAGAAAAAGAGCA---GCGGGA---ATAGGAGCT-----  
---GTGTTTCCTTGGGTTCTTGGGAGCT---GCAGGAAGCACTATG---GGCGCGGCGTCA---  
ATAACGCTGACGGTACAA---GCCAGACAA---TTGTTG---TCTGGTATAGTGCAACAGCAAAGT---  
AATTTG---CTGAAG---GCTATAGAGGCGCAACAACATCTGTTGCAACTCACGGTTTGGGGCATT  
>KX907425..1  
TTCTATTGCAATACAGTAGGCCTGTTTAAATAAAACATACAATAGTACC-----  
-----  
-----  
ATGAATGGTACCATCACACTCCCATGCAGAATAAAACAAATTATAAACATGTGGCAGGAGGTAGGACGAGCAA  
TCTATGCCCCCTCCCATTTGAAGGAAACATAACATGTAACCTCAAGT---  
ATCACAGGACTACTATTGACACGTGATGGAGGCAACACTAATGAA-----  
-----  
-----  
AGTGAAGAGATATTTCAGACCTGGAGGAGGAAACATGAGGGACAATTGGAGAAGTGAATTATATAAATATAAAG  
TGGTAGAAATTAAGCCATTG---GGAGTAGCACCCACTGAGGCAAAAAGGAGAGTGGTG-----  
-----GAGAGAGAAAAAGAGAGCA---GTAGGA---CTAGGAGCT-----  
GTGTTTCCTTGGGTTCTTGGGAGCA---GCTGGAAGCACTATG---GGCGCGGCGTCA---  
ATAACGCTGACGGCACAA---GCCAGACAA---TTGTTG---TCTGGTATAGTGCAACAGCAAAGC---  
AATTTG---CTGAGG---GCTATAGAGGCGCAACAACATATGTTGCAACTCACGGTTTGGGGCATT

>KX907428..1

TTCTATTGCAACACATCAGGCCTGTTTAAATAAAACATACAATGATACC-----

-----  
-----

ATGAATAGTACCATCACACTCCCATGTAGGATAAAAACAAATTGTAAACATGTGGCAGGAGGTAGGACGAGCAA  
TCTATGCCCCCTCCTATTGCAGGAAACATAACATGTAACCTCAAAT---

ATCACAGGACTACTACTGACACGTGATGGAGGCACGAATGTGACA-----

-----  
-----

AATGGCACACAGATTTTCAGACCTGGGGGAGGAGACATGAGGGACAATTGGAGAAGTGAATTATATAAAATATA  
AAGTGGTAGAAATTAAACCATTG---GGAATAGCACCCACTACGGCACAAAGGAGAGTGGTG-----

-----GCGAGAGAAAAAAGAGCA---GTGGGA---CTAGGAGCT-----

---GTGTTCCCTTGGGTTCTTGGGAGCA---GCTGGAAGCACTATG---GGCGCGGCGTCA---

ATAACGCTGACGGCACAA---GCCAGACAA---TTGCTG---TCTGGTATAGTGCAACAGCAAAGC---

AATTTG---CTGAGA---GCTATAGAGGCGCAACAACATATGTTGCAACTCACGGTTTGGGGCATC

>HQ615976..2

TTCTATTGCAATACATCAAAAAATTTTAAATAGTATATACCAGGAGAATTACACTAACAGTGCTAATAGTACAG  
AA-----

-----  
-----

AACAACGGCACACTCACACTCCCATGCAGAATAAAAACAAATTGTAAACATGTGGCAGGGGGTAGGACGGGCAG  
TGTATGCCCCCTCCCATTCAAGGGAACATAACATGTAAATCAAAT---

ATCACAGGACTGCTACTGACACGTGATGGAGGAATAAATGAGACA-----

-----  
-----

GATGAAACATTCAGGCCTATAGGGGGAAATATGAGGGACAATTGGAGAAGTGAATTATATAAAATATAAGGTGG  
TAGAAATTAAACCATTA---GGAATAGCACCCACTAAGGCAAAAAGGAGAGTGGTG-----

-----GAGAGAGAAAAAAGAGCG---GTAGGA---ATAGGAGCT-----

GTGCTCTTTGGGTTCTTGGGAGCA---GCAGGAAGCACTATG---GGCGCAGCGTCA---

ATAACGCTGACGGTACAA---GCCAGACAA---TTATTG---TCTGGTATAGTGCAACAGCAAAAC---

AATTTG---CTGAGG---GCTATAGAGGCGCAACAGCATATGTTGCAACTCACGGTCTGGGGCATT

>KF526226..1

TTCTATTGCCATACATCAACCCTGTTTAAATAATAATATTACAAATTCA-----

-----  
-----

ACCAATTCAACCATCACACTCCCATGCAGGATAAAAACAAATTATAAACATGTGGCAGGAGGTAGGACGAGCAA  
TGTATGCCCCGCCCATTCAGGAATAATAAGATGTAGATCAAAT---

ATCACAGGACTACTACTAACACGTGATGGAGGCACAGGGACAAATGAC-----

-----  
-----

ACAAACACAACCGAGACATTTAGACCTGGAGGAGGAGATATGAGGGACAATTGGAGAAGTGAATTATATAAAT  
ATAAGTGGTAGAAATTAAACCATTA---GGAATAGCACCCACTAAGGCAAAAAGGAGAGTGGTG-----

-----GAGAGAGAAAAAAGAGCA---GCA-----CTAGGAGCT---

-----TTGTTCCCTTGGGTTCTTGGGAGCA---GCAGGAAGCACTATG---GGCGCAGCATCA---

ATAACGCTGACGGTACAG---GCCAGACAA---TTATTG---TCGGGTATAGTGCAACAGCAAAGC---

AATTTG---CTGAGA---GCTATAGAAGCGCAACAGCATATGTTGCAACTCACGGTCTGGGGCATT

>AY463229..2

TTCTATTGCTATACATCAGAATTGTTTAAATAACACATACATACCTACATACATGAATAATAAAACAGAT----

-----  
-----

GATAATTCTACCATCACACTTCCATGCAGAATAAAAACAAATTATAAACATGTGGCAGGAGGTAGGACGAGCAA  
TGTATGCCCCCTCCCATTGCAGGAAACATAACATGTAACCTCAAGT---

ATCACAGGACTACTATTGACACGTGATGGAGGCAATAATAATAAT-----

-----  
-----

GATACTGAAATATTTCAGACCTGGAGGAGGAAATATGAAGGATAATTGGAGAAGTGAATTATATAAAATATAAAG  
TGGTAGAAATTTCAGCCACTG---GGAGTAGCACCCACTGGGGCAAAAAGGAGAGTGGTG-----

-----GAGAGAGAAAAAAGAGCA---GTGGGA---ATAGGAGCT-----

GTGTTCCCTTGGGTTCTTGGGAGCA---GCAGGAAGCACTATG---GGCGCGGCGTCA---

ATAACGCTGACGGTACAG---GCCAGACAA---CTGCTG---TCTGGTATAGTGCAACAGCAAAGC---

AATTTG---CTGAGA---GCTATAGAGGCGCAACAACACGTGTTGCAACTCACAGTCTGGGGCATT

>JX845587..1

TTCTATTGCAATACAACAACACTGTTTTCAAACAAAAGTGTT-----  
-----

CCAACCAACAAAACAATCATACTCCTATGCAGGATAAAACAAATTATAAACATGTGGCAGGGGGTAGGACGAG  
CAATGTATGCCCCCTCCCATTCAGGAAACATAACATGTAACCTCAAAT---  
ATCACAGGACTACTATTGACACGTGATGGAGGAAAAAACAACGCAACAGGG-----  
-----

GGCAACGAAACAGAGATATTCAGACCTGGAGGAGGAAATATGAAGGACAATTGGAGAAGTGAATTATACAAAT  
ATAAAGTGGTAGAAATTAAGCCATTA---GGAGTAGCACCCACTAAGGCACAAAGGAGAGTGGTG-----  
-----CAGAGAGAAAAAAGAGCA---GTGGGA---ATAGGAGCT---  
-----GTGCTCCTTGGGTTCTTGGGAGCA---GCAGGAAGCACTATG---GGCGCGGCGTCA---  
ATAACGCTGACGGTACAG---GCCAGACAG---CTGTTG---TCTGGTATAGTGCAAGCAGCAAAGC---  
AATTTG---CTGAGA---GCTATAGAGGCGCAACATCATATGTTGCAACTCACGGTCTGGGGCATT

>AY463235..3

TTCTATTGCAATACAACGCAACTGTTTAATAGTACATACTATAATAGTACTAATAGTACAGAGGAGACA----  
-----  
-----

GGAAATTCAAACATCACACTTCAATGCAGAATAAAACAAATTATAAACATGTGGCAAGGGGTAGGACAAGCAA  
TGTATGCCCCCTCCCATTCAGGAATAATAACATGTAGATCAAAC---  
ATCACAGGAATACTACTGGCACGTGATGGAGGAGCCTCAAAATAGCACAGAA-----  
-----

AACTCAACTAACACAGAGATATTCAGGCCTGGAGGAGGAGATATGAGGGACAATTGGAGAAATGAATTATATA  
AATATAAAGTGGTAGAAGTTAAACCATTA---GGAGTAGCACCTACTAGAGCAAAAAGGAGAGTGGTG-----  
-----GAGAGAGAAAAAAGAGCA---GTGGGA---  
ATAGGAGCT-----GTGTTCCCTTGGGTTCTTGGGAGCC---GCAGGGAGCACTATG---  
GGCGCAGCATCA---ATAACGCTGACGGTACAG---GCCAGACAA---TTATTG---  
TCGGGTATAGTGCAACAGCAAAGC---AATTTG---CTGAGG---  
GCTATAGAGGCGCAACAGCATATGTTGCAACTCACGGTCTGGGGCATT

>DQ369995..2

TTCTATTGCGACACATCACAACACTATTTAATAAGACATACAATGTTACAGATGATTCAAACACC-----  
-----  
-----

ACAGACACAAACAACACAATTCAATGCAGAATAAAGCAGATTATAAACATGTGGCAGGAAGTAGGACGAGCAA  
TGTATGCCCCCTCCCATCGCAGGAAGCATAACATGTACCTCAAAT---  
ATTACAGGACTACTATTGACACGTGATGGAGGGGGAGGCACAAATAGCACA-----  
-----

AGTAATACGGAAGAGATATTCAGACCCGGAGGAGGAAATATGAAGGATAATTGGAGAAGTGAATTATATAAAT  
ATAAAGTGGTAGAAGTTCAGCCATTA---GGAATAGCTCCCACTAAAGCAAAAAGGAGAGTGGTG-----  
-----GAGAGAGAAAAAAGAGCA---ATAGGA---ATAGGAGCT---  
-----GTGTTCCCTTGGGTTCTTGGGAGCA---GCAGGAAGCACTATG---GGCGCAGCGTCA---  
ATAACGCTGACGGTACAG---GCCAGACAA---CTATTG---TCTGGTATAGTGCAACAGCAAAGC---  
AACTTG---CTGAGG---GCTATAGAGGCGCAACAGCATATGTTGCAACTCACGGTCTGGGGCATC

>DQ351223..1

TTCTATTGCAATACAACAGGACTGTTTGCTAGTAAAAATGATTCAAACACAACCATCAGT-----  
-----  
-----

ACAAACGCAACCATCACACTCCCATGTAGAATAAAACAAATTATAAACATGTGGCAGGGGGTAGGACGAGCGA  
TGTATGCCCCCTCCCATTCAGGGAACATAACATGTAGATCAAAT---  
ATCACAGGATTGTTATTGCTACGTGATGGGGGAGACAATCAGACC-----  
-----

ACAGAGACATTGAGGCCTGGAGGAGGAAATATGAAGGACAACCTGGAGAAGTGAATTATATAAATATAAAGTAG  
TAGAAATTAAGCCATTG---GGAATAGCACCCACGAAGGCAAAAAGGAGAGTGGTG-----  
-----GAGAGAGAAAAAAGAGCA---GCGGGA---ATAGGAGCG-----  
ATGATCTTTGGGTTCTTGGGAGCA---GCAGGAAGCACTATG---GGCGCGGCGTCA---

ATAACGCTGACGGTACAG---GCCAGACAG---CTGTTG---TCTGGTATAGTGCAGCAGCAAAGC---  
 AATTTG---CTGAGA---GCTATAGAGGCGCAACAGCATATGTTGCAACTCACGGTCTGGGGCATT  
 >DQ396388..1  
 TTCTATTGCAATACATCAGGACTGTTTAATAGTACATACATGCCTAATGGTACAGAAAGCAATTCAACCATC-  
 -----  
 -----  
 ACAAAGTCAACCATCACACTCCTATGCAGAATAAAACAAATTATAAACATGTGGCAGCAAGTAGGAAGAGCAA  
 TGTATGCCCCCTCCCATTTGCAGGAAACATAACATGTACATCAAAC---  
 ATCACAGGAATATTATTAGTACGTGATGGAGGCTACAGTAACAAT-----  
 -----  
 -----  
 ACTACAGAGATATTCAGACCTGGAGGAGGAAATATGAAGGACAATTGGAGAAGTGAATTATATAAATACAAAG  
 TGGTAGAAGTTAAGCCATTG---GGAATAGCACCCACTAAGGCAAAAAGGAGAGTGGTG-----  
 -----GAGAGAGAAAAAAGAGCA---GCA-----CTAGGAGCT-----  
 ATGTTTCCTTGGGTTCTTGGGAGCA---GCAGGAAGCACTATG---GGCGCGGCGTCA---  
 ATAACGCTGACGGTACAG---GCCAGACAA---TTGTTG---TCTGGTATAGTGC AACAGCAAAGC---  
 AATTTG---CTGAGG---GCTATAGAGGCGCAACAGCATATGTTGCAACTCACGGTCTGGGGCATT  
 >DQ351228..1  
 TTTTATTGCAACACATCAAACTATTTAATGGTACATACGAGAATAGTACAGACAAGGAGTCAAACAGC----  
 -----  
 -----  
 ACAAATTCAATCATCACAATTCCATGCAGAATAAAACAAATTATAAACATGTGGCAGGAGGTGGGACGAGCAA  
 TGTATAACCCTCCCATTTGCAGGAAACATAACATGTAAATCAAAT---  
 ATCACAGGACTACTATTAGTACGTGATGGA---GACAACAATAGT-----  
 -----  
 -----  
 ACAGAAACATTTCAGACCTCAAGGAGGAAATATGAAGGACAATTGGAGGAGTGAATTATATAAATATAAAGTGG  
 TGGAAATTAAGCCATTG---GGAATAGCACCCACTGAAGCAAAAAGGAGAGTGGTG-----  
 -----GAGAGAGAAAAAAGAGCA---GTAGGA---ATAGGAGCG-----  
 GTACTCCTTGGGTTCTTGGGAGCA---GCAGGAAGCACTATG---GGCGCGGCGTCA---  
 ATAACGCTGACGGTACAG---GCCAGACAA---CTGTTG---TCTGGTATAGTGC AACAGCAAAGC---  
 AATTTG---CTGAGA---GCTATAGAGGCGCAACAGCATATGTTGCAACTCACAGTCTGGGGCATT  
 >DQ011175..1  
 TTCTATTGCAATACATCAAACTATTTAATAGTACATACAATCCTGACCATAATAGTACAGGAAAT-----  
 -----  
 -----  
 ATCACAGGGGTCATCACAATTCCATGCAGAATAAAACAAATTATAAACATGTGGCAGGAGGTGGGACGAGCTA  
 TGTATGCTCCTCCCATTAAGGAAACATAACATGTAACTCAAGT---  
 ATCACAGGACTACTATTAAACACGTGATGGAGGCAAGTCAAATGACACAATA-----  
 -----  
 -----  
 GAAAACAAAAATGAAACATTTAGACCTCAAGGAGGAAATATGAAGGACAATTGGAGAAGTGAATTATATAAAT  
 ATAAGGTGGTACAAATTGAGCCATTG---GGAATAGCACCCACTAAAGCAAAAAGGAGAGTGGTG-----  
 -----GAGAGAGAAAAAAGAGCA---GTGGA---ATAGGAGCT---  
 -----GTGTTTCCTTGGGTTCTTGGGAGCA---GCAGGAAGCACTATG---GGCGCGGCGTCA---  
 ATGGCGCTGACGGTACAG---GCCAGACAA---GTGCTG---TCTGGTATAGTGC AACAGCAAAGC---  
 AATTTG---CTGAGA---GCTATAGAGGCGCAACAGCATATGTTGCAGCTCACGGTCTGGGGCATT  
 >AY901971..2  
 TTCTATTGCAATACATCAAGACTATTTAATAATACATTTAATTATACAGACACAACAGAACTTAACAGCACAG  
 ACAGC-----  
 -----ACA---  
 GACTCAAACGAGACCATCACAATTCCATGCAGAATAAAACAAATTATAAACATGTGGCAGCAGGTAGGACGAG  
 CAATGTATGCTCCTCCCATTTGCAGGGAACATAACATGTACATCAAAT---  
 ATCACAGGATTACTATTGGTACGTGATGGAGGCAAGGATAATACA-----  
 -----  
 -----  
 GGTACAAATGAGACATTTCAGACCTCAAGGAGGAAATATGAAGGACAATTGGAGAAGTGAATTATACAAATATA  
 AAGTGGTAGAAATTAAACCATTG---GGAATAGCACCTACTGGGGCAAAAAGGAGAGTGGTG-----  
 -----GAAAGGGAAAAAAGAGCA---GCG-----CTAGGAGCT-----  
 ---ATGTTTCCTTGGGTTCTTGGGAGCA---GCAGGAAGCACTATG---GGCGCAGCGTCA---

ATAACGCTGACGGTACAG---GCCAGACAA---CTGTTG---TCTGGTATAGTGCAACAGCAAAAC---  
 AATTTG---CTGAGA---GCCATAGAGGCGCAACAGCATATGTTGCAACTCACAGTCTGGGGCATA  
 >DQ093597..1  
 TTCTATTGCAATACATCAAGACTATTTAATAGTACATACTGGGAAGGATCTAATAGTACAGGA-----  
 -----  
 -----  
 GGTGACTCAACCATCACAATTCCATGCAGAATAAAACAAATTATAAACATGTGGCAGGAGGTAGGACGAGCAA  
 TGTATGCCCCCTCCCATAGCAGGAAACATAACATGTAACCTCAAGT---  
 ATCACAGGATTACTATTAGTACGTGATGGAGGCCTATCCAAAAATAAC-----  
 -----  
 -----  
 ACAAATCAAATGAAACATTTCAGACCTGGAGGAGGAGATATGAAAGACAATTGGAGGAGTGAATTATATAAAAT  
 ACAAAGTGGTAGAAATTAAGCCATTG---GGAATAGCACCCACTAAAGCAAAAAGGAGAGTGGTG-----  
 -----GAGAGAGAAAAAAGAGCA---GTGGGA---ATAGGAGCT---  
 -----GTGCTCCTTGGGTTCTTGGGAGCA---GCAGGAAGCACTATG---GGCGCAGCGTCA---  
 ATAGCGCTGACGGCACAA---GCCAGACAA---GTGTTG---TCTGGTATAGTGCAACAGCAAAGT---  
 AATTTG---CTGAGG---GCTATAGAGGCGCAACAGCATATGTTGCAACTCACGGTCTGGGGCATT  
 >AY772692..1  
 TTCTATTGCAATACAACAAAACCTGTTTAATGAAAATGAAACAAGTAAG-----  
 -----  
 -----  
 GCAAATGACACAATCATACTCCCATGCAGAATTAAACAAATCATAAACATGTGGCAGACGGTAGGACGAGCAA  
 TGTATGCTCCTCCCATTTGAAGGATACATAAATTGTACATCAAAT---  
 ATCACAGGAATACTATTGACACGTGATGGAGGAAATAATAAAACAAAT-----  
 -----  
 -----  
 AACACAAAAGAGATATTTCAGACCTGCAGGAGGAGATATGAGGAACAATTGGAGAAGTGAATTATACAAATATA  
 AAGTAGTAGAAATTCAGCCATTG---GGAATAGCACCCACTACTGCAAAAAGGAGAGTGGTG-----  
 -----GAGAGAGAAAAAAGAGCA--GCA-----CTAGGAGCT-----  
 ---ATATTCCTTGGGTTCTTGGGAGCA--GCAGGAAGCACTATG--GGCGCGGCGGCA---  
 ATAACGCTGACGGTACAG---GCCAGACAA---CTGTTG---TCTGGTATAGTGCAACAGCAAAGC---  
 AATTTG---CTGAGA---GCTATAGAGGCGCAACAGCATCTGTTGCAACTCACGGTCTGGGGCATT  
 >DQ164107..2  
 TTCTATTGCAATACATCGGCACTATTTTCATAGTCTTACATACAATGAGACAAAAGGT-----  
 -----  
 -----  
 AATTCAACAACCATCACACTTCCATGTAGAATAAAACAAATTATAAACATGTGGCAGGGGGTAGGACGAGCTA  
 TGTATGCTCCTCCTATTGCAGGAGAAATAACATGTAACCTCAAGC---  
 ATCACAGGACTACTATTGACACGTGATGGAGGAGAAGGAGAGAAT-----  
 -----  
 -----  
 CACACAGAGATATTCAGGCCTGGAGGAGGAAATATGAAGGACAATTGGAGAAGTGAATTATATAAATATAAAG  
 TGGTAGAAATTAAGCCATTG---GGAGTAGCACCCACTAAGGCGGAAAGGAGAGTGGTG-----  
 -----AAAAAAGAAAAAAGAGCA---GTGGGA---ATAGGAGCG-----  
 TTGTTCTTGGGATCTTGGGAGCA---GCAGGAAGCACTATG---GGCGCGGCGTCA---  
 ATAACGCTGACGGTACAG---GCCAGACAA---CTGTTG---TCGGGTATAGTGCAACAGCAAAT---  
 AATTTG---CTGAGG---GCTATAGATGCGCAACAGCATATGTTGCAACTCACGGTCTGGGGCATT  
 >DQ093600..1  
 TTCTATTGCAATACAACAAAACCTGTTTAATGAAAGTGAAACACAGTTTGCGGCAACAACAGT-----  
 -----  
 -----  
 GCCAATAGTAACATCACACTCCCATGCAAGATAAAACAAATTATAAACATGTGGCAGCAGGTGGGACGAGCAA  
 TGTATGCCCCCTCCTGTTCAAGGAAACATAATATGTAACCTTAGT---  
 ATCACAGGACTACTATTGACACGTGATGGAGGAGTTAACAATACT-----  
 -----  
 -----  
 AATGAGACATTTCAGACCTGGAGGAGGAAATATGAAAGACAATTGGAGAAATGAATTATATAAATATAAAGTGG  
 TAGAAATTAAGCCATTA---GGAATAGCACCCACTAGGGCAAAAAGGAGAGTGGTG-----  
 -----GAGAGAGAAAAAAGAGCA---GTGGGA---CTAGGAGCT-----  
 GTGATCTTTGGGTTCTTGGGAGCA---GCAGGAAGCACTATG---GGCGCGGCGTCA---

ATAACGCTGACGGTACAG---GCCAAACAA---CTGTTG---TCTGGTATAGTGCAACAGCAAAGC---  
 AATTTG---CTGAGA---GCTATAGAGGCGCAACAGCATATGTTGCAACTCACGGTCTGGGGCATT  
 >DQ011166..1  
 TTCTATTGTAATACAACAGATCTGTTTAATAGTACATTTAATAGTGAATACAATAGTACAGACAGGCATAAT-  
 -----  
 -----  
 AATAATACCAATATCACACTCCAATGCAGGATAAAAACAAGTGATAAACATGTGGCAGCAGGTAGGACGAGCAA  
 TGTATGCTCCTCCCATTGCAGGAAACATAACATGTATCTCAAAT---  
 ATCACAGGATTACTATTGGTGCGTGATGGAGGAGGAAAAAATAACACA-----  
 -----  
 -----  
 AATCAAACAGAGGAGATATTCAGACCTGGAGGAGGAGATATGAGGGACAATTGGAGAAGTGAATTATACAAAT  
 ATAAGGTGGTAGAACTCAAACCATTG---GGAATAGCACCTACTGAGGCAAAGAGGAGAGTGGTG-----  
 -----GAGAGAGAAAAAAGAGCA---GTGGGA---ATAGGAGCT---  
 -----GTGTTCCCTTGGGTTCTTGAGTGCA---GCAGGAAGCACTATG---GGCGCGGCGTCA---  
 ATGACGCTGACGGTACAG---GCCAGACAA---TTGTTG---TCTGGTATAGTGCAACAGCAAAC---  
 AATTTG---CTGAAG---GCCATAGAGGCGCAACAACATCTGTTGCAACTCACGGTCTGGGGCATT  
 >DQ011167..1  
 TTCTATTGCAATACATCAGGACTGTTTAATAAGAGTAATACAGACATGACTAATAAAACAGAA-----  
 -----  
 -----  
 GATAATTCAACCATCACACTCCCATGTAGAATAAAACAGATTATAAACATGTGGCAGAACGTAGGACGAGCAA  
 TATATGCCCCCTCCCGTTCAAGGAAACATAACATGTAACTCAAGT---  
 ATCACAGGACTACTATTGACACGTGATGGAGGTAACGGAAATGACACT-----  
 -----  
 -----  
 AATGGCACAGAGATATTCAGACCTGGAGGAGGAGATATGAGGGACAATTGGAGAAGTGAATTATACAAATATA  
 AAGTGGTAGAAATTAAGCCATTG---GGAATAGCACCCACTAAGGCAAAAAGGAGAGTGGTG-----  
 -----GAGAGAGAAAAAAGAGCA--GTGGGA---ATAGGAGCT-----  
 ---GTGTTCCCTTGGGTTCTTGAGGAGCA--GCAGGAAGCACTATG---GGCGCAGCATCA---  
 ATAACGCTGACGGTACAG---GCCAGACAA---TTGTTG---TCTGGAATAGTGCAACAGCAAAGC---  
 AATTTG---CTGAGG---GCTATAGAGGCGCAACAGCATATGTTGCAACTCACGGTCTGGGGCATT  
 >DQ093590..1  
 TTCTATTGTAATACATCAAACTGTTTAATAGTACATACAATCCTAATAATACAGAAAGTAAT-----  
 -----  
 -----  
 TCAAGCGCAGTAATCACACTCCCATGCAAGATAAAGCAAATTATAAACATGTGGCAGCAGGTAGGGCGAGCAA  
 TGTATGCTCCTCCCATTGCAGGAAACATAACATGTAACTCAAAT---  
 ATCACAGGATTACTACTGGTGCGTGATGGGGGAACAATTGGCAATGGC-----  
 -----  
 -----  
 ACAAATAACGAGACATTTCAGACCTGGAGGAGGAGATATGAGGGACAATTGGAGAAGTGAATTATACAAATATA  
 AAGTGGTAGAAGTTAAACCATTG---GGAATAGCACCTACTCAGGCAAAAAGGAGAGTGGTG-----  
 -----GAGAGAGAAAAAAGAGCA---GTGGGA---CTAGGAGCT-----  
 ---GTGTTCCCTTGGGTTCTTGAGGAGCA---GCAGGAAGTACTATG---GGCGCGGCGTCA---  
 ATAACGCTGACGGTACAG---GCCAGACAA---CTGTTG---TCTGGCATAGTGCAACAGCAAAGC---  
 AATTTG---CTGAGG---GCCATAGAGGCGCAACAGCATATGTTGCAACTCACGGTCTGGGGCATT  
 >DQ011178..1  
 TTCTATTGCAACACATCAGGCCTGTTTAATACTACAGACCTGTTTAATAATACAGACCTGTCTAATAGTACAG  
 GA-----  
 -----  
 -----  
 AGTAATGAAAACATCACGCTTCCATGCAGAATAAAAACAATTTGTGAATATGTGGCAGGAGGTAGGGCGAGCAA  
 TGTATGCCCCCTCCCATTCAAGGAATCATAAATTGTATATCAAAT---  
 ATCACAGGAATACTATTGCTACGTGATGGAGGAAACACGAGTGCTAAT-----  
 -----  
 -----  
 GGAACATTAAACAGAGACATTTCAGACCTGGAGGAGGAAAATATGAAGGACAATTGGAGAAGTGAATTATATAAAT  
 ATAAGGTGGTAGAAATTAGGCCATTA---GGAGTAGCACCCACCAAGGCAAAAAGGAGAGTGGTG-----  
 -----GAGAGAGAAAAAAGAGCA---GTGGGA---ATAGGAGCT---  
 -----GTGCTCTTTGGGTTCTTGAGGAGCA---GCAGGAAGCACTATG---GGCGCGGCGTCA---

ATAACGCTGACGGTACAG---GCCAGACAA---CTGCTG---TCTGGTATAGTGCAACAGCAAAGC---  
 AATTTG---CTGAGG---GCTATAGAGGCGCAACAGCATATGTTGCAACTCACGGTCTGGGGCATT  
 >AY901980..2  
 TTTTATTGTAATACATCACAACGTTTTAATAGTACATACAATCCTGCATACAGTCATAATGAGACAGAA-----  
 -----  
 -----  
 AGTAATTCAACCATCATGCTTCCATGCAGAATAAAACAAATTATAAACATGTGGCAGGAGGTAGGAAAAGCAA  
 TGTATGCCCCCTCCCATTCAGGAAACATAATATGTAACCTCAAGT---  
 ATCACAGGACTACTATTGACACGTGATGGAGGAAACAATAACACG-----  
 -----  
 -----  
 AATACAGAAGAAATATTGAGACCTGGAGGAGGAAATATGAAGGACAATTGGAGAAATGAATTATATAAAATATA  
 AAGTGGTAGAAATTCAGCCATTG---GGAGTAGCACCCACCGAGGCAAAAAGGAGAGTGGTG-----  
 -----GAGAGAGAAAAAAGAGCA---GTGGGA---CTGGGAGCT-----  
 ---GTGTTCCCTGGGGTCTTGAGTTTG---GCAGGAAGCACTATG---GGCGCAGCGTCA---  
 ATAACGCTGACGGTACAG---GCCAGGCAA---CTGTTT---GCTGGTATAGTGCAACAGCAAAT---  
 AATTTG---CTGAGG---GCTATAGAGGCGCAACAGCATATGTTGCAACTCACAGTCTGGGGCATT  
 >AY878059..2  
 TTCTATTGCAATACAACAAAACTGTTTAACATAACCTATAATAACAGTAATTCA-----  
 -----  
 -----  
 GACAACAATACCATCACGCTCCCCCTGCAGAATCAAACAATTTATAAACCTGTGGCAGGAGGTAGGGCGAGCAA  
 TGTATGCCCCCTCCCATTCAGGAAAAATAACATGTCACTCAAGT---  
 ATTACAGGACTACTATTGACACGTGATGGAGGAACGAGTGCAAACAATGATACA-----CAA-----  
 -----  
 GCAAGTACAAACAAT---  
 AATACAGAGACATTGAGACCTGGAGGGGGAGATATGAAAAACAATTGGAGAAATGAATTATATAAAATATAAAG  
 TGGTAGAAATTAAGCCCTTA---GGAGTAGCACCCACTGGAGCAAAAAGGAGAGTGGTG-----  
 -----GAGAGAGAAAAAAGAGCA---GTAGGA---ATAGGAGCT-----  
 GTACTCTTTGGGTTCTTGGGAGCA---GCAGGAAGCACTATG---GGCGCGGCGTCA---  
 ATAACGCTGACGGTACAG---GCCAGACAA---TTGTTG---TCTGGTATAGTGCAACAGCAAAGC---  
 AATTTG---CTGAGA---GCTATAGAGGTGCAACAGCATATGTTGCAACTCACGGTTTGGGGCATT  
 >DQ011174..1  
 TTCTATTGCAATACGACAGAACTGTTTAATGATAGTAGCTCA-----  
 -----  
 -----  
 GAAAACATCACACTCCCATGCAGAATAAAACAAATTGTAAACATGTGGCAGGGGGTAGGACGAGCAATGTATG  
 CCCCTCCCATTCAGGGAAGCATAACATGTAATTCAAGT---  
 ATCACAGGACTACTATTAGAACGTGATGGAGGGGAAAGCTATAAT-----  
 -----  
 -----  
 AAAACAGAGATATTCAGGCCTGGAGGAGGAAATATGAAGGACAATTGGAGAAGTGAATTATATAAAATATAAAG  
 TGGTAGAAATTAAGCCATTA---GGAGTAGCACCCACAAGGGGCAAAAAGGAGAGTGGTG-----  
 -----GAGAGAGAAAAAAGAGCA---GTGGGA---ATAGGAGCT-----  
 GTGTTCTTTGGGTTCTTGGGGGCA---GCAGGAAGCACTATG---GGCGCGGCGTCA---  
 ATAACGCTGACGGTACAG---GCCAGACAA---CTGCTG---TCTGGTATAGTGCAACAGCAAAGC---  
 AATTTG---CTGAGA---GCTATAGAGGCGCAACAGCATATGTTGCAACTCACGGTCTGGGGCATT  
 >GQ999986..2  
 TTCTATTGCAATACATCAAACTTTTTAATAATACATACTATAATGGTACAGGAAATGCTAACAGT-----  
 -----  
 -----  
 ACGCATGAAAACATCACACTCCCATGCAGAATAAAACAAATTATAAGGATGTGGCAGAAGGTAGGACAAGCAA  
 TGTACGCCCCCTCCCATTCAGGAAACATAACATGTACATCAAAT---  
 ATCACAGGACTACTACTGGTACGTGATGGAGGAGAGGCAAATGGCACA-----  
 -----  
 -----  
 AACACATAGAGACATTGAGACCTGGAGGAGGAGATATGAGGGACAATTGGAGAAGTGAATTATATAAAATATA  
 AAGTGGTAGAAATTCAGCCATTG---GGAATAGCACCCACCAAGGCAAAAAGGAGAGTGGTG-----  
 -----GAGAGAGAAAAAAGAGCA---GTGGGA---ATAGGAGCT-----  
 ---ATGTTCTTTGGGTTCTTGGGAGCA---GCAGGAAGCACTATG---GGCGCGGCGTCA---

ATGGCGCTGACGGTACAG---TCCAGACAA---CTGTTG---TCTGGTATAGTGCAACAGCAAAGC---  
 AATTTG---CTGAGG---GCTATAGAGGCGCAACAGCATATGTTGCAACTCACGGTCTGGGGCATT  
 >GQ999987..2  
 TTCTACTGCAATACAACAGGACTGTTTAATCATAGTGGGGTAAACACCAAAGAAGTGCCTTAATAATAACTG  
 AG-----  
 -----  
 TCAACACAAACCATCACACTCCCATGCAAAATAAAACAAATTATAAACATGTGGCAGGAGGTAGGACGGGCAA  
 TGTATGCCCCCTCCCATTCAGGAAACATAACATGTAACTCAAGT---  
 ATCACAGGACTACTATTAACACGTGATGGAGGTAATAATAAAAATAAAACAGAA-----  
 -----  
 ----  
 AATGACACAAAGATAGAGATATTCAGACCTGGAGGAGGAAATATGAAGGACAATTGGAGAAGTGAATTATATA  
 AATATAAAGTGGTAGAAATTC AACCTG---GGAGTAGCACCCACGGAGGCAAAAAGGAGAGTGGTG-----  
 -----GAGAGAGAAAAAGAGCA---GTAGGA---  
 ATAGGAGCT-----GTACTCTTTGGGTTCTTGGGAGCA---GCAGGAAGCACTATG---  
 GGCGCGGCGTCA---ATAACGCTGACGGTACAG---GCCAGACAA---CTATTG---  
 TCTGGTATAGTGCAACAGCAAAGC---AATTTG---CTGAGA---  
 GCTATAGAGGCGCAACAGCATATGTTGCAACTCACAGTCTGGGGCATT  
 >GQ999977..2  
 TTCTATTGCAATACATCAGGACTGTTTAATGGTACATACAATGGTACGGGAAATAAT-----  
 -----  
 -----  
 TCAACAGAAACCATCACACTTCAATGCAGAATAAAACAAATTATAAATATGTGGCAGGAGGTAGGACGAGCAA  
 TGTATGCCCCCTCCCATTCAGGAAACATAACATGTAACTCAAAG---  
 ATCACAGGACTACTACTAGTACGTGATGGAGGCACATATGGAGAT-----  
 -----  
 -----  
 AACAAAACAGAGACATTTCAGACCTGGAGGAGGAAATATGAAGAACAATTGGAGAAGTGAATTATATAACTATA  
 AAGTGGTAGAAATTAAACCATTAA---GGAATAGCACCCACTGAGGCAAAAAGGAGAGTGGTG-----  
 -----GAGAGAGAAAAAGAGCA---GTAGGA---ATAGGAGCT-----  
 ---GTGTTCTTGGGTTCTTGGGAGTA---GCAGGAAGCACTATG---GGCGCAGCGTCA---  
 ATAACGCTGACGGCACAG---GCCAGACAA---CTATTG---TCTGGTATAGTGCAACAGCAAAGC---  
 AATTTG---CTGAGA---GCTATAGAGGCGCAACAGCATATGTTGCAACTCACGGTCTGGGGCATT  
 >JN687821..1  
 TTCTATTGCAATACATCACACCTGTTTAGTAATAATGGTACA-----  
 -----  
 -----  
 AATTCTATCATCACACTCCCATGCAGGATAAAACAAATAATAACATGTGGCAGGGGGTGGGACGAGCAATGT  
 ATGCCCCCTCTATTCAAGGAGACATAACATGTAAATCAAAC---  
 ATAACAGGAATACTATTGACACGTGATGGAGGAAGAAATGGCAAC-----  
 -----  
 -----  
 ACAACAGAGATATTTCAGACCTGGAGGAGGAGATATGAGGGACAATTGGAGAAGTGAATTATATAAATATAAAG  
 TGGTAGAAATTAAGCCATTG---GGAATAGCACCCACTGAAGCTAAAGGAGAGTGGTG-----  
 -----GAGAGAGAAAAAGAGAGCA---GTGGGA---ATAGGAGCT-----  
 GTGTTCTTGGGTTCTTGAGGAGCA---GCAGGAAGCACTATG---GGCGCGGCGTCG---  
 ATAACGCTGACGGTACAG---GCCAGACAA---CTGTTG---TCTGGTATAGTGCAACAGCAAAGC---  
 AATTTG---CTGAGA---GCCATAGAAGCGCAACAGCATATGTTGCAACTCACAGTCTGGGGCATT  
 >KC863367..1  
 TTCTATTGCAATACATCAGGCCTGTTTAATGGTACACTTAATGATACATACACGGCTAATAGTACAAGT----  
 -----  
 -----  
 GATAACTCAACCATCACACTCCAATGCAGAATAAAACAAATTATAAACATGTGGCAAGGGGTAGGACAAGCAA  
 TGTATGCCCCCTCCCATTCAGGGAACATAACATGTAAATCAAAT---  
 ATCACAGGGCTACTATTGACCCGTGATGGAGGAACAAATACTAGT-----  
 -----  
 -----  
 GAGGAGGAGACATTTCAGACCTGGAGGAGGAGATATGAGGGACAATTGGAGAAGTGAATTATACAAATATAAAG  
 TGGTAGAGATTAAGCCATTG---GGAATAGCACCCACTCAGGCAAAAAGGAGAGTGGTG-----  
 -----GAGAGAGAAAAAGAGAGCA---GTGGGA---ATAGGAGCT-----

GTGTTCCCTTGGGTTCTTGGGAGCA---GCCGGAAGCACTATG---GGCGCGGCGTCA---  
 ATAACGCTGACGGTACAG---GCCAGACAA---TTATTG---GCTGGTATAGTGCAACAGCAAAGC---  
 AATTTG---CTGAGG---GCTATAGAGGCGCAACAGCATATGTTGCAACTCACAGTCTGGGGCATT  
 >KC894137..1  
 TTCTATTGCAATACATCAAACCTGTTTAATGATACACATACAGCAAACATCACA-----  
 -----  
 -----  
 GCAAACATCACACTCACACTCCCATGCAGAATAAAACAAATTATAAACATGTGGCAGGAGGTAGGAAAAGCAA  
 TGTATGCCCCCTCCCATTCAGGAAACATAACATGTACATCAAAT---  
 ATCACAGGATTGCTATTGGTACGTGATGGAGGTACAAATAGAACT-----  
 -----  
 -----  
 AATGAAACATTTCAGACCTGGAGGAGGAGATATGAGGGACAATTGGAGAAGTGAATTATATAAATATAAAGTGG  
 TAGAAATTCAGCCATTG---GGAATAGCACCCACTAAGGCAAAAAGGAGAGTGGTG-----  
 -----GAGAGAGAAAAAAGAGCA---GTGGGA---ATTGGAGCT-----  
 GTGCTCCTTGGATTCTTGGGAGCA---GCAGGAAGCACTATG---GGCGCGGCGTCA---  
 ATAACGCTGACGGTACAG---GCCAGACAA---TTGTTG---TCTGGTATAGTGCAACAGCAAAGC---  
 AATTTG---CTGAAG---GCTATAGAGGCGCAACAGCATCTGTTGCAACTCACAGTCTGGGGCATT  
 >FJ443911..1  
 TTCTATTGCAATACAACAACACTGTTTAACAGTACATACAATACCAATGAT-----  
 -----  
 -----  
 ACAAGGGTAAACATCACACTTCCATGCAGAATAAAACAGATTATCAACATGTGGCAAAGGGTAGGACGAGCAA  
 TGTATGCTCCTCCCATTCAGGAAACATAACATGTATATCAAAC---  
 ATCACAGGACTACTGTTAGTACGTGATGGAGGCAATAGCAGTGAC-----  
 -----  
 -----  
 ACAACAGAAACATTTCAGACCTGGAGGAGGAAATATGAAGGACAATTGGAGAAGTGAAGTATATAAATATAAAG  
 TGGTAGAAATTCAGCCATTA---GGAGTAGCACCCACTAAGCAAAAAGGAGAGTGGTG-----  
 -----GAGAGAGAAAAAAGAGCA---GTGGGA---ATAGGAGCT-----  
 GTGTTCCCTTGGGTTCTTGGCAACA---GCAGGAGGCACTATG---GGCGCGGCGTCA---  
 ATAACGCTGACGGTACAG---ACCAGACAA---TTGTTG---TCTGGTATAGTGCAACAGCAAAGC---  
 AATTTG---CTGAAG---GCTATAGACGCGCAACAGCATCTGTTGCAACTCACAGTCTGGGGCATT  
 >KT183265..1  
 TTCTATTGTAATACATCAGGACTGTTTAATGGTACATACAATAATATATACAATACAGACAATGATACAACA-  
 -----  
 -----  
 GACAATGGAACCATCACACTCCCATGCAAAATAAAACAAATTATAAACATGTGGCAGGAGGTAGGAAGAGCAA  
 TATACGCCCCCTCCCATTCAGGAAATCTAACATGTATGTCAAAC---  
 ATCACAGGACTTCTCTTGGTACGGGATGGAGGTAATCAAAATAAT-----  
 -----  
 -----  
 AGCACAGAGGTATTTCAGACCTGGAGGAGGAGATATGAGGGACAATTGGAGAAGTGAATTATATAAATATAAAG  
 TGGTAGAAATTGAGCCATTG---GGAATAGCACCCACTAAGGCAAAAAGGAGAGTGGTG-----  
 -----GAGAGAGAAAAAAGAGCA---GTGGGA---ATAGGAGCT-----  
 GTACTCCTTGGGTTCTTGGGAGCA---GCAGGAAGCACTATG---GGCGCGGCGTCA---  
 ATAACGCTGACGGTACAG---GCCAGGCAA---CTGTTG---TCTGGTATAGTGCAACAGCAAAT---  
 AATTTG---CTGAGA---GCTATAGAGGCGCAACAGCATATGTTGCAGCTCACGGTCTGGGGCATT  
 >KC894114..1  
 TTCTATTGTGATACATCAAGACTATTTAATGGTACATACAATGGTACAGATAGTAATCCAAACAATGGTACAG  
 ATAGT-----GATTCA-----  
 -----  
 AACTCAAATTCAAACATCACACTTCCATGCAGAATAAAACAGATTATAAACATGTGGCAGGAGGTAGGAAGAG  
 CAATGTATGCTCCTCCCATTCAGGAAAGCATAACATGTAAATCAAAC---  
 ATCACAGGATTATTATTGACGCGTGATGGAGGCAAAGAGGAAAATAGC-----  
 -----  
 -----  
 ACAACTAACAGAATAGAGATATTTCAGACCTGGAGGAGGAAATATGAAGGACAATTGGAGAAGTGAATTATATA  
 AATATAAAGTAGTAGAAATCAAACCATTG---GGAATAGCACCCACTGGAGCAAAAAGGAGAGTGGTG-----  
 -----GAGAGAGAAAAAAGAGCA---GTGGGA---

ATAGGAGCT-----GTGTTCCCTTGGGTTCCCTGGGAGCG---GCAGGAAGCACTATG---  
 GGCGCGGCGTCA---ATAACGCTGACGGTACAG---GCCAGACAA---TTGTTG---  
 TCTGGTATAGTGCAACAGCAAAGC---AATTTG---CTGAG---  
 GCTATAGAGGCACAACATCATCTGTTGCAACTCACAGTCTGGGGCATT  
 >KC894120..1  
 TTCTATTGCAATACATCAAACCTGTTTAATAATATTAGTACAGGCAAT-----  
 -----  
 -----  
 TCTGGTAACATCACACTCCCATGCCAAATAAAACAAATTGTAAGAATGTGGCAGGGAGTGGGACAAGCAATGT  
 ATGCCCCCTCCCATTCAGGAAGCATAACATGTAGATCAAAT---  
 ATCACAGGACTATTATTGACACGTGATGGAGGCAAAACAAATTACACA-----  
 -----  
 -----  
 GACCTAGAGATATTCAGACCAGGAGGAGGTGATATGAGGGACAATTGGAGAAGTGAATTATATAAATATAAAAG  
 TAGTAGAAATTAAGCCATTA---GGAATAGCACCAACTGGGGCAAAAAGGAGAGTGGTG-----  
 -----GAGAGAGAAAAAAGAGCA---GTGGGA---ATAGGAGCT-----  
 GTA CTCCTTGGGTTCTTGGGAGCA---GCAGGAAGCACTATG---GGCGCGGCGTCA---  
 ATAACGCTGACGGTACAG---GCCAGACAA---TTGTTG---TCTGGTATAGTGCAACAGCAAAGC---  
 AATTTG---CTGAGA---GCCATAGAGGCGCAACAGCATATGTTGCAACTCACAGTCTGGGGCATT  
 >KC156115..1  
 TTCTATTGCAATACATCAAACTGTTTAATGGTACCATAGTTGATGGTACTACCCTGGTTAATAGTACCATAT  
 TTAAT-----  
 -----GATACC-----  
 ATGTCTAATGGAACCATCACACTCCCATGTAGAATAAAACAAATTATAAATATGTGGCAGGAGGTAGGACGAG  
 CAATCTATGCCCCCTCCCATTCAGGAACATCACATGTATCTCTAAT---  
 ATCACAGGACTACTATTGACACGTGATGGTGGAGGTGCCGGGGATGGG-----  
 -----  
 ----  
 TCAAAATGACACAGAAGAAATATTCAGACCTGGAGGAGGAGATATGAGGGACAATTGGAGAAGTGAATTATATA  
 AATATAAAGTGGTAGAAATTAAGCCGTTG---GGAATAGCACCCACTAAGGCAAAAAGGAGAGTGGTG-----  
 -----GAGAGAGAAAAAAGAGCA---GTGGGA---  
 ATGGGAGCT-----GTGTTCCCTTGGGTTCTTGGGAGCA---GCAGGAAGCACTATG---  
 GGCGCAGCGGCA---GTAACGCTGACGGTACAG---GCCAGACAA---TTGTTG---  
 TCTGGAATAGTGCAACAGCAAAGC---AATTTG---CTGAGA---  
 GCTATAGAGGCGCAACAGCATATGTTGAACTCACGGTCTGGGGCATT  
 >KC894124..1  
 TTTTACTGTAATACAACAAAACCTGTTTAATACAACAGAATTTAATGAAAATGAT-----  
 -----  
 -----  
 TCAAAATGATACCATCACACTCCCATGTAGAATAAAACAAATTTATAAACATGTGGCAGGGAGTAGGAAGAGCAA  
 TGTATGCCCCCTCCCATTCAGGAACATAACCTGTAACTCAAGT---  
 ATCACAGGAATATTATTGATACATGAAGAAAGGGGTGATAATCAGACAAGG-----  
 -----  
 -----  
 ATATTCAAACCTATAGGAGGAGATATGAAGAATAAATTGGAGAAGTGAAGTATAACAAATATAAAGTGGTAGAAA  
 TTAAGCCATTG---GGAATAGCACCCACTGATGCAAAAAGGAGAGTGGTG-----  
 -----GAGAGAGAAAAAAGAGCA---GTGGGA---ATAGGAGCT-----  
 TTGTTCCCTTGGGTTCTTGGGAGCA---GCAGGAAGCACTATG---GGCGCGGCGTCA---  
 GTGACGCTGACGGTACAG---GCCAGACAG---TTGTTG---TCTGGTATAGTGCAACAGCAAAGC---  
 AATTTG---CTGAGG---GCTATAGAGGCGCAACAGCATATGTTGCAACTCACAGTCTGGGGCATT  
 >HM204615..1  
 TTCTATTGCAATACATCAGGCCTGTTTAATGGTACATACAATAGTACAAACAATAGTACAGGA-----  
 -----  
 -----  
 GACAATAAGACCATCACACTCCCATGCAGAATAAAACAAATTATAAACATGTGGCAGGGGGTAGGACGAGCAA  
 TGTATGCCCCCTCCCATTCAGGAACATAACATGTAAATCAAAT---  
 ATCACAGGATTACTATTGACACGTGATGGAGGAAATACTCATAAT-----  
 -----  
 -----  
 AATACAGAGATATTCAGACCTGGAGGAGGCAATATGAAAAGACAATTGGAGAAATGAATTGTATAAATATAAAAG

TGGTAGAAATTAAGCCATTA---GGAATAGCACCCACTAGTGCAAAAAGGAGAGTGGTG-----  
-----GCAAGAGAAAAAAGAGCA---GTGGGA---ATAGGAGCT-----  
GTGTTTCCTTGGGTTCTTGGGAGCA---GCAGGAAGCACTATG---GGCGCGGCGTCA---  
ATAACGCTGACGGTACAG---GCCAGACAA---TTATTA---ACTGGTATAGTGCAACAGCAAAGT---  
AATTTG---CTGAGG---GCTATAGAGGCGCAACAGCATATGTTGCAACTCACGGTCTGGGGCATT  
>FJ443547..1  
TTCTATTGCAATACAACAGAACTGTTCAATAATACTAATAAA-----  
-----  
-----  
ACTGGCATACTCCCATGCAAAAATAAACAAATTATAAACATGTGGCAGGGGGTAGGACGAGCAATGTATGCCC  
CTCCCATTTGAAGGAAACATAACATGTAGGTCAATT---  
ATCACAGGACTACTATTGGTACGTGATGGAGGAGAAGATAATAGC-----  
-----  
-----  
ACAGAGGAGGTATTCAGACCTGGAGGAGGAAATATAAAGGACAATTGGAGAAGTGAATTATATCAATATAAAG  
TGGTAGCAATTAAGCCGTTG---GGAATAGCACCCACGCCGGCAAAAAGGAGAGTGGTGGAC---AGG-----  
-----GAAGTGGTGAAGAGAGGAAAAAGAGCA---GTGGGA---ATAGGAGCT-----  
GTGTTTCCTTGGGTTCTTGGGAGCA---GCAGGAAGCACTATG---GGCGCGGCGTCA---  
ATAACGCTGACGGTACAG---GCCAGACAA---CTGTTG---TCTGGTATAGTGCAACAGCAAAGC---  
AATTTG---CTGAGA---GCTATAGAGGCGCAACAGCATATGTTGCAACTCACGGTCTGGGGCATT  
>FJ443838..1  
TTCTATTGCAATACATCAAACTGTTTAAATGGTATATACAATAATACATACCATAAT-----  
-----  
-----  
ACATCTAGTAATATCATACTCAAAATGCAGAATAAAACAAATTATAAACATGTGGCAAAAGGTAGGACGAGCAA  
TGTATGCCCCCTCCCATTCAGGAAACATAACATGTACATCAAAAT---  
ATCACAGGACTACTATTGACACGTGATGGAGATAATAGGACTGAG-----  
-----  
-----  
TCAGAGACATTCAGACCTGGAGGAGGAGACATGAGGGACAATTGGAGAAGTGAATTATATAAATACAAGGTGG  
TAGAAATTC AACCATTA---GGAGTAGCACCCACTGAGGCAAGAAGGAGAGTGGTG-----  
-----GGGAAAGAAAAAGAGCAGTAGTAGGA---ATAGGAGCT-----  
GTGCTCCTTGGGTTCTTGAAGTGCA---GCAGGAAGCACTATG---GGCGCAGCGTCA---  
ATAACGCTGACGGTACAG---GCCAGACAA---TTGTTG---TCTGGTATAGTGCAACAGCAAAGC---  
AATTTG---CTGAGA---GCTATAGAGGCGCAACAGCATATGTTGCAACTCACGGTCTGGGGCATT  
>FJ443865..1  
TTCTATTGCAATACATCAAACCTGTTTAAATGATAGTACAAAA-----  
-----  
-----  
AGTAATTCAAGCATCACACTCCCATGCAGAATAAAACAAATTATAAACATGTGGCAGAAGGTAGGACGAGCAA  
TGTATGCCCCCTCCCATTCAGGAAACATAACATGTAGATCAGAG---  
ATCACAGGACTACTATTGGTACATGATGGAGGAACAAATAGCAGT-----  
-----  
-----  
AATGAGACATTCAGGCCTGGAGGAGGAGATATGAGGGATAATTGGAGAAGTGAATTATATAAATATAAAGTGG  
TAGAAATTAAGCCATTA---GGAGTAGCACCCACTCAGGCAAAAAGGAGAGTGGTG-----  
-----GAGAGAGAAAAAGAGCA---GTGGGA---ATAGGAGCT-----  
GTGTTTCCTTGGGTTCTTGGGAGCA---GCAGGAAGCACTATG---GGCGCGGCGTCA---  
ATAACGCTGACGGTACAG---GCCAGACAA---TTGTTG---TCTGGTATAGTGACAGCAAAGC---  
AATTTG---CTGAGG---GCTATAGAGGCGCAACAGCATATGTTGCAACTCACGGTCTGGGGCATT  
>KT183218..1  
TTCTATTGCAATACAACAAAGCTATTCACAAACACAACC-----  
-----  
-----  
ACAAAATACAACCATCCTAATCCCATGCAGAATAAAACAAATTTGTAAACATGTGGCAGGAGGTAGGGCGAGCAA  
TGTATGCCCCCTCCCATTCAGGAAACATAACATGTAACTCAAGT---  
ATCACAGGACTACTATTGGTACGTGATGGAGGAATTTCAAATGACACAAAT-----  
-----  
-----  
AACACAACCTGAAACATTCAGGCCTGGAGGAGGAAACATGAAGGACAATTGGAGAAGTGAATTATATAGCTATA

AAGTGGTAGAACTTAAGCCACTA---GGAGTAGCACCCACTGGAGCGAAAAGGAGAGTGGTGGAG-----  
-----ATGGAAAGATCAAAAAGAGCA---GTGGGA---ATAGGAGCT-----  
---GCACTCCTTGGGTTCTTGGGAGCA---GCAGGAAGCACTATG---GGCGCGGCGTCA---  
ATGGCGCTGACGGTACAG---GCCAGACAA---CTGCTG---TCTGGTATAGTGCAACAGCAAAGC---  
AATTTG---CTGAGA---GCCATAGAGGCGCAACAGCATATGTTGCAACTCACGGTCTGGGGCATT  
>HM623548..1  
TTCTATTGCAATACAACAAAACCTGTTTAAGGAAGGTGAGTCAAATGCAACAGAT-----  
-----  
-----  
TTAAATGCAACAATCATACTCCCATGCAGGATAAAAACAAATTATAAACATGTGGCAGGGGGTAGGACAAGCAA  
TGTATGCCCCCTCCCATTGCAGGAAACATAACATGTATCTCAAAT---  
ATCACAGGACTACTATTGACACGTGATGGAGGAAGAGACTCCAATAAC-----  
-----  
-----  
ACAAATGACACAGAGACATTCAGACCTGGAGGAGGAAATATGAAGGACAATTGGAGAAGTGAATTATATAAAT  
ATAAAGTGGTAGAAATTCAGCCATTG---GGAGTAGCTCCCCTGGATCAAAAAGGAGAGTGGTG-----  
-----GAGAGAGAAAAAAGAGCA---GTGGGA---CTGGGAGCT---  
-----GTACTCCTTGGGTTCTTGGGAGCA---GCAGGAAGCACTATG---GGCGCGGCGTCA---  
ATAGCGCTGACGGTACAG---GCCAGACAA---CTGTTG---TCTGGTATAGTGCAACAGCAAAAC---  
AATTTG---CTGAGA---GCTATAGAGGCGCAACAGCATATGTTGCAACTCACAGTCTGGGGCATT  
>HM623555..3  
TTCTATTGCAATACAACAAACCTGTTTTATTATAATGGAAGTGAGAAG-----  
-----  
-----  
AATGACACAACCATCACCATCCAATGCAAAATAAAAACAAATTATAAACATGTGGCAAGAGGTAGGACGAGCAA  
TGTATGCCCCCTCCCATTGCAGGAAACATAACATGTAGATCAAAT---  
ATCACAGGATTACTATTGACACGTGATGGAGGAAACACGAATAGT-----  
-----  
-----  
ACAGAGGAGATATTCAGACCTGGAGGAGGAAATATGAAGGACAATTGGAGAAGTGAATTATATAAATATAAGG  
TGGTAGAAATTCAGCCATTG---GGAATAGCACCCAATAAGGCAAAAAGGAGAGTGGTG-----  
-----GAGAGAGAAAAAAGAGCA---GTAGCA---ATAGGAGCT-----  
GTGCTCCTTGGGTTCTTGGGAGTA---GCCGGAAGCACTATG---GGCGCGGCGGCA---  
CTAACGCTGACGGTACAG---GCCAGACAA---CTGTTG---TCTGGTATAGTGCAACAGCAAAGC---  
AATTTG---CTGAGA---GCTATAGAGGCGCAACAGCATATGTTGCAACTCACAGTCTGGGGCATT  
>HM623562..1  
TTCTATTGCAATACAACAAAACCTGTTTAATGCAAGTGAGACGGCTAGAAATATTAGTAAC-----  
-----  
-----  
CCAAATGAAAATATCACACTCCCATGCAGGATAAAAACAAATTATAAACATGTGGCAGGAGGTAGGACGAGCAA  
TGTATGCCCCCTCCCATTGCAGGAAACATAACATGTAACCTCAAAT---  
ATCACAGGACTACTACTGACAAGGGATGGAGGAAACTATAGTATCACA-----  
-----  
-----  
AATAACACAGAGACATTCAGACCTGGAGGAGGAAATATGAAGGACAATTGGAGAAGTGAATTATATAAATATA  
AAGTAGTAGAAGTTAAGCCATTG---GGAGTAGCACCCACTAAAGCAAAAAGGAGAGTGGTG-----  
-----GAGAGAGAAAAAAGAGCA---ATAGGA---ATGGGAGCT-----  
---GTACTCCTTGGGTTCTTGGGAGCG---GCAGGAAGCACTATG---GGCGCAGCGTCA---  
ATAACGCTGACGGTACAG---GCCAGACAA---TTGTTG---TCTGGTATAGTGCAACAGCAAAGC---  
AATTTG---CTGAGA---GCCATAGAGGCGCAACAGCGCATGTTGCAACTCACGGTCTGGGGCATT  
>HM623568..1  
TTCTACTGCAATACATCAAACCTGTTTAATTCAACAAGACTAAAACCTGTTTAATTCAAGTGATCCA-----  
-----  
-----  
GGCGACAAAACCATCACACTCCAATGCAGAATAAAAACAAATTATAAACATGTGGCAGCAGGTAGGACGAGCCA  
TGTATGCCCCCTCCCATTGAAGGAAAAATATCATGTAACCTCAAGT---  
ATCACAGGATTACTATTGACACGTGATGGAGGACATAGAAACACAACA-----  
-----  
-----  
AACAAACACAGAGGTATTCAGACCTGGAGGAGGAGATATGAGGGACAATTGGAGAAGTGAATTATATAAATATA

AAGTGGTAGAAATTCAACCATTG---GGAGTAGCTCCCACCAAGGCAAAAAGGAGAGTGGTG-----  
 -----GAGAGAGAAAAAAGAGCA---TTGGGA---TTCGGAGCT-----  
 ---GTGCTCATTGGGTTCTTGGGAGCA---GCAGGAAGCACTATG---GGCGCGGCGTCA---  
 ATAACGCTGACGGTACAG---GCCAGACAA---CTGCTG---TCTGGTATAGTGCAACAGCAAAGC---  
 AATTTG---CTGAGA---GCTATAGAGGCGCAACAGCATATGTTGCAACTCACAGTCTGGGGCATT  
 >HM623571..2  
 TTCTATTGCAACACATCAAGACTGTTTAATGGTACATTTAATGAGACAAAGTTTAATAATACTTCAAACAACA  
 CC-----  
 -----  
 ACTCCTCAAAACATCACTCTCCAATGCAGAATAAAACAAATCATAAACACGTGGCAGGGGGTAGGACAAGCAA  
 TATATGCCCCCTCCCATTCAGGAAACATAACATGTAATTCAGT---  
 ATCACAGGAATACTATTAAACACGTGATGGAGGCCAAGACACAAATGGCACAGAT-----  
 -----  
 -  
 GAGACCAAAAACGACACAGAGACATTCAGACCTATAGGAGGAGATATGAGGGACAATTGGAGAAGTGAATTAT  
 ATAAGTATAAAGTGGTAGAAATTCAGCCATTA---GGAATAGCACCCACTAAGGCAAGAAGGAGAGTGGTG--  
 -----GAAAGAGTAAGAAGAGCA---GCA-----  
 CTGGGAGCT-----GTGTTCTTGGGTTCTTGGGAGCG---GCAGGAAGCACTATG---  
 GGCGCAGCGTCA---ATAACGCTGACGGTACAG---GCCAGACAA---TTATTG---  
 TCTGGTATAGTGCAACAGCAGAGT---AATCTG---CTGAGA---  
 GCTATAGAGGCGCAACAGCATATGTTGCAACTCACGGTCTGGGGCATT  
 >JN687726..1  
 TTCTATTGCAATACATCAAATCTGTTTAATACTACAGGACCTACA-----  
 -----  
 -----  
 ACAAATGCAACTATCACACTCCCATGCAGAATAAAACAGATTATAAACATGTGGCAGGGGGTAGGACAAGCAA  
 TGTATGCCCTCTCCCATTCAGGAAATATAACATGTAACCTCAAAT---  
 ATCACAGGATTACTATTGACACGTGATGGAGGTCATAATGGTACA-----  
 -----  
 -----  
 TATGGTAATGAGACATTCAGACCTGGAGGAGGAGATATGAGGGACAATTGGAGAAGTGAATTATATAAATATA  
 AGGTGGTGGAAATTAAACCATTA---GGAATAGCACCCACTGAGGCAAAAAGAAGAGTGGTG-----  
 -----CAGAGAGAGAAAAAGAGCA---GTGGGA---CTAGGAGCT-----  
 ---GTGTTCTTGGGTTCTTGGGAGCA---GCAGGAAGCACTATG---GGCGCGGCGTCA---  
 GTGGCGCTGACGGTACAG---GCCAGACAA---CTGTTG---TCTGGTATAGTGCAACAGCAAAGC---  
 AATTTG---CTGAAA---GCTATAGAGGCGCAACAACATATGTTGCAACTCACGGTCTGGGGCATT  
 >KC154023..1  
 TTCTATTGCAATACAACAGGACTGTTTAATGCAACAAACCTCAATGCAACAAAT-----  
 -----  
 -----  
 CCCAATGAAAACATCACACTCCCATGCAGAATAAAGCAATTTGTAAACATGTGGCAGGGGGTAGGACGAGCAA  
 TGTATGCCCCCTCCTGTTGAAGGAATAATAACATGTAACCTCAAGT---  
 ATCACAGGACTACTGTTGACACGTGATGGGGGAAACACAGACAAT-----  
 -----  
 -----  
 AACACAACAGAGACATTCAGACCTGGAGGAGGAAATATGAAGGACAATTGGAGAAGTGAATTATATAAATATA  
 AAGTAGTAGAAATTCAACCATTG---GGAATAGCACCCACAAACGCAAAAAGGAGAGTGGTG-----  
 -----GAGAGAGAAAAAAGAGCA---GTGGGA---ATAGGAGCT-----  
 ---GTATTCCTTGGGTTCTTGGGAGCA---GCAGGAAGCACTATG---GGCGCGGCGTCA---  
 ATAACGCTGACGGTACAG---GCCAGACTA---CTGTTG---TCTGGTATAGTGCAACAGCAAAGC---  
 AATTTG---CTGAGA---GCTATAGAGGCGCAACAACATATGTTGCAACTCACGGTCTGGGGCATT  
 >HM204619..1  
 TTCTATTGCAATACAACAATGTTTAATAGTACATATAATGTTACAGATCCGTTTAATAGTACAGAACTG-  
 -----  
 -----  
 GGTAATGATACCATCACACTCCCATGCAGAATAAAGCAAATTATAAACATGTGGCAGAGGGTAGGACGAGCAA  
 TGTATGCTCCTCCCATTCAGGAAACATAACATGTAGATCAAAT---  
 ATCACAGGATTGCTATTGGTGCGTGATGGAGGAAATAATAATCAG-----  
 -----  
 -----

ACAGGGAGAGAGATATTGACACCTGCAGGAGGGAATATGAAAGATAATTGGAGAAGTGAATTACATAAATATA  
 AAGTGGTAGAAATTAAGCCATTG---GGAATAGCACCCACTAAGGCCAAAAGGAGAGTGGTG-----  
 -----GAGAGAGAAAAAGAGCA---GTGGGA---CTGGGAGCT-----  
 ---GTGTTCTTTGGGTTCTTAGGCGCA---GCAGGAAGCACTATG---GGCGCGGCGTCA---  
 ATAGCGCTGACGGCACAG---GCCAGACAA---GTGTTG---TCTGGTATAGTGCAACAGCAAAGC---  
 AATTTG---CTGAGG---GCTATAGAGGCGCAACAACATATGTTGCAACTCACGGTCTGGGGCATT  
 >JX140666..1  
 TTTTATTGCAATACAACAAATCTGTCTAATACAAGTCTGTTTAATGACAGTAGT-----  
 -----  
 -----  
 TCAAAACAAAACCATCACGCTCCCATGTAGGATAAAAACAAATTATAAACATGTGGCAGGGGGTAGGACGAGCAA  
 TGTATGCCCCCTCCCATTGCAGGGAACATAACATGCAACTCAAGC---  
 ATCACAGGACTATTATTAACACGTGATGGAGGAAACATGAGTGGCACTGATGAAGGAAAAACAACACGACTA  
 AC-----  
 GGGAAATAACACGACTAACGGGATTGAAATATTTAGACCTGGAGGAGGAAATATGAAGGACAATTGGAGAAGTG  
 AATTATATAAATATAAAGTGGTAGAAATTCAGCCATTG---  
 GGAGTAGCACCCACGAAGGCCAAAAGGAGAGTGGTG-----  
 --GAGAGAGAAAAAGAGCA---GTGGGA---ATAGGAGCT-----  
 GTACTCCTTGGGTTCTTGGGAACA---GCAGGAAGCACTATG---GGCGCGGCGTCA---  
 ATAACGCTGACGGTACAG---GCCAGACAA---CTGTTG---TCTGGTATAGTGCAACAGCAAAGC---  
 AATTTG---CTGAGA---GCTATAGAGGCGCAACAGCATATGTTGCAACTCACAGTCTGGGGCATT  
 >JN681255..1  
 TTCTATTGCAATACATCACAACTGTTTACTGGAAATGGTACAGCTAATAGTACAGGC-----  
 -----  
 -----  
 AATACAACCATCACCACTCCCATGCAGAATAAAAACAAATTATAAACATGTGGCAGGGGGTAGGACGAGCAA  
 TGTATGCCCCCTCCCATTGAAGGAAACATAACATGTAAATCAAAC---  
 ATCACAGGACTACTATTGACACGTGATGGAGGCAACGACAACAATCAA-----  
 -----  
 -----  
 AGTAGAACAGAGACATTTAGACCTGGAGGAGGAAATATGAAGGACAATTGGAGAAGTGAATTATATAAATATA  
 AAGTGGTAGAAATTAAGCCATTA---GGAATAGCACCCACTGAAGCAAAAAGGAGAGTGGTG-----  
 -----GAGAGAGAAAAAGAGCA---GTGGGA---CTAGGAGCT-----  
 ---GTAATCTTTGGGTTCTTGGGAGCA---GCAGGAAGCACTATG---GGCGCGGCGTCA---  
 ATAACGCTGACGGTACAG---GCCAGACAA---TTGTTG---TCTGGTATAGTGCAACAGCAAAGC---  
 AATTTG---CTGAAA---GCTATAGAGGCGCAGCAGCATATGTTGCAACTCACAGTCTGGGGCATT  
 >HQ595752..1  
 TTCTATTGTAATACATCACAGCTGTTTAATAGGACTGATACAGACATGCAGCAAGACAACACA-----  
 -----  
 -----  
 GGAAATGATACAATCACACTCCAATGCAGAATAAAAACAAATTATAAACATGTGGCAGGAGGTAGGACGAGCAA  
 TGTATGCCTCTCCCATTGCAGGAGACATAACATGCAAATCAAAT---  
 ATCACAGGATTAATATTGACACGTGATGGAGGTAATAGCAGCACAGGGAATGAT-----  
 -----  
 -----  
 AGTAATAGCCGCACAGAGATATTGACACCTGCAGGAGGAGATATGAGGGACAATTGGAGAAGTGAATTATATA  
 AATATAAAGTGGTGGAGATTAAGCCATTA---GGAGTAGCACCCACTCATTCAAAAAGGAGAGTGGTG-----  
 -----GAAAGAGAAAAAGAGGA-----  
 ATAGGAGCT-----GTGCTCCTTGGGTTCTTGGGAGCA---GCAGGAAGCACTATG---  
 GGCGCAGCGTCA---ATAGCGCTGACGGTACAG---GCCAGACAA---CTGTTG---  
 TCTGGTATAGTGCAACAGCAAAGC---AATTTG---CTGAGA---  
 GCTATAGAGGCGCAACAGCATATGTTGCAACTCACGGTCTGGGGCATT  
 >HQ615957..1  
 TTCTATTGCAATACATCAGCACTGTTTAATGGCAATGGCACATCTGTTAATGAT-----  
 -----  
 -----  
 ACAACTTCAACCATCACACTTCCATGCAGAATAAAAACAAATTATAAACATGTGGCAGGAGGTAGGACGAGCAA  
 TGTATGCCCCCTCCCATTGCAGGAAACATAGCATGTGAATCAAAT---  
 ATCACAGGACTACTATTAGAACGTGATGGAGGTGGAGGCAATGAC-----  
 -----

-----  
ACAGAAGAGATATTCAGACCTGGAGGAGGAAATATGAGGGACAATTGGAGAAGTGAACGTGTATAAATATAAAG  
TGGTAGAAATTCAACCATTA---GGAGTAGCACCCACTAAGACAAAAGGAGAGTGGTG-----  
-----GAGAGAGAGAAAAGAGCA---GTGGGA---ATAGGAGCT-----  
GTGTTTCCTTGGGTTCTTGGGAGCA---GCAGGAAGCACTATG---GGCGCAGCATCA---  
ATAACGCTGACGGTACAC---GCCAGACAA---TTATTG---TCTGGTATAGTGCAACAGCAAAGC---  
AATTTG---CTGAGG---GCTATAGAGGCGCAACAGCATCTGTTGCAACTCACGGTCTGGGGCATT  
>HQ595760..2  
TTCTATTGTAATACAACAAGACTGTTTAATAATACAGAAAGTAACTCAACCATCACCGGGAAT-----  
-----  
-----  
CATTCAGACACTATCACACTCCCATGTAGAAATAAAACAATTTATAAACATGTGGCAGGAGGTAGGACGAGCAA  
TGTATGCCCCCTCCCATTGCAGGAACCATAACATGTATCTCAAAT---  
ATCACAGGACTACTATTGGTACGGGATGGAGGCATACCAAATGAG-----  
-----  
-----  
AACACAGAAATATTCAGACCTCAAGGAGGAAATATGAAGGACAATTGGAGAAGTGAATTATATAAATATAAAG  
TGGTAGAAATTAAGCCATTA---GGAATAGCACCCACTACGGCAAAGAGAAGAGTGGTG-----  
-----CAGAGAGAAAAAAGAGCA---GTGGGA---ATAGGAGCT-----  
GTGCTCCTTGGGTTCTTGGGAGCA---GCAGGAAGCACTATG---GGCGCGGCGTCA---  
ATAACGCTGACGGTACAG---GCCAGACAT---CTGTTG---TCTGGTATAGTGCAACAGCAAAGC---  
AATTTG---CTGAGA---GCTATAGAGGCGCAACAGCATATGTTGCAACTCACAGTTTGGGGCATT  
>KT183289..2  
TTCTATTGTAATACAACAAAATTGTTTAATAGTACATACAATAGTACATACTATAAGAATAATAACTAATA  
GTACAGAA-----  
-----  
GAAAACTCTACCATCACGCTCACATGCAGAATAAAGCAATTTATAAACATGTGGCAGGAGGTAGGACGGGCAA  
TGTATGCCCCCTCCCATTGAAGGAAACATAACATGTAGATCAAAC---  
ATCACAGGACTACTACTGACGCGTGATGGAGGAAATTC AACAGAT-----  
-----  
-----  
ACTCAAACGGAGACATT CAGGCCTGAGGGAGGAAATATGAAGAACAATTGGAGAAGTGAATTATATAAATACA  
AAGTGGTAGAAATTAAACCATTA---GGAATAGCACCCACTAGAGCAAAAAGGAGAGTGGTG-----  
-----CAGAGGGAAAAAAGAGCA---GTGGGA---ATAGGAGCT-----  
---GTGTTTCCTTGGGTTCTTGGGAGCA---GCAGGAAGCACTATG---GGCGCAGCATCA---  
ATAACGCTGACGGTACAA---GCCAGACAA---CTATTG---TCGGGTATAGTGCAACAGCAAAGC---  
AATTTG---CTGAGA---GCTATAGAGGCGCAACAGCATATGTTGCAACTCACGGTCTGGGGCATT  
>GU080183..1  
TTCTATTGCGATACATCAGCACTGTTTAATAGTACATACAATTCTGCATACAATAAGGAGACTAATAGTACAT  
ACAATAAT-----  
-----GGGACA-----  
GTAAGTAATTCAACTATCACACTTCCATGCAGAATAAAGCAAATTATAAACATGTGGCAAGAGGTAGGACGAG  
CAATGTATGCCCCCCCCATTGCAGGAAATATAACATGTAAATCAAAT---  
ATCACAGGATTACTATTAGTACGTGATGGAGGAGGCACAAATACA-----  
-----  
-----  
ACAAATGAGACATT CAGACCTCAAGGAGGAAATATGAAGGACAATTGGAGAAGTGAACATATATAAATATAAAG  
TGGTAGAAATTGAGCCATTG---GGAATAGCACCCGATAAGGCAAGAAGGAGAGTGGTG-----  
-----AAGAGAGAAAAAAGAGCA---GTGGGA---ATAGGAGCT-----  
TTGTTTCCTTGGGTTCTTGGGAGCA---GCAGGAAGCACTATG---GGCGCAGCATCA---  
TTAATGCTGACGGTACAG---GCCAGACAA---CTGTTG---TCTGGTATAGTGCAACAGCAAAGC---  
AATTTG---CTGAGA---GCTATAGAGGCGCAACAGCATATGTTGCAACTCACGGTCTGGGGCATT  
>GU080187..1  
TTCTACTGCAATACATCAAGCCTATTCAATATTACATACCATAACAATGGAACAAACACTAGTACATACACAG  
AC-----  
-----  
AGCAACAGCATAATTACAATTCCATGCAGAATAAAACAATTTATAAACATGTGGCAGGGGGTAGGACGAGCAA  
TGTATGCCTCCCCCATTGCAGGAAACATAACATGTAAATCAAAT---  
ATCACAGGAATACTATTAAACACGTGATGGAGGCTATCTAGAGAACAATACA-----  
-----

-----  
AATAATGACAAAGAAATATTCAGACCTGGAGGAGGAAATATGAAAGACAATTGGAGAAGTGAAGTATATAAAAT  
ATAAAGTGGTAGAAATTAGACCATTA---GGAATAGCACCCACTAAAGCAAAAAGGCTAGTGGTG-----  
-----AAGAGAGAAAAAAGAGCA---GTAACA---CTAGGAGCT---  
-----CTGTTTCCTTGGGTTCTTGGGAACA---GCTGGAAGCGCTATG---GGCGCGGCGTCA---  
CTGACGCTGACGGTACAG---GCCAGACAA---TTGTTG---TCTGGTATAGTGCAACAGCAAAAT---  
AATTTG---CTGAGG---GCTATAGAGGCGCAACAGCATATGTTGCAACTCACAGTCTGGGGCATT  
>HM623598..1  
TTCTATTGCAATACCACAAAATTGTTTAATAAGACTATTGCA-----  
-----  
-----  
AACGGAACCATCACACTCCCATGCAGAATAAAACAAATTATAAACATGTGGCAGGAGGTAGGACGAGCAATGT  
ATGCCCCCTCCCATTCAGGAAACATAACATGTGAATCAAAT---  
ATCACAGGACTATTATTGCTACGTGATGGAGGAAGGATTAATGACACT-----  
-----  
-----  
AATAACACAGAAGAGATATTCAGACCTGGAGGAGGAAATATGAAGGACAATTGGAGAAGTGAATTATATAAAAT  
ATAAAGTGGTAGAAGTTCAGCCATTG---GGAATAGCTCCTACTGAATCAAAAAGGAGAGTGGTG-----  
-----GAGAGAGAAAAAAGAGCA---GTGGGA---ATGGGAGCT---  
-----GTACTCCTTGGGTTCTTGGGAGCT---GCAGGAAGCACTATG---GGCGCGGCGTCA---  
ATAACGCTGACGGCACAG---GCCAGACAA---CTGTTG---TCTGGTATAGTGCAACAGCAAAGC---  
AATTTG---CTGAGA---GCTATAGAGGCGCAACAGCATATGTTGCAACTCACGGTCTGGGGCATT  
>HM623604..1  
TTCTATTGCAATACATCAGGACTGTTTAATAATAGCAAAAAGT-----  
-----  
-----  
GATTCAAACATAACCACACTCCCATGCAAAATAAAACAAATTATAAACATGTGGCAGAAGGTAGGACGAGCAA  
TGTATGCCCCCTCCCATTCAGGAAACATAACATGTAACCTCAAAT---  
ATCACAGGACTACTATTGGTACGCGATGGGGGATACAATGTAGACAATCAG-----  
-----  
-----  
ACAGACAATAAGACAGAGATTTTTAGACCTGGAGGAGGAAATATGAAGGATAATTGGAGAAGTGAATTATATA  
AATATAAAGTGGTTGAAATTAAGCCATTA---GGAATAGCACCCACTAAGGCAAAAAGGAGAGTGGTG-----  
-----GAGAGAGAAAAAAGAGCA---GTGGGA---  
CTAGGAGCT-----GTGTTTCCTTGGGTTCTTGGGAGCA---GCAGGAAGCACTATG---  
GGCGCGGCATCA---ATAACGCTGACGGTACAG---GCCAGACAA---CTGTTG---  
TCTGGTATAGTGCAACAGCAAAGC---AATTTG---CTGAGA---  
GCTATAGAGGCGCAACAGCATATGTTGCAACTCACGGTCTGGGGCATT  
>HM623587..1  
TTCTATTGCAATACAACAAACCTGTTCAATTTTAATGAAACACAACCTTAATGAAATACAACCTTAATAATGCAA  
CAGAA-----  
-----AAC---  
AACACAAGCACCAATATCACACTCACATGCAGAATAAAACAATTTGTAAACATGTGGCAAAGGGTAGGACGAG  
CAATGTATGCCCCCTCCCATTCAGGAAATATAACATGTCAATCAAAC---  
ATCACAGGACTGCTATTGACACATGATGAAGAAGAAATGAATAACGCAACT-----  
-----  
-----  
GGGGCAAATAAAACAGAGGTATTTCAGACCTATAGGAGGCAATATGAAGGACAATTGGAGAAGTGAATTATACA  
AATATAAAGTAGTAGAAATTAAACCATTG---GGAGTAGCACCCACAGAGGCAAAACGGAGAGTGGTG-----  
-----GAGAGAGAAAAAAGAGCA---GCA-----  
ATAGGAGCT-----ATGTTTCCTTGGGTTCTTGGGAGCG---GCAGGAAGCACTATG---  
GGCGCGGTGTCA---TTGACGCTGACGGTACAG---GCCAGACAA---CTGCTG---  
TCTGGTATAGTGCAACAGCAAAGC---AATTTG---CTGAGA---  
GCTATAGAGGCGCAACAACATCTGTTGCAACTCACGGTCTGGGGCATT  
>KF114887..1  
TTCTACTGCAATACAACATACCTGTTTAATAACAGTGCA-----  
-----  
-----  
TCAGAGGGAACATACAATCCCATGCAGAATAAAACAGATTATAAATATGTGGCAGGAGGTAGGACGAGCAA  
TGTATGCCCCGCCCCGTTGCAGGAAACATAACATGTAAATCAAAT---

ATCACAGGATTACTATTAGTACGTGATGGTGGAATGAGGACAACAGCACAGAT-----  
-----  
-----  
GGGAATAAGACAGAGATATTCAGACCTCAAGGAGGAAATATGAAGGACAATTGGAGAAGTGAATTATATAAAT  
ATAAAGTGGTAGAAGTTAAGCCATTA--GGAATAGCACCCACTACAGCAAAAAGGAGAGTGGTG-----  
-----GAAAGAGAAAAAAGAGCA--GTCGGA--ATAGGAGCT---  
-----GTGTTTCCTTGGGTTCTTGGGAGCA--GCAGGAAGCACTATG--GGCGCAGCGTCA---  
GTGGCGCTGACGGTACAA--GCCAGACAA--TTGTTG--TCTGGTATAGTGACAGCAGCAAAAT--  
AATTTG--CTGAGA--GCTATAGAGGCGCAACAGCATATGTTGCAACTCACAGTCTGGGGCATT  
>KF725917..1  
TTCTATTGCAACACATCACAATTGTTTAATAGTACAGTCAATGGTACAATATCTAATAATACAGGCAAT----  
-----  
-----  
AGTACAGACATCATCACACTCCCATGCAGGATAAAAACAAATTATAAACATGTGGCAGGGGGTAGGACGAGCAA  
TGTATGCCCCCTCCCATTCAGGAAACATAACATGTAAGTCAAAC---  
ATCACAGGATTACTATTGACACGTGATGGAGGATATAACACAAGTGGG-----  
-----  
-----  
GATAACGAGACATTTCAGACCTGCAGGAGGAGATATGAGAGACAATTGGAGAAGTGAATTGTATAAATATAAAG  
TAGTAGAAATTCAGCCATTA--GGAATAGCACCCACAGGAGCAAGAAGGAGAGTGGTG-----  
-----GAGAGGCAAAAAAGAGCA--GTAGGA--ATAGGAGCT-----  
GTGTTTCCTTGGGTTCTTGGGAGTA--GCCGGAAGCACTATG--GGCGCGGCGTCA---  
ATGGCGCTGACGGTACAG--GCCAGACAA--TTGTTG--TCTGGTATAGTGCAACAGCAAGGC---  
AATTTG--CTGAGA--GCTATAGAGGCGCAACAACACATGTTGCAACTCACAGTCTGGGGCATT  
>JN681257..1  
TTCTATTGTAATACATCAAACTGTTTAATGAGACAGAAACGAAGTCA-----  
-----  
-----  
AACATCTCAAACATCACACTTCCATGCAGAATAAAAACAAATTATAAACATGTGGCAGGGGGTAGGACGAGCAA  
TGTATGCCCCCTCCTATTGCAGGAAGCATAACATGTAACCTCAAAT---  
ATCACAGGACTACTATTGACACGTGATGGAGGAGGAGGAAATGAAACT-----  
-----  
-----  
AATCACACAGAAACATTTCAGACCTACAGGAGGAAATATGAAGGACAATTGGAGAAGTGAATTATATAAATATA  
AAGTGGTAGAAATTAAGCCATTG--GGAATAGCACCCACTAGAGCAAAAAGGAGAGTGGTG-----  
-----GAGAAAGAAAAAAGAGCA--GTGGGA--ATAGGAGCT-----  
--GTGTTTCCTTGGGTTCTTGGGGGCA--GCAGGAAGCACTATG--GGCGCGGCGTCA---  
ATAACGCTGACGGTACAG--GCCAGACAA--CTGTTG--TCTGGTATAGTGCAACAGCAAAAT--  
AATTTG--CTGAGG--GCTATAGAGGCGCAACAGCATATGTTGCAACTCACGGTCTGGGGCATT  
>JN681259..1  
TTCTATTGCAATACAACAAAACCTGTTTAATGAAAGTGAAGTAAAG-----  
-----  
-----  
TCAAACGAAACAATCACACTCCCATGCAGAATAAAAACAAATTATAAACATGTGGCAGGAGGTAGGACGAGCAA  
TGTATAACCCTCCCATTCAGGAAACATAACATGTAACCTCAAGT---  
ATCACAGGACTATTATTGACATGGGATGGAGGAAATAACACAAAT-----  
-----  
-----  
AAAAATCAAACATTTCAGACCTGGAGGAGGAGATATGAGGGACAATTGGAGAAGTGAATTATATAAATATAAAG  
TGGTAGAAATTAAGCCATTG--GGAGTAGCACCCACTGAGGCAAAAAGGAGAGTGGTG-----  
-----GAGAGAGAAAAAAGAGCA--GTGGGA--ATAGGAGCT-----  
GTGCTCTTTGGGTTCTTGGGAGCA--GCAGGAAGCACTATG--GGCGCGGCGTCA---  
ATAACGCTGACGGTACAT--GCCAGACAA--CTGTTG--AATGGTATAGTGCAACAGCAAAAC---  
AATTTG--CTGAGA--GCTATAGAGGCGCAACAGCATATGTTGCAACTCACGGTCTGGGGCATT  
>KC154028..2  
TTCTATTGTAACACAACAGAACTGTTTTATAATGATTTTAATAATACAGGA-----  
-----  
-----  
AAGAAATGTAAACATCACACTCCAGTGCAAAATAAAAACAAATTATAAACATGTGGCAGCAGGTAGGACGAGCAA  
TGTATGCCCCCTCCCATTCAGGAAACATAACATGTACATCAAAT---

ATTACAGGACTACTATTGACATGGGATGGAAACATAACAAATGAAGATAATACA-----TCT-----  
-----  
-----  
AGTACAAATCATACATTGACACCTGCAGGAGGAGATATGAGGGACAATTGGAGAAGTGAACATATATAAATATA  
AAGTGGTAGAAGTTAAGCCATTG---GGAGTAGCACCCACTAAGGCACAAAGGAGAGTGGTG-----  
-----GAGAGGAAAAAAGAGCA---TTGGGA---ATAGGGGCT-----  
---ATGTTCTTGGGATCTTGGGAACA---GCAGGAAGCACTATG---GGCGCGCGTCA---  
ATAACGCTGACGGTACAG---GCCAGACAA---TTATTG---TCTGGTATAGTGCAACAGCAAAGC---  
AATTTG---CTGAGA---GCTATAGAGGCGCAACAGCATCTGTTGCAACTCACGGTCTGGGGCATT  
>KF725924..1  
TTCTATTGCGATACATCAAATCTGTTCAATGAAAGTAAAAGTTGGTATTCAAACAACAGTACA-----  
-----  
-----  
GACGACATAAACATCACACTCCCTGTAGGATAAAAACAAATTGTAAACATGTGGCAGAGAGTAGGACAAGCAA  
TATATGCCCCCTCCCATTCAGGAAGCATAACATGTAAATCAAAT---ATCACAGGACTACTATTGGCA-----  
---CGCATAACAGATAACACA-----  
-----  
AATGGGACAGAGAAATTTAAACCTGAAGGAGGAAATATGAAGAATAATTGGAGAAGTGAATTATATAAATATA  
AAGTGGTAGAAATTC AACCATTA---GGAATAGCCCCACTGCATCAAAAAGGAGAGTGGTA-----  
-----GAGAGAGAAAAAAGAGCA---GTGGGA---ATAGGAGCT-----  
---GTGCTCCTTGGGTTCTTGGGAGCA---GCAGGAAGCACTATG---GGCGCGCGTCA---  
ATAACGCTGACGGTACAG---GCCAGACAA---CTGTTG---TCTGGTATAGTGCAACAGCAAAGC---  
AATTTG---CTGAGA---GCTATAGAGGCGCAACAGCATATGTTGCAGCTCACAGTCTGGGGCATT  
>KF725926..4  
TTCTATTGCTATACATCACAACCTGTTTAATAGTACATACAAGACATACAATCATAGTTGGACAACA-----  
-----  
-----  
GGTAATGCAACCATCACACTTCCATGCAGAATAAAAACAAATTATAAACATGTGGCAGGGAGTAGGACAAGCAA  
TGTATGCCCCCTCCCATTCAGGAAATATAACATGTAAATCAAAT---  
ATCACAGGAATACTATTAGTACGTGATGGAGACAAAATGATACA-----  
-----  
-----  
GAGACATTCAGACCTCAAGGAGGAAATATGAAAGACAATTGGAGAAGTGAATTATATAAATATAAAGTGGTAG  
AAATTAAGCCATTA---GGAATTGCACCTACTGGAGCAAAAAGGAGAGTGGTG-----  
-----GAGAGAGAAAAAAGAGCA---GTGGGA---ATAGGAGCT-----  
GTACTCCTTGGGTTCTTGGGAGCA---GCAGGAAGCACTATG---GGCGCAGCGTCA---  
ATAACGCTGACGGTACAG---GCCAGACAA---TTATTG---TCTGGTATAGTGCAACAGCAGGAC---  
AATCTG---CTGAGG---GCTATAGAGGCGCAACAGCATATGTTGCAACTCACGGTCTGGGGCATT  
>KF725934..2  
TTCTATTGCAATACATCAACCTTGTTTAATAGTACATATGGGTTTAATGGTACATACAATGGGACAACA-----  
-----  
-----  
AACAAATGATACATACACTCCAATGCAGAATAAAAACAAATTATAAACATGTGGCAAAAGGTAGGACAAGCAA  
TGTATGCCCCCTCCTATTCAAGGAGTAATACAATGTAAATCAAAT---  
ATCACAGGACTACTATTGACACGGGATGGAGGTGAAGGAAATAATACAAAT-----  
-----  
-----  
AATGGTACAGAGACATTGACACCTGGAGGAGGAGATATGAGGGATAACTGGAGAAGTGAATTATATAAATACA  
AGGTGGTAGAAGTTGAGCCATTA---GGAGTAGCACCCACTGCTGCAAGAAGGAGAGTGGTG-----  
-----CAGAGAGAAAAAAGAGCA---GTAACA---CTAGGAGCT-----  
---ATGATCCTTGGATTCTTGGGAACA---GCAGGAAGCACTATG---GGCGCGCGTCA---  
ATGGCGCTGACGGTACAG---GCCAAACAA---TTGTTG---TCTGGTATAGTGCAACAGCAAAGC---  
AATTTG---CTGAAG---GCTATAGAGGCGCAACAGCATATGTTGCAACTCACAGTCTGGGGCATA  
>KF725961..1  
TTCTATTGTAATACAACAAAGCTGTTTAATAGTACATACTTTCCTAATGGTACATACATGCCTAATGTTACAG  
AA-----  
-----  
GATAATGGCACAATCATACTCCCATGCAGGATAAAGCAAATTATAAACATGTGGCAGGCGGTAGGACAAGCAA  
TATATGCTCCTCCCATCGCAGGGAACATAACATGTATCTCAAAT---  
ATCACAGGATTACTATTGGAGCGTGATGGAGGAAATGAAAGTAACACAGAG-----

-----  
-----  
GAGATATTCAGACCTCAAGGAGGAAACATGAGGGACAATTGGAGAAGTGAATTATACAAATATAAAGTGGTAG  
AAGTTAAACCATTA---GGAATAGCACCTACTAAGGCAAAAAGGAGAGTGGTG-----  
-----GAGAGAGAAAAAAGAGCA---GTGGGA---CTAGGAGCT-----  
GTGTTCCCTTGGGTTCTTGGGAGCA---GCAGGAAGCACTATG---GGCGCGGCGTCA---  
ATAACGCTGACGGTACAG---GCCAGACAA---TTGCTG---TCTGGTATAGTGCAACAGCAAAAC---  
AATTTG---CTGAGA---GCCATAGAGGCGCAACAGCATATGTTGCAACTCACGGTCTGGGGCATT  
>KF725984..2  
TTCTATTGCAATACAACAAAACCTGTTTAATAGGATATATTATCCTAATGGTACATACAATGGTACA-----  
-----  
-----  
GAAAAATGATACCATCATACTCCCATGTAGAATAAAACAAATTATAAACATGTGGCAAGGGGTAGGACGAGCAA  
TGTATGCCCCCTCCCATTGCAGGAGAAATAACATGTAACCTCAAGT---  
ATCACAGGACTACTATTGACACGTGATGGAGGACGTGATGGAGGCAACAATAGC-----  
-----  
-----  
GCAGAGACAGAGACATTCAGACCTAGCGGAGGAAATATGAGGGACAACCTGGAGAAGTGAGTTATATAAATATA  
AAGTGGTAGAAATTCAGCCATTA---GGAGTAGCACCCACTAAGGCAAAAAGAAGAGTGGTG-----  
-----GAGAGAGAAAAAAGAGCA---GTGGGG---CTAGGAGCT-----  
---GTATTCCTTGGGTTCTTGGGAGCA---GCAGGAAGCACTATG---GGCGCGGCGTCA---  
ACAGCGCTGACGGTACAG---GCCAGACAA---CTGTTG---TCTGGTATAGTGCAACAGCAGAGC---  
AATCTG---CTGAGA---GCCATAGAGGCGCAACAGCATATGTTGCAACTCACGGTCTGGGGCATT  
>KF725994..1  
TTCTATTGCAATACATCAAAAACCTGTTTAATAGTAATTTTACAGAGAATTTTACAGAGACTTCTAATAGT----  
-----  
-----  
ACAGAGGGTGACATCACACTCCAATGCAGAATAAAACAAATTATTAACATGTGGCAGGGGGTAGGACGAGCAA  
TGTATGCCCCCTCCCATTGCAGGAACCATAACATGTAACCTCAAGC---  
ATCACAGGAATACTATTGACACATGATGGT--AACCATTGAGAAGAA-----  
-----  
-----  
GAGGTGGTGGTATTTCAGACCTGGAGGAGGAGATATGAGGGACAACCTGGAGAAGTGAATTATATAAATATAAAG  
TGGTAGAAGTTAAACCACTA---GGAATAGCACCCACTCAGGCAAAAAGAAGAGTGGTG-----  
-----GAGAGAGAAAAAAGAGCA---GTGGGA---CTAGGAGCT-----  
GTGTTCCCTTGGGTTCTTGGGAGCG---GCAGGAAGCACTATG---GGCGCAGCGTCA---  
ATAACGCTGACGGTACAG---GCCAGACAA---CTGCTG---TCTGGTATAGTGCAACAGCAAAGC---  
AATTTG---CTGAAG---GCTATAGAGGCGCAACAGCATATGTTGCAACTCACGGTCTGGGGCATT  
>KF725998..1  
TTCTATTGTAATACATCAAACCTGTTTAATGATACAGGGAGTAATTCA-----  
-----  
-----  
ACTAATTCAACCATCATACTCCCATGCAGAATAAGACAAATTATAAACATGTGGCAGGGGGTAGGACGAGCAA  
TGTATGCCCCCTCCCATTAAGGAAACATAACATGCAACTCAAGC---  
ATCACAGGAATACTATTGACACGTGATGGAGGAAAGGACAACAGTACA-----  
-----  
-----  
AATGAAACAGAGACATTCAGACCTATAGGAGGAAATATGAGGGACAACCTGGAGAAGTGAATTATATAAATATA  
AAGTGGTAGAAATCAAGCCATTG---GGAATAGCACCCACTCAGGCAAAAAGAAGAGTGGTG-----  
-----GAGAGAGAAAAAAGAGCA---GCGGGA---GTAGGAGCT-----  
---GTGCTCTTTGGGTTCTTGGGAGCA---GCCGGAAGCACTATG---GGCGCAGCGTCA---  
ATGGCGCTGACGGTACAG---GCCAGACAA---CTGTTG---TCTGGTATAGTGCAACAGCAAAGC---  
AATTTG---CTGAAG---GCTATAGAGGCGCAACAACATATGTTGCAACTCACGGTCTGGGGCATT  
>MH933706..2  
TTCTATTGCAACACATCAAGCTTGTTTAATGGAACATACAGTAATTACACTGATATAAACAGTTCTAGTATT-  
-----  
-----  
ATCACACTCCCATGCAGGATAAAACAAATTATAAACATGTGGCAGGCGGTAGGACGAGCAATATATGCCCCTC  
CCATCGAAGGGAACATAACATGTAAATCAAT---  
ATCACAGGACTACTATTGACACGTGATGGAGGAAAAGACAATAAT-----

-----  
-----  
AACACAGAGGTATTTCAGACCTGGAGGAGGAGAGATGAGGGACAACCTGGAGAAATGAATTATATAAATATAAAG  
TGGTAGAAATTAAGCCATTA---GGAATAGCACCCACTCATGCAAAAAGGAGAGTGGTG-----  
-----GAGAGAGAAAAAAGAGCA--GTGGGA---ATAGGAGCT-----  
TTGTTCTTGGGTTCTTGGGAGCA--GCAGGAAGCACTATG--GGCGCGGCGTCA---  
ATAACGCTGACGGTACAG---GCCAGACAA---CTGTTG---TCTGGTATAGTGCAACAGCAAAGC---  
AACTTG---CTGAGG---GCTATAGAGGCGCAACAGCATATGTTGCAACTCACAGTCTGGGGCATT  
>MK643550..1  
TTCTATTGCAATACATCACAACCTGTTTAATGGTACATATACAGGCAATAACACAGAGAACAAT-----  
-----  
-----

TCAAGCGAAACAATCACACTCCCATGCAGGATAAAAACAAATTATAAACATGTGGCAGGAGGTAGGACGAGCAA  
TGTATGCTCCTCCCATTGAAGGAAAAATAACATGTAACCTCAAGC---  
ATCACAGGACTACTATTGACAAGTGACAAAGGGGGTATAGGAAAT-----  
-----  
-----

AATCAGACAGAGACATTTCAGACCTGGGGGAGGCAATATGAAAGACAATTGGAGCAATGAATTATATAAATATA  
AAGTAGTGAAATTAGACCATTA---GGAGTAGCACCAACTGCTGCAAAGAGGAGAGTGGTG-----  
-----GAGAGAGAAAAAAGAGCA--GTAGGA---ATAGGAGCT-----  
---GTACTCTTTGGGTTCTTGGGAGCC--GCAGGAAGCACTATG--GGCGCGGCGTCG---  
ATAACGCTGACGGTACAA---GCCAGACAA---CTGTTG---TCTGGTATAGTGCAACAGCAAAGC---  
AATTTG---CTGAGA---GCTATAGAGGCGCAACAGCATATGTTGCAACTCACAGTTTGGGGCATT  
>MN611462..3  
TTCTATTGTGATACAACACAACCTGTTTAATCAAACACTGTTTAATGGAAGTGATTCAAACAAAACAAACATT-----  
-----  
-----

GTCTCCCCTACATTGTCTCCCATGCAGAATAAAACAGATTATAAACATGTGGCAGAAGGTAGGACGAGCAA  
TATATAATCCTCCCATTGCAGGAAACCTAACATGTAACCTCAAGT---  
ATCACAGGGCTACTATTGACACGTGATGGAGGAGAGAACATGACA-----  
-----  
-----

CAGGGAGCGGAAACATTTCAGACCTACAGGAGGAAATATGAAGGACAATTGGAGAAGTGAATTATATAAATATA  
AAGTGGTAGAAATTCAGCCATTG---GGAGTAGCACCCACTGAGGCAAAAAGGAGAGTGATG-----  
-----CAGAGAGAAAGAAGAGCAGTAGTGGA---ATGGGAGCT-----  
---GTGCTCCTTGGGTTCTTGGGAGCA--GCAGGAAGCACTATG--GGCGCGGCGTCA---  
ATAACGCTGACGGTACAG---GCCAGACAA---CTGTTG---TCTGGTATAGTGCAACAGCAAAGC---  
AATTTG---CTGAGA---GCTATAGAGGCGCAACAGCATCTGTTGCAACTCACGGTCTGGGGCATT  
>MN097669..1  
TTCTATTGTAATACAACACAGTTGTTTAATGATAGCATCTCAAACGCCACTAACCTCAACATCTCAAACGCC-----  
-----  
-----

ACTAACATCACACTCACACTCCCATGCAGAATCAAACAAATTATAAACATGTGGCAGGAGGTAGGACGAGCAA  
TGTATGCCCCCTCCCATCGAAGGAAACATAACATGTGTATCAAAT---  
ATCACAGGACTACTACTGCTACGTGATGGCGGAAACACCAATAACACC-----  
-----  
-----

ACTCAGCCAGAGATATTTCAGACCTGGAGGAGGAAATATGAAGGATAATTGGAGAAGTGAATTATATAAATATA  
AAGTGGTAGAAATTAAGCCATTA---GGAATAGCTCCACGAGGCAAAAAGGAGAGTGGTG-----  
-----GAAAGAGAAAAAAGAGCA--GTA-----CTAGGAGCT-----  
---TTGCTCCTTGGGTTCTTGGGAGCA--GCAGGAAGCACTATG--GGCGCGGCGTCA---  
ATAGCGCTGACGGTACAG---GCCAGAAAT---CTGTTG---TCTGGTATAGTGCAAGCAGCAAAGC---  
AATTTG---CTGAGA---GCTATAGAGGCGCAACAGCATATGTTGCAGCTCACGGTCTGGGGCATT  
>MN097680..1  
TTCTATTGCAATACATCAAACCTGTTTAATAGTACATACAACGGTACAGACATGGCTAATGGTACAGGAAAT-----  
-----  
-----

ACTTCAGAGTACATCACACTCCAATGCAGAATAAAAACAAATTATAAACATGTGGCAGGAGGTGGGGCGAGCAA  
TGTATGCCCCCTCCCATTGCAGGAAACATAACCTGTGAATCAAAT---  
ATCACAGGACTACTATTGACACGAGATGGAGGAAAAAGAAAATAAT-----  
-----  
-----

-----  
-----  
ACAGAGACATTTCAGACCTGAAGGAGGAGATATGAGGAATAATTGGAGAAGTGAATTATATAAAATATAAAGTAG  
TAGAAATTCAACCATTA---GGAATAGCACCCACTAAGGCAAGAAGGAGAGTGTTG-----  
-----CAGAAAGAGAAAAGAGCA---GTGGGA---ATGGGAGCG-----  
TTGTTTCCTTGGGTTCTTGGGGGCA---GCAGGAAGCACTATG---GGCGCAGCATCA---  
ATAACGCTGACGGTACAG---GCCAGACAA---TTATTG---TCTGGTATAGTGCAACAGCAAAGC---  
AATTTG---CTGAGG---GCTATAGAGGCGCAACAGCATATGTTGCAACTCACGGTCTGGGGCATT  
>AY162225..1  
TTCTATTGCAATACATCTGTACTGTTTAATGGCACATACAGTAATGGCACAAACAGTACA-----  
-----  
-----  
AATACAACAGTCATCACACTCCCATGCAGAATAAAACAAATTATAAACATGTGGCAGGGGGTAGGACGAGCAA  
TGTATGCCCCCTCCCATTGCAGGAAACATAACATGTAGATCAAAC---  
ATCACAGGACTAATATTGACACGTGATGGAGGGCAGGGAGAGAAT-----  
-----  
-----  
GACACAAATGAGATATTTAGACCTGCAGGAGGAGATATGAGGGACAATTGGAGAAGTGAATTATACAAATATA  
AAGTGGTAGAAATTCAGCCATTA---GGAGTAGCACCCACTAAGGCAAAAAGGAGAGTGTTG-----  
-----GAGAGAGAAAAAGAGCA---GCT-----TTGGGAGCT-----  
---GTGTTCCCTTGGGTTCTTGGGAGCA---GCAGGAAGCACTATG---GGCGCGGCATCA---  
ATAATGCTGACGGTACAG---GCCAGACAA---CTGTTG---TCTGGTATAGTGCAACAGCAAAGC---  
AATTTG---CTGAGA---GCTGTAGAGGCGCAACAGCATATGTTGCAACTCACGGTCTGGGGCATT  
>AF391249..1  
TTCTATTGCAATACATCAGAACTGTTTAATAGTACATACATGCCTAATGGTACAGAAAAGTAAT-----  
-----  
-----  
ACAAGCAAAACCATCATACTCCCATGCAGAATAAAACAAATTATAAATATGTGGCAGGGGGTAGGACGAGCAA  
TGTATGCCCCCTCCCATTGCAGGAAACATAACATGTCAATCAAAT---  
ATCACAGGAATACTATTGACCCGTGATGGAGGAGAAGAGTCAAAGTCA-----  
-----  
-----  
AATGGAACAGAGATATTCAGGCCTGCAGGAGGGGATATGAAGGACAATTGGAGAAGTGAATTATATAGATATA  
AAGTGGTAGAAATTAACCATTA---GGAGTAGCACCCACTGAGGCAAAAAGGAGAGTGTTG-----  
-----GAGAGAGAAAAAGAGCA---GTGGGA---ATAGGAGCT-----  
---GTGTTCCCTTGGGTTCTTGGGAGCA---GCAGGAAGCACTATG---GGCGCGGCGTCA---  
ATAACGCTGACGGTACAG---GCCAGACAA---CCGTTT---TCTGGTATAGTGCAACAGCAAAGC---  
AATTTG---CTGAGG---GCTATAGAGGCGCAACAGCATATGTTGCAACTCACAGTCTGGGGCATT  
>AY522721..1  
TTCTATTGCAACACATCAAGGCTGTTTAATGAGACAGTAAAA-----  
-----  
-----  
AATAATGCAACCATCACAATCCCATGCAAAATAAAACAATTTATAAACATGTGGCAAAAGGTAGGACAAGCAA  
TGTATGCCCCCTCCCATTAAGGAAACATAACATGTACATCAAAT---  
ATCACAGGACTACTATTGACACGTGATGGAGGGAATCACAACAATAGC-----  
-----  
-----  
CATAGCACAGAGATATTCAGACCTGGAGGAGGAGACATGAAAGATAACTGGAGAAGTGAATTATATAAAATATA  
AAGTGGTAGAAATTAAGCCATTG---GGCATAGCACCCACTGGGGCAAAAAGGAGAGTGTTG-----  
-----GAGAGAGAAAAAGAGCA---GTGGGA---ATAGGAGCT-----  
---GTGTTCCCTTGGGTTCTTGGGAGCA---GCAGGAAGCACTATG---GGCGCAGCGTCA---  
GTGACGCTGACGGTACAG---GCCAGACAA---TTGTTG---TCTGGTATAGTGCAACAGCAAAAC---  
AATTTG---CTGAGA---GCTATAGAGGCGCAACAACATCTGTTGCAACTCACGGTCTGGGGCATA  
>DQ447267..2  
TTCTACTGCAATACATCAGGACTGTTTAATAGAAGGTATAATGGTACAGAAAATAATACTTATGATGATACA-  
-----  
-----  
GATAATTCAACCATCACAATCCCATGCAGAATAAAACAATTTATAAACATGTGGCAGCAGGTAGGACGGGCAA  
TATATGCCCCCTCCCATTGCAGGAAACATAACATGTAATTCAAGT---  
ATCACAGGATTACTATTGACACGCGATGGAGGAAATCAGACTGAGGAGGAC-----

-----  
-----  
AATATCACAAAGACAGAGATATTCAGACCAGGAGGAGGAGATATGAGGGATAATTGGAGAAGTGAAGTATATA  
AATATAAAGCGGTAGAAATTAAGCCATTA---GGAGTAGCGCCCACTGGAGCAAAAAGGAGAGTGGTG-----  
-----GAGAGAGAAAAAAGAGCA---GTGGGA---  
ATAGGAGCT-----GTACTCCTTGGGTTCTTGGGAGCA---GCAGGAAGCACTATG---  
GGCGCAGCGTCA---ATAGCGCTGACGGCACAG---GCCAGACAA---GTGTTG---  
TCTGGAATAGTGCAACAGCAAAAC---AATTTG---CTGAGA---  
GCTATAGAGGCGCAACAGCATATGTTGCAACTCACAGTCTGGGGCATT  
>JX905394..1  
TTCTACTGCAATACATCAAACTGTTTAATGGTACATATAATGGTACATATAATGGTACA-----  
-----  
-----  
GAAAATAGCACCATTACCCTCCCATGCAAAATAAAACAAATTATAAACATGTGGCAAGGGGTAGGAAGAGCAA  
TGTATGCCCCGCCCATTCAAGGAAATATAACATGTGAATCAAAC---  
ATCACAGGACTACTATTGACACGTGATGGAGGCACAAATAATACT-----  
-----  
-----  
AATAGTACAGAGACATTTCAGACCTGGAGGAGGAAATATGAAGGACAATTGGAGAAGCGAATTATATAAATATA  
AAGTGGTAGAAATTAAGCCATTA---GGACTAGCACCCACTAATGCAAAAAGGAGAGTGGTG-----  
-----GAGAGAGAAAAAAGAGCA---GTGGGA---ATAGGAGCT-----  
---GTGTTCTTGGGTTCTTGGGAGCA---GCAGGAAGCACTATG---GGCGCAGCATCA---  
ATAACGCTGACGGTACAG---GCCAGACAA---TTATTG---TCTGGTATAGTGCAACAGCAAAGC---  
AATTTG---CTGAGA---GCTATAGAGGCGCAACAGCATATGTTGCAACTCACGGTCTGGGGCATT  
>HQ625577..1  
TTCTATTGCAATACATCAGGGCTGTTTAATAGAACATACCTGTCTAATGAAACATACCTGTCTAATGATACAC  
TGACTAATGGT-----  
-----  
ACAAATAGGAATATAACACTCCCATGCAAAATAAAACAAATTATAAACATGTGGCAGGGGGTAGGAAAAGCAA  
TGTATGCCCCCTCCCATTTGAAGGAAACATAACATGTAGATCAAAT---  
ATCACAGGAATACTATTAAACACGTGATGGAGGGAAAAGTGAGGGA-----  
-----  
-----  
ACGAAAAATGGTACAGAGATATTCAGACCTGGAGGAGGAGATATGAAGGACAATTGGAGAAATGAATTATATA  
AATATAAAGTGGTAGAAATTCAGCCATTA---GGAGTAGCACCCACTAAGGCAAAAAGGAGAGTGGTG-----  
-----GAGAGAGAAAAAAGAGCA---GTGGGA---  
CTGGGAGCT-----GTGCTCTTTGGGTTCTTGGGAGCA---GCAGGAAGCACTATG---  
GGCGCAGCGTCA---ATAACGCTGACGGTACAG---GCCAGACAA---TTGCTG---  
TCTGGTATAGTGCAACAGCAAAGC---AATTTG---CTGAGA---  
GCTATAGAGGCGCAACAGCATATGTTGCAACTCACGGTCTGGGGCATT  
>HQ625568..1  
TTCTATTGCAATACAACAAATCTGTTTAATACAACAGACCTGTTGAGTAACAATAGTACGTTAGAAAAC-----  
-----  
-----  
AAAACAAAAACCATCACACTCCCATGCAAAATAAAACAAATTATAAACATGTGGCAGGAAGTAGGACGAGCAA  
TGTATGCCCCGCCCATTGCAGGAAACATAACATGTAGATCAAAT---  
ATCACAGGACTACTATTGACCCGTGATGGAGGGAGCTATAGTGATAGA-----  
-----  
-----  
GGGAATAGTAGTGCAAAATGAAACA-----  
GAAAAAGAAATATTTCAGACCAGGAGGAGGAAATATGAAGGACAATTGGAGAAGTGAATTATATAAATATAAGG  
TGGTAGAAGTTAAGCCATTG---GGAGTAGCACCCACTGAGGC AAAAAGGAGAGTGGTG-----  
-----GAGAGACAAAAAAGAGCA---GTGGGA---CTAGGAGCT-----  
ATGTTCTTGGGATCTTGGGAATA---GCAGGAAGCACTATG---GGCGCGGCGTCA---  
ATCACGCTGACGGTACAG---ACCAGACAA---CTGTTG---TCTGGTATAGTGCAACAGCAAAGC---  
AATTTG---CTGAGA---GCTATAGAGGCGCAACAGCATATGTTGCAACTCACGGTCTGGGGCATT  
>HQ625588..1  
TTCTATTGTAATACATCACAACTGTTTAATGGTGTGTATAACTTCAACCAGCAGTAATTCAACCGAT-----  
-----  
-----  
AGTAAGAAAAACATCACACTCCCATGCAGAATAAAACAAATTATAAACATGTGGCAAGAGGTAGGACGAGCAA

TGTATGCCCCCTCCCATTCAGAGGAAACATAACATGTATCTCAAAC ---  
 ATCACAGGATTACTATTGACACGGGATGGAGGAACAAACAATGAGACT -----  
 -----  
 -----  
 AATGGTACAGAGACATTTCAGGCCTGGAGGAGGAAATATGAAGGACAATTGGAGAAGTGAATTATATAAGTATA  
 AGGTAGTGGAATTCACCATTA --- GGAATAGCACCCACTGATGCAAAAAGGAGAGTGGTG -----  
 -----  
 -----GAGAGACAGAAAAGAGCAGTAATAGGA --- CTAGGAGCT -----  
 ---ATGTTCCCTTGGGATCTTAGGAGTA --- GCAGGAAGCACTATG --- GGCGCAGCATCA ---  
 ATAACGCTGACGGTACAG --- GCCAGACAA --- TTGTTG --- TCTGGTATAGTGCAACAGCAAAGT ---  
 AATTTG --- CTGAAG --- GCTATAGAGGCGCAACAGCATATGTTGCAACTCACAGTCTGGGGCATT  
 >AB254156..1  
 TTCTATTGCGACACATCAAACCTGTTTAAACAGCACATTTAATGTTAACAGCACATTTAATGGTACAGATAATG  
 CA -----  
 -----  
 AATAGCACACAGAACATCACACTCCAATGCAGAATAAAACAAATTATAAACATGTGGCAGGAGGTAGGACGAG  
 CAATGTATGCCCCCTCCCATTCAGGAAACATAACATGTATTTCAAAT ---  
 ATCACAGGAATACTATTAACACGTGATGGA --- AATGATAATTAC -----  
 -----  
 -----  
 ACAGAGACATTTCAGACCTATAGGAGGAAATATGAAGGACAATTGGAGAAGTGAATTATACAAATATAAAGTGG  
 TAGAAATTAAGCCATTA --- GGAGTAGCACCCACCAAGGCAAAAAGGAGAGTGGTG -----  
 -----  
 -----GAGAGACAAAAAGAGCA --- GTGGGA --- CTAGGAGCT -----  
 GTGTTCCCTTGGGTTCTTAGGAGCA --- GCAGGAAGCACTATG --- GGCGCAGCGTCA ---  
 ATAACGCTGACGGTACAG --- GCCAGACAA --- TTGTTG --- TCTGGTATAGTGCAACAGCAAAGC ---  
 AATTTG --- CTGAGA --- GCTATAGAGGCGCAACAGCACATGTTGCAACTCACAGTCTGGGGCATA  
 >KY229510..1  
 TTCTATTGCAAGACATCACGACTATTTAATGGCACATACAGAGGTCCTAATGATACAAAAAGCAAT -----  
 -----  
 -----  
 TTAAGTGAGACTATCACACTCCAATGCAAAATAAAACAGATTATAAACACGTGGCAGGGGGTAGGACGAGCAA  
 TATATGCCCCCTCCCATTCGCGGAAACATAACATGTAAATCAAAT ---  
 ATCACAGGACTACTCTTGGTAAGGGATGGAGGGAATAATACAAAT -----  
 -----  
 -----  
 GAAGAAATATTTAGACCTGGAGGAGGAGATATGAGGGACAATTGGAGAAGTGAATTATATAAATATAAAGTAG  
 TAGAAATTAAGCCATTG --- GGAATAGCACCCACCAAGGCAAAAAGGAGAGTGGTG -----  
 -----  
 -----GAGAGAGAAAAAGAGCA --- GTGGGA --- ATAGGAGCT -----  
 GTACTCCTTGGGTTCTTGGGAACA --- GCAGGAAGCACTATG --- GGCGCAGCGTCA ---  
 ATAACGCTGACGGTACAG --- GCCAGACAA --- GTGTTG --- TCTGGTATAGTGCAACAGCAAAGC ---  
 AATTTG --- CTGAGG --- GCTATAGAGGCGCAGCATCATATGTTGCAACTCACGGTCTGGGGCATT  
 >HM036864..1  
 TTCTATTGTAATACATCAGGCCTGTTTAAATGGTACATTTAATGGAACATACCCTAATAGTACAGACCCTAAT-  
 -----  
 -----  
 -----  
 GGAAATGATACCATCACACTCCCATGCAGAATAAAACAGTTTATAAACATGTGGCAGAAGGTAGGACGAGCAA  
 TGTATGCCCCCTCCCATTAAGGAAACATAACATGTAACTCAAAT ---  
 ATCACAGGATTACTGTTGACGAGTGATTATGGAAGAAATGCAAGT -----  
 -----  
 -----  
 AAAAAACGAGACATTTCAGACCTGGAGGAGGAGATATGAGGGACAATTGGAGAAGTGAATTATATAAATATAAAG  
 TGGTAGAAATTAACCATTTG --- GGAGTAGCACCCACTGGAGCAAAAAGGAGAGTGGTG -----  
 -----  
 -----GAGAGAGAAAAAGAGCA --- GTGGGA --- ATAGGAGCT -----  
 GTTCTCCTTGGGTTCTTGGGAGCA --- GCAGGAAGCACTATG --- GGCGCAGCGTCA ---  
 ATAACGCTGACGGTACAG --- GCCAGACAA --- TTGTTG --- TCTGGTATAGTGCAACAGCAAAGC ---  
 AATTTG --- CTGAGG --- GCTATAGAGGCGCAACAGCATATGTTGCAACTCACGGTCTGGGGCATT  
 >DQ422948..2  
 TTCTATTGCAATACAACAAAACCTGTTTCATGAGGGAAGCAGGAAAAAT -----  
 -----  
 -----  
 GATAATGATACAATCACACTTCCATGCAGAATAAAACAAATTTATAAACATGTGGCAGGAGGTAGGACGAGCAA

TGTATGCACCTCCCATTGCAGGAAACATAACATGTAATTCAAGC ---  
 ATCACAGGAATACTATTGGTACGTGATGGAGGTACCAATAACACA -----  
 -----  
 -----  
 AATGAGACATTCAGACCTGGAGGAGGAGATATGAGGGACAATTGGAGAAGTGAATTATATAAAATATAAAGTGG  
 TAGAAATTCAACCATTG --- GGAATAGCACCCACTAAGGCAAAAAGGAGAGTGGTG -----  
 ----- GAGAGAGAAAAAAGAGCA --- GTGGGA --- CTAGGAGCT -----  
 GTGTTCCCTTGGGTTCTTGGGAGCA --- GCGGGAAGCACTATG --- GGCGCGGCGTCA ---  
 ATAACGCTGACGGCACAG --- GCCAGACAA --- TTGCTG --- TCTGGTATAGTGCAACAGCAAAGC ---  
 AATTTG --- CTGAGA --- GCTATAGAGGCGCAACAGCATATGTTGCAACTCACAGTCTGGGGCATT  
 >EU166653..1  
 TTCTATTGCAATACATCAAGACTGTTTAATAGTACACACTGGGCTAATGGTACTACAGACATGTCTAAT ----  
 -----  
 -----  
 GATACTAAGAATATCACCCCTCCCATGCAAAATAAAACAAATTATAAACATGTGGCAGGGGGTAGGACGAGCAA  
 TATATGCCCCCTCCCATTGAAGGAAGCATAACATGTAATTCAAGT ---  
 ATCACAGGACTACTATTGACACGTGATGGAGGAAACAGTCATAAT -----  
 -----  
 -----  
 ACTACAGAGACATTCAGACCTGGAGGAGGAGATATGAGAGACAATTGGAGAAGTGAATTATATAAAATATAAGG  
 TGGTAGAAATTAAGCCATTA --- GGACTAGCACCCACTGAGGCAAAAAGGAGAGTGGTG -----  
 ----- CAGAGAGAAAAAAGAGCA --- GTGGGG --- ATAGGAGCT -----  
 GCATTCCTTGGGTTCTTGGGATTA --- GCAGGAAGCACTATG --- GGCGCGGCATCA ---  
 ATAACGCTGACGGTACAG --- GCCAGACAA --- TTATTG --- TCTGGTATAGTGCAACAGCAAAGC ---  
 AATTTG --- CTGAGA --- GCTATAGAGGCGCAACAGCATATGTTGCAACTCACAGTCTGGGGCATT  
 >KY229617..1  
 TTCTATTGCGAAACATCAGACCTGTTTAATAGTACATTTAGATTTAATGGTACAGACATACAGACCACATTTA  
 ATGATACA -----  
 -----  
 TTGAATGATACACAGATCATCATCAAATGCAGAATAAAGCAAATTATAAACATGTGGCAAGGGGTAGGGCGAG  
 CAATATATGCCCCCTCCCATTGAAGGAATATAACATGTGAATCAAAT ---  
 ATCACAGGATTAATATTGACACGGGATGGAGGGAATACCACAGAT -----  
 -----  
 -----  
 CCAGAGACATTCAGACCTGCAGGAGGAGATATGAGGGACAATTGGAGAAGTGAATTATATAAAATATAAAGTGG  
 TAGAAATTCAGCCATTA --- GGAGTAGCACCCACAAAGGCAAAAAGGAGAGTGGTGGAG -----  
 ----- AGAAGAGAAAAAAGAGCA --- GTGGGA --- ATAGGAGCT -----  
 GTGTTCCCTTGGGTTCTTGGGAGCA --- GCAGGAAGTACTATG --- GGCGCAGCATCA ---  
 ATAACGCTGACGGTACAG --- GCCAGACAA --- CTGTTG --- TCTGGTATAGTGCAACAGCAGAGC ---  
 AATCTG --- CTGAGG --- GCTATAGAGGCGCAACAGCATATGTTGCAACTCACGGTCTGGGGCATT  
 >HM036739..2  
 TTCTATTGCAATACATCAGGCCTGTTTAATTATACATTTACAGCTAATGATACAAAGATACAGATCACATCTA  
 ATGAC -----  
 -----  
 ACACTTAATGATACACTGACCATCAAATGCAGAATAAAGCAAATTATAAACATGTGGCAGGGGGTAGGACGAG  
 CAATGTATGCCCCCTCCCATTGAAGGAATAATAGCATGTAATTCAACT ---  
 ATCACAGGATTAATATTGACACGGGATGGAGGGAAGAATACCAGTAAC -----  
 -----  
 -----  
 AATGACACAGAGACATTCAGACCTGCAGGAGGAGATATGAGGGACAATTGGAGAAGTGAATTATATAAAATATA  
 AAGTGGTAGAAATTCAGCCATTA --- GGAGTAGCACCCACAAAGGCAAAAAGGAGAGTGGTGGAG -----  
 ----- AGAAGAGAAAAAAGAGCA --- GTGGGA --- ATAGGAGCT -----  
 --- GTGTTCCCTTGGGTTCTTGGGAGCA --- GCAGGAAGCACTATG --- GGCGCAGCATCA ---  
 ATAACGCTGACGGTACAG --- GCCAGACAA --- CTGTTG --- TCTGGTATAGTGCAACAGCAGAGC ---  
 AATCTG --- CTGAGG --- GCTATAGAGGCGCAACAGCATATGTTGCAACTCACGGTCTGGGGCATT  
 >GU329051..1  
 TTCTATTGCGATACATCAGGCCTGTTTGATTCAAGCCTGTTGAATAAGACAGAAAAATAGTACAAAGACAGAA-  
 -----  
 -----  
 AATAATACAAACATCATACTCCAATGCAGAATAAAACAAATTATAAACATGTGGCAAGAGGTAGGAAAAGCAA

TATATGCCCCCTCCCATTTGAAGGAAACATAACATGTATATCAAAC ---  
ATCACAGGAATACTATTGACGAGGGATGGAGGAAACAATAACAAT -----  
-----  
GACACAGAGATATTCAGACCTGGAGGAGGGAATATGAAAGACAATTGGAGAAGTGAATTATATAAATATAAAG  
TAGTAGAAATTCAGCCATTG --- GGAATAGCACCTACCGAGGCAAAGAGAAGAGTGGTG -----  
-----GAGAGAGAAAAAAGAGCA --- GTGGGA --- ATAGGAGCT -----  
GTGTTCTTGGGTTCTTGGGAGCA --- GCAGGAAGCACTATG --- GGCGCAGCGTCA ---  
ATGACGCTGACGGTACAG --- GCCAGACAA --- TTGTTG --- TCTGGTATAGTGCAACAGCAAAGC ---  
AATTTG --- CTGAGA --- GCCATAGAGGCGCAACAGCATATGTTGCAACTCACAGTCTGGGGCATT  
>GU329105..1  
TTCTACTGCAATACATCAGACCTGTTTAAGGGTGAATTTAATGGTACGCGTAATCTAGGAAATGAT -----  
-----  
-----  
ACTTCAGGAAACATCACACTCAACTGCAGAATAAAACAAATTATAAACATGTGGCAGGAGGTAGGGCGAGCAA  
TGTATGCCCCCTCCCATTTGCAGGAAATATAACATGTAACCTCAAGT ---  
ATCACAGGACTACTATTGACACGTGATGGAGGAGAACTAATGAA -----  
-----  
-----  
ACTGAGAGTGAGACATTTAGACCTGGAGGAGGAGATATGAGGGACAATTGGAGAAGTGAATTATATAAATATA  
AAGTGGTAGAAGTTAATCCATTA --- GGAATAGCACCCACTAATGCAAGAAGGAGAGTGGTGACA -----  
-----AAAGAAGAAGTGAGAAAGAAAAGAGCA --- GTGGGA --- CTAGGAGCT -----  
---GTGTTCTTGGGTTCTTGGGAGCA --- GCAGGAAGCACTATG --- GGCGCGGCGTCA ---  
ATAACGCTGACGGTACAG --- GCCAGACAA --- TTAGTG --- TCTGGTATAGTGCAACAGCAAAAC ---  
AATTTG --- CTGAGA --- GCTATAGAGGCGCAACATCATATGTTGCAACTCACAGTCTGGGGCATC  
>GU329116..1  
TTCTATTGCAATACATCAGGCCTGTTTAATAAGACATACAATGATACA -----  
-----  
-----  
AGTGATAAAAACATCACACTCCCATGCAGGATAAAACAAATTATAAACATGTGGCAGAAGGTAGGACAGGCAA  
TGTATGCCCCCTCCCATTTAGAGGAAACATAACATGTCACTCAAAT ---  
ATCACAGGGCTATTATTGGTACGTGATGGGGGAAACACAAACAATACTGACACA -----AAT ---  
-----  
AATACTGATTCAAAT ---  
AGAACTGAGATATTTAGACCTGGAGGAGGAGATATGAGAGACAATTGGAGAAGTGAATTGTACAAATATAAAG  
TGGTAGAAATTAAGCCATTG --- GGAATAGCACCCACTGGAGCAAAAAGGAGAGTGGTG -----  
-----GGGAGAGAGAAAAGAGCA --- GCGGGA --- ATAGGAGCT -----  
TTACTCCTTGGGTTCTTGGGAGCT --- GCAGGAAGCACTATG --- GGCGCGGCGTCA ---  
ATAACGCTGACGGTACAG --- GCCAGACAA --- TTATTG --- TCTGGTATAGTGCAACAGCAAAGC ---  
AATTTG --- CTGAGA --- GCCATAGATGCGCAACAGCATATGTTGCAACTCACGGTCTGGGGCATT  
>GU329220..1  
TTCTATTGCAATACATCAAACCTTATTCAATAGATCACTGTCTAATGATACAGAAGAAGATACAGAC -----  
-----  
-----  
AGTAATAGAACCATCACACTCCCATGTAGAATAAAACAGATTATAAACATGTGGCAGGAAGTAGGAAGAGCAA  
TGTATGCCCCCTCCCATTTGCAGGAAACATAACATGTGTATCAAAT ---  
ATCACAGGACTACTCCTGGTGCGGGATGGAGGCCATCAAAATAGCACAGAG -----  
-----  
-----  
AATAATAACACAGAGATATTCAGACCTGGAGGAGGAGATATGAGGGACAATTGGAGAAGTGAATTATATAAAT  
ACAAAGTAGTAGAAATTAACCATTA --- GGAATAGCACCTACCAAGGCACGGAGGAGAGTGGTG -----  
-----CAGAGAGAAAAAAGAGCA --- GTGGGA --- ATAGGAGCT ---  
-----GTACTCCTTGGGTTCTTGGGAACA --- GCAGGAAGCACTATG --- GGCGCAGCGTCA ---  
ATAACGCTGACGGTACAG --- GCCAGACAA --- TTGCTG --- TCTGGTATAGTGCAACAGCAAAGC ---  
AATTTG --- CTGAGA --- GCTATTGAGGCGCAACAGCATATGTTGCAACTCACAGTCTGGGGCATT  
>GU329240..1  
TTCTATTGCAATACATCAGATCTGTTTAATTCATCAAAACTGTTTAATACAAACAATACTGAG -----  
-----  
-----  
AACTTAACAATAATCACCATTCCATGCAGAATAAAACAAATCATAAACATGTGGCAGGAGGTAGGACGAGCAA

TGTATGCTCCTCCCATTGCAGGAAACATAACATGTACATCAGAC ---  
 ATCACAGGATTACTATTGGTACGTGATGGAGGCACAGAAAGTAGC -----  
 -----  
 -----  
 ACAAAGAGATATTCAGACCTGGAGGAGGAGATATGAGGGATAATTGGAGAAGTGAATTATACAAATATAAAG  
 TGGTAGAAATTAAGCCATTG --- GGAATAGCACCCACCGAGGCAAAAAGGAGAGTGGTG -----  
 -----GAGAGAGAAAAAAGAGCA --- GTGGGA --- CTAGGAGCT -----  
 TTGTTCCCTTGGGTTCTTGGGAGTA --- GCAGGAAGCACTATG --- GGCGCGGCGTCA ---  
 ATAACGCTGACGGTACAG --- GCCAGACAA --- CTGTTG --- TCTGGTATAGTGCAGCAGCAAAGC ---  
 AATTTG --- CTGCAG --- GCTATAGAGGCTCAACAGCATATGTTGAAACTCACGGTCTGGGGCATT  
 >GU329324..1  
 TTCTATTGCAATACATCAGGGTTGTTTAATGGTACATACAATAGTACAGACAGTAAT -----  
 -----  
 -----  
 TCAAACTCAACCATCACAATTCCATGCAGAATAAAACAAATTATAAACATGTGGCAGGAAGTAGGACGAGCAA  
 TATATGCCCCCTCCCATTGCAGGAAACATAACATGTAACTCAAGT ---  
 ATCACAGGACTACTATTGGTACGTGATGGGGGCAGCAACGCCACT -----  
 -----  
 -----  
 AATGAAACATTCAAGGAGGAAATATGAAAGACAATTGGAGAAGTGAATTATATAAATATAAAGTGG  
 TAGAAGTTAAGCCATTA --- GGAATAGCACCAACTGAAGCAAAAAGGAGAGTGGTG -----  
 -----GAGAGAGAAAAAAGAGCA --- GTAGGA --- ATAGGAGCT -----  
 GTGTTCCCTTGGGTTCTTGGGAGCA --- GCAGGAAGCACTATG --- GGCGCAGCGTCA ---  
 ATAACGCTGACGGTACAG --- GCCAGACAA --- CTGCTG --- TCTGGTATAGTGCAACAGCAAAGC ---  
 AATTTG --- CTGAGG --- GCTATAGAGGCGCAACAGTATATGTTGCAACTCACAGTCTGGGGCATC  
 >GU329333..2  
 TTCTATTGCAATACATCAAATCTGTTTAATAGACACCTGCTCAATAGTAAAGGTATGTCTAATAATACAGAA-  
 -----  
 -----  
 AGTAATTCAACAATCATACTCCCATGCAAAATAAAACAAATTGTAAACATGTGGCAGGAGGTAGGACGAGCAA  
 TGTATGCCTCTCCCATTGCAGGAAACATAACATGTAAATCAAAT ---  
 ATCACAGGACTATTATTGGTACGTGATGGGGGAAGTAGCATAAAT -----  
 -----  
 -----  
 CAAACAGAGATATTTAGGCCTCAAGGAGGAGACATGAGGGACAACCTGGAGAAGTGAGTTATATAAATATAAAG  
 TGGTAGAAATTAACCATTG --- GGAGTAGCACCCACTGAGGCAAAAAGGAGAGTGATG -----  
 -----CAGAGAGAAAAAAGAGCA --- GTGGGA --- ATGGCAGCT -----  
 GTGTTCCCTTGGGTTCTTGGGAGCA --- GCAGGAAGCACTATG --- GGCGCGGCGTCA ---  
 ATAACGCTGACGGTACAG --- GCCAGACAA --- TTATTG --- TCTGGTATAGTGCAACAGCAAAGC ---  
 AATTTG --- CTGAGG --- GCTATAGAGGCGCAACAGCATCTGTTGCAACTCACGGTCTGGGGCATT  
 >GU329368..2  
 TTCTATTGCAATACAACACCACTGTTTAATTACAGTGCAACAGAGCTGTTTAGTAATAGTAGTAAAAACATTA  
 GT -----  
 -----  
 -----  
 GAAAAGGACACCATCACACTCCAGTGCAGAATAAAACAAATTATAAACATGTGGCAGAAAGTAGGACGAGCAA  
 TGTATGCCCCCTCCCATTGCAGGAAACATAACATGTACATCAAAC ---  
 ATCACAGGACTACTATTGGTCCGGGATGGAGGCGTCAACAGAACA -----  
 -----  
 -----  
 AATCACAATGAGACATTTAGACCTGGAGGGGGAGACATGAGAGACAATTGGAGAAGTGAATTATATAAATATA  
 AAGTGGTAGAGATAAAGCCATTG --- GGAATAGCACCAACTGAGGCAAAAAGGAGAGTGGTG -----  
 -----GAGAGACAAAAAAGAGCA --- GTGGGA --- CTGGGAGCT -----  
 --- ATGTTCCCTTGGGTTCTTGGGAGCA --- GCAGGAAGCACTATG --- GGCGCGGCGTCA ---  
 ATAGCGCTGACGGCACAG --- GCCAGACAA --- TTGTTG --- TCTGGTATAGTGCAGCAGCAAAC ---  
 AATTTG --- CTGCAG --- GCCATAGAGGCGCAACAGCATCTGTTGCAACTCACTGTCTGGGGCATT  
 >MK749242..1  
 TTCTATTGCAACACATCAGGGCTGTTTAAGGGAATGTACCTGGATAATAGCACAACCACAGAGAATTCA ----  
 -----  
 -----  
 ACTTCGCCAAACATCACACTCCACTGCAAAATAAAACAAATTTATAAACATGTGGCAGGGGGTAGGTCAAGCAA

TGTATGCCCCCTCCCATTCAGAGGAAACATAAGATGTGAATCAAAT ---  
 ATCACAGGAATACTGTTAACACGTGATGGAGGAGGGGAAAATAAT -----  
 -----  
 AACACAAAAGAAACCTTCAGACCTGGAGGAGGAGATATGAGGGACATATGGAGAAGTGAGTTATATAAATATA  
 AAGTGGTAGAAATTAAGCCATTA --- GGAGTAGCACCCACTGAGGCAAAAAGGAGAGTTGTG -----  
 -----GAGAGAGGAAAAAGAGCA --- GTGGGA --- GTAGGAGCT -----  
 ---GTGATCTTTGGGTTCTTGGGAGCA --- GCAGGAAGCACTATG --- GGCGCAGCGTCA ---  
 TTAACGCTGACGGTACAG --- GCCAGACAA --- TTGCTG --- TCTGGTATAGTGCAACAGCAAAGC ---  
 AATTTG --- CTGAGA --- GCCATAGAGGCGCAACAGCATATGTTGCAACTCACGGTCTGGGGCATT  
 >KU749426..2  
 TTCTATTGCAACACATCAGGACTGTTTAATGGTATATACAATACTACAAGTAATTCAAGTGAT -----  
 -----  
 -----  
 ACAAATAAAAACATCACACTCCAATGCAGGATAAGACAATTTATAAACTTGTGGCAGGAGGTAGGAAAGGCCAA  
 TGTATGCACCTCCCATTCAGAGGAAACATCACTTGTAATCAAAT ---  
 ATCACAGGAATACTATTAACACGTGATGGAGGAGAAGGAAAAGAAT -----  
 -----  
 -  
 CAAACAAACAGTAGTCAAGAGATATTCAGACCTGGAGGAGGAAATATAAAGGATAATTGGAGAAGTGAAGTAT  
 ACAAATATAAAGTGGTAGAAATTAAACCATTA --- GGACTAGCACCCACTCCGGCAAAAAGGAGAGTGGTG ---  
 -----GAGAGAGAAAAAGAGCA --- GTGGGA ---  
 ATAGGAGCT -----GTGTTCCCTTGGGTTCTTGGGAGCA --- GCCGGAAGCACTATG ---  
 GGCGCGGCGTCA --- ATAACGCTGACGGTACAG --- GCCAGACAA --- CTATTG ---  
 TCTGGTATAGTGCAACAGCAAAGC --- AATTTG --- CTGAGG ---  
 GCTATAGAGGCGCAACAGCATATGTTGCAACTCACGGTCTGGGGCATT  
 >KR820394..1  
 TTCTATTGCAATACATCAAGACTATTCAATGATGATGATAATGATACAGCACTGGCTAGTGATACAGCTTTAA  
 AT -----  
 -----  
 AAAAAATAAACCATCACACTCCCATGCAAAATAAACAGATTATAAACATGTGGCAGGAAGTAGGACGAGCAA  
 TGTATGCCCCCTCCCATTCAGAGGAAACATAACATGTAACTCAAAC ---  
 ATCACAGGAATACTATTAACACGTGATGGAGGAAATGGAAATCGC -----  
 -----  
 ACAGGAAATCAGACAGAGGCCAATCGCAAT -----  
 CGCACAGAGATATTTAGACCTGCAGGAGGAAATATGAAGGACAATTGGAGAAGTGAATTATATAAATATAAAG  
 TGGTAGAAATTAAGCCATTA --- GGAATAGCACCAACTGAAGCAAAAAGGAGAGTGGTG -----  
 -----GAGAGAGAAAAAGAGCA --- GTGGGA --- ATAGGAGCT -----  
 GTGTTCCCTTGGGTTCTTGGGAGCA --- GCAGGAAGCACTATG --- GGCGCGGCGTCA ---  
 ATAACGCTGACGGTACAG --- GCCAGACAA --- CTGCTG --- TCTGGTATAGTGCAACAGCAAAGT ---  
 AATTTG --- CTGAGG --- GCTATAGAGGCGCAACAGCATCTGTTGCAACTCACGGTCTGGGGCATT  
 >U88822..1  
 TTCTACTGCAATACATCAGGACTGTTTAATAGTGCATGGAATATATCAGGACATAGTACAGGGTTA -----  
 -----  
 -----  
 AATGATACAATCATAACCATCCCATGCAGAATAAAACAAATTATAAACATGTGGCAGGAAGTAGGAAAAGCAA  
 TGTATGCCCCCTCCCATTTGAAGGGCAAATTAATTGTTTCATCAAAT ---  
 ATTACAGGGCTACTATTGACAAGAGATGGTGGTGCTAATAATACT -----  
 -----  
 -----  
 CAGAAATGACACCTTTAGACCTGGAGGAGGAGATATGAGAGACAACCTGGAGAAGTGAATTATATAAATATAAAG  
 TAGTAAAAATTGAACCACTA --- GGAGTAGCACCCACCAAGGCAAGAGAAGAGTGGTG -----  
 -----GAAAGAGAAAAAGAGCA --- ATAGGA --- CTAGGAGCT -----  
 ATGTTCCCTTGGGTTCTTGGGAGCA --- GCAGGAAGCACGATG --- GGCGCAGCGTCA ---  
 ATGACGCTGACGGTACAG --- GCCAGACAA --- GTATTG --- TCTGGTATAGTGCAACAGCAAAAC ---  
 AATTTG --- CTGAGG --- GCTATAGAGGCGCAACAGCATCTGTTGCAACTCACGGTCTGGGGCATT  
 >AJ277820..1  
 TTCTACTGCAATACATCAAACTATTTAATAGTACATGGAGTATAGAGAGTAATATTACAGAGTCA -----  
 -----  
 -----

AATGATAGTACAATCATACTTCCATGCAGAATAAAACAGATTGTAAACATGTGGCAGAGAGTAGGAAAAGCAA  
 TGTATGCCCCCTCCCATTTGAAGGAATAATCAGATGTTTCATCAAAT ---  
 ATTACAGGGCTACTATTGCTAAGAGATGGTGGGGTAAATAATCAT -----  
 -----  
 -----  
 AGTAATGAGACCTTCAGACCTGGAGGAGGAGATATAAGGGACAATTGGAGAAGTGAATTATATAAATATAAAG  
 TAGTAAGACTTGAACCACTA --- GGAGTAGCACCCACCAGGGCAAAGAGAAGAGTGGTG -----  
 -----GAAAGAGAAAAAAGAGCA --- ATAGGA --- TTAGGAGCT -----  
 ATGTTCCCTTGGGTTCTTGGGAGCA --- GCAGGAAGCACGATG --- GGCGCAGTGTCA ---  
 ATGACGCTGACGGTACAG --- GCCAGACTG --- TTACTG --- TCTGGTATAGTGCAACAGCAAAAC ---  
 AATTTG --- CTGAGG --- GCTATAGAGGCGCAACAGCATCTGTTGCAACTCACGGTCTGGGGCATT  
 >AY371156..1  
 TTCTACTGCAATACATCAGGACTGTTTAATAGAAATATTAGTACAGAGAGTACTGAAAATAGTACAGGA ----  
 -----  
 -----  
 GTAAATGATACAATAACCATCCCATGTAAATAAGACAAATTATAAACATGTGGCAGGGAGTAGGAAAAGCAA  
 TATATGCCCCCTCCCATTTGAAGGACAAATTAAATGTTTCATCAAAT ---  
 ATTACAGGGCTACTATTGACAAGAGATGGTGGTAATACTTCTTAT -----  
 -----  
 -----  
 GAGGAGACCTTCAGGCCTGGAGGAGGAAATATGAAGGACAATTGGAGAAGTGAATTATATAAATATAAAGTAG  
 TAAGAATTGAACCACTA --- GGAGTAGCACCCACCAGGGCAAAGAGAAGAGTGGTG -----  
 -----GAAAGAGAAAAAAGAGCA --- ATAGGA --- TTAGGAGCT -----  
 ATGTTCCCTTGGGTTCTTGGGAGCA --- GCAGGAAGCACGATG --- GGCGCAGCGTCA ---  
 GTGACGCTGACGGTACAG --- GCCAGACAA --- TTATTG --- TCTGGTATAGTGCAACAGCAAAAT ---  
 AATTTG --- CTGAGG --- GCTATAGAGGCGCAACAGCATCTGTTGCAACTCACGGTCTGGGGCATT  
 >FJ388945..1  
 TTCTACTGTAATACATCAAACTGTTTAATACAACATGGTCTAGTGAAACATGGGAGAATAGTACGGGAAATA  
 ATACC -----  
 -----  
 -----  
 GAATTAAATGGTACGATAACCATCCCATGTACAATAAAACAAATTATAATCATGTGCCAGGGAGTGGGAGTAG  
 CAATGTATACCCCTCCCCCTGCAGGAATAATTCAGTGTAATCAAAT ---  
 ATTACAATTACAGGGCTGACAAGAGATGGTGGTAATAATAGTAAT -----  
 -----  
 -----  
 TGTAATGAGACCTTCAGGCCTGGAGGAGGAGATATGAGGGACAATTGGAGAAGTGAATTGTATAAATATAAAG  
 TAGTAAGAATTGAACCATTA --- GGAATAGCACCCACCAGAGCAAAGAGAAGAGTGGTG -----  
 -----GAAAGAGAAAAAAGAGCA --- ATAGGA --- TTAGGAGCT -----  
 ATGTTCCCTTGGGTTCTTGGGAGCA --- GCAGGAAGCACGATG --- GGCGCAGCGTCA ---  
 ATAGCGCTGACGGCACAG --- GCCAGACAA --- GTGTTG --- TCCGGTATAGTGCAACAGCAAAAT ---  
 AATTTG --- CTGAGG --- GCGATAGAGGCGCAACAACATCTGTTGCAACTCACGGTCTGGGGCATT  
 >AF219271..1  
 TTCTACTGTAATACATCAAACTGTTTAATAGTAATATTAGTACATCAGAAGGGGCTAATAGTACAAAGTCA -  
 -----  
 -----  
 -----  
 AATAATAGAACAATCACACTCCAATGCAGAATAAAACAAATTATAAATATGTGGCAAGGAGTAGGAAAAGCAA  
 TGTATGCCCCCTCCCATTTGAAGGACTAATTAGATGTTTCATCAAAT ---  
 ATTACAGGGCTACTATTGACAAGAGATGGTGGTTCAAATACTAGT -----  
 -----  
 -----  
 TCTCATGAGACCTTCAGACCTGGAGGAGGAAATATGAAGGACAATTGGAGAAGTGAATTATATAAATATAAAG  
 TAGTAAAAATTGAACCACTA --- GAAGTAGCACCCACCAGGGCAAAGAGAAGAGTGGTG -----  
 -----GAAAGAGAAAAAAGAGCA --- ATAGGA --- CTAGGAGCT -----  
 ATGTTCCCTTGGGTTCTTGGGAGCA --- GCAGGAAGCACGATG --- GGCGCAGCGTCA ---  
 GTGACGCTGACGGTACAG --- GCCAGACAG --- TTATTG --- TCTGGTATAGTGCAACAGCAAAAT ---  
 AATTTG --- CTGAGG --- GCTATAGAGGCGCAACAACATCTGTTGCAACTCACAGTCTGGGGCATT  
 >AF219272..1  
 TTCTACTGCAATACATCAGGACTGTTTAATAGTACATGGGGTTTCAGGACTGTCTAAT -----  
 -----  
 -----

GGTACTGAGAATATCACCATCCCATGCAGAATAAAACAAATTATAAACATGTGGCAGGGAGTAGGAAAAGCAA  
TGTATGCCCCCTCCCATTCGAGGAATAATCAGCTGTTTCATCAAAT---  
ATTACAGGGCTACTATTGACAAGAGATGGAGGTACAAATAGTAGT-----  
-----  
-----CATAACGAGACCTTC---AGACCT---  
GGAGATATGAGAGACAATTGGAGAAGTGAATTATATAAATATAAAGTAGTAAGAATTGAACCCCTA---  
GGAGTAGCACCCACCAGGGCAAAAAGAAGAGTGGTG-----  
--GAAAGAGAAAAAAGAGCA--ATTGGA--TTAGGAGCT-----  
TTGTTCCCTTGGGTTCTTGGGAGCA---GCAGGAAGCACAAATG---GGCGCAGCGTCA---  
TTGACGCTGACGGTACAG---GCCAGACAA---TTATTG---GCTGGTATAGTGCAACAGCAAAAC---  
AATTTG---CTGAGG---GCTATAGAGGCGCAACAGCATCTGTTGCAACTCACGGTCTGGGGCATT  
>HQ595791..2  
TTCTACTGCGATACATCAAGACTATTTAATAGTACCTGGACGAATAGTACCTGGGGGAACGATACTAGCTCAA  
AT-----  
-----  
AGGAATGATACAATCACACTCCCATGCAGGATAAAACAAATTATAAACATGTGGCAGGAAGTAGGAAAAGCAA  
TGTATGCCCCCTCCCATTCGAGGACTAATCAGATGCTCATCACGC---  
ATTACAGGACTATTGTTGACAAGAGATGGTGGTATCTATAATAGTAGT-----  
-----  
-----  
CAGGAAGAAGAGACCTTCAGACCGGGAGGAGGAGATATGAGGGACAATTGGAGAAGTGAATTATACAAATATA  
AGGTAGTAAGAATTGAACCACTA---GGTCTAGCACCCACCAGGGCAAAGAGAAGAGTGGTG-----  
-----GAAAGAGAAAAAAGAGCA--ATAGGA---CTGGGAGCT-----  
---GTGTTCCCTTGGGTTCTTAGGAGCA--GCAGGAAGCACAAATG---GGCGCAGCGTCA---  
CTGACGCTGACGGTACAG---GCCAGACAG---TTACTG---TCTGGTATAGTGCAACAGCAAAAC---  
AATTTG---CTGAGG---GCTATAGAGGCGCAACAGCATCTGTTGCAACTCACAGTCTGGGGCATT  
>KF716476..1  
TTCTACTGCAATACATCAAAATTGTTTACAACAAATATAACAAGTAACACT-----  
-----  
-----  
AGTGAAGGGAACATCACACTCCCATGCAGAATAAAACAAATTATAAACATGTGGCAGGGAGTAGGAGGAGCAA  
TGTATGCCCCCTCCTAGGGAAGGATTGATCACATGTTTCATCAAAT---  
ATCACAGGACTACTGTTGACAAGAGATCAAGAGGGCTCAAATAAC-----  
-----  
-----  
ATTAATGAGACCTTCAGACCTGGAGGAGGAAATATGAAAGACAATTGGAGAAGTGAATTATACAAATATAAAG  
TAGTAAGAATTGAACCACTA---GGTCTAGCACCCACCAGGGCAAAAAGAAGAGTGGTG-----  
-----GAAAGAGAAAAAAGAGCA--ATAGGC---CTGGGAGCT-----  
ATGTTCCCTTGGGTTCTTGGGAGCA---GCAGGAAGCACAAATG---GGCGCAGCGTCA---  
CTGACGCTGACGGTACAG---GCCAGACAG---TTACTG---TCTGGTATAGTGCAACAGCAAAAC---  
AATTTG---CTGAGA---GCTATAGAGGCGCAACAGCATCTGTTGCAACTCACAGTCTGGGGCATT  
>FJ866137..1  
TTCTACTGCAATACATCAGAACTGTTTAATAATACATGGTTAAATAATACAGGGAAGTGGTCATCAGAT---  
-----  
-----  
AGTACAGGGATAATCATGCTCCCATGCAGAATAAAACAAATTATAAACATGTGGCAGGGAGTAGGAAAAGCAA  
TGTATGCCCCCTCCCATTCGAGGACTAATCAATTGTTTCATCAAAT---  
ATTACAGGACTATTGTTGACAAGAGATGGTGGTGCAAATAGTAGT-----  
-----  
-----  
CAGAAATGAGACCTTCAGACCGGGAGGAGGAGATATGAGAGACAATTGGAGAAGTGAATTATACAAATATAAAG  
TAGTAAAAAATTGAACCACTA---GGATTAGCACCCACCAAGGCAAGGAGAAGAGTGGTG-----  
-----GAAAGAGAAAAAAGAGCA--ATAGGA---CTAGGAGCT-----  
ATGTTCCCTTGGGTTCTTGGGAGCA---GCAGGAAGCACGATG---GGCGCAGCGTCA---  
CTGACGCTGACGGTACAG---GCCAGACAG---TTATTG---TCTGGTATAGTGCAACAGCAAAAC---  
AATTTG---CTGAGG---GCTATAGAGGCGCAACAGCATCTGTTGCAACTCACAGTCTGGGGCATT  
>FJ866135..1  
TTCTACTGCAACACATCAAGACTGTTTAATAATAGTGAATGGAAATCAAATAGTAGTACAGGGGGA-----  
-----  
-----

AATGAAAGTATAATCATACTCCCATGCAGAATAAAACAAATTATAAACATGTGGCAGGGAGTAGGAAGAGCAA  
TGTATGCCCCCTCCCATTTGAAGGACACATCAATTGTTTCATCAAAT---  
ATTACAGGACTATTGTTGACAAGAGATGGTGGTGTAACTAATCAG-----  
-----  
-----  
AGTTCGAATGAGACCTTCAGACCTGGGGGAGGAGACATGAGAGACAATTGGAGAAGTGAATTATACAAATATA  
AAGTAGTAAGAATTGAACCACTA---GGTCTAGCACCCACCAGGGCAAAGAGAAGAGTGGTG-----  
-----GAAAGAGAAAAAAGAGCA---ATAGGA---CTGGGAGCT-----  
---ATGTTCCCTTGGGTTCTTGGGAGCA---GCAGGAAGCACGATG---GGCGCAGCGTCG---  
CTGACGCTGACGGTACAG---GCCAGACAG---TTATTG---TCTGGTATAGTGCAACAGCAAAAC---  
AATTTG---CTGAGG---GCTATAGAGGCGCAACAGCATCTGTTGCAACTCACAGTCTGGGGCATT  
>AY322189..1  
TTCTACTGCAACACATCAAACCTGTTTAATAGCATTTGGAATGTTACTAATGGTACTAGCCAGCTGGAGTCAA  
ATAGC-----  
-----ACA---  
GAGTTAGCCGGAATATAACTCTCCCATGCAGAATAAAGCAAATTATAAACATGTGGCAGGGAGTAGGAATAG  
CAATGTATGCCCCCTCCCATTTGCAGGAATAATCAAATGTTTCATCAAAT---  
ATTACAGGACTATTGTTAACAAGAGATGGTGGTGCAGATAATAGT-----  
-----  
-----  
AGTCAGAATGAGACCTTCAGACCAGGAGGAGGAGATATGAGAGACAATTGGAGAAGTGAATTATACAAATATA  
AAGTAGTAAGAGTTGAACCACTA---GGTATAGCACCCACCAAGGCAAAGAGAAGAGTGGTG-----  
-----GAAAGAGAAAAAAGAGCA---ATAGGA---CTGGGAGCT-----  
---ATGTTCCCTTGGGTTCTTGGGAGCA---GCAGGAAGCACGATG---GGCGCAGCGTCA---  
GTGACGCTGACGGTACAG---GCCAGACAG---TTACTG---TCTGGTATAGTGCAACAGCAAAAC---  
AATTTG---CTGAGA---GCTATAGAGGCGCAACAGCATCTGTTGCAACTCACAGTCTGGGGCATT  
>FJ866138..1  
TTCTACTGCAGTACATCAGAACTGTTTAATAGTACATGGAATACATCAATTAGTAGTACAAGGAATACATCAA  
AT-----  
-----  
AGTACAAGGGATATCAGACTCCCATGCAGAATAAAACAAATTATAAACATGTGGCAGGGAGTAGGAAAAGCAA  
TGTATGCCCCCTCCCATAGAAAGGACTAATCAAATGTTTCATCAAAT---  
ATTACAGGACTATTGTTGGCAAGAGATGGTGTATGTAAACAATAAT-----  
-----  
-----  
AGTCAGGAGACCCTTAGACCTGGAGGAGGAGATATGAGAGACAATTGGAGAAGTGAATTATACAAATATAAAG  
TAGTAAGACTTGAACCACTA---GGTCTAGCACCCACCAGGGCAAAGAGAAGAGTGGTG-----  
-----GAAAGAGAAAAAAGAGCA---ATAGGA---CTAGGAGCT-----  
ATGTTCCCTTGGGTTCTTGGGAGCA---GCAGGAAGCACGATG---GGCGCAGCGTCA---  
CTGACGCTGACGGTACAG---GCCAGACAG---TTATTG---TCTGGTATAGTGCAACAGCAAAAC---  
AATTTG---CTGAGG---GCTATAGAGGCGCAACAGCATCTGTTGCAACTCACAGTCTGGGGCATT  
>FJ866141..1  
TTCTACTGCAATACATCAAGACTGTTTAATAGTACATGGGGGGATAATAATACATCAAGTGATACA-----  
-----  
-----  
GAGGAAGGTAACATCACCATCCCATGTAGAATAAAACAAATTATAAACATGTGGCAAGGAGTAGGAAAAGCAA  
TGTATGCCCCCTCCCATTTGAAGGACTAATCAGATGTTTCATCAAAT---  
ATTACAGGATTACTGTTAACATATGATGGGGGTGTAAATAATAAT-----  
-----  
-----  
AGTCAGAGTGAGATCTTCAGACCTGGAGGAGGAGATATGAGAGACAATTGGAGAAGTGAATTATACAAATATA  
AAGTAGTAAGACTTGAACCACTA---GGTCTAGCACCCACCAAGGCAAAGAAGAGTGGTG-----  
-----GAAAGAGAAAAAAGAGCA---ATAGGC---CTAGGAGCT-----  
---ATGTTCCCTTGGGTTCTTGGGAGCA---GCAGGAAGCACGATG---GGCGCAGCGTCA---  
TTGACGCTGACGGTACAG---GCCAGACAA---TTATTG---TCTGGTATAGTGACGAGCAAAAC---  
AATCTG---CTGATG---GCTATAGAGGCGCAACAGCATCTGTTGCAACTCACAGTCTGGGGCATT  
>GU204938..1  
TTCTACTGCAATACAACCTGGACTGTTTAATAATAGTGTATGGAAGAATGATAGTGATACAGCAAAT-----  
-----  
-----

AGTACAGAGGTAATCAAACCTCCCATGCAGAATAAAACAAATTATAAACATGTGGCAGGGAGTAGGCAAAGCAA  
 TGTATGCCCCCTCCCATTTGAAGGACAAATCGAATGTACATCAAAT---  
 ATCACAGGACTATTGCTGACAAGAGATGGTGGTGTAAAGTAATAAT-----  
 -----  
 -----  
 AGTCAGAATGAAACCTTTAGGCCTGGAGGAGGAGATATGAGAGACAACCTGGAGGAGTGAACCTATACAAATATA  
 AGGTAGTAAGAATTGAACCACTA---GGTCTAGCACCCACCAGGGCAAGGAGAAGAGTGGTG-----  
 -----GAAAGAGAAAAAAGAGCA---ATAGGA---CTAGGAGCT-----  
 ---ATGTTCCCTTGGGTTCTTGGGAGCA---GCAGGAAGCACGATG---GGCGCAGCGTCA---  
 TTGACGCTGACGGTACAG---GCCAGACAG---TTAATG---TCTGGTATAGTGCAACAGCAAAAC---  
 AATTTG---CTGAGA---GCTATAGAGGCGCAGCAGCATCTGTTGCAACTCACAGTCTGGGGCATT  
 >HQ659623..1  
 TTCTACTGCAATACATCAGGACTGTTTAATAATAGTGAGTGGACAGATACGACACCAAATACGACA-----  
 -----  
 -----  
 TCAAAATGGTACCATCATACTCCCATGCAGAATAAAACAAATTTATAAACCTGTGGCAGGGAGTAGGAAGAGCAA  
 TGTATGCCCCCTCCCATTTCAAGGACTAATCAGATGTTTCATCAAAT---  
 ATTACAGGACTATTGTTGACAAGAGATGGTGGAAATAATAATAGT-----  
 -----  
 -----  
 AGTCTGAATGAGACCTTCAGACCTGGAGGAGGAGATATGAGAGACAATTGGAGAAGTGAATTATACAAATATA  
 AAGTAGTAAGAATTGAACCACTA---GGTCTAGCACCCACCAGTGCAAAGAGAAGAGTGGTG-----  
 -----GAAAGAGAAAAAAGAGCA---ATAGGA---CTGGGAGCT-----  
 ---GTGTTCCCTTGGGTTCTTGGGAGCA---GCAGGAAGCACGATG---GGCGCAGCATCA---  
 CTGATGCTGACGGTACAG---GCCAAACAG---CTATTG---TCTGGTATAGTGCAACAGCAAAAC---  
 AATTTG---CTGAGA---GCTATAGAGGCGCAGCAACATCTGTTGCAACTCACAGTCTGGGGCATT  
 >KX907406..1  
 TTCTACTGTAATACATCAGGACTGTTCAATAGTACATGGGATATTACGAATACTAGTAGCCCAAACAAC----  
 -----  
 -----  
 ACAGACCCAATTATCACACTACAATGCAGAATAAAACAAATTATAAACATGTGGCAGGGAGTAGGAAGAGCAA  
 TATATGCCCCCTCCCATTTGCAGGGCAAATTCATGTTTCATCAAAT---  
 ATTACAGGGCTACTATTGACAAGAGATGGTGGTGCAGATAATAGC-----  
 -----  
 -----  
 AGTCATAATGAGACCTTCAGACCTGGAGGAGGAAATATGAAGGACAATTGGAGAAGTGAATTGTATAAATATA  
 AAGTAGTAAAAATTGAACCACTA---GGAATAGCACCCACCAAGGCAAGGAGAAGAGTGGTG-----  
 -----GAAAGGGAAAAAAGAGCA---ATAGGA---CTAGGAGCT-----  
 ---ATGTTCCCTTGGGTTCTTGGGAGCA---GCAGGAAGCACGATG---GGCGCAGCGTCA---  
 GTGACGCTGACGGTACAG---GCCAGACAG---TTACTG---TCTGGTATAGTGCAAGCAGCAAAGC---  
 AATTTG---CTGAGG---GCTATACAGGCGCAACAGCATCTGTTGCAGCTCACTGTCTGGGGCATT  
 >HQ615975..2  
 TTCTACTGTAATACAACAAAACCTGTTTAATACAAGTGAATCAAATAGGACAGAG-----  
 -----  
 -----  
 GTAAATGGAACAATCACACTCCCATGCAGAATAAAACAAATTATAAACATGTGGCAGGGAGTAGGGAAAGCAA  
 TCTATGCCCCCTCCCATTTGAAGGACACATCAACTGTTTATCAAAT---  
 ATTACAGGACTATTGTTGACAAGAGATGGTGGTGTGCAACAATAAG-----  
 -----  
 -----  
 AGTCAGAATGAGACCTTCAGACCTGGAGGAGGAGATATGAGAGACAATTGGAGAAGTGAATTATACAAATATA  
 AAGTAGTAAGAATTGAACCACTA---GGTCTAGCACCCACCAAGGCAAGGAGAAGAGTGGTG-----  
 -----GAAAGAGAAAAAAGAGCA---ATAGGA---CTAGGAGCT-----  
 ---TTGTTCCCTTGGGTTCTTGGGAGTA---GCAGGAAGCACAAATG---GGCGCAGCGTCG---  
 ATGACGCTGACGGTACAG---GCCAGGCAA---TTATTG---TCTGGTATAGTGCAACAGCAAAAC---  
 AATTTG---CTGAGG---GCTATAGAGGCGCAACAGCATCTGTTGCAACTCACAGTCTGGGGCATT  
 >JX512899..1  
 TTCTACTGCAATACAACAAGACTGTTCAATAGTACATGGAATACAACCTACATCAAATAGTACAGAACAA----  
 -----  
 -----

AATGATACAAGAATACTATTCCCATGCAGAATAAAACAAATTATAAACATGTGGCAGGGAGTAGGAAAAGCAA  
TGTATGCTCCTCCCATTGAAGGACTAATCAGATGTACATCAAAT---  
ATTACAGGACTATTGTTGGCAAGAGATGGTGGTGAAGCAATAAT-----  
-----  
-----  
AGTCAGACTGAGACCTTCAGACCTGGAGGAGGAGATATGAGAGACAATTGGAGAAGTGAATTGTACAAATATA  
AAGTAGTAAGAATTGAGCCACTA---GGTCTAGCACCCACCAGGGCAAAGAGAAGAGTGGTG-----  
-----GAAAGAGAAAAAAGAGCA---ATAGGA---CTGGGAGCT-----  
---ATGTTCCCTTGGGTTCTTGGGAGCA---GCAGGAAGCACGATG---GGCGCAGCGTCA---  
CTGACGCTGACGGTACAG---GCCAGACAG---TTATTG---TCTGGTATAGTGCAACAGCAAAAC---  
AATTTG---CTGAGG---GCTATAGAGGCGCAACAGCATCTGTTGCAACTCACAGTCTGGGGCATT  
>KF986106..1  
TTCTACTGCAATACAACAAAACTGTTTAACAGTACATGGCATAACAGTACATGGAAG-----  
-----  
AATGATACTGCATTAAATACA-----  
ACAGGGGATAAGATAATCACACTCCCATGTAGAATAAAACAAATTATAAACATGTGGCAGGGAGTAGGCAAAG  
CAATGTATGCCCCCTCCCATTCAGGACTAATCAGATGTTTCATCAAAT---  
ATTACAGGACTATTGTTAACAAGAGATGGTGGTAAAACTAAT-----  
-----  
AATCATAGTGAGACC---  
CTTAATGAGACCTTCAGACCTGGAGGAGGAGATATGAGAGACAATTGGAGAAGTGAATTATACAAATATAAAG  
TAGTAAGACTTGAACCACTA---GGTCTAGCGCCCCACCAAGGCAAAGAGAAGAGTGGTG-----  
-----CAGAGAGAAAAAAGAGCA---ATAGGA---CTAGGAGCT-----  
ATGTTCCCTTGGATTCTTGGGAGCA---GCAGGAAGCACAATG---GGCGCAACGTCA---  
CTGACGTTGACGGTACAG---GCCAGACAG---TTATTG---TCTGGTATAGTGCAACAGCAAAAC---  
AATCTG---CTGAGG---GCTATAGAGGCGCAACAGCATCTGTTGCAACTCACAGTCTGGGGCATT  
>KF986033..1  
TTCTACTGTAATACAACAAAACTGTTTAATAACAATAAT-----  
-----  
-----AGT---  
ACTAATGAGACAGTAATCACACTCCCATGCAGAATAAAACAAATTATAAACATGTGGCAGGGAGTAGGAAAAG  
CAATGTATGCCCCCTCCCATTCAGGAAGCATTTCGCTGTTTCATCCAAT---  
ATTACAGGACTATTGTTGACAAGAGATGGTGGG-----  
-----  
-  
AATAAGACTGCTCAGAATGAAACCTTCAGACCTGGAGGAGGAGATATGAGAGACAATTGGAGAAGTGAATTGT  
ACAAATATAAAGTAGTAAAAATTGAACCACTA---GGTCTAGCACCCACCAAGGCAAAAAGAAGAGTGGTG--  
-----GAAAGAGAAAAAAGAGCA---GTAGGA---  
CTAGGAGCT-----ATGTTCCCTTGGGTTCTTGGGAGCA---GCAGGAAGCACAATG---  
GGCGCAGTGTCA---ATGACGCTGACGGTACAG---GCCAGACAG---GTGTTG---  
TCTGGTATAGTGCAACAGCAAAAC---AATTTG---CTGAGG---  
GCTATAGAGGCGCAACAGCATCTGTTGCAACTCACAGTCTGGGGCATT  
>KF716479..2  
TTCTACTGCAATACATCAGGACTGTTTAATAGTACATGGCAGGAAAATAGTACTCTATTAAATAAAACAAATT  
AT-----  
-----ACA---  
GAAGAAAATAAAACAATCACACTCCCATGCAGAATAAAACAAATTATAAATATGTGGCAGAGAATAGGAAAAG  
CAATGTATGCCCCCTCCCATTCAGGACTAATCAAATGTTCCCTCAAAT---  
ATTACAGGACTATTGTTGGAAAGAGATGGTAGTGTTGAAAAATAAT-----  
-----  
-----  
AGTCAGGAGACTGTGAGACCTGTAGGAGGAGAGATGAGAAACAATTGGAGAAGTGAATTATACAAATATAAAG  
TAGTAAGAATTAAACCAATA---GGTCTAGCACCCACCAGGGCAAAGAGAAGAGTGGTG-----  
-----GAAAAACAAAAAAGAGCA---ATAGGA---CTAGGAGCT-----  
ATGTTCCCTTGGGTTCTTGGGAGCA---GCGGGAAGCACGATG---GGCGCAGCGTCA---  
ATGGCGCTGACGGTACAG---GCCAGACAA---GTACTG---TCTGGTATAGTGCAACAGCAAAAC---  
AATTTG---CTGAGG---GCTATAGAGGCGCAACAGCATCTGTTGCAACTCACAGTCTGGGGCATT  
>AB485651..1  
TTCTACTGTAATACATCAAGATTGTTTAATAGTGAATGGAGATACAATACAACAAGTAAGGAATGGAGTTCTA  
ATACAACA-----

-----ATAAT-----  
ACAGGGGTAAATGAAATCAAACCTCCCATGCAGAATAAAACAGCTTATAAACATGTGGCAGAGAGTAGGAAAAG  
CAATGTATGCCCCCTCCCATTTGAAGCACTAATTAAGTGTTCATCAAAC---  
ATTACAGGACTATTGTTGTCAAGAGATGGTGGTGCAAATAATAAT-----  
-----  
-----  
AGTCAGAATGAGACCTTCAGACCTGGAGGAGGAGATATGAGAGACAATTGGAGAAGTGAATTGTACAAATATA  
AAGTAATAAGAATTGAACCAATA---GGTCTAGCACCCACCAAGGCAAAAAGAAGAGTGGTG-----  
-----GAAAGGGAAAAAGAGCA---ATAGGA---CTAGGAGCT-----  
---ATGTTCCCTTGGGTTCTTGGGAGCA---GCAGGAAGCACGATG---GGCGCAGCGTCA---  
TTGACGCTGACGGTACAG---GCCAGACAG---TTAATG---TCTGGTATAGTGCAACAGCAAAAT---  
AATTTG---CTGAGG---GCTATAGAGGCGCAACAACATCTGTTGCAACTCACAGTCTGGGGCATT  
>AJ320484..3  
TTCTACTGCAATACATCAAACTGTTTAAACAGTGCATGGAATGACAGTACATGGAATATAGGGAATAATAATA  
CAGGG-----  
-----  
TCAGATAATGAGACAATCATTATCCCATGCAGAATAAAACAAATTATAAACATGTGGCAGGGAGTAGGAAAAG  
CAATGTATGCCCCCTCCCATCGAAGGATGGATCAATTGTGCATCAAAT---  
ATTACAGGGCTCTTACTGGTAAGGATGGTGGTGGTGCAAAATGAT-----  
-----  
-----  
AGTCAGAACGAGACCTTCAGACCTCAAGGAGGAGATATGAGAGACAATTGGAGAAGTGAATTATACAAGTATA  
AAGTAGTAAAAATTGAACCACTA---GGAATAGCACCCACCAAGGCAAGAGAAGAGTGGTG-----  
-----GAAAGAGAAAAAGAGCA---ATAGGA---CTAGGAGCT-----  
---ATGTTCCCTTGGGTTCTTGGGAGCA---GCAGGAAGCACGATG---GGCGCAGCGTCA---  
TTGACGCTGACGGTACAG---GCCAGACAA---TTATTG---TCTGGTATAGTGCAACATCAAAAC---  
AATTTG---CTGATG---GCTATAGAGGCGCAACAGCATCTGTTGCAACTCACAGTCTGGGGCATT  
>U08805..3  
TTCTACTGCAATACATCAAAATTGTTTAAATCATAGTGTAGGGGAGAATAATACTCTATCAATTAGCAACGGG-  
-----  
-----  
GTAAATACTAACATCACACTCCCATGCAAAATAAAACAAATTGTAAACATGTGCCAGGGAGTAGGAAAAGCAA  
TGTATGCCCCCTCCCATTTCAAGGACTAATCAGATGTTTCATCAAAT---  
ATTACAGGACTATTGTTGACAAGAGATGGTGGTAATACTAGTCAG-----  
-----  
-----  
AATGAGACCTTCAGACCTGGAGGAGGAGATATGAGAGACAATTGGAGAAGTGAATTATACAATATAAAGTAA  
TAAAAATTGAACCACTA---GGTCTAGCACCCACCAAGGCAAGAGAAGAGTGGTG-----  
-----GCAAGAGAAAAAGAGCA---ATAGGA---CTAGGAGCT-----  
GTGTTCCCTTGGGTTCTTGGGAGCA---GCAGGAAGCACAAATG---GGCGCAGCGTCA---  
CTGACGCTGACGGTACAG---GCCAGACAG---TTAATG---TCTGGTATAGTGCAACAGCAAAAC---  
AATTTG---CTGAGG---GCTATAGAGGCGCAACAGCATCTGTTGCAACTCACAGTCTGGGGCATT  
>EU852998..1  
TTCTACTGCAATACATCAGGACTGTTTAACTAATGTGACATCAAATAGTACAGCAAAT-----  
-----  
-----  
CCAAATGGGAACATCACACTCCCATGCAGAATAAAACAAATTGTAAACATGTGGCAGGGAGTAGGAAAAGCAA  
TATATGCCCCCTCCCATTTGAAGGACTAATCAACTGCTCATCAAAT---  
ATTACAGGACTATTGTTGGCAAGAGATGGTGGTGCAAATAATAAT-----  
-----  
-----  
AGTCAGAATGAGACCTTCAGACCTGCAGGAGGAGATATGAGAGACAATTGGAGAAGTGAATTATACAATATA  
AAGTAGTAAGAATTGAGCCAATA---GGTCTAGCACCTGCCAGGGCAAGAGAAGAGTGGTG-----  
-----GAAAGAGAAAAAGAGCA---ATAGGA---CTGGGAGCT-----  
---ATGTTCCCTTGGGTTCTTGGGAGCA---GCAGGAAGCACGATG---GGCGCAGCGTCA---  
ATAACGCTGACGGTACAG---GCCAGACAA---GTACTG---TCTGGTATAGTGCAACAGCAAAAC---  
AATTTG---CTGAGG---GCTATAGAGGCGCAACAGCATCTGTTGCAACTCACAGTCTGGGGCATT  
>JX658585..1  
TTCTACTGCAATACATCAGGACTGTTTAAATAGTAGTGGTATAACAAATAGTACAGGAATGTTGAATAATAGT-  
-----

-----  
GATATATCAAATATCACAATCCACTGCAGAATAAGACAAATTATAAACATGTGGCAGGGAGTAGGAAAAGCAA  
TGTATGCCCCCTCCCATTAAGGACTAATCTACTGTTTCATCAAAT---  
ATTACAGGACTATTGTTAACAAGAGATGGTGCAGATAATAATAGT-----  
-----  
-----  
CCGAATGAAGCCTTCAGACCTGAAGGAGGAAATATGAAAGACAATTGGAGGAGTGAATTATACAAATATAAAG  
TAGTAAGAATTGAGCCATTA---GGTCTAGCACCCACCAGGGCAAAGAGAAGAGTGGTG-----  
-----GAAAGAGAAAAAAGAGCA---ATAGGA---CTAGGAGCT-----  
ATGTTTCCTTGGGTTCTTGGGAACA---GCAGGAAGCACGATG---GGCGCAGCGTCA---  
CTGACGCTGACGGTACAG---GCCAGACAA---TTATTG---TCTGGTATAGTGCAACAGCAAAAC---  
AATTTG---CTGAGG---GCTATAGAGGCGCAACAGCATCTGTTGCAACTCACAGTCTGGGGCATT  
>EU852934..1  
TTCTACTGCAATACATCACAGCTGTTTAATAGTACATGGGAAGCCAATACGACAGATAAG-----  
-----  
-----  
CTAAATGAGACAATCACACTCCCATGCAGAATAAAACAAATTATAAACATGTGGCAGGGAGTAGGAAAAGCAA  
TGTATGCCCCCTCCCATTAAGGACAAATCACATGTTTCATCAAAT---  
ATTACAGGGCTTTTATTGACAAGAGATGGTGGTACAAATAATAGT-----  
-----  
-----  
AGTCAGAATGAGACCTTCAGACCTGGAGGAGGAGATATGAGAGATAATTGGAGAAGTGAATTATACAAATATA  
AAGTAGTAAGAATTGAACCACTA---GGTCTAGCACCCACCAGGGCAAAGAGAAGAGTGGTG-----  
-----GAAAGAGAAAAAAGAGCA---ATAGGA---CTGGGAGCT-----  
---ATGTTTCCTTGGGTTCTTGGGAGCA---GCAGGAAGCACGATG---GGCGCAGCGTCA---  
CTGACGCTGACGGTACAG---GCCAGACAA---TTATTG---TCTGGTATAGTGCAACAGCAAAAC---  
AATTTG---CTGAGA---GCTATAGAGGCGCAACAGCATCTGTTGCAACTCACAGTCTGGGGCATT  
>EU852982..1  
TTCTACTGCAATACATCAGGACTGTTTAACAATACGTTTAAATGGGAGAATGGCACTTTATTAAATACTACAG  
TAAATATT-----  
-----ACAGAG-----  
AATAGTACAGAGAATATCACACTCCCATGCAGAATAAAACAAATTATAAACATGTGGCAGGGAGTAGGAAAAG  
CAATGTATGCCCCCTCCCATCGCAGGACTAATTAAATGTTTCATCAAAT---  
ATTACAGGACTATTATTGACAAGGGATGGTGGTACAAATAATAGT-----  
-----  
-----  
CAGGATGATGAGACCTTTAGACCTGGAGGAGGAGATATGAGGGACAATTGGAGAAGTGAATTATATAAATATA  
AAGTAGTAAAAATTGAACCACTA---GGTCTAGCACCCACCAAGGCAAAGAGAAGAGTGGTG-----  
-----GAAAGAGAAAAAAGAGCA---ATAGGA---CTGGGAGCT-----  
---TTGTTTCCTTGGGTTCTTGGGAGCA---GCAGGAAGCACGATG---GGCGCAGCGTCA---  
ATAACGCTGACGGTACAG---GCCAGACAG---TTATTG---TCTGGTATAGTGCAACAGCAAAAT---  
AATTTG---CTGAGA---GCTATAGAGGCGCAACAGCATCTGTTGCAACTCACAGTCTGGGGCATT  
>EU853014..2  
TTCTACTGCAATACATCAGGACTGTTCAATCATAGTGTATGGAGCAATAATGGTACATGGAATACTACATCAA  
TT-----  
-----  
AATAAAACAGAGAATATCATACTCCCATGCAGAATAAAACAAATTATAAACATGTGGCAAAGAGTAGGAAAAG  
CAATGTATGCCCCCTCCCATTCGAGGAGTAATCAATTGTGTATCAAAT---  
ATTACAGGACTATTGTTGATAAGAGATGGTGGTAATACTAATACTAGTCAT-----  
-----  
-----  
AATAATGGGACTGAGACCTTCAGACCTGGAGGAGGAGATATGAGAGACAATTGGAGAAGTGAATTATACAAAT  
ATAAAGTAGTAAGACTTGAGCCACTA---GGTCTAGCACCCACCAGGGCAAAGAGAAGAGTGGTG-----  
-----GAAAGAGAAAAAAGAGCA---GTAGGA---CTAGGAGCT---  
-----ATGTTTCCTTGGGTTCTTGGGAGCA---GCAGGAAGCACGATG---GGCGCAGCGTCA---  
CTGACGCTGACGGTACAG---GCCAGACTG---TTATTG---TCTGGTATAGTGCAACAGCAAAAT---  
AATTTG---CTGAGG---GCTATAGAGGCGCAACAGCATCTGTTGCAACTCACAGTCTGGGGCATT  
>AF484506..1  
TTCTACTGCAATACATCAGGACTGTTTAATAGTACATGGGAAAATGGTACATTAAATAGTGCGGAG-----  
-----

-----  
GGAAATGATACAATCACACTCCCATGCAGAATAAAACAAATTATAAACATGTGGCAGGAAGTAGGAAAAGCAA  
TGTATGCCCCCTCCCATTTGAAGGACTAATCCAATGTTTCATCAAAT---  
ATTACAGGACTATTGTTGACAAGAGATGGTGGTGTAAATAATAGT-----  
-----  
-----  
CAGAATGAGACCTTCAGGCCTGGAGGGGGAGATATGAGAGACAATTGGAGAAGTGAATTATACAAATATAAAG  
TAGTAAAAATTGAACCACTA---GGTATAGCACCCACCAAGGCAAAGAGAAGAGTGGTG-----  
-----GAAAAAGAAAAAAGAGCA---ATAGGC---CTGGGAGCT-----  
ATGTTTCCTTGGGTTCTTGGGAGCA---GCAGGAAGCACGATG---GGCGCAGCGTCA---  
CTGACGCTGACGGTACAG---GCCAGACAG---TTATTG---TCTGGTATAGTGCAACAGCAAAAC---  
AATTTG---CTGAGG---GCTATAGAGGCGCAACAGCATCTGTTGCAACTCACAGTCTGGGGCATT  
>AF484513..1  
TTCTACTGCAATACATCAGAACTGTTTAATAGTACATGGGGGAATTCTAGTACATCAACTAGTACAGGGGTA-  
-----  
-----  
AATAAGAGTACAATCACTATCCCATGCAGAATAAAACAAATTATAAACATGTGGCAGGAAGTAGGAAAAGCAA  
TGTATGCCCCCTCCCATTCGAGGACTAATCAAATGTTTCCTCAAAT---  
ATTACAGGACTATTGTTGGTAAGAGATGGTGGTGCAACTAATAAT-----  
-----  
-----  
AGTCAGAATGAGACCTTCAGACCTGGAGGAGGAGATATGAGAGACAATTGGAGAAGTGAATTATACAAATATA  
AAGTAGTAAGACTTGAACCACTA---GGTCTAGCACCCACCAAGGCAAAGAGAAGAGTGGTG-----  
-----GAAAGAGAAAAAAGAGCA---ATAGGA---CTGGGAGCT-----  
---ATGTTTCCTTGGGTTCTTGGGAACA---GCAGGAAGCACGATG---GGCGCAGCGTCA---  
CTGACGCTGACGGTACAG---GCCAGACAG---TTATTG---TCTGGTATAGTGCAACAGCAAAAC---  
AATTTG---CTGAGG---GCTATAGAGGCGCAACAGCATCTGTTGCAACTCACAGTCTGGGGCATT  
>AF484518..1  
TTCTACTGCAATACAACAGTACTGTTTAATAGCACATGGGAAAATAATAGTACATGGGGTAATGAGAGT----  
-----  
-----  
GCAATGGGTAATGTCACACTCCCATGCAGAATAAAACAAATTATAAACATGTGGCAGGGAGTAGGAAAAGCAA  
TGTATGCCCCCTCCCATTTGAAGGACTAATCAGCTGCTCATCAAAT---  
ATTACAGGATTACTGTTGACAAGAGATGGTGGTGGAAATGAAAGT-----  
-----  
-----  
AGTCAGAATGAGACCTTCAGACCTGGAGGGGGAGATATGAGAGACAATTGGAGAAGTGAATTATATAAATATA  
AAGTAGTAAGAATTGAACCATTA---GGTCTAGCACCCCTCCAAGGCAAAAAGAAGAGTAGTA-----  
-----GAAAGAGAGAAAAAGAGCA---ATTGGA---CTAGGAGCT-----  
---ATGTTTCCTTGGGTTCTTGGGAGCA---GCAGGAAGCACGATG---GGCGCAGCGTCA---  
CTGACGCTGACGGTACAG---GCCAGACAG---CTACTG---TCTGGTATAGTGCAACAGCAAAAC---  
AATTTG---CTGAGG---GCTATAGAGGCGCAACAGCACCTGTTGCAACTCACAGTCTGGGGCATT  
>AY304496..1  
TTCTACTGCAATACATCAGGACTGTTTAATGGTGTATGGAAGAATAATACATCAGATAATGAAACGGTAAAT-  
-----  
-----  
GGAAGTGAGACAATAACAATCCCATGCAGAATAAAACAAATTATAAACACGTGGCAAGGAGTAGGAAGAGCAA  
TGTATGCCCCCTCCCATTAGAGGACTAATCCGATGTTTCATCAAAC---  
ATTACAGGACTATTGTTAACAAGAGATGGTGGTACAAATGGTGTCT-----  
-----  
-----  
AGTCAGAAGGAGACCTTCAGACCCGAGGAGGAGATATGAGAGACAATTGGAGAAGTGAATTATACAAATATA  
AAGTAGTAAAAATTGAACCATTA---GGTCTAGCACCCACCAGGGCTAAAAGAAGAGTGGTG-----  
-----GAAAGAGAAAAAAGAGCA---ATAGGA---CTAGGAGCT-----  
---ATGTTTCCTTGGGTTCTTGGGAACA---GCAGGAAGCACGATG---GGCGCAGTGTCA---  
CTGACGCTGACGGTACAG---GCCAGACAG---GTACTG---TCTGGTATAGTGCAAGCAGCAAAAC---  
AATTTG---CTGAGG---GCCATAGAGGCGCAACAGCATCTGTTGCAACTCACAGTCTGGGGCATT  
>AF484480..2  
TTCTACTGCAATACATCAAACTGTTTAATAATACATTTAATACTAGTGATTGGAGGACTTATAATACATCAA  
ATAGT-----

-----  
ACAGGGAATGAGACAATCACACTCCCATGCAGAATAAAACAAATTATAAACATGTGGCAGGGAGTAGGAAGAG  
CAATGTATGCCCCCTCCCATTTGAGGGACTAATCAGATGTTTCATCAAAT---  
ATTACAGGACTATTGTTGACAAGAGATGGGGGTAATGCAAATAATACT-----  
-----  
-----  
AATCAAAGTGAGACCTTCAGACCTGGAGGAGGAGATATGAGAGACAATTGGAGAAGTGAATTATACAAATATA  
AAGTAGTAAGAATTGAGCCAATA---GGTCTAGCACCCACCAAGGCAAGGAGAAGAGTGGTG-----  
-----GAAAGAGAAAAAAGAGCA---ATAGGA---CTAGGAGCT-----  
---ATGTTCCCTTGGGTTCTTGGGAGCA---GCAGGAAGCACGATG---GGCGCAGCGTCA---  
CTGACGCTGACGGTACAG---GCCAGACAG---GTGTTG---TCTGGTATAGTGCAACAGCAAAAC---  
AACTTG---CTGAAG---GCTATAGAGGCGCAACAGCATCTGTTGCAACTCACAGTCTGGGGCATT  
>AF484485..1  
TTCTACTGCAATACATCAGAATTGTTTAATAATAGTGTATGGACATCAAATAATACAGGGATGTCAAATAGT-  
-----  
-----  
ACAAAGGCAAATATCACACTCCCGTGCAGAATAAAACAAATTATAAACATGTGGCAGGGAGTAGGAAAAGCAA  
TGTATGCCCCCTCCCATTTGAGGACAAATCAGATGCTCGTCAAAT---  
ATTACAGGATTATTGTTGACAAGAGATGGTGGTGCAAAATAATAAT-----  
-----  
-----  
AGTCAGAATGAGACCTTCAGACCTGGAGGAGGAGATATGAAAGACAATTGGAGAAGTGAATTATACAAATATA  
AAGTAGTAAGACTTGAACCACTA---GGTCTAGCACCCACCAAGGCAAAGAGAAGAGTGGTG-----  
-----GAAAGAGAAAAAAGAGCA---ATAGGA---CTGGGAGCT-----  
---ATGTTCCCTTGGGTTCTTGGGAGCA---GCAGGAAGCACGATG---GGCGCAGCGTCG---  
CTGACGCTGACGGTACAG---GCCAGACTA---TTATTG---TCTGGTATAGTGCAACAGCAAAAC---  
AATTTG---CTGAGG---GCTATAGAGGCGCAACAGCATCTGTTGCAACTCACAGTCTGGGGCATT  
>AF484486..1  
TTCTATTGCAATACATCAGGACTGTTTAATAGTACATGGAGGAATGATACATCAAGTAGTACATGGAGGAATG  
ATACATCAAGT-----  
-----AGTACA-----  
AAGCCAGATGAGACACTCACACTCCCATGCAGGATAAAACAAATTATAAACCTGTGGCAGGAAGTAGGAAGAG  
CAATGTATGCCCCCTCCCATTTGAGGAAACATCACATGTTTCATCAAAT---  
GTTACAGGACTATTGTTGACAAGAGATGGTGGTACACATAATAATAAT-----  
-----  
-----  
AGTCAGACTGAGACCATCAGGCCTGGAGGAGGAGATATGAGAAACAATTGGAGAAGTGAATTATACAAATATA  
AAGTAGTAAGAATTGAGCCAATA---GGCCTAGCACCCACCAAGGCAAAGAGAAGAGTGGTG-----  
-----GAAAGAGAAAAAAGAGCA---ATAGGC---CTGGGAGCT-----  
---ATGTTCCCTTGGGTTCTTGGGAGCA---GCAGGAAGCACGATG---GGCGCAGCGTCA---  
CTGACGCTGACGGTACAG---GCCAGACAA---GTATTG---TCTGGTATAGTGCAACAGCAAAAT---  
AATTTG---CTGAGG---GCTATAGAGGCGCAACAGCACCTGTTGCAACTCACAGTCTGGGGCATT  
>AF484487..1  
TTCTACTGTGATACAACAGGACTGTTTAATGGTACAAATAGTACAGGGGGA-----  
-----  
-----  
GATAATGAGACAATCACACTCCAATGCAGAATAAAACAAATTATAAACATGTGGCAGGGAGTAGGAAGAGCAA  
TGTATGCCCCCTCCCATTTGAGGGCAAATCTATTGCTCATCAAAT---  
ATTACAGGACTATTGCTGACAAGAGATGGTGGTAACAATGATACG-----  
-----  
-----  
GGGGAGGAGATTTTCAGACCTGTAGGAGGAGATATGAGAGACAATTGGAGAAGTGAATTATACAAATATAAAG  
TAGTAAGAATTGAACCACTA---GGTCTAGCACCTCCAAGGCAAGGAGAAGAGTGGTG-----  
-----GAAAGAGAAAAAAGAGCA---ATAGGA---CTAGGAGCT-----  
GTGTTCCCTTGGGTTCTTGGGAGCA---GCAGGAAGCACGATG---GGCGCAGCGTCG---  
CTGACGCTGACGGTACAG---GCCAGACAG---TTATTG---TCTGGTATAGTGCAACAGCAAAAC---  
AATTTG---CTGCAG---GCTATAGAGGCGCAACAGCATCTGTTGCAACTCACAGTCTGGGGCATT  
>AF484519..2  
TTCTATTGCAACACATCAGGACTGTTTAATAGTACATGGACATCAAATAGTACATCAAATAGTACAAAGGTAA  
AT-----

-----  
AGTACTGAGCCAATCACACTCCAATGCAGAATAAAACAAATTATAAATATGTGGCAGGGAGTAGGAAGAGCAA  
TGTATGCCCCGCCATTGAAGGACTAATTCATTGTTTCATCAAAT---  
ATTACAGGACTACTGTTGACAAGAGATGGTGGTACAAATAATACT-----  
-----  
-----  
AGTCAGAATGAGACTTTCAGACCTGGAGGAGGAAATATGAGAGACAATTGGAGAAGTGAATTATACAAATATA  
AAGTAGTAAGAATTGAACCAATA---GGTCTAGCACCCACCAAGGCAAAGAGGAGAGTGGTG-----  
-----GAAAGAGAAAAAAGAGCA---ATAGGA---CTAGGAGCT-----  
---ATGTTCCCTTGGGTTCTTGGGAACA---GCAGGAAGCACGATG---GGCGCAGCGTCA---  
ATAACGCTGACGGTACAG---GCCAGACAG---TTACTG---TCTGGTATAGTGCAACAGCAAAAC---  
AATTTG---CTGAGG---GCTATAGAGGCGCAACAGCATCTGTTGCAACTCACAGTCTGGGGCATT  
>AF484494..1  
TTCTACTGCAATACATCAGGACTGTTTAATAATAGTGTATGGAATACTAGTGTATGGAGAAATGATAGTACAT  
TA-----  
-----  
GATAATGAGACTATCACACTCCCATGCAGAATAAAACAAATTATAAACATGTGGCAAGGAGTAGGAAAAGCAA  
TGTATGCCCCCTCCCATTTGAAGGACGAATCAGTTGTTTCATCAAAT---  
ATTACAGGACTATTGTTGACAAGAGATGGTGGTGCAAAATAATAAT-----  
-----  
-----  
AGTCAGAATGAGACCTTCAGACCTGGAGGAGGAGATATGAGAGATAATTGGAGAAGTGAATTATACAAATACA  
AAGTAATAAGAATTGAACCACTA---GGTCTAGCACCCACCAAGGCAAAAAGAAGAGTGGTG-----  
-----GAAAGAGAAAAAAGAGCA---ATAGGA---CTAGGAGCT-----  
---ATGTTCCCTTGGGTTCTTGGGAGCA---GCAGGAAGCACGATG---GGCGCAGCGTCA---  
CTGACGCTGACGGTACAG---GCCAGACAG---TTATTG---TCTGGTATAGTGCAACAGCAAAAC---  
AATTTG---CTGAGG---GCTATAGAGGCGCAACAACATCTGTTGCAACTCACAGTCTGGGGCATT  
>AF484495..2  
TTCTACTGCAACACAACAGGATTGTTTAATCATAGTAAATGGAATAATAATAATACATCAGAATGGAATAAT-  
-----  
-----  
ACAGATAAGATAATCACACTCCCATGCAGACTAAACAAATTATAAACATGTGGCAGGGAGTAGGAAGAGCTA  
TGTATGCCCCCTCCCATTTGAAGGAGAAATTAAATGTTTCATCAAAT---  
ATTACAGGACTATTGTTAACAAGAGATGGAGGTACAAATAGTACT-----  
-----  
-----  
CAGAATGAGACCTTCAGACCTGGAGGGGGAGATATGAGAGACAATTGGAGAAGTGAATTATACAAATATAAAG  
TAGTAAGAATTGAACCACTA---GGTCTAGCACCCACCAGAGCAAAGAGAAGAGTGGTG-----  
-----CAAAGAGAAAAAAGAGCA---ATAGGA---CTGGGAGCT-----  
ATGTTCCCTTGGGTTCTTGGGAGCA---GCAGGAAGCACGATG---GGCGCAACGTCG---  
ATGGCGTTGACGGTACAG---GCCAGACAA---TTGTTG---TCTGGTATAGTGCAACAGCAAAAC---  
AATTTG---CTGAGG---GCTATAGAGGCGCAACAGCATCTGTTGCAACTCACAGTCTGGGGCATT  
>AF484497..1  
TTCTACTGCAATACATCAGGACTGTTTAATAGTGAATGGACATCGTCTAAAGGTGAATGGACAGGGGTAGAAA  
AGAAT-----  
-----  
AGTACAAGCAGCAACAACAACCTCCCATGCAGAATAAAACAAATTATAAACATGTGGCAGGGAGTAGGAAAAG  
CTATGTATGCCCCCTCCCATTTAAAGGACAAATCAGATGTTTCATCAAAT---  
ATTACAGGACTATTGTTGACAAGAGATGGTGGTGTAATAATAAT-----  
-----  
-----  
AGTCAGGAGACCTTCAGACCTGGAGGAGGAGATATGAGAGACAATTGGAGAAGTGAATTATACAAATATAAAG  
TAGTAAGAATTGAACCACTA---GGCCTAGCACCCACCAAGGCAAAAAGAAGAGTGGTG-----  
-----GAAAGAGAAAAAAGAGCA---ATAGGA---CTAGGAGCT-----  
TTGTTCCCTTGGGTTCTTGGGAGCA---GCAGGAAGCACAAATG---GGCGCAGCGTCA---  
CTGACGCTGACGGTACAG---GCCAGACAG---GTATTG---GCTGGTATAGTGCAACAGCAAAAC---  
AATTTG---CTGAGG---GCTATAGAGGCGCAACAGCATCTGTTGCAACTCACAGTCTGGGGCATT  
>AF484498..2  
TTCTACTGCAATACAGCAAGATTGTTTAATTATGAATGGAGTAATAATACATTAGCTAGTACAGGGAATGACA  
GT-----

-----  
AAAGGGAATGACAGTATCACACTCCAATGCAGAATAAAACAAATTATAAACATGTGGCAGGGAGTAGGAAAAG  
CAATGTATGCCCCCTCCCATTTGAGGGACTAATCACCTGTTTCATCAAAT---  
ATTACAGGACTATTGTTGACAAGAGATGGTGGTGCAAATAATAAT-----  
-----  
-----  
AGTCAGAATGAGACCTTCAGACCTGGAGGAGGAGATATAAGGGACAATTGGAGAAGTGAATTATACAAATATA  
AAGTAGTAAAACTTGAACCACTA---GGTCTAGCACCCACCAGGGCAAAGAGAAGAGTGGTG-----  
-----GAAAGAGAAAAAAGAGCA---ATAGGA---CTAGGAGCT-----  
---ATGTTCCCTTGGGTTCTTGGGAGCA---GCAGGAAGCACGATG---GGCGCAGCGTCC---  
CTGACGCTGACGGTACAG---GCCAGACAG---TTATTG---TCTGGTATAGTGCAACAGCAAAAT---  
AATTTG---CTAATG---GCTATAGAGGCGCAACAGCATCTGTTGCAACTCACAGTCTGGGGCATT  
>AF484499..1  
TTCTACTGCAATACATCAAAAGCTGTTTAAATAGTACATGGACAGGGGGTGGAAATATCACAAATATCACA-----  
-----  
-----  
AGTATCACAAATATCACACTCCCATGCAGAATAAAACAAATTATAAACATGTGGCAGGGAGTAGGCAAAGCAA  
TGTATGCCCCCTCCCATTTGAAGGACTAATCCAATGTTTCATCAAAT---  
ATTACAGGACTATTATTGACAAGAGATGGTGGTGCAACTAATGAT-----  
-----  
-----  
AGTCAGAGTGAGACCTTTAGACCTGCAGGAGGAGATATGAGAGATAATTGGAGAAGTGAATTATACAAATATA  
AAGTAGTAAGAATTGAACCACTA---GGTCTAGCACCCACCAAGGCAAAGAGAAGAACAGTG-----  
-----GAAAGAGAAAAAAGAGCA---ATAGGA---CTAGGAGCT-----  
---ATGTTCCCTTGGGTTCTTGGGAGCA---GCAGGAAGCACGATG---GGCGCAGCGTCA---  
CTGACGCTGACGGTACAG---GCCAGACTG---TTATTG---TCTGGTATAGTGCAACAGCAAAAC---  
AATTTG---CTGAGG---GCTATAGAGGCGCAACAGCATCTGTTGCAACTCACAGTCTGGGGCATT  
>U36871..1  
TCCTACTGCAATACATCAAAACTGTTTAAATAGTACATGGAGGAATAATAATACATCAAATAGTACAGGGGTAA  
ATAGT-----  
-----ACA---  
GGGGAAAATGAGATAATCAAACCTCCCATGCAGAATAAAACAAATTGTAAATATGTGGCAGGGAGTAGGAAAAG  
CAATGTATGCCCCCTCCCATTTGAAGGGCTAATCAATTGTTTCATCAAAT---  
ATTACAGGACTATTGTTGACAAGAGATGGTGGTGCCAATAATAGT-----  
-----  
-----  
CAGAATGAGACCTTCAGACCTGGAGGAGGAGATATGAGGGACAATTGGAGAAGTGAATTATACAAATATAAAG  
TAGTAAAACTTGAACCACTA---GGTCTAGCACCCACCAGGGCAAAGAGAAGAGTGGTG-----  
-----GAAAGAGAAAAAAGAGCA---ATAGGA---CTAGGAGCT-----  
ATGTTCCCTTGGGTTCTTGGGAGCA---GCAGGAAGCACGATG---GGCGCAGCGTCA---  
CTGACGCTGACGGTACAG---GCCAGACAG---TTAATG---TCTGGTATAGTGCAACAGCAAGAC---  
AATTTG---CTGAGG---GCTATAGAGGCGCAACAGCATCTGTTGCAACTCACAGTCTGGGGCATT  
>EF575364..1  
TTCTACTGCAACACATCAGGACTATTTAATGGTACATGGAGAAATGCTACATCAAATAGTACACAG-----  
-----  
-----  
CTGAATGGTACAATCACGCTCCCATGCAGAATAAAACAAATTATAAACATGTGGCAAGAAGTAGGAAAAGCAA  
TGTATGCCCCCTCCCATTTGAAGGATTCATCAATTGTTTCATCAAAT---  
ATTACAGGACTATTGTTGGTAAGAGATGGTGGTAGTAATGATGAT-----  
-----  
-----  
AGTCAGAATGAGACCTTCAGACCTGGAGGAGGAGATATGAGAGACAATTGGAGAAGTGAATTATACAAATATA  
AGGTAGTAAGAATTGAACCACTA---GGTCTAGCACCCACCAAGGCAAAAAGAAGAGTGGTG-----  
-----GAAAGAGAAAAAAGAGCA---ATAGGA---CTGGGAGCT-----  
---ATGTTCCCTTGGGTTCTTGGGAGCA---GCAGGAAGCACGATG---GGCGCAGCGTCA---  
ATAACGCTGACGGTACAG---GCCAGACAG---TTACTG---TCTGGTATAGTGCAACAGCAAAAC---  
AATTTG---CTGAGG---GCTATAGAGGCGCAACAGCATCTGTTGCAACTCACAGTCTGGGGCATT  
>EF575370..1  
TTCTACTGCAATACATCAAAACTGTTTAAATAGTACATGGGAGAATGTGAATGTTACTACATCAAATAATACAG  
GG-----

-----  
CCAGATAGTACAATCACACTCCCATGCAGAATAAAACAAATTATAAACATGTGGCAGGGAGTAGGAAAAGCAA  
TGTATGCCCCCTCCCATTTGAAGGGCTAATCAAATGTTTCATCAAAT---  
ATTACAGGACTATTGTTACTAAGAGATGGTGGTCTAAATACTAGT-----  
-----  
-----  
CAGAGTGAAACCTTCAGACCTGGAGGAGGAGATATGAGGGACAATTGGAGAAGTGAATTATACAAATATAAAG  
TAGTAAAAATTGAACCAATA---GGTCTAGCACCTACCAAGGCAAGGAGAAGAGTGATG-----  
-----GAAAGAGAAAAGAGAGCA---ATAGGA---CTGGGAGCT-----  
GTGTTTCCTTGGGTTCTTGGGAGCA---GCGGGAAGCACAAATG---GGCGCAGCGTCA---  
CTAACGCTGACGGTACAA---GCCAGACAA---GTATTG---TTTGGTATAGTGCAACAGCAAAAC---  
AATTTG---CTGAGG---GCTATAGAGGCGCAGCAGCATCTGCTGCAACTCACAGTCTGGGGCATT  
>EF575429..1  
TTCTACTGCAATACATCAGGACTGTTTAATAATACATTTAATACTAAGAATAGTACAGAGGTAAATAGTAAT-  
-----  
-----  
GGGACAGAGGTAATCATACTCCCATGCAGAATAAAACAAATTACAAACATGTGGCAGAAAGTAGGAAAAGCAA  
TGTATGCCCCCTCCTATTGAAGGACTAATCAGCTGTTTCATCAAAT---  
ATCACAGGACTATTGTTGACAAGAGATGGTGGTAATATAACTAGT-----  
-----  
-----  
CAGAAATGAGACCTTCAGGCCTGCAGGAGGAGATATGAGAGATAATTGGAGAAGTGAATTATACAAATATAAAG  
TAGTAAGAATCGAACCACTA---GGTCTAGCACCCACCAAGGCAAGGAGAAGAGTGGTG-----  
-----GAAAGGGAAAAAAGAGCA---ATAGGA---CTGGGAGCT-----  
TTGTTTCCTTGGGTTCTTGGGAACA---GCAGGAAGCACGATG---GGCGCAGCGTCA---  
CTGACGCTGACGGTACAG---GCCAGACAG---TTATTG---TCTGGTATAGTGCAACAGCAAAAC---  
AATTTG---CTGAGG---GCTATAGAGGCGCAACAGCATCTGTTGCAACTCACAGTCTGGGGCATT  
>EF575482..1  
TTCTACTGCAATACATCACGCCTGTTTAATAGTACATGGAATAATAATACAGGGGATATAGGGAGTAGTGAT-  
-----  
-----  
ACAAATAAGAATATCACAATCCCATGCAGAATAAAACAAATTATAAACATGTGGCAGGGAGTAGGAAAAGCAA  
TGTATGCCCCCTCCCATCGAAGGAAAAATCCAGTGTTAGATCAAAT---  
ATTACAGGGCTCTTACTGACAAGAGATGGTGGTGCAGATGCTAAT-----  
-----  
-----  
CAGAAATGAGACCATCAGACCTGGAGGAGGAGATATGAGAGACAATTGGAGAAGTGAATTATACAAATATAAGG  
TAGTAAGAATTGAACCACTA---GGAATAGCACCCACCAAGGCAAAGAGAAGAGTGGTG-----  
-----GAAAGAGAAAAGAGAGCA---ATAGGA---CTAGGAGCT-----  
GTGTTTCCTTGGGTTCTTGGGAGCA---GCAGGAAGCACGATG---GGCGCAGTGTC---  
TTAACGCTGACGGTACAA---GCCAGACAG---TTATTG---TCTGGTATAGTGCAACAGCAAAGC---  
AATTTG---CTGAAG---GCTATAGAGGCGCAACAGCGTCTGTTGCAACTCACAGTCTGGGGCATT  
>JQ403079..1  
TTCTACTGCAATACATCAGGACTGTTTAATAATATATGGAATGGCACTTGAATGGCACTTTAAATAGTACA-  
-----  
-----  
GGGAGAGAGAATATCACACTCCGATGCAGAATAAAACAAATTATAAACATGTGGCAGGGAGTAGGAAAAGCAA  
TGTATGCCCCCTCCCATTTGAAGGAGTAATTAATTGTACATCAAAT---  
ATTACAGGACTAATATTAACAAGAGATGGTGGTGTCTAATGAGAGT-----  
-----  
-----  
CAGAAATAATAATGAGACCTTCAGACCTGGAGGAGGAGATATGAGGGACAATTGGAGAAGTGAGTTATACAAAT  
ATAAAGTAGTAAAAATTGAACCATTA---GGTCTAGCACCCACCAGGGCAAAAAGGAGAGTGGTG-----  
-----GAAAGAGAAAAAAGAGCA---ATAGGA---CTGGGAGCT---  
-----TTGTTTCCTTGGGTTCTTGGGAGCA---GCAGGAAGCACGATG---GGCGCAGCGTCA---  
ATGGCGCTGACGGTACAG---GCCAGACAA---GTATTG---TCTGGTATAGTGCAACAGCAAAAC---  
AATTTG---CTGAGG---GCTATAGAGGCGCAACAGCATTTGTTGCAACTCACAGTCTGGGGCATT  
>AY773338..1  
TTCTACTGTAATACATCAAGGCTGTTTAATAATACATGGAATGGTACAACATGGTCAAATAAGACAGAC----

-----  
ACCAATGGGACAGTCACACTCCCATGCAGAATAAAACAAATTATAAACATGTGGCAGGAAGTAGGAAAAGCAA  
TGTATGCCCCCCCCCATAGAAGGACTACTTAGATGTTTCATCAAAT---  
ATTACAGGGTATATATTGACAAGAGATGGTGGTTATACCAGTTCT-----  
-----  
-----  
GGCAATGCGACCTTCAGACCTGGCGGAGGAGATATGAGGGACAATTGGAGAAGAGAATTATATACATACAAAG  
TAGTACAAATTGGACCAATA---GGAGTAGTGCCACCAGGGCAAAGAGAAGAGTGGTG-----  
-----GAAAGGGAAAAAAGAGGG---GTT-----  
-----TTCTTGGGAGCA---GCAGGAAGCACGATG---GGCGCAGCGTCA---  
TTGTGCGCTGCCGGTACAG---GCCAGACAG---GTATTG---TCTGGTACAGTGCAACAGCAAAGC---  
AATTTG---CTCAGG---GCTATATCGGCGCAACAGCATCTGTTGCAACTCACGGTCTGGGGCATT  
>EF633445..1  
TTCTACTGTAATACATCAGGGCTGTTTAATAGTACATGGAATAGGACAGGGAATAATAGTAGTAGTACAGGG-  
-----  
-----  
TCAAAATGAGACAATCACACTTCCATGCAGAATAAGACAAATTATAAACATGTGGCAGGGAGTAGGAAAAGCAA  
TGTATGCCCCCTCCCATAGAAGGACTAATTAGATGTTTCATCAAAT---  
ATTACAGGGCTAATATTGACAAGGGATGGTGGTGATAATAGTAGT-----  
-----  
-----  
TCTCACAATGAGACCTTCAGACCTGGAGGAGGAGATATGAGGGACAATTGGAGAAGTGAATTATATAAATACA  
AAGTAGTAAGAATTGAACCAATA---GGATTAGCACCCACCAGGGCAAAGAGAAGAGTGGTG-----  
-----GCAAGGGAAAAAAGAGCA---ATAGGA---CTAGCGAGC-----  
---TGGTTCCTTGGGTTCTTGGGAGCA---GCAGGAAGCACAAATG---GGCGCAGCGTCT---  
GTGACGCTGACGGTACAG---GCCAGACAG---TTATTG---TCTGGTATAGTGCAACAGCAAAAC---  
AATTTG---CTGAGA---GCTATAGAGGCGCAACAGCATCTGTTGCAACTCACAGTCTGGGGCATT  
>FJ900266..1  
TTCTACTGCAATACATCAGGATTGTTTAATAACAGTGATACC-----  
-----  
-----  
TCAAACAGAACTATTACTCTCCCATGTAGAATAAAACAAATTGTAAACATGTGGCAGGGAGTAGGACAAGCAA  
TGTATGCCGCTCCTGTTGCAGGAAAAATTACCTGTAACTCAAAC---  
ATTACAGGCCTACTATTGACAAGAGATGGTGGTAATAATAGTCAT-----  
-----  
-----  
ACCGAGACCTTCAGACCTGGGGGAGGAAATATGAAAGACAATTGGAGAAGTGAAGTATATAAATATAAAGTAG  
TAGAACTTGAACCATTA---GGAGTAGCACCCACCAAGGCAAGAAGAAGAGTGGTGGCG-----  
-----AGAGGGAGAGAAAAAAGAGCA---GTGGGA---ATAGGAGCT-----  
TTGTTCTTTGGGTTCTTGGGAGCA---GCAGGAAGCACTATG---GGCGCAGCGTCA---  
ATAACGCTGACGGTACAG---GCCAGACAA---TTATTG---TCTGGAATAGTGCAACAGCAGAAC---  
AATCTG---CTGAGA---GCTATTGAAGCGCAGCAGCATATGTTGCAGCTCACAGTCTGGGGCATT  
>FJ900267..1  
TTCTACTGCAATACATCAAAATTGTTTAATAATAACACAGAA-----  
-----  
-----  
CCCAATGGCACTATCACTCTTCCATGTAAATAAAACAAATTGTAAACATGTGGCAGGGAGTAGGACAAGCAA  
TGTATGCCGCTCCTATTGCAGGAAACATTACCTGTAACTCAAAT---  
ATTACAGGCTTACTATTGACAAGAGATGGTGGTACGAATCAGAGT-----  
-----  
-----  
GCTACTGAGACATTTCAGACCTGGGGGAGGAAATATGAAAGACAATTGGAGAAGTGAGCTATATAAATATAAAG  
TAGTACAAATTGAACCACTA---GGAGTAGCACCCACCAAGGCAAAAAGACGAGTGGTGGAG-----  
-----AAAGAGAGACCAAAGAGAGCA---GTGGGA---ATAGGAGCT-----  
CTGTTCTTGGGTTCTTGGGAGCA---GCAGGAAGCACTATG---GGCGCAGCATCA---  
ATAACGCTGACGGCACAG---GCCAGACAA---TTATTG---TCTGGAATAGTGCAACAGCAGAAC---  
AATCTG---CTGAGG---GCTATTGAAGCGCAGCAGCATCTGTTGCAGCTCACAGTCTGGGGCATT  
>DQ189088..1  
TTCTACTGCAATACATCAGGACTGTTTAATGACACAGATGAC-----  
-----

-----  
AATGGCACTATCACTCTCCCATGTCTGAATAAAACAAATTGTAAACATGTGGCAGGAAGTAGGACGAGCAAACA  
ATCACCCCTCCCCATGCAGGAAACATTACCTGTGGTTCAAAT---  
ATTACAGGTCTACTATTGACAAGAGATGGTGGTACTGGGAATTGCACTGATGGT-----  
-----  
-  
GGTACTGGGAATTGCACTGAGACCTTCAGACCTGGGGGAGGAAATATGAAAGATAATTGGAGAAGTGAATTAT  
ATAAATACAAAGTAGTAGAAATTGAACCACTA---GGAGTAGCACCCACCAAGCAAGAAGACAAGTGGTA--  
-----AAGAGAGAAAAAAGAGCA---GTGGGA---  
ATGGGAGCT-----TTGTTCATTGGGTTCTTGGCAGCA---GCAGGAGGCACTATG---  
GGCGCGGCGTCA---ATAACGCTGACGGTACAG---GCCAGACAG---TACTG---  
TCTGGAATAGTGCAACAGCAAAAC---AATTTG---CTGAGA---  
GCTATTGAAGCGCAACAGCATATGTTGCAGCTCACAGTCTGGGGCATT  
>MH746246..1  
TTCTACTGCGATACATCAAAATTGTTTAAT-----  
-----  
-AATAATACAAAAGCATCA-----  
GCATCCAATGGCACTATCACTATCCCATGTAAAATAAAACAAATTATAAACATGTGGCAGGGAGTAGGACAAG  
CAATGTATGCCCTCCCATTCAGGAAACATTACCTGTTCGTTCAAAC---  
ATTACAGGCCTACTATTGATAAGAGATGGTGGTAGTAATCAGAAT-----  
-----  
-----  
AATTCTGAGGAGATCTTTAGACCTGGGGGAGGAAATATGAAAGACAATTGGAGAAGTGAAGTATATAAATATA  
AAGTAGTAGAAATTGAGCCGCTA---GGAGTAGCACCCACCAAGGCAAGAAGACCAGTGGTG-----  
-----AGCAGAGAAAAAAGAGCA---GCAGGA---ATAGCAGCG-----  
---TTGTTCCTTGGGTTCTTGAGCA---GCAGGAAGCACTATG---GGCGCAGCGTCA---  
ATAACGCTGACGGTACAG---GCCAGACAA---TTATTG---TCTGGAATAGTGCAACAGCAAAAC---  
AATTTG---CTGAGG---GCTATTGAAGCGCAACAGCATATGTTGCAGCTCACAGTCTGGGGCATT  
>FJ771008..1  
TTCTACTGTAATACATCAGGACTGTTTAAATTCAATGCCTCATCCGGTGAG-----  
-----  
-----  
AATAGTACAAATATCACTCTCCCATGTAGAATAAAACAAGTTATAAACATGTGGCAGGAAGTAGGACGAGCAA  
TGTATGCCGCTCCTATTGAAGGAAAAATTTATTGTAGCTCAAAT---  
ATTACAGGTCTACTATTGACTAGAGATGGTGGTACTAATGATACT-----  
-----  
-----  
AATGGTACTGAGACCTTCAGACCTGGGGGAGGAGATATGAGAGACAATTGGAGAAGTGAATTATATAAATATA  
AGGTAGTAAGAATTGAACCACTA---GGAGTAGCACCCACCAAGGCAAAAAGACAAGTGGTG-----  
-----CAGAGAGAAAAAAGAGCA---GTGGGA---CTAGGAGCT-----  
---GTGTTCCTTGGGTTCTTGAGCA---GCAGGAAGCACTATG---GGCGCAGCGTCA---  
ATAACGCTGACGGTACAG---GCCAGACAA---TTATTG---TTTGAATAGTGCAACAGCAGAAC---  
AATCTG---CTGAGG---GCTATTGAAGCACAACAGCATATGTTGCAGCTCACAGTCTGGGGCATT  
>KJ849782..1  
TTCTACTGCAATACATCAGAACTGTTTAATGACACAGGCAAT-----  
-----  
-----GAC---  
ACTAGTGCCGCTACTATCACTCTCCCATGTAAAATAAAACAAGTTATAAACATGTGGCAGGAAGTAGGAAAAG  
CAGTGTATACTGCTCCCATTCAGGAAACCTTGCTGTAACCTCAACT---  
ATTACAGGTCTACTATTGACAAGAGATGGTGGT-----  
-----  
CAGGACAATAATAGT---  
ACTACTGAGATCTTCAGACCTGGGGGAGGAAATATGAAAGACAATTGGAGAAGTGAAGTTATATAAATATAAAG  
TAGTAGAAATTGAACCACTA---GGAGTAGCACCCACCAAGGCAAAAAGACAAGTGGTG-----  
-----CAGAAGCAAAAAGAGCA---GTGGGG---CTGGGAGCT-----  
ATGTTCTTGGGTTCTTGAGCA---GCAGGAAGCACTATG---GGCGCAGCGTCA---  
ATAACGCTGACGGCACAG---GCCAGACAA---GTATTG---TTTGAATAGTGCAACAGCAGAGC---  
AATTTG---CTGAGG---GCTATTGAAGCGCAACAGCACATGTTGCAGCTCACAGTCTGGGGCATT  
>KT427774..2

TTCTACTGCAATACATCAAAACTGTTTAAATGACAATAGCACTCAAAATCC-----  
-----  
-----  
AATAATGACACTATCACTCTCCCATGTCTGAATAAAACAAATGGTAAACATGTGGCAGGAAGTGGGGCGAGCAA  
TGTATGCCGCTCCCATTTGCAGGGAACATTACCTGTAATTCAAAT---  
ATTACAGGTCTACTATTGGTAAGAGATGGTGGAAATGCTGGAAATAAT-----  
-----  
-----  
ACTAATAAGACTGAGATCTTCAGACCTGGGGGAGGAAATATGAAAGACAACCTGGAGAAGTGAATTATATAAAAT  
ATAAAGTAGTAGAAATTCAGCCACTA---GGAGTAGCACCCACCAGGGCAAAAAGACAAGTGGTG-----  
-----AAGAGAGAAAAAAGAGCA---GTGGGA---CTGGGAGCT---  
-----TTGTTTCCTTGGGTTCTTGGGAGCA---GCAGGAAGCACTATG---GGCGCAGCGTCA---  
ATAACGCTGACGGTACAG---GCCAGACAA---TTATTG---TCTGGTATAGTGCAACAGCAGAAT---  
AATCTG---CTGAGG---GCTATTGAAGCGCAACAGCATCTGTTGCAGCTTACAGTCTGGGGCATT  
>MG365764..1  
TTCTACTGTAATACATCAGGACTGTTTAAATAATAAC-----  
-----  
-----ACA---  
GAATCCAATGACACTATCACTCTCCCATGTCTGAATAAGACAAATTGTAAACATGTGGCAGGAAGTAGGAAAAG  
CAATGTATGCCGCTCCCATTTGCAGGAAACCTTGCCTGCAGCTCAAAC---  
ATTACAGGTCTACTATTGACAAGAGATGGTGGTCAGAGTAATGGGACTAGTAAT-----  
-----  
-----  
GGGACTACTGAGACCTTCAGACCTGGGGGAGGAAATATGAAAGACAATTGGAGAAGTGAATTATATAAAATATA  
AAGTGGTAGAAATTGAACCACTA---GGAGTAGCACCCACCAAGGCAAGAAGACCAGTGGTG-----  
-----AAGAGAGAAAAAAGAGCA---GTGGGAATAATAGGAGCT-----  
---TTGTTTCCTTGGGTTCTTGGGAGCA---GCAGGAAGCACTATG---GGCGCAGCGTCA---  
ATAACGCTGACGGTACAG---GCCAGACAA---TTATTG---TCTGGAATAGTGCAACAGCAGAGC---  
AATTTG---CTGAGG---GCTATTGAAGCGCAACAGCATATGTTGCAGCTCACAGTCTGGGGCATT  
>KX181923..1  
TTCTACTGCAATACATCAAGACTGTTTAAATGACACAAAA-----  
-----  
-----  
TTCAATGACACTATCGTTCTCCCATGTCTGAATAAGACAACCTGGTAAGACTGTGGCAGGAAGTAGGACGAGCAA  
TGTATGCCGTTCCCATTTGCAGGAAGCATTACCTGTAACCTCAACT---  
ATTACAGGTCTACTATTGACAAGAGATGGTGGTCAGCATAATGAACT-----  
-----  
-----  
AATAAACTGAGATCTTCAGACCTGGGGGAGGAAATATGAAAGACAATTGGAGAAGTGAATTATATAAAATATA  
AAGTAGTAGAAATTGAACCACTA---GGAGTAGCACCCACTGGGGCAAGGAGACAAGTGGTG-----  
-----AAGAGAGAAAAAAGAGCAGTAGTGGA---ATAGGAGCT-----  
---GTGCTCATTGGGTTCTTGGGAGCA---GCAGGAAGCACTATG---GGCGCGGCGTCA---  
GTGACGCTGACGGTACAG---GCCAGACAA---TTATTG---TCTGGAATAGTGCAACAGCAGAAC---  
AATTTG---CTGAAG---GCTATTGACGCGCAACAACATATGTTGCAGCTCACAGTCTGGGGCATT  
>KX181926..1  
TTTTACTGCAATACATCAGGCCTGTTTAAATGACTCAATAATA-----  
-----  
-----  
AATGGCACTGAGAGTATCACTCTCCCATGTCTGAATAAAACAAATTGTAAACATGTGGCAGGAAGTAGGACGAG  
CAATGTATGCCGTTCTTATTGCAGGAAACATTACCTGTATTTCAAAT---  
ATTACAGGTCTGCTATTAACAAGAGATGGTGGTCTGAACAATGATACT-----  
-----  
-----  
AATCAGACTGAGACCTTCAGACCTGGGGGGGAAATATGAAGGACAATTGGAGAAGTGAATTATATAAAATATA  
AAGTAGTAGAAATTGAACCCCTA---GGGGTAGCCCCCCCAGGGCAAAAAGACAAGTGGTA-----  
-----AAGAGAGAAAAAAGAGCA---GTGGGA---ATAGGAGCT-----  
---TTGTTTCCTTGGGTTTTTGGGAGCA---GCAGGAAGCAATATG---GGCGCGGGGTCA---  
ATGACGCTGACGGTACAG---GCCAGACAA---TTGTTG---TCTGGGATAGTGCAACAGCAAAAC---  
AATTTG---CTGAGG---GCTATTGAAGCGCAACAGCATTTGTTGCAGCTCACAGTCTGGGGCATT  
>KX181925..3

TTCTACTGCAATACATCAGCTCTGTTTAAATAATGAAACAGGATCCAATGACACTACAGGA-----  
-----  
-----  
TCCAATAGCACTATCACTCTCCCATGTAGAAATAAAACAAGTTGTAAACATGTGGCAGGAAGTAGGGCGAGCAA  
TGTATACCGCTCCCATTGCAGGAAGCATTACCTGTAACTCAAAT---  
ATTACAGGTCTACTATTGACAAGAGATGGTGGTTATGAAAATAAT-----  
-----  
-----  
CAGACTGAGACCTTCAGACCTGGGGGAGGAAATATGAAAGACAATTGGAGAAGTGAATTATATAAATATAAAG  
TAGTAGAAATTTCAGCCACTA---GGAGTAGCACCCACCAGGGCAAAAAGACCAGTGGTG-----  
-----AGGAGAGAGAAAAAGAGCAGCAGTGGGA---ATAGGAGCT-----  
ATGTTTCCTTGGGTTCTTGGGAGCA---GCAGGAAGCACTATG---GGCGCGGCGTCA---  
ATAGCGCTGACGGTACAG---GCCAGACAA---TTATTG---TCTGGCATAGTGCAACAGCAGAAC---  
AATCTG---CTGAGG---GCTATTGAAGCGCAACAGCATCTGTTGCAGCTCACAGTCTGGGGCATT  
>MK041565..1  
TTCTACTGCAATACAACAAATCTATTTGGTGACACAATGGTAAATAAC-----  
-----  
-----  
ACAGATGACACAATCACACTCCCATGTAGAAATAAAACAAATTGTAAACATGTGGCAGGAAGTGGGACGAGCAA  
TGTATGCCAATCCTGTTGCAGGAAACATTACCTGTAACTCAAAT---  
ATTACAGGTCTACTATTGACAAGAGATGGTGGTACTAATAAAACA-----  
-----  
-----  
GATGAACTGAGACCTTTAGACCAGGGGGAGGAAATATGAAAGACAATTGGAGAAGTGAATTATATAAATATA  
AAGTAGTAAAAATTGAACCACTA---GGAATAGCACCCACCAGGGCAAAAAGACTAGTGGTG-----  
-----CAGAGAGAAAAAAGAGCA---GTAGGA---CTGGGAACT-----  
---CTGTTCCCTTGGGTTCTTGGGAGCA---GCCGGAAGCACTATG---GGCGCAGCGTCA---  
ATGACGCTGACGGTACAG---GCCAGACAA---TTATTG---TCTGGAATAGTGCAACAGCAGAGC---  
AATCTG---CTGAGG---GCTATTGAAGCGCAACATCACATGTTGCAGCTCACAGTCTGGGGCATT  
>AY173958..2  
TTCTACTGCAATACATCAGGACTGTTTAAATGACACAGGATCC-----  
-----  
-----  
AATGGCACTATCACTCTCCTATGTCTGAATAAAACAAATGGTAAACATGTGGCAGGAAGTGGGACGAGCAATGT  
ATGCCGCTCCCATCTCAGGAAACATTACCTGTAACTCGAAT---  
ATTACAGGTCTACTATTGACAAGAGATGGTGGTCAGAATAATAAT-----  
-----  
-----  
CAGACTGAGACCTTCAGACCTGGGGGAGGAAATATGAAAGACAATTGGAGAAGTGAATTATATAAGTATAAAG  
TAGTAGAAATTGAACCACTA---GGAGTAGCACCCACCAGGGCAAAAAGACAAGTGGTG-----  
-----AGGAGAGAAAAAAGAGCA---GTGGGA---ATGGGAGCT-----  
TTGTTCCCTTGGGTTCTTGGGAGCA---GCCGGAAGCACTATG---GGCGCGGCGTCA---  
ATAACGCTGACGGTACAG---GCCAGACAA---TTATTG---TCTGGAATAGTGCAACAGCAGAGT---  
AATCTG---CTGAGG---GCTATTGAAGCGCAACAGCATCTGTTGCAGCTCACAGTCTGGGGCATT  
>JF683771..1  
TTCTATTGTAATACATCAGAATTGTTTAAATAATAGTAACTCA-----  
-----  
-----  
AACAAATGGCACTATCACTCTCCCATGTAAATAAAACAAATTATAAACATGTGGCAGGGAGTAGGGCAAGCAA  
TGTATGCCCCCTCCCATTGCAGGAAAAATTACCTGTAACTCAAGT---  
ATTACAGGCCTACTATTGACAAGAGATGGTGGTCAAAGTAATAAGAGTAA-----  
-----  
-----  
GATAATGGGAGTGAGATCTTCAGACCTGGGAGAGGAAATATAAAAGACAATTGGAGAAGTGAAGTATATAAAT  
ACAAAGTAGTAGAAATTGAACCACTA---GGAATAGCACCCACCAAGGCAAAAAGACAAGTGGTA-----  
-----AAGAGAGAAAAAAGAGCA---GTGGAA---ATAGGAGCT---  
-----GTGTTCCCTTACGTTCTTGGGAGCA---GCAGGAAGCACTATG---GGCGCAGCGTCA---  
CTAACGCTGACGGTACAG---GCCAGACAA---TTATTG---TCTGGGATAGTGACAGCAGCAAAAC---  
AATTTG---CTGAAG---GCTATTGAAGCGCAACAGCATCTGTTGCAGCTCACAGTCTGGGGCATT  
>HM068554..1

TTCTACTGCAATACATCAAAACTGTTTAAACAACACAGAATTCAAT-----  
-----  
-----  
GTCAGTGACACTATCATTCTCCCATGTCTGAATAAAGCAAATTGTAAACATGTGGCAGGAAGTAGGACAAGCAA  
TGTATGCTAATCCTATTGCAGGAAACATCACCTGTAACTCAAGT---  
ATTACAGGTATACTATTGACAAGAGATGGTGGTAACGGGAATGAAACTGAG-----  
-----  
-----  
AATAATGATACTGAAATCTTCAGACCTGGGGGAGGAAATATGAAAGACAATTGGAGAAGTGAATTATATAAAT  
ATAAAGTAGTAGAAATTGAACCACTA---GGAGTAGCACCCACCAGGGCAAAAAGACAAGTGGTG-----  
-----AAGAGAGAAAAAGAGAGCA---GCGGGA---ATGGCAGCT---  
-----TTGCTCCTTGGGTTCTTGGGCGCA---GCAGGAAGCACTATG---GGCGCAGCGTCA---  
ATAACGCTGACGGTACAG---GCCAGACAA---TTATTG---TCTGGAATAGTGCAGCAGCAGAAC---  
AATCTG---CTGAGG---GCTATTGAAGCTCAACAGCATATGTTGAAGCTCACAGTCTGGGGCATT  
>JX140671..1  
TTCTACTGTAATACATCAAAACTGTTTAAATGAAACAGAATCCGGTAACACA-----  
-----  
-----  
CAGAAATGACACTATCATACTCCCATGTAGAATAAAACAAATTATAAACCTGTGGCAGCAAGTAGGGCGAGCAA  
TGTATGCCGCTCCCATTGCAGGACACATTACATGTAATTCAAGT---  
ATTACAGGGCTACTACTAATAAGAGATGGTGGTCAGCATAATAGTAGT-----  
-----  
-----  
AATGATGCTGAGATCTTCAGACCTGGGGGAGGAGATATGAGAGACAATTGGAGAAGTGAATTATACAAATATA  
AAGTAGTAGAAATTGAACCACTA---GGAGTAGCACCCACCAAGGCAAAAAGACAAGTGGTG-----  
-----AGGAGAGAAAAAGAGCA---GTGGGA---CTAGGAGCT-----  
---CTGTTCCCTTGGGTTCTTGAGTACA---GCAGGAAGCACTATG---GGCGCAGCGTCA---  
ATAACGCTGACGGTACAG---GCCAGACAA---TTATTG---TCTGGAATAGTGCAACAGCAAAAC---  
AATTTG---CTGAGG---GCTATTGAAGCGCAACAGCATATGTTGCAGCTCACAGTCTGGGGCATT  
>KJ883138..2  
TTCTACTGTAATACATCAAAACTGTTTAAATGAAAAAGAACTCAATAACACA-----  
-----  
-----  
CAGAAATGACACTATCATACTCCCATGTAGAATAAAACAAGTTATAAACCTGTGGCAGGAAGTAGGGCGAGCAA  
TGTATGCCGCTCCCATTGCAGGAAACATTACATGTCATTCAAAT---  
ATTACAGGGCTACTATTGACAAGAGATGGTGGTCAAAGGAATGAGACT-----  
-----  
-----  
AATACTACTGAGATCTTCAGGCCTGGGGGAGGAGATATGAGAGACAATTGGAGAAGTGAATTATATAAATATA  
AAGTAGTAGAAATTGAACCACTA---GGAGTAGCACCCACCAAGGCAAAAAGACAAGTGGTG-----  
-----AGGAGAGAAAAAGAGCA---GTGGGA---CTAGGAGCT-----  
---CTGTTCCCTTGGGTTCTTGAGCGCA---GCAGGAAGCACTATG---GGCGCGGCGTCA---  
ATGACGCTGACGGTACAG---GCCAGACAA---TTATTG---TCTGGAATAGTGCAACAGCAAAAC---  
AATTTG---CTGAGG---GCTATTGAAGCGCAACAGCATATGTTGCAGCTCACAGTCTGGGGCATT  
>DQ979023..1  
TTCTACTGCAATACATCAAAATTGTTTACAAATAACATAAGC-----  
-----  
-----  
TCCAATGGGACTATCACTCTCCCATGTAGAATAAAACAGATTATAAACATGTGGCAGGGAGTAGGACAAGCAA  
TGTATACCGCCCCCATTGCAGGAAACATTACATGTAACTCAAAT---  
ATTACAGGCTTACTCATAACAAGAGATGGTGGTCAGGAGGGGCGTAAT-----  
-----  
-----  
GATACTGAAGAAATATTTCAGACCTGGGGGAGGAAATATGAAAGACAATTGGAGAAGTGAAGTATATAAATATA  
AAGTAGTAGAAATTAAACCACTA---GGAATAGCACCCACCGAGGCAAGGAGACAAGTGGTG-----  
-----AAGAGAGAAAAAGAGCA---GCAGGA---CTAGGACTT-----  
---TTGTTCCCTTGGGTTCTTGGGAGCA---GCAGGAAGCACTATG---GGCGCAGCGTCA---  
ATAACGCTGACGGTACAG---GCCAGACAT---TTATTG---TCTGGAATAGTGCAACAGCAAAAC---  
AATTTG---CTGAAG---GCTATTGAAGCACAAACAGCATATGTTGCAGCTCACAGTCTGGGGCATT  
>DQ979024..1

TTCTATTGCAATACAACAAAATTGTTTAAATGGTAGTGGAACAATGACATTATC-----  
-----  
-----  
ACTAATGGCACTATCACTATCCCATGTAGAATAAAACAAATTGTAAACATGTGGCAGGGAGTAGGACAAGCAA  
TGTATGCCGCTCCCATTGCAGGACAAATTACCTGTAACCTCAAAT---  
ATTACAGGCATAATATTGACAAGAGATGGTGGTAACAAAATGAGACTAAT-----  
-----  
-----  
AAAAATGGGACTGAGATCTTCAGACCTGCAGGAGGAAATATGAAAGACAATTGGAGAAGTGAACCTCTATAAAAT  
ATAAAGTAGTAGAAATTGAACCACTA---GGAGTAGCACCTACCAAGGCAAAAAGACGAGTGGTG-----  
-----ACGAGAGAAAAAGAGCA---TTGGGA---ATGGGAGCC---  
-----TTGTTTCCTTGGGTTCTTGGGAGCA---GCAGGAAGCACTATG---GGCGCAGCGTCA---  
ATAACGCTGACGGTACAG---GCCAGACAA---TTATTG---TCTGGAATAGTGCAACAGCAAAAC---  
AATCTG---CTGAAG---GCCATTGAAGCGCAACAGCATCTGTTGCAGCTCACAGTCTGGGGCATT  
>AF075703..1  
TTCTACTGCAATACATCACTACTGTTTAAATAATACAGTACCT-----  
-----  
-----  
AATAATGGCACTATCACTCTCCCATGTGCAATAAAACAAATTTGTAAACATGTGGCAGGAAGTAGGACGAGCAA  
TGTATGCCGCTCCCATTGCAGGAAACATTACCTGTAACCTCAAAT---  
ATTACAGGTCTGCTATTGACAAGAGATGGTGGTCAGAGTAATAAT-----  
-----  
-----  
AGTGATTCTGAGACCTTCAGACCTGGGGGAGGAGATATGAAAGACAATTGGAGAAGTGAACCTATATAAAATATA  
AAGTAGTAGAAATTGAACCACTA---GGAGTAGCACCCACCAGGCCCAAAAGACCAGTGGTG-----  
-----AGGAGAGAAAGAGAGCA---GTGGCA---ATAGGAGCT-----  
---GTATTCCTTGGGTTCTTGAGCGCA---GCAGGAAGCACTATG---GGCGCGGCGTCA---  
CTAACGCTGACGGTACAG---GCCAGACAA---TTATTG---TCTGGAATAGTGCAACAGCAGAAC---  
AATCTG---CTGCAG---GCTATTGAAGCGCAACAGCATATGTTGCAGCTCACAGTCTGGGGCATT  
>KU168276..3  
TTCTACTGCAATACATCAGGGCTGTTTAAATAATACAGGAACT-----  
-----  
-----  
AATGAACTATCACTCTCCCATGTCAAATAAAACAAATTGTAAACATGTGGCAGGGAGTAGGACGAGCAATGT  
ATGCTGCTCCCATTGCAGGAAACATTACCTGTAGATCAAAC---  
ATTACAGGTCTACTATTGACAAGAGATGGTGGTCAGAGTACTAAT-----  
-----  
-----  
GGTAGTATTGAGACCTTCAGACCTGGGGGAGGAGATATGAAAGACAATTGGAGAAGTGAACCTATATAAAATACA  
AAGTAGTAGAAATTCAACCACTA---GGAATAGCACCCACCAGGGCAAAAAGACAAGTGGTG-----  
-----AAGAGAGAAAAAGAGCA---GTGGGA---ATAGGAGCT-----  
---TTGTTTCCTTGGGTTCTTGGGAGCA---GCAGGAAGCACTATG---GGCGCGGCGGCA---  
ACAACGCTGACGGTACAG---GCCAGACAA---TTATTG---TCTGGAATAGTGCAACAGCAAAAC---  
AATTTG---CTGAGG---GCTATTGAAGCGCAACAGCATATGTTGCAGCTCACAGTCTGGGGCATT  
>AJ249238..1  
TTCTACTGCGATACATCAGGATTGTTTAAATGAAAGTGAAAAG-----  
-----  
-----  
TACAATGGCACTATCATTCTCCCATGTAAATAAAACAAATTATAAACATGTGGCAGGGAGTAGGACAAGCAA  
TGTATTCCGCTCCCATTGCAGGACGCATTAACTGTAACCTCAACT---  
ATTACAGGCCTACTATTAACAAGAGATGGTGGTCAGAGTAATGATACT-----  
-----  
-----  
AATAGGACTGAGACTTTTCAGACCTGAGGGAGGAAACATGAAAGACAATTGGAGAAATGAACCTATATAAAATATA  
AAGTAGTAGAAATTGAACCACTA---GGAGTAGCACCCACCAAGGCAAGAAGACGAGTGGTG-----  
-----CAGAGAGAAAGAGAGCA---GTGGGA---ATAGGAGCT-----  
---CTGTTTCCTTAGATTCTTGGGAGCA---GCAGGAAGCAACATA---GGCGCAGCGTCA---  
ATAACGCTGACGGTACAG---GCCAGACAA---TTACTG---TCTGGAATAGTGCAAGCAGCAAAAC---  
AATTTG---CTGAGG---GCTATTGAAGCGCAACAGCATCTGTTGCAGCTCACAGTCTGGGGCATT  
>AY231157..2

TTCTACTGCGATACATCACAGCTGTTTGATAGTACAGTACTT-----  
-----  
-----  
AATGGCACCATCACTCTCCCATGTCGAATAAAACAAATTGTAAACATGTGGCAGGGAGTAGGAAAAGCAATGT  
ATGCTGCGCCCATTCAGGAAGCATTACCCGTCATTCAAAT---  
ATTACAGGTCTACTATTGACAAGAGATGGTGGTCAGAATAGTAGG-----  
-----  
-----  
AATGAGACCTTCAGACCTGGGGGAGGAGATATGAAAGACAATTGGAGAAGTGAAGTATATAAAATATAAAGTAG  
TAGAAATTGAACCACTA---GGAATAGCACCCACCAGGGCAAAAAGACCAGTGGTG-----  
-----AAGAGAGAAAAAAGAGCG---TTGGGA---ATGGGAGCT-----  
TTGTTTCTTGGGTTCTTGAGCGCA---GCAGGAAGCACTATG---GGCGCAGCGTCA---  
ATAACGCTGACGGCACAG---GCCAGACAA---TTATTG---TCTGGAATAGTGCAACAGCAGAAC---  
AATCTG---CTGAGG---GCTATTGAAGCGCAACAGCATCTGTTGCAGCTCACAGTCTGGGGCATT  
>KU168274..1  
TTCTATTGCAATACATCAGAGTTGTTTAAACTAATATA-----  
-----  
-----  
ACCAATAACACTATCACTCTCCCATGTAGAATAAAACAGATTGTAAAAATGTGGCAGGGAGTAGGACAAGCAA  
TGTATGCCGCTCCCATTGCAGGAAGCATTACCTGTAACTCAAAT---  
ATTACAGGATTACTATTGACAAGAGATGGTGGTCAGGATAATAAAAAATGGG-----  
-----  
-----  
ACTAATAGGACTGAGACCTTCAGACCTGGGGGAGGAAATATGAAAGACAATTGGAGAAGTGAAGTATATAAAAT  
ATAAAGTAGTAGAAATTGAACCACTA---GGAATAGCACCCACCAGGGCAAAAAGACAAGTGGTG-----  
-----CAGAGAGAAAAAAGAGCA---GCGGGA---ATAGGACTT---  
-----TTGTTCTTGGGTTCTTGAGCA---GCAGGAAGCACTATG---GGCGCAGCGTCG---  
ATAACGCTGACGGTACAG---ACCAGACAA---TTATTG---TCTGGAATAGTGCAACAGCAAAAC---  
AATTTG---CTGAAG---GCTATTGAAGCGCAACAGCATATGTTGCAGCTCACAGTCTGGGGCATT  
>AB485659..1  
TTCTACTGCAATACATCAGGACTGTTTAATAGTAGCACGAGCCCCGAAGGAGTGTTTAACACGAGC-----  
-----  
-----  
CACAAAGGAAATATCACTCTCCTATGTAGAATAAAACAGATTATAAACATGTGGCAGGGAGTAGGCCAAGCAA  
TGTATGCCGCTCCCATTGCAGGAAGCATTACCTGTAACTCAAAT---  
ATTACAGGCTTACTATTGACAAGAGATGGTGGTCAGAATAATGAG-----  
-----  
-----  
ACTGAGACCTTCAGACCTGGGGGAGGAAATATGAAAGACAATTGGAGAAGTGAAGTATATAAAATATAAAGTAG  
TAGAAATTGAACCACTA---GGAATAGCACCCACCAGGGCACAAAGACAAGTGGTG-----  
-----AAGAGAGAAAAACGAGCA---GCGGGA---TTAGGACTT-----  
TTGCTCCTTGGGTTCTTGAGCA---GCAGGAAGCACTATG---GGCGCGGCGTCA---  
ATAACGCTGACGGTACAG---GCCAGACAA---TTATTG---TCTGGAATAGTGCAACAGCAAAAC---  
AATTTG---CTGAAG---GCTATTGAAGCGCAACAGCATCTGTTGCAGCTCACAGTCTGGGGCATT  
>HQ236605..2  
TTCTACTGCAATACACAACCACTGTTTAACTACACAAGATATTCCAATGGCACTATCATTTTCGGT-----  
-----  
-----  
TCCAATGGCACTATCACTCTCCCATGCAGAATAAAACAAATTGTAAACATGTGGCAGGAAGTAGGACGAGCAA  
TATATGCCGCTCCAATTGCAGGGAACATCACCTGTCACTCAAAT---  
ATTACAGGCCTACTATTGACAAGAGATGGTGGTAGTGCAATGGTACT-----  
-----  
-----  
GACAAATAGAAGTGAGATCTTCAGACCTGGAGGGGAAACATGAAAGACAATTGGAGAAATGAATTATATAAAAT  
ATAAAGTAGTAAGAATTGAACCACTA---GGAATAGCACCCACCAGGGCACACAGACGAGTGGTG-----  
-----AAGAGACAAAAAAGAGCA---CTCGGA---ATGGGAGCC---  
-----ATGTTTCATTGGGTCTTGAGCA---GCAGGAAGCACTATG---GGCGCAGCGTCA---  
GTGACGCTGACGGTACAG---GCCAGACAA---TTGATG---TCTGGAATAGTGCAACAGCAAAAT---  
AATTTG---CTGATG---GCCATTAAAGCGCAACAGCATCTGTTGCAGCTCACAGTCTGGGGCATT  
>KU168275..1

TTCTACTGCAATACATCAGGGCTGTTTAAATAATACAGTACTC-----  
-----  
-----  
AATAACACTACTATCACTCTCCCATGTGCGAATAAAACAAATTGTAAACATGTGGCAGGGAGTAGGACAAGCAA  
TGTATGCCGCTCCCATTGCAGGAAACATTACCTGTAGATCAAAT---  
ATTACAGGTCTATTATTGACAAGAGATGGTGGTGAGAATAATGAT-----  
-----  
-----  
ACTGAGACCTTCAGACCTGGGGGAGGAGATATGAAAGACAATTGGAGAAGTGAAGTATATAAATACAAAGTAG  
TAGAAATTCAACCACTA---GGAATAGCACCCACCAAGGCAAAAAGACAAGTGGTG-----  
-----AAGAGGGAAAAAAGAGCA---GTTGGA---ATGGGAGCC-----  
TTGTTCCCTTGGGTTCTTGGGAGCA---GCAGGAAGCACTATG---GGCGCGGCGTCA---  
GTAACGCTGACGGTACAG---GCCAGACAA---TTATTG---TCTGGAATAGTGCAACAGCAAAGC---  
AATTTG---CTGAGG---GCTATTGAAGCGCAACAGCATCTGTTGCAGCTCACAGTCTGGGGCATT  
>MH705144..1  
TTCTACTGCAACACAAGTAAGCTGTTTAAACAACCTTGGCTAAATAATAAAACGGAACACAATGGCATTATCA  
ACAGC-----  
-----  
AGCACTGAAATTATGGTGCTTCCGTGTAGAATAAGACAATTTGTAAACATGTGGCAAAGAGTAGGAAGAGCAA  
TGTATGCCCCCTCCCATTGCAGGGGTAATTCAGTGTAATTCAGAT---  
ATCACAGGTCTACTATTGACAAGAGATGGTGGTAATACTGGTAATAAT-----  
-----  
ACAGGAGGTGATGGTAAT-----  
AATACCGACATCCTCAGACCTACAGGGGGAGATATGAGAGACAATTGGAGAAGTGAAGTATATAAATATAAGG  
TAGTAAACCTTGAACCACTA---GGAGTAGCACCCACCAGGGCAAAAAGACAAGTGGTGAAA-----  
-----GGAAAAGAAAGAGAAAAAAGAGCA---GTGGGA---CTGGGAGCT-----  
ATGTTCCCTTGGGTTCTTGGGAGCA---GCAGGAAGCACTATG---GGCGCAGCGTCA---  
ATAACGCTGACGGTACAG---GCTAGACTA---TTATTG---TCTGGTATAGTGCAACAGCAAAGC---  
AATTTG---CTGAGG---GCTATAGAAGCGCAACAGCATATGTTGCAGCTCACAGTCTGGGGCATT  
>AY371158..2  
TTCTACTGCGACACAACAGCACTGTTTAAACAACATTACTTAAACAACAATGGAT-----  
-----  
-----  
AATAATGGTACTATCATTATTCCATGTAGAATAAAACAAATTGTAAACGTGTGGCAAAGAGTAGGGCGAGCAA  
TGTATGCCCCCTCCCATTGCAGGAAAAATTTCAGTGCAACTCAAAT---  
ATCACAGGTCTACTATTGACAAGAGATGGTGGAAAGTAAGGCAAAT-----  
-----  
-----  
AACACAGACATCCTCAGACCTATAGGGGGAGAGATGAGAGACAATTGGAGAAGTGAATTATATAAATATAAGG  
TAGTACAAATTCAACCACTA---GGAATAGCACCCCTCCAGGGCAAAAAGACAAGTGGTG-----  
-----AAGAGAGAAAGAAGAGCA---GTAGGA---ATAGGAGCT-----  
GTGTTCCCTTGGGTTCTTGGGAGCA---GCAGGAAGCACTATG---GGCGCAGCGTCA---  
ATAACGCTGACGGTACAG---GCCAGACAA---TTATTG---TCTGGTATAGTGCAACAGCAAAC---  
AATTTG---CTGAAG---GCTATAGAAGCGCAACAGCATCTGTTGCAGCTCACAGTCTGGGGCATT  
>JX140672..3  
TTCTACTGCAATACATCAGCTCTGTTTAAATACAGAAGCTCTGAAAAATAACACAGGT-----  
-----  
-----  
CAAAATGGCACTACCACCATTATTGTAGAATAAAACAAATTATAAATATGTGGCAAAGAGTAGGAAAAGCAA  
TGTATGCCCCCTCCCATTGCAGGAAAAATTTCAGTGTAAGTCAAGT---  
ATCACAGGTCTAATATTAACAATAGATGGT---AATAGAACAAAT-----  
-----  
-----  
AATAAGAGTGAGACCTCAGACCTGGAGGGGGAGATATGAAAGACAATTGGAGAAGTGAAGTGTATAAATATA  
AGGTAGTGAAAATTGAACCATT---GGAGTAGCACCCACCAGGGCAAAAAGACGAGTGGTG-----  
-----AGCAGAGAGAAAAAGAGCA---GTGGGA---CTAGGAGCT-----  
---ATGTTCCCTTGGGTTCTTGGGAGCA---GCAGGAAGCACTATG---GGCGCGGCGTCA---  
ATAACGCTGACGGTACAG---GCCAGACAA---TTGTTG---TCTGGTATAGTGCAACAGCAAAGC---  
AATTTG---CTGAAG---GCTATTGAAGCGCAGCAGCACTTGTGTCAGCTCACAGTCTGGGGCATT  
>KU749420..1

TTCTACTGTAACACAAGCAGACTGTTTAAATAACACACTGTTTAAATAACACACAGCTTAATAACACA-----  
-----  
-----  
GAAGGAGGGAACATTACTCTTCCATGTAGAAATAAAACAATTTGTAAACATGTGGCAAAGAGTAGGAAAAGCAA  
TGTATGCCCCCTCCATTGCTGGAAGAATTTCAGTGTATCTCAAAT---  
ATCACAGGTCTACTATTGACAAGAGATGGTGGTACTAATGATACGTCT-----  
-----  
-----  
ACAAATGAGACCTTCAGACCTGGAGGGGGAGACATGAGAGATAATTGGAGAAGTGAACTGTATAAATATAAGG  
TAGTAAAAATTGAGCCACTA---GGAGTAGCCCCCACTAGGGCAAAAAGGCGAGTGGTG-----  
-----CAGAGAGAAAAAAGAGCT---GTGGGA---CTAGGAGCT-----  
CTGTTTCCTTGGGTTCTTGGGAGCA---GCAGGAAGCACTATG---GGCGCGGCGTCA---  
ATAACGCTGACGGTACAG---GCCAGAAAC---TTATTG---TCTGGTATAGTGCAACAGCAGAAT---  
AATCTG---CTGAAG---GCTATAGAAGCGCAACAGCATCTGTTGCAGCTCACAGTCTGGGGCATT  
>AJ277824..1  
TTCTACTGCAACACAGATGAGCTGTTTAAATAACAGCTTGTGAATAACACA-----  
-----  
-----  
AAAAAAGAAAATATCACTCTTCCATGTAGAAATAAAACAATTTGTAAACATGTGGCAAAGGGTAGGACAAGCAA  
TGTATGCCCCCTCCTATAGCCGGACAAATTCAGTGCAACTCAAGT---  
ATCACAGGTCTACTATTGACAAGAGATGGT---AACAAAAATGGG-----  
-----  
-----  
TCCGAGACCCTCAGACCTGGAAGGGGAGATATGAGAGACAATTGGAGAAGTGAACTATATAAATATAAGGTAG  
TAAAAATTGAACCCCTA---GGAGTAGCACCCACCAGGGCAAAAAGACAAGTGGTG-----  
-----AAGAGAGAAAGAAGAGCA---GTGGGA---ATAGGAGCT-----  
GTGTTTCCTTGGGTTCTTGGGAGCA---GCAGGAAGCACTATG---GGCGCGGCGTCA---  
ATAACGCTGACGGTACAG---GCCAGACAA---TTATTG---TCTGGTATAGTGCAACAGCAAAGC---  
AATTTG---CTGAAG---GCTATAGAAGCGCAACAGCATCTGTTGCAGCTCACAGTCTGGGGCATT  
>AJ249237..3  
TTCTACTGCAACACAACACTATTCTGTTTAAATCACACAAGAGTAAATGACATTCTGTCTAATAATCACACGAGA-  
-----  
-----  
GAAAAATGACACTATCACTCTTCCATGTAGAAATAAAACAATTTGTAAACATGTGGCAAAGAGTAGGACAGGCAA  
TGTATGCCCCCTCCATTGCCGGAATAATTCAGTGTAACTCAAAT---  
ATCACAGGTCTACTATTAAACAATAGATGGTGGGGAGGGAAATGAG-----  
-----  
-----  
TCCGAGACCCTCAGACCTGGAGGGGGAGATATGAGAGACAATTGGAGAAGTGAACTATATAAATATAAGGTAG  
TAAAAATTGAACCACTA---GGAGTAGCACCCACCAAGGCAAAAAGACAAGTGGTG-----  
-----CAGAGAGAAAAAAGAGCA---GTGGGA---ATGGGAGCT-----  
ATGTTTCCTTGGGTTCTTGGGAGCA---GCCGGAAGCACTATG---GGCGCGGCGTCA---  
ATAACGCTGACGGTACAG---GCCAGAAAC---TTATTG---TCTGGTATAGTGCAACAGCAAAGC---  
AATTTG---CTGAAA---GCTATTGAAGCGCAACAGCATCTGTTGCAGCTCACAGTCTGGGGCATT  
>AF377956..1  
TTCTACTGCAACACAGTAGCTCTGTTTAAATGCAACTAACATGACTAATGCAATGAACAGG-----  
-----  
-----  
TCCAATGGCATTATCACTCTTCCATGTAGAAATAAGACAAATTTGTAAACATGTGGCAAAGAGTAGGACGAGCAA  
TGTATGCCGCTCCATTGCTGGACAAATTCAGTGTAACTCAAGC---  
ATCACAGGTCTAATATTGACAAGAGATGGTGGGAAAAATAATACC-----  
-----  
-----  
AATAATGACACCCTCAGACCTGGAGGGGGAGATATGAGAGACAATTGGAGAAGTGAACTGTATAAATATAAGG  
TAGTAAAAATTGAACCACTA---GGAGTAGCACCCACCAAGGCAAAAAGACAAGTGGTGAAG-----  
-----AGAGAAAGAGAAAAAAGAGCA---GTGGGA---ATAGGAGCT-----  
GTGCTCCTTGGGTTCTTGGGAGCA---GCAGGAAGCACTATG---GGCGCGGCGTCA---  
ATGACGCTGACGGTACAG---GCCAGACAA---TTATTG---TCTGGTATAGTGCAACAGCAAAAC---  
AATTTG---CTGAAG---GCTATAGAAGCGCAACAGCATCTGTTGCAGCTCACAGTCTGGGGCATT  
>JN054264..1

TTCTACTGTAACACAACAAAGCTGTTTAAATTCAGTCTGCTTAACAGTACAAGTACAAATGAAAGTATACCTG  
 AG-----  
 -----  
 ATTATTCTTCCATGTAGAATAAAACAAATTATAAACATGTGGCAAAGAGTAGGAAAAGCAGTGTATTCTCCTCCC  
 CCATTGCAGGGAAAATTTCAGTGTATCTCAAAT---  
 ATCACAGGTCTATTATTGGTGAGGGATGGTGGTAATACATCCCAC-----  
 -----  
 -----  
 AATGACAATGACACCCTCAGACCTATGGGGGGAGATATGAAAGCCAATTGGAGAAGTGAAGTGTATAAATATA  
 AGGTAGTAAAAATTGAGCCACTA---GGAATAGCACCCCTCCAGGGCAAAAAGACGAGTGGTG-----  
 -----CAGAGAGAGAAAAGAGCT---GTGGGA---ATAGGAGCT-----  
 ---TTGCTCTTTGGGTTCTTTGGGAGCA---GCAGGAAGCACTATG---GGCGCAGCGTCA---  
 CTAACGCTGACGGTACAG---GCCAGACAA---TTATTG---TCTGGTATAGTGCAACAGCAAAGC---  
 AATTTG---CTGAAG---GCTATAGAAGCGCAACAGCATCTGTTGCAGCTCACAGTCTGGGGCATT  
 >KF725967..1  
 TTCTACTGTAATACAACAGATCTGTTTAAATATAACAGCTCTGGTTAATAAC-----  
 -----  
 -----  
 ACAGGGAACAATATCACTATCCCATGTAGAATAAAACAAATTATAAACATGTGGCAAAGAGTAGGACGAGCAA  
 TGTATGCCCCCTCCCATAGCCGGAAGAATTTCAGTGTAACTCAACT---  
 ATCACAGGTCTACTATTAACAAGAGATGGTAGAAATGATACAAAT-----  
 -----  
 -----  
 GAGACCCTCAGACCTGGAGGGGGAGATATGAGAGACAATTGGAGAAGTGAGCTATATAAATATAAGGTAGTGA  
 AAATTGAACCACTA---GGAGTAGCACCCACTGAGGCAAGAAGACAAGTGGTA-----  
 -----AAGAGAGAAAAAAGAGCA---GTGGGA---ATGGGAGCT-----  
 GTGCTCTTTGGGTTCTTTGGGAACA---GCAGGAAGCACTATG---GGCGCGGCGTCA---  
 ATAACGCTGACGGTACAG---GCCAGACAA---TTATTG---TCTGGTATAGTGCAAGCAGCAAAGC---  
 AATTTG---CTGAAG---GCTATAGACGCGCAACAGCATCTGTTGCAGCTTACAGTCTGGGGCATT  
 >AY371121..1  
 TTCTATTGTAATACATCAGAACTGTTTAAATATTAATATATCAAATAGTAGTACAAATAGTACT-----  
 -----  
 -----  
 GAGAATGAACTATCACACTCCCATGTAAAATAAAACAAATTGTAAGAATGTGGCAGAGAGTGGGACAAGCAA  
 TGTATGCCCCCTCCTATCGCCGGAACATTACATGTAAATCAAAC---  
 ATTACAGGACTAATATTAACAAGAGATGGTGGAAATACTAGGGAT-----  
 -----  
 -----  
 AATACCTCAGAGATCTTCAGACCTGGAGGAGGAGAAATGAGAGACAATTGGAGAAATGAATTATATAATTATA  
 AAACAGTAAAAATCAAATCATTA---GGAGTAGCACCCACCAGGGCAAGGAGAAGAGTGGTG-----  
 -----GAGAGAGAAAAAAGAGCA---GTTGGA---ATAGGAGCT-----  
 ---GTCTTCCTTGGGTTCTTAGGAGCA---GCAGGAAGCACTATG---GGCGCGGCGTCA---  
 ATAACGCTGACGGTACAG---GTCAGACAA---TTATTG---TCTGGCATAGTGCAACAGCAAAAC---  
 AATTTG---CTGAGG---GCTATAGAGGCGCAGCAGCATCTGTTGCAACTCACAGTCTGGGGCATT  
 >FJ389367..3  
 TTCTATTGTAATACATCAGGCCTGTTTAAATATATCATATAATAGTACAGAGAATAGTACTTATAATGAA----  
 -----  
 -----  
 GGGAAATGAGACTTATACACTCCCATGTAAAATAAAACAAATTGTGAGAATGTGGCAAAGAGTGGGACAAGCAA  
 TGTATGCCCCCTCCCATCAAAGGAAACATTACATGTAGATCAAAC---  
 ATTACAGGACTACTATTAACAAGAGATGGTGGGGAGAATGATAATAAT-----  
 -----  
 -----  
 AACAGTAGTGAGGTCTTCAGACCTGCAGGAGGAGACATGAGGGACAATTGGAGAAGTGAATTATATAAGTATA  
 AAATAGTAAAAATAAAACCATTA---GGAGTAGCACCCACCAAGGCAAGGAGAAGAGTGGTG-----  
 -----GGGAGAGAAAAAAGAGCA---GTAGTTGGACTAGGAGCT-----  
 ---GTTTTCTTGGGTTCTTAGGAGCA---GCAGGAAGCACTATG---GGCGCGGCGTCA---  
 ATAACGCTGACGGTACAG---GTCAGACAA---TTATTG---TCTGGCATAGTGCAACAGCAAAGC---  
 AATTTG---CTGAGA---GCTATAGAGGCACAGCATCATCTGTTGCAACTCACAGTCTGGGGCATT  
 >FJ389365..1

TTCTATTGTAATACATCAGACTTGTTTAAATATCAGTACAACAAATAGT-----  
-----  
-----  
ACTAATGATACTATCACACTCCCATGTAAAGATAAAACAAATTGTGAGAATGTGGCAGAGAGTGGGACAAGCAA  
TGTATGCCCCCTCCCATTCAGAGAGAAATTACATGCAGGTCAAAT---  
ATTACAGGACTACTATTAACAAGAGATGGTGGGGGTGGAGGTAAT-----  
-----  
-----  
CAAACAAATGAAACCTTCAGACTTGCAGGAGGAAATATGAGGGACAATTGGAGAAGTGAATTATATAAGTATA  
AAGTAGTAAAGATTAAACCACTA---GGAATAGCACCCACCAAGTCAAGGAGAAGAGTGGTG-----  
-----GAGAGAGAAAAAAGAGCA---GTTGGA---ATAGGAGCT-----  
---GCCTTCCTTGGGTTCTTAGGAGCA---GCAGGAAGCACTATG---GGCGCGGCGTCA---  
ATAACGCTGACGGTACAG---GTCAGACAA---TTATTG---TCTGGCATAGTGCAACAGCAAAGC---  
AATTTG---CTGAGA---GCTATAGAGGCGCAGCAACATCTGCTGCAACTCACAGTCTGGGGCATT  
>AY231156..1  
TTCTATTGTAATACATCAGGACTGTTTAAATAGTAGTAATCTGTCTAATAGTAGTAACAAT-----  
-----  
-----  
GAGACCGATATTATAACGCTCCCATGTAGAATAAAACAAATTGTAAGAATGTGGCAGAGAGTGGGACAAGCAA  
TGTATGCCCCCTCCCATAGAAGGAAACATTACATGTATATCAAAT---  
ATTACAGGACTATTATTAACAAGGGATGGTGGGAAGACTAACAGT-----  
-----  
-----  
AGTAATGAGACCTTCAGACCTGCAGGAGGAGACATGAGGGACAATTGGAGAAGTGAATTATATAAGTATAAAG  
TAGTAAAAATTAAACCACTA---GGAATAGCACCCACCAAGGCAAGGAGAAGAGTGGTG-----  
-----GGGAGAGAAAAAAGAGCA---GTTGGA---ATAGGAGCT-----  
GTCCTCCTTGGGTTCTTAGGAACA---GCAGGAAGCACTATG---GGCGCAGCGGCA---  
ATAACGCTGACGGTACAG---GTCAGACAA---TTATTG---TCTGGCATAGTGCAACAGCAAAGC---  
AATTTG---CTGAGG---GCTATAGAGGCTCAGCAACATATGTTGCAGCTCACAGTCTGGGGCATT  
>EF033660..1  
TTCTATTGTAATACATCAGGATTGTTTAAATAGTAGTAACCTTAAAAGTAGTAACCTGACT-----  
-----  
-----  
GGTAATGAGACCATCACACTCCCATGTAGGATAAAACAAATTGTGAGAATGTGGCAGAGAGTGGGACAAGCAG  
TGTATGCCCCCTCCCATTCAGGAAACATTACATGTATATCAAAC---  
ATTACAGGACTACTAATAACAAGAGATGGTGGGAATAATAGCAGC-----  
-----  
-----  
CAAAATGAGACCTTTAGACCTGCAGGAGGAGACATGAGGGACAATTGGAGAAGTGAATTATATAAGTATAAAG  
TAGTAAAAATTAAACCACTA---GGAGTAGCACCCACCAAGGCAAGGAGAAGAGTGGTG-----  
-----GGGAGAGAAAAAAGAGCA---GTTGGA---CTGGGAGCT-----  
GTCCTCCTTGGGTTCTTAGGAACA---GCAGGAAGCACTATG---GGCGCAGCGGCA---  
GTAACGCTGACGGTACAG---GTCAGACAA---CTATTG---TCTGGCATAGTGCAACAGCAAAGC---  
AATTTG---CTGAGG---GCTATAGAGGCTCAGCTACATCTGTTGCAACTCACAGTCTGGGGCATT  
>KT022379..1  
TTCTATTGTAATACATCTAGATTGTTTAAATGATAATATTACACATAATAATAGTGCATCTAATAATAAT----  
-----  
-----  
ACTAAGGGAAACATCACACTCCCATGTAAATAAAACAAATTGTGAGAATGTGGCAAAGAGTGGGACAAGCAA  
TGTATGCCCCCTCCTATCGCAGGAGAACTTACATGTAAATCAAAC---  
ATTACAGGACTATTATTAACAAGAGATGGTGGGACTCATAAAAAT-----  
-----  
-----  
AATAAAAGTGAGATCTTCAGACCTGCAGGAGGAGATATGAAGGACAATTGGAGAAGTAAATTATATAAGTATA  
AAGTAGTAAAAATTAAACCACTA---GGAGTAGCACCCACCAAGCAAGGAGAAGAGTGGTG-----  
-----GGAAGAAAAAAAAGAGCA---GTTGGA---CTGGGAGCT-----  
---GTCTTCCTTGGGTTCTTGGGAGCA---GCAGGAAGCACTATG---GGCGCAGCGTCG---  
ATAACGCTGACGGTACAG---GCCAGACAA---TTATTG---TCTGGCATAGTGCAACAGCAAAC---  
AATTTG---CTGAGA---GCTATAGAAGCGCAGCAGCATTGTTGTCAGCTCACAGTCTGGGGCATT  
>JN248582..1

TTCTATTGTAACACAACAGGACTGTTTAAATAATAGTACATTGGAGCTTAATAACACT-----  
 -----  
 -----  
 AGTAATGGCACTATCACACTCCCATGTAAGATAAAACAAATTGTGAGAATGTGGCAGAGAACTGGACAAGCAA  
 TGTATGCCCCCTCCCATCGCAGGAAATATTACATGTAGATCAAAC---  
 ATTACAGGACTATTATTAACAAGAGATGGTGGGAATAATGATACT-----  
 -----  
 -----  
 CATGAGACCTTCAGACCTGGAGGAGGAGATATGAGGGACAATTGGAGAAGCGAACTATATAAATATAAAATAG  
 TAAAAATTAAACCACTA---GGAATAGCACCCACCAAGGCAAGGAGAAGAGTGGTG-----  
 -----CAGAGGGAAAAAAGAGCAGTAGTTGGA---CTAGGAGCT-----  
 GTCTTCCTTGGGTTCTTGGGAGCA---GCAGGAAGCACTATG---GGCGCAGCGTCA---  
 ATAACGCTGACGGTACAG---GTCAGACAA---TTATTG---TCTGGCATAGTGCAACAGCAAAGC---  
 AATTTG---CTGAGG---GCTATAGAGGCACAGCAACATCTGTTGCAACTCACAGTCTGGGGCATT  
 >AF069947..1  
 TTCTATTGTAATACATCAGGATTGTTTAAATGATAGTGCATCA-----  
 -----  
 -----  
 AATGACACTATCACACTCCCATGTAAGATAAAACAAATAGTGAGAATGTGGCAAAGAGTGGGACAAGCAATGT  
 ATGCCCCCTCCCATCGCAGGAAACATTACATGTAGATCAAAT---  
 ATTACAGGGCTACTATTAACAAGAGATGGTGGAAATGATGGGGCTAATAGC-----  
 -----  
 -----  
 ACAAATCAAAATGAAACCTTCAGACCTGGAGGAGGAGATATGAGGGACAATTGGAGAAGTGAATTATATAAGT  
 AAAAAATAGTAAGAATTAAACCACTA---GGAATAGCACCCACCAGGGCAAGAAGAAGAGTGGTG-----  
 -----GAGAGAGAAAAAAGGGCA---GTTGGA---CTGGGAGCT---  
 -----GTCCTCCTTGGGTTCTTAGGAACA---GCAGGAAGCACTATG---GGCGCGGCGTCA---  
 ATAACGCTGACGGTACAG---GTCAGACAA---TTATTG---TCTGGCATAGTGCAACAGCAAAGC---  
 AATTTG---CTGAGG---GCTATAGAGGCGCAGCAACATCTGTTGCAACTCACAGTCTGGGGCATA  
 >KY229519..2  
 TTCTATTGTAATACATCAGAACTGTTTAAATCCTAATACCCTGAATAGTAATAGTAGT-----  
 -----  
 -----  
 GATCAGTCTAACATCACCTCCCATGTAATAAAACAAATTGTGAGAATGTGGCAGAAAGTGGGACAAGCGA  
 TGTATGCCCCCTCCCATTCAGGAGAGATTACATGTAGATCAAAC---  
 ATTACAGGAATACTATTAACAAGAGATGGTGGAAATCACCAGAACATT-----  
 -----  
 -----  
 AGTGGAATGAAACCTTCAGACCTGCAGGAGGAGACATGAGGGACAATTGGAGAAGTGAATTATATAAGTATA  
 AAGTAGTAAAAATTAAACCACTA---GGAATAGCACCCACCAAGGCAAAAAGAAGAGCGGTG-----  
 -----GAGAGAGAAAGAAGAGCA---GTTGGA---ATGGGAGCT-----  
 ---TACTCCTTGGGTTCTTAGGAACA---GCAGGAAGCACTATG---GGCGCAGCGTCA---  
 ATAACGCTGACGGTACAG---ATCAGACAG---TTGTTG---TCTGGTATAGTGCAACAGCAAAGC---  
 AATTTG---CTGAGA---GCTATAGAGGCGCAGCAGCATCTGTTGCAGCTTACAGTCTGGGGCATT  
 >KU168273..1  
 TTCTATTGCAATACATCAAACTGTTTAAATAGTATCTGGTATGTTAACGGGACAAATGGGACCGTACTAAATG  
 GAACAATTACT-----  
 -----GGGACC-----  
 GGAATAATGGAACAATTACACTGCCATGCAGAATAAAACAAATTGTAAACATGTGGCAGAGAGTAGGACAAG  
 CAATGTATGCCCCCTCCCATAGGGGAGATATTACATGCGAATCAAAT---  
 ATTACAGGACTAATATTAACAAGTGAATGTTAATACAACAGATACA-----  
 -----  
 -----  
 AATGGAAGTGTTACCCTCAGACCTACAGGAGGAGACATGAGGGACAATTGGAGAAGTGAATTATATAAATATA  
 AAGTAGTAAAAATTGAGCCACTA---GGAATAGCACCTCCAGGGCAAGGAGAAGAGTGGTG-----  
 -----GAAAGAGAAAAAAGAGCT---GTGGGA---ATGGGAGCT-----  
 ---TTTTTCCTTGGGTTCTTGGGAGCA---GCAGGAAGCACTATG---GGCGCGGCGTCC---  
 ATGGCGCTGACGGTACAG---GCCAGACAA---TTATTG---TCTGGTATAGTGCAACAGCAAAGT---  
 AATCTG---CTGAGA---GCTATAGAGGCGCAACAGCATATGTTGCAGCTCACAGTCTGGGGCATT  
 >AF005496..2

TTCTATTGCAATACATCAGGGCTGTTTAAATAGTAGTTGGGAAATGCATACTAATTACACATCAAATGACACAA  
AG-----  
-----  
GGAAACGAAAACATTACACTGCCATGCAGAATAAAACAAATTGTAAACATGTGGCAGAGAGTAGGACGAGCAA  
TGTATGCCCCCTCCCATCCAAGGAAACATTATGTGTGTATCAAAT---  
ATTACAGGACTAATATTGACAATTGACGAGGGTAACGCGTCTGCA-----  
-----  
-----  
GAAAAATTATACCTTCAGACCTGGAGGAGGAGATATGAGGGACAATTGGAGAAGTGAATTGTATAAATATAAAG  
TAGTAAAAAATTGAACCACTG---GGAATAGCACCCACCAAGACAAGGAGAAGAGTGGTG-----  
-----GAGAGAGAAAAAAGAGCA---GTGGGA---ATGGGAGCT-----  
TCTTTCCTTGGGTTCTTGGGAGCA---GCAGGAAGCACTATG---GGCGCGGCGTCA---  
ATAACGCTGACGGTACAG---GCCAGGCAA---TTATTG---TCTGGTATAGTGCAGCAGCAAAGC---  
AATTTG---CTGAGA---GCTATACAGGCGCGACAGCATATGTTGCAGCTCACGGTCTGGGGCATT  
>KY392776..1  
TTCTATTGTAATACATCAAACTGTTCAATAGTAGTGAAAAAT-----  
-----  
-----  
TCCAATGCAAACATCACACTCCCATGTAGAATAAGGCAAATTGTAAGGATGTGGCAGAGAGTAGGACAAGCAA  
TATATGCCCCCTCCCATCGCAGGAAACATTACATGCATGTCAAAT---  
ATTACAGGATTAATATTGACACGTGATGGGGGAGTTAAACAATAACAATGACAGT-----  
-----  
-----  
ACTAATAATACAGAAATCTTCAGACCTACAGGAGGAAATATGAAGGACAATTGGAGAAGTGAGCTATATAAAT  
ATAAAGTGGTAAAAAATTGAGCCACTA---GGAGTAGCACCTACCAGGGCAAAAAGAAGAGTGGTG-----  
-----GAGAGAGAAAAAAGAGCA---GTGGGA---ATGGGAGCT---  
-----GTGTTTCCTTGGGTTCTTGGGAACA---GCAGGAAGCACTATG---GGCGCAGCGTCA---  
ATAACGCTGACGGTACAG---GTCAGACAA---TTGTTG---TCTGGCATAGTGCAACAGCAAAGC---  
AATTTG---CTAAAG---GCTATAGAGGCTCAACAGCATCTGTTGAGACTCACTGTCTGGGGCATT  
>KU168280..1  
TTCTATTGCAATACATCACAACCTGTTCAATAATAGTTGGAATGGAAGTAGTTGGAATAACAATGCT-----  
-----  
-----  
ACAAATGACACTATCACAATTCCATGTAAAATAAGACAAATTGTGAGAATGTGGCAGAGAGTAGGACAAGCCA  
TATACGCCCCCTCCCATCGCAGGAAACATTACATGTGTATCAAAT---  
ATTACAGGATTAATATTAACACGTGATGGGGGACAGGGAGGAAAT-----  
-----  
-----  
GAGACAAACAAGACT---  
GAGGCTGAGACCTTCAGACCTACAGGAGGAGATATGAGGGACAATTGGAGAAGTGAATTATATAAATATAAAG  
TAGTGAGGTTGAGCCACTA---GGAGTAGCACCCACCAGGGCAAAAAGAAGAGTGGTG-----  
-----GGGAGAGAAAAAAGAGCG-----GGA---ATAGGAGCT-----  
CTGTTTCCTTGGGTTCTTGGGAGCA---GCAGGAAGCACTATG---GGCGCAGCGTCA---  
ATAACGCTGACGGTACAG---GCCAGACAA---TTGCTG---TCTGGCATAGTGCAACAGCAAAGC---  
AATTTG---CTGAAT---GCTATAGAGGCTCAACAGCATCTGTTGAAGCTCACTGTCTGGGGCATT  
>GU237072..2  
TTCTATTGTAATACATCAAGCCTGTTCAATAGTAGCTGGAGTAGTAAGAATGATACAAATAGC-----  
-----  
-----  
ACAGCAAATTACACAATCATCCCATGTAAAATAAGACAAATAGTGAGAATGTGGCAGAAAGTAGGACAAGCAA  
TATATGCCCCCTCCCATGAAGGAAACATTACATGCTCATCAAAT---  
ATTACAGGATTAATATTGACACGTGATGGAGGAGACAAGAACAGCACTAGC-----  
-----  
-----  
AACACAGTACTGAGATCTTTAGACCCACAGGAGGAGATATGAAAGACAATTGGAGAAGTGAATTATATAAAT  
ATAAAGTAGTAGAGATTGAGCCACTA---GGAGTAGCACCCACCAGGGCAAAAAGAAGAGTGGTG-----  
-----GAGAGAGAAAAAAGAGCA---CTGGGA---ATAGGAGCT---  
-----GTGTTTCCTTGGGTTCTTGGGAACA---GCAGGAAGCACTATG---GGCGCAGCGTCA---  
ATAACGCTGACGGTACAG---GTCAGACAA---TTGTTG---TCTGGCATAGTGCAACAGCAAAGC---  
AATTTG---CTGAAG---GCTATAGAGGCTCAACAGCATCTGTTGAAGCTCACTGTCTGGGGCATT  
>AJ249239..1

TTCTACTGCAATACAACAAAACCTGTTTAAATGAGACAGGGGAG-----  
-----  
-----  
AATGGTACTATCACACTCCCATGTAGAATAAAGCAGATTATAAACATGTGGCAGAAAGTGGGAAAAGCAATAT  
ATGCCCTCCCATTCAGGAAGTATTAAGTGTAGCTCAAAT---  
ATTACAGGAATGATATTGACAAGAGATGGTGGTAATAATACTCAT-----  
-----  
-----  
AATGAGACCTTCAGACCTGGAGGAGGAGACATGAGGGACAATTGGAGAAGTGAAGTGTATAAATATAAAGTAG  
TACAGATTGAACCACTA---GGAATAGCACCCACCAGGGCCAGGAGAAGAGTGGTG-----  
-----CAGAGAGAAAAAAGAGCA---GTAGGA---TTAGGAGCT-----  
GTGTTCTTTGGATTCTTGGGAGCA---GCAGGAAGCACTATG---GGCGCGGCGTCA---  
ATAACGCTGACGGTACAG---GCCAGACAA---TTATTG---TCTGGTATAGTGCAACAGCAAAGC---  
AATTTG---CTGAGA---GCTATAGAAGCGCAACAACATCTGTTACAGCTCACGGTCTGGGGCATT  
>MH746262..1  
TTCTATTGCAATACAACACAACCTGTTTAAATGGC-----  
-----  
-----  
ACGATTGGCAATATCACACTGCCATGTAGGATAAAACAAATTATAAACATGTGGCAAGGAGTAGGACAAGCAA  
TGTATGCTCCTCCCATCAATGGAATACTTAATTGTGTATCAAAT---  
ATTACAGGAATACTATTGACAAGAGATGGTGGTAATCATACGAAT-----  
-----  
-----  
GAAACTGAGACCTTCAGACCGGGAGGAGGAAATATAAAGGACAATTGGAGAAGTGAATTATATAAATATAAAG  
TAGTAGAAATTGAACCACTA---GGAATAGCACCCACCAAGGCAAAGAGAAGAGTGGTG-----  
-----GAGAGAGAAAAAAGAGCA---GTGGGA---ATAGGAGCT-----  
ATGATCTTTGGGTTCTTAGGAGCA---GCCGGAAGCACGATG---GGCGCGGCGTCA---  
ATAACGCTGACGGTACAG---GCCAGACAA---TTATTG---TCTGGTATAGTGCAAGCAGCAAAGC---  
AATTTG---CTGAGG---GCTATAGAGGCGCAGCAGCATATGTTGCAACTCACAGTCTGGGGCATT  
>U51188..2  
TTCTATTGCAATACAACAGCACTGTTTAAATAGTACTTGGATAAATGGAACCATGCAGGAGGTTAATGGCACA-  
-----  
-----  
AACTCAGGCAATATCACACTTCCATGCAGGATAAAGCAAATTGTAAACATGTGGCAGGAAGTAGGACGAGCAA  
TGTATGCTCCTCCCATCAGTGAAGTAATTAATTGTGTATCAAAT---  
ATTACAGGAATACTATTGACAAGAGATGGGGGTATTAATCAAATCAG-----  
-----  
-----  
ACTAACAAAAATGAGACCTTCAGACCTGGAGGAGGAAATATAAAGGACAATTGGAGAAGTGAATTATACAAAT  
ATAAAGTAGTACAAATTGAACCACTA---GGAATAGCACCCACCAAGGCAAAGAGAAGAGTGGTG-----  
-----GAGAGAGAAAAAAGAGCA---GTGGGA---ATAGGAGCT---  
-----ATGATCTTTGGGTTCTTAGGAGCA---GCAGGAAGCACTATG---GGCGCGGCGTCA---  
ATAACGCTGACGGTACAG---GCCAGACAA---TTATTG---TCTGGTATAGTGCAACAGCAAAGC---  
AATTTG---CTGAGG---GCTATAGAGGCGCAGCAGCATCTGTTGCAACTCACAGTCTGGGGCATT  
>JX112863..1  
TTCTATTGCAATACAACAAAACCTGTTTAAATAATACTTGCATAAATGGAACCACGAAGGGG-----  
-----  
-----  
TGTAATGGTACTATCATAATTCTATGCAAGATAAAGCAAATTGTAAACATGTGGCAGGGAGTAGGACAAGCAA  
TGTATGCTCCTCCCGTCAGAGGAACAATTAATTGTGTATCAAAT---  
ATTACAGGAATAATATTGACAAGAGATGGTGGAGTTAATAGGACA-----  
-----  
-----  
CATAACGAGACCTTCAGACCTGGAGGAGGAAATATGAAAGATAATTGGAGAAATGAATTATATAAATATAAAA  
CAGTACTAATTGAACCACTA---GGAATAGCACCCACCAGGGCAAAGAGAAGAGTGGTG-----  
-----GAGAGAGAAAAAAGAGCA---GTGGGA---ATAGGAGCT-----  
ATGATCTTTGGGTTCTTGGGAGCA---GCAGGAAGCACTATG---GGCGCAGCGTCA---  
ATAACGCTGACGGTACAG---GCCAGACAA---TTATTG---TCTGGTATAGTGCAACAGCAAAGC---  
AATTTG---CTGAGG---GCTATAGAGGCGCAACATCATCTGTTGCAACTCACAGTCTGGGGCATT  
>KF835503..1

TTCTATTGTAATACATCACAACCTGTTTAAATACAACACAACCTTAAACGGTTTAAATAATGGTGGG-----  
-----  
-----  
GGTAGTGACACTATCATACTTCCATGTAAGATAAAACAAATTATAAACATGTGGCAGGGAGCAGGACAAGCAA  
TGTATGCTCCTCCCATCAGTGGAGCAATTAATTGTTTCATCAAAT---  
ATTACAGGAATACTATTAAACAAGAGATGGTGGTGTTCATAATGGGAGT-----  
-----  
-----  
AACGAGACCGAGATCTTCAGACCTGGAGGAGGAAATATAAAGGACAATTGGAGAAGTGAACATATAAAATATA  
AAGTAGTAGAAATTGAACCATTA---GGAATAGCACCCACCAAGGCAAGGAGAAGAGTGGTG-----  
-----GAGAGAGAAAAAAGAGCA---GTGGGA---ATAGGAGCT-----  
---ATGATCTTTGGGTTCTTAGGAGCA---GCAGGAAGCACTATG---GGCGCGGCGTCA---  
ATAACGCTGACGGTACAG---GCCAGACAA---TTATTG---TCTGGTATAGTGCAACAGCAAAGC---  
AATTTG---CTGAGG---GCTATTGAGGCGCAACAGCATATGTTGCAACTCACAGTCTGGGGCATT  
>KF835527..1  
TTCTATTGCAACACATCAAACCTGTTTAAATACAACATACCTTAATAGTAGCACA-----  
-----  
-----  
GAAAAATAACAATATCACACTTCCATGCAGAATAAAGCAAATTATAAACATGTGGCAGGGAACAGGACAAGCAA  
TGTATGCTCCTCCCATCAGTGGAAACATTAGCTGTGTATCAAAT---  
ATTACAGGAATACTATTGACAAGAGATGGTGGTGGGAATGGTACAGAGGGG-----  
-----  
-----  
ACGAATGAGACCTTCAGACCTGGAGGAGGAAATATGAAGGACAATTGGAGAAATGAATTATATAAAATATAAAG  
TAGTACAAATTGAACCACTA---GGAATAGCACCCACCAGGGCAAGGAGAAGAGTGGTG-----  
-----GAGAGAGAAAAAAGAGCA---GTGGGA---ATAGGAGCT-----  
ATGATCTTTGGATTCTTGGGAGCA---GCAGGAAGCACTATG---GGCGCGGCGTCA---  
ATAACGCTGACGGTACAG---GCCAGACAA---TTATTG---TCTGGTATAGTGCAACAGCAAAGC---  
AATTTG---CTGAGG---GCTATAGAGGCGCAGCATCATTTGCTGCAACTCACAGTCTGGGGCATT  
>JX112809..2  
TTCTATTGCAATACAAGCCAACTGTTTAAATGCTACTTACGGAACAAATGAAACCACGCGTACG-----  
-----  
-----  
CGTAATGACACTATCATACTTCCATGCAGGATAAAGCAAATTATAAACATGTGGCAGGGAGTAGGACAAGCAA  
TGTATGCTCCTCCCATCAGTGGAGAATTAATTGTGTATCAAAT---  
ATTACAGGAATACTATTAAACAAGAGATGGTGGTGATAATAATAGT-----  
-----  
-----  
ACTAACGAGACCTTCAGACCTGGAGGGGGAGATATAAAGGACAATTGGAGAAGTGAATTATATAAAATATAAAG  
TAGTACAAATTGAACCACTA---GGAGTAGCACCCACCAGGGCAAAAAGAAGAGTGGTG-----  
-----GAGAGAGAAAAAAGAGCA---GTGGGA---ATAGGAGCT-----  
ATGATCTTTGGGTTCTTAGGAGCA---GCAGGAAGCACTATG---GGCGCGGCGTCA---  
ATAACGCTGACGGTACAG---GCCAGACAA---TTATTG---TCTGGTATAGTGCAACAGCAAAGC---  
AATTTG---CTGAGG---GCTATAGAGGCGCAGCATCATCTGTTGCAACTCACAGTCTGGGGCATT  
>JX112813..1  
TTCTATTGCAATACAACAAAACCTGTTTAAACAGTACTTGGACAGGAAATGAAACCATAAATGAGAAT-----  
-----  
-----  
GGGACTACTAAAATCATAATTCCATGCAGGATAAAGCAAATTATAAACATGTGGCAAGGAGCAGGACAAGCAA  
TATATGCTCCTCCCATCAGTGGAGCAATTAATTGTGTATCAAAT---  
ATTACAGGAATACTATTGACAAGAGATGGTGGTGATGGTAATCAT-----  
-----  
-----  
ATAAACGAGACCTTCAGACCTGCAGGAGGAAATATGAGGGACAATTGGAGAAGTGAATTATATAAAATATAAAG  
TAGTACAAATTGAACCATTA---GGAATAGCACCCACCAGGGCAAGAGAAGAGTGGTG-----  
-----GAGAGACAAAAAAGAGCA---GTGGGA---ATAGGAGCT-----  
ATGATCTTTGGGTTCTTAGGAGCA---GCAGGAAGCACTATG---GGCGCGGCGTCA---  
ATAACGCTGACGGTACAG---GCCAGACAA---TTATTG---TCTGGTATAGTGCAACAGCAAAGC---  
AATTTG---CTGAGG---GCTATAGAGGTGCAGCAGCATATGTTGCAACTCACAGTCTGGGGCATT  
>JX112814..3

TTCTATTGCAATACAAGCCAACTGTTTAAATAAACTTACTATGGAAATGAACTACTTCCATAGGGAATACC-  
-----  
-----  
ACGAATAACACTATCGTACTTCCATGCAAGATAAAGCAAATTATAAACATGTGGCAGGGAGTAGGACAAGCAA  
TGTATGCTCCTCCCATCAGTGGAAACATTAGTTGTGTATCAAAT---  
ATTACAGGAATACTATTAACAAGAGATGGTGGTAATAATAAGTCT-----  
-----  
-----  
CAGGTGAACGAGACCTTCAGACCTGGAGGAGGAAATATGAAGGACAACTGGAGAAGTGAATTATATAAAATATA  
AAGTAGTACAAATTGAACCATTA---GGAATAGCACCCACCAGGGCAAAGAGAAGAGTGGTG-----  
-----GAGAGAGAAAAAAGAGCA---GTGGGA---ATAGGAGCT-----  
---ATGATCTTTGGGTTCTTAGGAGCA---GCAGGAAGCACTATG---GGCGCGGCGTCA---  
ATAACGCTGACGGTACAG---GCCAGACAA---TTATTG---TCTGGTATAGTGCAACAGCAAAGC---  
AATTTG---CTGAGG---GCTATAGAGGCGCAGCAGCATCTGCTGCAACTCACAGTCTGGGGCATT  
>JX112820..1  
TTCTATTGCAATACATCAGGACTGTTTAAATAGTACTTGGGAAAGAAATGGAACCATGAGGGGGCATAATAGC-  
-----  
-----  
ACTAATGGCACTATCATACTTCCATGCAGGATAAAGCAAATTATAAACATGTGGCAGGGAGTAGGACAAGCAA  
TGTATGCTCCTCCCATCGCAGGAAGTATTAATTGTACATCAAAT---  
ATTACAGGGATACTATTGACAAGAGATGGTGGTTATGATGCGGAGAAT-----  
-----  
-----  
AATGAGACTGAGACTTTCAGACCTGGAGGAGGAAATATAAAAGACAATTGGAGAAGTGAATTATATAAAATATA  
AAGTAGTACAAATTGAACCACTA---GGAATAGCACCCACCATGGCAAAGAGAAGAGTGGTG-----  
-----GAAAGAGAAAAAAGAGCA---GTGGGA---ATAGGAGTT-----  
---ATGATCTTTGGGTTCTTAGGAGCA---GCCGGAAGCACTATG---GGCGCAGCGTCA---  
CTAACGCTGACGGTACAG---GCCAGACAA---TTATTG---TCTGGTATAGTGCAACAGCAAAGC---  
AATTTG---CTGAGG---GCTATAGAGGCGCAGCAGCATATGTTGCAACTCACAGTCTGGGGCATT  
>JX112823..1  
TTCTATTGCAATACAAGCCAACTGTTTAAATGATACAGGAAATGAAACCATAGGGAAT-----  
-----  
-----  
AATAGTAACACTATCATACTTCCATGCAGGATAAAGCAAATTATAAACATGTGGCAGGGAGTAGGACAAGCAA  
TGTATGCTCCTCCCATCAGTGGAAACAATTAATTGTGTATCAAAT---  
ATTACAGGAATACTATTAACAAGAGATGGCGGTACTAATGGTAATAATACTAAT-----AAT-----  
-----  
-----  
ACCACTAATAATACCGAGACCTTCAGACCTGGGGGAGGAAATATAAAGGACAATTGGAGAAGTGAATTATATA  
AATATAAAGTAGTACAAATTGAACCACTA---GGAATAGCACCCACCAGGGCAAAGAGAAGAGTGGTG-----  
-----GACAGAGAAAAAAGAGCA---GTGGGA---  
ATAGGAGCT-----ATGATCTTTGGGTTCTTAGGAGCA---GCTGGAAGCACTATG---  
GGCGCGGCGTCA---ATAACGCTGACGGTACAG---GCTAGACAA---TTATTG---  
TCTGGTATAGTGCAACAGCAAAGC---AATTTG---CTGAGG---  
GCTATAGAGGCGCAGCATCTTGTGTTGCAACTCACAGTCTGGGGCATT  
>JX112826..1  
TTCTATTGCAATACAAGCAAACCTGTTTAAATTTTACTTTCCCAAGAAATGAAACAGGGGAG-----  
-----  
-----  
AATGATACAACACTATCATACTTCCATGCAGGATAAAGCAAATTATAAACATGTGGCAGGGAGTAGGACAAGCAA  
TGTATGCTCCTCCCATCAGTGGGATAATTAATTGTGTATCAAAT---  
ATTACAGGAATACTATTAACAAGAGATGGTGGTCATAATAATAACT-----  
-----  
-----  
ATTACTAATGAGACCTTCAGACCTGGAGGAGGAAATATAAAGGACAATTGGAGAAGTGAATTATACAAATATA  
AAGTAGTACAAATTGAACCACTA---GGAATAGCACCCACCAGGGCAAAGAGAAGAGTGGTG-----  
-----GAGAGAGAAAAAAGAGCA---GTGGGA---ATAGGAGCT-----  
---ATGATCTTTGGGTTCTTAGGAGCA---GCAGGAAGCACTATG---GGCGCGGCGTCA---  
ATAACGCTGACGGTACAG---GCCAGACAA---TTATTG---TCTGGTATAGTGCAACAGCAAAGC---  
AATTTG---CTGAGG---GCTATAGAGGCGCAGCAGCATATGTTGCAACTCACAGTCTGGGGCATT

>JX112835..2

TTCTATTGCAATACAAACAACTGTTTAAATGTAACCTTACAATGAAAAGAATACCACAGGGGGG-----

-----  
-----

AGTAATGGCACTATCATACTCCTATGCAAGATAAAGCAAATTATAAACATGTGGCAGGAAGTAGGACAAGCAA  
TGTATGCTCCTCCCATCAGTGGAAGAATTAATTGTGTATCAAAT---  
ATTACAGGAATACTACTAACAAGAGATGGTGGTGGTACTAATAGG-----

-----  
-----

ACTAATGAGACCTTCAGACCTGGAGGAGGAAATATAAAGGACAATTGGAGAAGTGAATTATATAAATATAAAG  
TAGTACAACCTGAACCACTA---GGAATAGCACCCACCAGGGCAAAGAGAAGAGTGGTG-----  
-----GAGAGAGAAAAAAGAGCA---GTGGGA---ATAGGAGCT-----  
ATGATCTTTGGGTTCTTGGGAGCA---GCAGGAAGCACTATG---GGCGCGGCGTCA---  
ATAACGCTGACGGTACAG---GCCAGACAA---TTATTG---TCTGGTATAGTGCAACAGCAAAGC---  
AATTTG---CTGAGG---GCTATAGAGGCGCAGCATCATCTGTTGCAACTCACAGTCTGGGGCATT

>JX112844..1

TTCTATTGCAATACAACAAACCTGTTTAAACAGTACTTGGGAAAATGGAACCACGGAGGGTAAT-----

-----  
-----

GGCACCGAGAAGATCATACTTCCATGCAGGATAAAGCAAATTATAAACATGTGGCAGGGAGCAGGACAAGCAA  
TGTATGCTCCTCCCATCAGTGGAACAATTAATTGTGTATCAAAT---  
ATTACAGGAATACTATTAACAAGAGATGGTGGTTATAATAATGCG-----

-----  
-----

GATAACGAGACCTTCAGACCTGGAGGAGGAAATATAAAGGACAATTGGAGAAGTGAATTATATAAATATAAAG  
TAGTAGAAATTGAACCACTA---GGAATAGCACCCACCAGGGCAAAGAGAAGAGTGGTG-----  
-----GAGAGAGAAAAAAGAGCA---GTGGGA---ATAGGAGCT-----  
ATGATCTTTGGGTTCTTGGGAGCA---GCAGGAAGCACTATG---GGCGCGGCGTCA---  
ATAACGCTGACGGTACAG---GCCAGACAA---TTATTG---TCTGGTATAGTGCAACAGCAAAGC---  
AATTTG---CTGAGG---GCTATAGAGGCGCAGCAGCATATGCTGCAACTCACAGTCTGGGGCATT

>GU475036..2

TTCTATTGCAATACAACAAACCTGTTTAAATAGGAATAATAAC-----

-----  
-----

TATAGCACTATCATACTTCCATGCAAGATAAAGCAAATTGTAAGAATGTGGCAGGGAGTAGGACAAGCAATGT  
ATGCTCCTCCCATCAGTGGAAGCATAAATTGTGTATCAAAT---  
ATTACAGGAATACTATTGACAAGAGATGGTGGTATTTCATAATAGT-----

-----  
-----

AGTGATGAGACCTTCAGACCTGGAGGAGGAAATATAAAGGACAATTGGAGAAGTGAATTATATAAATATAAGG  
TAGTAGAAATTGAACCACTA---GGAATAGCACCCACCAAGGCAAAGAGAAGAGTGGTG-----  
-----GAGAGAGAAAAAAGAGCA---GTGGGA---ATAGGAGCT-----  
ATGATCTTTGGGTTCTTAGGAGCA---GCAGGAAGCACTATG---GGCGCGGCGTCA---  
ATAACGCTGACGGTACAG---GCCAGACAA---TTATTG---TCTGGTATAGTGCAACAGCAAAGC---  
AATTTG---CTGAGG---GCTATAGAGGCGCAACAGCATATGTTGCAACTCACAGTCTGGGGCATT

>GU475019..1

TTCTATTGCAATACAACAAATCTGTTTAAATAACTTGCATAAACAATGCAAGCACAAAAGGG-----

-----  
-----

TGTAATGAAAATATCATACTTCCATGCAGGATAAAACAAATTATAAACATGTGGCAAGGAGTAGGACAAGCAA  
TGTATGCTCCTCCCATCAGTGGAATAATTACTTGTAGATCAAAT---  
ATTACAGGAATACTATTGACAAGAGATGGTGGTAATCATAGCACA-----

-----  
-----

GGTAATGAGACCTTCAGACCTGAAGGAGGAAATATAAAGGACAATTGGAGAAATGAATTATATAAATATAAAG  
TAGTAGAAATTGAACCACTA---GGAATAGCACCCACCAGGGCAAAGAGAAGAGTGGTG-----  
-----GAGAGAGAAAAAAGAGCA---GTGGGA---ATAGGAGCT-----  
ATGATCTTTGGGTTCTTAGGAGCA---GCAGGAAGCACTATG---GGCGCAGCGTCA---  
ATAACGCTGACGGTACAG---GCCAGACAA---TTATTG---TCTGGTATAGTGCAACAGCAAAGC---  
AATTTG---CTGAGG---GCTATAGAGGCGCAGCAGCATCTGTTGCAACTCACAGTCTGGGGCATT

>JX960615..1

TTCTATTGCAATACAACAAAGCTGTTCAATAGTACTTGGATAGGAAATGAAACCACGGAGGGAGGTAAT----

-----  
-----

GATAATGACACTATCATACTTCCATGCAGGATAAAGCAAATTATAAACATGTGGCAAGGAGCGGGACAAGCAA  
TGTATGCTCCTCCCATCAGTGGAAATAATTAAATGTGTATCAAAT---

ATTACAGGAATACTATTGACAAGAGATGGTGGTGATTATAATAAT-----

-----  
-----

ACAAATGAGACCTTCAGACCTGGAGGAGGAAATATAAAGGACAATTGGAGAAGTGAATTATATAAATATAAGG  
TAGTACAAATAGAACCACTA---GGAGTAGCACCTACCAGGGCAAGGAGAAGAGTGGTG-----

-----GAGAGAGAAAAAAGAGCA---GTGGGA---ATAGGAGCT-----

ATGATCTTTGGGTTCTTAGGAGCA---GCAGGAAGCACTATG---GGCGCGGCGTCA---

ATAACGCTGACGGTACAG---GCCAGACAA---TTATTG---TCTGGTATAGTGCAACAGCAAAGC---

AATTTG---CTGAGG---GCTATAGAGGCGCAACAGCATATGTTGCAACTCACAGTCTGGGGCATT

>JX960639..1

TTCTATTGCAATACAACAAAATTGTTTAATAGTACAGAAAATGGAACCATGGAGGGG-----

-----  
-----

CTTAATGGCACTATTATACTCCCATGCAGGATAAAACAAATTGTAAACCTGTGGCAGGGAGCAGGACAAGCAA  
TGTATGCTCCTCCCGTCAGTGGAAAAATTAATTGTGCATCAAAT---

ATTACAGGAATACTATTAACAAGAGATGGTGGTAATAATGCAACA-----

-----  
-----

ACTAACGAGACCTTCAGACCGGGAGGAGGAAATATAAAGGACAATTGGAGAAGTGAATTATATAAATATAAAG  
TAGTACAAATTGAACCACTA---GGAGTAGCACCCACCAGGGCAAAGAGAAGAGTGGTG-----

-----GATAAAGAAAAAAGAGCA---GTGGGA---ATAGGAGCT-----

ATGATCTTTGGGTTCTTAGGAGCA---GCAGGAAGCACTATG---GGCGCGGCGTCA---

ATAACGCTGACGGTACAG---GCCAGACAA---TTATTG---TCTGGTATAGTGCAACAGCAAAGC---

AATTTG---CTGAGA---GCTATAGAGGCGCAGCATCATCTGTTGCAACTCACAGTCTGGGGCATT

>JX960632..1

TTCTATTGCAATACAACAAGGCTGTTCAATAGTACTTGGATAGGAAATGAGACCATAGGAAATGAGACCATGG  
GGGAAGGTAAT-----

-----  
-----

AATAATAACACTATCATACTTCCATGCAGGATAAAGCAAATTATAAACATGTGGCAAGGAGCAGGACAAGCAA  
TATATGCTCCTCCCATCAGTGGAAATAGTTAATTGTGTATCAAAT---

ATTACAGGGATACTATTGACAAGAGATGGTGGTCAAGAAGATAAT-----

-----  
-----

GGAACAAATAGCGAGATTTTCAGACCTGGAGGAGGAAATATAAAGGACAATTGGAGAAGTGAATTATATAAAT  
ATAAAGTAGTAGAAATAGAACCACTA---GGAGTAGCACCCACCAGGGCAAAGAGAAGAGTGGTA-----

-----AATAGAGAAAAAAGAGCA---GTGGGA---ATAGGAGCT---

-----ATGATCTTTGGGTTCTTGGGAGCA---GCAGGAAGCACTATG---GGCGCGGCGTCA---

ATAACGCTGACGGTACAG---GCCAGACAA---TTATTG---TCTGGTATAGTGCAACAGCAAAGC---

AATTTG---CTGAGG---GCTATAGAGGCGCAGCAGCATATGTTGCAACTCACAGTCTGGGGCATT

>MH672757..1

TTCTATTGCAATACAACAAAGCTGTTCAATGGTAATGGCACTAAAAATGGTAGTGAGACA-----

-----  
-----

AACAGTAGCACTATCATACTTCCATGCAGGATAAAGCAAATTATAAACATGTGGCAAGGAGCAGGACAAGCAA  
TGTATGCTCCTCCCATCAGTGGAAATAATTAAATGTGTATCAAAT---

ATTACAGGAATACTATTAACAAGAGATGGTGGTAATCATAATAAT-----

-----  
-----

ACTACCGAGATTTTCAGACCTGGAGGAGGAAATATGGAGGACAATTGGAGAAGTGAATTATATAAATATAAAG  
TAGTACAAATAGAACCACTA---GGAGTAGCACCCACCAAGGCAAAGAGAAGAGTGGTG-----

-----GATAGAGAAAAAAGAGCA---GTGGGA---ATAGGAGCT-----

ATGATCTTTGGGTTCTTGGGAGCA---GCAGGAAGCACTATG---GGCGCGGCGTCA---

ATAACGCTGACGGTACAG---GCCAGACAG---TTATTG---TCTGGTATAGTGCAAGCAGCAAAGC---

AATTTG---CTGAGG---GCTATAGAGGCGCAACAGCATATGTTGCAACTCACAGTCTGGGGCATT

>JX112798..2

TTCTATTGCAATACAACAAAACCTGTTCAATAATGAAACCATG-----

-----

-----

AAAGAGGACACTATCATACTTCCATGCAGGATAAAGCAAATTATAAACTTGTGGCAAGGAGTGGGACAAGCAA  
TGTATGCTCCTCCCATCAGTGGAATAATTCAATGTGTATCAAAT---

ATTACAGGAATAATATTAACAAGGGATGGTGGTAATCAAAGTAATAGTAATGTA-----

-----

-----

ACTAGAGAGATCTTCAGACCTGGAGGAGGAAATATGAAGGACAATTGGAGAAGTGAATTATATAAATATAAAG  
TAGTACAAATTGAACCACTA---GGAGTAGCACCCACCAGGGCAAAGAGAAGAGTGGTG-----

-----GATAGACAAAAAAGAGCA---GTGGGA---ATAGGAGCT-----

ATGATCTTTGGGTTCTTAGGAGCA---GCAGGAAGCACTATG---GGCGCGGCGTCA---

ATAACGCTGACGGTACAG---GCCAGACAA---TTATTG---TCTGGTATAGTGCAACAGCAAAGC---

AATTTG---CTGAGA---GCTATAGAGGCGCAGCAGCATATGTTGCAACTCACAGTCTGGGGCATT

>JX112799..1

TTCTATTGTAATACAACAAAATTGTTTAATAAGACAGAGAATGGAACCATGGAGGGG-----

-----

-----

TTTAATACCACTATCATACTTCCATGCAGGATAAAGCAAATTGTAAGGATGTGGCAGGGAGTAGAACAAGCAA  
TGTATGCTCCTCCCATCAGTGGAACATTACTTGTAGATCAAAT---

ATTACAGGAATACTATTAACAAGAGATGGTGGTGGTTATGATACA-----

-----

-----

TCTCCCGAAACCTTCAGACCAGGAGGAGGAAATATGAAGGACAATTGGAGAAGTGAATTATATAAATATAAAG  
TAGTACAAATTGAACCACTA---GGAATAGCACCTCCAGGGCAAAGAGAAGAGTGGTG-----

-----GATAGACAAAAAAGAGCA---GTGGGA---ATAGGAGCT-----

ATGATCTTTGGGTTCTTAGGAGCA---GCAGGAAGCACTATG---GGCGCAGCGTCA---

ATAACGCTGACGGTACAA---GCCAGACAA---TTATTG---TCTGGTATAGTGCAACAGCAAAGC---

AATTTG---CTGAGG---GCTATAGAGGCGCAGCAGCATCTGTTGCAACTCACAGTCTGGGGCATT

>KC870041..1

TTCTATTGCAATACAACAAAACCTGTTTAATAAGACTTTCGATAAGAACATAGAA-----

-----

-----

-AATGACACCATGGAT-----

GGCAGTAATAACACTATCATACTTCCATGCAGGATAAAGCAAATTATAAACATGTGGCAGGGAGTAGGACAAG

CAATGTATGCCCTCCCATAGGGGAAAAATTCAATTGTGTATCAAAT---

ATTACAGGAATACTATTGACAAGAGATGGTGGT-----

-----

-----

ACTGATAATAACGAGACCTTCAGACCTGGAGGGGGAAACATAAAAGACAATTGGAGAAGTGAATTATATAAAT  
ATAAAGTAGTACAAATTGAACCACTA---GGGGTAGCACCTACCAGGGCAAAGAGAAGAGTGGTG-----

-----GAAAGAGAAAAAAGAGCA---GTGGGA---ATAGGAGCT---

-----ATGATCCTTGGGTTCTTAGGAGCA---GCAGGAAGCACTATG---GGCGCGGCGTCA---

ATAACGCTGACGGTACAG---GCCAGACAA---TTATTG---TCTGGTATAGTGCAACAGCAAAGC---

AATTTG---CTGCGG---GCTATAGAGGCGCAACAGCATATGTTGCAACTCACAGTCTGGGGCATT

>MH672923..1

TTCTATTGCAATACAACAAAATTGTTTAATAGTACAGAAAATGGAACCATGGAGGGG-----

-----

-----

TTTAATACCACTATCATAATTCCATGCAAGATAAAGCAAATTGTAAATATGTGGCAGGGAGTAGGACAAGCAA  
TATATGCTCCTCCCATTAGTGAGTAATTAAGTGTCAATTCAAAT---

ATTACAGGAATACTATTAACAAGAGATGGTGGTAATAATAATGCA-----

-----

-----

AATAACGAAACCTTCAGACCGGGAGGAGGAAATATAAAGGACAATTGGAGAAATGAATTATATAAATATAAAG  
TAGTACAAATTGAACCACTA---GGAATAGCACCCACCAAGGCAAAAAGAAGAGTGGTG-----

-----GAGAGAGAAAAAAGAGCA---GTGGGA---ATAGGAGCT-----

ATGATCTTTGGGTTCTTAGGAGCA---GCAGGAAGCACTATG---GGCGCAGCGTCA---

GTAACGCTGACGGTACAG---GCCAGACAA---TTATTG---TCTGGTATAGTGCAACAGCAAAGC---

AATTTG---CTGAGA---GCTATAGAGGCGCAACAGCACCTGTTGCAACTCACAGTCTGGGGCATT

>MG655209..1

TTCTATTGCGATACAACAAAACCTGTTTAAATAGTACAGGAAATGGAACCATGGAGGGG-----

-----  
-----

CTTAATGGCACCATTATACTTCCATGCAAGATAAAGCAAATTATAAACATGTGGCAGGGAGCAGGACAAGCAA  
TATATGCTCCTCCCATCAGTGGAAGAATTGAGTGTAGATCAAAT---

ATTACAGGAATACTATTAACAAGAGATGGTGGTCATAATATAACT-----

-----  
-----

AACGAGACCTTCAGACCAGGAGGAGGAAATTTAAAGGACAATTGGAGAAATGAATTATATAAATATAAAGTAG  
TACAAATTGAACCACTA---GGAATAGCACCCACCAAGGCAAAGAGAAGAGTGGTG-----

-----AATAGAGAAAAAAGAGCA---GTGGGA---ATAGGAGCT-----

ATGATCTTTGGGTTCTTAGGAGCA---GCAGGAAGCACTATG---GGCGCGGCGTCA---

ATAACGCTGACGGTACAG---GCCAGACAA---TTATTG---TCTGGTATAGTGCAACAGCAAAGC---

AATTTG---CTGAGA---GCTATAGAGGCGCAGCAGCATCTGTTGCAACTCACAGTCTGGGGCATT

>MG655214..2

TTCTATTGCAATACAACAAAAGTTATTTAAATAGTACAGAAAATGGAACCAGGGAAGAGGGT-----

-----  
-----

CATAATGGCACTATTATACTCCCATGCAGGATAAAGCAAATTGTAAACATGTGGCAGGGAGCAGGCCAAGCAA  
TGTATGCTCCTCCCGTCAGAGGAAACATTAATTGTGTATCAAAT---

ATTACAGGACTACTATTAACAAGAGATGGTGGTATTAAGGGAAC-----

-----  
-----

CACAACGAGACCTTCAGACCGGGAGGAGGAAATATAAAGGACAATTGGAGAAGTGAATTATATAAATATAAAG  
TAGTACAAATTGAACCACTA---GGAGTAGCACCCACCAAGGCAAAAGAAGAGTGGTG-----

-----GATAGAGAAAAAAGAGCA---GTAGGA---ATAGGAGCT-----

ATGATCTTTGGGTTCTTAGGAGCA---GCAGGAAGCACTATG---GGCGCGGCGTCA---

ATAACGCTGACGGTACAG---GCCAGACAA---TTATTG---TCTGGTATAGTGCAACAGCAAAGC---

AATTTG---CTGAGA---GCTATAGAGGCGCAGCAGCATATGCTGCAACTCACAGTCTGGGGCATT

>MG655215..1

TTCTATTGCAATACAACACAATTGTTTAAATAATAATTCCACG-----

-----  
-----

TTTAATACCACTGTCATACTTCCATGCAGGATAAAGCAAATTGTAAATATGTGGCAGGGGGTAGGACGAGCAA  
TGTATGCTCCTCCCATCAGTGGAATGATTAATTGTGTATCAAAT---

ATTACAGGAATAATATTAACAAGAGATGGTGGTTATAGTAATACA-----

-----  
-----

ACTAACGAAACCTTCAGACCGGGAGGAGGAAATATAAAGGACAATTGGAGAAGTGAACTATATAAATATAAAG  
TAGTACAAATTGAACCACTA---GGAATAGCACCCACCAGGGCAAAGAGAAGAGTGGTG-----

-----ACTAGAGAAAAAAGAGCAGTAGTGGA---ATAGGAGCT-----

ATGATCTTTGGGTTCTTAGGAGCA---GCAGGAAGCACTATG---GGCGCAGCGTCA---

ATAACGCTGACGGTACAG---GCCAGACAA---TTATTG---TCTGGTATAGTGCAACAGCAAAGC---

AATTTG---CTGAGA---GCTATAGAGGCGCAGCAGCATCTGCTGCAACTCACAGTCTGGGGCATT

>DQ234790..1

TTCTATTGCAATACAACACAACCTGTTTGATAGTAGTTGGAATACAACAACAACCAATAGGGAG-----

-----  
-----

AACCGTAGTAATTTTATACTTCCATGCAGGATAAAACAAATTATAAACATGTGGCAGGAAACAGGAAAAGCAA  
TGTATGCTCCTCCCATCAGGGGAAGCATTGAGTGTATCAAAT---

ATTACAGGAATACTATTGACAAGAGATGGTGGTAATAATAATGGGTCT-----

-----  
-----

AACGAGACCGAGACCTTTAGACCTGGAGGAGGAGATATAAGAGACAATTGGAGAAGTGAATTATATAAATATA  
AAGTAGTACAAATTGAACCACTA---GGAGTAGCACCCACCAGGGCAAAGAGAAGAGTGGTG-----

-----GAGAGAGAAAAAAGAGCAGTAGTGGA---ATAGGAGCT-----

---ATGATCTTTGGGTTCTTAGGAGCA---GCAGGAAGCACTATG---GGCGCGGCGTCA---

TTAACGCTGACGGTACAG---GCCAGACAA---TTACTG---TCTGGTATAGTGCAACAGCAAAGC---

AATTTG---CTGAGG---GCTATAGAGGCGCAACAGCATATGTTGCAACTCACAGTCTGGGGCATT

>KF859741..2

TTCTATTGCAATACAACAAAATTATTTAATCACACAAACAATGACACCATGCAG-----

-----  
-----

TATAATGACACTATCACACTTCCATGCAGGATAAAAGCAAATTATAAACATGTGGCAGAGAGTAGGACAAGCAA  
TGTATGCTCCTCCCGTCAGGGGAAGAATTAATTGTGTATCAAAC---

ATTACAGGAATACTATTGACAAGGGATGGTGGTGGGACAAACAGT-----

-----  
-----

ACGAACGAGATCTTCAGACCTCAAGGAGGAAATATAAAGGACAATTGGAGAAGTAAATTATATAAATATAAAG  
TAGTACAAATTGAACCACTA---GGAGTGGCACCCACCAGGGCAAGGAGAAGAGTGGTG-----

-----GAGAGAGAAAAAAGAGCA---GTGGGA---ATAGGAGCT-----

CTGATCTTTGGGTTCTTAGGAGCA---GCAGGAAGCACTATG---GGCGCGGCGTCA---

ATAACGCTGACGGTACAG---GCCAGACAA---TTATTG---TCTGGTATAGTGCAACAGCAAAGC---

AATTTG---CTGAGG---GCTATAGAGGCGCAGCAGCATCTGTTGCAACTCACAGTCTGGGGCATT

>MH327759..1

TTCTATTGCAATACAACACAATTATTTAATAAC-----

-----  
-----

ACCAATGGTACTATCATACTTCCATGCAAGATAAAACAAATTATAAACATGTGGCAGGGAGTAGGACAAGCAA  
TGTATGCTCCTCCCGTCAGGGGAAAAATTAATTGTGTATCAAAC---

ATTACAGGAATACTATTGACAAGGGATGGTGGGGCAAATAGCACG-----

-----  
-----

AATGAGACCTTCAGACTTCAAGGAGGAAATATAAAGGACAATTGGAGAAATGAATTATATAAATATAAAGTAG  
TACAAATTGAACCACTA---GGAATAGCACCCACCAGGGCACGGCGAAGAGTGGTG-----

-----GAGAGAGAAAAAAGAGCA---GTGGGA---ATAGGAGCT-----

ATGATCTTTGGGTTCTTAGGAGCA---GCAGGAAGCACTATG---GGCGCGGCGTCA---

ATAACGCTGACGGTACAG---GCCAGACAA---TTATTG---TCTGGTATAGTGCAACAGCAAAGC---

AATTTG---CTGAGG---GCTATAGAGGCGCAGCAGCATCTGTTGCAACTCACAGTCTGGGGCATT

>MH078562..2

TTCTATTGCAATACAACACGATTATTTAATTGCACAAACAATAAACACG-----

-----  
-----

TGTAATGAAACTATCATACTTCCATGCAAGATAAAGCAAATTATAAACATGTGGCAGGGAGTAGGACAAGCAA  
TGTATGCTCCTCCCATCAGGGGAAGAATTAATTGTGTATCAAAC---

ATTACAGGAATACTATTAACAAGGGATGGTGGTCAGACAAACGATACG-----

-----  
-----

AACTACGAAACCTTCAGACCTGCAGGAGGAAATATAAAGGACAATTGGAGAAATGAATTATATAAATATAAAG  
TAATACAAATTGAACCACTA---GGATTGGCACCCACCAGGGCAAGGCGAAGAGTGGTG-----

-----GAGAGAGAAAAAAGAGCA---GTGGGA---ATAGGAGCT-----

ATGATCTTTGGGTTCTTAGGAGCA---GCAGGAAGCACTATG---GGCGCGGCGTCA---

ATAACGCTGACGGTACAG---GCCAGACAA---TTATTG---TCTGGTATAGTGCAACAGCAAAGC---

AATTTG---CTGAGG---GCTATAGAGGCGCAGCAGCATATGTTGCAACTCACAGTCTGGGGCATT

>MF373160..1

TTCTATTGCAATATAACAAAACCTGTTTAATAGTACTTGGGGGAGTAATGGCACTTGAATGGCACTGAA----

-----  
-----

TACAATAACGATAACCATACTCCCATGCAGGATAAAAGCAAATTATAAACATGTGGCAACAACCAGGACAAGCAA  
TGTATGCTCCTCCCGTTCAGGGAGTAATTAATTGTATATCAAAT---

ATTACAGGACTAATATTGACAAGAGATGGTGGTATTAATACTACA-----

-----  
-----

ATTAATGAAACCTTCAGACCTGGAGGAGGAAATATAAAGGACAATTGGAGAAGTGAATTATATAAATATAAAG  
TAGTACAAATTGAACCACTA---GGAATAGCACCCACCAAGGCAAGAGAAGAGTGGTG-----

-----GAGAGAGAGAAAAAGAGCA---GTGGGA---ATAGGAGCT-----

ATGATCTTTGGGTTCTTAGGAGCA---GCCGGAAGCACTATG---GGCGCGGCGTCA---

ATAACGCTGACGGTACAG---GCCAGACAA---TTATTG---ACTGGTATAGTGCAAGCAGCAAAGC---

AATTTG---CTGAGA---GCTATAGAGGCGCAACAGCATCTGTTGCAACTCACAGTCTGGGGCATT

>KP411840..2

TTCTATTGCAATACATCAAGGCTGTTTAAATAGTACTTACAATGGAAGTGAACCCGGGAAAGAG-----

GGTAATGGCACTATTATACTTCCATGCAGGATAAAGCAAATTATAAACATGTGGCAGGGAGTGGGACGAGCAA  
TGTATGCTCCTCCCATCAGTGGAAGCATTAAATTGTACATCAAAT---  
ATTACAGGAATACTATTGACAAGCGATTATGGTGGTAATAATACA-----

CAGAAATGAGACCTTCAGACCTGCAGGAGGAAATATAAAGGACAATTGGAGAAGTGAATTATATAAATATAAAG  
TAGTACAAATTGAACCACTA---GGAGTAGCACCCACCAAGGCAAAGAGAAGAGTGGTG-----  
-----GAGAGACAAAAAAGAGCA---GTGGGA---ATAGGAGCT-----  
ATGATCTTTGGGTTCTTGGGAGCA---GCAGGAAGCACTATG---GGCGCGGCGTCA---  
ATAACGCTGACGGTACAG---GCCAGACAA---TTATTG---ACTGGTATAGTGCAACAGCAAAGC---  
AATTTG---CTGAGG---GCTATAGAGGCGCAGCAGCATCTGTTGCAACTCACAGTCTGGGGCATT

>KP411841..3

TGCTACTGCAACCCCTGCAACTGTTTAAATAATAAGACTCATACTAATGGT-----

ACTAATGGCGCTATTGTACTTCTACGGATAATTAAGATAATGAAAATGATGAACCTGGGAGGAGGAGCAGCA-  
--CAGGCTCCGCCTGCTCCTCGAAGTAGTATATGTGTTATTTCA---  
GTTTCAAGAATAACACTGATACTAGTGGGTGGTGATGATGATAATAATAAT-----

AATAACCGCCAGAGCTTCGGACGAGCGGGAGGATGGATGAGGTACGATTATGGATATGAAGTATTACAATATG  
AACTAGTACGAATAGTACCA-----CCACCAACAACAACAACCATGGTGGAGATG-----  
-----AGAAAAAGAGAAAAAGGAAAAAGAGCA---GTGGTA---ATAAGAGTT-----  
---TTGATCATCGGAGGAATAGGAACA---GCA-----GCGGCACCA---  
TTATCGCTGACGGCGATG---GCCAGCAG---ATATTG---TCATGGATATTGAGACAGCGGAGG---  
CTGCTG---CTGATG---AGTATTAAGTTGATGGAGCATCAGCAGCAGCTCACCTGCTGGGCCATC

>KP411842..2

TTCTATTGCAATACATCAAGGCTGTTTAAATAGTACTTACAATGGAAGTGAAGTACCGAAGGGTCAAATGAG-

GGTAATGGCACTATTATACTTCCATGCAGGATAAAGCAAATTATAAACATGTGGCAGGGAGCAGGACGAGCAA  
TGTATGCTCCTCCCATCAGTGGAAGCATTAAATTGTACATCAAAT---  
ATTACAGGAATACTATTGACAAGCGATTATGGTGGTAGTAATACA-----

CAGAAATGAGACCTTCAGACCTGCAGGAGGAAATATAAAGGACAATTGGAGAAGTGAATTATATAAATATAAAG  
TAGTACAAATTGAACCACTA---GGAGTAGCACCCACCAAGGCAAAGAGAAGAGTGGTG-----  
-----GAGAGACAAAAAAGAGCA---GTGGGA---ATAGGAGCT-----  
ATGATCTTTGGGTTCTTGGGAGCA---GCAGGAAGCACTATG---GGCGCGGCGTCA---  
ATAACGCTGACGGTACAG---GCCAGACAA---TTATTG---ACTGGTATAGTGCAACAGCAAAGC---  
AATTTG---CTGAGG---GCTATAGAGGCGCAGCAGCATCTGTTGCAACTCACAGTCTGGGGCATT

>KY213735..1

TTCTATTGCAATACAACAAAACCTGTTTAAATAGTCCTTGCCTGAAAAATGAAGAAAATGGAACA-----

TGTAATAGCACTATCATACTTCCATGTAAGATAAAGCGAATTGTAAGATTGTGGCAGGAAGTAGGTCAAGCAA  
TGTATGCTCCTCCCATCAGCGGAATCATTAGGTGTAACCTCAACT---  
ATTACAGGAATACTATTGACAAGAGATGGTGGTAACCTTAATAAC-----

AGTACTAATGAAACCTCAGACCTGGAGGAGGAAATATAAAGGACAATTGGAGAAGTGAATTATATAAATATA  
AAGTAGTACAAATTGAACCACTA---GGAATAGCACCCACCAAGGCAAAAAGAAGAGTGGTG-----  
-----GAGAGAGAAAAAAGAGCA---GTGGGA---ATAGGAGCT-----  
---ATGATCTTTGGGTTCTTAGGAGCA---GCAGGAAGCACTATG---GGCGCGGCGTCA---  
ATAACGCTGACGGTACAG---GCCAGACAA---TTATTG---TCTGGTATAGTGCAACAGCAAAC---  
AATTTG---CTGAGG---GCTATAGAGGCGCAGCAGCATCTGTTGCAACTCACAGTCTGGGGCATT

>KY213733..1

TTCTATTGCAATACAACAAAACCTGTTTAAATAACACTTGCATAAATGGAACAATGGAAAATGAG-----

-----  
-----

AGTAATAGCACTATCATACTTCCATGCAAGATTAAACAAATTATAAACATGTGGCAGGGAGCAGGACAAGCAA  
TGTATGCTCCTCCCATCAGTGGGAAGAATTAATTGTATATCAAAT---

ATTACAGGAATACTATTAACAAGAGATGGTCAG-----

-----  
-----

CCGAATGATACGGAGATCTTCAGACCTGGAGGAGGAGATATGAAGGACAATTGGAGAAATGAATTATATAAAT  
ATAAAGTAGTACAAATTGAACCACTA---GGAATAGCACCCACCAGGGCAAAGAGAAGAGTGGTG-----

-----GAGAGAGAAAAAAGAGCA---GTGGGA---ATAGGAGCG---

-----ATGATCTTTGGGTTCTTAGGAGCA---GCAGGAAGCACTATG---GGCGCGGCGTCA---

ATAACGCTGACGGTACAG---GCCAGACAG---TTATTG---TCTGGTATAGTGCAACAGCAAAGC---

AATTTG---CTGAGG---GCTATAGAGGCGCAGCAGCATCTGCTGCAACTCACAGTCTGGGGCATT

>KJ952667..1

TTCTATTGCAATACAACAAAACCTGTTTAAATAATACGTGCATAGGAAATGAAACCATAGAGGGG-----

-----  
-----

TGTAATGACACTATCATACTTCCATGCAAGATAAAGCAAATTGTGAACATGTGGCAGGGAGCAGGACAAGCAA  
TGTATGCTCCTCCCATCAGTGGAAATAATTAATTGTGTATCAAAT---

ATTACAGGAATACTATTGACAAGAGATGGTGGTTATAATAATAATACT-----

-----  
-----

AAGGCTAACGAGACCTTCAGACCTGAAGGAGGAAATATAAAGGACAATTGGAGAAATGAATTATATAAATATA  
AAGTAGTAGAAATTGAACCACTA---GGAATAGCACCCACCAGGGCAAAGAGAAGAGTGGTG-----

-----GAGAGACAAAAAAGAGCA--GTGGGA---ATAGGAGCT-----

---ATGATCTTTGGGTTTTTGGGAGCA--GCAGGAAGCACTATG---GGCGCGGCGTCA---

ATAACGCTGACGGTACAG---GCCAGACAA---TTATTG---TCTGGTATAGTGCAACAGCAAAGC---

AATTTG---CTGAGG---GCTATAGAGGCGCAGCAGCATATGTTGCAACTCACAGTCTGGGGCATT

>KJ953089..1

TTCTATTGCAATACATCACAACCTGTTTAAATAGTACTTGGATAGGAAATGAAACCAAGGAAGAGTGT-----

-----  
-----AATAAATTCAAGAAA-----

GAGTGTAATAGCACTATCATACTTCCATGCAAGATAAAGCAAATTATAAACATGTGGCAGGGAGTAGGACAAG  
CAATGTATGCTCCTCCCATAGAGGAAGAATTAATTGTGTATCAAAT---

ATCACAGGAATACTATTGACAAGAGATGGTGGTAGTATTAATAGGAAT-----

-----  
-----

TATGAGAATGAGACCTTCAGACCTGGAGGAGGAAATATAAAGGACAATTGGAGAAGTGAATTATATAAATATA  
AAGTAGTAGAAATTGAACCACTA---GGAGTAGCACCCACCAAGGCAAAGAGGAGAGTGGTG-----

-----GAGAGAGAAAAAAGAGCA--GTGGGA---ATAGGAGCT-----

---ATGATCTTTGGGTTCTTAGGAGCA--GCAGGAAGCACTATG---GGCGCGGCGTCA---

ATAACGCTGACGGTACAG---GCCAGACAA---TTATTG---TCTGGTATAGTGCAACAGCAAAGC---

AATTTG---CTGAAG---GCTATAGAGGCGCAACAGCATCTGTTGCAGCTCACAGTCTGGGGCATT

>KJ953475..1

TTCTATTGTAATACAACAAAATTGTTTAAATAGTACTTGGACAGAAAATGAAACCGAGGAGGGG-----

-----  
-----

AATAATAACACTATCATACTTCCATGCAAGATAAAGCAAATTATAAACATGTGGCAGGGAGTAGGACAAGCAA  
TGTATGCTCCTCCCATCAGTGGAAAAATTAATTGTGTATCAAAT---

ATTACAGGAATACTATTGACAAGAGATGGTGGTAATAATGCGATGAATGAG-----

-----  
-----

ACCTATGAGACCTTTAGACCTGGAGGAGGAAATATGAAGGACAATTGGAGAAGTGAATTATATAAATATAAAG  
TGGTACAAATTGAACCACTA---GGAATAGCACCCACCAGGGCAAGGAGAAGAGTGGTG-----

-----GAGAGAGAAAAAAGAGCA--GTGGGA---ATAGGAGCT-----

ATGATCTTTGGGTTCTTAGGAGCA---GCAGGAAGCACTATG---GGCGCGGCGTCA---

ATAACGCTGACGGTACAG---GCCAGACAA---TTATTG---TCTGGTATAGTGCAACAGCAAAGC---

AATTTG---CTGAGG---GCTATAGAGGCGCAGCAGCATCTGTTGCAACTCACAGTCTGGGGCATT

>AY358059..1

TTCTATTGCGATACAACAAAACCTGTTTAAATAACTATAAAA-----  
-----

AATGGAACCATAACGCTTCCATGCAAGATAAAGCAAGTTGTAAACATGTGGCAGGGAGCAGGACAGGCAATGT  
ATGCTCCTCCCATCAAGGGAAGCATTAATTGTGTATCAAAT---  
ATTACAGGAATACTATTGACAAGAGATGGTGGTAATCAAAACGCG-----  
-----

ACTGAGATTTTCAGACCTGGAGGAGGAAATATAAGGGACAATTGGAGAAGTGAATTATATAAATATAAAGTGG  
TACAAATTGAACCACTA---GGAATAGCACCCACCAGGGCAAAGAGAAGAGTGGTG-----  
-----GAGAGAGAAAAAAGAGCA---GTGGGA---ATAGGAGCT-----  
ATGATCTTTGGGTTCTTAGGAGCA---GCAGGAAGCACTATG---GGCGCGGCGTCA---  
ATAACGCTGACGGTACAG---GCCAGACAA---TTATTG---TCTGGTATAGTGCAACAGCAAAGC---  
AATTTG---CTGAGG---GCTATAGAGGCGCAGCAGCATCTGTTGCAACTCACAGTCTGGGGCATT

>DQ314732..1

TTCTATTGCAATACAACACAACCTGTTTAAATAGTACTTGGGTAGGAAATGAAACCAAAAAGGGGGATAATGGCA  
CTATAAGAAAT-----  
-----GAAACCAAAAAG-----

GGGGATAATGGCACTATCATACTTCCATGCAGGATAAAGCAAATTATAAACATGTGGCAGGAAACAGGACAAG  
CAATGTATGCTCCTCCCATCAGTGGAACAATTAATTGTGTATCAAAT---  
ATTACAGGACTACTATTGACAAGAGATGGTGGAGGTAATAATGACTCG-----  
-----

AGTCAGAACGAGACCTTCAGGCCTGGAGGGGGAAATATAAAGGACAATTGGAGAAGTGAATTATATAAATATA  
AAGTAGTAGAAATTGAACCACTA---GGAATAGCACCCACCAGGGCAAAGAGAAGAGTGGTG-----  
-----GAGAGAGAAAAAAGAGCA---GTGGGA---ATAGGAGCT-----  
---ATGATCTTTGGGTTCTTAGGAGCG---GCAGGAAGCACTATG---GGCGCGGCGTCA---  
ATAACGCTGACGGTACAG---GCCAGACAA---TTATTG---TCTGGTATAGTGCAACAGCAAAGC---  
AATTTG---CTGAGG---GCTATAGAGGCGCAGCAGCATCTGTTGCAACTCACAGTCTGGGGCATT

>JX447561..1

TTCTATTGCAATACATCAAACCTGTTTGATAGAAATGAAACCACGAGTAAT-----  
-----

GGCACTGGCACTATCATACTTCCTTGCAAGATAAAGCAAATTGTACGCATGTGGCAGAGAACAGGACAAGCAA  
TGTATGCTCCTCCCATCAGTGGAAGCATCAATTGTGTATCAAAT---  
ATTACAGGAATTCTGTTGACAAGAGATGGTGGTAATGGTAATAATACT-----  
-----

AATCAGACAGAGATCTTCAGACCTGAGGGAGGAAATATAAAGGACAATTGGAGAAGTGAATTATATAAATATA  
AAGTGGTACAAATTGAACCACTA---GGAATAGCACCCACCAGGGCAAGAAGAAGAGTGGTG-----  
-----CAGAGAGAAAAAAGAGCA---GTGGGA---ATAGGAGCT-----  
---ATGATCTTTGGGTTCTTAGGAGTA---GCAGGAAGCACTATG---GGCGCGGCGTCA---  
ATAACGCTGACGGTACAG---GCCAGACAA---TTATTG---TCTGGTATAGTGCAACAGCAAAGC---  
AATTTG---CTGAGG---GCTATAGAGGCGCAGCAGCATCTGTTGCAACTCACAGTCTGGGGCATC

>JX447855..2

TTCTATTGCAATACAACACAACCTGTTTAAATAGTACTTACGGAGAAAATGGAGAAAATGAAACCATGGGGGGG-  
-----  
-----

AATAATGGCACTATCATACTTCCATGTAAGATAAAGCAGATTATAAACATGTGGCAGGGAGTAGGACAAGCAA  
TGTACGCTCCTCCCATCAGTGGAAGAATTAATTGTAGATCACAA---  
ATTACAGGAATACTATTGATAAGAGATGGTGGTTATGATCGTGTT-----  
-----

AACGAGACCTTCAGACCTGAAGGAGGAAATATGAAGGACAATTGGAGAAGTGAATTATATAAATATAAAGTAG  
TACAAATTGAACCACTA---GGAGTAGCACCCACCAGGGCAAAGAGAAGAGTGGTG-----  
-----GAGAGAGAAAAAAGAGCA---GTGGGA---ATAGGAGCC-----  
ATGATCTTTGGGTTCTTAGGAGCA---GCAGGAAGCACTATG---GGCGCGGCGTCA---  
ATAACGCTGACGGTACAG---GCCAGACAA---TTATTG---TCTGGTATAGTGCAACAGCAAAGC---  
AATTTG---CTGAGG---GCTATAGAGGCGCAGCAGCATCTGTTGCAACTTACAGTCTGGGGCATT

>JX448022..1

TTCTATTGCAATACAACATCACTGTTTAAATGATACTTGCATAGGAAATGAAACCAAGGAAGGG-----

-----  
-----

TGTAATACAACACTATCATACTTCCATGCAGGATAAAACAAATTGTAAACATGTGGCAGGGAGTAGGACAGGCAA  
TGTATGCTCCTCCCATCAGTGGAGAATTAATTGTGTATCAAAT---

ATTACAGGAATACTATTGACAAGAGATGGTGGTGTTAATAATGAT-----

-----  
-----

TCTAGTGAGATCTTCAGACCTGGAGGAGGGGATATAAGAGACAAATGGAGAAGTGAATTATATAAATATAAAG  
TAGTACAAATTGAACCATTA---GGAGTAGCACCCACCAGGGCAAAGAGAAGAGTGGTG-----

-----GAGAGACCAAAAAGAGCA---GTGGGA---ATAGGAGCT-----

ATGATCTTTGGGTTCTTAGGAGCA---GCAGGAAGCACTATG---GGCGCGGCGTCA---

ATAACGCTGACGGTACAG---GCCAGACAA---TTATTG---TCTGGTATAGTGCAACAGCAAAGC---

AATTTG---CTGAGG---GCTATAGAGGCGCAACATCATCTGTTGCAACTCACAGTCTGGGGCATT

>EU743764..1

TTCTATTGCAATACAACACAACCTGTTTAAATCTTAATAATGCTACTGACAGA-----

-----  
-----

GAAAAATAAAATATCACACTTCCATGCAGGATAAAGCAAATTATAAAAATGTGGCAGAGAGTAGGACAAGCAA  
TGTATGCTCCTCCCATCAGGGGAAAAATTAATTGTGTCTCCAAT---

ATTACAGGAATACTATTAACAAGAGATGGTGGTAGTCACAATGATACT-----

-----  
-----

AATAATAACTGAGACCTTTAGACCCGCAGGAGGAAATATAAAAGACAATTGGAGAAGTGAATTATATAAAT  
ATAAAGTAGTAAGAATTGAACCACTG---GGAATAGCACCCACCAGGGCAAGGAGAAGAGTGGTG-----

-----GACAGACCGAAAAGAGCA---GTGGGA---ATAGGAGCT---

-----ATGATCTTTGGGTTCTTAGGAGCA---GCAGGAAGCACTATG---GGCGCGGCGTCA---

CTAACGCTGACGGTACAG---GCCAGACAA---TTACTG---TCTGGTATAGTGCAACAGCAAAGC---

AATTTG---CTGAGG---GCTATAGAGGCGCAGCAGCATCTGTTGCAACTCACAGTCTGGGGCATT

>EU743781..2

TTCTATTGCGATACAACAAAACCTGTTTAAATAATAATTGCACACAAAATGCAACCGATCAGGATGAAAAAAG-

-----  
-----

TGTAATGGCACTCTCATACTTCCATGCAGGATAAAGCAAATTATAAACATGTGGCAGGGAGTAGGACAAGCAA  
TATATGCTCCTCCCGTCCGTGGAAGTATTACTTGTGTATCAAAT---

ATTACAGGAATAACTGACAAGAGATGGTGGTACTCATAAGAATGGTACT-----

-----  
----

GCTGATAATACAACCGAGATCTTCAGACCTACAGGAGGAAATATGAAGGACAATTGGAGAAGTGAATTATATA  
AATATAAAGTAGTACAAATTGAACCACTA---GGAATAGCACCCACCAGGGCAAAGAGAAGAGTGGTG-----

-----GAGAGAGAAAAAAGAGCA---GTGGGA---

CTAGGAGCT-----ATGATCTTTGGGTTCTTAGGAGCA---GCTGGAAGCACTATG---

GGCGCGGCGGCA---GTAACGCTGACGGTACAG---GCCAGACAA---TTATTG---

TCTGGTATAGTGCAACAGCAAAGC---AATTTG---CTGAGA---

GCTATAGAGGCGCAACACATCTGTTGCAACTCACAGTCTGGGGCATT

>JX446699..4

TTCTATTGCAATACATCAAGACTGTTTAAATAGCACTTGCTTCAAAAATCATAACACCACTGAGGCCACTCAGG  
AGTGTAAT-----

-----GACACTATC-----

ACAACAGATGGCAAGATCATACTTCACTGCAGGATAAAGCAAATTATAAACATGTGGCAGGGAGCAGGACAAG  
CAATGTATGCTCCTCCCATCAGTGGAGAATTAATTGTGTATCAAAC---

ATTACAGGAATACTATTGACAAGAGATGGTGGTGATACTGGTAAAAATTATACA-----AAT----

-----  
-----

GGTACCAGGAAAGAGATCTTCAGACCTGGAGGAGGAAATATGAAGGACAATTGGAGAAGTGAATTATATAAAT  
ATAAAGTAGTACAAATTGAACCACTA---GGAATAGCACCCACCAGGGCAAAGAGAAGAGTGGTG-----

-----GAGAGAGAAAAAAGAGCA---GTGGGA---ATAGGAGCT---

-----ATGATCTTTGGGTTCTTAGGAGCA---GCCGGAAGCACTATG---GGCGCAGCGTCA---

ATAACGCTGACGGTACAA---GCCAGACAA---TTATTG---TCTGGTATAGTGCAACAGCAAAGC---  
 AATTTG---CTGAGG---GCTATAGAGGCGCAGCAGCATATGTTGCAACTCACAGTCTGGGGCATT  
 >JX447312..1  
 TTCTATTGCAACACAACAAAACCTGTTTAATTGGACAGAAGGTGAAACCATAGAGAAT-----  
 -----  
 -----  
 AGCACGGAGAATATCATGCTGCCATGCAAGATAAAGCAAATTATAAACATGTGGCAGGAAACAGGACAAGCAA  
 TGTATGCTCCTCCCATCAGTGGAATGATTAATTGTGTATCAAAT---  
 ATTACAGGAATACTATTGACAAGAGATGGTGGTCATGATGGTAATAATACAAAT-----AAT----  
 -----  
 ----  
 ACAAATAATAATACCGAGACCTTCAGACCTGGAGGAGGAAATATAAAGGACAATTGGAGAAGTGAATTATATA  
 AATATAAAGTAGTACAAATTGAACCACTA---GGAATAGCACCCACCAGGGCAAAGAGAAGAGTGGTG-----  
 -----GAGAGAGAAAAAAGAGCA---GTGGGA---  
 ATAGGAGCT-----ATGATCTTTGGGTTCTTGGGAGCA---GCAGGAAGCACTATG---  
 GGCGCAGCGTCA---ATAACGCTGACGGTACAG---GCCAGACAA---TTATTG---  
 TCTGGTATAGTGCAACAGCAAAGC---AATTTG---CTGAGA---  
 GCTATAGAGGCGCAGCAGCATCTGTTGCAACTCACAGTCTGGGGCATT  
 >JX447646..1  
 TTCTATTGCAATACAACAAAACCTGTTTAATAATACTTGCTTAAATGAAACCAAG-----  
 -----  
 -----  
 TGTAATGGCACTGTCACACTTCCATGCAGGATAAAGCAAATTATAAACATGTGGCAGGGAGTAGGACAAGCAA  
 TGTATGCTCCTCCCATCAGGGGAAATATTACTTGTGTATCAAAT---  
 ATTACAGGAATACTATTGACAAGAGATGGTGGTAATGGGGGGAAC-----  
 -----  
 -----  
 GAGACCTTCAGACCTGAAGGAGGAAATATGAAGGACAATTGGAGAAATGAATTATATAAATATAAAGTAGTAC  
 AAATTGAACCACTA---GGATTAGCACCCACCAAGGCAAAAAGAAGAGTGGTG-----  
 -----GAGAGAGAAAAAAGAGCA---GTGGGA---ATAGGAGCT-----  
 ATGATCTTTGGGTTCTTAGGAGCA---GCAGGAAGCACTATG---GGCGCGGCGTCA---  
 ATAACGCTGACGGTACAG---GCCAGACAA---TTATTG---TCTGGTATAGTGCAACAGCAAAGC---  
 AATTTG---CTGAGG---GCTATAGAAGCGCAGCATCATCTGTTGCAACTCACAGTCTGGGGCATT  
 >JN944659..1  
 TTCTATTGTAATACAACAAAACCTGTTTAATAGTACTTGGAGAGAAAATGAAACCATAGAGGAGCATAATGGC-  
 -----  
 -----  
 ACTAATGGCACTATCATACTTCCATGTAGGATAAAGCAAATTATAAACATGTGGCAGGGAGTAGGACAAGCAA  
 TGTATGCTCCTCCCATCAGTGGAATAATTAGTTGTATATCAAAT---  
 ATTACAGGAATACTATTGACAAGAGATGGAGGTCATAATACGAGT-----  
 -----  
 -----  
 AACGAGACCTTCAGACCTGGAGGAGGAAATATAAAGGACAATTGGAGAAGTGAATTATATAAATATAAAGTAG  
 TACAAATTGAACCACTA---GGAATAGCACCCACCAGGGCAAAGAGAAGAGTGGTG-----  
 -----GAGAGAGAAAAAAGAGCA---GTGGGA---ATAGGAGCT-----  
 ATGATCTTTGGGTTCTTAGGAGCA---GCAGGAAGCACTATG---GGCGCGGCGTCA---  
 ATAACGCTGACGGTACAG---GCCAGACAA---TTACTG---TCTGGTATAGTGCAACAGCAAAGC---  
 AATTTG---CTGAGG---GCTATAGAGGCGCAACAGCATCTGTTGCAACTCACAGTCTGGGGCATT  
 >HQ691090..1  
 TTCTATTGCAATACAACAAAACCTGTTTAATAATACCTGCATAAATGAAACCATGAGGGGAAGCAATGAAACCA  
 GG-----  
 -----  
 GAGTGTAATAACACTATTACACTTCCATGCAGGATAAAGCAAATTATAAACATGTGGCAGGGAGTAGGACAAG  
 CAATGTATGCTCCTCCCATCAGTGGAATAATTAGTTGTGTATCAAAT---  
 ATTACAGGAATACTATTGACAAGAGATGGTGGTAATAATACTGGG-----  
 -----  
 -----  
 AATGACGAGATTTTCAGACCTGCAGGAGGAAATATAAAGGACAATTGGAGAAATGAATTATATAAGTATAAAG  
 TAGTACAAATTGAACCACTA---GGAGTAGCACCCACCAAGGCAAAGAGAAGAGTGGTG-----  
 -----GAGAGACAAAAAAGAGCA---GTGGGA---ATAGGAGCT-----

ATGATCTTTGGGTTCTTAGGAGCA---GCAGGAAGCACTATG---GGCGCGGCGTCA---  
 ATAACGCTGACGGTACAG---GCCAGACAA---CTATTG---TCTGGTATAGTGCAACAGCAGAGC---  
 AATCTG---CTGAGG---GCTATAGAGGCGCAACATCATCTGTTGCAACTCACAGTCTGGGGCATT  
 >JX446728..2  
 TTCTATTGCAATACAACAAAATTGTTTCATAGTAATTGGACAACAACAAATGGCACTATAGAAAGGTACAAT-  
 -----  
 -----  
 GACAATGAACTATCATACTTCCATGCAAGATAAAGCAAATTATAAATATGTGGCAGGGAGTAGGACAAGCAA  
 TGTATGCTCCTCCCATCAGAGGAATAATTAATTGTACATCAAAT---  
 ATTACAGGAATATTATTGACAAGAGATGGTGGTCTTCATAATGGGACT-----  
 -----  
 -----  
 AACGATACAGAGACATTCAAGCCTGAAGGAGGAAATATAAAGGACAATTGGAGAAGTGAATTATATAAATATA  
 AAGTAGTACAGATTGAACCATTA---GGAGTAGCACCTACCAGGGCAAGGAGAAGAGTGGTG-----  
 -----GAGAGAGAAAAAAGAGCA---GTGGGA---ATAGGAGCT-----  
 ---ATGATCTTTGGGTTCTTAGGAGCA---GCAGGAAGCACTATG---GGCGCGGCGTCA---  
 ATAACGCTGACGGTACAG---GCCAGACAA---TTATTG---TCTGGTATAGTGCAACAGCAAAGC---  
 AATTTG---CTGAGA---GCTATAGAGGCGCAGCAGCATCTGTTGCAACTCACAGTCTGGGGCATT  
 >JX447057..3  
 TTCTATTGCAATACAACACGACTGTTTAATCATTCTCACAATGAAACCTGGAAGGAGAAG-----  
 -----  
 -----  
 TATAATGGCACTATCATACTTCCATGCAAGATAAAGCAAATTATAAACATGTGGCAGGGAGTAGGACAAGCAA  
 TGTATGCTCCTCCCATCAGTGGAAAGATTGAGTGTGTATCAAAT---  
 ATTACAGGAATACTATTGACAAGAGATGGTGGTGTAAATCAAAC-----  
 -----  
 -----  
 AATGGGACCGAGATCTTCAAACCTGGAGGAGGAAATATAAAGGACAATTGGAGAAGTGAATTATATAAATACA  
 AAGTAGTACAAATTGAACCACTA---GGATTGGCACCTACCAAGGCAAAGAGAAGAGTGGTG-----  
 -----GAGAGAGAAAAAAGAGCA---GTGGGA---ATAGGAGCT-----  
 ---ATGATCTTTGGGTTCTTAGGAGCA---GCAGGAAGCACTATG---GGCGCGGCGTCA---  
 ATAACGCTGACGGTACAG---GCCAGACAA---TTATTG---TCTGGTATAGTGCAACAGCAAAGA---  
 AATTTG---CTGAGG---GCTATAGAGGCGCAGCAGCATCTGTTGCAACTCACAGTCTGGGGCATT  
 >JX447480..2  
 TTCTATTGCAACACAACAAAACCTGTTTAATAGTACTTGGAGAGGAAATGAAACCATAGCGGGCTATGAT----  
 -----  
 -----  
 AATAACAGCAATATCATACTTCCATGCAGGATAAAGCAAATTATAAACATGTGGCAGGAAGTAGGACAAGCAA  
 TGTATACTTCTCCCGTCAGTGGGAAGAATTAATTGTATCTCAAAT---  
 ATCACAGGAATACTATTAAACAAGAGATGGTGGTGGTAATCATAGC-----  
 -----  
 -----  
 AATGAGACCTTTAGACCTGGAGGAGGAAATATGAAGGACAATTGGAGAAGTGAAGTATATAAATATAAAGTAG  
 TACAACCTTGAACCACTA---GGAATAGCACCCACCAAGGCAAAGAGAAGAGTGGTG-----  
 -----GAGAGAGAAAAAAGAGCA---GTGGGA---ATAGGAGCT-----  
 ATGATCTTTGGGTTCTTAGGAGCA---GCCGGAAGCACTATG---GGCGCAGCGTCA---  
 ATAACGCTGACGGTACAG---GCCAGACAA---TTATTG---TCTGGTATAGTGCAACAGCAAAGC---  
 AATTTG---CTGAGG---GCTATAGAGGCGCAGCAGCATCGTCTGTTGCAACTCACAGTCTGGGGCATT  
 >HQ691006..1  
 TTCTATTGCAATACAACACAACCTGTTTAATAATAATTGTACAAATGAAACCATGAATGGG-----  
 -----  
 -----  
 TGTGATGGCAATATCACACTTCCATGCAAGATAAAGCAAATTGTAAACATGTGGCAGGGAGTGGGACAAGCAA  
 TGTATGCTCCTCCCATCAGAGGACAAATTAGTTGTGTGTCAAAT---  
 ATTACAGGGATACTACTGACAAGAGATGGTGGTCATAATGGTAGT-----  
 -----  
 -----  
 ACAAATAATGAGACCTTCAGACCTGGAGGAGGAAATATAAAGGACAATTGGAGAAGTGAATTATATAAATATA  
 AAGTAGTAGAAATTGAACCACTA---GGGATAGCACCTTCCTGGGCAAGGAGAAGAGTGGTG-----  
 -----GAGAGACAAAAAAGAGCA---GTGGGA---ATAGGAGCT-----

---ATGATCTTTGGGTTCTTAGGAGCA---GCAGGAAGCACTATG---GGCGCGGCGTCA---  
 GTAACGCTGACGGTACAG---GCCAGACAA---TTATTG---TCTGGTATAGTGCAACAGCAAAGC---  
 AATTTG---CTGAGG---GCTATAGAGGCGCAGCAGCATCTGTTGCAACTCACAGTCTGGGGCATT  
 >JX447303..2  
 TTCTATTGCAATACATCACAACCTGTTTAATTACACAACAGATGCAGACATGAGGAACAAGACAGCCATA-----  
 -----  
 -----  
 AAAAAATAGCACTATCATACTTCCATGCAGGATAAAAGCAAATTATAAACATGTGGCAGGGAGTAGGACAAGCAA  
 TGTATGCTCCTCCCATCAGTGGAATAATTAATTGTGTATCAAAT---  
 ATTACAGGAATATTATTGACAAGAGATGGTGGTGAGCAGAAGAATGAGAGT-----  
 -----  
 -----  
 AGGCGAAATGAGACCTTCAGACCTGAAGGAGGAAATATGAAGGACAATTGGAGAAAGTGAATTATATAAAATATA  
 AAGTAGTACAAATTGAACCACTA---GGAGTAGCACCCACTAAGGCAAGGAGAAGAGTGGTG-----  
 -----GAGAAACAAAAAGAGCA---GTGGGA---ATAGGAGCT-----  
 ---ATGATCTTTGGGTTCTTAGGAGCA---GCAGGAAGCACTATG---GGCGCGGCGTCA---  
 ATAACGCTGACGGTACAG---GCCAGACAA---TTATTG---TCTGGTATAGTGCAACAGCAAAGC---  
 AATTTG---CTGAGA---GCTATAGAGGCGCAACATCATATGTTGCAACTCACAGTCTGGGGCATT  
 >JX447335..2  
 TTCTATTGCAATACATCACAACCTGTTTAATAGTACTGTTAATGGCACTATCACACTTCCTAAT-----  
 -----  
 -----  
 GGCACACTTCCATGCAAGATAAAGCAAATTATAAAAAATGTGGCAAGGGGTAGGACAAGCAATGTATGCTCCTC  
 CCATCAATGGAAGCATTAATTGTGTATCAAAC---  
 ATTACGGGACTACTATTAACAAGGATGGTGGTAATCAGGGTAATCAT-----  
 -----  
 -----  
 ACTAATGATACTGAGACCTTCAGACCTGGAGGAGGAAACATAAAGGACAATTGGAGAAAGTGAATTATATAAAAT  
 ATAAGGTGGTACAAATTGAACCACTA---GGAATAGCACCCACCAGGGCAAAGAGAAGAGTGGTG-----  
 -----GAAAGAGAAAAAGAGCA---GTGGGA---ATAGGAGCT---  
 -----ATGATCTTTGGGTTCTTAGGAGCA---GCAGGAAGCACTATG---GGCGCGGCGTCA---  
 ATAACGCTGACGGTACAG---GCCAGACAA---TTATTG---TCTGGTATAGTGCAACAGCAAAGC---  
 AATTTG---CTGAGG---GCTATAGAGGCGCAGCAGCATCTGTTGCAACTCACAGTCTGGGGCATT  
 >JN388161..1  
 TTCTATTGCAATACAACACAACCTGTTTAATAGTACTTGCATGGGAGATATGCCCAAGGATGGGTGTAATGGCA  
 CTTTC-----  
 -----  
 AATGGCACCGGCACTATCATACTTCCATGCAGAATAAAGCAATTTATAAACATGTGGCAGGGAGTAGGACAAG  
 CAATGTATGCTCCTCCCATCAAGGGAACATTAGTTGTGTATCAAAT---  
 ATTACAGGAATACTATTAAACAAGAGATGGTGGTAATAGGACTCATAAC-----  
 -----  
 -----  
 GGGACTAAGGAAGAGATCTTCAGACCTGCAGGAGGAAATATGAAGGACAATTGGAGAAAGTGAATTATATAAAAT  
 ATAAAGTAGTACAAATTGAACCACTA---GGAGTAGCACCTACCAAGGCAAAGAGAAGAGTGGTG-----  
 -----GATAGACAAAAAGAGCA---GTGGGA---ATAGGAGCT---  
 -----ATGATCTTTGGGTTCTTGGGAGCA---GCAGGAAGCACTATG---GGCGCAGCGTCA---  
 ATAACGCTGACGGTACAG---GCCAGACAA---TTATTG---TCTGGTATAGTGCAACAGCAAAGC---  
 AATTTG---CTGAGA---GCTATAGAGGCGCAACAACATCTGTTGCAACTCACAGTCTGGGGCATT  
 >GQ916581..5  
 TTCTATTGCAATACAACAAAACCTGTTTAATAGTACCTGGGCCAAGGAGGGGTGGAATGGCACTAATTATAATG  
 ACATTATTAT-----  
 -----AATGGCACT-----  
 AATTATACTGGCAATATCACACTTCCATGCAGGATAAAAGCAAATTGTAAACATGTGGCAGGGAATAGGACAAG  
 CAATGTATGCTCCTCCCATCAGTGGAACGATTAGTGTGTATCAGAA---  
 ATTACAGGAATACTATTGACAAGAGATGGTGATATTACTAATGCG-----  
 -----  
 -----  
 GCTAACGAGACTTTTCAGACCTGGAGGAGGAAATATAAAGGACAATTGGAGAAAGTGAATTATATAAAATATAAAG  
 TAGTGCAAATTGAACCACTA---GGAATAGCACCCACCAGGGCAAAGAGAAGAGTGGTG-----  
 -----GAGAGAGAAAAAGAGCA---GTGGGA---ATAGGAGCG-----

ATGATCTTTGGGTTCTTAGGAGCA---GCAGGAAGCACTATG---GGCGCGGCGTCA---  
 ATAACGCTGACGGTACAG---GCCAGGCAA---TTATTG---TCTGGTATAGTGCAACAGCAAAGC---  
 AATTTG---CTGAGG---GCTATAGAGGCGCAGCAGCATCTGTTGCAACTCACAGTCTGGGGCATT  
 >JF680932..1  
 TTCTATTGCAATACAACAAAGATGTTTAATGCGACAGAAAATGGAACCAGGGAAGGG-----  
 -----  
 -----  
 AATAACAATACGATCATAATTCCATGCAGGATAAAAGCAAATTGTAAACATGTGGCAGAAAACAGGACAAGCAA  
 TGTATGCTCCTCCCATCAGGGGAATAATTAATTGTGTATCAAAT---  
 ATTACAGGAATATTATTAACAAGAGATGGTGGAAATGAGGATAATCAT-----  
 -----  
 -----  
 AGTAAGGACAACGAGACCTTCAGACCTGCAGGAGGAAAATATAAAGGACAATTGGAGAAGTGAATTATATAAAAT  
 AATAAGTAGTACAAATTGAACCACTA---GGAATAGCACCCACCAAGGCAAAGAGAAGAGTGGTG-----  
 -----GAGAGAGAAAAAAGAGCA---GTGGGA---ATAGGAGCT---  
 -----ATGATCTTTGGGTTCTTAGGAGCA---GCAGGAAGCACTATG---GGCGCGGCGTCA---  
 ATAACGCTGACGGTACAG---GCCAGACAA---TTATTG---TCTGGTATAGTGCAACAGCAAAGC---  
 AATTTG---CTGAGG---GCTATAGAGGCGCAACAGCATATGTTGCAACTCACAGTCTGGGGCATT  
 >KT185951..3  
 TTCTATTGCAATACAACAAAACCTGTTTAATGGTACTTACCCGAAAAATGGAACAGATGGAACA-----  
 -----  
 -----  
 AATAATGACACTATCATACTCCCATGTAGGATAAAAGCAAATTGTAAAGATTGTGGCAGGAAGTAGGTCAAGCAA  
 TGTATGCTCCTCCCATCAGTGGAGCATTGAGTGCTACTCAAAT---  
 ATTACAGGAATACTATTGACAAGAGATGGTGGTAATACTAGCAATAGT-----  
 -----  
 -----  
 GATGGTGGTAATATTAGC---  
 AATAGTGAAACCTTCAGACCTGGAGGAGGAAATATAAAGGACAATTGGAGAAGTGAATTATATAAATATAAAG  
 TAGTACAAATTGAACCACTA---GGAATAGCACCCACCAAGGCAAAAAGAAGAGTGGTG-----  
 -----GAGAGAGAAAAAAGAGCA---GTAGGA---ATAGGAGCT-----  
 ATGATCTTTGGGTTCTTAGGAGCA---GCAGGAAGCACTATG---GGCGCGGCATCA---  
 ATAACGCTGACGGTACAG---GCCAGACAA---TTATTG---TCTGGTATAGTGCAACAGCAAAGC---  
 AATTTG---CTGAGG---GCTATAGAGGCGCAGCAGCATCTGTTGCAACTCACAGTCTGGGGCATT  
 >KT185973..1  
 TTCTATTGCAATACATCAAAACCTGTTCAACAATACTTGCAGAGAAGATAGCACGAAGGAGGGGTGTAATGAT-  
 -----  
 -----  
 ACCATACTGCCATGCAAAATAAAGCAAATTATAAGGATGTGGCAGGGAGTAGGACAAGCAATGTATGCTCCTC  
 CCATCAGTGGGAGTATCAACTGTATATCAAAT---  
 ATTACAGGAATACTATTGACAAGAGATGGTGGTTACAACAATAAGAGTAATGGG-----  
 -----  
 -----  
 AACGAGACTGAGACTTTCAGACCTGGAGGAGGAAATATGAAGGACAATTGGAGAAAATGAATTATATAAAATATA  
 AAGTAGTACAAATTGAACCACTA---GGAATAGCACCCACCAAGGCAAAGAGAAGAGTGGTG-----  
 -----GAGAGAGAAAAAAGAGCA---GTGGGA---ATAGGAGCT-----  
 ---ATGATCTTTGGGTTCTTAGGAGCA---GCAGGAAGCACTATG---GGCGCGGCGTCA---  
 ATAACGCTGACGGTACAG---GCCAGACAA---TTATTG---TCTGGTATAGTGCAACAGCAAAGC---  
 AATTTG---CTGAGG---GCTATAGAGGCGCAACAGCATCTGTTGCAACTCACAGTCTGGGGCATT  
 >KT185837..2  
 TTCTATTGCAATACAACAAAACCTGTTTAATAGTACAGGGAAC-----  
 -----  
 -----  
 TATAATGACACTATCATACTTCCATGCAGGATAAAAGCAAATTATAAACATGTGGCAGAGAGTAGGACAAGCAA  
 TGTATGCTCCTCCCATCAGGGGCAACATTACTTGTGTATCAAAT---  
 ATTACAGGAATATTATTGACAAGAGATGGTGGTGCGAATCAGACTAATGAG-----  
 -----  
 -----  
 ACCGATGAGACCTTCAGACCGGGAGGAGGAGATATAAAGGACAATTGGAGAAAATGAATTATATAAATATAAAG  
 TAGTACAAATTGATCCATTA---GGAATAGCACCCACCAAGGCAAAGAGAAGAGTGGTG-----  
 -----GAGAGAGAAAAAAGAGCA---GTGGGA---ATAGGAGCT-----

ATGATCTTTGGGTTCTTAGGAGCA---GCAGGAAGCACTATG---GGCGCGGCGTCG---  
 ATAACGCTGACGGTACAG---GCCAGACAA---TTATTG---TCTGGGATAGTGCAACAGCAAAGT---  
 AATTTG---CTGAGG---GCTATAGAGGTGCAGCAGCATATGTTGCAACTCACAGTCTGGGGCATT  
 >MG989500..3  
 TTCTATTGCAATACAACAAAACCTGTTTAATAGGACTTACCCAGGAAATGATACCACTGAGGGG-----  
 -----  
 -----  
 CAGAATGGCACTATCATACTCCCATGCAGAATAAAGCAAATTATAAACATGTGGCAGGAAGTAGGACAAGCAA  
 TGTATGCTCCTCCCATCAGAGGACCGATTAAGTCTCATCAATT---  
 ATTACAGGAATACTATTGACAAGGGATGGTGGTAGTAGTACTCAAAACGAG-----  
 -----  
 -----  
 ACTCAAAACGGGACCGAGATCTTCAGACCTGGAGGAGGAAATATAAAGGACAATTGGAGAAGTGAATTATATA  
 AATATAAAGTAGTACAAATTGAACCACTA---GGAATAGCACCCACCAGGGCAAAGAGAAGAGTGGTG-----  
 -----GAGAGGGAAAAAAGAGCA---GTGGGA---  
 ATAGGAGCT-----ATGATCTTTGGGTTCTTGGGAGCA---GCAGGAAGCACTATG---  
 GGCGCGGCGTCA---ATAACGCTGACGGTACAG---GCCAGACAG---TTACTG---  
 TCTGGTATAGTGCAACAGCAAAGC---AATTTG---CTGAGA---  
 GCTATAGAGGCGCAGCAGCATATGCTGCAACTCACAGTCTGGGGCATA  
 >MG989502..3  
 TTCTATTGCAATACAACAAAACCTGTTTAATGGTACTTACCCGAAAAATGGAACAGATGGAACA-----  
 -----  
 -----  
 AATAATGACACTATCATACTCCCATGTAGGATAAAGCAAATTGTAAGATTGTGGCAGGAAGTAGGTCAAGCAA  
 TGTATGCTCCTCCCATCAGTGGAGCATTGAGTGCTACTCAAAT---  
 ATTACAGGAATACTATTGACAAGAGATGGTGGTAATACTAGCAATAGTGATGGT-----  
 -----  
 -  
 GGTAATATTAGCAATAGTGAAACCTTCAGACCTGGAGGAGGAAATATAAAGGACAATTGGAGAAGTGAATTAT  
 AATAATATAAAGTAGTACAAATTGAACCACTA---GGAATAGCACCCACCAAGGCAAAAAGAAGAGTGGTG--  
 -----GAGAGAGAAAAAAGAGCA---GTAGGA---  
 ATAGGAGCT-----ATGATCTTTGGGTTCTTAGGAGCA---GCAGGAAGCACTATG---  
 GGCGCGGCATCA---ATAACGCTGACGGTACAG---GCCAGACAA---TTATTG---  
 TCTGGTATAGTGCAACAGCAAAGC---AATTTG---CTGAGG---  
 GCTATAGAGGCGCAGCAGCATCTGTTGCAACTCACAGTCTGGGGCATT  
 >MG989521..1  
 TTCTATTGCAATACATCAAAACCTGTTCAACAATACTTGCAGAGAAGATAGCACGAAGGAGGGGTGTAATGAT-  
 -----  
 -----  
 ACCATACTGCCATGCAAAATAAAGCAAATTATAAGGATGTGGCAGGGAGTAGGACAAGCAATGTATGCTCCTC  
 CCATCAGTGGGAGTATCAACTGTATATCAAAT---  
 ATTACAGGAATACTATTGACAAGAGATGGTGGTTACAACAATAAGAGTAATGGG-----  
 -----  
 -----  
 AACGAGACTGAGACTTTCAGACCTGGAGGAGGAAATATGAAGGACAATTGGAGAAATGAATTATATAAATATA  
 AAGTAGTACAAATTGAACCACTA---GGAATAGCACCCACCAAGGCAAGAGAAGAGTGGTG-----  
 -----GAGAGAGAAAAAAGAGCA---GTGGGA---ATAGGAGCT-----  
 ---ATGATCTTTGGGTTCTTAGGAGCA---GCAGGAAGCACTATG---GGCGCGGCGTCA---  
 ATAACGCTGACGGTACAG---GCCAGACAA---TTATTG---TCTGGTATAGTGCAACAGCAAAGC---  
 AATTTG---CTGAGG---GCTATAGAGGCGCAACAGCATCTGTTGCAACTCACAGTCTGGGGCATT  
 >KU230418..3  
 TTCTATTGCAATACAACAAGCTTGTTTAATAAACTTACATAGGAAATGAAACCAGAAATGAAACCCATGATG  
 GG-----  
 -----  
 GGGAGTAATAAACTATTACACTTCCATGCAAGATAAAGCAAATTGTAAGGATGTGGCAGGGAGTAGGACAAG  
 CAATGTATGCTCCTCCCATCAGTGGAGTAATTAAGTGTATCAAAT---  
 ATTACAGGAATACTATTAACAAGAGATGGTGGTCAGGGTGGTCATAATAAT-----  
 -----  
 -----  
 ACAACTGAGACCGAGACCTTCAGACCTGGAGGAGGAAATATAAAGGATAATTGGAGAAGTGAATTATATAAAT

ATAAAGTAGTACAAATTGAACCACTA---GGAATAGCACCCACCAGGGCAAAGAGAAGAGTGGTG-----  
 -----GAGAGAGAAAAAAGAGCA---GTGGGA---ATAGGAGCT---  
 -----ATGATCTTTGGGTTCTTAGGAGCA---GCAGGAAGCACTATG---GGCGCAGCGTCA---  
 ATAACGCTGACGGTACAG---GCCAGACAA---TTATTG---TCTGGTATAGTGCAGCAGCAAAGC---  
 AATTTG---CTGAGG---GCTATAGAGGCGCAACAGCATCTGTTGCAACTCACAGTCTGGGGCATT  
 >MG989579..1  
 TTCTATTGCAATACAACAAAATTGTTTAATGGAACCATAGCAAGAGT-----  
 -----  
 -----  
 GGTAATGACAGCATCGTACTTCCATGTAAGATAAAGCAGATTATAAACCTGTGGCAGGGAGTAGGACAAGCAA  
 TGTATGCTCCTCCCATCAGGGGGATAATTAAGTGTGTATCAAAT---  
 ATTACAGGAATACTATTGACAAGAGATGGTGGAGCTCACAAATGGGAGT-----  
 -----  
 -----  
 AACGAGACTGAAATCTTTAGACCTGGAGGAGGAAATATGAAGGACAATTGGAGAAGTGAACCTATATAAATATA  
 AAGTAGTACAAATTGAACCTCTA---GGAATAGCACCCACCAGGGCAAAGAGAAGAGTGGTG-----  
 -----GAGAAAGAAAAAAGAGCA---GTGGGA---ATAGGAGCT-----  
 ---ATGATCTTTGGGTTCTTAGGAGCA---GCAGGAAGCACTATG---GGCGCGGCGTCA---  
 CTAACGCTGACGGTACAG---GCCAGACAA---TTATTA---TCTGGTATAGTGCAACAGCAAAGC---  
 AATTTG---CTGAGG---GCTATAGAGGCGCAGCAGCATCTGTTGCAACTCACAGTCTGGGGCATT  
 >MF957493..1  
 TTCTATTGCAATACAACAAAATTATTTAATGGTACAGAAAATGGAACCATGGAGGGGAATACTGAC-----  
 -----  
 -----  
 ACTAATGGCACTATCATCCTTCCATGCAGGATAAAGCAAATTGTAAGAATGTGGCAGGGAGTAGGACAAGCAA  
 TATATGCTCCTCCCATCAGTGGAAACATTAGTTGTGAATCAAAC---  
 ATTACAGGAATACTATTGACAAGAGATGGTGGTAGTGGTAGTTATACTAATGAT-----  
 -----  
 -  
 AGTGATGCTAATAATACAGAAATCTTCAGACCTGAGGGAGGAAATATAAAGGACAATTGGAGAAGTGAATTAT  
 ACAAATATAAAGTAGTACAAATTGAACCACTA---GGAGTAGCACCCACCAAGGCAAGGAGAAGAGTGGTG--  
 -----GAGAGAGAAAAAAGAGCA---GTGGGA---  
 ATAGGAGCT-----ATGATCTTTGGGTTCTTAGGAGCA---GCAGGAAGCACTATG---  
 GGCGCGGCGTCA---ATAACGCTGACGGTACAG---GCCAGACAA---TTATTG---  
 TCTGGTATAGTGCAACAGCAAAGC---AATTTG---CTGAGG---  
 GCTATAGAGGCGCAGCAGCATCTGTTGCAACTCACAGTCTGGGGCATT  
 >MG989524..1  
 TTCTATTGCAATACAACACAACCTTTTTAATAGTACTAGTACTAACAAC-----  
 -----  
 -----  
 TCAGAAGGGAATATCATAATTCCATGCAGGATAAAGCAAATTATAAACATGTGGCAGGGAGTAGGGCAAGTAA  
 TGTATGCTCCTCCTGTCCAAGGGCGAATTAATTGTGCATCAAAT---  
 ATTACAGGAATACTATTAAACAAGAGATGGTGGTCATAACGGGACATCC-----  
 -----  
 -----  
 CAGAACGAGACATTTTCGACCTGGAGGAGGAAATATAAAGGACAATTGGAGGAGTGAATTATATAAATATAAAG  
 TAGTACAAATTGAACCACTA---GGAATAGCACCCACCAGGGCAAAGAGAAGAGTGGTA-----  
 -----AAGAGAGAAAAAAGAGCA---GTGGGC---ATAGGAGCT-----  
 ATGATCTTTGGGTTCTTAGGAGCA---GCAGGAAGCACTATG---GGCGCGGCGTCA---  
 ATAACGCTGACGGTACAG---GCCAGACAA---TTATTG---TCTGGTATAGTGCAACAGCAAAGC---  
 AATTTG---CTGAGG---GCTATAGAGGCGCAGCAGCATATGTTGCAACTCACAGTCTGGGGCATT  
 >MG989535..2  
 TTCTATTGCAATACAACAAAACCTGCTTAATAATACTTGTATAAAAAATCACACCCAGAAGGGG-----  
 -----  
 -----  
 TGTAATGACAGTATCATACTTCCATGCAGAATAAAGCAGTTCATCAACATGTGGCAGGGAGTAGGACAAGCAA  
 TGTATGCTCCTCCCATCAGGGGAATCATTAATTGTGTATCAAAT---  
 ATTACAGGAATACTATTGACAAGAGATGGTGGTAATGTAACCTAAT-----  
 -----  
 -----

ACTAGTGAAATCTTCAGACCAGGGGGAGGAAATATAAAGGACAATTGGAGAAGTGAATTATATAAATATAAAG  
 TAGTACAAATTGAACCACTA---GGAATAGCACCCACCAGGGCAAAGAGAAGAGTGGTG-----  
 -----GAGAGAGAAAAAAGAGCA---GTGGGA---ATAGGAGCT-----  
 ATGATCTTTGGGTTCTTAGGAGCA---GCAGGAAGCACTATG---GGCGCAGCGTCA---  
 ATAACGCTGACGGCACAG---GCCAGACAA---TTATTG---TCTGGTATAGTGCAACAGCAAAGC---  
 AATTTG---CTGAGA---GCTATAGAGGCGCAGCATCATCTGTTGCAACTCACAGTCTGGGGCATT  
 >MG989548..1  
 TTCTACTGCAATACAACACAACACTATTTAATGGTACTGGT-----  
 -----  
 -----  
 ACTAATAGCACTATCACACTTCCATGCAGGATAAAAGCAAATTATAAACATGTGGCAGGGAGTAGGACAAGCAA  
 TGTATGCTCCTCCCATCAGTGGAACAATCAATTGTATATCAAAT---  
 ATTACAGGAATATTATTGACAAGAGATGGTGGTCATAATAATGGT-----  
 -----  
 -----  
 ACTAATGAGACCTTCAGACCTGGAGGAGGAAATATAAAGGACAATTGGAGAAGTGAATTATATAAATATAAAG  
 TAGTAGAAATTGAACCACTA---GGAATAGCACCCACCAAGGCAAGGAGAAGAGTGGTG-----  
 -----GAGAGAGAAAAAAGAGCA---GTAGGA---ATAGGGGCT-----  
 ATGATCTTTGGGTTCTTAGGAGCA---GCAGGAAGCACTATG---GGCGCGGCGTCA---  
 ATAACGCTGACGGTACAG---GCCAGACAA---TTATTG---TCTGGTATAGTGCAACAGCAAAGC---  
 AATTTG---CTGAGG---GCTATAGAGGCGCAGCAGCATCTGTTGCAACTCACAGTCTGGGGCATT  
 >MG989534..1  
 TTCTATTGCAATACATCAAACTGTTTAATAGAACATATGAGTTTAATAGAACACATGAGGGAAATGATACCA  
 TG-----  
 -----  
 -----  
 AATGATACCACTATCATAATTCCATGCAAAATAAAGCAAATAATAAGAATGTGGCAGGGAGCAGGACAAGCAA  
 TGTATGCTCCTCCCGTCAGGGGAAAAATTTCAGTGTGTATCAAAT---  
 ATTACAGGAATATTATTGACAAGAGATGGTGGTGGTGGGAATACT-----  
 -----  
 -----  
 AGTAATAATGAGACCTTCAGACCTGGAGGAGGAAACATAAAGGACAATTGGAGAAGTGAATTATACAAATATA  
 AAGTAGTACAAATTGAACCATTA---GGGATAGCACCCACCAGGGCAAAAAGAAGAGTGGTG-----  
 -----GAGAAACACAAAAGAGCA---GTGGGA---ATAGGAGCT-----  
 ---GTGATCTTTGGGTTCTTAGGAGCA---GCCGGAAGCACTATG---GGCGCGGCGTCA---  
 ATATCGCTGACGGTACAG---GCCAGACAA---TTATTG---TCTGGTATAGTGCAACAGCAAAGC---  
 AATTTG---CTGAGA---GCTATAGAGGCGCAACAGCATCTGTTGCAACTCACAGTCTGGGGCATC  
 >MG989537..1  
 TTCTATTGCAATACAACAAAACCTGTTT-----  
 -----  
 -----  
 -GATAATGAAACCACAGGG-----  
 CCGTGTAATGACACCATTATACTTCCATGCAGAATAAAGCAAATTATAAGAATGTGGCAGGGAGTAGGACAAG  
 CAATGTATGCTCCTCCCATCAGTGGAAGTATTAATTGTGTATCAAAT---  
 ATTACAGGAATACTATTGACAAGAGATGGTGGTAATCATAATGGG-----  
 -----  
 -----  
 AACAAATAGTACTGAGACCTTCAGACCTGGAGGAGGAAATATAAAGACAATTGGAGAAGTGAATTGTTTAAAT  
 ATAAAGTAGTAGAAATTGAACCACTA---GGAATAGCACCCACCAGGGCAAAGAGAAGAGTGGTG-----  
 -----GAAAGAGAAAAAAGAGCA---GTGGGA---CTAGGAGCT---  
 -----ATGATCTTTGGGTTCTTAGGAGCA---GCAGGAAGCACTATG---GGCGCAGCGTCA---  
 ATAACGCTGACGGTACAT---GCCAGACAA---TTGTTG---TCTGGTATAGTGCAACAGCAAAGC---  
 AATTTG---CTGAGG---GCTATAGAGGCGCAGCAGCATATGCTGCAACTCACAGTCTGGGGCATT  
 >JX848346..1  
 TTCTATTGCAATACAACACAACCTGTTTAATAAGACTGACATAGAAAATGAAACCAAGGAGGCTAAT-----  
 -----  
 -----  
 GCTAATGGCACTATCATACTTCCATGCAAGATAAAGCAAATTATAAACATGTGGCAGGGAGTAGGACAAGCAA  
 TGTATGCTCCTCCCATCAGTGGAACAATTAGTTGTGTATCAAAT---  
 ATTACAGGAATACTATTGACAAGAGATGGTGGTAGTCAGAACGAGAACGGG-----  
 -----  
 -----

ACCACCGAGACCTTCAGACCTGGAGGAGGAAATATAAAGGACAATTGGAGAAGTGAATTATATAAATATAAAG  
 TAGTACAAATTGAACCACTA---GGAGTAGCACCCACCAGGGCAAAGAGAAGAGTGGTG-----  
 -----GAGAGAGAAAAAAGAGCA--GTGGGA--ATAGGAGCT-----  
 ATGATCTTTGGGTTCTTAGGAGTA---GCAGGAAGCACTATG---GGCGCAGCGTCA---  
 ATAACGCTGACGGTACAG---GCCAGACAA---TTATTG---TCTGGTATAGTGCAACAGCAAAGC---  
 AATTTG---CTGAGA---GCTATAGAGGCGCAACAACATCTGTTGCAACTCACAGTCTGGGGCATT  
 >KJ952820..1  
 TTCTATTGCAATACAACAGGACTGTTTAATAATTGCACAGGAAATGAAACC-----  
 -----  
 -----  
 TGTAATGACACTATCATACTTCCATGCAGGATAAAAGCAAATTATAAACATGTGGCAGGGAGCAGGACAAGCAA  
 TGTATGCTCCTCCCATCAGGGGAACAATTAATTGTCTATCAAAT---  
 ATTACAGGAATAATATTGACAAGAGATGGTGGTAATAATATTAAGAAT-----  
 -----  
 -----  
 AACGAGACGGAGATCTTCAGACCTGGAGGAGGAGATATGAAGGACAATTGGAGAAAATGAATTATATAAATATA  
 AAGTAGTACAGATTGAACCACTA---GGAGTAGCACCCACCAGGGCAAAGAGAAGAGTGGTG-----  
 -----GAGAGAGAAAAAAGAGCA--GTGGGA--ATAGGAGCT-----  
 ---ATGATCTTTGGGTTCTTAGGAGCA---GCAGGAAGCACTATG---GGCGCAGCGTCA---  
 ATAACGCTGACGGTACAG---GCCAGACAA---TTATTG---TCTGGTATAGTGCAACAGCAAAGC---  
 AATTTG---CTGAGG---GCTATAGAGGCGCAGCATCATCTGTTGCAACTCACAGTCTGGGGCATT  
 >HM215432..1  
 TTCTATTGCAATACATCAAACTATTTAATAGTACAAAAAATAGTACTTGTGAGGGG-----  
 -----  
 -----  
 TGTAATGGTACTATCATACTTCCATGTAAGATAAAGCAATTTATAAACATGTGGCAGAACCCAGGACAAGCAA  
 TGTATGCTCCTCCCATCGAGGGAAAAATTAATTGTGTATCAAAT---  
 ATTACAGGAATACTATTGACAAGAGATGGTGGTGTAAATAGTACA-----  
 -----  
 -----  
 AATAACGAGACCTTCAGACCTCAAGGAGGAAATATGAAGGACAATTGGAGAAGTGAATTATATAAATATAAAG  
 TAGTACAAATTGAACCACTG---GGAATAGCTCCCACCAGGGCAAAGAGAAGAGTGGTG-----  
 -----GAGAGAGAAAAAAGAGCA--GTGGGA--ATAGGAGCT-----  
 ATGATCTTTGGGTTCTTAGGAGCA---GCAGGAAGCACTATG---GGCGCGGCGTCA---  
 ATAACGCTGACGGTACAG---GCCAGACAA---TTATTG---TCTGGTATAGTGCAACAGCAAAGC---  
 AATTTG---CTGAGG---GCTATAGAGGCGCAGCAGCATCTGTTGCAACTCACAGTCTGGGGCATT  
 >AY444805..2  
 TTTTATTGCAATACAACACAGTTGTTTAATAGTACTTGGAGAATAAATGAAACTATGGGGGAGTCTAATGAC-  
 -----  
 -----  
 ATAAACTCAAATATCACACTTCCATGCAGGATAAAGCAAATTGTAAAAATGTGGCAGGGAGTAGGACAAGCAA  
 TGTATGCTCCTCCCATCGATGAAGCAATTCAGTGTGTATCAAAT---  
 ATTACAGGAATACTATTGACAAGAGATGGTGGTCATAATGTGAGT-----  
 -----  
 -----  
 AATGATACTGAGACCTTCAGACCTGGAGGAGGAGATATAAGGGACAATTGGAGAAGTGAATTATATAAATATA  
 AAGTAGTAGAAATTGAACCACTA---GGAATAGCACCCACCAGGGCAAAGAGAAGAGTGGTG-----  
 -----GAGAGAGAAAAAAGAGCA--GTGGGA--ATAGGAGCT-----  
 ---ATGATCTTTGGGTTCTTAGGAGCA---GCAGGAAGCACTATG---GGCGCGGCGTCA---  
 ATAACGCTGACGGTGCAG---GCCAGACAA---TTATTG---TCTGGTATAGTGCAACAGCAAAGC---  
 AATTTG---CTGAGA---GCTATAGAGGCACAACAGCATCTGTTGCAACTCACAGTCTGGGGCATT  
 >FJ185251..1  
 TTCTATTGCAATACAACAAGACTGTTTAATAATACTTGCATAAAAAATGAAACCACGAGGGG-----  
 -----  
 -----  
 TGTGATGGCACTATCACACTGCCATGCAGGATAAAAGCAAATTATAAACATGTGGCAGGGAGTAGGACAAGCAA  
 TATATGCTCCTCCCATCAGAGGAAAAATTAATTGTGTATCAAAT---  
 ATTACAGGAATACTATTGACAAGAGATGGTGGTGCTCATAATACG-----  
 -----  
 -----

ACGACTAATGAGACCTTCAGACCTGGGGGAGGAAATATGAGGGACAATTGGGAAAGTGAATTATATAAATATA  
 AAGTAGTAGAAATTGAACCACTA---GGAATAGCACCCACCAGGGCAAAGAGAAGAGTGGTG-----  
 -----GAGATAGAAAAAAGAGCA---GTGGGA---ATAGGAGCT-----  
 ---ATGATCTTTGGGTTCTTAGGAGCA---GCAGGAAGCACTATG---GGCGCGGCGTCA---  
 ATAACGCTGACGGTACAG---GCCAGACAA---TTATTG---TCTGGTATAGTGCAACAGCAAAGC---  
 AATTTG---CTGAGG---GCTATAGAGGCGCAGCAGCATCTGTTGCAACTCACAGTCTGGGGCATT  
 >FN432728..1  
 TTCTATTGCAATACATCAAACTGTTTAATAGCACTTGGGACAGCAATAGCACTGTTAGCTCAGATGACAGTG  
 ATACT-----  
 -----  
 AATGACAATGTCAATATAACTCTCCCATGCAGAATAAAGCAAATTATAAATATGTGGCAGAGAGTAGGACAAG  
 CAATATATGCCCCCTCCCATCGAAGGAGTAATACAGTGTGAATCAAAC---  
 ATCACAGGACTACTATTAACAAGAGATGGAGGGAATGAGAATAATACAAAC-----  
 -----  
 -----  
 ACAACTAAAGGAGAAGTTTTTCAGGCCTGGAGGAGGAAATATGAGGGACAATTGGAGAAGTGAAGTATACAAGT  
 ATAAAGTAGTAAAAATTGAACCACTA---GGTGTAGCACCCCTCACCTGCAAGAAGAAGAGTGGTG-----  
 -----CAGAGAGAAAAAAGAGCA---GTCGGC---CTAGGAGCT---  
 -----TTCTTCCTTGGGTTCTTAGGAGCA---GCAGGAAGCACTATG---GGCGCAGCGTCA---  
 ATAACGCTGACGGTACAG---GCCAGACAG---TTACTG---TCTGGGATAGTGCAACAGCAAAGC---  
 AATTTG---CTGAGG---GCTATAGAGGCTCAACAACATATGTTGAAACTCACGGTCTGGGGCATT  
 >HQ912710..1  
 TTCTATTGCAATACATCAGAACTGTTTAATAGCACTTGGAAATAACAATAGCATTGCCAACTCAACAGAT---  
 -----  
 -----  
 AGCAAGAGCACCATAACTCTCCAATGCAAAATAAAGCAAATTGTAAATATGTGGCAGAAAGTAGGACAAGCAA  
 TGTATGCCCCCTCCCATCCAAGGAGTAATAAGCTGTAATTCGAAGC---  
 ATTACAGGATTACTATTAACAAGAGATGGAGGGAATAATAATAGT-----  
 -----  
 -----  
 ACAAAATGAGACCTTCAGGCCTGGAGGAGGAGATATGAGGGACAATTGGAGGAGTGAATTATATAAGTATAAAG  
 TAGTAAAAATTGAACCAATA---GGTGTAGCACCCACCCATGCAAAAAGAAGGGTGGTG-----  
 -----CAGAGAGAAAAAAGAGCA---GTTGGA---CTAGGAGCT-----  
 GTCCTCTTTGGGTTCTTAGGAGCA---GCAGGAAGCACTATG---GGCGCGGCGTCA---  
 ATAACGCTGACGGTACAG---GCCAGACAA---TTATTG---TCCGGTATAGTGCAACAGCAGGGC---  
 AATCTG---CTGAGA---GCTATAGAGGCTCAACAACATCTGTTGAAACTCACGGTCTGGGGCATT  
 >DQ313242..3  
 TTCTATTGCAATACACCGATACTGTTTAATAGCACCTGGGAGTACAATAGCACTTGGGGTAACTATAGCTCAA  
 ATTAC-----  
 -----ACA---  
 GGGTCAAATGACATTATAACTCTCCAATGCAAAATAAAGCAAATTGTAAATATGTGGCAGAAAGTAGGACAAG  
 CAATGTATGCCCCCTCCCATCCCAGGAGAGTTAAGGTGTGAATCAAAC---  
 ATTACAGGATTATTATTAACAAGGGATGGAGGGACTAATAGTACAAAT-----  
 -----  
 -----  
 GAGACTTTCGAGACTTTTAGGCCTGGAGGAGGAGACATGAGGGACAATTGGAGAAGTGAATTATATAAGTATA  
 AGGTAGTAAAAATTGAACCACTA---GGTGTGGCACCCACCCATGCAAAAAGAAGAGTGGTG-----  
 -----CAGAGAGAAAAAAGAGCA---GTTGGA---CTGGGAGCT-----  
 ---GTCTTCCTTGGGTTCTTAGGAGCA---GCAGGAAGCACTATG---GGCGCGGCGTCA---  
 ATAACGCTGACGGTACAG---GCCAGACAA---TTATTG---TCCGGTATAGTGCAACAGCAGAAC---  
 AATTTG---CTGAGG---GCTATAGAGGCTCAACAACATCTGTTGAAACTCACGGTCTGGGGCATT  
 >MH746242..1  
 TTCTATTGCAATACATCAGCACTATTTAATAGTAGTTGGAATAGCACTACTTGAATAGCACTCGAAATACCA  
 ATGCTAGCTCA-----  
 -----  
 AATGACACAGAACCTATAACTCTCCAATGCAGAATAAAACAAATTGTAAATATGTGGCAGAGGATAGGACAAG  
 CAATGTATGCCCCCTCCCATCAAAGGAGAAATAAGGTGTGAATCAAAC---  
 ATTACAGGACTACTATTAACAAGAGATGGAGGGACAAATAATAGT-----  
 -----  
 -----

ACAAATGAAACATTTCAGACCTGGAGGAGGAGATATGAGGGACAATTGGAGAAGTGAATTATATAAGTATAAGG  
TAGTACAAATTGAACCAATA---GGTGTGGCACCCACCCATGCAAAAAGAAGAGTGGTG-----  
-----GAGAGAGAAAAAAGAGCA---GTTGGA---CTGGGAGCT-----  
GTCTTCCTTGGGTTCTTAGGAGCA---GCAGGAAGCACTATG---GGCGCGGCGTCA---  
ATAACGCTGACGGTACAG---GCCAGACAA---TTATTG---TCTGGTATAGTGCAACAGCAGAGC---  
AATTTG---CTGAGG---GCTATAGAGGCTCAACAACATATGTTGAGACTCACGGTCTGGGGCATT  
>MH746250..1  
TTCTATTGCAATACATCAGGACTATTTAATAGCACTTGGAAATGGAATACTACCACTAGGAATTGGATTGACA  
TCTCA-----  
-AATAACACAGACACTGTC-----  
TCAAAATAACACAAATATAACTCTCCAGTGCAGAATAAAACAATTTGTAAATATGTGGCAGAGGGTAGGACAAG  
CAATGTATGCCCCCTCCCATCCCAGGAGAGATAAGATGTAACTCAAAC---  
ATTACAGGACTACTATTAAACAAGAGATGGAGGGAATAACAGTGGT-----  
-----  
-----  
GATGCAAATGAGACATTTCAGACCTGGAGGAGGAGATATGAGGGACAATTGGAGAAGTGAATTATATAAGTATA  
AGGTAGTACAAATTGAACCAATA---GGTCTGGCACCCACCCCTGCAAAACGAAGAGTGGTG-----  
-----GAGAGAGAAAAAAGAGCA---ATTGGA---ATGGGAGCT-----  
---TTCTTCCTTGGGTTCTTGGCAACA---GCAGGAAGCACTATG---GGCGCAGCGTCA---  
ATAACGCTGACGGTACAA---GCCAGACAA---TTATTG---TCTGGTATAGTGCAACAGCAAAGC---  
AATTTG---CTGAGG---GCTATAGAGGCTCAACAACATATGTTGAAACTCACGGTCTGGGGCATT  
>MH078536..1  
CTCTATTGCAATACATCAGGCTTGTTTAATAGCACTTGGGAAAACAATACTAACATA-----  
-----  
-----  
ACCAACTCCAATATAACGCTCAAATGCCAAATAAAGCAAATTATAAGGATGTGGCAGAGAGTAGGACAAGCAA  
TGTATGCCCCCTCCCATTAAGGAAATATAACATGTGTATCAAAC---  
ATTACTGGACTACTATTAAACAAGAGATGGAGGGGGGAATAATACT-----  
-----  
-----  
AATGAGACCTTCAGACCTGGAGGAGGAGATATGAGGGACAATTGGAGAAGTGAATTATATAAGTATAAAGTAG  
TAAAAATTGAACCACTA---GGTGTAGCACCCACCCATGCGAAGAGAAGAGTGGTG-----  
-----GAGAGAGAAAAAAGAGCA---GTTGGA---CTGGGAGCT-----  
GTCTTTCTTGGGTTCTTAGGGGCA---GCAGGAAGCACTATG---GGCGCAGCGTCA---  
ATAACGCTGACGGTACAG---GCCAGACAA---TTATTG---TCTGGTATAGTGCAACAGCAGAGC---  
AATCTG---CTGAAG---GCTATAGAGGCTCAACAACAGCTGTTGAGACTCACAGTCTGGGGCATT  
>MH078539..1  
TTCTATTGCGATACATCAGAGCTGTTCAATAGGACTTGGGTGTGGAATGACACTGTTGACAATAACACAGTTA  
ACAAT-----  
-----AGCACA-----  
GATGACAATAGCACAAATACTCTCCCATGCAAAATAAAGCAAATTGTAAGGATGTGGCAGAAAAGTAGGACAAG  
CAATGTATGCCCCCTCCCATCCCAGGAGTAATAAGGTGTGACTCAAAC---  
ATTACAGGACTAATATTAAACAAGAGATGGAGGGAATAGTAATAGTAGTAATAAT-----  
-----  
-----  
GGCACAAGGGAAGAAACTTTTCAGGCCTGGAGGGGGAGACATGAGGGACAATTGGAGAAGTGAATTATATAAGT  
ATAAGGTAATACAAATTGAACCATTA---GGAGTAGCACCCACCAAGGCAAGGAGAAGAGTGGTG-----  
-----GAGAGAGAAAAAAGAGCA---GTTGGA---ATGGGAGCT---  
-----CTTTTCCTTGGGTTCTTAGGAGCA---GCAGGAAGCACTATG---GGCGCGGCGTCA---  
ATAACGCTGACGGTACAG---GCCAGACAA---TTATTG---TCTGGTATAGTGCAACAGCAGAGC---  
AATCTG---CTGAAA---GCTATAGAGGCTCAACAACAGCTGTTGAGACTCACAGTCTGGGGCATT  
>HQ912707..2  
TTCTATTGCAATACATCAACACTGTTTAATAGCACTTGGAAATGGCAATGACACTGCCAGCTCAAATTACACAG  
GA-----  
-----  
TCAAAATGATACTATAACTCTCCAATGCAGAATAAAGCAAATTGTAACATGTGGCAGAGAGTAGGACAAGCCA  
TGTATGCCCCCTCCCATCAAAGGAAAAATAAAGTGTGAATCAAAC---  
ATTACAGGACTACTATTAAACAAGAGATGGAGGAAAGAATAGTAGT-----  
-----  
-----

AATACAAGTGAGACCTTCAGACCTGGAGGAGGAGATATGAGGGACAATTGGAGAAGTGAATTATATAAGTATA  
AAGTAGTCAAAATTGAACCACTA---GGTGTAGCACCTAACCGTGCAAAAAGAAGAGTGGTG-----  
-----GAGAGAGAAAAAAGAGCAGTTGGAGTTGGACTGGGAGCA-----  
---GTCTTCCTTGGGTTCTTAGGAGCA---GCAGGAAGCACTATG---GGCGCGGCGTCA---  
CTAACGCTGACGGTACAG---GCCAGACAA---TTATTG---TCCGGTATAGTGCAACAGCAGAGC---  
AATTTG---CTGAGG---GCTATAAAGGCTCAACAACATCTGTTGAAACTCACGGTCTGGGGCATT  
>EU513199..2  
TTCTATTGCAATACAACAAAGCTGTTTAATAGCACTTGGGAATAATGATAACTACAATGTCAGCGCAAACCTCA  
CAGAG-----  
-----GAA---  
AACAGAAAGGAAAACATAACTCTCCACTGCAGAATAAAGCAAATTGTAAATATGTGGCAGAGAGTAGGACAAG  
CAATATATGCCCCCTCCCATCCCAGGAAACATAAATTGTGGATCAAAC---  
ATTACTGGGCTACTATTAACAAGAGATGGAGGGAATAATGGTACA-----  
-----  
-----  
AATGATACTGAGACCTTCAGGCCTGGAGGAGGAGATATGAGGGACAATTGGAGAAGTGAATTATATAAATATA  
AAGTAGTAAAAATTGAACCACTA---GGTGTAGCACCAACCCCTGCAAAAAGAAGAGTGGTG-----  
-----GAAAGAGAAAAAAGAGCA---GTTGGA---ATGGGAGCT-----  
---TTGATCTTTGGGTTCTTAGGAGCA---GCAGGAAGCACTATG---GGCGCGGCGTCA---  
ATGGCGCTGACGGTACAG---GCCAGACAA---TTATTG---TCTGGTATAGTGCAACAGCAGAGC---  
AATCTG---CTGAAG---GCTATAGAGGCTCAACAACATCTGTTGAGACTCACGGTCTGGGGCATT  
>KU168265..3  
TTCTATTGTTATACATCAAAATTATTTAATAGCATTTGGAGGAGCAATGACACTTGGAGGAGCGATGGCAATG  
ACCAT-----  
-----  
ACAAAGGAAACCATAACTCTCCAATGCAGAATAAAGCAAATTGTAAATATGTGGCAGAGAGTAGGACAAGCAA  
TGTATGCCCCCTCCCATCCCAGGAGTAATAAGGTGTGAATCAAAC---  
ATTACAGGACTACTATTAACAAGAGATGGAGTAGGGAATAATATG-----  
-----  
-----  
ACAAATGAAACCTTCAGGCCTGGGGGAGGAAATATGAAGGACAATTGGAGAAGTGAAGTATATAAGTATAAAG  
TAGTAAAAATTGAACCACTA---GGTGTAGCACCCCTCCTATGCAAGGAGAAGAGTGGTG-----  
-----GAAAGAGAAAAAAGAGCA---GTTGGA---ATAGGAGCT-----  
GTCTTCCTTGGGTTCTTAGGAGCA---GCAGGAAGCACTATG---GGCGCGGCGTCA---  
CTAACGCTGACGGTACAG---GCCAGAAAA---TTATTG---TCTGGTATAGTGCAACAGCAGAGC---  
AATCTG---CTGCAG---GCTATAGAGGCTCAACAACAGCTGTTGAGGCTCACGGTCTGGGGCATT  
>MK086123..1  
TTCTATTGCAATACAACAGACCTATTT-----TCTTGGAATAGTAGTAACCCATGGAAGAACATAACG---  
-----  
-----  
TCAAATGACAGTATAACTCTCCAATGCAGAATAAAGCAAATTGTAAAGGATGTGGCAGCAAGTAGGACAAGCAA  
TGTATGCCCCCTCCTATACCAGGAATAATAAGGTGTGAATCAAAC---  
ATTACAGGAATACTGTTAACAAGAGATGGAGGAAATAATAATACA-----  
-----  
-----  
AATAACACAGAGGTATTTCAGGCCTGGAGGAGGAGATATGAGGGACAATTGGAGAAGTGAATTATATAAATATA  
AAGTAGTAAAAATTGAACCATTA---GGTGTAGCACCCCTCCCGTGCAAGAAGAAGAGTGGTG-----  
-----GAGAGAGAAAAAAGAGCA---GTTGGC---CTGGGAGCT-----  
---TTCTTCCTTGGGTTCTTAGGAGCA---GCAGGAAGCACTATG---GGCGCGGCGTCA---  
ATAACGCTGACGGTACAG---GCCAGACAA---TTATTG---TCTGGTATAGTGCAACAGCAGAGC---  
AATCTG---CTGCGG---GCCATAGAGGCTCAACAACATCTGTTGAAACTCACGGTCTGGGGCATT  
>AY371122..1  
TTCTATTGCAATACAACAAGCCTGTTTAATAGCACTTGGCATGACAATGACACTGCCAGCTCAAACCAC----  
-----  
-----  
ACAAATGGCACTATAACTCTCCAATGCAGAATAAAGCAAATTATAAATATGTGGCAGAGAGTAGGACAAGCAA  
TATATGCCCCCTCCTATCCCAGGAGAAATAAGGTGTGACTCAAAC---  
ATTACAGGACTACTATTAACAAGAGATGGAGGGAATAATAATGTGACG-----  
-----  
-----

AATGGGACTGAGACTTTCAGGCCTGAAGGAGGAGATATGAGAAACAATTGGAGAAGTGAATTATATAAGTATA  
AAGTAGTAAAAATTGAACCAATA---GGTGTAGCACCTACCCCTGCAAAAAGAAGAGTGGTG-----  
-----GGGAGAGAAAAAAGAGCA---CTG-----GGAGCTGCT-----  
---GTCTTCCTTGGGTTCTTAGGAGCA---GCAGGAAGCACTATG---GGCGCGGCGTCA---  
ATAACGCTGACGGTACAG---GCCAGACAA---CTATTG---TCCGGTATAGTGCAACAGCAGAGC---  
AATTTG---CTGAGG---GCTATAGAGGCTCAACAACACCTGTTGAGACTCACGGTCTGGGGCATT  
>AY371123..2  
TTCTATTGCAATACAACAGACCTATTTAATAGCACTTGGAACGAAACCACAGAGTCAAAT-----  
-----  
-----  
GGCAATATGAATCTAACAATCCCATGCAGAATAAAACAATTTGTGAATTTGTGGCAGAAAGTAGGACAAGCAA  
TGTATGCCCCCTCCCATCCAAGGAGAAATAAGGTGTGAATCAAAC---  
ATTACAGGATTACTATTAACAAGAGATGGAGGGGTAAATAATAAT-----  
-----  
-----  
AATAGTACGGAGATATTCAGGCCTGGAGGAGGAGATATGAGGGACAATTGGAGAAGTGAATTATATAAGTATA  
AGGTAGTTCAAATTAAACCACTA---GGTGTGGCACCTACCCATGCAAAACGAAGAGTGGTG-----  
-----GAGAGAGAAAAAAGAGCA---GTTGGA---ATAGGAGCT-----  
---GTTTTCTTGGGTTCTTAGGAGCA---GCAGGAAGCACTATG---GGCGCGGCGTCA---  
ATAACGCTGACGGCACAG---GCCAGACAA---TTATTG---TCTGGTATAGTGCAACAGCAGAGC---  
AATCTG---CTGAGG---GCTATAGAGGCTCAACAACATCTGTTGAAACTCACGGTCTGGGGCATT  
>AY371124..1  
TTCTATTGCAATACATCACAACCTGTTTAATAGAACTTGGGGTAAATAATAGCACCTGGGGAAACGAGACAGGGG  
AG-----  
-----  
GGCAATATAACTATCACTCTCCCATGCAGAATAAAGCAAATTTGTAAATATGTGGCAAAGAGTAGGACGAGCAA  
TGTATGCCCCCTCCCATCCAAGGAGAAATAAGGTGTAACTCAAAC---  
ATTACAGGACTACTATTAACAAGAGATGGAGGGAATAATACTAAT-----  
-----  
-----  
AGTACAGATGAGATCTTCAGGCCTGGAGGAGGAGATATGAGGGACAATTGGAGAAGTGAATTATATAAGTATA  
AGGTAGTAAAAATTGAACCACTA---GGTGTAGCACCCACCCATGCAAAAAGAAGAGTGGTG-----  
-----GAGAGAGAAAAAAGAGCA---GTTGGA---CTGGGAGCT-----  
---GTTTTCTTGGGTTCTTAGGAGCA---GCAGGAAGCACTATG---GGCGCGGCGTCA---  
ATAACGCTGACGGTACAG---GCCAGACAA---TTATTG---TCTGGTATAGTGCAACAGCAGAGC---  
AATTTG---CTGAAG---GCTATAGAGGCTCAACAACATCTGTTGAGACTCACAGTCTGGGGCATT  
>AY371131..2  
TTCTATTGCGATACATCAGGACTGTTTAATAGCACTTGGGACAGCACTTGGGGCAATAACAATGACAGCTCAG  
AG-----  
-----  
GCAAAATGGCACTATAACTCTCCAATGCAGAATAAAGCAAATTTGTAAATATGTGGCAGAAAGTAGGACAAGCAA  
TGTATGCCCCCTCCCATCCAAGGAGTAATAAGGTGTGAATCAAAC---  
ATTACAGGACTAATATTAACAAGGGATGGAGGGCCTGATAGTCCA-----  
-----  
-----  
AATGAGATATTCAGGCCTGGAGGAGGAGATATGAGGGACAATTGGAGAAGTGAATTATATAAGTATAAGGTAG  
TACAAATAGAACCAATA---GGTGTGGCACCCACTTATGCAAAGAGAAGAGTGGTG-----  
-----GAGAGAGAAAAAAGAGCA---TTTGGA---GTGGGAGCT-----  
GTCTTCCTTGGGTTCTTAGGAGCA---GCAGGAAGCACTATG---GGCGCGGCGTCA---  
ATAACGCTGACGGTACAG---GCCAGACAA---TTATTG---TCCGGTATAGTGCAACAGCAAAGC---  
AATTTG---CTGAGG---GCTATAGAGGCTCAACAACATCTGTTGAAACTCACGGTCTGGGGCATT  
>GU201498..1  
TTCTATTGCAATACATCACAACCTATTTAATAGCACTTGGGATGGTCCATTTAATAGCACTTGGAATGACAATA  
GCACAGAC-----ACA---  
GAGTTAAATGACACTATAACTCTCCAATGCAGAATAAAGCAAATTTGTAAATATGTGGCAGAGAGTAGGACAAG  
CAATGTATGCCCCCTCCCATCCAAGGAGTAATAAGGTGTGAATCAAAC---  
ATTACAGGACTGCTATTAACAAGGGATGGAGGGAATAATAGCACA-----  
-----  
-----

AATGAGACATTCAGGCCTGGAGGAGGAGATATGAGGGACAATTGGAGAAGTGAAGTATATAAGTATAAGGTAG  
TACAAATTGAACCACTA---GGTGTGGCACCCACCCGGGCAAAAAGAAGAGTGGTG-----  
-----GAGAGAGGAAAAAGAGCA---GTAGGA---CTGGGAGCT-----  
GTCTTCTTTGGGTTCTTAGGAGCA---GCAGGAAGCACTATG---GGCGCGGCGTCA---  
ATAACGCTGACGGTACAG---GCCAGACAA---TTATTG---TCCGGTATAGTGCAACAGCAGAGC---  
AATCTG---CTGAGG---GCTATAGAGGCTCAACAACATCTGTTGAAACTCACGGTCTGGGGCATC  
>GU201499..2  
TTCTATTGCAATACATCAAACTGTTTAATAGCACTTGGATTAATGGCACTAGCAATTGGATTAATGACACTT  
GGACTAAT-----  
-----GGCAAT-----  
GAGGATGATAATAAAATAACTCTCCAATGCAGAATAAAGCAAATTATAAATATGTGGCAGAGAGTAGGACAAG  
CAATGTATGCCCTCCCATCCGAGGAGAAATAAGGTGTCATTCAAAT---  
ATTACAGGTCTACTATTAACAAGAGATGGAGGGAATAATAATAGT-----  
-----  
-----  
GCTGCAAATGAAACCTTCAGGCCTACAGGAGGAGACATGAGGGACAATTGGAGAAGTGAATTATATAAATATA  
AAGTAGTAAAAATTGAACCACTA---GGTGTAGCACCAAAACAAGGCAAAAAGAAGAGTGGTG-----  
-----GAGAGAGAAAAAGAGCA---GTTGGA---ATGGGAGCT-----  
---TTCTTCCTTGGGTTCTTAGGAGCA---GCAGGAAGCACTATG---GGCGCGGCGTCA---  
ATAACGCTGACGGTACAG---GCCAGACAA---TTATTG---TCTGGTATAGTGCAACAGCAGAGA---  
AATCTG---CTGCAG---GCTATAGAGGCTCAACAACATCTGTTGAGACTCACGGTCTGGGGCATT  
>AY371137..2  
TTCTATTGCAATACATCACAACCTGTTTAATAGTACTTGGAAATAGTACTTATAGCAATAATGCCAACTTA----  
-----  
-----  
ACAAATGGCACTATAACTCTCCAATGCAGAATAAAGCAAATTGTACAGATGTGGCAGAGAGTAGGACAAGCAA  
TGTATGCCCCCTCCCATCCAAGGAGTAATAAGGTGTGAGTCAAAC---  
ATAACAGGATTACTATTAACAAGAGATGGAGGGACAAATAATACA-----  
-----  
-----  
AATAATACCGAGACATTCAGGCCTGGAGGAGGAGATATGAGGGACAATTGGAGAAGTGAATTATATAAGTATA  
AGGTAGTACAAATTGAACCAGTG---GGTGTGGCACCCACCCATGCAAAAAGAAGAGTGGTG-----  
-----GAGAGAGAAAAAGAGCA---GTTGGA---CTGGGAGTT-----  
---GCGTTCCTTGGGTTCTTAGGAGCA---GCAGGAAGCACTATG---GGCGCGGCGTCA---  
ATAACGCTGACGGTACAG---GCCAGACAA---TTATTG---TCTGGTATAGTGCAACAGCAGAGC---  
AATTTG---CTGAAG---GCTATAGAGGCTCAACAACATATGTTGAAACTCACGGTCTGGGGCATT  
>AY371132..1  
TTCTATTGCAGTACATCAAGACTATTTAATAGCACGTGGGATAATAGCACGTGGAATAACAATACCACT----  
-----  
-----  
GACACAGATGACATAACTCTCCCATGCAGAATAAAGCAATTTGTAAATATGTGGCAGAGAGTAGGACAAGCAA  
TGTATGCCCCCTCCTATCCGAGGAGAAATAAGGTGTGAGTCAAAC---  
ATTACAGGACTACTATTAACAAGGGATGGAGGAAATAATAGCACA-----  
-----  
-----  
AATGAGACATTCAGGCCTGGAGGAGGAGATATGAGGGACAACCTGGAGAAGTGAATTATATAAGTATAAGGTAG  
TACAAATTGAACCACTA---GGTGTGGCACCCACCCGTGCAAGGAGAAGAGTGGTG-----  
-----GAGAGAGAAAAAGAACA---GTAGGA---CTGGGAGCT-----  
GTCTTCCTTGGGTTCTTAGGAGCA---GCAGGAAGCACTATG---GGCGCGGCGTCA---  
ATAACGCTGACGGTACAG---GCCAGACAA---TTATTG---TCCGGTATAGTGCAACAGCAGAGC---  
AATCTG---CTGAGG---GCTATAGAGGCTCAACAACATCTGTTGAAACTCACGGTCTGGGGCATT  
>GU201500..1  
TTCTATTGCAATACATCAAACTGTTTAATAGCATTTGGTCTAACAATACATCAAAATCGTTTAATAGCACTT  
GGCTTAACAGT-----  
-----AGCATT-----  
GGGAATGACAGTAGCATAACTCTCCAATGCAGAATAAAGCAAATTTGTAAGTATGTGGCAGAGAGTAGGACAAG  
CAATGTATGCTCCTCCCATCCCAGGAGAACTAAGGTGCGAATCAAAC---  
ATTACAGGACTACTATTAACAAGAGATGGAGGAGGTAATAATAGG-----  
-----  
-----

GAAAATGAGACCTTCAGGCCTGGAGGAGGAGATATGAGGGACAATTGGAGAAGTGAATTATATAAGTATAAAG  
TAGTAAAAAATTGAACCACTA---GGTGTAGCACCTCCCAGGCAAAAAGAAGAGTGGTG-----  
-----AATAGAGAAAAAAGAGCA---GTTGGA---ATAGGAGCT-----  
CTCTTCCTTGGGTTCTTAGGAGCA---GCAGGAAGCACTATG---GGCGCGGCGTCA---  
ATGACGCTGACGGTACAG---GCCAGACAA---TTATTG---TCTGGTATAGTGCAACAGCAGAGC---  
AATCTG---CTGAAG---GCTATAGAGGCTCAACAACATCTGTTGAGACTCACGGTCTGGGGCATT  
>AY371134..1  
TTCTATTGCAATACATCACAACCTGTTTAATAGCACTTGGAAATCTAATAGCACTTGGAAACAGCACTAGGAACA  
AT-----  
-----  
AACACTGACATTATAACTCTCCAATGCAGAATAAAGCAAATTGTAAATATGTGGCAGAAAATAGGACAAGCAA  
TGTATGCCCCCTCCCATCCAAGGAGTAATAGAGTGTAAATCAAAC---  
ATTACAGGACTACTATTAACAAGGATGGAGGGCGAGGGCCTGAT-----  
-----  
-----  
AATACAACTGAGATATTCAGGCCTGGAGGAGGAGATATGAGGGACAATTGGAGAAGTGAATTATATAAGTATA  
AGGTAGTACAAATAGAGCCAATA---GGTGTGGCACCCACCCATGCAAAAAGAAGAGTTGTG-----  
-----GAGAGAGAAAAAAGAGCA---GTTGGA---CTGGGAGCT-----  
---GTCTTCCTTGGTTTCTTAGGAGCA---GCAGGAAGCACTATG---GGCGCGGCGTCA---  
ATAACGCTGACGGTACAG---GCCAGACAA---TTACTG---TCTGGTATAGTGCAACAGCAGAGC---  
AATCTG---CTGAGG---GCTATAGAGGCTCAACAGCATCTGTTGAAACTCACAGTCTGGGGCATT  
>AY371136..1  
TTCTATTGCAATACATCAAAGCTATTTAATAGCACTTGGACTTGGACCAATGACACTGCCAGCTCAAATGACA  
CAAAG-----  
-----  
GGGTAAATGACACTATAACGCTCCAATGCAGAGTAAGGCAAATTGTAAGAATGTGGCAGAAAGTAGGACAAG  
CAATGTATGCCCCCTCCCATCCGAGGAGTAATAAGATGTGAGTCAAAC---  
ATTACAGGACTACTATTAACAAGGATGGAGGGACAAATAATAAA-----  
-----  
-----  
AATAATGAGACATTTAGGCCTGGAGGAGGAAATATGAGGGACAATTGGAGAAGTGAATTATATAAGTATAAGG  
TAGTACAAATTGAACCACTA---GGTGTGGCACCCACCCATGCAAGAAGAAGAGTGGTG-----  
-----CAGAGAGAAAAAAGAGCA---GTTGGA---CTGGGAGCT-----  
GTCTTCCTTGGGTTCTTAGGAGCA---GCAGGAAGCACTATG---GGCGCGGCGTCA---  
ATAACGCTGACGGTACAG---GCCAGACAA---TTATTG---TCCGGTATAGTGCAACAGCAGAGC---  
AATCTG---CTGAGG---GCTATAGAGGCTCAACAGCATCTGTTGAAACTCACGGTCTGGGGCATT  
>AY371138..1  
TTCTATTGCAATACATCAGAACTATTTAATAGCACTTGGGCACATGACACAAATAACACAGGGTTG-----  
-----  
-----  
GATAATGGCAATCTAACTCTCCAATGCAGAATAAAGCAAATTGTAAGAATGTGGCAGAGGACAGGACAAGCAA  
TGTTTGCCCCCTCCCATCCAAGGAGAAATAAAGTGTGAATCAAAC---  
ATTACAGGATTACTATTAACAAGAGATGGAGGGAACAATGGTAGT-----  
-----  
-----  
GCAAATGAGACATTCAGGCCTGGAGGAGGAGATATGAGGGACAATTGGAGAAGTGAATTATATAAGTATAAGG  
TAGTACAAATTGAACCAATA---GGTGTGGCACCCACCCATGCAAAAAGAAGAGTGGTG-----  
-----GAGAGAGGAAAAAGAGCAGTAGTTGGA---CTGGGAGCT-----  
GTCTTCCTTGGGTTCTTAGGAGCA---GCAGGAAGCACTATG---GGCGCAGCGTCA---  
ATAACGCTGACGGTACAA---GCCAGACAA---TTATTG---TCTGGTATAGTGCAACAGCAGAGC---  
AATTTG---CTGAGG---GCCATAGAGGCTCAACAACAACCTGTTGAAACTCACGGTCTGGGGCATT  
>AY371142..2  
TTCTATTGCAATACATCAAACTGTTTAATAGCACTTGGGAAAATGGAACTTTAACCAGCTCAAACCACACAA  
GG-----  
-----  
TCAAAATGGCACCATAACCCTCCAATGCAAAATAAGGCAAATTGTAAGAATGTGGCAGAGAGTAGGACAAGCAA  
TGTATGCCCCCTCCCATCGACGGGGACATAAGGTGCGAATCAAAC---  
ATTACAGGACTACTATTAACAAGAGATGGAGGGAGTAAAAATAGC-----  
-----  
-----

ACAAATAATGAGACTTTCAGGCCTGGAGGAGGAGATATGAGGGACAATTGGAGAAGTGAATTATATAAGTATA  
 AAGTAGTAGAAGTTGAACCAATA---GGTGTAGCACCCACCTATGCAAAAAGAAGAGTGGTG-----  
 -----GAGAGAGAAAAAAGAGCA---GTTGGA---CTGGGAGCT-----  
 ---GTCTTCCTTGGGTTCTTAGGAGCA---GCAGGAAGCACTATG---GGCGCGGCGTCA---  
 ATAACGCTGACGGTACAG---GCCAGACAA---TTGTTG---TCTGGTATAGTGCAACAGCAGAGC---  
 AATTTG---CTGAAG---GCTATAGAGGCTCAACAACATCTGTTGAGACTCACGGTCTGGGGCATT  
 >AY371125..1  
 TTCTATTGCAATACATCAGGACTATTTAATAGCACTTGGACTTGGGAATAGTGATAATAACACTGGATATAGCA  
 AC-----  
 -----  
 AACACTAGTGAACCTATAACTCTCCAATGTAGAATAAAGCAGATTATAAATATGTGGCAGAGAGTAGGACAAG  
 CAATGTATGCCCTCCCATTAGAGGAATAATAAAATGTGAATCAAAC---  
 ATTACAGGGCTATTATTAACAAGAGATGGAGGAAATAATAGTACA-----  
 -----  
 -----  
 AATGAGACATTCAGGCCTGGAGGAGGAGATATGAGGGACAATTGGAGAAGTGAATTATATAAATATAAGGTAA  
 TACAAATTGAACCATTA---GGTGTGGCACCCAACAAGGCAAAAAGAAGAGTGGTG-----  
 -----GAGAGAGAAAAAAGAGCA---GTGGGA---ATTGGAGCT-----  
 GTCCTCTTTGGGTTCTTAGGAGCA---GCAGGAAGCACTATG---GGCGCAGCGTCA---  
 ATAACGCTGACGGTACAG---GCCAGACAA---TTATTG---TCTGGTATAGTGCAACAGCAGAGC---  
 AATCTG---CTGAGG---GCTATAGAGGCTCAACAACATCTGTTGCAACTCACGGTCTGGGGCATT  
 >AY371126..1  
 TTCTATTGCAATACATCAAACCTGTTTAATAGCACTTGGATTAGCAATAGCACTTGGGAATAGCAGTAGCAGTA  
 CA-----  
 -----  
 GGGTCAGACATTATAACTCTCCAATGCAGAATAAAGCAAATTGTAAATATGTGGCAGAAAGTAGGACAAGCAA  
 TGTATGCCCCCTCCCATCCGAGGAGAAATAAGATGTAACCTCGAAC---  
 ATTACAGGACTACTATTAACAAGGGATGGAGGGGATAGAGGGAATAGTGGT-----  
 -----  
 ----  
 GGTGCAAATGGGACCGAACTTTCAGGCCTGGAAGAGAAAAATATGAAGGACAATTGGAGAAGTGAATTATATA  
 AGTATAAGGTAGTAAAAATTGAACCACTA--GGTGTAGCACCCCTCCCATGCAAAAAGAAGAGTAGTG-----  
 -----GAGAGAGAAAAAAGAGCA---GTTGGA---  
 ATGGGAGCT-----GTCTTCCTTGGGTTCTTAGGAGCA---GCAGGAAGCACTATG---  
 GGCGCAGCGTCA--ATAACGCTGACGGTACAG---GCCAGACAA---TTATTG---  
 TCCGGTATAGTGCAACAGCAGAAC---AATCTG---CTGAGA---  
 GCTATAGAGGCTCAACAACATCTGTTGAACTCACGGTCTGGGGCATT  
 >AY371127..2  
 TTCTATTGCAACACAACAGACTTATTTAATAGCACTTGGGATAACAGTAGCATTGAGACTAACTATAGCACTG  
 GG-----  
 -----  
 AATAACAATGAACTATAACTCTCCAATGCAGAATAAAACAAATTGTAAATATGTGGCAGAAAGTAGGACAAG  
 CAATGTATGCCCTCCCATCCAGGAGTAATAAGGTGTGAATCAAAC---  
 ATTACAGGGTTACTATTAACAAGAGATGGAGGGAACAATACTGAGGCA-----  
 -----  
 -----  
 AATGAGAATGAGACATTCAGGCCTGGAGGAGGAGATATGAGGGACAATTGGAGAAGTGAATTATATAAGTATA  
 AGGTAGTACAAATTGAGCCACTA---GGTGTGGCACCCACCAGGCAAGAGAAGAGTGGTG-----  
 -----CAGAGAGAAAAGAGAGCA---GTTGGA---ATGGGAGCT-----  
 ---TTCTTCCTTGGGTTCTTAGGAGCA---GCAGGAAGCACTATG---GGCGCGGCGTCA---  
 ATAACGCTGACGGTACAG---GCCAGACAA---TTATTG---TCTGGTATAGTGCAACAGCAGAGC---  
 AATCTG---CTGAGG---GCTATAGAGGCTCAACAACATCTGTTGAACTCACGGTCTGGGGCATT  
 >AY371139..1  
 TTCTATTGCAATACATCAAGCCTGTTTAATAGCATTTGGAGTACCAATAGTACTGGGAATAACAATAGCACT-  
 -----  
 -----  
 GGGGATGGCAATATAACTCTCCAATGCAGAATAAAGCAAATTATAAAGATGTGGCAGAGAGTAGGACAAGCAA  
 TGTATGCCCCCTCCCATCCAGGAGAAATAAGGTGCAACTCAAAC---  
 ATTACAGGACTACTATTAACAAGAGATGGAGGGGTTAATAATAGT-----  
 -----

-----  
ATAAATGAGACCTTCAGGCCTGGAGGAGGAGATATGAGGGACAACCTGGAGAAGTGAATTATATAAGTATAAAG  
TAGTAAAGATTGAACCACTA---GGTGTAGCACCCACCCGTGCAAAAAGAAGAGTGGTG-----  
-----GGGAGAGAAAAAAGAGCAGTTGTTGGA---CTGGGAGCT-----  
GTCTTCCTTGGGTTCTTAGGAGCG---GCAGGAAGCACTATG---GGCGCGGCGTCA---  
ATAACGCTGACGGTACAG---GCCAGACAA---TTATTG---TCTGGTATAGTGCAACAGCAGAGC---  
AATTTG---CTGAGG---GCTATAGAGGCTCAACAACATCTGTTGAGACTCACGGTCTGGGGCATT  
>AY371140..1  
TTCTATTGCAATACATCAAAACTGTTTAATAGCACTTGGAGTAACAATGACACTGCCAGCTCAAACCACACAG  
GG-----  
-----  
TTAAATAACACTATAACTCTCCAATGCAGAATAAAGCAAATTATAAATATGTGGCAGAAAGTAGGACAAGCAA  
TGTATGCCCCCTCCCATCCGAGGAGAAATAAGGTGTGAATCAAAC---  
ATTACAGGACTACTACTAACAAGAGATGGAGGGAGTAATAATAGT-----  
-----  
-----  
ACAAATGAGACTTTTCAGGCCTGGAGGAGGAGATATGAGGGACAATTGGAGAAGTGAATTGTATAAGTATAAAG  
TAGTAAAAATTGAACCACTA---GGTGTAGCCCCACCAAGGCAAAAAGAAGAGTGGTG-----  
-----GGGAGAGAAAAAAGAGCA---GTTGTTGGACTGGGAGCT-----  
GTCTTCCTTGGGTTCTTAGGAGCA---GCAGGAAGCACTATG---GGCGCGGCGTCA---  
ATGACGCTGACGGTACAG---GCCAGACAA---TTGTTG---TCCGGTATAGTGCAACAGCAGAGC---  
AATTTG---CTGAGG---GCTATAGAGGCTCAACAACATCTGTTGAAACTCACGGTCTGGGGCATT  
>AY371146..1  
TTCTATTGCAATACAACAGCACTATTTAATAGCACTTGGTTTGGCAATGAGACTGACAGCTCAAACCATACAA  
GG-----  
-----  
-----  
TCAAATGACACTATAACTCTCCAATGCAGAATAAAGCAAATTGTAAGGATGTGGCAGAAAGTAGGACAAGCAA  
TGTATGCCCCCTCCCATCAAAGGAAACATAACGTGTAAATCAAAT---  
ATTACAGGAATACTATTAAACAAGAGATGGAGGAACTAATAGAACA-----  
-----  
-----  
AATGAGACATTCAGGCCTGGAGGAGGAGATATGAGAGACAATTGGAGAAGTGAATTATATAAGTATAAGGTAG  
TACAAATTGAACCACTA---GGTGTGGCACCTACCCCTGCAAAAAGAAGAGTGGTG-----  
-----CAGAGAGAAAAAAGAGCA---GTTGGA---ATGGGAGCT-----  
TTCTTCCTTGGGTTCTTAGGAGCA---GCAGGAAGCACTATG---GGCGCGGCGTCC---  
CTGACGCTGACGGTACAG---GCCAGACAA---TTGTTG---TCTGGTATAGTGCAACAGCAGAGC---  
AATTTG---CTGAGG---GCTATAGAGGCTCAACAACATCTGTTGAAACTCACAGTCTGGGGCATT  
>AY371128..1  
TTCTATTGCAATACATCAAAACTGTTCAATAGCATTTGGACTTTGGAGAATGGCAATTGGACTAACAATAGCA  
CAGAA-----  
-----  
-----  
AATGGAAATGACACTATAACTCTCCAATGCAGAATAAAGCAAATTATAAATATGTGGCAGAGAGTAGGACAAG  
CAATGTATGCCCCCTCCCATCCGAGGAGTAATAATGTGTAATTCAAAT---  
ATCACAGGACTACTATTAAACAAGAGATGGAGGGAACAGTGGTGGT-----  
-----  
-----  
GCAAATGAGACCTTCAGGCCTGGAGGAGGAGATATGAGAGACAATTGGAGAAGTGAATTATATAAGTATAAAG  
TGGTGAAGATTAAACCACTA---GGAGTAGCACCCACCAATGCAAAAAGAAGAGTGGTG-----  
-----GGGAGAGAGAAAAAGAGCA---GTTGGA---CTGGGAGCT-----  
GTCTTCCTTGGGTTCTTAGGAGCA---GCAGGAAGCACTATG---GGCGCGGCGTCA---  
ATAACGCTGACGGTACAG---GCCAGACTA---TTATTG---TCTGGTATAGTGCAACAGCAAAGC---  
AATTTG---CTGAAG---GCTATAGAGGCTCAACAACATCTGTTGAGACTCACGGTCTGGGGCATT  
>AY371129..2  
TTCTATTGCAATACATCAGAACTATTTAATAGCACTTGGGGTAATAGCACTTGGGATAATAGCACTTGGGATA  
ACAGC-----  
-----  
-----  
TCAAATTATGACAATATAACTCTCCAATGCAGAATAAAGCAAATTATAAATATGTGGCAGAAAGTAGGACAAG  
CAATGTATGCCCCCTCCCATCCGAGGAGTAATAAGGTGTGAATCAAAC---  
ATTACAGGACTACTATTAAACAAGGGATGGAGGGAGCAGTAATGGTACA-----  
-----

```

-----
AATGAGACAAGTGAGACATTCAGGCCTGGAGGAGGAGATATGAGAGACAATTGGAGAAGTGAATTATATAAGT
ACAAGGTAGTACAAATTGAACCATTA---GGTGTGGCACCCCTCCCATGCAAAAAGAAGAGTGGTG-----
-----GAGAGAGGAAAAAGAGCA---GTTGGA---ATGGGAGCT---
-----TTCTTCCTTGGGTTCTTAGGAGCA---GCAGGAAGCACTATG---GGCGCAGCGTCA---
CTGACGCTGACGGTACAA---GCCAGACAA---TTATTG---TCTGGTATAGTGCAGCAGCAGAGC---
AATTTG---CTGAAG---GCTATAGAGGCTCAACAACATCTGTTGAAACTCACGGTCTGGGGCATT
>AY371130..1
TTCTATTGTAATACAACAAAACCTATTTAACAACCTGCCAGCTTAAATGACACAGAG-----
-----
-----
ACAAATGGCACTATAACTCTCCCATGCAGAATAAAACAAATTGTAAATATGTGGCAGAAAGTAGGACAGGCCAA
TGTATGCCCCCTCCCATCCAAGGAGTAATAAGGTGTGAATCAAAC---
ATTACAGGACTACTATTAAACAAGAGATGGAGGGAACAATAGGAGT-----
-----
-----
ACAGAAACCTTTAGGCCTGGAGGAGGAGATATGAGGGACAATTGGAGAAGTGAATTATATAAGTATAAAGTAG
TAAAAATTGAACCACTA---GGTGTGGCACCCACCCGTGCAAAAAGAAGAGTGGTG-----
-----GAGAGAGAAAAAGAGCA---GTTGGA---ATGGCAGCT-----
GTCTTCTTTGGGTTCTTAGGAGCA---GCAGGAAGCACTATG---GGCGCGGCGTCA---
ATAACGCTGACGGTACAG---GCCAGACAA---TTATTG---TCCGGTATAGTGCAACAGCAGAGC---
AATTTG---CTGAAA---GCTATAGAGGCTCAACAACATATGTTGAGACTCACGGTCTGGGGCATT
>GU201513..1
TTCTATTGCAATACATCAAGACTATTTAATAGTACTTGGACTAGCAACTCTACAACAAATTCAACT-----
-----
-----
GCTAATGAAATTATAACTCTCCAATGTAGAATAAAGCAAATTGTAAATATGTGGCAGACGGTAGGACAAGCAA
TGTATGCCCCCTCCCATCCCAGGAATAATAAGGTGTGACTCAAAC---
ATTACAGGACTACTATTAAACAAGAGATGGAGGGGATACAAATAGA-----
-----
-----
ACAAATGAAATATTTCAGACCTGGAGGAGGAGATATGAGGGACAATTGGAGAAGTGAGTTATATAAGTATAAGG
TAGTAAAAATTGAACCAATA---GGTGTGGCACCCACCCCTGCAAAAAGAAGAGTGGTG-----
-----GAAAGAGGAAAAAGAGCA---GTTGGA---CTGGGAGCT-----
GTCTTCCTTGGGTTCTTAGGAGCA---GCAGGAAGCACTATG---GGCGCGGCGTCA---
ATAACGCTGACGGTACAG---GCCAGACAA---TTATTG---TCCGGTATAGTGCAACAGCAGAGC---
AATTTG---CTGAGG---GCTATAGAGGCTCAACAACATCTGTTGAAACTCACGGTCTGGGGCATT
>GU201514..2
TTCTATTGCAATACATCAGAGTTGTTTAATAGCATTTGGAATAACAATGGCAGCATTTGGTATAACAATGACA
CTGCTATCAAT-----AACACAGAG-----
-----
CCAAAGAATAAGACTCTAACTCTCCAATGCAGAATAAAGCAGGTTATAAAGATGTGGCAGAGAGTAGGACAAG
CAATGTATGCCCCCTCCCATCCGAGGAGAAATAAGGTGTGATTCAAAC---
ATTACAGGACTATTATTAAACAAGAGATGGAGGGAATAATAGGACA-----
-----
-----
GATGAGACCTTCAGGCCTGGAGGAGGAGATATGAGGGACAATTGGAGAAGTGAATTATATAAGTATAAAGTAG
TAAAAATTGAACCACTA---GGTGTAGCACCCACCTATGCAAAAAGAAGAGTGGTG-----
-----GAGAGAGAAAAAGAGCA---GTTGGA---ATAGGAGCT-----
GTCCTCCTTGGGTTCTTAGGAGCA---GCAGGAAGCACTATG---GGCGCGGCGTCA---
ATAACGCTGACGGTACAG---GCCAGACAA---TTATTG---TCTGGTATAGTGCAACAGCAGAGC---
AATTTG---CTGAAG---GCTATAGAGGCTCAACAACATCTGTTGAGACTCACGGTCTGGGGCATT
>AY371141..2
TTCTATTGCAATACATCAGGACTGTTTAATAGCAGTTGGGATAGCAATAGCACTGAGGAAACCAATAATTCAG
AA-----
-----
AATAATGAAACTATAACTCTCCAATGCAGAATAAAGCAAATTGTAAACATGTGGCAGAGAGTAGGACAAGGAA
TGTATGCCCCCTCCCATCCAGGGAATAATAAGGTGTGAATCAAAC---
ATTACAGGACTACTATTAAACAAGAGATGGAGGGGAAAAATAATAGT-----
-----

```

-----  
ACAAATCAGACCTTCAGGCCTGGAGGAGGAGATATGAGGGACAATTGGAGAAGTGAATTATATAAGTATAAAG  
TAGTAAAAATTGAACCAATA---GGTGTAGCACCCACCCATGCAAAAAGAAGAGTGGTG-----  
-----GAGAGAGGAAAAAGAGCA---GTTGGA---CTGGGAGCT-----  
GTCTTCCTTGGGTTCTTAGGAGCA---GCAGGAAGCACTATG---GGCGCGGCGTCA---  
ATAACGCTGACGGTACAG---GCCAGACAA---TTATTG---TCTGGTATAGTGCAACAGCAGAGC---  
AATCTG---CTGAAA---GCTATAGAGGCTCAACAACATCTGTTGAAACTCACGGTCTGGGGCATT  
>DQ313247..1  
TTCTATTGTAATACAACAGATCTGTTTAATAGCACTTGGGCTAATAATAGCAATAAGTGGGACTCAACAGCCC  
CA-----  
-----  
GAGAAATGGCACTATAACTCTCAAATGCAGAATAAAGCAAATTGTAAATATGTGGCAGAGAGTAGGACAAGCAA  
TATATGCCCCCTCCCATCGAAGGAGACATAAGGTGTGAATCAAAT---  
ATTACAGGACTACTATTAACAAGAGATGGAGGGGAAAAATAGTAGT-----  
-----  
-----  
GAGCCCACTGAGACCTTCAGGCCTGGAGGGGGAGATATGAGGGATAATTGGAGAAGTGAATTATATAAGTATA  
AAGTAGTAAAAATTGAACCACTA---GGTGTAGCACCTACCCATGCAAAAAGAAGAGTGGTG-----  
-----GAGAGAGGAAAAAGAGCA---GTTGGA---CTGGGAGCT-----  
---TTCTTCTTTGGGTTCTTAGGAGCA---GCAGGAAGCACTATG---GGCGCGGCGTCA---  
ATAACGCTGACGGTACAG---GCTAGACAA---TTATTG---TCTGGTATAGTGCAACAGCAGAGC---  
AATTTG---CTGAGA---GCTATAGAGGCTCAACAACATATGTTGAAACTCACGGTCTGGGGCATT  
>MK086121..2  
TTCTATTGCAATACATCAAATTTATTCAATAGCACTTGGGAATAGCACTTGGGGTAATAACACTTGGGAATAGCA  
GTAGC-----  
-----  
ACTAATATTAATATAACGCTTCAATGCAGAATAAAGCAAATTGTAAATATGTGGCAGACAGTAGGACAAGCAA  
TGTATGCCCCCTCCCATCCAAGGAGAAATAAGGTGTGAATCAAAC---  
ATTACAGGATTACTATTGACAAGAGATGGAGGGGGGACAGAGACC-----  
-----  
-----  
AATAATACAGAGATCTTCAGGCCTGGAGGAGGAGATATGAGGGACAATTGGAGAAGTGAATTATATAAGTATA  
AAGTAGTAAAAATTGAACCACTA---GGTGTAGCACCCACCCATGCAAAAAGAAGAGTGGTG-----  
-----GAGAGAGAAAAAGAGCA---GTTGGA---CTGGGAGCT-----  
---GTCTTCCTTGGGTTCTTAGGAGCA---GCAGGAAGCACTATG---GGCGCGGCGTCA---  
ATAACGCTGACGGTACAG---GCCAGACAA---TTATTG---TCTGGTATAGTGCAACAGCAGAGC---  
AATTTG---CTGAAG---GCTATAGAGGCTCAACAACAGATGTTGAGACTCACGGTCTGGGGCATT  
>EU513187..1  
TTCTATTGCAATACAACAGCACTATTTAATAGCACTTGGGATAACAATAGTACTAGGGAAGACAATAACTCAA  
CA-----  
-----  
GGGAATGACACTATAACTCTCCAATGCAGAATAAAGCAAATTGTGAGGATGTGGCAAAGATCAGGACAAGCAA  
TGTATGCCCCCTCCCATCCAAGGAGTAATAAAGTGTAATCAAAT---  
ATCACAGGACTACTATTAACAAGGGATGGGGGGAATAATGAAAGT-----  
-----  
-----  
ACAAATGAGACCTTCAGACCTGGAGGAGGAGATATGAGGGACAATTGGAGAAGTGAATTATATAAGTATAAAG  
TAGTAAAAATTGAACCACTA---GGTGTAGCACCCACCCATGCAAAAAGAAGAGTGGTG-----  
-----CAGAGAGAAAAAGAGCA---GTAGGA---CTGGGAGCT-----  
GTCTTCTTTGGGTTCTTAGGAGCA---GCAGGAAGCACTATG---GGCGCGGCGTCA---  
ATAACGCTGACGGTACAG---GCCAGACAA---TTATTG---TCTGGTATAGTGCAACAGCAGAGC---  
AATTTG---CTGAAG---GCTATAGAGGCTCAACAGCATCTGTTGAAACTCACGGTCTGGGGCATT  
>EU513195..1  
TTCTATTGCAATACATCAAGACTGTTTAATAGCACTTGGGGTAGCAATAACACTTGGGATAACAGC-----  
-----  
-----  
ACGGAGCAAAATATAACTCTCAGATGCAAAATAAAGCAGATTATAAATATGTGGCAGAGAGTAGGACAAGCAA  
TGTATGCCCCCTCCCATCCGAGGAGAAATAAGATGTGAATCAAAC---  
ATTACAGGACTACTATTAACAAGGGATGGAGGGGGTAATAGTAGT-----  
-----

-----  
 AGTGCAAATGAGACCTTCAGACCTACAGGAGGAAATATGAAGGACAATTGGAGAAGTGAATTATATAAGTATA  
 AAGTAGTAAAAATTGAACCACTA---GGTGTAGCACCCACCCGTGCAAAAAGAAGAGTGGTG-----  
 -----GGGAGAGAAAAAAGAGCA---GCA-----CTGGGAGCT-----  
 ---GTCTTCCTTGGGTTCTTAGGAGCA---GCAGGAAGCACTATG---GGCGCGGCGTCA---  
 ATAACGCTGACGGTACAG---GCCAGACAA---TTATTG---TCCGGTATAGTGCAACAGCAGAGC---  
 AATTTG---CTGAAG---GCTATAGAGGCTCAACAACATCTGTTGAAACTCACGGTCTGGGGCATT  
 >EU513189..1  
 TTCTATTGCAATACATCAGGACTATTTAATAGCACTTGGCACAATAGCACTTGGACCAATAGCACCCTGGCT  
 CAAATGGC-----  
 -----ACA---  
 GAGTCAAATGACACTATAACTCTCCAATGCGAAATAAAGCAAATTTATAAATATGTGGCAGAGAGTAGGACGAG  
 CAATGTATGCCCCCTCCCATCCCAGGAGTGATAAGGTGTGAATCAGAC---  
 ATTACAGGACTACTATTAACAAGAGATGGACCGAATAGTACACAA-----  
 -----  
 -----  
 AATGAGACATTCAGGCCTGGAGGAGGAGATATGAGAGACAATTGGAGAAGTGAATTATATAAGTATAAAGTAG  
 TACAAATTGAACCACTA---GGTGTGGCACCCACCCATGCAAAAAGAAGAGTGGTG-----  
 -----GAGAGAGAAAAAAGAGCA---GTTGGA---CTGGGAGCT-----  
 GTCTTCTTTGGGTTCTTGGGAGCG---GCAGGAAGCACTATG---GGCGCGGCGTCA---  
 ATAACGCTGACGGTACAG---GCCAGACAA---TTATTG---TCTGGTATAGTGCAACAGCAGAGC---  
 AATTGG---CTGAAA---GCTATAGAGGCTCAACAACATCTGTTGAGACTCACGGTCTGGGGCATT  
 >EU513196..2  
 TTCTATTGCAATACATCAGGCCTATTTAATAGCACTTGGTATAGCAATAGCACTAACAGCTCAAATCACACAA  
 AT-----  
 -----  
 GGCACAGATGATATAACTCTCCAATGCAGAATAAAGCAAATTGTAAATATGTGGCAGAGAGTAGGACAAGCAA  
 TGTATGCCCCCTCCCATCCGAGGAGAAATAAGGTGTGAATCAAAC---  
 ATTACAGGAATACTATTAACAAGAGATGGAGGGAATAATGGTAGT-----  
 -----  
 -----  
 AAAGCAAATGAGACCTTCAGACCTGGAGGAGGAGACATGAGGGACAATTGGAGAAGTGAATTATATAAATACA  
 AAGTAGTAAAAATTGAACCAATA---GGTATAGCACCCACCCATGCAAAAAGGAGAGTGGTG-----  
 -----GAGAGAGAAAAAAGAGCA---GTCGGA---CTGGGAGCT-----  
 ---TTCTTCCTTGGGTTCTTAGGAGTA---GCAGGAAGCACTATG---GGCGCGGCGTCA---  
 ATGACGCTGACGGTACAG---GCCAGACAT---TTATTG---TCTGGTATAGTGCAACAGCAGAGC---  
 AATCTG---CTGAAG---GCTATAGAGGCTCAACAACAGCTGTTGAGACTCACAGTCTGGGGCATT  
 >EU513191..1  
 TTCTATTGCAATACATCAAACTGTTTAGTAGCACTTGGGATAATAGCACTTGGGGTAATAACACTTGGGGTA  
 ACAGCACT-----  
 -----GGG---  
 GACAACAATGAGACCATAACCTCCAATGCAAAATAAAACAAATTATAAATATGTGGCAGCAAGTAGGACGAG  
 CAATGTATGCCCCCTCCCATCCAAGGAGAGATAAGGTGTGAGTCAAAC---  
 ATTACAGGACTACTATTAACAAGAGATGGAGGGGCTAATAGCAGT-----  
 -----  
 -----  
 ACAAATGAGACCTTCAGGCCTGGAGGAGGAGATATGAGGGATAATTGGAGGAGTGAATTATATAAGTATAAAG  
 TTGTAAAAATTGAACCACTA---GGTGTAGCACCCACCCGTGCAAAAAGAAGAGTGGTG-----  
 -----CAGAGAGAAAAAAGAGCG---GTTGGA---CTGGGAGCT-----  
 GTCTTCATTGGGTTCTTAGGAGCA---GCAGGAAGCACTATG---GGCGCAGCGTCA---  
 ATAACGCTGACGGTACAG---GCCAGACAA---TTATTG---TCCGGTATAGTGCAACAGCAGAGC---  
 AATTTG---CTGAAG---GCTATAGAGGCTCAACAACATCTGTTGAGACTCACGGTCTGGGGCATT  
 >EU513184..2  
 TTCTATTGCAATACATCAAACTATTTGATAGCATTTGGAATAGAATAATGGGTCAAATTACACAAGGTTAG  
 GTGATGAC-----  
 -----ACA---  
 GAGACAAATGACCCTATAACTCTCCAATGCAGAATAAAGCAAATTGTAAGAATGTGGCAGACAGTAGGACAAG  
 CAATGTATGCCCCCTCCCATCCGGGGAGAAATAAAATGTGAATCAAAC---  
 ATTACAGGACTGCTATTAACACGAGATGGAGGAAATAATAATAGT-----  
 -----

-----  
ATGAATGAGACATTTCAGGCCTGGAGGAGGAGATATGAGGGACAATTGGAGAAGTGAATTATATAAGTATAAGG  
TAGTACAAATTGAACCACTA---GGTGTGGCACCCACCTTTGCAAAAAGAAGAGTGGTG-----  
-----GAGAGAGGAAAAAGAGCA---GTTGGA---CTGGGAGCT-----  
GTTTTCCTTGGGTTCTTAGGAGCT---GCAGGAAGCACTATG---GGCGCGGCGTCA---  
ATAACGCTGACGGTACAG---GCCAGACAA---TTACTG---TCTGGTATAGTGCAACAGCAAAGC---  
AATTTG---CTGAGG---GCTATAGAGGCTCAACAACATCTGTTGAAACTCACGGTCTGGGGCATA  
>EU513193..2  
TTCTATTGCAATACATCAGGACTGTTTAATAGCACCTGGTGGGATAGCAACAATAGCACTGAGAATATAACTC  
AC-----  
-----  
AGAAAAGAAAATATAACTCTCCAATGCAGAATAAAGCAATTTATAAATATGTGGCAGAGAGTGGGACGAGCAA  
TGTATGCCCCCTCCCATCCAAGGAGTAATAAGGTGTGAATCAAAC---  
ATTACAGGAATACTATTAACAAGAGATGGTGGGGTTAATAATAATAAC-----  
-----  
-----  
ACAAACAAAACCTGAGACCTTCAGGCCTGGAGGAGGAGATATGAGGGACAATTGGAGAAGTGAATTATATAAGT  
ATAAAGTAGTGAAAATTGAACCACTA---GGTGTAGCACCCACCCATGCAAAAAGAAGAGTGGTG-----  
-----GAGAGAGAAAAAGAGCA---GTTGGA---CTGGGAGCT---  
-----GTCTTCCTTGGGTTCTTAGGAGCA---GCAGGAAGCACTATG---GGCGCGGCGTCA---  
ATAACGCTGACGGTACAG---GCCAGACAG---TTATTG---TCTGGTATAGTGCAACAGCAGAGC---  
AATTTG---CTGAAG---GCTATAGAGGCTCAACAACAGCTGTTGAGACTCACAGTCTGGGGCATT  
>EU513186..3  
TTCTATTGTAATACATCAAGCCTATTTAATTATACATTTAGCAATAGCACTGAGGATAACAACCCA-----  
-----  
-----  
AGTAATGCCACAATAACTCTCCAATGCAGAATAAGGCAAGTTGTAAATATGTGGCAGAGAGTAGGACTAGCAA  
TGTATGCCCCCTCCCATCAAAGGAAAATAAGATGTGAATCAAAC---  
ATTACAGGACTACTATTAACAAGAGATGGAGGGAATAATAATAAT-----  
-----  
-----  
GCAACTGAGACATTTCAGGCCTGGAGGAGGAGATATGAGGGACAACCTGGAGAAGTGAATTATATAAATATAAGG  
TAGTACAAATTGAACCCCTA---GGTGTGGCACCCACCTATGCAAAAAGAAGAGTGGTG-----  
-----GAAAGAGGAAAAAGAGCAGTAGTTGGA---CTAGGAGCT-----  
GTCTTCCTTGGGTTCTTAGGAGCA---GCAGGAAGCACTATG---GGCGCGGCGTCA---  
ATAACGCTGACGGTACAG---GCCAGACAA---TTATTG---TCTGGTATAGTGCAACAGCAGAGC---  
AATCTG---CTGAGG---GCTATAGAGGCTCAACAACAGCTGTTGAAACTCACGGTCTGGGGCATT  
>MH705136..2  
TTCTATTGCAATACCTCAAATCTATTTGATAGCGCTTGGAAGCAAACCTCAAATCACACAGAGTCAAATGAC-----  
-----  
-----  
ACAAGGGCAAATATAACTCTCCAATGCAGAATAAGGCAAATTGTAAAGGATGTGGCAGAGAGTAGGACAAGCAA  
TGTATGCCCCCTCCCATCCGAGGAGAAATAAGGTGTGAGTCAAAC---  
ATTACAGGACTACTATTAACAAGAGATGGAGGGGATGGGAACAATGCA-----  
-----  
-----  
ACTAATGAGACATTTCAGGCCTGGAGGAGGAGATATGAGAGACAATTGGAGAAGTGAACCTATATAAATATAAGG  
TAGTACAAATTGAACCACTA---GGTGTAGCACCCACCCATGCAAAAAGAAGAGTGGTG-----  
-----GAGAGAGAAAAAGAGCA---GTGGGA---ATAGGAGCT-----  
GTCTTCCTTGGGTTCTTAGGGGCA---GCAGGAAGCACTATG---GGCGCGGCGTCA---  
ATAACGCTGACGGTACAG---GCCAGACAA---TTATTG---TCCGGTATAGTGCAACAGCAGAGC---  
AATTTG---CTGAGG---GCTATAGAGGCTCAACAACACTGTTGAAACTCACAGTCTGGGGCATT  
>MH460467..3  
TTCTATTGTAATACATCAGGACTATTTAATTATAGTTGGAATACATCAGAACCAACCAATAATTGGAATAGTA  
GTGCTCAG-----  
-----  
GATAACGATACCATAACTCTCCAATGCAGAATAAAGCAAATAGTAAATATGTGGCAGGAAGTAGGACAAGCAA  
TGTATGCCCCCTCCCATCCAAGGAATAATAAGGTGTGAATCAAAC---  
ATTACAGGACTACTATTAACAAGAGATGGAGGGACAAATAATAGT-----  
-----

-----  
ACAAATGAGACATTTCAGACCTGGGGGAGGAGATATGAGGGACAATTGGAGAAGTGAATTATATAAGTATAAGG  
TAGTACAAATTGAACCAATA---GGTTTGGCACCCACCCATGCAAAAAGAAGAGTGGTG-----  
-----CAGAGAGAAAAAAGAGCAGTAATTGGA---ATGGGAGCT-----  
GTCTTCCTTGGGTTCTTAGGAGCA---GCAGGAAGCACTATG---GGCGCGGCGTCA---  
ATAACGCTGACGGTACAG---GCCAGACAA---TTATTG---TCCGGTATAGTGCAACAGCAGAGC---  
AATTTG---CTGAGG---GCTATAGAAGCTCAACAACATCTGTTGAAACTCACGGTCTGGGGCATT  
>EU513198..1  
TTCTATTGCAATACCTCAAACCTGTTTAATGGCACTTTGTATAACAACACCTGGATGTTTAATGGCACTTTGT  
ATAATAATACT-----  
-----AACGAGAGC-----  
TCAACATCAGGTACTATAACTATCAAGTGCAGAATAAAGCAAATCATAAATATGTGGCAGACAGTAGGACAAG  
CAATGTATGCCCTCCCATCCCAGGAGAAATAAGGTGTGAATCAAAC---  
ATTACAGGATTGCTATTAACAAGAGATGGAGAGGCTGGAAAAAGC-----  
-----  
-----  
ACAAATGAGACCTTCAGGCCTATAGGAGGAAATATGAGAGACAATTGGAGAAGTGAATTATACAAATATAAAG  
TAGTAAAAATTGAACCACTA---GGTGTAGCACCCACACCTGCAAAAAGAAGAGTGGTG-----  
-----GAGAGAGAAAAAAGAGCA---GTGGGA---CTGGGAGCT-----  
GTCTTCCTTGGGTTCTTAGGAGCA---GCAGGAAGCACTATG---GGCGCAGCGTCA---  
ATAACGCTGACGGTACAG---GCTAGACAA---TTATTG---TCTGGTATAGTGCAACAGCAAAGC---  
AATTTG---CTGAAG---GCTATAGAGGCTCAACAACATCTGTTGAAACTCACGGTCTGGGGCATT  
>JF706407..3  
TTCTATTGTGATACATCAAGACTGTTTAATAGCACTTGGCCTAATAGCACATGGGACAATAATACTCAAAAAG  
ATGAG-----  
-----  
AATGACACAGGGTACTATACTCTCCAATGCAGAATAAAGCAAATTATAAATATGTGGCAGAGAGTAGGACAAG  
CAATGTATGCCCTCCTATCCCAGGAGAAATAAGTTGTGAATCAAAC---  
ATTACAGGACTACTATTAACAAGAGATGGAGGGAATAATAATAAT-----  
-----  
-----  
AGTATAAATGAGACCTTCAGGCCTGGTGGAGGAGATATGAGGGACAATTGGAGAAGTGAATTATATAAGTACA  
AAGTGGTACAAATTGAGCCAATA---GGAATAGCACCCACCCCTGCAAAAAGAAGAGTGGTG-----  
-----GAGAGAGAGAAAAAGAGCAGTAGTTGGA---CTAGGAGCT-----  
---GTCTTCCTTGGGTTCTTAGGAGCA---GCAGGAAGCACTATG---GGCGCAGCGTCA---  
ATAACGCTGACGGTACAG---GCCAGACAA---TTATTG---TCTGGTATAGTGCAACAGCAGAGC---  
AATCTG---CTGCAG---GCTATAGAGGCTCAACAACATCTGTTGAGACTCACGGTCTGGGGCATT  
>JF706428..1  
TTCTATTGCAATACATCAGGACTATTTAATGGCACTTTGAATGGCACTGAAACTTGAATAACACTTGGGGTG  
ACAGTAGC-----  
-----AATGAG-----  
AATGAAAATGAGAATATAACTATCCAATGCAGAATAAAACAAATTGTAAATATGTGGCAGAGAGTAGGACGAG  
CAATGTATGCCCTCCCATCAAAGGAGTAATAAAGTGTGAATCAAAC---  
ATTACAGGACTACTATTAACAAGAGATGGAGAGGGTAATAATAGG-----  
-----  
-----  
ACAAATGAGACCTTCAGGCCTGGAGGAGGAGATATGAGGGATAATTGGAGAAGTGAATTATATAAATATAAAG  
TAGTAAAAATTGAACCACTA---GGTATAGCACCCACCCATGCAAAAAGAAGAGTGGTG-----  
-----CAGAGAGAAAAAAGAGCA---GTTGGA---CTGGGAGCT-----  
GTCTTCCTTGGGTTCTTAGGAGCA---GCAGGAAGCACTATG---GGCGCGGCGTCA---  
ATAACGCTGACGGTACAG---GCCAGACAA---TTATTG---TCTGGTATAGTGCAACAGCAGAGT---  
AATCTG---CTGAAG---GCTATAGAGGCTCAACAACATCTGTTGAGACTCACAGTCTGGGGCATT  
>KU168310..1  
TTCTATTGCAATACATCACAACATTTAATAGCACTTGAACAACACCAATATCAGCTTAAATGAC-----  
-----  
-----  
ACAAATGAAAATATAACTCTCCCATGCAGAATAAAGCAAAGTTATAAATATGTGGCAGAGAGTAGGACAAGCAA  
TGTATGCCCTCCCATCGCAGGAACACTAAAGTGTAAATCAAAC---  
ATTACAGGATTACTATTAACAAGAGATGGAGGGGAGAGCAATAATACA-----  
-----

-----  
AATACAAATGAGACCTTCAGGCCTGGAGGAGGAGATATGAGGGACAATTGGAGAAGTGAATTATATAAGTATA  
AAGTAGTAAAAATTGAACCACTA---GGTGTAGCACCTACCCATGCAAAAAGAAGAGTGGTG-----  
-----GAGAGAGAAAAAAGAGCAGTGTTTGGA---CTGGGAGCT-----  
---GTCTTCCTTGGGTTCTTAGGAGCA---GCAGGAAGCACTATG---GGCGCGGCGTCA---  
ATAACGCTGACGGTACAG---GCCAGACAA---CTATTG---TCTGGTATAGTGCAGCAGCAGAGC---  
AATTTG---CTGAGG---GCTATAGAGGCTCAACAACATCTGTTGAAACTCACGGTCTGGGGCATT  
>JN687776..2  
TTCTATTGTAATACAACAAAACCTATTTAATAGCACTTGGACTAATGAGACAAATCACACAGCTAGC-----  
-----  
-----  
ATAGATAGAAATATAACTCTCCAATGCAGAATTAAGCAAATTGTAAATATGTGGCAAAGAGTAGGACAAGCAA  
TATATGCCCCCTCCCATCCAGGAGTAATAAGGTGTGAATCAAAC---  
ATTACAGGACTACTACTAACAAGAGATGGAGGGACAAATAGTTCA-----  
-----  
-----  
AATAATGAGACATTCAGGCCTGGAGGAGGAGATATGAGGGACAATTGGAGAAGTGAATTATATAAGTATAAGG  
TAGTACAAATTGAACCAATA---GGTGTGGCACCCACCCCTGCAAAAAGAAGAGTGGTG-----  
-----GAGAGAGAAAAAAGAGCA---GTTGGA---GTAGGAGCT-----  
TTTATCCTTGGGTTCTTAGGAGCA---GCAGGAAGCACTATG---GGCGCGGCGTCA---  
ATAACGCTGACGGTACAA---GCCAGACAA---TTATTG---TCTGGTATAGTGCAACAGCAGAGC---  
AATTTG---CTGAAG---GCTATAGAGGCTCAACAACATCTGTTGAAACTCACGGTCTGGGGCATT  
>JX140646..2  
TTCTATTGCAATACAACAGAATTATTTAATAAGACTTTTAAATGATACTGATCTAAAGTTAAATAGCAGTAGCA  
TTAAGGAG-----  
-----  
TCAAATGATACTATAACTCTCCAATGTAGAATAAAGCAATTTGTAAGGATGTGGCAGAGAGTAGGACAAGCAA  
TGTATGCCTCTCCCATCCAGGAGTAATAAGGTGTGAATCAAAC---  
ATTACAGGTCTACTATTAACAAGAGATGGAGGGGGTAATGAAAGCACA-----  
-----  
-----  
AGAGATAATGAGACATTCAGGCCTGGAGGAGGAGATATGAGAGACAATTGGAGAAGTGAATTATATAAGTATA  
AGGTAGTACAAATTGAACCAATA---GGAGTGGCACCCACCTATGCAAAAAGAAGAGTGGTG-----  
-----GAGAGAGAAAAAAGAGCA---GTTGGA---CTGGGAGCT-----  
---GTCTTCCTTGGGTTCTTAGGGGCA---GCAGGAAGCACTATG---GGCGCGGCGTCA---  
ATAACGCTGACGGTACAG---GCCAGGCAA---TTATTG---TCTGGTATAGTGCAACAGCAGGGC---  
AATCTG---CTGAGG---GCTATAGAGGCTCAACAACACCTGTTGAAACTCACAGTCTGGGGCATT  
>JX140647..1  
TTCTATTGTAATACATCAGGACTATTTAATAGTAGTTGGACCGCGAACGACATTTTGAATAACAGTACTGCTA  
GCTCAAAT-----  
-----  
AACACAGAAGTTATAACTCTCCAATGCAGAATAAAGCAAATTATAAATATGTGGCAGACAGTAGGACAAGCAA  
TGTATGCCCCCTCCCATCCGAGGAGAAATAAGGTGTGAGTCAAAT---  
ATTACTGGACTACTATTAACAAGAGATGGAGGGAATAATATGACA-----  
-----  
-----  
AATGAAACCTTCAGGCCTGGAGGAGGGGATATGAGGGACAATTGGAGAAGTGAATTATATAAGTATAAAGTAG  
TACAAATTGAACCACTA---GGTGTAGCACCCACCCATGCAAAAAGAAGAGTGGTG-----  
-----GAGAGAGAAAAAAGAGCA---GTTGGA---ATAGGAGCT-----  
GTCTTCCTTGGGTTCTTAGGAGCA---GCAGGAAGCACTATG---GGCGCGGCGTCA---  
ATAACGCTGACGGTACAA---GCCAGACAA---TTATTG---TCTGGTATAGTGCAACAGCAGAGC---  
AATTTG---CTGATG---GCTATAGAGGCTCAACAACATATGTTGAAACTCACTGTCTGGGGCATT  
>KF859739..2  
TTCTATTGCAGTACATCAGCACTGTTTAATAGCACTTGGCTGTTTAATGAAACTTATAGCACTTGGCATAGCT  
CTTGGAACAGT-----  
-----  
AGCGCTGAGAATATAACTCTCCAATGCAGAATAAAGCAATTTGTGAATATGTGGCAGAGAGTAGGGCAAGCAA  
TGTATGCCCCCTCCCATTCGAGGAATGATAAGGTGTGAATCAAAC---  
ATTACAGGACTACTATTAACAAGAGATGGAGGGAATAAAAATACT-----  
-----

-----  
 AGTGCAAATGAGACCTTCAGGCCTGGAGGAGGAGATATGAAGGACAATTGGAGAAGTGAATTATATAAGTATA  
 AAGTAATAAAAAATAGAACCACTA---GGTGTGGCACCCACCCCTGCAAAAAGAAGAGTGGTG-----  
 -----GGAAGAGAAAAAAGAGCA---GTTGGA---CTAGGAGCT-----  
 ---GTCTTCTTTGGGTTCTTAGGAGCA---GCAGGAAGCACTATG---GGCGCAGCGTCA---  
 ATAACGCTGACGGTACAG---GCCAGACAA---TTATTG---TCTGGTATAGTGCAACAGCAGAGC---  
 AATTTG---CTGAAG---GCTATAGAGGCTCAACAACATCTGTTGAGACTCACGGTCTGGGGCATT  
 >KU749419..1  
 TTCTATTGCAGTACATCAAGCCTGTTTAATAGCACTTGGGAATAATAGCATTGGGGATAATAGCACTAGGGAT-  
 -----  
 -----  
 GACAATAGCACTATTACTCTCCCATGCAGAATAAAGCAAATTGTAAATATGTGGCAGGGAGTAGGACAAGCAA  
 TGTATGCCCCCTCCCATCCAGGAGAAATAAAGTGTGAATCAAAT---  
 ATTACAGGACTATTATTGACAAGAGATGGTGGGAGAAATAGCACA-----  
 -----  
 -----  
 AATGAGACCTTCAGGCCTGGAGGAGGAGATATGAGGGACAATTGGAGAAATGAATTATATAAGTATAAAGTAG  
 TAAAAATTGAACCACTA---GGTGTGGCACCCACCCATGCAAAAAGAAGGGTGGTG-----  
 -----GAGAGAGAAAAAAGAGCA---GTTGGA---CTAGGAGCT-----  
 GTCTTCCTTGGGTTCTTAGGAGCA---GCAGGAAGCACTATG---GGCGCGGCGTCA---  
 ATAACGCTGACGGTACAG---GCCAGACAA---TTATTG---TCCGGTATAGTGCAACAGCAGAGC---  
 AATTTG---CTGAGG---GCTATAGAGGCTCAACAACAGGTGTTGAGACTCACGGTCTGGGGCATT  
 >MK086109..1  
 TTCTATTGCAATACATCTAACCTATTTAATAGCACTTGGGGGAGCAATACCACTACCAGCTGGAATACCAGCT  
 CAATTGGC-----  
 -----  
 -----  
 ACAAATGAACTATAACTATCCAGTGCAGAATAAAGCAGATTGTAAGAATGTGGCAGAGAGTAGGACAAGCAA  
 TGTATGCCCCCTCCCATCCAGGAAAAATAAGGTGTAACCTCAAGC---  
 ATTACAGGACTGCTATTAACAAGAGATGGAGGGAATAATAGTAGT-----  
 -----  
 -----  
 GACAATGAGACCTTCAGGCCTGGAGGAGGAGATATGAGGGACAATTGGAGAAGTGAATTATATAAGTATAAAG  
 TAGTAAAAATTGAACCACTG---GGTGTAGCACCCACCCATGCAAGGAGAAGAGTGGTG-----  
 -----GAGAGAGAAAAAAGAGCA---GTTGGA---CTGGGAGCT-----  
 GTCTTCCTTGGGGTCTTAGGAGCA---GCAGGAAGCACTATG---GGCGCGGCGTCA---  
 ATAACGCTGACGGTACAG---GCCAGACAA---TTATTG---TCTGGTATAGTGCAACAGCAAAGT---  
 AATTTG---CTGAGG---GCTATAGAGGCTCAACAGCATATGTTGAGACTCACGGTCTGGGGCATT  
 >MK086113..1  
 TTCTATTGCAATACAACAAAACCTATTTAATAGCATTTGGAGTAAGAATAGTGGGAATTGGAGTAGTACAAATG  
 GG-----  
 -----  
 -----  
 ACAAATGACACTATAACTCTCCAATGCAGAATAAAACAAATTGTAAGAATGTGGCAGAGAGTAGGACAAGCAA  
 TGTACGCCCCCTCCCATCCGAGGAAACATAACGTGTGGATCAAAC---  
 ATTACAGGATTACTATTAAACAAGAGATGGAGATGGAGGTGCACAT-----  
 -----  
 -----  
 AGTCCCAATGAAACATTTCAGGCCTGGAGGAGGAAATATGAAGGACAATTGGAGAAGTGAATTATACAAGTATA  
 AGGTAGTACAAATTAAACCATTA---GGTGTAGCACCCACCCAGGCAAAAAGAAGAGTGGTG-----  
 -----GAGAGAGAAAAAAGAGCA---GTTGGA---CTGGGAGCT-----  
 ---GTCTTCCTTGGGTTCTTAGGAGCA---GCAGGAAGCACTATG---GGCGCGGCGTCA---  
 CTGACGCTGACGGTACAG---GCCAGACAA---TTATTG---TCTGGTATAGTGCAACAGCAGAGC---  
 AATCTG---CTGCGG---GCCATAGAGGCTCAACAACATCTGTTGAAACTCACGGTCTGGGGCATT  
 >MK086125..1  
 TTCTATTGCAATACATCAGGCCTATTCAATAGCACTTGGCACAATAGCACTTGGGATAGTAATGAAACTGCCA  
 GTGCA-----  
 -----  
 -----  
 ACAAATGACACTATAACTCTCCGATGCAGAATAAAGCAAATTGTAATATGTGGCAGAAAGTAGGACGAGCAA  
 TGTATGCCCCCTCCCATCCAGGAGTAATAAGATGTGAGTCAAAC---  
 ATTACAGGATTACTATTAAACAAGAGATGGAGGAAATAATAATAAT-----  
 -----  
 -----

-----  
AGTGTAATGAGACATTCAGGCCGGGAGGAGGAGATATGAGGGACAATTGGAGAAGTGAATTATATAAGTATA  
AAGTAGTACAAATTGAGCCACTA---GGTGTAGCACCCACCCATGCAAGAAGAAGAGTGGTA-----  
-----CAGAGGGAAAAAAGAGCA---GTTGGA---CTGGGAGCT-----  
---GTCTTCCTTGGGTTCTTAGGAGCA---GCAGGAAGCACTATG---GGCGCGGCGTCA---  
ATAACGCTGACGGTACAG---GCCAGACAA---TTATTG---TCTGGTATAGTGCAGCAGCAGAGT---  
AATTTG---CTGCGG---GCTATAGAGGCTCAACAACATCTGTTGAAACTCACGGTCTGGGGCATT  
>HQ912706..2  
TTCTATTGCAATACAACAGAACTATTTAATAGCACTTGGAACGTAAGTCCAGCTCAAACCTACACAGAGTCAA  
AC-----  
-----  
TCAAAATGACAGTATAACTCTCCCATGCAGAATAAAACAAATTGTGAATTTATGGCAGAAAGTAGGACAAGCAA  
TGTATGCCCCCTCCCATCCAAGGAGAAATAAGGTGTGAATCAAAC---  
ATTACAGGATTACTATTAACAAGAGATGGAGGGAATAATAGTACA-----  
-----  
-----  
AATGAGACATTCAGGCCTGGAGGAGGAGATATGAGGGACAATTGGAGAAGTGAATTATATAAGTATAAGGTAG  
TACAAATTGAACCACTA---GGTGTGGCACCCACCCAGGCAGGCAAAAAGAAGAGTGGTG-----  
-----GAGAGAGAAAAAAGAGCA---GTTGGA---ATAGGAGCT-----  
GTCTTCCTTGGGTTCTTAGGAGCA---GCAGGAAGCACTATG---GGCGCGGCGTCA---  
CTAACGCTGACGGTACAG---GCCAGACAA---TTATTG---TCTGGTATAGTGC AACAGCAGAGC---  
AATCTG---CTGAGG---GCTATAGAGGCTCAACAACATCTGTTGAAACTCACGGTCTGGGGCATT  
>AM279349..1  
TTCTATTGCAATACATCAGGCCTGTTTAATAACACTTTGAATAATAACACTTGGACTTGGGATAATAGCACA-  
-----  
-----  
AAGGATGACAATATAACTCTCCGATGCAGGATAAAGCAAATTGTAAATATGTGGCAGAGAGTAGGACAAGCAA  
TGTATGCCCCCTCCCATCCAAGGAGTGATAAGGTGTGAATCAAAC---  
ATTACAGGATTACTATTAACAAGAGATGGAGGGAATAATAATAGC-----  
-----  
-----  
ACAACAAATGAGACCTTCAGGCCTGGAGGAGGAGATATGAGGGACAATTGGAGAAGTGAATTATATAAATATA  
AGGTAGTAAAAATTGAACCACTA---GGTGTAGCGCCTACCCATGCAAAAAGAAGAGTGGTG-----  
-----GAGAGAGAAAAAAGAGCA---GTTGGA---CTGGGAGCT-----  
---GTCTTCCTTGGGTTCTTAGGAGCA---GCAGGAAGCACTATG---GGCGCGGCGTCA---  
ATAACGCTGACGGTACAG---GCCAGACAA---TTATTG---TCCGGTATAGTGC AACAGCAGAGC---  
AATCTG---CTGAAG---GCTATAGAGGCTCAACAACATCTGTTGAGACTCACGGTCTGGGGCATT  
>AM279361..3  
TTCTATTGCAATACATCAGCACTGTTCAATAGCACTTATGACAATAGCACTTGAATGACAGTACAAATACCA  
GCTCA-----  
-----  
GAGACAAATGACACTATAACTCTCCAATGCAAAATAAAGCAAATTGTGAAGAATGTGGCAGAGAGTAGGACAAG  
CAATGTATGCCCCCTCCCATCCCAGGAATAATAAGGTGTGAATCAAAC---  
ATTACAGGACTAATATTAACAAGAGATGGAGGGAATAATAATAGT-----  
-----  
-----  
GAAAATCAGACTTTTCAGGCCTGGAGGAGGAGATATGAGGGACAATTGGAGAAGTGAATTATATAAGTATAAAG  
TAGTAAAAATTGAACCACTA---GGTATAGCACCCACCCATGCAAAAAGAAGAGTGGTG-----  
-----CAGAGAGAAAAAAGAGCA---GTTGGA---ATAGGAGCT-----  
GTCTTCCTTGGGTTCTTAGGAGCA---GCGGGAAGCACTATG---GGCGCGGCGTCA---  
ATAACGCTGACGGTACAG---GCCAGACAA---TTATTG---TCCGGTATAGTGC AACAGCAGAAC---  
AATTTG---CTGAAG---GCTATAGAGGCTCAACAACAGTTGTTGAAACTCACAGTCTGGGGCATT  
>AM279360..1  
TTCTATTGCAATACAACAAAACCTGTTTAATAGCACGTGGAATAGCAGTACTGGGAATAACAATGTCAGC-----  
-----  
-----  
TCAAAATGACACTATAACCTCCATGCAAAATAAAGCAAATTGTAAATATGTGGCAAAAAGTAGGACAAGTAA  
TGTATGCCCCCTCCCATCCCAGGAATAATAAGGTGTGAATCAAAT---  
ATTACAGGACTATTATTAACAAGAGATGGAGGAAATAATAATGAAACA-----  
-----

-----  
GAGAAATGGGACTGAGACCTTCAGGCCTGGAGGAGGAGATATGAGGGACAATTGGAGAAGTGAATTGTATAAGT  
ATAAAGTAGTAAAAATTGAACCACTA---GGTGTAGCACCCACCCATGCAAAAAGAAGAGTGGTG---GAG--  
-----AGGAGAGAAAAAAGAGCA---GTTGGA---CTGGGAGCT---  
-----GTCTTCTTTGGGTTCTTAGGAGCA---GCAGGAAGCACTATG---GGCGCGGCGTCA---  
CTAACGCTGACGGTACAG---GCCAGACAA---TTATTG---TCTGGTATAGTGCAACAGCAGAGC---  
AATTTG---CTGAAG---GCTATAGAGGCTCAACAACATCTGTTGAAACTCACGGTCTGGGGCATT  
>AM279358..2  
TTCTACTGCAATACATCAGCACTGTTTAATAGCACTTGGGAATAACACTTTGGATACTAACAATAGCACTCAG-  
-----  
-----  
GATAATGACACTATAACTCTCCAATGCAGAATAAAGCAAATTATAAGGATGTGGCAGACAGTAGGACAAGCAA  
TGTATGCCCCCTCCCATCCAAGGAAAAATAAGGTGTGAATCAAAC---  
ATTACAGGACTACTGTTAACAAGAGATGGAGGGAACAGTGATGGT-----  
-----  
-----  
GCAAAATGAGACCTTCAGGCCTGGAGGAGGAGATATGAGGGACAATTGGAGAAGTGAATTATATAAGTATAAAG  
TAGTAAAAAATTGAACCACTA---GGTGTAGCACCCACCCGAGCAAAAAGAAGAGTGGTG-----  
-----GAGAGAGAAAAAAGAGCAGTAGTTGGA---CTGGGAGCT-----  
GTCTTCCTTGGGTTCTTAGGAGCA---GCAGGAAGCACTATG---GGCGCGGCGTCA---  
CTAACGCTGACGGTACAG---GCCAGACAA---TTATTG---TCCGGTATAGTGCAACAGCAGAGC---  
AATCTG---CTGAGG---GCTATAGAGGCTCAACAACATATGTTGAAACTCACAGTCTGGGGCATT  
>AJ286133..1  
TTCTATTGTAATACATCAGAACTATTTAATAGCATTGTGAATATTAATAGCACTTGGGAATAACAGTGACACTG  
CCAGC-----  
-----TCG---  
AAGCCAAATGACACTATAACTCTACAATGCAGAATAAGGCAAATTGTAAGAATGTGGCAGAAAGTAGGACAAG  
CAATATATGCCCCCTCCTATCCCAGGAGTAATAAGGTGTGAATCAAAC---  
ATTACAGGACTACTATTAACAAGAGATGGAGGGGAAGATAATAAT-----  
-----  
-----  
GCAAGTGAGACATTTCAGGCCTGGAGGAGGAGATATGAGGGACAATTGGAGAAGTGAATTATATAAGTATAAGG  
TAGTACAAATTGAACCACTA---GGCGTGGCACCCACCTGGGC AAAAAGAAGAGTGGTG-----  
-----GAGAGAGGAAAAAAGAGCA---GTTGGA---CTGGGAGCT-----  
GTCTTCCTTGGGTTTTTAGGAGCA---GCAGGAAGCACTATG---GGC---CGGTCA---  
ATAACGCTGACGGTACAG---GCCAGACAA---TTATTG---TCCGGTATAGTGCAACAGCAGAGC---  
AATTTG---CTGAGG---GCTATAGAGGCTCAACAACATCTGTTGAAACTCACGGTCTGGGGCATT  
>AF377955..1  
TTCTATTGTAATACATCAGCACTGTTTAATAGTACTTGGTTTAGCAATAGTACTGGGGATAACAATAGTTCAA  
CA-----  
-----  
GGGAATGAAACTATAACTCTCCAATGCAGAATAAAGCAAATTGTAAATATGTGGCAGAGAGTAGGACAAGCAA  
TGTATGCCCCCTCCCATCCAAGGAGTAATAAGGTGTGAATCAAAC---  
ATTACAGGATTACTATTGACAAGAGATGGAGGGAATAATAATAGC-----  
-----  
-----  
ACAAATGAGACCTTCAGACCTGGAGGAGGAGATATGAGGGACAATTGGAGAAGTGAATTATATAAGTATAAAG  
TAGTAAAACTTGAGCCACTG---GGTGTAGCACCCACCCGTGCAAAAAGAAGAGTGGTG-----  
-----GAGAGAGAAAAAAGAGCA---GTTGGA---CTGGGAGCT-----  
GTCTTCTTTGGGTTCTTAGGAGCA---GCAGGAAGCACTATG---GGCGCGGCGTCA---  
ATAACGCTGACGGTACAG---GCCAGACTA---TTATTG---TCTGGTATAGTGCAACAGCAGAGC---  
AATTTG---CTGAAA---GCTATAGAGGCTCAACAGCATCTGTTGAAACTCACGGTCTGGGGCATT  
>AM279352..1  
TTCTATTGCAATACATCAGGACTCTTTAATAGCACTTGGGAATAGCAATGACACTGACAGATCAAACCACACAG  
GA-----  
-----  
CCACATAACAATATAACTCTCCAATGCAGAATAAAGCAAATTGTAAATATGTGGCAGAGAGTAGGACAAGCAA  
TGTATGCCCCCTCCCATCCAAGGCGAAATAAGGTGTGTATCAAAC---  
ATTACAGGATTACTACTAACAAGAGATGGAGGGATCAGTAATAAG-----  
-----

-----  
 ACAGAGGAGATATTCAGGCCTGGAGGAGGAGATATGAGGGACAATTGGAGAAGTGAATTATATAAGTATAAGG  
 TAGTACAAATTAAACCACTA---GGTGTGGCACCAGACCGGGCAAAAAGAAGAGTGGTG-----  
 -----GGAAGAGAAAAAAGAGCA---GTTGGA---ATGGGAGCT-----  
 CTTTTCCTTGGGTTCTTAGGAGCA---GCAGGAAGCACTATG---GGCGCGGCGGCA---  
 ATGACGCTGACGGTACAG---GCCAGACAA---TTATTG---TCTGGTATAGTGCAACAGCAGAGC---  
 AATTTG---CTGAGG---GCTATAGAGGCTCAACAACATCTGTTGAAACTCACGGTCTGGGGCATT  
 >AY271690..3  
 TTCTATTGCAATACATCAGGACTATTTAATAGCACTTGGAGTAGGAATAGCACTGATAACAGCACTTGAATA  
 TCAATGACACT-----  
 -----GTCAGCTCA-----  
 AATCACACAGGAAATATAACTCTCCAATGCAGAATAAGGCAAGTTGTAAGAATGTGGCAGAGGGTAGGACAAG  
 CAATGTATGCCCCCTCCCATCCCAGGAGAAATTAAGTGTAAATCAAAC---  
 ATTACAGGAATACTATTGACAAGAGATGGAGGGACAAAAAATCAGAATGCAAGT-----  
 -----  
 -  
 GAGGAATTTAATACAACCTGAGGTATTCAGACCTGGAGGAGGAGACATGAGGGACAATTGGAGAAGTGAATTAT  
 ATAAATATAAGGTAGTACAAATTGAACCAATA---GGTGTGGCACCCACCCGTGCAAAAAGAAGAGTGGTG--  
 -----CAGAAAGAAAAAAGAGCA---GTTGGA---  
 CTGGGAGCT-----TTCTTCCTTGGGTTCTTAGGAGTT---GCAGGAAGCACTATG---  
 GGCGCAGCGTCA---ATAACGCTGACGGTACAG---GCCAGACAA---TTATTG---  
 TCTGGTATAGTGCAACAGCAGAGC---AATCTG---CTGAAG---  
 GCTATAGAGGCTCAACAACATATATTGAGACTCACGGTCTGGGGCATT  
 >HQ700002..2  
 TTTTATTGCAATACATCAAAGCTGTTTAATAGCACCTGGCCTGGGAATATCACTGGGAATAACTATAACCAGCT  
 CA-----  
 -----  
 AACTCAAGTGACAATATAGCTCTCCAATGCAGAATAAGACAAATTGTAAATATGTGGCAGAAAGTAGGAAAAG  
 CAATATATGCTCCTCCCATCCCAGGAGAAATAAAGTGTGAATCAAAC---  
 ATTACTGGACTACTACTAACAAGAGATGGAGGAAACAATAATGCA-----  
 -----  
 -----  
 AGTAATGAGACCTTCAGGCCTGGAGGAGGAGATATGAGGGACAATTGGAGAAGTGAATTATATAAGTATAAAG  
 TAGTGAGAATTAACCACTA---GGTATAGCACCCACCCACGC AAAAAGAAGAGTGGTG-----  
 -----GAGAGAGAAAAAAGAGCA---GTTGGA---CTGGGAGCT-----  
 GTCTTCCTTGGGTTCTTAGGAGCA---GCAGGAAGCACTATG---GGCGCGGCGTCA---  
 ATAACGCTGACGGTACAA---GCCAGACAA---TTATTG---TCTGGTATAGTGCAACAGCAGAGC---  
 AATCTG---CTGAAG---GCTATAGAGGCTCAACAGCATCTGTTGAAGTTCACAGTCTGGGGCATT  
 >JF683758..1  
 TTCTATTGCAATACATCAGGACTGTTTAATAGCATTTGGGATAATAACAGCACTTGAATGGGAGC-----  
 -----  
 -----  
 AACTCAGGCAATATAACTCTCCCATGCAGAATAAGGCAAATTGTAAATATGTGGCAGAGAGTAGGAAAAGCAA  
 TGTATGCCCCCTCCCATCCAAGGAGAAATAAGGTGTGACTCAAAC---  
 ATTACTGGACTACTATTAGCAAGAGATGGAGGGGATGGTACTGAG-----  
 -----  
 -----  
 ACAAATGAGACTTTTCAGGCCTATAGGAGGAGATATGAGAGACAATTGGAGAAGTGAATTATATAAGTATAAAG  
 TAGTAAAAATTGAACCATTA---GGCATAGCACCCACCCGGGCAAAAAGAAGAGTGGTG-----  
 -----AGCAGAGAGAAAAGAGCA---GTTGGA---ATGGCAGCT-----  
 ATCTTCCTTGGGTTCTTAGGAGCA---GCAGGAAGCACTATG---GGCGCGGCGTCA---  
 ATAACGCTGACGGTACAG---GCCAGACAG---TTATTG---TCTGGTATAGTGCAACAGCAGAGC---  
 AATCTG---CTGCAG---GCTATAGAGGCTCAACAGCACATGTTGAGACTCACGGTCTGGGGCATT  
 >JF683786..1  
 TTCTATTGCAATACATCAAAGTTGTTTAATAGCAGTTGGGGAAACAACACTGCCAGTAACCATACAGAGGCAA  
 GT-----  
 -----  
 GGAGAAAATGACACTATAACTATACAATGCAGAATAAAGCAAATTATAAATCTATGGCAGAGAGTAGGACAAG  
 CAATGTATGCCCCCTCCTATCCAAGGAATAATAAGGTGTGAATCAAAC---  
 ATTACAGGATTACTATTAAACAAGAGATGGAGGGAATAATAGTAGT-----

-----  
-----  
GGTGCAGATGAGACTTTCAGGCCTGGAGGAGGAGATATGAGAGACAATTGGAGAAGTGAATTATATAAGTATA  
AAGTAGTAAAAATTGAACCACTA---GGTGTTCACCCACCCGTGCAAAAAGAAGAGTGGTG-----  
-----GAAAGACAAAAAAGAGCA---ATTGGA---ATGGGAGCT-----  
---GTCTTCCTTGGGTTCTTAGGAGCA---GCAGGAAGCACTATG---GGCGCAGCGTCA---  
CTATCGCTGACGGTACAG---GCCAGACAA---TTATTG---TCCGGTATAGTGCAACAGCAGAGC---  
AATTTG---CTGAAG---GCTATAGAGGCTCAACAACATATGTTGAGACTCACGGTCTGGGGCATT  
>JF683792..2  
TTCTACTGCAATACAACAAACCTGTTTAATAGCACTTGGGAATAGCACTTGGTATAATAATGGGAGTAGCGCCA  
AC-----  
-----  
AATATAACTCACACTATAACTCTCCCATGCAGAATAAGGCAAATTGTAAATATGTGGCAGAGAGTAGGACAAG  
CAATGTATGCCAATCCCATCCCAGGAGTAATAAGGTGTGAATCAAAC---  
ATTACAGGACTACTACTAACAAGAGATGGAGGGAATAATAACTCA-----  
-----  
AATGAAGAGACCTTCAGGCCTGGAGGAGGAGATATGAGGGACAATTGGAGAAGTGAATTATATAAGTATAAAG  
TAGTAAAAATTGAACCACTA---GGTCTAGCACCCACCCATGCAAAAAGAAGAGTGGTG-----  
-----GAAAGAGAAAAAAGAGCAGTTGTTGGA---CTGGGAGCT-----  
GTCTTCCTTGGGTTCTTAGGAGCA---GCAGGAAGCACTATG---GGCGCAGCGTCA---  
ATAACGCTGACGGTACAG---GCCAGACAA---TTATTG---TCTGGTATAGTGCAACAGCAGAGC---  
AATTTG---CTGAAA---GCTATAGAGGCTCAACAACAGCTGTTGAGACTCACAGTCTGGGGCATT  
>JF683795..2  
TTCTATTGCAATACATCAGGACTATTTAATAGCACTTGGGATAATAGCACTTGGGAATACCACTGCAAATTACA  
CA-----  
-----  
GAGTCAAGTGACAATATAACTCTCCAATGCAGAATAAAGCAAATTGTAAATATGTGGCAGAGAGCAGGACAAG  
CAATATATGCCCCCTCCCATCCCAGGAGTAATAAGGTGTGAATCAAAC---  
ATTACAGGACTACTATTAAACAAGAGATGGAGGAAATGACAGTAGT-----  
-----  
ACAGAGGAGACCTTCAGGCCTGGAGGAGGAGATATGAGGGACAATTGGAGAAGTGAACCTATATAAGTATAAAG  
TGGTAAAAATTGAACCACTA---GGTGTAGCACCCACCCGTGCAAAAAGAAGAGTGGTG-----  
-----GAGAGAGGAAAAAGAGCAGTAGTTGGA---CTGGGAGCT-----  
GTCTTCCTTGGGTTCTTAGGAGCA---GCAGGAAGCACTATG---GGCGCGGCGTCA---  
ATAACGCTGACGGTACAG---GCCAGACAA---TTATTG---TCCGGTATAGTGCAACAGCAGAGC---  
AATTTG---CTGAAG---GCTATAGAGGCTCAACAACATATGTTGAAACTCACAGTCTGGGGCATT  
>JF683799..1  
TTTTATTGCGATACATCAAGACTGTTTAATAGCACTTGGGATACTAGCACTGGGTATGACAATAGCAGCAGA-  
-----  
-----  
GACAATGACACTATAACTCTCAAATGCAAAATAAGGCAAGTTGTAAGGATGTGGCAAAGAGTAGCACAAGCAA  
TGTATGCCCCCTCCCATCCAAGGAGAAATAAGGTGTAACCTCAACA---  
ATTACAGGACTACTATTAAACAAGAGATGGAGGGAATAGTAGTGGT-----  
-----  
GCAAATGAGACCTTCAGGCCTGGAGGAGGAGATATGAGGGACAATTGGAGAAGTGAATTATATAAGTATAAAG  
TAGTAAAGATTGAACCACTA---GGTGTAGCACCCACCCATGCAAAAAGAAGAGTGGTG-----  
-----GAGAGAGAAAAAAGAGCA---GTTGGA---ATAGGAGCT-----  
GTCCTCCTTGGGTTCTTAGGAGCA---GCAGGAAGCACTATG---GGCGCGGCGTCA---  
ATAACGCTGACGGTACAG---ACCAGACAA---TTATTG---TCTGGTATAGTGCAAGCAGCAGAGC---  
AATTTG---CTGAAG---GCTATAGAGGCTCAACAACAGCTGTTGAGACTCACGGTCTGGGGCATT  
>KT124792..1  
TTCTATTGCAATACATCAGGACTGTTTAATAGCACTTGGATCAATGGGAGCTGGGTCAATAATGATACCTGGG  
CCAAT-----  
-----AAT---  
GATACCTCAAAAAATATAACTCTCCAATGCAGAATAAAGCAAATTATAAATATGTGGCAGAGAGTAGGGCAAG  
CAATGTATGCCCCCTCCCATCAAAGGAGAAATAAGGTGTAGATCAAAC---  
ATTACTGGACTACTATTAAACAAGAGATGGAGGGAATAATAGTAGT-----

-----  
-----  
GGAAATGAGACATTTCAGGCCGGCAGGAGGAGATATGAGAGACAATTGGAGAAGTGAATTATATAAGTATAAGG  
TAGTAAAAAATTGAACCACTA---GGTGTAGCACCCACACATGCAAGGAGACAAGTAGTG-----  
-----GGGAGAGAAAAAAGAGCA--GTTGGA---CTGGGAGCT-----  
GTCTTCCTTGGGTTCTTAGGAGCA--GCAGGAAGCACTATG--GGCGCGGCGTCA---  
ATAACGCTGACGGTACAG---GCCAGACAA--TTATTG---TCTGGTATAGTGCAGCAGCAGAGC---  
AATCTG---CTGAAG---GCTATAGAGGCTCAACAACATATGTTGAGACTCACAGTCTGGGGCATT  
>L22939..3  
TTCTATTGCAATACATCAAGTCTGTTTAATAGCACTTGGGAATAGCAGCTCAATTCACACAAATTACAGCTCAA  
AT-----  
-----  
GACACAGACAATATAACTCTCCAATGCAGAATAAAGCAAATTGTAAATATGTGGCAGAAAGTAGGAAAAGCAA  
TATATGCCCCCTCCCATCTCAGGAGAAATAAGGTGTGAATCAAAC---  
ATTACAGGACTAATATTAACAAGAGATGGAGGGAGTAATAATAGT-----  
-----  
-----  
ACAAATGAGATCTTCAGGCCTGGAGGAGGAGATATGAGGGATAATTGGAGAAGTGAATTATATAAGTATAAAG  
TAGTAAAAAATTGAACCACTA---GGTGTAGCACCCACCCGTGCAAAAAGAAGAGTGGTG-----  
-----GAGAGAGAAAAAAGAGCA--GTTGGA---CTGGGAGCT-----  
TTCTTCCTTGGGTTCTTAGGAGCT---GCAGGAAGCACTATG--GGCGCGGCGTCA---  
ATAACGCTGACGGTACAG---GCCAGACAA--TTATTG---TCCGGTATAGTGCAACAGCAGAGC---  
AATTTG---CTGAGG---GCTATAGAGGCTCAACAACATCTGTTGAAACTCACGGTCTGGGGCATT  
>AY151002..1  
TTCTATTGCAATACAGCAGGCCTGTTTAATAGCACTTGGGATGATAACAATAGCACAGGGTCAAACACAAAG-  
-----  
-----  
TCAAATGACATTATAACTCTCCAATGTAGAATAAAGCAACTTATAAATATGTGGCAGAGAGTAGGACAGGCAA  
TGTATGCCCCCTCCCATCCGAGGAATAATAAGGTGTAACTCAAAC---  
ATTACTGGATTACTATTAACAAGAGATGGAGGGAATAATAGTACA-----  
-----  
-----  
AATGAGACCTTCAGGCCTGGAGGAGGAGATATGAGGGACAATTGGAGGAGTGAATTATATAAATATAAAGTAG  
TAAAAAATTGAACCACTA---GGTGTAGCACCCACCCCTGCAAAAAGAAGAGTGGTG-----  
-----GAGAGAGAAAAAAGAGCA--GCTGGA---CTGGGAGCT-----  
GTCTTCCTTGGGTTCTTAGGAGCA--GCAGGAAGCACTATG--GGCGCGGCGTCA---  
ATAACGCTGACGGTACAG---GCCAGACAG--TTATTG---TCCGGTATAGTGCAACAGCAAAGC---  
AATTTG---CTGAAG---GCTATAGAGGCTCAACAACATATGTTGAGACTCACGGTCTGGGGCATT  
>MK177825..1  
TTCTATTGCAATACATCACAACCTGTTTAATAGCACCTGGAATGAACATAACATTACCAACTCAACCTTTACAG  
AG-----  
-----  
GACAATACAACCTCTCACTCTCACATGTAGAATAAAGCAATTTATAAATATGTGGCAGAGAGTAGGACAAGCAA  
TGTATGCCCCCTCCCATCCAAGGAGAAATAAAATGTAATTCAAAC---  
ATTACTGGATTACTGTTAACACGGGATGGAGGGAAGAACACTGAG-----  
-----  
-----  
AGCAATGAGACCTTCAGGCCTGGAGGAGGGGATATGAGGAACAATTGGAGAAGTGAATTATATAAGTATAAGG  
TAGTAGAAATTAAACCACTA---GGTGTAGCACCTCACCTGCAAAAAGAAGAGTGGTG-----  
-----GAGAGAGAAAAAAGAGCA--GCA-----CTGGGAGCT-----  
GTCTTCCTTGGGTTCTTAGGAGCA--GCAGGAAGCACTATG--GGCGCGGCGTCA---  
ATAACGCTGACGGTACAG---GCCAGAAAG--TTATTG---TCTGGTATAGTGCAACCAGCAAAGC---  
AATTTG---CTGAAG---GCTATAGAGGCTCAACAACATATGTTGAGACTCACGGTCTGGGGCATT  
>MK177826..2  
TTCTATTGCAATACATCAAACTGTTTAATAGCACCTGGGAGAATGAAAATAACACTACCAACTCAAACCTCTG  
CA-----  
-----  
GAGAAATATAACTCTCACTCTCCCATGTAGAATAAAGCAAGTCATAAATATGTGGCAGAGAGTAGGACAAGCAA  
TGTATGCCCCCTCCCATCCAAGGAATAATAAAATGTAATTCAAAC---  
ATTACTGGATTACTGCTAACACGGGATGGAGGGAATAACAATACA-----

-----  
-----  
ACGAATGAGACCTTCAGGCCTGGAGGAGGGGATATGAGGGACAATTGGAGAAGTGAATTATACAAGTATAAAG  
TAGTAAAAAATTGAACCACTA---GGTGTAGCACCTCCTATGCAAAAAGAAGAGTGGTG-----  
-----GAGAGAGAAAAAAGAGCA--GTTGGA---CTAGGAGCT-----  
GTCTTCCTTGGGTTCTTAGGAGCA--GCAGGAAGCACTATG--GGCGCGGCGTCA---  
ATAACGCTGACGGTACAG---GCCAGACAA--TTATTG---TCTGGTATAGTGCAACAGCAGAGC---  
AATCTG---CTGAAG---GCTATAGAGGCTCAACAACAAATGTTGAGACTCACGGTCTGGGGCATT  
>KY989950..2  
TTCTATTGTAATACATCAAAATTGTTTAATAGCACTTGGAATACCAGCCACACAGAG-----  
-----  
-----  
TCAGGTGACAATATAACTCTCCCATGCCGAATAAAACAAATTGTAAGGATGTGGCAGAATGTAGGACAAGCAA  
TGTATGCCCCCTCCCATCCCGAGGAGAAATAAGGTGTGACTCAAAC---  
ATTACTGGACTACTATTAACAAGAGATGGAGGGGAGGAAAATAGGAATGGGACA-----  
AACGGGAATGGG---ACA-----  
-----  
AAGGAGGAGACCTTCAGGCCTGGAGGAGGAGATATGAGGGACAACCTGGAGAAGTGAATTATACAAGTATAAAG  
TAGTAAAAAATTGAACCAGTA---GGTGTAGCACCTACTCATGCAAAAAGAAGAGTGGTG-----  
-----GAGAGAGAAAAAAGAGCA--GTA-----CTTGGAGCT-----  
GTCTTCCTTGGGTTCTTGGGAGCA--GCAGGAAGCACTATG--GGCGCGGCGTCA---  
ATAACGCTGACGGTACAG---GCCAGACAA--TTGTTG---TCTGGTATAGTGCAACAGCAAAGC---  
AATTTG---CTGAAG---GCTATAGAGGCTCAGCAACAACCTGTTGAGGCTCACGGTCTGGGGCATT  
>MF157740..1  
TTCTATTGCAGTACATCAGAACTGTTTAATAGCACTTGGAACGGGTAAATAACACTACTACTTGAATAGCA  
CTGCCAAC-----  
-----  
TCAACAAATGACCCTATAACTCTCCGGTGTAGAATAAAGCAAATTGTAAGGATGTGGCAGAGAGTAGAACAAG  
CAATGTATGCCCCCTCCCATCCGAGGAGAAATAAGGTGTGAGTCAAAC---  
ATTACAGGATTACTATTAACAAGAGATGGAGGGCATGATGATGGGACAGAT-----  
-----  
-----  
GAGACAGAGGAGACCTTCAGGCCTGGAGGAGGAGATATGAGGGACAATTGGAGAAGTGAATTATATAAGTATA  
AAGTAGTAAAAAATTGAACCACTA---GGTGTAGCACCCACCCATGCAAAAAGAAGAGTGGTG-----  
-----GAGAGAGAAAAAAGAGCA--GTTGGA---CTGGGAGCT-----  
---GTCTTCCTTGGGTTCTTAGGAGCA--GCAGGAAGCACTATG--GGCGCGGCGTCA---  
ATAACGCTGACGGTACAG---GCCAGACAA--TTATTG---TCTGGTATAGTGCAACAGCAGAGC---  
AATTTG---CTGAGA---GCTATAGAGGCTCAACAACATCTGTTGAGACTCACGGTCTGGGGCATT  
>MH742763..1  
TTCTATTGCAATACATCAGAATTATTTAACAATAACACAGAATTAAACAATGGCACTGCCGGC-----  
-----  
-----  
GTAAATGACACTATAAACTCCCATGCAGGGTAAAGCAAATTGTAAGAATGTGGCAGAAAGTAGGGCAAGCAA  
TGTATGCCCCCTCCCATCAAAGGAGTAATAAGGTGTAACCTCAAAC---  
ATTACAGGACTACTGTTAACAAGGGATGGAGGGAATACTAGCACA-----  
-----  
-----  
GAGGAGGAGATATTTAGGCCTGGAGGAGGAGATATGAGGGACAACCTGGAGAAGTGAATTATATAAGTATAAGG  
TAGTACAAATTGAACCATTA---GGTGTGGCACCCACCCATGCAAAAAGAAGAGTGGTG-----  
-----GAGAGAGAAAAAAGAGCA--CTTGGA---ATAGGAGCT-----  
GTCTTCATTGGGTTCTTAGGAGCA--GCAGGAAGCACTATG--GGCGCGGCGTCA---  
ATAACGCTGACGGTACAG---GCCAGACAA--TTATTG---TCCGGTATAGTGCAACAGCAGAGC---  
AATCTG---CTGAGG---GCTATAGAGGCTCAACAACATCTGTTGAAACTCACGGTCTGGGGCATT  
>MH742765..2  
TTCTATTGCAATACATCAGCACTGTTTAATAGCACTTGGAATAACAGTACTGGCACTTGGAAGTACATAACA  
ATAGCAGTTCA-----  
-----  
GAGTCAAATGGCACTATCACTCTCAAATGCAAAATAAAGCAAATTGTAAATATGTGGCAGAGAGTAGGGCAAG  
CAATGTATGCCCCCTCCCATCGAAGGAATAATAAGGTGTGAATCAAAC---  
ATTACAGGACTACTATTAACAAGAGATGGAGGGAATAATAATGCA-----

-----  
-----  
AATGAGACTTTCAGGCCTGGAGGAGGAGATATGAGGGATAATTGGAGAAGTGAATTATATAAATATAAAGTAG  
TAAAAATTGAACCACTA---GGTGTAGCACCCACCTATGCAAAAAGAAGAGTGGTG-----  
-----GAGAGAGAAAAAAGAGCA---GTTGGA---CTGGGAGCT-----  
GTTCTCTTTGGGTTTCTAGGAGCA---GCAGGAAGCACTATG---GGCGCGGCGTCA---  
ATAACGCTGACGGTACAG---GCCAGACAA---TTATTG---TCCGGTATAGTGCAACAGCAGAGC---  
AATTTG---CTGAGA---GCTATAGAGGCTCAACAACATCTGTTGAAACTCACGGTCTGGGGCATT  
>MH742766..1  
TTCTACTGCAATACGACAGACCTGTTTAAACAGCCAGTGGCCCACTAACAACTCAGAG-----  
-----  
-----  
TCAAAATGACACTATAACTCTCCAATGCAGAATAAAGCAAATTTATAAATATGTGGCAGAGAGTAGGACAAGCAA  
TGTATGCCCCCTCCCATCCAAGGAAATATAAGTTGTAGATCAAAC---  
ATTACAGGACTACTATTAACAAGAGATGGAGGGAATAATAATAGT-----  
-----  
-----  
AAGACAAATGAGACTTTTAGGCCTGGAGGAGGAGATATGAGGGACAATTGGAGAAGTGAATTATATAAGTATA  
AAGTAGTAAAAATTGAACCAATA---GGTGTAGCACCCACCCATGCAAAAAGAAGAGTGGTG-----  
-----GAGAGAGAAAAAAGAGCA---GCTGGA---CTGGGAGCT-----  
---GTCTTCCTTGGGTTCTTAGGAGCA---GCAGGAAGCACTATG---GGCGCGGCGTCA---  
ATAACGCTGACGGTACAG---GCCAGACAA---TTATTG---TCTGGTATAGTGCAACAGCAGAGC---  
AATCTG---CTGAGG---GCTATAGAGGCTCAACAGCATCTGTTGAAACTCACGGTCTGGGGCATT  
>MH742768..1  
TTCTATTGCAATACAACAAAACTGTTTAATAGCACTTGGTTTAACAATGGCACAAACGCCACAAACAACGAAG  
CA-----  
-----  
ATGAATGACACTCTAACTCTCCAATGCAGAATAAAGCAAATTTGTGAGAATGTGGCAGACAGTAGGACAAGCAA  
TGTATGCCCCCTCCCATCTCAGGAGAGATAAGGTGTAATTCAAAC---  
ATTACTGGGTTGCTATTAACAAGGGATGGAGGGGAGGATAATAGTACAAAAAAT-----  
-----  
-----  
GAGACAAAGGAGACTTTCAGGCCTGGAGGAGGAGATATGAGGGACAATTGGAGAAGTGAATTATATAAATATA  
AAGTAGTAAAAATTGAACCTCTA---GGTGTAGCACCCACCCGTGCAAAGAGAAGAGTGGTG-----  
-----GAGAGAGAAAAAAGAGCA---GTTGGA---CTGGGAGCT-----  
---GTCTTCCTTGGGTTCTTAGGAGCA---GCAGGAAGCACTATG---GGCGCGGCGTCA---  
ATAACGCTGACGGTACAG---GCCAGACAA---TTATTG---TCTGGTATAGTGCAACAGCAGAGC---  
AATCTG---CTGAAG---GCTATAGAGGCTCAACAACAGCTGTTGAGACTAACAGTCTGGGGCATT  
>MH742770..1  
TTCTATTGTGATACATCAGGTCTGTTTAAATAGCGTTTGGGATAGGAATGGCACTACTTGGAATAGCAACACCA  
CAAGT-----  
-----  
-----  
GACACTGATGATATAATTCTCTCATGCAGAATAAGACAAATTTATAAATATGTGGCAGAGAGTAGGACAAGCAA  
TGTATGCCCCCTCCCATTAAGGAGTGATAAACTGTGAATCAAAC---  
ATTACAGGGCTACTGCTAACAAGAGATGGAGGGACTAATAGGGGT-----  
-----  
-----  
AGTACAAATGAGACTTTCAGGCCTGTAGGAGGAGATATGAGAGACAATTGGAGAAGTGAATTATATAAGTATA  
AAGTAGTAAAAATTGAGCCACTA---GGAGTAGCACCCACCAGGGCAAAAAGAAGAGTGGTG-----  
-----GAGAGAGAAAAAAGAGCA---GTTGGA---CTGGGAGCT-----  
---GTCTTCCTTGGGTTCTTAGGAGCA---GCAGGAAGCACTATG---GGCGCGGCGTCA---  
ATAACGCTGACGGTACAA---GCCAGACAA---TTATTG---TCTGGTATAGTGCAACAGCAAAGC---  
AATTTG---CTGAAG---GCTATAGAGGCTCAACAACATCTGTTGAGACTCACGGTCTGGGGCATT  
>MH742762..1  
TTCTATTGCAATACATCAGACCTGTTTAAATGCATCAAGCACT-----  
-----  
-----  
TGGGGTAACAATATAACTCTCCCATGCAGAATAAAGCAAATTTGTAAATATGTGGCAGAAAGTAGGACGAGCAA  
TGTATGCCCCCTCCCATTCAGGAGAAATAAGGTGTGAATCAAAC---  
ATAACAGGACTACTATTAACAAGAGATGGAGGGAATAATAATAAT-----

```

-----
-----
ACAAATGAGACCTTCAGACCTGGAGGAGGAGATATGAGGGACAATTGGAGAAGTGAATTATATAAGTATAAAG
TAGTAAAAAATTGAACCACTA---GGTGTAGCACCCACCCATGCAAAAAGAAGAGTGGTG-----
-----CAGAGAGAAAAAAGAGCA--GTTGGA---CTGGGAGCT-----
GTCTTCCTTGGGTTCTTAGGAGCA--GCAGGAAGCACTATG--GGCGCGGCGTCA---
ATAACGCTGACGGTACAG---GCCAGACAA--TTGCTA---TCTGGTATAGTGCAACAGCAGAGC---
AATTTG---CTGAAG---GCTATAGAGGCTCAACAACATCTGTTGAGACTCACGGTCTGGGGCATT
>MH000309..1
TTCTATTGCAATACGACAGACCTGTTTAAACAGCAAGTGTTTCAGT-----
-----
-----
AACAAACGGCATTATAACTCTCCAATGCAGAATAAAGCAAATTCATAAATATGTGGCAGAGAGTAGGACAAGCAA
TGTATGCCCCCTCCCATCTCAGGAATTATAAATTGTACATCAAAC---
ATTACAGGACTATTATTAACCAGAGATGGAGGA-----
-----
-----
ACTGAGACTTTTAGGCCTGGAGGAGGAGATATGAGGGACAATTGGAGAAGTGAATTATATAAGTATAAAGTAG
TAAAAAATTGAACCAATA---GGAATAGCACCCACCCATGCAAAAAGAAGAGTGGTG-----
-----GAGAGAGAAAAAAGAGCA--GTTGGA---CTGGGAGCT-----
GTCTTCCTTGGGTTCTTAGGAGCA--GCAGGAAGCACTATG--GGCGCGGCGTCA---
ATAACGCTGACGGTACAG---GCCAGACAA--TTATTG---TCTGGTATAGTGCAACAGCAGAGC---
AATCTG---CTGAGG---GCTATAGAGGCTCAACAACAGCTGTTGAAACTCACAGTCTGGGGCATT
>MH742757..1
TTCTACTGCAATACAACAAACTTGTTTAAACATCAGCCTGGGGAACAGTACCACTAACAGCTCAGAG-----
-----
-----
TCAAATGACAATATAACTCTCCAATGCAGAATAAAGCAAATTTATAAGGATGTGGCAGAGAGTAGGACAAGCAA
TGTATGCCCCCTCCCATCCAAGGAGATATAAGTTGTAGATCAAAC---
ATTACAGGACTACTATTAAACAAGAGATGGAGGGACAAGAGATGGAGGGAAT-----
-----
-----
GTGACTAATAATACTGAGATTTTTAGGCCTGAAGGAGGAAATATGAAGGACAATTGGAGAAGTGAATTATATA
AGTATAAAGTAGTAAGAATTGAACCAATA--GGTGTAGCACCCACCCGTGCAAAAAGAAGAACGGTG-----
-----GGGAGAGAGAAAAGAGCA--GTTGGA---
CTGGGAGCT-----GTCTTCCTTGGGTTCTTAGGAGCA--GCAGGAAGCACTATG---
GGCGCGGCGTCA--ATAACGCTGACGGTACAG--GCCAGACAA--TTATTG---
TCTGGTATAGTGCAACAGCAGAGC--AATCTG--CTGAGG---
GCTATTGAGGCTCAACAGCATCTGTTGAAACTCACAGTCTGGGGCATT
>AY231152..2
TTCTATTGCAATACATCAATACTGTTTAAATAGCACTTGGAATACCAATGACACTTGGAATATCAATAACACTG
ACACA-----
-----
GAGTCAAATGACACTATAACTATCCAATGCAGAATAAGGCAAGTTGTAAAGATGTGGCAGAAAGTAGGACAAG
CAATGTATGCCCCCTCCCATCGAAGGAGTAATAAGTTGTAAATCAAAC---
ATTACAGGACTACTATTAAACAAGAGATGGAGGGAATCATAATAAT-----
-----
-----
ACAAATGAGACTTTTCAGGCCTGGAGGAGGAGATATGAGGGACAATTGGAGAAGTGAATTATATAAGTATAAAG
TAGTAAAAAATTGAGCCACTA---GGTGTAGCACCCACCCGTGCAAAAAGAAGAGTGGTG-----
-----GAGAGAGAAAAAAGAGCAGTATTTGGA---CTGGGAGCT-----
GTTTTCTTGGGTTCTTAGGAGCA--GCAGGAAGCACTATG--GGCGCGGCGTCA---
ATAACGCTGACGGTACAG---GCCAGACAA--TTATTG---TCCGGTATAGTGCAACAGCGGAGC---
AATTTG---CTGAGG---GCTATAGAGGCTCAACAACATCTGTTGAAACTCACAGTCTGGGGCATT
>AY231153..1
TTCTATTGCAATACATCAAAACTGTTTGATAGCACTTGGTATAGCAATGATAGCACTTGGTATAGCAATGACA
CCAGCTTAAAC-----
-----CACACA-----
GAGTCAAATGGCACTATAACTCTCCAATGCAGAATAAAGCAAATTTATAAATATGTGGCAAAGGTAGGGCGAG
CAATGTATGCCCCCTCCCATCCAAGGAGTAATAAGGTGTGATTCAAAC---

```

ATTACAGGACTACTATTAACAAGAGATGGAGGGGATAATAATACT-----  
-----  
-----  
AAAAATGAGACCTTCAGGCCTGGAGGAGGAGATATGAGGGACAATTGGAGAAGTGAATTATATAAGTATAAAG  
TAGTAAAAATTGAACCACTA---GGTGTAGCACCCACCCATGCAAAAAGAAGAGTGGTG-----  
-----GAGAGAGAAAAAAGAGCA--GTTGGA---CTGGGAGCT-----  
GCCTTCCTTGGGTTCTTAGGAGCA---GCAGGAAGCACTATG---GGCGCGGCGTCA---  
ATAACGCTGACGGTACAA---GCCAGACAA---TTATTG---TCCGGTATAGTGCAACAGCAGAGC---  
AATCTG---CTGAAA---GCTATAGAGGCTCAACAACAGATGTTGAGACTCACGGTCTGGGGCATT  
>MH742764..1  
TTCTATTGCAATACATCAATACTGTTTAATAGCACTTGGGAATAATAGCACTTGGGATAATAACACTAGAGATA  
ACAAT-----  
-----AACAA-----  
GCCACAAATGATACTATGACTCTCCAATGCAGAATAAAGCAAATTGTAAGAATGTGGCAGACAGTAGGACAAG  
CAATGTATGCCCCCTCCCATCCAAGGAACAATAAAGTGTGAGTCAAAC---  
ATTACAGGACTACTATTAACAAGAGATGGAGGAAATAATAATAAT-----  
-----  
-----  
ACAAATGAGACTTTTCAGGCCTGGAGGAGGAGATATGAGGGACAATTGGAGAAGTGAATTATATAAGTATAAAG  
TAGTAAAACTTAAACCACTA---GGTGTAGCACCCACCCCTGCAAAAAGAAGAGTGGTG-----  
-----ATGAGAGAAAAAAGAGCA--GCA-----CTGGGAGCT-----  
ATTTTCCTTGGGTTCTTAGGAGCA---GCAGGAAGCACTATG---GGCGCGGCGTCA---  
ATAACGCTGACGGTACAG---GCCAGACAA---TTATTG---TCCGGTATAGTGCAACAGCAGAGC---  
AATTTG---CTGAGA---GCTATAGAGGCTCAACAACATATGTTGAAACTCACGGTCTGGGGCATT  
>AF321079..2  
TTCTATTGCAATACAGCATCACTGTTTAATAGCACTTGGTATAGCAATGGCAGCTCAAACACGCAGGG---  
-----  
-----  
TCAAATGGGAATATAACTCTCCAATGCAGAATAAAGCAAATTGTAAATATGTGGCAGAGAGTAGGACAAGCAA  
TGTATGCCCCCTCCCATCCAAGGAGTAATAAGGTGTGTATCAAAC---  
ATTACTGGACTACTATTAACAAGAGATGGAGGGAATAATAATAGT-----  
-----  
-----  
AGTACAAATGAGACCTTTAGGCCTGGAGGAGGAGACATGAGAGACAATTGGAGAAGTGAATTATATAAGTATA  
AAGTAGTAAAAATTGAACCACTA---GGTGTAGCACCCCTCCCGTGCAAAAAGAAGAGTGGTG-----  
-----GAGAGAGAAAAAAGAGCA--ATCGGA---CTGGGAGCT-----  
---GTTTTCCTTGGGTTCTTAGGAGCA---GCAGGAAGCACTATG---GGCGCGGCGTCA---  
ATAACGCTGACGGTACAG---GCCAGACAA---TTATTG---TCCGGTATAGTGCAACAGCAGAGC---  
AATCTG---CTGAAG---GCTATAGAGGCTCAACAACATATGTTGAAACTCACGGTCTGGGGCATT  
>AB286856..2  
TTCTATTGCTATACATCAGACCTGTTTAATAGCACTTGGCCCAATAAAGTGCAGAGTCAAATAGCACAGGGT  
CAATA-----  
-----  
AGGTCAAATGAGACTATAACTCTCAAATGCAGAATAAAGCAAATTATAAATATGTGGCAGAGAGTAGGACAAG  
CAATATATGCCCCCTCCCATCAGAGGAGAAATAAGGTGTGATTCAAAC---  
ATTACAGGACTAATATTAACAAGAGATGGAGGGAATAATAGTGAGAGT-----  
-----  
-----  
GCAATGGAACCTGAAATTTTCAGGCCTGGAGGAGGAGATATGAGGGACAATTGGAGAAGTGAATTATATAAGT  
ATAAAGTAGTAAAAATTGAACCACTA---GGATTAGCACCCACTAGAGCAAAAAGAAGAGTGGTG-----  
-----CAGAGAGAAAGAAGAGCA---GTTGGC---CTGGGAGCT---  
-----TTATTCATTGGGTTCTTAGGAGCA---GCAGGAAGCACTATG---GGCGCGGCGTCA---  
TTAACGCTGACGGTACAG---GCCAGACAA---TTACTG---TCTGGTATAGTGCAACAGCAAAGC---  
AATTTG---CTGAGG---GCTATAGAGGCTCAACAACATCTGTTGAAACTCACAGTCTGGGGCATT  
>AB286857..1  
TTCTATTGCAATACATCAGGACTGTTTAATAGCACTTGGGAGAATAATACTAGCACAGCCAGCTCAACAAATG  
TTAGCTCA-----  
-----ATA---  
AATGACACTGACATTATAGAACTCAAATGCAGAATAAAGCAAATTGTAAATATGTGGCAGAAAGTAGGACAAG  
CAATGTATGCTCCTCCCATTCAGGAGTAATAAGGTGTGATTCTGAAC---

ATTACAGGACTACTATTAACAAGAGATGGAGGGAAGAATAGTAGT-----  
-----  
-----  
GCTACAAATGAGACCTTCAGGCCTGGAGGGGGAGATATGAGAGACAATTGGAGAAGTGAATTATATAAATATA  
AAGTAGTAAAAATTGAACCACTG---GGTGTAGCACCCACCCATGCAAAAAGAAGAGTGGTG-----  
-----GAGAGAGAAAAAAGAGCA---GTTGGA---CTAGGAGCT-----  
---GTACTCCTTGGGTTCTTAGGAGCA---GCAGGAAGCACTATG---GGCGCGCGTCA---  
ATAACGCTGACGGTACAG---GCCAGACAA---TTATTG---TCTGGTATAGTGCAACAGCAGAGC---  
AATCTG---CTGAGA---GCTATAGAGGCTCAACAACAGCTGTTGAGACTCACGGTCTGGGGCATT  
>AB286859..2  
TTCTATTGTAATACAACAACACTGTTTAATAGCACTTGGGATGACAATAACACTGCCAGCTCAAACCTACACAG  
GG-----  
-----  
TCAAAATGGCACTATAACTCTCCAATGCAGAATAAAGCAAATTATAAATATGTGGCAGAAAGTAGGACAAGCAA  
TGTATGCCCCCTCCCATCCAAGGAGTAATAAGGTGTAACCTCAAGC---  
ATTACTGGACTACTATTAACAAGAGATGGAGGAAGTAATAGTAGT-----  
-----  
-----  
ACAAATGAAACTTTTCAGGCCTGGAGGAGGAGACATGAGGGACAATTGGAGAAGTGAATTATATAAGTATAAAG  
TAGTAAAAAATTGAACCACTG---GGTGTAGCACCCACCCATGCAAAAAGAAGAGTGGTG-----  
-----GAGAGAGAAAAAAGAGCA---GTTGGA---CTGGGAGCT-----  
GTCTTCCTTGGGTTCTTAGGAGCA---GCAGGAAGCACTATG---GGCGCAGCGTCA---  
CTAACGCTGACGGTACAG---GCCAGACAA---TTATTG---TCTGGTATAGTGCAACAGCAAAGC---  
AATTTG---CTGAAG---GCTATAGAGGCTCAACAACATCTGTTGAAACTCACAGTCTGGGGCATT  
>AB286862..2  
TTCTATTGCAATACAACAAATTTGTTTAATAGCACTTGGGAAAAGAAAAAGGGCACTTGGAAATGATACCACTG  
CCAAC-----  
-----  
CCACCAAATGGCACTATAACTCTCCAATGCAGAATAAAGCAAATTGTAAATATGTGGCAGAGAGTAGGACAAG  
CAATATATGCCCCCTCCCATCCCAGGAATAATAAGTTGTAATTCAGC---  
ATCACAGGATTACTATTAACAAGAGATGGGGGTGAGGGGAATGAAACT-----  
-----  
-----  
AGGAAAAATGAGACCTTCAGACCTGGAGGAGGAGATATGAGGGACAATTGGAGAAGTGAATTATATAAGTATA  
AAGTGGTAAAAATTGAACCACTA---GGTGTGGCACCTACCTATGCAAAAAGAAGAGTGGTG-----  
-----GAGAGAGAAAAAAGAGCA---GTTGGA---ATGGGAGCT-----  
---GTCTTACTTGGGTTCTTAGGAGCA---GCAGGAAGCACTATG---GGCGCAGCGTCA---  
ATAACGCTGACGGTACAG---GCCAGACAA---TTATTG---TCCGGTATAGTGCAACAGCAGAGC---  
AATCTG---CTGAAA---GCTATAGAGGCTCAACAACAACCTGTTGAGACTCACGGTCTGGGGCATT  
>AB286863..3  
TTCTATTGCTATACATCAGAACTGTTTAATAGCACTTGGAAATAATAACTGGCAGCCCAAACAGC-----  
-----  
-----  
ACAAATGACACTATAACTCTTCAATGCAAAATAAAGCAAATTGTAAATATGTGGCAGAGGGTAGGGCAAGCGA  
TGTATGCCCCCTCCCATCCCAGGAGAGCTAAGGTGTGACTCAAAC---  
ATTACTGGACTACTATTAACAAGAGATGGAGGGAATACTAATAATACA-----  
-----  
-----  
AATACAACCTGAAACCTTCAGGCCGGGAGGGGGAGATATGAGGGACAATTGGAGAAGCGAACTATACAAGTATA  
AAGTAGTACAAATTGAACCAATA---GGAGTAGCACCCACCCCGCAAAAAGAAGAGTGGTG-----  
-----GAGAGAGAAAAAAGAGCA---GTTGGA---CTGGGAGCT-----  
---GTCTTCCTTGGGTTCTTAGGAGCA---GCAGGAAGCACTATG---GGCGCAGCGTCA---  
ATAACGCTGACGGTACAG---GCCAGACAA---TTATTG---TCCGGTATAGTGCAACAGCAGAGC---  
AATTTG---CTGAGA---GCTATAGAGGCTCAACAACATCTGTTGAAACTCACGGTCTGGGGCATT  
>AB231895..2  
TTCTATTGCAATACATCAGGACTGTTTAATAGTACTTGGTATAGCGATACCACTGCAAACCAAACAGAG----  
-----  
-----  
TCAAAATGACACCATAACTCTACAATGCAGAATAAAGCAAATTATAAATATGTGGCAGACAGTAGGACAGGCAA  
TGTATGCCCCCTCCCATCCAAGGAGTAATAAGGTGTGAATCAAAC---

ATCACTGGATTACTATTAACAAGAGATGGAGGGAATAAGAATCAT-----  
-----  
-----  
ACAAATGAGACCTTCAGGCCTGGAGGAGGAGATATGAGAGACAATTGGAGAAGTGAATTATATAAGTATAAAG  
TAGTAAAGATTGAACCAATA---GGTGTAGCACCTCTCCTGCAAAAAGAAGAGTGGTG-----  
-----GGAAGAGAAAAAAGAGCA--GTCGGA---CTGGGAGCT-----  
GTCTTCCTTGGGTTCTTAGGAGCA---GCAGGAAGCACTATG---GGCGCGGCGTCA---  
ATGACGCTGACGGTACAA---GCCAGACAA---TTATTG---TCTGGTATAGTGCAACAGCAGAGC---  
AATTTG---CTGAAG---GCTATAGAGGCTCAACAACATCTGTTGAAACTCACGGTTTGGGGCATT  
>AB231896..1  
TTCTATTGCGATACATCAGGGCTGTTTAATAGCACTTGGGATAACATTACCAGTACAAATGGCACAAGGTAA  
AT-----  
-----  
GAAACTGAACTATAACTCTCCCATGCAGAATAAAACAAATTGTAAGAATGTGGCAGAGAGTAGGACAAGCAA  
TGTATGCCCCCTCCTATCCAAGGAGAACTACGGTGTGAATCAAAT---  
ATTACAGGACTACTATTAACAAGAGATGGAGGGAATAATAATCGT-----  
-----  
-----  
ACAAATGAGACCTTCAGGCCTATAGGAGGAGATATGAAGGACAATTGGAGAAGTGAATTATATAAATATAAAG  
TGGTAAAAAATTGAACCACTA---GGTATAGCACCTCCAGGGCAAAAAGGAGAGTGGTG-----  
-----GAGAGAGAAAAAAGAGCA--GTTGGA---CTGGGAGCT-----  
GTCTTCCTTGGGTTCTTAGGAGCA---GCAGGAAGCACTATG---GGCGCGGCGTCA---  
TTAACGCTGACGGTACAG---GCCAGACAA---TTATTG---TCCGGTATAGTGCAACAGCAAAGC---  
AATTTG---CTGAGG---GCTATAGAGGCTCAACAACATCTGTTGAAACTCACAGTCTGGGGCATT  
>AB231898..1  
TTCTATTGCAATACATCAAGACTGTTTAATAGCAATTGGAAAAACGGTACTGCCAGCTCAAATGGCACT----  
-----  
-----  
GCAATGACATTATAACTCTCCAATGCAGAATAAGGCAAATTATAAATATGTGGCAGAAAGTAGGAAAAGCAA  
TGTATGCCCCCTCCCATCCCAGGAGTAATAAGGTGTGAGTCAAAC---  
ATTACAGGACTACTATTAACAAGAGATGGAGGGAAAAATACTAGT-----  
-----  
-----  
GGTGTAATGAGACTTTCAGACCTGAAGGAGGAAATATGAAAGACAATTGGAGAAGTGAATTATATAAGTATA  
AAGTAATAAAAATTGAACCACTA---GGTGTAGCACCCACCCGTGCAAGAAGAAGAGTGGTG-----  
-----GGAAGAGAAAAAAGAGCA--ATAGGTGGACTGGGAGCT-----  
---GCCCTCCTTGGGTTCTTAGGAGCA--GCAGGAAGCACTATG---GGCGCGGCGTCA---  
ATAACGCTGACGGTACAG---GCCAGACAA---TTATTG---TCTGGTATAGTGCAACAGCAGAGC---  
AATCTG---CTGAGG---GCTATAAAGGCTCAACAAGAACTGTTGAGACTCACGGTCTGGGGCATT  
>AB049811..3  
TTCTATTGCAATACATCAGAACTGTTTAATAGGAATTACAATAGGTCTAGCAATAGCACTTGGAAATTACAATA  
GTTCTAGCAAG-----  
-----GGCACA-----  
GAGTCAAATGGCACTATAATTCTCCAATGCAGAATAAAGCAAATTGTAAATATGTGGCAGAGAGTAGGACAAG  
CAATATATGCCCCCTCCCATCCCAGGAGTAGTAAGGTGTGTCTCAAAC---  
ATTACAGGACTACTATTAACAAGAGATGGAGGGAATGGTAATAGT-----  
-----  
-----  
ACAAATGAGACTTTCAGACCGGGAGGAGGAGATATGAGGGACAATTGGAGAAGTGAATTATATAAGTATAAAG  
TAGTAAAAAATTGAACCACTA---GGTGTAGCACCCACCCATGCAAAAAGAAGAGTGGTG-----  
-----GGGAGAGAAAAAAGAGCA--GTTGGA---CTGGGAGCT-----  
GTCTTCCTTGGGTTCTTAGGAGCT---GCAGGAAGCACTATG---GGCGCAGCGTCA---  
ATAACGCTGACGGTACAG---GCCAGACAA---TTATTG---TCTGGTATAGTGCAACAGCAGAGC---  
AATCTG---CTGAGG---GCTATAGAAGCTCAACAACATATGTTGAAGCTCACGGTCTGGGGCATT  
>AB485633..1  
TTCTATTGTAAGACATCGAGACTGTTTAATAGCACTTGGCAGTTTAATAGCACTTGGAAAGAGCATTTCGGGATG  
GC-----  
-----  
AATGACAATGACACTATAACTCTCCCATGCAGAATAAGACAAATTGTACATATGTGGCAGAGAGTAGGACAAG  
CAATGTATGCCCCCTCCCATTCGAGGAGTAATAAACTGTCTATCAAGC---

ATTACAGGACTACTGCTAACAAGAGATGGTGGTGGGAATGGGAAT-----  
-----  
-----  
AGTACAAAGGAGATCTTCAGGCCTGGAGGAGGAGATATGAGGGACAATTGGAGAAGTGAATTATATAAGTATA  
AGGTAGTGAAAATTGAACCACTA---GGTGTAGCACCCACCCATGCAAAAAAAGAGTGGTG-----  
-----GAGAGAGAAAAAGAGAGCA---GTTGGA---CTGGGAGCT-----  
---GTCTTCCTTGGGTTCTTAGGAGCA---GCAGGAAGCACTATG---GGCGCGGCGTCA---  
ATAACGCTGACGGTACAG---GCCAGACAA---TTATTG---TCCGGTATAGTGCAACAGCAGAGC---  
AATCTG---CTGAAG---GCTATAGAGGCTCAACAACATCTGTTGAGACTCACGGTCTGGGGCATT  
>HQ385450..1  
TTCTATTGCAATACATCAGAACTGTTTACTAGCACTTGGCCCAATGAGAATAATAGCACCGAGACCAATAATA  
CTGCCAAC-----  
-----TTA---  
AATAATACAGACACTATAACTCTCCAATGCAGAATAAAGCAAATTGTAAGAATGTGGCAGACAGTGGGACAAG  
CAATGTATGCCCCCTCCCATCAAAGGGGTAATAAATTGTAAATCAAAC---  
ATTACAGGACTATTATTAATAAGAGATGGAGGGAAAAATAATAGT-----  
-----  
-----  
GAAAAATGAGACTTTTCAGGCCTGGAGGAGGAGATATGAGGGACAATTGGAGAAGTGAATTATATAAGTATAAAG  
TAGTAAAGATTGAACCAATA---GGTGTAGCACCCACCCATGCAAAAAGAAGAGTGGTG-----  
-----GAGAGAGAAAAAAGAGCA---GTTGGA---ATGGGAGTG-----  
TTTATCCTTGGGTTCTTAGGAGCA---GCAGGAAGCACTATG---GGCGCGGCGTCA---  
ATAACGCTGACGGTACAG---GCCAGACAA---TTATTG---TCTGGTATAGTGCAACAGCAGAGC---  
AATTTG---CTGAGG---GCTATAGAGGCTCAACAACATCTGTTGAAACTCACAGTCTGGGGCATC  
>HQ385451..1  
TTCTATTGCAATACATCAGGACTGTTTAATAGCACCTGGGTGAATAACAGTAGCACTGAGGGTGCCAGTAACA  
ATGCCAGC-----  
-----TCA---  
GATGCAAATGACACTATAACTCTCCAATGCAGGATAAAGCAAATTATAAATCTGTGGCAGAGAGTAGGAAAAG  
CAATGTATGCCCCCTCCCATCCCAGGAATAATAAGGTGTGACTCAAAC---  
ATTACAGGACTATTATTAACAAGAGATGGAGGGTATAATAATAAT-----  
-----  
-----  
AGTAGAAATGAGACTTTTCAGACCTGGAGGAGGAGATATGAGGGACAATTGGAGAAGTGAATTATATAAGTATA  
AAGTAGTAAAAATTGAACCACTA---GGTATAGCACCCACCAAGGCAAGGAGAAGAGTGGTG-----  
-----GAGAGAGAAAAAAGAGCA---GTTGGC---ATGGGAGCT-----  
---CTCTTCCTTGGGTTCTTAGGAGCA---GCAGGAAGCACTATG---GGCGCGGCGTCA---  
ATAACGCTGACGGTACAG---GCCAGACAA---TTATTG---TCTGGTATAGTGCAACAGCAGAGC---  
AATTTG---CTGAGA---GCTATAGAGGCTCAACAACATCTGTTGAAACTCACGGTCTGGGGCATT  
>HQ385460..1  
TTCTACTGCAATTTCATCAGCACTGTTTGATACAACATGGAACGCCACTACATGGAATAATACCATAGAGTCAA  
ATAATACC-----  
-----ACA---  
GGGCCAAACGATACAATCACACTCCACTGCAGGATAAAACAGATTATAAACATGTGGCAGACAGTAGGACAAG  
CAATGTACGCCCCCTCCCATCCGAGGAGAAATAAGGTGTGAATCAAAC---  
ATTACAGGACTACTATTAACAAGAGATGGAGGGAATGGTAATAGTAGT-----  
-----  
-----  
GGTGGTGCAAATGAGACTTTTAGGCCTGGAGGAGGAGATATGAGGGACAATTGGAGGAGTGAATTATATAAGT  
ATAAAGTAGTAAAAATTGAACCACTA---GGTGTAGCACCCACCCATGCAAGAGAAGAGTGGTG-----  
-----GAGAGAGAAAAAAGAGCA---ATTGGA---CTGGGAGCT---  
-----TTCTTCCTTGGGTTCTTAGGAACA---GCAGGAAGCACTATG---GGCGCAGCGTCA---  
ATAACGCTGACGGTACAG---GCCAGACAA---TTATTG---TCTGGTATAGTGCAACAGCAAAGC---  
AATTTG---CTGATG---GCTATAGAGGCTCAACAACATATGTTGAAACTCACTGTCTGGGGCATT  
>HQ385446..2  
TTCTATTGCAATACATCAGGACTGTTTAACATTTGGGAGAAC-----  
-----  
-----  
AATGACAATATAACTCTCCCATGCAGAATAAAGCAAATTATAAATATGTGGCAGAAAAGTAGGACAAGCAATGT  
ATGCCCCCTCCCATTCAGGAAAAATAGAGTGTGAGTCAAAC---

ATTACAGGACTACTGCTAACAAGAGATGGAGGAAATAATAATAGTACA-----  
-----  
-----  
AATAAAAGTGAGACTTTCAGGCCTGGAGGAGGAGACATGAGGGACAATTGGAGAAGTGAATTATATAAGTATA  
AGATAGTAAAAATTGAACCACTA---GGTGTGGCACCCACTCATGCAAAAAGAAGAGTGGTG-----  
-----GGGAGAGAAAAAAGAGCA---GTTGGA---CTGGGAGCT-----  
---GTTCTCTTTGGGTTCTTAGGAGCA---GCAGGAAGCACTATG---GGCGCGGCGTCA---  
ATAACGCTGACGGTACAG---GCCAGACAA---CTATTG---TCTGGTATAGTGCAACAGCAGAGC---  
AATCTG---CTGAAA---GCTATAGAGGCTCAACAACATCTGTTGAAACTCACAGTCTGGGGCATT  
>HQ385447..2  
TTCTATTGCAATACAACAGCACTGTTTTATGGTACATTGTATAACAATGACACTTGGGATAGAAATAGCACTT  
GGGAT-----  
-----AAC---  
AACAACTCAACAAATATAACTCTCCAATGCAAAATAAAGCAAATTATAAGAATGTGGCAGAGAGTAGGGCAAG  
CAATGTATGCCCCCTCCCATCCGAGGAAAAATATGGTGTGAATCAAAC---  
ATTACAGGAATACTATTAACAAGAGATGGGGGAATGATAATGCA-----  
-----  
-----  
AATGAGACCTTCAGGCCTGGAGGAGGAGATATGAGGGACAATTGGAGAAGTGAATTATATAAATATAAAGTAG  
TAAAAATTGAGCCACTA---GGTGTAGCACCCACCCATGCAAAAAGAAGAGCGGTG-----  
-----GATAGAGAAAAAAGAGCA---GTTGGA---CTGGGAGCT-----  
TTTTTCCTTGGGTTCTTAGGAGCA---GCAGGAAGCACTATG---GGCGCGGCGTCA---  
ATAACGCTGACGGTACAG---GCCAGACAA---TTATTG---TCTGGTATAGTGCAACAGCAGAGC---  
AATCTG---CTGAAG---GCTATAGAGGCTCAACAACATCTGTTGAGACTCACGGTCTGGGGCATT  
>HQ385462..1  
TTCTATTGCAATACATCAGGACTGTTTAATAGCACTTGGCCAGAGGCAAATGCCACACAGTCAAATACCACAC  
AG-----  
-----  
TCAAATAGCACTATAACTCTCCCATGCAGAATAAAGCAAATTGTAAATATGTGGCAGAAAGTAGGACAAGCAA  
TGTATGCCCCCTCCCATCCAAGGAATAATAAAGTGTGAATCAAAC---  
ATTACAGGGTTATTGTTAACAAGAGATGGGGGAAATAATAGTGGAAT-----  
-----  
-----  
AATGGTGAACCTGATATTTTCAGGCCCGAAGGAGGAGATATGAGAGATAATTGGAGAAGTGAATTATATAAGT  
ATAAAGTAGTAAAAATTGAACCACTG---GGTATAGCACCCAGCCATGCAAAAAGAAGAGTGGTG-----  
-----GAGAGAGAAAAAAGAGCA---GTTGGA---CTGGGAGCT---  
-----GTCTTCCTTGGGTTCTTAGGAGCA---GCAGGAAGCACTATG---GGCGCGGCGTCA---  
ATAACGCTGACGGCACAC---GCCAAACAA---TTACTG---TCTGGTATAGTGCAACAGCAGAGT---  
AATCTG---CTGAGG---GCTATAGAGGCTCAACAACATCTGTTGAAACTCACGGTCTGGGGCATT  
>HQ385455..2  
TTCTATTGCAATACAACAGCCCTGTTTAACACAACCTGGATCAATGGCACTGACAGCTCAAACAAC-----  
-----  
-----  
AGCACAGAGTCTATAACGATCCAATGCAGAATAAAGCAAATTATAAACATGTGGCAGAAAGTAGGACAAGCAA  
TATATGCCCCCTCCTATCCCAGGAACAATAAGGTGTGAATCAAAC---  
ATTACAGGACTATTATTAACAAGAGATGGAGGAAAGAATAGAACA-----  
-----  
-----  
AATAATGAGACTTTCAGGCCTGAAGGAGGAGATATGAGGGACAATTGGAGAAGTGAATTATATAAGTATAAAG  
TAGTAAAAATTGAACCACTA---GGTATAGCACCTACCTATGCAAAAAGAAGAGTGGTG-----  
-----GAGAGAGAAAAAAGAGCA---GTTGGA---CTGGGAGCT-----  
GTCTTCCTTGGGTTCTTAGGAGCA---GCAGGAAGCACTATG---GGCGCGGCGTCA---  
GTGACGCTGACGGTACAG---GCCAGACAA---TTATTG---TCTGGTATAGTGCAAGCAGCAAAGC---  
AATTTG---CTGAAG---GCTATAGAGGCTCAACAACATCTGTTGAGACTCACAGTCTGGGGCATT  
>HQ385457..1  
TTCTATTGCAATACATCAGAACTGTTTAATAGTACTTGAATAACAATAGCACTGGGGATAACAAT-----  
-----  
-----  
AGCTCAACACCAATAATTCTCCAATGCAAAATAAAGCAAATTATAAGAATGTGGCAGAAAGTAGGACAAGCAA  
TGTATGCCCCCTCCCATCCCAGGAGAAATAAGGTGTGAATCAAAC---

ATTACTGGACTACTATTAACAAGAGATGGAGGGAATAATAATAAT-----  
-----  
-----  
ACAAATGAAACATTTCAGGCCTGGGGGAGGAGATATGAGAGACAATTGGAGAAGTGAATTATATAAGTATAAAG  
TAGTAAAAATTGAACCACTA---GGTGTAGCACCTACCCGTGCAAAAAGAAGAGTGGTG-----  
-----GAGAGAGAAAAAAGAGCA--GTTGGA--ATGGGAGCT-----  
TTATTCCTTGGGTTCTTAGGAGCA--GCAGGAAGCACTATG--GGCGCGGCGTCA---  
ATAACGCTGACGGTACAG---GCCAGACAA--TTATTG---TCCGGTATAGTGCAACAGCAGAGC---  
AATTTG---CTGAAG---GCTATAGAGGCTCAACAGCATCTGTTGAGACTCACGGTCTGGGGCATT  
>HQ385449..1  
TTCTACTGCAATACATCAAGACTGTTTAATAGCACTTGGGAATAACATTAATAGCACTGGGTATAACCTCACAG  
GG-----  
-----  
TCACAGGAAAATATAACTCTCCAATGCAGAATAAAGCAAATTGTAAGAATGTGGCAGAGAGTAGGACAAGCAA  
TGTATGCCCCCTCCCATCCGAGGAGAAATAAGGTGTAACCTCAAAC---  
ATTACTGGACTACTATTAACAAGAGATGGAGGGAATGAAAATAAT-----  
-----  
-----  
AATACAAACGAGACCTTCAGGCCTGGAGGAGGAGATATGAGGGACAATTGGAGAAGTGAATTATATAAGTATA  
AAGTAGTAAAAATTGAACCACTA---GGTGTAGCACCCACCCGTGCAAGAAGAAGAGTGGTG-----  
-----GAGAGAGAAAAAAGAGCA--GTTGGA--CTGGGAGCT-----  
---GTCTTCCTTGGGTTCTTAGGAGCA--GCAGGAAGCACTATG--GGCGCGGCGTCA---  
ATAACGCTGACGGTACAG---GCCAGACAA--TTATTG---TCCGGTATAGTGCAACAGCAAAGC---  
AATTTG---CTGAAG---GCTATAGAGGCTCAACAACATCTGTTGAGACTCACGGTCTGGGGCATT  
>HQ385454..2  
TTCTATTGCTACACATCAAACCTGTTTAACAGTACTTGGGATGACAACAGTACTTGGGATAACAATACTACTT  
GGGATAAC-----  
-----AGCACG-----  
ACAGAGGACACCAACATAACTCTCCAATGCAGGATAAAGCAAATTGTAAATATGTGGCAGAGAGTAGGACAAG  
CAATATATGCCCCCTCCCATCCAAGGAGACATAAAGTGTGAATCAAAC---  
ATTACTGGATTATTGTTAACAAGAGATGGAGAGAATAATACTATG-----  
-----  
-----  
AATGAGACTTTTCAGGCCTGGAGGAGGAGACATGAGGGACAATTGGAGAAGTGAATTATATAAATATAAAGTAG  
TAAAAATTGAACCACTA---GGTGTAGCACCCACCCATGCAAAAAGAAGAGTGGTG-----  
-----GAGAGAGAAAAAAGAGCA--GTTGGA--CTAGGAGCT-----  
GTCTCTTTTGGGTTCTTAGGAGCA--GCAGGAAGCACTATG--GGCGCGGCGTCA---  
ATAACGCTGACGGTACAG---GCCAGACAA--TTATTG---TCTGGTATAGTGCAACAGCAGAGC---  
AATTTG---CTGAAG---GCTATAGAGGCTCAACAACATCTGTTGAAACTCACGGTCTGGGGCATT  
>MH078541..1  
TTCTACTGTAATACATCAGCACTGTTTAATAGCACTTGGAAATTGGAATAATAACACTTGGGGGACCAATGAGA  
GCAGCTCACAG-----  
-----GCAAAT-----  
GACACTGGTGAACCTATAACTCTCCAATGCAGAATAAAGCAAATTATAAATATGTGGCAGAAAGTAGGACGAG  
CAATGTATGCCCCCTCCCATCCCAGGAGTCATAAGGTGTGAGTCAAAC---  
ATTACAGGCCTACTGCTAACAAGAGATGGAGGAAGTACTAATAGT-----  
-----  
-----  
ACAAATGAGACTTTTCAGGCCTGGAGGAGGAGACATGAGGGATAATTGGAGGAGTGAATTATATAAGTATAAAG  
TAGTAAAAATTGAACCACTA---GGTGTAGCACCTACTCGTGCAAGAAGAAGAGTGGTG-----  
-----GGAAGAGAAAAAAGAGCA--GTTGGA--CTGGGAGCT-----  
GTTTTCTTGGGTTCTTAGGAGCA--GCAGGAAGCACTATG--GGCGCAGCGTCA---  
CTAACGCTGACGGTACAG---GCCAGACAA--TTATTG---TCTGGTATAGTGCAACAGCAGAGT---  
AATCTG---CTGAGG---GCTATAGAGGCTCAACAACAGATGTTGAGGCTCACGGTCTGGGGCATT  
>MH078542..3  
TTCTATTGCAATACATCAAAATTGTTTAATAGTACTTGGAAATGAGAATAGTACTTGGAAATAGTAGTCAG----

ATTACAGGGCTACTGCTAACAAGAGATGGTGGGAATAATAATAGT-----  
-----  
-----  
ACAAATGAGACCATCAGGCCTCAAGGAGGAAATATGAAGGACAATTGGAGGAGTGAATTATACAAATATAAAG  
TAGTAAAAATTGAACCAATA---GGAGTAGCACCCACCAAGGCAAAGAGAAGAGTGGTG-----  
-----GAGAGAGAAAAAAGAGCA--GTTGGA---CTGGGAGCT-----  
GTCTTCCTTGGGTTCTTAGGAGCA---GCAGGAAGCACTATG---GGCGCAGCGTCA---  
ATAACGCTGACGGTACAG---GCCAGACAA---TTATTG---TCTGGTATAGTGCAACAGCAAAGC---  
AATTTG---CTGAAG---GCTATAGAGGCTCAACAGCAGCTGTTGAGACTCACAGTCTGGGGCATT  
>MH078544..2  
TTCTATTGTAATACAACAAAATTGTTTAGTAGCACTTGGGCTAATAATAGCACTTTGGGTAATAGCACTGAGG  
ATAAC-----  
-----  
AACAACTACTACTATAACTCTCCAATGTAGAATAAAGCAAATTGTGAATATGTGGCAGAGAGTAGGACAAGCAA  
TGTATGCCCCCTCCCATTCCAGGAGAAATAAGTTGTGTATCGAAC---  
ATTACTGGACTTTTATTAACAAGAGATGGAGAGGGTAGTAATAGG-----  
-----  
-----  
ACAAATGAGACCTTCAGGCCTGGAGGAGGGGATATGAGGGACAATTGGAGAAGTGAATTATATAAGTATAAAA  
TAGTAAAAATTGAACCACTA---GGTATAGCACCTACTCATGCAAGAAGGAGAGTGGTG-----  
-----GAGAGAGAAAAAAGAGCA--GTTGGA---CTGGGAGCT-----  
TTCTTCCTTGGGTTCTTAGGAGCA---GCAGGAAGCACTATG---GGCGCGGCGTCA---  
ATAACGCTGACGGTACAA---GCCAGACAA---TTATTG---TCTGGTATAGTGCAACAGCAGAGC---  
AATCTG---CTGAAG---GCTATAGAGGCTCAACAACATCTGTTGAAACTCACGGTCTGGGGCATT  
>MK397970..2  
TTCTATTGCAATACATCACAGTTGTTTAATAGCACTTGGGAGAACGGGGAATTAAATGGCAGTATA-----  
-----  
-----  
TCAGATGGCAATATAACGATCCCCCTGCAGAATAAAGCAAATTATAAATATGTGGCAGAGAGTAGGACAAGCAA  
TGTATGCCCCCTCCCATCCAAGGAGAGATAAGGTGTCAATCAAAC---  
ATTACTGGACTAATATTAACAAGAGATGGAGGTA AAAATGAGACA-----  
-----  
-----  
CATACTGAGACCTTCAGGCCTGGAGGAGGAGATATAAGGGACAATTGGAGAAGTGAATTATATAAATATAAAG  
TAGTAAAAATTGAACCACTA---GGAGTAGCACCCACCGGGCAAAGAGAAGAGTGGTG-----  
-----GAAAGAGAAAAAAGAGCA--GTTGGA---CTGGGAGCT-----  
GTCTTCCTTGGGTTCTTAGGAGCA---GCAGGAAGCACTATG---GGCGCAGCGTCA---  
ATAACGCTGACGGTACAA---GCCAGACAA---CTATTG---TCCGGTATAGTGCAACAGCAGAAC---  
AATTTG---CTGAAG---GCCATAGAGGCTCAACAACAGATGTTGAGACTCACGGTATGGGGCATT  
>KF561435..1  
TTCTATTGCAATACATCAAAATTGTTTAATAGCACTTGGGACAACAATAGCACTTGGGACAACAATAGCACTT  
GGGAAAACAAT-----  
-----AGCAATACC-----  
AACTCAAGTGGCACTATAACTTTCCAATGCAAAATAAAGCAAATTGTAAATATGTGGCAGAGAGTAGGACAAG  
CAATGTATGCCCTTCCCATCCAAGGAGTAATAAGGTGTGAGTCAAAT---  
ATTACAGGATTATTGTTAACAAGAGATGGAGGGAATAAGAATAAT-----  
-----  
-----  
AGTAATAATGAGACTTTCAGACCTGGAGGAGGAGATATGAGGGATAATTGGAGAAGTGTATTATATAAGTATA  
AAGTAGTAAAAATTGAACCACTG---GGTGTAGCACCCACCCATGCAAGAAGAAGAGTGGTG-----  
-----GGGAGAGAAAAAAGAGCA--GTCGGA---CTGGGAGCT-----  
---GTCCTCTTGGGATTCTTAGGAGCA---GCAGGAAGCACTATG---GGCGCGGCGTCA---  
CTAACGCTGACGGTACAG---GCCAGACAA---TTATTG---TCCGGTATAGTGCAACAGCAGAGC---  
AATTTG---CTAAGG---GCTATAGAGGCTCAACAACATCTGTTGAAACTCACGGTCTGGGGCATT  
>DQ168577..1  
TTCTATTGCAATACATCAAACTGTTTAATAGCACTGGGGATACCAATACCACTGCCAAC-----  
-----  
-----  
TCAACAGGA ACTATAGAGCTCCAATGCAGAATAAAGCAAATTGTAAATATGTGGCAGAAAGTAGGACAAGCAA  
TATATGCCCCCTCCCATCCAAGGAATAATAAGGTGTGATTCAAAC---

ATTACAGGACTACTATTAACAAGAGATGGAGGGATTGAGAATGCA-----  
-----  
-----  
GATAATGAGACCTTCAGGCCGGGAGGAGGAGATATGAGGGACAATTGGAGAAGCGAATTATATAAGTATAAAG  
TAGTAAAAATTGAACCACTA---GGTGTAGCACCCACAAAAGCAAAAAGAAGAGTGGTG-----  
-----GAGAGAGAAAAAAGAGCA--GTC-----GTTGGAGCT-----  
CTCTTCCTTGGGTTCTTAGGAGCA--GCAGGAAGCACTATG--GGCGCGGCGTCA---  
ATAACGCTGACGGTACAG---GCCAGACAA--TTATTG---TCCGGTATAGTGCAACAGCAGAGC---  
AATTTG---CTGAGA---GCTATAGAGGCTCAACAACATCTGTTGAAACTCACGGTCTGGGGCATT  
>DQ168578..1  
TTCTATTGTAATACATCAAACCTGTTTAATAGCACTTGGAATACCAGCTCAATCCACACAGAGCAAAATGCA-  
-----  
-----  
ACTAATGAAACTATAACTCTCCAATGCAAAATAAAGCAAATTGTAAATATGTGGCAGAGAGCAGGACAAGCAA  
TATATGCCCCCTCCCATCCAAGGAGAAATAAGGTGTGACTCAAAC---  
ATTACAGGAATATTATTAACAAGAGATGGAGGAAATAATAATAGT-----  
-----  
-----  
ACAAATGAGACCTTCAGGCCTGGAGGAGGAGATATGAGAGACAATTGGAGAAGTGAATTATATAAGTACAAAAG  
TAGTAAAACTTGAACCACTA---GGTATAGCACCCACCCATGCAAAAAGAAGAGTGGTG-----  
-----GAGAGAGAAAAAAGAGCA--GTA-----CTGGGAGCT-----  
GTCTTCATTGGGTTCTTAGGAGCA--GCAGGAAGCACTATG--GGCGCGGCGTCA---  
ATAACGCTGACGGTACAG---GCCAGACAA--TTATTG---TCCGGTATAGTGCAACAGCAAAGC---  
AATTTG---CTGCAG---GCTATAGAGGCTCAACAACATCTGTTGAGACTCACGGTCTGGGGCATT  
>JN248580..1  
TTCTACTGCAATACATCAGCACTGTTTAACAACAGCTTAACA-----  
-----  
-----  
AATGGAECTATAACTCTCCCATGCAGAATAAAGCAAATTGTAAATATGTGGCAGAGAGTAGGACTAGCAATGT  
ATGCCCCCTCCCATCCAAGGAAACATAACATGTAATTCAAAC---  
ATTACAGGACTACTATTAACAAGAGATGGAGGGAATAATAGGAATAATGAG-----  
-----  
-----  
AATAGTAGTGAACCTGAGACCTTCAGGCCGGGAGGAGGAGATATGAGGGATAATTGGAGAAGTGAATTATATA  
AGTATAAAGTAGTAAAAATCGAACCACTA--GGTGTAGCACCTACTAAAGCAAAAAGAAGAGTGGTG----  
-----GAGAGAGAAAAAAGAGCA--GCCGGA---  
CTGGGAGCT-----TTTTTCCTTGGGTTCTTAGGAGCA--GCAGGAAGCACTATG---  
GGCGCGGCGTCA--ATAACGCTGACGGTACAG--GCCAGACAA--TTATTG---  
TCTGGTATAGTGCAACAGCAGAGC--AATCTG--CTGAGA---  
GCTATAGAGGCTCAACAACATCTGTTGAAACTCACGGTCTGGGGCATT  
>KX389630..1  
TTCTATTGCAATACATCATCACTGTTTAACGGCACCTGGAGGGCCAATGGCACTGACAATAACACTTTCAAC-  
-----  
-----  
TTAAATGACACTATAATTATCCCATGCAGAATAAAACAAATTGTAAACATGTGGCAGAAAGTAGGACAAGCAA  
TGATATGCCCCCTCCCATCAAAGGAGTAATAAGTTGTATTTCAAAC---  
ATTACGGGATTACTATTAACAAGAGATGGAGGGGAGCGTAACGAT-----  
-----  
-----  
AGTACAAATGAGACCTTCAGGCCTGGCGGAGGAGATATGAGGGACAATTGGAGAAGTGAATTATATAAGTATA  
AAGTAGTAAAAATTGAACCATTA---GGTGTAGCACCCACCTCTGCAAAAAGAAGAGTGGTG-----  
-----GAGAGAGAAAAAAGAGCA--GCTGGA---CTAGGAGCT-----  
---TTCTTCCTTGGGTTCTTAGGAGCA--GCAGGAAGCACTATG--GGCGCGGCGTCA---  
ATGACGCTGACGGTACAA---GCCAGACAA--TTATTG---TCTGGTATAGTGCAACAGCAAAGT---  
AATTTG---CTGAAA---GCTATAGAGGCTCAACAACAGATGTTGAGACTCACAGTCTGGGGCATT  
>KX389629..1  
TTCTATTGCAACACATCAGGACTATTTAATAGCAGTTGGCCTAACAATAGCACTTGGAATAATATA-----  
-----  
-----  
ACAAATGACAATATAACTCTCCAATGCAGAATAAAGCAAATTGTCAATATGTGGCAGAGAGTAGGACAAGCAA

TGTATGCCCCCTCCCATCCAAGGAGTAATAAGGTGTGAATCAAAC ---  
 ATTACAGGACTACTATTAACAAGAGATGGAGGGTATGATAATAGTACC-----  
 -----  
 -----  
 AATAACACAGAAACATTTCAGGCCTGCAGGAGGAGATATGAGAGATAATTGGAGAAGTGAATTGTATAAGTATA  
 AAGTAGTAAAAATTGAACCGCTG --- GGTGTAGCACCCACCCATGCAAAAAGAAGAGTGGTG-----  
 -----GAGAGAGAAAAAAGAGCA --- GTAGGA --- CTGGGAGCT-----  
 ---GTCTTCCTTGGGTTCTTAGGAGCA --- GCAGGAAGCACTATG --- GGCGCGGCGTCA ---  
 ATAACGCTGACGGTACAG --- GCCAGACAA --- TTATTG --- TCTGGTATAGTGCAACAGCAAGGC ---  
 AATTTG --- CTGAAG --- GCCATAGAGGCTCAACAACAGCTGTTGAGACTCACGGTCTGGGGCATT  
 >JN248585..2  
 TTCTATTGCAATACATCAGGACTGTTTAATAGTAATTGGCATAGAAATACTACTAATGATACTTGGTATACTA  
 ACGAC-----  
 -----ACA---  
 GCAAAACAGCAGCACTATAACTATCCAATGCAGAATAAAACAAATTGTAAACATGTGGCAGAGAGTAGGACAAG  
 CAATATATGCTCCTCCCATTCAGGAAAAATAGAGTGTAATCAAAC ---  
 ATTACTGGACTATTATTAATAAGAGATGGGGGAATACGAATACTAGC-----  
 -----  
 -----  
 AGTACAAATGAGACTTTCAGACCTGTAGGAGGAGAGATGAGAGACAATTGGAGAAGTGAATTATATAAGTATA  
 AAGTAGTAAAAATTGAACCACTA --- GGTGTAGCACCCACCTATGCAAAAAGAAGAGTGGTG-----  
 -----GAGAGAGAAAAAAGAGCA --- GTTGGA --- ATGGGAGCT-----  
 ---TTCTTCTTTGGGTTCTTAGCAGCA --- GCAGGAAGCACCATG --- GGCGCGGCGTCA ---  
 ATAACGCTGACGGTACAG --- GCCAGACAA --- TTATTG --- ACTGGTATAGTGCAACAGCAGAGC ---  
 AATCTG --- CTGAAG --- GCTATAGAGGCTCAACAACAGCTGTTGAGACTCACAGTCTGGGGCATT  
 >JN248589..1  
 TTCTATTGCAATACATCAGACCTGTTTAATAGCAGTTGGGATAATAACAATAACACTGATAGCTCAAACCACA  
 CAGGG-----  
 -----  
 -----  
 TCAGGTAACGATACCATAACTCTCCAATGCAGAATAAAGCAAATTATAAATATGTGGCAGAGAGTAGGACAAG  
 CAATATATGCCCCCTCCCATCCAAGGAGTAATAAACTGTGAATCAAAC ---  
 ATTACAGGGCTAATATTAACAAGAGATGGAGAGAATAATACTAAG-----  
 -----  
 -----  
 GCAAAATGAAACCTTCAGGCCTGGAGGAGGAGATATGAGGGACAATTGGAGAAGTGAATTGTATAAGTACAAGG  
 TAGTAAAAATTGAACCACTA --- GGTGTAGCACCCACCCGTGCAAGAAGAAGAGTGGTG-----  
 -----GAGAGAGAAAAAAGAGCG --- GTTGGA --- CTGGGAGCT-----  
 GTCTTCCTTGGGTTCTTAGGAGCA --- GCAGGAAGCACTATG --- GGCGCGGCGTCA ---  
 CTGACGCTGACGGTACAG --- ACCAGACAA --- TTATTG --- TCTGGTATAGTGCAACAGCAGAGC ---  
 AATTTG --- CTGAGA --- GCTATAGAGGCTCAACAGCATCTGTTGAAACTCACGGTCTGGGGCATT  
 >JN248590..1  
 TTCTATTGCAACACATCAAACTGTTTAATAGCACTTGGTTGTCTAATAGCACTTGAACACTACTGGCAAC-  
 -----  
 -----  
 -----  
 CAAAATGAAAATATAAACTCCAATGTAGGATAAAGCAAATTATAAATATGTGGCAGAGAGTAGGACAAGCAA  
 TATATGCCCCCTCCTATCCAAGGAGAAATAAAATGTGACTCAAAC ---  
 ATTACTGGACTACTATTAACAAGAGACGGAGGGGAGAGTAACAGT-----  
 -----  
 -----  
 ACAGAGGAGACCTTCAGGCCTGGAGGAGGAGATATGAGGGACAATTGGAGAAGTGAATTATATAAGTATAAAG  
 TAGTAAAAATTGAACCACTA --- GGTATAGCACCCACCCATGCAAAAAGAAGAGTGGTG-----  
 -----GAGAGAGAAAAAAGAGCA --- GTTGGA --- CTGGGAGCT-----  
 GTCTTCCTTGGGTTCTTAGGAGCA --- GCAGGAAGCACTATG --- GGCGCGGCGTCA ---  
 ATAACGCTGACGGTACAA --- GCCAGACAA --- TTATTG --- TCCGGCATAGTGCAACAGCAAAGC ---  
 AATTTG --- CTGAAG --- GCTATAGAGGCTCAACAACATCTGTTGAAACTCACGGTCTGGGGCATT  
 >JN248592..1  
 TTCTATTGCAATACAACACCACTGTTTAAGAGCGTTTGGGAATAAAAATGGGAGCACTTGAACAGCAATACCA  
 CTAACAGT-----  
 -----ACA---  
 GAGTCAAATAACACTATAACCTCCAGTGCAAAATAAAGCAAATTATAAATCTGTGGCAGAGAGTAGGACAAG

CAATATATGCCCCCCCCATCCCAGGAGTAATAAGGTGTGAATCAAAT---  
ATTACAGGACTACTATTAACAAGAGATGGGGGAAATATTGATGAT-----  
-----  
-----  
GATGCAAATGAGACTTTCAGGCCGGGAGGAGGAGATATGAGGGACAATTGGAGAAGTGAATTATATAAGTATA  
AAGTAGTAAAAATTGAACCACTA---GGTGTAGCACCCACCCGTGCAAGAAGAAGAGTGGTG-----  
-----GGGAGAGAAAAAAGAGCA---GTTGGA---CTAGGAGCT-----  
---GTCTTCCTTGGGTTCTTAGGAGCA---GCAGGAAGCACTATG---GGCGCAGCGTCA---  
GTAACGCTGACGGTACAA---GCCAGACAA---TTATTG---TCTGGTATAGTGCAACAGCAAAGC---  
AATTTG---CTGAGG---GCGATAGAGGCTCAACAACAGTTGTTGAAACTCACGGTCTGGGGCATT  
>KX389617..2  
TTCTATTGCAATACAACAGGACTGTTTAATAGCACGTGGACTAGCAGTGGCCATGGCACTTATAACATCACTG  
ACAGCTCA-----  
-----AAA---  
AACCTCACAGAGGACATTACACTCCAATGCAGAATAAAGCAAATTATAAATCTGTGGCAGAAAGTAGGGCAAAG  
CAATATATGCCCCCTCCCATCCCAGGAGTAATAAGTTGCAACTCAAAC---  
ATTACTGGACTACTATTGACAAGAGATGGAGGGAATAATAATGAT-----  
-----  
-----  
TCAACAGAGACCTTCAGACCTGGAGGAGGAGACATGAGGGACAATTGGAGAAGTGAATTATATAAGTATAAAG  
TAGTAAAAAATTGAACCACTA---GGTATAGCACCTACCCATGCAAAAAGAAGAGTGGTG-----  
-----GAAAGAGAAAAAAGAGGA---TTTGGA---ATGGGAGCT-----  
GTCTTCCTTGGGTTCTTAGGAGCA---GCAGGAAGCACTATG---GGCGCAGCGTCA---  
ATAACGCTGACGGTACAG---GCCAGACAA---TTATTG---TCCGGTATAGTGCAACAGCAGAGC---  
AATCTG---CTGAAG---GCTATTGAGGCTCAACAGCATCTGTTGAAACTCACAGTCTGGGGCATT  
>KX389614..2  
TTCTATTGCAATACATCAAACTGTTTGATAGCACTTGGCCTACAAATAGCACT-----  
-----  
-----  
TCAAATGGCACTATAACTCTTCAATGCAGAATAAAGCAAATAATCAATATGTGGCAGAGAGTAGGACAGGCAA  
TGTATGCCCCCTCCCATCAAAGGAGCACTAAATTGTTCTTCAAAC---  
ATTACAGGACTACTATTAACAAGAGATGGAGGGATAAGGAATGATACA-----  
-----  
-----  
GATAAGAATGAGACTTTCAGGCCGGGAGGAGGAGATATGAGGGACAATTGGAGAAGTGAATTATATAAATATA  
AAGTAGTAAAAATTGAACCACTA---GGTGTAGCACCCACCCCTGCAAGAAGAAGAGTGGTG-----  
-----GAGAGAGGAAAAAGAGCA---GTCGGA---ATGGGAGCT-----  
---GTCTTCCTTGGGTTCTTGGGAGCA---GCAGGAAGCACTATG---GGCGCAGCGTCA---  
ATAACGCTGACGGTACAG---GCCAGACAA---TTATTG---TCTGGTATAGTGCAACAGCAGAGC---  
AATCTG---CTGAGA---GCTATAGAGGCTCAACAACATCTGTTGAAACTCACGGTCTGGGGCATT  
>KX389610..1  
TTCTATTGCAATACATCAAACTGTTTAATAGCAGTTGGAGTAACGACAGTAACACTGACAACAATGACAATA  
ACACTGAC-----  
-----  
AACTCTAGCATTATAACTCTCCAATGCAGAATAAGGCAAATTGTAAATATGTGGCAGAGAGTAGGACAAGCAA  
TGTATGCCCCCTCCCATCCCAGGAGTAATTAGTTGTAATTCAAGC---  
ATTACAGGACTATTATTAACAAGAGATGGGGGAAATAAGAGTGAA-----  
-----  
-----  
AACGAGACCTTCAGGCCTGGAGGAGGAAATATGAGGGACAATTGGAGAAGTGAATTATATAAGTATAAGGTAG  
TAAGAATTGAACCATTA---GGTGTAGCACCCACCCATGCAAAAAGAAGAGTGGTG-----  
-----GAGAGACAAAAAAGAGCA---GTTGGA---CTGGGAGCT-----  
GTCTCTTTTGGGTTCTTAGGAGCG---GCAGGAAGCACTATG---GGCGCGGCGTCA---  
ATAACGCTGACGGTACAG---GCCAGACAA---TTATTG---TCCGGTATAGTGCAACAGCAGAGT---  
AATCTG---CTGAAA---GCTATAGAGGCTCAACAACATCTGTTGAGACTCACGGTCTGGGGCATT  
>KX389643..1  
TTCTATTGCAACACATCGAACCTGTTTAATAGCAGTTGGGAGAACGGTACCAGATTAAACAACACAAAG----  
-----  
-----  
TCAAATGGCACTATAATTCTCCAATGTAGAATAAAGCAAATTGTAAATATGTGGCAGAAAGTGGGACAAGCAA

TGTATGCCCCCTCCTATCCCAGGAATAATAAGGTGTGAGTCAAAC ---  
 ATCACTGGACTATTATTAACAAGAGATGGAGGGGAAAATAGTTCA -----  
 -----  
 -----  
 ACTGAGACTTTCAGACCTGAAGGAGGAAATATGAAGGACAATTGGAGAAGTGAATTATATAAGTATAAAGTTG  
 TAAAAATTGAACCACTA --- GGTGTAGCACCCCTCCCGTGCAAAAAGAAGAGTGGTG -----  
 ----- GAGAGAGAAAAAAGAGCA --- GTTGGA --- ATAGGAGCT -----  
 GTCTTCCTTGGGTTCTTAGGAGCA --- GCAGGAAGCACTATG --- GGCGCGGCGTCA ---  
 ATAACGCTGACGGTACAG --- GCCAGACAA --- TTATTG --- TCTGGTATAGTGCAACAGCAGAAT ---  
 AATTTG --- CTGAAA --- GCTATAGAGGCTCAACAACAGATGTTGAGACTCACGGTCTGGGGCATT  
 >KX389644..3  
 TTCTATTGCAATACATCAGGACTGTTTAATAACACGTTTAATCATGAAACGTTTGATAGCAATATGACGACTG  
 ATAAC -----  
 -----  
 AGCACAGGAAATATAACTCTCCCATGTAGAATAAGACAAATTGTAAATATGTGGCAGAGAGTAGGACAAGCAA  
 TGTATGCCCCCTCCCATCAGCGGAGTAATAAGGTGTAATTCAAAT ---  
 ATTACTGGACTAATATTAACAAGAGATGGAGGGAATAACAGTACA -----  
 -----  
 -----  
 AATGAGACCTTTAGGCCTGGAGGAGGGGATATGAGGGACAATTGGAGAAGTGAATTATATAAATATAAGGTAG  
 TAAAAATTGAACCAATA --- GGTGTGGCACCCACCTATGCAAGAAGAAGAGTGGTG -----  
 ----- CAGAGAGAAAAAAGAACA --- GTTGGA --- CTGGGAGCT -----  
 GTCCTCTTTGGGTTCTTAGGAGCA --- GCAGGAAGCACTATG --- GGCGCGGCGTCA ---  
 ATAACGCTGACGGTACAG --- GCCAGACAA --- TTATTG --- TCTGGTATAGTGCAACAGCAGAGC ---  
 AATCTG --- CTGAGG --- GCTATAGAGGCTCAACAACATATGTTGAAACTCACAGTCTGGGGCATT  
 >KY953197..5  
 TTCTATTGCAACACAACACAACCTGTTTAATAGTACTTGGGGACTGATTAATAATACTATTTGGGGAAGCTACA  
 ATAGTAGCTAC --- AAT -----  
 ----- AGTAGCCAGATA -----  
 AAGGAAAATGATACCATAATTCTCCCATGCAGACTAAAGCAAATTGTAAGAATGTGGCAGAGAGTAGGACAAG  
 CAATGTATGCCCCCTCCTATCCAGGGAGTAATAAAGTGTTATTCAAAC ---  
 ATTACAGGATTACTGTTAACGAGCGATGGAGGGTTTAGGAATACA -----  
 -----  
 -----  
 AGTGAGATCGTCAGGCCTGGAGGAGGAGACATGAGGGACAATTGGAGAAGTGAATTATATAAATACAAAGTAG  
 TAAAAATTATGCCACTA --- GGTGTAGCACCCCTCCTATGCAAAAAGAAGAGTGGTG -----  
 ----- CAGAGAGAAAAAAGAGCA --- GTTGGA --- ATGGGAGCT -----  
 ATGTTCTGTTGGGTTCTTAGGAGCT --- GCAGGAAGCACTATG --- GGCGCGGCGTCA ---  
 ATAACGCTGACGGTACAG --- GTCAGGCAA --- TTATTG --- TCTGGCATAGTGCAACAGCAGAGA ---  
 AATTTG --- CTGAAT --- GCTATAGAGGCTCAACAACAGCTGTTGAGACTCACGGTCTGGGGCATT  
 >KY953198..2  
 TTCTATTGTGATACATCAAACCTGTTTAATAGCACTTGGGATAATATCACTAGGAACAATAGCACTTGGGACA  
 AGAGC -----  
 ----- AATACA -----  
 GAGTCAAATGACACTATAACACTCCAATGCAAAATAAAACAGATTGTAAATATGTGGCAGAGAGTAGGACAAG  
 CAATATATGCCCCCTCCCATCGCAGGAGAAATAAGGTGTGAATCAAAT ---  
 ATTACTGGATTATTATTAACAAGAGATGGAGGGGATATAAATGAG -----  
 -----  
 -----  
 ACTGAGATCTTCAGGCCTGGAGGGGGAGATATGAGGGACAATTGGAGAAGTGAATTATATAAGTATAAAGTAG  
 TAAAAATTGAACCCCTA --- GGTATAGCACCTACTCATGCAAAAAGAAGAGTGGTG -----  
 ----- GGGAGAGAAAAAAGAGCA --- GTTGGA --- CTGGGAGCT -----  
 GTCTTCTTTGGGTTCTTAGGAGCA --- GCAGGAAGCACTATG --- GGCGCGGCGTCA ---  
 ATAACGCTGACGGTACAG --- GCCAGACAA --- TTATTG --- TCTGGTATAGTGCAACAGCAGAGC ---  
 AATCTG --- CTGAAG --- GCTATAGAGGCTCAACAGCATCTGTTGAAACTCACGGTCTGGGGCATT  
 >KX389647..1  
 TTCTATTGCAATACATCAGGACTGTTTAATAGCGCTTGGAGGATTAATGGCACTGTTAACCATACAGAATCAA  
 ATACCAACCAT -----  
 -----  
 ACAAATAACACCATAATTCTCCCATGCAGAATAAAGCAAATTGTAAATATGTGGCAAAGGGTAGGACAAGCAA

TATATGCCCCCTCCCATCCGAGGAATCATAAGGTGTGTATCAAAC ---  
ATTACAGGACTATTATTAACAAGAGATGGAGGGAATGAGGCAAAT-----  
-----  
AATAGTGAGACCTTCAGACCTGGAGGAGGGGATATGAGGGACAATTGGAGAAGTGAATTATATAAGTATAAAG  
TAGTAAAAATTGAACCACTG---GGTGTAGCACCCACCCATGCAAAAAGAAGAGTGGTG-----  
-----GAGAGAGAAAAAAGAGCA--GTTGGA---ATGGGAGCT-----  
CTTCTCTTTGGGTTCTTAGGAGCA---GCAGGAAGCACTATG---GGCGCGGCGTCA---  
ATAACGCTGACGGTACAA---GCCAGACAA---TTATTG---TCCGGTATAGTGCAACAGCAGAGC---  
AATTTG---CTGAGA---GCTATAGAGGCTCAACAACATCTGTTGAAACTCACAGTCTGGGGCATT  
>KX389649..1  
TTCTATTGCAATACATCAGGACTGTTTAGTAGCGTTTGGAGAAGACGAT-----  
-----  
-----  
ACCAATGCAACGATAACTCTCCAATGCAGAATAAAGCAAATTATCAATATGTGGCAGAGAGTAGGACAAGCAA  
TGTATGCCCCCTCCCATCCAGGAGCAATAAGGTGTGACTCAAAC---  
ATTACAGGACTACTATTACTAAGAGATGGAGGAGATAATAATAGT-----  
-----  
-----  
ACAAATGAGACTTTTCAGGCCTGGAGGAGGAAATATGAAGGACAATTGGAGAAGTGAATTATATAAGTATAAAG  
TAGTAAAAGTTGAACCACTA---GGTATAGCACCTACCCGTGCAAAAAGAAGAGTGGTG-----  
-----ATGAGAGAAAAAAGAGCA--GTTGGA---CTGGGAGCT-----  
GCCTTCCTTGGGTTCTTAGGAGCA---GCAGGAAGCACTATG---GGCGCGGCGTCA---  
ATAACGCTGACGGCACAG---GCCAGACAA---TTACTG---TCCGGTATAGTGCAACAGCAGAGC---  
AATCTG---CTGCAA---GCTATAGAGGCTCAACAGCATCTGTTGAAACTCACTGTCTGGGGCATT  
>AF069933..1  
TTCTATTGCAGTACATCAAACTTTTTAATAGCACTTGAATAACAGTAACATTAGCAGCTCAAATAACACAG  
AT-----  
-----  
TCAAATGACACTATAACTATCCAATGCAGAATAAAGCAAATTATAAATATGTGGCAGAGAGTAGGACAGGCAA  
TGTATGCCCCCTCCCATCCGAGGAGAAATAAGGTGTGAATCAAAC---  
ATTACAGGACTACTATTAAACAGGAGATGGAGGGGAAAAATAATGGGACA-----  
-----  
-----  
AACGGGACAGAGACATTTCAGGCCTGGAGGAGGAGATATGAGGGACAATTGGAGAAGTGAATTATATAAATATA  
AGGTAGCACAAATTGAACCAATA---GGTGTGGCACCCACCCATGCAAAAAGAAGAGTGGTG-----  
-----GAGAGAGAAAAAAGAGCA--GTTGGA---CTGGGAGTT-----  
---GCCTTCCTTGGGTTCTTAGGAGCA--GCAGGAAGCACTATG---GGCGCAGCGTCA---  
ATAACGCTGACGGTACAG---GCCAGACAA---TTATTG---TCTGGTATAGTGCAACAGCAGAGC---  
AATTTG---CTGAAG---GCTATAGAGGCTCAACAACATCTGTTGAAACTCACGGTCTGGGGCATT  
>AF069941..2  
TTCTATTGCAATACATCAGGACTGTTTAATAGCACTTGAATAATAACAATTGGAATACCACTAGCAATAACA  
GCTCA-----  
-----  
AAGTCAAATGAAATTATAAACTCCAATGCAGAATAAAGCAAATTGTAAATATGTGGCAGAGAGTAGGACAAG  
CAATGTATGCCCCCTCCACCCCTAGGAGTAATAAGGTGTGAATCAAAC---  
ATTACAGGACTACTATTAAACAAGAGATGGAGGGAAGCATAATAGT-----  
-----  
-----  
ACAAATGAGACTTTTCAGGCCTGGAGGAGGAGATATGAGGGACAATTGGAGAAGTGAATTATATAAGTATAAAG  
TAGTAAAAATTGAAGCACTA---GGTGTAGCACCTACCTATGCAAAAAGAAGAGTGGTG-----  
-----GAGAGAGAAAAAAGAGCA--GTTGGA---CTGGGAGCT-----  
GTCTTCCTTGGGTTCTTAGGAGCA---GCAGGAAGCACTATG---GGCGCGGCGTCA---  
ATAACGCTGACGGTACAG---GCCAGACAA---TTATTG---TCCGGTATAGTGCAACAGCAGAGC---  
AATCTG---CTGAGG---GCTATAGAGGCTCAACAACATCTGTTGAAACTCACAGTCTGGGGCATT  
>L39106..1  
TTCTATTGCAATACATCAAACTGTTTAATAGCACTTGGGATAATAGCAATAGCACTGCCAACCACACAGGG-  
-----  
-----  
TCAAATGACACTATAACTCTCCAATGCAGAATAAAGCAAATTGTAAATATGTGGCAGAAAGTAGGACAAGCAA

TGTATGCCCCCTCCCATCCAAGGAATAATAAGATGTGATTCAAAC ---  
 ATTACAGGACTACTATTAACAAGAGATGGAGGGAATAATAGTACA -----  
 -----  
 -----  
 AATGAAACCTTCAGGCCTGGAGGAGGAGATATGAGGGACAATTGGAGAAGTGAATTATATAAGTATAAAGTAG  
 TAAAAATTGAACCACTA --- GGTGTAGCACCCACCCGTGCAAAAAGAAGAGTGGTG -----  
 ----- GAGAGAGAAAAAAGAGCG --- GTTGGA --- CTGGGAGCT -----  
 GTCTTCCTTGGGTTCTTAGGAGCA --- GCAGGAAGCACTATG --- GGCGCGCGGTCA ---  
 ATAACGCTGACGGTACAG --- GCCAGACAA --- TTATTG --- TCCGGCATAGTGCAACAGCAGAGC ---  
 AATTTG --- CTGAAA --- GCTATAGAGGCTCAACAACATCTGTTGAAACTCACGGTCTGGGGCATT  
 >KX232598..2  
 TTCTATTGTAATACAACAGGACTATTTAATAGCGCTTGGCAATTTAATAGCGCTTGGCAGGAGAATGACACTG  
 AA -----  
 -----  
 ACAGAGGGAAATATAACTCTTCCATGCAAAATAAAGCAAATTATAAATATGTGGCAGAGGGTAGGACAAGCAA  
 TTTATGCCCCCTCCCATCCAAGGAGTAGTAAAGTGTGAGTCAAAC ---  
 ATTACTGGACTACTATTGACAAGAGATGGGGGAATTAAGAATAGT -----  
 -----  
 -----  
 ACGAATGAAACTTTTCAGGCCTGGAGGAGGAGATATGAGGGACAATTGGAGAAGTGAATTATATAAGTATAAAG  
 TAGTAAAAATTGAACCATTA --- GGTGTAGCACCCACCCGTGCAAAAAGAAGAGTGGTG -----  
 ----- GAGAGAGAAAAAAGAGCA --- ATTGGTGGACTGGGAGCT -----  
 GCATTCTTGGGTTCTTAGGAGCA --- GCAGGAAGCACTATG --- GGCGCGGCGTCA ---  
 ATAACGCTGACGGTACAG --- GCCAGACAA --- TTATTG --- TCTGGTATAGTGCAACAGCAGAGG ---  
 AATTTG --- CTGAAG --- GCTATTGAGGCTCAACAACAGATGTTGAGACTCACGGTCTGGGGCATT  
 >KY658712..3  
 TTCTATTGTAATACAACAAAACCTATTTAATAGCACTTGAATGCAACAAATCCATCTAATAGCAGCTAT ---  
 -----  
 -----  
 GGCAACGAAACTATAACTCTTCCATGCAGAATAAAGCAAATTATAAATATGTGGCAGAGGGTAGGACAAGCAA  
 TTTATGCCCCCTCCCATCCAAGGAATAATAAAGTGTGAGTCAAAC ---  
 ATTACTGGACTACTATTGACAAGAGATGGGGGAACAATAAGCTCG -----  
 -----  
 -----  
 AAGAATGAAACTTTTCAGGCCTGGAGGAGGAGACATGAGGGATAATTGGAGAAGTGAATTATATAAGTATAAAG  
 TAGTAAAAATTGAACCATTA --- GGTATAGCACCCACCCCTGCAAGAAGGAGAGTGGTG -----  
 ----- GAGAGAGAAAAAAGAGCA --- ATTGGT --- GTGGGAGCT -----  
 GTATTCTTGGGTTCTTATCAGCA --- GCAGGAAGCACTATG --- GGCGCGGCGTCA ---  
 ATAACGCTGACGGTACAG --- GCCAGACAA --- TTATTG --- TCTGGTATAGTGCAACAGCAAAGT ---  
 AATTTG --- CTGAAG --- GCTATTGAGGCTCAACAACAGATGTTGAGACTCACGGTCTGGGGCATT  
 >KX232616..2  
 TTCTATTGTGATACAACACAACCTATTTAATAGCACTTGAATACAACACAACCTCAACAATGACAACGAGACAG  
 AG -----  
 -----  
 GACAATACAACCTTTACTCTTCCATGCAGAATAAAGCAAATTGTAAATATGTGGCAGAGGGTAGGACAAGCAA  
 TTTATGCCCCCTCCCATCCCAGGAATAATAGAGTGTGAATCAAAC ---  
 ATTACTGGACTACTGTTGACAAGAGATGGGGGAAATAGTGATAGC -----  
 -----  
 -----  
 TCGAATGAAACTTTTAGGCCTGGAGGAGGAGACATGAGAGACAATTGGAGAAGTGAATTATATAAATATAAAG  
 TAGTAAAAATTGAACCACTA --- GGAGTAGCACCCACCAGGGCAAAGAGAAGAGTGGTG -----  
 ----- GAGAGAGAAAAAAGAGCA --- GTTGGA --- CTAGGAGCT -----  
 TTGTTTATTGGGTTCTTAGGAGCA --- GCAGGAAGCACTATG --- GGCGCGGCGTCA ---  
 GTGACGCTGACGGTACAG --- GCCAGACAA --- TTATTG --- TCTGGTATAGTGCAACAGCAAAGC ---  
 AATTTG --- CTGAGG --- GCTATTGAGGCTCAACAACAGATGTTGAGACTCACGGTCTGGGGCATT  
 >KX232622..2  
 TTCTATTGTAATACAACAAAACCTATTTAATAGCACTTGAATAGCAATGGCACTTGAATAGCACTGGGAAGG  
 ACAATAGCACT -----  
 ----- GGA ---  
 ACAGGGAACGATACAATAACTCTTCCATGCAAAATAAAGCAAATTATAAATATGTGGCAGAGGGTAGGACAAG

CAATTTATGCCCCCTCCTATCCCAGGAGTAATACAGTGTGAGTCAAAC---  
ATTACTGGACTACTATTGACAAGAGATGGGGGAGTTAATAGTACT-----  
-----  
-----  
ACAAATGAAACTTTTCAGGCCTGGAGGAGGAGACATGAGGGACAATTGGAGAAGTGAATTATATAAGTATAAAG  
TAGTAAAAAATTGAACCACTA---GGTGTAGCACCCCAACCGTGCAAGAAGGAGAGTGGTG-----  
-----GAGAGAGAAAAAAGAGCA---ATTGGA---ATGGGAGCT-----  
TTTTTCCTTGGGTTCTTAGGAGCA---GCAGGAAGCACTATG---GGCGCGGCGTCA---  
ATAACGCTGACGGTACAC---GCCAGACAA---TTATTG---TCTGGTATAGTGCAACAGCAAAGT---  
AATTTG---CTGAAG---GCTATTGAGGCTCAACAACAGATGTTGAGACTCACGGTCTGGGGCATT  
>KP411845..2  
TTCTATTGTAATACTTCAGGCCTGTTTAAACAGCACTTGGGATGGCACAGCACAAAGCAACACAGAT-----  
-----  
-----  
GATGATGACACTATCCTTCTCCCGCGAAAAATAAATATAATTATAAATATGAGGAGAAGAGTAGGACTATCAA  
TATCTGCTCCTCCTAGACGAGGAACAAGGAGGTGTACTTCTATT---  
ATTACAGTACTACTATTAACAGGAGGTGGGAGTACTACTAATACT-----  
-----  
-----AATGATGACATCTTG---  
CCTGCAGGAGGAGAAAAAGATGAACTACTGTAGAAGAGAACAAATATATATATAAAGTAGTAATAATAGCAGCAT  
TA---GTAGCAGCACCCCCCCCCCTCCTCAAGAAGAGTAGTG-----  
-----CTGAGAAAAAAGAGCA---GCAGTA---GTAGTAGCA-----  
GTCGTCTTTGTCTCTTAAGAGCA---GCAGGAAGCAGTATG---  
ATCGCGTCGTCGATAATGATGATGACAGTAGAC---GCATACCAG---TGTTTG---  
TCTGGTATAGTGCAACAGCAGTAC---AATTTG---CTGTAT---  
GCTAATGAGGTTCAACAACATCTGTTGAACTCTCATTTTGGGGCATT  
>MF373200..1  
TTCTATTGCAATACATCAGCATTGTTTAAATAGCACTTGGGTAAATAACACTTGAATAACGAGATCAACGAG-  
-----  
-----  
ACCAACAAGACCATAACTCTCCAATGCAGGATAAAGCAAATTATAAATATGTGGCAGAGAGTAGGACAAGCAA  
TGTATGCCCCCTCCCATCCCAGGAGCAATAAAATGTGAATCAAAC---  
ATTACAGGACTACTACTGACAAGAGATGGAGGAAATAATAATACA-----  
-----  
-----  
ACTGAGACTTTTTAGGCCTGGAGGAGGAGACATGAGGGACAATTGGAGAAGTGAATTATATAAGTATAAAGTAG  
TAAAAATTGAACCACTA---GGTGTAGCACCCAGTCGTGCAAAAAGAAGAGTGGTG-----  
-----GAGAGAGAAAAAAGAGCAGTTGTTGGA---ATGGCAGCT-----  
GTTTTCCTTGGTTTCTTAGGAGCA---GCAGGAAGCACTATG---GGCGCGGCGTCA---  
ATAACGCTGACGGTACAG---GCCAGACAA---TTATTG---TCTGGTATAGTGCAACAGCAGAGC---  
AATCTG---CTGAAG---GCTATAGAGGCTCAACAACATATGTTGAGACTCACGGTCTGGGGCATT  
>AF107770..2  
TTCTATTGCAATACATCAAATCTGTTTAAATAGAACTTGAATCATAATGGCACTTGAATGCACCAGGACCGT  
TTAATGACACT-----  
GAGGATAAAACAATAAATGGC-----  
ACTGAGGATAAAACAATAACTCTCCAATGCAGAATAAAGCAAATTGTGCGTATGTGGCAGAAAGTAGGACAAG  
CAATGTATGCCCCCTCCCATCCCAGGAGAAATAAGGTGTGAATCAAAC---  
ATTACAGGACTACTATTAACAAGAGATGGAGGGAATGATAATAAT-----  
-----  
-----  
AATACAGAGACCTTCAGGCCTGGAGGAGGAGATATGAGGGACAATTGGAGAAGTGAATTATATAAATATAAAG  
TAGTAAAAAATTGAACCACTA---GGTGTAGCACCCCTCCCATGCAAAAAGAAGAGTGGTG-----  
-----GAGAGAGAAAAAAGAGCACTTGTGGA---CTGGGAGCT-----  
TTCTTCTTTGGGTTCTTAGGAGCA---GCAGGAAGCACTATG---GGCGCGGCGTCA---  
ATAACGCTGACGGTACAG---GCCAGACAA---TTATTG---TCTGGTATAGTGCAACAGCAGAGC---  
AATCTG---CTGAAG---GCTATAGAGGCTCAACAACATCTGTTGAGACTCACGGTCTGGGGCATT  
>HM215281..1  
TTCTATTGCAATACAACACCACTGTTTAAATAGCACTTGGTACAGCAATAAAGCTGCCAATAGCTCAAACAGCA  
CA-----  
-----

GAGTTAAATGGAAC TATAACTCTCCAATGCAGAATAAAGCAAATTGTA ACTTATGTGGCAAAGGGTAGGACAGG  
CAATGTATGCCCCCTCCCATCCCAGGAGAAATAAGGTGTGAATCAAAC ---  
ATTACTGGACTACTATTAACAAGAGATGGAGGGGGGAATAATACA -----  
-----  
AATACAAATGAGACCTTTAGGCCTGGAGGAGGAGATATGAGGGACAATTGGAGAAGTGAATTATATAAGTATA  
AAGTAGTAAAAATTGAACCACTA --- GGTGTAGCACCCACCCCTGCAAAAAGAAGAGTGGTG -----  
-----GAGAGAGAAAAAAGAGCA --- GTTGGA --- CTGGGAGCT -----  
---GTCTTCTTTGGGTTCTTAGGAGCA --- GCAGGAAGCACTATG --- GGCGCGGCGTCA ---  
TTAACGCTGACGGTACAG --- GCCAGACAA --- TTATTG --- TCCGGTATAGTGCAACAGCAAAGT ---  
AATTTG --- CTGAAG --- GCTATAGAGGCTCAACAACATCTGTTGAAACTCACAGTCTGGGGCATT  
>HM215292..1  
TTCTATTGCGATACATCAAAACTGTTTAATAGCACTTGGACC AAAAATAGCACTTGGAACTACTACAGAA ----  
-----  
-----  
TTAGGTGGCAATATAACGCTCCAGTGCAAAATAAAGCAAATTATAAATACGTGGCAAAAAGTAGGACTAGCAA  
TGTATGCCCCCTCCCATCCAAGGAATAATAAGGTGTGATTCAAAC ---  
ATTACAGGACTACTATTAACAAGAGATGGAGGGAATAATAATGCA -----  
-----  
-----  
AGTGAGACTGAGACCTTCAGGCCTGGAGGAGGAGATATGAGGGACAATTGGAGAAGTGAATTATATAAAATACA  
AAGTAGTAAAAATTAAACCACTA --- GGTGTGCGACCCACCCATGCAAAAAGAAGAGTGGTG -----  
-----GAGAGAGAAAAAAGAGCA --- GTTGGA --- CTGGGAGCT -----  
---GTTTTCTTTGGGTTCTTAGGAGCA --- GCAGGAAGCACTATG --- GGCGCGGCGTCA ---  
ATAACGCTGACGGTACAG --- GCCAGACAA --- TTATTG --- TCCGGTATAGTGCAACAGCAGAGC ---  
AATTTG --- CTGCAA --- GCTATAGAGGCTCAACAACATCTGTTGAAACTCACGGTCTGGGGCATT  
>KT223759..2  
TTCTATTGCAATACATCAAAGCTGTTTAATAGCACTTGGAA TGCCACTGACATCAATAGCAATGTCAGCACAG  
ACTCAGGG -----  
-----  
AAAAATGACACTATAACTCTCCCATGCAGAATAAAGCAAATTATAAGGATGTGGCAGAGCGTAGGGCAAGCAA  
TGTATGCCCCCTCCTATCCAAGGAATAATAAAGTGTGAATCAAAC ---  
ATTACAGGACTACTATTAACAAGAGATGGAGGGAAGGAAAACAAT -----  
-----  
-----  
AGTACAAATGAGACTTACAGGCCAGGAGGAGACATGAGGGACAATTGGAGAAGTGAATTATATAAGTATA  
AAGTAGTGAAAATTGAACCATTT --- GGTATAGCACCCACCCCTTGCAAGGAGAAGAGTGGTG -----  
-----GAGAGAGAAAAAAGAGCA --- GTTGGA --- CTGGGAGCT -----  
---GTCTTCTTTGGGTTCTTAGGAGCA --- GCAGGAAGCACTATG --- GGCGCGGCGTCA ---  
GTGACGCTGACGGTACAA --- GCCAGACAA --- TTGTTG --- TCTGGTATAGTGCAACAGCAGAGC ---  
AATCTG --- CTGAAG --- GCTATAGAGGCTCAACAACACTTGT TGAGACTCACAGTCTGGGGCATT  
>KT223760..2  
TTCTATTGCAACACATTAGGACTGTTTAATAGCACTTGGAACTGGGAATGGCACTTGGATAACAATAGCTCAA  
TT -----  
-----  
AGCTATGCTCGTGTA ACTCTCCAATGCAAAATAAAGCAAATTGTAAATATGTGGCAGAGAGTAGGACAAGCAA  
TGTATGCCCCCTCCCATCCCAGGGGA ACTAAGGTGTGATTCAAAT ---  
ATTACAGGACTATTATTAACAAGAGATGGGGGA -----  
-----  
-  
AAAATAATACTAATGAATGAGACCTTCAGGCCTGGAGGAGGAGATATGAGGGACAATTGGAGAAGTGAATTAT  
ATAAGTATAAAGTAGTAAAAATTGAACCACTA --- GGTGTAGCACCTACCCATGCAAAAAGAAGAGTGGTG ---  
-----CAGAGAGAAAAAAGAGCA --- GTTGGA ---  
ATGGGAGCT ----- CTCTTCTTTGGGTTCTTAGGAGCA --- GCAGGAAGCACTATG ---  
GGCGCGGCGTCA --- ATAACGCTGACGGTACAG --- GCCAGACAA --- TTATTG ---  
TCTGGTATAGTGCAACAGCAGAGT --- AATCTG --- CTGAAG ---  
GCTATAGAGGCTCAACAACAGCTGTTGAGACTCACAGTCTGGGGCATT  
>AJ251056..1  
TTCTATTGCAATACAGCAGAACTGTTTAATAGCACTTGGGCTAGCAATACTAATGGCATT TGGGCTAGCAATA  
TAAATGCTAGC -----

-----AATAACAAG-----  
GACGCAAATGACACTATAACTCTCAAATGCAAAATAAAACAAATTATAAATATGTGGCAGAAAGTAGGACAAG  
CAATATATATGCCCCCTCCCATCGAAGGAGTAATAAGGTGTGATTCAAAC---  
ATTACAGGAATACTATTAACAAGAGATGGAGGGGATAATACTAAT-----  
-----  
GGTGATGAGACTTTTCAGGCCTGGAGGAGGAGATATGAGGGACAACCTGGAGAAGTGAACCTATATAAGTATAAAG  
TAGTAAAAAATTGAACCACTA---GGTGTAGCACCCCTCCCATGCAAAAAGAAGAGTGGTG-----  
-----GAGAGAGAAAAAAGAGCA---GTTGGA---CTGGGAGCT-----  
GTCTTCCTTGGGTTCTTAGGAGCA---GCAGGAAGCACTATG---GGCGCAGCGTCA---  
ATAACGCTGACGGTACAG---GCCAGACAA---TTATTG---TCTGGTATAGTGCAACAGCAGAAC---  
AATCTG---CTGAAG---GCTATAGAGGCTCAACAACATTTGTTGAAACTCACGGTCTGGGGCATT  
>AJ251057..2  
TTCTATTGCAATACATCAGGACTGTTTAATGGCACTTGGAAATGGCACTAGCAGCTCAAACCACACATGG----  
-----  
-----  
GTAAATGACACTATAACTCTCCAATGCAGAATAAGGCAAATTGTAAATATGTGGCAGAGAGTAGGACGAGCAA  
TGTATGCCCCCTCCCATCCAGGGAGAAATAAAGTGTGTATCAAAC---  
ATTACTGGACTACTATTAACAAGAGATGGAGGGGATAATAATAGT-----  
-----  
-----  
ACAAATGAGACTTTTCAGGCCTGGAGGAGGAGATATGAGGGACAATTGGAGAAGTGAATTATATAAATATAAAG  
TAGTAAAAAATTGAACCACTG---GGTGTAGCACCCCTACCGTGCAAAAAGGAGAGTGGTG-----  
-----GAGAGAGAAAAAAGAGCA---GTTGGA---ATAGGAGCT-----  
GTCTTCCTTGGGTTCTTAGGAGCA---GCAGGAAGCACTATG---GGCGCGGCGTCA---  
ATGACGCTGACGGTACAG---GCCAGACAA---TTATTG---TCTGGTATAGTGCAACAGCAGAGC---  
AATCTG---CTGAGG---GCTATAGAGGCTCAACAACATCTGTTGAAACTCACAGTCTGGGGCATT  
>HM215264..2  
TTCTATTGCAATACATCAGAACTGTTTAATAGCACTTGGACTAGCAATAACACTTGGGGTAGCAGTAGCTTA-  
-----  
-----  
AATCACACAAATATAACTCTCCAATGCAGAATAAAGCAAATTATAAGAATGTGGCAGAGAGTAGGACAAGCAA  
TGTATGCCCCCTCCTATCAAAGGGGAAATAAGGTGTGAATCAAAC---  
ATTACTGGACTACTATTAATAAGAGATGGA---ATTGTTAATAGT-----  
-----  
-----  
ACAAATGAGACCTTCAGGCCTGGAGGAGGAGATATGAGGGACAATTGGAGAAGTGAATTATATAAATATAAAG  
TAGTAAAAAATTGAACCACTA---GGGGTAGCACCTAACCGTGCAAAAAGAAGAGTGGTG-----  
-----GAGAGAGAAAAAAGAGCA---GTTGGA---CTGGGAGCT-----  
TTCTTTCTTGGGTTCTTAGGAGCA---GCAGGAAGCACTATG---GGCGCGGCGTCA---  
ATGACGCTGACGGTACAG---GCCAGACAA---TTATTG---TCCGGTATAGTGCAACAGCAGAGC---  
AATTTG---CTGAAG---GCTATAGAGGCTCAACAACATCTGTTGAGACTCACGGTCTGGGGCATT  
>HM215290..1  
TTCTATTGTAATACATCAGCACTGTTTAATAGCACTTGGAAATGGCACTGACAGTGCAAACAAGACAAAG----  
-----  
-----  
TCAAATGAAACTATAACTCTCCAATGCAAAATAAAGCAAATTATAAATATGTGGCAGAGAGTAGGACAAGCAA  
TGTATGCCCCCTCCCATCCAAGGAGAAATAAAGTGTACATCAAAC---  
ATTACAGGACTACTACTAACAAGAGATGGAGGGAATACTAGTGGT-----  
-----  
-----  
GCAAATGAGACTTTTCAGGCCTGGAGGAGGAGACATGAGGGACAATTGGAGAAGTGAGTTATATAAATATAAAG  
TAGTAAAAAATTGAGCCACTA---GGTGTAGCACCCACCCCTGCAAAAAGAAGAGTGGTG-----  
-----GGGAGAGAAAAAAGAGCA---GTTGGA---CTGGGAGCT-----  
GTCTTCCTTGGGTTCTTAGGAGCA---GCAGGAAGCACTATG---GGCGCGGCGTCA---  
ATAACGCTGACGGTACAG---GCCAGACAA---TTATTG---TCTGGCATAGTGCGACAGCAGAGC---  
AATCTG---CTGAGG---GCTATAGAGGCTCAACAACATCTGTTGAAACTCACGGTCTGGGGCATT  
>HM215291..1  
TTCTATTGCAATACATCAAACTATTTAATAGCACTTGGAAATAGCACTGAAAATAACAATACCAGTGAC----  
-----

-----  
ACAAATGGTATTATAACTCTCCAATGCAGAATAAAGCAAATTGTAAATATATGGCAGAGAGTAGGACAAGCAA  
TGTATGCCCCCTCCTATCCAAGGAGTAATAAGGTGTGAATCAAAC---  
ATTACAGGACTACTATTAACAAGAGATGGAGGGGATAATGATAGT-----  
-----  
-----  
ACAAATGAGACCTTCAGGCCTGGAGGAGGAGATATGAGGGACAATTGGAGAAGTGAATTATATAAGTATAAGG  
TAGTACAAGTTGAACCACTA---GGTGTGGCACCCACCCATGCAAGAAGAAGAGTGGTG-----  
-----GAGAGAGGAAAAAGAGCA---GTTGGA---GTGGGAGCT-----  
GTTTTCCTTGGGTTCTTAGGAGCA---GCAGGAAGCACTATG---GGCGCGGCGTCA---  
ATAACGCTGACGGTACAG---GCCAGACAA---TTATTG---TCTGGTATAGTGCAACAGCAGAGC---  
AATTTG---CTGAAG---GCTATAGAGGCTCAACAACATCTGTTGAAACTCACGGTCTGGGGCATT  
>HM215293..1  
TTCTATTGCAATACATCAAAGCTGTTTAATAGCACTTGGGGTAACAATACCACTAACAGCTCATCAGAATCAA  
AT-----  
-----  
AACAAATGACACTCTAATTCTCCAATGCAGAATAAGACAAATTGTAAAGGATGTGGCAGAGAGTAGGACAAGCAA  
TGTATGCCCCCTCCCATCAGAGGAGAAATAAGGTGTGAGTCAAAC---  
ATTACAGGGCTACTATTAACAAGAGATGGAGGGATTAATAATACA-----  
-----  
-----  
AATAATGAGACCTTCAGGCCTGGAGGAGGAGATATGAGGGACAATTGGAGAAGTGAATTATATAAGTATAAAG  
TAGTAAAAATTGAACCACTA---GGTGTAGCACCTACCCATGCAAAAAGAAGAGTGGTG-----  
-----GAGAGAGAAAAAGAGCA---GTTGGA---CTGGGAGCT-----  
TTCTTCCTTGGGTTCTTAGGAGCA---GCAGGAAGCACTATG---GGCGCGGCGTCA---  
ATAACGCTGACGGTACAA---GCCAGACAA---TTACTG---TCTGGTATAGTGCAACAGCAGAGC---  
AATCTG---CTGAGA---GCAATTGAGGCTCAACAACATCTGTTGAGACTCACGGTCTGGGGCATT  
>JX447154..3  
TTCTATTGCAATACATCAGGACTGTTTAATAGCACTTGAATCACAGGAGCACTTGAATAGCACTGATCACA  
ATATCTCT-----  
-----GAC---  
AGCTCAAACCCCAATATAACTCTCCAATGCAGAATAAAGCAAGTTATAAATATGTGGCAGAGAGTAGGACAAG  
CAATGTATGCCCCCTCCCATCCCAGGAGTAATAAGGTGTGAATCAAAC---  
ATTACTGGACTGTTATTAACAAGAGATGGAGGAAATGAGAGTAGT-----  
-----  
-----  
ACAAATGAGACTTTTCAGACCTGGAGGAGGAGACATGAGGGACAATTGGAGAAGTGAATTATATAAGTATAAAG  
TAGTAAAAATTGAACCACTG---GGTGTAGCACCTCCCGTGCAAAAAGAAGAGTGGTG-----  
-----GAGAGAGAAAAAGAGCA---GTTGGA---CTGGGAGCT-----  
GTCTTCCTTGGGTTCTTAGGAGCA---GCAGGAAGCACTATG---GGCGCGGCGTCA---  
GTGACGCTGACGGTACAG---GCCAGACAG---TTATTG---TCTGGTATAGTGCAACAGCAGAGC---  
AATTTG---CTGAGG---GCTATAGAGGCTCAACAACATTTGTTGAAACTCACGGTCTGGGGCATT  
>KF716488..1  
TTCTATTGCAACACCTCAGGACTGTTTAATAGCAGCTTCAATAGTAGCAGCATCAATGACACAGACACAGAG-  
-----  
-----  
TTAACTGGCAATATAACTCTTCCATGCAGAATAAAACAGATTGTAAATATGTGGCAGAAGGTAGGAAAAGCAA  
TGTATGCCCCCCTATTGAAGGAATAATAAGGTGTGAGTCAAAC---  
ATTACAGGACTGATATTAACAAGAGATGGAGGGGGCAATACAACA-----  
-----  
-----  
GAGGAGACGGAGACCTTCAGGCCTGGAGGAGGAGATATGAGGGACAATTGGAGAAATGAATTATATAAATATA  
AGGTAGTGAGAATTGACCCAATA---GGTGTAGCACCCACTAAGGCAAAAAGAAGAGTGGTG-----  
-----GAGAGAGGAAAAAGAGCA---GTTGGA---CTGGGAGTT-----  
---GCCTTCCTTGGGTTCTTAGGAGCA---GCAGGAAGCACTATG---GGCGCGGCGTCA---  
ATAACGCTGACGGTACAG---GCCAGACAA---TTATTG---TCTGGTATAGTGCAACAGCAGAGC---  
AATCTG---TTGAGA---GCTATAGAGGCTCAACAACATCTGTTGAAACTCACAGTCTGGGGCATT  
>AY444811..3  
TTCTATTGCAATACATCGGGACTGTTTAATAGTACTTTTAATAACACTCAGGCCAACTCAAGTTACACCTCAG  
GG-----

-----  
ACAAATGATACTATACTTCTCCAATGCAGAATAAGGCCAAATTATAAGAATGTGGCAGAGAGTAGGACAAGCAA  
TGTATGCCCCCTCCCATCCAAGGAGAAATAAGGTGTGAATCAAAC---  
ATTACTGGACTACTATTAACAAGAGATGGAGGGGATACTAGTGAT-----  
-----  
-----  
AATAGTACCGAGACCTTCAGGCCTGGAGGAGGAGATATGAGGGACAATTGGAGAAGTGAATTATATAAGTATA  
AAGTAGTAAAAATTGAACCAATA---GGTATAGCACCCACCAAGGCCAAAAGAAGAGTGGTG-----  
-----CAGAGAGAAAAAAGAGCA---GTTGGA---ATAGGAGCT-----  
---GTCCTCTTTGGGTTCTTGGGAGCA---GCAGGAAGCACTATG---GGCGCAGCGTCA---  
ATAACGCTGACGGTACAG---GCCAGACAA---TTATTG---TCCGGTATAGTGCAACAGCAAAGC---  
AATTTG---CTGAAG---GCCATAGAGGCTCAACAACATCTGTTGAGACTCACAGTCTGGGGCATT  
>DQ869018..1  
TTCTACTGCAATACAACAGCACTGTTTAATAGCACTTGGGATAGCAATACCACTGCCAGCGAAGAGTCAAATA  
GC-----  
-----  
ACCATAGATGACATTATAACTCTCCAATGCAGAATAAAGCAAAGTTGTAAACATGTGGCAGAAAGTAGGACAAG  
CAATGTATGCCCCCTCCCATTCAGGAGAAATAAGGTGTGAATCAAAC---  
ATTACAGGACTACTATTAACAAGAGATGGAGGGGATAATAATAAC-----  
-----  
-----  
AGTGAGACCTTCAGACCTGGAGGAGGAGATATGAGGGACAATTGGAGAAGTGAATTATATAAATATAAAGTAG  
TAAAAATTGAACCGCTA---GGAGTAGCACCCCTCCAGGGCAAAAAGAAGAGTGGTG-----  
-----GAGAGAGAAAAAAGAGCA---GTTGGA---CTGGGAGCT-----  
GTCTTCCTTGGGTTCTTAGGAACA---GCAGGAAGCACTATG---GGCGCGGCGTCA---  
ATAACGCTGACGGTACAG---GCCAGACAA---TTATTG---TCCGGTATAGTGCAACAGCAGAGC---  
AATCTG---CTGAAG---GCCATAGAGGCTCAACAGCAACTGTTGAGACTCACGGTCTGGGGCATT  
>JF320297..1  
TTCTATTGCAATACATCAGAACTATTTAATAGCAGTTGGAATAATGACACTGCCAGCTCAAATAACACAGGG-  
-----  
-----  
TCAAATGACACTATAACTCTCCAATGCAGAATAAAGCAAATTGTAAATATGTGGCAGAAGGTAGGACAAGCAA  
TGTATGCCCCCCCCCATCAAAGGAGTAATAAGGTGTGAATCAAAC---  
ATTACAGGACTAATATTAACAAGAGATGGAGGGGATAATAATAATAAT-----  
-----  
-----  
AGTGTAATGAGACCTTCAGGCCTGGAGGAGGAGATATGAGGGACAATTGGAGAAGTGAATTATATAAGTATA  
AAGTAGTAAAAATTGAACCACTA---GGTATAGCGCCACCCATGCAAGAAGAAGAGTGGTG-----  
-----CAGAGAGAAAAAAGAGCA---GTTGGA---CTAGGAGCT-----  
---CTCTTCCTTGGGTTCTTAGGAGCA---GCAGGAAGCACTATG---GGCGCGGCGTCA---  
ATAACGCTGACGGTACAG---GCCAGACAA---TTATTG---TCCGGTATAGTGCAACAGCAGAGC---  
AATCTG---CTGAAA---GCTATAGAGGCTCAACAACATCTGTTGAAACTCACGGTCTGGGGCATT  
>AY736840..1  
TTCTATTGCAATACATCAATACTGTTTAATAGCACTTGGGACAATAGCACTGTCAACACAAATAATATCACAG  
AG-----  
-----  
CCAAATGATACTATAACCCTCCAATGCAGAATAAAGCAAATTATAAATATGTGGCAGAAAGTAGGGCAAGCAA  
TGTATGCCCCCTCCCATCAAAGGAATCATAAGGTGTGATTCAAAC---  
ATTACTGGATTACTATTAACAAGAGATGGAGGGAATAATAATAGT-----  
-----  
-----  
ACAAATGAGACCTTCAGACCTGGAGGAGGAGATATGAGGGACAATTGGAGAAGTGAATTATATAAGTATAAAG  
TAGTAAAAATTGATCCAATA---GGGGTGGCTCCCACCCATGCAAAAAGAAGAGTGGTG-----  
-----GAGAAAGAAAAAAGAGCA---GTTGGA---CTGGGAGCT-----  
GTCTTCATTGGGTTCTTAGGAGCT---GCAGGAAGCACTATG---GGCGCGGCGTCA---  
ATAACGCTGACGGTACAA---GCCAGACAA---TTATTG---TCTGGTATAGTGCAACAGCAAAGC---  
AATTTG---CTGAAG---GCTATAGAGGCTCAACAACATCTGTTGAGACTCACAGTCTGGGGCATT  
>KU168266..2  
TTCTATTGCAATACATCAGGCCTGTTTAATAGTACTTGGAAATGTGACCACCAGCCTCAACCAGAGTGAA----

-----  
GCGGACGTAAATATAACTCTCCCATGCAAAATAAAACAAATTGTACGTATGTGGCAGGGAGTAGGACAAGCAA  
TGTATGCCCCCTCCCATTCAGGAGTAATTAAGTGTACATCAAAC---  
ATCACAGGGCTACTGCTAACAGAGACGGGGGGAGGGATAATGGT-----  
-----  
-----  
GCAAAATGAGACGTTTCAGACCCGGAGGAGGAAATATAAAGGACAATTGGAGAAGTGAATTATATAAATATAAGG  
TAGTAAAAAATTGAACCACTA---GGTGTAGCACCCACCCGTGCAAAAAGAAGAGTGGTG-----  
-----GAGAGAGAAAAAAGAGCA---GTTGGA---CTGGGAGCT-----  
GTCCTCTTTGGGTTCTTAGGAGCA---GCAGGAAGCACTATG---GGCGCGGCGTCA---  
ATAACGCTGACGGTACAG---GCCAGACAA---TTATTG---TCTGGTATAGTGCAACAGCAGAAC---  
AATCTG---CTGAGG---GCTATAGAGGCTCAACAGCAAATGTTGAACTTACGGTCTGGGGCATT  
>KU168267..1  
TTCTATTGCAATACATCAGATCTGTTTCGATAGCACTTGGACTTCAAACCACACCTCAAACCACACAGGGTCAG  
ATGAGACC-----  
-----ATA---  
ACGTCAAATGACACTATAATTCTCCAATGTAGAATAAAGCAAATTGTAAGGATGTGGCAGACAGTAGGACAAG  
CAATGTATGCCCCCTCCCATCCCAGGAGAAATAAGGTGTGAATCAAAC---  
ATTACTGGACTACTATTAACAAGAGATGGAGGGCAAACAGAAAAT-----  
-----  
-----  
AATAATGAGACCTTCAGGCCTGGAGGAGGAAATATGAAGGACAATTGGAGAAGTGAATTATATAAGTATAAAG  
TAGTAAAAAATTGAACCACTA---GGTGTAGCACCCACCCCTGCAAGAAGAAGAGTGGTG-----  
-----CAGAGAGAAAAAAGAGCA---GTTGGACTACTGGGAGCT-----  
GTCTTCCTTGGGTTCTTAGGAGCA---GCAGGAAGCACTATG---GGCGCGGCGTCA---  
ATAACGCTGACGGTACAG---GCCAGACAA---TTACTG---TCTGGTATAGTGCAACAGCAAAGC---  
AATTTG---CTGAAA---GCTATAGAGGCTCAACAACATCTGTTGAGACTCACGGTCTGGGGCATT  
>MF510462..1  
TTCTATTGCAATACATCAGACCTGTTTAATAGCACTTGGGATAACAATACCAACAGTTCAAACCTTCACA----  
-----  
-----  
GGTAATGACACTATAACTCTCCAATGCAGAATAAAGCAATTTGTAAATATGTGGCAGAGGGTAGGACAAGCAA  
TGTATGCCCCCTCCCATCGAAGGAAGAATAAGATGTGAATCAAAT---  
ATTACTGGACTACTATTAACAAGAGATGGAGGAGAAGGTAATAAT-----  
-----  
-----  
AGGACAAATGAAACCTTCAGGCCTGGAGGAGGAGATATGAGGGACAATTGGAGAAGTGAATTATATAAGTATA  
AAGTAGTAAAAAATTGAACCACTA---GGTGTAGCACCCACCCATGCAAAAAGAAGAGTGGTG-----  
-----CAGAGAGAAAAAAGAGCA---GTGGGA---CTGGGAGCT-----  
---GTCTTCCTTGGGTTCTTAGGAGCG---GCAGGAAGCACTATG---GGCGCGGCGTCA---  
ATAACGCTGACGGTACAG---GCCAGACAA---TTATTG---TCTGGTATAGTGCAACAGCAGAGC---  
AATTTG---CTGAAG---GCTATAGAGGCTCAACAACATCTGTTGAACTCACAGTCTGGGGCATT  
>AF082485..1  
TTCTACTGTAATACAACAAAACCTGTTTGATAGCACTTGAATGGTACTGAAGAGTTAGATAAACT-----  
-----  
-----  
GAAGGAGATATAGTCACACTCCCATGCAGAATAAAACAAATTATAAACATGTGGCAGGAAGTAGGAAAAGCAA  
TGTATGCCCCCTCCCATCGCGGGACAAATTAGATGTTCTCAAAT---  
ATTACAGGACTGCTATTAACAAGAGATGGTGGTTACCAGAGCAAT-----  
-----  
-----  
GTCACCGAGATCTTCAGACCTGGAGGAGGAGATATGAGGGACAATTGGAGAAGTGAATTATATAAATATAAAG  
TAGTAAAAAATTGAACCATTA---GGAGTAGCGCCCACCAGGGCAAAGAGAAGAGTGGTG-----  
-----CAGAGAGAGAAAAAGAGCA---GTGGGA---ATAGGAGCT-----  
GTGTTCTTGGGTTCTTGGGAGCA---GCAGGAAGCACTATG---GGCGCGGCGTCA---  
ATAACGCTGACGGTACAG---GCCAGACAA---TTATTG---TCTGGTATAGTGCAACAGCAGAAT---  
AATCTG---CTGAGG---GCTATTGAGGCGCAACAACATCTGTTGCAACTCACAGTCTGGGGCATC  
>FJ388917..2  
TTCTATTGCAATACAACAAAACCTGTTTAATAGTACACTGAAAAATGGTACATTTCATTCGGGGTACAAAT----  
-----

-----  
TCTAATTCAAACATCACACTCCAATGCAGACTAAAACAATTTGTAAGGATGTGGCAGGAAGTGGGACAAGCAA  
TGTAAGTCCCTCCCAATGGAAGGGAAAATTTACTGCAGCTCAAAT---  
ATTACAGGACTAATATTAACAAGAGATGGTGGTAATAATGGTGATGAC-----  
-----  
-----  
AATGGTACTGAGACCTTCAGACCTGGAGGAGGAGACATGAGGGACAATTGGAGAAGTGAACCTATATAAATATA  
AAGTAGTAAGGATTGAACCAATA---GGAGTAGCACCCACTGAAGCAAGGAGACGGGTGGTG-----  
-----CAGAGAGAAAAACGAGCA---GTGGGA---ATAGGAGCC-----  
---GTGTTCCCTTGGGTTCTCGGGAGCA---GCAGGAAGCACTATG---GGCGCAGCGTCA---  
TTGACGCTGACGGTACAG---GCCAGACAA---TTATTG---TCTGGTATAGTGACAGCAGCAGAGC---  
AATCTG---CTGAGG---GCTATAGAGGCTCAACAACATCTGTTGAGACTCACAGTCTGGGGCATT  
>JN687742..1  
TTCTATTGTAGCACAAACAGCACTGTTTAATAGTACCTGGACGTATAATGGTACCTGGACTACCAATGGCAGCA  
CTGAG-----  
-----  
ACAGATGACACAATCATTACACTGCAATGCAGAATAAGACAAATTGTAAACCTGTGGCAGGCAGTGGGACAAG  
CAATGTACGCCCCCCCCATTGCAGGAAACATTACCTGCAGCTCAAAT---  
ATTACAGGAATGATATTGACAAGAGATGGTACTAATAGTACTAAT-----  
-----  
-----  
AATGATACCTTCAGACCTGGAGGAGGAGACATGAGGGACAATTGGAGAAGTGAACCTATATAAATATAAAGTAG  
TAAAGATTGAACCAATA---GGAGTAGCACCCACTAGGGCAAGGAGACGAGTGGTG-----  
-----CAGAGAGAAAAACGAGCA---GTAGGA---CTGGGAGCT-----  
GTGTTCCCTTGGGTTCTTGGGAGCA---GCAGGAAGCACTATG---GGCGCAGCGTCA---  
ATAACGCTGACGGTACAG---GCCAGACAA---TTATTG---TCTGGCATAGTGCAACAGCAGAGC---  
AATCTG---CTAAGG---GCTATAGAGGCTCAACAACATCTGTTGAAACTCACAGTCTGGGGCATT  
>JX140648..1  
TTCTATTGCAACACAACAGAACTGTTTAATAGTACCTGGACACTGAATAATAGTACCAATAGCAGCATTGAGA  
CA-----  
-----  
-----  
AATGGCACAACTATTATACTGCCATGCAGAATAAGACAAATTTATAAACATGTGGCAGGAAGTGGGACAAGCAA  
TGTAAGTCCCCCCCCATTGAAGGAAGCATTAAATGCAGCTCAAAT---  
ATTACAGGAATGATACTGACAAGAGATGGTGGTAATAGTACTACT-----  
-----  
-----  
AATGAGACCTTCAGACCTGGAGGAGGAAACATGAGGGACAATTGGAGAAGTGAACCTATATAAATATAAAGTAG  
TAAAGATTGAACCAGTA---GGAGTAGCACCCACTAAGGCAAGGAGACGAGTGGTG-----  
-----CAGAGAGAAAAACGAGCA---GTAGGA---CTGGGAGTG-----  
ATGTTCCCTTGGGTTCTTGGGAGCA---GCAGGAAGCACTATG---GGCGCAGCGTCA---  
ATGACGCTGACGGTACAG---GCCAGACAA---TTATTG---TCTGGCATAGTGCAACAGCAGAGC---  
AATTTG---CTAAGG---GCTATAGAGGCTCAACAACATCTGTTGAAACTCACAGTCTGGGGCATT  
>JN687748..1  
TTCTATTGCAACACATCACAGCTGTTTTTAGGTAATGGTACAAATAGTACAAACACAAATAAT-----  
-----  
-----  
ACAAATTCAACTATTGAACTCAAATGCAGAATAAGACAAATTGTAAACATGTGGCAGGGAGTGGGACAAGCAA  
TGTAAGTCCCCACCCATTGCAGGGAGCATTAGCTGCAGCTCAAAT---  
ATTACAGGATTAATATTGACAAGAGATGGTGGTAATGATACTGGG-----  
-----  
-----  
ACGAATGAGACCTTCAGACCTGGAGGAGGAGACATGAGGGACAATTGGAGAAGTGAACCTATATAAATATAAAA  
TAGTAAAGATTGAACCAGTA---GGAGTAGCACCCACTAGGGCCAGGAGACGAGTGGTG-----  
-----CAGAGAGAAAAACGAGCA---GTGGGA---ATAGGAGCT-----  
GTGCTCCTTGGGTTCTTGGGAGCA---GCAGGAAGCACTATG---GGCGCAGCGTCA---  
ATAACGCTGACGGTACAG---GCCAGACAA---TTATTG---TCTGGCATAGTGCAACAGCAAGGC---  
AATTTG---CTGAGG---GCTATAGAAGCTCAACAACATCTGTTGAGGCTTACGGTCTGGGGCATT  
>AF119820..1  
TTCTACTGCAATACATCAGGACTGTTTAATAGTACATACATGTTTAATAGTACAAATAGGACAAACACAACCA  
AT-----

-----  
GGAACAAACTCAACCATCACGCTCCCATGCAGAATAAAACAAATTGTAAGAATGTGGCAGGGAGTAGGACAAG  
CAATGTACGCCCCCTCCCATTTGCAGGGAGCATTAACTGCAGCTCAGAT---  
ATTACAGGAATAATATTGACAAGAGATGGTGGTATAAGTAATAATAATGAG-----  
-----  
-----  
ACTAATGATAATGAGACCCTCAGACCTGGAGGAGGAGACATGAGGGACAATTGGAGAAGTGTACTATATAAAT  
ATAAAGTAGTAAAGATTGAACCAAGTG---GGAATAGCACCCACGGGGGCAAGGAGACGAGTGGTG-----  
-----CAGAAAGAAAAACGAGCA---GTGGGA---CTAGGAGCT---  
-----TTGTTCTTGGGTTCTTGGGAGCA---GCAGGAAGCACTATG---GGCGCAGCGTCA---  
CTAACGCTGACGGTACAG---GCCAGACAA---TTATTG---TCTGGTATAGTGCAACAGCAGAGC---  
AATCTG---CTGAGG---GCTATAGAGGCTCAGCAACATCTGCTGAAACTCACGGTCTGGGGCATT  
>KU168269..1  
TTCTATTGTAATACATCCAATCTGTTTAATAGTAATATAACAGAGAATGATACAACAAAT-----  
-----  
-----  
AGTAATGACAATATCACACTCCCATGTAGGATAAAACAAATTGTAAGAATGTGGCAGAGAGTGGGACAAGCAA  
TGTATGCCCCCTCCCATTTGCAGGAAACATTACATGTAGATCAAAC---  
ATTACAGGAATACTATTAACAAGAGATGGTAATGGTGGGAATGATACC-----  
-----  
-----  
AATAGCAATGAGACTTTCAGACCTGGAGGAGGAGATATGAGGGACAATTGGAGAAGTGAATTATACAACCTATA  
AAGTAGTAAAAATTAAACCACTA---GGAGTAGCACCCACCCATGCAAGAAGAAGAGTGGTG-----  
-----GGGAGAGAGAAAAGAGCA---GTTGGA---CTAGGAGCT-----  
---CTTCTCCTTGGGTTCTTGGGAACA---GCAGGAAGCACTATG---GGCGCAGCGTCA---  
ATAACGCTGACGGTACAG---GCCAGACAA---TTATTG---TCTGGTATAGTGCAACAGCAAAGT---  
AATTTG---CTGCAA---GCTATAGAGGCGCAACAGCATCTGTTGCAGCTCACAGTCTGGGGCATT  
>AB286852..1  
TTCTATTGTAATACATCAAACTATTTAATAGTACTTTTTCTAATGATAATTCCACAGATAATGATACCTCTT  
TA-----  
-----  
GAAAATAATGGTACCATCACACTCCCATGTAAGATAAAACAAATTGTAAGAATGTGGCAGAGAGTGGGACAGG  
CAATGTATGCCCCCTCCCATTTGAAGGAAACATTACATGTATATCAAAC---  
ATTACAGGACTAATATTAACAAGAGATGGGCACAATGGGCACAATCAG-----  
-----  
-----  
AGTAATAATGAGACCTTCAGACCTACAGGAGGAGATATGAGGGACAATTGGAGAAGTGAATTATATAAGTATA  
AAGTAGTAAGAATTAAACCACTA---GGAATAGCACCCACCAAGGCAAGAAGAAGAGTAGTG-----  
-----GGCAGAGAGAAAAGAGCA---GTTGGA---CTGGGAGCT-----  
---GTTTTCTTGGGTTCTTAGGAGCG---GCAGGAAGCACTATG---GGCGCAGCGTCA---  
ATAACGCTGACGGTACAG---GTCAGACAA---TTATTG---TCTGGCATAGTGCAAGCAGCAAAGC---  
AATTTG---CTGAGA---GCTATAGAAGCGCAGCAGCATCTGTTGCAGCTCACAGTCTGGGGCATT  
>AF069934..1  
TTTTATTGTAATACATCAGAGCTGTTTACTAATACATCAACTAAGAATGGG-----  
-----  
-----  
ACCAATGAAACACCCACACTCCCATGTAAGATAAAACAAATTGTAAGAATGTGGCAGAGAGTGAGACAAGCAA  
TGTATGCCCTTCCCATTTGCAGGAAACATTACGTGTACATCAAAC---  
ATTACAGGACTACTATTAACAAGAGATGGG---AATAATGACAGT-----  
-----  
-----  
CACACTGAGACCTTCAGACCTGGAGGGGGAGATATGAGGGACAATTGGAGAAGTGAATTATATAAGTATAAAG  
TAGTAAAAATTAAACCACTA---GGAATAGCACCCACCTGGGCGAGGAGAAGAGTAGTG-----  
-----GGGAGAGAGAAAAGAGCA---GTTGGA---CTGGGAGCT-----  
GTTTTCTTGGGTTCTTAGGGACA---GCAGGAAGCACTATG---GGCGCAGCGTCA---  
ATAACGCTGACGGTACAG---GTCAGACAA---TTATTG---TCTGGCATAGTGCAACCAGCAAAGC---  
AATTTG---CTGAGA---GCTATAGAGGCGCAGCAGCATCTGTTGCAACTCACAGTCTGGGGCATT  
>AJ288981..1  
TTTTATTGTAATACATCACAACCTGTTTAACAGTAGTAACCTTAATAATAATAGCTCAGAT-----  
-----

-----  
AATAATGGGACCATCACACTCCCATGTAGGATAAATCAAATTATAAGAATGTGGCAAAGAGTGGGACAAGCAA  
TGTATGCCCCCTCCCATTCAGAGAAACATTACATGTACATCAAAC---  
ATTACAGGACTACTATTAACAAGAGATGGGCATAATGACACTGAA-----  
-----  
-----  
ATCTTCAGACCTGGAGGAGGAAATATGAAGGACAATTGGAGAAGTGAATTATATAAGTATAAAGTAGTAAAAA  
TTAAACCACTA---GGGATAGCACCCACCAAGGCAAGGAGAAGAGTAGTG-----  
-----GGGAGAGAGAAAAGAGCAGTTGTTGGA---CTGGGAGCT-----  
GTTTTCTTGGGTTCTTAGGAACG---GCAGGAAGCACTATG---GGCGCAGCGTCA---  
ATAACGCTGACGGTACAG---GTCAGACAA---TTATTG---TCTGGCATAGTGCACCAGCAAAGC---  
AATTTG---CTGAGA---GCTATAGAGGCGCAGCAGCATCTGTTGCAACTCACAGTCTGGGGCATT  
>EU363837..1  
TTCTATTGTAATACATCAGGCCTGTTTAATGGTACATACATGTCTAATGGTACACAAAGTAAT-----  
-----  
-----  
TCAAGCTCAATCATCACGATTCCATGCAGAATAAAGCAAATTATAAACATGTGGCAGGAGGTAGGACGGGCAA  
TGTATGCCCCCTCCCATTTGAAGGAAACATAACATGTAAATCAAAT---  
ATCACAGGACTACTATTGGTACGTGATGGAGGAACGACAAATACTATA-----  
-----  
-----  
AATGATACAGAGATATTCAGACCTGGAGGAGGAGACATGAGGGACAATTGGAGAAGTGAATTATATAAATATA  
AAGTGGTAGAAATTAAGCCATTA---GGAGTAGCACCCACTGCAGCAAAAAGGAGAGTGGTG-----  
-----GAGAGAGAAAAAAGAGCA---GTGGGA---CTAGGAGCT-----  
---GTGTTCTTGGGTTCTTGGGTGCA---GCAGGAAGCACTATG---GGCGCGGCGTCA---  
ATAACGCTGACGGTACAA---GCCAGACAA---TTATTG---TCTGGTATAGTGCAACAGCAAAGC---  
AATTTG---CTGAGA---GCTATAGAGGCGCAACATCATCTGTTGCAACTCACAGTCTGGGGCATT  
>KC492737..1  
TTCTATTGTAATACATCAAGACTGTTTAATGGTACATACATGTTTAATGGTACAAGGGGTAATTCAAGC----  
-----  
-----  
TCAAACCTCAACCATCACAATCCCATGCAGAATAAAGCAAATTATAAATATGTGGCAGCAGGTAGGACGAGCAA  
TGTATGCCCCCTCCCATTTGAAGGAAACCTAACATGTAGATCAAAT---  
ATCACAGGATTACTATTGGTACGTGATGGAGGAGACAACACAAAT-----  
-----  
-----  
AAAACAGAGATATTCAGACCTCAAGGGGGAGATATGAGGGACAATTGGAGAAGTGAATTATATAAATATAAAG  
TAGTAGAAATTAAGCCATTG---GGAGTAGCACCCACTGCAGCAAAAAGGAGAGTGGTG-----  
-----GAGAGAGAAAAAAGAGCA---GTGGGA---ATAGGAGCT-----  
GTGTTCTTGGGTTCTTGGGAGCA---GCAGGAAGCACTATG---GGCGCGGCGTCA---  
ATAACGCTGACGGTACAG---GCCAGACAA---TTGCTG---TCTGGTATAGTGCAACAGCAAAGC---  
AATTTG---CTGAGG---GCTATAGAGGCGCAACAACATCTGTTGCAACTCACGGTCTGGGGCATT  
>KF835494..1  
TTCTATTGTAATACATCAGGCCTGTTTAATAGTACATACATGTTCAATAATACAGACATATTTAATGGTACAG  
GAAAT-----  
-----  
-----  
AGTTCAAAAGTCATCACGATTCCATGCAGAATAAAGCAAATTATAAATATGTGGCAGGAGGTAGGACGAGCAA  
TGTATGCCCCCTCCCATTTGAAGGAAACATAACATGTAACTCAACT---  
ATCACAGGACTACTATTGGTACGTGATGGAGGAAAGCATAATAATAGT-----  
-----  
-----  
AATACTACAGAAACATTTCAGACCTGGAGGAGGAGATATGAAGGACAATTGGAGAAGTGAATTATACAAATATA  
AAGTGGTAGAAATTCAGCCATTG---GGAGTAGCACCCACTGGAGCAAAAAGGAGAGTGGTG-----  
-----GAGAGAGAGAAAAGAGCA---GCAGGA---CTAGGAGCT-----  
---GTGTTCTTGGGTTCTTGGGAGCA---GCAGGAAGCACTATG---GGCGCGGCGTCA---  
TTAACGCTGACGGTACAG---GCCAGACAA---TTGCTG---TCTGGTATAGTGCAACAGCAAAGC---  
AATTTG---CTGAAG---GCTATAGAGGCGCAACAGCATCTGTTGCAACTCACAGTCTGGGGCATT  
>KF835511..1  
TTCTATTGTAATACATCAGACCTGTTTAATGGTACATATAATGGTACATACATACATAATGATACACAAGGT-----  
-----

-----  
AATTCAACTGTCTTTACAATCCAATGCAGAATAAAGCAAATTATAAATATGTGGCAGGAGGTAGGACGAGCAA  
TGTATGCTCCTCCCATTGCAGGAAATATAACATGTAAATCAAAT---  
ATCACAGGACTACTATTGGTACGTGATGGAGGAAATACTAGTACA-----  
-----  
-----  
GAAGAGATATTCAGACCTGGAGGAGGAGATATGAAAAACAATTGGAGAAGTGAATTATATAAATATAAAGTGG  
TAGAAATTAAGCCATTG---GGAATAGCACCCACTGCAGCAAAAAGGAGAGTGGTG-----  
-----GAGAGAGAAAAAAGAGCAGTAATGGGA---ATAGGAGCT-----  
GTGTTTCCTTGGGTTCTTGGGAGCA---GCAGGAAGCACTATG---GGCGCGGCGTCA---  
ATAACGCTGACGGTACAG---GCCAGACAA---TTGCTG---TCTGGTATAGTGCAACAGCAAAGC---  
AATTTG---CTGAAG---GCTATAGAGGCGCAACATCATCTGTTGCAACTCACGGTCTGGGGCATT  
>JF346907..1  
TTCTATTGTAATACATCAGGCCTGTTCAATAGTACATACCTGTTCAATAGTACATACATGTCTAATGGTAGTT  
CAAACCTCA-----  
-----AAC---  
AACACAAACTCAACCATCACAAATCCCATGCAGAATAAAGCAAATTATAAATATGTGGCAGGAGGTAGGACGAG  
CAATGTATGCCCCCTCCCATTCAGGAAACATAACATGTAAATCAAAT---  
ATCACAGGACTACTATTGGTCCGTGATGGAGGAGATCAAAAATCAAATGAGACA-----GAG-----  
-----  
-  
AATGGGACAGAGACTGAGGAGACATTTAGACCTGGAGGAGGAGATATGAGGGACAATTGGAGAAGTGAATTAT  
ATAAATATAAAGTGGTAGAAATTAAGCCATTG---GGAATAGCACCCACTAAAGCAAAAAGGAGAGTGGTG--  
-----GAGAGAGAAAAAAGGGGA-----  
CTAGGAGCT-----GTGTTTCCTTGGGTTCTTAGGAGCA---GCAGGAAGCACTATG---  
GGCGCGGCGTCA---ATAACGCTGACGGTACAG---GCCAGACAA---TTGCTG---  
TCTGGTATAGTGCAACAGCAAAGC---AATTTG---CTGAAG---  
GCTATAGAGGCGCAACAGCATCTGTTGCAACTCACGGTCTGGGGCATC  
>JF346913..2  
TTCTATTGTAATACAACAGGCCTGTTTAAGGGTACATACAACCCTAATTACACAAACCCTAATGGTACAGGGA  
GT-----  
-----  
AATTCAAGCTCAACCATCACAAATACCATGCAAAATAAAGCAAATTATAAATATGTGGCAGGAGGTAGGACGAG  
CAATGTATGCCCCCTCCCATTCAGGAAACATAACATGTAAATCAAAT---  
ATCACAGGACTGCTATTGGTACGTGATGGAGGATACACAAATAAGACA-----  
-----  
-----  
AATCATACAGAGATATTCAGGCCGGGAGGAGGAGATATGAAGGATAATTGGAGAAGTGAATTATATAAATATA  
AAGTGGTAGAAATCAAGCCATTG---GGAGTAGCACCCACTAAAGCAAAAAGGAGAGTGGTG-----  
-----GAGAGAGAAAAAAGAGCA---GCA-----TTAGGAGCT-----  
---GTGTTTCCTTGGGTTCTTGGGAGCA---GCAGGAAGCACTATG---GGCGCGGCGTCA---  
ATGGCGCTGACGGTACAG---GCCAGACAA---TTGCTG---TCTGGTATAGTGCAACAGCAAAGC---  
AATTTG---CTGAGG---GCTATAGAGGCGCAACAACATCTGTTGCAACTCACGGTATGGGGCATT  
>EU363847..2  
TTCTATTGTAATACCTCAAACTGTTTAATGGTACATACAACAATGGTACATACAATGGTACATACGGT----  
-----  
-----  
ACGGAAAGTAATATCACAAATCCCATGCAGAATAAAGCAAATTATAAACATGTGGCAGGAGGTAGGACGAGCAA  
TGTATGCTCCTCCCATTGCAGGAAACATAACATGTAACTCAACT---ATCACAGGCTACTAT---  
GTACGTGATGGAGGAACAGGAAATGGGACA-----  
-----  
GATAATGGTACAGAGATATTCAGACCTGGAGGAGGAGATATGAGAAACAATTGGAGAAGTGAATTATATAAAT  
ATAAAGTGGTAGAAATTAAGCCATTG---GGAGTAGCACCCACTGAAGCAAAAAGGAGAGTGGTG-----  
-----GAGAGAGAAAAAAGAGCA---GTGGGA---CTAGGAGCT---  
-----GTGTTTCCTTGGGTTCTTGGGAGCA---GCAGGAAGCACTATG---GGCGCGGCGTCA---  
ATAACGCTGACGGTACAA---GCCAGACAA---TTGTTG---TCTGGTATAGTGCAACAGCAAAGC---  
AATTTG---CTGAGA---GCTATAGAGGCGCAACAGCATCTGTTGCAACTCACAGTCTGGGGCATT  
>KF835500..1  
TTCTATTGTAATACATCAGGCATATTTAATAGTACATACAATGAGACATACCAAGGTAACCTCA-----  
-----

-----  
ACTAACTTAAACATCACAATTCCATGCAAAATAAAGCAAATTATAAACATGTGGCAGGGGGTAGGACGAGCAA  
TGTATGCCCCCTCCCATTAAGGAAACATAACATGTAGATCAAAT---  
ATCACAGGACTACTACTGACACGTGATGGAGGAATAAATGTAACAAAT-----  
-----  
-----  
AGAACAGATCAAGAGATATTCAGACCTGCAGGAGGAGATATGAGGGACAATTGGAGAAGTGAATTATATAAAT  
ATAAAGTGGTAGAAATTAAGCCATTG---GGGGTAGCACCCACTACAGCAAAAAGGAGAGTGGTG-----  
-----GAGAGAGAAAAAAGAGCA---GTGGGA---CTGGGAGCC---  
-----GTGTTCTTGGGTTCTTGGGAGCA---GCAGGAAGCACTATG---GGCGCAGCGTCA---  
ATAACGCTGACGGTACAA---GCCAGACAA---TTGTTG---TCTGGTATAGTGCAACAGCAAAGC---  
AATTTG---CTGAAA---GCTATAGAGGCGCAACAACATCTGTTGCAACTCACGGTCTGGGGCATT  
>KF835507..1  
TTCTATTGTAATACATCAGGCCTGTTTAATGGTACATACAGACAGCCTAATGGTACATACGTGTTTAAAGGAG  
ATTCA-----  
-----AAC---  
TCAAAACATTACAACCATTACACTCCCATGCAGAATAAAGCAAATTATAAACATGTGGCAGGAGGTAGGACGAG  
CAATGTATGCCCCCTCCCATTCAGGAAAAATAACATGTAAATCAAAT---  
ATCACAGGACTACTGTTGGTACGTGATGGAGGGTCAAATGATACA-----  
-----  
-----  
GAGACAAATAAAACAGAGACATTTAGACCTCAAGGAGGAGATATGAGGGACAATTGGAGAAGTGAATTATATA  
AATATAAAGTGGTAGAAATTAAGCCATTG---GGAATAGCACCCACTGGGGCAAAAAGGAGAGTGGTG-----  
-----GAGAGAGAAAAAAGAGCA---GTGGGA---  
CTAGGAGCT-----GTGTTCTTGGGTTCTTGGGAGCA---GCAGGAAGCACTATG---  
GGCGCGGCATCA---ATAACGCTGACGGTACAG---GCCAGACAA---CTGTTG---  
TCTGGTATAGTGCAACAGCAAAGC---AATTTG---CTGAAA---  
GCTATAGATGCGCAACAGCATCTGTTGCAACTCACGGTCTGGGGCATT  
>KF835509..2  
TTCTATTGTAATACATCAGGCCTGTTTAACAGTACATACAATCCTAATGGTACAAATTATAAT-----  
-----  
-----  
TCAAACTCAACCATCACAATCCCATGCAGAATAAAGCAAATTATAAACATGTGGCAGGGGGTAGGACGAGCAA  
TGTATGCCCCCTCCCATTCAGGAAACATAACATGTAGATCAAAT---  
ATCACAGGACTACTATTGTTACGTGATGGAGGAACTTCAGATTCAAGT-----  
-----  
-----  
AATACAACAGAGATATTCAGACCTGGAGGAGGGGATATGAGGGACAATTGGAGAAATGAATTATATAAATATA  
AAGTGGTAGAAATTCAGCCATTG---GGAATAGCACCCACTGGAGCAAAAAGGAGAGTGGTG-----  
-----GAGAGAGAAAAAAGAGCA---GTGGGA---CTAGGAGCT-----  
---ATGTTCAATTGGGTTCTTGGGAGCA---GCAGGAAGCACTATG---GGCGCGGCGTCA---  
ATAACGCTGACGGTACAA---GCCAGACAA---TTGTTG---TCTGGTATAGTGCAACAGCAAAGC---  
AATTTG---CTGAGA---GCTATAGAGGCGCAACAGCATCTGTTGCAACTCACTGTCTGGGGCATT  
>KF835534..1  
TTCTATTGTAATACATCAGGCCTGTTTAATAGTACATACATGTCTAATGGTACATACATGCCTAATGGT----  
-----  
-----  
ACAGGAACAAACATCACAATTCCATGCAGAATAAAACAAATTATAAACATGTGGCAGGAGGTAGGACGAGCAA  
TGTATGCCCCCTCCCATTCAGGAAACATAACATGTAGGTCAAAT---  
ATCACAGGATTACTCTTGGTACGTGATGGAGGAAAGAGAAATGGTACA-----  
-----  
-----  
AATAATACAGAGATATTCAGACCTGGAGGAGGAGATATGAGAGACAATTGGAGAAATGAATTATATAAATATA  
AAGTGGTAGAAATTCAGCCATTG---GGAGTAGCACCCACTAGAGCAAAAAGGAGAGTGGTG-----  
-----GAGAGAGAAAAAAGAGCAGTAGTAGGA---CTAGGAGCT-----  
---GTGTTCTTGGGTTCTTGGGAGCA---GCAGGAAGCACTATG---GGCGCGGCGTCA---  
ATAACGCTGACGGTACAG---GCCAGACAA---CTGTTG---TCTGGTATAGTGCAACAGCAAAGC---  
AATTTG---CTGAAA---GCTATAGAGGCGCAACAGCATCTGTTGCAACTCACGGTCTGGGGCATT  
>KF835545..1

TTCTATTGTGATACGTCAGACCTGTTTAAATGATACATACAATGACAAGTTTAAATGGTACAACAGGTGAT-----  
-----  
-----  
TCAAACAAAACCATCACAATCCAATGCAGAATAAAGCAAATTATAAACATGTGGCAGGAGGTAGGACGAGCAA  
TGTATGCCCCCTCCCATTCAGAGAAACATAACATGTAGATCAAAT---  
ATCACAGGACTACTATTGGTACGTGATGGAGGTAATGGGACAGAGACA-----  
-----  
-----  
AATGGCACAGAAACATTTCAGACCTGGAGGAGGAGATATGAGGGACAATTGGAGAAATGAACTATATAAAATATA  
AAGTGGTAGAAATTCAGCCATTG---GGAGTAGCACCCACTGCAGCAAAAAGGAGAGTTGTG-----  
-----GAGAGAGAAAAAAGAGCA---ATAGGA---TTTGGAGCT-----  
---ATGTTTCCTTGGGTTCTTGGGAGCA---GCAGGAAGCACTATG---GGCGCGGCGTCA---  
ATAACGCTGACGGTACAA---GCCAGACAA---TTGCTG---TCTGGTATAGTGCAACAGCAAAGT---  
AATTTG---CTAAGA---GCTATAGAGGCGCAACAGCATCTGTTGCAACTCACTGTCTGGGGCATT  
>HQ699961..1  
TTCTATTGCAATACATCAGGCCTGTTTAAATGGTAATATTACAAAAGATAACTCAAGCTCAGATAAT-----  
-----  
-----  
TCAAGCTCAGTCATCATACTCCCATGCAAAATAAAGCAAATTATAAATATGTGGCAGGAGGTAGGACGAGCAA  
TGTATGCCCCCTCCCATTTGAAGGAAACATAACATGTAAATCAAAT---  
ATCACAGGACTACTCTTAGTACGTGATGGGGGATACACAAATGGCACA-----  
-----  
-----  
GAGAGTAATAACGAGACATTTCAGACCAGGAGGAGGAGATATGAGAGACAATTGGAGAAAGTGAATTATATAAAAT  
ATAAGGTGGTAGAAATTAAGCCATTG---GGAATAGCACCCACTAAATCAAAAAGGAGAGTGGTG-----  
-----GAGAAAGAAAAAAGAGCA---GTGGGA---CTGGGAGCT---  
-----GTGTTTCCTTGGGTTCTTGGGAGCT---GCAGGAAGCACTATG---GGCGCGGCGTCA---  
ATAACGCTGACGGTACAA---GCCAGACAA---TTGCTG---TCTGGTATAGTGCAACAGCAAAGC---  
AATTTG---CTGAGA---GCTATGGAGGCGCAGCATCATCTGTTGCAACTCACAGTCTGGGGCATT  
>HM215416..1  
TTCTATTGTAATACATCAGGCCTGTTTAAATAGTACGTACAATGGTACATACAGGGGTACAGGAGATAAT-----  
-----  
-----  
TCAAGCTCAATCATCACAATCCCATGCAGAATAAGGCAAATTATAAACATGTGGCAGAAGGTAGGACGAGCAA  
TGTATGCCCCCTCCCATTTGAAGGAAACATAGCATGTAACTCAAGT---  
ATCACAGGACTACTGTTGGTACGTGATGGAGGAAGCCCAAATAATCCAGAG-----  
-----  
-----  
ATTCAAATAATACAGAGATATTTCAGACCTGGAGGAGGAGACATGAAGGACAATTGGAGAAATGAATTATATA  
AATATAAAGTGGTAGAAATTCACCATTG---GGAGTAGCACCCACTGAAGCAAAAAGGAGAGTGGTG-----  
-----CAGAGAGAAAAAAGAGCA---GTGGGA---  
ATAGGAGCT-----GTGTTTCCTTGGGTTCTTGGGAGCA---GCAGGAAGCATTATG---  
GGCGCGGCGTCA---ATAACGCTGACGGTACAA---GCCAGACAA---CTGTTG---  
TCTGGTATAGTGCAACAGCAAAGC---AATTTG---CTGAGA---  
GCTATAGAGGCGCAACAGCACATGTTGCAACTCACGGTCTGGGGCATT  
>KF250369..1  
TTCTATTGTAATACATCAAGACTGTTTAAATAGTACATACAATAGTACATTAGACCTGTCTAGT-----  
-----AGT---  
ACATACAATAGTACAAAAGAT-----  
AATTCAGCTCCCCCATCACAATCTCATGCAGAATAAAGCAAATTATAAACATGTGGCAGGAGGTAGGACGAG  
CAATGTATGCCCCCTCCCATTCAGGAAGCATAACATGTAAATCAAAT---  
ATCACAGGACTACTATTGGTGCGTGATGGAGGA-----  
-----  
-----  
ATAGGACCAAAAAGATACAGAGACATTTCAGACCTGGAGGAGGAGATATGAGAGACAATTGGAGAAATGAATTAT  
ATAAAATATAAAGTGGTAGAAATTCAGCCATTG---GGAGTAGCACCCACTGAAGCAAAAAGGAGAGTGGTG---  
-----GAGAGAGAAAAAAGAGCA---GTGGGA---  
CTAGGAGCT-----GTGTTTCCTTGGGTTCTTGGGAGCA---GCAGGAAGCACTATG---  
GGCGCGGCGTCA---ATAACGCTGACGGTACAG---GCCAGACAA---TTGTTG---

TCTGGTATAGTGCAACAGCAAAGC---AATTTG---CTGAGA---  
GCTATAGAGGCGCAACAACATATGTTGCAACTCACGGTCTGGGGCATT  
>KU820846..2  
TTCTATTGTAATACATCAGGCCTGTTTAAATGGTACATACAATGATACATACGAGCTAAATGGTACAGAAAGT-  
-----  
-----  
AATTCAAGCTTAATCACAATCCCATGCAGAATAAAGCAAATTATAAACATGTGGCAAAAGGTGGGACGAGCAA  
TGTATGCCCCCTCCCATTCAGGAAACATTACATGTAAATCAAAT---  
ATCACAGGACTACTATTAGTACGTGATGGAGGAGCAAATCAGACA-----  
-----  
-----  
AATGATACAGAGATATTCAGGCCTGGAGGAGGAAATATGAAGGACAATTGGAGAAGTGAATTATATAAAATATA  
AAGTGGTAGAAGTTAAGCCAGTA---GGAATAGCCCCCACTAAAGCAAAAAGGAGAGTGGTG-----  
-----GAGAGAGAAAAAAGAGCA---GCG-----CTAGGAGCT-----  
---GTGTTCCCTTGGGTTCTTGGGAGCA---GCAGGAAGCACTATG---GGCGCGGCGTCA---  
ATAACGCTGACGGTACAA---GCCAGACAA---TTGTTG---TCTGGTATAGTGCAACAGCAAAGC---  
AATTTG---CTGAGA---GCTATAGAGGCGCAACAGCATATGTTGCAACTCACGGTCTGGGGCATT  
>AJ866553..3  
TTCTATTGCAATACATCAGACCTGTTTAAATAGCATTTGGAATAGCACTAGGGAAAAATACAAATAACACAAATG  
CA-----  
-----  
AATTACACAGATTACATTATCCCATGCAGAATAAAGCAAATTGTGAGAATGTGGCAGAGAGTAGGACAAGCAA  
TGTATGCTCCTCCCATCCAGGAGTAATAAGCTGTACATCCAAT---  
ATTACAGGACTAATAATAACAAGAGATGGTGGGAGTAATAACACT-----  
-----  
-----  
GGGAGTGAAACCTTCAGACCTACAGGAGGAAATATGAAAAATAATTGGAGAAGTGAATTATATAAGTATAAAG  
TAGTAGAAATTGAACCACTA---GGAGTAGCACCCACCAGGGCAAGGAGAAGAGTGGTG-----  
-----CAGAGAGAAAAAAGAGCA---GTTGGA---ATGGGAGCT-----  
TTGTTCCCTTGGGTTCTTAGGAGCA---GCAGGAAGCACTATG---GGCGCAGCGTCA---  
ATAACGCTGACGGTACAG---GCCAGACAA---TTACTG---TCTGGTATAGTGACAGCAGCAGAGC---  
AATCTG---CTGAAG---GCTATAGAGGCTCAACAGCATATGTTGAGACTCACAGTCTGGGGCATA  
>AY093603..2  
TTCTATTGCAATACAACAAACCTATTTAAATTGGAATAACACTAAGGATATCATGCCAAAT-----  
-----  
-----  
GGCACAAAGAATTACTTTATCCAATGCAAAATAAAGCAAATTGTGAGAATGTGGCAGAGAGTAGGACAAGCAA  
TGTATGCCCCCTCCTATCCAGGAATAATAGAGTGTGTATCAAAC---  
ATTACAGGACTAGTATTAAACAAGAGATGGTGGGACTGGCAATACA-----  
-----  
-----  
AGTGAGACCTTCAGACCTACAGGAGGAAATATGAAGGACAATTGGAGAAGTGAATTATATAAGTATAAAGTAG  
TAAAAATTGAACCACTA---GGAGTGGCACCCACCAGGGCAAAGAGAAGAGTGGTG-----  
-----GAGAGAGAAAAAAGAGCA---GTTGGA---ATGGGAGCT-----  
CTTTTCCTTGGGTTCTTAGGAGCA---GCAGGAAGCACTATG---GGCGCGGCGTCA---  
ATGACGCTGACGGTACAG---GCCAGACAA---TTATTG---TCTGGTATAGTGCAACAGCAGAGC---  
AATCTG---CTGAAG---GCTATAGAGGCTCAACAGCATCTGTAAAACCTCACAGTCTGGGGCATT  
>AY093604..2  
TTCTATTGCGATACATCAGGCCTGTTTAAATAGCACGTGGAAAAATGGCACTAATATACAGGGGTCAAATGGCA  
CT-----  
-----  
GGATCAAATTACACACAGATCCAGTGCAAAATAAAGCAAATTGTGAGAATGTGGCAGAGAGTAGGACAAGCAA  
TGTATGCCCCCTCCCATCCAGGAGTAATAGGGTGTATATCAAAC---  
ATTACAGGACTAATATTAACAAGAGATGGTGGGGACAATACAGGT-----  
-----  
-----  
GATAATGAAACCTTCAGACCTATAGGAGGAAATATGAAGGACAATTGGAGAAGTGAATTATATAAGTATAAAG  
TAGTAAAACCTTGAACCACTA---GGAGTAGCACCCACCCCGGCAAAGAGAAGAGTGGTG-----  
-----GAGAGAGAAAAAAGAGCA---GTTGGA---ATGGGAGCT-----  
CTTTTCCTTGGGTTCTTAGGAGCA---GCAGGAAGCACTATG---GGCGCAGCGTCA---

ATAACGCTGACGGTACAG---GCCAGACAA---TTATTG---TCTGGCATAGTGCAACAGCAGAGC---  
 AATCTG---CTGAAG---GCTATAGAGGCTCAACAGCATTTGTTGAAACTCACGGTCTGGGGCATT  
 >AY093607..1  
 TTCTATTGCAATACATCAAGCCTATTTAATAGCACTTGGGATGAAAATAACACTAAAAGTGCACAGGGGCCAA  
 AT-----  
 -----  
 GGCACGGCCAATATCACAATCCCATGTAAATAAGACAAATTGTGAGAATGTGGCAGAGAGTAGGACAAGCAA  
 TGTATGCCCCCTCCCATCCAGGAGTAATAAATTGTATATCAAAC---  
 ATTACAGGACTAATATTAATAAGAGATGGGGGAATGAGAGCGCT-----  
 -----  
 -----  
 ACAAATGAGACCTTCAGACCTATAGGAGGAGATATGAAGAATAATTGGAGAAGTGAATTATATAAGTATAAAG  
 TAGTAAAAATTGAACCACTA---GGAGTGGCACCCACCAGGGCAAGAAGAAGAGTGGTG-----  
 -----CAGAGAGAAAAAAGAGCA---GTTGGA---ATGGGAGCT-----  
 CTGTTCCCTTGGGTTCTTAGGAGCA---GCAGGAAGCACTATG---GGCGCAGCGTCA---  
 ATAACGCTGACGGTACAG---GCTAGACAA---TTATTG---TCTGGTATAGTGCAACAGCAGAGC---  
 AATCTG---TTGAAG---GCTATAGAGGCTCAACAGCATCTGTTGAAACTCACGGTCTGGGGCATT  
 >AF289548..1  
 TTCTACTGCAATACATCAGAACTGTTTAATAGTACATGGACATCAAATAATACAAGTACAGGGGTA-----  
 -----  
 -----  
 AATGGGAGTACAATCACACTCCCATGCAGAATAAGACAAATTATAAATATGTGGCAGGGAGTAGGAAAAGCAA  
 TATATGCCCCCTCCCATTCAGGACTGATCAATTGTTTCATCAAAT---  
 ATTACAGGACTAGTGTTGACAAGAGATGGTGGTGCGAATAATAAT-----  
 -----  
 -----  
 AGTCAGAATGAGACCTTCAGACCTGGAGGAGGAGATATGAGGGACAATTGGAGAAGTGAATTATACAAATATA  
 AAGTAGTAAAAATTGAACCAATA---GGTCTAGCACCCACCACGGCAAAGAGAAGAGTGGTG-----  
 -----GAAAGAGAAAAAAGAGCA---ATAGGA---CTGGGAGCT-----  
 ---GTGTTCCCTTGGGTTCTTGGGAGCA---GCAGGAAGCACAATG---GGCGCGGCGTCG---  
 CTGACGCTGACGGTACAG---GCCAGACAA---GTATTG---TCTGGTATAGTGCAACAAAAAC---  
 AATTTG---CTGAGG---GCTATAGAGGCGCAACAGCATCTGTTGCAACTCACAGTCTGGGGCATT  
 >AF289549..1  
 TTCTACTGCAATACAACAATACTGTTTAATAATAGTGAATGGACATCAAATAATACAGGTAATACAAGTTCAG  
 GG-----  
 -----  
 GTAAATGATAGTACAATCATAATCCCATGCAGAATAAAACAAATTGTAAACATGTGGCAGAAAGTAGGAAAAG  
 CAATATATGCCCCCTCCCATTCAGGACTAATCAGCTGTTTCATCAAAC---  
 ATAACAGGACTATTGTTGACAAGAGATAGAGATGGTGGTGCAAATAAT-----  
 -----  
 -----  
 ACTAGTCAGAATGAGACCTTCAGACCTGGAGGAGGAGATATGAGAGACAATTGGAGAAGTGAATTATACAAAT  
 ACAAAGTAGTAAAAATTGAACCACTA---GGTCTAGCACCCACCAAGGCAAAGAGAAGAGTGGTG-----  
 -----GAAAGAGAAAAAAGAGCA---ATAGGA---CTGGGAGCT---  
 -----ATGTTCCCTTGGGTTCTTGGGAGCA---GCAGGAAGCACGATG---GGCGCAGCGTCG---  
 CTGACGCTGACGGTACAG---GCCAGACAG---TTATTG---TCTGGTATAGTGCAACAGCAAAAC---  
 AATTTG---CTGAAG---GCTATAGAGGCGCAACAGCATCTGTTGCAACTCACAGTCTGGGGCATT  
 >AF289550..1  
 TTCTACTGCAATACATCAAACTGTTTAATAGCAGTATAGAGATATCAAATACAAGTATAGGT-----  
 -----  
 -----  
 AATACAAGTATAATCAAACCTCCCATGCAAAATAAAACAAATTATAAACATGTGGCAGGGAGTAGGAAAAGCAA  
 TATATGCCCCCTCCCATTCAGGATTAATCAACTGTTTCATCAAAT---  
 ATTACAGGACTATTGTTAACAAGAGATGGTGGTGCAAATAATAGTAAT-----  
 -----  
 -----  
 CAGAGTGGGGAGATCTTCAGACCTGGAGGAGGAGATATGAGAGACAATTGGAGAAGTGAATTATATAAATATA  
 AAGTAGTAAGGATTGAACCACTA---GGTCTAGCACCCACCAAGGCAAAGAGAAGAGTGGTG-----  
 -----GAAAGAGAAAAAAGAGCA---ATAGGA---CTGGGAGCT-----  
 ---GTGTTCCCTTGGGTTCTTGGGAGCA---GCAGGAAGCACAATG---GGCGCAGCGTCG---

TTGACGCTGACGGTACAG---GCCAGGCAG---TTATTG---TCTGGTATAGTGCAACAGCAAAAC---  
 AATTTG---CTGAGG---GCTATAGAGGCGCAACAGCATATGTTGCAACTCACAGTCTGGGGCATT  
 >AY371149..2  
 TTCTATTGTAATACATCAGGCCTGTTTAATAGCAGTTGGAGTAGGGAGAATGGCAATGGCACAGACAATTGGA  
 ATATCACAACA-----  
 -----AACCACACG-----  
 AGCTCCAATGACACTATAACTCTCCCATGCAAAATAAAGCAAATTGTACATATGTGGCAGAGAGTAGGACAAG  
 CAATGTATGCCCCCTCCCATCCGAGGAGAAATAAGGTGTGTGTCAAAC---  
 ATTACAGGAATACTATTAACAAGAGATGGTGGGAGAGATACAAAT-----  
 -----  
 -----  
 CATACTACCGATACCTTCAGACCTACAGGAGGAGATATGAGGGACAATTGGAGAAGTGAATTATATAGGTATA  
 AAGTAGTGGCAATTGAACCACTA---GGAGTAGCACCCACCAGGGCAAGAAGAAGAGTGGTG-----  
 -----GAGAGAGAAAAAAGAGCA---GTAGGG---ATAGGAGCT-----  
 ---GTGCTCCTTGGGTTCTTGGGAACA---GCAGGAAGCACTATG---GGCGCAGCGTCA---  
 ATAACGCTGACGGTACAA---GCCAGACAA---TTATTG---TCTGGCATAGTGCAACAGCAAGGC---  
 AATTTG---CTGAAG---GCTATCGAGGCTCAACAGCAACTGTTGAGACTCACTGTCTGGGGCATT  
 >KP718935..1  
 TTCTATTGCAATACATCAAACCTGTTTAATAGCAGTTGGAAAATTGGAAATAGCACTGCAAATAACACTGGC-  
 -----  
 -----  
 ACAAATGACACTATAACTCTCCAATGTAGAATAAAGCAAATTGTACATATGTGGCAGAGAGTAGGACAAGCAA  
 TGTATGCCCCCTCCCATCCAGGAAAAATAAGGTGTGAATCAAAC---  
 ATTACAGGACTACTATTAACAAGAGATGGTGGGAATAATAGTGCA-----  
 -----  
 -----  
 AATGAAACCTTCAGACCTACAGGAGGAGATATGAAGGACATTTGGAGAAGTGAATTATATAAGTATAAAGTAG  
 TGGAAATTAAACCACTA---GGAGTAGCACCCACCAGGGCAAAAAGAAGAGTGGTG-----  
 -----GAGAGAGAAAAAAGAGCA---GTTGGA---CTAGGAGCT-----  
 GTACTCCTTGGGTTCTTGGGAACA---GCAGGAAGCACTATG---GGCGCGGCGTCA---  
 ATAACGCTGACGGTACAG---GCCAGACAA---TTATTG---TCTGGTATAGTGCAACAGCAAAGC---  
 AATTTG---CTGAAA---GCTATTGAGGCTCAACAGCAACTGTTGAAACTCACTGTCTGGGGCATT  
 >KP718938..1  
 TTCTATTGCAATACATCACAACCTGTTTAATAGCACTTGGGATAACAATAACAACCTTGGGATAACAATAACAAC  
 AGAATAAT-----  
 -----  
 AGCAGTAAGAATATAACTCTTCCATGCAAAATAAAGCAAATTGTAAGGATGTGGCAGAGAGTAGGACAAGCAA  
 TGTATGCCCCCTCCCATCCAAGGAGAAATAAAGTGTGAATCAAAC---  
 ATTACAGGACTAATATTAACAACAGATGGT---ACGGGAAATAGC-----  
 -----  
 -----  
 ACAAATGAGACCGTCAGACCTGCAGGAGGAGATATGAGGGACAATTGGAGAAGTGAGCTATATAAGTATAAAG  
 TAGTGGAGATTAAACCACTA---GGAGTAGCACCCACCAGGGCAAAAAGAAGAGTGGTG-----  
 -----GAGAGAGAAAAAAGAGCA---GTGGGA---CTAGGAACT-----  
 TTGCTCCTTGGGTTCTTGGGAACA---GCAGGAAGCACTATG---GGCGCAGCGTCA---  
 ATAACGCTGACGGTACAG---GCCAGACAA---TTATTG---TCTGGCATAGTGCAACAGCAAAGC---  
 AATTTG---CTGAAG---GCTATTGAAGCTCAACAGCAACTGTTGAAGCTCACTGTCTGGGGCATT  
 >KY658700..1  
 TTCTATTGCAACACAACAAAGCTGTTTAATAGCACTTGGCAGTTTAATGATACTAATGGTACTTGGCGGGAAA  
 ATGGCACT-----  
 -----GAA---  
 GACAAAAATGACACTATATATCTTCCATGCAGAATAAAGCAGATTGTAAGACTATGGCAGACAGTAGGACAAG  
 CAATGTATGCCCCCTCCCATCCGAGGAGAAATAAGGTGTAATTCAAAT---  
 ATTACAGGGTTGCTATTAACAAGAGATGGTGGACAGTCAAATGAGTCA-----  
 -----  
 -----  
 AAGGTTAATGAGACCTTCAGACCTACAGGAGGAAATATGAAAGACAATTGGAGAAGTGAATTATATAGGTATA  
 AGGTGGTGGAAATTAAACCACTA---GGAGTAGCACCCACCAAGGCAAGAAGAAGAGTGGTG-----  
 -----CAGAGAGAAAAAAGAGCA---GTGGGA---ATGGGAGCT-----  
 ---GTACTCCTTGGGTTCTTGGGAGCA---GCAGGAAGCACTATG---GGCGTAGCGTCA---

ATAACGCTGACGGTACAA---GCCAGACAA---TTATTG---TCTGGTATAGTGCAACAGCAAAGC---  
 AATTTG---CTGAGG---GCTATTGAGGCTCAACAGCAATTGTTGAGACTCACTGTCTGGGGCATT  
 >AF069945..1  
 TTCTATTGTAATACATCAAGTCTGTTTAATAGCACTTGGGAAAATGAAAATACAACCTAGCAATGGGACTGAG-  
 -----  
 -----  
 GAAAATGGCACTATAACTCTCCCATGCAGAATAAAGCAAATTGTAAATCTGTGGCAGAGAGTAGGACAAGCAA  
 TGTATGCCCCCTCCCATCCAAGGAACTTAACATGTAACCTCAAAC---  
 ATTACAGGGCTACTATTAACAAGAGATGGTGGGAAAAATAACACT-----  
 -----  
 -----  
 CATAATGAGACCTTCAGACCTACAGGAGGAGATATGAAGGACAATTGGAGAAGTGAATTATATAAATATAAAG  
 TGGTAGAAATTAAACCACTA---GGAGTAGCACCCACCAGGGCAAAAAGAAGAGTGGTG-----  
 -----GAGAGAGAAAAAAGAGCA---CTGGGA---ATAGGAGCT-----  
 GTGCTCCTTGGGTTCTTGGGGACA---GCAGGAAGCACTATG---GGCGCGGCGTCA---  
 ATAACGCTGACGGTACAG---GCCAGACAA---TTATTG---TCTGGCATAGTGCAACAGCAAAGC---  
 GATTTG---CTGAAG---GCTATAGATGCACAACAGCAACTGCTAAACTCACTGTCTGGGGCATA  
 >AF408631..3  
 TTCTACTGCAATACATCAAACTGTTTAATGACACAACAACC-----  
 -----  
 -----  
 AATGACACTATTATTCTCCCATGCAAAATAAAACAAATTGTAAATATGTGGCAGGAAGTGGGACGAGCAATGT  
 ATGCCGCTCCCATCGCAGGAAGCATTACCTGTAGATCAAAT---  
 ATTACAGGTCTACTATTGACAAGAGATGGTGGTCAGACTAATATTACTAATCAG-----ACT---  
 -----  
 -  
 GAGACTAATCAGACTACTGAGATCTTCAGACCTGGGGGAGGAGATATGAGAGACAATTGGAGAAGTGAATTAT  
 AATAATATAAAGTAGTAGAAATTGAGCCACTA---GGAGTAGCACCCACCAGGGCAAGAAGACAAGTGGTG--  
 -----AGAAGAGAAAAAAGAGCA---GTGGGA---  
 ATGACAGCT-----GTGTTCTTTGGGTTCTTGGCAGCA---GCAGGAAGCACTATG---  
 GGCGCAGCGTCA---ATAACGCTGACGGCACAG---GCCAGACAA---TTATTG---  
 TCTGGAATAGTGCAACAGCAGAAC---AATCTG---CTGAGG---  
 GCTATTGAAGCGCAACAGCATCTGTTGCAGCTCACAGTCTGGGGCATT  
 >AF408629..1  
 TTCTACTGCAATACATCAAACTGTTTGATGAAGGACTGTTTAATACAACAGAT-----  
 -----  
 -----  
 GACAAATGACACTATTATTCTCCCATGTGCAATAAAACAAATTGTAAACATGTGGCAGGAAGTGGGACGAGCAA  
 TGTATGCCGCTCCCATTCAGGAAACATTAACCTGTAACCTCAACT---  
 ATTACAGGTCTAATATTGACAAGAGATGGTGGGAAAAATACTACT-----  
 -----  
 -----  
 GGGAAATGAGACCTTCAGACCTGGGGGAGGAAATATGAAAGACAATTGGAGAAGTGAATTATATAAATATAAGG  
 TGGTAGAAATTCAACCACTA---GGAGTAGCACCCACCACGGCAAGAGACAAGTGGTG-----  
 -----CAGAGAGAAAGAAGAGCA---GTGGGA---ATGGGAGCT-----  
 TTGTTCTTGGGTTCTTGGGAGCA---GCAGGAAGCACTATG---GGCGCGGCGTCA---  
 ATAACGCTGACGGTACAG---GCCAGACAA---TTATTG---TCTGGAATAGTGCAACAGCAAAC---  
 AATTTG---CTGAGG---GCTATTGAAGCGCAACAGCATCTGTTGCAGCTCACAGTCTGGGGCATT  
 >AY037266..2  
 TTCTACTGTGATACATCAAACTGTTTCATGACACGCTGATTAATACCAATACATCCGATGACACT-----  
 -----  
 -----  
 GCTAATGGCACTATAACTCTCCCATGTAGAATAAACTAATTGTAAACCTGTGGCAGGAAGTGGCACGAGCAA  
 TGTATGCCGCTCCCATTCAGGAAGCGTTACCTGTAACCTCAAGT---  
 ATTACAGGTCTACTATTGACAAGAGATGGTGGTCAGAAGAATAGT-----  
 -----  
 -----  
 ACTAATGACACCTTCAGACCTGGGGGAGGAAATATGAGGGACAATTGGAGAAGTGAATTATATAAATATAAAG  
 TAGTAGAAATTAAACCATTA---GGAATAGCTCCCACCAAGGCAAAAAGACAAGTGGTG-----  
 -----AAGAGAGAAAGAAGAGCA---GTGGGA---ATAGGAGCG-----

TTGTTCCCTTGGGTTCTTGGGAACA---GCAGGAAGCACTATG---GGCGCGGCGTCA---  
 ATAACGCTGACGGTACAG---GCCAGACAA---TTATTG---TCTGGAATAGTGCAACAGCAGAAC---  
 AATTTG---CTGAGG---GCTATTGAAGCGCAACAGCATCTGTTGCAGCTCACAGTCTGGGGCATT  
 >AF385936..1  
 TTCTACTGCAATACATCAGGACTGTTTAATGATACAATATCC-----  
 -----  
 -----  
 AATGATACTATTATTCTCCCATGTAAAATAAAACAAATTGTAAACCTGTGGCAGGAAGTGGGACGAGCAATGT  
 ATGCCGCTCCCATTTGAAGGAAACATTACCTGTAACTCAAAT---  
 ATTACAGGTCTACTATTGACAAGAGATGGTGGTCTTAATGAGACT-----  
 -----  
 -----  
 AATCAGACTGAAACCTTCAGACCTGGGGGAGGAAATATGAAAGACAATTGGAGAAAGTGAATTATATAAAATATA  
 AAGTGGTAGAAATTGAACCACTA---GGAGTAGCACCCACCAGGGCAAAAAGACAAGTGGTG-----  
 -----ACGAGAGAAAAAAGAGCA---GTGGGA---ATAGGAGCT-----  
 ---TTGTTCCCTTGGGTTCTTGGGAGCA---GCAGGAAGCACTATG---GGCGCGGCGTCA---  
 GTGACGCTGACGGTACAG---GCCAGACAA---TTATTG---TCTGGAATAGTGCAACAGCAAAAC---  
 AACTTG---CTGCAG---GCTATTGAAGCGCAACAGCATCTGTTGCAGCTCACAGTCTGGGGCATT  
 >JN054280..1  
 TTCTACTGCAATACATCAAACTGTTTAATAACACAAAAATT-----  
 -----  
 -----  
 AATGGCACTATTACTCTCCCATGTCTGAATAAAACAAATTGTAAACCTGTGGCAGGAAGTGGGACGAGCAATGT  
 ATGCCGCTCCCATTTGCAGGAAACATTACCTGTAACTCAAAT---  
 ATTACAGGTCTGCTATTAACAAGAGATGGGGGACAAAGTTATAATAGTACTAAT-----AAC-----  
 -----  
 -  
 AGTACTATTAATAGGACTGAGATCTTCAGACCTGGGGGAGGAAATATGAAAGACAATTGGAGAAATGAATTAT  
 ATAAATATAAAGTGGTAGAAATTGAACCACTA---GGAATAGCACCCACCAAGGCAAAAAGACAAGTGGTG--  
 -----AAGAGAGAAAAAAGAGCA---  
 GTAGGAGTAATAGGAGCT-----ATGTTCCCTTGGGTTCTTGGGAGCA---GCAGGAAGCACTATG---  
 GGCGCAGCGTCA---ATAACGCTGACGGTACAG---GCCAGACAA---TTATTG---  
 TCTGGAATAGTGCAACAGCAAAAC---AATTTG---CTGAGG---  
 GCTATTGAAGCGCAACAGCATCTGTTGCAGCTCACAGTCTGGGGCATT  
 >JN235963..2  
 TTCTACTGCAATACATCAGGACTGTTTAATAATGACACAGTA-----  
 -----  
 -----  
 TCCAATGGCACTATTACTCTCCCATGTCTGAATAAAACAAATTATAAACATGTGGCAGGAAGTGGGACGAGCAA  
 TGTATGCCAATCCCATTGCAGGAAACATTACCTGTAACTCAAAT---  
 ATTACAGGTCTACTATTGACAAGAGATGGTGGTGGTCATAGTAATGAA-----  
 -----  
 -----  
 ACTAATCAGACTGAGATCTTCAGACCTGGGGGAGGAAATATGAAAGACAATTGGAGAAAGTGAATTATATAAAT  
 ATAAAGTAGTAGAAATTGAACCACTA---GGAGTAGCACCCACCAGGGCAAAAAGACAAGTGGTG-----  
 -----AAGAGAGAAAAAAGAGCA---GTGGGA---CTAGGAGCT---  
 -----GTGTTTCATTGGGTTCTTGGGAGCA---GCAGGAAGCACTATG---GGCGCAGCGTCA---  
 GTAACGCTGACGGTACAG---GCCAGACAA---TTATTG---TCTGGAATAGTGCAACAGCAGAGC---  
 AATTTG---CTGAAG---GCTATTGAAGCGCAACAGCATCTGTTGCGGCTCACAGTCTGGGGCATT  
 >AY037272..1  
 TTCTACTGCAATACATCAGGACTGTTTAATGAAAGCCTGATTAATGTCACA-----  
 -----  
 -----  
 CAACCCAATGACATTACTCTCCCATGTCTGAATAAAACAAATTGTAAACCTGTGGCAGAAAGTGGGACGAGCAA  
 TGTATGCCGCTCCCATTTGCAGGAAGCATTATCTGTATCTCAAAT---  
 ATTACAGGTCTACTATTGACAAGAGATGGTGGTCAGAATAATAGT-----  
 -----  
 -----  
 ACTCCTGAGATCTTCAGACCTGGGGGAGGAAATATGAAAGACAATTGGAGAAAGTGAATTATATAAATATAAAG  
 TAGTAGAAATTGAACCACTA---GGAATAGCACCCACCGGGGCAAAAAGACAAGTGGTA-----

-----AAGAGAGAAAAAAGAGCA---ATAGGA---ATGGGAGCT-----  
TTGTTCTTGGGTTCTTGGGAGCA---GCAGGAAGCACTATG---GGCGCGGCGTCA---  
ACAGCGCTGACGGTACAG---GCCAGACAG---TTATTG---TCTGGAATAGTGCAACAGCAGAAC---  
AATTTG---CTGAGA---GCTATTGAAGCGCAACAGCATCTGTTGCAGCTCACAGTCTGGGGCATT  
>AY371154..1  
TTCTATTGCAATACATCAGCCCTGTTTAATAGCGCTTGGAGAAATGATACTAACAGCACGCAGGTTTCGGGG-  
-----  
-----  
TCAAAATGACAATATAACTCTCCCATGCAGAATAAAGCAAATTTGTAAAGCTATGGCAGAGGGTGGGACAAGCAA  
TGTATGCCCCCTCCCATCCAAGGAGTAATAAGGTGCGAATCAAAC---  
ATTACAGGGCTACTATTAACAAGAGATGCTGAGGGTAATAATAGA-----  
-----  
-----  
ACAAATGAGACCTTCAGACCTGGAGGAGGAGATATGAGGGATAATTGGAGAAGTGAATTATATAAATATAAAG  
TAGTAAAAATTGAACCACTA---GGAGTAGCACCCAGCAGAGCAAGGAGAAGAGTGGTA-----  
-----GCAAGAGAAAAAAGAACA---GTTGGA---CTAGGAGCT-----  
GTCTTCCTTGGGTTCTTAGGAGCA---GCAGGAAGCACTATG---GGCGCAGCGTCA---  
CTGACGCTGACGGTACAG---GCCAGACAA---TTATTG---TCTGGCATAGTGCAACAACAGAAC---  
AATCTG---CTGATG---GCTATAGAGGCTCAACAGCACCTGTTGAAACTCACGGTCTGGGGCATT  
>DQ845388..1  
TTCTATTGCAATACATCAGCCCTGTTTAATAGCACTTGGGAAGGGAACAATACCAGCACGCAAGGGTCAAATG  
ACACA-----  
-----  
GGGTCAAATGACACTATAACTCTCCCATGCAGAATAAAACAATTTGTAAATATATGGCAGAGAGTAGGACAAG  
CAATATATGCCCCCCCCCATCCAAGGAGTAATAAGGTGTGACTCAAAC---  
ATTACAGGACTACTATTAACAAGAGATGGTGGGGATAATGATACTACT-----  
-----  
-----  
AGGGCAAATGAGACCTTCAGACCTGGAGGAGGAGATATGAAGGACAATTGGAGAAGTGAATTATATAAATACA  
AAGTAGTAAAAATTGAACCACTA---GGAGTAGCACCCACCAAGGCAAAGAGAAGAGTGGTG-----  
-----GCAAGAGAAAAAAGAGCA---GCA-----CTGGGAGCT-----  
---GTCTTCCTTGGGTTCTTAGGAGCA---GCAGGAAGCACTATG---GGCGCGGCGTCA---  
ATAACGCTGACGGTACAG---GCCAGACAA---TTATTG---TCTGGCATAGTGCAACAGCAGAGC---  
AATCTG---CTGATG---GCTATACAGGCTCAACAGCATATGTTGAAACTTACGGTCTGGGGCATT  
>DQ845386..1  
TTCTATTGCAATACATCAGAACTGTTTAATAGTGCATGGAGAAATGGGACCAGAGTGCGGGGGTCAACTAAC-  
-----  
-----  
ACAAGTGAAAATATAACTCTCCCATGCAGAATAAAGCAAATTTGTAAATATATGGCAGAGAGTAGGGCAGGCAA  
TATATGCCCCCTCCCATCCAAGGAGTAATAAGGTGTGAATCAAAC---  
ATTACAGGGCTACTATTAACAAGAGATGGTGGGAATAATAATGAGACA-----  
-----  
-----  
AATAAGACTGAGACCTTCAGACCTGGAGGAGGAGATATGAAGGACAATTGGAGAAGTGAATTATATAAATATA  
AAGTAGTAAAAATTGAACCACTA---GGAGTAGCACCCAGCAGAGCAAGGAGAAGAGTGGTG-----  
-----GCAAGAGAAAAAAGAGCA---GTTGGA---CTAGGAGCT-----  
---GTCTTCCTTGGGTTCTTAGGAGCA---GCAGGAAGCACTATG---GGCGCGGCGTCA---  
TTAACGCTGACGGTACAG---GCCAGACAA---TTGTTG---TCTGGTATAGTGCAACAGCAGAAT---  
AACCTG---CTGATG---GCTATAGAGGCTCAACAGCATATGTTGAAACTCACAGTCTGGGGCATT  
>DQ845387..1  
TTCTATTGTAATACATCAGAACTGTTTAATAGCACTTGGACAAATGACACTAACAGCACGCAGGGGTCAAAT-  
-----  
-----  
GACACAACGCCATTATTCTCCCATGCAGAATAAAGCAAATTTATAAATATGTGGCAGAGAGTAGGACAAGCAA  
TATATGCCCCCTCCCATTAAGGAGTAATAAGGTGTGAATCAAAC---  
ATTACAGGACTACTATTAACAAGAGATGGGGGTAATAACAGAAC-----  
-----  
-----  
AGTGAGATCTTCAGACCTGGAGGAGGGGATATGAGGGACAACTGGAGGAGTGAATTATATAAATATAAAGTAG  
TAAAAATTGAGCCACTA---GGAGTAGCACCCAGCAAGGCAAGGAGAAGAGTGGTG-----

-----ACGAGAGAAAAAGAGCA---GTTGGA---ATAGGAGCT-----  
 GTCTTCCTTGGGTTCTTAGGAGCA---GCAGGAAGCACTATG---GGCGCGGCGTCA---  
 TTAACGCTGACGGTACAG---GCCAGAAAC---TTATTG---TCTGGTATAGTGCAACAGCAGAAC---  
 AACCTG---CTGAGG---GCTATAGAGGCTCAACAGCAACTGTTGAAACTCACGGTCTGGGGCATT  
 >MH705141..1  
 TTCTACTGCAATACATCAGGCCTGTTTAATAGCAGTTGGGAAAATGACAATGCCAGCACAGGGTCAAATAACA  
 CAGAG-----  
 -----  
 TCAAAATGCCAATATAACTCTCCCATGCAAAATAAAGCAATTTGTAAATGTATGGCAGAGAGTAGGACAAGCAA  
 TGTATGCCCCCTCCCATTGCAGGATTAATAAGATGTGAATCAAAT---  
 ATTACAGGACTATTATTAACAAGAGATAATGAGGGTAATAACAGG-----  
 -----  
 -----  
 ACAAATGAGACCTTCAGACCCGGAGGAGGAGACATGAAGGACAATTGGAGAAGTGAATTATATAAGTATAAAG  
 TAGTAAAAATTGAACCACTA---GGAGTAGCACCCAGCAAGGCAAGGAGAAGAGTGGTG-----  
 -----GCAAGAGAAAAAAGAGCAGTTGTTGGA---CTAGGAGCT-----  
 GTCTTCATTGGGTTCTTAGGAGCA---GCAGGAAGCACTATG---GGCGCGGCGTCA---  
 TTAACGCTGACGGTACAG---GCCAGACAA---TTATTG---TCTGGCATAGTGCAACAACAGAAC---  
 AATCTG---TTGATG---GCTATAGAGGCTCAACAGCATTTGTTGAAGCTCACGGTCTGGGGCATT  
 >KP718924..1  
 TTCTATTGCAATACATCAGGCCTGTTTAATAGTACTTGGGAATCTAACAATACCAGCACGTGCGGGTCAAATG  
 ACACAGGG-----  
 -----  
 TCAAAATGACACTATAACTCTCCCATGCAGAATAAAGCAATTTGTAAAGATGTGGCAGAGAGTAGGACAAGCAA  
 TATATGCCCCCTCCCATCCCAGGAGTAATACAGTGTAATTCAAAC---  
 ATTACAGGACTACTATTAGCAAGAGATGGTGGGGATGATAATACA-----  
 -----  
 -----  
 ACAAATGAGACCTTCAGACCTATAGGAGGAGATATGAAGGACAATTGGAGAAGTGAATTATATAAATATAAAG  
 TAGTAAAAATTGAACCATTA---GGAGTAGCACCCAGCAAGGCAAGGAGAAGAGTGGTA-----  
 -----GCAAGAGAAAAAAGAGCA---ATCGGAGGACTAGGGGCT-----  
 GTCTTCCTTGGGTTCTTAGGAGCA---GCAGGAAGCACTATG---GGCGCGGCGTCA---  
 CTGACGCTGACGGTACAG---GCCAGACTA---TTATTG---TCTGGCATAGTGCAACAGCAGAAC---  
 AATCTG---CTGAGG---GCTATAGAGGCTCAACAACATCTGTTGAAACTCACGGTCTGGGGCATT  
 >KP718926..2  
 TTCTATTGCAATACAACAAAACCTGTTTAATAGCACTTGGGACAACCTACACGCAAGGGTCAAATGAC-----  
 -----  
 -----  
 ACAGAGGACCCTATAGTTCTCCCATGCAGAATAAAGCAATTTGTAAATATATGGCAGAGAGTAGGACAAGCAA  
 TATATGCCCCCTCCCATCCAAGGAGTAATAAATTGTAGCTCAAAC---  
 ATTACAGGACTACTATTAAACAAGAGATAATGATGAGGGTAGTAAT-----  
 -----  
 -----  
 AGGGCAAATGAGACCTTCAGACCTGGAGGAGGAGATATGAGGGACAATTGGAGAAGTGAATTATATAAATATA  
 AAGTAGTAAAAATTGAACCACTA---GGAGTAGCACCCAGCAGGGCAAGGAGAAGAGTGGTG-----  
 -----GCAAGAGAAAAAAGAGCAATAGTTGGA---ATAGGAGCT-----  
 ---CTCTTCCTTGGGTTCTTAGGAGCA---GCAGGAAGCACTATG---GGCGCGGCGTCA---  
 CTAACGCTGACGGTACAG---GCCAGACAA---TTATTG---TCTGGCATAGTGCAACAGCAGAGC---  
 AATCTG---CTGAGG---GCTATAGAGGCTCAACAGCATCTGTTGAAACTCACGGTCTGGGGCATT  
 >AF460972..1  
 TTCTATTGCAATACATCAGCCCTGTTTAATAGCACTTGGGAAAATGACACTGTCAGCACGCAAGGGTCAAATG  
 ACACA-----  
 -----  
 GGGTCAAATGACACTATAACTCTCCCATGCAGAATAAAGCAATTTGTAAACATGTGGCAGAGAGTAGGACAAG  
 CAATGTATGCCCCCTCCCATCCAAGGAATAATAAGGTGTGAATCAAAC---  
 ATTACAGGACTACTATTATCAAGAGATGGTGGTGTGGGTAATAAT-----  
 -----  
 -----  
 AGGACAAATGAGACATTTCAGACCTGGAGGAGGAAATATGAAAGACAATTGGAGAAGTGAATTATATAAGTATA  
 AAGTAGTAAAAATTGAACCATTA---GGAGTAGCACCCAGCAGAGCGAGGAGAAGAGTGGTG-----

-----GCAAGAGAAAAAGAGCA--GTAGTTGGACTAGGGGCT-----  
---GTCTTCCTTGGGTTCTTAGGAGCA--GCAGGAAGCACTATG--GGCGTGGCGTCA---  
CTAACGCTGACGGTACAG---GCCAGACAA---TTATTG---TCTGGCATAGTGCAACAACAGAAC---  
AATCTG---CTGATG---GCTATAGAGGCTCAACAGCATCTGTTGAAACTCACGGTCTGGGGCATT  
>AF460974..1  
TTCTATTGCAATACATCAACCCTGTTTAATAGCACTTGGGCAAATGACACAAAGGCAAATGACACAGGG-----  
-----  
-----  
TCAAAATGACACTATAACTCTCCCATGCAGAATAAAGCAATTTGTAAATAAGTGGCAAAGAGTAGGACAATCAA  
TGTATGCCCCCTCCCATCCAAGGAACAATAAGGTGTGACTCAAAC---  
ATTACAGGACTACTATTAACAAGAGATGGGGGTGATAATAGCCTA-----  
-----  
-----  
AATGAGACCTTCAGACCTGGAGGAGGAGATATGAGGGACAATTGGAGAAGTGAATTATATAAATATAAAGTAG  
TAAAAATTGAACCACTA---GGAGTAGCACCCAGCAAGGCAAGGAGAAGAGTGGTG-----  
-----ACAAGAGAAAAAGAGCA--GTGGGA---CTAGGGGCT-----  
GTCTTCCTTGGGTTCTTAGGAGCA--GCAGGAAGCACTATG--GGCGCGGCGTCA---  
CTAACGCTGACGGTACAG---GCCAGACAA---TTATTG---TCTGGCATAGTGCAACAACAGAAC---  
AATCTG---CTGAGG---GCTATAGAGGCTCAACAGCATCTGTTGAAACTCACGGTCTGGGGCATT  
>AF450097..1  
TTCTATTGTAATACAACAAAATTGTTTAACAGTACTTGGACTGTGAATGGAAC TACAAATACTACAAAT-----  
-----  
-----  
AACAAATGACACAATCACACTCCCATGCAAAATAAAACAAATTATAAACATGTGGCAGGAAGTAGGAAAAGCAA  
TGTATGCCCCCTCCCATCAGCGGTCAAATTAGATGCTCATCAAAT---  
ATTACAGGGCTGCTATTAGTAAGAGATGGTGGTAATAGTAACGAG-----  
-----  
-----  
ACCGAGATCTTCAGACCTGGAGGAGGAAATATGAAGGACAATTGGAGAAGTGAATTATATAAATATAAAGTAG  
TAAAAATTGAACCATTA---GGAGTAGCACCCACCAGGGCAAGGAGAAGAGTGGTG-----  
-----CAAAGAGAAAAAGAGCA--GTGGGA--ATAGGAGCT-----  
TTGCTCATTGGGTTCTTGGGAGCA--GCAGGAAGCACTATG--GGCGCAGCGTCA---  
ATGACGTTGACGGTACAG---GCCAGACAA---TTACTG---TCTGGTATAGTGCAACAGCAGAAC---  
AATCTG---CTGAGG---GCTATTGAGGCGCAACAGCATATGTTGCAACTCACAGTCTGGGGCATA  
>JN248351..1  
TTCTACTGTAATACATCACAACCTGTTTAATAGTACATGGAATAATACTGCAGGAAATTCTAATAATGAT-----  
-----  
-----  
ACCAATACCACTATCACGCTCCCTTGCAGAATAAGACAAATTGTAAATATGTGGCAGGAAGTAGGAAGAGCAA  
TGTATGCCCCCTCCCATTGAAGGACAAATTAGCTGTTTCATCAAAT---  
ATTACAGGGTTGCTATTAAACAAGAGATGGTGGTCATAACAATGTTAGC-----  
-----  
-----  
AATACCACCGAGACCTTCAGACCTGGAGGAGGAGATATGAGGGACAATTGGAGAAGTGAATTATATAAATATA  
AAGTAGTAAAAATTGAACCATTA---GGAGTAGCACCCACCAAGGCAAGAGGAGAGTGGTG-----  
-----CAAAGAGAAAAAGAGCA--GTGGGAACGATAGGAGCT-----  
---GTGTTCCCTTGGGTTCTTGGGAGCA--GCAGGAAGCACTATG--GGCACAGCGTCA---  
ATAACGCTGACGGTACAG---GCCAGACAA---TTGTTG---TCTGGTATAGTGCAACAGCAGAGA---  
AATTTG---CTGAGG---GCCATTGAGGCGCAACAGCATCTGCTGCAACTCACAGTCTGGGGCATC  
>KT022406..2  
TTCTATTGCAATACATCAAGCCTGTTTAATGGCACATGGAACAGGGCTAACTACACAATGGAG-----  
-----  
-----  
AATGACACTATTATGAATATCACATGCAGAATAAAACAAATTATAAACATGTGGCAGAGAGTAGGACAAGCAA  
TGTATGCCCCCTCCCATTCAGAGGTAATAAAGTGTACATCAAAC---  
ATTACAGGAATAATATTGACAAGAGATGGTGGGAACGGGAACAACAGT-----  
-----  
-----  
ACCAACAGTACAGAGACCTTCAGGCCTGGAGGAGGAGATATGAGAGACAATTGGAGAAGTGAATTATATAAGT  
ATAAAGTAGTAAAAATTGAACCATTA---GGAGTAGCACCCACCAAGGCAAGAGAGAAGAGTGGTG-----

-----GAGAGAGAAAAAGAGCA---GTTGGA---CTGGGAGCT---  
-----GTCTTCCTTGGGTTCTTGGGAGCA---GCAGGAAGCACTATG---GGCGCAGCGTCA---  
ATAACGCTGACGGTACAG---GCCAGACAA---TTATTG---TCTGGCATAGTGCAACAGCAAAGC---  
AATTTG---CTGAAG---GCTATAGAGGCTCAACAACATCTGTTGAGACTCACGGTCTGGGGCATT  
>AY945736..1  
TTCTATTGCAATACATCAGACCTGTTTAATAGCACGTGGACCAACGACACGTGGGGGGAAAATGGCACTGCCA  
ACGAC-----  
-----TCA---  
AAGTCAAATGACACTATAATGCTCCCATGCAGGATAAAACAAATTATAAACATGTGGCAGAGAGTAGGACAAG  
CAATGTATGCCCCCTCCCATTCAGGAATAATAAAGTGACATCAAAC---  
ATTACAGGAATAATATTGACAAGAGATGGTGGAGAGAACGATAGT-----  
-----  
-----  
ACAGAGACCTTCAGACCTGGAGGAGGAGATATGAGAGACAATTGGAGAAGTGAATTATATAAGTATAAAGTAG  
TAAAACTTGAACCACTA---GGAGTAGCACCCACCAAGGCCAGGAGAAGAGTGGTG-----  
-----GAGAGAGACAAAAGAGCA---GTTGGA---CTGGGAGCT-----  
TTCTTCCTTGGGTTCTTGGGAGCA---GCAGGAAGCACTATG---GGCGCAGCGTCA---  
CTAACGCTGACGGTACAG---GCCAGACAA---TTATTG---TCTGGCATAGTGCAACAGCAAAGC---  
AATTTG---CTGAAG---GCTATAGAGGCTCAACAACATCTGTTGAGACTCACAGTCTGGGGCATT  
>AF286239..1  
TTCTATTGCGATACATCAGGCCTGTTTAATAGCACGTGGCCTGCCAATGCATCAAGGGAGAATGAGGAG----  
-----  
-----  
AAAGATCGCAATGTGACTCTCCCATGCAGAATAAAACAAATTGTAAACATGTGGCAGAGAGTAGGACGAGCAA  
TGTATGCCCCCTCCCATTAACGGAACAATAAAGTGACATCCAAC---  
ATTACAGGAATGATATTAACAAGAGATGGG--AACAGTGGGGGCAAT-----  
-----  
-----  
GCAACCAATGAGACCTTCAGACCTGGAGGAGGAGATATGAGGGACAATTGGAGAAGTGAATTATATAAGTATA  
AAGTAGTAAACTAGAACCACTA---GGAGTAGCACCTACCAGGGCAAGAAGAAGAGTGGTG-----  
-----GAGAGGGAAAAAGAGCA---GCA-----GTTGGACTG-----  
---TTCTTCCTTGGGTTCTTGGGAGCA---GCAGGAAGCACTATG---GGCGCGGCGTCA---  
GTGACGCTGACGGTACAG---GCCAGACAA---TTATTG---TCTGGCATAGTGCAACAGCAAAGC---  
AATTTG---CTGAAG---GCTATAGAGGCTCAACAGCATATGTTGAGACTCACGGTCTGGGGCATT  
>EU581825..1  
TTCTACTGCAATACATCAGGATTGTTTAATAACTCAGTATTC-----  
-----  
-----  
AATAATAACACTATCACTCTCCCATGTCTGAATAAAACAAATTGTAAACATGTGGCAGGAAGTGGGACGAGCAA  
TGTATGCCGCTCCCATTCAGGAAACATTGCCTGTAGCTCAAAT---  
ATTACAGGTCTACTATTGACAAGAGACGGTGGTTGTGAGAACCAGAGCAAT-----  
-----  
-----  
ACTAACTGTACAGAGACCTTCAGACCTTGGGGAGGAAATATGAAAGACAATTGGAGAAGTGAATTATATAAAT  
ATAAAGTAGTAGAAATTGAACCATTA---GGAATAGCACCCACCAAGGCAAAGAGAAGAGTGGTG-----  
-----CAGAGAGACAAAAGAGCA---GTGGGA---TTGGGAGCT---  
-----ATGTTTCCTTGGGTTCTTGGGAGCA---GCAGGAAGCACTATG---GGCGCAGCGTCA---  
ATAACGCTGACGGTACAA---GCTAGACAA---TTATTG---TCTGGAATAGTGCAACAGCAAAC---  
AATTTG---CTGAGG---GCTATTGAAGCGCAACAGCATATGTTGCAGCTCACAGTCTGGGGCATT  
>AY037281..1  
TTCTACTGCAATACATCAAACTGTTTAATGACTCCCGGGATAATGACACAGAA-----  
-----  
-----  
TCCAATGACACTATCATTCTCCCATGTCTGAATAAAACAAATTGTAAACAGGTGGCAGGAAGTAGGACAAGCAA  
TGTATGCCGCTCCCATTCAGGAAACATTGTTTGTAACTCAAAT---  
ATTACAGGTCTACTATTGACAAGAGATGGTGGTCAGGGAAATGGT-----  
-----  
-----  
AGTGGACCAGAAATCTTCAGACCTGAGGGAGGAAATATGAAAGACAATTGGAGAAGTGAATTATATAAATACA  
AAGTAGTAGAAATTGAACCATTA---GGAGTAGCACCCACCAAGGCAAAGAGAAGAGTGGTG-----

-----CAGAGAGAAAAAGAGCA---GTGGGA---ATGGCAGCT-----  
---GTGTTTCATTGGGTTCTTGGGAGCA---GCAGGAAGCACTATG---GGCGCAGCGTCA---  
ATAACGCTGACGGTACAG---GCCAGACAA---TTATTG---TCTGGAATAGTGCAACAGCAGAGC---  
AATCTG---CTGAGG---GCTATTGAAGCGCAACAGCATATGTTGCAGCTCACAGTCTGGGGCATT  
>EU581827..1  
TTCTACTGCAATACATCAGGATTGTTTAATGACACAGTATCT-----  
-----  
-----  
AATGGCACTATCACTCTCCCATGTAAAATAAAACAAATTGTAAACATGTGGCAGGAAGTGGGAAGAGCAATGT  
ATGCCGCTCCCATTCAGGAAAAATTACCTGTAACTCAAGT---  
ATTACAGGTCTTCTATTGACAAGAGATGGTGGTAGTAATACAACA-----  
-----  
-----  
GGCAACACAGAGACCTTCAGACCTGGGGGAGGAGATATGAGAGACAATTGGAGAAGTGAATTATATAAAATATA  
AAGTAGTAGAAATTC AACCAATA---GGAGTAGCACCCACCCCGGCAAAAAGAAGAGTGGTG-----  
-----CAAAGAGAAAAAGAGCA---GCA-----TTAACAACT-----  
---ATGTTCCCTTGGGTTCTTGGGAGCA---GCAGGAAGCACTATG---GGCGCAGCGTCA---  
ATAGCGCTGACGGTACAG---GCCAGACAA---TTATTG---TCTGGAATAGTGCAACAGCAAAGC---  
AATTTG---CTGAGA---GCTATTGAAGCGCAACAACATATGTTGCAGCTCACAGTCTGGGGCATT  
>KP718931..2  
TTCTATTGTGATACAACAACCACTGTTTAATAGTACCTGGGATAAGAGTACCTGGAATAACACCAATAGCAGCT  
ATGAGGGA-----  
-----  
AATGGAGATGATACTATTACATTCAGTGCAAAATAAAACAAATTGTAAACATGTGGCAGAGAGTAGGACAAG  
CAATGTATGCCCTCCCATCGCGGGAATATTACATGTGTATCAAAT---  
ATTACAGGACTAATATTGACAAGTGACTTTGTTAATGCAACTACA-----  
-----  
-----  
GATGTGACCTTCAGACCTGGAGGAGGAGATATGAGGGACAATTGGAGAAGTGAATTATATAAAATATAAAGTGG  
TGAAAATTGAACCACTA---GGAGTAGCACCTCTAAGGCAAAGAGAAGAGTGGTG-----  
-----GAGAGAGAAAAAGAGCA---ATTGGA---ATAGGAGCT-----  
GTCTTCCTTGGGTTCTTAGGAGCA---GCAGGAAGCACTATG---GGCGCGGCGTCA---  
ATAACGCTGACGGTACAG---GCTAGACAA---TTATTG---TCTGGTATAGTGCAACAGCAAAGC---  
AATTTG---CTGAGG---GCTATAGAGGCTCAACAGCATCTGTTGAAACTCACGGTCTGGGGCATT  
>AF377959..2  
TTTTATTGTAATACAACAACCTGTTTACATGGGATAGCACCACCAATGGCACCAATGGCAACTACACAGTAA  
GT-----  
-----  
AATAATGATACTATTACACTGCAATGCAGAATAAAACAAATTATAAACATGTGGCAGAGAGTAGGACAAGCAA  
TGTACGCTCCTCCCATCGAAGGAAGCATTACATGTGTATCAAAT---  
GTTACAGGACTAATATTGACAAGTGACTTTGTTAATAAGTCAACA-----  
-----  
-----  
GAGGAGGTGACCTTCAGACCTGGAGGGGAGATATGAGAGACAATTGGAGAAGTGAATTATATAAAATATAAAG  
TAGTGAAAATTGAACCACTA---GGAGTAGCACCCACTAAGGCAAAGAGAAGAGTGGTG-----  
-----GGGAGAGAAAAAGAGCA---GTTGGA---CTAGGAGCT-----  
GTCTTCCTTGGGTTCTTAGGAGCA---GCAGGAAGCACTATG---GGCGCGGCGTCA---  
ATAACGCTGACGGTACAG---GCTAGACAA---TTATTG---TCTGGTATAGTGCAACAGCAAAGC---  
AATTTG---CTGAGG---GCTATAGAGGCTCAACAGCATCTGTTGAAACTCACGGTCTGGGGCATT  
>EU743963..2  
TTCTATTGCAATACATCAGGACTGTTCAATAGCACTTGGACTGACAACACGACAGAATTAAATAGCACGGATG  
GC-----  
-----  
AATATAACTCATATAATTCTTCCGTGCAGAATAAAGCAAATTATAAATATGTGGCAGAGAGTAGGACAAGCAA  
TGTATGCCCTCCCATCCAGGAATAATAAGGTGTGAGTCAAAC---  
ATTACAGGATTACTATTGACAAGAGATGGTGGGGTTACTGATAACAGT-----  
-----  
-----  
ACAGAAGATGAGACTTTCAGACCTGGAGGAGGAGATATGAGAGACAATTGGAGAAGTGAATTATATAAAATATA  
AAGTAGTACAAATTGAACCACTA---GGAGTAGCACCCACCAAGGCAAGGAGAAGGGTGGTG-----

-----GAGAGAGAAAAAGAGCA--GTTGCTGGACTTGGAGCT-----  
---GTCCTCTTTGGGTTCTTAGGAGCA--GCAGGAAGCACTATG--GGCGGGCGTCA---  
ATAACGCTGACGGTACAG--GCCAGACAA--TTATTG--TCTGGCATAGTGCAACAGCAAAGC--  
AATTTG--CTGAAT--GCTATAGAGGCTCAACAGAATCTGTTGAGACTCACGGTCTGGGGCATT  
>AY371165..1  
TTCTATTGTAATACAGCAAGCCTGTTTAAACAGTACTTGGGGACCAGGGTCAAATAACACGAATGACCCTAGTA  
AC-----  
-----  
ACGAGTGACACTATAATTCTCCCGTGCAGAATAAAGCAAATTATAAATATGTGGCAGAGAGCAGGACAAGCAA  
TGTATGCCCCCTCCCATCCAGGAATAATAAAGTGTGAATCAAAC---  
ATTACAGGACTACTATTGACAAGAGATGGTGGGGATAATAATAGT-----  
-----  
-----  
ACAAATGAGACTTTTCAGACCTGGAGGAGGAGATATGAGAGACAATTGGAGAAGTGAATTATTTAAATATAAAG  
TAGTAAAAATTGAACCACTA--GGAGTAGCACCCACCAAGGCAAAGAGAAGAGTGGTG-----  
-----GAAAGAGAAAAAGAGCA--GTTGGA--TTTGGAGCT-----  
GTCTTCCTTGGGTTCTTAGGAGCA--GCAGGAAGCACTATG--GGCGGGCGTCA---  
ATAACGCTGACGGTACAG--GCCAGACAA--TTATTG--TCTGGCATAGTGCAACAGCAAAGC--  
AATTTG--CTGAGG--GCTATAGAGGCTCAACAGCATATGTTGAGACTCACAGTCTGGGGCATT  
>JN864049..1  
TTCTATTGCAATACATCAGGCCTGTTTAAATAGCACTTGGCATAATAATGACACTGGCAGTGGGGCAGAGTACC  
AGAGC-----  
-----  
ACGAATGATAGTATAACTCTCCCGTGCAAAATAAAGCAAATTATAAATATGTGGCAGAGAGTAGGACAAGCAA  
TGTATGCTCCTCCCATCCAGGAATAATAGAGTGTAAGTCAAAC---  
ATTACAGGACTACTGTTGACACGAGATGGTGGAAATGGTAGTGAC-----  
-----  
-----  
AGTGCAAATGAGACTTTTCAGACCTGGAGGAGGAGATATGAGAGACAATTGGAGAAGTGAATTATATAAATATA  
AAGTAGTAAAAATTGAACCACTA--GGAGTAGCACCCACTAAGGCAAAGAGAAGGGTGGTGGAA--AGA--  
-----AAGGTGGTGGAGAGAAAGAAAAGAGCA--ATTGGA--TTTGGAGCT-----  
---GTCTTCCTTGGGTTCTTAGGAGCA--GCCGGAAGCACTATG--GGCGGGCGTCA---  
ATAACGCTGACGGTACAG--GCCAGACAA--TTATTT--TCTGGCATAGTGACAGCAGCAAAGC--  
AATTTG--CTGAGG--GCTATAGAGGCTCAACAACAAATGTTGAAACTCACGGTCTGGGGCATT  
>JN864050..1  
TTCTATTGCAATACATCAGGCCTGTTTAAATAGCACTTGGTATCCAAATGGCAGCATGACAGGGTATACAAATG  
ACACAAAT-----  
-----  
GACAAATGGCACCATAATTCTCCCTTGCAGAATAAAGCAGGTTATAAATATGTGGCAGAGAGCAGGAAAAGCAA  
TGTATGCCCCCTCCCATCCAGGAGTAATAAGGTGTGAGTCAAAC--  
ATTACAGGACTACTATTAAACAAGAGATGGTGGGATAAACAGTACA-----  
-----  
-----  
GAGGAGACTTTTACCTGGAGGAGGAGATATGAGAGACAATTGGAGAAGTGAATTATATAAATATAAGGTAG  
TAAAAATTGAACCACTA--GGAGTAGCACCCACCCACTCAATGAGAAGAGTGGTG-----  
-----CAGAGAGAAAAAGAGCA--GTTGGA--TTGGGAGCT-----  
GTCTTCCTTGGGTTCTTAGGAGCA--GCAGGAAGCACTATG--GGCGGGCGTCA---  
ATAACGCTGACGGCACAG--GCCAGACAA--TTATTG--TCTGGCATAGTGCAACAGCAAAGC--  
AATTTG--CTGAGG--GCTATAGAGGCTCAACAGAATATGTTGAGACTCACGGTCTGGGGCATT  
>JN864051..1  
TTCTATTGCAATACATCAGGCCTGTTTAAATAGCACTTGGAAATTGGAATGACACTGTCAACACGACAGAGAACA  
ATGAT-----  
-----  
ACAAACGGCACTATAACTCTCCAGTGCAGAATAAAGCAAATTATAAATATGTGGCAGAGAGTAGGACAAGCAA  
TGTATGCCCCCTCCCATCCAGGAGTAATACGATGTGAGTCAAAC---  
ATTACAGGAATACTATTGACAAGGGATGGTGGGACTAATGACAGT-----  
-----  
-----  
AGTCTAAATGAGACTTTTCAGACCTGGGGGAGGAGATATGAAAGACAATTGGAGAAGTGAATTATATAAATATA  
AAGTAGTAAAAATTGAACCACTA--GGAGTAGCGCCCAAGGCAAAGGAGAAGGGTGGTG-----

-----CAGAGAGAAAAAGAGCA---ATTGGA---TTTGGAGCT-----  
 ---TTCTTCCTTGGGTTCTTAGGAGCA---GCAGGTAGCACTATG---GGCGCGGCGTCA---  
 CTGACGCTGACGGTACAG---GCCAGACAA---TTATTA---TCTGGCATAGTGCAACAGCAAAAC---  
 AATTTG---CTGAGG---GCTATAGAGGCTCAACAACAGATGTTGAGACTCACAGTCTGGGGCATT  
 >JN864058..1  
 TTCTATTGCAATACATCAGGCCTGTTCAATAGCACTTGGGAATAATAGCACTTGGGAATAACAACAGACATGTTTA  
 ATAGCACT-----  
 -----GGG---  
 AATGAGAATGAGAACATAACTCTCCCATGCAGAATAAAGCAAATTATAAATATGTGGCAGAGAACAGGACAAG  
 CAATGTATGCCCCCTCCCATCCCAGGAATAATAAAGTGTGAGTCAAAC---  
 ATTACAGGACTACTATTGACAAGAGATGGTGGGATTAATAACAAT-----  
 -----  
 TCAAAATGAGACTTTTACAGCTGGAGGAGGAGATATGAAAAGACAATTGGAGAAGTGAATTATACAAATATAAAG  
 TAGTAAAAATTGAACCACTA---GGAGTAGCACCCACCAGGGCAAGGAGAAGGGTGGTG-----  
 -----CAGAGAGAAAAAGAGCA---GTTGGA---TTGGGAGCT-----  
 GTCTTCCTTGGGTTCTTAGGAGCA---GCAGGAAGCACTATG---GGCGCGGCGTCA---  
 CTAACGCTGACGGTACAG---GCCAGACAA---TTGTTG---TCTGGCATAGTGCAACAGCAAAAC---  
 AATTTG---CTGCAG---GCTATAGAGGCTCAACAGCAGATGTTGAGACTCACGGTCTGGGGCATT  
 >FM877780..1  
 TTCTATTGTAATACATCAGGCCTGTTTAATAGCACTTGGAAAAATGGAGTTTGGGAAAGGGGCAGGATGAACC  
 AGACA-----  
 -----AAT---  
 GACACGAATGAAAACATAACACTCCCATGCAGGATAAAAACAAATTGTAAACATATGGCAGGAAGTAGGACAAG  
 CAATGTATGCCCCCTCCAGTTGCAGGAGAGATACAGTGTGTAACAAAC---  
 ATTACAGGAATAATATTGACAAGAGATGGGGGAATTAATAATGAG-----  
 -----  
 ACTACTGAGACCTTCAGACCTGGAGGAGGAAATATGAAGGACAATTGGAGAAGTGAGTTATACAAATATAAAG  
 TAGTAAACCTTGAACCACTA---GGAGTAGCACCCGACAAGGCAAAGAGAAGAGTGGTG-----  
 -----GAGAGAGAAAAAGAGCA---GTTGGA---CTGGGAGCT-----  
 CTTTTCTTGGGTTCTTAGGAACA---GCAGGAAGCACTATG---GGCGCGGCGTCA---  
 ATAACGCTGACGGTACAG---GCCAGACAA---TTATTG---TCTGGCATAGTGCAACAGCAAAGC---  
 AATTTG---CTGAGG---GCTATAGAGGCTCAACAGCATGTGTTGAAGCTCACCGTCTGGGGCATT  
 >FM877781..2  
 TTCTATTGTGATACATCAGGACTGTTTAATAGCAGTTGGCCAATTAATAGCAGCTGGCCAACATAAACAGTG  
 AG-----  
 -----  
 ACAAATGAAACAATAACACTCCCATGCAGGATAAAAACAAATTGTAAACATGTGGCAAGGAGTAGGACAAGCAA  
 TGTATGCCCCCTCCTATCGAAGGAGAGATACAGTGTATATCAAAT---  
 ATTACAGGAATAATATTGACAAGAGATGGGGGAAATAACAGTAAC-----  
 -----  
 ACTGAAATCTTCAGACCTGGAGGAGGAAATATGAAGGACAATTGGAGAAGTGAATTATATAAGTATAAGGTAG  
 TTCAAATTGAACCGCTG---GGAGTAGCACCCAGCGAGGCAAGGAGAAGAGTGGTG-----  
 -----CAGAGAGAAAAAGAGCA---GTAGGA---ATGGCAACT-----  
 CTTTTCTTGGGTTCTTGGGAACA---GCAGGAAGCACTATG---GGCGCAGCGTCA---  
 ATAACGCTGACGGTACAG---GCCAGAAAA---TTATTG---TCTGGCATAGTGCAACAGCAAAGC---  
 AATTTG---CTGAAG---GCTATAGAAGCTCAACAGCATATGTTGAAGCTCACAGTCTGGGGCATT  
 >FM877782..1  
 TTCTATTGTAACACATCAGGCCTGTTTAATAGAACTTGGAAAGATGGCAATTGGACCACCCAGGAAAATGGG-  
 -----  
 -----  
 ACAAATGAAAACATAACACTCCCATGCAGGATAAAAACAAATTGTACGCATGTGGCAAGAAGTAGGACAAGCAA  
 TGTATGCCCCCTCCTGTGCGAGGAATGATACAGTGTATATCAAAT---  
 ATTACAGGATTAATATTGACAAGAGATGGGGGGAAAGATAAGAAT-----  
 -----  
 GATACTGAGATCTTCAGACCTGGAGGAGGAAATATGAAAAGACAATTGGAGAAGTGAATTATATAAGTATAAAG  
 TAGTACAAATTGAGCCACTA---GGATTAGCACCTACCAAGGCAAGGAGAAGAGTGGTG-----

-----GAGAGAGAAAAAAGAGCA---GTTGGA---ATGGGAGCT-----  
 CTTTTCCTTGGGTTCTTGGGAGCA---GCCGGAAGCACTATG---GGCGCGGCGTCA---  
 ATAACGCTGACGGTACAG---GCCAGACAA---TTGCTG---TCTGGCATAGTGCAACAGCAAAGC---  
 AATTTG---CTGAGG---GCTATAGAAGCTCAACAGCATATGTTGAAGCTCACAGTCTGGGGCATT  
 >AM851091..2  
 TTCTATTGCGATACAAAAGAACTGTTTAATAGTACCTGGAATAAGAGCACCAATGGCACCTGGACTAAGAACA  
 GCACCACTGGC-----  
 -----GAGACA-----  
 GGGAACACAGCAAATATTACACTGCAATGCAGAATAAAACAAATTGTAAACATGTGGCAGAGAACAGGACAAG  
 CAATATATGCCCCCTCTATTAGAGGAATAATTCAGTGTGAATCAAAT---  
 ATTACAGGGATACTATTGACAAGAGATAGG---CATAATCATACT-----  
 -----  
 -----  
 AATGAGACCTTCAGACCTGGAGGAGGAAATATGAAGGACAATTGGAGAAATGAATTATATAAATATAAAGTAG  
 TAGAAATTGAACCACTA---GGAATAGCACCCACCAGGGCAAAAAGGAGAGTGGTG-----  
 -----GAGAGAGAAAAAAGAGCA---GTGGGA---ATAGGAGCT-----  
 TTGATCTTTGGGTTCTTAGGAGCA---GCAGGAAGCACTATG---GGCGCGGCGTCA---  
 ATAACGCTGACGGTACAT---GCCAGACAA---TTATTG---TCTGGTATAGTGCAACAGCAAAGC---  
 AATTTG---CTGAGG---GCTATAGAGGCGCAACAGCATATGTTGCAACTCACAGTCTGGGGCATT  
 >JF804811..2  
 TTCTACTGTAATACATCACTGCTGTTTAATACTACTTGGGAGAAGCATAATACCACTCAACCTTGGATAATGA  
 AAAATGAACCT-----  
 -----GGGTAT-----  
 GATGTGAATAGGAATATCACACTCCACTGCAGAATAAAACAAATTATAAACAGGTGGCAGGAAGTAGGAAAAG  
 CAATGTATGCCCCCTCCCATCAGTGGAATAATTAAGTGTATCAAAT---  
 ATTACAGGGCTGTTACTAACAAGAGATGGAGGTCCAAACGGGACC-----  
 -----  
 -----  
 CAAAATGAGACCTTCAGACCTCAAGGAGGAGATATGAGAGACAATTGGAGAAGTGTATTATATAAATATAAAG  
 TAGTAAAAATTGAGCCATTA---GGGGTAGCACCCACCAGGGCAAAGAGAAGAGTGGTG-----  
 -----CAGAGAGAAAAAAGAGCA---GTGGGA---CTGGGAGTC-----  
 TTGTTCCCTTGGGTTCTTGGGAGCA---GCAGGAAGCACTATG---GGCGCAGCATCA---  
 ATAACGCTGACGGTACAG---GCCAGACAG---TTATTG---TCTGGTATAGTGCAACAGCAAAAC---  
 AATTTG---CTGAGG---GCTATTGAGGCGCAACAGCATCTGTTGCAGCTCACAGTCTGGGGCATT  
 >EF158043..2  
 TTCTATTGTAATACATCAGGCCTGTTTAATAGCACTTGGAAATATCAATGGCAGCGGAGGGTTTAATAGC---  
 -----  
 -----  
 ACAAATGACAACATAACTCTCCCATGTAGAATAAAGCAAATTATAAATATGTGGCAGAGAACAGGACAAGCAA  
 TGTATGCCCCCTCCCATCAAAGGAGAAATCAGGTGTGTATCAAAC---  
 ATTACAGGACTATTGTTGACAAGAGATGGTGGTGGTAATGCGAGT-----  
 -----  
 -----  
 CAGAAATGAGACCTTCAGACCTGGAGGAGGAGATATGAGAGACAATTGGAGAAGTGAATTATACAAATATAAAG  
 TAGTAAAAATTGAACCACTA---GGAGTAGCACCCACCGGGCAAAGAGAAGAGTGGTG-----  
 -----GAGAGAGAAAAAAGAGCA---GTTGGA---CTAGGAGCT-----  
 GTGTTTCATTGGGTTTTTATAGGAGCA---GCCGGAAGCACTATG---GGCGCGGCGTCA---  
 GTGACGCTGACGGTACAG---GCCAGGCAA---TTATTG---TCTGGCATAGTGCAACAGCAAAGC---  
 AATTTG---CTGAGG---GCTATAGAGGCTCAACAGCATGTGTTGAGGCTCACGGTCTGGGGCATT  
 >EF158040..2  
 TTCTATTGTGATACATCAGGTCTGTTTAATAGCGCTTGGAAATGGCACCAATGGCAACGAAATGTCAAATATC-  
 -----  
 -----  
 ACAAATGGCACTATAACTCTCCAATGCAGAATAAAGCAAATTGTAAATATGTGGCAGAGAGTAGGACAGGCAA  
 TGTATGCCCCCTCCCATCCAGGAGTAATCAGGTGTGTATCAAAC---  
 ATTACCGGACTATTGTTAACAAGAGATGGTGGTCAGGATAATGGG-----  
 -----  
 -----  
 AGTAGTGAGATCTTCAGACCTGGAGGAGGAGATATGAGAGACAATTGGAGAAGTGAATTATATAAATATAAAG  
 TAGTACAACTTGAACCACTA---GGAGTAGCACCCACTAAGGCAAGGAGAAGAGTGGTG-----

-----GAGAGAGAAAAAAGAGCA---GTTGGA---ATAGGAGCT-----  
GTGTTTCATTGGGTTCTTAGGAGCA---GCAGGAAGCACTATG---GGCGCAGCGTCA---  
ATGACGCTGACGGTACAG---GCCAGACAA---TTATTG---TCTGGCATAGTGCAACAGCAAAGT---  
AATTTG---CTGAGG---GCTATAGAGGCTCAACAGCATATGTTGAAACTCACGGTCTGGGGCATT  
>EF158041..1  
TTCTATTGTGATACATCAGGCCTGTTTAACAGTACCTGGAATATCACTGACATAGGAGAGCCAAATAGCACAA  
AT-----  
-----  
AGCACAAATGACACTATAACTCTCCCATGCAGAATAAAGCAAATTATAAATATGTGGCAGAGAACAGGACAAG  
CAATATATGCCCCCTCCCATCCGAGGAGAAATCAGGTGTGTATCAAAC---  
ATTACAGGACTATTGTTGACAAGAGATGGTGGTACTAATAACAGT-----  
-----  
-----  
AGTCTGAATGAGACCTTCAGACCTGGAGGAGGAGATATGAGAGACAACCTGGAGAAGCGAATTATACAAATATA  
AAGTAGTAAAACCTTGAACCACTA---GGAGTAGCACCCACCAGGGCAAAGAGAAGAGTGGTG-----  
-----GAGAGAGAAAAAAGAGCA---GTCGGA---CTGGGAGCT-----  
---ATGTTTCATTGGGTTCTTAGGAGCA---GCAGGAAGCACTATG---GGCGCGGCGTCA---  
ATGACGCTGACGGTACAG---GCCAGACAA---TTATTG---TCTGGCATAGTGCAACAGCAAAGC---  
AATTTG---CTGAGG---GCTATAGAGGCTCAACAGCATATGTTGAAACTCACGGTCTGGGGCATT  
>EF158042..1  
TTCTATTGTAATACATCAGGACTGTTTAACAGCACTTGGAAAATCAATGCCAGCGAAGAGTTAAATAGCACAA  
AT-----  
-----  
GACAAATGTAACCTATAACTCTCCCATGCAGAATAAAGCAAATTATAAATATGTGGCAGAGAACAGGACAGGCAA  
TGTATGCCCCCTCCCATCCGAGGAGAAATTAGGTGTGTATCAAAC---  
ATTACAGGAATATTGTTGACCAGAGATGGTGGTAGAGTTAATGAA-----  
-----  
-----  
AGTCTAAATGAGACCTTCAGACCTGGAGGAGGAGATATGAGAGACAATTGGAGAAGTGAATTATACAAATATA  
AAGTAGTAAAAATTGAACCACTA---GGAGTAGCACCCACCAGGGCAAAGAGAAGAGTGGTG-----  
-----GAGAGAGAAAAAAGAGCA---GTTGGA---CTGGGAGCT-----  
---GTGTTTCATTGGGTTCTTAGGAGCA---GCAGGAAGCACTATG---GGCGCGGCGTCA---  
GTGACGCTGACGGTACAG---GCCAGACAA---TTATTG---TCGGGCATAGTGCAACAGCAAAGC---  
AATTTG---CTGAGG---GCTATAGAGGCTCAACAGCATATGTTGAAACTCACGGTCTGGGGCATT  
>GQ477443..2  
TTCTATTGTGATACATCAGGCCTGTTTAATAGCACTTGGAAATATCAGTGGCAGCGAAGAGTTAAATAGC---  
-----  
-----  
ACAAATGACATAATAACTCTCCCATGCAGAATAAAGCAAATTATAAATCTATGGCAGAGAATAGGGCAAGCAA  
TGTATGCCCCCTCCCATCCGAGGAGAAATTAGGTGTGAATCAAGC---  
ATTACAGGACTATTGTTGACAAGAGATGGTGGTGTAAATGGGAGT-----  
-----  
-----  
CAGAAATGAAACCTTCAGACCTGGAGGAGGAGATATGAGAGACAATTGGCGAAGTGAATTATACAAATATAAAG  
TAGTAGAACTTGAACCACTA---GGAGTAGCTCCCACCAGGGCAAAGAGAAGAGTGGTG-----  
-----GAGAGAGAAAAAAGAGCA---GTCGGA---CTAGGAGCT-----  
ATGTTTCATTGGGTTCTTAGGAGCA---GCAGGAAGCACTATG---GGCGCGGCGTCA---  
ATGACGCTGACGGTACAG---GCCAGACAA---TTATTG---TCTGGCATAGTGCAACAGCAAAGT---  
AATTTG---CTGAGG---GCTATAGAGGCTCAACAGCATATGTTGAAACTCACGGTCTGGGGCATT  
>GQ477442..3  
TTCTATTGTAATACATCAGGCCTGTTTAATAGCACTTGGAAATATCAATGGCAGTGAAGGGGTAAATAGC---  
-----  
-----  
ACAAATGTCAATATAACTCTCCCATGCAGAATAAAGCAAATTTATAAATATGTGGCAGAGAACAGGACAAGCAA  
TGTATGCCCCCTCCCATCAAGGAGAAATCAGGTGTGTATCAAAC---  
ATTACAGGACTATTGTTGACAAGAGATGGTGGTAATGGTAATGACAGT-----  
-----  
-----  
CAGGCTAATGAGACCTTCAGACCTGGAGGAGGAGATATGAGAGACAATTGGAGAAGTGAATTATACAAATATA  
AAGTAGTAAAACCTTGAACCACTA---GGAGTAGCACCCACCAGGGCAAAGAGAAGAGTGGTG-----

-----GAGAGAGAAAAAGAGCA---GTTGGA---ATAGGAGCT-----  
---GTGTTTCATTGGGTTCTTAGGAGCA---GCAGGAAGCACTATG---GGCGCGGCGTCA---  
ATGACGCTGACGGTACAG---GCCAGACAA---TTATTG---TCTGGCATAGTGCAACAGCAAAGC---  
AATTTG---CTGAAG---GCTATAGAGGCTCAACAGCATATGTTGAGACTCACGGTCTGGGGCATT  
>GQ477446..1  
TTCTATTGTAATACATCAGGCCTGTTTAACAATAGCCTGTTTAACAGCAGCGGAGAGTCA-----  
-----  
-----  
GATAGCACAAATATAACTCTCCCATGCAGAATAAAGCAAATTATAAATATGTGGCAGAGAACAGGACAAGCAA  
TGTATGCCCCCTCCCATCCGAGGAGAAATCAGGTGTGTATCAAAC---  
ATTACAGGACTATTGTTGACAAGAGATGGTGGTGCTAATGAGAAT-----  
-----  
-----  
GAGAGTGAGACCTTCAGACCTGGAGGAGGAGATATGAGAGATAATTGGAGAAGTGAATTATACAAATATAAAG  
TAGTAAAAATTGAACCACTA---GGAGTAGCACCCACCAAGGCAAAGAGAAGAGTGGTG-----  
-----GAGAGAGAAAAAGAGCA---GTTGGA---CTGGGAGCT-----  
TTGTTTCATTGGGTTCTTAGGAGCA---GCAGGAAGCACTATG---GGCGCGGCGTCA---  
GTGACGCTGACGGTACAG---GCCAGACAA---TTATTG---TCTGGCATAGTGCAACAGCAAAGC---  
AATTTG---CTGAAG---GCTATAGAGGCTCAACAGCATATGTTGAGACTCACGGTCTGGGGCATT  
>GQ477448..4  
TTCTATTGTAATACATCAGGCCTGTTTAACAGCACTTGGGATAATAGCACTTGGTATAACAATGGCAGCCAAA  
GGTCA-----  
-----AAT---  
AGCACAAAGTGGCATTATAACTCTCCCATGCAGAATAAAGCAAATTATAAATATGTGGCAGAGAACAGGACAAG  
CAATGTATGCCCCCTCCCATCAAGGAGAAATCAAGTGTATATCAAAC---  
ATTACAGGACTATTGTTGACAAGAGATGGTGGTAATCATGATGGTAAT-----  
-----  
-----  
GAGAGTCAGGAGACCTTCAGACCTGGAGGAGGAGATATGAGAGACAATTGGAGAAGTGAATTATACAAATATA  
AAGTAGTAAAAATTGAACCACTA---GGAGTAGCACCTACCAGGGCAAGGAGAAGAGTGGTG-----  
-----GAGAGAGAAAAAGAGCA---GTTGGA---CTAGGAGCT-----  
---GTGTTTCATTGGGTTCTTAGGAGCA---GCAGGAAGCACTATG---GGCGCGGCGTCA---  
GTGACGCTGACGGTACAG---GCCAGACAA---TTGCTG---TCTGGCATAGTGCAACAGCAAAGC---  
AATTTG---CTAAG---GCTATAGAGGCTCAACAGCAGATGTTGAGACTCACAGTCTGGGGCATT  
>AB703608..3  
TTCTATTGTAATACATCAGGCCTGTTTAACAGCACTTGGGAATACCAATGGCAGCGAAGGGTCAACAGAC---  
-----  
-----  
ACAAGTGGCAATATAACTCTCCAATGCAGAATAAAGCAAATTATAAATATGTGGCAGAGAACAGGACAAGCAA  
TATATGCCCCCTCCCATCCGAGGAGAAATCATGTGTAAATCAAAC---  
ATTACAGGACTATTGTTAAACAAGAGATGGTGGTGGTGGTAATCAG-----  
-----  
-----  
AGTCAGAATGAGACCTTCAGACCTGGAGGAGGAGATATGAGAGACAATTGGAGAAGTGAATTATACAAATATA  
AAGTAGTAAAAATTGAACCACTA---GGAGTAGCACCCACCAAGGCAAAGAGAAGAGTGGTG-----  
-----CAGAGAGAAAAAGAGCA---GTTGGA---CTGGGAGCT-----  
---TTGTTTCATTGGGTTCTTAGGAGCA---GCAGGAAGCACTATG---GGCGCGGCGTCA---  
GTGACGCTGACGGTACAG---GCCAGACAA---TTATTG---TCTGGCATAGTGCAACAGCAAAC---  
AACTTG---CTGAGG---GCTATAGAGGCTCAACAGCATATGTTGAACTCACGGTCTGGGGCATT  
>AB703615..1  
TTCTATTGTAATACATCAAACCTGTTTAGTAGCACTTGGTTTATCAATGGCAGCGGAGAGTCACATAATAAAA  
ATGGC-----  
-----  
ACTAATGACACTATAACTCTCCAATGCAGAATAAAGCAAATTATAAATCTGTGGCAGAGAACAGGACAAGCAA  
TGTATGCCCCCTCCCATCCAAGGAGAAATTAGGTGTGTATCAAAC---  
ATTACAGGACTGTTGTTGACAAGAGATGGTGGTGGTAAATGTGAGC-----  
-----  
-----  
AATGAGACTGAAACCTTCAGACCTGGAGGAGGAGATATGAGAGACAATTGGAGAAATGAATTATACAAATATA  
AAGTAGTAAAAATTGAACCACTA---GGAGTAGCACCCACCAGGGCAAAGAGAAGAGTGGTG-----

-----GAGAGAGAAAAAGAGCA---GTTGGA---CTAGGAGCT-----  
---GTGTTTCATTGGGTTCTTAGGAGCA---GCAGGAAGCACTATG---GGCGCGGCGTCA---  
GTGACGCTGACGGTACAG---GCCAGACAA---TTATTG---TCTGGCATAGTGCAACAGCAAAGC---  
AATTTG---CTGAGG---GCTATAGAGGCTCAACAGCATATGTTGAAACTCACGGTCTGGGGCATT  
>AB703609..2  
TTCTATTGTAATACATCAGGCCTGTTTAAACAGTACTTGGAATATCAATGGCAGCGGAGGGTTAGATAAC-----  
-----  
-----  
ACAAATGATAATATAACTCTCCAATGCAGAATAAAGCAAATTATAAATATGTGGCAGAGAACAGGGCAAGCAA  
TGTATGCCCCCTCCCATCCGAGGAGAAATCAGGTGTGTATCAAAC---  
ATTACCGGACTATTGTTGACAAGAGATGGTGGTAATAATAGTGAG-----  
-----  
-----  
AGTCAGGAGACCTTCAGACCTGGAGGAGGAGATATGAGAGACAATTGGAGAAGTGAATTATACAAATATAAAG  
TAGTAAAAATTGAACCAATA---GGAGTAGCACCCACCAAGGCAAAAGAAGAGTAGTG-----  
-----GAGAGAGAAAAAGAGCA---GTTGGA---CTGGGAGCT-----  
ATGTTTCATTGGGTTCTTAGGAGCA---GCAGGAAGCACTATG---GGCGCGGCGTCA---  
GTGACGCTGACGGTACAG---GCCAGACAA---TTATTG---TCTGGCATAGTGCAACAGCAAGGC---  
AACTTG---CTGAGG---GCCATCGAGGCTCAACAGCATATGTTGAGACTCACAGTCTGGGGCATT  
>AB703611..1  
TTCTATTGTAATACGTCAGGTCTGTTTAAACAGTACTTGGAATGTCACTGGCAGCAAAGAGTCACATAGC-----  
-----  
-----  
CCAAATGATACTATAACTCTCCCATGCAGAATAAAGCAAATTATAAATATGTGGCAGAGAACAGGACAAGCAA  
TGTATGCCCCCTCCCATCAAAGGAGAAATCAGGTGTGTATCAAAC---  
ATTACAGGACTATTGTTGACAAGAGATGGTGGGGTTAATAACAGC-----  
-----  
-----  
CAGAAATGAGACCTTCAGACCTGGAGGAGGGAATATGAGAGACAATTGGAGAAGTGAATTATACAAATATAAAG  
TAGTGAAAATTGAACCACTA---GGAGTAGCACCCACCAGGGCAAAGAGAAGAGTGGTG-----  
-----GAGAGAGAAAAAGAGCA---GTAGGA---CTGGGAGCT-----  
GTGTTTCATTGGGTTCTTAGGAGCA---GCAGGAAGCACTATG---GGCGCAGCGTCA---  
ATGACGCTGACGGTACAG---GCCAGACAA---TTATTG---TCTGGCATAGTGCAACAGCAAAGT---  
AATTTG---CTGAAG---GCTATAGAGGCTCAACAGCATATGTTGAAACTCACGGTCTGGGGCATT  
>AB703612..3  
TTCTATTGTAATACATCAGGCCTGTTTAAATAGCACTTGGCCTATCAATGGTAGCAGCGAAGGGAAAAATAGC-----  
-----  
-----  
ACAGATGACACTATAACTCTCCACGCAGAATAAAGCAGATTATAAATATGTGGCAGAGAACAGGACAAGCAA  
TGTATGCCCCCTCCCATTAAGGAGAAATCAGATGTGTATCAAAC---  
ATTACAGGAATATTGTTGACAAGAGATGGTGGTGAGGGGAATCAGACTGAGGGG-----  
AATCAAACCTGAGGGGAAC-----  
-----  
CGGACCGAGACCTTCAGACCTGGAGGAGGAGATATGAGAGACAATTGGAGAAGTGAATTATACAAATATAAAG  
TAGTAGAACTTGAACCACTA---GGAGTAGCACCCACCAAGGCAAAGAGAAGAGTGGTG-----  
-----GAGAGAGAAAAAGAGCA---GTTGGA---CTAGGAGCT-----  
GTGTTTCATTGGGTTCTTGGGAGCA---GCAGGAAGCACTATG---GGCGCGGCGTCA---  
ATGACGCTGACGGTACAG---GCCAGACAA---TTATTG---TCTGGCATAGTGCAACAGCAAAGC---  
AATTTG---CTGAGG---GCTATAGAGGCTCAACAGCAGACGTTGAGACTCACGGTCTGGGGCATT  
>AB703613..2  
TTCTATTGTAATACATCGAGCCTGTTTAAACAGCACTTGGTATAACAATGGCAGCAAAGAGTTAAATAGC-----  
-----  
-----  
GCAAATGGCATTATAAAACTCCCATGTAGAATAAAGCAAATTATAAATACGTGGCAGAGAACAGGACAAGCAA  
TGTATGCCCCCTCCCATCCGAGGAGAAATTAGGTGTGAATCAAAC---  
ATTACAGGACTATTGTTGACAAGAGATGGTGGAAATGATACTAAT-----  
-----  
-----  
CAGACTGAGACCTTCAGACCTGGAGGAGGAGATATGAGAGACAATTGGAGAAGTGAATTATACAAATATAAAG  
TAGTAAAAATTGAACCACTA---GGAGTAGCACCCACCAAGGCAAAGAGAAGAGTGGTG-----

-----GAGAGAGAAAAAAGAGCA---TTTGGA---CTGGGAGCT-----  
TTGTTTCGTTGGGTTCTTAGGAGCA---GCAGGAAGCACTATG---GGCGCGGCGTCA---  
GTGACGCTGACGGTACAG---GCCAGACAA---TTATTG---TCTGGCATAGTGCAACAGCAAAGC---  
AATTTG---CTGAGG---GCTATAGAGGCTCAACAGCATATGTTGAAACTCACGGTCTGGGGCATT  
>AB703614..1  
TTCTATTGTAATACATCAGGCCTGTTTAACAGCGCTTGGAAATATCACTGGCAGCAGCGAAGGGTTAAATAGT-  
-----  
-----  
ACAAATGACACTATAACTCTCCCATGCAGAATAAAGCAAATTATAAATATGTGGCAGAGAATAGGACAAGCAA  
TGTATGCCCCCTCCCATCCAAGGAGTAATCAGGTGTGAATCAAAC---  
ATTACAGGACTATTGTTGACACGAGATGGTGGTAATAATAGGAATGAGAGT-----  
-----  
-----  
GAAAAATGAGACTGAGACCTTCAGACCTGGAGGGGGAGATATGAAAGATAATTGGAGAAGTGAATTATACAAAT  
ATAAAGTAGTAAACTTGAACCACTA---GGAGTAGCACCCACCAGGGCAAAGAGAAGAGTGGTG-----  
-----GAGAGAGAAAAAAGAGCA---GCTGGA---CTGGGAGCT---  
-----GTGTTTCATTGGGTTCTTAGGAGCA---GCAGGAAGCACTATG---GGCGCGGCGTCA---  
ATGACGCTGACGGTACAG---GCCAGACAA---TTATTG---TCTGGCATAGTGCAACAGCAAAGC---  
AATTTG---CTGAGG---GCTATAGAGGCTCAACAGCATATGTTGAAACTCACGGTCTGGGGCATT  
>EF087995..1  
TTCTATAGCGATACATCAGGCATGTTTAATAGCACTTGGGATAACAATAGCACTTGGAAATAACAATAGCAGCA  
TGACAGGG-----TCAAAT-----  
AACACAAATGACAATATAACACTCCCGTGTAGAATAAAGCAAGTTATAAATATGTGGCAGAGAGTAGGACAAG  
CAATGTATGCCCCCTCCCATCGCAGGAATAATAAGGTGTGAGTCAAAT---  
ATTACAGGACTACTATTGACAAGAGATGGTGGGAATACTAGCAGT-----  
-----  
ACAAATGAGACTTTTCAGACCAGGAGGAGGAGATATGAGGGACAATTGGAGAAGTGAATTATATAAGTATAAGG  
TAGTACAAATTGAACCACTA---GGTGTGGCACCCACCCGTGCAAAAAGAAGGGTGGTG-----  
-----GAGAGAGAAAAAAGAGCAGTTGTTGGA---CTGGGAGCT-----  
GTCTTCCTTGGGTTCTTAGGAGCA---GCAGGAAGCACTATG---GGCGCGGCGTCA---  
ATAACGCTGACGGTACAG---GCCAGACAA---TTACTG---TCCGGTATAGTGCAACAGCAAAGC---  
AATTTG---CTGAGG---GCTATAGAGGCTCAACAACATCTGTTGAAACTCACGGTCTGGGGCATT  
>EF087994..1  
TTCTATTGCAATACATCAGGCCTGTTTAATAGCACTTGGGGGTATAACAATAGCAACGTGACAAGGTTAAATA  
AC-----  
-----  
ACGAATGACACTATAATTCTCCCGTGTAAAATAAAGCAAATTATAAAGATGTGGCAGAGAGTAGGACAAGCAA  
TGTATGCCCCCTCCCATCGCAGGAAGGATAAGGTGTGAGTCAAAT---  
ATTACAGGACTACTATTGACAAGAGATGGTGGGAAAAATAACAGT-----  
-----  
-----  
ACAAATGAGACTTTTCAGACCAGGAGGAGGAGATATGAGGGACAATTGGAGGAGTGAATTATATAAGTATAAGG  
TAGTACAAATTGAACCACTA---GGTGTGGCACCCACCCGAGCAAAGAGAAGGGTGGTG-----  
-----GAGAGAGAAAAAAGAGCA---GTTGGA---CTGGGAGCT-----  
GTCTTCCTTGGGTTCTTAGGAGCA---GCAGGAAGCACTATG---GGCGCGGCGTCA---  
ATAACGCTGACGGTACAA---GCCAGACAA---TTACTG---TCCGGTATAGTGCAACAGCAAAGC---  
AATTTG---CTGAGG---GCTATAGAGGCTCAACAACATCTGTTGAAACTCACGGTCTGGGGCATT  
>EF116594..1  
TTCTACTGCAATACATCAGGCCTGTTCAATAGTACATGGAACACTACTACCAGCACGCAGATTCCAAATAGGA  
CT-----  
-----  
ACAGATGGGAATATAACTCTCCCTTGCAGAATAAAGCAAATTGTCAATATGTGGCAGAGAGTAGGACAAGCAA  
TGTATGCCCCCTCCCATCCAGGAGTAATAAGGTGTGAGTCCAAC---  
ATTACAGGACTAATGTTAACAAGAGATGGTGGGATTAACAAAACA-----  
-----  
-----  
GATAATGAGACCTTCAGACCTGGGGGAGGAGATATGAGGGATAATTGGAGAAGTGAATTATATAAGTATAAAG  
TAGTAAAAATTGAACCAATA---GGAATAGCACCCACCAAGGCAAGGAGAAGAGTGGTG-----

-----GAGAGAGAAAAAAGAGCA---GTTGGA---CTGGGAGCT-----  
 GTCTTCCTTGGGTTCTTAGGAGCA---GCAGGAAGCACTATG---GGCGCGGCGTCT---  
 ATAACGCTGACGGTACAG---GCTAGACAA---TTATTG---TCTGGCATAGTGCAACAGCAGAGC---  
 AACCTG---CTAAGG---GCTATAGAGGCTCAACAACATCTGTTGAAACTCACGGTCTGGGGCATT  
 >KP718917..2  
 TTCTATTGCAATACAACAAAACCTGTTCAATCACCTGTTCAATAATAGTGAGTGGGACAATGCAGCTAACAGC-  
 -----  
 -----  
 ACGAATGAGAGTATAACTCTCCCTTGCAGAATAAAGCAAATTATAAATATGTGGCAGAGAGTAGGACAAGCAA  
 TGTATGCCCCCTCCCATCCAGGAGAAATAAGGTGTAGATCTAAT---  
 ATTACAGGACTATTGTTAACAAGAGATGGTGGAAGCAACAATGCA-----  
 -----  
 -----  
 ACTAATGAAACCTTCAGACCTGGAGGAGGAGACATGAGGGACAATTGGAGAAGTGAATTATATAAGTATAAGG  
 TAGTGAAAATTGAACCAATA---GGAGTAGCACCCACCGGGGCAAGGAGAAGAGTGGTG-----  
 -----CAGAGAGAAAAAAGAGCA---GTTGGC---CTAGGAATT-----  
 GCCTTCCTTGGGTTCTTAGGAGCA---GCAGGAAGCACTATG---GGCGCGGCGGCC---  
 ATAACGCTGACGGTACAG---GCCAGACAA---TTGTTG---TCTGGCATAGTGCAACAGCAGAGC---  
 AATCTG---CTAAGG---GCTATAGAGGCTCAACAACACATGTTGAGACTCACGGTCTGGGGCATT  
 >AF377957..2  
 TTCTATTGCGATACAACAGGCCTGTTCAATAGTAGTTGGAGCTACAATGGCACGAGTTGGAATAAGACCACTA  
 CAAAT-----  
 -----GGC---  
 ACTACAAATGGCAATATAACTCTCCATTGCAGAATAAAACAAATTATAAATATGTGGCAGAGAGTAGGACAAG  
 CAATGTATGCCCCCTCCCATCCGAGGAGTAATAAGGTGTGAATCTAAC---  
 ATTACAGGATTGCTATTAACAAGAGATGGTGGAACAAACATAGT-----  
 -----  
 -----  
 AACACTACTGAAACCTTCAGACCTGGAGGAGGAGATATGAGGGACAATTGGAGAAGTGAATTATATAAGTATA  
 AAGTAGTAAAAATTGAACCAATA---GGAGTAGCACCTACCGGGGCAAGGAGAAGAACGGTG-----  
 -----GAGAGAGAGAAAAAGAGCA---GTTGGA---CTAGGAGCT-----  
 ---GTTTTTCTTGGATTCTTAGGAGCA---GCAGGAAGCACTATG---GGCGCGGCGTCT---  
 GTGACGCTGACGGTACAG---GCCAGACAA---TTATTG---TCTGGCATAGTGCAACAGCAGAGC---  
 AATCTG---CTGAGG---GCTATAGAGGCTCAACAACATCTGTTGAAACTCACGGTCTGGGGCATT  
 >JF683745..2  
 TTCTATTGCAATACAACAAACCTGTTCAATAGTGTTTGGACAGACGGGAAATGGAATAATACCATGAACAGCA  
 GTCAA-----  
 -----  
 TCAGATAGTAATAATATAACTCTCCATTGCAAAATAAAACAAATTGTAAGGATGTGGCAAAGAGTAGGACAAG  
 CAATGTATGCCCCCTCCCATCCGAGGAGTAATAAACTGTATATCCAAC---  
 ATTACAGGACTGCTATTAACAAGAGATGGTGCGCTAAGTAATAGG-----  
 -----  
 -----  
 ACAAATGAGACCTTCAGACCTGGAGGAGGAGATATGAGGGACAATTGGAGAAGTGAATTATATAAGTATAAAG  
 TAGTAAAAATTGATCCACTA---GGAGTAGCACCTCCAGGGCAAGGAGAAGAGTGGTG-----  
 -----GAGAGAGAAAAAAGAGCA---GTTGGA---CTGGGAGCT-----  
 ATGTTCTTTGGATTCTTAGGAGCA---GCAGGAAGCACTATG---GGCGCGGCGTCC---  
 TTAACGCTGACGGTACAG---GCCAGACAA---TTATTG---TCTGGCATAGTGCAACAGCAGAGC---  
 AATCTG---CTGAGG---GCTATAGAGGCTCAACAGCATCTGTTGAAACTCACGGTCTGGGGCATT  
 >FJ213783..2  
 TTCTACTGCAATACATCAAAACCTGTTTAATGACACAGCTTCC-----  
 -----  
 -----  
 AATAATGGTACCATCACTCTCCCATGTGCAATAAAACAAATTGTAAACATGTGGCAGGAAGTGGGACGAGCAA  
 TGTATACCGCTCCCATTCAGAGGACATTACCTGTAGATCAAAT---  
 ATTACAGGTCTACTATTGACAAGAGATGGTGGTCAGAAAAATAATGGAAGTTGT-----  
 -----  
 -----  
 ACAGAGGCAACTTGTACACAGATCTTCAGACCTCAGGGAGGAAATATGAAAGACAATTGGAGAAGTGAATTAT  
 AATAATATAAAGTAGTAGAAATTGAACCATTA---GGAATAGCACCCACCAGGGCAAAGAGAAGAGTGGTG--

-----CAGAGAGAAAAAGAGCA---GTGGGA---  
ATGGCAGCT-----GTGTTTCATTGGGTTCTTGGGAGCA---GCAGGAAGCACTATG---  
GGCGCGGCGTCA---ATAACGCTGACGGTACAG---GCCAGACAA---TTATTG---  
TCTGGAATAGTGCAACAGCAGAAC---AATCTG---CTGAGG---  
GCTATTGAAGCGCAACAGCATATGTTGCAGCTCACAGTCTGGGGCATT  
>FJ213780..1  
TTCTACTGCAATACATCAAACTGTTTGATAACATAGAAAAC-----  
-----  
AATGGAECTATCATTCTCCCATGTAAAATAAAACAAATAGTAAACATGTGGCAAGAAGTGGGACGAGCAATGT  
ATGCCGCTCCCATTCAGGAAACATTGTCTGTAACCTCAACT---  
ATTACAGGTCTACTCTTAACAAGAGATGGTGGTCATGGTAATGGCACA-----  
-----  
ATCAATAAGACAGAGATCTTCAGACCTGGGGGAGGAAATATGAAAGACAATTGGAGAAGTGAATTATATAAAAT  
ATAAAGTAGTAGAAATTGAACCATTA---GGAATAGCACCCACCAGGGCAAGGAGAAGAGTGGTG-----  
-----CAGAGAGATAAAAGAGCA---GTGGGA---ATGGCAGCT---  
-----ATGTTTCCTTGGGTTCTTGGGAGCA---GCAGGAAGCACTATG---GGCGCAGCGTCA---  
ATAACGCTGACGGTACAG---GCCAGACAA---TTATTG---TCTGGAATAGTGCAACAGCAAAGC---  
AATTTG---CTGAGG---GCTATTGAAGCGCAACAGCATATGTTGCAGCTCACAGTCTGGGGCATT  
>EU735535..1  
TTCTACTGCAATACATCAAACTCTGTTTAATGACACGATAGGC-----  
-----  
AATGGCACTATAATTCTCCCATGTAAAATAAGACAAATGTAAACATGTGGCAGGAAGTGGGACGAGCAATGT  
ATGCTGCTCCCATTCAGGAAACATTGCCTGTAACCTCAACT---  
ATTACAGGTCTACTATTGACAAGAGATGGTGGTAGTGGGAAGTAATGGT-----  
-----  
ACTAATCAAAATGAGACCTTCAGACCTGGGGGAGGAAATATGAAAGACAATTGGAGAAGTGAATTATACAAAT  
ATAAAGTAGTAGAAATTGAACCACTA---GGAATAGCACCCACCAGGGCACAAAGACAAGTGGTG-----  
-----AAGAGAGAAAAAGAGCA---GCA-----CTAGGAGTT---  
-----GTGTTTCCTTGGGTTCTTGGCAGCA---GCAGGAAGCACTATG---GGCGCGGCGTCA---  
ATAACGCTGACGGTACAG---GCCAGACAA---TTACTG---TCTGGAATAGTGCAACAGCAGAAT---  
AATCTG---CTGAAG---GCTATTGATGCGCAACAGCATCTGTTGCAGCTCACAGTCTGGGGCATT  
>EU735538..2  
TTCTACTGCAATACATCAGGACTGTTTAATGACACAGAAATTGAAGCTAATCACACAAATGCTAAT-----  
-----  
GATAATGACACTATCATTCTCCCATGTAAAATAAAACAGATGATAAACATGTGGCAGGAAGTAGGACGAGCAA  
TGTATGCTGCCCCCGTGGCAGGAAACATTATCTGTAACCTCAAT---  
ATTACAGGACTACTATTAAACAAGAGATGGTGGTAATAAGACTCATAAT-----  
-----  
GATACTAGGAATGAGATCTTTAGACCTGGAGGAGGAAATATGAAGGACAATTGGAGAAGTGAATTATATAAAT  
ATAAAGTAGTAAGAATTGAGCCATTA---GGAGTAGCACCCACCAGGGCAAGGAGAAGAGTGGTG-----  
-----CAGAGAGAAAAAGAGCA---GTAACA---ATGGGAGCT---  
-----ATGTTTCCTTGGGTTCTTGGGAGCA---GCAGGAAGCACTATG---GGCGCAGCGTCA---  
CTAACGCTGACGGTACAG---GCCAGACAA---TTATTG---TCTGGTATAGTGCAACAGCAGAAC---  
AATCTG---CTGAAG---GCTATTGAAGCGCAACAACATCTGTTGCAGCTCACAGTCTGGGGCATT  
>EU735537..1  
TTCTACTGCAATACATCAGGATTGTTTGATAATAACACAGGGACTGAC-----  
-----  
ACTAATGACACTATCACTCTCCCATGTAAAATAAAACAAATAGTAAATATGTGGCAAGAAGTAGGACGAGCAA  
TGTATGCCGCCCCCATTCAGGAAACATTACCTGTAACCTCAAGT---  
ATTACAGGACTACTATTGACAAGAGATGGTGGTCAGAATAATGAGACT-----  
-----  
AATAAATACTGAGACCTTCAGACCTGGGGGAGGAAATATGAAGGACAATTGGAGAAGTGAATTATATAAATATA

AAGTAGTAAAAATTGAGCCATTA---GGAGTAGCACCCACCAGGGCAAGGAGAAGAGTGGTG-----  
-----CAGAGAGAGAAAAAGAGCA---GTGACG---CTGGGAGCT-----  
---ATGTTCCCTTGGGTTCTTGGGAGCA---GCAGGAAGCACTATG---GGCGCAGCGGCA---  
ACAACGCTGACGGTACAG---GCCAGACAA---TTATTG---TCTGGTATAGTGCAGCAGCAAAGC---  
AATTTG---CTGAGG---GCTATTGAAGCGCAACAGCATATGTTGCAGCTCACAGTCTGGGGCATT  
>EU170155..2  
TTCTACTGCAATACAACAGAACTGTTTAATGACACAGAATCC-----  
-----  
-----  
AATAACACTATCATTACTCTCCCATGTCTGAATAAAACAAATTATAAACATGTGGCAGGAAGTGGGACGAGCAA  
TGTATGCTGCTCCCATTGCAGGAAACATTACCTGTTTCATCAAAT---  
ATTACAGGTCTACTATTGACAAGAGATGGTGGTCTGGCTAATCAGACT-----  
-----  
-----  
GGAAATCAGAATGACACCTTCAGACCTGGGGGAGGAGATATGAGAGACAATTGGAGAAGTGAATTATATAAAT  
ATAAAGTAGTAGAAATTGAGCCATTA---GGAATAGCACCCACCACAGCAAAGAGAAGAGTGGTG-----  
-----CAGAGAGAAAAAAGAGCA---GTG-----  
-----GGAAGCACTATG---GGCGCAGCGTCA---  
GTAACGCTGACGGTACAG---GCCAGACAA---TTATTG---TCTGGTATAGTGCAACAGCAGAAC---  
AATTTG---CTGAAG---GCTATTGAGGCGCAACAGCACCTGTTGCAACTCACAGTCTGGGGCATC  
>EU170139..1  
TTCTACTGTAATACAACAATACTGTTTAATGAAACAGGATTTAATGACACAAGA-----  
-----  
-----  
TCCAATGACACCATTACTCTCCCATGTCTGAATAAAACAGATTATAAACATGTGGCAGGAAGTGGGACGAGCAA  
TGTATACTGCTCCCATCGCAGGAAACATTGCTTGTTTCATCAAAT---  
ATTACAGGTCTACTATTGACAAGAGATGGTGGTAAGACTACTGAC-----  
-----  
-----  
AATCAGACTGACACCTTCAGACCTGGGGGAGGAGATATGAGAGACAATTGGAGAAGTGAATTATATAAATATA  
AAGTAGTAGAAATTGAGCCATTA---GGAATAGCACCCAATAAAGCAAGGAGAAGAGTGGTG-----  
-----CAGAGAGAAAAAAGAGCA---GTGGGG-----  
-----GGCGCAGCGTCA---  
GTAACGCTGACGGTACAG---GCCAGACAA---TTATTG---TCTGGTATAGTGCAACAGCAGAAT---  
AATTTG---CTGAGG---GCTATTGAGGCGCAACAGCACATGTTGCAACTCACAGTCTGGGGCATC  
>FN392874..1  
TTCTATTGCAATACATCAGGCCTATTTAATAGCACTTGGTCTGACAAAAATAATACAGACAGCAATAGCACGG  
AG-----  
-----  
TCAAATAGCACTATAACTCTTCCATGCAGAATAAAGCAAATTATAAATATGTGGCAGAGAGTAGGACGAGCAA  
TGTATGCTCCTCCCATCCGAGGAATAATAAAGTGTAATTCAAAC---  
ATTACAGGACTACTATTAAACAAGAGATGGTGGTGTAAATAATAGTACA-----  
-----  
-----  
AATGAGACCTTCAGACCAGGAGGAGGAGATATGAGGGACAATTGGAGAAGTGAATTATATAAGTATAAAGTAG  
TAAAAATTGAACCACTA---GGAGTAGCACCCACAAAGGCAAGGAGAAGAGTGGTG-----  
-----GAGAGAGAAAAAAGAGCA---GTTGGA---CTGGGAGCT-----  
TTCTTCCTTGGGTTCTTAGGAGCA---GCAGGAAGCACTATG---GGCGCAGCGGCA---  
GTAACGCTGACGGTACAG---GCTAGACAA---TTATTG---TCTGGCATAGTGCAACAGCAGAGC---  
AATCTG---CTGAGG---GCTATAGAGGCTCAGCAGCATCTGTTGAAACTCACGGTCTGGGGCATT  
>FN392876..2  
TTCTATTGCAATACATCAGGCCTGTTTAATACCACTTGGTACAACAATGGTTCAGACACTTGGTACAATGGTA  
CAAAT-----  
-----  
-----  
AGCACGGAGCCAATAACTCTTCAATGCAGAATAAAGCAAATTATAAATATGTGGCAGAGAGTAGGACAAGCAA  
TGTATGCCCCCTCCCATCCAGGAATAATACAATGTAACCTCAAGC---  
ATTACAGGAATACTATTAAACAAGAGATGGTGGTAACAATAGTACA-----  
-----  
-----  
AATGAGACCTTCAGACCTGGAGGAGGAGATATGAGGGACAATTGGAGAAGTGAATTATATAGGTATAAAGTAG

TACAAGTTGAACCACTA---GGAGTAGCACCCACCAGGGCAAAGAGAAGAGTGGTG-----  
-----GAGAGAGAAAAAGAGCA---GTTGGA---ATAGGGGCT-----  
GTCTTCCTTGGGTTCTTAGGAGCA---GCAGGAAGCACTATG---GGCGCAGCGTCA---  
ATAACGCTGACGGTACAG---GCCAGACAA---TTATTG---TCTGGCATAGTGCGACAGCAGAAC---  
AATCTG---CTGAAG---GCTATAGAGGCTCAACAGCATCTGTTGAAACTCACGGTCTGGGGCATT  
>EU448295..1  
TTCTATTGTAATACATCACAATTGTTTAATAGCACTTGGAGCCACAATGATACAGGCAGCACGAAGGAG----  
-----  
-----  
TACAAATGGCACTATACAACCTTCCATGCAGAATAAAAGCAAATTATAAATATGTGGCAGAGAGCAGGACGAGCAA  
TGTTTGCCCTCCCATCCAAGGAGCAATAAGGTGTGAATCAAAC---  
ATTACAGGACTATTATTAACAAGAGATGGTGGTAATGCAATGAGGCT-----  
-----  
-----  
AGAAATGAGACTGAGATCTTCAGACCTGGAGGAGGAGATATGAGGGACAATTGGAGAAGTGAATTATATAAGT  
ATAAAGTAGTACAAATTGAGCCACTA---GGAGTAGCACCCACCAGGGCAAGGAGAAGAGTGGTG-----  
-----GAGAGAGAAAAAGAGCAGTTGTTGGA---CTGGGAGCT---  
-----GTCTTCATTGGGTTCTTAGGAGCA---GCAGGAAGCACTATG---GGCGCAGCGGCA---  
GTGACGCTGACGGTACAG---GCCAGGCAA---TTATTG---TCTGGCATAGTGCAACAGCAGAGC---  
AATCTG---TTGAGG---GCTATAGAGGCTCAACAGCATCTGTTGAAGCTCACGGTCTGGGGCATT  
>DQ358801..2  
TTCTACTGCAATACATCAGGACTGTTTCAGTTTAATGACACAGAT-----  
-----  
-----  
TCCAATGACACTATCATTCTCCCATGTGCAATAAAACAAATTGTAAACATGTGGCAGGAAGTGGGGCGAGCAA  
TGTATGCCGCTCCCATTCAGGAAACATTACCTGTAACTCAAAT---  
ATTACAGGTCTACTATTGACAAGAGATGGTGGTCAGGATAATGGGACT-----  
-----  
-----  
AATGATATTGAGACCTTCAGACCTGGGGGAGGAAATATGAAAGACAACCTGGAGAAGTGAATTATATAAATATA  
AAGTAGTAGAAATTAATCCATTA---GGAATAGCACCTCCAGGGCAAAAAGACAAGTGGTG-----  
-----CAGAGAGAAAAAGAGCA---GCGGGA---ATAGCAGTT-----  
---ATGCTCTTTGGGTTCTTGGGAGCA---GCAGGAAGCACTATG---GGCGCGGCGTCA---  
ATGGCGCTGACGGTACAG---GCCAGACAA---TTATTG---TCTGGCATAGTGCAACAGCAGAAC---  
AATCTG---CTGAGA---GCTATTGAAGCGCAACAGCATCTGTTGCAGCTCACAGTCTGGGGCATT  
>DQ358802..2  
TTCTACTGCGATACATCAACACTGTTTAATGACAATGACACAGTA-----  
-----  
-----  
TCCAATGACACTATCACTCTCCCATGTAAATAAAACAAATTGTAAACATGTGGCAGGAAGTGGGGCGAGCAA  
TGTATGCCGCTCCCATTCAGGAGAAATTACCTGTAGATCAAAT---  
ATTACAGGTCTACTATTGACAAGAGATGGTGGCCGAAATATTAGTACT-----  
-----  
-----  
GATCAGCCTGAGATCTTCAGACCTGGGGGAGGAAATATGAAAGACAACCTGGAGAAGTGAATTATATAAATATA  
AAGTAGTAGAAATTGAGCCACTA---GGAGTAGCACCCACCGAGGCAAAAAGACAAGTGGTG-----  
-----AAGAGAAAAAAAGAGCA---GCGGGA---ATAACAGCT-----  
---TTGTTCCCTTGGGTTCTTGGGAGCA---  
GCAGGAAGCACTATGGGCGCAGCCTCAATGACGCTGACGGTACAGGACCAG---ACGAATTAT---  
TGGACTTGCCATATTGCAGTCCGCGGGAACAA---TCTGCT---GAGAGG---  
ACTATTGAAGCGCAACAGCATCTGTTGCAGCTCACAGTCTGGGGCATT  
>MG365771..3  
TTCTACTGCAATACATCAAACTGTTTAATAATGACACAGGATCCAATGACACTACAGGA-----  
-----  
-----  
TCCAATGACACTATCACTCTCCCATGTAGAATAAAACAAAGTTGTAAACATGTGGCAGGAAGTGGGGCGAGCAA  
TGTATGCCGCTCCCATTCAGGAGAAATTACCTGTAACTCAAAT---  
ATTACAGGTCTACTATTGACAAGAGATGGTGGTCACACTAGTACTAATGAGACT-----  
-----  
-----

AATCAGACTGAGACCTTCAGACCTGAGGGAGGAAATATGAAAGACAATTGGAGAAGTGAATTATATAAAATATA  
AAGTAGTAGAAATTCAGCCACTA---GGAGTAGCACCTCCAGGGCAAAAAGACCAGTGGTG-----  
-----CAGAGAGAAAAAAGAGCA---GTGGGA---CTAGGAGCT-----  
---ATGTTCCCTTGGGTTCTTGGGAGCA---GCAGGAAGCACTATG---GGCGCGGCGTCA---  
ATAACGCTGACGGTACAG---GCCAGACAA---TTATTG---TCTGGCATAGTGCAACAGCAGAAC---  
AATCTG---CTGAGG---GCTATTGAAGCGCAACAGCATCTGTTGCAGCTCACAGTCTGGGGCATT  
>HM026456..1  
TTCTACTGCAATACATCAGGACTGTTTAATGACACAGGATCC-----  
-----  
-----  
AACAAATGAGACTATCATTCTCCCATGTAGAATAAAACAAATGATAAACATGTGGCAGGAAGTGGGGCGAGCAA  
TGTATGCCGCCCGCTTGCAGGAAACATTACCTGTAACCTCGAAT---  
ATTACAGGTCTACTATTGACAAGAGATGGTGGTCTCTGGTAATAAG-----  
-----  
-----  
ACTCAAATCTTCAGACCTGGGGGAGGAGATATGAAAGACAACCTGGAGAAGTGAATTATACAAATATAAAGTAG  
TAGAAATTCAGCCACTA---GGAATAGCACCCACCAAGGCAAAAAGACAAGTGGTG-----  
-----ACGAGAGAAAAAAGAGCA---GTGGGA---CTGGGAGCG-----  
TTGTTCCCTTGGGTTCTTGGGAGCA---GCAGGAAGCACTATG---GGCGCGGCGTCA---  
ATAACGCTGACGGTACAG---GCCAGACAA---TTATTG---GCTGGCATAGTGCAACAGCAAAAC---  
AATTTG---CTGAGG---GCTATTGAAGCGCAACAGCATCTGTTGCAGCTCACAGTCTGGGGCATT  
>HM026459..1  
TTTTACTGCAATACATCAGGACTGTTTAATAATAATATCACACAA-----  
-----  
-----  
TCTAAGGACATTATCACCTCCCATGTCTGAATAAAACAAGTGGTAAACCTGTGGCAGGAAGTGGGGCGAGCAA  
TGTATGCCGCCCGCTTGAAGGAATAATTACCTGTAACCTCAAGT---  
ATTACAGGTCTACTATTGACAAGAGATGGTGGTCAGGGTAATAGTACT-----  
-----  
-----  
GATAATAACACTGAGATCTTTAGACCTGGGGGGGAAATATGAAAGACAACCTGGAGAAGTGAATTATATAAAAT  
ATAAAGTAGTAGAAATTGAGCCACTA---GGAGTAGCACCCACCGGGGCAAAAAGACAAGTGGTG-----  
-----AAGAGAGAGAAAAGAGCA---GTAGGGCTACTGGGAGCT---  
-----TTGTTCCCTTGGGTTCTTGGGAACA---GCAGGAAGCACTATG---GGCGCAGCGTCA---  
ATGGCGCTGACGGTACAG---GCCAGACAA---TTATTG---TCTGGCATAGTGCAACAGCAAAAC---  
AATTTG---CTGAGG---GCTATTGAAGCGCAACAACATCTGTTGCAGCTCACAGTCTGGGGCATT  
>HM026460..1  
TTCTACTGCAACACATCAAGACTGTTTAATGACACAGGATCCAGA-----  
-----  
-----  
TCCAATGACACTATCATTCTCCCATGTCTGAATAAAACAAATTGTAAACATGTGGCAGGAAGTGGGGCGAGCAA  
TGTATGCCGCTCCCATTCAGGAAATATTACCTGTAATTCAAAT---  
ATTACAGGTCTACTATTGACAAGAGATGGTGGTAATCAGACTGAGAGT-----  
-----  
-----  
AATAATAATGAGATCTTCAGACCTGGGGGAGGAAATATGAAAGACAACCTGGAGAAGTGAATTATATAAAATATA  
AGGTAGTAGAAATTGAGCCACTA---GGAATAGCACCCACCAAGGCAAGAAGACGAGTGGTGGCGAGAGAA---  
-----AAAAGAGCAGTGGTGGCGAGAGAAAAAAGAGCA---GTAGGA---CTAGGAGCT-----  
---ATGTTCAATTGGTATCTTGGGAGCA---GCAGGAAGCACTATG---GGCGCGGCGTCA---  
ATAACGCTGACGGTACAG---GCCAGACAA---TTATTG---TCTGGCATAGTGCAACAGCAGAGT---  
AATCTG---CTGAGG---GCTATTGAAGCGCAACAGCATCTGTTGCAGCTCACAGTCTGGGGCATT  
>AF192135..1  
TTCTATTGTAATACATCAGGATTGTTTAATAAATCATTATTGAATGAGACTAGTAATGAGACTACAGATGGT-  
-----  
-----  
GCAATAATACTATCACACTCACATGTAGAATAAAGCAAATTGTAGAATGTGGCAGAGAGTAGGACAAGCAA  
TATATGCCCTCCCATTCAGGAAACATTACATGCACATCAAAT---  
ATTACAGGATTGCTATTGACACGTGATGGGGGATATACAAATAATACT-----  
-----  
-----

AATGGAACAGAGATTTTCACACCTACAGGAAGAAATATGAGGGACAATTGGAGAAGTGAGTTATATAAATATA  
 AAGTGGTGAAGATTGAGCCAATA---GGAGTAGCACCCACCAGGGCAAAAAGAAGAGTGGTG-----  
 -----GGGAGAGAAAAAAGAGCA---GTAGGAATAATGGGAGCT-----  
 ---ATGTTCCCTTGGGTTCTTGGGAACA---GCAGGAAGCACTATG---GGCGCAGCGTCA---  
 ATAACGCTGACGGTACAG---GCCAGACAA---TTGTTG---TCTGGTATAGTGCAACAGCAAAGC---  
 AATTTG---CTGAAG---GCTATAGAGGCTCAACAGCACCTGTTGAGACTCACTGTCTGGGGCATT  
 >JN417239..1  
 TTCTATTGCAATACATCACACCTGTTTAATAGCACTTGGAATAACAGCACACAGGTGTCAAATAACACACAG-  
 -----  
 -----  
 TTAAATGACACTATAACTCTCCAATGCAGAATAAAACAAATTATAAACATGTGGCAGGGAGTAGGAAAAGCAA  
 TGTATGCCCCCTCCCATTGAAGGAAAGATTACATGTTTATCAAAT---  
 ATTACAGGACTAATATTAACAAGAGATGGTGGTGCAAAATAATAAT-----  
 -----  
 -----  
 AGTCAGAATGAGACTTTCAGACCTGCAGGAGGAGATATGAGAGACAATTGGAGAAGTGAATTATACAAATATA  
 AAGTAGTAAGACTTGAACCACTA---GGTCTAGCACCCACCAGGGCAAGGAGAAGAGTGGTG-----  
 -----GCAAGAGAAAAAAGAGCA---ATAGGA---CTAGGAGCT-----  
 ---ATGTTCCCTTGGGTTCTTGGGAGCA---GCAGGAAGCACAATG---GGCGCAGCGTCA---  
 CTGACGCTGACGGTACAG---GCCAGAAAA---TTATTG---TCTGGTATAGTGCAAGCAGCAAAAC---  
 AATTTG---CTGAGG---GCTATAGAGGCGCAACAACATTTGTTGCAACTCACAGTCTGGGGCATT  
 >JN882655..1  
 TTCTATTGCAATACATCAGGACTGTTTAATAGTACTTGGAATGACACTAGTACTTGGAATGAC-----  
 -----  
 -----  
 ACTGATAGGAATGTAACCTCTCCCATGCAGAATAAAGCAATTTATAAATATGTGGCAGAGAGTAGAGCGAGCAA  
 TGTATGCCCCCTCCCATCCGAGGAGACATAAAATGTGCATCAAAC---  
 ATCACTGGACTACTACTAACAAGAGATGGAGGGAATAATAATAGT-----  
 -----  
 -----  
 ACAAATGAGACCTTCAGGCCTGCAGGAGGAGATATGAGAGACAATTGGAGAAGTGAATTATATAAGTATAAGG  
 TAGTAAAAATTGAACCATTA---GGAATAGCACCCACCAGGGCAAAAAGGAGAGTAGTG-----  
 -----GGGAGAGAGAAAAAGAGCA---GTTGGA---ATGGGAGCT-----  
 GTCTTCCTTGGGTTCTTGGGAGCA---GCAGGAAGCACTATG---GGCGCGGCGTCA---  
 ATAACGCTGACGGTACAG---GCCAGACAA---TTATTG---TCTGGTATAGTGCAACAGCAAAAC---  
 AATTTG---CTGAAG---GCTATAGAGGCTCAACAACATATGTTGAGACTCACAGTTTGGGGCATT  
 >KC898985..1  
 TTCTATTGTAACACATCAGGCCTGTTTAATAGTACATACATACTTAATGGTACATACATGTACAGGGCTAATG  
 GTACAGACAAG-----AAT---  
 ACGACTGATGGTACAATTAGT-----  
 AATCCAACTCAACCATCACAATCCCATGTAGAATAAAGCAAATTGTAAACATGTGGCAGGAGGTGGGACAAG  
 CAATGTATGCCTCTCCCATTCAGGAAACATAACATGTAAATCAAAT---  
 ATCACAGGACTACTATTGGTACGTGATGGAGGTGGAGAGAAAAAT-----  
 -----  
 -----  
 GATACAGAAATCTTCAGACCTGGAGGAGGAGATATGAGGGACAATTGGAGAAGTGAATTATATAAATATAAAG  
 TGGTAGAAATTCAGCCATTG---GGGGTAGCACCCACTAAAGCAAAAAGGAGAGTAGTG-----  
 -----GAGAGAGAAAAAGAGAGCA---GTGGGA---ATAGGAGCT-----  
 GTGTTCCCTTGGGATCTTGAGTGTA---GCTGGAAGCACTATG---GGCGCGGCGTCA---  
 ATGGCGCTGACGGTACAG---GCCAGACAA---TTGCTG---TCTGGTATAGTGCAACAGCAGAAC---  
 AATTTG---CTGAGG---GCTATAGAGGCGCAACAGCATATGTTGCAACTCACGGTCTGGGGCATT  
 >KC899008..1  
 TTCTATTGTGATACATCAGGCCTGTTTAATGGTACATATGGTACATACGATCCTAATGGCACAGAAGGTAATT  
 CAAGC-----  
 -----TCAGAA-----  
 GGTAATTCAAAATTCATCATACTTCCATGCAGAATAAAGCAAATTATAAACATGTGGCAGGAGGTAGGACGAG  
 CAATGTATGCCCCCTCCCATTGAGGGAACATAACATGTAAATCAAAT---  
 ATCACAGGACTACTATTGGTACGTGATGGAGGAACCAAAATGAAACA-----  
 -----  
 -----

AAAAATGAAGAGATATTCAGACCTGAAGGAGGAGATATGAGGGACAATTGGAGAAGTGAATTATATAAAATATA  
AAGTGGTAGAAATTAAGCCATTG---GGAGTAGCACCCACTGAAGCAAAAAGGAGAGTAGTG-----  
-----GAGAGAGAAAAAAGAGCA---GTGGGA---CTAGGAGCT-----  
---GTGTTCCCTTGGGTTCTTGGGTGCA---GCCGGAAGCACTATG---GGCGCAGCGTCA---  
GTAGCGCTGACGGTACAG---GCCAGACAA---TTGCTG---TCTGGTATAGTGCAACAGCAAAAC---  
AATTTG---CTGAGG---GCTATAGAGGCGCAACAGCATATGTTGCAACTCACGGTCTGGGGCATT  
>JX679207..1  
TTCTATTGTAATACATCAAGACTATTTAATAGTACATACATGTCTAATGGTACATACACATACACAATTAATA  
GT-----  
-----  
AACATCTCAAACATCACAATTCATGCAGAATAAAGCAAATTGTAAACATGTGGCAGGAGGTAGGACGAGCAA  
TGTATGCCCCCTCCCATTCGAGGAAATATAACATGTAAATCAAAT---  
ATCACAGGACTACTATTGGTACGTGATGGAGGATCAAATGAGACT-----  
-----  
-----  
CAGCCAGAGATATTCAGACCTGGAGGAGGAGATATGAGGGACAATTGGAGAAGTGAATTATATAAAATATAAAG  
TGGTAGAAATTAAGCCATTG---GGACTAGCACCCACTACTGCAAAAAGGAGAGTAGTG-----  
-----GAGAGAGAAAAAAGAGCA---GTGGGA---ATAGGAGCT-----  
GTGTTCCCTTGGGTTCTTGGGTGCA---GCCGGAAGCACTATG---GGCGCGGCGTCA---  
ATAACGCTGACGGTACAG---GCCAGACAA---TTGTTG---TCTGGGATAGTGCAACAGCAAAGC---  
AATTTG---CTGAAG---GCTATAGAGGCGCAACAGCATCTGTTGCAACTCACGGTCTGGGGCATT  
>JN230353..1  
TTCTATTGCAATACATCAGCACTATTTAATAGCAGTTGGAATAGCACTGGGAATAGCACTGGGGTGAAT----  
-----  
-----  
ATCACTGACCCTATAAGACTCCCATGCAAAATAAAGCAAATTATAAATATGTGGCAGAGAGTAGGACAAGCAA  
TATATGCCCCCTCCTATCCCAGGAGTAATAAGGTGTAATTCAAAC---  
ATTACAGGAATACTATTAACAAGAGATGGAGGGACTGGGACTAACAGT-----  
-----  
-----  
ACAAATGAGACCGAGACCTTCAGACCTGGAGGAGGAGACATGAGGGATAATTGGAGAAGTGAATTATATAAGT  
ATAAAGTAGTAAAAATTGAACCACTA---GGTGTAGCACCCACCGGGGCAAAACGAAGAGTGGTG-----  
-----GAGAGAGGAAAAAGAGCAGTCGTCGGA---CTGGGAGCT---  
-----GTCTTCCTTGGGTTCTTAGGAACA---GCAGGAAGCACTATG---GGCGCAGCAGCA---  
TTAACGCTGACGGTACAG---GCCAGACAA---TTATTG---TCTGGTATAGTGCAACAGCAGAAC---  
AATCTG---CTGAGG---GCTATAGAGGCTCAACAGCACATGTTGAAACTCACGGTCTGGGGCATT  
>KC899009..1  
TTCTATTGTAATACATCAGGTCTGTTTAATGGAACATACATGCCTAATGGTACAATGGATAGTCCA-----  
-----  
-----  
AGCACAATCCCATGCAGAATAAAGCAAATTATAAACATGTGGCAGGAGGTAGGGCGAGCAATGTATGCCCCCTC  
CTATTGAAGGAAACATAACATGTCAATCAAAT---  
ATCACAGGAATACTATTGGTACGGGATGGAGAGTTAAATAGGACA-----  
-----  
-----  
GAAGAGATATTCAGACCTGGAGGAGGAGATATGAGGAACAATTGGAGAAGTGAATTATATAAAATATAAAGTGG  
TAGAAATTAAGCCATTG---GGAATAGCACCCACTGAAGCAAAAAGGAGAGTGGTG-----  
-----GAGAGAGAAAAAAGAGCA---GTGGGA---ATAGGAGCT-----  
GTGTTCCCTTGGGTTCTTGGGAGCA---GCAGGAAGCACTATG---GGCGCGGCGTCA---  
ATAACGCTGACGGTACAG---GCCAGACAA---TTGTTG---TCTGGGATAGTGCAACAGCAAAGC---  
AATTTG---CTGAGG---GCTATAGAGGCGCAACAGCATATGTTGCAACTCACGGTCTGGGGCATT  
>KC870043..1  
TTCTATTGTAATACATCAGGCCTGTTTAAGGGTACATACACTAATGGT-----  
-----  
-----ACATTAAGT-----  
AATTCAAGCTCAGACATCACAATCCCATGCAGAATAAAGCAAATTATAAACATGTGGCAGGAGGTAGGAAGAG  
CAATGTATGCCCCCTCCCATTTGAAGGAAACATAACATGTAAATCAAAT---  
ATCACAGGACTACTATTGGTACGTGATGGAGGT-----  
-----  
-

ACTTCTAATAATAATACAGAGGTATTTAGACCTGGAGGAGGAGATATGAGGGACAATTGGAGAAGTGAATTAT  
 ATAAATATAAAGTGGTAGAAATTAAGCCATTG---GGAGTAGCACCCACTGGAGCAAAAAGGAGAGTGGTG--  
 -----GAGAGAGAAAAAAGAGCA---GTGGGA---  
 ATAGGAGCT-----GTGTTCTTGGGTTCTTGGGAGCA---GCAGGAAGCACTATG---  
 GGCGCGGCGTCA---ATAACGCTGACGGTACAG---GCCAGACAA---TTGTTG---  
 TCTGGCATAGTGCAACAGCAAAAC---AATTTG---CTGAAG---  
 GCTATAGAGGCGCAACATCATCTGTTGCAACTCACAGTCTGGGGCATT  
 >JN251903..1  
 TTCTACTGCAATACATCAGGACTGTTTAATAACACACTGTAAATGTAAATGAAACAGGA-----  
 -----  
 -----  
 TCTAATAACACTATCACTCTCCCATGTGCAATAAAACAAATTGTAAACATGTGGCAGGAAGTAGGGCGAGCAA  
 TGTATGCCGCTCCCATTGCAGGAAACATTACCTGTAACTCAAAT---  
 ATTACAGGTCTACTATTGACAAGAGATGGTGGTCAGACTAATGAGACT-----  
 -----  
 -----  
 AATGGGAATGAGACTGTCAGGCCTGGGGGAGGAAATATGAAAGACAATTGGAGAAATGAATTATATAAATATA  
 AAGTAGTAGAAATTGAACCTCTA---GGAGTAGCACCCACCAAGGCAAAAAGACAAGTGGTG-----  
 -----CAGAGAGAAAAAAGAGCA---ATAGGA---ATAGGAGCT-----  
 ---ATGTTCTTGGGTTCTTGGGAGCA---GCAGGAAGCACTATG---GGCGCGGCGTCA---  
 ATAACGCTGACGGTACAG---GCCAGACAA---TTATTG---TCTGGAATAGTGCAACAGCAGAAC---  
 AATTTG---CTGCAG---GCTATTGAAGCGCAACAGCATCTGTTGCAGCTTACAGTCTGGGGCATC  
 >AB845347..1  
 TTCTATTGCAATACAACAAAACTGTTTAATAATACTTGCATAAGAAATAAAACCATGGAGGGG-----  
 -----  
 -----  
 TGTAGTGGCAATATCACTATCCCATGCAAGATAAAACAAATTATAAACATGTGGCAGGGCATAGGACAAGCAA  
 TGTATGCTCCTCCCATCAGTGGAAAAATTAATTGTGTATCAAAT---  
 ATTACAGGAATACTATTGACAAGAGATGGTGGTGCTAATAATACA-----  
 -----  
 -----  
 AATAATGAGACCTTCAGACCTGGAGGAGGAGATATGAAGGACAATTGGAGAAGTGAATTATATAAATATAAAG  
 TAGTAGAAATTGAACCACTA---GGAATAGCACCCACCAGGGCAAAGAGAAGAGTGGTG-----  
 -----GAGAGAGAAAAAAGAGCA---GTGGGA---ATAGGAGCT-----  
 ATGATCTTTGGGTTCTTAGGAGCA---GCAGGAAGCACTATG---GGCGCGGCGTCA---  
 ATAACGCTGACGGTACAG---GCCAGACAA---TTATTG---TCTGGTATAGTGCAACAGCAAAGC---  
 AATTTG---CTGAGG---GCTATAGAGGCGCAGCATCATCTGTTGCAACTCACAGTCTGGGGCATC  
 >KU749388..1  
 TTCTACTGTGACTCCACTCCACTGTTTAATAGTACTTGAATGGTACTGAAGAAATAAATGGCACTGAA---  
 -----  
 -----  
 GGAAATGACACGATCACACTCAAATGCAGAATAAAACAAATTATAAACATGTGGCAGAGAGTAGGAAGAGCAA  
 TGTATGCCCCCTCCCATTCAAGGACAAATTAGCTGTTTCATCAAAT---  
 ATTACAGGGATTCTATTAAACAAGAGATGGTGGTAGTGGCAACGAG-----  
 -----  
 -----  
 ACGAACAACAAGACAGAGACCTTCAGACCTGGAGGAGGAGATATGAGGGACAATTGGAGAAGTGAATTATATA  
 AATATAAAGTAGTAAAAATTGAACCATTA---GGAGTGGCACCAACCCATGCAAAGAGAAGAGTGGTG-----  
 -----CAGAGAGAAAAAAGAGCA---ATAGGA---  
 CTAGGAGCT-----ATGTTCTTGGGTTCTTGGGAGCA---GCAGGAAGCACTATG---  
 GGCGCAGCGTCA---ATAACGCTGACGGTACAG---GCCAGACAA---TTATTG---  
 TCTGGTATAGTGACAGCAGCAGAAT---AATCTG---CTGAGG---  
 GCTATTGAAGCGCAACAGCATATGTTGCAACTCACAGTCTGGGGCATC  
 >DQ358811..1  
 TTCTACTGTAACTCAACACAACCTGTTTAATAGTACTTGGTATGGTAATGAAACTTGAATGGTACTGAAAAAT  
 TCAAT-----  
 -----  
 GAGGAAAATGACACAATCAGCCTCCCATGCAGAATAAAACAAATTATAAACATGTGGCAAGGAGTAGGAAAAG  
 CAATGTATGCCCCCTCCCATCCAAGGACAAATTAGATGTACATCAAAT---  
 ATTACAGGGCTGATGTTAAACAAGAGATGGTGGTCATAACAATGACACG-----

-----  
-----  
CACCAGATGACAGAGACCTTCAGACCTGGAGGAGGAGACATGAGGGACAATTGGAGAAGTGAATTATATAAAT  
ATAAAGTAGTAAGAATTGAACCATTA---GGAATAGCACCCACCAAGGCAAAGAGAAGAGTGGTG-----  
-----CAGAGAGAAAAAAGAGCA---ATAGGA---ATAGGAGCT---  
-----ATGCTCCTTGGGTTCTTGGGAGCA---GCAGGAAGCACTATG---GGCGCAGCATCA---  
ATAACGCTGACGGTACAG---GCCAGACTA---TTATTG---TCTGGTATAGTGCAACAGCAAAAC---  
AATTTG---CTGAGG---GCTATTGAGGCGCAACAGCATCTGTTGCAACTCACAGTCTGGGGCATC  
>KJ671535..1  
TTTTATTGCAATACATCAAGATTGTTTACTGGCACAGTGGTCAATGGCACT-----  
-----  
-CTCACTAATGCCACT-----  
ATCACTAATGGCACTATCACTCTCCCCTGTCTGAATAAAAACAAATTGTAAACATGTGGCAAGAAGTAGGACGAG  
CAATGTATGCCGCTCCTGTTGCAGGAAGCATTAACTGTACATCAAAT---  
ATTACAGGGCTACTATTGACAAGAGATGGGGGT-----  
-----  
AAGGATAATCAGACTAAT---  
AAGAATGAGATCTTTAGACCTGGAGGAGGAAATATGAAAAGATAATTGGAGAAGTGAATTATATAAATATAAAG  
TGGTAGAAATTGAACCACTA---GGAGTAGCACCCACCAAGGCAAAGAGGCAAGTGGTG-----  
-----AAGAGAGAAAGAAGAGCA---GTGGGA---ATAGGAGCT-----  
TTGTTTCCTTGGGTTCTTGGGAGCA---GCAGGAAGCACTATG---GGCGCAGCGTCA---  
ATGACGCTGACGGTACAA---GCTAGACTA---TTATTG---TCTGGTATAGTGCAACAGCAGAAC---  
AATCTG---CTGAGA---GCTATTGAGGCACAACAGCATCTGTTGCAACTCACAGTCTGGGGCATT  
>KJ671537..1  
TTCTATTGCAATACATCAGGACTGTTTAATGACTCAAAATTCATGACTCAAAATTC-----  
-----  
AATGGCAATTTCTCTTCC-----  
AATGACACTAGCACTATCACTATCCCATGTAGAATAAAAACAAGTCATAAACATGTGGCAGGAAGTAGGACGAG  
CAATGTATGCTGCTCCTATTGCAGGAAACATTATCTGTAACCTCAAAT---  
ATTACAGGTCTACTATTGACAAGAGATGGTGGT-----  
-----  
-  
CAAACAAATAATACAAACGAGACCTTCAGACCTGGGGGAGGAAATATGAAAGACAATTGGAGAAGTAAGTTAT  
ATAAATATAAAGTAGTAGAAGTTGAACCACTA---GGAGTAGCACCCACCAAGGCACAAAGACGAGTGGTA---  
-----AAGAGAGACAAAAGAGCA---GTGGGA---  
ATGGGAGCT-----TTGTTTCATTGGGTTCTTGAGCGCA---GCAGGAAGCACTATG---  
GGCGCAGCGTCA---GTGACGCTGACGGTACAG---GCCAGACAA---TTATTA---  
TCTGGTATAGTGCAACAGCAGAAC---AATTG---CTGAGA---  
GCTATTGAGGCGCAACAGCATCTGTTGCAACTCACAGTCTGGGGCATT  
>MK341078..1  
TTTTATTGTAATACTTCACAACTGTTTAATAGTACTTGGATCAATAGTATTTGG-----  
-----  
-----  
AGCAATGACACAATCATACTTCCATGCAGAATAAGACAAATTATAAACTTGTGGCAGGAAGTAGGAAGAGCAA  
TGTATGCCCCCTCCCATTAGTGGACCTATTAAATGTTTCATCAAAT---  
ATTACAGGTCTACTACTAACAAGGGATGGGGGTGAGAGTAATAAC-----  
-----  
-----  
GAGACTGAGACCTTCAGACCTGGGGGAGGGAATATGAAAGACAATTGGAGAAGTGAATTATATAAATATAAAG  
TAGTAGAACTTAAACCACTA---GGAGTAGCACCCACCAAGGCAAAAAGACAAGTGATA-----  
-----GGGAGACAAAAAAGAGGG-----CTAGGCGCT-----  
GTGTTTCCTTGGGTTCTTGGGAGCA---GCAGGAAGCACTATG---GGCGCAGCGTCG---  
CTGACGCTGACGGTACAA---GCCAGACTA---TTATTG---TCTGGTATAGTGCAACAGCAGAAC---  
AATCTG---CTGAGG---GCCATTGAGATGCAACAACATCTGTTGAAACTCACAGTCTGGGGCATT  
>GU595149..1  
TTCTATTGTAATACAGCACAACTGTTTAATAGTACTTGGACGAATGGTACTGAACAGACAAATAGCACTATA-  
-----  
-----  
GGAAATGACACAATCACACTCCCATGCAAAATAAAAACAAATTATAAACTTGTGGCAGGAAGTAGGAAAAGCAA  
TGTATGCCCCCTCCCATCAGTGGACTAATTAGATGTTTCATCAAAT---

ATTACAGGTCTACTACTGACAAGGGATGGGGGTCAGAATAATGAT-----  
-----  
-----  
ACTAAGAATGAGACCTTCAGACCTGGGGGAGGGGATATGAAAGACAATTGGAGAAGTGAATTATATAAATATA  
AAGTAGTAGAAATTAAACCACTA---GGAGTAGCACCCACCAAGGCAAAAAGACAAGTGGTG-----  
-----GGGAGACAAAAAAGAGGA-----CTAGGAGCT-----  
---GTGTTCCCTTGGGTTCTTGGGAGCA---GCAGGAAGCACTATG---GGCGCAGCGTCA---  
ATAACGCTGACGGTACAG---GCCAGACTA---TTATTG---TCTGGTATAGTGCAACAGCAGAAC---  
AATCTG---CTGAGG---GCTATTGAGGCGCAACAGCATCTGTTGCAACTCACAGTCTGGGGCATC  
>AY037271..1  
TTCTACTGCAATACATCAAACTGTTTAATAACAACACAGAA-----  
-----  
-----  
TTCAATAACACTATTATTCTCCCATGTGCAATAAAACAGATGGTAAACATGTGGCAGGAAGTGGGACGAGCAA  
TGTATGCCGCTCCCATTGCAGGAAACATTAAGTGTAGCTCAAAT---  
ATTACAGGTTTACTATTGACAAGAGATGGTGGTATAAAATATAACA-----  
-----  
-----  
AGTGGTCAGGAGACCTTCAGACCTGGGGGAGGAAATATGAAAGACAATTGGAGAAGTGAATTATATAAATATA  
AAGTAGTAGAAATTGAACCATTA---GGAGTAGCACCCACCAAGGCAAGAGAAGAGTGGTG-----  
-----CAGAGAGAAAAAAGAGCA---GTGGGA---ATGGGAGCT-----  
---TTGTTCCCTTGGGTTCTTGGGAGCA---GCAGGAAGCACTATG---GGCGCGGCGTCA---  
ATAACGCTGACGGTACAG---GCCAGACAA---TTATTG---TCTGGAATAGTGCAACAGCAGAAC---  
AATTTG---CTAAGG---GCTATTGAAGCGCAACAGCATCTGTTGCAGCTCACAGTCTGGGGCATT  
>MF372649..1  
TTCTATTGCAATACATCAGCACTGTTTAATAGCACTTGGAAATCCACTTCAATTGCAAATTTACAGAG----  
-----  
-----  
GAAAATGGCACTATTACTATCCAATGCAGAATAAAGCAATTTATAAATATGTGGCAGAGAGTAGGAAGAGCAA  
TGTATGCCCCCTCCCATCAAAGGAAAGATACAATGTAAGTCAACC---  
ATAACAGGACTCATATTAAACAAGAGATGGAGGTAATGGTAATAGC-----  
-----  
-----  
AGTGCAAATGAGACATTTCAGACCTGGAGGAGGAGACATGAGGGACAATTGGAGAAGTGAATTATACAAGTACA  
AAGTAGTAAAAATTGAACCATTA---GGTGTAGCACCCACCAAGGCAAAAAGAAGAGTGGTG-----  
-----GAGAGAGAAAAAAGAGCG---GTTGGA---CTGGGAGCT-----  
---GTTTTCCCTTGGGTTCTTAGGAGCA---GCAGGAAGCACTATG---GGCGCGGCGTCA---  
ATAACGCTGACGGTACAA---GCCAGACAA---TTATTG---TCTGGTATAGTGCAACAGCAGAGC---  
AATCTG---CTGAAG---GCTATAGAGGCTCAACAACAGCTGTTGAGACTCACAGTCTGGGGCATT  
>MH666154..3  
TTCTATTGCAATACATCAGGACTGTTTGATAGTACTTGGAAATACATCAAGACTGTCTAATGGTACTTGGAAATG  
AT-----  
-ACATCAAGAGAATCTAAT-----  
AACTCAGTCAATAACATAACTCTTCAATGCAGAATAAGGCAAATTGTAAGAATGTGGCAGAGAGTAGGGCAAG  
CAATGCATGCCCCCTCCCATCCGAGGAGAAATAAGATGTGTATCAAAC---  
ATTACTGGACTACTATTAAACAAGGGATGGAGGGACGACTAATGAGACAGAG-----  
-----  
-----  
ACAGAGGAGATCTTCAGGCCTGCAGGAGGAGATATGAGAGACAATTGGAGAAGTGAATTATATAAGTATAAAG  
TAGTAAAAATTGAACCACTA---GGTGTAGCACCCAACTATGGAAGAAGAAGAGTGGTG-----  
-----GAGAGAGAAAAAAGAGCA---GTTGGA---CTGGGAGCT-----  
GTCTTCCTTGGGTTCTTAGGAGCA---GCAGGAAGCACTATG---GGCGCGGCGTCA---  
ATAACGCTGACGGTACAG---GCCAGGCAG---TTATTG---TCTGGTATAGTGCAACAGCAAAGC---  
AATTTG---CTGAAG---GCTATAGAGGCTCAACAACAGCTGTTGAGACTCACAGTCTGGGGCATT  
>MH666157..2  
TTCTACTGCAATACATCAGAACTGTTTAATAGTACTTGGAAATGCCAATGGTAGCAATGATAGCCTAAAC----  
-----  
-----  
CACACTGGCAACATAACTCTCAATTGCAGAATAAAGCAAATTATAAATATGTGGCAGAGAGTAGGGCAAGCAA  
TTTATGCCCCCTCCCATCCGAGGAGTAATAAGGTGTGAATCAAAC---

ATTACTGGAATATTATTAAACAAGAGATGGAGGGAAAAGTAATGCT-----  
-----  
-----  
ACAAATGAGACCTTCAGGCCTGCAGGAGGAGATATGAGAGACAATTGGAGAAGTGAATTATATAAGTATAAAG  
TAGTAAAAATTGAACCACTA---GGTGTAGCACCCACCCCTGCAAAAAGAAGAGTAGTG-----  
-----GGGAGAGAAAAAAGAGCA--GTTGGA---CTGGGAGCT-----  
GTCTTCCTTGGGTTCTAGGAGCA---GCAGGAAGCACTATG---GGCGCGGCGTCA---  
ATAACGCTGACGGTACAG---GCCAGACAA---TTATTG---TCTGGTATAGTGCAACAGCAGAGC---  
AATTTG---CTGAAG---GCTATAGAGGCTCAACAGCATATGTTGAGACTCACAGTTTGGGGCATT  
>MH666161..2  
TTCTATTGCAATACATCAGGACTGTTTAATAGTACTTGGACAATACTTGGAAAGATACATCAGAATAT----  
-----  
-----  
AATGGATCTACCATAACTCTCCAATGCAGAATAAGGCAAATTGTAAGGATGTGGCAGAGAGTAGGGCAAGCAA  
TGTATGCCCCCTCCCATCCAAGGAGAAATAAGATGTGCATCAAAC---  
ATTACTGGACTACTATTAACAAGAGATGGAGGGGATAATAGTGGG-----  
-----  
-----  
ACAAATGAGACCTTCAGGCCTGAGGGAGGAGATATGAAAAGACAATTGGAGAAGTAAATTATATAAATATAAAG  
TAGTGAAAATTGAACCACTA---GGTGTAGCACCCACCTATGGAAGAAGGAGAGTGGTG-----  
-----GGGAGAGAAAAAAGAGCA--GTTGGA---CTGGGAGCT-----  
GTCTTCCTTGGGTTCTAGGAGCA---GCAGGAAGCACTATG---GGCGCGGCGTCA---  
ATAACGCTGACGGTACAG---GCCAGACAA---TTATTG---TCTGGTATAGTGCAACAGCAAAGC---  
AATTTG---CTGAAG---GCTATAGAGGCTCAACAACAACCTGTTGAGACTCACAGTCTGGGGCATT  
>MH666156..1  
TTCTATTGTAATACATCAGGACTGTTTAATAGTACTTGGAGCAATACGAGCAATACATCAGGACCTAATACC-  
-----  
-----  
TCAGACGCTGACATAACTCTCCAATGCAGAATAAGGCAAATTATAAGGATGTGGCAGAGAGTAGGGCAGGCAA  
TATATGCCCCCTCCCATCCAAGGAGAAATAAGGTGTGTATCAAAC---  
ATTACTGGACTACTATTAACAAGGGATGGAGGGACTGATAATAAT-----  
-----  
-----  
ACAGATGAGACCTTCAGGCCTGCAGGAGGAGATATGAGAGATAATTGGAGAAGTGAATTATATAAATATAAAG  
TAGTAAAAATTGAACCACTA---GGTGTAGCACCCACCCCTGCAAGAAGAAGAGTGGTG-----  
-----GGGAGAGAAAAAAGAGCA--GTT-----CTGGGAGCT-----  
GTCTTCCTTGGGTTCTAGGAGCA---GCAGGAAGCACTATG---GGCGCGGCGTCA---  
ATAACGCTGACGGTACAG---GCCAGACAA---TTATTG---TCTGGTATAGTGCAACAGCAAAGT---  
AATTTG---CTGAAG---GCTATAGAGGCTCAACAACAGCTGTTGAGACTCACAGTCTGGGGCATT  
>MH666155..1  
TTCTATTGCAATACATCAGGACTGTTTAATAGTACTTGGAAATAGTACTTGGACCAATACATCAGGCATTAAT-  
-----  
-----  
AGCTCAGAACCTATAATTCTCCAATGCAGGATAAGGCAAATTATAAGAATGTGGCAGAGAGTAGGGCAAGCAA  
TGTATGCCCCCTCCCATCCGAGGAGAAATAAGGTGTGAATCAAAC---  
ATTACTGGACTACTATTAACAAGGGATGGAGGGAATGATAATACA-----  
-----  
-----  
AATGAGACCTTCAGGCCTGCAGGAGGAGATATGAGAGACAATTGGAGAAGTGAATTGTATAAGTATAAAGTAG  
TAAAAATTGAACCACTA---GGTGTAGCACCCGCCAGGCAAGGAGAAGAGTAGTG-----  
-----GGGAGAGAAAAAAGAGCA--GTTGGA---ATAGGAGCT-----  
GTCTTCCTTGGGTTCTAGGAGCA---GCAGGAAGCACTATG---GGCGCGGCGTCA---  
ATAACGCTGACGGTACAG---GCCAGGCAG---TTATTG---TCTGGGATAGTGCAACAGCAAAGC---  
AATTTG---CTGAAG---GCTATAGAGGCTCAACAACATATGTTGAGACTCACAGTCTGGGGCATT  
>KF850149..1  
TTCTATTGTAATACAACAAAATTGTTTAATAGTACTTGGAAAGGGAAATGAA-----  
-----  
-----  
-ACCATGGAGAGGGAT-----  
AATAAGACTGAGATCATCATACTTCCATGCAGGATAAAAGCAAATTATAAACATGTGGCAGGGAGCAGGACAAG  
CAATGTATGCTCCTCCCATCAAGGGATTAATTAATTGTACATCAAAT---

ATTACAGGAATACTATTAACAAGAGATGGTGGT-----  
-----  
-----  
CATAATGGTACAAATGAGACCTTCAGACCTGGAGGAGGAAAATATAAAGGACAATTGGAGAAGTGAATTATATA  
AATATAAAGTAGTAGAACTTGAACCACTA--GGGGTAGCACCCACCAGGGCAAAGAGAAGAGTGGTG-----  
-----GAAAGAGAAAAAAGAGCA--GTGGGA--  
ATAGGAGCT-----ATGATCTTTGGGTTCTTAGGAGCA--GCAGGAAGCACTATG--  
GGCGCGGCGTCA--ATAACGCTGACGGTACAG--GCCAGACAA--TTATTG--  
TCTGGTATAGTGCAACAGCAAAGC--AATTTG--CTGAGG--  
GCTATAGAGGCGCAACAGCGTATGTTGCAACTCACAGTCTGGGGCATT  
>MG518476..1  
TTCTATTGTAATACAACAAAATTGTTTAATAGTACTTGGAAAGGGAATGAAACCATGGAGAGGAATAAT----  
-----  
-----  
AACACTGACACTATCATACTTCCATGCAGGATAAAGCAAATTATAAACCTGTGGCAGGGAGTAGGACAAGCAA  
TGTATGCTCCTCCCATCAGGGGAGCAATTAATTGTGTATCAAAT--  
ATTACAGGAATACTATTAACAAGAGATGGTGGTCATAATAGTACA-----  
-----  
-----  
AATGAGACCTTCAGACCTGGAGGAGGAAAATATAAAGGACAATTGGAGAAGTGAATTATATAAATATAAAGTAG  
TAGAGATTGAACCACTA--GGAATAGCACCCACCAGGGCAAAGAGAAGAGTGGTG-----  
-----GAGAGAGAAAAAAGAGCA--GTGGGA--ATAGGAGCT-----  
ATGATCTTTGGGTTCTTAGGAGCA--GCCGGAAGCACTATG--GGCGCGGCGTCA--  
CTAACGCTGACGGTACAG--GCCAGACAA--TTATTG--TCTGGTATAGTGCAACAGCAAAGC--  
AATTTG--CTGAGG--GCTATAGAGGCGCAACAGCATATGTTGCAACTCACAGTCTGGGGCATT  
>AY371145..2  
TTCTATTGCAATACATCAGGACTATTTAATAGCACTTGGGAAATGAACACAACCAGCTTAGGG-----  
-----  
-----  
TTAAATGATACTATAATTCTCCAGTGCAGAATAAAGCAAATTGTAAATATGTGGCAGAGAGTAGGACAAGCAA  
TGTACGCCCCCTCCCATCCCAGGAAAAATAAGGTGTCAAGTCAAAC--  
ATTACAGGACTACTATTGACAAGAGATGGTGGGACTAGTAACAATACAGAG-----  
-----  
-----  
ACTAGTAACAGTACAGAGACTTTCAGACCTGGAGGAGGAGATATGAGAGATAATTGGAGAAGTGAATTATATA  
AATATAAAGTAGTAAAAATTGAACCACTA--GGAGTAGCACCTACCAGGGCAAAGAGGAGGGTGGTG-----  
-----GAGAGAGAAAAAAGAGCA--GTTGGA--  
CTGGGAGCT-----GTCTTCCTTGGGTTCTTAGGAGCA--GCAGGAAGCACTATG--  
GGCGCGGCGTCA--ATAACGCTGACGGTACAG--GCCAGACAA--TTATTG--  
TCTGGCATAGTGCAACAGCAAAGC--AATTTG--CTGAGG--  
GCTATAGAGGCTCAACAACATATGTTGAGACTCACGGTCTGGGGCATT  
>KP718921..1  
TTCTATTGTAATACAACAGAACTATTTAATAGCACTTGGGAGAGTAGCAATAGCACTAACAGCTCAAGTGCA-  
-----  
-----  
ACAAATGGAACTATAACTCTCAAATGCAGGATAAAGCAAATTATAAATATGTGGCAGAGAGTAGGACAAGCAA  
TGTATGCCCCCTCCCATCCAAGGAATAATAAGGTGTGAATCAAAC--  
ATTACAGGACTACTATTAACAAGAGATGGAGGAGATACTAATAGT-----  
-----  
-----  
AATAATAGTGAGATCTTCAGGCCTGGAGGAGGAGATATGAGGGACAATTGGAGAAGTGAATTATATAAGTATA  
AAGTAGTAAAAATTGAACCAATA--GGTATAGCACCCACCCATGCAAAAAGAAGAGTGGTG-----  
-----GAGAGAGAAAAAAGAGCA--GTTGGACTACTGGGAGCT-----  
---GCCTTCCTTGGGTTCTTAGGAGCA--GCAGGAAGCACTATG--GGCGCAGCGTCA--  
ATAACGCTGACGGTACAG--GCCAGACAA--TTATTG--TCTGGCATAGTGCAACAGCAAAGC--  
AATTTG--CTGAGG--GCTATAGAGGCTCAACAACAGCTGTTGAAACTCACAGTCTGGGGCATT  
>KP718922..1  
TTCTATTGCCATACATCAAACCTATTTAATAGCACTTGGAAAGAGAACACAACAGAGTCAAGTGGCAATATA-  
-----  
-----

ACAAGTGGCAATATAACTCTCCAGTGCAGAATAAAGCAAATTGTAAATATGTGGCAGAGAGCAGGAAAAGCAA  
 TGTATGCCCCCTCCCATTCAGGAGTGATAGAGTGTAGGTCAAAC---  
 ATTACAGGGCTCCTATTACAAAGAGATGGAGGGAAAAATAATACAAATAAT-----  
 -----  
 -----  
 ACCTTATGGCCTGGAGGAGGAGATATGAGGGATAATTGGAGAAGTGAGTTATACAAATATAAAGTAGTGAAAA  
 TTGAACCACTA---GGAGTAGCACCCACCAGGGCAAGGAGAAGGGTGGTG-----  
 -----CAGAGAGAAAAAAGAGCA---GTTGGA---ATAGGAGCT-----  
 GTCTTCCTTGGGTTCTTAGGAACA---GCAGGAAGCACTATG---GGCGCAGCGGCA---  
 GTAACGCTGACGGTACAG---GCCAGACAA---TTATTG---TCTGGTATAGTGCAACAGCAAAGC---  
 AATTTG---CTGAAG---GCTATAGAGGCTCAACAACAACCTGTTGAGACTCACGGTCTGGGGCATT  
 >JF683748..1  
 TTCTATTGTAACACATCAGGCCTGTTTAATAGCACTTGGACTGCCAATGGTGGCAGGCTGCGGGAAGATAGTG  
 CA-----  
 -----  
 AAGTCAAACAGCACTATAACTCTCCAATGTAGAATAAAGCAAATTATAAATATGTGGCAGAGAGCAGGACAAG  
 CAATATATGCCCCCTCCCATCCAAGGAGTAATAAGGTGTGAATCAAAC---  
 ATTACAGGGCTAATATTAACAAGAGATGGTGGGGGGAGTAATGAT-----  
 -----  
 -----  
 ACAGCGGAAACCTTCAGACCTGGAGGAGGAGATATGAGGGACAATTGGAGAAGTGAATTATATAAGTATAAAG  
 TAGTAAAAATTGAACCATTA---GGAGTAGCACCCACCAAGGCAAGGAGAAGAGTGGTG-----  
 -----GAGAGAGAAAAAAGAGCA---GTTGGA---CTGGGAGCT-----  
 GTCTTCATTGGGTTCTTGGGAGCA---GCAGGAAGCACTATG---GGCGCGGCGTCA---  
 GTGACGCTGACGGTACAG---GCCAGGCAA---TTATTG---TCTGGCATAGTGCAACAGCAAAGC---  
 AATTTG---CTGAAG---GCTATAGAGGCTCAACAGCAGCTGTTGAGACTCACAGTTTGGGGCATT  
 >MK086114..3  
 TTCTATTGCAATACAACAAACCTGTTTAACAGCATTGGAATTACAATAGCACTGGGAATCACAGTGACAGCA  
 TGACAAATAAC-----  
 -----  
 ACGGATGGCAATATAATTCTCCAGTGCAGAATAAAGCAAATTATAAATATGAGGCAGAGAGCAGGAAAAGCAA  
 TATATGCCCCCTCCCATTCGAGGAAGAATACAGTGTGAGTCAAAC---  
 ATTACAGGAATACTATTGACAAGAGATGGTGGGAATAATGCTAGT-----  
 -----  
 -----  
 AATTCAAATGAGACTTTTAGACCTGGAGGAGGAGATATGAGAGACAATTGGAGAAGTGAATTATATAAATATA  
 AAGTAGTAAAAATTGAACCACTA---GGAGTAGCACCCACCAAGGCAAGAAGGAGAGTGGTG-----  
 -----GAGAGAGAAAAAAGAGCA---TTTGGA---TTGGGAGCT-----  
 ---ATGTTCCCTTGGGTTCTTGGGAACA---GCAGGAAGCACTATG---GGCGCAGCGTCG---  
 CTAACGCTGACGGTACAG---GCCAGACAA---TTATTG---TCTGGCATAGTGCAACAGCAAAGC---  
 AATTTG---CTGAGA---GCTATAGAGGCTCAACAGAATATGTTGAGACTCACAGTCTGGGGCATT  
 >KX159285..2  
 TTCTACTGCGATACAACAAAATTGTTTAATGAGAGACAGAAAATGGATCACGGAAGA-----  
 -----  
 -----  
 GCTATAATGGCTACTATCTTACATCCATGTAGGATAAAACAAATTGTAAACATCTGGCAGCGAGTGGGACAAG  
 CAACGTGCTCCTCCCATGCTGCAGCAAACATATCATGTCAGTCAAAT---  
 ATCACAGGACTACTATTAGTACGTGATGGAGGAAATGATACAGAG-----  
 -----  
 -----  
 GAGACAGAGACATTTCAGGCCTGGAGGAGGAGATATAAAGGACAATTGGAGAAGTGAATTATATAAATATAAAG  
 TAGTACAAATTGAACCATTA---GGAATAGCACCCACCAAGCAAAGAGAAGAGTGGTA-----  
 -----GACAGAGAAAAAAGAGCA---GTGGGA---ATAGGAGCT-----  
 ATGATCTTTGGGTTCTTAGGAGCA---GCAGGAAGCACTATG---GGCGCGGCGTCA---  
 ATAACGCTGACGGTACAG---GCCAGACAA---TTATTG---TCTGGTATAGTGCAACAGCAAAC---  
 AATTTG---CTGAGA---GCTATAGAGGCGCAACAACATCTGTTGCAACTCACAGTCTGGGGCATT  
 >MN452901..1  
 TTCTATTGTAATACATCAAGCCTGTTTAATGGTACATACAATAGCAGTAGGCCAAACAGTACT-----  
 -----  
 -----

TCAAACCTCAATCATCATAATCCCATGCAGAATAAAGCAAATTATAAATATGTGGCAAGGAGTAGGACAAGCAA  
TGTACGCTCCTCCCATCAGTGGAACAATTAATTGTGTATCAAAT---  
ATTACAGGAATCTTATTGACAAGGGATGGTGGTAATGATACCGTGAGTAGG-----  
-----  
GAAAATGAGACCTTCAGACCTGGAGGAGGCAATATAAAGGACAATTGGAGAAATGAATTATATAAATATAAAG  
TAGTAGAAATTGAACCACTA---GGAATAGCACCCACCAGGGCAAAGAGAAGAGTGGTG-----  
-----GAGAGAGAAAAAAGAGCA--GTGGGA---ATAGGAGCT-----  
ATGATCTTTGGGTTCTTAGGAGCA---GCAGGAAGCACTATG---GGCGCAGCGTCA---  
ATAACGCTGACGGTACAG---GCCAGACAA---TTATTG---ACTGGTATAGTGCAACAGCAAAGC---  
AATTTG---CTGAGG---GCTATAGAGGCGCAACATCATCTGTTGCAACTCACAGTCTGGGGCATT  
>AY371167..1  
TTCTATTGCAATACATCAGGCCTGTTTAATAGCACTTGGAATGACACTGGCAGCATGCCAGAGTCAAATAAC-  
-----  
-----  
ACGAATGGCAATATAACTCTCCAGTGCAGAATAAAGCAGATTATAAATATGTGGCAGAGAACAGGACAAGCAA  
TGTATGCCCCCTCCCATCCCAGGAACAATAAGGTGTGAGTCAAAC---  
ATTACAGGACTACTACTGACAAGAGATGGTGGGACTCCTAACAGT-----  
-----  
ACAAATGAAACTTTTCAGACCTGGAGGAGGAGATATGAGAGACAATTGGAGAAGTGAATTATATAAATATAAAG  
TAGTAAACTTGAACCACTA---GGAGTAGCACCCACCAGGGCAAAGAGAAGAGTGGTG-----  
-----CAGAGAGAAAAAAGAGCG--GTTGGA---TTGGGAGCT-----  
GTCTTCCTTGGGTTCTTAGGAGCA---GCAGGAAGCACTATG---GGCGCGGCGTCA---  
ATAACGCTGACGGTACAG---GCCAGACAA---TTATTG---TCTGGCATAGTGCAACAGCAAAGC---  
AATTTG---CTGAAG---GCTATAGAGGCTCAACAGCATCTGTTGAGACTCACAGTCTGGGGCATT  
>FJ388953..1  
TTCTATTGTAACACATCAGGCCTGTTTAATAGCACTTGGCATGCCAATGACAGTTTGCAAGAGTCAAATGACA  
CA-----  
-----  
ACAATAAAGAAGAATATAACTCTCCAATGCAGAATAAAGCAGATTATAAATCTGTGGCAGAGAGCAGGACAAG  
CAATGTATGCCCCCTCCCATCCCAGGAGTAATAAAGTGTGTATCAAAC---  
ATAACAGGACTAATATTAACAAGAGATGGTGGAGGTAATAACACAGCT-----  
-----  
CGTGATAATGAAACCTTCAGACCTGGAGGAGGAGATATGAGGGACAATTGGAGAAGTGAATTATATAAGTATA  
AAGTAGTAAAAATTGAGCCACTA---GGAGTAGCACCCACCAGGGCAAAGGAGGAGAGTGGTG-----  
-----GAGAGAGAAAAAAGAGCA--GTTGGA---ATAGGAGCT-----  
---GTCTTCATTGGGTTCTTGGGAGCA--GCAGGAAGCACTATG---GGCGCGGCGTCA---  
GTGACGCTGACGGTACAG---GCCAGGCAA---TTATTG---TCTGGCATAGTGCAACAGCAAAGC---  
AATTTG---CTGAGG---GCTATAGAGGCTCAACAACATCTGTTGAAACTCACAGTCTGGGGCATT  
>KR017779..1  
TTCTATTGCAATACATCAGGACTGTTTAATAGCACTTGGAAGATTAATAGCACTTGGAATAGC-----  
-----  
-----  
ACTAATGGCACTATAACTCTCCTGTGCAGAATAAAGCAAATTGTAAACATGTGGCAGAGAGCAGGACAAGCAA  
TGTATGCCCCCTCCCATCCCAGGAGTAATAAGATGTGAATCAAAC---  
ATTACAGGGATACTATTGACAAGAGATGGCGGGGAGGATTCTAAT-----  
-----  
-----  
AAGACTAATGAAACAGAAATTTTCAGACCTGGAGGAGGAGATATGAGAGACAATTGGAGAAGTGAATTATATA  
AATATAAAGTAGTAAAAATTGAACCACTA---GGAGTAGCACCCACCAGGCAAAGAGAAGGGTGGTG-----  
-----GAGAGAGAAAAAAGAGCA---GTTGGA---  
CTGGGAGCT-----GTTTTCCTTGGGTTCTTAGGAGCA---GCAGGAAGCACTATG---  
GGCGCGGCGTCA---ATAACGCTGACGGTACAG---GCCAGACAA---TTATTG---  
TCTGGTATAGTGCAACAGCAAAGC---AATTTG---CTGAGG---  
GCCATAGAAGCTCAACAGCATGTGTTGAGACTCACAGTCTGGGGCATT  
>U76035..1  
TTCTATTGCAATACATCAGGCCTGTTTAATAGCACTTGGAATAATAGCACCAGCATAAATGACACGGTG----

-----  
TCAAAATGGCACTATAACTCTCCCATGCAGAATAAAGCAAATTGTAAATATGTGGCAAAGAGTAGGACAAGCAA  
TGTATGCCCCCTCCCATCAAAGGAGTAATAAAGTGTGAATCAAAC---  
ATTACAGGAATACTATTAACAAGAGATGGTGTGGGTAATAACACA-----  
-----  
-----  
GCAAATGAGACCTTCAGACCTGGAGGAGGAGATATGAGGGACAATTGGAGAAGTGAATTATATAAGTATAAAG  
TAGTAAAGATTGAACCACTA---GGAGTAGCACCCACCAAGGCAAAGAGAAGAGTGGTG-----  
-----GCGAGAGAAAAAAGAGCA---ATTGGA---ATGGGAGCT-----  
TTCTTCCTTGGGTTCTTAGGAGCA---GCAGGAAGCACTATG---GGCGCGGCGTCA---  
ATAACGCTGACGGTACAT---GTCAGACAA---TTATTG---TCTGGTATAGTGCAGCAGCAGAGC---  
AATCTG---CTGAGG---GCTATAGAGGCTCAACAGCATCTGTTGAAACTCACAGTCTGGGGCATT  
>MH327751..1  
TTCTATTGCAATACAACAAAATTGTTTAATTGCACAGACAATAATAACACATACACA-----  
-----  
-----  
TGTAATGACACTATCGTACTTCCATGCAAGATAAAGCAAATTATAAACATGTGGCAAGGAGTAGGACAAGCAA  
TGTATGCTCCTCCCGTCAGGGGAATAATTAATTGTGTATCAAAC---  
ATTACAGGAATACTATTGACAAGGGATGGTGGGACAAATAGCACT-----  
-----  
-----  
AATAGAAATGAGACCTTCAGACCTCAAGGAGGAAATATAAAGGACAATTGGAGAAGTGAATTATATAAATATA  
AAGTAGTACAAATTGAACCACTA---GGAGTGGCACCCACTAGGGCAAGGCGAAGAGTGGTG-----  
-----GAGAGAGAAAAAAGAGCA---GTGGGA---ATAGGAGCT-----  
---ATGATCTTTGGGTTCTTAGGAGCA---GCAGGAAGCACTATG---GGCGCGGCGTCA---  
ATAACGCTGACGGTACAG---GCCAGACAA---TTATTG---TCTGGTATAGTGC AACAGCAAAGC---  
AATTTG---CTGAGG---GCTATAGAGGCGCAGCAGCATCTGTTGCAACTCACAGTCTGGGGCATT  
>KP411826..1  
TTCTACTGTAACACAACAGAACTGTTTAACAGTACTTGAATAGCACTGAAGAGTCAAGTACCCCTAAA---  
-----  
-----  
GGAAATGACACAATTACACTCCAATGTAGAATAAAACAAATTATAAACATGTGGCAGGAAGTAGGAAAAGCAA  
TGTATGCCCCCTCCCATCAGAGGACAAATTAATTGTTTCATCAAAC---  
ATCACAGGGCTACTGTTAACAAGAGATGGCGATCAGAACGCACGT-----  
-----  
-----  
GAGACTTTCAGACCTGGAGGAGGAAATATGAAAGACAATTGGAGAAGTGAATTATATAAATATAAAGTAATAA  
AAATTGAACCACTA---GGAATAGCACCCACCAGGGCAAAGAGAAGAGTGGTG-----  
-----GAGAGAGAAAAAAGAGCA---GTGGGA---ATAGGAGCT-----  
ATGATCTTTGGGTTCTTGGGAGCA---GCAAGAAGCACTATG---GGCGCAGCGTCA---  
CTGACGCTGACGGTACAG---GCCAGACAA---TTATTG---TCTGGTATAGTGC AACAGCAGAAT---  
AATTTG---CTGAAG---GCTATTGAGGCGCAACAGCATCTGTTGCAACTCACAGTCTGGGGCATT  
>AY358069..2  
TTCTATTGCAACACAACAGATCTGTTCAACACAACAAAATAAATGAAACCACGTTAAATAATAGC-----  
-----  
-----  
ACTAATAGCACTATCATACTTCCATGCAGAATAAAGCAAATTATAAACATGTGGCAGGGAGTAGGACAAGCAA  
TGTATGCTCCTCCCATCAGAGGAAAGATTAATTGTGTATCAAAT---  
ATTACAGGAATACTATTGACAAGAGATGGTGGTAATAATAATCAGACTAATAAT-----  
-----  
-----  
CAGACTAACAAGACCGAGACCTTCAGACCTGGAGGAGGAAATATGAAGGACAATTGGAGAAATGAATTATATA  
AATATAAAGTAGTACAAATTGAACCACTA---GGAATAGCACCCACCAAGGCAAAAAGAAGAGTGGTG-----  
-----GAGAGAGAAAAAAGAGCA---GTGGGA---  
ATAGGAGCT-----ATGATCTTTGGGTTCTTAGGAGCA---GCAGGAAGCACTATG---  
GGCGCGGCGTCA---ATAACGCTGACGGTACAG---GCCAGACAA---TTATTG---  
TCTGGTATAGTGC AACAGCAAAGC---AATTTG---CTGAGG---  
GCTATAGAGGCGCAGCAGCATCTGTTGCAACTCACAGTCTGGGGCATT  
>MG989522..1

TTCTATTGCAATACATCACGACTGTTTAAATAACTTGTGCAAAAAATGTAACCCAGGAAGGG-----  
 -----  
 -----  
 TGTAATGAAACTATCATACTCCCATGCAGGATAAAGCAAATAGTAAACATGTGGCAGAGAGCAGGACAAGCAA  
 TGTATGCTCCTCCCATCAGTGGACAAATTAATTGCATATCAAAT---  
 ATTACAGGAATACTGTTGACAAGAGACGGTGGTAAGGACGGTGATAATGGT-----  
 -----  
 ----  
 ACTCATAATGGGAGCGAGATCTTCAGACCTACAGGAGGAAATCTAAGGGACAATTGGAGAAATGAATTATATA  
 AATATAAGGTAGTGCAAATTGAACCACTA---GGAATAGCACCCACCAAGGCAAAGAGAAGAGTAGTG-----  
 -----GAGAGAGAAAAAAGAGCAGTAGTGGGA---  
 ATAGGAGCT-----ATGATCTTTGGGTTCTTAGGAGCA---GCAGGAAGCACTATG---  
 GGCGCGGCGTCA---ATAACGCTGACGGTACAG---GCCAGACAA---TTATTG---  
 TCTGGTATAGTGCAACAGCAAAGC---AATTTG---CTGAGA---  
 GCTATAGAGGCGCAACAGCATATGTTGCAACTCACAGTCTGGGGCATC  
 >MG989595..1  
 TTCTACTGTAATACAACAACCACTGTTTAAATAGTACTTGGTATGGGAATGATTCTGACAAGAATAATAACAATA  
 ATAAT-----  
 -----  
 GACAAATGACACAATCATACTCCCATGTAAAATAAGACAAATTGTAAACATGTGGCAGGAAGTAGGAAAAGCAA  
 TATATGCTCCTCCTATCAGTGGACAAATTAAGTGTTCATCAAAG---  
 ATTACAGGGCTGTTATTAACAAGAGATGGTGGTAATGGTAACGGTACC-----  
 -----  
 -----  
 AGGAATGAAACCTTCAGACCTGGAGGAGGAAATATGAGGGACAATTGGAGAAGTGAATTATATAAATATAAAG  
 TAGTAAAAATTGAACCATTA---GGAGTAGCACCCACTAAGGCAAAGAGAAGAGTGGTG-----  
 -----CAGAGAGAAAAAAGAGCT---GTAACA---CTGGGAGCT-----  
 GTGTTCTTGGGTTCTTGGGAGCA---GCAGGAAGCACTATG---GGCGCAGCGTCA---  
 TTGACACTGACGGTACAG---GCCAGACAA---TTATTG---TCTGGTATAGTGCAACAGCAGAAC---  
 AATCTG---CTGAGG---GCTATTGAGGCGCAACATCATCTGTTGCAACTCACAGTCTGGGGCATT  
 >MG989556..1  
 TTCTATTGCAATACATCAAACTGTTTAAATAGTACTTGAATGGAACAAACAATACAGGAGGG-----  
 -----  
 -----  
 GATACTGGCACTATCATACTTCCATGTAGGATAAAGCAAATTATAAACATGTGGCAGCAAACAGGACAAGCAA  
 TGTATGCTCCTCCCATCAGTGGACCAATTAATTGTATGTCAAAT---  
 ATTACAGGAATACTATTGACAAGAGATGGTGGAGTTAATAATAGT-----  
 -----  
 -----  
 CATACTAATGAAACCTTCAGACCTGGAGGAGGAGATATGAAAAATAATTGGAGAAATGAATTATATAAATATA  
 AAGTAGTACAAATTGACCCACTA---GGAATAGCACCCACCAAGGCAAAGAGGAGAGTGGTG-----  
 -----GAGAGAGAAAAAAGAGCA---GTGGGA---ATAGGAGCT-----  
 ---ATGATCTTTGGGTTCTTAGGAGCA---GCAGGAAGCACTATG---GGCGCGGCGTCA---  
 ATAACGCTGACGGTACAG---GCCAGACAA---TTATTG---TCTGGTATAGTGCAACAGCAAAGC---  
 AATTTG---CTGAGG---GCTATAGAGGCGCAGCAGCATCTGTTGCAACTCACAGTCTGGGGCATT  
 >MG989612..1  
 TTCTACTGTAATACAACAAAACCTGTTTAAATAGTACTTGAATAATACTGGAGAGTCAAATGAGATCTCTACA-  
 -----  
 -----  
 GGAAATGACACCATCACACTCCCATGCAGAATAAAACAAATTATAAACATGTGGCAGCAAGTAGGGAAAGCAA  
 TGTATGCTCCTCCCATCAGTGGTCAAATTAAGTGTCTCATCAAAT---  
 ATTACAGGGCTACTATTATTAAGAGACGGTGGTAACCAGAACAAATAGCGCC-----  
 -----  
 -----  
 AACACAGAGACATTTCAGACCGGGAGGAGGAGACATGAGGGACAATTGGAGAAGTGAATTATATAAATATAAAG  
 TAGTAAAAATTGAACCATTA---GGAGTAGCACCAACCAAGGCAAGAAGAAGAGTGGTG-----  
 -----CAGAGAGACAAAAAGAGCA---GCA-----CTAGGAGCG-----  
 GTGTTCTTGCCTTCTTGGGAGCA---GCAGGAAGCACTATG---GGCGCAGCGTCA---  
 ATAACGCTGACGGTACAG---GCCAGACAA---TTACTG---TCTGGTATAGTGCAACAGCAGAAC---  
 AATTTG---CTGAGA---GCTATTGAGGCGCAACAGCATATGTTGCAACTCACAGTCTGGGGCATA

>KF250395..2

TTCTATTGTAATACATCACAACCTGTTTAAATAGTACATGGAAGAATCACACTGGTACATATGAGACGAATGATA  
CAAGTAACAAT-----

-----  
CCAAACATCACAATCACAATTCCATGCAGAATAAAGCAAGTTATAAACATGTGGCAGGAGGTCGGGCGAGCAA  
TGTATGCCCCCTCCCATCAAGGAACCATAACATGTAAATCAAAT---  
ATCACAGGGCTACTATTGACACGTGATGGAGGAAATGGAAATATGACA-----

-----  
AATGAGACAGAGACATTGAGACCTGGAGGAGGAGATATGAGGGACAATTGGAGAAAGTGAATTATATAAAATATA  
AAGTAGTAGAAATTAAGCCATTG---GGAGTAGCACCCACTGGAGCAAAAAGGAGAGTGGTG-----  
-----GAGAGAGAAAAAAGAGCA---GTGGGA---ATAGGAGCT-----  
---GTGTTCTTGGGTTCTTGGGAGCA---GCAGGAAGCACTATG---GGCGCGGCGTCA---  
ATAACGCTGACGGTACAG---GCCAGACAA---TTGTTG---TCTGGTATAGTGCAACAGCAAAGT---  
AATTTG---CTGAGG---GCTATAGAGGCGCAACAACATATGTTGCAACTCACGGTCTGGGGCATT

>KF250398..1

TTCTATTGTAATACATCAGGCCTGTTTAAATGAGACAGACATGCTGCGTATTACA-----

-----  
GAAGGTAATATCACCACAATCCCATGCAGAATAAAGCAAATTATAAACATGTGGCAGAGGGTAGGAAAAGCAA  
TGTATGCCTCTCCCATCAAAGGAAACATAACATGTAAATCAAAT---  
ATCACAGGACTACTATTGGTACATGATCAAGTA-----AATTCA-----

-----  
ACCAATATGACATTGAGACCTGAAGGAGGAGATATGAAGAACAATTGGAGAAAGTGAATTATATAAAATATAAAG  
TAGTAGAAATTAATCCATTG---GGAATAGCACCCACTGCAGCAAAAAGGAGAGTGGTGGAG---AGA-----  
-----GAAAATAAGAGAGAAAAAAGAGCG---GTGGGA---CTAGGAGCT-----  
TTGTTCTTGGGTTCTTGGGAGCA---GCAGGAAGCACTATG---GGCGCGGCGTCA---  
ATAACGCTGACGGTACAA---GCCAGACAA---TTGCTG---TCTGGTATAGTGCAACAGCAAAAC---  
AATTTG---CTGATG---GCTATAGAGGCGCAACAGCATATGTTGCAACTCACAGTCTGGGGCATT

>MG519330..1

TTCTATTGCAATACAACAAACCTGTTTAAATAATGATTGCATAACAATACCACAGCGGGGGG-----

-----  
TGTAATAAGACTATCATACTTCCATGCAAGATAAAACAAATTATAAACATGTGGCAAGGAGTAGGACAAGCAA  
TGTATGCTCCTCCCATCCAGGGAATAATTAATTGTGTATCAAAT---  
ATTACAGGAATACTATTGACAAGAGATGGTGGTATTGATAACACAAGCGCA-----

-----  
GGTAACGAGACCTTTAGACCAGGAGGAGGAAATATGAAGGACAATTGGAGAAATGAATTATATAAAATATAAAG  
TAGTAGAAATTGAACCACTA---GGAATAGCACCCACCAGGGCAAAGAGAAGAGTGGTG-----  
-----GAAAGACAAAAAAGGGCA---GTGGGA---ATAGGAGCT-----  
ATGATCTTTGGGTTCTTAGGAGCA---GCAGGAAGCACTATG---GGCGCGGCGTCA---  
ATAACGCTGACGGTACAG---GCCAGACAA---TTATTG---TCTGGTATAGTGCAACAGCAAAGC---  
AATCTG---CTAAGG---GCTATAGAGGCGCAGCAGCATCTGTTGCAACTCACAGTCTGGGGCATT

>MN336531..1

TTCTATTGCAATACATCAAAATTGTTT---AGCACCAGGGAAGGG-----

-----  
CTTAATAGCACTATCATACTTCCATGCAGGATAAAACAAATTGTAAACATGTGGCAGGGAGCAGGACAAGCAA  
TGTATGCTCCTCCCATCAAAGGAAGCATTAATTGTTATTCAAAT---  
ATTACAGGAATACTATTAACAAGAGATGGTGGTAATAATAGTACG-----

-----  
GAGACCTTCAGACCAGGAGGAGGAAATATGAAGGACAATTGGAGAAATGAATTATATAAAATATAAAGTAGTAG  
AAATTGAACCACTA---GGAGTAGCACCCACCAGGGCAAAGAGGAGAGTGGTG-----  
-----GATAGAGAAAAACGAGCA---GTGGGA---ATAGGAGCT-----  
ATGATCTTTGGGTTCTTAGGAGCA---GCAGGAAGCACTATG---GGCGCAGCGTCA---  
ATAACGCTGACGGTACAG---GCCAGACAA---TTATTG---TCTGGTATAGTGCAAGCAGCAAAGC---  
AATTTG---CTGAGA---GCTATAGAGGCGCAGCAGCATCTGTTGCAACTCACAGTCTGGGGCATT

>KU820848..1

TTCTATTGTAATACATCGAAACTGTTTAATGGTACATACAATAACAAGTAATTCAAGTAATGGTACATACA  
ATACAACA-----

-----AGT---

AATTCAAGTTCAGTCATCACAATCCCATGCAAAATAAAACAAATTATAAACATGTGGCAGGAGGTAGGACGAG  
CAATGTATGCTCCACCCATTGAAGGAAATATAACATGTAGATCAAAT---

ATTACAGGGTTGCTATTAACAAGAGATGGTGGTAGT-----  
-----

AATACCACCGAGACATTTCAGACCTCAAGGAGGAGATATGAGAGACAATTGGAGAAGTGAATTATATAAAATATA  
AAGTAGTAAAAATTGAACCATTA---GGAGTAGCACCCACCAGGGCAAAGAGAAGAGTAGTG-----

-----CAGAGAGAAAAAAGAGCA---GTGGGA---ATAGGAGCT-----  
---GTGTTCCCTTGGGTTCTTGGGAGCA---GCAGGAAGCACTATG---GGCGCAGCGTCA---

ATAACGCTGACGGTACAG---GCCAGACAA---TTGTTG---TCTGGTATAGTGCAACAGCAAAAC---

AATTTG---CTGAGA---GCTATAGAGGCGCAACAACATATGTTGCAACTCACGGTCTGGGGCATT

>MH327758..1

TTTTATTGCAATACATCAGGCCTGTTTAATAAGACATACCCGTCTAATAGTACAGTTAATAATACAGAA----  
-----

ACTGATTCGATCATCACGATCCCATGCAAAATAAAGCAAATTATAAATATGTGGCAGGAGGTGGGACGAGCAA  
TGTATGCTCCTCCCATTGCAGGAAACATAACATGTAGGTCAAAT---

ATCACAGGACTACTATTAGTACGTGATGGAGGATTAAATAATACA-----  
-----

ACTGAGGTATTCAGGCCTCAAGGAGGAGATATGAGGGACAATTGGAGAAGTGAATTATATAAAATATAAAGTGG  
TAGAGATTAAAGCCATTG---GGAATAGCACCCACTGGAGCAAAAAGGAGAGTGGTG-----

-----GAGAGAGAAAAAAGAGCA---GTGGGA---ATAGGAGCT-----

GCGTTCCTTGGGTTCTTGGGAGTA---GCAGGAAGCACTATG---GGCGCGGCGTCA---

GTGACGCTGACGGTACAG---GCCAGACAA---TTGCTG---TCTGGTATAGTGCAACAGCAAAGC---

AATTTG---CTGAGG---GCTATAGAGGCGCAACAGCATATGTTGCAACTCACGGTCTGGGGCATT

>KF250401..2

TTCTATTGTAATACATCAGGCCTGTTTAATAGTACATACTCGTCTAATAGTACATACAATGATACAGGA----  
-----

AGTAATGAAACCATCACAATCCCATGCAAACTAAAGCAAATTATAAACATGTGGCAGAAGGTAGGACGAGCAA  
TGTATGCCCCCTCCCATTGCAGGAAACATAACATGTAACCTCAAAT---

ATCACAGGACTACTGTTGGTACGTGATGGAGGAGGAACAAATAAT-----  
-----

TCAGAGGAGATATTTCAGACCTCAAGGAGGAAATATGAAGGACAATTGGAGAAGTGAATTATATAAAATATAAAG  
TAGTAAAAATTGAACCATTA---GGATTGGCACCCACCCCTGCAAAGAGAAGCGTGGTG-----

-----CAGAGAGAAAAAAGAGCA---GTGACA---CTAGGAGCT-----  
TTGTTCCCTTGGGTTCTTGGGAACA---GCAGGAAGCACTATG---GGCGCGGCGTCA---

ATAACGCTGACGGTACAG---GCCAGACAA---TTGTTG---TCTGGTATAGTGCAACAGCAAAGC---

AATTTG---CTGATG---GCTATAGAGGCGCAACATCATATGTTGCAACTCACGGTCTGGGGCATT

>AJ508597..1

TTCTATTGTAATACATCAGGACTGTTTAATGGTACAGAACTGCTTAATAGTACATCT-----  
-----

AATAATACTGCAATCACACTCCGATGTAGAATAATACGAATTATAAGGATGTGGCAGAGAGTGGGACAAGCCA  
TTTACGCCCCCTCCCATTGAAGGATACATTACATGTACATCAAAT---

ATAACAGGATTACTATTTACAAGAGATGGA---AATAACAATGAC-----  
-----

AGTGAGACCTTCAGACCTGGAGGAGGAGATATGAGGGACAATTGGAGAAGTGAATTATATAAGTATAAAGTAG  
TAAAGTTAAACCACTA---GGAATAGCACCCAACAAGGCAAGGAGAAGAGTAGTG-----

-----GGGAGAGAGAAAAAGAGCA---GTTGGA---CTGGGAGCT-----

GTTTTCCCTTGGGTTCTTAGGAACA---GCCGGAAGCACTATG---GGCGCGGCGTCA---

ATAACGCTGACGGTACAG---GTCAGACAA---TTATTG---TCTGGCATAGTGCAACAGCAAAGC---

AATTTG---CTGAGA---GCTATAGAGGCGCAGCAGCATCTGTTGCAACTCACAGTCTGGGGCATT

>AJ508595..3

TTCTATTGTAATACATCAGGCCTGTTTAAATATGTCAGGGAGTAGTAATATATCAGGGAAT-----

-----  
-----

AGTAATGAGACCATCACACTCCCATGTAGGATAAAAACAAATTGTAAGGATGTGGCAGAGAGTGGGACAAGCCA  
TTTATGCCCCCTCCCATCGCAGGATACATTACATGCACATCAGAC---

ATTACAGGACTACTATTTACAAGAGACGGGGGTCATCACAGCAGT-----

-----  
-----

AATGAGACCTTCAGACCGGAAGGAGGAGATATGAGGAACAATTGGAGAAGTGAATTATATAAGTATAAAGTAG  
TAAAAATTAAACCACTA---GGAATAGCACCCACCAGAGCAAGGAGAAGAGTAGTG-----

-----GGGAGAGAGAAAAGAGCA---GTTGGA---CTGGGAGCT-----

GTGTTCTTGGGTTCTTAGGAACA---GCAGGAAGCACTATG---GGCGCAGCGTCA---

ATAACGCTGACGGTACAG---GCCAGACAA---TTATTG---TCTGGCATAGTGCAACAGCAAAGC---

AATTTG---CTGAGA---GCTATAGAGGCGCAGCAGCATCTGTTGCAACTCACAGTCTGGGGCATT

>KU168299..1

TTCTATTGCAATACAACAGCATTGTTTAAATAGCTCTTGGGATGCCAACACACTAAGTAATAGCACT-----

-----  
-----

GTAAATGACACTATAACTCTCCAATGCAGAATAAAGCAAATTGTAAATATGTGGCAGAAAGTAGGACAAGCAA  
TGTATGCCCCCTCCCATCCCAGGAATAATAAAGTGTGAATCAAAC---

ATTACAGGGTTACTATTAACAAGAGATGGAGGGAACACAGATAAT-----

-----  
-----

ATAACTGAGACTTTTCAGGCCTGGAGGAGGAAATATGAGGGACAATTGGAGGAGTGAATTGTATAAATATAAAG  
TAGTAAAAATTGAACCATTA---GGTGTAGCACCCACCCATGCAAAAAGAAGAGTGGTG-----

-----GGAAGAGAAAAAAGAGCA---GTTGGA---CTGGGAGCT-----

GTCTTCCTTGGGTTCTTAGGAGCA---GCAGGAAGCACTATG---GGCGCGGCGTCA---

ATAACGCTGACGGTACAA---GCCAGACAA---TTATTG---TCCGGTATAGTGCAACAGCAGAGC---

AATCTG---CTAAGG---GCTATAGAGGCTCAACAACATATGTTGAAGCTCACGGTCTGGGGCATT

>AJ866554..1

TTCTATTGCAATACAACAAAACCTGTTTAAATAGCACTTGAATAGTTGGGATAATAGCACTTGAATAGTACCA  
GCTCAAACGAC-----

-----ACATGG-----

CCAAAGGGGTCAAATATAACTCTCCAATGCAGAATAAAGCAAATTATAAATATGTGGCAGAGAGTAGGACAAG  
CAATGTATGCCCCCTCCCATCCCAGGAGAAATAAAGTGTGTATCAAAC---

ATTACTGGACTAATATTAACAAGAGATGGAGGGAATAATAATAGT-----

-----  
-----

GCAAGTGAGACCTTCAGGCCTGGAGGAGGAGATATGAGGGACAATTGGAGAAGTGAATTATATAAATATAAAG  
TAGTAAAAATTGAACCACTA---GGAGTAGCACCCACTAGAGCGAAGAGAAGAGTGGTG-----

-----GAGAGAGAAAAAAGAGCA---GTTGGA---CTGGGAGCT-----

TTCTTCTTTGGGTTCTTAGGAGCA---GCAGGAAGCACTATG---GGCGCGGCGTCA---

ATAACGCTGACGGCACAG---GCCAGACAA---TTATTG---TCTGGCATAGTGCAACAGCAGAGC---

AATCTG---CTGAAG---GCTATAGAGGCTCAACAGCATCTATTGAAACTCACGGTCTGGGGCATT

>AJ866556..1

TTCTATTGCAATACATCAGCACTGTTTAAATAGCACTTGGGTAGGGGTAAATGGCAATTGGAGCAATACCAGCT  
CAAACAAC-----

-----ACA---

GGGTAAATGACATTATAACTCTTCGATGCAGAATAAAAACAAATTATAAATATGTGGCAGAGAGTAGGACAAG  
CAATGTATGCCCCCTCCCATCCAAGGAGAACTAAGGTGTGACTCAAAC---

ATTACTGGATTACTATTAACAAGAGATGGAGAGGGTGATACTAAG-----

-----  
-----

GAAAAATGAGACCTTCAGGCCTGGAGGAGGAGATATGAGGGACAATTGGAGAAGTGAATTATATAAGTATAAAG  
TAGTAAAAATTAAACCACTA---GGTGTAGCACCCACCCGTGCAAAAAGGAGAGTGGTG-----

-----GAGAGAGAAAAAAGAGCA---GTTGGA---CTGGGAGCT-----

GTCTTCCTTGGGTTCTTAGGAGCA---GCAGGAAGCACTATG---GGCGCGGCGTCA---

ATAACGCTGACGGTACAG---GCCAGACAA---TTATTG---TCCGGTATAGTGCAACAGCAGAAC---

AATTTG---CTGAAG---GCTATAGAGGCTCAACAACATTTGTTGAGACTCACGGTCTGGGGCATT

>AJ866558..2

TTCTATTGCAGTACATCAGCATTGTTTAAATAGCACCTGGATGATGGTTAATGGCACCTGGAGCGACACTGCAA  
ATGACACAGAG-----

-----GCAAAT-----

AACAATATAACTCATATAACTCTCCAATGCAAAATAAAGCAAATTGTAAATATGTGGCAGAGAGTAGGACAAG  
CAATATATGCCCCCTCCTATCCAAGGAAAAATAAGTTGTAATTCAGC---

ATTACAGGACTGCTATTAACAAGAGATGGAGGAGGGAATAATACT-----  
-----

GCAAAATGAAACTTTTCAGGCCTGGAGGAGGAGATATGAGGGACAATTGGAGAAGTGAATTATATAAGTATAAAG  
TAGTAAAAAATTGAACCACTA---GGTGTGGCACCCACCCATGCAAAAAGAAGAGTGGTG-----

-----GGAAGAGAGAAAAAGAGCG---GTTGGA---CTGGGAGCT-----  
GTCTTCCTTGGGTTCTTAGGAGCA---GCAGGAAGCACTATG---GGCGCGGCGTCA---

ATAACGCTGACGGTACAG---GCCAGACAA---TTATTG---TCCGGTATAGTGCAACAGCAGAGT---  
AATTTG---CTGAGG---GCTATAGAGGCTCAACAACAACCTGTTGAAACTCACGGTCTGGGGCATT

>AJ866555..1

TTCTACTGCAATACAACAACCACTGTTTAAATAGCGCTTGGTTTAAATGGCACTTGGGTATACAACAATAACACCA  
ATGTC-----

AGCTCAGGGTCAAATATAACTCTCCCATGCAGCATAAAGCAAATTGTGAGAATGTGGCAGAAAGTAGGACAAG  
CAATGTATGCCCCCTCCCATCCCAGGAATAATAAGGTGTGAGTCAAAT---

ATTACAGGACTAATCTTAACAAGAGATGGGGGGAACGATAGCAGT-----  
-----

GTAAATGAGACCTTCAGGCCTGGAGGAGGAGATATGAGGGACAATTGGAGAAGTGAATTATATAAGTATAAAG  
TAGTAAAAAATTGAACCACTA---GGTGTAGCACCCACCCCTGCAAAAAGAAGAGTGGTG-----

-----CAGAGAGAAAAAAGAGCAGTAGTTGGA---ATGGGAGCT-----  
CTTTTCCTTGGGTTCTTAGGAGCA---GCAGGAAGCACTATG---GGCGCAGCGTCA---

GTAACGCTGACGGTACAG---GCCAGACAA---TTATTG---TCCGGTATAGTGCAACAGCAGAGC---  
AATTTG---CTGAGG---GCTATAGAGGTTCAACAACATCTGTTGAAACTCACGGTCTGGGGCATT

>AF184155..1

TTCTATTGCAATACATCAGGACTGTTTAAATAGCACTTGGTATAAAAATAGCACTTGGTATAGCAATAGCACTG  
CCAGCTCAAAC-----

-----CACACA-----

GAGTTAAATAGCACTATAACTCTCCAATGCAAAATAAAGCAAATTATAAATATGTGGCAGAAAGTAGGACAAG  
CAATGTATGCCCCCTCCCATCCAAGGAGTAATAAGATGTGATTCAAAC---

ATTACAGGACTACTATTAACAAGAGATGGAGGGAGTAATAAAT-----  
-----

ACACCTGAGATCTTCAGGCCTGGAGGAGGAAATATGAGGGACAATTGGAGAAGTGAATTATATAAGTATAAAG  
TAGTAAAAAATTGAACCACTA---GGTGTAGCACCCACCCGTGCAAAAAGAAGAGTGGTG-----

-----GAGAGAGAAAAAAGAGCA---GTTGGA---CTGGGAGCT-----  
GTCTTCCTTGGGTTCTTAGGAGCA---GCAGGAAGCACTATG---GGCGCAGCGTCA---

ATAACGCTGACGGTACAG---GCCAGACAA---TTATTG---TCCGGTATAGTGCAACAGCAGAGC---  
AATTTG---CTGAGA---GCTATAGAGGCTCAACAACATCTGTTGAAACTCACGGTCTGGGGCATT

>HQ385445..3

TTCTATTGCAATACATCAAGCCTATTTAAATAGCACTTGAATACATCAAGCATTAGCATTGAGAATAGTACCG  
AT-----

TACTCAAATGAACTATAACTCTCCAATGCAGAATAAAGCAAATTATAAATATGTGGCAGACAGTAGGACAAG  
CAATATATGCCCCCTCCCATCCCAGGAATAATAAGCTGTAATTCAACT---

ATTACTGGACTACTATTAACAAGAGATGGAGGAAATACTAATAGT-----  
-----

ACGAATGAAACCTTCAGGCCTGGGGGAGGAGATATGAGGGACAATTGGAGAAGTGAATTATATAAGTATAAAG  
TAGTGAAAATTGAACCACTA---GGTGTAGCACCCACTCATGCAAAAAGAAGAGTGGTG-----

-----GAGAGAGAAAAAAGAGCA---GTTGGA---CTGGGAGCT-----  
GTCTTCCTTGGGTTCTTAGGAGCA---GCAGGAAGCACTATG---GGCGCGGCGTCA---

ATGGCGCTGACGGTACAG---GCCAGACAA---TTATTG---TCCGGTATAGTGCAACAGCAGAGC---  
AATTTG---CTGAAG---GCTATAGAGGCTCAACAGCATCTGTTGAGACTCACGGTCTGGGGCATT

>GU201497..2

TTCTATTGCAATACATCAAGACTGTTTAAATAGCACTTGGTATAATGACACTAGAAAGGCCCACTACACAGAG-

-----  
-----

TTAAATGGCACTATAACCCCTCCAATGCAGAATAAAGCAAATTATAAATATGTGGCAGAGAACAGGACAAGCAA  
TATATGCCCCCTCCCATCCCAGGAGAAATAAGGTGTAATTCAAAC---

ATTACAGGAATACTATTAGTAAGAGATGGAGGGGTTAATACTAGT-----

-----  
-----

ACAAATGAGACCTTCAGGCCTGCAGGAGGAGATATGAGGGATAATTGGAGAAGTGAATTATATAAGTATAAAG  
TAGTAAAAAATTGAACCACTA---GGTGTAGCACCCACCCATGCAAGAAGAAGAGTGGTG-----

-----CAGAGAGAAAAAAGAGCA---GTTGGA---CTGGGAGCT-----

GTCTTCCTTGGGTTCTTAGGAGCA---GCAGGAAGCACTATG---GGCGCGGCGTCA---

ATAACGCTGACGGTACAA---GCCAGACAA---TTATTG---TCCGGTATAGTGCAACAGCAGAGC---

AATCTG---CTGAGA---GCTATAGAGGCTCAACAACATATGTTGAGACTCACGGTCTGGGGCATT

>JN864047..2

TTCTATTGCAATACATCAGGCCTGTTTAAATGGCACTTGGGATAAATCTTACAACATGACAGAG-----

-----  
-----

TTGACTGGCACTATAATTCTCCCGTGCAGAATAAAGCAAATTATAAATATGTGGCAGAGAGTGGGACAAGCAA  
TGTATGCCCCCTCCCATCCCAGGAAGAATAAAGTGTGAGTCAAAT---

ATTACAGGGCTACTATTGACAAGAGATGGTGGAAGTAATAATGAT-----

-----  
-----

ACTAGTGAGATTTTTAGACCTGGAGGAGGAGACATGAGAGATAATTGGAGAAGTGAACATATAAATATAAAG  
TAGTAAAAAATTGAACCAATA---GGAGTAGCACCCACCAAGGCAAGAAGAAGGGTGGTG-----

-----GAGAGAGAAAAAAGAGCA---ATTGGA---TTTGGAGCT-----

GCCTTCATTGGGTTCTTAGGAGCA---GCCGGAAGCACTATG---GGCGCGGCGTCA---

ATAACGCTGACGGTACAG---GCCAGACAA---TTATTG---TCTGGCATAGTGCAACAGCAAAGC---

AATTTG---CTGAAG---GCTATAGAGGCTCAACAGCATATGTTGAGACTCACGGTCTGGGGCATT

>JN864052..2

TTCTATTGCAATACATCACAACATTTTAAATGGCACTTGGTCTAATAAACTGGGAATGGGAATGCTACCAGCT  
CA-----

-----  
-----

AATGAACTATAAATACTCTTCCATGTAGAATAAAGCAAATTATCAATATGTGGCAGAGAGTAGGACAAGCAA  
TGTATGCCCCCTCCCATCCGAGGAGGAATAAGGTGCGACTCAAAC---

ATTACAGGATTACTATTAAACAAGAGATGGAGGAACGAATAGTACA-----

-----  
-----

CATCAGACATTCAGGCCTGGAGGAGGAGATATGAGAAACAATTGGAGAAGTGAATTATATAAGTATAAGGTAG  
TACAAATTGAACCAATA---GGTGTGGCACCCACCCCTGCAAAAAGAAGAGTGGTG-----

-----GAAAGAGAAAAAAGAGCA---GTAGGA---CTGGGAGCT-----

GTCTTCCTTGGGTTCTTAGGAGCA---GCAGGAAGCACTATG---GGCGCAGCGTCA---

ATAACGCTGACGGTACAG---ACCAGACAA---TTATTG---TCCGGTATAGTGCAACAGCAGAGC---

AATCTG---CTGAGG---GCTATAGAGGCTCAACAGCATCTGTTGAAACTCACAGTCTGGGGCATT

>JN864053..2

TTCTATTGCAATACAAACAAACCTGTTTAAATAGCACTTGGTATAACAATGACACTAGTGCTTGGTATAACAATG  
GCACAGGACCA-----

TACAATGGCACAGGACTA-----

TGGATAAATGGCACTATAATTCTCTCGTGTAGAATAAAGCAAATTGTAAACATGTGGCAAAGAGTAGGACAAG  
CAATGTATGCTCCCCCATCCGAGGAAGAATAGAGTGTCATCAAAC---

ATTACAGGACTACTGTTGACAAGAGATGGTGGGGAGCATAATAACTAATAAT-----

AATAATACTAATAAT-----

-----  
-----

AATACTGAGATTTTTAGGCCTGGAGGAGGAGATATGAGAGACAATTGGAGAAGTGAATTATATAAATATAAAG  
TAGTAAAAAATTGAACCACTA---GGAATAGCACCCACCAAGGCAAGGAGAAGAGTGGTG-----

-----CAGAGAGAAAAAAGAGCA---GTTGGA---TTTGGAGCT-----

GTCTTCCTTGGGTTCTTAGGAGTA---GCCGGAAGCACTATG---GGCGCGGCGTCA---

ATGGCGCTGACGGTACAG---GCCAAACAA---TTATTG---TCTGGCATAGTGCAACAGCAAAGC---

AATTTG---CTGAGG---GCTATAGAGGCTCAACAGCAGATGTTGAGACTCACGGTCTGGGGCATT

>DQ826727..2

TTCTATTGCAATACATCAGGCTTATTTAATAGTAGTTGGACAGGAAATAACACAGAAAATAACACTGCA----

-----  
-----

CTGAATGGCACTATAACTCTCCCGTGCAGAATAAAACAAATTGTAAACATGTGGCAGAGAGTAGGACGAGCAA  
TGTATGCCCCCTCCCATCCCAGGAGTAATAAGGTGCACATCAAAC---

ATTACAGGATTAATACTGACAAGGGATGGTGGAAACCATGGAAATAGT-----  
-----

-----  
-----

AGTTATAAAAATGAAACCTTCAGACCTGGAGGAGGAGACATGAGGGACAATTGGAGAAGTGAATTATATAAGT  
ATAAGGTAGTACAAATTGAACCAGTA---GGTGTGGCACCCACCCATGCAAGAAGAAGAGTGGTG-----

-----GAGAGAGGAAAAAGAGCA---GTTGGA---CTGGGAGCT---

-----GTCTTCCTTGGGTTCTTAGGAGCA---GCAGGAAGCACTATG---GGCGCGGCGTCA---

ATAACGCTGACGGTACAG---GCCAGACAA---TACTG---TCCGGTATAGTGCAACAGCAGAGC---

AATTTG---CTGAAG---GCTATAGAGGCTCAACAACAGCTGTTGAAACTCACGGTCTGGGGCATT

>MH078538..1

TTCTATTGCAATACATCAGGACTGTTCAATAAGAATTGGACATATGATAACAGCAATATCACCTCAAATAAC-

-----  
-----

ACAGAATCAACTATAACTCTCCCATGCAACATAAGGCAAATTGTAAAGATGTGGCAGAGAGTAGGACGAGCAA  
TGTATGCCCCCTCCTATCGCAGGAAACATAAGTTGCAACTCAAAC---

ATTACTGGATTACTCTTAACAAGAGATGGAGGGAATAATACACAT-----  
-----

-----  
-----

AAGAATAAGACCGAGACCTTCAGGCCTGCAGGAGGAGATATGAGGGACAATTGGAGAAGTGAATTATATAAAT  
ATAAAGTAGTAAAAATTGAACCATTA---GGTATAGCACCCCTCCAAGGCAAAAAGAAGAGTGGTG-----

-----GAGAGAGAAAAAAGAGCA---GTTGGA---ATGGGAGCT---

-----GTCTTCTTTGGGTTCTTAGGAGCA---GCAGGAAGTACTATG---GGCGCGGCGTCA---

ATAACGCTGACGGCACAG---GCCAGGCAA---CTATTG---TCTGGTATAGTACAACAGCAGAGT---

AATCTG---CTAAGG---GCTATAGAGGCTCAACAAAACATGTTGAGACTCACGGTCTGGGGCATT

>AY371143..1

TTCTATTGCAGTACATCACCCTGTTTAATAGCACTTGGGACAGTAATAACACTGCCAGTTCAAACCACACAG

AG-----  
-----

TCAAATGACATTATAACTCTCCAATGCAGAATAAAGCAAATTATAAATATGTGGCAGAGGGTGGGACAAGCAA  
TGTATGCCCCCTCCCATCAGTGGAAACATAACTTGTGAATCAAAC---

ATAACAGGACTACTATTAACAAGAGATGGAGGGGCTACTAATAGT-----  
-----

-----  
-----

ACAACAAATGAGACCTTCAGGCCTGGAGGAGGAGATATGAGGGACAATTGGAGAAGTGAATTATATAAGTATA  
AAGTAGTAAAAATTGAACCACTA---GGTGTAGCACCCACCCCTGCAAGAAGAAGAGTGGTG-----

-----CAGAGAGAAAAAAGAGCA---GTTGGA---CTGGGAGCT-----

---GTTTTCCTTGGGTTCTTAGGAGCA---GCAGGAAGCACTATG---GGCGCGGCGTCA---

GTGACGCTGACGGTACAG---GCCAGACAA---TTATTG---TCTGGTATAGTGACAGCAGCAGCGC---

AATCTG---CTGCAG---GCTATAGAGGCTCAACAACATCTGTTGAAACTCACGGTCTGGGGCATT

>KF716465..1

TTCTATTGCAATACATCACAACCTGTTTAATGGCACTTGGTTTAATGACACTTGAACAACAATACCAATGACA

AC-----  
-----

AGCTCAGAATTTATAACTCTCCAATGCAGAATAAAGCAAATTGTAAATATGTGGCAGAGAGTAGGACAAGCAA  
TGTATGCCCCCTCCCATCCCAGGAGTAATAAGTTGTAATTCAAAC---

ATTACTGGACTACTATTAATAAGAGATGGAGGGAATAATAATATT-----  
-----

-----  
-----

ATGAAGGAGACCTTCAGGCCTGGAGGAGGAGATATGAGGGACAATTGGAGAAGTGAATTATATAAATATAAAG  
TAGTAAAAATTGAACCACTA---GGTGTAGCACCCACCCATGCAAAAAGAAGAGTGGTG-----

-----GAGAGAGAAAAAAGAGCA---GTTGGA---CTGGGAGCT-----

GTCTTCTTTGGGTTATTAGGAGCA---GCAGGAAGCACTATG---GGCGCGGCGTCA---

ATCACGCTGACGGTACAG---GCCAGACAA---TTATTG---TCCGGTATAGTGCAACAGCAGAGC---

AATTTG---CTGAAG---GCTATAGAGGCTCAACAACATATGTTGAGACTCACGGTCTGGGGCATT

>FJ670515..2

TTTTATTGCAATACATCAAGCCTGTTTAAATAGTACTTGGTACGGTAATGGCACTAACAATACAACCTGACACGG  
GG-----

-----  
TCCAATGATACTATAAGTCTCCCATGCAGGATAAAAACAAATTGTACATATGTGGCAGAGAGTAGGACAAGCAA  
TGTATGCCCCCTCCAATTCAAGGAATAATAAACTGTAAATCAAAC---  
ATTACAGGGCTACTGCTAGTAAGAGATGGTGGGAATGGGAATGGTACA-----

-----  
AATGAGACCGAGACGTTTCTGACCTGGAGGAGGAAACATGAAGGACAATTGGAGAAGTGAATTATATAAAATATA  
AAGTAGTAAAAATTGAACCACTA---GGAGTAGCACCCACCAGGGCAAAGAGAAGAGTGGTG-----  
-----GGGAGAGAGAAAAAGAGCA---GTTGGA---CTGGGAGCT-----  
---GTCTTCCTTGGGTTCTTAGGAGCA---GCCGGAAGTACTATG---GGCGCGGCGTCA---  
ATAACGCTGACGGCACAG---GCCAGACAA---TTATTG---TCTGGCATAGTACAACAGCAGAGC---  
AATCTG---CTGAGG---GCTATAGAGGCTCAACAGCACATGTTGAGACTCACGGTCTGGGGCATT

>KU685587..1

TTCTATTGCAGTACATCAGGATTGTTTAAATATGACTTGGTATAAGAACAGCTCAGAGTCAAATAGCACTGAC-

-----  
AGGCCTGGAAATATAACTCTCCAATGCAGAATAAAGCAATTTATAAATATGTGGCAGAGAGTAGGGCAAGCAA  
TGTATGCCCCCTCCCATCAGAGGAGAAATAAGTTGTGTGTCAAAC---  
ATTACTGGAATACTATTAACAAGAGATGGAGGGAAAAATAGTACT-----

-----  
GAAAAGGAGATCTTCAGGCCTGGAGGAGGAGACATGAGGGACAATTGGAGAAGTGAATTATACAAGTATAAAG  
TAGTAGAAATTGAACCACTA---GGTGTAGCACCCACCCGTGCAAAAAGAAGAGTGGTG-----  
-----GAGAGAGAGAAAAAGAGCA---GCA-----CTAGGAGCT-----  
GTCTTCATTGGGTTCTTGGGAGCA---GCAGGAAGCACTATG---GGCGCGGCGTCA---  
GTGGCGCTGACGGTACAG---GCCAGACAA---TTATTG---TCTGGTATAGTGCAACAGCAAAGC---  
AATTTG---CTGAAA---GCTATAGAGGCTCAACAGCAACTGTTGAAACTCACAGTCTGGGGCATT

>KR067669..1

TTCTATTGTAATACATCAAACTGTTCAATAGCACTTGGCCGGTTAATAGCACTTGGCATAATAGAACTAACA  
TTGACAGT-----

-----  
TCAAATGGCACAATAACTCTCCAATGCAGAATAAAGCAAGTTATAAATATGTGGCAGAAAGTAGGGCAAGCCA  
TGTATGCCCCCTCCCATCCAAGGAGAAATAAGGTGTGACTCAAAC---  
ATTACTGGACTACTATTAACAAGAGATGGAGGGAGTAGTAATGAT-----

-----  
ATGAGTGAGACCTTCAGGCCTGGAGGAGGAGATATGAAGGACAATTGGAGAAGTGAATTATATAAGTATAAAG  
TAGTAAAAATTGAACCAATA---GGGGTGGCACCCACCCCTGCAAAAAGAAGAGTGGTG-----  
-----GAGAGAGAGAAAAAGAGCA---GTAGGA---CTGGGAGCT-----  
GTCTTCTTTGGGTTCTTAGGAGCA---GCAGGAAGCACTATG---GGCGCGGCGTCA---  
ATAACGCTGACGGTACAG---GCCAGACAG---TTATTG---TCTGGTATAGTGCAACAGCAAAGC---  
AATTTG---CTGAGG---GCTATAGAGGCTCAACAACAGCTGTTGAGACTCACGGTCTGGGGCATT

>KR067670..2

TTCTATTGCAATACATCAAACTGTTTAGTGGCTCTTGAATGATAGCTCTTTGAATGATAGTAATACAAATG  
GAAAC-----

-----  
TCAAGTGAACTACTATAATTCTCCCATGCAAAATAAGACAAATTGTACGTATGTGGCAGACAGTAGGACAAG  
CAATGTATGCCCCCTCCCATCAAGGAGCAATAAATTGTACATCAAAC---  
ATTACAGGGCTACTGCTAACGAGAGATGGTGGGGATGAACCAGAG-----

-----  
AATGAGACGTTTCTGACCTGGAGGAGGAGATATGAGGGATAATTGGAGAAGTGAATTATATAAATATAAAGTAG  
TAAAAATTGAACCACTA---GGAGTGGCACCCACCAGGGCAAAGAGAAGAGTGGTG-----  
-----GGGAGAGAGAAAAAGAGCA---ATTGGA---ATAGGAGCT-----  
GTCTTCCTTGGGTTCTTAGGAGCA---GCAGGAAGCACTATG---GGCGCGGCGTCA---  
GTAACGCTGACGGTACAG---GCCAGACAA---TTATTG---TCCGGTATAGTGCAACAGCAAAAC---  
AATTTG---CTGAGG---GCTATAGAGGCTCAACAGCAGTTGTTGAAACTCACGGTCTGGGGCATT

>KR067667..1

TTCTATTGCAATACATCAAACCTGTTTAAACAGTACTTGGTATAGTAACGGTACCAACAGTACTGAGAAAAAT-

-----  
-----

AATGACACCAACATAAATCTCCAATGTAGAATAAGACAAATTGTAAATATGTGGCAGAGGGTAGGACAAGCAA  
TGTATGCCCCCTCCCATCAGAGGAAACATAAATCTGTATATCAAAC---

ATTACAGGACTGTTGTTAACAAGAGATGGAGGGGATAATAGTACA-----  
-----

-----  
-----

AATGCAACTGAGACTTTCAGGCCTGGAGGAGGAGATATGAGGGACAATTGGAGAAGTGAATTATATAAATATA  
AAGTAGTACAAGTTGAACCGCTA---GGAGTAGCACCCAACAGGGCAAAAAGAAGAGTGGTG-----

-----CAGAGAGAAAAAAGAGCA---GTTGGA---CCGGGAGCT-----

---GTCTTCATTGGGTTCTTAGGAGCT---GCAGGAAGCACTATG---GGCGCGGCGTCA---

ATGACGCTGACGGTACAG---GCCAGACAA---TTATTG---TCTGGTATAGTGCAGCAGCAAAGT---

AATTTG---CTGAGG---GCTATAGAGGCTCAACAGCAGGTGTTGAGACTCACGGTCTGGGGCATT

>KR067671..1

TTCTATTGTAATACAGCAGAGTTGTTTAAATAGCACTTGGATAATGATACTATGAGCTCAAATGACACTAGC-

-----  
-----

TCAAATGACACTATAAATCTCCAATGCAGAATAAGGCAAAATTATAAAGATGTGGCAGAAAGTAGGACAAGCAA  
TGTATGCCCCCTCCCATCCAGAGAAATAAGGTGTGAATCAAAC---

ATTACTGGACTACTATTAACAAGGGATGGAGGGAATGGGAATAAT-----  
-----

-----  
-----

GATCCAAATGAGACCTTCAGGCCTGGAGGAGGAGATATGAGGGACAATTGGAGAAGTGAATTATATAAGTATA  
AAGTAGTAAAAATTGAACCACTA---GGTGTAGCGCCACCCATGCAAGAAGAAGAGTGGTG-----

-----GAAAGAGAAAAAAGAGCA---GTTGGA---CTGGGAGCT-----

---GTCCTCTTTGGATTCTTAGGAGCA---GCAGGAAGCACTATG---GGCGCGGCGTCA---

ATAACGCTGACGGTACAA---GCCAGACAA---TTATTG---TCCGGTATAGTGCAGCAGCAGAGC---

AATCTG---CTGAAG---GCTATAGAGGCTCAACAACATTTGTTGAGACTCACGGTCTGGGGCATT

>MH078547..1

TTCTATTGCAATACATCAGCATTATTTAATAGCACTTGGATAAGCCTTGGATAAATTCAATGAATAACACTG  
AGGGAGGG-----  
-----

TCAAATGACATTCTTACTCTCAAATGCAAGATAAGGCAAGTTGTAAGAATGTGGCAAAGAGTGGGACAAGCAA  
TGTATGCCAATCCCATCCAGGAGTAATAAGGTGTGAATCAAAC---

ATAACAGGACTACTATTAACAAGAGATGGAGGGAATAACAATAGT-----  
-----

-----  
-----

ACAAATGAAACTTTTAGGCCTGGAGGAGGAGATATGAGGGACAATTGGAGAAGTGAATTATATAAGTATAAAG  
TAGTAAAAATTGAACCATTA---GGTGTAGCACCTACCCGTGCAAGAAGAAGAGTGGTG-----

-----CAGAGAGAAAAAAGAGCA---GTTGGA---ATGGCAGCT-----

GTCTTCTTTGGGTTCTTGGGAGCA---GCAGGAAGCACTATG---GGCGCGGCGTCA---

ATAACGCTGACGGTACAA---GCCAGACAA---TTATTG---TCTGGTATAGTGCACAGCAGAGC---

AATCTG---CTGCGG---GCTATAGAGGCTCAACAACATCTGTTGAAACTCACGGTCTGGGGCATT

>MH078549..1

TTTTATTGCAATACATCAAGCCTGTTTAAATAGCAGATGGTATAATGGAACATAACTGCAAACAACACAGATG  
AC-----  
-----

AATGCTGATAATATAAATCTCCCATGCAGACTAAAACAAGTGATAAGAATGTGGCAGAAAGTAGGGCAAGCAA  
TGTATGCCCCCTCCTATCAAAGGAGAAATAAGGTGTGTCTCAAAT---

ATTACTGGACTACTATTAACAAGAGATGGAGGGTATGGAGGGAAT-----  
-----

-----  
-----

AGTACAGATGAGACCTTCAGGCCTGGAGGAGGAGATATGAGGGACAATTGGAGGAGTGAATTATATAAGTATA  
AAGTAGTAAAAATCGAACCACTA---GGGGTGGCACCCACCCGAGCAAAAAGAAGAGTGGTG-----

-----GAGAGAGAAAAAAGAGCA---GTTGGA---ATGGCAGCT-----

---GTCTTCCTTGGGTTCTTAGGAGCA---GCAGGAAGCACTATG---GGCGCGGCGTCA---

CTGACGTTGACGGTACAA---GCCAGACAA---TTATTG---TCCGGTATAGTGCACAGCAAAGC---

AATTTG---CTGAAG---GCTATAGAGGCTCAACAACAGATGTTGAGACTCACGGTCTGGGGCATT

>MH078550..2

TTCTATTGCAACACAGCAGGCCTGTTTAAATGGTACTTGGGCTAATGATACTTGGGATCAAGGAAATGGCACGA  
AA-----

-----  
GAAATGACACTATAACTCTCCAATGCAAAATAAAACAAGTTGTACATATGTGGCAGAGAGTAGGACAAGCAA  
TGTATGCCCTCCCATTCCAGGAGAAATAAGATGTGGATCAAAC---  
ATTACAGGGCTACTGCTAACAAGAGATGGTGGGAATACTAATAAT-----

-----  
ACAGAGGAGACGTTTCAGACCTGGAGGAGGAAATATGAAAGACAATTGGAGAAGTGAATTATATAAATATAAAG  
TAGTACAAATTGAACCAATA---GGAATAGCACCCACCAAGGCAAAGAGAAGAGTGGTG-----  
-----GAGAGAGAAAAAAGAGCA---ATTGGA---CTGGGAGCT-----  
GTCTTCCTTGGGTTCTTAGGAGCA---GCAGGAAGTACTATG---GGCGCGGCGTCA---  
ATAACGCTGACGGTACAG---GCCAGACAA---TTATTG---ACTGGTATAGTACAACAGCAGAGC---  
AATCTG---CTGAGG---GCTATAGAGGCTCAACAGCACATGTTGAAGCTCACAGTCTGGGGCATT

>KX389616..1

TTCTATTGCAACACATCAAACTGTTTAAATAGTATTTGGGATAACAATGCCACAAAAAATAATATTACTGACA  
AAAAATGGT-----

-----  
ATTAATGATACTATAACTCTCCCATGCAGAATAAGACAAATTGTACATATGTGGCAGAGAGTAGGACAAGCAA  
TGTATGCTCCTCCCATTCCAGGAGTAATAAACTGTACATCAAAC---  
ATTACAGGGATATTGCTAACAAGAGATGGTGGCAATAATAGTGAT-----

-----  
ACAAATGAGACATTTCAGACCTGGAGGAGGAGATATGAGAGATAATTGGAGAAGTGAATTGTATAAATATAAAG  
TAGTAAAAATTGAACCACTA---GGAGTAGCACCCACCAATGCAAAGAGAAGAGTGGTG-----  
-----GAGAGAGAAAAAAGAGCA---GTTGGA---CTGGGAGCT-----  
GTCTTCCTTGGGTTCTTAGGAGCA---GCAGGAAGTACTATG---GGCGCGGCGTCA---  
ATGGCGCTGACGGCACAG---GCCAGACAA---CTATTG---ACTGGTATAGTACAACAGCAGAAC---  
AATCTG---CTGAGG---GCTATAGAGGCTCAGCAGCAAATGTTGAGACTCACAGTCTGGGGCATT

>KU168304..2

TTCTATTGCAATACATCAGGACTATTTAATAGCACTTGGAGTAATCTAAATGACACAAATGGCACAAATCCAG  
AGCCAAAT-----

-----  
GACACTCACACTCTAACTATCCAATGCAGAATAAAGCAAATTGTAAGAATGTGGCAGAGGGTAGGACAAGCAA  
TGTATGCCCTCCCATCGAAGGAGAAATAAGGTGTGAATCAAAC---  
ATTACAGGATTACTATTAACAAGAGATGGAGGAGCAAATAATAAT-----

-----  
AATACAAAGGAGACATTTCAGGCCTGGAGGAGGAGATATGAGGGACAATTGGAGAAGTGAATTATATAAGTATA  
AGGTAGTACAAATTGAACCAATA---GGTGTGGCACCCACCCATGCAAAAAGAAGAGTGGTG-----  
-----GAGAGAGGAAAAAGAGCA---GTTGGA---ATAGGAGCT-----  
---GTCTTCCTTGGGTTCTTAGGAGCA---GCAGGAAGCACTATG---GGCGCAGCATCA---  
ATGACGCTGACGGTACAG---GCCAGACAA---TTATTG---TCCGGTATAGTGCAGCAGCAAAGC---  
AATTTG---CTGAGG---GCTATAGAGGCTCAACAACAGCTGTTGAAGCTCACAGTCTGGGGCATT

>EU513188..3

TTCTATTGCAATACATCAGAACTGTTTAAATAGCAATTGGACTAATACTAATAACAATACCAATAATGCCAGCT  
CA-----

-----  
GAGGCAAATGGCAATATAACTCTCACATGCAAAATAAAGCAAATTATAAATATGTGGCAAAGAGTGGGACAAG  
CAATGTATGCCCTCCCATCCAGGGAATAATAAGGTGTGAATCAAAC---  
ATTACAGGATTATTATTAACAAGAGATGGAGGGTTTAGGAATGATACA-----

-----  
AATGAGACCTATGAGGCCTTCAGGCCTGGAGGAGGAGATATGAGGGACAATTGGAGAAGTGAAGTATATAAGT  
ATAAAGTAGTAAAAATTGAACCACTA---GGTGTAGCACCCACTCATGCAAAAAGAAGAGCGGTG-----  
-----CAGAGAGAAAAAAGAGCA---GTTGGG---CTGGGAGCT---  
-----GTCTTCCTTGGGTTCTTAGGAGCA---GCAGGAAGCACTATG---GGCGCGGCGTCA---  
ATGACGCTGACGGTACAG---GCCAGACAA---TTATTG---TCCGGTATAGTGCAACAGCAGAGT---  
AATCTG---CTGAGG---GCTATAGAGGCTCAACAACATCTGTTGAGACTCACGGTCTGGGGCATT

>EU513185..1

TTCTATTGCAGTACATCAAATCTATTTAATAGTACCTGTACAAATAATAACGGCACTGCAAATTGTACAAATA  
CAAATGGG-----

-----ACA---

GCATTAAATGAACTATAACTCTCCAATGCAGAATAAAACAAATTGTAAGGATGTGGCAGAGAGTAGGACAAG  
CAATGTATGCCCCCTCCCATCCAAGGAGTAATAAGGTGTGAATCAAAC---

ATTACAGGAATAATATTAACAAGGGATGGAGGGGATAGTAATGATACA-----  
-----

AATGGAAATGAGACATTTCAGGCCTGGAGGAGGAGATATGAGGGACAATTGGAGAAGTGAATTATATAAGTATA  
AAGTAGTGCAACTTGAACCATTA---GGTGTGGCACCTACCCAGTCAAGAAGAAGAGTGGTG-----

-----GAGAGAGAAAAAAGAGCA---GTTGGA---ATGGGAGCT-----  
---TTGTTCCCTTGGGTTCTTAGGAGCA---GCAGGAAGCACTATG---GGCGCGGCGTCA---

GTGACGCTGACGGTACAG---GCCAGACAA---TTATTG---TCTGGTATAGTGCAACAGCAAAGC---

AATTTG---CTGAGG---GCTATAGAGGCTCAACAGCATCTGTTGAAACTCACAGTCTGGGGCATT

>EU513194..1

TTCTATTGCAATACATCAGGACTGTTTAAACAGCACTTGGTGGAATAACAATAACAGT-----  
-----

TCAAATAACATTACCACTCTCCAATGCAGAATAAAGCAGATTGTGAATCTGTGGCAGAGAGTAGGAAAAGCAA  
TGTATAACCCTCCCATCCAAGGAGTAATAAGGTGCGAATCAAAC---

ATTACAGGGCTACTATTAACAAGAGATGGAGGGCTTAATGATAGT-----  
-----

AGTACAAATGAAACCTTCAGGCCTGGAGGAGGAGATATGAGGGACAATTGGAGAAGTGAATTGTATAGGTACA  
AAGTAGTAAAAATTGAACCATTA---GGAGTAGCACCTCCAGGGCAAGGAGAAGAGTGGTG-----

-----CAGAGAGAAAAAAGAGCA---ATTGGA---ATGGGAGCT-----  
---GTCTTCCTTGGGTTCTTAGGAGCA---GCAGGAAGCACTATG---GGCGCGGCGTCA---

ATAACGCTGACGGTACAG---GCCAGACAA---TTATTG---TCTGGTATAGTGCGACAGCAAAGC---

AATTTG---CTGAAG---GCTATAGAGGCTCAACAACATCTGTTGAAACTCACGGTCTGGGGCATT

>EU513183..1

TTCTATTGCAATACATCAAGCCTGTTTAAATAGCACTTGGAAATTGGAATGGCACTAGCATAACAGGGGCCAAATG  
ACACG-----

CAGTCAAATGGCACTATAACACTCCCATGCAGAATAAAACAAATTGTAAATATGTGGCAGAGAGCAGGACAAG  
CAATGTATGCCCCCTCCCATCCCAGGAATAATAAAGTGTGAGTCAAAC---

ATTACAGGACTACTATTGGTAAGAGATGGTGGGAATAATAGTGGT-----  
-----

TCAAATGAAACCTTCAGACCTACAGGAGGAGATATGAGAGACAATTGGAGAAGTGAACCTATATAAATATAAAG  
TAGTAGAAATTGAACCACTA---GGAGTAGCACCCACCAGGGCAAAAAGAAGAGTGGTG-----

-----GAGAGAGAAAAAAGAGCA---GTTGGA---TTGGGAGCT-----  
GTCTTCCTTGGGTTCTTAGGAGCA---GCAGGAAGCACTATG---GGCGCGGCGTCA---

ATAACGCTGACGGTACAG---GCCAGACAA---TTATTG---TCTGGCATAGTGCAACAGCAAAGC---

AATTTG---CTGAGG---GCTATAGAGGCTCAACAACATCTGTTGAAACTCACGGTCTGGGGCATT

>KU168307..2

TTCTATTGCAATACATCAGACCTGTTTGATAGCACATGGCCTAACAATAGTAGTAACAATAGCACTAAC----  
-----

AATAGCACTACCATAACTCTCAAATGCAGAATAAAGCAAATTGTAAATATGTGGCAGAGAACAGGGCAAGCAA  
TGTATGCCCCCTCCCATCCCAGGACTAATAAGGTGTGAGTCAAAC---

ATTACAGGACTGCTATTGACAAGAGATGGAGGGGATAATAACAGT-----  
-----

ACAAATGAGACTTTTCAGACCTGGAGGAGGAGATATGAGAGATAATTGGAGAAGTGAATTATATAACTATAAAG  
TAGTAAAAATTGAACCAGTA---GGCATAGCACCCACCAAGGCAAAAAGAAGGTGGTG-----

-----GAGAGAGAAAAAAGAGCA---GTTGGA---ATAGGAGCT-----  
GTCTTCCTTGGGTTCTTAGGAGCA---GCAGGAAGCACTATG---GGCGCGGCGTCA---

ATAACGCTGACGGTACAG---GCCAGACAA---TTATTG---TCTGGCATAGTGCAACAGCAAAGT---

AATTTG---CTGAGA---GCTATAGAGGCTCAACAACAGTTGTTGAGACTCACAGTCTGGGGCATT

>AM279362..2

TTCTATTGCAATACATCAGGCCTATTTTAATAGCATTTGGTCTTGGAATACTAGCACTTGGAATTATACCAACT  
CAAATTCC-----

-----ACAGGG-----

TTAGATAATGACACTATAACTCTCCAATGCAGAATAAAGCAAATTGTAAATATGTGGCAGAGAGTAGGACAAG  
CAATGTATGCCCCCTCCCATCAAAGGAATGATAAGGTGTGAATCAAAC---

ATTACAGGATTACTATTAACAAGAGATGGAGGGAAGACTAATGATACT-----

-----

AATACAACTGAGACATTTCAGGCCTGGAGGAGGAGATATGAGGGATAATTGGAGAAGTGAATTATATAAGTATA  
AGGTAGTACAAATTAAACCATTTG---GGTGTGGCACCCACCCATGCAAAAAGAAGAGTGGTG-----

-----GAGAGAGAAAAAAGAGCA---GTTGGA---CTGGGAGTT-----

---GCCTTCCTTGGGTTCTTAGGAGCA---GCAGGAAGCACTATG---AGCGCAGCGTCC---

ATAACGCTGACGGTACAG---GCCAGACAA---TTATTG---TCTGGTATAGTGCAGCAGCAAAGC---

AATTTG---CTGAGG---GCTATAGAGGCTCAACAACATCTGTTGAAACTCACGGTCTGGGGCATT

>AM279356..2

TTCTATTGCAATACATCAAACTATTTTAATAGCACTTGGTATAGCAATGGTAGTGCCAGCTTAGATCACACAA  
AT-----

-----

AAAGATGAAAATATAACTCTCCTATGTAGAATAAGGCAAATTGTAAATATGTGGCAGAGAGTAGGACAAGCAA  
TGTATGCCCCCTCCCATCGAAGGAGTAATAAGGTGTGAATCAAAC---

ATTACAGGATTGCTATTAACAAGAGATGGAGGGAAGATAATAGTACA-----

-----

AATAGTACACAGGAGATATTCAGGCCTGGAGGAGGAGATATGAGGGACAATTGGAGAAGTGAATTATATAAGT  
ATAAGGTAGTACAAATTGAACCAATA---GGTGTAGCACCCACACATGCAAAAAGAAGAGTGGTG-----

-----GAGAGAGAAAAAAGAGCA---GTTGGA---CTGGGAGTT---

-----TTCTTCCTTGGGTTCTTAGGAGCT---GCAGGAAGCACTATG---GGCGCGGCGTCA---

ATAACGCTGACGGCACAG---GCCAGACAA---TTATTG---TCCGGTATAGTGC AACAGCAAAGC---

AATTTG---CTGAGG---GCTATAGAGGCTCAACAACATATGTTGAAACTCACGGTCTGGGGCATT

>AM279363..1

TTCTATTGCAATACATCAGGATTATTTAATAGTACTTGGAATCTAATAGCACTTGGGACAATAAACTGACA  
CAGGG-----

-----

TCAAACAATATAACTCTCACCTCCAATGCAGAATAAAGCAAATTGTAAATATGTGGCAGAGGGTAGGACAAG  
CAATGTATGCCCCCTCCCATCCCAGGAGTAATAAGGTGTGACTCAAAC---

ATTACAGGACTCCTATTAACAAGGGATGGAGGGAATACTAGCACA-----

-----

GATGAAACATTTCAGGCCTGGAGGAGGAGATATGAGGGACAATTGGAGAAGTGAATTATATAAGTATAAGGTAG  
TACAAATTGAACCAATA---GGTGTGGCACCCACCCATGCAAAAAGAAGAGTGGTG-----

-----GAGAGAGAAAAAAGAGCA---GTAGGA---CTGGGAGCT-----

GTCTTCATTGGGTTCTTAGGAGCA---GCAGGAAGCACTATG---GGCGCGGCGTCA---

ATAACGCTGACGGTACAG---GCCAGACAA---TTATTG---TCTGGTATAGTGC AACAGCAGAGT---

AATCTG---CTGAAG---GCTATAGAGGCTCAACAACATCTGTTGAAACTCACAGTCTGGGGCATT

>KM606636..1

TTCTATTGTAATACATCAAATCTGTTTAATAAAACCTTTAACCACAACCTCAACAGGGTCAAATTCAACAGAG-  
-----

-----

TCAGATAGGACTATAACTCTCCCATGCAGAATAAAGCAAATTATAAATATGTGGCAGAAAGTAGGACAAGCAA  
TGTATGCCCCCTCCCATCCGAGGAGTAATAAAGTGTGAATCAAAC---

ATTACAGGACTACTATTAACAAGAGATGGAGGGGTGAATAATGGT-----

-----

AGTACAAACGAGACTTTCAGGCCTGGAGGAGGAGACATGAGGGACAATTGGAGAAGTGAATTATATAAGTATA  
AAGTAGTAAAAATTGAACCACTA---GGTGTGGCACCCACCCCTGCAAAAAGAAGAGTGGTG-----

-----GAGAGAGAAAAAAGAGCA---ATTGGA---ATAGGAGCT-----

---GTCTTCCTTGGGTTCTTAGGAGCA---GCAGGAAGCACTATG---GGCGCAGCGTCA---

ATAACGCTGACGGTACAG---GCCAGACAA---TTACTG---TCTGGTATAGTGC AACAGCAGAGC---

AATCTG---CTGAGA---GCTATAGAGGCTCAACAACATATGTTGAAACTCACGGTCTGGGGCATT

>AB052867..2

TTCTATTGCAATACATCAAGACTGTTTAAATAGTACTTGGAATGACAATAGCACTTGGAATGACAGTAGCTCAA  
ATTAC-----

-----ACA---

GAGTCAAATGACACTATAACTCTCCAATGCAGAATAAAGCAAATTATAAATATGTGGCAGGGAGTAGGACAAG  
CAATGTATGCCCCCTCCATTAGAGGAGTGATAAGGTGTGAATCAAAT---

ATTACAGGACTACTATTAACAAGAGATGGAGGGATTAATAATAGT-----

-----  
-----

ACAAATGAGACCTTCAGACCTGGAGGAGGAGATATGAGAGACAATTGGAGAAGTGAATTATACAAGTATAAAG  
TAGTAAAACTTGAACCACTA---GGAGTGGCACCCACCAGGGCAAGGAGAAGAGTGGTA-----

-----ACAAGAGAAAAAAGAGCA---GTTGGA---ATGGGAGCT-----

TTGTTCTTTGGGTTCTTAGGAGCA---GCAGGAAGCACTATG---GGCGCGGTGTCA---

ATGACGCTGACGGTACAG---GCCAGACAA---TTATTG---TCCGGTATAGTGCAACAGCAGAGC---

AATCTG---CTAAAA---GCTATAGAGGCTCAGCAGCATCTGTTGAAACTCACGGTCTGGGGCATT

>HQ385444..2

TTCTATTGCAATACATCAGACCTGTTTAAATAGTACTTGGCTAAACTCAACTGTGGAA-----

-----  
-----

TCAAATGAGACTATAATTCTCCCATGCAAAATAAAACAAATTATAAATATGTGGCAGAGAGTAGGACAAGCAA  
TGTATGCACCTCCCATTCAAGGAGTAATAAACTGTGTATCAAAC---

ATTACAGGGATACTGCTAGTAAGAGATGGTGGGAATAATAATAGT-----

-----  
-----

ACAGCTGAGACATTCAGACCTGGAGGAGGAGATATGAAGGACAATTGGAGAAGTGAATTGTATAAATATAAAG  
TAGTAAAAATTGAACCACTA---GGAGTAGCACCTACCAGGGCAAAGAGACGAGTGGTG-----

-----GAGAGAGAAAAAAGAGCA---GTTGGA---CTGGGAGCT-----

GTCTTCTTTGGGTTCTTAGGAGCA---GCAGGAAGTACTATG---GGCGCAGCGTCA---

ATAACGCTGACGGTACAG---GCCAGACAA---TTATTG---TCTGGTATAGTACAACAGCAGAGT---

AATTTA---CTGAAG---GCTATAGAGGCTCAACAACATCTGTTGAAACTCACGGTCTGGGGCATT

>KR067668..1

TTCTATTGCAATACATCAGGACTGTTTAAATAGCGCTTGGAACAGTAGCACTTGGAACAATACCCTGACCAAC-

-----  
-----

AATACTGGCAATATAACGCTCCACTGCAGAATAAAGCAAATTATAAATAAGTGGCAGAGAGTAGGACAAGCAA  
TGTATGCCCCCCCCATCCCAGGAGTAATAAGGTGTGAGTCAAAC---

ATCACAGGATTACTACTAACAAGAGATGGAGGAAACAATAATAGG-----

-----  
-----

ACAAATGAGACTTTTCAGGCCTGAAGGAGGAGATATAAGGGACAATTGGAGGAGTGAATTATATAAGTATAAAG  
TAGTAAAAATTGAACCAGTA---GGAGTAGCACCCACCAGGGCAAGGAGAAGAGTGGTG-----

-----GAAAGAGAGAAAAAGAGCA---GTCGGA---CTGGGAGCT-----

GTCTTCTTTAGGTTCTTAGGAGCA---GCAGGAAGCACCATG---GGCGCGGCGTCA---

ATAACGCTGACGGTACAG---GCCAGACAA---TTATTG---TCTGGTATAGTGCAACAGCAAAGT---

AATTTG---CTGAAG---GCTATAGAGGCTCAACAACACCTGTTGAGACTCACGGTCTGGGGCATT

>KU749413..1

TTCTATTGTAATACAACAAGCCTGTTTAAATAGTACTTGGTATAATAATGAGACTGAGAACACAAATAGCACGG  
GA-----

-----  
-----

TCAAATGAAACCATAACACTCCCATGCAGAATAAAGCAAATTGTAAATGTATGGCAGAGAGTAGGACAAGCAA  
TATATGCCCCCTCCCATCCAAGGACTAATACAATGTAACCTCAAAT---

ATTACGGGGATACTATTAACAAGAGATGGTGGGAATAACGGATCA-----

-----  
-----

TCTAATGAAACTTTTCAGGCCTGGAGGAGGAGATATGAGGGACAATTGGAGAAGTGAATTATATAAGTATAAAG  
TAGTGAAAATTGAACCATTA---GGTGTAGCACCCACCCATGCAAAAAGAAGAGTGGTG-----

-----CAGAGAGAAAAAAGAGCA---ATTGGA---ATAGGAGCT-----

GTGCTCATTGGGTTCTTGGGAGCA---GCCGGAAGCACTATG---GGCGCGGCGTCC---

ATAACGCTGACGGTACAG---GCCAGACAA---TTATTG---TCTGGTATAGTGCAACAGCAAAGC---

AATTTG---CTGAGG---GCTATAGAGGCTCAGCAACATATGCTGAAACTCACAGTCTGGGGCATT

>KX232596..3

TTCTATTGTAATACAACACAGCTATTTTAATAGCACTTGGAATATAACAGGACTATCTAATAGCAATTGGACAG  
GTAAT-----

-----  
GACACTAGCAATATAACTCTTCCATGCAGAATAAAGCAAGTTGTAAATATGTGGCAGAGGGTAGGACAAGCAA  
TTTATGCCCCCTCCCATCCCAGGAATAATACAGTGTCACTCAAAC---  
ATTACTGGACTACTATTGACAAGAGATGGGGGAAATAATAATAAT-----

-----  
AGTTCGAATGAACTTTTCAGGCCTGGAGGAGGAGACATGAGGGACAATTGGAGAAGTGAGTTATATAAGTATA  
AAGTAGTAAAAATTGAGCCATTA---GGTGTAGCACCCCACTCCTGCAAAAAGGAGAGTGTTG-----  
-----GAGAGAGAAAAAAGAGCA---ATTGGTGGACTGGGAGCT-----  
---GTATTCCTTGGGTTCTTAGGAGCA---GCAGGAAGCACTATG---GGCGCGGCGTCA---  
ATAACGCTGACGGTACAG---GCCAGACAA---TTATTG---TCTGGTATAGTGCAACAGCAGAGT---  
AATTTG---CTAAAG---GCTATTGAGGCTCAACAACAGATGTTGAGACTCACGGTCTGGGGCATT

>KY658718..2

TTCTATTGTAATACAACAGGACTATTTAATAGCACTTGGAATGGAATAAGCAGCATTGTTGGGAAAGCAATGGCA  
ATAAA-----

-----  
ACAAATGAACTATAACTCTTCCATGCAGAATAAAGCAAATTGTAAATATGTGGCAGAGAGTGGGACAAGCAA  
TTTATGCCCCCTCCCATCCCAGGAATAATACAGTGTGAGTCAAAC---  
ATTACTGGACTACTATTGACAAGAGATGGGGAAATTAATAGTTCA-----

-----  
AATGAACTTTTCAGGCCTGGAGGAGGAGACATGAGGGACAATTGGAGAAGTGAATTATATAAGTATAAAGTAG  
TAAAAATTGAACCAGTA---GGTGTAGCACCCACCCGTGCAAGAAGGAGAGTGTTG-----  
-----GAGAGAGAAAAAAGAGCA---ATTGGTGTACTGGGAGCT-----  
GCATTCCTTGGGTTCTTAGGAGCA---GCAGGAAGCACTATG---GGCGCGGCGTCA---  
ATAACGCTGACGGTACGG---GCCAGACAA---TTATTG---TCTGGTATAGTGCAACAGCAGAGT---  
AATTTG---CTGAAG---GCTATTGAGGCTCAACAACAGATGTTGAGACTCACGGTCTGGGGCATT

>KX232617..3

TTCTATTGTAATACAACAAAACTATTTAATAGCACTTGGAAGGAAATATCACTTGGGAGAGCAATGGCAATA  
AA-----

-----  
ACAAATGACAGTATAACTCTTCCATGCAGAATAAAGCAAATTGTAAATATGTGGCAGAGGGTAGGACAAGCAA  
TTTATGCCCCCTCCCATCCCAGGAGTAATAACGTGTGAGTCAAAC---  
ATTACTGGACTACTATTGACAAGAGATGGGGGAAATAATAATAATAGA-----

-----  
AATAATGAACTTTTCAGGCCTGGAGGAGGAGACATGAGGGACAATTGGAGAAGTGAATTATATAAGTATAAAG  
TAGTAAAAATTGAACCATTA---GGTGTAGCACCCACCCCTGCAAGAAGGAGAGTGTTG-----  
-----GAGAGAGAAAAAAGAGCA---ATTGGTGGACTGGGAGCT-----  
GTATTCCTTGGGTTCTTAGGAGCA---GCAGGAAGCACTATG---GGCGCGGCGTCA---  
ATAACGCTGACGGTACAG---GCCAGACAA---TTATTG---TCTGGTATAGTGCAACAGCAGAGT---  
AATTTG---CTGAAG---GCTATAGAGGCTCAACATCAAATGTTGAGACTCACGGTCTGGGGCATT

>KX232623..1

TTCTATTGTAATACAACAGGCCTGTTTAATAGTACTTGGCCTAGGAATGAGAATGAGACTAGGGAAGCAAATA  
GCACAGGG-----

-----  
TCAGATGACATCATAACACTCCCATGCAGAATAAAGCAAATTATAAATGTATGGCAGAGAGTAGGGCAAGCAA  
TATATGCCCCCTCCTATCCCAGGACTAATAAGATGTAAGTCAAGT---  
ATTACGGGGCTACTATTAGTAAGAGATGGTGGAAATAATAACACA-----

-----  
GATAATGAAACCTTCAGACCTGGAGGAGGAAATATGAAGGACAATTGGAGAAGTGAATTGTATAAGTATAAAG  
TAGTAAAACTTGAACCACTA---GGAGTAGCACCCACCAGGGCAAAGAGAAGAGTGTTG-----  
-----GAGAGAGAAAAAAGAGCA---TTTGGA---TTAGGAGCT-----  
GTATTCATTGGGTTCTTGGGAGCA---GCCGGAAGCACTATG---GGCGCGGCGTCT---  
GTAACGCTGACGGTACAG---GCCAGGCAA---TTATTG---TCTGGCATAGTGCAACAGCAAAGC---  
AATTTG---CTGAGG---GCTATAGAGGCTCAGCAGCAGATGCTGAAACTCACGGTCTGGGGCATT

>KX232627..2

TTCTATTGTAATACAACAAAACCTATTTTAATAGTACTTGGGGCAATGGCAGTGAACCAGAG-----

-----  
-----

GTAAACAATACCATAACCCCTGCCATGCAGAATAAAGCAATTTGTAAATATGTGGCAGAGGGTAGGACAAGCAA  
TTTATGCCCCCTCCCATCCCAGGAAGAATAAAGTGTGAATCAAAC---

ATTACTGGACTACTATTGACAAGGGATGGGGGACAGAATAATAGG-----

-----  
-----

TCAAAATGAAACTTTTCAGGCCTGGAGGAGGAGATATGAGGGACAATTGGAGAAGTGAATTATATAAGTATAAAA  
TAGTAAAAAATTGAACCATTA---GGTGTAGCACCCACCCATGCAAGAAGGAGAGTGGTG-----

-----GGGAGAGAAAAAAGAGCA---ATTGGTGGACTGGGAGCT-----

GTATTCCTTGGGTTCTTAGGAGCA---GCAGGAAGCACTATG---GGCGCAGCGTCA---

ATAACGCTGACGGTACAG---GCCAGACAA---TTATTG---TCTGGTATAGTGCAACAGCAAAGT---

AATTTG---CTGAAG---GCTATTGAGGCTCAACAACAGATGTTGAGACTCACAGTCTGGGGCATT

>HM215282..1

TTCTATTGTAATACATCAAGCCTGTTTAAATAGCACTTGGTATAACAATAGCAATAACAACAATGCCAGCTCAA  
ACCCC-----

-----ACA---

GAGTTAAATGGCACTATAACTCTCCCATGCAGAATAAAGCAAATTGTAAATATGTGGCAGAAAGTAGGACAAG  
CAATGTATGCCCCCTCCCATCCCAGGAATAATAGAGTGTAAATCAAAC---

ATTACAGGATTGTTATTAACAAGAGATGGAGGGAATAGTAATGGT-----

-----  
-----

GCAAAATGAAACTTTTCAGGCCTGGAGGAGGAGATATAAGGGACAATTGGAGAAGTGAATTATATAAGTATAAAG  
TAGTAAAAAATTGAACCACTA---GGTGTAGCACCCACCCATGCAAGAAGAAGAGTGGTG-----

-----GGGAGAGAAAAAAGAGCA---GTAGGA---CTGGGAGCT-----

GTCATCTTTGGGTTCTTAGGAGCA---GCAGGAAGCACTATG---GGCGCGGCGTCA---

ATAACGCTGACGGTACAG---GCCAGACAA---TTATTG---TCTGGTATAGTGCAACAGCAAAGC---

AATTTG---CTGCAG---GCTATAAAGGCTCAACAACATCTGTTGAGGCTCACGGTCTGGGGCATT

>KR017777..2

TTCTATTGCAATACATCAAAGCTGTTTGAAGGTTGGATTGGAATCATAGCAATGGGAGTTGGGAAAGGAATA  
ATAAA-----

ACAAATGATGAAAATAAA-----

ACAGAGGATGGAAATATAATTCTCCCATGCAAAATAAAGCAAATAGTAAGAATGTGGCAGAGAGCAGGACAGG  
CAATGTATGCCCCCTCCCATCAAAGGATTAATAAATTGTAAATCAAAC---

ATTACAGGACTACTATTAACAAGGGATGGA---ACACATAATGGG-----

-----  
-----

ACCAACGAGACCTTCAGGCCTATAGGAGGAGAGATGAGGGACAATTGGAGAAGTGAATTATATAAATATAAAG  
TAGTGGAATTAACCACTA---GGAGTAGCACCCACCGAGGCAAGGAGAAGAGTGGTG-----

-----CAGAGAGAAAAAAGAGCA---GTGGGA---ATAGGAGCT-----

GTGCTCCTTGGGTTCTTAGGAGCA---GCAGGAAGCACTATG---GGCGCGGCGTCA---

ATAACGCTGACGGTACAG---GCCAGACAA---TTATTG---TCTGGTATAGTGCAACAGCAGAGC---

AATTTG---CTGAAG---GCTATAGAGGCTCAACAACATCTGTTGAGACTCACGGTCTGGGGCATT

>KU749421..3

TTCTATTGTAATACATCAAAGCTATTTAATAGCACCTGGAATAGCACTGGGGAGAATCAGAAAATT-----

-----  
-----

AGGAATGGGACTCTCATCCTCCCATGCAGAATAAAGCAAATTTGTACGGATGTGGCAGAGAGTAGAACAAGCAA  
TGTATGCCCCCTCCCATCCAAGGAGAAATAAGATGTCATTCAAAT---

ATTACAGGAATACTGTTAACGAGAGATGGCGGGGGTAACGAGACA-----

-----  
-----

AAGGAGACCTTCAGACCTGTAGGAGGAAATATGAAAGACAATTGGAGAAGTGAATTATATAAGTATAAAGTAG  
TAAAAAATTGAGCCAATA---GGAATAGCACCCCTCCAGGGCACGAAGAATAGTGGTG-----

-----GGGAGAGAAAAAAGAGCA---GTTGGA---CTGGGAGCT-----

GTCTTCCTTGGGTTCTTAGGAGCA---GCAGGAAGCACTATG---GGCGCGGCGTCA---

GTGACGCTGACGGTACAG---GCCAGACAA---TTATTG---TCGGGCATAGTGCAACAGCAAAGC---

AATTTG---CTGATG---GCTATAGAGGCTCAACAACATATGTTGAAACTCACGGTCTGGGGCATT

>GU201504..1

TTCTATTGTGATACAGCAGAACTATTTTAATAGTACTTGGGAAAGGGAAAATGGCACTCGGAGAAAT-----

-----  
-----

AGCACTGGGAATATAAATCTCCAGTGCAGAATAAAGCAAATTGTAAATATGTGGCAGAGAACAGGACAAGCAA  
TGTATGCCCCCTCCCATTCAGGAATAATAGAATGTAAGTCAAAC---

ATTACAGGACTACTATTGACAAGAGATGGTGGAGCTAATAACAGT-----

-----  
-----

GCAGAGGAGACTTTTCAGACCTGGAGGAGGAGATATGAGAGACAATTGGAGAAGTGAATTATATAAGTATAAAG  
TAGTAAAAAATTGAACCACTA---GGGGTAGCACCCACCCATGCAAAAAGAAGAGTGGTG-----

-----GAGAGAGAAAAAAGAGCA---GTTGGA---CTGGGAGCT-----

GTCTTCCTTGGGTTCTTAGGAGCA---GCAGGAAGCACTATG---GGCGCGGCGTCA---

ATAACGCTGACGGTACAG---GCTAGACAA---TTATTG---TCTGGCATAGTGCAACAGCAAAGC---

AATTTG---CTGAGG---GCTATAGAGGCTCAACAGCATATGTTGAGACTCACGGTCTGGGGCATT

>KR017773..1

TTCTATTGCAATACATCAGGCCTATTTAATAGCACTTGGAAATAGCACTGGGAATAATAATAATATC-----

-----  
-----

AGCTCAGACAATATCACTCTCCCATGCAGAATAAAGCAAATTGTGAGGCTATGGCAGAGAGTAGGACAAGCAA  
TGTATGCCCCCTCCCGTCTCAGGAGTAATAAGATGTGAATCAAAC---

ATTACAGGACTACTATTAACAAGAGATGGAGGGAAGAAAAATAAGAGT-----

-----  
-----

AGTGACCCTGAAACCTTCAGACCTGGAGGAGGAGATATGAAGGACAATTGGAGAAGTGAATTATATAAGTATA  
AAGTAGTAAAAAATTGAACCATTA---GGAGTAGCACCCACCAAGGCAAAAAGAAGAGTGGTG-----

-----GAGAGAGAAAAAAGAGCA---GCTGGA---CTGGGAGCT-----

---GTCCTCCTTGGGTTCTTAGGAGCA---GCAGGAAGCACTATG---GGCGCGGCGTCA---

ATAACGCTGACGGTACAG---GCCAGACAA---TTATTG---TCTGGCATAGTGCAACAGCAAAGC---

AATTTG---CTGAGA---GCTATAGAGGCTCAACAGCAGATGTTGAGACTCACGGTCTGGGGCATT

>KR017772..1

TTCTATTGCGATACATCAGATCTGTTTAATAGCACTTGGGACAATAACTGTTCAGCCCAAACGACACAGAG-

-----  
-----

GCAAAAGACAATATAACCCCTCCAGTGCAGAATAAAGCAGATTGTAAATATGTGGCAGAGAGTAGGACAAGCAA  
TATATGCCCCCTCCCATCCGAGGAGTAATAAGGTGTGAATCAAAC---

ATTACTGGACTACTATTAGTAAGAGATGGAGGAATTGATAATAGG-----

-----  
-----

ACAAATGAGACCTTCAGGCCTGGAGGAGGAGATATGAGGGACAATTGGAGAAGTGAATTATATAAGTATAAAG  
TAGTAAAAAATTGAACCACTA---GGTGTAGCACCCACTAGGGCAAAAAGAAGAGTGGTG-----

-----GAGAGAGAAAAAAGAGCA---GTTGGA---ATAGGAGCT-----

GTCTTCCTCGGGTTCTTAGGAGCA---GCAGGAAGCACTATG---GGCGCGGCGTCA---

CTAACGCTGACGGTACAG---GCCAGACAA---TTATTG---TCTGGTATAGTGCAACAGCAAAGC---

AATTTG---CTGAAG---GCTATAGAGGCTCAACAACATCTGTTGAAACTCACGGTCTGGGGCATT

>GQ372986..1

TTCTATTGCAATACAACAGATCTGTTTAATAGCGCCTGGAATGCCAGCTCAACCTGGCCCAAC-----

-----  
-----

TCAACAGGTAATATAACTCTCCAATGCAGAATAAAGCAAATTATAAATATGTGGCAGAGGGTAGGACAAGCAA  
TGTATGCCCCCTCCCATCCGAGGAGAAATAAGGTGTGAATCAAAC---

ATTACAGGACTACTCTTAACAAGAGATGGAGGGACTAACACTAACAGT-----

-----  
-----

AGTGGTGCAAACGAGACTTTTCAGGCCTGGAGGAGGAGATATGAGAGACAATTGGAGAAGTGAATTATATAAAT  
ATAAAGTAGTAAAAAATTGAACCACTA---GGAGTAGCACCCCTCCAAGGCAAAGAGAAGAGTGGTG-----

-----GAGAGAGAAAAAAGAGCA---GTTGGA---TTTGAGACT---

-----GTCTTCCTTGGGTTCTTGGGAGCA---GCAGGAAGTACTATG---GGCGCGGCGTCA---

ATAACGCTGACGGTACAG---GCCAGACAA---TTATTG---TCTGGGATAGTACAACAGCAGAGC---

AATCTG---CTGAGG---GCTATAGAGGCTCAACAGCAACTGTTGAAACTCACGGTCTGGGGCATT

>AB231894..1

TTCTACTGCAATACAGATGAACTGTTTAAATAGCACTTGGAATAGTAGCACTTGGAATAGTAGCAGTACTACC-

-----  
-----

GATAGCTCAAATATAACTCTCCACTGCAGAATAAAACAAATTATAAATATGTGGCAGACAGTAGGACGAGCAA  
TGTATGCCCCCTCCCATCCCAGGAATAATACAGTGTAACACTCAAAC---

ATTACAGGATTGCTATTAACAAGAGATGGAGGAAAGGATAATAGTACTGAG-----  
-----

-----  
-----

ACTAATAATACTGAGACTTTCAGGCCTGGAGGAGGAGACATGAGGGACAATTGGAGAAGTGAATTATATAAAT  
ATAAAGTAGTAAAAGTTGAACCAATA---GGTGTAGCACCCACCAAGGCAAAAAGAAGAGTGGTG-----

-----GAGAGAGAAAAAGAGCA---GTTGGA---ATAGGAGCT---

-----GTCTTCCTTGGGTTCTTAGGAGCA---GCAGGAAGCACTATG---GGCGCGGCGTCA---

ATAACGCTGACGGTACAA---GCCAGACAA---TTATTG---TCTGGTATAGTGCAACAGCAGAGC---

AATTTG---CTGAGA---GCTATAGAGGCTCAACAACAGATGTTGAGACTCACGGTCTGGGGCATT

>AY521632..1

TTCTATTGCAATACATCAGGCCTGTTTAAATAGTAGTTGGAGTTGGAATGACACTACAAATTTAACGGAA----

-----  
-----

TCAAAATGGTACTATAAATCTCCCATGTAAAATAAAACAAATTATACGTATGTGGCAGAGAGTAGGGCAAGCAG  
TGTATGCCCCCTCCCATCCAAGGAGTAATACGCTGTAAATCAAAC---

ATTACAGGGCTACTGCTAACAAGAGATGGTGGAATGATAATGAT-----  
-----

-----  
-----

AATACAACTGAGAAGTTTAGACCTGGAGGAGGAAATATGAAGGACAATTGGAGAAGTGAATTATATAAATATA  
AAGTAGTAAAAATTGAACCACTA---GGAGTAGCACCCACCAAGGCAAAAAGAAGAGTGGTG-----

-----GAGAGAGAAAAAGAGCA---GTTGGA---CTGGGAGCT-----

---GTCTTCCTTGGGTTCTTAGGCGCA---GCTGGAAGTACTATG---GGCGCGGCGTCA---

ATAACGCTGACGGCACAG---GCCAGACAA---TTACTG---TCTGGCATAGTACAACAGCAGAGT---

AATCTG---CTGAGA---GCTATAGAGGCTCAACAGCACCTGTTGAAACTCACGGTCTGGGGCATT

>AY521633..1

TTCTATTGCAATACATCAGGCCTGTTTAAATAGTACTTGGATTCTGGTATGCCAATGGCACCGTGCAGAACAATG  
GCACG-----  
-----

GAGCCAAATGGTATTATTCTCTCCAATGCAGAATAAGACAAGTTGTACGTATGTGGCAGAAAGTACGACAAG  
CAATATATGCCCCCTCCCATAGAGGAGTAATATGCTGTGTATCCATC---

ATTGCAGGGCTACTACTAACAAGAGATGGTGGGGATAATAATACT-----  
-----

-----  
-----

ACCGAGAAGTTCAGACCTGGAGGAGGAGATATGAGGGACAATTGGAGAAGTGAATTATATAAATATAAAGTAG  
TAAAAATTGAACCACTA---GGAGTAGCACCCACCAAGGCAAAAAGAAGAGTGGTG-----

-----GGGAGAGAAAAGAGAGCA---GTTGGA---CTGGGAGCT-----

GTCTCTTTGGGTTCTTAGGAGCA---GCAGGAAGTACTATG---GGCGCGGCGTCA---

ATAACGCTGACGGCACAG---GCCAGACAA---TTATTG---TCTGGCATAGTACAACAGCAGAGC---

AATCTG---CTGAGG---GCTATAGAGGCTCAACAGCACCTGCTGAAACTCACAGTCTGGGGCATT

>JN864055..1

TTCTATTGCGATACAACAGAATTATTTAAATAGTACTTGGGAGACTAATAACACTGCCAGCTCCAATACC----

-----  
-----

ACAAATGGAACTATAACTCTCCAATGCAGAATAAAGCAAATTATAAATATGTGGCAGAGAGTAGGACAAGCAA  
TGTATGCCCCCTCCCATCCGAGGAGTAATAAGGTGTGAATCAAAC---

ATTACAGGACTACTATTAACAAGAGATGGAGGGACAACCTGAGACA-----  
-----

-----  
-----

AATAATAAAGAGACATTTCAGGCCTGCAGGAGGAGATATGAGGGACAATTGGAGAAGTGAATTATATAAGTATA  
AGGTAGTACAAATTGAACCACTA---GGTGTGGCACCCACCCATGCAAAAAGAAGAGTGGTG-----

-----GAGAGAGGAAAAAGAGCA---GTTGGA---ATAGGAGCT-----

---GCTTTCCTTGGGTTCTTATCAGCA---GCAGGAAGCACTATG---GGCGCGGCGTCA---

ATAACGCTGACGGTACAG---GCCAGACAA---TTATTG---TCTGGTATAGTGCAACAGCAAAGC---

AATTTG---CTGAAG---GCTATAGAGGCTCAACAACATCTGTTGAAACTCACAGTCTGGGGCATT

>FJ388896..1

TTCTATTGCAATACATCAGGCCTGTTTAATAGCTCTTGGTATAACAATGGCACTGCCATCTCAAACCACACAG  
GGTCAAAT-----

-----GGCACT-----

GGGTCAAATGGCACTATCACTCTCCAATGCAGAATAAAGCAAGTTATAAATATGTGGCAGAAAGTAGGACAGG  
CAATGTATGCCCCCTCCCATCCCAGGAATAATAAGATGTGACTCAAAC---

ATTACTGGACTACTATTAACAAGAGATGGAGGGAGTAATAATAATACAAAT-----

-----

GAGACTAAGACTAAGATCTTCAGGCCTGGAGGAGGAGATATGAGGGACAATTGGAGAAGTGAATTATACAAGT  
ATAAAGTAGTAGAAATTGAACCACTA---GGTGTAGCACCCACCCCTGCAAGAAGAAGAGTGGTG-----

-----CAGAGAGAAAAAAGAGCA---GTTGGA---ATGGGAGCT---

-----TTGCTCTTTGGGTTCTTAGGAGCA---GCAGGAAGCACTATG---GGCGCGGCGTCA---

ATAACGCTGACGGTACAG---GCCAGACAA---TTACTG---TCTGGTATAGTGCAACAGCAGAGC---

AATCTG---CTGAAG---GCTATAGAGGCTCAACAACAGATGTTGAGACTCACGGTCTGGGGCATT

>DQ926899..2

TTCTATTGCAATACATCAGAACTGTTTAATAGCACTTGGGGCAATAACACCTGGGACAATAACACTGCC----

-----

-----

AGCTCAGAAAATATAACTCTCCAATGCAGAATAAAACAATTTATAAATATGTGGCAGAGAGTAGGAAGAGCAA  
TGTATGCCCCCTCCCATCCGAGGAATAATAAGTTGTAAATCAAAC---

ATTACTGGACTACTATTAACAAGAGATGGAGGGAAATATAATGATAGC-----

-----

-----

AATGCAACTCAGATCTTCAGGCCTGGAGGAGGAGATATGAGGGACAATTGGAGAAGTGAATTATATAAGTATA  
AAGTAGTAAAAATTGAACCACTA---GGTGTAGCACCCACACATGCAAGAAGAAGAGTGGTG-----

-----GGGAGAGACAAAAGAGCA---GTTGGA---CTGGGAGCT-----

---TTCTTCCTTGGGTTCTTAGGAGCA---GCAGGAAGCACTATG---GGCGCAGCGTCA---

ATAACGCTGACGGTACAA---GCCAGACAA---TTATTG---TCTGGTATAGTGCAACAGCAAAGC---

AATTTG---CTGAAA---GCTATAGAGGCTCAACAACAGCTGTTGAGACTCACGGTCTGGGGCATT

>JN882651..1

TTCTATTGCAATACGACAAGCCTGTTTAACAACAGCCAGTGGCCATTTAATGGGAGTAGTAACCCTGTC----

-----

-----

CCTAATGGCACCATAACTCTCCAATGCAGAATAAAGCAATTCATAAATATGTGGCAGAGAGTAGGACAAGCAA  
TGTATGCCCCCTCCCATCCCAGGAAATATAAGTTGTATGTCAAAC---

ATTACAGGACTACTATTAATAAGAGATGGAGGGAATGGTAATAGT-----

-----

-----

ACAAATGAGACTTTTAGGCCTGGAGGAGGAGATATGAGGGACAATTGGAGAAGTGAATTATATAAGTATAAAG  
TAGTAAAAATTGAACCAATA---GGTATAGCACCCACCCATGCAAGAAGAAGGGTGGTG-----

-----GGGAGAGACAAAAGAGCA---GCTGGA---CTGGGAGCT-----

GTCTTCCTTGGGTTCTTAGGAGCA---GCAGGAAGCACTATG---GGCGCGGCGTCA---

ATAACGCTGACGGTACAG---GCCAGACAA---TTATTG---TCTGGTATAGTGCAACAGCAGAGC---

AATCTG---CTGAAG---GCTATTGAGGCTCAACAGCATCTGTTGAAACTCACGGTCTGGGGCATT

>MH666158..1

TTCTATTGCGATACATCAGGACTGTTTAATAGTTCTTGGAAATGGCACTAGTCCTAGGAATGATACT-----

-----

-----

ACCAATAGCACTATAACTCTCCAATGCAGAATAAAGCAAATTATCAATATGTGGCAGAGAGTAGGGCAAGCAA  
TGTATGCCCCCTCCCATCCGAGGGTAATAAGGTGTGAATCAAAC---

ATTACTGGACTATTATTAACAAGAGATGGAGGGAATAAAAAATAAT-----

-----

-----

AGTGATCCTGAGATCTTCAGGCCTGCAGGAGGAGATATGAGAGACAATTGGAGAAGTGAATTATATAAGTATA  
AAGTAGTGAAAATTGAACCACTA---GGTATAGCACCCAACCGTGCAAAAAGAAGAGTAGTG-----

-----GGGAGAGAAAAAAGAGCA---GTTGGA---CTGGGAGCT-----

---GTCTTCCTTGGGTTCTTAGGAGCA---GCAGGAAGCACTATG---GGCGCGGCGTCA---

ATAACGCTGACGGTACAG---GCCAGACAA---TTACTG---TCCGGTATAGTGCAACAGCAGAGC---

AATCTG---CTGAAG---GCTATAGAGGCTCAACAACAGCTGTTGAGACTCACAGTTTGGGGCATC

>JN882653..1

TTCTATTGCAATACATCAATACTGTTTAATGGTACATTTAATGGTACAGAATTTAATGATACAGAAATTAAC-

-----  
-----

AATACAACCACACTCCGACTCCCATGCAGAATAAAACAGATTGTAAACATGTGGCAGGGAGTAGGAAAAGCAA  
TGTATGCCCCCTCCCATTTGAAGGAAAAATCAACTGTTTCTCAAAT---

ATTACAGGGCTACTATTAGTAAGAGATGGAGGGACTAATAATAGT-----  
-----

-----  
ACAAATGAGACCTTTAGACCTGGAGGAGGAGATATGAGGGACAATTGGAGAAGTGAATTATATAAGTATAAAG

TAGTAAAAAATTGAACCATTA---GGAGTAGCACCCACCAGGGCAAGGAGAAGAGTGGTG-----

-----GAGAGAGAAAAAAGAGCA---ATTGGA---ATGGGAGCT-----

CTTTTCCTTGGGTTCTTAGGAGCA---GCAGGAAGCACTATG---GGCGCAGCGTCA---

ATAACGCTGACGGTACAG---GCCAGACAA---TTATTG---TCTGGCATAGTGCAACAGCAGAGC---

AATCTG---CTGAGA---GCTATAGAGGCTCAGCAGCAAATGTTGAGGCTCACGGTCTGGGGCATT

>JF683752..2

TTCTATTGCAATACATCAGGACTGTTTAATAGTACTTGAATACCACTGATACTTGAATAACACTTATAGC-

-----  
-----

CACAAATGACACTATAACTCTCCAATGCAGAATAAAGCAATTTGTAAATATGTGGCAGAGAGTAGGGCGGGCAA  
TGTATAACCCTCCCATCCCAGGAGAAATAAAGTGTGCATCAAAC---

ATTACTGGACTACTATTAACAAGAGATGGAGGGAGTAATAATATT-----  
-----

-----  
ACAAATGAGATCTTCAGGCCTGCAGGAGGAGATATGAGAGACAATTGGAGAAGTGAACATATAAGTATAAAG

TAGTAAAAAATTGAACCACTG---GGTGTAGCACCCACCCCTGCAAAAAAAGAGTAGTG-----

-----GGGAGAGAGAAAAAGAGCA---GTTGGA---CTGGGAGCT-----

GTCTTCCTTGGGTTCTTAGGACCA---GCAGGAAGCACTATG---GGCGCGGCGTCA---

ATAACGCTGACGGTACAG---GCCAGACAA---TTATTG---TCTGGTATAGTGCAACAGCAGAGC---

AATTTG---CTGAAG---GCTATAGAGGCTCAACAACATATGTTGAGACTCACAGTCTGGGGCATT

>MH666162..1

TTCTACTGCAATACATCAGGACTGTTTAATAGTACTTGAATAGTACTTGGATCAACTTAGATAAC-----

-----  
-----

TTAAATGGCAGCATAACTCTCCAATGCAAAATAAAGCAATTTATAAATATGTGGCAGAGAGTAGGGCAAGCAA  
TGTATGCCCCCTCCCATCAAAGGAATGATACAGTGTAGATCAAAC---

ATTACTGGACTAATATTAACAAGAGATGGAGGGAATACTGAGAATGCT-----  
-----

-----  
ACTGATAATGATACAGAGATCTTCAGGCCTACAGGAGGAGATATGAGAGACAATTGGAGAAGTGAATTATATA

AGTATAAAGTAGTAAAAATTGAACCACTA---GGTGTAGCACCCACCCATGCAAGAAGAAGAGTGGTG----

-----GAGAGACAAAAAAGAGCA---GTTGGA---

CTGGGAGCT-----GTCTTCCTTGGGTTTCTAGGAGCA---GCAGGAAGCACTATG---

GGCGCAGCGTCA---ATAACGCTGACGGTACAG---GCCAGACAA---TTATTG---

TCTGGTATAGTGCAACAGCAGAGA---AATTTG---CTGCAA---

GCTATAGAGGCTCAACAACATATGTTGAGACTCACAGTCTGGGGCATT

>JF683766..1

TTCTACTGCAATACATCAACACTATTTAATAGAACATGGAATGGTACCACATGGAAT-----

-----  
-----

AACACAGCAAATAGTACAATCCCATGTAGAATAAAACAAATTATAAACATGTGGCAGGGAGTAGGAAAAGCAA  
TGTATGCCCCCTCCCATTTGAAGGACAAATAAATTGTACATCAAAT---

ATTACAGGGCTACTACTGACAGTAGATGGTGGTAATAATACTAAT-----  
-----

-----  
AATTCAGAGACATTTCAGACCTGGAGGAGGAGATATGAAAAGACAATTGGAGAAGTGAATTATATAAGTATAAGG

TAGTACAAATTGAACCAATA---GGTGTGGCACCCACCCATGCAAAAAGAAGAGTGGTG-----

-----GAGAGAGAAAAAAGAGCA---GTTGGA---CTGGGAGCT-----

GTCTTCCTTGGGTTCTTAGGAGCA---GCAGGAAGCACTATG---GGCGCGGCGTCA---

ATAACGCTGACGGTACAG---GCCAGACAA---TTATTG---TCTGGTATAGTGCAACAGCAGAGC---  
 AATCTG---CTGAGG---GCTATAGAGGCTCAACAACATCTGTTGAACTCACAGTCTGGGGCATT  
 >AB231897..2  
 TTCTATTGCAATACATCAACACTGTTTAATAGCACTTGGATTAGGAATAGCTCAAATAGCACTTGAATAGCT  
 CTGCCTCGAAC-----  
 -----AGCACA-----  
 GAGTTAAATAGCAATATAACTCTTCAGTGCAGAATCAAGCAAATTGTAAGAATGTGGCAGAGAGTAGGACAAG  
 CAATGTATGCCCCCTCCAATCGCAGGAGACATAAGGTGTGAATCAAAC---  
 ATTACTGGACTACTATTAACAAGAGATGGAGGGCATGAGACTGAG-----  
 -----  
 -----  
 AATAAGACTGAGATCTTCAGGCCTGGAGGAGGAGATATGAGGGACAATTGGAGAAGTGAATTATATAAGTATA  
 AAGTAGTAAAAATTAAACCATTA---GGTATAGCACCCACCCATGCAAAAAGAAGAGTGGTG-----  
 -----ACGAGAGAAAAAAGAGCA---GTTGGA---CTGGGAGCT-----  
 ---GTCTTCCTTGGGTTCTTAGGAACA---GCAGGAAGCACTATG---GGCGCAGCGTCA---  
 CTAACGCTGACGGTACAG---GCCAGACAA---TTATTG---TCCGGTATAGTGCAGCAGCAAAAC---  
 AATTTG---CTGAAG---GCTATAGAGGCTCAACAACAGCTGTTGAGACTCACGGTCTGGGGCATT  
 >AB480046..2  
 TTCTATTGCAATACATCAGGCCTGTTTAATAGTACCTGGTATGGAAATGGCAATGACACCACAAATGGCACGA  
 TTCTA-----  
 -----CAT---  
 GGTAATAGAACTCATATAACTCTCCCATGCAGAATAAGACAAATTGTACATATGTGGCAGAGAGTAGGACAAG  
 CAATGTATGCCCCCTCCCATTAAGGAATAATAAAATGTACATCAAAC---  
 ATTACAGGGCTACTGCTAACAAGAGATGGTGGGAATAATAATAGT-----  
 -----  
 -----  
 ACAAATGAGACATTTCAGACCTGGGGGAGGAAATATGAAGGACAATTGGAGAAGTGAATTATATAGATATAAAG  
 TAGTAAAAATTGAACCACTA---GGAGTAGCACCCACCAGGGCAAAAAGAAGAGTGGTG-----  
 -----GAGAGAGAAAAAAGAGCAATTGTTGGA---CTGGGAGCT-----  
 GTCTTCTTTGGGTTCTTAGGAGCA---GCAGGAAGTACTATG---GGCGCGGCGTCA---  
 ATAACGCTGACGGTACAG---GCCAGACAA---TTATTG---TCTGGTATAGTACAACAGCAGAAC---  
 AATCTG---CTAAGG---GCCATAGAGGCTCAACAGCAACTGTTGAACTCACGGTCTGGGGCATT  
 >MK086119..1  
 TTCTATTGCAATACAACAGACCTATTT-----TCTTGGAATAGTAGTAGCCCATGGAAGAACATAACG---  
 -----  
 -----  
 TCAAATGACAGTATAACTCTCCAATGCAGAATAAAGCAAATTGTAAGGATGTGGCAGCAAGTAGGACAAGCAA  
 TGTATGCCCCCTCCTATACCAGGAATAATAAGGTGTGAATCAAAC---  
 ATTACAGGAATACTGTTAACAAGAGATGGAGGAAATAATAATACA-----  
 -----  
 -----  
 AATAACACAGAGGTATTTCAGGCCTGGAGGAGGAGATATGAGGGACAATTGGAGAAGTGAATTATATAAATATA  
 AAGTAGTAAAAATTGAACCATTA---GGTGTAGCACCCCTCCCGTGCAAGAAGAAGAGTGGTG-----  
 -----GAGAGAGAAAAAAGAGCA---GTTGGC---CTGGGAGCT-----  
 ---TTCTTCCTTGGGTTCTTAGGAGCA---GCAGGAAGCACTATG---GGCGCGGCGTCA---  
 ATAACGCTGACGATACAG---GCCAGACAA---TTATTG---TCTGGTATAGTGCAGCAGCAGAGC---  
 AATTCTGCTGACGGGCTC---ATAGAGGCTCAACAACATCTGTTGAACTCACGGTCTGGGGCATT  
 >MK086120..1  
 TTCTATTGCAATACAACAGACCTATTT-----TCTTGGAATAGTAGTAGCCCATGGAAGAACATAACG---  
 -----  
 -----  
 TCAAATGACAGTATAACTCTCCAATGCAGAATAAAGCAAATTGTAAGGATGTGGCAGCAAGTAGGACAAGCAA  
 TGTATGCCCCCTCCTATACCAGGAATAATAAGGTGTGAATCAAAC---  
 ATTACAGGAATACTGTTAACAAGAGATGGAGGAAATAATAATACA-----  
 -----  
 -----  
 AATAACACAGAGGTATTTCAGGCCTGGAGGAGGAGATATGAGGGACAATTGGAGAAGTGAATTATATAAATATA  
 AAGTAGTAAAAATTGAACCATTA---GGTGTAGCACCCCTCCCGTGCAAGAAGAAGAGTGGTG-----  
 -----GAGAGAGAAAAAAGAGCA---GTTGGC---CTGGGAGCT-----  
 ---TTCTTCCTTGGGTTCTTAGGAGCA---GCAGGAAGCACTATG---GGCGCGGCGTCA---

ATAACGCTGACGGTACAG---GCCAGACAA---TTATTG---TCTGGTATAGTGCAGCAGCAGAGC---  
 AATCTG---CTGCGG---GCCATAGAGGCTCAGCAACATCTGTTGAAACTCGCGGTCTGGGGCATT  
 >KR017771..1  
 TTCTACTGTAATACAACAAATCTGTTTAATAATCTGTTTAATAATACAGAA-----  
 -----  
 -----  
 GACAATGGTACAATCACTATTCCATGTAGAATAAAGCAAATTATAAACATGTGGCAAAGAGTAGGACGAGCAA  
 TGTATGCCCCCTCCCATAGCCGAAAAATTTCAGTGTAACCTCAACT---  
 ATCACAGGTCTACTATTAACAAGAGATGGTGGTAATACTAATGTG-----  
 -----  
 -----  
 ACTGTGACTGAGATCCTCAGACCTGGAGGGGGAGATATGAGAGACAATTGGAGAAAGTGAAGTGTATAAATATA  
 AGGTAGTGAATAATTGAACCACTA---GGAGTAGCACCCACCAGGGCAAAAAGACAAGTGGTA-----  
 -----  
 -----ACCAGAGCAAAAAGAGAC---ATGGGA---ATAGGAGCT-----  
 ---ATGCTCCTTGGGTTCTTGGGAGCA---GCAGGAAGCACTATG---GGCGCGGCGTCA---  
 ATAACGCTGACGGTACAG---GCCAGACAA---CTATTG---TCTGGTATAGTGC AACAGCAAAAT---  
 AATTTG---CTGAAG---GCTATAGAAGCGCAACAGCATCTGTTGCAGCTTACAGTCTGGGGCATT  
 >MK086117..1  
 TTCTATTGCAATACAACAGACCTATTT-----TCTTGAATAGTAGTAGCCCATGGAAGAACATAACG----  
 -----  
 -----  
 TCAAAATGACAGTATAACTCTCCAATGCAGAATAAAGCAAATTGTAAGGATGTGGCAGCAAGTAGGACAAGCAA  
 TGTATGCCCCCTCCTATACCAGGAATAATAAGGTGTGAATCAAAC---  
 ATTACAGGAATACTGTTAACAAGAGATGGAGGAAATAATAATACA-----  
 -----  
 -----  
 AATAACACAGAGGTATTTCAGGCCTGGAGGAGGAGATATGAGGGACAATTGGAGAAAGTGAATTATATAAATATA  
 AAGTAGTAAAAATTGAACCATTA---GGTGTAGCACCTCCCGTGCAAGAAGAAGAGTGGTG-----  
 -----  
 -----GAGAGAGAAAAAAGAGCA---GTTGGC---CTGGGAGCT-----  
 ---TTCTTCCTTGGGTTCTTAGGAGCA---GCAGGAAGCACTATG---GGCGCGGCGTCA---  
 ATAACGCTGACGATACAG---GCCAGACAA---TTATTG---TCTGGTATAGTGCAGCAGCAGAGC---  
 AATCTG---CTGCGG---GCCATAGAGGCTCAACAACATCTGTTGAAACTCACGGTCTGGGGCATT  
 >MK086118..1  
 TTCTATTGTAATACATCAGAACTATTTAATAGCACATGGAATAGTAGCACTCCTAGCACT-----  
 -----  
 -----  
 GGAAATAGAACTATAACTCTCCAATGCAAAATAAAGCAAATTGTAAGAATGTGGCAAAAGGTAGGACAAGCAA  
 TGTATGCTCCTCCCATTAGTGGAATATAAGTTGTAACCTCAAAC---  
 ATTACAGGATTGCTATTAAACAAGAGATGGAGTGGACAATAATAGT-----  
 -----  
 -----  
 ACAAATGAGACATTCAGGCCTGGAGGAGGAGATATGAGGGACAATTGGAGAAAGTGAATTATATAAGTATAAGG  
 TAGTACAAATTAAACCATTA---GGTGTGGCACCCACCAGGCAAAAAGAAGAGTGGTG-----  
 -----  
 -----CAGAGAGAAAAAAGAGCA---ATTGGA---CTGGGAGCT-----  
 GTGTTTCATTGGGTTCTTAGGAGCA---GCAGGAAGCACTATG---GGCGCGGCGTCA---  
 ATAACGCTGACGGTACAG---GCCAGAGAA---TTATTG---TCTGGTATAGTGCAGCAGCAGAGC---  
 AATCTG---CTGCAG---GCTATAGAGGCTCAACAGCATCTGTTGAAACTCACAGTCTGGGGCATT  
 >MK086115..1  
 TTCTATTGCAATACAACAAGACTATTTAATAGCATTTGGAGTAGGAATGAGACTAAGAATGACAATGACACTT  
 GGAGTAAT-----  
 -ATCACTAATAGCACTGCC-----  
 TGGACAAATGACACTATAACTCTCCAATGCAGAATAAAGCAAATTGTAAGAATGTGGCAGAGAGTAGGACAAG  
 CAATGTACGCCCTCCCATCCAAGGAGAAATAAAGTGTGAGTCAAAC---  
 ATTACAGGATTACTATTAACAAGAGATGGAGGTGCACATGGTGAC-----  
 -----  
 -----  
 AATGAGACATTCAGGCCTGGAGGAGGAAATATGAAGGACAATTGGAGAAAGTGAATTATATAAGTATAAGGTAG  
 TACAAATTAAACCATTA---GGTGTAGCACCTACACATGCAAAAAGAAGAGTGGTG-----  
 -----  
 -----GAGAGAGAAAAAAGAGCA---GTTGGA---CTGGGAGCT-----  
 GTCTTCCTTGGGTTCTTAGGAGCA---GCAGGAAGCACTATG---GGCGCGGCGTCA---

ATAACGCTGACGGTACAG---GCCAGACAA---TTATTG---TCTGGTATAGTGCAACAGCAGAGC---  
 AATTTG---CTGAGG---GCTATAGAGGCTCAACAACATCTGTTGAAACTCACAGTCTGGGGCATT  
 >MK086126..2  
 TTCTATTGTAATACAACACCACTATTTAATAGCACTTGGAAAGAGCAATGACACTGCCAGTTCAAAC-----  
 -----  
 -----  
 CCAAATGACACTATAACTCTCCAATGCAGAATAAAACAAATTGTAAATATGTGGCAGAAAGTAGGACAAGCAA  
 TGTATGCCCCCTCCCATCTCAGGAAACATAATGTGTAACCTCAACC---  
 ATTACAGGAATACTATTAACAAGAGATGGAGGGATTAATAATACA-----  
 -----  
 -----  
 GAGGAGGAGGAGACGTTTCAGGCCTGGAGGAGGAGATATGAGGGACAATTGGAGAAAGTGAATTATATAAGTATA  
 AGGTAGTAAAAATTGAGCCACTA---GGTGTGGCACCCACCTATGCAAAAAGAAGAGTGGTG-----  
 -----GAGAGAGAAAAAAGAGCA---GTTGGA---CTGGGAGCT-----  
 ---GTCTTCCTTGGGTTCTTAGGAGCA---GCAGGAAGCACTATG---GGCGCGGCGTCG---  
 ATAACGCTGACGGTACAG---GCCAGACAA---TTATTG---TCTGGTATAGTGCAACAGCAGAGC---  
 AATCTG---CTGAAG---GCTATAGAGGCTCAACAACATCTGTTGAAACTCACGGTCTGGGGCATT  
 >JN864057..1  
 TTCTATTGCAATACAACAAGACTGTTTAATAGCATGTGGATCAAAAATGTCAGCAGTGACACTTGAATAACA  
 ACATCACTAGT-----  
 -----  
 GATAACAATGGCACTATAACTCTCCAATGCAGAATAAAGCAAATTGTAAATATGTGGCAAAGAGTAGGACAAG  
 CAATGTATGCCCCCTCCCATCCAAGGAGAATTAAGGTGTGAATCAAAC---  
 ATTACAGGACTACTGTTAACAAGAGATGGAGGGGATACTAATAAT-----  
 -----  
 -----  
 ACAGAGACCTTCAGGCCTGGAGGAGGAGATATGAAGGACAATTGGAGAAAGTGAATTATACAAGTATAAAGTAG  
 TGAAAATTGAACCACTA---GGTATAGCACCCACCCCTGCAAAAAGAAGAGTGGTG-----  
 -----GAGAGAGAAAAAAGAGCA---GTTGGA---CTAGGAGCT-----  
 GTTTTCCTTGGGTTCTTAGGAGCA---GCAGGAAGCACTATG---GGCGCGGCGTCA---  
 ATAACGCTGACGGTACAG---GCCAGACTA---TTAATG---TCTGGTATAGTGCAACAGCAGAGC---  
 AATTTG---CTGAAG---GCTATAGAGGCTCAACAACAGCTGTTGAGACTCACGGTCTGGGGCATT  
 >MK086116..1  
 TTCTACTGTAATACAACAGTTCTGTTTAATACCACAGGG-----  
 -----  
 -----  
 TTAAGACAGTATCACTATTCCATGTAAATAAAACAAATCATAAACATGTGGCAAAGAGTAGGACGAGCAA  
 TGTATGCCCCCTCCATTGCAGGAAAAATTCAATGTAACCTCAAGT---  
 ATTACAGGTCTACTCTTAACAAGAGATGGTGTTAATGATACAAAA-----  
 -----  
 -----  
 AATGAAACCCTCAGACCTGGAGGGGAGATATGAGAGACAATTGGAGAAAGTGAAGTGTATAAATATAAGGTAG  
 TGCAAAATTGAACCACTA---GGAGTAGCACCCACCAGGGCACAAAGACGAGTGGTA-----  
 -----CAGAGAGAAAAAAGAGCAGTAGTGGGA---CTAGGAGCT-----  
 ATGTTCAATTGGGTTCTTGGGAGCA---GCAGGAAGCACTATG---GGCGCGGCGTCA---  
 ATAACGCTGACGGTACAG---GCCAGACAA---TTATTG---TATGGTATAGTGCAACAGCAGAGC---  
 AATCTG---CTGAGG---GCTATAGAAGCGCAACAGCATCTGTTGCAGCTCACAGTCTGGGGCATT  
 >AJ866557..1  
 TTCTATTGCAATACATCACAACCTGTTTAACAGTACTTGGAGTAACAATGGCACTGCCATCCACACAGGG----  
 -----  
 -----  
 TCAAATGATACTATAACTCTCCAATGCAGAATAAAGCAAATTGTAAAGGATGTGGCAGAGAGTAGGACAAGCAA  
 TGTATGCCCCCTCCTATCCAGGAATAATAAGGTGTGAATCAAAC---  
 ATTACAGGCCTACTATTAACAAGAGATGGAGGGAATAGTAATAATAGT-----  
 -----  
 -----  
 AATACAAATGAGACTTTTCAGGCCTGGAGGAGGAGATATGAGGGACAATTGGAGAAAGTGAATTATATAAGTATA  
 AAGTAGTAAGAATTGAACCACTA---GGTGTAGCACCCCTCCCGTGCAAGAAGAAGAGTGGTG-----  
 -----GAGAGAGAAAAAAGAGCA---GTTGGA---ATAGGAGCT-----  
 ---GTCTTCCTTGGGTTCTTAGGAGCA---GCAGGAAGCACTATA---GGCGCAGCATCA---

GTAACGCTGACGGTACAG---GCCAGACAA---CTATTG---TCTGGTATAGTGCACCAGCAGAGC---  
 AATCTG---CTGAAG---GCTATAGAGGCTCAACAACAGCTGTTGAGACTCACAGTCTGGGGCATT  
 >MH667256..1  
 TTCTATTGTAATACATCAAACCTGTTTAATAGCACTTGGAAACAATAGCACTTGGGATAACAATAACACT-----  
 -----  
 -----  
 GGGAAATGAGAATATAACTCTCCAATGCAAAATAAAGCAATTTGTAAATATGTGGCAGAGGGTAGGAAGAGCAA  
 TGTATGCCCCCTCCCATCCGAGGAGTAATAAAGTGTGTATCACAC---  
 ATTACAGGACTAATATTAACAAGAGATGGAGGAAATAATAATACA-----  
 -----  
 -----  
 CAGGAGGAGATTTTTAGGCCTGGAGGAGGAGATATGAGGGACAATTGGAGAAGTGAATTATATAAATATAAAG  
 TAGTAAAAATTAAACCACTA---GGAGTAGCACCCACTATGGCTAAAAGAAGAGTGGTG-----  
 -----GAGAGAGAAAAAAGAGCA---GTTGGA---ATAGGAGCT-----  
 GTCTTCCTTGGGTTCTTAGGAGCA---GCAGGAAGCACTATG---GGCGCGGCGTCA---  
 GTGACGCTGACGGTACAG---GCCAGACAA---TTATTG---TCTGGCATAGTGC AACAGCAAAGC---  
 AATTTG---CTGAAG---GCTATAGAGGCTCAACAACAGCTGTTGAGACTCACGGTCTGGGGCATT  
 >FJ388944..1  
 TTCTATTGCAATACAACATTACTATTTGATAGCACTTGGTATGGAAATGGCTCTGACATCGACAAAATAAATA  
 AAACA-----  
 -----  
 ATGTCAAATGAACTATAATTCTCCCATGCAGAATAAAGCAAATTGTACGCATGTGGCAGAGAGTAGGACAAG  
 CAATGTACGCCCTCCCATCCCAGGAGAAATAAGGTGTGAGTCAAAC---  
 ATTACAGGACTACTATTGACAAGAGATGGTGGGGGTAACGGTAGC-----  
 -----  
 -----  
 AGTACAAATGAGACCTTCAGGCCTGGAGGAGGAGATATGAGAGACAATTGGAGAAGTGAATTATATAAGTATA  
 AGGTAGTAAAAATTGAACCACTA---GGTGTAGCACCCAACAAGGCAAGAAGGAGAGTGGTG-----  
 -----GAGAGAGAAAAAAGAGCA---GTTGGA---ATAGGAGCT-----  
 ---GTCTTCCTTGGGTTCTTAGGAGCG---GCAGGAAGCACTATG---GGCGCGGCGTCA---  
 ATAACGCTGACGGTACAG---GCCAGGCAA---TTATTG---TCTGGTATAGTGC AACAGCAGAGT---  
 AATTTG---CTGAAG---GCTATAGAGGCTCAACAACACTTGTGAGACTCACGGTCTGGGGCATT  
 >DQ313254..2  
 TTCTATTGCAATACATCAGGTCTGTTTAATAGTACTTGGTATCGGAATGGCACTGCCATCAGGCAGAACGGCA  
 CG-----  
 -----  
 -----  
 GGGTTAAATGATACTATAACTCTCCCATGCAGAATAAAGCAAATTGTACGTACATGGCAGAGAGTAGGACAAG  
 CAATGTATGCCCCCTCCCATCAAGGAGTAATAAAATGTGAATCAAAC---  
 ATTACGGGGCTACTGTTAAACAAGAGATGGTGGGAATAATAGTAGTAAT-----  
 -----  
 -----  
 AATGACACTGAGACCTTCAGACCTGGAGGAGGAGATATGGAAGACAATTGGAGAAGTGAATTATACAACCTATA  
 AGGTAGTAAAAATTAAACCATTA---GGAATAGCACCCACCAAGGCAAGGAGAAGAGTAGTG-----  
 -----GGGAGAGAGAAAAAGAGCA---GTTGGA---CTGGGAGCT-----  
 ---GTTTTCCTTGGGTTCTTAGGGACA---GCAGGAAGCACTATG---GGCGCAGCGTCA---  
 ATAACGCTGACGGTACAG---GTCAGACAA---TTATTG---TCTGGCATAGTGCACCAGCAAAGC---  
 AATTTG---CTGAGA---GCTATAGAGGCGCAGCAGCATCTGTTGCAGCTCACAGTCTGGGGCATT  
 >AM279364..2  
 TTCTATTGCAATACATCAGGCCTGTTTAATAGTACTTGGAAATGACACTAGCATCAATGAGAACTACACGGAT-  
 -----  
 -----  
 -----  
 CCAAATGCAACTCTTATTCTCCTATGCAGAATAAAACAAATTGTGCGTATGTGGCAGAGAGTAGGGCAAGCAA  
 TGTATGCCCCCTCCCATCCAGGAGTAATACAGTGTGTATCAAAC---  
 ATTACAGGGCTACTGCTAACAAGAGATGGTGGGAATAATACTAAT-----  
 -----  
 -----  
 AGGACAGATGAGACGTTTCAGACCTGGAGGAGGAGATATGAAGGACAATTGGAGAAAATGAGTTATATAAGTATA  
 AAGTAGTAAAAATTGAACCACTA---GGAGTAGCACCCACCAAGGCAAGGAGAAGAGTGGTG-----  
 -----CAGAGAGAAAAAAGAGCA---ATTGGA---ATGGGAGCT-----  
 ---CTTTTCCTTGGGTTCTTAGGAACA---GCAGGAAGCACTATG---GGCGCGGCGTCA---

ATAACGCTGACGGTACAG---GCCAGGCAA---TTATTG---TCTGGCATAGTGCAACAGCAGAGC---  
 AATCTG---CTGATG---GCCATAGAGGCTCACCAGCATTTGTTGAACTCACGGTCTGGGGCATT  
 >KR017778..1  
 TTCTATTGCAATACATCACGATTGTTTAATAGCACTTGGACTGGGAATAACACTACTTGGAGTATCAGCAGCG  
 AGAACGATACT-----  
 -----  
 GGGAAAGATGATCCCATAAATTCTCCCATGTAGAATAAAGCAAATTATAAATATGTGGCAGAGAGTAGGACAAG  
 CAATATACACTCCTCCTATTCAAGGAGAACTAAGGTGTGACTCAAAC---  
 ATTACAGGACTATTGTTAACAAGAGATGGTGGGAATAACAATGAC-----  
 -----  
 -----  
 ACAGAGATCTTCAGACCTATAGGAGGAAATATGAAGGACAATTGGAGAAGTGAATTATATAAGTATAAAGTGG  
 TGGAGATTAAAGCCACTA---GGAATAGCACCCACCAAGGCAAAAAGAAGAGTGGTG-----  
 -----GAGAGAGAAAAAAGAGCA---GTAGGA---ATAGGAGCT-----  
 GTACTCCTTGGGTTCTTGGGAGCA---GCAGGAAGCACTATG---GGCGCGGCGTCA---  
 ATAACGCTGACAGTGCAG---GCCAGACAA---TTATTG---TCTGGCATAGTGCAACAGCAAAAC---  
 AACTTG---CTGAAG---GCTATAGAAGCACAAACAGCAGCTGTTAAACTCACTGTCTGGGGCATA  
 >EU513192..1  
 TTCTATTGTAATACATCAGACCTGTTTAATTGGGAGAATGACACCTTGCAGGGGCCAAATAAGGCTGTG----  
 -----  
 -----  
 TCAAAATGATAATATAACTCTCCCATGCAGAATAAAGCAAATTATAAATATGTGGCAGAGAGTAGGACAAGCAA  
 TATATGCCCCCTCCTATCCAAGGAGTAATAAGGTGTAACTCAAAC---  
 ATTACAGGACTACTATTAACAAGAGATGGTGGGAACAATAGTAAT-----  
 -----  
 -----  
 CCGACTGAGACCTTCAGACCTGAAGGAGGGGATATGAGGGACAATTGGAGGAGTGAATTATATAAGTATAAAG  
 TAGTAAAAAATTGAACCACTA---GGAGTAGCACCCACCAAGGCAAGGAGAAGAGTGGTG-----  
 -----ACGAGAGAAAAAAGAGCA---ATTGGA---ATGGGAGCT-----  
 GTCCTCTTTGGGTTCTTAGGAGCA---GCAGGAAGCACTATG---GGCGCGGCGTCA---  
 ATAACGCTGACGGTACAG---GCCAGACAA---TTATTG---TCTGGCATAGTGCAACAACAGAAC---  
 AACCTG---CTGAGG---GCTATAGAGGCTCAACAGCAACTGTTGAACTCACAGTCTGGGGCATT  
 >AY894995..2  
 TTCTATTGTAATACAACAAAATTATTTAATGGTATCTGGAATAAAACAGGTAGTACCACATATAACTATACAA  
 ATAGC-----  
 -----  
 ACAGAGAATGATACTATTACACTGCCATGCAGAATAAAACAAGTTGTAAGAATGTGGCAGAGGACAGGACAAG  
 CAATGTATGCCCCCTCCTATCCAGGGAATAATAAGGTGTGCATCTAAC---  
 ATTACAGGAATAATATTAACAAGAGATGGTGGGAATAACAATAAT-----  
 -----  
 -----  
 GCAACTGAGACCTTCAGACCTGGAGGAGGAAATATGAAAGACAATTGGAGAAGTGAATTATATAAATATAAGG  
 TAGTGAAAATTGAACCACTA---GGAGTAGCACCCACTAGGGCAAGGAGGAGAGTAGTG-----  
 -----GGGAGAGAAAAAAGAGCA---GTTGGA---CTAGGAGCT-----  
 GTCTTCCTTGGGTTCTTGGGA-----GGCGCAAAATCA---  
 ATGACGCTGACGGTACAG---GCCAGACAA---TTATTG---TCTGGTATAGTGCAACAGCAAAGC---  
 AATTTG---CTGAGG---GCTATAGAGGCTCAACAACAGATGTTGAGACTCACGGTCTGGGGCATT  
 >AY371163..1  
 TTCTATTGCAATACATCAGGCCTGTTTAATAGCACTTGGAGAAACATTAATGGCACTTGGGAATAGCACTGGCA  
 ACACA-----  
 -----  
 GAGTTAAATAGCACTATAATTCTCCTGTGTAGGATAAAACAAATTGTAAATATGTGGCAGAGAACAGGACAAG  
 CAATGTATGCCCCCTCCCATCCCAGGAGTGATAAGGTGTGAGTCAAAC---  
 ATTACAGGACTACTATTGACAAGAGATGGTGGGAATGAGAATAATATTAAT-----  
 -----  
 -----  
 ACAAATACAACCTGAAACCTTCAGACCTGGAGGAGGAGATATGAGAGACAATTGGAGAAGTGAATTATATAAAT  
 ATAAAGTAGTAAAAATCGAACCCTA---GGAGTAGCACCCACCAAGGCAAGAGAGAAGAGTGGTG-----  
 -----GAGAGAGAAAAAAGAGCA---GTTGGA---TTGGGAGCT---  
 -----GTTTTCTTGGGTTCTTAGGAGCA---GCAGGAAGCACTATG---GGCGCGGCGTCA---

ATAACGCTGACGGTACAG---GCCAGACAA---TTATTG---TCTGGCATAGTGCAACAGCAAAGC---  
 AATTTG---CTGAGG---GCTATAGAGGCTCAACAGCATCTGTTGAGACTCACGGTCTGGGGCATT  
 >FM877779..1  
 TTCTATTGTAATACATCAAGCCTGTTTAATAGCACGTACTTGAATATAACA-----  
 -----  
 -----  
 AAGGGAAACATAACAATGCTCCCATGCAGGATAAAACAAATTGTAAACATGTGGCAGGGAGTAGGACGAGCAA  
 TATATGCCCCCTCCTATTGCAGGAAAGATACAGTGTGTATCTAAT---  
 ATAACAGGACTAATATTGACAAGAGATGGGGGAAATGAAGATAAT-----  
 -----  
 -----  
 AATACTGAAACCTTCAGACCTGGAGGAGGAAATATGAAAGACAATTGGAGAAGTGAATTATATAAGTATAAAAG  
 TAGTAAAAATTGAACCACTA---GGAATAGCACCCACCAAGGCAAAGAGAAGAGTGGTG-----  
 -----GAGAGAGAAAAAAGAGCA---GTTGGA---CTGGGAGCT-----  
 CTTTTCTTTGGGTTCTTAGGAGCA---GCAGGAAGCACTATG---GGCGCAGCGTCA---  
 ATAACGCTGACGGTACAG---GCCAGACAA---TTATTG---TCTGGCATAGTGCAACAGCAAAGC---  
 AATTTG---CTGAGG---GCTATAGAGGCTCAACAGCACATGTTGAAGCTCACAGTCTGGGGCATT  
 >FM877778..1  
 TTCTATTGTAATACATCAGGACTGTTTAATAGCACTTGGCTGGTTAATAGCACTAGGGAGAATGGCACGAGC-  
 -----  
 -----  
 ACCATGGGAAACATAACACTCCCATGCAGGATAAAACAAATTGTAAACATGTGGCAGGGAGTAGGACAAGCAA  
 TGTATGCCCCCTCCTGTGCGCAGGAATGATACAGTGTGTATCAAAT---  
 ATTACAGGACTAATATTAACAAGAGATGGGGGAAGTAATGATAATAGTACT-----  
 -----  
 -----  
 GATAATAATACTGAGACCTTCAGACCTACAGGAGGAAATATGAAAGACAATTGGAGAAGTGAATTATACAAAT  
 ATAAAGTAGTACAACCTGAACCACTA---GGATTAGCACCCACCGAGGCAAAAAGAAGAGTGGTG-----  
 -----GAGAGAGAAAAAAGAGCA---GTTGGA---ATGGGAGCT---  
 -----CTTTTCCTTGGGTTTTTAGGAACA---GCAGGAAGCACTATG---GGCGCGGTGTCA---  
 ATGACGCTAACGGTACAG---GCCAGACAA---TTATTG---TCTGGCATAGTGCAACAGCAAAGC---  
 AATTTG---CTGAGG---GCTATAGAGGCTCAACAGCATATGTTGAAACTCACAGTCTGGGGCATT  
 >FM877783..1  
 TTCTATTGTAATACATCAGGCCTGTTTAATAACGAGTGGAATAGCACTTGGAAGAATAGCACTTGG-----  
 -----  
 -----  
 GAAAAATGGCACCATAACACTCCCATGCAGGATAAAACAAATAGTAAATATGTGGCAGGGAGTAGGACAAGCAA  
 TGTATGCCCCCTCCTGTGCGCAGGAATGATACAGTGTGCATCAAAT---  
 ATTACAGGACTAATATTGACAAGAGATGGGGGAGAGAATAATAGT-----  
 -----  
 -----  
 AGTAAGGAGACCTTCAGACCTGGAGGAGGAGATATGAAGGACAATTGGAGAAGTGAATTATATAAGTACAAAG  
 TAGTACAACCTGAACCATTA---GGAGTAGCACCCACCAAGGCAAAAAGAAGAGTGGTG-----  
 -----GAGAGAGAAAAAAGAGCA---ATGGGA---ATGGCAGCT-----  
 ATGTTCCCTTGGGTTCTTAGGAGCA---GCAGGAAGCACTATG---GGCGCGGCGTCA---  
 ATAACGCTGACTGTACAG---GTCAGACAA---TTATTG---TCTGGAATAGTGCAACAGCAAAGC---  
 AATTTG---CTGAGA---GCTATAGAGGCTCAACAGCATATGTTGCAGCTCACAGTCTGGGGCATT  
 >FM877784..1  
 TTCTATTGCAATACCTCAGGTCTGTTTAATAGCACTTGAATGGAATAACAAGTGGGTCAAATGTCAAT----  
 -----  
 -----  
 ACAACTGGCAATATAACACTACCATGCAAAATAAAACAAATTATAAACATGTGGCAGAGAGTAGGACAAGCAA  
 TGTATGCTCCTCCCATCCAGGAATAATACAGTGTATATCAAAT---  
 ATTACAGGGTTATTAATAACAAGAGATGGTGGAAATAATGCAACT-----  
 -----  
 -----  
 AATGAAACGGAGATCTTCAGACCTGGAGGAGGAGATATGAGGGACAATTGGAGAAGTGAATTATATAAATATA  
 AAGTAGTAGAAATTGAACCACTA---GGAGTAGCACCCACCAAGCAAAGAGAAGGGTGGTG-----  
 -----CAGAGAGAAAAAAGAGCA---GTAGGA---ATAGGAGCT-----  
 ---GTGTTCCCTTGGGTTCTTAGGAGCA---GCAGGAAGCACTATG---GGCGCGGCGTCA---

ATGACGCTGACGGTACAG---GCCAGACAA---CTATTG---TCGGGCATAGTGCAACAGAAAAAC---  
 AACTTT---CTGAAG---GCTATAGAGGCTCAACAGCACCTGTTGAACTCACGGTCGGGGGCATT  
 >KT022402..1  
 TTCTATTGTAACACATCAGGCCTTTTAAATAGCAAGTGGCATAGGGATAACAATAGCAGCATTTGGGTATAGCA  
 ATAATAGCACA-----  
 -----  
 GAGTCAAATGACACTATAACTCTCCAATGCAGAATAAAGCAATTTATAAACTGTGGCAGAGAGTAGGACAAG  
 CAATGTATGCCCCCTCCCATCCCAGGAATAATAAGGTGTGACTCAAAT---  
 ATTACAGGTCTCATATTAACAAGAGATGGGGGAAATAACAATGCA-----  
 -----  
 -----  
 AGCAATGAAACCTTCAGACCTGGGGGAGGAGATATGAGGGACAATTGGAGAAGTGAACTATATAAGTATAAAG  
 TAGTAAAAATTGAACCACTA---GGGTTAGCACCTCCAGGGCAAGGAGAAGAGTGGTG-----  
 -----GAGAGAGAAAAAAGAGCA---GTTGGA---CTGGGAGCT-----  
 GTATTCCTTGGGTTCTTGGGAGCA---GCTGGAAGCACTATG---GGCGCAGCGGCA---  
 ATAACGCTGACGGCACAG---GCCAGACAA---TTATTG---TCTGGTATAGTGCAAGCAGCAAAGC---  
 AATTTG---CTGCAA---GCTATAGAGGCTCAACAGCAACTGTTGAGACTCACGGTCTGGGGCATT  
 >KT022407..1  
 TTCTATTGCAATACATCAAGCTTGTTTAAATAGCACATGGAACGGCACTGCACGGGATAACAAAAAC-----  
 -----  
 -----  
 TCAAATGATACTATGACTCTCCCATGCAAAATAAAACAAATTATAAACATGTGGCAGAGAGTAGGACAAGCAA  
 TATATGCCCCCTCCCATTCAGGAATGATACAGTGTACATCAAAC---  
 ATTACAGGAATAATATTGATAAGAGATGGGGGTAATCTCAGTGCG-----  
 -----  
 -----  
 AGCAATGAGACCTTCAGACCTGGAGGAGGAGATATGAGGGACAATTGGAGAAGCGAATTATATAAGTATAAAG  
 TAGTAAAAATTGAACCACTA---GGAGTGGCACCCACCAGGGCAAGGAGAAGAGTGGTG-----  
 -----GAGAGAGAAAAAAGAGCA---GTTGGA---ATAGGAGCT-----  
 GTCTTCCTTGGGTTCTTAGGAGCA---GCAGGTAGCACTATG---AGCGCGGCGTCA---  
 ATAACGCTGACGGTACAG---GCCAGACAA---TTATTG---TCTGGCATAGTGCAACAGCAAAGC---  
 AATTTG---CTGAGG---GCTATAGAGGCTCAACAGCATCTGTTGAACTCACGGTCTGGGGCATT  
 >KT022386..1  
 TTTTATTGTAACACATCAGGTCTGTTCAATAGCTCTTTCAAGAGCTCTTGGAAGGTTAATGTGTCAAAT---  
 -----  
 -----  
 GACAATAGCACTATAACTCTCCCATGCAGAATAAAACAAATTGTAAACATGTGGCAGAGAGTAGGACGTGCAA  
 TGTATGCCCCCTCCCATTCAGGAGTAATAAAATGTGAGTCAAAC---  
 ATTACAGGACTAATATTAACAAGAGATGGAGGGAAAGTGACAAT-----  
 -----  
 -----  
 GACAATGACACTGAGACCTTCAGACCTGGAGGAGGAGATATGAGGGACAATTGGAGAAGTGAATTATATAAGT  
 ATAAAGTAGTAAACTTGAACCACTA---GGAGTAGCACCCACCGAGGCAAGGAGAAGAGCGGTG-----  
 -----CAGAGAGAAAAAAGAGCA---ATTGGA---CTGGGAGCT---  
 -----TTCTTCCTTGGGTTCTTGGGAACA---GCAGGAAGCACTATG---GGCGCGGCGTCA---  
 CTAACGCTGACGGTACAG---GCCAGGCAA---TTATTA---TCTGGCATAGTGCAACAGCAAAGC---  
 AACTTG---CTGAAG---GCTATAGAGGCTCAACAACATATGTTGAGACTCACGGTCTGGGGCATT  
 >KU749429..2  
 TTCTATTGTGATACATCAATCCTGTTTAAATAGCACTTGGTATCACAATGGCAGTATCTTGCAGAAGTCAAAT-  
 -----  
 -----  
 AGCACGGATAATATAATTCTCCCATGCAGAATAAAGCAAATTATAAATATGTGGCAGAGAGCAGGACAAGCAA  
 TATATGCCCCCTCCCATCAAAGGACCAATAGTGTGTGAATCAAAT---  
 ATTACAGGACTAATATTAACAAGAGACGGTGGCACGGATGACAAT-----  
 -----  
 -----  
 ACAACTGAAACTTTTCAGACCTGGAGGAGGAGATATGAGGGACAATTGGAGAAGTGAATTATATAAGTATAAAG  
 TAGTAAAAATTGAACCATTA---GGATTAGCACCTCCAGGGCAAGGAGAAGAGTGGTG-----  
 -----GAGAGAGAAAAAAGAGCA---GCGGGG---CTAGGAGCT-----  
 GTCTTCATTGGGTTCTTAGGAATG---GCAGGAAGCACTATG---GGCGCGGCGTGC---

ATGACGCTGACGGTACAG---GCCAGACAA---TTATTG---TCTGGTATAGTGCAACAGCAAAGC---  
 AATTTG---CTGAGG---GCTATAGAGGCTCAACAGCAGATGTTGAGACTCACGGTCTGGGGCATT  
 >KU749427..1  
 TTTTATTGCAATACAACAGAGTTGTTTAATGGCACATGGAGTAATGGCACTGAATGGAGCAAGGGCAATGTCA  
 GC-----  
 -----  
 ACAAATGGCAATATAACTATCCCATGCAGAATAAAACAAATTATAAACATGTGGCAGAGAGTAGGAAAAGCAA  
 TGTATGCTCCTCCCATCCAGGAGTAATAAGGTGTGTATCAAAC---  
 ATTACAGGACTAATATTAACAAGAGATGGTGATACTAGCAGTGCA-----  
 -----  
 -----  
 GATGAAACCTTCAGACCTGGAGGAGGAGATATGAGAGACAATTGGAGAAGTGAATTGTATAAGTATAAAGTAG  
 TAAAGATTGAACCACTA---GGAGTAGCACCTACCAGGGCAAAGAGAAGAGTGGTG-----  
 -----CAGAGAGACAAAAGAGCA---GTGGGA---ATGGGAGCT-----  
 TTATTCCTTGGGTTCTTGGGAGCA---GCAGGAAGCACTATG---GGCGCAGCGTCA---  
 ATAACGCTGACGATACAG---GCCAGACAA---TTATTG---TCTGGCATAGTGCAACAGCAAAGC---  
 AATTTG---CTGAAA---GCTATAGAGGCTCAGCAGCAACTGTTGAGGCTCACGGTCTGGGGCATT  
 >AF457088..1  
 TTCTATTGTAACACATCAGGCCTGTTTAATAATAGTGTTTGGAAATAGCACTACCGTCACGCAGGAGTCAAATA  
 GCACG-----  
 -----  
 GAGTCAAATGGCAATATAACTCTCAATTGCAGAATAAAGCAAATTATAAATATGTGGCAGAGAGTAGGACAAG  
 CAATGTATGCCCTCCTATTCCAGGAGTAATACAGTGTGTATCAAAC---  
 ATTACAGGACTAATATTAACAAGAGATGGTGGGAAGAATAACAGT-----  
 -----  
 -----  
 ACAAATGAAACCTTCAGACCTGGAGGAGGAGATATGAGGGACAATTGGAGAAGTGAACCTATATAAATATAAAG  
 TAGTAAAAATTGAACCACTA---GGAGTAGCACCCACCAGGGCAAAGAGAAGAGTGGTG-----  
 -----GAGAGAGAAAAAAGAGCC---GTTGGA---ATAGGAGCT-----  
 GTATTCCTTGGGTTCTTGGGAGCA---GCAGGAAGCACTATG---GGCGCGGCGTCA---  
 ATAACGCTGACGGTACAG---GCCAGACAA---TTATTG---TCTGGCATAGTGCAACAGCAAAGC---  
 AATTTG---CTGAGA---GCTATAGAGGCTCAACAACATCTGTTGAAACTCACGGTCTGGGGCATT  
 >FJ623492..1  
 TTCTATTGCAATACATCAGGCCTGTTTAATAGCACATGGAATAGCACATGGGAGAATAACATTAATGAC---  
 -----  
 -----  
 ACGAAGCCAAATATAACTCTCCCATGCAGAATAAAGCAAATTATAAATATGTGGCAGAGAACAGGACAAGCAG  
 TATATGCTCCTCCCATCCAAGGAGTAATAAGGTGTATATCAAAC---  
 ATTACAGGACTAATATTAACAAGAGATGGTGGGAATAATAGTAGG-----  
 -----  
 -----  
 ACAAATGAAATCTTCAGACCTGGAGGAGGAGATATGAGAGACAATTGGAGAAGTGAATTATATAAGTATAAAG  
 TAGTAAAGATTGAACCACTA---GGAGTAGCACCCACCAAGGCAAGGAGAAGAGTGGTG-----  
 -----CAGAGAGAAAAAAGAGCA---GTTGGA---ATAGGAAT-----  
 GTCCTCCTTGGGTTCTTAGGAGCA---GCCGGAAGCACTATG---GGCGCGGCGTCA---  
 ATAACGCTGACGGTACAG---GCCAGACAA---TTATTG---TCTGGCATAGTGCAACAGCAAAGC---  
 AATTTG---CTGAAG---GCTATAGAGGCTCAACAGCAGATGTTGAGACTCACTGTCTGGGGCATT  
 >AY945739..1  
 TTCTATTGTAATACATCAGGTCTGTTCAATAGCACTTGGTATGCCAATAGCAGCATGCAAGGGTCAAATGACA  
 CG-----  
 -----  
 GAGTTAAATGGCACTATAACTCTCCCATGCAGAATAAAACAAATTATAAATATGTGGCAAAGAGTAGGACAAG  
 CAATGTATGCCCTCCCATCCAAGGAGTAATAAGATGTAAATCAAAT---  
 ATCACAGGACTACTGTTAACAAGAGATGGAGGGAAGGGAAATGAC-----  
 -----  
 -----  
 ACTGAAACTTTTCAGACCCGGAGGAGGAGATATGAGGGACAATTGGAGAAGTGAATTATATAAGTACAAAGTAG  
 TAAAAATTGAACCATTAA---GGAGTAGCACCCAACAAGGCAAAGAGAAGAGTGGTG-----  
 -----GAGAGAGAAAAAAGAGCA---GTTGGA---ATAGGAGCT-----  
 GTCTTCCTTGGGTTCTTAGGAGCA---GCAGGAAGCACTATG---GGCGCAGCGTCA---

CTAACGCTGACGGTACAG---GCCAGACAA---TTATTG---TCTGGCATAGTGCAACAGCAAAGC---  
AATTTG---CTGAGG---GCTATAGAGGCTCAACAACATATGTTGAAACTCACGGTCTGGGGCATT  
>KC473836..1  
TTCTACTGTAACACATCAGACCTGTTTAATAGCACTTGGAATAGCACTGAGTCAAATAGCACAGAGGCAGAGT  
CA-----  
-----  
AACAAATGACACTATAACTCTTCCATGCAGAATAAAGCAAATTATAAATATGTGGCAGAGAGTAGGACAAGCAA  
TATACGCCCCCTCCCATCCCAGGAGTAATAAAGTGTAATCAAAC---  
ATTACAGGACTAATATTAACAAGAGATGGGGGTATTAACAATAGT-----  
-----  
-----  
AGCAGCTCCGAGACCTTCAGACCTGGAGGGGGAGATATGAGGGACAATTGGAGAAGTGAATTATATAAGTATA  
AAGTAGTACAAATTGAACCATTA---GGAGTAGCACCCCTCCAGGGCAAGGAGAAGAGTGGTG-----  
-----CAGAGAGAAAAAAGGGCA---GTAACC---CTAGGAGCT-----  
---CTATTCCCTTGGGTTCTTGGGAACA---GCAGGAAGCACTATG---GGCGCAGCGTCA---  
GTAACGCTGACGGTACAG---GCCAGGCAA---TTATTG---TCTGGTATAGTGCAACAGCAGAGC---  
AATCTG---CTGAGG---GCTATTGAGGCGCAACATCATCTGTTGCAACTCACAGTCTGGGGCATT  
>EU220698..1  
TTCTATTGTAATACATCACAACCTGTTTAATAGCACTTGGGACAAAAATGGCACTTGGATCAATGGCAGCGCAG  
AC-----  
-----  
ACAACAAATGGAACCTATCACTCTCCCGTGCAGAATAAAGCAAATTATAAATATGTGGCAGCGAGTAGGAAAAG  
CAATGTATGCCCCCTCCCATCCAAGGAGTAATAGAATGTAGATCAGAG---  
ATTACAGGACTACTATTAACAAGAGATGGTGGGAATGAGAGCAGT-----  
-----  
-----  
TCAGCAGAGACCTTCAGACCTGGAGGAGGAAATATGAAGGACAATTGGAGAAGTGAATTATATAAGTATAAAG  
TAGTAAAACCTAGAACCACTA---GGAGTAGCACCCACCAAGGCAAGGAGAAGAGTGGTG-----  
-----GAGAGAGAAAAAAGAGCA---GCT-----CTAGGAGCA-----  
GTCCTTTTTGGGTTCTTAGGAGCA---GCAGGAAGCACTATG---GGCGCAGCGTCA---  
ATAACGCTGACGGTACAG---GCCAGAAAA---TTATTG---TCTGGCATAGTGCAACAGCAAAGC---  
AATTTG---CTGATG---GCTATAGAGGCTCAACAGCATATGTTGAAACTCACGGTCTGGGGCATT  
>DQ083238..1  
TTCTATTGTAATACATCAGAACTGTTTAATAGCACTTGGAAATCCAGTACGCAGGGGACAAATAACACAGAG-  
-----  
-----  
CTAAATGACACGATAACTCTCCCATGCAGAATAAAGCAAGTTATAAATATGTGGCAGAGAGTGGGACAAGCAA  
TGTATGCCCCCTCCCATCAAAGGAATAATAAAGTGTTGTATCAAAC---  
ATTACAGGACTAATATTAACAAGAGATGGTGGGATTAATAGTACA-----  
-----  
-----  
AATGGAACCTGAAACCTTCAGACCTGGAGGAGGAGATATGAGGGACAATTGGAGAAGTGAATTATATAAATATA  
AGGTAGTACAAATTGAACCACTA---GGAGTAGCACCCACCAAGGCAAGGAGAAGAACGGTG-----  
-----GGGAGAGAAAAAAGAGCA---ATTGGA---CTAGGAGCT-----  
---GTGTTCCCTTGGGTTCTTAGGAGCA---GCAGGAAGCACTATG---GGCGCAGCATCA---  
ATAACGCTGACGGTACAG---GCCAGACAA---TTATTG---TCTGGTATAGTGCAACAGCAAAGC---  
AATTTG---CTGAGG---GCTATAGAGGCTCAACAACAAATGTTGAGACTCACGGTCTGGGGCATT  
>AF067156..2  
TTCTATTGTAATACATCAGGCCTGTTTAATGGCACTTGGAAATGCCAGCATGCAGGAGTCAAATAGCACGGAG-  
-----  
-----  
TCAAATGAAACTATAATTCTCCCATGCAGAATAAAACAAATTATAAATATGTGGCAGAGAGTAGGACAAGCAA  
TGTATGCCCCCTCCCATCAAGGAATAATAAAGTGTTGTATCAAAC---  
ATTACAGGACTAATATTAACAAGAGATGGT---AAAAGTAGTAAC-----  
-----  
-----  
AGTACAGATGAAATCTTCAGACCTGGAGGAGGAGATATGAGGGACAATTGGAGAAGTGAATTATATAAGTATA  
AAGTAGTAAAAATTGAACCACTA---GGAGTAGCACCCACCAGGGCAAGGAGAAGAGCGGTG-----  
-----GGGAGAGAAAAAAGAGCA---GTTGGA---ATAGGAGCT-----  
---GTCTTCCTTGGGTTCTTAGGAGCA---GCAGGAAGCACTATG---GGCGCAGCGTCA---

ATAACGCTGACGGTACAG---GCCAGACAA---TTATTG---TCTGGCATAGTGCAACAGCAAAGC---  
 AATTTG---CTGAGG---GCTATAGAGGCTCAACAACATCTGTTGAACTCACGGTCTGGGGCATT  
 >AF457087..1  
 TTCTATTGTAACACATCAGGCCTGTTTAATAGCACTTGGAATGACACTGCCATCGAGGCTAAGTCAAATAACA  
 CG-----  
 -----  
 GAGACAGACGGTATTATAACTCTCCAATGCAGAATAAAGCAACTTATAAATATGTGGCAGAGGGTAGGACAAG  
 CAATATATGCCCCCTCCCATCCCAGGATTAATAAGGTGTGAATCAAAC---  
 ATTACAGGGCTAATATTAACAAGAGATGGTGGGAATAATGGTGGGAATAAT-----  
 -----  
 ----  
 AGCAGTGAAAAAATGAAACCTTCAGACCTGGAGGAGGAGATATTAGGGACAATTGGAGAAGTGAATTATATA  
 AGTATAAAGTAGTAAAAATTGAACCACTA---GGAGTAGCACCCACCAAGGCAAGGAGAAGAGTGGTG-----  
 -----CAGAGAGAAAAAAGAGCA---ATTGGA---  
 CTGGGAGCT-----GTCTTCATTGGGTTCTTAGGAGCA---GCAGGAAGCACTATG---  
 GGC GCGGCGTCA---ATAACGCTGACGGTACAG---GCCAGACAA---TTATTG---  
 TCTGGCATAGTGCAACAGCAAAGC---AATTTG---CTGAGG---  
 GCTATAGAGGCTCAACAGCATCTGTTGAACTCACAGTCTGGGGCATT  
 >KT022391..2  
 TTCTATTGTGATACATCAGGCCTGTTTAATAGCGCTTGGGCAGCCAATAGCACTTGGACAGCCAATGACACTG  
 AC-----  
 -AGAAATCAGGTAGAT-----  
 AACAAATGACACCATAACTCTCCCATGTAAAATAAAGCAAATTATAAATATGTGGCACAGAGTAGAACAAAG  
 CAATATATGCCCCCTCCCATTCAGGAGTAATAAGGTGTGAATCAAAC---  
 ATTACAGGACTACTATTAACAAGAGATGGTGGGGTTAGGGTTGAC-----  
 -----  
 -  
 AATACAAGTAATACAAGTGAAACCTTCAGACCTGGAGGAGGAGATATGAAGGATAATTGGAGAAGTGAATTAT  
 ATAAGTATAAAGTAGTAGAAATTGAACCACTA---GGAGTAGCACCCACCAGGGCAAAGAGAAGAGTGGTG--  
 -----GAGAGAGAAAAAAGAGCA---GTTGGA---  
 ATAGGAGCT-----GTTTTTCATTGGGTTCTTAGGAGCA---GCAGGAAGCACTATG---  
 GGC GCGGCGTCA---GTGACGCTGACGGTACAG---GCCAGACAA---GTATTG---  
 TCTGGCATAGTGCAACAGCAAAGC---AATTTG---CTAAGG---  
 GCTATAGAGGCTCAACAACATCTGTTGAACTCACGGTCTGGGGCATT  
 >KT022393..1  
 TTTTATTGTAACACATCAGGCCTGTTTAATAGCAGTTGGGCAAATAACACAGAGTCAAACAACACAGAG---  
 -----  
 -----  
 TTAAACAGAACTATAACGCTCCCATGCAGAATAAAGCAAATTATAAATATGTGGCAGAGAACAGGACAAGCAA  
 TGTATGCCCCCTCCCATCCAAGGAGTAATAAGGTGTGAATCAAAC---  
 ATTACAGGATTAATATTGACAAGAGATGGTGGGGATAATAGTATA-----  
 -----  
 -----  
 AATGAAACCTTCAGACCGGGAGGAGGAGATATGAGGGATAATTGGAGAAGTGAATTATATAAGTATAAAGTAG  
 TAAAAATTGAACCACTA---GGAGTAGCACCCACCAGGGCAAAGAGAAGAGTGGTG-----  
 -----GAGAGAGAAAAAAGAGCA---GTTGGA---ATAGGAGCT-----  
 GTCTTCCTTGGGTTCTTAGGAGCA---GCAGGAAGTACTATG---GGCGCGGCGTCA---  
 ATGACGCTGACGGTACAG---GCCAGGCAA---TTATTG---TCTGGAATAGTACAACAGCAAAGT---  
 AATTTG---CTGAGG---GCTATAGAGGCTCAACAGCATCTGTTGAAGCTCACGGTCTGGGGCATT  
 >KT022395..1  
 TTTTATTGTAATACATCAGGACTGTTTAATGAGAGTTGGGTAAATGGCACTGAACCAAGTAGCAATGATACT-  
 -----  
 -----  
 GATATGACTCCCATAACTCTCCAATGCAGAATAAAGCAAATTATAAATATGTGGCAGAGAATAGGACAGGCAC  
 TGTATGCCCCCTCCCATCCCAGGAGAAATAAGGTGTAACCTCAAAC---  
 ATTACCGGACTACTATTAGTAAGAGATGGAGGGTCTCTTAACAGT-----  
 -----  
 -----  
 ACAAATGAAACCTTCAGACCTGGAGGAGGAGACATGAGGGACAATTGGAGAAGTGAATTATATAAGTATAAAG  
 TAGTAAAAATTGAACCACTA---GGAGTAGCACCCAAACAAGGCAAAGAGAAGAGTGGTG-----

-----GAAAGAGAAAAAAGAGCA---GCTGGA---ATAGGAGCT-----  
TTGCTCATTGGGTTCTTAGGAGCA---GCAGGAAGCACTATG---GGCGCGGCGTCA---  
ATAACGCTGACGGTACAG---GCCAGACAA---TTGTTG---TCTGGCATAGTGCAACAGCAAAGC---  
AATTTG---CTGAGG---GCTATAGAGGCTCAACAGCATCTGTTGAAACTCACGGTCTGGGGCATT  
>KT022408..2  
TTCTATTGTAATACATCAGGCCTGTTTAATAGTACTTGGAATAGCACAGAGCGGTCTAGAAATAGCACTAACA  
GCACAGGG-----  
-----  
GAAGGTAGAAATATAACTCTCCAATGCAGAATAAAGCAAATTATAAATATGTGGCAGAGAGTAGGACAAGCAA  
TGTATGCCCCCTCCCATCCAAGGAGAAATAAAGTGTGTATCAAAC---  
ATTACAGGAATACTATTAACAAGAGATGGTGGGAACAATACAAGT-----  
-----  
-----  
CAAAATGAAACCTTTAGACCTGGAGGAGGAGATATGAGGGACAATTGGAGAAGTGAATTATATAAGTATAAAG  
TAGTACAAATTGAACCACTA---GGAGTAGCACCCACCAGGGCAAGGAGAAGAGTGGTG-----  
-----CAGAGAGAAAAAAGAGCA---GTTGGA---CTGGGAGCT-----  
GTCTTCATTGGGTTCTTAGGAGCA---GCAGGAAGCACTATG---GGCGCAGCGTCA---  
ATAACGCTGACGGTACAA---GCCAGACAA---TTATTG---TCTGGCATAGTGCAACAGCAAAGC---  
AATTTG---CTGAGG---GCTATAGAGGCTCAACAGCATCTGTTGAAACTCACAGTCTGGGGCATT  
>KT022413..3  
TTCTATTGTAATACATCAAGCCTGTTTAATAGCGCTTGGAATCACACTCACAATGACAGCATACAGGGG---  
-----  
-----  
TCAAATGACACTCTAACTCTCCCATGTAGAATAAAGCAAATTATAAATATGTGGCAGAGAGTAGGACAAGCAA  
TGTATGCCCCCTCCCATCCAAGGAATAATAAAGTGTGAATCAAAC---  
ATTACAGGACTAATATTAACAAGAGATGGTGGTGGGAGTAATAAC-----  
-----  
-----  
AGTACAGATGAAATCTTCAGACCGGGAGGAGGAAATATGAGGGACAATTGGAGAAGTGAATTATATAAGTATA  
AAGTAGTAAAAATTGAACCAATA---GGAGTAGCACCCACCAAGGCAAGGAGAAGGGTGGTG-----  
-----GAGAGAGAAAAAAGAGCA---GTTGGA---ATAGGAGCT-----  
---GTTTTCTTGGGTTCTTGGGAGCA---GCAGGAAGCACTATG---GGCGCGGCGTCA---  
ATAACGCTGACGGTACAG---GCCAGACAA---TTATTG---TCTGGCATAGTGCAACAGCAAAGC---  
AATTTG---CTGAGG---GCTATAGAGGCTCAACAACAGATGTTGAGACTCACGGTCTGGGGCATT  
>FJ623489..1  
TTCTATTGTGACACATCAGGCCTATTTAATAGCACTTGGTATGGGAATGGGACCAACACAACGGAACCAGATA  
GC-----  
-----  
ACAAATGACAATATAACTCTCCCATGCAGAATAAAGCAAATTATAAATATGTGGCAGAGAGTAGGACAAGCAA  
TGTACGCCCCCTCCCATCCAGGAGCAATAAGCTGTACCTCAAAC---  
ATTACAGGATTATTATTAACAAGAGATGGTGGGTATAATAGCACT-----  
-----  
-----  
AATGAAACCTTCAGACCTGGTGGAGGAGATATGAGGGACAATTGGAGAAGTGAATTATTTAAGTACAAGGTAG  
TACAAATTAAACCACTA---GGAGTAGCACCCACCGAGGCAAGGAGAAGAGTGGTG-----  
-----CAGAGAGAAAAAAGAGCA---GTTGGA---CTAGGAGCT-----  
TTCTTCATTGGGTTCTTAGGAGCA---GCTGGAAGCACTATG---GGCGCGGCGTCA---  
ATAACGCTGACGGTACAG---GCCAGACAA---CTGTTG---TCTGGCATAGTGCAACAGCAAAGC---  
AATTTG---CTGAGG---GCTATAGAGGCTCAACAGCATCTGTTGAAACTCACAGTCTGGGGCATT  
>HM215276..2  
TTCTATTGTGATACATCAATCCTGTTTAATAGCACTTGGTATCACAATGGCAGTATCTTGCAGAAGTCAAAT-  
-----  
-----  
AGCACGGATAATATAATTCTCCCATGCAGAATAAAGCAAATTATAAATATGTGGCAGAGAGCAGGACAAGCAA  
TATATGCCCCCTCCCATCAAAGGACCAATAGTGTGTGAATCAAAT---  
ATTACAGGACTAATATTAACAAGAGACGGTGGCACGGATGACAAT-----  
-----  
-----  
ACAACTGAAACCTTCAGACCTGGAGGAGGAGATATGAGGGACAATTGGAGAAGTGAATTATATAAGTATAAAG  
TAGTAAAAATTGAACCATTA---GGATTAGCACCCCTCCAGGGCAAGGAGAAGAGTGGTG-----

-----GAGAGAGAAAAAAGAGCA---GCGGGG---CTAGGAGCT-----  
GTCTTCATTGGGTTCTTAGGAATG---GCAGGAAGCACTATG---GGCGGGCGTCA---  
ATGACGCTGACGGTACAG---GCCAGACAA---TTATTG---TCTGGTATAGTGCAACAGCAAAGC---  
AATTTG---CTGAGG---GCTATAGAGGCTCAACAGCAGATGTTGAGACTCACGGTCTGGGGCATT  
>KF716469..3  
TTCTATTGTAATACATCAGGCCTGTTTAATCATAACATCACACGCAGGAGGCAAATGGCACGGGG-----  
-----  
-----  
TCAAAATGGCAATATAACTCTCCCATGCAGAATAAAGCAAATTATAAATATGTGGCAGAGAACAGGACAAGCAA  
TGTATGCCCCCTCCCATCCAAGGAGTAATAAAATGTGTATCAAAT---  
ATTACAGGACTACTATTAAACAAGAGATGGTGGGGGAAATAACAGGACAGAG-----  
-----  
-----  
GAAATCTTTAGACCTGGAGGAGGAGATATGAGGGACAATTGGAGAAGTGAATTATATAAGTATAAAGTAGTAA  
AAATTGAACCACTG---GGAGTAGCACCTACCACGGCAAGGAGAAGAGTGGTG-----  
-----GGAAGAGAAAAAAGAGCA---GTTGGA---CTAGGAGCT-----  
GTCTTCTTTGGGTTCTTAGGAGCA---GCCGGAAGCACTATG---GGCGGGCGTCA---  
ATAACGCTGACGGCACAG---GCCAGACAA---TTATTG---TCTGGCATAGTGCAACAGCAGAGC---  
AATCTG---CTGAGG---GCTATAGAGGCTCAACAACATCTGTTGAAACTCACGGTCTGGGGCATT  
>KF716471..2  
TTCTATTGTAATACATCAGGCCTGTTTAATCATAACATGACACGCAGGAGGCAAACAGCACGGGG-----  
-----  
-----  
TTAAATGGCAATATAACTCTCCCATGCAGAATAAAGCAAATTGTAAATATGTGGCAGAGAGCAGGACAAGCAA  
TGTATGCCCCCTCCCATCCAAGGAGTAATAAAATGTGTATCAAAT---  
ATTACAGGACTACTATTAAACAAGAGATGGTGGGGGAAATAGCAGT-----  
-----  
-----  
ACAAAGGAAATCTTTAGACCTGGAGGAGGAGATATGAGGGACAACCTGGAGAAGTGAATTATATAAGTATAAAG  
TAGTAAAAATTGAGCCACTG---GGGGTAGCACCTACCGAGGCACGGAGAAGAGTGGTG-----  
-----GGAAGAGAAAAAAGAGCA---GTTGGA---ATAGGAGCT-----  
GTCTTCCTTGGGTTCTTAGGAGCA---GCAGGAAGCACTATG---GGCGGGCGTCA---  
ATAACGCTGACGGTACAG---GCCAGACAA---TTATTG---TCTGGCATAGTGCAACAGCAGAGC---  
AATCTG---CTGAGG---GCTATAGAGGCTCAACAACATCTGTTGAAACTCACGGTCTGGGGCATT  
>KU921793..1  
TTCTATTGTAACACATCAAGCCTGTTTAATAGCACTTGGGGTAATACCAGTGTGCCAGAGTTAAATAGCACGG  
AGGCAAATAGC---ACG-----GAG-----  
-----  
-----  
CAAAACAATATAACAATAACACTCCAATGCAGAATAAAGCAAATTATAAACATGTGGCAGAGAGCAGGACAAG  
CAATGTATGCCCCCTCCCATCCAAGGAGAGATAAGGTGTATATCAAAC---  
ATTACAGGATTAATATTAACAAGAGATGGTGGGAATAATAATAAC-----  
-----  
-----  
AGCACAAATGAAACCTTCAGACCTGGAGGAGGAGATATGAGGGACAATTGGAGGAGTGAATTATATAAGTATA  
AAGTGGTAAAAATTGAACCAATA---GGAATAGCACCCACCAGGGCAAAAAGAAGAGTGGTG-----  
-----CAGAGAGAGAAAAGAACA---GTAGGA---CTAGGAGCT-----  
---GTCTTCATTGGGTTCTTAGGAGCA---GCAGGAAGCACTATG---GGCGGGCGTCA---  
GTGACGCTGACGGTACAG---GCTAGACAA---CTATTG---TCTGGCATAGTGCAACAGCAAAGC---  
AATTTG---CTGAGG---GCTATAGAGGCTCAACAGCATCTGTTGAAACTCACGGTCTGGGGCATT  
>KU921796..2  
TTCTATTGTGACACATCAGGCCTGTTTAATAGCACTTGGGATAGCAATAACAGCGAGCAAGAGTCAAATAGCA  
CTGAGTTA-----  
-----  
-----  
AACAAATATAACTCTAACTCTCCACTGCAGAATAAAGCAAATTATAAATATGTGGCAGAGAGCAGGACAAGCAA  
TGTATGCCCCCTCCCATCCAAGGAGTGATAAGATGTGTATCAAAC---  
ATTACAGGATTAATATTAACAAGAGATGGTGGGGATCATAATAAC-----  
-----  
-----  
AGCGCAAATGAAACCTTCAGACCTGGAGGAGGAGATATGAGGGACAATTGGAGGAGTGAATTATATAAGTATA  
AAGTAGTAAAAATTGAACCAATA---GGAATAGCACCCACCAAGGCAAGAAGAAGAGTGGTG-----

-----CAGAGAGAGAAAAGAGCA---ATAGGA---ATGGGAGCC-----  
---GTCTTCCTTGGGTTCTTAGGAGCA---GCAGGAAGCACTATG---GGCGCAGCGTCA---  
GTAGCGCTGACGGTACAG---GCCAAACAA---CTATTG---TCTGGCATAGTGCAACAGCAAAAC---  
AATTTG---CTGAGG---GCTATAGAGGCTCAACAGCATATGTTGAAACTCACGGTCTGGGGCATT  
>KU921839..1  
TTCTATTGTAATACATCAGGACTGTTTAATAGCACTTGGAATTCCTACTAACATGCAGGAGCTAGATAGCACAG  
AG-----  
-----  
GCAAAATGGTACTATAATACTCCCATGCAAAATAAAGCAAATCATAAATATGTGGCAGAGAGTAGGACAAGCAA  
TGTATACCCCTCCCATACCGGGAGTAATAAATTGTGAATCAAAC---  
ATCACAGGATTAATATTAACAAGGGATGGTGGCCCTAATAACGAT-----  
-----  
-----  
ACAGAAATCTTCAGACCAGGAGGAGGAGATATGAGGGACAATTGGAGAAGTGAATTATACAAGTATAAAGTAG  
TAAAAATTGAACCATTA---GGAGTAGCACCCACCAAAGCAAGGAGAAGAGTGGTG-----  
-----GAGAGAGAAAAAAGAGCA---GTTGGA---ATAGGAGCT-----  
GTTCTCGTTGGGTTCTTGGGAGCA---GCAGGAAGCACTATG---GGCGCGGCGTCA---  
ATAACGCTGACGGCACAG---GCCAGGCAA---TTATTG---TCTGGCATAGTGCAACAGCAAAGC---  
AATTTG---CTGAGG---GCTATCGAGGCTCAACAACAGCTGTTGAAACTCACGGTCTGGGGCATT  
>KU749431..2  
TTCTATTGTGATACAACAAGCCTGTTTAATAGTACTCACTCCCCTAACGACACGCAGGGTGACCAGGAGTCAA  
AT-----  
-----  
TCAAAATGACACTATAACTCTCCCATGCAGAATAAAGCAAATTATAAATATGTGGCAGAGAACAGGACAAGCAA  
TATATGCCCCCTCCCATCGAAGGAGATATAAGGTGTAGCTCAAAC---  
ATTACAGGATTATTATTAACAAGAGATGGTGGGATTAATGTGAGC-----  
-----  
-----  
ACTACTAATGAAACCTTCAGACCTAGTGGAGGAGATATGAGGGACAATTGGAGAAGTGAATTATATAAGTACA  
AGGTAGTAAGAATTAAACCACTA---GGAGTAGCACCCACCAAGGCAAGGAGAAGAGTGGTG-----  
-----GAGAGAGAAAAAAGAGCA---GTTGGA---ATGGGAGCT-----  
---TTCTTCCTTGGGTTCTTAGGAGCA---GCAGGAAGCACTATG---GGCGCAGCGTCA---  
ATAACGCTGACGGTACAG---GCCAGAAAC---TTATTG---TCTGGCATAGTGCAACAGCAAAAC---  
AATTTG---CTGAGG---GCTATAGAGGCTCAACAACATCTGTTGAAACTCACAGTCTGGGGCATT  
>FJ396022..1  
TTCTATTGTAACACATCAGGCCTGTTTAATAGCACTTGGTATAATGGCAGCATGTCAAATAGCACGGAG---  
-----  
-----  
TCAAAATGACAATATAAACACTCCAATGCAGAATAAAGCAAATTATAAATATGTGGCAGAGAGTAGGACAAGCAA  
TGTATGCCCCCTCCCATCCAAGGAGAAATAAAGTGTGTATCAAAC---  
ATTACAGGGCTAATATTAACAAGAGATGGTGGTGACAGCACAAAT-----  
-----  
-----  
GAAACCTTCAGACCTGGAGGAGGAGATATGAGGGACAATTGGAGAAGTGAATTATATAAATATAAAGTGGTAG  
AAATTAAACCATTA---GGAGTAGCACCCACTGAGGCAAAAAGGAGAGTGGTG-----  
-----GAGAGAGAAAAAAGAGCA---GTGGGA---ATAGGAGCT-----  
GTGTTCTTGGGTTCTTGGGAGCA---GCAGGAAGCACTATG---GGCGCAGCGTCA---  
ATAACGCTGACGGTACAG---GCCAGACAA---TTATTG---TCTGGCATAGTGCAACAGCAAAGC---  
AATTTG---CTGAGG---GCTATAGATGCTCAACAGCATATGTTGAAACTCACGGTCTGGGGCATT  
>AF457064..1  
TTCTATTGTAACACATCAGGCCTGTTTAATAGCACTTGAATGACAGTGACAGCATGCAGGGGCCAAATAGCA  
CG-----  
-----  
AAGTCAAATGGCACTATAACTCTCCCATGCAGAATAAAGCAAATTATAAATATGTGGCAGAGAGCAGGACAAG  
CAATATATGCCCCCTCCCATCCCAGGAATAATAAGGTGTGAATCAAAC---  
ATTACAGGCCTAATATTAACAAGAGATGGTGGGGATAATAGCAGT-----  
-----  
-----  
ACAAATGAAACCTTCAGACCTGGAGGAGGAGATATGAGGGACAATTGGAGAAGTGAATTATATAAGTATAAAG  
TAGTAAAAATTGAACCACTA---GGAGTAGCACCCACCGAGGCAAAGAGAAGAGTGGTG-----

-----GAGAGAGAAAAAAGAGCA---GTTGGA---ATAGGAGCT-----  
GTCTTCATTGGGTTCTTAGGAGCA---GCAGGAAGCACTATG---GGCGCGGCGTCA---  
ATGACGCTGACGGTACAG---GCCAGACAA---TTATTG---TCTGGCATAGTGCAACAGCAAAGC---  
AATTTG---CTGAGG---GCTATAGAGGCTCAACAGCAACTGTTGAAACTCACGGTCTGGGGCATT  
>KU749428..1  
TTCTATTGCAACACATCACAGCTGTTTAATTCATCACTGCTCAATAGTACAGAAAGTATTAATGAAACAAGT-  
-----  
GGTAATGAAACAATCACACTCCCATGCAGAATAAAACAGATTATAAACATGTGGCAGGAGGTAGGGCGGGCAA  
TGTATGCCCCCTCCCATTAGAGGAATAATAACATGTAAATCAAAT---  
ATCACAGGACTACTACTGACACGTGATGGAGGAAATGAGAAAAAT-----  
-----  
AACTCAGAGGCAAAT---  
AACACAGAGATATTCAGGCCTGGAGGAGGAAATATGAAGGACAATTGGAGAAGTGAATTATATAAGTATAAAG  
TAGTAAAAGTTGAACCACTA---GGAGTAGCACCCACCAAGGCAAAGAGAAGAGTGGTG-----  
-----GAGAGAGAAAAAAGAGCA---GTAGGA---ATAGGAGCT-----  
GTCTTCATTGGGTTCTTAGGAGCA---GCCGGAAGCACTATG---GGCGCAGCGTCG---  
GTGACGCTGACGGTACAG---GCCAGACAA---TTATTG---TCTGGCATAGTGCAACAGCAAAGT---  
AATTTG---CTGAGG---GCTATAGAGGCTCAACAACATTTGTTGAAACTCACGGTCTGGGGCATT  
>KX983685..2  
TTCTATTGTAATACATCAGGCCTGTTTAATAACACATGGGCTAATAACAATTGGACTGACAGCACAAATTAC-  
-----  
ACAAATGACAATATAACTCTCCAATGCAGAATAAAGCAAATTATAAATATGTGGCAGAGGACAGGACAAGCAA  
TGTATGCCCCCTCCCATCCAAGGAATAATAATGTGTAGGTCAAAC---  
ATTACAGGCCTACTATTAACAAGAGATGGAGGGAATACAAATGATACA-----  
-----  
AATGCAACTGAAACCTTCAGACCTGGGGGAGGAAATATGAGGGATAATTGGAGAAGTGAGCTATATAAATATA  
AAGTAGTAAAAGTTGAACCACTA---GGAGTAGCACCCACCGAGGCAAGAAGAAGAGTGGTG-----  
-----CAGAGAGAAAAAAGAGCA---GTTGGA---CTGGGAGCT-----  
---GCCCTCCTTGGGTTCTTAGGAGCA---GCAGGAAGCACTATG---GGCGCGGCGTCA---  
ATAACGCTGACGGTACAG---GCCAGACTA---TTATTG---TCTGGTATAGTGCAACAGCAAAGC---  
AATTTG---CTGAGG---GCTATAGAGGCTCAACAGCATATGTTGAAGCTCACAGTCTGGGGCATT  
>U88823..1  
TTCTATTGTAATACATCAGGCTTGTTTAATAGCACCTGGAGTAAAAGAAATGGCACCTGGCAGTCAAATGGC-  
-----  
ACAGAATTAAATATAAACAATCCCATGCAGAATAAAGCAAATTATAAATATGTGGCAGAGGACAGGACAAGCAA  
TGTATGCCCCCTCCCATCCAAGGAGTAATAAGCTGTGTATCAAAC---  
ATTACAGGACTACTATTAACAAGAGATGGTGGAAATAATAACT-----  
-----  
ACAACTGAAACCTTCAGACCTGGAGGAGGAGATATGAGGGATAATTGGAGAAGTGAAGTATATAAATATAAAG  
TAGTAAAAATTGAACCACTA---GGAGTAGCACCCACCGGGCAAAGAGGAGAGTGGTG-----  
-----GAGAGAGAAAAAAGAGCA---GTTGGA---CTGGGAGCT-----  
GTCTTCATTGGGTTCTTAGGAGCA---GCAGGAAGCACTATG---GGCGCGGCGTCA---  
ATAACGCTGACGGTACAG---GCCAGACAA---TTATTG---TCTGGCATAGTGCAACAGCAAAGC---  
AATTTG---CTGAGG---GCTATAGAGGCTCAACAGCATCTATTAAAACTCACAGTCTGGGGCATT  
>MF373141..1  
TTTTATTGTAATACATCAGTACTTTTTTAACAGAAGTATAACAGGCAATATCACAAACCTAACAGAAGTA----  
-----  
AACAGTACAAACATCACACTCCCATGCAGAATAAAACAAATTATAAACATGTGGCAGGGGGTAGGACGAGCAA  
TGTATGCCCCCTCCCATTCAGGATTCATAAAATGTGAATCAAAT---  
TTCACAGGACTACTCCTGACACGTGATGGAGGGAATATTAGTACA-----  
-----  
GAGAACGAGACATTTCAGGCCGGAAGGAGGAAATATGAAGGACAATTGGAGAAGTGAATTATATAAATATAAAG  
TGGTAGAAATTAAACCATTA---GGAATAGCACCCCATAGGCAAAAAGAAGAGTGGTG-----

-----GAGAGAGAAAAAAGAGCA---GTGGGA---ATAGGAGCT-----  
GTGTTCTTGGGTTCTTGGGAGCA---GCAGGAAGCACTATG---GGCGCAGCATCA---  
CTAACGCTGACGGTACAG---GCCAGACAA---TTATTG---TCGGGTATAGTGCAACAGCAGAGC---  
AATCTG---CTGAGG---GCTATTGAGGCGCAACAGCATATGTTGCAACTCACAGTCTGGGGCATT  
>MF373155..1  
TTCTATTGTAATACAACAGGCCTGTTTAATAGCACTTGGAATGATACCACTTTGAACAGCACCAGTGAAGTTAA  
ACAAC-----  
-----  
ACATATGAAAATATAACTCTTCCATGTAGAATAAAGCAAATTATAAACATGTGGCAGAGAGCAGGAAAAGCAA  
TGTATGCCCCCTCCCATCCAGGAATAATAAGGTGTGAGTCAAAC---  
ATTACAGGACTACTGTTAACAAGCGATGGTGGGAATAAAAGTACT-----  
-----  
-----  
ACAAATGAAACCTTCAGACCTGGAGGAGGAGATATGAGGGACAATTGGAGAAGTGAATTATATAAGTATAAAG  
TAGTAAAACCTGAACCACTA---GGAGTAGCACCTGAAAAGGCAAAAAGAAGAGTGGTG-----  
-----GCGAGAGAAAAAAGAGCA---GTTGGA---CTGGGAGCT-----  
GTCTTCATTGGGTTCTTAGGAGCA---GCAGGAAGCACTATG---GGCGCGGCGTCA---  
CTGACGCTGACGGTACAG---GCCAGACAA---TTATTG---TCTGGTATAGTGCAACAGCAAAGC---  
AATTTG---CTGAAG---GCTATAGAGGCTCAACAGCACCTGTTGAGACTCACGGTCTGGGGCATT  
>AF071474..1  
TTCTATTGTGATACATCAGGGCTGTTTAATAGCACCTGGCCGTTTAATAGCACAAACAGCACAGGG-----  
-----  
-----  
CCAAATGGCACTATAACTCTCCAATGCAGAATCAAGCAAATTATAAGGATGTGGCAGAGAACAGGACAAGCAA  
TATATGCCCCCTCCCATCCAGGAGAAATAAACTGTGTATCAAAC---  
ATTACAGGACTACTATTAACAAGAGATGGTGGGAATAATATTACA-----  
-----  
-----  
AATGAAACCTTCAGACCTGGAGGAGGAGATATGCAGGACAATTGGAGAAGTGAATTATATAAGTATAAGGTAG  
TACAAATTGAACCACTA---GGAGTAGCACCCACCAAGGCAAGGAGAAGAGTGGTG-----  
-----GAGAGAGAAAAAAGAGCA---GTTGGC---ATGGGAGCT-----  
GTCTTCATTGGGTTCTTAGGAGCA---GCAGGAAGCACTATG---GGCGCAGCGTCA---  
GTAACGCTGACGGTACAG---GCCAGACAA---TTATTG---TCTGGCATAGTGCGACAGCAAAGC---  
AATTTG---CTGAGA---GCTATAGAGGCTCAACAACATTTGTTGAAACTCACAGTCTGGGGCATT  
>AY253318..2  
TTCTATTGTAACACATCAGGCCTGTTTAATAGCACTTGGAATAGCAATGCCAGCATGCAGACGTCAAATGGTA  
CG-----  
-----  
GGGTAAATGACACTATAATTCTTCTATGTTGTATAATAACAATTATTATTATGTGGCGGAGAGCAGGACGAG  
CAGTATTTGCCCTCCTATCCTACGAGGAGTAATGTGGGGATCATAC---  
ATCACAGGGCTACTATTATCAACAGATGGTGGGGATGGTACACAT-----  
-----  
-----  
GAAGAACTCTTCGTACCTGGACGAGGAGATATGAAGGTCAAGGGCAGAAGCAAATTCTATTTGTATAAAGTTG  
TAAAAATTGAACCTGTA---CGTGTAGCACCCACCCCTGCCAACACAAAAGTGGTG-----  
-----GAGAGAGAAAAAAGAGCA---GTTGCA---ATAGGAACT-----  
GGATTTGTTGGGTTTTTAGGATCA---GGAGCAAGCACTATG---GGTGCGGCGTCA---  
ATAACGCTGACGGTACAG---GCCAGACAA---TTATTG---TCTGGCATAGTGCAACAGCAAAGC---  
AATTTG---CTGAGG---GCTATAGAGGCTCAACAACATCTGTTGAAGCTTACGGTCTGGGGCATT  
>AY253315..1  
TTCTATTGCAACACAACAGACCTGTTTAATTGGAATAATGACACCAGGCAGAAGCGAAATAGAACAGAG-----  
-----  
-----  
TCAGATAACACTATAACTCTCCAATGCAGAATAAAGCAAATTATAAATATGTGGCAGAGAACAGGACAAGCAA  
TATATGCCCCCTCCCATCCAAGGAGCAATAAGGTGTGACTCAAAC---  
ATTACAGGACTAATATTAGCAAGAGATGGGGGTAACACAAATGAA-----  
-----  
-----  
AGTGAAGAGGAAATCTTCAGACCTATAGGAGGAGATATGAGGGACAATTGGAGAAGTGAATTATATAAGTACA  
AAGTAGTGAAAATTGAGCCACTA---GGAGTAGCACCCACCACGGCAAAGAGAAGAGTGGTG-----

-----GAGAGAGAAAAAGAGCA---GTTGGA---CTGGGAGCT-----  
---GTCTTCCTTGGGTTCTTAGGAGCA---GCAGGAAGCACTATG---GGCGCAGCATCA---  
CTGACGCTGACGGTACAG---GCCAGACAA---TTATTG---TCTGGCATAGTGCAACAGCAAAGC---  
AATTTG---CTGAGG---GCTATAGAGGCTCAACAACATCTGTTGAGACTCACAGTCTGGGGCATT  
>AY253319..1  
TTCTATTGCAACACATCAGGCCTGTTTGATAGCATTGGAATGACACTGACAGCATGCAGGGGTAGATAGCA  
TG-----  
-----  
GAGTCAGATGGCACTATAACTCTCCAATGCAGAATAAAGCAAATTATAAATATGTGGCAGAGAGCAGGACAAG  
CAATATATGCCCTCCCATCCCAGGAGTAATAGAGTGACATCAAAC---  
ATTACAGGACTAATATTAACAAGAGATGGTGGAATAGTAGCAGT-----  
-----  
-----  
ACAAATGAAACCTTCAGACCTGGAGGAGGAGATATGAGGGACAATTGGAGAAATGAATTATATAAGTATAAGG  
TAGTAAAAATTGAGCCACTA---GGAGTAGCACCCACCAAGGCAAAAAGAAAAGTGGTG-----  
-----GAGAGAGAAAAAGAGCA---GTTGGA---ATAGGAGCT-----  
GTTTTCCTTGGGTTCTTGGGAGCA---GCAGGAAGCACTATG---GGCGCGGCGTCA---  
ATAACGCTGACGGTACAG---GCCAGACAA---TTATTG---TCTGGCATAGTGCAACAGCAAAGC---  
AATTTG---CTGAGG---GCTATAGAGGCTCAACAGCATCTGTTGAAACTCACGGTCTGGGGCATT  
>AY734552..1  
TTCTATTGTAATACATCAGGCCTGTTTAATGGCATTGGAACAATACCAGCACGCAGGAGTCAAATAGCACGG  
AA-----  
-----  
TCAAATGACACTATAACTATTCCATGCAGAATAAAGCAAATTATAAATATGTGGCAGAGAGTAGGACAAGCAA  
TGTATGCCCCCTCCCATCCAAGGAATGATAAGGTGTGAATCAAAC---  
ATTACAGGACTACTGTTAACAAGAGATGGTGGAATGAGAGCAGT-----  
-----  
-----  
ACAAATGAAACCTTCAGACCTGGAGGAGGAGATATGAGGGACAATTGGAGAAGTGAATTATATAAGTATAAAG  
TAGTAAAAATTGAACCGTTA---GGAGTAGCACCCACCAGGGCAAAGAGAAGAGTGGTG-----  
-----GGAAGAGAAAAAGAGCA---GTTGGA---ATAGGAGCT-----  
GTCTTCCTTGGGTTCTTAGGAGCA---GCCGGAAGCACTATG---GGCGCGGCGTCA---  
ATAACGCTGACGGTACAG---GCCAGACAA---TTATTG---TCTGGTATAGTGCAACAGCAAAGC---  
AATTTG---CTGAAG---GCTATAGAGGCTCAACAACATATGTTGAGACTCACAGTCTGGGGCATA  
>AY734553..1  
TTCTATTGCAACACATCAAGCCTGTTTAATAGCACTTGAATGGCACTACTGATAATGGCACTGGCAGCACAA  
AC-----  
-----  
AGCGCAAATAGCAATATAACTCTCCAATGCAAAATAAAGCAAATTATAAATATGTGGCAGAGAGCAGGACAAG  
CAATATATGCCCTCCCATCCCAGGAGTGATAAAGTGTGTATCAAAC---  
ATTACAGGACTAATATTAACAAGAGATGGTGGAATAATAACAGT-----  
-----  
-----  
ACAAATGAAACCTTCAGACCAGGAGGAGGAGATATGAGGGACAATTGGAGAAGTGAATTATATAAGTATAAGG  
TAGTAAAAATTGAACCACTA---GGAGTAGCACCCACCAGGGCAAAGAGAAGAGTGGTG-----  
-----GAGAGAGAAAAAGAGCA---GTCGGA---ATAGGAGCT-----  
GTTCTCCTTGGGTTCTTAGGAACA---GCAGGAAGCACTATG---GGCGCGGCGTCA---  
ATAACGCTGACGGTACAG---GCCAGACAA---TTATTG---TCTGGCATAGTGCAACAGCAAAGC---  
AATTTG---CTGAGG---GCTATAGAGGCTCAACAACACATGTTGAAACTCACAGTCTGGGGCATT  
>AY734562..1  
TTCTATTGTGATACATTTGAACTGTTTAATAGCACTTGAATCTCACTGCCAGCATGCAGGGGTCAAATAGA-  
-----  
-----  
ACGGAGGGCAATATAACACTCCCGTGCAGAATAAAACAAATTGTAAACATGTGGCAGGGGTAGGACGAGCAA  
TGTATGCCCCCTCCCATTCAGGAAATATAACATGTAGATCAAAC---  
ATCACAGGACTATTATTGACAAGTGATCATGGTAATGGTAGTCCA-----  
-----  
-----  
ACAAATGAGACATTTCAGACCTGGAGGAGGAAATATGAGGGACAATTGGAGAAATGAATTATATAAATACAAAG  
TGGTAGAAATTAAGCCATTA---GGAATAGCACCCACTAAGGCAAAAAGGAGAGTGGTG-----

-----GAGAGAGAAAAAAGAGCA---GTGGGA---ATAGGAGCT-----  
 GTGCTCCTTGGGTTCTTGGGAGCA---GCAGGAAGCACTATG---GGCGCGGCGTCA---  
 ATAACGCTGACGGTACAG---GCCAGACAA---TTATTG---TCTGGTATAGTGCAACAGCAAAGC---  
 AATTTG---CTGAAG---GCTATAGAGGCGCAACAACATATGTTGCAACTCACAGTCTGGGGCATT  
 >AY734554..1  
 TTCTATTGTAACACATCAGGACTGTTTAATAGCACTTGGGAATAGCAATGACAACGTGCAGGAGTCAAATAGCA  
 CA-----  
 -----  
 AAGTCAAACGACACTATAACTCTCCAATGCAGAATAAAACAAATTATAAATATGTGGCAGAGGGTAGGACGAG  
 CAATGTATGCCCCCTCCCATCCCAGGAGTAATAAGGTGTAATTCAAAC---  
 ATTACAGGACTAATATTAACAAGAGATGGTGGGAATGAGAGCAGT-----  
 -----  
 -----  
 ATAAATGAAACCTTCAGACCTGGAGGAGGAGATATGAGAGACAATTGGAGAAGTGAATTATATAAGTATAAAG  
 TAGTAAAAATTGAACCACTA---GGAGTAGCACCCACCAGGGCAAGGAGAAGAGTGGTG-----  
 -----GAGAGAGAAAAAAGAGCA---GTTGGA---ATAGGAGCT-----  
 GTCTTCATTGGGTTCTTAGGAGCA---GCAGGAAGCACTATG---GGCGCGGCGTCA---  
 ATAACGCTGACGGTACAG---GCCAGACAA---TTACTG---TCTGGCATAGTGCAACAGCAAAGC---  
 AATTTG---CTGAGG---GCTATAGAGGCTCAACAGCATCTGTTGAAACTCACGGTCTGGGGCATT  
 >AY734555..1  
 TTCTATTGTAACACATCAGGCCTGTTTAATAGCACTTGGAACTAACAACCTTTGAATAGCAGTAACAGCATGG  
 AG-----  
 -----  
 GAGTCAAATGACAATATAACTCTCCAATGTAGAATAAAGCAAATTATAAATATGTGGCAGAGAGCAGGACAAG  
 CAATGTATGCCCCCTCCCATCCCAGGAATAATAAGGTGTGAATCAAAC---  
 ATTACAGGACTAATATTAATGAGAGATGGTGGGAATAATAATACA-----  
 -----  
 -----  
 AATGAGACATTTCAGACCTGGAGGGGGAGATATGAGGGACAATTGGAGAAGTGAATTATACAAATATAAAGTAG  
 TAGAAATTAAGCCATTA---GGAATAGCACCCAACAGGGCAAAAAGGAGAGTGGTG-----  
 -----GAGAGAGAAAAAAGAGCA---GTTGGA---CTGGGAGCT-----  
 TTGTTCTTGGGTTCTTAGGAGCA---GCAGGAAGCACTATG---GGCGCGGCGTCA---  
 ATAACGCTGACGGTACAG---GCCAGAAAT---TTACTG---TCTGGCATAGTGCAAGCAGCAAAGC---  
 AATTTG---CTGAGG---GCTATAGAGGCTCAACAGCAGATGTTGAGACTCACGGTCTGGGGCATT  
 >KX907342..2  
 TTCTACTGCAATACATCAGGTCTGTTTAATTATACAGAAGGTACTTTAAATAGTACAATCAAT-----  
 -----  
 -----  
 AGTACAGAACCAATCACACTCCCATGCAGGATAAAACAAATTATAAACATGTGGCAGGGGGTAGGACGAGCAA  
 TGTATGCCCCGCCCATTCAGGAACCATAACATGTAGATCAAAC---  
 ATTACAGGACTACTATTGACACGTGATGGAGGATGTCATAATAAT-----  
 -----  
 -----  
 TGTACAGAGAAATTCAGACCTGGAGGAGGAGATATGAGGGACAATTGGAGAAGTGAATTATATAAATATAAAG  
 TGGTAGAAATCAAACCATTA---GGAATAGCACCCACTAGGGCAAAAAGGAGAGTGGTG-----  
 -----GAGAGAGAAAAAAGAGCA---GTGGGA---ATAGGAGCT-----  
 GTGTTCTTGGGTTCTTGGGAGCA---GCAGGAAGCACTATG---GGCGCAGCATCA---  
 ATAACGCTGACGGTACAG---GCCAGACAA---TTACTG---TCTGGTATAGTGCAACAGCAAAGC---  
 AATTTG---CTGAGG---GCTATAGAGGCGCAACAGCATATGTTGCAACTCACAGTCTGGGGCATT  
 >KX907377..1  
 TTCTATTGCAACACCACAGAACTGTTTAATAGAACATACTGGTCAAATGAGACAGGAAGCAATTCAAACAATT  
 CAAGCAGT-----  
 -----  
 TCAAATGACACCATCACACTCCCATGCAGAATAAAACAAATTATAAACATGTGGCAGAGAGTAGGACAAGCAA  
 TGTACGCCCCCTCCCATTCAGGAAACATAACATGTGAATCAAAC---  
 ATTACAGGGCTACTGTTAACAAGAGATGGTGAGAAT-----  
 -----  
 -----  
 AACGGTACAGAACTTTTAGACCTGGAGGAGGAGATATGAGGGACAATTGGAGAAGTGAATTATATAAGTATA  
 AAGTAGTAAAAATTGAACCACTA---GGAGTGGCACCCACCAGGGCAAAAAGGAGAGTGGTG-----

-----GAGAGAGAAAAAGAGCA---GTTGGA---ATAGGAGCT-----  
---GTCCTCTTTGGGTTCTTAGGAACA---GCAGGAAGCACTATG---GGCGCGGCGTCA---  
ATGACGCTGACGGTACAG---GCCAGACAA---TTATTG---TCTGGCATAGTGCAACAGCAAAGC---  
AATTTG---CTGAGG---GCTATAGAGGCTCAACAACATATGTTGAAACTCACGGTCTGGGGCATT  
>KX907379..2  
TTCTATTGTAATACATCAAGCCTGTTTAATAGCACTTGGGACAACAGTAGCATCACACAGAATTACACGGAG-  
-----  
-----  
TCAAAATGAGACTATAACTCTCCAGTGCAGAATAAAACAAATTGTAAACGCGTGGCAGAGAGTAGAACAAGCAA  
TATATGCCCCCTCCCATCCAAGGAGTAATAAGGTGTGACTCAAAC---  
ATTACAGGACTACTATTAACAAGAGATGGTGGTGGTAATAACAGT-----  
-----  
-----  
AGTGAAAACGAAACCTTTAGACCTGGAGGAGGAGATATGAGGGACAATTGGAGAAGTGAATTATATAAGTATA  
AAGTAGTAAAACCTTGAACCACTA---GGAGTAGCACCTACCAAGGCAAAAAGAAGAGTGGTG-----  
-----GAAAGAGAAAAAGAGCA---GTCGGA---ATAGGAGCT-----  
---GTTTTCCTTGGGTTCTTAGGAGCA---GCAGGAAGCACTATG---GGCGCGGCGTCA---  
ATGACGCTGACGGTACAG---GCCAGACAA---TTATTG---ACTGGCATAGTGCAACAGCAAAGC---  
AATTTG---CTGAGG---GCTATAGAGGCTCAACAACACCTGTTGAAACTCACGGTCTGGGGCATT  
>KX907409..2  
TTCTATTGTAACACATCATCCCTGTTTAATAGTACTTGGCAGGTCAGCGGGCAGGGGTAAATAGCACGGAG-  
-----  
-----  
TTAGGTGACACTATAACTCTCCAATGCAGAATAAAGCAAATTATAAATATGTGGCAGAGAGCAGGACAAGCAA  
TATATGCCCCCTCCCATCCCAGGAGTAATAAGGTGCGAATCAAAC---  
ATAACAGGACTAATATTAACAAGTGATTATGGGAATAGTAGCAGT-----  
-----  
-----  
GACAATGAAACCTTCAGACCTACAGGAGGAGATATGAGGGACAATTGGAGAAGTGAATTATATAAGTATAAAG  
TAGTGAAAATTGAACCAATA---GGAGTAGCACCCACCAAGCAAGAAGAAGAGTGGTG-----  
-----CAGAGAGAAAAAGAGCA---GTTGGA---CTGGGAGCT-----  
GTCTTCATTGGGTTCTTAGGAGCA---GCAGGAAGCACTATG---GGCGCGGCGTCA---  
GTGACGCTGACGGTACAG---GCCAGACAA---TTATTA---TCTGGCATAGTGCAACAGCAAAGC---  
AATTTG---CTGAGG---GCTATAGAGGCTCAACAGCATATGTTGAAACTCACAGTCTGGGGCATT  
>KX907362..1  
TTCTATTGTGACACATCAGACCTGTTTAATAGCACTTGGCCTAGCAATACCAATAACAGCATAACAGGAGTCAA  
ATAGCACA-----  
-----  
GAGCCAAACGCCACTATAACACTCCCATGCAGAATAAAACAAATTATAAATATGTGGCAGAGAGCAGGACAAG  
CAATGTATGCCCCCTCCCATCCCAGGAATGATAAAGTGTAACCTCAAAC---  
ATTACAGGACTCATATTAACAAGAGATGGTGGAAATGATAGCAGT-----  
-----  
-----  
ACAGATGAAATCTTCAGACCTGGAGGAGGAGACATGAGGGACAATTGGAGAAGTGAATTATATAAGTATAAAG  
TAGTACAAATTGAACCACTA---GGAGTAGCACCTACCAGGGCAAGGAGAAGAGTGGTG-----  
-----CAGAGAGAAAAAGAGCA---GTTGGA---ATGGGAGCT-----  
GTGCTCATTGGGTTCTTAGGAGCA---GCAGGAAGCACTATG---GGCGCAGCGTCA---  
GTAACGCTGACGGTACAG---GCCAGACAA---TTATTG---TCTGGCATAGTGCAACAGCAAAGC---  
AATTTG---CTGAGG---GCTATAGAGGCTCAACAGCATCTGTTGAAACTCACAGTCTGGGGCATT  
>KX907381..1  
TTCTATTGTAATACATCAGGTCTGTTTAATAGCACTTGGTCTAACAGCACGCAGGCGTCAAATGACACAGAG-  
-----  
-----  
TCAAAATGACACTATAACTCTCCCATGCAGAATAAAGCAAATTATAAATATGTGGCAGAGAGTAGGACAAGCAA  
TGTATGCCCCCTCCCATCCAAGGAATAATAAAGTGTATATCAAAT---  
ATTACAGGACTAATATTAACAAGAGATGGTGGGAATAACAATGGA-----  
-----  
-----  
ACTGAAACCTTCAGACCTGGAGGAGGAGACATGAGGGACAATTGGAGAAGTGAATTATATAAGTATAAAGTAG  
TAAAAATTGAACCACTA---GGAGTAGCACCCACCAGGGCAAGAGAAGAGTGGTG-----

-----GAGAGAGAAAAAGAGCA---GTAGGA---ATAGGAGCT-----  
GTCCTCTTTGGGTTCTTAGGAGCA---GCAGGAAGCACTATG---GGCGCGGCGTCA---  
ATAACGCTGACGGTACAG---GCCAGACAA---TTATTG---TCTGGTATAGTGCAACAGCAAAGC---  
AATTTG---CTGAGG---GCCATAGAGGCTCAACAACAACCTGTTGAAACTCACAGTCTGGGGCATC  
>KX907386..1  
TTCTATTGTAATACATCAAACCTGTTTAATGACACTTGGCCTATGTCAAATAACACGGAG-----  
-----  
-----  
TCAGATGACAACATAACCCCTCCAATGCAGGATAAAAGCAAATTATAAATATGTGGCAGAGAGCAGGACAAGCAA  
TGTATGCCCCCTCCCATTCAGGAAACATAACATGTATATCAAAT---  
ATTACAGGACTACTGTTAACAAGAGATGGTGGGGGGAATAGCAGT-----  
-----  
-----  
ACTGGTAATGAAACCTTCAGACCTGGAGGAGGAAATATGAAGGACAATTGGAGAAGTGAATTATATAAGTATA  
AAGTAGTACAACCTTGAACCCCTA---GGAGTAGCACCTACCAGGGCAAGAAGAAGAGTGGTG-----  
-----CAGAGAGAAAAAGAGCAGTAGTTGGA---CTGGGAGCT-----  
---GTTTTCAATTGGGTTCTTAGGAGCA---GCAGGAAGCACTATG---GGCGCGGCGTCA---  
ATAACGCTGACGGTACAG---GCCAGACAA---TTATTG---TCTGGTATAGTGCAACAGCAAAGC---  
AATTTG---CTGAGG---GCTATAGAGGCTCAACAGCATATGTTGAAACTCACAGTCTGGGGCATT  
>KX907429..1  
TTCTATTGCAACACATCAGGTTTGTTTAATAGCACTTGGGATATCAATGACACTGCCAGCGTGCAGGTGTCAA  
ATGGCACG-----  
-----  
AAGTCAAACAGCACTATAACTCTCCAATGCAGAATAAAGCAAATTATAAATATGTGGCAAAGAGTAGGGCAAG  
CAATATATGCCCCCTCCCATCCAAGGAATGATAAGGTGTGTATCAAAT---  
ATTACAGGACTAATATTAACAAGAGATGGTGGGAATGATAGCAGG-----  
-----  
-----  
ACAAATGAAACCTTCAGACCTGGAGGAGGAGATATGAGGGACAATTGGAGAAGTGAATTATATAAGTATAAGG  
TAGTAAACCTTGAGCCATTA---GGAATAGCACCCAACAGGGCAAAGAGAAGAGTGGTG-----  
-----GAGAGAGAAAAAGAGCA---GTTGGA---ATAGGAGCT-----  
GTCCTCTTTGGGTTCTTGGGAGCA---GCAGGAAGCACTATG---GGCGTGGCGTCA---  
ATGACGCTGACGGTACAG---GCCAGACAA---TTATTG---TCTGGCATAGTGCAACAGCAAGGC---  
AATTTG---CTGAGG---GCTATAGAGGCTCAACAGCATCTGTTGAAACTCACAGTCTGGGGCATT  
>HQ615972..2  
TTTTATTGTAACACATCAGGCCTGTTTAATAGCACTTGGAGTTTTAATAGCACTGGAAATAATTACAGCATGA  
ATAGCACCAAT-----  
-----GACACT-----  
ATAACTAACGACACTATAATTCTCCAATGTAGAATAAAGCAAATTATAAATATGTGGCAGAGAGTAGGACAGG  
CAATGTATGCCCCCTCCCATTCGAGGAGTAATAAGGTGTGAATCAAAC---  
ATTACAGGACTAATATTAACAAGAGATGGAGGTAATAATGGGTCA-----  
-----  
-----  
AATGAAATCTTCAGACCTGGAGGAGGAGATATGAGGGACAATTGGAGAAGTGAATTATATAAATATAAAGTAG  
TAAAAATTGAGCCACTA---GGAGTAGCACCCACCAAGGCAAAAAGAAGAGTGGTG-----  
-----GAGAGAGCAAAAAGAACA---GTAGGA---CTGGGAGCT-----  
GTCTTCCTTGGGTTCTTAGGAGCA---GCAGGAAGCACTATG---GGCGCAGCGTCA---  
ATAACGCTGACGGCACAG---GCCAGACAA---TTATTG---TCTGGCATAGTGCAACAGCAAAGC---  
AATTTG---CTGAGG---GCTATAGAGGCTCAACAGTATCTGTTGAAGCTCACAGTCTGGGGCATT  
>HM204625..1  
TTCTATTGTGACACATCAGGCCTGTTTGATAGCCAGGCAAATAGA-----  
-----  
-----  
ACAAATGACACTATAACTCTCCAATGCAGAATAAAGCAAATTATAAATATGTGGCAGAGAGTAGGACAAGCAA  
TGTATGCCCCCTCCCATTAAGGAGTAATAAATTGTACATCACAT---  
ATTACAGGATTAATATTAACAAGAGATGGTGGTAATGATACAACT-----  
-----  
-----  
GAAACCTTCAGACCTGGAGGAGGAGATATGAGGGACAATTGGAGAAGTGAAGTATATAAGTATAAAGTAGTAA  
AAATTGAGCCACTA---GGAGTAGCACCCACCAGGGCAAGGAGAAGAGTGGTG-----

-----GGGAGAGAAAAAGAACA---GTTGGA---CTAGGAGCT-----  
 GTCCTCTTTGGGTTCTTAGGAGCA---GCAGGAAGCACTATG---GGCGCGGCGTCA---  
 ATAACGCTGACGGTACAG---GCCAGACAA---TTATTG---TCTGGCATAGTGCAACAGCAAAGC---  
 AATTTG---CTGAAG---GCTATAGAGGCTCAACAGCATATGTTGAGACTCACGGTCTGGGGCATT  
 >KY658699..1  
 TTCTATTGTAACACATCAGGCCTGTTTGATAACAACACGCTGACAAATACA-----  
 -----  
 -----  
 ACGCAGGAAAATATAACTCTCCCATGCAGAATAAAGCAAATTATAAATATGTGGCAGAGAGCAGGACAAGCAA  
 TATATGCCCCCTCCCATTAAGGAGTAATAAAGTGTGAATCAAAT---  
 ATTACAGGATTAATATTAACAAGAGATGGTGGTAATACTAATGATAGCGAT-----  
 -----  
 -----  
 GAAATTGAAACCTTCAGACCTGGAGGAGGAGATATGAGGGACAATTGGAGAAGTGAACTATATAAGTATAAAG  
 TAGTAAAAATTGAGCCACTA---GGAGTAGCACCCACCAAGGCAAGGAGAAGAGTGGTG-----  
 -----GGGAGAGAAAAAAGAGCA---GTTGGA---ATAGGAGCT-----  
 GTCCTCTTTGGGTTCTTAGGAGCA---GCAGGAAGCACTATG---GGCGCGGCGTCA---  
 ATAACGCTGACGGTACAG---GCCAGACAA---TTATTG---TCTGGCATAGTGCAACAGCAAAGC---  
 AATTTG---CTGCAG---GCTATAGAGGCTCAACAGCATATGTTGAGACTCACGGTCTGGGGCATT  
 >AF361876..1  
 TTCTATTGTAATACAACAGACCTGTTTAATAGCACCAGGTACCGGGTTAATAGCACTTGAATATGCAGGGGT  
 CAAATAGT-----  
 -----ACG---  
 GAGTCCAATGACACTATAACTCTCCAATGCAGAATAAAGCAAATCATAAATATGTGGCAGAGAGCAGGACAAG  
 CAATGTATGCCCCCTCCCATTTGAAGGAAACATAACATGTATGTCAAAC---  
 ATTACAGGACTACTGTTAACAAGAGATGGTGGGAATAATAACAGT-----  
 -----  
 -----  
 ACAAATGAAACCTTCAGACCTGAAGGAGGAGATATGAGGGACAATTGGAGAAGTGAAATTATATAAGTATAAAG  
 TAGTAAACCTTGAACCACTA---GGAGTAGCACCTACCAGGGCAAAAAGAAGAGTGGTG-----  
 -----GAAAGAGAAAAAAGAGCA---GTTGGA---CTGGGAGCT-----  
 GTCTTCCTTGGGTTCTTAGGAGCA---GCAGGAAGCACTATG---GGCGCGGCGTCA---  
 ATAACGCTGACGGTACAG---GCCAGAAAT---TTATTG---TCTGGTATAGTGCAACAGCAAAAC---  
 AATTTG---CTGAGG---GCTATAGAGGCTCAACAGCATATGTTGAAACTCACGGTCTGGGGCATT  
 >AF361879..1  
 TTCTATTGTAATACTTCAGGCCTGTTTAATAGCACTTGGAACATTACCAGCACACAGAAGTCAAATAGCACGG  
 AG-----  
 -----  
 TCAAATAATGACACTATAACTCTCCAATGCAGAATAAAGCAAATTATAAATATGTGGCAGAGAGTAGGACAAG  
 CAATGTATGCCCCCTCCCATCCCAGGAGCAATAGGGTGTAATCAAAC---  
 ATTACAGGACTATTGTTAACAAGAGATGGTGGGGAGAATAACAGT-----  
 -----  
 -----  
 GAAAATGAAACCTTCAGACCTGGAGGAGGAAATATGAGGGACAATTGGAGAAGTGAAATTATATAAGTATAAAG  
 TAGTAAACCTTGAACCACTA---GGAGTAGCACCTACCAAGGCAAAAAGAAGAGTGGTG-----  
 -----GAGAGAGAAAAAAGAGCA---GTTGGA---CTAGGAGCT-----  
 GTCTTCATTGGGTTCTTAGGAGCA---GCAGGAAGCACTATG---GGCGCGGCGTCA---  
 ATAACGCTGACGGTACAG---GCCAGACAA---TTATTG---TCTGGCATAGTGCAACAGCAAAGC---  
 AATTTG---CTGAAG---GCTATAGAGGCTCAACAACAATTGTTGAGACTCACGGTCTGGGGCATT  
 >HM215279..1  
 TTCTATTGCAATACATCAGACCTATTTAATGGCACGTTTAATGAGACATCAGGCCAGTTTAAT-----  
 -----  
 -----  
 AGCACATTTAATAGTACACTCCAGTGCAGAATAAAACAAATTATAAACATGTGGCAGGAAGTCGGACAAGCAA  
 TGTATGCCCCCTCCCATTCAGGAAGCATAACATGTATATCGAAT---  
 ATCACAGGACTAATATTAACAAGAGATGGTGGGAATACTAACAGT-----  
 -----  
 -----  
 ACAAAGGAAACCTTCAGACCTGGAGGAGGAAATATGAGGGACAATTGGAGAAGTGAAATTATATAAGTATAAAG  
 TAGTAAAAATTGAACCACTA---GGAGTAGCACCCACCAAGGCAAGGAGAAGAGTGGTG-----

-----GAGAGAGAAAAAAGAGCA---GTAGGA---ATAGGAGCT-----  
 GTCTTCATTGGGTTCTTAGGCGCA---GCAGGAAGCACTATG---GGCGCGGCGTCA---  
 ATAACGCTGACGGTACAG---GCCAGACAA---TTATTG---TCTGGTATAGTGCAACAGCAAAGC---  
 AATTTG---CTGAGG---GCTATAGAGGCTCAACAGCATCTGTTGAAACTCACGGTCTGGGGCATT  
 >HM215315..1  
 TTCTATTGTGATACATCAGCCCTGTTTAATAGCACTTGGAATAACAGCACGAGGAACAGCATGGAGTGG----  
 -----  
 -----  
 TTAAATGACACTATAACTCTCCAATGCAAAATAAAGCAAATTATAAATATGTGGCAGAGAGCAGGACAAGCTA  
 TGTACGCCCCCTCCCATCCAAGGAACAATAAGTTGTAACCTCAAAC---  
 ATTACAGGACTACTGTTAACAAGAGATGGGGGGAAGGACACCACA-----  
 -----  
 -----  
 AATGAAACCTTTAGACCTGGAGGAGGAGACATGAGGAACAATTGGAGAAGTGAATTATATAAGTATAAAGTAG  
 TAAAACTTGAACCACTA---GGAGTAGCACCTACCAAGGCAAAAAGAAGAGTGGTG-----  
 -----GAGAGAGAAAAAAGAGCA---GTTGGA---ATAGGAGCT-----  
 GTCCTCATTGGGTTCTTAGGAGCA---GCAGGAAGCACTATG---GGCGCGGCGTCA---  
 ATAACGCTGACGGTACAG---GCCAGACAA---TTATTG---TCTGGTATAGTGCAACAGCAAAGC---  
 AATTTG---CTGAGG---GCTATAGAGGCTCAACAGCAACTGTTGAAACTCACGGTCTGGGGCATT  
 >HM215322..2  
 TTCTATTGTGATACATCAGACCTGTTTAATAGCACTTGGAATTATACTAGTATCACGTCAAATAGCACGGAG-  
 -----  
 -----  
 TCAAAATGACACTATAACTCTCCAATGCAGAATAAAGCAAATTATAAATATGTGGCAGAGAGAAGGACAAGCAA  
 TGTATGCCCCCTCCCATGAAGGAAACATAACATGTATGTCAAAC---  
 ATTACAGGACTACTGTTAGTAAGAGATGGTGGGATTAATAACAGG-----  
 -----  
 -----  
 ACAGATGAAATCTTCAGACCTGGAGGAGGAAATATGAAAGACAATTGGAGAAGTGAATTATATAAGTATAAAG  
 TAGTAAAACTTGAACCACTA---GGAGTAGCACCTACCAGGGCAAAAAGAAGAGTGGTG-----  
 -----GAGAGAGAAAAAAGAGCA---GTTGGA---CTGGGAGCT-----  
 GTCTTCATTGGGTTCTTAGGAGCA---GCAGGAAGCACTATG---GGCGCGGCGTCA---  
 ATAACGCTGACGGTACAG---GCCAGAAAT---TTATTG---TCTGGTATAGTGCAACAGCAAAAC---  
 AATTTG---CTGAGG---GCTATAGAGGCTCAACAGCATATGTTGAAACTCACAGTCTGGGGCATT  
 >AF484491..1  
 TTCTATTGTAATACATCAGGTTTGTTTAATAGCTCCTGGGCAAATAACACTGACAATAGCAATAACACTGTCA  
 AT-----  
 -----  
 AGCACGGACATTATAACTCTCCCATGCAGAATAAAGCAAATTGTAAATATGTGGCAAAGAACAGGACAAGCAA  
 TGTATGCCCCCTCCCATCAAAGGAGTGATAAGGTGTGAATCAAAT---  
 ATTACAGGACTACTATTAAACAAGAGATGGTGGGGCTACTAGCATT-----  
 -----  
 -----  
 ATAAATGAAACCTTCAGACCTGGAGGAGGAAATATGAGGGACAATTGGAGAAGTGAATTATATAAGTATAAAG  
 TAGTACAAATTGAACCACTA---GGAGTAGCACCCACCAGGGCAAGGAGAAGAGTGGTG-----  
 -----GAGAGGGGAAAAAAGAGCA---ATTGGA---ATAGGAGCT-----  
 GTATTTCCTTGGGTTCTTAGGAACA---GCAGGAAGCACTATG---GGCGCGGCGTCA---  
 ATAACGCTGACGGTACAG---GCCAGACAA---TTACTG---TCTGGTATAGTGCAACAGCAAAGC---  
 AATTTG---CTGAGG---GCTATAGAGGCTCAACAGCATATGTTGAAACTCACGGTCTGGGGCATT  
 >AF484501..3  
 TTTTATTGTAACACATCAGGCCTGTTTAATCACACTTACACTTGGTATAATGGCAGCTTGCAGGAGTCAAATA  
 GC-----  
 -----  
 ACGGGGTCAGACAACATAACTCTCCAATGCAGAATAAAGCAAATTATAAATATGTGGCAGAGAGTGGGACAAG  
 CTATGTATGCCCCCTCCCATTCGAGGAGTAATACAGTGTGAATCAAAC---  
 ATTACAGGACTAATATTAACAAGAGATGGTGGAAATAATAATGAT-----  
 -----  
 -----  
 AATACAACCTGAAATCTTCAGACCTGGAGGAGGAGATATGAGGGACAATTGGAGAAGTGAATTATATAAGTATA  
 AAGTAGTAACAATTGAACCACTA---GGAGTAGCACCCACCAGGCAAGGAGAAGAGTGGTG-----

-----GAGAGAGAAAAAGAGCA---GTGGGA---ATAGGAGCT-----  
---GTCCTCCTTGGGTTCTTAGGAACA---GCAGGAAGCACTATG---GGCGCGGCGTCC---  
ATGACGCTGACGGTACAG---GCCAGACAA---TTATTG---TCTGGCATAGTGCAACAGCAAAGC---  
AATTTG---CTGAAG---GCTATAGAGGCTCAACAGCAACTGTTGAGACTCACGGTCTGGGGCATT  
>FJ647147..1  
TTCTATTGCAATACATCAGGCCTGTTTAAACAGCACTTGGGAGTTTAAACAACCCCTTTTAATGAACTGAGTGGC  
CA-----  
-----  
CAAAATAAAACTATAATTCTCCAATGCAGAATAAAGCAAATTGTAAATATGTGGCAGAGAGTAGGACAGGCGA  
TGTATGCCCCCTCCCATCAAAGGAGTAATAAGGTGTAATTCAACC---  
ATTACAGGACTATTCTTAAACAAGAGATGGTGGAAATACTAGCAGT-----  
-----  
-----  
ACAAATGAGACCTTCAGGCCTGGAGGAGGAGATATGAGGGACAATTGGAGAAGTGAATTGTATAAATATAAAG  
TAATAAAAATTGAACCAATA---GGAGTAGCACCCACCAGGGCAAAAAGAAGAGTGGTG-----  
-----GAAAGAGAAAAAGAGCA---GTTGGA---CTGGGAGCT-----  
GTTTTCTTGGGTTCTTAGGAGCA---GCAGGAAGCACTATG---GGCGCAGCGTCA---  
ATAACGCTGACGGTACAG---GCCAGACAA---TTATTG---TCTGGCATAGTGCAACAGCAAAGC---  
AATTTG---CTGAGG---GCTATAGAGGCTCAACAGCATCTGTTGAAACTCACAGTCTGGGGCATT  
>KT183118..2  
TTCTACTGCAATACATCAGGCCTGTTTAATGACACATTTATGCCCAATAATACGGCTAATAGTACTAAGAATG  
AAACA-----  
-----  
CAGGAAAAGAATATAACTATCTCATGCAAAATAAAACAAATTATAAGAATGTGGCAAAGAGTAGGACAAGCAA  
TGTATGCCCCCTCCCATGAAAGGATTAATAAAATGTGAATCAAAC---  
ATTACAGGAATACTATTGACAAGAGATGGTGGGAACAATACTAAC-----  
-----  
-----  
AGTACAGAGGTCTTCAGACCTGGAGGGGGAAATATGAAGGACAAGTGGAGAAGTGAATTATATAATTATAAGG  
TAGTAAAAATTGAACCACTA---GGAGTAGCACCCACCGGGCAAGGAGAAGAGTGGTG-----  
-----GAGAGAGAGAAAAGAGCAGTAGTTGGA---CTGGGAGCT-----  
GTCTTCCTTGGGTTCTTAGGAGCA---GCAGGAAGCACTATG---GGCGCGGCGTCA---  
TTAACGCTGACGGTACAG---GCCAGGCAA---TTATTG---GCTGGCATAGTGCAACAGCAAAGC---  
AATTTG---CTGCAG---GCTATAGAGGCTCAACAACATATGTTGAAACTCACTGTCTGGGGCATT  
>GU201611..1  
TTCTATTGTAACACAACAGACTTGTTTAATAGCAGTTGGGCTAACAATGGCAGCAGGCTGGGGCCAAATGGTA  
CA-----  
-----  
GAGTCAGACATTATAACTATCCAATGCAGAATAAAGCAAATTATAAATATGTGGCAAAGAGTAGGACAAGCAA  
TATATGCCCCCTCCAGAAAAGGAGTAATAAGGTGTGACTCAAAC---  
ATTACAGGACTGATATTAAACAAGAGATGGTGGTAGCAATAACACA-----  
-----  
-----  
AATAATGAAACCTTCAGACCTGGAGGAGGAGACATGAGGGACAATTGGAGAAGTGAATTATATAAGTATAAAG  
TAGTAAACTTGAACCACTA---GGGGTAGCACCTACCCGGCAAAAAGAAGAGTGGTG-----  
-----GAGAGAGAGAAAAGAGCA---GTTGGA---CTAGGAGCT-----  
GTTTTCATTTGGGTTCTTAGGAGCA---GCAGGAAGCACTATG---GGCGCGGCGTCA---  
GTAACGCTGACGGTACAG---GCTAGACAA---TTATTG---TCTGGCATAGTGACAGCAAAGT---  
AATTTG---CTGAGG---GCTATAGAGGCTCAACAACATATGTTGAAACTCACGGTCTGGGGCATT  
>GU329121..2  
TTCTATTGCAACACATCAGGCCTGTTTAAATAGCAGTTGGAAAATTGAGAATGGCAATGCCACGCTAAATAGCA  
CG-----  
-----  
TGGCCAAATGGCACCATAACTCTTCAATGCAGAATAAAGCAAATTATAAATATGTGGCAAAGGACAGGACAAG  
CAATATATGCCCCCTCCCATCCAAGGAGTAATAAGGTGTGACTCAAAC---  
ATTACAGGACTACTATTAAACAAGAGATGGTGGGGATAATAATGGT-----  
-----  
-----  
ACAGAAACCTTCAGACCTGGAGGAGGAGATATGAGGGACAATTGGAGAAGTGAAGTTATATAAATATAAAGTAG  
TAAAAATTGAGCCACTA---GGAGTAGCACCCACCAGGGCAAAGAGAAGAGTGGTG-----

-----GAGAGAGAAAAAGAGCA---GTAGGA---ATAGGAGCT-----  
 GTGTTCTTGGGTTCTTAGGAGCA---GCAGGAAGCACTATG---GGCGCGGCGTCA---  
 ATAACGCTGACGGTACAG---GCCAGACAA---TTATTG---TCTGGCATAGTGCAACAGCAAAGC---  
 AATTTG---CTGAGG---GCTATAGAGGCTCAACAGCATATGTTGAAACTCACGGTCTGGGGCATT  
 >JF680922..3  
 TTCTATTGCAACACATCAGGACTGTTTAATAGCACTTGGTTTCAGAATGGCACTAACATTACACAGGGG----  
 -----  
 -----  
 TCAGATGGCAATATAACTCTTCATTGCAGAATAAAGCAAATCATAAATATGTGGCAGAGAGCAGGACAAGCAA  
 TATATGCCCCCTCCCATCAAGGGAGTAATAAAGTGTGTATCAAAC---  
 ATTACAGGACTAATATTAACAAGAGATGGTGGTACCAATGTGACG-----  
 -----  
 -----  
 AATGGAAGTGAATCTTCAGGCCTGGAGGGGGAGATATGAAGGATAATTGGAGAAGTGAATTATATAAATATA  
 AAGTGGTAGAAATTAAACCATTA---GGAGTAGCACCCACCAAGGCAAAAAGGAGAGTGGTG-----  
 -----GGAAGAGAAAAAGAGCA---GTAGGA---ATAGGAGCT-----  
 ---GTGTTCTTGGGTTCTTGGGAGCA---GCAGGAAGCACTATG---GGCGCAGCGTCA---  
 ATAACGCTGACGGTACAG---GTCAGACAA---TTATTG---TCTGGCATAGTGCAACAGCAAAC---  
 AATTTG---CTGAGG---GCTATAGAGGCTCAACAGCATCTGTTGAGACTCACAGTCTGGGGCATT  
 >AF457056..3  
 TTCTATTGTGATACATCAGGCCTGTTTAATTACACGTTTTATCCCAATGGCAGCTTGCAGGGGGAATCAAATG  
 AC-----  
 -----  
 ACGCAGGAGAAGATAACTCTCCCATGCAGAATAAAGCAAATTATAAATATGTGGCAGAGAACAGGGCAAGCAA  
 TATATGCCCCCTCCCATCCAAGGAGTAATAAGATGTGTATCAAAC---  
 ATTACAGGAATACTATTAACAAGAGATGGTGGAGATACTGGGGAC-----  
 -----  
 -----  
 AACAACTACTGAAACCTTCAGACCTGGAGGAGGAGATATGAGGGACAATTGGAGAAGTGAATTATATAAGTATA  
 AAGTAGTACAAATTGAACCACTA---GGAGTAGCACCCACCAGGGCAAGGAGAAGAGTGGTG-----  
 -----GGAAGAGAAAAAGAGCA---GTTGGA---ATAGGAGCT-----  
 ---GTTTTCTTGGGTTCTTAGGAGCA---GCAGGAAGCACTATG---GGCGCGGCGTCA---  
 ATAACGCTGACGGTACAG---GCCAGACAA---TTGTTG---TCTGGTATAGTGCAACAGCAAAGC---  
 AATTTG---CTGAGG---GCTATAGAGGCTCAACAACATCTGTTGAAACTCACGGTCTGGGGCATT  
 >KT022400..2  
 TTCTATTGTAACACAGCAGGCCTGTTTAATAGCACTTGGAAATAGTAGCACTTATAGTAACAATGCCAGCGGGC  
 AGGAG-----  
 -----  
 TCAAATGACACTATAACTCTCCAATGCAGAATAAAGCAAATTATAAATATGTGGCAGAGAGCAGGACAAGCAA  
 TATATGCCCCCTCCCATCGAAGGAGTAATAAAGTGTGTATCAAAC---  
 ATTACAGGACTAATATTAACAAGAGATGGTGGGAATGCTAACAGT-----  
 -----  
 -----  
 ACAAATGAAACCTTCAGACCTGGAGGAGGAGATATGAGGGACAATTGGAGAAGTGAATTATATAAGTATAAAG  
 TAGTAGAACTTGAACCACTA---GGAGTAGCACCCACCAAGGCAAGAGAGAAGAGTGGTG-----  
 -----GAGAGAGAAAAAGAGCA---GTTGGA---CTGGGAGCT-----  
 GTTCTCATTTGGGTTCTTAGGAGCA---GCAGGAAGCACTATG---GGCGCAGCGTCA---  
 GTGACGCTGACGGTACAG---GCCAGACAA---CTATTG---TCTGGCATAGTGCAACAGCAAAGC---  
 AATTTG---CTGATG---GCTATAGAGGCTCAACAGCAACTGTTGAAACTCACAGTCTGGGGCATT  
 >KT022401..1  
 TTCTATTGCAACACAAATGAATTGTTTAATAGCACTTGGTTTTTGAACACTACTAATACCAGCACGTGGGAGT  
 CAAATGGG-----  
 -----  
 ACGAGGTCAGAAAATATAACTCTCAAATGCAGAATAAAGCAAATTATAAATATGTGGCAGAGAGCAGGACAAG  
 CAATGTATGCCCCCTCCCATCCGAGGAGTAATAAAGTGTACATCAAAC---  
 ATTACAGGACTAATATTAACGAGAGATGGTGGGGTTAATAACAAT-----  
 -----  
 -----  
 ACAAATGAAATCTTCAGACCTGGAGGAGGAGATATGAGGGACAATTGGAAAAGTGAATTATATAAATATAAGG  
 TAGTAAAAAATTGAACCACTA---GGAGTAGCACCCACCAAGGCAAGAGAGAAGAGTGGTG-----

-----GAGAGAGAAAAAAGAGCA---GTTGGA---ATAGGAGCT-----  
GTATTCATTGGGTTCTTAGGAGCA---GCAGGAAGCACTATG---GGCGCGGCGTCA---  
ATAACGCTGACGGTACAG---GCCAGACAA---TTATTG---TCTGGCATAGTGCAACAGCAAAGC---  
AATTTG---CTGAAG---GCTATAGAGGCTCAACAGCATCTGTTGAGACTCACGGTCTGGGGCATT  
>KT022414..2  
TTCTATTGCAATACATCAAGACTGTTTAATAGCATTGTTGGGAGCATAATAGCACTTGGACCAATACACGGGGA-  
-----  
-----  
TCAAAATAGCACATAACTCTCCCATGCAGAATAAAGCAAATTATAAATATGTGGCAGAGAGTAGGACAAGCAA  
TGTATGCTCCTCCCATCGCAGGAGCAATACAGTGTGCATCAAAT---  
ATTACAGGACTAATATTAACAAGAGATGGTGGAAATCATAACAGG-----  
-----  
-----  
ACAAATGAAACCTTCAGACCTGGAGGAGGAGATATGAGGGACAATTGGAGAAGTGAATTATATAAGTATAAAG  
TAGTAAAAATTGAACCACTA---GGAGTAGCACCCACCAGGGCAAAGAGAAGAGTGGTG-----  
-----GAGAGAGAAAAAAGAGCA---GTTGGA---CTAGGAGCT-----  
GTTTTTCATTGGGTTCTTAGGAGCA---GCAGGAAGCACTATG---GGCGCAGCGTCA---  
GTGACGCTGACGGTACAA---GCCAGGCAA---TTACTG---TCTGGCATAGTGCAACAGCAAAGC---  
AATTTG---CTGAGG---GCTATAGAGGCTCAACAGCACCTGTTGAGACTCACGGTCTGGGGCATT  
>KU749430..1  
TTCTATTGCGATACAGCAAACTGTTTAATAGCACGTGGGAGTACAATGGCACTGAATACAACATGACCAAAG  
GG-----  
-----  
TCAAAATGGAATCTGACTCTCCCATGCAGAATAAAACAAATTGTACACATGTGGCAGAGAGTAGGACAAGCAA  
TGTATGCCCCCTCCCATCCCAGGAATAATAAAGTGTGAATCAAAC---  
ATCACAGGACTAATATTAACAAGAGATGGTGGGAAGAATACCAGT-----  
-----  
-----  
AATGAGACCTTCAGACCTGGAGGAGGAGATATGAGGGATAATTGGAGAAGTGAATTATATAAGTATAAAGTAG  
TAAAACTTGAACCACTA---GGAGTAGCACCCACCGCAGCAAGGAGAAGAGTGGTG-----  
-----CAGAGAGAAAAAAGAGCA---GTTGGA---ATGACAGCT-----  
GTCTTCCTTGGGTTCTTAGGAGCA---GCAGGAAGCACTATG---GGCGCGGCGTCA---  
ATAACGCTGACGGTACAG---GCCAGACAA---CTGTTG---TCTGGCATAGTGCAACAGCAAAGC---  
AATTTG---CTGAAG---GCTATAGAGGCTCAACAGCATATGTTGAGACTCACGGTCTGGGGCATT  
>KF716470..1  
TTCTATTGTAATACATCAGGCCTATTTAATAGTACTTGGCATTGGAATAATACTGATACTAATGGCACCAATG  
GT-----  
-----  
ACTAATGATACTATAACTCTCCCATGCAGAATAAAGCAAATTATAAATATGTGGCAGAGGGTAGGACAAGCAA  
TATATGCCCCCTCCCATCCCAGGGGTAATAAAATGTGTATCAGAC---  
ATTACAGGACTCCTATTAACAAGAGATGGTGGGGTCAATAATAGC-----  
-----  
-----  
AGCAATAATGAAACCTTCAGACCTGGAGGAGGGGATATGAGGGACAATTGGAGAAGTGAATTATATAAGTATA  
AGGTAGTAAAAATTGAACCACTA---GGAGTAGCACCCACCAAGGCAAAGAGAAGAGTGGTG-----  
-----GAGAGAGAAAAAAGAGCA---GTTGGA---CTGGGAGCT-----  
---GTCTTCATTGGGTTCTTGGGAGCA---GCAGGAAGCACTATG---GGCGCGGCGTCA---  
ATAACGCTGACGGTACAG---GCCAGGCAA---TTATTG---TCTGGCATAGTGCAACAGCAAAGC---  
AATTTG---CTGAGG---GCTATAGAGGCTCAACAACATCTGTTGAACTCACAGTCTGGGGCATT  
>KU921717..2  
TTCTATTGTAACACATCAAGCCTGTTTAATAGCACTTGGGAATAGCACTTGGGAATGGCAATGACAGCAGCACA-  
-----  
-----  
GAAAAATGGCACTATAACTTTACAATGCAAAATAAAGCAAATCATAAATATGTGGCAGAGAGTAGGACAAGCAA  
TGTATGCCCCCCCCATTCAAGGAGTCATAAATTGTAAATCAAAC---  
ATTACAGGATTGATATTAACAAGGGATGGTGGAAACACTACCAGC-----  
-----  
-----  
AGTGAGGAAATTTTCAGACCTGGAGGGGGAGATATAAGGGATAATTGGAGAAGTGAATTATATAAGTATAAAG  
TAGTAAAAATTGAGCCACTA---GGAGTAGCACCCACCAGGGCAAAGAGAAGAGTGGTG-----

-----AAGAGAGAAAAAAGAGCA---GTTGGA---CTGGGAGCT-----  
TTTTTCCTTGGGTTCTTAGGAGCA---GCGGGAAGCACTATG---GGCGCGGCGTCA---  
ATAACGCTGACGGTACAG---GCCAGGCAA---TTATTG---TCTGGCATAGTGCAACAGCAAAGC---  
AATTTG---CTGAGG---GCTATAGAGGCTCAACAACATCTGTTGAGACTCACGGTCTGGGGCATT  
>KU921730..1  
TTCTATTGTAATACATCAAACTGTTTAATAGCACTTGGTATAATTCCACTAATACCACTTGGGAGGATGAC-  
-----  
-----  
GGCACACAGAATATAACTCTCCCATGCAGAATAAAGCAAATTATAAATCTGTGGCAGAGAACAGGACGAGCAA  
TGTATGCCCCCTCCCATCCGAGGAGTAATACAGTGTAGGTCAAAT---  
ATTACAGGGCTAATATTAACAAGAGATGGTGGGAATGATAATGATACC-----  
-----  
-----  
AGTAACAATGAAACCTTCAGACCTGGAGGTGGAAATATGAGGGACAATTGGAGAAGTGAATTATATAAGTATA  
AAGTAGTACAAATTGAACCAATA---GGAATAGCACCCACCAAGGCAAGGAGGATAGTGGTA-----  
-----GGGAGAGAAAAAAGAGCA---GTTGGA---CTAGGAGCT-----  
---GTCTTCCTTGGGTTCTTAGGAGCA---GCCGGAAGCACTATG---GGCGCAGCGTCA---  
ATGACGCTGACGGTACAG---GCCAGACAG---TTATTG---TCTGGCATAGTGCAACAGCAAAGC---  
AATTTG---CTGAGG---GCTATAGAGGCTCAACAGCATCTGTTGAAACTCACAGTCTGGGGCATT  
>KU921766..3  
TTCTACTGCAATACATCAAATCTGTTTAATGGTACATGGATAGTAAATAATACAAATAGTACAAATAATGCAG  
ATACA-----  
-----  
TCAAAATAGTAATATTACACTCCAATGCAGAATAAAACAAATTATAAACAGGTGGCAGGAAGTAGGAAAAGCAA  
TCTATGCCCCCTCCTATTGCAGGACTAATAAAATGTTTCATCAAAT---  
ATTACAGGAATATTGTTAACAAGAGATGGTGGTGCAAGTCATAAT-----  
-----  
-----  
AATCAGAGTGAGACCCTCAGACCTGGAGGAGGAAATATGAAAGATAATTGGAGAAGTGAATTATACAAATATA  
AAGTAGTAAGGCTTGAACCAATA---GGTCTAGCACCCACCAGGGCAAAAAGAAGAGTGGTG-----  
-----GAAAGAGAAAAAAGAGCA---ATAGGA---CTGGGAGCT-----  
---ATGTTCTTGGGTTCTTGGGAGCA---GCAGGAAGCACAAATG---GGCGCAGCGTCG---  
GTGACGCTGACGGTACAG---GCCAGACAG---TTATTG---TCTGGCATAGTGCAACAGCAAAT---  
AATTTG---CTGAGG---GCTATAGAGGCGCAACAGCATATGTTGCAACTCACAGTCTGGGGCATT  
>AF075702..1  
TTCTATTGTAATACATCAGGCCTGTTTAATAGCACTTGGGTAAATGGCAGCAGGGAATCAAATAGCACA---  
-----  
-----  
GATAATGATACTATAACTCTCCCGTGTAGAATAAAGCAAATTATAAATATGTGGCAGAGAGTAGGACAAGCAA  
TGTATGCCCTTCCCATCCGAGGAGTAATAAGGTGTGAATCAAAC---  
ATTACAGGATTAATATTAACAAGAGATGGTGGGAATAATACCACT-----  
-----  
-----  
ACAAATGAAACCATCAGACCTGCAGGAGGAGATATGAGGGACAATTGGAGAAGTGAATTATATAAATATAAAG  
TAGTAAAAATTGAACCACTA---GGAGTAGCACCCACCAAGGCAAGGAGAAGAGTGGTG-----  
-----GAGAGAGAAAAAGAGAGCA---GTTGGA---ATAGGAGCT-----  
GTGTTCTTGGGTTCTTAGGAGCA---GCAGGAAGCGCTATG---GGCGCAGCGGCA---  
GCAACGCTGACGGTACAG---GCCAGGCAA---TTATTG---TCTGGCATAGTGCAACAGCAAAGC---  
AATTTG---CTGAAG---GCTATAGAGGCTCAACAGCATCTGTTGAAACTCACGGTCTGGGGCATT  
>HQ659612..1  
TTTTATTGTAATACATCAGACATGTTTAATAGCACTTGGAAATTGGAATAGCAGTGCCAACATGATGGAGTCAA  
ATAGCACCAGC-----  
-GTGCAGGGGCCAAAT-----  
ATAACTGAGCAAAATATAACTCTCCAATGCAGAATAAAGCAAATTATAAATATGTGGCAGAGAGCAGGACAAG  
CAATATATGCCCCCTCCTATCAAAGGAGTAATAAGGTGTGAATCAAAC---  
ATTACAGGGCTAATATTAACAAGAGATGGGGGAAAAAGTAACAACACA-----  
-----  
-----  
AATAAATACTGAAACCTTCAGACCTACAGGAGGAGATATGAGGGACAATTGGAGAAGTGAATTATACAAATATA  
AAGTGGTGGAAATTAAACCATTA---GGAGTAGCACCCACTGAGGCAAAAAGGAGAGTGGTG-----

-----AAGAGAGGAAAAAGAGCA---GTAGGA---ATAGGAGCT-----  
---GTATTCCTTGGGTTCTTGGGAGCA---GCAGGAAGCACTATG---GGCGCAGCGTCA---  
ATAACGCTGACGGTACAG---GCCAGACAA---TTATTG---TCTGGCATAGTGCAACAGCAAAGC---  
AATTTG---CTGAGG---GCTATAGAGGCTCAACAGCATCTGTTGAAGCTCACAGTCTGGGGCATT  
>KX907397..2  
TTCTATTGTAATACATCAGGCCTGTTTAATAGCACGTGGAACAATAGCATGTGGAACAACATGCTGACTTGGA  
ATGCC-----  
-----  
ACGGGGAAGTACATTATGACTCTCCCATGTAAAATAAAACAAATTATAAATATGTGGCAGGGAGTAGGAAAAG  
CAATGTATGCCCCCTCCCATTTGAAGGACTAATTCAATGCTCATCAAAT---  
ATTACTGGACTATTATTAACAAGAGATGGGGGTGTAAATAATGAT-----  
-----  
-----  
AGTCAGAGTGAGACCTTCAGACCTGGAGGGGGAGATATGAGAGACAATTGGAGAAGTGAATTATACAAATATA  
AAGTAGTAAGAATTGAACCAATA---GGTCTGGCACCTACCAGGGCAAAAAGAAGAGTGGTG-----  
-----GAAAGAGAAAAAAGAGCA---ATAGGA---CTGGGAGCT-----  
---ATGTTCCCTTGGGTTCTTGGGAGCA---GCAGGAAGCACGATG---GGCGCAGCGTCA---  
CTGACGCTGACGGTACAA---GCCAGAGAG---TTATTG---TCTGGTATAGTGCAACAGCAAAT---  
AATTTG---CTGAGA---GCTATAGAGGCGCAACAGCATCTGTTGCAACTCACTGTCTGGGGCATT  
>KX907350..1  
TTCTATTGCAATACATCAAACCTGTTTAACGGCACTTGGAATGGTAGCACTTGGGATAGCCCTTGGAATAGGA  
ATAAC-----  
-----  
AGCAATGAAAATATAACACTCCAATGCAGAATAAAACAAATTATAAATATGTGGCAGAGAGCAGGACAAGCAA  
TGTATGCCCCCTCCCATCCAAGGAGTAATAAGGTGTGAATCAAAC---  
ATCACAGGACTACTATTAACACGTGATGGAGGAGAAAAATAATAAT-----  
-----  
-----  
ACTACAGAGACATTTCAGGCCGGTAGGAGGAAATATGAAAGACAACCTGGAGAAGTGAATTATATAAGTATAAAG  
TAGTAAAAATTGAACCACTA---GGAGTAGCACCCACTAGGGCAAGGAGAAGAGTGGTG-----  
-----GAGAGAGAGAAAAAGAGCA---GTTGGA---ATAGGAGCT-----  
GTGTTCCCTTGGGTTCTTGGGAGCA---GCAGGAAGCACTATG---GGCGCAGCGTCA---  
ATAACGCTGACGGTACAG---GCCAGACAA---TTATTG---ACTGGCATAGTGCAACAGCAAAGC---  
AATTTG---CTGAGG---GCTATAGAGGCTCAACAGCAAATGTTGAGACTCACAGTCTGGGGCATT  
>KX907351..1  
TTTTATTGTAACACATCAGGCTTGTTTAATAGCTCTTGGTCTTGGAATGGTACCAATAACACGGAGTCAGGTA  
AC-----  
-----  
ATAAATGTCAATATAACTCTCCCATGCAGAATAAAGCAAATTATAAATATGTGGCAGAGAGTAGGACAAGCAA  
TGTATGCCCCCTCCCATTCAGGAGTGATACAGTGTGTATCAAAC---  
ATTACAGGACTAATATTAACAAGAGATGGTGGGAATAATAGCAGT-----  
-----  
-----  
ACAAATGAAATCTTCAGACCTGGAGGAGGAGATATGAGGGACAATTGGAGAAGTGAATTATATAAGTATAAAG  
TAGTAAGAATTGAACCATTA---GGAGTAGCACCCACTAAGGCAAAAAGGAGAGTGGTG-----  
-----GAGAGAGAAAAAAGAGCA---GTGGGA---ATAGGAGCT-----  
GTGTTCCCTTGGGTTCTTGGGAGCA---GCAGGAAGCACTATG---GGCGCAGCGTCA---  
ATAACGCTGACGGTACAG---GCCAGACAA---TTATTG---TCTGGTATAGTGCAACAGCAAAGC---  
AATTTG---CTGAGG---GCTATAGAAGCGCAACAGTACCTGTTGAAGCTCACGGTCTGGGGCATT  
>KX907353..1  
TTCTATTGTAACACATCAAAGTTGTTTGACAGCAGTTGGCCAAAACAAATAGCACGGTGCAGGAGTCAAAT-  
-----  
-----  
AGCACAGACAATATAACGCTCCAATGTAGAATAAAGCAAATTATAAATATGTGGCAGAGAGTAGGACAAGCAA  
TGTATGCCCCCTCCCATTCAGGAGTAATAAGGTGTGAATCAAAC---  
ATTACAGGACTAATACTAACAAGAGATGGTGGAAAGTAATACCAAT-----  
-----  
-----  
GCAAGTGAAACCTTCAGACCTGGAGGAGGAGATATGAGGGACAATTGGAGAAGTGAATTATATAAGTACAAAAG  
TAGTAAAAATTGAACCACTA---GGAGTAGCACCCACCAGGGCAAGAGAAGAGTGGTG-----

-----GAGAGAGAAAAAAGAGCA---GTTGGA---ATAGGAGCT-----  
GTATTCATTGGGTTCTTAGGAGCA---GCAGGAAGCACTATG---GGCGCAGCGTCA---  
ATAACGCTGACGGTACAG---GCCAGACAA---TTATTG---GCTGGCATAGTGCAACAGCAAAGT---  
AATTTG---CTGAGG---GCTATAGAGGCTCAACAGCATCTGTTGAAACTCACGGTCTGGGGCATT  
>KX907419..1  
TTTTATTGTGACACATCAAACCTGTTTAATAGCAATTGGACTGTGACTGACAGCGAACCGAAGCTAAATAGCA  
CGGAG-----  
-----  
CCAAACGACAATATAACTCTCCAATGCAGAATAAAGCAAATTATAAGGATGTGGCAGAGAGTAGGACAAGCAA  
TGTATGCCCCCTCCCATCCAGGAATAATAGAGTGTAATCAAAC---  
ATTACAGGACTAATACTAACAAGAGATGGTGGGCCTCCTAATACA-----  
-----  
-----  
ACTGAGACCTTCAGACCTGGAGGAGGAGATATGAGGGACAATTGGAGAAGTGAATTATATAAATATAAGGTAG  
TAAAAATTGAACCAATA---GGAGTAGCACCCACCGGGGCACGGAGAAGAGTGGTG-----  
-----GGGAGAGAAAAAAGAGCA---GTAGGA---ATAGGAGCT-----  
GTGTTTCCTTGGGTTCTTGGGAGCA---GCAGGAAGCACGATG---GGCGCAGCGTCA---  
GTGACGCTGACGGTACAG---GCCAGACAG---TTACTG---TCTGGTATAGTGCAACAGCAAAGC---  
AATTTG---CTGAGG---GCTATAGAGGCTCAACAGCATCTGTTGAGACTCACAGTCTGGGGCATT  
>KX907370..1  
TTCTACTGCAATACAACAAATTTGTTTAATGCAACAAATGGTTTAATAGGAGTATAGAGGAAAGTGCAAATG  
CAAATGAC-----  
-----ACA---  
AGTGAGAATTCCACACTCACACTCCCATGCAGAATAAAACAAATTATAAACATGTGGCAGGGAGTAGGAAAAG  
CAATGTATGCCCCCTCCCATTCAGGGCAAATCAAATGTTTCATCAAAT---  
ATTACAGGACTATTGTTGACAAGAGATGGT---AATAATAGTCAT-----  
-----  
-----  
GAGACCTTCAGACCTGGGGGAGGAGATATGAGAGACAATTGGAGAAGTGAATTATACAAATATAAAGTAGTAA  
AAATTGAACCAATA--GGTCTAGCACCCACCAGGGCAAAGAGAAGAGTGGTG-----  
-----GAAAGAGAAAAAAGAGCA---ATAGGA---CTGGGAGCT-----  
GTGTTTCCTTGGGTTCTTGGGGGCA---GCAGGAAGCACAATG---GGCGCAGCGTCG---  
CTAACGCTGACGGTACAG---GCCAGGCAA---GTATTG---TCTGGTATAGTGCAACAGCAAAAC---  
AATTTG---CTGAGG---GCTATAGAGGCGCAACAGCATCTGTTGCAACTCACAGTCTGGGGCATT  
>HM215280..1  
TTCTACTGCAATACATCACAACCTGTTTAATACTACATGGAGTAAAAATGGTACATCAAATAGTACAGGGTCA-  
-----  
-----  
AATAATAGTACAATCATACTCCCATGCAGAATAAAACAAATTATAAATATGTGGCAGAGAACAGGACAAGCAA  
TGTATGCCCCCTCCCATCCAGGAGTAATAAGGTGTGTATCAAAC---  
ATTACAGGACTAATTTTAAACAAGAGATGGTGGAAATAATAACAAA-----  
-----  
-----  
ACAGATGAAACTCTCAGACCTGGAGGTGGAGATATGAGGGACAATTGGAGAAGTGAATTATATAAGTATAAAG  
TAGTAAACTTGAACCACTA---GGAGTAGCACCCACCAGGGCAAAGAGAAGAGTGGTG-----  
-----GGGAGAGAAAAAAGAGCA---GTTGGA---ATAGGAGCT-----  
GTTTTTCATTGGGTTCTTAGGAGCA---GCAGGAAGCACTATG---GGCGCAGCGTCA---  
GTAACGCTGACGGTACAG---GCCAGACAA---TTATTG---TCTGGCATAGTGCAACAGCAAAGC---  
AATTTG---CTGAGG---GCTATAGAGGCTCAACAGCATATGTTGAAACTCACGGTCTGGGGCATT  
>KF716489..1  
TTCTATTGTAATACATCAGGCCTGTTTAATAGTACTTGGTATCCTAATAGTACTTTGAATGATAGTACTGGAA  
AG-----  
-----  
TATAATAAGACAATAACACTCCCATGTAGAATAAAGCAAATTGTAAACATGTGGCAAAGAGTAGGACAAGCAA  
TATATACCCCTCCCATTCAGGAATAATAAAGTGTGTATCAAAC---  
ATTACAGGACTATTATTAACAAGAGATGGTGGTATGAGTAACACAAAT-----  
-----  
-----  
AACACAACCTGAAATCTTCAGACCTGGAGGAGGAGATATGAGGGACAATTGGAGAAGTGAATTGTATAAGTATA  
AAGTAGTAGAAATTAAACCACTA---GGAATAGCCCCCTAGCAAGGCAAAGAGAAGAGTGGTG-----

-----GAGAGAGAAAAAGAGCA---GTTGGA---ATAGGAGCT-----  
---GTACTCTTTGGGTTCTTAGGAGCA---GCAGGAAGCACTATG---GGCGCAGCGTCA---  
ATAACGCTGACGGTACAG---GCCAGACAA---TTATTG---TCTGGCATAGTGCAACAGCAAAGC---  
AATTTG---CTGAGA---GCTATAGAGGCTCAACAGCATATGTTGAAACTCACAGTCTGGGGCATT  
>EU110096..1  
TTCTATTGTAACACATCAGGCTTGTTTAATAGCACTTGGAATAGCAATAGCACTTGGAATAGCACTGCCACGC  
AGGAGTCAAAT-----  
-----AACACG-----  
GAGTTAAATGGCAATATAACTCTCCCATGCAGAATAAAGCAAATTGTAAGAATGTGGCAGAGAGTAGGACAAG  
CAATGTATGCCCCCTCCCATTCAGGAGTAATACAGTGTAATCAAAC---  
ATTACAGGAATGATATTGACAAGAGATGGTGGAATAGTACAGAGACT-----  
-----  
-----  
TCCAATAATAATGAGACTTTCAGACCTGGAGGAGGAGATATGAGAGATAATTGGAGAAGTGAATTATATAAGT  
ATAAAGTAGTAAACTTGAACCACTA---GGAGTAGCACCCACAAAAGCAAGGAGAAGAGTGGTG-----  
-----GAGAGAGAGAAAAGAGCA---GTGGGA---CTGGGAGCT---  
-----CTCTTCCTTGGGTTCTTAGGAGCA---GCCGGAAGCACTATG---GGCGCGGCGTCA---  
CTAACGCTGACGGGACAG---GCCAGACAA---TTATTG---TCTGGCATAGTGCAACAGCAAAGC---  
AATTTG---CTGCAG---GCTATAGAGGCTCAACAGCATCTGTTGAAACTCACAGTCTGGGGCATT  
>DQ912822..1  
TTCTATTGTAACACATCAGGTCTGTTTAATAGCACTTGGAACAAAAGTACAGTGGCAGCATGCAGGGATCAA  
ATAGC-----  
-----  
ACAACAAGTGACGTTATAACTCTCCCATGCAGAATAAAACAAATTGTAAATATGTGGCAGAGAGCAGGACAAG  
CAATGTATGCCCCCTCCCATTCAGGAGTAATAAGGTGTGTATCAAAC---  
ATTACAGGACTACTATTAACAAGAGATGGTGGAATGATAACT-----  
-----  
-----  
ACCGAAATTTTCAGACCTGGAGGAGGAAATATGAGGGACAATTGGAGAAGTGAATTATATAAGTATAAAGTAG  
TAAAAATTGAACCACTA---GGAGTAGCACCCACCAGGGCAAAGAGAAGAGTGGTG-----  
-----GAGAGAGAAAAAGAGCA---GTTGGA---ATAGGAGCT-----  
GTCCTCATTGGGTTCTTAGGAGCA---GCAGGAAGCACTATG---GGCGCGGCGTCA---  
ATAACGCTGACGGTACAG---GCCAGACAA---TTATTG---TCTGGTATAGTGCAACAGCAAAGC---  
AATTTG---CTGAGA---GCTATAGAGGCTCAACAGCATATGTTGAGACTCACGGTCTGGGGCATT  
>AF457058..2  
TTCTATTGTAATACATCAGGACTGTTCAATAGTACTGTGAATACTTTGAATATTAGCACTTGGAATTACAATG  
AG-----  
-----  
TCAGATAACACTACTATACAACCTCCCATGCAGAATAAAACAAATTATAAACATGTGGCAGGGAGTGGGACAAG  
CAATGTATGCCCCCTCCCATTCAGGAGTCATCAAATGTTTCATCAAAT---  
ATTACAGGACTATTGTTGACAAGAGATGGTGTTGCAAATAGTACC-----  
-----  
-----  
AGTCAGAAAGAAACCTTCAGACCTGGAGGGGGAGACATGAGAGACAATTGGAGAAGTGAATTATATAAATATA  
AAGTAGTAAGAATTGAACCACTA---GGTCTAGCACCCACCAGGGCAAGAAGAAGAGTGGTG-----  
-----GAAAGAGAAAAAGAGCA---ATAGGA---CTGGGAGCT-----  
---ATGTTCCCTTGGGTTCTTGGGAGCA---GCAGGAAGCACGATG---GGCGCAGCGTCA---  
CTGACGCTGACGGTACAT---GCCAGACAG---TTATTA---TCTGGTATAGTGCAACAGCAAAC---  
AATTTG---CTGAGG---GCTATAGAGGCGCAACAACATCTGTTGCAACTCACAGTCTGGGGCATT  
>AF457082..1  
TTCTATTGCAACACATCAGACCTGTTTAATAGCAATTGGACTTGGGATAGTAATAATGGCACTATGAAGGAGG  
TAAATAGC-----  
-----ACG---  
GGGTCAAATGGCACTATAACTCTCCAATGCAGAATAAAGCAAATTATAAATATGTGGCAGAGAGCAGGACAAG  
CAATATATGCCCCCTCCCATCAAAGGAGTAATAAACTGTGTATCAAAT---  
ATTACAGGACTAATATTAACAAGAGATGGTGGGGATAATAGTAGT-----  
-----  
-----  
ACAGAAACCTTCAGACCTGGAGGAGGAGATATGAGGGACAATTGGAGAAGTGAATTATATAAGTATAAAGTAG  
TAAAAATTGAACCACTA---GGAGTAGCACCCACCAGGGCAAAGAGAAGAGTGGTG-----

-----GAGAGAGAAAAAGAGCA---GTTGGA---ATAGGAGCT-----  
 GTCTTCCTTGGGTTCTTGGGAGCA---GCAGGAAGCACTATG---GGCGCGGCGTCA---  
 ATAACGCTGACGGTACAG---GCCAGACAA---TTATTA---TCTGGCATAGTGCAACAGCAAAGC---  
 AATTTG---CTGAGG---GCTATAGATGCTCAACAACATCTGTTGAAGCTCACGGTCTGGGGCATT  
 >KT022385..1  
 TTCTATTGTAATACAACAGCCCTGTTTAATAGCATTGGAATGATACTGGCCTTAATAATAAACTTGGGATA  
 CAAAT-----  
 -----  
 ACAAATGATACTATAATCCCATGCAGAATAAAGCAAATTATACGAATGTGGCAGAGAGTAGGACAAGCAATGT  
 ACGCCCCTCCCATCCCGGGAGTGATAAAGTGTATATCTAAC---  
 ATTACAGGGCTACTATTAACAAGAGATGGTGGACAGGGCAATAAT-----  
 -----  
 -----  
 GAAACTGAAACCTTCAGACCTGGAGGAGGAAATATGAAGGACAATTGGAGAAGTGAATTATATAAGTATAAAG  
 TAGTAAAAATTGAACCACTA---GGAGTAGCACCCACCAGGGCAAGGAGAAGAGTGGTG-----  
 -----GAGAGAGAAAAAGAGAGCA---GTTGGA---CTGGGAGCT-----  
 GTATTCATTGGGTTCTTAGGAGCA---GCAGGAAGCACTATG---GGCGCAGCGTCA---  
 ATAACGCTGACGGCACAG---GCCAGACAA---TTGTTG---TCTGGTATAGTGCAACAGCAAAGC---  
 AATTTG---CTGAGG---GCTATAGAGGCTCAACAGCATCTGTTGAAACTCACAGTCTGGGGCATT  
 >KT022387..1  
 TTCTATTGTAATACAACAGAACTGTTTAATAGCACCTGGTTTAATAGCACTTGGGACAGCACGCAGGCGCCAA  
 ATAGCACG-----  
 -----  
 GATTCAAATGACACTATAACCCCTCCAATGCAGAATAAAACAAATTATAAATATGTGGCAGAGAGTAGGACAAG  
 CAATGTATGCCCCCTCCCATCCCAGGAGTAATACAGTGTGTATCAAAC---  
 ATTACAGGATTACTATTAACAAGAGATGGTGGGGATAATAACAGT-----  
 -----  
 -----  
 ACAAATGAAACCTTCAGACCTGGAGGAGGAGATATGAGGGACAATTGGAGAAGTGAATTATATAAGTATAAAG  
 TAGTAAAAATTGAACCACTA---GGAGTAGCACCCACCGGGGCACAGAGAAGAGTGGTG-----  
 -----GAAAGACAAAAAAGGGCA---GTTGGA---ATAGGAGCT-----  
 GTGTTCCCTTGGGTTCTTAGGAGCA---GCAGGAAGCACTATG---GGCGCGGCGTCA---  
 ATAACGCTGACGGTACAG---GCCAGACTA---TTATTG---TCTGGCATAGTGCAACAGCAAAGC---  
 AATTTG---CTGAGG---GCTATAGAGGCTCAGCAACATCTGTTGAAACTCACAGTCTGGGGCATT  
 >KT022388..1  
 TTCTATTGTGACACATCCAGCCTGTTTAATAGCACTTGGGATACCGATGACACCAGGCGAGAGTTAAATAGCA  
 CAGAG-----  
 -----  
 TCAAATGACACTATAACACTCCAATGCAGAATAAAGCAAATTATAAATATGTGGCAGAGAGTAGGACAAGCAA  
 TGTATGCCCCCTCCCATCCAAGGAATAATAAGGTGTAAATCAAAA---  
 ATTACAGGACTAATATTAACAAGAGATGGTGGTAAGAATAGCAGT-----  
 -----  
 -----  
 ACCAATGAAATCTTCAGACCTGGAGGAGGAGATATGAGGGACAATTGGAGAAGTGAATTATATAAGTATAAAG  
 TAGTAAACTTGAACCATTA---GGAGTAGCACCCACAAGGGCAAAAAGAAGAGTGGTG-----  
 -----GAGAGAGAAAAAAGAGCA---GTTGGA---ATAGGAGCT-----  
 GTCTTCCTTGGGTTCTTAGGAGCA---GCAGGAAGCACTATG---GGCGCAGCGTCA---  
 ATAACGCTGACGGCACAG---GCCAAACAA---TTATTG---TCTGGCATAGTGCAACAGCAAAGC---  
 AATTTG---CTGAGG---GCTATAGAGGCTCAACAACATCTGTTGAAACTCACAGTCTGGGGCATT  
 >KT022389..2  
 TTCTACTGCAATACATCAGCACTGTTTAATAGGACTTATAATATATCAGAACTGGGTAATACTAATAATATAT  
 CAGATACTAGT-----  
 -----  
 AATACATCAAAGGTTATCCCACTCCCATGCAGAATAAGACAAATTATAAACATGTGGCAGGAAGTAGGCAAAG  
 CAATATATGCCCCCTCCATTGCAGGAATAATCAGATGTTTCATCAAAT---  
 ATTACAGGACTATTGATGACAAGGGATGGTGGTGAATATAATAAT-----  
 -----  
 -----  
 AGTCAGAATGAAACCTTCAGACCTGGAGGGGGAGATATGAGAGACAACCTGGAGAAGTGAATTATATAAATATA  
 AAGTAGTAAAACTCGAACCATTA---GGTCTAGCACCCACCAGGGCAAAGAGAAGAGTGGTG-----

-----GACAGAGAAAAAGAGCA---ATAGGA---CTAGGAGCT-----  
---ATGTTCTTGGGTTCTTGGGAGCA---GCAGGAAGCACGATG---GGCGCAGCGTCA---  
CTGACGCTGACGGTACAG---GCCAGACAG---TTATTG---TCTGGTATAGTGCAACAGCAAAAT---  
AATTTG---CTGAGA---GCTATAGAGGCGCAACAGCATATGTTGCAACTCACAGTCTGGGGCATT  
>KT022390..1  
TTCTATTGCAATACATCAGGACTGTTTAATACATTAAATAGTACAGGGATA-----  
-----  
-----  
AATGAGACTACAATCACACTCCCATGCAGGATAAAACAAATTATAAACATGTGGCAGGGAGTAGGAAAAGCAA  
TGTATGCCCCCTCCCATTTGAAGGACTAATCCACTGTTTCATCAAAC---  
ATTACAGGACTATTATTGACAAGAGATGGTGGTAATGATGGTGCA-----  
-----  
-  
AATATTACTAATCAGAATGAGACTTTTAAACCTGAAGGAGGAGATATGAGAGACAATTGGAGAAGTGAATTAT  
ACAAATATAAAGTAGTAAAAATTGAACCACTA---GGTCTAGCACCCACCAAGGCAAAAAGAAGAGTGGTG--  
-----GAAAGACAAAAAGAGCA---ATAGGA---  
CTAGGAGCT-----GTGTTCTTGGGTTCTTGGGAGCA---GCAGGAAGCACAAATG---  
GGCGCAGCGTCA---CTGACGCTGACGGTACAG---GCCAGACAG---TTATTG---  
TCTGGTATAGTGCAACAGCAAAAC---AATTTG---CTGAGG---  
GCTATAGAGGCGCAACAGCATCTGTTGCAACTCACAGTCTGGGGCATT  
>KT022392..1  
TTCTATTGTAACACATCAGGCCTGTTTAATGGCACTGTCAAACAGGAGTCAAATGGCACAGAG-----  
-----  
-----  
TCAAATGATACTATAATTCTCCAATGCAAAATAAAGCAAATTATAAATATGTGGCAGAGAGTAGGACAAGCAA  
TATATGCCCCCTCCCATCCCAGGAGTAATAAGGTGTGTCTCAAAC---  
ATTACAGGACTAATATTAACAAGAGATGGTGTTAATAGCAGTGCA-----  
-----  
-----  
AATGAAACCTTCAGACCTGGAGGAGGGGATATGAGGGACAACCTGGAGAAGTGAATTATATAAGTATAAAGTAG  
TAAAAATTGAACCACTA---GGAGTAGCACCCACCAGGGCAAAAAGAAGAGTGGTG-----  
-----GAGAGAGAAAAAGAGCA---GTTGGA---ATAGGAGCT-----  
GTTTTCAATTGGGTTCTTGGGAGCA---GCAGGAAGCACTATG---GGCGCGGCGTCA---  
ATGACGCTGACGGTACAG---GCCAGACAA---TTATTG---TCTGGCATAGTGCAACAGCAAAGC---  
AATTTG---CTGAGG---GCTATAGAGGCTCAACAACATCTGTTGAAACTCACGGTCTGGGGCATT  
>KT022394..1  
TTCTACTGCAATACATCAAGACTGTTCAATAGTACATGGGTATTAAATAGTACATCAAATAGTACATGGACAT  
TAAATAGTACA-----  
-----ACGGGAGAT-----  
AGCAGTACATCAAATATCACAATCCCATGCAGAATAAAACAAATTATAAACAGGTGGCAGGAAACAGGAACAG  
CAATATACGCCCCCTCCCATTTGAAGGACTAATTCATGTTTCATCAAAT---  
ATTACAGGACTACTATTAAACAAGAGATGGTGGGAACCCCTAATGAGACAAGG-----  
-----  
-----  
GAGAAATGAAACCTTTAGACCAGAAGGAGGAAATATGAAAGACAATTGGAGAAGTGAATTATACAAATATAAAG  
TAGTAAGACTTGAACCACTA---GGTCTAGCACCCACCAAGGCAAAGAGAAGAGTGGTG-----  
-----GAAAGAGAAAAAGAGCA---ATAGGA---CTAGGAGCT-----  
ATGTTCTTGGGTTCTTGGGAGCA---GCAGGAAGCACGATG---GGCGCAGCGTCA---  
CTGACGCTGACGGTACAG---GCCAGACAG---TTATTG---TCTGGTATAGTGCAACAGCAAAAC---  
AATTTG---CTGAGG---GCTATAGAGGCGCAACAGCATATGTTGCAGCTCACAGTCTGGGGCATT  
>KT022396..1  
TTCTATTGCAGCACATCAGGCCTGTTTAATGGCACTTGGACTTGGACTAATGACACTGGGAGTAATAACAATG  
TCAGCCAGCAA-----  
-----  
GAGTTAAATGACACTATAACTCTCCCATGCAAAATAAAGCAAGTTATAAATATGTGGCAAAGGGTGGGACAAG  
CAATATATGCCCCCTCCCATCCCAGGAGTAATAAGGTGTGAATCAAAC---  
ATTACAGGACTAATATTATCAAGAGATGGTGGAGATAATAACAGT-----  
-----  
-----  
ACAAATGAAACCTTCAGACCTGGAGGAGGAGATATGAGGGACAATTGGAGAAGTGAATTATATAAGTATAAAG

TAGTAAAAATTGAACCACTA---GGAGTAGCACCCACCAGGGCAAAGAGAAGAGTGGTG-----  
 -----GAGAGAGAAAAAAGAGCA---GTTGGA---CTGGGAGCT-----  
 GTTTTCATTGGGTTCTTAGGAGCA---GCAGGAAGCACTATG---GGCGCGGCGTCA---  
 GTGACGCTGACGGTACAG---GCCAGACAA---TTATTG---TCTGGCATAGTGCAACAGCAAAGC---  
 AATTTG---CTGAGG---GCTATAGAGGCTCAACAACATCTGTTGAAACTCACGGTCTGGGGCATT  
 >KT022409..1  
 TTCTACTGTAATACAACAGGCCTGTTTAATAGCACTTGGAAGTTTAATAGCACTTGGGAGCAAGGGTCAAATA  
 CCACGGAG-----  
 -----  
 ACAAATGAAACTATAACTCTCCAATGCAGAATAAAGCAAATCATAAACATGTGGCAGACAGTAGGACAAGCAA  
 TGTATGCTCCCCCATCCAGGAGTAATAAAGTGTAAGTCAAAAC---  
 ATTACAGGATTAATATTAACAAGAGATGGTGGGAATAATAACAAT-----  
 -----  
 GGAAGTGGAATAATAACAAT-----  
 GGAAGTGAAATCTTCAGACCTGGAGGAGGAGATATGAGAGACAATTGGAGAAGTGAATTATATAAGTATAAAG  
 TAGTAAAAATTGAACCCCTA---GGAGTAGCACCCACCAGGGCAAAGAGAAGAGTGGTG-----  
 -----GAGAGAGAAAAAAGAGCA---GTTGGA---ATAGGAGCT-----  
 GTCTTCCTTGGGTTCTTAGGAGCA---GCAGGAAGCACTATG---GGCGCGGCGTCA---  
 ATAACGCTGACGGTACAG---GCCAGACAA---TTATTG---TCTGGCATAGTGCAACAGCAAAGC---  
 AATTTG---CTGAAG---GCTATAGAGGCTCAACAACATCTGTTGAAACTCACGGTCTGGGGCATT  
 >KT022410..1  
 TTCTATTGTAACACATCAAGCCTGTTTAATAGCACTTGGAATTTAACTGCCAACAGGCAGGGACCAAATAGCA  
 CGGAG-----  
 -----  
 TCAACTGACACCATAACTCTACAGTGCAGAATAAAGCAAATTATAAATATGTGGCAGAGAACAGGACAAGCAA  
 TATATGCCCCCTCCAATCCAGGGAGTAATAAGGTGTGCATCAAAC---  
 ATTACAGGACTACTATTAACAAGAGATGGTGTCT-----  
 -----  
 -----  
 GGCAGTGACAGTGAAACCTTCAGACCTACAGGAGGAGATATGAGAGACAATTGGAGAAGTGAATTATATAAAT  
 ATAAAGTAGTAAAAATTGAACCATTA---GGAGTAGCACCCACCAGGGCAAGGAGAAGAGTGGTG-----  
 -----GGGAGAGAAAAAAGAGCA---GTTGGA---ATAGGAGCT---  
 -----GTATTCCTTGGGTTCTTAGGAGCA---GCAGGAAGCACTATG---GGCGCGGCGTCA---  
 ATAACGCTGACGGTACAG---GCCAGACAA---TTGTTG---TCTGGCATAGTGCAACAGCAAAGC---  
 AATTTG---CTGAAG---GCTATAGAGGCTCAACAACAGCTGTTGAGACTCACTGTCTGGGGCATT  
 >KT022411..1  
 TTCTACTGTAACACATCAAATCTGTTTAATAGCACATGGACTAATAGTACATGGAATATAACAGAAGAGGCTA  
 AT-----  
 -----  
 AGTACAGAGCCAATTATACTCCAATGCAGAATAAAGCAAATTATAAATCTGTGGCAGAGAGTAGGACAAGCAA  
 TGTATGCTCCTCCCATCCAAGGAGTAATAAGGTGTGAATCAAAC---  
 ATTACAGGACTAATATTAACAAGAGATGGTGGGCATAATAAGACA-----  
 -----  
 -----  
 AATGAAACCTTCAGACCTGGAGGAGGAGACATGAGGGATAATTGGAGAAGTGAATTATACAAATATAAGGTGG  
 TAAAAATCGAGCCACTA---GGAGTAGCACCCACAAGGGCAAGGAGAAGAGTGGTG-----  
 -----CAGAGAGAAAAAAGAGCA---GTTGGA---ATAGGAGCT-----  
 GTCTTCCTTGGGTTCTTGGGAGCA---GCAGGAAGCACTATG---GGCGCAGCGTCA---  
 ATAACGCTGACGGTACAG---GCTAGACAA---TTATTG---TCTGGCATAGTGCAACAGCAAAGC---  
 AATTTG---CTGAAG---GCTATAGAGGCTCAACAACATCTGTTGAAACTCACGGTCTGGGGCATT  
 >FJ623491..1  
 TTCTATTGTAACACCTCAGGCCTGTTTAATAGCGCTTGGTCGGGCAATACCAGTAATACCAGAACCAATAGT-  
 -----  
 -----  
 GCAGAAGCCAATATAACTCTCCAATGCAGGATAAAGCAAAGTTATAAATATGTGGCAGAGAGTAGGACAAGCAA  
 TATATGCCCCCTCCCATCTCAGGAGTAGTAAGGTGTAAATCAAAT---  
 ATTACAGGACTACTATTAACAAGAGATGGTGGGGGTAATGGTACA-----  
 -----  
 -----  
 AATGAAACCTTTAGACCTGGAGGAGGAGATATGAGGGACAATTGGAGAAGTGAATTATATAAGTATAAGGTAG

TAAAAATTGAACCACTA---GGAGTAGCACCCACCAGGGCAAAGAGAAGAGTGGTG-----  
-----GAGAGAGAAAAAGAGCA---GTTGGA---ATAGGAGCT-----  
GTTTTTCATTGGGTTCTTGGGAGCA---GCAGGAAGCACTATG---GGCGCGGCGTCA---  
ATAACGCTGACGGTACAG---GCTAGACAA---TTATTG---TCTGGCATAGTGCAACAGCAAAGC---  
AATTTG---CTGAGG---GCTATAGAGGCTCAACAACATCTGTTGAAACTCACGGTCTGGGGCATT  
>KP174771..1  
TTCTATTGTAACACATCAGGCCTATTTAATAGCACGTGGGATGCGAATGCCACCATGAATGCCAACAGTACGG  
AGTCA-----  
-----  
AATGACACAACCTATCACTCTCCAATGCAGAATAAAAGCAAATTATAAATATGTGGCAGAGAACAGGACAAGCAA  
TGTATGCCCCCTCCCATCCAGGAGAAATAAGGTGTGAATCAAAC---  
ATTACAGGACTAATACTAACAAGAGATGGGGGAAGTAATAATACA-----  
-----  
-----  
AATGAGACCTTCAGACCTGGAGGAGGAGATATGAGGGACAATTGGAGAAGTGAATTATATAAGTATAAAGTAG  
TAAAAATTGAACCACTA---GGAGTAGCACCCACCAGGGCAAAAAGGAGAGTGGTG-----  
-----GAGAGACAAAAAGAGCA---GTTGGC---ATAGGAGCT-----  
GTCTTCCTTGGGTTCTTAGGAGCA---GCAGGAAGCACTATG---GGCGCGGCGTCA---  
ATAACGCTGACGGTACAG---GCCAGACAA---TTATTG---TCTGGTATAGTGCAAGCAGCAAAGC---  
AATTTG---CTGAGG---GCTATAGAGGCTCAACAACATCTGTTGAAACTCACAGTCTGGGGCATT  
>KU921707..1  
TTCTACTGTAATACATCGAACCTGTTTAATAGCACTTGGTACAGTAACGGTTCGATGCCAAATATC-----  
-----  
-----  
ACTACTGGCAATATAACTCTCCCGTGCAGAATAAAACAAATTATAAAGATGTGGCAGAGAGCAGGACAAGCAA  
TATATGCCCCCTCCCATCAAAGGAGTAATAAGGTGTGACTCAAAC---  
ATTACAGGATTACTACTAACAAGAGATGGTGGGAGTACTAACAGT-----  
-----  
-----  
ACAAATGAAACCTTCAGACCTGCAGGAGGAGACATGAGGGACAATTGGAGAAGTGAATTATATAAATATAAAG  
TAGTAAAAATTGAACCACTA---GGAGTAGCACCCACCAAGGCAAAGAGAAGAGTGGTG-----  
-----GAAAGAGAAAAAGAGCAATTATTGGA---CTGGGAGCT-----  
GTATTCGTTGGGTTCTTAGGAGCA---GCAGGAAGCACTATG---GGCGCGGCGTCA---  
GTGACGCTGACGGTACAG---GCCAGACAA---TTATTG---TCTGGCATAGTGCAACAGCAAAGC---  
AATTTG---CTGATG---GCTATAGAGGCTCAACAACATTTGTTGAAACTCACAGTCTGGGGCATT  
>KU921719..1  
TTCTACTGTAATACATCAGGCTTGTTTAATAGCACTTGGTTTAGCAATGTCAGCTTGCAAGAAAATAGCACAG  
AG-----  
-----  
TCAAGTGGCAATATAACTCTCCACTGCAGAATAAAGCAAGTTATAAATATGTGGCAGAGAGTAGGACAAGCAA  
TGTATGCCCCCTCCCATCTCGGGAATAAAGGTGTGAATCAAAC---  
ATTACAGGACTAATATTAACAAGGGATGGTGGGAATAGTGACAATACA-----  
-----  
-----  
AGTACAGATGAGACCTTCAGACCTGCAGGAGGAGATATGAGGGACAATTGGAGAAGTGAATTATACAAGTATA  
AAGTAGTACAAATTGAACCACTA---GGAGTAGCACCCACCAGGGCAAAAAGAAGAGTGGTG-----  
-----GAGAGAGGAAAAAGAGCA---GTTGGG---CTGGGAGCT-----  
---GTGTTTCATTGGGTTCTTGGGAGCA---GCAGGAAGCACGATG---GGCGCAGCGTCC---  
CTGACGCTGACGGTACAG---GCCAGACAA---TTATTG---TCTGGTATAGTGCAACAGCAAAGC---  
AATTTG---CTGAGG---GCTATAGAGGCTCAACAAAGTCTGTTGAAACTCACAGTCTGGGGCATT  
>KU921749..2  
TTCTACTGCAATACATCAAGCCTGTTTAGGAGTACATGGGAAAATAGTACTACATTAAATAGTACAGGG----  
-----  
-----  
GGAAATGAGACAATTACACTCCAATGCAGAATAAAACAGATTATAAACATGTGGCAGGGAGTAGGGAAGGCAA  
TGTATGCCCCCTCCTATTGAAGGACTAATCTCCTGTTTCATCCAAT---  
ATTACAGGGCTATTATTAACGAGAGATGGT---AATAAAAAATAGT-----  
-----  
-----  
CAGAAGAATGAGACCTTCAGACCTGGAGGAGGAGATATGAGGGACAATTGGAGAAGTGAATTATATAAATATA

AAGTAGTAAAAATTGAACCACTA---GGAGTAGCACCCACCGGGGCACGGAGAAGAGTGGTG-----  
-----GGAAGAGAAAAAAGAGCA---GTTGGA---ATAGGAGCG-----  
---GTCCTCCTTGGGTTCTTAGGAGCA---GCAGGAAGCACTATG---GGCGCGGCGTCA---  
ATAACGCTGACGGTACAG---GCCAGAGAA---TTACTG---TCTGGCATAGTGCAACAGCAAAGT---  
AATTTG---CTGAGG---GCTATAGAGGCTCAACAACAACCTGTTGAAACTCACGGTCTGGGGCATT  
>KU921798..3  
TTCTATTGTAACACATCAGGCCTGTTTCATGGCAAATGGTCTAATGGCACTTGGACTAGGAATGACACT----  
-----  
-----  
GCAAAACGACACTATAAGGCTCCCATGCAGAATAAAGCAAATTATAAATATGTGGCAGAGAGCAGGACAAGCAA  
TATATGCCCCCTCCCATAAAAAGGAGTAATAACATGTAGATCAAAT---  
ATTACAGGACTACTATTAAACAAGAGATGGTGGAAACGAATAGTACA-----  
-----  
-----  
AATGAAACCTTCAGACCTGGAGGAGGAGATATGAGGGACAATTGGAGAAGTGAATTATATAATTATAAAGTAG  
TAAAAATTGAACCACTA---GGAGTAGCACCTCCAAAGGCAAAGAGAAGAGTGGTG-----  
-----GAGAGAGAAAAAAGAGCA---GTC-----GGAATG-----  
GTCTTCATTGGGTTCTTAGGAGCA---GCAGGAAGCACTATG---GGCGCAGCGGCA---  
GTAACGCTGACGGAACAG---GCCAGACAA---TTATTG---TCTGGCATAGTGCAACAGCAAAGC---  
AATTTG---CTGAAG---GCTATAGAGGCTCAACAGCATCTGTTGAAACTCACGGTCTGGGGCATT  
>KU921799..1  
TTCTATTGTGACACATTAGGCCTGTTTAAAGGCACTTGGTCTAATGGCACTTGGTCTAATGGCAATTGGACTA  
GGAATGACACT-----  
-----  
GGCAGCAACAACACTATAATTCTCCCATGCAGAATAAAGCAAATTATAAAGATGTGGCAGAGAACAGGACAAG  
CAATATATGCCCCCTCCCATAGAAGGAGTAATAAGATGTGAATCAAAT---  
ATTACAGGACTAATATTAAACAAGAGATGGTGGAAAGAATGAGCTA-----  
-----  
-----  
AATGAAACCTTCAGACCTGGAGGAGGAAATATGAAGGACAATTGGAGAAGTGAATTATATAAATATAAAGTAG  
TAAAAATTGAACCACTA---GGAGTAGCACCCACCGGGCAAAGAGAAGAGTGGTG-----  
-----GAGAGAGAAAAAAGGGGA---GTTGGA---ATAGGAGTT-----  
GTCTTCTTTGGGTTCTTAGGAGCA---GCAGGAAGCACGATG---GGCGCAGCGGCA---  
CTAACGCTGACGGTACAG---GCCAGACAA---TTATTG---TCTGGCATAGTGCAACAGCAAAGC---  
AATTTG---CTGAAG---GCTATAGAGGCTCAACACCATCTGTTGAAACTCACAGTCTGGGGCATT  
>KU921805..1  
TTCTATTGTGACACATCAAGACTGTTTAATGGCGCTTGGTCTGGGAATGACACTAGCATTGAACAGGAGCAAA  
AT-----  
-----  
GGAACCGACCCTATAACTCTCCCATGCAGAATAAAGCAAATTATAAATATGTGGCAGAGAACAGGACAAGCAA  
TATATGCCCCCTCCCATTCAGGAGTAATAAGATGTGAATCAAAT---  
ATTACAGGATTAATATTAAACAAGAGATGGGGGACTTAATAATACAAAT-----  
-----  
-----  
AAAGATAATGAAACCTTCAGACCTACAGGAGGAAATATGAGGGACAATTGGAGAAGTGAATTATATAAATATA  
AGGTAGTAAAAATTGAACCACTA---GGAGTCGCACCCACCAGAGCAAGGAGAAGAGTGGTG-----  
-----GAGAGAGAAAAAAGAGCA---GTTGGA---ATAGGAGCT-----  
---GTCTTCCTTGGGTTCTTAGGAGCA---GCAGGAAGCACTATG---GGCGCAGCGGCA---  
GTGACGCTGACGGTACAG---GCCAGACAA---TTATTG---TCTGGTATAGTGCAACAGCAAAGC---  
AATTTG---CTGCAG---GCTATAGAGGCTCAACAGCATCTGTTGAAACTCACAGTCTGGGGCATT  
>KU921813..1  
TTCTATTGTAATACATCAAGCTTGTGTTGGTAGCACTTGGGTCCCTAATAGCACTGTGGACACCAACAGTACCA  
ACAGC-----  
-----  
ACGCAGGGGACAACCTATAACTCTCCAATGCAGAATAAAACAAATTATAAACATGTGGCAGAGAGTAGGAAGAG  
CCATGTATGCCCCCTCCCATTCAGGAACAATCAGCTGTTTCATCAAAT---  
ATTACAGGACTATTGTTGACAAGAGATGGTGGTGCAAACAGTAGT-----  
-----  
-----  
CATAATGAGACTTTTCAGACCTGGAGGGGGAGATATAAGAGACAATTGGAGAAGTGAATTATACAAATACAAAG

TAGTAAGAATTGAACCATTA---GGACTAGCACCCACCAGGGCAAAGAGAAGAGTGGTG-----  
 -----GAAAGAGAAAAAAGAGCA---ATAGGA---CTAGGAGCT-----  
 GTGTTTCCTTGGGTTCTTGGGAGCA---GCAGGAAGCACGATG---GGCGCAGCGTCA---  
 TTGACGCTGACGGTACAG---GCCAGACAA---TTATTG---ACTGGTATAGTGCAACAGCAAAAC---  
 AATTTG---CTGAGG---GCTATAGAGGCGCAACAGCATTTGTTGCAACTCACAGTCTGGGGCATT  
 >AF407149..1  
 TTCTATTGTAATACATCAGGCCTGTTTGATAGCACTTGGAATGACACTGACAGCAGACAG-----  
 -----  
 -----  
 GAAAAATGGCACTATAACTCTCCCATGCAGAATAAAGCAAATTATAAATATGTGGCAGAGAACAGGACAAGCAA  
 TATATGCCCCCTCCCATCCAAGGAGCAATAAGGTGTGTATCAAAC---  
 ATTACAGGACTAATATTAACAAGAGATGGTGGGAACAATAACAGT-----  
 -----  
 -----  
 ACAAAATGAAACCTTCAGACCTGGAGGAGGAGATATGAGGGACAATTGGAGAAGTGAATTATATAAGTATAAAG  
 TAGTAAAAAATTGAACCACTA---GGAGTAGCACCCACCAAGGCAAGGAGAAGAGTGGTG-----  
 -----GGGAGAGAAAAAAGAGCA---GTTGGA---ATAGGAGCT-----  
 GTCTTCCTTGGGTTCTTAGGAGCA---GCAGGAAGCACTATG---GGCGCGGCGTCA---  
 ATAACGCTGACGGTACAG---GCCAGACAA---TTACTG---TCTGGCATAGTGCAACAGCAAAGC---  
 AATTTG---CTGAAA---GCTATAGAGGCTCAACAGCATCTGTTGAGACTCACGGTCTGGGGCATT  
 >AF457059..1  
 TTCTACTGTAACACATCAAGCCTGTTTAATAGCACTTGGAATAGTACTAGCACTGGGCACAATGCCAGCGGGC  
 AG-----  
 -----  
 GAGATAAATGACACTATAATTCTCCAATGCAGAATAAAGCAAATTATAAATATGTGGCAGAGAATAGGACAAG  
 CAATGTATGCCCCCTCCCATCAAAGGAGCAATATGGTGTAGATCAAAC---  
 ATTACAGGACTAATATTAACAAGAGATGGTGGGGAGGACAATAGC-----  
 -----  
 -----  
 AGTACTGAAACCTTCAGACCTGGAGGAGGAAACATGAAGGATAATTGGAGAAGTGAATTATATAAGTATAAAG  
 TAGTAAAACTTGAACCATTA---GGAGTGGCACCCACCAGGGCAAAGAGAAGAGTGGTG-----  
 -----GAGAGAGAAAAAAGAGCA---GCTGGA---CTGGGAGCT-----  
 GTTTTCATTGGGTTCTTAGGAGCA---GCCGGAAGCACTATG---GGCGCAGCGTCA---  
 GTAACGCTGACGGTACAG---GCCAGACAG---TTATTG---TCTGGCATAGTGCAACAGCAAAAC---  
 AATTTG---CTGAAG---GCTATAGAGGCTCAACAACATCTGTTGAAACTCACGGTCTGGGGCATT  
 >AF457073..1  
 TTCTATTGTAACACATCAGACCTGTTTAATAGCACCTGGAACAGCACCACACTGGAGTCAAACACCACAGGG-  
 -----  
 -----  
 TCAAATGGCACTTTAATTCTCCAATGCAGAATAAAGCAAATTATAAATATGTGGCAGAGAGTAGGACAAGCAA  
 TGTATGCCCCCTCCCATCAAAGGAGTAATAAGGTGTAATTCAACA---  
 ATTACAGGGCTACTATTAAACAAGGGATGGTGGAAAGGATAACAGTAGT-----  
 -----  
 -----  
 GAGAGTAGTGAAGAAATCTTCAGACCTGAAGGAGGAAATATGAGGGACAATTGGAGAAATGAATTATATAAGT  
 ATAAAGTAGTAAAAATTGAACCACTA---GGAGTAGCACCCACCAGGGCAAAGAGAAGAGTGGTG-----  
 -----GGGAGAGAGAAAAAGAGCA---GTTGGA---CTGGGAGCT---  
 -----GTTTTTCCTTGGGTTCTTAGGAGCA---GCAGGAAGCACTATG---GGCGCGGCGTCA---  
 ATAACGCTGACGGTACAG---GCCAGACAA---TTATTG---TCTGGCATAGTGCAACAGCAAAGC---  
 AATTTG---CTGAGA---GCTATAGAGGCTCAACAGCATCTGTTGAAACTCACGGTCTGGGGCATT  
 >DQ208501..2  
 TTCTATTGTAATACATCAGGCCTGTTTAATAGCACTTGAGGTTGGAATCACACTGTCAGCAGCATGCAGGAAG  
 CAAATGGC-----  
 -----ACG---  
 GAGTCAAATGGCACTATAACCCCTCCAATGCAGAATAAAGCAAATTATAAATATGTGGCAGAGAGTAGGACGAG  
 CAATGTATGCCCCCTCCCATCGAAGGAATAATAAGGTGTGAATCAAAC---  
 ATTACAGGACTAATATTAACAAGAGATGGTGGGGTTAATAACAGT-----  
 -----  
 -----  
 ACAAAATGAAACCTTCAGACCTGGAGGAGGAGATATGAGGGACAATTGGAGAAGTGAATTATATAAGTATAAGG

TAGTAAAAATTGAACCACTA---GGAGTAGCACCCACCCGGCGAAGAGAAGAGTGGTG-----  
 -----GAGAGAGAAAAAAGAGCA---GTCGGA---ATAGGAGCT-----  
 GTCTTCCTTGGTTTCTTAGGAGCA---GCAGGAAGCACTATG---GGCGCGGCGTCA---  
 ATAACGCTGACGGTACAG---GCCAGACAA---TTATTG---TCTGGCATAGTGCAACAACAAAGC---  
 AATTTG---CTGAGG---GCTATAGAGGCTCAACAGCAGATGTTGAGACTCACGGTCTGGGGCATT  
 >DQ187009..1  
 TTCTATTGTAATACATCAGGCCTGTTTTCCAGCACGCAGGAG-----  
 -----  
 -----  
 TCAAGTGATCCTATAACTCTCCCATGCAGAATAAAGCAAATTATAAATATGTGGCAGAGAGTAGGACAAGCAA  
 TGTATGCTCCTCCCATCCAAGGAGAAATAAGGTGTAAATCAAAC---  
 ATTACAGGAATAATATTAACAAGAGATGGTGGGCTTGGTACTACA-----  
 -----  
 -----  
 AATGAAACCTTCAGACCTGGAGGAGGAGACATGAGGGACAATTGGAGAAGTGAGTTATATAAGTATAAAGTAG  
 TAAAAATTGAACCACTA---GGAGTAGCACCCACCAGGGCAAGGAGAAGAGTGGTG-----  
 -----GAGAGAGAGAAAAAGAGCA---GTTACA---ATAGGAGCT-----  
 GTTCTCCTTGGGTTCTTGGGAACA---GCAGGAAGCACTATG---GGCGCAGCGTCA---  
 CTAACGCTGACGGTACAG---GCCAGACTA---TTATTG---TCTGGCATAGTGCAACAGCAAAGC---  
 AATTTG---CTGAGG---GCTATAGAGGCTCAACAACATCTGTTGAAACTCACAGTCTGGGGCATT  
 >AF075701..1  
 TTCTATTGTAACACAACAGGCCTGTTTAATAGCACGTGGAATGACACTGCCACAGAGCAGAAG-----  
 -----  
 -----  
 CCAAACGACACTATAAGACTCCAATGCAGAATAAAGCAAATTATAAATATGTGGCAAAGAGCAGGACGAGCAA  
 TATATGCCCCCTCCCATCCAAGGAGTAATAAATTGTGTATCAGAC---  
 ATTACAGGACTAATATTAACAAGAGATGGTGGGGTTAATAATACA-----  
 -----  
 -----  
 AATGAAACCTTCAGACCTGGAGGGGGAGATATGAGGGACAATTGGAGAAGTGAATTATATAAGTATAAAGTAG  
 TAAAAATTGAACCACTA---GGAGTAGCACCCACCAGGGCAAAGAGAAGAGTGGTG-----  
 -----GAGAGAGAAAAAAGAGTA---GCTGGA---CTAGGAGCT-----  
 GTCTTCATTGGGTTCTTAGGAGCA---GCAGGAAGCACTATG---GGCGCGGCGTCA---  
 ATAACGCTGACGGTACAG---GCCAGACAA---TTGTTG---TCTGGCATAGTGCAACAGCAAAAC---  
 AATTTG---CTGAAG---GCTATAGAGGCTCAACAACATCTGTTGAAACTCACGGTCTGGGGCATT  
 >AF071473..1  
 TTCTATTGTAATACATCAGGCCTGTTTAATAGCACTTGAATAACACTGACAGCATGCAGGAGTCACATAGCA  
 CG-----  
 -----  
 -----  
 GAGACAAATGACACTATAACTCTCCCATGCAGAATAAAGCAAATTATAAATATGTGGCAGAGAGTAGGACAAG  
 CAATGTATGCCCCCTCCCATCCAAGGAGTAATAAAGTGACATCAAAC---  
 ATTACAGGACTGATATTAACAAGAGATGGTGGGGGTAATAACAGC-----  
 -----  
 -----  
 ATAAATGCAACCTTCCGACCTGGAGGAGGAGATATGAGGGACAATTGGAGAAGTGAATTATATAAGTATAAAG  
 TAGTAAAAATTGAACCACTA---GGAATAGCACCCAACAGGGCAAAGAGAAGAGTGGTG-----  
 -----GAGAGAGAAAAAAGAGCA---GTTGGA---ATAGGAGTT-----  
 GTCTTCTTTGGGTTCTTGGGAGCA---GCAGGAAGCACTATG---GGCGCAGCGTCA---  
 ATAACGCTGACGGTACAG---GCCAGACAA---TTATTG---TCTGGCATAGTGCAACAGCAAAGC---  
 AATTTG---CTGAGG---GCTATAGAGGCTCAACAACATCTGTTGAAACTCACGGTCTGGGGCATT  
 >AY253316..1  
 TTCTACTGCAATACATCAGAACTGTTTAATAGTACATGGAGCATGAACAATAATACATCAAATAGTACAGGG-  
 -----  
 -----  
 -----  
 GTAAATGAGAATATCACACTCCAATGCAGGATAAAACAAATTATAAACATGTGGCAGGGAGTAGGAAAAGCAA  
 TATATGCTCCTCCCATTTGAAGGAATAATCAGCTGTTTCATCAAAT---  
 ATTACAGGACTAATATTAACAAGAGATGGTGGGAATAATAACAGTACA-----  
 -----  
 -----  
 AATGAAAATGAAACCTTTAGACCTGGAGGAGGAGATATGAGGGACAATTGGAGAAGTGAATTATATAAGTATA

AAGTAGTAAAAATTGAACCACTA---GGAGTAGCACCCACCAGGGCAAAGAGAAGAGTGGTG-----  
-----GAGAGAGAAAAAAGAGCA---GTTGGA---ATAGGAGCT-----  
---GTCCTCTTTGGGTTCTTAGGAGCA---GCAGGAAGCACTATG---GGCGCAGCGTCA---  
ATAACGCTGACGGCACAG---GCCAGACAA---TTATTG---TCTGGTATAGTGCAACAGCAAAGC---  
AATTTG---CTGAGG---GCTATAGAGGCTCAACAGCATGTGTTGAGACTCACGGTCTGGGGCATT  
>KX907376..3  
TTCTATTGTAATACATCAGGCCTGTTTAGTAGCACTTGGAATGTCACCTTACAATAATAACACTTGGAATGCCA  
CTCAGGTG-----  
-----TCAAATAGCACA-----  
GAGCCAAATGGCACTATAGTGATCCCATGCAGAATAAAGCAAATTATAAATATGTGGCAGAGAACAGGACAAG  
CAATGTATGCCCTCCCATTCAGGAAAAATACAGTGCAATATCAAAC---  
ATTACAGGACTACTATTAACAAGAGATGGTGGGGACACTAGCAGT-----  
-----  
-----  
ATGAATGAAACCTTCAGACCTGGAGGAGGAGATATGAGGGACAATTGGAGAAGTGAATTATATAAATATAAAG  
TAGTAAAAATTGAACCATTA---GGAGTAGCACCCACCAGGGCGCAGAGACGAGTGGTG-----  
-----GGAAGAGAAAAAAGAGCA---GTTGGA---CTGGGAGCT-----  
GTCTTCCTTGGGTTCTTAGGAGCA---GCAGGAAGCACTATG---GGCGCAGCGTCA---  
CTGACGCTGACGGTACAG---GCCAGACAA---TTATTG---TCTGGCATAGTGCAAGCAGCAAAAT---  
AATTTG---CTGAGG---GCTATAGAGGCTCAACAACAACCTGTTGAAACTCACAGTCTGGGGCATT  
>KX907355..2  
TTCTATTGTAACACATCAGGCCTGTTTAGCAGCATTAGCCGATTTAATAACAATAGCGAAATAAATAGCACAG  
GG-----  
-----  
TTAAACGGCACTATAACTCTCCAATGCAAAATAAAGCAAATTATAAGAATGTGGCAGAGAACAGGACAAGCAA  
TGTATGCCCCCTCCCATCCAGGAGTAATAAGGTGTCAATCAAAC---  
ATTACAGGAATAATATTAACAAGAGATGGTGGGATTAATAACACA-----  
-----  
-----  
AATGAAACCTTCAGACCTGGAGGAGGAGATATGAGGGACAATTGGAGAAGTGAATTATACAAATATAAAGTAG  
TAAAAATTGAACCAATA---GGAGTAGCACCCACCAGGGCAAAGAGAAGAGTGGTG-----  
-----GAGAGAGAAAAAAGAGCA---GTTGGA---ATAGGAGCT-----  
GTCTTCATTGGGTTCTTAGGAGCA---GCAGGAAGCACTATG---GGCGCGGCGTCA---  
ATAACGCTGACGGTACAA---GCCAGACAA---TTATTG---TCTGGTATAGTGCAACAGCAAAGT---  
AATTTG---CTGAGG---GCTATAGAAGCTCAACAGCATCTGTTGAAACTCACAGTCTGGGGCATT  
>KX907361..1  
TTCTATTGTAACACATCAAAGTTATTTAATAATGGCACTGCCAAC-----  
-----  
-----  
ATAGATGACTCTATAACTCTCCCATGCAAAATAAAGCAAATTATAAGGATGTGGCAGAGAACAGGACAAGCAA  
TGTATGCCCCCTCCTATCCAAGGAACAATAGAGTGTATATCAAAC---  
ATTACAGGACTGCTATTAACAAGAGATGGTGGGAGTGATAGCAAT-----  
-----  
-----  
ACAAATGAAACCTTCAGACCTGGAGGAGGAGATATGAGGGACAATTGGAGAAGTGAATTATATAAGTATAAGG  
TAGTAAAAATTGAACCACTA---GGAGTAGCACCCACCAAGGCAAAGAGAAGAGTGGTG-----  
-----GAGAGAGAAAAAAGAGCA---GTTGGA---ATAGGAGCT-----  
GTCCTCTTTGGGTTCTTAGGAGCA---GCAGGAAGCACTATG---GGCGCGGCGTCA---  
TTAGCGCTGACGGAACAG---GCCAGGCAA---TTATTG---TCTGGCATAGTGCAACAGCAAAGT---  
AATTTG---CTGAGG---GCTATAGAGGCTCAACAGAATATGTTGAGGCTCACAGTCTGGGGCATT  
>HQ615969..1  
TTCTACTGCAATACATCAGGACTATTTAATAGTACATGGTTAGCAAATGGGACACCAAATAGTACAGGGATA-  
-----  
-----  
AATGAGAGTACAATTACACTCCCATGCAGAATAAAACAAATTATAAATATGTGGCAGAGAACAGGACAAGCAA  
TATATGCCCCCTCCCATCCAAGGAGTAATAAGGTGTGAATCAAAT---  
ATTACAGGACTAATATTAACAAGAGATGGTGGGGATACTAATGGA-----  
-----  
-----  
ACAGATGAAACCTTCAGGCCTGGAGGAGGAGATATGAGAGACAATTGGAGAAGTGAATTATACAAATATAAGG

TAGTAAAAATTGAACCACTA---GGAGTAGCACCCACCAGGGCAAGGAGAAGAGTGGTG-----  
 -----GACAGAGAAAAAAGAGCA---GTTGGA---TTAGGAGCT-----  
 GTCTTCCTTGGGTTCTTAGGAGCA---GCAGGAAGCACTATG---GGCGCAGCGTCA---  
 ATAACGCTGACGGTACAG---GCTAGACAA---TTATTG---TCTGGCATAGTGCGGCAGCAAAGC---  
 AATTTG---CTGCAG---GCTATAGAGGCTCAACAGCAGCTGTTGAAACTTACGGTCTGGGGCATT  
 >KY658698..1  
 TTCTATTGTAATACATCAGGCCTGTTTAAACAGTGCTTGGGAATAACACTAACCTCTTGACAAATAGCACAGGG-  
 -----  
 -----  
 ACAAATGGCACTATAACTCTCCCATGCAGGATAAAAGCAAATTATAAACATGTGGCAGAGAGTAGGGCAAGCAA  
 TGTATGCCCCCTCCCATCCAAGGAGTAATAAAGTGTGTATCAAAC---  
 ATTACAGGACTAATATTAACAAGAGATGGAGGGGATAATAACAGT-----  
 -----  
 -----  
 ACAAGGGAAATCTTCAGACCTGGAGGAGGAGATATGAGGGACAATTGGAGAAGTGAATTATATAAGTATAAAG  
 TAGTACAACTTGAACCATTA---GGAGTAGCACCCACCAGGGCAAAGAGAAGAGTGGTG-----  
 -----GAGAGAGAAAAAAGAGCA---GTCGGA---ATGGCAGCT-----  
 GTTTTCATTGGGTTCTTAGGAGCA---GCAGGAAGCACTATG---GGCGCGGCGTCA---  
 ATAACGCTGACGGTACAG---GCCAGACAA---TTATTG---TCTGGCATAGTGCAACAGCAAAGC---  
 AATTTG---CTGAGG---GCTATAGAGGCTCAACAACATCTGTTGAAACTCACAGTCTGGGGCATT  
 >AF442565..1  
 TTCTATTGTAACACATCAGGCCTGTTTAAATAGCACTTGGGAGGGCAACAATACCAGCATATTAAATGGCACGG  
 GG-----  
 -----  
 TCAAACGACAATACAACCTCTCCCATGCAGAATAAAGCAAATTATAAATATGTGGCAGAGAGTAGGACAAGCAA  
 TATATGCCCCCTCCCATCCCAGGAGTAATAAAGTGTGTGTCAAAT---  
 ATTACAGGACTAATATTAACAAGAGATGGTGGTAATGATGGTAGT-----  
 -----  
 -----  
 AATGAGACCTTCAGACCTGGAGGAGGAGATATGAGGGACAATTGGAGAAGTGAATTATATAAGTATAAAGTAG  
 TAAAAATTGAACCAATA---GGAGTAGCACCCACCAGGGCAAAGAGAAGAGTGGTG-----  
 -----GAGAGAGAAAAAAGAGCA---GTTGGA---CTGGGAGCT-----  
 GTCTTCATTGGGTTCTTAGGAGCA---GCAGGAAGCACTATG---GGCGCGGCGTCA---  
 ATAACGCTGACGGTACAG---GCCAGGCAA---TTATTG---TCTGGCATAGTGCAACAGCAAAGC---  
 AATTTG---CTGAGG---GCTATAGAGGCTCAACAGCATCTGTTGAAACTCACTGTCTGGGGCATT  
 >AF442570..3  
 TTCTACTGTAACACATCAAACCTGTTTAAATAGCACTTGGGAATAATGACAATGCCACACAGTTAAATAGCACGG  
 AG-----  
 -----  
 TCAAACGAAACTATAACTCTTCAATGCAAAATAAAGCAAATTATAAATATGTGGCAGAGAGTAGGACAAGCAG  
 TATATGCCCCCTCCCATCAAGGAGTAATAAAATGTGAATCAAAC---  
 ATTACAGGAATAATATTAACAAGAGATGGTGGAAATAATAGCAGT-----  
 -----  
 -----  
 GCAGAGGAGACCTTCAGACCTGGAGGAGGAGATATGAGGGACAATTGGAGAAGTGAATTATATAAATATAAAG  
 TAGTAAAAATTGAACCACTA---GGAGTAGCACCCACCAAGGCAAGGAGAAGAGTGGTG-----  
 -----GAGAGAGAAAAAAGAGCA---GTTGGA---ATAGGAGCT-----  
 GTTTTCATTGGGTTCTTAGGAGCA---GCTGGAAGCACTATG---GGCGCGGCGTCA---  
 GTGACGCTGACGGTACAG---GCCAGACAA---TTATTG---TCTGGCATAGTGCAACAGCAAAGC---  
 AATTTG---CTGAGG---GCTATAGAGGCTCAACAGCAAATGTTGAAACTCACAGTCTGGGGCATT  
 >AF442566..1  
 TTCTATTGTAACACATCAGGCCTGTTTAAATAGCACTTGGAGTAATGGCACTAGGAAGGACAATGACAGCAGGC  
 AGAAA-----  
 -----  
 -----  
 ACAAATGACACTATAATAACTCTCCAATGCAGAATAAAGCAAATTATAAATTTGTGGCAGAGAGCAGGACAAG  
 CAATATATGCCCCCTCCCATCGAAGGAATAATAAGATGTAACCTCAAAC---  
 ATTACAGGACTAATATTAACAAGAGATGGGGGCGAATCTAATAACAAA-----  
 -----  
 -----  
 ACTGAAGAACTGAAACCTTCAGACCTGGAGGAGGAGATATGAGGGACAATTGGAGAAGTGAATTATATAAGT

ATAAAGTAGTAAAAATTGAACCACTA---GGAGTAGCACCCACCAGGGCAAGGAGAAGAGTGGTG-----  
 -----CAGAGAGAAAAAAGAGTA---GCT-----TTTGGAGCT---  
 -----GTCTTCATTGGGTTCTTAGGAGCA---GCAGGAAGCACTATG---GGCGCAGCGTCA---  
 ATAGCGCTGACGGCACAG---GCCAGACAG---TTATTG---TCTGGTATAGTGCAACAGCAAAGC---  
 AATTTG---CTGAGG---GCTATAGAGGCTCAACAGCATATGTTGAAACTCACGGTCTGGGGCATT  
 >HM027851..1  
 TTCTATTGTAACACAACAAACCTGTTCAATAGCACCTGGGAGAACGGCAAGCAGACATCAAATAGCACA----  
 -----  
 -----  
 AACAAATGACACTATAACTCTCCCATGTAGAATAAAAACAAATTGTAAATATGTGGCAGAGAACAGGACAGGCAA  
 TATATGCCCCCTCCCATCCAAGGAATAATAAGGTGTAACCTCAACC---  
 ATTACAGGACTACTATTAACAAGAGATGGTGGGAATAATAACAAT-----  
 -----  
 -----  
 ACAAATGACACCTTCAGACCTGGAGGAGGAGATATGAGGGACAATTGGAGAAGTGAATTATATAAATATAAAAG  
 TAGTACGAATTGAACCATTA---GGAGTAGCACCCACCAGGGCAAGGAGAAGAGTGGTG-----  
 -----GGGAGAGAAAGAAGAGCA---GTTGGA---CTGGGAGTT-----  
 TTCTTCCTTGGGTTCTTAGGAGCA---GCAGGAAGCACTATG---GGCGCAGCGTCA---  
 ATAACGCTGACGGTACAG---GCCAGACAG---TTACTG---TCTGGCATAGTGCAACAGCAAAAT---  
 AATTTG---CTGAGA---GCTATAGAGGCTCAACAGCATCTGTTGAGACTCACAGTCTGGGGCATT  
 >HM027850..1  
 TTCTATTGTAACACATCAGATCTGTTTAATGGCAGTTGGAATAACACAATGCAGGGGTCAAATAACACGGGG-  
 -----  
 -----TCAAATGACACTATAACTCTCAAATGTAGAATA-----  
 -----  
 --ATAACAGTACAA-----AATGAAACTAAA-----  
 -----  
 -----  
 ACCTTTAGACCTACAGGAGGAGATATGAGGGACAATTGGAGAAGTGAATTATATAAATATAAGGTAGTAAAAA  
 TTGAGCCACTA---GGAGTAGCACCCACCAAGGCAAAGAGAAGAGTGGTG-----  
 -----GAGAGAGAAAAAAGAGCA---GTTGGA---CTAGGAGCT-----  
 GTCTTCCTTGGGTTCTTAGGAGCA---GCAGGAAGCACTATG---GGCGCGGCGTCA---  
 ATGACGCTGACGGTACAG---GCCAGACAA---TTATTG---TCTGGTATAGTGCAACAGCAAAAC---  
 AATTTG---CTGAAG---GCTATAGAGGCTCAACAACATCTGTTGAAACTCACAGTCTGGGGCATT  
 >HM027864..2  
 TTCTACTGTAATACATCAGGCCTATTTAATGGCAGTTGGAGTAGAAATGATACTACAAATGACACAGAG---  
 -----  
 -----  
 TCAAATGACACTATAACTCTACAATGTAGAATAAAAACAAATTTATAAATATGTGGCAAAGAGTAGGACAAGCAA  
 TGTATGCCCCCTCCCATTAAGGACCAATCACGTGTAACCTCAAAT---  
 ATAACAGGACTATTGTTGACAAGGGATGGTAGTGGTAATCAAAT-----  
 -----  
 -----  
 AATGATACCGAGACCTTTAGACCTGGAGGAGGAAATATGAGGGACAATTGGAGAAGTGAATTATACAAATATA  
 AAGTAGTAAAAATTGAACCACTA---GGAGTAGCACCCACCAGGGCAAGGAGAAGAGTGGTG-----  
 -----GAGAGAGAAAAAAGAGCA---GTTGGA---ATAGGAGCT-----  
 ---GTCCTCTTTGGGTTCTTAGGAGCA---GCAGGAAGCACTATG---GGCGCAGCGTCA---  
 ATAACGCTGACGGTACAG---GCCAGACAA---TTATTG---TCTGGCATAGTGCAACAGCAAAGC---  
 AATTTG---CTGAGG---GCTATAGAGGCTCAACAACATATGTTGAAACTCACAGTCTGGGGCATT  
 >HM027870..1  
 TTCTATTGTAATACATCAGGCCTGTTTAATAGCACTTGGGATAGCAATGAGCTTAATAGCACTTTGAATGGCA  
 CT-----  
 -----  
 -----  
 GAGTCAAATGACACTATAACTCTCCCATGCAGAATAAAAACAAATTATAAATATGTGGCAGAGAGTAGGACAGG  
 CAATGTATGCCCCCTCCCATCCCAGGAATAATAAGGTGTGAATCAAAC---  
 ATTACAGGACTAATATTAACAAGAGATGGTGGAAACATTACCAAC-----  
 -----  
 -----  
 AATACAGAAATCTTCAGACCGGGGGGAGGAGATATGAGGGACAATTGGAGAAGTGAATTATATAAGTATAAAAG  
 TAGTAAAAATTGAACCACTA---GGAGTAGCACCTACCAAGCAAAGAGAAGAGTGGTG-----

-----GAGAGAGAAAAAAGAGCA---GTTGGA---CTAGGAGCT-----  
 GTCTTCATTGGATTCTTAGGAGCA---GCAGGAAGCACTATG---GGCGCGGCGTCA---  
 ATAACGCTGACGGTACAG---GCCAGACAA---TTATTG---TCTGGCATAGTGCAACAGCAAAGC---  
 AATTTG---CTGAGA---GCTATAGAGGCTCAACAACATCTGTTGAAGCTCACGGTCTGGGGCATT  
 >JX658625..1  
 TTCTACTGTAATACATCAAACTGTTTAATAATAGTATAGGGAGGAATGCTACTACATCAAAT-----  
 -----  
 -----  
 AGTACAGAATCTATAACACTCCCATGCAAAATAAAACAAATTATAAACATGTGGCAGGGAGTAGGCAAAGCAA  
 TGTATGCCCCCTCCCATTTGAAGGACTAATCAAATGTGAATCAAAT---  
 ATTACAGGGCTATTGTTGACAAGAGATGGTGGTAATACTAATAAT-----  
 -----  
 -----  
 CAGAAATGAGACCTTCAGACCTGGAGGAGGAGATATGAGAGACAATTGGAGAAGTGAATTATACAAATATAAAG  
 TAGTAAGAATTGAACCACTA---GGTCTAGCACCCACCAGGGCAAAGAGAAGAGTGGTG-----  
 -----GAAAGAGAAAAAAGAGCA--ATAGGA---CTGGGAGCT-----  
 TTGTTTCCTTGGGTTCTTGGGAGCA---GCAGGAAGCACAAATG---GGCGCAGCGTCG---  
 CTGACGCTGACGGTACAG---GCCAGACAA---GTACTG---TCTGGTATAGTGCAACAAAAAT---  
 AATTTG---CTGAGA---GCTATTGAGGCGCAACAGCATCTGTTGCAACTCACAGTCTGGGGCATT  
 >HM027827..1  
 TTCTACTGTAATACATCAGGCCTGTTTAATGGCACCTGGAATAGTAATGATACTATAAATGAAACAGAG----  
 -----  
 -----  
 ACAAATGACATTATAATTCTCCAATGTAGAATAAAACAAATTATAAATATGTGGCAAAGAGTAGGACAAGCAA  
 TGTATGCCCCCTCCCATTAAGGACCAATCACGTGTAACCTCAAAT---  
 ATAACAGGACTATTGTTGACAAGAGATGGTGGTGAAGAGAAAGAGAAA-----  
 -----  
 -----  
 CAGAATAATGAGACCTTTAGACCTGAAGGAGGAAATATGAAGGACAATTGGAGAAGTGAATTATACAAATATA  
 AAGTAGTAAAAATTGAACCACTA---GGAGTAGCACCCACCAGGGCAAAGAGAAGAGTGGTG-----  
 -----GAGAGAGAAAAAAGAGCA--GTTGGA---ATAGGAGCT-----  
 ---GTCCTCTTTGGGTTCTTAGGAGCA--GCAGGAAGCACTATG---GGCGCAGCGTCA---  
 ATAACGCTGACGGTACAG---GCCAGGCAA---TTATTG---TCTGGCATAGTGCAACAGCAAAGC---  
 AATTTG---CTGAGG---GCTATAGAGGCTCAACAACATATGTTGAAACTCACAGTCTGGGGCATT  
 >HM215273..2  
 TTCTATTGTAATACATCAGGATTGTTTAATAGCACTCATCCTATCAACAGGACGACAAATAGCACAGAG----  
 -----  
 -----  
 AACAAATGGAACCTATAACTCTCCCATGCAGAATAAAACAAATTATAAATATGTGGCAGAGGGCAGGACAAGCAA  
 TATATGCCCCCTCCCATCCAGGAATAATAAGGTGTACATCAAAC---  
 ATTACAGGACTATTATTAACAAGAGATGGTGGGAATCATAATGATACT-----  
 -----  
 -----  
 AACAACTACTGAAACCTTCAGACCTGGAGGAGGAGATATGAAAGATAATTGGAGAAGTGAACCTGTATAAATATA  
 AAGTAGTAAAAATTGAACCACTA---GGTCTAGCACCCACCAAGGCAAAAAGAAGGTGGTG-----  
 -----AAAAGAGAAAAAAGAGCA---ATAGGA---CTAGGAGCT-----  
 ---TTGTTCCCTTGGGTTCTTGGGAGCA---GCAGGAAGCACGATG---GGCGCAGCGTCA---  
 CTGACGCTGACGGTACAG---GCCAGACAA---GTACTG---TCTGGTATAGTGCAACAGCAAAAC---  
 AATTTG---CTGATG---GCTATAGAGGCGCAACAGCATCTGTTGCAACTCACAGTCTGGGGCATT  
 >HM215274..2  
 TTCTATTGTAATACATCAAGCTTGTTTAATAGCACCTGGAACAAGAACAGTGACACCTGGAACACCACCAGGA  
 ACGTG-----  
 -----  
 CCTAAGTTAGAACCTATAACACTCCCATGCAGAATAAAGCAAATTATAAATATGTGGCAGCGAACAGGACAAG  
 CAATGTATGCCCCCTCCCATCCAGGGAGTAATAAGGTGTAACCTCAACC---  
 ATTACAGGACTCCTATTAACAAGAGATGGTGGGCTTAATAATGAA-----  
 -----  
 -----  
 ACCTATGAAACCTTCAGACCTGGAGGAGGAGATATGAGGGACAATTGGAGAAGTGAGTTATACAAATATAAAG  
 TAGTAAGAATTGAACCAATA---GGAATAGCACCCACCAAGGCAAAGAGAAGAGTGGTG-----

-----GAGAGAGAAAAAGAGCA---GTTGGA---ATGGCAGCT-----  
GTATTCATTGGGTTCTTGGGAGCA---GCAGGAAGCACTATG---GGCGCGGCGTCA---  
ATAACGCTGACGGTACAG---GCCAGACAA---TTATTG---TCTGGCATAGTGCGACAGCAAAAC---  
AAGTTG---CTGAGA---GCTATAGAGGCTCAGCAGCATCTGCTGAGACTCACGGTCTGGGGCATT  
>JX236674..1  
TTCTATTGCAACACATCAGACCTGTTTAATAGCAGTTGGAAGAACAGTACCAGCATAACAGTACC-----  
-----  
AGCAATGACACTATAACTATCCCATGCAGGATAAAAGCAAATTATAAATATGTGGCAGAGAGCGGGAAAAGCAA  
TATATGCCCCCTCCCATCCAAGGAGTAATAAAGTGTGAATCCAAC---  
ATTACAGGACTAATATTAACAAGAGATGGTGGAATTAGTAACAGTACA-----  
-----  
AATAAAAAATGAAACCTTCAGACCTGGAGGGGGAGATATGAGGGACAATTGGAGAAAGTGAATTATATAAGTATA  
AAGTAGTAAAAATCGAGCCAATA---GGAATAGCACCCACCAGGGCAAGGAGAAGAGTGGTG-----  
-----GAGAGAGAGAAAAAGAGCA---GTTGGA---CTAGGAGCT-----  
---GTTTTCATTGGGTTCTTAGGAGCA---GCAGGAAGCACTATG---GGCGCGGCGTCA---  
ATAACGCTGACGGTACAG---GCCAGACAA---TTATTG---TCTGGCATAGTGCAACAGCAGAGT---  
AATCTG---CTGAAG---GCTATAGAGGCTCAACAGCAGCTGTTGAGACTCACGGTCTGGGGCATT  
>KF859746..1  
TTCTATTGTAATACATCAAGCCTGTTCAATAGCACGTGGCCTGCTAATGACAGCATGCAGGCAAATAGCACGG  
AAAAAT-----  
-----  
AGCACGGAGATGATAAACTCTCATGCAACATAAAGCAAATTATAAATATGTGGCAGAGAGTAGGACAAGCAA  
CATATGCCCCCTCCCATCAAAGGAATAATAAAGTGTGAATCAAAC---  
ATTACAGGATTAATATTAACAAGAGATGGTGGAATAATAACAATGGA-----  
-----  
AACAAATAAAAGTGAACCTTCAGACCTGGAGGAGGAGATATGAGGGATAATTGGAGAAAGTGAATTATATAAGT  
ATAAGGTAGTAAGGATTGAACCATTA---GGAGTAGCACCCACCAGGGCAAAAAGACGAATGGTG-----  
-----GAGAGAGAGAAAAAGAGCA---GTTGGC---CTGGGAGCT---  
-----GTCTTCTTTGGGTTCTTAGGAGCA---GCAGGAAGCACTATG---GGCGCGGCGTCA---  
ATAACGCTGACGGTACAG---GCCAGACAA---TTATTG---TCTGGCATAGTGCAACAGCAAAGC---  
AATTTG---CTGAGA---GCTATAGAGGCTCAACAGCAGCTGTTGAGACTCACAGTCTGGGGCATT  
>KF859747..1  
TTCTACTGTGATACATCAGGCCTGTTTAATAGTACTTGGAATACCACTGACACTGGCAGCATAAACTCAAAT-----  
-----  
AGTACAGATAATATAACTCTCCCATGCAGAATAAAGCAAATTGTAAATATGTGGCAGAGAGTAGGACGAGCAA  
TGTACGCCCCCTCCCATCCAGGAATAATAAAGGTGTGAATCAAAC---  
ATTACAGGATTACTATTAAACAAGAGATGGTGGAACAGTACAAAT-----  
-----  
GAAACCTTCAGACCTGGGGGAGGAGATATGAAAGACAATTGGAGAAAGTGAATTATACAAATATAAAGTAGTAA  
GAATTGAACCACTA---GGAATAGCACCCAACAGGGCCAGGAAAAGAGTGGTG-----  
-----GGAAGAGAGAAAAAGAGCA---GTTGGA---ATTGGAGCT-----  
GTATTCCTTGGGTTCTTAGGAGCA---GCAGGAAGCACTATG---GGCGCGGCGTCA---  
ATAACGCTGACGGTACAG---GCCAGACAA---TTATTG---TCTGGCATAGTGCAACAGCAAAGC---  
AATTTG---CTGAGG---GCTATAGAGGCTCAACAGCAGATGTTGAAACTCACAGTCTGGGGCATT  
>KP109491..1  
TTCTATTGTAATACATCAGACCTGTTTAATAGCACCTGGCCCAGGGATGCCTGGAATAGCAGCAACCAGACTG  
GGACAAGG-----  
-----  
GACAAATATAAATATAACTCTCCAATGTAGAATAAAGCAAATTATAAATATGTGGCAGAGAACAGGACAAGCAA  
TATATGCCCCCTCCCATCCAGGAAACATAACTTGTGTATCAAAC---  
ATTACAGGACTAATATTAACAAGAGATGGTGGGGCTAATAATGAA-----  
-----  
GGCAATGAAACCTTCAGACCTGGAGGAGGAGATATGAGGGACAATTGGAGAAAGTGAATTATATAAGTATAAAG  
TAGTAAAAAATTGAACCACTA---GGAGTGGCACCCACCAAGGCAAGGAGAAGAGTGGTG-----

-----CAGAGAGAAAAAAGAGCA---GTTGGA---ATGGGAGCT-----  
 TTGTTTCATTGGGTTCTTAGGAGCA---GCAGGGAGCACTATG---GGCGCGGCGTCA---  
 ATAACGCTGACGGTACAG---GCCAGACAA---TTATTG---TCTGGTATAGTGCAACAGCAAAGC---  
 AATTTG---CTGAGG---GCTATAGAGGCTCAACAACATCTGTTGAAGCTCACAGTCTGGGGCATT  
 >KF716487..2  
 TTCTATTGTAATACAACAAAATTGTTTGATAGCACTTGGAACAAAACCACTTGGAACACAACGAGCACAGGGG  
 AGACAAAT-----  
 -----AACACAGGG-----  
 GAGACAAATGACACTATAACTATCCCATGTAGAATAAAGCAAATTATAAATATGTGGCAGAGGACAGGACAAG  
 CAATATATGCCCCCTCCCATTC AAGGAATAATAAGGTGTGACTCAAAC---  
 ATTACAGGACTACTATTAACAAGAGATGGTGGGCCTGGTAATACA-----  
 -----  
 -----  
 ACTGAAATCTTCAGACCTGGAGGAGGAGATATGAGGGATAATTGGAGAAGTGAACCTATATAAATATAAAGTAG  
 TAAAAAGTTGAACCATTA---GGAGTAGCACCCACCAGGGCAAAGAGAAGAGTGGTG-----  
 -----GAGAGAGAAAAAAGAACA---GTTGGA---CTGGGAGCT-----  
 GTTTTCCTTGGGTTCTTGGGAGCA---GCAGGAAGCACTATG---GGCGCGGCGTCA---  
 ATAACGCTGACGGTACAG---GCCAGACAG---TTATTG---TCTGGCATAGTGCAACAGCAAAGT---  
 AATTTG---CTGAGG---GCTATAGAGGCTCAACAGCATCTGTTGAAACTCACGGTCTGGGGCATT  
 >KF716490..1  
 TTCTATTGTAATACAACAAACCTGTTTAATACTACTTGGAGTAATGGCAGCCTGGTTAATATTACGGAGTCAA  
 ATAAT-----  
 -----GCT---  
 ACAAATAATGCTACGATTCTTCTCCCATGCAGAATAAAGCAAATTATAAATATGTGGCAGAGAGTAGGACAAG  
 CAATGTATGCCCCCTCCCATCCCAGGAGTAATACAGTGTACATCAAAC---  
 ATTACAGGACTATTATTAACAAGAGATGGTGGGAATATTACTAAC-----  
 -----  
 -----  
 AATACAGAGATCTTTAGACCTGGAGGGGGAGATATGAGGGACAATTGGAGAAGTGAACCTATATAAATATAAAG  
 TAGTAAGAATTGAACCATTA---GGAGTAGCACCCACCGGGCAAAGAGAAGAGTGGTG-----  
 -----GAGAGAGAAAAAAGAGCAATTGCTGGA---ATAGGAGCT-----  
 GTCCTCTTTGGGTTCTTAGGAGCA---GCAGGAAGCACTATG---GGCGCGGCGTCA---  
 CTAACGCTGACGGTACAG---GCCAGACAA---TTATTG---TCTGGCATAGTGCAACAGCAAAGC---  
 AATTTG---CTGCAG---GCTATAGAGGCTCAACAGCATCTGTTGAAACTCACGGTCTGGGGCATT  
 >KF716482..3  
 TTCTATTGTGACACATCAGGCCTGTTTAATAGCAGCTGGGATGGCAACAGCGAGGATAACAATACTCAG---  
 -----  
 -----  
 GGAAGTACACTATAACTCTCCAATGCAAAATAAAGCAAATTATAAGGATGTGGCAAAGAACAGGACAAGCAA  
 TGTATGCCCCCTCCCATCCAAGGAACAATAAAGTGTCAATCAAAC---  
 ATTACAGGGCTATTATTGACAAGAGATGGGGGGAGTGAAAGTACA-----  
 -----  
 -----  
 AATGAAAGTGAAACCTTCAGACCTGGAGGAGGAAATATGAGGGACAATTGGAGAAGTGAATTATATAAATATA  
 AAGTAGTAAAGATTGAACCACTA---GGAGTAGCACCCACCAGGGCAAAGAGAAGAGTGGTG-----  
 -----GAGAGAGAAAAAAGAGCA---GTTGGA---CTGGGAGCT-----  
 ---GTCTTCATTGGGTTCTTAGGAGCA---GCAGGAAGCACTATG---GGCGCAGCGTCA---  
 GTGACGCTGACGGTACAG---GCCAGACAA---TTATTG---TCTGGTATAGTGCAACAGCAAAC---  
 AATTTG---CTGAGG---GCTATAGAGGCTCAACAGCATCTGTTGAAACTCACGGTCTGGGGCATT  
 >KP109493..2  
 TTCTATTGCAACACAACAAGGCTGTTTAATAGCACTTGGAGTAATGACACTTGGGATAATAGCACTTGGGATA  
 AA-----  
 -----  
 TCAACAACATTATAAATCTCCAATGCAGAATAAAGCAAATCATAAATATGTGGCAGAGAACAGGACGAGCAA  
 TGTATGCCCCCTCCCATTC AAGGAGTAATAAGGTGTGAATCAAAC---  
 ATTACAGGACTAATATTAACAAGAGATGGTGGGAATAGTAACGAG-----  
 -----  
 -----  
 ACAGAAATCTTCAGACCTGGGGGAGGAGATATGAGGGACAATTGGAGAAGTGAATTATATAAGTATAAAGTAG  
 TAAAAATTGAACCACTA---GGAGTAGCACCCACCAGGGCAAAGAGAAGAGTGGTG-----

-----GAGAGAGAAAAAGAGCAGCTGTTGGA---CTGGGAGCG-----  
 TTCTTCATTGGGTTCTTAGGAGCA---GCAGGAAGCACTATG---GGCGCGGCGTCA---  
 ATAACGCTGACGGTACAG---GCCAGACAA---TTATTG---TCTGGCATAGTGCAACAGCAAAGC---  
 AATTTG---CTGAGG---GCTATAGAGGCTCAACAGCATATGTTGAAACTCACGGTCTGGGGCATT  
 >KY580490..1  
 TTCTATTGTGATACAGCAGAACTGTTTGATAGCGCTTGGAATAGTAGTAGCAATTGGACTATAACTGACAAGT  
 CA-----  
 -----  
 AATAATACCAATATAACCCCTCCAGTGCAGAATAAAGCAAATTATAAATATGTGGCAGAGAGTAGGACAAGCAA  
 TGTATGCCCCCTCCCATCCAGGAGTAATAAGGTGTACATCAAAC---  
 ATTACAGGACTAATATTAACAAGAGATGGTGGGGAGACTAACAATGCA-----  
 -----  
 -----  
 ACTGAAGAAACCTTCAGACCGGGAGGAGGAGACATGAGGGACAATTGGAGAAGTGAATTATATAAATATAAAG  
 TAGTAAAAATTGAACCACTA---GGAGTAGCACCCACCGGGGCAAAAAGAAGAGTGGTG-----  
 -----GAGAGAGAAAAAAGAGCA---ATTGGA---ATAGGAGCT-----  
 GTCTTCATTGGGTTCTTAGGAGCA---GCAGGAAGCACTATG---GGCGCAGCGTCA---  
 ATAACGCTGACGGTACAG---GCCAGACAA---TTATTG---TCTGGCATAGTGCAACAGCAAAGC---  
 AATTTG---CTGAAG---GCTATAGAGGCTCAACAACATCTGTTGAGACTCACAGTCTGGGGCATT  
 >KP109497..1  
 TTCTACTGTAATACATCAGGGTTGTTTAATAGTACATGGAGAAGGAACAGTACAAATGGTACATGGGAAAGTG  
 ATATATCAGGG-----  
 -----  
 GTAAATGAGAGTACAATCACACTCCCATGCAGAATAAAACAAATTATAAACATGTGGCAGGGGGTAGGAAGAG  
 CAATGTATGCCCCCTCCCATTCAGGATCAATTAATTGTTTCATCAAAT---  
 ATTACAGGATTATTGTTGACAAGAGATGGTGGTACAAACAGTAGT-----  
 -----  
 -----  
 CAGAATGACACCTTCAGACCTGGAGGAGGAGATATGAGGGACAATTGGAGAAGTGAATTATACAAATATAAAG  
 TAGTAAGAATTGAACCAATA---GGTCTGGCACCCACCAAGGCACAAAGAAGAGTGGTG-----  
 -----GCAAGAGAAAAAAGAGCA---ATAGGA---CTGGGAGCT-----  
 ATGTTCCCTTGGGTTCTTGGGAGCA---GCAGGAAGCACGATG---GGCGCAGCGTCA---  
 GTGACGCTGACGGTACAG---GCCAGACAG---TTATTG---TCTGGTATAGTGCAACAGCAAAAC---  
 AATTTG---CTGAGG---GCTATAGAGGCGCAACAGCATCTGTTGCAACTCACAGTCTGGGGCATT  
 >KF716484..1  
 TTCTATTGTAACACATCAGGTCTGTTTAATAGCACATGGGAAAGGAATATGACATCAAATAGCACAGAG---  
 -----  
 -----  
 TCAAATGACACCATAACTCTCCAATGCAGAATAAAGCAGATTGTAAACATGTGGCAGAGAGTAGGACAAGCAA  
 TATATGCCCCCTCCCATTCAGGAGAAATAAGGTGTAGATCAAAC---  
 ATTACAGGACTAATATTAACAAGAGATGGTGGGGGGCAGAACGATACAGGA-----  
 -----  
 -----  
 GGAGGAGGAAACGAAACCTTCAGACCTGGAGGAGGAGATATGAGGGACAATTGGAGAAGTGAATTATACAAGT  
 ATAAAGTAGTAAAGATTGAACCACTA---GGAGTAGCACCCACCAAGGCAAGAGAGAAGAGTGGTG-----  
 -----GCGAGAGAAAAAAGAGCA---ATTGGA---CTGGGAGCT---  
 -----GCGTTCCCTTGGGTTCTTAGGAGCA---GCAGGAAGCACTATG---GGCGCAGCGTCA---  
 ATAACGCTGACGGTACAG---GCCAGAGCA---TTATTG---TCTGGCATAGTGCAACAGCAAAGC---  
 AATTTA---CTGAAG---GCTATAGAGGCTCAACAGCAACTGTTGAAACTCACGGTCTGGGGCATT  
 >AY352657..2  
 TTCTACTGCAATACATCAGGACTGTTTAATAATAGTGTATGGAGGAATGATTATCCATCAAATAGTACAGGAG  
 TA-----  
 -----  
 AAGGAGAGCGTAATCACACTCCCATCCAAATAAAACAAATTATAAACCTGTGGCAGGGAGTAGGAACAGCAA  
 TGTATCCCCCTCCCATTTGAAGGACTAATCAAATGTTTCATCAAAT---  
 ATTACAGGACTATTATTGACAAGAGATGGTGGTGTCAATAATAGT-----  
 -----  
 -----  
 CAGAATGAGACCTTCAGACCTGGAGGAGGAGATATGAGGGACAATTGGAGAAGTGAATTATACAAATATAAAG  
 TAGTAAGACTTGAACCACTA---GGTCTGGCACCTACCAGGGCAAGAGAAGAGTGGTG-----

-----GAAAGAGAAAAAAGAGCA---ATAGGA---CTAGGAGCT-----  
 ATGTTCTTGGGTTCTTGGGAGCA---GCAGGAAGCACGATG---GGCGCAGCGTCA---  
 CTGACGCTGACGGTACAG---GCCAGACTG---TTATTG---TCTGGTATAGTGCAACAGCAAAAC---  
 AATTTG---CTGATG---GCTATAGAGGCGCAACAGCATCTATTGCAACTCACAGTCTGGGGCATT  
 >U36883..1  
 TTCTACTGCAATACATCAGGACTGTTTAATGGTACATGGAGTAATGGTACATGGAGTAATGATACATCAAATA  
 GTGCA-----  
 -----  
 AATGGAAATGGTACAATCACTCTCCCATGTAGAATAAAACAAATTATAAACATGTGGCAGGGAGTAGGAAAAG  
 CAATGTATGCCCCCTCCCATTAAGGACGAATCCAATGTGAATCAAAT---  
 ATTACAGGACTATTGTTGACAAGAGATGGCGGTGAGACCAATGAT-----  
 -----  
 -----  
 AGTACTGAGACCTTCAGACCTGGAGGAGGAGATATGAGGGACAATTGGAGAAGTGAATTATACAAATATAAAG  
 TAGTAAGAGTTGAACCACTA---GGTCTAGCACCCACCAGGGCAAAGAGAAGAGTGGTG-----  
 -----GAAAGAGAAAAAAGAGCA---ATAGGA---CTAGGAGCT-----  
 GTGTTCTTGGGTTCTTGGGAGCA---GCAGGAAGCACGATG---GGCGCAGCGTCA---  
 CTAACGCTGACGGTACAG---GCCAGACAG---TTAATG---GCTGGTATAGTGCAACAGCAGAAC---  
 AATTTG---CTGAGG---GCTATAGAGGCGCAACAGCACCTGTTGCAACTCACAGTCTGGGGCATT  
 >KJ579955..1  
 TTCTATTGCAACACATCAGGCCTATTTAATAGCATTTGGGAGAATGGCACT-----  
 -----  
 -TTGAAAAGCAATGAC-----  
 AGCATGTCAAACAACATAACTCTCCAATGCAGAATAAAGCAAATTATAAATATGTGGCAGAGAACAGGACAAG  
 CAATGTATGCCCCCTCCCATCCCAGGAGTAATAAGGTGTGAGTCAAAC---  
 ATTACAGGATTAATATTAACAAGAGATGGTGGG-----  
 -----  
 -  
 AATAATAACAATGAAAGTGAAACCTTCAGACCTGGAGGAGGAGATATGAGGGACAATTGGAGAAGTGAATTAT  
 ATAAGTATAAAGTAGTAAAAATGAACCACTA---GGAGTAGCACCCACCAAAGCAAGGAGAAGAGTGGTG--  
 -----GAGAGAGAAAAAAGAGCAGTTGTTGGA---  
 ATAGGAGCT-----GTCTTCTTTGGGTTCTTAGGAGCA---GCAGGAAGCACTATG---  
 GGCGCGGCGTCA---CTAACGCTGACGGTACAG---GCCAAGCAA---TTATTG---  
 TTTGGCATAGTGCAACAGCAAAGC---AATTTG---CTGAGG---  
 GCTATAGAGGCTCAACAGCATCTGTTGAACTCACGGTCTGGGGCATT  
 >AF484503..1  
 TTCTATTGTAACACATCAGGCCTGTTTAATAACAGTTGGAATGGCACGCAGATGTCAAATAGCATGAAG---  
 -----  
 -----  
 CCAAATGACACCATAACTCTCCAATGCAGGATAAAGCAAATTGTAAATATGTGGCAGAGAGCAGGACAAGCAA  
 TATATGCCCCCTCCTATCCGAGGAGTAATAAGGTGTGTATCAAAC---  
 ATTACAGGACTGATATTAACAAGAGATGGTGTCTGAGGATAAGGAC-----  
 -----  
 -----  
 AGTACAAAGGAAACCTTCAGACCTGCAGGAGGAGATATGAGGGACAATTGGAGAAGCGAATTATATAAATATA  
 AAGTAGTAAAAATTGAACCACTA---GGAGTAGCACCCACCAAGGCAAAGAGAAGAGTGGTG-----  
 -----GAGAGAGAAAAAAGAGCA---GTTGGA---ATAGGAGCT-----  
 ---GTCTTCCTTGGGTTCTTAGGAGCA---GCCGGAAGCACTATG---GGCGCAGCGTCA---  
 ATAACGCTGACGGTACAG---GCCAGACAA---TTGTTG---TCTGGCATAGTGCAACAGCAAAGC---  
 AATTTG---CTGAAG---GCTATAGAGGCTCAACAGCATCTGTTGAACTCACGGTCTGGGGCATT  
 >AF484521..1  
 TTCTACTGCAATACATCACAACATTTAATAGAACATGGAATGATAGTATATCAAATAATGCATGGAAGAATA  
 ATAGT-----  
 -----ACA---  
 GGGGAAAATGACACAATCACTCTCCCATGCAGAATAAAACAAATTATAAACATGTGGCAGGAAGTAGGAAAAG  
 CAATGTATGCCCCCTCCCATTAAGGTCTAATCAGATGTTCTTCAAAT---  
 ATTACAGGACTATTGTTAGTAAGAGATGGTGGAAATAATAGTAGT-----  
 -----  
 -----  
 CAGAATGAAACCTTCAGACCTGGAGGAGGAGATATGAGAGACAATTGGAGAAGTGAATTATACAAATATAAAG

TAGTAAGAATTGAACCACTA---GGTCTAGCACCCACCAAGGCAAAGAGGAGAGTGGTG-----  
 -----GAAAGAGAAAAAAGAGCA---ATAGGA---CTGGGAGCT-----  
 GTATTCCTTGGGTTCTTGGGAGCA---GCGGGAAGCACGATG---GGCGCAGCGTCA---  
 CTGACGCTGACGGTACAG---GCCAGAAAT---CTATTG---TCTGGTATAGTGCAACAGCAAAAT---  
 AATTTG---CTGAGG---GCTATAGAGGCGCAACAGCATCTGTTGCAACTCACAGTCTGGGGCATT  
 >AF484522..1  
 TTCTACTGCAATACATCAGGACTGTTTAAACAATAGTGTATGGACATCAAATAGTACGATAGGG-----  
 -----  
 -----  
 GCAAAATGGGACAATCACACTCCCATGCAGAATAAAACAAATTATAAATATGTGGCAGGGAGTAGGAAAAGCAA  
 TGTATGCCCCCTCCCATTGAAGGACAAATCAACTGTTTCATCAACT---  
 ATTACAGGACTATTGTTGACAAGAGATGGTGGTGTAAAAATAAT-----  
 -----  
 -----  
 AGTCAGAACGAGACCTTCAGACCTGGAGGGGGAGATATGAGAGACAACCTGGAGAAATGAATTATACAAATATA  
 AAGTAGTAAGAATTGAACCACTA---GGTCTAGCACCCACCAAGGCAAGGAGAAGAGTGGTG-----  
 -----GAAAGAGAAAAAAGAGCA---ATAGGA---CTGGGAGCT-----  
 ---GTGTTCTTGGGTTCTTGGGAGCA---GCAGGAAGCACGATG---GGCGCAGCGTCG---  
 CTGACGCTGACGGTACAG---GCCAGACAG---TTACTG---TCTGGTATAGTGCAACAGCAAAAC---  
 AATTTG---CTGAGG---GCTATAGAGGCGCAACAGCATTTGTTGCAACTCACAGTTTGGGGCATT  
 >AF484482..1  
 TTCTACTGCAATACATCAGAACTGTTTAAATAGTGAATGGAAAAATGGGACTACATCAAACAGTACA-----  
 -----  
 -----  
 AGAAATAGGACAATCACACTCCCATGCAGAATAAAACAAATCATCAACATGTGGCAGGGAGTAGGAAGAGCAA  
 TGTATGCCCCCTCCCATTAAAGGACTAATCAATTGTTTCATCAAAAT---  
 ATTACAGGACTATTGTTAACAAGAGATGGTGGTACAAATCAAAGT-----  
 -----  
 -----  
 GAGGAGACTTTCAGACCTGGGGGAGGAGATATGAGAGACAATTGGAGAAATGAATTATACAAATATAAAGTAG  
 TAAGAATTGAACCACTA---GGTCTAGCACCCACCAGGGCAAAAAGAAGAGTGGTG-----  
 -----GAAAGAGAAAAAAGAGCA---ATAGGA---CTAGGAGCT-----  
 TTGTTCTTGGGTTCTTGGGAACA---GCAGGAAGCACGATG---GGCGCAGCGTCA---  
 CTGACGCTGACGGTACAG---ACCAGACAA---GTATTG---TCTGGTATAGTGCAACAGCAAAAC---  
 AATTTG---CTGAGG---GCTATAGAGGCGCAACAGCATCTGTTGCAACTCACAGTCTGGGGCATT  
 >AF484479..1  
 TTCTATTGTAACACATCAGGGTTGTTTAAATAGCACTTGGACGGGTAACAACGCTGCCAACAGC-----  
 -----  
 -----  
 ACGGAGGGCAATATAACTCTCCCGTGCAGAATAAAGCAAATTATAAATATGTGGCAGAGAGTAGGACAAGCAA  
 TGTATGCCCCCTCCCATCCAAGGAGTAATAAAATGTGTATCAAAAT---  
 ATTACAGGAATATTATTAAACAAGAGATGGTGGATCAAATGGAAC-----  
 -----  
 -----  
 GGAAATGAAACCTTCAGACCTGGAGGAGGAGATATGAGGGACAATTGGAGAAGTGAACATATATAAGTATAAAG  
 TAGTAAAAGTTGAGCCACTA---GGGGTAGCACCCACCAGGGCAAGGAGAAGAGTGGTG-----  
 -----GAGAGAGAAAAAAGAGCA---GTTGGA---ATAGGAGCT-----  
 GTATTCCTTGGGTTCTTAGGAGCA---GCAGGAAGCACTATG---GGCGCGGCGTCA---  
 ATAACGCTGACGGTACAG---GCCAGACAA---TTATTG---TCTGGCATAGTGACAGCAGCAAAGC---  
 AATTTG---CTGAGG---GCTATAGAGGCTCAACAGCATTTGTTGAGACTCACAGTCTGGGGCATT  
 >AF484517..1  
 TTCTATTGTAACACATCAGGCCTGTTTAAACAGCACTTGGACAAATGGCACTATGCAGGGGTTAAAT-----  
 -----  
 -----  
 GGCACAGGAAACATAACACTCTCATGCAGAATAAAACAAATTATAAACATGTGGCAGGGAGTAGGAAAAGCAA  
 TGTATGCCCCCTCCCATTGAAGGACTAATCCAATGTTTCATCAAAAT---  
 ATTACAGGACTATTGTTGACAAGAGATGGTGGTAATAATAATAGT-----  
 -----  
 -----  
 CAAAATGAGACCTTCAGACCTGGAGGAGGAGATATGAGAGACAATTGGAGAAGTGAATTATATAAATATAAAG

TAGTAAGAGTTGAACCAATA---GGTCTAGCACCCACCAAGGCAAAGAGAAGAGTGGTG-----  
 -----GAAAGAGAAAAAAGAGCA---ATTGGA---CTGGGAGCT-----  
 GTGTTCTTGGGTTCTTGGGAGCA---GCAGGAAGCACGATG---GGCGCAGCGTCA---  
 ATGACGCTGACGGTACAG---GCCAGACAG---GTATTG---TCTGGTATAGTGCAACAGCAAAT---  
 AATTTG---CTGAGG---GCTATAGAGGCGCAACAGCATCTGTTGCAACTCACAGTCTGGGGCATT  
 >AF484488..1  
 TTCTATTGTAATACATCAGGTCTGTTTAATAGTACTTGGAATAGTACTAAGGAAAATGATACTGACAGC----  
 -----  
 -----  
 GGGAGTGGCACCATAACTCTCCCATGCAAAATAAAGCAAATTATAAATATGTGGCAGAGAGTAGGACAAGCAA  
 TATATGCCCCCTCCCATCAGAGGAGTAATAAGGTGTGATTCAAAC---  
 ATTACAGGACTACTGTTAACAAGAGATGGAGGGGATAGTAACAAT-----  
 -----  
 -----  
 AATGAAACCTTCAGACCTGGAGGGGGAGATATGAGGGACAATTGGAGAAGTGAATTATATAAGTATAAAGTAG  
 TAAAAATTGAGCCAATA---GGAGTAGCACCCACCAGGGCAAAGAGAAGAGTGGTG-----  
 -----CAGAGAGAAAAAAGAGCA---GTTGGA---ATAGGAGCT-----  
 GTATTCTTGGGTTCTTGGGAGCA---GCAGGAAGCACTATG---GGCGCAGCGTCA---  
 ATAACGCTGACGGTACAG---GCCAGACAA---TTATTG---TCTGGCATAGTGCAACAGCAAAGC---  
 AATTTG---CTGATG---GCTATAGAGGCTCAACAGCATCTGTTGAAACTCACGGTCTGGGGCATT  
 >AF484492..2  
 TTCTATTGTAACACATCAAAGTTGTTTAATAGCACTTGGGGGGAAAATAGCACTTGGGGGGAAAATAGCACTA  
 GCATA-----  
 -----  
 GAGTTAAATGACACTATAACTCTCCCGTGCAAAATAAAGCAAATTATAAATATGTGGCAGAGAACAGGACAAG  
 CAATATATGCCCCCTCCCATCCAAGGAGTGATAAGGTGCGAGTCAAAT---  
 ATTACAGGACTATTGTTAACAAGAGATGGTGGTAAAAATAATAGT-----  
 -----  
 -----  
 AATCAGAATGAAACCTTCAGACCTGGAGGAGGAGATATGAGGGACAACCTGGAGAAGTGAGTTATATAAGTATA  
 AAGTAGTAAAAATTGAACCTTTG---GGAGTAGCACCCACCAAGGCAAGGAGAAGAGTGGTG-----  
 -----GGAAGAGAAAAAAGAGCA---GTAGGA---CTAGGAGCT-----  
 ---TTGTTCTTGGGTTCTTGGGAGCA---GCAGGAAGCACTATG---GGCGCAGCGTCA---  
 ATAACGCTGACGGTACAA---GCCAGACAA---TTATTG---TCTGGCATAGTGCAACAGCAAAC---  
 AATTTG---CTGAGG---GCTATAGAGGCTCAACAGCATCTGTTGAAACTCACGGTCTGGGGCATT  
 >AF484496..2  
 TTCTATTGTAATACATCAGGCCTGTTTAATAGCACCTGGGACAGCAAGACAAATTACACGGAGTCAAAT---  
 -----  
 -----  
 AGCACTACTAATATAACTCTTCCATGCAGAATAAAGCAAATTATAAATATGTGGCAGAGAGTAGGACAAGCAA  
 TGTATGCCCCCTCCCATCCAAGGAGTAATAAATTGTGTGTCAGAC---  
 ATTACAGGACTACTATTAGTAAGAGATGGTGGTCTCGGAAATACA-----  
 -----  
 -----  
 TCTGAAACCTTCAGACCTGGAGGAGGAAATATGAGGGACAATTGGAGAGGTGAATTATATAAGTATAAAGTAG  
 TACAAATTGAACCACTA---GGAGTAGCACCCACCAGGGCAAAGAGAAGAGTGGTG-----  
 -----GAGAGAGAAAAAAGAGCA---GTTGGA---ATAGGAGCT-----  
 GTATTCTTGGGTTCTTGGGAGCA---GCAGGAAGCACTATG---GGCGCGGCGTCA---  
 ATAACGCTGACGGTACAG---GCCAGACTA---TTATTG---TCTGGTATAGTGCAACAGCAAAT---  
 AATTTG---CTGAGG---GCTATAGAGGCTCAACAGCATCTGTTGAAACTCACAGTCTGGGGCATC  
 >KJ948659..1  
 TTCTATTGTAACACATCAGAACTGTTTAATAGCACTTGGAATGACACTAAC-----  
 -----  
 -----TGGCAGGGATCA-----  
 AATGACACGGAGAACATAACGCTCCCATGCAGAATAAAGCAAATTATAAATATGTGGCAGAGAACAGGACAAG  
 CGATATATGCCCCCTCCCATCCAAGGAGTAATACAGTGTAATCAAAC---  
 ATTACAGGACTAATATTAACAAGAGATGGGGGG-----  
 -----  
 -  
 AAGAATAACAGTAATAATGAAACCTTTAGACCTATAGGAGGAGATATGAGGGACAATTGGAGAAGTGAATTGT

ATAAGTATAAAGTAGTAAAAATTGAACCCCTTA---GGAGTAGCACCCACTAAGGCAAAGAGAAGAGTGGTG--  
 -----GAGAGAGAAAAAGAGCA---GTGGGA---  
 CTAGGAGCT-----GTTTTCTCTCGGGTTCTTAGGAGCA---GCAGGAAGCACTATG---  
 GGCGCGGCGTCA---ATAACGCTGACGGCACAG---GCCAGACAA---CTATTG---  
 TCTGGCATAGTGCAACAGCAAAGC---AATTTG---CTGAGG---  
 GCTATAGAGGCTCAACAGCATCTGTTGAAGCTCACGGTCTGGGGCATT  
 >JF683744..3  
 TTCTACTGCAATACATCACGGCTATTTAATAATAGCGCAGCATCCAAT-----  
 -----  
 -----  
 GGTACTATCCCTATCACAATCCCATGTATCATAAACATGTGGCAGGGAGTGGGGCAGGCAATGTATCAGGCAA  
 TCTATGCTGGAACATTGCAGGAAAAATAATAGTACATCCATT---ATT-----  
 TCAGCAAGAGATGGGGCCAGAGATGGAGGCAATGAT-----  
 -----  
 AGTAACTATACTGAAACCTTCAGGCCTGGGGGAGGAAATATGAAAGACAATTGGAGAAGTGAGCTATATAAAT  
 ACAAAGTAGTAGAAATTAACCCTA---GGAGTAGCGCCACCAGGGCAAAAAGACAAGTGGTG-----  
 -----AGAAGAGAAAAAGAGCG---GCA-----CTAGGAGCT---  
 -----TTGTTCTTGGGTTCTTGGGAGCA---GCAGGAAGCACTATG---GGCGCGGCGTCA---  
 ATAACGCTGACGGTACAG---GCCAGACAA---TTATTG---TCTGGAATAGTGCAACAGCAAAT---  
 AATTTG---CTGAGA---GCTATTGAAGCGCAACAACATCTGTTGCAGCTCACAGTCTGGGGCATT  
 >AY371164..2  
 TTCTATTGTAATACATCAGGCCTGTTTAATAGCACTTGGCCCAATGGCACTGGGCCTAATAATGGCACTTGGG  
 GC-----  
 -----  
 AGTGAAAGTGACATTATACAACCTCCCATGCAAAATAAAGCAAATTATAAATGTGTGGCAGAGAACAGGACAAG  
 CAATATATGCCCCCTCCCATCCCAGGAGTAATAAGGTGTGAATCAAAC---  
 ATTACAGGACTACTTTTAAACAAGAGATGGTGGGAATGGTGGGAATGAT-----  
 -----  
 -----  
 ACCAATCACACTGAGATCTTCAGACCTGGAGGAGGAAATATGAAGGACAATTGGAGAAGTGAATTATATAAAT  
 ATAAAGTAGTAAAAATTGAACCCTTA---GGAATAGCACCCACCAGGGCAAAGAGAAGAGTGGTG-----  
 -----GAGAGAGAAAAAGAGAGCA---GTCGGA---ATAGGAGCT---  
 -----GTGTTCTTGGGTTCTTGGGAGCA---GCAGGAAGCACTATG---GGCGCAGCGTCA---  
 ATAACGCTGACGGCACAG---GCCAGACAG---TTATTG---TCTGGTATAGTGCAACAGCAAAGC---  
 AATTTG---CTAAGG---GCTATAGAGGCTCAACAGCAACTGTTGAAACTCACGGTCTGGGGCATT  
 >KP718932..1  
 TTCTATTGCAATACATCAGGCCTGTTTAATAGCACGTGGAATAACACTGGCAGCATGCAAGACAATAATAGTG  
 AC-----  
 -----  
 ACTACTGGCACTATAATTCTCCCGTGCAACATAAAGCAAATTGTAAACATGTGGCAGAGAGTAGGACAAGCAA  
 TGTATGCCCCCTCCCATCCCAGGAATAATAAAATGTGACTCAAAC---  
 ATTACAGGGATGTTATTGACAAGGGATGGCGGTCTTAATGATAGT-----  
 -----  
 -----  
 GCAGAGACTTTCAGACCTGGAGGAGGAGATATGAGAGACAATTGGAGAAGTGAATTATATAAATATAAAGTAG  
 TAAAAATTGAACCACTA---GGAGTAGCACCCACCAGGGCAAAGAGAAGGGTGGTG-----  
 -----GAGAGAGAAAAAGAGCA---GTTGGA---CTGGGAGCT-----  
 GTTTTCTTGGGTTCTTAGGAGCA---GCAGGAAGCACTATG---GGCGCGGCGTCA---  
 ATAACGCTGACGGTACAG---GCCAGACAA---TTATTG---TCTGGTATAGTGCAACAGCAAAGC---  
 AATTTG---CTGAGG---GCCATAGAAGCTCAACAGCATATGTTGAGACTCACAGTCTGGGGCATT  
 >GU332510..2  
 TTCTACTGTAACACAACCCAGCTGTTTAATAACATAAGAGGA-----  
 -----  
 -----  
 AATGACACTATCACCTACCATGTAGAATAAAACAAATTGTAAATATGTGGCAGGGGGTAGGACAAGCAATGT  
 ATGCTTCTCCCATTGCCGGAAAAATTCAAGTGTAACCTCAACT---  
 ATCACAGGTCTCATATTGACAAGAGATGGTGGTAATACCACCAAT-----  
 -----  
 -----  
 GGTACCGACACCCTCAGACCTGGAGGGGGAAATATGAAAGACAATTGGAGAAGTGAATTGTATAAATATAAGG

TAGTGAAAATTGAGCCAATA---GGAGTAGCACCCACCAAGGCAAAAAGACAAGTGGTG-----  
 -----AGGAGAGAAAAAAGGGCA---GTGGGA---ATGGGAGCT-----  
 GTGTTTCCTTGGGTTCTTAGGAGCA---GCAGGAAGCACTATG---GGCGCAGCGTCA---  
 ATAACGCTGACGGTACAG---GCCAGACAA---TTATTG---TCCGGTATAGTGCAACAGCAGAGC---  
 AATCTG---CTGAGG---GCTATAGAGGCTCAACAACATCTGTTGAAGCTCACGGTCTGGGGCATT  
 >EU191618..3  
 TTCTATTGCAGTACATCAGGCCTGTTTAATAGCACTTGGGAAAATGGCACTCAGGTGGCAAATGACACGGGG-  
 -----  
 -----  
 TCAAAATGACACTATAACTCTCCCATGCAGAATAAAGCAAATTGTAAGAATGTGGCAGAGAGTAGGACAAGCAA  
 TGTATGCCCCCTCCCATCCAAGGAATGATAAGATGTGAATCAAAC---  
 ATTACAGGATTAATATTAACAAGAGATGGTGTGGGAATAACAGT-----  
 -----  
 -----  
 ACAAATGAAACCTTCAGACCTGGAGGAGGAGATATGAGGGACAATTGGAGAAGTGAATTATATAAGTATAAAG  
 TAGTAAAAATTGAACCATTA---GGAGTAGCACCCAGCAGGGCAAAGAGAAGAGTGGTG-----  
 -----GCGAGAGAAAAAAGAGCA---GTTGGA---CTGGGAGCT-----  
 GTTTTCCTTGGGTTCTTAGGAGCA---GCAGGAAGCACTATG---GGCGCAGCGTCA---  
 CTAACGCTGACGGTACAG---GCCAGACAA---TTATTG---TCTGGCATAGTGCAACAGCAGAGC---  
 AATCTG---CTAAGG---GCTATAGAGGCTCAACATCATCTGTTGCAGCTCACTGTCTGGGGCATT  
 >EF025170..1  
 TTCTATTGTAATACATCAGGCCTGTTTAATAGTACTTGGCCTAATGGCACTCGGAGCGAAGAGGACAAT----  
 -----  
 -----  
 GAAACTGACATTATAACTCTCCCATGCAGAATAAAGCAAATTATAAATATGTGGCAGAGAACAGGACAAGCAA  
 TATATGCCCCCTCCCATCCAAGGAGTAATAAGGTGTGAATCAAAC---  
 ATTACAGGACTACTTTTAAACAAGAGATGGTGGGAATGATAGCAAT-----  
 -----  
 -----  
 CACACTGAGATCTTCAGACCTGGAGGGGGAAATATGAAGGACAACCTGGAGAAGTGAATTATATAAGTATAAAG  
 TAGTAAAAATTAAACCATTA---GGGGTAGCACCCACCAGGGCAAGAAGAAGAGTGGTG-----  
 -----GGAAGAGAAAAAAGAGCA---GTTGGA---CTGGGCGTC-----  
 GTCCTCCTTGGGTTCTTAGGAACA---GCAGGAAGCACTATG---GGCGCGGCGTCA---  
 ATAACGCTGACGGTACAG---GTCAGACAA---TTATTG---TCTGGCATAGTGCAACAGCAAAGC---  
 AATTTG---CTGAGG---GCTATAGAGGCGCAGCAACATCTGCTGCAACTCACAGTCTGGGGCATT  
 >JX422197..1  
 TTCTATTGCAATACATCAGGACTGTTTAATAGCACTTGGGAAGACAATGGCAATGGCACTTGGAGGGGAAAATA  
 GCACTGGGGAT-----  
 -----  
 GATAATACAGGCAACATAACTCTCCAATGTAGAATAAAGCAAATTGTAAATATGTGGCAGAAAAGTAGGACAAG  
 CAATGTATGCCCCCTCCCATCCAAGGAGTAATAAGGTGTGAATCAAAC---  
 ATTACTGGGCTATTATTAACAAGAGATGGAGGAAATACTAATAATACA-----  
 -----  
 -----  
 ATTAATGAAACCTTCAGACCTGGAGGGGGAGATATGAGGGACAATTGGAGAAGTGAATTATATAAGTATAAAG  
 TAGTAAAAATTGAACCACTA---GGTGTAGCACCCACCCGTGCAAAAAGAAGAGTGGTG-----  
 -----GAGAGAGAAAAAAGAGCA---GTAGGA---CTGGGAGCT-----  
 GTCTTCCTTGGGTTTCTAGGAGCA---GCAGGAAGCACTATG---GGCGCGGCGTCA---  
 ATAACGCTGACGGTACAG---GCTAGACAA---TTATTG---TCTGGTATAGTGCAACAGCAGAGC---  
 AATTTG---CTGAAG---GCTATAGAGGCTCAACAACAGCTGTTGAGACTCACAGTCTGGGGCATT  
 >AF457062..1  
 TTCTATTGTAATACATCAAGCCTGTTTAATAGCACCTGGCCCTGGGAGAAGTTAAACAGCACAGATAATAGTA  
 GC-----  
 -----  
 -----  
 ACAGATGACAATATAACTCTCACATGCAGAATAAAGCAAATTATAAATATGTGGCAGAGAGTAGGACAAGCAA  
 TATATGCCCCCTCCTATCCAGGAGAAATAAGATGTGTATCAAAC---  
 ATTACAGGACTAATATTAACAAGAGATGGTGGGGATAATAGCAGT-----  
 -----  
 -----  
 ACAAATGAAACCTTCAGACCTGGAGGAGGAAATATGAGGGACAATTGGAGAAGTGAATTATATAAGTATAAAG

TAGTAAAAATTGAACCACTA---GGAGTAGCACCCACCACGGCAAGGAGAAGAGTGGTG-----  
 -----CAGAGAGAAAAAAGAGCA---GTTGGA---ATAGGAGCT-----  
 GTTTTCATTGGGTTCTTAGGAGCA---GCAGGAAGCACTATG---GGCGCAGCGTCA---  
 ATAACGCTGACGGTACAG---GCCAGACAA---TTATTG---TCGGGCATAGTGCAACAGCAAAGC---  
 AATTTG---CTGAGG---GCTATAGAGGCTCAACAGCATCTGTTGAAACTCACAGTCTGGGGCATT  
 >KC186563..1  
 TTCTATTGCAACACATCAGGCCTGTTTAATAGCACTTGGAGTAATACTACTGTGGCAAATAATACGGGG----  
 -----  
 -----  
 GTAAATGGAACATAATACTCCCATGCAGAATAAAACAAATTATAAATATGTGGCAGAGAGCAGGACAAGCAA  
 TATATGCCCCCTCCCATCCAAGGATTAATAAATTGTGTATCAAAC---  
 ATTACAGGACTACTATTAACAAGAGATGGTCAGAAGAATGGTAGT-----  
 -----  
 -----  
 GACAAATGATACCTTTAGACCTATAGGAGGAAATATGAAGGACAATTGGAGAAGTGAATTATATAAATATAAAG  
 TGGTGGAGATTAGACCATTA---GGAGTAGCACCCACCAGGGCAAAAAGAAGAGTGGTG-----  
 -----GAGAGAGAAAAAAGAGCA---GTGGGA---ATAGGAGCT-----  
 GTGCTCTTTGGGTTCTTGGGAGCA---GCAGGAAGCACTATG---GGCGCGGCGTCA---  
 ATAACGCTGACGGTACAG---GCCAGACAA---TTGTTG---ACTGGCATAGTGCAACAGCAAAGC---  
 AATTTG---CTGCAG---GCTATAGAGGCACAACAGCATCTATTAAAGCTCACTGTCTGGGGCATT  
 >GU201508..1  
 TTCTATTGCAATACATCACTCCTGTTTAACAGCACCTGGATGGTGAATGGCACTGGGGTCACCAATGGCAATA  
 AT-----  
 -----  
 GTCACCAATGACATTATAACACTCCCATGCAGAATAAAGCAAATTATAAATATGTGGCAGAGGGTAGGACAAG  
 CAATGTACGCCCTCCCATCCGAGGAATCATAAATTGTGTATCAAAC---  
 ATTACAGGACTACTCTTAACAAGAGATGGTGGTAGCAGCCAAAAC-----  
 -----  
 -----  
 GGATCTGAGACCTTCAGACCTGGAGGAGGAGATATGAGAGACAATTGGAGAAGTGAATTATATAAGTATAAAG  
 TAGTAAAAATTGACCCAATA---GGAGTAGCACCCACCAGGGCAAAAAGAAGAGTGGTG-----  
 -----GAGAGAGAAAAAAGAGCA---CTTGTTGGACTGGGAGCT-----  
 GTCTTCCTTGGGTTCTTAGGAACA---GCAGGAAGCACTATG---GGCGCGGCATCA---  
 CTAACGCTGACGGTACAG---GCCAGACAA---TTATTG---TCTGGCATAGTGCAACAGCAGAGC---  
 AATCTG---CTGAGG---GCTATAGAGGCTCAACAGCATTTGTTGAGACTCACGGTCTGGGGCATT  
 >KP718927..2  
 TTCTATTGCAATACAACACAACCTGTTTAATAGTACCTGGCAAGAGGGCACCAACAACAGCAATGCAGGT----  
 -----  
 -----  
 AATGATACTACTATTACACTGCCATGCAGAATAAAACAAATTGTAAACATGTGGCAGAGAGTAGGACAAGCAA  
 TGTATGCCCCCTCCCATCCAAGGAGCGATAAAGTGTGTATCTAAC---  
 ATTACAGGACTAATATTGACAAGAGATGGTGGGAATAATAGGACA-----  
 -----  
 -----  
 AATGAGACCATCAGACCTGGAGGAGGGGATATGAGGGACAATTGGAGAAGTGAATTATATAAATATAAAACAG  
 TGAGAATTGAACCACTA---GGAATAGCACCCACTCATGCAAGGAGAAGAATGGTG-----  
 -----AACAGAGAAAAAAGAGTA---GCTGGA---ATGGGAGCT-----  
 GTCTTCTTTGGGTTCTTAGCAGCA---GCAGGAAGCACTATG---GGCGCAGCGTCA---  
 ATAACGCTGACGGTACAG---GCCAGACAA---CTATTG---TCTGGTATAGTGCAACAGCAAAGC---  
 AATTTG---CTGAAT---GCTATAGAGGCTCAACAGCAGCTGTTGAAACTCACGGTCTGGGGCATT  
 >KP718919..2  
 TTCTATTGCAATACATCGGGCCTGTTTAATAGCACTTGGGGAAGTGGGGACTACACTGCAGGAAATGACACTG  
 TA-----  
 -----  
 -----  
 GGAAATGACACTATAACTCTCCGGTGCAGAATAAAGCAAATTATAAATATGTGGCAGAAAGTAGGACAAGCAA  
 TGTATGCCCCCTCCCATCCAGGAGTAATAAGGTGTGAGTCAAAT---  
 ATTACAGGACTACTCTTGACAAGAGATGGTGGGAATAATAATAGT-----  
 -----  
 -----  
 ATAAATGAGACTTTTCAGACCTGGAGGAGGAGATATGAGAGACAATTGGAGAAGTGAATTATATAAATATAAAG

TAGTAAAAATTGAACCACTA---GGAATAGCACCTACCCAGGCAAAGAGAAGGGTGGTG-----  
 -----GAGAGAGAAAAAAGAGCA---GTTGGA---TTAGGAGCT-----  
 TTCTTCCTTGGGTTCTTAGGAGCA---GCTGGAAGCACTATG---GGCGCAGCATCA---  
 CTAACGCTGACGGTACAG---GCCAGACAA---TTATTG---TCTGGCATAGTGCAACAGCAAAGC---  
 AATTTG---CTAAGG---GCTATAGAGGCTCAACAACAGATGTTGAGACTCACGGTCTGGGGCATT  
 >KY359380..1  
 TTTTATTGCAATACATCAGGCCTGTTTACTAATGGCACAAATATAACT-----  
 -----  
 -----  
 ACAAATATAAATATAACTCTCCCGTGCAGAATAAAACAAATTATAAATATGTGGCAGAGAGTAGGACAAGCAA  
 TGTATGCCCCCTCCCATCGCCGGAGTAATAAGATGTGACTCAAAC---  
 ATTACAGGACTACTGTTAACAAGAGATGGTGGAATTAACAATGAC-----  
 -----  
 -----  
 AGTAATACTGAGGTCTTCAGGCCTACAGGAGGAGATATGAGGGACAATGGGAGAAGTGAATTATACAAATATA  
 AAGTAGTAAAACTTGAACCCCTA---GGAGTAGCACCCACCAGGGCAAGGAGAAGAGTGGTG-----  
 -----GGAAGAGAAAAAAGAGCA---GTTGGA---CTGGGAGCT-----  
 ---GCCTTCCTTGGGTTCTTAGGAGCA---GCAGGAAGCACTATG---GGCGCAGCGTCA---  
 CTAACGCTGACGGTACAG---GCCAGACAA---TTATTG---TCTGGCATAGTGCAACAGCAAAGC---  
 AATTTG---CTGAGG---GCTATAGAGGCTCAACAACATATGTTGAAACTCACAGTCTGGGGCATT  
 >KJ849789..2  
 TTCTATTGCAATACATCAGGCCTGTTTAATAGCACTTGGAAATAACACACAGCCA-----  
 -----  
 -GATAACACAACAGAT-----  
 AACACAACAGAGTTCATAACTCTGCCATGCAGAATAAAGCAAATCATAAATATGTGGCAGAGAGTAGGACAAG  
 CAATGTATGCCCCCTCCCATTC AAGGAATAATAAATTGTACATCAAAT---  
 ATTACAGGGCTAATATTAACAAGAGACGGT-----  
 -----  
 -  
 AATCCTAATGCGAGTAGTGAAACCTTCAGACCTGGAGGAGGGGATATGAGGGACAATTGGAGAAGTGAAGTAT  
 ATAAGTATAAAGTAGTACAAATTGAACCACTA---GGAGTAGCACCCACCTGGGCAAGGAGAAGAGTGGTG--  
 -----CAGAGAGAAAAAAGAGCA---GTTGGA---  
 CTGGGAGCT-----GTCTTCCTTGGGTTCTTGGGAGCA---GCAGGAAGCACTATG---  
 GGCGCAGCGTCA---ATGACGCTGACGGTACAG---GCCAGACAA---TTATTG---  
 TCTGGTATAGTGCAACAGCAGAGC---AATCTG---CTGAAG---  
 GCTATAGAGGCTCAACAACATCTGTTGAAACTCACAGTCTGGGGCATT  
 >FJ388929..3  
 TTCTATTGCAATACATCAGGCCTGTTTAATAGTACTTACAATGGGACAGAGGAGGCAAATGAAAATGACACTA  
 AG-----  
 -----  
 GCAAATGACACTATAATACTTCCATGCAGAATAAAGCAATTTATAAATATGTGGCAGAGAGTAGGAAAAGCAA  
 TGTATGCCCCCTCCCATTC AAGGAGTAGTACAGTGTAATTC AAGC---  
 ATTACAGGATTATTATTAACAAGAGATGGTGGTAGTAAAAATGAG-----  
 -----  
 -----  
 ACTGGGGAAACATTTCAGACCTGGAGGAGGAAATATGAGAGACAATTGGAGAAGTGAATTATATAAGTATAAAG  
 TAGTAAGGATTGAACCACTA---GGAGTAGCACCCACCAAGGCAAAGAGAAGAGTGGTG-----  
 -----GAGAGAGAAAAAAGAGCA---GTCGGA---CTGGGAGCG-----  
 GTTTTCCTTGGGTTCTTAGGAACA---GCAGGAAGCACTATG---GGCGCAGCGTCA---  
 ATAACGCTGACGGTACAG---GCCAGACAG---CTATTA---TCTGGCATAGTGCAACAGCAGAGA---  
 AATCTG---CTGCAG---GCTATAGAGGCTCAACAGCATCTGTTGAAACTCACAGTTTGGGGCATT  
 >EU191612..1  
 TTCTATTGCGATACAACAAAATTGTTTACAACTTGTCTACAAATAGCACGGGGTTGGATGATAATAGCACGG  
 GG-----  
 -----  
 TCGAATGATACCATAATTCTCCCGTGCAGAATAAAACAAAGTTATAAATATGTGGCAGAGAGTAGGACAAGCAA  
 TGTATGCCCCCTCCTATCCGAGGAGTAATAAGGTGTAACCTCTAAC---  
 ATTACAGGACTACTATTAACAAGAGATGGTGGAATGGGAATAAC-----  
 -----  
 -----

AGTACAGAGGAGATTTTCAGACCTGGAGGAGGAGATATGAGGGATAATTGGAGAAGTGAATTATATAAGTATA  
 AAGTAGTAAAAATTGAACCACTG---GGAGTAGCACCCACCAGGGCAAGGAGAAGAGTGGTG-----  
 -----CAGAGAGAAAAAAGAGCA---GTTGGA---CTGGGAGCT-----  
 ---GTCTTCCTTGGATTCTTAGGAGCA---GCAGGAAGCACTATG---GGCGCGGCGTCC---  
 ATAACGCTGACGGTACAG---GCCAGACAA---TTATTG---TCTGGCATAGTGCAACAGCAGAGC---  
 AATTTG---CTGAGG---GCTATAAAGGCTCAACAACATCTGTTGAAACTCACGGTCTGGGGCATT  
 >AF069672..2  
 TTCTATTGTAATACATCAAGCCTGTTTAACAGCACGTGGAGTAACGATAACAACACTCAGGGGTCAAATAGCA  
 CA-----  
 -----  
 GAGACAAAAGGCACTATAACTCTCCCATGCAGAATAAAGCAAATTATAAATATGTGGCAGAGAGCAGGAAAAG  
 CAATGTATGCCCCCTCCCATCCAAGGAGTAATAAGGTGTGAATCAAAC---  
 ATCACAGGACTAATATTAACAAGAGATGGTGGAGATGCCGGGGAA-----  
 -----  
 -----  
 AATGAAACCTTCAGACCTGGAGGAGGAGATATGAGGGACAATTGGAGAAGTGAGTTATATAAGTATAAAGTAG  
 TAAAAATTGAACCACTA---GGAGTAGCACCCACCAGGCAAGGAGAAGAGTGGTG-----  
 -----AAGAGAGAAAAAAGAGCA---GTTGGA---CTAGGAGCT-----  
 GTCTTCATTGGGTTCTTAGGAGCA---GCAGGAAGCACTATG---GGCGCGGCGTCA---  
 ATAACGCTGACGGTACAG---GCCAGACAA---TTATTG---TCTGGCATAGTGCGACAGCAAAGT---  
 AATTTG---CTGAAG---GCTATAGAGGCTCAACAACATCTGTTGAAACTCACGGTCTGGGGCATT  
 >AF411965..2  
 TTCTACTGCAATACATCAAGACTGTTTAATAGCACATTTGATAACACATCTCTGGTTAATGGCACGGGTAATA  
 GTACCAAC-----  
 -----ACACAG-----  
 GGGGCAAATGACACTATATATATTCATGCAGAATAAAACAGATTATAAACATGTGGCAAAGAGTGGGACAAG  
 CAATGTATGCCCCCTCCCATTCAGGAGTAATAAAATGTGAATCAAAC---  
 ATTACAGGAATGCTATTAACAAGAGACGGTGGGTCTGAAAGTAAC-----  
 -----  
 -----  
 GGTACAGAGGTCTTCAGACCTGGAGGAGGAGATATGAAGGACAATTGGAGAAGTGAATTATATAATTATAAAG  
 TAGTAAAAATTGAACCACTA---GGAGTAGCACCCACCAGGGCAAAGAGAAGAGTGGTG-----  
 -----GAGAGAGAAAAAAGAGCA---GCTGGA---ATAGGAGCT-----  
 GTCTTCCTTGGCTTCTTAGGAGCA---GCAGGAAGCACTATG---GGCGCGGCGTCA---  
 ATAACGCTGACGGTACAG---GCCAGGAAA---TTATTG---ACTGGCATAGTGCGGCAGCAAAGC---  
 AATTTG---CTGCAG---GCTATAGAGGCTCAACAACATCTGTTGAAACTCACGGTCTGGGGCATT  
 >U86778..1  
 TTCTATTGCAATACATCAGGCCTGTTTAATAGTACATACAATAGGGCATAACGACTAATGGTACAGGA---  
 -----  
 -----  
 AATGACTCAACCATCACACTCCCATGCAGAATAAAACAAATTATAAACATGTGGCAGGAGGTAGGGCGAGCAA  
 TATATGCCCCCTCCCATTCAGGAAACATAACATGTATATCAAAT---  
 ATCACAGGACTATTATTGCTACGTGATGGAGGAAAAGAAGACAAT-----  
 -----  
 -----  
 AAAACAGAGATGTTTCAGACCTGGAGGAGGAGATATGAGGGACAATTGGAGAAGTGAATTATATAAATATAAAG  
 TGGTAGAAATTAAACCATTG---GGAATAGCACCCACTAAGCCACCCAGGAGAGTGGTG-----  
 -----GAGAGAGGTGGAAGAACA---GTGGGA---ATAGGAGCT-----  
 GTGTTCTTGGGTTCTCGGGAGCA---GCAGGAAGCACTATG---GGCGCGGCGTCA---  
 ATAACGCTGACGGTACAG---GCCAGACAA---CTGTTG---TCTGGTATAGTGCAACAGCAAAGC---  
 AATTTG---CTGAAG---GCTATAGAGGCTCAACAGCATCTGTTGAAACTCACGGTCTGGGGCATT  
 >L22955..1  
 TTCTATTGCAATACATCAAACCTGTTTAATAGTACATACAATCCTAATAGTACAGAAAGTAAT-----  
 -----  
 -----  
 TCAGACTTAAACATCACACTCCCATGCAGAATAAAACAAATTATAAACATGTGGCAGAGAGTAGGACGAGCAA  
 TGTATGCCCCCTCCCATTCAGGAGTAATAAAGTGTACATCAAAC---  
 ATTACAGGAATAATATTGTCAAGAGATGGTGGGAACAGTGGGAACAGT-----  
 -----  
 -----

ACCAATGGGACTGAGACCTTCAGACCTGGAGGAGGAGATATGAGGGACAATTGGAGAAGTGAATTATATAAGT  
 ATAAAGTAGTAAACTAGAACCACTA---GGAGTAGCACCCACCAAGCCAAGGAGAAGAGTGGTG-----  
 -----GAGAGAGAAAAAAGAGCA---GTTGGA---CTGGGAGCT---  
 -----GTCTTCCTTGGGTTCTTGGGAGCA---GCAGGAAGCACTATG---GGCGCGGCATCA---  
 ATAACGCTGACGGTACAG---GCCAGACAA---CTGTTG---TCTGGTATAGTGCAACAGCAAAGC---  
 AATTTG---CTGAAG---GCTATAGAGGCTCAACAGCATCTGTTGAAACTCACGGTCTGGGGCATT  
 >MK086111..1  
 TTCTATTGTAATACATCAAGCCTGTTTCGATAGTGCTTGGCTTAATAATGAAACTGGCATCGGGCAAACATCA  
 CAGAG-----  
 -----  
 TCAAATAATACTATAACTCTCCAATGCAGAATAAAACAATTTATAAATATGTGGCAGAGAGTAGGGCAAGCAC  
 TGTATGCCCCCTCCTATTCCAGGAAACATAACCTGTAGATCAAAC---  
 ATTACAGGGCTGCTACTAACAAGAGATGGTGGGAATAATACGAGTGATAATGGT-----  
 -----  
 -----  
 ACAGTTATTGAAACATTTCAGACCTGGAGGAGGAGATATGAGGGACAATTGGAGAAGTGAATTATATAAATATA  
 AAGTAGTAAACTTTGAACCACTA---GGAATAGCACCCACCGAGGCAAGGAGAAGAGTGGTG-----  
 -----GAGAGAGAAAAAAGAGCA---ATTGGA---CTAGGAGCT-----  
 ---TTTTTCCTTGGGTTCTTGGGAGCA---GCAGGAAGCACTATG---GGCGCAGCGTCA---  
 CTAACGCTGACGGTACAG---GCCAGACAA---TTATTG---TCTGGTATAGTGCAACAGCAAAAC---  
 AATTTG---CTGAAG---GCTATAGAGGCTCAGCAGCTCATGTTGAAACTCACGGTCTGGGGCATT  
 >HQ385818..1  
 TTCTACTGTAATACATCACAATTGTTTAATAGTACTTGAAGAATGGTACTTTTGCCAATGGCACTGAA----  
 -----  
 -----  
 GGAAATGGCACAATCACACTCCCATGCAGAATAAAGCAATTTATAAACATGTGGCAACAAGTAGGAAAAGCAA  
 TGTATGCCCCCTCCCATCAGTGGACAAATTAACTGCTCATCAAAT---  
 ATTACAGGGCTACTATTAACAAGAGATGGTGGTAGTGGTAACAGCACA-----  
 -----  
 -----  
 GAGAACGAGACTGAGATCTTCAGACCTGCAGGGGGAGATATGAGGGACAATTGGAGAAGTGAATTATATAAAT  
 ATAAAGTAGTACAAGTTGAGCCATTA---GGATTAGCACCCACCAGGGCAAAGAGAAGAGTGGTG-----  
 -----CAGAGAGAAAAAAGAGCA---ATAGGC---CGGGGAGCT---  
 -----GCCTTCCTTGGGTTCTTAGGAGCA---GCAGGAAGCACTATG---GGCGCGGCGTCA---  
 ATGACGCTGACGGTACAG---GCCAGACAA---TTATTG---TCTGGCATAGTGCAACAGCAAAGC---  
 AATTTG---CTGAGG---GCCATAGAGGCTCAGCAACATATGCTGAAACTCACGGTCTGGGGCATT  
 >MN485971..1  
 TTCTATTGCAATACATCAGGCCTGTTTAATAGTATTTGGAATAGTAGCACTTGAATAATAATAGCACTGGGA  
 ATAACAGCACA---CAG-----GAG-----  
 -----  
 TCAAATGACACTATAACTCTCCAATGCAGTATAAAACAAATTATAAACATGTGGCAGGGAGTAGGAAAAGCAA  
 TGTATGCCCCCTCCCATTTGAAGGAAAGATTGCATGTTTATCAGAA---  
 ATTACAGGACTAATATTAACAAAAGATGGTGGTGCAAAAAATAAT-----  
 -----  
 -----  
 AGTCAGAATGAGACTTTTCAGACCTGCAGGAGGAGATATGAGAGACAATTGGAGAAGTGAATTATACAAATATA  
 AAGTAGTAAGACTTTGAACCACTA---GGTCTAGCACCCACCAGGGCAAGGAGAAGAGTGGTG-----  
 -----GTAAGAGAAAAAAGAGCA---ATAGGA---CTAGGAGCT-----  
 ---ATGTTCTTGGGTTCTTGGGAGCA---GCAGGAAGCACAATG---GGCGCAGCGTCA---  
 CTGACGCTGACGGTACAG---GCCAGACAA---TTACTG---TCTGGTATAGTGCAACAGCAGAAC---  
 AATTTG---CTGAGG---GCTATTGAGGCGCAACAGCATATGTTGCAACTCACAGTCTGGGGCATC  
 >AJ277825..1  
 TTCTATTGTAATACATCAGGCCTGTTTAATAGCACTTGGAGCCTTAACAGCAGCGCGCCAGATGACACAGAA-  
 -----  
 -----  
 TCAAATGACACTATAACTCTCCCATGCAGAATAAAGCAAATTATAAACATGTGGCAAAGGGCAGGACGAGCAA  
 TATATGCCCCCTCCCATCCAAGGAATAATAAGGTGTAATTCAAGC---  
 ATTACAGGACTACTATTAACAAGAGATGGTGGGGATAACAATACG-----  
 -----  
 -----

CATAATGAAACCTTCAGACCTGGAGGTGGAAATATGAGGGATAATTGGAGAAGTGAACCTATATAAATATAAAG  
 TAGTAAAAATTGAACCACTA---GGAGTAGCACCCACCAAGGCAAAAAGAAGAGTGGTG-----  
 -----GAGAGAGAAAAAAGAGCA---GTTGGA---CTGGGAGCT-----  
 GTCTTCATTGGGTTCTTAGGAGCA---GCAGGAAGCACTATG---GGCGCGGCGTCA---  
 ATAACGCTGACGGTACAG---GCCAGACAA---TTATTG---TCTGGCATAGTGCGACAGCAAAGC---  
 AATTTG---CTGAGG---GCTATAGAGGCTCAACAGCATCTGTTGAAACTCACGGTCTGGGGCATT  
 >HQ595799..3  
 TTCTATTGTAACACATCAAGACTGTTTAATAGCACTTGGCATGATAACAGCACGCTAGAGTCAAATCAAACAG  
 AG-----  
 -----  
 TCAAACGATACTATAATACTCCCATGCAGAATAAAACAAATTATAAACATGTGGCAGAGAGCAGGACAAGCAA  
 TGTATGCCCCCCCCATTCAAGGAGTGATAAGGTGTGTATCAAAT---  
 ATTACAGGACTAATATTAACAAGAGATGGTGGGGATAATAACAGC-----  
 -----  
 -----  
 GCAAACGAAACCTTCAGACCTGGAGGAGGAGATATGAGGGACAATTGGAGGAGTGAATTATATAAATATAAAG  
 TAGTAAAAATTGAACCAATA---GGAATAGCACCCACCGAGGCAAGGAGAAGAGTGGTG-----  
 -----CAGAGAGAGAAAAAGAGCA---GTAGGA---CTAGGAGCT-----  
 GTTTTCATTGGGTTCTTAGGAGCA---GCAGGAAGCACTATG---GGCGCGGCGTCA---  
 ATGACGCTGACGGTACAG---GCCAGACAA---TTATTG---TCTGGCATAGTGCAACAGCAAAGC---  
 AATTTG---CTGAAG---GCTATAGAAGCTCAACAGCATCTGTTGAAACTCACGGTCTGGGGCATT  
 >AY322191..1  
 TTCTATTGTACTACCTCAGGCCTGTTTAATGGCACTTGGGACAGCAAGCAGAAGTCAAATAGCACGGAG----  
 -----  
 -----  
 TCAGATGACACTATAACTCTCCCATGCAAAATAAAGCAAATTATAAATATGTGGCAGAGGGTGGGACAAGCAA  
 TGTATGCCCCCTCCTATCCAAGGAATAATAAGTTGTGTATCAAAC---  
 ATTACAGGACTAATATTAACAAGAGATGGTGGGGGTAATAACAGT-----  
 -----  
 -----  
 AGCAATGAAACCTTCAGACCTGGAGGAGGAGATATGAGAGACAATTGGAGAAGTGAATTATATAAGTATAAAG  
 TAGTAAAAATTGAACCACTA---GGAGTAGCACCCACCAGGGCAAGGAGAAGAGTGGTG-----  
 -----GGGAGAGAAAAAAGAGCA---GTTGGA---ATGGGAGCT-----  
 GTCTTCCTTGGGTTCTTAGGAGCA---GCAGGAAGCACTATG---GGCGCGGCGTCA---  
 ATAACGCTGACGGTACAG---GCCAGACAA---TTATTG---TCTGGCATAGTGCAACAGCAAAGC---  
 AATTTG---CTGAGA---GCTATAGAGGCTCAACAACATCTGTTGAAACTCACGGTCTGGGGCATT  
 >JN977603..1  
 TTCTATTGCAACACATCACAGCTGTTTAATTCATCACTGCTCAATAGTACAGAAAGTATTAATGAAACAAGT-  
 -----  
 -----  
 GGTAATGAAACAATCACACTCCCATGCAGAATAAAACAGATTATAAACATGTGGCAGGAGGTAGGGCGGGCAA  
 TGTATGCCCCCTCCCATTAGAGGAATAATAACATGTAAATCAAAT---  
 ATCACAGGACTACTACTGACACGTGATGGAGGAAATGAGAAAAATAACTCA-----  
 -----  
 -----  
 GAGGCAAATAACACAGAGATATTGAGGCCTGGAGGAGGAAATATGAAGGACAATTGGAGAAGTGAATTATATA  
 AGTATAAAGTAGTAAAAGTTGAACCACTA---GGAGTAGCACCCACCAAGGCAAGGAGAAGAGTGGTG-----  
 -----GAGAGAGAAAAAAGAGCA---GTAGGA---  
 ATAGGAGCT-----GTCTTCATTGGGTTCTTAGGAGCA---GCCGGAAGCACTATG---  
 GGCGCAGCGTCG---GTGACGCTGACGGTACAG---GCCAGACAA---TTATTG---  
 TCTGGCATAGTGCAACAGCAAAGT---AATTTG---CTGAGG---  
 GCTATAGAGGCTCAACAACATTTGTTGAAACTCACGGTCTGGGGCATT  
 >AY887516..2  
 TTCTATTGTGATACAAAAACCTGTTTAATAGCACTTGGACGACAGTAACATCAACATCACACAGGAGTCAA  
 ATGAC-----  
 -----ACA---  
 GATTCAAAAGGCAATATAACTCTCCAGTGCAGAATAAAGCAAATTATAAATATGTGGCAGAGAGCAGGACAAG  
 CAATATATGCCCCCTCCCATCCCGGAGTAATAAGATGTGAGTCGAAC---  
 ATTACAGGAATAATATTAACAAGAGATGGTGGGAATGTTAGCAGT-----  
 -----

-----  
CAAAATGAAACCTTCAGACCTGGAGGAGGAGATATGAGGGACAATTGGAGAAGTGAATTATATAAGTATAAAG  
TAGTAAAAATTGAACCACTA---GGAGTAGCACCTCCAAGGCAAAGAGAAGAGTGGTG-----  
-----GAGAGAGAAAAAAGAGCA---GTCGGA---ATAGGAGCT-----  
GTTTTCCTTGCGTTCTTAGGAGCA---GCAGGAAGCACTATG---GGCGCGGCGTCA---  
CTGACGCTGACGGTACAG---GCCAGACAA---TTATTG---ACTGGCATAGTGCAACAGCAAAGC---  
AATTTG---CTGAGG---GCTATAGAGGCTCAACAACATCTGTTGAAACTCACAGTCTGGGGCATT  
>HQ540690..2  
TTCTATTGTAATACATCAGGCCTGTTTAATAGCACTTGGAACCTCTACTAATGGAAATTGGACTCAAAACGAAA  
CTGAC-----  
-----  
AATAAGACTGAAACTATAAGTCTCCCATGCAGAATAAAAGCAAATTATAAACATGTGGCAGAGAGTAGGACAAG  
CAATGTATGCCCTCCCATACAAGGAGTAATAAGCTGTAACCTCAAGC---  
ATTACAGGACTGCTACTAACAAGAGATGGTGGTTACAATAATAGC-----  
-----  
-----  
AATAATGAAACCTTCAGACCTGTAGGAGGAAACATGAAGGACAATTGGAGAAGTGAATTATATAAGTATAAAG  
TAGTAAAAATTGAGCCACTA---GGAATAGCACCCACCAGGGCAAAGAGAGTGGTG-----  
-----GAGAGAGAAAAAAGAGCA---GTGGGA---TTCGGAGCT-----  
TTGTTTCCTTGCGTTCTTGGGAGCA---GCAGGAAGCACTATG---GGCGCAGCATCA---  
ATAACGCTGACGGTACAG---GCCAGACAA---TTATTG---TCGGGTATAGTGCAACAGCAAAAC---  
AATTTG---CTGAGG---GCTATAGAGGCGCAACAGCATATGTTGCAACTCACAGTCTGGGGCATT  
>DQ093606..2  
TTCTACTGCAATACATCAAGATTGTTTAATAGCACATTTAAGGTCAAGGACACAGATAATAATGCTGGGGACA  
AC-----  
-----  
ACAGAAGAGGATATAACTATCCCATGCAGAATAAAACAAATTATAAACATGTGGCAGAGAGTAGGACAAGCAA  
TGTATGCCCCCTCCCATTCAGGAGTAATAAAATGTGAATCAAGC---  
ATCACAGGAATACTATTGACAAGAGATGGGGGGGAGTCTGATAAC-----  
-----  
-----  
AAAACAGAAGAGGTCTTCAGACCTGAAGGAGGAAATATGAAGGACAATTGGAGAAGTGAATTATATAATTATA  
AGGTAGTAAAAATTGAACCACTA---GGAGTAGCACCCACCAAGGCAAAGAGAAGAGTGGTG-----  
-----GAGAGAGAAAAAAGAGCAGTAGTTGGA---CTGGGAGCT-----  
---GTTTTCCTTGCGTTCTTAGGAGCA---GCAGGAAGCACTATG---GGCGCAGCATCG---  
ATAACGCTGACGGTACAG---GCCAGGCAA---TTATTG---ACTGGCATAGTGCGGCAGCAAGGC---  
AATTTG---CTGCAG---GCTATAGAGGCTCAACAACATCTGTTGAAGCTCACTGTCTGGGGCATT  
>HQ540691..3  
TTCTACTGCAATACATCAGGCCTGTTTAAGGGCACATTTAGGTTAATGACACGGGTAATAGTAACAGCACAC  
AG-----  
-----  
GGGGCAAATGACACCATAACTATCCCATGCAGAATAAAACAGATTATAAATATGTGGCAAAGAGTGGGACAAG  
CAATGTATGCCCTCCCATTCAGGAGTAATAAAATGTAAGTCAAAC---  
ATTACAGGAATGCTATTGACAAGAGACGGCGGGGCTGAAAGCAAT-----  
-----  
-----  
ACAGAGGTCTTCAGACCTGGGGGAGGAGATATGAAGGACAATTGGAGAAGTGAATTATATAATTATAAAGTAG  
TAAAAATTGAACCAGTA---GGAGTAGCACCCGCCAAGGCAAAGAGAAGAGTGGTG-----  
-----GAGAGAGAAAAAAGAGCA---GTTGGA---ATAGGAGCT-----  
GTCCTCCTTGCGTTCTTAGGAGCA---GCAGGAAGCACTATG---GGCGCAGCGTCA---  
ATAACGCTGACGGTACAG---GCCAGACAA---TTATTG---ACTGGCATAGTGCGGCAGCAAAGC---  
AATTTG---CTGCAG---GCTATAGAGGCTCAACAACATCTGTTGAAACTCACGGTCTGGGGCATT  
>HQ595773..1  
TTCTATTGCAATACATCAAACTGTTTAATAGCACTTGGAAGAATGCACTTGGGAGTCAAATAGCACAGAG-  
-----  
-----  
TCAAAATGGCACTATATATCTTAATTGCAGAATAAAACAAATTATAAACATGTGGCAGGGAGTAGGAAAAGCAA  
TGTATGCCCCCTCCCATTCAGGAGTAATAAAATGTAAGTCAAAC---  
ATTACAGGGATATTATTAACAAGAGATGGTGGTGCAAATAATAAT-----  
-----

-----  
AGTCAGAATGAGACTTTTCAGACCTGGAGGAGGAGATATGAGAGACAATTGGAGAAGTGAATTATATAAAATATA  
AAGTAGTAAGGCTTGAACCACTA---GGTCTAGCACCCACCAAGGCAAGGAGAAGAGTGGTG-----  
-----ACAAGAGAAAAAAGAGCA---ATAGGA---CTAGGAGCT-----  
---ATGTTCCCTTGGGTTCTTGGGAGCA---GCAGGAAGCACAATG---GGCGCAGCGTCA---  
CTGACGCTGACGGTACAG---GCCAGGCAG---TTATTG---TCTGGTATAGTGCAGCAGCAAAAC---  
AATTTG---CTGATG---GCTATAGAGGCGCAACAACATTTGTTGCAACTCACAGTCTGGGGCATT  
>HQ595793..1  
TTCTATTGCAATACATCAGGCCTGTTTAATAGCACTTGGGAATAACAGCACACAGGTGTCAAATGACACACAG-  
-----  
-----  
TTAAATGACACTATAACTCTCCAATGCAGGATAAAAACAAATTATAAACTTGTGGCAGGGAGTAGGAAAAGCAA  
TGTATGCTCCTCCCATTGAAGGAAATATTACATGTTTATCAAAT---  
ATTACAGGACTAATATTAACAAGAGATGGTGGTGCAAATACTACT-----  
-----  
-----  
AGTCAGAATGAGACTCTCAGGCCTGCAGGAGGAGATATGAGAGACAATTGGAGAAGTGAATTATACAAATATA  
AAGTAGTAAGACTTGAACCACTG---GGTCTAGCACCCACCAGGGCAAGGAGAAGAGTGGTG-----  
-----GCAAGAGAAAAAAGAGCA---ATAGGA---CTAGGAGCT-----  
---GTGTTCCCTTGGGTTCTTGGGAGCA---GCAGGAAGCACAATG---GGCGCAGCGTCA---  
CTGACGCTGACGGTACAG---GCCAGACAA---TTATTG---TCTGGTATAGTGCAGCAGCAAAAC---  
AATTTG---CTGAGG---GCTATAGAGGCGCAACAACACTTGTGCAACTCACAGTCTGGGGCATT  
>L22942..1  
TTCTACTGCAATACATCAAACTGTTTAATAGTGTATGGGGAAATTCAGTAATGTGACAAAGGTAAATGGGA  
CA-----  
-----  
AAGGTAAAAGAGACAATCACACTCCCATGTAAAATAAAAACAAATTATAAACATGTGGCAGGAAGTAGGACGAG  
CAATGTATGCCCTCCCATTGAAGGACTCATCAACTGTTTCATCAAAT---  
ATTACAGGACTATTGTTGACAAGAGATGGTGGTGAAAATAATAGT-----  
-----  
-----  
AGTCAGAATGAGACCTTCAGACCTGGAGGAGGAGATATGAGAGACAATTGGAGAAGTGAATTATACAAATATA  
AAGTAGTAAAAATTGAACCACTA---GGTCTAGCACCCACCAGCGCAAAGAGAAGAGTGGTG-----  
-----GAAAGAGAAAAAAGAGCA---ATAGGA---CTGGGAGCT-----  
---ATGTTCCCTTGGGTTCTTGGGAGCA---GCAGGAAGCACGATG---GGCGCAGCGTCA---  
ATGACGCTGACGGTACAG---GCCAGACAG---TTAATG---TCTGGTATAGTGCAACAGCAAAAC---  
AATTTG---CTGAGG---GCTATAGATGCGCAACAGCATCTGTTGCAACTCACAGTCTGGGGCATT  
>DQ208482..1  
TTCTACTGTAACACATCAGAACTGTTTAATAGTGTATGGGCAAATGATAGTACAGAAAATAATAGTACATGGA  
AC-----  
-----  
AATGAGAGTATAATCACACTCCCATGCAGAATAAAAACAAATTTATAAACATGTGGCAGGGAGTAGGACGAGCAA  
TGTATGCCCTCCCATTGAAGGATACATCAACTGTTTCATCAAAT---  
ATTACAGGACTATTGCTGACAAGAGATGGTGGTATAAATAATAATAGT-----  
-----  
-----  
CATGATAATGAGACCTTCAGACCTGGAGGAGGAGATATGAGAGACAATTGGAGAAGTGAATTATACAAATATA  
AAGTAGTAAAAATTGAACCACTA---GGTCTAGCACCCACCAAGGCAAGGAGAAGAGTGGTG-----  
-----GAAAAAGAAAAAAGAGCA---ATAGGA---CTAGGAGCT-----  
---ATGTTCCCTTGGGTTCTTGGGAGCA---GCAGGAAGCACGATG---GGCGCAGCGTCA---  
CTGGCGCTGACGGGACAG---GCCAGACAG---TTAATG---TCTGGTATAGTGCAACAGCAAAAC---  
AATTTG---CTGAGG---GCTATAGATGCGCAACAGCATCTGTTGCAACTCACAGTCTGGGGCATT  
>U36866..2  
TTCTACTGCAATACATCAGACCTGTTTAATAGTACATGGGAGAGTAATAATACATCAAATAGTACAGGGTCA-  
-----  
-----  
AATAATGGTACAATCATACTTCCATGCAGAATAAAAACAAATTATAAACCTGTGGCAGCAAGTAGGAAAAGCAA  
TGTATGCCCTCCCATCGAAGGAATAATCACGTGTAGATCAAAT---  
ATTACAGGGCTATTACTGACAAGAGATGGGGGTAGTAATAATAGT-----  
-----

-----  
CATAACGAGACCTTCAGACCTGGAGGAGGAGATATGAGAGACAATTGGAGAAGTGAATTATACAAATATAAAG  
TAGTAAAAATTGAACCACTA---GAAGTAGCACCCACCAGGGCAAAGAGAAGAGTGGTG-----  
-----GAGAGAGAAAAAAGAGCA---GTTGGA---ATAGGAGCT-----  
GTCTTCATTGGGTTCTTAGGAGCA---GCAGGAAGCACTATG---GGCGCGGCGTCA---  
ATAACGCTGACGGTACAG---GCCAGACAA---TTATTG---TCTGGCATAGTGCAACAGCAAAGT---  
AATTTG---CTGAGG---GCTGTAGAGGCTCAACAGCATATGTTGAAACTCGCGGTCTGGGGCATT  
>AY444799..1  
TTCTATTGTGACACATCAGGCCTGTTTAATAGCACGTGGAATGTCAATACCAGCGTGCAGCAGTCAAATATCA  
CGGGC-----  
-----  
AATATCACGGACAATATAACTCTCCCATGCAGAATAAAGCAAATTATAAATATGTGGCAGAGAGCAGGACAAG  
CAATGTATGCCCCCTCCCATCCAAGGAAAAATAAAGTGTGTATCAAAC---  
ATTACAGGACTAATATTAACAAGAGATGGTGGAGGTAATAGCAGT-----  
-----  
-----  
GCAAAATGAAACCTTTAGACCTGGAGGAGGAGATATGAGGGACAATTGGAGAAGTGAATTATATAAGTATAAAG  
TAGTAAGAATTGAACCACTA---GGAGTAGCACCCACCAAGGCAAAAAGAAGAGTGGTG-----  
-----CAGAGAGAAAAAAGAGCA---ATTGGA---ATAGGAGCT-----  
GTCCCTCATTGGGTTCTTAGGAGCA---GCCGGAAGCACTATG---GGCGCAGCGTCA---  
ATAACGCTGACGGTACAG---GCCAAACAA---TTATTG---TCTGGTATAGTGCAACAGCAAAGC---  
AATTTG---CTGAGG---GCTATAGAGGCTCAACAGCAGCTGTTGAAACTCACAGTCTGGGGCATT  
>AY371160..1  
TTCTATTGTAATACATCAGGCTTGTTTAACAGCACTTGGTATAAGGAGACTGCCCCCTGTCAGCAGAACAGGGT  
CAAAT-----  
-----  
GACACAAGTGACAATATAACTCTCCCGTGTAGAATAAAGCAAATTATAAATATGTGGCAGAGAACAGGACAAG  
CAATGTATGCCCCCTCCCATCCCAGGAATAATAAGGTGTGAGTCAAAC---  
ATTACAGGACTATTATTGACAAGAGATGGTGGGATTAGCAATAAC-----  
-----  
-----  
AGTAATGAGACTTTTCAGACCTACAGGAGGAGAGATGAAAGATAATTGGAGAAGTGAATTATATAAATATAAAG  
TAGTAAAAATTGAACCACTG---GGAGTAGCACCCACCAAGGCAAGGAGAAGGGTGGTG-----  
-----GAGAGAGAAAAAAGAGCA---GTTGGA---CTTGAGCT-----  
GTCTTCCTTGGGTTCTTAGGAGCA---GCCGGAAGCACTATG---GGCGCGGCGTCA---  
ATAACGCTGACGGTACAG---GCCAGACAA---TTATTG---TCTGGCATAGTGCAACAGCAAAGT---  
AATTTG---CTGAAG---GCTATAGAGGCTCAACAGAATCTGTTGAGACTCACAGTCTGGGGCATT  
>MK086110..1  
TTCTATTGCAACACATCAAACCTTGTTT-----AATTGGAATGGTACTTGAATGGTAACACAACA-----  
-----  
-----  
GGCAATGACACGATAACTCTCCAGTGCAGAATAAAGCAAATTATAAATATGTGGCAGAGGGTAGGACAAGCAA  
TGTATGCCCCCTCCCATTCAGGAGAAATAAAGTGTGAGTCAAAC---  
ATTACAGGACTACTATTGACAAGAGATGGTGGGAACAGTACAGAT-----  
-----  
-----  
AATGAGACTTTTCAGACCTGGAGGAGGAGATATGAGAGACAATTGGAGAAGTGAATTATATAAATATAAAGTAG  
TAAAAATTGAACCACTA---GGAGTAGCACCCAACAAGGCACGGAGGAGAGTGGTG-----  
-----GGGAGAGAAAAAAGAGCA---GTTGGA---CTAGGAGCT-----  
GTCTTCCTTGGGTTCTTGAGTGCA---GCAGGAAGCACTATG---GGCGCGGCGTCA---  
CTGACGCTGACGGTACAG---GCCAGGCAA---TTATTG---TCTGGCATAGTGCAACAGCAAAC---  
AATTTG---CTGAGG---GCAATAGAGGCTCAACAGCATATGTTGAGACTCACGGTCTGGGGCATT  
>AF377958..1  
TTCTATTGCGATACATCAAACTGTTTAATAGTACTTGGGACAAGAATGGCACGTGGGTAAATGGCCACACAG  
GG-----  
-----  
TCAGATAATGACAATATAACTCTCCAATGCAGAATAAAAACAAATTATAAATATGTGGCAGAGAGTAGGACAAG  
CAATGTATGCCCCCTCCCATCCCAGGAGTAATAAGGTGTGAATCTAAC---  
ATTACAGGACTACTATTAACAAGAGATGGAGGGAATAATAATAAT-----  
-----

-----  
AGTGCAAATGAGACCTTCAGGCCTGGAGGAGGAGATATGAGGGACAATTGGAGAAGTGAATTATATAAGTATA  
AGGTAGTAGAAATTGAACCACTA---GGTGTAGCACCCAACCATGCAAGAAGAAGAGTGGTG-----  
-----GAGAGAGAAAAAAGAGCA---GTTGGA---CTGGGAGCT-----  
---GTCTTCCTTGGGTTCTTAGGAGCA---GCAGGAAGCACTATG---GGCGCAGCGTCA---  
ATAACGCTGACGGTACAG---GCCAGACAA---TTATTG---TCTGGTATAGTGCAACAGCAGAGC---  
AATTTG---CTGAAA---GCTATAGAGGCTCAACAACATATGTTGAGACTCACGGTCTGGGGCATT  
>MH705142..3  
TTCTATTGCAATACATCAGCCCTGTTTAATAGCAAGTGGGAAAGTGAATACAATGCCAGCGAGAATGAACAAA  
AG-----  
-----  
AGTGACACTAATATAACTATTCCATGTAGAATAAAGCAATTTGTAAATGTATGGCAGAGAGTAGGACAAGCAA  
TGTATGCCCCCTCCAGTCCAAGGAGAAATAAGATGTGACTCAAAC---  
ATTACAGGACTACTATTAGAAAAGAGAATATGGGGATCATCATAATGGG-----  
-----  
-----  
ACAAATGAGACTTTTCAGACCTACAGGAGGAGACATGATGAACAATTGGAGAAGTGAATTATATAAGTATAAAG  
TAGTAAAAGTTGAACCACTA---GGAGTAGCACCCAGCGGAGCAAGGAGAAGAGTGGTG-----  
-----GCAAGAGAAAAAAGAGCA---CTTGGAGGACTAGGGGCT-----  
GTCTTCCTTGGGTTCTTAGGAGCA---GCAGGAAGCACTATG---GGCGCGGCGTCA---  
CTGACGCTGACGGTACAG---GCCAGACAA---TTACTG---TCTGGTATAGTGCAACAGCAGAGC---  
AATCTG---CTAAGG---GCTATAGAGGCTCAACAACATATGTTGAAACTCACAGTCTGGGGCATT  
>AY371162..1  
TTCTATTGCAATACAACACAACCTGTTTAATAGTACCTGGGAAAATGACACCCTGAAGGGAGCGGCA-----  
-----  
-----  
GGTAATGATACTATTACACTGCCATGCAGAATAAAACAAATTGTAAACATGTGGCAGAGAGTAGGACAAGCAA  
TGTATGCCCCCTCCCATCCAAGGAGTAATACAGTGTGTATCAAAC---  
ATTACAGGACTAATATTGACAAGAGATGGTGGGAGTAATAACAAT-----  
-----  
-----  
ACAAATGAGACCATCAGACCTGGAGGAGGGGAGATGAGGGACAATTGGAGAAGTGAATTATATAAATATAAAG  
TAGTACAAATTGAACCACTA---GGAGTAGCACCCACCAGGGCAAGGAGAAGAGTGGTG-----  
-----CAGAGAGAAAAAAGAGCA---GTTGGA---TTGGGAGCT-----  
CTTTTCCTTGGGTTCTTAGGAGCA---GCAGGAAGCACTATG---GGCGCAGCGTCA---  
ATAACGCTGACGGTACAG---GCCAGACAA---TTATTG---TCTGGCATAGTGCAACAGCAGGGC---  
AATCTG---CTGAGG---GCTATAGAGGCTCAACAACATCTGTTGAAGCTCACGGTCTGGGGCATT  
>MH705135..1  
TTCTATTGTGATACATCAAGCCTGTTTAATAGCACTTGGTCCTGGGAAAATGGCAATTGGTCTTGAATAATA  
ATGACACGACC-----  
-----ACCATGAAC-----  
GAGATAAATACAAATGTGACTATCCCATGCAGAATAAAGCAAATAGTAAATATGTGGCAGAGAGTAGGACAAG  
CAATGTATGCCCCCTCCCATCCAGGAATAATAAATTGTGTATCAAAC---  
ATTACAGGACTATTATTGACAAGAGATGGTGGGAGTAATAACAGT-----  
-----  
-----  
ACAAATGAGACTTTTAGACCTGGAGGAGGAGATATGAGGGACAATTGGAGAAGTGAATTATATAAGTATAAAG  
TAGTAAAAATTGAACCACTA---GGAGTAGCACCCACTAGGGCCAGGAGACGAGTGGTG-----  
-----CAGAGAGAAAAACGAGCA---ATGGGA---ATAGGAGCT-----  
GTGCTCCTTGGGTTCTTGGGAGCA---GCAGGAAGCACTATG---GGCGCGGCGTCA---  
ATAACGCTGACGGTACAG---GCCAGACAA---TTATTG---TCTGGTATAGTGCAACAGCAAAGC---  
AATTTG---CTGAGG---GCTATAGAGGCTCAACAGCATCTGTTGAAACTCACGGTCTGGGGCATT  
>AF069932..1  
TTCTATTGCAATACATCAGGCTTGTTTAATAGCACTTGGACAAATGGGACAAACAGCACGGGG-----  
-----  
-----  
ACTAATGACAATATAACTCTTCCATGCAGAATAAAGCAAATTATAAATATGTGGCAGAGAGTAGGACAAGCAA  
TGTATGCCCCCTCCCATCAAAGGAGTAATAGAGTGTAATCAAAT---  
ATTACAGGAATACTATTAATGAGAGATGGTGGTGCTAATGATACA-----  
-----

-----  
GCTAACAGTGAGACATTTCAGACCTGGAGGAGGAGATATGAAGGACAATTGGAGAAGTGAATTATATAAGTATA  
AAGTAGTAAAAATTGAACCACTA---GGAGTAGCACCCACCAGGGCAAAGAGAAGAGTGGTG-----  
-----GAGAGAGAAAAAAGAGCA---GTTGGA---CTGGGGGCT-----  
---GTCTTCCTTGGGTTCTTAGGAGCA---GCAGGAAGCACTATG---GGCGCGCGTCA---  
TTAACGCTGACGGTACAG---GCCAGACAA---TTATTG---TCTGGCATAGTGCAACAGCAGAGC---  
AATCTG---CTGAAG---GCTATAGAGGCTCAACAGCATCTGTTGAAACTCACAGTCTGGGGCATT  
>AF069939..1  
TTCTATTGCAACACATCAGGACTGTTTAATAGCACTTGGGATAACAACAACATTGCCAGCTCAAACCACACAG  
GG-----  
-----  
TCAAAATGATACTATAACTCTCCAATGCAGAATAAAGCAAATTATAAATCTGTGGCAGAAAGTAGGACAAGCAA  
TGTATGCCCCCTCCCATCCCAGGAATAATAAGGTGTGAATCAAAT---  
ATTACTGGACTCCTATTAACAAGAGATGGAGGGAATAATAATAGT-----  
-----  
-----  
ACAAATGAGACCTTCAGACCTGGAGGAGGAGATATGAGGGACAACCTGGAGAAGTGAATTATATAAGTATAAAG  
TAGTAAAAATTGAACCACTA---GGTGTAGCACCCACCAAGGCAAAAAGAAGAGTGGTG-----  
-----GCGAGAAAAAAAAGAGCA---GTTGGA---CTGGGAGCT-----  
GTCTTCCTTGGTTTCTTAGGAGCT---GCAGGAAGCACTATG---GGCGCAGCGTCA---  
ATAGCGCTGACGGTACAG---GCCAGACAA---TTATTG---TCCGGCATAGTGCAACAGCAGAGC---  
AATCTG---CTGAGG---GCTATAGAGGCTCAACAGCATATGTTGAAACTCACGGTCTGGGGCATT  
>KT427849..1  
TTCTACTGCAACACAATACAGCTGTTTAATAGTACTTGGTTCAATGAGAATAGTACTTGGTTCAATGAGAGTG  
GTACAGGG-----  
-----  
TCAAACTGAAAATATCACACTCCCATGCAGAATAAAGCAAATTATAAATAGGTGGCAGGAAGTAGGAAAAG  
CAATGTATGCCCCCTCCCATCAGTGGACGAATTAAGTGTTCATCAAAT---  
ATTACAGGGCTGCTATTGGTAAGAGATGGTGGTGTATGGGAACGCG-----  
-----  
-----  
ACAGCAGAAATCTTCAGACCTGGAGGAGGAGATATGAGGGACAATTGGAGAAGTGAATTATATAAATATAAAG  
TAGTACAAATAGAACCATTA---GGAATAGCACCCACCAAGGCGAGGAGAAGAGTGGTG-----  
-----CAGAGAGAAAAAAGAGCA---GTGGGAACGATAGGAGCT-----  
ATGTTCTTGGGTTCTTGGGAACA---GCAGGAAGCACTATG---GGCGCAGCGTCA---  
GTAGCGCTGACGGTACAG---GCCAGACAA---TTATTG---TCTGGTATAGTGCAACAGCAAAAT---  
AATTTG---CTGAAG---GCTATTGAGGCGCAACATCATCTGTTGCAACTCACAGTCTGGGGCATT  
>KT427790..1  
TTCTATTGCAATACATCAGGACTGTTTAATGGTACATACAGACCTAATATTACAGGAAACCATAGTGAAATA-  
-----  
-----  
GAAAAATTCGACCATTACAATCCCATGCAGAATAAAACAAATTATAAATATGTGGCAGGAGGTAGGAAAAGCAA  
TGTATGCCCCCTCCCATCAAGGAATAATAACATGTAGATCAAAT---  
ATCACAGGACTACTACTAACACGGGATGGAGGAGGCAATGTCAAT-----  
-----  
-----  
GACAGCACAGAGACATTTCAGGCCTGGAGGAGGAGATATGAGGGACAATTGGAGAAGTGAATTATATAAATATA  
AAGTGGTAGAAATTAAACCATTA---GGAATAGCACCCACTGCGGCAAAAAGGAGAGTGGTG-----  
-----GAGAGAGAAAAAAGAGCA---GTGGGA---ATAGGAGCT-----  
---ATGATCTTTGGGTTCTTGGGAGCA---GCAGGAAGCACTATG---GGCGCAGCATCA---  
ATAACGCTGACGGTACAA---GCCAGACAA---TTATTG---TCTGGGATAGTGCAACAGCAAAAGC---  
AATTTG---CTGAGA---GCTATAGAGGCGCAACAGCATATGTTGCAACTCACGGTCTGGGGCATT  
>KF835539..1  
TTCTATTGTAATACTTCAGGCCTGTTTAATGGTACATACCTGCCTAATGGTACATACATGCCTAATGATATAC  
AAGAT-----  
-----  
ACAAACTCAACCATCACGATTCCATGCAGAATAAAGCAAATTATAAATATGTGGCAGGAGGTAGGACGAGCAA  
TGTATGCCCCCTCCCATTTGAAGGAAACATAACATGTAAATCAAAT---  
ATCACAGGACTACTATTGGTACGTGATGGAGGAAACCAAGAAAAACAGGAAAT-----AAT-----  
-----

-

ACAACAAATGATACAACAGAGACATTTCAGACCTCAAGGAGGAGATATGAGGGATAATTGGAGAAGTGAATTAT  
ATAAATATAAAGTGGTAGAAATTAAGCCATTG---GGAATAGCACCCACTAAAGCAAAAAGGAGAGTAGTG--  
-----GAGAGAGAAAAAAGAGCA---GTGGGA---  
CTAGGAGCT-----GTGTTCTTGGGTTCTTGGGAGCA---GCAGGAAGCACTATG---  
GGCGCGGCGTCA---ATAACGCTGACGGTACAG---GCCAGACAA---TTGCTG---  
TCTGGTATAGTGCAACAGCAAAGC---AATTTG---CTGCAA---  
GCTATAGAGGCGCAACAGCATCTGTTGCAACTCACGGTCTGGGGCATT  
>KC898983..1  
TTCTATTGTAATACATCAAAGCTGTTTAATGGCACATACAATGGCACAGACATGACTAATATGATTAAT----  
-----  
-----  
AGTTCAGCAGTAATCATAATCAGATGCAGAATAAAGCAAATTGTAAACATGTGGCAGGAGGTAGGACGAGCAA  
TGTATGCCCCCTCCCATTCAGGAAACATAACATGTAGATCAAAT---  
ATCACAGGACTATTATTGGTACGTGATGGAGGAAAATCAAATACT-----  
-----  
-----  
ACAGAGACATTTCAGACCTCAAGGGGGAGATATGAGGGACAATTGGAGAAGTGAATTATATAAATATAAAGTGG  
TAGAAATTAAGCCATTA---GGAATAGCACCCACTGAAGCAAAAAGGAGAGTAGTG-----  
-----GAGAGAGAAAAAAGAGCA---GCGGGA---ATAGGAGCT-----  
GTGTTCTTGGGTTCTTGAGTGCA---GCCGGAAGCACTATG---GGCGCGGCGTCA---  
GTAACGCTGACGGTACAG---GCCAGACAA---TTGCTG---TCTGGTATAGTGCAACAGCAAAGC---  
AATTTG---CTGAGG---GCTATAGAGGCGCAACAGCATATGTTGCAACTCACGGTCTGGGGCATT  
>HM776938..2  
TTCTATTGTAATACATCAGGCCTGTTTAATAGTACATACTGGCCTAATGGTACATACATGTATTATAAAACAA  
AC-----  
-----  
AATGATTCAATCATCACAATCCCATGCAGAATAAAGCAAATTATAAACATGTGGCAGCAGGTAGGAAGAGCAA  
TGTATGCCCCCTCCCATTCAGGAAGAATAACATGTAACCTCAAAT---  
ATCACAGGACTACTATTGGTACGTGATGGAGGCCTAGGTAATACTACA-----  
-----  
-----  
GATAATACTACAGAGACGTTTCAGACCCCAAGGAGGAAATATGAGGGACAATTGGAGAAGTGAAGTATATAAAT  
ATAAAGTGGTAGAAATTCAGCCGTTG---GGAATAGCACCCACTAAAGCAAAGAGGAGAGTGGTG-----  
-----GAGAGAGAAAAAAGAGCA---GTGGGA---ATAGGAGCT---  
-----GTGTTCTTGGGTTCTTGGGAGCA---GCAGGAAGCACTATG---GGCGCGGCGTCA---  
ATAACGCTGACGGTACAG---GCCAGACAA---TTGCTG---TCTGGTATAGTGCAACAGCAAAGC---  
AATTTG---CTGAAG---GCTATAGAGGCGCAACAGCATATGTTGCAACTCACGGTCTGGGGCATT  
>KF250381..1  
TTCTATTGTAATACATCAGGTCTGTTTAATGGTACATACAATAGTACAAGA-----  
-----  
-----TACAATAATACA-----  
AGGGAGAATGGAACCATCACAATCCCATGTAGAATAAAGCAAATTATAAACATGTGGCAAGAGGTAGGACGAG  
CAATGTATGCCCCCTCCCATTAAGGAAACATAACATGTAAATCAAAT---  
ATCACAGGACTACTATTGGTACGTGATGGAGGA-----  
-----  
-----  
ACAAATCAAAGTAAT---  
ACAACAGAGATATTCAGACCTGGAGGAGGGGATATGAGGGACAATTGGAGAAGTGAATTATATAAATATAAAG  
TGGTAGAAATTAAGCCATTG---GGAGTAGCACCCACTAAAGCAAAAAGGAGAGTGGTG-----  
-----GAGAGAGAAAAAAGAGCA---GTGGGA---TTGGGAGCT-----  
ATGTTCTTGGGTTCTTGGGAGCA---GCAGGAAGCACTATG---GGCGCAGCGTCA---  
ATAACGCTGACGGTACAA---GCCAGACAA---TTGTTG---TCTGGTATAGTGCAACAGCAAAGC---  
AATTTG---CTGAGA---GCTATAGAGGCGCAACAGCATCTGTTGCAACTCACTGTCTGGGGCATT  
>KF250382..1  
TTCTATTGTAATACATCAGGCTTGTTTAATGGTACATACCATAATGGTACATAC-----  
-----  
-----  
ACATTTAATGGTACAGAA-----  
GGTAATGCAAGCTCAATCATCATTCATGCAGAATAAAGCAAATTATAAATATGTGGCAAGAGGTAGGACGAG  
CAATGTATGCCCCCTCCCATTAAGGAAAATTAGAATGTAAATCAAAT---  
ATCACAGGACTACTATTGGTACGTGATGGAGG-----

-----  
 ----  
 ATAAATACTACAGAGGAGACATTTCAGACCTGGAGGAGGAGATATGAGGGACAATTGGAGAAATGAATTATATA  
 AATATAAAGTGGTAGAAGTTCAGCCATTG---GGAATAGCACCCACTAAAGCAAAAAGGAGAGTGGTG-----  
 -----GAGAGAGAAAAAAGAGCA---GCGGGA---  
 CTGGGAGCT-----GTGTTCCCTTGGGTTCTTGGGAGCA---GCAGGAAGCACTATG---  
 GGCGCGGCGTCA---ATAACGCTGACGGTACAG---GCCAGACAA---TTGTTG---  
 TCTGGTATAGTGCAACAGCAAAGC---AATCTG---CTGAGA---  
 GCTATAGAGGCGCAACAACATCTGTTGCAACTCACTGTCTGGGGCATT  
 >KC898988..2  
 TTCTATTGTAATACATCAAGCCTGTTTAAATAGTACATACACGAATGGTACATACATGTTTAAATGGTACGATAG  
 GTAAT-----  
 -----  
 TCAAGTTCAGACATCACAATTCAATGCAAAATAAAGCAAATTATAAACATGTGGCAGGAGGTAGGACGAGCAA  
 TGTATGCCCCCTCCCATTAAGGAAACATAACATGTAAATCAAAT---  
 ATCACAGGACTACTATTGGTACGTGATGGAGGAAATGGGACAAAT-----  
 -----  
 -----  
 CAGACAGAGACATTTCAGACCTGGAGGAGGAGATATGAGAGACAACCTGGAGAAGTGAATTATATAAATATAAAG  
 TGGTAGAAATTAAGCCATTG---GGAGTAGCACCCACTAAGGCAAAAAGGAGAGTGGTG-----  
 -----GAGAGAGAAAAAAGAGCA---GTGGGA---ATAGGAGCT-----  
 GTGTTCCCTTGGGTTCTTAGGTGCA---GCCGGGAGCACTATG---GGCGCGGCGTCA---  
 ATAACGCTGACGGTACAG---GCCAGACAA---TTGTTG---TCTGGTATAGTGCAACAGCAAAGC---  
 AATTTG---CTGAGG---GCTATAGAGGCGCAACAGCATATGTTGCAACTCACGGTCTGGGGCATT  
 >KC899010..1  
 TTCTACTGTAATACAACAAAACCTGTTTAAATAACTTGAATAGTACTAAACGAGACTTTGAGAAACCTTGA  
 GTGATGATAAC-----  
 -----  
 AGAACAGGCATTATCACAATCCCATGCAGAATAAAACAAATTATAAACATGTGGCAGGGAGTAGGAAAAGCAA  
 TGTATGCCCCCTCCCATTCAGGAAACATAACATGTAACCTCCACT---  
 ATCACAGGACTACTGTTGGTACGTGATGGAGGAAATACTACAGGGAAAAATGAT-----  
 -----  
 -----  
 ACAAATAATATAGAGATATTCAGGCCTCAAGGAGGAAATATGAAGGACAATTGGAGAAGTGAATTATATAAAT  
 ATAAAGTAGTAAAAATTGAACCATTG---GGAGTAGCACCCACCAAGGCAAAGAGAAGAGTGGTG-----  
 -----CAGAGGGAAAAAAGAGCA---GTGGGGGCGTTTGGAGCT---  
 -----ATGTTCCCTTGGGTTCTTGGGAGCA---GCAGGAAGCACTATG---GGCGCAGCGTCA---  
 ATAACGCTGACGGTACAG---GCCAGACAA---TTGTTG---TCTGGTATAGTGCAACAGCAGAGA---  
 AATTTG---CTGAGG---GCTATTGAGGCGCAACAACATCTGTTGCAACTCACAGTCTGGGGCATC  
 >KC807955..1  
 TTCTATTGTAATACATCAAGCCTGTTTAAATAGTACATACAATGGTACATACATGTTTAAATGGTACAATGGTTG  
 ATAATATA-----  
 -----AATAGG-----  
 ACTTCAGACTTAAACTTCACAATCCCATGCAGGATAAAGCAAATTATAAATCTGTGGCAGGAGGTAGGACGAG  
 CAATGTATGCCCCCTCCCATTCAGGAAAGAAATAACATGTAAATCAAAT---  
 ATCACAGGACTACTATTGACACGTGATGGAGGGAATGGGACAGAGACA-----  
 -----  
 -----  
 AATCAGACAGAGATATTCAGACCTGGAGGAGGAGATATGAGGGACAATTGGAGAAGTGAATTATATAAATATA  
 AAGTAGTAGAAATTAAGCCATTG---GGAGTAGCACCCACTACAGCAAAAAGGAGAGTGGTG-----  
 -----GAGAGAGAAAAAAGAGCA---GTGGGA---ATAGGAGCT-----  
 ---GTGTTCCCTTGGGGTCTTGGGAGTA---GCCGGAAGCACTATG---GGCGCGGCGTCA---  
 ATAACGCTGACGGTACAG---GCCAGACAA---TTGCTG---TCTGGTATAGTGCAACAGCAAAAT---  
 AATTTG---CTGAGA---GCTATAGAGGCGCAACAGCATCTGTTGCAACTCACGGTCTGGGGCATT  
 >KC807982..1  
 TTCTATTGTAATACATCAAAACCTGTTTAAATAGTACATACATGCCTACATACAATGATACAGAGAATAGT----  
 -----  
 -----  
 TCAAAATGAAAGCATCACAATCCCATGCAGAATAAAGCAAATTATAAATATGTGGCAGAAGGTAGGACGAGCAA  
 TGTATGCCCCCTCCCATTCAGGAATCATAACATGTAAATCAAAT---

ATCACAGGACTACTATTGGCACGTGATGGAGGAAAAGGTAATGAGACAGAT-----  
-----  
-----  
AATAAGACAGAAATATTTAGACCTCAAGGAGGAAATATGAGGGACAATTGGAGAAATGAATTATATAAAATATA  
AAGTGGTAGAAATCAAGCCATTG---GGAATAGCACCAACTGGAGCAAAAAGGAGAGTGGTG-----  
-----GACAGACAAAAAAGAGCA---GTGGGA---ATAGGAGCT-----  
---GTGTTCCCTTGGGTTCTTGGGAGCA---GCAGGAAGCACTATG---GGCGCGGCGTCA---  
ATAACGCTGACGGTACAG---GCCAGAAAA---TTGCTG---TCTGGTATAGTGCAACAGCAAAGC---  
AATTTG---CTGAGA---GCTATAGAGGCGCAACAGCACATGTTGCAACTCACGGTCTGGGGCATT  
>KF250399..1  
TTCTATTGTAATACATCAAACTGTTTAATGGTACATACAATGATACAGACATGTCTAATGGTACAGAA----  
-----  
-----  
AGTAATTCAACCATCACAATTCCATGCAGAATAAAGCAAATTATAAACATGTGGCAGGGGGTAGGACGAGCAA  
TGTATGCCCCCTCCCATTTGAAGGAAACATAACATGTAAATCAAAT---  
ATCACAGGACTACTATTGGTACGTGATGGAGGAGAAGAGACAAAT-----  
-----  
-----  
GTTACAAATAACACAGAGACATTCAGACCTCAAGGAGGAGATATGAAGGACAATTGGAGAAGTGAATTATATA  
AATATAAAGTGGTAGAAATTAAGCCATTG---GGAATAGCACCCACTGGAGCAAAAAGGAGAGTGGTG-----  
-----GAGAGAGAAAAAAGAGCA---GTAGGA---  
ATAGGAGCT-----GTGTTCCCTTGGGTTCTTGGGAGCA---GCAGGAAGCACTATG---  
GGCGCGGCGTCA---ATAACGCTGACGGTACAG---GCCAGACAA---TTGTTG---  
TCTGGTATAGTGCAACAGCAAAGC---AATTTG---CTGAGA---  
GCTATAGAGGCGCAACAACATCTGTTGCAACTCACGGTCTGGGGCATT  
>KF250405..1  
TTCTATTGTAATACATCAGGCCTGTTTAATGGTACATACAACAATACAGCCAATAATTCAAGC-----  
-----  
-----  
TCAAACAGCACAATCATAATCCCATGTAGAATAAAGCAAATTATAAATATGTGGCAGGAGGTAGGACGAGCAA  
TGTATGCCCCCTCCCATTTAAAGGAAACATAACATGTAAATCAAAT---  
ATCACAGGAATATTATTGATCCGTGATGGAGGAAATGGAAATGAGACA-----  
-----  
-----  
AATGAAACAGAGACATTCAGACCTCAAGGAGGAGATATGAGGGACAATTGGAGAAGTGAATTATATAAAATATA  
AAGTAGTAAAAATAGAACCATTA---GGAGTAGCACCCACCAAGGCAAAAAGAAGAGTGGTG-----  
-----CAGAGAGAAAAAAGAGCA---GTAGGA---ATAGGAGCT-----  
---GTGTTCCCTTGGGTTCTTGGGAGCA---GCAGGAAGCACTATG---GGCGCGGCGTCA---  
ATAACGCTGACGGTACAG---GCCAGACAA---TTGTTG---TCTGGTATAGTGCAACAGCAAAGC---  
AATTTG---CTGAGG---GCTATAGATGCGCAACAACATATGTTGCAACTCACAGTCTGGGGCATC  
>MK792287..2  
TTCTATTGCAATACATCAGGCCTGTTTAATAGTACATACTGGTCTAATGGTACATACAAGATCAATGATACAT  
ACAAAGTT-----  
-AATGATACAGAAAGT-----  
AAGTCAATCATCTTCCAAATCCCATGCAGAATAAAGCAAATTGTAAACATGTGGCAGGAGGTAGGAAGAGCAT  
TTTATGCCCCCTCCCATTTGAAGGAAACATAACATGTAAATCAAAT---  
ATCACAGGACTACTATTGGTACGTGATGGAGGGCAGCCAAAAAATGGT-----  
-----  
-----  
ACAAATAGTACAGAAGAGATATTAGGAGGAAATATGAAGGACAATTGGAGAAGTGAATTATACATA  
AGTATAAAGTGGTAGAAATCAACCATTG---GGAGTAGCACCCACTACAGCAAAAAGGAGAGTGGTG-----  
-----GGAAGAGAAAAAAGAGCAGTATTTGGA---  
ATAGGAGCT-----GTGTTCCCTTGGGTTCTTGGGAGCA---GCAGGAAGCACTATG---  
GGCGCGGCGTCA---ATAGCGCTGACGGTACAG---GCCAGACAA---TTGCTG---  
TCTGGTATAGTGCAACAGCAAAC---AATTTG---CTGAGA---  
GCTATAGAGGCGCAACAGCATATGTTGCAACTCACGGTCTGGGGCATT  
>EU000514..1  
TTCTACTGTAATACATCAAACTGTTTAATAGTACTTGGAACAGTAGTAGTACTTGGACTACT-----  
-----  
-----

ACAGGAAATATCACCACAATCCCATGCAGAATAAAGCAAATTGTAAATATGTGGCAGGAAGTAGGACGAGCAA  
TGTATGCCCCCTCCCATTTGAAGGACTAATTAGATGTACATCAAAT ---  
ATTACAGGGTTACTATTAACAAGAGATGGTGGTTATGAGAACAAGACA-----  
-----  
GGGAACAGGACAGAGACCTTCAGACCTGCAGGAGGAAATATGAGGGACAATTGGAGAAGTGAATTATATAAAT  
ATAAAGTAGTAAAAATTGAACCATTA --- GGAGTAGCACCCACCAAGGCAAAGAGAAGAGTGGTG-----  
-----CAAAGAGAAAAAAGAGCA --- GTGGGAGCGATAGGAGCT ---  
-----GTGTTCTTGGGTTCTTGGGAGCA --- GCAGGAAGCACTATG --- GGCGCAGCGGCA ---  
ATAACGCTGACGGTACAG --- GCCAGACAA --- TTGATG --- TCTGGTATAGTGCAACAGCAGAGA ---  
AATTTG --- CTGAGA --- GCTATTGAGGCGCAACAGCATCTGTTGCAACTCACAGTCTGGGGCATT  
>AB097873..1  
TTCTATTGTAATACAACAACACTGTTTAATAGTAGTTGGAATGAGACTGATATTGGGAATAATACTAGTACTG  
GG-----  
-----  
AATGATACTACTATCATGCTCCCTTGCAGAATAAAACAAGTTGTAAACATGTGGCAGGAAGTAGGAAAAGCAA  
TGTATGCCCCCTCCCATCAGAGGACTAATTAAATGTTTCATCAAAT ---  
ATTACAGGGTTACTATTGACAAGAGATGGTGGTCATAATGAGACT-----  
-----  
GAGACTGAGACCTTCAGACCTGGAGGAGGAGATATGAGGGACAATTGGAGAAGTGAATTATATAAATATAAAG  
TAGTAAAAATTGAACCATTA --- GGAGTAGCACCCACCAGGGCAAAGAGAAGAGTGGTG-----  
-----CAGAGAGAAAAAAGAGCA --- GTGGGAATGATGGGAGCT-----  
ATGTTCTTGGGTTCTTGGGAACA --- GCAGGAAGCACTATG --- GGCGCAGCGTCA ---  
ATAACGCTGACGGTACAG --- GCCAGACAA --- TTGTTG --- TCTGGTATAGTGCAACAGCAGAGA ---  
AATTTG --- CTGAGG --- GCTATTGAGGCGCAACAGCATATATTGCAACTCACAGTCTGGGGCATC  
>MF373189..1  
TTCTACTGTAATACATCAAACCTGTTTAATACATCAAACCTGTTTAATACTGATGATAATGCAACTGGA ---  
-----  
-----  
AAAAGTGACACTATCACTCTCACATGCCCAAGAAAACTAATTATAAACATGTGGCAGGAATTAGGGAAAGGGA  
AGGATGCGCCTCCCATTTCCAAGCCAAAGACAATGTACATCTTCC ---  
ATTACCGGACTGCTATTGCTAATAGATGGAGGTTTAGACAACACC-----  
-----  
AACAACGAGACCTTCAGACCTGGAGGAGGAGATATAAGAGATAATTGGAAAAGTGGGAATATATAAATATTATG  
CATTAAAAATAGAACCATTA --- GGAATATCACCCAACACTGCAACGAAAACAGTGATG-----  
-----CTAAGGGAACAAAGAGTA --- ATGAGA --- ACAGGAGCT-----  
GTGTTCTTGGGTTCTTGGGAGCA --- GCAGGAAGCACTATG --- GGCGCAGCGTCA ---  
ATAACGCTGACGGTACAG --- GCCAGGCTA --- TTATTG --- TCTGGTATAGTGCAACAGCAGAGC ---  
AATTTG --- CTGAGG --- GCTATTGAGGCGCAACAACATCTGTTGCAACTCACAGTCTGGGGCATC  
>KT183077..1  
TTCTACTGTAATACATCAAACTGTTTAATACTACACTGTTTAATAAGAATAGTACTACACTGACTTGGAATG  
ATACTGAC-----  
-----  
ACTGCAGAAAATATTACAATCCCATGCAGAATAAAACAAATTATAAATATGTGGCAGGAAGTAGGAAAAGCAA  
TATATGCTCCTCCCATCAGTGGACTAATTAGATGCTCATCAAAT ---  
ATTACAGGACTGCTATTAATAAGAGATGGGGGTAATGATAATCAG-----  
-----  
-----  
ACTGAGATCTTTAGACCTGGAGGAGGAGATATGAGGGATAACTGGAGAAGTGAATTATACAAATATAAAGTAG  
TAGAAATTAAGCCATTA --- GGAGTAGCACCCACCAAGGCAAAGAGAAGAGTGGTG-----  
-----CAGAGAGAAAAAAGAGCA --- ATAATAGGGATGGGAGCT-----  
GTGCTCTTTGGGTTCTTGGGAGCA --- GCAGGAAGCACTATG --- GGCGCAGCGTCA ---  
ATAACGCTGACGGTACAG --- GCCAGACAA --- TTAATA --- TCTGGTATAGTGCAACAGCAAAAC ---  
AATTTG --- CTGAGA --- GCTATTGAGGCGCAACAACATCTGTTGCAACTCACAGTCTGGGGCATT  
>KJ849787..3  
TTCTACTGCAATACATCAGGACTGTTTAATTACTTCAATAATAACACCAAT-----  
-----  
-AATAACAAATCCTCT-----

TCTGATGACACTCATATCACTCTCCCATGTCTGAATAAAACAAATTATAAACATGTGGCAGGAAGTAGGAAGAG  
CAATGTATGCTAATCCCATTTGCAGGAAACATTACCTGTAGATCAAAT---  
ATTACAGGCCTACTATTGACTAGAGATGGTGGT-----  
-----  
CATAATGATAATACTACTAAT-----  
CGGACTGAGATCTTTAGACCTGGGGGAGGAAATATGAAAGACAATTGGAGAAGTGAATTATATAAATACAAAG  
TAGTAGAAATTGAACCACTA---GGAGTAGCACCCACAAAGGCAAAAAGACAAGTGGTG-----  
-----AGCAGACACAGAAGAGCA--GTGGGA---TTTGGAGCT-----  
GTGTTTCCTTGGGTTCTTGTTCGGCA---GCAGGAAGCACTATG---GGCGCAGCGTCA---  
GTGACGCTGACGGTACAG---GCCAGGCAA---TTATTG---TCTGGTATAGTGCAACAGCAGAAC---  
AATTTG---CTGAAA---GCTATTGAGGCGCAACAGCATTTGTTGCAACTCACAGTCTGGGGCATT  
>KJ849800..2  
TTCTACTGCAATACATCACAACCTGTTTAATGAGACA-----  
-----  
-----  
ATAAGCAATGACACTATCAAACTCCCATGTCTGAATAAAACAAATTGTAAACATGTGGCAAGAAGTAGGAAAAG  
CAATGTATGCCACTCCCATTTGAAGGAAACATTACCTGTAACTCAAAC---  
ATTACAGGTCTACTATTGACAAGGGATGGTGGT-----  
-----  
CAGAATAATGATACCAAT---  
AAGACTGAGACCTTCAGACCTGGGGGAGGAAATATGAAGGACAATTGGAGAAGTGAATTATATAAATATAAAG  
TAGTAGAAATTCAACCACTA---GGAATAGCACCCACCAAGGCAAAAAGACAAGTGGTG-----  
-----AAAAAGAAAAAGAGCA--ATAGGA---CTAGGAGCT-----  
ATGTTTCCTTGGGTTCTTGGGAGCA---GCAGGAAGCACTATG---GGCGCAGCGTCA---  
ATAACGCTGACGGTACAG---ACCAGACAA---TTAATG---TCTGGTATAGTGCAACAGCAAAGC---  
AATTTG---CTGAGG---GCTATTGAGGCGCAACAGCATCTGTTGCAACTCACGGTTTGGGGCATC  
>KY968400..1  
TTCTACTGTAATACAACACAACCTATTTAATACTACTTGGAAAAATAATAACTGAAGAGACAAATAGCACTA  
AA-----  
-----  
GGAAATGACACTATCACACTCCCATGTCAGAATAAAACAGATCATAAATATGTGGCAGGAAGTAGGAAAAGCAA  
TGTATGCCCCCTCCTATCAGCGGAAAAATTAGATGCTCATCAAAT---  
ATTACAGGACTGCTACTAACAAGAGATGGTGGTATTCTATAACAATAGC-----  
-----  
-----  
AATGGGACTGAGACCTTCAGACCTGGGGGAGGAAATATGAAGGATAATTGGAGAAGTGAATTATATAAATATA  
AAGTAGTACAAATTGAACCATTA---GGAGTAGCACCCACCAGGGCAAAGCGAAGAGTGGTG-----  
-----CAGAGAGAAAAAGAGCA--GCAGGA---ATGGGAGCT-----  
---TTGTTTCCTTGGGTTCTTGGGAGCA--GCAGGAAGCACTATG---GGCGCAGCGGCA---  
GTGACGCTGACGGTACAG---GCCAGACAA---TTATTG---TCTGGTATAGTGCAACAGCAAAAC---  
AATTTG---CTGATG---GCTATTGAGGCGCAACAGCATCTGTTGCAACTCACAGTCTGGGGCATC  
>KY968405..1  
TTCTACTGTAATACAACACCACTGTTTAATAGCACTTGGAAATAGGACTAATAGCACTTGGAAATAGGAATGGGA  
ATAGT-----  
-----  
ACTAATGGTACAATCACACTCCAATGCAGAATAAAACAAATTATAAACATGTGGCAGGAAGTAGGAAAAGCAA  
TGTATGCCCCCTCCCATCCAAGGACTAGTTAACTGTTTCATCAAAT---  
ATTACAGGTCTACTATTGACAAGAGATGGTAGTCAG-----  
-----  
-----  
AATGATACTGAGACCTTCAGACCTGGGGGAGGAGATATGAAAGACAATTGGAGAAGTGAATTATATAAATATA  
AAGTAGTAAGAATTGAACCATTA---GGAGTAGCACCAACAAAGGCAAAGAGAAGAGTGGTG-----  
-----CAGAGAGAAAAAGAGCA---GTGGGA---CTAGGAGCT-----  
---ATGTTTCCTTGGGTTCTTGGGAGCA---GCAGGAAGCACTATG---GGCGCAGCGTCA---  
GTGACGCTGACGGTACAG---GCCAGACAA---TTATTG---TCTGGTATAGTGCAACAGCAGAAC---  
AATCTG---CTGAGA---GCTATTGAGGCGCAACAACATCTGTTGCAACTCACAGTCTGGGGCATC  
>MH078535..2  
TTTTACTGCAATACAGCAGGATTGTTTAATAACATAAAA-----  
-----  
-----

AATAATGGAACAATCATACTCCCTTGCAGAATAAAACAAATAATAAACATGTGGCAGGAAGTAGGAAAAGCAA  
TGTATGCTCCTCCCATCAGCGGACGAATCAACTGTTTCATCAAAT---  
ATTACAGGTCTAATATTGACAAGAGATGGTGGCTATCAAAATGATAGT-----  
-----  
-----  
AATGCTAGTGAAATCTTCAGACCTGGAGGAGGAGATATGAGGGACAATTGGAGAAGTGAATTATATAAAATATA  
AAGTAGTAAAAGTTGAACCATTA---GGGATAGCACCCACCAAGGCAAAGAGAAGAGTGGTG-----  
-----CAGAGAGAAAAGAAGAGCA---GTGGGA---CTAGGAGCT-----  
---GTGTTCCCTTGGGTTCTTGGGAGCA---GCAGGAAGCACTATG---GGCGCAGCGTCA---  
ATAACGCTGACGGTACAG---GCCAGACAA---TTATTG---TCTGGTATAGTGCAAGCAGCAGAAC---  
AATCTG---CTGAGG---GCTATTGAGGCGCAACAGCACCTGTTGCAACTCACAGTCTGGGGCATC  
>AF408628..3  
TTCTACTGTAACCAACACCGCTGTTTAATAGTACTTGGCATACAAATGGTACTAGTACTTTAGAGTCAAATG  
CCACT-----  
-----  
GAAGGAAACGACACAATCATACTCCCATGCAGAATAAAACAAATTATAAACAGGTGGCAGGAAGTAGGAAAAG  
CAATGTATGCCCTCCCATCAGAGGAATAATTAAGTGTATCAAAT---  
ATTACAGGGCTGCTGTTAATAAGAGATGGTGGTAATCAGAATCAGACA-----  
-----  
-----  
GGGGATCAGACAGAGACCTTCAGACCTGGAGGAGGAAATATAAAAGACAATTGGAGAAGTGAATTATATAAAAT  
ATAAAGTAGTAGAAATTGAACCATTA---GGAGTAGCACCCACCAAGGCAAAGAGAAGAGTGGTG-----  
-----CAGAGAGAAAAAGAGCA---GCG-----ATAGGAGCT---  
-----ATATTCCTTGGGTTCTTGGGAGCA---GCAGGAAGCACTATG---GGCGCAGCGTCA---  
ATAACGCTGACGGTACAG---GCCAGACTA---TTATTG---TCTGGTATAGTGCAACAGCAGAAC---  
AATTTG---CTGAGG---GCTATTGAGGCACAACAACATCTGTTGCAACTCACAGTCTGGGGCATC  
>AY037278..1  
TTCTACTGCAATACATCAGGACTGTTTAATAACACAAAAGAA-----  
-----  
-----  
AATGGCACTATTATTCTCCCATGTAGAATAAAACAAATTGTAAACATGTGGCAGGAAGTGGGACAAGCAATGT  
ATGCCGCTCCCATTCAGGAAACATTTCTGTAACTCAAAT---  
ATTACAGGTCTACTATTGACAAGAGATGGTGGTCAGAATAATGATACT-----  
-----  
-----  
AATGGAAGTGAAGATCTTCAGACCTGGGGGAGGAAATATGAAAGACAATTGGAGAAATGAATTATATAAAATATA  
AGGTAGTAGAAATTGAACCACTA---GGAATAGCACCCACCAGGGCAAAGAGACGAGTGGTG-----  
-----GAGAGAGAAAAAGAGCA---GTGGGA---ATAGGAGCT-----  
---TTGTTCCCTTGGGTTCTTGGGAGCA---GCAGGAAGCACTATG---GGCGCAGCGTCA---  
ATAACGCTGACGGTACAG---GCCAGGCAA---TTATTG---TCTGGAATAGTGCAACAGCAGAAC---  
AATCTG---CTGAGA---GCTATTGAAGCGCAACAACATATGTTGCAGCTCACAGTCTGGGGCATT  
>AY037283..1  
TTCTACTGCAATACATCAAGACTGTTTAATGACACACTGTTTAATGATACAGAA-----  
-----  
-----  
TCCAATGAAACTATTATTCTCCCATGTAAATAAAACAAAGTTGTAAACCTGTGGCAGGAAGTGGGACGAGCAA  
TGTATGCCGCTCCCATTCAGGAGCCATTACCTGTAACTCAACT---  
ATTACAGGTCTATTATTGACAAGAGATGGTGGTCAGAGTAATGATACTAAT-----  
-----  
-----  
GGTACTAAGATTGAGACCTTCAGACCTGGGGGAGGAAATATGAAAGACAATTGGAGAAGTGAATTATATAAAAT  
ATAAAGTAGTAGAAATTGAACCAATA---GGAGTAGCACCCACCAAGGCAAAAAGACAAGTGGTG-----  
-----AGGAGAGAAAAAGAGCA---GCA-----TTGGGAGCG---  
-----TTGCTCCTTGGGTTCTTGGGAGCA---GCAGGAAGCACTATG---GGCGCGGCGTCA---  
ATAACGCTGACGGTACAG---GCCAGACAA---TTATTG---TCTGGAATAGTGCAACAGCAAAAC---  
AATTTG---CTGAGG---GCTATTGAAGCGCAACAGCATCTGTTGCAGCTCACAGTCTGGGGCATT  
>DQ358803..2  
TTCTACTGTAATACAACACAACTGTTTAATAGTACTTGGGATAGTACTGCAGGGAGCAACACTGAT-----  
-----  
-----GGAAGTGACGCCATCATACTCCTATGCCGAATA---

AACAAATTATACATGTGGCAGAAAGTAGGAAAAGC ---  
 ATGTTTGCCCCCTCCCATCAGCGGACAAATCAGATGCTCATCAAAT ---  
 ATTACAGGTATACTATTGACAAGAGATGGTGGTCAGAATAATGATACT -----  
 -----  
 -----  
 AATGAGACTGAGATCTTCAGACCTGGAGGAGGAGATATGAGAGACAATTGGAGGAGTGAATTATATAGATATA  
 AAGTGGTAAAAATTGAGCCATTA --- GGAGTAGCACCCACCTTGGCAAAGAGAAGAGTGGTG -----  
 ----- CAGAGAGAAAAAAGAGCA --- GTGGGG --- ATAGGAGCT -----  
 --- TTGTTCTTGGGTTCTTGGGAGCA --- GCAGGAAGCACTATG --- GGCGCAGCGTCA ---  
 ATAACGCTGACGGTACAG --- GCCAGACAA --- TTATTG --- TCTGGTATAGTGCAACAGCAGAAC ---  
 AATTTG --- CTGAGG --- GCTATTGAGGCGCAACAACATCTGTTGCAACTCACAGTCTGGGGCATC  
 >DQ358804..1  
 TTCTACTGCAATACATCAGGACTGTTTGATGAAACAAAATTTAATGACACAGAATCC -----  
 -----  
 -----  
 AATAACGCCACTATCACTCTCCTATGTCTGAATAAAACAAATTGTAAACATGTGGCAGGAAGTAGGACGAGCAA  
 TGTATGCCAATCCCATTGCAGGAAGCATTACCTGTAACTCAACT ---  
 ATCACAGGTCTATTATTGACAAGAGATGGTGGTCAGAATACTACG -----  
 -----  
 -----  
 AATAGTACTGAGATCTTCAGACCTGGGGGAGGAAATATGAAAGACAATTGGAGAAGTGAATTATATAAAATATA  
 AAGTAGTAGAAATTGAACCACTA --- GGAATAGCACCTCCAGGGCAAAAAGACAAGTGGTG -----  
 ----- AAGAGAGAAAAAAGAGCA --- GTTGGA --- CTAGGAGCT -----  
 --- ATGTTTCATTGGGTTCTTGGGAGCA --- GCAGGAAGCACTATG --- GGCGCGGCGTCA ---  
 ATAACGCTGACGGTACAG --- GCCAGACAA --- TTAGTG --- TCTGGAATAGTGACAGCAGCAAAAT ---  
 AATTTG --- CTGAGG --- GCTATTGAAGCGCAACAGCATCTGTTGCAGCTCACAGTCTGGGGCATT  
 >DQ358806..1  
 TTCTACTGCAATACATCAGGACTGTTTAATGACACAGTACCC -----  
 -----  
 -----  
 AATGGCACTATCACTCTCCCATGTCTGAATAAAACAAATTGTAAATATGTGGCAAGGAGTGGGGCAAGCAATGT  
 ATGCCGCTCCCATTCAGGAAATATTACCTGCAGATCAAAT ---  
 ATTACAGGTATACTATTGACAAGAGATGGTGGTGATGCTAATCAGAATGAT -----  
 -----  
 -----  
 CCCAATGGAAATGAGACCTTTAGACCTGGGGGAGGAAATATGAAAGACACCCGGAGAAGTGAATTATATAAAT  
 ATAAAGTAGTAAAAATTGAGCCATTA --- GGAATAGCACCCACCAAGGCAAAGAGAAGAGTGGTG -----  
 ----- CAGAGAGAAAAAAGAGCA --- GTGGGCACGTTAGGAGCT ---  
 ----- ATGTTCTTGGGTTCTTGGGAGCA --- GCAGGAAGCACTATG --- GGCGCAGCGTCA ---  
 ATAACGCTGACGGTACAG --- GCCAGGCAA --- TTATTG --- TCTGGTATAGTGCAACAGCAAAAC ---  
 AATTTG --- CTGAGG --- GCTGTTGAAGCGCAACAACATCTGTTGCAACTCACAGTCTGGGGCATC  
 >DQ358812..2  
 TTTTACTGCAATACATCAGAACTGTTTAATAACACAAAAAAC -----  
 -----  
 -----  
 AATGGCACCATCATTCTCCCATGTAAAATAAAACAAATTGTAAACATGTGGCAGAGAGTAGGACGAGCAATGT  
 ATGCCAATCCCATTGCAGGAAAAATTAAGTGAAGTCAAT ---  
 ATTACAGGTCTATTATTGACAAGAGATGGTGGTAATCAGGCTAATGAGACTAGT ----- GGT ---  
 -----  
 -  
 ATTCAGACTAATGGGACTGAGATCTTCAGACCTGGAGGAGGAAATATGAGAGACAATTGGAGAAGTGAATTAT  
 ATAAATATAAAGTAGTACAAATTAAACCACTA --- GGAATAGCACCCACCAGGGCAAAAAGACGAGTGGTG ---  
 ----- CAGAGAGCAAGAAGAGCA --- GTGGGA ---  
 ATAGGAGCT ----- CTTTTCATTGGATTCTTAGGAGCA --- GCAGGAAGCACTATG ---  
 GGCGCGGCGTCA --- ATAACGCTGACGGTACAG --- GCCAGACAA --- TTATTG ---  
 TCTGGAATAGTGCAACAGCAAAAC --- AATTTA --- CTGCAG ---  
 GCTATTGAAGCGCAACAGCATCTGTTGCAGCTCACAGTCTGGGGCATT  
 >MG365770..2  
 TTCTACTGCAATACATCAGGGCTGTTTAATGAAACAAAC -----  
 -----

-----  
TTTAATGACACTATCACTCTCCCATGTCTGAATAAAACAAATTGTAAACATGTGGCAGGAAGTAGGACGAGCAA  
TGTATGCCAATCCCATTAAAGGAAACATTACCTGCAGCTCAAAT---  
ATTACAGGTCTAATATTGACAAGAGATGGTGGTCAGAAGAATGATACT-----  
-----  
-----  
AATCAGACTGAGACCTTCAGACCTGGGGGAGGAAATATGAAAGACAATTGGAGAAGTGAATTATACAAATATA  
AAGTAGTAGAAATTGAACCACTA---GGAGTAGCACCCACCAAGGCAAAAAGACAAGTGGTG-----  
-----ACGAGACAAAAAAGAGCA---GCA-----ATAGGAGCT-----  
---TTGTTCCCTTGGGTTCTTGAGTGCA---GCAGGAAGCACTATG---GGCGCGGCGTCA---  
ATAACGCTGACGGTACAG---GCCGACAA---TTATTG---TCTGGGATAGTGCAACAGCAGAGC---  
AATTTG---CTGAGG---GCTATTGAAGCGCAACAACATCTGTTGCAGCTCACAGTCTGGGGCATA  
>JN692449..2  
TTCTACTGTAATACAACAACACTGTTTAATAGTACTTGGCATTGTAATGCCACTGGAAAGTCTAATTACACAG  
AA-----  
-----  
GGAAATGACACAATCACACTCCCATGCAGAATAAAACAAATTGTAAACATGTGGCAAGAAGTAGGAAAAGCAA  
TGTATGCCCCCTCCCATCAGAGGACAAATTAGCTGTTTCATCAAAT---  
ATTACAGGACTGCTATTAACAAGAGATGGTAGTAACAACACCAAC-----  
-----  
-----  
GAAAGCGAGATCTTCAGACCTGGAAGAGGAAATATAAAGAACAATGGAAGGAGTGAACATACAAATATAAAG  
TAGTAAAAATTTCAGCCATTA---AGAGTAGCACCTACCAAGGCAAAGAGAAGAGTGGTG-----  
-----CAGAGAGAAAAAAGAGCA---GTGACC---CTAGGAGCT-----  
GTGTTCCCTTGGGTTCTTGGGAGCA---GCAGGAAGCACTATG---GGCGCAGCGTCG---  
CTGACGCTGACGGTACAG---GCCAGACAA---TTATTG---TCTGGTATAGTGCAGCAGCAAAAC---  
AATTTG---CTGAGA---GCTATTGAAGCGCAACAACATATGTTGCAGCTCACAGTCTGGGGCATC  
>EF637052..2  
TTCTACTGCAATACATCAGGACTATTTAATAACGCACTGTTTAATGACACAGGAGTCAATAATGGC-----  
-----  
-----  
AGTGATGACAATATCATTCTCCCATGTCTGAATAAAACAAATTGTAAACATGTGGCAGGAAGTAGGACGAGCAA  
TGTATACTGCTCCTATTGCAGGAAACATTACCTGTAGATCAAAT---  
ATTACAGGTCTTCTATTGACAAGGGATGGTGGTAATAATGGTGAT-----  
-----  
-----  
AATCAGACTCAGATTTTCAGACCTGGGGGAGGAAACATGAAAGACAATTGGAGAAGTGAATTATATAAATATA  
AAGTAGTAGAGATTGAACCACTA---GGAGTAGCACCCACCAGGGCAAAAAGACAAGTGGTG-----  
-----ACAAGAGAAAGAAGAGCA---GCA-----GTGGGACTG-----  
---TTTTTCCTTGGGTTCTTGGGAGCA---GCAGGAAGCACTATG---GGCGCAGCGTCA---  
CTGACGCTGACGGTACAG---GCCAGACTA---TTACTG---TCTGGTATAGTGCAGCAGCAGAGC---  
AATCTG---CTGAGA---GCTATTGAGGCGCAACAGCATCTGTTGCAACTCACAGTCTGGGGCATT  
>MH938678..2  
TTCTACTGTAATACAACAAGCTGTTTAATAGTACTTGGAAATGGCACTAATAGTATTAAT-----  
-----  
-----  
AAGACTGGTACTATCACAAATCCCATGCAGAATAAAACAAATTATAAACAGGTGGCAGGAAGTAGGAAAAGCAA  
TATATGCCCCCTCCCATTTGGAGGACAAATTAGATGTTTCATCAAAT---  
ATTACAGGGCTGCTAATAACAAGAGATGGTGGTCATAATCAGACT-----  
-----  
-----  
GCTGAAACCTTCAGACCTGGAGGAGGAGATATGAAAGACAACCTGGAGAAATGAATTATATAAATATAAAGTAG  
TAGAAATTGAGCCACTA---GGAATAGCACCTCCAAGGCAAAGAGAAGAGTAGTG-----  
-----CAGAGAGAAAAGAGAGCA---GTGACA---TTAGGAGCT-----  
ATGTTCCCTTGGGTTCTTGGGAGCA---GCAGGAAGCACTATG---GGCGCAGCGTCA---  
ATGACGCTGACGGTACAG---GCCAGACAA---TTATTG---TCTGGTATAGTGCAGCAGCAGAAC---  
AATTTG---CTGAAG---GCTATTGAAGCGCAACAGCATATGTTGCAGCTCACAGTCTGGGGCATT  
>JN692456..1  
TTCTACTGTAATACATCAGCACTGTTTAATAGTACTTGGCCGTCTAATAGTACTTGGAAATGATACTGACAATA  
AA-----

-----  
GGAAATGATACTATCATCATACTCCCATGCAGAATAAAACAAATTATAAACAGGTGGCAGGAAGTAGGAAAAG  
CAATGTATGCCCCCTCCCATCGCAGGACAAATTAGATGTTTCATCAAAC---  
ATTACAGGGCTGCTATTAACAAGAGATGGTGGTAACAACAGCACC-----  
-----  
-----  
AATGAAACCTTCAGACCAGGAGGAGGAGATATGAGGGACAATTGGAGAAGTGAATTATTTAAATATAAAGTAA  
TAAGAATTGAACCATTA---GGAATAGCCCCCACTCAGGCAAAGAGAAGAGTGGTG-----  
-----CAGAGAGAAAAAAGAGCA---GCA-----CTAGGAGCT-----  
ATGTTTCCTTGGGTTCTTGGGAGCA---GCAGGAAGCACTATG---GGCGCAGCATCA---  
ATAACGCTGACGGTACAG---GCCAGACAA---TTATTG---TCTGGTATAGTGCAACAGCAGAAC---  
AATCTG---CTGAGA---GCTATTGAGGCGCAACAACATCTGTTGCAACTCACAGTCTGGGGCATC  
>JF804808..1  
TTCTACTGTAATACAACAACAACTGTTTAAATAGTACTTGGACTTGAATAATAGCAATAGTACTTGAATAGGA  
ATGATAGCACT-----  
-----AATACTTGGGAT-----  
AGTGCTAATGAAAATATCACACTCCCATGCAGAATAAAACAAATTATAAACAGGTGGCAGGAAGTAGGAAAAG  
CAATGTATGCCCCCTCCCATCAAAGGACAAATTAGATGTTTCATCAAAT---  
ATTACGGGGCTGATATTAACAAGAGATGGTGGGTCCAATCACAGC-----  
-----  
-----  
TCCACCGAGACCTTCAGACCTGGAGGGGGAGATATGAGGGATAATTGGAGAAGTGAGTTATATAAATATAAAG  
TAGTAAAAATTGAGCCATTA---GGAATAGCCCCCAACAAGGCAAAAAGAAGAGTGGTG-----  
-----CAGAGAGAAAAAAGAGCA---GTGGGAGTGATAGGAGCT-----  
ATGTTTCCTTGGGTTCTTGGGAGCA---GCAGGAAGCACTATG---GGCGCAGCGTCA---  
ATGACGCTGACGGTACAG---GCCAGACAA---CTGTTG---TCTGGTATAGTGCAACAGCAAAAT---  
AATTTG---CTGAGA---GCTATTGAGGCGCAACAGCATCTGTTGCAGCTCACAGTCTGGGGCATC  
>HM026455..1  
TTCTACTGCAATACATCAGAATTGTTTACTGACAAAAAATTCAATGCC-----  
-----  
-----  
ACCCATGGCACTATCACTCTCCCATGTCTGAATAAAACAAATTGTAAACCTATGGCAGGAAGTAGGAAGAGCAA  
TATATGCCGCTCCCATTTGAAGGAAACATTACCTGTAATTCAAAT---  
ATTACAGGTCTACTACTAACAAGAGATGGTGGTCAGAACAGTAGT-----  
-----  
-----  
GCTAATGAGACCTTCAGACCTGGGGGAGGAGATATGAGAGACAATTGGAGAAGTGAATTATATAAATATAAAG  
TAGTAGAAATTGAACCACTA---GGAATAGCACCCACCAAGGCAAAAAGAAGAGTGGTG-----  
-----CAGAGAGAAAAAAGAGCA---GTGGGA---ATAGGAGCG-----  
TTGTTTCATTGGGTTCTTGGGAGCA---GCAGGAAGCACTATG---GGCGCAGCGTCA---  
ATAACGCTGACGGTACAG---GCCAGACAA---TTATTG---TCTGGAATAGTGCAACAGCAGAAC---  
AACCTG---CTGAGG---GCTATTGAAGCGCAACAGCATCTGTTGCAGCTCACAGTCTGGGGCATT  
>HQ236610..1  
TTCTACTGTAATACATCAGGACTGTTTAAATACATCAAGACTGATTATTAATGACACTTCCCCT-----  
-----  
-----  
CTCAATGACACTATCATTCTCCCATGTAGATAAAACAAATTGTAAACATGTGGCAGGGAGTAGGAAGAGCAA  
TGTATGCTAATCCAATTGCAGGAAACATTACCTGTAACTCAAAT---  
ATTACAGGGCTACTATTGACAAGAGATGGTGGAAAGAAAGATAAT-----  
-----  
-----  
CAGACTGACGAGATCTTCAGACCTGGGGGAGGAAATATGAAAGACAATTGGAGAAGTGAATTATATAAATATA  
AAGTAGTAGAAATTGAACCACTA---GGAATAGCTCCACAAAGGCAAAAAGACAAGTGGTG-----  
-----CGGAGAGACAAAAGAGCA---GTGGGA---TTTGGAGCT-----  
---TTGTTCCCTTGGGTTCTTGTTCAGCA---GCAGGAAGCACTATG---GGCGCAGCGTCA---  
GTGACGCTGACGGTACAG---GCCAGGCAA---TTGTTG---TCTGGTATAGTGCAACAGCAGAAT---  
AATTTG---CTGAAA---GCTATTGAGGCGCAACAGCATCTGTTGCAACTCACAGTCTGGGGCATT  
>KT427871..1  
TTCTACTGTAACACATCAAAACTGTTTAGTAGTACTTGAATAGTAGTACTTTGAATAGTACTGGAGAGTCAA  
ATAAC-----

-----  
ACTGAGGACACAATTATACTCCCATGCAGAATAAAACAAATTATAAACATGTGGCAGAGAGTAGGAAAAGCAA  
TGTATGCCCCCTCCCATCCAAGGACAAATTAAGTGTTCATCAAAT---  
ATTACAGGGATGATATTAACAAGAGATGGGGGTCATAACACGAGC-----  
-----  
-----  
GAGACGACCGAAATCTTCAGACCTGGAGGAGGAAATATGAAGGACAATTGGAGAAGTGAATTATATAAATATA  
AAGTAGTACAAATTGAACCATTA---GGAATAGCACCCACCAGGGCTAAGAGAAGAGTGGTG-----  
-----CAGAGAGAAAAAAGAGCA---GTAGGA---CTAGGAGCT-----  
---TTGTTCCCTTGGGTTCTTAGGAGCA---GCGGGAAGCACTATG---GGCGCAGCGTCA---  
ATAACGCTGACGGTACAG---GCCAGACAA---TTATTG---TCTGGTATAGTGCAACAGCAAAAT---  
AATTTG---CTGAGG---GCTATTGAGGCGCAACAGCATATGTTGCAACTCACAGTCTGGGGCATT  
>KT427779..1  
TTCTACTGCAATACATCACAGCTGTTTAATGACACAGAATCC-----  
-----  
-----  
AATAATAGCATTATTACTCTCCCATGTAGAATAAAACAAATAGTAAACATGTGGCAGGAAGTAGGAAAGGCAA  
TGTATGCCGCTCCCATTCAGGAAACATTACCTGTAACTCAAAT---  
ATTACAGGTCTGCTACTAACAAGAGATGGTGGCCAGGATAATAATACT-----  
-----  
-----  
AATCAGAATGAGACCTTCAGACCTGGGGGAGGAGATATGAGAGATAATTGGAGAAGTGAGTTATATAAATATA  
AAGTAGTAGAAATTGAACCATTA---GGAATAGCACCCACCAGGGCAAGAAGACGAGTGGTG-----  
-----CAGAGAGAGAAACGAGCA---GTGGGA---CTAGGAGCT-----  
---GTGTTCCCTTGGATTCTTAGGAGCA---GCAGGAAGCACTATG---GGCGCAGCATCA---  
ATAACGCTGACGGTACAG---GCCAGACAA---TTATTG---TCTGGAATAGTGCAACAGCAGAAC---  
AATTTG---CTGAGG---GCTATTGAAGCGCAACAGCATCTGTTGCAGCTCACAGTCTGGGGCATT  
>KT427651..1  
TTCTACTGTAACACATCCCGACTATTTGATGATAGTTGGAATGGTACTTGGTCAAAGAACACT-----  
-----  
-----  
ACTATAGAAAATATCACACTCCCATGCAGAATAAAACAAAGTTGTAAACCTGTGGCAGCAAGTAGGAAAAGCAA  
TGTATGCCGCTCCCATCAAAGGACTACTTAACTGTACATCAAAT---  
ATTACAGGGCTGATATTAGCAAGAGATGGTGGTTATAATGTTGAT-----  
-----  
-----  
AACAAATACAGAGATCTTCAGACCTGCAGGAGGAGATATGAGGGACAATTGGAGAAGTGAATTATATAAATATA  
AAGTAGTAAAAATTGAGCCATTA---GGAGTAGCACCCACCAAGGCAAAGAGAAGAGTGGTG-----  
-----CAGAGAGAAAAAAGAGCA---GTAACA---TTAGGAGCT-----  
---ATGTTCCCTTGGGTTCTTGGGAGCA---GCAGGAAGCACTATG---GGCGCAGCGTCA---  
ATGACGCTGACGGTACAG---GCCAGACTA---TTATTG---TCTGGTATAGTGCAACAGCAGAAC---  
AATTTG---CTGAGA---GCTATTGAGGCGCAACAGCATCTGTTGCAACTCACAGTCTGGGGCATT  
>KJ849794..1  
TTCTACTGCAATACAACACTATTGTTTAACGAAGAATTAAATAACACTGGC-----  
-----  
-----ACTGATGACACT-----  
GGCACTAACGACACTATCATTCTCCCATGTAAAATAAAACAAATAATAACATGTGGCAGGAAGTGGGACGAG  
CTATGTACGCTGCTCCCATTCAGGAAACATTACCTGTTACTCAAAT---  
ATTACAGGTCTACTATTGGTAAGAGATGGTGGTAATACT-----  
-----  
-----  
AATGATGGTAATACTACTAGTGGTAAT-----  
AAGACCGAGATCTTCAGACCTGAGGGAGGAAATATGAAAGACAATTGGAGAAGTGAAGTATATAAATATAAAG  
TAATAGAAATAGAACCACTA---GGGGTAGCACCCACCAAGGCAAAAAGACAAGTGGTG-----  
-----AAGAGAGAAAAAAGAGCA---ATAGGA---ATGGGAGCT-----  
TTGTTCCCTTGGGTTCTTGGGAGCA---GCAGGAAGCACTATG---GGCGCAGCGTCA---  
GTAACGCTGACGGTACAG---GCCAGACAA---TTATTG---TCTGGTATAGTGCAACAGCAGAAC---  
AATCTG---CTGAGG---GCTATTGAAGCGCAACAGCATCTGTTGCAGCTCACAGTCTGGGGCATC  
>KT427660..2  
TTCTACTGTAATACAACACAGCTGTTTAATAGTACAATAGTTAATAATACAATGCAGAATAAGACT-----  
-----

-----  
GGGAATGGTAATATCACACTCCCATGCACAATAAAACAAATTATAAATATGTGGCAGAAAGTAGGGAAAGCAA  
TGTATGCCCCCTCCCATCAGAGGACAAATTAGCTGTACATCAAAT---  
ATTACAGGTCTACTATTGACTAGAGATGGGGATCAGAATGACAGT-----  
-----  
-----  
GAGACCTTCAGACCTCAGGGAGGAAATATGAAAGATAATTGGAGAAGTGAATTATATAAATACAAAGTAGTAA  
GAATTGAGCCATTA---GGAGTAGCACCCACCAAGGCAAAGAGAAGAGTGGTG-----  
-----CAGAGAGAAAAAAGAGCA---GTGGGAACATTAGGAGCT-----  
ATGTTTCCTTGGGTTCTTGGGAGCA---GCAGGAAGCACTATG---GGCGCAGCGGCA---  
CTGACGCTGACGGTACAG---GCCAGACTA---TTATTG---TCTGGTATAGTGCAACAGCAAAAC---  
AATTTG---CTGAGA---GCTATTGAGGCGCAACAGCATCTGTTGCAACTCACAGTCTGGGGCATC  
>KX181927..1  
TTCTATTGCAATACATCAGGCCTGTTCAATATGTCCCATAACAATGGCAATGAC-----  
-----  
-----  
ACAACCACTGTCACTATCACCTCCCGTGTGCAATAAAACAAATTGTAAACATGTGGCAGGAGGTAGGACGAG  
CAATGTATGCCGCTCCCATTCAGGAAGCATTACCTGCAAAATCAAAT---  
ATTACAGGTCTGCTATTGACAAGAGATGGTAGTAGCAATAATAGTACT-----  
-----  
-----  
CATAATAACACTGAGACCTTCAGACCTGGGGGAAAGAATATAAAAGACAATTGGAGAAGTGAAGTGTATAAAT  
ATAAAGTAATAGAAATTGAACCACTA---GGAATAGCACCCACCAAGGCAAAAGACGAGTGGTG-----  
-----ACGAGAGAAAAAAGAGCA---GTAGGA---ATAGGAGCT---  
-----TTGTTTCCTTAAGTTCTTAGGAGCA---GCAGGAAGCACTATA---GGCGCAGCGTCA---  
GTGACGCTGACGGTACAG---GCCAGACAA---TTATTG---TCTGGTATAGTGCAACAGCAGAAC---  
AATTTG---CTGAGA---GCTATTGAGGCGCAACAGCATATGTTGCAACTCACAGTCTGGGGCATT  
>MK041580..1  
TTCTACTGCAATACATCAGGACTGTTTAAATGAGACA-----  
-----  
-----  
GAATTCAATGGTACTATCACTCTCCCATGTGCAATAAAACAAATTGTAAACATGTGGCAGGAAGTAGGAAAAG  
CAATGTATGCCGCTCCCATTCGAGGAAACATTACCTGCAACTCAAAT---  
ATTACAGGTCTACTATTGACAAGAGATGGTGGTCAGAATAATAAT-----  
-----  
-----  
GCTACTGAGATCTTCAGACCTGGGGGAGGAAATATGAAAGACAATTGGAGAAGTGAATTATATAAATATAAAG  
TAGTAGAAATTGAACCACTA---GGAGTAGCACCCACCAGGGCAAAAGACAAGTGGTG-----  
-----AGGAGAGAAAAAAGGGCA---GTGGGA---ATAGGAGCT-----  
TTGTTTCCTTGGGTTCTTGGGAGCA---GCAGGAAGCACTATG---GGCGCAGCGTCA---  
CTAACGCTGACGGTACAG---GCCAGACAA---TTATTG---TCTGGAATAGTGCAACAGCAGAGC---  
AATTTG---CTGAGG---GCTATTGAAGCGCAACAGCATATGTTGCAGCTCACAGTCTGGGGCATT  
>AF005495..2  
TTCTACTGCAATACATCAGGACTGTTTAAATGACACAGTAGAC-----  
-----  
-----  
AATGGCACTATCACTCTCCCATGTGCAATAAAGCAAATTGTAAATATGTGGCAGGAAGTGGGGCGAGCAATGT  
ATGCCGCTCCCATTCAGGAAACATTACCTGTAGCTCAAAT---  
ATTACAGGTCTACTATTGACAAGAGATGGTGGTCAGAATAATCAG-----  
-----  
-----  
ACGGAGGAGACCTTCAGACCTGGGGGAGGAAATATGAAAGACAAGTGAATTATATAAATATAAAG  
TAGTAGAAATTGAGCCATTA---GGAGTAGCACCCACCAAGGCAAAAGACAAGTGGTG-----  
-----AAGAGAGAAAAAAGAGCA---GTGGGA---ATGGGAGCT-----  
TTGTTTCCTTGGGTTCTTGGGAGCA---GCAGGAAGCACTATG---GGCGCAGCGTCA---  
ATAACGCTGACGGCACAG---GCCAGACAA---TTATTG---TCTGGCATAGTGCAACAGCAGAAAT---  
AATTTG---CTGAGG---GCTATTGAAGCGCAACAGCATCTGTTGCAGCTCACAGTCTGGGGCATT  
>AY455784..1  
TTCTACTGCAATACATCAGGACTGTTTAAATAACACAAGATCC-----  
-----

```

-----
AATGGCACTATCACTCTCCCATGTCTGAATAAAACAAATTATAAATATGTGGCAGGAAGTAGGACGAGCAATGT
ATGCCCCCTCCCGTTGCAGGAAACATTACCTGTAACTCAAAT---
ATTACAGGTCTACTATTGACAAGAGATGGTGGTAAACAGAATGGTACT-----
-----
-----
AATCAGACTGAGATCTTCAGACCTGGGGGAGGAGATATGAGAGACAATTGGAGAAGTGAATTATATAAATATA
AAGTAGTAGAAATTGAACCACTA---GGAGTAGCACCCACCAAGGCAAAAAGACAAGTGGTG-----
-----AAGAGAGAAAAAAGAGCA---ATAGGA---ATAGGAGCT-----
---GTACTCCTTGGGTTCTTGGGAAGA---GCAGGAAGCACTATG---GGCGCGGCGTCA---
ATAACGCTGACGGCACAG---GCCAGACAA---GTATTG---TCTGGAATAGTGCAACAGCAGAAC---
AATCTG---CTGAGG---GCTATTGAAGCGCAACAGCATCTGTTGCAGCTCACAGTCTGGGGCATT
>AY455785..1
TTCTACTGCAATACATCAAACTGTTTAATAACATAGGAGAC-----
-----
-----
AATGGCACTATCATTCTCCCATGTCTGAATAAAACAAATTATAAACATGTGGCAGGAAGTAGGACGAGCAATGT
ATGCCGCTCCCATTCAGGAAAACATTACCTGTAACTCAAAT---
ATTACAGGTTTACTATTGACAAGAGATGGTGGTCAGACTAATGAA-----
-----
-----
ACTAATACTGAGACCTTCAGACCTGGGGGAGGAAATATGAAAGACAATTGGAGAAGTGAATTATATAAATATA
AAGTAGTAGAAATTGAACCAATA---GGAATAGCACCCACCAGGGCAAAAAGACGAGTGGTG-----
-----CAGAAAGAAAAAAGAGCA---GTGGGA---ATGGGAGCT-----
---TTGTTCTTGGGTTCTTGGGAGCA---CAAGGAAGCACTATG---GGCGCGGCGTCA---
ATAGCGCTGACGGTACAG---GCCAGACAA---TTATTG---TCTGGAATAGTGCAACAGCAGAAC---
AATTTG---CTGAGG---GCTATTGAAGCGCAACAGCACCTGTTGCAGCTCACAGTCTGGGGCATT
>AY455780..1
TTCTATTGCGACACATCACAACCTGTTTAATAACACAAAAGTC-----
-----
-----
AATGACACTATCACCTCTCCCGTGTAGAATAAAACAAATTGTAAACATGTGGCAGGAAGTAGGACGAGCAATGT
ATGCCGCTCCTATTGCAGGAAAACATTACCTGTAAATTCAAGT---
ATTACAGGTCTACTATTGACAAGAGATGGTGGTCAGGCTAATAGG-----
-----
-----
ACTGAGACCTTCAGACCTGGGGGAGGAAATATGAAAGACAATTGGAGAAGTGAATTATATAAATATAAAGTAG
TAGAAATTGAACCACTA---GGAGTAGCACCCACCGGGGCAAGAAGACAAGTGGTG-----
-----AGGAGAGAAAGAAGAGCA---GTGGGAATGCTAGGAGCT-----
ATGTTCTTGGGTTCTTGGGAGCA---GCAGGAAGCACTATG---GGCGCAGCGTCA---
ATATCGCTGACGGTACAG---GCCAGACAA---TTATTG---TCTGGTATAGTGCAACAGCAGAAC---
AATCTG---CTGAGA---GCTATTGAGGCGCAACAGCATATGTTGCAACTCACAGTCTGGGGCATT
>AY771592..3
TTCTACTGTGATACAAACAACTGTTTAATAGTACTTGAATGATACTTGGTATAATAATGTGAATGAT---
-----
-----
ACTAGTGAAAATATCACACTCCCATGCAGAATAAAACAAATTATAAACAAGTGGCAGGAAGTAGGAAAAGCAT
TTTATGCCCCCTCCTATCAGCGGACAAATTAGATGTTTCATCAAAT---
ATTACAGGTATACTATTGACAAGAGATGGTGGTCAGAATAGTCAG-----
-----
-----
AATGAGACCTTCAGACCAGGAGGAGGAAATATGAAGGACAATTGGAGAAGTGAATTATATAAATATAAAGTAG
TAAGAGTTGAGCCATTA---GGAATAGCACCCACCAGGGCAAAGAGAAGAGTGGTG-----
-----CAGAGAGAAAGAAGAGCA---GTGGGAACACTAGGAGCT-----
ATGTTCTTGGGTTCTTGGGAGCA---GCAGGAAGCACTATG---GGCGCAGCGTCA---
ATGACGCTGACGGTACAG---GCCAGACTA---CTATTG---TCTGGTATAGTGCAACAGCAGAAC---
AATCTG---CTGAGA---GCTATTGAGGCGCAACAGCATATGTTGCAGCTCACAGTCTGGGGCATC
>AY771593..5
TTCTACTGTAATTCAACTCAACTGTTCAATAGTACTTGGCTCAATAATACTTGGTATAATACTACTTGGGAAG
GAAAT-----

```

-----  
AGCACTGAAGACAATATCACACTCCCATGCAGAATAAAACAAATTATAAACCTGTGGCAGAAAGTAGGAAAAG  
CAATGTATGCCCCCTCCTATCAGAGGACAAATTAGATGCTCATCAAAT---  
ATTACAGGTCTAATATTGACAAGAGATGGTGGTCGTCAGAAATGATACT-----  
-----  
-----  
AATGCTACTGACACCTTAACAGCTGGAGGAGGAAATATGAACGACTGTTGGAGAGGTGAATTTTATTATTATA  
AAGTAGTAATAGTTGCGCCAATA---GGAGCACCCCCCCCCCAGGCAAAGAGAATAGTGGTG-----  
-----CAAAAAGAAAAAGAGCG---GTGGGAGTAATAGGAGCT-----  
---ATGTTCTTGGGTTCTTGGGAGCA---GCAGGAAGCACTATG---GGCGCAGCGTCA---  
ATGACGCTGACGGTACAG---GCCAGGTCA---TTATTG---TCTGGTATAGTGCAACAGCAGAAC---  
AATCTG---CTGAGG---GCTATTGAGGCGCAACAGCATCTGTTGCAACTCACAGTCTGGGGCATC  
>AY536233..1  
TTCTACTGCAATACATCAGGACTGTTTAATGAAACAAGGTTTAATAACACAACA-----  
-----  
-----  
TCCAATGACACCATTATTCTCCAATGTAAATAAGACAAATAGTAAACCTGTGGCAGGAAGTGGGACGAGCAA  
TGTATGCCGCTCCCATTGAAGGAAATATTACCTGTAACTCAAAT---  
ATTACAGGTCTACTATTGACAAGAGATGGTGGTAATACTAGTCAGGCT-----  
-----  
-----  
AATAAGACTGAGACCTTCAGACCTGGGGGAGGAAATATGAGAGACAATTGGAGAAGTGAATTATATAAAATATA  
AAGTAGTAGAAATTGAACCACTA---GGAATAGCACCCACCAAGGCAAAAAGACAAGTGGTG-----  
-----CAGAGAGAAAAAGAGCAGTAGTGGGA---ATAGGAGCT-----  
---GTTCTCCTTGGGTTCTTGGGAGCA---GCAGGAAGCACTATG---GGCGCAGCGTCA---  
ATAACGCTGACGGTACAG---GCCAGACAA---TTATTG---TCTGGAATAGTGCAACAGCAGAGC---  
AATTTG---CTGAGG---GCTATTGATGCGCAACAGCATATGTTGCAGCTCACAGTCTGGGGCATT  
>AY536238..1  
TTCTACTGCAATACATCAGAACTGTTTAATAACACAGAAACCAATAGCACAAACACCAATGGCACAGAA---  
-----  
-----  
ACCAATGGCACTATTATTCTCCCATGTAGAATAAAACAAATTGTGAACATGTGGCAGGAAGTGGGACGAGCAA  
TGTATGCCAATCCCATTGCAGGAAACATTACCTGCAACTCAAAT---  
ATTACAGGTCTACTATTGACAAGAGATGGTGGTAATACTAGTAAT-----  
-----  
-----  
AATACTGAGACCTTCAGACCTGGGGGAGGAGATATGAGAGACAATTGGAGAAGTGAATTATATAAAATATAAGG  
TAGTAGAAATTCAACCATTA---GGAATAGCACCCACCAAGGCAAGGAGACCAGTGGTG-----  
-----AAGAGAGAAAAAGAGCA---GTGGGA---CTAGGAGCT-----  
TTGATCATTTGGGTTCTTGGGAGCA---GCAGGAAGCACTATG---GGCGCAGCGTCA---  
ATGGCGCTGACGGTACAG---GCCAGACAA---TTATTG---TCTGGAATAGTGCAACAGCAAAAC---  
AATTTG---CTGAGA---GCTATTGAAGCGCAACAACATATATTGCAGCTCACAGTCTGGGGCATT  
>KU749408..1  
TTCTACTGCAATACATCAGGACTGTTTAATAACTCACTGCTCAATGACACAAAATCCAATAATGACACAGGA-  
-----  
-----  
-----  
TCCAATAATACTATTACTCTCCCATGTAGAATAAGACAAATTGTAAACCTGTGGCAGGAAGTAGGACGAGCAA  
TGTATGCCGCTCCCATTGCAGGAAACATTACCTGTAACTCAAAT---  
ATTACAGGTATACTATTGACAAGAGATGGTGGTCAGAATAATAAGAATGAGACC-----TTC-----  
-----  
-----  
AAGAATGAGACCTTCAGACCTGGGGGAGGAAATATGAGAGACAATTGGAGAAGTGAATTATATAAAATATAAAG  
TAGTAGAAATTGAACCACTA---GGAGTAGCACCCACCAAGGCAAAAAGACAAGTGGTG-----  
-----AAGAGAGAAAAAGAGCA---GTAGGA---ATGGGAGCT-----  
TTGTTCTTGGGTTCTTGGGAGCA---GCAGGAAGCACTATG---GGCGCAGCGTCA---  
GTAGCGCTGACGGTACAG---GCCAGACAA---TTATTG---TCTGGAATAGTGCAACAGCAGAAC---  
AATTTG---CTGAGG---GCTATTGAAGCGCAACAGCATATGTTGCAGCTCACAGTCTGGGGCATT  
>FJ853621..1  
TTCTACTGTAATACATCAGAACTGTTTAATAACACAATATCC-----  
-----

-----  
AAAAATGGCACTATCATTCTCCCATGTCTCGAATAAAACAAATTATAAACATGTGGCAGGAAGTGGGGCGAGCAA  
TGTATGCCGCTCCCATTGCAGGAAACATTACCTGTAACCTCAAAT---  
ATTACAGGTCTACTATTGGTAAGAGATGGTGGTAATCGTAATCAGACA-----  
-----  
-----  
AATAAGACTGAGACCTTCAGACCTGGGGGAGGAAATATGAAGGACAATTGGAGAAGTGAATTATATAAATATA  
AAGTAGTAGAAATTGAACCACTA---GGAATAGCACCCACCAAGGCAAAAAGACAAGTGGTA-----  
-----ACGAGAGAAAAAAGAGCA---GTGGGA---CTGGGAGCT-----  
---CTGTTCCCTTGGGTTCTTGGGAGCA---GCAGGAAGCACTATG---GGCGCGGCGTCA---  
ATAACGCTGACGGTACAG---GCCAGACAA---TTATTG---TCTGGAATAGTGCAACAGCAGAGC---  
AATCTG---CTGAGA---GCTATTGAAGCGCAACAGCATATGTTGCAGCTCACAGTCTGGGGCATT  
>JX140661..2  
TTCTATTGCAATACATCAGGACTGTTTAATAACATAAAAAATT-----  
-----  
-----  
AATGGTACTATTACTCTCCCATGTCTCGAATAAAACAAATTGTAAACATGTGGCAGGAAGTGGGACGAGCAATGT  
ATGCCAATCCCATTGCAGGAAACATTACCTGTAGCTCAATT---  
ATTACCGGTCTGTTATTGACAAGAGATGGTGGTAATCAGACTGGTAATAAT-----  
-----  
-----  
AGTTATATTGAGACCTTCAGACCTGGGGGAGGAAATATGAAAGACAATTGGAGAAGTGAATTATATAAATATA  
AAGTAGTAGAAATTGAACCACTA---GGAGTAGCACCCACCAGGGCAAAAAGACAAGTGGTG-----  
-----AAGAGAGAAAAAGAGAGCA---CTAGGA---CTAGGAGCT-----  
---TTGTTCCCTTGGGTTCTTGGGAGCA---GCAGGAAGCACTATG---GGCGCAGCGTCA---  
GTGACGCTGACGGTACAG---GCCAGACAA---TTATTG---TCTGGAATAGTGCAACAGCAGAAC---  
AATTTG---CTGAAG---GCCATTGAAGCGCAGCAGCATCTGTTGCAGCTCACAGTCTGGGGCATT  
>FJ904244..3  
TTCTATTGCGATACATCTAAATTGTTTAAAGTGTTTAATGACACCAATGGCACAAAAGCCAATAAT-----  
-----  
-----  
GACACAGACCCTATCATTCTCCCATGTCTCGAATAAAACAAATTGTAAACATGTGGCAAGAAGTAGGACGAGCAA  
TGTATGCTAATCCCATTGAGGGAAACATCACCTGTAGATCAAAT---  
ATTACAGGTCTAATATTGACAAGAGATGGTGGTAATCATAATAATGATAGT-----  
-----  
-----  
CAGGATAATCAGACTGAAATCTTTAGACCTGGAGGAGGAAATATGAAAGACAATTGGAGAAGTGAATTATATA  
AATATAAAGTAGTAGAAATTGAACCACTA---GGAGTAGCACCCACCAGGGCAAAAAGGCAAGTGGTG-----  
-----AAGAGAGAAAAAAGAGCA---ATGGGA---  
CTAGGAGCT-----TTGTTCCCTTGGGTTCTTGGGAGCA---GCAGGAAGCACTATG---  
GGCGCAGCGTCA---GTGACGCTGACGGTACAA---GCCAGACAA---TTACTG---  
TCTGGTATAGTGCAACAGCAGAAC---AATCTG---CTGAGA---  
GCTATTGAGGCACAACAGCATCTGTTGCAACTCACAGTCTGGGGCATT  
>AB480301..2  
TTCTACTGCAATACATCAGGATTGTTTAATGACACAGAAACC-----  
-----  
-----  
AATGATACTATCATTCTCCCATGTAAAATAAAACAAATTATAAACATGTGGCAGGAAGTGGGACGAGCAATGT  
ATGCCGCTCCCATTGCAGGAAACATTACCTGTAACTCAAGT---  
ATTACAGGTCTACTATTGACAAGAGATGGTGGTCAGAAAAATAAT-----  
-----  
-----  
ACTAATGAGACCTTCAGACCTGGGGGAGGAAATATGAAAGACAATTGGAGAAGTGAATTATATAAATATAAAG  
TAGTAGAAATTCAACCACTA---GGAGTAGCACCCACCAGGGCAAGAAGATTGGTGGTG-----  
-----AAGAGAGAAAAAAGAGCA---GTGGGA---ATGGGAGCT-----  
ATGTTCCCTTGGGTTCTTGGGAGCA---GCAGGAAGCACTATG---GGCGCAGCATCA---  
ATAACGCTGACGGTACAG---GCCAGACAA---TTATTG---TCTGGAATAGTGCAACAGCAAAAC---  
AATTTG---CTGAAG---GCTATTGAAGCGCAACAGCATCTGTTGCAGCTCACAGTCTGGGGCATT  
>JN251899..2

TTCTACTGCAATACATCAGGACTGTTTAAATGACACAAGACTGTTAAATGACACA-----  
 -----  
 -----  
 TCCAATAACACTATTGTTCTACCATGTCAAATAAAACAAATTGTAACTTATGGCAGGAAGTAGGACGAGCAA  
 TGTATGCCGCTCCCATTGCAGGAAATATTACCTGTAGCTCAAAT---  
 ATTACAGGTCTACTATTGACAAGAGATGGTGGTCACAGTAATAAT-----  
 -----  
 -----  
 ACTAATGAGACCTTCAGACCTGGGGGAGGAAACATGAAAGACAATTGGAGAAGTGAATTATATAAAATATAAAG  
 TAGTAGAAATTGAACCACTA---GGAGTAGCACCCACCAAGGCAAAAGACAAGTGGTG-----  
 -----AAGAGAGAAAAAAGAGCA---GTGGGA---ATAGGAGCT-----  
 GTTCTCCTTGGGTTCTTGGGAGCA---GCAGGAAGCACTATG---GGCGCAGCGTCA---  
 GTAGCGCTGACGGTACAG---GCCAGACAA---TTATTG---TCTGGAATAGTGCAACAGCAGAAC---  
 AATCTG---CTGAGG---GCTATTGAAGCGCAACAGCATATGTTGCAGCTCACAGTCTGGGGCATT  
 >JN251905..1  
 TTCTACTGTGATACATCAAACTGTTTAAATGAGACAAAATTCAATGACACTAGTGAA-----  
 -----  
 -----  
 GGTAGTCCTAATATTACTCTCCCATGTGCAATAAAACAAATTGTAAACATGTGGCAGGAAGTGGGGCGAGCAA  
 TGTATGCCGCTCCCATTGCAGGAGCCATTACCTGTAACTCAAAT---  
 ATTACAGGTCTCCTATTGACAAGAGATGGTGGTAATACTACTAAT-----  
 -----  
 -----  
 CAGACTATTGAGATCTTCAGACCTGGGGGAGGAGATATGAAAGACAATTGGAGAAGTGAATTATATAAAATATA  
 AAGTAGTAGAAATTGAACCATTA---GGAATAGCACCCACCAAGGCAAAGAGACGAGTGGTG-----  
 -----CAGAGAGAAAGAAGAGCA---GTGGGA---ATGGCAGCT-----  
 ---GTACTCCTTGGGTTCTTGGGAGCA---GCAGGAAGCACTATG---GGCGCAGCGTCA---  
 ATAACGCTGACGGTACAG---GCCAGACAA---TTATTG---TCTGGGATAGTGCAACAGCAGAGC---  
 AATTTG---CTGAGG---GCTATTGAAGCGCAACAGCATCTGTTGCAGCTCACAGTCTGGGGCATT  
 >AY781128..1  
 TTCTACTGCAATACAACACAACCTGTTTAAATGACGCAGTATCT-----  
 -----  
 -----  
 AGTGACACTATTATTCTCCCATGTAAAATAAAGCAAATTATAAACATGTGGCAGGAAGTGGGACGAGCAATGT  
 ATGCCGCTCCCATTGCAGGAAATATTACCTGTAACTCAAAC---  
 ATTACAGGTCTATTATTGGTAAGAGATGGTGGTAATAATAATCAGACT-----  
 -----  
 -----  
 AATAAATACTGAGACCTTTAGACCTGGGGGAGGAAATATGAAAGACAATTGGAGAAATGAATTATATAAAATATA  
 AAGTAGTAGAAATTGAACCACTA---GGAGTAGCACCCACCAGGGCAAAAAGACAAGTGGTG-----  
 -----AAGAGAGAAAAAAGAGCA---GCAGGA---ATAGGAGCT-----  
 ---GTGCTCATTGGGTTCTTGGGAGCA---GCTGGAAGCACTATG---GGCGCGGCGTCA---  
 ATGACGCTGACGGTACAG---GCCAGACAA---TTATTG---TCTGGAATAGTGCAACAGCAGAGC---  
 AATCTG---CTGAGG---GCTATTGAAGCGCAACAGCATCTGTTGCAGCTCACAGTCTGGGGCATT  
 >JN235953..1  
 TTCTACTGCAATACATCAGGACTGTTTAAATGACACAATATCC-----  
 -----  
 -----  
 AATGACACTATCATCTCCCGTGTGCAATAAAACAAATTGTAAACATGTGGCAGGAAGTGGGACGAGCAATGT  
 ATGCCGCTCCCATTGCAGGAAACATTACCTGTAGCTCAAAT---  
 ATTACAGGTCTACTATTGACAAGAGATGGTGGTCAGAATAATGGA-----  
 -----  
 -----  
 ACAGAGACCTTCAGACCTGGAGGAGGAGATATGAGGGACAATTGGAGAAGTGAATTATATAAAATATAAAGTAG  
 TAGAAATTGAACCATTA---GGAATAGCACCCACCAAGGCAAAGAGAAGAGTGGTG-----  
 -----CAGAGAGAAAAAAGAGCAGTAATGGGA---TTAGGAGCT-----  
 GTGTTCTTGGGTTCTTGGGAGCA---GTAGGAAGCACTATG---GGCGCAGCATCA---  
 CTAACGCTGACGGTACAG---GCCAGACAA---TTATTG---TCTGGTATAGTGCAACAGCAAAAC---  
 AATTTG---CTGAGG---GCTATTGAGGCGCAACAGCATATGTTGCAACTCACAGTCTGGGGCATC  
 >KF726017..1

TTCTACTGTAATACAACAAAACCTGTTTAAATAGTACTTGGAGACTGCTTAATAGTACTTGGGAATAGTACTGAAG  
 GGTAAAT-----GACACT-----  
 GTAGGAAATGACACAATCACACTCCCATGCAGAATAAAACAAATTGTAAATTTGTGGCAGGAAGTAGGAAGAG  
 CAATGTATGCCCCCCCCATCAGTGGAACATTAGATGTTTCATCAAAT---  
 ATTACAGGTCTATTACTGACAAGGGATGGGGGTCAGGGTAATTCAAGTAAT-----  
 -----  
 AGTACTACGGAGACCTTCAGACCTGGGGGAGGAAATATGAAAGACAATTGGAGAAGTGAACATATAAAATATA  
 AAGTAGTAGAAATCAAACCACTA---GGAGTAGCACCCACCAAGGCAAGAAGACAAGTGGTG-----  
 -----AGGAGAGAAAAAAGAGGC-----CTAGGAGCT-----  
 ---GTGTTCCCTTGGGTTCTTAGGAGCA---GCAGGAAGCACTATG---GGCGCAGCGTCA---  
 ATAACGCTGACGGTACAG---GCCAGACTA---TTATTG---TCTGGTATAGTGCAACAGCAGAAC---  
 AATCTG---CTGAGG---GCTATTGAGGCGCAACAGCATCTGTTGCAACTCACAGTCTGGGGCATC  
 >MK086130..1  
 TTCTACTGTAACACAACAAGGCTGTTT-----GAGGAGAATAATAATGCAACACAGAAAAAT-----  
 -----  
 -----  
 AATGAACTATTATCACTCTTCCCTGTAGAATAAGACAACATGTAAACATGTGGCAAAGAGTGGGACGAGCAA  
 TGTATGCCCCCCCCATTGCTGGAATAATTCAAGTGTAACTCAAAT---  
 ATCACAGGTCTACTATTAACAAGAGATGGT---AATAACACTGGA-----  
 -----  
 -----  
 AATAATGACACCCTCAGACCTGGAGGGGGAGATATGAGAGACAATTGGAGAAGTGAACGTATATAAATATAAGG  
 TAGTAAAAATTGAACCACTA---GGAATAGCACCCCTCCAAGGCAAAAAGACGAGTGGTG-----  
 -----CAGAGAGAAAAAAGAGCA---GTGGGA---ATGGGAGCT-----  
 ATGTTCCCTTGGGTTCTTGGGAACA---GCAGGAAGCACTATG---GGCGCGGCGTCA---  
 ATGGCGCTGACGGTACAG---GTCAGACAA---TTATTG---TCTGGTATAGTGCAAGCAGCAAAGC---  
 AATTTG---CTGAAG---GCTATAGAAGCGCAACAGCATCTGTTGCAGCTCACAGTCTGGGGCATT  
 >U39253..1  
 TTCTACTGCAATACATCAAACTGTTTAGTACATCAAATAGTACATGGGTA-----  
 -----  
 -----  
 AACAAAGACTACAATCACACTCCCATGCAGAATAAGACAAATTATAAACATGTGGCAGAAAGTAGGAAAAGCAA  
 TGTACGCCCCCTCCCATGGAAGCACTAATCAACTGTTTCATCAAAT---  
 ATTACAGGACTATTGTTGACAAGAGATGGTGGTGTAAATAATAGT-----  
 -----  
 -----  
 CAGGAGGAGATCTTCAGGCCTGGAGGTGGAGATATGAGAGACAATTGGAGGAGTGAATTATACAAATATAAAG  
 TAATAAGAATTGAACCAATA---GGTCTAGCACCCACCAGGGCAAAGAGAAGAGTGGTG-----  
 -----GAAAGAGAAAAAAGAGCA---ATAGGA---CTGGGAGCT-----  
 GTGTTCCCTTGGGTTCTTGGGAGCA---GCAGGAAGCACTATG---GGCGCAGCATCA---  
 ATAACGCTGACGGTACAA---GCCAGACAA---TTATTG---TCAGGTATAGTGCAACAGCAAGAT---  
 AATTTG---CTGAGG---GCTATAGAGGCGCAACAGCATATGTTGCAACTCACAGTCTGGGGCATT  
 >AY074891..1  
 TTCTACTGTAACACATCAGGACTGTTTAAATAGTATAAGTATAAGTGAATCAAATAGTACAGGG-----  
 -----  
 -----  
 GTAAATGGTACAATCACACTCCGATGCAGAATAAAACAAATTATAAACATGTGGCAGGGAGTAGGAAAAGCAA  
 TATATGCCCCCTCCCATGAGGGACTAATCCAATGTTTCATCAAAT---  
 ATTACAGGACTATTGTTGACAAGAGATGGTGGTAATAATAGTCAG-----  
 -----  
 -----  
 ACTGAGACTGAGACCTTCAGACCTGGAGGAGGAGATATGAGAGATAATTGGAGAAGTGAATTATACAGATATA  
 AAGTAGTAAGAATTGAACCAATA---GGTCTAGCACCCACCAGGGCAAAAAGAAGAGTGGTG-----  
 -----ACAAGAGAAAAAAGAGCA---ATAGGA---CTGGGAGCT-----  
 ---ATGTTCCCTTGGGTTCTTGGGAGCA---GCAGGAAGCACGATG---GGCGCAGCGTCG---  
 CTGACGCTGACGGTACAG---GCCAGACAG---TTATTG---TCTGGTATAGTGCAACAGCAAAAC---  
 AATTTG---CTGAGA---GCTATAGAGGCGCAACAGCATCTGTTGCAACTCACAGTCTGGGGCATT  
 >KU921741..1

TTCTACTGCAAGACATCAGAACTGTTTAAATAGTACATGGACATTAAATAGTACAAGTGAAGGGACATCAAATA  
 GTACAAAG-----ATA---  
 ACAAATAGTACAAATATAACACTCCCGTGCAGAATAAAACAAATTATTAACATGTGGCAGGGAGTAGGAAAAG  
 CAATGTATGCCCCCTCCCATTTGAAGGACTTATCAAATGCTCATCAAAT---  
 ATTACAGGAATATTGTTGACAAGAGATGGTGGTACAGATAATCAGACAAATGAG-----  
 -----  
 ACCTTCAGTGAGACCTTCAGACCTGGAGGAGGAGATATGAGGGACAATTGGAGAAGTGAATTATACAAATATA  
 AAGTAGTAAAAATTGAACCAATA---GGTCTAGCACCCACCAGGGCAAAAAGGAGAGTGGTG-----  
 -----GAAAGAGAAAAAAGAGCA---ATAGGA---CTGGGAGCT-----  
 ---ATGTTCCCTTGGGTTCTTGGGAGCT---GCAGGAAGCACGATG---GGCGCAGCGTCG---  
 GTGACGCTGACGGTACAG---GCCAGACAG---CTAATG---TCTGGTATAGTGCAACAGCAAAGC---  
 AATTTG---CTGAGG---GCTATAGAGGCGCAACAACATATGTTGCAACTCACAGTCTGGGGCATT  
 >MF373183..3  
 TTCTATTGCAATACATCAAGCCTGTTTCATGAGAACATCACTGCAAACAGCACAAACAGCACAGAT-----  
 -----  
 GTAAATAAAAACATCACACTTCAATGCAAAATCAGACAAATTGTAAGAATGTGGCAAGGGATAGGACAAGCAA  
 TGTATGCCCCCTCCCATTTGAAGGACTAATAAATTGTAAATCAAAT---  
 ATCACAGGGCTGTTGCTGACACGTGATGGAGGCCCAACAACCG-----  
 -----  
 ACTAATGAAACATTTAGACCTCAAGGGGGAAATATGAGGGACAATTGGAGAAGTGAATTATATAAATACAAAG  
 TGGTAGAAATTAAGCCATTA---GGACTAGCACCCACTGGGGCACAGAGGAGAGTGGTG-----  
 -----GGAAGAGAAAAAAGAGCA---GCAACA---CTAGGAGCT-----  
 TTGTTCCCTTGGGTTCTTGGGAGCA---GCCGGAAGCACTATG---GGCGCAGCGTCA---  
 ATAACGCTGACGGTACAG---GCCAGACAA---TTATTG---TCTGGTATAGTGCAACAGCAAAGC---  
 AATTTG---CTGAGA---GCCATAGAGGCGCAACAGCATATGTTGCAACTCACAGTCTGGGGCATT  
 >AY253309..2  
 TTCTACTGCAATACATCAGGGCTATTTAATAATAGTGAGTGGACATCAAATAGTACAAATAGTACATCAAATA  
 GTACA-----  
 -----  
 GGGGGAGATGATGTAATCACACTCCAATGCAAAATAAAACAGATCATAAACATGTGGCAGGGAGTAGGAAAAG  
 CAATGTATGCCCCCTCCCATTTGAAGGCCAAATCAGATGTTTCATCAAAT---  
 ATTACAGGACTATTGTTAACAAGAGATGGTGGTCAGAATAAGAGT-----  
 -----  
 CAGGAGGAGACCTTCAGACCTGGAGGAGGAAATATGAGAGACAATTGGAGAAGTGAATTATACAAATATAAAG  
 TAGTAAGGATTGAACCACTA---GGTCTAGCACCCACCAGGGCACAAAGAAGAGTGGTG-----  
 -----CAAAGAGAAAAAAGAGCA---ATAGGC---CTGGGAGCT-----  
 ATGTTCCCTTGGGTTCTTGGGAGCA---GCAGGAAGCACGATG---GGCGCGGCGTCG---  
 CTGACGCTGACGGTACAG---GCCAGACAG---TTATTG---TCTGGTATAGTGCAACAGCAAAC---  
 AATTTG---CTGAGG---GCTATAGAGGCGCAACAACATTTGTTGCAACTCACAGTCTGGGGCATT  
 >HQ615974..4  
 TTCTACTGCAATACAACACCACTGTTTAAATAATAGTGTATGGTCAAGTAATACAAGTATAGATACAAGTACAA  
 ATAATACA-----GAG---  
 GGAAATAATGGGACAATCATACTCCAATGTAGAATAAAACAAATTGTAAACATGTGGCAAAAAGTAGGAAAAG  
 CAATATATGCCCCCTCCCATTTGCAGGACTAATCAATTGTCACTCAAAT---  
 ATTACAGGAATATTGTTGACAAGAGATGGTGGTAACAATATTAATCAGACTAAG-----  
 AACAATAGTAGTCAGACTGAGAGC-----  
 -----  
 AATAGGAGTCAGACTGAGACCTTCAGACCTGGAGGAGGAGATATGAGAGACAATTGGAGAAGTGAATTATATA  
 AATATAAAGTAGTAAGAATTGAACCAATA---GGTATAGCACCCACCAAGGCAAGAGAGAGTGGTG-----  
 -----GAAAGAGAAAAAAGAGCA---ATAGGA---  
 CTGGGAGCT-----ATGTTCCCTTGGGTTCTTGGGAGCA---GCAGGAAGCACAAATG---  
 GGCGCAGCGTCG---GTGACGCTGACGGTACAG---GCCAGACAG---TTATTG---  
 TCTGGTATAGTGCAACAGCAGAGC---AATTTG---CTGAGG---  
 GCTATAGAGGCGCAACAGCATCTGTTGCAACTCACAGTCTGGGGCATT

>AF484500..1

TTCTACTGCAATACATCAGGGATATTTTAATAGTACATGGGAGGCTAATAATACAGCAAATAGTACAGGG----

-----  
-----

GTAGATAAGAATATCACACTCTCATGCAGAATAAAACAAATTATAAACATGTGGCAGGGAGTAGGAACAGCAA  
TGTATGCCCCCTCCCATTTGAAGGACTAATTAAATGTACATCAAAT---  
ATTACAGGACTATTGTTAACAAGAGATGGTGGTGCAAATAATAAT-----

-----  
-----

AGTCAGAATGAGACCTTCAGACCTGGAGGGGGAGATATGAGAGACAATTGGAGAAGTGAATTATACAAATATA  
AAGTAGTAAGAATTGAACCACTA---GGTCTAGCACCCACCAGGGCAAAGAGAAGAGTGGTG-----  
-----GAAAGAGAGAAAAAGAGCA---ATAGGA---CTGGGAGCT-----  
---ATGTTCCCTTGGGTTCTTGGGAGCA---GCAGGAAGCACGATG---GGCGCAGCGTCA---  
CTGACGCTGACGGTACAT---GCCAGACAG---TTATTG---TCTGGTATAGTGCAACAGCAAAAT---  
AATTTG---CTGAGG---GCTATAGAGGCGCAGCAGCATCTGTTGCAACTCACAGTCTGGGGCATT

>MF373188..1

TTCTACTGCAATACATCAGAGCTGTTTAATGAAACAGAAAAAC-----

-----  
-----

TCCAATGGCACTATTATTCTCCCATGTAGAATAAAACAAATGATAAACATGTGGCAGGAAGTGGGACGAGCAA  
TGTATGCCGCTCCTATTGCAGGAAACATTGTCTGTAACTCATCT---  
ATTACAGGTCTACTATTGACAAGAGATGGGGGTAATAATGATAAT-----

-----  
-----

AATAACACTGAGATCTTCAGGCCTGGAGGAGGAGATATGAGGGACAATTGGAGAAGTGAATTATACAAATATA  
AAGTGGTAGAAATTCAACCATTA---GGAATAGCACCCACCAAGGCAAAAAGGAGAGTGGTG-----  
-----GAGAGAGAAAAAGAGCA---GCA-----TTGGGAGCT-----  
---TTGTTCCCTTGGGTTCTTGGGAGCA---GCCGGAAGCACTATG---GGCGCAGCATCA---  
ATAACGCTGACGGTACAG---GCCAGACAA---TTATTG---TCTGGGATAGTGCAACAGCAGAGC---  
AATCTG---CTGAGG---GCTATTGAAGCGCAACAGCATCTGTTGCAGCTCACAGTCTGGGGCATT

>EU166607..2

TTCTATTGCAACACATCAGAACTGTTTAATGATACATACAATAATACTACT-----

-----  
-----

CCAAATGGGACCATCACACTCCAATGCAGAATAAAACAAATTATAAACATGTGGCAGGGAGTAGGACAAGCAA  
TGTATGCCGCCCCCATTTGCAGGAAACATTATCTGTAACTCAAGT---  
ATTACGGGGCTACTATTGACAAGAGATGGTGGTAAAAATAAACT-----

-----  
-----

GGAGAAGAGATATTTCAGACCTGGAGGAGGAGATATGAGGGACAATTGGAGAAGTGAAGTCTATAAATATAAAG  
TAGTAGAAATTCAACCACTA---GGAGTAGCACCCACCAGGGCAAGAAGACAAGTGGTG-----  
-----AGAAGAGAAAAAGAGCA---GTGGGA---ATAGGAGCC-----  
TTGTTCCCTTGGGTTCTTGGGAGCA---GCAGGAAGCACTATG---GGCGCAGCATCA---  
ATAACGCTGACGGTACAG---GCCAGACAA---GTGCTG---TCTGGTATAGTGCAACAGCAAAAC---  
AATTTG---CTGAGA---GCTATAGAGGCGCAACAGCATATGTTGCAACTCACAGTCTGGGGCATT

>KY392768..1

TTCTACTGCGACACATCAGGATTATTTAATGTTACATATGAGGTCAATAGTTCAAACCAAATTAATAATGCT-

-----  
-----

ACTAATAATAACATCACACTTCCATGTAAATAAAACAAATTATAAACATGTGGCAGAAGGTAGGACGAGCAA  
TGTATGCCCCCTCCTATTGAAGGAATAATAACATGTGTATCAAAT---  
ATTACAGGTCTACTATTGACTCGTGATGGAGGTCAAATAAATCA-----

-----  
-----

GACACAGAGACCTTCAGACCAACAGGGGGAAATATGAAGGACAATTGGAGAAGTGAATTATATAAATATAAAG  
TAGTAGAAATTAAACCACTA---GGAGTAGCACCCACCAAGGCAAGAAGGAGAGTGGTG-----  
-----GAGAGAGAAAAAGAGCA---GCGGGA---CTGGGAGCT-----  
GTGATCATTGGGTTCTTGGGAGCA---GCAGGAAGCACTATG---GGCGCAGCGTCA---  
CTAACGCTGACGGTACAG---GCCAGACAA---TTATTG---TCTGGTATAGTGCAACAGCAAAAT---  
AATTTG---CTGAAA---GCTATAGAGGCGCAACAGCATCTGTTGCAGCTCACAGTCTGGGGCATT

>AB286849..4

TTCTATTGCAATACATCAGGCCTGTTTAAATAGTACATATTACAGCCTGTTTAAATAGTACATATTACAATGGTACATAC-----

-----  
AATAATAATACCAACATCACCCCTCCAATGCAGGATAAGACAAATTGTAAACATGTGGCAAGAGGTAGGAAAAGCAATGTATGCTGCTCCCATTC AAGGAAGCATAACATGTGCATCAAAC---  
ATCACAGGGTTACTCTTGACACGCGACGGAGGCAATGGAGAGACA-----

-----  
AATGGGACAGAGATTTTCAGACCTCAAGGAGGAAATATAAAGGACAATTGGAGAAGTGAATTATATAAAATATAAAGTAGTAGAAGTTGAACCACTA---GGAGTAGCACCCACTAAGGCAAAAAGGAGAGTGGTG-----  
-----GAGAGAGAAAAAAGAGCA---GTGGGA---CTGGGAGCT-----  
---GCGTTCTTGGGGTTCTTAGGAGCA---GCAGGAAGCACTATG---GGCGCAGCGTCA---  
CTAGCGCTGACGGTACAG---GCCAGACAA---TTACTG---TCTGGTATAGTGCAACAGCAAAAT---  
AATTTG---CTGAGA---GCTATAGAGGCGCAACAACATATGTTGCAACTCACAGTCTGGGGCATT

>AJ277819..2

TTCTACTACAACACAACAGATCTGTTTAAATACATGGAAAAAACT-----

-----  
AACAAATAACACTATCATTCTCCCATGTAAAATAAGACAATTTGTAAACATGTGGCAAAGAGTGGGACGAGCCATGTATGCCCCCTCCCATTGCCGACAAATTCAGTGTAATTCAAAG---  
ATCACAGGTCTACTATTGACAAGAGATGGTGGAGAGAATACAAAT-----

-----  
GGGTCCGAGACCCTCAGGCCTGGAGGAGGAGATATGAGAGACAATTGGAGAAGTGAACCTATATAAAATATAAGGTAGTAAGAATAGAACCACTA---GGAGTAGCACCTACCAAGGCAAAAAGACAAGTGGTG-----  
-----CAGAGAGGAAAAAGAGCA---GTGGGA---ATAGGAGCT-----  
GTACTCTTTGGGTTCTTAGGAGCA---GCAGGAAGCACTATG---GGCGCGGCGTCA---  
ATAACGCTGACGGTACAG---GCCAGACAA---TTATTG---TCTGGTATAGTGCAACAGCAGAAT---  
AATTTG---CTGAAG---GCTATAGAAGCGCAACAGCATCTGTTGCAGCTCACAGTCTGGGGCATT

>MN485986..1

TTCTACTGCAACACCTCACAACTGTTT-----ACATGGTCAGATAATAGCACAGGGATA-----

-----  
AATGATAGCACAAATCGTACTCTCTTGTAGAATAAAACAAATTATAAATATGTGGCAGGAAGTAGGAAAAGCTATGTATGCCCCCTCCCATTGCAGGAAAAATCAGTTGTTTCATCAAAA---  
ATTACAGGGCTGTTATTGACAAGGGATGGTGGTAAAGAGACTAACGAGACCTCC-----

-----  
GCTCACGAGATAGAGATCTTCAGACCTGCAGGAGGAGATATGAGGGACAATTGGAGAAGTGAATTATATAAATATAAAGTAGTAAGAATTGAACCCCTT---GGAATAGCACCCACTAGGGCAAAAAGAAGAGTGGTG-----  
-----GAAAGAGAAAAAAGAGCA---ATAGGA---CTAGGAGCT---  
-----ATGTTCTTGGGTTCTTGGGAGCA---GCAGGAAGCACTATG---GGCGCGGCGTCA---  
ATAACGCTGACGGTACAG---GCCAGACAA---TTATTG---TCTGGTATAGTGCAACAGCAAAAT---  
AATTTG---CTGAGA---GCTATAGAGGCGCAACAGCATCTGTTGCAACTCACGGTCTGGGGCATT

>FJ670527..2

TTCTACTGCAACACATCATCCCTGTTTAAATGGGACATGGACTAATAATACATGGCACAATATTACA-----

-----  
TGGAACACAAATATGACAATCCCATGCAAAATAAGGCAAAATTGTAAACATGTGGCAAGGAGTAGGAAAAGCAA TGTATGCCCCCTCCCATCGAAGGACACATCAACTGTTTCATCAAAT---  
ATTACAGGACTACTATTGATAAGAGATGGGGGTAAAGGACAGAATCAG-----

-----  
AGTAATCAGAGTGAGACTTTTCAGACCTGGAGGAGGAGATATGAGGGACAATTGGAGAAGTGAATTATATAAATATAAAGTAGTAATAAATTGAACCTCTA---GGAATAGCACCCACCAAGGCAAGGAGAAGAGTGGTG-----  
-----CAAAGAGAAAAAAGAGCA---ATAGGA---CTAGGAGCT---  
-----ATGTTCTTGGGTTCTTGGGAGCA---GCAGGAAGCACGATG---GGCGCAGCGTCA---  
GTGACGCTGACGGTACAG---GCCAGACAA---TTGATG---TCTGGTATAGTGCAACAGCAAAAC---  
AATTTG---CTGAGA---GCTATAGAGGCGCAACAGCATCTGTTGCAACTCACAGTCTGGGGCATT

>FJ388908..1

TTCTACTGCAATACATCAAACTGTTTAAATAGGACATGGGATACAGGAATACTACAGAACAGGGTATTAGTA  
TA-----

-----  
GGGTCAAATGATATAATCATACTCCCATGCAAATAAAACAAATTATAAACATGTGGCAGGAAGTAGGAAAAG  
CAATGTATGCCCCCTCCCATTTGAAGGAGAAATCAAATGCTCATCAAAT---  
ATTACAGGGCTACTATTAACAAGAGATGGGGGAAATATTAATGGAAGT-----

-----  
AGTAATCAGACAGAGATCTTCAGACCTGGAGGAGGAGATATGAGAGACAATTGGAGAAGTGAATTATATAAAT  
ATAAAGTAGTAACAATTGAACCAATA---GGACTAGCACCCACCAAGGCAAAAAGAAGAGTGGTG-----  
-----GAAAGAGAAAAAAGAGCA---ATAGGG---TTAGGAGCT---  
-----ATGTTTCCTTGGGTTCTTGGGAGCA---GCCGGAAGCACGATG---GGCGCAGCGTCA---  
GTGACGCTGACGGTACAG---GCCAGACAA---TTGTTG---TCTGGTATAGTGCAGCAGCAAAAC---  
AATTTG---CTGAGG---GCTATAGAGGCGCAACAGCACTTGTGCAACTCACGGTCTGGGGCATT

>KX579838..1

TTCTACTGCAATACATCAGAACTGTTTAAATTGGGATAATAGTACAAAGAGTACTGTAAATGGA-----

-----  
ACAAAATTAAATATAACTATCCACTGTAAAATAAAACAAATTATAAACATGTGGCAGGGAGTAGGAAGAGCAA  
TGTATGCCCCCTCCCATCGAAGGACAAATTCATGTATATCAAAT---  
ATTACAGGGCTACTATTGACAAGAGATGGTGGTAGTGATTCTAAT-----

-----  
GAGACCTTCAGGCCTGGAGGAGGAGATATGAGAGACAATTGGAGAAGTGAATTATATAAATATAAAGTAGTAA  
GAGTTGAGCCATTA---GGAGTAGCACCCACCAGGGCAAAGAGAAGAGTGGTG-----  
-----GACAGAGAAAAAAGAGCA---ATAGGA---TTAGGAGCT-----  
ATGTTTCCTTGGGTTCTTGGGAGCA---GCAGGAAGCACTATG---GGCGCAGCGTCA---  
GTGACGCTGACGGTACAG---GCCAGACAA---TTATTG---TCTGGTATAGTGCAACAGCAAAAT---  
AATTTG---CTGAGG---GCTATAGAGGCGCAACAGCATCTGTTGCAACTCACGGTCTGGGGCATT

>MN337382..1

TTCTACTGCAATACATCAGGACTGTTTAAATAGAGCATTTAATAATACAACATGGGATACTAGTACAGGGAGTG  
CTAGA-----

-----  
TTAAATAATACAATAACCATCCTATGTAGAATAAAACAAATTATAAACATGTGGCAGGGAGTAGGAAGAGCAA  
TGTATGCCCCCTCCCATTTGAAGGACAAATTAAATGTTTCATCAAAT---  
ATTACAGGGTTACATTTGACAGCAGATTGGGTTGGAATGAGTCTGTG-----

-----  
TCTAGAGTAATTTACAGGCCTGGAGGAGGAAATATGAAGGACAATTGGAGAAGTGAATTATATAAATATAAAG  
TAGTAAAAATTGAACCACTA---GGAGTAGCACCCACCAGGGCAAGGAGAAGAGTGGTG-----  
-----GAAAGAGAAAAAAGAGCA---ATAGGA---CTAGGAGCT-----  
ATGTTTCCTTGGGTTCTTGGGAGCA---GCAGGAAGCACGATG---GGCGCAGCGTCA---  
GTGACGCTGACGGTACAA---GCCAGACAA---CTGTTG---TCTGGTATAGTGCAACAGCAAAAT---  
AACTTG---CTGAGG---GCTATAGAGGCGCAACAGCATCTGTTGCAACTCACGGTCTGGGGCATT

>AF286236..1

TTCTATTGCAACACATCAGAGCTGTTTACTGGTATTTGGAATGGTACTTGGGATAAGAATTGCACTAGCACTG  
AGAGT-----

-----  
AATTGCACTGGAAATATTACACTCCCATGCAGGATAAAACAAGTGGTAAGAACATGGCAGGGAGTAGGACAAG  
CAATGTATGCCCCCTCCTATCGAAGGACAATTAGGTGCTCATCAAAT---  
ATTACAGGTCTACTATTGACAAGAGATGGTGGTAATGGCAATGCA-----

-----  
ACTCAAAATGAGACCTTTAGACCTGGAGGAGGAGACATGAAAGATAATTGGAGAAGTGAATTGTATAAGTATA  
AAGTAGTAAAAATTGAACCACTA---GGAGTAGCACCCACCAGGGCAAAAAGAAGAGTGGTG-----  
-----GAGAGAGAAAAAAGAGCA---GTGGGG---ATGGGAGCT-----  
---TTGTTTCTCGGGTTCTTGGGAGCA---GCCGGAAGCACTATG---GGCGCGGCGTCA---  
ATGGCGCTGACGGCACAG---GCCAGACAA---TTATTG---TCTGGTATAGTGCAGCAGCAAAAC---  
AATTTG---CTGAGG---GCTATAGAGGCGCAACAGCATCTGTTGCAACTCACAGTCTGGGGCATT

>MN617377..1

TTCTACTGTAATACATCACAACCTGTTTAGTAGTACTTGGGATAATAATGGTACTGAGATTAATACTACAGGAACTACA-----

-----  
GGAAATGACACTATCATTCTCCCTTGCAGAATAAAACAACCTTGTAAACATGTGGCAGGAAGTAGGGAAAGCAA  
TGTATGCCCCCTCCCATTAGTGGGAATAATTAGATGTTTCATCGAAT---  
ATTACAGGATTGCTATTAACAAGAGATGGTGGTAACAATCAGAGCACT-----

-----  
ATCAATGAGACTTTTCAGACCTGGAGGAGGAGACATGAGAGACAATTGGAGAAGTGAATTATATAAATATAAAAG  
TAGTAAAAAATTGAACCATTA---GGAGTAGCACCCACCAAGGCAAAGAGAAGAGTGGTG-----  
-----CAAAGAGAAAAAAGAGCA---GTGGGAACATATAGGAGCT-----  
ATGTTCCCTTGGGTTCTTGGGAGCA---GCAGGAAGCACAAATG---GGCGCAGCGTCA---  
ATAACGCTGACGGTACAG---GCCAGACAA---TTGTTG---TCTGGTATAGTGCAACAGCAGAGA---  
AATCTG---CTGAGG---GCTATTGAGGCGCAACAGCATCTGTTGCAACTCACAGTCTGGGGCATC

>MH705158..1

TTCTATTGCAATACATCAGGCCTGTTTAATAGTAGTTGGAACGAAAGTGACACTGCAAATGACACTATAACGC  
TCCCGTGCAAAATAAAACAAATTGTAAGGATGTGGCAGAGAGTAGGACAAGCAATGTATGCCCCCTCCCATCCA  
AGGGGTAAATGAGGTGTGAATCTAACATTACAGGACTACTATTAACAAGAGATGGTGGGAATGAGGGCAATGAA  
AGTAGTGAGACGTGCAGACCTGGAGGAGGAGATATGAGGGATAATTGGAGAAGTGAACATATAAATATAAAAG  
TAGTAAAAAATTGAACCACTAGGAGTAGCACCCACCAGGGCAAAGAGAAGAGTGGTGGAGAGAGAAAAAGAGC  
AGTTGGACTGGGAGCTGTCTTCATTGGGTTCTTAGGAGCAGCAGGAAGCACTATGGGCGCGGCGTCAGTGACG  
CTGACGGTACAGGCCAGACAATTATTGTCTGGCATAGTGCAACAGCAAAACAATTTGCTGAGGGCTATAGAGG  
CTCAACAGCATCTGTTGAAACTCACGGTCTGGGGCATT

>MH705151..1

TTCTATTGCAATACATCAGACCTGTTTAATAGCACTTGGCGGAAACTGGCAAATGGCACTTGGAGCAACATAA  
ATAATGCAACGTCAAATGACACTATAACTCTCCAATGCAAAATAAAGCAAATTGTAAACATGTGGCAGAGAGT  
AGGACAAGCAATGTATGCCCCCTCCCATCCAAGGAGTAATACAGTGTGTATCAAACATTACAGGACTACTCTTA  
ACAAGAGATGGTGGGAGTAGTAACAGGGCAAATGAGACCTTCAGACCTGGAGGAGGAGATATGAGGGACAATT  
GGAGAAGTGAATTATATAAGTATAAAGTAGTAAAAATTGAACCACTAGGAGTAGCACCCACCAGGGCAAAGGAG  
AAGAGTGGTGGAGAGAGAAAAAGAGCAATTGGAATGGGAGCTCTTTTCCTTGGGTTCTTAGGAACAGCAGGA  
AGTACTATGGGCGCGGCGTCAATAACGCTGACGGTACAGGCCAGACAATTATTGTCTGGTATAGTACAACAGC  
AGAGCAATCTGCTGAGGGCTATAGAGGCTCAACAGCATCTGTTGAAACTCACAGTCTGGGGCATT

>MH705157..1

TTCTATTGTAATACATCAAGCCTGTTTAATAGCACTTGGAAAGAGGAGAATGGCACTGTCAGCATGCAGAATG  
ACACGGAGTCAACTGACCCCTATAACTCTCCAATGTAGAATAAAGCAAAGTTATAAACATGTGGCAGAGAGTAGG  
ACAAGCAATATATGCCCCCTCCCATCCAAGGAGTAATAAGATGTGTATCAAACATTACAGGACTACTATTAACA  
AGAGATGGTGGGAGTAATAATAACTTCAAATGAAACCTTCAGACCTGGAGGAGGAGATATGAGGGACAATT  
GGAGAAGTGAATTATATAAGTATAAAGTAGTAAAAATTGAACCACTAGGAGTAGCACCCACCAAGGCAAAGAG  
AAGAGTGGTGGAGAGAGAAAAAGAGCAGTTGGACTGGGAGCTGTCTTCCTTGGGTTCTTAGGAGCAGCAGGA  
AGTACGATGGGCGCGGCGTCAATAACGCTGACGGTACAGGCCAGACAATTATTGTCTGGCATAGTGCAACAGC  
AGAGCAATCTGCTGAGGGCTATAGAGGCTCAACAGCAACTGTTGAGACTCACGGTCTGGGGCATT

>MH705153..2

TTCTATTGCGATACATCAGGCCTGTTTAATGGCACTTGGAGCAATACATCAGGCCTGATTAATAGCACTTGA  
GCGAGAATGACACTATAACTCTCCCATGTAGAATAAAGCAAATTGTAAATATGTGGCAGAGAGTAGGACAAGC  
AATGTATGCCCCCTCCCATCCAAGGAATAATAAATTGTACATCAAACATTACAGGACTACTGTTAACAAGAGAT  
GGTGGGAATAATAACAGTATAAATGAGCCTGAGACCTTCAGACCTGGAGGAGGAGATATGAGGGACAATTGGA  
GAAGTGAACATATATAAAGTATAAAGTAGTAAAAATTCAACCACTAGGAGTAGCACCCACCAGGGCAAAGAGAAG  
AGTGGTGGAGAGAGAAAAAGAGCAGTTGGCATGGGAGCTCTTCTCCTTGGGTTCTTAGGAGCAGCAGGAAGC  
ACGATGGGCGCGGCGTCAATAACGCTGACGGTACAGGCCAGACAATTATTGTCTGGTATAGTGCAACAGCAGA  
GCAATCTGCTGAGGGCTATAGAGGCTCAACAGCATCTGTTGAAACTCACGGTCTGGGGCATT

>MH705133..1

TTCTATTGCAATACGTGAGGCCTGTTTAATAGCACTTGGAAAGAATGGCACTAAAGAGGGGAAATGACACTGCAA  
AGTTAAGTGACACTATAACTCTCCCATGCAGAATAAAGCAAATTGTAAGGATGTGGCAGAGAACAGGACAAGC  
AATGTATGCCCCCTCCCATCCAAGGAGTAATAAATTGTGTCTCTAACATTACAGGGATACTATTAACAAGGGAT  
GGTGGGAATAGTAGTAATGCCAATGAAACCTTCAGACCTGGAGGAGGAAATATGAAGGACAATTGGAGAAGTG  
AACTATATAAGTATAAAGTAGTAAAAATTGAACCAATAGGAGTAGCACCCACCAGGGCAAAGAAAAGAGTGGT  
GGAGAGAGAAAAAGAGCAGTTGGACTGGGAGCTGTCTTCCTTGGGTTCTTAGGAGCAGCAGGAAGTACTATG  
GGCGCGGCGTCAATAACGCTGACGGTACAGGCCAGACAATTATTGTCTGGCATAGTACAACAGCAAAGCAATT  
TGCTGAGGGCTATAGAGGCTCAACAGCATATGTTGAGACTCACAGTCTGGGGCATT

>JQ403028..1

TTCTACTGCAATACAACAGAACTGTTTAAATAGCACGTGGAATGACACGAGCAACACATCGCAGGGGACAAATA  
ACAATAGTACTATTACTCTCCCATGCAGAATAAAGCAATTTGTAAATATGTGGCAGAGAGTAGGACAAGCAAT  
GTATGCCCTCCCATCAAAGGAAAAATACAGTGCATATCAAATATTACAGGTCTACTATTAACAAGAGATGGG  
GGTAAGGGTAAAAGCAATATTACAGAGATCTTCAGACCTGAAGGAGGAAATATGAAGGACAACTGGAGAAGTG  
AATTATATAAATATAAAGTAGTAAAAATTGAACCACTAGGAGTAGCACCCACCAAGGCAAAGAGAAGAGTGGT  
GGAGAGAGAAAAAGAGCAGTTGGACTGGGAGCTGTGTTCCCTTGGGTTCTTAGGAGCAGCCGGAAGTACTATG  
GGCGCGCGTCAATAACGCTGACGGCACAGGCCAGGCAATTATTGTCTGGTATAGTACAACAGCAGAGCAATC  
TGCTGAGGGCTATAGAGGCTCAACAGCATCTGTTGAAACTCACGGTCTGGGGCATT

>KX389622..1

TTCTATTGCAATACATCAGACTTGTTTAAATAGCAATTGGACAAATGGGAATTGGACAAATGGGATAGGCAGCA  
CGGAGACTAATGACACTATAACTCTTCCATGCAGAATAAAGCAGATTATAAGAATGTGGCAGAGAGTAGGACA  
AGCAATGTATGCCCTCCCATCAAAGGGGTAATAGAGTGTAATCAAATATTACAGGAATAATATTAGTAAGA  
GATGGTGGTAAGAATAACACAGACAAGGAGACATTTAGACCTGGAGGAGGAGATATGAGGGACAATTGGAGAA  
GTGAACTATACAAATATAAAGTAGTAAAAATTGAACCATTAGGAGTAGCACCCACCAGGGCAAAAAGAAGAGT  
GGTGGAGAGAGAAAAAGAGCAGTTGGAATAGGAGCTGTCTTCCCTTGGGTTCTTAGGAGCGGCAGGAAGCACT  
ATGGGCGCAGCGTCAATAACGCTGACGGTACAGGCCAGACAATTATTGTCTGGCATAGTGCAACAGCAGAGCA  
ATCTGCTGAGGGCTATAGAGGCTCAACAACATCTGTTGAAACTCACAGTCTGGGGCATT

>DQ396400..1

TTCTATTGCAATACATCAGGCCTGTTTAAACAGAACTTGGAATGACACCGCTTGGAATGAAACAACTTGGAATA  
ACATAAATTCAAATGGAAGTATAACTCTCCAATGTAGAATAAAGCAAATTTTAAATATGTGGCAGAGAGTAGG  
ACAGGCGATGTATGCCCTCCCATCCCAGGAGAAATAAGGTGTGAATCAAACATTACAGGACTAATCTTAACA  
AGAGACGGGGGGCTTGAGCTTAACAATACGAATAATGAGACCTTCAGGCCTGGAGGAGGAGATATGAGGGACA  
ATTGGAGAAGTGAATTGTATAAATACAAAGTAATAAAAAATTGAACCACTAGGAGTAGCACCCACCAGGGCAAAA  
AAGAAGAGTGGTGGAGAGAGAAAAAGAGCAGTTGGACTGGGAGCTGTTTTCCCTTGGGTTCTTAGGGGCAGCA  
GGAAGCACTATGGGCGCAGCGTCAATAACGCTGACGGTACAGGCTAGGCAATTATTGTCTGGCATAGTGCAAC  
AGCAAAGCAATTTGCTGAGGGCTATAGAGGCTCAACAACATTTGTTGAAACTCACAGTCTGGGGCATT

>FM165645..2

TTCTACTGTAACACATCAGGCCTGTTTAAATAGCAGTTGGGAAAATGACACTGGCAGCACGCAGGAGTCAAATA  
GAACAAAGTCAAATGACACTATAACTCTCCCATGCAGAATAAAGCAAATTATAAATATGTGGCAGAGGGCAGG  
ACAAGCAATATATGCCCTCCCATCCCAGGGGTAATACAGTGTCAAGTCAAACATTACAGGACTACTATTAACA  
AGAGATGGTGGGAATAACAATACTAATGAAACCTTCAGACCTGGAGGAGGAAATATGAGGGATAATTGGA  
GAAGTGAACATATAAATATAAAGTAGTAAAAATTGAACCACTAGGAGTAGCACCCACCACGGCAAGGAGAAG  
AGTGGTGGAGAGAGAAAAAGAGCAGTGGGACTGGGAGCTCTGTTTCATTGGGTTCTTAGGAGCCGCAGGAAGC  
ACTATGGGCGCGCGTCAAGTACGCTGACGGTACAGGCCAGACAATTATTGTCTGGCATAGTGCAACAGCAAAA  
ACAATTTGCTGAGGGCTATTGAGGCTCAACAGCATCTGTTGAAACTCACGGTCTGGGGCATT

>FM165628..2

TTCTACTGCAACACATCAAGACTGTTTAAATAGCAGTTGGGAACCATTAGGCCAGTATGATGACAGTCAGAGCA  
ATGACACAAATATAACTCTCCCATGCAGAATAAAGCAAATTATAAGGATGTGGCAGAGGACAGGACAAGCAAT  
ATATGCCCTCCCATCCAAGGGGAAATAACGTGTAGATCAAATATTACAGGACTACTATTAACAAGAGATGGT  
GGAAATAAACTAATGAAACCTCCGAAACCTTCAGACCTGGAGGAGGAGATATGAGAGATAATTGGAGAAGTG  
AACTATATAAATATAAAGTAGTAAAAATTGAACCACTAGGAGTAGCACCCACCAAGGCAAAAAGAAGAGTGGT  
GGAGAGAGAAAAAGAGCAGTGGGACTGGGAGCTGTTCTCATTGGGTTCTTAGGAACAGCAGGAAGCACTATG  
GGCGCGCGTCAGTGACGCTGACGGTACAGGCCAGACAATTATTGTCTGGCATAGTGCAACAGCAAAAACATTT  
TGCTGAGGGCTATAGAGGCTCAACAGCATCTGTTGAAACTCACGGTCTGGGGCATT

>EU191615..1

TTCTACTGCAACACATCAACACTGTTTAAATAGCAGTTGGCCATTAAACCAGTCTAACAGTTGGAGCAATGGCG  
GAAATGACACAAATATAACTCTCCCATGCAGAATAAAGCAAATTATAAGGATGTGGCAGAGGACAGGACAAGC  
AATATATGCCCTCCCATCGAAGGGGTAATAATGTGTAGGTCAAATATTACAGGACTCCTATTAAACAAGAGAT  
GGTGAAATGAAGCTAATAAACTAATGAAACTGCTGAAATCTTCAGACCTGGAGGAGGGGATATGAGAGATA  
ATTGGAGAAGTGAACATATAAATATAAAGTAGTAAAAATTGAACCACTAGGAGTAGCACCCACCAGGGCAAAA  
AAGAAGAGTGGTGGAGAGAGAAAAAGAGCAGTGGGACTGGGAGCTGTTCTCATTGGGTTCTTAGGAACAGCA  
GGAAGCACTATGGGCGCGCGTCAAGTACGCTGACGGTACAGGCCAGACAATTATTGTCTGGCATAGTGCAAC  
AGCAAAAACATTTGCTGAGGGCTATAGAGGCTCAACAGCATCTGTTGAAACTCACGGTCTGGGGCATT

>MH746258..1

TTCTATTGTAACACATCAGGCCTGTTTAAATAGCACATGGTCTAAAAATGGCACACAGCAGGTAGACAACATAA  
CCAATCCTATAATTCTCCAATGCAGAATAAAGCAGATTATAAATATGTGGCAGAGAGCAGGACAAGCAATATA  
TGCCCTCCCATCCAAGGACTAATAAGGTGTGAATCAAAACATTACAGGACTAATATTAAACAAGAGATGGTGG  
AATGGGAATACAACAAACATGAAACCGAAACCTTCAGACCTGGAGGAGGAGATATGAGGGACAATTGGAGAA  
GTGAATTATATAAGTATAAGGTAGTACAAGTTGAACCACTAGGAGTAGCACCCACCAAGGCAAAAAGAAGAGT

GGTGGAGAGAGAAAAAGAGCAGTTGGACTAGGAGCTGTATTTCATTGGATTCTTAGGAGCAGCAGGAAGCACT  
ATGGGCGCGGCGTCTGTGACGCTGACGGTACAGGCCAGGCAATTATTGTCTGGTATAGTGCAACAGCAAAGCA  
ATTTGCTGAGGGCTATAGAGGCTCAACAGCATTTGTTGAACTCACAGTCTGGGGCATT

>MH746253..1

TTCTATTGTAATACATCAGCCTTATTTAATAGCACTTGGAATGATACCAATAATACGGGATCAAATACTGACA  
ATAACACCACGGGGTCAAATGAAGTTATAACTCTCCCTTGCAGAATAAAACAAATTATACGTATGTGGCAGAG  
AACAGGACAAGCAATGTATGCCCCCTCCCATTTTCAGGAATAATAAATTGTACATCAAACATTACAGGACTAATA  
TTGACAAGAGATGGTAGTAATGGTGATAATAACAGTGAAACCTTCAGACCTGGAGGAGGAGATATGAGGGACA  
ATTGGAGAAGTGAATTATATAAGTATAAAGTAGTAAAAATTGAACCATTAGGGGTAGCACCCACCAGGGCAAG  
GAGAAGAGTGGTGCAGAGAGAAAAAGAGCAGTTGGAATAGGAGCTGTCTTCCTTGGGTTCCTTAGGAGCAGCA  
GGAAGCACTATGGGCGCAGCGTCAATAACGCTGACGGTACAGGCCAGACAATTATTGTCTGGCATAGTGCAAC  
AGCAAAACAATTTGCTGAGGGCTATAGAGGCTCAACAACAGCTGTTGAACTCACAGTCTGGGGCATT

>MH746251..1

TTCTATTGCAATACATCAGCCCTGTTCAATAGTACTTGGAATGGCACTGTCACAAATGGCACACAAGCAAATG  
GAACTATAATTCTACCATGCAGAATAAAGCAAATTATAAGAATGTGGCAGAGAGTAGGACAAGCAATGTATGC  
CCCTCCTATCAGAGGAGTGATAAGGTGTGAATCAAACATTACAGGACTAATACTAACAAGAGATGGTGGAGGT  
GGAACATAAGCAGCAATGAGACCTTCAGGCCTACAGGAGGAGATATGAGGGACAATTGGAGAAGTGAATAT  
ATAAGTATAAAGTAGTAAAAATTGAACCAATAGGATTAGCACCTACCGAGGCAAGGAGGAGAGTGGTGGAGAG  
AGAAAAAGAGCAATTGGACTGGGAGTTGCCTTCCTTGGGTTCCTTAGGAGCAGCAGGAAGTACTATGGGCGCG  
GCGTCATTGACGCTGACGGCACAGCCAGACAATTATTGTCTGGTATAGTGCAACAGCAAAGCAATTTGCTGA  
GGGCTATAGAGGCTCAGCAGCATCTGCTGAACTCACAGTCTGGGGCATT

>KU168256..1

TTCTATTGCAATACATCAGGCCTGTTTAATAGCACTTGGCATGTCAATAATACATCAAGCCTGGTTAATAGCA  
CTGGGAACATAACTCTCCCATGCAGAATAAAGCAAATTATAAATATGTGGCAGAGAGTAGGACAAGCAATGTA  
TGCCCCCTCCTATTCCAGGAATAATAAAGTGTGAGTCAAACATTACAGGACTACTATTGATAAGAGATGGTGGGA  
ATTAATAATAACAGTATGAATGAGACCTTCAGACCTGGAGGAGGAGATATGAGAGACAATTGGAGAAGTGAAT  
TATATAAATATAAAGTAGTACAAATTGAACCACTAGGAGTAGCACCTACCAAGGCAAAGAGAAGAGTGGTGGGA  
GAGAGAAAAAGAGCAGTTGGATTGGAGCTGTCTTCCTTGGGTTCCTTAGGAGCAGCAGGAAGCACTATGGGC  
GCGGCGTCAATAACGCTGACGGCACAGGCCAGACAATTATTGTTTGGCATAGTGCAACAGCAAAGCAATTTGC  
TGAGGGCTATAGAGGCTCAACAGCATCTGTTGAACTCACAGTCTGGGGCATT

>KU168305..1

TTCTATTGTAATACATCAGGCCTGTTTAATAGCACTTGGAAGACTAATGGCACTAGCACTTGGAAGGAGACTA  
ATGGCACTGGGAGCCAGGAAAAAGCAATGACAATATAACTCTCCCATGCAGAATAAAGCAAATTATAAATAT  
GTGGCAGAGAGCAGGACAAGCAATGTATGCCCCCTCCCATCGCAGGAGTAATAAAGTGTAACTCAAACATTACA  
GGACTACTATTAACAAGAGATGGGGGAAGTAATAACAATAGCCAAGAGGAGACTTTCAGACCTGGAGGAGGAA  
ATATGAAGGATAACTGGAGAAGTGAATTATATAGGTACAAAGTAGTACAAATTGAACCCCTAGGAATAGCACC  
CACCAGGGCAAGGAGAAGAGTGGTGGGGAGAGAAAAAGAGCAGTTGGACTGGGAGCTGTCTTCATTGGGTTC  
TTAGGAGCAGCTGGAAGCACTATGGGCGCAGCGTCAATAACGCTGACGGCACAGGCCAGACAATTATTGTCTG  
GCATAGTGCAACAGCAAAGCAATTTGCTGAGGGCTATAGAGGCTCAACAGCATATGTTGAACTCACGGTCTG  
GGGCATT

>KP718918..2

TTCTATTGTAATACATCAGGCCTGTTTAATAGCACTTGTTTAGTAATGGGAGCAGGGGCAATGAGAGCATGG  
AAGATGACACCAATATAACTCATATAACTCTCCCATGCAGAATAAAGCAAATTGTGAATATGTGGCAGAGAGC  
AGGACAAGCAATGTATGCCCCCTCCCATCCAAGGAGTAATAAAGTGTACATCAAATATTACAGGAATACTATTA  
ACAAGAGATGGTGGATATAATATTAGCAATAACGACACCGAGATTTTCAGACCTGGAGGAGGAATATGAAGG  
ACAATTGGAGAAGTGAATTATATAAATATAAAGTAGTAAAAGTTGAACCACTAGGAATAGCACCCTAGGGC  
AAAGAGAAGAGTGGTGGAGAGAGAAAAAGAGCAGTTGGAATAGGAGCTGTGTTTCATTGGGTTCCTAGGAGCA  
GCAGGAAGCACTATGGGCGCAGCGTCAATAACGCTGACGGCACAGGCCAGACAAGTATTGTCTGGAATAGTGC  
AACAGCAAAGCAATTTGCTGAGGGCTATAGAGGCTCAACAGCATTTGTTGAACTCACGGTCTGGGGCATT

>KP718928..1

TTCTATTGTAATACATCAGGCCTGTTTAATAGCACTTGGCATAGTAATGGCACTGCAAATGGCACTGAAAAATG  
CCACTATAACTCTCCCATGCAGGATAAAGCAGATTATAAATCTATGGCAGAGAGTAGGGCAAGCAATGTATGC  
CCCTCCTATCCCAGGAATAATAAATTGTACATCAAACATTACAGGACTACTATTAACAAGAGATGGTGGGAAT  
GCTAGTGAGGAACTGAGACCTTCAGACCTGGAGGAGGAAATATGAAGGACAATTGGAGGAGTGAATTATATA  
AATATAAAGTAGTAAAGATTGAACCACTAGGAGTAGCACCCACCAGGGCAAAGAGAAGAGTGGTGGAGAGAGA  
AAAAAGAGCAGTCGGAATAGGAGCTGTGTTTCATTGGGTTCCTTAGGAGCAGCAGGAAGCACTATGGGCGCAGCG  
TCAATAACGCTGACGGCACAGGCCAGACAGTTACTGTCTGGTATAGTGCAACAGCAAAGCAATTTGCTGAGGG  
CTATAGAGGCTCAACAGCACATGTTGAACTCACAGTCTGGGGCATT

>AM279343..1

TTCTATTGTAATACATCAGGCCTGTTTAAATAGCACTTGGTTTAAATAGCACTTGAATGACACTATCAGCAATA  
ATAACACAGGGTCAAATGACACCATATATCTCCCATGCAGAATAAAGCAAATTATAAATATGTGGCAAAGGAC  
AGGACAAGCAATGTATGCCCCCTCCCATCCGAGGAATAATACAGTGTAAATCAACCATACAGGACTACTATTA  
ACAAGAGATGGTGGGATTAACAACAACAGTACAAATGAAACCTTCAGACCTGGAGGAGGAAATATGAGGGATA  
ATTGGAGAAGTGAACATATATAAATATAAAGTAGTAAAAATTGAACCACTAGGAGTAGCACCCACCAAGGCAAG  
GAGAAGAGTGGTGGAGAGAGAAAAAAGAGCAGTTGGACTGGGAGCTGTATTTCATTGGGTTCTTAGGAGCAGCA  
GGAAGCACTATGGGCGCGGCGTCAATAACGCTGACGGTACAGGCCAGACAATTATTGTCTGGCATAGTGCAAC  
AGCAAAACAATTTGCTGAGGGCTATAGAGGCTCAACAGCATCTGTTGAAACTCACGGTCTGGGGCATT

>AM279348..2

TTCTATTGCAATACATCAGGCCTGTTTGCTCAGGAGTTAAAAAATGACACAAATGACAATAACACAATAATTC  
TCCTATGCAAAATAAAGCAAATTATAAATATGTGGCAGAGAGTAGGACAAGCAATGTATGCCCCCTCCAGAGC  
AGGAGTAATAAGGTGTGTATCAAACATTACAGGACTACTGTTAACAAGAGATGGTGGAAAAAATGACAATGGA  
ACTAATGGAACCTGAGATATTCAGGCCTGGAGGAGGAGATATGAGGGACAATTGGAGAAGTGAATTATATAAGT  
ATAAAGTAGTAAGAATTGAACCAGTAGGGGTAGCACCCACCAGGGCAAAGAGAAGAGTGGTGGAGAGAGAGAA  
AAGAGCAGTTGGACTGGGAGCTGTCTTCCTTGGGTTCTTAGGAGCAGCAGGAAGCACTATGGGCGCGGCGTCA  
CTGACGCTGACGGTACAGGCCAGGCAATTATTGTCTGGCATAGTGCAACAGCAGAGCAATTTGCTGAGGGCTA  
TAGAGGCTCAACAACATATGTTGAGACTCACAGTCTGGGGCATC

>FJ388894..1

TTCTATTGTAACACATCAAGCCTGTTTAAATAGCACCTGGAATATTAATACTATTTGGAATAACACTATGTCAA  
ACAGCACTGAGTCAAACGGCACTATAGTGCTCCCATGCAGAATAAAGCAAATTGTAAATGTGTGGCAGAGAGC  
AGGACAAGCAATATACGCCCCCTCCCATCCAAGGAATAATACAGTGTGTCTCAAACATTACAGGACTAATATTA  
ACAAGAGATGGTGGGAATAATAAACAACAATAATACTGAAATCTTCAGACCTGGAGGAGGAGATATGAGGG  
ACAATTGGAGAAGTGAATTATATAAATATAAGGTAGTAAAAATTGAACCATTAGGAGTAGCACCCACCAAGGC  
AAGGAGAAGAGTGGTGGGGAGAGAAAAAAGAGCAGTTGGACTGGGAGCTGTCTTCCTTGGGTTCTTAGGAACA  
GCAGGAAGCACTATGGGCGCGGCGTCAATAACGCTGACGGTACAGGCCAGGCAATTATTGTCTGGCATAGTGC  
AACAGCAAAGCAATTTGCTGAGGGCTATAGAGGCTCAACAACATCTGTTGAAACTCACTGTCTGGGGCATT

>FJ388903..3

TTCTATTGTAACACATCGGGCCTGTTTAAATAGCCAATATAACACATCAGGCCTGGTTAATAACACGCAGGAGT  
CAGGAAGCACAGAGTCAAATGACACTGAGTCAATTGTACAGACAATATAACTCTCCAAATCAGAATAAAGCA  
AATTATAAATCAGTGGCAAAGAGTAGCTCAAGCAACATATGCCCCCTCCCATCCCAGGAGTAATAAAATGTGTA  
TCAAACATTACAGGACTAATATTAAGTAGAGATGGTGGGAGTAGTAGCGGAAATGAAACCTTCAGACCTGGAG  
GAGGAGATATGAGGGACAATTGGAGAAGTGAATTATATAAGTATAAAGTAGTAAAAATTGAACCACTAGGAGT  
AGCACCCACCAGGGCAAAGAGAAGAGTGGTGGAGAGAGAAAAAAGAGCAGTTGGAATAGGAGCTGTCTTCATT  
GGGTTCTTAGGAGCAGCAGGAAGCACTATGGGCGCGGCGTCAATGACGCTGACGGTACAGGCCAGGCAATTAT  
TGTCTGGCATAGTGCAACAGCAAAGTAATTTGCTGAGGGCTATAGAGGCTCAACAGCATCTGTTGAAACTCAC  
GGTTTGGGGCATT

>FJ388909..1

TTCTATTGTAATACATCAGGCCTGTTTAAATAGCACTTGAATAATGACACCTGGAATGGCAATGACACACAAG  
AGTCAAATGAAACCTCGTCAAATGGCACCATAATTCACCATGCAAAATAAAACAAATTGTAAATATGTGGCA  
GAGAGTACAACAAGCAATGTATCCCCCTCTCGTCGAAGGAGTAATAAGGTGTGAATCCATCATTACAGGACTA  
CTATCAACAAGAGATGGTGGGATTAACAGCAGGACAAATGAAACCTTCAGACCTGGGGGAGGAGATATGAGGG  
ACAATTGGAGAAGTGAACATATATAAATATAAGGTAGTAAAAATTGAACCACTAGGAGTAGCACCCACCACGGC  
AAAGAGAAGAGTGGTGGAGAGAGAAAAAAGAGCAGCTGGACTGGGAGTTATGTTCTTGGGTTCTTAGGAGCA  
GCCGGAAGCACTATGGGCGCGGCGTCAATAACGCTGACGGTACAGGCCAGACAGTTATTATCTGGTATAGTGC  
AACAGCAAAGCAATTTGCTGAAGGCTATAGAGGCTCAACAGCACCTGTTGAGACTCACGGTCTGGGGCATT

>FJ388925..1

TTCTATTGTAACACATCAGGCTTGTTTAAATAGCACTTGAATGCCACTGCCAGCATGCAGGAGTCAAATAGCA  
CAGAGTCAAACGACACTACTATAACTCTCCCATGCAGAATAAAGCAAATTATAAATATGTGGCAGAGAGCAGG  
ACAAGCAATATATGCCCCCTCCCATCCGAGGAGTAATAAGGTGTGAATCAAACATTACAGGACTAATATTAACA  
AGAGATGGAGGGAATAGTAACAGCACAAATGAAACCTTCAGACCTGGAGGAGGAGATATGAGGGATAATTGGA  
GAAGTGAATTATATAAGTATAAAGTAGTAAAAATTGAACCACTAGGAGTAGCACCCACCAGGGCAAGGAGAAG  
AGTGGTGGAGAGAGAAAAAAGAGCAGTTGGAATAGGAGCTGTCTTCATTGGGTTCTTAGGAGCAGCAGGAAGC  
ACTATGGGCGCGGCGTCAATAGCGCTGACGGTACAGGCCAGGCAATTATTGTCTGGCATAGTGCAACAGCAAA  
GCAATTTGCTGAGGGCTATAGAGGCTCAACAGCATATGTTGAAACTCACGGTCTGGGGCATT

>FJ388932..1

CTCTATTGTAACACATCAGGCCTGTTTAAATAGCACTTGGCCTGCCAATAACAGTACGCAGGGGTCAAATAGCA  
CAGAGTCAAACGACACCGTAATTCCTCAATGCAGAATAAAGCAAATTATAAATATGTGGCAAAGAGTAGGACA  
AGCAATATATGCCCCCTCCCATACCAGGAGAAATAAAGTGTGTATCAAACATTACAGGACTAATATTAACAAGA  
GATGGTGGGAGTAGCAATAATACAGAAAATGAAACCTTCAGACCAGGAGGAGGAGATATGAGGGACAATTGGA  
GAAGTGAATTATATAAGTATAAAGTAGTAAAAATTGAACCACTAGGAGTAGCACCCACCAGGGCAAAGAGAAG

AGTGGTGCAGAGAGAAAAAGAGCAGTATTAGGTGGACTGGGAGCTGTCTTCGTTGGGTTCCTGGGAGCAGCA  
GGAAGCACTATGGGCGCGGCGTCAGTGACGCTGACGGTACAGGCCAGGAAATTATTGACTGGCATAGTGCAAC  
AGCAAAGTAATTTGCTGAGGGCTATCGAGGCTCAACAGCATCTGTTGAAACTCACGGTCTGGGGCATT  
>FJ388938..1

TTCTATTGTAACACATCAGGCCTGTTTAATAGCACTTGGAATGGCACTACCATGCAGGAGTCAAATAACACAG  
AGTCAAACGACACTGAGTCAAACGACATTATAACTCTCCGATGCAGAATAAGGCAAATTATAAGAATGTGGCA  
GAGAGCAGGACAAGCAATGTATGCCCCACCCATCCAAGGAATAATAAAGTGTGAATCAAACATTACAGGACTA  
ATATTAGCAAGAGATGGTGGGAATAGAAATGAACTGAAACCTTCAGACCTGGAGGAGGAGACATGAGGGACA  
ATTGGAGAAGTGAATTATATAAGTATAAAGTAGTAAAAATTGAACCATTAGGAGTAGCACCCACCAAGGCAAG  
GAGAAGAGTGGTGCAGAGAGAAAAAGAGCAGTTGGAATAGGAGCTGTCTTCATTGGGTTCCTAGGAGCAGCA  
GGAAGCACTATGGGCGCGGCGTCAATAACGCTGACGGTACAGGCCAGGCAACTATTGTCTGGCATAGTGCAAC  
AGCAAAGTAATTTGCTGAAGGCTATAGAGGCTCAACAACATCTGTTGAAACTCACGGTTTGGGGCATT  
>FJ388942..1

TTCTATTGTAACACATCAGGCCTGTTTAATAGCTCTTGGCTGAAGTCAAATAGAACAGGGCCTAGCACAGAGC  
CAAACAACACTGAGCCAAACAACACTATTATAACTCTCCCATGCAAAATAAAGCAAATTATAAATATGTGGCA  
GAGAACAGGACAAGCAATGTATGCCCCCTCCCATCCCAGGAGTAATAAGGTGTGAATCAAACATTACAGGACTA  
ATATTAACAAGAGATGGTGGGAATAGTAGCAATAGCAATGAAACCTTCAGACCTGGAGGAGGAAATATGAGGG  
ACAATTGGAGAAGTGAATTATATAAGTATAAAGTAGTAAAAATTGAACCACTAGGAGTAGCACCCACCAGGGC  
AAGGAGAAGAGTGGTGGAGAGAGAAAAAGAGCAGTTGGAATAGGAGCTGTCTTCATTGGGTTCCTTAGGAGCA  
GCAGGAAGCACTATGGGCGCGGCGTCAATGACGCTGACGGTACAGGCCAGGCAATTATTGTCTGGCATAGTGC  
AACAGCAAAGCAATTTGCTGAGGGCTATAGAGGCTCAACAGCATATGTTGAAACTCACGGTCTGGGGCATT  
>FJ388946..2

TTTTATTGTAATACATCAGGCCTGTTTAATAGAACTTGGTCTACCAATACCAGCATGCAGGTGTCAAATAGCA  
CAGAGTTAAATGGCCCTATAATTCTCCAATGCAGAATAAAGCAAATTATAAATATGTGGCAAAGAGTAGGACA  
AGCAATATATGCCCCCTCCCATCCCAGGAGTAATAAGGTGTGAATCAAACATTACAGGACTAATATTAACAAGA  
GATGGTGGAAATAATAATACCGGAAATCAAACCTTCAGACCTGTAGGAGGAGATATGAAGGACAATTGGAGAA  
GTGAATTATATAAGTATAAAGTAGTAAAAATTGAACCACTAGGAGTAGCACCTCCAAGGCAAAGAGAAGAGT  
GGTGGAGAGAGAAAAAGAGCAATTGGAATAGGAGCTGTCTTCATTGGGTTCCTTAGGAGCAGCAGGAAGCACT  
ATGGGCGCGGCGTCAGTGACGCTGACGGTACAGGCCAGGCAATTATTGTCTGGCATAGTGCAACAGCAAAGTA  
ATTTGCTGAGGGCTATAGAGGCTCAACAGCATCTGTTGAACTCACGGTCTGGGGCATT  
>JF683737..1

TTCTATTGTAACACATCAGGCCTGTTTAATAGCACGTGGAATGCTAGTGACATCACGCAGGGGTAAATGACA  
CAATAACTCTCCAATGCAGAATAAAGCAAATTATAAATATGTGGCAGAGAGTAGGGCAGGCAATGTATGCCCC  
TCCCATCCAGGGAGAAATAAGGTGTGAATCAAACATTACAGGACTAATATTAACAAGAGATGGTGGGAATGGG  
AATGGAACAAATGAAACCTTCAGACCTGGAGGAGGAGATATGAGGGACAATTGGAGAAGTGAATTATATAAGT  
ATAAAGTAGTAAAAATTGAACCACTAGGAGTAGCACCCACCAGGGCAAAGAGAAGAGTGGTGGAGAGAGAAAA  
AAGAGCAGTTGGACTGGGAGCTGTATTTCATTGGGTTCCTTAGGAGCAGCAGGAAGCACTATGGGCGCGGCGTCA  
GTGACGCTGACGGTACAGGCCAGGCAATTATTGTCTGGCATAGTGCAACAGCAAAGCAATTTGCTGAGGGCTA  
TAGAGGCTCAACAGCATTTGTTGAACTCACAGTCTGGGGCATT  
>JF683759..1

TTCTATTGTGACACATCAGGCCTGTTTAATAGCACTTGGAATACCACTGACACCATGCACGAGGAGACTAATA  
CAGAGGCAAATAGTACTATTACTCTCCCATGCAGAATAAAGCAAATTATAAATATGTGGCAGAGAGCAGGACA  
AGCAATATATGCCCCCTCCCATCCCAGGAGTAATACAGTGTAATCAAACATTACAGGACTAATATTAACAAGA  
GATGGTGGGAGTAATAGCAGCACAATGAAACCTTCAGACCTGGAGGAGGAGATATGAGGGACAATTGGAGAA  
GTGAATTATATAAGTATAAAGTAGTAAAAATTGAACCACTAGGAGTAGCACCCACCAAGGCAAGGAGAAGAGT  
GGTGCAGAGAGAAAAAGAGCAGTAGGACTGGGAGCGGTATTTCATTGGGTTCCTTAGGAGCAGCTGGAAGCACC  
ATGGGCGCGGCGTCAATAACGCTGACGGTACAGGCCAGGCAATTATTGTCTGGTATAGTGCAACAGCAAAGCA  
ATTTGCTGAGGGCTATAGAGGCTCAACAGCATCTGTTGAACTCACAGTCTGGGGCATT  
>JF683760..1

TTCTATTGTAACACCTCAAAGTTGTTTAATAGCACTTGGAATACCACTGACACCATGCACGAGGAGTCAAATA  
GCACAAATGATAATATAAATTCTCCCATGCAGAATAAAGCAAATTATAAATATGTGGCAGAGAGCAGGACAAGC  
AATATATGCCCCCTCCCATCCAAGGAATAATAAAGTGTGTATCAAACATTACAGGATTAATATTAACAAGAGAT  
GGGGGTGTAGGTAACAACGCAAAGGAAGTCTTCAGACCTGGAGGAGGAGATATGAGGGACAATTGGAGAAGTG  
AATTATATAAGTATAAAGTAGTAAAAATTGAGCCACTAGGAGTAGCACCCACTGGGGCAAGGAGAAGAGTGGT  
GCAGAGAGAAAAAGAGCAGTTGGACTGGGAGCTGTTTTTCATTGGGTTCCTGGGAGCAGCAGGAAGCACTATG  
GGCGCGGCGTCAATGACGCTGACGGTACAGGCCAGACAATTATTGTCTGGCATAGTGCAACAGCAAAGCAATT  
TGCTGAGGGCTATAGAGGCTCAACAGCATATGTTGAGACTCACGGTCTGGGGCATT  
>JF683761..1

TTCTATTGTAACACCTCAAAGCTGTTTAATAGCACTTGGAATAATACCAGCACGCAGGAGTCAAATAGCACTA  
ATCCAAATGATAATATAAATTCTCCCATGCAGAATAAAGCAAATTATAAATATGTGGCAAAGAGCAGGACAAGC

AATATATGCCCCCTCCCATCCAAGGAAAAATAAACTGTGTATCAAACATTACAGGATTAATATTAACAAGAGAT  
GGGGGGGGTAACAGCACAGAGGAAGTCTTCAGACCTGGAGGAGGAGATATGAGGGACAATTGGAGAAGTGAAT  
TATATAAGTATAAAGTAGTAAAAATTGAGCCAATAGGAGTAGCACCCACTGAGGCAAGGAGAAGAGTGGTGCA  
GAGAGAAAAAAGAGCGGTTGGACTGGGAGCTGTTTTTCATTGGGTTCTTGGGAGCAGCAGGAAGCACTATGGGC  
GGGGCGTCAATGACGCGGACGGTACAGGCCAGACAATTATTGTCTGGCATAGTGCAACAGCAAAGCAATTTGC  
TGAGGGCTATAGAGGCTCAACAGCATATGTTGAGACTCACGGTCTGGGGCATT

>JF683767..1

TTCTATTGTAATACATCAGGTCTGTTCAATAGCTCTTGGAATATCAATGGCAGCAGGTCAAATAGCACAAGGT  
CAAATGGCAATATAACTCTCCCATGCAGAATAAAGCAAATTATAAATATGTGGCAAAGAACAGGACAGGCAAT  
GTATGCCCCCTCCCATCCAAGGAGTAATAAGGTGTGTATCAAACATTACAGGACTACTGTTAACAAGAGATGGA  
GGGGGTAACAATACAAATGAAACTGAAATTTTCAGACCTGGAGGAGGAGATATGAGGGGCAATTGGAGAAGTG  
AATTATATAAGTATAAAGTAGTAAAAATTGACCCACCAGGAGTAGCACCCAACACAGCAAGGAGAAGAGTGGT  
GGGGAGAGAAAAAAGAGCAGCTGGAATAATAGGAGCTGTCTTCCTTGGGTTCTTAGGAGCAGCAGGAAGCACT  
ATGGGCGCGGCGTCAGTGACGCTGACGGTACAGGCCAGACAATTATTGTCTGGTATAGTGCAACAGCAAAGCA  
ATTTGCTGAGGGCTATAGAGGCTCAACAACACCTGTTGAAACTCACGGTCTGGGGCATT

>JF683779..2

TTCTACTGTAACACATCAGGCCTGTTTAATAGCACTTGGTATACCAATAACAGCATGCAGCCAAATTACACAA  
AACTATAACTTTGCCATGCAGAATAAAGCAAGTTATAAATATGTGGCAAAGAGTAGGACAAGCAATGTATGC  
CCCTCCCATCCCAGGAATAATACAATGTGTATCAAACATTACAGGACTAATATTAACAAGAGATGGTGGGCAT  
AATAATAGTGCAATGAGACCTTCAGACCTGGAGGAGGAGATATGAGGGACAATTGGAGAAGTGAATTATATA  
AGTATAAAGTAGTGAAAGTTGAACCATTAGGAGTAGCACCCACCAGGGCAAGGAGAAGAGTGGTGGAGAGAGA  
AAAAAGAGCAGTTGGAATAGGAGCTGTCTTCCTTGGGTTCTTAGGAGCAGCAGGAAGCACTATGGGCGCGGCG  
TCAGTGACGCTGACGGTACAGGCCAGGCAATTATTGTCTGGCATAGTGCAACAGCAAAGCAATTTGCTGAGGG  
CTATAGAGGCTCAACAACATATGTTGAAACTCACGGTCTGGGGCATT

>JF683782..1

TTCTATTGTAATACATCAAAATTGTTTAATACAACTTGAATGCCAATGGCAGCGTACAGGAGTCAGTCAACA  
CTGCAGGCAACACTACTATATTTCTCCCATGCAGAATAAAGCAAATTATAAGGATGTGGCAGAGAGCAGGACA  
AGCAATATATGCCCCCTCCCATCCAGGGAAGAATAAGGTGTGAATCAAACATTACAGGACTACTGTTAACAAGA  
GATGGTGGAGGTAATGCAACAACACAGAAATCTTTAGACCTGGAGGAGGAGATATGAGGGACAATTGGAGAA  
GTGAATTATATAAGTACAAGGTAGTAAAAATTGAACCACTAGGAGTAGCACCCACCAAGGCAAGGAGAAGAGT  
GGTGCAGAGAGAAAAAAGAGCAGTTGGACTAGGAGCTGTCTTCCTTGGGTTCTTAGGAGCAGCAGGAAGCACT  
ATGGGCGCGGCGTCAATAACGCTGACGGTACAGGCCAGGCAATTATTGTCTGGCATAGTGCAACAGCAAAGCA  
ATTTGCTGAGGGCTATTGAGGCTCAACAGCAGATGTTGAGACTCACGGTCTGGGGCATT

>JF683783..1

TTCTATTGTAATACATCAAAATTGTTTAATACAACTTGAATGTCACTGACAGCATAGAAGAGTCAGGCAACA  
CTATTATAGTCCTCCCATGCAAAATAAAGCAAATTATAAATATGTGGCAGAGAGCAGGACAAGCAATATATCC  
CCCTCCCATCCGGGGAATAATAAGGTGTGAATCCAACATTACAGGACTATTATTAACAAGAGATGGTGGAGAT  
ACTGAAAACACCACAGAAATCTTTAGACCTGGAGGAGGAGATATGAGGGACAATTGGAGAAGTGAATTATATA  
AGTATAAAGTAGTAAAAATTGAACCACTAGGAGTAGCACCCACCGAGGCAAGGAGAAGAGTGGTGCAGAGAGA  
AAAAAGAGCAGTTGGAATAGGAGCTGTCTTCCTTGGGTTCTTAGGAGCAGCAGGAAGCACTATGGGCGCGGCG  
TCAATAACGCTGACGGTACAGGCCAGGCAATTATTGTCTGGCATAGTGCAACAGCAAAGCAATTTGCTGAGGG  
CTATAGAGGCTCAACAGCAGATGTTGAGACTCACGGTCTGGGGCATT

>JF683789..1

TTCTATTGTAACACCTCAAAGCTGTTTAATAGCATTTGGCATCCTAATGATACCATGCAGGAGGAGACTAATA  
CAAATCCAAATGCTAATATAACTCTCCCATGCAGAATAAAGCAAATTATAAATCTGTGGCAAAGAGTAGGGAA  
AGCAATATATGCCCCCTCCCATCCGAGGAAGAATAGAGTGTGTATCAAACATTACAGGATTAATAATAACAAGA  
GATGGTGGAAATAACACAAATAACACTGAAATCTTCAGACCTGCAGGAGGAGACATGAGGGACAATTGGAGAA  
GTGAATTATATAAATATAAAGTAGTACAAATTGAGCCACTAGGAATAGCACCCACTGAGGCAAGGAGAAGAGT  
GGTGCAGAGAGAAAAAAGAGCAATTGGACTAGGAGCTATGTTTCATTGGGTTCTTAGGAGCAGCAGGAAGCACT  
ATGGGCGCGGCGTCAGTGACGCTGACGGTACAGGCCAGGCAATTATTGTCTGGCATAGTGCAACAGCAAAGCA  
ATTTGCTGATGGCTATAGAGGCTCAACAGCATCTGTTGAAACTCACAGTCTGGGGCATT

>FJ670523..1

TTCTATTGTAACACATCAGGCCTGTTTAATAGCACTTGGCCTAATAGCACTTGAATGCCAATACCAGCATAC  
AGGAGTCAAATAGCACAGACAATATAACTCTCCAATGCAGAATAAAGCAAATTATAAATCTGTGGCAGAGAGC  
AGGAAAAGCAATATATGCCCCCTCCCATCCAAGGAGCAATACAGTGTATATCAAACATTACAGGACTAATATTA  
ACAAGAGATGGAGGTAATAATGGAACATAAACAACCTGAGATCTTCAGACCTGGAGGAGGAGATATGAGAGATA  
ATTGGAGAAGTGAATTATATAAAGTATAAGGTAGTAAAAATTGAACCATTAGGAGTAGCACCCCTCAGGGCAAA  
GAGAAGAGTAGTGGGGAGAGAAAAAAGAGCAGTTACAATAGGAGCTGTCTTCCTTGGGTTCTTAGGAGCAGCA  
GGAAGCACTATGGGCGCGGCGTCACTGACGCTGACGGTACAGGCCAGGCAATTATTGTCTGGCATAGTGCAAC  
AGCAAAGCAATTTGCTGCAGGCTATAGAGGCTCAACAGCATCTGTTGAAACTCACGGTCTGGGGCATT

>AF219261..2

TTCTATTGTAATACATCAGGCCTGTTTAAATAGCACTTGGGTGTCAAACAACACTGGGAAATATTATAGTAATA  
GCACTAGGGAAAATCCAAATATAACTCTCCCATGCAGAATAAAACAAATTATAAATATGTGGCAGAGAGCAGG  
ACAAGCAATATATGCCCCCTCCCATCGAAGGAGTAATAAGGTGTGAATCAAACATTACAGGACTACTATTAACA  
AGAGATGGTGGGGATAAGAACAACACAAGTGAAATCTTCAGACCTGGAGGAGGAAATATGAAGGACAACCTGGA  
GAAGTGAATTATATAAGTATAAAGTAGTAAAAATTGAACCATTTAGGAGTAGCACCCACCCCGGCAAGGAGAAG  
AGTGGTGCAGAGAGAAAAAGAGCAGTATTTGGGCTGGGAGCTGTCTTTCTTGGGTCTTTAGGAGCAGCAGGA  
AGCACTATGGGCGCGGCGTCGATAACGCTGACGGTACAGGCCAGACAATTATTGTCTGGCATAGTGCAACAGC  
AAAGTAATTTGCTGAGGGCTATAGAGGCTCAACAGCATTTGTTGAAACTCACGGTCTGGGGCATT

>AF219265..2

TTCTATTGTAATACATCAGGCCTGTTTAAATAGCACTTGGAGTAATAGCACTTGGAGTTCCAATGCCAGCACGC  
AGGGGTTCAGAAAATGACACTATAACTCTCCCATGCAGAATAAAACAAATTATAAATATGTGGCAGAGAGCAGG  
ACAAGCAATGTATGCCCCCTCCCATTCAGGAGTAATAAGGTGTGATTCAAATATTACAGGACTAATATTAACA  
AGAGATGGTGGGGTTACAAATGAAACCGAAACCTCCAGACCTGGAGGAGGAGATATGGGGGACAATTGGAGAA  
GTGAATTATATAAATATAAAGTAGTGAAAATTGAACCACTAGGAGTAGCACCCACCAGGGCAAAAAGAGTAGT  
GGTGGGGAGAGAAAAAGAGCAATTGGAATAGGAGCTGTTTTCATTGGGTTCTTAGGAGCAGCAGGAAGCACT  
ATGGGCGCGGCGTCAATGACGCTGACGGTACAGGCCAGACAATTATTGTCTGGCATAGTGCAACAGCAAAGCA  
ATTTGCTGAGGGCTATAGAGGCTCAACAACATCTGTTGAAACTCACGGTCTGGGGCATT

>HM204635..1

TTCTATTGTAATACATCACACCTGTTTAAATAGCGCTTGGTCTGTCAATGACACCGTGCAGGAGTCAAATAGCA  
CGGAGTCAAATGACACTATAACTCTCCAATGCAGAATAAAGCAAATTATAAATATGTGGCAGAGAACAGGACA  
AGCAATGTATGCCCCCTCCCATCCCAGGAGTAATAAGATGTAACCTCAAACATTACAGGACTAATATTAACAAGA  
GATGGTGGGAATAATAATAGTTCAAATGAAAATGAAACCTTCAGACCTGGAGGAGGAGATATGAGAGACAATT  
GGAGAAGTGAATTATATAAGTATAAAGTAGTAAAAATTGAACCACTAGGAGTAGCACCCACCAAGGCAAGGAG  
AAGAGTGGTGCAGAGAGAAAAAGAGCAGTTGGACTGGGAGCTGTCTTCATTGGGTTCTTAGGAGCAGCAGGA  
AGCACTATGGGCGCGGCGTCAGTGACGCTGACGGTACAGGCCAGACAATTATTGTCTGGCATAGTGCAACAGC  
AAAGCAATTTGCTGAGGGCTATAGAGGCTCAACAACATCTGTTGAAACTCACAGTCTGGGGCATT

>HM204648..2

TTTTATTGTAACACATCAGGCCTGTTTACTGGCACTTGGAAATCAGACTAATAGTACTTGGAAATAGTGGCACTT  
GGACTAACACTACTGGCAATATAACTCTCCAATGCAGAATAAAGCAGGTCATAAGAATGTGGCAGAGAGTAGG  
ACAAGCAATGTATGCCCCCTCCCATCCCAGGAGTAATAAGGTGTGAATCAAACATTACAGGACTAATATTAACA  
AGAGATGGGGAAAGGTAACAGTAGCATAAAAGATGAAACCTTCAGACCTGGAGGAGGGAATATGAAGGACAATT  
GGAGAAGTGAATTATATAAATATAAAGTAGTAAAAATTGAACCAATAGGAGTAGCACCCACCAGGGCAAGAG  
AAGAGTGGTGGAGAGAGAAAAAGAGCAGTTGGACTAGGAGCTGTCTTCATTGGGTTCTTAGGAGCAGCAGGA  
AGCACTATGGGCGCAGCGTCAATAACGCTGACGGTACAGGCCAGGCAATTGTTGTCTGGCATAGTGACAGCAGC  
AAAGCAATTTGCTGAAGGCTATTGAGGCTCAACAACAGTTGTTGAGACTCACGGTCTGGGGCATT

>HQ595782..1

TTCTATTGCAATACGTCTAAACTGTTTAAATAGCACGTGGAAAAATGAAAGCAGGCAGGGGTCAAATGACATTA  
TAACTCTCCCATGCAGAATAAAGCAAATTATAAGGATGTGGCAAAGAGTAGGGCAAGCAATGTATGCCCCCTCC  
CATCCCAGGAGTAATAGAGTGTAATTCAAACATTACAGGGCTACTATTGACAAGAGATGGTGGTAATAGAACC  
GAAAATGAGACCTTCAGACCTGAGGGAGGAGATATGAGAAACAATTGGAGAAGTGAATTATATAAGTATAAAG  
TAGTAAGAATTGAACCATTTGGGAGTAGCACCCACCAGGGCAAAAAGAAGAGTGGTGGAGAGAGAAAAAGAGC  
AGCTGGATTGGGAGCTGTCTTCTTGGGTTCTTAGCAGCAGCAGGAAGTACTATGGGCGCAGCGTCAATAACG  
CTGACGGCACAGGCCAGACAATTATTGTCTGGCATAGTACAACAGCAAAGCAATTGCTGAGGGCTATAGAGG  
CTCAACAGCAACTGTTGAGGCTCACGGTCTGGGGCATT

>HQ595784..2

TTCTATTGCAACACAGCAGGTCTGTTTAAATAGCAGCTGGGGGAACAATGACACTGACAGCAACCAGACAGCAA  
AGATAAATATAACTCTCCAATGCAGAATAAAGCAAATTGTAAGGATGTGGCAGAGAGTAGGACAAGCAATGTA  
TGCCCCCTCCCATCGCAGGAACGATAAACTGTTTATCAAATATTACAGGACTACTATTAACAAGAGATGGGGGG  
ACAAATAAGACGTGGTCTCACAATGAGACCTTCAGACCTGAAGGAGGAAATATGAAGGACAATTGGAGAAGTG  
AATTATATAGGTATAAAGTAGTAAAAATTGAACCACTAGGAGTAGCACCCACCAGGCAAGGAGAAGAGTGGT  
GGAGAGAGGAAAAAGAGCAGTTGGAATAGGAGCTGTTCTCTTTGGGTTCTTAGGAGCAGCAGGAAGCACTATG  
GGCGCGGCGTCACTAACGCTGACGGTACAGGCCAGACAATTACTGTCTGGCATAGTGCAACAGCAGAGCAATC  
TGCTGAGGGCTATAGAGGCTCAACAGCATCTGTTGAAGCTCACAGTCTGGGGCATT

>Y13718..1

TTCTATTGTAACACATCAAGACTGTTTAAATAGCACTTGGAAATGACACTACCAGTATGCTAAATGACACGAAGC  
CAAACGACACTATAACTCTCCCATGCAGAATAAAGCAAATTATAAATATGTGGCAAAGAGCAGGACAAGCAAT  
ATATGCCCCCTCCCATCCAAGGAGTAATAAGGTGTGAATCAAACATTACAGGACTAATATTAACAAGAGATGGT  
GGGGGTAAATAGCAGTGTAAGTAGTGAACCTTTTCAGACCTGGAGGAGGAGATATGAGAGACAATTGGAGAAGTG  
AATTATATAAGTATAAAGTAGTAAAAATTGAACCACTAGGAGTAGCACCCACCAAGGCAAGAGAAGAGTGGT

GGAGAGAGAAAAAGAGCAGTTGGACTAGGAGCTGTTTTTCATTGGGTTCTTAGGAGCAGCAGGAAGCACTATG  
GGCGCGGCGTCAATAACGCTGACGGTACAGGCCAGACAATTATTGTCTGGCATAGTGCAACAGCAAAGCAATT  
TGCTGAGGGCTATAGAGGCTCAACAGCATCTGTTGAACTCACGGTCTGGGGCATT

>Y13717..1

TTCTATTGTAACACATCAGGCCTGTTTAATAGCACTTGGGATAGCAGTGCCAGCATGCAAGAGTCAAATAGCA  
CGGCCAATATAACTCTCCCATGCAGAATAAGGCAAATTATAAATCTGTGGCAGAGAACAGGACAAGCAATATA  
TGCCCCCTCCCATCCAAGGAGTAATAAGGTGTGTATCAGACATCACAGGACTAATATTAACAAGAGATGGTGGG  
GGTAATGGTACTGAAAGTAAAAAAGAACTTTTCAGACCTGGAGGAGGAGATATGAGGGACAATTGGAGAAGTG  
AATTATATAAGTATAAAGTAGTAAAAATTGAACCACTAGGAGTAGCACCCACCAAGGCAAAGAGAAGAGTGGT  
GGAGAGAGAAAAAGAGCAGTTGGAATGGGAGCTGTCTCCTGGGGTTCTTAGGAGCAGCAGGAAGCACTATG  
GGCGCGGCGTCAATAACGCTGACGGTACAAGCCAGACAATTATTGTCTGGCATAGTGCAACAGCAAAGCAATT  
TGCTGAGGGCTATAGAGGCTCAACAGCAGGTGTTGAGACTCACGGTCTGGGGCATT

>HQ385459..2

TTCTATTGCGATACATCAGGCCTGTTTAATAGTATTTGGAATAGCACTGCCATCAGCCAGAATGTGAGGAGT  
CAAATGATACTATAACTCTCCCATGCAAAATAAGACAAAATTGTAAATATGTGGCAGAGAGTAGGACAAGCAAT  
ATATGCCCGTCCCATTCAGGAATAATAAACTGTACATCAAACATTACAGGGCTACTGCTAACAAGAGATGGT  
GGGGATAATGATAATAAACTGAGACTTTTCAGACCTGGAGGAGGAAATATGAAGGACAATTGGAGAAGTGAGT  
TATATAGATATAAAGTAGTAAAAATTGAACCACTAGGAGTAGCACCCACCAAGGCAAAGAGAAGAGTGGTGGG  
GAGAGAAAAAGAGCAGTTGGACTAGGAGCTGTCTCTTTGGGTTCTTGGGAGCAGCCGGAAGTACTATGGGC  
GCGGCGTCAATAACGCTGACGGCACAGGCCACACAATTATTGTCTGGTATAGTACAACAGCAAAGCAATCTGC  
TGAGGGCTATAGAGGCTCAACAGCACCTGTTGAACTCACGGTCTGGGGCATT

>HQ385452..1

TTCTATTGCAATACATCAGGCCTGTTTTCTGGCTCTTGGTATAATGGCACTTGGGCTAATGACTCTTGGAGTG  
CTGGTCTGGGACCAATGATAATATAACTCTCCCATGCAAAATAAGCAAATCATAAGAATGTGGCAGAGAGT  
GGGACAAGCAATGTATGCCCCCTCCCATCCAAGGAGAAATAAATTGTGTATCAAACATCACAGGACTATTACTA  
ACAAGAGATGGTGGTAATAGTAGTGAAGAGATCTTCAGACCTGGAGGAGGAGATATAAGAGACAATTGGAGGA  
GTGAATTATATAAATATAAAGTGGTAAAAATTGAACCATTAGGAGTAGCGCCACCAGGGCAAGGAGAAGAGT  
GGTGGGAAGAGAAAAAGAGCAGTTGGACTGGGAGCTGTCTTCCTTGGGTTCTTAGGAGCAGCAGGAAGCACT  
ATGGGCGGCGTCAATCACGCTGACGGTACAGGCCAGGCAATTATTGTCTGGCATAGTGCAACAGCAGAGCA  
ATCTGCTGAGGGCTATAGAGGCTCAACACCATCTGTTGAACTCACGGTCTGGGGCATT

>HQ385453..1

TTCTACTGCGACACAACAGGCCTGTTTAATAACACAGAGAAAAATGACACTATAATGCTCCCATGCAAAATAA  
GACAAATTGTACGTATGTGGCAGAGAGTAGGACAAGCAATGTATGCCCCCTCCCATTCAGGAGTAATAAACTG  
TCTATCAAACATTACAGGGCTACTGCTGACAAGAGATGGTGGGGATAGTACTAATAATACTGAGAAATTGAGA  
CCAGGAGGAGGAGATATAAGGGACAATTGGAGAAGTGAATTATATAAATATAAAGTAGTAAAAATTGAACCAC  
TAGGAGTAGCACCTACCAAGGCAAAGAGAAGAGTGGTGGAGAGAAGAAAAAGAGCAGGACTAGCAGCTGTCTT  
CCTTGGGTTCTTAGGAGCAGCAGGAAGCACTATGGGCGCAGCGTCAATAACGCTGACGGTACAGGCCAGACAA  
TTATTGTCTGGTATAGTGCAACAGCAAACAATTGCTGAAGGCTATAGAGGCTCAACAACAGATGTTGAGAC  
TCACGGTCTGGGGCATT

>KT152846..2

TTCTATTGTAATACATCAAACCTGTTTAATAGCACTTGGACGAAAAATGACAGCATGCAGGGGTTAAATCACA  
CGGAGTCAAATGACAATATAACTCTCCCATGCAGACTAAGGCAAATTATAAAAAATGTGGCAGAGAGTAGGACA  
AGCAATGTATGCCCCCTCCCATCCAAGGAATAATAAAGTGTGAATCAAACATTACAGGGCTAATATTAACAAGA  
GATGGTGGGAATAACAACAGTGCAGAGGAAACCTTCAGACCTGGAGGAGGAGATATGAGGGACAATTGGAGAA  
GTGAATTATATAAGTATAAAGTAGTACAAATTGAACCACTAGGGGTAGCACCCACCAAGGCAAGGAGAAGAAC  
GGTGGGGAGAGAAAAAGAGCAGTTGGAATGGGAGCTGTTTTCTTGGGTTCTTAGGAGCAGCAGGAAGCACT  
ATGGGCGCAGCGTCAATAACGCTGACGGTACAGGCCTGGCAATTATTGTCTGGCATAGTGCAACAGCAAAGCA  
ATTTGCTGAGGGCTATAGAGGCTCAACAACATCTGTTGAACTCACGGTCTGGGGCATT

>KT152841..1

TTCTATTGTGATACATCAGCCCTGTTTAATGGCACTTGGGAATAATACCAGCATGAAGGAGTCAAATAGCACGG  
AATCAAATGACACTATAACTCTCCCATGCAGAATAAAGCAAATTATAAATATGTGGCAGAGAGTAGGACAAGC  
AATGTATGCCCCCTCCCATCCAAGGAATAATAAAGTGTGAATCAAACATTACAGGACTACTATTAAACAAGAGAT  
GGTGTGGGGATAACAGTACAAATGAGGAAACCTTCAGACCTGGAGGAGGAGATATGAGGGACAATTGGAGAA  
GTGAATTATATAGGTATAAAGTAGTAAAAATTGAACCACTAGGAGTAGCACCCACCAGGGCAAGGAGAAGAAC  
GGTGGGGAGAGAAAAAGAGCAGTGGAAATAGGAGCTGTCTTCCTTGGGTTCTTAGGAGCAGCAGGAAGCACT  
ATGGGCGCAGCGTCAATAACGCTGACGGTACAGGCCAGACAATTATTGTCTGGCATAGTGCAACAGCAAAACA  
ATTTGCTGAGGGAAGAGGCTCAACAACATTTGTTGAACTCACGGTCTGGGGCATA

>KT152842..1

TTCTATTGTAATACATCAGCTCTGTTTAATGGCACTTGGGGGCAAATGCCAGCATGGAGTCAAATGGCACTA  
TAAATGACACTATAATTCTCCCATGCAGACTAAAGCAAATTGTAAGGATGTGGCAGAGAGTAGGACAAGCAAT

GTATGCCCCCTCCCATCCAAGGAGAAATAAATTGTGTATCAAACATTACAGGACTAATATTAACAAGAGATGGT  
GGGAATAATACAGAGGAAATCTTCAGACCTGGAGGAGGAGATATGAGGGACAATTGGAGAAGTGAATTATATA  
AGTATAAAGTAGTAAAAATTGAACCACTAGGAGTAGCACCCACCAGTGCAAGGAGAAGAACGGTGGGGAGAGA  
AAAAAGAGCAGTTGGAATAGGAGCTGTCTTCCTTGGGTTCTTAGGAGCAGCAGGAAGCACTATGGGCGCGGCG  
TCAATAACGCTGACGGTACAGGCCAGACAATTATTGTCTGGCATAGTGCAACAGCAAAGCAATTTGCTGAGGG  
CTATAGAGGCTCAACAACATCTGTTGAAACTCACAGTCTGGGGCATT

>KT152844..1

TTCTACTGTAATACATCAGCCCTGCTTAATGGCACTTGGCAAAATGCCAGCATGCAGGAGTCAAATAGCACAG  
AGTCAAATGACACCATAACTCTCCCATGCAGAATAAAGCAAAGTTATAAATATGTGGCAGAGAGTAGGACAAGC  
AATGTATGCCCCCTCCCATCCAAGGAATAATAAAGTGCGTATCAAACATCACAGGACTAATATTAACAAGAGAT  
GGTGGGAATAGTAACAGTAGTACAGTTGAAACCTTCAGGCCTGGAGGAGGAGATATGAGGGACAATTGGAGAA  
GTGAATTATATAAGTATAAAGTAGTAAAAATTGAACCACTAGGAGTAGCACCCACCAGGGCAAGGAGAAGAAC  
GGTGGAGAGAGAAAAAAGAGCAGTTGGAATAGGAGCTGTCTTCCTTGGGTTCTTAGGAGCAGCAGGAAGCACT  
ATGGGCGCAGCGTCAATAACGCTGACGGTACAGGCCAGACAATTATTGTCTGGCATAGTGCAACAGCAAAGTA  
ATTTGCTGAGGGAAATAGAGGCTCAACAACATCTGTTGAAACTCACGGTCTGGGGCATT

>AY736809..2

TTCTATTGTAATACATCAGGCCTGTTCAATAGCACTTGGCCTGTCAATGCCAGTGAGCAGGAGTCAAATAGCA  
CAGAGTCAGATGGCATTATAACTCTCCGATGCAGAATAAAGCAAATCATAAATATGTGGCAGAGAACAGGACA  
AGCAATGTATGCCCCCTCCCATCAAGGAATAATAAAGTGTGTATCAAACATTACAGGACTACTGTTAACAAGA  
GATGGTGGGAATAGTACTGTCAATGAACTTTTCAGACCTGGAGGAGGAGATATGAGGGACAATTGGAGAAGTG  
AATTATATAAGTATAAAGTAGTAAAAATTGAACCACTAGGAGTAGCACCCACCAAGGCAAGGAGAAGAGTGGT  
GGGGAGAGAAAAAAGAGCAGTTGGAATAGGAGCTGTTTTCTTGGGTTCTTAGGAGCAGCTGGAAGCACTATG  
GGCGCGGCGTCAATAACGCTGACGGTACAGGCCAGACAATTACTGTCTGGCATAGTGCAACAGCAAACAATT  
TGCTGAGGGCTATAGAGGCTCAACAACAACCTGTTGAAACTCACGGTCTGGGGCATT

>AY736810..2

TTTTATTGTAATACATCAGACCTGTTTAATAGTACTTGGAACATTGAAGGCACTGCCAGCATAAATGGCACGG  
AGTCAAATGACAATATAACTCTCCCATGCAGAATAAAGCAAATTATAAATATGTGGCAGAGAGTAGGACAAGC  
AATGTATGCCCCCTCCCATCCAAGGAGTAATAAGGTGTCAATCAAACATTACAGGAATACTATTAAACAAGAGAT  
GGTGGGAATACTGGGAATAATAGCAGGACAAATGAAACCTTTAGACCTGGAGGAGGAGATATGAGGGACAATT  
GGAGAAGTGAATTATATAAGTATAAAGTAGTAAAAATTGAACCACTGGGAGTAGCACCCACCAAGGCAAAGAG  
AAGAGTGGTGGAGAGAGAAAAAAGAGCAGTTGGAAGTGGAGCTGTATTCAATTGGGTTCTTAGGAGCAGCCGGA  
AGCACTATGGGCGCGGCGTCAATAACGCTGACGGTACAGGCCAGACAATTATTGTCTGGCATAGTGCAACAGC  
AAAGCAATTTGCTGAGGGCTATAGAGGCTCAACAGCATTTGTTGAAACTCACGGTCTGGGGCATT

>AY736812..1

TTCTATTGTAATACATCAGGTCTGTTCAATAGCACCTGGAAGGCCAACAATGGCACCTGGAAGGCCAACATAT  
CAGAGTCAAATAACACGGAGATAACTCTCCAATGCAGAATAAAGCAAATTATAAATATGTGGCAGAGAACAGG  
ACAAGCAATATATGCCCCCTCCCATCCAGGGAGTGATAAGGTGTGAATCAAACATCACAGGACTACTGTTAACA  
AGAGATGGTGGGGAGGGGAACAATGAAAGTGAGATCTTCAGACCTGGAGGAGGAGATATGAGGGACAATTGGA  
GAAGTGAATTATATAAGTATAAAGTAGTAAAAATTGAACCACTAGGAGTAGCACCCACCAGGGCAAGGAGAAG  
AGTGGTGGGAAGAGAAAAAAGAGCAGTTGGAATAGGAGCTGTTTTCTTGGGTTCTTAGGAGCAGCAGGAAGC  
ACTATGGGCGCGGCGTCAATAACGCTGACGGTACAGGCCAGGCAATTATTGTCTGGCATAGTGCAACAGCAAA  
GCAATTTGCTGAGGGCTATAGAGGCTCAACAACATATGTTGAAACTCACGGTCTGGGGCATT

>AY736815..1

TTCTATTGTAATACATCAGGTCTGTTTAATAGCACCTGGGACAACAACACCGACCCAACCAACACAACGTCAA  
ATGACACTTACTCTCCAATGCAGAATAAAGCAATTTATAAATATGTGGCAGAGAACAGGGCAAGCAATGTA  
TGCCCCCTCCCATCCAAGGGGTAATAAGGTGTGATTCCAACATTACAGGACTACTATTAAACAAGAGATGGTGGA  
GTAGGTAACAATACAACCTGAAACCTTCAGACCTGGAGGAGGAGATATGAGGGACAATTGGAGAAGTGAATTAT  
ATAAGTATAAAGTAGTAAAAATTGAACCACTAGGAGTAGCACCCACCGGGGCAAAGAGAAGAGTGGTGGAGAG  
AGAAAAAAGAGCAGTTGGAATAGGAGCTGTTTTCTTGGGTTCTTAGGAGCAGCAGGAAGCACTATGGGCGCG  
GCGTCAGTAACGCTGACGGTACAGGCCAGACAATTATTGTCTGGCATAGTGCAACAGCAAAGCAATTTGCTGA  
GGGCTATAGAGGCTCAACAGCATCTGTTGAAACTCACGGTCTGGGGCATT

>AY736813..1

TTCTATTGTGATACATCAGGCCTGTTTAATAGCAGTTGGAATAATAACACTTGGAAAGGAGTCAAATAGCACGG  
GGTCAAATGACACTATAACTCTCCTATGCAGAATAAAGCAAATTATAAATATGTGGCAGAGAACAGGACAAGC  
AATGTATGCCCCCTCCCATCCAGGGTTAATAAGCTGTAAATCAAACATTACAGGTATAATATTGACAAGAGAT  
GGTGGGAATGGTAACAGTACAAATGAAACCTTCAGACCTGGAGGAGGAGATATGAGGGACAATTGGAGAAGTG  
AACTATATAGGTATAAAGTAGTACAAATTGAACCACTAGGAGTAGCACCCACCAGGGCAAGGAGAAGAGTGGT  
GCAGAGAGAAAAAAGAGCAGTAGGAATAGGAGCTGTCTTCCTTGGGTTCTTAGGAGCAGCAGGAAGCACTATG  
GGCGCAGCGTCAATAACGCTGACGGTACAGGCCAGACAATTATTGTCTGGCATAGTGCAACAGCAAAGCAATT  
TGCTGAGGGCTATAGAGGCTCAACAACATCTGTTGAAACTCACGGTCTGGGGCATT

>AY736816..1

TTCTATTGTGACACATCAGGCCTGTTTACTTTGGAATAGCACTTTGGAATGGCACTGAGTCAAACAACACAAAGT  
CAAACGACACTATAACTCTCCAATGCAGAATAAAGCAAATTATAAATATGTGGCAGAGAGTAGGACAAGCAAT  
ATATGCCCTCCCATCAAAGGAGTAATAAGGTGTGAATCAGACATTACAGGACTTATACTAACAAGAGATGGT  
GGGAATACTAACAGTACAGAGGAAACCTTCAGACCTGGAGGAGGAGATATGAGGGACAATTGGAGAAGTGAAT  
TATATAAGTATAAAGTAGTAAAAATTGAACCACTAGGAGTAGCACCCACCAAGGCAAAGAGAAGAGTGGTGGG  
GAGAGGAAAAAGAGCAGTTGGAATAGGAGCTGTCTTCCTTGGGTTCTTAGGAGCAGCCGGAAGCACTATGGGC  
GCGGCGTCAATAACGCTGACGGTACAGGCCAGACAATTATTGTCTGGCATAGTGCAACAGCAAAGCAATTTGC  
TAAGGGCTATAGAGGCTCAACAGCATCTGTTGAAACTCACGGTCTGGGGCATT

>AF457053..2

TTCTATTGTAATACATCAGGCCTGTTTAAACAGCACCTGGCACTATAACAGCAATGGTACTTTGGCACAATAACA  
GCACAAATAGCATGGACTCAAATGAAACTATAACTCTCACATGCAGAATAAAGCAAATTATAAATATGTGGCA  
GAGAGTAGGAAAAGCAATGTATGCTAATCCCATCCAAGGAATAATAAAGTGTGAATCAAACATTACAGGACTA  
CTCTTAACAAGAGATGGTGGGAATACTAGCAGTACAAATGAAACCTTCAGACCTGGAGGAGGAGATATGAGGG  
ACAATTGGAGAAGTGAATTATACAAATATAAAGTAGTAAAGATTGAGCCACTAGGAGTAGCACCCACCAGGGC  
ACAGAGAAGAGTGGTGGGGAGAGAAAAAGAGCAATTGGAATAGGAGCTGTCTTCCTTGGGTTCTTAGGAGCA  
GCAGGAAGCACTATGGGCGCGGCGTCAATGACGCTGACGGTACAGGCCAGACAATTATTGTCTGGCATAGTGC  
AACAGCAAAGCAATTTGCTGAGGGCTATAGAGGCTCAACAACAACCTGTTGAAACTCACGGTCTGGGGCATT

>AF457055..1

TTCTATTGTAATACAAACAAACCTGTTTAAATAGCACCTGGAGAGGAAATAAACTGTCAGCAATAGCACAGAGT  
TAGATGAAAATGGCACTATAACTCTCCCATGCAGAATAAAGCAAATTATAAATATGTGGCAGAGAACAGGACA  
AGCAATGTATGCCCTCCCATCCAAGGAGTAATAAAGTGTGTATCAAACATTACAGGACTACTATTAACAAGA  
GATGGTGGAAGTGATAACAATATAAGTAGTGAAACCTTCAGACCAGGAGGAGGAGATATGAGGGACAATTGGA  
GAAGTGAATTATATAAGTATAAAGTAGTGAACTTTGAACCACTAGGAGTAGCACCCACAAGGCAAGGAGAAG  
AGTGGTGGAGAGAGAAAAAGAGCAGTTGGACTGGGAGCTGTATTTCATTGGGTTCTTAGGAGCAGCAGGAAGC  
ACTATGGGCGCGGCGTCAATAACGCTGACGGCAGAGGCCAGACAATTATTGTCTGGCATAGTGCAACAGCAAA  
GCAATTTGCTGAAGGCTATAGAGGCTCAACAGCATCTGTTGAAACTCACGGTCTGGGGCATT

>AF457070..1

TTCTATTGTAATACATCAGGCCTGTTTAAATAGCACTTTGGAATAGCACTGGGAATGACACTTTGGAGTGGCAATG  
CCAGCACGCAGGAGTCAAATGACACTATAACTCTCCCATGCAGAATAAAGCAAATTGTAAATATGTGGCAGAG  
AATAGGACAAGCAATGTATGCCCCCTCCCATCCAAGGAGTAATAAAGTGTGAATCAAACATTACAGGACTACTA  
TTAACAAGAGATGGTGGGAACAATGAAAGTGAACCTTCAGACCTGGAGGAGGAAATATGAGGGACAATTGGA  
GAAGTGAATTATATAGGTACAAAGTAGTGAAATTTGAACCACTAGGAGTAGCACCCACCAGGGCAAAAAGAAG  
AGTGGTGGGGAGAGAAAAAGAGCAGTTGGAATAGGAGCTGTGTTTCCTTGGGTTCTTAGGAGCAGCAGGAAGC  
ACTATGGGCGCGGCGTCAATAACGCTGACGGTACAGGCCAGACAATTATTGTCTGGCATAGTGCAACAGCAAA  
GCAACTTGCTGAGGGCTATAGAGGCTCAACAACATCTGTTGAAACTCACGGTCTGGGGCATT

>AF457077..1

TTCTATTGTAATACATCAGGCCTGTTTAAATAGCACTTTGGTCTTTGGAATGACACTGCAAATGGCACTGCAATGG  
AGCCAAATAGCACTATAACTCTCCCATGCAGAATAAAGCAAATTATAAATATGTGGCAGAGAGTAGGACAAGC  
AATGTATGCCCCCTCCCATCCCAGGAGTAATAAGTTGTGTATCAAACATTACAGGACTAATATTAGTAAGAGAT  
GGAGGGAATAATGTTACAAATGAAACCTTCAGACCTGGAGGAGGAGATATGAGGGACAATTGGAGAAGTGAAT  
TATATAAGTATAAAGTAGTAAAAATTGAACCACTAGGAGTAGCACCCACCAAGGCAAAGAGAAGAGTGGTGGGA  
GAGAGAAAAAGAGCAGTTGGAATAGGAGCTGTCTTCCTTGGGTTCTTAGGAGCAGCAGGAAGCACTATGGGC  
GCGGCGTCAATAACGCTGACGGTACAGGCCAGACAATTATTGTCTGGTATAGTGCAACAGCAAAGCAATTTGC  
TGAGGGCTATAGAGGCTCAACAACATCTGTTGAAACTCACAGTCTGGGGCATT

>AF457080..2

TTCTATTGTAATACATCGGGCCTGTTTAAATAGCACCTACAATGGCACTGACATCGCTGAAAATAGCACGGAGT  
CAAATGACACTATAGTTCTCCCATGCAGAATAAAGCAAATTATAAAGATGTGGCAGCGAGTAGGACAAGCAAT  
GTATGCCCCCTCCCATCCCAGGAATAATAAGATGTGACTCAAACATTACAGGATTACTATTAACAAGAGATGGT  
GGGGATGATAATGAAACTGAAACCTTTAGACCTGGAGGAGGAGATATGAGGGATAATTGGAGAAGTGAATTAT  
ATAAGTATAAAGTAGTAAAAATTGAACCACTAGGAGTAGCACCCACCAGGGCAAAAAGAAGAGTGGTGGAGAG  
AGAAAAAGAGCAGTTGGAATAGGGGCTTTTGTCTTGGGTTCTTAGGAGCAGCAGGAAGCACTATGGGCGCA  
GCATCAATAACGCTGACGGTACAGGCCAGACAATTATTGTCTGGCATAGTGCAACAGCAAAGCAATTTGCTGA  
GGGCTATAGAGGCTCAACAACAAATATTGAGACTCACGGTCTGGGGCATT

>AF457081..1

TTCTATTGTAATACATCAGGCCTGTTTAAATAGCACTTTGGACAAATGACAGTATCAGCACAAATAGCACAAAGT  
CAAATGACACTATAACTCTCCCATGCAGAATAAAGCAAATTATAAATATATGGCAGAGAGTGGGACAAGCAAT  
GTATGCCCCCTCCCATCCAAGGAGTAATACAGTGTGTATCAAACATTACAGGACTACTATTAACAAGAGATGGT  
GGGGATAACAGTAGTACGAATGAAACCTTCAGACCTGGAGGAGGAGATATGAGGGACAATTGGAGAAGTGAAT  
TATATAAGTATAAAGTAGTAAAAATTGAACCACTAGGAGTAGCACCCACCAGGGCAAGGAGAAGAGTGGTGGGA

GAGAGAGAAAAGAGCAGTTGGACTGGGAGCTGTTTTTCATTGGGTTCTTGGGAGCAGCAGGGAGCACTATGGGC  
GCAGCGTCAATAACGCTGACGGTACAGGCCAGACAATTATTGTCTGGCATAGTGCAACAGCAAAGCAATTTGC  
TGAGGGCTATAGAGGCTCAACAACATCTGTTGAAACTCACGGTCTGGGGCATT

>AF457083..1

TTCTATTGTAATACATCAAGTCTGTTTAATAGTACTTGGAATAACAGTACTTGGAATACCAGCAGGCAGGAGG  
CAAATAATAGCCCGGGTCAAACGACACTATAACTCTCAAATGCAGAATAAAGCAAATTATAAATATGTGGCA  
GAGAGCGGGACAAGCAATATATGCCCCCTCCCATCCAAGGAGTAATAAGGTGTAACCTCAAACATTACAGGACTA  
ATATTAACAAGAGATGGTGGGGTAATAACAATACAAATGAAACCTTCAGACCTGGAGGAGGAGATATGAGGG  
ACAATTGGAGAAGTGAATTATATAAGTACAAAGTAGTAAAAATTGAACCACTAGGAGTAGCACCCACCAGGGC  
AAAGAGAAGAGTGGTGGAGAGAGGAAAAAGAGCAGTTGGAATAGGAGCTGTCCTCATTGGGTTCTTAGGAGCA  
GCAGGAAGCACTATGGGCGCGGCGTCAATAACGCTGACGGCAGAGGCCAGACAATTATTGTCTGGCATAGTGC  
AACAGCAAAACAATTTGCTGAGGGCTATAGAGGCTCAACAACATCTGTTGAGACTCACGGTCTGGGGCATT

>AF457084..1

TTCTATTGTGACACATCAGGCCTGTTTAATAGCAGTTGGACTGCTAGCAATGATAGCATGCAGGAGGCACATA  
GCACAGAGTCAAATATAACTCTCCAATGCAGAATAAAGCAAATTATAAATATGTGGCAGAGAGCAGGACAAGC  
AATGTATGCCCCCTCCCATTCAGGAATAATAAGGTGTGAATCAAACATTACAGGACTAATATTAACAAGAGAT  
GGTGGTGAGGGTAATAACAGTACAAATGAAACCTTCAGACCTAGGAGGAGGAAATATGAGGGACAATTGGAGAA  
GTGAATTATATAAGTATAAAGTAGTAAAAGTTGAACCACTAGGAGTAGCACCCACCAAGTCAAGGAGGAGAGT  
GGTGGAGAGAGAAAAAGAGCAGTTGGACTAGGAGCTGTGTTTCATTGGGTTCTTAGGAGCAGCAGGAAGCACT  
ATGGGCGCGGCGTCAATGACGCTGACGGTACAGGCCAGACAATTATTGTCTGGCATAGTGCAACAGCAAAGCA  
ATTTGCTGAGGGCTATAGAGGCTCAACAGCATCTGTTGAAACTCACGGTTTGGGGCATT

>AF457086..3

TTCTATTGTAATACAACAAAACTGTTTAATAGCACTTGAGTCAATAATGACAGCACGCAAGAGTCAAATAGCA  
CAAAGTCAAATGACACTATAACTCTCCCATGCAGAATAAAGCAAATTATAAATATGTGGCAGAGAGTAGGACA  
AGCAATATATGCCCCCTCCCATACAAGGAATAATAAGGTGTGAATCAAATATTACAGGACTAATATTAACAAGA  
GATGGAGGTACCAATAGTACAAATGAAACCTTCAGACCTGGAGGAGGAGATATGAGGGACAATTGGAGAAGTG  
AATTATATCAGTATAAAGTAGTAAAAATTGAACCACTAGGAGTAGCACCTACCAGGGCAAAGAGAAGAGTGGT  
GGAGAGAGCAAAAAGAGCAGTTGGAATAGGAGCTGTCTTCCTTGGGTTCTTAGGAGCAGCAGGAAGCACTATG  
GGCGCGGCGTCAATAACGCTGACGGTACAGGCCAGACAATTATTGTCTGGCATAGTGCAACAGCAAAGTAATT  
TGCTGAGGGCTATAGAGGCTCAACAGCATCTGTTGAAACTCACGGTCTGGGGCATT

>AF457089..1

TTTTATTGCAATACATCAGATCTGTTTAATAGTACTTGCCCTGTCAATGCCAGCATGGAGTCAAATAGCACGG  
AGTCAAATGACAATATAACACTCCAATGCAGAATAAAGCAAATTATAAATATGTGGCAGAAAGTAGGACAAGC  
AATGTATGCCCCCTCCCATACAAGGAGTAATAAGGTGTGAATCAAACATTACAGGACTACTATTAACAAGAGAT  
GGTGGATCTAACAGTACAGAAGAAACCTTCAGACCTGGAGGAGGAGATATGAGGGACAATTGGAGAAGTGAAT  
TATATAAGTATAAAGTAGTGAAAATTGAGCCATTAGGGGTAGCACCCACCAGGGCAAAGAGAAGAGTGGTGGA  
GAGAGAAAAAGAGCGGTTACACTAGGAGCTGTATTTCATTGGGTTCTTAGGAGCAGCAGGAAGCACTATGGGC  
GCAGCGTCAGTAACGCTGACGGTACAGGCCAGACAATTACTGTCTGGCATAGTGCAACAGCAAAGCAATTTGC  
TGAGGGCTATAGAGGCTCAACAGCATATGTTGAAACTCACGGTCTGGGGCATT

>EU110088..2

TTCTATTGTAACACATCACGCCTGTTTAATAGCACCTGGTGGGCCAATGGCACCAGGACGGGCTACAACAGCA  
CTGATGGCAATATAACACTCCCATGCAGAATAAAGCAAATTATAAATATGTGGCAGAGAGTAGGACAAGCAAT  
GTATGCCCCCTCCCATCCCAGGAAGAATAAGTTGTGAATCAAACATTACAGGACTAATATTAACAAGAGATGGT  
GGGAGTGATAATACAACCTGAAACCTTCAGACCTGGAGGAGGAGATATGAGGGACAATTGGAGAAGTGAATTAT  
ATAAGTATAAAGTAGTAGAAGTTGAACCACTAGGAGTAGCACCCACAGAGGCAAGGAGAAGAGTGGTGCAGAG  
AGAAAAAGAGCAGTCGGACTGGGAGCTGTCTTCATTGGGTTCTTGGGAGCAGCAGGAAGCACTATGGGCGCG  
GCGTCAGTGACGCTGACGGTACAGGCCAGACAATTATTGTCTGGTATAGTGCAACAGCAAAGCAATTTGCTGA  
GGGCTATAGAGGCTCAACAACATCTGTTGAAACTCACGGTCTGGGGCATT

>EU110092..1

TTCTATTGTGATACATCAGCTCTGTTCAATAGCACTTGGAATGCCACTGAGTCAAATGACACAAACTCCACAG  
AATCAAACCTCAAATGACACTATAACTCTCCCATGCAGAATAAACAATTAATAAATATGTGGCAGAGAATAGG  
ACAAGCAATGTATAACCTCCCATCCAAGGAAAAATAAAGTGTGAATCAAACATTACAGGACTATTGTTAACA  
AGAGATGGTGGAGAAAAATAGAGAAAAATAATGACAGTAGTGAAATCTTCAGACCAGGAGGAGGAGATATGAAGG  
ACAATTGGAGAAGTGAATTGTATAAGTATAAAGTAGTAAAAATTGAACCACTAGGAGTAGCACCCACCAGGGC  
AAGGAGAAGAGTGGTGGGGAGAGAAAAAGAGCAGTTGGAATAGGAGCTGTCTTCCTTGGGTTCTTAGGAGCA  
GCAGGAAGCACTATGGGCGCGGCGTCAATAACGCTGACGGTACAGGCCAGACAATTATTGTCTGGCATAGTGC  
AACAGCAAAGCAATTTGCTGAGGGCTATAGAGGCTCAACAACATCTGTTGAAACTCACAGTCTGGGGCATT

>EU110094..1

TTCTATTGTAATACATCAGGCCTGTTTAGTAGCACTTGAGTGGGAATGACACTACCAAAACAATGGAATCAA  
ATAGCACGGTGTGAGATGGCACTATAAATCTCCCATGCAGAATAAAGCAAATTATAAATATGTGGCAGAGAGT

AGGGCAAGCAATGTATGCCCCCTCCCATCCAAGGAGCAATAAGGTGTACATCAAACATTACAGGACTAATATTA  
 ACAAGAGATGGTGGGAAAGATGACAGGAATAATGAAACCTTCAGACCTGGAGGAGGAGATATGAGGGACAATT  
 GGAGAAGTGAATTATATAAAATATAAAGTAGTAAAAATTGAACCACTAGGAGTAGCACCCACCAGGGCAAAGAG  
 AAGAGTGGTGGAGAGAGAAAAAGAGCAGTTGGAATAGGAGCTGTCTTCCTTGGGTTCCTTAGGAGCAGCAGGA  
 AGCACTATGGGCGCGGCGTCAATAACGCTGACGGTACAGGCCAGACAATTATTGGCTGGCATAGTGCAACAGC  
 AAAGCAATTTGCTGAGGGCTATAGAGGCTCAACAACATCTGTTGAAACTCACGGTCTGGGGCATT  
 >KT022360..2  
 TTCTATTGTAACACATCAGGCTTGTTTAATAACACTTGGGTGTTTAAATAGCATTGTTGGGATAATAGCACTCAGG  
 AGTCCAATAGCACAGAGTCAAATAAACTATAATTCTCCAATGCAGAATAAAGCAAATTATAAATATGTGGCA  
 GAGAGCAGGACAAGCAATATATGCTCCTCCCATTCCAGGAGTAATAAGGTGTGAATCAAACATTACAGGACTA  
 ATATTAACAAGAGATGGTGGAAATAATAACACGATAAAATGAAACATTTAGACCTGGAGGAGGAGACATGAGGG  
 ACAATTGGAGAAGTGAATTATATAAGTACAAAGTAGTAAAAATTGAACCACTAGGAGTAGCACCTACCAAGGC  
 ACGGAGAAGAGTGGTGGAGAGAGAAAAAGAGCAGTTACAATAGGAGCTATGTTTCATTGGGTTCCTTAGGAGCA  
 GCAGGAAGCACTATGGGCGCGGCGTCAATGACGCTGACGGTACAGGCCAGACAATTATTGTCTGGCATAGTGC  
 AACAGCAAAGCAATTTGCTGAGGGCTATAGAGGCTCAACAGCATCTGTTGAAACTCACGGTCTGGGGCATC  
 >KT022361..3  
 TTCTATTGTAATACATCAGGCTTGTTTAATTACAGCTACAGCATGCAGGAGTCAAATGATACGGAGGCAAATG  
 GCACTATAACTCTCCAATGCAAAATAAAACAAATTATAAATATGTGGCAGAGAGTAGGACAAGCAATGTACGC  
 CCTCCCCTCCAAGGAGTAATACAGTGTAAATCAAACATTACAGGACTAATATTAACAAGAGATGGTGGAAAT  
 AGTACTAATGGTACAGAAATCTTCAGACCTGGAGGAGGAGATATGAGAGACAATTGGAGAAGTGAGTTATATA  
 AGTATAAAGTAGTACAACCTTGAACCACTAGGAGTAGCACCCACCAAGGCAAAGAGAAGAGTGGTGGAAAGAGA  
 AAAAAAGAGCAGTTGGAATAGGAGCTGTCTTCCTTGGGTTCCTTAGGAACAGCAGGAAGCACTATGGGCGCGGCG  
 TCACTGACGCTGACGGTACAAGCCAGACTATTATTGTCTGGCATAGTGCAACAGCAAAGCAATTTGCTGAGGG  
 CTATAGAGGCTCAACAATATCTGTTGAAACTCACGGTCTGGGGCATT  
 >KT022363..1  
 TTCTATTGTGACACCTCGAAGCTGTTTAATAGCTCTTGGAATGAGAGCACTTGGGATGAAAATAGCACGAAGC  
 CTAACAACAATGAACTATAATTCTCCCATGCAGAATAAAGCAAATCATAAATATGTGGCAGAGAACAGGACA  
 AGCAATATATGCCCCCTCCCATGAAGGAATAATAAAGTGTGACTCAAACATTACAGGACTAATATTAACAAGA  
 GATGGTGGGAGGATTAACACAACCTAATGAAACCTTCAGACCTGGAGGAGGAGATATAAGGGACAATTGGAGAA  
 GTGAATTATATAAATATAAAGTAGTAAAAATTGAGCCACTAGGAGTAGCACCTCCAGGGCAAAGGAGAAGAGT  
 GGTGGGAGAGAGAAAAAGAGCAGTTGGAATAGGAGCTGTCTTCCTTGGGTTCCTTAGGAGCAGCAGGAAGCACT  
 ATGGGCGCGGCGTCACTAACGCTGACGGTACAGGCCAGGCAATTATTGTCTGGCATAGTGCAACAGCAAAGCA  
 ATTTGCTGAGGGCTATAGAGGCTCAACAGCATATGTTGAAACTCACGGTCTGGGGCATT  
 >KT022364..1  
 TTTTATTGTGATACCTCAGGCTTGTTTAATAGTACTTGGGAAATTGAAAACAATACTGCCAGAATAAAGCCAA  
 ATAACACGGGGTTAAATATAACGCTCCCGTGCAGAATAAAGCAAATTATAAATATGTGGCAAAGGGTAGGACA  
 AGCAATGTATGCCCCCTCCCATCAAAGGAGTAATAAGGTGTGTATCAAACATCACAGGACTACTGCTAACAAGA  
 GATGGTGGGAGTAAAAATAGAAGTAATGAAACCTTCAGACCTGGAGGAGGAGATATGAGGGACAATTGGAGAA  
 GTGAATTATATAAATATAAAGTAGTAAAAATTGAACCACTAGGAGTAGCACCTCCAGGGCAAAGAGGAGAGT  
 GGTGGAGAGAGAGAAAAAGAGCAGTTGGAATAGGAGCTGTATTCTTCCTTGGGTTCCTTAGGAGCAGCAGGAAGCACT  
 ATGGGCGCGGCGTCACTGACGCTGACGGTACAGGCCAGACAATTATTGTCTGGCATAGTGCAACAGCAAAGCA  
 ATTTGCTGAGGGCTATAGAAGCTCAACAGCATCTGTTGAAAGCTTACAGTCTGGGGCATT  
 >KT022365..1  
 TTCTATTGTGATACGTCAGGCTTATTTCAGTAGCACCTGGCAATTCAATGGGAGTACCTGGAACAACACAGATT  
 CAAACAGCACAGGGTCAGATGACACTATAGAAGCTCCCATGCAGAATAAAGCAAATTATAAATATGTGGCAGAG  
 AGTAGGACGAGCAATGTATGCCCCCTCCCATCCAAGGAGTAATAAGTTGTGTATCAAACATCACAGGACTAATA  
 TTAACAAGAGATAGTAATAACAGAACTAATGAAACCTTCAGACCTGGAGGAGGAGACATGAGAGACAATTGGA  
 GAAGTGAATTATATAAGTATAAAGTAGTAAAAATTGAACCACTAGGAGTAGCACCCACCAAGGCAAAAAGAAG  
 AGTGGTGGAGAGAGAGAAAAAGAGCAGTTGGAATAGGAGCTGTCTTCCTTGGGTTCCTTAGGAGCAGCAGGAAGC  
 ACTATGGGCGCGGCGTCAATAACGCTGACGGTACAGGCCAGACAATTATTGTCTGGCATAGTGCAACAGCAAAA  
 GCAATTTGCTGAGGGCTATAGAGGCTCAACAACATCTGTTGAAACTCACAGTCTGGGGCATT  
 >KT022367..1  
 TTCTATTGTAATACATCAGGCTTATTTAATAGCAGTTGGAATGATACTGAAATCGGGCGGGAGATAAATAGGA  
 CGGAGTCAAATGACACTATAATTCTCCCATGCAGAATAAAGCAAATTATAAATATGTGGCAGAGAGTAGGACA  
 AGCAATATATGCCCCCTCCCATCCAAGGAGTAATAAGGTGTGAATCAAACATTACAGGACTAATATTAACAAGG  
 GATGGTGGGGGTAATAACAGAAAAAATGAAACCTTCAGACCTGGAGGAGGAGATATGAGGGACAATTGGAGAA  
 GTGAATTATATAAGTATAAAGTAGTAAAAATTGAACCAATAGGAATAGCACCCACCAGGGCAAAGAGAAGAGT  
 GGTGGAGAGAGAGAAAAAGAGCAATTGGAATGGGAGCTGTATTTCATTGGGTTCCTTAGGAGCAGCAGGAAGCACT  
 ATGGGCGCGGCGTCAATAACGCTGACGGTACAGGCCAGACAATTGTTGTCTGGCATAGTGCAACAGCAAAA  
 ATTTGCTGAGGGCTATAGAGGCTCAACAACATCTGTTGAAAGCTCACGGTCTGGGGCATT

>KT022368..2

TTCTATTGTAATACAACAGACCTGTTTGTATAGCATTTGGCTTTACAATGCCAGCATGCATAATGCAAATAGCA  
CGATAACTCTCCAATGCAGAATAAAGCAAATTATCAATATGTGGCAGAGAGTAGGACAAGCAATGTATGCCCC  
TCCCGTCGAAGGAAAAATACAGTGCAAATCAAACATTACAGGACTAATATTAACAAGAGATGGTGGGGTTAAC  
GATACAAATGGAACCGAAATCTTCAGACCTGGAGGAGGGGATATGAGGGACAATTGGAGAAGTGAATTATATA  
AGTATAAAGTAGTAAAAATTGAACCACTAGGAGTAGCACCCACCAGGGCAAGGAGAAGAGTGGTGCAGAGAGA  
AAAAAGAGCAGTTGGAATAGGAGCTGTATTCCCTTGGGTCTTAGGAGCAGCAGGAAGCACTATGGGCGCAGCG  
TCAGTGACGCTGACGGTACAGGCCAGAAGATTATTGTCTGGCATAGTGCAACAGCAAAGCAATTTGCTGAAGG  
CTATAGAAGCTCAACAGCATCTGTTGAAGCTCACGGTCTGGGGCATT

>KT022369..2

TTCTATTGTAATACATCAGGCCTGTTTAATAGCACTTGGAATTATACTAATAGCATGCAGCAGTCAAATAGCA  
CAGAGTCAAACGAACTATAACTCTCCAATGCAGAATAAAGCAAATTATAAATATGTGGCAGAGAGTGGGGCA  
AGCAATATATGCCCCCTCCCATCCCAGGGGTAATAAGGTGTGAATCAAACATTACAGGACTAATATTGACAAGA  
GATGGTGGGAGTAATAACAGTACAAATGAAACCTTCAGACCTGGAGGAGGGAATGTGAGGGACAATTGGAGAA  
GTGAATTATATAAGTATAAAGTAGTAAAAATTGAACCACTAGGAGTAGCACCCACCAGGGCAAAGAGAAGAGT  
GGTGGAGAGAGAAAAAAGAGCAGTTGGACTAGGAGCTGTCTTCATTGGGTCTTTGGGAACAGCAGGAAGCACT  
ATGGGCGCGCGTCAATAACGCTGACGGTACAGGCCAGACAATTATTGTCTGGTATAGTGCAACAGCAAGGCA  
ATTTGCTGAGAGCTATAGAAGCTCAACAACAACCTGTTGAGACTCACGGTCTGGGGCATT

>FJ866117..1

TTTTATTGTAATACATCAGGCCTGTTTAATAGTACTTGGTCACCTGACAATAGTACTGGGACTAGTACTGGGA  
ATAATGACACTGCCAGCAATGGCACTATAACTCTCCCATGTAGAATAAAGCAGATTATAAATATGTGGCAGAG  
AGTAGGACAAGCAATGTATGCCCCCTCCCATCCAAGGAGTAATAAGGTGTGACTCAAACATTACAGGACTACTA  
TTAACAAGAGATGGTGGGAGTGGGAATAATACCACAGAGATCTTCAGACCTGGAGGAGGAGATATGAGGGACA  
ATTGGAGAAGTGAATTATATAAGTATAAAGTAGTAAGAATCGAACCTCTAGGAGTAGCACCCACCAGGGCAAA  
GAGAAGAGTGGTGGAGAGAGAAAAAAGAGCAGTTGGAATAGGAGCTGTATTTCATTGGGTCTTAGGAGCAGCA  
GGAAGCACTATGGGCGCAGCGTCAATAACGCTGACGGTACAGGCCAGACAATTATTGTCTGGCATAGTGCAAC  
AGCAAAGCAATTTGCTGAGGGCTATAGAGGCTCAACAGCATTTGTTGAAGCTCACAGTCTGGGGCATT

>KT022370..3

TTCTATTGTAATACATCAGGCCTGTTTAATAGAGCTTACACTAACAGCACTTACAATAACAGCACGCAGGACA  
ATGACAATAACAGCACGCAGGACAATGCAACTATAACTCTCCCATGCAGAATAAGGCAAATTATAAATATGTG  
GCAGAGAGCAGGGAAAGCAATGTATGCCCCCTCCCATCCAAGGAGTAATAAACTGTGTATCAAACATTACAGGA  
CTAATTTTAACAAGAGATGGTGGAAAGAGTAACAGTACGGAGGGGGAAATCTTCAGACCTGGGGGAGGAGATA  
TGAGGGATAATTGGAGAAGTGAATTATATAAGTATAAAGTAGTAAAAATTGAACCACTAGGAGTAGCACCTAC  
CAAGGCAAGGAGAAGAGTGGTGGGGAGAGAGAAAAGAGCAGTTGGACTAGGAGCTGTCTTCATTGGGTCTTA  
GGAGCAGCCGGAAGCACTATGGGCGCGCGTCAAGTACGCTGACGGTACAGGCCAGGCAATTATTGTCTGGCA  
TAGTGCAACAGCAAAGCAATTTGCTGAGGGCTATAGAGGCTCAACAACATCTGTTGAACTCACGGTCTGGGG  
CATT

>KT022372..2

TTCTATTGTGATACAGCAGGCCTGTTTAATAGCACTTGAGTCACAATGACAGCATACAGGGGACAAATAGCG  
CAGAGTCAAATGAACTATAACTCTCCCATGCAGAATAAAGCAAATTATAAATATGTGGCAGAGAGCAGGACA  
AGCAATGTATGCCCCCTCCCATCCCAGGAGTAATAAAGTGTGTATCAAACATTACAGGACTAATATTAACAAGA  
GATGGTGGGAAGAACAATACAGAGGAAGTCTTCAGACCTGGAGGAGGAGATATGAGGGATAATTGGAGAAGTG  
AATTATATAAGTATAAAGTAGTAAAAATTGAACCACTAGGAGTAGCACCCACCAAGGCAAGGAGAAGAGTGGT  
GGGGAGAGAGAAAAGAGCAGTTGGAGTAGGAGCTGTCTTCATTGGGTCTTAGGAGCAGCCGGAAGCACTATG  
GGCGCGCGCTCAGTGACGCTGACGGTACAGGCCAGACGATTATTGTCTGGCATAGTGCAACAGCAAAGCAATT  
TGCTGAAGGCTATAGAGGCTCAACAACACCTGTTGAACTCACGGTCTGGGGCATT

>KT022373..1

TTCTATTGTAACACATCAAGCTTGTTTAGGGGCGCTTGAATAGTACAACCTGCAACACTTAATAGCACTGGGA  
ATAGCAATGACACTATAACTCTTCCATGCAGAATAAAGCAAATTATAAATATGTGGCAGAGAGCAGGACAAGC  
AATATATGCCCCCTCCATAAAAGGAGTAATAAGGTGTAACCTCAAATATTACAGGACTAATATTAACAAGAGAT  
GGTGGGGTAGTGATAATAGAAGTGAACCTTTTAGACCTGGAGGAGGAGATATGAGAGACAATTGGAGAAGTG  
AATTATATAAGTATAAAGTAGTAAAAATTGAACCACTAGGAGTAGCACCCACCAGGGCAAAGAGAAGAGTGGT  
GGAGAGAGAAAAAAGAGCAGTTGGAATAGGAGCTGTCTTCATTGGGTCTTAGGAGCAGCAGGAAGCACTATG  
GGCGCGCGCTCGATAACGCTGACGGTACAGGCCAGACAATTATTGTCTGGCATAGTGCAACAGCAAAGAAATT  
TGCTGAGGGCTATAGAGGCTCAACAACATCTGTTGAACTCACGGTCTGGGGCATT

>KT022374..1

TTCTATTGTAATACAACAAAGCTGTTCAATAGCTCTTGGTCTGCCAATGCCAGTGAGTCAAATAGTACAGATG  
GCAATAGTACAGATGGCACTATAACTCTCCCATGCAAAAATAAAGCAAATTATAAATATGTGGCAGAGAGTAGG  
ACGAGCAATGTATGCCAATCCCATCCAAGGAAAAATAGAGTGTGCATCAAACATTACAGGACTAATATTAACA  
AGAGATGGTGGGAATGTGAGCAGGGAAAATGAAACCTTCAGACCTGGAGGAGGAGATATGAGGGACAATTGGA

GAAGTGAATTATATAAGTATAAAGTAGTAAAGATTGAACCACTAGGAGTAGCACCCCATACGGCAAGGAGAAG  
AGTGGTGGGGAGAGAAAAAGAGCAGTTGGAATGGGAGCTGTCTTCCTTGGGTTCTTAGGAGCAGCAGGGAGC  
ACTATGGGCGCAGCGTCACTAACGCTGACGGTACAGGCCAGACAATTATTGTCTGGCATAGTGCAACAGCAAA  
GCAATTTGCTGAGGGCTATAGAGGCTCAACAACATCTGTTGAAACTCACAGTCTGGGGCATT

>KT022375..1

TTCTATTGTAATACATCAAACTGTTTAATAGCACTTGGCCACAGTCAAACCACACGGAAGACAATGGAAATC  
TAACTCTCCCATGCAGAATAAAACAACCTTATAAACCTGTGGCAAAGAGCAGGACAAGCAATGTATGCCCCCTCC  
CATAACCAGGAAATATAAGTTGTGTATCAAACATTACAGGACTACTATTGACAAGAGATGGTGGGAACACTGGG  
AACAAATACAGAGGGAAATAAAACTGAAATCTTCAGACCTGGAGGAGGAAATATGAGGGACAATTGGAGAAGTG  
AATTATATAAGTATAAAGTAGTGAATTTGAACCAATAGGAATAGCACCCACCAAGGCAAAGAGAAGAGTGGT  
GGAGAGAGAAAAAGAGCAGCACTTGCTGGAGCTTTCTTTCTTGGGTTCTTAGGAACAGCAGGAAGCACTATG  
GGCGCGGCGTCAATAGCGCTGACGGTACAGGCCAGGCAATTATTGTCTGGCATAGTGCAACAGCAAAGCAATT  
TGCTGAGGGCTATAGAGGCTCAACAGCAATTGTTGAGACTCACAGTCTGGGGCATT

>KT022376..1

TTCTATTGTAATACATCAGGCCTGTTTGATAGCACTTGGTCGTTTAAATAGCACACAGGAGTCAAATAACACGG  
GGGAAAATGATACTATAATTCTCCCATGCAGAATAAAGCAAATTATAAACATGTGGCAGAGAGTAGGACAAGC  
AATGTATGCCCCCTCCCATCCAGGAGTAATACAGTGTAACCTCAACCATTACAGGGCTAATATTAACAAGAGAT  
GGTGGGGAGGATAATAATAACACAGAAACCTTCAGACCTGCAGGAGGAGATATGAGGGACAATTGGAGAAGTG  
AATTATATAAATATAAAGTAGTAAACTTTGAACCACTAGGAGTAGCGCCACCAAGGCAAAGAGAAGAGTGGT  
GGAGAGAGAAAAAGAGCAGTTGGACTAGGAGCTGTCTTCCTTGGGTTCTTAGGAGCAGCAGGAAGCACTATG  
GGCGCGGCGTCAATAACGCTGACGGTACAGGCCAGGCAATTATTGTCTGGCATAGTGCAACAGCAAAGCAATT  
TGCTGAGGGCTATAGAGGCTCAACAACATATGTTGAAACTCACAGTCTGGGGCATT

>KT022377..1

TTCTATTGTAATACATCAGGGCTGTTCAATAGTACTTGAATACCACGAAGGTAAAATAGCACAGAGTCAAATG  
GCACTATAACTCTCCCATGCAGAATAAAGCAAATTATAAATATGTGGCAAAGAACAGGACAAGCAATGTATGC  
CCCTCCCATCAAAGGAATAATAAATTGTGCATCAAATATTACAGGACTACTATTAACAAGAGATGGTGGGGAT  
AATAACAGTACAAATGAAACCTTCAGACCTGGAGGAGGAGATATGAGGGACAATTGGAGAAGTGAATTATATA  
AGTATAAAGTAGTAAAAATTGAACCACTAGGGGTAGCACCCACCGAGGCAAGGAGAAGAGTGGTGGAGAGAGA  
AAAAAGAGCATTTGTTGGAATAGGAGCTGTCTTCCTTGGGTTCTTAGGAGCAGCCGGCAGCACTATGGGCGCG  
GCGTCATTAACGCTGACGGTACAGGCCAGACAATTATTGTCTGGTATAGTGCAACAGCAAACAATTTGCTGA  
GGGCTATAGAGGCTCAACAACATCTGTTGAAACTCACGGTCTGGGGCATT

>FJ866116..2

TTCTACTGTGATACATCAGGACTGTTTAATAGCTCTTGAATAATACATCGGGCCAGTTTAAATAGCACTTGA  
CTGATGGCTACAATAGAAAGAGCGAGAATATAACTCTCCAATGCAGAATAAAGCAATTTATAAATATGTGGCA  
GAGAACAGGGCAAGCAATGTATGCCCCCTCCCATCCAGGAATAATAAAATGTGAATCAAACATTACAGGACTA  
ATACTAACAAGAGATGGTGGGCAGGCTAACAAAACAGAGGAAACCTTCAGACCTGGAGGAGGAGATATGAGGG  
ACAATTGGAGAAGTGAATTATTTAGGTATAAAGTAGTAAAAATTGAACCACTAGGAGTAGCACCCACCAAGGC  
AAAGAGAAGAGTGGTGGAGAGAGAGAAAAGAGCAGTAATTGGCATGGGAGCTGTTTTCCTTGGGTTCTTAGGA  
GCAGCAGGAAGCACTATGGGCGCGGCGTCACTGACGCTGACGGTACAGGCCAGACAATTATTGTCTGGCATAG  
TGCAACAGCAAGGCAATTTGCTGAGGGCTATAGAGGCTCAACAACATCTGTTGAGACTCACGGTCTGGGGCAT  
T

>FJ866118..1

TTCTATTGTAATACACAGGACTGTTCAATCTCACTTGAATGGCACTGACAGCACAAATAGAAATGAGTCAG  
GCAATATAACTCTCCCATGCAGAATAAAGCAAATTATAAATATGTGGCAAAGAGTAGGACGAGCAATATATGC  
CCCTCCCATCCAGGAGTAGTAAAGTGTAATCAAATATTACAGGATTAATATTAACAAGGGATGGTGGAGAC  
GACGAGAATAACACTGAAACCTTCAGACCTGGAGGAGGAAATATGAGGGACAATTGGAGAAGTGAATTATATA  
AATATAAAGTAGTAAAAATTGAACCACTAGGGGTAGCACCCACCAAGGCAAGGAGGAGAACGGTGGAGAGAGA  
AAAAAGAGCAGTTGGAATAGGAGCTGTCTTCCTTGGGTTCTTAGGAGCAGCAGGAAGCACTATGGGCGCGGCG  
TCAATAACGCTGACGGTACAGGCCAGACAATTATTGGCTGGCATAGTGCAACAGCAAAGCAATTTGCTGAGGG  
CTATAGAGGCTCAACAACAGATGTTGAGACTCACAGTCTGGGGCATT

>FJ866120..2

TTCTATTGTAATACATCACTCCTGTTTGAAAGCATTGTGGTATGGCAATGAAAGCATAAATGCCACAGAAGAGG  
CAAATGACACTATAATAACTCTCCGATGCAGAATAAAGCAAATTTATAAAAATGTGGCAGAGAGTAGGACAAGC  
AATGTATGCCCCCTCCCATCCAGGAGCAATCAGGTGTAATTCAAACATTACAGGACTAATATTAACAAGAGAT  
GGAGGGCTTAATGACAATGGAGCTGATGGAAGAAATGAAACCTTCAGACCTGGAGGAGGAGATATGAGGGACA  
ATTGGAGAAGTGAATTATATAAAGTATAAAGTGGTAGAAATTGAACCACTAGGAGTAGCCCCCACTCAGGCAAG  
AAGAAGAGTGGTGCAGAGAGAAAAAGAGCAGTTGGAATAGGAGCTGTCTTCATTGGGTTCTTAGGAGCAGCA  
GGAAGCACTATGGGCGCAGCGTCAATAGCGCTGACGGCACAGGCCAGACAATTATTGTCTGGCATAGTGCAAC  
AGCAAAGCAATTTGCTGAGGGCTATAGAGGTTCAACAACAGTTGTTGAAACTCACGGTCTGGGGCATT

>FJ866121..2

TTCTACTGTAACACATCAAACTGTTTAAATAGTACTTGGCATTACAATAACAGCACTGGGTATAATAATGGCA  
GCCTACAGGAGGAAAATAACACAGAGATAGTTCTCCTATGCAGAATAAAGCAAATTATAAATCTGTGGCAGAG  
GGTAGGAAAGGCAATGTATGCCCTCCCATCCAAGGAAGCATAAAGTGTAACTCAAACATTACAGGACTACTA  
TTAATCAGGGATGGTGGGGTTAATACTACTAATGAAACCTTCAGACCTGGAGGAGGAGATATGAGGGACAATT  
GGAGAAGTGAATTATATAAAATATAAAGTAATAAAAATTGAACCACTAGGAATAGCACCCACCAGGGCAAAGAG  
AAGAGTGGTGGAGAGAGAAAAAGAGCAGTTGGACTAGGAGCTGTTTTTCGTTGGGTCTTTAGGAGCAGCAGGA  
AGCACTATGGGCGCAGCGTCAGTGACGCTGACGGTACAGGCCAGACAGTTATTGTCTGGTATAGTGCAACAGC  
AAAGCAATTTGCTGAGGGCTATAGAGGCTCAACAACATATGTTGAAACTCACGGTCTGGGGCATT

>KT022380..1

TTCTATTGTAATACATCAGGCTTGTTTAAATAGGACTTGGAAGGGGATAATCAAGGGCACTGCCAATAACA  
CGGAGTCAGACCCTATAGTGCTCCAATGCAGAATAAAGCAAATTATAAATATGTGGCAGAGAGTAGGACGAGC  
AATGTATGCCCTCCCATCCAGGAATAATAAATGTGTATCAAACATTACAGGACTAATATTAACAAGAGAT  
GGTGGGAATAGTAATGGAGATAATGAAACCTTCAGACCTGGAGGAGGAGATATGAGGGACAATTGGAGAAGTG  
AATTATATAAGTATAAAGTAGTAAAGTTGAGCCATTAGGAGTAGCACCCACCAGGGCAAGGAGGAGAGTGGT  
GGCGAGAGAAAAAGAGCAGTAGTTGGACTGGGAGCTGTTTTTCATTGGGTTCTTAGGAGCAGCAGGAAGCACT  
ATGGGCGCGGCTCAATAACGCTGACGGTACAGGCCAGACAATTATTGTCTGGCATAGTGCAACAGCAAAGCA  
ATTTGCTGAGGGCTATAGAGGCTCAACAACATCTGTTGAAACTCACGGTCTGGGGCATT

>KT022381..4

TTCTATTGTAATACATCAGGCTTGTTTAAATTACACCTATCCATCAAATCACAGTGATAAGTCAAATAACACTA  
TAAATGAGACTATAACTCTCCCATGCAGAATAAAACAAATTATAAGAATGTGGCAGAGAACAGGACAAGCAAT  
GTATGCCCTCCCATCCAGGAATAATTAAAGTGTGAATCAAACATTACAGGACTAATATTAACAAGAGATGGT  
TTTAAATGGCACGAATGAAACCTTCAGGCTGTAGGAGGAGATATGAGGGACAATTGGAGAAGTGAATTATATA  
AGTATAAAGTAGTAAGAATTGAACCACTAGGAGTAGCACCCACCAGGGCAAAGAGAAGAGTGGTGGGAAGAGA  
GAAAAGAGCAGTTGGAATGGGAGCTGTATTCCTTGGGTTCTTAGGAGCAGCAGGAAGCACTATGGGCGCGGCG  
TCAATAACGCTGACGGTACAGGCCAGACAATTATTGTCTGGCATAGTGCAACAGCAAAGCAATTTGCTGAAGG  
CAATAGAGGCTCAACAACATCTGCTGAGACTCACGGTCTGGGGCATC

>KT022382..2

TTCTATTGTAATACATCAGGCTTGTTCAATAGTAGCTGGGGTCCAAATGACACGAAATCAGATAACTCAACTA  
CAAATTACACTCTCCCATGCAGAATAAAGCAAATTGTAAGGATGTGGCAGAAAAATAGGACAAGCAATGTATGC  
CCCTCCAATCGAGGGAGAAATAAATTGTGTATCAAACATTACAGGACTATTATTAACAAGAGATGGTGGGCAT  
AACAGTATTAACAATGAACTGAAACATTACAGACCTGGAGGAGGAGATATGAAGGACAATTGGAGAAGTGAAT  
TATATAAGTATAAAGTAGTAAAAATTGAACCACTAGGAGTAGCACCCACCAGGGCAAAGAGAAGAGTGGTGGG  
GAGAGAAAAAGAGCAGTTGGAATAGGAGCTGTTTTCTTGGGTTCTTGGGAGCAGCAGGAAGCACTATGGGC  
GCGGCGTCAATAACGCTGACGGTACAGGCCAGACAATTATTGTCTGGCATAGTGCAACAGCAAAGCAATTTGC  
TGAGGGCTATAGAGGCTCAACAACATCTGTTGAAACTCACGGTCTGGGGCATT

>KT022383..1

TTCTATTGTAATACATCAGGCTTGTTTAAATAGCACTTGGAACAGCCCTTGGAATAACACTGGGGAACAAGAAG  
GCAATATAACTCTCCCATGCAGAATAAAGCAAATTATAAATATGTGGCAGAGAGTAGGACAAGCAATATATGC  
CCCTCCCATCCAGGAGTAATAAAGTGTGAATCGAACATTACAGGGCTACTATTAAACAAGAGATGGTGGGAAC  
ACTAACAGTAGTACTGAAACCTTCAGACCTGGAGGAGGAGATATGAGGGACAATTGGAGAAGTGAATTATATA  
AATATAAAGTAGTAAAGTTGAACCACTAGGAGTAGCACCCACCAGGGCAAAGAGAAGAGTGGTGGGGAGAGA  
AAAAAGAGCAGTTGGAATAGGAGCTGTCTTCCTTGGGTTCTTAGGAGCAGCAGGAAGCACTATGGGCGCGGCG  
TCAATAACGCTGACGGTACAGGCCAGACAATTATTGTCTGGCATAGTGCAACAGCAAAGCAATTTGCTGAGGG  
CTATAGAGGCTCAACAACATATGTTGAAACTCACGGTCTGGGGCATT

>FJ623487..1

TTCTATTGTAATACATCAAGACTGTTTAAATAGCACTTGGAACAATGGCACTTGGAACAATACCAACATGCAGG  
AGTCAAATAGCAGAGTCAAGAAATGGCACTATAACTCTCCCATGCAGAATAAAGCAAATTATAAATATGTG  
GCAGAGAACAGGACAAGCAATGTATGCCCTCCCATCCGAGGAGTAATAAGATGTGAATCAAACATTACAGGA  
CTAATATTAACAAGAGATAGTGTGAATAATAGCAAAGACAATGAAACCTTCAGACCAAGGAGGAGGAGATATGA  
GGGACAATTGGAGAAGTGAATTATATAAGTATAAAGTAGTAAAAGTTGAACCACTAGGAGTAGCACCCACCAC  
GGCAAGGAGAAGAGTGGTGGGAAGAGAAAAAGAGCAGTGGGAATAGGAGCTGTATTCCTTGGGTTCTTGGGA  
GCAGCAGGAAGCACGATGGGCGCGGCTCAATGACGCTGACGGTACAGGCCAGACAATTATTGTCTGGTATAG  
TGCAACAGCAAAGCAATTTGCTGAGGGCTATAGAGGCTCAACAACACCTGTTGAAACTCACGGTCTGGGGCAT  
T

>FJ623481..2

TTTTATTGTAATACATCAGGCTTGTTTAAATAGCACTTGGAATCACACTGACATAAAGGGGTCAAATAGCACGG  
AGTCAAGTGAAACTATAACTCTCACATGCAGAATAAAGCAAATTATAAATATGTGGCAGAGAGTAGGGCAAAGC  
AATGTATGCCCTCCCATACAGGAGCAATAAGGTGTGAATCAAACATTACAGGAATACTCTTAACAAGAGAT  
GGTGGGAATAGCAAGAACAGCACAAACAGAAATCTTCAGACCTGGAGGAGGAAACATGCGGGACAATTGGAGAA  
GTGAATTATATAAGTATAAAGTAGTACAAATTGAACCACTAGGAGTAGCACCTACCAGGGCAAAGAGAAGAGT

GGTGGAGAGAGAAAAAGAGCAATTGGAATAGGAGCTGTATTCATTGGGTTCTTAGGAGCAGCAGGAAGCACT  
ATGGGCGCGGCGTCAATAACGCTGACGGTACAGGCCAGACAATTATTGACTGGCATAGTGCGACAGCAAAGCA  
ATTTGCTGAGGGCTATAGAGGCTCAACAACATCTGTTGAAACTCACGGTCTGGGGCATT

>FJ623475..1

TTTTACTGTGATACATCAGGCCTGTTTAATAGCACTTGGGGAGCCACTGACAGCATGCATGGGGCAAATGACA  
CGGAGTCAAATGACACTATAACTCTCCCATGTAGGATAAAACAAATTATAAATAGGTGGCAGAGAGTAGGACA  
AGCAATGTATGCCCCCTCCCATCCAAGGAGTAATAAAGTGCAAATCAGACATTACAGGAATAATATTAACAAGA  
GATGGTGGGAATAATAATGACAGTAGAAATGAAACCTTCAGACCTGGAGGAGGAGATATGAGGGACAATTGGA  
GAAGTGAATTGTATAAGTATAAGGTGGTAAAGATTGAACCACTAGGAGTAGCACCCACCAGGGCAAAGAGAAG  
AGTGGTGGAGAGAGGAAAAAGAGCAGTTGGGATAGGAGCTGTTTTCTTGATTCTTAGGAGCAGCCGGAAGC  
ACTATGGGCGCGGCGTCAATAACGCTGACGGTACAGGCCAGGCAATTATTGTCTGGCATAGTGCAACAGCAAA  
GCAATTTGCTGAGGGCTATAGAGGCTCAACAACATATGTTGAAACTCACGGTCTGGGGCATA

>FJ623476..2

TTCTATTGTAATACATCAGGCCTGTTTAATAGCACTTGGAATATCACTGACAATCTCAACATAACTCAGTCAA  
ATGAGAACATAACTCTCCCATGCAAAATAAAGCAAATTATAAATATGTGGCAGAGAGTAGGACAAGCAATATA  
TGCCCCCTCCCATCCCAGGAAGGGTAAGTTGTGTCTCAAACTTACAGGACTAATATTAACAAGAGATGGTGGG  
AACATAACAGTACAAATGAAACCTTCAGGCCTGGAGGAGGAGATATGAGGGACAATTGGAGAAGTGAATTAT  
ATAAGTATAAAGTAGTAAGAATTGAACCACTAGGAGTAGCACCTACCCAGGCAAAAGAGAAGTGGTGGGAAG  
AGAAAAAGAGCAATTGGAATAGGAGCTGTCTTCCTTGGGTTCTTAGGAGCAGCAGGAAGCACTATGGGCGCG  
GCGTCAATAACGCTGACGGTACAGGCCAGACAGTTATTGTCTGGCATAGTGCAACAGCAAAACAATTTGCTGA  
GGGCTATAGAGGCTCAACAACAACCTGTTGAAACTCACGGTCTGGGGCATT

>FJ623485..3

TTTTATTGTAATACATCAGGCCTGTTTAATAGCACTTGGTATCACAATAGCACTTGGAATGATCAAACTGACG  
AGAGGTCAAATGACACTATAACTCTCCAATGCAGAATAAAGCAAATTATAAATATGTGGCAGAGAGTAGGACA  
AGCAATATATGCCCCCTCCTATCCAAGGAACAATAAGGTGTGAATCAAACATTACAGGACTAATATTAACAAGA  
GATGGTGGGGAGGATAGCAATACAACACTGAAACCTTCAGACCTAGCGGAGGAGATATGAAGGACAATTGGA  
GAAGTGAATTATATAAATATAAAGTAGTAAAAATTGAACCACTAGGAGTAGCACCTCCAGGGCAAGGAGAAG  
AGTGGTGGGAAGAGAAAAAGAGCAGTTGGAATAGGAGCTGTCTTCCTTGGGTTCTTAGGAGCAGCAGGAAGC  
ACTATGGGCGCAGCGTCAATAACGCTGACGGTACAGGCCAGACAATTACTGTCTGGCATAGTGCAACAGCAAA  
GCAATTTGCTGAGGGCTATAGAGGCTCAACAACATATGTTGAGACTCACGGTCTGGGGCATT

>FJ623488..1

TTCTATTGTAACACATCAGGTCTGTTTAATAGCACTTGGGATAACAATACTGGCAATTGGTCTAGCAATAGCA  
GCAGCATGCAGGGGTCAAATAGCACAGATGATACTATAACTCTCCCATGCAGAATAAAGCAAATTATAAATAT  
GTGGCAGAGAACAGGACAAGCAATGTATGCCCCCCCCATCCAAGGGATAATAAGGTGTGAATCAAACATCACA  
GGGATAATATTAACAAGAGATGGTGGGGGTACTGAGGATAATACTACAGAAGTCTTCAGACCTGGAGGAGGAG  
ATATGAGGGACAATTGGAGAAGTGAATTATATAAATATAAAGTAGTACAAGTTGAACCAGTAGGAATAGCACCC  
CTCCAAGGCAAGGAGAAGAGTGGTGCAGAGAGAAAAAGAGCAATTGGAATGGGAGCTGTCTTCCTTGGGTTC  
TTAGGAGCAGCAGGAAGCACTATGGGCGCGGCGTCAATGACGCTGACGGTACAGGCCAGAAATTTATTGTCTG  
GCATAGTGCAACAGCAGAGTAATTTGCTGAGGGCTGTAGAGGCTCAACAACAACCTGTTGAGACTCACGGTCTG  
GGGCATT

>FJ623478..4

TTCTATTGTAATACATCAGGCCTGTTTAATCACACTTACCTGCCTAAGAGCACTTACCTGCCTAATAGCACTT  
GGAATAACAGTACGGGATCAAATGACAGTATAACTCTTCCATGTAGAATAAAGCAAATTATAAATATGTGGCA  
GAGAGTAGGACAAGCAATGTATGCCCCCTCCTATCCAAGGAGTAATAAAGTGTAATCAGATATTACAGGACTA  
ATATTGACAAGAGATGGTGGGAATAGTAACAGTGATAATGAAACCTTCAGACCTGGAGGAGGAGATATGAGGG  
ACAATTGGAGAAGTGAATTATATAAGTATAAAGTAGTAAAAATTGAACCACTAGGAGTAGCACCCACCAGGGC  
AAAGAGAAGAGTGGTGGAGAGAGAAAAAGAGCAGTTGGAATAGGAGCTGTTTTCATTTGGGTTCTTAGGAGCA  
GCAGGAAGCACTATGGGCGCGGCGTCAATAACGCTGACGGTACAGGCTAGACAATTATTGTCTGGCATAGTGC  
AACAGCAAAGCAATTTGCTGAGGGCTATAGAGGCTCAACAACATATGTTGAAACTCACGGTCTGGGGCATT

>FJ623482..1

TTCTATTGTAATACATCAGACCTGTTTAATGGCAATAGCACTAGGAATGGCACTGGGAATAGCAACAGCACGC  
CGGTAACCTGGCAATATAACTCTCCCATGCAGAATAAAGCAAATTATAAATATGTGGCAGAGAGTAGGACAAGC  
AATGTATGCCCCGCCCATCCAAGGGTAATAAGGTGTGTATCAAACATTACAGGATTAATATTGACAAGAGAT  
GGTGGGAAACAGAATAATAATAGTAATAGTAATAGTAGTATTTGAAGTCTTCAGACCTGGAGGAGGAGATA  
TGAGGGACAATTGGAGAAGTGAATTATATAAGTATAAAGTAGTAAAAATTGAACCACTAGGAATAGCACCTAC  
CAAGGCAAAAAGAAGAGTGGTGGAGAGAGAAAAAGAGCAATTGGAATAGGAGCTGTCTTCCTTGGGTTCTTA  
GGAACAGCAGGAAGCACTATGGGCGCGGCGTCAATAGCGCTGACGGTACAGGCCAGACAATTAATGTCTGGCA  
TAGTGCAACAGCAAAGCAATTTGCTGAGGGCTATAGAGGCTCAACAGCATATGTTGAAACTCACAGTCTGGGG  
CATT

>FJ623477..1

TTCTATTGTGATACATCAGGCCTGTTTAAATAGCACCTGGAATAATAGCACCTGGAATAATAATGACACTGCCC  
AGTCAAATGACACAATAACTCTCCCATGCAGAATAAAACAAATTGTAAATATGTGGCAGAGAACAGAACAGC  
AATGTATGCCCCCTCCCATCCAAGGAGTAATAAGGTGTGAATCAAACATCACAGGACTACTATTAACAAGAGAT  
GGTGGGATTAATAACACAAATGAAACCTTCAGACCTGGAGGAGGAGATATGAGGGACAATTGGAGAAGTGAAC  
TATATAAGTATAAAGTAGTAAAAATTGAACCACTGGGAGTAGCACCTCCAGGGCAAGGAGAAGAGTGGTGGG  
GAGAGAAAAAAGAGCAGTTGGAATAGGAGCTTTATTCTTGGATTCTTGGGCGCAGCAGGAAGCACTATGGGC  
GCGGCGTCAATGACGCTGACGGTACAGGCCAGACAATTATTGTCTGGCATAGTGCAACAGCAAAGCAATTTGC  
TGAAGGCTATAGAGGCTCAACAACATCTGTTGAGACTCACGGTCTGGGGCATT

>FJ623486..3

TTCTATTGTAATACATCAGAACTATTTAAATAGCACTTGGAACTCTTAATAGCACTTGGAAATCACACTGGCAGCA  
TACCGGAGTCAAATAGCACGGAGTCAAATGGCACTATAACCCTCAAATGCAGAATAAAGCAAATTATAAATAT  
GTGGCAGAGAGTAGGGCAAGCAATGTATGCCCCCTCCCATCAAAGGGACAATAAGGTGTAAATCAAACATCACA  
GGACTAATATTAACAAGAGATGGTGGGGATAATAACAGTACAAAGGAAACCTTCAGGCCTGGAGGAGGAGATA  
TGAGGGGACAATTGGAGAAGTGAATTATATCAGTATAAAGTAGTAAAACCTTGAACCACTAGGAGTAGCACCCAC  
CAGGGCAAGGAGAAGAGTGGTGGGGAGAAAAAAGAGCAGTTGGACTAGGAGCTGTTTTTCATTGGGTTCTTG  
GGAGCAGCAGGAAGCACTATGGGCGCGGCGTCAATGACGCTGACGGTACAAGCTAGACAATTATTGTCTGGCA  
TAGTGCAACAGCAAAGCAATTTGCTGAGGGCTATAGAGGCTCAACAACATCTGTTGAAACTCACGGTCTGGGG  
CATT

>FJ623479..1

TTCTATTGTAATACATCAGACCTGTTTAAATGGTACTTGGAAATAATAGCACTTTGAATGGCACTGCCAAGCAGG  
AGGTAAATGACAGCACTATAACGATCTCATGCAGGATAAAGCAATTTATAAATATGTGGCAGAGAACAGGACG  
AGCAATGTATGCCCCCTCCCATTCAGGAGTAATAAGTTGTAACCTCAAGCATTACAGGATTAATATTAACAAGA  
GATGGTGGGGATGATAACAATAAATGAAACATTCAGACCTGGAGGAGGAGATATGAGGGACAATTGGAGAA  
GTGAATTATATAAGTATAAAGTAGTAAAAATTGAACCACTAGGAGTAGCACCCACCAAGGCAAGGAGAAGAGT  
GGTGGAGAGAGAAAAAAGAGCAGTTGGAATAGGAGCTGTACTCCTTGGGTTCTTAGGAGCAGCAGGAAGCACT  
ATGGGCGGCGTCAATAACGCTGACGGTACAGGCCAGACAATTATTGTCTGGCATAGTGCAACAGCAAAGCA  
ATTTGCTGAAGGCTATAGAGGCTCAACAACAACCTGTTGAAACTCACAGTCTGGGGCATT

>HM215275..1

TTCTATTGTAATACATCAGGTCTGTTCAATAGCACTTGGGAGGCCAATAGTACTGCCAATACCAGCACGACAA  
ATATAACTCTCCCATGCAAAATAAAGCAACTTGTAAGAATGTGGCAGAGGACAGGACAAGCATTGTATGCCCC  
TCCCATCGAAGGAGTAATAAAATGTGTATCAAACATTACAGGACTAATATTAACAAGAGATGGTGGGGGTAAT  
AACAGTGCAACAAATGAAACCTTCAGACCTGGAGGAGGAGATATGAGGGACAATTGGAGAAGTGAATTATATA  
AGTATAAAGTAGTACAAATTGAACCACTAGGAGTTGCACCCACCGAGGCAAGGAGAAGAGTGGTGAAGAGAGA  
AAAAAGAGCAGTTCCTGGACTGTTTTCTTGGGTTCTTAGCAGCAGCAGGAAGCACTATGGGCGCGGCGTCA  
ATAACGCTGACGGTACAGGCCAGACAATTATTGTCTGGCATAGTGCAACAGCAAAGCAATTTGCTGAGGGCTA  
TAGAGGCTCAACAGCATCTGTTGAAACTCACGGTCTGGGGCATT

>KT252544..1

TTCTATTGTAACACATCAGGCCTGTTTAAATAGTACTTGGGATGGGAATAGCACTGAGGCAAACATTACGCAGT  
CAAATGAGACTATAACTCTCCCATGCAAAATAAAGCAAATTGTAAATATGTGGCAGAGAGTGGGACGAGCAAT  
GTATGCCCCCTCCTATCCCAGGAGTAATAAAGTGTGAATCAAACATTACAGGGCTAATACTGACAAGAGATGGT  
GGGAATGAAACAAATGGAAACAGAAATCTTCAGACCTGTAGGAGGAGACATGAGGGACAATTGGAGAAGTGAAT  
TATATAAGTATAAAGTAGTACAAATTAAACCACTAGGAGTAGCACCCACCAAGGCAAAGAGAAGAGTGGTGCA  
GAGAGAAAAAAGAGCAGTTGGAATGGGAGCTGTTTTCTTGGGTTCTTAGGAGCAGCTGGAAGCACTATGGGC  
GCGGCGTCAATAACGCTGACGGTACAGGCCAGACAATTATTGACTGGCATAGTGCAACAGCAAAGCAATTTGC  
TGAGGGCTATAGAGGCTCAACAGCATCTGTTGAAACTCACTGTCTGGGGCATT

>HQ540689..1

TTCTACTGTAATACAACAAACCTGTTTAAATAGTAGCATTCCTTCAACGCCAGCGAGAGGGCAAATAACACCA  
ATAGCACAGATGACATTATAACTCTCCAATGCAGAATAAAGCAAATTGTAAGGATGTGGCAAAGAGTAGGACA  
AGCAATGTATGCCCCCTCCCATCCCAGGAGTAATAAGGTGTGAATCAAACATTACAGGACTTATGTTAACATGG  
GATGGTGGGAGTAAAAATATTACTGAGGGCAATAGAACTGAAACCTTTAGACCTGGAGGAGGAGACATGAGGG  
ACAATTGGAGAAGTGAATTATATAAATATAAAGTAGTAAAAATTGAACCACTAGGAGTTGCACCCACCAAGGC  
AAGGAGAAGAGTGGTGGGAAGAGAAAAAAGAGCAGTTGGAATAGGAGCTGTTTTCTTGGGTTCTTAGGAGCA  
GCAGGAAGCACTATGGGCGCGGCGTCAGTGACGCTGACGGTACAGGCCAGACAATTATTGTCTGGTATAGTGC  
AACAGCAAAGCAATTTGCTGAGAGCTATAGAGGCTCAACAACAGTTGTTGAAACTCACGGTCTGGGGCATT

>KU921708..2

TTCTATTGTAATACAGTAAATCTGTTCAATAGCTCTTGGGGTGCCAACGCCACTGAGTCAAATAGCACAGGGT  
TAAATAATCAAACCTATACATCTCCCATGCAGAATAAAGCAAATTATAAATATGTGGCAGAGAACAGGACAAGC  
AATGTATGCCCCCTCCCGTCGAAGGAATAATAAGTTGTGTATCAGACATTACAGGACTACTGTTAAACAAGAGAC  
GGAGGAGAAAAATACAACACATGAAATTTTCAGACCTGGAGGAGGAGATATGAGGGACAATTGGAGAAGTGAAT  
TATATAAGTATAAAGTAGTAAAAATTGAACCCCTAGGAGTAGCACCCACCAAGGCAAGGAGAAGAGTGGTGCA

GAGAGAAAAAAGAGCAGTTGGAATGGGAGCTGTCTTCCTTGGGTTCTTAGGAGCAGCAGGAAGCACTATGGGC  
GCAGCGTCAATAACGCTGACGGTACAGGCCAGACAATTATTGTCTGGTATAGTGCAACAGCAAAGCAATTTGC  
TGAGGGCTATAGAGGCTCAACAGCATCTGTTGAACTCACTGTCTGGGGCATT

>KU921712..2

TTCTATTGTAATACATCAAAGCTGTCTAACAGCACATTTCCACTTAATAACACTCAGAATAACAGCACGCAGA  
CAAACAGTACTATAACTCTCCCATGCAGAATAAAGCAAATTATAAATATGTGGCAGAGAACAGGAAAAGCAAT  
ATATGCCCTCCCATCTCAGGACCAATAAAGTGTACATCAAACATTACAGGACTAATATTAACAAGAGATGGT  
GGAAATGATAATAATAATGATACCAATGGAAATGAAACCTTCAGACCTGGAGGAGGAGATATGAGGGACAATT  
GGAGAAGTGAATTATATAAGTATAAAGTAGTAAACTTGAACCACTAGGAGTAGCACCCACCAGGGCAAGAAG  
AAGAGTGGTGCAGAGAGAGAAAAAGAGCAATTGGACTGGGAGCTGTATTCAATTGGGTTCTTAGGAGCAGCAGGG  
AGCACTATGGGCGCGGCGTCAAGTACGCTGACGGTACAGGCCAGAGCCTTATTGTCTGGCATAGTGCAACAGC  
AAAGCAATTTGCTGAGGGCTATAGAAGCTCAACAACATCTGTTGAAGCTCACGGTCTGGGGCATT

>KU921727..2

TTCTATTGTGACACATCAAGCCTGTTTAATAGCACTTGGAAATGAGAATGACAATGTCAGCAGAACAGAGTCAA  
ATAGTACAGAAGATATAACTCTCCAATGCAGAATAAAACAAATTGTAAATATGTGGCAGAGAGTAGGACAAGC  
GATGTATGCCCTCCCATCCAAGGAATAATAAAGTGTGAATCAAACATAACAGGACTAATATTAACAAGAGAT  
GGTGGGAATCATAATAGTACAAATGAAACCTCCAGAAATGAAACCTTCAGACCTGGAGGAGGAGATATGAGGG  
ACAATTGGAGAAGTGAATTATATAAGTATAAGGTAGTAAAAATTGAACCTCTAGGAGTAGCACCCACCAAGGC  
AAAGAGAAGAGTGGTGGAGAGAGAAAAAGAGCAGTTGGAATAGGAGCTGTCTTCCTTGGATTCTTGGGAGCA  
GCAGGAAGCACTATGGGCGCGGCGTCAATAACGCTGACGGCAGAGGCCAGACAATTATTGTCTGGTATAGTGC  
AACAGCAAAGCAATTTGCTGAGGGCTATAGAGGCTCAACAGCATCTGTTGAGACTCACAGTCTGGGGCATT

>KU921732..1

TTCTATTGTAATACATCAGGCCTTTTTGATGACACTTGGAAATGGCACGAAGTCAAATGACACTATAACACTCC  
CATGCAGAATAAAGCAAGTTATAAATATGTGGCAGAGGACAGGACAAGCAATGTATGCCCTCCCATCCAAGG  
AGTAATAAGGTGCGAATCAAACATCACAGGACTAATATTAACAAGAGATGGTGGGCATAACATTACAAATGAA  
ACCTTCAGACCTACAGGAGGAAATATGAGGGACAATTGGAGAAGTGAATTATATAAGTATAAAGTAGTAAGAA  
TTGAACCACTAGGAGTAGCACCCACCTCGGCAAAGAGAAGAGTGGTGGAGAGAGAAAAAGAGCAGTAGTTGG  
AATGGGAGCTGTCTTCATTGGGTTCTTGGGAGCAGCAGGAAGCACTATGGGCGCGGCGTCAATGACGCTGACG  
GTACAGGCCAGACAATTATTGTCTGGCATAGTGCAACAGCAAAGCAATTTGCTGAGGGCTATAGAGGCTCAAC  
AGCATTTGTTGAAGCTCACGGTCTGGGGCATT

>KU921734..1

TTCTATTGTAACACATCAGGTCTGTTTAATAGCACGTGGAATAAGGATAATAACACCTTGAATGGCGCTGTAA  
ATAACATAACAGACAATATAACCTCCAATGCAGAATAAAACAAATTATAAATATGTGGCAGAGAGCAGGACA  
AGCAATATATGCTCCTCCCATCCCAGGAGTAATAAGGTGCACCTCAAATATTACAGGATTAATATTAACAAGA  
GATGGTGGGAAAGATAGCAATGAAAGTGCTGAAACCTTCAGACCTGGAGGAGGAGATATGGGGGACAACCTGGA  
GAAGTGAATTATATAAGTATAAGGTAGTAAAAATTGAACCACTAGGAATAGCACCCAACAGGGCAAAGAGAAG  
AGTGGTGGAGAGAGAAAAAGAGCAATCTTGGGACTGGGAGCTGTTTTCGTTGGGTTCTTAGGAGCAGCAGGA  
AGCACTATGGGCGCGGCGTCACTGACGCTGACGGTACAGGCCAGAACTTATTGTCTGGCATAGTGCAACAGC  
AAAACAATTTGCTGAAGGCTATAGAGGCTCAACAGCATCTGTTGAACTCACGGTCTGGGGCATT

>KU921738..2

TTCTATTGTAACACATCAGAGCTGTTTAATAGCACTTGGAAATAGGACTGACCCTGGCACTTGGAAATAACACCA  
GCACGCAGGAGTCAAATAGCACAGATCAAAAAATAACTCTCCAATGCAGCATAAAGCAAATTATAAATATGTG  
GCAAAGGGTAGGACGAGCAATGTATGCCCTCCCATCCCAGGACCAATACAGTGTAGATCAAACATTACAGGA  
CTAATATTAGTGAGAGATGGTGGGAATACGAATACTAGCAAGGAAACCTTTAGACCTGCAGGAGGGGATATGA  
GGGACAATTGGAGAAGTGAATTATATAAATATAAAGTAGTAAAAATTGAACCACTAGGAGTAGCACCCACCAA  
GGCAAAGAGAAGAGTGGTGGAGAGAGGAAAAAGAGCAGTTGGACTAGGAGCTGTCTTCATTGGGTTCTTAGGA  
GCAGCAGGAAGCACTATGGGCGCAGCGTCAATAACGCTGACGGTACAGGTACAGGTACAGCAATTATTGTCTGGCATAG  
TGCGACAGCAAAGCAATTTGCTGAGGGCTATAGAAGCTCAACAACATCTGTTGAACTCACGGTCTGGGGCAT  
T

>KU921746..1

TTCTATTGTAACACATCAGGTCTGTTTCAACAGCACTTGGGATGATACCGCCATACAGGAAAATATCACGGAGA  
TCACGGAGTCAAATGACACAATAACTCTCCAATGCAGAATAAGGCAATTTATAAGGATGTGGCAGAGGACAGG  
ACAGGCAATGTATGCCCTCCCATACCAGGAGTAATAAGGTGTGAATCAAACATTACAGGACTAATATTAACA  
AGAGATGGTGGGCATAGTAATAGTACTAGTAATGAAACCTTCAGACCTGGAGGAGGAGATATGAGGGACAATT  
GGAGAAGTGAATTATATAAGTATAAAGTAGTAAAAATTGAACCACTAGGAGTAGCACCTCCAGGGCAAGGAG  
AAGAGTGGTGGGAAGAGAAAAAGAGCAGTTACAATAGGAGCCGTCTTCCTTGGGTTCTTAGGAGCAGCCGGA  
AGCACTATGGGCGCGGCGTCAATAACGCTGACGGTACAGGCCAGGCAATTATTGTCTGGTATAGTGCAACAGC  
AAAGCAATTTGCTGAAGGCTATAGAGGCTCAACAACATCTGTTGAGACTCACGGTCTGGGGCATT

>KU921752..1

TTCTATTGTAACACATCAGGCCTGTTTAAATAGCACTTGGAATGACACCAGCAATGGGAATGACACCAACATAT  
CAAATAGCACGGAGAAGAATGAGAATATAACTCTCCAATGCAGAATAAAGCAAATTATAAATATGTGGCAAAG  
AGTAGGAAAAGCAATGTATGCTCCTCCCATCCCAGGAATAATAAAATGTGAATCAAACATTACAGGACTAATA  
TTAACAAGAGATGGGGGAAAGGAGGAAAACGAAAGTGAAACCTTCAGACCTGGAGGAGGAGATATGAGGGACA  
ATTGGAGAAGTGAATTATATAAGTATAAAGTAGTAAAAATTGAACCACTAGGAGTAGCACCCACCAGGGCAAG  
GAGAAGAGTGGTGGAGAGAGAAAAAAGAGCAGTTGGAATGGGAGCTTTGTTTCATTGGGTTCCTTAGGAGCAGCT  
GGAAGCACTATGGGCGCGGCGTCGATGACGCTGACGGTACAGGCTAGACAACCTATTGTCTGGCATAGTGCAAC  
AGCAAAGCAATTTGCTGAGGGCTATAGAGGCTCAACAGCATCTGTTGAAACTCACAGTCTGGGGCATT

>KU921756..1

TTCTATTGTAACACATCAAACCTGTTTAAATAGTACTTGGCTTAACAATGGCACATTAGGTAGTGACAATGGCA  
TATCAGATAGTAAAAACATAACTCTCCCATGCAAAATAAGGCAAATTATCAGAATGTGGCAGAGAGTAGGACA  
AGCAATATATGCCCCCTCCCATCCAAGGAGTAATAAGGTGTAAATCAGACATTACAGGACTAATATTAACAAGA  
GATGGTGGAGTTAATAACAATATAACTGAAACCTTCAGACCTGGAGGAGGAGATATGAGGGACAATTGGAGAA  
GTGAGTTATATAAATATAAAGTAGTAAAAATTGAACCACTAGGAGTAGCACCCACCAGGGCAAGGAGAAGAGT  
GGTGGGGAGAGAAAAAAGAGCAGTTGGAGTAGGAGCTGTATTCCTTGGGTTCTTAGGAGCAGCAGGAAGCACT  
ATGGGCGCGGCGTCAATAACGCTGACGGTACAGGCCAGACAATTATTGTCTGGCATAGTGCAACAGCAAAGCA  
ATTTGCTAAGGGCTATAGAGGCTCAACAGCATCTGTTGAAACTCACAGTCTGGGGCATT

>KU921759..1

TTCTATTGCAGTACAAAAGGCCTGTTTAAATAGCACTTGGAATGCTAATGGCACCAAGGAATGACTTAGGGAGCT  
CGGAATCAGATGGCACTATAACTCTCCAGTGCAGAATAAAACAAATTATAAATATGTGGCAGAGAACAGGACA  
AGCAATGTATGCCCCCTCCCATCGCAGGAGTAATAAGTTGTAATTC AACCATTAACAGGACTACTATTAACAAGA  
GATGGTGGGAACAATAGTACAAGTGAACCTGAAACCTTTAGACCTGGAGGAGGAGATATGAGGGACAATTGGA  
GAAGTGAATTATATAAGTATAAAGTAGTAAAAATTGAACCACTAGGAGTAGCACCCACCAGGGCGCGGAGAAG  
AGCGGTGGGGAGAGAAAAAAGAGCAGTTGGACTGGGAGCTGTTTTTCTTGGGTTCTTAGGAGCAGCAGGAAGC  
ACTATGGGCGCGGCGGCAGTGACGCTGACGGTACAGGCCAGACAATTATTGTCTGGCATAGTGCAACAGCAAAA  
GCAATTTGCTGAGAGCTATAGAGGCTCAACAACATCTGTTGAAACTCACTGTCTGGGGCATT

>KU921772..1

TTCTATTGTAACACATCAGGCTTGTTTAAATAGCAGTTGGAATAGCACCAAGGAGCTAAATAGCACCAACA  
GGGAGCTAAATAACATGACTGTAACCTCTCCAATGTAGAATAAAACAAATTATAAATATGTGGCAGAGAGTGGG  
ACAAGCAATGTATGCCCCCTCCCATCCCAGGAGTAATAAAGTGTGTATCAAACATTACAGGATTAATATTAACA  
AGGGATGGTGGGCTTAATCCTACAGAGAACGAAACCGAAACCTTCAGACCTGGAGGAGGAGATATGAGAGACA  
ATTGGAGAAGTGAATTATATATGTATAAAGTAGTAAAAATTGAACCACTAGGAGTAGCACCCACCAGGGCAAAA  
GAGAAGAGTGGTGGAGAGAGAAAAAAGAGCAGTTGGAATAGGAGCTGTTTTCTTGGGTTCTTGGGAGCAGCA  
GGAAGCACTATGGGCGCGGCGTCAATAACGCTGACGGTACAAGCCAGACAATTATTGTCTGGCATAGTGCAAC  
AGCAAAGCAATTTGCTGAGGGCTATAGAGGCTCAACAGCATCTGTTGAAACTCACAGTCTGGGGCATT

>KU921780..1

TTCTATTGTAATACATCAGGCTTATTTAAATGGCACTTGGAACCAATGCTAGCATACAAGAAAATAGCACGGAGT  
CAAATATAACTCTCCAATGCAGAATAAAACAAATTATAAATATGTGGCAGACAGTAGGACGAGCAATGTATGC  
TCCTCCCATTTGAAGGAGCAATAAGGTGTGTATCAAACATTACAGGACTAATATTAACCAGAGATGGTGGGGAT  
AACACAACCTACAACCTGAAATCTTCAGACCTGGAGGAGGAAAATATGAAGGACAATTGGAGAAGTGAATTATATA  
AGTATAAAGTAGTAAAAATTGAACCACTAGGAGTAGCACCCACCAAGGCAAAGAGAAGAGTGGTGGAGAGAGA  
AAAAAGAGCAGTTGGACTGGGAGCTGTCTTCTTGGGTTCTTAGGAGCAGCAGGAAGCACTATGGGCGCGGCG  
TCAGTAACGCTGACGGTACAGGCCAGACAATTATTGTCTGGCATAGTGCAACAGCAAAAACAATTTGCTGAGGG  
CTATCGAGGCTCAACAACATCTGTTGAAACTCACGGTCTGGGGCATT

>KU921783..1

TTCTATTGTAATACACAGGCCTGTTTAAATAGCACTTGCGGGAATGGCACTTGGAATGCCAGCAGCCAGGGGG  
AGTCAAATGACACTATACTCCTCCAATGCAAAATAAAGCAAATTATAAATATGTGGCAGAGAGTAGGACAAGC  
AATGTATGCTCCTCCCATCCCAGGAGTAATAAGGTGTGAATCAAACATTACAGGACTAATATTAACAAGAGAT  
GGTGGGGGGATGACAATGGAACCGAAACCTTCAGACCTGGAGGAGGAGATATGAGGGATAAATTGGAGAAGTG  
AATTATATAAGTATAAAGTAGTAAAAATTGAACCACTAGGAGTAGCACCCACCAGGGCAAAGGAGAAGAGTGGT  
GGAGAGAGAGAAAAGAGCAGTTACAATAGGAGCTGTTTTCTTGGGTTCTTAGGAACAGCAGGAAGCACTATG  
GGCGCGGCGTCAATAGCGCTGACGGCACAGGCTAGACAATTATTGTCTGGCATAGTGCAACAGCAAAGCAATT  
TGCTGAGGGCTATAGAGGCTCAACAACATATGTTGAGACTCACGGTCTGGGGCATT

>KU921785..1

TTCTATTGTAACACATCAGACCTGTTTAAATAGCACTTGGTATGGCAATAACACCATGCAGGGATTAAATGGCA  
CAAATGACACTATAATTCTCAAATGCAGAATAAAGCAAATTATAAATATGTGGCAGAGAACAGGACAAGCAAT  
ATATGCCCTCCCATCCCAGGAGTAATAGAGTGTGTATCAAACATAACAGGACTAATATTGACAAGAGATGGT  
GGGGGTAGTGAGAGCAGGACAGAGGAAACATTTAGACCTGGAGGAGGAGATACGAGGGACAATTGGAGAAGTG  
AATTATATAAGTATAAAGTAGTAAAAATTGAACCACTAGGAGTAGCACCCACCAGGGCAAAGAGAAGAGTGGT  
GGAGAGAGAAAAAAGAGCAATTGGAATAGGAGCTGTCTTCATTGGGTTCTTAGGAGCAGCAGGAAGCACTATG

GGCGCGGCGTCAATAACGCTGACGGTACAGGCCAGACAATTATTGTCTGGTATAGTGCAACAGCAAAGCAATT  
TGCTGAGGGCTATAGAGGCTCAACAGCATCTGTTGAAACTCACAGTCTGGGGCATT

>KU921788..1

TTCTATTGTGATACATCAAGCCTGTTTAAACAGCACTTGGAACCAAACAATGTTAGTAGCAATTTAAATGGCA  
CTATAACTCTCCAATGCAGAATAAAGCAAGTCATAAATATGTGGCAGAGAGTAGGACAAGCAATGTATGCCCC  
TCCCATCCCAGGAAACATAACATGTAGATCAAACATTACAGGAATAATATTAACAAAAGATAAGGATGGTATA  
AATAATTCAGATGAAACCTTGAGGCCAGGAGGAGGAGATATGAGGGACAATTGGAGAAGTGAATTATATAAGT  
ATAAAGTGGTAAAAATTGAACCACTAGGAGTAGCACCCACCAAGGCAAGGAGAAGAGTGGTGGAGAGAGAAAA  
AAGAGCAGTTGGACTAGGAGCTGTTTTCTTGGGTTCTTAGGAGCAGCAGGAAGCACTATGGGCGCAGCGCCA  
ATAACGCTGACGGTACAGGCCAGACAATTGTTGTCTGGCATAGTGCAACAGCAAAGCAATTTGCTGAGGGCTA  
TAGAGGCTCAACAACAGCTGTTGAAGCTCACGGTCTGGGGCATT

>KU921804..1

TTCTATTGTGATACATCAAGCCTGTTTACTGGTACTTGGAATGGTACTACTTGGATGAATAGCACTGACACTG  
AAAAATATAACTCTTCCATGCAGAATAAAGCAAATTATAAATATGTGGCAGAGGGTAGGGAGAGCAATGTATGC  
CCCTCCCATCCAAGGAAAAATAAATTGTACATCAAACATTACAGGACTACTATTAACAAGAGATGGTGGGAAA  
ACTAATAATTCATCTGAAACCTTCAGACCAGGAGGAGGAGATATGAGGGACAATTGGAGAAGTGAATTATATA  
AGTATAAAGTAGTAAAGATTGAACCACTAGGAGTAGCACCCACCAGGGCAAGAAGGAGAGTGGTGGAAAGAGA  
AAAAAGAGCAGTTGGACTGGGAGCTGTATTCATTGGGTTCTTGGGAGCAGCAGGGAGCACTATGGGCGCGGCG  
TCAGTGACGCTGACGGTACAGGCCAGACGATTACTATCTGGCATAGTGACAGCAGCAAAGCAATTTGCTGAGGG  
CTATAGAGGCTCAACAGCATCTGTTGAAACTCACGGTCTGGGGCATC

>KU921831..3

TTCTATTGTAATACATCACGCCTGTTTAGTTACAGGTGCACGTTGAAAAATGAGACTAATACTTACACCTGCA  
CTAACACCATGCATGAGTTCAATAGCACGGCAAATATAACTCTCCAATGCAGACTAAAGCAGATCATAAGGAT  
GTGGCAGAGGACAGGACAAGCAATGTATGCCCCCTCCCATCCCAGGGCAAATAATGTGTAGATCAAACATTACA  
GGGTTAATATTAACAAGAGATGGTGGGGTTGATAACAATACAGATGCTACCGAAATCTTCAGACCTGGAGGAG  
GAGATATGAAGGACAATTGGAGAAGTGAATTATATAAGTATAAAGTAGTAAAAATTGAACCACTAGGAGTAGC  
ACCCACCAGGGCAAGGAGAAGAGTGGTGGGGAGAGAAAAAGAGCAGTTGGACTGGGAGCTGTTTTTCATTGGG  
TTCTTAGGAGCAGCAGGAAGCACTATGGGCGCGGCGTCAGTGACGCTGACGGTACAGGCCAGACAATTATTGT  
CTGGTATAGTGCAACAGCAAAGCAATTTGCTGAAGGCTATTGAGGCTCAACAACATCTGTTGAGGCTCACGGT  
CTGGGGCATT

>KU921835..2

TTCTATTGTAACACATCAGAACTGTTTAATAGCACTTGAGGTTGGAATAACACTTGAATAACACTCATGAGC  
CAAATGGCACTATAACTCTCCAATGCAGAATAAAGCAAATTATAAATATGTGGCAGAGAGTAGGACAAGCAAT  
GTATGCCCCCTCCCATACAAGGAGAAATAAAGTGTGAATCAAACATCACAGGACTAATATTAACAAGAGATGGT  
ATGGGTAAACATGTATCAAATGAAACCTTCAGACCTGGAGGAGGAGATATGAGGGACAACCTGGAGAAGTGAGT  
TATATAAATATAAAGTAGTAAAAATTGAACCATTAGGAGTAGCACCCACTGGGGCAAGGAGAAGGGTGGTGCA  
GAGAGAAAAGAGAGCGGTTGGAATAGGAGCTGTCTTCTTGGGTTCTTAGGAGCAGCAGGAAGCACTATGGGC  
GCAGCGTCATTAACGCTGACGGTACAGGCCAGACAATTACTGTCTGGCATAGTGACAGCAGCAAAGCAATTTGC  
TGAGGGCTATAGAGGCTCAACAACATATGTTGAAACTCACGGTCTGGGGCATT

>KU921841..2

TTCTATTGCAACACATCAGGCCTGTTTAATAGCACTGACATGAGTTCAAATAACACAGAGTTAAATGACACTA  
TAAGACTCCCATGCAGAATAAAACAAATTATACGTATGTGGCAGAAAGTAGGACAAGCAATGTATGCCCCCTCC  
CATTCAAGGAGTGATAAGATGTAGCTCAAACATTACAGGAATACTATTAACAAGAGATGGTGGGATAGAAAAAT  
GAAACAGAAATCTTCAGACCTGGAGGAGGAAACATGAAGGACAATTGGAGAAGTGAATTATATAAGTATAAAG  
TAGTAAAAATTGAACCACTAGGAGTAGCACCCACCTCGGCAAGGAGAAGAGTGGTGGAGAGAGAAAAAGAGC  
AGTTGGACTGGGAGCTGTATTCATTGGGTTCTTAGGAGCAGCAGGAAGCACTATGGGCGCGGCGTCAATGACG  
CTGACGGTACAAGCCAGACAATTATTGTCTGGCATAGTGCAACAGCAAAGCAATTTGCTGAGGGCTATAGAGG  
CTCAACAGCATCTGTTGAAACTCACGGTCTGGGGCATC

>KU921852..1

TTCTATTGTAATACATCAGGCTTGTTTAATAGCACTTGGAATGACACTGTCATGTTTAATAGCACTGGGAATG  
ACACTGTGCGCAGGGAGTCAAATGAAACTATAACACTCCAATGCAGGATAAAACAAATTATAAATATGTGGCA  
GAGAACAGGACAAGCAATATATGCCCCCTCTATCCCAGGAGTAATAAGGTGTGTATCAAACATTACAGGACTA  
ATATTAACAAGAGATGGTGGGAATACGGCAGGGACAGGTTCTGAAACCTTCAGACCTGGAGGAGGAGATATGA  
GGGACAATTGGAGAAGTGAATTATATAAGTATAAAGTAGTAAAGTTGAACCACTAGGAGTAGCACCCACCAG  
GGCACAGAGAAGAGTGGTGCAGAGGGAAAAAGAGCAGTTGGAATAGGAGCTGTCTTCATTGGGTTCTTAGGA  
GCAGCAGGAAGCACTATGGGCGCGGCGTCAATAACGCTGACGGCACAGGCCAGACAATTATTGTCTGGTATAG  
TGCAACAGCAAAGCAATTTGCTGAGGGCTATAGAGGCTCAACAGCATCTGTTGAAACTCACAGTCTGGGGCAT

C

>KF716474..1

TTCTATTGTGACACATCAGGCCTGTTTAAATAGCACTTGGAATGGTACGGCCAGCAATGTCAGCATACCTGACA  
CGGTGACAAATGGCACTATAACACTCCCATTGCAAAATAAAGCAAATTATAAATATGTGGCAGAGAGTAGGACA  
AGCAATGTATGCCCCCTCCCATTTGCAGGAGTAATAAGGTGTGATTCAAACATTACAGGGATGATATTAACAAGA  
GATGGTGGTGATAACAGGACAGAAACCTTCAGACCTGGAGGAGGAGATATGAGGGACAATTGGAGAAGTGAAT  
TATATAAATATAAAGTAGTAAAAGTTGAACCACTAGGAGTAGCACCTACCAGGGCAAGAAGAAGAGTGGTGGA  
GAGAGAAAAAAGAGCAGTAGGAATAGGAGCTGTTTTCTTGGGTTCTTAGGAGCAGCAGGAAGCACTATGGGC  
GCAGCGTCAATAACGCTGACGGTACAGGCCAGACAATTATTGTCTGGTATAGTGCAACAGCAAAGTAATTTGC  
TGAGGGCTATAGAGGCTCAACAACAGCTGTTGAAACTCACAGTCTGGGGCATT

>KF716475..1

TTCTACTGTAATACATCAGGCCTGTTTAAATAGCACTTGGTCCCTTAACAACACTTGGTCCCTTAACAGCACGC  
AGTCAAATGACACAGGGATAAATGATACCATAACTCTCCCATGCAGAATAAAGCAAATTATAAATATGTGGCA  
GAGAGTAGGACAAGCAATGTATGCCCCCTCCCATCCAAGGAGTAATACAGTGTGTATCAAACATTACAGGACTA  
CTGTTAACAAGAGATGGGGGGAATGTGAATAGCAGTAATGGCAATGAAATCTTCAGACCTGGAGGAGGAGATA  
TGAGGGACAATTGGAGAAGTGAATTATATAAGTATAAAGTAGTAAAAATTGAACCACTAGGAGTAGCACCCAC  
CAGGGCAAAGAGAAGAGTGGTGGGGAGAGAAAAAAGAGCAATTGGTGGGCTAGGAGCTGTTTTCTTGGGTTT  
TTAGGAATGGCAGGAAGCACTATGGGCGCGGCGTCAATGACGCTGACGGTACAGGCCAGAACTTATTGTCTG  
GCATAGTGCAACAGCAAAGCAATTTGCTGAGGGCTATAGAGGCTCAACAACATCTGTTGAAACTCACAGTCTG  
GGGCATT

>AY322184..1

TTCTATTGTAACACATCAGATCTGTTTAAATGAGTCAAATAGTACGGAGTTAAACGACACTATAACTCTCCAAT  
GCAGAATAAAGCAAATTATAAATATGTGGCAGAGAGCAGGACAAGCAATATATGCCCCCTCCCATCCCAGGAGT  
AATAAGGTGTGTATCAAACATTACAGGACTATTGTTAACAAGGGATGGTGGGATTAATACCAGTACAAGTGAA  
ACCTTCAGACCTGGAGGAGGAGATATGAGGGACAATTGGAGAAGTGAATTATATAGGTATAAAGTAGTAAAAA  
TTGAACCACTAGGAGTAGCACCCACCAGGGCAAAGAGAAGAGTGGTGGAGAGAGAAAAAAGAGCAGTTGGAAT  
AGGAGCTGTTTTCTATTGGGTTCTTAGGAGCAGCAGGAAGCACTATGGGCGCGGCGTCAATAACGCTGACGGTA  
CAGGCCAGACAATTATTGTCTGGCATAGTGCAACAGCAAAGCAATTTGCTGAGGGCTATAGAGGCTCAACAAC  
ATCTGTTGAAACTCACGGTCTGGGGCATT

>AF539405..1

TTCTATTGTAACACATCAGGCCTGTTTAAATAGCACTTGGAATGGCAGTGAGGCAAATAGCACGCCACACGAGA  
ATATAACTCTCCAATGCAGAATAAAGCAAATTATAAATATGTGGCAGAGAGCAGGACAAGCAATATATGCCCC  
TCCCATCCCAGGAGTAATAAAATGTAATTCAAACATTACAGGACTAATATTAACAAGAGATGGTGGGGTTAAT  
AGCAGTGCAAATGAAACCTTCAGACCTGGAGGAGGAGATATGAGGGACAATTGGAGAAGTGAATTATATAAGT  
ATAAAGTAGTAAAAATTGAACCACTAGGAGTAGCACCCACCAGGGCAAAGAGAAGAGTGGTGGAGAGAGAAAA  
AAGAGCAGTTGGAATAGGAGCTGTCTTCATTGGGTTCTTAGGAGCAGCAGGAAGCACTATGGGCGCGGCGTCA  
ATAACGCTGACGGTACAGGCCAGACAATTATTGTCTGGCATAGTGCAACAGCAAAGCAATTTGCTGAGGGCTA  
TAGAGGCTCAACAACATCTGTTGAAACTCACGGTCTGGGGCATT

>L22943..1

TTCTATTGTAATTTCATCAGGCCTGTTTAAATAGCACTTGGAACCAATGCAGGAGTCAAATAGCACGGAGTCAA  
ATGACACTATAACTCTCCCATGCAGAATAAAGCAAATTATAAATATGTGGCAGAGAGCAGGACAAGCAATGTATGC  
CCCTCCCATCCAAGGAATAATAAAGTGTGTATCAAACATTACAGGACTAATATTAACAAGAGATGGTGGGGAT  
AATAACAGTGAAAGTGAACCTTCAGACCTGGAGGAGGAGATATGAGGGACAATTGGAGAAGTGAATTATATA  
AGTATAAAGTAGTAAAAATTGAACCACTAGGAGTAGCACCCACCAAGGCAAAGAGAAGAGTGGTGGAGAGAGA  
AAAAAGAGCAGTTGGAATAGGAGCTGTCTTCCTTGGGTTCTTAGGAGCAGCAGGAAGCACTATGGGCGCGGCG  
TCAATAACGCTGACGGTACAGGCCAGACAATTATTGTCTGGCATAGTGCAACAGCAAAGCAATTTGCTGAGGG  
CTATAGAGGCTCAACAACATCTGTTGAAACTCACGGTCTGGGGCATT

>KX168075..1

TTCTATTGTAACACATCAGGCCTGTTTAAATAGCACTTGGAAGTTTAAATAGCACTTGGGAGTTTAAATAGCACTT  
GGGAGTTTAAATAGCACTTGGAATAATTCAAATAGCACAGAGAATATAACTCTCCAATGCAGAATAAAGCAAAT  
TGTAATATGTGGCAAAGAGCAGGACAAGCAATATATGCCCCCTCCCATACCAGGAGTAATAAGGTGTGAATCA  
AATATTACAGGACTAATATTAACAAGAGATGGTGGGGATAATAATAGTACAAATAATACAAGTGAACCTTCA  
GACCTGGAGGAGGAGATATGAGGGACAATTGGAGAAGTGAATTATATAAGTATAAAGTAGTAAAAATTGAACC  
AATAGGAGTAGCACCCACCAGGGCAAAAAGAAGAGTGGTGGAGAGAGAAAAAAGAGCAGTTGGAATAGGAGCT  
GTCTTCATTGGGTTCTTAGGAGCAGCAGGAAGCACTATGGGCGCAGCGTCAGTAACGCTGACGGTACAGGCCA  
GACAGTTATTGTCTGGTATAGTGCAACAGCAAAGCAATTTGCTGAGGGCTATAGAGGCTCAACAGCATCTGTT  
GAAACTCACGGTCTGGGGCATT

>AF004885..2

TTCTATTGTAATACATCAGGCCTGTTTAAATAGCACTTGGTATGTTAATAGCACTTGGAATGACACTGACAGCA  
CTCAGGAGTCAAATGACACTATAACTCTCCCATGCAGAATAAAGCAAATTATAAATATGTGGCAGAGAGCAGG  
ACAAGCAATGTATGCCCCCTCCCATCCCAGGAGTAATAAAGTGTGAATCAAACATTACAGGACTACTATTAACA  
AGGGATGGTGGAAAGGATAACAATGTAAATGAAACCTTCAGACCTGGAGGAGGAGATATGAGGGACAATTGGA

GAAGTGAATTATATAAGTATAAAGTAGTAGAAATTGAACCACTAGGAGTAGCACCTACCAGGGCAAAGAGAAG  
AGTGGTGGAGAGAGAAAAAGAGCAGTTGGAATAGGAGCTGTCTTCCTTGGGTTCTTAGGAGCAGCAGGAAGC  
ACTATGGGCGCAACGTCAATAACGCTGACGGTACAGGCCAGACAATTATTGTCTGGCATAGTGCAACAGCAAA  
ACAATTTGCTGAGGGCTATAGAGGCTCAACAACATCTGTTGAAACTCACGGTCTGGGGCATT

>AF407151..2

TTCTATTGTAACACATCAGGCCTGTTTAAACAGAGCTTATGGCAATGTCAGCAAGCAAGAGCCAAATAGCTCCG  
GCAATATAACACTCCAATGCAGAATAAAGCAAGTTATAAATATGTGGCAGAGAGCAGGACAAGCAATATATGC  
CCCTCCCATACAAGGAGTAATAAGATGTGACTCAAATATTACAGGACTAATATTAACAAGAGATGGTGGGAAA  
GATAGTAATATAACTGAAACATTCAGACCTGGAGGAGGAGATATGAGGGACAATTGGAGAAGTGAATTATATA  
AGTATAAAGTAGTAAAAATTGAACCACTAGGAGTAGCACCCACCAGGGCAAAGAGAAGAGTGGTGGAGAGAGA  
AAAAAGAGCAGTTGGAATAGGAGCTGTCTTCATTGGGTTCTTAGGAGCAGCAGGAAGCACTATGGGCGCGGCG  
TCAATAACGCTGACGGCACAGGCCAGAAAATTATTGTCTGGCATAGTGCAACAGCAAAGCAATTTGCTGAGGG  
CTATAGAGGCTCAACAACATCTGTTGAAACTCACGGTCTGGGGCATT

>AF407162..2

TTCTATTGCAATACAACAAACCTGTTTAAATAGCACTTGGAATCACACTGCCAGCATGAATAGCACAGAGTCAA  
ATGACACTATAATTCTCCCATGCAGAATAAAACAAATTATAAATATGTGGCAGAGAGTAGGACAAGCAATGTA  
TGCCCCCTCCCATTCGAGGAGTAATAAGGTGTGAATCAACATTACAGGACTAATATTAACAAGAGATGGTGGG  
AATACTACCGGTACAAGTGAAATCTTCAGACCTGGAGGTGGAGATATGAGGGACAATTGGAGAAGTGAATTAT  
ATAAGTATAAAGTAGTAAAAATTGAACCACTAGGAGTAGCACCCACCAGGGCAAAGAGAAGAGTGGTGGAGAG  
AGAAAAAGAGCAGTTGGAATAGGAGCTGTCTTCATTGGGTTCTTAGGAGCAGCAGGAAGCACTATGGGCGCG  
GCGTCAATAACGCTGACGGTACAGGCCAGACAATTATTGTCTGGCATAGTGCAACAGCAAAGCAATTTGCTGA  
GGGCTATAGAGGCTCAACAGCATCTGTTGAAACTCACGGTCTGGGGCATT

>AF407156..1

TTCTATTGCAATACATCAAACTGTTTAAATAGCAGGTGGGAGAACAATGGCACCGCCAACATGTTGAAGAATG  
ACACAGGGTCAAATGAGACTACTCTGATTCTCCGATGCAGAATAAAACAAATTATAAATATGTGGCAGAGAGT  
AGGACAAGCGATGTATGCCCCCTCCCATCCAAGGAGTAATAAATTGTACATCAACATCACAGGACTAATATTA  
ACAAGAGATGGTGGTGGTGAACCGATACAGAGACCTTCAGACCTGGAGGAGGAGATATGAGGGACAATTGGA  
GAAGTGAATTATATAAGTATAAAGTAGTAAAACTTGAACCACTAGGAGTAGCACCCACCATGGCAAAGAGAAG  
AGTGGTGGAGAGGGAAAAAGAGCAGTTGGAATGGCAGCTGTCTTCCTTGGGTTCTTGGGAACAGCAGGGAGC  
ACTATGGGCGCGGCGTCACTAACGCTGACGGTACAGGCCAGACAATTATTGTCTGGCATAGTGCAACAGCAAA  
GCAATTTGCTGAAGGCTATAGAGGCTCAACAGCATCTGTTGAGACTCACGGTCTGGGGCATT

>KT008652..1

TTCTATTGTAACACATCAGGCCTGTTTAAATAGCACTTGGGGGCACAAATGCCAGCAGGCAGGAGAATAGCACGG  
AGTCAAGTGACACTATAACTCTCCCATGCAAAATAAAGCAAATTATAAATATGTGGCAGAGAGCAGGGCAAAGC  
AATATATGCCCCCTCCCATCCAGGAGTAATAAGGTGTGAATCAACATTACAGGACTAATATTAACAAGAGAT  
GGTGGGAACAACAACAGTACAAGTGAAACCTTCAGACCTGGAGGAGGAAATATGAGGGACAATTGGAGAAGCG  
AATTATATAAGTATAAAGTAGTAAAAATTGAACCACTAGGAGTAGCACCCACCAGGGCAAAGAGAAGAGTGGT  
GGGGAGAGAAAAAGAGCAGTTGGAATAGGAGCTGTTTCTTGGGTTCTTAGGCGCAGCAGGAAGCACTATG  
GGCGCAGCGTCAGTAACGCTGACGGTACAGGCCAGACAATTATTGTCTGGCATAGTGCAACAGCAAAGCAATT  
TGCTGAGGGCTATAGAGGCTCAACAACATCTGTTGAAACTCACGGTCTGGGGCATT

>AF407157..2

TTCTATTGTAACACATCAGGCCTGTTTAAATGGCATTGGAATGGCACGCAGGAGCCAAATAGAACGGAGTCAA  
ACGATACTATAACACTCCAATGCAGAATAAAGCAAATTATAAATATGTGGCAAAGAGTAGGACAAGCAATATA  
TGCCCCCTCCCATTCAGGAGAAATAAGGTGTGAGTCAAACATTACAGGACTAATATTAACAAGAGATGGTGGG  
ATAATTAACGGTACAGAGGAGACCTTCAGACCTGGAGGAGGAGATATGAGGGACAATTGGAGAAGTGAATTAT  
ATAAGTATAAAGTAGTAAAGATTGAACCATTAGGAGTAGCACCCACCAAGGCAAAGAGAAGAGTGGTGGAGAG  
GGAAAAAGAGCAGTTGGATTTCGGAGCTTTCTTCTTGGGTTCTTAGGAGCAGCAGGAAGCACTATGGGCGCG  
GCGTCAATAACGCTGACGGTACAGGCTAGACAATTATTGTCTGGCATAGTGCAACAGCAAACAATTTGCTGA  
GGGCTATAGAGGCTCAACAGCATCTGTTGAAACTCACGGTCTGGGGCATT

>FJ866112..1

TTCTATTGTAATACATCAGAACTATTTAAATAGCACTTGGAATGGCAAGGCAATAATGACAGCATGCAGGGGT  
TAAATAGCACGGGGTTAAACAACACTATAACTCTCCACTGCAGCATAAAGCAAATTATAAATATGTGGCAGAG  
AGTAGGACAAGCAATGTATGCCCCCTCCCATCCAAGGAGTAATAAAGTGTGAATCAACATTACTGGACTACTA  
TTAACAAGAGATGGTGGGAATAATAACATAAACGAGACCCTCAGACCTGGAGGAGGAGATATGAGGGACAATT  
GGAGAAGTGAATTATATAAGTATAAAGTAGTAAAAATTGAACCACTAGGAGTAGCACCCACCAAGGCAAAGAG  
AAGAGTGGTGGAGAGAGAAAAAGAGCAGTTGGAATAGGAGCTGTCTTCTTGGGTTCTTAGGAGCAGCAGGA  
AGCACTATGGGCGCAGCGTCAATAACGCTGACGGCACAGGCCAGAAATTATTATTGTCTGGCATAGTGACAGCAGC  
AAAGCAATTTGCTGAAGGCTATAGAGGCTCAACAGCATCTGTTGAGGCTCACGGTCTGGGGCATT

>AY322190..2

TTCTATTGTAATACATCAGGCCTGTTTAAATAGCATTGGAATCACACTAATGGCACTTGGGAATAGCACGGAGT  
TAAATGGCAATATAACTCTCAATATAACTCTCCCATGCAGAATAAACCAAATTATAAATATGTGGCAGAGAGT  
AGGACAAGCAATATTTGCCCCCTCCCATCCAAGGAGTAATACAGTGTGTATCAAACATTACAGGACTAATATTA  
ACAAGAGATGGAGGGAATAATAACACTACAAATGAAACCTTCAGACCTGGAGGAGGAGATATGAGGGACAATT  
GGAGAAGTGAATTATATAAGTATAAAGTAGTAAAAATTGAACCACTAGGAGTAGCACCCACCAGGGGCACAGAG  
AAGAGTGGTGCAGAGAGAAAAAGAGCAATTGGAATGGGAGCTGTCTTCATTGGGTTCCTTAGGAGCAGCAGGA  
AGCACTATGGGCGCGGCGTCAATAACGCTGACGGTACAGGCCAGACAATTATTGTCTGGTATAGTGCAACAGC  
AAAGCAATTTGCTGAGGGCTATAGAGGCTCAACAGCATCTGTTGAAACTCACGGTCTGGGGCATT

>AY322193..1

TTCTATTGTAACACATCAAGCCTATTTAATGGCACTTGGACGGGCAATGACAGCAGGCAGGAGTCAAATAGCA  
GCGACACTATAACTCTTCCATGCAGAATAAAACAAATTATAAATATGTGGCAGAGGGTAGGACAAGCAATATA  
TGCCCCCTCCCCCTACAAGGAGTAATCAGATGTGATTCAAATATTACAGGACTAATCTTAACAAGAGATGGTGGG  
AGTCCGGATAATGAAACCTTCAGACCTGTTGGAGGAGATATGAGGGACAATTGGAGAAGTGAATTATATAAGT  
ATAAAGTAGTAAAAATTGAACCATTAGGAGTAGCACCCACCAGGGCAAAGAGAAGAGTGGTGGAGAGAGAAAA  
AAGAGCAGTTGGAATAGGAGCTGTCTTCATTGGGTTCCTTAGGAGCAGCAGGAAGCACTATGGGCGCGGCGTCA  
ATAACGCTGACGGTACAGGCCAGACAATTATTGTCTGGCATAGTGCAACAGCAAAGCAATTTGCTGAGGGCTA  
TAGAGGCTCAACAGCATCTGTTGAAACTCACGGTCTGGGGCATT

>FJ396018..1

TTTTATTGTAATACATCAGGCCTGTTTAAATAGTACTTGGGATGACAATAATACTAGGAATAATGAGACTGCCA  
GAAATAACTATAACTCTCCCATGTAGAATAAAGCAAATTATAAATATGTGGCAGAGGGTAGGACAAGCAAT  
GTATGCCCCCTCCCATCAAAGGAGTAATAAGGTGTGAATCAAACATTACAGGACTAATATTAACAAGAGATGGT  
GGACTTAATAACAATACAGAGACCTTCAGACCTGGAGGAGGAGATATGAGGGACAATTGGAGAAGTGAATTAT  
ATAAGTATAAAGTAGTAAAAATTGAACCACTAGGAGTAGCACCCACCAGGGCAAAGAGAAGAGTGGTGGGAAG  
AGAAAAAAGAGCAGTTGGAATAGGAGCTGTCTTCCTTGGGTTCCTTAGGAGCAGCAGGAAGCACTATGGGCGCG  
GCGTCAATAACGCTGACGGTACAGGCCAGACAATTATTGTCTGGCATAGTGCAACAGCAAAGCAATTTGCTGA  
GGGCTATAGAGGCTCAACGACATCTGTTGAAACTCACGGTCTGGGGCATT

>AY736811..1

TTCTATTGTAATACATCAGGCCTGTTTAAATAGCACATATAGCGGGAACGAAACTGTCAGCAATAGCACAGAGT  
ACAACATAACTCTCCCATGCAAAATAAAGCAAATTATAAATATGTGGCAGAGAACAGGACAAGCAATGTATGC  
CCCTCCCATCCAAGGAGTAATAAGCTGTGTGTCAAACATTACAGGACTACTATTAACAAGAGATGGTGGTAAT  
GGTGGTAATAACAATACAACTGAGACCTTCAGACCTGGAGGAGGAAATATGAAGGACAATTGGAGAAGTGAAT  
TATATAAGTATAAAGTAGTAAAAATTGAACCACTAGGAGTAGCACCCACCAGGGCAAAGAGAAGAGTGGTGGGA  
GAGAGAAAAAAGAGCAGTTGGACTGGGAGCTGTATTCTTGGGTTCCTTAGGAGCAGCAGGAAGCACTATGGGC  
GCGGCGTCCATAACGCTGACGGTACAGGCCAGACAATTACTGTCTGGCATAGTGCAACAGCAAAGCAATTTGC  
TGAGGGCTATAGAGGCTCAACAGCATCTGTTGAAACTCACGGTCTGGGGCATT

>AY736814..1

TTCTATTGCAACACATCAGGCCTGTTTAAATAGCACTTGGGATGATAACATTAAGAATGATACTAACAGCACAC  
AGGGGTCAAATAGCACGGAGATAATTCTCCCATGCAAAATAAAGCAAATTGTAAGGATGTGGCAGAGAACAGG  
ACAAGCAATGTATGCTCCTCCAATCCCAGGAGTAATAAGGTGTGTATCAAACATTACAGGACTAATACTAACA  
AGAGATGGTGGGAATACTAGCAGCATAAATGAAACCTTTAGACCTGGAGGAGGAGATATGAGGGACAACCTGGA  
GAAGTGAATTATATAAGTATAAAGTAGTAAAAATTGAACCACTAGGAGTGGCACCCACCAAGGCAAGGAGAAG  
AGTGGTGGAGAGAGAAAAAGAGCAGTTGGAATAGGAGCTGTCTCTTTGGTTTCCTTAGGAGCAGCCGGAAGC  
ACTATGGGCGCGGCGTCAATAACGCTGACGGTACAGGCCAGACAATTATTGGCTGGCATAGTGCAACAGCAAA  
GCAATTTGCTGAGGGCTATAGAGGCTCAACAGCAAATGTTGAGACTCACGGTCTGGGGCATT

>AF457075..1

TTCTATTGTGATACATCAAGCCTGTTTAAATGGCACTTTAGAGGCCAATGCCACCGTGCAAAACTTCAATAGCA  
CAGAGCATATAATTCTCCCATGCAAAATAAAGCAAATTATAAATATGTGGCAGAGAGCAGGACAAGCAATGTA  
TGCCCCCTCCCATCCAAGGAGTAATAAATTGTGTGTCAAACATTACAGGACTAATATTAACAAGAGATGGTGGG  
GATAATAATAAGTAGTACAAATGAAACATTAGACCTGGAGGAGGAGATATGAGGGACAATTGGAGAAGTGAAT  
TATATAAGTATAAAGTAGTAAAAATTGAACCACTAGGAGTAGCACCACCAAGGCAAAAAGAAGAGTGGTGGGA  
GAGAGAAAAAAGAGCAGTAATTGGACTGGGAGCTGTTTTATTGGGTTCCTTAGGAGCAGCAGGAAGCACTATG  
GGCGCGGCGTCAATAACGCTGACGGTACAGGCCAGACAATTATTGTCTGGTATAGTGCAACAGCAAAGCAATT  
TGCTGAGGGCTATAGAGGCTCAACAACATCTGTTGAAACTCACGGTCTGGGGCATT

>DQ208458..1

TTCTATTGTAACACATCAGGCCTGTTCAATAGCACTTGGATTAGCAATACCAGCGTGCAGGGGTCAAATAGCA  
CGGGGTCAAATGACAGTATAACTCTCCCATGCAGAATAAAGCAAATTATAAATATGTGGCAGAGAAATAGGACA  
AGCAATGTATGCCCCCTCCCATCCAAGGAGTAATAAGATGTGTATCAAACATTACAGGGCTAATATTAACAAGA  
GATGGTGGGAGTACTAATAGTACAACTGAAACCTTCAGACCTGGAGGAGGAGATATGAGGGACAATTGGAGAA  
GTGAATTATATAAGTATAAAGTAGTAAAAATTGAACCACTAGGAGTAGCACCCACCAGGGCAAAGAGAAGAGT  
GGTGGGGAGAGAAAAAAGAGCAGTTGGAATAGGAGCTGTCTTCCTTGGGTTCCTTAGGAGCAGCAGGAAGCACT

ATGGGCGCGGCGTCAATGACGCTGACGGTACAGGCCAGAAAATTTATTATCTGGCATAGTGCAACAGCAAAGCA  
 ATTTGCTGAGGGCTATAGAGGCTCAACAACATCTGTTGAAACTCACGGTCTGGGGCATT  
 >DQ208467..2  
 TTCTATTGTAATACATCAGGCCTGTTTAAATAGCAATTGGAATTACACTAACAGCACGCAGGAGTCAAATAGCA  
 CGGAGTCAAATGGCACTATAACTCTCCAATGCAGAATAAAGCAAATTATAAATATGTGGCAGAGAGTAGGACA  
 AGCAATGTATGCCCCCTCCTATCCCAGGAGTAATAAGGTGTGTATCAAACATTACAGGACTAATATTAACAAGA  
 GATGGCGGGGACAACAACAGTATAACTGAAACCTTCAGACCTGGAGGAGGAGATATGAGGGACAATTGGAGAA  
 GTGAATTATATAAGTATAAAGTAGTAAAAATTGAACCACTAGGAGTAGCACCCACCAGGGCAAGGAGAAGAGT  
 GGTGGGAAGAGAAAAAAGAGCAGTTGGAATAGGAGCTGTCTTCATTGGGTTCTTAGGAGCAGCCGGAAGCACG  
 ATGGGCGCGGCGTCAATAACGCTGACGGTACAGGCCAGACAATTATTGTCTGGCATAGTGCAACAGCAAAGCA  
 ATTTGCTGAGGGCTATAGAGGCTCAACAACATCTGTTGAAACTCACGGTCTGGGGCATT  
 >DQ208448..1  
 TTCTATTGTAACACATCAGACTTGTTTAAATAGCACTTGGTATGGGAATGGGACCAGCATGCGGGAGTCAAATA  
 GCACGGAGTCAAACGACACTATAATTCTCCGATGCAGAATAAAGCAAATTATAAATATGTGGCAGAGAGTAGG  
 ACAAGCAATATATGCCCCCTCCCATCCCAGGAGTAATAAACTGTGTATCAAACATCACAGGACTAATATTAACA  
 AGAGATGGTGGGAATAATAAATGAACTGAAACCTTCAGACCTGGGGGAGGAGATATGAGGGACAATTGGA  
 GAAGTGAATTATATAAGTATAAAGTAGTAAAAATTGAACCACTAGGAGTAGCACCCACCAGGGCAAGGAGAAG  
 AGTGGTGGAGAGAGAAAAAAGAGCAGTAGTTGGAATAGGAGCTGTCTTCCTTGGGTTCTTAGGAGCAGCAGGA  
 AGCACTATGGGCGCGGCGTCAATAACGCTGACGGTACAGGCCAGACAATTATTGTCTGGCATAGTGCAACAGC  
 AAAGCAATTTGCTGAGGGCTATAGAGGCTCAACAACATCTGTTGAAACTCACAGTCTGGGGCATT  
 >KU749411..1  
 TTCTATTGTAATACAACAGGCCTATTTAAATAGTACTTGGAATACAACAGGCCCATTTAATAATACTTGGCCTG  
 ATGATGTCAATATAGTACTCCCATGCAAAATAAAGCAAATTATAAATGTATGGCAGAGAGTAGGACAAGCAAT  
 ATATGCCCCCTCCCATCCAAGGACTAATACAATGTAACCTCAAATATTACGGGGCTACTATTAACAAGAGATGGT  
 GGGAAATATGGCACACTTAATGAAACCTTCAGACCTGGAGGAGGAAATATGAAGGACAATTGGAGAAGTGAAC  
 TGTATAAATATAAAGTAGTAAAAATTGAACCACTAGGAGTAGCACCCACCAGGGCAAGAGAAGAGTGGTGGGA  
 GAGAGGAAAAAGAGCAATTGGAATAGGAGCTGTGCTCATTTGGGTTCTTGGGGGAGCCGGAAGCACTATGGGC  
 GCGGCGTCTGTAACGCTGACGGTACAGGCCAGACAATTATTGTCTGGCATAGTGCAACAGCAAAGCAATTTGC  
 TGAGGGCTATAGAGGCTCAGCAACAGATGCTGAAACTCACAGTCTGGGGCATT  
 >KX232594..1  
 TTCTATTGTAATACAACAGGACTGTTTAAATAGTACTTGGTATAAAAAATGGAACGACTGAGGGAACAAATAGCA  
 CGGGGTCAAATGACACTATAACACTCCCATGCAGAATAAAGCAAAGTTATAAATGTATGGCAGAGAGTAGGACA  
 AGCAATATATGCCCCCTCCCATCCCAGGGATAATAAGGTGTGAATCAAATATTACGGGGCTACTATTAACAAGA  
 GATGGTGGAAATAATAACAAGTAATGAAACCTTCAGACCTGGAGGAGGAAATATGAAGGACAATTGGAGAAGTG  
 AACTGTATAAGTATAAAGTAGTAAAACTTGAACCACTAGGAGTAGCACCCACCAGGCAAGAGAAGAGTGGT  
 GGAGAGAGAAAAAAGAGCAATTGGATTTGGAGCTTTCTTCCTTGGGTTCTTGGGAGCAGCTGGAAGCACTATG  
 GGCGCGGCGTCCGTAACGCTGACGGTACAGGCCAGACAATTATTGTCTGGCATAGTGCAACAGCAAAGCAATT  
 TGCTGAGGGCTATAGAGGCTCAGCAGCATATGCTGAAACTCACGGTCTGGGGCATT  
 >KX232597..1  
 TTCTATTGTAATACAACAGGTCTGTTTAAATAGTACTTGCCCTAGTAATGAGACTAAGGAAGTAAATAACACGG  
 AGTCAAATGACATTATCACACTCCCATGCAGAATAAAGCAAATTGTAAATGTATGGCAAAGAGTAGGACAAGC  
 AATATACGCCCCCTCCCATCAAAGGACTAGTACAGTGTAATTCAAGTATTACGGGGCTACTATTAACAGAGAT  
 GGTGGGAATAATAACACAGATGAAACCTTCAGACCTGGAGGAGGAAATATGAAGGACAATTGGAGAAGTGAAC  
 TATATAAGTATAAAGTAGTAAAAATTGAACCACTAGGAGTAGCACCCACCAGGGCAAGGAGAAGAGTGGTGGGA  
 GAGAGAAAAAAGAGCAGCTGGACTAGGAGCTTTATTTCATTGGGTTCTTGGGAGCAGCCGGAAGCACTATGGGC  
 GCAGCGTCTGTAAACGCTGACGGTACAGGCCAGACAATTATTGTCTGGCATAGTGCAACAGCAAAGCAATTTGC  
 TGAGGGCTATAGAGGCTCAGCAGCATATGCTGAAACTCACAGTCTGGGGCATT  
 >KX232609..1  
 TTCTATTGTGATACAACAAACCTGTTTAAATAGTACTTGCTTTGATAATGGGACTACTGAAGCAAATAGCACGG  
 GGTCAAGTGACATTATAACACTCCCATGCAGAATAAAGCAAATTGTAAATGTATGGCAGAGAGTAGGACAAGC  
 AATATATGCCCCCTCCCATCAGAGGACTAATAAAGTGTGAATCAAATATTACGGGGCTACTATTAACAGAGAT  
 GGTGGGCATAATAGCACAAATGCAAGTAGTGAAACCTTCAGACCTGGAGGAGGAAATATGAAGGACAATTGGA  
 GAAGTGAACTATATAAGTATAAAGTAGTAAAAATTGAACCACTAGGAGTAGCACCCACCAGAGCAAGGAGAAG  
 AGTGGTGGAGAGAGAAAAAAGAGCAATTGGAATAGGAGCTGTACTCTTTGGGTTCTTGGGAGCAGCCGGAAGC  
 ACTATGGGCGCGGCGTCCATAACGCTGACGGTACAGGCCAGACAATTATTGTCTGGCATAGTGCAACAGCAAA  
 GCAATTTGCTGAGGGCTATAGAGGCTCAGCAGCATCTGCTGAAACTCACGGTCTGGGGCATT  
 >KX232613..1  
 TTCTATTGTAATACATCAGCCCTGTTTAAATAGCACTTGAGAGACAACCAGACAGATAACCAAACACATACAA  
 ATGACACTGACATTATAACTCTCCCATGCAGAATAAAGCAAAGTTATAAACATGTGGCAGAGGACAGGACAAGC  
 AATGTATGCCCCCTCCTATCCAAGGAGTAATAAAGTGTACATCAAATATTACAGGACTATTATTAACAAGAGAT

GGGGGTGCTAACACAACAAATGAAACTTTTCAGACCTACAGGAGGAGATATGAAAGACAATTGGAGAAGTGAAT  
TATACAAGTATAAAGTAGTAAAAATTGAACCACTAGGAGTAGCACCCACCAGGGCAAAGAGAAGAGTGGTGGA  
GAGAGAAAAAAGAGCAGTTGGACTGGGAGCTGTATTCATTGGGTTCTTGGGAGCAGCAGGAAGCACTATGGGC  
GCGGCGTCAATCACGCTGACGGTACAGGCTAGACAATTATTGTCTGGCATAGTGCAACAGCAAAGCAATTTGC  
TGAGGGCTATAGAGGCTCAACAACATATGTTGAAGCTCACAGTCTGGGGCATT

>KX232614..1

TTCTATTGTAATACAACAAACCTGTTTAATAGTACTTGGCCTGAGAATAAAAAATAGCACAGGGTCAAATGACA  
CAGGGTCAAATGGCACTATAACTCTCCAGTGCAAAATAAAGCAAATTATAAATGTATGGCAGAGAGTAGGACA  
AGCAATATATGCCCCCTCCCATCCCAGGAGCAATAAGATGTAACCTCAAATATTACGGGGCTACTATTAACAAGA  
GATGGTGGGAATAATAACACAAATGAAACCTTCAGACCTGGAGGGGAAATATGAAGGACAATTGGAGAAGTG  
AACTGTATAAATATAAAGTAGTAAAACCTTGAACCACTAGGAGTAGCACCCACCAAGGCAAAGAGAAGAGTGGT  
GGAGAGAGAAAAAAGAGCATTTCGGACTAGGAGCTGTATTCATTGGGTTCTTGGGAGCAGCCGGAAGCACTATG  
GGCGCGGCGTCTGTAACGCTGACGGTACAGGCCAGACAATTATTGTTTGGCATAGTGCAACAGCAAAGCAATT  
TGCTGAGGGCTATAGAGGCTCAGCAACACCTGCTGAAACTCACGGTCTGGGGCATT

>KX232618..2

TTCTATTGTAATACATCAGGCCTGTTTAATAGTACTTGGTCTAATAATGAGACTGAGGGAGCGGGGTCAAATG  
ACACTATAACACTCCCATGCAGAATAAAGCAAATTGTAAATGTATGGCAGAGAGTAGGACAAGCAATATATGC  
CCCTCCCATCGAAGGACTAATAAAATGTAACCTCAAATATTACGGGGCTACTATTGACAAGAGATGGTGGGGAT  
TATAACACATCTACAAATAATGAAACCTTCAGACCTGGAGGAGGAAATATGAAGGACAATTGGAGAAGTGAAC  
TGTATAAGTATAAAGTAGTAAGACTTGAACCACTAGGAGTAGCACCCACCAAAGCGAAGAGAAGAGTGGTGGA  
GAGACAAAAAAGAGCAATTGGAATAGGAGCTGTGTTTCATTGGGTTCTTGGGAGCAGCTGGAAGCACTATGGGC  
GCGGCGTCCGTAACGCTGACGGTACAGGCCAGACAATTATTGTCTGGCATAGTGCAACAGCAAAGCAATTTGC  
TGCAGGCTATAGAGGCTCAGCAACATCTGCTGAAACTCACAGTCTGGGGCATT

>KX232620..2

TTCTATTGTAATACAACAAGCCTGTTTAATAGTACTTGGCCTCATAATGAGACGAAAAATAAATAGCACGGAAT  
CAAATGACAATGGCACTATAACACTCCCATGCAGAATAAAGCAAATTGTAAATATATGGCAGAGAGTAGGACA  
AGCAATGTATGCCCCCTCCCATCAAAGGACTAATAAGGTGTAATTCAACTATTACGGGGCTACTATTAACAAGA  
GATGGGGGTGAGACTAATGGCACAATGAAACCTTTAGACCTGGAGGAGGAGATATGAGGGATAATTGGAGAA  
GTGAACTGTATAAGTATAAAGTAGTAAAAATTGAACCACTAGGAATAGCACCCACCAAAGCAAGGAGAAGAGT  
GGTGGAGAGAGAAAAAAGAGCAATTGGACTAGGAGCTGTATTCATTGGGTTCTTGGGAGCAGCCGGAAGCACT  
ATGGGCGGCGTCTGTAAACGCTGACGGTACAGGCCAGACAATTATTGTCTGGCATAGTGCAACAGCAAAGCA  
ATTTGCTGAAGGCTATAGAGGCTCAGCAGCAACTGCTGAAACTCACAGTCTGGGGCATT

>KX232624..1

TTCTATTGTAATACAACAGGCCTGTTTAATAGTACTTGGTATAATAATGGAAGTGAAGGAAAGCAATAACACGG  
GGTCAAATGACACTATAACACTCCCATGCAGAATAAAGCAAATTATAAATGTATGGCAAAGAGTAGGACAAGC  
AATATATGCCCCCTCCCATCGAAGGACTAATAAGGTGTAATTCAACTATTACGGGGCTACTATTAACAAGAGAT  
GGGGGTAAATAACACAAATGACACAAGTGAACCTTCAGACCTGGAGGAGGAGATATGAGGGATAATTGGAGAA  
GTGAACTGTATAAGTATAAAGTAGTAAAAATTGAACCACTAGGAATAGCACCCACCAAAGCAAGGAGAAGAGT  
GGTGGAGAGGGAAAAAAGAGCAGTTGGACTAGGAGCTGTATTCATTGGGTTCTTGGGAGCAGCCGGAAGCACT  
ATGGGCGGCGTCCGTGACGCTGACGGTACAGGCCAGGCAATTATTGTCTGGCATAGTGCAACAGCAAAGCA  
ATTTGCTGAGGGCTATAGAGGCTCAGCAACATCTGCTGAAACTCACAGTCTGGGGCATT

>KX232626..1

TTCTATTGTGATACAACAGGCCTGTTTAATAGTACTTGGCCTAACAATGAAACTGGGGAAGTAAATAGCACGG  
GATCAAACGATATTATAACACTCCCATGCAGAATAAAGCAAAGTTGTAAATGTATGGCAGAGAGTGGGACAAGC  
AATATATGCCCCCTCCCATCCAAGGACTAATAAAATGTAACCTCAAATATTACGGGGATAATATTAACAAGAGAT  
GGTGGGAATCTTAATTCTACAAATGAAACCTTCAGACCTGGAGGAGGAAATATGAAGGACAATTGGAGAAGTG  
AACTGTATAAGTATAAAGTAGTAAAACCTTGAACCACTAGGAGTAGCACCCACCAAGAGAGAAGAGTGGT  
GGAGAGAGAAAAAAGAGCAATTACCATAGGAGCTGTGCTCATTGGGTTCTTGGGAGCAGCCGGAAGCACTATG  
GGCGCGGCGTCTGTAACGCTGACGGTACAGGCCAGACAATTATTGTCTGGCATAGTGCAACAGCAAAGCAATT  
TGCTAAGGGCTATAGAGGCTCAGCAACATCTGCTGAAACTCACAGTCTGGGGCATT

>KU749423..1

TTCTATTGTAATACATCAGGCCTGTTCAATAGCACCTGGTATCCCAATGGCACCAACATAACTAACCCAGGAC  
CAGAGAATATAACCCCTCCCATGCAGAATAAAGCAAATTGTAAATATGTGGCAGAGAGTAGGGAGAGCAATGTA  
TGCTCCTCCCATCAAAGGAGTAATACAATGTGTATCAAACATTACAGGACTACTATTAACAAGAGATGGTGGG  
AATAATAATAATACAACTGAAACCTTCAGACCAGGAGGAGGAGATATGAGGGACAATTGGAGAAGTGAATTAT  
ATAAGTATAAAGTAGTACAAGTTGAACCACTAGGAATAGCACCCACTAGGGCAAAGGAGAAGAGTGGTGGAGAG  
AGAAAAAAGAGCAGTTGGAATGGGAGCTCTTTTCATTGGGTTCTTAGGAGCAGCCGGAAGCACTATGGGCGCG  
GCATCAATGATGCTGACGGTACAGGCCAGACAATTATTGTCTGGCATAGTGCAACAGCAAAGCAATTTGCTGA  
GGGCTATTGAAGCTCAACAGCATATGTTGAAGCTCACGGTCTGGGGCATT

>KX983643..1

TTCTATTGTAATACATCAGAACTGTTTAAATAGCACTTGGGGAGAGGAAGGGCGAAAGGACAATATCACGAAGT  
CAAATGCCACTATAACTCTCCCATGTAGAATAAAGCAAGTCATCAATATGTGGCAGAGAGCAGGACGAGCAAT  
GTATGCCCTCCCATCCAAGGAGTAATAAATTGTGCATCAAACATTACAGGACTACTACTAACAAGAGACGGT  
GGGAATACTAATACTAGCGATCTACCTGAAATCTTCAGACCAGGAGGAGGAGATATGAGGGACAATTGGAGAA  
GTGAATTATATAAGTATAAGGTAGTAAAAATTGAACCACTAGGAGTAGCACCCACCAAGGCAAGGAGAAGAGT  
GGTGGAGAGAGAAAAAAGAGCAGTTGGACTGGGAGTTGTCTTCCTTGGGTTCTTAGGAGCAGCAGGAAGCACT  
ATGGGCGCGGCGTCAATAACGCTGACGGTACAGGCCAGACAATTATTGTCTGGCATAGTGCAGCAGCAAAGCA  
ATTTGCTGAAGGCTATAGAGGCTCAACAGCATCTGTTGAAGCTCACAGTCTGGGGCATT

>KX983542..2

TTCTATTGTGATACAACAGGCCTGTTTAAATAGCACTTGGGAAGAATGGCACTCTCAACATGCAGGAATTAAC  
TCACAGTCACAACTACACAAATCTCACAGACAGTATAAATATAACTCTTCCATGTAGAATAAAGCAAATTAT  
AAATATGTGGCAGAGAGTAGGACAGGCAATGTATGCTCCTCCCATCCAAGGAGTAATAAATGTGTGTCAAAC  
ATTACGGGACTACTATTAACGAGAGATGGGGGGAATAATGAGACAGAAACCTTCAGACCTGGAGGAGGAAATA  
TGAAGGACAATTGGAGAAGTGAATTATATAAGTATAAAGTAGTAAAAGTTGAGCCTATAGGAGTAGCACCCAC  
CAGGGCAAGGAGAAGAGTGGTGGAGAGAGAAAAAAGAGCAGTTGGAATAGGAGCTGTTTTATTGGGTTCTTA  
GGAGCAGCAGGAAGCACTATGGGCGCGGCGTCAATAACGCTGACGGTACAGGCCAAACAATTATTGTCTGGCA  
TAGTGCAACAGCAAAGCAATTTGCTGAGGGCTATAGAGGCTCAACAGCATCTGTTGAAACTCACGGTCTGGGG  
CATT

>KX983566..2

TTCTATTGTAATACATCAAGCCTGTTTAAATAGCATTGTTGGTTAATGGCACTAGGAATGACACTGTCAGCAATG  
GAACTTATATAACTCTCCCATGCAGAATAAAGCAAATTATAAATATGTGGCAGAGAGTAGGGCAAGCAATGTA  
TGCCCCCTCCCATTAGAGGAGTAATAAAGTGTGAATCAAACTTACAGGACTACTGTTAACAAGAGATGGTGGG  
GAGAAATAAGTACCAATGAAACCTTCAGACCTGGAGGAGGAGATATGAGGGACAATTGGAGAAGTGAATTAT  
ATAAGTACAAAGTAGTAAAAATTAAACCACTAGGAGTAGCACCCACCAAGGCAAAGAGAAGAGTGGTGGAGAG  
AGAAAAAAGAGCAGTAGTTGGACTGGGAGCTGTCTTCCTTGGGTTCTTAGGAGCAGCAGGAAGCACTATGGGC  
GCAGCGTCAATAACGCTGACGGTACAGGCCAGACAATTATTGTCTGGCATAGTGCAACAGCAAAGCAATTTGC  
TGAGGGCTATAGAGGCTCAACAACATCTGTTGAAACTCACGGTCTGGGGCATT

>JX236677..1

TTCTATTGTAATACATCAGCCCTGTTTGATAGCACTTGGCGGTTTAAATGGCATTGGCAGTGGAAATGACACTG  
TCAATGCCACTAGAAGCGAGAATGATACTATAAATCTCCCATGCAGGATAAAGCAAATTATAAATATGTGGCA  
GAGAGCAGGACAGGCAATGTATGCCCCCTCCCATCCAAGGAGTAATAAGGTGTGACTCAAACATTACAGGTCTA  
TTATTAACAAGAGATGGTGGGAGGGGGAATGATAATAACACTGAGGTCTTCAGACCTGGAGGAGGAAATATGA  
AGGACAATTGGAGGAGTGAATTATATAAGTACAAAGTAGTAAAAATTGAACCATTAGGAGTAGCACCCACCAG  
GGCAAGGAGAAGAGTGGTGGAGAGAGGAAAAAAGAGCAGTTGGAATAGGAGCTGTTTTATTGGGTTCTTAGGA  
GCAGCAGGAAGCACTATGGGCGCAGCGTCAATAACGCTGACGGTACAGGCCAGGCAATTATTGTCTGGCATAG  
TGCAACAGCAAAGCAATTTGCTGAGGGCTATAGAGGCTCAACAGCATCTGTTGAGACTCACAGTCTGGGGCAT  
T

>JX236678..2

TTCTATTGTAACACATCAACCCTGTTTAGTAGCACTTGGGAGAACGGTACGGAACATAACAGCACGAAGTCAA  
ATGACACTATAACTCTCCCATGCAGAATAAAGCAAATTATAAATATGTGGCAGAGAGTAGGACAAGCAATATA  
TGCTCCTCCAATCGAAGGAGAAATAAGGTGTCAATCAAATATTACAGGACTAATATTAACAAGAGATGGTGGT  
GAGGATATTAACAGTACAAGTGAAACCTTCAGACCTGGAGGAGGAGATATGAGGGACAATTGGAGAAGTGAAT  
TATATAAGTATAAGGTAGTAAAAATTGAACCACTAGGAGTAGCACCCACCAGGGCAAGAAGAAGAGTGGTGGG  
GAGAGAAAAAAGAGCAGTTGGAATAGGAGCTGTCTTCATTGGGTTCTTAGGAGCAGCAGGAAGCACTATGGGC  
GCGGCGTCAATAACGCTGACGGTACAGGCCAGACAATTATTGTCTGGCATAGTGCAACAGCAAAGCAATTTGC  
TGAGGGCTATAGAGGCTCAACAACATCTGTTGAAGCTCACGGTCTGGGGCATT

>KU749424..1

TTTTATTGTAATACATCAGAACTGTTTAAATAGCACTTGGGTATACAATGCATCAGAACTTAATGGCACTTGGG  
TAAACAATGCCAGCATGCCAGGATCAAATAGCACAAAGTGAAAATATAACTCTCCACTGCAGAATAAAGCAAAT  
TATAAATATGTGGCAGAGAGCAGGAAAAGCAATGTACGCCCTCCCATCTCAGGAAACATAACGTGTGTTTCA  
AACATTACAGGACTCATATTAACAAGAGATGGTGGGAATACCAATACAACCTGAAATCTTCAGACCTGAAGGAG  
GAGATATGAGAGACAATTGGAGAAGTGAATTATATAAGTATAAAGTAGTAAAAATTGAACCACTAGGAGTAGC  
ACCCACCAAGGCAAGGAGGAGAGTGGTGGAGAGAGAAAAAAGAGCAATTGGAATAGGAGCTGTCTCTTTGGG  
TTCTTAGGAGCAGCAGGAAGCACTATGGGCGCGGCGTCAATAACGCTGACGGTACAGGCCAGACAATTATTGT  
CTGGCATAGTGCAACAGCAAAGCAATTTGCTGAGGGCTATAGAGGCTCAACAACATCTGTTGAAACTCACAGT  
CTGGGGCATT

>MF565934..1

TTCTATTGCAATACATCAAGCCTGTTTAAATAGTACTTGGGATGGGAATAGCACTACTAACAGCACGCAGAAGC  
CAAATGGAACATAACTCTCCCATGCAGGATAAAGCAAATTATAAATATGTGGCAGAGAACAGGGCAAGCAAT  
GTATGCCCTCCCATCCCAGGAAAAATAAGGTGTGACTCAAACATCACAGGACTAATATTAACAAGAGATGGT

GAAAATAATAACACTGAAAGTGAAACCTTTAGACCTGAAGGAGGAGACATGAGGAACAATTGGAGAAGTGAGT  
TATATAAGTATAAAGTAGTAAAGATTGACCCACTAGGAGTAGCACCCACCGGGGCAAAGAGAAGAGTGGTGGA  
GAGAGAAAAAAGAGCAGTTGGAATAGGAGCTGTCTCTTTGGGTTCTTAGGAGCAGCAGGAAGCACTATGGGC  
GCAGCGTCTCTAACGCTGACGGTACAGGCCAGACAATTATTGTCTGGCATAGTGCAACAGCAAAGCAATTTGC  
TGAGGGCTATAGAGGCTCAACAACATCTGTTGAGACTCACGGTCTGGGGCATT

>KX983624..1

TTCTACTGTAATACATCAGGCCTGTTTAATAGCCTCTGGATAAATGGCACCATGCTGAATGGTACCCTGAAGA  
ATTCACCCAGCACAAATGACACCATAACTCTCCCATGCAGAATAAAGCAAATCATAAACATGTGGCAGAAAGT  
AGGACAAGCAATGTATGCCCCCTCCCATCCAGGAAGCATAACGTGTGTATCAAACATTACAGGACTAATATTA  
ACAAGAGATGGTGGGAATACTAACAGGACAGATGAAATCTTCAGACCTGAAGGGGGAAATATGAGGGACAATT  
GGAGAAGTGAATTATATAAAGTATAAAGTAGTAAAAATTGAACCACTAGGAGTAGCACCCACTAGGGCAAAGAG  
AAGAGTGGTGGAGAGAGAAAAAAGAGCAGTTGGACTGGGAGCTGTCTTCATTGGGTTCTTAGGAGCAGCAGGA  
AGCACTATGGGCGCGGCGTCAATAACGCTGACGGTACAGGCCAGAACTTATTGTCTGGCATAGTGCAACAGC  
AAAGCAATTTGCTGAGGGCTATTGAGGCTCAACAGCATCTGTTGAACTCACAGTCTGGGGCATT

>KF716472..1

TTCTATTGTAACACAACAGGTCTGTTTAATAGCACTTGGAGTCGGAACACAACAGATAATAACACTTGGTTTA  
GGAACAATGCTAGCAGTAGCACAGGGTTAAATGGCACAATAACTCTCCAATGCAAAAATAAAGCAAATTATAAA  
TATGTGGCAGAGAACAGGACGAGCAATGTATGCCCCCTCCCATACCAGGAACAATAATGTGTAACCTCAAGCATC  
ACAGGACTGCTATTAACAAGAGATGGTGGGAATAGTGGGAACAACAGTAATGAAACCTTCAGGCCTGGAGGAG  
GAGATATGAAAGACAATTGGAGAAGTGAATTATATAAGTATAAAGTAGTAAAAATTGAACCACTAGGAGTAGC  
ACCCACCAGGGCAAAGAGAAGAGTGGTGGAGAGAGAAAAAAGAGCAGTTGGAATGGGAGCTCTTTTCATTGGG  
TTCTTGGGAGCAGCAGGAAGCACTATGGGCGCGGCGTCAGTGACGCTGACGGTACAGGCCAGACAATTATTGT  
CTGGTATAGTGCAACAGCAAAGCAATTTGCTGAAGGCTATAGAGGCTCAACAACATCTGTTGAGACTCACAGT  
CTGGGGCATT

>AB253421..1

TTTTATTGTGATTTCATCAGGCCTGTTTAATAGCACTTGGGATAACACTAACATCACGCAGCCAAATAGCACAG  
GGTCAAATGACACCATAACTCTCCAATGCAGAATAAAGCAAATTATAAATATGTGGCAGAGAGCAGGACAGGC  
AATGTATGCCCCCTCCCATCCAGGAGTAATAAGTTGTGTATCAAACATTACAGGATTACTATTAACAAGAGAT  
GGTGGGATTACCAGTGCAATGAAACCTTCAGACCTGGAGGAGGAGATATGAGGGACAATTGGAGAAGTGAAT  
TATATAAGTATAAAGTAGTAAAACTTGAACCACTAGGAGTAGCACCCACCAGGGCAAGGAGAAGAGTGGTGGA  
GAGAGAAAAAAGAGCAGTTGGAATAGGAGCTGTATTTCATTGGTTTCTTAGGAGCAGCAGGAAGCACTATGGGC  
GCGGCGTCAATGACGCTGACGGTACAGGCCAGACAATTATTGTCTGGCATAGTGCAACAGCAAAGCAATTTGC  
TGAGGGCTATAGAGGCTCAACAACATCTGTTGAACTCACGGTCTGGGGCATT

>AB287377..1

TTCTATTGTAATACATCAGGCCTGTTTAATAGCACCTGGAATAATAATAATACCAGGGAGAAGATAAATGGTA  
CAGAGTCAAATAGCACTATAACTCTCCATTGCAGAATAAAGCAAATTATAAATAGGTGGCAGGAAGTAGGACA  
AGCAATGTATGCCCCCTCCCATCCAGGAGTAATAAATTGTAGATCAAACATTACAGGACTAATATTAACAAGA  
GATGGTGGGGATGGGGATAACAATACGGAAATCTTCAGACCTGGAGGAGGAAATATGAAGGACAATTGGAGAA  
GTGAATTATATAAGTATAAAGTAGTAAAAATTGAACCACTGGGAGTAGCACCCACCAGGGCTAAGAGAAGAGT  
GGTGGAGAGAGCAAAAAGAGCAGTTGGAATAGGAGCTGTTTTCTTGGGTTCTTAGGAGCAGCAGGAAGCACT  
ATGGGCGCGGCGTCAATAACGCTGACGGTACAGGCCAGACAATTATTGTCTGGCATAGTGCAACAGCAAAGCA  
ATTTGCTGAGGGCTATAGAGGCTCAACAACATCTGTTGAACTCACGGTCTGGGGCATT

>AB287379..1

TTCTATTGTAATACATCAGGCCTGTTTAATAGCACTTGGACCAATGAAAGCATGCAAGTAAATAGCACAGAAT  
CAAATGACACTATAACTCTCCCATGCAGAATAAAGCAAATTATAAATATGTGGCAGAGGGCAGGACAAGCAAT  
ATATGCCCCCTCCCATCGAAGGAGTAATAAGGTGTAGCTCAAACATTACAGGACTACTATTAACAAGAGATGGT  
GGGTTAACAATAACAGTCAATGAAACCTTCAGACCTGGAGGAGGAAATATGAGGGATAATTGGAGAAGTGAAC  
TATATAAATATAAAGTAGTAAAAATTGAACCACTAGGAGTAGCACCCACCAGGGCAAAAAGAAGAGTGGTGGA  
GAGAGAAAAAAGAGCAGTTGGACTGGGAGCTGTCTTCATTGGGTTCTTAGGAGCAGCAGGAAGCACTATGGGC  
GCGGCGTCAATAACGCTGACGGTACAGGCCAGACAATTATTGTCTGGCATAGTGCAACAGCAAAAACAATTTGC  
TGAGGGCTATAGAGGCTCAACAACATCTGTTGAACTCACGGTCTGGGGCATT

>AY713406..1

TTCTATTGTAATACATCAAGCCTGTTTAATAGCACTTGGAAATAACACTGCCAGCATGCAGAAGTCAAATAGCA  
CGGGGTCAAATGACACTATAACTCTCCAATGCAGAATAAAGCAAATTATAAGAATGTGGCAAAGAACAGGACA  
GGCAATGTATGCCCCCTCCCATCAAAGGAGATATAAGGTGTGAATCAAACATTACAGGACTAATATTAACAAGA  
GATGGTGGGAATGATAGCAGTCCAGATGAAATCTTCAGACCTGGAGGAGGAGATATGAGGGACAATTGGAGAA  
GTGAATTATATAAGTATAAAGTAGTACAAATTGAACCTCTAGGAGTAGCACCCACCAAGGCAAGAAGAAGAGT  
GGTGCAGAGAGAGAAAAAGAGCAATTGGAATAGGAGCTGTCTTCCTTGGGTTCTTAGGAGCAGCAGGAAGCACT  
ATGGGCGCGGCGTCAATAACGCTGACGGTACAGGCCAGACAATTATTGTCTGGCATAGTGCAACAGCAAAGCA  
ATTTGCTGAGGGCTATAGAGGCTCAACAACATCTGTTGAACTCACGGTCTGGGGCATT

>L07082..1

TTCTATTGTAATACAACAGGCCTGTTTAAATAGCACCTGGAAAAATGTAAATGGCACCATGCAGGAGTCAAGCA  
GCACAAAGTTAAATGACACTATAACACTCACATGCAGAATAAAGCAAATTATAAATATGTGGCAGAGAGCAGG  
ACAGGCAATGTATGCCCTCCCATCGAAGGAATAATAAGGTGTGACTCAAACATTACAGGACTACTATTAACA  
AGAGATGGTGGGGTTGGGGATAACAGTACAAATGGAACCTGAAACATTACAGACCTGGAGGAGGAAATATGAGGG  
ACAATTGGAGAAGTGAATTATATAAGTATAAAGTAGTAAAAATTGAACCACTAGGAGTAGCACCCACCACGGC  
AAAAAGAAAAGTGGTGGAGAGAGAAAAAGAGCAATTGGAATAGGAGCTGTCTTCCTTGGGTTCTTAGGAGCA  
GCAGGAAGCACTATGGGCGCGGCGTCAATAACGCTGACGGTACAGGCCAGACAATTATTGTCTGGCATAGTGC  
AACAGCAAAGCAATTTGCTGAGGGCTATAGAGGCTCAACAGCATCTGTTGAAACTCACAGTCTGGGGCATT

>MF373167..1

TTCTATTGTAATACATCAGGCCTGTTTAAATAGCACTTGGAAATGAAACTACCATGCAGGAGTCAAATGGAACAG  
AGTCAAACGACAGCATAAATCTCCCATGCAGAATAAAGCAGATTGTAAATATGTGGCAGAGAACAGGACAAGC  
AATGTATGCCCTCCCATCCAAGGAGTAATACAGTGTGTATCAAATATTACAGGACTAATATTAATGAGAGAT  
GGTGGGAATAGTAGTAGGGAAAAATGAAACCTTCAGACCTGGAGGAGGAGATATGAGGGACAATTGGAGAAGTG  
AATTATATAAGTATAAAGTAGTAAAAATTGAACCACTAGGAGTAGCACCCACCAGGGCAAGGAGAAGAGTGGT  
GCAGAGAGAAAAAGAGCGGTTGGACTGGGAGCTGTTTTCATTGGGTTCTTAGGAGCAGCAGGAAGCACTATG  
GGCGCAGCGTCAGTGACGCTGACGGTACAGGCCAGGCAATTATTGTCTGGCATAGTGCAACAGCAAAGCAATT  
TGCTGAGGGCTATAGAGGCTCAACAGCATCTGTTGAGACTCACGGTCTGGGGCATT

>MF373168..1

TTCTATTGTGATACATCAGACCTGTTTAAATAGCATTGCGCCGTTTAAATAGCACTCGGGGACACAATGAGACTG  
AAAGATCAAATAGCACAGAGACAAATAACACTATTATAAACTTCCATGTAGAATAAAACAAATTATAAATAT  
GTGGCAGAGAGTAGGACAAGCAATATTTGCCCTCCCATCCAAGGAGTAATACAGTGTGTATCAAACATTACA  
GGACTAATATTAACAAGAGATGGAGGGAATAATAACACTACAAATGAAACCTTCAGACCTGGAGGAGGAGATA  
TGAGGGACAATTGGAGAAGTGAATTATATAAGTATAAAGTAGTAAAAATTGAACCACTAGGAGTAGCACCCAC  
CAGGGCACAGAGAAGAGTGGTGCAGAGAGAAAAAGAGCAATTGGAATGGGAGCTGTCTTCATTGGGTTCTTA  
GGAGCAGCAGGAAGCACTATGGGCGCGGCGTCAATAACGCTGACGGTACAGGCCAGACAATTATTGTCTGGTA  
TAGTGCAACAGCAAAGCAATTTGCTGAGGGCTATAGAGGCTCAACAGCATCTGTTGAAACTCACGGTCTGGGG  
CATT

>MF373181..2

TTCTACTGTAATACATCAGGCCTGTTTAAACAGTAGTTGGGGAAATGGCACTAACAAACAGCAGCACTGGGGGGC  
AAACTATAACTCTCCCATGCAAAATAAAGCAAATTGTAAATATGTGGCAGAGGACAGGACAAGCAATGTATGC  
CCCTCCTATCGAAGGAGTAATAAGGTGTGTATCAAACATTACAGGAATACTATTAAGTAGAGATGGTGGGCCT  
AATAATAGTACAAATGAAACCTTCAGACCGGGAGGAGGAAATATGAAGGACAATTGGAGAAGTGAATTATATA  
ACTATAAAGTAGTACAAATTAACCCATTAGGAATAGCACCCACCAAGGCAAAGAGAAGAGTGGTGGAGAGAGA  
AAAAAGAGCAGTAGTTGGACTGGGAGCTTTGTTTCATTGGGTTCTTAGGAGCTGCAGGAAGCACTATGGGCGCG  
GCGTCAATGACGCTGACGGTACAGGCCAGACAATTATTGTCTGGCATAGTGCAACAGCAAAGCAATTTGCTGA  
GAGCTATAGAGGCTCAACAGCATGTGTTGAGACTCACGGTCTGGGGCATT

>MF373182..1

TTCTATTGTAATACATCAGGCCTGTTTAAATAGCAGTTGGGGAGTAAACAACACTGATGGCAATATAACTAATG  
GCACGATAACTCTCCCCTGCAAAATAAACAATTTATAAATATGTGGCAGAGAGTAGGACAAGCAATGTATGC  
CCCTCCCATCGAAGGGGCAATAAGTTGTAATTCAACCATCACAGGACTACTATTAACAAGAGATGGTGGGTAC  
AACAACAGCACTAACCAAATCGACAAAATCTTCAGACCTGCAGGAGGAGATATGCAGGACAACCTGGAGAAGTG  
AATTATATAAGTATAAAGTAGTAAAAATTGAACCATTAGGAGTAGCACCCACCTGGGCAAGGAGAAGAGTGGT  
GCAGAGAGAAAAAGAGCAGTTGGACTGGGAGCTGTCTTCTTGGGTTCTTAGGAGCAGCAGGAAGCACTATG  
GGCGCGGCGTCGATAACGCTGACGGTACAGGCCAGACAATTATTGTCTGGCATAGTGCAACAGCAAAGCAATT  
TGCTGATGGCTATAGAGGCTCAACAGCATTTGTTGAAACTCACAGTCTGGGGCATT

>AF069670..1

TTCTATTGTAATACATCAGGCCTGTTTAAATAGCACTTGGAGCCAAAATGACACTGGGGTATCAAATAGCACGG  
AGTCAAATGACACTATAAATCTTCCATGCAGAATAAACAATTTATAAATATGTGGCAGAGAGCAGGACAAGC  
AATATATGCCCTCCCATCCCAGGAATAATAAGGTGTGAATCAAACATTACAGGGCTACTGTTAACAAGAGAT  
GGTGGGTTGTGTTAACAGTACAAATGAAACCTTCAGACCTGGAGGAGGAAATATGAAGGACAATTGGAGAAGTG  
AATTATATAAGTATAAAGTAGTAAAAATTGAACCACTAGGAGTAGCACCCACCAGGGCAAGGAGAAGAGTGGT  
GCAGAGAGAAAAAGAGCAGTTGGACTGGGAGCTTTATTTCATTGGGTTCTTAGGAGCAGCAGGAAGCACTATG  
GGCGCGGCGTCAATAACGCTGACGGTACAGGCCAGACAATTATTATCTGGCATAGTGCAACAGCAAAGTAATT  
TGCTGAGGGCTATAGAGGCTCAACAGCATCTGTTGAAACTCACTGTCTGGGGCATT

>AF069671..1

TTCTATTGTAATACATCAGGCCTGTTTAAATAGCACTATTTTGAATAGCACTAAGATGAATGACAATGCCAGCA  
GGGAGTCGTATGATGACACTATAACCCTCCAGTGCAGAATAAAGCAAATTATAAATATGTGGCAGAGAGTAGG  
ACAAGCAATGTATGCCCTCCCATCCGAGGAGCAATAAGATGTAAATCAAACATTACAGGACTATTATTAACA  
AGAGATGGTGGAAATAGTAACAGTAGTACAAATGAAACCTTCAGACCTGGAGGAGGAGATATGAGAGATAATT

GGAGAAGTGAATTATATAAAATATAAAGTAGTAAAAATTGAACCACTAGGAGTAGCACCCACCAAGGCCAAAGAG  
AAGAGTGGTGGAGAGAGAAAAAGAGCAGTTGGAATAGGAGCTGTCTTCCTTGGGTCTTTAGGAGCAGCAGGA  
AGCACTATGGGCGCGGCGTCAATAACGCTGACGGTACAGGCCAGACAATTATTGTCTGGCATAGTGCAACAGC  
AAAGCAATTTGCTGAGGGCTATAGAGGTTCAACAACATCTGTTGAAACTCACGGTCTGGGGCATT

>AF069673..1

TTCTATTGTAATACATCAGGCCTGTTTAAATAGTACTTGAATGGCACTGACAGCATGCAGAAGTTAAATAGCA  
CGGGCAATATAACTCTCCCATGCAGAATAAAACAAATTATAAATATGTGGCAGAGAGCAGGACAAGCAATATA  
TGCCCCCTCCCATCCAAGGAGTAATAAGGTGTGAATCAAACATTACAGGACTAATATTAACAAGAGATGGTGGG  
AATGATAACAATGAAAGTGAAATCTTCAGGCCTGGAGGAGGAGACATGAGGGACAATTGGAGAAGTGAATTAT  
ATAAGTATAAGGTAGTAAAAATTGAACCACTAGGAGTAGCACCCACCAAGGCCAAAAAGAGTGGTGGAGAG  
AGAAAAAGAGCAATTGGAATAGGAGCTGTCTTCATTGGGTCTTTGGGAGCAGCAGGAAGCACTATGGGCGCA  
GCGTCAATAACGCTGACGGTACAGGCCAGGCAATTATTGTCTGGCATAGTGCAACAGCAAAGCAATTTGCTGA  
TGGCTATAGAGGCTCAACAGCATCTGTTGAAACTCACGGTCTGGGGCATT

>AF107771..2

TTCTATTGTAATACATCAGGTCTGTTTAAATAGTAGTTGGAATGAAAATGACACCAAAGTAAATTACAACACTG  
AGTCAAATGACACTATAACTCTCCAATGCAGAATAAAGCAAATTATAAATATGTGGCAGAGAACAGGACAAGC  
AACGTATGCCCCCTCCCATCCAGGGGTAATACAGTGTAGATCAAACATTACAGGACTACTATTAACAAGGGAT  
GGTGGGGTAACATAACAATACAAATAATGAAACCTTCAGACCTGGAGGAGGAGATATGAGGGACAATTGGAGAA  
GTGAATTATACAAGTATAAAGTAGTAAAACTTGAACCACTAGGAGTAGCACCCACCAAGGCACAGAGAAGAGT  
GGTGAAGAGAGAAAAAGAGCAGTTGGACTGGCAGCTGTATTCTTTGGGTCTTAGGAGCAGCAGGAAGCACT  
ATGGGCGCGGCGTCAATAACGCTGACGGTACAGGCCAGACAATTATTGTCTGGTATAGTGCAACAGCAAAACA  
ATTTGCTGAGGGCTATAGAGGCTCAACAGCATATGTTGAGACTCACGGTCTGGGGCATT

>HQ659604..1

TTTTATTGTGATACATCAGGCCTGTTTAAATAGCACATGGGGGGGAAATAGCACTGACAGCATAACAGGAGTCAA  
ATAGCACAGAGTCAAATGACACTATAATTCTCCCATGCAGAATAAAGCAAATTATAAATATGTGGCAGAGAGT  
AGGACAAGCAATGTATGCCCCCTCCCATCCAAGGAGTAATAAAGTGTATATCAAATATTACAGGACTTCTATTA  
ACAAGAGATGGTGGGGATAATAACAGTGCAAATGAAACCTTCAGACCTACAGGAGGAAATATGAGGGACAATT  
GGAGAAGTGAATTATATAAGTATAAAGTAGTAAAAATTGAACCACTAGGAGTAGCACCCACCCCGGCAAAGAG  
AAGAGTGGTGCAGAGAGAAAAAGAGCAGTTGGAATAGGAGCTGTATTCTTTGGGTCTTAGGAGCAGCCGGA  
AGCACTATGGGCGCGGCGTCAATAACGCTGACGGTACAGGCTAGACAATTATTGTCTGGCATAGTGCAACAGC  
AAAGCAATTTGCTGAGGGCTATAGAGGCTCAACAACATCTGTTGAAACTCACGGTCTGGGGCATT

>HQ659597..1

TTCTATTGCAACACATCAGAATTGTTTAAATAGCACTTGGGATAATAGCACTTGGGATAATAGCACTTGGGATA  
ATAACATGCATGAGTCGAATAGCACGGAGAATATAACTCTCCAATGTAGGATAAAGCAAATTATAAATATGTG  
GCAGAGAGCAGGACAAGCAATATATGCCCCCTCCCATCAAAGGAGTAATAGGGTGTAATCAAACATTACAGGA  
CTAATATTAACAAGAGATGGTGGGGAGAAGGGTAATAACAGTATCAATGAAACCTTCAGACCTGGAGGAGGAG  
ATATGAGGGACAATTGGAGAAGTGAATTATACAAGTATAAAGTAGTAAAAATTGAACCACTAGGAGTAGCACC  
CACCAAGGCCAAAGAGAAGAGTGGTGGAGAGAGAAAAAGAGCAGTTGGAATAGGAGCTGTCTTCCTTGGATTCT  
TTAGGAACAGCAGGAAGCACTATGGGCGCGGCGTCAGTAACGCTGACGGTACAGGCCAGACAATTATTGTCTG  
GCATAGTGCAACAGCAAAGCAATTTGCTGAGGGCTATAGAGGCTCAACAGCATCTGTTGAAACTCACAGTCTG  
GGGCATT

>HQ697994..3

TTCTATTGCTACACATCAGGCCTGTTTAAATTATACCTTTAATGATACCAGCACAAATAGCACGGAGTCGAAGT  
CAAATGACACTATAACTCTCCAATGCAGAATAAAGCAAATTATAAATATGTGGCAGAGAGCAGGACAAGCAGT  
ATATGCCCCCTCCCATACAGGGATAATAAGGTGTGAATCAAACATTACAGGACTAATATTAACAAGAGATGGT  
GGGAATAATAATAGTAATACAAATGAAACCTTCAGACCTGGAGGAGGAGATATGAGGGACAATTGGAGAAGTG  
AATTATATCGGTATAAAGTAGTAAAAATTGAACCAATAGGAGTAGCACCTACCACGGCAAAGAGAAGAGTGGT  
GGAGAGAGAAAAAGAGCAGTTGGAATAGGAGCTGTCTTCCTTGGGTCTTAGGAGCAGCAGGAAGCACTATG  
GGCGCGGCGTCAATAACGCTGACGGTACAGGCCAGACAATTATTGTCTGGCATAGTGCAACAGCAAAGCAATT  
TGCTGAGGGCTATAGAGGCTCAACAGCATCTGTTGAAACTCACGGTCTGGGGCATT

>HQ698029..1

TTCTATTGCAACACGGCAGGCCTGTTTGATAGCATTTGGAATGGTAGCATTGGGAATAACACTGACAATAGTA  
GCATGGAGTTAAATGACGATAATGACACTATAACTCTCCCATGCAGAATAAAGCAAATTATAAATATGTGGCA  
GAGAGTAGGACAAGCAATATATGCCCCCTCCCATCCAAGGAGTAATAAGGTGTGACTCAAATATTACAGGGTTA  
ATATTAACAAGAGATGGTGGGGATAATAATAGTGCAAATGAAACCTTCAGACCTGTAGGAGGAGATATGAGGG  
ACAATTGGAGAAGTGAATTATATAAGTATAAAGTAGTAAAAATTGAGCCACTAGGAGTAGCACCCACCAGGGC  
AAAGAGAAGAGTGGTGGGGAGAGAAAAAGAGCAGTTGGACTAGGAGCTGTCTTCATTGGGTCTTAGGAGCA  
GCAGGAAGCACTATGGGCGCAGCGTCAGTAACGCTGACGGTACAGGCCAGACAATTATTGTCTGGCATAGTGCA  
AACAGCAAAGCAATTTGCTGAAGGCTATAGAGGCTCAACAGCATCTGTTGAGACTCACAGTCTGGGGCATT

>AY253305..2

TTCTATTGTAACACATCAGGCCTGTTTAAATGGCCTGTTTAAATGGCACCTGGAATGGCAATCACACAAACAGCA  
CGGAGTTAAATAGCACTATAATTCTCCAATGCAAAATAAAGCAAATTATAAATATGTGGCAGAGAGCAGGACA  
AGCAATATATGCCCCCTCCCATCCAAGGAGTAATAAAGTGTGTATCAAATATTACAGGACTAATATTAACAAGA  
GATGGTGAGAGGAACAATAGTCTAAATGAAACCTTCAGACCTGGAGGAGGAGATATGAGGGACAATTGGAGAA  
GTGAATTATATAAGTATAAAGTAGTAAAAAATTGAACCACTAGGAGTAGCACCTACCAGGGCAAAGAGAAGAGT  
GGTGGAGAGAGAAAAAAGAGCAGTCGGACTGGGAGCTGTCTTCATTGGGTTCTTAGGAGCAGCAGGAAGCACT  
ATGGGCGCGGCGTCAGTAACGCTGACGGTACAGGCCAGACAATTATTGTCTGGCATAGTGCAACAGCAAAGCA  
ATTTGCTGAGGGCTATAGAGGCTCAACAGCATCTGTTGAAACTCACGGTCTGGGGCATT

>AY253314..1

TTCTATTGTAATACATCAGGCCTGTTTAAATAGCACTTGGACTACCAACAACATGCAGGAGTCAAATGACACTA  
GCAATGGCACTATAACTCTCCCATGCAGAATAAAGCAAATTATAAGGATGTGGCAGAGAGTAGGACAAGCAAT  
GTATGCCCCCTCCCATTTGAAGGAGTAATAAGATGTGAATCAAACATTACAGGACTAATACTAACAAGAGATGGC  
GGGAATAATAACAGTGCAAAATGAAACCTTTAGACCTGGAGGAGGAGATATAAGGGACAATTGGAGAAGTGAAT  
TATATAAGTATAAAGTAGTAAAAAATTGAACCACTAGGAGTAGCACCCACCAGGGCAAAGAGAAGAGTGGTGGA  
GAGAGAGAAAAAGAGCAGTTGGAATAGGAGCTGTCTTCCTTGGGTTCTTAGGAGCAGCAGGAAGCACTATGGGC  
GCGGCGTCAATAACGCTGACGGTACAAGCCAGACAATTATTGTCTGGCATAGTGCAACAGCAAAGCAATTTGC  
TGAGGGCTATAGAGGCTCAACAACAGCTGTTGAAACTCACGGTCTGGGGCATT

>KX907352..1

TTCTATTGTAATACATCAGGCCTGTTTAAATAGCACTTGGCTATTTAACAAGTCAAATGAGAATAAGTCAAATG  
AGTCAGATGTCAATATAACACTCCCATGCAGAATAAAGCAAATTATAAATATGTGGCAGAGAGCAGGACAAGC  
AATGTATGCCCCCTCCCATCCAGGAGTAATAAAGTGTGAATCAAACATTACAGGACTACTATTAAACAAGAGAT  
GGTGGGAATAACAACAATTCAAATGAGACCTTCAGACCTGGAGGAGGAGATATGAGGGACAATTGGAGAAGTG  
AATTATATAAGTATAAAGTAGTCAAAATTGAACCACTAGGAGTAGCACCCACCAGGGCAAAGAGAAGAGTGGT  
GGGAAGAGAAAAAAGAGCAGTTGGAATAGGAGCTGTTTTCCTTGGGTTCTTAGGAGCAGCAGGAAGCACTATG  
GGCGCGGCGTCAATAACGCTGACGGTACAGGCCAGACAATTATTGTCTGGCATAGTGCAACAGCAAAGCAATT  
TGCTGAGGGCTATAGAGGCTCAACAACATCTGTTGAAACTCACAGTCTGGGGCATT

>KX907348..1

TTCTATTGTAACACATCAGGTCTGTTTAAATAGCACTTGGTATGGCAATGGCAGCAAGCTGGAGTCAAATAGCA  
CGGGGTCAGACGACAATATAACTCTCCACTGTAGAATAAAGCAAATTATAAATATGTGGCAAAGAGCAGGACA  
AGCAATATATGCCCCCTCCCATCCCAGGAGTAATAAAGTGTCTATCAAACATTACAGGACTAATATTAACAAGA  
GATGGTGGGGACAATAACAGTACAAATGAAACCTTCAGACCTGGAGGAGGAGATATGAGGGACAATTGGAGAA  
GTGAATTATATAAGTATAAAGTAGTAAAAAATTGAACCATTAGGAGTAGCACCCACCAGGGCAAAGAGAAGAGT  
GGTGGAAAGAGAAAAAAGAGCAGTTGGACTGGGAACTGTTCTCTTTGGGTTCTTAGGAGCAGCAGGAAGCACT  
ATGGGCGCGGCGTCAGTAACGCTGACGGTACAGGCCAGAAAAGTTACTATCTGGCATAGTGCAACAGCAAAGCA  
ATTTGCTGAGGGCTATAGAGGCTCAACAACATCTGTTGAAACTCACAGTCTGGGGCATT

>KX907336..1

TTCTATTGTAATACATCAGGCCTGTTTAAATAGCACTTGGAAACAGCACTGGGTCAAGAAATGACAGTGGCAATA  
TAACTCTCCCATGCAGAATAAAGCAAATTGTAAATATGTGGCAGAGGACAGGACAAGCAATATACGCCCCCTCC  
CATCCAAGGAAGAATACAGTGTGTGTCAAATATTACAGGACTACTATTGACAAGAGATGGAGGGATTAAACAAC  
AGTGAGGAAACCTTCAGACCTGGAGGAGGAAATATGAGAGATAATTGGAGAAGTGAACTATATAAATATAAAG  
TAGTAAAAAATTGAACCACTAGGAGTAGCACCCACCAGGGCAAAGAGAAGAGTGGTGGAGAGAGAAAAAAGAGC  
AGTAGTTGGACTGGGAGCTGTCTTCCTTGGGTTCTTAGGAGCAGCAGGAAGCACTATGGGCGCGGCGTCACTG  
ACGCTGACGGTACAGGCCAGACATTTATTGTCTGGCATAGTGCAACAGCAAAAACAATTTGCTGAGGGCTATAG  
AGGCTCAACAGCATCTGTTGAAACTCACGGTCTGGGGCATT

>KX907372..1

TTCTATTGTAATACATCAGGCCTGTTTAAATAGCAGTTGGAACATTAATGGCAGTCGGGAGTCAAATAAAACAC  
AGTCAAATGGCACTATAACTCTCCCATGCAGAATAAAGCAAATTATAAATATGTGGCAGAGAGCAGGACAAGC  
AATATATGCTCCTCCCATCCAAGGAGTAATAAAGTGTGTATCAAACATTACAGGACTAATATTAACAAGAGAT  
GGTGGGAATAATAATAACAGTTCAAATGAAACCTTCAGACCTGGAGGAGGAGATATGAGGGACAATTGGAGAA  
GTGAATTGTATAAGTATAAGGTAGTAAAAAATTGAACCACTAGGGGTAGCACCCACCAGGGCAAAGAGAAGAGT  
GGTGGAGAGAGAAAAAAGAGCAGTTGGAATAGGAGCTGTTTTCCTTGGGTTCTTAGGAGCAGCAGGAAGCACT  
ATGGGCGCGGCGTCAATAACGCTGACGGTACAGGCCAGACAATTACTGTCTGGCATAGTGCAACAGCAGAGCA  
ATTTGCTGAGGGCTATAGAGGCTCAACAACAGTTGTTGAAACTCACGGTCTGGGGCATT

>KX907383..1

TTCTATTGTGACACATCAAGCCTGTTTAAATATCACTTGGGATAGAAGTAACGTCACGCAGGAGTTAAATAACA  
CAAAGTTAAATGACACTATAATTCTCCAATGCAGGATAAAGCAAATTATAAATATGTGGCAGAGAGCAGGACA  
AGCAATGTATGCCCCCTCCCATCCCAGGAATAATAAAGTGTGAATCAAACATTACAGGACTAATATTAACAAGA  
GATGGGAGTGAGAATGAAACTGAAACCTTCAGACCTGGAGGAGGAGACATGAGGGACAATTGGAGAAGTGAGT  
TATATAAGTATAAAGTGGTAAAAAATTGAACCACTAGGAGTAGCACCCACCAAGGCAAAGAGAAGAGTGGTGGA  
GAGAGAGAAAAAGAGCAGTCGGACTAGGAGCTGTCTTCCTTGGGTTCTTAGGAGCAGCAGGAAGCACTATGGGC

GCAGCGTCAATAACGCTGACGGTACAGGTACAGACAATTGTTGTCTGGCATAGTGCAACAGCAAAACAATTTGC  
TGAGGGCTATAGAAGCTCAACAGCATCTGTTGAAGCTCACGGTCTGGGGCATT

>KX907389..2

TTCTATTGTAACACATCAATCCTGTTTAAATAGCACTTGGAATAGCACTAGCACTTGGAATATCTCTGAGAGTG  
TAAATAGCAGCAGTCAGGAGTCAAATGACACTATAACTCTCCAATGCAGAATAAAGCAAATTATAAATATGTG  
GCAGAGAACAGGACAAGCAATGTATGCCCCCTCCCATCCAAGGAGTAATAAAGTGCATATCAAATATTACAGGA  
CTAATATTAACAAGAGATGGTGGGGGTGATGACAATACAACCTGAAACCTTCAGACCTGGAGGAGGAGATATGA  
GGGACAATTGGAGAAGTGAATTATATAAGTATAAAGTAGTAAAAGTTGAACCACTAGGAATAGCACCCACCAG  
GGCAAGGAGAAGAGTGGTGGAGAGAGAAAAAAGAGCAGTTGGAATAGGAGCTGTTTTTCATTGGGTTCTTAGGA  
GCAGCAGGAAGCACTATGGGCGCGCGTCAATAACGCTGACGGCACAGGCCAGACAACCTATTGGCTGGCATAG  
TGCAACAGCAAAGCAATTTGCTGAGGGCTATAGAGGCTCAACAGCATCTGTTGAAACTCACAGTCTGGGGCAT  
T

>KX907341..2

TTCTATTGTAATACATCAGGCCTGTTTAAATAGTACTTGGGATGACACCTCGAATCATAATACAAGTGGCACGG  
AGTCAAATGCCAATATAACTCTCCAGTGTAGAATAAAGCAAATTATAAATATGTGGCAGAGAGCAGGACAAGC  
AATATATGCCCCCTCCCATCCAAGGAATAATAAAGTGTGAATCAAACATTACAGGACTGATATTAACAAGAGAT  
GGTGGAGATAACAATAACACTACCACCGAAACCTTCAGACCTGGAGGAGGAGATATGAGGGACAATTGGAGAA  
GTGAATTATATAAGTATAAAGTAGTAAAAATTGAACCACTAGGAGTAGCACCCACCAAGGCAAGGAGACGAGT  
GGTGCAGAGAGAAAAAAGAGCAGTTGGAATGGCAGCTTTATTTCTTTGGGTTCTTAGGAGCAGCAGGAAGCACT  
ATGGGCGCGCGTCCATAACGCTGACGGTACAGGCCAGACAATTATTGTCTGGCATAGTGCAACAGCAAAGCA  
ATTTGCTGAGGGCTATAGAGGCTCAACAGCATATGTTGAGACTCACGGTCTGGGGCATT

>KX907347..1

TTCTATTGTAATACATCAGGCCTGTTTAAATAGCACTTGCTGTCTAATAGTACTAACAGCACGGATAACACGG  
GGACAAATGACACTATAACTCTCCAATGCAGAATAAAGCAAATTATAAATATGTGGCAAAGAGTAGGACAAGC  
AATGTATGCCCCCTCCCATCCAGGAGTAATAAGGTGTGAATCAAACATTACAGGACTAATGTTAACAAGAGAT  
GGTGGGAATAATGCTACCAATGAAACCTTTAGACCTGGAGGAGGAGATATGAGGGACAATTGGAGAAGTGAAT  
TATATAAGTATAAAGTAGTAAAAATTGAACCACTAGGAGTAGCACCCACCAAGGCAAAGAGAAGAGTGGTGA  
GAGAGAAAAAAGAGCAGTTGGAATAGGAGCTGTCTTCTTGGGTTCTTAGGAGCAGCAGGAAGCACTATGGGC  
GCGGCGTCAATAACGCTGACGGTACAGGCCAGACAATTATTGTCTGGCATAGTGCAACAGCAAAGGCAACTTGC  
TGAGGGCTATAGAGGCTCAACAACATCTGTTGAAACTCACAGTCTGGGGCATT

>KX907364..2

TTCTATTGTAACACATCAGCCCTGTTCAATAGCAGTTGGAGTAGTGTAATGACAGCGGGAACATTAGCCCAG  
AGCCAAACAAAAATATAACCTCCGATGCAGAATAAAGCAAATTATAAATATGTGGCAGAGAGTAGGACAAGC  
AATATATGCCCCCTCCCATCCAAGGAGTAATAAGGTGTGACTCAAACATTACGGGATTAATATTAACAAGCGAT  
TATGGAGGGACTAACAGTACACATGAAATCTTCAGACCTGCAGGAGGAAATATGAGGGACAATTGGAGAAGTG  
AATTATATAAGTATAAAGTAGTACAAATTGAACCAATAGGAGTAGCACCCATCAGGGCAAAGAGAAGAGTGGT  
GGAGAGAGAAAAAAGAGCAGTCGGACTGGGAGCTGTCTTCTTGGTTTCTTAGGAGCAGCAGGAAGCACTATG  
GGCGCGCGTCAATGACGCTGACGGTACAGGCCAGACAATTATTGTCTGGTATAGTGCAACAGCAAAGCAATT  
TGCTGAGGGCTATAGAGGCTCAACAGCATCTGTTGAAACTCACGGTCTGGGGCATT

>KX907412..3

TTCTATTGTAACACATCAGGCCTGTTTCATAGCACTTGCTTAAATAGCACTTGCTTAAATAGCACTTGCGAAG  
ACAATCAGGCAAATAGCACAAATGACACTATAGTACTCCCATGCAGAATAAAGCAAATTATTAATATGTGGCA  
GAGAGCAGGACAAGCAATATATGCCCCCTCCCATCCAGGGGAAATAAGGTGTGAATCAAACATTACAGGGCTA  
ATGTTAACAAGAGATGGTGGGAATAATAACAATAACAGGACAAATGAAACCAAAAATGAAACCTTCAGACCTG  
GAGGAGGAGATGAGGGACAATTGGAGAAGTGAATTATATAAGTATAAAGTAGTAAAAATTGAACCACTAGG  
ACTAGCACCCACCGGGGCAAAGAGAAGAGTGGTGGAGAGAGAAAAAAGAGCAGTTGGAATAGGAGCTGTCTTC  
CTTGGGTTCTTAGGAGCAGCAGGAAGCACTATGGGCGCGCGTCAATAACGCTGACGGTACAGGCCAGACAAT  
TATTGTCTGGCATAGTGCAACAGCAAAGCAATTTGCTGAAGGCTATAGAGGCTCAACAACATCTGTTGAAACT  
CACGGTCTGGGGCATT

>KX907414..1

TTCTATTGTAACACATCAGGCCTGTTTAAATAGCACTTGAGTAACACTACCCTTGGGAAAACATTACCGAAA  
GGCAGGAACCAAGCAGCAACAAGACAAACGCAACTATAACTCTCCAATGCAGAATAAAGCAAATTATAAATAT  
GTGGCAGAGAACAGGACGAGCAATGTATGCCCCCTCCCATCCAGGAATAATAAGTTGTAACCTCAAATATTACA  
GGACTAATATTAACAAGAGATGGTGGAAATAACAGTACAAATGAAACCTTCAGACCTGGAGGAGGAGACATGA  
GGGACAATTGGAGAAGTGAATTATATAGGTATAAAGTAGTAAAAATTGAACCACTAGGAGTAGCACCCACTGA  
GGCAAAGAGAAGAGTGGTGGAGAGAGGAAAAAAGAGCAATTGGAATAGGAGCTGTTTTTCATTGGGTTCTTAGGA  
GCAGCAGGAAGCACTATGGGCGCGCGTCAATAACGCTGACGGTACAGGCCAGACAATTATTGTCTGGCATAG  
TGCAACAGCAAACAATTTGCTGAGGGCTATAGAGGCTCAACAGCATCTGTTGAAACTCACGGTCTGGGGCAT  
T

>KX907423..2

TTCTATTGTAACACATCAGGCCTGTTTAAATAGCATTTGGGTAAAGGGCCAGGAAAGCAATCAGTCAAATAGCG  
CAAATGACACTATAGTACTCCCATGCAGAATAAAGCAAATTATAAATATGTGGCAGAGAGCAGGACAAGCAAT  
ATATGCCCTCCCATCCCAGGGGAAATAAAGTGTGTATCAAACATTACAGGGCTAATATTAACAAGAGATGGT  
GGGAATAACGGGATAAATGAAACCTTCAGACCTGGAGGAGGAGATATGAGGGACAATTGGAGAAGTGAATTAT  
ATAAGTATAAAGTAGTAAAAATTGAACCACTAGGAGTAGCACCCACCAGGGCAAAGAGAAGAGTGGTGGAGAG  
AGAAAAAAGAGCAGTTGGAATAGGAGCTGTCTTCCTTGGGTTCCTTAGGAGCAGCAGGAAGCACTATGGGCGCG  
GCGTCAATAACGCTGACGGTACAGGCCAGACAATTATTGTCTGGCATAGTGCAACAGCAAAGCAATTTGCTGA  
AGGCTATAGAGGCTCAACAACATCTGTTGAGACTCACGGTCTGGGGCATT

>KX907431..1

TTCTATTGTAACACAACAGACCTGTTTAAATAGCACCTGGAATGAGACCAGCATACAGGAAAATAGCACAGAGA  
CAAACAACGAGACTATAACTCTCCAATGCAGAATAAAGCAAATTATAAATATGTGGCAGAGAGCAGGACAAGC  
AATATATGCCCTCCCGTACCAGGAGTAATAAGGTGTGACTCAAATATTACAGGGCTAATATTAACAAGAGAT  
GGTGGGACTAATAATACAAATGAAACATTTCAGGCCTGTAGGAGGAGATATGAAGGACAATTGGAGAAGTGAAT  
TATATAAGTATAAAGTAGTAAAAATTGAACCACTAGGGGTAGCACCCACCAGGGCAAAGAGAAGAGTGGTGGGA  
GAGAGAAAAAAGAGCAGTTGGAATAGGAGCTGTCTTCCTTGGGTTCCTTAGGAGCAGCAGGAAGCACTATGGGC  
GCAGCATCAATAACGCTGACGGTACAGGCCAGACAATTATTGTCTGGCATAGTGCAACAGCAAAGCAATTTGC  
TGAGGGCTATAGAGGCTCAACAACAACTGTTGAAACTCACAGTCTGGGGCATT

>HQ615968..1

TTCTATTGCAACACATCAGACCTATTTAAATAGCACTTGGGAAAATAACCCTGTCAGCCAGGAGTCAAATAGCA  
CAAGGTCAAACGACACTATAACTCTCCAATGCAAAATAAGGCAAATTATAAGAATGTGGCAGAGAGTAGGACA  
AGCAATGTATGCCCTCCCATCCAAGGAGTAATAAACTGTACATCAAATATTACAGGACTAATATTAACAAGA  
GATGGTGGGAATAATAATAACAGTGGAAATGAAACCTTCAGACCTGCAGGAGGAGATATGAGGGACAATTGGA  
GAAGTGAATTATATAAGTATAAAGTAGTAAAAATTGAACCACTAGGAGTAGCACCCACCGGGGCAAAGAGAAG  
AGTGGTGGAGAGAGAAAAAAGAGCAGTTGGAATAGGAGCTGTCTTCATTGGGTTCCTTAGGAGCAGCAGGAAGC  
ACTATGGGCGCAGCGTCAATAACGCTGACGGTACAGGCCAGACAATTATTGTCTGGCATAGTGCGGCAGCAAAA  
GCAATTTGCTGCAGGCTATAGAGGCTCAACAGCATCTGTTGAAACTCACGGTCTGGGGCATT

>HQ615970..2

TTCTATTGTAATACATCAAGCCTGTTTAAATAGTACTTGAATTTGAATCACACAAACAGCTTGCAGGATTCAA  
ATAGCACAGAGACAAATGGCACTATAATTCTCAAATGCAGAATAAAACAAATTATAAGGATGTGGCAGAGAGT  
AGGACAAGCAATGTATGCCCTCCTATCCCAGGAGTAATAAGGTGTGTATCAAACATTACAGGATTAATATTA  
ACAAGCGATGGCGGGAATAAGACCAGTACAACAGAGACCTTCAGACCTGGGGGAGGAGATATGAGGGACAATT  
GGAGAAGTGAATTATATAAGTATAAAGTAGTCAAATTTGAACCACTAGGAGTAGCACCCACCAGGGCAAAGAG  
AAGAGTGGTGGAGAGAGAAAAAAGAGCAGTTGGAATAGGAGCTGTCTTCCTTGGGTTCCTTAGGAGCAGCAGGA  
AGCACTATGGGCGTGGCGTCAATGACGCTGACGGTACAGGCCAGGCAATTATTGTCTGGCATAGTGCAACAGC  
AAAGCAATTTGCTGAGGGCTATAGAGGCTCAACAGCATCTGTTGAAACTCACAGTCTGGGGCATT

>HQ615971..2

TTTTATTGTAATACATCAAACTGTTTAAATAGCAGTATATCCTACAATGGCAGTACAAAGTCAGTAGAGTCAA  
TAAACAGTAACGAGACAATAAGTCTCCCATGCAGAATAAAGCAAATTATAAATATGTGGCAGAGAGCAGGACA  
AGCAATATATGCCCTCCCATCCGAGGAGTAATAAAGTGTAAAGTCAGACATTACAGGACTACTATTAACAAGA  
GATGGTGGGGTTACCAACACAAATGAGACCTTTAGACCTGGAGGAGGAAATATGAGGGATAATTGGAAAAGTG  
AACTATATAAATATAAAGTAGTAAAAATTGAACCACTAGGAGTGGCACCCCTCTCCTGCAAAGAGAAGAGTGGT  
GCAGAGAGAAAAAAGAGCAGTAGGACTGGGAGCTGTTTTCATTGGGTTCCTTAGGAGCAGCAGGAACCACTATG  
GGCGCGCGTCAATGACGCTGACGGTACAGGCCAGACAATTATTGTCTGGCATAGTGCAACAGCAAGGCAATT  
TGCTGAGGGCTATAGAGGCTCAACAGCATCTGTTGAAACTCACGGTCTGGGGCATT

>HM204620..2

TTCTATTGCAACACATCAGGATTGTTTAAATAGCAGATGGGAAAATGACACGCAACCAAATAACACGCAGCCAA  
ACGGCACTATAACTCTCCCATGCAGAATAAAGCAAATTATAAATATGTGGCAGAGAACAGGACAAGCAATATA  
TGCCCTCCCATCAGAGGAGTAATAAGTTGTCAATCAAACATTACAGGACTACTACTAACAAGAGATGGGGGG  
GGGAAGAATACTAGTGATAATGAAACCTTCAGACCTGGAGGAGGAGATATGAGGGACAATTGGAGAAGTGAAT  
TATATAAGTATAAAGTAGTAAAAATTGAACCACTAGGAGTAGCACCCAACAGGGCAAAGGAGAAGAGTGGTGGGA  
GAGAGAAAAAAGAGCAGTTGGAATAGGAGCTGTGTTTCCTTGGGTTCCTTGGGAGCAGCAGGAAGCACTATGGGC  
GCAGCGTCAATGACGCTGACGGTACAGGCTAGACAATTATTGTCTGGTATAGTGCAACAGCAAAGCAATTTGC  
TGAGGGCTATAGAGGCTCAACAGCATCTGTTGAAACTCACAGTCTGGGGCATT

>HM204621..2

TTCTATTGTAATACATCAAACTGTTTAAATAGCACTTGGGGTAATGGCAGTTACAGCACCAATGACACAGGGG  
ACGCAAATTCAAATATAACTATCCAATGCAGAATAAAGCAAATTGTAAGGATGTGGCAGAGGACAGGACAAGC  
AATGTATGCCCTCCCATCAAAGGAATAATAAGATGTATGTCAAATATTACAGGCCTACTATTAACAAGAGAT  
GGTGGGATTAATAGGACGAATGAAACCTTCAGACCTATAGGAGGAGATATGATGGATAATTGGAGAAGTGAAGC  
TATATAAATATAAAGTAGTAAAGATTGAACCAATAGGAGTAGCACCCAACAGGGCAAAGAGAAGAGTGGTGGGA  
GAGAGAAAAAAGAGCAGTCTTTGGAATGGGAGCTGTCTTCCTTGGGTTCCTTAGGAGCAGCCGGAAGCACTATG

GGCGCAGCGTCGATAACGCTGACGTTACAGGCCAGACAATTGTTGTCTGGTATAGTGCAACAGCAAAGCAATT  
TGCTGAGGGCTATAGAGGCTCAACAGCATCTGTTGAAACTCACGGTCTGGGGCATT  
>KY658695..2  
TTCTATTGTAACACATCAAGTTTGT'TTAAAGGCACTTGGAATAATGGCACTTGGAATGATAGCATGTGAGAGG  
TAAATAGCACAGAGTCAAATGACAACATAACTCTCCCATGCAGAATAAAGCAAATTATAAATATGTGGCAGAA  
AGTAGGGCAAGCAATGTATGCCCCACCCATCCAGGGAGTAATAAGGTGTGAATCAAACATTACTGGACTAATA  
TTAACAAGAGATGGTGGGAATAGTAGCGGTGAGAATGAAACCTTTAGACCTGGAGGAGGAGATATGAGGGACA  
ATTGGAGAAGTGAATTATATAAGTATAAAGTAGTAAAAATTGAACCACTAGGAGTAGCACCCACCAAGGCAAG  
AAGAAGAGTGGTGCAGAGAGAAAAAGAGCAGTTGGAATGGGAGCACTTTTCATTGGGTTCCTTAGGAGCAGCA  
GGAAGCACTATGGGCGCGGCGTCAATAACGCTGACGGTACAGGCCAGACAATTATTGTCTGGCATAGTGCAAC  
AGCAAAGCAATTTGCTGAAGGCTATAGAGGCTCAACAGCATCTGTTGAGACTCACTGTCTGGGGCATT  
>KY658696..1  
TTCTACTGTAATACATCAGGCCTGTTTAAATAGCAATAGCACAGCAAATAGCACAGCAAAGTTTAAATAGCAATA  
GCACAGCAAATAGCACAGCAAATATAACTCTCCCATGCAGAATAAAACAAATTGTAAATATGTGGCAGAGGCC  
AGGACAAGCAATGTATGCCCCCTCCAATCCAAGGGCCAATAAGTTGTAGGTCAAACATTACAGGATTACTAATA  
ACAAGAGATGGTGGAGAAAAAATGGAACGAATGAAACCTTCAGACCTGGAGGAGGAGAGATGAGGGATATTT  
GGAGAAGTGAACATATATAAATATAAAGTAGTAAAAATTGAACCACTAGGAGTAGCACCCACCAAGGCAAGGAG  
AAGAGTGGTGGAGAGAGAAAAAGAGCAGTTGGACTGGGAGCTGTCTTCATTGGGTTCCTTAGGAGCAGCCGGA  
AGCACTATGGGCGTGGCGTCAATAACGCTGACGGTACAGGCCAGACAATTATTGTCTGGTATAGTGACAGCAGC  
AAAACAATTTGCTGAGGGCTATAGAGGCTCAACAGCATATGTTGAAACTCACAGTCTGGGGCATT  
>AF361872..2  
TTCTATTGTAATACAACAAGCCTGTTTAAATAGCACCTGGTATCACAAGAACAGCACGCAGGGGTCAAATGACA  
CGGGGTCAGATGACACTATAACTCTCCCATGCAAAATAAAACAAATTGTAAGGATGTGGCAGAGAGCAGGACA  
AGCAATGTATGCCCCCTCCCATTCAGGAGTAATAAGGTGTGAATCAAACATTACAGGACTAATATTAACAAGA  
GATGGGGGGAGTGAGGACAATACCACTGAAATCTTCAGACCTGGAGGAGGAAATATGAGGGACAATTGGAGAA  
GTGAATTATATAAGTATAAAGTAGTAAAAATTGAACCACTAGGAGTAGCACCCACCAAGGCAAAGAGAAGAGT  
GGTGGGAAGAGAAAAAGAGCAGTTGGACTGGGAGCTGTCTTCCTTGGGTTCCTTAGGAGCAGCCGGAAGCACT  
ATGGGCGCGGCGTCAGTAACGCTGACGGTACAGGCCAGACAATTATTGTCTGGCATAGTGCAACAGCAGAACA  
ATTTGCTGAGGGCTATAGAGGCTCAACAACATCTGTTGAAACTCACAGTCTGGGGCATC  
>AF361873..1  
TTCTATTGTAACACATCAGGCCTGTTTAAACAGCACTTGGCATAGCAATGCCAGCATACAAGAGCCAAACAGCA  
CAGAGTCAAATGACACTATTATAACTCTCCAATGTAGAATAAAACAAATTATAAATATGTGGCAGAGAACAGG  
AAAAGCAATATATGCTCCTCCCATCCAAGGAATAATAAGGTGTGAATCAAACATTACAGGACTAATATTAACA  
AGAGATGGTGGGAGTAATAATAGCACCAATGAAACCTTCAGACCTGGAGGAGGAGATATGAGGGACAATTGGA  
GAAGTGAATTATATAAGTATAAAGTAGTAAAAATTGAACCACTAGGAGTAGCACCCCTCTGGGCAAGGAGAAG  
AGTGGTGCAGAGAAAAAGAGCAGTTGGAATAGGAGCTGTCTTCCTTGGGTTCCTTAGGAGCAGCTGGAAGC  
ACTATGGGCGCGGCGTCAATAACGCTGACGGTACAGGCCAGACAATTATTGTCTGGCATAGTGCAACAGCAAA  
GCAATTTGCTGAGGGCTATAGAGGCTCAACAGCATCTGTTGAAACTCACGGTCTGGGGCATT  
>HM027846..2  
TTCTATTGTAACACATCAGGTCTGTTTAAATAGCACGTGGAATACTACCAACATGTGGGAGCAAAATAGCACGG  
AGTCAAACAATAACTATATATCTTCAATGCAGAATAAAGCAAATTATCAATATGTGGCAGAGAGTAGGACA  
AGCAATATATGCCCCCTCCCATCCAGGAATGATAAGGTGTGTCTCAAATATTACAGGACTAATATTAACAAGG  
GATGGTGGGAATATTAGTGAGAATAATGCCAGTGAAATCTTCAGACCAGGAGGAGGAGATATGAGGGACAATT  
GGAGAAGTGAATTATACAAGTATAAAGTAGTAAAAATTGAACCACTAGGAGTAGCACCAACCCCGGCAAGGAG  
AAGAGTGGTGGAGAGAGAAAAAGAGCAGTCGGAATAGGAGCTGTCTTCCTTGGGTTCCTTAGGAGCAGCAGGA  
AGCACTATGGGCGCGGCGTCAATAACGCTGACGGTACAGGCCAGACAATTATTGTCTGGCATAGTGCAACAGCAA  
AAAGCAATTTGCTGAGGGCTATAGAGGCTCAACAGCATCTGTTGAAACTCACGGTCTGGGGCATT  
>JX877522..1  
TTCTATTGTGACACATCAGAACTATTTAAATAGCACTTGGAATGACGCTGCCATTATGAGGGAATTAAATAGAA  
CGGAGTCAAACGACACCATAACTCTCCAATGCAAAATAAAGCAAATTATAAATATGTGGCAGAGAGCAGGACG  
AGCAATGTATGCCCCCTCCCATCCGAGGAGTAATAAGATGTGAGTCAAATATTACAGGACTAATATTAACAAGA  
GATGGTGGGAGGGATGATAACAATACAACTGAAACCTTCAGACCTGGAGGAGGAGATATGAGGGACAATTGGA  
GAAGTGAATTATATAAGTATAAAGTAGTAAAACTTGAGCCACTAGGAATAGCACCCACCAAGGCAAAGAGAAG  
AGTGGTGGAGAGAGAAAAAGAGCAGTTGGACTGGGAGCTGTTTTTCATTGGGTTCCTTAGGAGCAGCAGGAAGC  
ACTATGGGCGCGGCGTCAATAACGCTGACGGTACAGGCCAGACAATTATTGTCTGGCATAGTGCAACAGCAAA  
GCAATTTGCTGAGGGCTATAGAGGCTCAACAGCATATGTTGAAACTCACAGTCTGGGGCATT  
>HM215272..1  
TTCTATTGTAATACATCAAGCCTATTTAAATAGTACTTGGTGGAGCAACAACAGCAACAACACTGACAGTGAGG  
AGTCAAATAGCATGGGGTTAAATGACACTATAACTCTCCAATGCAGAATAAAGCAAATTATAAATATGTGGCA  
GAGAGTAGGACAAGCAATGTATGCCCCCTCCCATCCAAGGAGTAATAAGGTGTGAGTCAAACATCACAGGAATA

CTATTAACAAGAGATGGTGGGGATAATAACAATGAAAGTGAAACCTTCAGACCTGTAGGAGGAGATATGAGGG  
ACAATTGGAGAAGTGAATTATATAAATATAAAGTAGTAAAAATTGAACCATTAGGAGTAGCACCCACAGAGGC  
AAGGAGAAGAGTGGTGGGAAGAGGAAAAAGAGCAGTTGTTGGAATGGGAGCTATGTTCCCTTGGGTTTTTGGGA  
GCAGCTGGGAGCACTATGGGCGCGGCGTCAATAACGCTGACGGTACAGGCCAGACAATTATTGTCTGGCATAG  
TGCAACAGCAAAGCAATTTGCTGAGGGCTATAGAGGCTCAACAGCATCTGTTGAAACTCACTGTCTGGGGCAT  
T

>HM027824..1

TTCTATTGTAACACATCAGGTCTGTTTAATAGCACGTGGAATGGTACCCAAATGATGGAGCCAAATAGCACAG  
AAAACATTAATGATACTATAACTCTTAAATGCAGAATAAAGCAAATTATACATATGTGGCAGAGAGTAGGACA  
AGCAATATATGCCCCCTCCCATCAAAGGAGTGATAAGATGTAACCTCAAACATTACAGGACTAATATTAACAAGA  
GATGGTGGGACTGAAGGGAATAGCAGTGAAACCTTCAGACCGGGAGGAGGTGATATGAGGGACAATTGGAGAA  
GTGAATTATATAAGTATAAAGTAGTAAAAATTGAACCACTAGGAGTAGCACCTACCAAGGCAAGGAGAAGAGT  
GGTGGAGAGAGAAAAAAGAGCAATCGGACTGGGAGCTGTCTTCCCTTGGGTTCTTAGGAGCAGCAGGAAGCACT  
ATGGGCGCGGCGTCAATAACGCTGACGGCACAGGCCAGACAATTATTGTCTGGCATAGTGCAACAGCAAAGCA  
ATTTGCTGCAGGCTATAGAGGCTCAACAGCATCTGTTGAAACTCACAGTCTGGGGCATT

>JX236669..1

TTCTACTGTAATACATCAGGCCTGTTTAATAGCACTTGGAACATTGCTGGGAACAGGACAAATGACACGAAGT  
CAAATGAACTATAACTCTCCCATGCAGAATAAAGCAAATTGTAAATGTGTGGCAGAGAGTAGGACAAGCAAT  
ATATGCCCCCTCCCATCGCAGGAGTAATAAGATGTAACCTCAAACATTACAGGATTACTATTAGTAAGAGATGGT  
GGAGCTACTAACAATACTGATGAAACCTTCAGGCCTGGAGGAGGAAATATGAGGGACAATTGGAGAAGTGAAT  
TATATAAGTATAAAGTAGTAAAAATTGAACCACTAGGAGTAGCACCCACCAGGGCAAGGAGAAGAGTGGTGGGA  
GAGAGAAAAAAGAGCAGTTGGACTGGGAGCTGTATTCAATTGGGTTCTTAGGAGCAGCAGGAAGCACTATGGGC  
GCGGCGTCAGTGACGCTGACGGTACAGGCCAGACAATTATTGTCTGGCATAGTGCAACAGCAAAGCAATTTGC  
TGAGGGCTATAGAGGCTCAACAGCATCTGTTGAAGCTCACGGTCTGGGGCATT

>JX236671..2

TTCTATTGTAATACAGCAGGTCTGTTCAATAGAAATTGGACTTGAGTAAGGAGAATGGGACCAGAATGCAGA  
ATAAAACGGATTCAAATGGCACTATAACTCTCCAATGCAGAATAAAGCAAATTATAAATATGTGGCAGAGAAC  
AGGACAGGCAATGTATGCCCCCTCCCATCCAAGGAGTAATAAAATGTGCATCAAACATTACAGGACTACTGTTA  
ACAAGGGATGGTGGAGATAACAAAAACAATAGTACCAATAGTACCAATCAAATAACACTGAAATCTTTAGAC  
CTATAGGAGGAGATATGAGGAATAATTGGAGAAGTGAATTATATAAGTATAAAGTAGTAAAAATTGAACCACT  
AGGAGTAGCACCTACCACGGCAAGGAGAAGAGTGGTGGGAAGAGAAAAAAGAGCAGTACTAGGTGGACTAGGA  
GCTGTATTCCTTGGGTTCTTAGGAGCAGCCGGAAGCACTATGGGCGCAGCGTCAATAACGCTGACGGTACAGG  
CCAGGCAATTATTGTCTGGCATAGTGCAACAGCAAAGCAATTTGCTGAGGGCTATAGAGGCTCAACAACATCT  
GTTGAAACTCACGGTCTGGGGCATT

>JX236676..1

TTCTATTGTAACACATCAAGCCTATTTAATAGCATTTGGAATGGCAGTAAATCAAATAACACGGAGCCAGATA  
GCACCATAACTCTCCAATGCAGAATAAAGCAAATTATAAATATGTGGCAGAGAGTAGGACAAGCAATGTATGC  
CCCTCCCATCCAAGGAGTAATAAGGTGTGAGTCAAACATTACAGGGCTAATATTAACAAGAGATGGTGGGAGT  
AATAGCAGTAGTACAAATGAAACCTTCAGACCTGGAGGAGGAGATATGAGAGACAATTGGAGAAGTGAATTAT  
ATAAGTACAAAGTAGTAAAAATTGAACCACTAGGAGTAGCACCCACCAAGGCAAAGAGAAGAGTGGTGGAAAG  
AGAAAAAAGAGCAGTTGGAATAGGAGCTGTTTTCTTGGGTTCTTAGGAGCAGCAGGAAGCACTATGGGCGCA  
GCGTCAATAACGCTGACGGTACAGGCCAGACAATTATTGTTTGGCATAGTGCAACAGCAAAGTAATTTGCTGA  
GGGCTATAGAGGCTCAACAGCATCTGTTGAAACTCACGGTCTGGGGCATT

>KF716478..2

TTCTATTGTAATACATCAAGCCTGTTTAATAGTACTTGGGTATATGGTAATGGAAGCTGGGGGTCAAATAGCA  
CGGGGTAAATAGTACAATGATAAATAAATACTATTTTCAGTGATAACCATAATTCTTCAATGCAGAATAAAGCA  
AATTATAAATATGTGGCAGAGAGCAGGACAAGCAATATATGCCCCCTCCCATCAAAGGAGTAATAAGCTGTAGA  
TCAAACATCACAGGACTAATATTAACAAGAGATGGTGGGAGTAACAGCAATGCAAGTACAAATGGAAGTGAAA  
CCTTCAGACCTGGAGGAGGAGATATGAGGGACAATTGGAGAAGTGAATTATATAAGTATAAAGTAGTAAAAAGT  
TGAACCACTAGGAATAGCACCTCCAAGGCAAGGAGAAGAGTGGTGGCGAGAGAAAAAAGAGCAGTTGGAATA  
GGAGCTGTACTCCTTGGGTTCTTAGGAACAGCAGGAAGCACTATGGGCGCAGCGTCAATAACGCTGACGGTAC  
AGGCGAGAAAATTATTGTCTGGCATAGTGCAACAGCAAAGCAATTTGCTGAGGGCTATAGAGGCTCAACAGCA  
TCTGTTGAAACTCACTGTCTGGGGCATT

>KP109490..1

TTCTACTGTAATACATCAGGCCTGTTCAATAGCACTTGGAATAACACCTCGCAGGCCAAATAGCTCGGAGTTAA  
AGGGCAATATAACTCTCCCATGCAAAATAAAACAAATTATCAGGATGTGGCAAAGAACAGGACAAGCAATGTA  
TGCCCCCTCCCATCCAAGGAGTAATAAATTGTGTATCAAAACATTACAGGACTACTATTAACAAGAGATGGTGGG  
GAGGAGGACAATAGTACTGAAACCTTCAGACCTGGAGGAGGAGATATGAGGGATAATTGGAGAAGTGAATTAT  
ATAAGTATAAAGTAGTAAAAATTGAACCAGTAGGAGTAGCACCCACCAAGGCAAAGGAGAAGGGTGGTGGAGAG  
AGAAAAAAGAGCAGTTGGAATAGGAGCTGTCCTCCTTGGATTCTTAGGAGCAGCAGGAAGCACTATGGGCGCG

GCGTCAATAACGCTGACGGTACAGGCCAGACAGTTATTGTCTGGTATAGTGCAGCAGCAAAGCAATTTGCTGA  
GGGCTATAGAGGCTCAACAACAACCTGTTGAAACTCACGGTCTGGGGCATT

>JF680921..1

TTCTATTGTAACACATCAGGCCTGTTTAAATAGCACTTGGACTAAGAATAGCAGCACTAACACTTGAATAGTA  
CTGACATCATGTGGGGGGTAAATAACAGTGACCATAATATAACTCTCCAATGCAAAATAAGCAAATTATAAC  
CATGTGGCAGAGGACAGGGCAGGCAATGTACGCCCCCTCCATCCCAGGAATAATAAACTGTGTGTCAAACATT  
ACAGGACTACTATTAACAAGAGATGGTGGTGAGGAGAGTAACAGTAGAGATAATGAAACCTTCAGACCTATAG  
GAGGAAATATGAAGGATAATTGGAGAAGTGAACATATATAAAATATAAAGTAGTAAAAATTGAACCACTAGGAGT  
AGCACCACCAAGGCAAAGAGAAGAGTGGTGCAGAGAGAAAAAGAGCAGTTGGACTGGGAGCTGTCTTCATT  
GGGTTCTTAGGAGCAGCCGGAAGCACTATGGGCGCGGCGTCAATAACGCTGACGGTACAGGCCAGACAATTAT  
TGTCTGGCATAGTGCAACAGCAAAACAATTTGCTGAGGGCTATAGACGCTCAACAGCATCTGTTGAAGCTCAC  
GGTCTGGGGCATT

>KF859745..2

TTCTATTGTAACACATCAGGCCTGTTTAAATAGCACTTGGAAACAATAGCACTCAAGAGTCTAATAGCACGGAGA  
CTATAACTCTCCCATGCCGAATAAAGCAAATTGTAAATATGTGGCAGAGAGCAGGACAAGCCATATATGCCCC  
TCCCATCAAAGGAATAATAAAATTGTAGATCAAACATTACAGGACTAATATTAACAAGAGATGGTGGACATAAT  
AATACAAATGAAACCTTCAGGCCTGGAGGAGGAGATATGAGGGACAATTGGAGAAAGTGAATTATATAAGTATA  
AAGTAGTAAAAGTTGAACCACTAGGAGTAGCACCCACCACGGCAAGGAGAAGAGTGGTGCAGAGAGAAAAAG  
AGCAGTATTTGGACTGGGAGCTGTCTTCATTGGGTTCTTAGGAGCAGCAGGAAGCACTATGGGCGCGGCGTCA  
ATAACGCTGACGGTACAGGCCAGACAATTATTGTCTGGCATAGTGCAACAGCAAAAGCAATTTGCTGAGGGCTA  
TAGAGGCTCAACAGCATCTGTTGAAACTCACGGTCTGGGGCATT

>KF716486..2

TTCTATTGTAATACATCAAGTCTGTTTAAATAGTACTTGGGACCTTAATGCTACTAGGGAAGATAGCACGGAGA  
ACATAACTCTCCCATGCAGAATAAAGCAAATCATAAATATGTGGCAAAGAGTAGGACAAGCAATGTATGCCCC  
TCCCATCGAAGGAATAATAAGATGTGACTCAAACATTACAGGACTACTCTTAACAAGAGATGGTGGGAATAGT  
AGTACAAATGAACTCAGGAAATCTTCAGACCTATAGGAGGGGATATGAAAGATAATTGGAGAAATGAATTAT  
ACAAGTATAAAGTAGTAAAAATTGAACCTCTGGGAGTAGCACCCCTCCTGGGCAAGGAGAAGAGTGGTGGAGAG  
AGGAAAAAGAGCAGTTGGAATAGGAGCTGTATTCCTTGGGTTCTTAGGAGCAGCAGGGAGCACTATGGGCGCA  
GCGTCAATAACGCTGACGGTACAGGCCAGGCAATTATTGTCTGGCATAGTGCAACAGCAAAAGCAATTTGCTGA  
AGGCTATAGAAGCTCAACAACAACCTGTTGAGACTCACGGTCTGGGGCATT

>M62320..1

TTCTATTGCAACACATCAGGCCTGTTTAAATAGCATTTGGAATGGCAGCATGTCAAATGACATGGGGCCAAATG  
GCACTATAACTCTCCAATGTAGAATAAAGCAAATTATAAATATGTGGCAGAGAGTAGGACAAGCAATGTATGC  
CCCTCCCATCCAAGGAGTAATAAGGTGTGAATCAAACATTACAGGACTACTATTAACAAGAGATGGGGGTACT  
AACAATACAAAAATGAGACCTTCAGACCTGGAGGAGGAGATATGAGGGACAATTGGAAGTGAATTATATA  
AGTATAAAGTAGTAAAAATTGAACCACTAGGAGTAGCACCCACCAGGGCAAAGAGAAGAGTGGTGGAGAGAGA  
AAAAAGAGCAGTTGGACTAGGAGCTATCTTCCTTGGGTTCTTAGGAGCAGCTGGAAGCACAAATGGGCGCGGCG  
TCAATAACGCTGACGGTACAGGCCAGACAATTATTGTCTGGTATAGTGCAACAGCAGAGCAATCTGCTGAGGG  
CTATAGAGGCTCAACAGCATCTGTTGAAACTCACTGTCTGGGGCATT

>L22957..2

TTCTATTGTAATACAGCAGGCCTGTTTAAATAGTACTTGAATAAAAAATGACAGCATAAAGTCAAATGACACAA  
AGTCAAATGACATTATAACTCTTCAATGCAGAATAAAGCAAATTATAAATATGTGGCAGAGAGTAGGACGAGC  
AATGTATGCCCCCTCCCATCAAAGGAGTAATAAGGTGTGAATCAAACATTACAGGACTACTATTAACAAGAGAT  
GGTGGAAATGGGAGCAATACAAATGAAACCTTCAGACCAGGAGGAGGAGATATGAGGGACAATTGGAGAAATG  
AATTATATAAGTATAAAGTAGTACAAATTGAACCATTAGGAGTAGCACCTACCCAGCAAAGAGAAGAGTGGT  
GCAGAGAGAAAAAGAGCAGTTGGACTAGGAGCTGTATTCAATTGGGTTCTTAGGAGCAGCAGGAAGCACTATG  
GGCGCGGCGTCAATAACGCTGACGGTACAGGCCAGACAATTATTGTCTGGCATAGTGCAACAGCAAAAGCAATT  
TGCTGAGAGCTATAGAGGCTCAACAGCATCTGTTGAAACTCACAGTCTGGGGCATT

>L22951..1

TTCTATTGTGACACATCAGGCCTGTTTAAATAGCACTTGAATGGCAATACCAGCAAGCAGGAGTCAAGTAGCA  
CAGAGTCAAATGGCAATATAACTCTCCAATGCAGAATAAAGCAAATTATAAATATGTGGCAGAGAGCAGGAAA  
AGCAATATATGCCCCCTCTATCAAAGGAGTAATAAGGTGTGTATCAAACATTACAGGACTAATATTAACAAGA  
GATGGTGGGGGTAATAACAGTGAAAATGAAACCTTCAGACCTGGAGGAAGAGATATGAGGGACAATTGGAGAA  
GTGAATTATATAAGTATAAAGTAGTAAAAATTGAACCACTAGGAGTAGCACCCACCAGGGCAAGGAGGAGAGT  
GGTGGAGAGAGAAAAAGAGCAGTTGGAGTAGGAGCTGTCTTCCTTGGGTTCTTAGGAGCAGCAGGAAGCACT  
ATGGGCGCGGCGTCAATAACGCTGACGGTACAGGCCAGACAATTATTGTCTGGCATAGTGCAACAGCAAAAGCA  
ATTTGCTGAAGGCTATAGAGGCTCAACAGCATCTGTTGAAACTCACGGTCTGGGGCATT

>AB253429..1

TTCTATTGTAATACATCAGGCCTGTTTAAATAGTACTTGGGTAAATGGCACTACCAGCAGCATGTCAAATGGCA  
CTATAACTCTCCCATGCAGAATAAAGCAAATTATAAATATGTGGCAGAGAGTAGGACAAGCAATGTATGCCCC

TCCCATCCAAGGAGTAATAAAGTGTGAATCAAACATTACAGGACTAATATTAACAAGAGATGGTGGGGTTAAT  
AGCAGTGACAGTGAAACCTTCAGACCTGGAGGAGGAGATATGAGGGATAATTGGAGAAGTGAATTATATAAGT  
ATAAGGTAGTAAAAATTGAACCACTAGGAGTAGCACCCACCAAGGCAAGGAGAAGAGTGGTGGAGAGAGAAAA  
AAGAGCAGTTACACTGGGAGCTGTATTCATTGGGTTCTTAGGAACAGCTGGAAGCACAATGGGCGCGGCGTCA  
ATAACGCTGACGGTACAGGCCAGAAAATTATTGTCTGGCATAGTGCAACAGCAAAGCAATTTGCTGAGGGCTA  
TAGAGGCTCAACAGCATCTGTTGAACTCACTGTCTGGGGCATT

>AY494973..1

TTCTATTGTAATACATCAGGCCTGTTTAAATAGCACTTGGCCTTGGAATGAGACAAATAGCGAGACAAATAACA  
CGAACGCTACTATAGTGCTCCCATGCAGAATAAAACAAATTGTAAGAATGTGGCAGAGAGTAGGACAAGCAAT  
GTATGCCCTCCCATCCAAGGAGTAATAAAGTGTACATCAAACATTACAGGACTACTATTAATAAGAGATGGT  
GGGGTTGGTAACAATACAAATGGAACCTTCAGACCTGGAGGAGGAAAATATGAGGGACAATTGGAGAA  
GTGAATTATATAAGTATAAAGTAGTAAAAATTGAACCACTAGGAGTAGCACCCACCGGGGCAAAAAGAAGAGT  
GGTGGAGAGAGAAAAAAGAGCAGTTGGAATAGGAGCTGTGTTTCATTGGGTTCTTAGGAGCAGCTGGAAGCACT  
ATGGGCGCAGCATCAGTAACGCTGACGGTACAGGCCAGACAATTGTTGTCTGGCATAGTGCAACAGCAAAGCA  
ATTTGCTGAGGGCTATAGAGGCTCAACAGCATATGTTGAACTCACGGTCTGGGGCATT

>EU853062..2

TTCTATTGTAATACATCAGACCTGTTTAAATAGCACTTGGTACTTAAATGGCACTAGCACTTGGTACAATGGCA  
CTGCAAATAACGCACCGTTAAATGGTAATATAACTCTCCCATGCAGAATAAAGCAAATCATAAGGATGTGGCA  
GAGAACAGGACAAGCAATGTATGCCCCCTCCATTCAAGGAAAAATAGAATGTGTATCAAACATTACAGGACTC  
CTATTAGTAAGAGATGGTGGGAATGATGAGAATAACAACACAAGAAATAACACCCTCAAAGATGAAAAATTCA  
GACCTGGAGGAGGAGATATGAAGGACAATTGGAGAAATGAATTATATAGGTATAAAGTAGTAAGAGTTGAACC  
ACTAGGAGTAGCACCCACCAAGGCAAGGAGAAGAGTGGTGGGGAGAGAAAAAAGAGCAGTTGGAATAGGAGCT  
GTGTTCTTGGGTTCTTAGGAGCAGCAGGAAGCACTATGGGCGCGGCGTCAATAACGCTGACGGAACAGGCCA  
GACAATTATTGTCTGGTATAGTGCAACAGCAAAGCAATTTGCTGAGGGCTATAGAGGCTCAACAGCAACTGTT  
GAACTCACAGTCTGGGGCATT

>EU852958..1

TTCTATTGTAATACATCAGGCCTGTTTAAATAGCACCTGGGATAAAAAATACCACCGTGCAGGAGTCAAATAGCA  
CGGGGTCAAATGACACTATAACTCTCCAATGTAGAATAAAGCAAATTATAAATATGTGGCAGGAAGTAGGACG  
AGCAATGTATGCTCCTCCCATCAAAGGAGTAATAAGGTGTGAATCAAACATTACAGGAATGATATTAACAAGA  
GATGGGGTAATACTACCGGGAAAAATGAGATCTTTAGGCCCTGGAGGAGGAGATATGAGGGATAATTGGAGAA  
GTGAATTGTATAAGTATAAAGTAGTAAAAATTGAACCACTAGGAGTAGCACCCACCGAGGCAAAGAGAAGAGT  
GGTGGAGAGAGAAAAAAGAGCAATTGGTGGAAATAGGAGCTGTCTTCTTGGGTTCTTAGGAGCAGCAGGAAGC  
ACTATGGGCGCAGCGTCAATAACGCTGACGGCACAGGCCAGACAATTATTGTCTGGTATAGTGCAACAGCAAA  
GCAATTTGCTGAGGGCTATAGAGGCTCAACAGCATCTGTTGAACTCACGGTCTGGGGCATT

>EU852954..1

TTCTATTGTAACACATCAGGCCTGTTTAAATAGCACCTGGTATACAAATAATACCAGCGTGCAGGAGACAAATA  
GCACGGGGACAAATGACACTATAATTCTCCAATGTAGAATAAAGCAAATTATAAATATGTGGCAGGAAGTAGG  
ACGAGCCATGTATGCTCCTCCCATCAGGGGAGTAATAAGGTGTGAATCAAACATTACAGGAATGATATTAACA  
AGAGATGGGGGTGTGAGTGTTAACAAGACAACCTGAGACTGAGGTCTTCAGACCTGGAGGAGGAGATATGAGGG  
ATAATTGGAGAAGTGAATTGTATAAGTATAAAGTAGTAAAAATTGAACCACTAGGAGTAGCACCTACCAAGGC  
AAAGAGAAGAGTGGTGGAGAGAGAAAAAAGAGCAATTACTGGAATAGGAGCTGTCTTCTTGGGCTCTTAGGA  
GCAGCAGGAAGCACTATGGGCGCAGCGTCAATAACGCTGACGGCACAGGCCAGACAATTATTGTCTGGTATAG  
TGCAACAGCAAAGCAATTTGCTGAGGGCTATAGAGGCTCAACAACATCTGTTGAACTCACGGTCTGGGGCAT  
T

>AF484507..1

TTCTATTGTAATACATCACAATTGTTTAAATAGCATTTGGAATGTCACTAACAGCACAGAGTCAGAGAATAGCA  
CGGGGTGAGATGACACTATAACTCTTCCATGCAGAATAAAGCAAATTATAAAGATGTGGCAGAGAACAGGACA  
AGCAATATATGCCCCCCCATCCAAGGAGTAATAAGGTGTGAATCAAACATTACAGGACTATTATTAACAAGA  
GATGGTGGGAATAACAATACAGGTAATGAAACCTTCAGACCTGCAGGAGGAGATATGAAGGACAATTGGAGAA  
GTGAATTATATAAGTACAAAGTAGTAAAAATTGAACCACTAGGAGTAGCACCCACCAAGGCAAGAAGGAGAGT  
GGTGGAGAGAGAAAAAAGAGCAGTTGGAATAGGAGCTGTATTCCTTGGGTTCTTAGGAACAGCAGGAAGCACT  
ATGGGCGCGGCGTCAATAACGCTGACGGTACAGGTGAGACAATTATTGTCTGGCATAGTGCAACAGCAAGGCA  
ATTTGCTGAGGGCTATAGAGGCTCAACAACAGCTGTTGAACTCACGGTCTGGGGCATT

>AF484508..2

TTCTACTGTAACACATCAAGCCTGTTTAAATGGCACTTGGAAATGGCACTGAGAACATAACGGAGTCAAATAGCA  
TGAACGACTCTATAATACTCCAATGCAGAATAAAGCAAATTATAAATATGTGGCAGAGAGCAGGACAAGCAAT  
ATATGCCCTCCCATCCCAGGAGTAATAAGGTGTCAATCAAACATTACAGGACTAATATTAACAAGAGATGGT  
GGAAAATAACAGTACAAATGAAACCTCCAGACCTGGAGGGGAGATATGAGGGACAACCTGGAGAAGTGAATTAT  
ATAAGTATAAAGTAGTAAAACTTGAACCACTAGGAGTAGCACCCACCAGGGCAAAAGAGAAGAGTGGTGGAGAG  
AGAGAAAAGAGCAGTTGGACTAGGAGCTGTTTTCTTTGGGTTCTTAGGAGCAGCAGGAAGCACTATGGGCGCG

GCGTCAATAACGCTGACGGTACAGGCCAGACAATTATTGTCTGGTATAGTGCAACAGCAAAGCAATTTGCTGA  
GGGCTATAGAGGCTCAACAGCATCTGTTGAACTCACGGTCTGGGGCATT

>AF484509..1

TTCTATTGTGACACATCAGGCCTGTTTAATAGCACTTGGTATAATACTTGAATAGCACTGAATCAAAAAGCA  
CGGAGTCAAACGACATTACTCTCCAATGCAGAATAAAGCAAATTATAAATATGTGGCAGAGAGCAGGACAAGC  
AATATATGCCCCCTCCCATCCAAGGAGTAATAATGTGTAAATCAAATATTACAGGACTAATATTAACAAGAGAT  
GGTGGAGGTAATAGCAGTGAACCTGAAACCTTCAGACCTGGAGGAGGAGACATGAGGGACAATTGGAGAAGTG  
AATTGTATAAGTATAAAGTAGTAAAAATTGAACCACTAGGAGTAGCACCCACCAAGGCAAGGAGAAGAGTGGT  
GCAGAGAGAAAAAGAACAGTTGGAATAGGAGCTGTGTTCTTGGGTTCTTAGGAGCAGCAGGAAGCACTATG  
GGCGCGCGCTCAATAACGCTGACGGCACAGGCCAGAGCATTACTGTCTGGCATAGTGCAACAGCAAAGCAATT  
TGCTGAGGGCTATAGAGGCTCAACAACATCTGTTGAGACTCACGGTCTGGGGCATT

>AF484512..2

TTCTATTGTGATACAACAGGACTGTTTAATAGCAATTGGACTTGAATGACACTGCCAGCATAATGGAGTCAA  
ATAGCATGGAGTCAACTCAAAATATAACACTCCAATGCAGAATAAAGCAGATTATAAATATGTGGCAGAGAGC  
AGGTAAAGCAATGTATGCCCCCTCCCATCCAAGGAACAATAAGGTGTGAATCAAACATTACAGGACTACTGTTA  
ACAAGAGATGGTGGGGATAATAGAGATAATAGAACTGAAACCTTCAGACCTGGAGGAGGAGATATGAGGGATA  
ATTGGAGAAGTGAATTATATAAGTATAAAGTAGTCAAAATTGAACCACTAGGAGTAGCACGCACCAGGGCAAA  
GAGAAGAGTGGTGGAGAGAGAAAAAGAGCAGTTGGAATAGGAGCTGTCTTCTTGGGTTCTTAGGAGCAGCA  
GGAAGCACTATGGGCGCGGCTCAATAACGCTGACGGTACAGGCCAGACTATTATTGTCTGGTATAGTGCAAC  
AGCAAAGCAATTTGCTGAGGGCTATAGAGGCTCAACAACATTTGTTGAAGCTCACGGTCTGGGGCATT

>EU853030..1

CTCTATTGTAATACATCAGGCCTGTTTAATAGCACTTGAATAACACTGTCAGCACGGAGTTAAATAGCAAGG  
AGGCAAATAACAATATAACTCTCCCATGCAAAATAAAGCAAATTATAAACATGTGGCAAAGAACAGGACAAGC  
AATGTATGCCCCCTCCCATCCGAGGAGTAATAAATTGTGTGTCAAACATTACAGGACTAATATTAACAAGAGAT  
GGTGGGCCTAACGATACACATGAAAATGAAACCTTCAGACCTGGAGGAGGAAATATGAGGGACAATTGGAGAA  
GTGAATTATATAAATATAAAGTAGTAAAAATTGAACCATTAGGAGTAGCACCCACCAGGGCAAAGAGAAGAGT  
GGTGGAAAGAGAAAAAGGAGCAGTTGGAATAGGAGCTGTCTTCTTGGGTTCTTAGGAGCAGCAGGAAGCACT  
ATGGGCGCGGCTCAATAACGCTGACGGTACAGGCCAGACAATTGTTGTCTGGCATAGTGCAACAGCAAAGCA  
ATTTGCTGAGGGCTATAGAGGCTCAACAACATCTGTTGAACTCACGGTCTGGGGCATT

>AF484478..1

TTCTATTGTAACACAACAAACCTGTTTAATAACATTTGGAGTAATGCCAGCATGCAGAAGGCAAATAGCATAA  
ACGACACTATAACTCTCCAATGCAGAATAAAGCAAATTATAAATATGTGGCAGAGAGTAGGACAAGCAATATA  
TGCCCCCTCCCATCCAAGGAGTGATAAAGTGTGAATCAAACATTACAGGACTAATATTAACAAGAGATGGTGGG  
GGTAATAACAATACAAATGAAACCTTCAGACCTGGAGGAGGAGATATGAGGGACAATTGGAGAAGTGAATTAT  
ATAAGTATAAAGTAGTAAAAATTGAACCACTAGGAGTAGCACCTACCAGGGCAAAGAGAAGAGTGGTGGAGAG  
AGAAAAAAGAGCAGTTGGAATGGGAGCTGTCTCATTGGGTTCTTAGGAGCAGCAGGAAGCACTATGGGCGCG  
GCGTCAATAACGCTGACGGTACAGGCCAGACAATTATTGTCTGGCATAGTGCAACAGCAAAGCAATTTGCTGA  
GGGCTATAGAGGCTCAACAGCATCTGTTGAACTCACGGTCTGGGGCATT

>AF484493..2

TTCTATTGTAATACATCAGGCCTGTTTAATAATACTTACACTACTGACAGCATAGAGTCAAATGACACGGAGC  
CAGATGCAAATATAACTCTTCCATGCAGAATAAAGCAAATTATAAATATGTGGCAGAGAGTAGGACAAGCAAT  
ATATGCCCCCTCCCATCCAAGGAGTAATAAAGTGTGAGTCAAACATCACAGGACTACTATTAACAAGAGATGGT  
GGTACTAACAGTACTAAAAGTACTGAAACCTTCAGACCTGGAGGAGGAGATATGAGGGACAATTGGAGAAGTG  
AATTATATAAGTATAAAGTAGTACAAGTTGAACCAATAGGAGTAGCACCCACCAGGGCAAAGAGAAGAGTGGT  
GGAGAGAGAAAAAGAGCAGTTGGAATAGGAGCTGTACTCTTGGGTTCTTAGGAGCAGCTGGAAGCACAAATG  
GGCGCGCGCTCAATAACGCTGACGGTACAGGCCAGACAGTTATTGTCTGGCATAGTGACAGCAAAGCAATTT  
TGCTGAGGGCTATAGAGGCTCAACAGCAACTGTTGAGACTCACTGTCTGGGGCATT

>AB098330..2

TTCTATTGTAATACATCAGGCCTGTTCAATGGCACCTGGAAGCCAAACAGCACAGAGTCAAACAACACAACGC  
CAAATGACACTATAACTCTTACATGCAGAATAAAGCAAATTATAAATATGTGGCAGAAAGTAGGACAAGCAAT  
GTATGCCCCCTCCATTCAAGGAGTAATAAGGTGTGAATCAAACATTACAGGACTACTATTAACAAGAGATGGA  
GGGATTAACAGTATAAATGAAACCTTCAGACCTGGAGGAGGAAATATGAGGGACAATTGGAGAAGTGAATTAT  
ATAAGTATAAAGTAGTAAAAATTGAACCACTAGGAGTAGCACCTCCAGGGCAAAGAGAAGAGTGGTGGAGAG  
AGAAAAAAGAGCAGTTGGAATAGGAGCTGTCTTCTTGGGTTCTTAGGAGCAGCTGGAAGCACTATGGGCGCG  
GCGTCAATAACGCTGACGGCACAGGCCAGACAATTATTGTCTGGTATAGTGCAACAGCAAAGCAATTTGCTGA  
GGGCTATAAAGGCTCAACAGCATATGTTGAAGCTCACGGTCTGGGGCATT

>GU367412..5

TTCTATTGTGATACATCAGGCCTGTTTAATAGTACTTGAATGACACTGCCACCAATCAGACTTTTGTATGCAA  
ATAGCAATATAACTCTTCAATGTAAAATAAGACAAATTGTACGTATGTGGCAGAGAATAGGACAAGCATTGTA  
TGCCCCCTCCCATTCAGGAGTAATAAGCTGTAAATCAAACATTACAGGGCTGCTACTAACAAGAGATGGTATG

AATGAGAGTAGTGAGACGTTTCAGACCTCAAGGAGGAAATATGAAGGACAATTGGAGAAGTGAATTATATAAAAT  
ATAAAGTAGTAAAAATTGAACCACTAGGAATAGCACCCACCAGGGCAAAGAGAAGAGTGGTGGAGAGAGAAAA  
AAGAGCAGTTGGACTGGGAGCTGTCTTCTTTGGGTTCTTGGGAGCAGCAGGAAGTACTATGGGCGCGGCGTCA  
ATAACGCTGACGGCACAGGCCAGACAATTATTGTCTGGTATAGTACAACAGCAGAGCAATCTGCTGAGGGCTA  
TAGAGGCTCAACAGCAACTGTTGAACTCACAGTCTGGGGCATT

>FJ647148..1

TTCTATTGTAATACATCAGGTCTGTTTAGTAGCAGGTGGTTCACTAATGGCACTAACAGCACGGAGTCAAATG  
GCACAGGCAATATAACTCTCCAATGCAGGATAAAGCAAATTATAAATATGTGGCAGAGAGTAGGACAAGCAAC  
GTACACCCCTCCCATCCAAGGAGAAATAAGGTGTAGATCAAACATTACAGGACTACTATTAACAAGAGATGGT  
GGGATTAACACAACAGAGGAAATCTTCAGACCTGGAGGGGGAAATATGAAGGACAATTGGAGAAGTGAATTAT  
ATAAGTATAAAGTAGTAAAAATTGAACCACTAGGAGTAGCACCATCCAAGGCAAAGAGAAGAGTGGTGGGAAG  
AGAAAAAAGAGCAGTTGGACTGGGAGCTGTATTTCATTGGGTTCTTGGGAGCAGCAGGAAGCACTATGGGCGCG  
GCGTCAGTGACGCTGACGGTACAGGCCAGACAATTATTGTCTGGCATAGTGCAGCAGCAAAGCAATTTGCTGA  
GGGCTATAGAGGCTCAACAGCATCTGTTGAACTCACAGTCTGGGGCATT

>KT183312..1

TTCTATTGTGACACATCAGGTCTGTTTAATGGCAGTTGGAGTGAAAATAGCACTTGGAATAGCACTATGGAGG  
CAAATAGCACAAATTATACTCCCATGTAGAATAAAGCAAATTATAAATATGTGGCAGAGAACAGGACGAGCAAT  
GTATGCCCTCCCATCCAAGGAACAATACAGTGACATCAAACATCACAGGATTAATATTAACAAGAGATGGT  
GGTGAGAAAAACAATAGCACTGAAGAAATCTTCAGACCTGGAGGAGGAGATATGAGGGACAATTGGAGGAGTG  
AATTATATAAATATAAAGTAGTAAAAATTGAACCACTAGGAGTAGCACCCACCAGGGCAAAGAGAAGAGTGGT  
GGAGAGAGAAAAAAGAGCAGTTACACTAGGAGCTGTATTTCATTGGGTTCTTAGGAGCAGCAGGAAGCACTATG  
GGCGCGGCGTCAGTGACGCTGACGGTACAGGCCAGACAATTATTGTCTGGCATAGTGCACAGCAAAGCAATT  
TGCTGAGGGCTATAGAGGCTCAACAGCATATGTTGAACTCACGGTCTGGGGCATT

>KC863311..1

TTCTATTGTAATACAACAGACCTGTTTAAGGGTACTTGGCATCCTGATAATAAACTTGGAGTGATCCTTGGGA  
ATGCCAGCATGAAGTCAAATAACACATCAAATGTCAATATAACTATCCTATGCAAGATAAAGCAAATTGTAAG  
GATGTGGCAGAGAGTAGAACAAGCAATGTATGCCCTCCCATCCAAGGAGTAATAAGCTGTTTCATCAAACATT  
ACAGGACTACTATTAAACAAGCGATGGTGGTAGGGATAATAGCAATAATACTGGTAAGGATAATAGCAATAAAA  
ATAACTTGAAACCTTCAGACCTGGAGGAGGAAATATGAGGGACAATTGGAGAAGTGAATTATATAAGTATAA  
AGTAGTAAAAATTGAACCACTAGGAGTAGCACCTACCCCGCAAGGAGAAGAGTGGTGCAGAGAGAAAAAGA  
GCAGTTGGCCTAGGAGCTGTCTTCATTGGGTTCTTAGGAGCAGCAGGAAGCACTATGGGCGCGGCGTCAGTGA  
CGCTGACGGTACAGGCCAGACAATTATTGACTGGTATAGTGCAGCAGCAAAGCAATTTGCTGAAGGCTATAGA  
GGCTCAACAACATCTGTTGAGACTCACAGTCTGGGGCATT

>HM623589..3

TTCTACTGCAACACATCAAGCTTGTTTAATAGGACATTTCCGGCCAACTACACGTATAATAGGACTGCTGACA  
GCACACAGGGGAATACAACATACTATCCCATGCAGAATAAAACAAATTATAAACATGTGGCAGAGAGTAGG  
ACAAGCAATGTATGCCCTCCCATTTGAAGGAGTAATAAGATGTGAATCAAACATTACAGGAATACTATTGACA  
AGAGATGGTGGGAATGAGACAAATGTAGAAGTCTTCAGACCAGAGGGAGGAAATATGAGGGACAATTGGAGAA  
GTGAATTATATAATTACAAGGTAGTAAGAATTGAACCACTAGGAGTAGCACCCACCAGGGCAAGGAGGAGAGT  
GGTGGAGAGAGAAAAAAGAGCAGTTGGACTGGGAGCTGTCTTCCTTGGGTTCTTAGGAGCAGCAGGAAGCACT  
ATGGGCGCGGCGTCAATAACGCTGACGGTACAGGCCAGGCAATTATTGGCTGGCATAGTGCACAGCAAAGCA  
ATTTGCTGCAAGCTATAGAGGCTCAACAGCATCTGTTGAACTCACTGTCTGGGGCATT

>MH705163..1

TTCTATTGCAATACAACAGCCCTGTTTAATAGCACGTGGGAGAATGAGAATGACACGGCCAACATACAGAAGA  
ATGGCACGGAGTCAAATGACACTATAAAGTATCCCATGCAGAATAAAACAAATTATAAACATGTGGCAGAGAGT  
AGGACGAGCAATGTATGCCCTCCCATTTGAGGAGTAATAAAGTGTACATCAACATTACAGGAATAATATTG  
ACAAGAGATGGTGGGATAGTGGGAACAATACCAGGGAGGAGATCTTCAGACCTGGAGGAGGAGATATGAGGG  
ACAATTGGAGAAGTGAATTATATAAGTATAAAGTAGTAAACTTGAACCACTAGGAGTAGCACCCACCAAGGC  
AAGGAGAAGAGTGGTGGAGAGAGAAAAAAGAGCAGTTGGACTGGGAGCTGTCTTCCTTGGGTTCTTGGGAGCA  
GCAGGAAGCACTATGGGCGCAGCGTCAATAACGCTGACGGTACAAGCCAGACAATTATTGTCTGGCATAGTGC  
AACAGCAAGGCAATTTGCTGAAGGCTATAGAGGCTCAACAGCATCTGTTGAACTCACGGTCTGGGGCATT

>AF286241..1

TTCTATTGTAATACAACAAGCCTGTTTAATAGCACATGGAAGAATGGCGCCACCATACAGGAGAATAGCACGG  
AGACAAATGGAATTATGACTCTCCCATGCAGAATAAAACAAATTGTAGACATGTGGCAGGAAGTAGGACAAGC  
AATGTATGCCCTCCCATTTGAGGAGTAATATATTGTACATCAAACATTACAGGAATAATATTGACAAGAGAT  
GGTGGGAGCAGTAACACCAATAGTGAGATCTTTAGGCCTGGAGGAGGAGATATGAGGGACAATTGGAGAAGTG  
AATTATATAAGTATAAAGTAGTAAAAATTGAACCACTAGGAGTAGCACCTCCAGGGCAAAGAGAAGAGTGGT  
GGAGAGAGAAAAAAGAGCAGTGGGAATAGGAGCTGTTTTCTTGGGTTCTTGGGAGCTGCAGGAAGCACTATG  
GGCGCGGCGTCAATAACGCTGACGGTACAGGCCAGACAGTTATTATCTGGCATAGTGCACAGCAAAGCAATT  
TGCTGAAGGCTATAGAGGCTCAACAGCATCTGTTGAACTCACAGTCTGGGGCATT

>AF286238..2

TTCTATTGCAATACAACAGGCCTGTTTAAATAGCACATGGGAAAATGGCACTAACAAACAGAATTACACGGAGT  
CAAATGACACTATAACGCTCCAATGCAGAATAAAACAAATTATAAACATGTGGCAGAGAGTAGGCCGAGCAAT  
GTATGCCCTCCCATTGCAGGAGTAATAAAGTGTACATCAAACATTACAGGAATGATATTGACAAGAGACGGT  
GGGAAGAACAGTATTAATGAGACCTTCAGACCTGGAGGAGGAGATATGAGGGACAATTGGAGAAGTGAATTAT  
ATAAGTATAAAGTAGTAAAAATTGAACCACTAGGAATAGCACCCACAGAGGCAAGGAGAAGAGTGGTGCAGAG  
AGAAAAAAGAGCAGTTGGATTGGGAGCTGTTTTCTTGGGTTCTTGGGAGCAGCAGGAAGCACTATGGGCGCG  
GCGTCAATAACGCTGACGGTACAGGCCAGACAATTATTGACTGGCATAGTGCAACAGCAAAGCAATTTGCTGA  
AGGCTATAGAGGCTCAACAACAGATGTTGAGGCTCACAGTCTGGGGCATT

>AF286237..2

TTCTATTGCAATACAACAGGCCTGTTTAAATGGTACGTGGTGGAAACAATGGTACGTGGAACGGGCCCTACACAC  
CTAATAACACCAATGGAAGTATAATCCTCCCATGCAGAATAAAACAAATTATAAACATGTGGCAGAGAGTAGG  
AAGAGCAATGTATGCCCTCCCATTGCAGGAATAATAAAGTGTACATCAAACATTACAGGAATAATATTGACA  
AGAGATGGTGGTAACAATGGGACTAATGAGACCTTCAGACCTGGAGGAGGAGATATGAGGGACAATTGGAGAA  
GTGAATTATATAAATATAAAGTAGTAAAACTTGAACCACTAGGAGTAGCACCTACCAGGGCAAAAAGAAGAGT  
GGTGGAGAGAGAAAAAAGAGCAGTTGGACTGGGAGCTGTCTTCTTGGGTTCTTGGGAGCAGCAGGAAGCACT  
ATGGGCGCGGCGTCACTAACGCTGACGGTACAGGCCAGACAATTATTGTCTGGTATAGTGCAACAGCAAAGCA  
ATTTGCTGCAGGCTATAGAAGCTCAACAGCATCTGTTGAAACTCACAGTCTGGGGCATT

>AY521629..3

TTCTATTGCAATACATCAGGTCTGTTTAAATAGTACTTGGAAATGACACGGCCATCAATGACACTATCAACGTGC  
AGAATTCAACTTACAATATAACTCTCCCATGCAGAATAAGACAAATTGTACATATGTGGCAGAGAGTAGGACA  
AGCAATGTATGCCCTCCCATTCAAGGGGTAATAAACTGTACATCAAACATTACAGGGCTACTGTTAACAAGG  
GATGGTGGGGATAATAGTAGTACAAATGAGACATTTCAGACCTGGAGGAGGAAATATGAAGGACAATTGGAGAA  
GTGAATTATATAAATATAAAGTAGTAAAAATTGAACCACTAGGAGTAGCACCCACCAAGGCAAAGAGGAGAGT  
GGTGGAGAGAGAAAAAAGAGCAGTTGGACTAGGAGCTGTCTTCTTGGGTTCTTAGGAGCAGCAGGAAGTACT  
ATGGGCGCGGCGTCAATGACGCTGACGGTACAGGCCAGACAATTATTGTCTGGCATAGTACAACAGCAGAGCA  
ATCTGCTGAGGGCTATAGAGGCTCAACAGCACATGTTGAAACTCACAGTCTGGGGCATT

>AY521631..2

TTCTATTGCAATACATCAGGCCTGTTTAAATAGTACTTGGTATAATAGTACTTGGAAATAACACTGACAGCACAC  
AGAAATCAAATGGCACGGAGAAAAATACTCTCCCATGCAGAATAAAACAAGTTATAAAAATGTGGCAAAGAGT  
AGGACAAGCAATGTATGCCCTCCCATTCAAGGAGTAATAAAATGTGTATCAAACATTACAGGGTACTGCTA  
ACAAGAGATGGGGGAACCTTAATAGCTCATTTGAGACGTTTCAGACCTGGAGGAGGAAATATGAAGGACAATT  
GGAGAAGTGAATTATATAAATATAAAGTAGTAAAAATTGAACCACTAGGAGTAGCACCCACCAAGGCAAAGAG  
AAGAGTGGTGGAGAGAGAAAAAAGAGCGGTGCGACTGGGAGCTGTCTTCTTGGGTTCTTAGGAGCAGCAGGA  
AGTACTATGGGCGCGGCGTCAATAACGCTGACGGCACAGGCCAGACAATTATTGTCTGGTATAGTACAACAGC  
AGAGCAATCTGCTGAGGGCTATAGAGGCTCAACAGCAAATGTTGAAACTCACGGTCTGGGGCATT

>AY521630..1

TTCTATTGCAATACATCAGGTCTGTTTAAATAGTACTTGGAAATAGCACTACCATCAAGCAGAATTTAACTAACA  
ATGACACGGGGGTAATAAATCTCCCATGCAGAATAAGACAAATTGTACATATGTGGCAGAGAGTAGGACAAGC  
AATGTATGCCCTCCCATTAAAGGGGTAATAAACTGTACATCAAACATTACAGGGCTACTGCTAACAAGGGAT  
GGTGGGGATAATAATAGTACAGATGAGAAGTTTCAGACCTGGAGGAGGAGATATGAGGGACAATTGGAGAAGTG  
AATTATATAAATATAAAGTAGTAAAAATTGAACCACTAGGAGTAGCACCCACCAGGGCAAAGAGAAGAGTGGT  
GCAGAGAGAAAAAAGAGCAGTTGGACTAGGAGCTGTCTTCTTGGGTTCTTAGGAGCAGCAGGAAGTACTATG  
GGCGCGGCGTCAATAACGCTGACGGCACAGGCCAGACAATTATTGTCTGGCATAGTACAACAGCAGAGCAATC  
TGCTGAGGGCTATAGAGGCTCAACAGCACTTGTTGAAACTCACAGTCTGGGGCATT

>AM000053..1

TTCTATTGCAATACATCAGGCCTATTTAAATAGCAGTTGGGCGCCCAACGGCAGTTGGATCAACAACATTGGCA  
GTAGGGAAAATGACACTATGACTCTGCCATGCAGAATAAAACAAATTATAAATATGTGGCAGAGAGTAGAACA  
AGCAATGTATGCCCTCCTATCAAAGGAAACATAACTTGTGTATCAAACATTACAGGACTACTGTTAACAAGA  
GATGGTGGAACTAATGAACTAGGGAGAATGAGACCTTCAGACCTATAGGAGGAGAGATGAGAGACAATTGGA  
GAAGTGAATTATATAAGTATAAAGTAGTAAAAATTGAACCACTAGGAGTAGCACCCACCAAGGCAAAGAGAAG  
AGTGGTGGAGGGGAGAGAAAAAAGAGCAGTTGGAATGGGAGCTTTCTTCTTGGGTTCTTAGGAGCAGCAGGA  
AGCACTATGGGCGCGGCGTCAATAACGCTGACGGTACAGGCCAGACAATTATTGGCTGGTATAGTGCAACAGC  
AAAGCAATTTGCTGAAGGCTATAGAGGCTCAACAACATCTGTTGAGACTCACAGTCTGGGGCATT

>AM000054..2

TTCTATTGTAATACATCAAGCCTGTTTAAATAGCTCTTGGCCCATTAACAGCACTACCAGCAATAACAGCACTG  
CCAGTAATGAGACCATAAATCTGCCATGTAGAATAATACAAATTATAAATATGTGGCAGAGACTAGGACAGGC  
AATGTATGCCCTCCCATCAAAGGATTAATAAATTGTGTATCAAACATTACAGGACTACTGTTGACAAGGGAT  
GGTGGAGATAGGAACAGTAGTTATGAGACCTTCAGACCTATAGGAGGAAATATGAAGGACAATTGGAGAAGTG  
AACTGTATAAGTATAAAGTAGTAAAAATTGAACCACTAGGAGTAGCACCTACCAAGGCAAGGAGGAGAGTGGT

GGAGAGAGAAAAAGAGCAGTTGGAATAGGAGCTTTCTTCCTTGGGATCTTAGGAGCAGCAGGAAGCACTATG  
GGCGCGGCGTCAATAACGCTGACGGTACAAGCCAGGCAAGTATTGTCTGGTATAGTGCAACAGCAGAGCAATT  
TGCTGAAGGCTATAGAGGCTCAACAACATTTGTTGAAACTCACAGTCTGGGGCATC

>FJ388892..2

TTCTATTGCAATACAACAGACCTGTTTAATAGCACTTGGTACACTAATGACACTGGCACAAATAGCACAGGGG  
CCAATGAAAATGGGGCCAATGAAAATATAACTTTACCATGCAGAATAAAGCAAATTATAAATATGTGGCAGAG  
AGTAGGGCAAGCAATGTATGCCCCCTCCTATCAAAGGAAGTATAAGGTGTGAATCAAACATTACAGGACTACTA  
CTAACAGAGATGGTGGAAAGTGAAATGATAGCTACAATGAGACCTTCAGACCTATAGGAGGAAATATGAGGG  
ATAATTGGAGAAGTGAACCTATATAAGTATAAAGTAGTAGAAATTGAACCAATAGGAGTAGCACCTACCAAGGC  
AAGGAGAAGAGTGGTGGGGGAGAGAAAAAGAGCAATTGGACTGGGAGCTGCCTTCCTTGGGTTCTTAGGAGCA  
GCAGGAAGCACTATGGGCGCGGCGTCAATAACGCTGACGGTACAGGCCAGACAATTATTGTCTGGCATAGTGC  
AACAGCAAAGCAATTTGCTGAGGGCTATAGAGGCTCAGCAGCATCTGCTGAAACTCACAGTCTGGGGCATT

>JF683763..1

TTCTATTGCAATACAACAGACCTGTTTCAGTAGCACTTGGGACGAAGATGACACTGACATCACTCTCGCCCAGG  
ACAATGGAACATAACTCTGCCATGCAGAATAAAGCAAATTATAAATATGTGGCAGAGAGTAGGACAAGCAAT  
GTATGCCCCCTCCTATCAAAGGAAGTATAAGGTGTGAATCAAACATTACAGGACTACTACTAACAGAGATGGT  
GGAGCTAATAGCAGTAATGAGACCTTCAGACCTATAGGAGGAGATATGAGAGACAATTGGAGAAGTGAACCTAT  
ATAAATATAAAGTGGTACAAATTGAACCAATAGGAATAGCACCTACCAGGGCAAGGAGAAGAGTGGTGGAGAG  
AGAAAAAGAGCAATTGGACTGGGAGCTGCCTTCCTTGGGTTCTTAGGAGCAGCAGGAAGTACTATGGGCGCG  
GCGTCACTGACGCTGACGGTACAGGCCAGAAAATTATTGTCTGGCATAGTGCAACAGCAAACAATTTGCTGA  
GGGCTATAGAGGCTCAGCAGCATCTGCTGAAACTCACGGTCTGGGGCATT

>JF683798..1

TTCTATTGCGATACAACAAACCTGTTCAATAGCACTTGGGACGGAATAGCACTGTCACAAATATCACACAGA  
CCAATGAAAATATAACTTTACCATGCAAAATAAGGCAAATTATAAGGATGTGGCAGAGAGTAGGACAAGCAAT  
GTATGCCCCCTCCTATCAAAGGAATTATAAGGTGTGAATCAAACATTACAGGACTACTGCTAACAGAGATGGT  
GGAAATAAAACCAATAGCAACAATGAGACCTTCAGACCTATAGGAGGAGATATGAGGGACAATTGGAGAAGTG  
AACTATATAAGTATAAAGTAGTAAAAGTGAACCAATAGGAGTAGCACCTACCAGAGCAAGGAGAAGAGTGGT  
GGAGAGAGAAAAAGAGCAATAATTGGACTGGGAGCTGCCTTCATTGGGTTCTTAGGAGCAGCAGGAAGCACT  
ATGGGCGCGGCGTCAATAACGCTGACGGTACAGGCCAGACAATTATTGTCTGGCATAGTGCAACAGCAAAGCA  
ATTTGCTGAGGGCTATAGAGGCTCAGCAGCATCTGCTGAAACTCACGGTCTGGGGCATT

>EF545108..1

TTCTATTGCAATACAACAGGCCTGTTCAATAATGCCAGCAACAATGGTACAAACCGCACAGACCCTATAATTC  
TCCCATGCAGAATAAAGCAGATTATAAATATGTGGCAAAGAGTAGGGCAGGCAATGTATGCTCCTCCTATCAA  
AGGAATCATAAGGTGTGAATCAAACATTACAGGACTACTATTAACAAGAGATGGTGGGAATAAAAATGGAAGC  
AACGGGACCGAGACCTTCAGACCTATAGGAGGAGATATGAGGGACAATTGGAGAAGTGAATTATATAAGTATA  
AAGTAGTAAAAATTGAACCAATAGGAGTAGCACCTACCAGGGCAAAGAGAAGAGTGGTGGAGAGAGAAAAAGAG  
AGCAATTGGACTGGGAGCTGCCTTCCTTGGGTTCTTAGGAGCAGCAGGAAGTACTATGGGCGCGGCGTCAATA  
ACGCTGACGGTACAGGCCAGACAATTACTGTCTGGCATAGTACAACAGCAAAGCAATTTGCTGAGGGCTATAG  
AGGCTCAGCAGCATCTGCTGAAGCTCACGGTCTGGGGCATT

>GU481566..1

TTCTATTGCAATACAACAGCCCTGTTCAATAGCACTTGGGATGAAAATAGCACTGTCACAAATAGCACACAGG  
CCAATGAAAATATAACTCTGCCATGCAGAATAAAGCAAATTATAAATATGTGGCAGAGAGTAGGACAAGCAAT  
GTATGCCCCCTCCTATCGCAGGAATTATAAGGTGTGAATCAAACATTACAGGACTACTAATAACAAGAGATGGT  
GGAATAATAGCAGCAATGAGACTGAGACCTTCAGACCTACAGGAGGAAATATGAGGGACAATTGGAGAAGTG  
AACTATATAAGTATAAAGTAGTACAAATTGAACCAATAGGAGTAGCACCTACCAAGGCAAAGAGAAGAGTGGT  
GGAGAGAGAAAAAGAGCAATTGGACTGGGAGCCGCTTCCTTGGGTTCTTAGGAGCAGCAGGAAGTACTATG  
GGCGCGGCGTCACTGACGCTGACGGTACAGGCCAGACAATTATTGTCTGGCATAGTACAACAGCAAAGCAATT  
TGCTGAGGGCTATAGAGGCTCAGCAGCATCTGCTGAAACTCACGGTCTGGGGCATT

>GU481615..1

TTCTATTGCAATACAACAGAACTGTTCAATAGCACTTGGAAACACAAGCAGCACTGTCACAAATAGCACACAGG  
CCAATGAAACTATAAGTCTACCATGCAAAATAAAGCAAATTATAAGGATGTGGCAGAGAGTAGGACAAGCAAT  
GTATGCCCCCTCCTATCAACGGAACCTATAAGGTGTGAATCAAACATTACAGGACTACTACTAACAAGAGATGGT  
GGAGGTGAAAATAATAGCAGCAATGAGACCTTCAGACCTGCAGGAGGAGATATGAAGGACAATTGGAGAAGTG  
AACTATATAAGTATAAAGTAGTAGAAATTGAACCAATAGGATTAGCACCTACCAAGGCAAAGAGAAGAGTGGT  
GGAGAGAGAAAAAGAGCAATTGGACTGGGAGCTGCCTTCCTTGGGTTCTTAGGAGCAGCAGGAAGTACTATG  
GGCGCGGCGTCAATTGACGCTGACGGTACAGGCCAGACAATTATTGTCTGGCATAGTGCAACAGCAAAGCAATT  
TGCTGAGGGCTATAGAGGCTCAGCAGCATCTGCTGAAACTCACAGTCTGGGGCATT

>HQ896489..1

TTCTATTGCAATACAACAGACCTGTTTCACAAATAGCACTCTCACAGATAACACAGAGACCAATGAAACTATAA  
CTCTGCCATGCAGAATAAAGCAAATCATAAATATGTGGCAGAGAGTAGGACAAGCAATGTATGCCCCCTCCTAT

CAGAGGAAGTATAAGGTGTAATTCAAACATTACAGGACTACTGCTAATAAGAGATGGTGGAGCTAATAGCAGC  
AATGAGACCTTCAGACCTATAGGAGGAAATATGAGGGACAAATTGGAGAAGTGAAGTATATAAGTATAAAGTAG  
TAAAAATTGAACCAATAGGAGTAGCACCTACCAAGGCAAAGAGAAGAGTGGTGGAGAGAGAAAAAGAGCAAT  
TGGACTGGGAGCCGCTTCCTTGGGTTCTTAGGAACAGCAGGAAGCACTATGGGCGCGGCGTCACTGACGCTG  
ACGGTACAAGCCAGACAATTATTGTCTGGCATAGTGCAACAGCAAAGCAATTTGCTGAGGGCTATAGAGGCTC  
AGCAACATCTGCTGAAACTCACGGTCTGGGGCATT

>JQ292897..1

TTCTATTGCGATACAACAGCCCTGTTCAATAGCACTTGGGAAAATGGCACTGTTATAAATAGCACACAGGCCA  
ATGAGACTATAACTCTACCATGCAGAATAAAGCAAATTATAAATATGTGGCAGAGAGTAGGACGAGCAATGTA  
TGCCCCCTCCTATCAGAGGAATTATAAGGTGTGAATCAAACATTACAGGACTACTACTAACAAGAGATGGTGGA  
GGTGGAAATAATAGCAGCAATGAGACCTTCAGACCTATAGGAGGAAATATGGAGGACAATTGGAGAAGTGAAC  
TATATAAGTATAAAGTAGTAGAAATTGAACCAATAGGAGTAGCACCTACCAAGGCAAAGAGAAGAGTGGTGGA  
GAGGGAAAAAAGAGCAATTGGACTGGGAGCTGCCTTCCTTGGGTTCTTGGGAGCAGCAGGAAGCACTATGGGC  
GCGGCGTCACTAACGCTGACGGTACAGGCCAGACAATTATTGTCTGGCATAGTGCAACAGCAAAGCAATTTGC  
TGAGGGCTATAGAGGCTCAGCAGCATCTGCTGAAACTCACGGTCTGGGGCATT

>JQ292899..1

TTCTATTGCAATACAACAGACCTGTTCAATTGGGACGGAAATGGCAATGTTACAAACAGCACACAGGCCGATG  
GAAATATAACTCTACCATGCAGAATAAAGCAAATTATAAATATGTGGCAGAGAGTAGGACAAGCAATGTATGC  
CCCTCCTATCAAAGGAAATATAACGTGTGTATCAAACATTACAGGACTACTATTAACAAGAGATGGTGGAGGT  
GGAATTAATAGTAGCAATGAGACCTTCAGACCTATAGGAGGAGATATGAGGGACAATTGGAGAAGTGAAGTAT  
ATAAGTATAAAGTAGTAAAAATTGAACCAATAGGAGTAGCACCTACCAAGGCAAAGAGAAGAGTGGTGGAGAG  
AGAAAAAAGAGCAATTGGACTGGGAGCTGCCTTCCTTGGGTTCTTGGGAGCAGCAGGAAGTACTATGGGCGCG  
GCGTCAATAACGCTGACGGTACAGGCCAGACAATTATTGTCTGGCATAGTGCAACAGCAAAGCAATTTGCTGA  
GGGCTATAGAGGCTCAGCAGCATCTGCTGAAACTCACGGTCTGGGGCATT

>HQ385841..2

TTCTATTGCTATACAACAAAACTGTTCAATAGCACTTGGAACGGAAATGACACTGTTACAAATAGCACACAGG  
CCAATGAAATATAACTTACCATGCAGAATAAAGCAAATTATAAATATGTGGCAGAGAGTAGGACAAGCAAT  
GTATGCCCCCTCCTATCAAAGGAAATATAAGCTGTACATCAAACATTACAGGACTACTACTAACAAGAGATGGT  
GGAAC TAATAGCAGTAATGAGACCTTCAGACCTATAGGAGGAGATATGAGGGACAATTGGAGAAGTGAAGTAT  
ATAAGTATAAAGTAGTACAAATTGAACCAATAGGAGTAGCACCTACCAGGGCAAAGAGAAGAGTGGTGGAGAG  
AGAAAAAAGAGCAATTGGACTGGGAGCTGCCTTCCTTGGGTTCTTGGGAGCAGCAGGAAGTACTATGGGCGCG  
GCGTCAATAACGCTGACGGTACAGGCCAGACAATTATTGTCTGGCATAGTACAACAGCAAAGCAATTTGCTGA  
GGGCTATAGAGGCTCAGCAGCATCTGCTGAAACTCACGGTCTGGGGCATT

>HQ385843..1

TTCTATTGCAATACAACAGCCCTGTTCAATAGTACTTGGCACGAAAATAGCACTGATACAATAGCACACAGG  
ACAATGAACTATAACTCTACCATGCAGAATAAAGCAAATTATAAATATGTGGCAGAGAGTAGGACAAGCAAT  
GTATGCCCCCTCCTATCGAAGGAAATATAAGCTGTACATCAAACATTACAGGACTACTACTAACAAGGGATGGT  
GGAGCTAATAGCAGCAATGAGACCTTCAGACCTATAGGAGGAGATATGAGGGACAATTGGAGAAGTGAAGTAT  
ATAAGTATAAAGTAGTACAAATTGAACCAATAGGAGTAGCACCTACCAAGGCAAAGAGAAGAGTGGTGGAGAG  
AGAAAAAAGAGCAATTGGACTGGGAGCTGCCTTCCTTGGGTTCTTGGGAGCAGCAGGAAGCACTATGGGCGCG  
GCGTCAATAACGCTGACGGTACAGGCCAGACAATTATTGTCTGGCATAGTGCAACAGCAAAGCAATTTGCTGA  
GGGCTATAGAGGCTCAGCAGCATCTGCTGAAACTCACGGTCTGGGGCATT

>HQ385846..1

TTCTATTGCAATACAACAGAACTGTTCAATAGCACTTGGGGCAATGGCACTGTCACAAATAGCACAGGGGACA  
ATGAAAATATAATTCTACCATGCAGAATAAAGCAAATCATAAGGATGTGGCAGAGAGTAGGACAAGCAATGTA  
TGCCCCCTCCTATCAAAGGAATTATAAAGTGTAAATCAAACATTACAGGACTACTACTAACAAGAGATGGTGGA  
GGTGGAAATAGCAGCAATGAGACCAAGTGAACCTTCAGGCCTATAGGAGGAGATATGAGGGACAATTGGAGAA  
GTGAACTATACAAGTATAAAGTAGTACAAATTGAACCAATAGGAGTAGCACCTACCAGGGCAAAGAGAAGAGT  
GGTGGAGAGAGAAAAAAGAGCAATTGGACTGGGAGCTGCCTTCCTTGGGTTCTTAGGAGCAGCAGGAAGCACT  
ATGGGCGCGGCGTCAATAACGCTGACGGTACAGGCCAGACAATTATTGTCTGGCATAGTGCAACAGCAAAGCA  
ATTTGCTGAGAGCTATAGAGGCTCAGCAGCATCTGCTGAAACTCACGGTCTGGGGCATT

>GU481434..2

TTCTATTGCTATACAACAAACCTGTTCAATAGCACTTGGGGCGAAAATAGCACTGATATAAATAGCACACAGG  
CCAATGAAAATATAACTCTACCATGCAGAATAAAGCAAATTATAAATATGTGGCAGAGAGTAGGACAAGCAAT  
GTATGCCCCCTCCTATCAAAGGAAGTATAATGTGTACATCAAACATTACAGGGCTATTACTAACAAGAGATGGT  
GGAGGTGGAGCTAATAGCAGCAATGAGACCTTCAGACCTATAGGAGGAAATATGAGGGACAATTGGAGAAGTG  
AACTATATAAGTATAAAGTAGTAAAAATTGAACCAATAGGAGTAGCACCTACCACGGCAAAGAGAAGAGTGGT  
GGAGAGAGAAAAAAGGGCAATTGGACTGGGAGCTGCCTTCCTTGGGTTCTTGGGAGCAGCAGGAAGCACTATG  
GGCGCGGCGTCACTAACGCTGACGGTACAGGCCAGACAATTATTGTCTGGCATAGTGAGCAGCAAAGCAATT  
TGCTGAAGGCTATAGAGGCTCAGCAGCATCTGCTGAAACTCACGGTCTGGGGCATT

>GU481486..1

TTCTATTGCAATACAACAGACCTGTTCAATAGCACTTGGAACGAAACTGACATTGATGCACAGGCCAATGAAG  
TCAATGAACTATAACTCTACCATGCAGAATAAAGCAAATTATAAATATGTGGCAGAGAGTAGGGCAAGCAAT  
GTATGCCCTCCTATCAAAGGAAGTATAAGGTGTGAATCAAACATTACAGGACTACTACTAACAAGAGATGGT  
GGAAGACTTAATGGCAGCAATGAGACCTTTAGACCTATAGGAGGAGATATGAGGGACAATTGGAGAAGTGAAC  
TATATAAGTATAAAGTAGTACAAATTGAACCAATAGGAGTAGCACCTACCAAGGCAAAGAGAAGAGTGGTGGA  
GAGAGAAAAAAGAGCAATTGGACTGGGAGCTGCCTTCCTTGGGTTCTTGGGAGCAGCAGGAAGTACTATGGGC  
GCGGCGTCAATAACGCTGACGGTACAGGCCAGACAATTATTGTCTGGCATAGTGCAACAGCAAAGCAATTTGC  
TGAGGGCTATAGAGGCTCAGCAGCATCTGCTGAAACTCACGGTCTGGGGCATT

>GU481644..1

TTCTATTGCAATACAACAAACCTGTTCAATAGCACTTGGAATGAAACAGACATTGTTACAAATATCACACAGG  
GCAATGGAACATAACTCTACCATGCAGAATAAAGCAAATTATAAATATGTGGCAGAGAGTAGGACAAGCAAT  
GTATGCCCTCCTATCAAAGGAAATATAACGTGTACATCAAACATTACAGGACTACTACTAACAAGAGATGGT  
GGAACATAATAGCAGCAATGAGACCTTCAGACCTATAGGAGGAGATATGAGGGACAATTGGAGAAGTGAACAT  
ATAAATATAAAGTAGTACAAATTGAACCAATAGGAGTAGCACCTACCAGGGCAAAGAGAAGAGTGGTGGAGAG  
AGAAAAAAGAGCAATTGGACTGGGAGCTGCCTTCCTTGGGTTCTTGGGAGCAGCAGGAAGCACTATGGGCGCG  
GCGTCACTAACGCTGACGGTACAGGCCAGACAATTACTGTCTGGCATAGTGCAACAGCAAAGCAATTTGCTGA  
GGGCTATAGAGGCTCAGCAGCATCTGCTGAAACTCACGGTCTGGGGCATT

>JQ292891..1

TTCTATTGCAATACAACAGACCTGTTCAATAGCACTTGGGACAATAGCACTGTCACAAATAGCACAGGGACCA  
ATGAAACTATAACTCTGCCATGTAGAATAAAGCAAATTATAAATATGCGGCAGAGAGTAGGACAAGCAATGTA  
TGCCCCCTCCTATTAGAGGAAGTATAAGGTGTGAATCAAACATTACAGGACTACTACTAATAAGAGATGGTGGA  
GCTAATAGCAGCAATGAGACCTTCAGACCTATAGGAGGAAATATGAGGGACAATTGGAGAAGTGAACATATA  
AGTATAAAGTAGTAAAAATTGAACCAATAGGAGTAGCACCTACCAAGGCAAAGAGAAGAGTGGTGGAAAGAGA  
AAAAAGAGCAATTGGACTGGGAGCCGCCTTCCTTGGGTTCTTAGGAGCAGCAGGAAGCACTATGGGCGCGGCG  
TCAATGACGCTGACGGTACAGGCCAGACAATTATTGTCTGGCATAGTGCAACAGCAAAGCAATTTGCTGAGGG  
CTATAGAGGCTCAGCAGCATCTGCTGAAACTCACGGTCTGGGGCATT

>HQ385820..1

TTCTATTGCAATACAACAAACCTGTTCAATAGCACTTGGGACACAAATATCACAGAGGCCAATATCACAGAGG  
CCAATGAACTATAATTCTACCATGCAAAATAAAGCAAATTATAAATATGTGGCAGAGAGTAGGAAAAGCAAT  
GTATGCCCTCCTATCAAAGGAAGTATAAGGTGTGAATCAAACATTACAGGACTACTACTAACAAGAGATGGT  
GGAACATAATAGCAGCAATAGCAATGAGACCTTCAGACCTATAGGAGGAAATATGAGGGACAATTGGAGAAGTG  
AACTATATAAATATAAAGTAGTAAAAATTGAACCAATAGGAGTAGCACCTACCAAGGCAAAGAGAAGAGTGGT  
GGAGAGAGAAAAAAGAGCAATTGGGTTGGGAGCTGCCTTCCTTGGGTTCTTAGGAGCAGCAGGAAGCACTATG  
GCCGCGGGTCAATAACGCTGACGGTACAGGCCAGACAATTATTGTCTGGCATAGTGCAACAGCAAAGCAATT  
TGCTGAGGGCCATAGAGGCTCAGCAACATATGCTGAAACTCACGGTCTGGGGCATT

>JF952018..1

TTTTATTGCAATACAACAGCCCTGTTCAATAGCACTTGGGACAATAGTAGCATTGCCGAAAATAGCACAGAGG  
ACAATGCAACTATAACTCTACCATGCAGAATAAAGCAAATTATAAATATGTGGCAGAGAGTAGGGCAAGCAAT  
GTATGCCCTCCTATCAAAGGAAGTATAAGGTGTGAATCAAATATTACAGGACTACTACTAACAAGAGATGGT  
GGAGATGCCGATGGAAATGGAACATAATAGCAACAATGAAACCTTCAGACCTACAGGAGGAGATATGAGGAACA  
ATTGGAGAAGTGAACATATAAATATAAAGTAGTACAAATTGAACCAATAGGGGTAGCACCTACCACGGCAAAA  
GAGAAGAGTGGTGGAGAGAGAAAAAAGAGCAATTGGACTGGGAGCTGCCTTCCTTGGGTTCTTAGGAGCAGCA  
GGAAGCACTATGGGCGCGGCGTCAATAACGCTGACGGTACAGGCCAGACAATTATTGTCTGGCATAGTGCAAC  
AGCAAAGCAATTTGCTGAGGGCTATAGAGGCTCAGCAGCATCTGCTGAAACTCACGGTCTGGGGCATT

>HQ338112..1

TTCTATTGCAATACAACAGAAGCTGTTCAATAGCACTTGGGACAATAGCACTTGGGACAAAATGACACTAGCA  
CAAATATCACACAGGTCATAACTCTGCCATGCAGAATAAAACAAATTATAAATATGTGGCAGAGAGTAGGACA  
AGCAATGTATGCCCTCCTATTAAAGGAGTTATGAGGTGTGAATCAAACATTACAGGACTACTACTAACAAGA  
GATGGTGGAGCTAATAGCAGCAATGAGACCTTCAGACCTATAGGAGGAGATATGAGGGACAATTGGAGAAGTG  
AACTATATAAGTATAAAGTAGTAGAAATTGAACCAATAGGAGTAGCACCTACCAGGGCAAAGAGAAGAGTGGT  
GGAGAGAGAAAAAAGAGCAATTACACTGGGAGCTGCCTTCCTTGGGTTCTTAGGAGCAGCAGGAAGCACTATG  
GGCGCGGCGTCATTGACGCTGACGGTACAGGCCAGACAATTATTGTCTGGCATAGTGCAACAGCAAAGCAATT  
TGCTGAGGGCTATAGAGGCTCAGCAGCATCTGCTGAAACTCACGGTCTGGGGCATT

>GU481277..1

TTCTATTGCAATACAGCAGACCTGTTCAATAGCACTTGGGACACAAATAGCACACAGACCAATAGAAATATAA  
CTGCCAGTGAAAATATAACTCTACCATGCAGAATAAAGCAAATTATAAATATGTGGCAGAGAGTAGGACAAGC  
AATGTATGCCCTCCTATCAAAGGAATTATAATGTGTACATCAAACATTACAGGACTACTCCTAACAAGAGAT  
GGTGGAGGTGAAACTAATAGCAGCAATGAGACCTTCAGACCTATAGGAGGAGACATGAGGGACAATTGGAGAA  
GTGAACTATATAAATATAAAGTAGTAAAAATTGAACCAATAGGGGTAGCACCTACCAGGGCAAAGAGAAGAGT

GGTGGAGAGAGAAAAAAGAGCAATTGGACTGGGAGCTGCCTTCCTTGGGTTCTTGGGAGCGGCAGGAAGTACT  
ATGGGCGCGGCGTCAATAACGCTGACGGTACAGGCCAGACAATTATTGTCTGGCATAGTACAACAGCAAAGCA  
ATTTGCTGAGGGCTATAGAGGCTCAGCAGCATCTGTTGAAGCTCACGGTCTGGGGCATT

>GU481544..1

TTCTATTGCAATACAACAAAACCTGTTCAATAGCTCTTGGGGCGAAAATGGCACAAATAGCATCGAGACCAATG  
AACTATAATTCTACCATGCAGAATAAAGCAAATTATAAATATGTGGCAGAGAGTAGGACAAGCAATGTATGC  
CCCTCCTATCAAAGGAATTATAAAGTGTGAATCAAACATTACAGGACTACTACTAATCAGAGATGGTGGAAC  
AACAGCAGTAATGAGACCTTCAGACCTATAGGAGGAGATATGAGGGACAATTGGAGAAAGTGAAGTATATAAGT  
ATAAAGTAGTAAAAATTGAACCAATAGGAGTAGCACCTACCAAGGCAAGGAGAAGAGTGGTGGAGAGAGAAAA  
AAGAGCAATTGGACTGGGAGCTGCCTTCCTTGGGTTCTTAGGAGCAGCAGGAAGCACTATGGGCGCGGCATCA  
ATAACGCTGACGGTACAGGCCAGACAATTATTGTCTGGCATAGTGCAACAGCAAAGCAATTTGCTGAGGGCTA  
TAGAGGCTCAGCAACATCTGCTGAAACTCACGGTCTGGGGCATT

>GU481661..1

TTCTATTGCGATACAACAAAACCTGTTCAATAGCACTTGGGAAGAAAAAGCACTGTTACAAATAGCACCAATG  
ACACTATAACTCTACCATGCAGAATAAAGCAAATTATAAATATGTGGCAGAGAGTAGGACAAGCAATGTATGC  
CCCTCCTATCCAAGGAAATATAAGTTGTGAATCAAACATTACAGGACTACTACTAACAAGAGATGGTGGAAGT  
GAAAAAATGAGACCTTCAGACCTATAGGAGGAGATATGAGGGACAATTGGAGAAAGTGAATTATACAAGTATA  
AAGTAGTAAAAATTGAACCAATAGGAGTAGCACCTACCAGGGCAAGGAGAATAGTGGTGAAGAGAGAAAAAAG  
AGCAATTGGACTGGGAGTTGCCTTCCTTGGGTTCTTAGGAGCAGCAGGAAGCACTATGGGCGCAGCGTCACTA  
ACGCTGACGGTACAGGCCAGACAATTATTGTCTGGCATAGTGCAACAGCAAAGCAATTTGCTGAGGGCTATAG  
AGGCTCAGCAACATCTGCTGAAACTCACGGTCTGGGGCATT

>KF716491..1

TTCTATTGCAATACAACAAAACCTGTTGATAGCACTTGGAAATGACACTGACACAAATAGCACTGACACAAATA  
GCACAGGGGGCCAATGAAATTATAACTCTACCATGCAGAATAAGGCAAATTATAAATATGTGGCAGAGAGTAGG  
ACAAGCAATGTATGCCCCCTCTATCAAAGGAGTTATAAGGTGTGAATCAAACATTACAGGACTACTACTAACA  
AGAGATGGTGGAACTAATAGCAGCAATGAGAATGAGATCTTCAGACCTATAGGAGGAGATATGAGGGACAATT  
GGAGAAGTGAAGTATATAAGTATAAAGTAGTAGAAGTTGAACCAATAGGAGTAGCGCTACCAAGGCAAGGAG  
AAGAGTGGTGGAGAGAGAAAAAAGAGCAATTGGACTGGGAGCTGCCTTCCTTGGGTTCTTAGGAGCAGCAGGA  
AGTACTATGGGCGCGGCGTCAATAACGCTGACGGTACAGGCCAGACAATTATTGTCTGGCATAGTGCAACAGC  
AAAGCAATTTGCTGAAAGCTATAGAGGCTCAGCAGCATCTGCTGAAACTCACGGTCTGGGGCATT

>KF716492..1

TTCTATTGCAATACAACAGAACTGTTCAATAGCACTTGGAAAGAAAATAGCACTATCACAAATAACACAACAG  
CCAATGACACTATAACTCTACCATGCAGAATAAAGCAAATTATAAATATGTGGCAGAGAGTAGGACAAGCAAT  
GTATGCCCCCTCTATCAAAGGAAGTATAAGGTGTAAATCAAACATTACAGGACTACTACTAACAAGAGATGGT  
GGAAGTGAACCTAATAGCAGTGAGGAAATCTTCAGACCTATAGGAGGAAATATGAGGGACAATTGGAGAAGTG  
AACTATATAAGTATAAAGTAGTAAAAATTGAACCAATAGGAGTAGCACCTACCAAGGCAAAGAGAAGAGTGGT  
GGAGAGAGAAAAAAGAGCAATAATTGGACTGGGAGCTGCCTTCCTTGGGTTCTTAGGAGCAGCAGGAAGCACT  
ATGGGCGCGGCGTCACTGACGCTGACGGTACAGGCCAGACAATTATTGTCTGGCATAGTGCAACAGCAAAGCA  
ATTTGCTGAGGGCTATAGAGGCTCAGCAGCATCTGCTGAAACTCACGGTCTGGGGCATT

>FJ864679..1

TTCTATTGTAATACAACAGAACTGTTCAATAGCACTTGGTACAAAAATGGCACTAACACAACCTAGCACACAGA  
CCAGTGAACATAACTCTGCCATGCAGAATAAAGCAAATTGTAAGGATGTGGCAGAGAGTAGGACAAGCAAT  
GTATGCCCCCTCTATCAGTGGAATTATAAAGTGTGAATCAAACATTACAGGATTAATACTAACAAGAGATGGT  
GGAGATAATAGTAGCAGCAATGAGACCTTCAGACCTGAAGGAGGAGACATAAGGGACAATTGGAGAAATGAAC  
TATATAAGTATAAAGTAGTAGAAATTGAACCAATAGGAGTAGCACCTACTGAGGCAAGGAGAAGAGTGGTGCA  
GAGAGAAAAAAGAGCAATTGGACTGGGAGCTGCCTTCATTGGGTTCTTAGGAGCAGCAGGAAGCACTATGGGC  
GCAGCGTCACTGACGCTGACGGTACAGGCCAGAAAAATTATTGTCTGGCATAGTGCAACAGCAAAGCAATTTGC  
TGAGGGCTATAGAGGCTCAGCAGCATCTGCTGAAACTCACGGTCTGGGGCATT

>JQ292893..1

TTCTATTGCAATACCACAGACCTGTTCAATAGCACTTGGGACAAAAATGACACTATCACAAATACCCAGAGG  
TCAATGGAACACTATAACTCTGCCATGCAGAATAAAGCAAATTGTAATATGTGGCAGAGAGTAGGACAAAC  
AATGTATGCCCCCTCTATCAAAGGAAGTATAAGGTGTGAATCAAACATTACAGGACTACTGCTAATAAGAGAT  
GGTGGAGAACTAATAGCAGCAGTGAGACCTTCAGACCTGTAGGAGGAGATATGAGGGATAATTGGAGAAGTG  
AACTATATAAGTATAAAGTAGTAAAAATTGAACCAATAGGAGTAGCACCTACCAGGGCAAAGAGAAGAGTGGT  
GGAGAGAGAAAAAAGAGCAATTGGACTGGGAGCCGCTTCCTTGGGTTCTTAGGAGCAGCAGGAAGTACTATG  
GGCGCGGCGTCACTGACGCTGACGGTACAGGCCAGACAATTATTGTCTGGCATAGTGCAACAGCAAAGCAATT  
TGCTGAGGGCTATAGAGGCTCAGCAGCATCTGCTGAAACTCACGGTCTGGGGCATT

>JF430898..1

TTCTATTGCAATACAACAGACCTGTTCAATAGCACTTGGAGGAATGACACTGTGCGCAAATATCACGGCCAATG  
GAACTATAACTCTGCCATGCAGAATAAAGCAAATTATAAATATGTGGCAGAGAGTAGGACAAGCAATGTATGC

CCCTCCTATCGAAGGAAATATAAGTTGTGAATCAAACATTACAGGGCTACTACTAATAAGAGATGGTGGAACT  
GATGACAGCAATGAGACTGAGTCCTTCAGACCCATAGGAGGAGATATGAGGGACAATTGGAGAAGTGAAGTAT  
ATAAATATAAAGTGGTACAAATTGAACCAATAGGAGTAGCACCTACCAAGGCAAGGAGAAGAGTGGTGGAGAG  
AGAAAAAAGAGCAATTGGACTGGGAGCTGCCTTCCTTGGGTTCTTAGGAGCAGCAGGAAGCACTATGGGCGCG  
GCGTCATTGACGCTGACGGTACAGGCCAGACAATTATTGTCTGGCATAGTGCAACAGCAAACAATTTGCTGA  
GGGCTATAGAGGCTCAGCAGCATCTGCTGAAACTCACGGTCTGGGGCATT

>HQ834967..1

TTTTATTGCAATACAACAGGCCTGTTCAATAGCACTTGGGGCAATAGCACTGACGCAAATAGCAATGAAAATA  
TAACTCTACCATGCAGAATAAAGCAAATTATAAATATGTGGCAGAGAGTAGGACAAGCAATGTATGCCCCCTCC  
TATCAGCGGAAATATAAGTTGTGTATCAAACGTTACAGGACTACTACTAGTAAGAGATGGTGGAGGTGGAAAT  
AGTAGCAACAATGAGACCTTCAGACCTATAGGAGGAGATATGAGGGACAATTGGAAAAGTGAAGTATATAAGT  
ATAAAGTAGTAGAAATTGAACCAATAGGAGTAGCACCTACCAAGGCAAAGAGAAGGGTGGTGCAGAGAGAAAA  
AAGAGCAATTGGAGGACTGGGAGCTGCCCTCCTTGGATTCTTAGGAGCAGCAGGAAGCACTATGGGCGCGGCG  
TCACTGACGCTGACGGTACAGGCCAGACAATTATTGTCTGGCATAGTGCAACAGCAAAGCAATTTGCTGAGGG  
CTATAGAGGCTCAGCAGCATCTGCTGAAACTCACCGTCTGGGGCATT

>JX500696..1

TTCTATTGTAATACAACAAAACTGTTCAATAGCACTTGGGACAAAAATAGTACTTGGAAATGAAAATAGCACTG  
CCAATGAAAATATAACTCTGCCATGCAGGATAAAGCAAATTATAAATATGTGGCAGAGAGTAGGACAAGCAAT  
GTATGCCCCCTCCTATCAAAGGAGTTATAATGTGTAAATCAAACATTACAGGTCTACTCCTAACAAGAGATGGT  
GGAGGTGGAGCTAATAGCAGCAATGAGACTTTCAGACCTATAGGAGGAAATATGAGGGACAATTGGAGAAGTG  
AACTATATAAGTATAAAGTAGTACAAATTGAACCAATAGGAGTAGCACCTACCAGGGCAAAGAGAAGAGTGGT  
GGAGAGAGAAAAAAGAGCAATTGGACTGGGAGCCGCTTTCCTTGGGTTCTTAGGAGCAGCAGGAAGCACTATG  
GGCGCGGCGTCACTGACGCTGACGGTACAGGCCAGACAATTATTGTCTGGCATAGTGCAACAGCAAAGCAATT  
TGCTGAGGGCTATAGAGGCTCAGCAGCAGCTGCTGAAACTCACGGTCTGGGGCATT

>JX500695..1

TTCTATTGCAATACAACAGGCCTGTTCAATAGCACTTGGGACACAAATGGCACTGTCACAAGTAGCACAAATG  
GAACAAATAAACTATAACTCTGCCATGCAGAATAAAGCAAATTATAAATATGTGGCAGAGAGTAGGACAAGC  
AATGTACGCCCCCTCCTATCAAAGGAAGTATAAGGTGTGAATCAAACATTACAGGTCTACTACTAATAAGAGAT  
GGTGAAGGAATAGCAGCAATGAGACCTTTAGACCTATAGGAGGAAATATGAGGGACAATTGGAGGAGTGAAC  
TATATAAGTATAAAGTAGTACAAATTGAACCAATAGGACTAGCACCTACCAGGGCAAAGAGAAGAGTGGTGGGA  
GAGAGAAAAAAGAGCAATTGGACTGGGAGCCGCCCTCCTTGGGTTCTTAGGAGCAGCAGGAAGCACTATGGGC  
GCGGCGTCAATGACGCTGACGGTACAGGCCAGACAATTATTGTCTGGCATAGTGCAACAGCAAAGCAATTTGC  
TGAGGGCTATAGAGGCTCAGCAGCATCTGCTGAAACTCACGGTCTGGGGCATT

>JX500694..1

TTCTATTGCAATACAACAGAACTGTTCAATAGCACTTGGGACGGAAATGGCACTGCCACAAATAACACAGAGG  
ACAATGTAACCTCTGCCATGCAGAATAAAGCAAATTATAAATATGTGGCAGAGAGTAGGACAAGCAATGTATGC  
CCCTCCTATCAGAGGAAGTATAAAGTGTGTATCAAACATTACAGGACTACTACTAATAAGAGATGGTGGAGGT  
GGAAATAATAGCAACAATGAGACCTTCAGACCTATAGGAGGAAATATGAGGGACAATTGGAGAAGTGAAGTAT  
ATAAGTATAAGGTAGTACAAATTGAACCAATAGGAATAGCACCTACCACAGCAAAAAGAAGAGTGGTGGAGAG  
AGAAAAAAGAGCAATTGGACTGGGAGCTGCCTTCCTTGGGTTCTTAGGAGCAGCAGGAAGTACTATGGGCGCG  
GCGTCAATAACGCTGACGGTACAGGCCAGACAATTATTGTCTGGTATAGTACAACAGCAAAGCAATTTGCTGA  
GGGCTATAGAGGCTCAGCAGCATCTGCTGAAACTCACGGTCTGGGGCATT

>MH603967..1

TTCTATTGCAATACAACACAACCTGTTTCGATAGCACGTGGGAAGAGAATGCCAATATCACAAATACAAATAATA  
CACAGAATAATGAAAATATAACTCTACCATGCAGAATAAAGCAAATTATAAAGATGTGGCAGGGGGTAGGACA  
AGCAATGTATGCCCCCTCCTATAAGAGGAGAAATAAGGTGTGAATCAAACATTACAGGATTACTACTAACAAGA  
GATGGTGGAGGTACAAATAGCAGCAACAATGAGACCTTCAGACCTATAGGAGGAGACATGAGGGACAATTGGA  
GAAGTGAACCTATATAAGTATAAAGTAGTACAAATTGAACCCATAGGAGTAGCACCTACCAAGGCAAAGAGAAG  
AGTGGTGGAGAGAGAAAAAAGAGCAATTGGACTGGGAGCTGCCTTCCTTGGGTTCTTAGGAGCAGCAGGAAGC  
ACTATGGGCGCGGCGTCAATAACGCTGACGGTACAGGCCAGACAATTATTGTCTGGCATAGTGCAACAGCAAAA  
GCAATTTGCTGAGGGCTATAGAGGCTCAGCAGCATCTGCTGAAACTCACGGTCTGGGGCATT

>MH604120..1

TTTTATTGTAATACAACAGACCTGTTCAATAGCGCTTGGGAAAATGGCAATGCTACAAATATCACACAGGCCA  
ATGACAATGAACTATAAATTCTACCATGCAGAATAAAGCAAATTATAAATATGTGGCAAAGAGTAGGACAGGC  
AATGTATGCCCCCTCCTATCAGAGGAAATATAACGTGTATATCAAATATTACAGGACTACTACTAACAAGAGAT  
GGTGGAGGTGGAAATAATAGCAACAATGAGACCTTCAGACCTATAGGAGGAGATATGAGGGACAATTGGAGAA  
GTGAACTATATAAATATAAAGTAGTACAAATTGAACCAATAGGAATAGCACCTAACAGGGCAAAGAGAAGAGT  
GGTGGAGAGAGAAAAAAGAGCAATTGGACTGGGAGCTGCCTTCCTTGGGTTCTTGGGAGCAGCAGGAAGTACT  
ATGGGCGCGGCGTTCGTAACGCTGACGGTACAGGCCAGAAAATTATTGTCTGGCATAGTGCAACAGCAAAAACA  
ATTTGCTGAAGGCTATAGAGGCTCAGCAGCATCTGCTGAGACTCACGGTCTGGGGCATT

>MH604308..1

TTCTATTGCAATACAACAGACCTGTTCAATAGCACTTGGGACGGAAATAGCACTAGAGATGAAAATGGCAATG  
ATACAGATAGCACACAGAACAATAGACCTATAACTCTGCCATGCAGAATAAAGCAAATTATAAATATGTGGCA  
GAGAGTAGGACAAGCAATGTATGCCCCCTCTATAAAAGGAATTATAAGGTGTACATCAAACATTACGGGACTA  
CTACTAATAAGAGATGGTGGAGGCGGAGCTAATAGCAGCAATGAGACCTTCAGACCTATAGGAGGAGATATAA  
GGGACAATTGGAGAAGTGAACCTATTTAAGTATAAAGTAGTACAAATTGAACCAATAGGAGTAGCACCTACCAG  
GGCAAAGAGAAGAGTGGTGGAGAGAGAAAAAAGAGCAATTGGACTGGGAGCTGCCTTCCTTGGGTTCTTGGGA  
GCAGCAGGAAGTACTATGGGCGCGGCGTCAATAACGCTGACGGTACAGGCCAGACAATTATTGTCTGGCATAG  
TACAACAGCAAAGCAATTTGCTGAGGGCTATAGAGGCTCAGCAGCATCTGCTGAAACTCACGGTCTGGGGCAT  
T

>MH604056..1

TTCTATTGCAATACAACAGCCCTGTTCAATTGGAACGGCAATGAAACTGTTACAAATAGCACACAGGCCAATG  
AAACTATAACTTTTACCATGCAGAATAAAGCAAATTATAAATATGTGGCAGAGAGTAGGACAAGCAATGTATGC  
CCCTCCTATCAAAGGAAGTATAAGGTGTACATCAAACATTACAGGACTGCTGCTAACAAGAGATGGTGGAACT  
AACAGCAGCAACAGCACTGAGATCTTCAGACCTATAGGAGGAAATATGAAGGACAATTGGAGAAGTGAACCTAT  
ATAAATATAAAGTAGTAAAAATTGAACCAATAGGAGTAGCACCTACCAAGGCAAGGAGAAGAGTGGTGGAGAG  
AGAAAAAAGAGCAATTGGACTGGGAGCTGCCTTCCTTGGGTTCTTGGGAGCAGCAGGAAGCACTATGGGCGCG  
GCGTCAATAACGCTGACGGTACAGGCCAGACAATTATTGTCCGGCATAGTGCAACAGCAAAGCAATTTGCTGA  
GGGCTATAGAGGCTCAGCAGCATCTGCTGAAACTCACGGTCTGGGGCATT

>MH604408..1

TTCTATTGCAATACAACAAACCTGTTCAATAGCACGTGGAACGAAACTGACAGTGTTACAAATAGCACACAGG  
CCAATAATGAAACTATAATTTTACCATGCAGGATAAAGCAAATTATAAGGACGTGGCAGAGAGTAGGACAAGC  
AATGTATGCCCCCTCCTATCAAAGGAAGGATAAGGTGTGAATCAAACATTACAGGACTACTACTAACAAGAGAT  
GGTGGAGGTAAAAGTAATAATGAGACAAGTAATAATGAGACCTTCAGACCTATAGGAGGAGATATGAGGGACA  
ATTGGAGAAGTGAACCTATATAAATATAAAGTAGTAGAAATTGAACCAATAGGAGTAGCACCTACCAAGGCAAA  
GAGAAGAGTGGTGGAGAGACAAAAAAGAGCAATTGGACTGGGAGCTGCCTTCCTTGGGTTCTTAGGAGCAGCA  
GGAAGCACTATGGGCGCGGCGTCACTAACGCTGACGGTACAGGCCAGACAATTATTGTCTGGCATAGTGCAAC  
AGCAAAGCAATTTGCTGAGGGCTATAGAGGCTCAGCAGCATCTGCTGAAACTCACGGTCTGGGGCATT

>MH604109..1

TTCTACTGCAGTACAGCAGCCCTGTTCAATAGCACTTGGGACGGAAATACCACTATTGCAAATAACACACAGA  
ACAATGAAAATATAACTATAACCATGCAGAATAAAGCAAATTATCAATATGTGGCAGAGAGTAGGACAAGCAAT  
GTATGCCCCCTCCTATACAAGGAGTTATAAATTGTGAATCAAACATTACAGGACTACTACTAACAAGAGATGGT  
GGAGTTAATAGCAGCAATGAAACCTTCAGGCCTATAGGAGGAGATATGAGGGACAATTGGAGAAGTGAATTAT  
ATAAGTATAAAGTAGTAAAGTTGAACCAATAGGAGTAGCACCTACCACGGCAAGGAGAAGAGTGGTGGGGAG  
AGAAAAAAGAGCAATTGGACTGGGAGCTGCCCTCCTTGGGTTCTTGGGAGCAGCAGGAAGCACTATGGGCGCG  
GCGTCAATAACGCTGACGGTACAGGCCAGACAATTATTGTCTGGCATAGTGCAACAGCAAAGCAATTTGCTAA  
GGGCCATAGAGGCTCAGCAGCATCTGCTGAAACTCACGGTCTGGGGCATT

>MH604508..2

TTCTATTGCTATACAACAGGGCTGTTCAATAGCACTTGGGACGAAAATAGCACTAGCACAAATATCACACAGA  
AAAATGAAAATATAACTATAACCATGCAGAATAAAGCAAATTATAAATATGTGGCAGAGAGTAGGACAAGCAAT  
GTATGCCCCCTCCTATCAGAGGAAATATAAGATGTGTATCAAACATTACAGGACTACTACTAACAAGAGATGGT  
GGAGATGGAGATAATAGCAGTGAGACCTTCAGACCTATAGGAGGAGATATGAGGGACAATTGGAGAAGTGAAC  
TATATAAATATAAAGTAGTACAAATTGAACCCATAGGAGTAGCACCTACCAAGGCAAGGAGAAGAGTGGTGGGA  
GAGAGAAAAAAGAGCAATTGGACTGGGAGCTGCCTTCCTTGGGTTCTTAGGAGCGGCAGGAAGCACTATGGGC  
GCGGCGTCAATAACGCTGACGGTACAGGCCAGACAATTATTGTCTGGCATAGTGCAACAGCAAAGCAATTTGC  
TGAGGGCTATAGAGGCTCAGCAGCATCTGCTGAAACTCACGGTCTGGGGCATT

>MH604524..1

TTCTATTGCAATACAACAAACCTGTTCAATAGTGCTTGGAAAAATGGCAGTGCTACAAATAGCACACAAGCCA  
ATGGAACAACATAACTCTACCATGCAGAATAAAGCAAATTATAAATATGTGGCAGAGAGTAGGACAAGCAAT  
GTATGCCCCCTCCTATCAAAGGAAGTATAAGGTGTGAATCAAACATTACAGGACTACTACTAACAAGAGATGGT  
GGAGGTGAACTAATAGCAGCGATGAAACCGAAACCTTCAGACCTATAGGAGGAGATATGAGGAATAATTGGA  
GAAGTGAATTATATAAGTATAAAGTAGTAAAAATTGAACCAATAGGAGTAGCACCTACCAGGGCAAGGAGAAG  
AGTGGTGGAGAGAGAAAAAAGAGCAGTTGGACTGGGAGCTGCCTTCCTTGGGTTCTTGGGAGCAGCAGGAAGC  
ACTATGGGCGCGGCGTCAATGACGCTGACGGTACAGGCCAGAAAATTATTGTCTGGCATAGTGCAACAGCAAA  
GCAATTTGCTGAGGGCTATAGAGGCTCAGCAGCATCTGCTGAAACTCACGGTCTGGGGCATT

>MH604541..1

TTCTATTGCAATACAACAAAGCTGTTCAATAGCACTTGGGAAAAATAGCACTTGGGAAAAATGGCACTGTTGCAA  
ATAGCACAGGGGACAATGACACTATAACTATAACCATGCAGAATAAAGCAAATTATAAATATGTGGCAAAGAGT  
AGGACAAGCAATGTATGCCCCCTCCTATCAAAGGAATTATAAGGTGTGAATCAAACATTACAGGACTACTACTA  
ACAAGAGATGGTGGAGGTGGAACCTAATAGCAGCAATGAGACCTTCAGACCTATAGGAGGAGACATGAGGGACA

ATTGGAGAAGTGAAGTATATAAGTATAAAGTAGTAAAAATTGAACCAATAGGAGTAGCACCTACCAGGGCAAA  
GAGAAGAGTGGTGGAGAGAGAAAAAGGGCATTGGACTGGGAGCTGCCTTCCTTACGTTCTTGGGAGCAGCA  
GGAAGCACTATGGGCGCGCGTCAATAACGCTGACGGTACAGGCCAGACAATTATTGTCTGGCATAGTGCAAC  
AGCAAAGCAATTTGCTGAGGGCTATAGAGGCTCAGCAGCATCTGCTGAAACTCACGGTCTGGGGCATT  
>MH330347..1

TTCTATTGCAATACCACATACCTGTTCAATAGCACTTGGGATGGAAATAGCACTGTAAATAGCACAGGGGGCG  
ATAGAAATATAACTTTACCATGCAGAATAAAGCAAATTATAAATATGTGGCAGAGAGTAGGACAAGCAATGTA  
TGCCCCCTCCTATCCGAGGAAACATAAGTTGTGAATCAAACATCACAGGACTACTCCTAATAAGAGATGGTGGA  
GGTGGAAATAATAAGACTAATGAGACCTTCAGACCTATAGGAGGAGATATGAGGGACAATTGGAGAAGTGAAC  
TATATAAGTATAAAGTAGTAAAAATTGAACCAATAGGGGTAGCACCTACCCTGGCCAGGAGAAGAGTGGTGGA  
GAGAGAAAAAAGAGCAATAATTGGACTGGGAGCTGCCTTCATTGGGTTCTTAGGAGCAGCAGGAAGCACTATG  
GGCGCGGCGTCACTGACGCTGACGGTACAGGCCAGACAATTATTGTCTGGCATAGTGCAACAGCAAAGCAATT  
TGCTGAGGGCTATAGAGGCTCAGCAGCATCTGCTGAAACTCACGGTCTGGGGCATT

>MH330348..1

TTCTATTGCAATACAACAAACCTGTTCAACATAAATAGCACTGACACAAATATCACACAGGACAATGAAACTA  
TAACTCTACCATGCAGAATAAAGCAAATTATAAATATGTGGCAGAGAGTAGGACAAGCAATGTATGCCCCCTCC  
TATCAAAGGAAGTATAATGTGTGAATCAAACATTACAGGACTACTACTAACAAGAGATGGTGGAGGTGACAGA  
AATGATACTAATAGTACTGAGACCTTCAGACCTATAGGAGGAGATATGAGGGACAATTGGAGAAGTGAAGTAT  
ATAAGTATAAAGTAGTAAAAATTGAACCAATAGGAGTAGCACCTACCAGGGCAAAAGAGAAGAGTGGTGGGGAG  
AGAAAAAAGAGCAATTGGACTGGGAGCCGCTTCCTTGGGTTCTTAGGAGCAGCAGGAAGCACTATGGGCGCG  
GCGTCACTGACGCTGACGGTACAGGCCAGACAATTATTGTCTGGCATAGTGCAACAGCAAAGCAATTTGCTGA  
GGGCTATAGAGGCTCAGCAGTATATGCTGAAACTCACGGTCTGGGGCATT

>MH330349..1

TTCTATTGCAATACAACAGCCCTGTTCAATAGCACTTGGAGTGAAAATGGCACTGCCATAAATAGCACAGAGG  
CCAATGGAAGTATAACTCTGCCATGCAGAATAAGGCAAATTATAAATATGTGGCAGAGAGTAGGACAAGCAAT  
GTATGCCCCCTCCTATCAGAGGAATTATAAGGTGTGAATCAAACATTACAGGACTACTGCTAACACGAGATGGT  
GTAGCTAATAGCAGCAATGAGACCTTCAGACCTATAGGAGGAGATATGAGGAACAATTGGAGAAGTGAAGTAT  
ATAAGTATAAAGTAGTAAAAATTGAACCAATAGGAGTAGCACCTACCAGGGCAAAAGAGAAGAGTGGTGGAGAG  
AGAAAAAAGAGCAATTGGACTGGGAGCCGCTTCCTTGGGTTCTTAGGAGCAGCAGGAAGCACTATGGGCGCG  
GCGTCACTGACGCTGACGGTACAGGCCAGACAATTATTGTCTGGCATAGTGCAACAGCAAAGCAATTTGCTGA  
GGGCTATAGAGGCTCAGCAGTATATGCTGAAACTCACGGTCTGGGGCATT

>MH330350..1

TTTTATTGTAATACAACAGAACTGTTCAATAGTACTTGGGACGGAAATAACACTGTTACAAATAGCACACAGG  
ACAATGGCACTATAACTCTACCATGCAGAATAAGGCAAATTATAAATATGTGGCAGAGAGTAGGACAAGCAAT  
GTATGCCCCCTCCTATCAGAGGAATTATAAGGTGTGAATCAAACATTACAGGACTACTACTAACAAGAGATGGT  
GGAGTTAATACCAGCAATGAGACCTTCAGACCTACAGGAGGAGATATGAGGAACAATTGGAGAAGTGAAGTAT  
ATAAGTATAAAGTAGTACAAATTGAACCAATAGGAGTAGCACCTACCAAGGCAAAAGAGAAGAGTGGTGGAGAG  
AGGAAAAAGGGCAATTGGACTGGGAGCTGCCTTCCTTGGGTTCTTAGGAGCAGCAGGAAGTACTATGGGCGCG  
GCGTCAATAACGCTGACGGTACAGGCCAGACAATTATTGTCTGGCATAGTCAACAGCAAAGCAATTTGCTGA  
TGGCTATAGAGGCTCAGCAGCATCTGCTGAAACTCACGGTCTGGGGCATT

>MH330351..1

TTCTATTGCAATACAACAAACCTGTTCAATAGCACTTGGGACAAAAATAGTACTGTCACAAATAGCACAAACA  
GCACAGAACTATAACTCTACCATGCAGAATAAAGCAAATTATAAATATGTGGCAGAGAGTAGGACAAGCAAT  
GTATGCCCCCTCCTATCAAAGGAAGTATAAGGTGTGAATCAAACATTACAGGACTACTACTAATAAGAGATGGT  
GGAAATAATAGCAGCAATGAGACCTTCAGACCTATAGGAGGAAATATGAGGGACAATTGGAGAAGTGAAGTAT  
ATAAATATAAAGTAGTAGAGATTGAACCAATAGGAATAGCACCTACCAAGGCAAAAGAGAAGAGTGGTGGAGAG  
AGAAAAAAGAGCAATTGGACTGGGAGCTGCCTTCCTTGGGTTCTTAGGAGCAGCAGGAAGCACTATGGGCGCG  
GCGTCAATAACGCTGACGGTACAGGCCAGACAATTATTGTCTGGCATAGTGCAACAGCAAAGCAATTTGCTGA  
GGGCTATAGAAGCTCAGCAGCATCTGCTGAAGCTCACGGTCTGGGGCATT

>MH330352..1

TTCTATTGCAATACAACACAACCTGTTCAATAGCACTTGGCCTTGGAATGACACTGTCACAAATAGCACAGAGA  
CCAGTGAATAATAACTCTACCATGCAGAATAAAGCAAATTATAAATATGTGGCAGAGAGTAGGACAAGCAAT  
GTATGCCCCCTCCTATCAGAGGAAGTATAAGGTGTGAATCAAACATTACAGGACTACTACTAATAAGAGATGGT  
GGAACATAATAGCACCAATGAGACCTTCAGACCTATAGGAGGAGATATGAGGGACAATTGGAGAAGTGAAGTAT  
ATAAGTATAAAGTAGTACAAATTGAACCAATAGGAGTAGCACCTACCAAGGCAAAAGAGAAGAGTGGTGGAGAG  
AGAAAAAAGAGCAATTGGACTGGGAGCTGCCTTCCTTGGGTTCTTAGGAGCAGCAGGAAGCACTATGGGCGCG  
GCGTCAATAACGCTGACGGTACAGGCCAGACAATTATTGTCTGGCATAGTGCAACAGCAAAGCAATTTGCTGA  
GGGCTATAGAGGCTCAGCAGCATCTGCTGAAACTCACGGTCTGGGGCATT

>MH330353..1

TTCTATTGCAATACAACAGACCTGTTTCGATAGCACTTGGGATGGAAATAACACAGATAACACTGTCACAAATA  
TCACGGGCAATGGAACCTATGACTCTGCCATGCAGAATAAGGCAAATTGTAAGGATGTGGCAGAGAGTAGGACA  
AGCAATGTATGCCCCCTCCTATTGAAGGGAAAATAAGGTGTGAATCAAACATTACAGGACTACTACTACTAAGA  
GATGGTGGAAATTAATAGCAGCAATGAGACCTTCAGACCTATAGGAGGAGATATGAGGGACAATTGGAGAAGTG  
AGCTATATAAGTATAAAGTAGTAAAAATTGAACCAATAGGAGTAGCACCTACCCAGGCAAGGAGAAGAGTGGT  
GGCGAGAGAAAAAGAGCAATTGGATTAGGAGCTGCCTTCCTTGGGTTCTTAGGAGCAGCAGGAAGCACTATG  
GGCGCGCGCTCAATAACGCTGACGGTACAGGCCAGACAATTATTGTCTGGCATAGTGCAACAGCAAAGCAATT  
TGCTGAAGGCTATAGAGGCTCAGCAGCATCTGCTGAAACTCACAGTCTGGGGCATT

>MH330354..1

TTCTATTGCAATACAACAAGCCTGTTCAATAGCACTTGGGATGAAAATAGCACTGTCACAAACACAGAGGCCA  
ATGGAACCTATAATTCTGCCATGCAGAATAAAGCAAATTATAAATATGTGGCAAAGAGTAGGACAAGCAATGTA  
TGCCCCCTCCTATCAGAGGAAGGATAAGGTGTGAATCAAACATTACAGGACTACTAATAACAAGAGATGGTGGGA  
GGTGGAAATAATAGCACCAATGAAACCTTCAGACCTATAGGAGGAGATATGAGGGACAATTGGAGAAGTGAAC  
TATATAAGTATAAAGTAGTAAAAATTGAACCAATAGGAGTAGCACCTACCAGGGCAAAGAGAAGAGTGGTGGGA  
GAGAGAAAAAAGAGCAATTGGACTGGGAGCCGCCTTCCTTGGGTTCTTAGGAGCAGCAGGAAGCACTATGGGC  
GCAGCGTCAATGACGCTGACGGTACAGGCCAGACAATTATTGTCTGGCATAGTGCAACAGCAAAGCAATTTGC  
TGAGGGCTATAGAGGCTCAGCAGCATCTGCTGAAACTCACGGTCTGGGGCATT

>MH330355..1

TTCTATTGCAATACAACAAGGCTGTTCAATAGCTCTTGGGGCGAAAATAGCACTGTCACAAATAGCACAGATG  
TCAATGGAACCTATAATTCTGCCATGCAGAATAAAACAAAATTATAAATATGTGGCAGAGAGTAGGACAAGCAAT  
GTATGCCCCCTCCTATCCCAGGAAATATAACATGTATATCAAACATTACAGGACTACTACTAGTAAGAGATGGT  
GGACAGAACAGTAGTAACACCAGTGAACCTTCAGACCCATAGGAGGAGATATGAAGCACAATTGGAGAAGTG  
AACTATATAAGTATAAAGTAGTAGAAATTGAACCAATAGGAGTAGCACCTACCAAGGCAAAGAGAAGAGTGGT  
GGAGAGAGAAAAAAGAGCAATTATTGGACTGGGAGCTGCCTTCATTGGGTTCTTAGGAGCAGCAGGAAGCACT  
ATGGGCGCGCGCTCAATAACGCTGACGGTACAGGCCAGACAATTACTGTCTGGCATAGTGCAACAGCAAAGCA  
ATTTGCTGAGGGCTATAGAGGCTCAGCAGCATCTGCTGAAACTCACGGTCTGGGGCATT

>MH330356..1

TTCTATTGCAATACAACAGACCTGTTTAATAGCACTTGGGAGGAAAATAGCACTGTTACAAATAACACAAATG  
CCAATGAAAATATAACTCTGCCATGCAGGATAAAGCAAATTATAAATTTGTGGCAGAGAGTAGGGCGAGCAAT  
GTATGCCCCCTCCTATCAGAGGAATTATAAGGTGTAACCTCACTATTACAGGACTACTACTAACAAGAGATGGT  
GGAAATGGAATAGTAGCAACAATGAGACTGAGACCTTCAGACCTATAGGAGGAAATATGAGGGACAATTGGA  
GAAGTGAACCTATATAAGTATAAAGTAGTAGAAATTGAACCAATAGGAGTAGCACCTACCAGGGCAAAGAGAAG  
AGTGGTGCAGAGAGAAAAAAGAGCAGTTGGACTGGGAGCCGCCTTCCTTGGGTTCTTAGGAGCAGCAGGAAGC  
ACTATGGGCGCGCGCTCACTGACGCTGACGGTACAGGCCAGACAATTATTGTCTGGCATAGTGCAACAGCAAA  
GTAATTTGCTGAGGGCTATAGAGGCTCAGCAGCATCTGCTGAAACTCACGGTCTGGGGCATT

>MG902950..1

TTCTATTGCAATACAACAAACCTGTTTCAGTAGCACTTGGAAACGACACTATCACAAATTTACAGAGACCAATG  
AAACTATAATTCTGCCATGCAGAATAAGGCAATTTATAAAGATGTGGCAGAGAGTAGGACAAGCAATGTATGC  
CCCTCCTATCAAAGGGAGCATAAGGTGTGAATCAAACATTACAGGACTACTACTAACAAGAGATGGTGGAAAT  
GGAACCTACTGACAGCAATGAGACCTTCAGACCTATAGGAGGAGATATGAGGGACAATTGGAGAAGTGAACCTAT  
ATAAGTATAAAGTAGTACAAATTGAACCAATAGGAATAGCACCTACCAAGGCAAAGAGAAGAGTGGTGGAGAG  
AGAAAAAAGAGCAATTGGACTGGGAGCCGCCTTCCTTGGGTTCTTAGGAGCAGCAGGAAGTACTATGGGCGCG  
GCGTCAATAACGCTGACGGCACAGGCCAGACAATTATTGTCTGGTATAGTACAACAGCAAAGCAATTTGCTGA  
GGGCTATAGAGGCTCAGCAGCATCTGCTGAAACTCACGGTCTGGGGCATT

>MG902951..1

TTCTATTGCAATACAACAGACCTGTTCAATAGCACTTGGGGAAAATAACACAAATAGCACAGGGACCAATGAAA  
CTATAACTCTGCCATGCAGAATAAAGCAAATTATAAATATGTGGCAGAGAGTAGGACAAGCAATGTATGCCCC  
TCCTATCCGAGGAATTATAAAGTGTGAATCAAACATTACAGGACTACTACTAACAAGAGATGGTGGAGGTGAA  
GCTAATAATAGCGAGAGCGAGACCTTCAGACCTATAGGAGGAGATATGAGGGACAATTGGAGAAGTGAACCTAT  
ATAAGTATAAAGTAGTAGAAATTGAACCAATAGGAGTAGCACCTACCAGGGCAAAGAGAAGAGTGGTGCAGAG  
AGAAAAAAGAGCAATTGGACTGGGAGCCGCCTTCCTTGGGTTCTTAGGAGCAGCAGGAAGCACTATGGGCGCG  
GCGTCAATAACGCTGACGGTACAGGCCAGACAATTATTGTCTGGTATAGTGCAACAGCAAAGCAATTTGCTGG  
ATGCTATAGAGGCTCAGCAGCATCTGCTGAGACTCACGGTCTGGGGCATT

>MH330337..1

TTCTATTGCAATACAACAGACCTGTTCAATAGCACTTGGGACGAAAATGACACTGTTACAAATAGCACACAGG  
CCAATGAACTATAATTCTACCATGCAGGATAAAGCAAATTATAAATATGTGGCAGAGAGTAGGACAAGCAAT  
GTATGCCCCCTCCTATCAAAGGAAGTATAAGGTGTGAATCAAACATTACAGGACTAATACTAACAAGAGATGGT  
GGAACCTAATAGCAGCAATGAGACCTTCAGACCTATAGGAGGAAATATGAGGGACAATTGGAGAAGTGAACCTAT  
ATAAGTATAAAGTAGTAAAAATTGAACCAATAGGAGTAGCACCTACCAAGGCAAAGAGAAGAGTGGTGGAAAG  
AGAAAAAAGAGCAATTGGACTGGGAGCTGCCTTCCTTGGGTTCTTGGGAGCAGCAGGAAGTACTATGGGCGCG

GCGTCAATAACGCTGACGGTACAGGTACAGACAATTATTGTCTGGCATAGTGCAACAGCAAAGCAATTTGCTGA  
GGGCTATAGAGGCTCAGCAGCATCTGCTGAAACTCACGGTCTGGGGCATT

>MH330338..1

TTCTATTGCGATACAACAAAACCTGTTCAATAGCACTTGGAAACGAAAATGGCACTAGGACAGATACAGATACCA  
CACAGGATGAAAATATAACTATAACCATGCAGAATAAAGCAAATTATAAATATGTGGCAGAGAGTAGGACAAGC  
AATGTATGCCCCCTCCCATCAGAGGAACATAATGTGTATATCAAACATTACAGGGCTACTCCTAACAAAGAGAT  
GGTGGAGCTAATAACAGCAATGAAACCTTCAGACCTATAGGAGGAGATATGAGAGACAATTGGAGAAGTGAAC  
TATATAAGTATAAAGTAGTAGAAATTGAACCAATAGGGGTAGCACCTACCAAGGCAAAGAGAAGAGTGGTGGA  
GAGAGAAAAAAGAGCAGTTGGACTGGGAGTTGCCTTCCTCGGGTTCCTTAGGAGCAGCAGGAAGTACTATGGGC  
GCGGCGTCACTGACGCTGACGGTACAGGCCAGACAATTATTGTCTGGCATAGTGGAACAGCAAAGCAATTTGC  
TGAGGGCTATAGAGGCTCAGCAGCATCTGCTGAAACTCACGGTCTGGGGCATT

>MH330339..1

TTCTATTGCAATACAACAGCACTGTTCAATAGCACTTGGGGAGGAAATAACACACAGGGCAATGAAAGTATAA  
CTCTACCATGCAGAATAAAGCAAATTATAAGGATGTGGCAGAGAGTAGGACAAGCAATGTATGCCCCCTCCTAT  
CCAAGGAAGGATAAGGTGTGAATCAAATATTACAGGACTACTATTAACAAGAGATGGTGGAGTAACTAATAGC  
AGCAATGGGACTGAGACCTTCAGACCTACAGGAGGAGATATGAGGGACAATTGGAGAAGTGAACATATAAGT  
ATAAAGTGGTAGAAATTGAACCAATAGGAATAGCACCTACCAGGGCAAGGAGAAGAGTGGTGCAGAGAGAAAA  
AAGAGCAATTACACTGGGAGCTGCCTTCCTTGGGTTCTTGGGAGCAGCAGGAAGTACTATGGGCGCGGCGTCA  
ATAACGCTGACGGTACAGGCCAGGCAATTATTGTCTGGTATAGTACAACAGCAAAGCAATTTGCTAAAGGCTA  
TAGAGGCTCAGCAGCATCTGCTGAAACTCACGGTCTGGGGCATT

>MH330340..1

TTCTATTGCAATACAACAGACCTGTTCAATAGCATTGTTGGGAAAACGGCAATGTCACAAATAGCACAGAGACCA  
ATGAAACTATAACTCTACAATGCAGAATAAAGCAAATTATAAATATGTGGCAAAGAGTAGGACAAGCAATGTA  
TGCCCCCTCCTATCAGTGGAAGCATAAGGTGTGAATCAAACATTACAGGACTAATACTAATAAGAGATGGTGGA  
TATAATAGCAGCAATGAGACCTTCAGACCTATAGGAGGAAAATATGAAGGACAATTGGAGAAGTGAACATATA  
AGTATAAAGTAGTAAAAATTGAACCAATAGGAGTAGCACCTACCAGGGCAAAGAGAAGAGTGGTGGAGAGAGA  
AAAAAGAGCAATCGGACTGGGAGCTGCCTTCCTTGGGTTCTTAGGAGCAGCAGGAAGTACTATGGGCGCGGCG  
TCACTGACGCTGACGGTACAAGCCAGACAATTATTGTCTGGCATAGTGCAACAGCAAAGCAATTTGCTGAGGG  
CTATAGAGGCTCAGCAACATCTGCTGAAACTCACGGTCTGGGGCATT

>MH330341..1

TTCTATTGCAATACAACAGCCCTGTTCAATAGCACTTGGCACGAAAATGACACTGTTACAAATAGCACACAGA  
ACAATGAACTATAATTCTACCATGCAGAATAAAGCAAATTATAAATATGTGGCAGAGAGTAGGACAAGCAAT  
GTATGCCCCCTCCGATCAGAGGAAGTATAAGGTGTGAATCAAACATTACAGGACTACTACTAACAAGAGATGGT  
GGGGCTAATAGCAGCAATGAGACCTTCAGACCTATAGGAGGAGATATGAGGGACAATTGGAGAAGTGAACATAT  
ATAAGTATAAAGTAGTAAAAATTGAACCAATAGGAGTAGCACCTACCAGGGCAAAGAGAAGAGTGGTGGAAAG  
AGAAAAAAGAGCAATTGGACTGGGAGTTGCCTTCCTTGGGTTCTTGGGAGCAGCAGGAAGCACTATGGGCGCG  
GCGTCAATAACGCTGACGGTACAGGCCAGACAATTATTGTCTGGCATAGTGCAACAGCAAAGCAATTTGCTGA  
GGGCTATAGAGGCTCAGCAGCATCTGCTGAAACTCACGGTCTGGGGCATT

>MH330342..1

TTCTATTGCAATACAACAGCCCTGTTCAATAACACTGACACAAATAGCACAGAGACCAAGTGGAAATATAACTA  
TACCATGTAGAATAAAGCAAATTATAAGAATGTGGCAGAGAGTAGGACAAGCAATGTATGCCCCCTCCTATCGA  
AGGAAATATAACGTGTGTATCAAACATTACAGGTCTACTACTAACAAGAGATGGTGGGGTAAATAACACCAAT  
GAGACCTTCAGACCCATAGGAGGAGATATGAGGGACAATTGGAGAAGTGAACATATAAGTATAAAGTAGTAG  
AAATTGAACCAATAGGAGTAGCACCTACCAGGGCAAAGAGAAGAGTGGTGGAGAGAGAAAAAAGAGCAATTGG  
ACTGGGAGCTGCCTTCCTTGGGTTCTTAGGAGCAGCAGGAAGCACTATGGGCGCGGCGTCAATGACGCTGACG  
GTACAGGCCAGACAATTATTGTCTGGCATAGTGACAGCAGCAAAGCAATTTGCTGCAGGCTATAGAGGCTCAGC  
AGCATCTGCTGAGACTCACGGTCTGGGGCATT

>MH330344..1

TTCTATTGTAATACAACAAAACCTGTTCAATAGCACTTGGGACAAAAATAGCACAAAGTACAAATATCACACAGA  
CAAATGGAAATATAACTCTACCATGCAGAATAAAGCAAATTATAAATATGTGGCAGAGAGTAGGACAAGCAAT  
ATATGCCCCCTCCTATCAAAGGAAATATAATGTGTGTATCAAACATTACAGGACTACTACTAATAAGAGATGGG  
GGAGTGGAAATAATAGCATCAATGAAACTTTCAGACCTATAGGAGGAGATATGAGGGACAATTGGAGAAGTG  
AACTATATAAGTATAAAGTAGTACAAATTGAACCAATAGGGGTAGCACCTACCAGGGCAAAGGAGAAGAGTGGT  
GCAGAGAGAAAAAAGAGCAATTGGACTGGGAGCCGCTTCCTCGGGTTCCTTAGGAGCAGCAGGAAGCACTATG  
GGCGCAGCGTCACTGACGCTGACGGTACAGGCCAGACAATTATTGTCTGGCATAGTGCAACAGCAAAGCAATT  
TGCTGAGGGCTATAGAGGCTCAGCAGCATCTGCTGAAACTCACGGTCTGGGGCATT

>MH330345..1

TTCTATTGCAATACAACAGCCCTGTTCAATAGCATTGTTGAAACGAAAATGACAATGGCACAAATAGTACAGAGG  
ACACTGACCCCTATAATTCTACCATGCAGAATAAAGCAAATTGTAAATATGTGGCAGAGAGTAGGACAAGCAAT  
GTATGCCCCCTCCTATCCCAGGAAATATAAGTTGTACATCAAACATTACAGGACTACTACTAACAAGAGATGGA

ATTAATGGCAGCAATGAGACCTTCCGACCTATAGGAGGAGACATGAGGGACAATTGGAGAAGTGAACCTATATA  
AGTATAAAGTAGTAAAAATTGAACCAATAGGAGTAGCACCTACCAAGGCAAAGAGAAGAGTGGTGGAGAGAGA  
AAAAAGAGCAATTGGACTGGGAGCTGCCTTCCTTGGGTTCTTAGGAGCAGCAGGAAGCACTATGGGCGCGGCG  
TCAATAACGCTGACGGTACAGGCCAGACAATTATTGTCTGGCATAGTGCAACAGCAAAGCAATTTGCTGAGGG  
CTATAGAGGCTCAGCAGCATCTGCTGAAACTCACGGTCTGGGGCATT

>MH330346..1

TTCTATTGCAATACATCAGACCTGTTTCACACATAATATCACAGGGGCCAATGAAACAGGGGCCAATGGAACCTA  
TAACTATAACCATGCAAAATAAAACAAATTATAAATATGTGGCAGAGAGTAGGACAAGCAATGTATGCCCCCTCC  
TATCAGAGGAATTATAAGGTGTGAATCAAACATTACAGGACTATTACTAACAAGAGATGGTGGAAAGAGCGAG  
AATGAGACCTTCAGACCTATAGGGGGAGATATGAGGGACAATTGGAGAAGTGAACCTATATAAGTATAAAGTAG  
TAGAAATTGGACCAATAGGAGTAGCACCTACCAGGGCACAGAGGAAAGTGGTGAAGAGAGAAAAAGAGCAAT  
TATTGGACTGGGAGCTGCCTTCCTTGGGTTCTTAGGAGCAGCAGGAAGCACTATGGGCGCGGCGTCATTGACG  
CTGACGGTACAGGCCAGACAATTATTGTCTGGCATAGTGCAACAGCAAAGCAATTTGCTGAGGGCTATAGAGG  
CTCAGCAGCATCTGCTGAAACTCACGGTCTGGGGCATT

>HQ616082..1

TTCTATTGCAATACAACAAACCTGTTCAATGGCACTTGGTCAAAAAGCACAAACGGCCAATGCAACTGCCAATG  
AACTATAACTCTACCGTGCAGAATAAAGCAAATTATAAATATGTGGCAGAGAGTAGGACAAGCAATGTATGC  
CCCTCCTATCATAGGCAATATAAGCTGTGAATCAAACATTACAGGACTGCTACTGACAAGAGATGGTGGAAACA  
ACTAATAGCAGCGATGAGACCTTCAGACCTATAGGAGGAAAATAGAGGGACAATTGGAGAAGTGAACCTATATA  
AGTATAAAGTAGTAATAATTGATCCAATAGGAGTAGCACCTACCAGGGCAAAGAGAAGAGTGGTGGAGAGGGA  
AAAAAGAGCAATTGGACTGGGAGTTGCCTTCCTTGGGTTCTTAGGAGCAGCAGGAAGCACTATGGGCGCGGCG  
TCACTGACGCTGACGGTACAGGCCAGACAATTATTGTCTGGTATAGTGCAACAGCAAAGCAATTTGCTGAGGG  
CTATAGAGGCTCAGCAGCATCTGCTGAAACTCACGGTCTGGGGCATT

>DQ823357..1

TTCTATTGCAATACAACAGAACTGTTCAATAGCACTTGGGGCGAAAATGGCACTATCACAAATAGCACAGAGA  
CCAGTGAAAATATAACTCTACCATGCAGAATAAAGCAAATTATAAATATGTGGCAGAGAGTAGGACAAGCAAT  
GTATGCCCCCTCCTATCAGAGGAAATATAAGTTGTGTATCAAACATTACAGGACTACTACTAACAAGAGATGGT  
GGAACCTAATAGCAGCACTGAGACCTTCAGACCTACAGGAGGAGATATGAGGGACAATTGGAGAAGTGAACCTAT  
ATAAGTATAAAGTAGTAGAAATTGAACCAATAGGAGTAGCACCTACCAAGGCAAAGAGAAGAGTGGTGGAGAG  
AGAAAAAGAGCAATAATTGGACTGGGAGCTGCCTTCCTTGGGTTCTTAAGTGACAGCAGGAAGCACTATGGGC  
GCAGCGTCACTGACGCTGACGGTACAGGCCAGACAATTATTGTCTGGCATAGTGCAACAGCAAAGCAATTTGC  
TGAGGGCTATAGAGGCTCAGCAGCATTTGCTGAGACTCACGGTCTGGGGCATT

>KU749399..1

TTCTATTGCAATACAACAGGCCTGTTCAATAGTACTTGGGACAATAGTACTTGGGACAAAAATAGCACTGTCA  
CAAATGGCACCGAGGACAATATAACTCTACAATGCAAAATAAAGCAAATTATAAGGATGTGGCAGAGAGTAGG  
ACAAGCAATGTATGCCCCCTCCTATCAGAGGAAATATAAAGTGTACATCAAACATTACAGGACTACTACTAATA  
AGAGATGGTGGAAATGGAAATAATAGCAACAATGAGACCTTCAGACCGACAGGAGGAGATATGAGAAATAATT  
GGAGAAGTGAACCTATATAAGTATAAAGTAGTAGAAGTTGAACCAATAGGAATAGCACCTACCAAGGCAAAGAG  
AAGAGTGGTGGAGAGAGAAAAAGAGCAATAGTTGGACTGGGAGCTGCCTTCCTTGGGTTCTTAGGAGCAGCA  
GGAAGTACTATGGGCGCGGCGTCAATAACGCTGACGGTACAGGCCAGACAATTACTATCTGGCATAGTACAAC  
AGCAGAGCAATCTGCTGAGGGCTATAGAGGCTCAGCAGCATCTGCTGAAACTCACGGTCTGGGGCATT

>KU749401..1

TTCTATTGCAATACAACAGACCTGTTCAATAGCACTTGGAACGGCAGCAATAGCACTGCCATGAATAGCTCAG  
GCAATGAAAATATAACCATACACTGCAGAATAAAGCAAATTATAAATATGTGGCAGAGAGTAGGACAAGCAAT  
GTATGCCCCCTCCTATCAGAGGAAATATAACATGTGTATCAAACATTACAGGGCTACTACTAATAAGAGATGGG  
GGAATGGAAATAATAGCAACAATGAGACCTTCAGACCTATAGGAGGAGATATGAGGGATAATTGGAGAAGTG  
AACTATATAAATATAAAGTAGTAAAAATTGAACCAATAGGAGTAGCACCTACCAAGGCAAGGAGAAGAGTGGT  
GGGGAGAGAAAAAGAGCAATTGGACTGGGAGCTGCCTTCCTTGGGTTCTTAGGAGCAGCAGGAAGCACTATG  
GGCGCGGCGTCACTGACGCTGACGGTACAGGCCAGAAAAATTGCTATCTGGCATAGTGCAACAGCAAAGCAATT  
TGCTGAGGGCTATAGAGGCTCAGCAGCAACTGCTGAGACTCACAGTCTGGGGCATT

>KY658681..1

TTCTATTGCAATACAACAGCCCTGTTCAATAGCACTTGGAACACCCTTGGAACGAAAATAGCACTGTTGAAA  
GTAGTACAGGGGACAATGAAAATATAACTATAACCATGCAGAATAAAGCAAATTATAAATATGTGGCAGAGAGT  
AGGACAAGCAATGTATGCCCCCTCCTATCAAAGGAATTATAAAGTGTGAATCAAACATTACAGGACTACTACTG  
GTAAGAGATGGTGGAAACACTAATAGCAGCAATGAGACCTTCAGACCTATAGGAGGAGATATGAGGGACAATT  
GGAGAAGTGAACCTATATAAGTATAAGGTAGTAAAAATTGAACCAATAGGAGTAGCACCAACCAAGGCACAGAG  
AAGAGTGGTGGGGAGAGAAAAAGAGCAATTGGACTGGGAGTTGCCTTCCTTGGGTTCTTAGGAGCAGCAGGA  
AGCACTATGGGCGCAGCGTCAATAACGCTGACGGTACAGGCCAGACAATTACTGTCTGGCATAGTGCAACAGC  
AAAGCAATTTGCTGAAGGCTATAGAGGCTCAGCAGCATCTGCTGAAACTCACAGTCTGGGGCATT

>KU749402..1

TTCTATTGCAATACATCAAACTGTTCAATAGCACTTGGGACGAAAATAGCACTGCCATAAATAGTACAGAGG  
ACAGTGGAATTATAACTATAACCATGCAGAATAAGGCAAGTTATAAATATGTGGCAGAGAGTAGGACAAGCAAT  
GTATGCCCTCCTATCAGAGGAAGTATAAGGTGTGAATCAAACATTACAGGATTAATACTAACAAGAGATGGT  
GGAAATATTAGTAGCACCAATGAGACCTTCAGACCTACAGGAGGAGATATGAGGGACAATTGGAGAAGTGAAC  
TATACAAGTATAAAGTAGTAAGCATTGAACCAATAGGAGTAGCACCTACCAAGGCAAGGAGAAGAGTGGTGCA  
GAGAGAAAAAGAGCAGTTGGACTGGGAGCTGCCTTCCTTGGGTTCTTAGGAGCAGCAGGAAGCACTATGGGC  
GCGGCGTCATTGACGCTGACGGTACAGGCCAGAAAATTATTGTCTGGCATAGTGCAACAGCAAAACAATTTGC  
TGAAGGCTATAGAGGCTCAGCAGCATCTGCTGAAACTCACAGTCTGGGGCATT

>KU749403..1

TTCTATTGTAATACAACAGACCTGTTCAATAGCACTTGGGACAGAAATGACACTGATGCAAATAGTACACAGG  
TTGATAGTACACAGGTTGATGTAACCTATAACTCTACCATGCAGAATAAAGCAAATTTGTAAGGATGTGGCAGAG  
AGTAGGACAAGCAATGTATGCCCTCCTATCGGAGGAGTTATAAGGTGTGAATCAAACATTACAGGACTACTA  
CTAACAAGGGATGGTGGAGCTAATAATAGCACTAATGAGACCTTTAGACCTCTAGGAGGAGATATGAGGGACA  
ATTGGAGAAGTGAACCTATATAAGTATAAAGTAATACAAGTTGAACCAATAGGAGTAGCACCTACCCAGCAAA  
GAGAAGAGTGGTGGAGAGACAAAAAGAGCAATTGGACTGGGAGCTGCCTTCCTTGGGTTCTTAGGAGCAGCA  
GGAAAGTACTATGGGCGCGGCGTCAATAACGCTGACGGTACAGGCCAGACAATTATTGTCTGGCATAGTACAAC  
AGCAAAGTAATTTGCTGAGAGCTATAGAGGCTCAGCAGCATCTGCTGAAACTCACAGTCTGGGGCATT

>KU749404..1

TTCTATTGCAATACAACAGAGCTGTTCAATAGCACTGAGGACAAAAATGGCACTGTCACAAATAGCAATGAAA  
ATATAACTCTACCATGCAGGATAAAGCAAATTATAAATATGTGGCAGAGAGTAGGACAAGCAATGTATGCCCTC  
TCCTATCAGAGGAAATATAACTTGTGAATCAAACATTACAGGACTACTACTAACAAGAGATGGAGATGATAAT  
AGCAGTGAGACCTTCAGACCTATAGGAGGAAATATGAGGGACAATTGGAGAAGTGAACCTATATAAATATAAAG  
TAGTCCAAATTGAACCAATAGGAGTAGCACCTACCAAGGCAAGGAGAAGAGTGGTGGGGAGAGAAAAAGAGC  
AATTGGACTGGGAGCTGCCTTCCTTGGGTTCTTAGGAGCAGCAGGAAGCACTATGGGCGCGGCGTCACTGACG  
CTGACGGTACAGGCCAGACAATTATTGTCTGGTATAGTGCAACAGCAAAGCAATTTGTTGAGGGCTATAGAGG  
CTCAGCAGCATCTGCTGAAACTCACAGTCTGGGGCATT

>KU749405..1

TTCTATTGCAATACAACAGACTTGTTCAATTGGGATAGAAATAGCACTGTCCCAAATAACACAAGTAGCAATA  
TAACTCTGCCATGCAGAATAAAGCAAATTATAAATATGTGGCAGAGAGTAGGACAATCAATGTATGCCCTCC  
TATCAGCGGAAAGATAAGGTGTGAATCAAACATTACAGGACTACTACTAGTAAGAGATGGTGGAGATAATAAT  
AGCACCAATGAGACCTTCAGACCTATAGGAGGAGAAATGAGGCACAATTGGAGAAGTGAACCTATATAAGTATA  
AAGTAGTAGAAATTGAACCAATAGGAGTAGCACCTACCAAGGCAAGGAGAAGAGTGGTGGGAAGAGAAAAAG  
AGCAGCCTTTGGACTGGGAGCTGTCTTCCTTGGGTTCTTAGGAGCAGCAGGAAGCACTATGGGCGCGGCGTCA  
CTGACGCTGACGGTACAGGCCAGGCAATTATTGGCTGGCATAGTGCAACAGCAAAGCAATTTGCTGAGGGCTA  
TAGAGGCTCAGCAGCATCTGCTGAAACTCACAGTCTGGGGCATT

>KY658682..1

TTCTATTGCAATACAACAGAACTGTTCAATAGCACTTGGAAATGGCACTGACACAAACAGCACAGAGGACAATA  
ATGTAAATATAACTATAACCATGCAGAATAAAGCAAATTATAAATATGTGGCAGAGAGTAGGACGAGCAATGTA  
TGCCCTCCTATCAGAGGAAATATAACTTGTGAATCAAACATTACAGGACTACTACTAACAAGAGATGGTGGT  
AAAGAGAAAAATGACAACGAAACCTTTAGACCTATAGGAGGAAATATGAAGGACAATTGGAGAAGTGAACCTAT  
ATAAGTATAAAGTAGTAGAAATTAACCCAATAGGAGTAGCACCTACCCCGGCAAAGAGAAGAGTGGTGGAGAG  
AGAAAAAGAGCAGTTAGCCTAGGAGTTGCCTTCCTTGGGTTCTTAGGAGCAGCAGGAAGTACTATGGGCGCG  
GCGTCACTGACGCTGACGGTACAGGCCAGACAACCTATTGTCTGGCATAGTACAACAGCAAAGCAATTTGCTGA  
GGGCTATAGAGGCTCAGCAGCAATTGCTGAAACTCACGGTCTGGGGCATT

>KU749407..1

TTCTATTGCAATACAACAGAACTGTTCAATAGCACTTGGGACGACAATAGCACTGTTGCAAATATCACAAGA  
CCAATGAAAATATAACTCTACCATGCAGACTAAGGCAAATCATAAAGATGTGGCAGAGAGTAGGACAAGCAAT  
GTATGCCCTCCTATCCAAGGAGTTATAAAGTGTGAATCAAACATTACAGGACTACTACTAACAAGAGATGGT  
GGAGATGGAACCTAATAACAGCAATAATGAGATTTTCAGACCTATAGGAGGAAATATGAGGGACAATTGGAGAA  
GTGAACCTATATAAGTATAAAGTAGTAGAAATTGAACCAATAGGAGTAGCACCTACCAAGGCAAAGAGAAGAGT  
GGTGCAGAGAGAAAAAGAGCAGTTATTGGACTGGGAGCTGCCTTCCTTGGGTTCTTAGGAGCAGCAGGAAGC  
ACTATGGGCGCGGCGTCAATAACGCTGACGGTACAGGCCAGACAATTACTGTCTGGCATAGTGCAACAGCAAA  
GCAATTTGCTGAGGGCTATAGAGGCTCAGCAGCATCTGCTGAAACTCACGGTCTGGGGCATT

>AF082486..1

TTCTATTGCAATACAACAGACCTGTTCAATAGCACTTGGGACGAACATGGCACTGTCACAAATAGCACAAATGG  
CCAATGGAACCTATAACTCTACCATGCAGAATAAAGCAAATTTATAAATATGTGGCAGAGAGTAGGACAAGCAAT  
GTATGCCCTCCTATTAAAGGAAGTATAAGGTGTGAATCAAACATTACAGGACTACTATTAAACAAGAGATGGT  
GGAAAGTGAACCTAATAGCAGCAATGAGACCTTCAGACCTATAGGAGGAAATATGAGGGATAATTGGAGAAGTG  
AACTATATAAGTATAAAGTAGTAAAAATTGAACCCATAGGATTAGCACGTACCAGGGCAAAGAGAAGAGTGGT  
GGAGAGAGAAAAAGAGCCATTGGACTGGGAGCTGCCTTCCTTGGGTTCTTAGGAGCAGCAGGAAGTACTATG

GGCGCGGCGTCAATGACGCTGACGGTACAGGCCAGACAATTATTGTCTGGCATAGTGCAACAGCAAAGCAATT  
TGCTGAGGGCTATAAAGGCTCAGCAGCATCTGCTGAAACTCACGGTCTGGGGCATT

>KY968402..1

TTCTACTGTAACACAACAAAACCTGTTTAAATAGTACTTGGTCTAATAATGATACTGGGGAGGGTACTGCAGATT  
CAAATAACGAAACTATCACAATCCCATGCAGAATAAAACAAATTATAAACATGTGGCAACAAGTAGGAAAAGC  
AATGTATGCCCCCTCCCATCAGTGGAACATTAGTTGCTCATCAAATATTACAGGGTTACTGTTAAACAAGAGAT  
GGTGGAGATAATGATGACCTAAACGGGACCGAGACCTTCAGACCTCAAGGAGGAAACATGAAGGACAATTGGA  
GAAGTGAATTATATAAATATAAAGTAGTAAAAATTGAACCATTAGGAGTAGCACCCACCAAGGCAAAGAGAAG  
AGTGTTCAGAGAGACAAAAGAGCAGTGGGACTAGGAGCTATGTTTCCTTGGGTTCTTGGGAGCAGCAGGAAGC  
ACTATGGGCGCAGCGTCAATAGCGCTGACGGTACAGACCAGACAATTATTGTCTGGTATAGTGCAACAGCAGA  
ACAATATGCTGAGGGCTATTGAGGCGCAACAGCATATGTTGCAACTCACTGTCTGGGGCATC

>KY968404..2

TTCTACTGTAATACAACACAACCTGTTTTATAGTACTTGGTTGTCTAATGGTAGTAGTTTGACAAATAACACTG  
AAGGAAATGACACTATCACACTCCCATGCAGAATAAAACAGATTATAAATATGTGGCAGCAAGTAGGAAAAGC  
AATGTATGCCCCCTCCCATCAAAGGACTAATTAGATGCTCATCGAATATTACAGGACTGCTACTAACAAGAGAT  
GGTGGTAGTCATAACGAGAGCAATGAGACTGAGACATTCAGACCTGGGGGAGGAGATATGAGGGACAATTGGA  
GAAGTGAATTATACAAATATAAAGTAGTACAAATTGAACCATTAGGAATAGCACCCACCAAGGCAAAGAGAAG  
AGTGGTGCAGAGAGAAAAAGAGCAGTGGGACTGGGAGCTTTGTTTCCTTGGGTTCTTGGGAACAGCAGGAAGC  
ACTATGGGCGCAGCGTCATTGACGCTGACGGTACAGGCCAGACAATTATTGTCTGGTATAGTGCAACAGCAGA  
ATAATCTGCTGAGAGCTATTGAGGCGCAACACATCTGTTGCAGCTCACAGTCTGGGGCATC

>KY968408..1

TTCTACTGTAATACAACAAAACCTGTTTAAATAAGACTTGGAAATGGTACTTGGCTTAATAATGAGAATACTACAC  
AGAATATCACACTCCCATGCAGAATAAAACAAATTATAAACAGGTGGCAGGAAGTAGGAAAAGCAATGTATGC  
CCCTCCCATCAAAGGACAAATTAGCTGCTCATCAAATATTACAGGGCTGCTATTAAACAAGAGATGGTGATAAC  
GAGACTGGGTTCGAGACCTTCAGACCTGGAGGAGGAGATATGAGGGACAATTGGAGAAGTGAATTATATAAAT  
ATAAAGTAGTAAAAATTAGCCATTAGGAGTAGCACCCACCAAGGCAAAGAGAAGAGTGGTGCAAAGAGAAAA  
AAGAGCAGTGGGAATAGGAGCTGTGTTTCCTTGGGTTCTTGGGAGCAGCAGGAAGCACTATGGGCGCAGCGTCA  
GTAACGCTGACGGTACAGGCCAGACAATTATTGTCTGGTATAGTGACAGCAGCAGAACAAATTTGCTGAGGGCTA  
TTGAGGCGCAACAGCATCTGTTGCAACTCACAGTCTGGGGCATC

>DQ383749..1

TTCTACTGTAATACATCACAACCTGTTTAAATAGTACTTGGCCTTGGAAATGGGAATGCGACTACAGATAATACTA  
CAGGAGTAAATATCACACTCCCATGCAGAATAAAACAAATTATAAACAGGTGGCAGGAAGTAGGAAAAGCAAT  
GTATGCCCCCTCCTATTAAAGGACAAATTAGATGTTTCATCAAATATTACAGGGCTGCTATTAAACAAGAGATGGT  
GGTCATAACGAGACCAACGACACTGAGACCTTCAGACCTGGAGGAGGAAATATGAAGGATAATTGGAGAAGTG  
AATTATATAAATATAAAGTAGTAAAAATTGAACCATTAGGAATAGCACCCACCACGGCAAAGAGAAGAGTGGT  
GCAGAGAGAGAAAAGAGCAATAACAATAGGAGCTATGTTACTTGGTTTCTTGGGAACAGCAGGAAGCACTATG  
GGCGCAGCGTCAATCACGCTGACGGTACAGGCCAGACAATTATTGTCTGGTATAGTGCAACAGCAGAACAAATC  
TGCTGAGGGCTATTGAGGCGCAACAGCATCTGTTGCAACTCACAGTCTGGGGCATC

>MH078532..1

TTCTACTGTAACACATCAAAGCTGTTTAAACAGTACTTGGCATAGGAATGGTACTTGGAAATGGTACTAGTACTG  
AGAATAATACAATCACAATCCCATGCAGAATAAAACAAATTATAAACAGGTGGCAGGAAGTAGGAAAAGCAAT  
GTATGCCCCCTCCCATCAGAGGAAATATTACATGTACATCTAATATTACAGGACTGTTATTAAATAAGAGATGGT  
GGTAACATTAAACACCACGAATGAGACCGAGATCTTCAGACCTGGAGGAGGAGACATGAGGGATAATTGGAGAA  
GTGAATTATATAAATATAAAGTAGTAAAGATTAGCCATTAGGAATAGCACCCACCAGGCAAAGAGAAGAGT  
GGTGCAAAGAGAAAAGAGAGCGGTGGGAACACTAGGAGCTGTGTTTCCTTGGGTTCTTGGGAGCAGCAGGAAGC  
ACTATGGGCGCAGCGGCAACAACGCTGACGGTACAGGCCAGACAGTTACTGTCTGGCATAGTGCAACAGCAAAA  
ACAATTTGCTGAGAGCTATTGAGGCGCAACAGCATACGTTGCAACTCACAGTCTGGGGCATT

>AF538307..1

TTCTACTGTGATTCAACACAACCTGTTTAAATAGTACTTGGCATAATAGTACTTGGAAATAATAATAAAGAGTCAA  
ATAGCACTGATCCAATCACACTCCCATGCAGAATAAAACAAAATATAAACATGTGGCAGGAAGTAGGAAAAGC  
AATGTATGCCCCCTCCCATCAGAGGACAAATTAAATGTTTCATCAAACATTACAGGGCTAATATTAAACAAGAGAT  
GGTGGTAATAACACAGACAATAACAACACCGAAACCTTCAGACCTGGAGGAGGAAATATGAAGGACAATTGGA  
GAAGTGAATTATATAAATATAAAGTAGTAAAAATTGAACCATTAGGAGTAGCACCCACCAAGGCAAAGAGAAG  
AGTGGTGCAGAGAGAGAAAAGAGAAGTAGGACTAGGAGTTATGTTTCCTTGGGTTCTTGGGAGCAGCAGGAAGC  
ACTATGGGCGCAGCGTCACTGAGGCTGACGGTACAGGCCAGACAATTATTGTATGATATAGTGCAACAGCAAAA  
ACAATTTGCTGAGAGCTATTGAGGCGCAACATCATCTGTTGCAACTCACAGTCTGGGGCATC

>GU367404..1

TTCTATTGTAATACAACACAACCTGTTTAAACAGTACTTGGAGAAAGGAGTCAAATAACACTGGAGGAAATATCA  
CACGAAATATCACGCTCCCATGTAGAATAAGACAGATTGTAAACATGTGGCAGGAAGTAGGAAAAGCAATATA  
TGCCCCCTCCCATTTGAAGGACTAATTAGATGTTTATCAAATATTACAGGGCTGCTATTAAACAAGAGACGGTGGT

AATCAGAATGGGACTAATGACACTGAAATCTTCAGACCTGGAGGGGGAGATATGAGGGACAATTGGAGAAGTG  
AATTATATAAATATAAAGTAGTAAAAATTGAACCCCTTAGGAATAGCACCCACCAAGGCAAAGAGAAGAGTGGT  
GCAAAGAGAAAAAAGAGCAGTGGGAGCATTAGGAGCTATGTTCCCTTGGGTTCTTGGGAGCAGCAGGAAGCACT  
ATGGGCGCAGCGTCAGTAACGCTGACGGTACAGGCCAGACAATTATTGTCTGGTATAGTGCAACAGCAGAATA  
ATCTGCTGAAGGCTATTGAGGCGCAACAGCATCTGTTGCAACTCACAGTCTGGGGCATC

>AF146728..1

TTCTACTGTAATTCAACACAACCTGTTTAATAGTACTTGGTTTAATAGTACTGGGAATGATACTGAAAGGGCAA  
CTAACAATACAGAAAATATCACACTCCCATGTAGAATAAAACAAATTATAAACATGTGGCAGAAAGTAGGAAA  
AGCAATGTATGCCCCCTCCCATCAACGGACAGATTAGATGTTTCATCAAATATTACAGGGCTGATACTAACAAGA  
GATGGTGGTAATCAAGAGAACAAAGACCGAGATCTTCAGACCTGGAGGAGGAGATATGAGGGACAATTGGAGAA  
GTGAATTATATAAATATAAAAGTAGTAAGAATTGAACCATTAGGAGTAGCACCCACCAAGGCAAAGAGAAGAGT  
GGTGCAGAGAGAAAAAAGAGCAGTGGGAATGATAGGGGCAATGATCCTTGGGTTCTTGGGAGCAGCAGGAAGC  
ACTATGGGCGCAGCGTCACTGGCGCTGACGGTACAGACCAGGCAATTGTTGTCTGGTATAGTGCAACAGCAGA  
ACAATCTGCTGAGGGCTATTGAGGCGCAACAGCATCTGTTGCAACTCACAGTCTGGGGCATC

>MN485974..1

TTCTATTGTAATACAACAAAACTGTTTAATGGTACTTGGAAATGGTACTTGGCTATCGGGGAACTGGCCAAATG  
AAAATATCACACTCCCATGTAGAATAAAACAAATTGTAAACATGTGGCAAGAAGTAGGAAAAGCAATGTATGC  
CCCTCCCATCCAAGGACAGATTAGATGTGACTCAAATATTACAGGGCTGCTATTAACAAGAGATGGTGGTTCC  
GGGAATGGAACCTGAGAATAACACTGAGATCTTCAGACCTGGAGGAGGAAATATGAGAGACAATTGGAGAAGTG  
AATTATATAAATATAAAGTAGTAAAAATTGCACCATTAGGAATAGCACCCACCAAGGCAAAGAGAAGAGTGGT  
GCAGAGAGAAAAAAGAATAGGAACGCTAGGAGCTGTGTTCCCTTGGGTTCTTGGGAACAGCAGGAAGCACTATG  
GGCGCAGCGTCACTGACGCTGACGGTACAGGCCAGACAATTATTGTCTGGTATAGTGCAACAGCAGAACAATT  
TGCTGAGGGCTATTGAGGCGCAACATCATCTGTTGCAACTCACAGTCTGGGGCATC

>MN485990..1

TTCTACTGTGATTCAACAGAACTATTTAATAGTACTTGGAATTTTAATAATAACTTGGTATGAGAACTCAA  
ATAACACAAGTGACAAAGAAAAATCACACTCCCATGTAGAATAAAACAAATTAGAACTTGTGGCAGGAAGT  
AGGAAAAGCAATGTATGCCCCCTCCCATCCAAGGGCTAATTACATGTCAATCAAATATTACTGGGGTGCTACTA  
ACAAGAGATGGTGGTATTAATAACACCAGGAACGAGACCTTTAGACCTGGAGGAGGAAATATGAAAGACAATT  
GGAGAAGTGAACATATACAAAATATAAAGTAATAAAAAATTGAACCATTAGGAGTGGCACCCACCAAGGCAAAGAG  
AAGAGTGGTGCAGAGAGAAAAAAGAGCAGTGGGAACAATAGGAGCTGTGTTCCCTTGGTTTTCTTGGGAACAGCA  
GGAAGCACTATGGGCGCAGCGTCAATAGCGCTGACGGCACAGGCCAGACAATTATTGTCTGGTATAGTGCAAC  
AGCAAAACAATTTGCTGAGAGCTATTGAGGCGCAACATCATCTGTTGCAACTCACAGTCTGGGGCATC

>MN485995..1

TTCTACTGTAATACAACACAACCTGTTTAATAGTACTTGGTGGTCTAATAGTACTGGGAATATTACTGGACAGC  
CAGAAAATATCACTCTCCCATGCAGAATAAAACAAATCATAACTTGTGGCAAGAGGTAGGAAAAGCAATGTA  
TGCCCCCTCCCATCCAAGGACTAATTAGATGTTTCATCAAATATTACAGGGTTACTATTAACAAGAGATGGTGAT  
AATCAAATAAAGAGACTGAGATCTTTAGACCGGGAGGAGGAGATATGAGGGACAATTGGAGAAGTGAATTAT  
ATAAATATAAAATAGTAAAAATTGAGCCATTGGGAATAGCACCCACCAGGGCAAAGAGAAGAGTGGTGCAAAG  
AGAAAAAAGAGCAGTGGGAATAGGAGCTCTGTTCCCTTGGGTTCTTGGGAGCTGCAGGAAGCACTATGGGCGCA  
GCGTCGGTGACGCTGACGGTACAGGCCAGACAATTATTGTCTGGTATAGTGCAACAGCAAAACAACCTTGCTGA  
GAGCTGTTGAGGCGCAACAACATATGTTGCAACTCACAGTCTGGGGCATC

>MN486034..1

TTCTACTGTAATACAACAGAGCTATTTAATAGGAATATTACTGAAGAGTCAAACACTAATGGAAATAGCAGTA  
GCGCAGGAAATATCACACTCCAATGCAGAATAAAACAGATTATAAACATGTGGCAGGAAGTAGGAAAAGCAAT  
GTATGCCCCCTCCCATCAGAGGACAAATTCAATGTATATCAAATATTACAGGACTAATATTAACAAGAGATGGT  
GGTAAGACAAATAATGAGACAAATGGGACTGAGATTTTCAGACCTGGAGGAGGAAATATGAGAGACAATTGGA  
GAAGTGAATTATATAAATATAAGGTAGTAAAAATTGAACCATTAGGAGTAGCACCCACCAGGGCAAAGAGAAG  
AGTGGTGCAGAGAGAAAAAAGAGCAGTGGGAATAGGAGCTGTGTTCCCTTGGGTTCTTGGGAGCAGCAGGAAGC  
ACTATGGGCGCAGCGTCAATAACGCTGACGGTACAGGCCAGACAATTATTGTCTGGTATAGTGCAACAGCAAA  
ACAATTTGCTGAGAGCTATTGAGGCGCAACAGCATCTGTTGCAACTCACAGTCTGGGGCATC

>DQ358805..1

TTCTACTGTAATACAACGAAGCTGTTTACTGGTACTTTGAATAGCACTGGGACTTGGCATACAGAAAACCAGA  
CTGATACTATCACACTCCCATGCAAAATAAAACAAATTATAAACAGGTGGCAGGAAGTAGGAAAAGCAATGTA  
TGCCCCCTCCCATTAAGGACAAATTAGCTGTTTCATCAAATATTACAGGGATACTATTAACACGAGATGGTGGT  
GGGAATGGGTCCGACACCACCGCCTCCTTAACACCAGGAGGAGGAGATATGAGGAACAGTTGGAGAAATGAAT  
TATATAATTATGAGGTGGTAAAAATTCCACCATTAGGAGTACCACCCACCGAGGCGAGGAGAAGAGTGGTGCA  
GAGAGAAAAAAGAGCAGTGGGGGCCTAGGAGCTATGTTCCCTTGGGTTCTTGGGAACAGCAGGAAGCACTATG  
GGCGCAGCGTCACTGACGCTGACGGTACAGGCCAGACAATTATTGTCTGGTATAGTGCAACAGCAGAATAATT  
TGCTGAGAGCTATTAAGGCGCAACAGCATATGTTGCAACTCACAGTCTGGGGCATC

>JN692439..3

TTCTACTGTGATACCTCACAAATATTTAATAGTAATTGGAATAGTTCTTCAAATTTTAGTCATCATGAAAATT  
CAAATGAAAATATCACACTCCAATGCAGAATAAAACAAATTATAAACAGGTGGCAGGAAGTAGGAAGAGCAAT  
GTATGCCCCCTCCCATCCGAGGACTAATTAGATGTTTCATCAAATATTACAGGGCTGCTATTAACAAGAGATGGT  
GGTAAGAATGATAACAATGGGACTGAGAATGGGACTGAGACCTTCAGACCTGGAGGGGGAGATATGAGGGACA  
ATTGGAGAAGTGAATTATATAAATATAAAGTAGTTCAAATTGAGCCAGTAGGAATAGCACCCACCAAGGCCAAA  
GAGAAGAGTGGTGCAAAGAGAAAAAAGAGCAGTAGGAGTAGGAGCTGTGTTCTTGGGTTCTTGGAACAGCA  
GGAAGCACTATGGGCGCAGCGTCACTCACGCTGACGGTACAGGCCAGACAATTGTTGTCTGGTATAGTGCAAC  
AGCAGAACAATCTGCTGAAGGCTATTGATGCGCAACAGCATCTGTTGCAGCTCACAGTCTGGGGCATC

>JN692462..1

TTCTACTGTAATACATCACCCTGTTTAAATAGTACTTGGAAAATTGGAACATAAAGTCTATAGAAAATGGAA  
CTATCACACTCCCATGCAGAATAAAACAAATTATAAACAGGTGGCAGGAAGTAGGAAAAGCAATGTATGCCCC  
TCCCATCGAAGGACCAATTAGATGTTTCATCAAATATTACAGGGCTGCTATTAACAAGAGATGGTGGTGAAGAC  
AACAAATGGGTCCGAGACCTCCAATGAGACCTACACCTCTGGACCAGGAGATATGAATATGAATTGCAATTGTG  
AATTATATTTATATAAAGATATGGAAATGGAGCCTGTACCATTAGCACCCACCCGACCAAGGCCAAAGAGAAG  
AGTGGTGCAGAGAGAAAAAAGAGCAGTGGGAGTAGGAGCTGTGTTCTTGGGTTCTTGGGAGCAGCAGGAAGC  
ACTATGGGCGCAGCGTCAGTGGCGCTGACGGCACAAGCCAGACAATTATTGTCTGGTATAGTGCAACAGCAGG  
ACAATCTGCTGAGGGCTATTGAGGCGCAACAGCATCTGTTGCAACTCACAGTCTGGGGCATC

>JN692465..1

TTCTATTGTAATACAACAGAGCTGTTTAAAGGGTACTTGGAAATGGTACTTGGAAATGGTACTACTTGGGCTAATA  
GTACTTGGGCTAATGGTACTGGGAATATGAACATCACACTCCCATGCAGAATAAGACAAATTATAAACATGTG  
GCAGGAGGTAGGAAAAGCAATGTATGCCCCCTCCCATCAGCGGACCCATTAAGTGTACATCAAATATTACAGGG  
ATGATATTAACAAGAGATGGTGGTGTATGGTAACGGGAGTCAGGAGATCTTCAGACCTGGAGGAGGAGATATGA  
GGGACAATTGGAGAAGTGAATTATATAAATATAAAGTAATAAAAATTGAACCATTAGGAGTAGCACCCACCAG  
GGCAAAGAGAAGAGTGGTGCAGAGAGAAAAAAGAGCAGCTATAGGAGCTGTGCTCATTTGGGTTCTTGGGAGCA  
GCAGGAAGCACTATGGGCGCAGCGTCAATAACGCTGACGGTACAAGCCAGGCAATTATTGTCTGGTATAGTGC  
AACAGCAGAGCAATCTGCTGAGAGCTATTGAGGCGCAACACACCTGTTGCAACTCACTGTCTGGGGCATC

>JN692473..1

TTCTACTGTAATACATCAAAGCTGTTTAAATAGGAATTGGACTGATAATAGTAATAATACTGGAAATGATACTG  
GGAATAATACTATCACACTCCCATGCAGAATAAAACAAATTATAAACAGATGGCAGGAAGTAGGAAAAGCAAT  
GTATGCCCCCTCCCATTCGAGGACTAATTAGATGTTTCATCAAATATTACAGGGCTGATATTAACAAGAGATGGT  
GGTAATCATAACAATAGTAACGGTAGTGAAATCTTCAGACCTGGGGGAGGAGATATGAGGGACAATTGGAGAA  
GTGAATTATATAAATATAAAGTAATAAAAATTGAGCCATTAGGAATAGCACCCACCAAGGCCAAAGAGAAGAGT  
GGTGCAGAGAGAAAAAAGAGCAGTGGGAACGATAGGAGCTATGTTCTTGGGTTCTTGGGAGCAGCAGGAAGC  
ACTATGGGCGCAGCGGCAGTGACGCTGACGGTACAGGCCAGACAATTATTGTCTGGTATAGTGCAACAGCAGA  
ACAATCTGCTGAGAGCTATTGAGGCGCAACAGCATATGTTGCAACTCACAGTCTGGGGCATC

>JN692474..2

TTTTACTGTAATACAACACAGCTGTTTAAATAGCACTTGGCTGTTTAAACAGCACTTGGAAATCAAAGTGCTAATG  
ATGCAGACAATATCACACTCCCATGCAGAATAAAACAAATAGTAAACAGATGGCAGGAAGTAGGAAAAGCAAT  
GTATGCCCCCTCCCATCAAAGGACAAATTAGATGTTTCATCAAATATTACAGGGCTGCTCTTAACAAGAGATGGT  
GATAATAACACCAACAACAACGAGACCTTTAGACCTGGAGGAGGAGATATGAGGGACAATTGGAGAAGTGAAT  
TATATAAATATAAAGTAGTAAAAATTGAGCCATTAGGAATAGCACCCACCAAGGCCAAAAGAAGAGTGGTGCA  
GAGAGAAAAAAGAGCAGTGGGAACAATAGGAGCTGTGTTCTTGGGTTCTTGGGAGCAGCAGGAAGCACTATG  
GGCGCAGCGTCAGTGACGCTGACGGTACAGGCCAGACTATTATTGTCTGGTATAGTGCAACAGCAGAACAAATC  
TGCTGAAGGCTATTGAAGCGCAACATCATCTGTTGCAGCTCACAGTCTGGGGCATC

>JN692480..1

TTCTACTGTAACACAGCACAGCTGTTTAAATAATACTTGGCTGTCCAATAATACCTGGCTACAGAATAATACTT  
GGATTAATGGCACTATCACACTCCCATGCAGAATAAGACAAATTGTAAACAGGTGGCAGGAAGTAGGGAGAGC  
GATGTATGCTCCTCCCATCGCAGGAATAATCAACTGTGTATCAAACATTACAGGGCTGATATTAACAAGAGAT  
GGAAACATAACAACAATAAGTACTCTGAAAACAATACTGAAATCTTCAGACCTGGAGGAGGAGATATGA  
GGGACAATTGGAGAAGTGAATTATATAAATATAAAGTGGTAACAATTGAGCCAGTGGGAATAGCACCCACCGA  
GGCAAGGAGAAGAGTGGTGCAGAGAGAAAAAAGAGCAGTGGGAACGATAGGAGCTATGTTCTTGGGTTCTTG  
GGAGCAGCAGGAAGCACTATGGGCGCAGCGTCACTAACGCTGACGGTACAGGCCAGAAATATTATTGTCTGGTA  
TAGTGCAACAGCAAAACAATTTGCTGAGAGCTATTGAGGCGCAACAACATATGTTGCAACTCACAGTCTGGGG  
CATC

>HQ377423..2

TTCTACTGTGATACAAAACCACTGTTCAATAGTACTTGGAAATGATACTACAGGGTCAATTCACATTAATGGAA  
CTATCACACTCCGATGCAGAATAAAACAAATTATAAACATGTGGCAGGGAGTAGGAAAAGCAATGTATGCCCC  
TCCCATCAGAGGACTAATTAACTGTACATCAAATATTACAGGGCTGCTATTAACAAGAGATGGTGGTAAAGAG  
AACAGGACCACCGAGACCTTTAGACCTCAAGGAGGAAATATGAAAGACAATTGGAGAAGTGAAGTATATAAAT  
ATAAAGTAGTAAAAATTGAACCATTAGGAATAGCACCCACCAAGGCCAAAGCGAAGAGTGGTACAAAGAGAAAA

AAGAGCAATAGGGGTAATAGGAGCTATGTTTCCTTGGGTTCTTGGGAACAGCAGGAAGCACTATGGGCGCAGCG  
TCACTGACGCTGACGGTACAGGCCAGACAATTATTGTCTGGTATAGTGCAACAGCAGAACAATTTGCTGAGAG  
CTATTGAGGCGCAACAACATCTGTTGCAACTCACAGTCTGGGGCATC

>KT427681..1

TTCTACTGTAATACATCAACGCTGTTTAAATTGGACTGAAAATTCAAATAACAATGCAAGTGACAATATGACAA  
TCCCATGCAGAATAAGACAAATTGTAAACAGGTGGCAGGAAGTAGGAAAAGCAATGTATGCCCCCTCCCATCAG  
CGGACAGATTAGCTGTTTATCAAATATCACAGGGCTGATATTAACAAGAGATGGTGGTATCAACAGCAGCAGC  
AGCAATGAGACCTATGAGACCTTCAGACCTGCAGGAGGAAAATATGAAAGATAATTGGAGAAGTGAATTATATA  
AATATAAAGTAGTAAAAGTTGAGCCATTAGGAGTAGCACCCACCAAGGCAAAGAGAAGAGTGGTGCAGAGAGA  
AAAAAGAGCAATAACACTAGGAGCCATGTTTCCTTGGGTTCTTGGGAGCAGCAGGAAGCACTATGGGCGCAGCG  
TCGATGACGCTGACGGTACAGGCCAGACTATTATTGTCTGGTATAGTGCAACAGCAGAACAACCTGCTGAGAG  
CTATTGAGGCGCAACAACATCTGTTGCAACTCACAGTCTGGGGCATT

>KT427732..1

TTCTACTGTAAGACAACACAGCTGTTTAAATAGCACTTGGTTAAATACTAGTATTGAGTATAATAATACTGAAG  
GGGCTGGAGTACCAAATATCACACTCCAATGCAGAATAAAAACAAATTATAAACAGATGGCAGGGAGTAGAAAAG  
AGCAATATATGCCCCCTCCCATCCCGGGACAAATTAGATGTACATCAAATATTACAGGGCTGATATTGACACGG  
GATGGTAATGGTAATCAAAACAGATAGCACTAACGAAACCTTCAGACCAATAGGAGGAAATATGCAGGACAATT  
GGAGAAGTGAATTATATAAAATATAAAGTGGTAAAAATTGAGCCAGTAGGAATAGCACCCACCAAGGCAAAGAG  
AAGAGTGGTGCAGAGAGAAAAAAGAGCAGTGGGAACACTAGGAGCTATGTTTCCTTGGGTTCTTGGGAGCAGCA  
GGAAGCACTATGGGCGCAGCGTCAGTGACGCTGACGGTACAGGCCAGACTATTATTGTCTGGTATAGTGCAAC  
AGCAGAACAACCTGCTGAAGGCTATTGAGGCGCAACAGCATTTGTTGCAACTCACAGTCTGGGGCATC

>KT427713..1

TTCTATTGTAATACAACAAACCTGTTCAACAGTACTTGGAAATGACACTACTGAAGGAAATAACACAGGAAATA  
TAGGAAATATCACACTCCCGTGCAGAATAAAAACAAATTATAAACATGTGGCAGCAAGTAGGAAAAGCAATGTA  
TGCCCCCTCCCATCGCAGGACAAATTAGCTGTTTCATCAAATATTACAGGGTTGTTACTAACAAGAGATGGTGGT  
AATAATGATTCTAATAATTATGAAATCTTCAGGCCTGGAGGAGGAGATATGAGGGACAATTGGAGAAGTGAAT  
TATACAAATATAAAGTAGTAAAAATTGAACCATTAGGAGTAGCACCCACTAAGGCAAAGAGAAGAGTGGTGCA  
GAGAGAAAAAAGAGCGGCACTAGGAGCTTTGTTTCCTTGGGTTCTTGGGAGCAGCAGGGAGCACTATGGGCGCA  
GCGGCAGTAACGCTGACGGTACAGGCCAGAACATTATTGTCTGGTATAGTGACAGCAGCAAAGGAATTTGCTGA  
GAGCTATTGAGGCGCAACAACATCTGTTGCAACTCACAGTCTGGGGCATC

>KT427870..2

TTCTACTGTAATACATCAGGACTGTTTAAATAGTACTTGGAAATAGGGATGGTAATTGGTCTCAGGATGATACTA  
ATGGGTCAAATGAAACAATCACACTCCCATGCAGAATAAAAACAAGTTATAAACAGGTGGCAGGAAGTAGGAAA  
AGCAATGTATGCCCCCTCCCATCAGCGGAAGGATTTTCTGTTTCATCAAACATTACAGGGCTACTCTTAGTAAGA  
GATGGTGGTAACCAGAGCCACGAGAGTGAGACCTTCCGACCTGGAGGAGGAGATATGAGGGACAATTGGAGAA  
GTGAATTATATAAATATAAAGTAGTAAAAATTGAGCCATTAGGAATAGCACCCACCAAGGCAAAGAGAAGAGT  
GGTGCAGAGAGAAAAAAGAGCAGTGGGAACGCTAGGAGCTATGTTTCCTTGGGTTCTTGGGAACAGCAGGAAGC  
ACTATGGGCGCAGCGTCACTGACGCTGACGGTACAGGCCAGACAATTATTGTCTGGTATAGTGCAACAGCAGA  
ACAATCTGCTGAAGGCTATTGAGGCGCAACATCATCTGTTGCGACTCACAGTCTGGGGCATA

>KT427707..1

TTCTACTGTAATACAACAGGGCTGTTTAAATAGTAATAATACTTGGAAATAATACTAATAATAATAGTAGGAATA  
ATGAAACATATACCATACCATGCAGAATAAAGCAAATTATAAACAGGTGGCAAGAAGTAGGAAAAGCAATGTA  
CGCCCCCTCCCATCAAAGGAATAATTCACCTGTACATCAAATATTACAGGGCTGCTATTAACAAGAGATGGTGGG  
AATAGTTCAGAAAATGAACTTTCAGACCTGCAGGAGGAGATATGAGGGACAATTGGAGAAGCGAATTATATA  
AATATAAAGTAGTAAAAATTGAGCCAATAGGACTAGCACCTACCAAGGCACAGAGAAGAGTGGTGCAGAGAGA  
AAAAAGAGCAGTGACACTGGGAGCTATGTTTCCTTGGGTTCTTAGGAGCAGCAGGAAGCACTATGGGCGCAGCG  
TCAATAACGCTGACGGTACAGGCCAGACAATTGCTGTCTGGTATAGTGCAACAGCAGAGTAATCTGCTGAGGG  
CTATTGAGGCGCAACAGCATATGTTGCAACTCACAGTCTGGGGCATC

>KT427873..1

TTCTACTGTAATTCAACACAACCTGTTTAAATAGTACCTGGGATACTAATGCAACCTTGAATGCTACAGACAGCC  
AAGATGAACCTTAACAAAACCTATCACACTCCCATGTAGAATAAAAACAAATTATAAACATGTGGCAGGAAGTAGG  
AAAAGCAATGTATGCCCCCTCCCATTAGAGGGCTAATTAGATGTACAACAAATATTACAGGGCTACTATTAACA  
AGAGATGGTGGCACAGGCAATAAGACTCAAATAACACTGAGGTCTTCAGACCTGGAGGAGGAGATATGAAGG  
ATAATTGGAGGAGTGAGTTATATAAATATAAAGTAGTAAAAATTGAACCATTAGGAGTAGCACCTACCAAGGC  
CAAGAGAAGAGTGGTGCAGAGAGAAAAAAGAGCAGTGGGAACAATAGGAGCTATGTTTCCTTGGGTTCTTGGGA  
GCAGCAGGAAGCACTATGGGCGCAGCGTCAATAACGCTGACGGCACAGGCCAGACAATTATTGTCTGGTATAG  
TGCAGCAGCAGAATAATCTGCTGAGGGCTATTGAGGCGCAACAACATCTGTTGCAACTCACAGTCTGGGGCATC

>KT427695..1

TTCTACTGCAATACATCGGTGCTGTTTAAATGATACTTGGCTGAATAATAATAAGACTGAACACCAAAATATCA  
CGCTCCCATGCAAAATAAAACAGATTATAAACATGTGGCAGGAAGTAGGAAAAGCAATGTATGCCCCCTCCCAT  
CAGTGGACCAATTAGGTGTTTCATCAAATATCACAGGGCTGCTATTAACAAGAGATGGTGGTAATAGCACAAAT  
AATAACGAGACCTTCAGACCTGGAGGAGGAGATATGAGGGACAATTGGAGAAGTGAATTATATAAATATAAAG  
TAGTAAACCTTGAGCCATTAGGATTAGCACCCACCAAGGCAAAAAGGAGAGTGGTGCAGAGAGAAAAAGAGC  
AGTGGGAACGCTAGGAGCTATGTTCCCTTGGGTTCTTGGGAACAGCAGGAAGCACTATGGGCGCAGCATCACTA  
ACGCTGACGGTACAGGCCAGACTATTATTGTCTGGCATAGTGCAACAGCAGAGCAATTTGCTGAGGGCTATTG  
AGGCGCATCAGCATATGTTGCAACTCACAGTCTGGGGCATC

>KT427785..1

TTTTACTGTAATACAACACAACCTATTTAATAGTACTTGGGTAAATGATACTTTTAGTACTTGGGTAAATAATA  
CTTGGGTAAATGGTACTGTAAAGTCAATTAGTAATAAAACAAATATTAATATTACACTTCCATGCAGAATAAAA  
GCAAAATTATAAACATGTGGCAGGAAGTAGGAAAAGCAATGTATGCCCCCTCCCATCAAGGGACCAATTAGCTGT  
TCATCAAATATTACAGGACTGCTATTAACAAGAGATGGGGGAAATAGTGATAATAGTAGCAAAAATGAGACAA  
ATGAGACCGGAGACTTTTAGACCTGGAGGAGGAAATATGAAAGACAATTGGAGAAGTGAATTATATAAATATAA  
AGTAGTGCAAATTGAACCATTAGGAATAGCACCCACCAGGGCAAAAAGAAGAGTGGTGCAAAGAGAGAAAAAGA  
GCAGTGGGAATAGGAGCATTGTTTCATTGGGTTCTTGGGAGCAGCAGGAAGCACTATGGGCGCAGCGTCAATGA  
CGCTGACGGTACAGGCCAGACAATTATTGTCTGGTATAGTGCAACAGCAGAACCAACCTGCTGAGGGCTATTCA  
GGCGCAACAGCATTTGTTGCAGCTCACAGTCTGGGGCATC

>KJ849814..2

TTCTACTGCAATACAACACAGCTATTTAATTGGACAATTGGCAAGTCAAATATAACCCAAAATGATAGTGAAA  
TTATTACAATCCAATGCAGAATAAAACAGATTATAAATAAGTGGCAGGAAGTAGGAAAATCAATATATGCCCC  
TCCTATCAGAGGAAATATTAGCTGTTTCATCAAATATTACAGGACTGATATTAACAAGAGATGGTGGTAATCAC  
AATGAACTAAAAACAAGACTAAGACTGAGACTTTTCAGACCTGGAGGAGGAGATATGAGGGACAATTGGAGAA  
GTGAATTATATAAATATAAGGTAGTGAAAATTTCAGCCATTAGGAATAGCACCCACCAGGGCAAGGCGAAGAGT  
GGTGCAGAGAGAAAAAGAGCAGTGGGAACACTAGGAGCTATGTTCCCTTGGGTTCTTGGGAGCAGCAGGAAGC  
ACTATGGGCGCAGCGTCAATAACGCTGACGGTACAGGCCAGACAATTGTTGTCTGGTATAGTGACAGCAGCAGA  
ACAATCTGCTGAAAGCTATTGAGGCGCAACAGCATCTGTTGCAACTCACAGTCTGGGGCATC

>KT427771..1

TTCTACTGTAATACAACACAACCTGTTTAAATAGTACTTGGCAAAGTAATAGTACTGGAAATAGTACTGAGAATA  
ATAGCACAATAATCACACTCCCCTGTAGGATAAAACAAGTTATAAACATGTGGCAGGAGGTAGGAAAAGCAAT  
GTATGCCCCCTCCCATCAGTGGACTAATTCAATGTACATCAAATATTACAGGGCTGCTGTTAACAAGAGATGGT  
GGGTCTGATGGTGAATCTAATAAAACAGAGAGTGAGATCTTCAGACCTGGAGGAGGAGATATGAGGGACAATT  
GGAGAAGTGAATTATATAAATATAAAATAGTAAAAATTGAACCATTAGGAGTAGCGCCACCAAGGCAAAGAG  
AAGAGTGGTGCAGAGAGAAAAAGAGAGCACTAGGGGGACTAGGAGCTGTATTCCCTTGGGTTCTTGGGAGCAGCA  
GGAAGCACTATGGGCGCAGCGTCAATAACGCTGACGGTACAGGCCAGACAATTATTGTCTGGTATAGTGACAGC  
AGCAGAACAACTCTGCTGAGGGCTATTGATGCGCAACGGCACATGTTGCAACTCACAGTCTGGGGCATC

>KT427753..1

TTCTACTGTAATACAACAAAACCTGTTCAATAGTACTTGGAAGTGGAATAATGGTACTTGGAAATAGGAATGATA  
CTGAAGGACAAGATAACACTGGAGAACTATTACACTTCCATGCAGAATAAAACAAATCATAAACATGTGGCA  
GGAAGTAGGAAAAGCAATGTATGCCCCCTCCCATCAGAGGACAAATTAATTGCACATCAAATATTACAGGACTG  
CTATTAACAAGGGATGGTGGTAATAATAATAGCAAGAATAACGAGACTTTCAGACCTGGAGGAGGAAATA  
TGAAGGACAATTGGAGAAGTGAATTATATAAATATAAAGTAGTACAAATTGAACCATTAGGAATAGCACCCAC  
CAAGGCAAAAAGGAGAACGGTGCAGAGAGAAAAAGAGCAGTGGGAATAGGAGCTGTGCTCTTTGGGTTCTTG  
GGAGCAGCAGGAAGCACTATGGGCGCAGCGTCAGTAACGCTGACGGTACAGGCCAGACAATTGTTGTCTGGTA  
TAGTGCAACAGCAGAGCAATCTGCTGAAGGCTATTTCAGGCGCAACAGCATCTGTTGCAGCTCACAGTCTGGGG  
CATC

>KT427749..3

TTCTACTGTAATACAACAGAACCTGTTCTATAGTAATTGGACGTGGAATGGTACTTGGAAATAGGAATGATACTG  
AAGGATTACAAAATAAACTATTACTTCCATGCAGAATAAAACAAATCATAAACATGTGGCAGGAAGTAGG  
AAAAGCAATGTATGCCCCCTCCCATCAGAGGACAAATTAATTGCACATCAAATATTACAGGACTGCTATTAATA  
AGAGATGGTGGTAATGATACTGGAACCTAGTGGGACTGAAATTTTCAGACCTCAAGGAGGAAACATGAAAGACA  
ATTGGAGAAGTGAATTATATAAATATAAAGTAGTACAAATTGAACCATTAGGAATAGCACCCACCAAGGCAAA  
GAGAAGAACGGTGCAGAGAGAAAAAGAGCAGTGGGATTTGGAGCTGTGATCTTTGGGTTCTTGGGAGCAGCA  
GGAAGCACTATGGGCGCAGCGTCAATAACGCTGACGGTACAGGCCAGACAATTGTTGTCTGGTATAGTGCAAC  
AGCAGAGCAATTTGCTGAAGGCTATTCAAGCGCAACAGCATCTGTTGCAGCTCACAGTCTGGGGCATC

>KT427826..1

TTTTACTGTAATACAACAAAACCTGTTTAAATACTACGTGGAATATTACTGGAGAAGGAAACAACAATCTCACTA  
ATGAAACTATCACACTCCCATGCAGAATAAAACAGTTTCATAAACATGTGGCAGGAAGTAGGAAAAGCAATGTA  
TGCCCCCTCCTATCAGGGGACAAATTCAGTCTCATCAAATATTACAGGGCTACTATTAACAAGAGATGGTGGT  
AATAGTAATAATGAGTCGGAGACCTTCAGACCGGGAGGAGGAGATATGAGGGACAATTGGAGGAGTGAATTAT

ATAAATATAAAGTAGTAAAAATTGAACCATTAGGAATAGCACCCACCAAGGCAAGAAGGAGAGTGGTGCAAAG  
AGAAAAAAGAGCAATAGGAGGAATAGGAGTTGTGATCCTTGGGTTCTTGGGAGCAGCAGGAAGCACTATGGGC  
GCAGCGTCGCTAACGCTGACGGTACAGGCCAGACAATTATTGTCTGGTATAGTGCAACAGCAAAGCAATTTGC  
TGAGAGCTATTGAGGCGCAACAGCGTTTGTGCAACTCACTGTCTGGGGCATC

>KJ849821..1

TTCTACTGTGATACAGCAAAGCTGTTTAAACAGTACTTGGGAGAGGCGTAATGACACGAACACTTGGGAGTCTGA  
ACAATACAATACCAAATGAGAATATCACACTCCCATGCAGAATAAAACAAATTATAAACAGGTGGCAGGAAGT  
AGGAAAAGCAATGTATGCCCCCTCCCATTCAGGACGAATTGAATGTACATCAAATATTACAGGGCTACTATTA  
ACAAGAGATGGTGGTTCTAACAAATAGTAGTAACGATACCTTCAGACCAGGAGGAGGAGATATGAAGGACAATT  
GGAGAAGTGAATTATATAAAATATAAAGTAGTACAAATTCAGCCATTAGGAGTAGCACCCACCAGGTCAAGGAG  
AAGAGTGGTGCAGAGAGAAAAAAGAGCAGTAACACTGGGAGCTATGTTCTTGGGTTCTTGGGAGCAGCAGGA  
AGCACTATGGGCGCAGCGTCAGTGACGCTGACGGTACAGGCCAGACAATTATTGTCTGGTATAGTGACAGCAGC  
AAAGCAATTTGCTGAGGGCTATTGATGCGCAACAGCACATGTTGCAACTCACAGTCTGGGGCATC

>KT427811..1

TTTTACTGTAATACATCAAGACTGTTTAAACAGTATTTGGAACAGTACCTGGCAGGATAATACAGCTGAAGAGT  
CAAATAACTTGACATCATACTCCATTGCAGAATAAAACAAATTATAAACAGATGGCAGGAAGTAGGAAAAGC  
AATGTATGCCCCCTCCCATCAAGGGAAAAATTCAATGTTTCATCAAATATTACAGGGCTGCTATTAGTAAGAGAT  
GGTGGTAACGAGAACACTAGTAACACCGAGACCTTCAGACCTGGAGGAGGAGACATGAGGGACAATTGGAGAA  
GTGAATTATATAAATATAAAGTAGTGCAAATTGAGCCAGTAGGAATAGCACCCACCAAGGCAAGAAGAAGAGT  
GGTGCAGAGAGAAAAAAGAGCAGTAACAATAGGAGCTATGTTCTTGGGTTCTTGGGAGCAGCAGGAAGCACT  
ATGGGCGCAGCGTCAATCGCGCTGACGGGACAGGCCAGACAATTATTGTCTGGTATAGTGCAACAGCAGAATA  
ATCTGCTGAAGGCTATTGAGGCGCAACAACATATGTTGCAACTCACAGTCTGGGGCATC

>KT427796..1

TTCTATTGTAATACATCACAGCTGTTCAATAGTACTTGGAAATTTCACTAGTGCTAGGAATGAGACTGAAGAGT  
CAAATGACACTATCACACTCCCATGTAGGATAAAACAAATTATAAATAAGTGGCAAGAAGTAGGAAAAGCAAT  
ATATGCTCCTCCTATCCAAGGACGAATTTACTGTTTCATCAAACATTACAGGGTTGCTATTAACAAGAGATGGG  
GGTGA AAAACAACCTGACCAATGAGACTTTTAGACCTGGAGGAGGAGATATGAGGGACAATTGGAGAAGTGAAC  
TGTATAAATATAAAGTAGTAAAAATTGAGCCATTAGGACTAGCACCCACCAAGGCAAGAGAAGAGTGGTGCA  
GAGAGAAAAAAGAGCAGTGGGAACGCTGGGAGCAATGTTCTTGGGTTCTTGGGAACAGCAGGAAGCACTATG  
GGCGCAGCGTCGCTGACGCTGACGGTACAGGCCAGACAATTATTGTCTGGTATAGTGCAACAGCAAACAATT  
TGCTGAAGGCTATTGAGGCGCAACAGCATCTGTTGCAACTCACAGTCTGGGGCATC

>KX181909..1

TTCTACTGTAATACAGCAGAGCTGTTTAGTAATACTTGGTTAAATAAGAGTGGCAATAACGATGGAACATATCA  
CACTTCCATGCAGAATAAAACAAATTATAAACAGATGGCAGGAAGTAGGAAAAGCAATGTATGCCCCCTCCCAT  
CAGGGGATTAATTGAATGTTTCATCAAATATTACAGGGCTGATACTAACAAAGAGATGGTGGTAATAATAGTGCA  
AACAAATGCTAGTGAAACCTTCAGACCCGGAGGGGGAAATATGAAGGACAATTGGGGAGTGAATTATATAAAT  
ATAAAGTAGTAAAAATTAGCCCTTAGGAATAGCACCCACCAGGGCAAAAAGAAGAGTGGTGCAAAGAGAAAA  
AAAAGCAGTAACGCTAGGAGCTATGTTCTTGGGTTCTTGGGAACAGCAGGAAGCACTATGGGCGCAGCGTCA  
GTGACGCTGACGGTACAGGCCAGACAGTTACTGTCTGGTATAGTGCAACAGCAGAGCAATCTGCTGAAGGCTA  
TTGAGGCGCAACAGCATCTGTTGCAACTCACAGTCTGGGGCATC

>KX181908..2

TTTTACTGTGATACAACAAAGCTGTTTAAATAGTACTTGGAAATAACTGGAGAGTCAAATTACACGGAGGGAA  
ATGCCACTATCATACTTCCATGCAGAATAAAACAAATTATAAACAGATGGCAGGAAGTAGGAAAAGCAATGTA  
TGCCCCCTCCCCCTCAGTGGAATATTAGCTGTTTATCAAATATTACAGGGGTACTATTAACAAGAGATGGGGGT  
AATGAAACAAATGCCCTGAGACCTTCAGACCTCAAGGGGGAAATATAAAGGATAATTGGGGAAGTGAATTAT  
ATAAATATAAAGTAGTAAAAATTGAACCTTAGGAGTAGCCCCCCCCAAGGCAAGAGAAGAGTGGGGCAAAG  
AGAAAAAAGAGCAGTGGGAATAGGAGCTATGTTCTTGGGTTCTTGGGAGCAGCAGGAAGCAATATGGGCGCA  
GCATCACTAACGCTGACGGTACAGGCCAGACTATTATTGTCTGGTATAGTGCAACAGCAAACAATTTGCTGA  
GAGCTATTGAGGCGCAACAGCATCTGTTGCAACTCACAGTCTGGGGCATC

>KX181898..2

TTCTACTGTAATACATCACAGCTGTTTAAATTGGACTGAAAGAAATAGAAATAGCTCAGATGGGACAGGGTCAA  
ATGAGACTGAGACCATTACACTCCCATGCAGAATAAAACAAATTATAAACAGATGGCAGGAAGTAGGAAAAGC  
AATGTATGCCCCCTCCCATCAAAGGAAATATTAGCTGTTTCATCAAATATTACTGGGCTGCTATTAAACAAGAGAT  
GGTGGTACAAACCTGACTGGGTCTAACGGGACCGAGACCTTCAGACCTCAAGGAGGAAATATGAAGGATAATT  
GGAGAAGTGAATTATATAAAATATAAAGTAGTAAGAATTGAGCCAGTAGGAATAGCACCCACCGAGGCAAAGAG  
AAGAGTGGTGC AAAGAGAAAAAAGAGCAGTGGGAACACTAGGAGCTATGTTCTTGGGTTCTTGGGAGCAGCA  
GGAAGCACTATGGGCGCAGCGTCAATGACGCTGACGGTACAGGCCAGACAATTATTGTCTGGTATAGTGCAAC  
AGCAAAAACAATCTGCTGAAAAGCTATTGAGGCGCAACATCATCTGTTGCAACTCACAGTCTGGGGCATC

>MK041573..1

TTCTACTGTAATACAACAAAACCTATTTTAATAGTACTTGGGATGGGTCAAACATCATAGGAAATGATACAAATG  
ACACAGTGATCACACTCCCATGCAGAATAAAACAAATTATAAACATGTGGCAGCGAGTAGGAAAAGCAATGTA  
TGCCCCCTCCCATCAGAGGACAAATTAGATGTTTCATCAAATATTACAGGGCTGCTGTTAACAAGAGATGGTGGA  
AATCATACAAGTGGGAATGAGACCTTCAGACCAGGAGGAGGAGATATGAGGGACAATTGGAGAAGTGAATTAT  
ATAAATATAAAGTAGTAAAAATTGAACCATTGGGAGTAGCACCCACCAGGGCAAAGAGAAGGGTGGTGCAGAG  
AGAAAAAAGAGCAGTAGGACTAGGAGCTTTGTTCTTGGGTTCTTGGGAGCAGCAGGAAGCACTATGGGCGCA  
GCGTCACTAACGCTGACGGTACAGGCCAGACAGTTATTGTCTGGTATAGTGCAACAGCAGAACAACTTGCTGA  
GGGCTATTGAGGCGCAACAGCACATGTTGCAACTCACAGTCTGGGGCATC

>MK041575..1

TTCTACTGTAATACAACACAGCTGTTTAATAATACTTGGAAATGATACTGCTTGGAAATGATACTAGCTGGTCAA  
ATGGCACTATCACACTCCCATGCAGAATAAAACAAATTATAAACAGGTGGCAGGAAGTAGGAAAAGCAATGTA  
TGCCCCCTCCCATCAGCGGACAAATTAAATTGTTTCATCAAATATTACAGGACTGTTATTAACAAGAGATGGTGGT  
AATGACAATGACACGAATACGAATGAGACCGAGATCTTCAGACCTGCAGGAGGAGATATGAGGGACAATTGGA  
GAAGTGAATTATATAAATATAAAGTAGTAAAAATTGAACCATTAGGAATAGCACCCACCAGGGCAAAGAGAAG  
AGTGGTGCAGAGAGAAAAAAGAGCAGTGACATTAGGAGCTGTGTTCTTGGGTTCTTGGGAGCAGCAGGAAGC  
ACTATGGGCGCAGCGTCAGTGACGCTGACGGTACAGGCCAGACTATTATTGTCTGGTATAGTGCAACAGCAGA  
GCAATTTGCTGAGAGCCATTCAGGCGCAACAGCATCTGCTGCAACTCACAGTCTGGGGCATC

>MG571983..1

TTCTACGGTAATACATCAAACCTGTTTAATAATAATATTACAGGGATTATAAAGAATGGGACTATCATACTCC  
CATGCAGAATAAAACAAATTATAAACAGGTGGCAGGAAGTAGGAAGAGCAATGTATGCCCCCTCCCATCAGAGG  
ACTAATCAACTGTACATCAAATATTACAGGGCTGCTATTAACAAGAGATGGTGGTGGTGAATGAGAGTCAT  
AACGAGACCTTCAGACCTGGAGGAGGAGATATGAGGGACAATTGGAGAAGTGAATTATATAAATATAAAGTAG  
TAAGAATTGAGCCATTAGGAATAGCACCCACCAAGGCACAGAGAAGAGTGGTGCAAAGAGAAAAAAGAGCAGT  
GGGAGCACTAGGAGCTATGTTCTTGGGTTCTTGGGAGCAGCAGGAAGCACTATGGGCGCAGCGTCAATAACG  
CTGACGGCACAGGCCAGACAAGTATTGTCTGGTATAGTGCAACAGCAAAACAATTTGCTGAGGGCTATTGAGG  
CGCAACAGCATTTGTTGCAACTCACAGTCTGGGGCATC

>MG571987..3

TTCTACTGTAATACAACATCACTGTTTAATAGTACTTGGCTGCTTAATGATACTGGAAATGTTACTGTGCCAA  
ACAAAACGGACGAAATTATCATACTCCCATGCAGAATAAAACAAATTATAAATATGTGGCAAAAAGTAGGAAG  
AGCAATGTATGCCCCCTCCCATCAGAGGTTATATTAAGTTCATCAAATATTACAGGGCTGCTATTAGTAAGG  
GATGGTGGTAATAATAATCAGTCTAATCAGGCTGAAACCTTCAGACCTGGAGGAGGAGATATGAGGGACAATT  
GGAGAAGTGAATTATATAAATATAAAGTAGTAAAAATTGAGCCATTAGGAATAGCACCCACCAAGGCAAAGAG  
AAGAGTGGTGCAGAGAGAAAAAAGAGCAGTGGGGACACTAGGAGCTGTGTTCTTGGGTTCTTGGGAGCAGCA  
GGGAGCACTATGGGCGCAGCGTCACTAACGCTGACGGTACAGGCTAGACTATTATTGTCTGGTATAGTGCAAC  
AGCAGAACAAATTTGCTGAGAGCTATTGAGGCGCAACAGCATATATTGCAACTCACAGTCTGGGGCATC

>MG571990..1

TTCTACTGTAATACAACAAAACCTATTTAATAGTACTTGGGATGGGTCAAACATCATAGGAAATGATACAAATG  
ACACAGTGATCACACTCCCATGCAGAATAAAACAAATTATAAACATGTGGCAGCGAGTAGGAAAAGCAATGTA  
TGCCCCCTCCCATCAGAGGACAAATTAGATGTTTCATCAAATATTACAGGGCTGCTGTTAACAAGAGATGGTGGA  
AATCATACAAGTGGGAATGAGACCTTCAGACCAGGAGGAGGAGATATGAGGGACAATTGGAGAAGTGAATTAT  
ATAAATATAAAGTAGTAAAAATTGAACCATTGGGAGTAGCACCCACCAGGGCAAAGAGAAGGGTGGTGCAGAG  
AGAAAAAAGAGCAGTAGGACTAGGAGCTTTGTTCTTGGGTTCTTGGGAGCAGCAGGAAGCACTATGGGCGCA  
GCGTCACTAACGCTGACGGTACAGGCCAGACAGTTATTGTCTGGTATAGTGCAACAGCAGAACAACTTGCTGA  
GGGCTATTGAGGCGCAACAGCACATGTTGCAACTCACAGTCTGGGGCATC

>MG572002..1

TTCTATTGTAATTTCATCACAGCTGTTTAATACAACCTTGGATAAATGGCACTACAGGAAATAGAACTAATGAAA  
ATGACACACTTATCACACTCCCATGCAGAATAAAACAAATTATAAACAGATGGCAGGAAGTAGGAACAGCAAT  
ATATGCCCCCTCCCATTTGAAGGCATGATTAATGTTTCATCAAATATTACGGGGGTGCTATTAAACAAGAGATGGT  
GGTTATGATAACAATAGCAGCGCCAGAACGAGACCTTCAGACCTGGAGGGGGAAATATGAAGGACAATTGGA  
GAAGTGAATTATATAAATATAAAGTAGTAAAAGTTGAGCCATTAGGACTAGCACCCACCAAGGCAAAGAGAAG  
AGTGGTGCAAAGAGAAAAAAGAGCGGTAACATTAGGAGCTATGTTCTTGGGTTCTTGGGAGCAGCAGGAAGC  
ACTATGGGCGCAGCGTCAATGACGCTGACGGTACAGGCCAGACAATTGTTGTCTGGTATAGTGCAACAGCAGA  
ACAATCTGCTGAGAGCTATTGAGGCGCAACAGCATATGTTGCAACTCACAGTCTGGGGCATA

>JF320427..1

TTCTACTGCAATACAACAGCACTGTTTAATAGTACATGGAACGGTACAGAGGGGATAAGTAATGCTACAGGAA  
ATATCACACTCCCATGCAGAATAAAACAAGTTATAAACAGATGGCAGGAAGTAGGAAAAGCAATGTATGCCCC  
TCCCATTAAGGAGTAATTAGATGTGTATCAAATATCACAGGGATACTATTAACGAGAGATGGGGGTAATAAT  
AATAATACTAATCACACCGAGATATTACAGACCTGGAGGAGGAGATATGAGAGACAATTGGAGAGGTGAATTAT  
ATAAATATAAGGTAGTAAAAATTGAACCATTAGGAGTAGCACCCACCAAGGCAAAGAGAAGTGGTGCAGAG  
AGAAAAAAGAGCAGTGGGAATAGGAGCTTTGTTCTTGGGTTCTTGGGAGCAGCAGGAAGCACGATGGGCGCA

GCGTCAGTGACGCTGACGGTACAGGCCAGACAATTATTGTCTGGTATAGTGCAACAGCAGAGCAATTTGCTGAGGGCTATTGAGGCGCAACAACATATGTTGCAACTCACAGTCTGGGGCATC

>GU562236..3

TTCTACTGCAATACAACGCAGCTGTTTAATAGTACTTGGTATAGTAATGGTACTTGGTCTTGGGAATGGTACTACTTGGGAATGGTACTAGAGAGACAAATAGTACGGAAGGAAACGACACAATGATCACACTCCCATGCAGAATAAAACAATTTATAAACATGTGGCAGGCAGTAGGAAAAGCAATATATGCCCTCCCATCAGTGGACTAATCAAATGTACATCAAATATTACAGGGCTGTTAATAACAAGAGATGGGGGTGATGAAAGTAATAAAAAGTAACTATGGTTATGAAAGTAGTAAAAGTGAGAATGAGACCTTCAGACCTGGAGGAGGAAATATGAGGGATAATTGGAGAAGTGAATTGTATAAATATAAAATAGTAAGAATTGAACCATTAGGACTAGCACCCACCAAGGCAAGAGAGAAGAGTGGTGCAGAGAGAAAAGAGAGCCGCACTAGGAGCCATGTTCTTGGGTTCTTGGGAGCAGCAGGAAGCACTATGGGCGCAGCGTCACTGACGCTGACGGTACAGGCCAGACAATTATTGTCTGGTATAGTGCAACAGCAGAGCAATTTGCTGAGGGCTATTGAGGCGCAACAGCATATGTTGCAACTCACGGTCTGGGGCATC

>JQ403024..1

TTCTACTGTAATACAACACAACTGTTTAATAGAGATTGGAATGATACTAGTACTATTAACAGTACTGAAAAATAGAAATATCACACTCCCATGTAGAATAAAACAAATTATAAACATGTGGCAGGAAGTAGGAAAAGCAATGTATGCCCTCCCATCCAAGGACAAATTAGATGTTTCATCAAATATTACAGGGTTGCTATTAAACAAGAGATGGTGGTAATGACAATACCACTAACACCACTGAGATCTTCAGACCTGTAGGAGGAAATATGAGGGACAATTGGAGAAGTGAATTATACAAATATAAAGTAGTACAAATTGAACCATTAGGATTAGCACCCACCAAGGCAAGAGAGAAGAGTGGTGCAAGAGAGAAAAAGAGCAGTAACGTTAGGAGCTATGTTCTTGGGTTCTTGGGAGCAGCAGGAAGCACTATGGGCGCAGCGTCAATGACGCTGACGGTACAGGCCAGACAATTATTGTCTGGTATAGTGCAAGCAGCAAAATAATTTGCTGAAGGCTATTGAGGCGCAACATCATCTGTTGCAACTCACAGTCTGGGGCATC

>JQ403041..2

TTCTACTGTAATACAACACGACTGTTTAATAGTACTTGGGAATAGTACCGAATCAAATAACTATAGGAAATGGCAATCACACTCCCATGCAGAATAAAACAAATTGTAAACATGTGGCAGGAAGTAGGAAAAGCAATGTATGCCCTCCCATCAGAGGACAAATTAGATGTTTCATCAAATATTACAGGGCTGATATTAAACAAGAGATGGTGGTCATGGTGGTCATAATAAGAATACCACCAACACCACAGAGATCTTCAGACCTGGAGGAGGAGATATGAGGGACAATTGGAGAAGTGAATTATATAAATATAAAGTAGTAAACTTGAACCATTAGGAATAGCCCCACCTCGGCAAGGAGAAGAGTGGTGCAAGAGAGAAAAAGAGCAGTGGGAATAGGAGCTATGTTCTTGGGTTCTTGGGAGCAGCAGGAAGCACTATGGGCGCAGCGTCAGTGACGCTGACGGTACAAGCCAGACTATTATTGTCTGGTATAGTGCAACAGCAGAACAATTTGCTGAAGGCTATTGAGGCGCAACAGCATATGTTGCAACTCACAGTCTGGGGCATC

>KC797225..3

TTCTACTGTAATACATCACAATTGTTTAATAGTACTTGGGAATGCTACTGGTACTCAGAATACTACTGGTACTCAGAATGAGACTAAAATAGGCAATATCACACTCCCATGTAAAATAAAACAAATTATAAACAGGTGGCAAGAAGTAGGAAAAGCAATGTATGCCCTCCCATCAAAGGACTAATTAACCTGTGTATCAAATATTACAGGGATACTATTAACAAGAGATGGTGGTCATTCTAAGAATACAAATAGTACAGATAATGATACCGAGGTCTTCAGACCTGGAGGAGGAGATATGAGGGACAATTGGAGAAGTGAATTATATAAATATAAAGTGGTAAAAATTGAGCCATTAGGAGTAGCACCCACCAAGGCAAGAGAGAAGAGTGGTGCAAGAGAGAAAAAGAGCAGTGACGCTAGGAGCCATGTTCTTGGGTTCTTGGGAGCAGCAGGAAGCACTATGGGCGCAGCGTCGCTGACGCTGACGGTACAGGCCAGACAATTATTGTCTGGTATAGTGCAACAGCCTGGGGCATC

>HQ699978..2

TTCTACTGTAATACATCACAACCTGTTTAATAGTACTTATAATGGTACTTGGAGTGGTACTACAGGAAATGATCTATCACGCTCCCTTGCAGAATAAAACAAATTGTAAACAGGTGGCAGGAAGTAGGGAAAGCAATGTATGCCCTCCCATTCAAGGAATAATTAGATGTTTCATCAAATATTACAGGGTTGCTATTAAACAAGAGATGGTGGTAAGAATGAGAGCGATAGCAATACCACCGAGACCTTCAGACCTGGAGGAGGAAATATGAGAGACAATTGGAGGAGTGAATTATATAAATATAAAGTAGTAAAAATTGAACCATTAGGAGTAGCACCCACCAAGGCAAAAGAGAAGAGTGGTGCAAGAGAGAAAAAGAGCAGTGGGAACGATAGGAGCTATGTTCTTGGGTTCTTGGGAGCAGCAGGAAGCACTATGGGCGCAGCGTCAATAACGCTGACGGTACAGGCCAGACAATTGTTGTCTGGTATAGTGCAACAGCAGAGAAATTGCTGAGGGCTATTGAGGCGCAACAGCATCTGTTGCAACTCACAGTCTGGGGCATC

>EU131792..1

TTCTACTGTAATACATCAGAGCTGTTTAAAGTACTTGGGAATAATACTAGTACTGGGAATGATCCTATCACGCTCCCTTGCAGAATAAAGCAAATTGTAAACATGTGGCAAGAAGTAGGGAAAGCAATGTATGCTCCTCCATTGAGGACAAATTAGATGTTTATCAAATATTACAGGATTGCTATTAAACAAGGGATGGTGGTCATAATGGGAGCGGAGACCAACGAGACCTTCAGACCTGCAGGAGGAAATATGAGAGACAATTGGAGAAGTGAATTATATAAATATAAAGTAGTAAAAATTGAACCATTAGGAGTAGCACCCACCAAGGCAAGAGAGAAGAGTGGTGCAAGTGGGAACAATAGGAGCTATGTTCTTGGGTTCTTGGGAGCAGCAGGAAGCACTATGGGCGCAGCGTCAATGACGCTGACGGTACAGGCCAGACAATTGTTGTCTGGTATAGTGCAACAGCAAAGAAATTTGCTGAGGGCTATTGAGGCGCAACAGCATCTGTTGCAACTCACAGTCTGGGGCATC

>EU131803..1

TTCTACTGTAATACATCAAAATTATTTAATAGTACTTGGTATAATAATGGTACTTGGAAATAATGCTAGTACTG  
GGAATGATACTATCACGCTCCCTTGCAGAATAAAACAAATTGTAAACATGTGGCAGGAAGTAGGGAAAGCAAT  
GTATGCCCTCCCATTTGCAGGACAAATTAGATGTTTCATCAAAGATTACAGGGTTGCTATTAACAAGAGATGGT  
GGTAATGAGAACAAGACTAAGGACAACAACACCGAGACTGAGACCTTTAGACCTGGGGGAGGAGATATGAGAG  
ACTATTGGAGAAGTGAATTATATAAATATAAAGTAGTAAAAATTGAACCATTAGGAGTAGCACCCACCAAGGC  
AAAGAGAAGAGTGGTGCAGAGAGAAAAAAGAGCAGTGGGAACAATAGGGGCTATGTTCCCTTGGGTTCTTGGGA  
GCAGCAGGAAGCACTATGGGCGCAGCGTCAATAACGCTGACGGTACAGGCCAGACAATTGTTGTCTGGTATAG  
TGCAACAGCAGAGAAATTTGCTGATGGCTATTGAGGCGCAACAACATTTGTTGCAACTCACAGTCTGGGGCAT  
C

>EU363829..1

TTCTACTGTAATACAACAAAACTGTTTAAATAGTATTTGGTATAATAATGGTACTTCGAGTGGTACTACAGGAA  
ATGAAACTATCATACTCCCTTGCAGAATAAAACAAATTGTAAACATGTGGCAGAAAAGTAGGGAGAGCAATGTA  
TGCCCCCTCCCATTTGAAGGAAAAATTAGCTGTGTATCAAAATACACAGGGTTGCTATTAACAAGAGATGGTGGT  
CAGAAATGAGAACAATACCGAAACCTTCAGACCTGAAGGAGGAAATATGAAAGACAATTGGAGAAGTGAATTAT  
ATAAATATAAAGTAGTAAAAATTGAACCATTAGGAGTAGCACCCACCAAGGCAAAAGAGAAGAGTGGTGCAAAG  
AGAAAAAAGAGCAGTGGGAGCAATAGGAGCTATGTTCCCTTGGGTTCTTAGGAGCAGCAGGAAGCACTATGGGC  
GCAGCGTCAATAACGCTGACGGTACAGGCCAGACAATTGTTGTCTGGCATTGTGCAACAGCAGAGAAATTTGC  
TAAGGGCTATTGAGGCGCAACAGCATCTGTTGCAACTCACAGTCTGGGGCATT

>HM215413..1

TTCTACTGTAATACAGCACAACTGTTTAAATAGTACTTGGAACTACTACTAAGATTTGGGGGAATACTACAGAAG  
GTAACAATAGCACTATCATGCTCCCTTGCAAAATAAAGCAAATTATAAACCTGTGGCAGGAAGTAGGAAAAGC  
AATATATGCCCTCCCATCGCAGGGCGAATTAGATGTGTATCAAATATTACAGGGTTGCTATTAACAAGAGAT  
GGTGGTCATAATGGGAACGGGTCCAACGAGACCGAGACCTTCAGACCTGCAGGAGGAGATATGAGGGACAATT  
GGAGAAGTGAATTATATAAATATAAAGTAGTAAAAATTGAACCAATAGGATTAGCACCCACCAAGGCAAAAGAG  
AAGAGTGGTGCAGAGAGAAAAAAGAGCAATGGGAATAGGAGCTATGTTCCCTTGGGTTCTTGGGAGCAGCAGGA  
AGCACTATGGGCGCAGCGTCAATAACGCTGACGGTGCAGGCCAGACGATTATTGTCTGGTATAGTGCAACAGC  
AAAGAAATTTGCTGAGGGCTATTGAGGCGCAACAACATCTGTTGCAACTCACCGTCTGGGGCATC

>EU131802..1

TTCTACTGTAATACATCACAACTGTTTAAATAGTACTTGGAAATGATACTAGTACTTGGAAATGGTAATACAGGAA  
CTACTGTCACGCTCCCTTGCAGAATAAAACAAATTGTAAACATGTGGCAGAAAAGTAGGGAAAGCCATGTACGC  
CCCTCCCATTTCAAGGACAAATTAGATGTTTCATCAAATATTACAGGGTTGCTATTAACAAGAGATGGTGGTAAT  
AATGAGAGCGAGAATACCGAGACCTTCAGACCTGCAGGAGGAAATATGAGAGATAATTGGAGAAGTGAATTAT  
ATAAATATAAAGTAGTAAAAATTGAACCATTAGGAGTAGCCCCACCAAGGCAAAAGAGAAGAGTGGTGCAGAG  
AGAAAAAAGAGCAGTGGGATTGATAGGAGCTATGTTCCCTTGGGTTCTTGGGAGCAGCAGGAAGCACTATGGGC  
GCAGCGTCAATAACGCTGACGGTACAGGCCAGGCAATTATTGTCTGGTATAGTGCAACAGCAGAGAAATTTGC  
TGATGGCTATTGAGGCGCAACAGAATATGTTGCGACTCACAGTCTGGGGCATC

>EU131804..1

TTCTACTGTAACACATCACAACTGTTTAAATAGTACTTGGTATAGTAATGGTACTAGGAAGGATCCTACAGGAA  
ATGGCACTATCACGCTCCCTTGCAGAATAAAACAAATTATAAACATGTGGCAGCAAGTAGGGAAAGCAATGTA  
TGCACCTCCCATTTAAAGGACAAATTAGATGTTTCATCAAATATTACAGGGTCGCTATTAACAAGAGATGGTGGT  
TATAATGAGAGCAACACCAACCGAGACCTTCAGACCTGGAGGAGGAGATATGAGAGACAATTGGAGAAGTGAAT  
TATATAAATATAAAGTAGTAAAAATTGAACCATTAGGAGTAGCCCCACCAAGGCAAAAGAGAAGAGTGGTGCAG  
GAGAGAAAAAAGAGCAGTAGGACTAGGAGCTATGTTCCCTTGGGTTCTTGGGAGCAGCAGGAGGCACCATGGGC  
GCAGCGTCAATAACGCTGACGGTACAGGCCAGGCAATTATTGTCTGGTATAGTGCAACAGCAGAGAAATTTGC  
TGATGGCTATTGAGGCGCAACAGAAATATGTTGCGACTCACAGTCTGGGGCATC

>JF932472..1

TTCTACTGTAATACAGCACAACTGTTTAAATAGTACTTGGACAGGAAATGATACTAGCATTTTGGAAATGATACTA  
CAGGAAATGACACTATCACACTCCCTTGCAGAATAAAACAAATTATAAACATGTGGCAGGAAGTAGGGAAAGC  
AATGTATGCCCTCCCATTTGCAGGACAAATTAGATGTTTCATCAAATATTACAGGGTTGCTATTAACAAGAGAT  
GGTGGTAATCATGAGAACAACACTGAGACCTTCAGACCTGGAGGAGGAGATATGAGAGACAATTGGAGAAGTG  
AATTATATAGATATAAAGTAGTAAAAATTGAACCATTAGGAGTAGCACCCACCAAGGCAAAAGAGAAGAGTGGT  
GCAGAGAGAAAAAAGAGCAGTGGGAACGCTAGGAGCTATGTTCCCTTGGGTTCTTGGGAGCAGCAGGAAGCACT  
ATGGGCGCAGCGTCAATAACGCTGACGGTACAGGCCAGACAATTGTTGTCTGGTATAGTGCAACAGCAGAGAA  
ATTTGCTGAGGGCTATTGAGGCGCAACAGCATCTGTTGCAACTCACAGTCTGGGGCATC

>JF932474..3

TTCTACTGTAATACATCACAACTGTTTAAATAGTACTTGGCCTTGGAAATAATGATACTAGTGTTTGGGATGATA  
CTACAGAAAATGACATTATCACGCTCCCTTGCAGAATAAAACAAATTATAAACATGTGGCAGGAAGTAGGGAA  
AGCAATGTATGCCCTCCCATTTCAAGGACAACTTAACTGTTTCATCAAATATTACAGGGTTGCTATTAACAAGA  
GATGGTGGTTATCATAATGAGAGCAATAACACCGAGACCTTCAGACCTGGAGGAGGAGATATGAGAGACAATT  
GGAGAAGTGAATTATATAAATATAAAGTAGTAAAAATTGAACCATTAGGAGTAGCACCCACCAAGGCAAAAGAG

AAGAGTGGTGCAAAGAGAAAAAGAGCAGTGGGAGCGATAGGAGCTATGTTCCCTTGGGTTCCTTGGGAGCAGCA  
 GGAAGCACTATGGGCGCAGCGTCAATAACGCTGACGGTACAGGCCAGACAACCTGTTGTCTGGTATAGTGCAAC  
 AGCAGAGAAATTTGCTGAGGGCTATTGAGGCGCAACAGCATCTGTTGCAACTCACAGTCTGGGGCATT  
 >HQ215554..1  
 TTCTACTGTAATACAACAGGGCTGTTTAATAGTACTTTGACTAATGATACCTGGAATGATAATCGGTCATATA  
 ACAATGGAACAGGTAACATCACACTCCACTGCAGAATAAAACAAATTATAAACAGGTGGCAGGAAGTAGGAAA  
 AGCAATGTATGCCCCCTCCCATCAGTGGACCAATTAGCTGTTTATCAAATATTACAGGACTGATATTAACAAGA  
 GATGGAGGTAACAATACCGGAATCAATCTGATACTGAAACCTTCAGACCTGGGGGAGGGGATATGAAGGACA  
 ATTGGAGAAGTGAATTATATAAAATATAAAGTAGTACAAATTGAGCCAATAGGATTAGCACCCACCAGGGCAAG  
 GAGAAGAGTGGTGCAGAGAGAAAAAGAGCAGTGGGAACATTAGGAGCTATGTTCCCTTGGGTTCCTTGGGAGCA  
 GCAGGAAGCACTATGGGCGCAGCGTCAGTCACGCTGACGGTACAGGCCAGACAATTACTGTCTGGTATAGTGC  
 AACAGCAGAACAATTTGCTGAAAGCTATTGAGGCGCAACAACATATGTTGCAACTCACAGTCTGGGGCATC  
 >JF346917..1  
 TTCTACTGTAATACATCACAACCTGTTTAATAGTACTTTGGGATATTAATAGTAATGGGACTAATAATACAAATA  
 GCAATATCAATATCACACTCCCTTGCAAAATAAAACAAATTGTAAACATGTGGCAGGAAGTAGGGAAAGCAAT  
 GTACGCCCCCTCCCATTAGAGGACAAATTAGATGTTTCATCACAATTACAGGGTTGTTATTAACAAGAGATGGT  
 GGTACTAATAATAATCATACCAACGAAACCTTCAGACCTGCAGGGGGAGACATGAGAGACAATTGGAGAAGTG  
 AATTATATAAAATATAAAGTAGTAAAAATTGAACCATTAGGAATAGCACCCACCAAGGCAAAGAGAAGAGTGGT  
 GCAGAGAGAAAAAGAGCAGTGGGAACAATAGGAGCTATGTTCCCTTGGGTTCCTTAGGAGCAGCAGGAAGCACT  
 ATGGGCGCAGCGTCAGTAACGCTGACGGTACAGGCCAGACAATTATTGTCTGGTATAGTGCAACAGCAGAGAA  
 ATCTGCTGAGGGCTATTGAGGCGCAACAGCGTGTGTTGCAACTCACAGTCTGGGGCATC  
 >JX960599..1  
 TTCTACTGCAATACAACACAACCTGTTTAATAGTACTTTGGAATACTTGGGATAATATTACTGGGAATAGTAATG  
 AGAATAATACACAGAACAATATCACACTTCCATGTAGAATAAAACAAATTATAAACATGTGGCAGGGAGTAGG  
 AAAAGCAATGTACGCCCCCTCCCATCGCAGGACGAATTAATGTTTCATCAGATATTACAGGACTATTATTAGTG  
 AGAGATGGTAATAACAATAACAATACAGATAACAAGACAGAACTTTCAGACCTCAGGGAGGAAACATGAAGG  
 ACAATTGGAGAAGTGAATTATATAAAATATAAAGTAGTAAAAATTGAACCAATAGGAATAGCACCCACTACGGC  
 AAGGAGAAGAGTGGTGCAGAGAGAAAAAGAGCAGTGACACTAGGAGCTATGTTCCCTTGGGTTCCTTAGGAGCA  
 GCAGGAAGCACAATGGGCGCAGCGTCAATAACGCTGACGGTACAGGCCAGACAATTACTGTCTGGTATAGTGC  
 AACAGCAGAACAATTTGCTGAGGGCCATTGAGGCGCAACAGCATATGTTGCAACTCACAGTCTGGGGCATC  
 >JF932497..2  
 TTCTACTGTAATACATCACGACTGTTTAGTAGTACATGGTATACTAATGATACTCAGAATGGTACTACAGGAA  
 ATGACACTATCACACTCCCTTGCAAGAATAAAACAAATTGTAAACATGTGGCAGGAAGTAGGAAAAGCAATGTA  
 TGCCCCCTCCCGTTGAAGGACTAATTAGATGTTTCATCAAATATTACAGGGTTGCTATTAACAAGAGATGGTGGT  
 TATAATGTAAGCAACAACACCGAGATCTTCAGACCTGGAGGAGGAGATATGAGGGACAATTGGAGAAGTGAAT  
 TATATAAATATAAAGTAATAAAAAATTGAACCATTAGGAGTAGCACCCACCAAGGCAAAGAGAAGAGTGGTGCA  
 AAGAGAAAAAGAGCAGTGGGAATAGGAGCTATGTTCCCTTGGGTTCCTTGGGAGCAGCAGGAACCACTATGGGC  
 GCAGCGTCAATGACGCTGACGGTACAGGCCAGACAATTGTTGTCTGGTATAGTGCAACAGCAGGGAAATCTGC  
 TGAGGGCTATTGAGGCGCAACAGCATATGTTGCAACTCACAGTCTGGGGCATT  
 >KX693642..1  
 TTCTACTGTAATACATCACAACCTGTTTAATAGTACTTTGGGATGTTAATGACACTAGTAATGATACTACAGGAA  
 ATGAACTATCACGCTCCCTTGCAAGAATAAAACAAATTATAAACATGTGGCAGGGAGTAGGGAAAGCAATGTA  
 TGCCCCCTCCCATTAAGGAAAAATTAGATGTTTCATCAAATATTACAGGGTTGATATTAACAAGAGATGGTGGT  
 GTAAATGAGAGCGAGTTCAATGAGACCTTCAGACCTCAAGGAGGAAATATGAAAGACAATTGGAGAAGTGAAT  
 TGTATAAATATAAAGTAGTAAAAATTGAACCATTAGGAGTAGCACCCACCAAGGCAAAGAGAAGAGTGGTGCA  
 GAGAGAAAAAGAGCAGGAATAGGAGCTCTGTTCCCTTGGGTTCCTTGGGAGCAGCAGGAAGCACTATGGGCGCA  
 GCGTCAATAACGCTGACGGTACAGGCCAGACAATTGATGTCTGGTATAGTGCAACAGCAGAGAAATTTGCTGA  
 GAGCTATTGAGGCGCAACAGCATCTGTTGCAACTCACAGTCTGGGGCATC  
 >KX693171..1  
 TTTTACTGTAATACATCACAACCTGTTTGACAGTATTTGGAATGCTACTACTGGTACTTGGGAATGGTACTACAG  
 GAGTGACAATATCACGCTCCCTTGCAAGAATAAAACAAATTGTAAACATGTGGCAGGAAGTAGGGAAAGCAAT  
 GTATGCCCCCTCCCATTAGAGGACAAATTTATTGTTTCATCAAGTATTACAGGGTTGCTATTAACAAGAGATGGT  
 GGTACGAGTAAGAATGAGAGCAATACCACCGAGACCTTCAGACCTGGAGGAGGAGATATGAGGGACAATTGGA  
 GAAGTGAATTATATAAATACAAAGTAGTAAAACCTGAACCACTAGGAGTAGCACCCACCGAGGCAAAGAGAAG  
 AGTGGTGCAGAGAGAAAAAGAGCAGTGGGAGCGATAGGAGCTATGTTCCCTTGGGTTCCTTGGGAGCAGCAGGA  
 AGCACTATGGGCGCAGCGTCAATAACGCTGACGGTACAGGCCAGACAATTATTGTCTGGTATAGTGCAACAGC  
 AAAGAAATTTGCTGAGGGCTATTGAGGCGCAACAGCATATGTTGCAACTCACAGTCTGGGGCATC  
 >KX693309..1  
 TTCTACTGTAATACATCAAAACCTGTTTAATAGTACTTTGGAGTAAGACTAGTACTTGGGAATGATACTACAGGAA  
 ATGACACTATCACGCTCCCTTGCAAGAATAAAACAAATTGTAAACATGTGGCAGGAAGTAGGGAAAGCAATGTA

TGCCCCCTCCCATTTCAAGGACTAATTAACTGTTTCATCAAATATTACCGGGTTGCTATTAACAAGAGATGGTGGT  
AATAAATACTGAGAGCAACACCACCGAGACCTTCAGACCTACAGGAGGAAATATGAGAGACAATTGGAGAAGTG  
AATTATATAAATATAAAGTAGTACAAATTGAACCATTAGGAGTAGCACCCACCAAGGCAAAGAGAAGAGTGGT  
GCAGAGAGAAAAAAGAGCAGTGGGAACAATAGGAGCTATGTTCCCTTGGGTTCTTGGGAGCAGCAGGAAGCACT  
ATGGGCGCAGCGTCGGTAACGCTGACGGTACAGGCCAGACAATTGTTGTCTGGTATAGTGCAACAGCAGAGAA  
ATTTGCTGAGGGCTATTGAGGCGCAACAGCATCTGTTGCAACTCACAGTCTGGGGCATT

>KX693362..1

TTCTACTGTAATACATCAAACTGTTTAAATAGTACTTGGAAATGATAATAGTACTTGGAAATGATAATGATAAGA  
CAGGAGATGACAATCTCACGCTCCCTTGTAGAATAAAACAAATTGTAAACATGTGGCAGGAAGTAGGGAAAAGC  
AATGTATGCCCCCTCCCATTTAAAGGACAAATTAGATGTTTCATCAAATATTACAGGGTTGCTATTAACAAGAGAT  
GGTGGTCAGAATGTGAGCAATACCACCGAGACCTTCAGACCTGCAGGAGGAGATATGAGAGACAATTGGAGAA  
GTGAATTATATAAATATAAAGTAGTAAAAATTGAACCATTAGGAGTAGCACCTACCAAGGCAAAGAGAAGAGT  
GGTGCAGAGAGAAAAAAGAGCAGTGGGAACGATAGGAGCTATGTTCCCTTGGGTTCTTGGGAGCAGCAGGAAGC  
ACGATGGGCGCAGCGTCAATAACGCTGACGGTACAGGCCAGACAATTGTTGTCTGGTATAGTGCAACAGCAGAGA  
GAAATTTGCTGAGGGCTATTGAGGCGCAACAGCATCTGTTGCAACTCACAGTCTGGGGCATC

>KX693411..2

TTTTACTGTAATACATCAAACTGTTTAAATAGTACTTGGAGTAATAATAATCCTTGGAACTACTACTAGTATTC  
AAAAATGATACTATCACGCTCCCTTGCAGAATAAAACAAATTGTAAACATGTGGCAGGAAGTAGGGAAAGCAAT  
GTATGCCCCCTCCCATTTGCAGGACCAATTAATTGTTTCATCAAATATTACGGGGTTGCTATTAACAAGAGATGGT  
GGTAAAGGTGGGGATGTGAGCAACTACACCGAGACCTTCAGACCTGCAGGGGGAAAATATGAGAGACAATTGGA  
GAAGTGAATTATATAGATATAAAGTAGTAAAAATTGAACCATTAGGAGTAGCACCCACCAAGGCAAAGAGAAG  
AGTGGTGCAGAGAGAAAAAAGAGCAGTGGGAGCAATAGGAGCTATGTTCCCTTGGGTTCTTGGGAGCAGCAGGA  
AGCACTATGGGCGCAGCGTCAATAACGCTGACGGTACAGGCCAGACAATTGTTGTCTGGTATAGTGCAACAGC  
AGAGAAATTTGCTGAGGGCTATTGAGGCGCAACAGCATCTGTTGCAACTCACAGTCTGGGGCATC

>KR914676..3

TTCTACTGTAACACAACACCACTGTTTAAATAGTAGTTGGTACAAGTCAAATTGGAAAAGTCAAAGGACAAAGG  
AGATTGGAGGAAGGGAGACAATCACACTCCAATGTAGAATAAAACAAATTGTAAACATGTGGCAGGAAGTAGG  
ACGAGCAATGTATGCCCCCTCCCATCAAAGGACAAATTAGATGTTTCATCAAATATTACAGGGGTGCTATTAACA  
AGAGATGGTGGTAATACCACCAATCACTCCGAGATCTTCAGACCTGGAGGAGGAAAATATGAAGGACAATTGGA  
GAAGTGAATTATATAAATATAAAGTAGTACAAATTGAACCATTAGGAATAGCACCCACCAAGGCAAAGAGAAG  
AGTGGTGCAGAGAGAAAAAAGAGCAATAGGATTTCGGAGCTGTGTTCCCTTGGGTTCTTGGGAGCAGCAGGAAGC  
ACTATGGGCGCAGCGTCAGTAACGCTGACGGTACAAGCCAGACAATTATTGTCTGGTATAGTGCAACAGCAGA  
GCAATTTGCTGAATGCTATTTCAGGCGCAACAGCATCTGTTGCAACTCACAGTCTGGGGCATT

>FJ388899..1

TTCTACTGCAATACAACAGAACTGTTTAAATAGTACTTGGAAATAGTACTACTTGGAAATAGTAATAGTACTACAA  
ATGCAATGCAACAAATACAGCTAACCTAGTACTCCCATGCAGAATAAAACAGATTGTAAACATGTGGCAGAA  
AGTAGGAAAAGCAATGTATGCCCCCTCCCATCAAAGGAATAATTAGATGTTTCATCAAATATTACAGGGATAATA  
TTAACAAGAGATGGTGGTAATAGTAATCAGACCAACACCACAGAGATTTTCAGACCTGTAGGAGGAAATATGA  
AGGACAATTGGAGAAGTGAATTATATAAATATAAAGTAGTACAAATTGAACCATTAGGAGTAGCACCCACCAA  
GGCAAAAAGAAGAGTGGTGCAGAGAGAAAAAAGAGCAGTGACATTAGGAGCTATGTTCCCTTGGGTTCTTGGGA  
GCAGCAGGAAGCACTATGGGCGCAGCGTCAATAACGCTGACGGTACAGGCCAGACAATTACTGTCTGGTATAG  
TGCAACAGCAGAGCAATCTGCTGAGGGCTATTGAGGCGCAACAGCACCTGTTGCAACTCACAGTCTGGGGCAT  
C

>FJ388916..3

TTCTACTGTAATACAACAGGGCTGTATAATAGTACTTGGCAGTTTAAATAGTACTTGGAACTACTACTTGGAAATC  
ATACTGACCCTAATCATACTGACCCTATCACACTACCATGCAGAATAAGACAAATTGTAAACAGGTGGCAGGA  
AGTAGGAAAAGCAATGTATGCCCCCTCCCATCAGCGGACAAATTAGCTGTTTCATCAAACATTACAGGGCTACTA  
TTAACAAGAGATGGTGGTAGTAATGAGAGCAGAACCAACGAGACCTTTAGACCTGGAGGAGGAGATATGAGGG  
ACAATTGGAGAAGTGAATTATATAAATATAAAGTAGTAAGAATTCAACCATTAGGAATAGCACCCACCAAGGC  
AAAAAGAAGAGTGGTGCAAGAGAAAAAAGAGCAGTGGGAACGCTGGGAGCTATGTTCCCTTGGGTTCTTGGGA  
GCAGCAGGAAGCACTATGGGCGCAGCGTCACTGACGCTGACGGTACAGGCCAGACAATTATTGACTGGTATAG  
TGCAACAGCAGACAATCTGCTGAGAGCTATTGAGGCGCAACAGCATATGTTGCAACTCACAGTCTGGGGCAT  
C

>JF683738..2

TTCTACTGTGATACTACAAAAGCTGTTTAAATAGTACTTGGACTGGGAATGAAACTTGGACTGGGAATGAAAAGT  
AAGAGTCAAATAATAGTACTATCACACTCCCATGCAGAATAAAACAAATTATAAACAGATGGCAGGAAGTAGG  
AAAAGCAATGTATGCCCCCTCCCATCAGAGGAGAAATTAATGTACATCAAATATTACAGGGCTACTATTAACA  
AGAGATGGTGGTAATGGTAATGGGACTCAGAATCAGACCGAGATCTTCAGACCTGGAGGAGGAGACATGAAGG  
ACAATTGGAGAAGTGAATTATATAAATATAAAGTAGTAAAAATTGAGCCATTAGGAATAGCACCTACCAAGGC  
AAAAAGAAGAGTGGTGCAGAGAGAAAAAAGAGCAATAGGACTGGGAGCTGTGTTTCATTGGGTTCTTGGGAGCA

GCAGGAAGCACTATGGGCGCAGCGTCGGTGACGCTGACGGTACAGGCCAGACAGTTATTGTCTGGTATAGTGC  
AACAGCAAAACAATTTGCTAAAAGCTATTGAGGCGCAACAGCATCTGTTGCAACTCACAGTCTGGGGCATC  
>JF683756..1

TTCTACTGTAATACATCAAAGCTGTTTAATAGTACTTGGACTAATAGTAGTAGTACTTGGGAATAATACTGAAG  
AGTCAAATGACACTATCACACTCCCATGTAAAATAAAACAAATTATAAACATGTGGCAGGAAGTAGGAAGAGC  
AATGTATGCCCCCTCCCATCAGTGGGCAAATTAGGTGCTCATCAAATATTACAGGGCTACTATTAACAAGAGAT  
GGTGGTCATAACGGAACCAATAACGAGACCGAGATCTTCAGACCTGCAGGAGGAAATATGAAGGACAATTGGA  
GAAGTGAATTATATAAATATAAAGTAGTGAAAATTGAGCCATTAGGAGTAGCACCCACCAGGGCAAAAAGAAG  
AGTGGTGCAGAGAGAAAAAGAGCAGTGGGAATGGGAGCTTTGCTCCTTGGGTTCTTGGGAGCAGCAGGAAGC  
ACTATGGGCGCAGCATCGGTGATGCTGACGGTACAGGCCAGACAATTATTGTCTGGTATAGTGCAACAGCAGA  
ACAATCTGCTGAGAGCTATTGAGGCGCAACAACATATGTTGCAACTCACAGTCTGGGGCATT  
>JF683764..1

TTCTACTGTGATACAACAACCACTGTTTAATAGTACTTGGTTTATGAATGGGACTAATACAACCTACCCTTACCG  
CAAATGCCACAATCCCAAGCCGAATAAAACAAATTATACACAGGAGGCAGGAAGTAGGAAGAGCAATGTATGT  
CCCTGCCCTCAGAGGACCAATTACATGTATATCAAATATGACAGGGACGTTATTAACAAGAGATGGTGGTCAT  
AACATGGCATTAATGACATTGAGACCTTCAGACCAGGAGGAGGAGATATGAGGGACAATTGGAGAAGTGAAT  
TATATAAATATAAAGTAGTAAGAGTTGAACCATTAGGAATAGCACCCACCAGGGCAAGAGAAGAGTGGTGCA  
GAGAGAAAAAGAGCAGCACTAGGAGCTATGTTCTTGGGTTCTTGGGAGCAGCAGGAAGCACTATGGGCGCA  
GCGTCAATAACGCTGACGGTACAGGCCAGACAATTGTTGCTGGTATAGTGCAACAGCAAAACAATTTGCTGA  
GAGCTATTGAGGCGCAACAACACATGTTGCAACTCACAGTCTGGGGCATC  
>JF683773..1

TTCTACTGTAATACATCACAACCTGTTTAATAGTACTTGGACACCTAATGGTACTTGGACATTTAATGCTGCTA  
GTGGGGCTTCAGGATTCAAGGGCACTATCACACTCCCATGTAGAATAAAACAAATTATAAACATGTGGCAGGA  
AGTAGGAAAAGCAATGTATGCCCCCTCCCATCAGTGGACTAATTAGATGCTCATCAAATATTACAGGACTGCTA  
TTAACAAGAGATGGTGGTATAAAACAATACCAATACCACCGAGATCTTCAGACCTGTAGGAGGAAATATGAAGG  
ACAATTGGAGAAGTGAATTATATAAATATAAAGTAGTACAAGTTGAACCAATAGGAATTGCACCCACCAAGGC  
AAAGAGAAGAGTGGTGCAGAGAGAAAAAGAGCAGTTACACTAGGAGCTGTGTTCTTGGGTTCTTGGGAGCA  
GCAGGAAGCACTATGGGCGCAGCGTCAATGACGCTGACGGTACAGGCCAGGCAATTATTGTCTGGTATAGTGC  
AACAGCAGAACAATCTGCTGAGAGCTATTGAGGCGCAACAGCATCTGTTGCAACTCACAGTCTGGGGCATC  
>JQ416158..1

TTCTACTGTAATACATCACAACCTGTTTAATAGTATTTGGCCTTGGGAATAGTACTGCAAACAACACTGGAGGAA  
ATGACACAATCACACTCCCATGCAGGATAAGACAAATTGTAAATAGGTGGCAGGAAGTAGGAAAAGCAATGTA  
TGCCCCCTCCCATCAGTGGACAAATTAGATGTTTCATCAAATATTACAGGGCTGCTATTAACAAGAGATGGAGGT  
CAGACTAACAACCAGACTGGGAACCAGACCGAGATTTTCAGACCTGGAGGAGGAGATATAAAGATAATTGGA  
GAAGTGAATTATACAAATATAAAGTAGTACAAATTGAACCATTAGGAGTAGCTCCCACTAAGGCAAGGAGAAG  
AGTGGTGCAGAGAGAAAAAGAGCACTAACACTGGGAGCTGTGTTCTTGGGTTCTTGGGAACAGCAGGAAGC  
ACTATGGGCGCAGCGTCACTAACGCTGACGGTACAGGCCAGACAATTATTGTCTGGTATAGTGACAGCAGCAGA  
ACAATCTGCTGAGAGCTATTGAGGCGCAACAACATTTGTTGCAACTCACAGTCTGGGGCATC  
>KT124803..1

TTCTACTGTAATACAACAAGCCTGTTTAATAGTACTTGGTATGCAAATGGTACAAATAGCACTTGGTCTGATG  
AGTCAGATGTTATCACACTTCCATGCAGAATAAGACAAATTGTAAACATGTGGCAGGGGTAGGAAAAGCAATGTA  
GTATGCCCCCTCCCATCAGAGGACAGATTAATTGTACATCAAATATTACAGGGCTAATATTAACAAGAGATGGT  
GGGAACAAGAATGGCACTAATGAGACCTATGAGACCTTCAGACCTGCAGGAGGAAATATGAAGGACAATTGGA  
GAAGTGAATTATATAAATATAAAGTAGTAAAGATTGAACCATTAGGAATAGCACCCACCAAGGCAAGAGAAG  
AGTGGTGCAGAGAGAAAAAGAGCAATAGGAATGGGAGCCTTGTTCTTGGGTTCTTGGGAGCAGCAGGAAGC  
ACTATGGGCGCAGCGTCAATGACGCTGACGGTACAGGCCAGACAATTATTGTCTGGTATAGTGCAACAGCAAA  
ACAATTTGCTGAGAGCTATTGAGGCGCAACAACACCTGTTGCAACTCACAGTCTGGGGCATC  
>KT124789..1

TTCTACTGTAATACAACAGAGCTGTTTAACGGTACTTGGGAATGGTACTTTCTTGAATGTTACTACAGGGCGAG  
AGAAATATCACACTCCCATGCAGAATAAAACAGATTATAAACAGGTGGCAGGAAGTAGGAAAAGCAATGTACGC  
CCCTCCCATCAGAGGACCAATTAGATGCTCATCAAATATTACAGGGCTGATATTAACAAGAGATGGTGGTCAG  
AATGCGAGTGCAGACCAACGAAACCTTCAGACCGGGAGGAGGAGATATGAGGGACAATTGGAGAAGTGAATTAT  
ATAAATATAAAGTAGTAAAAATTGAGCCATTAGGAATAGCACCCACCAAGGCAAGGAGGAGAGTGGTGCAGAG  
AGAAAAAGAGCAGTGACACTAGGAGCTATGTTCTTGGGTTCTTGGGAGCAGCAGGAAGCACTATGGGCGCA  
GCTTCATTGACGCTGACGGTACAGGCCAGACTATTATTGTCTGGTATAGTGCAACAGCAAAACAATTGCTGA  
GGGCTATTGAGGCGCAGCAGCATCTGCTGCAACTCACAGTCTGGGGCATC  
>KT124805..1

TTTTACTGTGATACAACAACCACTGTTCAACAGTACGTGGGATACAAATAATACTGGGGGAGTGAATGATACTG  
ACGAGCCAATTACACTCCCATGCAGGATAAAACAATTTATAAACATGTGGCAGGAAGTAGGGAAAGCAATGTA  
TGCCCCCTCCCATCCAAGGAATAATTCAGTGTTCATCAAATATTACAGGACTACTATTAACAAGAGATGGTGGT

AAGACAGAGAACGGGACAGAGAATGTTACTGAGATCTTTAGACCTGGAGGAGGAGACATGAGGGACAATTGGA  
GAAGTGAATTATATAAATATAAAGTAGTAAAAATTGAACCATTTAGGAGTAGCACCCACCAGGGCAAAGAGAAG  
AGTGGTGCAGAGAGAAAAAGAGCAGTGACACTGGGAGCTGTGTTTCCTTGGGTTCTTGGGAGCAGCCGGAAGC  
ACTATGGGCGCAGCGTCACTGACGCTGACGGTACAGGCCAGACAATTATTGTCTGGTATAGTGCAACAGCAGA  
ACAATTTGCTGAGAGCTATTGAGGCGCAACACCATCTGTTGCAACTCACAGTCTGGGGCATT

>KT124763..1

TTCTACTGTAATTCATCGACACTGTTTAATAGTACTTGGAATGAACTATTGCAGGGATTACCAATGCAAATG  
AACTATCACACTCCCATGCAGAATAAGGCAAATTATAAACATGTGGCAGGAAGTAGGAAAAGCAATGTATGC  
CCCTCCCATTAGTGGAATAATTAGATGTTTCATCAAATATTACAGGGCTGCTATTAACAAGAGATGGTGGTAAT  
AATGGTAATCATAGCGAGAATAATACCATTGAGATCTTCAGACCTGGAGGAGGAGATATGAGGGATAATTGGA  
GAAGTGAATTATATAAATATAAAGTAGTACAAATTGAACCACTAGGAGTAGCACCTACCAAGGCAAAGAGAAG  
AGTGGTGCAGAGAGAAAAAGAGCAGTGGGACTAGGAGCTTTGTTTCCTTGGGTTCTTGGGAGCAGCAGGAAGC  
ACTATGGGCGCAGCGTCAATAACGCTGACGGTACAGGCCAGACAATTATTGTTTGGTATAGTGCAACAGCAGA  
ACAATCTGCTGAGAGCTATTGAGGCGCAACAGCACCTGTTGCAACTCACAGTCTGGGGCATC

>KT124779..1

TTCTACTGTGATACAACACAACCTGTTTAATAGTACTTGAGTAATGCTACTTGGAATGAGACTACAGGTTCAA  
ATGACACGATTACACTCCAATGTAAAATAAAACAAATTATAAACAGGTGGCAGGAAGTAGGAAAAGCAATGTA  
TGCCCCCTCCCATCCGAGGACAAATAAAGTGTTTCATCAAAATATTACAGGGTTGCTATTAACAAGAGATGGTGGT  
AACGAGACTAACGGGACCGAGGTCCTTCAGACCTATAGGAGGAGATATGAAAGACAATTGGAGAAGTGAATTAT  
ATAAAATATAAAGTAGTTCAAATTGAACCATTAGGAATAGCACCCACCAAGGCAAAGAGAAGAGTGGTGCAGAG  
AGAAAAAAGAGCGGTGACACTGGGAGCTATGTTTCCTTGGGTTCTTGGGAGCAGCGGGAAGCACTATGGGCGCA  
GCGTCAGTGGCGCTGACGGTACAGGCCAGACAATTATTGTCTGGTATAGTGCAACAGCAGAACAAATATGCTGA  
GGGCTATTGAGGCACAACAGCATATGTTGCAACTCACAGTCTGGGGCATC

>KT124787..2

TTCTACTGTGATACAACACAGCTGTTTAATAGCAATAGCACTTGCGTGTTTAATAACACTTGGAATAGTACTG  
AGAATAATAACTGAGAATAATAATATCACACTCCAGTGCAGAATAAGACAAATTGTAAACATGTGGCAGAA  
AGTAGGAAAAGCAATGTATGCCCCCTCCCATCAGAGGACAAATTTACTGTGCATCACAAATAACAGGGCTGCTA  
TTAACAAGAGATGGTGGTAGTAGTGATCAGAACACACCGAGATCTTCAGACCTGCAGGAGGAAATATGAGGG  
ACAATTGGAGAAGTGAATTATATAAATATAAAGTAGTAAAAATTAAACCATTAGGAGTAGCACCCACCAAGGC  
AAAGAGAAGAGTGGTGCAGAGAGAAAAAGAGCAGTAACGCTAGGAGCTATGTTTCCTTGGGTTCTTGGGAGCA  
GCGGGAAGCACTATGGGCGCAGCGGCAATGACGCTGACGGTACAGGCCAGACAATTATTGTCTGGTATAGTGC  
AACAGCAGAATAATCTGCTGAGAGCTATTGAGGCGCAACAGCATCTGTTGCAACTCACAGTCTGGGGCATC

>KC596067..1

TTCTACTGTAATACAACACAATTGTTTAACAGTACTTGGAATACTACTGAAGATTTAAATAAACTAGAACTG  
AAGTAAATGACACAATCACACTCCCATGTAGAATAAGACAAATTATAAACAGATGGCAGGAAGTGGGAAAAGC  
AATGTATGCCCCCTCCCATCAGCGGAAACATTAGTTGTTTCATCAACATCACAGGGCTGCTATTAACAAGAGAT  
GGTGGTCAGAATAATGTGAGCAACACCACAGAGATCTTCAGACCTGGAGGAGGAGATATGAGGGACAATTGGA  
GAAGTGAATTATATAAATATAAAATAATAAAATCGAACCATTAGGAATAGCACCCACCAAGGCAAGGAGAAG  
AGTGGTGCAGAGAGAGAAAAAGAGCAGCACTAGGAGCTATGTTTCCTTGGGTTCTTAGGAGCAGCAGGAAGCACT  
ATGGGCGCAGCGTCAGTGACGCTGACGGTACAGGCCAGACAATTATTGTCTGGTATAGTGCAACAGCAAAGTA  
ACTTGCTGAAAGCTATTGAGGCGCAACAGCATCTGTTGCAACTCACAGTCTGGGGCATC

>EF514700..2

TTTTACTGTAATACGTCAAAACCTGTTTGATAGTACCTGGAATGAACTAGTATTTGGAATTATACCACTACTA  
ATGATACCACAAAAATGACACACTCACACTCCCATGTAAAATAAAACAAATTATAAACATGTGGCAGGAAGT  
AGGAAAAGCAATGTATGCCCCCTCCCATCAGAGGACAAATCAGATGCTCATCAAATATTACAGGGCTGTTATTA  
ACAAGAGATGGTGGTCAGGGTAACGGGACCGATAACACCACCGAGATCTTCAGACCTGCAGGAGGAGATATGA  
GGGACAATTGGAGAAGTGAATTATATAAATATAAAGTAGTAAGAATTGAACCATTAGGAGTAGCACCCACCAA  
GGCAAAGAGAAGAGTGGTGCAGAGAGAAAAAGAGCAGTGGGACTGGGAGCTTTGTTTCCTTGGGTTCTTGGGA  
ACAGCAGGAAGCACTATGGGCGCAGCATCTAACGCTGACGGTACAGGCCAGACAATTGTTGTCTGGTATAG  
TGCAACAGCAGAACAAATCTGCTGAGAGCTATTGAGGCGCAACACATCTGTTGCAACTCACAGTCTGGGGCAT  
T

>EU839598..1

TTCTACTGTAATACAACAAAACCTGTTTAACAATACTGGACAATTAGATAAAGAAGAAGATGAAGGAGAAGAAG  
GCAATATCACACTTCCATGCAGAATAAGGCAATTCGTAAACAGGTGGCAAGAAGTAGGAAAAGCAATGTATGC  
CCCTCCCATCAGTGACAAATTAGATGTTTCATCAAATATTACAGGGCTACTATTAACAAGAGATGGTGGTGGT  
AGTGGTAATAGTGAGAATGAGACCTTCAGACCTGGGGGAGGAGATATGAAAGACAATTGGAGAAGTGAGTTAT  
ATAAAATATAAAGTAGTAAAAATTTCAGCCATTAGGAATAGCACCCAGCAAGGCAAAGAGAAGAGTGGTGCAAAG  
AGAAAAAAGAGCAGTGACACTAGGAGCTATGTTTCCTTGGGTTCTTAGGAGCAGCAGGAAGCACTATGGGCGCA  
GCGTCAGTAACGCTGACGGTACAGGCCAGACTATTATTGTCTGGTATAGTGCAACAGCAGAACAAATCTGCTGA  
GGGCTATTGAGGCGCAACACATCTGTTGCAACTCACGGTCTGGGGCATC

>KC595194..1

TTTTACTGTAATTCAACACAACCTGTTTAAACAGTGTGTTGGAAGGCTAACAGTACTTGGAATAGTACTGAAGGGT  
CAAATAACAATGCAGGAAATATCACACTCCCATGCAGAATAAAACAAATTATAAACATGTGGCAGGAAGTAGG  
AAAAGCAATGTATGCCCCCTCCCATCAGAGGCCAAATTAGCTGTTTCATCAAATATTACAGGGCTACTATTAACA  
AGAGATGGTGGTAACATCACTAACGGGACCGAGATCTTCAGACCTGGAGGAGGAGATATGAGGGACAATTGGA  
GAAGTGAATTATATAAATATAAAGTAGTAAAAATTGAACCATTAGGAATAGCACCCACCAAGGCAAAGAGAAG  
AGTGGTGCAGAGAGAGAAAAGAGCAGTGGGAATAGGAGCTATGTTCCCTTGGGTTCTTGGGAGCAGCAGGAAGC  
ACTATGGGCGCGGCGTCAATGACGTTGACGGTACAGGCCAGACTATTATTGTCTGGTATAGTGCAACAGCAGA  
ACAATTTGCTAAGGGCTATTGAGGCGCAACATCATCTGTTGCAACTCACAGTCTGGGGCATC

>KC595151..1

TTCTACTGTGATACAACAAAAATTGTTTAAATAGTACTTGGGATATTAATGATACTTGGAATGGTACTAACGGGC  
CAGATAACACTATCATACTCCCATGCAGAATAAAACAAATTATAAACATGTGGCAGGAAGTAGGAAAAGCAAT  
GTATGCCCCCTCCCATCAGAGGACGAATTAGGTGTGAATCAAATATTACAGGGCTGCTATTAACAAGAGATGGT  
GGTGATGATAGCAGTAACCAGACCGAGATCTTCAGACCTGGAGGAGGAGATATGAGGGACAATTGGAGAAGTG  
AATTATATAAATATAAAGTAGTAAAAATTCAACCATTAGGAATAGCACCCAACAAGGCAAAGAGAAGAGTGGT  
GCAGAGAGAAAAAAGAGCAGTGGGAATAGGAGCTTTGTTCCCTTGGGTTCTTGGGAGCAGCAGGAAGCACTATG  
GGCGCAGCGTCAATGACGTTGACGGTACAGGCCAGACAATTATTGTCTGGTATAGTGCAACAGCAGAACAAATC  
TGCTGAGGGCTATTGAGGCGCAACAGCATCTGTTGCAACTCACAGTCTGGGGCATC

>EU786679..1

TTCTACTGTAATACAACACAGCTGTTTAAATAGTACTTGGGGTATGAATACGACTAAAGGGACAAATACCACTG  
AAGGAGATATCATACTCCCATGCAGAATAAAACAAATTATAAACATGTGGCAGGAAGTAGGAAAAGCAATGTA  
TGCCCCCTCCCATCAGCGGGCCAATTACATGTACATCAAAATATTACAGGGCTGCTACTAACAAGAGATGGGGGT  
CAGAGCAAGAACGAAAGTAACGAGACAGAGATCTTCAGACCAGGAGGAGGAGACATGAAGGACAATTGGAGAA  
GTGAATTATATAAATATAAAGTAGTAAAAATTGAACCATTAGGAATAGCACCCACCAAGGCAAAAAGAAGAGT  
GGTGCAAAGAGAAAAAAGAGCAGTGGGACTAGGAGCTGTGTTCCCTTGGGTTCTTGGGAGCAGCAGGAAGCACT  
ATGGGCGCAGCGTCAATAACGCTGACGGTACAGGCCAGACAATTATTGTCTGGTATAGTGCAACAGCAGAACAA  
ACTTGCTGAGGGCTATTGATGCGCAACAGCATATGTTGCAGCTCACAGTCTGGGGCATC

>KC473841..1

TTCTACTGTAATACATCACAACCTGTTTAGTAGTACTTGGAATAATACTGTAGGGTTAAATACTACAGGAAATG  
ATACTATCACACTCCACTGCAGAATAAGACAAATTATAAACCTGTGGCAGAGAGTAGGAAAAGCAATGTATGC  
CCCTCCCATTAGAGGACAAATTAGTTGTTTCATCAAACATTACAGGGTTGCTATTAACAAGAGATGGTGGTAAC  
AACAATCAGAGCAATAACACCGAAATCTTCAGACCTGGAGGAGGAGATATGAGGGACAATTGGAGAAGTGAAT  
TATATAAATATAAAGTAGTAAGAATTGAACCACTAGGAGTAGCACCCACCAAGGCAAAGAGAAGAGTGGTGCA  
GAGAGAAAAAAGAGCAGTGGGACTAGGAGCTGTGCTCTTTGGGTTCTTGGGAGCAGCAGGAAGCACTATGGGC  
GCAGCGTCAGTGACGCTGACGGTACAGGCCAGACAATTATTGTCTGGTATAGTGCAACAGCAGAAAATAATTTGC  
TGAAAGCTATTGAGGCGCAACAGCATCTGTTGCAACTCACAGTCTGGGGCATC

>KT200357..1

TTCTACTGTAATACAACACAGCTGTTCAATAGTACTTGGGAGCCAGGGAAGAATACTACTACAGAGGGAAATG  
ACACTATCACGCTCCCATGCAGAATAAAACAGATTATAAACAGGTGGCAGGAAGTAGGAAAAGCAATGTATGC  
CCCTCCCATTAGAGGACGAATTAATTGTACATCAAATATTACAGGGCTGTTATTAACAAGAGATGGTGGTAAC  
AATAATAACCAGACAAATAGGACAGAGACCTTTAGACCTCAAGGAGGGAATATGAAGGACAATTGGAGAAGTG  
AATTATATAAATATAAAGTAGTACAAGTTGAGCCATTAGGAATAGCACCCACCAAGGCAAGGAGAAGAGTGGT  
GCAGAGAGAAAAAAGAGCAGTGGGACTAGGAGCTGTGTTCCCTTGGGTTCTTAGGAGCAGCAGGAAGCACTATG  
GGCGCAGCGTCAATAACGCTGACGGTACAGGCCAGACAATTGTTGTCTGGTATAGTGCAACAGCAGAACCAACC  
TGCTGAGGGCTATTGAAGCGCAACACATATGTTGCAGCTCACAGTCTGGGGCATC

>KP109518..1

TTCTACTGTAATACAACACAACCTGTTTAAATAGTACCTGGAATGATACTAGTATTAGTGAAAGGTCAAATACTA  
CTAAAAACATCACGCTTCCATGCAGAATAAAACAAATTATAAACATGTGGCAAGAAGTAGGGAAAGCAATGTA  
TGCCCCCTCCCATCCCAGGACCAATTCAATGTAGATCAAATATTACAGGGATATTATTAACAAGAGATGGTGGT  
AATACTAGTGATAGCCAGAATGAAACCTTCAGACCTGGAGGAGGAAATATGAAGGACAATTGGAGAAGTGAAT  
TATATAAATATAAAGTAGTAGAAATTGAACCATTAGGAGTGGCACCCACAGGGCAAGGAGAAGAGTGGTGCA  
GAGAGAAAAAAGAGCAGTGGGAGTAGTAGGAGCTATGTTCCCTTGGGTTCTTGGGAGCAGCAGGAAGCACTATG  
GGCGCAGCGTCAATGACGTTGACGGTACAGGCCAGACTATTACTGTCTGGTATAGTGCAACAGCAGACAACATC  
TGCTGAGAGCTATTGAAGCGCAACAGCATCTGTTGCAGCTCACAGTCTGGGGCATT

>KY465969..2

TTCTACTGTAATACAACACAGCTGTTTAAATAGCACTTGGAATAAAACTGTAGTTGAGAATAATAATTATGGTT  
CTGAGAATGGTACTATCACACTCCAGTGCAGAATAAGACAAATTGTAAACAGGTGGCAGGAAGTAGGAAAAGC  
AATGTATGCCCCCTCCCATCAGAGGAGTAATTAACCTGTTTCATCAAGTATTACAGGGCTGTTATTAACAAGGGAT  
GGTGGTAATAGTAAGAACACCAACAGGTCATCTGAGATCTTCAGACCTGGAGGAGGAGATATGAGGGACAATT  
GGAGAAGTGAATTATACAAATATAAAGTAGTAAAGATTGAACCATTAGGAGTAGCACCCACCAAGGCAAAGAG

GAGAGTGGTGCAGAGAGAAAAAGAGCAGTGGGAGCATTAGGAGCTATGTTCCCTTGGGTTCCTTGGGAACAGCA  
GGAAGCACTATGGGCGCAGCGTCACTGACGCTGACGGTACAAGCCAGACAACCTATTGTCTGGTATAGTGCAAC  
AGCAGAACAACTCTGCTGCAGGCTATCGAGGCGCAACATCATCTGTTGCAACTCACCGTCTGGGGCATC

>KC595204..2

TTCTACTGTAACCAACACAGCTGTTTAAATAGTACTTGGAAATAGTACTGGGAATCAGAATAATATTGAAGGGT  
TAAATGACACAATCACACTCCCATGCAGAATAAAACAAATTATAAACATGTGGCAGGAAGTAGGAAGAGCAAT  
GTATGCCCTCCCATTAGAGGACAAATTAGATGTTTCATCAAATATTACAGGGCTGTTATTAACAAGAGATGGT  
GGTCATAACACGACAGAGACCGAGATCTTCAGACCTGGAGGAGGAGATATGAGGGACAATTGGAGAAGTGAAT  
TATATAAATATAAAGTAGTAAAAATTGAACCATTAGGAGTAGCACCCACCAGAGCAAAGAGAAGAGTGGTGCA  
GAGAGAAAAAGAGCAGTGGGAATAGGAGCTGTGTTCCCTTGGGTTCCTTGGGAGCAGCAGGAAGCACTATGGGC  
GCAGCGTCAGTGACGCTGACGGTACAGGCCAGACTATTATTGTCTGGTATAGTGCAACAGCAGAATAATTTGC  
TGAAGGCTATTGAGGCGCAACAGCATCTGTTGCAACTCACAGTCTGGGGCATC

>DQ141342..1

TTCTACTGTAATACAACACAACCTGTTTAAATAGTACTTGGCCTAAGAATGGTACCAGCGAGTTAAATACCACTG  
ACCCATTTCATACTCCCATGTAAAAATAAAACAAATTATAAACATGTGGCAGAAAAGTAGGAAAAGCAATGTATGC  
CCCTCCCATCCGTGGACAGATTAGATGCTCATCAAATATTACAGGGCTGCTATTACCAAGAGATGGTGGTAAC  
AACAACAATGGTAGTAACAACCGCAGTCCTGAGATCTTCAGACCTGGAGGAGGAGATATGAGGGATAATTGGA  
GAAGTGAATTATACAAATATAAAGTAGTAAAAATTCAACCATTAGGAGTAGCACCCACCAAGGCAAAGAGAAG  
AGCGGTGCATAGAGACAAAAGAGCAGTGGGACTCGGAGCTGTGTTCCCTTGGATTCTTGGGAGCAGCAGGAAGC  
ACTATGGGCGCAGCGTCACTGACGTTGACGGTACAGGCCAGACAATTATTGTCTGGTATAGTGCAACAGCAAAA  
ACAACCTTGCTGAGGGCTATTGAGGCGCAACAGCATCTGTTGCAACTCACAGTCTGGGGCATC

>DQ141343..2

TTCTACTGTGATACATCACAACTATTTAAATAGTACTTGGAAATAGTAGTACTTTGAATAATTTTACTAACGGGT  
CAAATATACTAATGAAACTTTTCACTCCCATGCAGAATAAAACAAATTTATAAACATGTGGCAGGAAGTAGG  
AAAAGCAATGTATGCCCTCCTATCAGAGGAGTAATTAACCTGTTTATCAAATATTACAGGGCTGCTATTAAACA  
AGAGATGGTGGTAATAATCATAGTGACACCAATCAGGAGATCTTCAGGCCTGCAGGAGGAGATATGAGGGACA  
ATTGGAGAGGTGAATTATATAAGTATAAAGTAGTAAGAGTAGAACCATTAGGGATAGCACCCACCAAGGCAAAA  
GAGAAGAGTGGTGCAGAGAGAAAAAGAGCAGTGGGACTAGGAGCTTTGTTCCCTTGGGTTCCTTGGGAGCAGCA  
GGAAGCACTATGGGCGCAGCATCAATGACGCTGACGGTACAGGCCAGACAATTATTGTCTGGTATAGTGCAAC  
AGCAGAACAACTTGCTGAGGGCTATTGAGGCGCAACAGCATATGTTGCAACTCACAGTCTGGGGCATC

>DQ448819..1

TTCTACTGTAATACAACACAACCTGTTTAAATAGTACTTGGTATGCTAGTAATAATACTTGAAGGGTACTAACA  
TTACAGGCAATATCACACTCCCATGCAAAATAAAACAAATTATAAACATGTGGCAGGAAGTAGGAAAAGCAAT  
GTATGCCCTCCCATCAGAGGACAAATTAGATGCTCATCAAATATTACAGGGTTACTATTAACAAGAGATGGG  
GGTCAGGGAACAACACCGACAACGACACTGAGATCTTCAGACCTGGAGGAGGAAATATGAGGGACAATTGGA  
GAAGTGAATTATATAAATATAAAGTAGTAAGAATTGAACCATTAGGACTAGCACCCACCAAGGCAAAGAGAAG  
AGTGGTGCAGAGAGAGAAAAAGAGCAGTGGGACTAGGAGCGTTGTTTCATTGGGTTCCTTGGGAGCAGCAGGAAGC  
ACTATGGGCGCAGCGTCAGTGACGTTGACGGTACAGGCCAGACAATTACTGTCTGGTATAGTGCAACAGCAGA  
ATAATTTGCTGATGGCTATTGAGGCGCAACAGCATATGTTGAAACTCACGGTCTGGGGCATT

>EF531331..1

TTTTACTGTAATACAACACAACCTATTTAAATAGTACTTGGAAATATAACAAATCTGTTTAAATAGTACTTGGAA  
TACTGAAGGGTCAAATAACACTAAAAGAAATGGCACAATCATACACCCATGCAGAATAAAACAGATTATAAA  
CATGTGGCAGAAAGTAGGAAAAGCAATGTATGCCCTCCCATCGAAGGAATAATTAGATGTGAATCAAAAATT  
ACAGGGATGATACTAACAAGAGATGGTGGTCTTGGTCGTAACATTAGCAACGAGACCGAGATCTTCAGACCTG  
GAGGAGGAGATATGAGGGACAATTGGAGAAGTGAATTGTATAAATATAAAGTAGTAAAAATAGAACCCTTAGG  
AATAGCACCCCTCCAAGGCAAAGAGAAGAGTGGTGCAGAGAGAAAAAGAGCAATAGGATTCCGAGCTATGTTTC  
CTTGGGTTCCTTGGGAGCAGCAGGAAGCACTATGGGCGCAGCGTCACTAACGCTGACGGTACAGGCCAGACAAT  
TACTGTCTGGTATAGTGCAACAGCAGAACAATTTGCTGAGGGCTATTGAGGCGCAACATCATCTGTTGCAACT  
CACAGTCTGGGGCATC

>MH000288..1

TTCTATTGTAATACAACACAACCTGTTTGTATAGTACTTGGAAATGATACTACAGACACAATCACACTCCCATGCA  
AAATAAGACAAATTGTAACTTGTGGCAGGAAGTAGGAAAAGCAATGTATGCCCTCCCATCAGTGAATAAT  
TCAGTGATACATCAAATATTATAGGGTTGCTATTAAACAAGAGACGGTGGTACCGAAATCTTCAGACCAGGAGGA  
GGAGATATGAGGGACAATTGGAGAAGTGAATTATATAAATATAAAGTAGTACAAGTTGAACCATTAGGAATAG  
CACCCACCAAGGCAAAGAGAAGAGTGGTGCAGAGAGAAAAAGAGCAGTGGGAACGCTAGGAGCTGTATTCCCT  
CGGGTTCTTGGGAGCAGCAGGAAGCACTATGGGCGCAGCGTCAACAGCGCTGACGGTACAGGCCAGACAATTA  
TTGTCTGGTATAGTGCAACAGCAGAACAATCTGCTGAAGGCTATTGAGGCGCAACAGCATTTGTTGCAGCTCA  
CAGTCTGGGGCATC

>KC699040..1

TTCTATTGTGATACAGCACAACTGTTTAAATAGTACTTGGCCTAAGAATAGCACCAGTAGCACCAATAGCACCG  
GTAAAGGGGGGCCAACAACTATCACACTCCCATGCAGAATAAGACAAATTGTAAACATGTGGCAGGAAGTAGG  
AAAAGCAATGTATGCTCCTCCCATCAGCGGAAACATCACATGTTTCATCAAATATTACAGGGCTGCTATTAACA  
AGAGATGGGGGTAATAAGAATGAGACGACCAACAGGACTCAGACCTTCAGACCTATAGGAGGAGATATGAGGG  
ACAATTGGAGAAGTGAATTATATAAATATAAAGTAGTAAAAATTGAACCATTAGGAATAGCACCCACCAAGGC  
AAAGAGAAGAGTGGTGCAGAGAGAAAAAAGAGCAGTGGGAGTAGGAGCTTTGTTCCCTTGGGTTCTTGGGAGCA  
GCAGGAAGCACTATGGGCGCAGCGTCAGTGACGTTGACGGTACAAGCCAGACAATTATTGTCTGGTATAGTGC  
AACAGCAGAACAATCTGCTGAGAGCTATTGAGGCGCAACAGCATATGTTGCAACTCACAGTCTGGGGCATC

>KC699032..1

TTTTACTGTAATACAACACAGCTGTTTAAATAGTACTTGGAAATGCTAATGGTACTAGTCGGGATGGTACTACAG  
GGAATGATACTATCACAAATCCAATGCAGAATAAAGCAAATTATAAACAGGTGGCAGGAGGTAGGAAAAGCAAT  
GTATGCCCTCCCATCCAAGGACAAATTTACTGTTTCATCAAATATTACAGGGCTTCTATTAACAAGAGATGGG  
GGTAATGACAATAACACTAGCACTAATGAGACCTTCAGACCTGCAGGAGGAAAATATGAAGGACAATTGGAGAA  
GTGAATTATATAAATATAAAGTAGTAAAAATTGAGCCATTAGGACTGGCACCCACCAGGGCAAGGAGAAGAGT  
GGTGCAGAGAGAAAAAAGAGCAGTGGGACTAGGAGCTATGTTCCCTTGGGTTCTTGGGAGCAGCAGGAAGCACT  
ATGGGCGCAGCGTCATTGACGCTGACGGTACAGGCCAGGCAATTATTGTCTGGTATAGTGCAACAGCAAAAAA  
ATTTGCTAAGAGCTATTGAGGCGCAACAGCATATGTTGCAACTCACAGTCTGGGGCATC

>KC699037..2

TTTTATTGTAATACATCACAACTGTTTAAATAGTAGTTGGACCAATTACACTAATGGTACTTGGGACAATGACA  
CCATAATAGATAACACTACCACTGGAGTAAATATCACACTCCCATGCAGAATAAAAACAAATTATAAACATGTG  
GCAGAAAGTAGGAAAAGCCATGTATGCCCTCCCATCAGAGGACTAATTCAATGTACATCAAATATTACAGGA  
ATACTATTAACAAGAGATGGAGGTAATAGGAATGAGAGCAATGGCAAAGCAATGAGACCTTCAGACCTGTAG  
GGGGAGATATGAGGGACAATTGGAGAAGTGAATTATATAAATATAAAGTAGTAAAAATTAAACCATTAGGAAT  
AGCACCCACCAGGGCAAAGAGAAGAGTGGTACAGAGAGAAAAAAGAGCAGTGGGAACGTTGGGAGCCATGTTT  
CTTGGGTTCTTGGGAGCAGCAGGAAGCACTATGGGCGCAGCGTCACTAACGCTGACGGTACAAGCCAGACAAT  
TATTGTCTGGTATAGTGCAACAGCAAAGCAATTTGCTGAGGGCTATTGAGGCGCAGCAGCACATGTTGCAACT  
CACAGTCTGGGGCATT

>MH000292..1

TTCTATTGTAACACAACACAGCTATTTAAATAGTACTTGGATGCCTAATGGTGGCACTATCACACTCCCATGCA  
GAATAAAACAAATTATAAACAGGTGGCAGGAAGTAGGAAAAGCAATGTATGCCCTCCCATTAGTGGACAAAT  
TAACTGCTCATCAAACATTACAGGGTTACTATTAATAAGAGATGGTGGTAACGAGACCTTCAGACCTGGAGGA  
GGAAATATGAAAGACAATTGGAGAAGTGAATTATATAAATATAAAGTAGTACAAATTCAGCCATTAGGAGTAG  
CACCCACCAAGGCAAAGAGAAGAGTGGTGCAGAGAGAAAAAAGAGCAGTGGGAACGCTAGGAGCTATGTTCCCT  
TGGGTTCTTGGGAGCAGCAGGAAGCACTATGGGCGCAGCGTCAGTGACGCTGACGGTACAGGCCAGACAATTA  
TTGTCTGGTATAGTGCAACAGCAAAACAACCTTGCTGAAAGCTATTGAGGCGCAACACCATCTGTTGCAACTCA  
CAGTCTGGGGCATT

>KC699006..1

TTCTACTGTAATACAACACAACCTGTTTAAATAGTACTTGGAAATAGTACTTGGGATATTAATAGTACTATAGAGT  
CAAATAACACTGGAGAATATATCACACTCCCATGTAGAATAAAACAAATTATAAACATGTGGCAGGAAGTAGG  
AAAAGCAATGTATGCCCCCTCCCATCAAAGGACAAATTAGATGTTTCATCAAACATTACAGGGCTGCTATTAACA  
AGAGATGGTGGTAATAACAATAGTAGCAACACCACCGAGACCTTCAGACCTGGAGGAGGAGATATGAGGGACA  
ATTGGAGAAGTGAATTATATAAATATAAAGTAGTAAAAATTGAACCATTAGGAGTAGCACCCACCAAGGCAAA  
GAGAAGAGTGGTGCAGAGAGAAAAAAGAGCAGTGGGAATAGGAGCCGTGTTCCCTTGGGTTCTTGGGAGCAGCA  
GGAAGCACTATGGGCGCAGCGTCAATAACGCTGACGGTACAAGCCAGACTATTATTGTCTGGTATAGTGCAAC  
AGCAGAACAATCTGCTGAGGGCCATTGAGGCGCAACATCATCTGTTGCAACTCACAGTCTGGGGCATC

>KC699007..1

TTCTACTGTAATTCAACACAACCTGTTTAAATAGTACTTGGAGTGAAGGGTCAAATAACACTGAAGGAAATAACA  
CTGAAGGAAATGACACAATCACACTCCCATGCAGAATAAAACAAATTATAAACATGTGGCAGAACGTAGGAAA  
AGCAATGTATGCCCCCTCCCATCAGCGGACAAATTAGATGTTTCATCAAATATTACAGGGCTGATATTAACAAGA  
GATGGTGGTAATAACCCAAACGGGACCGAGATCTTCAGACCTGGAGGAGGAGATATGAGGGACAATTGGAGAA  
GTGAATTATATAAATATAAAGTAGTAAAAATTGAACCATTAGGAGTAGCACCTACCAAGGCAAAGAGAAGAGT  
GGTGCAGAGAGAAAAAAGAGCAGCGGGACTAGGAGCTGTGTTCCCTTGGGTTCTTGGGAGCAGCAGGAAGCACT  
ATGGGCGCAGCGTCAATAACGCTGACGGTACAGGCCAGACGATTATTGTCTGGTATAGTGCAACAGCAGAACA  
ATTTGCTGAGGGCTATTGAGGCGCAACATCATCTATTGCAACTCACAGTCTGGGGCATC

>KC699025..1

TTCTACTGTAATACAACAAAACTGTTTAAATAGTACTTGGAAAGGAAAATGGCACCATTTGAAGACGATGGTACAA  
AGGATACTAACATCACACTCCCATGCAAAATAAAACAAATTATAAACAGGTGGCAGGCAGTAGGAAAAGCAAT  
GTATGCCCTCCCATCAGAGGACAAATTAAATGTACATCAAATATTACAGGGTTGCTGTTAGTAAGAGATGGT  
GGTCATAACACTGACAACGAGACCTTCAGACCTGGAGGGGGAGACATGAAGGACAATTGGAGAAGTGAAGTAT  
ATAAATATAAAGTAGTAAAAAGTTGAACCATTAGGAATAGCACCCACCAAGGCAAAGAGAAGAGTGGTGCAGAG

AGACAAAAGAGCAGTGGGAACACTAGGAGCAATGTTCTTGGGTTCTTGGGAACAGCAGGAAGCACTATGGGC  
GCAGCGTCAGTGGCGCTGACGGTACAGGCCAGACAATTACTGTCTGGTATAGTGCAACAGCAAAACAATTTGC  
TGAAGGCTATTGAGGCGCAACAGCATCTGTTGCAACTCACAGTCTGGGGCATC

>JF706474..1

TTCTACTGTAATTCAGCACCACTGTTTAATAGTACTTGGAATAGTATTGAGGGTAGTACTGAGGGTAAGAATG  
AAAGCAGTGGAGGAAATATCACACTCCTATGTAGAATAAAACAAATTATAAACATGTGGCAGGAAGTAGGAAA  
AGCAATGTATGCCCCCTCCTATCAGAGGAGTAATTCATGCTCATCAAATATTACAGGGCTGCTATTAACAAGA  
GATGGTGGTAGTGGTAATAGTAGCAATGAGAACGAGACCGAGACCTTCAGACCTGGGGGGGAAATATGAAGG  
ACAATTGGAGAAGTGAATTATATAAAATATAAAGTAGTACAAATTGAACCATTAGGAATAGCACCCACCAAGGC  
AAAGAGAAGAGTGGTGCAGAGAGAAAAAGAGCGGTGGGAACACTAGGAGCTGTGTTCTTGGGTTCTTGGGA  
GCAGCAGGAAGCACTATGGGCGCAGCGTCGGTAACGCTGACGGTACAGGCCAGACAATTATTGTCTGGTATAG  
TGCAACAGCAGAACAATTTGCTGAAGGCTATTGAGGCGCAACAGCATCTGTTGCAACTCACAGTCTGGGGCAT  
C

>HM204630..1

TTCTACTGTAATACAACAAAACTGTTTAATAGTACTTGGGGGAATAATACTGCAGGACAAGGTAATAACACTA  
TCACACTCCCATGCAGAATAAAACAAATTATAAACTTGTGGCAGGAAGTAGGAAAAGCAATGTATGCCCCCTCC  
CATTAGTGGACACATTTACTGTTTCATCAAATATTACAGGGCTACTATTAACAAGAGATGGTGGTACTACCAAC  
ATAACCAATGAACTGAGATCTTCAGACCTGGAGGGGGAGATATGAGGGACAATTGGAGAAGTGAATTATATA  
AATATAAAGTAGTAAAAGTTGAACCATTAGGAATAGCACCCACCAAGGCGAAGAGAAGAGTGGTGCAGAGAGA  
AAAAAGAGCAGTGGGAATAGGAGCTGTGTTCTTGGGTTCTTGGGAGCAGCAGGAAGCACTATGGGCGCAGCG  
TCACTGACGCTGACGGTACAGGCCAGACAATTATTGTCTGGTATAGTGCAACAGCAGAACAATTTGCTGAGAG  
CTATTGAGGCGCAACAGCATCTGTTGCAACTCACAGTCTGGGGCATC

>HM204631..2

TTTTACTGTAATTCATCACAACCTGTTTAATAGTACTTGGAATGCCACTAGTACTGGGAATAACAGTATAGGGT  
TAAATGGCACTATCACACTCCCATGTAAAATAAAACAGATTATAAACAGGTGGCAGGAAGTAGGAAGAGCAAT  
GTATGCCCCCTCCCATTCAGGAATAATTAGATGTGAATCAAATATTACAGGGCTACTGTTAACAAGAGATGGT  
GGTAATATAACTAGTAATGGGAACGAGACCTTCAGACCCATAGGAGGAAATATGAAGGACAATTGGAGAAGTG  
AACTCTATAAATATAAAGTAGTACAAATTGAACCCTTAGGAATAGCACCCACCAAGGCAAAGAGAAGAGTGGT  
GCAGAGAGAAAAAGAGCAGTGGGAACAATAGGAGCTATGTTCTTGGGTTCTTGGGAGCAGCAGGAAGCACT  
ATGGGCGCAGCGTCGGTGGCGCTGACGGTACAGGCCAGACAATTATTGTCTGGTATAGTGACGAGCAGACA  
ACCTGCTGAGGGCTATTGAGGCGCAACAGCACATGTTGCAACTCACAGTCTGGGGCATC

>HM204636..1

TTCTATTGTAAAACAACAGAGCTGTTTAATAGTACTTGCCAGGGAATAGTACTGTGAATAATGCTACAGAAT  
CAAATGACAATGACACTATCACACTCCCATGCAGAATAAAACAAATTATAAACAGGTGGCAGGAAGTAGGAAA  
AGCAATGTATGCCCCCTCCCATCCAAGGAACATTAGCTGTTTCATCAAACATTACAGGACTGCTATTAACAAGA  
GATGGTGGTAAAGATCATAACTCCACCGAGACCTTTAGACCTGGAGGAGGAGATATGAGAGACAATTGGAGAA  
GTGAATTATACAAATATAAAGTAGTAAGAATTGAGCCATTAGGAGTAGCACCCACCAAGGCAAGGAGAAGAGT  
GGTGCAGAGAGAAAAAGAGCAGCACTGGGAGCTGTGTTCTTGGATTCTTGGGAGCAGCAGGAAGCACTATG  
GGCGCAGCGTCAGTGGCGCTGACGGTACAGGCCAGACAATTATTGTCTGGTATAGTGCAACAGCAAAACAATT  
TGCTGAGGGCTATTGAGGCGCAACAACATCTGTTGCAACTCACAGTCTGGGGCATC

>HM204637..1

TTCTACTGTAATACAACACAGTTGTTTAATAATACACAGTGGGTTAATAGTAATAGTACAAATAGCAATGACA  
CCATCACACTCCCATGCAGAATAAAACAAATTATAAACAGATGGCAGGAAGTAGGAAAAGCAATGTATGCCCC  
TCCCATCGCGGGACAAATTCAGTGTTCATCAAATATTACAGGGCTAATATTAAACAAGAGATGGTGGTAATAAA  
AATGACACCAACGGGACTGAGACTTTCAGGCCTGGAGGAGGAGATATGAGGGACAATTGGAGAAGTGAATTAT  
ATAAATATAAAGTAGTAAAAATTGAACCATTAGGAATAGCACCCACCAAGGCAAGGAGAAGAGTGGTGCAGAG  
AGAAAAAGAGCAGTAACCTTAGGAGCTATGTTCTTGGGTTCTTGGGAGCAGCAGGAAGCACTATGGGCGCA  
GCGTCAATGACGCTGACGGTACAAGCCAGACAATTATTGTCTGGTATAGTGCAACAGCAAAACAATTTGCTGA  
GAGCTATTGAGGCGCAACAGCACCTGTTGCAACTCACAGTCTGGGGCATC

>HM204644..2

TTCTACTGCAACACATCAAACTGTTTAATAGTAGTTGGAGTACTAATGGAACATTGTTAATGGAACGTGGG  
TAAATGAGACTAGAATAAATGACACAATCATACTCCCATGCAAAATAAAACAAATTATAAACATGTGGCAGAA  
AGTAGGAAAAGCAATGTATGCTCCCCCATCCAAGGAATAATTAACTGCTCATCAAATATTACAGGACTGCTA  
TTAACAAGAGATGGTGGTCATAATCAAAATAGCACCAATGACACAGAGACCTTCAGACCAGGAGGAGGAGATA  
TGAGGGACAATTGGAGAAGTGAATTATATAAATATAAAGTAGTAAGAATTGAACCATTAGGAATAGCACCCAC  
CAAGGCAAAGAGAAGAGTGGTGCAGAGAGAAAAAGAGCAGTGGGATTTCGGAGCTATGTTCTTGGGTTCTTG  
GGAGCAGCAGGAAGCACTATGGGCGCAGCGTCAATAACGCTGACGGTACAGGCCAGACAATTGCTGTCTGGTA  
TAGTGCAACAGCAAAACAATTTGCTGAGGGCTATTGAGGCGCAACAGCATATGTTGCAACTCACAGTCTGGGG  
CATC

>JF680923..1

TTCTACTGTAACACAACAAAACACTGTTTAAATAGTACCTGGGAGAATAATAGTACTTGGGGGAATAATACTACAG  
GTACTATCACACTCCCATGCAGAATAAAACAAATTGTAAACATGTGGCAAGAAGTAGGAAAAGCAATGTATGC  
CCCTCCCATCCAAGGACAAATTAGATGCTCATCAAATATTACAGGACTGTTATTAACAAGAGATGGTGGTAAT  
AATAATAGCACAAATCAGAGCGAGACCTTCAGACCTGGAGGAGGAAATATGAAGGACAATTGGAGAAGTGAAT  
TATATAAATATAAAGTAGTAAAAATTGAGCCATTAGGAATAGCACCCACCAGGGCAAAAAGAAGAGTGGTGCA  
GAGAGAAAAAAGAGCAGCCATAGGAGCTGTGTTCTTGGGTTCTTGGGAGCAGCAGGAAGCACTATGGGCGCA  
GCGTCAGTGACGCTGACGGTACAGGCCAGACAATTATTGTCTGGTATAGTGCAACAGCAGAACAAATTTGCTGA  
AGGCTATTGATGCGCAACAGCATCTGTTGCAGCTCACAGTCTGGGGCATC

>JF680924..1

TTCTACTGCAATACAACATTACTGTTCAATAGTGATTGGTATCCTAATGATACTAGCACAGGTACTCCAGGGT  
CAGATGGGAATGACTCACTCATACTCCCATGCAGAATAAGACAAATTGTAAACATGTGGCAGGAAGTAGGAAA  
AGCAATGTATGCTCCTCCCATCAAAGGACAAATTAGGTGTCATTCAAATATTACAGGGATACTACTAACAAGA  
GATGGTGGGATTGACAACAACAGGACTAATGAGACCTTTAGACCTGGAGGAGGAGATATGAGGGACAATTGGA  
GAAGTGAATTATATAAATATAAAGTAGTAAAACTTGAACCATTAGGATTAGCACCCACCAAGGCAAAGAGAAG  
AGTGGTGCAGAGAGAAAAAAGAGCAGTGGGACTAGGAGCTATGTTCTTGGGTTCTTGGGAGCAGCAGGAAGC  
ACTATGGGCGCAGCGTCAATGACGCTGACGGTACAGGCCAGACAATTATTGTCTGGTATAGTGCAACAGCAGA  
ACAATCTGCTGAAGGCTATTGAGGCGCAACAGCATATGTTGCAACTCACAGTCTGGGGCATC

>JF680933..1

TTCTATTGCAATACAACACAACACTGTTTAACTACTTGGAAATATTACTAATAATATTAATGTTACTAGGAATG  
ATAGTGACAACAGCATTATCACACTCCCATGCAGAATAAAACAAATTATAAACATGTGGCAGGAAGTAGGAAA  
AGCAATGTACGCCCTCCCATCAGAGGACAGATTAGATGTTTCATCAAAATTACAGGGCTACTATTAACAAGA  
GATGGTGGTAATACAAGCATTGCGAACGGGTCTGAGATCTTCAGACCTGGAGGAGGAAATATGAAGGACAATT  
GGAGAAGTGAATTATACAAATATAAAGTAGTAAAGTTCAACCATTAGGAATAGCACCCACCAAGGCAAAAAG  
AAGAGTGGTCCAGAGAGAAAAAAGAGCAATAACACTAGGAGCTGTTTCTTGGGTTCTTGGGAGCAGCAGGA  
AGCACTATGGGCGCAGCGTCAATAACGCTGACGGTACAGGCCAGACAATTATTGTCTGGTATAGTGACAGCAGC  
AGAGCAACTTGCTGAGGGCTATTGAGGCGCAACAACATATGTTGCAACTCACAGTCTGGGGCATC

>HQ595797..1

TTCTACTGTAATTCAACACAACACTGTTTAGTAGTACTTGGATGGCTAATGGTACTTCAAATGGTACCGTAGGGA  
ATGACACTATCATACTCCCATGTAAAATAAAACAATTTGTAAACATGTGGCAGCGAATAGGACAAGCAGTGTA  
TGCCCCCTCCCATTAGAGGATACATTAATTGTTTCATCAAAATTACAGGACTGCTATTAACAATAGATGGTGAC  
AGGAATGACACCCAGAGTGAGACCTTCAGACCTGGAGGAGGAGATATGAGGGACAATTGGAGAAGTGAATTAT  
ATAAATATAAAGTAGTAAAAATTGAACCATTAGGAATAGCACCCACTAAGGCAAAGAGAAGAGTGGTGCAGAG  
AGAAAAAAGAGCAGTAACGCTGGGAGCTATGTTCTTGGATTCTTGGGAGCAGCAGGAAGCACTATGGGCGCA  
GCGTCAATGACGCTGACGGTACAGGCCAGACTATTACTGTCTGGTATAGTGCAACAGCAGAGCAATCTGCTGA  
GGGCTATTACAGGCGCAACAGCATCTGTTGCAACTTACAGTCTGGGGCATC

>AJ535611..1

TTCTACTGTAATACAACACAGCTGTTTAAATAGTACTTGGAAATATTACACAGCTGTTGAATAGTACTGAGTCAA  
ATAACACTGGCAATATCACACTCCCATGCAGAATAAGACAAATTGTAAACAGGTGGCAGGAAGTAGGAAAAGC  
AATGTATGCCCCCTCCCATCAGCGGACAAATTAGTTGTTTCATCAAATATTACAGGGTTGCTATTAACAAGAGAT  
GGAGGTAACAGTAGCTACAATGAGACCGAGACCTTCAGACCAGGAGGAGGAAATATGAGGGACAATTGGAGAA  
GTGAATTATATAAATATAAAGTAGTAAGAATTGAACCAATAGGAGTAGCACCCACCAGGGCAAAGAGAAGAGT  
GGTACAGAGAGAAAAAAGAGCAATAACGCTGGGAGCTGTGCTCCTTGGGTTCTTGGGAGCAGCAGGAAGCACT  
ATGGGCGCAGCGTCAATAACGCTGACGGTACAGGCCAGACAGTTATTGTCTGGTATAGTGACAGCAGCAGAAC  
ATCTGCTGAGGGCTATTGAGGCGCAACAGCACCTGTTGCAACTCACAGTCTGGGGCATC

>AJ286339..1

TTCTACTGTAGTACAACAGAACTGTTTAAATGACACTTGGGATAAGACTAGGAATAATACTGGAGAGGCAGATA  
ACAGCACAATCACACTCCCCCTGCAGAATAAAACAAATTATAAACAGGTGGCAAGAAGTAGGAAAAGCAATGTA  
TGCCCCCTCCCATCAGAGGACAAATTAAGTGTACATCAAATATTACAGGGCTAGTCTTAACAAGAGATGGTGGT  
AATGAGACTCATAATGAGACTGAGATCTTCAGACCTGGAGGAGGAGATATGAGGGACAATTGGAGAAGTGAAT  
TATACAAATATAAAGTAGTAAAAATTGAGCCATTAGGAGTAGCACCCACCAAGGCAAAGAGAAGAGTGGTGCA  
GAGAGAAAAAAGAGCAGTGGGAACAATAGGAGCTATGTTCTTGGGTTCTTGGGAGCAGCAGGAAGCACTATG  
GGCGCAGCGCAATGACGCTGACGGTACAGGCCAGACAATTATTGTCTGGTATAGTGACAGCAGCAGAACATC  
TGCTGAAGGCTATTGAGGCGCAACAGCATCTGTTGCAACTCACAGTCTGGGGCATC

>DQ207942..1

TTCTATTGTAATACAACACAGCTGTTCAATAATACTTGGCTGAATAATGATACTGGGAATAGCACTAAGAATA  
ATGCTACAATCACACTCCCCGTGCAGAATAAAACAAATTATAAACAGATGGCAGGAAGTAGGAAAAGCAATGTA  
TGCCCCCTCCCATCAGAGGACTAATTAGATGTTCTCAAATATTACAGGGCTACTATTAGTAAGAGATGGTGGT  
AATAGTAGTGCTGATCAGGAGATCTTCAGACCTGGGGGAGGAAATATAAAGGACAATTGGAGAAGTGAATAT  
ATAAATATAAAGTAGTAAAACTTGAAGCATTAGGAGTAGCACCCACCAAGGCAAAGAGAAGAGTGGTGCAGAG  
AGAAAAAAGAGCAGTGGGAGTGTTTGGAGCCATGTTCTTGGGTTCTTGGGAGCAGCAGGAAGCACTATGGGC

GCAGCGTCAATAACGCTGACGGTACAGGCCAGACAATTATTGTCTGGTATAGTGCAACAGCAGAGCAATTTGC  
TGAGAGCTATTGAGGCGCAACAGCATCTGTTGCAACTCACAGTCTGGGGCATT

>MH078546..1

TTCTACTGTGATTCAACACAACCTGTTCAATAGTACTTGGTGGACTAATGGTACTGAGAACGGTACTAGAGGGGA  
CAATTGGCACCATCACACTCCAATGCAGAATAAAACAAATTATAAACATGTGGCAGAAAATAGGAAAAGCAAT  
GTATGCCCCCTCCCATCAAAGGACAAATTTATTGTTTCATCAAATATTACAGGGATAATATTAACAAGAGATGGT  
GGTAGGGACAATAATACTAATGGCACTGAGACCTTCAGACCTGGAGGAGGAAATATGAAAGACAATTGGAGAA  
ATGAATTATATAAATATAAAGTAGTAAACTTAAGCCATTAGGAATAGCACCCACCAAGGCACGGAGAAGAGT  
GGTGCAAAGAGAAAAAAGAGCAGTGGGAATAGGAGCTCTGTTCCCTTGGGTTCTTGGGAGCAGCAGGAAGCACT  
ATGGGCGCAGCGTCAGTGACGTTGACGGTACAGGCCAGACAATTGTTGTCTGGTATAGTGCAACAGCAACACA  
ACTTGCTGAATGCTATTGAGGCGCAACAACACCTGTTGCAACTCACAGTCTGGGGCATC

>EU839600..1

TTCTACTGTAATACATCAAAGCTATTTAACAATACTTGGAACTACTACTAATACTAAGAATTGGACTGGTTTTTA  
TCATACTCCCATGCAGAATAAAACAAATTATAAATATGTGGCAAAAAGTAGGCAAAAGCAATGTATGCCCCCTCC  
CATCAGGGGACAAATCAAATGTATATCAGCTATTACAGGGATGCTATTAACAAGAGATGGTGGGAACAACAAC  
GAGAAATAAGACTGTAGGGAATAGGACCGAGATCTTCAGACCTACAGGAGGAAATATGAAAGATAATTGGAGAA  
GTGAATTATACAGCTATAAAGTAGTAAAAATTGAACCATTAGGATTAGCACCCACCAGGGCGAAAAGAAGAGT  
GGTGCAAGAGAGAAAAAAGAGCAGTGGGAGCACTGGGAGCTATGTTCCCTTGGGTTCTTGGGAGCAGCAGGAAGC  
ACTATGGGCGCAGCGTCATTGACGCTGACGGTACAGGCCAGACAATTACTGTCTGGTATAGTGCAACAGCAAAA  
ATAATTTGCTAAGGGCTATTGAGGCGCAACAGCATCTGTTGCAACTCACAGTCTGGGGCATC

>MK303349..1

TTCTACTGTGATACAACAGAACTGTTTAATAGTACTTGGAAATAATAGTGTGGAGGGTTAAATAACAGTAACA  
GTAATACTATCACACTCCCATGTAGAATAAAACAAATGGTAAACATGTGGCAGAGAGTAGGAAGAGCAATGTA  
TGCCCCCTCCCATCAAAGGACTAATTAGCTGTTTCATCAGATATTACAGGGCTGCTATTAACAAGAGATGGTGGT  
AACTATAGTGATAACAGTAATAACACTGAGACCTTCAGACCAGGAGGAGGAGATATGAAAGACAATTGGAGAA  
GTGAATTATATAAATATAAAGTAGTAGAAATTAAACCACTAGGAGTAGCGCCACCAAGGCAAAAAGAAGAGT  
GGTGCAAAGAGAAAAAAGAGCAGTGGGAATAGGAGCCTTGTTCCCTTGGGTTCTTGGGAGCAGCAGGAAGCACT  
ATGGGCGCAGCGTCAATAACGCTGACGGCACAGGCCAGACAATTATTGTCTGGTATAGTGCAACAGCAGAAACA  
ATCTGCTGAGGGCTATTGAGGCGCAACAGCAGCTATTGCAACTCACAGTCTGGGGCATC

>EF694037..1

TTCTACTGTATTACAACACAACCTGTTTAATAGTACTTGGTGGAAATGATACTGAAAGGATAAATAACATTGAAG  
AAAACACAGAAAATATCACACTCCCATGCAGAATAAGGCAGATTGTAAACCTGTGGCAGACAGTAGGAAAAGC  
AATGTATGCCCCCTCCCATCAGAGGACAAATTAGATGTTTCATCAAATATTACGGGGCTGCTATTAACAAGAGAT  
GGTGGTAATCCCAATACCACGGAAGAGAGCTTCAGACCTGGAGGAGGAGATATGAGGGACTATTGGAGAAGTG  
AATTATATAAATATAAAGTAGTAAAAATTGAACCATTAGGAGTAGCACCCACCAAGGCAAAGAGAAGAGTGGT  
GCAAAGAGAAAAAAGAGCAGTAGGAATAGGAGCTGTGTTCCCTTGGGTTCTTGGGAGTAGCAGGAAGCACTATG  
GGCGCAGCGTCAATGACGCTGACGGTACAGGCCAGACTATTATTGTCTGGTATAGTGCAACAGCAGAATAACC  
TGCTGAGGGCTATTGAGGCGCAACAGCATCTGTTGCAACTCACAGCCTGGGGCATC

>JF680930..2

TTCTATTGTAATACAACGAACTGTTTAGCAGTAGTTGGAATGAACTACAAATAGCACTGAAAATGGCACTG  
AAAATGACACAATCACACTTCAATGCAGAATAAAACAAATTATAAACATGTGGCAGGAAGTAGGAAAAGCAAT  
GTATGCCCCCTCCCATCAAAGGTCCAATTAGATGCTCATCAAATATTACAGGGCTAATATTAACAAGAGATGGT  
GGTCATAACAATAACACGAACGAGACTGAGATATTACAGACCTGGAGGAGGAGATATGAGGGACAATTGGAGAA  
GTGAATTATACAAATATAAAGTAGTAAGAATTGAACCTTGGGAGTAGCACCCACCAAGGCAAAGAGAAGAGT  
GGTGCAAGAGAGATAAAGAGCAGTGGGAGTATTCGGAGCTATGTTCCCTTGGGTTCTTGGGAGCAGCAGGAAGC  
ACTATGGGCGCAGCGTCAGTGGCGTTGACGGTACAGGCCAGACAATTATTGTCTGGTATAGTGCAACAGCAGA  
ATAATCTGCTGAGAGCTATTGAGGCGCAACAACATCTGTTGCAACTCACAGTCTGGGGCATC

>AB287372..1

TTCTACTGTAATTCAACACCACTGTTTAGTAGTAATTGGACTAAGAATACTACTACCGGGTCTTGGATTGGCA  
GATATGGATCAAATGAGACTGATGCAAATATTACACTCATATGCAGAATAAAACAAATTATAAACATGTGGCA  
GGGGGTAGGAAAAGCAATGTATGCCCCCTCCCATCAGTGGACCAATCAGATGTTTCATCAAATATTACAGGGCTG  
CTATTAACAAGAGATGGTGGTGAGGATAAGAACAGCACTAAAGAGACCTTCAGACCCCTAGGAGGAAATATGA  
AAGACAATTGGAGAAGTGAATTATATCAATATAAAGTAGTAGGAATTGAACCATTAGGAGTAGCACCCACCAA  
GGCAAGGAGAAGAGTGGTGCAGAGAGAAAAAAGAGCAGTGGGAACGCTGGGAGCTATGTTCCCTTGGGTTCTTG  
GGAGCAGCAGGAAGCACTATGGGCGCAGCGTCAATGGCGCTGACGGTACAGGCCAGACAATTATTGTCTGGTA  
TAGTGCAACAGCAGAAACAATTTGCTGAGGGCTATTGAGGCGCAACAACATTTGTTGCAACTCACAGTCTGGGG  
CATC

>AB588264..1

TTCTACTGCAATACATCACAACCTGTTTAATAGTACTTGGAAATAGTACTGGGAATAGTAGTACTGAGAATAGTA  
TGTCAAATGACACTATCACACTCCCATGTAGGATAAAACAAATTATAAATATGTGGCAGGAAGTAGGAAAAGC

AATGTATGCCCCCTCCCATCGCAGGACTAATTAGATGTTTCATCAAATATTACAGGGCTATTATTAGTGAGAGAT  
GGTGGTGGTAATCAGACTAACGGGACAGAAATCTTCAGACCTGGGGGAGGAAATATGAAGGACAATTGGAGAA  
GTGAATTATATAAATATAAAGTAGTAAAAAATTGAACCAGTAGGAATAGCACCCGACAGGGCAAAGAGAAGAGT  
GGTGCAGAGAGAAAAAAGGGCAGTGGGAATAGGAGCTGTGTTCCCTTGGGTTCTTGGGAGCAGCAGGAAGCACT  
ATGGGCGCAGCGTCAATAACGCTGACGGCACAGGCCAGACAATTATTGTCTGGTATAGTGCAACAGCAGAACAA  
ATCTGCTGAGGGCCATTGAGGCGCAACAGCATATGTTGCAACTCACAGTCTGGGGCATC

>AB731669..1

TTCTACTGTAATACATCAGCACTGTTTAAATTGGAGTATTACTGGGTCAAATATTACAAAAGACATTAATAGGT  
CAAATACTATCCCATGCAGAATAAAACAAATTATCAACATGTGGCAGAAAGTAGGAAAAGCAATATATGCCCC  
TCCCATCAGCGGGCAAATTAATTGTTTCATCAAATATTACAGGGTTGCTATTAACAAGAGATGGTGGTAAAAAGT  
AATCAGACTAATAACACTGAGGTTTTTCAGACCTACAGGAGGAAATATGAGAGATAAATTGGAGGAGTGAATTAT  
ATAAATATAAAGTAGTAAGGATTGAACCATTAGGAGTAGCACCCACCAAGGCAAGGAGAAGAGTGGTGC AAAAG  
AGAAAAAAGAGCAGTGGGAACAATAGGAGCTATGTTCCCTTGGGTTCTTGGGAGCAGCAGGAAGCACTATGGGC  
GCAGCGTCAATAACGCTGACGGTACAAGCCAGACTATTATTGTCTGGTATAGTGCAACAGCAAAACAATTTGC  
TGAGAGCTATTGAGGCGCAACAACATCTGTTGCAACTCACAGTCTGGGGCATC

>AB565478..1

TTCTACTGTAATACAACAAAAGCTGTTTAAATAGTACTTGGTATACTAATGGGAATAAGACTGAAGAATCAAATA  
ACAATGACACTATTACACTCCCATGCAGAATAAAACAAATTATAAACAGATGGCAGGAAGTAGGAAAAGCAAT  
GTATGCCCCCTCCCATCCAAGGACGAATTTACTGCTCATCAAATATTACAGGACTGTTATTAAATAAGAGATGGT  
GGTAACAGTACTGATAACGAGTCTGAGATCTTCAGACCTGGAGGAGGAGATATGAGGGACAATTGGAGAAGTG  
AATTATATAAATATAAAGTAGTACAAATTGAGCCATTAGGAGTAGCACCCACCAAGGCAAAGAGAAGGGTGGT  
GCAGAGAGAAAAAAGAGCAGTGGGAATAGGAGCTATGTTCCCTTGGGTTCTTGGGAGCAGCAGGAAGCACTATG  
GGCGCAGCGTCACTAACGCTGACGGTACAGGCCAGACGATTATTGTCTGGTATAGTGCAACAGCAGAACAAATC  
TGCTGAGAGCTATTGAGGCGCAACAGCATATGTTGCAACTCACAGTCTGGGGCATC

>JQ316131..2

TTCTACTGTAATACATCAAAGCTGTTTAAATAGTACTTGGGCTGTGAATATGACTAACGGGTCAAATATAACTA  
AAGAAGGAAATACCACAACAATCCCATGCAGAATAAAACATATTATAAACAGGTGGCAAGAAGTGGGAAAAGC  
AATGTATGCCCCCTCCCATCGAGGGACAAATTAGATGTACATCAAATATTACGGGGCTACTATTAAACAAGAGAT  
GGGGGGACTCAGAAAAATGGGAGTAACAATGGGACTCACACAACACTGAGATCTTCAGACCTGGGGGAGGAA  
ATATGAAGGACAATTGGAGAAGTGAATTATATAAATATAAAGTAGTAAAAAATTGAGCCATTAGGAATAGCACC  
CACCAAGGCAAGGAGAAGAGTGGTGCAGAGAGAAAAAAGAGCAGTGGGAACAATAGGAGCTATGTTCCCTTGGG  
TTCTTGGGAACAGCAGGAAGCACTATGGGCGCAGCGTCACTGACGCTGACGGTACAGGCCAGACTATTATTGT  
CTGGTATAGTGCAACAGCAAAATAATTTGCTGAGAGCTATTGAGGCGCAACAGCATCTGTTGCAACTCACAGT  
CTGGGGCATC

>JQ316133..1

TTCTACTGTAATACAACAAAACCTGTTTGATAGTACTTGGGAATGGTACTAAAGAGTGGAATGATACTAAAGAGT  
CAGATAAAAACATTACACTCCAATGCAGAATAAAACAAATTATAAACAGGTGGCAGGAAGTAGGACAAGCAAT  
GTATGCCCCCTCCCATCAGCGGACTAATTAGATGTTTCGTCAAATATTACAGGGCTAATATTAACAAGAGACGGG  
GGGGCTAACGAGACTCACACCAACACTGAAACCTTCAGACCTGCAGGAGGAGATATGAAGGACAATTGGAGAA  
GTGAATTATATAAATATAAAGTAGTAAGAATTGAGCCATTAGGGATAGCACCCACCAAGGCAAGGAGAAGAGT  
GGTGCAGAGAGAAAAAAGAGCAGTGGGAATATTAGGAGCTATGTTCCCTTGGGTTCTTGGGAGCAGCAGGAAGC  
ACTATGGGCGCAGCGTCAATGACGCTGACGGTACAGGCCAGACAATTATTGTCTGGTATAGTGCAACAGCAGA  
ATAATTTGCTGAGAGCTATTGATGCGCAACAACATCTGTTGCGACTCACAGTCTGGGGCATT

>DQ295192..1

TTCTACTGTGATACAACACAACCTATTTAAATAGCACTTGGACATGGAATGGTACTTGGATTAAACGGGTCAACTA  
AAGCTGAGAATGACACAATTGTCTCCCATGCAGAATAAAACAAATTATAAACAGATGGCAGGAAGTAGGAAA  
AGCAATGTATGCCCCCTCCCATCAGCGGACACATTAATTGCTCATCAAAGATTACAGGACTGCTATTAACAAGA  
GATGGGGGGATTAAAAACAGCACGAACGGGACTCAGACTGAGATCTTCAGACCTGGGGGAGGAGATATGAGGG  
ACAATTGGAGAGAAGTGAATTATATAAATATAAAGTAGTAAAAAATTGAGCCATTAGGGATAGCACCCACCAAGGC  
AAGGAGAAGAGTGGTGCAGAGAGAAAAAAGAGCAGTGGGAACAATAGGAGCTATGTTCCCTTGGGTTCTTGGGA  
GCAGCAGGAAGCACTATGGGCGCAGCGTCACTGACGCTGACGGTACAGGCCAGACTACTATTGTCTGGTATAG  
TGCAACAGCAGAAATAATTTGCTGAGAGCTATTGAGGCGCAACAGCATCTGTTGCAACTCACAGTCTGGGGCAT  
C

>KT878039..2

TTCTACTGTAATACAACAAAACCTGTTTAAATAGTACTTGGTATAGTAATGGTACTAGGAAAGATCAAATGAAG  
GAGATGACACAATTACACTCCAGTGCAGGATAAAACAAATTATAAACAGGTGGCAAGAAGTAGGAAGGGCAAT  
GTACGCCCTCCCATCAGAGGAATAATTAAATGTTTCATCAAACATTACAGGGCTGCTATTAACAAGAGATGGG  
GGGAACGGGACTAATGGGACTGAGACCTTCAGACCTGGGGGAGGAAATATGAAAAGACAATTGGAGAAGCGAAT  
TATATAAATATAAAGTAGTAAAAAATTGAGCCATTAGGGATAGCACCCACCAAGGCAAGGAGAAGAGTGGTGCA  
GAGAGAAAAAAGAGCAGTGGGGACGCTAGGAGCTGTGTTCCCTTGGGTTCTTGGGAGCAGCAGGAAGCACTATG

GGCGCAGCGTCAGTGGCGCTGACGGGACAGGCCAGACAATTATTGTCTGGTATAGTGCAACAGCAGAATAATT  
TGCTGAGAGCTATTGAGGCGCAACAGCATCTGTTTCAACTCACAGTCTGGGGCATC

>KT878021..2

TTCTACTGTAATACAACACAGTTGTTCAATAGTACTTGGTTTCATAATGGTACTTGGAGTGGTGCTAATGGGG  
ATGAGACTATGACACTCCCATGTCAGAATAAAACAAATTATAAACAGATGGCAAGAAGTAGGAAAAGCAATGTA  
TGCCCCCTCCCATCGCAGGATCAATTAATTGCTCATCAAATATTACAGGACTGTTATTAACAAGAGATGGTGGT  
ATTACCAGCAACAAGACTAAGAACAGCACCGAGACTGAGACCTTTAGACCGGGGGGAGGAGATATGAGGGACA  
ATTGGAGAAGTGAATTATACAAATATAAAGTAGTAAAAATTGAACCACTAGGAGTAGCACCAACCAAGGCCAAA  
GAGAAGAGTGGTGCGGAGAGAAAAAGAGCAGTAACACTGGGAGCTGTGTTCCCTTGGGTTCCTTGGGAGCAGCA  
GGAAGCACTATGGGCGCAGCGTCAGTGACGCTGACGGTACAGGCCAGACTATTATTGTCTGGTATAGTGACGC  
AGCAGAACAATCTGCTGAGGGCTATTTCAGGCGCAACAGCATCTGTTGCAGCTCACAGTCTGGGGCATT

>KT878029..1

TTCTACTGTAATACAACAAGACTGTTTAATAGTACTTGGCATACTAATACTACAGGGTTAAATGAACTGAAG  
GAAATAGCACAACTATCACACTCCCATGTCAGAATAAAACAAATTATAAACAGATGGCAGGAAGTAGGAACAGC  
AATGTATGCCCCCTCCCATCAGCGGACAAATTAGATGTTTCATCAAATATTACAGGGCTGCTATTAAACAAGAGAT  
GGGGGGAATAACACTCATGGGAATGGGACTGAGATCTTCAGACCTCTGGGAGGAGATATGAAGGACAATTGGA  
GAAGTGAATTATATAAATATAAAGTAGTGAGAATTGAGCCATTAGGGATAGCACCCACCAGGGCAAGGAGAAG  
AGTGGTGCAGAGAGAAAAAGAGCAGTGGGAACGATAGGAGCTATGTTCCCTTGGGTTCCTTGGGAGCAGCAGGA  
AGCACTATGGGCGCAGCGTCATTGACGCTGACGGTACAGGCCAGACTATTATTGTCTGGTATAGTGCAACAGC  
AGAATAATTTGCTGAGAGCTATTGAGGCGCAACAGCATCTGTTGCAACTCACAGTCTGGGGCATC

>KF561441..1

TTCTACTGTAATACAACACCACTGTTTAATAGTATTTGGTATAGTAATAATACTGAAAAGTCATATAATACTG  
CAGAAAATGACACAATTACCCTCCAATGTCAGAATAAGACAAATTATAAAAAGGTGGCAGGAGGTAGGAAAAGC  
AAGGTATGCCCCCTCTCATCACCTGCCTAATTAGATGCTATTCAAATATTACAGGGCTGTTATTGGCAGGTGAT  
GGAGGTGAGGCAGGGAAGGATAACGGGAATAAGAATGAGACCTTCAGGCCTGGGGGAGGAGATATGAGGGACA  
ATTGGAGAAGTGAATTGTATAAATATAAAGTAGTAGAAATTGAACCATTAAGGATAGCACCCACCAGGGCAAG  
GAGAATAGTGGTGCAGAGAGAAAAAGAGCAGTGGGAACATTAGGAGCCATGTTCCCTTGGGTTCCTTGGGAGCA  
GCAGGAAGCACTATGGGCGCAGCGTCACTGACGCTGACGGTACAGGCCAAGCAAGTATTGTCTGGTATAGTGC  
GACAGCAGAATAATTTGCTGAGAGCTATTGAGGCGCAACAGCGTCTGTTGCAACTCACAGTCTGGGGCATC

>MN043577..1

TTCTACTGTAATACAACACAACCTGTTTAATAGTACTTGGTATAGTCCTTGGAATAGTACTAACGGGTCAAATA  
TAACTGAAAGAAATATCACAACTCCCATGTCAGAATAAAACAAATTATAAACAGATGGCAGGAAGTAGGAAA  
AGCAATGTATGCCCCCTCCCATCAGTGGACAAATTAGATGTTTCATCAAATATTACAGGGCTGCTATTAAACAAG  
GATGGGGGGACTCAGAACAAATGGGACTGAGATCTTCAGACCTGGGGGAGGAAATATGAAGGACAATTGGAGAA  
GTGAATTATATAAATATAAAGTAGTAAAAATTGAGCCATTAGGGATAGCACCCACCAGGGGCAAGAGAAGAGT  
GGTGCAGAGAGAAAAACAGTGGGAACGATAGGAGCTATGTTCCCTTGGGTTCCTTGGGAGCAGCAGGAAGCACT  
ATGGGCGTAGCGTCAATGACGCTGACGGTACAGGCCAGACTATTATTGTCTGGTATAGTGCAACAGCAGAATA  
ATTTGCTGAGAGCTATTGAGGCGCAACAGCATCTGTTGCAACTCACAGTCTGGGGCATC

>MN043581..2

TTCTACTGTAATACAACACAACCTGTTTAATAGTACTTGGATGATTACTAATAATTGCAATAGTACTGAAGGAT  
ACAATAACACTGCACGAAATAGCACAAATTACCCTCCCATGTCAGAATAAAACAAATTATAAACAGGTGGCAGGA  
AGTAGGAAAAGCAATGTATGCCCCCTCCCATCAGAGGACAAATTAGATGTTTCATCAAATATTACAGGGCTACTA  
TCAACAAGAGATGGGGGGACTGGGAACAACGAGACTGAGATCTTCAGACCTGGGGGAAGAAATATGAGGGACA  
ATTGGAGAAGTGAATTATATATATAAAGTAGTAACAATTGAGCCATTAGGGATAGCACCCACCAGGGGCAAA  
GAGAAGAATGGTGCAAGAGAGAAAAAGAGCAGTGGGAACGATGGGAGCTATGTTCCCTTGGGTTCCTTGGGAGCA  
GCAGGAAGCACTATGGGCGCGACATCAATGACGCTGACGGTACAGGCCAGACTATTATTGTCTGGTATACTGC  
ATCATCAGAATAATCTGCTGAAAGCTATTGAGGCGCAACAGCATCTGTTGCAACTCACAGTCTGGGGCATC

>HQ386180..1

TTCTATTGTAACACAGCACAACTGTTTAATAGTACTTGGAAATGCAACAGAAATGCTTAATAGTACAGAATCAA  
ATGACACAAATAGCAACATCAACATCACACTCCAATGTCAGAATAAGACAAATTATAAACATGTGGCAGGAAGT  
AGGAAAAGCAATGTATGCCCCCTCCCATCGAAGGACAAATTAGATGTTTCATCAAATATTACAGGGATACTATTA  
ACAAGAGATGGTGGTCATAGCACGAACGGGACTGAGAACGGGAACGAGACCTTCAGACCTGGAGGAGGAAACA  
TGAGGGACAATTGGAGAAGTGAATTATATAAATATAAAGTAGTAAACTTGAACCATTAGGAATAGCACCCAC  
CAAGGCAAAGAGAAGAGTGGTGCAGAGAGAAAAAGAGCGGTGGGAATGCTAGGAGCTATGTTCCCTTGGGTTC  
TTGGGAGCAGCAGGAAGCACTATGGGCGCAGCGTCACTAACGCTGACGGTACAGACCAGACATTTATTGGCTG  
ATATAGTGCAACAGCAGAACAAATTTGCTGAGAGCTATTGAGGCGCAGCAGCATCTGTTGCAACTCACAGTCTG  
GGGCATC

>EU744081..1

TTCTACTGTAATACAACACAACCTGTTTAATAGTACTTGGATGTTTAATGGTACTTGGGAGTCAAATAGCACTG  
AGGGAAATCCACAGAAAATATCACACTCCCATGTCAGAATAAAACAAATTATAAACCTGTGGCAGGAAGTAGG

AAAGGCAATGTATGCCCCCTCCTATCAGGGGACTAATTCAATGTGTATCAAATATTACAGGGTTGCTATTAAACA  
AGAGATGGTGGGAACAACACGACTGAGAATGGGACCGAGATTTTCAGACCTGGAGGAGGAGATATGAGGGACA  
ATTGGAGAAGTGAATTATATAAAATATAAAGTAGTAAAAATTGAACCATTAGGGGTAGCACCCACCAGGGCAAA  
GAGAAGAGTGGTGCAGAGAGAAAAAAGAGCAGTGGGAGTGATAGGAGCTATGTTCCCTTGGGTTCTTGGGAGCA  
GCAGGAAGCACTATGGGCGCAGCGTCAATGACGCTGACGGTACAGGCCAGACAATTACTGTCTGGTATAGTGC  
AGCAGCAGAACAATCTGCTGAGGGCTATTGAGGCGCAACAGCATCTGTTGCAACTCACAGTCTGGGGCATC

>JF320244..3

TTCTACTGTAATACATCACAACCTGTTTAATGGAAGTTGGCAACCACCGCTTAATGAACTATATTTCAATACA  
ATGCTACATGGGCAAAAAATGACACTAATATCACACTCCCATGCAGAATAAAACAATTTGTAAACATGTGGCA  
GGAAGTAGGAAAAGCAATGTATGCCCCCTCCCATCAGCGGACCAATCAAATGTGTATCAAATATTACAGGGTTG  
CTAATAACAAGAGATGGGGGTTACAACAGTAGTAGCAATGAGACCAATGAGACCTTCAGACCTGCAGGAGGAG  
AAATGAGGGACAATTGGGAGAAGTGAATTATATAAAATATAAAGTAGTACAAGTTGAACCATTAGGATTAGCACC  
CACCAAGGCAAAGAGAAGAGTGGTGCAGAGAGAAAAAAGAGCAGTGACGCTGGGAGCTATGTTCCCTTGGGTTCT  
TTGGGAGCAGCAGGAAGCACTATGGGCGCAGCGTCAATAACGCTGACGGTACAGGCCAGACAGTTATTGTCTG  
GTATAGTGCAACAGCAGAACAATCTGCTGAGGGCTATTGAGGCGCAACATCATCTGTTGCAACTCACAGTCTG  
GGGCATA

>JF320226..1

TTCTACTGTAATACCACACCACTGTTTAATAGTACCTGGAATGCCACACAACCTGGTTAATATTACTGGGAATA  
TCACAGGGCTTAGTAATAGAACTGAAAATATTACACTCCCATGTAGAATAAAACAAATTATAAACATGTGGCA  
GGAAGTAGGAAAAGCAATGTATGCTCCTCCCATCGCAGGACGAATTAAATGTTTATCAAATATTACAGGTTTA  
CTATTAGTAAGAGATGGTGGCAATAGCAATGACACGGAGACCTTCAGACCTCAAGGAGGAAATATGAAGGACA  
ATTGGAGAAGTGAATTATATAAAATATAAAGTAGTAAAAATTGAACCATTAGGAGTAGCACCCACCAAGGCAAA  
GAGAAGAGTGGTGCAGAGAGAAAAAAGAGCAGTGGGAGTACTGGGAGCTATGTTCCCTTGGGTTCTTGGGAGCA  
GCAGGAAGCACTATGGGCGCAGCGTCAATAACGCTGACGGCAGGCCAGACAATTATTGTCTGGTATAGTGC  
AACAGCAGAACAATCTGCTGAGGGCTATTGAGGCGCAACAGCACCTGTTGCAACTCACAGTCTGGGGCATC

>JF320189..1

TTCTACTGTAATTCATCAGAACTGTTTAATAGTACCTGGACCTGGAATGAGACTGAAGGGTCTATTACTGAAG  
GGTCAATTACTAATGGGACAATCACACTCCCATGTAGAATAAGACAAATTATAAACATGTGGCAGAGAGTAGG  
AAAAGCAATGTATGCCCCCTCCCATCCAAGGACAAATTAGATGTTTCATCAAATATTACGGGGCTGCTATTAAACA  
AGAGATGGTGGTGAAGGTAACACCACCAATAACAACGAAACCTTCAGACCTGGAGGAGGTGATATGAGGGACA  
ATTGGAGAAATGAATTATATAAAATATAAAGTAGTACAAATTGAACCATTAGGAATAGCACCCACCAAGGCAAG  
GAGAAGAGTGGTGCAGAGAGAAAAACGAGCAGTGGGACTAGGAGCTGTGTTCCCTTGGGTTCTTGGGAGCAGCA  
GGAAGCACTATGGGCGCAGCGTCAGTGACGCTGACGGTACAGGCCAGACAATTATTGTCTGGTATAGTGCAAC  
AGCAGAACAATCTGCTAAAGGCTATTGAGGCGCAACATCATCTGTTGCAACTCACAGTCTGGGGCATC

>EF210727..1

TTCTACTGTAACCTCTACACAGCTGTTTAATAGTACTTGGAACAGCAGCAATTGGAATTGGAATGATACTGAAA  
AGACAAATAAAAGTATCACACTCCCATGCAGAATAAAACAAATTATAAACATGTGGCAGGAAGTAGGAAAAGC  
AATGTATGCCCCCTCCCATCAGAGGACAAATTAGATGTTTCATCAAATATTACAGGGCTGATGCTAACAAGGGAT  
GGTAGTAATGAGAGTCACAGTGAGATCTTCAGACCAGGAGGAGGAAATATGAGGGATAATTGGAGAAGTGAAT  
TATATAAAATATAAAGTAGTAAAAATTGAACCATTAGGAGTAGCACCCACCAAGGCAAAGAGAAGAGTGGTGCA  
GAGAGAAAAAAGAGCAGTAGTGGGGATAGGAGCTGTGTTCCCTTGGGTTCTTGGGAGCAGCAGGAAGCACTATG  
GGCGCAGCGTCAATGATGCTGACGGTACAGGCCAGACAATTATTGTCTGGTATAGTGCAACAGCAGAACAATT  
TGCTGAGGGCTATTGAGGCGCAACAGCATATGTTGCAACTCACAGTCTGGGGCATC

>EF210729..2

TTTTATTGTAATACAACACGGCTGTTTAATAGTACTTGGAAGAATAAATACTTGGAATAAGAATCATATTGAGA  
ACGAGACTGAAACAATCACACTCCCATGCAAAATAAAACAAATTATAAACAGGTGGCAGGAAGTAGGACAAGC  
AATGTATGCCCCCTCCCATCCAGGATGGATTAACCTGTTTCATCAAATATTACAGGGCTACTATTAACAAGAGAT  
GGTGGTGAAAACGGAACCAACCGAGACCGAGACCTTCAGACCTGGAGGAGGAGATATGAGGGACAATTGGAGAA  
GTGAATTATATAAAATATAAAGTAGTTGAAATTCAACCATTAGGAGTAGCACCCACCAAGGAGAGAGTGGTGC  
GGTGAGAGAGAAAAAAGGGCAGTAACACTAGGAGCTATGTTCCCTTGGGTTCTTGGGAACAGCAGGAAGCACT  
ATGGGCGCAGCGTCGCTGACGGTACAGGCCAGACAATTATTGACTGGTATAGTGCAACAGCAGAACA  
ATCTGCTGAGGGCTATTGAGGCGCAACAGCATATGTTGCAACTCACAGTCTGGGGCATC

>EF210731..2

TTCTACTGTAATCTATCAAAATTGTTTAATAGTACATGGAATGATACTACTTGGAACACGACTGATGAGTCAA  
ATGACACTTACATCCTGCTCCCATGTAGGATAAAACAAATTATAAACATGTGGCAGACAGTAGGAAAAGCAAT  
GTACGCCCTCCCATCAAAGGAAAAAATTAGTTGTTTCATCAAATATTACAGGGCTGCTATTAAACAAGAGATGGA  
GGGAATGACAACAGGACTCAGGGGGTTCGAGATCTTCAGACCTGGAGGAGGAGATATGAGAGATAATTGGAGAA  
GTGAATTATATAAAATATAAAGTAGTAAAAATTGAACCATTAGGAATAGCACCCACCGAGGCAAAAAGAAGAGT  
GGTGCAGAGAGAAAAAAGAGCAGTGGGAATAGGAGCTGTGTTCCCTTGGGTTCTTGGGAGCAGCAGGAAGCACT

ATGGGCGCAGCGGCAGTGACGCTGACGGTACAGGCCAGACAATTATTGTCTGGTATAGTGCAACAGCAGAAACA  
ATCTGCTAAAGGCCATTGAGGCGCAACAGCATCTGTTGCAACTCACAGTCTGGGGGCATC

>EF210735..1

TTCTACTGTAACACATCACACCTATTTAATAGTACTTGGAATGATACTAGTAGTTGGGATAATAGCACTGAAG  
GAAATATCACACTCCAATGTAGAATAAAACAAATCATAAACAGGTGGCAGGAAGTAGGAAAAGCAATGTATGC  
CCCTCCCATTCAGGACAAATTAGATGCTCATCAAATATTACAGGGCTGCTATTAAACAAGAGATGGTGGTCAG  
GGCAGTAACGAGACCGAGGTCTTTAGACCTGGAGGAGGAAATATGAAGGACAATTGGAGAAGTGAACATATATA  
AATATAAAGTAGTAAAAGTTGAACCATTAGGAATAGCACCCACCAAGGCAAGGAGAAGAGTGGTGCAGAAAGA  
AAAAAGAGCAATAACACTAGGAGCTATGTTTCCTTGGTTTCTTGGGAGCAGCAGGAAGCACTATGGGCGCAGCG  
TCGATAACGCTGACGGTACAGGCCAGACAATTATTGTCTGGTATAGTGACAGCAGCAGAATAATTTGCTGAGGG  
CTATTGAGGCGCAACAGCATATGTTGCAACTCACAGTCTGGGGGCATC

>MH327746..1

TTCTACTGCAATACAACAAAACTGTTTAAACAGTAGTTGGCCAAATAGTACTAGGAATAATACTGAAGAGTCAA  
ATAGCACTGTTATCACACTCCCATGTAGAATAAAACAAATTATAAACATGTGGCAGGAAGTAGGAAAAGCAAT  
GTATGCCCTCCCATCAGGGGACGAATTAATTGTACATCAAACATTACAGGGCTACTATTAACAAGAGATGGG  
GGCAATGGAATAGCACGAATGAAACCTTCAGACCTCAAGGAGGAAATATAAGGGACAATTGGAGAAGTGAAC  
TATATAAATATAAAGTAGTAAAAATTGAACCATTAGGAGTAGCACCTACCAAGGCAAAGAGAAGAGTGGTGCA  
AAGAGAAAAGAGAGCAGTGGGAATGGGAGCTTGGTTTCCTTGGGTTCTTGGCAGCAGCAGGAAGCACTATGGGC  
GCAGCGTCAGTGACGTTGACGGTACAGGCCAGACAATTATTGTCTGGTATAGTGACAGCAGCAAAATAATTTGC  
TGCAAGCTATTGAGGCGCAACAGCATTTGTTGCAACTCACAGTCTGGGGGCATC

>KY658690..1

TTCTACTGCAATACAACAAAACTGTTTAAACAGTAGTTGGCCAAATAGTACTAGGAATAATACTGAAGAGTCAA  
ATAGCACTGTTATCACACTCCCATGTAGAATAAAACAAATTATAAACATGTGGCAGGAAGTAGGAAAAGCAAT  
GTATGCCCTCCCATCAGGGGACGAATTAATTGTACATCAAACATTACAGGGCTACTATTAACAAGAGATGGG  
GGCAATGGAATAGCACGAATGAAACCTTCAGACCTCAAGGAGGAAATATAAGGGACAATTGGAGAAGTGAAC  
TATATAAATATAAAGTAGTAAAAATTGAACCATTAGGAGTAGCACCTACCAAGGCAAAGAGAAGAGTGGTGCA  
AAGAGAAAAGAGAGCAGTGGGAATGGGAGCTTGGTTTCCTTGGGTTCTTGGCAGCAGCAGGAAGCACTATGGGC  
GCAGCGTCAGTGACGTTGACGGTACAGGCCAGACAATTATTGTCTGGTATAGTGACAGCAGCAAAATAATTTGC  
TGCAAGCTATTGAGGCGCAACAGCATTTGTTGCAACTCACAGTCTGGGGGCATC

>MF373127..1

TTCTACTGTAATACAACAAGACTGTTTAACTACTTGGAAATAACACTGAGAAATCAAATCCCACTGAAGGAA  
ATGGCACAAATCACACTCCAATGCAGAATAAAACAAATTATAAACCTGTGGCAGGAAGTAGGAAAAGCAATGTA  
TGCCCCCTCCCATCAGAGGACAAATTAACCTGTTTCATCCAACATTACAGGACTGCTATTAAACAACAGATGGTGGT  
ATGAACACCAGTAATAACAAGACCTTTATACCTGCAGGAGGAGATATGAGAGACTATTGGAGGAGTGGAGTAT  
TGAAATATGATGTAGTAATAGTTGAGCCATTAGGAATAGCACCAACCACGGATATGAGAAGAGTGGTGCAGAT  
ACAAAAAAGAGCAGAGCTACTACGAGCTCTGTTGCTTGTGTTCTTGGGAGCAGCAGGAAGGACGATGAGCGCA  
GCGTCGATGACGCTGACGGTACAGGCCAGACAATTATTGTCTGGTATAGTGCAACAGCAAAATAATTTGCTGC  
AGGCTATTGAGGCGCAACAGCATATGTTGAAACTCACAGTCTGGGGGCATC

>MF373129..2

TTCTACTGTAATACAGCAGAACTGTTTAAACAGTACTTGGAGGAATGACACTGAAAGGTCAAATACCACTACAG  
GAAATGACACAATCACACTTCAATGCACAATAAAACGAATTGTAAACATGTGGCAGGAAGTAGGAAAAGCAAT  
GTATGCCCTCCCATCACAGGACAAATTAATTGTTTCATCAAAAATTACAGGGCTACTGTTAAACAAGAGATGGT  
GGTGGGAACCAGAACACCAGCGAGACTTTTCAGACCTGGAGGGGGGAAATATGAAAGACAATTGGAGAAGTGAAT  
TATATAAATATAAAGTAATAAAAAATTGAACCATTAGGAGTAGCACCCACCAAGGCAAAGAGAAGAGTGGTGCA  
GAGAGAAAAAAGAGCAGTGGGAATAGGAGCTGTGTTTCCTTGGGTTCTTGGGAGCAGCAGGAAGCACTATGGGC  
GCAACGTCGATGACGCTGACGGTACAGGCCAGACAATTATTGTCTGGTATAGTGCAACAGCAGAATAATTTGC  
TGAAGGCTATTGAGGCGCATCAGCATATGTTGCAACTCACAGTCTGGGGGCATC

>KP411829..1

TGCTATTGCAAAACCATCACTTCTGTTTACTGGCACATACAAGAGTAACATTAATATTTCAAATATCACCCAAT  
CCTCACAATCCGATGAAAGGTATATTTTAATTCTGGCTTGTATGACGATCAATGTGTGGCAGGTAGTAGGAAA  
AGCGATCTATTCCCCTCCCATCAGTGGACAAATTAGATGTTTCATCAAATATTACAGGGCTGCTATTAAACAAGA  
GATGGTGGTAGCAACAGCAGTAACGAGACCGAGACTGAAATCTTCAGACCTGTGGGAGGAAATATGAGGGACA  
ATTGGAGAAGTGAATTATATAAATATAAAGTAGTACAAATTGAACCATTAGGAGTAGCACCCACCAAGGCAAA  
GAGAAGAGTGGTGCAAAGAGAAAAAAGAGCAGTGGGATTAGGAGCAATGTTTCCTTGGGTTCTTGGGAGCAGCA  
GGAAGCACTATGGGCGCAGCGTCAATAACGCTGACGGTACAGGCCAGACAATTATTGTCTGGTATAGTGCAAC  
AGCAGAATAATTTGCTGAGAGCTATTGAGGCGCAACAGCATCTGTTGCAACTCACAGTCTGGGGGCATC

>MF373151..2

CTCTACTGTAATTCACACAACCTATTTAATAGTACTTGGAATGGTACTGAAAGATCAAACCTATTCCACTGAGA  
CTAATGAACTATCACACTCCCATGCAGAATAAAACAAATTATAAACATGTGGCAGAGAGTAGGAAGAGCAAT  
GTATGCCCTCCCATCCAAGGACTAATTAGATGTTTCATCAAATATTACAGGGCTGCTGCTAACAAGAGATGGA

GGTCAGAATAGTAGTAATAGCACTGAGACCTTCAGACCGGGAGGAGGAAACATGAAGGATAATTGGAGAAGTG  
AATTATATAAATATAAAGTAATAAAGATTGAACCATTAGGAGTAGCACCCACCAAGGCAAAGAGAAGAGTGGT  
GCAAAGAGAAAAAAGAGCAATAACAGTAGGAGCTATGTTCCCTTGGGTTCTTGGGAGCAGCAGGAAGCACTATG  
GGCGCAGCGTCAATGGCGCTGACGGTACAGGCCAGACAATTGTTGTCTGGTATAGTGCAACAGCAGAACAATC  
TGCTGAGGGCTATTGAGGCGCAACAGCATCTGTTGCAACTCACAGTCTGGGGCATC

>KP411823..1

TTCTACTGTAATACAACACAACCTGTTTAATAGTACTTGGGAATATCACTGGAGGGTTAAATAACACTGAAGGAA  
ATGGCACAATCACACTCCAATGCAAAATAAAACAATTTATAAACATGTGGCATGAAGTAGGGAAAGCAATGTA  
TGCCCCCTCCCATCAGAGGACAGATTACATGTTTCATCAAACATTACAGGGCTGCTATTAACAAGAGATGGTGGT  
GAGAACCCGGGCAACGACACTGATACCTTTCACACCTGGAGGGGGAGATATGAAAGACAATTGGAGTAGTGAAT  
TAGATAAATATAGAGTAATAGGAATAGCACCACTACCAGTAGCACCCACCAAGGCAAAGACAAGATTGTTGCA  
GAGAGATAAAAGAGCAGTTGGAATAGGATCTGTGTTCCCTTGTCTTCTGGTAGCGGCAGGAAGCACTATGTCT  
GCAATGTCAATGACGATGACGCTACAAGCTCAAGAATTACTGTATGTGACCGAGCGAATGCAAAAAAATTTGC  
TGAAGGCTATTGAGGCGCAACAGCATCTGTTGCAACTCACAGTCTGGGGCATC

>MF373162..4

TTCTATTGTAATACAACACAGTTATTTAATAGTACTTGGGAGGCTCATCAGCTTAATCAGACTTGGAATGAGC  
CCCTAGGGCCAAATGTTACTAATATCACACTCCCATGCAGAATAAAACAAATTATAAACAGGTGGCAGGAAGT  
GGGAAAAGCAATGTTTGCCGCTCCCATCAGCGGACGAATTCATGCAAATCAAATATTACAGGGTTGTTATTA  
ACAAGAGATGGTGGTACTAACACCAGCGACCCCAACAGAACTGAGACCTTCAGACCTGGAGGAGGAGATATGA  
GAGACAATTGGAGAAGTGAATTATATAAGTATAAAGTAGTACAAATTGAGCCATTAGGAATAGCACCCACCAA  
GGCAAAGAGAGTAGTGGTAAAGAGAGAAAAAAGAGCAGTGGGAGTGCTAGGAGCTATGTTCCCTTGGGTTCTTG  
GGAACAGCAGGAAGCGTTATGGGCGCAGCGTCAATGACGCTGACGGTACAGGCCAGACAATTATTGTCTGGTA  
TAGTGCAACAGCAGAACAATCTGCTGAGAGCTATTGAGGCGCAACAACATATGTTGCAACTCACAGTCTGGGG  
CATC

>KP411824..3

TTCTACTGCAATTCAACACCACTGTTTAATAGCACCTGGGATACTAATGGGACTTGCAAGGGCTCTAATAGTG  
CTGATTGGAATGTTACTGTCCCATGCATTAGCATCCCAATTACTACAATGGGGCAGAACTAGAACAAAGCAAT  
GGACGTGCGTCCCATTCAGGAAAAGCAATATGTTTCATCAAGTTTGTCCAAAGGTATCCTTTTAGCCAATTCC  
CATAATAGCATTATTGTGCCCCGGCTGGTTATGCCTAAAGGTAAAGATAAGAAGTTCAATTGGAACAGGAAAA  
TGTATCAATGTCAAGTACAATGTCAAATTGAACCATTAGGAGTAGCACCCACCATGGCAAAGAGAAGAGTGGT  
GCAAAGAGAGAAAAGAGATTTGGGACTAGGAGCTCTGTTCCCTTGGGTTCTTGGGAGCAGCAGGAAGCACTATG  
GGCGCAGCGTCAATAACGCTGACGGTACAGGCCAGACAATTATTGTCTGGTATAGTGCAACAGCAGAACAAT  
TGCTGAGGGCTATTGAGGCGCAACAGCATCTGTTGCAACTCACAGTCTGGGGCATC

>MF373185..1

TTCTACTGTAATTCAACACCACTGTTTAATAGTACTTGGTATGTTAATGGAAGTAGGAATAATGATACTGATA  
TTGGAAAAGATAAACATCACACTCTCATGTAGAATAAAACAAATTATAAACATGTGGCAGGAAGTAGGAAAAGC  
AATGTATGCCCCCTCCCATCCAGGAAAAATTCAATGTATATCAAATATTACAGGGCTGCTATTAACAAGAGAT  
GGAGGTAATACCAGTGAGACCAGGAACGGGACCGAGATTTTCAGACCTGGAGGAGGAAATATGAGGGACAATT  
GGAGAAGTGAATTATATAAATACAAAGTAGTACAAGTTGAACCATTAGGAATAGCACCCACCAAGGCAAGGAG  
AAGAGTGGTGCAGAGAGAAAAAAGAGCTCTGGGACTAGGAGCTTTGTTTCTTGGGTTCTTGGGAGCAGCAGGA  
AGCACTATGGGCGCAGCGTCAGTGACGCTGACGGTACAGGCCAGACAATTATTGTCTGGTATAGTGACAGCAGC  
AGAACAATCTGCTGAGAGCTATTGAGGCGCAACAACACATGTTGCAACTCACAGTCTGGGGCATC

>MF373186..1

TTCTACTGCAACACAACACAACCTGTTTAATAGTACTTGGGAATGATACACAACCTGTCTGATAGCACTTGGAATA  
ATACAAGAGGGATAAATGACACTATCACACTCCAATGTAGAATAAGACAAATCATAAACATGTGGCAGAAGGT  
AGGAAAAGCAATGTATGCCCCCTCCCATCAGTGGACAAATTAGATGTACATCAAATATTACAGGGCTGATATTA  
ACAAGAGATGGTGGTAAATAGTGACAACAACACCACCCAGCCCGAGATCTTCAGACCTCAAGGAGGAAATATGA  
AAGACAATTGGAGAAGTGAATTATATAAATATAAAGGTAGTAGCAATTGAACCATTAGGACTAGCACCCACCAA  
GGCAAAGAGAAGAGTGGTGACAGAGACAAAAGAGCAGTAGGACTGGGAGCTCTGTTCCCTTGGGTTCTTGGGA  
GCAGCAGGAAGCACTATGGGCGCAGCGTCAATGGCGCTGACGGTACAAGCCAGACAATTATTGTCTGGTATAG  
TGCAACAGCAGAACAATTTGCTGAGGGCTATTGAGGCGCAACAGCATCTGTTGCAGCTCACAGTCTGGGGCAT  
T

>KY213743..1

TTTTACTGTAATACATCAAAACTGTTTAATAGTACTTGGCTGAATAATAATACAGGGTCAAATGCCACTGAAC  
CTATCATACTCCCATGCAGGATAAAACAAATTGTAAACATGTGGCAGGAAGTAGGAAAAGCAATGTATGCCCC  
TCCCATCAGAGGACAAATTAGATGCATATCAAATATTACAGGGCTCCTATTAACAAGAGATGGTGGTCAAGAG  
AACAAAACCGAGAACCACACCGAGGTCTTTAGACCCACGGGAGGAAATATGAAGGACAATTGGAGAAGTGAAT  
TATATAAATATAAAGTAGTAAAAAATTGAACCATTAGGAATAGCACCCACCAAGGCAAAAAGAAGAGTGGTGCA  
GAGAGAAAAAAGAGCAGTGGGAATAGGAGCGATGTTCCCTTGGGTTCTTGGAGCGCAGCAGGAAGCACTATGGGC

GCAGCGTCAATAACGCTGACGGTACAGGCCAGACAGTTACTGTCTGGTATAGTGCAACAGCAAAACAATTTGC  
TGAGAGCTATTGAGGCGCAACAACATATGTTGCAACTCACAGTCTGGGGCATC

>KY213745..1

TTCTACTGCAATACAACACAACACTATTTAATAGTTCTTGGAATAATAGTAGTTTGAATAGTACTGAGGGTAATG  
GAGGGTCAAATGACACTATCACACTCCCGTGTAGAATAAAACAAATTATAAACATGTGGCAGGAAGTAGGAAA  
AGCAATGTATGCCCCCTCCCATTC AAGGACAAATTAGATGCTCCTCAAATATTACAGGACTATTATTAGTAAGA  
GATGGTGGTAATAACAGGACGGGCGGCAGTGAGACCTTCAGACCTGGAGGAGGAAATATGAAGGACAATTGGA  
GAAGTGAATTATATAAATATAAAGTAGTAAAAATTGAACCATTAGGAATAGCACCCACCAGGGCAAGGAGAAG  
AGTGGTGCAGAGAGAAAAAGAGCAGTGGGACTAGGAGCTTTGTTTCCTTGGGTTCTGGGAGCAGCAGGAAGC  
ACTATGGGCGCAGCGTCAATGACGCTGACGGTACAGGCCAGACAATTATTGTCTGGTATAGTGCAACAGCAGA  
ACAATCTGCTGAAGGCCATTGAGGCGCAACAGCATATGTTGCAACTCACAGTCTGGGGCATC

>JN248346..2

TTCTACTGTGATTCAACACAACCTGTTTAAATAGTAGTTGGAATAGTAATTGGTCTAATAATACTGAAGGGTCAG  
ACAACATTACACTTCAATGCAGAATAAAACAAATTATAAACATGTGGCAGCAAAACAGGAAAGGCAATGTATGC  
CCCTCCCATCAGTGGAATAATTAGCTGTTTCATCAAATATTACAGGGCTGTTATTAAACAAGAGATGGTGGTAAC  
AATCAGACTAATAATAATGAGACCTTCAGACCTGGAGGAGGAAATATGAAGGACAATTGGAGAAGTGAATTAT  
ATAGATATAAAGTAGTACAAATTGAACCATTAGGAGTAGCACCCACCATTGGCAAAAGAGAAGAGTGGTGCAGAG  
AGAAAAAGAGCAGTGGGAATAGGAGCTCTATTCCTTGGGTTCTTGGGAGCAGCAGGAAGCACTATGGGCGCA  
GCATCAATAACGCTGACGGTACAGGCCAGACAATTATTGTCTGGTATAGTGCAACAGCAGAACAAATTTGCTGA  
GAGCTATTGAGGCGCAACAGCATATGTTGCAACTCACAGTCTGGGGCATA

>KJ769147..1

TTCTACTGTAACACATCACAACTGTTTAAATAGTACTTGGTATAGTAATGGTACTCGAAATGATACTGTAGGAA  
ATGGCAATATCACGCTCCCTTG CAGAATAAAACAAATTGTAAACATGTGGCAGGAAGTAGGAAAAGCAATGTA  
TGCCCCCTCCCATTTGGAGGACAAATTAGATGTTTCATCAAATATTACAGGGTTGCTATTAACAAGAGATGGTGGT  
AACAA TCAGAGCAACATCACCAACGAGACCTTCAGACCAGGAGGAGGAGATATGAGGGACAATTGGAGAAGTG  
AACTATATAAATATAAAGTGGTAAAAATTGAACCATTAGGAATAGCACCCACCAAGGCAAAGAGAAGAGTGGT  
GCAGAGAGAAAAAGAGCAGTGGGAATGATAGGAGCTATGTTCCCTTGGGTTCTTGGGAGCAGCAGGAAGCACT  
ATGGGCGCAGCGTCAATAACGCTGACGGTACAGGCCAGGCAATTGTTGTCTGGTATAGTGCAACAGCAGAGTA  
ATCTGCTGAGAGCTATTGAGGCGCAACAGCATATGTTGCAACTCACAGTCTGGGGCATC

>KP109514..1

TTCTACTGTAATACAACACAGCTATTTAATAATACTTGGCTTACTTGG AAGGCCAATGCAAGTGATCCTGAAA  
AAAATAACACAAAAAATATCACACTCCCATGCAGAATAAAACAAATTATAAACATGTGGCAGGAAGTAGGAAA  
AGCAATGTATGCCCCCTCCCATCGCAGGACAAATTAAATGTGTATCAAATATTACAGGGTTACTATTAACAAGA  
GATGGGGGT CAGGACAATAACACTAACGGTAACGAGACCTTCAGACCTGGAGGAGGAGATATGAGGGACAATT  
GGAGGAGTGAATTATATAAATATAAAGTAGTAAAAATTGAACCATTAGGAATAGCACCCACTAAGGCAAAGAG  
AAGAGTGGTGCAGAGAGAAAAAGAGCAGCACTAGGAGCTATGTTCCCTTGGGTTCTTGGGAATGGCAGGAAGC  
ACTATGGGCGCAGCGTCAATAACGCTGACGGCAGAGCCAGACAATTGTTGTCTGGTATAGTGCAACAGCAGAGA  
ACAATCTGCTGAGGGCTATTGAGGCGCAACAACATTTGTTGCAACTCACAGTCTGGGGCATC

>EU578539..1

TTCTACTGTAATGCAACACAACCTGTTTAAATAGTACTTGGCCATTAAACGGTACTTGGGAAGGATCAAATAATA  
CTAATGT CACACTACCATGCAGAATAAAACAAATTATAAACATGTGGCAGAGAGTAGGCAAAGCAATGTATGC  
CCCTCCCATCAGAGGACAAATTAGATGTTTCATCAAATATCACAGGGCTGCTATTAAACAAGAGATGGTGGTGGT  
AGTAACCAAAGCAACGAGACCTTTAGACCTGGAGGAGGAGACATGAAAGACAATTGGAGAAGTGAATTATATA  
AGTATAAAGTAGTAAGAATTAAACCATTAGGAGTAGCCCCACCAAGGCAAAGAGAAGAGTGGTGCAGAGAGA  
AAAAAGAGCAGTGGGAACAATAGGAGCTATGTTCCCTTGGGTTCTTGGGAGCAGCAGGAAGCACTATGGGCGCA  
GCGTCAGTGACGCTGACGGTACAGGCCAGACAATTATTGTCTGGTATAGTGCAACAGCAGAACAAATTTGCTGA  
GGGCTATT CAGGCGCAACAGCATCTGTTGCAACTTACGGTCTGGGGCATC

>HQ217760..1

TTCTATTGTAATACAACAGAGCTGTTTAAATAGTACTTGGGATGTTAATAGTACTTTGAATGTTAATAATACTT  
GGAATAACTGAAGGAGCAAGTGGCAATATCACACTCCCATGCAGAATAAAACAAATTATAAATATGTGGCA  
GAAAGTAGGCAAGGCAATGTATGCCCCCTCCCATCAGAGGACAAATTAGATGTACATCAAAGATCACAGGGCTG  
CTATTAAACAAGAGATGGTTATAATAATAAACAACACCGAGACTTTCAGACCTGGAGGAGGAAATATGAAGG  
ACAATTGGAGAAGTGAGTTATATAAGTATAAAGTAGTAAAAATTGAACCATTAGGAGTAGCACCCACCATTGGC  
AAGGAGGAGAGTGGTGCAGAGAGAAAAAGAGCAGTGGGAACAATAGGAGCTATGTTCCCTTGGGTTCTTGGGA  
GCAGCAGGAAGCACTATGGGCGCAGCGTCACTGACGCTGACGGTACAGGCCAGACTATTATTGTCTGGTATAG  
TGCAACAGCAGAACAAATCTGCTGAGGGCTATTGAGGCGCAACAGCATCTGTTGCAACTCACGGTCTGGGGCAT  
C

>AF277071..1

TTCTACTGTAATTCAACACAGCTGTTTAAATAGTACTTGG AATATTAATGATACTAGGAATGATACTACAGGGGA  
ATATCACACTCCCATGCAGAATAAGACAAATTGTGAACAGGTGGCAGGAAGTAGGCAAAGCAATGTATGCCCC

TCCCATCAGAGGACAAATTAGCTGTTTCATCAAATATTACAGGGGTGCTATTAACAAGAGATGGTGGTAATCAC  
ACGAGCGAAACTGAGATCTTCAGACCTGGAGGAGGAGATATGAGGGACAATTGGAGAAGTGAATTATATAAAT  
ATAAAGTAGTAAAAATTGAACCATTAGGAAAAGCACCCACCAAGGCAAGGAGAAGAGTGGTGCAAAGAGAAAA  
AAGAGCAGTGACAATGGGAGCTATGTTCCCTTGGGTTCTTAGGAGCAGCAGGAAGCACTATGGGCGCAGCATCC  
ATGACGCTGACGGTACAGGCCAGGCTATTATTGCCTGGTATAGTGCAACAGCAGAGCAATCTGCTGAGGGCTA  
TCGAGGCGCAACAACATCTGTTGCAACTCACAGTCTGGGGCATC

>EF593267..1

TTCTACTGTAATACAACAAAGCTGTTTAATAGTACTTGGCATGCTAATGGCACTCGGAATGATACTGGAGGGT  
CAAATGACACTATCATACTACCATGCAGAATAAAACAAATTATAAACATGTGGCAGAAAGTAGGCAAAGCAAT  
CTATGCCCTCCCATCAGAGGACAAATTAGATGTGAATCAAAGATCACAGGGCTGCTATTAACAAGAGATGGT  
GGTGATGATAACAGAACCACCGAGATCTTCAGACCTGGAGGAGGAGATATGAGGGACAATTGGAGAAGTGAAT  
TATATAAATATAAAGTAGTAAAAATTGAACCATTAGGAATAGCACCCACCAAGGCAAGGAGAAGAGTGGTGCA  
GAGAGAAAAAAGAGCAGTGGGAATAGGAGCTGTGTTCCCTTGGGTTCTTGGGAGCAGCAGGAAGCACTATGGGC  
GCAGCGTCAATGACGCTGACGGTACAGGCCAGACTATTATTGTCTGGTATAGTGCAACAGCAGAACAATTTGC  
TGCAGGCTATTGAGGCGCAACAGCATCTGTTGCAACTCACGGTCTGGGGCATC

>DQ853436..1

TTCTACTGTAATTCAACACGATTGTTTAGTAGTAAGTGGCATGCTAATGATAGTTGGAGTAGTAGTACTTGA  
ACGATACTGGAGAGTCAAATGACACTATCACACTCCCATGTAGAATAAAACAAATTATAAACATGTGGCAGGA  
AGTAGGAAAAGCAATGTATGCCCTCCCATCAAAGGACAAATTCAATGTTTCATCAAATATTACAGGGCTAATA  
TTAACAAGAGATGGTGGTGCAAACACGAACACGAGCGAGGAGGTCTTCAGACCTGCAGGAGGAAATATGGGGG  
ACAATTGGAGAAGTGAATTATATAAATATAAAGTAGTAAAAATTGAACCAATAGGAATAGCACCCACCAAGGC  
AAAAAGAAGAGTGGTGAGAGAGAAAAAAGAGCAGTGACACTGGGAGCTGTGTTCCCTTGGGTTCTTGGGAGCA  
GCAGGAAGCACTATGGGCGCAGCGTCAATAACGCTGACGGTACAGGCCAGACAATTATTGTCTGGTATAGTGC  
AGCAGCAGAACAATCTGCTGAGGGCTATTGAGGCGCAACAACATCTGTTGCAACTCACAGTCTGGGGCATC

>KT124806..1

TTCTACTGTGATACAAACAGAACTGTTTAATAGTACTTGGAGTATTAATGGTACTAGGAATACTACTGAAGGGT  
CAAATAGCACAGACATCACACTCCAATGTAGAATAAAACAAATTATAAACATGTGGCAGGAAGTAGGGAAAGC  
AATGTATGCCCTCCCATTAGAGGACAAATTAGATGTTTCATCAAATATTACAGGGCTGCTATTAACAAGAGAT  
GGTGGTAGCGGAGTGAGACTAAAAACGAGACTGAAACCTTCAGACCTGGAGGAGGAAATATGAAGGATAATT  
GGAGAAGTGAATTATATCAATATAAAGTAGTAAAAATTGAACCATTAGGAGTAGCACCCACCAGGGCAAAGAG  
AAGAGTGGTGAGAGAGAAAAAAGAGCAGTGACACTAGGAGCTGTGTTCCCTTGGGTTCTTGGGAGCAGCAGGA  
AGCACTATGGGCGCAGCGTCAATAACGCTGACGGTACAGGCCAGACAATTATTGTCTGGAATAGTGCAACAGC  
AAAGCAATCTGCTGAGAGCTATTGAGGCGCAACAGCATCTGTTGCAACTCACAGTCTGGGGCATC

>EF593290..1

TTTTACTGTGATACAAACAGAGCTGTTTAATAGTACTTGGAAATAACTGATAGTACTCGGAATGATACTGAGT  
CAGACAAAATCACCTCCAATGTAGAATAAAACAAATTATAAACATGTGGCAGGAAGTAGGAAAAGCAATGTA  
TGCCCTCCCATCCAAGGACAAATTCAATGTAACCTCAAGTATTACAGGGCTACTATTAACAAGAGATGGTGGG  
AACAACTCCACTAATTCCACCGAGATATTAGACCTGGAGGAGGAGACATGAGGGATAATTGGAGAAGTGAAT  
TATATAAATATAAAGTAGTAAAAATTGAACCATTAGGAGTGGCACCCACCAAGGCAAAGCAGAGTGGTACA  
GAGAGAAAAAAGAGCAATAACGATGGGAGCTATGTTCCCTTGGGTTCTTGGGAGCAGCAGGAAGCACTATGGGC  
GCAGCGTCAATAGCGCTGACGGCACAGGCCAGACTATTATTGTCTGGTATAGTGCAACAGCAGAACAATCTGC  
TGAGAGCTATTGAGGCGCAACAGCATATGTTGCAACTCACAGTCTGGGGCATC

>JX863967..2

TTCTACTGTAATACAAACCACTGTTTAATAGTACTTGGAAATGAACTCAACTGTTTAATAGTACTTGGAAATG  
AACTGAGGCAAATGGAACAATTACACTCCCATGCAGAATAAAACAAATTATAAACATGTGGCAGGAAGTAGG  
AAAAGCAATGTATGCCCTCCCATCGAAGGACAAATTTACTGTTCTTCAAACATTACAGGGCTACTGTTATTA  
AGGGATGGTGGTAATACCACAAACGGGACTGAGATCTTCAGACCTGGAGGAGGAGACATGAGGGACAATTGGA  
GAAGTGAATTATATAAATATAAAGTAGTAAAAATTGAACCATTAGGAGTAGCACCCACTAGGGCAAAGAGAAG  
AGTGGTGAGAGAGAAAAAAGAGCAGTGGGAATAGGAGCTATGTTCCCTTGGGTTCTTGGGAATGGCAGGAAGC  
ACTATGGGCGCAGCGTCACTAACGCTGACGGTACAGGCCAGACAATTGTTGTCTGGTATAGTGCAACAGCAGA  
ATAATTTGCTGAGAGCTATTGAGGCGCAACAGCACCTGTTGCAACTCACAGTCTGGGGCATC

>KT124764..2

TTCTACTGTAATACCACACAACCTGTTTAATAGTACTTGGTATGCAAACAATACAAATAGTACTGAAGGGGGAA  
ACAGTGGGAATATCACACTCCCATGCAGAATAAAACAAATTTATAAACATGTGGCAGGAAGTAGGAAAAGCAAT  
GTATGCCCTCCCATCAGTGGACAGATTAAATGTACATCAAATATTACAGGGCTGCTATTAACAAGAGATGGT  
GGTCAAGGCAATCAGACCAACAACCAGACTGAGATCTTCAGACCTGTAGGAGGAGATATGAAGGACAATTGGA  
GAAGTGAATTATATAAATATAAAGTAGTAAAGATTGAACCATTAGGAATAGCACCCACCAGGGCAAAGAGGAG  
AGTGGTGAGAGAGAAAAAAGAGCAGTGGGAATAGGAGCGTTGTTCCCTTGGGTTCTTGGGAGCAGCAGGAAGC  
ACTATGGGCGCAGCGTCAATGACGCTGACGGTACAGGCCAGACTATTATTGTCTGGTATAGTGCAACAGCAGA  
ACAATCTGCTGAGAGCTATTGAGGCGCAACAGCATCTGTTGCAACTCACAGTCTGGGGCATC

>KT124814..1

TTCTACTGTAATACAACACCATTATTTTAATAGTACTTGGAATAATACTAGAAATATCAGTGGTCTTGAAGGGT  
CAAAGGACAATGGAAATATCACCCCTCCAATGCAGAATAAAACAAATTATAAACATGTGGCAGGAAGTAGGAAA  
AGCAATGTATGCCCCCTCCCATCAGAGGACAAATTCAATGCTCATCAAATATTACAGGACTCCTATTAACAAGA  
GATGGTGGTACTAATGTTACTGATAACACCACTGAGATCTTCAGACCTGGAGGAGAAGATATGAGGGACAATT  
GGAGAAGTGAATTATATAAAATATAAAGTAGTACAAATTGAACCATTAGGAGTAGCACCCACCAAGGCAAGGAG  
AAGAGTGGTGCAGAGAGAAAAAAGAGCAGTGGGAATAGGAGCTTTGTTCTTGGGTCTTGGGAGCAGCAGGA  
AGCACTATGGGCGCAGCGTCAGTGACGCTGACGGTACAAGCCAGACAATTATTGTCTGGTATAGTGCAGCAGC  
AGAACAATCTGCTGAGGGCTATTGAGGCGCAACAGCATATGTTGCAACTCACAGTCTGGGGCATC

>EU578104..1

TTCTACTGTAACACAGCACAACTGTTTAATACTATTTGGAATAATACTTGGAATAGTAATGGGAATGATACTG  
AAGGGGATAATAAAACAATCATACTCCCGTGCAGAATAAAACAAATTGTAAACAGGTGGCAGGAAGTAGGAAA  
AGCAATGTATGCCCCCTCCCATCAGCGGAATCATTAACCTGTTTATCAAACATTACGGGGCTGCTATTAACAAGA  
GATGGTGGAAATAACAGTAGTACCAACGAGACCTTCAGACCTGGAGGAGGAGATATGAGGGACAATTGGAGAA  
GTGAACTCTATAAATATAAAGTAGTAAAAATTGAGCCATTAGGAGTAGCACCCACCAAGGCAAAAAGAAGAGT  
GGTGCAGAGAGAAAAAAGAGCAGTGGGAACGTTAGGAGCGATGTTCTTGGGTCTTGGGAGCAGCAGGAAGC  
ACTATGGGCGCAGCGTCAGTGACGCTGACGGTACAGGCCAGACAATTATTGTCTGGTATAGTGCAACAGCAGA  
ATAATCTGTTGAAGGCTATTGAGGCGCAACAGCATCTGTTGCAGCTCACAGTCTGGGGCATC

>JQ403105..1

TTCTACTGTAATACAACAAAACTGTTTAATAGTACTTGGTATGAAAATGGTACAAATAGTACTTGGTATGCAA  
ATGGTACAAATAGTACTGGAGAGGGAAACAGTGATATTATCACAATCCCATGCAGAATAAAACAATTTATAAAA  
CATGTGGCAGGAAGTAGGAAAAGCAATGTATGCCCCCTCCCATCAGTGGACAGATTAGATGTTTCATCAAACATT  
ACAGGGCTGCTATTAACAAGAGATGGTGGTGAAGGCAATCAAACCAACAACCAGGAGATCTTCAGACCTGTAG  
GAGGAGATATGAAAAACAATTGGAGAAGTGAATTATATAAATATAAAGTAGTAAGAATTGAACCATTAGGAAT  
AGCACCCACCAAGGCAAAAAGGAGAGTGGTGCAGAGAGAAAAAAGAGCAGTGGGAATAGGAGCGTTGTTCTT  
GGGTCTTGGGAGCAGCAGGAAGCACTATGGGCGCAGCGTCAATGACGCTGACGGTACAGGCCAGACTATTAT  
TGTCTGGTATAGTGCAACAGCAGAACAATCTGCTGAGAGCTATTGAGGCGCAACAGCATCTGTTGCAACTCAC  
AGTCTGGGGCATC

>EU578230..2

TTCTACTGTAATACATCAGGACTGTTTAATGGTACTTGGAATGGTACTAGCACTTGGAATGATACTGCAAATT  
ATACTGCAAATGAGAATATCACACTCCCATGCAGAATAAAACAAATTATAAACATGTGGCAGGAAGTAGGAAA  
AGCAATGTATGCCCCCTCCCATCAGAGGACAAATTAACTGTTTCATCAAAAATTACAGGGCTGCTATTAACAAGA  
GATGGTGGCCATCACAACGGCAGCAACAACGACACAGAAATCTTCAGACCTGGAGGAGGAGATATGAGGGACA  
ATTGGAGAAGTGAATTATATAAATATAAAGTAGTAAAAATTGAACCATTAGGAGTAGCACCCACCAGGGCAAA  
AAGAAGAGTGGTGCAGAGAGAAAAAAGAGCAGTGGGAATGGGAGCTTTGTTCTTGGGTCTTGGGAGCAGCA  
GGAAGCACTATGGGCGCAGCGTCACTAACGCTGACGGTACAGGCCAGACAATTATTGTCTGGTATAGTGCAAC  
AGCAGAACAACTCTGCTGAGGGCTATTGATGCGCAACAACATCTGTTGCAACTCACAGTCTGGGGCATT

>FJ469754..1

TTCTACTGTAATACAACAAGACTGTTTAATAGTAATTGGAATAGCAGTACTTGGAATAACACTGAAGGGTTAA  
ATACCACTAACCTTGAGAGAAAATGACACAATCATACTCCCATGCAGAATAAAACAGATTATAAACACGTGGCA  
GAAAGTAGGAAAAGCAATATATGCCCCCTCCCATCGAAGGACAAATTAAATGTATATCAAATATTACAGGGCTG  
CTATTATTAAGAGATGGTGGTATAAATGTGAGTGAGACCAACGAAACCTTCAGACCTGGAGGAGGAGATATGA  
AGGATATTTGGAGAAGTGAATTATATAAATATAAAGTAGTAAAAATTGAACCATTAGGAATAGCACCCAAACAA  
GGCAAAGAGAAGAGTGGTGCAGAGAGAAAAAAGAGCAGTGGGAATAGGAGCTGTGTTCTTGGGTCTTGGGA  
GCAGCCGGAAGCACTATGGGCGCAGCGTCAATGACGCTGACGGTACAGGCCAGACAATTATTGTCTGGTATAG  
TGCAACAGCAAAGCAATTTGCTGAGGGCTATTGAGGCTCAACAACATCTGTTGAAACTCACAGTCTGGGGCAT  
C

>FJ469757..2

TTCTACTGTAATTCCTCACAACTGTTTCAGTAGTACTTGGAATAGGACTAACGGGACTTGGAATGATGTTGAAG  
GGTTAAATTACACTAATGGAAATGACACAATCACACTCCCATGCAGAATAAAACAATATATAAACATGTGGCA  
GGAAGTAGGAAAAGCAATGTATGCCCCCTCCCATCAGAGGGCAACTTAATTGTTTCATCAAAGATTACAGGGTTG  
CTATTAAACAAGAGATGGTGTGAACGACACCGACAAAAATGAGACTTTCAGACCTCAAGGAGGGGATATGAAGG  
ACAATTGGAGAAGTGAATTATATAAATATAAAGTAGTAAAAATTGAACCGTTAGGGATAGCACCCACCAGGGC  
AAAGAGAAGAGTGGTGCAGAGAGAAAAAAGAGCAGTGGGATTAGGAGCTATGTTCTTGGGTCTTGGGAGCA  
GCAGGAAGCACTATGGGCGCAGCATCAATAACGCTGACGGTACAGGCCAGACAATTACTGTCTGGTATAGTGC  
AACAGCAGAACAACTCTGCTGAGGGCTATTGAGGCGCAACACCATCTGTTGCAACTCACAGTCTGGGGCATC

>GU330538..2

TTCTACTGTAATACAACAAAACTGTTTTATAGTAATTGGACTATTAATGGGACTATTGTGAGTAATTGGACAT  
ATGAAAATGACACTGGAACAAAATGACACTATCATACTCCCATGTAGAATAAAACAAATTATAAACATGTGGCA  
GGAAGTAGGAAAAGCAATGTATGCCCCCTCCCATCAAAGGACCAATTACATGTAACCTCAAGTATTACAGGGTTG

CTATTAACAAGAGATGGTGGTATTAACAGGACCAATAATGAGACCGAGATCTTCAGACCTGTAGGGGGAGATA  
TGAGGGACAATTGGAGAAGTGAATTATATAAATATAAAGTAGTAGAAATTC AACCATTAGGAATAGCACCCAC  
CAAGGCAAAGAGAAGAGTGGTGCAGAGAGAAAAGAGAGCGGTAACACTAGGAGCTATGTTCCCTTGGGTTCTTG  
GGAGCAGCAGGAAGCACTATGGGCGCAGCGTCAATGGCGCTGACGGTACAGGCCAGACAATTATTGTCTGGTA  
TAGTGCAACAGCAGAACAATCTGCTGAGGGCTATTGAGGCGCAACAGCACATGTTGCAACTCACAGTCTGGGG  
CATT

>GU330550..3

TTCTACTGTAATTTAACACAACCTGTTTAATAGTACTTGGAATATTACTGACAGATTAAATAATAATGAAACTC  
AAGGAAATGACACAACAATTCACCTCCCGTGCAGAATAAAACAAATTATAAACATGTGGCAAGAAGTAGGAAA  
AGCAATGTATGCCCCCTCCCATCAGGGGGATAATTAGATGTTTCATCAAATATTACAGGGCTGCTATTAACAAGA  
GATGGTGGTACAAATACCACTGACAATGACACTGAGGTCTTCAGACCTGGAGGAGGAGACATGAGGGACAATT  
GGAGAAGTGAATTGTATAAAATACAAAGTAATACAAATTGAACCATTAGGAGTAGCACCCACTAAGGCAAAGAG  
AAGAGTGGTGCAGAGAGAAAAAAGAGCAGTGGGAATAGGAGCTGTGTTCCCTTGGGTTCTTGGGAGCAGCAGGA  
AGCACTATGGGCGCAGCGTCAGTGACGCTGACGGTACAGGCCAGACAATTATTGTCTGGTATAGTGCAGCAGC  
AGAGCAATCTGCTGAGGGCTATTGAGGCGCATCAACATCTGTTGCAACTCACAGTCTGGGGCATC

>KT124781..1

TTCTACTGTAATTTCAACACCACTGTTTAATAGTGAATGGTCAGATAATAATACTTGGAATAGTGCTGAAGAAG  
GAAATGCCACAATCACACTCCAATGCAGAATAAAACAAATTGTAAACATGTGGCAGGAAGTAGGAAGAGCAAT  
GTATGCACCTCCCATCAAAGGAGTAATTAGCTGTACATCAAATATTACAGGACTGATATTAACAAGAGATCAT  
AGTAAGGATAATGTAACCTTCACCTTCAGACCTGGAGGAGGAAATATGAAGGACAATTGGAGAAGTGAATTAT  
ATAAAATATAAAGTAGTAAAAATGAACCATTAGGAGTAGCACCCACTACAGCCAAGAGAAGAGTGGTGCAGAG  
AGAAAAGAAGAGCAGTGGGAATAGGAGCTGTGTTCCCTTGGGTTCTTGGGAGCAGCAGGAAGCACTATGGGCGCA  
GCGTCAATAACGCTGACGGTACAGGCCAGACTATTATTGTCTGGTATAGTGCAACAGCAGAACAATCTGCTGA  
GAGCTATTGAGGCGCAACAGCACCTGTTGCAACTCACAGTCTGGGGCATC

>MH060965..1

TTCTACTGTAATTTCAACACAACCTGTTTAATAGTACTTGTTTACTGAGGATAATGCGACCGGCACTACCGGAA  
ATGAAACAATCATACTCCCATGCAGAATAAAACAAATTATAAACATGTGGCAGGAAGTAGGAAGAGCAATGTA  
TGCCCCCTCCCATCAGAGGACAAATTAAGTGTACATCAAATATTACAGGACTGATATTAACAAGAGATGGTGGT  
AATAACAATCACACTAATGAGAACGAAACCTTCAGACCTGGAGGAGGAGATATGAGGGACAATTGGAGAAGTG  
AATTATATAAATATAAAGTAGTAAAAGTTGAACCATTAGGAATAGCACCCCTCTAAGGCAAGGAGAAGAGTGGT  
GCAGAGAGAAAAAAGAGCAGCAGGACTAGGAGCTTTGCTCCTTGGGTTCTTGGGAGCAGCAGGAAGCACTATG  
GGCGCAGCGTCACTGACGCTGACGGTACAGGCCAGGCAATTATTGTCTGGTATAGTGCAACAGCAAAACAATT  
TGCTGAGGGCTATTGAGGCGCAACAGCATATGTTGCAACTCACAGTCTGGGGCATC

>FJ469731..1

TTCTACTGCAATTTCAACACCACTGTTTAATAAGACTTGGAATAAGAATGATATTAGGAATAATACTACTGGGA  
ATGATAATGACACTATCACACTCCAATGCAGAATAAAACAAATTATAAACATGTGGCAGGAAGTAGGAAAAGC  
AATGTATGCCCCCTCCCATTAGAGGACTAATCAGCTGTTTCATCAAATATTACAGGGCTACTATTAACAAGAGAT  
GGAGGTGATAACACAAGTAGGGCAAATGAGACCTTCAGGCCCTGGAGGAGGAAATATGAAGGACAATTGGAGAA  
GTGAATTATATAAATATAAAGTAGTAAAAATGAACCATTAGGAGTAGCACCCACCAGGGCAAAGAGAAGAGT  
GGTGCAGAGAGAAAAAAGAGCAGTGGGACTAGGAGCTTTATTCCTTGGGTTCTTGGGAGCAGCAGGAAGCACT  
ATGGGCGCAGCGTCGATAACGCTGACGGTACAGGCCAGACAATTATTGTCTGGTATAGTGCAACAGCAGAACA  
ATTTGCTGAGAGCTATTGAGGCGCAACAGCATCTGTTGCAACTCACAGTCTGGGGCATC

>HQ216397..1

TTCTACTGTAATTTCAACACTGCTGTTTAATAGTAGTTGGAAGAATGAGACCAATGCTGACGGGACAGAGGGCA  
ATGATACTATTACACTCCAATGCAGAATAAAACAAATCATAAACAGATGGCAGGAAGTAGGAAAAGCAATGTA  
TGCCCCCTCCCATCGCAGGACAAATTAAGTGTTCATCAAAAATTACAGGATTGCTATTAACAAGAGATGGTGGT  
AATCATACCGCCAACACCGAGACCTTCAGACCTGGAGGAGGAGATATGAGAGACAATTGGAGAAGTGAATTAT  
ATAAATACAAAGTAGTAAAAATGAGCCATTAGGAATAGCGCCACCAAGGCAAGGAGAAGAGTGGTGCAAAG  
AGAAAGAAGAGCAGTGGGAACATTTGGAGCTTTGTTCCCTTGGGTTCTTGGGAGCAGCAGGAAGCACTATGGGC  
GCAGCATCAGTGACGCTGACGGTACAAGCCAGACAATTATTGTCTGGTATAGTGCAACAGCAGAACAATCTGC  
TGAAGGCTATTGAGGCGCAACAACAGCTGTTGCAACTCACAGTCTGGGGCATC

>KT124758..1

TTCTACTGCAACACAACACAACCTGTTTAATAGTACTTGGAATGATACACAACCTGTCTAATAGCACTTGGAATA  
ATACAAGAGGGATAAATGACACTATCACACTCCAATGTAAAATAAAACAAATCATAAACATGTGGCAGAAGGT  
AGGAAAAGCAATGTATGCCCCCTCCCATCAGTGGACAAATTAGATGTTTCATCAAATATTACAGGGCTGATATTA  
ACAAGAGATGGTGGTAATACTGACAACACCACCCAGCCCCGAGATCTTCAGACCTCAAGGGGGAAATATGAAGG  
ACAATTGGAGAAGTGAATTATATAAATATAAGGTAGTAGCAATTGAACCATTAGGAATAGCACCCACCAAGGC  
AAAGAGAAGAGTGGTGCAGAGAGACAAAAGAGCAGTGGGAATGGGAGCTCTGTTCCCTTGGGTTCTTGGGAGCA  
GCAGGAAGCACTATGGGCGCAGCGTCAATAACGCTGACGGCACAGGCCAGACAATTATTGTCTGGTATAGTGC  
AACAGCAGAACAATTTGCTGAGGGCTATTGAGGCGCAACAGCATCTGTTGCAGCTCACAGTCTGGGGCATT

>JX863968..1

TTCTATTGTAATTCAACATCACTGTTTAAATAGTACTTGGAGGACAAATGAACTGCAGACTTAAATACTACAG  
AAATTATCACACTCCCATGCAGAATAAAACAAATTATAAACATGTGGCAAGAAGTAGGAAAAGCAATATATGC  
CCCTCCCATCGAAGGAAACATTACATGTGTATCAAATATTACAGGGCTGCTATTAACAAGAGATGGTGGTAAC  
AATAATCAGAGTAATGAGACGACTGAGATCTTTAGACCTGGAGGAGGAGATATGAGGGACAATTGGAGAAGTG  
AATTATATAAATATAAAGTAGTAAAAATTGAACCACTAGGAGTAGCACCCACCAAGGCAAAGAGAAGAGTGGT  
GCAGAGAGAAAAAAGAGCAGCGGGACTAGGAGCTGTGTTTCTTGGGTTCTTGGGAGCAGCAGGAAGCACTATG  
GGCGCAGCGTCAATAACGCTGACGGCACAGGCCAGGCAATTATTGTCTGGTATAGTGCAACAGCAAAATAACT  
TGCTGAGAGCTATTGAGGCGCAACAACATCTGTTGCAACTCACAGTCTGGGGCATC

>EF593190..1

TTCTACTGTAATACAACACGATTGTTTAAATAGTACTTGGGAGGCTAATGGTAATTGGACTGGAAGGAA  
ATGATAATGGCACAGTCACACTTCCATGCAGAATAAAACAAATTATAAACATGTGGCAACAAGTAGGAAAAGC  
AATGTATGCCCCCTCCCATTCGAGGAAAGATTACATGTAACTCAAGTATTACAGGAATACTATTAACAAGAGAT  
GGAGGTATCACTAACAACACCGAGACCCACACCGAGACCTTCAGACCTGGAGGAGGAGATATGAGGGACAATT  
GGAGAAGTGAATTATATAAAATATAAAGTAGTAAAAATTCAACCATTAGGAGTAGCACCCACCAAGGCAAGAAG  
AAGAGTGGTGCAGAGAGAAAAAAGAGCAGTGGGATTAGGAGCTATGTTCTTGGGTTCTTGGGAGCAGCAGGA  
AGCACTATGGGCGCAGCGTCAGTAACGCTGACGGTACAGGCCAGACAATTATTGTCTGGTATAGTGCAACAGC  
AGAACAACCTTGCTGAGGGCTATTGAGGCGCAACAGCATCTGTTGCAACTCACAGTCTGGGGCATC

>MH060681..1

TTCTACTGTAATTCAACACCACTATTTAAATAGTACACACAACAGTACTACTACAAGGTCAAATGAACTGAAC  
CAATCATACTCCAATGTAGAATAAAACAAATTGTAAACATGTGGCAGGAGGTAGGAAAAGCAATGTATGCCCC  
TCCCATTCGAGGACAAATTAAGTGTACATCAAATATTACAGGGCTACTGTTAACAAGAGATGGTGGCAATAAT  
CAGAGTAGAGAAAATAATACCGAGATCTTCAGACCTGGAGGAGGAAATATGAAGGACAATTGGAGAAGTGAAT  
TATATAAATATAAAGTAGTAAAAAGTTGAACCATTAGGAGTAGCACCCACCAAGGCAAAAAGAAGAGTGGTGCA  
AAGAGAAAAAAGAGCAGTGGGATTTCGGAGCTTTGTTCTTGGGTTCTTAGGAGCAGCAGGAAGCACTATGGGC  
GCAGCGTCAATGACGCTGACGGTACAGGCCAGACAATTATTGTCTGGTATAGTGCAACAGCAGAACAACTCTGC  
TGAGGGCTATTGAGGCGCAACAACATCTGTTGCAACTCACAGTCTGGGGCATC

>MH060990..2

TTCTACTGTAATACAACAAAACCTGTTTAAATAGTACTTGGAAATAGTACTGAGAATTTTGAGGGAGGGTCAGATA  
ACAATATCACACTCCCATGCAGGATAAAGCAAATTATAAACATGTGGCAGGAAGTAGGAAAAGCAATGTATGC  
CCCTCCCATCGCAGGACAAATTAGATGTTTCATCAAACATTACAGGGCTGATATTAACAAGAGATGGTGGTAGT  
CATAATGGTAGTAATAATAGTGAGACCTTCAGACCTGGAGGAGGAGATATGAGGGACAATTGGAGAAGTGAAC  
TTTATAAATATAAAGTAGTAAAAATTGAACCATTAGGAGTAGCACCCACTAAGGCAAAAAGAAGAGTGGTGCA  
GAGAGAAAAAAGAGCAGCAATAGGAGCTTTGTTCTTGGGTTCTTGGGAGCAGCAGGAAGCACTATGGGCGCA  
GCGTCAGTAACGCTGACGGTACAGGCCAGACTATTGTTGTCTGGTATAGTGCAACAGCAGAGCAATCTGCTGA  
AAGCTATTGAGGCGCAACAGCATCTGTTGCAACTCACAGTCTGGGGCATC

>DQ410526..1

TTCTATTGTAATACAACACCACTGTTTAAATAACTTGGTTTAAATAGTACTAATAATTTAAATGAAACAAAGG  
ACAACAACAACAACAATCATACTCCAATGCAGAATAAAACAAATTATAAACATGTGGCAGGAAGTAGGAAA  
AGCAATGTATGCCCCCTCCCATCAGGGGAAACATTAGCTGTTTCATCAAATATTACAGGACTATTATTAACAAGA  
GACGGTGGTCATAATGTGAGCAACACGAACGAGACTTTCAGACCTGGAGGAGGAGATATGAGGGACAATTGGA  
GAAGTGAATTATATAAATATAAAGTAGTAAGAATTGAACCATTAGGAATAGCACCCACCAAGCAAAGAGAAG  
AGTGGTGCAAAGAGAAAAAAGAGCAGTGGGATTAGGAGCTGTGTTTCATTGGGTTTCTGGGAGCAGCAGGAAGC  
ACTATGGGCGCAGCGTCAATGACGCTGACGGTACAGGCCAGACAATTATTGTCTGGTATAGTGCAACAGCAGAGCAATCTGCTGA  
ACAATCTGCTGAGAGCTATTGAGGCGCAACAGCATCTGTTGCAACTCACAGTCTGGGGCATT

>EF363127..1

TTCTACTGTAATACAACAGACTTGTTTACTTGGAAATGGTACTTGGAAATGGTACTGCAGGGGCAGATAACAATA  
CAATCACACTCCAATGCAGAATAAGACAAATTATAAACATGTGGCAGGAAGTAGGAAAAGCAATGTATGCCCC  
TCCCATCCCAGGATACCTTAACTGTTTCATCAAATATTACAGGACTGCTATTAACAAGGGATGGTGGTCATAAC  
ACGAATACTACTGAGATCTTCAGACCTGGAGGAGGAGATATGAGGGACAATTGGAGAAGTGAATTATATAAAT  
ATAAAGTAGTAAAAATTGAACCATTAGGAATAGCACCCACCAAGGCAAAGAGAAGTGGTGCAGAGAGAAAA  
AAGAGCAGTGGGAATAGGAGCTGTGTTCTTGGGTTCTTGGGAGCAGCAGGAAGCACTATGGGCGCAGCGTCA  
ATAACGCTGACGGTACAGGCCAGGCTATTATTGTCTGGTATAGTGCAACAGCAAAACAACCTTGCTGAGAGCTA  
TTGAGGCGCAACAGCATCTGTTGCAACTCACAGTCTGGGGCATC

>DQ410205..1

TTCTACTGTAATACATCACAACCTGTTTAAATAGTAATTGGACTTGGCCTGATACTGAAGGGTCAAATGACACTA  
ACACTAACGAAAATATCACACTCCCATGCAGAATAAAACAAATTATAAACATGTGGCAGGAGGTAGGAAAAGC  
AATGTATGCCCCCTCCCATCAGAGGACAAATTAGCTGTAAATCAAATATTACAGGACTGCTATTGACAAGAGAT  
GGTGGTCAGGACGAGAACGGGACCGAGACCTTCAGACCTGGAGGAGGAGATATGAGGGACAATTGGAGAAGTG  
AATTATATAAATATAAAGTAGTAAAAATTGAACCATTAGGAGTAGCACCCACCAAGGCAAAGAGAAGAGTGGT

GCAGAGAGAAAAAGAGCATTAGGAATAGGAGCCGTGTTCTTGGGTTCTTGGGAGCAGCAGGAAGCACTATG  
GGCGCAGCGTCAATGACGCTGACGGTACAAGCCAGACTGCTATTGTCTGGTATAGTGCAACAGCAGAACAATT  
TGCTGAGGGCTATTGAGGCGCAACAGCATCTGTTGCAACTCACAGTCTGGGGCATC

>FJ469733..1

TTCTACTGTAATTCAACACAACCTGTTTAATAGTACTTGGTATACTAATAATACTATGGAGGGGTACATGGTA  
ATGAGACAAATGGCACTATCACTCTCCCATGCAAAATAAGACAAATTGTAAACAAGTGGCAAGAAGTAGGAAA  
AGCAATGTATGCCCCCTCCCATTAGAGGACTAATTAGATGTTTCATCAAATATTACAGGGCTGCTATTAACAAGA  
GATGGTGGTCATAATAATAATAATAATACTAATGAGACCTTCAGACCTGGAGGAGGAGATATGAGGGACAATT  
GGAGAAGTGAATTATATAAAATACAAAGTAGTAAGAATTGAGCCATTAGGAGTAGCACCCACCAAGGCACAGAG  
AAGAGTGGTGCAAAGAGAGAAAAAGAGCAGTGGGACTAGGAGCTGTGTTCTTGGGTTCTTGGGAGCAGCAGGA  
AGCACTATGGGCGCAGCGTCAATAACGCTGACGGCACAGGCCAGACAATTATTGTCTGGTATAGTGCAACAGC  
AGAACAACCTGCTGAGAGCTATTGAGGCGCAACAGCATATGTTGCAACTCACAGTCTGGGGCATA

>JQ403107..1

TTCTACTGTGATACAACACAACCTGTTTAATAGCAGCTGGGAGGGGAATGGTACTAAAGATACTATAGAGTCAA  
ATGACACTGGAGGAAATATCACACTCCCATGTAGAATAAAACAGATTATAAACATGTGGCAGGAAGTAGGAAA  
AGCAATGTATGCCCCCTCCCATCAGTGGACCAATTAGCTGTTTCATCAAACATTACAGGGCTACTATTAACAAGA  
GATGGGGGTGATAACAATGACACTAACGGGAACGAGACCTTCAGACCTGGAGGAGGAAATATGAAGGACAATT  
GGAGAAATGAATTATATAAAATATAAAGTAGTAAAAATTGAACCACTAGGAGTAGCACCCACCAAGGCAAAGAG  
AAGAGTGGTGAGAGAGAAAAAGAGCAATGGGACTAGGAGCTATGTTTCATTGGGTTCTTGGGAGCAGCAGGA  
AGCACTATGGGCGCAGCGTCAGTGACGCTGACGGTACAGGCCAGACAATTACTGTCTGGTATAGTGCGCCAGC  
AGAACAATCTGCTGAGAGCTATTGAGGCGCAACAGCATATGTTGCAACTCACAGTCTGGGGCATC

>JN024100..1

TTCTACTGTAATACAACAAAACTGTTTAATAGTACTTGGAAATAGTACTGAGAATGTGGAGGAAGGGCCAGATA  
ACAATATCACACTCCCATGCAGGATAAAGCAAATTATAAACATGTGGCAGGAAGTAGGAAAAGCAATGTATGC  
CCCTCCCATCGCAGGACAAATTAGATGTTTCATCAAATATTACAGGGCTGATATTAACAAGAGATGGTGGTGAG  
AATAACAACGAGACCGAGACCTTCAGACCTGGAGGAGGAGATATGAGGGACAATTGGAGAAGTGAACCTTTATA  
AATATAAAGTAGTAAAAATTGAACCATTAGGAGTAGCACCCACTAAGGCAAAAAGAAGAGTGGTGAGAGAGA  
AAAAAGAGCAGCAATAGGAGCTTTGTTCTTGGTTTCTTGGGAGCAGCAGGAAGCACTATGGGCGCAGCGTCA  
ATAACGCTGACGGTACAGGCCAGACTATTGTTGTCTGGTATAGTGCAACAGCAGAGCAATCTGCTGAAAGCTA  
TTGAGGCGCAACAGCATCTGTTGCAACTCACAGTCTGGGGCATC

>HQ216601..2

TTCTACTGTGATACAACACAGCTGTTTAATAGTACTTGGAAATATTGAGAATGATACGAACAGGTCAAATGAAA  
GTGAAACAATTATACTTCCATGCAAAATAAAGCAAATTATAAACCTGTGGCAGGAAGTAGGAAAAGCAATGTA  
TGCCCCCTCCCATCAGAGATCAAATTAGATGCTCATCAAATATTACAGGGCTGCTATTAACAAGAGATGGTGGT  
AATAATACAACCTGAGAACATAACGAGACCTTCAGACCTGGAGGAGGAGATATGAGGGACAATTGGAGAAGTG  
AACTTTATAAATATAAAGTAGTAAAAATTGAACCATTAGGAATAGCACCCACTACTGCAAAAAGAAGAGTGGT  
GCAGAGAGAAAAAGAGCGGCACTAGGAGCCTTGTTCTTGGGTTCTTGGGAGCAGCAGGAAGCACTATGGGC  
GCAGCGTCAATAACGCTGACGGTACAGGCCAGACTATTGTTGTCTGGTATAGTGCAACAGCAGAACAAATCTGC  
TGAAGGCTATTGAGGCGCAACAGCATCTGTTGCAACTCACAGTCTGGGGCATC

>HQ216795..1

TTCTACTGTAACACATCACAGCTGTTTGATAGTACTTGGCTGTTTAATAAGACTGGGGATAATAATACTGAAG  
GGTCAAATGACACTATCATACTCCATGCAGAATAAAACAAATTATAAACAGGTGGCAGGAAGTAGGAAAAGGC  
AATGTATGCCCCCTCCCATCGCAGGACAAATTAGATGTCAATCAAATATTACAGGGGTGCTACTAACAAGAGAT  
GGGGGTAAAGAGTGGGAACGGTACTAATGAGACCGAAACATTCAGACCTGTTGGAGGAAATATGAAGGACAATT  
GGAGAAGTGAATTGTATAAATATAAGGTAGTAAAGATTGAACCATTAGGAGTAGCACCCACCAAGGCAAAGAG  
GCTAGTGGTGCAGAGAGAAAAAGAGCAGTGACGCTGGGAGCTATGTTTCATTGGGTTCTTGGGAGCAGCAGGA  
AGCACTATGGGCGCAGCGTCACTGACGCTGACGGTACAGGCCAGACAATTACTGTCTGGTATAGTGCAACAGC  
AGAACAATCTGCTGAGAGCTATTGAGGCGCAACAGCATCTGTTGCAACTCACAGTCTGGGGCATT

>JX863965..1

TTCTACTGTAATTGAGCACAACCTGTTTAATAGTACTTGGGATAATACTGCTGGGAATAATACAGCTGGAGAAA  
ATGACACAATCACACTCCCATGCAGAATAAAACAAATTGTAAATAGGTGGCAAGAAGTAGGAAAAGCAATGTA  
CGCCCCCTCCCATCAGCGGACCAATTAAATGTTTCATCAAATATTACAGGACTGCTATTAACAAGAGATGGTGGT  
CAAAATACAACATAAACCAGAAATTTTCAGACCAGGAGGAGGAGATATGAGGGACAATTGGAGAAGTGAAT  
TATAATAAATATAAAGTAGTAAAAATTGAACCATTAGGAGTAGCACCCACTAAGGCAAAGAGAAGAGTGGTGCA  
GAGAGAAAAAGAGCAGTGGGAATAGGAGCTATGTTCTTGGGTTCTTGGGAGCAGCAGGAAGCACTATGGGC  
GCAGCATCAATAACGCTGACGGTACAGGCCAGACAATTATTGTCTGGTATAGTGCAACAGCAGAACAAATCTGC  
TGAGAGCTATTGAGGCGCAACAGCATCTGTTGCAACTCACAGTCTGGGGCATT

>JF320043..1

TTTTACTGTAATACAACAAAACTATTTAATAGCACTTGGGAGCCTAATAATGTAACTGTCACTGGTGATAATG  
ACACAATCACACTCCCATGCAGAATAAAACAAATTGTAAACTTGTGGCAGGAAGTAGGAAAGAGCAATGTATGC

CGCTCCCATCAGAGGACTGATCAGATGTTTCATCAAATATTACAGGGCTACTATTAACAAGAGATGGTGGTGT  
GATAACAATCAGACCAATGTGACTAATAACACAGAAACCTTCAGACCAGGAGGAGAGATATGAGGGACAATT  
GGAGAAGTGAATTATATAAAATATAAAGTAGTAAAAATTGAACCATTAGGAGTAGCACCCACCAAGGCAAAGAG  
AAGAGTGGTGCAGAGAGAAAAAGAGCAATGGGATTTCGGAGCTTTTTTCTTGGGTCTTGGGAGCAGCAGGA  
AGCACTATGGGCGCAGCGTCAATAACGCTGACGGCAGAGCCAGACAATTATTGTCTGGTATAGTGCAACAGC  
AAAACAATTTGCTGAGGGCTATTGAGGCGCAACAACACCTGTTGCAACTCACAGTCTGGGGCATC

>EU577873..1

TTCTACTGTAATACAACAAAACCTGTTTAATAGTACTTGAATACTACTAGTATTTGGAATAATACTGCAGAGA  
ATAATACTACAGGGTCAAATGAACTGAACCAATCACACTCCCATGCAGAATAAAACAAATTATAAATATGTG  
GCAGGAAGTAGGAAAAGCAATGTATGCCCCCTCCCATTAAGGAAACATTAGCTGTTTCATCAAATATTACAGGA  
TTGATATTAACAAGAGATGGTGGTAACGTTAACGGGACCAATGGAACCTGAAATCTTTAGACCTGCAGGAGGAA  
ATATGAAGGACAATTGGAGGAGTGAATTATATAAAATATAAAGTAGTAAAAATTGAGCCATTAGGAGTAGCACC  
CACCAAGGCAAAGAGAAGAGTGGTGCAGAGAGAAAAAGAGCAGTGGGATTTCGGAGCTGTGTTCTTGGGTTC  
TTGGGAGCAGCAGGAAGCACTATGGGCGCAGCGTCGGTGACGCTGACGGTACAGGCCAGACAACCTATTGTCTG  
GTATAGTGCAACAGCAAAACAATTTGCTGAGAGCTATTGAGGCGCAACATCATCTGTTGCAACTCACCGTTTG  
GGGCATC

>KT124778..1

TTCTACTGTAATACGTCACAACTGTTTAATAGTACTTGGCTGGGGAATGACACTGAAAGGTTAAACAGAACTG  
AAGGGTCAGACAGCACTGAAAGTAATCACACTCCAGTGTAGAATAAAACAAATTATAAACATGTGGCAGGAAGT  
AGGAAAAGCAATGTATGCCCCCTCCCATCGCAGGACAAATTAACCTGTTTCATCAAATATTACGGGGCTACTATTA  
ACAAGAGATGGTGGTTACAATGATACTAGCCAGAACGAGACCTTCAGACCTGGGGGAGGAGATATGAGGGACA  
ATTGGAGAAGTGAATTATATAAAATATAAAGTAGTAAGAAATTGAACCATTAGGAGTAGCCCCACCAAGGCAAA  
GAGAAGAGTGGTGCAAAGAGAAAAGAGCAGTGGGATTAGGAGCTGTGTTCTTGGGTCTTGGGAGCAGCA  
GGAAGCACTATGGGCGCAGCGTCAGTGACGCTGACGGTACAGGCCAGACAATTATTGTCTGGTATAGTGCAAGC  
AGCAAAACAATTTGCTGAAGGCTATTGAGGCGCAACACCATCTGTTGCAACTCACAGTCTGGGGCATC

>DQ410562..2

TTCTACTGTAATACAACACTGCTGTTTGATAGTACTTGGGATGATAATAATAGAAGTTTGAATTTGAATAATA  
CTAATAGAAACATCACACTCCCATGCAAGATAAAACAAATTATAAACAGGTGGCAGGAAGTGGGAAAAGCAAT  
GTATGCCCCCTCCCATTCAGGAGTAATTCAATGTTTCATCAAATATTACAGGGCTGTTATTAGTAAGAGATGGT  
GGCAACACTGCTAACAATACTGCTAACAAAACCTGAGACCTTCAGACCTGGAGGAGGAAATATGAAGGACAATT  
GGAGAAGTGAATTATATAAAATATAAAGTAGTAAAAATTGAACCATTAGGAGTGGCACCCACCAAGGCAAAGAG  
GAGAGTGGTGCAGAGGGAAAAAGAGCAGTGGGAATAGGAGCTATGTTCTTGGATTCTTAGGAGCAGCAGGA  
AGCACTATGGGCGCAGCGTCAATAACGCTGACGGTACAGGCCAGGCAATTATTGTCTGGTATAGTGCAACAGC  
AGAACAATCTGCTGAGAGCTATTGAGGCGCAACAGCATCTGTTGCAACTCACAGTCTGGGGCATC

>FJ469717..1

TTCTACTGTAATACAACACAGCTGTTTAATAGTACTTGGTTTACTAATGGCACTTGGATTAATGGTACTGTGT  
TAAATACAAATGATACTGACAAGGGAAACATCACACTCCCATGTAAAATAAAACAAATTATAAACATGTGGCA  
GGAAGTAGGAAAAGCAATATATGCCCCCTCCCATCAAAGGACCAATTAACCTGTACATCAAATATTACAGGGATA  
ATAATAACAAGAGATGGTGGTAATAACACGGGCGAAAAATAAAATAAACTTTCACTGAACTTTTCAGACCTG  
GAGGAGGAAATATGAGGGATAATTGGAAAAGTGAACCTATATAAATATAAAGTAGTACAGATTCAACCAATAGA  
AATAGCACCCACCAGGGCAAAGAGAAGAGTGGTGCAGAGAGAAAAAGAGCAGTGGGAGCGCTGGGAGCTGTG  
TTCCTTGGGTCTCTTGGGAGCAGCAGGAAGCACTATGGGCGCAGCGTCAATAACGCTGACGGTACAGGCCAGAC  
AATTATTGTCTGGTATAGTGCAACAGCAGAACAATCTGCTGAAGGCTATTGAGGCGCAACAGCATCTGTTGCA  
ACTCACAGTCTGGGGCATC

>FJ469724..1

TTCTACTGTAATACAACACAACCTGTTTAATAGTACTTGAATAATGATACTTGAATGATAATAAACTGAAG  
GAAATGGCACAAATTACACTCCAATGCAGAATAAAACAAATTTATAAACCTGTGGCAGAAAGTAGGAAAAGCAAT  
ATATGCCCCCTCCCATCCAAGGAAATATTAGCTGTTTCATCAAATATTACAGGGCTGCTATTAAACAAGGGATGGT  
GGTGTTAACGGGAGCGAGCACACGAGACACTCAGACCTGGAGGAGGAGATATAAAAGACAATTGGAGAAGTG  
AATTATATCAATATAAAGTAGTAAAAATTGAACCATTAGGAATAGCACCCACTGCAGCAAGAGAAGAGTGGT  
GCAGAGAGAAAAAGAGCAGCAGGAATAGGAGCTCTGCTCCTTGGGTCTTGTGACAGCAGGGAAGCACTATG  
GGCGCAGTGTGAGTGACGCTGACGGTACAGGCCAGACAATTATTGTCTGGTATAGTGCAACAGCAAAACAATT  
TGCTGAGAGCTATTGAGGCGCAACAGCATCTGTTGCAACTCACGGTCTGGGGCATC

>FJ653159..1

TTCTATTGTAATACAACACAACCTGTTTAATAGTAATTGGAATGAGAGTAGTATTAATAGTACTTGAATAGTA  
CTTGGAAAGTCAAATGACCCAAAATGACACCATCACACTCCCATGCAGAATAAAACAAATTATAAACATGTGGCA  
AGAAGTGGGAAAAGCAATGTATGCCCCCTCCCATCAAAGGTGTAATTCAGTGTTCATCAAATATTACAGGGCTG  
CTATTAAACAAGAGATGGTGGGAGTAATGAGACTAATACCACCGAGACTTTTCAGACCTGGGGGAGGAGATATGA  
GGGACAATTGGAGAAGTGAACCTATACAAATATAAAGTAGTAAAAATTGAACCATTAGGAGTAGCACCCACCAA  
GGCAAAAAGAAGAGTGGTGCAAAGAGAAAAAGAGCAGTGGGAACAATAGGAGCTATGTTCTTGGGTCTTGTG

GGAGCAGCAGGAAGCACTATGGGCGCAGCGTCAGTGACGCTGACGGTACAAGCCAGACAATTATTGTCTGGTA  
TAGTGCAGCAGCAGAGCAATTTGCTGCAGGCTATTAATGCACAACAACATTTGCTGCAACTAACAGTCTGGGG  
CATC

>FJ653573..1

TTTTACTGTAATACAACAACCACTGTTTAATAGTACTTGGAATATGACTGGTACCTGGAATGATACCTGGAATG  
GTAATAAAAGGTCAAATGAACTGACAATATCACACTCCCATGCAGAATAAAACAAATAGTAAACAGGTGGCA  
GGAAGTAGGCAAAGCAATGTATGCCCCCTCCCATCAGAGGAAGCATTAGATGTTTCATCAAATATTACAGGGCTG  
CTATTAACAAGAGATGGGGGGATTTCATAATAGCACTGAGGCAAATAAAGTACTGAGATTTTCAGACCTGGAGGAG  
GAGACATGAGGGACAATTGGAGAACTGAATTATATAAGTATAAAGTAGTGAAAATTGAACCATTAGGAGTAGC  
ACCCACCAAGGCAAGGAGAAAGAGTGGTGCAGAGAGAAAAAGAGCAGTGGGAGCACTAGGAGCTATGTTCCCTT  
GGGTTCTTGGGAGCAGCAGGAAGCACTATGGGCGCAGCGTCACCTGACGCTGACGGTACAGGCCAGACAATTGT  
TGTCTGGTATAGTGCAACAGCAGAACAACCTGCTGAGAGCTATTGAGGCGCAACAGCATCTGTTGCAACTCAC  
AGTCTGGGGCATC

>EU578629..1

TTCTACTGCAATACAACAAAACTGTTTCAGTAGTACTTGGAATAGTACTACTTGGGATAGTTGGAATAGTACTG  
AAACAAATAGCACTGACAGAAATATCACACTCCCATGCAGAATAAAACAAATTATAAACATGTGGCAGGAAGT  
AGGAAGAGCAATGTATGCCCCCTCCCATCAGAGGACAAATTAGATGCTCATCAAATATTACAGGGCTGATATTA  
ACAAGAGATGGTGGTAACAATACAATACAACGAGACCTTCAGACCTCAAGGAGGAAACATGAAGGACAATT  
GGAGAAGTGAATTATATAAAATATAAAGTAGTAAAAATTGAACCCTAGGAATAGCACCCACCAAGGCAAAGAG  
AAGAGTGGTGCAGAGAGAAAAAGAGCAGTGGGAATGGGAGCTTTGTTCCCTTGGGTTCTTGGGAGCAGCAGGA  
AGCACTATGGGCGCAGTGTGATGACGCTGACGGTACAGGCCAGACAATTATTGTCTGGTATAGTGCAACAGC  
AGAATAATCTGCTGAGAGCTATTGAGGCGCAACAGCATCTGTTGCAACTCACAGTCTGGGGCATC

>HQ217860..1

TTCTACTGTAATACAACAAAACTATTTAATAGTACTTGGAATATAGAAACAATACTTAAGCATACTAAAAATA  
GTAATGACACAACTCACTATTACACTCCAATGCAGAATAAAACAAATTGTAAACATGTGGCAGGAAGTAGG  
AAAAGCAATGTACGCCCCCTCCCATCAGAGGAATAATTAAGTGTACATCAAATATTACAGGGCTGCTATTAACA  
AGAGATGGGGGTCTATAACAACAGCACCAACGAGACCTTCAGACCGGGAGGAGGAGATATGAGAGACAATTGGA  
GAAGTGAATTATACAATATAAAGTAGTAAAAGTTGAACCATTAGGAATAGCACCCACCAAGGCAAAAAGAAG  
AGTGGTGCAGAGAGAAAAAGAGCAGTGGGAATAGGAGCTGTGTTCCCTTGGGTTCTTGGGAGCAGCAGGAAGC  
ACTATGGGCGCAGCGACAGTGACGCTGACGGTACAGGCCAGACAATTATTGTCTGGTATAGTGCAACAGCAGA  
GCAATTTGCTGAGAGCTATTGAGGCGCAACAGCATCTGTTGCAGCTCACAGTCTGGGGCATC

>JF689865..1

TTCTACTGTAATACAACAAAACTGTTTAATAGTACTTGCCCTTGGAATGTTACTGGGTCAAATGTTACTGGGT  
TAAATGACACAATCACAATTCATGCAGAATAAAACAAATTATAAACATGTGGCAGGAAGTAGGAAAAGCAAT  
GTATGCCCCCTCCCATCCAAGGACAAATTAGATGTTTCATCAAATATTACAGGGCTACTATTAACCAGAGATGGT  
GGTAATACAATGAGAGCAATACCACCGAGACCTTCAGACCTGGAGGAGGAGATATGAGGGACAATTGGAGAA  
GTGAATTATATAAATATAAAGTAGTAAAATTGAACCATTAGGAGTAGCACCCACCAAGGCAAAGAGAAGAGT  
GGTGCAGAGAGAAAAAGAGCAGTGGGACTAGGAGCTCTGTTCCCTTGGGTTCTTGGGAGCAGCAGGAAGCACT  
ATGGGCGCAGCGTCAATGACGCTGACGGTACAAGCCAGGCAATTATTGTCTGGTATAGTGCAACAGCAAAAACA  
ATTTGCTGAGGGCTATTGAAGCGCAACATCACCTGTTGCAACTCACAGTCTGGGGCATC

>JF689874..1

TTCTACTGTAATACAACAAAGCTGTTTACAAGCGGTTTGATTGGAATAGGACTGAAGGGTTAAATGACACTG  
CAGGAAATAACACTGGAGGAAATAACATCATAATCCCATGCAGAATAAAACAAATTATAAACATGTGGCAAGA  
AGTAGGAAAAGCAATATATGCCCCCTCCCATCAGTGAGCAATTAAGTGTACATCAAACATTACTGGGCTGCTA  
TTAATAAGAGATGGTGGGATAGCCCCGGGGACAGACAATACTAGTGAAACCTTCAGACCTCAAGGAGGGAATA  
TAAGAGATAATTGGAGAAGTGAATTATATAAATATAAAGTAGTAAAATTGAACCATTAGGACTAGCGCCAC  
CAAGGCAAGGAGAAGAGTGGTGCAGAGAGAAAAAGAGCAATGGGACTAGGAGCTTTGTTCCCTTGGGTTCTTG  
GGAGCAGGAGCACTATGGGCGCAGCGTCACCTGACGCTGACGGTACAGGCCAGACAATTATTGTCTGGTA  
TAGTGCAACAGCAGAACAATTTGCTGAGAGCTATTGAGGCGCAACAGCATATGTTGCAACTCACAGTCTGGGG  
CATC

>JF689875..1

TTCTACTGTAATACAACACAACCTGTTTAATAGTACTTGGAATGAGAATAGTACTAAAGAAGGAAATGGAAATG  
ACACAATAACCACACTCCCATGCAGAATAAAACAAATTATAAACATGTGGCAAGAAGTAGGAAAAGCAATGTA  
TGCCCCCTCCCATCAGAGGAAACATTAGCTGTACATCAAATATTACAGGGCTGCTATTAACAAGAGATGGTGGG  
AATAATGAGACCGAGACCTTCAGACCTGGAGGAGGAAATATGAAGGATAATTGGAGAAGTGAATTATATAAAT  
ATAAAGTAGTAAAATTCAACCATTAGGAGTAGCACCCACCAAGGCAAAGAGAAGAGTGGTGCAGAGAGAAAA  
AAGAGCAGTGGGACTAGGAGCTGTGTTCCCTTGGGTTCTTGGGAGCAGCAGGAAGCACTATGGGCGCAGCGTCA  
ATAACGCTGACGGTACAGGCCAGACAATTATTGTCTGGTATAGTGCAACAGCAGAACAATTTGCTGAGGGCTA  
TTGAGGCGCAACAGCATCTGTTGCAACTCACAGTCTGGGGCATC

>JX863990..1

TTCTACTGTAATACAACACAACACTGTTTAAATAGTACTTGGAATTCTACTACTTTGAATTCTACTAGTACTGGGA  
ATGGGACCATCACACTCTCATGTAGAATAAAACAAATTATAAACAGGTGGCAGGAAGTAGGAAAAGCAATGTA  
TGCTCCTCCCATCAGAGGACAAATTAAGTGTTTCATCAAATATTACAGGGCTACTGTTAACAAGAGATGGTGGT  
CACACAAACAACACCAACAAAACCTGAGACCTTTAGACCTGGAGGAGGAGACATGAGGGACAATTGGAGAAGTG  
AATTATACAAATATAAAGTAGTAAAAATTGAACCATTAGGAATAGCACCCACCAAGGCAAGGAGAAGAGTGGT  
GCAGAGAGAAAAAAGAGCAATAGGAATAGGAGCTGTGTTCCCTTGGGTTCTTGGGAACAGCAGGAAGCACTATG  
GGCGCAGCGGCAGTGACGCTGACGGTACAAGCCAGACAATTACTGTCTGGTATAGTGCAACAGCAAAACAATT  
TGCTGAGGGCTATTGAGGCGCAGCAGCATCTGTTGCAACTCACAGTCTGGGGCATC

>JF320363..1

TTCTACTGTAACACAGCAAAAACCTGTTTGATACATCACAACTACAACCTGTCTAATAGCAGCACTGAAGAAAAATG  
ACACACTCACAAATTCATGCAGAATAAAACAAGTTATAAACAGGTGGCAGGAAGTAGGAAAAGCAATGTATGC  
CCCTCCCATCAGAGGACAAATTAATGTGTATCAAACATTACAGGGCTGCTATTAAACAAGAGATGGTGGAAAAG  
ACTGAGGATAATACTACTAATACTACTGAGGTCTTCAGACCTCAAGGAGGAAAATATGAAAGATAAATTGGAGAA  
GTGAATTATATAAATATAAGGTAGTAAGAACTGAACCATTAGGAGTAGCACCCACCAAGGCAAAGAGAAGAGT  
GGTGCAGAGAGAAAAAAGAGCAATAGGGGGATTAGGAGCGTTGTTCCCTTGGGTTCTTGGGAGCAGCAGGAAGC  
ACTATGGGCGCAGCGTCAATAACGCTGACGGCACAGGCCAGACAATATTGTCTGGTATAGTGCAACAGCAGAGA  
ATAATTTGCTGAGAGCTATTGAGGCGCAACAACATCTGTTGCAACTCACAGTCTGGGGCATC

>JF320036..1

TTCTACTGTAATACAACACAGCTGTTTAAATATTAGTAGTACACAACCTGTTTAAATAGTACTTGGAATAGTACCG  
AAGGGCTAAACACAAAAAATATCACACTCCAATGCAGAATAAAACAAATTATAAACATGTGGCAGCAAGTAGG  
AAAAGCAATGTATGCCCCCTCCCATCAGAGGACCAATTAATGTATATCAAATATTACAGGGCTGCTGTTAACA  
AGAGATGGTGGGAAGATAAATGAGAGTAGGGCAAATGAGACTGAGACCTTCAGACCTGGAGGAGGAGATATGA  
GGGACAATTGGAGAAGTGAACCTCTATAAATATAAAGTAGTAAAAATTAAACCATTAGGAGTAGCACCCACTAA  
GGCAAAAAGAAGAGTGGTGCAGAGAGAAAAAAGAGCAGTGGGACTAGGAGCATTGTTCCCTTGGGTTCTTGGGA  
GCAGCAGGAAGCACTATGGGCGCAGCGTCAATAACGCTGACGGTACAGGCCAGACAATTATTGTCTGGTATAG  
TGCAACAGCAGAACAACTCTGCTGAGGGCTATTGAGGCGCAACAGCACCTGTTGCAACTCACAGTCTGGGGCAT  
C

>JF320502..1

TTCTACTGTAATACAACAAAACTGTTTAAATAGCATTGGAATGAAACACAACCTGTTTAAATAGTACTTGGAATG  
AGACTGAAAGAGGAGTCAATATCACACTCCCATGTAGAATAAAACAAATTATAAATATGTGGCAGGAAGTAGG  
AAAAGCAATGTATGCCCCCTCCCATCAGAGGAATAATTCAATGTACATCAAACATTACAGGACTGATATTAACA  
AGAGATGGTGGTAAAAAATAATGGGAGTGAAACCTCCAATGGGAATGAAACCTTCAGACCTGGAGGAGGAG  
ATATGAGAGACAATTGGAGAAGTGAATTATATAAATATAAAGTAGTAAAGTTGAACCATTAGGAATAGCACC  
CACTAGGGCAAGGAGAAGAGTGGTGCAGAGAGAGAAAAAGAGCAGTGGGAATAGGAGCTGTGTTCCCTTGGGTTT  
TTGGGAGCAGCAGGAAGCACTATGGGCGCAGCGTCAATAACGCTGACGGTACAGGCCAGACAATTATTGTCTG  
GTATAGTGCAACAGCAGAACAACTCTGCTGAAAGCTATTGATGCGCAACAGCATCTGTTGCAACTCACAGTCTG  
GGGCATC

>JF320151..2

TTCTACTGTAATACAACAGAGCTGTTTAAATGATACTTGCTGAGTAATAATACTTGCTGTCAAATTATACTG  
AGAGTAATAATAACTGCTAAAAATATCGTACTCCCATGCAGAATAAAACAAATTATAAACAGATGGCAGGA  
AGTAGGAAAAGCAATGTATGCCCCCTCCCATCAGTGGAATAATTAGATGCTCATCAAATATTACAGGGCTGCTC  
TTAACAAGAGATGGTGGTAATCATAACACTAGTAATGACACCGAGACTTTTCAGACCAGGAGGAGGAGATATGA  
GGGATAATTGGAGAAGTGAATTATATAAATATAAAGTAGTAAAAATTGAGCCATTAGGAGTAGCACCCACCAA  
GGCAAGGAGAAGAGTGGTGCAGAGAGAGAAAAAAGAGCAGTGGGACTAGGAGCTTGTTCCTTGGGTTCTTGGGA  
GCAGCAGGAAGCACTATGGGCGCAGCATCAGTGACGCTGACGGTACAAGCCAGACAATTATTGTCTGGTATAG  
TGCAACAGCAAAACAATTTGCTGAGGGCTATTGAGGCGCAACAGCATATGTTGCAACTCACAGTCTGGGGCAT  
T

>JF320145..1

TTCTACTGTAATTCAACAAAACTGTTTAGCAGTGCTTGCTTACTAATAATACTAATAGTAGTAATACTGAAG  
GGTCAAATGACACTGTTATCATACTTCCATGCAAAATAAAACAAATTATAAACATGTGGCAGGAAGTAGGAAG  
AGCAATGTATGCCCCCTCCCATCGCAGGAACATTAGCTGTTTCATCAAATATTACAGGACTGCTGTTAACAAGA  
GATGGTGGTCACACGGAACCTGCCAACACCACAGAAATCTTCAGACCTGGAGGAGGAGATATGAGGGACAATT  
GGAGAAGTGAATTATATAAATATAAAGTAGTAAAAATTGAACCATTAGGAGTAGCACCCACCAAGGCAAGGAG  
AAGAGTGGTGCAGAGAGAGAAAAAAGAGCAGTAACAGTGGGAGCTGTGTTCCCTTGGGTTCTTGGTGCAGCAGGA  
AGCACTATGGGCGCAGCGTCACTGACGCTGACGGTACAGGCCAGACTACTGTTGTCTGGTATAGTGACAGCAGC  
AGAGCAATCTGCTGAGGGCTATTGAGGCGCAACAACAACCTGTTGCAACTCACAGTCTGGGGCATC

>HQ908232..2

TTCTACTGTAATACAACAAGGCTGTTTAAATAGTACTTGCGAGTCCAATAGTACGGGGGAATGATACTGGAGGGT  
CAAATAACACTGAACCTATCACACTCCTATGCAGAATAAAACAAATTGTAAACAGGTGGCAAGAAGTAGGAAA  
AGCAATGTATGCCCCCTCCCATCAGAGGACAAATTTACTGTAGATCAAATATTACAGGGCTGCTATTAAACAAGG

GATGGTGGTAATGTCCAGAACAAACATGACTGAGACCTTCAGACCAGGAGGAGGAGATATGAGGGACAATTGGA  
GAAGTGAATTATATAAATATAAAGTAGTAAAAATTCAGCCATTAGGAATAGCACCCACCGGGGCAAAGAGAAG  
AGTGGTGCAGAGAGAAAAAGAGCGGTGACACTGGGAGCTATGTTCCCTTGGGTTCTTGGGAGCAGCAGGAAGC  
ACTATGGGCGCAGCGTCAATAACGCTGACGGTACAGGCCAGACAATTACTGTCTGGTATAGTGCAACAGCAGA  
ACAATCTGCTGAAGGCTATTGATGCGCAGCAGCATATGTTGCAACTCACCGTCTGGGGCATC

>KM353665..1

TTCTACTGTAATACAACAAAATTGTTTAATAGTACTTGGTATAATAATAGTACTTGGAAATAACTGGAGGAA  
ATGACACATTCCACTCCCATGTAGAATAAAACAAATTATAAACATGTGGCAGACAGTAGGAAGAGCAATGTA  
TACCCCTCCCATCAGAGGATTAATTAAGTGTACATCAAATATTACAGGGCTGATATTAACAAGAGATGGTGGG  
GGTGGTAACGAGAGTAATCATACCACAGAGGTCTTCAGACCTGCAGGAGGAGATATGAGGGACAATTGGAGGA  
GTGAATTATATAAATACAAAAGTAGTAAAAATTGAACCATTAGGAATAGCACCCACCAGGGCAAAAAGAAGAGT  
GGTGCAGAGAGAAAAAGAGCAGTGGGGATGGGAGCTCTGTTCCCTTGGGTTCTTAGGAGCAGCAGGAAGCACT  
ATGGGCGCAGCGTCAATAACGCTGACGGTACAGGCCAGACAATTATTGTCTGGTATAGTGCAACAGCAGAGCA  
ATTTGCTGAAGGCTATTGAGGCGCAACAGCATCTGTTGCAACTCACAGTCTGGGGCATC

>JN687750..1

TTCTACTGTGATACAAAAAGCTGTTTAATAGTACTTGGTGGGTTAATAATACTTGGAAAGGCACTAAAGGGG  
ATGAGACTAGGAATGGCACAATCGAACTCCCATGCAGAATAAAACAAATTATAAACATGTGGCAGGAAGTAGG  
AAAAGCAATGTATGCCCTCCCATCAGAGGACAAATTCAGTGTTCATCAAATATTACAGGGCTGCTATTAAACA  
AGAGATGGGGGTAATAATGAAACGAACGGAACAGAAACCTTCAGACCTGGAGGAGGAGATATGAGGGACAATT  
GGAGAAGTGAATTATATAAATATAAAGTAGTAAAAATTGAGCCATTAGGAATAGCACCCGGCAGGGCAAGAG  
AAGAGTGGTGCAGAGAGAAAAAGAGCAGTGGGACTAGGAGCTATGTTCCCTTGGGTTCTTGGGAGCAGCAGGA  
AGCACTATGGGCGCAGCGTCAATAACGCTGACGGTACAGGCCAGACAATTACTGTCTGGTATAGTGCAACAGC  
AGAACAACCTTGCTGAGAGCTATTGAGGCGCAGCAGCATATGTTGCAACTCACAGTCTGGGGCATC

>HM204582..1

TTTTATTGTAATACATCAGAACTGTTTAAAAGTACCTGGAATAGTACTGATACCTTCAACAGTACTGGAGAGA  
GAGGGAATGACACAATCATTCTCCCATGCAAAATAAGGCAAGTTGTAAACATGTGGCAGGAAGTAGGAAAAGC  
AATGTATGCCCTCCTATCAGAGGTCAAATTAAGTGTTCATCAAATATTACAGGGCTGCTATTAAACAAGAGAT  
GGTGGTGATAAAAAATAGTACAAACGAGACCTTCAGACCTGGAGGAGGAGATATGAGGGACAATTGGAGAAGTG  
AATTATATAAATATAAGGTAGTAAAAATTGAACCATTAGGAATAGCACCCACCAAGGCAAAGAGAAGAGTGGT  
GCAAAGAGAAAAAGAGCAGTGGGAATAGGAGCTTTGTTCCCTTGGGTTCTTGGGAGCAGCAGGAAGCACTATG  
GGCGCAGCGTCACTGACGCTGACGGTACAAGCCAGACTATTATTGTCTGGTATAGTGCAACAGCAGAAACAATT  
TGCTGAGGGCTATTGAGGCGCAACAGCATCTGTTGCAACTCACGGTCTGGGGCATC

>HM204589..1

TTCTACTGTAATTCAACACAATTGTTTAATAGTACTTGGGATAAGAATGGTAGTAGAATAAATGGAACCTGAAG  
GAGAAAGTGGTACCATCACACTCCCATGCAGAATAAAACAAATTATAAACATGTGGCAGGAAGTAGGAAAAGC  
AATGTATGCCCTCCCATCAGAGGACAAATTTATTGTTTCATCAAATATTACAGGGATGCTATTAAACAAGAGAT  
GGTGGTACTAATGATACTGACAAAAACGACACCGAGACCTTCAGACCTGGAGGAGGAGATATGAGGGATAATT  
GGAGAAGTGAATTATATAAATATAAAGTAGTAAAAATTGAGCCATTAGGAGTAGCACCCACCAAGGCAAAGAG  
AAGAGTGGTGCAGAGAGAAAAAGAGCAGTGGGATTGGGAGCTCTGTTCCCTTGGGTTCTTGGGAGCAGCAGGA  
AGCACTATGGGCGCAGCGTCACTGACGCTGACGGTACAGGCCAGACAATTATTGTCTGGTATAGTGCAACAGC  
AGAACAATCTGCTGAGGGCTATTGAGGCGCAACAGCATCTGTTGCAACTCACAGTCTGGGGCATC

>KY112061..1

TTCTACTGTAATTCAACACAGCTGTTTAATAGTGCTTGGCCTTGGGAATGATACTGAAGGGTCAAATGACGCTA  
AAAAAGATAATATCACACTCCCATGCAAAATAAAACAAATTATAAACATGTGGCAGGGAGTAGGAAAAGCAAT  
GTATGCCCTCCCATCGAAGGAAAAATTAAATGCTCATCAAATATTACAGGACTGCTATTAAACAAGAGATGGT  
GGTTATGAGAACAATGAGACCAAGCCCGAGATCTTCAGACCTGGAGGAGGAGATATGAGGGACAATTGGAGGA  
GTGAATTATATAAATATAAAGTAGTAAAAATTGAACCATTGGGAGTAGCACCTACCAAGGCAAAGAGAAGAGT  
GGTGCAGAGAGAAAAAGAGCATTTGGACTAGGAGCTGTGTTCCCTTGGGTTCTTGGGAGCAGCAGGAAGCACT  
ATGGGCGCAGCATCAATAACGCTGACGGTACAGGCCAGACAATTATTGTCTGGTATAGTGCAACAGCAGAAACA  
ATTTGCTGAGGGCTATTGAGGCGCAACAGCATCTGTTGCAACTCACAGTCTGGGGCATC

>EU576345..1

TTCTACTGTGATACAACAAAACCTGTTTAATAGTACTTGGGGGAATAGTACTTGGGGGTATAAAATGACAAATG  
ACACTGCAAAAGACAACATCACACTCCCATGTAGAATAAAACAAATTATAAACATGTGGCAGGAAGTAGGAAA  
AGCAATGTATGCCCTCCCATCAAAGGACAAATTAGATGTACATCAAATATTACAGGGTTGGTGTAAACAAGA  
GATGGTGGTGGTGGTAGTGGTACAAATAACACCACAGAGATCTTCAGACCTGGAGGAGGAGATATGAGGGACA  
ATTGGAGAAGTGAATTATATAAATATAAAGTAGTAAGAAATTGAACCATTAGGAATAGCACCCACCAAGGCAAA  
GAGAAGAGTGGTGCAGAGAGAAAAAGAGCAGCAATAGGAGCTATGTTCCCTTGGGTTCTTGGGAGCAGCAGGA  
AGCACTATGGGCGCAGCGTCAATAACGCTGACGGTACAGGCCAGACTATTATTGTCTGGTATAGTGCAACAGC  
AGAACAATCTGCTGAGGGCTATTGAGGCGCAACATCAACTGTTGCAACTCACAGTTTGGGGCATC

>EU576383..1

TTCTACTGTAATTCAACACAACCTGTTTAAACAGTACTTGGCATAGTAACAGTACTTGGAAATGATACTGGAAAGT  
CAGAAAATAATACAAAAATCATCACACTCCCATGCAGAATAAAACAAATTATAAACATGTGGCAGGAAGTAGG  
AAAAGCAATGTATGCCCCCTCCTATCAGAGGACAAATTAGATGTTTCATCAAATATTACAGGGCTGATACTAACA  
AGGGATGGAGGTATGGAGGTAATGACAATAACCAGACCACCGAGACCTTCAGACCTGGAGGAGGAAATATGA  
AGGACAATTGGAGAAGTGAATTATATAAATATAAAGTAGTAAAAATTGAACCATTAGGAGTAGCACCCACCCC  
GGCAAAAAGAAGAGTGGTGCAGAGAGAAAAAAGAGCATTAGTGGGATTTCGGAGCTCTGTTTCCTTGGGTTCTTG  
GGAGCAGCAGGAAGCACTATGGGCGCAGCGTCAATAACGCTGACGGTACAGGCCAGACAATTACTGTCTGGTA  
TAGTGCAACAGCAAAACAATTTGCTGAAGGCTATTGAGGCGCAACAGCATCTGCTGCAACTCACAGTCTGGGG  
CATC

>KX129209..1

TTCTACTGTAATTCAACACAACCTGTTTAAATAGTACGTGGATTGGGAATAGCACTGAAGAGTCAAATGGCACTG  
AAAAATCATCACACTCCCATGTAGAAATAAAACAATTTGTAAATCTGTGGCAGGAAGTAGGAAGAGCAATGTATGC  
CCCTCCCATCAGAGGACTAATTAAATGTTTCATCAAATATTACTGGGCTGTTGTTAACGAGAGATGGTGGTCAG  
TCTGACAATACTACCAACGGGACCGAGACCTTTAGACCTGGAGGAGGAAATATGAAGGACAATTGGAGAAGTG  
AATTATATAAATATAAAGTAGTACAAATTGAACCATTAGGAATAGCACCCACCAAGGCAAAGAGAAGAGTGGT  
GCAGAGAGAAAAAAGAGCAGTGGGACTAGGAGCTTTGTTTCCTTGGGTTCTTGGGAGCAGCAGGAAGCACTATG  
GGCGCAGCGTCAGTGACGCTGACGGTACAGGCCAGACAATTATTGTCTGGTATAGTGCAGCAGCAGAAACAAT  
TGCTGAGAGCTATTGAGGCGCAACAACATATGTTGCAACTCACAGTCTGGGGCATC

>KM259534..1

TTCTACTGTAATACAACAAAACTGTTTAAATAGTACTTGGAAATGGGACTAATATTGATATTGGAAACAGTACGA  
AAGATGACAATATCACACTCCCATGCAGAATAAAACAAATTATAAATAGGTGGCAAGAGGTAGGAAAAGCAAT  
GTATGCCCCCTCCCATCAGAGGACAAATTAGATGTTTCATCAAACATTACAGGGCTGCTATTAAACAAGAGATGGT  
GGTAATAGCAATAACACCAACGAGACCACCGAGACCTTCAGACCTACAGGAGGAAAATATGGAGGACAATTGGA  
GAAGTGAATTATATAAATATAAAGTAGTGCAATTCAACCATTAGGAGTAGCACCCACCGAGGCAAAGAGAAG  
AGTGGTGCAGAGAGAAAAAAGAGCAGTGGGATTAGGAGCTATGTTTCCTTGGGTTCTTGGGAGCAGCAGGTAGC  
ACTATGGGCGCAGCGTCAATAACGCTGACGGTACAGGCCAGACAATTACTGTCTGGTATAGTGCAACAGCAGA  
ACAATTTGCTGAGGGCTATTGAGGCGCAACAGCATATGTTGCAACTCACAGTCTGGGGCATC

>HQ217957..1

TTCTACTGTAATACATCAGAACTGTTTAAATAGTACCTGGAATATAACACACTTTAATAGTACCTGGAATGATA  
CTGAAGGATCAAATAACATCACACTCCCATGCAGAATAAAACAAATTATAAATATGTGGCAACAAGTAGGAAA  
AGCAATGTATGCCCCCTCCCATCCAAGGATTAATTCAATGTTTCATCAAATATTACAGGGCTGCTATTAAACAAGA  
GATGGAGGTAATAATAGTACTAACGAGATCTTCAGACCTGGAGGAGGGGATATGAGGGACAATTGGAGAAGTG  
AATTATATAGATATAAAGTAGTAAGAATTGAACCATTAGGAGTAGCACCCACCAAGGCAAGGAGAAGAGTGGT  
GCAAAGAGAAAAAAGAGCAGTGGGAACAATAGGAGCTATGTTTCCTTGGGTTCTTGGGAGCAGCAGGAAGCACT  
ATGGGCGCAGCGTCAGTGACGCTGACGGTACAGGCCAGACAATTATTGTCTGGAATAGTGCAACAGCAAAACA  
ATTTGCTGAAGGCTATTGAGGCGCAACAACACCTGTTGCAACTCACAGTCTGGGGCATC

>HQ217984..1

TTCTACTGTAATTCAACACAACCTGTTTAAATAGTACTTGGACTAGGGAAAATGGTAGTTGGACTAGGAATGATA  
CCGCTGCAAATGAGACTGAGATTATCACACTCCCATGCAGAATAAAACAAATTATAAACATGTGGCAGGAAGT  
AGGAAAAGCAATGTATGCCCCCTCCCATCAAAGGACTTATTCAATGTTTCATCAAATATTACAGGATTGTTATTA  
ACAAGAGATGGTGGTAATAATAGCAACATCAATGAGATCTTTAGACCTGGAGGAGGAGATATGAGGGACAATT  
GGAGAAGTGAATTGTACAAATATAAGGTAGTAAAAATTGAACCATTAGGAGTAGCACCCACCAAGGCAAGGAG  
GAGAGTGGTGCAAAGAGAGAAAAAGAGCAGTGGGACTAGGAGCTCTGTTTCCTTGGGTTCTTGGGAGCAGCAGGA  
AGCACTATGGGCGCAGCGTCATTGACGCTGACGGTACAGGCCAGACAATTATTGTCTGGTATAGTGCAACAGC  
AGAACAAATATGCTGAGGGCTATTGAGGCGCAGCAGCACCTGTTGCAACTCACAGTCTGGGGCATC

>JF689886..1

TTCTACTGTAATTCAACACAACCTGTTTAAATAGTACTTGGACTAAATATGATAATGGAACCTTGGGTTAAGAAGA  
ATGGCACTGAATGGGTGAATGATACAATCACACTCCCATGCAGAATAAAACAAATTATAAACATGTGGCAGGA  
AGTAGGAAAAGCAATGTATGCCCCCTCCCATCAGGGGACTAATTAAATTGTATATCAAATATTACAGGGATACTG  
CTAACAGAGATGGTGGTCAGGTTAATGGTACCAATGAGACCTTCAGACCAGGAGGAGGAGATATAAAGGATA  
ATTGGAGAAGTGAATTATATAAATATAAAGTAGTAAAAATTGAACCATTAGGAGTAGCACCCACCAAGGCAAG  
GAGAAGAGTGGTGCAGAGGGAAAAAAGAGCAATTGGAATAGGAGCTTTGTTTCCTTGGGTTCTTGGGAGCAGCA  
GGAAGCACTATGGGCGCAGCGTCAGTGACGCTGACGGTACAAGCCAGACAATTATTGTCTGGTATAGTGCAAC  
AGCAGAACAAATTTGCTGAGGGCTATTGAGGCGCAACAACATCTGTTGCAACTCACAGTCTGGGGCATC

>JF320385..1

TTCTACTGTAATACAACACAACCTGTTTAAATAGTACTTGGATTTCGGAATGATACTAAATGGTCAAGTAACTCTA  
CAGGAAATGGCACCATTATACTCCCATGCAGAATAAAACAAATTATAAACATGTGGCAGGAAGTAGGAAAAGC  
AATGTATGCCCCCTCCTATCAGAGGAAACATTAGCTGTTTCATCAAATATTACAGGGCTGCTATTAAACAAGAGAT  
GGGGGCAATAGTAATCAAACGACCCAGACCAAAGAAAACAGAAACCTTCAGACCTGGAGGAGGAGATATGAGGG  
ACAATTGGAGAAGTGAATTATATAAATATAAAGTAGTAAAAATTGAACCATTAGGAGTAGCACCCACCAAGGC

AAAGAGAAGAGTGGTGCAGAGAGAAAAAGAGCAGTGGGAATAGGAGCAATGTTCCCTTGGATTCTTGGGAGCA  
GCAGGAAGCACTATGGGCGCAGCGTCACTAACGCTGACGGTACAGGCCAGACAATTATTGTCTGGTATAGTGC  
AGCAGCAGAACAATCTGCTGAGAGCTATTGAGGCGCAACAGCATCTGTTGCAACTCACAGTCTGGGGCATC  
>JF320539..1

TTCTACTGTAATACAACACAATTGTTCAATAATACTTGGAAAGGTAAGTGAAGAAGAGAATAGTACTAGGAATA  
GTAATGACACCATCACACTCCCATGCAGAATAAAACAAATTGTAAACATGTGGCAGGAAGTAGGAAAAGCAAT  
GTATGCCCTCCCATCAGAGGACTAATTCAATGTACATCAAACATTACAGGGATAATATTAACAAGAGATGGT  
GGTAATAACACGAATACCACTGAGATCTTCAGACCAGGAGGAGGAGACATGAGGGACAATTGGAGAAGTGAAT  
TATATAAATATAAAGTAGTAAAAATTGAACCATTAGGAATAGCACCCACTAGGGCAAAGAGAAGAGTGGTGCA  
GAGAGAAAAAGAGCAGTGGGAATAGGAGCTTTGTTCCCTTGGGTTCTTGGGAGCAGCAGGAAGCACTATGGGC  
GCAGCGTCAATGACGCTGACGGTACAGGCCAGACTATTATTGTCTGGTATAGTGCAACAGCAGAACAATCTGC  
TGCAGGCTATTGAGGCGCAACAGCGTCTGTTGCAACTCACAGTCTGGGGCATC

>JF320131..1

TTCTATTGTAATACAACACAACCTGTTCAATAGTACTTGGGAGAGCAATATTACTACTGGGAATTGGAGCAAAA  
CTGAAGGATCAAATAACACTAACATCACACTCCCATGTAGAATAAGACAAATTGTAAACATGTGGCAGAAAAGT  
AGGAAAAGCAATGTATGCCCTCCCATCAGGGGACCAATTCATGTATATCAGATATCACAGGGCTGCTATTA  
ACAAGAGATGGAGGTAATAACGGGGACAATAACAACACAGAGACCTTCAGACCTGGAGGAGGAGATATGAGGG  
ACAATTGGAGAAGTGAATTATATAAATATAAAGTAGTACAAATTGAACCAATAGGAATAGCACCCACCAAGGC  
GCAGAGAAGAGTGGTGCAGAGAGAAAAAGAGCAGTGGGAGTAGGAGCTTTTCTCTTTGGGTCTTGGCAACA  
GCAGGAAGCACTATGGGCGCAGCGTCAATAACGCTGACGGTACAAGCCAGACAATTATTGTCTGGTATAGTGC  
AACAGCAGAGCAATTTGCTGAGGGCTATTGAGGCGCAACAGCATATGTTGCAACTCACAGTCTGGGGCATC

>HM638503..2

TTCTACTGTAATACAACAGGGCTGTTTAGTAGTACTTGGAAATGAGAGTACTACTTGGGAAAGGTCAAATGACA  
CTGAAATAATCACTCTCCCATGCAGAATAAAACAAATTATAAACATGTGGCAGGCAGTAGGAAAAGCAATATA  
TGCCCCCTCCCATCAGTGGACAAATTAATTGTTTCATCAAAATTTACAGGGCTGCTATTAACAAGAGATGGTGGT  
TACAAATGGTACGAATGACACCCAGACCGAGACCTTCAGACCTCAGGGAGGAAATATGAAAGACAATTGGAGAA  
GTGAATTATATAAATATAAAGTAGTAAAAATTGAACCATTAGGACTAGCACCCACCAAGGCAAAGAGAAGAGT  
GGTGCAGAGAGAAAAAGAGCAGTGGGAATAGGAGCTATGTTCTTTGGGCTCTTGGGAGCAGCAGGAAGCACC  
ATGGGCGCAGCGTCAGTGACGCTGACGGTACAGGCCAGAAAGTTGTTGTCTGGTATAGTGCAACAGCAGAACA  
ATCTGCTGAGGGCTATTGAGGCGCAACAGCATATGTTGCAACTCACAGTCTGGGGCATC

>KT124801..1

TTCTACTGTAATACAACCGAACTGTTTAATAGTACTTGGACTAGGAATAATGGTACCGGGTATGATGGGTCTA  
ATGGCACTGAAGGAAATGACACAATCACACTCCCATGCAGAATAAAACAAATTATAAACATGTGGCAGGAAGT  
AGGAAAAGCAATGTATGCCCTCCTATTAGAGGACAAATTAGATGCTCATCAAAATTTACAGGACTGATATTA  
ACAAGAGATGGGGGTCAAAGAAACGGGAGTACTAATGAGACCTTCAGACCAGGAGGAGGAAATATGAGGGACA  
ATTGGAGAAGTGAATTATATAAGTATAAAGTAATAAAAAATTGAACCACTAGGAGTAGCACCCACCAGGGCAAA  
GAGAAGAGTGGTGCAGAGAGAAAAAGAGCAGTGGGAATAGGAGCTGTGTTCCCTTGGGTTCTTGGGAGCAGCA  
GGAAGCACTATGGGCGCAGCGTCACTAACGCTGACGGTACAGGCCAGACAATTATTGTCTGGTATAGTGCAAC  
AGCAAAACAATTTGCTGAGAGCTATTGAGGCGCAACAACATATGTTGCAACTCACAGTCTGGGGCATC

>JN687763..1

TTCTACTGCAATACAACACAACCTGTTTAATAGTACTTGGAACTAATGGTACTTGGACAGGAAGTAATACTA  
ATAGCAGTAACATTACACTCCCATGCAGAATAAAACAAATTGTAAACATGTGGCAGGAAGTAGGAAAAGCAAT  
GTATGCCCTCCCATCAGCGGACTAATTCACTGTTTCATCAAATATTACAGGGCTGATATTAACAAGGGATGGT  
GGTAGTGGTAATGACACCAACAACAACACTGAGACCTTCAGACCTGCAGGAGGAGATATGAGGGACAATTGGA  
GAAGTGAATTATACAAATATAAAGTAGTAAAAATTGAACCATTAGGAGTAGCACCCACCAGGGCAAAGAGAAG  
AGTGGTGCAAAGAGAGAAAAAGAGCAGTGGGAATGGGAGCTCTGTTCCCTTGGGTTCTTGGGAGCAGCAGGAAGC  
ACTATGGGCGCAGCGTCAATGACGCTGACGGTACAGGCCAGACAATTATTGTCTGGTATAGTGCAACAGCAGA  
GCAATTTGCTGAGGGCTATTGAGGCGCAACAGCATCTGTTGCAACTCACAGTCTGGGGCATC

>JQ403073..1

TTCTACTGTAATACAACACAACCTGTTTGATGATAAATTGGCCTAATGGAACCTTGGATGTATAATAGCACTAGAA  
ATGACACTATCATACTCCCATGCAGGATAAAACAAATTGTAAACATGTGGCAGGAAGTAGGAAAAGCAATGTA  
TGCCCCCTCCCATCAAAGGACTAATTCAGTGAATTCAAGTATTACAGGGCTGCTATTAACAAGAGATGGTGGC  
ACTAATAACACCAACGAGACCTTCAGACCGGGAGGAGGAGACATGAGGGACAATTGGAGAAGTGAATTATATA  
AATATAAAGTAGTAAAAATTGAACCATTAGGAGTAGCACCCACCAAGGCAAAGAGAAGAGTGGTGCAGAGAGA  
GAAAAGAGCAGTGGGACTAGGAGCTCTGTTCCCTTGGGTTCTTGGGAGCAGCAGGAAGCACTATGGGCGCAGCG  
TCAATGGCGCTGACGGTACAGACCAGACAATTATTGTCTGGTATAGTGCAACAGCAGAACAATTTGCTGAGGG  
CTATTGAGGCGCAACAGCATCTGTTGCAACTCACAGTCTGGGGCATC

>JQ403078..1

TTCTATTGTAATACAACACAGCTGTTTAATAGTACTTGGAAATGGTACTGAGACTGAGAATAATACTACAGGGT  
CAAATAACACTGATAATATCAGACTCCCATGCAGAATAAAACAAATTGTAAACAGGTGGCAGGAAGTAGGAAA

AGCAATGTATGCCCCCTCCCATCGAGGGCATAATTAGTTGTTTCATCAAATATTACAGGGCTTTTATTAACCAGA  
GATGGTGGTAACGGGAGCAGTAACGCCGAGATCTTCAGACCTCAAGGAGGAGATATAAGGGACAATTGGAGAA  
GTGAATTATATAAATATAAAGTAGTAAAAATTGAGCCACTAGGAGTAGCACCCACCAAGGCAAAGAGAAGAGT  
GGTGCAGAGAGAAAAAAGAGCAGTGGGAATAGGAGCTGTGTTCCCTTGGGTTCTTGGGAGCAGCAGGAAGCACT  
ATGGGCGCAGCGTCAATAACGCTGACGGTACAGGCCAGACAATTATTGTCTGGTATAGTGCAACAGCAGAACAA  
ATCTGCTGAGGGCTATTGAGGCGCAACAACATCTGTTGCAACTCACAGTCTGGGGCATC

>JQ610064..1

TTCTATTGCAATACAACAGAACTGTTTACTTGAATTTAACACAACCTGTCTGAGAATTCAACTGGGAATGATG  
CTAATATCACACTCCCATGTAGAATAAAACAAATTATAAACATGTGGCAGGAAGTAGGAAAAGCAATGTATGC  
CCCCCCCATCAGCGGACCAATTAATTGCACATCAAATATTACAGGACTACTATTAACAAGAGATGGTGGTAAT  
AACAAATGACAGGACTAACAAATGGCAGTGATAGTAATAACAGTACTCAGACTGAGATCTTCAGACCTGGAGGAG  
GAGATATGAAGGACAATTGGAGAAAGTGAATTATATAAAATATAAAGTAGTAAGAATTGAACCATTAGGAGTAGC  
ACCCACCAAGGCAAAGAGAAAGAGTGGTGCAAAGAGAAAAAAGAGCGGTGGGAACGCTAGGAGCTTTGTTCCCTT  
GGGTTCTTGGGAGCAGCAGGAAGCACTATGGGCGCAGCGTCAATAACGCTGACGGTACAAGCCAGACAATTAT  
TGTCTGGTATAGTGCAACAGCAAAGCAATTTGCTGAGAGCTATTGAGGCGCAACAGCATCTGTTGCAACTCAC  
AGTCTGGGGCATC

>HQ217713..1

TTCTACTGTGATTCAACACCACTGTTTAAATAGGACCTGGATGGCTAATGAGACTTTGAATAGTACTACTTTGA  
ATAGTACTGGAGAGTCAAATAAAAAATATCACACTCGCATGCAGAATAAAACAAATTATAAACATGTGGCAGCG  
AGTAGGGAAAGCAATGTATGCCCTCCTATCAGAGGACAAATTAGATGTTTCATCAAATATTACAGGGCTGCTG  
TTAACAAGAGATGGGGGTCAACAACAGGACTGGAGATAACAGGACTGAGATCTTCAGACCGGGAGGAGGAG  
ATATGAGGGACAATTGGAGAAAGTAAATTATATAAAATATAAAGTAGTAAAAATTGAACCATTAGGAGTAGCACC  
CACCAAGGCAAAGAGAAGAGTGGTGCAAGAGAAAAAAGAGTAGCGGGATTTCGGAGCTTTGTTCCCTTGGGTTT  
TTGGGAGCAGCAGGAAGCACTATGGGCGCAGCGTCAGTGACGCTGACGGTACAGGCCAGACAATTACTGTCTG  
GTATAGTGCAAGCAGCAGAACAAATTTGCTGAGGGCTATTGAGGCGCAACAGCATCTGTTGCAACTCACAGTCTG  
GGGCATC

>MK383397..2

TTCTACTGTAATTCAACACCACTGTTTAAATAGTACTTGGGAATGGTACTGACGAGTCAAATCACCATGGAGAAA  
ATGACACAATCATCACACTCCGCTGCAGAATAAAACAAATTATAAACATGTGGCAGGAAGTAGGAAGAGCGAT  
GTATGCCCTCCCATTAAAGGAAACATTAGCTGTTTCATCAAATATTACAGGGCTGCTATTAACAAGAGATGGT  
GGTAATGGTAACCGGACTGACAACAACCCGAGATCTTCAGACCTCAGGGAGGAAATATGAAAGATAATTGGA  
GAAGTGAATTATATAAATATAAAGTAGTAAGAATTGAACCATTAGGAATAGCACCCACCAAGGCAAGGAGAAG  
AGTGGTGCAAGAGAGAAAAGAGAGTAGTGGGAATGGGAGCTTTGTTCCCTTGGGTTCTTGGGAGCAGCAGGAAGC  
ACTATGGGCGCAGCGTCAGTGACGCTGACGGTACAAGCCAGACTATTACTGTCTGGTATAGTGCAAGCAGCAGCA  
ACAATTTGCTGAGGGCTATTGAGGCGCAACAGCGTCTGTTGCAACTCACAGTCTGGGGCATC

>KT124761..1

TTCTACTGTAATACAACAAAGCTATTTAAATAGTACTTGGGATCGGAATGGAACACAGATAAATGACACTATCA  
CAAATGACACTATCATACTCCCATGTAGAATAAAACAAATTCATAAACAGGTGGCAAGAAGTAGGAAAAGCAAT  
GTATGCCCTCCCATTAGAGGAGACATTAAGTGTTCATCACAGATTACAGGGCTGCTATTAACAAGAGATGGT  
GGTCAGAGCAATGACAGCAGTATGAATGAGATCTTCAGACCTGGAGGAGGAGATATGAGGGACAATTGGAGAA  
GTGAATTATATAAATATAAAGTAGTAAGAATTGAGCCATTAGGAGTAGCACCCACCAAGGCAAAAAGAAGGGT  
GGTGCAGAGAGAAAAAAGAGCAGTAACACTAGGAGCTGTGTTCCCTTGGGTTCTTGGGAGCAGCAGGAAGCACT  
ATGGGCGCAGCGTCAATAACGCTGACGGCACAGGCCAGACAATTATTGTCTGGTATAGTGCAACAGCAGAGCA  
ATCTGCTGAAAGCTATTGAGGCGCAACAGCGTCTGTTGCAACTCACAGTCTGGGGCATC

>KM353846..1

TTCTACTGTAATACATCAAAGTTGTTTAAACAGTACTTGGGAATGGCACTAAGGAATACCAGGGAGTGAATGGCA  
CACTCACACTCCCATGCAGAATAAAACAAATCATAAACAGGTGGCAAGAAGTAGGAAAAGCAATGTATGCCCT  
TCCCATCCAGGGAATATTAATTGCTCATCAAATATTACAGGGCTGCTATTAATGAGAGATGGTGGTAACAAG  
GGGAACGAAACCGATAATACTACCGAGATCTTTAGACCTGGAGGAGGAAATATGAGGGACAATTGGAGAAGTG  
AATTATATAAATATAAAGTAGTGAAGAATTGAACCATTAGGAGTAGCACCCACCAAGGCAAAAAGAAGAGTGGT  
GCAGAGAGAAAAAAGAGCGGTAACAGTGGGAGCTATGTTCCCTTGGGTTCTTGGGAGCAGCAGGAACCACTATG  
GGCGCAGCATCATTGACGCTGACGGTACAGGCCAGACAATTATTGTCTGGTATAGTGCAACAGCAAAGCAATT  
TGCTGAGGGCTATTCAGGCGCAACAGCATCTGTTGCAGCTCACAGTCTGGGGCATC

>KY112135..1

TTCTACTGTAATACAACAGAACTGTTTAAATAGTACTTGGGATAAGGATGGGACAAGGCTTAATGACACTGGAG  
GAGATGGCAACATCACACTCCCATGTAGAATAAAACAAATTATAAACATGTGGCAGGAAGTAGGAAAAGCAAT  
GTATGCCCTCCCATCAGAGGACAAATTAGCTGTGTATCAAATATCACAGGGCTACTATTAACAAGAGATGGG  
GGTGTAGACGATACTCAAAACGAAACCTTCAGACCTGGAGGAGGAGATATGAGGGACAATTGGAGAAGTGAAT  
TATATAAATATAAAGGTAGTAAAAATTGAACCATTAGGAGTAGCACCTAGCAAGGCAAAGAGAAGAGTGGTGCA  
AAGAGAAAAAAGAGCAGTGGGAACGTTAGGAGCCATGTTCCCTTGGGTTCTTGGGAGCAGCAGGAAGCACTATG

GGCGCAGCGTCACTGACGCTGACGGTACAGGCCAGACAATTATTGTCTGGTATAGTGCAACAGCAGAACAATC  
TGCTGAGAGCTATTGAGGCGCAACAGCATCTGTTGCAACTCACAGTCTGGGGCATC

>JQ403070..2

TTCTACTGTAATACAACAACACTGTTTAAATAGTACTTGGCTGTTTAAATGATACTTTGAATGATACTCAAGAGG  
AGTATGGTGAGAATAACGGGACTATCACACTCCCATGCAGAATAAAACAAATTATAAACAGATGGCAGGAAGT  
AGGAAAAGCAACATATGCCCCCTCCCATCAGAGGACAAATTAAATGTTTCATCAAATATTACAGGGATACTATTA  
ACAAGAGATGGTAGTCAAGGCAACGGGAGTGAGACCTTCAGACCAGGAGGAGGAGATATGAGGGACAATTGGA  
GAAGTGAATTATATAAAATATAAAGTAGTAAAAATTGAGCCATTAGGAGTAGCACCCACCAAGGCAAGGAGAAG  
AGTGGTGCAAAGGGAAAAAAGAGCAGTGGGAACGCTAGGAGCCATGTTCTTGGGTTCTTGGGAGCAGCAGGA  
AGCACTATGGGCGCAGCGTCAGTGACGCTGACGGTACAGGCCAGACAACACTATTGTCTGGTATAGTGCAACAGC  
AGAACAACCTGCTGAGAGCTATTGAGGCGCAACAGCATCTGTTGCAACTCACAGTCTGGGGCATC

>JQ403031..2

TTCTACTGCAATACAACAAAACTATTTAAATAGTACTTGGAAATAGTAGTAGTAGTGGGTTATTGAGGGTC  
AGGAAGAGTCAAATGACAATATCACACTCCCATGTAGAATAAAACAAATTATAAACATGTGGCAGGGAGTAGG  
AAAAGCAATGTATGCCCCCTCCCATCCAAGGAAAAATTAGATGTTTCATCAAACATTACAGGGCTATTATTAGTG  
AGAGATGGTGGTATTAACAAGACGAATGACACTGAAACCTTCAGACCTCAAGGAGGAAATATGATGGACAATT  
GGAGAAGTGAATTATATAAAATATAAAGTAGTAAAAATTGAACCATTAGGAATAGCACCCACCAAGGCAAAGAG  
AAGAGTGGTGCAGAGAGAAAAAAGAGCAGTGGGAATGGGAGCTTTGTTCTTGGGTTCTTGGGAGCAGCAGGA  
AGCACTATGGGCGCAGCGTCAATGGCGCTGACGGTACAGGCCAGACAATTATTGTCTGGTATAGTGCAACAGC  
AGAACAATCTGCTGAGAGCCATTGAGGCGCAACAGCATATGTTGCAACTCACAGTCTGGGGCATC

>JQ403085..1

TTCTACTGTAATACATCACAACACTGTTTAAAGGGTACCTGGTTGACTAATGATACCTGGGCTAATGGTACCTGGA  
CAAATGACACTAGCAAAAATGACAACATCACACTCCCATGCCGAATAAAACAAATTGTAAACTTGTGGCAGGA  
AGTAGGAAGAGCAATGTATGCCCCCTCCCATCAGAGGAGAAATTCATTGTATATCAAATATTACAGGGCTGTTA  
TTAACAAGAGATGGTGGCCAGAATGCAACCAACGAGACCTTCAGACCTGTAGGAGGAGATATGAGGGACAATT  
GGAGAAGTGAATTATATAAAATATAAAGTAGTAAAAATTGAACCATTAGGAGTAGCACCCACCAAGGCAAAGAG  
AAGAGTGGTGCAGAGAGAAAAAAGAGCAGTGGGACTAGGAGCTGTGTTCTTGGGTTCTTGGGAGCAGCAGGA  
AGCACTATGGGCGCAGCGTCACTGACGCTGACGGTACAGGCCAGGCAATTATTGTCTGGTATAGTGCAACAGC  
AAAACAACCTGCTGAGAGCTATTGAGGCGCAACAGCACCTGTTGCAACTCACAGTCTGGGGCATC

>JQ403094..1

TTCTACTGTAATACATCACGACTATTTAAATAGTACTTGGAACTACTAGTAGTATTTGGAATACTACTGGAAGGC  
CAAATATTACAGGGAGCACTGACATTATCATACTCCCATGCAGAATAAGACAAATTATAAACATGTGGCAGGA  
AGTAGGAAAAGCAATGTATGCCCCCTCCCATCAGAGGACGAATTCAGTGTAGCTCAAATATTACAGGGCTGCTA  
TTAACAAGAGATGGTGGTAATACTAATAACTCAGACGCACATGAGATCTTCAGACCTGGAGGAGGAGATATGA  
GGGACAATTGGAGAAGTGAATTATATAAAATATAAAGTAGTAAAAATTGAACCATTAGGAATAGCGCCACCAA  
GGCAAAGAGAAGAGTGGTGCAGAGAGAAAAAAGAGCAGTGGGAATGGGAGCTCTGTTCTTGGGTTCTTGGGA  
ACAGCAGGAAGCACTATGGGCGCAGCGTCAGTGACGCTGACGGTACAGGCCAGACAATTATTGTCTGGTATAG  
TGCAACAGCAGAGCAATCTGCTGAGGGCTATTGATGCGCAACAGCATCTGTTGCAGCTCACAGTCTGGGGCAT  
C

>KR423482..3

TTCTACTGTAATACAACGAAACTGTTTAAATAGTAGTTGGAATCAGAATGCTACTAATCAGAATGCTACTAACA  
ATGGAGGAAATGACACAATTACACTCCCATGTAGAATAAAACAGATTATAAACATGTGGCAGGAAGTAGGAAA  
GGCAATGTATGCCCCCTCCCATATAAAGGATTAATTAGATGTTTCATCAAATATTACAGGGCTGATATTAACAAGA  
GATGGTGGTAATGACAATAGCACAAACAACACTGAAATCTTCAGACCGGGAGGAGGAGATATGAGGGACA  
ATTGGAGAAGTGAATTATATAAAATACAAAGTAGTAAGAGTTGAACCATTAGGGATAGCACCCAACAAGGCAAA  
GAGGAGAGTGGTGCAGAGAGAAAAAAGAGCAGTGGGATAGGAGCTTTGTTCTTGGGTTCTTGGGAGCAGCA  
GGAAGCACTATGGGCGCAGCGTCAGTGACGCTGACGGTACAAGCCAGACAATTATTGTCTGGTATAGTGCAGC  
AGCAGAACAACTCTGCTGAGGGCTATTGAGGCGCAACAGCAACTGTTGCAGCTCACAGTCTGGGGCATC

>GU733713..2

TTCTACTGTAATACAACACTAGACTGTTCAATAGTACTTGGAAATGTTAGTACTTGGAAATATTAGTCAGACTGAAG  
GGTCATACAACACTGAAGAAAAATATCACACTCCCATGCAGAATAAAACAGATTGTAAACATGTGGCAGGAAGT  
AGGAAAAGCAATGTATGCCCCCTCCCATCAGAGGAATAATTAGATGTTTCATCAAATATTACAGGGATAATGTTA  
ACAAGAGATGGTGGTAAGAATAGGACAGAGAACACCACTGAGACTTTTCAGACCGGGAGGAGGAAATATGATGG  
ACAATTGGAGAAGTGAACATATAAAGTAGTAAAAATTGAACCATTAGGGGTAGCACCCACCAAGGC  
AAAGAGAAGAGTGGTGCAGAGAGAAAAAAGAGCAGCGGGACTAGGAGCTTTGTTCTTGGGTTCTTGGGAGCA  
GCAGGAAGCACTATGGGCGCAGCGTCACTGACGCTGACGGTACAGGCCAGACAATTATTGTCTGGTATAGTGC  
AACAGCAGAACAAATTTGCTGAGAGCTATTGAGGCGCAACAGCACCTGTTGCAACTCACAGTCTGGGGCATC

>MK164668..1

TTCTACTGTAATACAACAGAACTGTTTAAATAGTACTTGGGGTAATAGTAATAATACTAACAATAATACTGGAG  
GGGAAGAACTATCACTCTCCCATGCAGAATCAAACAAATTATAAACATGTGGCAGGAAGTAGGAAAAGCAAT

GTATGCCCCCTCCCATCAGAGGACAAATTAGGTGTTTCATCAAAGATTACAGGGCTAATATTAACAAGAGATGGT  
GGCAACGAGAACAACGACAGTGAGATCTTCGAGATCTTCAGACCTACAGGAGGAAATATGAGGGACAATTGGA  
GAAGTGAATTATACAAATATAAAGTAGTAAAAATTGAACCATTTAGGAATAGCACCCACCAAGGCCAAAAAGAAG  
AGTGGTGCAGAGAGAAAAAGAGCAGTGGGAATACTAGGAGCTATGTTCTTTGGGTCTTTGGGCGCAGCAGGA  
AGCACTATGGGCGCAGCGTCACTGACGCTGACGGTACAGGCCAGACAACCTCTTGTCTGGTATAGTGCAACAGC  
AGAACAACCTGCTGAGGGCTATTGAGGCGCAACATCATCTGTTGCAACTCACAGTCTGGGGCATC

>KC935959..1

TTCTACTGTAATACAACAAAACCTGTTTAGTAGTACTTTGGAAGTGGGATAATGGTACTTTGGAATATTAGTGGGT  
TAGATAACAGTACAGAACAAAATATCACACTCCCATGCAGAATAAAACAAATCATAAATATGTGGCAGACAGT  
AGGAAAAGCAATGTATGCCCCCTCCCATTAAGGGACAAATTCATGTATATCAAATATTACAGGGCTGCTATTA  
ACAAGAGATGGTGGTAATGAAAAGTGATACAACCAGGAACAACGAGACCTTCAGACCGGGAGGAGGAGATATGA  
GGGACAATTGGAGAAGTGAATTATATAAATATAAAGTAGTAGAAGTTGAACCATTAGGAATAGCACCCACCAA  
GGCAAAGAGAAGAGTGGTGCAGAGAGAAAAAGAGCAGTGACACTAGGAGCTCTGTTCTTTGGGTTCTTTGGGA  
GCAGCAGGAAGCACTATGGGCGCAGCATCAATGACGCTGACGGTACAGGCCAGACAATTATTGTCTGGTATAG  
TGCAACAGCAGAATAATCTGCTGAGGGCTATTGAGGCGCAACAGCATCTGTTGCAGCTCACAGTCTGGGGCAT

C

>KM082006..2

TTCTACTATAACACAACCCAGCTGTTTGATAGTACGTGGTTAACTAATGGTACTAGGATAAGACCAAATACTA  
CTGATGGAAC TAATGGAAATATCACACTTCCATGCAGAATAAAACAAATTATAAACAGGTGGCAAGAAGTAGG  
AAAAGCAATGTATGCCCCCTCCCATCAGAGGACAAATTAGATGTACATCAAATATTACAGGGTTAATATTAACA  
AGAGATGGTGGTCATGACGGGAACGAGACAAATGAGAAGGAGACCTTCAGACCTGGAGGAGGAGATATGAGGG  
ACAATTGGAGAAGTGAATTATATAAATATAAAGTAGTAAAAATTGAGCCAATAGGAATAGCACCCACCATGGC  
AAAGAGAAGGGTGGTGCAGAGAGAAAAAGAGCAGTAACGCTGGGAGCTATGTTCTTTGGGTCTTTGGGAGCA  
GCAGGAAGCACTATGGGCGCAGCGTCGATGACGCTGACGGTACAGGCCAGACTATTATTGTCTGGTATAGTGC  
AACAGCAGAGCAATCTGCTGAGAGCTATTGAGGCGCAACAGCAACTGTTGCAACTCACAGTCTGGGGCATC

>MG196775..3

TTCTATTGTAATACATCAGAACTGTTTAATAGTGAGTGGCATACTAATTATACATGGAATAGTACTTACAGTA  
CAATAAATGGTACTTTGGAATAGTACTGACATTGAGGGTGTAACGCTACTGAAAAGATCACACTCCCATGTAG  
AATAAAACAAATTATAAACAGGTGGCAGGAAGTAGGAAAAGCAATGTATGCCCCCTCCCATCGCAGGAACAATT  
AAATGTGTATCAAATATTACGGGGCTGCTGTTAACCAGAGACGGTGGCAACAATGAAACCAAAGCCACTGAGG  
TCTTCAGACCTCAAGGAGGAAATATGAAGGACAATTGGAGAAGCGAATTATATAAATATAAAGTAGTACAAAT  
TGAACCATTTAGGAGTAGCACCCAACAAGGCAAAGAGAAGAGTGGTGCAGAGAGAAAAAGAGCAATAACAATA  
GGAGCTATGTTCTTTGGGTCTTTGGGAGCAGCAGGAAGCACTATGGGCGCAGCGTCAATGACGCTGACGGTAC  
AGGCCAGACAATTACTGTCTGGTATAGTGCAACAGCAGAGCAATTTGCTGAGAGCTATTGAGGCGCAACAGCA  
TCTGTTGCAACTCACAGTCTGGGGCATC

>JQ182826..2

TTCTACTGCAATACATCAGCACTGTTTAATAGTACTTTGAGTACTAAGAATGGTACTCAGGTGTTGAATATAA  
CTAATGACACCAGCACCAACATCACACTCCCATGCAGAATAAAACAAATTATAAACATGTGGCAGGAAGTAGG  
AAAAGCAATGTATGCCCCCTCCCATCAGAGGACTAATTAGGTGTACATCAAACATTACAGGACTACTATTAACA  
AGAGATGGTGGTAATGGTAATGGCAATACCACGAATGGGACAGAGACCTTCAGACCTGTAGGAGGAGATATGA  
AGAATAATTGGAGAAGTGAATTATATAAATATAAAGTAGTACAAATTCAACCATTAGGAGTAGCACCCACCAA  
GGCAAAGAGAAGAGTGGTGCAGAGAGAGAAAAGGGATTGAGGACTAGGAGCTTTGTTTCATTGGGTTCTTTGGGA  
GCAGCAGGAAGCACTATGGGCGCAGCGTCAATAACGCTGACGGCACAGGCCAGACAATTGCTGTCTGGTATAG  
TGCAACAGCAGAGCGATCTGATGAAGGCTATTGAGGCGCAGCAGCATCTGTTGCAACTCACAGTCTGGGGCAT

C

>KM353922..1

TTCTATTGCGATACAACACAACCTGTTTAATAGTAGTTGGCCTTTGGAATGGTACAGAAGAGTCAAATAACACTG  
AAGGAAATGACACAATCACCTCCCATGCAAAATAAAACAAATTATAAACCTGTGGCAGGAAGTAGGAAAAGC  
AATGTATGCCCCCTCCCATCAGAGGACAAATTAATTGCACATCAAATATTACAGGGTTACTATTAAACAAGAGAT  
GGTGGTAGTACCAGCAATGAGACCGAGATCTTTAGACCTGCAGGAGGAGACATGAGAGATAATTGGAGAAGTG  
AATTATATAAATACAAAGTAGTAAAAATTGAACCAATAGGAGTAGCACCCACCAGGGCAAAGAGAAGAGTGGT  
GCAGAGAGAAAAAGAGCAGTGGGATTAGGAGCTATGTTCTTTGGGTCTTTGGGAGCAGCAGGAAGCACTATG  
GGCGCAGCGTCAGTGACGCTGACGGTACAGGCCAGACAATTACTGTCTGGTATAGTGCAACAGCAGAACAATT  
TGCTGAGGGCTATTGAGGCGCAACATCATCTGTTGCAACTCACAGTCTGGGGCATC

>KM354862..1

TTCTACTGTAATACAACACAACCTATTTAATAGTAATTGGACTGCTACTGGAAATACAAATAACACTGGAGGAA  
ATGCCACAATCACACTCCCTTGCAGAATAAAACAACTTATAAACATGTGGCAGGGAGTAGGAAAAGCAATGTA  
TGCCCCCTCCAATAAGAGGACTAATTAGATGTTTCATCAAAACATTACAGGGCTACTGTTAACAAGAGATGGTGGT  
GGTAGCAATGGAAC TAATGGAACTGAGGTCTTCAGACCTCATGGAGGGGATATAAGGGACAATTGGAGAAGTG  
AATTATATAAATACAAAGTAGTAAAAATTGAACCATTTAGGAGTAGCACCCAACAAGGCAGAGAGAAGAGTGGT

GCAGAGAGAAAAAGAGCAGTGACAATAGGAGCTGTGTTCTTGGGTTCTTGGGAGCAGCAGGAAGCACTATG  
GGCGCAGCGTCAATGACGCTGACGGTACAGGCCAGACAACCTATTGTCTGGTATAGTGCAACAGCAAAGCAATT  
TGCTGAGGGCTATTGAGGCGCAACAGCACCTGTTGCAACTCACAGTCTGGGGCATC

>KX587241..1

TTCTACTGTAATACGACACAACCTGTTTAATAATACTTGGGAATGGTACTTGGGGTGAGAATATTACCGGAATA  
TTATCACACTCCCATGCAGAATAAAACAAATTATAAACATGTGGCAGGAAGTAGGAAAAGCAATGTATGCCCC  
TCCCATCAGAGGAAATATTAGCTGTTTCATCAGATATTACAGGGCTAATATTAACAAGAGATGGTGGTCATGAC  
AATGAGACCAACAACACAGCGATCTTCAGACCAGGAGGAGGAAATATGAAGGACAATTGGAGAAGTGAATTAT  
ATAAATATAAAGTAGTAAAAATTGAACCAATAGGAGTAGCACCCACCAAGGCAAAGAGAAGAGTGGTGCAGAG  
AGAAAAAGAGCAGTGGGAGTAGGAGCTGTGCTCCTTGGGTTCTTGTTCAGCAGCAGGAAGCACTATGGGCGCA  
GCGTCAATAACGCTGACGGCACAGGCCAGACAATTACTGTCTGGTATAGTGCAACAGCAAACAATTTGCTGA  
GAGCTATTGAGGCGCAACAACATATGTTGCAACTCACAGTCTGGGGCATC

>KX587299..1

TTCTACTGTAATACAACAAAGCTGTTTAATAGTACTTGGGATAATACAACCTGCAGGGTTAAATACCACTGAAA  
AAATTATCACACTCCCATGCAGAATAAGACAAATTATAAATATGTGGCAGCAGGTAGGAAAAGCAATGTATGC  
CCCTCCTATCAGAGGAAAAATCCAATGCACATCAAAACATTACAGGGTTATTATTAACAAGAGATGGTGGTAAC  
GAGAACGAGACCTATAACAATGAGACTTTTCAGACCTGGAGGAGGAGATATGAAGGACAATTGGAGAAGTGAAT  
TATATAAATATAAAGTAGTAAGAAATTGAACCATTAGGAATAGCACCCACCAAGGCAAAAAGAAGAGTGGTGCA  
GAGAGAAAAAGAGCAATAGGAATGGGAGCCTTCTTCTTGGGTTCTTGGGAGCGGCCGGAAGCACTATGGGC  
GCAGCGTCAATGGCGCTGACGGTACAGGCCAGACAATTATTGTCTGGTATAGTGCAAGCAGCAAAACAACCTTGC  
TGAGGGCTATTGAGGCGCAACAGCATCTGTTGCAACTCACAGTCTGGGGCATC

>MG900412..2

TTCTACTGTAATTCAACAAAGCTGTTTAATAGTACTTGGCCTTGGGAATGATACTCAAGGGTCACATGACACTA  
ATGGCACACTCACACTCCCATGCAGAATAAAACAAATTATAAACATGTGGCAGGAAGTAGGAAAAGCAATGTA  
TGCCCCCTCCCATCGAAGGAATAATTAATGCTCATCAAAACATTACAGGACTGTTATTAACAAGAGATGGTGGT  
TACGAGAGCAATAAGACTGATGAGATCTTCAGACCTGGAGGAGGAGATATGAGGGACAATTGGAGGAGTGAAT  
TATATAAATATAAAGTAGTAAAAATTGAACCATTGGGAGTAGCACCTACCAAGGCAAAAGAGGAGAGTGGTGCA  
GAGGGAAAAAGAGCATTTGGACTAGGAGCTGTGTTCTTGGGTTCTTGGGAGCAGCAGGAAGCACTATGGGC  
GCAGCATCAATAACGCTGACGGTACAGGCCAGACAATTATTGTCTGGTATAGTGCAACAGCAGAACAATTTGC  
TGAGGGCTATTGAGGCGCAACAGCATCTGTTGCAACTCACAGTCTGGGGCATT

>KC473826..1

TTCTACTGTAATTCAACACAGCTGTTTAGTAGTAATTGGACTAGGGATAATACGTCTAGTAATTGGACTAGGA  
AGGATAACGATACAGAGCCTAATAAGACTGTGATCACACTCCCATGCAGAATAAAACAAATTATAAACATGTG  
GCAGGAAGTAGGAAAAGCAATGTATGCCCCCTCCTATCAAAGGACTTATTCAATGTTTCATCAAATATTACAGGA  
TTGTTATTAACAAGAGATGGTGGCGACAACAATAGCAACACTGAAATCTTTAGACCTGGAGGAGGAGATATGA  
GGGACAATTGGAGAAGTGAATTATACAAATATAAAGTAGTAAAAATTGAACCATTAGGAGTAGCACCCACCAA  
GGCAAGGAGGAGAGTGGTGCAAAGAGAGAAAAAGAGCATTTGGGAATGGGAGCTCTGTTCTTGGGTTCTTGGGA  
GCAGCAGGAAGCACTATGGGCGCAGCGTCATTGATGCTGACGGTACAGGCCAGACAATTATTGTCTGGTATAG  
TGCAACAGCAGAACAATATGCTGAGGGCTATTGAGGCGCAGCAGCATCTGCTGCAACTCACAGTCTGGGGCAT  
C

>KC473828..1

TTCTACTGTAATACAACAAAGCTGTTTAATAGCACTCTTAATGACACTTGGGAATTTTGGGAATGAAACTGGGG  
ATATCATACTCCCGTGAGAATAAAACAAATTATAAATCTGTGGCAGAAAGTAGGAAAAGCAATGTATGCCCC  
TCCCATTAAGGACAGATTAACTGCACATCAAATATTACAGGGCTACTCTTAATAAGAGATGGCGGTGATAAC  
GGGACTGCCAGTGAGACCTTCAGACCTCAAGGAGGAAATATGAAGGACAATTGGAGAAGTGAATTATATAAAT  
ATAAAGTAGCACAAAGTTGAGCCAATAGGAATAGCACCCACCAAGGCAAAGAGAAGAGTGGTGCAGAGAGAAAA  
AAGAGCAGTGACTATTGGGAGCTTTGTTCTTGGGTTCTTGGGAACAGCAGGAAGCACTATGGGCGCAGCGTCG  
ATAACGCTGACGGTACAGGCCAGACAATTACTGTCTGGTATAGTGCAACAGCAGAGCAATCTGCTGAGAGCTA  
TTGAGGCGCAACAGCATCTGTTGCAACTCACAGTCTGGGGCATC

>KC473829..1

TTCTACTGTAATACGACAGAACCTGTTTAATAGTTCTTGGTATTGGAATGATACGAATGATACTTTAAAGAGCA  
ATGAAGAAAATATCACACTTCTGTGAGAATAAAACAAATTGTAAACATGTGGCAGGAAGTAGGAAAAGCAAT  
GTATGCCCCCTCCATTAGAGGACCAATTAGCTGTACATCAAATATTACAGGGATACTCTTAACAAGAGATGGA  
GGTCAGGGTAATAATACTAATGATACTGAAATCTTCAGACCAGGAGGAGGAGATATGAGGGACAATTGGAGAA  
GTGAATTATATAAATATAAAGTAGTAAAAATTGAACCATTAGGAGTAGCACCCACCAGGGCAAAAAGAAGAGT  
GGTACAGAGAGAAAAAGAGCAATAGGGGGATTAGGAGCGTTGTTCTTGGGTTCTTGGGAGCAGCAGGAAGC  
ACTATGGGCGCAGCGTCAATGACGCTGACGGTACAAGCCAGGCTATTATTGACTGGTATAGTGCAACAGCAAA  
ATAATTTGCTGAAGGCTATTGAGGCGCAACAACATCTGTTGCAACTCACAGTCTGGGGCATT

>KC473830..1

TTCTACTGTGATTCAACACAACCTGTTTGTAGTAGTAATTGGACTAGGAATGATAGTAGTAGTAATTGGACTAGGA  
GTGATAATGATACAGAGTCTAACAATACTGTGATCACACTCCCATGCAGAATAAGACAAATTATAAACATGTG  
GCAGGAAGTAGGAAAAGCAATGTATGCCCCCTCCTATCAAAGGACTTATTCAATGTACATCAAATATTACAGGA  
TTATTATTAACAAGAGATGGTGGTAATGGTAATAAAACGAACGACACTCTGGAGATCTTTAGACCTGGAGGAG  
GAGATATGAGGGACAATTGGAGAAGTGAATTGTACAAATATAAAGTAGTAAAAATTGAACCATTAGGAGTAGC  
ACCCACCAAGGCAAGGAGGAGAGTGGTGCAAAGAGAGAAAAGAGCAGTGGGACTAGGAGCTCTGTTCCCTGGG  
TTCTTGTGTCAGCAGCAGGAAGCACTATGGGCGCAGCATCATTGACGCTGACGGTACAGGCCAGACAATTACTGT  
CTGGTATAGTGCAACAGCAGAACAAATATGCTGAGGGCTATTGAGGCGCAACAGCATCTGTTGCAACTCACAGT  
CTGGGGCATC

>KU677990..1

TTCTACTGTAATACATCAAGACTGTTTAATAGTACTTTGTATAGTAATAATACTTGGAGTAGTAATATTACAG  
AATTAAATGGCATTATCACACTCCCATGCAGAATAAAACAAATTGTAAACATGTGGCAGGAAGTAGGAAAAGC  
AATGTATGCCCCCTCCCATCAGTGGACAAATTAAGTGTTCATCAAACATTACAGGACTATTATTAACAAGAGAT  
GGTGGTGATGAGGAGAAACAAGACTGATGAGATTTTCAGACCTGGAGGAGGAGATATGAGGGACAATTGGAGAA  
GTGAACTATATAAATATAAAGTAGTAAAAATTGAACCATTAGGAGTAGCACCTCCAGGGCAAAGAGAAGAGT  
GGTGACAGAGAGAAAAAAGAGCAGTGGGACTAGGAGCTTTGTTTCATTGGGTTCTTGGGAGCAGCAGGAAGCACT  
ATGGGCGCAGCGTCAGTGACGCTGACGGTACAGGCCAGACAATTATTGTCTGGTATAGTGCAACAGCAGAACAA  
ATTTGCTGAGGGCTATTGAGGCGCAACATCATCTGTTGCAACTCACAGTCTGGGGCATC

>KF384800..1

TTCTACTGTAATACAACAGGACTGTTTAATAGTACTTGGAAATAGTACTAGTACTGAGCTAAATGACACTACAG  
GAAATATCAAACCTCCCATGCAGAATAAAACAAATTATAAACATGTGGCAGAAAAGTAGGAAAAGCAATGTATGC  
CCCTCCCATAGAAGGAGTAATTCATGTTCATCAAATATTACAGGGCTAATATTAACAAGAGATGGTGGTGGT  
GGTAACGATACGATGGGGAACGAGACCTTCAGACCGGGAGGGGGAGATATGAGGGACAATTGGAGGAGTGAAC  
TATATAGATATAAAGTAGTAAAAATTGAACCATTAGGAATAGCACCCACCAAGGCAAAGAGAAGAGTGGTGCA  
GAGAGAAAAAAGAGCAGTGATAGGAGCGATGTTCCCTTGGGTTCTTGGGAGCAGCAGGAAGCACTATGGGCGCA  
GCGGCAGTGACGCTGACGGTACAGGCCAGACTATTATTGTCTGGTATAGTGCAACAGCAAACAACCTTGCTGA  
GAGCTATTGAGGCGCAACAGCATATGTTGCAACTCACAGTCTGGGGCATT

>KF384801..1

TTTTACTGTAATACATCACAACCTGTTTAAGAGTACTTGGTGGACAAATAATACTCGGAATATACCACTACAAG  
GAAATGTCACACTCCCATGCAAAATAAAGCAAATTATAAACATGTGGCAAGAAGTAGGAAAAGCAATGTATGC  
CCCTCCCATCGGAGGACTAATTAATTGTACATCAAATATTACAGGGCTGCTATTATAACAAGAGATGGTGGTATA  
ACGAATGGGACTGAGACCTTCAGACCTGGAGGGGGAGATATGAGGGACAATTGGAGAAGTGAATTATATAAAT  
ATAAAGTAATAAAAAATTCAACCATTAGGGATAGCACCCACCAAGGCAAAGAGAAGAGTGGTGCAGAGAGAAAA  
AAGAGCAGTGGGAGTGGGAGCTTTGTTCCCTTGGGTTCTTGGGAGCAGCAGGAAGCACTATGGGCGCAGCGTCC  
GTAACGCTGACGGTACAGGCCAGACAATTATTGTCTGGTATAGTGCAACAGCAGAGCAATCTGCTGAGGGCTA  
TTGAGGCGCAACAACATCTGTTGCAACTCACAGTCTGGGGCATT

>KF384803..1

TTCTACTGTAATTCAACACCACTGTTTAATAGTACCTGGGAAAATGGTACTTGGACGAATGAGAGTGGTATTG  
GAGGATCAGATAATATCACACTCCATGCAGAATAAAACAAATTATAAACCTGTGGCAGGAAGTAGGAAAAGC  
AATGTATGCTCCTCCCATCGAAGGACAAATTAGATGTTTCATCAAATATTACAGGGCTGTTATTATAACAAGAGAT  
GGTGGTTCTAATCAGACTAACGAGACCTTCAGACCTGGAGGAGGAGATATGAGGGACAATTGGAGAAGTGAAT  
TATATAAATATAAAGTAGTAAAAATTGAACCATTAGGATTAGCACCCACCAAGGCAAAGAGAAGAGTGGTGCA  
GAGAGAAAAAAGAGCAGCAGGACTGGGAGCTCTGTTCCCTTGGGTTCTTGGGAGCAGCAGGAAGCACTATGGGC  
GCAGCGTCAATGACGCTGACGGTACAGGCCAGACTATTATTGTCTGGTATAGTGCAACAGCAGACAATTTGC  
TGAGAGCTATTGAGGCGCAACAGCATCTGTTGCAACTCACAGTCTGGGGCATT

>KF384804..1

TTCTATTGTAATACAACACAACCTGTTTAATAGTACTTGGAAATGTTACTGATCCTTGAATTCTCCTGGAGGGT  
CAAATAACACTGGAGATATCACACTCCCATGCAGAATAAAACAAATTGTGAACAGGTGGCAGGAAGTAGGAAA  
AGCAATGTATGCCCCCTCCAATCTCAGGATATATTAAGTGTTCATCAAAAATTACAGGGCTGATATTAACAAGA  
GATGGTGGTTATAACACCACCAATGAGACTGAGATCTTCAGACCTGGAGGAGGAGATATGAGGGACAATTGGA  
GAAGTGAATTATATAAATATAAAGTAGTAAGAATTGAACCATTAGGAATAGCACCTACCACGGCAAAGAGAAG  
GGTGGTGACAGAGAGAAAAAAGAGCAGTGGGAATGGGAGCGTTGTTCCCTTGGGTTCTTGGGAGCAGCAGGAAGC  
ACTATGGGCGCAGCGTCAATGATGCTGACGGTACAGGCCAGACAATTATTGTCTGGTATAGTGCAACAGCAGACA  
ACAATCTGCTGAGGGCTATTGAGGCGCAACAACATCTGTTGCAACTCACAGTCTGGGGCATC

>KF384807..1

TTCTACTGTAACACAACAACACTGTTCAATAGTACTTGGGATGGGAATGATACTACTGAAAGGTCAAAGAGTA  
CTGAAGAAAATGCAACAATCATCACAATCCCATGCAGAATAAAACAAATTATAAACATGTGGCAGAAAAGTAGG  
AAAAGCAATATATGCCCCCTCCCATCAAAGGAAACATTAGTTGTTTCATCAAATATTACAGGGCTGCTATTAAACA  
AGAGATGGTGGGAATAACGAGGACAGCACCAATGAGACCTTCAGACCTCAAGGAGGAGATATGAGGGACAATT  
GGAGAAGTGAGCTATATAAATACAAGTAGTAAGAATTGAACCATTAGGAATAGCACCCACCAAGGCAAAGGAG

AAGAGTGGTGCAGAGAGAAAAAGAGCAGTGGGAATAGGAGCTTTGTTCTTGGGTTCTTGGGAGCAGCAGGA  
AGCACTATGGGCGCAGCGTCGCTGACGCTGACGGTACAGGCCAGACAATTATTGTCTGGTATAGTGCAACAGC  
AGAACAATCTGCTGAGAGCTATTGAGGCGCAACAGCATATGTTGCAACTCACAGTCTGGGGCATC

>KF384811..1

TTCTACTGTAATTCATCAAACTGTTTAATAATACTTGAATGGTACTAACTGGACAGATACATGGTATAATA  
GCACAAATGAACTATCATACTCCCGTGCAGAATAAAACAAGTTATAAACATGTGGCAGGAAGTAGGAAAAGC  
AATGTATGCCCCCTCCCATCAGAGGAAAAATTAAATGTAAATCAAACATTACAGGGCTGTTGTTAACAAGAGAT  
GGCGGTGGTGGGAGCAATGAAACCACCGAGACCTTCAGACCTGGAGGAGGAAATATGAGGGACAATTGGAGAA  
GTGAATTATATAAAATATAAAGTAGTAAAAATTCAACCAGTAGGCTTGGCACCCACCAGGGCAAAAAGAAGAGT  
GGTGCAGAGAGAAAAAGAGCAGTAACACTGGGAGCTGTGTTCTTGGGTTCTTGGGAGCAGCAGGAAGCACT  
ATGGGCGCAGCGTCAATGACGCTGACGGTACAGGCCAGACAATTATTGTCTGGTATAGTGCAACAGCAGAGCA  
ATTTGCTGAAAGCTATTGAGGCGCAACAGCATCTGTTGCAACTCACAGTCTGGGGCATT

>KX156409..2

TTTTACTGTAATACAACAAAACTGTTCAATAGTACTTGAATAGTAATAGTACTAGCAACAACACTAAAGGAA  
ATGAGACTATTATCGAAATACCATGCAGGATAAGACAAAATTATAAACATGTGGCAGCAAGTAGGAAGAGCAAT  
GTATGCCCCCTCCCATCAGAGGACTAATTAGATGTTTCATCAAACATTACAGGACTAATATTAACAAGAGATGGT  
GGTCATAATCAGGCCAATGACAGTGAGATCTTCAGACCTGGAGGAGGAGATATGAGGGACAATTGGAGAAGTG  
AATTATATAAAATATAAAGTAGTAAGAATTGAACCATTAGGAATAGCACCCACCAAGGCAAAAAGAAGAGTGGT  
GCAGAGAGAAAAAGAGCAGTGGGACTAGGAGCTATGTTCTTGGGTTCTTAGGAGCAGCAGGAAGCACTATG  
GGCGCAGCGTCAGTGACGCTGACGGTACAAGCCAGACAATTATTGTCTGGTATAGTGCAACAGCAGAACAAATT  
TGCTGAGAGCTATTGAGGCGCAACAGCATATGTTGCAACTCACAGTCTGGGGCATT

>KY778615..1

TTCTACTGTAATACATCAAAGTTGTTTAACAGTACTTGAATGGCACTGAGGAAAACCAGGGAGTGAATGGCA  
CACTCACACTCCCATGCAGAATAAAACAAATCATAAACATGTGGCAGAAAGTAGGAAAAGCAATGTATGCCCC  
TCCCATCCAGGGAAATATTAATTGCTCATCAAATATTACAGGGCTGCTATTAATGAGAGATGGTGGTAACAAG  
GGGAACGGAACCGATAATACTACCGAGATCTTTAGACCTGGAGGAGGAAATATGAGGGACAATTGGAGAAGTG  
AATTATATAAAATATAAAGTAGTGAGAATTGAACCATTAGGAGTAGCACCCACCAAGGCAAAAAGAAGAGTGGT  
GCAGAGAGAAAAAGAGCGGTAAACAGTGGGAGCTATGTTCTTGGGTTCTTGGGAGCAGCAGGAAGCACTATG  
GGCGCAGCATCATTGACGCTGACGGTACAGGCCAGACAATTATTGTCTGGTATAGTGCAACAGCAAAGCAATT  
TGCTGAAGGCTATTTCAGGCGCAACAGCATCTGTTGCAGCTCACAGTCTGGGGCATC

>KT124768..1

TTCTACTGTAATACATCAGAACTGTTTAATAGTACTTGGTATAACAGTACATACAATGAGACTGCACCAGGCA  
ATGAAACAATCACACTCCCATGCAAAATAAGGCAGTTTGTAACAGGTGGCAGGAAGTAGGAAAAGCAATGTA  
TGCCCCCTCCCATCAGAGGAATAATTAGATGTTTATCAAATATTACAGGATTGATATTAACAAGAGATGGGGGT  
ATCTATAATAACACGAATGGGACCATTGGGAATGAGACTTTTCAGACCTGGAGGGGGAGATATGAGGGACAATT  
GGAGAAGTGAATTATATAAAATATAAAGTAGTAAAAATTGAACCATTAGGAGTAGCACCCACCAAGCAAGGAG  
AAGAGTGGTGCAGAGAGAAAAAGAGCAGTGGGATTTCGAGCTATGTTCTTGGGTTCTTGGGAGCAGCAGGA  
AGCACTATGGGCGCAGCGTCAGTGACGCTGACGGTACAGGCCAGGCAATTATTGTCTGGTATAGTGACAGCAGC  
AAAACAACCTTGCTGAGGGCTATTGAGGCGCAACAGCATATGTTGCAACTCACAGTCTGGGGCATT

>MG196879..1

TTCTACTGTAATACAACGCAACTGTTTAGGGGTAATGGTACTGGTAATGGTACTGGAGAGTCAAGTGACATTG  
TCACACTCCCATGCAGAATAAAACAAATTGTAAACATGTGGCAGAAAGTAGGAAAAGCTATGTATGCCCCCTCC  
CATCAAAGGACTAATTAGATGTTTCATCAAATATTACAGGGCTAATATTAACAAGAGATGGTAGTAATAAAAGT  
AAAAGTGATCCAGAGATCTTCAGACCTGCAGGAGGAGATATGAGGGACAATTGGAGAAGTGAATTATATAAAAT  
ATAAAGTAGTAAAAATTCAACCATTAGGAGTAGCACCCACCAAGGCAAGAGAAGAGTGGTGCAGAGAGAAAA  
AAGAGCAGTGGGAATAGGAGCTGTGTTCTTGGGTTCTTAGGAGCAGCAGGAAGCACTATGGGCGCAGCGTCA  
ATAACGCTGACGGTACAGGCCAGACAATTATTGTCTGGTATAGTGCAACAGCAGAACAACTCTGCTGAGAGCTA  
TTGAGGCGCAACAGCATCTGTTGCAACTCACAGTCTGGGGCATC

>MG197013..1

TTCTACTGTAATACAACACAGCTGTTTAATAGCACTTGAATAGCACGACTAATAATGACACTGAAGGATCAA  
GTAATGCTACGATCACACTCCCATGTAGAATAAGACAAAATTATAAACATGTGGCAGACAGTAGGAAAAGCAAT  
GTATGCCCCCTCCCATCAGAGGAGAGATTAGCTGTTTCATCAAATATTACAGGGCTGCTGTTAACAAGAGATGGT  
AATACCAATCACACTGATGCCACTGAGACCTTTAGACCTGGAGGAGGAGATATGAGGGACAATTGGAGAAGTG  
AATTATATAAAATATAAAGTGATACAACCTTGAACCAATAGGAGTAGCACCCACCAAGGCAAGAGAAGAGTGGT  
GCAAGAGAAAAAGAGCAGTGGGGGCAATAGGAGCTATGTTCTTGGGTTCTTGGGAGCAGCAGGAAGCACT  
ATGGGCGCAGCGTCAATAACGCTGACGGTACAGGCCAGACTATTATTGTCTGGTATTGTGCAACAGCAAAAACA  
ATTTGCTGAGGGCTATTGAGGCGCAACAGCATCTGTTGCAACTCACAGTCTGGGGCATC

>MG197046..2

TTCTACTGTAATACCTCAAACTGTTTAACAGTACATGGCCAAATAATACTAAAAATGCTAATATCACTGAAG  
GAACTATCACACTCCCGTGCAGAATAAAACAAATTATAAACATGTGGCAGGAAGTAGGAAAGGCAATGTATGC

CCCTCCCATCAGAGGACAACTTAACTGTTTCATCAAATATTACAGGGCTGCTATTAAACAAGAGATGGGGGTTAT  
AATCAGGCGAACAATAGCGAGACCTTCAGACCGGGAGGAGAGATATGAGGAACAATTGGAGAAGTGAATTAT  
ATAAATATAAAGTAGTAAGAGTTGAACCATTAGGAGTAGCACCCACCAAGGCAAAGAGAAGAGTGGTGCAAAG  
AGAAAAGAGAGCAGTGGGAATGGGAGCTTTGTTCTTGGGTTCTTGGGAGCAGCAGGAAGCACTATGGGCGCA  
GCGTCACTAACGCTGACGGTACAAGCCAGACAATTATTGTCTGGTATAGTGCAACAGCAAAACAATTTGCTGA  
GAGCTATTGAGGCGCAGCAGCATATGTTGCAACTCACAGTCTGGGGCATC

>MG197064..1

TTCTACTGTAATACATCAAACTGTTTAAACAATACCTGGACTAAGGGTACTTGGAAATAGTACATGGTCATGGG  
CAAATGAACTAACATCACACTCCCATGCAGAATAAAACAGATTATAAACATGTGGCAGGAAGTAGGAAAAGC  
AATGTATGCCCCCTCCCATCGAAGGAATAATTAGATGTGCCTCAAACATTACAGGGCTGCTATTAAACAAGAGAT  
GGTGGTAAACATGATAATATTACCATTAAATGGTAATGTCATTGACTATAACACCACCGAGGTCTTCAGACCTG  
GAGGGGGAGATATGAGGGACAATTGGAGAAGTGAATTATATAAATACAAAGTAGTACAAATTGAACCATTAGG  
AGTAGCACCCACTAAGGCAAAAAGAAGAGTGGTGACAGAGAGAAAAAGAGCAGTGGTACTAGGAGCTTTGTTTC  
CTTGGGTTCTTGGGAGCAGCAGGAAGCACTATGGGCGCAGCGTCAATGACGCTGACGGTACAGGCCAGACTAT  
TATTGTCTGGTATAGTGCAACAGCAGAACAAATTTGCTGAGGGCTATTGAGGCGCAACAACATCTGTTGCAACT  
CACAGTCTGGGGCATT

>MG197113..2

TTCTACTGTAACACATCAAAGTTGTTTAAATAGCACTTGGAACTATAATAATGCTACAGGAAACACTGAAGGAA  
ATAGCACACAAGGAAATATCACACTCATCACACTCCCATGCAGAATAAAACAGATTATAAACAGGTGGCAGGA  
AGTAGGAAAAGCAATGTATGCCCCCTCCCATCAGCGGACAAATTAAGTGTTCATCAAATATTACAGGACTACTA  
TTAACAAGAGATGGTGGTCATAATAACAATAGCACAAATTGAGACCTTTAGACCTACAGGAGGAGATATGAGGA  
ACAATTGGAGAAGTGAATTATATAAATATAAAGTAGTAAAAATTGAGCCATTAGGAATAGCACCCACCAAGGC  
AAAAAGAAGAGTGGTGACAGAGAGAAAAAGAGCAGTAGGAACGCTGGGAGCTATGTTCTTGGGTTCTTAGGA  
GCAGCAGGAAGCACTATGGGCGCAGCGTCAGTGACGTTGACGGTACAGGCCAGACTATTATTGTCTGGTATAG  
TGCAGCAGCAGAGCAAGCTGCTGAGGGCTATTGAGGCGCAACAGCATATGTTGCAACTCACAGTCTGGGGCAT  
C

>KM355159..1

TTCTATTGTAATTTAACAAAACCTGTTTAAATAGTACTTGGAAATAAGACTGAAGGGCCTTGGAAATGTTACTGAAG  
AGTATGGGAATATTACTGACCCATATCATACTCCCATGCAGAATAAAACAAATTATAAACATGTGGCAGAGAGT  
AGGAAGGGCAATGTATGCCCCCTCCCATCAAAGGCAAACTTCAATGTACATCAAATATTACAGGGCTCCTATTA  
ACAAGAGATGGTGGTAAGGTGAATAATGAGACTGAGATCTTTAGGCCTGCAGGAGGAGATATGAGGGACAATT  
GGAGAAGCGAATTATATAAATATAAAGTAGTAAAAATTGAACCATTAGGAATAGCACCCACCAGGGCGAAGAG  
AAGAGTGGTGACAGAGAGAAAAAGAGCAGTGGGATTAGGAGCTATGTTCTTGGGTTCTTGGGAGCAGCAGGA  
AGCACTATGGGCGCAGCGGCAGTGACGCTGACGGTACAGGCCAGACAATTATTGTCTGGTATAGTGACGACAGC  
AGAACAATCTGCTGAAGGCTATTGAGGCGCAGCAGCATCTGTTGCAACTCACAGTCTGGGGCATC

>MG196745..1

TTCTACTGTAATTTCAACACCACTGTTTAAATGGGACTTGGCAGAATATGACGAATATTACTGAAAACCTTAAATA  
TCACACTCCCATGCAGAATAAAGCAGATTATAAACATGTGGCAGAAAGTAGGAAAAGCAATGTATGCCCCCTCC  
CATCAGTGGAAGTATTCAATGTTTCATCAAACATTACAGGGCTACTGTTAACAAGAGATGGTGGCATCACTAAT  
AACACTAATAGCAGTAATGATGAGACCTTCAGACCTGGAGGGGGAGATATGAGGGACAATTGGAGAAGTGAAT  
TATATAAATATAAAGTAGTAAAAATTGAACCTTTAGGATTAGCACCCACCAGGGCAAGGAGACTAGTGGTGCA  
AAGAGACAAAAGAGCAGTGGGAATGGGAGCTATGTTCTTGGGTTCTTGGGAGCAGCAGGAAGCACTATGGGC  
GCGGCGTCAATGACGCTGACGGTACAGGCCAGACAATTATTGTCTGGTATAGTGCAACAGCAAAACAACCTTGC  
TGAAGGCTATTGAGGCGCAACAGCACCTGTTGCGACTCACAGTCTGGGGCATC

>MG196964..1

TTCTACTGTAATACAACAAAATTTGTTTAAATAGTACTTGGACTGAGAATAGTACTGAAGGGTCAAACAGCACTG  
AAATAATCACACTCCCATGCAGGATAAAACAAATTATAAACATGTGGCAGAGAGTAGGGAGAGCAATGTATGC  
CCCTCCCATCAAAGGACCAATTAGATGTTTCATCAAATATTACAGGGCTGCTATTAAACAAGAGATGGTGGTCAT  
AATATGACTAATGATAGTGAGACCTTCAGACCTGTGGGAGGAGATATGAAGAACAATTGGAGAAGTGAATTAT  
ATAAATATAAAGTAGTAAAGTGAACCATTAGGAGTAGCACCCACCAAGGCAAGGAGAAGAGTGGTGACAG  
AGAGAAAAGAGCAGTGGGAATAGGAGCTGTGTTCTTGGGTTCTTGGGAGCAGCAGGAAGCACTATGGGCGCA  
GCGTCAATGACGCTGACGGTACAGGCCAGACAATTATTGTCTGGTATAGTGCAACAGCAAAACAACCTTGCTAA  
GAGCTATTGAAGCGCAACAGCATCTGTTGACGCTCACAGTCTGGGGCATT

>MG197035..1

TTCTACTGTGATACAACACAACCTGTTCAATATTACTTGGGATACTAACAACACTAGTAATAGCAATGGTACTG  
ACGGTGATAAAATCACACTCCCATGCAGAATAAAACAAATTATAAATCTGTGGCAGGGAGTAGGAAGAGCAAT  
GTATGCCCCCTCCCATCAGCGGACTAATTAGCTGTTTCATCAAATATTACAGGTCTGCTGTTAGTAAGTGATAGT  
GGTAATCAAACCTAACGAGACTGAGACCTTCAGACCTATAGGAGGAGAGATGAGGGACATTTGGAGAAGTGAAT  
TATACAAGTATAAAGTAGTACAAATTGAACCATTAGGAGTAGCACCCACCAAGGCAAAGAGAAGAGTGGTGCA  
GAGAGAAAAAGAGAGCTGACATTAGGAGCTTTGTTTCATTGGGTTCTTGGGGGCAGCAGGAAGCACTATGGGC

GCAGCGTCGATGACGCTGACGGTACAGGCCAGACTATTATTGTCTGGTATAGTGCAACAGCAGAACAAATCTGC  
TGAGAGCTATTGAGGCGCAACAGCATCTGTTGCAACTCACAGTCTGGGGCATC

>MK214316..1

TTCTACTGTAATACCGCACAACCTGTTTAATAGTAGTTGGACTACTACTGAAAAGACAAATAACACTGAAGGAG  
GAAATGACACAATAATCATGCTCCCTTGCGAATAAAACAAATTTATAAACAGGTGGCAGGAAGTAGGAAAAGC  
AATGTATGCCCCCTCCAATCAGCGGACTAATTAGATGTTTCATCAAACATTACAGGGGCTACTGTTAACAAGAGAT  
GGTGGTAGCAGCAATAAACTAATGAACTGAGATCTTCAGACCTCATGGAGGGGATATGAGGGACAATTGGA  
GAAGTGAATTATATAAATATAAAGTAGTAAAAATTGAACCATTAGGAATAGCACCTAGCAAGGCAAAGAGAAG  
AGTGGTGCAGAGAGAAAAAGAGCGGTGACAATAGGAGCTGTGTTCCCTTGGGTTCTTGGGAGCAGCAGGAAGC  
ACTATGGGCGCAGCGTCACTGACGCTGACGGTACAGGCCAGACAACCTATTGTCTGGTATAGTGCAACAACAAA  
GCAATTTGTTGAGGGCTATTGAGGCGCAACAGCACCTGTTGCAACTCACAGTCTGGGGCATC

>KX505616..1

TTCTACTGTAATACAACACAACCTGTTTAATAGTACTTGGAAAGGAAAATAGTACTGGGAATAATACTGAAGAGT  
TAAATGACACTATCACACTCCCATGTAGAATAAAACAAATTATAAACATGTGGCAGGAAGTAGGAAAAGCAAT  
GTATGCCCCCTCCCATCCAAGGACAAATTAGATGTTTCATCAAATATTACAGGGCTAGTATTAACAAGAGATGGT  
GGTCATACCAATAAGACTGAGAACAAGACTGAGGTCTTCAGACCTGTAGGAGGGAATATGAAGGACAATTGGA  
GAAGTGAATTATATAAATATAAAGTAGTAAAAATTGAACCATTAGGAGTAGCACCCACTAAGGCAAAGAGAAG  
AGTGGTGCAGAGAGAAAAAGAGCAGCAATAGGAGCTGTGTTCCCTTGGGTTCTTGGGAGCAGCAGGAAGCACT  
ATGGGCGCAGCGTCGATAACGCTGACGGTACAGGCCAGACTATTATTGTCTGGTATAGTGCAACAGCAGAGCA  
ATCTGCTGAGGGCTATTGAGGCGCAACAGCAGCTGTTGCAGCTTACAGTCTGGGGCATC

>KR182192..1

TTCTACTGCGATACAACACAGCTGTTTAACAGTACTTGGTGGACTAATGAACTTGGAAAGGATATCGAAGGGT  
CAAATAACACTAACATCACACTTCCATGCAGGATAAAACAAATTATAAACAGGTGGCAGGGAGTAGGAAAAGC  
AATGTATGCCCCCTCCCATCAAAGGACAAATTAGCTGTTTCATCAAATATTACAGGGCTAATATTAACAAGAGAT  
GGTGGTACTCACGAGGACGAGACCCCTGAGATCTTCAGACCTGGAGGAGGAGATATGAGGGACAATTGGAGAA  
GTGAATTATATAAATATAAAGTAGTAAAAATTGAGCCATTAGGAGTAGCACCCACCAAGGCAAAGAGGAGAGT  
GGTGCAGAGAGAAAGAAGAGCAGTGGGAACGCTGGGAGCTATGTTCCCTTGGGTTCTTGGGAGCAGCAGGAAGC  
ACTATGGGCGCAGCATCGATAACGCTGACGGTACAAGCCAGACAATTATTGTCTGGTATAGTGCAACAGCAGA  
ACAACCTTGCTGAAGGCTATTGAGGCGCAACAGCACCTGTTGCAACTCACAGTCTGGGGCATC

>KR182242..1

TTCTATTGTAATACAACACCACTGTTTAACAGTACTTGGGTGCTTAACAGTACTTTGAATAGTACTGAAGGGT  
CCAATAGTACTGGACAAAATATCACACTCCAATGTAGAATAAAGCAAATTATAAATATGTGGCAGGAGGTAGG  
AAAAGCAATGTTTGCCCCCTCCCATCAGAGGATCAATTCATGTTTCATCCAACATTACAGGGCTGCTACTAACA  
AGAGATGGTGGTAATGACAATAACAAGACTGAGATCTTTAGGCCTTGGGGAGGAGATATGAAGGACAATTGGA  
GAAGTGAATTATATAAATATAAAGTAATAAAAAATTGAACCATTAGGAGTAGCACCCACCAAGGCAAAGAGAAG  
AGTGGTGCAGAGAGAAAAAGAGCGGCAGGACTGGGAGCTCTGCTCATTGGGTTCTTGGGAGCAGCAGGAAGC  
ACAATGGGCGCAGCGTCAGTGACGCTGACGGTACAGGCCAGACTATTATTGTCTGGTATTGTGCAACAGCAGA  
GCAATCTGCTGAGAGCTATTGAGGCGCAACAGCATATGTTGAAGCTCACAGTCTGGGGCATC

>KR182343..1

TTCTACTGTGATACAACAAAACCTGTTTAATAGTACTTGGCCTTGGCCTGCTAATAAAAACAGATGATGGCACAA  
ATGCAACAGCATCAGACAAAAATATCACACTCCCATGCAGAATAAAACAAATTATAAACATGTGGCAGAAAGT  
GGGAAGAGCAATATATGCCCCCTCCCATCAAAGGACCAATTGAATGTGTATCAAATATTACAGGGATAATATTA  
ACAAGGGATGGTGATAAGAATAATACCTACAATGAGACCTTCAGACCTACAGGAGGAGAAATGAAGGACAATT  
GGAGAAGTGAATTATATAAATATAAAGTAATAAAAAATTGAACCATTAGGAATAGCACCTACCAGGGCAAAGAG  
AAGAGTGGTGCAGAGAGAAAAAGAGCAGTGGGAATAGGAGCTCTGCTTCTTGGGTTCTTGGGAGCAGCAGGA  
AGCACTATGGGCGCAGCGTCAATGACGCTGACGGTACAAGCCAGGCAATTACTGTCTGGCATAGTGCAACAGC  
AGAACAATCTGCTGAAAGCTATTGAGGCGCAACAGCAGCTGTTGCAACTCACAGTCTGGGGCATC

>KT986555..1

TTCTACTGTAATACTACACAACCTGTTTAATAGTACTTGGAAATAAGAATAAACTAATAATACTTGGGAAAGGA  
ATGACACAAATAGTAATGAAACAACAATCACAATCCCATGCAGAATAAAACAAATTATAAACATGTGGCAGGG  
AGTAGGCAAGGCAATGTATGCCCCCTCCCATCAGAGGATTAATCAGATGTTTCATCAAACATTACAGGACTGATA  
TTAACAAGAGATGGTGGTCAGAGTAATGAAAACAGGGAACAACACCGAGATATTCAGACCTGGAGGAGGAGACA  
TGAGGGACAATTGGAGAAGTGAATTATATAGATATAAAGTAGTAGAAATTGAACCATTAGGAATAGCACCCAC  
CAAGGCGAAGAGAAGAGTGGTGCAGAGAGAAAAAGAGCGGTACACTAGGAGCTGTGTTCCCTTGGGTTCTTG  
GGAGCAGCAGGAAGCACTATGGGCGCAGCGTCAATGACGTTGACGGTACAAGCCAGACAGTTATTGTCTGGTA  
TAGTGCAACAGCAGAACAAATCTGCTAAGAGCTATTGAGGCGCAACAGCACCTGTTGCAACTCACGGTCTGGGG  
CATC

>KX505508..1

TTCTATTGTAATTTAACAACAACTGTTTAATAGTACTTGGAAATAAGACTGAAGGGCCTTGGAAATGTTACTGAAG  
AGTATGGGAATATTACTGACCCCTATCATACTCCCATGCAGAATAAAACAAATTATAAACATGTGGCAGAGAGT

AGGAAGGGCAATGTATGCCCCCTCCCATCAAAGGCCAACTTCAATGTACATCAAATATTACAGGGCTCCTATTA  
ACAAGAGATGGTGGTAAGGTGAATAATGAGACTGAGATCTTTAGGCCTGCAGGAGGAGATATGAGGGACAATT  
GGAGAAGTGAATTATATAAAATATAAAGTAGTAAAAATTGAACCATTAGGAATAGCACCCACCAGGGCGAAGAG  
AAGAGTGGTGCAGAGAGAAAAAGAGCAGTGGGATTAGGAGCTATGTTCTTGGGTCTTGGGAGCAGCAGGA  
AGCACTATGGGCGCAGCGGCAGTGACGCTGACGGTACAGGCCAGACAATTATTGTCTGGTATAGTGCAGCAGC  
AGAACAATCTGCTGAAGGCTATTGAGGCGCAGCAGCATCTGTTGCAACTCACAGTCTGGGGCATC

>KX027971..1

TTCTACTGTAATACAACACGACTGTTTCGAAAGTACTTGGCATGGAAATGAGACTTGGTATGGGAATGAGACTA  
TAGAGCCAGAGGCAAATGACACAATAATCGAACTCCCATGCAGAATAAAACAAATTATAAACATGTGGCAGGA  
AGTAGGAAAAGCAATGTACGCCCTCCCATCAGAGGACCAATTAAATGTTTCATCAAATATTACAGGGCTACTA  
TTAACAGAGATGGTGGTGTATGATCAGTACAGTAAGAATGAGACCTCCTGCAATAATACTACTGAGACCTTCA  
GACCTGGAGGAGGGAATATGAAGGACAATTGGGAGAAGTGAATTATATAAAATATAAAGTAGTAAAAATAGAACC  
ATTAGGAGTAGCACCCACCAAGGCCAAAAGAAGAGTGGTGCAGAGAGAAAAAGAGCAGTAGGAATAGGAGCT  
ATGTTCTTGGGTTCTTGGGAGCAGCAGGAAGCACTATGGGCGCAGCATCAATAACGCTGACGGTACAGGCCA  
GACAATTATTGTCTGGTATAGTGCAACAGCAGAACAACTCTGCTAAGGGCTATTGAGGCGCAACAACATCTGTT  
GCAACTCACAGTCTGGGGCATC

>KX505446..1

TTCTACTGCAATACAACACAACCTATTTAATAGTACTTGGTCAAAAAATAATACTTGGGAGAAGAATGAAGACA  
ATTCAATTAATAGTACTATCACACTCCCATGCAGAATAAAACAAATTATAAACATGTGGCAGGAAGTAGGAAA  
AGCAATGTATACCTCCCCAATCAAAGGACAGATTAGCTGTAACCTCAAGTATTACAGGGATACTATTAACAAGA  
GATGGTGGAGAATAATAGTGACAATGAGACCTTCAGACCTGGAGGAGGAGATATGAGGGACAATTGGAGAA  
GTGAATTATATAAAATATAAAGTAGTAAAAATTGTACCATTAGGAATAGCACCCACTGCGGCAAAAAGAAGAGT  
GGTGCAGAGAGAAAAAGAGCAGCACTAGGAGCTATGTTCTTGGGTTCTTGGGAGCAGCAGGAAGCACTATG  
GGCGCAGCATCAGTGACGCTGACGGTACAGGCCAGACTATTATTGTCTGGTATAGTGCAACAGCAGAACAACT  
TGCTGAGGGCTATTGAGGCGCAACATCATCTGTTGCAACTCACAGTCTGGGGCATC

>KT986947..1

TTCTACTGTGATACAACAAAACTATTTAATAGTACTTGGAAATAGTACTTGGGACAATAATAGTACTCGGAATA  
ATAACAGATCAGAGGACAGATCAGAGAGCGATGACACAATCACACTACCATGCAGAATAAGACAAATTATAAA  
CAGATGGCAAGAAGTAGGAAAAGCAATGTATGCCCCCTCCCATCAAAGGACTAATTGAATGTAACCTCAACAATT  
ACAGGGCTGCTCTTAGCAAGAGATGGTGGTATCAACAGCACAGGGAATGAGACCTTCAGACCTCAAGGAGGAA  
ATATGAGGGACAATTGGGAGAAGTGAATTATATAAGTATAAAATAGTAAAAATTGAACCATTAGGAATAGCACC  
CACTAAGGCCAAAAGAAGAGTGGTGCAGAGAGAAAAAGAGGAGCGGGACTAGGAGCTTTGTTCTTGGATTCT  
TTGGGAGCAGCAGGAAGCACTATGGGCGCAGCGTCAGTGACGCTGACGGTACAAGCCAGACAATTATTGTCTG  
GTATAGTGCAACAGCAGAACAACTCTGCTGAGGGCTATTGAGGCGCAGCAGCATATGTTGCAACTCACAGTCTG  
GGGCATC

>MH264238..1

TTCTACTGTAATTCAACACAGCTGTTTAAATAGTACTTGGTATCTTAATGGTACTTGGAAATGCAACTGAAGGGT  
TAAATAACACTGAAGGAAATATCACACTCCCATGCAGAATAAAACAAATTATAAACATGTGGCAGCAGGTAGG  
AAAAGCAATGTATGCCCCCTCTATCAGAGGACTAATTAGATGCACATCAAACATTACAGGGATAATATTAA  
AGAGATGGTGGTTACGAGAACAAAGACCGATAACAATACTAATACTGAGATCTTCAGACCTGGAGGAGGAGATA  
TGAGGGACAATTGGGAGAAGTGAATTATATAAAATATAAAGTAGTAAGAATTGAACCATTAGGAGTAGCACCCAC  
CAAGGCCAAAGAGAAGAGTGGTGCAGAGAGAAAAAGAGCAGTGGGAATAGGAGCCTTGTTCTTGGGTTCTTG  
GGAGCGGCAGGAAGCACTATGGGCGCAGCGTCAATGACGCTGACGGTACAGGCCAGACAATTATTGTCTGGTA  
TAGTGCAACAGCAAAACAACTTGCTGAGGGCTATTGAGGCGCAACAGCATCTGTTGCAACTCACAGTCTGGG  
CATC

>KX587339..1

TTCTATTGTAATACAACAAACCTGTTTAAATAGTACATGGCATACTAACGGAACAAATAGCACTGACAATGGTA  
CTGACACAATCACAATCCAATGCAGAATAAAACAAATAATAAACACGTGGCAGGAAGTAGGAAAAGCAATGTA  
TGCCCCCTCCCATCCAAGGACAACCTTAAGTGTTCATCAAATATTACAGGGCTGCTATTAAACAAGAGATGGTGGT  
AATGATAGTAATACTACCAATAACACTGAGATCTTCAGACCTCAAGGAGGAAATATGAGAGACAATTGGAGAA  
GTGAATTATATAAAATATAAAGTAGTAAAAATTGAACCATTAGGAGTAGCACCCACCGAGGCAAAGAGAAGAGT  
GGTGCAGAGAGAAAGAAGAGCAGTGGGACTAGGAGCTATGTTCTTGGGTTCTTAGGAGCAGCAGGAAGCACT  
ATGGGCGCAGCGTCATTGACGCTGACGGTACAGGCCAGACAATTATTGTCTGGTATAGTGCAACAGCAGAACAA  
ATTTGCTGAGAGCTATTGAGGCGCAACAGCATCTGTTGCAACTCACAGTCTGGGGCATT

>KX505536..1

TTCTACTGTAATACAACACAGCTGTTCAATAGTACATGGGATTGTACTGGAACCTGCATGTACATTGAATGGAA  
CTGTTCTTAATGGGATAAAATAACACCAATATTACTCTCCCATGCAGGATAAAACAAATTATAAACATGTGGCA  
AAAAGTAGGAAAAGCAATGTACAACCCTCCCATCAAAGGAGTAATTCAATGTACATCAAATATTACAGGGATA  
ATATTAAACAAGCGATAATGGTGGGATTGGAAATAATGAAAATGAAACCTTCAGACCTGCAGGAGGAGATATGA  
GGGACAATTGGGAGAAGTGAATTATATAAAATATAAAGTAGTAAGAATTGAGCCATTAGGAATAGCACCCACCAA

GGCAAAAAGGAGAGTGGTGCAGAGAGAAAAAAGAGCAGTAACATTAGGAGCTATGTTTCATTGGGTTCTTGGA  
GCAGCAGGAAGCACTATGGGCGCAGCGTCAGTGACGCTGACGGTACAGGCCAGACAATTGCTGTCTGGTATAG  
TGCAACAGCAGAGCAATCTGCTGAAGGCTATTGAGGCGCAACAGCATCTGTTGCAACTCACAGTCTGGGGCAT  
C

>MG196412..1

TTCTACTGTAATTCATCAAACTGTTTAAATAGTACTTGGGGAAGTACTGACGGGTCAAATAGCACTGAAACAA  
ATGGCACAATCATACTCCCATGCGAATAAGACAAATTATAAACAAAGTGGCAGCAAGTAGGAAAAGCAATATA  
CGCCCCCTCCCATCCAAGGACGAATTAAATGTTTATCAAATATTACAGGGCTGCTATTAACAAGAGATGGTGGT  
CATAACAACAGTAGCAATGAGAGTAGGAGTGAGATCTTCAGACCTGGAGGAGGAGACATGAGGGACAATTGGA  
GAAGTGAATTATATAAAATATAAAGTAGTAAGAATTGAACCAGTAGGAATAGCACCCACCAAGGCAAAGAGAAG  
AGTGGTGCAGAGAGAAAAAAGAGCAGTGGGAACAATAGGAGCTATGTTCTTTGGGTTCTTGGGAGCAGCAGGA  
AGCACTATGGGCGCAGCGTCATTGACGCTGACGGTACAGGCCAGACAATTATTGTCTGGTATAGTGCAACAGC  
AGAACAATCTGCTGAAGGCTATTGAGGCGCAACAGCACCTGTTGCAACTCACAGTCTGGGGCATC

>MK169417..1

TTCTACTGTAATACAACACAATTGTTTAAATAGTAGTTGGATTTCGGAATGGTACTGATTGGACTTGGAATAGTA  
CCACACAAAATGATACTATCATACTCCCATGCAAAATAAAACAAATTATAAACATGTGGCAGGAAGTAGGAAA  
AGCGATGTATGCCCCCTCCTATCGAAGGAATAATTAGGTGTGTATCAAATATTACTGGGTTGCTATTAACAAGA  
GATGGTGGTCACAACAGCAGCAACGGTACTGAGACCTTCAGACCTGCAGGAGGAAAATGAAGGACAATTGGA  
GAAGTGAATTATACAAATATAAAGTAGTAAAAGTTGAACCATTAGGAGTAGCACCCACCAAGGCAAAGAGAAG  
AGTGGTGCAGAGAGAAAAAAGAGCAATAGGAGGACTAGGAGCTGTGTTCTTTGGGTTCTTGGGAGCAGCAGGA  
AGCACTATGGGCGCAGCATCAATGACGCTGACGGTACAGGCCAGACAATTATTGTCTGGTATAGTGACAGCAGC  
AGAACAATCTGCTGAAGGCTATTGAGGCGCAACAGCATATGTTGCAACTCACAGTCTGGGGCATC

>MK169834..1

TTCTACTGTAATACAACACCACTGTTTAAATCCAAATGGAATAAGAAATGACACTGGAAATATCACACTCCAAT  
GCAGAATAAAACAAATTATAAACATGTGGCAGGAAGTGGGAAAAGCAATGTATGCCCCCTCCCATCCCAGGTCA  
AATTAGGTGTGTATCAAATATTACAGGGCTGATATTAACAAGAGATGGTGGTGATAATAACGAGACCGAGGTC  
TTCAGACCTGGAGGAGGAGATATGAGGGACAATTGGAGAAGTGAATTATATAAAATATAAAGTAGTACAAATTG  
AACCATTAGGAGTAGCACCCACCACGGCAAGAAGAAGAGTGGTGCAGAGAGAAAAAAGAGCAGTAACTTTTGG  
AGCTCTGTTCTTTGGGTTCTTGGGAGCAGCAGGAAGCACTATGGGCGCAGCGTCAATGACGCTGACGGTACAG  
GCCAGGCAATTATTGTCTGGTATAGTGACAGCAGAGAACAATCTGCTGAGAGCTATTGAGGCGCAACAACATA  
TGTTGCAACTCACAGTCTGGGGCATT

>AF025753..1

TTCTACTGTAATACAACAAAACCTGTTTAAATAGTACTTGGAAATAGTACTTGGAAATGATACTGAAGGGTCAATTG  
CCACTGAAGGAAATACCACTGAAGAAAATATCACACTCCCATGCGAATAAAACAAATTATAAACATGTGGCA  
GGAAGTAGGAAAAGCAATGTATGCCCCCTCCCATCGCAGGACAAATTAGATGTTTCATCAAATATTACAGGGCTG  
CTATTAACAAGAGATGGTGGTAATGGTAATAGCAGCAACTACACTTCCGAGATCTTCAGACCGGGAGGAGGAG  
ATATGAGGGACAATTGGAGAAGTGAATTATATAAAATATAAAGTAGTAAAAATTGAACCATTAGGAGTAGCACC  
CACCAAGGCAAAGAGAAGAGTGGTGCAGAGAGAAAAGAGAGCAGTGGGAATAGGAGCGTTGTTCTTCGGGTTT  
TTGGGAGCAGCAGGAAGCACTATGGGCGCAGCGTCACTGACGCTGACGGCACAGGCCAGACTATTATTGTCTG  
GTATAGTGCAACAGCAGAAACAATCTGCTGAGGGCTATTGAGGCGCAACAGCATCTGTTGCAACTCACAGTCTG  
GGGCATT

>MH012806..2

TTCTACTGTAATTCACACAACTGTTTAAATAGTACTTGGAGTAGTAATAGTACTGGGAGTAATAGCACTGAAG  
AAGAAAGAAATATCACACTCCCATGCGAATAAAGCAAATTATAAACATGTGGCAGGAAGTAGGAAAAGCAAT  
GTATACCCCTCCCATCGGAGGACAAATTCAATGTTTCATCAAATATTACAGGGCTACTATTAACAAGAGATGGT  
GGTCATAGTGGGAACGAGTCCGAGAACAGGCCCGAGATCTTCAGACCAGGAGGAGATATGAGGGATAATT  
GGAGAAGTGAATTATATAAAATATAAAGTAGTAAAAGTTGAACCATTAGGAATAGCACCCACCAAGGCAAAGAG  
AAGAGTGGTGCAGAGAGAAAAAGAGAGCAGTGGGAATAGGAGCTATGTTCTTTGGGTTCTTGGGAGCAGCAGGA  
AGCACTATGGGCGCAGCGTCGGTGACGCTGACGGTACAGGCCAGACAATTATTGTCTGGTATAGTGCAACAGC  
AGAACAATCTGCTGAAGGCTATTGAGGCGCAACAGCATCTGTTGCAACTCACAGTCTGGGGCATC

>MH012971..1

TTCTACTGTAATTCACACAACTGTTTAAAGAGTATTTGGCATGGGAATGAAACCACGTGGAATACAAATAACA  
CTGAAAATATCACACTCCCGTGCGAATAAAACAAATTATAAACATGTGGCAGGAAGTAGGAAAAGCAATGTA  
TGCCCCCTCCCATCAGTGGACAAATTAGATGTTTCATCAAATATTACAGGGCTGCTATTAACAAGAGATGGTGGT  
GCTAAGGAGAACGAGACCACCTACAATGAGACCTTCAGACCTGGAGGAGGAGATATGAGGGACAATTGGAGAA  
GTGAATTATATAAAATATAAAGTAGTAAGAATTGAACCATTAGGAGTAGCACCCACCAAGGCAAAGAGAAGAGT  
GGTGCAGAGAGAAAAAAGAGCAGTGGGAATAGGAGCTCTGTTCTTTGGGTTCTTGGGAACAGCAGGAAGCACT  
ATGGGCGCAGCGTCACTGACGCTGACGGTACAGGCCAGACAATTATTGACTGGTATAGTGCAACAGCAGAAACA  
ACCTGCTGAGAGCTATTGAGGCGCAACAGCATCTGTTGCAACTCACAGTCTGGGGCATC

>MH012542..1

TTCTACTGTAATACAACACAACACTGTTTAAATAGTACTTGGACTTGGGAATGATACTAAAGGGTCAAATGACACTG  
GAGGAAATGGCACAATCACACTCCCATGCAGAATAAAACAAATTATAAACATGTGGCAGGAAGTAGGAAAAGC  
AATGTATGCCCCCTCCCATCCAGGACAAATTAGATGTTTCATCAAATATTACAGGGCTGCTATTAACAAGAGAT  
GGTGGTAACAATAATCAGAGCAGCGAGACCACCGAGGTCTTCAGACCTGGAGGAGGAGATATGAGGGACAATT  
GGAGAAGTGAATTATATAAAATATAAAGTAGTAAAAATTGAACCATTAGGAGTAGCACCCACCAAGGCAAAGAG  
AAGAGTGGTGCAGAGAGAAAAAAGAGCAGTGGGAATAGGAGCTGTGTTCTTGGGTTCCTTGGGAGCAGCAGGA  
AGCACTATGGGCGCAGCGTCAATGACGCTGACGGTACAGGCCAGACTATTATTGTCTGGTATAGTGCAACAGC  
AGAACAATTTGCTGAGGGCTATTGAGGCGCAACAGCATCTGTTGCAACTCACAGTCTGGGGCATC

>AY835435..1

TTCTACTGTAATACAACACAACACTGTTTAAATAGTACTTGGTTTAAATAATGCTACTTTGAATGTTAATAGTAATG  
TACTGAAGGGTCAGAAAATATCACACTCCCATGCAGAATAAGACAAATTGTGAACATGTGGCAAGAAGTAGG  
AAAAGCAATGTATGCCCCCTCCCATCCAAGGGCAAATTAGATGTTTCATCAAATATTACAGGGCTGCTATTAACA  
AGAGATGGTGGTGGTAGTAACAGTAGTAACACGAGCGAGGAGGTCTTCAGACCTGGAGGAGGAAATATGAGGG  
ACAATTGGAGAAGTGAATTATATAAAATATAAAGTAGTAAAAATTGAACCATTAGGAATAGCACCCACCAAGGC  
AAAGAGAAGAGTGGTGCAGAGAGAAAAAAGGACAGTGGGAATAGGAGCTTTGTTCTTGGGTTCCTTGGGAGCA  
GCAGGAAGCACTATGGGCGCAGCGTCAATGACGCTGACGGTACAGGCCAGACAATTACTGTCTGGTATAGTGC  
AACAGCAGAACAATCTGCTGAGGGCTATTGAGGCGCAACAGCATCTGTTGCAGCTCACAGTCTGGGGCATT

>AY331292..1

TTCTACTGTGATACAACAAAACTGTTTAAATAGTACTTGGCATGGTAATGAAACATCTTGGAATAATACTGAAA  
AGTTAAATGACACTATCATACTCCCATGCAGAATAAAACAAATTATAAACATGTGGCAGGAAGTAGGAAAAGC  
AATGTATGCCCCCTCCAATCGAAGGACTAATTAAGTGTTCATCAAGTATTACGGGGCTGCTATTAACAAGAGAT  
GGTGGTAAGAGCAATAATCAGACTGAGATCTTCAGACCTGGAGGAGGAGATATGAGGGACAATTGGAGAAGTG  
AACTATATAAATATAAAGTAGTAAAAATTGAACCAGTAGGAGTAGCACCCACCAAGGCAAAGAGAAGAGTGGT  
GCAGAGAGACAAAAGAGCAGTGGGACTAGGAGCGTTGTTTCATTGGGTTCCTTGGGAGCAGCAGGAAGCACTATG  
GGCGCAGCGTCAATGACACTGACGGTACAGGCCAGACAATTATTGTCTGGTATAGTGCAACAGCAGAACT  
TGCTGAGGGCTATTGAGGCGCAACACATCTGTTGCAACTCACAGTCTGGGGCATC

>EU289191..1

TTCTACTGTAATACATCAAACTGTTTAAATAGTACTTGGGAATGGTACTGAAGGGTTTAAATAGTACTGGGAGTG  
AAAATATCACACTCCCATGCAGAATAAGACAAGTTGTAAACCTGTGGCAGGAAGTAGGAAAAGCAATGTATGC  
CCCTCCCATCAGGGGAGTAATTAAATGTTTCATCAAACATTACAGGGGTACTATTAACAAGAGATGGTGGTTAT  
GATGATAATAATACCGCAACACCAACGAGACCTTCAGACCAGGAGGAGGAGATATGAGGGACAATTGGAGAA  
GTGAATTATATAAATATAAAGTAGTAAGAATTGAACCATTAGGAGTAGCACCCACCAGGGCAAAGAGAAGAGT  
GGTGCAGAGAGAAAAAAGAGCAGTGACACTAGGAGCTTTGTTCTTGGGTTCCTTGGGAGCAGCAGGAAGCACT  
ATGGGCGCAGCGTCACTGACGCTGACGGTACAGGCCAGACTCTTGTTGTCTGGTATAGTGCAACAGCAGAACT  
ATCTGCTGAGGGCTATTGAGGCGCAACACATCTGTTGCAACTCACCGTCTGGGGCATC

>KT124770..1

TTCTACTGTAATACATCAAACTGTTTAAATAGTACCTGGGAGTGGAATAATAGTACCAGAGATTGGAATAATA  
CTGAAATGTCAAATAACACTGAAGGAAATGGAACATCACTCTCCAATGCAGAATAAAACAAATTGTAAATAT  
GTGGCAGGAAGTAGGAAAAGCAATGTATGCCCCCTCCCATCAGAGGACAAATTAGATGTTTCATCAAATATTACC  
GGGTGCTATTAAACAAGAGATGGTGGTTACAACATCAGCAATAACAACGAGACCTTCAGACCTGGAGGAGGAG  
ATATGAGGGACAATTGGAGAAGTGAATTATACAGATATAAAGTAGTAAAAATTGAACCATTAGGAATAGCACC  
CACCAAGGCAAGGAGAAGAGTGGTGCAGAGAAAAAAGAGCAGTGGGATTAGGAGCTATGTTCTTGGGTTC  
TTGGGAGCAGCAGGAAGCACTATGGGCGCAGCATCAATGATGCTGACGGTACAGGCCAGACAATTATTGTCTG  
GTATAGTGCAACAGCAGAGCAATCTGCTGCAGGCTATTGAGGCACAACAGCATCTGTTGAACTCACAGTCTG  
GGCATT

>EU575670..1

TTCTACTGTAATACAACAAAACTGTTTAAATAGTACTTGGGTAAATGGTACTAGGAATGATACTGAAGAGTCAA  
ATAGCACTGAAATCACACTCCCATGCAGAATAAAACAAATCATAAACATGTGGCAGGAAGTAGGAAAAGCAAT  
GTATGCCCCCTCCTATCAGAGGACAAATTAGATGTTTCATCAAATATCACAGGGCTGCTATTAACAAGAGATGGG  
GGTGAGGGAGTTGAGAAAAACGATACCGAGATCTTTAGACCTGAAGGAGGAGATATGAAGAACAATTGGAGAA  
GTGAATTATATAAATATAAAGTAGTACAAATTGAACCATTAGGAGTAGCACCCACCAGGGCAAAGAGAAGAGT  
GGTGCAGAGAGAAAAAAGAGCAGTGGGAATAGGAGCTATGTTCTTGGGTTCCTTGGGAGCAGCAGGAAGCACT  
ATGGGCGCAGCGTCAATGGCGCTGACGGTACAATCCAGACAATTATTGTCTGGTATAGTGCAACAGCAAAACA  
ACTTGCTGAGAGCTATTGAGGCGCAACATCATCTGTTGCAACTCACAGTCTGGGGCATT

>EU575927..1

TTCTACTGTAATACCTCAAACTGTTTAAATAGCTCTTGGTATTCAAATGGTACTCGGAATGGTACTGAAGAAT  
CAAATGACCTTATCACACTCCCATGCAGAATAAAACAAATTGTAAACATGTGGCAGGAAGTAGGAAAAGCAAT  
GTATGCCCCCTCCATTAGAGGACACATTAAGTGTACATCAAATATTACAGGGCTGTTATTAAACAAGAGATGGG  
GGTCAGAGTAATGAAACCAAGGACGAGGAGATCTTCAGACCTGGAGGAGGAGATATGAGGGACAATTGGAGAA  
GTGAATTATATAAATATAAAGTAGTAAGAATTGAACCATTAGGAATAGCACCCACCAGGGCAAAGAGAAGAGT

GGTGCAGAGAGAAAAAAGAGCAGTGGGAATAGGAGCTCTGTTCCCTTGGGTTCTTGGGAGCAGCAGGAAGCACT  
ATGGGCGCAGCGTCAATAACGCTGACGGTACAGGCCAGGCTATTAATGTCTGGTATAGTGCAACAGCAAAACA  
ATCTGCTGAGAGCTATTGAGGCGCAACAGCATCTGTTGCAACTCACAGTCTGGGGCATC

>AY835442..1

TTCTACTGTAATACAACACAACCTGTTTAATAATACTTGGAAATGGTACTGGATGGTCAGATAACTCAGAGAACA  
CTACAGGAAACGGAACCTATCACACTCCCATGCAGAATAAAACAAATTGTTAACCTGTGGCAGGAAGTAGGAAA  
AGCAATGTATGCCCCCTCCCATCAGAGGACTAATTAGATGTTTCATCAAATATTACAGGGCTGCTATTAACAAGA  
GATGGAGGTAATAATACCACCACGAACGGGACTCAGACTGAGATATTAGACCTGGAGGAGGAGATATGAGGG  
ACAATTGGAGAAGTGAATTATATAAATATAAAGTAGTAAAAATTGAACCATTAGGAGTAGCACCCACTAGGGC  
AAAGAGAAGAGTGGTGCGGAGAGAAAAGAAGAGCAGCACTAGGAGCTTTGTTCCCTTGGGTTCTTGGGAGCAGCA  
GGAAGCACTATGGGCGCAGCGTCAATGACGCTGACGGTACAGGCCAGACTATTATTGTCTGGTATAGTGCAAC  
AGCAGAATAATTTGCTGAGGGCTATTGAGGCGCAACAGCATCTGTTGCAACTCACAGTCTGGGGCATC

>DQ853463..1

TTCTACTGTAATACAACACAATTTGTTTAATGGTATGTGGCATGCTAATGGTACTTGGAAATAGTACTTGGAAATG  
ATACTGGAGGGTCAAATGACACTATCAGACTCCCATGTAGAATAAAACAAATTGTAAACATGTGGCAGGAAGT  
AGGAAAAGCAATGTATGCCCCCTCCCATCAAAGGACAAATTCATGTTTCATCAAATATTACAGGGCTGATATTA  
ACAAGAGATGGTGGTAACAGCACGAACGAGACCGGGGAGGTCTTCAGACCTGGAGGAGGAAATATGAAGGACA  
ATTGGAGAAGTGAATTATATAAATATAAAGTAGTAGAAATTGAACCATTAGGAGTAGCACCCACCAAGGCAAA  
GAGAAGAGTGGTGCAGAGGGAAAAAAGAGCAGTGGGATTAATAGGAGCTGTGTTCCCTTGGGTTCTTGGGAGCA  
GCAGGAAGCACTATGGGCGCAGCGTCAATAGCGCTGACGGTACAGACCAGACACTTATTGTCTGGTATAGTGC  
AACAGCAGAACAATCTGCTGAGGGCTATTGAGGCGCAACAACATCTGTTGCAACTCACAGTCTGGGGCATC

>KT124769..2

TTCTACTGTAATACAGCAGAACTGTTTAATAGTACTTGGTATGCAAATGGTACTTGGTATGCAAATGGTACAA  
ATAGTACTGGAGGGGGAAACAAGACTAATATCACACTCCCATGCAGAATAAAACAAATTTATAAACATGTGGCA  
GGAAGTAGGAAAAGCAATGTATGCCCCCTCCCATCAGTGGACAGATTAGATGTGCATCAAATATTACAGGACTG  
CTATTAACAAGAGATGGTGGTCAGGGCAATCAGACCGACAACCAGACTGAGATCTTCAGACCTGTAGGAGGAG  
ATATGAAGAACAATTGGAGAAGTGAATTATATAAATATAAAGTAGTAAGAATTGAACCATTAGGAATAGCACC  
CACCAGGGCAAAAAGGAGAGTGGTGCAGAGAGAAAAAAGAGCAGTGGGAATAGGAGCTTTGTTCCCTTGGGTTCT  
TTGGGAGCAGCAGGAAGCACTATGGGCGCAGCGTCAATGACGCTGACGGTACAGGCCAGACTATTATTGTCTG  
GTATAGTGCAACAGCAGAAACAATCTGCTGAGGGCTATTGAGGCGCAACAACATCTGTTGCAACTCACAGTCTG  
GGGCATC

>EU289196..1

TTCTACTGTAATACATCAAACTGTTTAATAGTACTTGGAAATAGTACTGGAGGGTCCATTTCTGAAGACTCAG  
AAAATATCACACTCCCATGCAGAATAAAACAAATTGTAAACATGTGGCAGGAGGTAGGAAAAGCAATGTATGC  
CCCTCCCATCAGAGGACAGATCAGATGTTTCATCAAATATTACAGGGCTGCTATTAACAAGAGATGGTGGTATA  
AATCAGAGCATCAGCGAGACCTTCAGACCGGGAGGAGGAGATATGAGGGACAATTGGAGAAGTGAATTATACA  
AATATAAAGTAGTAAAAATTGAACCATTAGGAATAGCACCCACCAAGGCAAGGAGAAGAGTGGTGC AAAGAGA  
AAAAAGAGCAGTGGGAATAGGAGCTGTGTTCCCTTGGGTTCTTGGGAGCAGCAGGAAGCACTATGGGCGCAGCG  
TCACTGACGCTGACGGTACAGGCCAGACTATTATTGTCTGGTATAGTGCAACAGCAGAAACAATCTGCTGAGGG  
CTATTGAGGCGCAACAGCATATGTTGCAACTCACAGTCTGGGGCATC

>EU576141..2

TTCTACTGTAATACAACACCACTGTTTAATAGTACTTGGAAATAATACTCGGACTGATGATTATCCTACTGGGG  
GGGAACAAAATATCACACTCCAATGCAGAATAAAACAAATTATAAACATGTGGCAGGGAGTAGGAAAAGCAAT  
GTATGCTCCTCCCATCAGAGGACAAATTAGATGTTTCATCAAATATTACAGGGCTGCTATTAACAAGAGATGGT  
GGTAGAGATCAGAATGGTACTGAGACCTTCAGACCTGGAGGAGGAAATATGAGGGACAATTGGAGAAGTGAAT  
TATATAAATATAAAGTAGTAAAAATTGAACCATTAGGAATAGCACCCACCGCGGCAAAGAGAAGAGTGGTGCA  
GAGAGAAAAAAGAGCAGTGGGACTAGGAGCTTTTATCCTTGGGTTCTTGGGAGCAGCAGGAAGCACTATGGGC  
GCAGCGTCAATTGGCGCTGACGGTACAGGCCAGACTATTATTGTCTGGTATAGTGCAACAGCAAAACAATTTGC  
TGAGAGCTATTGAGGCGCAACAGCATATGTTGCAACTCACAGTCTGGGGCATC

>AY835446..1

TTCTACTGTAATACAGCAGAACTGTTTAATAGTACTTGGTATGCAAATGGCACAATTAGTATTGGAGGGGGAA  
ACAAGACTAATATCATACTCCCATGCAGAATAAAACAAATTTATAAACATGTGGCAGGAAGTAGGAAAAGCAAT  
GTATGCCCTCCCATCAGTGGACAGATTAGATGTTTCATCAAATATTACAGGACTGCTATTAACAAGAGATGGT  
GGTAGGGGCAATCAGACCGACAACCAGACTGAGATCTTCAGACCTGTAGGAGGAGATATGAAAAACAATTGGA  
GAAGTGAATTATATAAATATAAAGTAGTAAGAATTGAACCATTAGGAATAGCACCCACCAGGGCAAAAAGGAG  
AGTGGTGCAGAGAGAAAAAAGAGCAGTGGGAATAGGAGCTTTGTTCCCTTGGGTTCTTGGGAGCAGCAGGAAGC  
ACTATGGGCGCAGCGTCAATGACGCTGACGGTACAGGCCAGACTATTATTGTCTGGTATAGTGCAACAGCAGA  
ACAATCTGCTGAGGGCTATTGAGGCGCAACAGCATCTGTTGCAACTCACAGTCTGGGGCATC

>EF593282..1

TTCTACTGTAATTCAACACCACTGTTTGTAGTAGTACTTGGTATACTGGGAATAGTACCAATAGTACTAAAGGGT  
TAAATAACGCTACAGAAATTATCACACTCCTATGTAGAATAAAACAAATTATAAACATGTGGCAGGAAGTAGG  
AAAAGCAATGTATGCCCCCTCCCATCAGAGGACAAATTAGATGCTCATCAAATATTACAGGGCTGCTATTAA  
AGAGATGGTGGTAATAGCAGCAGCAATGAAGAGATTTTCAGACCTGCAGGAGGAGATATGAGGGACAATTGGA  
GAAGTGAATTATATAAATATAAAGTAGTAAAAATTGAACCATTAGGAGTAGCACCCACCAAGGCAAAGAGAAG  
AGTGGTGCAGAGAGAAAAAGAGCAGTGGGAATAGGAGCTGTGTTTCCTTGGGTTCTTGGGAGCAGCAGGAAGC  
ACTATGGGCGCAGCGTCAGTGACGCTGACGGTACAGGCCAGACAATTATTGTCTGGAATAGTGCAGCAGCAGA  
ACAATCTGCTGAGGGCTATTTCAGGCGCAACAGCATCTGTTGCAACTCACAGTCTGGGGCATC

>JQ610043..1

TTCTATTGTAATACAACACCGCTGTTTGTAGCAGCAGGTGGGGGCCTGACGGCACTTGGAATAGCACTTGGAACA  
GTACAAGTACAATAACAACGACACTATCACACTCCAATGCAGAATAAAACAAATTATAAACAGGTGGCAGGA  
AGTAGGAAGAGCAATGTATGCCCCCTCCCATCCAAGGACAAATTAGATGCTCATCAAATATTACAGGGCTGCTA  
TTAACAGAGATGGTGGTCATGGTAATGACACGGATAATACCACCGAGACCTTCAGACCTGGAGGAGGAAATA  
TGAGGGGACAATTGGAGAAGTGAACTGTATAAATATAAAGTAGTAAAAATTGAGCCATTAGGATTAGCACCCAC  
CAAGGCAAAGAGAAGAGTGGTGCAAAGAGAAAAAGAGCAGTGGGAACGCTAGGAGCTATGTTTCCTTGGGTTT  
TTGGGAGCAGCAGGAAGCACTATGGGCGCAGCGGCAGTGACGCTGACGGTACAGGCCAGACAATTATTGTCTG  
GTATAGTGCAACAGCAGAAACAATTGCTGAAGGCTATTGAGGCGCAACAGCATATGTTGCAACTCACAGTCTG  
GGGCATC

>EF593212..2

TTCTACTGTAATACAACACCACTGTTTAAATAGTACTTGGAAATAACTAATGAAGGGTCAGGTAACCTATGAAG  
GAAATATCACACTCCAATGCAGAATAAAACAAATTATAAATATGTGGCAGCAAGTAGGAAAAGCAATGTATGC  
CCCTCCCATCCAAGGACAAATTTACTGTTTCATCAAATATTACAGGGCTGCTATTAAACAAGAGATGGTGGTGGT  
AATAACGAGAGCAGCGAGACCTTCAGACCTGGAGGAGGAGATATGAGGGACAATTGGAGAAGTGAATTATATA  
AATATAAAGTAGTAAAACTTGAACCATTAGGAATAGCACCCACCAGGGCAAAGAGAAGAGTGGTGCAGAGAGA  
AAGAAGAGCAGCGGGACTAGGAGTTATGTTTCCTTGGGTTCTTGGGAGCAGCAGGAAGCACTATGGGCGCAGCG  
TCAATGGCGCTGACGGTACAAGCCAGACAATTATTGTCTGGTATAGTGCAACAGCAGAGCAATCTGCTGAGGG  
CTATTGAGGCGCAACAACATATGTTGCAACTCACAGTCTGGGGCATC

>EF593300..1

TTCTACTGTAATACAACACAGTTGTTTAAATAGTACTTGGAAATAGTACTGGGAATAATAAACAGGTCAGGAG  
AAAATATCACACTCCCATGCAGAATAAAACAAATTCATAAACCTGTGGCAAGAAGTAGGAAAAGCAATGTATGC  
TCCTCCCATCAAAGGAGAAATTCATGCCGATCAAATATTACAGGGCTAATAATAACAAGAGATGGTGGTAAC  
ACTACTGAAGAGATCTTCAGACCTGGAGGAGGAGATATGAGGGACAATTGGAGAAGTGAATTATATAAATATA  
AAGTAGTAAGAATTGAACCATTAGGAATAGCACCCACCAAGGCAAAGAGAAGAGTGGTGCAAAGAGAAAAAAG  
AGCAGTGGGATTTCGGAGCTATGTTTCCTTGGGTTCTTGGGAGCAGCAGGAAGCACTATGGGCGCAGCGTCAATA  
GCGCTGACGGCACAGGCCAGACAATTATTGTCTGGTATAGTGCAACAGCAAAACAATTTGCTGAGGGCTATTG  
AGGCGCAACAGCATATGTTGCAACTCACAGTCTGGGGCATC

>GQ153937..2

TTCTACTGTGATACAACACAACCTGTTTAAATAGTACTTGGGATAATACTAGTACTTGGAAATAATAGTAACACTC  
AGAATAAAAATGATAGGAATATCACACTCCAATGCAGGATAAAACAAATTATAAACATGTGGCAGGAAGTAGG  
AAAAGCAATGTATGCCCCCTCCCATATGGGACAAATTAGATGTGTATCAAATATTACAGGGCTGCTATTAA  
CGGGATGGTGGTAACGGTAGCGAGGCCAAAAACGACACGGAGATCTTCAGACCTGGAGGAGGAGATATGAGGG  
ACAATTGGAGAAGCGAATTATATAAATATAAAGTAGTAAAAATTGAACCATTAGGAGTAGCACCCACCAAGGC  
AAAGAGAAGAGTGGTGCAGAGAGAAAAAGAGCAGTGGGAACGATAGGAGCTATGTTTCCTTGGGTTCTTGGGA  
GCAGCAGGAAGCACTATGGGCGCAGCGTCATTGACGCTGACGGTACAGGCCAGACAATTGTTGTCTGGTATAG  
TGCAGCAGCAGAAACAATCTGCTGAGAGCCATTTCAGGCGCAACAGCACCTGTTGCAGCTCACAGTCTGGGGCAT  
T

>MH263520..1

TTCTACTGTAATACAGCAAAGCTATTTAAATAGTACATGGTATAGTGCAGGGAATAGCACTGATGGGGATAAAG  
GAAATAAATAACATAATCACACTCCCATGCAGAATAAAACAAATTGTAAACATGTGGCAGGAAGTAGGAAAAGC  
AATGTATGCCCCCTCCCATCAGTGGACAAATTAGATGCTCATCAAATATTACAGGGCTGCTATTAAACAAGAGAT  
GGTGGTCATGACAATGACACAAACGGGACAGAGATCTTCAGACCTGGAGGAGGGAATATGAAGGACAATTGGA  
GAAGTGAATTATATAAATATAAAGTAGTAAGAATTGAACCATTAGGAGTAGCACCCACCAAGGCAAAGAGAAG  
AGTGGTGCAGAGAGACAAAAGAGCAGTGGGAATAGGAGCTCTGTTTCCTTGGGATCTTGGGAGCAGCAGGAAGC  
ACTATGGGCGCAGCGTCAATAACGCTGACGGTACAGACCAGACAATTATTGTCTGGTATAGTGCAACAGCAGA  
ACAATTTGCTGAGGGCTATTGAGGCGCAACAGCACATGTTGCAACTCACAGTCTGGGGCATC

>KX984437..2

TTCTACTGTAATACATCAAAATTGTTTGTAGTAGTACTTGGAAATGGTACTACCACACTGCCTAGTAGTACTTGG  
ATACTACTCAGAATGATACTATCACACTCCCATGCAGAATAAAACAAATTATAAACCTGTGGCAGGAAGTAGG  
AAAAGCAATGTATGCCCCCTCCCATCAAAGGACAGATTAAATGTTTCATCAAATATTACAGGGCTGTTATTAA  
AGAGATGGTGGTATTACCAACAACAGCATGAATCAGACCTTCAGACCTGGAGGAGGAGATATGAAGGACAATT

GGAGAAGTGAATTATATAAAATATAAAGTAGTAAAAATTGAACCATTAGGAATAGCGCCTACCAAGGCAAAGAG  
AAGAGTGGTGCAGAGAGAAAAAGAGCAGTGGGAATAGGAGCTTTGTTCTTGGGTCTTGGGAGCAGCAGGA  
AGCACTATGGGCGCAGCGTCAATAACGCTGACGGTACAGGCCAGACTATTATTGTCTGGTATAGTGCAACAGC  
AGAACAATTTGCTGAGGGCTATTGAGGCGCAACAGCATATGTTGCAACTCACAGTCTGGGGCATC

>KX984699..1

TTCTACTGTAATACAACAAAACCTGTTTAGCAGTACTTGGTATGATAATGGAACGTCAAAAAGCACTGAAAGAT  
TAAATGACACTATCATACTCCCATGCAGGATAAAACAGATTATAAACATGTGGCAGGAAGTAGGAAAAGCAAT  
GTATGCCCTCCCATCAGAGGACAAATTAAGTGTTCATCAAATATTTAGGGCTGCTATTAACAAGAGATGGT  
GGTAATGATAATAACACGAACGACATCGAGACATTCAGACCGGGAGGAGGAGATATGAGGGACAATTGGAGAA  
GTGAATTATATAATTATAAAGTGGTAAAAATTGAACCATTAGGAATAGCACCCACTAAGGCAAAGAGAAGAGT  
GGTGCAAAGAGAAAAAGAGCGGGAATAGGAGCTTTGTTCTTGGGTCTTGGGATTAGCAGGAAGCACTATG  
GGCGCAGCGTCAGTGACGCTGACGGTACAAGCCAGACTATTATTGTCTGGTATAGTGCAACAGCAGAACAAATC  
TGCTGAGGGCTATTGAGGCGCAACAGCATCTGTTGCAACTCACGGTCTGGGGCATC

>MH632763..1

TTCTACTGTGATACAACAAAATTGTTTAATAGTACTTGGAAATGTTAGTAGTATTTGGAATGTTACTGAGGATA  
AAAATATCACACTCACATGTAGAATAAGACAAATTATAAACAGGTGGCAAGAAGTAGGAAAAGCAATGTATGC  
CCCTCCCATCAGAGGACAAATTAGATGTTTCATCAAATATTACAGGACTGTTATTAACAAGAGATGGTGGTCAG  
AACACAACAAGCGAGACCTTTAGACCTGGAGGAGGAGATATGAGGGACAATTGGAGAAGTGAATTATATAAAT  
ATAAAGTAGTACAAATTAACCATTAGGAATAGCACCCACCAGGGCACGGAGAAGAGTGGTGCAGAGAGAGAA  
AAGAGCAGTAGGACTGGGAGCAATGTTCTTGGGTCTTGGGAGCAGCAGGAAGCACTATGGGCGCAGCGTCA  
GTGACGCTGACGGTACAGGCCAGACAATTACTGTCTGGTATAGTGCAACAGCAGAACAAATCTGCTGAGGGCTA  
TTGATGCGCAACAGCACCTGTTGCAACTCACAGTCTGGGGCATC

>MH576107..1

TTCTACTGTAATACAACACAACCTGTTTACTTGGGGGAGTAATAGTACTAACATTACAGGAAGTAATAGCACAC  
TCACACTCCCATGCAGAATAAAACAAATTATAAATATGTGGCAGAGAGTAGGAAGAGCAATGTATACCCCTCC  
TATCAGAGGACTAATTCAATGCTCATCAAATATTACAGGACTACTATTAACAAGAGATGGTGGGTATGGCAAT  
AACAAATACCAATGATACTGAGATCTTCAGACCTGGAGGAGGAGACATGAGGGATAATTGGAGAAGTGAATTAT  
ATAAATATAAAGTGGTAAAAATTGAACCATTAGGAGTAGCACCCACCAAGGCAAGGAGAAGAGTGGTGCAAAG  
AGAAAAAGAGCAGTAGGAATAGGAGCTGTGTTCTTGGGTCTTGGGAGCAGCAGGAAGCACTATGGGCGCA  
GCGTCAATAACGCTGACGGTACAGGCCAGACAATTACTGTCTGGTATAGTGCAACAGCAGAACAAATTTGCTGA  
GGGCTATTGAGGCGCAACAGCACCTGTTGCAACTCACAGTCTGGGGCATC

>EU616649..1

TTCTACTGCAATACATCAGGACTGTTTAATAGTTCTTGGGATATTAATGGTTCTTGGTATGGTAATAGAGGGT  
CAAATGACACAATTACACTCCCATGCAGAATAAAACAAATTTATAAACATGTGGCAGGAAGTAGGAAAAGCAAT  
GTATGCCCCCTCCTATCCAAGGACTAATTAACTGTTTATCAAATATTACAGGGCTGCTATTAACAAGAGATGGT  
GGCAATAGCAGTCATAGTAATGGGACAGAGACCTTTAGACCTGGAGGAGGAGATATGAGAGATAATTGGAGAA  
GTGAATTATATAAATATAAAGTAGTAAAAATTGAACCATTAGGAGTAGCACCCACCAAGGCAAAGAGAAGAGT  
GGTGCAGAGAGAAAAAGAGCAGTGGGAATAGGAGCTTTATTCCTTGGGTCTTGTCTAGCAGCAGGAAGCACT  
ATGGGCGCAGCGTCAATGACGCTGACGGTACAGGCCAGACAATTATTGTCTGGTATAGTGCAACAGCAGAACAA  
ATTTGCTGAGAGCTATTGAGGCGCAACAGCATATGTTGCAACTCACAGTCTGGGGCATC

>FJ469704..1

TTCTACTGTAACCTTAACAAAACCTGTTTAATAGTACTTGGGCTTGGAAATAGTACTTGGAAATAGTACTGAAGGAA  
ATGAAAAATAACTATCACACTCCCATGTAGAATAAAACAAATTATAAACATGTGGCAGACAGTAGGAAAAGC  
AATGTATGCCCCCTCCTATCAGAGGACAAATTACATGCTCATCACATATTACAGGGATACTATTAACAAGAGAT  
GGTGGTAACAGTGATGACACAACTATACTGAGATCTTCAGACCTGCAGGAGGAGATATGAGGGACAATTGGA  
GAAGTGAATTATATAAATATAAAGTAGTAAAAATTGAACCATTAGGAGTAGCACCTACCAAGGCAAAGAGAAG  
AGTGGTGCAGAGAGAAAAAGAGCAGTGGGATTAGGAGCTATGTTCTTGGGTCTTGGGAGCAGCAGGAAGC  
ACTATGGGCGCAGCGTCGCTGACGCTGACGGTACAGGCCAGGCAGTTATTGTCTGGTATAGTGCAACAGCAGAA  
ACAATCTGTTGAGGGCTATTGAGGCGCAACAGCATCTGTTGCAACTCACAGTCTGGGGCATC

>MN515543..1

TTCTACTGTAATTCAACATCACTGTTTAATAGTACTTGGATGTTTAATAGTACTTGGAAATGGCACTGATGGGA  
ATGATGCTGACTCTAGAGAAAAATATCACACTCCAATGCAGAATAAAACAAATTATAAACATGTGGCAGGAAGT  
AGGAAAAGCAATGTATGCCCCCTCCCATCCAAGGGCTAATTAGATGTTTCATCAAATATTACTGGGCTGCTATTA  
ACAAGAGATGGTGGTAATCACAATAACAGTAATGGGACAGAGACCTTTAGACCTGGAGGAGGAGATATGAGGG  
ACAATTGGAGAAGTGAATTATATAAATATAAAGTAGTAAAAATTGAACCATTGGGAGTAGCACCCACCAAGGC  
AAAGAGAAGAGTGGTGCAGAGAGAAAAAGAGCACTAGGGGGACTAGGAGCTTTGTTCTTGGGTCTTGGGA  
GCAGCAGGAAGCACTATGGGCGCAGCGTCCCTGACGCTGACGGTACAGGCCAGACTATTATTGTCTGGTATAG  
TGCAACAGCAGAACAAATCTGCTGAGAGCTATTGAGGTGCAACAGCATCTGTTGCAACTCACAGTCTGGGGCAT  
C

>MN515731..1

TTCTATTGTAATACCGCAAACTGTTTGTAGTAGTACTTGGCATGCTAATGGTACGTGGAATGGTACTTGGAAATA  
ATACTACAGAGCAAAATATTACAAATTCTATGCAGAATAAAACAAATTATAAACATGTGGCAGGAAGTAGGAAA  
AGCAATGTATGCCCCCTCCCATCGGAGGAAAAATTAGATGCTCATCAAATATCACAGGGCTACTATTAGTGAGA  
GATGGTGGCAACACCACCATCGGGAACACCCTGAGATTTTCAGACCTCAAGGAGGAAATATGAAGGACAATT  
GGAGAAGTGAATTATATAAAATATAAAGTAGTACAAATTGAACCAATAGGAGTAGCACCCACCAAGGCAAAAAG  
AAGAGTGGTGCAGAGAGAAAAAGAGCAGTGGGAATAGGAGCTCTGCTCCTTGGGTTCCTTGGGAGCAGCAGGA  
AGCACTATGGGCGCAGCGTCAATAACGCTGACGGTACAGGCCAGACAATTATTGTCTGGTATAGTGCAACAGC  
AAAACAATTTGCTGAGAGCTATTGAGGCGCAACAGCATCTGTTGCAACTCACAGTCTGGGGCATC

>GU728412..1

TTCTACTGTAATACAACACAACCTGTTTAAATAGTACTTGGGATATAAAGAGTAATATGACAAGGTCAAATAACA  
CTGAACCAATCACCCCTCCAATGCAGAATAAAGCAAATTATAAACATGTGGCAGGAAGTAGGAAAAGCAATGTA  
TGCCCCCTCCCATCAGAGGACAAATTAAATGTTTCATCAAAATATTACAGGGCTGCTATTAACAAGAGATGGTGGT  
AATGAGACAGGGAAAGAGAATGATACAGAGAAAGAGACCTTCAGACCTGGAGGAGGAGATATGAGGGACAATT  
GGAGAAGTGAACCTTTATAAAATATAAAGTAGTAAAAATTAAACCATTAGGAGTAGCACCCACTGCAGCAAAAAG  
AAGAGTGGTGCAGAGAGAAAAAGAGCGGCACTAGGAGCCTTGTTTCCTTGGGTTCCTTGGGAGCAGCAGGAAGC  
ACTATGGGCGCAGCGTCAGTAACGCTGACGGTACAGGCCAGACTATTATTGTCTGGTATAGTGCAACAGCAGA  
ACAATCTGCTGAGAGCTATTGAGGCGCAACAGCATCTGTTGCAACTCACAGTCTGGGGCATC

>GU727880..1

TTCTACTGTAATACAACACAACCTGTTTAAATAGTACTTGGAAATGGTACACAACCTGCCTAATCTTACTGGGAATG  
AAAATATCACACTCCAATGCAGAATAAAGCAAATTATAAAATATGTGGCAGGAAGTAGGAAAAGCAATATATAA  
CCCTCCCCTCCCATCAGAGGACTAATTAGATGTTTCATCAAATATTACAGGGCTGTTATTAACAAGAGATGGTGGT  
GGGAATAATGACACCGAGATCTTCAGACCAGGAGGAGGAGATATGAGGGACAATTGGAGAAGTGAATTATATA  
AATATAAAGTAGTAAAAATTGAACCATTAGGACTAGCACCCACCACGGCGAAGAGAAGAGTGGTGCAGAGAGA  
AAAAAGAGCAGTGGGAATAGGAGCATTGTTTCCTTGGGTTCCTTGGGAGCAGCAGGAAGCACTATGGGCGCAGCG  
TCAATGACGCTGACGGTACAAGCCAGACAATTATTGTCTGGTATAGTGCAACAGCAGAACAATCTGCTGAGGG  
CTATTGAGGCGCAACAACATGTATTGCAGCTCACAGTCTGGGGCATC

>DQ886031..1

TTCTACTGTAATACATCACGGCTGTTTAAATAGTACTTGGAAATATTACTGAAGGGTCAAATAGCACTGCAGGCT  
CTAACAGAATATCACACTCCCATGCAGGATAAAACAAATTATAAACATGTGGCAGGAAGTAGGAAAAGCAAT  
GTATGCCCCCTCCCATCAGCGGACTAATTAGATGTACATCAAATATTACAGGGCTGTTACTAACAAGAGATGGT  
GGTCATGATAATAAAACAAATGACACCGAGATCTTCAGACCTGGAGGAGGAAACATGAGGGACAATTGGAGAA  
GTGAATTATATAAATATAAAGTAGTAAAAATTGAACCATTAGGAATAGCACCCACCAAGGCAAGGAGAAGAGT  
GGTGCAAAGAGACAAAAGAGCAGTGGGAATAGGAGCTATGTTTCCTTGGGATCTTAGGAGCAGCAGGAAGCACT  
ATGGGCGCAGCGTCAATAACGCTGACGGTACAGGCCAGACAACATATTGTCTGGTATAGTGCAACAGCAGAACA  
ATTTGCTGAGGGCCATTGAGGCGCAACAGCATCTGTTGCAACTCACAGTCTGGGGCATA

>DQ886032..1

TTCTACTGTAACACAACAAAACCTTTTTAAATAATAACTGAAGGGTCAAAAAACACTGAAGACAATACCACAC  
TCACACTCCCATGCAGAATAAAACAGATTATAAACATGTGGCAGGAAGTAGGAAGAGCAATGTATGCCCCCTCC  
TATCAAAGGAATAATTAGATGTACATCAAATATTACAGGGCTGATATTAACAAGAGATGGTGGTCATAACATG  
AATAACACGAATGAGACCACCGAGACCTTCAGACCTGGAGGAGGAGATATGAGGGACAATTGGAGAAGTGAAT  
TATATAAATATAAAGTAGTAAAGATTGAACCATTAGGAATAGCACCTTCAGGGCAAAGAGAAGAGTGGTGCA  
GAGAGAAAAAGAGCAGTGGGAATAGGAGCTGTGTTTCCTTGGGTTCCTTGGGAGCAGCAGGAAGCACTATGGGC  
GCAGCGTCACTGACGCTGACGGTACAGGCCAGACAATTATTGTCTGGTATAGTGCAACAGCAGAACAATTTGC  
TGAGAGCTATTGAGGCGCAACAGCATCTGTTGCAGCTCACAGTCTGGGGCATC

>GU367399..1

TTCTACTGCAATACAACAGGACTGTTTAAATAGTTCTTGGAAATAATGATACTATCTGGAATGATACTAGCACTG  
AAGGAAGGAGAAATGACACAATCATACTCCCATGCAGAATAAGACAAATTGTAAACATGTGGCAGGAAGTAGG  
AAAAGCAATGTATGCCCCCTCCTATCCAAGGACTAATTAACTGTTTCATCAAATATTACAGGGCTGCTATTAACA  
AGAGATGGTGGTAATAGCAACAATAGCTATGAGACCTTTAGACCTGGAGGAGGAGATATGAGGGACAATTGGA  
GAAGTGAACCTATATAAATATAAAGTAGTAAAAATTGAACCAATAGGAGTAGCACCCACCAAGGCAAAGAGACG  
AGTGGTGCAGAGAGAAAAAGAGGGGTGCGGATCGGAGCTTTGTTTCCTTGGGTTCCTTGGGAGCAGCAGGAAGC  
ACTATGGGCGCAGCGTCAATAACGCTGACGGTACAGGCCAGACAACATATTGTCTGGTATAGTGCAACAGCAAAA  
ACAACCTGCTGAGGGCTATTGAGGCGCAACAACATCTGTTGCAACTCACAGTCTGGGGCATC

>GU367403..1

TTCTACTGTAATACATCAAAACCTGTTTAAATAGTACTTGGGGGTGGAATGTCACTGAAAATGGCACTGAAGTGT  
CAAATAACACTGAAGGAAATATCACACTTCCATGCAGAATAAAACAAATTATAAACATGTGGCAAAAAGTAGG  
AAAAGCTATATATGCCCCCTCCTATCAGAGGACAAATTAGCTGTTTATCAAATATTACAGGGCTGCTATTAACA  
AGAGATGGTGGTCATAACGAGGGTAACGAGACTAAGACTGAGGTCTTCAGACCTGGAGGAGGAGATATGAGGG  
ACAACCTGGAGGAGTGAATTATATAAATATAAAGTAGTAAAAATTGAACCATTAGGAGTAGCACCCACCAAGGC  
AAAAAGAAGAGTGGTGCAAAAGAGAAAAAGAGCAGTAGGAATAGGAGCTGTGTTTCCTTGGGTTCCTTGTGCA

GCAGGAAGCACTATGGGCGCAGCGTCACTGACGCTGACGGTACAGGCCAGACAATTATTGTCTGGTATAGTGC  
AACAGCAGAACAATCTGCTGAGGGCTATTGAGGCGCAACAGCATCTGTTGCAACTCACAGTCTGGGGCATC  
>KP754469..1

TTCTACTGTGATACATCAAACTGTTTAATAGTACTTGGGATAAGGGTAATTGGAGTACAGGGACAATTGCCA  
CTAACGGAAATGACACTATCATACTCCAATGCAGAATAAGACAAATTATAAACATGTGGCAGGAAGTAGGAAA  
AGCAATCTATGCCCCCTCCTATCAGTGGATACGTTAACTGTACATCAAATATTACAGGGTTGATATTAACAAGA  
GATGGTGGTAATGATAATGGTACAAAAAATGGTACAACTCCACCGAGACTTTTAGACCTGGAGGAGGAGATA  
TGAGGGACAATTGGAGAAGTGAATTATATAAATATAAAGTAGTAAAAATTGAACCATTAGGAATAGCACCCAC  
CAAGGCAAAGAGAAGAGTGGTGCAGAGAGAAAAAAGAGCAGTGGGGATGGGAGCTTTGTTTCCTTGGGTTCTTG  
GGAGCAGCAGGAAGCACTATGGGCGCAGCGTCAATAACGCTGACGGTACAAGCCAGACAATTGTTGTCTGGTA  
TAGTGCAACAGCAGAACAATCTGCTGAAGGCTATTGAGGCGCAACAGCATCTGTTGCAACTCACAGTCTGGGG  
CATC

>KP754471..1

TTCTACTGTAACACATCACAACTGTTTAATAGTACGTGGAATGATACTGAAAGGCCAAATAGCAATGGAGAAA  
ATGACCAAAATATTACACTCCCTTGCGAGAATAAGACAAAATTGTAAACATGTGGCAGGAGGTAGGAAAAGCAAT  
GTATGCCCCCTCCCATCAGAGGACCAATTCAATGCTCATCAAACATTACAGGGATGATATTAACAAGAGATGGT  
GGCAATAACAGTGCCCAGAACGAGACCTTCAGACCTGGAGGAGGAGACATGAGGGACAATTGGAGAAGTGAAT  
TATATAAATATAAAGTAGTAAAAATTGAACCATTAGGAGTAGCACCCACCAAGGCCAAAAGAAGAGTGGTGCA  
GAGAGAAAAAAGAGCAGTGGGAATAGGAGCTTTGTTTCATCGGGTTCTTGGGAGCAGCAGGAAGCACTATGGGC  
GCAGCGTCAATGACGCTGACGGTACAGGCCAGACAGTTACTGTGAGGTATAGTGCAACAGCAAAAACAATTTGC  
TGAGAGCTATTGAGGCGCAACAGCATATGTTGCAACTCACAGTCTGGGGCATC

>FJ469744..3

TTCTACTGTAATTCAACACAACCTGTTTGATAGTACTTGGGATAATGGAACAAAAACAATACCACTGAGGGAA  
GAAATAGCGATGGAGGAAATAGCAGCGAACCCATCATACTCCCATGCAGAATAAAAACAAATTATAAACATGTG  
GCAGGAAGTAGGAAAAGCAATGTATGCCCCCTCCCATCAGTGGAACATTACATGTTTCATCCAATATTACAGGG  
TTGCTATTAACAAGAGATGGTGGCAAGGGCAATGAGACTCAGGGCTATGGGACTCAGGGCACTGAGATCTTCA  
GACCTGGAGGAGGAGATATGAGAGACAACCTGGAGAAGTGAATTATATAAATATAAAGTAGTAAGAATTGAACC  
ATTAGGAGTAGCACCCACCAAGCCAAAGAGAAGAGTGGTGCAGAGAGAAAAAAGAGCAGTGGGATTAGGAGCT  
CTGTTCCCTTGGGTTCTTGGGAGCAGCAGGAAGCACTATGGGCGCAGCGTCAATGACGCTGACGGTACAGGCCA  
GACTATTATTGTCTGGTATAGTGAGCAGCAGAACAACTCTGCTGAGGGCTATTGAGGCGCAACAGCATCTGTT  
GCAACTCACAGTCTGGGGCATC

>FJ687543..1

TTCTACTGTGACTCAACAAAACTGTTTAATTTTACTTGGGAATGGTACTGAAACAAATAACACTGGAGGAAGTG  
ATAAAATCATACTCCCATGCAGAATAAAACAAATTATAAAAATGTGGCAGAAAGTAGGACAAGCAATGTATGC  
CCCTCCCATCCAAGGAAAAATTTACTGCTCATCAAATATTACAGGGCTACTATTAACAAGAGATGGTGGCATC  
AACAAATGAACCTAACAACTACTGAGACCTTCAGACCTGGAGGAGGAAATATGAAGGATAATTGGAGAAGTGAAT  
TATATAAATATAAAGTAGTACAAATTGAACCATTAGGAGTAGCACCCACCAAGGCCAAAAGAAGAGTGGTGCA  
GAGAGAAAAAAGAGCAGTGGGCATAGGAGCTTTGTTTCCTTGGGTTCTTGGGAGCAGCAGGAAGCACTATGGGC  
GCAGCGTCAATAACGCTGACGGTACAGGCCAGACAATTATTGTCTGGTATAGTGCAACAGCAGAACAACTCTGC  
TGAGGGCTATTGAGGCGCAACAGCATATGTTGCAACTCACAGTCTGGGGCATC

>KF725982..2

TTCTACTGTAACACAACACCACTGTTTAACAAAACACACCTGGATAGCCTGAATAGCACTACAGACGGTAATA  
TTACACTTCAATGCAGAATAAAACAAATTATAAACATGTGGCAGGAAGTAGGAAAAGCAATGTATGCCCCCTCC  
CATCAGAGGACAAATTAGATGTTTCATCAAATATTACAGGGCTGTTATTAACAAGAGATGGTGGTAATGGTAAT  
GAGAGCAGCAACCATGAGACCTTCAGACCTGGGGGAGGAGATATGAGGGACAATTGGAGAAGTGAATTATATA  
AATATAAAGTAGTACAAATTGAACCATTAGGAATAGCACCCACCAAGGCAAAGAGAAGAGTGGTGCAGAGAGA  
AAAAAGAGCAGTGGGAATAGGAGCTTTGTTTCCTTGGGTTCTTGGGAGCAGCAGGAAGCACTATGGGCGCAGCG  
TCAGTGACGCTGACGGTACAAGCCAGACAATTACTGTCTGGTATAGTGCAACAGCAGAACAAATTTGCTGAGGG  
CTATTTCAGGCGCAACAACTTTGTTGCAACTTACAGTCTGGGGCATC

>KF725986..1

TTCTACTGTAATACAGCACCACTGTTTAATAGTACTTGGGAATGATACCAGTGCCTGGAATATAACTGATACTA  
GCCCCTCACAAATCCAGTGCAGAATAAGACAAATTATAAATAGGTGGCAGGAAGTAGGAAAATCGATGTATGC  
CCCTCCCATCAGTGGACAAATTAAGTTCATCAAATATTACAGGGCTGCTATTAACAAGAGATGGTGGTGGGA  
AACAGGTCCCAGGAAAAAGGTCCGAGACCTTCAGACCTGGAGGAGGAGACATGAGGGACAATTGGAGGAGTG  
AATTATATAAATATAAAGTAGTAAAAATTGAGCCATTAGGGATAGCACCCACCAAGGCCAAGGAGGAGAGTGGT  
GCAAAGAGAAAAAAGAGCAGTGGGAGCGATAGGAGCTATGTTCCCTTGGATTCTTGGGGACAGCAGGAAGCACT  
ATGGGCGCAGCGGCATTGACGCTGACGGTACAGGCCAGACAATTATTGTCTGGTATAGTGCAACAGCAAAAACA  
ATTTGCTGAGGGCTATTGAGGCGCAACATCATCTGTTGCAACTCACAGTCTGGGGCATC

>KF725988..2

TTCTACTGTGATACAAAAAACTGTTTAAATAGTACATGGAATTTTAAATAACTTTGGAATTTCTACTCAAACAG  
GCAATGACACAATCACACTCCCATGCAGAATAAAACAAATTATAAACATGTGGCAAGGAGTAGGAAAAGCAAT  
GTATGCCCTCCCATTAGTGGACAAATCAACTGTTTATCAAATATTACAGGGCTGATATTAACAAGAGATGGT  
GGTCAGAACGATAGCAGTAAGGAGACCTTCAGACCTGCAGGAGGAAATATGAAGGACAATTGGAGAAGTGAAT  
TATATAAATATAAAGTAGTACAAATTGAACCATTAGGAGTAGCACCCACCAAGGCAAAGAGAAGAGTGGTGCA  
AAGAGACAAAAGAGCAGTGGGAATAGGAGCATTGTTCTTGGGTTCTTGGGAGCAGCAGGAAGCACTATGGGC  
GCAGCGTCAATGACGCTGACGGTACAGGCCAGGCAATTATTGTCTGGTATAGTGCAGCAGCAGAACAATCTGC  
TGAGGGCTATTGAGGCGCAGCAGCACCTGCTGCAACTCACAGTCTGGGGCATC

>KU168260..5

TTCTACTGTAATACAACACAACCTGTTTAAATAGTATTTGGGAAGGTAATAAGACTCAGACAGGTCATAGTACTC  
ATAATGCTAGGAATGACACTATCACGCTCCCATGTAGAATAAAACAAATTATAAACATGTGGCAGGAAGTAGG  
AAAAGCAATGTATGCCCTCCCATCCATGGACAAATTAGATGTATATCAAATATCACAGGTCCTGCTATTAAACA  
AGAGACGGTGGTATACACAACAAAACCCACATGACTGAGGTCCTTCAGACCTGGAGGAGGAAATATGAAGGACA  
ATTGGAGAAGTGAATTATACAAATATAAAGTAGTACAAATTGAACCATTAGGGCTGGCACCCACCAAGGCAAA  
GAGAAGAGTGGTGCAGAGAGAAAAAAGAGCAGTGGGAGCAATAGGAGCTTTGTTCTTGGGTTCTTGGGAGCA  
GCAGGAAGCACTATGGGCGCAGCGTCACTGGCGCTGACGGTACAGACCAGACAATTACTGTCTGGTATAGTGC  
AACATCAGAACAATCTGCTGAGGGCTATTCAAGCGCAACAGCATCTGTTGCAGCTTACAGTCTGGGGCATC

>KT452481..1

TTCTACTGTAATACAACAAAACTGTTTAAACAGTACTTGGATTTGGAATAGTACTGAAGGGTCAAACCTCCAGTG  
AAGGAAACACAACACTCCAATGCAGAATAAAACAAATTGTAAACATGTGGCAGGAAGTAGGAAAAGCAATGTA  
TGCTCCTCCCATCAAAGGAGTAATCAGATGTTTCATCAAATATTACAGGGCTGTTATTAACAAGAGATGGTGGT  
AGCAAGAACAGTAGCGAGAACACCACCCTAAGGAGACCTTCAGACCTGGAGGAGGAGATATGAGGGATAATT  
GGAGAAGTGAATTATATAAATATAAAGTAGTAAAAATTGAACCATTAGGAATAGCACCCACCAAGGCAAGGAG  
AAGAGTGGTGCAGAGAGAAAAAAGAGCCGTGGGAATAGGAGCATTGTTCTTGGGTTCTTGGGAGCAGCAGGA  
AGCACTATGGGCGCAGCGTCACTAACGCTGACGGTACAGGCCAGACAATTATTGTCTGGTATAGTGCAGCAGC  
AAAACGATTTGCTGAGAGCTATTGAGGCGCAACATCATCTGTTGCAACTCACAGTCTGGGGCATC

>KT452508..1

TTCTACTGTGATACAAACAAAACTGTTTGATAGCTCTTGGAAATAAACTGGAAGAATAGATAAAAGGAATAATA  
CAGAAGGGTCAAATGACACAATCACACTCCCATGCAGAATAAAACAAATTATAAACATGTGGCAGGAAGTAGG  
AAAAGCAATGTATGCTCCTCCCATCAGTGGACGGATTAAGTGTACATCAAATATTACAGGGCTGATATTAACA  
AGAGATGGTGGTCATAATGTTTCAACTAAAGGGGACACCTTCAGACCTGGAGGAGGAAATATGAAGGACAATT  
GGAGAAGTGAATTATATAAATATAAAGTAGTAAAAATTGAACCATTAGGAATAGCACCCACCAAGCAAGGAG  
AAGAGTGGTGCAGAGAGAAAAAAGAGCCGTGGGATTAGGAGCTTTGTTCTTGGGTTCTTGGGAGCAGCAGGA  
AGCACTATGGGCGCAGCGTCAATGGCGCTGACGGTACAGGCCAGACAATTATTGTCTGGTATAGTGCACAGC  
AGAACAATCTGCTGAGGGCCATTGAGGCGCAACAGCATCTGTTGCAACTCACAGTCTGGGGCATC

>KT452155..1

TTCTACTGCAATACATCACGACTATTTAAATAGTACTTGGTTTAAAGATGATAGTACTTGGTTTAGGAATGATA  
CTGGGAATGATACAGAAAAGTCAGAAAAGATCATACTTCCATGCAGAATAAAACAAATTATAAATATGTGGCA  
GGAAGTAGGAAAAGCAATGTATGCCCTCCCATCCGAGGACTAATTAGTTGTCCATCAAATATTACAGGACTG  
TTATTAACAAGAGATGGTGGTGGAGATAATAACAGAACTAATGAGACTTTTCAGACCTCAAGGAGGAGATATGA  
GGGACAATTGGAGAAGTGAATTATATAAATATAAAGTAGTAAGAATTGAACCATTAGGAATAGCACCCACCAA  
GGCAAGGAGGAGAGTGGTGCAGAGAGAAAAAAGAGCAGTGGGAACATTAGGAGCTATGTTCTTGGGTTCTTG  
GGAACAGCCGGAAGCACTATGGGCGCAGCGTCAATAACGCTGACGGTACAGGCCAGACAATTATTGTCTGGTA  
TAGTGCAACAGCAAAATAACTTGCTGAGAGCTATTGAGGCGCAACAGCATCTGTTGCAACTCACAGTCTGGGG  
CATC

>U39243..1

TTCTATTGCAATACAACAAAACTGTTTAGTAGTACATATATAGTTAATAATACACATGACAGTAATACAACAA  
AAATTTTAAACATCACATGCAGAATAAAACAAATTATAAACATGTGGCAAGGGGTAGGACGAGCAATGTATGC  
CCCTCCCATTGCAGGAAACATAACATGTAAATCAAATATCACGGGACTACTACTGACACGTGATGGAGGAAAT  
AAGACAGAAAGCAATGACACAGAGACATTGAGGCCTCAGGGAGGAGATATGAGGGACAATTGGAGAATGAAT  
TATATAAATATAAAGTGGTAGAAGTTAACCATTAGGAATAGCACCCACTAAGGCAAAAAGGAGAGTGGTGGA  
CAGAGAAAAAAGAGCAGTAGTGGGACTAGGAGCTGTGTTCTTGGGGTCTTGACACCCGAGGAAGCACTATG  
GGCGCAGCATCAATAACGCTGACGGTACAGGCCAGACAATTATTGTCTGGGCATAGTGCAACAGCAAAACAATT  
TGCTGAGGGCTATAGAGGCGCAACAGCATATGTTGCAACTCACGGTCTGGGGCATT

>U39240..1

TTCTATTGCAATACATCAATACTGTTTAAATACAACATACCTGGTTAATAATAATTTGACTGAGAAAAATTCAA  
CCATTATGCTCCCATGCAGAATAAAACAAATTATAAACATGTGGCAGGAGGTAGGACGAGCAATGTATGCCCT  
TCCCATTGCAGGACTCATACAATGTAACCTCAAGTATCACAGGACTGCTACTGACACGTGATGGAGGAGTGAGA  
AATGACACAAATGAGACAGAGACAGAGACATTGAGACCTGCAGGAGGAGATATGAGGGACAATTGGAGAAGTG  
AATTATATAAATATAAAGTGGTAGAAATTGAGCCATTAGGAATAGCACCCACTAAGGCAAAAAGGAGAGTGGT

GGAGAGAGAAAAAGAGCAGCGGAATAGGAGCTTTGTTCTTGGGTTCTTGGGAGCAGCAGGAAGCACTATG  
GGCGCAGCGTCGATAACGCTGACGGTACAGGCCAGACAATTATTGTCGGGTATAGTGCAACAGCAAAACAATT  
TGCTGAGAGCTATAGAGGCGCAACAGCATATGTTACAACCTCACAGTCTGGGGCATT

>AF443090..1

TTCTATTGCAATACATCACGCCTGTTTAATAGTACATACAATCCTAATAGTACATACAATAATAGTATAGAAG  
GTAGGTCAAATGCAACCATTACACTCCAATGCAGAATAAAGCAAATTATAAACCTCTGGCAGGAGGTAGGACG  
AGCAATATATGCCCCCTCCCATTCGAGGAAACATAACATGTAAATCAAATATCACAGGATTACTCTTGACACGT  
GATGGAGGTAATAATTCAACGACAGAGATATTAGACCTCAAGGAGGGAATATGAAGGACAATTGGAGAAGTG  
AATTATATAAATATAAAGTGGTAGAAGTTAAGCCATTGGGGGTAGCACCCACTAAGGCAAAAAGGAGAGTGGT  
GGAGAGAGAAAAAGAGCAGTAGGAATAGGAGCTGTGTTCTTGGGTTCTTGGGAGCAGCAGGAAGCACTATG  
GGCGCAGCGTCAATGACGCTGACGGTACAAGCCAGACAACCTGTTGTCTGGTATAGTGCAACAGCAAAGCAATT  
TGCTGAGGGCTATAGAGGCGCAACAGCATATGTTGCAACTCACAGTCTGGGGCATT

>AF443097..1

TTCTATTGCAATACATCAGAGCTGTTTAATGGTACATACAACAGTACAGGAAATGATTCAAATTCAAACCTCA  
TCACACTCCAATGCAGAATAAAACAAATTATAAACATGTGGCAGAAGGTAGGACGAGCCATGTATGCCCCCCC  
CATTGAAGGAAACATAACATGTATATCAAATATCACAGGACTATTATTAACACGTGATGGAGGATATGAGGCA  
AATCATACTGAGATATTAGACCTATAGGAGGAGATATGAGGGACAATTGGAGAAAGTGAATTATATAAATATA  
AAGTGGTAGAAATTAAGCCATTAGGACTAGCACCCACTGAGTCAAAAAGGAGAGTGGTGGAGAGAGAAAAAG  
AGCAGTGGGAATAGGAGCTGTGTTCTTGGGTTCTTGGGAGCAGCAGGAAGCACTATGGGCGCGGCGTCAATA  
ACGCTGACGGTACAGGCCAGACAACCTGTTGTCTGGTATAGTGCAACAGCAAAGCAATTTGCTGAGAGCTATAG  
AGGCGCAACAACATATGCTGCAACTCACGGTCTGGGGCATT

>AF443109..3

TTCTATTGCAATACATCACTACTGTTTAATAGCAGTTATAATGGTAATAGTAGTTATAATGATACAGGAAGCA  
ATTCAACCATCACACTCCAATGCAGAATAAAACAAGTTATAAACATGTGGCAGAGGGTAGGACAAGCAATATA  
TGCCCCCTCCCATTTGAAGGAATAATAACATGTAACTCAAGTATCACAGGATTACTCTTAGTGAGGGATGGAGAC  
AATCAACAAGTGATACAGAGACATTCAGACCACAAGGAGGAGAAATGAGGGACAATTGGAGAAGTGAGTTAT  
ATAAATATAAAGTGGTAGAAATTAAGCCATTGGGAGTAGCACCCACTACGGCAAAAAGGAGAGTGGTGGAGAG  
AGAAAAAGAGCTGTGGGAATGGGAGCTATGATCCTTGGGTTCTTGAGTGACAGCAGGAAGCACTATGGGCGCA  
GCGTCAATAACGCTGACGGTACAGGCCAGACAATTGTTGTCTGGAATAGTGCAACAGCAAAGCAATTTGCTGA  
GGGCTATAGAGGCGCAACAGCATATGTTGCAACTCACAGTCTGGGGCATT

>AF443114..2

TTCTATTGCAACACATCAAGCCTGTTTAATAATACATACCGGCCTACATACTGGCCTAATGGTACAGAAAGTA  
ATTCAACCATCACACTTCAATGCAGAATAAAACAAATTATAAACATGTGGCAAAAAGTAGGACGAGCAATATA  
TGCCCCCTCCCATTTGCAGGAAAAATAACATGTAAATCAAACATCACAGGACTACTATTAGTACGTGATGGAGGT  
AATGGAGGCAACAATACCGCAACAGAAATATTAGACCTGGAGGAGGAAATATGAAGGACAATTGGAGAAGTG  
AATTATATAAATATAAAGTGGTAGAAATTAAGCCATTGGGAATAGCACCCACTGGAGCAAAAAGGAGAGTGGT  
GGGGAGAGAAAAAGAGCAGTGGGAATAGGAGCTGTGTTCTCGGGTTCTTGGGAGCAGCAGGAAGCACTATG  
GGCGCGCGTCAATAACGCTGACGGTACAGGCCAGACAACCTGTTGTCTGGTATAGTGCAACAGCAAAGCAATT  
TGCTGAAGGCTATAGAGGCGCAACATCATCTGTTGCAACTCACGGTCTGGGGCATT

>KR861314..2

TTCTATTGTAATACATCAAGACTGTTTGATAGTAATGGCACTTATAATAATACAGAATCAAACAGCACAAATCA  
CACTCCCATGCAGAATAAAACAAATTATAAACATGTGGCAGAAAGTGGGACGAGCAATGTATGCCCCCTCCCAT  
TGAAGGAATGCTAACATGTAAATCAAATATCACTGGACTACTATTGACACGAGATGGAGGAGAAGGAAATCAA  
GGGTGAGAGATATTAGACCTGGAGGAGGAAATATGAGGGACAATTGGAGAAGTGAATTATATAAATATAAAG  
TGGTAGAGATTAAACCATTGGGAGTAGCACCCACTGGGGCAAAAAGGAGAGTGGTGGAGAGAGAAAAAGAGC  
AGTGGGAATAGGAGCTGTGCTCCTTGGGTTCTTGGGAGCAGCAGGAAGCACTATGGGCGCGGCGTCACTCACG  
CTGACGGTACAGGCCAGACAATTATTGTCCGGTATAGTGCAACAGCAAAGCAATTTGCTGAGGGCCATAGAGG  
CGAACAGCATATGTTGCAACTCACAGTCTGGGGCATT

>KR861341..3

TTCTATTGCAATACATCAGGACTGTTTAATGGTACATACCATCCTCAATATAATGATACACAGAATAATTACA  
CAGACTCAAACATCACACTCCCATGCAGAATAAAACAAATTGTAAATATGTGGCAGGGGGTAGGAAGGGCAAT  
ATATGCCGCTCCCATTTGAAGGAAAAATAGTATGTACATCAAATATCACAGGACTAATATTGACAAGGGATGGA  
GGAGAAAAATAATAGAACAGAAACATTTAGACCTGAAGGAGGAAATATGAGGGACAATTGGAGAAGTGAATTAT  
ATAAATATAAAGTGGTAGAAATTCAGCCATTGGGAGTGGCACCCACTGAGGCAAAAAGGAGAGTGGTGGAGAG  
AGAAAAAGAGCAGTGGGAATAGGAGCTGTGTTCTTGGGTTCTTGGGAGCAGCAGGAAGCACTATGGGCGCG  
GCGTCAATAACGCTGACGGTACAGGCCAGACAACCTGTTGTCTGGTATAGTGCAACAGCAAAGCAATTTGCTGA  
GGGCTATAGAGGCGCAACAGCATATGTTGCAACTCACAGTCTGGGGCATT

>KR861270..1

TTCTATTGCAATACATCAAGACTGTTTACAAACATAGATAATAATAATACAGAACTGATAATGATACCACCA  
TCACCATCCCATGCAAAATAAAACAAATTATAAACATGTGGCAGAAGGTAGGACGAGCAATGTATGCCCCCCC

CATTGAAGGAAACATAACATGTAAATCAAATATCACAGGACTACTATTGACACGTGATGGAGGTAATGAAACA  
AACTACAACACTGAGATATTCAGACCTGGAGGAGGAGATATGAGGGACAATTGGAGAAGTGAGTTATATAAAT  
ATAAAGTGGTGGAGGTTAGGCCATTAGGAATAGCACCCACTAAAGCAAAAAGGAGAGTGGTGGAGAGAGAGAA  
AAGAGCAGTGGGAATAGGAGCTGTGTTCCCTTGGGTTCTTGGGAGCAGCAGGAAGCACTATGGGCGCGGCATCA  
CTAACGCTGACGGTACAGGCCAGACAATTATTGTCTGGTATAGTGCAACAGCAAAGCAATTTGCTGAGGGCGA  
TAGAGGCGCAACAACATATGTTGCAACTCACAGTCTGGGGCATT

>KR861273..1

TTCTATTGCAATACATCTGAGCTGTTTAATAAGCAGTTTAAACAATACAAACAGTACAGAAAGTGAGTCAAAT  
CAAATTCATCATCACACTCCCATGTAGAATAAAACAAATTATAAACATGTGGCAGGAGGTAGGACGAGCGAT  
GTATGCCCTCCCATTCAGGAAACATAACATGTAAATCAAATATCACAGGACTACTATTGACACGCGATGGA  
GGACCTGGAATAGAAGTAACGAGACATTAGACCTTAGGAGGAGATATGAAGGACAATTGGAGAAGTGAAAT  
TATATAAGTATAAAGTGGTAGAGATTAGCCATTAGGACTAGCACCCACTAGGGCAAAAAGGAGAGTGGTGGGA  
GAGAGAGAAAAGAGCAGTGGGAATAGGAGCTGTGTTCCCTTGGGTTCTTGGGAGCAGCAGGAAGCACTATGGGC  
GCAGCATCAATAACGCTGACGGTACAGGCCAGACAATTGTTGTCTGGTATAGTGCAACAGCAAACAATTTGC  
TGAGGGCTATAGAGGCGCAACAACATTTGTTGCAACTCACAGTCTGGGGCATT

>KY658708..1

TTCTATTGCAACACATCACAACCTGTTTAATAGTACATACAGTCCCAGTTTTAATGGTACAGAAGGTAAATTAA  
ATGGGACCATCACAATCCCATGTAGAATAAAACAAATTATAAACATGTGGCAGAAAGTAGGACAAGCAATGTA  
TGCCCCCTCCCATTCAGGAAACCTAACATGTGAATCAAATATCACAGGATTACTATTGACACGTGATGGAGGA  
AAAACAGGTTCAAATCACCCAGAGATATTAGACCTGGAGGAGGGGATATGAGGGATAACTGGAGAAGTGAAAT  
TATATAAATATAAAGTGGTAGAAATTAAGCCATTGGGAGTAGCACCCACTGAGGCAAAAAGGAGAGTGGTGGGA  
GAGAGAAAAAAGAGCAGTGGGAATAGGAGCTGTGTTCCCTTGGGTTCTTGGGAGCAGCTGGAAGCACTATGGGC  
GCAGCGTCAATAACGCTGACGGTACAGGCCAGACAATTGTTGTCTGGTATAGTGCAACAGCAAAGCAATTTGC  
TGAGGGCTATAGAGGCGCAACAGCATCTGTTGCAACTCACAGTCTGGGGCATT

>AF443084..1

TTTTATTGCAATACATCAAACTGTTTACATACCAGTCTAATAGCACATACGTGGCTAATAGTACCATCACGC  
TCCCATGCAAAATAAAACAAATTATAAACATGTGGCAGGAGGTGGGACGAGCAATGTATGCACCTCCCATTCG  
AGGAAACATAACATGTCAATCAAATATCACAGGACTACTGTTGACACGTGACGGAGGCACAGAGACAGACAAT  
AAGACAGAGACATTAGACCTGGAGGAGGAGATATGAGGGACAGTTGGAGAAGTGAAATTATATAAATATAAAG  
TGGTAGAAATTAAGCCATTAGGAGTAGCACCCACTAAGGCAAAAAGAAGAGTGGTGGAAAGAGAAAAAAGAGC  
AGTGGGAATAGGAGCTGTACTCCTTGGGTTCTTGGGAGCAGCTGGAAGCACTATGGGCGCAGCGTCAATAGCG  
CTGACGGCACAGGCCAGACAAGTGTGTCTGGTATAGTGCAACAGCAAAGCAATTTGCTGAGGGCTATAGAGG  
CGCAACAGCATATGTTGCAACTCACAGTCTGGGGCATT

>KC899004..1

TTCTATTGTAATACATCAGGCCTGTTTAATGGTACATACAGGCCTAATGGTAATAATAATGGTACTAATGATA  
CAATGAGTAATGCAACCATCACAATCCCATGCAGAATAAAGCAAATTATAAACATGTGGCAGGAGGTAGGACG  
AGCAATGTATGCCCTCCTATTGCAGGGAACATAACATGTAAATCAAATATCACAGGGATACTATTGGTACGT  
GATGGAGGAGATAATCAGACAGAAGAGATATTAGACCTGGAGGAGGAGATATGAGGAACAATTGGAGAAGTG  
AATTATATAAATATAAAGTGGTAGAAATTAAGCCATTGGGAATAGCACCCACTGGAGCAAAAAGGAGAGTGGT  
GGAGAGAGAAAAAAGAGCAGTAGTGGGAATAGGAGCTGCGCTCCTTGGGTTCTTGAGTACAGCCGGAAGCACT  
ATGGGCGCGGCGTCAATAGCGCTGACGGTACAGGCCAGACAATTGCTGTCTGGTATAGTGCAACAGCAAAGTA  
ATTTGCTGAGGGCTATAGAGGCGCAGCAGCATATGTTGCAACTCACGGTCTGGGGCATT

>KF835522..1

TTCTATTGTAATACATCAAGACTGTTTAATAGTACATACAATCCTAAGAGTACAGGAAGTAATTCAAGCTCAA  
TCATCACAATCCCATGCAGAATAAAGCAAATTATAAACATGTGGCAGGAGGTAGGAAGAGCAATGTATGCCCC  
TCCCATTTGAAGGAAACATAACATGTAGATCAAAGATCACAGGACTACTATTGGTACGTGATGGAGGAAGCCCA  
GTGCCAAACAGTACAGAGACAGAGACAGAGATATTAGACCTGGAGGAGGAGATATGAGGGACAATTGGAGAA  
GTGAATTATATAAATATAAAGTGGTAGAAATTCAGCCATTGGGAATAGCACCCACTAAAGCAAAAAGGAGAGT  
GGTGGAGAGAGAAAAAAGAGCAGCACTAGGAGCTTTGTTCCCTTGGGTTCTTGGGAGCAGCAGGAAGCACTATG  
GGCGCGGCGCAGTAACGCTGACGGTACAGGCCAGACAATTATTGTCTGGTATAGTGCAACAGCAAAGCAATT  
TGCTGAGGGCTATAGAGGCGCAACAGCATATGTTGCAACTCACGGTCTGGGGCATT

>HM215403..1

TTCTATTGTAATACATCAAGCCTGTTTAATGGCACATACAATGGCACATACATGACTAATATGGCTAATGATT  
CATCAGAAATCACAATCCCATGCAGAATAAAGCAAATTGTAAACATGTGGCAGGAGGTAGGACGAGCAATGTA  
TGCCCCCTCCCATTCAGGAAACATAACATGTAGATCAAATATCACAGGACTATTATTGGTACGTGATGGAGGA  
CGATCAGAGGTGTCAAATACTACAGAGACATTAGACCTCAAGGGGGAGATATGAGGGACAATTGGAGAAGTG  
AATTATATAAATATAAAGTGGTAGAAATTAAGCCATTAGGAATAGCACCCACTGGAGCGAAAAGGAGAGTAGT  
GGAGAGAGAAAAAAGAGCAGCGGGAATAGGAGCTGTGTTCCCTTGGGTTCTTGAGTGACGCCGGAAGCACTATG  
GGCGCGGCGTCAATTAACGCTGACGGTACAGGCCAGACAATTGCTGTCTGGTATAGTGCAACAGCAAAGCAATT  
TGCTGAGGGCTATAGAGGCGCAACAGCATATGTTGCAACTCACAGTCTGGGGCATT

>HM215408..1

TTCTATTGTAATACATCAAGACTGTTTAAATAGTACATACAGCAATGGTACACTCAGGTTTAAATGGTACAGACT  
TTAATGGTACAATGGATAATTCAAGCTCAACCATCACAATCCCATGCAGAATAAAGCAATTTATAAACATGTG  
GCAGGAAGTAGGAAGAGCAATGTATGCCCCCTCCCATTTGAAGGAAACATAACATGTAGATCAAATATCACAGGA  
CTACTATTGGTACGTGATGGAGGAACAAATTTAACAGCAGAATTAAATCAGACAGAGATATTTAGACCTGAAG  
GAGGAAATATGAGGGACAATTGGA AAAATGAATTATATAAAATATAAAGTGGTAGAAATTAAGCCATTGGGACT  
AGCACCCTACTGGAGCAAAAAGGAGAGTGGTGGAGAGACAAAAAGAGCAGTGGGAATAGGAGCTGTAATCTTT  
GGGTTCTTGGGAGCAGCCGGAAGCACTATGGGCGCGGCGTCAATGGCGCTGACGGTACAGGCCAGACAATTGT  
TGTCTGGTATAGTGCAACAGCAAAGCAATTTGCTGAGGGCTATAGAGGCGCAACAGCATCTGTTGCAACTCAC  
GGTCTGGGGCATT

>HQ699950..2

TTCTATTGTAATACATCAGGCCTGTTTAAATAGTACATACATGCCTAATGGTACCTACATGTCTAATGGTACCA  
ATAGTAATGCAACCATCACAATCCCATGCAGAATAAAGCAAATTATAAACATGTGGCAGGAGGTAGGACGAGC  
AATATATGCCCCCTCCCATTTGCAGGAAACATAACATGTAAATCAAATATCACAGGGCTACTATTGGTACGTGAT  
GGAGGACCAGATAATCAGACAGAGATATTCAGACCTGAAGGAGGAGATATGAGGAAACAATTGGAGAAGTGAAT  
TATATAAATATAAAGTGGTAGAAATTAAGCCATTGGGACTAGCACCCACTGGAGCAAAAAGGAGAGTGGTGGGA  
GAGAGAAAAAAGAGCAGTGGGAATAGGAGCTGTGTTCTTTGGGTTCTTGAGTGCAGCCGGAAGCACTATGGGC  
GCGGCGTCAATAACGCTGACGGTACAGGCCAGACAATTGCTGTCTGGTATAGTGCAACAGCAAAGTAATTTGC  
TGAGGGCTATAGAGGCGCAGCAGCATATGTTGCAACTCACGGTCTGGGGCATT

>HQ699981..1

TTCTATTGTAACACATCAGGCCTGTTTAAATAGTACATACATGCCTAGTGGTACATACATAACTAATGATACAA  
ATAGTAGTTCAGATACAATCACAATCCCATGCAAAAATAAAGCAAATTATAAACATGTGGCAGGAGGTAGGACG  
AGCAATGTATGCCTCTCCCATTTGCAGGAAACATAACATGTACATCAAATATCACGGGACTACTATTGGTACGT  
GATGGAGACAAAACAAGTAATACTACAGAGACATTCAGACCTCAAGGAGGAGACATGAGGGACAATTGGAGGA  
GTGAATTATATAAATATAAAGTGGTAGAAATTAAGCCATTGGGAATAGCACCCACTAAAGCAAAAAGGAGAGT  
GGTGGAGAGAGAAGAAAGAGCAGCGGAATAGGAATAGGAGCTTTGTTCTTTGGGTTCTTGAGTGCAGCCGGA  
AGCACTATGGGCGCGGCGTCAATAACGCTGACGGTACAGGCCAGACAATTGTTGTCCGGTATAGTGCAACAGC  
AAAGCAATTTGCTGAGGGCTATAGAGGCGCAACAGCATATGTTGCAACTCACGGTCTGGGGCATT

>KC807928..2

TTCTATTGTAATACAACAAACCTGTTTAAATAGTACATACAATAGTACAACAGGCCTGTTTACTTATACATACA  
ATGGTACTACATACAATGGTAGTGTTACAGACAATGATAGCATCCCAATCCAAATCCAATGCAGAATAAAGCA  
AATTATAAACATGTGGCAGGAGGTAGGACGAGCAATGTATGCCCCCTCCCATTTGCAGGGAACATAACATGTAGC  
TCAAATATCACAGGACTACTATTGACACGTGATGGAGGAAATACAACCTGTGACACAAAAAGAGATATTCAGAC  
CTCAAGGAGGAAATATGAGAGACAATTGGAGAAATGAATTATATAAATATAAAGTGGTAGAAGTTAAGCCATT  
GGGACTAGCACCCACTAAAGCAAAAAGGAGAGTGGTGGAAAAGAGAAAAAAGAGCAGTGGGACTAGGAGCTGTG  
TTCCTTGGGTTCTTGGGAGCAGCAGGAAGCACTATGGGCGCGGCGTCAATGACGCTGACGGTACAGGCCAGAC  
AATTGTTGTCTGGTATAGTGCAACAGCAAAGCAATTTGCTGAGAGCTATAGAGGCGCAACAGCATATGTTGCA  
ACTCACGGTCTGGGGCATT

>JF683757..3

TTCTATTGCAACACATCAGTACTGTCTAATAGTACCCATAATAGTGGTACTGGATGGCACCTACAATCAAGTG  
ATATTAATTCTTATGCAACCATCGCGTTTTATATAGAATAGGACAAATTATAAACATGTGGCGGCAGGTAGG  
ACGAGCAATCTATGGCCCTCCGGTGGCAGCAAAAATGTCAGCCCATCCAAGTACCACAGGCCATTATTGGTA  
TGTGATGGGGGTGAGAAGAGCTTAAATAGCACAAATGGCACAGGTATCACAAATGCCACAGAGATATTTAGAC  
CTCAAGGAGGAGATATGAAGGACAATTGGAGAAGTGAATTATATAAGTATAAAGTGGTAGAAATTAAGCCATT  
GGGAATAGCACCCACTGAAGCAAGAAGGAGAGTGGTGGAGAGAGAAAAAAGAGCAGTGGGAATAGGAGCTGTG  
ATCCTTGGGTTCTTGGGAGCAGCAGGAAGCACTATGGGCGCGGCGTCAATAGCGCTGACGGCAGGCCAGAA  
CAGTAATGGCTGGTATAGTGCAACAGCAAAGCAATTTGCTGAGAGCTATAGAGGCGCAACAGCATATGTTGCA  
GCTCACAGTCTGGGGCATT

>L23065..3

TTCTATTGTAATACATCAGCCTTGTTTAAATGATTCAATTACAAATGCACCCATTAAATAATTTCGAGTACAGATG  
CAAACATCAACTTCAATGCAGAATAAACAATTTATAAACATGTGGCAGGAGGTAGGACGAGCAATGTATGC  
CCCTCCCATTTCAAGGAATAATAGCATGTAAATCAAATATCACAGGACTGCTACTGACACGTGATGGAGGGACA  
AATAGCACAGACGAGACATTCAGACCTGGAGGAGGAGATATGAGGGACAATTGGAGAAGTGAATTATATAAAT  
ACAAAGTGGTAGAAATTAAGCCATTAGGACTAGCACCCACTAAGGCAAAAAGGAGAGTGGTGGAGAGAGAAAA  
AAGAGCAGCACTAGCAGCTGTGTTCTTTGGGTTCTTGGGAGCAGCCGGAAGCACTATGGGCGCAGCATCAATA  
ACGCTGACGGTACAGGCCAGACAATTATTGTCTGGTATAGTGCAACAGCAAAGCAATTTGCTGAAGGCTATAG  
AGGTGCATCAGCATATGTTGCAACTCACAGTCTGGGGCATT

>EF531335..1

TTCTATTGCAACACATCAGATCTGTTTAAATAGTACATATTTTAAATAATACATATTTTAAATGGTGTATATAATG  
GTACAAGAGATAATGGTACCATCACACTCCCTTGCAGAATAAACAATTTATAAACATGTGGCAGAGGGTAGG

AAGAGCAATGTACGCCCCCTCCCATTTCAAGGACTTATAACATGTAGGTCAAATATCACAGGACTACTATTGACA  
CGTGATGGAGGAAACACTATTAACAATACAAATAACAATACAGAGATATTCAGACCTGGAGGAGGAGATATGA  
GGGACAAATTGGAGAAGTGAATTATATAAATATAAAGTGGTAGAAATTAGGCCATTAGGAGTAGCACCTACTGA  
TGCAAGAAGGAGAGTGGTGGGGAGAGAAAAAAGAGCAGTAATGGGAGCTTTGTTCTTGGGTTCTTGGGAGCA  
GCAGGAAGCACTATGGGCGCAGCGTCAATGGCGCTGACGGTACAGACCAGACAATTATTGTCTGGTATAGTGC  
AACAGCAAAGCAATTTGCTGAGGGCCATAGAGGGCGCAACAGCATATGTTGCAACTCACGGTCTGGGGCATC  
>KU319529..3  
TTCTATTGCGATACATCAAATCTGTTTAATATGACATACTTGTTTAATGATTGGAGTTACGAACATAGTACTG  
ACTCAGATTTTCATCATCATGATCCGCTGCAGAATAACACATATAATAAACATGTGGCAGGTAGTGAGAGCAGT  
ACTGTATGCCCCCTGCCCTTCGCAGGCAACAGTTAAGCAAGCAATCCATCTACGCAGTACTACTATGGACTCGT  
GATGCAGCAAGTAGTTACTGGCGCGAGAAAGAGATATTCAGACCTGCAGGAGGAGATATGAGGGACAATTGGA  
GAAGTGAATTATATAAATATAAAGTGGTAGAGATTAACCATTAGGAATAGCACCCACTGAGGCCAAAAAGGAG  
AGTGGTGGAGAGAGAAAAAAGAGCAGTGGGAATAGGAGCTGTGTTCTTGGGTTCTTGGGAGCAGCAGGAAGC  
ACTATGGGCGCAGCGTCACTGACGCTGACGGTACAGGCCAGGCAATTGCTGTCTGGTATAGTGCAACAGCAAAA  
ACAATTTGCTGAGAGCTATAGAGGGCGCAACAGCATATGTTGCAACTCACAGTCTGGGGCATA  
>KU319530..1  
TTCTATTGCAATACATCAAGACTGTTTAATGGTGCATACATGTATAACAGTACTAATAGTACTTCAAATGCAA  
CCATCACACTCCAATGCAGAATAAAGCAAATTATAAACATGTGGCAGGGGGTAGGACGAGCAATGTATGCCCC  
TCCCATTTGAAGGAAACATTACATGTAAATCAATATCACAGGATTTCTATTGACCCTGATGGAGGATTGGGCCAA  
AAACCCAAGGTTTCCAACCTGGGAGAGGAACTTAGGGACATTGGAAATGGATCCTTTGGGTTACCCCCTGGCCA  
AAAAGGAAGGGGAGAAAAAGAAAAAAGGACAGGGGTTTTACGAAAAAACTGGGCGCAGAAGCCTATGGGCGC  
AGCATCAATAACGCTGACGGTACAGGCCAGACAATTGTTGTCTGGTATAGTGCAACAGCAAAGTAATTTGCTG  
AGGGCTATAGAGGGCGCAACAGCATATGTTGCAACTCACGGTCTGGGGCATT  
>KU319539..2  
TTCTATTGTAATACATCAAACTGTTTAATGGTACATACAATAAGAACAATACTAATAGGACTAATACTAATA  
GTACTTCAACCATCACACTTCAATGCAGAATAAAACAAATTATAAACATGTGGCAGGGGGTAGGACAAGCAAT  
GTCTGCCCCCTCCCATTTCAAGGAAACATAACATGTGAATCAAATATCACAGGACTACTATTGACACGTGATGGA  
GGAACAAC TAATAAACGAAAACAAATAATAACACAGAAGCAAATAAACAACAGAAACATT CAGACCTGGAG  
GAGGAGATATGAGGGACAATTGGAGAAATGGAGGTGAGTTATATAAATATAAAGTGGTAGAAGTTAATCCATT  
AGGAATAGCACGCACTGAGGCCAAAAAGGAGAGTGGTGCAGAGAGAAAAAAGAGCAGTGGGAATAGGAGCTGTG  
CTCCTTGGGTTCTTGGGAGCAGCTGGAAGCACTATGGGCGCAGCGTCAGTAACGCTGACGGTACAGGCCAGAC  
AATTGCTGTTTGGTATAGTGCAACAGCAAAGCAATTTGCTGAAGGCTATAGAGGGCGCAACAGCATATGTTGCA  
ACTCACGGTCTGGGGCATT  
>KU319542..1  
TTCTATTGCAATACAACAAAACTGTTTAATAGTACATACAATGCTAATAGTACAAACAGTACTTCAAATTCAA  
CCATCACAAATCCAATGCAGAATAAAACAAATTATAAACATGTGGCAGGAGGTAGGACGAGCAATGTATGCCCC  
TCCCATTTGCAGGAAACATAACATGTAACTCAACTATTACAGGAATACTATTAACACGTGATGGAGGGTATAAT  
ATTACCAACGACACAAAAACATTCTTACCTGGAGGAGGAGATATGATGAACAATTGGAGAAATGAATTATATA  
ATTATAAAGTGGTAGAAAAATAAACCATTAGGAATAGCTCCTACTAGTGCAAAGAGGAGAGTGGTGGAGAAAA  
AAAAAGAGCAATATGGGGAATAGGAGCTGCGCTCCTTGGTTTCTTACGAGCAGCAGGAAGCACTATGGGCGCA  
GCGTCATTGACGCTGACGGTACAGGCCAGGCAATTGTTGTCTGGTATAGTGCAACAGCAAAGCAATTTGCTGA  
GGGCTATAGAGGGCGCAACAACATATGTTGCAACTCACGGTCTGGGGCATT  
>KU319543..4  
TTCTACTGCAATACATCAAATTTGTTTAATAGAACTTACCTGATTAATGGTACCTATAATAATAATAAACTT  
CCATAAGCACCATCACACTCCACTGCAAAATAAAACAAATTATAAATATGTGT CAGGGGGTAGGACAAGCAAT  
GTATGCCCCCTGCCACTGCAGGAATCATATCATGTATATCAACTATCGCAGTACTACTACTTGTCTGGTGTATGGA  
GGCAATGATACAAGTGATACAGAGACATT CAGACCTGGAGGAGGAGATATGAGGGACAATTGGAGAAGTGAAT  
TATATAAATATAAAGTGGTAGAAGTT CACCCATTAGGAGTAGCACCCACTAGAGCAAAAAGGAGAGTGGTGGGA  
GAGAGAAAAAAGAGCAGCACTAGGAGCTATGATCATTGGGTTCTTGGGAGCAGCAGGAAGCACTATGGGCGCA  
GCATCAATAACGCTGACGGTACAGGCCAGGCAATTGTTGTCTGGTATAGTGCAACAGCAAAGCAATTTGCTGA  
GGGCTATAGAGGGCGCAACAGCATATGTTGCAACTCACAGTCTGGGGCATA  
>KU319548..2  
TTCTATTGCAATACATCACAACCTGTTTAATAGGACATACATGGAACTACTATTAGCGCTGTGTCAACAAATA  
CAAAAAATCACCCTCCTATGCAAAATAAAACAAATTATTCAAATGCTTCAGGGAGTAGGACGAGCAATGTATGC  
CCCTCGCAATGAAAGAAAACATAACATGTCTTTCAAATATCACAGGATTACTATTGACACGTGATGGAGGAATT  
AACAGTAGCACAACCTGAGATATTCAGACCTGGGGGAGGAGATATGAGGGACAATTGGAGAAGTGAATTATATA  
AATATAAAGTGGTAGAAATCAAACCATTAGGAGTAGCACCCACTAAGGCAAAAAGGAGAGTGGTGGAGAGAGA  
AAAAAGAGCAGTGGGAATAGGAGCTGTGCTCCTTGGGTTCTTGGGAGCAGCAGGAAGCACTATGGGCGCAGCA  
TCAATAACGCTGACGGTACAGGCCAGGCAATTGTTGTCTGGTATAGTGCAACAGCAAAGCAATTTGCTGAGGG  
CTATAGAGGGCGCAACAGCATATGTTGCAACTCACAGTCTGGGGCATT

>KU319549..1

TTCTATTGCAAAACATCAAAACTGTTTATTAAGACTTGGAAAAGTTGGAACCATCGGAATGATGGAACCATCA  
TCACGATCCCATGCAGAATAAAACAAATTATACATATGTGGCAGGGAGTAGGACGAGCAATGTATGCCCCCTCC  
CATCAGTGGACCAATAACATGTAGATCAAATATCACAGGACTACTACTGACACGGGATGGAGGCATCAGTGAC  
AATAACAGTACCAATACCACAGAGATATTAGACGTCAAGGAGGAGATATGAAAGACAATTGGAGAAGTGAAT  
TATATAAATATAAAGTGGTAGAAATTAAGCCATTAGGAATAGCACCCACTAAGGCAAAAAGGAGAATGGTGCA  
GAGAGAGAGAGGAGAAAAGAGGCACGGAGCTATGTTCTTGGGTTCTTGGGAGCAGCCGGAAGCACTATGGGC  
GCAGCATCAATAACGCTGACGGTACAGGCCAGACAATTATTGTGAGGTATAGTGCAACAGCAAAGCAATTTGC  
TGAGGGCTATAGAGGCGCAACAGCATATGTTGCAACTCACGGTCTGGGGCATT

>AF219266..3

TTCTATTGCTATACTTCAAGACTGTTTAAACAGTACATACCTGTTTAAATGGTACTTACCTGGTTAATGATATAA  
ATAGTACAGGAAATGCAACCATCATACTCCCATGCAAAAATAGAACAAATTATAAAACATGTGGCAGGAGGTAGG  
GCGAGCAATGTATGCCCCCTCCCATTTGAAGGAAACATAACATGTAGCTCAAACATCACAGGACTATTATTGGTA  
CGTGATGGAGGAAAAGATTCAAATGGCACAGAGATATTAGACCTGGAGGAGGAGATATGAGGGACAATTGGA  
GAAGTGAATTATATAAATATAAAGTGGTAGAAATTAAGCCATTGGGAATAGCACCCACTAAGGCAAAAAGGAG  
AGTGGTGGAGAGAGAAAAAGAGCAGTAGGAATAGGAGCTGTGTTCTTGGGTTCTTGGGAGCAGCAGGAAGC  
ACTATGGGCGCGGCGTCAATAACGCTGACGGTACAGGCCAGACAAGTGTGTCTGGTATAGTGCAACAGCAAAA  
GCAATTTGCTGAGGGCTATAGAGGCTCAACAGCATATGTTGCAACTCACGGTCTGGGGCATT

>FJ977095..1

TTCTATTGCAATACATCAGAACTGTTTAAAGAATGGTACAAATAATGGTACCAATAGTACAGACTCAACAAATT  
CAACATCCATCACAATCCAATGCAGAATAAAACAAATTATAAATATGTGGCAGGGGGTAGGTGAGCAATATA  
TGCCCCCTCCCATTAAGGAAAACATAACATGTAACCTCAAATATCACAGGACTACTGCTGACACGTGATGGAGGA  
AAAGGAGAAGAAAGTGATAATAAGACAGAGATATTAGACCTGCAGGAGGAGATATGAGGGACAATTGGAGAA  
GTGAATTATATAAATACAAAGTGGTAGAAATTCAGCCATTAGGAGTAGCACCCACTGAGGCGAAAAGGAGAGT  
GGTGGAGAGAGAAAAAGAGCAGTGGGAATAGGAGCTGTGTTTCTTGGGTTCTTGGGAGCAGCAGGAAGCACT  
ATGGGCGCAGCGTCAATAACGCTGACGGTACAGGCCAGACAATTATTGTGAGGCATAGTGCAACAGCAAAGTA  
ATTTGCTGAGAGCTATAGAGGCGCAACAGCATATGTTGCAACTCACGGTCTGGGGCATT

>AY255823..1

TTCTATTGCAATACATCAGCCCTGTTTACAAATTCAACCATCCCAAATACAACCATCACACTCCCATGCAAAA  
TAAACAAATTATAAATATGTGGCAGGAGGTAGGACGAGCAATGTATGCCCCCTCCCATTAAGGAGAGATAAC  
ATGTAATTCAACTATCACAGGAATACTACTGACACGTGATGGAGGCAACACCACAAACGAAATCGAAACATTC  
AGACCTGGAGGAGGAGATATGAGGGACAATTGGAGAAGTGAATTATATAAATACAAAGTGGTAGAAATTAAGC  
CATTAGGAATAGCACCCACGGAGGCAAAAAGGAGAGTGGTGGAGAGAGAAAAAGAGCAGCACTAGGAGCTGT  
GTTCTTGGGTTCTTGGGAGCAGCCGGAAGCACTATGGGCGCAGCATCAATGACGCTGACGTTACAGGCCAGA  
CAATTACTGTGCGGTATAGTGCAACAGCAAAGCAATTTGCTGAGGGCTATAGAGGCGCATCAGCATATGCTGC  
AACTCACAGTCTGGGGCATT

>KP109480..2

TTCTATTGCAACACATCAAGCCTGTTTAAAGGGTACATATAGGCCTAATGGTACAAGTAATTCCTACTTCAGGCT  
CTATCATCACACTCCCATGCTACATAAAACAAGTTATAAACTTGTGGCAGGAGGTAGGACGAGCAATATATGC  
CCCTCCCATTTGAAGGAAAACATAACATGTATATCAAATATCACAGGACTACTATTGGTAAGAGATGGAGGAAAT  
CATGAAGAGGCAAATACGACAGAGACATTAGACCTGGAGGAGGAAATATGAGAGACAATTGGAGAAGTGAAT  
TATATAAATATAAAGTAGTAGAAATTAAGCCATTGGGAGTAGCACCCACTAAAGCAAGAAGGAGAGTGGTGGA  
GAGAGAAAAAGAGCAGTGGGAGTAGGAGCTGTTATGTTCTTGGGTTCTTGGGAGCAGCAGGAAGCACTATG  
GGCGCGGCGTCAATAACGCTGACGGTACAGGCCAGACAATTGCTGTCTGGTATAGTGCAACAGCAAAGCAATT  
TGCTGAAGGCTATAGAGGCGCAACAGCATCTGTTGCAACTCACGGTCTGGGGCATT

>KP109483..1

TTCTATTGTAATACATCAAGCCTGTTTAAATAGTACATTTAATAGTACATACATGACTAATGATACAGACATGA  
ATTCAAACTCAACCATCTCAATCCCATGCCGCATAAAACAAATTATAAACATGTGGCAGGAGGTAGGACGAGC  
AATGTATGCCCCCTCCCATTTGCAGGAAACATAACATGTAAATCAAATATCACAGGACTACTATTGGTACGAGAT  
GGAGGAAACTCAAATGATACAAATGAGCCAGAGATATTCCGACCTCAAGGAGGAGATATGAGGGACAATTGGA  
GAAGTGAATTATATAAATATAAAGTGGTAGAAATTAAGCCATTGGGAGTAGCACCCACTGCAGCAAAAAGGAG  
AGTGGTGGGAAGAGAAAAAGAGCAGTGGGACTAGGAGCTATGATCCTTGGGTTCTTGGGAGCAGCCGGAAGC  
ACTATGGGCGCGGCGTCAATAACGCTGACGGTACAGGCCAGACAATTGTTGTCTGGTATAGTGCAACAGCAAAA  
GCAATTTGCTGAGGGCTATAGAGGCGCAACAGCATATGTTGCAACTCACGGTCTGGGGCATT

>KY929363..1

TTCTATTGCAATACATCAAAACTGTTCAACAGTACATACTGGCAGAATGGTACATACTCATACTGGAATAATG  
GGTCATTCTTAGAATGGAATGATACACAAAGCACTCCAAATCGAAGCATCACAATTCATGCAGAATAAAAAA  
AATTATAAACATGTGGCAGGAGGTAGGACGAGCAATGTATGCCCCCTCCCATTTGCAGGAAAAATAATGTGTAAA  
TCCAATATCACAGGAATACTATTGGAACGTGATGGAGGAAATACAAATGAGACAAAATAAGACAGAGACATTCA  
GACCAATAGGAGGAGATATGAGGAATAATTGGAGAAGTGAATTATATAAATATAAAGTGGTAGAAATTAAGCC

ATTGGGGGTAGCGCCCACTAAGGCAAGAAGGAGAGTGGTGGAGAGAGAAAAAGAGCAATAGGGGGAATAGGA  
GCTGTATTCCTTGGGTTCTTAGGAGCAGCAGGAAGCACTATGGGCGCGCGTCAATAACGCTGACGGTACAGG  
CCAGACAATTGTTGTCTGGTATAGTGCAACAGCAAAGCAATTTGCTGAAGGCTATAGAGGCGCAACATCATCT  
GTTGCAACTCACGGTCTGGGGCATT

>KY929365..2

TTCTATTGCAATACATCAGGCCTGTTTAAATGCTACATACAATAGTACATCAGGCCTGTTTAAATGCTACTAATC  
ACACAAATAACACCATCACCATCCCCTGCAGAATAAAACAATTTATAAACATGTGGCAGGGGGTAGGAAAAGC  
AATGTATGCCCTCCCATTGCAGGGAACATAACATGTACATCAAATATCACAGGAATACTATTGACATGGGAT  
GGAGGAGAAAATAGAACAGATAATGATACAGAGACATTGAGACCTGCAGGAGGAGATATGAGGGACAATTGGA  
GAAGTGAATTATACAAATATAAAGTGGTAGAAATTCAGCCATTGGGGGTAGCACCCACTAAAGCAAAAAGGAG  
AGTGGTGGAGAGAGAAAAAGAGCAGTGGGACTAGGAGCTGTGTTCTTGGGTTCTTGGGAGCAGCAGGAAGC  
ACTATGGGCGCAGCGTCAATGGCGCTGACGGTACAGGCCAGACAATTGTTGTCTGGTATAGTGCAACAGCAAA  
GCAATTTGCTGAGGGCTATAGAGGCGCAACAACACATGTTGCAACTCACGGTCTGGGGCATT

>KY929369..1

TTCTATTGTAATACATCAGGCCTGTTTAAATAGTAATAATGAGACAAACAATAATTCAAGCTTAATCACAATTC  
CATGCAGAATAAAACAAGTTGTAAACTTGTGGCAGGGGGTAGGACGAGCAATGTATGCTCCTCCCATAGCAGG  
AAACATAACATGTAATTCAAATATCACAGGACTACTATTGGTACGTGATGGAGGAACAGGAAATAACACAATA  
GAGAAATTCAGACCTCAAGGAGGAGATATGAGAGACAATTGGAGGAACGAACTATATAAATATAAAGTGGTAG  
AAATTAAACCATTGGGAGTAGCACCCACTAAAGCAAAAAGGAGAGTGGTGGAGAGAGAAAAAGAGCAATAGC  
GGGACTAGGAGCTGTGTTCTTGGGTTCTTGGGAGCAGCAGGAAGCACTATGGGCGCGCGTCAATAACGCTG  
ACGGTACAGGCCAGACAATTGTTGTCTGGTATAGTGCAACAGCAAAGTAATTTGCTGAGGGCTATAGAGGCGC  
AACAGCATCTGTTGCAACTCACGGTCTGGGGCATT

>KY929370..3

TTCTATTGTAATACATCAGGCCTGTTTAAATGGTACATACATGTCTAATGGTACTTATAATGAGACAAACAATA  
ATTCAAGCTCAAACATCACAATTCATGCAGAATAAAACAAGTTATAAACTTGTGGCAGGGGGTAGGACGAGC  
AATGTATGCTCCTCCCATTGCAGGAAAAATAACATGTAACCTCAAATATCACAGGACTACTATTGGTACGTGAT  
GGAGGAACAGGTAATCAGACAAATGATATAGAGACATTGAGACCTCAAGGAGGAGATATGAGAGACAATTGGA  
GGAGCGAATTATATAAATATAAGGTGGTAGAAATTAACCATTTGGGAATAGCACCCACTGAAGCAAAAAGGAG  
AGTGGTGGGAAGAGAAAAAGAGCAGTGGGACTAGGAGCTGTGCTCTTTGGGTTCTTGGGAGCAGCAGGAAGC  
ACTATGGGCGCGCGTCAATAACGCTGACGGTACAGGCCAGACAATTGTTGTCTGGTATAGTGCAACAGCAAA  
GCAATTTGCTGATGGCTATAGATGCGCAACAGCATCTGTTGCAACTCACAGTCTGGGGCATT

>KX756609..1

TTCTATTGCAATACCTCAAACTGTTTAAATATATCAAACCTGTCTTCTAATGATACAACAGATAATGGCACAA  
TCATGATCCCATGCAGAATAAAACAATTTATAAACATGTGGCAGGAGGTAGGACGAGCAATGTATGCTCCTCC  
CATTGCAGGAAACATAACGTGTAGTTCAAACATCACCGGACTACTGTTGGAACGTGATGGAGGAAATTCAACT  
AATTCAACTAATTCAAATAGGACAGAGACATTGAGGCCTCAAGGAGGAAATATGAGGAACAATTGGAGAAGTG  
AATTATATAAATATAAGGTGGTAGAAATACAACCAGTGGGAATAGCGCCCACTACAGCAAAAAGGAGAGTGGT  
GGAGAGAGAAAAAGAGCAGTGGGAATAGGAGCTATGTTCTTGGGTTCTTGGGAGCAGCAGGAAGCACTATG  
GGCGCAGCGTCGATAACGCTGACGGTACAGGCCAGACAATGTTGTCTGGTATAGTGCAACAGCAAAGCAATT  
TGCTGAGAGCTATAGAGGCGCAACAACATCTGTTGCAACTCACAGTCTGGGGCATT

>MK076687..2

TTCTATGGTAATACAGCAGGCCTGTTTAAATAATACATACAATATTACAACAGGCACGCTTACATACAATGGTA  
AATCCCTTAATGATTTAACTCAACCATCACACTCCCATGCAGAATAAAGCAGTTTAAAAATATGTGGCAGGG  
GGTAGGAAGAGCAATGTATGCCCTCCCATTGCAGGAAACATAACATGTACATCAAATATCACAGGCATAATA  
TTGACACGTGATGGAGGGAATGAGAGTAGTACTGAAGTTCACAATAATACAGAGACATTCAGACCTCAAGGGG  
GAAATATGAGAGATAATTGGAGAAGTGAATTATACAAATATAAAGTGGTAGAAATTAAGCCATTGGGAGTAGC  
ACCCACTGCAGCAAAAAGGAGAGTGGTGGAAAAAGAAAAAGGGGCCTAGGAGCTATACTCATTGGGTTCTTG  
GGAACAGCAGGAAGCACTATGGGCGTGGCGTCAATAACGCTGACGGTACAGGCCAGACAATTGTTGTCTGGTA  
TAGTGCAACAGCAAAGCAATTTGCTGAGAGCTGTAGAGGCGCAACAACATCTGTTGCAACTCACGGTCTGGGG  
CATT

>KY713231..1

TTCTATTGCAATACCTCAAGCTTGTTTAGCAGTATAAGCCCTAATAGTACAAATAATACTGTAATAACAATCC  
CATGCAGAATAAAACAATTTATAAACATGTGGCAAGGGGTAGGACGAGCAATATACGCCCCCTCCTATTGAAGG  
AAACATAACATGTAAATCAAATATCACAGGAATACTATTGGTACGTGATGGAGGCACAAATACTACAGAAGAA  
GGAAAAGAAATAGAAATATTTAGACCTCAAGGAGGAAATATGAAGGACAATTGGAGAAGTGAATTATATAAAT  
ATAAAGTGGTAGAAATTAAGCCATTAGGAGTAGCACCCACTAAAGCAAAAAGGAGAGTGGTGGAGAGAGAAAA  
AAGAGCAGTAGTGGGGCTAGGAGCTGCGTTCTTGGGTTCTTGTGCTGCTGAGGAGCACTATGGGCGCGGCG  
TCAATAACGCTGACGGTACAAGCCAGACAATTGTTGTCTGGTATAGTGCAACAGCAAAGCAATTTGCTGAGAG  
CTATAGAGGCGCAACAGCATATGTTGCAACTCACAGTCTGGGGCATT

>KY713235..2

TTCTATAGGAGACAGTCAAAATTGTTTAAATCACACATACATGCAGAATGGTACACACAATGGTACAATAAATG  
GTTTACAGACCCAATCATAATTCCATGCAGAATAAAGCAAATTATAAACATGTGGCAGGAGGTAGGAAGAGCAAT  
GTATGCCTCTCCATTGCAGGAAACATAACCTGTAAATCAAATATCACAGGACTACTATTGACACGAGATGGA  
GGAATCAAAAATGATAGTAGTAATGAGACAAAGATAGAGATATTCAGACCTGGAGGAGGAAACATGAAAGACA  
ATTGGAGAAGTGAATTATACAAATATAAAGTGGTAGAAATTAAGCCATTGGGAATAGCACCCACTGAAGCAAG  
AAGAAGAGTAGTGCAGAGAGAAAAAAGAGCAGTGACACTAGGAGCTATGTTCCCTTGGGTTCTTGGGAGCAGCA  
GGAAGCACTATGGGCGCGGCGTCAATAACGCTGACGGTACAGGCCAGACAATTGTTGTCTGGTATAGTGCAAC  
AGCAAAGCAATTTGCTGAGGGCTATAGAGGCGCAACATCATCTGTTGCAACTCACAGTTTGGGGCATT

>MN703343..1

TTCTATTGTAATACATCAAGACTGTTTAAATGGTACATATAATACAACAGAGGAGTCAAACCTCAACCATCACAA  
TCCAATGCAGAATAAAACAAATTATAAACATGTGGCAGGAGGTAGGACGAGCAATGTATGCCCCCTCCATTGC  
AGGAAACATAACATGTGAATCAAACATCACAGGACTAATATTGGTACGTGATGGAGGAACTCATGAAAATAGT  
AATACTACAGAGATATTAGACCTGGAGGAGGAGATATGAGGGACAATTGGAGAAAGTGAACCTATATAAATATA  
AAGTGGTAGAAGTTAGGCCTTTGGGAATAGCACCCACTAAAGCAAAAAGGAGAGTGCTGGAGAGACAAAAAAG  
AGCAGTAGGAATGGGAGCTGTGTTCCCTTGGGATCTTGGGAGCAGCAGGAAGCACTATGGGCGCGGCGTCAATA  
ACGCTGACGGTACAGGCTAGACAATTGTTGTCTGGTATAGTGCAACAGCAAAACAATTGCTGAGGGCTATAG  
AGGCGCAACAGCACATGTTGCAACTCGCAGTCTGGGGCATT

>MN703361..1

TTCTATTGTAATACATCAGGCCTGTTTAAATGAAAGCCGGCTTAACGAAACAGAAGGTGATTCAAGTAAAAACA  
TCACACTTCCATGTAGAATAAAGCAAATTATAAACATGTGGCAGGCGGTAGGAAAAGCAATATATGCCCCCTCC  
CATTGCAGGAAACATAACATGTAAATCAAATATCACAGGATTACTATTGGAACGTGATGGAGGCAAAGGCAAT  
GCAACAGAGGAAATATTAGACCTGGAGGAGGAAATATGGGGGACAATTGGAGAAAGTGAATTATATAAATATA  
AAGTGGTAGAATTCAACCATTTGGGAATAGCACCTACTGGAGCAAAAAGGAGAGTAGTGGAGAGAGAAAAAAG  
AGCAGTAGTGGGAATAGGAGCTGTGTTCCCTTGGGATCTTGAGTGCAGCAGGAAGCACTATGGGCGCGGCGGCA  
ATAACGCTGACGGTACAAGCCAGACAATTATTGTCTGGTATAGTGCAACAGCAAAAGCAATTTGCTGAAGGCTA  
TAGAGGCGCAACAGCATATGTTGCAGCTCACGGTCTGGGGCATT

>AF067159..2

TTCTATTGTAATACATCAGGCCTGTTTAAATAGTACATACATGAGTGGTACATACATGAATTCAAGTGCAGACA  
TGAATTCAAGCTACATCACAATCCCATGCAGAATAAAGCAAATTATAAACATGTGGCAGGAGGTAGGACGAGC  
AATGTATGCCCCCTCCATTGCAGGAAACATAACATGTAAATCAAATATCACAGGAATACTATTGGAACGTGAT  
GGAGGGTCAGGGTCAAATGGCACAGAGACATTAGACCTGGAGGAGGAGATATGAGGAACAATTGGAGAAGTG  
AATTATATAAATATAAAGTGGTAGAATTAGCCATTGGGAGTAGCACCCACGGAAGCAAAAAGGAGAGTGGT  
GGAGAGAGGAAAAAGAGCAGTGGGAATAGGAGCTGTGTTCCCTTGGGTTCTTGGGAGCAGCAGGAAGCACTATG  
GGCGCGGCGTCAATAACGCTGACGGTACAGGCCAGACAATTGTTGTCTGGTATAGTGCAACAGCAAAAGCAATT  
TGCTGAGGGCTATAGAGGCGCAACAGCATCTGTTGCAACTCACGGTCTGGGGCATT

>FJ866133..1

TTCTATTGCAATACATCAGGACTGTTTAAATAATAATATTACAAATGCAACCACCACCCTCCCATGCAGAATAA  
AACAAATTGTAAACATGTGGCAGGGGGTAGGACGAGCAATGTATGCCCCCTCCATTGAAGGAAAAATAACATG  
TAACTCAAATATCACAGGACTGCTCCTGACACGTGATGGAGGGGTGAATAATGAAACGACAGAGACATTAGAG  
CCTGGAGGAGGAGATATGAAGGACAATTGGAGAAATGAATTATATAAATATAAAGTGGTAGAAATTAGCCAT  
TAGGAATAGCACCCACTGGAGCAAAAAGGAGAGTGGTGGAGAGAGAAAAAAGAGCGGTGGGACTAGGAGCTGT  
GTTCCCTTGGGTTCTTGGGAGCCGAGGAAGCACTATGGGCGCAGCATCAATAACGCTGACGGTACAAGCCAGA  
CAATTATTGTGCGGTATAGTGCAACAGCAAAACAACCTGCTGAGAGCTATAGAGGCGCAACAACATATGTTGC  
AACTCACAGTCTGGGGCATT

>AB097871..1

TTCTATTGTAATACATCAGGCCTGTTTAAATGGGACATACAATGATACATACAGGTCTAATGATACAGATAGTA  
ATTCAACCATCACACTCCCATGCAGAATAAAGCAAATTATAAACATGTGGCAGGAGGTAGGACGAGCAATGTA  
TGCCCCCTCCTATTGCAGGAAACATAACATGTAAATCAAACATCACAGGACTACTATTGGTACGTGATGGAGGA  
AATGGTACACAGACATTAGACCTGGAGGAGGAAATATGAAGGATAATTGGAGAAGTGAATTATATAAATATA  
AAGTGGTAGAATTAGCCATTAGGAATAGCACCCACTGGAGCAAAAAGGAGAGTGGTGGAGAGAGAAAAAAG  
AGCAGCAATAGGAGCTATGTTCCCTTGGGTTCTTGGGAGCAGCAGGAAGCACTATGGGCGCGGCGTCGATGGCG  
CTGACGGTACAGGCCAGACAATTGTTGTCTGGTATAGTGCAACAGCAAAAGCAATTTGCTGAGGGCTATAGAGG  
CGCAACAGCATATGTTGCAACTCACAGTCTGGGGCATT

>KC894073..1

TTCTATTGCAATACATCAAAACTGTTTAAATGGTACATACAATGGTACATACACAAATAATGATACAAACAGCA  
CAATCATACTCCCATGCAGAATAAAACAAATTATAAACATGTGGCAGGAGGTAGGACAAGCAATGTATGCCCC  
TCCCATTTGAAGGAATCATAGCATGTAATTCAACTATCACAGGATTATTATTGACACGTGATGGAGGAGACAAG  
AATGGGAGTAAGCCAGAAATATTAGACCTGGAGGAGGAGATATGAGGGACAATTGGAGGAGTGAATTATATA  
AATATAAAGTGGTAGAATTAAGCCATTGGGAATAGCACCCACTAAGGCAAAAAGGAGAGTGGTGGAGAAAAGA  
AAAAACAATTCAAAAAGAGCAGTAGGAATAGGAGCTGTGTTCCCTTGGGTTCTTGGGAGCAGCAGGAAGCACT

ATGGGCGCGGCGTCAATAACGCTGACGGTACAGGCCAGACAATTGTTGTCTGGTATAGTGCAACAGCAAAGCA  
ATTTGCTGAGGGCTATAGAGGCGCAACAGCATATGTTGCAACTCACAGTCTGGGGCATT

>FJ444207..1

TTCTATTGCAATACATCAAACTGTTTACAGAAAGTAATTCAACCTCAAACAGCACCTCAAACACCGTACTCA  
CACTCCCATTGAGAATAAAACAAATTATAAACATGTGGCAGGGGGTAGGACGAGCAATGTATGCCCTCCCATT  
TGAGGGAAATATAACATGTGAATCAAACATCACAGGATTACTATTGACGCGTGATAGAACAGACAATAAAACA  
GAGACATTTAGACCTGGAGGAGGAGACATGAGGGACAATTGGAGAAGTGAATTATACAAATATAAAGTGGTAG  
AAATTCAGCCATTAGGAGTAGCACCCACTAAGGCCAAAAGGAGAGTGGTGGAGAGAGAAAAAGAGCAGTGGG  
AATAGGAGCTGTGTTCTTGGGTTCTTGGGAGCAGCAGGAAGCACTATGGGCGCAGCATCAATAACGCTGACG  
GTACAGGCCAGACAATTGTTGTCTGGTATAGTGACAGCAGCAGAGCAATTTGCTGAGGGCTATAGAGGCGCAAC  
AGCATATGTTGCAACTCACGGTCTGGGGCATT

>KC894078..1

TTCTATTGTAATACATCAAACTGTTTAAATATTAATATTACAGGAAATATTACAGGAAATATGACAGGAAATG  
AAAACATCACACTCCCATTGAGAATAAAACAAATTATAAACATGTGGCAAAGGGTAGGGCAAGCTATATATGC  
CCCTCCCATTGACAGGAAACATAACATGTAACCTCAAGTATCACAGGACTACTGTTGACACGTAATGGAGGCAAT  
GATAACAGAACAGGGAATAATAACAGAGACATTCAGACCTGGAGGAGGAGATATGAGGGATAATTGGAGAA  
GTGAATTATATAAATATAAAGTGGTAGAAGTTCAGCCATTGGGAGTAGCACCCACTGGAGCAAAAAGGAGAGT  
GGTGGAGAGAGAAAAAGAGCAGTAATGGGAGCTATGTTCTTGGGTTCTTGGGAGCAGCAGGAAGCACTATG  
GGCGCGGCGTCAGTGGCGCTGACGGTACAGGCCAGACAACCTATTGTCTGGTATAGTGCAACAGCAAAGCAATT  
TGCTGAGGGCTATAGAGGCGCAACAGCATCTGTTGCAACTCACGGTCTGGGGCATT

>KC894079..2

TTCTATTGCAATACATCAGACCTGTTTAAATGGTACATACAGAAATGGTACATACAATCATACAGGAAGAAGTT  
CAAATGGAACCATCACCTCCAATGCAAAATAAAACAAATTATAAACATGTGGCAGGAGGTAGGAAGAGCAAT  
ATATGCCCCCTCCCATTGAAGGAGAAATAACATGTAACCTCAAATATCACAGGACTACTATTGCTACGTGATGGA  
GGTCAATCAAATGAAACAAATGACACAGAGACATTCAGACCTGGAGGAGGAGATATGAGGGACAATTGGAGAA  
GTGAATTATATAAATATAAAGTAGTAGAAATTAAACCATTTGGGAGTAGCACCCACTGAGGCAAAAAGGAGAGT  
GGTGGAGAGAGAAAAAGAGCAGTGGGAATAGGAGCTGTGTTCTTGGGTTCTTGGGAGCAGCCGGAAGCACT  
ATGGGCGCAGCATCAATGACGCTGACGGTACAGGCCAGGCAATTATTGTCTGGTATAGTGCAACAGCAAAGCA  
ATTTGCTGAGGGCTATAGAGGCGCAACAGCATATGTTGCAACTCACGGTCTGGGGCATT

>KC894081..1

TTCTATTGTAATACATCAGGACTGTTTAAATGGTACATACCACCCTAATGGTACATACAATGAGACAGCAGTTA  
ATTCAAGCGACACAATCACACTCCAATGCAGAATAAAACAAATTATAAACATGTGGCAAGAGGTAGGAAGAGC  
AATGTATGCTCCTCCCATTGACAGGAAATATAACATGTAATTCAACTATCACAGGACTACTATTGCTACGTGATGGA  
GGAGGAATAAATCAGACAGGAGAAGAGATATTAGACCTGGAGGAGGAGATATGAGGGATAATTGGAGAAATG  
AATTATATAAATATAAAGTGGTGGAGATTAAAGCCATTAGGAATAGCACCCACTAAGGCCAAAAGGAGAGTGGT  
GGAGAGAGAAAAAGAGCAGTGGGAATAGGAGCTGTGTTCTTGGGTTCTTGGGAGCAGCAGGAAGCACTATG  
GGCGCGGCGTCAATAACGCTGACGGTACAGGCCAGACAACCTGTTGTCTGGTATAGTGCAACAGCAAAGCAATT  
TGCTGAGGGCCATAGAGGCGCAACAGCATATGTTGCAACTCACGGTCTGGGGCATT

>FJ444522..1

TTCTATTGCAATACATCAGGCCTGTTTAAATAGTACATATAATCCAAATAGTACATATAATAATTCAAGCTCAG  
ACACACCACTTAGACTCTCATGTAGAATAAAACAAATTATAAATATGTGGCAGGGGGTAGGAAGAGCAATATA  
TGCCCCCTCCCATTGAAGGAAGCATAACATGTAACCTCAAGTATCACAGGACTACTATTGCTACGTGATGGAGGT  
CATGACGGTGACTCAAATAACACAGAGACATTTAGACCGGGAGGAGGAGATATGAGGGACAACCTGGAGAAGTG  
AATTATATAAATATAAAGTGGTAGAAATTAAAGCCATTGGGAGTAGCACCCACTGACGCAAAAAGAAGAGTGGT  
GGAAAGAGAAAAAGAGCAGTAGTGGGAATAGGAGCTGTGTTCTTGGGTTCTTGGGAGCAGCCGGAAGCACT  
ATGGGCGCGGCGTCACTAACGCTGACGGTACAGGCCAGACAACCTGCTGTCTGGTATAGTGCAACAGCAAAACA  
ATTTGCTGAGGGCTATAGAGGCGCAACAGCATATGTTGCAACTCACGGTCTGGGGCATT

>KC894089..1

TTTTATTGCAATACATCAGCACTGTTTAAATGGTACATACAATTCTACATACAATTCTACTAGTAACCCAAACA  
TCACAATCACAAATCCAATGCAGAATAAAACAAATTATAAACATGTGGCAGGAGGTGGGACGAGCAATGTATGC  
CGCTCCCATTGACAGGAGACATAACATGTGAATCAAACATCACAGGACTACTATTGACACGTGATGGAGGAAAT  
ACTGCAAACGGGACAGAGATATTAGACCTGGAGGAGGAGATATGAGGGATAATTGGAGAAGTGAATTATATA  
AATATAAAGTGGTAGAAGTTCAGCCATTGGGAGTAGCACCTACCAAGGCCAAAAGAAGAGTGGTGGGTAGAGA  
AAAAAGAGCAGTACTGGGAGCTGTGTTCTTGGGTTCTTGGGAGCAGCAGGAAGCACTATGGGCGCGGCGTCA  
ATGGCGCTGACGGTACAGGCCAGACAATTGTTGTCTGGTATAGTGCAACAGCAAAGTAATTTGCTGAGGGCTA  
TAGAGGCGCAACAGCATATGTTGCAACTCACAGTCTGGGGCATT

>KC894084..1

TTCTATTGCAATACATCAGAACTGTTTAAATAATACATACTGGCCTAATAGTACTGTTACAAATGGAACCTTTAA  
ATGGAACCTTCACACTCCCATTGCAAAATAAAACAAATTATAAACATGTGGCAGGAGATAGGAAGAGCAATATA  
TGCCCCCTCCCATTGACAGGAAACATAACATGTAATCAAATATCACAGGACTACTATTAAACACGTGATGGAGGT

CATAACCCAGAGAAGAATGACACAGAGACATTCAGACCTGGAGGAGGAGATATGAGGGATAATTGGAGAAGTG  
AATTATACAAATATAAAGTAGTAGAAGTCAAGCCATTAGGAATAGCACCCACGGGGGCAAAAAGGAGAGTGGT  
GGAGAGAGAAAAAGAGCAGTGGGAATAGGAGCTGTGTTCTTGGGTTCTTGGGAGCAGCAGGAAGCACTATG  
GGCGCGCGTCAATAACGCTGACGGTACAGGCCAGACAATTATTGTCTGGTATAGTGCAACAGCAAAGCAATT  
TGCTGAGGGCTATAGAGGCGCAGCAGCATATGCTGCAACTCACGGTCTGGGGCATT

>KC156114..2

TTCTATTGCAACACATCAAGATTGTTTAATCATACATTTAATGAGACATCAGACGAAGACATCACACTCCAAT  
GTAGGATAAAACAAATTATAAACATGTGGCAGGGGGTAGGACGAGCAATATATGCCCTCCCATTCAGGAAA  
CATAACATGTAACCTCAAATATCACAGGACTACTATTGACACGTGATGGAGGGAAGAGTAATAGTAGTAATCAG  
ACAGAGATATTCAGACCTGCAGGAGGAAATATGAGGGACAAATTGGAGAAGTGAATTATATAAATATAAAGTGG  
TAGAAATTAAACCATTAGGAATAGCACCCACTAAGGCGAAAAGGAGAGTGGTGGAGAGAGAAAAAGAGCGGC  
AATAGGAGCTATGTTCTTGGGTTCTTGGGAGCAGCAGGAAGCACTATGGGCGCGGCGTCAATAACGCTGACG  
GTACAGGCCAGACAATTATTGTCTGGTATAGTGCAACAGCAAAGCAATTTGCTGAGAGCTATAGAGGCGCAAC  
AGCATATGTTGCAACTCACGGTCTGGGGCATT

>KC156120..1

TTTTATTGCAATACATCAATACTGTGGGATAGTGATAAGAGTAATGACACAAACATCACACTCCCATGCAGAA  
TAAAACAAATTATAAATATGTGGCAGGAGGTAGGACGAGCAATGTATGCCCTCCCATTCAGGAAGCATAAC  
ATGTAAATCAAAAATCACAGGACTACTATTGGTACGTGATGGAGGAATAAATAGCAGCACAGAGACATTCAGA  
CCTGGAGGAGGAAATATGAAGGACAAATTGGAGAAGTGAATTATATAAATATAAAGTGGTAGAAATTCAGCCAT  
TAGGAGTTGCACCCACTGGAGCAAAAAGGAGAGTGGTGGAGAGGGAGAAAAGAGCAGTGGGAATAGGAGCTGT  
GTTCTTGGGTTCTTGGGAGCAGCTGGAAGCACTATGGGCGCAGCGTCAATAACGCTGACGGTACAGGCCAAA  
CAACTGTTGTCTGGTATAGTGCAACAGCAGAGTAATTTGCTGAGAGCTATAGAGGCGCAACAGCATATGCTGC  
AACTCACAGTCTGGGGCATA

>HQ615984..1

TTCTATTGCAATACATCAGGCCTGTTTAATGGTACATTTAATGGTACATACATGCCAAATAGTACAGAAAGTA  
CTTCAAATACAAACATCACACTCCAATGCAGAATAAAACAAATCATAAACATGTGGCAGCAGGTAGGACGAGC  
AATGTATGCCCCGCCCATTTGAAGGAAACATAACATGTAGATCAAATATCACAGGACTACTATTGACACGTGAC  
GGAGGCGGAAGAGCAAATGATACTGAAGAGATATTCAGGCCCTGGAGGAGGAGATATGAGGGACAATTGGAGAA  
GTGAATTATACAAATATAAAGTGGTAGAGTTTCAAGCCATTGGGAATAGCACCCACTAAGGCAAAAAGGAGAGT  
GGTGGAGAGAGAAAAAGAGCAGTGGGAATGGGAGCTGTGTTCTTGGGTTCTTGGGAGCAGCAGGAAGCACT  
ATGGGCGCGGCGTCAATAACGCTGACGGTACAGGCCAGACAATTGTTGTCTGGTATAGTGCAACAGCAAAGCA  
ATTTGCTGAGGGCCATAGAGGCGCAACAGCATATGTTGCAACTCACGGTCTGGGGCATT

>KC156216..1

TTCTATTGCAATACATCAAACTGTTTAATAGTATACACAATAGTACAGATATGTATAATAGTACAGTTAGTA  
ATTCAACCATCACACTCCAATGCAAAATAAAACAAATTATAAATATGTGGCAGGGGGTAGGACGAGCAATGTA  
TGCCCCCTCCCATAGCAGGAAACATAACATGTAAATCAAATATCACAGGACTACTATTAACACGGGATGGAGGA  
AACGTGAGTGGAAACAACAGAGACATTCAGACCTGGAGGAGGAAATATGAAGGACAATTGGAGAAGTGAATTAT  
ATAAATATAAAGTGGTGGAAATTCAGCCATTAGGAATAGCACCCACTAAGGCAAAAAGGAGAGTGGTGGAAAG  
AGAAAAAGAGCAGTGGGAATAGGAGCTGTGTTCTTGGGTTCTTGGGAGTAGCCGGAAGCACTATGGGCGCA  
GCATCAATGACGCTGACGGTACAGGCCAGACAATTGTTGTCTGGTATAGTGCAACAGCAAAGCAATTTGCTGA  
GGGCTATAGAGGCGCAACAGCATATGTTGCAGCTCACGGTCTGGGGCATT

>KC156219..2

TTCTATTGCTATACATCAGAACTGTTTAATGAGACAGACAACTGCTTAATAAGACAAAAGAGAAAGACAATT  
CAACCATCATACTCCCATGCAGAATAAAACAAATTATAAACATGTGGCAGGGGGTAGGACGAGCAATATATGC  
CCCTCCCATTTGAAGGAAATATAACATGTAAGTCAAATATCACAGGACTACTATTGACACGTGATGGAGGAGAG  
GACATTAATGGAACATAATAGAGAAGAGATATTCAGACCTGGAGGAGGAGATATGAAGGATAAATTGGAGAAGTG  
AATTATATAAATATAAAGTAGTAGAAATTCAAGCCATTAGGAATAGCACCCACTAAGGCAAAAAGGAAAGTGGT  
GGAGAGAGAAAAAGAGCAGCAATAGGAGCTGTGTTCTTGGGTTCTTGGGGGAGCAGGAAGCACTATGGGCGC  
GCGGCGTCAATAACGCTGACGGTACAAGCCAGACAATTATTGTCTGGTATAGTGCAACAGCAAAGCAATTTGCTG  
TGAGAGCTATAGAGGCGCAACAGCATATGTTGCAACTCACGGTCTGGGGCATT

>HQ615963..2

TTCTATTGCAATACATCAAGCCTGTTTAATAGGACATATAATAGTACAGATATGGCCAATAGTACAGAAGCTA  
ACAGTACCATCACAATCCACTGCAGAATAAAACAAATTATAAACATGTGGCAGGAGGTGGGACGAGCAATGTA  
TGCCCCCTCCCATTAAGGAAACATAACATGTATATCAAATATCACAGGACTACTATTAACAAGGGATGGAGGA  
GATAATAATGAAACGGAGACATTCAGACCTGGAGGAGGAAATCTGAGGGACAATTGGAGAAGTGAATTATATA  
AATATAAAGTGGTAGAAGTTCAAGCCATTGGGAGTAGCACCCACTAATTCAAGAAGGAGAGTGGTGGAGAGAGA  
AAAAAGAGCAGTGGGACTAGGAGCTGTGTTCTTGGGTTCTTGGGGGAGCAGGAAGCACTATGGGCGCAGCA  
TCAATAACGCTGACGGTACAGGCCAGACAATTATTGTCTGGTATAGTGCAACAGCAAAGCAATTTGCTGAAAG  
CTATAGAGGCTCAACAGCATATGTTGAAACTCACGGTCTGGGGCATT

>HQ615964..2

TTCTACTGCAATACATCAAACCTGTTTAAACAGTACATATAACAGTAACAGTACATATAACAGTACAGATACTC  
CTGAGGATAAAAAACATCACACTCCAATGCAGAATAAAACAAATTATAAACATGTGGCAGGGGGTAGGACAAGC  
AATGTATGCCCCCTCCCATTCGAGGAAACATAACATGTAAATCAAATATCACAGGATTATTATTAAACACGTGAT  
GGAGGAACCAACACAAACAACACAACAGAAATATTCAGACCTGGAGGAGGAGATATGAGGGACAATTGGAGAA  
GTGAATTATATAAATATAAAGTGGTAGAAATTCAACCATTAGGAGTAGCACCTACTCAGGCAAAAAGGAGAGT  
GGTGGAGAGAGAAAAGAGGGGAATAGGAGCTGTGTTCCCTTGGGTTCTTGGGAGCAGCAGGAAGCACTATGGGC  
GCAGCATCAATGACGCTGACGGTACAGGCCAGACAATTGTTGTCTGGTATAGTGCAACAGCAAAGCAATTTGC  
TGAGGGCTATAGAGGCGCAACAGCATATGTTGCAACTCACGGTCTGGGGCATT

>HM204613..1

TTCTATTGCGATACATCAAAACTGTTTAAATAGTACATACCTGGCTAATGGCACACGCTGGATTAATGATAGTA  
CAGAACAGAATACAAGCAAAGTCATCTCACTCCCATGTAGAATAAAACAAATTATAAACATGTGGCAGGAGGT  
AGGACGAGCAATGTATGCTCCTCCCATTTGAAGGAAACATAAGATGTGAATCAAATATCACAGGATTGTTATTG  
ACGCGTGATGGAGGAATAGATAACAACAAGAGCGAGATATTCAGACCTGGAGGAGGAGATATGAGGGACAATT  
GGAGAAGCGAATTATATAAATATAAAGTGGTAGAAATTAAACCATTGGGAATAGCACCCACTAAGGCAAAAAG  
GAGAGTGGTGGAGAGAGAGAAAAAGAGCAGTGGGAATAGGAGCTCTGTTCCCTTGGGTTCTTGGGAGCAGCAGGA  
AGCACTATGGGCGCGGCGTCAATGACGCTGACGGTTACAGGCCAGACAATTGTTGTCTGGTATAGTGCAACAGC  
AAAGCAATTTGCTGAGGGCTATAGAGGCGCAACAACATATGTTGCAACTCACGGTCTGGGGCATT

>KC187578..1

TTCTATTGCAATACATCAGGACTGTTTAAATAGTACATACAATAATGGTACATACACTAGTGCATACAATATTA  
CAGAAAATAAATCAAGTATTACACTCCCATGCAGAATAAAGCAGATTATTAACATGTGGCAGGGGGTAGGACG  
AGCAATGTATGCCCCCTCCCATTCGAGGAAACATAACATGCAGATCAAATATCACAGGACTACTATTGACACGG  
GATGGTGGCAATGGAATCAATGTGACCACAGAGATATTCAGACCTGAAGGGGGAAATATGAAGGACAATTGGA  
GAAGTGAATTATACAAATACAAAGTGGTAGAAATTCAGCCATTGGGAATAGCACCCACCAAGGCAAAAAGGAG  
AGTGGTGGAGAGAGAAAAAGAGCAGTGGGAATAGGAGCTGTGTTCCCTTGGGTTCTTGGGAGCAGCAGGAAGC  
ACTATGGGCGCGGCGTCAATAACGCTGACGGTACAGGCCAGACAATTATTGTCTGGTATAGTGCAACAGCAAA  
GCAATTTGCTGAGAGCTATAGAGGCGCAACAGCATATGTTGCAACTCACGGTCTGGGGCATT

>KC187323..1

TTCTATTGTAATACATCAAAACTGTTTAAATAATACATTTGATGGTACAAACATGATGAATAACAATACAGATG  
AAACCATCACACTCCAATGCAGAATAAAACAAATTATAAACATGTGGCAGGGGGTAGGACGAGCAATGTATGC  
CCCCCCCATTAAAGGAATCATAACATGTAAATCAAATATCACAGGACTACTATTGACACGTGATGGAGGAAAT  
CACAATGAGACTAATAACACAGAGACATTAGACCTGCAGGAGGAAATATGAAGGACAATTGGAGAAGTGAAT  
TATATAAATATAAAGTGGTAGAAATTAAGCCATTAGGAATAGCACCCACTACGGCAAAAAGGAGAGTGGTGG  
GAGAGAAAAAAGAGCAGTGGGAATAGGAGCTGTGTTCCCTTGGGTTCTTGGGAGCAGCAGGAAGCACTATGGGC  
GCAGCATCAATAACGCTGACGGTACAGGCCAGACAATTGTTGTCTGGTATAGTGCAACAGCAAAGCAATTTGT  
TGAGAGCTATAGAGGCGCAACAGCATATGTTGCAACTCACAGTCTGGGGCATT

>KC186955..1

TTCTATTGCAATACATCGCAACTGTTTAAATAGTACATACCCTAATGAGACATATAATATTAATGTTAATGATA  
CAAATTCACAGAGATTGTACTCCCATGCAGGATAAAACAAATTATAAACATGTGGCAGGAGGTAGGACGAGC  
AATGTATGCTCCTCCCATTCGAGGAAACATAACATGTAGATCAAATATCACAGGATTACTATTGACGCGAGAT  
GGAGGACCTAATCAGACCACAGAAACATTAGACCTGCAGGAGGAGATATGAGGGACAATTGGAGAAGTGAAT  
TATACAAATATAAAGTGGTAGAAATTAAGCCATTGGGAATAGCACCCACTGGGGCAAAAAGGAGAGTGGTGG  
GAGAGGAAAAAAGAGCAGTGGGAATAGGAGCTGTGTTCCCTTGGGTTCTTGGGAGCAGCAGGAAGCACTATGGGC  
GCGGCGTCACTAACGCTGACGGTACAGGCCAGACAATTGTTGTCTGGTATAGTGCAACAGCAAAGCAATTTGT  
TGAGAGCCATAGAGGCGCAACAGCATCTGTTGCAACTCACAGTCTGGGGCATT

>KC187164..1

TTCTATTGCAATACATCAGGACTGTTTAAAAATAGGATATACAGTAGTACATACAATGATACAGTAAATAATT  
CAAGCTCAGAGAACATCACAATCACACTCCCATGCAGAATAAAACAAATTATAAACATGTGGCAGAGGGTAGG  
ACGAGCAATGTATGCTCCTCCCATTAAGGAAGCTTAACATGTAACCTCAAGTATCACAGGGTTACTATTGACG  
AGGGATGGAGGCAGTGGAGACAACAAGTACAGAGATCTTCAGACCTGGAGGAGGAGATATGAGGGACAATT  
GGAGAAGTGAATTATACAAATATAAAGTGGTAGAAGTTCAACCATTAGGAATAGCACCCACTAAGGCAAAAAG  
GAGAGTGGTGGAGAGAGAAAAAGAGCAGTGGGAATAGGAGCTGTGTTCCCTTGGGTTCTTGGGAGCAGCCGGA  
AGCACTATGGGCGCGGTGTCAATAACGCTGACGGTACAGGCCAGACAATTGCTGTCTGGTATAGTGCAACAGCAAAGCAATTTGC  
AAAGCAATTTGCTGAAGGCTATAGAGGCGCAACAGCATATGTTGCGACTCACGGTCTGGGGCATT

>KC187620..2

TTCTATTGCAATACATCAGGACTATTTAAATGGTACATATACAAACATGAGCAGCACAGGAAATGCAAATGCAA  
ACATCACACTTCAATGCAAAAATAAAACAAATTATAAACATGTGGCAACAGGTGGGAAAAGCAATGTATGCTGC  
TCCCATTCGAGGAAACATAACATGTAAATCAAATATCACAGGACTTCTATTGACACGTGATGGAGGAGTAGGA  
AACATGACACAAATGGCACAGAGACATTAGACCTGGAGGAGGAGATATGAGGGACAATTGGAGAAGTGAAT  
TATACAAATATAAAGTGGTAGAAATTCAGCCATTAGGAATAGCACCCACTAAGGCAAAAAGGAGAGTGGTGG  
GAGAGAAAAAAGAGCAGTAGGAATAGGAGCTTTGTTCCCTTGGGTTCTTAGGAGCAGCCGGAAGCACTATGGGC

GCAGCGTCAATAACGCTGACGGTACAGGCCAGACAATTGTTGTCTGGTATAGTGCAACAGCAAAGCAATTTGC  
TGAGAGCTATAGAGGCGCAACAGCATATGTTGCAACTCACAGTCTGGGGCATT  
>KY111994..2  
TTCTATTGCAATACATCAAATCTGTTTAAATGGTACATACAATGGTACATACATAAGTACAAACAGTACTTCAA  
ACATCACGCTTCAATGCAGAATAAAACAAATTATAAACATGTGGCAGGGGGTAGGAAGAGCAATGTATGCTCC  
TCCCATTCGAGGAAACATAACATGTAAATCAAATATCACAGGGCTACTATTGACACGTGATGGAGGGACCAAA  
AATAATAGCAACGAAACAGAGGAGACATTAGGCCTGCAGGAGGAGATATGAGGGATAATTGGAGAAGTGAAT  
TATATAAATATAAAGTAGTAGAAATTCAGCCATTAGGAATAGCACCAACTGGTGCAAAAAGGAGAGTGGTGGA  
GAGAGAAAAAGAGCAGCAGGACTAGGAGCTTTGTTCTTGGGTTCTTGGGAGCAGCAGGAAGCACTATGGGC  
GCAGCATCAATAACGCTGACGGTACAGGCCAGACAATTGTTGTCTGGTATAGTGCAACAGCAAAGCAATTTGC  
TGAGGGCTATAGAGGCGCAACAGCATATGTTGCAACTCACGGTCTGGGGCATC  
>KC187280..1  
TTCTATTGTAATACATCACAATTGTTTAAATAGTACACACAAGAGTACAGCCGATCCTACAAGGAGTGAGTCAA  
ATGAAAATGAAACCATTATACTCCCATGCAAAATAAAACAAATTATAAACATGTGGCAGGAGGTAGGACGAGC  
AATGTATGCCCCCTCCCATTCGAGGAAACATAACATGTAAATCAAATATCACAGGGCTATTATTGACACGTGAT  
GGAGAGTATAATGGGACAAAACAAAATGAAACATTCAGACCTGCAGGAGGAGACATGAGGGACAACCTGGAGAA  
GTGAATTATATAAATATAAAGTGGTAGAAATTCAACCATTGGGAGTGGCACCCACTAAGGCAAAAAGGAGAGT  
GGTGGAGAGAGAAAAAGAGCAATAACAATGGGAGCTGTGTTCTTGGGTTCTTAGGAGCAGCAGGAAGCACT  
ATGGGCGCAGCGGCAGTAACGCTGACGGCACAGGCCAGACAACCTGTTGTCTGGTATAGTGCAACAGCAAAGCA  
ATTTGCTGAGGGCTATAGAGGCACAACAGCATATGTTGCAACTCACAGTCTGGGGCATT  
>KC187249..2  
TTCTATTGCAATACATCACAACCTGTTTAAATGGAACATACTATGCAAATGGGACATCCACGTCTAATGATACAG  
CAGGTAATTCAAGCGACATCATCACTCCCATGCAGAATAAAACAAATTATAAATATGTGGCAGAAGGTAGG  
ACGGGCAATGTATGCTCCTCCCATTCGAGGAAACATAACATGTCACTCAAACATCACAGGATTACTATTGACA  
AGGGATGGTGGAAACAGGAATGGCACAAATGAGACATTCAGACCTGCAGGAGGAGATATGAGGGACAATTGGA  
GAAGTGAATTATACAAATACAAAGTGGTAGAAGTTAATCCATTGGGAGTAGCACCCACTAGGGCAAAAAGGAG  
AGTGGTGGAGAGAGAAAAAGAGCAGTGGGAATAGGAGCTATGTTCTTGGGTTCTTGGGAGCAGCAGGAAGC  
ACTATGGGCGCGCGTCAATAACGCTGACGGTACAGGCCAGACAGTTGTTGTCTGGTATAGTGCAACAGCAAAA  
GCAACCTGCTGAGGGCCATAGAGGCGCAACAGCATATGTTGCAACTCACGGTCTGGGGCATT  
>MF502153..1  
TTCTATTGCAATACATCACAACCTGTTCAATAGTAGCAGTAATTCAAGCTCAACCAGCAATTCAAACCTCAACCA  
TCACCCCTCCCATGCAGAATAAAACAAATTATAAACATGTGGCAGGGGGTAGGACGGGCAATGTATGCCCCCTCC  
CATTCAAGGAAAAATAACATGTAATTCAAGTATCACAGGATTACTATTGACACGTGATGGGGGACCTCGGAAT  
GGCACAGAGACATTAGACCTGGAGGAGGAGATATGAGGGACAATTGGAGAAGTGAATTATATAAATATAAAG  
TGGTAGAAGTTAAACCATTGGGAATAGCACCCACTGGAGCAAAAAGGAGAGTGGTGGAGAGAGAAAAAGAGC  
AGTGGGAATGGGAGCTATGTTCTTGGGTTCTTGGCAGCAGCAGGAAGCACTATGGGCGTGGCGTCAATAACG  
CTGACGGTACAGGCCAGACAATTGCTGTCTGGTATAGTGCAACAGCAAAGTAATTTGCTGAGAGCCATAGAGG  
CGCAACAGCATATGTTGCAACTCACAGTCTGGGGCATT  
>MF353063..1  
TTCTATTGCAATACATCAAGCCTGTTTAAATAGGACATATATGGCTAATAGTACAGATATGGCTAATAGTACAG  
AAACTAACAGTAACGGAACCATCACAATCCAATGCAGAATAAAACAAATTATAAACATGTGGCAAGGGGTGGG  
ACGAGCAATGTATGCCCCCTCCCATTCGAGGAAACATAACATGTATATCAAATATCACAGGACTACTATTGACA  
AGGGATGGAGGAAACACCAAGTATCAGTGAGAAGACAGAGACATTAGACCTGAAGGAGGAAATATGAAGGACA  
ATTGGAAGTGAATTATATAAATATAAAGTGGTAGAAGTTAAGCCATTAGGAGTAGCACCCACTAATGCAAG  
AAGGAGAGTGGTGGAGAGAGAAAAAGAGCAGTAGTGGGAATGGGAGCTGTGTTCTTGGGTTCTTGGGAGCG  
GCAGGAAGCACTATGGGCGCAGCATCAATAACGCTGACGGTACAGGCCAGACAATTATTGTCTGGTATAGTGC  
AACAGCAAAGCAATTTGCTGAAGGCTATAGAGGCTCAACAGCATATGTTGAGACTCACGGTCTGGGGCATT  
>HM638803..1  
TTCTATTGCAATACTGCAAGCCTGTTTAAATAGTACATACAATCCTAATCCTAATGGTACAGAAGACAATTCAA  
ATTCAACTTCAAATTCAAGCATCACAATCAAATGCAGAATAAAGCAAATTATAAACATGTGGCAGGAGGTAGG  
AAAAGCAATGTATGCCCCCTCCCGTTGCAGGAAATATAACATGTATATCCAATATCACAGGACTACTATTGACA  
CGTGATGGAGGAAAGGGAGGTGGCACAAAGTAATGACACAGAGATATTAGACCTCAAGGAGGAAATATGAAGG  
ACAATTGGAGAAGTGAATTATATAAATATAAAGTGGTAGAATTAACCATTAGGAGTAGCACCAACTAAGGC  
AAAAAGGAGAGTGGTGGAGAGAGAAAAAGAGCAGTGGGACTAGGAGCTGTGCTCTTTGGGTTCTTGGGAGCA  
GCAGGAAGCACTATGGGCGCAGCATCAATAACGCTGACGGTACAGGCCAGACAATTGTTGTCTGGTATAGTGC  
AACAGCAAAGCAATTTGCTGAGAGCTATAGAGGCGCAACAGCATATGTTGCAACTCACGGTCTGGGGCATT  
>KC894127..1  
TTCTATTGCAATACATCAAGATTGTTTGATCCTAAAGGTACTAATGGTACAGATAATTCAACCATCCAACCTCC  
CATGCAGAATAAAACAAATTGTAAACATGTGGCAGGGGGTAGGAAGAGCAATGTATGCCCCCTCCCATTCGAGG  
AAACATAACATGTAGATCAAATATCACAGGACTACTATTGGTACGTGATGGAGGCAGAGACGCAAAATACCACA

GAGCCAGAGATCTTCAGACCTGGAGGAGGAGATATGAGGGACAATTGGAGAAGTGAATTATATAAATATAAAG  
TGGTAGAAATTCAGCCATTGGGAGTAGCACCCACTAGGGCAAAAAGGAGAGTGGTGGAGAGAGAAAAAGAGC  
AGTGGGAATAGGAGCTGTGTTCTTGGGTTCTTGGGAGCAGCAGGAAGCACTATGGGCGCGGCGTCAATGACG  
CTGACGGTACAGGCCAGACAACCTGCTGTCTGGTATAGTGCAACAGCAAAGCAATTTGCTGAGAGCTATAGAGG  
CGCAACAGCATATGTTGCAACTCACAGTCTGGGGCATT

>HM639260..1

TTCTATTGCAATACATCAGGACTGTTTAAATGAGACATACAATCCTAATGGTACAGAAAGTAATTCAGCGCAG  
TCATCACACTCCCATGCAGAATAAAACAAATTATAAACATGTGGCAGGAAGTAGGAAAAGCAATATATGCCCC  
TCCCATTCAGGAAACATAACATGTAAATCAAATATCACAGGACTACTATTGGTACGTGATGGAGGAAACTCA  
AATGGCACAAATAACACAGAGATATTCAGACCTGGAGGAGGAGATATGAGGGACAATTGGAGAAGTGAATTAT  
ATAAATATAAAGTGGTAGAAATTAACCATTGGGAATAGCACCCACTAGTGCAAAAAGGAGAGTGGTGGAGAG  
AGAAAAAGAGCAGTTGGAATAGGAGCTGTGTTCTTGGGTTCTTGGGAGCAGCAGGAAGCACTATGGGCGCG  
GCGTCAATAACGCTGACGGTACAGGCCAGACAACCTGTTGTCTGGTATAGTGCAACAGCAAAGCAATTTGCTGA  
GAGCTATAGAGGCGCAACAGCATATGTTGCAACTCACGGTTTGGGGCATT

>KJ541837..2

TTCTATTGTAATACATCAGGCCTGTTTAAATGGTTTCATACAATTATAATGCTACAGCAAGTAATTCAGCTCAG  
ACAATTCAGCTCAGTCATCAGAATCCCATGCAGAATAAAGCAAATTATAAACATGTGGCAGGAGGTAGGACG  
AGCAATGTATGCCCCCTCCCATTCGAGGAAACATAACATGTAAATCAAATATCACAGGAATACTATTGTATCAC  
AGGACTACTGTTGGAGGAAAAGGAAAATGATAAATACTGGAAAGAGACATTCAGACCTACAGGAGGAGATATGA  
GGGACAATTGGAGAAGTGAATTATATAAATATAAAGTGGTAGAAATTAACCATTGGGGATAGCACCCACTGA  
AGCAAGAAGGAGAGTGGTGGAAAGAGAAAAAGAGCAGTGGGAGTAGGAGCTATGTTCTTGGGTTCTTGGGA  
GCAGCAGGAAGCACTATGGGCGCGGCGTCAATAACGCTGACGGTACAGGCCAGACAATTGTTGTCTGGTATAG  
TGCAACAGCAAAGCAATTTGCTGAGGGCTATAGAGGCGCAACAGCATCTGTTGCAACTCACAGTCTGGGGCAT  
T

>KJ541839..4

TTCTATTGTAATACATCAAACTGTTTAAATGGTACATACATTCCTAATGGTACAGGAAGTTACTTAAGCAGTA  
ATTCAAGCTCAAACATCACAATTCATGCAGAATAAAGCAAATTATAAACATGTGGCAGGAGGTAGGACGAGC  
AATATATGCCCCCTCCCATTCGAGGAAACATAACATGTAGATCAAATATCACAGGAATAATATTGACACGTGAT  
GGAGGAAAAATCCAAAATCAAAATGAGACAGACAATACAACAGAAGACTATTCTAGCGTGGAAGGAATGAAGG  
ACAATTGGAGAAGTGAATTATATAAATATAAAGTGGTAGAAATTCAGCCATTGGGAATAGCACCCACTGGAGC  
AAAAAGGAGAGTGGTGGAGAGAGAAAAAGGGATGTGACACTAGGAGCTTTGTTCTTGGGTTCTTGGGAGCG  
GCAGGAAGCACTATGGGCGCGGCGTCAATAACGCTGACGGTACAGGCCAGACAATTGTTGTCTGGTATAGTGC  
GACAGCAAAGCAATTTGCTGAGAGCTATAGAGGCGCAACAGCATCTGTTGCAACTCACAGTCTGGGGCATT

>KJ541841..3

TTCTATTGTAATACATCAAACTGTTTAAATGGTACATACATGCTTAATGGTACAGGAAGTTATTTAATCAGTA  
ATTCAAGCTCAAACATCACAATTCATGCAGAATAAAGCAAATTATAAACATGTGGCAGGAGGTAGGACGAGC  
AATATATGCCCCCTCCCATTCGAGGAAACATAACATGTAGATCAAATATCACAGGACTACTATTGACACGTGAT  
GGAGGACAATCCAAAATCAAATTAGACAGTCAATCCACAGAGATATTTAGACCTGGAGGAGGAGATATGAAGG  
ACAATTGGAGAAGTGAATTATATAAATATAAAGTGGTAGAAATTCAGCCATTGGGAATAGCACCCACTGGAGC  
AAAAAGGAGAGTGGTGGAGAGAGAAAAAGGGATGTGACACTAGGAGCTTTGTTCTTGGGTTCTTGGGAGCG  
GCAGGAAGCACTATGGGCGCGGCGTCAATAACGCTGACGGTACAGGCCAGACAATTGTTGTCTGGTATAGTGC  
AACAGCAAAGCAATTTGCTGAGAGCTATAGAGGCGCAACAGCATCTGTTGCAACTCACAGTCTGGGGCATT

>KJ541848..1

TTCTATTGCAACACATCAAACTGTTTAAATAGTACATACATGCCTAAACATGCAAAGTGCCATACAATCACAA  
AGGCACACGCAATCATCACAATTCATGCAGAATAAAACAAATTATAAATATGTGGCAGGAGGTAGGACGAGC  
AATGTATGCTCCTCCCATTAAGGAAAAATAACATGTAATTCAGTATCACAGGACTGCTATTGACACGTGAC  
GGAAGGGAAAAACAAAAGAATTCAAAGGGGGGTGATACAGAAACTTTTACAGCCTGAAGGAGGAAATATGAAAG  
ACAATTGGAGAAGTGAATTATATAAATATAAAGTGGTAGAAATTAAGCCATTGGGAATAGCACCCACTGGAGC  
AAAAAGGAGAGTGGTGGAGAGAGAAAAAGAGCAGTGGGAGCTCTGTTCTTGGGTTCTTGGGAGCA  
GCAGGAAGCACTATGGGCGCAGCGTCAATGACGCTGACGGTACAGGCCAGACAATTGTTGTCTGGTATAGTGC  
AGCAGCAAAACAATTTGCTGAGAGCTATAGAGGCGCAACATCAGTTGTTGCAACTCACGGTCTGGGGCATT

>MF373132..1

TTCTATTGCAATACATCAAACTGTTTAAATAGTAGTAAAACTAATATAACAGCAAAATGAAAATGGAACCATCA  
CACTCCCATGCAGAATAAAACCAATTGAAACCTTGGGGCAGGGGGTAGGAAAAGCAATTTATTGCCCCCTCCAT  
TAAAGGAAAAATTACCTGGTACTTCCAAATTCACAGGCTTACCCTGGCCCCGAGTAGGGGTGAAAAAATAGGA  
ACCTATGGAAATTTGGCAAAAAGAGAATTTTCCCCGGGGGGGGGAGATATGAGTGACAATTGGAGAAGTGAAT  
TATATAAATATAAAGTGGTAGAAATTAATCCATTAGGAGTAGCACCCACTAAGGCAAAAAGGAGAGTGGTGGGA  
GAGAGAAAAAGAGCAGTGGGAATAGGAGCTGTGTTCTTGGGTTCTTGGAGTGACAGCAGGAAGCACTATGGGC  
GCAGCGTCAATAACGCTGACGGTACAAGCCAGACAATTGTTGTCTGGTATAGTGCAACAGCAAAACAATTTGC  
TGAGAGCTATAGAGGCGCAACACATATGTTGAAACTCACAGTCTGGGGCATT

>MF373137..1

TTCTATTGTAATACATCAGGCTTGTTTAAATACATCAGGCCCATTTAATAATAGTGAAACAAATAACACAGCAA  
ATGTAAACATCACACTCCCATGTCAGAATAAAACAAATTATAAACATGTGGCAGGGGGTAGGACAAGCAATGTA  
TGCCCCCTCCTGTTGCAGGAAACATAACATGTAGATCAAATATCACAGGAATACTACTGACACGTGATGGAGGA  
ATAAATACCACAATAATAACACATACGAATATTTCAGGCCTACAAGAAGAGACAATAGGGACAATTGGAGAA  
GTGAATTATATAAATATAAAGTAGTAGAAATTTCAGCCATTAGGAGTAGCACCCACTGAGGCAAGAAGGAGAGT  
GGTGGAGAGAGAAAAAAGAGCAGTGGGAATAGGAGCTGTGTTCCCTTGGGTTCTTGGGAGCAGCAGGAAGCACT  
ATGGGCGCAGCATCCATAACGCTGACGGTACAGGCCAGACAATTATTGTCTGGTATAGTGCAACAGCAGAACAA  
ATCTGCTGCGGGCTATAGAGGCGCAACAGCATATGTTGCAACTCACAGTCTGGGGCATT

>MF373139..3

TTCTATTGCAATACATCGGGCCTGTTTAGTATAAAATTATACAGAAAATAATACAGATAATATTCAGAGTATGG  
ACATCACACTCCCCTGCCCCGATCAGACAAATCATAATCATGTGGCAGGGGGCTAGAGGTAGCAATATCTACCCC  
TCCCCCTAACGGTACAGTATCATGTACTTCTAATTTCACTGGCGTAGTCCTGCTACGTGCTGGAGGGCGTCAT  
CGGGGAAATGAAAGTGGGACAGAGACATTTCAGACCTGCAGGAGGAGATATGAAGGACAATTGGAGAAGTGAAT  
TATATAAATATAAGGTAGTAGAAATTAAGCCATTAGGAGTAGCACCCACTAAGGCAAAAAGGAGAGTGGTGGGA  
GAGAGAAAAAAGAGCAGTGGGACTAGGAGCTGTGTTCCCTTGGGTTCTTGGGAGCGGCAGGAAGCACTATGGGC  
GCAGCATCAATAACGCTGACGGTACAGGCCAGACAATTATTGTCTGGTATAGTGCAACAGCAAAACAATTTGC  
TGAGGGCTATAGAGGCGCAACAGCATATGTTGCAACTCACAGTCTGGGGCATT

>KP411839..2

TTCTACTGCAATACATCAAAGCTGTTTAAATAGTACATACCCGCCTAACAGTACTGATACGTACATGAACAGTG  
CTAATACTTCAAACATCATACTTCAATGCAGAATAAAACAAATCATAAACATGTGGCAGGGGGTAGGACAAGC  
AATGTATGCCCCCTCCTATTGCAGGGAACATAACATGTGAATCAAATATCACAGGACTGCTGTTAACACGTGAT  
GGAGGAAACAATCAAACAGAGGAGGAGACATTTACACCTGGAGGAGGAGATATGAGAGACAATTGGAGAAGTG  
AATTATATAAATACAAAGTGGTAGAAATTAAGCCATTAGGAATAGCACCCACCAAGGCAAAAAGGAGAGTGGT  
GGAGAGAGAAAAAAGAGCAGTGGGAATAGGAGCTGTGTTCCCTTGGGTTCTTGGGAGCAGCAGGAAGCACTATG  
GGCGCAGCATCAATAACGCTGACGGTACAGGCCAGACAATTGTTGTCTGGTATAGTGCAACAGCAAAAGCAATC  
TGCTGAGGGCTATAGAGGCGCAACAGCATATGTTGCAACTCACAGTCTGGGGCATT

>MF373148..1

TTCTATTGCAATACATCAGAACTGTTTAAACGGTACATACAGCAACGGTACATACACGCCTAATAATAATGGGA  
GTGACTCAAATTTGACCATCACCATCCCGTGCAGAATAAAACAAGTTGTAAATCTGTGGCAGGGAGTAGGACA  
AGCAATGGATGCCCCCTCCCATTCAGGAGCATATCGTGGGGATCAATATCCGAGGACTACTATTGCCCCGTGGA  
GGAGGACCGAACCCAGTACCGCGGAGATATTTCAGACCTGGAGGAGGAGATATGAGGGACAATTGGAGAAGTG  
AATTATATAAATATAAAGTGGTGGAAAGTTAACCATTAGGAATAGCACCCACTAGAGCAAAAAGGAGAGTGGT  
GGAGAGAGAAAAAAGAGCAGTGGGAATAGGAGCTGTGTTCCCTTGGGTTCTTAGGAGCAGCAGGAAGCACTATG  
GGCGCAGCATCAGTAACGCTGACGGTACAAGCCAGGCAATTGTTGTCTGGTATAGTGCAACAGCAAAAGCAATT  
TGCTGAGGGCTATAGAGGCGCAACAGCATATGTTGCAACTCACAGTCTGGGGCATT

>KP411836..5

TTCTATTGCAATACATCAAACCTGTTTAAATAGTACATACAATAGTACTAATGATACCATCACACTCCAATGTA  
AGATAAAACAAATCATAAACATGTGGCAGGGGGTAGGACGAGCAGCAGTATTCTCCTCCCATCGCAGGCAAG  
ACATCACATCTTATACTACTATTACAGCAGTACTGCTGACGACCTGATGGAGGACGATGAACTAATAATACT  
GTAGAGACATTTCAGACCTGGAGGAGGGGATATGAGAGACAATTGGAGAAGTGAATTGTATAAATATAAAGTGG  
TAGAAGTTAAACATTAGGAATAGCTCCATCTCATTCAAAAAGGAGAGTGGTGCAGAGAGAAAAAAGAGCAGT  
GGGCTTGGGAGCTATGTTCCCTTGGGTTCTTGGGAGCCGCAGGAAGCACTATGGGCGTGGCGTCATTGACGCTG  
ACGGTACAGGCCAGACAATTATTGTCTGGTATAGTGCAGCAGCAAGGCAACTTGCTGAGGGCTATAGAGGCGC  
AACAGCATCTGTTGCAACTCACAGTCTGGGGCATT

>MF373159..1

TTCTATTGCAATACATCAGGGCTGTTTCGAATTAATATTTCTGATGCACATAATGATGCACATAATGACACAA  
ATGTAAACATCACAATTCATGCAGAATAAAGCAAATTATAAATATGTGGCAGGGGGTAGGACGAGCAATGTA  
TGCTCCTCCCATTAAGGAATAATACAATGTAGATCAAATATCACAGGACTGCTACTGACACGTGATGGTGGT  
AATGGTGGTAATGAAACAAATTCAGAGACGTTTAGACCTTTAGGAGGAGATATGAAGGACAATTGGAGAAGTG  
AATTATATAAATACAAAGTAGTAGAAATTCAACCAGTAGGAATAGCACCCACTAGAGCAAGAAGGAGAGTGGT  
GGAGAGAGAAAAAAGAGCAGCACTAGGAGCTATGTTCCCTTGGGTTCTTAGGAGCAGCCGGAAGCACTATGGGC  
GCAGCATCAATAACGCTGACGGTACAGGCCAGACAATTATTGTCTGGTATAGTGCAACAGCAAAACAATTGC  
TGAGAGCTATAGAGGCGCAACAGCATATGTTGCAACTCACGGTCTGGGGCATT

>MF373175..3

TTTTATTGCAATACATCCAACCTGTTTAAATAATAGTATGATAAATCCAAATGTTACCATCACACTCCCATGCA  
GAATAAAACAGATTATAAACATGTGGCAGCAGGTAGGAAAGGCAATGTATGCCCCCTCCCATTCAGGAAGAAT  
AACATGTAACCTCAAATATCACAGGACTGCTACTGACACGTGATGGGGGAACAAATCAGACAAACAGCACAGAG  
ATATTTCAGACCTGGAGGAGGAGACATGAGAGACAATTGGAGAAGTGAATTATATAAATATAAAGTGGTAGAAA  
TTCAGCCATTAGGAGTAGCACCCACTAGGGCAAAAAGGAGAGTAGTGGGCAGAGAGAAAAGAGCAGTGGGACT

AGGAGCTATGTTCTTGGGTTCTTGAGTGCAGCAGGAAGCACTATGGGCGCAGCATCACTAACGCTGACGGTA  
CAGGCCAGACAATTGTTGTCTGGTATAGTGCAACAGCAAAGAAATTTGCTGAGGGCTATAGAGGTGCATCAGC  
ATATGTTGCAACTCACGGTCTGGGGCATT

>MF373179..4

GTCTATTGCGATACATCAGACCTGCTCACTACATCAGTTAGTGTTCAAAAAGTACTAGTTATCACTAGTACAG  
ATGCCATCATACTCCGCATGCCAAATACAACACATTATAAGCATGTGGCAGTGAGTACGACGAGCATTGTATG  
CCCCCTCCTATGAAAGGCATGCGTAGCAGTACATGCACTATCACAGGTACTACTGACCTCAGGGATGGAAGG  
ACTGACTATCACAGCATGTACATAGTCAGACCTGGAGGAGGAGATATGAGGGACAATTGGAGAAGTGAATTAT  
ATAAATATAAAGTGGTAGAAGTTAAGCCAATAGGAATAGCACCCACTGGGGCAAAAAGGAGAGTGGTGGAGAG  
AGAAAAAGAGCGGCACTAGGAGCTGTGTTCTTGGGTTCTTGGGAGCAGCCGGAAGCACTATGGGCGCAGCA  
TCAGTAACGCTGACGGTACAGGCCAGACAATTATTGTCTGGGTATAGTGCAACAGCAGAACAATTTGCTGAGGG  
CTATAGAGGCGCAACAGCATATGTTGCAACTCACGGTCTGGGGCATT

>MF373192..2

TTCTATTGCAATACAACAGCCTTGTTTCATAATAATATTACAAATTCAACCATCATGCTCCCATGCAGAATAA  
AACAAATTTATAAACCTGTGGCAGGGGGTAGGACGAGCAATGTATGCTCCTCCCATTAAGGACTAATAACATG  
TAATTCAGTATCACAGGAATACTACTGACACGAGATGGAGGAGATGTCAATCAACAGCAAATGAAACAGAG  
ACATTCAGACCTGGAGGAGGAGACATGAGGGACAATTGGAGAAGTGAATTATATAAATACAAAGTGGTAGAAA  
TTAAACCATTAGGAATAGCACCTACCCCGGCAAAAAGGAGAGTGGTGGAGAGAGAAAAAGAGCAGCACTAGG  
AGTTATGTTCTTGGGTTCTTGGGAGCAGCTGGAAGCACTATGGGCGCAGCATCATTAACGCTGACGGTACAG  
GCCAGACAATTATTGTCTAGGTATAGTGCAACAGCAAACAATTTGCTGAGAGCTATAGAGGCGCAACAGCATA  
TGTTGCAACTCACAGTCTGGGGCATT

>KP411835..1

TTCTATTGCGATACATCAAACCTGTTTAATGAGACAAAATTTAATAGTAGTACAAATGAAAACATCACACTCC  
GATGCAGAATAAAACAAATTATAAACATGTGGCAGAAGGTAGGACGGGCAATGTATGCCCCCTCCCATTCAGG  
AACAAATAAATGTGACTCAAATATCACAGGATTACTACTAACACGAGATGGAGGCAAAATGAAAATGAAACA  
CAAGAGATATTCAGACCTGCAGGAGGAGATATGAGGGACAATTGGAGAAGTGAATTATATAAATATAAAGTGG  
TAGAAATTAAGCCATTAGGAATAGCACCCACTGCTGCAAAAAGGAGAGTGGTGGGGAGAGAGAAAAGAGCAGC  
ACTAGGAGCTATGTTCTTGGGTTCTTGGGAGCAGCAGGAAGCACTATGGGCGCAGCATCAATAACGCTGACG  
GTACAGGCCAGACAATTATTGTCTGGTATAGTGCAACAGCAAAGCAATTTGCTGAGAGCTATAGAGGCGCAAC  
AACATATGTTGCAACTCACAGTCTGGGGCATT

>MF373198..2

TTCTATTGCAATACATCAGGCCTGTTTAATGAGACAAATGGTACATATGCTACAAATGGTACAACCATCACAC  
TTCCATGCAGAATAAAGCAAATTATAAGGATGTGGCAGGGGGTAGGACAAGCAATGTATGCCCCCTCCCATTCG  
AGGAGTAATATCATGTAATTCAAATATCACAGGACTGCTACTAACCCGTGATGGAGGTAGTGGTCACAATAAT  
AACACAGAGATATTCAGACCTGAAGGAGGAGATATGAGGGATAATTGGAGAAGTGAATTATATAAATACAAAG  
TGGTAGAAATTAAGCCATTAGGGATAGCACCCACTAAGGCAAGAAGGATGGTGGTGCAGAGAGAAAAAGAGC  
AGCACTGGGAGCTGTATTCTTGGGTTCTTGGGAGCAGCTGGAAGCACTATGGGCGCAGCATCAATAACGCTG  
ACGGTACAGGCCAGACAATTATTGTCTGGCATAGTGCAACAGCAAAGCAATTTGCTGAAGGCTATAGAGGCGC  
ATCAGCATATGCTGCAACTCACAGTTTGGGGCATT

>HM215318..1

TTTTATTGCAATACATCCAACCTGTTTAATAGTACATACATAAACAGCACAAACATCACATACATACAATCC  
CATGCAGAATAAAACAAATAATAAACATGTGGCAGAGGGTAGGACAAGCAATGTATGCCCCCTCCCATTCGAGG  
AAACATAACATGTAACCTCAAGTATCACAGGACTAATATTGACACGGGATGGAGGAAAAACAACACAAATGAA  
ACATTCAGACCTGGAGGAGGAGATATGAGGGACAATTGGAGAAGTGAATTATATAAATATAAAGTGGTAGAAA  
TTCAACCATTTGGGAATAGCACCCACCAAGGCAAAAAGGAGAGTGGTGGAGAGAGAAAAAGAGCAGTTGGACT  
AGGAGCTTTGTTCTTGGGTTCTTGGGAGCAGCAGGAAGCACTATGGGCGCGGCGGCAATAACGCTGACGGCA  
CAGGCCAGACAAGTGTTGTCTGGCATAGTGCAACAGCAGAGCAATTTGCTGAGAGCTATAGAGGCGCAACAGC  
ATATGTTGCAACTCACGGTCTGGGGCATT

>KX907415..1

TTCTATTGCAATACATCAGGCTTGTTTAATGAAACAGGCTTGTTTAATGAAACACACAATAGTACCATGAATG  
ATAACATCACACTCCCATGCAGAATAAAACAAATTATAAACATGTGGCAGGAGGTAGGACGAGCAATCTATGC  
CCCTCCCATTCGAGGAAACATAGCCTGTAACCTCAAATATCACAGGACTACTATTGACACGTGATGGAGGCAGC  
ATTAATGGAAGCGAGGATGAGAATAACACAGAAATATTGAGACCTGGAGGAGGAAACATGAAGGACAATTGGA  
GAAGTGAATTATATAAATATAAAGTGGTAGAAATTAAGCCATTGGGAATAGCACCCACTGCGGCAAAAAGGAG  
AGTGGTGGAGAGAGAAAAAGAGAGCAGTGGGACTAGGAGCTGTGTTCTTGGGTTCTTGGGAGCAGCTGGAAGC  
ACTATGGGCGCGGCGTCAATAACGCTGACGGCACAAGCCAGACAAGTGTTGTCTGGTATAGTGCAACAGCAAA  
GCAATTTGCTGAGGGCTATAGAGGCGCAACAGCATATGTTGCAACTCACGGTTTGGGGCATC

>KX907398..2

TTCTATTGCAATACATCAAAGCTGTTTGATAGTAGTCTGTTTAATAGTACTGAAAGTAATAGTACTGGTAATA  
ATTTACTGACATCAAACCTCCCATGCAGAATAAAACAAATTATAAACATGTGGCAGGGGGTAGGACGAGCAAT

ATATGCCCCCTCCCATTTGCAGGAAACATAACATGTAAATCAAATATCACAGGAATATTATTAACACGTGATGGA  
GGCTATGACAACGCTACAAATGGCACGGAGACCTTCAGACCTGGAGGAGGAGATATGAGGGACAATTGGAGAA  
GTGAATTATATAAATATAAAGTGGTAGAAATTAAGCCATTGGGAATAGCACCCACTAAGGCAAAAAGGAGAGT  
GGTGGAGAGAGAAAAAAGAGCAGCGGGAATAGGAGCTGTGTTCCCTTGGGTTCTTGGGAGCTGCAGGAAGCACT  
ATGGGCGCGGCGTCAATAACGCTGACGGTACAAGCCAGACAATTGTTGTCTGGTATAGTGCAACAGCAAAGTA  
ATTTGCTGAAGGCTATAGAGGCGCAACAACATCTGTTGCAACTCACGGTTTGGGGCATT

>KX907425..1

TTCTATTGCAATACAGTAGGCCTGTTTAATAAAACATACAATAGTACCATGAATGGTACCATCACACTCCCAT  
GCAGAATAAAACAAATTATAAACATGTGGCAGGAGGTAGGACGAGCAATCTATGCCCCCTCCCATTTGAAGGAAA  
CATAACATGTAACCTCAAGTATCACAGGACTACTATTGACACGTGATGGAGGCAACACTAATGAAAGTGAAGAG  
ATATTCAGACCTGGAGGAGGAAACATGAGGGACAATTGGAGAAGTGAATTATATAAAATATAAAGTGGTAGAAA  
TTAAGCCATTGGGAGTAGCACCCACTGAGGCAAAAAGGAGAGTGGTGGAGAGAGAAAAAGAGAGCAGTAGGACT  
AGGAGCTGTGTTCCCTTGGGTTCTTGGGAGCAGCTGGAAGCACTATGGGCGCGGCGTCAATAACGCTGACGGCA  
CAAGCCAGACAATTGTTGTCTGGTATAGTGCAACAGCAAAGCAATTTGCTGAGGGCTATAGAGGCGCAACAAC  
ATATGTTGCAACTCACGGTTTGGGGCATT

>KX907428..1

TTCTATTGCAACACATCAGGCCTGTTTAATAAAACATACAATGATACCATGAATAGTACCATCACACTCCCAT  
GTAGGATAAAACAAATTGTAAACATGTGGCAGGAGGTAGGACGAGCAATCTATGCCCCCTCCTATTGCAGGAAA  
CATAACATGTAACCTCAAATATCACAGGACTACTACTGACACGTGATGGAGGCACGAATGTGACAAATGGCACA  
CAGATTTTCAGACCTGGGGGAGGAGACATGAGGGACAATTGGAGAAGTGAATTATATAAAATATAAAGTGGTAG  
AAATTAAACCATTGGGAATAGCACCCACTACGGCACAAAGGAGAGTGGTGGCGAGAGAAAAAAGAGCAGTGGG  
ACTAGGAGCTGTGTTCCCTTGGGTTCTTGGGAGCAGCTGGAAGCACTATGGGCGCGGCGTCAATAACGCTGACG  
GCACAAGCCAGACAATTGCTGTCTGGTATAGTGCAACAGCAAAGCAATTTGCTGAGAGCTATAGAGGCGCAAC  
AACATATGTTGCAACTCACGGTTTGGGGCATC

>HQ615976..2

TTCTATTGCAATACATCAAAAAATTTTAATAGTATATACCAGGAGAATTACACTAACAGTGCTAATAGTACAG  
AAAACAACGGCACACTCACACTCCCATGCAGAATAAAACAAATTGTAAACATGTGGCAGGGGGTAGGACGGGC  
AGTGTATGCCCCCTCCCATTTCAAGGGAACATAACATGTAAATCAAATATCACAGGACTGCTACTGACACGTGAT  
GGAGGAATAAATGAGACAGATGAAACATTCAGGCCTATAGGGGGAATATGAGGGACAATTGGAGAAGTGAAT  
TATATAAATATAAGGTGGTAGAAATTAACCATTAGGAATAGCACCCACTAAGGCAAAAAGGAGAGTGGTGGGA  
GAGAGAAAAAAGAGCGGTAGGAATAGGAGCTGTGCTCTTTGGGTTCTTGGGAGCAGCAGGAAGCACTATGGGC  
GCAGCGTCAATAACGCTGACGGTACAAGCCAGACAATTATTGTCTGGTATAGTGCAACAGCAAACAATTTGC  
TGAGGGCTATAGAGGCGCAACAGCATATGTTGCAACTCACGGTCTGGGGCATT

>KF526226..1

TTCTATTGCCATACATCAACCCTGTTTAATAATAATATTACAAATTCAACCAATTCAACCATCACACTCCCAT  
GCAGGATAAAACAAATTATAAACATGTGGCAGGAGGTAGGACGAGCAATGTATGCCCCGCCCATTCAAGGAAT  
AATAAGATGTAGATCAAATATCACAGGACTACTACTAACACGTGATGGAGGCACAGGGACAAATGACACAAAC  
ACAACCGAGACATTTAGACCTGGAGGAGGAGATATGAGGGACAATTGGAGAAGTGAATTATATAAATATAAAG  
TGGTAGAAATTAACCATTAGGAATAGCACCCACTAAGGCAAAAAGGAGAGTGGTGGAGAGAGAAAAAAGAGC  
AGCACTAGGAGCTTTGTTCCCTTGGGTTCTTGGGAGCAGCAGGAAGCACTATGGGCGCAGCATCAATAACGCTG  
ACGGTACAGGCCAGACAATTATTGTCGGGTATAGTGCAACAGCAAAGCAATTTGCTGAGAGCTATAGAAGCGC  
AACAGCATATGTTGCAACTCACGGTCTGGGGCATT

>AY463229..2

TTCTATTGCTATACATCAGAATTGTTTAATAACACATACATACCTACATACATGAATAATAAAACAGATGATA  
ATTCTACCATCACACTTCATGCAGAATAAAACAAATTATAAACATGTGGCAGGAGGTAGGACGAGCAATGTA  
TGCCCCCTCCCATTTGCAGGAAACATAACATGTAACCTCAAGTATCACAGGACTACTATTGACACGTGATGGAGGC  
AATAATAATAATGATACTGAAATATTTCAGACCTGGAGGAGGAAATATGAAGGATAATTGGAGAAGTGAATTAT  
ATAAATATAAAGTGGTAGAAATTCAGCCACTGGGAGTAGCACCCACTGGGGCAAAAAGGAGAGTGGTGGAGAG  
AGAAAAAAGAGCAGTGGGAATAGGAGCTGTGTTCCCTTGGGTTCTTGGGAGCAGCAGGAAGCACTATGGGCGCG  
GCGTCAATAACGCTGACGGTACAGGCCAGACAACCTGCTGTCTGGTATAGTGCAACAGCAAAGCAATTTGCTGA  
GAGCTATAGAGGCGCAACAACACGTGTTGCAACTCACAGTCTGGGGCATT

>JX845587..1

TTCTATTGCAATACACAACCACTGTTTTCAAACAAAAGTGTTCACCAACAAAACAATCATACTCCTATGCA  
GGATAAAACAAATTATAAACATGTGGCAGGGGGTAGGACGAGCAATGTATGCCCCCTCCCATTTGCAGGAAACAT  
AACATGTAACCTCAAATATCACAGGACTACTATTGACACGTGATGGAGGAAAAAACAACGCAACAGGGGGCAAC  
GAAACAGAGATATTTCAGACCTGGAGGAGGAAATATGAAGGACAATTGGAGAAGTGAATTATACAAATATAAAG  
TGGTAGAAATTAAGCCATTAGGAGTAGCACCCACTAAGGCACAAAGGAGAGTGGTGCAGAGAGAAAAAAGAGC  
AGTGGGAATAGGAGCTGTGCTCCTTGGGTTCTTGGGAGCAGCAGGAAGCACTATGGGCGCGGCGTCAATAACG  
CTGACGGTACAGGCCAGACAGCTGTTGTCTGGTATAGTGCAAGCAGCAAAGCAATTTGCTGAGAGCTATAGAGG  
CGCAACATCATATGTTGCAACTCACGGTCTGGGGCATT

>AY463235..3

TTCTATTGCAATACAACGCAACTGTTTAAATAGTACATACTATAATAGTACTAATAGTACAGAGGAGACAGGAA  
ATTCAAACATCACACTTCAATGCAGAATAAAACAAATTATAAACATGTGGCAAGGGGTAGGACAAGCAATGTA  
TGCCCCCTCCCATTCAGGAATAATAACATGTAGATCAAACATCACAGGAATACTACTGGCACGTGATGGAGGA  
GCCTCAAATAGCACAGAAAACCTCAACTAACACAGAGATATTCAGGCCTGGAGGAGGAGATATGAGGGACAATT  
GGAGAAATGAATTATATAAAATATAAAGTGGTAGAAGTTAAACCATTAGGAGTAGCACCTACTAGAGCAAAAAG  
GAGAGTGGTGGAGAGAGAAAAAGAGCAGTGGGAATAGGAGCTGTGTTCTTGGGTCTTGGGAGCCGCAGGG  
AGCACTATGGGCGCAGCATCAATAACGCTGACGGTACAGGCCAGACAATTATTGTCTGGGTATAGTGCAACAGC  
AAAGCAATTTGCTGAGGGCTATAGAGGCGCAACAGCATATGTTGCAACTCACGGTCTGGGGCATT

>DQ369995..2

TTCTATTGCGACACATCACAACCTATTTAATAAGACATACAATGTTACAGATGATTCAAACACCACAGACACAA  
ACAACACAATTCAATGCAGAATAAAGCAGATTATAAACATGTGGCAGGAAGTAGGACGAGCAATGTATGCCCC  
TCCCATCGCAGGAAGCATAACATGTACCTCAAATATTACAGGACTACTATTGACACGTGATGGAGGGGGAGGC  
ACAAATAGCACAAAGTAATACGGAAGAGATATTCAGACCCGGAGGAGGAAATATGAAGGATAATTGGAGAAGTG  
AATTATATAAAATATAAAGTGGTAGAAGTTCAGCCATTAGGAATAGCTCCCACTAAAAGCAAAAAGGAGAGTGGT  
GGAGAGAGAAAAAGAGCAATAGGAATAGGAGCTGTGTTCTTGGGTCTTGGGAGCAGCAGGAAGCACTATG  
GGCGCAGCGTCAATAACGCTGACGGTACAGGCCAGACAACCTATTGTCTGGTATAGTGCAACAGCAAAGCAACT  
TGCTGAGGGCTATAGAGGCGCAACAGCATATGTTGCAACTCACGGTCTGGGGCATC

>DQ351223..1

TTCTATTGCAATACAACAGGACTGTTTGCTAGTAAAAATGATTCAAACACAACCATCAGTACAAACGCAACCA  
TCACACTCCCATGTAGAATAAAACAAATTATAAACATGTGGCAGGGGGTAGGACGAGCGATGTATGCCCCCTCC  
CATTGCAGGGAACATAACATGTAGATCAAATATCACAGGATTGTTATTGCTACGTGATGGGGGAGACAATCAG  
ACCACAGAGACATTCAGGCCTGGAGGAGGAAATATGAAGGACAACCTGGAGAAGTGAATTATATAAAATATAAAG  
TAGTAGAAATTAAGCCATTGGGAATAGCACCCACGAAGGCAAAAAGGAGAGTGGTGGAGAGAGAAAAAGAGC  
AGCGGGAATAGGAGCGATGATCTTTGGGTCTTGGGAGCAGCAGGAAGCACTATGGGCGCGCGCTCAATAACG  
CTGACGGTACAGGCCAGACAGCTGTTGTCTGGTATAGTGACAGCAGCAAAGCAATTTGCTGAGAGCTATAGAGG  
CGCAACAGCATATGTTGCAACTCACGGTCTGGGGCATT

>DQ396388..1

TTCTATTGCAATACATCAGGACTGTTTAAATAGTACATACATGCCTAATGGTACAGAAAGCAATTCAACCATCA  
CAAAGTCAACCATCACACTCCTATGCAGAATAAAACAAATTATAAACATGTGGCAGCAAGTAGGAAGAGCAAT  
GTATGCCCCCTCCCATTCAGGAAACATAACATGTACATCAAACATCACAGGAATATTATTAGTACGTGATGGA  
GGCTACAGTAACAATACTACAGAGATATTCAGACCTGGAGGAGGAAATATGAAGGACAATTGGAGAAGTGAAT  
TATATAAATACAAAGTGGTAGAAGTTAAGCCATTGGGAATAGCACCCACTAAGGCAAAAAGGAGAGTGGTGGGA  
GAGAGAAAAAGAGCAGCACTAGGAGCTATGTTCTTGGGTCTTGGGAGCAGCAGGAAGCACTATGGGCGCG  
GCGTCAATAACGCTGACGGTACAGGCCAGACAATTGTTGTCTGGTATAGTGCAACAGCAAAGCAATTTGCTGA  
GGGCTATAGAGGCGCAACAGCATATGTTGCAACTCACGGTCTGGGGCATT

>DQ351228..1

TTTTATTGCAACACATCAAAACTATTTAATGGTACATACGAGAATAGTACAGACAAGGAGTCAAACAGCACAA  
ATTCAATCATCACAATTCCATGCAGAATAAAACAAATTATAAACATGTGGCAGGAGGTGGGACGAGCAATGTA  
TAACCTTCCCATTCAGGAAACATAACATGTAAATCAAATATCACAGGACTACTATTAGTACGTGATGGAGAC  
AACAAATAGTACAGAAACATTCAGACCTCAAGGAGGAAATATGAAGGACAATTGGAGGAGTGAATTATATAAAT  
ATAAAGTGGTGGAAATTAAGCCATTGGGAATAGCACCCACTGAAGCAAAAAGGAGAGTGGTGGAGAGAGAAAA  
AAGAGCAGTAGGAATAGGAGCGGTACTCTTGGGTCTTGGGAGCAGCAGGAAGCACTATGGGCGCGCGCTCA  
ATAACGCTGACGGTACAGGCCAGACAACCTGTTGTCTGGTATAGTGCAACAGCAAAGCAATTTGCTGAGAGCTA  
TAGAGGCGCAACAGCATATGTTGCAACTCACAGTCTGGGGCATT

>DQ011175..1

TTCTATTGCAATACATCAAAACTATTTAATAGTACATACAATCCTGACCATAATAGTACAGGAAATATCACAG  
GGTCATCACAATTCCATGCAGAATAAAACAAATTATAAACATGTGGCAGGAGGTGGGACGAGCTATGTATGC  
TCTTCCCATTAAGGAAACATAACATGTAACTCAAGTATCACAGGACTACTATTAACACGTGATGGAGGCAAG  
TCAAATGACACAATAGAAAAACAAAATGAAACATTTAGACCTCAAGGAGGAAATATGAAGGACAATTGGAGAA  
GTGAATTATATAAATATAAGGTGGTACAAATTGAGCCATTGGGAATAGCACCCACTAAAGCAAAAAGGAGAGT  
GGTGGAGAGAGAAAAAGAGCAGTGGGAATAGGAGCTGTGTTCTTGGGTCTTGGGAGCAGCAGGAAGCACT  
ATGGGCGCGCGCTCAATGGCGCTGACGGTACAGGCCAGACAAGTGCTGTCTGGTATAGTGCAACAGCAAAGCA  
ATTTGCTGAGAGCTATAGAGGCGCAACAGCATATGTTGCAGCTCACGGTCTGGGGCATT

>AY901971..2

TTCTATTGCAATACATCAAGACTATTTAATAATACATTTAATTATACAGACACAACAGAACTTAACAGCACAG  
ACAGCACAGACTCAAACGAGACCATCACAATTCCATGCAGAATAAAACAAATTATAAACATGTGGCAGCAGGT  
AGGACGAGCAATGTATGCTCCTCCCATTCAGGGAACATAACATGTACATCAAATATCACAGGATTACTATTG  
GTACGTGATGGAGGCAAGGATAATACAGGTACAAATGAGACATTCAGACCTCAAGGAGGAAATATGAAGGACA  
ATTGGAGAAGTGAATTATACAAATATAAAGTGGTAGAAATTAACCATTGGGAATAGCACCTACTGGGGCAAA

AAGGAGAGTGGTGGAAAGGGAAAAAAGAGCAGCGCTAGGAGCTATGTTCTTGGGTTCCTTGGGAGCAGCAGGA  
AGCACTATGGGCGCAGCGTCAATAACGCTGACGGTACAGGCCAGACAACCTGTTGTCTGGTATAGTGCAACAGC  
AAAACAATTTGCTGAGAGCCATAGAGGCGCAACAGCATATGTTGCAACTCACAGTCTGGGGCATA

>DQ093597..1

TTCTATTGCAATACATCAAGACTATTTAATAGTACATACTGGGAAGGATCTAATAGTACAGGAGGTGACTCAA  
CCATCACAATTCATGCAGAATAAAACAAATTATAAACATGTGGCAGGAGGTAGGACGAGCAATGTATGCCCC  
TCCCATAGCAGGAACATAACATGTAACCTCAAGTATCACAGGATTACTATTAGTACGTGATGGAGGCCTATCC  
AAAAATAACACAAATCAAAATGAAACATTAGACCTGGAGGAGGAGATATGAAAGACAATTGGAGGAGTGAAT  
TATATAAATACAAAGTGGTAGAAATTAAGCCATTGGGAATAGCACCCACTAAAGCAAAAAGGAGAGTGGTGGA  
GAGAGAAAAAAGAGCAGTGGGAATAGGAGCTGTGCTCCTTGGGTTCCTTGGGAGCAGCAGGAAGCACTATGGGC  
GCAGCGTCAATAGCGCTGACGGCACAAGCCAGACAAGTGTGTCTGGTATAGTGCAACAGCAAAGTAATTTGC  
TGAGGGCTATAGAGGCGCAACAGCATATGTTGCAACTCACGGTCTGGGGCATT

>AY772692..1

TTCTATTGCAATACAACAAAACTGTTTAAATGAAAATGAAACAAGTAAGGCAAATGACACAATCATACTCCCAT  
GCAGAATTAACAAATCATAAACATGTGGCAGACGGTAGGACGAGCAATGTATGCTCCTCCCATTTGAAGGATA  
CATAAATTTGTACATCAAATATCACAGGAATACTATTGACACGTGATGGAGGAAAATAATAAAACAAATAACACA  
AAAGAGATATTCAGACCTGCAGGAGGAGATATGAGGAACAATTGGAGAAGTGAATTATACAAATATAAAGTAG  
TAGAAATTCAGCCATTGGGAATAGCACCCACTACTGCAAAAAGGAGAGTGGTGGAGAGAGAAAAAAGAGCAGC  
ACTAGGAGCTATATTCCTTGGGTTCCTTGGGAGCAGCAGGAAGCACTATGGGCGCGGCGGCAATAACGCTGACG  
GTACAGGCCAGACAACCTGTTGTCTGGTATAGTGCAACAGCAAAGCAATTTGCTGAGAGCTATAGAGGCGCAAC  
AGCATCTGTTGCAACTCACGGTCTGGGGCATT

>DQ164107..2

TTCTATTGCAATACATCGGCACTATTTTCATAGTCCTACATACAATGAGACAAAAGGTAATTCAACAACCATCA  
CACTTCCATGTAGAATAAAACAAATTATAAACATGTGGCAGGGGGTAGGACGAGCTATGTATGCTCCTCCTAT  
TGCAGGAGAAATAACATGTAACCTCAAGCATCACAGGACTACTATTGACACGTGATGGAGGAGAAGGAGAGAAT  
CACACAGAGATATTCAGGCCTGGAGGAGGAAATATGAAGGACAATTGGAGAAGTGAATTATATAAATATAAAG  
TGGTAGAAATTAAGCCATTGGGAGTAGCACCCACTAAGGCGGAAAGGAGAGTGGTGAAAAAAGAAAAAGAGC  
AGTGGGAATAGGAGCGTTGTTCTTGGGATCTTGGGAGCAGCAGGAAGCACTATGGGCGCGGCGTCAATAACG  
CTGACGGTACAGGCCAGACAACCTGTTGTCTGGTATAGTGCAACAGCAAATAAATTTGCTGAGGGCTATAGATG  
CGCAACAGCATATGTTGCAACTCACGGTCTGGGGCATT

>DQ093600..1

TTCTATTGCAATACAACAAAACTGTTTAAATGAAAGTGAAACACAGTTTGCGGCAAACAACAGTGCCAATAGTA  
ACATCACACTCCCATGCAAGATAAAACAAATTATAAACATGTGGCAGCAGGTGGGACGAGCAATGTATGCCCC  
TCCTGTTCAAGGAAACATAATATGTAACCTCTAGTATCACAGGACTACTATTGACACGTGATGGAGGAGTTAAC  
AATACTAATGAGACATTAGACCTGGAGGAGGAAATATGAAAGACAATTGGAGAAATGAATTATATAAATATA  
AAGTGGTAGAAATTAAGCCATTAGGAATAGCACCCACTAGGGCAAAGGAGAGTGGTGGAGAGAGAAAAAAG  
AGCAGTGGGACTAGGAGCTGTGATCTTTGGGTTCCTTGGGAGCAGCAGGAAGCACTATGGGCGCGGCGTCAATA  
ACGCTGACGGTACAGGCCAAACAACCTGTTGTCTGGTATAGTGCAACAGCAAAGCAATTTGCTGAGAGCTATAG  
AGGCGCAACAGCATATGTTGCAACTCACGGTCTGGGGCATT

>DQ011166..1

TTCTATTGTAATACAACAGATCTGTTTAAATAGTACATTTAATAGTGAATACAATAGTACAGACAGGCATAATA  
ATAATACCAATATCACACTCCAATGCAGGATAAAACAAAGTGATAAACATGTGGCAGCAGGTAGGACGAGCAAT  
GTATGCTCCTCCCATTTGCAGGAAACATAACATGTATCTCAAATATCACAGGATTACTATTGGTGCCTGATGGA  
GGAGGAAAAAATAACACAAATCAAACAGAGGAGATATTCAGACCTGGAGGAGGAGATATGAGGGACAATTGGA  
GAAGTGAATTATACAAATATAAGGTGGTAGAACTCAAACCAATTGGGAATAGCACCTACTGAGGCAAAGAGGAG  
AGTGGTGGAGAGAGAAAAAAGAGCAGTGGGAATAGGAGCTGTGTTCTTGGGTTCCTTGAGTGCAGCAGGAAGC  
ACTATGGGCGCGGCGTCAATGACGCTGACGGTACAGGCCAGACAATTGTTGTCTGGTATAGTGCAACAGCAAAA  
ACAATTTGCTGAAGGCCATAGAGGCGCAACAACATCTGTTGCAACTCACGGTCTGGGGCATT

>DQ011167..1

TTCTATTGCAATACATCAGGACTGTTTAAATAAGAGTAATACAGACATGACTAATAAAACAGAAGATAATTCAA  
CCATCACACTCCCATGTAGAATAAAACAGATTATAAACATGTGGCAGAACGTAGGACGAGCAATATATGCCCC  
TCCCGTTCAAGGAAACATAACATGTAACCTCAAGTATCACAGGACTACTATTGACACGTGATGGAGGTAACGGA  
AATGACACTAATGGCACAGAGATATTCAGACCTGGAGGAGGAGATATGAGGGACAATTGGAGAAGTGAATTAT  
ACAAATATAAAGTGGTAGAAATTAAGCCATTGGGAATAGCACCCACTAAGGCAAAGGAGAGTGGTGGAGAG  
AGAAAAAAGAGCAGTGGGAATAGGAGCTGTGTTCTTGGGTTCCTTGGGAGCAGCAGGAAGCACTATGGGCGCA  
GCATCAATAACGCTGACGGTACAGGCCAGACAATTGTTGTCTGGAATAGTGCAACAGCAAAGCAATTTGCTGA  
GGGCTATAGAGGCGCAACAGCATATGTTGCAACTCACGGTCTGGGGCATT

>DQ093590..1

TTCTATTGTAATACATCAAACTGTTTAAATAGTACATACAATCCTAATAATACAGAAAAGTAATTCAAGCGCAG  
TAATCACACTCCCATGCAAGATAAAGCAAATTATAAACATGTGGCAGCAGGTAGGGCGAGCAATGTATGCTCC

TCCCATTGCAGGAAACATAACATGTAACCTCAAATATCACAGGATTACTACTGGTGCGTGATGGGGGAACAATT  
GGCAATGGCACAAATAACGAGACATTACAGACCTGGAGGAGGAGATATGAGGGACAATTGGAGAAGTGAATTAT  
ACAAATATAAAGTGGTAGAAGTTAAACCATTGGGAATAGCACCTACTCAGGCAAAAAGGAGAGTGGTGGAGAG  
AGAAAAAGAGCAGTGGGACTAGGAGCTGTGTTCTTGGGTTCTTGGGAGCAGCAGGAAGTACTATGGGCGCG  
GCGTCAATAACGCTGACGGTACAGGCCAGACAACCTGTTGTCTGGCATAGTGCAACAGCAAAGCAATTTGCTGA  
GGGCCATAGAGGCGCAACAGCATATGTTGCAACTCACGGTCTGGGGCATT

>DQ011178..1

TTCTATTGCAACACATCAGGCCTGTTTAATACTACAGACCTGTTTAATAATACAGACCTGTCTAATAGTACAG  
GAAGTAATGAAAACATCACGCTTCCATGCAGAATAAAACAATTTGTGAATATGTGGCAGGAGGTAGGGCGAGC  
AATGTATGCCCCCTCCCATTCAGGAATCATAAATTGTATATCAAATATCACAGGAATACTATTGCTACGTGAT  
GGAGGAAACACGAGTGCTAATGGAACATTAACAGAGACATTACAGACCTGGAGGAGGAAATATGAAGGACAATT  
GGAGAAGTGAATTATATAAATAAAGGTGGTAGAAATTAGGCCATTAGGAGTAGCACCCACCAAGGCAAAAAAG  
GAGAGTGGTGGAGAGAGAAAAAGAGCAGTGGGAATAGGAGCTGTGCTCTTTGGGTTCTTGGGAGCAGCAGGA  
AGCACTATGGGCGCGGCGTCAATAACGCTGACGGTACAGGCCAGACAACCTGCTGTCTGGTATAGTGCAACAGC  
AAAGCAATTTGCTGAGGGCTATAGAGGCGCAACAGCATATGTTGCAACTCACGGTCTGGGGCATT

>AY901980..2

TTTTATTGTAATACATCACAACCTGTTTAATAGTACATACAATCCTGCATACAGTCATAATGAGACAGAAAGTA  
ATTC AACCATCATGCTTCCATGCAGAATAAAACAATTTATAAACATGTGGCAGGAGGTAGGAAAAGCAATGTA  
TGCCCCCTCCCATTCAGGAAACATAATATGTAACCTCAAGTATCACAGGACTACTATTGACACGTGATGGAGGA  
AACAAATAACCGAATACAGAAGAAATATTCAGACCTGGAGGAGGAAATATGAAGGACAATTGGAGAAATGAAT  
TATATAAATATAAAGTGGTAGAAATTCAGCCATTGGGAGTAGCACCCACCGAGGCAAAAAGGAGAGTGGTGGA  
GAGAGAAAAAGAGCAGTGGGACTGGGAGCTGTGTTCCCTGGGGTCTTGAGTTTGGCAGGAAGCACTATGGGC  
GCAGCGTCAATAACGCTGACGGTACAGGCCAGGCAACTGTTTGTCTGGTATAGTGCAACAGCAAAATAATTTGC  
TGAGGGCTATAGAGGCGCAACAGCATATGTTGCAACTCACAGTCTGGGGCATT

>AY878059..2

TTCTATTGCAATACAACAAAACTGTTTAACATAACCTATAATAACAGTAATTCAGACAACAATACCATCACGC  
TCCCCTGCAGAATCAAACAATTTATAAACCTGTGGCAGGAGGTAGGGCGAGCAATGTATGCCCCCTCCCATTTGA  
AGGAAAAATAACATGTCACTCAAGTATTACAGGACTACTATTGACACGTGATGGAGGAACGAGTGCAACAAT  
GATACACAAGCAAGTACAAACAATAACAGAGACATTACAGACCTGGAGGGGGAGATATGAAAAACAATTGGA  
GAAATGAATTATATAAATATAAAGTGGTAGAAATTAAGCCCTTAGGAGTAGCACCCACTGGAGCAAAAAGGAG  
AGTGGTGGAGAGAGAAAAAGAGCAGTAGGAATAGGAGCTGTACTCTTTGGGTTCTTGGGAGCAGCAGGAAGC  
ACTATGGGCGCGGCGTCAATAACGCTGACGGTACAGGCCAGACAATTGTTGTCTGGTATAGTGCAACAGCAAA  
GCAATTTGCTGAGAGCTATAGAGGTGCAACAGCATATGTTGCAACTCACGGTTTGGGGCATT

>DQ011174..1

TTCTATTGCAATACGACAGAACTGTTTAATGATAGTAGCTCAGAAAACATCACACTCCCATGCAGAATAAAAC  
AAATTGTAAACATGTGGCAGGGGGTAGGACGAGCAATGTATGCCCCCTCCCATTTGAAGGAAGCATAACATGTAA  
TTCAAGTATCACAGGACTACTATTAGAACGTGATGGAGGGGAAAGCTATAATAAAACAGAGATATTACAGGCCT  
GGAGGAGGAAATATGAAGGACAATTGGAGAAGTGAATTATATAAATATAAAGTGGTAGAAATTAAGCCATTAG  
GAGTAGCACCCACAAGGGCAAAAAGGAGAGTGGTGGAGAGAGAAAAAGAGCAGTGGGAATAGGAGCTGTGTT  
CCTTGGGTTCTTGGGGCAGCAGGAAGCACTATGGGCGCGGCGTCAATAACGCTGACGGTACAGGCCAGACAA  
CTGCTGTCTGGTATAGTGCAACAGCAAAGCAATTTGCTGAGAGCTATAGAGGCGCAACAGCATATGTTGCAAC  
TCACGGTCTGGGGCATT

>GQ999986..2

TTCTATTGCAATACATCAAACTTTTTAATAATACATACTATAATGGTACAGGAAATGCTAACAGTACGCATG  
AAAACATCACACTCCCATGCAGAATAAAACAATTTATAAGGATGTGGCAGAAGGTAGGACAAGCAATGTACGC  
CCCTCCCATTCAGGAAACATAACATGTACATCAAATATCACAGGACTACTACTGGTACGTGATGGAGGAGAG  
GCAATGGCACAAACAACATAGAGACATTACAGACCTGGAGGAGGAGATATGAGGGACAATTGGAGAAGTGAAT  
TATATAAATATAAAGTGGTAGAAATTCAGCCATTGGGAATAGCACCCACCAAGGCAAAAAGGAGAGTGGTGGA  
GAGAGAAAAAGAGCAGTGGGAATAGGAGCTATGTTCTTGGGTTCTTGGGAGCAGCAGGAAGCACTATGGGC  
GCGGCGTCAATGGCGCTGACGGTACAGTCCAGACAACCTGTTGTCTGGTATAGTGCAACAGCAAAGCAATTTGC  
TGAGGGCTATAGAGGCGCAACAGCATATGTTGCAACTCACGGTCTGGGGCATT

>GQ999987..2

TTCTACTGCAATACAACAGGACTGTTTAATCATAGTGGGGTAAACACCAAAGAACTGCTTAATAATAATACTG  
AGTCAAACACAACCATCACACTCCCATGCAAAATAAAACAATTTATAAACATGTGGCAGGAGGTAGGACGGGC  
AATGTATGCCCCCTCCCATTCAGGAAACATAACATGTAACTCAAGTATCACAGGACTACTATTAAACAGTGAT  
GGAGGTAAATAATAAAAAATAAAACAGAAAATGACACAAAAGATAGAGATATTACAGACCTGGAGGAGGAAATATGA  
AGGACAATTGGAGAAGTGAATTATATAAATATAAAGTGGTAGAAATTAACCACTGGGAGTAGCACCCACGGA  
GGCAAAAAGGAGAGTGGTGGAGAGAGAAAAAGAGCAGTAGGAATAGGAGCTGTACTCTTTGGGTTCTTGGGA  
GCAGCAGGAAGCACTATGGGCGCGGCGTCAATAACGCTGACGGTACAGGCCAGACAACCTATTGTCTGGTATAG

TGCAACAGCAAAGCAATTTGCTGAGAGCTATAGAGGCGCAACAGCATATGTTGCAACTCACAGTCTGGGGCAT  
T

>GQ999977..2

TTCTATTGCAATACATCAGGACTGTTTAATGGTACATACAATGGTACGGGAAATAATTCAACAGAAACCATCA  
CACTTCAATGCAGAATAAAACAAATTATAAATATGTGGCAGGAGGTAGGACGAGCAATGTATGCCCCCTCCCAT  
TGCAGGAAACATAACATGTAACCTCAAAGATCACAGGACTACTACTAGTACGTGATGGAGGCACATATGGAGAT  
AACAAAACAGAGACATTGAGACCTGGAGGAGGAAATATGAAGAACAATTGGAGAAGTGAATTATATAACTATA  
AAGTGGTAGAAATTAAACCATTAGGAATAGCACCCACTGAGGCAAAAAGGAGAGTGGTGGAGAGAGAAAAAG  
AGCAGTAGGAATAGGAGCTGTGTTCCCTTGGGTTCTTGGGAGTAGCAGGAAGCACTATGGGCGCAGCGTCAATA  
ACGCTGACGGCACAGGCCAGACAACCTATTGTCTGGTATAGTGCAACAGCAAAGCAATTTGCTGAGAGCTATAG  
AGGCGCAACAGCATATGTTGCAACTCACGGTCTGGGGCATT

>JN687821..1

TTCTATTGCAATACATCACACCTGTTTAGTAATAATGGTACAAATTCTATCATCACACTCCCATGCAGGATAA  
AACAAATAATAAACATGTGGCAGGGGGTGGGACGAGCAATGTATGCCCCCTCCTATTCAAGGAGACATAACATG  
TAAATCAAACATAACAGGAATACTATTGACACGTGATGGAGGAAGAAATGGCAACACAACAGAGATATTCAGA  
CCTGGAGGAGGAGATATGAGGGACAATTGGAGAAGTGAATTATATAAATATAAAGTGGTAGAAATTAAGCCAT  
TGGGAATAGCACCCACTGAAGCTAAAAGGAGAGTGGTGGAGAGAGAAAAGAGAGCAGTGGGAATAGGAGCTGT  
GTTCCCTTGGGTTCTTGGGAGCAGCAGGAAGCACTATGGGCGCGGCGTCGATAACGCTGACGGTACAGGCCAGA  
CAACTGTTGTCTGGTATAGTGCAACAGCAAAGCAATTTGCTGAGAGCCATAGAAGCGCAACAGCATATGTTGC  
AACTCACAGTCTGGGGCATT

>KC863367..1

TTCTATTGCAATACATCAGGCCTGTTTAATGGTACACTTAATGATACATACACGGCTAATAGTACAAGTGATA  
ACTCAACCATCACACTCCAATGCAGAATAAAACAAATTATAAACATGTGGCAAGGGGTAGGACAAGCAATGTA  
TGCCCCCTCCCATTGAGGGAAACATAACATGTAAATCAAATATCACAGGGCTACTATTGACCCGTGATGGAGGA  
ACAAATACTAGTGAGGAGGAGACATTGAGACCTGGAGGAGGAGATATGAGGGACAATTGGAGAAGTGAATTAT  
ACAAATATAAAGTGGTAGAGATTAAGCCATTGGGAATAGCACCCACTCAGGCAAAAAGGAGAGTGGTGGAGAG  
AGAAAAAAGAGCAGTGGGAATAGGAGCTGTGTTCCCTTGGGTTCTTGGGAGCAGCCGGAAGCACTATGGGCGCG  
GCGTCAATAACGCTGACGGTACAGGCCAGACAATTATTGGCTGGTATAGTGCAACAGCAAAGCAATTTGCTGA  
GGGCTATAGAGGCGCAACAGCATATGTTGCAACTCACAGTCTGGGGCATT

>KC894137..1

TTCTATTGCAATACATCAAACCTGTTTAATGATACACATACAGCAAACATCACAGCAAACATCACACTCACAC  
TCCCATGCAGAATAAAACAAATTATAAACATGTGGCAGGAGGTAGGAAAAGCAATGTATGCCCCCTCCCATTGC  
AGGAAACATAACATGTACATCAAATATCACAGGATTGCTATTGGTACGTGATGGAGGTACAAATAGAACTAAT  
GAAACATTGAGACCTGGAGGAGGAGATATGAGGGACAATTGGAGAAGTGAATTATATAAATATAAAGTGGTAG  
AAATTCAGCCATTGGGAATAGCACCCACTAAGGCAAAAAGGAGAGTGGTGGAGAGAGAAAAAAGAGCAGTGGG  
AATTGGAGCTGTGCTCCTTGGATTCTTGGGAGCAGCAGGAAGCACTATGGGCGCGGCGTCAATAACGCTGACG  
GTACAGGCCAGACAATTGTTGTCTGGTATAGTGCAACAGCAAAGCAATTTGCTGAAGGCTATAGAGGCGCAAC  
AGCATCTGTTGCAACTCACAGTCTGGGGCATT

>FJ443911..1

TTCTATTGCAATACAACACAACCTGTTTAACAGTACATACAATACCAATGATACAAGGGTAAACATCACACTTC  
CATGCAGAATAAAACAGATTATCAACATGTGGCAAAGGGTAGGACGAGCAATGTATGCTCCTCCCATTGCAGG  
AAACATAACATGTATATCAAACATCACAGGACTACTGTTAGTACGTGATGGAGGCAATAGCAGTGACACAACA  
GAAACATTGAGACCTGGAGGAGGAAATATGAAGGACAATTGGAGAAGTGAATTATATAAATATAAAGTGGTAG  
AAATTCAGCCATTAGGAGTAGCACCCACTAAGGCAAAAAGGAGAGTGGTGGAGAGAGAAAAAAGAGCAGTGGG  
AATAGGAGCTGTGTTCCCTTGGGTTCTTGGCAACAGCAGGAGGCACTATGGGCGCGGCGTCAATAACGCTGACG  
GTACAGACCAGACAATTGTTGTCTGGTATAGTGCAACAGCAAAGCAATTTGCTGAAGGCTATAGAGGCGCAAC  
AGCATCTGTTGCAACTCACAGTCTGGGGCATT

>KT183265..1

TTCTATTGTAATACATCAGGACTGTTTAATGGTACATACAATAATATATACAATACAGACAATGATACAACAG  
ACAATGGAACCATCACACTCCCATGCAAAATAAAACAAATTATAAACATGTGGCAGGAGGTAGGAAGAGCAAT  
ATACGCCCCCTCCCATTGCAGGAAATCTAACATGTATGTCAAACATCACAGGACTTCTCTTGGTACGGGATGGA  
GGTAATCAAATAATAGCACAGAGGTATTGAGACCTGGAGGAGGAGATATGAGGGACAATTGGAGAAGTGAAT  
TATATAAATATAAAGTGGTAGAAATTGAGCCATTGGGAATAGCACCCACTAAGGCAAAAAGGAGAGTGGTGGAG  
GAGAGAAAAAAGAGCAGTGGGAATAGGAGCTGTACTCCTTGGGTTCTTGGGAGCAGCAGGAAGCACTATGGGC  
GCGGCGTCAATAACGCTGACGGTACAGGCCAGGCAACTGTTGTCTGGTATAGTGCAACAGCAAATAAATTTGC  
TGAGAGCTATAGAGGCGCAACAGCATATGTTGCAGCTCACGGTCTGGGGCATT

>KC894114..1

TTCTATTGTGATACATCAAGACTATTTAATGGTACATACAATGGTACAGATAGTAATCCAAACAATGGTACAG  
ATAGTGATTCAAACCTCAAATTCAAACATCACACTTCCATGCAGAATAAAACAGATTATAAACATGTGGCAGGA  
GGTAGGAAGAGCAATGTATGCTCCTCCCATTGCAGGAAGCATAACATGTAAATCAAACATCACAGGATTATTA

TTGACGCGTGATGGAGGCAAAGAGGAAAATAGCACAACTAACAGAATAGAGATATTCAGACCTGGAGGAGGAA  
ATATGAAGGACAATTGGAGAAGTGAATTATATAAAATATAAAGTAGTAGAAATCAAACCATTGGGAATAGCACC  
CACTGGAGCAAAAAGGAGAGTGGTGGAGAGAGAAAAAAGAGCAGTGGGAATAGGAGCTGTGTTCCCTTGGGTTT  
CTGGGAGCGGCAGGAAGCACTATGGGCGCGGCGTCAATAACGCTGACGGTACAGGCCAGACAATTGTTGTCTG  
GTATAGTGCAACAGCAAAGCAATTTGCTGAAGGCTATAGAGGCACAACATCATCTGTTGCAACTCACAGTCTG  
GGGCATT

>KC894120..1

TTCTATTGCAATACATCAAACCTGTTTAAATAATATTAGTACAGGCAATTCTGGTAACATCACACTCCCATGCC  
AAATAAAACAAATTGTAAGAATGTGGCAGGGAGTGGGACAAGCAATGTATGCCCCCTCCCATTCAGGAAGCAT  
AACATGTAGATCAAATATCACAGGACTATTATTGACACGTGATGGAGGCAAACAAATTACACAGACCTAGAG  
ATATTCAGACCAGGAGGAGGTGATATGAGGGACAATTGGAGAAGTGAATTATATAAAATATAAAGTAGTAGAAA  
TTAAGCCATTAGGAATAGCACCAACTGGGGCAAAAAGGAGAGTGGTGGAGAGAGAAAAAAGAGCAGTGGGAAT  
AGGAGCTGTACTCCTTGGGTTTCTTGGGAGCAGCAGGAAGCACTATGGGCGCGGCGTCAATAACGCTGACGGTA  
CAGGCCAGACAATTGTTGTCTGGTATAGTGCAACAGCAAAGCAATTTGCTGAGAGCCATAGAGGCGCAACAGC  
ATATGTTGCAACTCACAGTCTGGGGCATT

>KC156115..1

TTCTATTGCAATACATCAAACCTGTTTAAATGGTACCATAGTTGATGGTACTACCCTGGTTAATAGTACCATAT  
TTAATGATACCATGTCTAATGGAACCATCACACTCCCATGTAGAATAAAACAAATTATAAATATGTGGCAGGA  
GGTAGGACGAGCAATCTATGCCCCCTCCCATTCAGGAAAACATCACATGTATCTCTAATATCACAGGACTACTA  
TTGACACGTGATGGTGGAGGTGCCGGGGATGGGTCAAATGACACAGAAGAAATATTCAGACCTGGAGGAGGAG  
ATATGAGGGACAATTGGAGAAGTGAATTATATAAAATATAAAGTGGTAGAAATTAAGCCGTTGGGAATAGCACC  
CACTAAGGCAAAAAGGAGAGTGGTGGAGAGAGAAAAAAGAGCAGTGGGAATGGGAGCTGTGTTCCCTTGGGTTT  
TTGGGAGCAGCAGGAAGCACTATGGGCGCAGCGGCAGTAACGCTGACGGTACAGGCCAGACAATTGTTGTCTG  
GAATAGTGCAACAGCAAAGCAATTTGCTGAGAGCTATAGAGGCGCAACAGCATATGTTGAAACTCACGGTCTG  
GGGCATT

>KC894124..1

TTTTACTGTAATACAACAAAACCTGTTTAAATACAACAGAATTTAATGAAAATGATTCAAATGATACCATCACAC  
TCCCATGTAGAATAAAACAAATTATAAACATGTGGCAGGGAGTAGGAAGAGCAATGTATGCCCCCTCCCATTCG  
AGGAAACATAACCTGTAACCTCAAGTATCACAGGAATATATTGATACATGAAGAAAGGGTGATAATCAGACA  
AGGATATTCAAACCTATAGGAGGAGATATGAAGAATAATTGGAGAAGTGAAGTATACAAATATAAAGTGGTAG  
AAATTAAGCCATTGGGAATAGCACCCACTGATGCAAAAAGGAGAGTGGTGGAGAGAGAAAAAAGAGCAGTGGG  
AATAGGAGCTTTGTTCCCTTGGGTTTCTTGGGAGCAGCAGGAAGCACTATGGGCGCGGCGTCAGTGACGCTGACG  
GTACAGGCCAGACAGTTGTTGTCTGGTATAGTGCAACAGCAAAGCAATTTGCTGAGGGCTATAGAGGCGCAAC  
AGCATATGTTGCAACTCACAGTCTGGGGCATT

>HM204615..1

TTCTATTGCAATACATCAGGCCTGTTTAAATGGTACATACAATAGTACAAACAATAGTACAGGAGACAATAAGA  
CCATCACACTCCCATGCAGAATAAAACAAATTATAAACATGTGGCAGGGGGTAGGACGAGCAATGTATGCCCC  
TCCCATTCAGGAAACATAACATGTAAATCAAATATCACAGGATTACTATTGACACGTGATGGAGGAAATACT  
CATAATAATACAGAGATATTCAGACCTGGAGGAGGCAATATGAAAGACAATTGGAGAAATGAATTGTATAAAT  
ATAAAGTGGTAGAAATTAAGCCATTAGGAATAGCACCCACTAGTGCAAAAAGGAGAGTGGTGGCAAGAGAAAA  
AAGAGCAGTGGGAATAGGAGCTGTGTTCCCTTGGGTTTCTTGGGAGCAGCAGGAAGCACTATGGGCGCGGCGTCA  
ATAACGCTGACGGTACAGGCCAGACAATTATTAACCTGGTATAGTGCAACAGCAAAGTAATTTGCTGAGGGCTA  
TAGAGGCGCAACAGCATATGTTGCAACTCACGGTCTGGGGCATT

>FJ443547..1

TTCTATTGCAATACAACAGAACCTGTTCAATAATACTAATAAAACCTGGCATACTCCCATGCAAAATAAAACAAA  
TTATAAACATGTGGCAGGGGGTAGGACGAGCAATGTATGCCCCCTCCCATTTGAAGGAAACATAACATGTAGGTC  
AATTATCACAGGACTACTATTGGTACGTGATGGAGGAGAAGATAATAGCACAGAGGAGGTATTTCAGACCTGGA  
GGAGGAAATATAAAGGACAATTGGAGAAGTGAATTATATCAATATAAAGTGGTAGCAATTAAAGCCGTTGGGAA  
TAGCACCCACGCCGGCAAAAAGGAGAGTGGTGGACAGGGAAGTGGTGAAGAGAGGAAAAAGAGCAGTGGGAAT  
AGGAGCTGTGTTCCCTTGGGTTTCTTGGGAGCAGCAGGAAGCACTATGGGCGCGGCGTCAATAACGCTGACGGTA  
CAGGCCAGACAACCTGTTGTCTGGTATAGTGCAACAGCAAAGCAATTTGCTGAGAGCTATAGAGGCGCAACAGC  
ATATGTTGCAACTCACGGTCTGGGGCATT

>FJ443838..1

TTCTATTGCAATACATCAAACCTGTTTAAATGGTATATACAATAATACATACCATAATACATCTAGTAATATCA  
TACTCAAATGCAGAATAAAACAAATTATAAACATGTGGCAAAAGGTAGGACGAGCAATGTATGCCCCCTCCCAT  
TGCAGGAAACATAACATGTACATCAAATATCACAGGACTACTATTGACACGTGATGGAGATAATAGGACTGAG  
TCAGAGACATTTCAGACCTGGAGGAGGAGACATGAGGGACAATTGGAGAAGTGAATTATATAAATACAAGGTGG  
TAGAAATTCAAACATTAGGAGTAGCACCCACTGAGGCAAGAAGGAGAGTGGTGGGGAAAGAAAAAAGAGCAGT  
AGTAGGAATAGGAGCTGTGCTCCTTGGGTTTCTTGAGTGACAGCAGGAAGCACTATGGGCGCAGCGTCAATAACG

CTGACGGTACAGGCCAGACAATTGTTGTCTGGTATAGTGCAACAGCAAAGCAATTTGCTGAGAGCTATAGAGG  
CGCAACAGCATATGTTGCAACTCACGGTCTGGGGCATT

>FJ443865..1

TTCTATTGCAATACATCAAACCTGTTTAAATGATAGTACAAAAAGTAATTCAGCATCACACTCCCATGCAGAA  
TAAACAAATTATAAACATGTGGCAGAAGGTAGGACGAGCAATGTATGCCCCCTCCCATTCAGGAAACATAAC  
ATGTAGATCAGAGATCACAGGACTACTATTGGTACATGATGGAGGAACAAATAGCAGTAATGAGACATTCAGG  
CCTGGAGGAGGAGATATGAGGGATAATTGGAGAAGTGAATTATATAAATATAAAGTGGTAGAAATTAAGCCAT  
TAGGAGTAGCACCCTCAGGCAAAAAGGAGAGTGGTGGAGAGAGAAAAAAGAGCAGTGGGAATAGGAGCTGT  
GTTCTTGGGTTCTTGGGAGCAGCAGGAAGCACTATGGGCGCGGCGTCAATAACGCTGACGGTACAGGCCAGA  
CAATTGTTGTCTGGTATAGTGCAGCAGCAAAGCAATTTGCTGAGGGCTATAGAGGCGCAACAGCATATGTTGC  
AACTCACGGTCTGGGGCATT

>KT183218..1

TTCTATTGCAATACAACAAAAGCTATTACAAACACAACCACAAATACAACCATCCTAATCCCATGCAGAATAA  
AACAAATTTGTAAACATGTGGCAGGAGGTAGGGCGAGCAATGTATGCCCCCTCCCATTCAGGAAACATAACATG  
TAACTCAAGTATCACAGGACTACTATTGGTACGTGATGGAGGAATTTCAAATGACACAAATAACACAACCTGAA  
ACATTCAGGCCTGGAGGAGGAAACATGAAGGACAATTGGAGAAGTGAATTATATAGCTATAAAGTGGTAGAAC  
TTAAGCCACTAGGAGTAGCACCCCTGGAGCGAAAAAGGAGAGTGGTGGAGATGGAAAGATCAAAAAGAGCAGT  
GGGAATAGGAGCTGCACTCCTTGGGTTCTTGGGAGCAGCAGGAAGCACTATGGGCGCGGCGTCAATGGCGCTG  
ACGGTACAGGCCAGACAACCTGCTGTCTGGTATAGTGCAACAGCAAAGCAATTTGCTGAGAGCCATAGAGGCGC  
AACAGCATATGTTGCAACTCACGGTCTGGGGCATT

>HM623548..1

TTCTATTGCAATACAACAAAAGCTGTTTAAAGGAAGGTGAGTCAAATGCAACAGATTTAAATGCAACAATCATAC  
TCCCATGCAGGATAAAAACAAATTATAAACATGTGGCAGGGGGTAGGACAAGCAATGTATGCCCCCTCCCATTCG  
AGGAAACATAACATGTATCTCAAATATCACAGGACTACTATTGACACGTGATGGAGGAAGAGACTCCAATAAC  
ACAAATGACACAGAGACATTCAGACCTGGAGGAGGAAATATGAAGGACAATTGGAGAAGTGAATTATATAAAT  
ATAAAGTGGTAGAAATTCAGCCATTGGGAGTAGCTCCCACTGGATCAAAAAGGAGAGTGGTGGAGAGAGAAAA  
AAGAGCAGTGGGACTGGGAGCTGTACTCCTTGGGTTCTTGGGAGCAGCAGGAAGCACTATGGGCGCGGCGTCA  
ATAGCGCTGACGGTACAGGCCAGACAACCTGTTGTCTGGTATAGTGCAACAGCAAAAACAAATTTGCTGAGAGCTA  
TAGAGGCGCAACAGCATATGTTGCAACTCACAGTCTGGGGCATT

>HM623555..3

TTCTATTGCAATACAACAAAAGCTGTTTTATTATAATGGAAGTGAGAAGAATGACACAACCATCACCATCCAAT  
GCAAAATAAAACAAATTATAAACATGTGGCAAGAGGTAGGACGAGCAATGTATGCCCCCTCCCATTCAGGAAA  
CATAACATGTAGATCAAATATCACAGGATTACTATTGACACGTGATGGAGGAAACACGAATAGTACAGAGGAG  
ATATTCAGACCTGGAGGAGGAAATATGAAGGACAATTGGAGAAGTGAATTATATAAATATAAAGGTGGTAGAAA  
TTCAGCCATTGGGAATAGCACCCAATAAGGCAAAAAGGAGAGTGGTGGAGAGAGAAAAAAGAGCAGTAGCAAT  
AGGAGCTGTGCTCCTTGGGTTCTTGGGAGTAGCCGGAAGCACTATGGGCGCGGCGGCACTAACGCTGACGGTA  
CAGGCCAGACAACCTGTTGTCTGGTATAGTGCAACAGCAAAGCAATTTGCTGAGAGCTATAGAGGCGCAACAGC  
ATATGTTGCAACTCACAGTCTGGGGCATT

>HM623562..1

TTCTATTGCAATACAACAAAAGCTGTTTAAATGCAAGTGAGACGGCTAGAAATATTAGTAACCCAAATGAAAATA  
TCACACTCCCATGCAGGATAAAAACAAATTATAAACATGTGGCAGGAGGTAGGACGAGCAATGTATGCCCCCTCC  
CATTCAGGAAACATAACATGTAACCTCAAATATCACAGGACTACTACTGACAAGGGATGGAGGAACTATAGT  
ATCACAATAACACAGAGACATTCAGACCTGGAGGAGGAAATATGAAGGACAATTGGAGAAGTGAATTATATA  
AATATAAAGTAGTAGAAGTTAAGCCATTGGGAGTAGCACCCACTAAAGCAAAAAGGAGAGTGGTGGAGAGAGA  
AAAAAGAGCAATAGGAATGGGAGCTGTACTCCTTGGGTTCTTGGGAGCGGCAGGAAGCACTATGGGCGCAGCG  
TCAATAACGCTGACGGTACAGGCCAGACAATTGTTGTCTGGTATAGTGCAACAGCAAAGCAATTTGCTGAGAG  
CCATAGAGGCGCAACAGCGCATGTTGCAACTCACGGTCTGGGGCATT

>HM623568..1

TTCTACTGCAATACATCAAACCTGTTTAAATTCAACAAGACTAAAAGCTGTTTAAATTCAGTGATCCAGGCGACA  
AAACCATCACACTCCAATGCAGAATAAAACAAATTATAAACATGTGGCAGCAGGTAGGACGAGCCATGTATGC  
CCCTCCCATTCAGGAAAAAATATCATGTAACCTCAAGTATCACAGGATTACTATTGACACGTGATGGAGGACAT  
AGAAACACAACAAACACAGAGGTATTAGACCTGGAGGAGGAGATATGAGGGACAATTGGAGAAGTGAAT  
TATATAAATATAAAGTGGTAGAAATTCACCATTGGGAGTAGCTCCACCAAGGCAAAAAGGAGAGTGGTGGAG  
GAGAGAAAAAAGAGCATTGGGATTCGGAGCTGTGCTCATTGGGTTCTTGGGAGCAGCAGGAAGCACTATGGGC  
GCGGCGTCAATAACGCTGACGGTACAGGCCAGACAACCTGCTGTCTGGTATAGTGCAACAGCAAAGCAATTTGC  
TGAGAGCTATAGAGGCGCAACAGCATATGTTGCAACTCACAGTCTGGGGCATT

>HM623571..2

TTCTATTGCAACACATCAAGACTGTTTAAATGGTACATTTAATGAGACAAAGTTTAAATAACTTCAAACAACA  
CCACTCCTCAAACATCACTCTCCAATGCAGAATAAAAACAAATCATAAACACGTGGCAGGGGGTAGGACAAGC  
AATATATGCCCCCTCCCATTCAGGAAACATAACATGTAATTCAAGTATCACAGGAATACTATTAAACACGTGAT

GGAGGCCAAGACACAAATGGCACAGATGAGACCAAAAACGACACAGAGACATTCAGACCTATAGGAGGAGATA  
TGAGGGACAATTGGAGAAGTGAATTATATAAGTATAAAGTGGTAGAAATTCAGCCATTAGGAATAGCACCCAC  
TAAGGCAAGAAGGAGAGTGGTGAAAAGAGTAAGAAGAGCAGCACTGGGAGCTGTGTTCTTGGGTTCTTGGGA  
GCGGCAGGAAGCACTATGGGCGCAGCGTCAATAACGCTGACGGTACAGGCCAGACAATTATTGTCTGGTATAG  
TGCAACAGCAGAGTAATCTGCTGAGAGCTATAGAGGCGCAACAGCATATGTTGCAACTCACGGTCTGGGGCAT  
T

>JN687726..1

TTCTATTGCAATACATCAAATCTGTTTAATACTACAGGACCTACAACAAATGCAACTATCACACTCCCATGCA  
GAATAAACAGATTATAAACATGTGGCAGGGGGTAGGACAAGCAATGTATGCCTCTCCCATTCAGGAAATAT  
AACATGTAACCTCAAATATCACAGGATTACTATTGACACGTGATGGAGGTCATAATGGTACATATGGTAATGAG  
ACATTCAGACCTGGAGGAGGAGATATGAGGGACAATTGGAGAAGTGAATTATATAAAATATAAGGTGGTGGAAA  
TTAAACCATTAGGAATAGCACCCACTGAGGCAAAAAGAGAGTGGTGCAGAGAGAGAAAAGAGCAGTGGGACT  
AGGAGCTGTGTTCTTGGGTTCTTGGGAGCAGCAGGAAGCACTATGGGCGCGGCGTCAGTGGCGCTGACGGTA  
CAGGCCAGACAACCTGTTGTCTGGTATAGTGCAACAGCAAAGCAATTTGCTGAAAAGCTATAGAGGCGCAACAAC  
ATATGTTGCAACTCACGGTCTGGGGCATT

>KC154023..1

TTCTATTGCAATACAACAGGACTGTTTAATGCAACAAACCTCAATGCAACAAATCCCAATGAAAACATCACAC  
TCCCATGCAGAATAAAGCAATTTGTAAACATGTGGCAGGGGGTAGGACGAGCAATGTATGCCCCCTCCTGTTGA  
AGGAATAATAACATGTAACCTCAAGTATCACAGGACTACTGTTGACACGTGATGGGGGAAACACAGACAATAAC  
ACAACAGAGACATTCAGACCTGGAGGAGGAAATATGAAGGACAATTGGAGAAGTGAATTATATAAAATATAAAG  
TAGTAGAAATTCACCATTGGGAATAGCACCCACAAACGCAAAAAGGAGAGTGGTGGAGAGAGAAAAAGAGC  
AGTGGGAATAGGAGCTGTATTCCTTGGGTTCTTGGGAGCAGCAGGAAGCACTATGGGCGCGGCGTCAATAACG  
CTGACGGTACAGGCCAGACTACTGTTGTCTGGTATAGTGCAACAGCAAAGCAATTTGCTGAGAGCTATAGAGG  
CGCAACAACATATGTTGCAACTCACGGTCTGGGGCATT

>HM204619..1

TTCTATTGCAATACAACACAATGTTTAATAGTACATATAATGTTACAGATCCGTTTAATAGTACAGAACTGG  
GTAATGATACCATCACACTCCCATGCAGAATAAAGCAAAATTATAAACATGTGGCAGAGGGTAGGACGAGCAAT  
GTATGCTCCTCCCATTCAGGAAACATAACATGTAGATCAAATATCACAGGATTGCTATTGGTGCGTGATGGA  
GGAAATAATAATCAGACAGGGAGAGAGATATTCAGACCTGCAGGAGGGAATATGAAAGATAATTGGAGAAGTG  
AATTACATAAAATATAAAGTGGTAGAAATTAAGCCATTGGGAATAGCACCCACTAAGGCAAAAAGGAGAGTGGT  
GGAGAGAGAAAAAGAGCAGTGGGACTGGGAGCTGTGTTCTTTGGGTTCTTAGGCGCAGCAGGAAGCACTATG  
GGCGCGGCGTCAATAGCGCTGACGGCACAGGCCAGACAAGTGTGTCTGGTATAGTGCAACAGCAAAGCAATT  
TGCTGAGGGCTATAGAGGCGCAACAACATATGTTGCAACTCACGGTCTGGGGCATT

>JX140666..1

TTTTATTGCAATACAACAAATCTGTCTAATACAAGTCTGTTTAATGACAGTAGTTCAAACAAAACCATCACGC  
TCCCATGTAGGATAAAAACAAATTATAAACATGTGGCAGGGGGTAGGACGAGCAATGTATGCCCCCTCCCATTC  
AGGGAAACATAACATGCAACTCAAGCATCACAGGACTATTATTAACACGTGATGGAGGAAACATGAGTGGCACT  
GATGAAGGAAAAACAACACGACTAACGGGAATAACACGACTAACGGGATTGAAATATTTAGACCTGGAGGAG  
GAAATATGAAGGACAATTGGAGAAGTGAATTATATAAAATATAAAGTGGTAGAAATTCAGCCATTGGGAGTAGC  
ACCCACGAAGGCAAAAAGGAGAGTGGTGGAGAGAGAAAAAGAGCAGTGGGAATAGGAGCTGTACTCCTTGGG  
TTCTTGGGAACAGCAGGAAGCACTATGGGCGCGGCGTCAATAACGCTGACGGTACAGGCCAGACAACCTGTTGT  
CTGGTATAGTGCAACAGCAAAGCAATTTGCTGAGAGCTATAGAGGCGCAACAGCATATGTTGCAACTCACAGT  
CTGGGGCATT

>JN681255..1

TTCTATTGCAATACATCACAACCTGTTTACTGGAAATGGTACAGCTAATAGTACAGGCAATACAACCATCACCA  
CACTCCCATGCAGAATAAAAACAAATTATAAACATGTGGCAGGGGGTAGGACGAGCAATGTATGCCCCCTCCCAT  
TGAAGGAAACATAACATGTAAATCAAACATCACAGGACTACTATTGACACGTGATGGAGGCAACGACAACAAT  
CAAAGTAGAACAGAGACATTTAGACCTGGAGGAGGAAATATGAAGGACAATTGGAGAAGTGAATTATATAAAT  
ATAAAGTGGTAGAAATTAAGCCATTAGGAATAGCACCCACTGAAGCAAAAAGGAGAGTGGTGGAGAGAGAAAA  
AAGAGCAGTGGGACTAGGAGCTGTAATCTTTGGGTTCTTGGGAGCAGCAGGAAGCACTATGGGCGCGGCGTCA  
ATAACGCTGACGGTACAGGCCAGACAATTGTTGTCTGGTATAGTGCAACAGCAAAGCAATTTGCTGAAAGCTA  
TAGAGGCGCAGCAGCATATGTTGCAACTCACAGTCTGGGGCATT

>HQ595752..1

TTCTATTGTAATACATCACAGCTGTTTAATAGGACTGATACAGACATGCAGCAAGACAACACAGGAAATGATA  
CAATCACACTCCAATGCAGAATAAAAACAAATTATAAACATGTGGCAGGAGGTAGGACGAGCAATGTATGCCTC  
TCCCATTCAGGAGACATAACATGCAAATCAAATATCACAGGATTAATATTGACACGTGATGGAGGTAATAGC  
AGCACAGGGAATGATAGTAATAGCCGCACAGAGATATTCAGACCTGCAGGAGGAGATATGAGGGACAATTGGA  
GAAGTGAATTATATAAAATATAAAGTGGTGGAGATTAAGCCATTAGGAGTAGCACCCACTCATTCAAAAAGGAG  
AGTGGTGGAAAGAGAAAAAAGAGGAATAGGAGCTGTGCTCCTTGGGTTCTTGGGAGCAGCAGGAAGCACTATG

GGCGCAGCGTCAATAGCGCTGACGGTACAGGCCAGACAACCTGTTGTCTGGTATAGTGCAACAGCAAAGCAATT  
TGCTGAGAGCTATAGAGGCGCAACAGCATATGTTGCAACTCACGGTCTGGGGCATT

>HQ615957..1

TTCTATTGCAATACATCAGCACTGTTTAAATGGCAATGGCACATCTGTTAATGATACAACTTCAACCATCACAC  
TTCCATGCAGAATAAAACAAATTATAAACATGTGGCAGGAGGTAGGACGAGCAATGTATGCCCCCTCCATTGC  
AGGAAACATAGCATGTGAATCAAATATCACAGGACTACTATTAGAACGTGATGGAGGTGGAGGCAATGACACA  
GAAGAGATATTCAGACCTGGAGGAGGAAATATGAGGGACAATTGGAGAAGTGAACGTGTATAAATATAAAGTGG  
TAGAAATTCAACCATTAGGAGTAGCACCCACTAAGACAAAAAGGAGAGTGGTGGAGAGAGAGAAAAGAGCAGT  
GGGAATAGGAGCTGTGTTCTTGGGTTCTTGGGAGCAGCAGGAAGCACTATGGGCGCAGCATCAATAACGCTG  
ACGGTACACGCCAGACAATTATTGTCTGGTATAGTGCAACAGCAAAGCAATTTGCTGAGGGCTATAGAGGCGC  
AACAGCATCTGTTGCAACTCACGGTCTGGGGCATT

>HQ595760..2

TTCTATTGTAATACAACAAGACTGTTTAAATAATACAGAAAAGTAACTCAACCATCACCGGGAATCATTGAGACA  
CTATCACACTCCCATGTAGAATAAAACAATTTATAAACATGTGGCAGGAGGTAGGACGAGCAATGTATGCCCC  
TCCCATTCAGGAACCATAACATGTATCTCAAATATCACAGGACTACTATTGGTACGGGATGGAGGCATACCA  
AATGAGAACACAGAAATATTCAGACCTCAAGGAGGAAATATGAAGGACAATTGGAGAAGTGAATTATATAAAT  
ATAAAGTGGTAGAAATTAAGCCATTAGGAATAGCACCCACTACGGCAAAGAGAAGAGTGGTGCAGAGAGAAAA  
AAGAGCAGTGGGAATAGGAGCTGTGCTCCTTGGGTTCTTGGGAGCAGCAGGAAGCACTATGGGCGCGGCGTCA  
ATAACGCTGACGGTACAGGCCAGACATCTGTTGTCTGGTATAGTGCAACAGCAAAGCAATTTGCTGAGAGCTA  
TAGAGGCGCAACAGCATATGTTGCAACTCACAGTTTGGGGCATT

>KT183289..2

TTCTATTGTAATACAACAAAATGTTTAAATAGTACATACAATAGTACATACTATAAGAATAATAACTAATA  
GTACAGAAGAAAACCTCTACCATCACGCTCACATGCAGAATAAAGCAATTTATAAACATGTGGCAGGAGGTAGG  
ACGGGCAATGTATGCCCCCTCCCATTTGAAGGAAACATAACATGTAGATCAAACATCACAGGACTACTACTGACG  
CGTGATGGAGGAAATTC AACAGATACTCAAACGGAGACATTCAGGCCTGAGGGAGGAAATATGAAGAACAAAT  
GGAGAAGTGAATTATATAAAATACAAAGTGGTAGAAATTA AACCATTAGGAATAGCACCCACTAGAGCAAAAAG  
GAGAGTGGTGCAGAGGGAAAAAAGAGCAGTGGGAATAGGAGCTGTGTTCTTGGGTTCTTGGGAGCAGCAGGA  
AGCACTATGGGCGCAGCATCAATAACGCTGACGGTACAAGCCAGACAACCTATTGTCTGGGTATAGTGCAACAGC  
AAAGCAATTTGCTGAGAGCTATAGAGGCGCAACAGCATATGTTGCAACTCACGGTCTGGGGCATT

>GU080183..1

TTCTATTGCGATACATCAGCACTGTTTAAATAGTACATACAATTTCTGCATACAATAAGGAGACTAATAGTACAT  
ACAATAATGGGACAGTAAGTAATTC AACTATCACACTTCCATGCAGAATAAAGCAAATTTATAAACATGTGGCA  
AGAGGTAGGACGAGCAATGTATGCCCCCCCCATTGCAGGAAATATAACATGTAAATCAAATATCACAGGATTA  
CTATTAGTACGTGATGGAGGAGGCACAAATACAACAAATGAGACATTCAGACCTCAAGGAGGAAATATGAAGG  
ACAATTGGAGAAGTGAACATATATAAATATAAAGTGGTAGAAATTGAGCCATTGGGAATAGCACCCGATAAGGC  
AAGAAGGAGAGTGGTGAAGAGAGAAAAAAGAGCAGTGGGAATAGGAGCTTTGTTCTTGGGTTCTTGGGAGCA  
GCAGGAAGCACTATGGGCGCAGCATCATTAATGCTGACGGTACAGGCCAGACAACCTGTTGTCTGGTATAGTGC  
AACAGCAAAGCAATTTGCTGAGAGCTATAGAGGCGCAACAGCATATGTTGCAACTCACGGTCTGGGGCATT

>GU080187..1

TTCTACTGCAATACATCAAGCCTATTCAATATTACATACCATAACAATGGAACAAACACTAGTACATACACAG  
ACAGCAACAGCATAATTACAATTCATGCAGAATAAAACAAATTTATAAACATGTGGCAGGGGGTAGGACGAGC  
AATGTATGCCCTCCCCCATTGCAGGAAACATAACATGTAAATCAAATATCACAGGAATACTATTAAACAGTGAT  
GGAGGCTATCTAGAGAACAATACAAATAATGACAAAGAAATATTCAGACCTGGAGGAGGAAATATGAAAGACA  
ATTGGAGAAGTGAACATATATAAATATAAAGTGGTAGAAATTAGACCATTAGGAATAGCACCCACTAAAGCAAA  
AAGGCTAGTGGTGAAGAGAGAAAAAAGAGCAGTAACACTAGGAGCTCTGTTCTTGGGTTCTTGGGAACAGCT  
GGAAGCGCTATGGGCGCGGCGTCACTGACGCTGACGGTACAGGCCAGACAATTGTTGTCTGGTATAGTGCAAC  
AGCAAAATAAATTTGCTGAGGGCTATAGAGGCGCAACAGCATATGTTGCAACTCACAGTCTGGGGCATT

>HM623598..1

TTCTATTGCAATACCACAAAATGTTTAAATAAGACTATTGCAAACGGAACCATCACACTCCCATGCAGAATAA  
AACAAATTATAAACATGTGGCAGGAGGTAGGACGAGCAATGTATGCCCCCTCCCATTCAGGAAACATAACATG  
TGAATCAAATATCACAGGACTATTATTGCTACGTGATGGAGGAAGGATTAATGACACTAATAACACAGAAGAG  
ATATTCAGACCTGGAGGAGGAAATATGAAGGACAATTGGAGAAGTGAATTATATAAATATAAAGTGGTAGAAG  
TTCAGCCATTGGGAATAGCTCCTACTGAATCAAAAAGGAGAGTGGTGGAGAGAGAAAAAAGAGCAGTGGGAAT  
GGGAGCTGTACTCCTTGGGTTCTTGGGAGCTGCAGGAAGCACTATGGGCGCGGCGTCAATAACGCTGACGGCA  
CAGGCCAGACAACCTGTTGTCTGGTATAGTGCAACAGCAAAGCAATTTGCTGAGAGCTATAGAGGCGCAACAGC  
ATATGTTGCAACTCACGGTCTGGGGCATT

>HM623604..1

TTCTATTGCAATACATCAGGACTGTTTAAATAATAGCAAAAGTGATTCAAACATAACCACACTCCCATGCAAAA  
TAAAACAAATTTATAAACATGTGGCAGAAGGTAGGACGAGCAATGTATGCCCCCTCCCATTCAGGAAACATAAC  
ATGTAACCTCAAATATCACAGGACTACTATTGGTACGCGATGGGGGATACAATGTAGACAATCAGACAGACAAT

AAGACAGAGATTTTTAGACCTGGAGGAGGAAATATGAAGGATAATTGGAGAAGTGAATTATATAAATATAAAG  
TGGTTGAAATTAAGCCATTAGGAATAGCACCCACTAAGGCAAAAAGGAGAGTGGTGGAGAGAGAAAAAGAGC  
AGTGGGACTAGGAGCTGTGTTCTTGGGTTCTTGGGAGCAGCAGGAAGCACTATGGGCGCGGCATCAATAACG  
CTGACGGTACAGGCCAGACAACCTGTTGTCTGGTATAGTGCAACAGCAAAGCAATTTGCTGAGAGCTATAGAGG  
CGCAACAGCATATGTTGCAACTCACGGTCTGGGGCATT

>HM623587..1

TTCTATTGCAATACAACAAACCTGTTCAATTTTAATGAAACACAACCTTAATGAAATACAACCTTAATAATGCAA  
CAGAAAACAACACAAGCACCAATATCACACTCACATGCAGAATAAAACAATTTGTAAACATGTGGCAAAGGGT  
AGGACGAGCAATGTATGCCCCCTCCATTGCAGGAAATATAACATGTCATTCAAACATCACAGGACTGCTATTG  
ACACATGATGAAGAAGAAATGAATAACGCAACTGGGGCAAATAAAACAGAGGTATTCAGACCTATAGGAGGCA  
ATATGAAGGACAATTGGAGAAGTGAATTATACAAATATAAAGTAGTAGAAATTAAACCATTGGGAGTAGCACC  
CACAGAGGCAAAACGGAGAGTGGTGGAGAGAGAAAAAGAGCAGCAATAGGAGCTATGTTCTTGGGTTCTCTG  
GGAGCGGCAGGAAGCACTATGGGCGCGGTGTCTATTGACGCTGACGGTACAGGCCAGACAACCTGCTGTCTGGTA  
TAGTGCAACAGCAAAGCAATTTGCTGAGAGCTATAGAGGCGCAACAACATCTGTTGCAACTCACGGTCTGGGG  
CATT

>KF114887..1

TTCTACTGCAATACAACATACCTGTTTAATAACAGTGCATCAGAGGGAAACATCACAAATCCCATGCAGAATAA  
AACAGATTATAAATATGTGGCAGGAGGTAGGACGAGCAATGTATGCCCCGCCCCGTTGCAGGAAACATAACATG  
TAAATCAAATATCACAGGATTACTATTAGTACGTGATGGTGGAAATGAGGACAACAGCACAGATGGGAATAAG  
ACAGAGATATTCAGACCTCAAGGAGGAAATATGAAGGACAATTGGAGAAGTGAATTATATAAATATAAAGTGG  
TAGAAGTTAAGCCATTAGGAATAGCACCCACTACAGCAAAAAGGAGAGTGGTGGAAAAGAGAAAAAGAGCAGT  
CGGAATAGGAGCTGTGTTCTTGGGTTCTTGGGAGCAGCAGGAAGCACTATGGGCGCAGCGTCAGTGGCGCTG  
ACGGTACAAGCCAGACAATTGTTGTCTGGTATAGTGACGAGCAGCAAAATAATTTGCTGAGAGCTATAGAGGCGC  
AACAGCATATGTTGCAACTCACAGTCTGGGGCATT

>KF725917..1

TTCTATTGCAACACATCACAAATGTTTAATAGTACAGTCAATGGTACAATATCTAATAATACAGGCAATAGTA  
CAGACATCATCACACTCCCATGCAGGATAAAACAAATTATAAACATGTGGCAGGGGGTAGGACGAGCAATGTA  
TGCCCCCTCCCATTCAGGAAACATAACATGTAAGTCAAACATCACAGGATTACTATTGACACGTGATGGAGGA  
TATAACACAAGTGGGGATAACGAGACATTGAGACCTGCAGGAGGAGATATGAGAGACAATTGGAGAAGTGAAT  
TGTATAAATATAAAGTAGTAGAAATTGAGCCATTAGGAATAGCACCCACAGGAGCAAGAAGGAGAGTGGTGGGA  
GAGGCAAAAAGAGCAGTAGGAATAGGAGCTGTGTTCTTGGGTTCTTGGGAGTAGCCGGAAGCACTATGGGC  
GCGGCGTCAATGGCGCTGACGGTACAGGCCAGACAATTGTTGTCTGGTATAGTGCAACAGCAAAGGCAATTTGC  
TGAGAGCTATAGAGGCGCAACAACACATGTTGCAACTCACAGTCTGGGGCATT

>JN681257..1

TTCTATTGTAATACATCAAAACTGTTTAATGAGACAGAAACGAAGTCAAACATCTCAAACATCACACTTCCAT  
GCAGAATAAAACAAATTATAAACATGTGGCAGGGGGTAGGACGAGCAATGTATGCCCCCTCCTATTGCAGGAAG  
CATAACATGTAACCTCAAATATCACAGGACTACTATTGACACGTGATGGAGGAGGAGGAAATGAAACTAATCAC  
ACAGAAACATTGAGACCTACAGGAGGAAATATGAAGGACAATTGGAGAAGTGAATTATATAAATATAAAGTGG  
TAGAAATTAAGCCATTGGGAATAGCACCCACTAGAGCAAAAAGGAGAGTGGTGGAGAAAGAAAAAGAGCAGT  
GGGAATAGGAGCTGTGTTCTTGGGTTCTTGGGGGCAGCAGGAAGCACTATGGGCGCGGCGTCAATAACGCTG  
ACGGTACAGGCCAGACAACCTGTTGTCTGGTATAGTGCAACAGCAAATAATTTGCTGAGGGCTATAGAGGCGC  
AACAGCATATGTTGCAACTCACGGTCTGGGGCATT

>JN681259..1

TTCTATTGCAATACAACAAAACCTGTTTAATGAAAGTGAACCTAAGTAAGTCAAACGAAACAATCACACTCCCAT  
GCAGAATAAAACAAATTATAAACATGTGGCAGGAGGTAGGACGAGCAATGTATGCCCCCTCCTATTGCAGGAAG  
CATAACATGTAACCTCAAATATCACAGGACTACTATTGACACGTGATGGAGGAGGAGGAAATGAACTAATCAC  
ACAGAAACATTGAGACCTACAGGAGGAAATATGAAGGACAATTGGAGAAGTGAATTATATAAATATAAAGTGG  
TAGAAATTAAGCCATTGGGAATAGCACCCACTAGAGCAAAAAGGAGAGTGGTGGAGAAAGAAAAAGAGCAGT  
GGGAATAGGAGCTGTGTTCTTGGGTTCTTGGGGGCAGCAGGAAGCACTATGGGCGCGGCGTCAATAACGCTG  
ACGGTACAGGCCAGACAACCTGTTGTCTGGTATAGTGCAACAGCAAATAATTTGCTGAGGGCTATAGAGGCGC  
AACAGCATATGTTGCAACTCACGGTCTGGGGCATT

>KC154028..2

TTCTATTGTAACACAACAGAACTGTTTTATAATGATTTTAATAATACAGGAAAGAATGTAAACATCACACTCC  
AGTGCAAAAATAAAACAAATTATAAACATGTGGCAGCAGGTAGGACGAGCAATGTATGCCCCCTCCATTGAAGG  
AAACATAACATGTACATCAAATATTACAGGACTACTATTGACATGGGATGGAAACATAACAAATGAAGATAAT  
ACATCTAGTACAAATCATAACATTGAGACCTGCAGGAGGAGATATGAGGGACAATTGGAGAAGTGAACCTATATA  
AATATAAAGTGGTAGAAGTTAAGCCATTGGGAGTAGCACCCACTAAGGCACAAAAGGAGAGTGGTGGAGAGGAA  
AAAAAGAGCATTGGGAATAGGGGCTATGTTCTTGGGATCTTGGGAACAGCAGGAAGCACTATGGGCGCGGCG  
TCAATAACGCTGACGGTACAGGCCAGACAATTATTGTCTGGTATAGTGCAACAGCAAAGCAATTTGCTGAGAG  
CTATAGAGGCGCAACAGCATCTGTTGCAACTCACGGTCTGGGGCATT

>KF725924..1

TTCTATTGCGATACATCAAATCTGTTCAATGAAAGTAAAAGTTGGTATTCAAACAACAGTACAGACGACATAA  
ACATCACACTCCCCTGTAGGATAAAAACAAATTGTAAACATGTGGCAGAGAGTAGGACAAGCAATATATGCCCC  
TCCCATTTGCAGGAAGCATAACATGTAAATCAAATATCACAGGACTACTATTGGCACGCATAACAGATAACACA  
AATGGGACAGAGAAATTTAAACCTGAAGGAGGAAATATGAAGAATAATTGGAGAAGTGAATTATATAAAATATA  
AAGTGGTAGAAATTC AACCATTAGGAATAGCCCCACTGCATCAAAAAGGAGAGTGGTAGAGAGAGAAAAAAG  
AGCAGTGGGAATAGGAGCTGTGCTCCTTGGGTTCTTGGGAGCAGCAGGAAGCACTATGGGCGCGGCGTCAATA  
ACGCTGACGGTACAGGCCAGACAACCTGTTGTCTGGTATAGTGCAACAGCAAAGCAATTTGCTGAGAGCTATAG  
AGGCGCAACAGCATATGTTGCAGCTCACAGTCTGGGGCATT

>KF725926..4

TTCTATTGCTATACATCACAACCTGTTTAAATAGTACATACAAGACATACAATCATAGTTGGACAACAGGTAATG  
CAACCATCACACTTCCATGCAGAATAAAAACAAATTATAAACATGTGGCAGGGAGTAGGACAAGCAATGTATGC  
CCCTCCCATTCAAGGAAATATAACATGTAAATCAAATATCACAGGAATACTATTAGTACGTGATGGAGACAAA  
AATGATACAGAGACATTCAGACCTCAAGGAGGAAATATGAAAGACAATTGGAGAAAGTGAATTATATAAAATATA  
AAGTGGTAGAAATTAAGCCATTAGGAATTGCACCTACTGGAGCAAAAAGGAGAGTGGTGGAGAGAGAAAAAAG  
AGCAGTGGGAATAGGAGCTGTACTCCTTGGGTTCTTGGGAGCAGCAGGAAGCACTATGGGCGCAGCGTCAATA  
ACGCTGACGGTACAGGCCAGACAATTATTGTCTGGTATAGTGCAACAGCAGGACAATCTGCTGAGGGCTATAG  
AGGCGCAACAGCATATGTTGCAACTCACGGTCTGGGGCATT

>KF725934..2

TTCTATTGCAATACATCAACCTTGTTTAAATAGTACATATGGGTTTAAATGGTACATACAATGGGACAACAAACA  
ATGATACATACACTCCAATGCAGAATAAAAACAAATTATAAACATGTGGCAAAAAGGTAGGACAAGCAATGTA  
TGCCCCCTCCTATTCAAGGAGTAATACAATGTAAATCAAATATCACAGGACTACTATTGACACGGGATGGAGGT  
GAAGGAAATAATACAAATAATGGTACAGAGACATTCAGACCTGGAGGAGGAGATATGAGGGATAACTGGAGAA  
GTGAATTATATAAAATACAAGGTGGTAGAAGTTCAGCCATTAGGAGTAGCACCCACTGCTGCAAGAAGGAGAGT  
GGTGCAGAGAGAAAAAAGAGCAGTAACACTAGGAGCTATGATCCTTGGATTCTTGGGAACAGCAGGAAGCACT  
ATGGGCGCGGCGTCAATGGCGCTGACGGTACAGGCCAAAACAATTGTTGTCTGGTATAGTGCAACAGCAAAGCA  
ATTTGCTGAAGGCTATAGAGGCGCAACAGCATATGTTGCAACTCACAGTCTGGGGCATA

>KF725961..1

TTCTATTGTAATACAACAAAGCTGTTTAAATAGTACATACTTTCCTAATGGTACATACATGCCTAATGTTACAG  
AAGATAATGGCACAATCATACTCCCATGCAGGATAAAGCAAATTATAAACATGTGGCAGGCGGTAGGACAAGC  
AATATATGCTCCTCCCATCGCAGGGAACATAACATGTATCTCAAATATCACAGGATTACTATTGGAGCGTGAT  
GGAGGAAATGAAAGTAACACAGAGGAGATATTAGACCTCAAGGAGGAAACATGAGGGACAATTGGAGAAGTG  
AATTATACAAATATAAAGTGGTAGAAGTTAAACCATTAGGAATAGCACCTACTAAGGCAAAAAGGAGAGTGGT  
GGAGAGAGAAAAAAGAGCAGTGGGACTAGGAGCTGTGTTCTTGGGTTCTTGGGAGCAGCAGGAAGCACTATG  
GGCGCGGCGTCAATAACGCTGACGGTACAGGCCAGACAATTGCTGTCTGGTATAGTGCAACAGCAAACAATT  
TGCTGAGAGCCATAGAGGCGCAACAGCATATGTTGCAACTCACGGTCTGGGGCATT

>KF725984..2

TTCTATTGCAATACAACAAAACCTGTTTAAATAGGATATATTATCCTAATGGTACATACAATGGTACAGAAAATG  
ATACCATCATACTCCCATGTAGAAATAAAAACAAATTATAAACATGTGGCAAGGGGTAGGACGAGCAATGTATGC  
CCCTCCCATTGCAGGAGAAATAACATGTAACTCAAGTATCACAGGACTACTATTGACACGTGATGGAGGACGT  
GATGGAGGCAACAATAGCGCAGAGACAGAGACATTCAGACCTAGCGGAGGAAATATGAGGGACAACCTGGAGAA  
GTGAGTTATATAAAATATAAAGTGGTAGAAATTCAGCCATTAGGAGTAGCACCCACTAAGGCAAAAAGAAGAGT  
GGTGGAGAGAGAAAAAAGAGCAGTGGGGCTAGGAGCTGTATTCTTGGGTTCTTGGGAGCAGCAGGAAGCACT  
ATGGGCGCGGCGTCAACAGCGCTGACGGTACAGGCCAGACAACCTGTTGTCTGGTATAGTGCAACAGCAGAGCA  
ATCTGCTGAGAGCCATAGAGGCGCAACAGCATATGTTGCAACTCACGGTCTGGGGCATT

>KF725994..1

TTCTATTGCAATACATCAAAAACCTGTTTAAATAGTAATTTTACAGAGAATTTTACAGAGACTTCTAATAGTACAG  
AGGGTGACATCACACTCCAATGCAGAATAAAAACAAATTATTAACATGTGGCAGGGGGTAGGACGAGCAATGTATGC  
TGCCCCCTCCCATTGCAGGAACCATAAACATGTAACTCAAGCATCACAGGAATACTATTGACACATGATGGTAAC  
CATCTCAGAAGAAGAGGTGGTATTTCAGACCTGGAGGAGGAGATATGAGGGACAACCTGGAGAAGTGAATTAT  
ATAAATATAAAGTGGTAGAAGTTAAACCCTAGGAATAGCACCCACTCAGGCAAAAAGAAGAGTGGTGGAGAG  
AGAAAAAAGAGCAGTGGGACTAGGAGCTGTGTTCTTGGGTTCTTGGGAGCGGCAGGAAGCACTATGGGCGCA  
GCGTCAATAACGCTGACGGTACAGGCCAGACAACCTGCTGTCTGGTATAGTGCAACAGCAAAGCAATTTGCTGA  
AGGCTATAGAGGCGCAACAGCATATGTTGCAACTCACGGTCTGGGGCATT

>KF725998..1

TTCTATTGTAATACATCAAAACCTGTTTAAATGATACAGGGAGTAATTC AACTAATTCAACCATCATACTCCCAT  
GCAGAATAAGACAAATTATAAACATGTGGCAGGGGGTAGGACGAGCAATGTATGCCCTCCCATTAAAGGAAA  
CATAACATGCAACTCAAGCATCACAGGAATACTATTGACACGTGATGGAGGAAAAGGACAACAGTACAAATGAA  
ACAGAGACATTCAGACCTATAGGAGGAAATATGAGGGACAACCTGGAGAAGTGAATTATATAAAATATAAAGTGG  
TAGAAATCAAGCCATTGGGAATAGCACCCACTCAGGCAAAAAGAAGAGTGGTGGAGAGAGAAAAAAGAGCAGC

GGGAGTAGGAGCTGTGCTCTTTGGGTTCTTGGGAGCAGCCGGAAGCACTATGGGCGCAGCGTCAATGGCGCTG  
ACGGTACAGGCCAGACAACCTGTTGTCTGGTATAGTGCAACAGCAAAGCAATTTGCTGAAGGCTATAGAGGCGC  
AACACATATGTTGCAACTCACGGTCTGGGGCATT

>MH933706..2

TTCTATTGCAACACATCAAGCTTGTTTAATGGAACATACAGTAATTACACTGATATAAACAGTTCTAGTATTA  
TCACACTCCCATGCAGGATAAAACAAATTATAAACATGTGGCAGGCGGTAGGACGAGCAATATATGCCCCCTCC  
CATCGAAGGGAACATAACATGTAAATCAAATATCACAGGACTACTATTGACACGTGATGGAGGAAAAGACAAT  
AATAACACAGAGGTATTTCAGACCTGGAGGAGGAGAGATGAGGGACAACCTGGAGAAATGAATTATATAAATATA  
AAGTGGTAGAAATTAAGCCATTAGGAATAGCACCCACTCATGCAAAAAGGAGAGTGGTGGAGAGAGAAAAAAG  
AGCAGTGGGAATAGGAGCTTTGTTCTTGGGTTCTTGGGAGCAGCAGGAAGCACTATGGGCGCGGCGTCAATA  
ACGCTGACGGTACAGGCCAGACAACCTGTTGTCTGGTATAGTGCAACAGCAAAGCAACTTGCTGAGGGCTATAG  
AGGCGCAACAGCATATGTTGCAACTCACAGTCTGGGGCATT

>MK643550..1

TTCTATTGCAATACATCACAACCTGTTTAATGGTACATATACAGGCAATAACACAGAGAACAATTCAAGCGAAA  
CAATCACACTCCCATGCAGGATAAAACAAATTATAAACATGTGGCAGGAGGTAGGACGAGCAATGTATGCTCC  
TCCCATTTGAAGGAAAAATAACATGTAACCTCAAGCATCACAGGACTACTATTGACAAGTGACAAAGGGGGTATA  
GGAAATAATCAGACAGAGACATTCAGACCTGGGGGAGGCAATATGAAAGACAATTGGAGCAATGAATTATATA  
AATATAAAGTAGTGAAATTAGACCATTAGGAGTAGCACCAACTGCTGCAAAGAGGAGAGTGGTGGAGAGAGA  
AAAAAGAGCAGTAGGAATAGGAGCTGTACTCTTTGGGTTCTTGGGAGCCGAGGAAGCACTATGGGCGCGGCG  
TCGATAACGCTGACGGTACAAGCCAGACAACCTGTTGTCTGGTATAGTGCAACAGCAAAGCAATTTGCTGAGAG  
CTATAGAGGCGCAACAGCATATGTTGCAACTCACAGTTTGGGGCATT

>MN611462..3

TTCTATTGTGATACAACACAACCTGTTTAATCAAACACTGTTTAATGGAAGTGATTCAAACAAAACAAACATTG  
TCCTCCCCCTACATTGTCTCTCCCATGCAGAATAAAACAGATTATAAACATGTGGCAGAGGTAGGACGAGCAAT  
ATATAATCCTCCCATTCAGGAAACCTAACATGTAACCTCAAGTATCACAGGGCTACTATTGACACGTGATGGA  
GGAGAGAACATGACACAGGGAGCGGAAACATTTCAGACCTACAGGAGGAAATATGAAGGACAATTGGAGAAGTG  
AATTATATAAATATAAAGTGGTAGAAATTCAGCCATTGGGAGTAGCACCCACTGAGGCAAAAAGGAGAGTGAT  
GCAGAGAGAAAAGAAGAGCAGTAGTGGGAATGGGAGCTGTGCTCCTTGGGTTCTTGGGAGCAGCAGGAAGCACT  
ATGGGCGCGGCGTCAATAACGCTGACGGTACAGGCCAGACAACCTGTTGTCTGGTATAGTGCAACAGCAAAGCA  
ATTTGCTGAGAGCTATAGAGGCGCAACAGCATCTGTTGCAACTCACGGTCTGGGGCATT

>MN097669..1

TTCTATTGTAATACAACACAGTTGTTTAATGATAGCATCTCAAACGCCACTAACCTCAACATCTCAAACGCCA  
CTAACATCACACTCACACTCCCATGCAGAATAAAACAAATTATAAACATGTGGCAGGAGGTAGGACGAGCAAT  
GTATGCCCCCTCCCATCGAAGGAAACATAACATGTGTATCAAATATCACAGGACTACTACTGCTACGTGATGGC  
GGAAACACCAATAACACCACTCAGCCAGAGATATTTCAGACCTGGAGGAGGAAATATGAAGGATAATTGGAGAA  
GTGAATTATATAAATATAAAGTGGTAGAAATTAAGCCATTAGGAATAGCTCCACGGAGGCAAAAAGGAGAGT  
GGTGGAAAGAGAAAAAAGAGCAGTACTAGGAGCTTTGCTCCTTGGGTTCTTGGGAGCAGCAGGAAGCACTATG  
GGCGCGGCGTCAATAGCGCTGACGGTACAGGCCAGAAATCTGTTGTCTGGTATAGTGACGAGCAAAGCAATT  
TGCTGAGAGCTATAGAGGCGCAACAGCATATGTTGCAGCTCACGGTCTGGGGCATT

>MN097680..1

TTCTATTGCAATACATCAAACCTTGTTTAATAGTACATACAACGGTACAGACATGGCTAATGGTACAGGAAATA  
CTTCAGAGTACATCACACTCCAATGCAGAATAAAACAAATTATAAACATGTGGCAGGAGGTGGGGCGAGCAAT  
GTATGCCCCCTCCCATTCAGGAAACATAACCTGTGAATCAAATATCACAGGACTACTATTGACACGAGATGGA  
GGAAAAGAAAATAATACAGAGACATTTCAGACCTGAAGGAGGAGATATGAGGAATAATTGGAGAAGTGAATTAT  
ATAAATATAAAGTAGTAGAAATTCACCATTAGGAATAGCACCCACTAAGGCAAGAAGGAGAGTGGTGCAGAA  
AGAGAAAAGAGCAGTGGGAATGGGAGCGTTGTTCTTGGGTTCTTGGGGGCAGCAGGAAGCACTATGGGCGCA  
GCATCAATAACGCTGACGGTACAGGCCAGACAATTATTGCTCTGGTATAGTGCAACAGCAAAGCAATTTGCTGA  
GGGCTATAGAGGCGCAACAGCATATGTTGCAACTCACGGTCTGGGGCATT

>AY162225..1

TTCTATTGCAATACATCTGTACTGTTTAATGGCACATACAGTAATGGCACAAACAGTACAAATACAACAGTCA  
TCACACTCCCATGCAGAATAAAACAAATTATAAACATGTGGCAGGGGGTAGGACGAGCAATGTATGCCCCCTCC  
CATTCAGGAAACATAACATGTAGATCAAACATCACAGGACTAATATTGACACGTGATGGAGGGCAGGGAGAG  
AATGACACAAATGAGATATTTAGACCTGCAGGAGGAGATATGAGGGACAATTGGAGAAGTGAATTATACAAAT  
ATAAAGTGGTAGAAATTCAGCCATTAGGAGTAGCACCCACTAAGGCAAAAAGGAGAGTGGTGGAGAGAGAAAA  
AAGAGCAGCTTTGGGAGCTGTGTTCTTGGGTTCTTGGGAGCAGCAGGAAGCACTATGGGCGCGGCATCAATA  
ATGCTGACGGTACAGGCCAGACAACCTGTTGTCTGGTATAGTGCAACAGCAAAGCAATTTGCTGAGAGCTGTAG  
AGGCGCAACAGCATATGTTGCAACTCACGGTCTGGGGCATT

>AF391249..1

TTCTATTGCAATACATCAGAACTGTTTAATAGTACATACATGCCTAATGGTACAGAAAAGTAATACAAGCAAAA  
CCATCATACTCCCATGCAGAATAAAACAAATTATAAATATGTGGCAGGGGGTAGGACGAGCAATGTATGCCCC

TCCCATTGCAGGAAACATAACATGTCAATCAAATATCACAGGAATACTATTGACCCGTGATGGAGGAGAAGAG  
TCAAAGTCAAATGGAACAGAGATATTCAGGCCTGCAGGAGGGGATATGAAGGACAATTGGAGAAGTGAATTAT  
ATAGATATAAAGTGGTAGAAATTAAACCATTAGGAGTAGCACCCACTGAGGCCAAAAGGAGAGTGGTGGAGAG  
AGAAAAAGAGCAGTGGGAATAGGAGCTGTGTTCTTGGGTTCTTGGGAGCAGCAGGAAGCACTATGGGCGCG  
GCGTCAATAACGCTGACGGTACAGGCCAGACAACCGTTTCTGGTATAGTGCAACAGCAAAGCAATTTGCTGA  
GGGCTATAGAGGCGCAACAGCATATGTTGCAACTCACAGTCTGGGGCATT

>AY522721..1

TTCTATTGCAACACATCAAGGCTGTTTAATGAGACAGTAAAAAATAATGCAACCATCACAATCCCATGCAAAA  
TAAAACAATTTATAAACATGTGGCAAAAGGTAGGACAAGCAATGTATGCCCCCTCCCATTTAAAGGAAACATAAC  
ATGTACATCAAATATCACAGGACTACTATTGACACGTGATGGAGGGAATCACAACAATAGCCATAGCACAGAG  
ATATTCAGACCTGGAGGAGGAGACATGAAAGATAAAGTGGAGAAGTGAATTATATAAAATATAAAGTGGTAGAAA  
TTAAGCCATTGGGCATAGCACCCACTGGGGCAAAAAGGAGAGTGGTGGAGAGAGAAAAAGAGCAGTGGGAAT  
AGGAGCTGTGTTCTTGGGTTCTTGGGAGCAGCAGGAAGCACTATGGGCGCAGCGTCAGTGACGCTGACGGTA  
CAGGCCAGACAATTGTTGTCTGGTATAGTGCAACAGCAAAAACAATTTGCTGAGAGCTATAGAGGCGCAACAAC  
ATCTGTTGCAACTCACGGTCTGGGGCATA

>DQ447267..2

TTCTACTGCAATACATCAGGACTGTTTAATAGAAGGTATAATGGTACAGAAAATAATACTTATGATGATACAG  
ATAATTC AACCATCACAATTC CATGCAGAATAAAACAATTTATAAACATGTGGCAGCAGGTAGGACGGGCAAT  
ATATGCCCCCTCCCATTCAGGAAACATAACATGTAATTCAGTATCACAGGATTACTATTGACACGCGATGGA  
GGAAATCAGACTGAGGAGGACAATATCACAAGACAGAGATATTCAGACCAGGAGGAGGAGATATGAGGGATA  
ATTGGAGAAGTGA ACTATATAAAATATAAAGCGGTAGAAAATTAAGCCATTAGGAGTAGCGCCCACTGGAGCAAA  
AAGGAGAGTGGTGGAGAGAGAAAAAGAGCAGTGGGAATAGGAGCTGTACTCCTTGGGTTCTTGGGAGCAGCA  
GGAAAGCACTATGGGCGCAGCGTCAATAGCGCTGACGGCACAGGCCAGACAAGTGTGTCTGGAATAGTGCAAC  
AGCAAAAACAATTTGCTGAGAGCTATAGAGGCGCAACAGCATATGTTGCAACTCACAGTCTGGGGCATT

>JX905394..1

TTCTACTGCAATACATCAAAACTGTTTAATGGTACATATAATGGTACATATAATGGTACAGAAAATAGCACCA  
TTACCCCTCCCATGCAAAAATAAAACAATTTATAAACATGTGGCAAGGGGTAGGAAGAGCAATGTATGCCCCGCC  
CATTCAAGGAAATATAACATGTGAATCAAACATCACAGGACTACTATTGACACGTGATGGAGGCACAAATAAT  
ACTAATAGTACAGAGACATTCAGACCTGGAGGAGGAAATATGAAGGACAATTGGAGAAGCGAATTATATAAAT  
ATAAAGTGGTAGAAATTAAGCCATTAGGACTAGCACCCACTAATGCAAAAAGGAGAGTGGTGGAGAGAGAAAA  
AAGAGCAGTGGGAATAGGAGCTGTGTTCTTGGGTTCTTGGGAGCAGCAGGAAGCACTATGGGCGCAGCATCA  
ATAACGCTGACGGTACAGGCCAGACAATTATTGTCTGGTATAGTGCAACAGCAAAGCAATTTGCTGAGAGCTA  
TAGAGGCGCAACAGCATATGTTGCAACTCACGGTCTGGGGCATT

>HQ625577..1

TTCTATTGCAATACATCAGGGCTGTTTAATAGAACATACCTGTCTAATGAAACATACCTGTCTAATGATACAC  
TGACTAATGGTACAAATAGGAATATAACACTCCCATGCAAAAATAAAACAATTTATAAACATGTGGCAGGGGGT  
AGGAAAAGCAATGTATGCCCCCTCCCATTCAGGAAACATAACATGTAGATCAAATATCACAGGAATACTATTA  
ACACGTGATGGAGGGAAAAGTGAGGGAACGAAAAATGGTACAGAGATATTCAGACCTGGAGGAGGAGATATGA  
AGGACAATTTGGAGAAATGAATTATATAAATATAAAGTGGTAGAAATTCAGCCATTAGGAGTAGCACCCACTAA  
GGCAAAAAGGAGAGTGGTGGAGAGAGAAAAAGAGCAGTGGGACTGGGAGCTGTGCTCTTTGGGTTCTTGGGA  
GCAGCAGGAAGCACTATGGGCGCAGCGTCAATAACGCTGACGGTACAGGCCAGACAATTGCTGTCTGGTATAG  
TGCAACAGCAAAGCAATTTGCTGAGAGCTATAGAGGCGCAACAGCATATGTTGCAACTCACGGTCTGGGGCAT  
T

>HQ625568..1

TTCTATTGCAATACACAACAAATCTGTTTAATACAACAGACCTGTTGAGTAACAATAGTACGTTAGAAAACAAAA  
CAAAAACCATCACACTCCCATGCAAAAATAAAACAATTTATAAACATGTGGCAGGAAGTAGGACGAGCAATGTA  
TGCCCCGCCCATTGCAGGAAACATAACATGTAGATCAAATATCACAGGACTACTATTGACCCGTGATGGAGGG  
AGCTATAGTGATAGAGGGAATAGTAGTGCAAATGAAACAGAAAAAGAAATATTAGACCAGGAGGAGGAAATA  
TGAAGGACAATTTGGAGAAGTGAATTATATAAATATAAGGTGGTAGAAGTTAAGCCATTGGGAGTAGCACCCAC  
TGAGGCAAAAAGGAGAGTGGTGGAGAGACAAAAAGAGCAGTGGGACTAGGAGCTATGTTCTTGGGATCTTG  
GGAATAGCAGGAAGCACTATGGGCGCGGCGTCAATCACGCTGACGGTACAGACCAGACAACCTGTTGTCTGGTA  
TAGTGCAACAGCAAAGCAATTTGCTGAGAGCTATAGAGGCGCAACAGCATATGTTGCAACTCACGGTCTGGGG  
CATT

>HQ625588..1

TTCTATTGTAATACATCACAACCTGTTTAATGGTGTGTATAATACTTCAACCAGCAGTAATTC AACCGATAGTA  
AGAAAAACATCACACTCCCATGCAGAATAAAACAATTTATAAACATGTGGCAAGAGGTAGGACGAGCAATGTA  
TGCCCCCTCCCATTGCAGGAAACATAACATGTATCTCAAACATCACAGGATTACTATTGACACGGGATGGAGGA  
ACAAAACAATGAGACTAATGGTACAGAGACATTCAGGCCTGGAGGAGGAAATATGAAGGACAATTTGGAGAAGTG  
AATTATATAAGTATAAGGTAGTGGAATTC AACCATTAGGAATAGCACCCACTGATGCAAAAAGGAGAGTGGT  
GGAGAGACAGAAAAGAGCAGTAATAGGACTAGGAGCTATGTTCTTGGGATCTTAGGAGTAGCAGGAAGCACT

ATGGGCGCAGCATCAATAACGCTGACGGTACAGGCCAGACAATTGTTGTCTGGTATAGTGCAACAGCAAAGTA  
ATTTGCTGAAGGCTATAGAGGCGCAACAGCATATGTTGCAACTCACAGTCTGGGGCATT

>AB254156..1

TTCTATTGCGACACATCAAACCTGTTTAAACAGCACATTTAATGTTAACAGCACATTTAATGGTACAGATAATG  
CAAATAGCACACAGAACATCACACTCCAATGCAGAATAAAACAAATTATAAACATGTGGCAGGAGGTAGGACG  
AGCAATGTATGCCCCCTCCCATTTGCAGGAAACATAACATGTATTTCAAATATCACAGGAATACTATTAACACGT  
GATGGAAATGATAATTACACAGAGACATTCAGACCTATAGGAGGAAATATGAAGGACAATTGGAGAAGTGAAT  
TATACAAATATAAAGTGGTAGAAATTAAGCCATTAGGAGTAGCACCCACCAAGGCAAAAAGGAGAGTGGTGGA  
GAGACAAAAAAGAGCAGTGGGACTAGGAGCTGTGTTCTTGGGTTCTTAGGAGCAGCAGGAAGCACTATGGGC  
GCAGCGTCAATAACGCTGACGGTACAGGCCAGACAATTGTTGTCTGGTATAGTGCAACAGCAAAGCAATTTGC  
TGAGAGCTATAGAGGCGCAACAGCACATGTTGCAACTCACAGTCTGGGGCATA

>KY229510..1

TTCTATTGCAAGACATCACGACTATTTAATGGCACATACAGAGGTCCTAATGATACAAAAAGCAATTTAAGTG  
AGACTATCACACTCCAATGCAAAATAAAACAGATTATAAACACGTGGCAGGGGGTAGGACGAGCAATATATGC  
CCCTCCCATTTGCGGGAAACATAACATGTAAATCAAATATCACAGGACTACTCTTGGTAAGGGATGGAGGGAAT  
AATACAAATGAAGAAATATTTAGACCTGGAGGAGGAGATATGAGGGACAATTGGAGAAGTGAATTATATAAAT  
ATAAAGTAGTAGAAATTAAGCCATTGGGAATAGCACCCACCAAGGCAAAAAGGAGAGTGGTGGAGAGAGAAAA  
AAGAGCAGTGGGAATAGGAGCTGTACTCCTTGGGTTCTTGGGAACAGCAGGAAGCACTATGGGCGCAGCGTCA  
ATAACGCTGACGGTACAGGCCAGACAAGTGTGTCTGGTATAGTGCAACAGCAAAGCAATTTGCTGAGGGCTA  
TAGAGGCGCAGCATCATATGTTGCAACTCACGGTCTGGGGCATT

>HM036864..1

TTCTATTGTAATACATCAGGCCTGTTTAAATGGTACATTTAATGGAACATACCCTAATAGTACAGACCCTAATG  
GAAATGATACCATCACACTCCCATGCAGAATAAAACAGTTTATAAACATGTGGCAGAAGGTAGGACGAGCAAT  
GTATGCCCCCTCCCATTAAGGAAACATAACATGTAACTCAAATATCACAGGATTACTGTTGACGAGTGATTAT  
GGAAGAAATGCAAGTAAAAACGAGACATTCAGACCTGGAGGAGGAGATATGAGGGACAATTGGAGAAGTGAAT  
TATATAAATATAAAGTGGTAGAAATTAACCATTGGGAGTAGCACCCACTGGAGCAAAAAGGAGAGTGGTGGA  
GAGAGAAAAAAGAGCAGTGGGAATAGGAGCTGTTCTCCTTGGGTTCTTGGGAGCAGCAGGAAGCACTATGGGC  
GCAGCGTCAATAACGCTGACGGTACAGGCCAGACAATTGTTGTCTGGTATAGTGCAACAGCAAAGCAATTTGC  
TGAGGGCTATAGAGGCGCAACAGCATATGTTGCAACTCACGGTCTGGGGCATT

>DQ422948..2

TTCTATTGCAATACAACAAAACCTGTTTCATGAGGGAAGCAGGAAAAATGATAATGATACAATCACACTTCCAT  
GCAGAATAAAACAATTTATAAACATGTGGCAGGAGGTAGGACGAGCAATGTATGCACCTCCCATTGCAGGAAA  
CATAACATGTAATTCAGCATCACAGGAATACTATTGGTACGTGATGGAGGTACCAATAACACAAATGAGACA  
TTCAGACCTGGAGGAGGAGATATGAGGGACAATTGGAGAAGTGAATTATATAAATATAAAGTGGTAGAAATTC  
AACCATTGGGAATAGCACCCACTAAGGCAAAAAGGAGAGTGGTGGAGAGAGAAAAAAGAGCAGTGGGACTAGG  
AGCTGTGTTCTTGGGTTCTTGGGAGCAGCGGAAGCACTATGGGCGCGGCGTCAATAACGCTGACGGCACAG  
GCCAGACAATTGCTGTCTGGTATAGTGCAACAGCAAAGCAATTTGCTGAGAGCTATAGAGGCGCAACAGCATA  
TGTTGCAACTCACAGTCTGGGGCATT

>EU166653..1

TTCTATTGCAATACATCAAGACTGTTTAAATAGTACACACTGGGCTAATGGTACTACAGACATGTCTAATGATA  
CTAAGAATATCACCTCCCATGCAAAATAAAACAAATTATAAACATGTGGCAGGGGGTAGGACGAGCAATATA  
TGCCCCCTCCCATTTGAAGGAAGCATAACATGTAATTCAGTATCACAGGACTACTATTGACACGTGATGGAGGA  
AACAGTCATAATACTACAGAGACATTCAGACCTGGAGGAGGAGATATGAGAGACAATTGGAGAAGTGAATTAT  
ATAAATATAAGGTGGTAGAAATTAAGCCATTAGGACTAGCACCCACTGAGGCAAAAAGGAGAGTGGTGCAGAG  
AGAAAAAAGAGCAGTGGGGATAGGAGCTGCATTCTTGGGTTCTTGGGATTAGCAGGAAGCACTATGGGCGCG  
GCATCAATAACGCTGACGGTACAGGCCAGACAATTATTGTCTGGTATAGTGCAACAGCAAAGCAATTTGCTGA  
GAGCTATAGAGGCGCAACAGCATATGTTGCAACTCACAGTCTGGGGCATT

>KY229617..1

TTCTATTGCGAAACATCAGACCTGTTTAAATAGTACATTTAGATTTAATGGTACAGACATACAGACCACATTTA  
ATGATACATTGAATGATACACAGATCATCATCAAATGCAGAATAAAGCAAATTATAAACATGTGGCAAGGGGT  
AGGGCGAGCAATATATGCCCCCTCCCATTTGAAGGAAATATAACATGTGAATCAAATATCACAGGATTAATATTG  
ACACGGGATGGAGGGAATACCACAGATCCAGAGACATTCAGACCTGCAGGAGGAGATATGAGGGACAATTGGA  
GAAGTGAATTATATAAATATAAAGTGGTAGAAATTCAGCCATTAGGAGTAGCACCCACAAAGGCAAAAAGGAG  
AGTGGTGGAGAGAAGAGAAAAAAGAGCAGTGGGAATAGGAGCTGTGTTCTTGGGTTCTTGGGAGCAGCAGGA  
AGTACTATGGGCGCAGCATCAATAACGCTGACGGTACAGGCCAGACAAGTGTGTCTGGTATAGTGCAACAGC  
AGAGCAATCTGCTGAGGGCTATAGAGGCGCAACAGCATATGTTGCAACTCACGGTCTGGGGCATT

>HM036739..2

TTCTATTGCAATACATCAGGCCTGTTTAAATTATACATTTACAGCTAATGATACAAAAGATACAGATCACATCTA  
ATGACACACTTAATGATACACTGACCATCAAATGCAGAATAAAGCAAATTATAAACATGTGGCAGGGGGTAGG  
ACGAGCAATGTATGCCCCCTCCCATTTGAAGGAATAATAGCATGTAATTCAACTATCACAGGATTAATATTGACA

CGGGATGGAGGGAAGAATACCAAGTAACAATGACACAGAGACATTTCAGACCTGCAGGAGGAGATATGAGGGACA  
ATTGGAGAAGTGAATTATATAAAATATAAAGTGGTAGAAATTTCAGCCATTAGGAGTAGCACCCACAAAGGCAAA  
AAGGAGAGTGGTGGAGAGAAGAGAAAAAAGAGCAGTGGGAATAGGAGCTGTGTTCTTGGGTTCTTGGGAGCA  
GCAGGAAGCACTATGGGCGCAGCATCAATAACGCTGACGGTACAGGCCAGACAACCTGTTGTCTGGTATAGTGC  
AACAGCAGAGCAATCTGCTGAGGGCTATAGAGGCGCAACAGCATATGTTGCAACTCACGGTCTGGGGCATT  
>GU329051..1  
TTCTATTGCGATACATCAGGCCTGTTTGATTCAAGCCTGTTGAATAAGACAGAAAAATAGTACAAAGACAGAAA  
ATAATACAAACATCATACTCCAATGCAGAATAAAACAAATTATAAACATGTGGCAAGAGGTAGGAAAAGCAAT  
ATATGCCCTCCCATTTGAAGGAAACATAACATGTATATCAAACATCACAGGAATACTATTGACGAGGGATGGA  
GGAAACAATAACAATGACACAGAGATATTTCAGACCTGGAGGAGGGAATATGAAAGACAATTGGAGAAGTGAAT  
TATATAAAATATAAAGTAGTAGAAATTTCAGCCATTGGGAATAGCACCTACCGAGGCAAAGAGAAGAGTGGTGGA  
GAGAGAAAAAAGAGCAGTGGGAATAGGAGCTGTGTTCTTGGGTTCTTGGGAGCAGCAGGAAGCACTATGGGC  
GCAGCGTCAATGACGCTGACGGTACAGGCCAGACAATTGTTGTCTGGTATAGTGCAACAGCAAAGCAATTTGC  
TGAGAGCCATAGAGGCGCAACAGCATATGTTGCAACTCACAGTCTGGGGCATT  
>GU329105..1  
TTCTACTGCAATACATCAGACCTGTTTAAGGGTGAATTTAATGGTACGCGTAATCTAGGAAATGATACTTCAG  
GAAACATCACACTCAACTGCAGAATAAAACAAATTATAAACATGTGGCAGGAGGTAGGGCGAGCAATGTATGC  
CCCTCCCATTTGCAGGAAATATAACATGTAACCTCAAGTATCACAGGACTACTATTGACACGTGATGGAGGAGAA  
ACTAATGAACTGAGAGTGAGACATTTAGACCTGGAGGAGGAGATATGAGGGACAATTGGAGAAGTGAATTAT  
ATAAAATATAAAGTGGTAGAAGTTAATCCATTAGGAATAGCACCCACTAATGCAAGAAGGAGAGTGGTGACAAA  
AGAAGAAGTGAGAAAGAAAAGAGCAGTGGGACTAGGAGCTGTGTTCTTGGGTTCTTGGGAGCAGCAGGAAGC  
ACTATGGGCGCGCGTCAATAACGCTGACGGTACAGGCCAGACAATTACTGTCTGGTATAGTGCAACAGCAAAA  
ACAATTTGCTGAGAGCTATAGAGGCGCAACATCATATGTTGCAACTCACAGTCTGGGGCATC  
>GU329116..1  
TTCTATTGCAATACATCAGGCCTGTTTAATAAGACATACAATGATACAAGTGATAAAAAACATCACACTCCCAT  
GCAGGATAAAACAAATTATAAACATGTGGCAGAAGGTAGGACAGGCAATGTATGCCCTCCCATTAGAGGAAA  
CATAACATGTCACTCAAATATCACAGGGCTATTATTGGTACGTGATGGGGGAAACACAAACAATACTGACACA  
AATAACTGATTCAAATAGAACTGAGATATTTAGACCTGGAGGAGGAGATATGAGAGACAATTGGAGAAGTG  
AATTGTACAAATATAAAGTGGTAGAAATTAAGCCATTGGGAATAGCACCCACTGGAGCAAAAAGGAGAGTGGT  
GGGAGAGAGAAAAAGAGCAGCGGGAATAGGAGCTTTACTCCTTGGGTTCTTGGGAGCTGCAGGAAGCACTATG  
GGCGCGCGTCAATAACGCTGACGGTACAGGCCAGACAATTATTGTCTGGTATAGTGCAACAGCAAAGCAATT  
TGCTGAGAGCCATAGATGCGCAACAGCATATGTTGCAACTCACGGTCTGGGGCATT  
>GU329220..1  
TTCTATTGCAATACATCAAACCTTATTCAATAGATCACTGTCTAATGATACAGAAGAAGATACAGACAGTAATA  
GAACCATCACACTCCCATGTAGAATAAAACAGATTATAAACATGTGGCAGGAAGTAGGAAGAGCAATGTATGC  
CCCTCCCATTTGCAGGAAACATAACATGTGTATCAAATATCACAGGACTACTCCTGGTGCGGGATGGAGGCCAT  
CAAAATAGCACAGAGAATAATAACACAGAGATATTTCAGACCTGGAGGAGGAGATATGAGGGACAATTGGAGAA  
GTGAATTATATAAATACAAAGTAGTAGAAATTAACCATTAGGAATAGCACCTACCAAGGCACGGAGGAGAGT  
GGTGACAGAGAGAAAAAGAGCAGTGGGAATAGGAGCTGTACTCCTTGGGTTCTTGGGAACAGCAGGAAGCACT  
ATGGGCGCAGCGTCAATAACGCTGACGGTACAGGCCAGACAATTGCTGTCTGGTATAGTGCAACAGCAAAGCA  
ATTTGCTGAGAGCTATTGAGGCGCAACAGCATATGTTGCAACTCACAGTCTGGGGCATT  
>GU329240..1  
TTCTATTGCAATACATCAGATCTGTTTAATTTCATCAAACTGTTTAATACAAACAATACTGAGAACTTAACAA  
TAATCACCATTCCATGCAGAATAAAACAAATCATAAACATGTGGCAGGAGGTAGGACGAGCAATGTATGCTCC  
TCCCATTTGCAGGAAACATAACATGTACATCAGACATCACAGGATTACTATTGGTACGTGATGGAGGCACAGAA  
AGTAGCACAAAAGAGATATTTCAGACCTGGAGGAGGAGATATGAGGGATAATTGGAGAAGTGAATTATACAAAT  
ATAAAGTGGTAGAAATTAAGCCATTGGGAATAGCACCCACCGAGGCAAAAAGGAGAGTGGTGGAGAGAGAAAA  
AAGAGCAGTGGGACTAGGAGCTTTGTTCTTGGGTTCTTGGGAGTAGCAGGAAGCACTATGGGCGCGCGCTCA  
ATAACGCTGACGGTACAGGCCAGACAACCTGTTGTCTGGTATAGTGACAGCAGCAAAGCAATTTGCTGCAGGCTA  
TAGAGGCTCAACAGCATATGTTGAACTCACGGTCTGGGGCATT  
>GU329324..1  
TTCTATTGCAATACATCAGGGTTGTTTAATGGTACATACAATAGTACAGACAGTAATTCAAACCTCAACCATCA  
CAATTCATGCAGAATAAAACAAATTATAAACATGTGGCAGGAAGTAGGACGAGCAATATATGCCCTCCCAT  
TGCAGGAAACATAACATGTAACCTCAAGTATCACAGGACTACTATTGGTACGTGATGGGGCAGCAACGCCACT  
AATGAAACATTTCAGACCTCAAGGAGGAAATATGAAAGACAATTGGAGAAGTGAATTATATAAAATATAAAGTGG  
TAGAAGTTAAGCCATTAGGAATAGCACCAACTGAAGCAAAAAGGAGAGTGGTGGAGAGAGAAAAAAGAGCAGT  
AGGAATAGGAGCTGTGTTCTTGGGTTCTTGGGAGCAGCAGGAAGCACTATGGGCGCAGCGTCAATAACGCTG  
ACGGTACAGGCCAGACAACCTGCTGTCTGGTATAGTGCAACAGCAAAGCAATTTGCTGAGGGCTATAGAGGCGC  
AACAGTATATGTTGCAACTCACAGTCTGGGGCATC  
>GU329333..2

TTCTATTGCAATACATCAAATCTGTTTAAATAGACACCTGCTCAATAGTAAAGGTATGTCTAATAATACAGAAA  
GTAATTCAACAATCATACTCCCATGCAAAATAAAACAAATTGTAAACATGTGGCAGGAGGTAGGACGAGCAAT  
GTATGCCTCTCCCATTTGCAGGAAACATAACATGTAAATCAAATATCACAGGACTATTATTGGTACGTGATGGG  
GGAAGTAGCATAAATCAAACAGAGATATTTAGGCCTCAAGGAGGAGACATGAGGGACAACCTGGAGAAGTGAGT  
TATATAAATATAAAGTGGTAGAAATTAACCATTGGGAGTAGCACCCACTGAGGCAAAAAGGAGAGTGATGCA  
GAGAGAAAAAAGAGCAGTGGGAATGGCAGCTGTGTTCTTGGGTTCTTGGGAGCAGCAGGAAGCACTATGGGC  
GCGGCGTCAATAACGCTGACGGTACAGGCCAGACAATTATTGTCTGGTATAGTGCAACAGCAAAGCAATTTGC  
TGAGGGCTATAGAGGCGCAACAGCATCTGTTGCAACTCACGGTCTGGGGCATT

>GU329368..2

TTCTATTGCAATACAACACCACTGTTTAAATTACAGTGCAACAGAGCTGTTTAGTAATAGTAGTAAAAACATTA  
GTGAAAAGGACACCATCACACTCCAGTGCAGAATAAAACAAATTATAAACATGTGGCAGAAAGTAGGACGAGC  
AATGTATGCCCCCTCCCATTTGCAGGAAACATAACATGTACATCAAACATCACAGGACTACTATTGGTCCGGGAT  
GGAGGCGTCAACAGAACAAATCACAATGAGACATTTAGACCTGGAGGGGGAGACATGAGAGACAATTGGAGAA  
GTGAATTATATAAATATAAAGTGGTAGAGATAAAGCCATTGGGAATAGCACCAACTGAGGCAAAAAGGAGAGT  
GGTGGAGAGACAAAAAAGAGCAGTGGGACTGGGAGCTATGTTCTTGGGTTCTTGGGAGCAGCAGGAAGCACT  
ATGGGCGCGGCGTCAATAGCGCTGACGGCAGGCCAGACAATTGTTGTCTGGTATAGTGACAGCAGCAAAAACA  
ATTTGCTGCAGGCCATAGAGGCGCAACAGCATCTGTTGCAACTCACTGTCTGGGGCATT

>MK749242..1

TTCTATTGCAACACATCAGGGCTGTTTAAAGGGAATGTACCTGGATAATAGCACCAACCACAGAGAATTCAACTT  
CGCCAAACATCACACTCCACTGCAAAATAAAACAATTTATAAACATGTGGCAGGGGGTAGGTCAAGCAATGTA  
TGCCCCCTCCCATTTGCAGGAAACATAAGATGTGAATCAAATATCACAGGAATACTGTTAACACGTGATGGAGGA  
GGGGAAAATAATAACACAAAAAGAAACCTTCAGACCTGGAGGAGGAGATATGAGGGACATATGGAGAAGTGAGT  
TATATAAATATAAAGTGGTAGAAATTAAGCCATTAGGAGTAGCACCCACTGAGGCAAAAAGGAGAGTTGTGGA  
GAGAGGAAAAAAGAGCAGTGGGAGTAGGAGCTGTGATCTTTGGGTTCTTGGGAGCAGCAGGAAGCACTATGGGC  
GCAGCGTCATTAACGCTGACGGTACAGGCCAGACAATTGCTGTCTGGTATAGTGCAACAGCAAAGCAATTTGC  
TGAGAGCCATAGAGGCGCAACAGCATATGTTGCAACTCACGGTCTGGGGCATT

>KU749426..2

TTCTATTGCAACACATCAGGACTGTTTAAATGGTATATACAATACTACAAGTAATTCAAGTGATACAAATAAAA  
ACATCACACTCCAATGCAGGATAAGACAATTTATAAACTTGTGGCAGGAGGTAGGAAAGGCAATGTATGCACC  
TCCCATTTGCAGGAAACATCACTTGTAATCAAATATCACAGGAATACTATTAACACGTGATGGAGGAGAAGGA  
AAGAATCAAACAAACAGTAGTCAAGAGATATTAGACCTGGAGGAGGAAATATAAAGGATAATTGGAGAAGTG  
AACTATACAAATATAAAGTGGTAGAAATTAACCATTAGGACTAGCACCCACTCCGGCAAAAAGGAGAGTGGT  
GGAGAGAGAAAAAAGAGCAGTGGGAATAGGAGCTGTGTTCTTGGGTTCTTGGGAGCAGCCGGAAGCACTATG  
GGCGCGGCGTCAATAACGCTGACGGTACAGGCCAGACAATTGCTGTCTGGTATAGTGCAACAGCAAAGCAATT  
TGCTGAGGGCTATAGAGGCGCAACAGCATATGTTGCAACTCACGGTCTGGGGCATT

>KR820394..1

TTCTATTGCAATACATCAAGACTATTCAATGATGATGATAATGATACAGCACTGGCTAGTGATACAGCTTTAA  
ATAAAAAATAAACCATCACACTCCCATGCAAAATAAAACAGATTATAAACATGTGGCAGGAAGTAGGACGAGC  
AATGTATGCCCCCTCCCATTTGCAGGGAACATAACATGTAACCTCAAACATCACAGGAATACTATTAACACGTGAT  
GGAGGAAATGGAAATCGCACAGGAAATCAGACAGAGGCCAATCGCAATCGCACAGAGATATTTAGACCTGCAG  
GAGGAAATATGAAGGACAATTGGAGAAGTGAATTATATAAATATAAAGTGGTAGAAATTAAGCCATTAGGAAT  
AGCACCAACTGAAGCAAAAAGGAGAGTGGTGGAGAGAGAAAAAAGAGCAGTGGGAATAGGAGCTGTGTTCTT  
GGGTTCTTGGGAGCAGCAGGAAGCACTATGGGCGCGGCGTCAATAACGCTGACGGTACAGGCCAGACAACCTGC  
TGTCTGGTATAGTGCAACAGCAAAGTAATTTGCTGAGGGCTATAGAGGCGCAACAGCATCTGTTGCAACTCAC  
GGTCTGGGGCATT

>U88822..1

TTCTACTGCAATACATCAGGACTGTTTAAATAGTGCATGGAATATATCAGGACATAGTACAGGGTTAAATGATA  
CAATCATAACCATCCCATGCAAGAATAAAACAAATTATAAACATGTGGCAGGAAGTAGGAAAAGCAATGTATGC  
CCCTCCCATTTGAAGGGCAAATTAATTGTTTCATCAAATATTACAGGGCTACTATTGACAAGAGATGGTGGTGCT  
AATAAATACTCAGAATGACACCTTTAGACCTGGAGGAGGAGATATGAGAGACAACCTGGAGAAGTGAATTATATA  
AATATAAAGTAGTAAAAATGAACCACTAGGAGTAGCACCCACCAAGGCAAAGAGAAGAGTGGTGGAAAGAGA  
AAAAAGAGCAATAGGACTAGGAGCTATGTTCTTGGGTTCTTGGGAGCAGCAGGAAGCACGATGGGCGCAGCG  
TCAATGACGCTGACGGTACAGGCCAGACAAGTATTGTCTGGTATAGTGCAACAGCAAAAACAATTTGCTGAGGG  
CTATAGAGGCGCAACAGCATCTGTTGCAACTCACGGTCTGGGGCATT

>AJ277820..1

TTCTACTGCAATACATCAAAACTATTTTAAATAGTACATGGAGTATAGAGAGTAATATTACAGAGTCAAATGATA  
GTACAATCATACTTCCATGCAAGAATAAAACAGATTGTAAACATGTGGCAGAGAGTAGGAAAAGCAATGTATGC  
CCCTCCCATTTGAAGGAATAATCAGATGTTTCATCAAATATTACAGGGCTACTATTGCTAAGAGATGGTGGGGTA  
AATAATCATAGTAATGAGACCTTCAGACCTGGAGGAGGAGATATAAGGGACAATTGGAGAAGTGAATTATATA  
AATATAAAGTAGTAAGACTTGAACCACTAGGAGTAGCACCCACCAGGGCAAAGAGAAGAGTGGTGGAAAGAGA

AAAAAGAGCAATAGGATTAGGAGCTATGTTTCCTTGGGTTCTTGGGAGCAGCAGGAAGCACGATGGGCGCAGTG  
TCAATGACGCTGACGGTACAGGCCAGACTGTTACTGTCTGGTATAGTGCAACAGCAAAACAATTTGCTGAGGG  
CTATAGAGGCGCAACAGCATCTGTTGCAACTCACGGTCTGGGGCATT

>AY371156..1

TTCTACTGCAATACATCAGGACTGTTTAAATAGAAATATTAGTACAGAGAGTACTGAAAATAGTACAGGAGTAA  
ATGATACAATAACCATCCCATGTAAAATAAGACAAATTATAAACATGTGGCAGGGAGTAGGAAAAGCAATATA  
TGCCCCCTCCCATTTGAAGGACAAATTAAATGTTTCATCAAATATTACAGGGCTACTATTGACAAGAGATGGTGGT  
AATACTTCTTATGAGGAGACCTTCAGGCCTGGAGGAGGAAATATGAAGGACAATTGGAGAAGTGAATTATATA  
AATATAAAGTAGTAAGAATTGAACCACTAGGAGTAGCACCCACCAGGGCAAAGAGAAGAGTGGTGGAAAGAGA  
AAAAAGAGCAATAGGATTAGGAGCTATGTTTCCTTGGGTTCTTGGGAGCAGCAGGAAGCACGATGGGCGCAGCG  
TCAGTGACGCTGACGGTACAGGCCAGACAATTATTGTCTGGTATAGTGCAACAGCAAAATAATTTGCTGAGGG  
CTATAGAGGCGCAACAGCATCTGTTGCAACTCACGGTCTGGGGCATT

>FJ388945..1

TTCTACTGTAATACATCAAACTGTTTAAATACAACATGGTCTAGTGAAACATGGGAGAATAGTACGGGAAAATA  
ATACCGAATTAATGGTACGATAACCATCCCATGTACAATAAAACAAATTATAATCATGTGCCAGGGAGTGGG  
AGTAGCAATGTATACCCCTCCCCCTGCAGGAATAATTCAGTGTAATCAAATATTACAATTACAGGGCTGACA  
AGAGATGGTGGTAATAATAGTAATTGTAATGAGACCTTCAGGCCTGGAGGAGGAGATATGAGGGACAATTGGA  
GAAGTGAATTGTATAAATATAAAGTAGTAAGAATTGAACCATTAGGAATAGCACCCACCAGAGCAAAGAGAAG  
AGTGGTGGAAAGAGAAAAAGAGCAATAGGATTAGGAGCTATGTTTCCTTGGGTTCTTGGGAGCAGCAGGAAGC  
ACGATGGGCGCAGCGTCAATAGCGCTGACGGCACAGGCCAGACAAGTGTTCGGTATAGTGCAACAGCAAAA  
ATAATTTGCTGAGGGCGATAGAGGCGCAACAACATCTGTTGCAACTCACGGTCTGGGGCATT

>AF219271..1

TTCTACTGTAATACATCAAACTGTTTAAATAGTAATATTAGTACATCAGAAGGGGCTAATAGTACAAAGTCAA  
ATAATAGAACAATCACACTCCAATGCAGAATAAAACAAATTATAAATATGTGGCAAGGAGTAGGAAAAGCAAT  
GTATGCCCCCTCCCATTTGAAGGACTAATTAGATGTTTCATCAAATATTACAGGGCTACTATTGACAAGAGATGGT  
GGTTCAAATACTAGTTCTCATGAGACCTTCAGACCTGGAGGAGGAAATATGAAGGACAATTGGAGAAGTGAAT  
TATATAAATATAAGGTAGTAAAAATTGAACCACTAGAAGTAGCACCCACCAGGGCAAAGAGAAGAGTGGTGGGA  
AAGAGAAAAAAGAGCAATAGGACTAGGAGCTATGTTTCCTTGGGTTCTTGGGAGCAGCAGGAAGCACGATGGGC  
GCAGCGTCAGTGACGCTGACGGTACAGGCCAGACAGTTATTGTCTGGTATAGTGCAACAGCAAAATAATTTGC  
TGAGGGCTATAGAGGCGCAACAACATCTGTTGCAACTCACAGTCTGGGGCATT

>AF219272..1

TTCTACTGCAATACATCAGGACTGTTTAAATAGTACATGGGGTTTCAGGACTGTCTAATGGTACTGAGAATATCA  
CCATCCCATGCAGAATAAAACAAATTATAAACATGTGGCAGGGAGTAGGAAAAGCAATGTATGCCCCCTCCCAT  
TGCAGGAATAATCAGCTGTTTCATCAAATATTACAGGGCTACTATTGACAAGAGATGGAGGTACAAATAGTAGT  
CATAACGAGACCTTCAGACCTGGAGATATGAGAGACAATTGGAGAAGTGAATTATATAAATATAAAGTAGTAA  
GAATTGAACCCCTAGGAGTAGCACCCACCAGGGCAAAGAGAAGAGTGGTGGAAAGAGAAAAAAGAGCAATTGG  
ATTAGGAGCTTTGTTTCCTTGGGTTCTTGGGAGCAGCAGGAAGCACAAATGGGCGCAGCGTCATTGACGCTGACG  
GTACAGGCCAGACAATTATTGGCTGGTATAGTGCAACAGCAAAACAATTTGCTGAGGGCTATAGAGGCGCAAC  
AGCATCTGTTGCAACTCACGGTCTGGGGCATT

>HQ595791..2

TTCTACTGCGATACATCAAGACTATTTAAATAGTACCTGGACGAATAGTACCTGGGGGAACGATACTAGCTCAA  
ATAGGAATGATACAATCACACTCCCATGCAGGATAAAACAAATTATAAACATGTGGCAGGAAGTAGGAAAAGC  
AATGTATGCCCCCTCCCATTCGAGGACTAATCAGATGCTCATCACGCATTACAGGACTATTGTTGACAAGAGAT  
GGTGGTATCTATAATAGTAGTCAGGAAGAAGAGACCTTCAGACCGGGAGGAGGAGATATGAGGGACAATTGGA  
GAAGTGAATTATACAAATATAAGGTAGTAAGAATTGAACCACTAGGTCTAGCACCCACCAGGGCAAAGAGAAG  
AGTGGTGGAAAGAGAAAAAAGAGCAATAGGACTGGGAGCTGTGTTTCCTTGGGTTCTTAGGAGCAGCAGGAAGC  
ACAATGGGCGCAGCGTCACTGACGCTGACGGTACAGGCCAGACAGTTACTGTCTGGTATAGTGCAACAGCAAAA  
ACAATTTGCTGAGGGCTATAGAGGCGCAACAGCATCTGTTGCAACTCACAGTCTGGGGCATT

>KF716476..1

TTCTACTGCAATACATCAAAATTGTTTACAACAAATATAACAAGTAACACTAGTGAAGGGAACATCACACTCC  
CATCAGAATAAAACAAATTATAAACATGTGGCAGGGAGTAGGAGGAGCAATGTATGCCCCCTCCTAGGGAAGG  
ATTGATCACATGTTTCATCAAATATCACAGGACTACTGTTGACAAGAGATCAAGAGGGCTCAAATAACATTAAT  
GAGACCTTCAGACCTGGAGGAGGAAATATGAAAGACAATTGGAGAAGTGAATTATACAAATATAAAGTAGTAA  
GAATTGAACCACTAGGTCTAGCACCCACCAGGGCAAAGAGAAGAGTGGTGGAAAGAGAAAAAAGAGCAATAGG  
CCTGGGAGCTATGTTTCCTTGGGTTCTTGGGAGCAGCAGGAAGCACAAATGGGCGCAGCGTCACTGACGCTGACG  
GTACAGGCCAGACAGTTACTGTCTGGTATAGTGCAACAGCAAAACAATTTGCTGAGAGCTATAGAGGCGCAAC  
AGCATCTGTTGCAACTCACAGTCTGGGGCATT

>FJ866137..1

TTCTACTGCAATACATCAGAACTGTTTAAATAATACATGGTTAAATAATACAGGGAAGTGGTCATCAGATAGTA  
CAGGGATAATCATGCTCCCATGCAGAATAAAACAAATTATAAACATGTGGCAGGGAGTAGGAAAAGCAATGTA

TGCCCCCTCCCATTTGCAGGACTAATCAATTGTTTCATCAAATATTACAGGACTATTGTTGACAAGAGATGGTGGT  
GCAAAATAGTAGTCAGAATGAGACCTTCAGACCGGGAGGAGGAGATATGAGAGACAATTGGAGAAGTGAATTAT  
ACAAATATAAAGTAGTAAAAATTGAACCACTAGGATTAGCACCCACCAAGGCAAGGAGAAGAGTGGTGGAAAG  
AGAAAAAAGAGCAATAGGACTAGGAGCTATGTTCCCTTGGGTTCTTGGGAGCAGCAGGAAGCACGATGGGCGCA  
GCGTCACTGACGCTGACGGTACAGGCCAGACAGTTATTGTCTGGTATAGTGCAACAGCAAAACAATTTGCTGA  
GGGCTATAGAGGCGCAACAGCATCTGTTGCAACTCACAGTCTGGGGCATT

>FJ866135..1

TTCTACTGCAACACATCAAGACTGTTTAATAATAGTGAATGGAAATCAAATAGTAGTACAGGGGAAATGAAA  
GTATAATCATACTCCCATGCAGAATAAAACAAATTATAAACATGTGGCAGGGAGTAGGAAGAGCAATGTATGC  
CCCTCCCATTTGAAGGACACATCAATTGTTTCATCAAATATTACAGGACTATTGTTGACAAGAGATGGTGGTGTA  
ACTAATCAGAGTTTGAATGAGACCTTCAGACCTGGGGGAGGAGACATGAGAGACAATTGGAGAAGTGAATTAT  
ACAAATATAAAGTAGTAAGAATTGAACCACTAGGTCTAGCACCCACCAGGGCAAAAGAGAAGAGTGGTGGAAAG  
AGAAAAAAGAGCAATAGGACTGGGAGCTATGTTCCCTTGGGTTCTTGGGAGCAGCAGGAAGCACGATGGGCGCA  
GCGTCGCTGACGCTGACGGTACAGGCCAGACAGTTATTGTCTGGTATAGTGCAACAGCAAAACAATTTGCTGA  
GGGCTATAGAGGCGCAACAGCATCTGTTGCAACTCACAGTCTGGGGCATT

>AY322189..1

TTCTACTGCAACACATCAAACCTGTTTAATAGCATTTTGAATGTTACTAATGGTACTAGCCAGCTGGAGTCAA  
ATAGCACAGAGTTAGCCGGAATATAACTCTCCCATGCAGAATAAAGCAAATTATAAACATGTGGCAGGGAGT  
AGGAATAGCAATGTATGCCCCCTCCCATTTGCAGGAATAATCAAATGTTTCATCAAATATTACAGGACTATTGTTA  
ACAAGAGATGGTGGTGAGATAATAGTAGTCAGAATGAGACCTTCAGACCAGGAGGAGGAGATATGAGAGACA  
ATTGGAGAAGTGAATTATACAAATATAAAGTAGTAAGAGTTGAACCACTAGGTATAGCACCCACCAAGGCAAA  
GAGAAGAGTGGTGGAAAGAGAAAAAAGAGCAATAGGACTGGGAGCTATGTTCCCTTGGGTTCTTGGGAGCAGCA  
GGAAAGCACGATGGGCGCAGCGTCAGTGACGCTGACGGTACAGGCCAGACAGTTACTGTCTGGTATAGTGCAAC  
AGCAAAACAATTTGCTGAGAGCTATAGAGGCGCAACAGCATCTGTTGCAACTCACAGTCTGGGGCATT

>FJ866138..1

TTCTACTGCAGTACATCAGAACTGTTTAATAGTACATGGAATACATCAATTAGTAGTACAAGGAATACATCAA  
ATAGTACAAGGGATATCAGACTCCCATGCAGAATAAAACAAATTATAAACATGTGGCAGGGAGTAGGAAAAGC  
AATGTATGCCCCCTCCCATAGAAAGGACTAATCAAATGTTTCATCAAATATTACAGGACTATTGTTGGCAAGAGAT  
GGTGATGTAAACAATAATAGTCAGGAGACCCTTAGACCTGGAGGAGGAGATATGAGAGACAATTGGAGAAGTG  
AATTATACAAATATAAAGTAGTAAGACTTGAACCACTAGGTCTAGCACCCACCAGGGCAAAAGAGAAGAGTGGT  
GGAAAGAGAAAAAAGAGCAATAGGACTAGGAGCTATGTTCCCTTGGGTTCTTGGGAGCAGCAGGAAGCACGATG  
GGCGCAGCGTCACTGACGCTGACGGTACAGGCCAGACAGTTATTGTCTGGTATAGTGCAACAGCAAAACAATTT  
TGCTGAGGGCTATAGAGGCGCAACAGCATCTGTTGCAACTCACAGTCTGGGGCATT

>FJ866141..1

TTCTACTGCAATACATCAAGACTGTTTAATAGTACATGGGGGGATAATAATACATCAAGTGATACAGAGGAAG  
GTAACATCACCATCCCATGTAGAATAAAACAAATTATAAACATGTGGCAAGGAGTAGGAAAAGCAATGTATGC  
CCCTCCCATTTGAAGGACTAATCAGATGTTTCATCAAATATTACAGGATTACTGTTAACATATGATGGGGGTGTA  
AATAATAATAGTCAGAGTGAGATCTTCAGACCTGGAGGAGGAGATATGAGAGACAATTGGAGAAGTGAATTAT  
ACAAATATAAAGTAGTAAGACTTGAACCACTAGGTCTAGCACCCACCAAGGCAAAAAGAAGAGTGGTGGAAAG  
AGAAAAAAGAGCAATAGGCCTAGGAGCTATGTTCCCTTGGGTTCTTGGGAGCAGCAGGAAGCACGATGGGCGCA  
GCGTCATTGACGCTGACGGTACAGGCCAGACAATTATTGTCTGGTATAGTGCAACAGCAAAACAATCTGCTGA  
TGGCTATAGAGGCGCAACAGCATCTGTTGCAACTCACAGTCTGGGGCATT

>GU204938..1

TTCTACTGCAATACAACTGGACTGTTTAATAATAGTGTATGGAAGAATGATAGTGATACAGCAAATAGTACAG  
AGGTAATCAAATCCCATGCAGAATAAAACAAATTATAAACATGTGGCAGGGAGTAGGCAAAGCAATGTATGC  
CCCTCCCATTTGAAGGACAAATCGAATGTACATCAAATATCACAGGACTATTGCTGACAAGAGATGGTGGTGTA  
AGTAATAATAGTCAGAATGAAACCTTTAGGCCTGGAGGAGGAGATATGAGAGACAATTGGAGGAGTGAACCTAT  
ACAAATATAAAGTAGTAAGAATTGAACCACTAGGTCTAGCACCCACCAGGGCAAGGAGAAGAGTGGTGGAAAG  
AGAAAAAAGAGCAATAGGACTAGGAGCTATGTTCCCTTGGGTTCTTGGGAGCAGCAGGAAGCACGATGGGCGCA  
GCGTCATTGACGCTGACGGTACAGGCCAGACAGTTAATGTCTGGTATAGTGCAACAGCAAAACAATTTGCTGA  
GAGCTATAGAGGCGCAGCAGCATCTGTTGCAACTCACAGTCTGGGGCATT

>HQ659623..1

TTCTACTGCAATACATCAGGACTGTTTAATAATAGTGAGTGGACAGATACGACACCAAATACGACATCAAATG  
GTACCATCATACTCCCATGCAGAATAAAACAAATTTATAAACCTGTGGCAGGGAGTAGGAAGAGCAATGTATGC  
CCCTCCCATTTCAAGGACTAATCAGATGTTTCATCAAATATTACAGGACTATTGTTGACAAGAGATGGTGGAAAT  
AATAATAGTAGTCTGAATGAGACCTTCAGACCTGGAGGAGGAGATATGAGAGACAATTGGAGAAGTGAATTAT  
ACAAATATAAAGTAGTAAGAATTGAACCACTAGGTCTAGCACCCACCAGTGCAAAAGAGAAGAGTGGTGGAAAG  
AGAAAAAAGAGCAATAGGACTGGGAGCTGTGTTCCCTTGGGTTCTTGGGAGCAGCAGGAAGCACGATGGGCGCA  
GCATCACTGATGCTGACGGTACAGGCCAAACAGCTATTGTCTGGTATAGTGCAACAGCAAAACAATTTGCTGA  
GAGCTATAGAGGCGCAGCAACATCTGTTGCAACTCACAGTCTGGGGCATT

>KX907406..1

TTCTACTGTAATACATCAGGACTGTTCAATAGTACATGGGATATTACGAATACTAGTAGCCCAAACAACACAG  
ACCCAATTATCACACTACAATGCAGAATAAAACAAATTATAAACATGTGGCAGGGAGTAGGAAGAGCAATATA  
TGCCCCCTCCCATTCAGAGGCAAATTCCTATGTTTCATCAAATATTACAGGGCTACTATTGACAAGAGATGGTGGT  
GCAGATAATAGCAGTCATAATGAGACCTTCAGACCTGGAGGAGGAAATATGAAGGACAATTGGAGAAGTGAAT  
TGTATAAATATAAAGTAGTAAAAATTGAACCACTAGGAATAGCACCCACCAAGGCAAGGAGAAGAGTGGTGGGA  
AAGGGAAAAAAGAGCAATAGGACTAGGAGCTATGTTCTTGGGTTCTTGGGAGCAGCAGGAAGCACGATGGGC  
GCAGCGTCAGTGACGCTGACGGTACAGGCCAGACAGTTACTGTCTGGTATAGTGCAAGCAGCAAAGCAATTTGC  
TGAGGGCTATACAGGCGCAACAGCATCTGTTGCAGCTCACTGTCTGGGGCATT

>HQ615975..2

TTCTACTGTAATACAACAAAACTGTTTAATACAAGTGAATCAAATAGGACAGAGGTAAATGGAACAATCACAC  
TCCCATGCAGAATAAAACAAATTATAAACATGTGGCAGGGAGTAGGGAAAGCAATCTATGCCCTCCCATTTGA  
AGGACACATCAACTGTTTATCAAATATTACAGGACTATTGTTGACAAGAGATGGTGTGCAAACAATAAGAGT  
CAGAAATGAGACCTTCAGACCTGGAGGAGGAGATATGAGAGACAATTGGAGAAGTGAATTATACAAATATAAAG  
TAGTAAGAATTGAACCACTAGGTCTAGCACCCACCAAGGCAAAGAGAAGAGTGGTGGAAAGAGAAAAAGAGC  
AATAGGACTAGGAGCTTTGTTCTTGGGTTCTTGGGAGTAGCAGGAAGCACAATGGGCGCAGCGTCGATGACG  
CTGACGGTACAGGCCAGGCAATTATTGTCTGGTATAGTGCAACAGCAAAACAATTTGCTGAGGGCTATAGAGG  
CGCAACAGCATCTGTTGCAACTCACAGTCTGGGGCATT

>JX512899..1

TTCTACTGCAATACAACAAGACTGTTCAATAGTACATGGAATACAACACTACATCAAATAGTACAGAACAAAATG  
ATACAAGAATACTATTCCCATGCAGAATAAAACAAATTATAAACATGTGGCAGGGAGTAGGAAAAGCAATGTA  
TGCTCCTCCCATTTGAAGGACTAATCAGATGTACATCAAATATTACAGGACTATTGTTGGCAAGAGATGGTGGT  
GCAAGCAATAATAGTCAGACTGAGACCTTCAGACCTGGAGGAGGAGATATGAGAGACAATTGGAGAAGTGAAT  
TGTACAAATATAAAGTAGTAAGAATTGAGCCACTAGGTCTAGCACCCACCAGGGCAAAGAGAAGAGTGGTGGGA  
AAGAGAAAAAAGAGCAATAGGACTGGGAGCTATGTTCTTGGGTTCTTGGGAGCAGCAGGAAGCACGATGGGC  
GCAGCGTCACTGACGCTGACGGTACAGGCCAGACAGTTATTGTCTGGTATAGTGCAACAGCAAAACAATTTGC  
TGAGGGCTATAGAGGCGCAACAGCATCTGTTGCAACTCACAGTCTGGGGCATT

>KF986106..1

TTCTACTGCAATACAACAAAACTGTTTAACAGTACATGGCATAACAGTACATGGAAGAATGATACTGCATTAA  
ATACAACAGGGGATAAGATAATCACACTCCCATGTAGAAATAAAACAAATTATAAACATGTGGCAGGGAGTAGG  
CAAAGCAATGTATGCCCCCTCCCATTCAGGACTAATCAGATGTTTCATCAAATATTACAGGACTATTGTAAACA  
AGAGATGGTGGTAAACTAATAATCATAGTGAGACCTTAATGAGACCTTCAGACCTGGAGGAGGAGATATGA  
GAGACAATTGGAGAAGTGAATTATACAAATATAAAGTAGTAAGACTTGAACCACTAGGTCTAGCGCCACCAA  
GGCAAAGAGAAGAGTGGTGCAGAGAGAAAAAAGAGCAATAGGACTAGGAGCTATGTTCTTGGATTCTTGGGA  
GCAGCAGGAAGCACAATGGGCGCAACGTCCTGACGTTGACGGTACAGGCCAGACAGTTATTGTCTGGTATAG  
TGCAACAGCAAAACAATCTGCTGAGGGCTATAGAGGCGCAACAGCATCTGTTGCAACTCACAGTCTGGGGCAT  
T

>KF986033..1

TTCTACTGTAATACAACAAAACTGTTTAATAACAATAATAGTACTAATGAGACAGTAATCACACTCCCATGCA  
GAATAAAACAAATTATAAACATGTGGCAGGGAGTAGGAAAAGCAATGTATGCCCTCCCATTCAGGAAGCAT  
TCGCTGTTTCATCCAATATTACAGGACTATTGTTGACAAGAGATGGTGGGAATAAGACTGCTCAGAATGAAACC  
TTCAGACCTGGAGGAGGAGATATGAGAGACAATTGGAGAAGTGAATTGTACAAATATAAAGTAGTAAAAATTG  
AACCCTAGGTCTAGCACCCACCAAGGCAAAGAAGAGTGGTGGAAAGAGAAAAAAGAGCAGTAGGACTAGG  
AGCTATGTTCTTGGGTTCTTGGGAGCAGCAGGAAGCACAATGGGCGCAGTGTCAATGACGCTGACGGTACAG  
GCCAGACAGGTGTTGTCTGGTATAGTGCAACAGCAAAACAATTTGCTGAGGGCTATAGAGGCGCAACAGCATC  
TGTTGCAACTCACAGTCTGGGGCATT

>KF716479..2

TTCTACTGCAATACATCAGGACTGTTTAATAGTACATGGCAGGAAAATAGTACTCTATTAAATAAAACAAATT  
ATACAGAAGAAAATAAAACAATCACACTCCCATGCAGAATAAAACAAATTATAAATATGTGGCAGAGAATAGG  
AAAAGCAATGTATGCCCCCTCCCATTTGAAGGACTAATCAAATGTTCTCAAATATTACAGGACTATTGTTGGAA  
AGAGATGGTAGTGTGAAAATAATAGTCAGGAGACTGTGACACCTGTAGGAGGAGAGATGAGAAACAATTGGA  
GAAGTGAATTATACAAATATAAAGTAGTAAGAATTAAACCAATAGGTCTAGCACCCACCAGGGCAAAGAGAAG  
AGTGGTGGAAAAACAAAAAAGAGCAATAGGACTAGGAGCTATGTTCTTGGGTTCTTGGGAGCAGCGGGAAGC  
ACGATGGGCGCAGCGTCAATGGCGCTGACGGTACAGGCCAGACAAGTACTGTCTGGTATAGTGCAACAGCAAA  
ACAATTTGCTGAGGGCTATAGAGGCGCAACAGCATCTGTTGCAACTCACAGTCTGGGGCATT

>AB485651..1

TTCTACTGTAATACATCAAGATTGTTTAATAGTGAATGGAGATACAATACAACAAGTAAGGAATGGAGTTCTA  
ATACAACAAATAATACAGGGGTAAATGAAATCAAACCTCCCATGCAGAATAAAACAGCTTATAAACATGTGGCA  
GAGAGTAGGAAAAGCAATGTATGCCCCCTCCCATTTGAAGCACTAATTAACCTGTTTCATCAAACATTACAGGACTA  
TTGTTGTCAAGAGATGGTGGTGCAAATAATAATAGTCAGAAATGAGACCTTCAGACCTGGAGGAGGAGATATGA

GAGACAATTGGAGAAGTGAATTGTACAAATATAAAGTAATAAGAATTGAACCAATAGGTCTAGCACCCACCAA  
GGCAAAAAGAAGAGTGGTGGAAAGGGAAAAAAGAGCAATAGGACTAGGAGCTATGTTCCCTTGGGTTCTTGGGA  
GCAGCAGGAAGCACGATGGGCGCAGCGTCATTGACGCTGACGGTACAGGCCAGACAGTTAATGTCTGGTATAG  
TGCAACAGCAAAATAATTTGCTGAGGGCTATAGAGGCGCAACAACATCTGTTGCAACTCACAGTCTGGGGCAT  
T

>AJ320484..3

TTCTACTGCAATACATCAAAACTGTTTAAACAGTGCATGGAATGACAGTACATGGAATATAGGGAATAATAATA  
CAGGGTCAGATAATGAGACAATCATTATCCCATGCAGAATAAAACAAATTATAAACATGTGGCAGGGAGTAGG  
AAAAGCAATGTATGCCCCCTCCCATCGAAGGATGGATCAATTGTGCATCAAATATTACAGGGCTCTTACTGGTA  
AGGGATGGTGGTGGTGCAAAATGATAGTCAGAACGAGACCTTCAGACCTCAAGGAGGAGATATGAGAGACAATT  
GGAGAAGTGAATTATACAAGTATAAAGTAGTAAAAAATTGAACCACTAGGAATAGCACCCACCAAGGCAAAGAG  
AAGAGTGGTGGAAAGAGAAAAAAGAGCAATAGGACTAGGAGCTATGTTCCCTTGGGTTCTTGGGAGCAGCAGGA  
AGCACGATGGGCGCAGCGTCATTGACGCTGACGGTACAGGCCAGACAATTATTGTCTGGTATAGTGCAACATC  
AAAACAATTTGCTGATGGCTATAGAGGCGCAACAGCATCTGTTGCAACTCACAGTCTGGGGCATT

>U08805..3

TTCTACTGCAATACATCAAAATTGTTTAAATCATAGTGTAGGGGAGAATAATACTCTATCAATTAGCAACGGGG  
TAAATACTAACATCACACTCCCATGCAAAATAAAACAAATTGTAAACATGTGCCAGGGAGTAGGAAAAGCAAT  
GTATGCCCCCTCCCATTAAGGACTAATCAGATGTTTCATCAAATATTACAGGACTATTGTTGACAAGAGATGGT  
GGTAATACTAGTCAGAATGAGACCTTCAGACCTGGAGGAGGAGATATGAGAGACAATTGGAGAAGTGAATTAT  
ACAAATATAAAGTAATAAAAAATTGAACCACTAGGTCTAGCACCCACCAGGGCAAAGAGAAGAGTGGTGGCAAG  
AGAAAAAAGAGCAATAGGACTAGGAGCTGTGTTCCCTTGGGTTCTTGGGAGCAGCAGGAAGCACAAATGGGCGCA  
GCGTCACTGACGCTGACGGTACAGGCCAGACAGTTAATGTCTGGTATAGTGCAACAGCAAAACAATTTGCTGA  
GGGCTATAGAGGCGCAACAGCATCTGTTGCAACTCACAGTCTGGGGCATT

>EU852998..1

TTCTACTGCAATACATCAGGACTGTTTAACTAATGTGACATCAAATAGTACAGCAAATCCAAATGGGAACA  
TCACACTCCCATGCAGAATAAAACAAATTGTAAACATGTGGCAGGGAGTAGGAAAAGCAATATATGCCCCCTCC  
CATTGAAGGACTAATCAACTGCTCATCAAATATTACAGGACTATTGTTGGCAAGAGATGGTGGTGCAAAATAT  
AATAGTCAGAATGAGACCTTCAGACCTGCAGGAGGAGATATGAGAGACAATTGGAGAAGTGAATTATACAAAT  
ATAAAGTAGTAAGAATTGAGCCAATAGGTCTAGCACCTGCCAGGGCAAAGAGAAGAGTGGTGGAAAGAGAAAA  
AAGAGCAATAGGACTGGGAGCTATGTTCCCTTGGGTTCTTGGGAGCAGCAGGAAGCACGATGGGCGCAGCGTCA  
ATAACGCTGACGGTACAGGCCAGACAAGTACTGTCTGGTATAGTGCAACAGCAAAACAATTTGCTGAGGGCTA  
TAGAGGCGCAACAGCATCTGTTGCAACTCACAGTCTGGGGCATT

>JX658585..1

TTCTACTGCAATACATCAGGACTGTTTAAATAGTAGTGGTATAACAAATAGTACAGGAATGTTGAATAATAGTG  
ATATATCAAATATCACAATCCACTGCAGAATAAGACAAATTATAAACATGTGGCAGGGAGTAGGAAAAGCAAT  
GTATGCCCCCTCCCATTAAGGACTAATCTACTGTTTCATCAAATATTACAGGACTATTGTTAACAAGAGATGGT  
GCAGATAATAATAGTCCGAATGAAGCCTTCAGACCTGAAGGAGGAAATATGAAAGACAATTGGAGGAGTGAAT  
TATACAAATATAAAGTAGTAAGAATTGAGCCATTAGGTCTAGCACCCACCAGGGCAAAGAGAAGAGTGGTGGGA  
AAGAGAAAAAAGAGCAATAGGACTAGGAGCTATGTTCCCTTGGGTTCTTGGGAACAGCAGGAAGCACGATGGGC  
GCAGCGTCACTGACGCTGACGGTACAGGCCAGACAATTATTGTCTGGTATAGTGCAACAGCAAAACAATTTGC  
TGAGGGCTATAGAGGCGCAACAGCATCTGTTGCAACTCACAGTCTGGGGCATT

>EU852934..1

TTCTACTGCAATACATCACAGCTGTTTAAATAGTACATGGGAAGCCAATACGACAGATAAGCTAAATGAGACAA  
TCACACTCCCATGCAGAATAAAACAAATTATAAACATGTGGCAGGGAGTAGGAAAAGCAATGTATGCCCCCTCC  
CATTGAAGGACAAATCACATGTTTCATCAAATATTACAGGGCTTTTATTGACAAGAGATGGTGGTACAAATAAT  
AGTAGTCAGAATGAGACCTTCAGACCTGGAGGAGGAGATATGAGAGATAATTGGAGAAGTGAATTATACAAAT  
ATAAAGTAGTAAGAATTGAACCACTAGGTCTAGCACCCACCAGGGCAAAGAGAAGAGTGGTGGAAAGAGAAAA  
AAGAGCAATAGGACTGGGAGCTATGTTCCCTTGGGTTCTTGGGAGCAGCAGGAAGCACGATGGGCGCAGCGTCA  
CTGACGCTGACGGTACAGGCCAGACAATTATTGTCTGGTATAGTGCAACAGCAAAACAATTTGCTGAGAGCTA  
TAGAGGCGCAACAGCATCTGTTGCAACTCACAGTCTGGGGCATT

>EU852982..1

TTCTACTGCAATACATCAGGACTGTTTAAACAATACGTTTAAATGGGAGAATGGCACTTTTATTAAATACTACAG  
TAAATATTACAGAGAATAGTACAGAGAATATCACACTCCCATGCAGAATAAAACAAATTATAAACATGTGGCA  
GGGAGTAGGAAAAGCAATGTATGCCCCCTCCCATCGCAGGACTAATTAAATGTTTCATCAAATATTACAGGACTA  
TTATTGACAAGGGATGGTGGTACAAATAATAGTCAGGATGATGAGACCTTTAGACCTGGAGGAGGAGATATGA  
GGGACAATTGGAGAAGTGAATTATATAAATATAAAGTAGTAAAAAATTGAACCACTAGGTCTAGCACCCACCAA  
GGCAAAGAGAAGAGTGGTGGAAAGAGAAAAAAGAGCAATAGGACTGGGAGCTTTGTTCCCTTGGGTTCTTGGGA  
GCAGCAGGAAGCACGATGGGCGCAGCGTCAATAACGCTGACGGTACAGGCCAGACAGTTATTGTCTGGTATAG  
TGCAGCAGCAAAATAATTTGCTGAGAGCTATAGAGGCGCAACAGCATCTGTTGCAACTCACAGTCTGGGGCAT  
T

>EU853014..2

TTCTACTGCAATACATCAGGACTGTTCAATCATAGTGTATGGAGCAATAATGGTACATGGAATACTACATCAA  
TTAATAAAACAGAGAATATCATACTCCCATGCAGAATAAAACAAATTATAAACATGTGGCAAAGAGTAGGAAA  
AGCAATGTATGCCCCCTCCCATTCAGGAGTAATCAATTGTGTATCAAATATTACAGGACTATTGTTGATAAGA  
GATGGTGGTAATACTAATACTAGTCATAATAATGGGACTGAGACCTTCAGACCTGGAGGAGGAGATATGAGAG  
ACAATTGGAGAAGTGAATTATACAAATATAAAGTAGTAAGACTTGAGCCACTAGGTCTAGCACCCACCAGGGC  
AAAGAGAAGAGTGGTGGAAAGAGAAAAAAGAGCAGTAGGACTAGGAGCTATGTTCCCTTGGGTTCTTGGGAGCA  
GCAGGAAGCACGATGGGCGCAGCGTCACTGACGCTGACGGTACAGGCCAGACTGTTATTGTCTGGTATAGTGC  
AACAGCAAAATAATTTGCTGAGGGCTATAGAGGCGCAACAGCATCTGTTGCAACTCACAGTCTGGGGCATT

>AF484506..1

TTCTACTGCAATACATCAGGACTGTTTAATAGTACATGGGAAAATGGTACATTAAATAGTGCGGAGGGAAAATG  
ATACAATCACACTCCCATGCAGAATAAAACAAATTATAAACATGTGGCAGGAAGTAGGAAAAGCAATGTATGC  
CCCTCCCATTTGAAGGACTAATCCAATGTTTCATCAAATATTACAGGACTATTGTTGACAAGAGATGGTGGTGTA  
AATAATAGTCAGAATGAGACCTTCAGGCCTGGAGGGGGAGATATGAGAGACAATTGGAGAAGTGAATTATACA  
AATATAAAGTAGTAAAAATTGAACCACTAGGTATAGCACCCACCAAGGCAAAGAGAAGAGTGGTGGAAAAAGA  
AAAAAGAGCAATAGGCCTGGGAGCTATGTTCCCTTGGGTTCTTGGGAGCAGCAGGAAGCACGATGGGCGCAGCG  
TCACTGACGCTGACGGTACAGGCCAGACAGTTATTGTCTGGTATAGTGCAACAGCAAAACAATTTGCTGAGGG  
CTATAGAGGCGCAACAGCATCTGTTGCAACTCACAGTCTGGGGCATT

>AF484513..1

TTCTACTGCAATACATCAGAACTGTTTAATAGTACATGGGGGAATTCTAGTACATCAACTAGTACAGGGGTAA  
ATAAGAGTACAATCACTATCCCATGCAGAATAAAACAAATTATAAACATGTGGCAGGAAGTAGGAAAAGCAAT  
GTATGCCCCCTCCCATTCGAGGACTAATCAAATGTTCTCAAATATTACAGGACTATTGTTGGTAAGAGATGGT  
GGTGCAACTAATAATAGTCAGAATGAGACCTTCAGACCTGGAGGAGGAGATATGAGAGACAATTGGAGAAGTG  
AATTATACAAATATAAAGTAGTAAGACTTGAACCACTAGGTCTAGCACCCACCAAGGCAAAGAGAAGAGTGGT  
GGAAAAGAGAAAAAAGAGCAATAGGACTGGGAGCTATGTTCCCTTGGGTTCTTGGGAACAGCAGGAAGCACGATG  
GGCGCAGCGTCACTGACGCTGACGGTACAGGCCAGACAGTTATTGTCTGGTATAGTGCAACAGCAAAACAATT  
TGCTGAGGGCTATAGAGGCGCAACAGCATCTGTTGCAACTCACAGTCTGGGGCATT

>AF484518..1

TTCTACTGCAATACAAACAGTACTGTTTAATAGCACATGGGAAAATAATAGTACATGGGGTAATGAGAGTGCAA  
TGGGTAATGTCACTCCCATGCAGAATAAAACAAATTATAAACATGTGGCAGGGAGTAGGAAAAGCAATGTA  
TGCCCCCTCCCATTTGAAGGACTAATCAGCTGCTCATCAAATATTACAGGATTACTGTTGACAAGAGATGGTGGT  
GGAAATGAAAGTAGTCAGAATGAGACCTTCAGACCTGGAGGGGGAGATATGAGAGACAATTGGAGAAGTGAAT  
TATATAAATATAAAGTAGTAAGAATTGAACCATTAGGTCTAGCACCCCTCCAAGGCAAAAAGAAGAGTAGTAGA  
AAGAGAGAAAAGAGCAATTGGACTAGGAGCTATGTTCCCTTGGGTTCTTGGGAGCAGCAGGAAGCACGATGGGC  
GCAGCGTCACTGACGCTGACGGTACAGGCCAGACAGCTACTGTCTGGTATAGTGCAACAGCAAAACAATTTGC  
TGAGGGCTATAGAGGCGCAACAGCACCTGTTGCAACTCACAGTCTGGGGCATT

>AY304496..1

TTCTACTGCAATACATCAGGACTGTTTAATGGTGTATGGAAGAATAATACATCAGATAATGAAACGGTAAATG  
GAAGTGAGACAATAACAATCCCATGCAGAATAAAACAAATTATAAACACGTGGCAAGGAGTAGGAAAGAGCAAT  
GTATGCCCCCTCCCATTTAGAGGACTAATCCGATGTTTCATCAAACATTACAGGACTATTGTTAACAAGAGATGGT  
GGTACAAATGGTGCTAGTCAGAAGGAGACCTTCAGACCCGAGGAGGAGATATGAGAGACAATTGGAGAAGTG  
AATTATACAAATATAAAGTAGTAAAAATTGAACCATTAGGTCTAGCACCCACCAGGGCTAAAAGAAGAGTGGT  
GGAAAGAGAAAAAAGAGCAATAGGACTAGGAGCTATGTTCCCTTGGGTTCTTGGGAACAGCAGGAAGCACGATG  
GGCGCAGTGTCACTGACGCTGACGGTACAGGCCAGACAGGTACTGTCTGGTATAGTGCAACAGCAAAACAATT  
TGCTGAGGGCTATAGAGGCGCAACAGCATCTGTTGCAACTCACAGTCTGGGGCATT

>AF484480..2

TTCTACTGCAATACATCAAAACTGTTTAATAATACATTTAATACTAGTGATTGGAGGACTTATAATACATCAA  
ATAGTACAGGGAATGAGACAATCACACTCCCATGCAGAATAAAACAAATTATAAACATGTGGCAGGGAGTAGG  
AAGAGCAATGTATGCCCCCTCCCATTTGAGGGACTAATCAGATGTTTCATCAAATATTACAGGACTATTGTTGACA  
AGAGATGGGGGTAATGCAAATAATACTAATCAAAGTGAGACCTTCAGACCTGGAGGAGGAGATATGAGAGACA  
ATTGGAGAAGTGAATTATACAAATATAAAGTAGTAAGAATTGAGCCAATAGGTCTAGCACCCACCAAGGCAAG  
GAGAAGAGTGGTGGAAAGAGAAAAAAGAGCAATAGGACTAGGAGCTATGTTCCCTTGGGTTCTTGGGAGCAGCA  
GGAAGCACGATGGGCGCAGCGTCACTGACGCTGACGGTACAGGCCAGACAGGTGTTGTCTGGTATAGTGCAAC  
AGCAAAACAACCTTGCTGAAGGCTATAGAGGCGCAACAGCATCTGTTGCAACTCACAGTCTGGGGCATT

>AF484485..1

TTCTACTGCAATACATCAGAATTGTTTAATAATAGTGTATGGACATCAAATAATACAGGGATGTCAAATAGTA  
CAAAGGCAAATATCACACTCCCGTGCAGAATAAAACAAATTATAAACATGTGGCAGGGAGTAGGAAAAGCAAT  
GTATGCCCCCTCCCATTTGCAGGACAAATCAGATGCTCGTCAAATATTACAGGATTATTGTTGACAAGAGATGGT  
GGTGCAAATAATAATAGTCAGAATGAGACCTTCAGACCTGGAGGAGGAGATATGAAAGACAATTGGAGAAGTG  
AATTATACAAATATAAAGTAGTAAGACTTGAACCACTAGGTCTAGCACCCACCAAGGCAAAGAGAAGAGTGGT

GGAAAGAGAAAAAGAGCAATAGGACTGGGAGCTATGTTCTTGGGTTCTTGGGAGCAGCAGGAAGCACGATG  
GGCGCAGCGTCGCTGACGCTGACGGTACAGGCCAGACTATTATTGTCTGGTATAGTGCAACAGCAAAACAATT  
TGCTGAGGGCTATAGAGGCGCAACAGCATCTGTTGCAACTCACAGTCTGGGGCATT

>AF484486..1

TTCTATTGCAATACATCAGGACTGTTTAATAGTACATGGAGGAATGATACATCAAGTAGTACATGGAGGAATG  
ATACATCAAGTAGTACAAAGCCAGATGAGACACTCACACTCCCATGCAGGATAAAACAAATTATAAACCTGTG  
GCAGGAAGTAGGAAGAGCAATGTATGCCCCCTCCCATTCAGGAAACATCACATGTTTCATCAAATGTTACAGGA  
CTATTGTTGACAAGAGATGGTGGTACACATAATAATAATAGTCAGACTGAGACCATCAGGCCTGGAGGAGGAG  
ATATGAGAAACAATTGGAGAAGTGAATTATACAAATATAAAGTAGTAAGAATTGAGCCAATAGGCCTAGCACC  
CACCAAGGCAAAGAGAAGAGTGGTGGAAAGAGAAAAAGAGCAATAGGCCTGGGAGCTATGTTCTTGGGTTCT  
TTGGGAGCAGCAGGAAGCACGATGGGCGCAGCGTCACTGACGCTGACGGTACAGGCCAGACAAGTATTGTCTG  
GTATAGTGCAACAGCAAAATAATTGCTGAGGGCTATAGAGGCGCAACAGCACCTGTTGCAACTCACAGTCTG  
GGGCATT

>AF484487..1

TTCTACTGTGATACAACAGGACTGTTTAATGGTACAAATAGTACAGGGGGAGATAATGAGACAATCACACTCC  
AATGCAGAATAAAACAAATTATAAACATGTGGCAGGGAGTAGGAAGAGCAATGTATGCCCCCTCCCATTCAGG  
GCAAACTCTATTGCTCATCAAATATTACAGGACTATTGCTGACAAGAGATGGTGGTAACAATGATACGGGGGAG  
GAGATTTTCAGACCTGTAGGAGGAGATATGAGAGACAATTGGAGAAGTGAATTATACAAATATAAAGTAGTAA  
GAATTGAACCACTAGGTCTAGCACCCCTCCAAGGCAAGGAGAAGAGTGGTGGAAAGAGAAAAAGAGCAATAGG  
ACTAGGAGCTGTGTTCTTGGGTTCTTGGGAGCAGCAGGAAGCACGATGGGCGCAGCGTCGCTGACGCTGACG  
GTACAGGCCAGACAGTTATTGTCTGGTATAGTGCAACAGCAAAACAATTTGCTGCAGGCTATAGAGGCGCAAC  
AGCATCTGTTGCAACTCACAGTCTGGGGCATT

>AF484519..2

TTCTATTGCAACACATCAGGACTGTTTAATAGTACATGGACATCAAATAGTACATCAAATAGTACAAAGGTAA  
ATAGTACTGAGCCAATCACACTCCAATGCAGAATAAAACAAATTATAAATATGTGGCAGGGAGTAGGAAGAGC  
AATGTATGCCCCGCCATTGAAGGACTAATTCATTGTTTCATCAAATATTACAGGACTACTGTTGACAAGAGAT  
GGTGGTACAAATAATACTAGTCAGAATGAGACTTTCAGACCTGGAGGAGGAAATATGAGAGACAATTGGAGAA  
GTGAATTATACAAATATAAAGTAGTAAGAATTGAACCAATAGGTCTAGCACCCACCAAGGCAAAGAGGAGAGT  
GGTGGAAAGAGAAAAAGAGCAATAGGACTAGGAGCTATGTTCTTGGGTTCTTGGGAACAGCAGGAAGCACG  
ATGGGCGCAGCGTCAATAACGCTGACGGTACAGGCCAGACAGTTACTGTCTGGTATAGTGACGAGCAAAACA  
ATTTGCTGAGGGCTATAGAGGCGCAACAGCATCTGTTGCAACTCACAGTCTGGGGCATT

>AF484494..1

TTCTACTGCAATACATCAGGACTGTTTAATAATAGTGTATGGAATACTAGTGTATGGAGAAATGATAGTACAT  
TAGATAATGAGACTATCACACTCCCATGCAGAATAAAACAAATTATAAACATGTGGCAAGGAGTAGGAAAAGC  
AATGTATGCCCCCTCCCATTTGAAGGACGAATCAGTTGTTTCATCAAATATTACAGGACTATTGTTGACAAGAGAT  
GGTGGTGCAATAATAATAGTCAGAATGAGACCTTCAGACCTGGAGGAGGAGATATGAGAGATAATTGGAGAA  
GTGAATTATACAAATACAAAGTAATAAGAATTGAACCACTAGGTCTAGCACCCACCAAGGCAAAAAGAAGAGT  
GGTGGAAAGAGAAAAAGAGCAATAGGACTAGGAGCTATGTTCTTGGGTTCTTGGGAGCAGCAGGAAGCACG  
ATGGGCGCAGCGTCACTGACGCTGACGGTACAGGCCAGACAGTTATTGTCTGGTATAGTGACGAGCAAAACA  
ATTTGCTGAGGGCTATAGAGGCGCAACAACATCTGTTGCAACTCACAGTCTGGGGCATT

>AF484495..2

TTCTACTGCAACACAACAGGATTGTTTAATCATAGTAAATGGAATAATAATAATACATCAGAATGGAATAATA  
CAGATAAGATAATCACACTCCCATGCAGACTAAACAAATTATAAACATGTGGCAGGGAGTAGGAAGAGCTAT  
GTATGCCCCCTCCCATTTGAAGGAGAAATTAAATGTTTCATCAAATATTACAGGACTATTGTTAACAAGAGATGGA  
GGTACAAATAGTACTCAGAATGAGACCTTCAGACCTGGAGGGGAGATATGAGAGACAATTGGAGAAGTGAAT  
TATACAAATATAAAGTAGTAAGAATTGAACCACTAGGTCTAGCACCCACCAGAGCAAAGAGAAGAGTGGTGCA  
AAGAGAAAAAGAGCAATAGGACTGGGAGCTATGTTCTTGGGTTCTTGGGAGCAGCAGGAAGCACGATGGGC  
GCAACGTCGATGGCGTTGACGGTACAGGCCAGACAATTGTTGTCTGGTATAGTGCAACAGCAAAACAATTTGC  
TGAGGGCTATAGAGGCGCAACAGCATCTGTTGCAACTCACAGTCTGGGGCATT

>AF484497..1

TTCTACTGCAATACATCAGGACTGTTTAATAGTGAATGGACATCGTCTAAAGGTGAATGGACAGGGGTAGAAA  
AGAATAGTAAAGCAGCAACAACACCTCCCATGCAGAATAAAACAAATTATAAACATGTGGCAGGGAGTAGG  
AAAAGCTATGTATGCCCCCTCCCATTTAAAGGACAAATCAGATGTTTCATCAAATATTACAGGACTATTGTTGACA  
AGAGATGGTGGTGTAATAATAATAGTCAGGAGACCTTCAGACCTGGAGGAGGAGATATGAGAGACAATTGGA  
GAAGTGAATTATACAAATATAAAGTAGTAAGAATTGAACCACTAGGCCTAGCACCCACCAAGGCAAAAAGAAG  
AGTGGTGGAAAGAGAAAAAGAGCAATAGGACTAGGAGCTTTGTTCTTGGGTTCTTGGGAGCAGCAGGAAGC  
ACAATGGGCGCAGCGTCACTGACGCTGACGGTACAGGCCAGACAGGTATTGGCTGGTATAGTGCAACAGCAAA  
ACAATTTGCTGAGGGCTATAGAGGCGCAACAGCATCTGTTGCAACTCACAGTCTGGGGCATT

>AF484498..2

TTCTACTGCAATACAGCAAGATTGTTTAAATTATGAATGGAGTAATAATACATTAGCTAGTACAGGGAATGACA  
GTAAAGGGAATGACAGTATCACACTCCCAATGCAGAATAAAACAAATTATAAACATGTGGCAGGGAGTAGGAAA  
AGCAATGTATGCCCCCTCCCATTTGAGGGACTAATCACCTGTTTCATCAAATATTACAGGACTATTGTTGACAAGA  
GATGGTGGTGCAAATAATAATAGTCAGAATGAGACCTTCAGACCTGGAGGAGGAGATATAAGGGACAATTGGA  
GAAGTGAATTATACAAATATAAAGTAGTAAAACTTGAACCACTAGGTCTAGCACCCACCAGGGCAAAGAGAAG  
AGTGGTGGAAAGAGAAAAAGAGCAATAGGACTAGGAGCTATGTTTCCTTGGGTTCTTGGGAGCAGCAGGAAGC  
ACGATGGGCGCAGCGTCCCTGACGCTGACGGTACAGGCCAGACAGTTATTGTCTGGTATAGTGCAACAGCAAA  
ATAATTTGCTAATGGCTATAGAGGCGCAACAGCATCTGTTGCAACTCACAGTCTGGGGCATT

>AF484499..1

TTCTACTGCAATACATCAAAAGCTGTTTAAATAGTACATGGACAGGGGGTGGAAATATCACAAATATCACAAAGTA  
TCACAAATATCACACTCCCATGTCAGAATAAAACAAATTATAAACATGTGGCAGGGAGTAGGCAAAGCAATGTA  
TGCCCCCTCCCATTTGAAGGACTAATCCAATGTTTCATCAAATATTACAGGACTATTATTGACAAGAGATGGTGGT  
GCAACTAATGATAGTCAGAGTGAGACCTTTAGACCTGCAGGAGGAGATATGAGAGATAATTGGAGAAGTGAAT  
TATACAAATATAAAGTAGTAAGAATTGAACCACTAGGTCTAGCACCCACCAAGGCAAAGAGAAGAACAGTGGA  
AAGAGAAAAAGAGCAATAGGACTAGGAGCTATGTTTCCTTGGGTTCTTGGGAGCAGCAGGAAGCACGATGGGC  
GCAGCGTCACTGACGCTGACGGTACAGGCCAGACTGTTATTGTCTGGTATAGTGCAACAGCAAAACAATTTGC  
TGAGGGCTATAGAGGCGCAACAGCATCTGTTGCAACTCACAGTCTGGGGCATT

>U36871..1

TCCTACTGCAATACATCAAACTGTTTAAATAGTACATGGAGGAATAATAATACATCAAATAGTACAGGGGTAA  
ATAGTACAGGGGAAAATGAGATAATCAAACCTCCCATGTCAGAATAAAACAAATTGTAAATATGTGGCAGGGAGT  
AGGAAAAGCAATGTATGCCCCCTCCCATTTGAAGGGCTAATCAATTGTTTCATCAAATATTACAGGACTATTGTTG  
ACAAGAGATGGTGGTGCCAATAATAGTCAGAATGAGACCTTCAGACCTGGAGGAGGAGATATGAGGGACAATT  
GGAGAAGTGAATTATACAAATATAAAGTAGTAAAACTTGAACCACTAGGTCTAGCACCCACCAGGGCAAAGAG  
AAGAGTGGTGGAAAGAGAAAAAGAGCAATAGGACTAGGAGCTATGTTTCCTTGGGTTCTTGGGAGCAGCAGGA  
AGCACGATGGGCGCAGCGTCACTGACGCTGACGGTACAGGCCAGACAGTTAATGTCTGGTATAGTGCAACAGC  
AAGACAATTTGCTGAGGGCTATAGAGGCGCAACAGCATCTGTTGCAACTCACAGTCTGGGGCATT

>EF575364..1

TTCTACTGCAACACATCAGGACTATTTAATGGTACATGGAGAAATGCTACATCAAATAGTACACAGCTGAATG  
GTACAATCACGCTCCCATGTCAGAATAAAACAAATTATAAACATGTGGCAAGAAGTAGGAAAAGCAATGTATGC  
CCCTCCCATTTGAAGGATTCATCAATTGTTTCATCAAATATTACAGGACTATTGTTGGTAAGAGATGGTGGTAGT  
AATGATGATAGTCAGAATGAGACCTTCAGACCTGGAGGAGGAGATATGAGAGACAATTGGAGAAGTGAATTAT  
ACAAATATAAGGTAGTAAGAATTGAACCACTAGGTCTAGCACCCACCAAGGCAAAAAGAAGAGTGGTGGAAAG  
AGAAAAAGAGCAATAGGACTGGGAGCTATGTTTCCTTGGGTTCTTGGGAGCAGCAGGAAGCACGATGGGCGCA  
GCGTCAATAACGCTGACGGTACAGGCCAGACAGTTACTGTCTGGTATAGTGCAACAGCAAAACAATTTGCTGA  
GGGCTATAGAGGCGCAACAGCATCTGTTGCAACTCACAGTCTGGGGCATT

>EF575370..1

TTCTACTGCAATACATCAAACTGTTTAAATAGTACATGGGAGAATGTGAATGTTACTACATCAAATAATACAG  
GGCCAGATAGTACAATCACACTCCCATGTCAGAATAAAACAAATTATAAACATGTGGCAGGGAGTAGGAAAAGC  
AATGTATGCCCCCTCCCATTTGAAGGGCTAATCAAATGTTTCATCAAATATTACAGGACTATTGTTACTAAGAGAT  
GGTGGTCTAAATACTAGTCAGAGTGAAACCTTCAGACCTGGAGGAGGAGATATGAGGGACAATTGGAGAAGTG  
AATTATACAAATATAAAGTAGTAAAAATTGAACCAATAGGTCTAGCACCTACCAAGGCAAGGAGAAGAGTGAT  
GGAAAGAGAAAAGAGAGCAATAGGACTGGGAGCTGTGTTTCCTTGGGTTCTTGGGAGCAGCGGAAGCACAAATG  
GGCGCAGCGTCACTAACGCTGACGGTACAAGCCAGACAAGTATTGTTTGGTATAGTGCAACAGCAAAACAATT  
TGCTGAGGGCTATAGAGGCGCAGCAGCATCTGCTGCAACTCACAGTCTGGGGCATT

>EF575429..1

TTCTACTGCAATACATCAGGACTGTTTAAATAATACATTTAATACTAAGAATAGTACAGAGGTAAATAGTAATG  
GGACAGAGGTAATCATACTCCCATGTCAGAATAAAACAAATTATAAACATGTGGCAGAAAGTAGGAAAAGCAAT  
GTATGCCCCCTCCTATTGAAGGACTAATCAGCTGTTTCATCAAATATCACAGGACTATTGTTGACAAGAGATGGT  
GGTAATATAACTAGTCAGAATGAGACCTTCAGGCCTGCAGGAGGAGATATGAGAGATAATTGGAGAAGTGAAT  
TATACAAATATAAAGTAGTAAGAATCGAACCACTAGGTCTAGCACCCACCAAGGCAAGGAGAAGAGTGGTGG  
AAGGGAAAAAGAGCAATAGGACTGGGAGCTTTGTTTCCTTGGGTTCTTGGGAACAGCAGGAAGCACGATGGGC  
GCAGCGTCACTGACGCTGACGGTACAGGCCAGACAGTTATTGTCTGGTATAGTGCAACAGCAAAACAATTTGC  
TGAGGGCTATAGAGGCGCAACAGCATCTGTTGCAACTCACAGTCTGGGGCATT

>EF575482..1

TTCTACTGCAATACATCACGCTGTTTAAATAGTACATGGAATAATAATACAGGGGATATAGGGAGTAGTGATA  
CAAATAAGAATATCACAATCCCATGTCAGAATAAAACAAATTATAAACATGTGGCAGGGAGTAGGAAAAGCAAT  
GTATGCCCCCTCCCATCGAAGGAAAAATCCAGTGATAGTCAAATATTACAGGGCTCTTACTGACAAGAGATGGT  
GGTGCAGATGCTAATCAGAATGAGACCATCAGACCTGGAGGAGGAGATATGAGAGACAATTGGAGAAGTGAAT  
TATACAAATATAAGGTAGTAAGAATTGAACCACTAGGAATAGCACCCACCAAGGCAAAGAGAAGAGTGGTGG  
AAGAGAAAAGAGAGCAATAGGACTAGGAGCTGTGTTTCCTTGGGTTCTTGGGAGCAGCAGGAAGCACGATGGGC

GCAGTGTCAATTAACGCTGACGGTACAAGCCAGACAGTTATTGTCTGGTATAGTGCAACAGCAAAGCAATTTGC  
TGAAGGCTATAGAGGCGCAACAGCGTCTGTTGCAACTCACAGTCTGGGGCATT

>JQ403079..1

TTCTACTGCAATACATCAGGACTGTTTAATAATATATGGAATGGCACTTGAATGGCACTTTAAATAGTACAG  
GGAGAGAGAATATCACACTCCGATGCAGAATAAAACAAATTATAAACATGTGGCAGGGAGTAGGAAAAGCAAT  
GTATGCCCTCCCATTTGAAGGAGTAATTAATTGTACATCAAATATTACAGGACTAATATTAACAAGAGATGGT  
GGTGCTAATGAGAGTCAGAATAATAATGAGACCTTCAGACCTGGAGGAGGAGATATGAGGGACAATTGGAGAA  
GTGAGTTATACAAATATAAAGTAGTAAAAATTGAACCATTAGGTCTAGCACCCACCAGGGCAAAAAGGAGAGT  
GGTGGAAAGAGAAAAAAGAGCAATAGGACTGGGAGCTTTGTTCCCTTGGGTTCTTGGGAGCAGCAGGAAGCACG  
ATGGGCGCAGCGTCAATGGCGCTGACGGTACAGGCCAGACAAGTATTGTCTGGTATAGTGCAACAGCAAAACA  
ATTTGCTGAGGGCTATAGAGGCGCAACAGCATTTGTTGCAACTCACAGTCTGGGGCATT

>AY773338..1

TTCTACTGTAATACATCAAGGCTGTTTAATAATACATGGAATGGTACAACATGGTCAAATAAGACAGACACCA  
ATGGGACAGTCACACTCCCATGCGAGAATAAAACAAATTATAAACATGTGGCAGGAAGTAGGAAAAGCAATGTA  
TGCCCCCCCCATAGAAGGACTACTTAGATGTTTCATCAAATATTACAGGGTATATATTGACAAGAGATGGTGGT  
TATACAGTTCTGGCAATGCGACCTTCAGACCTGGCGGAGGAGATATGAGGGACAATTGGAGAAGAGAATTAT  
ATACATACAAAGTAGTACAAATTGGACCAATAGGAGTAGTGCCACCAGGGCAAAAGAGAAGAGTGGTGGAAAG  
GGAAAAAAGAGGGGTTTTCTTGGGAGCAGCAGGAAGCACGATGGGCGCAGCGTCATTGTCTGCTGCCGGTACAG  
GCCAGACAGGTATTGTCTGGTACAGTGCAACAGCAAAGCAATTTGCTCAGGGCTATATCGGCGCAACAGCATC  
TGTTGCAACTCACGGTCTGGGGCATT

>EF633445..1

TTCTACTGTAATACATCAGGGCTGTTTAATAGTACATGGAATAGGACAGGGAATAATAGTAGTAGTACAGGGT  
CAAATGAGACAATCACACTTCCATGCGAGAATAAGACAAATTATAAACATGTGGCAGGGAGTAGGAAAAGCAAT  
GTATGCCCTCCCATAGAAGGACTAATTAGATGTTTCATCAAATATTACAGGGCTAATATTGACAAGGGATGGT  
GGTGATAATAGTAGTTCTCACAATGAGACCTTCAGACCTGGAGGAGGAGATATGAGGGACAATTGGAGAAGTG  
AATTATATAAATACAAAGTAGTAAGAATTGAACCAATAGGATTAGCACCCACCAGGGCAAAAGAGAAGAGTGGT  
GGCAAGGGAAAAAAGAGCAATAGGACTAGCGAGCTGGTTCCTTGGGTTCTTGGGAGCAGCAGGAAGCACAAATG  
GGCGCAGCGTCTGTGACGCTGACGGTACAGGCCAGACAGTTATTGTCTGGTATAGTGCAACAGCAAAACAATT  
TGCTGAGAGCTATAGAGGCGCAACAGCATCTGTTGCAACTCACAGTCTGGGGCATT

>FJ900266..1

TTCTACTGCAATACATCAGGATTGTTTAATAAACAGTGATACCTCAAACAGAACTATTACTCTCCCATGTAGAA  
TAAACAAATTGTAAACATGTGGCAGGGAGTAGGACAAGCAATGTATGCCGCTCCTGTTGCAGGAAAAATTAC  
CTGTAACCTCAAACATTACAGGCCTACTATTGACAAGAGATGGTGGTAATAATAGTCATACCGAGACCTTCAGA  
CCTGGGGGAGGAAATATGAAAGACAATTGGAGAAGTGAACCTATATAAATATAAAGTAGTAGAAGTTGAACCAT  
TAGGAGTAGCACCCACCAAGGCAAGAAGAAGAGTGGTGGCGAGAGGGAGAGAAAAAAGAGCAGTGGGAATAGG  
AGCTTTGTTCTTTGGGTTCTTGGGAGCAGCAGGAAGCACTATGGGCGCAGCGTCAATAACGCTGACGGTACAG  
GCCAGACAATTATTGTCTGGAATAGTGCAACAGCAGAAACAATCTGCTGAGAGCTATTGAAGCGCAGCAGCATA  
TGTTGCAGCTCACAGTCTGGGGCATT

>FJ900267..1

TTCTACTGCAATACATCAAAATTGTTTAATAATAACACAGAACCCAATGGCACTATCACTCTTCCATGTAAAA  
TAAACAAATTGTAAACATGTGGCAGGGAGTAGGACAAGCAATGTATGCCGCTCCTATTGCAGGAAACATTAC  
CTGTAACCTCAAATATTACAGGCTTACTATTGACAAGAGATGGTGGTACGAATCAGAGTGCTACTGAGACATTC  
AGACCTGGGGGAGGAAATATGAAAGACAATTGGAGAAGTGAACCTATATAAATATAAAGTAGTAGAAGTTGAAC  
CACTAGGAGTAGCACCCACCAAGGCAAAAAGACGAGTGGTGGAGAAAGAGAGACCAAAGAGAGCAGTGGGAAT  
AGGAGCTCTGTTCTTGGGTTCTTGGGAGCAGCAGGAAGCACTATGGGCGCAGCATCAATAACGCTGACGGCA  
CAGGCCAGACAATTATTGTCTGGAATAGTGCAACAGCAGAAACAATCTGCTGAGGGCTATTGAAGCGCAGCAGC  
ATCTGTTGCAGCTCACAGTCTGGGGCATT

>DQ189088..1

TTCTACTGCAATACATCAGGACTGTTTAATGACACAGATGACAATGGCACTATCACTCTCCCATGTGCAATAA  
AACAAATTGTAAACATGTGGCAGGAAGTAGGACGAGCAACAATCACCTCCCCATGCAGGAAACATTACCTG  
TGGTTCAAATATTACAGGTCTACTATTGACAAGAGATGGTGGTACTGGGAATTGCACTGATGGTGGTACTGGG  
AATTGCACTGAGACCTTCAGACCTGGGGGAGGAAATATGAAAGATAATTGGAGAAGTGAATTATATAAATACA  
AAGTAGTAGAAATTGAACCACTAGGAGTAGCACCCACCAAGCAAGAAGACAAGTGGTAAAGAGAGAAAAAAG  
AGCAGTGGGAATGGGAGCTTTGTTTATTGGGTTCTTGGCAGCAGCAGGAGGCACTATGGGCGCGGCGTCAATA  
ACGCTGACGGTACAGGCCAGACAGTTACTGTCTGGAATAGTGCAACAGCAAAACAATTGCTGAGAGCTATTG  
AAGCGCAACAGCATATGTTGCAGCTCACAGTCTGGGGCATT

>MH746246..1

TTCTACTGCGATACATCAAAATTGTTTAATAATAATACAAAAGCATCAGCATCCAATGGCACTATCACTATCC  
CATGTAAAATAAAACAAATTATAAACATGTGGCAGGGAGTAGGACAAGCAATGTATGCCCTCCCATTTGCAGG  
AAACATTACCTGTCTGTTCAAACATTACAGGCCTACTATTGATAAGAGATGGTGGTAGTAATCAGAATAATTCT

GAGGAGATCTTTAGACCTGGGGGAGGAAATATGAAAGACAATTGGAGAAGTGAAGTATATAAATATAAAGTAG  
TAGAAATTGAGCCGCTAGGAGTAGCACCCACCAAGGCAAGAAGACCAGTGGTGAGCAGAGAAAAAAGAGCAGC  
AGGAATAGCAGCGTTGTTCTTGGGTTCTTGGGAGCAGCAGGAAGCACTATGGGCGCAGCGTCAATAACGCTG  
ACGGTACAGGCCAGACAATTATTGTCTGGAATAGTGCAACAGCAAAACAATTTGCTGAGGGCTATTGAAGCGC  
AACAGCATATGTTGCAGCTCACAGTCTGGGGCATT

>FJ771008..1

TTCTACTGTAATACATCAGGACTGTTTAAATTCAATGCCTCATCCGGTGAGAATAGTACAAATATCACTCTCC  
CATGTAGAATAAAACAAGTTATAAACATGTGGCAGGAAGTAGGACGAGCAATGTATGCCGCTCCTATTGAAGG  
AAAAATTTATTGTAGCTCAAATATTACAGGTCTACTATTGACTAGAGATGGTGGTACTAATGATACTAATGGT  
ACTGAGACCTTCAGACCTGGGGGAGGAGATATGAGAGACAATTGGAGAAGTGAATTATATAAATATAAAGGTAG  
TAAGAATTGAACCACTAGGAGTAGCACCCACCAAGGCAAAAAGACAAGTGGTGACAGAGAGAAAAAAGAGCAGT  
GGGACTAGGAGCTGTGTTCTTGGGTTCTTGGGAGCAGCAGGAAGCACTATGGGCGCAGCGTCAATAACGCTG  
ACGGTACAGGCCAGACAATTATTGTTTGAATAGTGCAACAGCAGACAATCTGCTGAGGGCTATTGAAGCAC  
AACAGCATATGTTGCAGCTCACAGTCTGGGGCATT

>KJ849782..1

TTCTACTGCAATACATCAGAACTGTTTAAATGACACAGGCAATGACACTAGTGCCGCTACTATCACTCTCCCAT  
GTAAAAATAAAACAAGTTATAAACATGTGGCAGGAAGTAGGAAAAGCAGTGTATACTGCTCCCATTCAGGAAA  
CCTTGCTGTAACTCAACTATTACAGGTCTACTATTGACAAGAGATGGTGGTCAGGACAATAATAGTACTACT  
GAGATCTTCAGACCTGGGGGAGGAAATATGAAAGACAATTGGAGAAGTGAGTTATATAAATATAAAGTAGTAG  
AAATTGAACCACTAGGAGTAGCACCCACCAGGGCAAAAAGACAAGTGGTGACAGAGCAAAAAGAGCAGTGGG  
GCTGGGAGCTATGTTCTTGGGTTCTTGGGAGCAGCAGGAAGCACTATGGGCGCAGCGTCAATAACGCTGACG  
GCACAGGCCAGACAAGTATTGTTTGAATAGTGCAACAGCAGAGCAATTTGCTGAGGGCTATTGAAGCGCAAC  
AGCACATGTTGCAGCTCACAGTCTGGGGCATT

>KT427774..2

TTCTACTGCAATACATCAAACTGTTTAAATGACAATAGCACTCAAAAATCCAATAATGACACTATCACTCTCC  
CATGTGCAATAAAACAATGGTAAACATGTGGCAGGAAGTGGGGCGAGCAATGTATGCCGCTCCCATTCAGG  
GAACATTACCTGTAATTCAAATATTACAGGTCTACTATTGGTAAGAGATGGTGGAAATGGTGGAAATAATACT  
AATAAGACTGAGATCTTCAGACCTGGGGGAGGAAATATGAAAGACAAGTGGAGAAGTGAATTATATAAATATA  
AAGTAGTAGAAATTCAGCCACTAGGAGTAGCACCCACCAGGGCAAAAAGACAAGTGGTGAAGAGAGAAAAAAG  
AGCAGTGGGACTGGGAGCTTTGTTCTTGGGTTCTTGGGAGCAGCAGGAAGCACTATGGGCGCAGCGTCAATA  
ACGCTGACGGTACAGGCCAGACAATTATTGTCTGGTATAGTGCAACAGCAGACAATAATCTGCTGAGGGCTATTG  
AAGCGCAACAGCATCTGTTGCAGCTTACAGTCTGGGGCATT

>MG365764..1

TTCTACTGTAATACATCAGGACTGTTTAAATAATAACACAGAATCCAATGACACTATCACTCTCCCATGTGAA  
TAAGACAAATTGTAAACATGTGGCAGGAAGTAGGAAAAGCAATGTATGCCGCTCCCATTCAGGAAACCTTGC  
CTGCAGCTCAAACATTACAGGTCTACTATTGACAAGAGATGGTGGTCAGAGTAATGGGACTAGTAATGGGACT  
ACTGAGACCTTCAGACCTGGGGGAGGAAATATGAAAGACAATTGGAGAAGTGAATTATATAAATATAAAGTGG  
TAGAAATTGAACCACTAGGAGTAGCACCCACCAAGGCAAGAAGACCAGTGGTGAAGAGAGAAAAAAGAGCAGT  
GGGAATAATAGGAGCTTTGTTCTTGGGTTCTTGGGAGCAGCAGGAAGCACTATGGGCGCAGCGTCAATAACG  
CTGACGGTACAGGCCAGACAATTATTGTCTGGAATAGTGCAACAGCAGAGCAATTTGCTGAGGGCTATTGAAG  
CGCAACAGCATATGTTGCAGCTCACAGTCTGGGGCATT

>KX181923..1

TTCTACTGCAATACATCAAGACTGTTTAAATGACACAAAATTCAATGACACTATCGTTCTCCCATGTGCAATAA  
GACAACTGGTAAGACTGTGGCAGGAAGTAGGACGAGCAATGTATGCCGTTCCCATTCAGGAAGCATTACCTG  
TAACTCAACTATTACAGGTCTACTATTGACAAGAGATGGTGGTCAGCATAATGAACTAATAAACTGAGATC  
TTCAGACCTGGGGGAGGAAATATGAAAGACAATTGGAGAAGTGAATTATATAAATATAAAGTAGTAAATTG  
AACCCTAGGAGTAGCACCCACTGGGGCAAGGAGACAAGTGGTGAAGAGAGAAAAAAGAGCAGTAGTGGGAAT  
AGGAGCTGTGCTCATTGGGTTCTTGGGAGCAGCAGGAAGCACTATGGGCGCGGCGTCAGTGACGCTGACGGTA  
CAGGCCAGACAATTATTGTCTGGAATAGTGCAACAGCAGACAATTTGCTGAAGGCTATTGACGCGCAACAAC  
ATATGTTGCAGCTCACAGTCTGGGGCATT

>KX181926..1

TTTTACTGCAATACATCAGGCCTGTTTAAATGACTCAATAATAAATGGCACTGAGAGTATCACTCTCCCATGTC  
GAATAAAACAATTTGTAAACATGTGGCAGGAAGTAGGACGAGCAATGTATGCCGTTCCCATTCAGGAAGCAT  
TACCTGTATTTCAAATATTACAGGTCTGCTATTAACAAGAGATGGTGGTCTGAACAATGATACTAATCAGACT  
GAGACCTTCAGACCTGGGGGGGAAATATGAAGGACAATTGGAGAAGTGAATTATATAAATATAAAGTAGTAG  
AAATTGAACCCCTAGGGGTAGCCCCCCCCAGGGCAAAAAGACAAGTGGTAAAGAGAGAAAAAAGAGCAGTGGG  
AATAGGAGCTTTGTTCTTGGGTTTTTGGGAGCAGCAGGAAGCAATATGGGCGCGGGGTCAATGACGCTGACG  
GTACAGGCCAGACAATTGTTGTCTGGGATAGTGCAACAGCAAAACAATTTGCTGAGGGCTATTGAAGCGCAAC  
AGCATTTGTTGCAGCTCACAGTCTGGGGCATT

>KX181925..3

TTCTACTGCAATACATCAGCTCTGTTTAAATAATGAAACAGGATCCAATGACACTACAGGATCCAATAGCACTA  
TCACTCTCCCATGTAGAATAAAACAAGTTGTAAACATGTGGCAGGAAGTAGGGCGAGCAATGTATACCGCTCC  
CATTGCAGGAAGCATTACCTGTAACCTCAAATATTACAGGTCTACTATTGACAAGAGATGGTGGTTATGAAAAT  
AATCAGACTGAGACCTTCAGACCTGGGGGAGGAAATATGAAAGACAATTGGAGAAGTGAATTATATAAAATATA  
AAGTAGTAGAAATTCAGCCACTAGGAGTAGCACCCACCAGGGCAAAAAGACCAGTGGTGAGGAGAGAGAAAAG  
AGCAGCAGTGGGAATAGGAGCTATGTTCCCTTGGGTTCTTGGGAGCAGCAGGAAGCACTATGGGCGCGGCGTCA  
ATAGCGCTGACGGTACAGGCCAGACAATTATTGTCTGGCATAGTGCAACAGCAGAACAATCTGCTGAGGGCTA  
TTGAAGCGCAACAGCATCTGTTGCAGCTCACAGTCTGGGGCATT

>MK041565..1

TTCTACTGCAATACAACAAATCTATTTGGTGACACAATGGTAAATAACACAGATGACACAATCACACTCCCAT  
GTAGAATAAAACAATTTGTAAACATGTGGCAGGAAGTGGGACGAGCAATGTATGCCAATCCTGTTGCAGGAAA  
CATTACCTGTAACCTCAAATATTACAGGTCTACTATTGACAAGAGATGGTGGTACTAATAAAACAGATGAAACT  
GAGACCTTTAGACCAGGGGGAGGAAATATGAAAGACAATTGGAGAAGTGAATTATATAAAATATAAAGTAGTAA  
AAATTGAACCACTAGGAATAGCACCCACCAGGGCAAAAAGACTAGTGGTGACAGAGAGAAAAAAGAGCAGTAGG  
ACTGGGAACCTCTGTTCCCTTGGGTTCTTGGGAGCAGCCGGAAGCACTATGGGCGCAGCGTCAATGACGCTGACG  
GTACAGGCCAGACAATTATTGTCTGGAATAGTGCAACAGCAGAGCAATCTGCTGAGGGCTATTGAAGCGCAAC  
ATCACATGTTGCAGCTCACAGTCTGGGGCATT

>AY173958..2

TTCTACTGCAATACATCAGGACTGTTTAAATGACACAGGATCCAATGGCACTATCACTCTCCTATGTGGAATAA  
AACAAATGGTAAACATGTGGCAGGAAGTGGGACGAGCAATGTATGCCGCTCCCATCTCAGGAAACATTACCTG  
TAACTCGAATATTACAGGTCTACTATTGACAAGAGATGGTGGTCAGAATAATAATCAGACTGAGACCTTCAGA  
CCTGGGGGAGGAAATATGAAAGACAATTGGAGAAGTGAATTATATAAGTATAAAAGTAGTAGAAATTGAACCA  
TAGGAGTAGCACCCACCAGGGCAAAAAGACAAGTGGTGAGGAGAGAAAAAAGAGCAGTGGGAATGGGAGCTTT  
GTTCCCTTGGGTTCTTGAGCGCGCAGGAAGCACTATGGGCGCGGCGTCAATAACGCTGACGGTACAGGCCAGA  
CAATTATTGTCTGGAATAGTGCAACAGCAGAGTAATCTGCTGAGGGCTATTGAAGCGCAACAGCATCTGTTGC  
AGCTCACAGTCTGGGGCATT

>JF683771..1

TTCTATTGTAATACATCAGAATTGTTTAAATAATAGTAACTCAAACAATGGCACTATCACTCTCCCATGTAAAA  
TAAAACAAATTATAAACATGTGGCAGGGAGTAGGGCAAGCAATGTATGCCCTCCCATTCAGGAAAAATTAC  
CTGTAACCTCAAGTATTACAGGCCTACTATTGACAAGAGATGGTGGTCAAAGTAATAAGAGTAAAGATAATGGG  
AGTGAGATCTTCAGACCTGGGAGAGGAAATATAAAAGACAATTGGAGAAGTGAATTATATAAATACAAAGTAG  
TAGAAATTGAACCACTAGGAATAGCACCCACCAAGGCAAAAAGACAAGTGGTAAAGAGAGAAAAAAGAGCAGT  
GGAAATAGGAGCTGTGTTCCCTTACGTTCTTGGGAGCAGCAGGAAGCACTATGGGCGCAGCGTCACTAACGCTG  
ACGGTACAGGCCAGACAATTATTGTCTGGGATAGTGACAGCAGCAAAACAATTTGCTGAAGGCTATTGAAGCGC  
AACAGCATCTGTTGCAGCTCACAGTCTGGGGCATT

>HM068554..1

TTCTACTGCAATACATCAAAACTGTTTAAACAACACAGAATTCAATGTCAGTGACACTATCATTCTCCCATGTC  
GAATAAAGCAAATTGTAAACATGTGGCAGGAAGTAGGACAAGCAATGTATGCTAATCCTATTGCAGGAAACAT  
CACCTGTAACCTCAAGTATTACAGGTATACTATTGACAAGAGATGGTGGTAAACGGGAATGAACTGAGAATAAT  
GATACTGAAATCTTCAGACCTGGGGGAGGAAATATGAAAGACAATTGGAGAAGTGAATTATATAAATATAAAG  
TAGTAGAAATTGAACCACTAGGAGTAGCACCCACCAGGGCAAAAAGACAAGTGGTGAAGAGAGAAAAAAGAGAGC  
AGCGGAATGGCAGCTTTGCTCCTTGGGTTCTTGGGCGCAGCAGGAAGCACTATGGGCGCAGCGTCAATAACG  
CTGACGGTACAGGCCAGACAATTATTGTCTGGAATAGTGACAGCAGCAGAACAATCTGCTGAGGGCTATTGAAG  
CTCAACAGCATATGTTGAAGCTCACAGTCTGGGGCATT

>JX140671..1

TTCTACTGTAATACATCAAAACTGTTTAAATGAAACAGAATCCGGTAACACACAGAATGACACTATCATACTCC  
CATGTAGAATAAAACAAGTTATAAACCTGTGGCAGCAAGTAGGGCGAGCAATGTATGCCGCTCCCATTCAGG  
ACACATTACATGTAAATCAAGTATTACAGGGCTACTACTAATAAGAGATGGTGGTCAAAGGAATGAGACTAAT  
GATGCTGAGATCTTCAGACCTGGGGGAGGAGATATGAGAGACAATTGGAGAAGTGAATTATACAAATATAAAG  
TAGTAGAAATTGAACCACTAGGAGTAGCACCCACCAAGGCAAAAAGACAAGTGGTGAAGAGAGAAAAAAGAGC  
AGTGGGACTAGGAGCTCTGTTCCCTTGGGTTCTTGGGCGCAGCAGGAAGCACTATGGGCGCAGCGTCAATAACG  
CTGACGGTACAGGCCAGACAATTATTGTCTGGAATAGTGCAACAGCAAAACAATTTGCTGAGGGCTATTGAAG  
CGCAACAGCATATGTTGCAGCTCACAGTCTGGGGCATT

>KJ883138..2

TTCTACTGTAATACATCAAAACTGTTTAAATGAAAAAGAACTCAATAACACACAGAATGACACTATCATACTCC  
CATGTAGAATAAAACAAGTTATAAACCTGTGGCAGGAAGTAGGGCGAGCAATGTATGCCGCTCCCATTCAGG  
AAACATTACATGTCATTCAAATATTACAGGGCTACTATTGACAAGAGATGGTGGTCAAAGGAATGAGACTAAT  
ACTACTGAGATCTTCAGGCCTGGGGGAGGAGATATGAGAGACAATTGGAGAAGTGAATTATATAAATATAAAG  
TAGTAGAAATTGAACCACTAGGAGTAGCACCCACCAAGGCAAAAAGACAAGTGGTGAAGAGAGAAAAAAGAGC  
AGTGGGACTAGGAGCTCTGTTCCCTTGGGTTCTTGGGCGCAGCAGGAAGCACTATGGGCGCGGCGTCAATGACG

CTGACGGTACAGGCCAGACAATTATTGTCTGGAATAGTGCAACAGCAAAACAATTTGCTGAGGGCTATTGAAG  
CGCAACAGCATATGTTGCAGCTCACAGTCTGGGGCATT

>DQ979023..1

TTCTACTGCAATACATCAAAATTGTTTACAAATAACATAAGCTCCAATGGGACTATCACTCTCCCATGTAGAA  
TAAACAGATTATAAACATGTGGCAGGGAGTAGGACAAGCAATGTATACCGCCCCCATTCAGGAAACATTAC  
ATGTAACCTCAAATATTACAGGCTTACTCATAACAAGAGATGGTGGTCAGGAGGGGCGTAATGATACTGAAGAA  
ATATTGAGACCTGGGGGAGGAAATATGAAAGACAATTGGAGAAGTGAAGTATATAAAATATAAAGTAGTAGAAA  
TTAAACCACTAGGAATAGCACCCACCGAGGCAAGGAGACAAGTGGTGAAGAGAGAAAAAGAGCAGCAGGACT  
AGGACTTTTGTTCCTTGGGTTCTTGGGAGCAGCAGGAAGCACTATGGGCGCAGCGTCAATAACGCTGACGGTA  
CAGGCCAGACATTTATTGTCTGGAATAGTGCAACAGCAAAACAATTTGCTGAAGGCTATTGAAGCACAAACAGC  
ATATGTTGCAGCTCACAGTCTGGGGCATT

>DQ979024..1

TTCTATTGCAATACAACAAAATTGTTTAATGGTAGTGGAACAATGACATTATCACTAATGGCACTATCACTA  
TCCCATGTAGAATAAAACAAAATTGTAACATGTGGCAGGGAGTAGGACAAGCAATGTATGCCGCTCCCATTCG  
AGGACAAATTACCTGTAACCTCAAATATTACAGGCATAATATTGACAAGAGATGGTGGTAACAAAATGAGACT  
AATAAAAATGGGACTGAGATCTTCAGACCTGCAGGAGGAAATATGAAAGACAATTGGAGAAGTGAAGTCTATA  
AATATAAAGTAGTAGAAATTGAACCACTAGGAGTAGCACCTACCAAGGCAAAAAGACGAGTGGTGACGAGAGA  
AAAAAGAGCATTGGGAATGGGAGCCTTGTTTCCTTGGGTTCTTGGGAGCAGCAGGAAGCACTATGGGCGCAGCG  
TCAATAACGCTGACGGTACAGGCCAGACAATTATTGTCTGGAATAGTGCAACAGCAAAACAATCTGCTGAAGG  
CCATTGAAGCGCAACAGCATCTGTTGCAGCTCACAGTCTGGGGCATT

>AF075703..1

TTCTACTGCAATACATCACTACTGTTTAATAATACAGTACCTAATAATGGCACTATCACTCTCCCATGTGCGAA  
TAAACAATTTGTAAACATGTGGCAGGAAGTAGGACGAGCAATGTATGCCGCTCCCATTCAGGAAACATTAC  
CTGTAACTCAAATATTACAGGTCTGCTATTGACAAGAGATGGTGGTCAGAGTAATAATAGTGATTCTGAGACC  
TTCAGACCTGGGGGAGGAGATATGAAAGACAATTGGAGAAGTGAAGTATATAAAATATAAAGTAGTAGAAATTG  
AACCCTAGGAGTAGCACCCACCGAGGCCAAAAGACCAAGTGGTGAGGAGAGAAAGAAGAGCAGTGGCAATAGG  
AGCTGTATTCCTTGGGTTCTTGAGCGCAGCAGGAAGCACTATGGGCGCGGCGTCACTAACGCTGACGGTACAG  
GCCAGACAATTATTGTCTGGAATAGTGCAACAGCAGAACATCTGCTGCAGGCTATTGAAGCGCAACAGCATA  
TGTTGCAGCTCACAGTCTGGGGCATT

>KU168276..3

TTCTACTGCAATACATCAGGGCTGTTTAATAATACAGGAACCTAATGAACTATCACTCTCCCATGTCAAATAA  
AACAAATTGTAAACATGTGGCAGGGAGTAGGACGAGCAATGTATGCTGCTCCCATTCAGGAAACATTACCTG  
TAGATCAAACATTACAGGTCTACTATTGACAAGAGATGGTGGTCAGAGTACTAATGGTAGTATTGAGACCTTC  
AGACCTGGGGGAGGAGATATGAAAGACAATTGGAGAAGTGAAGTATATAAAATACAAAGTAGTAGAAATTCAAC  
CACTAGGAATAGCACCCACCGAGGCCAAAAGACAAGTGGTGAAGAGAGAAAAAGAGCAGTGGGAATAGGAGC  
TTTGTTCCTTGGGTTCTTGGGAGCAGCAGGAAGCACTATGGGCGCGGCGGCAACAACGCTGACGGTACAGGCC  
AGACAATTATTGTCTGGAATAGTGCAACAGCAAAACAATTTGCTGAGGGCTATTGAAGCGCAACAGCATATGT  
TGCAGCTCACAGTCTGGGGCATT

>AJ249238..1

TTCTACTGCGATACATCAGGATTGTTTAATGAAAGTGAAAAGTACAATGGCACTATCATTCTCCCATGTAAAA  
TAAACAAATTATAAACATGTGGCAGGGAGTAGGACAAGCAATGTATTCCGCTCCCATTCAGGACGCATTAA  
CTGTAACTCAACTATTACAGGCTACTATTAAACAAGAGATGGTGGTCAGAGTAATGATACTAATAGGACTGAG  
ACTTTCAGACCTGAGGGAGGAAACATGAAAGACAATTGGAGAAATGAAGTATATAAAATATAAAGTAGTAGAAA  
TTGAACCACTAGGAGTAGCACCCACCAAGGCAAGAAGACGAGTGGTGCAGAGAGAAAGAAGAGCAGTGGGAAT  
AGGAGCTCTGTTCTTAGATTCTTGGGAGCAGCAGGAAGCAACATAGGCGCAGCGTCAATAACGCTGACGGTA  
CAGGCCAGACAATTACTGTCTGGAATAGTGCAACAGCAGCAAAACAATTTGCTGAGGGCTATTGAAGCGCAACAGC  
ATCTGTTGCAGTCTCACAGTCTGGGGCATT

>AY231157..2

TTCTACTGCGATACATCACAGCTGTTTGATAGTACAGTACTTAATGGCACCATCACTCTCCCATGTGCAATAA  
AACAAATTGTAAACATGTGGCAGGGAGTAGGAAAAGCAATGTATGCTGCGCCCATTCAGGAAAGCATTACCCG  
TCATTCAAATATTACAGGTCTACTATTGACAAGAGATGGTGGTCAGAATAGTAGGAATGAGACCTTCAGACCT  
GGGGGAGGAGATATGAAAGACAATTGGAGAAGTGAAGTATATAAAATATAAAGTAGTAGAAATTGAACCACTAG  
GAATAGCACCCACCGAGGGCAAAAAGACCAAGTGGTGAAGAGAGAAAAAGAGCGTTGGGAATGGGAGCTTTGTT  
TCTTGGGTTCTTGAGCGCAGCAGGAAGCACTATGGGCGCAGCGTCAATAACGCTGACGGCACAGGCCAGACAA  
TTATTGTCTGGAATAGTGCAACAGCAGAACATCTGCTGAGGGCTATTGAAGCGCAACAGCATCTGTTGCAGC  
TCACAGTCTGGGGCATT

>KU168274..1

TTCTATTGCAATACATCAGAGTTGTTTAAACTAATATAACCAATAACACTATCACTCTCCCATGTAGAATAA  
AACAGATTGTAAAAATGTGGCAGGGAGTAGGACAAGCAATGTATGCCGCTCCCATTCAGGAAAGCATTACCTG  
TAACTCAAATATTACAGGATTACTATTGACAAGAGATGGTGGTCAGGATAATAAAAATGGGACTAATAGGACT

GAGACCTTCAGACCTGGGGGAGGAAATATGAAAGACAATTGGAGAAGTGAAGTATATAAATATAAAGTAGTAG  
AAATTGAACCACTAGGAATAGCACCCACCAGGGCAAAAAGACAAGTGGTGCAGAGAGAAAAAGAGCAGCGGG  
AATAGGACTTTTTGTTTCCTTGGGTTCTTGGGAGCAGCAGGAAGCACTATGGGCGCAGCGTCGATAACGCTGACG  
GTACAGACCAGACAATTATTGTCTGGAATAGTGCAACAGCAAAACAATTTGCTGAAGGCTATTGAAGCGCAAC  
AGCATATGTTGCAGCTCACAGTCTGGGGCATT

>AB485659..1

TTCTACTGCAATACATCAGGACTGTTTAAATAGTAGCACGAGCCCCGAAGGAGTGTTTAACACGAGCCACAAAG  
GAAATATCACTCTCCTATGTAGAATAAAACAGATTATAAACATGTGGCAGGGAGTAGGCCAAGCAATGTATGC  
CGCTCCCATTGCAGGAAGCATTACCTGTAACCTCAAATATTACAGGCTTACTATTGACAAGAGATGGTGGTCAG  
AATAATGAGACTGAGACCTTCAGACCTGGGGGAGGAAATATGAAAGACAATTGGAGAAGTGAAGTATATAAAT  
ATAAAGTAGTAGAAATTGAACCACTAGGAATAGCACCCACCAGGGCACAAGACAAGTGGTGAAGAGAGAAAA  
ACGAGCAGCGGGATTAGGACTTTTGTCTCCTTGGGTTCTTGGGAGCAGCAGGAAGCACTATGGGCGCGGCGTCA  
ATAACGCTGACGGTACAGGCCAGACAATTATTGTCTGGAATAGTGCAACAGCAAAACAATTTGCTGAAGGCTA  
TTGAAGCGCAACAGCATCTGTTGCAGCTCACAGTCTGGGGCATT

>HQ236605..2

TTCTACTGCAATACACAACCACTGTTTAACTACACAAGATATTCCAATGGCACTATCATTTTTCGGTTCCAATG  
GCACTATCACTCTCCCATGCAGAATAAAACAAATTGTAAACATGTGGCAGGAAGTAGGACGAGCAATATATGC  
CGCTCCAATTGCAGGGAACATCACCTGTCACTCAAATATTACAGGCCTACTATTGACAAGAGATGGTGGTAGT  
GGCAATGGTACTGACAATAGAAAGTGAGATCTTCAGACCTGGAGGGGAAACATGAAAGACAATTGGAGAAATG  
AATTATATAAATATAAAGTAGTAAGAATTGAACCACTAGGAATAGCACCCACCAGGGCACAACAGACGAGTGGT  
GAAGAGACAAAAAGAGCACTCGGAATGGGAGCCATGTTCAATTGGGTTCTTGGGAGCAGCAGGAAGCACTATG  
GGCGCAGCGTCAGTGACGCTGACGGTACAGGCCAGACAATTGATGTCTGGAATAGTGCAACAGCAAAATAATT  
TGCTGATGGCCATTAAAGCGCAACAGCATCTGTTGCAGCTCACAGTCTGGGGCATT

>KU168275..1

TTCTACTGCAATACATCAGGGCTGTTTAAATAATACAGTACTCAATAACACTACTATCACTCTCCCATGTGCGAA  
TAAAACAAATTGTAAACATGTGGCAGGGAGTAGGACAAGCAATGTATGCCGCTCCCATTGCAGGAAACATTAC  
CTGTAGATCAAATATTACAGGTCTATTATTGACAAGAGATGGTGGTGAGAATAATGATACTGAGACCTTCAGA  
CCTGGGGGAGGAGATATGAAAGACAATTGGAGAAGTGAAGTATATAAATACAAAGTAGTAGAAATTCAACCAC  
TAGGAATAGCACCCACCAAGGCAAAAAGACAAGTGGTGAAGAGGGAAAAAGAGCAGTTGGAATGGGAGCCTT  
GTTCTTGGGTTCTTGGGAGCAGCAGGAAGCACTATGGGCGCGGCGTCAGTAACGCTGACGGTACAGGCCAGA  
CAATTATTGTCTGGAATAGTGCAACAGCAAAGCAATTTGCTGAGGGCTATTGAAGCGCAACAGCATCTGTTGC  
AGCTCACAGTCTGGGGCATT

>MH705144..1

TTCTACTGCAACACAAGTAAGCTGTTTAAACACAACCTTGGCTAAATAATAAAACGGAACACAATGGCATTATCA  
ACAGCAGCACTGAAATTATGGTGCCTCCGTGTAGAATAAGACAATTTGTAAACATGTGGCAAAGAGTAGGAAG  
AGCAATGTATGCCCCCTCCCATTCAGGGGTAATTCAAGTGTAAATCAGATATCACAGGTCTACTATTGACAAGA  
GATGGTGGTAATACTGGTAATAATACAGGAGGTGATGGTAATAATACCGACATCCTCAGACCTACAGGGGGAG  
ATATGAGAGACAATTGGAGAAGTGAAGTATATAAATATAAGGTAGTAAACTTGAACCACTAGGAGTAGCACC  
CACCAGGGCAAAAAGACAAGTGGTGAAGGAAAAAGAGAAAAAGAGCAGTGGGACTGGGAGCTATGTTTC  
CTTGGGTTCTTGGGAGCAGCAGGAAGCACTATGGGCGCAGCGTCAATAACGCTGACGGTACAGGCTAGACTAT  
TATTGTCTGGTATAGTGCAACAGCAAAGCAATTTGCTGAGGGCTATAGAAGCGCAACAGCATATGTTGCAGCT  
CACAGTCTGGGGCATT

>AY371158..2

TTCTACTGCGACACAACAGCACTGTTTAAACACAACATTACTTAAACACAACAATGGATAATAATGGTACTATCA  
TTATTCCATGTAGAATAAAACAAATTGTAAACGTGTGGCAAAGAGTAGGGCGAGCAATGTATGCCCTCCCAT  
TGCAGGAAAAATTCAAGTGAACCTCAAATATCACAGGTCTACTATTGACAAGAGATGGTGAAGTAAGGCAAAT  
AACACAGACATCCTCAGACCTATAGGGGGAGAGATGAGAGACAATTGGAGAAGTGAATTATATAAATATAAGG  
TAGTACAAATTCAACCACTAGGAATAGCACCTCCAGGGCAAAAAGACAAGTGGTGAAGAGAGAAAGAGAGC  
AGTAGGAATAGGAGCTGTGTTCTTGGGTTCTTGGGAGCAGCAGGAAGCACTATGGGCGCAGCGTCAATAACG  
CTGACGGTACAGGCCAGACAATTATTGTCTGGTATAGTGCAACAGCAAAACAATTTGCTGAAGGCTATAGAAG  
CGCAACAGCATCTGTTGCAGCTCACAGTCTGGGGCATT

>JX140672..3

TTCTACTGCAATACATCAGCTCTGTTTAAATACAGAAGCTCTGAAAAATAACACAGGTCAAATGGCACTACCA  
CCATTTATTGTAGAATAAAACAAATTATAAATATGTGGCAAAGAGTAGGAAAAGCAATGTATGCCCTCCCAT  
TGCAGGAAAAATTCAAGTGAACCTCAAGTATCACAGGTCTAATATTAAACAATAGATGGTAATAGAACAAATAAT  
AAGAGTGAGACCCTCAGACCTGGAGGGGGAGATATGAAAGACAATTGGAGAAGTGAAGTGTATAAATATAAGG  
TAGTGAAAATTGAACCATTAGGAGTAGCACCCACCAGGGCAAAAAGACGAGTGGTGAAGAGAGAAAAAGAGC  
AGTGGGACTAGGAGCTATGTTCTTGGGTTCTTGGGAGCAGCAGGAAGCACTATGGGCGCGGCGTCAATAACG  
CTGACGGTACAGGCCAGACAATTGTTGTCTGGTATAGTGCAACAGCAAAGCAATTTGCTGAAGGCTATTGAAG  
CGCAGCAGCACTTGTTCAGCTCACAGTCTGGGGCATT

>KU749420..1

TTCTACTGTAACACAAGCAGACTGTTTAAATAACACACTGTTTAAATAACACACAGCTTAATAACACAGAAGGAG  
GGAACATTACTCTTCCATGTAGAAATAAAACAATTTGTAAACATGTGGCAAAGAGTAGGAAAAGCAATGTATGC  
CCCTCCCATTTGCTGGAAGAATTCAAGTGTATCTCAAATATCACAGGTCTACTATTGACAAGAGATGGTGGTACT  
AATGATACGTCTACAAATGAGACCTTCAGACCTGGAGGGGGAGACATGAGAGATAAATTGGAGAAGTGAAGTGT  
ATAAATATAAGGTAGTAAAAATTGAGCCACTAGGAGTAGCCCCCACTAGGGCAAAAAGGCGAGTGGTGCAGAG  
AGAAAAAAGAGCTGTGGGACTAGGAGCTCTGTTCTTGGGTTCTTGGGAGCAGCAGGAAGCACTATGGGCGCG  
GCGTCAATAACGCTGACGGTACAGGCCAGAACTTATTGTCTGGTATAGTGCAACAGCAGAATAATCTGCTGA  
AGGCTATAGAAGCGCAACAGCATCTGTTGCAGCTCACAGTCTGGGGCATT

>AJ277824..1

TTCTACTGCAACACAGATGAGCTGTTTAAATAACAGCTTGTTGAATAACACAAAAAAGAAAATATCACTCTTC  
CATGTAGAAATAAAACAATTTGTAAACATGTGGCAAAGGGTAGGACAAGCAATGTATGCCCCCTCCTATAGCCGG  
ACAAATTCAGTGCAACTCAAGTATCACAGGTCTACTATTGACAAGAGATGGTAACAAAAATGGGTCCGAGACC  
CTCAGACCTGGAAGGGGAGATATGAGAGACAATTGGAGAAGTGAAGTATATAAATATAAGGTAGTAAAAATTG  
AACCCTTAGGAGTAGCACCCACCAGGGCAAAAAGACAAGTGGTGAAGAGAGAAAAGAGCAGTGGGAATAGG  
AGCTGTGTTCTTGGGTTCTTGGGAGCAGCAGGAAGCACTATGGGCGCGGCGTCAATAACGCTGACGGTACAG  
GCCAGACAATTATTGTCTGGTATAGTGCAACAGCAAAAGCAATTTGCTGAAGGCTATAGAAGCGCAACAGCATC  
TGTTGCAGCTCACAGTCTGGGGCATT

>AJ249237..3

TTCTACTGCAACACAACACTATTCTGTTTAAATCACACAAGAGTAAATGACATTCTGTCTAATAATCACACGAGAG  
AAAATGACACTATCACTCTTCCATGTAGAAATAAAACAATTTGTAAACATGTGGCAAAGAGTAGGACAGGCAAT  
GTATGCCCCCTCCCATTTGCCGGAAAAATTCAAGTGTAACTCAAATATCACAGGTCTACTATTAACAATAGATGGT  
GGGGAGGGAAATGAGTCCGAGACCTCAGACCTGGAGGGGGAGATATGAGAGACAATTGGAGAAGTGAAGTGT  
ATAAATATAAGGTAGTAAAAATTGAACCACTAGGAGTAGCACCCACCAAGGCAAAAAGACAAGTGGTGCAGAG  
AGAAAAAAGAGCAGTGGGAATGGGAGCTATGTTCTTGGGTTCTTGGGAGCAGCCGGAAGCACTATGGGCGCG  
GCGTCAATAACGCTGACGGTACAGGCCAGAACTTATTGTCTGGTATAGTGCAACAGCAGCAAAAGCAATTTGCTGA  
AAGCTATTGAAGCGCAACAGCATCTGTTGCAGCTCACAGTCTGGGGCATT

>AF377956..1

TTCTACTGCAACACAGTAGCTCTGTTTAAATGCAACTAACATGACTAATGCAATGAACAGGTCCAATGGCATT  
TCACTCTTCCATGTAGAAATAAGACAAATTGTAAACATGTGGCAAAGAGTAGGACGAGCAATGTATGCCGCTCC  
CATTGCTGGACAAATTCAGTGTAACTCAAGCATCACAGGTCTAATATTGACAAGAGATGGTGGGAAAAATAAT  
ACCAATAATGACACCCTCAGACCTGGAGGGGGAGATATGAGAGACAATTGGAGAAGTGAAGTGTATAAATATA  
AGGTAGTAAAAATTGAACCACTAGGAGTAGCACCCACCAAGGCAAAAAGACAAGTGGTGAAGAGAGAAAGAGA  
AAAAAGAGCAGTGGGAATAGGAGCTGTGCTCCTTGGGTTCTTGGGAGCAGCAGGAAGCACTATGGGCGCGGCG  
TCAATGACGCTGACGGTACAGGCCAGACAATTATTGTCTGGTATAGTGCAACAGCAAAACAATTTGCTGAAGG  
CTATAGAAGCGCAACAGCATCTGTTGCAGCTCACAGTCTGGGGCATT

>JN054264..1

TTCTACTGTAACACAACAAAGCTGTTTAAATCAAGTCTGCTTAAACAGTACAAGTACAAATGAAAGTATACCTG  
AGATTATTCTTCCATGTAGAAATAAAACAATTTATAAACATGTGGCAAAGAGTAGGAAAAGCAGTGTATTCTC  
CCCCATTGCAGGGAAAATTCAAGTGTATCTCAAATATCACAGGTCTATTATTGGTGAGGGATGGTGGTAATACA  
TCCACAATGACAATGACACCCTCAGACCTATGGGGGGAGATATGAAAGCCAATTGGAGAAGTGAAGTGTATA  
AATATAAGGTAGTAAAAATTGAGCCACTAGGAATAGCACCCCTCAGGGCAAAAAGACGAGTGGTGCAGAGAGA  
GAAAAGAGCTGTGGGAATAGGAGCTTTGCTCTTTGGGTTCTTGGGAGCAGCAGGAAGCACTATGGGCGCAGCG  
TCACTAACGCTGACGGTACAGGCCAGACAATTATTGTCTGGTATAGTGCAACAGCAAAAGCAATTTGCTGAAGG  
CTATAGAAGCGCAACAGCATCTGTTGCAGCTCACAGTCTGGGGCATT

>KF725967..1

TTCTACTGTAATACAAACAGATCTGTTTAAATATAACAGCTCTGGTTAATAACACAGGGAACAATATCACTATCC  
CATGTAGAAATAAAACAATTTATAAACATGTGGCAAAGAGTAGGACGAGCAATGTATGCCCCCTCCATAGCCGG  
AAGAATTCAGTGTAACCTCAACTATCACAGGTCTACTATTAACAAGAGATGGTAGAAATGATACAAATGAGACC  
CTCAGACCTGGAGGGGGAGATATGAGAGACAATTGGAGAAGTGAAGTGTATAAATATAAGGTAGTAAAAATTG  
AACCACCTAGGAGTAGCACCCACTGAGGCAAGAAGACAAGTGGTAAAGAGAGAAAAAAGAGCAGTGGGAATGGG  
AGCTGTGCTCTTTGGGTTCTTGGGAACAGCAGGAAGCACTATGGGCGCGGCGTCAATAACGCTGACGGTACAG  
GCCAGACAATTATTGTCTGGTATAGTGCAACAGCAGCAAAAGCAATTTGCTGAAGGCTATAGACGCGCAACAGCATC  
TGTTGCAGCTTACAGTCTGGGGCATT

>AY371121..1

TTCTATTGTAATACATCAGAACTGTTTAAATATTAATATATCAAATAGTAGTACAAAATAGTACTGAGAATGAAA  
CTATCACACTCCCATGTAAAAATAAAACAATTTGTAAAGATGTGGCAGAGAGTGGGACAAGCAATGTATGCCCC  
TCCTATCGCCGGAAACATTACATGTAAATCAAACATTACAGGACTAATATTAACAAGAGATGGTGGAAATACT  
AGGGATAATACCTCAGAGATCTTCAGACCTGGAGGAGGAGAAATGAGAGACAATTGGAGAATGAATTATATA  
ATTATAAAACAGTAAAAATCAAATCATTAGGAGTAGCACCCACCAGGGCAAGGAGAAGAGTGGTGGAGAGAGA

AAAAAGAGCAGTTGGAATAGGAGCTGTCTTCCTTGGGTTCTTAGGAGCAGCAGGAAGCACTATGGGCGCGGCG  
TCAATAACGCTGACGGTACAGGTACAGTCAACAATTATTGTCTGGCATAGTGCAACAGCAAAACAATTTGCTGAGGG  
CTATAGAGGCGCAGCAGCATCTGTTGCAACTCACAGTCTGGGGCATT

>FJ389367..3

TTCTATTGTAATACATCAGGCCTGTTTAATATATCATATAATAGTACAGAGAATAGTACTTATAATGAAGGGA  
ATGAGACTTATACACTCCCATGTAAAATAAAACAAATTGTGAGAATGTGGCAAAGAGTGGGACAAGCAATGTA  
TGCCCCCTCCCATCAAAGGAAACATTACATGTAGATCAAACATTACAGGACTACTATTAACAAGAGATGGTGGG  
GAGAATGATAATAATAACAGTAGTGAGGTCTTCAGACCTGCAGGAGGAGACATGAGGGACAATTGGAGAAGTG  
AATTATATAAGTATAAAATAGTAAAAATAAAACCATTAGGAGTAGCACCCACCAAGGCAAGGAGAAGAGTGGT  
GGGGAGAGAAAAAAGAGCAGTAGTTGGACTAGGAGCTGTTTTCCTTGGGTTCTTAGGAGCAGCAGGAAGCACT  
ATGGGCGCGGCGTCAATAACGCTGACGGTACAGGTACAGTCAACAATTATTGTCTGGCATAGTGCAACAGCAAAAGCA  
ATTTGCTGAGAGCTATAGAGGCACAGCATCATCTGTTGCAACTCACAGTCTGGGGCATT

>FJ389365..1

TTCTATTGTAATACATCAGACTTGTTTAATATCAGTACAACAAATAGTACTAATGATACTATCACACTCCCAT  
GTAAGATAAAACAAATTGTGAGAATGTGGCAGAGAGTGGGACAAGCAATGTATGCCCTCCCATTCAGGAGA  
AATTACATGCAGGTCAAATATTACAGGACTACTATTAACAAGAGATGGTGGGGGTGGAGGTAATCAAACAAAT  
GAAACCTTCAGACTTGAGGAGGAAATATGAGGGACAATTGGAGAAGTGAATTATATAAGTATAAAGTAGTAA  
AGATTAAACCACTAGGAATAGCACCCACCAAGTCAAGGAGAAGAGTGGTGGAGAGAGAAAAAAGAGCAGTTGG  
AATAGGAGCTGCCTTCCTTGGGTTCTTAGGAGCAGCAGGAAGCACTATGGGCGCGGCGTCAATAACGCTGACG  
GTACAGGTACAGCAATTATTGTCTGGCATAGTGCAACAGCAAAAGCAATTTGCTGAGAGCTATAGAGGCGCAGC  
AACATCTGCTGCAACTCACAGTCTGGGGCATT

>AY231156..1

TTCTATTGTAATACATCAGGACTGTTTAATAGTAGTAATCTGTCTAATAGTAGTAACAATGAGACCGATATTA  
TAACGCTCCCATGTAGAATAAAACAAATTGTAAGAATGTGGCAGAGAGTGGGACAAGCAATGTATGCCCTCC  
CATAGAAGGAAACATTACATGTATATCAAATATTACAGGACTATTATTAACAAGGGATGGTGGGAAGACTAAC  
AGTAGTAATGAGACCTTCAGACCTGCAGGAGGAGACATGAGGGACAATTGGAGAAGTGAATTATATAAGTATA  
AAGTAGTAAAAATTAAACCACTAGGAATAGCACCCACCAAGGCAAGGAGAAGAGTGGTGGGGAGAGAAAAAAG  
AGCAGTTGGAATAGGAGCTGTCTTCCTTGGGTTCTTAGGAACAGCAGGAAGCACTATGGGCGCAGCGGCAATA  
ACGCTGACGGTACAGGTACAGCAATTATTGTCTGGCATAGTGCAACAGCAAAAGCAATTTGCTGAGGGCTATAG  
AGGCTCAGCAACATATGTTGCAGCTCACAGTCTGGGGCATT

>EF033660..1

TTCTATTGTAATACATCAGGATTGTTTAATAGTAGTAACCTTAAAAGTAGTAACCTGACTGGTAATGAGACCA  
TCACACTCCCATGTAGGATAAAACAAATTGTGAGAATGTGGCAGAGAGTGGGACAAGCAGTGTATGCCCTCC  
CATTGCAGGAAACATTACATGTATATCAAACATTACAGGACTACTAATAACAAGAGATGGTGGGAATAATAGC  
AGCCAAAATGAGACCTTTAGACCTGCAGGAGGAGACATGAGGGACAATTGGAGAAGTGAATTATATAAGTATA  
AAGTAGTAAAAATTAAACCACTAGGAGTAGCACCCACCAAGGCAAGGAGAAGAGTGGTGGGGAGAGAAAAAAG  
AGCAGTTGGACTGGGAGCTGTCTTCCTTGGGTTCTTAGGAACAGCAGGAAGCACTATGGGCGCAGCGGCAGTA  
ACGCTGACGGTACAGGTACAGCAACTATTGTCTGGCATAGTGCAACAGCAAAAGCAATTTGCTGAGGGCTATAG  
AGGCTCAGCTACATCTGTTGCAACTCACAGTCTGGGGCATT

>KT022379..1

TTCTATTGTAATACATCTAGATTGTTTAATGATAATATTACACATAATAATAGTGCATCTAATAATAATACTA  
AGGGAAACATCACACTCCCATGTAAAATAAAACAAATTGTGAGAATGTGGCAAAGAGTGGGACAAGCAATGTA  
TGCCCCCTCCTATCGCAGGAGAACTTACATGTAAATCAAACATTACAGGACTATTATTAACAAGAGATGGTGGG  
ACTCATAAAAAATAATAAAAGTGAGATCTTCAGACCTGCAGGAGGAGATATGAAGGACAATTGGAGAAGTAAAT  
TATATAAGTATAAAGTAGTAAAAATTAAACCACTAGGAGTAGCACCCACCAAGCAAGGAGAAGAGTGGTGGG  
AAGAAAAAAGAGCAGTTGGACTGGGAGCTGTCTTCCTTGGGTTCTTGGGAGCAGCAGGAAGCACTATGGGC  
GCAGCGTCGATAACGCTGACGGTACAGGCCAGACAATTATTGTCTGGCATAGTGCAACAGCAAAACAATTTGC  
TGAGAGCTATAGAAGCGCAGCAGCATTTGTTGCAGCTCACAGTCTGGGGCATT

>JN248582..1

TTCTATTGTAACACAACAGGACTGTTTAATAATAGTACATTGGAGCTTAATAACACTAGTAATGGCACTATCA  
CACTCCCATGTAAAGATAAAACAAATTGTGAGAATGTGGCAGAGAACTGGACAAGCAATGTATGCCCTCCCAT  
CGCAGGAAATATTACATGTAGATCAAACATTACAGGACTATTATTAACAAGAGATGGTGGGAATAATGATACT  
CATGAGACCTTCAGACCTGGAGGAGGAGATATGAGGGACAATTGGAGAAGCGAACTATATAAATATAAAATAG  
TAAAAATTAAACCACTAGGAATAGCACCCACCAAGGCAAGGAGAAGAGTGGTGCAGAGGGAAAAAAGAGCAGT  
AGTTGGACTAGGAGCTGTCTTCCTTGGGTTCTTGGGAGCAGCAGGAAGCACTATGGGCGCAGCGTCAATAACG  
CTGACGGTACAGGTACAGCAATTATTGTCTGGCATAGTGCAACAGCAAAAGCAATTTGCTGAGGGCTATAGAGG  
CACAGCAACATCTGTTGCAACTCACAGTCTGGGGCATT

>AF069947..1

TTCTATTGTAATACATCAGGATTGTTTAATGATAGTGCATCAAATGACACTATCACACTCCCATGTAAAGATAA  
AACAAATAGTGAGAATGTGGCAAAGAGTGGGACAAGCAATGTATGCCCTCCCATCGCAGGAAACATTACATG

TAGATCAAATATTACAGGGCTACTATTAACAAGAGATGGTGGAAATGATGGGGCTAATAGCACAAATCAAAAT  
GAAACCTTCAGACCTGGAGGAGGAGATATGAGGGACAATTGGAGAAGTGAATTATATAAGTATAAAATAGTAA  
GAATTAAACCACTAGGAATAGCACCCACCAGGGCAAGAAGAAGAGTGGTGGAGAGAGAAAAAGGGCAGTTGG  
ACTGGGAGCTGTCCTCCTTGGGTTCTTAGGAACAGCAGGAAGCACTATGGGCGCGGCGTCAATAACGCTGACG  
GTACAGGTGAGACAATTATTGTCTGGCATAGTGCAACAGCAAAGCAATTTGCTGAGGGCTATAGAGGCGCAGC  
AACATCTGTTGCAACTCACAGTCTGGGGCATA

>KY229519..2

TTCTATTGTAATACATCAGAACTGTTTAATCCTAATACCCTGAATAGTAATAGTAGTGATCAGTCTAACATCA  
CCCTCCCATGTAAAATAAAACAAATTGTGAGAATGTGGCAGAAAGTGGGACAAGCGATGTATGCCCCCTCCCAT  
TGCAGGAGAGATTACATGTAGATCAAACATTACAGGAATACTATTAACAAGAGATGGTGGAAATCACCAGAAC  
ATTAGTGGAAATGAAACCTTCAGACCTGCAGGAGGAGACATGAGGGACAATTGGAGAAGTGAATTATATAAGT  
ATAAAGTAGTAAAAATTAACCACCTAGGAATAGCACCCACCAAGGCAAAAAGAAGAGCGGTGGAGAGAGAAAAG  
AAGAGCAGTTGGAATGGGAGCTTTACTCCTTGGGTTCTTAGGAACAGCAGGAAGCACTATGGGCGCAGCGTCA  
ATAACGCTGACGGTACAGATCAGACAGTTGTTGTCTGGTATAGTGCAACAGCAAAGCAATTTGCTGAGAGCTA  
TAGAGGCGCAGCAGCATCTGTTGCAGCTTACAGTCTGGGGCATT

>KU168273..1

TTCTATTGCAATACATCAAACTGTTTAATAGTATCTGGTATGTTAACGGGACAAATGGGACCGTACTAAATG  
GAACAATTACTGGGACCGGACTAAATGGAACAATTACACTGCCATGCAGAATAAAACAAATTGTAAACATGTG  
GCAGAGAGTAGGACAAGCAATGTATGCCCCCTCCCATTAGGGGAGATATTACATGCGAATCAAATATTACAGGA  
CTAATATTAACAAGTACTATGTTAATACAACAGATACAAATGGAAGTGTACCCCTCAGACCTACAGGAGGAG  
ACATGAGGGACAATTGGAGAAGTGAATTATATAAAATATAAAGTAGTAAAAATTGAGCCACTAGGAATAGCACC  
CTCCAGGGCAAGGAGAAGAGTGGTGGAAAGAGAAAAAGAGCTGTGGGAATGGGAGCTTTTTTCTTGGGTTTCT  
TTGGGAGCAGCAGGAAGCACTATGGGCGCGGCGTCCATGGCGCTGACGGTACAGGCCAGACAATTATTGTCTG  
GTATAGTGCAACAGCAAAGTAATCTGCTGAGAGCTATAGAGGCGCAACAGCATATGTTGCAGCTCACAGTCTG  
GGGCATT

>AF005496..2

TTCTATTGCAATACATCAGGGCTGTTTAATAGTAGTTGGGAAATGCATACTAATTACACATCAAATGACACAA  
AGGGAAACGAAAACATTACACTGCCATGCAGAATAAAACAAATTGTAAACATGTGGCAGAGAGTAGGACGAGC  
AATGTATGCCCCCTCCCATCCAAGGAAACATTATGTGTGTATCAAATATTACAGGACTAATATTGACAATTGAC  
GAGGGTAACGCGTCTGCAGAAAATTATACCTTCAGACCTGGAGGAGGAGATATGAGGGACAATTGGAGAAGTG  
AATTGTATAAATATAAAGTAGTAAAAATTGAACCACTGGGAATAGCACCCACCAAGACAAGGAGAAGAGTGGT  
GGAGAGAGAAAAAGAGCAGTGGGAATGGGAGCTTCTTTCCTTGGGTTCTTGGGAGCAGCAGGAAGCACTATG  
GGCGCGGCGTCAATAACGCTGACGGTACAGGCCAGGCAATTATTGTCTGGTATAGTGAGCAGCAAAGCAATT  
TGCTGAGAGCTATACAGGCGCGACAGCATATGTTGCAGCTCACGGTCTGGGGCATT

>KY392776..1

TTCTATTGTAATACATCAAACTGTTCAATAGTAGTGAAAAATCCAATGCAAACATCACACTCCCATGTAGAA  
TAAGGCAAATTGTAAGGATGTGGCAGAGAGTAGGACAAGCAATATATGCCCCCTCCCATCGCAGGAAACATTAC  
ATGCATGTCAAATATTACAGGATTAATATTGACACGTGATGGGGGAGTTAACAATAACAATGACAGTACTAAT  
AATACAGAAATCTTCAGACCTACAGGAGGAAATATGAAGGACAATTGGAGAAGTGAGCTATATAAATATAAAG  
TGGTAAAAATTGAGCCACTAGGAGTAGCACCTACCAGGGCAAAAAGAAGAGTGGTGGAGAGAGAAAAAGAGC  
AGTGGGAATGGGAGCTGTGTTCTTGGGTTCTTGGGAACAGCAGGAAGCACTATGGGCGCAGCGTCAATAACG  
CTGACGGTACAGGTGAGACAATTGTTGTCTGGCATAGTGCAACAGCAAAGCAATTTGCTAAAGGCTATAGAGG  
CTCAACAGCATCTGTTGAGACTCACTGTCTGGGGCATT

>KU168280..1

TTCTATTGCAATACATCACAACCTGTTCAATAATAGTTGGAATGGAAGTAGTTGGAATAACAATGCTACAAATG  
ACACTATCACAATTCATGTAAAATAAGACAAATTGTGAGAATGTGGCAGAGAGTAGGACAAGCCATATACGC  
CCCTCCCATCGCAGGAAACATTACATGTGTATCAAATATTACAGGATTAATATTAACACGTGATGGGGGACAG  
GGAGGAAATGAGACAAACAAGACTGAGGCTGAGACCTTCAGACCTACAGGAGGAGATATGAGGGACAATTGGA  
GAAGTGAATTATATAAATATAAAGTAGTGGAGGTTGAGCCACTAGGAGTAGCACCCACCAGGGCAAAAAGAAG  
AGTGGTGGGGAGAGAAAAAGAGCGGGAATAGGAGCTCTGTTTCCTTGGGTTCTTGGGAGCAGCAGGAAGCACT  
ATGGGCGCAGCGTCAATAACGCTGACGGTACAGGCCAGACAATTGCTGTCTGGCATAGTGCAACAGCAAAGCA  
ATTTGCTGAATGCTATAGAGGCTCAACAGCATCTGTTGAAGCTCACTGTCTGGGGCATT

>GU237072..2

TTCTATTGTAATACATCAAGCCTGTTCAATAGTAGCTGGAGTAGTAAGAATGATACAAATAGCACAGCAAATT  
ACACAATCATCCCATGTAAAATAAGACAAATAGTGAGAATGTGGCAGAAAGTAGGACAAGCAATATATGCCCC  
TCCCATTGAAGGAAACATTACATGCTCATCAAATATTACAGGATTAATATTGACACGTGATGGAGGAGACAAG  
AACAGCACTAGCAACAACAGTACTGAGATCTTTAGACCCACAGGAGGAGATATGAAAGACAATTGGAGAAGTG  
AATTATATAAATATAAAGTAGTAGAGATTGAGCCACTAGGAGTAGCACCCACCAGGGCAAAAAGAAGAGTGGT  
GGAGAGAGAAAAAGAGCACTGGGAATAGGAGCTGTGTTCTTGGGTTCTTGGGAACAGCAGGAAGCACTATG

GGCGCAGCGTCAATAACGCTGACGGTACAGGTCAGACAATTGTTGTCTGGCATAGTGCAACAGCAAAGCAATT  
TGCTGAAGGCTATAGAGGCTCAACAGCATCTGTTGAAGCTCACTGTCTGGGGCATT

>AJ249239..1

TTCTACTGCAATACAACAAAACCTGTTTAAATGAGACAGGGGAGAATGGTACTATCACACTCCCATGTAGAATAA  
AGCAGATTATAAACATGTGGCAGAAAGTGGGAAAAGCAATATATGCCCCCTCCCATTCAGGAAGTATTAACCTG  
TAGCTCAAATATTACAGGAATGATATTGACAAGAGATGGTGGTAATAATACTCATAATGAGACCTTCAGACCT  
GGAGGAGGAGACATGAGGGACAATTGGAGAAGTGAACCTGTATAAATATAAAGTAGTACAGATTGAACCACTAG  
GAATAGCACCCACCAGGGCCAGGAGAAGAGTGGTGCAGAGAGAAAAAGAGCAGTAGGATTAGGAGCTGTGTT  
CTTTGGATTCTTGGGAGCAGCAGGAAGCACTATGGGCGCGCGTCAATAACGCTGACGGTACAGGCCAGACAA  
TTATTGTCTGGTATAGTGCAACAGCAAAGCAATTTGCTGAGAGCTATAGAAGCGCAACAACATCTGTTACAGC  
TCACGGTCTGGGGCATT

>MH746262..1

TTCTATTGCAATACAACACAACCTGTTTAAATGGCACGATTGGCAATATCACACTGCCATGTAGGATAAAACAAA  
TTATAAACATGTGGCAAGGAGTAGGACAAGCAATGTATGCTCCTCCCATCAATGGAATACTTAATTGTGTATC  
AAATATTACAGGAATACTATTGACAAGAGATGGTGGTAATCATACGAATGAAACTGAGACCTTCAGACCGGGA  
GGAGGAAATATAAAGGACAATTGGAGAAGTGAATTATATAAATATAAAGTAGTAGAAATTGAACCACTAGGAA  
TAGCACCCACCAAGGCAAAGAGAAGAGTGGTGGAGAGAGAAAAAGAGCAGTGGGAATAGGAGCTATGATCTT  
TGGGTTCTTAGGAGCAGCCGGAAGCACGATGGGCGCGCGTCAATAACGCTGACGGTACAGGCCAGACAATTA  
TTGTCTGGTATAGTGACGAGCAAAGCAATTTGCTGAGGGCTATAGAGGCGCAGCAGCATATGTTGCAACTCA  
CAGTCTGGGGCATT

>U51188..2

TTCTATTGCAATACAACAGCACTGTTTAAATAGTACTTGGATAAATGGAACCATGCAGGAGGTTAATGGCACAA  
ACTCAGGCAATATCACACTTCCATGCAGGATAAAGCAAATTTGTAAACATGTGGCAGGAAGTAGGACGAGCAAT  
GTATGCTCCTCCCATCAGTGAAGTAATTAATTGTGTATCAAATATTACAGGAATACTATTGACAAGAGATGGG  
GGTATTAATCAAATCAGACTAACAAAAATGAGACCTTCAGACCTGGAGGAGGAAATATAAAGGACAATTGGA  
GAAGTGAATTATACAAATATAAAGTAGTACAAATTGAACCACTAGGAATAGCACCCACCAAGGCAAGGAGAAG  
AGTGGTGGAGAGAGAAAAAGAGCAGTGGGAATAGGAGCTATGATCTTTGGGTTCTTAGGAGCAGCAGGAAGC  
ACTATGGGCGCGCGTCAATAACGCTGACGGTACAGGCCAGACAATTATTGTCTGGTATAGTGCAACAGCAAA  
GCAATTTGCTGAGGGCTATAGAGGCGCAGCAGCATCTGTTGCAACTCACAGTCTGGGGCATT

>JX112863..1

TTCTATTGCAATACAACAAAACCTGTTTAAATAATACTTGCATAAATGGAACCACGAAGGGGTGTAATGGTACTA  
TCATAATTCTATGCAAGATAAAGCAAATTTGTAAACATGTGGCAGGGAGTAGGACAAGCAATGTATGCTCCTCC  
CGTCAGAGGAACAATTAATTGTGTATCAAATATTACAGGAATAATATTGACAAGAGATGGTGGAGTTAATAGG  
ACACATAACGAGACCTTCAGACCTGGAGGAGGAAATATGAAAGATAATTGGAGAAATGAATTATATAAATATA  
AAACAGTACTAATTGAACCACTAGGAATAGCACCCACCAGGGCAAAGAGAAGAGTGGTGGAGAGAGAAAAAG  
AGCAGTGGGAATAGGAGCTATGATCTTTGGGTTCTTGGGAGCAGCAGGAAGCACTATGGGCGCAGCGTCAATA  
ACGCTGACGGTACAGGCCAGACAATTATTGTCTGGTATAGTGCAACAGCAAAGCAATTTGCTGAGGGCTATAG  
AGGCGCAACATCATCTGTTGCAACTCACAGTCTGGGGCATT

>KF835503..1

TTCTATTGTAATACATCACAACCTGTTTAAATACAACACAACCTTAAACGGTTTAAATAATGGTGGGGGTAGTGACA  
CTATCATACTTCCATGTAAAGATAAAACAAATTATAAACATGTGGCAGGGAGCAGGACAAGCAATGTATGCTCC  
TCCCATCAGTGGAGCAATTAATTGTTTCATCAAATATTACAGGAATACTATTAAACAAGAGATGGTGGTGTTCAT  
AATGGGAGTAACGAGACCGAGATCTTCAGACCTGGAGGAGGAAATATAAAGGACAATTGGAGAAGTGAACCTAT  
ATAAATATAAAGTAGTAGAAATTGAACCATTAGGAATAGCACCCACCAAGGCAAGGAGAAGAGTGGTGGAGAG  
AGAAAAAGAGCAGTGGGAATAGGAGCTATGATCTTTGGGTTCTTAGGAGCAGCAGGAAGCACTATGGGCGCG  
GCGTCAATAACGCTGACGGTACAGGCCAGACAATTATTGTCTGGTATAGTGCAACAGCAAAGCAATTTGCTGA  
GGGCTATTGAGGCGCAACAGCATATGTTGCAACTCACAGTCTGGGGCATT

>KF835527..1

TTCTATTGCAACACATCAAACCTGTTTAAATACAACATACCTTAAATAGTAGCACAGAAAATAACAATATCACAC  
TTCCATGCAGATAAAGCAAATTATAAACATGTGGCAGGGAACAGGACAAGCAATGTATGCTCCTCCCATCAG  
TGGAAACATTAGCTGTGTATCAAATATTACAGGAATACTATTGACAAGAGATGGTGGTGGGAATGGTACAGAG  
GGGACGAATGAGACCTTCAGACCTGGAGGAGGAAATATGAAGGACAATTGGAGAAATGAATTATATAAATATA  
AAGTAGTACAAATTGAACCACTAGGAATAGCACCCACCAGGGCAAAGAGAAGAGTGGTGGAGAGAGAAAAAG  
AGCAGTGGGAATAGGAGCTATGATCTTTGGATTCTTGGGAGCAGCAGGAAGCACTATGGGCGCGCGTCAATA  
ACGCTGACGGTACAGGCCAGACAATTATTGTCTGGTATAGTGCAACAGCAAAGCAATTTGCTGAGGGCTATAG  
AGGCGCAGCATCATTTGCTGCAACTCACAGTCTGGGGCATT

>JX112809..2

TTCTATTGCAATACAAGCCAACCTGTTTAAATGCTACTTACGGAACAAATGAAACCACGCGTACGCGTAATGACA  
CTATCATACTTCCATGCAGGATAAAGCAAATTATAAACATGTGGCAGGGAGTAGGACAAGCAATGTATGCTCC  
TCCCATCAGTGGAGAATTAATTGTGTATCAAATATTACAGGAATACTATTAAACAAGAGATGGTGGTGATAAT

AATAGTACTAACGAGACCTTCAGACCTGGAGGGGGAGATATAAAGGACAATTGGAGAAGTGAATTATATAAAT  
ATAAAGTAGTACAAATTGAACCACTAGGAGTAGCACCCACCAGGGCAAAAAGAAGAGTGGTGGAGAGAGAAAA  
AAGAGCAGTGGGAATAGGAGCTATGATCTTTGGGTTCTTAGGAGCAGCAGGAAGCACTATGGGCGCGGCGTCA  
ATAACGCTGACGGTACAGGCCAGACAATTATTGTCTGGTATAGTGCAACAGCAAAGCAATTTGCTGAGGGCTA  
TAGAGGCGCAGCATCATCTGTTGCAACTCACAGTCTGGGGCATT

>JX112813..1

TTCTATTGCAATACAACAAAACCTGTTTAAACAGTACTTGGACAGGAAATGAAACCATAAATGAGAATGGGACTA  
CTAAAATCATAATTCATGCAGGATAAAGCAAATTATAAACATGTGGCAAGGAGCAGGACAAGCAATATATGC  
TCCTCCCATCAGTGGAGCAATTAATTGTGTATCAAATATTACAGGAATACTATTGACAAGAGATGGTGGTGAT  
GGTAATCATATAAACGAGACCTTCAGACCTGCAGGAGGAAAATATGAGGGACAATTGGAGAAGTGAATTATATA  
AATATAAAGTAGTACAAATTGAACCATTAGGAATAGCACCCACCAGGGCAAAGAGAAGAGTGGTGGAGAGACA  
AAAAAGAGCAGTGGGAATAGGAGCTATGATCTTTGGGTTCTTAGGAGCAGCAGGAAGCACTATGGGCGCGGCG  
TCAATAACGCTGACGGTACAGGCCAGACAATTATTGTCTGGTATAGTGCAACAGCAAAGCAATTTGCTGAGGG  
CTATAGAGGTGCAGCAGCATATGTTGCAACTCACAGTCTGGGGCATT

>JX112814..3

TTCTATTGCAATACAAGCCAACTGTTTAAATAAACTTACTATGGAAATGAAACTACTTCCATAGGGAATACCA  
CGAATAACACTATCGTACTTCCATGCAAGATAAAGCAAATTATAAACATGTGGCAGGGAGTAGGACAAGCAAT  
GTATGCTCCTCCCATCAGTGGAAACATTAGTTGTGTATCAAATATTACAGGAATACTATTAAACAAGAGATGGT  
GGTAATAATAAGTCTCAGGTGAACGAGACCTTCAGACCTGGAGGAGGAAATATGAAGGACAACCTGGAGAAGTG  
AATTATATAAATATAAAGTAGTACAAATTGAACCATTAGGAATAGCACCCACCAGGGCAAAGAGAAGAGTGGT  
GGAGAGAGAAAAAGAGCAGTGGGAATAGGAGCTATGATCTTTGGGTTCTTAGGAGCAGCAGGAAGCACTATG  
GGCGCGGCGTCAATAACGCTGACGGTACAGGCCAGACAATTATTGTCTGGTATAGTGCAACAGCAAAGCAATT  
TGCTGAGGGCTATAGAGGCGCAGCAGCATCTGCTGCAACTCACAGTCTGGGGCATT

>JX112820..1

TTCTATTGCAATACATCAGGACTGTTTAAATAGTACTTGGGAAAGAAATGGAACCATGAGGGGGCATAATAGCA  
CTAATGGCACTATCATACTTCCATGCAGGATAAAGCAAATTATAAACATGTGGCAGGGAGTAGGACAAGCAAT  
GTATGCTCCTCCCATCGCAGGAAGTATTAATTGTACATCAAATATTACAGGGATACTATTGACAAGAGATGGT  
GGTTATGATGCGGAGAATAATGAGACTGAGACTTTCAGACCTGGAGGAGGAAATATAAAAGACAATTGGAGAA  
GTGAATTATATAAATATAAAGTAGTACAAATTGAACCACTAGGAATAGCACCCACCATGGCAAAGAGAAGAGT  
GGTGGAAAGAGAAAAAGAGCAGTGGGAATAGGAGTTATGATCTTTGGGTTCTTAGGAGCAGCCGGAAGCACT  
ATGGGCGCAGCGTCACTAACGCTGACGGTACAGGCCAGACAATTATTGTCTGGTATAGTGCAACAGCAAAGCA  
ATTTGCTGAGGGCTATAGAGGCGCAGCAGCATATGTTGCAACTCACAGTCTGGGGCATT

>JX112823..1

TTCTATTGCAATACAAGCCAACTGTTTAAATGATACAGGAAATGAAACCATAGGGAATAATAGTAACACTATCA  
TACTTCCATGCAGGATAAAGCAAATTATAAACATGTGGCAGGGAGTAGGACAAGCAATGTATGCTCCTCCCAT  
CAGTGGAAACAATTAATTGTGTATCAAATATTACAGGAATACTATTAAACAAGAGATGGCGGTACTAATGGTAAT  
AATACTAATAATACCACTAATAATACCGAGACCTTCAGACCTGGGGGAGGAAATATAAAGGACAATTGGAGAA  
GTGAATTATATAAATATAAAGTAGTACAAATTGAACCACTAGGAATAGCACCCACCAGGGCAAAGAGAAGAGT  
GGTGGACAGAGAAAAAGAGCAGTGGGAATAGGAGCTATGATCTTTGGGTTCTTAGGAGCAGCTGGAAGCACT  
ATGGGCGCGGCGTCAATAACGCTGACGGTACAGGCTAGACAATTATTGTCTGGTATAGTGCAACAGCAAAGCA  
ATTTGCTGAGGGCTATAGAGGCGCAGCAGCATATTTGTTGCAACTCACAGTCTGGGGCATT

>JX112826..1

TTCTATTGCAATACAAGCAAACCTGTTTAAATTTTACTTTCCCAAGAAATGAAACAGGGGAGAATGATACAAC  
TCATACTTCCATGCAGGATAAAGCAAATTATAAACATGTGGCAGGGAGTAGGACAAGCAATGTATGCTCCTCC  
CATCAGTGGGATAATTAATTGTGTATCAAATATTACAGGAATACTATTAAACAAGAGATGGTGGTCATAATAAT  
AATACTATTACTAATGAGACCTTCAGACCTGGAGGAGGAAATATAAAGGACAATTGGAGAAGTGAATTATACA  
AATATAAAGTAGTACAAATTGAACCACTAGGAATAGCACCCACCAGGGCAAAGAGAAGAGTGGTGGAGAGAGA  
AAAAAGAGCAGTGGGAATAGGAGCTATGATCTTTGGGTTCTTAGGAGCAGCAGGAAGCACTATGGGCGCGGCG  
TCAATAACGCTGACGGTACAGGCCAGACAATTATTGTCTGGTATAGTGCAACAGCAAAGCAATTTGCTGAGGG  
CTATAGAGGCGCAGCAGCATATGTTGCAACTCACAGTCTGGGGCATT

>JX112835..2

TTCTATTGCAATACAACAAAACCTGTTTAAATGTAACCTTACAATGAAAAGAATACCACAGGGGGGAGTAATGGCA  
CTATCATACTCCTATGCAAGATAAAGCAAATTATAAACATGTGGCAGGAAGTAGGACAAGCAATGTATGCTCC  
TCCCATCAGTGGAAAGAATTAATTGTGTATCAAATATTACAGGAATACTACTAACAAGAGATGGTGGTGGTACT  
AATAGGACTAATGAGACCTTCAGACCTGGAGGAGGAAATATAAAGGACAATTGGAGAAGTGAATTATATAAAT  
ATAAAGTAGTACAACTTGAACCACTAGGAATAGCACCCACCAGGGCAAAGAGAAGAGTGGTGGAGAGAGAAAA  
AAGAGCAGTGGGAATAGGAGCTATGATCTTTGGGTTCTTGGGAGCAGCAGGAAGCACTATGGGCGCGGCGTCA  
ATAACGCTGACGGTACAGGCCAGACAATTATTGTCTGGTATAGTGCAACAGCAAAGCAATTTGCTGAGGGCTA  
TAGAGGCGCAGCATCATCTGTTGCAACTCACAGTCTGGGGCATT

>JX112844..1

TTCTATTGCAATACAACAAACCTGTTTAAACAGTACTTGGGAAAATGGAACCACGGAGGGTAATGGCACCGAGA  
AGATCATACTTCCATGCAGGATAAAGCAAATTATAAACATGTGGCAGGGAGCAGGACAAGCAATGTATGCTCC  
TCCCATCAGTGGAAACAATTAATTGTGTATCAAATATTACAGGAATACTATTAACAAGAGATGGTGGTTATAAT  
AATGCGGATAACGAGACCTTCAGACCTGGAGGAGGAAATATAAAGGACAATTGGAGAAGTGAATTATATAAAT  
ATAAAGTAGTAGAAATTGAACCACTAGGAATAGCACCCACCAGGGCAAAGAGAAGAGTGGTGGAGAGAGAAAA  
AAGAGCAGTGGGAATAGGAGCTATGATCTTTGGGTTCTTGGGAGCAGCAGGAAGCACTATGGGCGCGGCGTCA  
ATAACGCTGACGGTACAGGCCAGACAATTATTGTCTGGTATAGTGCAACAGCAAAGCAATTTGCTGAGGGCTA  
TAGAGGCGCAGCAGCATATGCTGCAACTCACAGTCTGGGGCATT

>GU475036..2

TTCTATTGCAATACAACAAAACCTGTTTAAATAGGAATAATAACTATAGCACTATCATACTTCCATGCAAGATAA  
AGCAAATTTGTAAGAATGTGGCAGGGAGTAGGACAAGCAATGTATGCTCCTCCCATCAGTGGAAAGCATAAATTG  
TGTATCAAATATTACAGGAATACTATTGACAAGAGATGGTGGTATTCATAATAGTAGTGATGAGACCTTCAGA  
CCTGGAGGAGGAAATATAAAGGACAATTGGAGAAGTGAATTATATAAATATAAAGGTAGTAGAAATTGAACCAC  
TAGGAATAGCACCCACCAAGGCAAAGAGAAGAGTGGTGGAGAGAGAAAAAAGAGCAGTGGGAATAGGAGCTAT  
GATCTTTGGGTTCTTAGGAGCAGCAGGAAGCACTATGGGCGCGGCGTCAATAACGCTGACGGTACAGGCCAGA  
CAATTATTGTCTGGTATAGTGCAACAGCAAAGCAATTTGCTGAGGGCTATAGAGGCGCAACAGCATATGTTGC  
AACTCACAGTCTGGGGCATT

>GU475019..1

TTCTATTGCAATACAACAAATCTGTTTAAATAACTTGCATAAACAAATGCAAGCACAAAAGGGTGAATGAAA  
ATATCATACTTCCATGCAGGATAAAACAAATTATAAACATGTGGCAAGGAGTAGGACAAGCAATGTATGCTCC  
TCCCATCAGTGGAAAAATTACTTGTAGATCAAATATTACAGGAATACTATTGACAAGAGATGGTGGTAATCAT  
AGCACAGGTAATGAGACCTTCAGACCTGAAGGAGGAAATATAAAGGACAATTGGAGAAGTGAATTATATAAAT  
ATAAAGTAGTAGAAATTGAACCACTAGGAATAGCACCCACCAGGGCAAAGAGAAGAGTGGTGGAGAGAGAAAA  
AAGAGCAGTGGGAATAGGAGCTATGATCTTTGGGTTCTTAGGAGCAGCAGGAAGCACTATGGGCGCAGCGTCA  
ATAACGCTGACGGTACAGGCCAGACAATTATTGTCTGGTATAGTGCAACAGCAAAGCAATTTGCTGAGGGCTA  
TAGAGGCGCAGCAGCATCTGTTGCAACTCACAGTCTGGGGCATT

>JX960615..1

TTCTATTGCAATACAACAAAGCTGTTCAATAGTACTTGGATAGGAAATGAAACCACGGAGGGAGGTAATGATA  
ATGACACTATCATACTTCCATGCAGGATAAAACAAATTATAAACATGTGGCAAGGAGCGGGACAAGCAATGTA  
TGCTCCTCCCATCAGTGGAAATAATTAATGTGTATCAAATATTACAGGAATACTATTGACAAGAGATGGTGGT  
GATTATAATAATACAAATGAGACCTTCAGACCTGGAGGAGGAAATATAAAGGACAATTGGAGAAGTGAATTAT  
ATAAATATAAGGTAGTACAAATAGAACCACTAGGAGTAGCACCTACCAGGGCAAAGAGAAGAGTGGTGGAGAG  
AGAAAAAAGAGCAGTGGGAATAGGAGCTATGATCTTTGGGTTCTTAGGAGCAGCAGGAAGCACTATGGGCGCG  
GCGTCAATAACGCTGACGGTACAGGCCAGACAATTATTGTCTGGTATAGTGCAACAGCAAAGCAATTTGCTGA  
GGGCTATAGAGGCGCAACAGCATATGTTGCAACTCACAGTCTGGGGCATT

>JX960639..1

TTCTATTGCAATACAACAAAATGTTTAAATAGTACAGAAAATGGAACCATGGAGGGGCTTAATGGCACTATTA  
TACTCCCATGCAGGATAAAACAAATTGTAAACCTGTGGCAGGGAGCAGGACAAGCAATGTATGCTCCTCCCGT  
CAGTGGAAAAATTAATTGTGCATCAAATATTACAGGAATACTATTAACAAGAGATGGTGGTAATAATGCAACA  
ACTAACGAGACCTTCAGACCGGGAGGAGGAAATATAAAGGACAATTGGAGAAGTGAATTATATAAATATAAAG  
TAGTACAAATTGAACCACTAGGAGTAGCACCCACCAGGGCAAAGAGAAGAGTGGTGGATAAAGAAAAAAGAGC  
AGTGGGAATAGGAGCTATGATCTTTGGGTTCTTAGGAGCAGCAGGAAGCACTATGGGCGCGGCGTCAATAACG  
CTGACGGTACAGGCCAGACAATTATTGTCTGGTATAGTGCAACAGCAAAGCAATTTGCTGAGAGCTATAGAGG  
CGCAGCATCATCTGTTGCAACTCACAGTCTGGGGCATT

>JX960632..1

TTCTATTGCAATACAACAAGGCTGTTCAATAGTACTTGGATAGGAAATGAGACCATAGGAAATGAGACCATGG  
GGGAAGGTAATAATAAATAACACTATCATACTTCCATGCAGGATAAAGCAAATTATAAACATGTGGCAAGGAGC  
AGGACAAGCAATATATGCTCCTCCCATCAGTGGAAATAGTTAATTGTGTATCAAATATTACAGGGATACTATTG  
ACAAGAGATGGTGGTCAAGAAGATAATGGAACAAATAGCGAGATTTTCAGACCTGGAGGAGGAAATATAAAGG  
ACAATTGGAGAAGTGAATTATATAAAGTAGTAGAAATAGAACCCTAGGAGTAGCACCCACCAGGGC  
AAAGAGAAGAGTGGTAAATAGAGAAAAAAGAGCAGTGGGAATAGGAGCTATGATCTTTGGGTTCTTGGGAGCA  
GCAGGAAGCACTATGGGCGCGGCGTCAATAACGCTGACGGTACAGGCCAGACAATTATTGTCTGGTATAGTG  
AACAGCAAAGCAATTTGCTGAGGGCTATAGAGGCGCAGCAGCATATGTTGCAACTCACAGTCTGGGGCATT

>MH672757..1

TTCTATTGCAATACAACAAAGCTGTTCAATGGTAATGGCACTAAAAATGGTAGTGAGACAAACAGTAGCACTA  
TCATACTTCCATGCAGGATAAAGCAAATTATAAACATGTGGCAAGGAGCAGGACAAGCAATGTATGCTCCTCC  
CATCAGTGGAAATAATTAATTGTGTATCAAATATTACAGGAATACTATTAACAAGAGATGGTGGTAATCATAAT  
AATACTACCGAGATTTTCAGACCTGGAGGAGGAAATATGGAGGACAATTGGAGAAGTGAATTATATAAATATA  
AAGTAGTACAAATAGAACCCTAGGAGTAGCACCCACCAAGGCAAAGAGAAGAGTGGTGGATAGAGAAAAAAG  
AGCAGTGGGAATAGGAGCTATGATCTTTGGGTTCTTGGGAGCAGCAGGAAGCACTATGGGCGCGGCGTCAATA

ACGCTGACGGTACAGGCCAGACAGTTATTGTCTGGTATAGTGCAGCAGCAAAGCAATTTGCTGAGGGCTATAG  
AGGCGCAACAGCATATGTTGCAACTCACAGTCTGGGGCATT

>JX112798..2

TTCTATTGCAATACAACAAAACCTGTTCAATAATGAAACCATGAAAGAGGACACTATCATACTTCCATGCAGGA  
TAAAGCAAATTATAAACTTGTGGCAAGGAGTGGGACAAGCAATGTATGCTCCTCCCATCAGTGGAATAATTCA  
ATGTGTATCAAATATTACAGGAATAATATTAACAAGGGATGGTGGTAATCAAAGTAATAGTAATGTAAGTAGA  
GAGATCTTCAGACCTGGAGGAGGAAATATGAAGGACAATTGGAGAAGTGAATTATATAAAATATAAAGTAGTAC  
AAATTGAACCACTAGGAGTAGCACCCACCAGGGCAAAGAGAAGAGTGGTGGATAGACAAAAAGAGCAGTGGG  
AATAGGAGCTATGATCTTTGGGTTCCTTAGGAGCAGCAGGAAGCACTATGGGCGCGGCGTCAATAACGCTGACG  
GTACAGGCCAGACAATTATTGTCTGGTATAGTGCAACAGCAAAGCAATTTGCTGAGAGCTATAGAGGCGCAGC  
AGCATATGTTGCAACTCACAGTCTGGGGCATT

>JX112799..1

TTCTATTGTAATACAACAAAATGTTTAAATAAGACAGAGAATGGAACCATGGAGGGGTTTAAATACCACTATCA  
TACTTCCATGCAGGATAAAGCAAATTGTAAGGATGTGGCAGGGAGTAGAACAAGCAATGTATGCTCCTCCCAT  
CAGTGGAACATTACTTGTAGATCAAATATTACAGGAATACTATTAACAAGAGATGGTGGTGGTTATGATACA  
TCTCCCGAAACCTTCAGACCAGGAGGAGGAAATATGAAGGACAATTGGAGAAGTGAATTATATAAAATATAAAG  
TAGTACAAATTGAACCACTAGGAATAGCACCTCCAGGGCAAAGAGAAGAGTGGTGGATAGACAAAAAGAGC  
AGTGGGAATAGGAGCTATGATCTTTGGGTTCCTTAGGAGCAGCAGGAAGCACTATGGGCGCAGCGTCAATAACG  
CTGACGGTACAAGCCAGACAATTATTGTCTGGTATAGTGCAACAGCAAAGCAATTTGCTGAGGGCTATAGAGG  
CGCAGCAGCATCTGTTGCAACTCACAGTCTGGGGCATT

>KC870041..1

TTCTATTGCAATACAACAAAACCTGTTTAAATAAGACTTTCGATAAGAACATAGAAAAATGACACCATGGATGGCA  
GTAATAACACTATCATACTTCCATGCAGGATAAAGCAAATTATAAACATGTGGCAGGGAGTAGGACAAGCAAT  
GTATGCCCTCCCATTAGGGGAAAAATTCATTGTGTATCAAATATTACAGGAATACTATTGACAAGAGATGGT  
GGTACTGATAATAACGAGACCTTCAGACCTGGAGGGGGGAAACATAAAAGACAATTGGAGAAGTGAATTATATA  
AATATAAAGTAGTACAAATTGAACCACTAGGGGTAGCACCTACCAGGGCAAAGAGAAGAGTGGTGGAAAGAGA  
AAAAAGAGCAGTGGGAATAGGAGCTATGATCCTTGGGTTCCTAGGAGCAGCAGGAAGCACTATGGGCGCGGCG  
TCAATAACGCTGACGGTACAGGCCAGACAATTATTGTCTGGTATAGTGCAACAGCAAAGCAATTTGCTGCGGG  
CTATAGAGGCGCAACAGCATATGTTGCAACTCACAGTCTGGGGCATT

>MH672923..1

TTCTATTGCAATACAACAAAATGTTTAAATAGTACAGAAAATGGAACCATGGAGGGGTTTAAATACCACTATCA  
TAATTCATGCAAGATAAAGCAAATTGTAAATATGTGGCAGGGAGTAGGACAAGCAATATATGCTCCTCCCAT  
TAGTGAGTAATTAAGTGTCAATCAAATATTACAGGAATACTATTAACAAGAGATGGTGGTAATAATAATGCA  
AATAACGAAACCTTCAGACCGGGAGGAGGAAATATAAAGGACAATTGGAGAAATGAATTATATAAAATATAAAG  
TAGTACAAATTGAACCACTAGGAATAGCACCCACCAAGGCAAAGAAGAGTGGTGGAGAGAGAAAAAGAGC  
AGTGGGAATAGGAGCTATGATCTTTGGGTTCCTTAGGAGCAGCAGGAAGCACTATGGGCGCAGCGTCAGTAACG  
CTGACGGTACAGGCCAGACAATTATTGTCTGGTATAGTGCAACAGCAAAGCAATTTGCTGAGAGCTATAGAGG  
CGCAACAGCACCTGTTGCAACTCACAGTCTGGGGCATT

>MG655209..1

TTCTATTGCGATACAACAAAACCTGTTTAAATAGTACAGGAAATGGAACCATGGAGGGGCTTAATGGCACCATTA  
TACTTCCATGCAAGATAAAGCAAATTATAAACATGTGGCAGGGAGCAGGACAAGCAATATATGCTCCTCCCAT  
CAGTGGAAGAATTGAGTGTAGATCAAATATTACAGGAATACTATTAACAAGAGATGGTGGTCATAATATAACT  
AACGAGACCTTCAGACCAGGAGGAGGAAATTTAAAGGACAATTGGAGAAATGAATTATATAAAATATAAAGTAG  
TACAAATTGAACCACTAGGAATAGCACCCACCAAGGCAAAGAGAAGAGTGGTGAATAGAGAAAAAGAGCAGT  
GGGAATAGGAGCTATGATCTTTGGGTTCCTTAGGAGCAGCAGGAAGCACTATGGGCGCGGCGTCAATAACGCTG  
ACGGTACAGGCCAGACAATTATTGTCTGGTATAGTGCAACAGCAAAGCAATTTGCTGAGAGCTATAGAGGCGC  
AGCAGCATCTGTTGCAACTCACAGTCTGGGGCATT

>MG655214..2

TTCTATTGCAATACAACAAAGTTATTTAAATAGTACAGAAAATGGAACAGGGAAGAGGGTCATAATGGCACTA  
TTATACTCCCATGCAGGATAAAGCAAATTGTAAACATGTGGCAGGGAGCAGGCCAAGCAATGTATGCTCCTCC  
CGTCAGAGGAAACATTAATTGTGTATCAAATATTACAGGACTACTATTAACAAGAGATGGTGGTATTAAGGGA  
ACTCACAACGAGACCTTCAGACCGGGAGGAGGAAATATAAAGGACAATTGGAGAAGTGAATTATATAAAATATA  
AAGTAGTACAAATTGAACCACTAGGAGTAGCACCCACCAAGGCAAAGAAGAGTGGTGGATAGAGAAAAAG  
AGCAGTAGGAATAGGAGCTATGATCTTTGGGTTCCTTAGGAGCAGCAGGAAGCACTATGGGCGCGGCGTCAATA  
ACGCTGACGGTACAGGCCAGACAATTATTGTCTGGTATAGTGCAACAGCAAAGCAATTTGCTGAGAGCTATAG  
AGGCGCAGCAGCATATGCTGCAACTCACAGTCTGGGGCATT

>MG655215..1

TTCTATTGCAATACAACACAATTGTTTAAATAATAATTCCACGTTTAAATACCACTGTCATACTTCCATGCAGGA  
TAAAGCAAATTGTAAATATGTGGCAGGGGGTAGGACGAGCAATGTATGCTCCTCCCATCAGTGGAATGATTAA  
TTGTGTATCAAATATTACAGGAATAATATTAACAAGAGATGGTGGTTATAGTAATACAACCTAACGAAACCTTC

AGACCGGGAGGAGGAAATATAAAGGACAATTGGAGAAGTGAAC TATATAAATATAAAGTAGTACAAATTGAAC  
CACTAGGAATAGCACCCACCAGGGCAAAGAGAAGAGTGTTGACTAGAGAAAAAGAGCAGTAGTGGAATAGG  
AGCTATGATCTTTGGGTTCTTAGGAGCAGCAGGAAGCACTATGGGCGCAGCGTCAATAACGCTGACGGTACAG  
GCCAGACAATTATTGTCTGGTATAGTGCAACAGCAAAGCAATTTGCTGAGAGCTATAGAGGCGCAGCAGCATC  
TGCTGCAACTCACAGTCTGGGGCATT

>DQ234790..1

TTCTATTGCAATACAACAACCACTGTTTGATAGTAGTTGGAATACAACAACAACCAATAGGGAGAACCGTAGTA  
ATTTTCATACTTCCATGCAGGATAAAACAAATTATAAACATGTGGCAGGAAACAGGAAAAGCAATGTATGCTCC  
TCCCATCAGGGGAAGCATT CAGTGTGTATCAAATATTACAGGAATACTATTGACAAGAGATGGTGGTAATAAT  
AATGGGTCTAACGAGACCGGAGACCTTTAGACCTGGAGGAGGAGATATAAGAGACAATTGGAGAAGTGAATTAT  
ATAAAATATAAAGTAGTACAAATTGAACCACTAGGAGTAGCACCCACCAGGGCAAAGAGAAGAGTGGTGGAGAG  
AGAAAAAAGAGCAGTAGTGGAATAGGAGCTATGATCTTTGGGTTCTTAGGAGCAGCAGGAAGCACTATGGGC  
GCGGCGTCATTAACGCTGACGGTACAGGCCAGACAATTACTGTCTGGTATAGTGCAACAGCAAAGCAATTTGC  
TGAGGGCTATAGAGGCGCAACAGCATATGTTGCAACTCACAGTCTGGGGCATT

>KF859741..2

TTCTATTGCAATACAACAAAAATTATTTAATCACACAAACAATGACACCATGCAGTATAATGACACTATCACAC  
TTCCATGCAGGATAAAGCAAATTATAAACATGTGGCAGAGAGTAGGACAAGCAATGTATGCTCCTCCCGTCAG  
GGGAAGAATTAATTGTGTATCAAACATTACAGGAATACTATTGACAAGGGATGGTGGTGGGACAAACAGTACG  
AACGAGATCTTCAGACCTCAAGGAGGAAATATAAAGGACAATTGGAGAAGTAAATTATATAAATATAAAGTAG  
TACAAATTGAACCACTAGGAGTGGCACCCACCAGGGCAAAGAGAAGAGTGGTGGAGAGAGAAAAAAGAGCAGT  
GGGAATAGGAGCTCTGATCTTTGGGTTCTTAGGAGCAGCAGGAAGCACTATGGGCGCGGCGTCAATAACGCTG  
ACGGTACAGGCCAGACAATTATTGTCTGGTATAGTGCAACAGCAAAGCAATTTGCTGAGGGCTATAGAGGCGC  
AGCAGCATCTGTTGCAACTCACAGTCTGGGGCATT

>MH327759..1

TTCTATTGCAATACAACACAATTATTTAATAACACCAATGGTACTATCATACTTCCATGCAAGATAAAACAAA  
TTATAAACATGTGGCAGGGAGTAGGACAAGCAATGTATGCTCCTCCCGTCAGGGGAAAAATTAAATTGTGTATC  
AAACATTACAGGAATACTATTGACAAGGGATGGTGGGGCAAATAGCACGAATGAGACCTTCAGACTTCAAGGA  
GGAAATATAAAGGACAATTGGAGAAATGAATTATATAAATATAAAGTAGTACAAATTGAACCACTAGGAATAG  
CACCCACCAGGGCAGGCGAAGAGTGGTGGAGAGAGAAAAAAGAGCAGTGGGAATAGGAGCTATGATCTTTGG  
GTTCTTAGGAGCAGCAGGAAGCACTATGGGCGCGGCGTCAATAACGCTGACGGTACAGGCCAGACAATTATTG  
TCTGGTATAGTGCAACAGCAAAGCAATTTGCTGAGGGCTATAGAGGCGCAGCAGCATCTGTTGCAACTCACAG  
TCTGGGGCATT

>MH078562..2

TTCTATTGCAATACAACACGATTATTTAATTGCACAAACAATAAACACGTGTAATGAACTATCATACTTC  
CATGCAAGATAAAGCAAATTATAAACATGTGGCAGGGAGTAGGACAAGCAATGTATGCTCCTCCCATCAGGGG  
AAGAAATTAATTGTGTATCAAACATTACAGGAATACTATTACAAGGGATGGTGGT CAGACAAACGATACGAAC  
TACGAAACCTTCAGACCTGCAGGAGGAAATATAAAGGACAATTGGAGAAATGAATTATATAAATATAAAGTAA  
TACAAATTGAACCACTAGGATTGGCACCCACCAGGGCAAAGGCGAAGAGTGGTGGAGAGAGAAAAAAGAGCAGT  
GGGAATAGGAGCTATGATCTTTGGGTTCTTAGGAGCAGCAGGAAGCACTATGGGCGCGGCGTCAATAACGCTG  
ACGGTACAGGCCAGACAATTATTGTCTGGTATAGTGCAACAGCAAAGCAATTTGCTGAGGGCTATAGAGGCGC  
AGCAGCATATGTTGCAACTCACAGTCTGGGGCATT

>MF373160..1

TTCTATTGCAATATAACAAAACCTGTTTAATAGTACTTGGGGGAGTAATGGCACTTGGAATGGCACTGAATACA  
ATAACGATACCATACTCCCATGCAGGATAAAGCAAATTATAAACATGTGGCAACAACCAGGACAAGCAATGTA  
TGCTCCTCCCGTT CAGGGAGTAATTAATTGTATATCAAATATTACAGGACTAATATTGACAAGAGATGGTGGT  
ATTAATACTACAATTAATGAAACCTTCAGACCTGGAGGAGGAAATATAAAGGACAATTGGAGAAGTGAATTAT  
ATAAATATAAAGTAGTACAAATTGAACCACTAGGAATAGCACCCACCAAGGCAAAGAGAAGAGTGGTGGAGAG  
AGAGAAAAGAGCAGTGGGAATAGGAGCTATGATCTTTGGGTTCTTAGGAGCAGCCGGAAGCACTATGGGCGCG  
GCGTCAATAACGCTGACGGTACAGGCCAGACAATTATTGACTGGTATAGTGCAACAGCAAAGCAATTTGCTGA  
GAGCTATAGAGGCGCAACAGCATCTGTTGCAACTCACAGTCTGGGGCATT

>KP411840..2

TTCTATTGCAATACATCAAGGCTGTTTAATAGTACTTACAATGGAACCTGAAACCGGGAAAGAGGGTAATGGCA  
CTATTATACCTCCATGCAGGATAAAGCAAATTATAAACATGTGGCAGGGAGTGGGACGAGCAATGTATGCTCC  
TCCCATCAGTGGAAGCATT AATTGTACATCAAATATTACAGGAATACTATTGACAAGCGATTATGGTGGTAAT  
AATACACAGAATGAGACCTTCAGACCTGCAGGAGGAAATATAAAGGACAATTGGAGAAGTGAATTATATAAAT  
ATAAAGTAGTACAAATTGAACCACTAGGAGTAGCACCCACCAAGGCAAAGAGAAGAGTGGTGGAGAGACAAAA  
AAGAGCAGTGGGAATAGGAGCTATGATCTTTGGGTTCTTGGGAGCAGCAGGAAGCACTATGGGCGCGGCGTCA  
ATAACGCTGACGGTACAGGCCAGACAATTATTGACTGGTATAGTGCAACAGCAAAGCAATTTGCTGAGGGCTA  
TAGAGGCGCAGCAGCATCTGTTGCAACTCACAGTCTGGGGCATT

>KP411841..3

TGCTACTGCAACCCCTGCAACTGTTTAAATAATAAGACTCATACTAATGGTACTAATGGCGCTATTGTACTTC  
TACGGATAATTAAGATAATGAAAATGATGAACCTGGGAGGAGGAGCAGCACAGGCTCCGCCTGCTCCTCGAAG  
TAGTATATGTGTTATTTTCAGTTTCAAGAATAACACTGATACTAGTGGGTGGTGATGATGATAATAATAATAAT  
AACCGCCAGAGCTTCGGACGAGCGGGAGGATGGATGAGGTACGATTATGGATATGAAGTATTACAATATGAAC  
TAGTACGAATAGTACCACCACCAACAACAACCATGGTGGAGATGAGAAAAAGAGAAAAAGGAAAAAGAGC  
AGTGGTAATAAGAGTTTTGATCATCGGAGGAATAGGAACAGCAGCGGCACCATTATCGCTGACGGCGATGGCC  
CAGCAGATATTGTCATGGATATTGAGACAGCGGAGGCTGCTGCTGATGAGTATTAAGTTGATGGAGCATCAGC  
AGCAGCTCACCTGCTGGGCCATC

>KP411842..2

TTCTATTGCAATACATCAAGGCTGTTTAAATAGTACTTACAAATGGAAGTACCGAAGGGTCAAATGAGG  
GTAATGGCACTATTATACTTCCATGCAGGATAAAGCAAATTATAAACATGTGGCAGGGAGCAGGACGAGCAAT  
GTATGCTCCTCCCATCAGTGGGAAGCATTAATTGTACATCAAATATTACAGGAATACTATTGACAAGCGATTAT  
GGTGGTAGTAATACACAGAATGAGACCTTCAGACCTGCAGGAGGAAATATAAAGGACAATTGGAGAAGTGAAT  
TATATAAATATAAAGTAGTACAAATTGAACCACTAGGAGTAGCACCCACCAAGGCAAAGAGAAGAGTGGTGGGA  
GAGACAAAAAAGAGCAGTGGGAATAGGAGCTATGATCTTTGGGTTCTTGGGAGCAGCAGGAAGCACTATGGGC  
GCGGCGTCAATAACGCTGACGGTACAGGCCAGACAATTATTGACTGGTATAGTGCAACAGCAAAGCAATTTGC  
TGAGGGCTATAGAGGCGCAGCAGCATCTGTTGCAACTCACAGTCTGGGGCATT

>KY213735..1

TTCTATTGCAATACAACAAAACTGTTTAAATAGTCCTTGCCCTGAAAAATGAAGAAAAATGGAACATGTAATAGCA  
CTATCATACTTCCATGTAAGATAAAGCGAATTGTAAGATTGTGGCAGGAAGTAGGTCAAGCAATGTATGCTCC  
TCCCATCAGCGGAATCATTAGGTGTAACCTCAACTATTACAGGAATACTATTGACAAGAGATGGTGGTAACCTT  
AATAACAGTACTAATGAAACCTCAGACCTGGAGGAGGAAATATAAAGGACAATTGGAGAAGTGAATTATATA  
AATATAAAGTAGTACAAATTGAACCACTAGGAATAGCACCCACCAAGGCAAAAAGAGTGGTGGAGAGAGA  
AAAAAGAGCAGTGGGAATAGGAGCTATGATCTTTGGGTTCTTAGGAGCAGCAGGAAGCACTATGGGCGCGGCG  
TCAATAACGCTGACGGTACAGGCCAGACAATTATTGTCTGGTATAGTGCAACAGCAAACAATTGCTGAGGG  
CTATAGAGGCGCAGCAGCATCTGTTGCAACTCACAGTCTGGGGCATT

>KY213733..1

TTCTATTGCAATACAACAAAACTGTTTAAATAACACTTGCATAAATGGAACAATGGAAAAATGAGAGTAATAGCA  
CTATCATACTTCCATGCAAGATTAACAAATTATAAACATGTGGCAGGGAGCAGGACAAGCAATGTATGCTCC  
TCCCATCAGTGGGAATAATTAATTGTATATCAAATATTACAGGAATACTATTAACAAGAGATGGTCAGCCGAAT  
GATACGGAGATCTTCAGACCTGGAGGAGGAGATATGAAGGACAATTGGAGAAATGAATTATATAAATATAAAG  
TAGTACAAATTGAACCACTAGGAATAGCACCCACCAGGGCAAAGAGAAGAGTGGTGGAGAGAGAAAAAAGAGC  
AGTGGGAATAGGAGCGATGATCTTTGGGTTCTTAGGAGCAGCAGGAAGCACTATGGGCGCGGCGTCAATAACG  
CTGACGGTACAGGCCAGACAGTTATTGTCTGGTATAGTGCAACAGCAAAGCAATTGCTGAGGGCTATAGAGG  
CGCAGCAGCATCTGCTGCAACTCACAGTCTGGGGCATT

>KJ952667..1

TTCTATTGCAATACAACAAAACTGTTTAAATAATACGTGCATAGGAAATGAAACCATAGAGGGGTGTAATGACA  
CTATCATACTTCCATGCAAGATAAAGCAAATTGTGAACATGTGGCAGGGAGCAGGACAAGCAATGTATGCTCC  
TCCCATCAGTGGGAATAATTAATTGTGTATCAAATATTACAGGAATACTATTGACAAGAGATGGTGGTTATAAT  
AATAACTAAGGCTAACGAGACCTTCAGACCTGAAGGAGGAAATATAAAGGACAATTGGAGAAATGAATTAT  
ATAAATATAAAGTAGTAGAAATTGAACCACTAGGAATAGCACCCACCAGGGCAAAGAGAAGAGTGGTGGAGAG  
ACAAAAAAGAGCAGTGGGAATAGGAGCTATGATCTTTGGGTTTTTGGGAGCAGCAGGAAGCACTATGGGCGCG  
GCGTCAATAACGCTGACGGTACAGGCCAGACAATTATTGTCTGGTATAGTGCAACAGCAAAGCAATTTGCTGA  
GGGCTATAGAGGCGCAGCAGCATATGTTGCAACTCACAGTCTGGGGCATT

>KJ953089..1

TTCTATTGCAATACATCACAACTGTTTAAATAGTACTTGGATAGGAAATGAAACCAAGGAAGAGTGTAATAAAT  
TCAAGAAAGAGTGTAATAGCACTATCATACTTCCATGCAAGATAAAGCAAATTATAAACATGTGGCAGGGAGT  
AGGACAAGCAATGTATGCTCCTCCATTAGAGGAAGAATTAATTGTGTATCAAATATCACAGGAATACTATTG  
ACAAGAGATGGTGGTAGTATTAATAGGAATTATGAGAATGAGACCTTCAGACCTGGAGGAGGAAATATAAAGG  
ACAATTGGAGAAGTGAATTATATAAATATAAAGTAGTAGAAATTGAACCACTAGGAGTAGCACCCACCAAGGC  
AAAGAGGAGAGTGGTGGAGAGAGAAAAAAGAGCAGTGGGAATAGGAGCTATGATCTTTGGGTTCTTAGGAGCA  
GCAGGAAGCACTATGGGCGCGGCGTCAATAACGCTGACGGTACAGGCCAGACAATTATTGTCTGGTATAGTGCA  
AACAGCAAAGCAATTTGCTGAAGGCTATAGAGGCGCAACAGCATCTGTTGCAGCTCACAGTCTGGGGCATT

>KJ953475..1

TTCTATTGTAATACAACAAAAATTGTTTAAATAGTACTTGGACAGAAAATGAAACCGAGGAGGGGAATAATAACA  
CTATCATACTTCCATGCAAGATAAAGCAAATTATAAACATGTGGCAGGGAGTAGGACAAGCAATGTATGCTCC  
TCCCATCAGTGGAAAAATTAATTGTGTATCAAATATTACAGGAATACTATTGACAAGAGATGGTGGTAATAAT  
GCGATGAATGAGACCTATGAGACCTTTAGACCTGGAGGAGGAAATATGAAGGACAATTGGAGAAGTGAATTAT  
ATAAATATAAAGTGGTACAAATTGAACCACTAGGAATAGCACCCACCAGGGCAAAGAGAAGAGTGGTGGAGAG  
AGAAAAAAGAGCAGTGGGAATAGGAGCTATGATCTTTGGGTTCTTAGGAGCAGCAGGAAGCACTATGGGCGCG

GCGTCAATAACGCTGACGGTACAGGCCAGACAATTATTGTCTGGTATAGTGCAACAGCAAAGCAATTTGCTGAGGGCTATAGAGGCGCAGCAGCATCTGTTGCAACTCACAGTCTGGGGCATT

>AY358059..1

TTCTATTGCGATACAACAAAACCTGTTTAAATAATACTATAAAAAATGGAACCATAACGCTTCCATGCAAGATAAAGCAAGTTGTAAACATGTGGCAGGGAGCAGGACAGGCAATGTATGCTCCTCCCATCAAGGGAAGCATTAAATTGTGTATCAAATATTACAGGAATACTATTGACAAGAGATGGTGGTAATCAAACGCGACTGAGATTTTCAGACCTGGAGGAGGAAATATAAGGGACAATTGGAGAAGTGAATTATATAAATATAAAGTGGTACAAATTGAACCACTAGGAATAGCACCCACCAGGGCAAAGAGAAGAGTGGTGGAGAGAGAAAAAGAGCAGTGGGAATAGGAGCTATGATCTTTGGGTTCTTAGGAGCAGCAGGAAGCACTATGGGCGCGCGTCAATAACGCTGACGGTACAGGCCAGACAAATTATTGTCTGGTATAGTGCAACAGCAAAGCAATTTGCTGAGGGCTATAGAGGCGCAGCAGCATCTGTTGCAACTCACAGTCTGGGGCATT

>DQ314732..1

TTCTATTGCAATACAACACAACCTGTTTAAATAGTACTTGGGTAGGAAATGAAACCAAAAAGGGGGATAATGGCACTATAAGAAATGAAACCAAAAAGGGGGATAATGGCACTATCATACTTCCATGCAGGATAAAGCAAATTATAAATCATGTGGCAGGAAACAGGACAAGCAATGTATGCTCCTCCCATCAGTGGAAACAATTAATTGTGTATCAAATATTACAGGACTACTATTGACAAGAGATGGTGGAGGTAATAATGACTCGAGTCAGAACGAGACCTTCAGGCCTGGAGGGGAAATATAAAGGACAATTGGAGAAGTGAATTATATAAATATAAAGTAGTAGAAATTGAACCACTAGGAATAGCACCCACCAGGGCAAAGAGAAGAGTGGTGGAGAGAGAAAAAGAGCAGTGGGAATAGGAGCTATGATCTTTGGGTTCTTAGGAGCGGCAGGAAGCACTATGGGCGCGCGTCAATAACGCTGACGGTACAGGCCAGACAATTATTGTCTGGTATAGTGCAACAGCAAAGCAATTTGCTGAGGGCTATAGAGGCGCAGCAGCATCTGTTGCAACTCACAGTCTGGGGCATT

>JX447561..1

TTCTATTGCAATACATCAAACCTGTTTGATAGAAATGAAACCACGAGTAATGGCACTGGCACTATCATACTTCCTTGCAAGATAAAGCAAATTGTACGCATGTGGCAGAGAACAGGACAAGCAATGTATGCTCCTCCCATCAGTGGAAAGCATCAATTGTGTATCAAATATTACAGGAATTCTGTTGACAAGAGATGGTGGTAATGGTAATAATACTAATCAGACAGAGATCTTCAGACCTGAGGGAGGAAATATAAAGGACAATTGGAGAAGTGAATTATATAAATATAAAGTGGTACAAATTGAACCACTAGGAATAGCACCCACCAGGGCAAAGAAGAGTGGTGCAGAGAGAAAAAGAGCAGTGGGAATAGGAGCTATGATCTTTGGGTTCTTAGGAGTAGCAGGAAGCACTATGGGCGCGCGTCAATAACGCTGACGGTACAGGCCAGACAATTATTGTCTGGTATAGTGCAACAGCAAAGCAATTTGCTGAGGGCTATAGAGGCGCAGCAGCATCTGTTGCAACTCACAGTCTGGGGCATT

>JX447855..2

TTCTATTGCAATACAACACAACCTGTTTAAATAGTACTTACGGAGAAAATGGAGAAAATGAAACCATGGGGGGGATAAATGGCACTATCATACTTCCATGTAAGATAAAGCAGATTATAAACATGTGGCAGGGAGTAGGACAAGCAATGTACGCTCCTCCCATCAGTGGGAAGAATTAATTGTAGATCACAAATTACAGGAATACTATTGATAAGAGATGGTGGTTATGATCGTGTTAACGAGACCTTCAGACCTGAAGGAGGAAATATGAAGGACAATTGGAGAAGTGAATTATATAAATATAAAGTAGTACAAATTGAACCACTAGGAGTAGCACCCACCAGGGCAAAGAGAAGAGTGGTGGAGAGAGAAAAAGAGCAGTGGGAATAGGAGCCATGATCTTTGGGTTCTTAGGAGCAGCAGGAAGCACTATGGGCGCGCGTCAATAACGCTGACGGTACAGGCCAGACAATTATTGTCTGGTATAGTGCAACAGCAAAGCAATTTGCTGAGGGCTATAGAGGCGCAGCAGCATCTGTTGCAACTCACAGTCTGGGGCATT

>JX448022..1

TTCTATTGCAATACAACATCACTGTTTAAATGATACTTGCATAGGAAATGAAACCAAGGAAGGGTGTAATACAACTATCATACTTCCATGCAGGATAAAACAAATTGTAAACATGTGGCAGGGAGTAGGACAGGCAATGTATGCTCTCCCATCAGTGGGAAGAATTAATTGTGTATCAAATATTACAGGAATACTATTGACAAGAGATGGTGGTGTAAATAATGATTCTAGTGAGATCTTCAGACCTGGAGGAGGGGATATAAGAGACAAATGGAGAAGTGAATTATATAAATATAAAGTAGTACAAATTGAACCATTAGGAGTAGCACCCACCAGGGCAAAGAGAAGAGTGGTGGAGAGACCAAAAGAGCAGTGGGAATAGGAGCTATGATCTTTGGGTTCTTAGGAGCAGCAGGAAGCACTATGGGCGCGCGTCAATAACGCTGACGGTACAGGCCAGACAATTATTGTCTGGTATAGTGCAACAGCAAAGCAATTTGCTGAGGGCTATAGAGGCGCAACATCATCTGTTGCAACTCACAGTCTGGGGCATT

>EU743764..1

TTCTATTGCAATACAACACAACCTGTTTAAATCTTAATAATGCTACTGACAGAGAAAAATAAAATATCACACTTCATGCAGGATAAAGCAAATTATAAAATGTGGCAGAGAGTAGGACAAGCAATGTATGCTCCTCCCATCAGGGGAAAAATTAATTGTGTCTCCAATATTACAGGAATACTATTAACAAGAGATGGTGGTAGTCACAATGATACTAATAATAACTGAGACCTTTAGACCCGAGGAGGAAATATAAAGACAATTGGAGAAGTGAATTATATAAATATAAAGTAGTAAGAATTGAACCACTGGGAATAGCACCCACCAGGGCAAAGAGAAGAGTGGTGGACAGACCGAAAAAGAGCAGTGGGAATAGGAGCTATGATCTTTGGGTTCTTAGGAGCAGCAGGAAGCACTATGGGCGCGCGTCACTACGCTGACGGTACAGGCCAGACAATTACTGTCTGGTATAGTGCAACAGCAAAGCAATTTGCTGAGGGCTATAGAGGCGCAGCAGCATCTGTTGCAACTCACAGTCTGGGGCATT

>EU743781..2

TTCTATTGCGATACAACAAAACCTGTTTAAATAATAATTGCACACAAAATGCAACCGATCAGGATGAAAAAAGTGTAATGGCACTCTCATACTTCCATGCAGGATAAAGCAAATTATAAACATGTGGCAGGGAGTAGGACAAGCAAT

ATATGCTCCTCCCGTCCGTGGAAGTATTACTTGTGTATCAAATATTACAGGAATAATACTGACAAGAGATGGT  
GGTACTCATAAGAATGGTACTGCTGATAATACAACCGAGATCTTCAGACCTACAGGAGGAAATATGAAGGACA  
ATTGGAGAAGTGAATTATATAAAATATAAAGTAGTACAAATTGAACCACTAGGAATAGCACCCACCAGGGCAA  
GAGAAGAGTGGTGGAGAGAGAAAAAAGAGCAGTGGGACTAGGAGCTATGATCTTTGGGTTCTTAGGAGCAGCT  
GGAAGCACTATGGGCGCGGCGGCAGTAACGCTGACGGTACAGGCCAGACAATTATTGTCTGGTATAGTGCAAC  
AGCAAAGCAATTTGCTGAGAGCTATAGAGGCGCAACAACATCTGTTGCAACTCACAGTCTGGGGCATT

>JX446699..4

TTCTATTGCAATACATCAAGACTGTTTAATAGCACTTGCTTCAAAAATCATAACACCACTGAGGCCACTCAGG  
AGTGTAAATGACACTATCACAACAGATGGCAAGATCATACTTCACTGCAGGATAAAGCAAATTATAAACATGTG  
GCAGGGAGCAGGACAAGCAATGTATGCTCCTCCCATCAGTGGAAGAATTAATTGTGTATCAAACATTACAGGA  
ATACTATTGACAAGAGATGGTGGTGATACTGGTAAAAATTTATACAAATGGTACCAGGAAAGAGATCTTCAGAC  
CTGGAGGAGGAAATATGAAGGACAATTGGAGAAGTGAATTATATAAAATATAAAGTAGTACAAATTGAACCACT  
AGGAATAGCACCCACCAGGGCAAAGAGAAGAGTGGTGGAGAGAGAAAAAAGAGCAGTGGGAATAGGAGCTATG  
ATCTTTGGGTTCTTAGGAGCAGCCGGAAGCACTATGGGCGCAGCGTCAATAACGCTGACGGTACAAGCCAGAC  
AATTATTGTCTGGTATAGTGCAACAGCAAAGCAATTTGCTGAGGGCTATAGAGGCGCAGCAGCATATGTTGCA  
ACTCACAGTCTGGGGCATT

>JX447312..1

TTCTATTGCAACACAACAAAACTGTTTAATTGGACAGAAGGTGAAACCATAGAGAATAGCACGGAGAATATCA  
TGCTGCCATGCAAGATAAAGCAAATTATAAACATGTGGCAGGAAACAGGACAAGCAATGTATGCTCCTCCCAT  
CAGTGGAATGATTAATTGTGTATCAAATATTACAGGAATACTATTGACAAGAGATGGTGGTCATGATGGTAAT  
AATACAAATAATACAAATAATAATACCGAGACCTTCAGACCTGGAGGAGGAAATATAAAGGACAATTGGAGAA  
GTGAATTATATAAAATATAAAGTAGTACAAATTGAACCACTAGGAATAGCACCCACCAGGGCAAAGAGAAGAGT  
GGTGGAGAGAGAAAAAAGAGCAGTGGGAATAGGAGCTATGATCTTTGGGTTCTTGGGAGCAGCAGGAAGCACT  
ATGGGCGCAGCGTCAATAACGCTGACGGTACAGGCCAGACAATTATTGTCTGGTATAGTGCAACAGCAAAGCA  
ATTTGCTGAGAGCTATAGAGGCGCAGCAGCATCTGTTGCAACTCACAGTCTGGGGCATT

>JX447646..1

TTCTATTGCAATACAACAAACCTGTTTAATAATACTTGCTTAAATGAAACCAAGTGTAAATGGCACTGTCACAC  
TTCCATGCAGGATAAAGCAAATTATAAACATGTGGCAGGGAGTAGGACAAGCAATGTATGCTCCTCCCATCAG  
GGGAAATATTACTTGTGTATCAAATATTACAGGAATACTATTGACAAGAGATGGTGGTAATGGGGGGAACGAG  
ACCTTCAGACCTGAAGGAGGAAATATGAAGGACAATTGGAGAAATGAATTATATAAAATATAAAGTAGTACAAA  
TTGAACCACTAGGATTAGCACCCACCAAGGCAAAAAGAAGAGTGGTGGAGAGAAAAAAGAGCAGTGGGAAT  
AGGAGCTATGATCTTTGGGTTCTTAGGAGCAGCAGGAAGCACTATGGGCGCGGCGTCAATAACGCTGACGGTA  
CAGGCCAGACAATTATTGTCTGGTATAGTGCAACAGCAAAGCAATTTGCTGAGGGCTATAGAAGCGCAGCATC  
ATCTGTTGCAACTCACAGTCTGGGGCATT

>JN944659..1

TTCTATTGTAATACAACAAAACTGTTTAATAGTACTTGAGAGAGAAAATGAAACCATAGAGGAGCATAATGGCA  
CTAATGGCACTATCATACTTCCATGTAGGATAAAGCAAATTATAAACATGTGGCAGGGAGTAGGACAAGCAAT  
GTATGCTCCTCCCATCAGTGGAATAATTAGTTGTGTATCAAATATTACAGGAATACTATTGACAAGAGATGGA  
GGTCATAATACGAGTAACGAGACCTTCAGACCTGGAGGAGGAAATATAAAGGACAATTGGAGAAGTGAATTAT  
ATAAAATATAAAGTAGTACAAATTGAACCACTAGGAATAGCACCCACCAGGGCAAAGAGAAGAGTGGTGGAGAG  
AGAAAAAAGAGCAGTGGGAATAGGAGCTATGATCTTTGGGTTCTTAGGAGCAGCAGGAAGCACTATGGGCGCG  
GCGTCAATAACGCTGACGGTACAGGCCAGACAATTACTGTCTGGTATAGTGCAACAGCAAAGCAATTTGCTGA  
GGGCTATAGAGGCGCAACAGCATCTGTTGCAACTCACAGTCTGGGGCATT

>HQ691090..1

TTCTATTGCAATACAACAAAACTGTTTAATAATACCTGCATAAATGAAACCATGAGGGGAAGCAATGAAACCA  
GGGAGTGTAAATAACACTATTACACTTCCATGCAGGATAAAGCAAATTATAAACATGTGGCAGGGAGTAGGACA  
AGCAATGTATGCTCCTCCCATCAGTGGAATAATTAGTTGTGTATCAAATATTACAGGAATACTATTGACAAGA  
GATGGTGGTAATAATACTGGGAATGACGAGATTTTCAGACCTGCAGGAGGAAATATAAGGGACAATTGGAGAA  
ATGAATTATATAAGTATAAAGTAGTACAAATTGAACCACTAGGAGTAGCACCCACCAAGGCAAAGAGAAGAGT  
GGTGGAGAGACAAAAAAGAGCAGTGGGAATAGGAGCTATGATCTTTGGGTTCTTAGGAGCAGCAGGAAGCACT  
ATGGGCGCGGCGTCAATAACGCTGACGGTACAGGCCAGACAACCTATTGTCTGGTATAGTGCAACAGCAGAGCA  
ATCTGCTGAGGGCTATAGAGGCGCAACATCATCTGTTGCAACTCACAGTCTGGGGCATT

>JX446728..2

TTCTATTGCAATACAACAAAAATTGTTTCATAGTAATTGGACAACAACAAATGGCACTATAGAAAGGTACAATG  
ACAATGAACTATCATACTTCCATGCAAGATAAAGCAAATTATAAAATATGTGGCAGGGAGTAGGACAAGCAAT  
GTATGCTCCTCCCATCAGAGGAATAATTAAATTGTACATCAAATATTACAGGAATATTATTGACAAGAGATGGT  
GGTCTTCATAATGGGACTAACGATACAGAGACATTCAGGCCCTGAAGGAGGAAATATAAAGGACAATTGGAGAA  
GTGAATTATATAAAATATAAAGTAGTACAGATTGAACCATTAGGAGTAGCACCTACCAGGGCAAAGAGAAGAGT  
GGTGGAGAGAGAAAAAAGAGCAGTGGGAATAGGAGCTATGATCTTTGGGTTCTTAGGAGCAGCAGGAAGCACT

ATGGGCGCGGCGTCAATAACGCTGACGGTACAGGCCAGACAATTATTGTCTGGTATAGTGCAACAGCAAAGCA  
ATTTGCTGAGAGCTATAGAGGCGCAGCAGCATCTGTTGCAACTCACAGTCTGGGGCATT

>JX447057..3

TTCTATTGCAATACAACACGACTGTTTAAATCATTCTCACAATGAAACCTGGAAGGAGAAGTATAATGGCACTA  
TCATACTTCCATGCAAGATAAAGCAAATTATAAACATGTGGCAGGGAGTAGGACAAGCAATGTATGCTCCTCC  
CATCAGTGGAAGATTGAGTGTGTATCAAATATTACAGGAATACTATTGACAAGAGATGGTGGTGTTAATCAA  
ACTAATGGGACCGAGATCTTCAAACCTGGAGGAGGAAATATAAAGGACAATTGGAGAAGTGAATTATATAAAT  
ACAAAGTAGTACAAATTGAACCACTAGGATTGGCACCTACCAAGGCAAAGAGAAGAGTGGTGGAGAGAGAAAA  
AAGAGCAGTGGAATAGGAGCTATGATCTTTGGGTTCTTAGGAGCAGCAGGAAGCACTATGGGCGCGGCGTCA  
ATAACGCTGACGGTACAGGCCAGACAATTATTGTCTGGTATAGTGCAACAGCAAAGAAATTTGCTGAGGGCTA  
TAGAGGCGCAGCAGCATCTGTTGCAACTCACAGTCTGGGGCATT

>JX447480..2

TTCTATTGCAACACAACAAAACTGTTTAAATAGTACTTGGAGAGGAAATGAAACCATAGCGGGCTATGATAATA  
ACAGCAATATCATACTTCCATGCAGGATAAAGCAAATTATAAACATGTGGCAGGAAGTAGGACAAGCAATGTA  
TACTTCTCCCGTCAGTGGAAGAATTAATTGTATCTCAAAATATCACAGGAATACTATTAACAAGAGATGGTGGT  
GGTAATCATAGCAATGAGACCTTTAGACCTGGAGGAGGAAATATGAAGGACAATTGGAGAAGTGAAGTATATA  
AATATAAAGTAGTACAACCTTGAACCACTAGGAATAGCACCCACCAAGGCAAAGAGAAGAGTGGTGGAGAGAGA  
AAAAAGAGCAGTGGAATAGGAGCTATGATCTTTGGGTTCTTAGGAGCAGCCGGAAGCACTATGGGCGCAGCG  
TCAATAACGCTGACGGTACAGGCCAGACAATTATTGTCTGGTATAGTGCAACAGCAAAGCAATTTGCTGAGGG  
CTATAGAGGCGCAGCATCGTCTGTTGCAACTCACAGTCTGGGGCATT

>HQ691006..1

TTCTATTGCAATACAACACAACCTGTTTAAATAATAATTGTACAAATGAAACCATGAATGGGTGTGATGGCAATA  
TCACACTTCCATGCAAGATAAAGCAAATTGTAAACATGTGGCAGGGAGTGGGACAAGCAATGTATGCTCCTCC  
CATCAGAGGACAAATTAGTTGTGTGTCAAATATTACAGGGATACTACTGACAAGAGATGGTGGTCATAATGGT  
AGTACAAATAATGAGACCTTCAGACCTGGAGGAGGAAATATAAAGGACAATTGGAGAAGTGAATTATATAAAT  
ATAAAGTAGTAGAAATTGAACCACTAGGGATAGCACCTTCTGGGCAAGGAGAAGAGTGGTGGAGAGACAAAA  
AAGAGCAGTGGAATAGGAGCTATGATCTTTGGGTTCTTAGGAGCAGCAGGAAGCACTATGGGCGCGGCGTCA  
GTAACGCTGACGGTACAGGCCAGACAATTATTGTCTGGTATAGTGCAACAGCAAAGCAATTTGCTGAGGGCTA  
TAGAGGCGCAGCAGCATCTGTTGCAACTCACAGTCTGGGGCATT

>JX447303..2

TTCTATTGCAATACATCACAACCTGTTTAAATTACACAACAGATGCAGACATGAGGAACAAGACAGCCATAAAAA  
ATAGCACTATCATACTTCCATGCAGGATAAAGCAAATTATAAACATGTGGCAGGGAGTAGGACAAGCAATGTA  
TGCTCCTCCCATCAGTGGAATAATTAATTGTGTATCAAATATTACAGGAATATTATTGACAAGAGATGGTGGT  
GAGCAGAAGAAATGAGAGTAGGCGAAATGAGACCTTCAGACCTGAAGGAGGAAATATGAAGGACAATTGGAGAA  
GTGAATTATATAAATATAAAGTAGTACAATTGAACCACTAGGAGTAGCACCCACTAAGGCAAGGAGAAGAGT  
GGTGGAGAAACAAAAAAGAGCAGTGGAATAGGAGCTATGATCTTTGGGTTCTTAGGAGCAGCAGGAAGCACT  
ATGGGCGCGGCGTCAATAACGCTGACGGTACAGGCCAGACAATTATTGTCTGGTATAGTGCAACAGCAAAGCA  
ATTTGCTGAGAGCTATAGAGGCGCAACATCATATGTTGCAACTCACAGTCTGGGGCATT

>JX447335..2

TTCTATTGCAATACATCACAACCTGTTTAAATAGTACTGTTAATGGCACTATCACACTTCCTAATGGCACACTTC  
CATGCAAGATAAAGCAAATTATAAAAATGTGGCAAGGGGTAGGACAAGCAATGTATGCTCCTCCCATCAATGG  
AAGCATTAATTGTGTATCAAACATTACGGGACTACTATTAACAAGGGATGGTGGTAATCAGGGTAATCATACT  
AATGATACTGAGACCTTCAGACCTGGAGGAGGAAACATAAAGGACAATTGGAGAAGTGAATTATATAAATATA  
AGGTGGTACAAATTGAACCACTAGGAATAGCACCCACCAGGGCAAAGAGAAGAGTGGTGGAAAGAGAAAAAAG  
AGCAGTGGAATAGGAGCTATGATCTTTGGGTTCTTAGGAGCAGCAGGAAGCACTATGGGCGCGGCGTCAATA  
ACGCTGACGGTACAGGCCAGACAATTATTGTCTGGTATAGTGCAACAGCAAAGCAATTTGCTGAGGGCTATAG  
AGGCGCAGCAGCATCTGTTGCAACTCACAGTCTGGGGCATT

>JN388161..1

TTCTATTGCAATACAACACAACCTGTTTAAATAGTACTTGCATGGGAGATATGCCCAAGGATGGGTGTAATGGCA  
CTTTCAATGGCACCGGCACTATCATACTTCCATGCAGAATAAAGCAATTTATAAACATGTGGCAGGGAGTAGG  
ACAAGCAATGTATGCTCCTCCCATCAAGGGAAACATTAGTTGTGTATCAAATATTACAGGAATACTATTAACA  
AGAGATGGTGGTAATAGGACTCATAACGGGACTAAGGAAGAGATCTTCAGACCTGCAGGAGGAAATATGAAGG  
ACAATTGGAGAAGTGAATTATATAAATATAAAGTAGTACAATTGAACCACTAGGAGTAGCACCTACCAAGGC  
AAAGAGAAGAGTGGTGGATAGACAAAAAAGAGCAGTGGAATAGGAGCTATGATCTTTGGGTTCTTGGGAGCA  
GCAGGAAGCACTATGGGCGCAGCGTCAATAACGCTGACGGTACAGGCCAGACAATTATTGTCTGGTATAGTG  
AACAGCAAAGCAATTTGCTGAGAGCTATAGAGGCGCAACAACATCTGTTGCAACTCACAGTCTGGGGCATT

>GQ916581..5

TTCTATTGCAATACAACAAAACTGTTTAAATAGTACCTGGGCCAAGGAGGGGTGGAATGGCACTAATTATAATG  
ACACTTATTATAATGGCACTAATTATACTGGCAATATCACACTTCCATGCAGGATAAAGCAAATTGTAAACAT  
GTGGCAGGGAATAGGACAAGCAATGTATGCTCCTCCCATCAGTGGAACGATTCAGTGTGTATCAGAAATTACA

GGAATACTATTGACAAGAGATGGTGATATTACTAATGCGGCTAACGAGACTTTCAGACCTGGAGGAGGAAATA  
TAAAGGACAATTGGAGAAGTGAATTATATAAATATAAAGTAGTGCAAATTGAACCACTAGGAATAGCACCCAC  
CAGGGCAAAGAGAAGAGTGGTGGAGAGAGAAAAAGAGCAGTGGGAATAGGAGCGATGATCTTTGGGTTCTTA  
GGAGCAGCAGGAAGCACTATGGGCGCGGCGTCAATAACGCTGACGGTACAGGCCAGGCAATTATTGTCTGGTA  
TAGTGCAACAGCAAAGCAATTTGCTGAGGGCTATAGAGGCGCAGCAGCATCTGTTGCAACTCACAGTCTGGGG  
CATT

>JF680932..1

TTCTATTGCAATACAACAAAGATGTTTAAATGCGACAGAAAATGGAACCAGGGAAGGGAATAACAATACGATCA  
TAATTCCATGCAGGATAAAGCAAATTGTAAACATGTGGCAGAAAACAGGACAAGCAATGTATGCTCCTCCCAT  
CAGGGGAATAATTAATTGTGTATCAAATATTACAGGAATATTATTAACAAGAGATGGTGGAAATGAGGATAAT  
CATAGTAAGGACAACGAGACCTTCAGACCTGCAGGAGGAAAATATAAAGGACAATTGGAGAAGTGAATTATATA  
AATATAAAGTAGTACAAATTGAACCACTAGGAATAGCACCCACCAAGGCAAAGAGAAGAGTGGTGGAGAGAGA  
AAAAAGAGCAGTGGGAATAGGAGCTATGATCTTTGGGTTCTTAGGAGCAGCAGGAAGCACTATGGGCGCGGCG  
TCAATAACGCTGACGGTACAGGCCAGACAATTATTGTCTGGTATAGTGCAACAGCAAAGCAATTTGCTGAGGG  
CTATAGAGGCGCAACAGCATATGTTGCAACTCACAGTCTGGGGCATT

>KT185951..3

TTCTATTGCAATACAACAAAAGTGTTTAATGGTACTTACCCGAAAAATGGAACAGATGGAACAAATAATGACA  
CTATCATACTCCCATGTAGGATAAAGCAAATTGTAAAGATTGTGGCAGGAAGTAGGTCAAGCAATGTATGCTCC  
TCCCATCAGTGGAAGCATTGAGTGCTACTCAAATATTACAGGAATACTATTGACAAGAGATGGTGGTAATACT  
AGCAATAGTGATGGTGGTAATATTAGCAATAGTGAAACCTTCAGACCTGGAGGAGGAAATATAAAGGACAATT  
GGAGAAGTGAATTATATAAAATATAAAGTAGTACAAATTGAACCACTAGGAATAGCACCCACCAAGGCAAAAAG  
AAGAGTGGTGGAGAGAGAAAAAGAGCAGTAGGAATAGGAGCTATGATCTTTGGGTTCTTAGGAGCAGCAGGA  
AGCACTATGGGCGCGGCATCAATAACGCTGACGGTACAGGCCAGACAATTATTGTCTGGTATAGTGCAACAGC  
AAAGCAATTTGCTGAGGGCTATAGAGGCGCAGCAGCATCTGTTGCAACTCACAGTCTGGGGCATT

>KT185973..1

TTCTATTGCAATACATCAAAAAGTGTTCACAATACTTGCAGAGAAGATAGCACGAAGGAGGGGTGTAATGATA  
CCATACTGCCATGCAAAAATAAAGCAAATTATAAGGATGTGGCAGGGAGTAGGACAAGCAATGTATGCTCCTCC  
CATCAGTGGGAGTATCAACTGTATATCAAATATTACAGGAATACTATTGACAAGAGATGGTGGTTACAACAAT  
AAGAGTAATGGGAACGAGACTGAGACTTTCAGACCTGGAGGAGGAAATATGAAGGACAATTGGAGAAATGAAT  
TATATAAATATAAAGTAGTACAAATTGAACCACTAGGAATAGCACCCACCAAGGCAAAGAGAAGAGTGGTGGGA  
GAGAGAAAAAGAGCAGTGGGAATAGGAGCTATGATCTTTGGGTTCTTAGGAGCAGCAGGAAGCACTATGGGC  
GCGGCGTCAATAACGCTGACGGTACAGGCCAGACAATTATTGTCTGGTATAGTGCAACAGCAAAGCAATTTGC  
TGAGGGCTATAGAGGCGCAACAGCATCTGTTGCAACTCACAGTCTGGGGCATT

>KT185837..2

TTCTATTGCAATACAACAAAAGTGTTTAATAGTACAGGGAAGTATAATGACACTATCATACTTCCATGCAGGA  
TAAAGCAAATTATAAACATGTGGCAGAGAGTAGGACAAGCAATGTATGCTCCTCCCATCAGGGGCAACATTAC  
TTGTGTATCAAATATTACAGGAATATTATTGACAAGAGATGGTGGTGCATCAGACTAATGAGACCGATGAG  
ACCTTCAGACCGGGAGGAGGAGATATAAAGGACAATTGGAGAAATGAATTATATAAATATAAAGTAGTACAAA  
TTGATCCATTAGGAATAGCACCCACCAAGGCAAAGAGAAGAGTGGTGGAGAGAGAAAAAGAGCAGTGGGAAT  
AGGAGCTATGATCTTTGGGTTCTTAGGAGCAGCAGGAAGCACTATGGGCGCGGCGTCGATAACGCTGACGGTA  
CAGGCCAGACAATTATTGTCTGGGATAGTGCAACAGCAAAGTAATTTGCTGAGGGCTATAGAGGTGCAGCAGC  
ATATGTTGCAACTCACAGTCTGGGGCATT

>MG989500..3

TTCTATTGCAATACAACAAAAGTGTTTAATAGGACTTACCCAGGAAATGATACCACTGAGGGGCGAGAATGGCA  
CTATCATACTCCCATGCAGAAATAAAGCAAATTATAAACATGTGGCAGGAAGTAGGACAAGCAATGTATGCTCC  
TCCCATCAGAGGACCGATTAACTGCTCATCAATTATTACAGGAATACTATTGACAAGGGATGGTGGTAGTAGT  
ACTCAAACGAGACTCAAACCGGACCGAGATCTTCAGACCTGGAGGAGGAAATATAAAGGACAATTGGAGAA  
GTGAATTATATAAATATAAAGTAGTACAAATTGAACCACTAGGAATAGCACCCACCAAGGCAAAGAGAAGAGT  
GGTGGAGAGGGAAAAAGAGCAGTGGGAATAGGAGCTATGATCTTTGGGTTCTTGGGAGCAGCAGGAAGCACT  
ATGGGCGCGGCGTCAATAACGCTGACGGTACAGGCCAGACAGTTACTGTCTGGTATAGTGCAACAGCAAAGCA  
ATTTGCTGAGAGCTATAGAGGCGCAGCAGCATATGCTGCAACTCACAGTCTGGGGCATA

>MG989502..3

TTCTATTGCAATACAACAAAAGTGTTTAATGGTACTTACCCGAAAAATGGAACAGATGGAACAAATAATGACA  
CTATCATACTCCCATGTAGGATAAAGCAAATTGTAAAGATTGTGGCAGGAAGTAGGTCAAGCAATGTATGCTCC  
TCCCATCAGTGGAAGCATTGAGTGCTACTCAAATATTACAGGAATACTATTGACAAGAGATGGTGGTAATACT  
AGCAATAGTGATGGTGGTAATATTAGCAATAGTGAAACCTTCAGACCTGGAGGAGGAAATATAAAGGACAATT  
GGAGAAGTGAATTATATAAAATATAAAGTAGTACAAATTGAACCACTAGGAATAGCACCCACCAAGGCAAAAAG  
AAGAGTGGTGGAGAGAGAGAAAAAGAGCAGTAGGAATAGGAGCTATGATCTTTGGGTTCTTAGGAGCAGCAGGA  
AGCACTATGGGCGCGGCATCAATAACGCTGACGGTACAGGCCAGACAATTATTGTCTGGTATAGTGCAACAGC  
AAAGCAATTTGCTGAGGGCTATAGAGGCGCAGCAGCATCTGTTGCAACTCACAGTCTGGGGCATT

>MG989521..1

TTCTATTGCAATACATCAAACTGTTCAACAATACTTGCAGAGAAGATAGCACGAAGGAGGGGTGTAATGATA  
CCATACTGCCATGCAAAATAAAGCAAATTATAAGGATGTGGCAGGGAGTAGGACAAGCAATGTATGCTCCTCC  
CATCAGTGGGAGTATCAACTGTATATCAAATATTACAGGAATACTATTGACAAGAGATGGTGGTTACAACAAT  
AAGAGTAATGGGAACGAGACTGAGACTTTTCAGACCTGGAGGAGGAAATATGAAGGACAATTGGAGAAATGAAT  
TATATAAATATAAAGTAGTACAAATTGAACCACTAGGAATAGCACCCACCAAGGCAAAGAGAAGAGTGGTGGA  
GAGAGAAAAAAGAGCAGTGGGAATAGGAGCTATGATCTTTGGGTTCTTAGGAGCAGCAGGAAGCACTATGGGC  
GCGGCGTCAATAACGCTGACGGTACAGGCCAGACAATTATTGTCTGGTATAGTGCAACAGCAAAGCAATTTGC  
TGAGGGCTATAGAGGCGCAACAGCATCTGTTGCAACTCACAGTCTGGGGCATT

>KU230418..3

TTCTATTGCAATACAACAAGCTTGTTTAAATAAACTTACATAGGAAATGAAACCAGAAATGAAACCCATGATG  
GGGGGAGTAATAAACTATTACACTTCCATGCAAGATAAAGCAAATTGTAAGGATGTGGCAGGGAGTAGGACA  
AGCAATGTATGCTCCTCCCATCAGTGGAGTAATTAAGTGTATCAAATATTACAGGAATACTATTAACAAGA  
GATGGTGGTCAGGGTGGTCATAATAATACAACCTGAGACCGAGACCTTCAGACCTGGAGGAGGAAATATAAAGG  
ATAATTGGAGAAGTGAATTATATAAATATAAAGTAGTACAAATTGAACCACTAGGAATAGCACCCACCAGGGC  
AAAGAGAAGAGTGGTGGAGAGAGAAAAAAGAGCAGTGGGAATAGGAGCTATGATCTTTGGGTTCTTAGGAGCA  
GCAGGAAGCACTATGGGCGCAGCGTCAATAACGCTGACGGTACAGGCCAGACAATTATTGTCTGGTATAGTGC  
AGCAGCAAAGCAATTTGCTGAGGGCTATAGAGGCGCAACAGCATCTGTTGCAACTCACAGTCTGGGGCATT

>MG989579..1

TTCTATTGCAATACAACAAAAATTGTTTAAATGGAAACCATAGCAAGAGTGGTAATGACAGCATCGTACTTCCAT  
GTAAGATAAAGCAGATTATAAACCTGTGGCAGGGAGTAGGACAAGCAATGTATGCTCCTCCCATCAGGGGGAT  
AATTAACCTGTGTATCAAATATTACAGGAATACTATTGACAAGAGATGGTGGAGCTCACAATGGGAGTAACGAG  
ACTGAAATCTTTAGACCTGGAGGAGGAAATATGAAGGACAATTGGAGAAGTGAAGTATATAAATATAAAGTAG  
TACAAATTGAACCTCTAGGAATAGCACCCACCAGGGCAAAGAGAAGAGTGGTGGAGAAAGAAAAAAGAGCAGT  
GGGAATAGGAGCTATGATCTTTGGGTTCTTAGGAGCAGCAGGAAGCACTATGGGCGCGGCGTCACTAACGCTG  
ACGGTACAGGCCAGACAATTATTATCTGGTATAGTGCAACAGCAAAGCAATTTGCTGAGGGCTATAGAGGCGC  
AGCAGCATCTGTTGCAACTCACAGTCTGGGGCATT

>MF957493..1

TTCTATTGCAATACAACAAAAATTATTTAATGGTACAGAAAATGGAACCATGGAGGGGAATACTGACACTAATG  
GCACTATCATCCTTCCATGCAGGATAAAGCAAATTGTAAGAATGTGGCAGGGAGTAGGACAAGCAATATATGC  
TCCTCCCATCAGTGGAAACATTAGTTGTGAATCAAACATTACAGGAATACTATTGACAAGAGATGGTGGTAGT  
GGTAGTTATACTAATGATAGTGATGCTAATAATACAGAAATCTTCAGACCTGAGGGAGGAAATATAAAGGACA  
ATTGGAGAAGTGAATTATACAAATATAAAGTAGTACAAATTGAACCACTAGGAGTAGCACCCACCAAGGCAAG  
GAGAAGAGTGGTGGAGAGAGAAAAAAGAGCAGTGGGAATAGGAGCTATGATCTTTGGGTTCTTAGGAGCAGCA  
GGAAGCACTATGGGCGCGGCGTCAATAACGCTGACGGTACAGGCCAGACAATTATTGTCTGGTATAGTGCAAC  
AGCAAAGCAATTTGCTGAGGGCTATAGAGGCGCAGCAGCATCTGTTGCAACTCACAGTCTGGGGCATT

>MG989524..1

TTCTATTGCAATACAACACAACCTTTTTAATAGTACTAGTACTAACAACCTCAGAAGGGAATATCATAATTCCAT  
GCAGGATAAAGCAAATTATAAACATGTGGCAGGGAGTAGGGCAAGTAATGTATGCTCCTCCTGTCCAAGGGCG  
AATTAATTGTGCATCAAATATTACAGGAATACTATTAACAAGAGATGGTGGTCATAACGGGACATCCCAGAAC  
GAGACATTTTCGACCTGGAGGAGGAAATATAAAGGACAATTGGAGGAGTGAATTATATAAATATAAAGTAGTAC  
AAATTGAACCACTAGGAATAGCACCCACCAGGGCAAAGAGAAGAGTGGTAAAGAGAGAAAAAAGAGCAGTGGG  
CATAGGAGCTATGATCTTTGGGTTCTTAGGAGCAGCAGGAAGCACTATGGGCGCGGCGTCAATAACGCTGACG  
GTACAGGCCAGACAATTATTGTCTGGTATAGTGCAACAGCAAAGCAATTTGCTGAGGGCTATAGAGGCGCAGC  
AGCATATGTTGCAACTCACAGTCTGGGGCATT

>MG989535..2

TTCTATTGCAATACAACAAAACTGCTTAAATAATACTTGTATAAAAAATCACACCCAGAAGGGGTGTAATGACA  
GTATCATACTTCCATGCAGAATAAAGCAGTTCATCAACATGTGGCAGGGAGTAGGACAAGCAATGTATGCTCC  
TCCCATCAGGGGAATCATTAATTGTGTATCAAATATTACAGGAATACTATTGACAAGAGATGGTGGTAATGTA  
ACTAATACTAGTGAAATCTTCAGACCAGGGGGAGGAAATATAAAGGACAATTGGAGAAGTGAATTATATAAAT  
ATAAAGTAGTACAAATTGAACCACTAGGAATAGCACCCACCAGGGCAAAGAGAAGAGTGGTGGAGAGAGAAAA  
AAGAGCAGTGGGAATAGGAGCTATGATCTTTGGGTTCTTAGGAGCAGCAGGAAGCACTATGGGCGCAGCGTCA  
ATAACGCTGACGGCACAGGCCAGACAATTATTGTCTGGTATAGTGCAACAGCAAAGCAATTTGCTGAGAGCTA  
TAGAGGCGCAGCATCATCTGTTGCAACTCACAGTCTGGGGCATT

>MG989548..1

TTCTACTGCAATACAACACAACCTATTTAATGGTACTGGTACTAATAGCACTATCACACTTCCATGCAGGATAA  
AGCAAATTATAAACATGTGGCAGGGAGTAGGACAAGCAATGTATGCTCCTCCCATCAGTGGAAACAATCAATTG  
TATATCAAATATTACAGGAATATTATTGACAAGAGATGGTGGTCATAATAATGGTACTAATGAGACCTTCAGA  
CCTGGAGGAGGAAATATAAAGGACAATTGGAGAAGTGAATTATATAAATATAAAGTAGTAGAAATTGAACCAC  
TAGGAATAGCACCCACCAAGGCAAGGAGAAGAGTGGTGGAGAGAGAAAAAAGAGCAGTAGGAATAGGGGCTAT

GATCTTTGGGTTCTTAGGAGCAGCAGGAAGCACTATGGGCGCGGCGTCAATAACGCTGACGGTACAGGCCAGA  
CAATTATTGTCTGGTATAGTGCAACAGCAAAGCAATTTGCTGAGGGCTATAGAGGCGCAGCAGCATCTGTTGC  
AACTCACAGTCTGGGGCATT

>MG989534..1

TTCTATTGCAATACATCAAACTGTTTAAATAGAACATATGAGTTTAAATAGAACACATGAGGGAAATGATACCA  
TGAATGATACCACTATCATAATCCATGCAAAATAAAGCAAATAATAAGAATGTGGCAGGGAGCAGGACAAGC  
AATGTATGCTCCTCCCGTCAGGGGAAAAATTGAGTGTGTATCAAATATTACAGGAATATTATTGACAAGAGAT  
GGTGGTGGTGGGAATACTAGTAATAATGAGACCTTCAGACCTGGAGGAGGAAACATAAAGGACAATTGGAGAA  
GTGAATTATACAAATATAAAGTAGTACAAATTGAACCATTAGGGATAGCACCCACCAGGGCAAAAAGAAGAGT  
GGTGGAGAAACACAAAAGAGCAGTGGGAATAGGAGCTGTGATCTTTGGGTTCTTAGGAGCAGCCGGAAGCACT  
ATGGGCGCGGCGTCAATATCGCTGACGGTACAGGCCAGACAATTATTGTCTGGTATAGTGCAACAGCAAAGCA  
ATTTGCTGAGAGCTATAGAGGCGCAACAGCATCTGTTGCAACTCACAGTCTGGGGCATC

>MG989537..1

TTCTATTGCAATACAACAAAACTGTTTGATAATGAAACCACAGGGCCGTGTAATGACACCATTATACTTCCAT  
GCAGAATAAAGCAAATTATAAGAATGTGGCAGGGAGTAGGACAAGCAATGTATGCTCCTCCCATCAGTGGAAAG  
TATTAATTGTGTATCAAATATTACAGGAATACTATTGACAAGAGATGGTGGTAATCATAATGGGAACAATAGT  
ACTGAGACCTTCAGACCTGGAGGAGGAAATATAAAGACAATTGGAGAAGTGAATTGTTTAAATATAAAGTAG  
TAGAAATTGAACCACTAGGAATAGCACCCACCAGGGCAAAAGAGAAGAGTGGTGGAAAAGAGAAAAAGAGCAGT  
GGGACTAGGAGCTATGATCTTTGGGTTCTTAGGAGCAGCAGGAAGCACTATGGGCGCAGCGTCAATAACGCTG  
ACGGTACATGCCAGACAATTGTTGTCTGGTATAGTGCAACAGCAAAGCAATTTGCTGAGGGCTATAGAGGCGC  
AGCAGCATATGCTGCAACTCACAGTCTGGGGCATT

>JX848346..1

TTCTATTGCAATACAACACAACCTGTTTAAATAAGACTGACATAGAAAATGAAACCAAGGAGGCTAATGCTAATG  
GCACTATCATACTTCCATGCAAGATAAAGCAAATTATAAACATGTGGCAGGGAGTAGGACAAGCAATGTATGC  
TCCTCCCATCAGTGGACAAATAGTTGTGTATCAAATATTACAGGAATACTATTGACAAGAGATGGTGGTAGT  
CAGAACGAGAACGGGACCACCGAGACCTTCAGACCTGGAGGAGGAAATATAAAGGACAATTGGAGAAGTGAAT  
TATATAAATATAAAGTAGTACAAATTGAACCACTAGGAGTAGCACCCACCAGGGCAAAAGAGAAGAGTGGTGGGA  
GAGAGAAAAAAGAGCAGTGGGAATAGGAGCTATGATCTTTGGGTTCTTAGGAGTAGCAGGAAGCACTATGGGC  
GCAGCGTCAATAACGCTGACGGTACAGGCCAGACAATTATTGTCTGGTATAGTGCAACAGCAAAGCAATTTGC  
TGAGAGCTATAGAGGCGCAACAACATCTGTTGCAACTCACAGTCTGGGGCATT

>KJ952820..1

TTCTATTGCAATACAACAGGACTGTTTAAATAATTGCACAGGAAATGAAACCTGTAATGACACTATCATACTTC  
CATGCAGGATAAAGCAAATTATAAACATGTGGCAGGGAGCAGGACAAGCAATGTATGCTCCTCCCATCAGGGG  
AACAAATTAATTGTCTATCAAATATTACAGGAATAATATTGACAAGAGATGGTGGTAATAATATTAAGAATAAC  
GAGACGGAGATCTTCAGACCTGGAGGAGGAGATATGAAGGACAATTGGAGAAATGAATTATATAAATATAAAG  
TAGTACAGATTGAACCACTAGGAGTAGCACCCACCAGGGCAAAAGAGAAGAGTGGTGGAGAGAGAAAAAAGAGC  
AGTGGGAATAGGAGCTATGATCTTTGGGTTCTTAGGAGCAGCAGGAAGCACTATGGGCGCAGCGTCAATAACG  
CTGACGGTACAGGCCAGACAATTATTGTCTGGTATAGTGCAACAGCAAAGCAATTTGCTGAGGGCTATAGAGG  
CGCAGCATCATCTGTTGCAACTCACAGTCTGGGGCATT

>HM215432..1

TTCTATTGCAATACATCAAACTATTTAATAGTACAAAAAATAGTACTTGTGAGGGGTGTAATGGTACTATCA  
TACTTCCATGTAAGATAAAGCAATTTATAAACATGTGGCAGAACCCAGGACAAGCAATGTATGCTCCTCCCAT  
CGAGGGAAAAATTAATTGTGTATCAAATATTACAGGAATACTATTGACAAGAGATGGTGGTGTAAATAGTACA  
AATAACGAGACCTTCAGACCTCAAGGAGGAAATATGAAGGACAATTGGAGAAGTGAATTATATAAATATAAAG  
TAGTACAAATTGAACCACTGGGAATAGCTCCACCAGGGCAAGGAGAAGAGTGGTGGAGAGAGAAAAAAGAGC  
AGTGGGAATAGGAGCTATGATCTTTGGGTTCTTAGGAGCAGCAGGAAGCACTATGGGCGCGGCGTCAATAACG  
CTGACGGTACAGGCCAGACAATTATTGTCTGGTATAGTGCAACAGCAAAGCAATTTGCTGAGGGCTATAGAGG  
CGCAGCATCATCTGTTGCAACTCACAGTCTGGGGCATT

>AY444805..2

TTTTATTGCAATACAACACAGTTGTTTAAATAGTACTTGGAGAATAAATGAACTATGGGGGAGTCTAATGACA  
TAAACTCAAATATCACACTTCCATGCAGGATAAGGCAAATTTGTAATAATGTGGCAGGGAGTAGGACAAGCAAT  
GTATGCTCCTCCCATCGATGAAGCAATTCAGTGTGTATCAAATATTACAGGAATACTATTGACAAGAGATGGT  
GGTCATAATGTGAGTAATGATACTGAGACCTTCAGACCTGGAGGAGGAGATATAAGGGACAATTGGAGAAGTG  
AATTATATAAATATAAAGTAGTAGAAATTGAACCACTAGGAATAGCACCCACCAGGGCAAGGAGAAGAGTGGT  
GGAGAGAGAAAAAAGAGCAGTGGGAATAGGAGCTATGATCTTTGGGTTCTTAGGAGCAGCAGGAAGCACTATG  
GGCGCGGCGTCAATAACGCTGACGGTGCAGGCCAGACAATTATTGTCTGGTATAGTGCAACAGCAAAGCAATT  
TGCTGAGAGCTATAGAGGCACAACAGCATCTGTTGCAACTCACAGTCTGGGGCATT

>FJ185251..1

TTCTATTGCAATACAACAAGACTGTTTAAATAACTTGCATAAAAAATGAAACCACGGAGGGGTGTGATGGCA  
CTATCACACTGCCATGCAGGATAAAGCAAATTATAAACATGTGGCAGGGAGTAGGACAAGCAATATATGCTCC

TCCCATCAGAGGAAAAATTAATTGTGTATCAAATATTACAGGAATACTATTGACAAGAGATGGTGGTGCTCAT  
AATACGACGACTAATGAGACCTTCAGACCTGGGGGAGGAAAATATGAGGGACAATTGGGAAAGTGAATTATATA  
AATATAAAGTAGTAGAAATTGAACCACTAGGAATAGCACCCACCAGGGCAAAGAGAAGAGTGGTGGAGATAGA  
AAAAAGAGCAGTGGGAATAGGAGCTATGATCTTTGGGTCTTAGGAGCAGCAGGAAGCACTATGGGCGCGGCG  
TCAATAACGCTGACGGTACAGGCCAGACAATTATTGTCTGGTATAGTGCAACAGCAAAGCAATTTGCTGAGGG  
CTATAGAGGCGCAGCAGCATCTGTTGCAACTCACAGTCTGGGGCATT

>FN432728..1

TTCTATTGCAATACATCAAACTGTTTAATAGCACTTGGGACAGCAATAGCACTGTTAGCTCAGATGACAGTG  
ATACTAATGACAATGTCAATATAACTCTCCCATGCAGAATAAAGCAAATTATAAAATATGTGGCAGAGAGTAGG  
ACAAGCAATATATGCCCCCTCCCATCGAAGGAGTAATACAGTGTGAATCAAACATCACAGGACTACTATTAACA  
AGAGATGGAGGGAATGAGAATAATACAAACACAACCTAAAGGAGAAGTTTTTCAGGCCTGGAGGAGGAAATATGA  
GGGACAATTGGAGAAGTGAACCTATACAAGTATAAAGTAGTAAAAATTGAACCACTAGGTGTAGCACCCCTCACC  
TGCAAGAAGAAGAGTGGTGCAGAGAGAAAAAAGAGCAGTCGGCCTAGGAGCTTTCTTCCTTGGGTTCTTAGGA  
GCAGCAGGAAGCACTATGGGCGCAGCGTCAATAACGCTGACGGTACAGGCCAGACAGTTACTGTCTGGGATAG  
TGCAACAGCAAAGCAATTTGCTGAGGGCTATAGAGGCTCAACAACATATGTTGAAACTCACGGTCTGGGGCAT

T

>HQ912710..1

TTCTATTGCAATACATCAGAACTGTTTAATAGCACTTGGGAATAACAATAGCATTGCCAACTCAACAGATAGCA  
AGAGCACCATAACTCTCCAATGCAAAATAAAGCAAATTGTAAATATGTGGCAGAAAAGTAGGACAAGCAATGTA  
TGCCCCCTCCCATCCAAGGAGTAATAAGCTGTAATTCAAGCATTACAGGATTACTATTAACAAGAGATGGAGGG  
AATAATAATAGTACAAATGAGACCTTCAGGCCTGGAGGAGGAGATATGAGGGACAATTGGAGGAGTGAATTAT  
ATAAGTATAAAGTAGTAAAAATTGAACCAATAGGTGTAGCACCCACCCATGCAAAAAGAAGGTGGTGCAGAG  
AGAAAAAAGAGCAGTTGGACTAGGAGCTGTCTCTTTGGGTCTTAGGAGCAGCAGGAAGCACTATGGGCGCG  
GCGTCAATAACGCTGACGGTACAGGCCAGACAATTATTGTCCGGTATAGTGCAACAGCAGGGCAATCTGCTGA  
GAGCTATAGAGGCTCAACAACATCTGTTGAAACTCACGGTCTGGGGCATT

>DQ313242..3

TTCTATTGCAATACACCGATACTGTTTAATAGCACCTGGGAGTACAATAGCACTTGGGGTAACTATAGCTCAA  
ATTACACAGGGTCAAATGACATTATAACTCTCCAATGCAAAATAAAGCAAATTGTAAATATGTGGCAGAAAAGT  
AGGACAAGCAATGTATGCCCCCTCCCATCCCAGGAGAGTTAAGGTGTGAATCAAACATTACAGGATTATTATTA  
ACAAGGGATGGAGGGACTAATAGTACAAATGAGACTTTCGAGACTTTTAGGCCTGGAGGAGGAGACATGAGGG  
ACAATTGGAGAAGTGAATTATATAAGTATAAGGTAGTAAAAATTGAACCACTAGGTGTGGCACCCACCCATGC  
AAAAAGAAGAGTGGTGCAGAGAGAAAAAAGAGCAGTTGGACTGGGAGCTGTCTTCTTGGGTCTTAGGAGCA  
GCAGGAAGCACTATGGGCGCGGCGTCAATAACGCTGACGGTACAGGCCAGACAATTATTGTCCGGTATAGTGC  
AACAGCAGAACAATTTGCTGAGGGCTATAGAGGCTCAACAACATCTGTTGAAACTCACGGTCTGGGGCATT

>MH746242..1

TTCTATTGCAATACATCAGCACTATTTAATAGTAGTTGGAATAGCACTACTTGGAAATAGCACTCGAAATACCA  
ATGCTAGCTCAAATGACACAGAACCTATAACTCTCCAATGCAGAATAAAACAAATTGTAAATATGTGGCAGAG  
GATAGGACAAGCAATGTATGCCCCCTCCCATCAAAGGAGAAAATAAGGTGTGAATCAAACATTACAGGACTACTA  
TTAACAAGAGATGGAGGGACAAATAATAGTACAAATGAAACATTACAGACCTGGAGGAGGAGATATGAGGGACA  
ATTGGAGAAGTGAATTATATAAGTATAAGGTAGTACAAATTGAACCAATAGGTGTGGCACCCACCCATGCAAA  
AAGAAGAGTGGTGGAGAGAGAAAAAAGAGCAGTTGGACTGGGAGCTGTCTTCTTGGGTCTTAGGAGCAGCA  
GGAAGCACTATGGGCGCGGCGTCAATAACGCTGACGGTACAGGCCAGACAATTATTGTCTGGTATAGTGCAAC  
AGCAGAGCAATTTGCTGAGGGCTATAGAGGCTCAACAACATATGTTGAGACTCACGGTCTGGGGCATT

>MH746250..1

TTCTATTGCAATACATCAGGACTATTTAATAGCACTTGGAAATGGAATACTACCACTAGGAATTGGATTGACA  
TCTCAAATAACACAGACACTGTCTCAAATAACACAAATATAACTCTCCAGTGCAGAATAAAACAATTTGTAAA  
TATGTGGCAGAGGGTAGGACAAGCAATGTATGCCCCCTCCCATCCCAGGAGAGATAAGATGTAACCTCAAACATT  
ACAGGACTACTATTAACAAGAGATGGAGGGAATAACAGTGGTGTATGCAATGAGACATTACAGACCTGGAGGAG  
GAGATATGAGGGACAATTGGAGAAGTGAATTATATAAGTATAAGGTAGTACAAATTGAACCAATAGGTCTGGC  
ACCCACCCCTGCAAAACGAAGAGTGGTGGAGAGAGAAAAAAGAGCAATTGGAATGGGAGCTTTCTTCTTGGG  
TTCTTGGCAACAGCAGGAAGCACTATGGGCGCAGCGTCAATAACGCTGACGGTACAAGCCAGACAATTATTGT  
CTGGTATAGTGCAACAGCAAAGCAATTTGCTGAGGGCTATAGAGGCTCAACAACATATGTTGAAACTCACGGT  
CTGGGGCATT

>MH078536..1

CTCTATTGCAATACATCAGGCTTGTTTAATAGCACTTGGGAAAACAATACTAACATAACCAACTCCAATATAA  
CGCTCAAATGCCAAATAAAGCAAATTATAAGGATGTGGCAGAGAGTAGGACAAGCAATGTATGCCCCCTCCCAT  
TAAAGGAAATATAACATGTGTATCAAACATTACTGGACTACTATTAACAAGAGATGGAGGGGGGAATAATACT  
AATGAGACCTTCAGACCTGGAGGAGGAGATATGAGGGACAATTGGAGAAGTGAATTATATAAGTATAAAGTAG  
TAAAAATTGAACCACTAGGTGTAGCACCCACCCATGCGAAGAGAAGAGTGGTGGAGAGAGAAAAAAGAGCAGT  
TGGACTGGGAGCTGTCTTTCTTGGGTCTTAGGGGCAGCAGGAAGCACTATGGGCGCAGCGTCAATAACGCTG

ACGGTACAGGCCAGACAATTATTGTCTGGTATAGTGCAACAGCAGAGCAATCTGCTGAAGGCTATAGAGGCTC  
AACAAACAGCTGTTGAGACTCACAGTCTGGGGCATT

>MH078539..1

TTCTATTGCGATACATCAGAGCTGTTCAATAGGACTTGGGTGTGGAATGACACTGTTGACAATAACACAGTTA  
ACAATAGCACAGATGACAATAGCACAACTCTCCCATGCAAAATAAAGCAAATTGTAAGGATGTGGCAGAA  
AGTAGGACAAGCAATGTATGCCCCCTCCCATCCCAGGAGTAATAAGGTGTGACTCAAACATTACAGGACTAATA  
TTAACAAGAGATGGAGGGAATAGTAATAGTAGTAATAATGGCACAAGGGAAGAACTTTCAGGCCTGGAGGGG  
GAGACATGAGGGACAATTGGAGAAGTGAATTATATAAGTATAAGGTAATACAAATTGAACCATTAGGAGTAGC  
ACCCACCAAGGCAAGGAGAAGAGTGGTGGAGAGAGAAAAAGAGCAGTTGGAATGGGAGCTCTTTTCCTTGGG  
TTCTTAGGAGCAGCAGGAAGCACTATGGGCGCGGCGTCAATAACGCTGACGGTACAGGCCAGACAATTATTGT  
CTGGTATAGTGCAACAGCAGAGCAATCTGCTGAAAGCTATAGAGGCTCAACAACAGCTGTTGAGACTCACAGT  
CTGGGGCATT

>HQ912707..2

TTCTATTGCAATACATCAACACTGTTTAATAGCACTTGGAAATGGCAATGACACTGCCAGCTCAAATTACACAG  
GATCAAATGATACTATAACTCTCCAATGCAGAATAAAGCAAATTGTAAACATGTGGCAGAGAGTAGGACAAGC  
CATGTATGCCCCCTCCCATCAAAGGAAAAATAAAGTGTGAATCAAACATTACAGGACTACTATTAACAAGAGAT  
GGAGGAAAGAATAGTAGTAATACAAGTGAGACCTTCAGACCTGGAGGAGGAGATATGAGGGACAATTGGAGAA  
GTGAATTATATAAGTATAAAGTAGTCAAAATTGAACCACTAGGTGTAGCACCTAACCGTGCAAAAAGAAGAGT  
GGTGGAGAGAGAAAAAGAGCAGTTGGAGTTGGACTGGGAGCAGTCTTCCTTGGGTTCTTAGGAGCAGCAGGA  
AGCACTATGGGCGCGGCGTCACTAACGCTGACGGTACAGGCCAGACAATTATTGTCCGGTATAGTGCAACAGC  
AGAGCAATTTGCTGAGGGCTATAAAGGCTCAACAACATCTGTTGAACTCACGGTCTGGGGCATT

>EU513199..2

TTCTATTGCAATACAAACAAAGCTGTTTAATAGCACTTGGAAATAATGATAACTACAATGTCAGCGCAAACCTCA  
CAGAGGAAAACAGAAAGGAAAAACATACTCTCCACTGCAGAATAAAGCAAATTGTAAATATGTGGCAGAGAGT  
AGGACAAGCAATATATGCCCCCTCCCATCCCAGGAAACATAACTTGTGGATCAAACATTACTGGGCTACTATTA  
ACAAGAGATGGAGGGAATAATGGTACAAATGATACTGAGACCTTCAGGCCTGGAGGAGGAGATATGAGGGACA  
ATTGGAGAAGTGAATTATATAAATATAAAGTAGTAAAAATTGAACCACTAGGTGTAGCACCAACCCCTGCAAA  
AAGAAGAGTGGTGGAAAGAGAAAAAGAGCAGTTGGAATGGGAGCTTTGATCTTTGGGTTCTTAGGAGCAGCA  
GGAAGCACTATGGGCGCGGCGTCAATGGCGCTGACGGTACAGGCCAGACAATTATTGTCTGGTATAGTGCAAC  
AGCAGAGCAATCTGCTGAAGGCTATAGAGGCTCAACAACATCTGTTGAGACTCACGGTCTGGGGCATT

>KU168265..3

TTCTATTGTTATACATCAAAATTATTTAATAGCATTTGGAGGAGCAATGACACTTGGAGGAGCGATGGCAATG  
ACCATACAAAGGAAACCATAACTCTCCAATGCAGAATAAAGCAAATTGTAAATATGTGGCAGAGAGTAGGACA  
AGCAATGTATGCCCCCTCCCATCCCAGGAGTAATAAGGTGTGAATCAAACATTACAGGACTACTATTAACAAGA  
GATGGAGTAGGGAATAATATGACAAATGAAACCTTCAGGCCTGGGGGAGGAAATATGAAGGACAATTGGAGAA  
GTGAACTATATAAGTATAAAGTAGTAAAAATTGAACCACTAGGTGTAGCACCTCCTATGCAAGGAGAAGAGT  
GGTGGAAAGAGAAAAAGAGCAGTTGGAATAGGAGCTGTCTTCCTTGGGTTCTTAGGAGCAGCAGGAAGCACT  
ATGGGCGCGGCGTCACTAACGCTGACGGTACAGGCCAGAAAATTATTGTCTGGTATAGTGCAACAGCAGAGCA  
ATCTGCTGCAGGCTATAGAGGCTCAACAACAGCTGTTGAGGCTCACGGTCTGGGGCATT

>MK086123..1

TTCTATTGCAATACAAACAGACCTATTTTCTTGAATAGTAGTAACCCATGGAAGAACATAACGTCAAATGACA  
GTATAACTCTCCAATGCAGAATAAAGCAAATTGTAAGGATGTGGCAGCAAGTAGGACAAGCAATGTATGCCCC  
TCCTATACCAGGAATAATAAGGTGTGAATCAAACATTACAGGAATACTGTTAACAAGAGATGGAGGAAATAAT  
AATACAAATAACACAGAGGTATTCAGGCCTGGAGGAGGAGATATGAGGGACAATTGGAGAAGTGAATTATATA  
AATATAAAGTAGTAAAAATTGAACCATTAGGTGTAGCACCTCCCGTGCAAGAAGAAGAGTGGTGGAGAGAGA  
AAAAAGAGCAGTTGGCCTGGGAGCTTTCTTCCTTGGGTTCTTAGGAGCAGCAGGAAGCACTATGGGCGCGGCG  
TCAATAACGCTGACGGTACAGGCCAGACAATTATTGTCTGGTATAGTGCAACAGCAGAGCAATCTGCTGCGGG  
CCATAGAGGCTCAACAACATCTGTTGAACTCACGGTCTGGGGCATT

>AY371122..1

TTCTATTGCAATACAAACAGCCTGTTTAATAGCACTTGGCATGACAATGACACTGCCAGCTCAAACCACACAA  
ATGGCACTATAACTCTCCAATGCAGAATAAAGCAAATTATAAATATGTGGCAGAGAGTAGGACAAGCAATATA  
TGCCCCCTCCTATCCCAGGAGAAATAAGGTGTGACTCAAACATTACAGGACTACTATTAACAAGAGATGGAGGG  
AATAATAATGTGACGAATGGGACTGAGACTTTCAGGCCTGAAGGAGGAGATATGAGAAACAATTGGAGAAGTG  
AATTATATAAGTATAAAGTAGTAAAAATTGAACCAATAGGTGTAGCACCTACCCCTGCAAAAAGAAGAGTGGT  
GGGGAGAGAAAAAGAGCACTGGGAGCTGCTGTCTTCCTTGGGTTCTTAGGAGCAGCAGGAAGCACTATGGGC  
GCGGCGTCAATAACGCTGACGGTACAGGCCAGACAATTATTGTCCGGTATAGTGCAACAGCAGAGCAATTTGC  
TGAGGGCTATAGAGGCTCAACAACACCTGTTGAGACTCACGGTCTGGGGCATT

>AY371123..2

TTCTATTGCAATACAAACAGACCTATTTAATAGCACTTGGAAACGAAACCACAGAGTCAAATGGCAATATGAATC  
TAACAATCCCATGCAGAATAAAACAATTTGTGAATTTGTGGCAGAAAGTAGGACAAGCAATGTATGCCCCCTCC

CATCCAAGGAGAAATAAGGTGTGAATCAAACATTACAGGATTACTATTAACAAGAGATGGAGGGGTAAATAAT  
AATAATAGTACGGAGATATTCAGGCCTGGAGGAGGAGATATGAGGGACAATTGGAGAAGTGAATTATATAAGT  
ATAAGGTAGTTCAAATTAACCACCTAGGTGTGGCACCTACCCATGCAAAACGAAGAGTGGTGGAGAGAGAAAA  
AAGAGCAGTTGGAATAGGAGCTGTTTTCTTGGGTTCTTAGGAGCAGCAGGAAGCACTATGGGCGCGGCGTCA  
ATAACGCTGACGGCACAGGCCAGACAATTATTGTCTGGTATAGTGCAACAGCAGAGCAATCTGCTGAGGGCTA  
TAGAGGCTCAACAACATCTGTTGAAACTCACGGTCTGGGGCATT

>AY371124..1

TTCTATTGCAATACATCACAACCTGTTTAATAGAACTTGGGGTAATAATAGCACCTGGGGAAACGAGACAGGGG  
AGGGCAATATAACTATCACTCTCCCATGCAGAATAAAGCAAATTGTAAATATGTGGCAAAGAGTAGGACGAGC  
AATGTATGCCCCCTCCCATCCAAGGAGAAATAAGGTGTAACCTCAAACATTACAGGACTACTATTAACAAGAGAT  
GGAGGGAATAATACTAATAGTACAGATGAGATCTTCAGGCCTGGAGGAGGAGATATGAGGGACAATTGGAGAA  
GTGAATTATATAAGTATAAGGTAGTAAAAATTGAACCACTAGGTGTAGCACCCACCCATGCAAAAAGAAGAGT  
GGTGGAGAGAGAAAAAAGAGCAGTTGGACTGGGAGCTGTTTTCTTGGGTTCTTAGGAGCAGCAGGAAGCACT  
ATGGGCGCGGCGTCAATAACGCTGACGGTACAGGCCAGACAATTATTGTCTGGTATAGTGCAACAGCAGAGCA  
ATTTGCTGAAGGCTATAGAGGCTCAACAACATCTGTTGAGACTCACAGTCTGGGGCATT

>AY371131..2

TTCTATTGCGATACATCAGGACTGTTTAATAGCACTTGGGACAGCACTTGGGGCAATAACAATGACAGCTCAG  
AGGCAAATGGCACTATAACTCTCCAATGCAGAATAAAGCAAATTGTAAATATGTGGCAGAAAGTAGGACAAGC  
AATGTATGCCCCCTCCCATCCAAGGAGTAATAAGGTGTGAATCAAACATTACAGGACTAATATTAACAAGGGAT  
GGAGGGCCTGATAGTCCAATGAGATATTACAGGCCTGGAGGAGGAGATATGAGGGACAATTGGAGAAGTGAAT  
TATATAAGTATAAGGTAGTACAAATAGAACCAATAGGTGTGGCACCCACTTATGCAAAAGAGAAGAGTGGTGGA  
GAGAGAAAAAAGAGCATTTGGAGTGGGAGCTGTCTTCTTGGGTTCTTAGGAGCAGCAGGAAGCACTATGGGC  
GCGGCGTCAATAACGCTGACGGTACAGGCCAGACAATTATTGTCCGGTATAGTGCAACAGCAAAGCAATTTGC  
TGAGGGCTATAGAGGCTCAACAACATCTGTTGAAACTCACGGTCTGGGGCATT

>GU201498..1

TTCTATTGCAATACATCACAACCTATTTAATAGCACTTGGGATGGTCCATTTAATAGCACTTGGAAATGACAATA  
GCACAGACACAGAGTTAAATGACACTATAACTCTCCAATGCAGAATAAAGCAAATTGTAAATATGTGGCAGAG  
AGTAGGACAAGCAATGTATGCCCCCTCCCATCCAAGGAGTAATAAGGTGTGAATCAAACATTACAGGACTGCTA  
TTAACAAGGGATGGAGGGAATAATAGCACAAATGAGACATTCAGGCCTGGAGGAGGAGATATGAGGGACAATT  
GGAGAAGTGAATATATAAGTATAAGGTAGTACAAATTGAACCACTAGGTGTGGCACCCACCCGGGCAAAAAG  
AAGAGTGGTGGAGAGAGGAAAAAGAGCAGTAGGACTGGGAGCTGTCTTCTTTGGGTTCTTAGGAGCAGCAGGA  
AGCACTATGGGCGCGGCGTCAATAACGCTGACGGTACAGGCCAGACAATTATTGTCCGGTATAGTGCAACAGC  
AGAGCAATCTGCTGAGGGCTATAGAGGCTCAACAACATCTGTTGAAACTCACGGTCTGGGGCATC

>GU201499..2

TTCTATTGCAATACATCAAACTGTTTAATAGCACTTGGATTAAATGGCACTAGCAATTGGATTAAATGACACTT  
GGACTAATGGCAATGAGGATGATAATAAAATAACTCTCCAATGCAGAATAAAGCAAATTATAAATATGTGGCA  
GAGAGTAGGACAAGCAATGTATGCCCCCTCCCATCCGAGGAGAAATAAGGTGTCAATCAAATATTACAGGTCTA  
CTATTAACAAGAGATGGAGGGAATAATAATAGTGCTGCAATGAAACCTTCAGGCCTACAGGAGGAGACATGA  
GGGACAATTGGAGAAGTGAATTATATAAATATAAAGTAGTAAAAATTGAACCACTAGGTGTAGCACCAAAACAA  
GGCAAAAAGAAGAGTGGTGGAGAGAGAAAAAAGAGCAGTTGGAATGGGAGCTTTCTTCTTGGGTTCTTAGGA  
GCAGCAGGAAGCACTATGGGCGCGGCGTCAATAACGCTGACGGTACAGGCCAGACAATTATTGTCTGGTATAG  
TGCAACAGCAGAGAAATCTGCTGCAGGCTATAGAGGCTCAACAACATCTGTTGAGACTCACGGTCTGGGGCAT  
T

>AY371137..2

TTCTATTGCAATACATCACAACCTGTTTAATAGTACTTGGAAATAGTACTTATAGCAATAATGCCAACTTAACAA  
ATGGCACTATAACTCTCCAATGCAGAATAAAGCAAATTGTACAGATGTGGCAGAGAGTAGGACAAGCAATGTA  
TGCCCCCTCCCATCCAAGGAGTAATAAGGTGTGAGTCAAACATAACAGGATTACTATTAACAAGAGATGGAGGG  
ACAAATAATACAAATAATACCGAGACATTCAGGCCTGGAGGAGGAGATATGAGGGACAATTGGAGAAGTGAAT  
TATATAAGTATAAGGTAGTACAAATTGAACCACTAGGTGTGGCACCCACCCATGCAAAAAGAAGAGTGGTGGA  
GAGAGAAAAAAGAGCAGTTGGACTGGGAGTTGCGTTCTTGGGTTCTTAGGAGCAGCAGGAAGCACTATGGGC  
GCGGCGTCAATAACGCTGACGGTACAGGCCAGACAATTATTGTCTGGTATAGTGCAACAGCAGAGCAATTTGC  
TGAAGGCTATAGAGGCTCAACAACATATGTTGAAACTCACGGTCTGGGGCATT

>AY371132..1

TTCTATTGCAGTACATCAAGACTATTTAATAGCACGTGGGATAATAGCACGTGGAATAACAATACCACTGACA  
CAGATGACATAACTCTCCCATGCAGAATAAAGCAAATTGTAAATATGTGGCAGAGAGTAGGACAAGCAATGTA  
TGCCCCCTCCTATCCGAGGAGAAATAAGGTGTGAGTCAAACATTACAGGACTACTATTAACAAGGGATGGAGGA  
AATAATAGCACAAATGAGACATTCAGGCCTGGAGGAGGAGATATGAGGGACAATTGGAGAAGTGAATTATATA  
AGTATAAGGTAGTACAAATTGAACCACTAGGTGTGGCACCCACCCGTGCAAGGAGAAGAGTGGTGGAGAGAGA  
AAAAAGAACAGTAGGACTGGGAGCTGTCTTCTTGGGTTCTTAGGAGCAGCAGGAAGCACTATGGGCGCGGCG

TCAATAACGCTGACGGTACAGGCCAGACAATTATTGTCCGGTATAGTGCAACAGCAGAGCAATCTGCTGAGGG  
CTATAGAGGCTCAACAACATCTGTTGAAACTCACGGTCTGGGGCATT

>GU201500..1

TTCTATTGCAATACATCAAACTGTTTAAATAGCACTTTGGTCTAACAATACATCAAAATCGTTTAAATAGCACTT  
GGCTTAACAGTAGCATTGGGAATGACAGTAGCATAACTCTCCAATGCAGAATAAAGCAATTTGTAAGTATGTG  
GCAGAGAGTAGGACAAGCAATGTATGCTCCTCCCATCCCAGGAGAACTAAGGTGCGAATCAAACATTACAGGA  
CTACTATTAACAAGAGATGGAGGAGGTAATAATAGGGAAAATGAGACCTTCAGGCCTGGAGGAGGAGATATGA  
GGGACAATTGGAGAAGTGAATTATATAAGTATAAAGTAGTAAAAAATTGAACCACTAGGTGTAGCACCCCTCCCA  
GGCAAAAAGAAGAGTGGTGAATAGAGAAAAAAGAGCAGTTGGAATAGGAGCTCTCTTCCTTGGGTTCTTAGGA  
GCAGCAGGAAGCACTATGGGCGCGCGTCAATGACGCTGACGGTACAGGCCAGACAATTATTGTCTGGTATAG  
TGCAACAGCAGAGCAATCTGCTGAAGGCTATAGAGGCTCAACAACATCTGTTGAGACTCACGGTCTGGGGCAT  
T

>AY371134..1

TTCTATTGCAATACATCACAACCTGTTTAAATAGCACTTGGAAATCTAATAGCACTTGGAACAGCACTAGGAACA  
ATAACACTGACATTATAACTCTCCAATGCAGAATAAAGCAAATTTGTAAATATGTGGCAGAAAATAGGACAAGC  
AATGTATGCCCCCTCCCATCCAAGGAGTAATAGAGTGTAAATCAAACATTACAGGACTACTATTAACAAGGGAT  
GGAGGGCGAGGGCCTGATAATACAACCTGAGATATTTCAGGCCTGGAGGAGGAGATATGAGGGACAATTGGAGAA  
GTGAATTATATAAGTATAAGGTAGTACAAATAGAGCCAATAGGTGTGGCACCCACCCATGCAAAAAGAAGAGT  
TGTGGAGAGAGAAAAAAGAGCAGTTGGACTGGGAGCTGTCTTCCTTGGTTTCTTAGGAGCAGCAGGAAGCACT  
ATGGGCGCGGCGTCAATAACGCTGACGGTACAGGCCAGACAATTACTGTCTGGTATAGTGCAACAGCAGAGCA  
ATCTGCTGAGGGCTATAGAGGCTCAACAGCATCTGTTGAAACTCACAGTCTGGGGCATT

>AY371136..1

TTCTATTGCAATACATCAAAGCTATTTAAATAGCACTTGGACTTGGACCAATGACACTGCCAGCTCAAATGACA  
CAAAGGGGTAAATGACACTATAACGCTCCAATGCAGAGTAAGGCAAATTTGTAAGAATGTGGCAGAAAAGTAGG  
ACAAGCAATGTATGCCCCCTCCCATCCGAGGAGTAATAAGATGTGAGTCAAACATTACAGGACTACTATTAACA  
AGGGATGGAGGGACAATAATAAAAATAATGAGACATTTAGGCCTGGAGGAGGAAAATATGAGGGACAATTGGA  
GAAGTGAATTATATAAGTATAAGGTAGTACAAATTGAACCACTAGGTGTGGCACCCACCCATGCAAGAAGAAG  
AGTGGTGCAGAGAGAAAAAAGAGCAGTTGGACTGGGAGCTGTCTTCCTTGGGTTCTTAGGAGCAGCAGGAAGC  
ACTATGGGCGCGGCGTCAATAACGCTGACGGTACAGGCCAGACAATTATTGTCCGGTATAGTGCAACAGCAGA  
GCAATCTGCTGAGGGCTATAGAGGCTCAACAGCATCTGTTGAAACTCACGGTCTGGGGCATT

>AY371138..1

TTCTATTGCAATACATCAGAACTATTTAAATAGCACTTGGGCACATGACACAAATAACACAGGGTTGGATAATG  
GCAATCTAACTCTCCAATGCAGAATAAAGCAAATTTGTAAGAATGTGGCAGAGGACAGGACAAGCAATGTTTGC  
CCCTCCCATCCAAGGAGAAATAAAGTGTGAATCAAACATTACAGGATTACTATTAACAAGAGATGGAGGGAAC  
AATGGTAGTGCAATGAGACATTCAGGCCTGGAGGAGGAGATATGAGGGACAATTGGAGAAGTGAATTATATA  
AGTATAAGGTAGTACAAATTGAACCAATAGGTGTGGCACCCACCCATGCAAAAAGAAGAGTGGTGGAGAGAGG  
AAAAAGAGCAGTAGTTGGACTGGGAGCTGTCTTCCTTGGGTTCTTAGGAGCAGCAGGAAGCACTATGGGCGCA  
GCGTCAATAACGCTGACGGTACAAGCCAGACAATTATTGTCTGGTATAGTGACAGCAGCAGAGCAATTTGCTGA  
GGGCCATAGAGGCTCAACAACAACCTGTTGAAACTCACGGTCTGGGGCATT

>AY371142..2

TTCTATTGCAATACATCAAACTGTTTAAATAGCACTTGGGAAAATGGAACTTTAAACCAGCTCAAACCACACAA  
GGTCAAATGGCACCATAACCTCTCAATGCAAAATAAGGCAAATTTGTAAGAATGTGGCAGAGAGTAGGACAAGC  
AATGTATGCCCCCTCCCATCGACGGGGACATAAGGTGCGAATCAAACATTACAGGACTACTATTAACAAGAGAT  
GGAGGGAGTAAAAATAGCACAAATAATGAGACTTTTCAGGCCTGGAGGAGGAGATATGAGGGACAATTGGAGAA  
GTGAATTATATAAGTATAAAGTAGTAGAAGTTGAACCAATAGGTGTAGCACCCACCTATGCAAAAAGAAGAGT  
GGTGGAGAGAGAAAAAAGAGCAGTTGGACTGGGAGCTGTCTTCCTTGGGTTCTTAGGAGCAGCAGGAAGCACT  
ATGGGCGCGGCGTCAATAACGCTGACGGTACAGGCCAGACAATTGTTGTCTGGTATAGTGCAACAGCAGAGCA  
ATTTGCTGAAGGCTATAGAGGCTCAACAACATCTGTTGAGACTCACGGTCTGGGGCATT

>AY371125..1

TTCTATTGCAATACATCAGGACTATTTAAATAGCACTTGGACTTGGAAATAGTGATAATAACACTGGATATAGCA  
ACAACACTAGTGAACCTTATAACTCTCCAATGTAGAATAAAGCAGATTATAAATATGTGGCAGAGAGTAGGACA  
AGCAATGTATGCCCCCTCCCATTAGAGGAATAATAAAATGTGAATCAAACATTACAGGGCTATTATTAACAAGA  
GATGGAGGAAATAATAGTACAAATGAGACATTCAGGCCTGGAGGAGGAGATATGAGGGACAATTGGAGAAGTG  
AATTATATAAATATAAGGTAAATACAAATTGAACCAATTAGGTGTGGCACCCAACAAGGCAAAAAGAAGAGTGGT  
GGAGAGAGAAAAAAGAGCAGTGGGAATTGGAGCTGTCTCTTTGGGTTCTTAGGAGCAGCAGGAAGCACTATG  
GGCGCAGCGTCAATAACGCTGACGGTACAGGCCAGACAATTATTGTCTGGTATAGTGCAACAGCAGAGCAATC  
TGCTGAGGGCTATAGAGGCTCAACAACATCTGTTGCAACTCACGGTCTGGGGCATT

>AY371126..1

TTCTATTGCAATACATCAAACCTGTTTAAATAGCACTTGGATTAGCAATAGCACTTGGAAATAGCAGTAGCAGTA  
CAGGGTCAGACATTATAACTCTCCAATGCAGAATAAAGCAAATTTGTAAATATGTGGCAGAAAGTAGGACAAGC

AATGTATGCCCCCTCCCATCCGAGGAGAAATAAGATGTAACCTCGAACATTACAGGACTACTATTAAACAAGGGAT  
 GGAGGGGATAGAGGGAATAGTGGTGGTGCAAATGGGACCGAACTTTTCAGGCCTGGAAGAGAAAATATGAAGG  
 ACAATTGGAGAAGTGAATTATATAAGTATAAGGTAGTAAAAATTGAACCACTAGGTGTAGCACCCCTCCCATGC  
 AAAAAAGAAGAGTAGTGGAGAGAGAAAAAGAGCAGTTGGAATGGGAGCTGTCTTCCTTGGGTTCTTAGGAGCA  
 GCAGGAAGCACTATGGGCGCAGCGTCAATAACGCTGACGGTACAGGCCAGACAATTATTGTCCGGTATAGTGC  
 AACAGCAGAACAATCTGCTGAGAGCTATAGAGGCTCAACAACATCTGTTGAAACTCACGGTCTGGGGCATT  
 >AY371127..2  
 TTCTATTGCAACACAACAGACTTATTTAATAGCACTTGGGATAACAGTAGCATTGAGACTAACTATAGCACTG  
 GGAATAACAATGAACTATAACTCTCCAATGCAGAATAAAACAAATTGTAAATATGTGGCAGAAAGTAGGACA  
 AGCAATGTATGCCCCCTCCCATCCCAGGAGTAATAAGGTGTGAATCAAACATTACAGGGTTACTATTAACAAGA  
 GATGGAGGGAACAATACTGAGGCAAATGAGAATGAGACATTACAGGCCTGGAGGAGGAGATATGAGGGACAATT  
 GGAGAAGTGAATTATATAAGTATAAGGTAGTACAAATTGAGCCACTAGGTGTGGCACCCACCCAGGCAAAGAG  
 AAGAGTGGTGCAGAGAGAAAAAGAGAGCAGTTGGAATGGGAGCTTTCTTCCTTGGGTTCTTAGGAGCAGCAGGA  
 AGCACTATGGGCGCGGCGTCAATAACGCTGACGGTACAGGCCAGACAATTATTGTCTGGTATAGTGCAACAGC  
 AGAGCAATCTGCTGAGGGCTATAGAGGCTCAACAACATCTGTTGAAACTCACGGTCTGGGGCATT  
 >AY371139..1  
 TTCTATTGCAATACATCAAGCCTGTTTAATAGCACTTGGAGTACCAATAGTACTGGGAATAACAATAGCACTG  
 GGGATGGCAATATAACTCTCCAATGCAGAATAAAGCAAATTATAAAGATGTGGCAGAGAGTAGGACAAGCAAT  
 GTATGCCCCCTCCCATCCCAGGAGAAATAAGGTGCAACTCAAACATTACAGGACTACTATTAACAAGAGATGGA  
 GGGGTTAATAATAGTATAAATGAGACCTTCAGGCCTGGAGGAGGAGATATGAGGGACAACCTGGAGAAGTGAAT  
 TATATAAGTATAAAGTAGTAAAGATTGAACCACTAGGTGTAGCACCCACCCGTGCAAAAAGAAGAGTGGTGGG  
 GAGAGAAAAAAGAGCAGTTGTTGGACTGGGAGCTGTCTTCCTTGGGTTCTTAGGAGCGGCAGGAAGCACTATG  
 GCGCGGCGTCAATAACGCTGACGGTACAGGCCAGACAATTATTGTCTGGTATAGTGCAACAGCAGAGCAATT  
 TGCTGAGGGCTATAGAGGCTCAACAACATCTGTTGAGACTCACGGTCTGGGGCATT  
 >AY371140..1  
 TTCTATTGCAATACATCAAACTGTTTAATAGCACTTGGAGTAACAATGACACTGCCAGCTCAAACCACACAG  
 GGTAAATAACACTATAACTCTCCAATGCAGAATAAAGCAAATTATAAATATGTGGCAGAAAGTAGGACAAGC  
 AATGTATGCCCCCTCCCATCCGAGGAGAAATAAGGTGTGAATCAAACATTACAGGACTACTACTAACAAGAGAT  
 GGAGGGAGTAATAATAGTACAAATGAGACTTTTCAGGCCTGGAGGAGGAGATATGAGGGACAATTGGAGAAGTG  
 AATTGTATAAGTATAAAGTAGTAAAAATTGAACCACTAGGTGTAGCCCCACCAAGGCAAAAAGAAGAGTGGT  
 GGGGAGAGAAAAAAGAGCAGTTGTTGGACTGGGAGCTGTCTTCCTTGGGTTCTTAGGAGCAGCAGGAAGCACT  
 ATGGGCGGCGTCAATGACGCTGACGGTACAGGCCAGACAATTGTTGTCTGGTATAGTGCAACAGCAGAGCA  
 ATTTGCTGAGGGCTATAGAGGCTCAACAACATCTGTTGAAACTCACGGTCTGGGGCATT  
 >AY371146..1  
 TTCTATTGCAATACAACAGCACTATTTAATAGCACTTGGTTTGGCAATGAGACTGACAGCTCAAACCATACAA  
 GGTCAAATGACACTATAACTCTCCAATGCAGAATAAAGCAAATTGTAAGGATGTGGCAGAAAGTAGGACAAGC  
 AATGTATGCCCCCTCCCATCAAAGGAAACATAACGTGTAAATCAAATATTACAGGAATACTATTAAACAAGAGAT  
 GGAGGAACTAATAGAACAAATGAGACATTTCAGGCCTGGAGGAGGAGATATGAGAGACAATTGGAGAAGTGAAT  
 TATATAAGTATAAGGTAGTACAAATTGAACCACTAGGTGTGGCACCTACCCCTGCAAAAAGAAGAGTGGTGCA  
 GAGAGAAAAAAGAGCAGTTGGAATGGGAGCTTTCTTCCTTGGGTTCTTAGGAGCAGCAGGAAGCACTATGGGC  
 GCGGCGTCCCTGACGCTGACGGTACAGGCCAGACAATTGTTGTCTGGTATAGTGCAACAGCAGAGCAATTTGC  
 TGAGGGCTATAGAGGCTCAACAACATCTGTTGAAACTCACAGTCTGGGGCATT  
 >AY371128..1  
 TTCTATTGCAATACATCAAACTGTTCAATAGCACTTGGACTTTGGAGAATGGCAATTGGACTAACAATAGCA  
 CAGAAAATGGAATGACACTATAACTCTCCAATGCAGAATAAAGCAAATTATAAATATGTGGCAGAGAGTAGG  
 ACAAGCAATGTATGCCCCCTCCCATCCCAGGAGTAATAATGTGTAAATCAAATATCACAGGACTACTATTAAACA  
 AGAGATGGAGGGAACAGTGGTGGTGCAAATGAGACCTTCAGGCCTGGAGGAGGAGATATGAGAGACAATTGGA  
 GAAGTGAATTATATAAGTATAAAGTGGTGAAGATTAAACCACTAGGAGTAGCACCCACCAATGCAAAAAGAAG  
 AGTGGTGGGAGAGAGAGAAAAAGAGCAGTTGGAATGGGAGCTGTCTTCCTTGGGTTCTTAGGAGCAGCAGGAAGC  
 ACTATGGGCGCGGCGTCAATAACGCTGACGGTACAGGCCAGACTATTATTGTCTGGTATAGTGCAACAGCAAAA  
 GCAATTTGCTGAAGGCTATAGAGGCTCAACAACATCTGTTGAGACTCACGGTCTGGGGCATT  
 >AY371129..2  
 TTCTATTGCAATACATCAGAACTATTTAATAGCACTTGGGGTAATAGCACTTGGGATAATAGCACTTGGGATA  
 ACAGCTCAAATTATGACAATATAACTCTCCAATGCAGAATAAAGCAAATTATAAATATGTGGCAGAAAGTAGG  
 ACAAGCAATGTATGCCCCCTCCCATCCCAGGAGTAATAAGGTGTGAATCAAACATTACAGGACTACTATTAAACA  
 AGGGATGGAGGGAGCAGTAATGGTACAAATGAGACAAGTGAGACATTTCAGGCCTGGAGGAGGAGATATGAGAG  
 ACAATTGGAGAAGTGAATTATATAAGTACAAGGTAGTACAAATTGAACCACTAGGTGTGGCACCCCTCCCATGC  
 AAAAAAGAAGAGTGGTGGAGAGAGGAAAAAGAGCAGTTGGAATGGGAGCTTTCTTCCTTGGGTTCTTAGGAGCA  
 GCAGGAAGCACTATGGGCGCAGCGTCACTGACGCTGACGGTACAAGCCAGACAATTATTGTCTGGTATAGTGC  
 AGCAGCAGAGCAATTTGCTGAAGGCTATAGAGGCTCAACAACATCTGTTGAAACTCACGGTCTGGGGCATT

>AY371130..1

TTCTATTGTAATACAACAAAACCTATTTTAACACTGCCAGCTTAAATGACACAGAGACAAATGGCACTATAACTC  
TCCCATGCAGAATAAAACAAATTGTAAATATGTGGCAGAAAAGTAGGACAGGCAATGTATGCCCCCTCCCATCCA  
AGGAGTAATAAGGTGTGAATCAAACATTACAGGACTACTATTAACAAGAGATGGAGGGAACAATAGGAGTACA  
GAAACCTTTTAGGCCTGGAGGAGGAGATATGAGGGACAATTGGAGAAGTGAATTATATAAGTATAAAGTAGTAA  
AAATTGAACCACTAGGTGTGGCACCCACCCGTGCAAAAAGAAGAGTGGTGGAGAGAGAAAAAAGAGCAGTTGG  
AATGGCAGCTGTCTTCTTTGGGTTCTTAGGAGCAGCAGGAAGCACTATGGGCGCGGCGTCAATAACGCTGACG  
GTACAGGCCAGACAATTATTGTCCGGTATAGTGCAACAGCAGAGCAATTTGCTGAAAGCTATAGAGGCTCAAC  
AACATATGTTGAGACTCACGGTCTGGGGCATT

>GU201513..1

TTCTATTGCAATACATCAAGACTATTTAATAGTACTTGGACTAGCAACTCTACAACAAATTCAACTGCTAATG  
AAATTATAACTCTCCAATGTAGAATAAAGCAAATTGTAAATATGTGGCAGACGGTAGGACAAGCAATGTATGC  
CCCTCCCATCCCAGGAATAATAAGGTGTGACTCAAACATTACAGGACTACTATTAACAAGAGATGGAGGGGAT  
ACAAATAGAACAAATGAAATATTCAGACCTGGAGGAGGAGATATGAGGGACAATTGGAGAAGTGAGTTATATA  
AGTATAAGGTAGTAAAAATTGAACCAATAGGTGTGGCACCCACCCCTGCAAAAAGAAGAGTGGTGGAAAGAGG  
AAAAAGAGCAGTTGGACTGGGAGCTGTCTTCCTTGGGTTCTTAGGAGCAGCAGGAAGCACTATGGGCGCGGCG  
TCAATAACGCTGACGGTACAGGCCAGACAATTATTGTCCGGTATAGTGCAACAGCAGAGCAATTTGCTGAGGG  
CTATAGAGGCTCAACAACATCTGTTGAAACTCACGGTCTGGGGCATT

>GU201514..2

TTCTATTGCAATACATCAGAGTTGTTTAATAGCATTGGAATAACAATGGCAGCATTTGGTATAACAATGACA  
CTGCTATCAATAACACAGAGCCAAAGAATAAGACTCTAACTCTCCAATGCAGAATAAAGCAGGTTATAAAGAT  
GTGGCAGAGAGTAGGACAAGCAATGTATGCCCCCTCCCATCCGAGGAGAAATAAGGTGTGATTCAAACATTACA  
GGACTATTATTAACAAGAGATGGAGGGAATAATAGGACAGATGAGACCTTCAGGCCTGGAGGAGGAGATATGA  
GGGACAATTGGAGAAGTGAATTATATAAGTATAAAGTAGTAAAAATTGAACCACTAGGTGTAGCACCCACCTA  
TGCAAAAAGAAGAGTGGTGGAGAGAGAAAAAAGAGCAGTTGGAATAGGAGCTGTCTCCTTGGGTTCTTAGGA  
GCAGCAGGAAGCACTATGGGCGCGGCGTCAATAACGCTGACGGTACAGGCCAGACAATTATTGTCTGGTATAG  
TGCAACAGCAGAGCAATTTGCTGAAGGCTATAGAGGCTCAACAACATCTGTTGAGACTCACGGTCTGGGGCAT  
T

>AY371141..2

TTCTATTGCAATACATCAGGACTGTTTAATAGCAGTTGGGATAGCAATAGCACTGAGGAAACCAATAATTCAG  
AAAATAATGAAACTATAACTCTCCAATGCAGAATAAAGCAAATTGTAAACATGTGGCAGAGAGTAGGACAAGG  
AATGTATGCCCCCTCCCATCCAGGGAATAATAAGGTGTGAATCAAACATTACAGGACTACTATTAACAAGAGAT  
GGAGGGGAAAATAATAGTACAAATCAGACCTTCAGGCCTGGAGGAGGAGATATGAGGGACAATTGGAGAAGTG  
AATTATATAAGTATAAAGTAGTAAAAATTGAACCAATAGGTGTAGCACCCACCCATGCAAAAAGAAGAGTGGT  
GGAGAGAGGAAAAAGAGCAGTTGGACTGGGAGCTGTCTTCCTTGGGTTCTTAGGAGCAGCAGGAAGCACTATG  
GGCGCGGCGTCAATAACGCTGACGGTACAGGCCAGACAATTATTGTCTGGTATAGTGCAACAGCAGAGCAATC  
TGCTGAAAGCTATAGAGGCTCAACAACATCTGTTGAAACTCACGGTCTGGGGCATT

>DQ313247..1

TTCTATTGTAATACAACAGATCTGTTTAATAGCACTTGGGCTAATAATAGCAATAAGTGGGACTCAACAGCCC  
CAGAGAATGGCACTATAACTCTCAAATGCAGAATAAAGCAAATTGTAAATATGTGGCAGAGAGTAGGACAAGC  
AATATATGCCCCCTCCCATCGAAGGAGACATAAGGTGTGAATCAAATATTACAGGACTACTATTAACAAGAGAT  
GGAGGGGAAAATAGTAGTGAGCCAGTGAGACCTTCAGGCCTGGAGGGGGAGATATGAGGGATAATTGGAGAA  
GTGAATTATATAAGTATAAAGTAGTAAAAATTGAACCACTAGGTGTAGCACCTACCCATGCAAAAAGAAGAGT  
GGTGGAGAGAGGAAAAAGAGCAGTTGGACTGGGAGCTTCTTCTTTGGGTTCTTAGGAGCAGCAGGAAGCACT  
ATGGGCGCGGCGTCAATAACGCTGACGGTACAGGCTAGACAATTATTGTCTGGTATAGTGCAACAGCAGAGCA  
ATTTGCTGAGAGCTATAGAGGCTCAACAACATATGTTGAAACTCACGGTCTGGGGCATT

>MK086121..2

TTCTATTGCAATACATCAAATTTATTCAATAGCACTTGGGAATAGCACTTGGGGTAATAACACTTGGGAATAGCA  
GTAGCACTAATATTAATATAACGCTTCAATGCAGAATAAAGCAAATTGTAAATATGTGGCAGACAGTAGGACA  
AGCAATGTATGCCCCCTCCCATCCAAGGAGAAATAAGGTGTGAATCAAACATTACAGGATTACTATTGACAAGA  
GATGGAGGGGGGACAGAGACCAATAACAGAGATCTTCAGGCCTGGAGGAGGAGATATGAGGGACAATTGGA  
GAAGTGAATTATATAAGTATAAAGTAGTAAAAATTGAACCACTAGGTGTAGCACCCACCCATGCAAAAAGAAG  
AGTGGTGGAGAGAGAAAAAAGAGCAGTTGGACTGGGAGCTGTCTTCCTTGGGTTCTTAGGAGCAGCAGGAAGC  
ACTATGGGCGCGGCGTCAATAACGCTGACGGTACAGGCCAGACAATTATTGTCTGGTATAGTGCAACAGCAGA  
GCAATTTGCTGAAGGCTATAGAGGCTCAACAACAGATGTTGAGACTCACGGTCTGGGGCATT

>EU513187..1

TTCTATTGCAATACAACAGCACTATTTAATAGCACTTGGGATAACAATAGTACTAGGGAAGACAATAACTCAA  
CAGGGAATGACACTATAACTCTCCAATGCAGAATAAAGCAAATTGTGAGGATGTGGCAAAGATCAGGACAAGC  
AATGTATGCCCCCTCCCATCCAAGGAGTAATAAAGTGTAATCAAATATCACAGGACTACTATTAACAAGGGAT  
GGGGGGAATAATGAAAGTACAAATGAGACCTTCAGACCTGGAGGAGGAGATATGAGGGACAATTGGAGAAGTG

AATTATATAAGTATAAAGTAGTAAAAATTGAACCACTAGGTGTAGCACCCACCCATGCAAAAAGAAGAGTGGT  
GCAGAGAGAAAAAGAGCAGTAGGACTGGGAGCTGTCTTCTTTGGGTTCTTAGGAGCAGCAGGAAGCACTATG  
GGCGCGGCGTCAATAACGCTGACGGTACAGGCCAGACAATTATTGTCTGGTATAGTGCAACAGCAGAGCAATT  
TGCTGAAGGCTATAGAGGCTCAACAGCATCTGTTGAAACTCACGGTCTGGGGCATT

>EU513195..1

TTCTATTGCAATACATCAAGACTGTTTAAATAGCACTTGGGGTAGCAATAACACTTGGGATAACAGCACGGAGC  
AAAATATAACTCTCAGATGCAAAATAAAGCAGATTATAAAATATGTGGCAGAGAGTAGGACAAGCAATGTATGC  
CCCTCCCATCCGAGGAGAAATAAGATGTGAATCAAACATTACAGGACTACTATTAACAAGGGATGGAGGGGGT  
AATAGTAGTAGTGCAAATGAGACCTTCAGACCTACAGGAGGAAATATGAAGGACAATTGGAGAAGTGAATTAT  
ATAAGTATAAAGTAGTAAAAATTGAACCACTAGGTGTAGCACCCACCCGTCGCAAAAAGAAGAGTGGTGGGGAG  
AGAAAAAGAGCAGCACTGGGAGCTGTCTTCCTTGGGTTCTTAGGAGCAGCAGGAAGCACTATGGGCGCGGCG  
TCAATAACGCTGACGGTACAGGCCAGACAATTATTGTCCGGTATAGTGCAACAGCAGAGCAATTTGCTGAAGG  
CTATAGAGGCTCAACAACATCTGTTGAAACTCACGGTCTGGGGCATT

>EU513189..1

TTCTATTGCAATACATCAGGACTATTTAATAGCACTTGGCACAATAGCACTTGGACCAATAGCACCACTGGCT  
CAAATGGCACAGAGTCAAATGACACTATAACTCTCCAATGCGAAATAAAGCAATTTATAAAATATGTGGCAGAG  
AGTAGGACGAGCAATGTATGCCCTCCCATCCCAGGAGTGATAAGGTGTGAATCAGACATTACAGGACTACTA  
TTAACAAGAGATGGACCGAATAGTACACAAAATGAGACATTCAGGCCTGGAGGAGGAGATATGAGAGACAATT  
GGAGAAGTGAATTATATAAGTATAAAGTAGTACAAATTGAACCACTAGGTGTGGCACCCACCCATGCAAAAAG  
AAGAGTGGTGGAGAGAGAAAAAGAGCAGTTGGACTGGGAGCTGTCTTCTTTGGGTTCTTGGGAGCGGCAGGA  
AGCACTATGGGCGCGGCGTCAATAACGCTGACGGTACAGGCCAGACAATTATTGTCTGGTATAGTGCAACAGC  
AGAGCAATTGGCTGAAAGCTATAGAGGCTCAACAACATCTGTTGAGACTCACGGTCTGGGGCATT

>EU513196..2

TTCTATTGCAATACATCAGGCCTATTTAATAGCACTTGGTATAGCAATAGCACTAACAGCTCAAATCACACAA  
ATGGCACAGATGATATAACTCTCCAATGCAGAATAAAGCAAATTTGTAAATATGTGGCAGAGAGTAGGACAAGC  
AATGTATGCCCTCCCATCCGAGGAGAAATAAGGTGTGAATCAAACATTACAGGAATACTATTAAACAAGAGAT  
GGAGGGAATAATGGTAGTAAAGCAAATGAGACCTTCAGACCTGGAGGAGGAGACATGAGGGACAATTTGGAGAA  
GTGAATTATATAAATACAAAGTAGTAAAAATTGAACCAATAGGTATAGCACCCACCCATGCAAAAAGGAGAGT  
GGTGGAGAGAGAAAAAGAGCAGTCGGACTGGGAGCTTTCTTCCTTGGGTTCTTAGGAGTAGCAGGAAGCACT  
ATGGGCGCGGCGTCAATGACGCTGACGGTACAGGCCAGACATTTATTGTCTGGTATAGTGCAACAGCAGAGCA  
ATCTGCTGAAGGCTATAGAGGCTCAACAACAGCTGTTGAGACTCACAGTCTGGGGCATT

>EU513191..1

TTCTATTGCAATACATCAAACTGTTTAGTAGCACTTGGGATAATAGCACTTGGGGTAATAACACTTGGGGTA  
ACAGCACTGGGGACAACAATGAGACCATAACCCTCCAATGCAAAATAAAACAAATTATAAAATATGTGGCAGCA  
AGTAGGACGAGCAATGTATGCCCTCCCATCCAAGGAGAGATAAGGTGTGAGTCAAACATTACAGGACTACTA  
TTAACAAGAGATGGAGGGGCTAATAGCAGTACAAATGAGACCTTCAGGCCTGGAGGAGGAGATATGAGGGATA  
ATTGGAGGAGTGAATTATATAAGTATAAAGTTGTAAAAATTGAACCACTAGGTGTAGCACCCACCCGTCGAAA  
AAGAAGAGTGGTGCAGAGAGAAAAAGAGCGGTTGGACTGGGAGCTGTCTTCATTGGGTTCTTAGGAGCAGCA  
GGAAGCACTATGGGCGCAGCGTCAATAACGCTGACGGTACAGGCCAGACAATTATTGTCCGGTATAGTGCAAC  
AGCAGAGCAATTTGCTGAAGGCTATAGAGGCTCAACAACATCTGTTGAGACTCACGGTCTGGGGCATT

>EU513184..2

TTCTATTGCAATACATCAAACTATTTGATAGCATTTGGAATAGAATAATGGGTCAAATTACACAAGGTTAG  
GTGATGACACAGAGACAAATGACCCTATAACTCTCCAATGCAGAATAAAGCAAATTTGTAAGAATGTGGCAGAC  
AGTAGGACAAGCAATGTATGCCCTCCCATCCGGGGAGAAATAAAATGTGAATCAAACATTACAGGACTGCTA  
TTAACACGAGATGGAGGAAATAATAATAGTATGAATGAGACATTCAGGCCTGGAGGAGGAGATATGAGGGACA  
ATTGGAGAAGTGAATTATATAAGTATAAAGGTAGTACAAATTGAACCACTAGGTGTGGCACCCACCCGTCGAAA  
AAGAAGAGTGGTGGAGAGAGGAAAAAGAGCAGTTGGACTGGGAGCTGTTTTCTTGGGTTCTTAGGAGCTGCA  
GGAAGCACTATGGGCGCGGCGTCAATAACGCTGACGGTACAGGCCAGACAATTACTGTCTGGTATAGTGCAAC  
AGCAAAGCAATTTGCTGAGGGCTATAGAGGCTCAACAACATCTGTTGAGACTCACGGTCTGGGGCATA

>EU513193..2

TTCTATTGCAATACATCAGGACTGTTTAAATAGCACCTGGTGGGATAGCAACAATAGCACTGAGAATATAACTC  
ACAGAAAAGAAAATATAACTCTCCAATGCAGAATAAAGCAAATTTATAAAATATGTGGCAGAGAGTGGGACGAGC  
AATGTATGCCCTCCCATCCAAGGAGTAATAAGGTGTGAATCAAACATTACAGGAATACTATTAAACAAGAGAT  
GGTGGGGTTAATAATAATAACACAAAACAACTGAGACCTTCAGGCCTGGAGGAGGAGATATGAGGGACAATT  
GGAGAAGTGAATTATATAAGTATAAAGTAGTAAAAATTGAACCACTAGGTGTAGCACCCACCCATGCAAAAAG  
AAGAGTGGTGGAGAGAGAAAAAGAGCAGTTGGACTGGGAGCTGTCTTCCTTGGGTTCTTAGGAGCAGCAGGA  
AGCACTATGGGCGCGGCGTCAATAACGCTGACGGTACAGGCCAGACAGTTATTGTCTGGTATAGTGCAACAGC  
AGAGCAATTTGCTGAAGGCTATAGAGGCTCAACAACAGCTGTTGAGACTCACAGTCTGGGGCATT

>EU513186..3

TTCTATTGTAATACATCAAGCCTATTTTAATTATACATTTAGCAATAGCACTGAGGATAACAACCCAAGTAATG  
CCACAATAACTCTCCAATGCAGAATAAGGCAAGTTGTAAATATGTGGCAGAGAGTAGGACTAGCAATGTATGC  
CCCTCCCATCAAAGGAAAACTAAGATGTGAATCAAACATTACAGGACTACTATTAACAAGAGATGGAGGGAAT  
AATAATAATGCAACTGAGACATTCAGGCCTGGAGGAGGAGATATGAGGGACAACCTGGAGAAGTGAATTATATA  
AATATAAGGTAGTACAAATTGAACCCCTAGGTGTGGCACCACCTATGCAAAAAGAAGAGTGGTGGAAAGAGG  
AAAAAGAGCAGTAGTTGGACTAGGAGCTGTCTTCCTTGGGTTCTTAGGAGCAGCAGGAAGCACTATGGGCGCG  
GCGTCAATAACGCTGACGGTACAGGCCAGACAATTATTGTCTGGTATAGTGCAACAGCAGAGCAATCTGCTGA  
GGGCTATAGAGGCTCAACAACAGCTGTTGAAACTCACGGTCTGGGGCATT

>MH705136..2

TTCTATTGCAATACCTCAAATCTATTTGATAGCGCTTGGGAAGCAAACCTCAAATCACACAGAGTCAAATGACA  
CAAGGGCAAATATAACTCTCCAATGCAGAATAAGGCAAATTTGAAGGATGTGGCAGAGAGTAGGACAAGCAAT  
GTATGCCCTCCCATCCGAGGAGAAATAAGGTGTGAGTCAAACATTACAGGACTACTATTAACAAGAGATGGA  
GGGGATGGGAACAATGCAACTAATGAGACATTCAGGCCTGGAGGAGGAGATATGAGAGACAATTGGAGAAGTG  
AACTATATAAATATAAGGTAGTACAAATTGAACCACTAGGTGTAGCACCCACCCATGCAAAAAGAAGAGTGGT  
GGAGAGAGAAAAAGAGCAGTGGGAATAGGAGCTGTCTTCCTTGGGTTCTTAGGGGCAGCAGGAAGCACTATG  
GGCGCGGCGTCAATAACGCTGACGGTACAGGCCAGACAATTATTGTCCGGTATAGTGCAACAGCAGAGCAATT  
TGCTGAGGGCTATAGAGGCTCAACAACAACCTGTTGAAACTCACAGTCTGGGGCATT

>MH460467..3

TTCTATTGTAATACATCAGGACTATTTAATTATAGTTGGAATACATCAGAACCAACCAATAATTGGAATAGTA  
GTGCTCAGGATAACGATACCATAACTCTCCAATGCAGAATAAAGCAAATAGTAAATATGTGGCAGGAAGTAGG  
ACAAGCAATGTATGCCCCCTCCCATCCAAGGAATAATAAGGTGTGAATCAAACATTACAGGACTACTATTAACA  
AGAGATGGAGGGACAAATAATAGTACAAATGAGACATTCAGACCTGGGGGAGGAGATATGAGGGACAATTGGA  
GAAGTGAATTATATAAGTATAAGGTAGTACAAATTGAACCAATAGGTTTGGCACCCACCCATGCAAAAAGAAG  
AGTGGTGCAGAGAGAAAAAGAGCAGTAATTGGAATGGGAGCTGTCTTCCTTGGGTTCTTAGGAGCAGCAGGA  
AGCACTATGGGCGCGGCGTCAATAACGCTGACGGTACAGGCCAGACAATTATTGTCCGGTATAGTGCAACAGC  
AGAGCAATTTGCTGAGGGCTATAGAAGCTCAACAACATCTGTTGAAACTCACGGTCTGGGGCATT

>EU513198..1

TTCTATTGCAATACCTCAAACCTGTTTAATGGCACTTTGTATAACAACACCTGGATGTTTAATGGCACTTTGT  
ATAATAACTAACGAGAGCTCAACATCAGGTACTATAACTATCAAGTGCAGAATAAAGCAAATCATAAATAT  
GTGGCAGACAGTAGGACAAGCAATGTATGCCCCCTCCCATCCCAGGAGAAATAAGGTGTGAATCAAACATTACA  
GGATTGCTATTAACAAGAGATGGAGAGGCTGGAAAAAGCACAAATGAGACCTTCAGGCCTATAGGAGGAAATA  
TGAGAGACAATTGGAGAAGTGAATTATACAAATATAAAGTAGTAAAAATTGAACCACTAGGTGTAGCACCCAC  
ACCTGCAAAAAGAAGAGTGGTGGAGAGAGAAAAAGAGCAGTGGGACTGGGAGCTGTCTTCCTTGGGTTCTTA  
GGAGCAGCAGGAAGCACTATGGGCGCAGCGTCAATAACGCTGACGGTACAGGCTAGACAATTATTGTCTGGTA  
TAGTGCAACAGCAAAGCAATTTGCTGAAGGCTATAGAGGCTCAACAACATCTGTTGAAACTCACGGTCTGGGG  
CATT

>JF706407..3

TTCTATTGTGATACATCAAGACTGTTTAATAGCACTTGGCCTAATAGCACATGGGACAATAATACTCAAAAGA  
ATGAGAATGACACAGGGTACTATACTCTCCAATGCAGAATAAAGCAAATTATAAATATGTGGCAGAGAGTAGG  
ACAAGCAATGTATGCCCCCTCCTATCCCAGGAGAAATAAGTTGTGAATCAAACATTACAGGACTACTATTAACA  
AGAGATGGAGGGAATAATAATAATAGTATAAATGAGACCTTCAGGCCTGGTGGAGGAGATATGAGGGACAATT  
GGAGAAGTGAATTATATAAGTACAAAGTGGTACAAATTGAGCCAATAGGAATAGCACCCACCCCTGCAAAAAG  
AAGAGTGGTGGAGAGAGAGAAAAAGAGCAGTAGTTGGAAGTGGAGCTGTCTTCCTTGGGTTCTTAGGAGCAGCA  
GGAAGCACTATGGGCGCAGCGTCAATAACGCTGACGGTACAGGCCAGACAATTATTGTCTGGTATAGTGCAAC  
AGCAGAGCAATCTGCTGCAGGCTATAGAGGCTCAACAACATCTGTTGAGACTCACGGTCTGGGGCATT

>JF706428..1

TTCTATTGCAATACATCAGGACTATTTAATGGCACTTTGAATGGCACTGAAACTTGAATAACACTTGGGGTG  
ACAGTAGCAATGAGAATGAAAAATGAGAATATAACTATCCAATGCAGAATAAAACAAATTGTAAATATGTGGCA  
GAGAGTAGGACGAGCAATGTATGCCCCCTCCCATCAAAGGAGTAATAAAGTGTGAATCAAACATTACAGGACTA  
CTATTAACAAGAGATGGAGAGGGTAATAATAGGACAAATGAGACCTTCAGGCCTGGAGGAGGAGATATGAGGG  
ATAATTGGAGAAGTGAATTATATAAATATAAAGTAGTAAAAATTGAACCACTAGGTATAGCACCCACCCATGC  
AAAAAGAAGAGTGGTGCAGAGAGAAAAAGAGCAGTTGGACTGGGAGCTGTCTTCCTTGGGTTCTTAGGAGCA  
GCAGGAAGCACTATGGGCGCGGCGTCAATAACGCTGACGGTACAGGCCAGACAATTATTGTCTGGTATAGTGCA  
AACAGCAGAGTAATCTGCTGAAGGCTATAGAGGCTCAACAACATCTGTTGAGACTCACAGTCTGGGGCATT

>KU168310..1

TTCTATTGCAATACATCACAACCTATTTAATAGCACTTGGAAACAACCAATATCAGCTTAAATGACACAAATG  
AAAAATATAACTCTCCCATGCAGAATAAAGCAAGTTATAAATATGTGGCAGAGAGTAGGACAAGCAATGTATGC  
CCCTCCCATCGCAGGAACACTAAAGTGTAAATCAAACATTACAGGATTACTATTAACAAGAGATGGAGGGGAG  
AGCAATAATACAAATACAAATGAGACCTTCAGGCCTGGAGGAGGAGATATGAGGGACAATTGGAGAAGTGAAT  
TATATAAGTATAAAGTAGTAAAAATTGAACCACTAGGTGTAGCACCTACCCATGCAAAAAGAAGAGTGGTGGGA

GAGAGAAAAAAGAGCAGTGTCTTGGACTGGGAGCTGTCTTCCTTGGGTTCTTAGGAGCAGCAGGAAGCACTATG  
GGCGCGGCGTCAATAACGCTGACGGTACAGGCCAGACAACCTATTGTCTGGTATAGTGACAGCAGCAGAGCAATT  
TGCTGAGGGCTATAGAGGCTCAACAACATCTGTTGAAACTCACGGTCTGGGGCATT

>JN687776..2

TTCTATTGTAATACAACAAAACCTATTTAATAGCACTTGGACTAATGAGACAAATCACACAGCTAGCATAGATA  
GAAATATAACTCTCCAATGCAGAAATTAAGCAAATTTGTAATATGTGGCAAAGAGTAGGACAAGCAATATATGC  
CCCTCCCATCCCAGGAGTAATAAGGTGTGAATCAAACATTACAGGACTACTACTAACAAGAGATGGAGGGACA  
AATAGTTCAAATAATGAGACATTCAGGCCTGGAGGAGGAGATATGAGGGACAATTTGGAGAAGTGAATTATATA  
AGTATAAGGTAGTACAAATTGAACCAATAGGTGTGGCACCCACCCCTGCAAAAAGAAGAGTGGTGGAGAGAGA  
AAAAAGAGCAGTTGGAGTAGGAGCTTTTATCCTTGGGTTCTTAGGAGCAGCAGGAAGCACTATGGGCGCGGCG  
TCAATAACGCTGACGGTACAAGCCAGACAATTATTGTCTGGTATAGTGCAACAGCAGAGCAATTTGCTGAAGG  
CTATAGAGGCTCAACAACATCTGTTGAAACTCACGGTCTGGGGCATT

>JX140646..2

TTCTATTGCAATACAACAGAATTATTTAATAAGACTTTTAAATGATACTGATCTAAAAGTTAAATAGCAGTAGCA  
TTAAGGAGTCAAATGATACTATAACTCTCCAATGTAGAAATAAGCAATTTGTAAGGATGTGGCAGAGAGTAGG  
ACAAGCAATGTATGCCTCTCCCATCCCAGGAGTAATAAGGTGTGAATCAAACATTACAGGTCTACTATTAACA  
AGAGATGGAGGGGGTAATGAAAAGCACAAGAGATAATGAGACATTCAGGCCTGGAGGAGGAGATATGAGAGACA  
ATTGGAGAAGTGAATTATATAAGTATAAGGTAGTACAAATTGAACCAATAGGAGTGGCACCCACCTATGCAAA  
AAGAAGAGTGGTGGAGAGAGAAAAAGAGCAGTTGGACTGGGAGCTGTCTTCCTTGGGTTCTTAGGGGCAGCA  
GGAAGCACTATGGGCGCGGCGTCAATAACGCTGACGGTACAGGCCAGGCAATTATTGTCTGGTATAGTGCAAC  
AGCAGGGCAATCTGCTGAGGGCTATAGAGGCTCAACAACACCTGTTGAAACTCACAGTCTGGGGCATT

>JX140647..1

TTCTATTGTAATACATCAGGACTATTTAATAGTAGTTGGACCGGAACGACATTTTGAATAACAGTACTGCTA  
GCTCAAATAACACAGAAGTTATAACTCTCCAATGCAGAAATAAGCAAATTATAAATATGTGGCAGACAGTAGG  
ACAAGCAATGTATGCCCCCTCCCATCCGAGGAGAAATAAGGTGTGAGTCAAATATTACTGGACTACTATTAACA  
AGAGATGGAGGGAATAATATGACAAATGAAACCTTCAGGCCTGGAGGAGGGGATATGAGGGACAATTGGAGAA  
GTGAATTATATAAGTATAAAGTAGTACAAATTGAACCACTAGGTGTAGCACCCACCCATGCAAAAAGAAGAGT  
GGTGGAGAGAGAAAAAGAGCAGTTGGAATAGGAGCTGTCTTCCTTGGGTTCTTAGGAGCAGCAGGAAGCACT  
ATGGGCGCGGCGTCAATAACGCTGACGGTACAAGCCAGACAATTATTGTCTGGTATAGTGCAACAGCAGAGCA  
ATTTGCTGATGGCTATAGAGGCTCAACAACATATGTTGAAACTCACTGTCTGGGGCATT

>KF859739..2

TTCTATTGCAGTACATCAGCACTGTTTAAATAGCACTTGGCTGTTTAAATGAAACTTATAGCACTTGGCATAGCT  
CTTGGAACAGTAGCGCTGAGAATATAACTCTCCAATGCAGAATAAAGCAATTTGTGAATATGTGGCAGAGAGT  
AGGGCAAGCAATGTATGCCCCCTCCCATTCGAGGAATGATAAGGTGTGAATCAAACATTACAGGACTACTATTA  
ACAAGAGATGGAGGGAATAAAAACTAGTGCAAATGAGACCTTCAGGCCTGGAGGAGGAGATATGAAGGACA  
ATTGGAGAAGTGAATTATATAAGTATAAAGTAATAAAAAATAGAACCACTAGGTGTGGCACCCACCCCTGCAAA  
AAGAAGAGTGGTGGGAAGAGAAAAAGAGCAGTTGGACTAGGAGCTGTCTTCTTGGGTTCTTAGGAGCAGCA  
GGAAGCACTATGGGCGCAGCGTCAATAACGCTGACGGTACAGGCCAGACAATTATTGTCTGGTATAGTGCAAC  
AGCAGAGCAATTTGCTGAAGGCTATAGAGGCTCAACAACATCTGTTGAGACTCACGGTCTGGGGCATT

>KU749419..1

TTCTATTGCAGTACATCAAGCCTGTTTAAATAGCACTTGGGAATAATAGCATTGGGGATAATAGCACTAGGGATG  
ACAATAGCACTATTACTCTCCCATGCAGAATAAAGCAAATTTGTAATATGTGGCAGGGAGTAGGACAAGCAAT  
GTATGCCCCCTCCCATCCCAGGAGAAATAAAGTGTGAATCAAATATTACAGGACTATTATTGACAAGAGATGGT  
GGGAGAAATAGCACAAATGAGACCTTCAGGCCTGGAGGAGGAGATATGAGGGACAATTGGAGAAATGAATTAT  
ATAAGTATAAAGTAGTAAAAATTGAACCACTAGGTGTGGCACCCACCCATGCAAAAAGAAGGGTGGTGGAGAG  
AGAAAAAGAGCAGTTGGACTAGGAGCTGTCTTCCTTGGGTTCTTAGGAGCAGCAGGAAGCACTATGGGCGCG  
GCGTCAATAACGCTGACGGTACAGGCCAGACAATTATTGTCCGGTATAGTGCAACAGCAGAGCAATTTGCTGA  
GGGCTATAGAGGCTCAACAACAGGTGTTGAGACTCACGGTCTGGGGCATT

>MK086109..1

TTCTATTGCAATACATCTAACCTATTTAATAGCACTTGGGGGAGCAATACCACTACCAGCTGGAATACCAGCT  
CAATTGGCACAAATGAACTATAACTATCCAGTGCAGAATAAAGCAGATTGTAAGAATGTGGCAGAGAGTAGG  
ACAAGCAATGTATGCCCCCTCCCATCCCAGGAAAAATAAGGTGTAACCTAAGCATTACAGGACTGCTATTAACA  
AGAGATGGAGGGAATAATAGTAGTGACAATGAGACCTTCAGGCCTGGAGGAGGAGATATGAGGGACAATTGGA  
GAAGTGAATTATATAAGTATAAAGTAGTAAAAATTGAACCACTGGGTGTAGCACCCACCCATGCAAGGAGAAG  
AGTGGTGGAGAGAGAAAAAGAGCAGTTGGACTGGGAGCTGTCTTCCTTGGGTTCTTAGGAGCAGCAGGAAGC  
ACTATGGGCGCGGCGTCAATAACGCTGACGGTACAGGCCAGACAATTATTGTCTGGTATAGTGCAACAGCAAA  
GTAATTTGCTGAGGGCTATAGAGGCTCAACAGCATATGTTGAGACTCACGGTCTGGGGCATT

>MK086113..1

TTCTATTGCAATACAACAAAACCTATTTAATAGCATTGTGGAGTAAGAATAGTGGGAATTGGAGTAGTACAAATG  
GGACAATGACACTATAACTCTCCAATGCAGAATAAAACAAATTGTAAGAATGTGGCAGAGAGTAGGACAAGC

AATGTACGCCCCCTCCCATCCGAGGAAACATAACGTGTGGATCAAACATTACAGGATTACTATTAAACAAGAGAT  
GGAGATGGAGGTGCACATAGTCCCAATGAAACATTTCAGGCCTGGAGGAGGAAATATGAAGGACAATTGGAGAA  
GTGAATTATACAAGTATAAGGTAGTACAAATTAAACCATTAGGTGTAGCACCCACCCAGGCAAAAAGAAGAGT  
GGTGGAGAGAGAAAAAAGAGCAGTTGGACTGGGAGCTGTCTTCCTTGGGTTCTTAGGAGCAGCAGGAAGCACT  
ATGGGCGCGGCGTCACTGACGCTGACGGTACAGGCCAGACAATTATTGTCTGGTATAGTGCAGCAGCAGAGCA  
ATCTGCTGCGGGCCATAGAGGCTCAACAACATCTGTTGAAACTCACGGTCTGGGGCATT

>MK086125..1

TTCTATTGCAATACATCAGGCCTATTCAATAGCACTTGGCACAATAGCACTTGGGATAGTAATGAAACTGCCA  
GTGCAACAAATGACACTATAACTCTCCGATGCAGAATAAAGCAATTTGTAAATATGTGGCAGAAAGTAGGACG  
AGCAATGTATGCCCCCTCCCATTCAGGAGTAATAAGATGTGAGTCAAACATTACAGGATTACTATTAACAAGA  
GATGGAGGAAATAATAATAATAGTGTAAATGAGACATTTCAGGCCGGGAGGAGGAGATATGAGGGACAATTGGA  
GAAGTGAATTATATAAGTATAAAGTAGTACAAATTGAGCCACTAGGTGTAGCACCCACCCATGCAAGAAGAAG  
AGTGGTACAGAGGGAAAAAAGAGCAGTTGGACTGGGAGCTGTCTTCCTTGGGTTCTTAGGAGCAGCAGGAAGC  
ACTATGGGCGCGGCGTCAATAACGCTGACGGTACAGGCCAGACAATTATTGTCTGGTATAGTGCAGCAGCAGA  
GTAATTTGCTGCGGGCTATAGAGGCTCAACAACATCTGTTGAAACTCACGGTCTGGGGCATT

>HQ912706..2

TTCTATTGCAATACAACAGAACTATTTAATAGCACTTGGAACGTAACCTGCCAGCTCAAACCTACACAGAGTCAA  
ACTCAAATGACAGTATAACTCTCCCATGCAGAATAAAACAAATTGTGAATTTATGGCAGAAAGTAGGACAAGC  
AATGTATGCCCCCTCCCATCCAAGGAGAAATAAGGTGTGAATCAAACATTACAGGATTACTATTAAACAAGAGAT  
GGAGGGAATAATAGTACAAATGAGACATTTCAGGCCTGGAGGAGGAGATATGAGGGACAATTGGAGAAGTGAAT  
TATATAAGTATAAGGTAGTACAAATTGAACCACTAGGTGTGGCACCCACCCAGGCAAAAAGAAGAGTGGTGGA  
GAGAGAAAAAAGAGCAGTTGGAATAGGAGCTGTCTTCCTTGGGTTCTTAGGAGCAGCAGGAAGCACTATGGGC  
GCGGCGTCACTAACGCTGACGGTACAGGCCAGACAATTATTGTCTGGTATAGTGCACAGCAGAGCAATCTGC  
TGAGGGCTATAGAGGCTCAACAACATCTGTTGAAACTCACGGTCTGGGGCATT

>AM279349..1

TTCTATTGCAATACATCAGGCCTGTTTAATAACACTTTGAATAATAACACTTGGACTTGGGATAATAGCACAA  
AGGATGACAATATAACTCTCCGATGCAGGATAAAGCAAATTTGTAAATATGTGGCAGAGAGTAGGACAAGCAAT  
GTATGCCCCCTCCCATCCAAGGAGTGATAAGGTGTGAATCAAACATTACAGGATTACTATTAAACAAGAGATGGA  
GGGAATAATAATAGCACAAACAAATGAGACCTTCAGGCCTGGAGGAGGAGATATGAGGGACAATTGGAGAAGTG  
AATTATATAAATATAAGGTAGTAAAAATTGAACCACTAGGTGTAGCGCCTACCCATGCAAAAAGAAGAGTGGT  
GGAGAGAGAAAAAAGAGCAGTTGGACTGGGAGCTGTCTTCCTTGGGTTCTTAGGAGCAGCAGGAAGCACTATG  
GGCGCGGCGTCAATAACGCTGACGGTACAGGCCAGACAATTATTGTCCGGTATAGTGCACAGCAGAGCAATC  
TGCTGAAGGCTATAGAGGCTCAACAACATCTGTTGAGACTCACGGTCTGGGGCATT

>AM279361..3

TTCTATTGCAATACATCAGCACTGTTCAATAGCACTTATGACAATAGCACTTGGAAATGACAGTACAAATACCA  
GCTCAGAGACAAATGACACTATAACTCTCCAATGCAAAATAAAGCAAATTTGTAAGAATGTGGCAGAGAGTAGG  
ACAAGCAATGTATGCCCCCTCCCATCCCAGGAATAATAAGGTGTGAATCAAACATTACAGGACTAATATTAAACA  
AGAGATGGAGGGAATAATAATAGTGAATCAGACTTTCAGGCCTGGAGGAGGAGATATGAGGGACAATTGGA  
GAAGTGAATTATATAAGTATAAAGTAGTAAAAATTGAACCACTAGGTATAGCACCCACCCATGCAAAAAGAAG  
AGTGGTGCAGAGAGAAAAAAGAGCAGTTGGAATAGGAGCTGTCTTCCTTGGGTTCTTAGGAGCAGCGGAAGC  
ACTATGGGCGCGGCGTCAATAACGCTGACGGTACAGGCCAGACAATTATTGTCCGGTATAGTGCACAGCAGAGA  
ACAATTTGCTGAAGGCTATAGAGGCTCAACAACAGTTGTTGAAACTCACAGTCTGGGGCATT

>AM279360..1

TTCTATTGCAATACAACAAAACCTGTTTAATAGCACGTGGAATAGCAGTACTGGGAATAACAATGTCTAGCTCAA  
ATGACACTATAACCCCTCCAATGCAAAATAAAGCAAATTTGTAATATGTGGCAAAAAGTAGGACAAGTAATGTA  
TGCCCCCTCCCATCCCAGGAATAATAAGGTGTGAATCAAATATTACAGGACTATTATTAAACAAGAGATGGAGGA  
AATAATAATGAAACAGAGAATGGGACTGAGACCTTCAGGCCTGGAGGAGGAGATATGAGGGACAATTGGAGAA  
GTGAATTGTATAAGTATAAAGTAGTAAAAATTGAACCACTAGGTGTAGCACCCACCCATGCAAAAAGAAGAGT  
GGTGGAGAGGAGAGAAAAAAGAGCAGTTGGACTGGGAGCTGTCTTCCTTGGGTTCTTAGGAGCAGCAGGAAGC  
ACTATGGGCGCGGCGTCAATAACGCTGACGGTACAGGCCAGACAATTATTGTCCGGTATAGTGCACAGCAGAGA  
GCAATTTGCTGAAGGCTATAGAGGCTCAACAACATCTGTTGAAACTCACGGTCTGGGGCATT

>AM279358..2

TTCTACTGCAATACATCAGCACTGTTTAATAGCACTTGGAAATAACACTTTGGATACTAACAATAGCACTCAGG  
ATAATGACACTATAACTCTCCAATGCAGAATAAAGCAAATTTATAAGGATGTGGCAGACAGTAGGACAAGCAAT  
GTATGCCCCCTCCCATCCAAGGAAAAATAAGGTGTGAATCAAACATTACAGGACTACTGTTAACAAGAGATGGA  
GGGAACAGTGTATGGTGCAATGAGACCTTCAGGCCTGGAGGAGGAGATATGAGGGACAATTGGAGAAGTGAAT  
TATATAAGTATAAAGTAGTAAAAATTGAACCACTAGGTGTAGCACCCACCCGAGCAAAAAGAAGAGTGGTGGA  
GAGAGAAAAAAGAGCAGTAGTTGGACTGGGAGCTGTCTTCCTTGGGTTCTTAGGAGCAGCAGGAAGCACTATG  
GGCGCGGCGTCACTAACGCTGACGGTACAGGCCAGACAATTATTGTCCGGTATAGTGCACAGCAGAGCAATC  
TGCTGAGGGCTATAGAGGCTCAACAACATATGTTGAAACTCACAGTCTGGGGCATT

>AJ286133..1

TTCTATTGTAATACATCAGAACTATTTTAATAGCATTTTGGAAATATTAATAGCACTTGGAATAACAGTGACACTG  
CCAGCTCGAAGCCAAATGACACTATAACTCTACAATGCAGAATAAGGCAAATTGTAAGAATGTGGCAGAAAAGT  
AGGACAAGCAATATATGCCCCCTCCTATCCCAGGAGTAATAAGGTGTGAATCAAACATTACAGGACTACTATTA  
ACAAGAGATGGAGGGGAAGATAATAATGCAAGTGAGACATTCAGGCCTGGAGGAGGAGATATGAGGGACAATT  
GGAGAAGTGAATTATATAAGTATAAGGTAGTACAAATTGAACCACTAGGCGTGGCACCCACCTGGGCAAAAAG  
AAGAGTGGTGGAGAGAGGAAAAAGAGCAGTTGGACTGGGAGCTGTCTTCCTTGGGTTTTTTAGGAGCAGCAGGA  
AGCACTATGGGCCGGTCAATAACGCTGACGGTACAGGCCAGACAATTATTGTCCGTATAGTGCAACAGCAGAGA  
GCAATTTGCTGAGGGCTATAGAGGCTCAACAACATCTGTTGAAACTCACGGTCTGGGGCATT

>AF377955..1

TTCTATTGTAATACATCAGCACTGTTTAAATAGTACTTGTTTGTAGCAATAGTACTGGGGATAACAATAGTTCAA  
CAGGGAATGAAACTATAACTCTCCAATGCAGAATAAAGCAAATTGTAAATATGTGGCAGAGAGTAGGACAAGC  
AATGTATGCCCCCTCCCATCCAAGGAGTAATAAGGTGTGAATCAAACATTACAGGATTACTATTGACAAGAGAT  
GGAGGGGAATAATAATAGCACAAATGAGACCTTCAGACCTGGAGGAGGAGATATGAGGGACAATTGGAGAAGTG  
AATTATATAAGTATAAAGTAGTAAAACCTTGAGCCACTGGGTGTAGCACCCACCCGTGCAAAAAGAAGAGTGGT  
GGAGAGAGAAAAAGAGCAGTTGGACTGGGAGCTGTCTTCTTTGGGTTCTTAGGAGCAGCAGGAAGCACTATG  
GGCGCGGCGTCAATAACGCTGACGGTACAGGCCAGACTATTATTGTCTGGTATAGTGCAACAGCAGAGCAATT  
TGCTGAAAGCTATAGAGGCTCAACAGCATCTGTTGAAACTCACGGTCTGGGGCATT

>AM279352..1

TTCTATTGCAATACATCAGGACTCTTTAATAGCACTTGGAATAGCAATGACACTGACAGATCAAACCACACAG  
GACCACATAACAATATAACTCTCCAATGCAGAATAAAGCAAATTGTAAATATGTGGCAGAGAGTAGGACAAGC  
AATGTATGCCCCCTCCCATCCAAGGCGAAATAAGGTGTGTATCAAACATTACAGGATTACTACTAACAAGAGAT  
GGAGGGATCAGTAATAAGACAGAGGAGATATTACAGGCCTGGAGGAGGAGATATGAGGGACAATTGGAGAAGTG  
AATTATATAAGTATAAGGTAGTACAAATTAAACCACTAGGTGTGGCACCAGACCCGGGCAAAAAGAAGAGTGGT  
GGGAAGAGAAAAAGAGCAGTTGGAATGGGAGCTCTTTTCTTGGGTTCTTAGGAGCAGCAGGAAGCACTATG  
GGCGCGGCGCAATGACGCTGACGGTACAGGCCAGACAATTATTGTCTGGTATAGTGCAACAGCAGAGCAATT  
TGCTGAGGGCTATAGAGGCTCAACAACATCTGTTGAAACTCACGGTCTGGGGCATT

>AY271690..3

TTCTATTGCAATACATCAGGACTATTTAATAGCACTTGAGTAGGAATAGCACTGATAACAGCACTTGGAATA  
TCAATGACACTGTCAGCTCAAATCACACAGGAAATATAACTCTCCAATGCAGAATAAGGCAAGTTGTAAGAAT  
GTGGCAGAGGGTAGGACAAGCAATGTATGCCCCCTCCCATCCCAGGAGAAATTAAGTGTAATCAAACATTACA  
GGAATACTATTGACAAGAGATGGAGGGACAAAAATCAGAAATGCAAGTGAGGAATTTAATACAACTGAGGTAT  
TCAGACCTGGAGGAGGAGACATGAGGGACAATTGGAGAAGTGAATTATATAAATATAAGGTAGTACAAATTGA  
ACCAATAGGTGTGGCACCCACCCGTGCAAAAAGAAGAGTGGTGCAGAAAGAAAAAGAGCAGTTGGACTGGGA  
GCTTCTTCTTGGGTTCTTAGGAGTTGCAGGAAGCACTATGGGCGCAGCGTCAATAACGCTGACGGTACAGG  
CCAGACAATTATTGTCTGGTATAGTGCAACAGCAGAGCAATCTGCTGAAGGCTATAGAGGCTCAACAACATAT  
ATTGAGACTCACGGTCTGGGGCATT

>HQ700002..2

TTTTATTGCAATACATCAAAGCTGTTTAAATAGCACCTGGCCTGGGAATATCACTGGGAATAACTTATACCAGCT  
CAAACCTCAAGTGACAATATAGCTCTCCAATGCAGAATAAGACAAATTGTAAATATGTGGCAGAAAGTAGGAAA  
AGCAATATATGCTCCTCCCATCCCAGGAGAAATAAAGTGTGAATCAAACATTACTGGACTACTACTAACAAGA  
GATGGAGGAAACAATAATGCAAGTAATGAGACCTTCAGGCCTGGAGGAGGAGATATGAGGGACAATTGGAGAA  
GTGAATTATATAAGTATAAAGTAGTGAGAATTAAACCACTAGGTATAGCACCCACCCACGCAAAAAGAAGAGT  
GGTGGAGAGAGAAAAAGAGCAGTTGGACTGGGAGCTGTCTTCTTGGGTTCTTAGGAGCAGCAGGAAGCACT  
ATGGGCGCGGCTCAATAACGCTGACGGTACAAGCCAGACAATTATTGTCTGGTATAGTGCAACAGCAGAGCA  
ATCTGCTGAAGGCTATAGAGGCTCAACAGCATCTGTTGAAGTTCACAGTCTGGGGCATT

>JF683758..1

TTCTATTGCAATACATCAGGACTGTTTAAATAGCATTTTGGGATAATAACAGCACTTGGAATGGGAGCAACTCAG  
GCAATATAACTCTCCCATGCAGAATAAGGCAAATTGTAAATATGTGGCAGAGAGTAGGAAAAGCAATGTATGC  
CCCTCCCATCCAAGGAGAAATAAGGTGTGACTCAAACATTACTGGACTACTATTAGCAAGAGATGGAGGGGAT  
GGTACTGAGACAAATGAGACTTTCAGGCCTATAGGAGGAGATATGAGAGACAATTGGAGAAGTGAATTATATA  
AGTATAAAGTAGTAAAAATTGAACCATTAGGCATAGCACCCACCCGGGCAAAAAGAAGAGTGGTGAGCAGAGA  
GAAAAGAGCAGTTGGAATGGCAGCTATCTTCTTGGGTTCTTAGGAGCAGCAGGAAGCACTATGGGCGCGGCG  
TCAATAACGCTGACGGTACAGGCCAGACAGTTATTGTCTGGTATAGTGCAACAGCAGAGCAATCTGCTGCAGG  
CTATAGAGGCTCAACAGCACATGTTGAGACTCACGGTCTGGGGCATT

>JF683786..1

TTCTATTGCAATACATCAAAGTTGTTTAAATAGCAGTTGGGGAAACAACACTGCCAGTAACCATACAGAGGCAA  
GTGGAGAAAAATGACACTATAACTATACAATGCAGAATAAAGCAAATTATAAATCTATGGCAGAGAGTAGGACA  
AGCAATGTATGCCCCCTCCTATCCAAGGAATAATAAGGTGTGAATCAAACATTACAGGATTACTATTAACAAGA  
GATGGAGGGGAATAATAGTAGTGGTGCAGATGAGACTTTCAGGCCTGGAGGAGGAGATATGAGAGACAATTGGA

GAAGTGAATTATATAAGTATAAAGTAGTAAAAATTGAACCACTAGGTGTTGCACCCACCCGTGCAAAAAGAAG  
AGTGGTGGAAAGACAAAAAGAGCAATTGGAATGGGAGCTGTCTTCCTTGGGTTCTTAGGAGCAGCAGGAAGC  
ACTATGGGCGCAGCGTCACTATCGCTGACGGTACAGGCCAGACAATTATTGTCCGGTATAGTGCAACAGCAGA  
GCAATTTGCTGAAGGCTATAGAGGCTCAACAACATATGTTGAGACTCACGGTCTGGGGCATT

>JF683792..2

TTCTACTGCAATACAACAAACCTGTTTAATAGCACTTGGAATAGCACTTGGTATAATAATGGGAGTAGCGCCA  
ACAATATAACTCACACTATAACTCTCCCATGCAGAATAAGGCAAATTGTAAATATGTGGCAGAGAGTAGGACA  
AGCAATGTATGCCAATCCCATCCCAGGAGTAATAAGGTGTGAATCAAACATTACAGGACTACTACTAACAAGA  
GATGGAGGGAATAATAACTCAAATGAAGAGACCTTCAGGCCTGGAGGAGGAGATATGAGGGACAATTGGAGAA  
GTGAATTATATAAGTATAAAGTAGTAAAAATTGAACCACTAGGTCTAGCACCCACCCATGCAAAAAGAAGAGT  
GGTGGAAAGAGAAAAAGAGCAGTTGTTGGACTGGGAGCTGTCTTCCTTGGGTTCTTAGGAGCAGCAGGAAGC  
ACTATGGGCGCAGCGTCAATAACGCTGACGGTACAGGCCAGACAATTATTGTCTGGTATAGTGCAACAGCAGA  
GCAATTTGCTGAAGGCTATAGAGGCTCAACAACAGCTGTTGAGACTCACAGTCTGGGGCATT

>JF683795..2

TTCTATTGCAATACATCAGGACTATTTAATAGCACTTGGGATAATAGCACTTGGAAATACCACTGCAAATTACA  
CAGAGTCAAGTGACAATATAACTCTCCAATGCAGAATAAAGCAAATTGTAAATATGTGGCAGAGAGCAGGACA  
AGCAATATATGCCCCCTCCCATCCCAGGAGTAATAAGGTGTGAATCAAACATTACAGGACTACTATTAACAAGA  
GATGGAGGAAATGACAGTAGTACAGAGGAGACCTTCAGGCCTGGAGGAGGAGATATGAGGGACAATTGGAGAA  
GTGAACTATATAAGTATAAAGTGGTAAAAATTGAACCACTAGGTGTAGCACCCACCCGTGCAAAAAGAAGAGT  
GGTGGAGAGAGGAAAAAGAGCAGTAGTTGGACTGGGAGCTGTCTTCCTTGGGTTCTTAGGAGCAGCAGGAAGC  
ACTATGGGCGCGGCGTCAATAACGCTGACGGTACAGGCCAGACAATTATTGTCCGGTATAGTGCAACAGCAGA  
GCAATTTGCTGAAGGCTATAGAGGCTCAACAACAGCTGTTGAAACTCACAGTCTGGGGCATT

>JF683799..1

TTTTATTGCGATACATCAAGACTGTTTAATAGCACTTGGGATACTAGCACTGGGTATGACAATAGCAGCAGAG  
ACAATGACACTATAACTCTCAAATGCAAAATAAGGCAAGTTGTAAGGATGTGGCAAAGAGTAGCACAAGCAAT  
GTATGCCCCCTCCCATCCAAGGAGAAATAAGGTGTAACCAACAATTACAGGACTACTATTAACAAGAGATGGA  
GGGAATAGTAGTGGTGCAATGAGACCTTCAGGCCTGGAGGAGGAGATATGAGGGACAATTGGAGAAGTGAAT  
TATATAAGTATAAAGTAGTAAAGATTGAACCACTAGGTGTAGCACCCACCCATGCAAAAAGAAGAGTGGTGGA  
GAGAGAAAAAGAGCAGTTGGAATAGGAGCTGTCTTCCTTGGGTTCTTAGGAGCAGCAGGAAGCACTATGGGC  
GCGGCGTCAATAACGCTGACGGTACAGACCAGACAATTATTGTCTGGTATAGTGACAGCAGCAGAGCAATTTGC  
TGAAGGCTATAGAGGCTCAACAACAGCTGTTGAGACTCACGGTCTGGGGCATT

>KT124792..1

TTCTATTGCAATACATCAGGACTGTTTAATAGCACTTGGATCAATGGGAGCTGGGTCAATAATGATACCTGGG  
CCAATAATGATACCTCAAAAAATATAACTCTCCAATGCAGAATAAAGCAAATTATAAATATGTGGCAGAGAGT  
AGGGCAAGCAATGTATGCCCCCTCCCATCAAAGGAGAAATAAGGTGTAGATCAAACATTACTGGACTACTATTA  
ACAAGAGATGGAGGGAATAATAGTAGTGGAAATGAGACATTCAGGCCGGCAGGAGGAGATATGAGAGACAATT  
GGAGAAGTGAATTATATAAGTATAAGGTAGTAAAAATTGAACCACTAGGTGTAGCACCCACACATGCAAGGAG  
ACAAGTAGTGGGGAGAGAAAAAGAGCAGTTGGACTGGGAGCTGTCTTCCTTGGGTTCTTAGGAGCAGCAGGA  
AGCACTATGGGCGCGGCGTCAATAACGCTGACGGTACAGGCCAGACAATTATTGTCTGGTATAGTGACAGCAGC  
AGAGCAATCTGCTGAAGGCTATAGAGGCTCAACAACATATGTTGAGACTCACAGTCTGGGGCATT

>L22939..3

TTCTATTGCAATACATCAAGTCTGTTTAATAGCACTTGGAAATAGCAGCTCAATTCACACAAATTACAGCTCAA  
ATGACACAGACAATATAACTCTCCAATGCAGAATAAAGCAAATTGTAAATATGTGGCAGAAAGTAGGAAAAGC  
AATATATGCCCCCTCCCATCTCAGGAGAAATAAGGTGTGAATCAAACATTACAGGACTAATATTAACAAGAGAT  
GGAGGGAGTAATAATAGTACAAATGAGATCTTCAGGCCTGGAGGAGGAGATATGAGGGATAATTGGAGAAGTG  
AATTATATAAGTATAAAGTAGTAAAAATTGAACCACTAGGTGTAGCACCCACCCGTGCAAAAAGAAGAGTGGT  
GGAGAGAGAAAAAGAGCAGTTGGACTGGGAGCTTTCTTCCTTGGGTTCTTAGGAGCTGCAGGAAGCACTATG  
GCGCGGCGTCAATAACGCTGACGGTACAGGCCAGACAATTATTGTCCGGTATAGTGCAACAGCAGAGCAATT  
TGCTGAGGGCTATAGAGGCTCAACAACATCTGTTGAAACTCACGGTCTGGGGCATT

>AY151002..1

TTCTATTGCAATACAGCAGGCCCTGTTTAATAGCACTTGGGATGATAACAATAGCACAGGGTCAAACACAAAGT  
CAAATGACATTATAACTCTCCAATGTAGAATAAAGCAACTTATAAATATGTGGCAGAGAGTAGGACAGGCAAT  
GTATGCCCCCTCCCATCCGAGGAATAATAAGGTGTAACCAACAATTACTGGATTACTATTAACAAGAGATGGA  
GGGAATAATAGTACAAATGAGACCTTCAGGCCTGGAGGAGGAGATATGAGGGACAATTGGAGGAGTGAATTAT  
ATAAATATAAAGTAGTAAAAATTGAACCACTAGGTGTAGCACCCACCCCTGCAAAAAGAAGAGTGGTGGAGAG  
AGAAAAAGAGCAGCTGGACTGGGAGCTGTCTTCCTTGGGTTCTTAGGAGCAGCAGGAAGCACTATGGGCGCG  
GCGTCAATAACGCTGACGGTACAGGCCAGACAGTTATTGTCCGGTATAGTGCAACAGCAAAGCAATTTGCTGA  
AGGCTATAGAGGCTCAACAACATATGTTGAGACTCACGGTCTGGGGCATT

>MK177825..1

TTCTATTGCAATACATCACAACCTGTTTAAATAGCACCTGGAATGAACATAACATTACCAACTCAACCTTTACAG  
AGGACAATACAACCTCTCACTCTCACATGTAGAATAAAGCAAATTTATAAATATGTGGCAGAGAGTAGGACAAGC  
AATGTATGCCCCCTCCCATCCAAGGAGAAATAAAATGTAATTCAAACATTACTGGATTACTGTTAACACGGGAT  
GGAGGGAAGAACACTGAGAGCAATGAGACCTTCAGGCCTGGAGGAGGGGATATGAGGAACAATTGGAGAAGTG  
AATTATATAAGTATAAGGTAGTAGAAATTAACCCTAGGTGTAGCACCCCTCACCTGCAAAAAGAAGAGTGGT  
GGAGAGAGAAAAAGAGCAGCACTGGGAGCTGTCTTCCTTGGGTTCTTAGGAGCAGCAGGAAGCACTATGGGC  
GCGGCGTCAATAACGCTGACGGTACAGGCCAGAAAGTTATTGTCTGGTATAGTGCACCAGCAAAGCAATTTGC  
TGAAGGCTATAGAGGCTCAACAACATATGTTGAGACTCACGGTCTGGGGCATT

>MK177826..2

TTCTATTGCAATACATCAAAACTGTTTAAATAGCACCTGGGAGAATGAAAATAACACTACCAACTCAAACCTCTG  
CAGAGAATATAACTCTCACTCTCCCATGTAGAATAAAGCAAAGTCATAAATATGTGGCAGAGAGTAGGACAAGC  
AATGTATGCCCCCTCCCATCCAAGGAATAATAAAATGTAATTCAAACATTACTGGATTACTGCTAACACGGGAT  
GGAGGGAATAACAATACAACGAATGAGACCTTCAGGCCTGGAGGAGGGGATATGAGGGACAATTGGAGAAGTG  
AATTATACAAGTATAAAGTAGTAAAAATTGAACCCTAGGTGTAGCACCCCTCCTATGCAAAAAGAAGAGTGGT  
GGAGAGAGAAAAAGAGCAGTTGGACTAGGAGCTGTCTTCCTTGGGTTCTTAGGAGCAGCAGGAAGCACTATG  
GGCGCGGCGTCAATAACGCTGACGGTACAGGCCAGACAATTATTGTCTGGTATAGTGCACAGCAGAGCAATC  
TGCTGAAGGCTATAGAGGCTCAACAACAAATGTTGAGACTCACGGTCTGGGGCATT

>KY989950..2

TTCTATTGTAATACATCAAAATTGTTTAAATAGCACTTGGAAATACCAGCCACACAGAGTCAGGTGACAATATAA  
CTCTCCCATGCCGAATAAAACAAATTTGTAAGGATGTGGCAGAATGTAGGACAAGCAATGTATGCCCCCTCCCAT  
CCCAGGAGAAATAAGGTGTGACTCAAACATTACTGGACTACTATTAACAAGAGATGGAGGGGAGGAAAAATAGG  
AATGGGACAAACGGGAATGGGACAAAGGAGGAGACCTTCAGGCCTGGAGGAGGAGATATGAGGGACAACCTGGA  
GAAGTGAATTATACAAGTATAAAGTAGTAAAAATTGAACCAGTAGGTGTAGCACCTACTCATGCAAAAAGAAG  
AGTGGTGGAGAGAGAAAAAGAGCAGTACTTGGAGCTGTCTTCCTTGGGTTCTTGGGAGCAGCAGGAAGCACT  
ATGGGCGGCGTCAATAACGCTGACGGTACAGGCCAGACAATTGTTGTCTGGTATAGTGCACAGCAAAGCA  
ATTTGCTGAAGGCTATAGAGGCTCAGCAACAACCTGTTGAGGCTCACGGTCTGGGGCATT

>MF157740..1

TTCTATTGCAGTACATCAGAACTGTTTAAATAGCACTTGGAAACGGGTAAATAACACTACTACTTGGAAATAGCA  
CTGCCAACTCAACAAATGACCCATAACTCTCCGGTGTAGAATAAAGCAAATTTGTAAGGATGTGGCAGAGAGT  
AGAACAAGCAATGTATGCCCCCTCCCATCCGAGGAGAAATAAGGTGTGAGTCAAACATTACAGGATTACTATTA  
ACAAGAGATGGAGGGCATGATGATGGGACAGATGAGACAGAGGAGACCTTCAGGCCTGGAGGAGGAGATATGA  
GGGACAATTGGAGAAGTGAATTATATAAGTATAAAGTAGTAAAAATTGAACCACTAGGTGTAGCACCCACCCA  
TGCAAAAAGAAGAGTGGTGGAGAGAGAAAAAGAGCAGTTGGACTGGGAGCTGTCTTCCTTGGGTTCTTAGGA  
GCAGCAGGAAGCACTATGGGCGGCGTCAATAACGCTGACGGTACAGGCCAGACAATTATTGTCTGGTATAG  
TGCAACAGCAGAGCAATTTGCTGAGAGCTATAGAGGCTCAACAACATCTGTTGAGACTCACGGTCTGGGGCAT  
T

>MH742763..1

TTCTATTGCAATACATCAGAATTATTTAAACAATAACACAGAATTAAACAATGGCACTGCCGGCGTAAATGACA  
CTATAAACTCCCATGCAGGGTAAAGCAAATTTGTAAGAATGTGGCAGAAAGTAGGGCAAGCAATGTATGCCCC  
TCCCATCAAAGGAGTAATAAGGTGTAACCTCAAACATTACAGGACTACTGTTAAACAAGGGATGGAGGGAATACT  
AGCACAGAGGAGGAGATATTTAGGCCCTGGAGGAGGAGATATGAGGGACAACCTGGAGAAGTGAATTATATAAGT  
ATAAGGTAGTACAAATTGAACCATTAGGTGTGGCACCCACCCATGCAAAAAGAAGAGTGGTGGAGAGAGAAAA  
AAGAGCACTTGGAAATAGGAGCTGTCTTCATTGGGTTCTTAGGAGCAGCAGGAAGCACTATGGGCGGCGCGTCA  
ATAACGCTGACGGTACAGGCCAGACAATTATTGTCCGGTATAGTGCAACAGCAGAGCAATCTGCTGAGGGCTA  
TAGAGGCTCAACAACATCTGTTGAAACTCACGGTCTGGGGCATT

>MH742765..2

TTCTATTGCAATACATCAGCACTGTTTAAATAGCACTTGGAAATAACAGTACTGGCACTTGGACTGACACTAACA  
ATAGCAGTTTCAGAGTCAAATGGCACTATCACTCTCAAATGCAAAATAAAGCAAATTTGTAATATGTGGCAGAG  
AGTAGGGCAAGCAATGTATGCCCCCTCCCATCGAAGGAATAATAAGGTGTGAATCAAACATTACAGGACTACTA  
TTAACAAGAGATGGAGGGAATAATAATGCAATGAGACTTTCAGGCCTGGAGGAGGAGATATGAGGGATAATT  
GGAGAAGTGAATTATATAAATAAAGTAGTAAAAATTGAACCCTAGGTGTAGCACCCACCTATGCAAAAAG  
AAGAGTGGTGGAGAGAGAAAAAGAGCAGTTGGACTGGGAGCTGTTCTCTTTGGGTTTCTTAGGAGCAGCAGGA  
AGCACTATGGGCGGCGTCAATAACGCTGACGGTACAGGCCAGACAATTATTGTCCGGTATAGTGCAACAGC  
AGAGCAATTTGCTGAGAGCTATAGAGGCTCAACAACATCTGTTGAAACTCACGGTCTGGGGCATT

>MH742766..1

TTCTACTGCAATACGACAGACCTGTTTAAACAGCCAGTGGCCCACTAACAACCTCAGAGTCAAATGACACTATAA  
CTCTCCAATGCAGAATAAAGCAAATTTATAAATATGTGGCAGAGAGTAGGACAAGCAATGTATGCCCCCTCCCAT  
CCAAGGAAATATAAGTTGTAGATCAAACATTACAGGACTACTATTAACAAGAGATGGAGGGAATAATAATAGT  
AAGACAAATGAGACTTTTAGGCCTGGAGGAGGAGATATGAGGGACAATTGGAGAAGTGAATTATATAAGTATA  
AAGTAGTAAAAATTGAACCAATAGGTGTAGCACCCACCCATGCAAAAAGAAGAGTGGTGGAGAGAGAAAAAG

AGCAGCTGGACTGGGAGCTGTCTTCCTTGGGTTCTTAGGAGCAGCAGGAAGCACTATGGGCGCGGCGTCAATA  
ACGCTGACGGTACAGGCCAGACAATTATTGTCTGGTATAGTGCAACAGCAGAGCAATCTGCTGAGGGCTATAG  
AGGCTCAACAGCATCTGTTGAAACTCACGGTCTGGGGCATT

>MH742768..1

TTCTATTGCAATACAACAAAACCTGTTTAATAGCACTTGGTTTAACAATGGCACAAACGCCACAAACAACGAAG  
CAATGAATGACACTCTAACTCTCCAATGCAGAATAAAGCAAATTGTGAGAATGTGGCAGACAGTAGGACAAGC  
AATGTATGCCCCCTCCCATCTCAGGAGAGATAAGGTGTAATTCAAACATTACTGGGTGCTATTAACAAGGGAT  
GGAGGGGAGGATAATAGTACAAAAAATGAGACAAAGGAGACTTTTCAGGCCTGGAGGAGGAGATATGAGGGACA  
ATTGGAGAAGTGAATTATATAAAATATAAAGTAGTAAAAATTGAACCTCTAGGTGTAGCACCCACCCGTGCAAA  
GAGAAGAGTGGTGGAGAGAGAAAAAGAGCAGTTGGACTGGGAGCTGTCTTCCTTGGGTTCTTAGGAGCAGCA  
GGAAGCACTATGGGCGCGGCGTCAATAACGCTGACGGTACAGGCCAGACAATTATTGTCTGGTATAGTGCAAC  
AGCAGAGCAATCTGCTGAAGGCTATAGAGGCTCAACAACAGCTGTTGAGACTAACAGTCTGGGGCATT

>MH742770..1

TTCTATTGTGATACATCAGGTCTGTTTAATAGCGTTTGGGATAGGAATGGCACTACTTGGGAATAGCAACACCA  
CAAGTGACACTGATGATATAATTCTCTCATGCAGAATAAGACAAATTATAAATATGTGGCAGAGAGTAGGACA  
AGCAATGTATGCCCCCTCCCATTAAGGAGTGATAAACTGTGAATCAAACATTACAGGGCTACTGCTAACAAGA  
GATGGAGGGACTAATAGGGGTAGTACAAATGAGACTTTCAGGCCTGTAGGAGGAGATATGAGAGACAATTGGA  
GAAGTGAATTATATAAGTATAAAGTAGTAAAAATTGAGCCACTAGGAGTAGCACCCACCAGGGCAAAAAGAAG  
AGTGGTGGAGAGAGAAAAAGAGCAGTTGGACTGGGAGCTGTCTTCTTTGGGTTCTTAGGAGCAGCAGGAAGC  
ACTATGGGCGCGGCGTCAATAACGCTGACGGTACAAGCCAGACAATTATTGTCTGGTATAGTGCAACAGCAAA  
GCAATTTGCTGAAGGCTATAGAGGCTCAACAACATCTGTTGAGACTCACGGTCTGGGGCATT

>MH742762..1

TTCTATTGCAATACATCAGACCTGTTTAATGCATCAAGCACTTGGGGTAACAATATAACTCTCCCATGCAGAA  
TAAAGCAAATTGTAAATATGTGGCAGAAAGTAGGACGAGCAATGTATGCCCCCTCCCATTCAGGAGAAATAAG  
GTGTGAATCAAACATAACAGGACTACTATTAACAAGAGATGGAGGGAATAATAATAACAAATGAGACCTTC  
AGACCTGGAGGAGGAGATATGAGGGACAATTGGAGAAGTGAATTATATAAGTATAAAGTAGTAAAAATTGAAC  
CACTAGGTGTAGCACCCACCCATGCAAAAAGAAGAGTGGTGCAGAGAGAAAAAGAGCAGTTGGACTGGGAGC  
TGTCTTCCTTGGGTTCTTAGGAGCAGCAGGAAGCACTATGGGCGCGGCGTCAATAACGCTGACGGTACAGGCC  
AGACAATTGCTATCTGGTATAGTGCAACAGCAGAGCAATTTGCTGAAGGCTATAGAGGCTCAACAACATCTGT  
TGAGACTCACGGTCTGGGGCATT

>MH000309..1

TTCTATTGCAATACGACAGACCTGTTTAACAGCAAGTGGTTCAGTAACAACGGCATTATAACTCTCCAATGCA  
GAATAAAGCAATTCATAAATATGTGGCAGAGAGTAGGACAAGCAATGTATGCCCCCTCCCATCTCAGGAATTAT  
AAATTGTACATCAAACATTACAGGACTATTATTAACCAGAGATGGAGGAACTGAGACTTTTAGGCCTGGAGGA  
GGAGATATGAGGGACAATTGGAGAAGTGAATTATATAAGTATAAAGTAGTAAAAATTGAACCAATAGGAATAG  
CACCCACCCATGCAAAAAGAAGAGTGGTGGAGAGAGAAAAAGAGCAGTTGGACTGGGAGCTGTCTTCCTTGG  
GTTCTTAGGAGCAGCAGGAAGCACTATGGGCGCGGCGTCAATAACGCTGACGGTACAGGCCAGACAATTATTG  
TCTGGTATAGTGCAACAGCAGAGCAATCTGCTGAGGGCTATAGAGGCTCAACAACAGCTGTTGAAACTCACAG  
TCTGGGGCATT

>MH742757..1

TTCTACTGCAATACAACAAACTTGTTTAACATCAGCCTGGGGAACAGTACCACTAACAGCTCAGAGTCAAATG  
ACAATATAACTCTCCAATGCAGAATAAAGCAAATTATAAGGATGTGGCAGAGAGTAGGACAAGCAATGTATGC  
CCCTCCCATCCAAGGAGATATAAGTTGTAGATCAAACATTACAGGACTACTATTAACAAGAGATGGAGGGACA  
AGAGATGGAGGGAATGTGACTAATAACTGAGATTTTAGGCCTGAAGGAGGAAATATGAAGGACAATTGGA  
GAAGTGAATTATATAAGTATAAAGTAGTAAGAATTGAACCAATAGGTGTAGCACCCACCCGTGCAAAAAGAAG  
AACGGTGGGGAGAGAGAAAAAGAGCAGTTGGACTGGGAGCTGTCTTCCTTGGGTTCTTAGGAGCAGCAGGAAGC  
ACTATGGGCGCGGCGTCAATAACGCTGACGGTACAGGCCAGACAATTATTGTCTGGTATAGTGCAACAGCAGA  
GCAATCTGCTGAGGGCTATTGAGGCTCAACAGCATCTGTTGAAACTCACAGTCTGGGGCATT

>AY231152..2

TTCTATTGCAATACATCAATACTGTTTAATAGCACTTGGGAATACCAATGACACTTGGGAATATCAATAACACTG  
ACACAGAGTCAAATGACACTATAACTATCCAATGCAGAATAAGGCAAGTTGTAAAGATGTGGCAGAAAGTAGG  
ACAAGCAATGTATGCCCCCTCCCATCGAAGGAGTAATAAGTTGTAAATCAAACATTACAGGACTACTATTAACA  
AGAGATGGAGGGAATCATAATAATACAAATGAGACTTTCAGGCCTGGAGGAGGAGATATGAGGGACAATTGGA  
GAAGTGAATTATATAAGTATAAAGTAGTAAAAATTGAGCCACTAGGTGTAGCACCCACCCGTGCAAAAAGAAG  
AGTGGTGGAGAGAGAAAAAGAGCAGTATTTGGACTGGGAGCTGTTTTCTTGGGTTCTTAGGAGCAGCAGGA  
AGCACTATGGGCGCGGCGTCAATAACGCTGACGGTACAGGCCAGACAATTATTGTCCGGTATAGTGCAACAGC  
GGAGCAATTTGCTGAGGGCTATAGAGGCTCAACAACATCTGTTGAAACTCACAGTCTGGGGCATT

>AY231153..1

TTCTATTGCAATACATCAAAACCTGTTTGATAGCACTTGGTATAGCAATGATAGCACTTGGTATAGCAATGACA  
CCAGCTTAAACCACACAGAGTCAAATGGCACTATAACTCTCCAATGCAGAATAAAGCAAATTATAAATATGTG

GCAAAAGGTAGGGCGAGCAATGTATGCCCCCTCCCATCCAAGGAGTAATAAGGTGTGATTCAAACATTACAGGA  
CTACTATTTAACAAGAGATGGAGGGGATAATAATACTAAAAATGAGACCTTCAGGCCTGGAGGAGGAGATATGA  
GGGACAAATTGGAGAAGTGAATTATATAAGTATAAAGTAGTAAAAATTGAACCACTAGGTGTAGCACCCACCCA  
TGCAAAAAGAAGAGTGGTGGAGAGAGAAAAAAGAGCAGTTGGACTGGGAGCTGCCTTCCTTGGGTTCTTAGGA  
GCAGCAGGAAGCACTATGGGCGCGGCGTCAATAACGCTGACGGTACAAGCCAGACAATTATTGTCCGGTATAG  
TGCAACAGCAGAGCAATCTGCTGAAAGCTATAGAGGCTCAACAACAGATGTTGAGACTCACGGTCTGGGGCAT  
T

>MH742764..1

TTCTATTGCAATACATCAATACTGTTTAATAGCACTTGGAATAATAGCACTTGGGATAATAACACTAGAGATA  
ACAATAACAATGCCACAAATGATACTATGACTCTCCAATGCAGAATAAAGCAAATTGTAAGAATGTGGCAGAC  
AGTAGGACAAGCAATGTATGCCCCCTCCCATCCAAGGAACAATAAAGTGTGAGTCAAACATTACAGGACTACTA  
TTAACAAGAGATGGAGGAAAAATAATAATACAAATGAGACTTTTCAGGCCTGGAGGAGGAGATATGAGGGACA  
ATTGGAGAAGTGAATTATATAAAGTATAAAGTAGTAAAACTTAAACCACTAGGTGTAGCACCCACCCCTGCAAA  
AAGAAGAGTGGTGTATGAGAGAAAAAAGAGCAGCACTGGGAGCTATTTTCCTTGGGTTCTTAGGAGCAGCAGGA  
AGCACTATGGGCGCGGCGTCAATAACGCTGACGGTACAGGCCAGACAATTATTGTCCGGTATAGTGCAACAGC  
AGAGCAATTTGCTGAGAGCTATAGAGGCTCAACAACATATGTTGAAACTCACGGTCTGGGGCATT

>AF321079..2

TTCTATTGCAATACAGCATCACTGTTTAATAGCACTTGGTATAGCAATGGCAGCTCAAACCTACGCAGGGTCAA  
ATGGGAATATAACTCTCCAATGCAGAATAAAGCAAATTGTAATATGTGGCAGAGAGTAGGACAAGCAATGTA  
TGCCCCCTCCCATCCAAGGAGTAATAAGGTGTGTATCAAACTTACTGGACTACTATTAACAAGAGATGGAGGG  
AATAATAATAGTAGTACAAATGAGACCTTTAGGCCTGGAGGAGGAGACATGAGAGACAATTGGAGAAGTGAAT  
TATATAAGTATAAAGTAGTAAAAATTGAACCACTAGGTGTAGCACCCCTCCCGTGCAAAAAGAAGAGTGGTGGGA  
GAGAGAAAAAAGAGCAATCGGACTGGGAGCTGTTTTCTTGGGTTCTTAGGAGCAGCAGGAAGCACTATGGGC  
GCGGCGTCAATAACGCTGACGGTACAGGCCAGACAATTATTGTCCGGTATAGTGCAACAGCAGAGCAATCTGC  
TGAAGGCTATAGAGGCTCAACAACATATGTTGAAACTCACGGTCTGGGGCATT

>AB286856..2

TTCTATTGCTATACATCAGACCTGTTTAATAGCACTTGGCCCAATAACACTGCAGAGTCAAATAGCACAGGGT  
CAATAAGGTCAAATGAGACTATAACTCTCAAATGCAGAATAAAGCAAATTATAAATATGTGGCAGAGAGTAGG  
ACAAGCAATATATGCCCCCTCCCATCAGAGGAGAAATAAGGTGTGATTCAAACATTACAGGACTAATATTAACA  
AGAGATGGAGGGAATAATAGTGAGAGTGCAAATGGAACCTGAAATTTTCAGGCCTGGAGGAGGAGATATGAGGG  
ACAATTGGAGAAGTGAATTATATAAGTATAAAGTAGTAAAAATTGAACCACTAGGATTAGCACCCACTAGAGC  
AAAAAGAAGAGTGGTGCAGAGAGAAAGAAGAGCAGTTGGCCTGGGAGCTTTATTCTATTGGGTTCTTAGGAGCA  
GCAGGAAGCACTATGGGCGCGGCGTCATTAAACGCTGACGGTACAGGCCAGACAATTACTGTCTGGTATAGTGC  
AACAGCAAAGCAATTTGCTGAGGGCTATAGAGGCTCAACAACATCTGTTGAAACTCACAGTCTGGGGCATT

>AB286857..1

TTCTATTGCAATACATCAGGACTGTTTAATAGCACTTGGGAGAATAATACTAGCACAGCCAGCTCAACAAATG  
TTAGCTCAATAAATGACACTGACATTATAGAACTCAAATGCAGAATAAAGCAAATTGTAATATGTGGCAGAA  
AGTAGGACAAGCAATGTATGCTCCTCCCATTCAGGAGTAATAAGGTGTGATTGGAACATTACAGGACTACTA  
TTAACAAGAGATGGAGGGAAGAATAGTAGTGCTACAAATGAGACCTTCAGGCCTGGAGGGGGAGATATGAGAG  
ACAATTGGAGAAGTGAATTATATAAATATAAAGTAGTAAAAATTGAACCACTGGGTGTAGCACCCACCCATGC  
AAAAAGAAGAGTGGTGGAGAGAGAAAAAAGAGCAGTTGGACTAGGAGCTGTACTCCTTGGGTTCTTAGGAGCA  
GCAGGAAGCACTATGGGCGCGGCGTCAATAACGCTGACGGTACAGGCCAGACAATTATTGTCTGGTATAGTGC  
AACAGCAGAGCAATCTGCTGAGAGCTATAGAGGCTCAACAACAGCTGTTGAGACTCACGGTCTGGGGCATT

>AB286859..2

TTCTATTGTAATACAACAACACTGTTTAATAGCACTTGGGATGACAATAACACTGCCAGCTCAAACCTACACAG  
GGTCAAATGGCACTATAACTCTCCAATGCAGAATAAAGCAAATTATAAATATGTGGCAGAAAGTAGGACAAGC  
AATGTATGCCCCCTCCCATCCAAGGAGTAATAAGGTGTAACTCAAGCATTACTGGACTACTATTAACAAGAGAT  
GGAGGAAGTAATAGTAGTACAAATGAAACTTTTCAGGCCTGGAGGAGGAGACATGAGGGACAATTGGAGAAGTG  
AATTATATAAGTATAAAGTAGTAAAAATTGAACCACTGGGTGTAGCACCCACCCATGCAAAAAGAAGAGTGGT  
GGAGAGAGAAAAAAGAGCAGTTGGACTGGGAGCTGTCTTCTTGGGTTCTTAGGAGCAGCAGGAAGCACTATG  
GGCGCAGCGTCACTAACGCTGACGGTACAGGCCAGACAATTATTGTCTGGTATAGTGCAACAGCAAAGCAATT  
TGCTGAAGGCTATAGAGGCTCAACAACATCTGTTGAAACTCACAGTCTGGGGCATT

>AB286862..2

TTCTATTGCAATACAACAATTTGTTTAATAGCACTTGGGAAAAGAAAAAGGGCACTTGGGAATGATACCACTG  
CCAACCCACCAAATGGCACTATAACTCTCCAATGCAGAATAAAGCAAATTGTAATATGTGGCAGAGAGTAGG  
ACAAGCAATATATGCCCCCTCCCATCCCAGGAATAATAAGTTGTAATTCAAGCATCACAGGATTACTATTAACA  
AGAGATGGGGGTGAGGGGAATGAAACTAGGAAAAATGAGACCTTCAGACCTGGAGGAGGAGATATGAGGGACA  
ATTGGAGAAGTGAATTATATAAAGTATAAAGTGGTAAAAATTGAACCACTAGGTGTGGCACCTACCTATGCAAA  
AAGAAGAGTGGTGGAGAGAGAAAAAAGAGCAGTTGGAATGGGAGCTGTCTTACTTGGGTTCTTAGGAGCAGCA

GGAAGCACTATGGGCGCAGCGTCAATAACGCTGACGGTACAGGCCAGACAATTATTGTCCGGTATAGTGCAAC  
AGCAGAGCAATCTGCTGAAAGCTATAGAGGCTCAACAACAACCTGTTGAGACTCACGGTCTGGGGCATT  
>AB286863..3

TTCTATTGCTATACATCAGAACTGTTTAATAGCACTTGGGAATAATAATACTGGCAGCCCAAACAGCACAAATG  
ACACTATAACTCTTCAATGCAAAAATAAAGCAAATTGTAAATATGTGGCAGAGGGTAGGGCAAGCGATGTATGC  
CCCTCCCATCCCAGGAGAGCTAAGGTGTGACTCAAACATTACTGGACTACTATTAACAAGAGATGGAGGGAAT  
ACTAATAATACAAATACAACCTTCAGGCCGGGAGGGGAGATATGAGGGACAATTGGAGAAGCGAAC  
TATACAAGTATAAAGTAGTACAAATTGAACCAATAGGAGTAGCACCCACCCCGGCAAAAAGAAGAGTGGTGGA  
GAGAGAAAAAAGAGCAGTTGGACTGGGAGCTGTCTTCCTTGGGTTCTTAGGAGCAGCAGGAAGCACTATGGGC  
GCAGCGTCAATAACGCTGACGGTACAGGCCAGACAATTATTGTCCGGTATAGTGCAACAGCAGAGCAATTTGC  
TGAGAGCTATAGAGGCTCAACAACATCTGTTGAAACTCACGGTCTGGGGCATT  
>AB231895..2

TTCTATTGCAATACATCAGGACTGTTTAATAGTACTTGGTATAGCGATACCACTGCAAACCAAACAGAGTCAA  
ATGACACCATAACTCTACAATGCAGAATAAAGCAAATTATAAATATGTGGCAGACAGTAGGACAGGCAATGTA  
TGCCCCCTCCCATCCAAGGAGTAATAAGGTGTGAATCAAAACATCCTGGATTACTATTAACAAGAGATGGAGGG  
AATAAGAATCATACAAATGAGACCTTCAGGCCTGGAGGAGGAGATATGAGAGACAATTGGAGAAGTGAATTAT  
ATAAGTATAAAGTAGTAAAGATTGAACCAATAGGTGTAGCACCCCTCTCCTGCAAAAAGAAGAGTGGTGGGAAG  
AGAAAAAAGAGCAGTCGGAAGTGGGAGCTGTCTTCCTTGGGTTCTTAGGAGCAGCAGGAAGCACTATGGGCGCG  
GCGTCAATGACGCTGACGGTACAAGCCAGACAATTATTGTCTGGTATAGTGCAACAGCAGAGCAATTTGCTGA  
AGGCTATAGAGGCTCAACAACATCTGTTGAAACTCACGGTCTGGGGCATT  
>AB231896..1

TTCTATTGCGATACATCAGGGCTGTTTAATAGCACTTGGGATAACATTACCAGTACAAATGGCACAAAGGTAA  
ATGAAACTGAAACTATAACTCTCCCATGCAGAATAAAACAAATTGTAAGAATGTGGCAGAGAGTAGGACAAGC  
AATGTATGCCCCCTCCTATCCAAGGAGAACTACGGTGTGAATCAAATATTACAGGACTACTATTAACAAGAGAT  
GGAGGGAATAATAATCGTACAAATGAGACCTTCAGGCCTATAGGAGGAGATATGAAGGACAATTGGAGAAGTG  
AATTATATAAATATAAAGTGGTAAAAATTGAACCACTAGGTATAGCACCCCTCCAGGGCAAAAAGGAGAGTGGT  
GGAGAGAGAAAAAAGAGCAGTTGGACTGGGAGCTGTCTTCCTTGGGTTCTTAGGAGCAGCAGGAAGCACTATG  
GGCGCGGCGTCATTAAACGCTGACGGTACAGGCCAGACAATTATTGTCTGGTATAGTGCAACAGCAAAGCAATT  
TGCTGAGGGCTATAGAGGCTCAACAACATCTGTTGAAACTCACAGTCTGGGGCATT  
>AB231898..1

TTCTATTGCAATACATCAAGACTGTTTAATAGCAATTGGAAAAACGGTACTGCCAGCTCAAATGGCACTGCAA  
ATGACATTATAACTCTCCAATGCAGAATAAGGCAAATTATAAATATGTGGCAGAAAGTAGGAAAAGCAATGTA  
TGCCCCCTCCCATCCCAGGAGTAATAAGGTGTGAGTCAAACATTACAGGACTACTATTAACAAGAGATGGAGGG  
AAAAATACTAGTGGTGTAAATGAGACTTTCAGACCTGAAGGAGGAAATATGAAAGACAATTGGAGAAGTGAAT  
TATATAAGTATAAAGTAATAAAAAATTGAACCACTAGGTGTAGCACCCACCCGTGCAAGAAGAAGAGTGGTGGG  
AAGAGAAAAAAGAGCAATAGGTGGACTGGGAGCTGCCCTCCTTGGGTTCTTAGGAGCAGCAGGAAGCACTATG  
GGCGCGGCGTCAATAACGCTGACGGTACAGGCCAGACAATTATTGTCTGGTATAGTGCAACAGCAGAGCAATC  
TGCTGAGGGCTATAAAGGCTCAACAAGAACTGTTGAGACTCACGGTCTGGGGCATT  
>AB049811..3

TTCTATTGCAATACATCAGAACTGTTTAATAGGAATTACAATAGGTCTAGCAATAGCACTTGGAAATTACAATA  
GTTCTAGCAAGGGCACAGAGTCAAATGGCACTATAATTCTCCAATGCAGAATAAAGCAAATTGTAAATATGTG  
GCAGAGAGTAGGACAAGCAATATATGCCCCCTCCCATCCCAGGAGTAGTAAGGTGTGTCTCAAACATTACAGGA  
CTACTATTAACAAGAGATGGAGGGAATGGTAATAGTACAAATGAGACTTTCAGACCCGGGAGGAGGAGATATGA  
GGGACAATTGGAGAAGTGAATTATATAAGTATAAAGTAGTAAAAATTGAACCACTAGGTGTAGCACCCACCCA  
TGCAAAAAGAAGAGTGGTGGGGAGAGAAAAAAGAGCAGTTGGACTGGGAGCTGTCTTCCTTGGGTTCTTAGGA  
GCTGCAGGAAGCACTATGGGCGCAGCGTCAATAACGCTGACGGTACAGGCCAGACAATTATTGTCTGGTATAG  
TGCAACAGCAGAGCAATCTGCTGAGGGCTATAGAAGCTCAACAACATATGTTGAAGCTCACGGTCTGGGGCAT  
T  
>AB485633..1

TTCTATTGTAAGACATCGAGACTGTTTAATAGCACTTGGCAGTTTAATAGCACTTGGGAAGAGCATTTCGGGATG  
GCAATGACAATGACACTATAACTCTCCCATGCAGAATAAGACAAATTGTACATATGTGGCAGAGAGTAGGACA  
AGCAATGTATGCCCCCTCCATTGAGGAGTAATAAACTGTCTATCAAGCATTACAGGACTACTGCTAACAAGA  
GATGGTGGTGGGAATGGGAATAGTACAAAGGAGATCTTCAGGCCTGGAGGAGGAGATATGAGGGACAATTGGA  
GAAGTGAATTATATAAGTATAAAGTAGTAAAAATTGAACCACTAGGTGTAGCACCCACCCATGCAAAAAAAG  
AGTGGTGGAGAGAGAAAAAGAGAGCAGTTGGACTGGGAGCTGTCTTCCTTGGGTTCTTAGGAGCAGCAGGAAGC  
ACTATGGGCGCGGCGTCAATAACGCTGACGGTACAGGCCAGACAATTATTGTCCGGTATAGTGCAACAGCAGA  
GCAATCTGCTGAAGGCTATAGAGGCTCAACAACATCTGTTGAGACTCACGGTCTGGGGCATT  
>HQ385450..1

TTCTATTGCAATACATCAGAACTGTTTACTAGCACTTGGCCCAATGAGAATAATAGCACCGAGACCAATAATA  
CTGCCAACTTAAATAATACAGACACTATAACTCTCCAATGCAGAATAAAGCAAATTGTAAGAATGTGGCAGAC

AGTGGGACAAGCAATGTATGCCCCCTCCCATCAAAGGGGTAATAAATTGTAAATCAAACATTACAGGACTATTA  
TTAATAAGAGATGGAGGGAAAAATAAGTAGTGAAGATGAGACTTTTCAGGCCTGGAGGAGGAGATATGAGGGACA  
ATTGGAGAAGTGAATTATATAAGTATAAAGTAGTAAAGATTGAACCAATAGGTGTAGCACCCACCCATGCAAA  
AAGAAGAGTGGTGGAGAGAGAAAAAAGAGCAGTTGGAATGGGAGTGTTCCTTGGGTTCTTAGGAGCAGCA  
GGAAGCACTATGGGCGCGGCGTCAATAACGCTGACGGTACAGGCCAGACAATTATTGTCTGGTATAGTGCAAC  
AGCAGAGCAATTTGCTGAGGGCTATAGAGGCTCAACAACATCTGTTGAAACTCACAGTCTGGGGCATC

>HQ385451..1

TTCTATTGCAATACATCAGGACTGTTTAATAGCACCTGGGTGAATAACAGTAGCACTGAGGGTGCCAGTAACA  
ATGCCAGCTCAGATGCAAATGACACTATAACTCTCCAATGCAGGATAAAGCAAATTATAAATCTGTGGCAGAG  
AGTAGGAAAAGCAATGTATGCCCCCTCCCATCCCAGGAATAATAAGGTGTGACTCAAACATTACAGGACTATTA  
TTAACAAGAGATGGAGGGTATAATAATAATAGTAGAAATGAGACTTTTCAGACCTGGAGGAGGAGATATGAGGG  
ACAATTGGAGAAGTGAATTATATAAGTATAAAGTAGTAAAAATTGAACCACTAGGTATAGCACCCACCAAGGC  
AAGGAGAAGAGTGGTGGAGAGAGAAAAAAGAGCAGTTGGCATGGGAGCTCTCTTCCTTGGGTTCTTAGGAGCA  
GCAGGAAGCACTATGGGCGCGGCGTCAATAACGCTGACGGTACAGGCCAGACAATTATTGTCTGGTATAGTGC  
AACAGCAGAGCAATTTGCTGAGAGCTATAGAGGCTCAACAACATCTGTTGAAACTCACGGTCTGGGGCATT

>HQ385460..1

TTCTACTGCAATTCATCAGCACTGTTTGATACAACATGGAACGCCACTACATGGAATAATACCATAGAGTCAA  
ATAATACCACAGGGCCAAACGATACAATCACACTCCACTGCAGGATAAAACAGATTATAAACATGTGGCAGAC  
AGTAGGACAAGCAATGTACGCCCCCTCCCATCCGAGGAGAAATAAGGTGTGAATCAAACATTACAGGACTACTA  
TTAACAAGAGATGGAGGGAATGGTAATAGTAGTGGTGGTGCAAATGAGACTTTTAGGCCTGGAGGAGGAGATA  
TGAGGGACAATTGGAGGAGTGAATTATATAAGTATAAAGTAGTAAAAATTGAACCACTAGGTGTAGCACCCAC  
CCATGCAAAGAGAAGAGTGGTGGAGAGAGAAAAAAGAGCAATTGGACTGGGAGCTTTCTTCCTTGGGTTCTTA  
GGAACAGCAGGAAGCACTATGGGCGCAGCGTCAATAACGCTGACGGTACAGGCCAGACAATTATTGTCTGGTA  
TAGTGCAACAGCAAAGCAATTTGCTGATGGCTATAGAGGCTCAACAACATATGTTGAAACTCACTGTCTGGGG  
CATT

>HQ385446..2

TTCTATTGCAATACATCAGGACTGTTTAACATTTGGGAGAACAAATGACAATATAACTCTCCCATGCAGAATAA  
AGCAAATTATAAATATGTGGCAGAAAGTAGGACAAGCAATGTATGCCCCCTCCCATGCAGGAAAAATAGAGTG  
TGAGTCAAACATTACAGGACTACTGCTAACAAAGAGATGGAGGAAATAATAATAGTACAAATAAAAGTGAGACT  
TTCAGGCCTGGAGGAGGAGACATGAGGGACAATTGGAGAAGTGAATTATATAAGTATAAGATAGTAAAAATTG  
AACCCTAGGTGTGGCACCCACTCATGCAAAAAGAAGAGTGGTGGGGAGAGAAAAAAGAGCAGTTGGACTGGG  
AGCTGTTCTCTTTGGGTTCTTAGGAGCAGCAGGAAGCACTATGGGCGCGGCGTCAATAACGCTGACGGTACAG  
GCCAGACAACATATTGTCTGGTATAGTGCAACAGCAGAGCAATCTGCTGAAAGCTATAGAGGCTCAACAACATC  
TGTTGAAACTCACAGTCTGGGGCATT

>HQ385447..2

TTCTATTGCAATACAACAGCACTGTTTTATGGTACATTGTATAACAATGACACTTGGGATAGAAATAGCACTT  
GGGATAACAACAACCTCAACAAATATAACTCTCCAATGCAAAATAAAGCAAATTATAAGAATGTGGCAGAGAGT  
AGGGCAAGCAATGTATGCCCCCTCCCATCCGAGGAAAAATATGGTGTGAATCAAACATTACAGGAATACTATTA  
ACAAGAGATGGGGGGAATGATAATGCAATGAGACCTTCAGGCCTGGAGGAGGAGATATGAGGGACAATTGGA  
GAAGTGAATTATATAAATATAAAGTAGTAAAAATTGAGCCACTAGGTGTAGCACCCACCCATGCAAAAAGAAG  
AGCGGTGGATAGAGAAAAAAGAGCAGTTGGACTGGGAGCTTTTTTCTTGGGTTCTTAGGAGCAGCAGGAAGC  
ACTATGGGCGCGGCGTCAATAACGCTGACGGTACAGGCCAGACAATTATTGTCTGGTATAGTGCAACAGCAGA  
GCAATCTGCTGAAGGCTATAGAGGCTCAACAACATCTGTTGAGACTCACGGTCTGGGGCATT

>HQ385462..1

TTCTATTGCAATACATCAGGACTGTTTAATAGCACTTGGCCAGAGGCAAATGCCACACAGTCAAATACCACAC  
AGTCAAATAGCACTATAACTCTCCCATGCAGAATAAAGCAAATTGTAAATATGTGGCAGAAAGTAGGACAAGC  
AATGTATGCCCCCTCCCATCCAAGGAATAATAAAGTGTGAATCAAACATTACAGGGTTATTGTTAACAAGAGAT  
GGGGGAAATAATAGTGGAAATAATGGTGAACCTGATATTTTCAGGCCCGAAGGAGGAGATATGAGAGATAATT  
GGAGAAGTGAATTATATAAGTATAAAGTAGTAAAAATTGAACCACTGGGTATAGCACCCAGCCATGCAAAAAG  
AAGAGTGGTGGAGAGAGAAAAAAGAGCAGTTGGACTGGGAGCTGTCTTCCTTGGGTTCTTAGGAGCAGCAGGA  
AGCACTATGGGCGCGGCGTCAATAACGCTGACGGCACACGCCAAACAATTACTGTCTGGTATAGTGCAACAGC  
AGAGTAATCTGCTGAGGGCTATAGAGGCTCAACAACATCTGTTGAAACTCACGGTCTGGGGCATT

>HQ385455..2

TTCTATTGCAATACAACAGCCCTGTTTAACACAACCTTGGATCAATGGCACTGACAGCTCAAACAACAGCACAG  
AGTCTATAACGATCCAATGCAGAATAAAGCAAATTATAAACATGTGGCAGAAAGTAGGACAAGCAATATATGC  
CCCTCCTATCCCAGGAACAATAAGGTGTGAATCAAACATTACAGGACTATTATTAACAAGAGATGGAGGAAAG  
AATAGAACAATAATGAGACTTTTCAGGCCTGAAGGAGGAGATATGAGGGACAATTGGAGAAGTGAATTATATA  
AGTATAAAGTAGTAAAAATTGAACCACTAGGTATAGCACCTACCTATGCAAAAAGAAGAGTGGTGGAGAGAGA  
AAAAAAGAGCAGTTGGACTGGGAGCTGTCTTCCTTGGGTTCTTAGGAGCAGCAGGAAGCACTATGGGCGCGGCG

TCAGTGACGCTGACGGTACAGGCCAGACAATTATTGTCTGGTATAGTGCAGCAGCAAAGCAATTTGCTGAAGG  
CTATAGAGGCTCAACAACATCTGTTGAGACTCACAGTCTGGGGCATT

>HQ385457..1

TTCTATTGCAATACATCAGAACTGTTTAAATAGTACTTGGAATAACAATAGCACTGGGGATAACAATAGCTCAA  
CACCAATAATTCTCCAATGCAAAATAAAGCAAATTATAAGAATGTGGCAGAAAGTAGGACAAGCAATGTATGC  
CCCTCCCATCCCAGGAGAAATAAGGTGTGAATCAAACATTACTGGACTACTATTAACAAGAGATGGAGGGAAT  
AATAATAATACAAATGAAACATTCAGGCCTGGGGGAGGAGATATGAGAGACAATTGGAGAAGTGAATTATATA  
AGTATAAAGTAGTAAAAATTGAACCACTAGGTGTAGCACCTACCCGTGCAAAAAGAAGAGTGGTGGAGAGAGA  
AAAAAGAGCAGTTGGAATGGGAGCTTTATTCTTGGGTTCTTAGGAGCAGCAGGAAGCACTATGGGCGCGGCG  
TCAATAACGCTGACGGTACAGGCCAGACAATTATTGTCCGGTATAGTGC AACAGCAGAGCAATTTGCTGAAGG  
CTATAGAGGCTCAACAGCATCTGTTGAGACTCACGGTCTGGGGCATT

>HQ385449..1

TTCTACTGCAATACATCAAGACTGTTTAAATAGCACTTGGAATAACATTAATAGCACTGGGTATAACCTCACAG  
GGTCACAGGAAAATATAACTCTCCAATGCAGAATAAAGCAAATTGTAAGAATGTGGCAGAGAGTAGGACAAGC  
AATGTATGCCCCCTCCCATCCGAGGAGAAATAAGGTGTAACTCAAACATTACTGGACTACTATTAACAAGAGAT  
GGAGGGAATGAAAATAATAATACAAACGAGACCTTCAGGCCTGGAGGAGGAGATATGAGGGACAATTGGAGAA  
GTGAATTATATAAGTATAAAGTAGTAAAAATTGAACCACTAGGTGTAGCACCCACCCGTGCAAGAAGAAGAGT  
GGTGGAGAGAGAAAAAAGAGCAGTTGGACTGGGAGCTGTCTTCTTGGGTTCTTAGGAGCAGCAGGAAGCACT  
ATGGGCGCGGCGTCAATAACGCTGACGGTACAGGCCAGACAATTATTGTCCGGTATAGTGC AACAGCAAAGCA  
ATTTGCTGAAGGCTATAGAGGCTCAACAACATCTGTTGAGACTCACGGTCTGGGGCATT

>HQ385454..2

TTCTATTGCTACACATCAAACCTGTTTAAACAGTACTTGGGATGACAACAGTACTTGGGATAACAATACTACTT  
GGGATAACAGCACGACAGAGGACACCAACATAACTCTCCAATGCAGGATAAAGCAAATTGTAAATATGTGGCA  
GAGAGTAGGACAAGCAATATATGCCCCCTCCCATCCAAGGAGACATAAAGTGTGAATCAAACATTACTGGATTA  
TTGTTAACAAGAGATGGAGAGAATAACTATGAATGAGACTTTCAGGCCTGGAGGAGGAGACATGAGGGACA  
ATTGGAGAAGTGAATTATATAAATATAAAGTAGTAAAAATTGAACCACTAGGTGTAGCACCCACCCATGCAAA  
AAGAAGAGTGGTGGAGAGAGAAAAAAGAGCAGTTGGACTAGGAGCTGTCTCTTTGGGTTCTTAGGAGCAGCA  
GGAAGCACTATGGGCGCGGCGTCAATAACGCTGACGGTACAGGCCAGACAATTATTGTCTGGTATAGTGC AAC  
AGCAGAGCAATTTGCTGAAGGCTATAGAGGCTCAACAACATCTGTTGAAACTCACGGTCTGGGGCATT

>MH078541..1

TTCTACTGTAATACATCAGCACTGTTTAAATAGCACTTGGAATTGGAATAATAACACTTGGGGGACCAATGAGA  
GCAGCTCACAGGCAAATGACACTGGTGAACCTATAACTCTCCAATGCAGAATAAAGCAAATTATAAATATGTG  
GCAGAAAGTAGGACGAGCAATGTATGCCCCCTCCCATCCCAGGAGTCATAAGGTGTGAGTCAAACATTACAGGC  
CTACTGCTAACAAGAGATGGAGGAAGTACTAATAGTACAAATGAGACTTTCAGGCCTGGAGGAGGAGACATGA  
GGGATAATTGGAGGAGTGAATTATATAAGTATAAAGTAGTAAAAATTGAACCACTAGGTGTAGCACCTACTCG  
TGCAAGAAGAAGAGTGGTGGGAAGAGAAAAAAGAGCAGTTGGACTGGGAGCTGTTTTCTTGGGTTCTTAGGA  
GCAGCAGGAAGCACTATGGGCGCAGCGTCACTAACGCTGACGGTACAGGCCAGACAATTATTGTCTGGTATAG  
TGCAACAGCAGAGTAATCTGCTGAGGGCTATAGAGGCTCAACAACAGATGTTGAGGCTCACGGTCTGGGGCAT  
T

>MH078542..3

TTCTATTGCAATACATCAAAATTGTTTAAATAGTACTTGGAATGAGAATAGTACTTGGAATAGTAGTCAGAGTA  
ATGAGAATATAACCATCCCATGCAGAATAAGACAAATTGTACATCTGTGGCAGAGAGTAGGACAAGCAATGTA  
TGCCCCCTCCCATTCGAGGAGTAATAACCTGTACATCAAATATTACAGGGCTACTGCTAACAAGAGATGGTGGG  
AATAATAATAGTACAAATGAGACCATCAGGCCTCAAGGAGGAAATATGAAGGACAATTGGAGGAGTGAATTAT  
ACAAATATAAAGTAGTAAAAATTGAACCAATAGGAGTAGCACCCACCAAGGCAAAGAGAAGAGTGGTGGAGAG  
AGAAAAAAGAGCAGTTGGACTGGGAGCTGTCTTCTTGGGTTCTTAGGAGCAGCAGGAAGCACTATGGGCGCA  
GCGTCAATAACGCTGACGGTACAGGCCAGACAATTATTGTCTGGTATAGTGC AACAGCAAAGCAATTTGCTGA  
AGGCTATAGAGGCTCAACAGCAGCTGTTGAGACTCACAGTCTGGGGCATT

>MH078544..2

TTCTATTGTAATACAAACAAAATTGTTTATAGTACTTGGGCTAATAATAGCACTTTGGGTAAATAGCACTGAGG  
ATAACAACAATACTACTATAACTCTCCAATGTAGAATAAAGCAAATTGTGAATATGTGGCAGAGAGTAGGACA  
AGCAATGTATGCCCCCTCCCATTCAGGAGAAATAAGTTGTGTATCGAACATTACTGGACTTTTATTAACAAGA  
GATGGAGAGGGTAGTAATAGGACAAATGAGACCTTCAGGCCTGGAGGAGGGGATATGAGGGACAATTGGAGAA  
GTGAATTATATAAGTATAAATAGTAAAAATTGAACCACTAGGTATAGCACCTACTCATGCAAGAAGGAGAGT  
GGTGGAGAGAGAAAAAAGAGCAGTTGGACTGGGAGCTTTCTTCTTGGGTTCTTAGGAGCAGCAGGAAGCACT  
ATGGGCGCGGCGTCAATAACGCTGACGGTACAAGCCAGACAATTATTGTCTGGTATAGTGC AACAGCAGAGCA  
ATCTGCTGAAGGCTATAGAGGCTCAACAACATCTGTTGAAACTCACGGTCTGGGGCATT

>MK397970..2

TTCTATTGCAATACATCACAGTTGTTTAAATAGCACTTGGGAGAACGGGGAATTAAATGGCAGTATATCAGATG  
GCAATATAACGATCCCCTGCAGAATAAAGCAAATTATAAATATGTGGCAGAGAGTAGGACAAGCAATGTATGC

CCCTCCCATCCAAGGAGAGATAAGGTGTCAATCAAACATTACTGGACTAATATTAACAAGAGATGGAGGTAAA  
AATGAGACACATACTGAGACCTTCAGGCCTGGAGGAGGAGATATAAGGGACAATTGGAGAAGTGAATTATATA  
AATATAAAGTAGTAAAAATTGAACCACTAGGAGTAGCACCCACCAGGGCAAAGAGAAGAGTGGTGGAAAGAGA  
AAAAAGAGCAGTTGGACTGGGAGCTGTCTTCCTTGGGTCTTAGGAGCAGCAGGAAGCACTATGGGCGCAGCG  
TCAATAACGCTGACGGTACAAGCCAGACAACCTATTGTCCGGTATAGTGCAACAGCAGAACAATTTGCTGAAGG  
CCATAGAGGCTCAACAACAGATGTTGAGACTCACGGTATGGGGCATT

>KF561435..1

TTCTATTGCAATACATCAAAATTGTTTAATAGCACTTGGGACAACAATAGCACTTGGGACAACAATAGCACTT  
GGGAAAACAATAGCAATACCAACTCAAGTGGCACTATAACTTTCCAATGCAAAATAAAGCAAATTGTAAATAT  
GTGGCAGAGAGTAGGACAAGCAATGTATGCCCTTCCCATCCAAGGAGTAATAAGGTGTGAGTCAAATATTACA  
GGATTATTGTTAACAAGAGATGGAGGGAATAAGAATAATAGTAATAATGAGACTTTCAGACCTGGAGGAGGAG  
ATATGAGGGATAATTGGAGAAAGTGTATTATATAAGTATAAAGTAGTAAAAATTGAACCACTGGGTGTAGCACC  
CACCCATGCAAGAAGAAGAGTGGTGGGGAGAGAAAAAAGAGCAGTCGGACTGGGAGCTGTCTCTTGGGATTTC  
TTAGGAGCAGCAGGAAGCACTATGGGCGCGGCGTCACTAACGCTGACGGTACAGGCCAGACAATTATTGTCCG  
GTATAGTGCAACAGCAGAGCAATTTGCTAAGGGCTATAGAGGCTCAACAACATCTGTTGAAACTCACGGTCTG  
GGGCATT

>DQ168577..1

TTCTATTGCAATACATCAAACTGTTTAATAGCACTGGGGATACCAATACCACTGCCAATCAACAGGAACTA  
TAGAGCTCCAATGCAGAATAAAGCAAATTGTAAATATGTGGCAGAAAGTAGGACAAGCAATATATGCCCTCC  
CATCCAAGGAATAATAAGGTGTGATTCAAACATTACAGGACTACTATTAACAAGAGATGGAGGGATTGAGAAT  
GCAGATAATGAGACCTTCAGGCCGGGAGGAGGAGATATGAGGGACAATTGGAGAAGCGAATTATATAAGTATA  
AAGTAGTAAAAATTGAACCACTAGGTGTAGCACCCACAAAAGCAAAGAAGAGTGGTGGAGAGAGAAAAAAG  
AGCAGTCGTTGGAGCTCTCTTCCTTGGGTCTTAGGAGCAGCAGGAAGCACTATGGGCGCGGCGTCAATAACG  
CTGACGGTACAGGCCAGACAATTATTGTCCGGTATAGTGCAACAGCAGAGCAATTTGCTGAGAGCTATAGAGG  
CTCAACAACATCTGTTGAAACTCACGGTCTGGGGCATT

>DQ168578..1

TTCTATTGTAATACATCAAACCTGTTTAATAGCACTTGGGAATACCAGCTCAATCCACACAGAGCAAAATGCAA  
CTAATGAACTATAACTCTCCAATGCAAAATAAAGCAAATTGTAAATATGTGGCAGAGAGCAGGACAAGCAAT  
ATATGCCCCCTCCCATCCAAGGAGAAATAAGGTGTGACTCAAACATTACAGGAATATTATTAACAAGAGATGGA  
GGAAATAATAATAGTACAAATGAGACCTTCAGGCCTGGAGGAGGAGATATGAGAGACAATTGGAGAAGTGAAT  
TATATAAGTACAAAGTAGTAAAACTTGAACCACTAGGTATAGCACCCACCCATGCAAAAAGAAGAGTGGTGGA  
GAGAGAAAAAAGAGCAGTACTGGGAGCTGTCTTCATTGGGTCTTAGGAGCAGCAGGAAGCACTATGGGCGCG  
GCGTCAATAACGCTGACGGTACAGGCCAGACAATTATTGTCCGGTATAGTGCAACAGCAAAGCAATTTGCTGC  
AGGCTATAGAGGCTCAACAACATCTGTTGAGACTCACGGTCTGGGGCATT

>JN248580..1

TTCTACTGCAATACATCAGCACTGTTTAACAACAGCTTAACAAATGGAATATAACTCTCCCATGCAGAATAA  
AGCAAATTGTAAATATGTGGCAGAGAGTAGGACTAGCAATGTATGCCCTCCCATCCAAGGAAACATAACATG  
TAATTCAAACATTACAGGACTACTATTAACAAGAGATGGAGGGAATAATAGGAATAATGAGAATAGTAGTGAA  
CCTGAGACCTTCAGGCCGGGAGGAGGAGATATGAGGGATAATTGGAGAAGTGAATTATATAAGTATAAAGTAG  
TAAAAATCGAACCCTAGGTGTAGCACCTACTAAAGCAAAAAGAAGAGTGGTGGAGAGAGAAAAAAGAGCAGC  
CGGACTGGGAGCTTTTTCTTGGGTCTTAGGAGCAGCAGGAAGCACTATGGGCGCGGCGTCAATAACGCTG  
ACGGTACAGGCCAGACAATTATTGTCTGGTATAGTGCAACAGCAGAGCAATCTGCTGAGAGCTATAGAGGCTC  
AACAACATCTGTTGAAACTCACGGTCTGGGGCATT

>KX389630..1

TTCTATTGCAATACATCATCACTGTTTAACGGCACCTGGAGGGCCAATGGCACTGACAATAACACTTTCAACT  
TAAATGACACTATAATTATCCCATGCAGAATAAAACAAATTGTAAACATGTGGCAGAAAGTAGGACAAGCAAT  
GTATGCCCCCTCCCATCAAAGGAGTAATAAGTTGTATTTCAAACATTACGGGATTACTATTAACAAGAGATGGA  
GGGAGCGTAACGATAGTACAAATGAGACCTTCAGGCCTGGCGGAGGAGATATGAGGGACAATTGGAGAAGTG  
AATTATATAAGTATAAAGTAGTAAAAATTGAACCATTAGGTGTAGCACCCACCTCTGCAAAAAGAAGAGTGGT  
GGAGAGAGAAAAAAGAGCAGCTGGACTAGGAGCTTTCTTCCTTGGGTCTTAGGAGCAGCAGGAAGCACTATG  
GGCGCGGCGTCGATGACGCTGACGGTACAAGCCAGACAATTATTGTCTGGTATAGTGCAACAGCAAAGTAATT  
TGCTGAAAGCTATAGAGGCTCAACAACAGATGTTGAGACTCACAGTCTGGGGCATT

>KX389629..1

TTCTATTGCAACACATCAGGACTATTTAATAGCAGTTGGCCTAACAATAGCACTTGGGAATAATATAACAAATG  
ACAATATAACTCTCCAATGCAGAATAAAGCAATTTGTCAATATGTGGCAGAGAGTAGGACAAGCAATGTATGC  
CCCTCCCATCCAAGGAGTAATAAGGTGTGAATCAAACATTACAGGACTACTATTAACAAGAGATGGAGGGTAT  
GATAATAGTACCAATAACACAGAAACATTTCAGGCCTGCAGGAGGAGATATGAGAGATAATTGGAGAAGTGAAT  
TGTATAAGTATAAAGTAGTAAAAATTGAACCGCTGGGTGTAGCACCCACCCATGCAAAAAGAAGAGTGGTGGA  
GAGAGAAAAAAGAGCAGTAGGACTGGGAGCTGTCTTCCTTGGGTCTTAGGAGCAGCAGGAAGCACTATGGGC

GCGGCGTCAATAACGCTGACGGTACAGGCCAGACAATTATTGTCTGGTATAGTGCAACAGCAAGGCAATTTGC  
TGAAGGCCATAGAGGCTCAACAACAGCTGTTGAGACTCACGGTCTGGGGCATT

>JN248585..2

TTCTATTGCAATACATCAGGACTGTTTAATAGTAATTGGCATAGAAATACTACTAATGATACTTGGTATACTA  
ACGACACAGCAAACAGCAGCACTATAACTATCCAATGCAGAATAAAACAAATTGTAAACATGTGGCAGAGAGT  
AGGACAAGCAATATATGCTCCTCCCATTGCAGGAAAAATAGAGTGTAAATCAAACATTACTGGACTATTATTA  
ATAAGAGATGGGGGGAATACGAATACTAGCAGTACAAATGAGACTTTCAGACCTGTAGGAGGAGAGATGAGAG  
ACAATTGGAGAAGTGAATTATATAAGTATAAAGTAGTAAAAATTGAACCACTAGGTGTAGCACCCACCTATGC  
AAAAAGAAGAGTGGTGGAGAGAGAAAAAGAGCAGTTGGAATGGGAGCTTTCCTTCTTGGGTTCTTAGCAGCA  
GCAGGAAGCACCATGGGCGCGGCGTCAATAACGCTGACGGTACAGGCCAGACAATTATTGACTGGTATAGTGC  
AACAGCAGAGCAATCTGCTGAAGGCTATAGAGGCTCAACAACAGCTGTTGAGACTCACAGTCTGGGGCATT

>JN248589..1

TTCTATTGCAATACATCAGACCTGTTTAATAGCAGTTGGGATAATAACAATAACACTGATAGCTCAAACCACA  
CAGGGTCAGGTAACGATACCATAACTCTCCAATGCAGAATAAAGCAAATTATAAATATGTGGCAGAGAGTAGG  
ACAAGCAATATATGCCCCCTCCCATCCAAGGAGTAATAAACTGTGAATCAAACATTACAGGGCTAATATTAACA  
AGAGATGGAGAGAATAATACTAAGGCAAATGAAACCTTCAGGCCTGGAGGAGGAGATATGAGGGACAATTGGA  
GAAGTGAATTGTATAAGTACAAGGTAGTAAAAATTGAACCACTAGGTGTAGCACCCACCCGTGCAAGAAGAAG  
AGTGGTGGAGAGAGAAAAAGAGCGGTTGGACTGGGAGCTGTCTTCCTTGGGTTCTTAGGAGCAGCAGGAAGC  
ACTATGGGCGCGGCGTCACTGACGCTGACGGTACAGACCAGACAATTATTGTCTGGTATAGTGCAACAGCAGA  
GCAATTTGCTGAGAGCTATAGAGGCTCAACAGCATCTGTTGAAACTCACGGTCTGGGGCATT

>JN248590..1

TTCTATTGCAACACATCAAACTGTTTAATAGCACTTGGTTGTCTAATAGCACTTGGAACACTACTGGCAACC  
AAAATGAAAATATAAACTCCAATGTAGGATAAAGCAAATTATAAATATGTGGCAGAGAGTAGGACAAGCAAT  
ATATGCCCCCTCCTATCCAAGGAGAAATAAAATGTGACTCAAACATTACTGGACTACTATTAACAAGAGACGGA  
GGGGAGAGTAACAGTACAGAGGAGACCTTCAGGCCTGGAGGAGGAGATATGAGGGACAATTGGAGAAGTGAAT  
TATATAAGTATAAAGTAGTAAAAATTGAACCACTAGGTATAGCACCCACCCATGCAAAAAGAAGAGTGGTGGGA  
GAGAGAAAAAGAGCAGTTGGACTGGGAGCTGTCTTCCTTGGGTTCTTAGGAGCAGCAGGAAGCACTATGGGC  
GCGGCGTCAATAACGCTGACGGTACAAGCCAGACAATTATTGTCCGGCATAGTGCAACAGCAAAGCAATTTGC  
TGAAGGCTATAGAGGCTCAACAACATCTGTTGAAACTCACGGTCTGGGGCATT

>JN248592..1

TTCTATTGCAATACAACACCACTGTTTAAGAGCGTTTGGAAATAAAAATGGGAGCACTTGGAACAGCAATACCA  
CTAACAGTACAGAGTCAAATAACACTATAACCCTCCAGTGCAAAATAAAGCAAATTATAAATCTGTGGCAGAG  
AGTAGGACAAGCAATATATGCCCCCCCCATCCCAGGAGTAATAAGGTGTGAATCAAATATTACAGGACTACTA  
TTAACAAGAGATGGGGGAAATATTGATGATGATGCAAATGAGACTTTCAGGCCGGGAGGAGGAGATATGAGGG  
ACAATTGGAGAAGTGAATTATATAAGTATAAAGTAGTAAAAATTGAACCACTAGGTGTAGCACCCACCCGTGC  
AAGAAGAAGAGTGGTGGGGAGAGAAAAAGAGCAGTTGGACTAGGAGCTGTCTTCCTTGGGTTCTTAGGAGCA  
GCAGGAAGCACTATGGGCGCAGCGTCAGTAACGCTGACGGTACAAGCCAGACAATTATTGTCTGGTATAGTGC  
AACAGCAAAGCAATTTGCTGAGGGCGATAGAGGCTCAACAACAGTTGTTGAAACTCACGGTCTGGGGCATT

>KX389617..2

TTCTATTGCAATACAACAGGACTGTTTAATAGCACGTGGACTAGCAGTGGCCATGGCACTTATAACATCACTG  
ACAGCTCAAAAACCTCACAGAGGACATTACACTCCAATGCAGAATAAAGCAAATTATAAATCTGTGGCAGAA  
AGTAGGGCAAGCAATATATGCCCCCTCCCATCCCAGGAGTAATAAGTTGCAACTCAAACATTACTGGACTACTA  
TTGACAAGAGATGGAGGGAATAATAATGATTCAACAGAGACCTTCAGACCTGGAGGAGGAGACATGAGGGACA  
ATTGGAGAAGTGAATTATATAAGTATAAAGTAGTAAAAATTGAACCACTAGGTATAGCACCTACCCATGCAAA  
AAGAAGAGTGGTGGAAAGAGAAAAAGAGGATTTGGAATGGGAGCTGTCTTCCTTGGGTTCTTAGGAGCAGCA  
GGAAGCACTATGGGCGCAGCGTCAATAACGCTGACGGTACAAGCCAGACAATTATTGTCTGGTATAGTGC  
AGCAGAGCAATCTGCTGAAGGCTATTGAGGCTCAACAGCATCTGTTGAAACTCACAGTCTGGGGCATT

>KX389614..2

TTCTATTGCAATACATCAAACTGTTTGTATAGCACTTGGCCTACAAATAGCACTTCAAATGGCACTATAACTC  
TTCAATGCAGAATAAAGCAAATAATCAATATGTGGCAGAGAGTAGGACAGGCAATGTATGCCCTCCCATCAA  
AGGAGCACTAAATTGTTCTTCAAACATTACAGGACTACTATTAACAAGAGATGGAGGGATAAGGAATGATACA  
GATAAGAATGAGACTTTCAGGCCGGGAGGAGGAGATATGAGGGACAATTGGAGAAGTGAATTATATAAATATA  
AAGTAGTAAAAATTGAACCACTAGGTGTAGCACCCACCCCTGCAAGAAGAAGAGTGGTGGAGAGAGGAAAAAG  
AGCAGTCGGAATGGGAGCTGTCTTCCTTGGGTTCTTGGGAGCAGCAGGAAGCACTATGGGCGCAGCGTCAATA  
ACGCTGACGGTACAGGCCAGACAATTATTGTCTGGTATAGTGCAACAGCAGAGCAATCTGCTGAGAGCTATAG  
AGGCTCAACAACATCTGTTGAAACTCACGGTCTGGGGCATT

>KX389610..1

TTCTATTGCAATACATCAAACTGTTTAATAGCAGTTGGAGTAACGACAGTAACACTGACAACAATGACAATA  
ACACTGACAACCTCTAGCATTATAACTCTCCAATGCAGAATAAAGCAAATTGTAAATATGTGGCAGAGAGTAGG  
ACAAGCAATGTATGCCCCCTCCCATCCCAGGAGTAATTAGTTGTAATTCAAGCATTACAGGACTATTATTAACA

AGAGATGGGGGAAATAAGAGTGAAAACGAGACCTTCAGGCCTGGAGGAGGAAATATGAGGGACAATTGGAGAA  
GTGAATTATATAAGTATAAGGTAGTAAGAATTGAACCATTAGGTGTAGCACCCACCCATGCAAAAAGAAGAGT  
GGTGGAGAGACAAAAAAGAGCAGTTGGACTGGGAGCTGTCTCTTTGGGTTCTTAGGAGCGGCAGGAAGCACT  
ATGGGCGCGGCGTCAATAACGCTGACGGTACAGGCCAGACAATTATTGTCCGGTATAGTGCAACAGCAGAGTA  
ATCTGCTGAAAGCTATAGAGGCTCAACAACATCTGTTGAGACTCACGGTCTGGGGCATT

>KX389643..1

TTCTATTGCAACACATCGAACCTGTTTAATAGCAGTTGGGAGAACGGTACCAGATTAAACAACACAAAGTCAA  
ATGGCACTATAATTCTCCAATGTAGAATAAAGCAAATTGTAAATATGTGGCAGAAAAGTGGGACAAGCAATGTA  
TGCCCCCTCCTATCCCAGGAATAATAAGGTGTGAGTCAAACATCACTGGACTATTATTAACAAGAGATGGAGGG  
GAAAAATAGTTCAACTGAGACTTTTCAGACCTGAAGGAGGAAAATATGAAGGACAATTGGAGAAGTGAATTATATA  
AGTATAAAGTTGTAAAAAATTGAACCACTAGGTGTAGCACCTCCCGTGCAAAAAGAAGAGTGGTGGAGAGAGA  
AAAAAGAGCAGTTGGAATAGGAGCTGTCTTCCTTGGGTTCTTAGGAGCAGCAGGAAGCACTATGGGCGCGGCG  
TCAATAACGCTGACGGTACAGGCCAGACAATTATTGTCTGGTATAGTGCAACAGCAGAATAATTTGCTGAAAG  
CTATAGAGGCTCAACAACAGATGTTGAGACTCACGGTCTGGGGCATT

>KX389644..3

TTCTATTGCAATACATCAGGACTGTTTAATAACACGTTTAATCATGAAACGTTTGATAGCAATATGACGACTG  
ATAACAGCACAGGAAATATAACTCTCCCATGTAGAATAAGACAAATTGTAAATATGTGGCAGAGAGTAGGACA  
AGCAATGTATGCCCTCCCATCAGCGGAGTAATAAGGTGTAATTCAAATATTACTGGACTAATATTAACAAGA  
GATGGAGGGAATAACAGTACAAATGAGACCTTTAGGCCTGGAGGAGGGGATATGAGGGACAATTGGAGAAGTG  
AATTATATAAATATAAGGTAGTAAAAATTGAACCAATAGGTGTGGCACCCACCTATGCAAGAAGAAGAGTGGT  
GCAGAGAGAAAAAAGAACAGTTGGACTGGGAGCTGTCTCTTTGGGTTCTTAGGAGCAGCAGGAAGCACTATG  
GGCGCGGCGTCAATAACGCTGACGGTACAGGCCAGACAATTATTGTCTGGTATAGTGCAACAGCAGAGCAATC  
TGCTGAGGGCTATAGAGGCTCAACAACATATGTTGAAACTCACAGTCTGGGGCATT

>KY953197..5

TTCTATTGCAACACAACAACCACTGTTTAATAGTACTTGGGGACTGATTAATAATACTATTTGGGGAAGCTACA  
ATAGTAGCTACAATAGTAGCCAGATAAAGGAAAATGATACCATAATTCTCCCATGCAGACTAAAGCAAATTGT  
AAGAATGTGGCAGAGAGTAGGACAAGCAATGTATGCCCTCCTATCCAGGGAGTAATAAAGTGTATTCAAAC  
ATTACAGGATTACTGTTAACGAGCGATGGAGGGTTTAGGAATACAAGTGAGATCGTCAGGCCTGGAGGAGGAG  
ACATGAGGGACAATTGGAGAAGTGAATTATATAAATACAAAGTAGTAAAAATTATGCCACTAGGTGTAGCACC  
CTCCTATGCAAAAAGAAGAGTGGTGCAGAGAGAAAAAAGAGCAGTTGGAATGGGAGCTATGTTCTGTTGGGTTT  
TTAGGAGCTGCAGGAAGCACTATGGGCGCGGCGTCAATAACGCTGACGGTACAGGTCAGGCAATTATTGTCTG  
GCATAGTGCAACAGCAGAGAAAATTTGCTGAATGCTATAGAGGCTCAACAACAGCTGTTGAGACTCACGGTCTG  
GGGCATT

>KY953198..2

TTCTATTGTGATACATCAAACCTGTTTAATAGCACTTGGGATAATATCACTAGGAACAATAGCACTTGGGACA  
AGAGCAATACAGAGTCAAATGACACTATAACACTCCAATGCAAAATAAAACAGATTGTAAATATGTGGCAGAG  
AGTAGGACAAGCAATATATGCCCTCCCATCGCAGGAGAAAATAAGGTGTGAATCAAATATTACTGGATTATTA  
TTAACAAGAGATGGAGGGGATATAAATGAGACTGAGATCTTCAGGCCTGGAGGGGAGATATGAGGGACAATT  
GGAGAAGTGAATTATATAAGTATAAAGTAGTAAAAATTGAACCCCTAGGTATAGCACCTACTCATGCAAAAAG  
AAGAGTGGTGGGAGAGAAAAAAGAGCAGTTGGACTGGGAGCTGTCTTCTTTGGGTTCTTAGGAGCAGCAGGA  
AGCACTATGGGCGCGGCGTCAATAACGCTGACGGTACAGGCCAGACAATTATTGTCTGGTATAGTGCAACAGC  
AGAGCAATCTGCTGAAGGCTATAGAGGCTCAACAGCATCTGTTGAAACTCACGGTCTGGGGCATT

>KX389647..1

TTCTATTGCAATACATCAGGACTGTTTAATAGCGCTTGGAGGATTAATGGCACTGTTAACCATAACAGAATCAA  
ATACCAACCATAACAATAACACCATAATTCTCCCATGCAGAATAAAGCAAATTGTAAATATGTGGCAAAGGGT  
AGGACAAGCAATATATGCCCTCCCATCCGAGGAATCATAAGGTGTGTATCAAACATTACAGGACTATTATTA  
ACAAGAGATGGAGGGAATGAGGCAAATAATAGTGAGACCTTCAGACCTGGAGGAGGGGATATGAGGGACAATT  
GGAGAAGTGAATTATATAAGTATAAAGTAGTAAAAATTGAACCACTGGGTGTAGCACCCACCCATGCAAAAAG  
AAGAGTGGTGGAGAGAGAAAAAAGAGCAGTTGGAATGGGAGCTCTTCTCTTTGGGTTCTTAGGAGCAGCAGGA  
AGCACTATGGGCGCGGCGTCAATAACGCTGACGGTACAGGCCAGACAATTATTGTCTGGTATAGTGCAACAGC  
AGAGCAATTTGCTGAGAGCTATAGAGGCTCAACAACATCTGTTGAAACTCACAGTCTGGGGCATT

>KX389649..1

TTCTATTGCAATACATCAGGACTGTTTAGTAGCGTTTGGAGAACGATACCAATGCAACGATAACTCTCCAAT  
GCAGAATAAAGCAAATTATCAATATGTGGCAGAGAGTAGGACAAGCAATGTATGCCCTCCCATCCCAGGAGC  
AATAAGGTGTGACTCAAACATTACAGGACTACTATTACTAAGAGATGGAGGAGATAATAATAGTACAAATGAG  
ACTTTTCAGGCCTGGAGGAGGAAAATATGAAGGACAATTGGAGAAGTGAGTTATATAAGTATAAAGTAGTAAAAAG  
TTGAACCACTAGGTATAGCACCTACCCGTGCAAAAAGAAGAGTGGTGTATGAGAGAAAAAAGAGCAGTTGGACT  
GGGAGCTGCCTTCTTTGGGTTCTTAGGAGCAGCAGGAAGCACTATGGGCGCGGCGTCAATAACGCTGACGGCA  
CAGGCCAGACAATTACTGTCCGGTATAGTGCAACAGCAGAGCAATCTGCTGCAAGCTATAGAGGCTCAACAGC  
ATCTGTTGAAACTCACTGTCTGGGGCATT

>AF069933..1

TTCTATTGCAGTACATCAAACTTTTTTAATAGCACTTGGAATAACAGTAACATTAGCAGCTCAAATAACACAG  
ATTCAAATGACACTATAACTATCCAATGCAGAATAAAGCAAATTATAAATATGTGGCAGAGAGTAGGACAGGC  
AATGTATGCCCCCTCCCATCCGAGGAGAAATAAGGTGTGAATCAAACATTACAGGACTACTATTAACAGGAGAT  
GGAGGGGAAAATAATGGGACAAACGGGACAGAGACATTTCAGGCCTGGAGGAGGAGATATGAGGGACAATTGGA  
GAAGTGAATTATATAAATATAAGGTAGCACAAATTGAACCAATAGGTGTGGCACCCACCCATGCAAAAAGAAG  
AGTGGTGGAGAGAGAAAAAGAGCAGTTGGACTGGGAGTTGCCTTCCTTGGGTTCTTAGGAGCAGCAGGAAGC  
ACTATGGGCGCAGCGTCAATAACGCTGACGGTACAGGCCAGACAATTATTGTCTGGTATAGTGCAACAGCAGA  
GCAATTTGCTGAAGGCTATAGAGGCTCAACAACATCTGTTGAAACTCACGGTCTGGGGCATT

>AF069941..2

TTCTATTGCAATACATCAGGACTGTTTAATAGCACTTGGAATAATAACAATTGGAATACCACTAGCAATAACA  
GCTCAAAGTCAAATGAAATTATAAACTCCAATGCAGAATAAAGCAAATTGTAAATATGTGGCAGAGAGTAGG  
ACAAGCAATGTATGCCCCCTCCCACCCCTAGGAGTAATAAGGTGTGAATCAAACATTACAGGACTACTATTAACA  
AGAGATGGAGGGAAGCATAATAGTACAAATGAGACTTTCAGGCCTGGAGGAGGAGATATGAGGGACAATTGGA  
GAAGTGAATTATATAAGTATAAAGTAGTAAAAATTGAAGCACTAGGTGTAGCACCTACCTATGCAAAAAGAAG  
AGTGGTGGAGAGAGAAAAAGAGCAGTTGGACTGGGAGCTGTCTTCCTTGGGTTCTTAGGAGCAGCAGGAAGC  
ACTATGGGCGCGGCGTCAATAACGCTGACGGTACAGGCCAGACAATTATTGTCCGGTATAGTGCAACAGCAGA  
GCAATCTGCTGAGGGCTATAGAGGCTCAACAACATCTGTTGAAACTCACAGTCTGGGGCATT

>L39106..1

TTCTATTGCAATACATCAAACTGTTTAATAGCACTTGGGATAATAGCAATAGCACTGCCAACCACACAGGGT  
CAAATGACACTATAACTCTCCAATGCAGAATAAAGCAAATTGTAAATATGTGGCAGAAAAGTAGGACAAGCAAT  
GTATGCCCCCTCCCATCCAAGGAATAATAAGATGTGATTCAAACATTACAGGACTACTATTAACAAGAGATGGA  
GGGAATAATAGTACAAATGAAACCTTCAGGCCTGGAGGAGGAGATATGAGGGACAATTGGAGAAGTGAATTAT  
ATAAGTATAAAGTAGTAAAAATTGAACCACTAGGTGTAGCACCCACCCGTGCAAAAAGAAGAGTGGTGGAGAG  
AGAAAAAGAGCGGTTGGACTGGGAGCTGTCTTCCTTGGGTTCTTAGGAGCAGCAGGAAGCACTATGGGCGCG  
CGGTCAATAACGCTGACGGTACAGGCCAGACAATTATTGTCCGGCATAGTGCAACAGCAGAGCAATTTGCTGA  
AAGCTATAGAGGCTCAACAACATCTGTTGAAACTCACGGTCTGGGGCATT

>KX232598..2

TTCTATTGTAATACAACAGGACTATTTAATAGCGCTTGGCAATTTAATAGCGCTTGGCAGGAGAATGACACTG  
AAACAGAGGGAAATATAACTCTTCCATGCAAAATAAAGCAAATTATAAATATGTGGCAGAGGGTAGGACAAGC  
AATTTATGCCCCCTCCCATCCAAGGAGTAGTAAAGTGTGAGTCAAACATTACTGGACTACTATTGACAAGAGAT  
GGGGGAATTAAGAATAGTACGAATGAACTTTTCAGGCCTGGAGGAGGAGATATGAGGGACAATTGGAGAAGTG  
AATTATATAAGTATAAAGTAGTAAAAATTGAACCATTAGGTGTAGCACCCACCCGTGCAAAAAGAAGAGTGGT  
GGAGAGAGAAAAAGAGCAATTGGTGGACTGGGAGCTGCATTCCTTGGGTTCTTAGGAGCAGCAGGAAGCACT  
ATGGGCGCGGCGTCAATAACGCTGACGGTACAGGCCAGACAATTATTGTCTGGTATAGTGCAACAGCAGAGGA  
ATTTGCTGAAGGCTATTGAGGCTCAACAACAGATGTTGAGACTCACGGTCTGGGGCATT

>KY658712..3

TTCTATTGTAATACAACAAAACCTATTTAATAGCACTTGGAATGCAACAAATCCATCTAATAGCAGCTATGGCA  
ACGAACTATAACTCTTCCATGCAGAATAAAGCAAATTATAAATATGTGGCAGAGGGTAGGACAAGCAATTTA  
TGCCCCCTCCCATCCAAGGAATAATAAAGTGTGAGTCAAACATTACTGGACTACTATTGACAAGAGATGGGGGA  
ACAACTAATAGCTCGAAGAATGAACTTTTCAGGCCTGGAGGAGGAGACATGAGGGATAATTGGAGAAGTGAAT  
TATATAAGTATAAAGTAGTAAAAATTGAACCATTAGGTATAGCACCCACCCCTGCAAGAAGGAGAGTGGTGGGA  
GAGAGAAAAAGAGCAATTGGTGTGGGAGCTGTATTCTTGGGTTCTTATCAGCAGCAGGAAGCACTATGGGC  
GCGGCGTCAATAACGCTGACGGTACAGGCCAGACAATTATTGTCTGGTATAGTGCAACAGCAAAGTAATTTGC  
TGAAGGCTATTGAGGCTCAACAACAGATGTTGAGACTCACGGTCTGGGGCATT

>KX232616..2

TTCTATTGTGATACAACACAACCTATTTAATAGCACTTGGAATACAACACAACCTCAACAATGACAACGAGACAG  
AGGACAATACAACCTTACTCTTCCATGCAGAATAAAGCAAATTGTAAATATGTGGCAGAGGGTAGGACAAGC  
AATTTATGCCCCCTCCCATCCAGGAATAATAGAGTGTGAATCAAACATTACTGGACTACTGTTGACAAGAGAT  
GGGGGAAATAGTGATAGCTCGAATGAACTTTTAGGCCTGGAGGAGGAGACATGAGAGACAATTGGAGAAGTG  
AATTATATAAATATAAAGTAGTAAAAATTGAACCATTAGGTATAGCACCCACCAGGCAAAGAGAAGAGTGGT  
GGAGAGAGAAAAAGAGCAGTTGGACTAGGAGCTTTGTTTCATTGGGTTCTTAGGAGCAGCAGGAAGCACTATG  
GGCGCGGCGTCAGTGACGCTGACGGTACAGGCCAGACAATTATTGTCTGGTATAGTGCAACAGCAAAGCAATT  
TGCTGAGGGCTATTGAGGCTCAACAACAGATGTTGAGACTCACGGTCTGGGGCATT

>KX232622..2

TTCTATTGTAATACAACAAAACCTATTTAATAGCACTTGGAATAGCAATGGCACTTGGAATAGCACTGGGAAGG  
ACAATAGCACTGGAACAGGGAAACGATACAATAAATCTTCCATGCAAAATAAAGCAAATTATAAATATGTGGCA  
GAGGGTAGGACAAGCAATTTATGCCCCCTCCTATCCAGGAGTAATACAGTGTGAGTCAAACATTACTGGACTA  
CTATTGACAAGAGATGGGGGAGTTAATAGTACTACAAATGAACTTTTCAGGCCTGGAGGAGGAGACATGAGGG  
ACAATTGGAGAAGTGAATTATATAAGTATAAAGTAGTAAAAATTGAACCAGTAGGTGTAGCACCCAACCGTGC

AAGAAGGAGAGTGGTGGAGAGAGAAAAAGAGCAATTGGAATGGGAGCTTTTTTCTTGGGTCTTTAGGAGCA  
GCAGGAAGCACTATGGGCGCGCGTCAATAACGCTGACGGTACACGCCAGACAATTATTGTCTGGTATAGTGC  
AACAGCAAAGTAATTTGCTGAAGGCTATTGAGGCTCAACAACAGATGTTGAGACTCACGGTCTGGGGCATT  
>KP411845..2

TTCTATTGTAATACTTCAGGCCTGTTTAAACAGCACTTGGGATGGCACAGCACAAAGCAACACAGATGATGATG  
ACACTATCCTTCTCCCGCGAAAAATAAATATAATTATAAATATGAGGAGAAGAGTAGGACTATCAATATCTGC  
TCCTCCTAGACGAGGAACAAGGAGGTGTACTTCTATTATTACAGTACTACTATTAACAGGAGGTGGGAGTACT  
ACTAATACTAATGATGACATCTTGCCTGCAGGAGGAGAAAAAGATGAACTACTGTAGAAGAGAACAATATATAT  
ATAAAGTAGTAATAATAGCAGCATTAGTAGCAGCACCCCCCCCCCTCCTCAAGAAGAGTAGTGCTGAGAAAAAA  
AAGAGCAGCAGTAGTAGTAGCAGTCGTCTTTGTCTGCTTAAGAGCAGCAGGAAGCAGTATGATCGCGTCTGTCG  
ATAATGATGATGACAGTAGACGCATACCAGTGTTTTGTCTGGTATAGTGCAACAGCAGTACAATTTGCTGTATG  
CTAATGAGGTTCAACAACATCTGTTGAAACTCTCATTTTGGGGCATT

>MF373200..1

TTCTATTGCAATACATCAGCATTGTTTAAATAGCACTTGGGTTAATAACACTTGGAAATAACGAGATCAACGAGA  
CCAACAAGACCATAACTCTCCAATGCAGGATAAAGCAAAATTATAAATATGTGGCAGAGAGTAGGACAAGCAAT  
GTATGCCCTCCCATCCCAGGAGCAATAAAATGTGAATCAAACATTACAGGACTACTACTGACAAGAGATGGA  
GGAAATAATAATACAACCTGAGACTTTTAGGCCTGGAGGAGGAGACATGAGGGACAATTGGAGAAGTGAATTAT  
ATAAGTATAAAGTAGTAAAAATTGAACCACTAGGTGTAGCACCCAGTCGTGCAAAAAGAAGAGTGGTGGAGAG  
AGAAAAAAGAGCAGTTGTTGGAATGGCAGCTGTTTTCTTGGTTTCTTAGGAGCAGCAGGAAGCACTATGGGC  
GCGGCGTCAATAACGCTGACGGTACAGGCCAGACAATTATTGTCTGGTATAGTGCAACAGCAGAGCAATCTGC  
TGAAGGCTATAGAGGCTCAACAACATATGTTGAGACTCACGGTCTGGGGCATT

>AF107770..2

TTCTATTGCAATACATCAAACTCTGTTTAAATAGAACTTGGAAATCATAATGGCACTTGGAAATGCACCAGGACCGT  
TTAATGACACTGAGGATAAAAACAATAAATGGCACTGAGGATAAAAACAATAACTCTCCAATGCAGAATAAAGCA  
AATTGTGCGTATGTGGCAGAAAGTAGGACAAGCAATGTATGCCCTCCCATCCCAGGAGAAATAAGGTGTGAA  
TCAAACTTACAGGACTACTATTAACAAGAGATGGAGGGAATGATAATAATAACAGAGACCTTCAGGCCTG  
GAGGAGGAGATATGAGGGACAATTGGAGAAGTGAATTATATAAATATAAAGTAGTAAAAATTGAACCACTAGG  
TGTAGCACCCCTCCCATGCAAAAAGAAGAGTGGTGGAGAGAGAAAAAAGAGCACTTGTTGGACTGGGAGCTTTC  
TTCTTTGGGTCTCTTAGGAGCAGCAGGAAGCACTATGGGCGCGCGTCAATAACGCTGACGGTACAGGCCAGAC  
AATTATTGTCTGGTATAGTGCAACAGCAGAGCAATCTGCTGAAGGCTATAGAGGCTCAACAACATCTGTTGAG  
ACTCACGGTCTGGGGCATT

>HM215281..1

TTCTATTGCAATACAACACCACTGTTTAAATAGCACTTGGTACAGCAATAACACTGCCAATAGCTCAAACAGCA  
CAGAGTTAAATGGAATAAATACTCTCCAATGCAGAATAAAGCAAATTGTAATATGTGGCAAAGGGTAGGACA  
GGCAATGTATGCCCTCCCATCCCAGGAGAAATAAGGTGTGAATCAAACATTACTGGACTACTATTAACAAGA  
GATGGAGGGGGGAATAATACAAATACAAATGAGACCTTTAGGCCTGGAGGAGGAGATATGAGGGACAATTGGA  
GAAGTGAATTATATAAGTATAAAGTAGTAAAAATTGAACCACTAGGTGTAGCACCCACCCCTGCAAAAAGAAG  
AGTGGTGGAGAGAGAAAAAAGAGCAGTTGGACTGGGAGCTGTCTTCTTTGGGTCTTAGGAGCAGCAGGAAGC  
ACTATGGGCGCGCGTCATTAAACGCTGACGGTACAGGCCAGACAATTATTGTCCGGTATAGTGCAACAGCAAA  
GTAATTTGCTGAAGGCTATAGAGGCTCAACAACATCTGTTGAAACTCACAGTCTGGGGCATT

>HM215292..1

TTCTATTGCGATACATCAAACTGTTTAAATAGCACTTGGACCAAAAATAGCACTTGGAACTACAGAATTAG  
GTGGCAATATAACGCTCCAGTGCAAAATAAAGCAAATTATAAATACGTGGCAAAAAGTAGGACTAGCAATGTA  
TGCCCTCCCATCCAAGGAATAATAAGGTGTGATTCAAACATTACAGGACTACTATTAACAAGAGATGGAGGG  
AATAATAATGCAAGTGAGACTGAGACCTTCAGGCCTGGAGGAGGAGATATGAGGGACAATTGGAGAAGTGAAT  
TATATAAATACAAAGTAGTAAAAATTAAACCACTAGGTGTGCGACCCACCCATGCAAAAAGAAGAGTGGTGG  
GAGAGAAAAAAGAGCAGTTGGACTGGGAGCTGTTTTCTTGGGTCTTAGGAGCAGCAGGAAGCACTATGGGC  
GCGGCGTCAATAACGCTGACGGTACAGGCCAGACAATTATTGTCCGGTATAGTGCAACAGCAGAGCAATTTGC  
TGCAAGCTATAGAGGCTCAACAACATCTGTTGAAACTCACAGTCTGGGGCATT

>KT223759..2

TTCTATTGCAATACATCAAAGCTGTTTAAATAGCACTTGGAAATGCCACTGACATCAATAGCAATGTGAGCACAG  
ACTCAGGGAATAATGACACTATAACTCTCCCATGCAGAATAAAGCAAATTATAAGGATGTGGCAGAGCGTAGG  
GCAAGCAATGTATGCCCTCCTATCCAAGGAATAATAAAGTGTGAATCAAACATTACAGGACTACTATTAACA  
AGAGATGGAGGGAAGGAAAAAATAAGTACAAATGAGACTTACAGGCCAGGAGGAGGAGACATGAGGGACAATT  
GGAGAAGTGAATTATATAAGTATAAAGTAGTAAAAATTGAACCACTTGGTATAGCACCCACCCCTTGAAGGAG  
AAGAGTGGTGGAGAGAGAAAAAAGAGCAGTTGGACTGGGAGCTGTCTTCTTGGGTCTTAGGAGCAGCAGGA  
AGCACTATGGGCGCGCGTCAGTGACGCTGACGGTACAAGCCAGACAATTGTTGTCTGGTATAGTGCAACAGC  
AGAGCAATCTGCTGAAGGCTATAGAGGCTCAACAACACTTGTGAGACTCACAGTCTGGGGCATT

>KT223760..2

TTCTATTGCAACACATTAGGACTGTTTAAATAGCACTTGGAAGTGGCACTTGGATAACAATAGCTCAA  
TTAGCTATGCTCGTGTAACCTCTCCAATGCAAAATAAAGCAAATTGTAAATATGTGGCAGAGAGTAGGACAAGC  
AATGTATGCCCCCTCCCATCCAGGGGAACTAAGGTGTGATTCAAATATTACAGGACTATTATTAACAAGAGAT  
GGGGGAAAAATAATACTAATGAATGAGACCTTCAGGCCTGGAGGAGGAGATATGAGGGACAATTGGAGAAGTG  
AATTATATAAGTATAAAGTAGTAAAAATTTGAACCACTAGGTGTAGCACCTACCCATGCAAAAAGAAGAGTGGT  
GCAGAGAGAAAAAGAGCAGTTGGAATGGGAGCTCTCTTCCTTGGGTTCTTAGGAGCAGCAGGAAGCACTATG  
GGCGCGCGCTCAATAACGCTGACGGTACAGGCCAGACAATTATTGTCTGGTATAGTGCAACAGCAGAGTAATC  
TGCTGAAGGCTATAGAGGCTCAACAACAGCTGTTGAGACTCACAGTCTGGGGCATT

>AJ251056..1

TTCTATTGCAATACAGCAGAACTGTTTAAATAGCACTTGGGCTAGCAATACTAATGGCATTGTTGGGCTAGCAATA  
TAAATGCTAGCAATAACAAGGACGCAAATGACACTATAACTCTCAAATGCAAAATAAAACAAATTATAAAATAT  
GTGGCAGAAAGTAGGACAAGCAATATATGCCCCCTCCCATCGAAGGAGTAATAAGGTGTGATTCAAACATTACA  
GGAATACTATTAAACAAGAGATGGAGGGGATAATACTAATGGTGATGAGACTTTCAGGCCTGGAGGAGGAGATA  
TGAGGGGACAACCTGGAGAAGTGAACTATATAAGTATAAAAGTAGTAAAAATTGAACCACTAGGTGTAGCACCCCTC  
CCATGCAAAAAGAAGAGTGGTGGAGAGAGAAAAAGAGCAGTTGGACTGGGAGCTGTCTTCCTTGGGTTCTTA  
GGAGCAGCAGGAAGCACTATGGGCGCAGCGTCAATAACGCTGACGGTACAGGCCAGACAATTATTGTCTGGTA  
TAGTGCAACAGCAGAACAACTCTGCTGAAGGCTATAGAGGCTCAACAACATTTGTTGAAACTCACGGTCTGGGG  
CATT

>AJ251057..2

TTCTATTGCAATACATCAGGACTGTTTAAATGGCACTTGGAAATGGCACTAGCAGCTCAAACCACACATGGGTAA  
ATGACACTATAACTCTCCAATGCAGAATAAGGCAAATTGTAAATATGTGGCAGAGAGTAGGACGAGCAATGTA  
TGCCCCCTCCCATCCAGGGAGAAATAAAGTGTGTATCAAAACATTACTGGACTACTATTAACAAGAGATGGAGGG  
GATAATAATAGTACAAATGAGACTTTCAGGCCTGGAGGAGGAGATATGAGGGACAATTGGAGAAGTGAATTAT  
ATAAAATATAAAGTAGTAAAAATTGAACCACTGGGTGTAGCACCCCTACCGTGCAAAAAGGAGAGTGGTGGAGAG  
AGAAAAAAGAGCAGTTGGAATAGGAGCTGTCTCTCTTGGGTTCTTAGGAGCAGCAGGAAGCACTATGGGCGCG  
GCGTCAATGACGCTGACGGTACAGGCCAGACAATTATTGTCTGGTATAGTGCAACAGCAGAGCAATCTGCTGA  
GGGCTATAGAGGCTCAACAACATCTGTTGAAACTCACAGTCTGGGGCATT

>HM215264..2

TTCTATTGCAATACATCAGAACTGTTTAAATAGCACTTGGACTAGCAATAACACTTGGGGTAGCAGTAGCTTAA  
ATCACACAAATATAACTCTCCAATGCAGAATAAAGCAAATTATAAGAATGTGGCAGAGAGTAGGACAAGCAAT  
GTATGCCCCCTCCTATCAAAGGGGAAATAAAGTGTGAATCAAACATTACTGGACTACTATTAATAAGAGATGGA  
ATTGTTAATAGTACAAATGAGACCTTCAGGCCTGGAGGAGGAGATATGAGGGACAATTGGAGAAGTGAATTAT  
ATAAAATATAAAGTAGTAAAAATTGAACCACTAGGGGTAGCACCTAACCGTGCAAAAAGAAGAGTGGTGGAGAG  
AGAAAAAAGAGCAGTTGGAAGTGGAGCTTTCTTTCTTGGGTTCTTAGGAGCAGCAGGAAGCACTATGGGCGCG  
GCGTCAATGACGCTGACGGTACAGGCCAGACAATTATTGTCCGGTATAGTGCAACAGCAGAGCAATTTGCTGA  
AGGCTATAGAGGCTCAACAACATCTGTTGAGACTCACGGTCTGGGGCATT

>HM215290..1

TTCTATTGTAATACATCAGCACTGTTTAAATAGCACTTGGAAATGGCACTGACAGTGCAACAAGACAAAGTCAA  
ATGAAACTATAACTCTCCAATGCAAAATAAAGCAAATTATAAATATGTGGCAGAGAGTAGGACAAGCAATGTA  
TGCCCCCTCCCATCCAAGGAGAAATAAAGTGTACATCAAACATTACAGGACTACTACTAACAAGAGATGGAGGG  
AATACTAGTGGTGCAAATGAGACTTTCAGGCCTGGAGGAGGAGACATGAGGGACAATTGGAGAAGTGAATTAT  
ATAAAATATAAAGTAGTAAAAATTGAGCCACTAGGTGTAGCACCCACCCCTGCAAAAAGAAGAGTGGTGGGAG  
AGAAAAAAGAGCAGTTGGAAGTGGAGCTTTCTTTCTTGGGTTCTTAGGAGCAGCAGGAAGCACTATGGGCGCG  
GCGTCAATAACGCTGACGGTACAGGCCAGACAATTATTGTCTGGCATAGTGCGACAGCAGAGCAATTTGCTGA  
GGGCTATAGAGGCTCAACAACATCTGTTGAAACTCACGGTCTGGGGCATT

>HM215291..1

TTCTATTGCAATACATCAAAACTATTTTAAATAGCACTTGGAAATAGCACTGAAAATAACAATACCAGTGACACAA  
ATGGTATTATAACTCTCCAATGCAGAATAAAGCAAATTGTAAATATATGGCAGAGAGTAGGACAAGCAATGTA  
TGCCCCCTCCTATCCAAGGAGTAATAAAGTGTGAATCAAACATTACAGGACTACTATTAAACAAGAGATGGAGGG  
GATAATGATAGTACAAATGAGACCTTCAGGCCTGGAGGAGGAGATATGAGGGACAATTGGAGAAGTGAATTAT  
ATAAGTATAAGGTAGTACAAGTTGAACCACTAGGTGTGGCACCCACCCATGCAAGAAGAAGAGTGGTGGAGAG  
AGGAAAAAAGAGCAGTTGGAGTGGAGCTGTTTTCTTGGGTTCTTAGGAGCAGCAGGAAGCACTATGGGCGCG  
GCGTCAATAACGCTGACGGTACAGGCCAGACAATTATTGTCTGGTATAGTGCAACAGCAGAGCAATTTGCTGA  
AGGCTATAGAGGCTCAACAACATCTGTTGAAACTCACGGTCTGGGGCATT

>HM215293..1

TTCTATTGCAATACATCAAAAGCTGTTTAAATAGCACTTGGGGTAACAATACCACTAACAGCTCATCAGAATCAA  
ATAACAATGACACTCTAATTCTCCAATGCAGAATAAAGCAAATTGTAAAGGATGTGGCAGAGAGTAGGACAAGC  
AATGTATGCCCCCTCCCATCAGAGGAGAAATAAAGTGTGAGTCAAACATTACAGGGCTACTATTAAACAAGAGAT  
GGAGGGATTATAATAACAAATAATGAGACCTTCAGGCCTGGAGGAGGAGATATGAGGGACAATTGGAGAAGTG  
AATTATATAAGTATAAAGTAGTAAAAATTGAACCACTAGGTGTAGCACCTACCCATGCAAAAAGAAGAGTGGT

GGAGAGAGAAAAAGAGCAGTTGGACTGGGAGCTTTCTTCCTTGGGTTCTTAGGAGCAGCAGGAAGCACTATG  
GGCGCGGCGTCAATAACGCTGACGGTACAAGCCAGACAATTACTGTCTGGTATAGTGCAACAGCAGAGCAATC  
TGCTGAGAGCAATTGAGGCTCAACAACATCTGTTGAGACTCACGGTCTGGGGCATT

>JX447154..3

TTCTATTGCAATACATCAGGACTGTTTAATAGCACTTGGAATCACAGGAGCACTTGGAATAGCACTGATCACA  
ATATCTCTGACAGCTCAAACCCCAATATAACTCTCCAATGCAGAATAAAGCAAGTTATAAATATGTGGCAGAG  
AGTAGGACAAGCAATGTATGCCCCCTCCCATCCCAGGAGTAATAAGGTGTGAATCAAACATTACTGGACTGTTA  
TTAACAAGAGATGGAGGAAATGAGAGTAGTACAAATGAGACTTTTCAGACCTGGAGGAGGAGACATGAGGGACA  
ATTGGAGAAGTGAATTATATAAGTATAAAGTAGTAAAAATTGAACCAGTGGGTGTAGCACCCCTCCCGTGCAAA  
AAGAAGAGTGGTGGAGAGAGAAAAAGAGCAGTTGGACTGGGAGCTGTCTTCCTTGGGTTCTTAGGAGCAGCA  
GGAAGCACTATGGGCGCGGCGTCCGTGACGCTGACGGTACAGGCCAGACAGTTATTGTCTGGTATAGTGCAAC  
AGCAGAGCAATTTGCTGAGGGCTATAGAGGCTCAACAACATTTGTTGAAACTCACGGTCTGGGGCATT

>KF716488..1

TTCTATTGCAACACCTCAGGACTGTTTAATAGCAGCTTCAATAGTAGCAGCATCAATGACACAGACACAGAGT  
TAACTGGCAATATAACTCTTCCATGCAGAATAAAACAGATTGTAAATATGTGGCAGAAAGGTAGGAAAAGCAAT  
GTATGCCCCCTTATTGAAGGAATAATAAGGTGTGAGTCAAACATTACAGGACTGATATTAACAAGAGATGGA  
GGGGGCAATACAACAGAGGAGACGGAGACCTTCAGGCCTGGAGGAGGAGATATGAGGGACAATTGGAGAAATG  
AATTATATAAATATAAGGTAGTGAGAATTGACCCAATAGGTGTAGCACCCACTAAGGCAAAAAGAAGAGTGGT  
GGAGAGAGGAAAAAGAGCAGTTGGACTGGGAGTTGCCTTCCTTGGGTTCTTAGGAGCAGCAGGAAGCACTATG  
GGCGCGGCGTCAATAACGCTGACGGTACAGGCCAGACAATTATTGTCTGGTATAGTGCAACAGCAGAGCAATC  
TGTTGAGAGCTATAGAGGCTCAACAACATCTGTTGAAACTCACAGTCTGGGGCATT

>AY444811..3

TTCTATTGCAATACATCGGGACTGTTTAATAGTACTTTTAATAACACTCAGGCCAACTCAAGTTACACCTCAG  
GGACAAATGATACTATACTTCTCCAATGCAGAATAAAGCAAATTATAAGAATGTGGCAGAGAGTAGGACAAGC  
AATGTATGCCCCCTCCCATCCAAGGAGAAATAAGGTGTGAATCAAACATTACTGGACTACTATTAACAAGAGAT  
GGAGGGGATACTAGTGATAATAGTACCGAGACCTTCAGGCCTGGAGGAGGAGATATGAGGGACAATTGGAGAA  
GTGAATTATATAAGTATAAAGTAGTAAAAATTGAACCAATAGGTATAGCACCCACCAAGGCAAAAAGAAGAGT  
GGTGCAGAGAGAAAAAGAGCAGTTGGAATAGGAGCTGTCTCTTGGGTTCTTGGGAGCAGCAGGAAGCACT  
ATGGGCGCAGCGTCAATAACGCTGACGGTACAGGCCAGACAATTATTGTCCGGTATAGTGCAACAGCAAAGCA  
ATTTGCTGAAGGCCATAGAGGCTCAACAACATCTGTTGAGACTCACAGTCTGGGGCATT

>DQ869018..1

TTCTACTGCAATACAACAGCACTGTTTAATAGCACTTGGGATAGCAATACCACTGCCAGCGAAGAGTCAAATA  
GCACCATAGATGACATTATAACTCTCCAATGCAGAATAAAGCAAGTTGTAAACATGTGGCAGAAAGTAGGACA  
AGCAATGTATGCCCCCTCCCATTCAGGAGAAATAAGGTGTGAATCAAACATTACAGGACTACTATTAACAAGA  
GATGGAGGGGATAATAATAACAGTGAGACCTTCAGACCTGGAGGAGGAGATATGAGGGACAATTGGAGAAGTG  
AATTATATAAATATAAAGTAGTAAAAATTGAACCGCTAGGAGTAGCACCCCTCCAGGGCAAAAAGAAGAGTGGT  
GGAGAGAGAAAAAGAGCAGTTGGACTGGGAGCTGTCTTCCTTGGGTTCTTAGGAACAGCAGGAAGCACTATG  
GGCGCGGCGTCAATAACGCTGACGGTACAGGCCAGACAATTATTGTCCGGTATAGTGCAACAGCAGAGCAATC  
TGCTGAAGGCCATAGAGGCTCAACAGCAACTGTTGAGACTCACGGTCTGGGGCATT

>JF320297..1

TTCTATTGCAATACATCAGAACTATTTAATAGCAGTTGGAATAATGCACTGCCAGCTCAAATAACACAGGGT  
CAAATGACACTATAACTCTCCAATGCAGAATAAAGCAAATTGTAAATATGTGGCAGAAAGGTAGGACAAGCAAT  
GTATGCCCCCCCCATCAAAGGAGTAATAAGGTGTGAATCAAACATTACAGGACTAATATTAACAAGAGATGGA  
GGGGATAATAATAATAGTGTAATGAGACCTTCAGGCCTGGAGGAGGAGATATGAGGGACAATTGGAGAA  
GTGAATTATATAAGTATAAAGTAGTAAAAATTGAACCACTAGGTATAGCGCCACCCATGCAAGAAGAAGAGT  
GGTGCAGAGAGAAAAAGAGCAGTTGGACTAGGAGCTCTCTTCCTTGGGTTCTTAGGAGCAGCAGGAAGCACT  
ATGGGCGCGGCGTCAATAACGCTGACGGTACAGGCCAGACAATTATTGTCCGGTATAGTGCAACAGCAGAGCA  
ATCTGCTGAAAGCTATAGAGGCTCAACAACATCTGTTGAAACTCACGGTCTGGGGCATT

>AY736840..1

TTCTATTGCAATACATCAATACTGTTTAATAGCACTTGGGACAATAGCACTGTCAACACAAATAATATCACAG  
AGCCAAATGATACTATAACCCCTCCAATGCAGAATAAAGCAAATTATAAATATGTGGCAGAAAGTAGGGCAAGC  
AATGTATGCCCCCTCCCATCAAAGGAATCATAAGGTGTGATTCAAACATTACTGGATTACTATTAACAAGAGAT  
GGAGGGAATAATAATAGTACAAATGAGACCTTCAGACCTGGAGGAGGAGATATGAGGGACAATTGGAGAAGTG  
AATTATATAAGTATAAAGTAGTAAAAATTGATCCAATAGGGGTGGCTCCACCCATGCAAAAAGAAGAGTGGT  
GGAGAAAGAAAAAGAGCAGTTGGACTGGGAGCTGTCTTCATTGGGTTCTTAGGAGCTGCAGGAAGCACTATG  
GGCGCGGCGTCAATAACGCTGACGGTACAAGCCAGACAATTATTGTCTGGTATAGTGCAACAGCAAAGCAATT  
TGCTGAAGGCTATAGAGGCTCAACAACATCTGTTGAGACTCACAGTCTGGGGCATT

>KU168266..2

TTCTATTGCAATACATCAGGCCTGTTTAATAGTACTTGGAATGTGACCACCAGCCTCAACCAGAGTGAAGCGG  
ACGTAAATATAACTCTCCCATGCAAAATAAAACAAATTGTACGTATGTGGCAGGGAGTAGGACAAGCAATGTA

TGCCCCCTCCCATTC AAGGAGTAATTAACTGTACATCAAACATCACAGGGCTACTGCTAACAAGAGACGGGGGG  
AGGGATAATGGTGC A AATGAGACGTT CAGACCCGGAGGAGGAAATATAAAGGACAATTGGAGAAGTGAATTAT  
ATAAATATAAGGTAGTAAAAATTGAACCACTAGGTGTAGCACCCACCCGTGCAAAAAGAAGAGTGGTGGAGAG  
AGAAAAAAGAGCAGTTGGACTGGGAGCTGTCTCTTTGGGTTCTTAGGAGCAGCAGGAAGCACTATGGGCGCG  
GCGTCAATAACGCTGACGGTACAGGCCAGACAATTATTGTCTGGTATAGTGCAACAGCAGAACAATCTGCTGA  
GGGCTATAGAGGCTCAACAGCAAATGTTGAACTTACGGTCTGGGGCATT

>KU168267..1

TTCTATTGCAATACATCAGATCTGTTTCGATAGCACTTGGACTTCAAACCACACCTCAAACCACACAGGGTCAG  
ATGAGACCATAACGTCAAATGACACTATAATTCTCCAATGTAGAATAAAGCAAATTGTAAGGATGTGGCAGAC  
AGTAGGACAAGCAATGTATGCCCTCCCATCCCAGGAGAAATAAGGTGTGAATCAAACATTACTGGACTACTA  
TTAACAAGAGATGGAGGGCAAACAGAAAATAATAATGAGACCTTCAGGCCTGGAGGAGGAAATATGAAGGACA  
ATTGGAGAAGTGAATTATATAAGTATAAAGTAGTAAAAATTGAACCACTAGGTGTAGCACCCACCCCTGCAAG  
AAGAAGAGTGGTGCAGAGAGAAAAAAGAGCAGTTGGACTACTGGGAGCTGTCTTCCTTGGGTTCTTAGGAGCA  
GCAGGAAGCACTATGGGCGCGGCGTCAATAACGCTGACGGTACAGGCCAGACAATTACTGTCTGGTATAGTGC  
AACAGCAAAGCAATTTGCTGAAAGCTATAGAGGCTCAACAACATCTGTTGAGACTCACGGTCTGGGGCATT

>MF510462..1

TTCTATTGCAATACATCAGACCTGTTTAATAGCACTTGGGATAACAATACCAACAGTTCAAACCTTCACAGGTA  
ATGACACTATAACTCTCCAATGCAGAATAAAGCAATTTGTAATATGTGGCAGAGGGTAGGACAAGCAATGTA  
TGCCCCCTCCCATCGAAGGAAGAATAAGATGTGAATCAAAATATTACTGGACTACTATTAACAAGAGATGGAGGA  
GAAGGTAATAATAGGACAAATGAAACCTTCAGGCCTGGAGGAGGAGATATGAGGGACAATTGGAGAAGTGAAT  
TATATAAGTATAAAGTAGTAAAAATTGAACCACTAGGTGTAGCACCCACCCATGCAAAAAGAAGAGTGGTGCA  
GAGAGAAAAAAGAGCAGTGGGACTGGGAGCTGTCTTCCTTGGGTTCTTAGGAGCGGCAGGAAGCACTATGGGC  
GCGGCGTCAATAACGCTGACGGTACAGGCCAGACAATTATTGTCTGGTATAGTGCAACAGCAGAGCAATTTGC  
TGAAGGCTATAGAGGCTCAACAACATCTGTTGAACTCACAGTCTGGGGCATT

>AF082485..1

TTCTACTGTAATACAACAAAACTGTTTGATAGCACTTGGAAATGGTACTGAAGAGTTAGATAAACTGAAGGAG  
ATATAGTCACACTCCCATGCAGAATAAAACAAATTATAAACATGTGGCAGGAAGTAGGAAAAGCAATGTATGC  
CCCTCCCATCGCGGGACAAATTAGATGTTCTCCTCAAATATTACAGGACTGCTATTAACAAGAGATGGTGGTTAC  
CAGAGCAATGTCACCGAGATCTTCAGACCTGGAGGAGGAGATATGAGGGACAATTGGAGAAGTGAATTATATA  
AATATAAAGTAGTAAAAATTGAACCACTAGGAGTAGCGCCACCAGGGCAAAGAGAAGAGTGGTGCAGAGAGA  
GAAAAGAGCAGTGGGAATAGGAGCTGTGTTCTTGGGTTCTTGGGAGCAGCAGGAAGCACTATGGGCGCGGCG  
TCAATAACGCTGACGGTACAGGCCAGACAATTATTGTCTGGTATAGTGCAACAGCAGAATAATCTGCTGAGGG  
CTATTGAGGCGCAACAACATCTGTTGCAACTCACAGTCTGGGGCATC

>FJ388917..2

TTCTATTGCAATACAACAAAACTGTTTAATAGTACACTGAAAAATGGTACATTCATTCCGGGTACAAATTCTA  
ATTCAAACATCACACTCCAATGCAGACTAAAACAATTTGTAAGGATGTGGCAGGAAGTGGGACAAGCAATGTA  
CTCCTCCCCAATGGAAGGGAAAAATTTACTGCAGCTCAAATATTACAGGACTAATATTAACAAGAGATGGTGGT  
AATAATGGTGATGACAATGGTACTGAGACCTTCAGACCTGGAGGAGGAGACATGAGGGACAATTGGAGAAGTG  
AACTATATAAATATAAAGTAGTAAGGATTGAACCAATAGGAGTAGCACCCACTGAAGCAAGGAGACGGGTGGT  
GCAGAGAGAAAAACGAGCAGTGGGAATAGGAGCCGTGTTCCTTGGGTTCTCGGGAGCAGCAGGAAGCACTATG  
GGCGCAGCGTCATTGACGCTGACGGTACAGGCCAGACAATTATTGTCTGGTATAGTGACAGCAGCAGAGCAATC  
TGCTGAGGGCTATAGAGGCTCAACAACATCTGTTGAGACTCACAGTCTGGGGCATT

>JN687742..1

TTCTATTGTAGCACAAACAGCACTGTTTAATAGTACCTGGACGTATAATGGTACCTGGACTACCAATGGCAGCA  
CTGAGACAGATGACACAATCATTACACTGCAATGCAGAATAAGACAATTGTAAACCTGTGGCAGGCAGTGGG  
ACAAGCAATGTACGCCCCCCCCATTGACAGGAACATTACCTGCAGCTCAAATATTACAGGAATGATATTGACA  
AGAGATGGTACTAATAGTACTAATAATGATACCTTCAGACCTGGAGGAGGAGACATGAGGGACAATTGGAGAA  
GTGAACTATATAAATATAAAGTAGTAAAGATTGAACCAATAGGAGTAGCACCCACTAGGGCAAGGAGACGAGT  
GGTGCAGAGAGAAAAACGAGCAGTAGGACTGGGAGCTGTGTTCTTGGGTTCTTGGGAGCAGCAGGAAGCACT  
ATGGGCGCAGCGTCAATAACGCTGACGGTACAGGCCAGACAATTATTGTCTGGCATAAGTGCAACAGCAGAGCA  
ATCTGCTAAGGGCTATAGAGGCTCAACAACATCTGTTGAACTCACAGTCTGGGGCATT

>JX140648..1

TTCTATTGCAACACAACAGAACTGTTTAATAGTACCTGGACACTGAATAATAGTACCAATAGCAGCATTGAGA  
CAAATGGCACAACCTATTATACTGCCATGCAGAATAAGACAATTTATAAACATGTGGCAGGAAGTGGGACAAGC  
AATGTACGCCCCCCCCATTGAAGGAAGCATTAAATGCAGCTCAAATATTACAGGAATGATACTGACAAGAGAT  
GGTGGTAATAGTACTACTAATGAGACCTTCAGACCTGGAGGAGGAAACATGAGGGACAATTGGAGAAGTGAAC  
TATATAAATATAAAGTAGTAAAGATTGAACCAGTAGGAGTAGCACCCACTAAGGCAAGGAGACGAGTGGTGCA  
GAGAGAAAAACGAGCAGTAGGACTGGGAGTGATGTTCTTGGGTTCTTGGGAGCAGCAGGAAGCACTATGGGC  
GCAGCGTCAATGACGCTGACGGTACAGGCCAGACAATTATTGTCTGGCATAAGTGCAACAGCAGAGCAATTTGC  
TAAGGGCTATAGAGGCTCAACAACATCTGTTGAACTCACAGTCTGGGGCATT

>JN687748..1

TTCTATTGCAACACATCACAGCTGTTTTTTAGGTAATGGTACAAATAGTACAAACACAAATAATACAAATTCAA  
CTATTGAACTCAAATGCAGAATAAGACAAATTGTAAACATGTGGCAGGGAGTGGGACAAGCAATGTACGCCCC  
ACCCATTGCAGGGAGCATTAGCTGCAGCTCAAATATTACAGGATTAATATTGACAAGAGATGGTGGTAATGAT  
ACTGGGACGAATGAGACCTTCAGACCTGGAGGAGGAGACATGAGGGACAATTGGAGAAGTGAAGTATATAAAT  
ATAAAATAGTAAAGATTGAACCAGTAGGAGTAGCACCCACTAGGGCCAGGAGACGAGTGGTGCAGAGAGAAAA  
ACGAGCAGTGGGAATAGGAGCTGTGCTCCTTGGGTTCTTGGGAGCAGCAGGAAGCACTATGGGCGCAGCGTCA  
ATAACGCTGACGGTACAGGCCAGACAATTATTGTCTGGCATAGTGCAACAGCAAGGCAATTTGCTGAGGGCTA  
TAGAAGCTCAACAACATCTGTTGAGGCTTACGGTCTGGGGCATT

>AF119820..1

TTCTACTGCAATACATCAGGACTGTTTAATAGTACATACATGTTTAATAGTACAAATAGGACAAACACAACCA  
ATGGAACAAACTCAACCATCACGCTCCCATGCAGAATAAAACAAATTGTAAGAATGTGGCAGGGAGTAGGACA  
AGCAATGTACGCCCTCCCATTCAGGGAGCATTAACTGCAGCTCAGATATTACAGGAATAATATTGACAAGA  
GATGGTGGTATAAGTAATAATAATGAGACTAATGATAATGAGACCCTCAGACCTGGAGGAGGAGACATGAGGG  
ACAATTGGAGAAGTGTACTATATAAATATAAAGTAGTAAAGATTGAACCAGTGGGAATAGCACCCACGGGGGC  
AAGGAGACGAGTGGTGCAGAAAAGAAAACGAGCAGTGGGACTAGGAGCTTTGTTCTTGGGTTCTTGGGAGCA  
GCAGGAAGCACTATGGGCGCAGCGTCACCTAACGCTGACGGTACAGGCCAGACAATTATTGTCTGGTATAGTGC  
AACAGCAGAGCAATCTGCTGAGGGCTATAGAGGCTCAGCAACATCTGCTGAAACTCACGGTCTGGGGCATT

>KU168269..1

TTCTATTGTAATACATCCAATCTGTTTAATAGTAATATAACAGAGAATGATACAACAAATAGTAATGACAATA  
TCACACTCCCATGTAGGATAAAACAAATTGTAAGAATGTGGCAGAGAGTGGGACAAGCAATGTATGCCCTCC  
CATTGCAGGAAACATTACATGTAGATCAAACATTACAGGAATACTATTAACAAGAGATGGTAATGGTGGGAAT  
GATACCAATAGCAATGAGACTTTCAGACCTGGAGGAGGAGATATGAGGGACAATTGGAGAAGTGAATTATACA  
ACTATAAAGTAGTAAAAATTAAACCACTAGGAGTAGCACCCACCCATGCAAGAAGAAGAGTGGTGGGGAGAGA  
GAAAAGAGCAGTTGGACTAGGAGCTCTTCTCCTTGGGTTCTTGGGAACAGCAGGAAGCACTATGGGCGCAGCG  
TCAATAACGCTGACGGTACAGGCCAGACAATTATTGTCTGGTATAGTGCAACAGCAAGTAATTTGCTGCAAG  
CTATAGAGGCGCAACAGCATCTGTTGCAGCTCACAGTCTGGGGCATT

>AB286852..1

TTCTATTGTAATACATCAAACTATTTAATAGTACTTTTTCTAATGATAATTCCACAGATAATGATACCTCTT  
TAGAAAATAATGGTACCATCACACTCCCATGTAAGATAAAACAAATTGTAAGAATGTGGCAGAGAGTGGGACA  
GGCAATGTATGCCCTCCCATTTGAAGGAAACATTACATGTATATCAAACATTACAGGACTAATATTAACAAGA  
GATGGGCACAATGGGCACAATCAGAGTAATAATGAGACCTTCAGACCTACAGGAGGAGATATGAGGGACAATT  
GGAGAAGTGAATTATATAAGTATAAAGTAGTAAGAATTAAACCACTAGGAATAGCACCCACCAAGGCAAGAAG  
AAGAGTAGTGGGCAGAGAGAAAAGAGCAGTTGGACTGGGAGCTGTTTTCTTGGGTTCTTAGGAGCGGCAGGA  
AGCACTATGGGCGCAGCGTCAATAACGCTGACGGTACAGGTACAGACAATTATTGTCTGGCATAGTGCAGCAGC  
AAAGCAATTTGCTGAGAGCTATAGAAGCGCAGCAGCATCTGTTGCAGCTCACAGTCTGGGGCATT

>AF069934..1

TTTTATTGTAATACATCAGAGCTGTTTACTAATACATCAACTAAGAATGGGACCAATGAAACACCCCACTCC  
CATGTAAGATAAAACAAATTGTAAGAATGTGGCAGAGAGTGAGACAAGCAATGTATGCCCTTCCCATTGCAGG  
AAACATTACGTGTACATCAAACATTACAGGACTACTATTAACAAGAGATGGGAATAATGACAGTCACACTGAG  
ACCTTCAGACCTGGAGGGGGAGATATGAGGGACAATTGGAGAAGTGAATTATATAAGTATAAAGTAGTAAAA  
TTAAACCACTAGGAATAGCACCCACCTGGGCGAGGAGAAGAGTAGTGGGGAGAGAGAAAAGAGCAGTTGGACT  
GGGAGCTGTTTTCTTGGGTTCTTAGGGACAGCAGGAAGCACTATGGGCGCAGCGTCAATAACGCTGACGGTA  
CAGGTACAGACAATTATTGTCTGGCATAGTGCACCAGCAAAGCAATTTGCTGAGAGCTATAGAGGCGCAGCAGC  
ATCTGTTGCAACTCACAGTCTGGGGCATT

>AJ288981..1

TTTTATTGTAATACATCACAACTGTTTAAACAGTAGTAACCTTAATAATAATAGCTCAGATAATAATGGGACCA  
TCACACTCCCATGTAGGATAAATCAAATTATAAGAATGTGGCAAAGAGTGGGACAAGCAATGTATGCCCTCC  
CATTCAGGAAACATTACATGTACATCAAACATTACAGGACTACTATTAACAAGAGATGGGCATAATGACACT  
GAAATCTTCAGACCTGGAGGAGGAAATATGAAGGACAATTGGAGAAGTGAATTATATAAGTATAAAGTAGTAA  
AAATTAAACCACTAGGGATAGCACCCACCAAGGCAAGGAGAAGAGTAGTGGGGAGAGAGAAAAGAGCAGTTGT  
TGGACTGGGAGCTGTTTTCTTGGGTTCTTAGGAACGGCAGGAAGCACTATGGGCGCAGCGTCAATAACGCTG  
ACGGTACAGGTACAGACAATTATTGTCTGGCATAGTGCACCAGCAAAGCAATTTGCTGAGAGCTATAGAGGCGC  
AGCAGCATCTGTTGCAACTCACAGTCTGGGGCATT

>EU363837..1

TTCTATTGTAATACATCAGGCCTGTTTAAATGGTACATACATGTCTAATGGTACACAAAGTAATTCAAGCTCAA  
TCATCACGATTCCATGCAGAATAAAGCAAATTATAAACATGTGGCAGGAGGTAGGACGGGCAATGTATGCCCC  
TCCCATTTGAAGGAAACATAACATGTAAATCAAATATCACAGGACTACTATTGGTACGTGATGGAGGAACGACA  
AATACTATAAATGATACAGAGATATTACAGACCTGGAGGAGGAGACATGAGGGACAATTGGAGAAGTGAATTAT  
ATAAAATATAAAGTGGTAGAAAATTAAGCCATTAGGAGTAGCACCCACTGCAGCAAAAAGGAGAGTGGTGGAGAG

AGAAAAAAGAGCAGTGGGACTAGGAGCTGTGTTCTTGGGTTCCTTGGGTGCAGCAGGAAGCACTATGGGCGCG  
GCGTCAATAACGCTGACGGTACAAGCCAGACAATTATTGTCTGGTATAGTGCAACAGCAAAGCAATTTGCTGA  
GAGCTATAGAGGCGCAACATCATCTGTTGCAACTCACAGTCTGGGGCATT

>KC492737..1

TTCTATTGTAATACATCAAGACTGTTTAAATGGTACATACATGTTTAAATGGTACAAGGGGTAATTCAAGCTCAA  
ACTCAACCATCACAATCCCATGCAGAATAAAGCAAATTATAAATATGTGGCAGCAGGTAGGACGAGCAATGTA  
TGCCCCCTCCCATTTGAAGGAAACCTAACATGTAGATCAAATATCACAGGATTACTATTGGTACGTGATGGAGGA  
GACAACACAAATAAAACAGAGATATTTCAGACCTCAAGGGGGAGATATGAGGGACAATTGGAGAAGTGAATTAT  
ATAAATATAAAGTAGTAGAAATTAAGCCATTGGGAGTAGCACCCACTGCAGCAAAAAGGAGAGTGGTGGAGAG  
AGAAAAAAGAGCAGTGGGAATAGGAGCTGTGTTCTTGGGTTCCTTGGGAGCAGCAGGAAGCACTATGGGCGCG  
GCGTCAATAACGCTGACGGTACAGGCCAGACAATTGCTGTCTGGTATAGTGCAACAGCAAAGCAATTTGCTGA  
GGGCTATAGAGGCGCAACAACATCTGTTGCAACTCACGGTCTGGGGCATT

>KF835494..1

TTCTATTGTAATACATCAGGCCTGTTTAAATAGTACATACATGTTCAATAATACAGACATATTTAATGGTACAG  
GAAATAGTTCAAAAGTCATCACGATTCCATGCAGAATAAAGCAAATTATAAATATGTGGCAGGAGGTAGGACG  
AGCAATGTATGCCCCCTCCCATTTGAAGGAAACATAACATGTAACCTCAACTATCACAGGACTACTATTGGTACGT  
GATGGAGGAAAGCATAATAATAGTAATACTACAGAAACATTCAGACCTGGAGGAGGAGATATGAAGGACAATT  
GGAGAAGTGAATTATACAAATATAAAGTGGTAGAAATTCAGCCATTGGGAGTAGCACCCACTGGAGCAAAAAG  
GAGAGTGGTGGAGAGAGAGAAAAAGAGCAGCAGGACTAGGAGCTGTGTTCTTGGGTTCCTTGGGAGCAGCAGGA  
AGCACTATGGGCGCGGCGTCAATTAACGCTGACGGTACAGGCCAGACAATTGCTGTCTGGTATAGTGCAACAGC  
AAAGCAATTTGCTGAAGGCTATAGAGGCGCAACAGCATCTGTTGCAACTCACAGTCTGGGGCATT

>KF835511..1

TTCTATTGTAATACATCAGACCTGTTTAAATGGTACATATAATGGTACATACATACATAATGATACACAAGGTA  
ATTCAACTGTCTTTACAATCCAATGCAGAATAAAGCAAATTATAAATATGTGGCAGGAGGTAGGACGAGCAAT  
GTATGCTCCTCCCATTTGCAGGAAATATAACATGTAAATCAAATATCACAGGACTACTATTGGTACGTGATGGA  
GGAAATACTAGTACAGAAGAGATATTTCAGACCTGGAGGAGGAGATATGAAAAACAATTGGAGAAGTGAATTAT  
ATAAATATAAAGTGGTAGAAATTAAGCCATTGGGAATAGCACCCACTGCAGCAAAAAGGAGAGTGGTGGAGAG  
AGAAAAAAGAGCAGTAATGGGAATAGGAGCTGTGTTCTTGGGTTCCTTGGGAGCAGCAGGAAGCACTATGGGC  
GCGGCGTCAATAACGCTGACGGTACAGGCCAGACAATTGCTGTCTGGTATAGTGCAACAGCAAAGCAATTTGC  
TGAAGGCTATAGAGGCGCAACATCATCTGTTGCAACTCACGGTCTGGGGCATT

>JF346907..1

TTCTATTGTAATACATCAGGCCTGTTCAATAGTACATACCTGTTCAATAGTACATACATGTCTAATGGTAGTT  
CAAACCTCAAACAACACAACTCAACCATCACAATCCCATGCAGAATAAAGCAAATTATAAATATGTGGCAGGA  
GGTAGGACGAGCAATGTATGCCCCCTCCCATTTGCAGGAAACATAACATGTAAATCAAATATCACAGGACTACTA  
TTGGTCCGTGATGGAGGAGATCAAAAATCAAATGAGACAGAGAATGGGACAGAGACTGAGGAGACATTTAGAC  
CTGGAGGAGGAGATATGAGGGACAATTGGAGAAGTGAATTATATAAATATAAAGTGGTAGAAATTAAGCCATT  
GGGAATAGCACCCACTAAAGCAAAAAGGAGAGTGGTGGAGAGAGAAAAAGGGGACTAGGAGCTGTGTTCTT  
GGGTTCCTTAGGAGCAGCAGGAAGCACTATGGGCGCGGCGTCAATAACGCTGACGGTACAGGCCAGACAATTGC  
TGTCTGGTATAGTGCAACAGCAAAGCAATTTGCTGAAGGCTATAGAGGCGCAACAGCATCTGTTGCAACTCAC  
GGTCTGGGGCATC

>JF346913..2

TTCTATTGTAATACACAGGCCTGTTTAAAGGGTACATACAACCCTAATTACACAAACCCTAATGGTACAGGGA  
GTAATTCAAGCTCAACCATCACAATACCATGCAAAATAAAGCAAATTATAAATATGTGGCAGGAGGTAGGACG  
AGCAATGTATGCCCCCTCCCATTTGCAGGAAACATAACATGTAAATCAAATATCACAGGACTGCTATTGGTACGT  
GATGGAGGATACACAAATAAGACAAATCATACAGAGATATTTCAGGCCGGGAGGAGATATGAAGGATAATT  
GGAGAAGTGAATTATATAAATATAAAGTGGTAGAAATCAAGCCATTGGGAGTAGCACCCACTAAAGCAAAAAG  
GAGAGTGGTGGAGAGAGAAAAAAGAGCAGCATTAGGAGCTGTGTTCTTGGGTTCCTTGGGAGCAGCAGGAAGC  
ACTATGGGCGCGGCGTCAATGGCGCTGACGGTACAGGCCAGACAATTGCTGTCTGGTATAGTGCAACAGCAAA  
GCAATTTGCTGAGGGCTATAGAGGCGCAACAACATCTGTTGCAACTCACGGTATGGGGCATT

>EU363847..2

TTCTATTGTAATACCTCAAACTGTTTAAATGGTACATACAACAATGGTACATACAATGGTACATACGGTACGG  
AAAGTAATATCACAATCCCATGCAGAATAAAGCAAATTATAAACATGTGGCAGGAGGTAGGACGAGCAATGTA  
TGCTCCTCCCATTTGCAGGAAACATAACATGTAACCTCAACTATCACAGGCTACTATGTACGTGATGGAGGAACA  
GGAAATGGGACAGATAATGGTACAGAGATATTTCAGACCTGGAGGAGGAGATATGAGAAACAATTGGAGAAGTG  
AATTATATAAATATAAAGTGGTAGAAATTAAGCCATTGGGAGTAGCACCCACTGAAGCAAAAAGGAGAGTGGT  
GGAGAGAGAAAAAAGAGCAGTGGGACTAGGAGCTGTGTTCTTGGGTTCCTTGGGAGCAGCAGGAAGCACTATG  
GGCGCGGCGTCAATAACGCTGACGGTACAAGCCAGACAATTGTTGTCTGGTATAGTGCAACAGCAAAGCAATT  
TGCTGAGAGCTATAGAGGCGCAACAGCATCTGTTGCAACTCACAGTCTGGGGCATT

>KF835500..1

TTCTATTGTAATACATCAGGCATATTTTAATAGTACATACAATGAGACATACCAAGGTAAC TCAACTAACTTAA  
ACATCACAATTCCATGCAAAATAAAGCAAATTATAAACATGTGGCAGGGGGTAGGACGAGCAATGTATGCCCC  
TCCCATTTAAAGGAAACATAACATGTAGATCAAATATCACAGGACTACTACTGACACGTGATGGAGGAATAAAT  
GTAACAAATAGAACAGATCAAGAGATATTAGACCTGCAGGAGGAGATATGAGGGACAATTGGAGAAGTGAAT  
TATATAAATATAAAGTGGTAGAAATTAAGCCATTGGGGGTAGCACCCACTACAGCAAAAAGGAGAGTGGTGGA  
GAGAGAAAAAAGAGCAGTGGGACTGGGAGCCGTGTTTCTTGGGTTCTTGGGAGCAGCAGGAAGCACTATGGGC  
GCAGCGTCAATAACGCTGACGGTACAAGCCAGACAATTGTTGTCTGGTATAGTGCAACAGCAAAGCAATTTGC  
TGAAAGCTATAGAGGCGCAACAACATCTGTTGCAACTCACGGTCTGGGGCATT

>KF835507..1

TTCTATTGTAATACATCAGGCCTGTTTAAATGGTACATACAGACAGCCTAATGGTACATACGTGTTTAAAGGAG  
ATTCAAAC TCAAACATTACAACCATTACACTCCCATGCAGAATAAAGCAAATTATAAACATGTGGCAGGAGGT  
AGGACGAGCAATGTATGCCCCCTCCCATTCAGGAAAAATAACATGTAAATCAAATATCACAGGACTACTGTTG  
GTACGTGATGGAGGGTCAAATGATACAGAGACAAATAAAACAGAGACATTTAGACCTCAAGGAGGAGATATGA  
GGGACAATTGGAGAAGTGAATTATATAAATATAAAGTGGTAGAAATTAAGCCATTGGGAATAGCACCCACTGG  
GGCAAAAAGGAGAGTGGTGGAGAGAGAAAAAAGAGCAGTGGGACTAGGAGCTGTGTTTCTTGGGTTCTTGGGA  
GCAGCAGGAAGCACTATGGGCGCGCATCAATAACGCTGACGGTACAGGCCAGACAAC TGTGTCTGGTATAG  
TGCAACAGCAAAGCAATTTGCTGAAAGCTATAGATGCGCAACAGCATCTGTTGCAACTCACGGTCTGGGGCAT

T

>KF835509..2

TTCTATTGTAATACATCAGGCCTGTTTAAACAGTACATACAATCCTAATGGTACAAAATTATAATTCAAACTCAA  
CCATCACAATCCCATGCAGAATAAAGCAAATTATAAACATGTGGCAGGGGGTAGGACGAGCAATGTATGCCCC  
TCCCATTCAGGAAACATAACATGTAGATCAAATATCACAGGACTACTATTGTTACGTGATGGAGGAAC TTCA  
GATTCAAGTAATACAACAGAGATATTAGACCTGGAGGAGGGGATATGAGGGACAATTGGAGAAATGAATTAT  
ATAAATATAAAGTGGTAGAAATTCAGCCATTGGGAATAGCACCCACTGGAGCAAAAAGGAGAGTGGTGGAGAG  
AGAAAAAAGAGCAGTGGGACTAGGAGCTATGTTTCATTGGGTTCTTGGGAGCAGCAGGAAGCACTATGGGCGCG  
GCGTCAATAACGCTGACGGTACAAGCCAGACAATTGTTGTCTGGTATAGTGCAACAGCAAAGCAATTTGCTGA  
GAGCTATAGAGGCGCAACAGCATCTGTTGCAACTCACTGTCTGGGGCATT

>KF835534..1

TTCTATTGTAATACATCAGGCCTGTTTAAATAGTACATACATGTCTAATGGTACATACATGCCTAATGGTACAG  
GAACAAACATCACAATTCCATGCAGAATAAAACAAATTATAAACATGTGGCAGGAGGTAGGACGAGCAATGTA  
TGCCCCCTCCCATTCAGGAAACATAACATGTAGGTCAAATATCACAGGATTACTCTTGGTACGTGATGGAGGA  
AAGAGAAATGGTACAAATAATACAGAGATATTAGACCTGGAGGAGGAGATATGAGAGACAATTGGAGAAATG  
AATTATATAAATATAAAGTGGTAGAAATTCAGCCATTGGGAGTAGCACCCACTAGAGCAAAAAGGAGAGTGGT  
GGAGAGAGAAAAAAGAGCAGTAGTAGGACTAGGAGCTGTGTTTCTTGGGTTCTTGGGAGCAGCAGGAAGCACT
[truncated: 310,837 more chars]
