# Supplementary material for: Extending the Coding Potential of Viral Genomes with Overlapping Antisense ORFs: A Case for the De Novo Creation of the Gene Encoding the Antisense Protein ASP of HIV-1
Source: Viruses. 2022 Jan 14;14(1):146. doi: 10.3390/v14010146 (PMC8781085; doi:10.3390/v14010146)
Supplement: Supplementary file 1 [file viruses-14-00146-s001.zip › Supplementary File S2B.pdf]

## Supplementary File S2B.

Supplementary File S2B is a complement of Supplementary File S2A. The latter contains a control set of 1753 *env/asp* overlaps in which the *asp* ORF is delimited by a start and stop codons at canonical positions but that have lost the ability to encode a full-length ASP protein because of the presence of one or more internal *stop* codons. Supplementary File S2B contains the non-overlapping coding region of the 1735 *env* sequences. It includes the region of *env* outside the antisense overlap with *asp*, as well as the region outside the sense overlap with genes *vpu* and *tat/rev*. The non-overlapping coding region of *env* is reported in the alignment format with gaps and it consists of 2436 nucleotide positions. Considering the 3822 nucleotide positions of the multiple alignment of *env* (see paragraph 2.1 in Materials and Methods), the non-overlapping coding region is comprised between nucleotide positions 151-1815, 2683-3264 and 3634-3822. All sequences belong to the group M of HIV-1. The non-overlapping coding region of *env* is also reported in the format without gaps.

```
>MH705158
GCT---GCA-----
GAAAACTTGTGGGTTACTGTCTACTATGGGGTACCTGTGTGG---AAAGACGCAGAG---
ACCACCTTATTTTGTGCATCAGATGCTAAAGCATATGATACAGAA---GTGCATAAT-----
-----GTCTGGGCTACA---CATGCCTGTGTACCCACAGAC---
CCCAATCCACAAGAAATACATTTGGAA-----AATGTGACAGAAGAGTTTAAAC-----
-----ATGTGGAAAAATAACATGGTAGAGCAGATGCATACAGATATA---
ATCAGTCTATGGGACCAAAGCCTA---AAACCATGTGTAAAGTTA---
ACCCCTCTCTGTGTACTTTAGATTGCACCAATAACATCACCAATAGCAACGATAACAACACT-----
-----CAAAGTGAAATGAAA---
AACTGCTCTTTCAATATGACCACAGAATTAAGG-----
GATAAGAAACGGAAAGTGTATTCACTT---TTTTATAGACTTGATATAGTACAAATTAATGAC-----
-----
AATAATAATAGCAGTGAGTATAGATTAATAAATTGTAATACCTCAGCCATTACACAA---
GCTTGTCCAAAGGTGACCTTTGAGCCAATTCCCATACATTATTGTGCCCCAGCTGGTTTGTCAATTCTAAAGT
GTAAG---GATATAGAGTTCAAT-----GGAACAGGACCATGCAAGAAT-----
-GTCAGC---ACAGTACAATGCACACATGGAATCAAGCCAGTAATATCAACT---
CAACTGCTGTTAAATGGCAGTCTAGCAGAACAAAAG-----
GTAAGGATTAGATCTGAAAATATCACAACAAT-----GCCAAAACCATAATAGTACAATTTGAC----
-----CAGCCTGTAGAA-----ATTAATTGTACCAGACCTAACAACAATACAAGAAAA-----
-AGTGTACGTATA-----GGACCAGGACAAACA---TTC-----TATGCAACAGGTGAC-----
-----ATAATAGGGGATATA-----AGACAAGCAGTGTGT---AATGTCAGTAAACA---
GAATGGAATAACACTTTACAACAGGTAGCTACACAATTAAGA-----AAATACTTTGGG----
-----AACGCAACAATAATCTTTGCT-----
AACTCCTCAGGAGGAGATTTAGAAATTACA---ACACATAGTTTTAATTGTGCAGGAGAA---
TTTAAACAGCTCCAGGCAAGAGTCTTGGCTGTGGAAAAGATACCTAAAAGATCAACAGCTCCTAGGAATTTGGG
GCTGCTCTGGAAAACCTCATCTGCACCCTACTGTGCCCTGGAACCTCAGTTGGAGT-----
-----AATAAATCTCAGAGTGAGATATGG-----GAT-----
AACATGACCTGGCTGCAATGG---GATAAAGAAATTAGCAATTACACAGACATAATATAT---
ACTCTAATTGAAGAAGCGCAAAACCAGCAGGAA-----
-----
AAGAATGAACAAGACTTATTGGCATTGGATAAGTGGGCAAATCTGTGGAATTGGTTTGAAATATCAAATTGGC
TGTGGTATATAAAAATATTTATAATGATAGTAGGAGACTTAATAGAATTAAAAATAGTTTTTTGCT---
GTGCTTTCTATAATA-----AATAGAGTTAGGCAGGGATACTCACCT-----
TTGTCGTTTGTATTAGTTTGCTTGATACCATAGCAATAGCAGTAGCTGGC---
TGGACAGATAGGGTTATAGAAAATAGGACAAGGAATTTGTAGAGCT-----
-----ATTGCAATATA-----CCTAGAAGAATCAGACAAGGCTTAGAACGGGCTTTGCTA---TAA
>MH705151
GCT---ACA-----
GGAAACTTGTGGGTACGGTATATTATGGGGTACCTGTGTGG---AAAGACGCAGAG---
```

ACCACCCTATTTTGTGCGTCAGATGCTAAAGCATATGATACAGAA---GTGCATAAT-----  
 -----GTCTGGGCTACA---CATGCCTGTGTACCCACAGAC---  
 CCCAGCCCACAAGAAATAGACCTGGAA-----AATGTAACAGAAAAGTTTAACT-----  
 -----ATGTGGAAAAATAACATGGTAGAGCAGATGCATATGGATATA---  
 ATTAGTCTATGGGATCAAAGCCTA---AAGCCATGTGTAAAGTTA---  
 ACCCCTCTCTGTGTTACTTTAGATTGTAGCCATAGCATCACCACCATCAATAGCACCACCATCAAT-----  
 -----  
 -----AGCAACAGCACAAGTGATATATCAGGAGAAATAAAA---  
 AACTGCTCTTTCAATATGACCACAGAATAAGA-----  
 GATAAGACAAAGAAAGTATATTCACCTT---TTTTATAGACTTGATGTGGTACAAATTGATGAA-----  
 -----  
 -----  
 AATAATGGTAGTAATAACAGTGAGTATAGACTAATAAAATTGTAATACCTCAGCCATTACACAG---  
 GCTTGTCCAAAGGTAACCTTTGAGCCAATTCCCATACATTATTGTGCCCCAGCTGGTTTTTCGATTCTAAAGT  
 GTAAG---GAGGAGAATTTCAAT-----GGAACAGGGATATGCAGGAAT-----  
 -GTCAGC---ACAGTACAATGCACACATGGAATTAAGCCAGTAGTATCAACT---  
 CAACTGCTGTTAAATGGCAGCCTAGCAGAAGGAGAG-----  
 GTAGTGATTAGATCTGAAAACTTCACAAACAAT-----GCCAAAATCATAATAGTACAGTTTAAT---  
 -----GAGTCTGTACAA-----ATTAATTGTACCAGACCTAACAAACAATACAAGAAGA-----  
 -AGTTTCCGTATA-----GGACCAGGACAGACA---TTC-----TATGCAACAGGTGAA-----  
 -----ATAATAGGAAATATA-----AGACAAGCACATTGT---AATGTCAGTAAACA---  
 GACTGGGAGAGCACTTTACAAAAGGTAGCTGCACAATTAGGC-----AAAGAATTTAAA---  
 -----ACCAACACAACAATCTTTGCT-----  
 AACTCCTCAGGAGGGGATATAGAAATTACA---ACACATAGTTTTAATTGTAGAGGGGAA---  
 TTTAAACAGCTCCAGGCAAGAGTCCCTGGCTGTGGAAAGATACCTAAAGGATCAACAGCTCCTAGGAATTTGGG  
 GTTGCTCTGGAAACTCATCTGCACCACTACTGTGCCCTGGAACTCTAGTTGGAGT-----  
 -----AATAGATCTCAGGAGGAAATATGG-----AAC-----  
 AACATGACCTGGCTGCAATGG---GAAAAAGAAATTAGCAATTACACAGACATAATATAT---  
 AGTCTACTTGAAGAATCACAGAACCAGCAGGAA-----  
 -----  
 AAGAATGAACAAGACTTATTGGCATTGGACAAGTGGGCAAGTCTGTGGAATTGGTTTGACATAACAAATTGGC  
 TATGGTATATAAAAAATATTTATAATGATAGTAGGAGGCTTAATAGGATTAAGAATAGTATTTGCT---  
 GTGCTTTCTATAATA-----AATAGAGTTAGGCAGGGATACTCACCT-----  
 CTCTCGTTTGCTATTAATTTGCTTGATACCACAGCAGTAGCAGTAGCTGAG---  
 TGGACAGATAGGATTATAGAAATAGGACAAAGACTTGCTAGAGCT-----  
 -----ATTCTCAACATA-----CCTAGAAGAATCAGACAGGGCTTAGAAAGGGCTTTGCTA---TAA  
 >MH705157  
 GCT---GCA-----  
 GAAAACTTGTGGGTACGGTCTACTATGGGGTACCTGTGTGG---AGAGACGCAGAT---  
 ACCACCCTATTTTGTGCATCAGATGCTAAAGCACATGATACAGAG---GTGCATAAT-----  
 -----ATCTGGGCTACA---CATGCCTGTGTACCCACAGAC---  
 CCCAACCCACAAGAAATAAAGTTGGAC-----AATGTGACAGAAGAGTTTAACT-----  
 -----ATGTGGAAAAATAACATGGTAGAGCAGATGCATGAAGATATA---  
 ATCAGTCTATGGGACCAAAGCCTA---ACGCCATGTGTAAAGTTA---  
 ACCCCTCTCTGTGTTACTTTAGATTGTAGCCATAACATCACCAGAAACAACACC-----  
 -----  
 -----AATAGCACATTAGAGGAGATGAAACAAGAAATAAAA---  
 AACTGCTCTTTCAATATGACCACAGAATAAGA-----  
 GATAAGAAACAGAAAGTATATGCACCTT---TTTTATAGACTTGATGTAGTGCAAATTAATGAAAATAATGAT-  
 -----  
 -----  
 AATGGTAGTGATCATAACCAATATAGACTAATAAAATTGTAATACCTCAGCCATTACACAG---  
 GCTTGTCCCAAGGTGACCTTTGAGCCAATTCCCATACATTATTGTGCCCCAGCTGGTTTTTCGATTCTAAAGT  
 GTAAG---GATAAGAAGTTCAAT-----GGAACAGGGCCATGCAAGAAT-----  
 -GTCAGC---ACAGTGCAATGTACACATGGAATCAAGCCAGTAGTATCAACT---  
 CAACTGCTGTTAAATGGCAGTCTAGCAGAAGAACAG-----  
 GTAATGATTAGATCTGAAAAATATCAGACAAAT-----GCCAAAACCATAATAGTACAGCTTGCC---  
 -----ACGCCTGTAGAA-----ATTAATTGTACCAGGCCAAACAACAATACAAGAAAA-----  
 -AGTGTACGGATA-----GGACCAGGACAAAACA---TTC-----TATGCAACAGGTGAC-----  
 -----ATAATAGGGAATATA-----AGACAAGCACATTGT---GAAGTTAGTAAAGAG---

AAATGGCAGGATGCTTTACAACAGGTAGCTAAACAATTGATA-----AAACACTTTAAG----  
 -----AACAAAACAATAAACTTTACT-----  
 GACTCCTCAGGAGGGGATTTAGAAATTACA---ACACATAGCTTTAATTGTGGAGGAGAA---  
 TTTAAACAGCTCCAGGCAAGAGTCCTGGCTGTGGAAAGATACCTAAAGGATCAACAGCTCCTAGGAATTTGGG  
 GCTGCTCTGGAAGAACTCATCTGCACCACTTCTGTGCCCTGGAACAATAGTTGGAGT-----  
 -----AATAAATCTCAGAATGAAATATGG-----GAC-----  
 AACATGACTTGGCTGCAATGG---GATAAAGAAATTAGCAATTACACACAAATAATATAT---  
 AATCTACTTGAAGAATCGCAGAACCAGCAGGAA-----  
 -----  
 AAGAATGAACAAGACTTATTGGCATTGGACAAATGGGCAAATCTGTGGACTTGGTTTGACATCTCAAATTGGC  
 TATGGTATATAAAAAATATTTATAATGGTAGTAGGAGGCTTAATAGGATTAAGAATAGTTTTTTGAT---  
 GGGCTTTCTATAATA-----CGTAGAGTTAGGCAGGGATACTCACCT-----  
 TTGTCGTTTGTCTATTACTTTGCTTGACACTGCAGCAGTAGTGGTAGCTGGG---  
 TGGACAGATAGGGTTATAGAAAGTAGGACAAAGAGTGGGGAGAGCT-----  
 -----GTTCTCCATATA-----CCTAGAAGAATCAGACAAGGCTTCGAAAGGGCTTTGCTA---TAA  
 >MH705153  
 GCT---GCA-----  
 GAAAACTTGTGGGTACGGTCTACTATGGGGTACCTGTGTGG---AAAGACGCAGAT---  
 ACCACCCCTATTTTGTGCATCAGATGCTAAAGCATATGATGCAGAA---GTACATAAT-----  
 -----GTCTGGGCTACA---CATGCCTGTGTACCCACAGAC---  
 CCCAATCCACAAGAAATAAATTTGGTC-----AATGTGATAGAAGAGTTTAAC-----  
 -----ATGTGGAAAAATAACATGGTAGAGCAGATGCATGTAGACATA---  
 ACCAGTCTATGGGACCAAAGTCTA---AAGCCATGTGTAAAGTTA---  
 ACCCCTCTCTGCGTTACATTAGACTGTAGCCATAACATCACCCTAATAACACCAATAAA-----  
 -----  
 -----ATCACAAACAGCACAAATTCACATGATAGAAGAAATAAAA---  
 AACTGCACATACAATACAACCACAATACTAAGA-----  
 GATAAAAAACAGCAAGTATATTCACCT--TTTTATAGACTTGATGTAGTACAAATTAATAAAAAAGAAT---  
 -----  
 -----  
 GGTAATAACAGTGAACAGTATAGGCTAATAAATTGTAATACCTCAGCCATTACACAG---  
 GCTTGTCCTCAAGGTGACCTTTGAGCCAAATCCCATACATTATTGTGCCCCAGCTGGTTTTGCGATTCTAAAGT  
 GTAAG---GATGAGGAGTTCAAT-----GGAACAGGGCCATGCAAGAAT-----  
 -GTCAGC---ACCGTCCAATGTACACATGGAATCAAGCCAGTAGTATCAACT---  
 CAACTGCTGTAAATGGCAGTCTAGCAGAGAAGGAG-----  
 GTAAGGATTAGATCTGAAAATCTCAAAGACAAT-----ACCAAACCATAATAGTACAGCTTGAC---  
 -----AAGCCTGTAATA-----ATTAATTGTACCAGACCTAACAATAATACAAGACAA-----  
 -AGTATACGTATA-----GGACCAGGACAAGCA---TTC-----TATGCAACAGGTGCC-----  
 -----ATAATAGGAAATATA-----AGACAAGCATATTGT---AATGTCAGTAGAACA---  
 GAATGGAATCAAACCTTTACAAAAGGTAGGTACACAATTAGGA-----AAATACTTTAAG---  
 -----AACAAAACAATAATCTTTACT-----  
 AACTCCTCAGGAGGGGATATAGAAATTACA---ACACATAGCTTTAATTGTGGGGGAGAA---  
 TTTAAACAGCTCCAGGCAAGAGTCCTGGCTGTGGAAAGATACCTACAGGATCAACAGCTCCTAGGAATTTGGG  
 GCTGCTCTGGAAGAACTCATCTGCACCACTACTGTGCCCTGGAATTCTAGTTGGAGT-----  
 -----AATAAATCTCTGAGTGAATATATGG-----GAT-----  
 AACATGACCTGGTTGCAATGG---GATAAAGAAATTAGTAATTACACACAAAAAATATAT---  
 ACTCTAATTGAAGAATCGCAGAACCAGCAGGAA-----  
 -----  
 AAGAATGAACAAGAGTTATTGGAATTGGACAAGTGGGCAAATCTGTGGAATTGGTTTGACATCTCAAATTGGC  
 TATGGTATATAAAAAATATTTATAATGATAGTAGGAGGCTTAGTAGGATTAAGAATAGTTTTTTGCT---  
 GTGCTTTCTGTAATA-----AATAGAGTTAGGCAGGGATACTCACCT-----  
 TTGTCGTTTGTCTATTACTTTGCTTGACGCTACAGCAATAGCAGTAGCTGGG---  
 TGGACAGATAGGGCTATTGAATTAGGACAAAGAATTTGTAGAGCT-----  
 -----ATTCTTCACATA-----CCTGTAAGAATCAGACAAGGCTTAGAAAGGGCTTTGCTA---TAA  
 >MH705133  
 GCT---GCA-----  
 GAAAACTTGTGGGTTACGGTTTACTATGGGGTACCTGTGTGG---AAAAATGCGGAG---  
 ACCACCCCTCTTCTGTGCATCAGAAGCTAAAGCATATGAGAAAGAA---GTGCATAAT-----  
 -----GTCTGGGCTACA---CATGCCTGTGTGCCACAGAC---  
 CCCAACCCACGAGAAATAAATTTGGAC-----AATGTGACAGAAGAGTTTAAC-----

-----ATGTGGAAGAATAACATGGTCGAGCAGATGCATACAGATATA---  
ATCAGTCTATGGGACCAAAGCCTA---AAGCCATGTGTAAAGTTA---  
ACCCCTCTCTGTGTTACTTTAAATTGTAGCCATAACATCACCAGAAACATTACCGATATC-----  
-----  
-----GGCAACAGCACAATTAATATGAGAGAAGAAATAAAA---  
AACTGCTCTTTCAATGTGACCACAGCAATAAAA-----  
GATAGGAGAGAGAAAGTATATTCACCT--TTTTATAGACTTGATGTAGTACAAATGAATGAA-----  
-----  
-----  
AATAATGGTAGTAAACAGTATAGATTAATAAATTGTAATACCTCAGCCATTACACAA---  
GCTTGTCCAAAGGTATCCTTTGAGCCAATTCCCATACATTATTGTGCCCCAGCTGGTTTTGCGATTCTAAAGT  
GTAAT---GATAAGCAGTTCAAT-----GGAACAGGGCTATGCAAAAAT-----  
-GTTAGC---ACAGTACAATGCACACATGGAATTAAGCCAGTAGTATCAACT---  
CAACTGCTGCTAAATGGCAGTCTAGCAGAAAAAAG-----  
GTAATGATTAGATCTGAGAATTTCTCAGACAAT-----GCCAAAACCATAATAGTACAGCTTGTC----  
-----AAGCCTGTAAAA-----ATTAATTGTACAAGACCTAACAACAATACAAGAAG-----  
-AGTGTACATATA-----GGACCAGGACAAGCA---TTC-----TATGCAACAGGTGAC-----  
-----ATAATAGGGGACATA-----AGACAGGCATATTGT---ACAGTCAATAGAACA---  
GCATGGAATGAACTTTGAAAGAGGTAGCTATGCAATTAGGT-----AACATCTC-----  
-----AACAAAACAATAATCTTTACT-----  
AATCACTCCGGAGGGGATTTAGAAATTACA--ACACATAGTTTTAATTGTGGAGGAGAA---  
TTTAAACAGCTCCAGGCAAGAGTCCTGGCTGTGGAAAGATACCTAAAGGATCAACAGCTCCTAGGAATTTGGG  
GTTGCTCTGGAAACTCATCTGCACCACTGCTGTGCCCTGGAACCTCTAGTTGGAGT-----  
-----AATAAATCTCAGAATGAGATATGG-----GAG-----  
AACATGACCTGGCTGCAATGG---GATAAAGAAATTAGCAATTACACAAACATAATATAT---  
AGTTTAATTGAAGACTCGCAGAACCAGCAGGAA-----  
-----  
AAGAATGAACAAGACTTATTAGCACTGGACAAGTGGGGAAATCTGTGGAATTGGTTTGACATATCAAATTGGC  
TGTGGTATATAAGAATATTTATAATGATAGTAGGAGGCTTAATAGGATTAAGAATAGTTTTTTGCT---  
GTGCTTGCTGTAATA-----AATAGAGTTAGGCAGGGATACTCACCT-----  
TTGTCGTTTGCTATTAATTTGCTTGATACCACAGCAGTAGCAGTAGCTGGG---  
TGGACAGATAGGGTTATAGAAATAGGACAAGGAGTTGGTAGAGCT-----  
-----ATTCTCCACATA-----CCTAGAAGAATCAGACAGGGCTTGGAAGGGCTTTGCTA--TAA  
>JQ403028  
GCT---ACA-----  
GAAAAATTGTGGGTACGGTCTACTATGGGGTGCCTGTGTGG--AAAGACGCAGTG---  
ACCACCCATTTTTGTGCATCAGATGCTAAAGCATATGATACAGAA--GTGCACAAT-----  
-----GTCTGGGCTACA--CATGCCTGTGTACCCACAGAC---  
CCCAACCCACACGAAATACCTTTAGCT-----AATGTGACAGAAGAGTTTAAC-----  
-----ATGTGGAAAAATAACATGGTAGAGCAAATGCATACAGACATA---  
ATCAGTCTATGGGACCAAAGCCTA--AAGCCATGTGTAAAGTTA---  
GCCCTCTCTGTGTAACCTTAGAGTGTAATGATGCCAACAGAACAAACATCAAT-----  
-----  
-----ATAACTGAAGAAGAATTTAAAGTAAAA---  
AACTGCTCTTTCAATATGACCACAATTCTAAGA-----  
GATAAGAAACAGAAAATGCATGCACCT--TTTTATAGAACTGATGTAGTACAAATTGGAAGT-----  
-----  
-----  
AATAGTAGTGAAAGATATAAGTATAGACTAATAAATTGTAATACCTCAGCTATCACACAG---  
GCTTGTCCAAAGGTATCCTTTGAGCCAATTCCCATACATTATTGTGCCCCAGCTGGTTTTGCGATTCTAAAAT  
GTAAT---GATAAGGAATTCAAT-----GGAACAGGGCCATGCATGAAT-----  
-GTCAGT---ACAGTACAATGCACACATGGAATCAAACCAGTAGCGTCAACT---  
CAGCTGCTGTTAAATGGCAGTCTAGCAGAAGGAAAA-----  
ATAATGATTAGATCTGAAAATCTCACAGACAAT-----GCCAAAATCATAATAGTGCAGCTTAAT----  
-----GAGTCTGTATCA-----ATTAATTGTACCAGACCTAACAACAATACAAGAAAA-----  
-AGTTGGCATATA-----GGACCAGGACAGGCT---TTC-----TATGCAATGGACGAC-----  
-----ATACTAGGGGACATA-----AGAAAAGCACAGTGT---AATGTCAACAGAACA---  
GCATGGGAAAACACTTTACAAAAGATAGCTACACAATTAAGA-----ATTATGTAC-----  
-----AACAAAACAATAGAATTTAAG-----  
AATTCCTCAGGAGGGGATTTAGAAATTACA--ACACATAGTTTTAATTGTGGAGGAGAA---

TTTAAACAGCTCCAGGCACGAGTCCTGGCTGTAGAAAGATACCTACAGGATCAACAGCTCCTAGGAATTTGGG  
 GTTGCTCTGGAAACTCATCTGCACCACTAATGTGCCCTGGAAGCTCCAGTTGGAGT-----  
 -----AATAAATCTCAGGAAGACATATGG-----GGT-----  
 AACATGACCTGGTTACAATGG---GAGAAAGAAATTAGCAATTACACATCCATAATATAT---  
 GAGCTACTTGAAGAATCAGACAACCAGCAGGAA-----  
 -----  
 AAGAATGAACAAGACTTATTGGCATTGGACAAGTGGGCAAGTCTGTGGAATTGGTTTAACATATCAAATTGGC  
 TATGGTATATAAAAAATATTCATAATGATAGTAGGAGGCTTAATAGGATTAAGAATAGTTTTTTACT---  
 GTGCTTTCTATAATA-----AATAGAGTTAGGCAGGGCTACTCACCT-----  
 TTGTCAATTTGCTATTACTTTGCTTGATGCTACAGCAATAACAGTAGCTGGG---  
 TGGACAGATAGGGTTATAGAAAATAGGACAAAGATTTTGCAGAGCT-----  
 -----ATACTCCATATA-----CCTAGAAGAATCAGACAGGGCTTAGAAAAGGGCTTTAATA---TAA  
 >KX389622  
 GCT---ACA-----  
 GACAACTTGTGGGTCACAGTCTATTATGGGGTACCGGTATGG--AAAGATGCAGAG---  
 ACCACCTTATTTTGTGCATCAGATGCTAAAGCACATCATAACAGAA--GCACATAAT-----  
 -----GTCTGGGCTACA---CATGCTTGTGTACCCACAGAC---  
 CCCGACCCACAAGAAATAAATCTGGAA-----AATGTGACAGAAAAGTTTAAAC-----  
 -----ATGTGGAAAAATAAGATGGTAGATCAGATGCATGAGGATATA---  
 ATCAGTATATGGGATCAAAGCCTA---AAGCCATGTGTAAAGTTA---  
 ACCCCTCTCTGCGTCACTTTAGAATGCAGTAAGGTCACAATCAATAACAGTACCACCCAC-----  
 -----  
 -----AACACCGCCCCAAACAACAACAACACGATAGAAAAAGAAATGAGA---  
 AACTGTACCTACAATATGACCACAGAAGTAATA-----  
 GATAAGAAAAAGAAAGTACATTCACTT---TTTTATAGGCTTGATATAGTACCAATAACAAATGAAACCACG-  
 -----  
 -----  
 AATGGTAGCCAGTATAGACTAATAAACTGTAATACCTCAGCCATTACACAG---  
 GCTTGCCCAAAGGTAAATTTTGTAGCCAATTCCAATACATTATTGTGCCCCAGCTGGTTTTGCGATTCTAAAAT  
 GTAAG---GATAAGAATTTCAAT-----GGAACAGGGACATGCAGGAAT-----  
 -GTCAGC---ACAGTACAATGCACACATGGAATTAAGCCAGTAGTCTCAACT---  
 CAACTGCTGTAAATGGCAGTCTAGCGGAGGAAAAC-----  
 ATAAGGATTAGCTCTGAAAATCTCACAGATAAT-----GCTAAAATCATAATAGTACAGCTAAAT---  
 -----GAGTCTGTACCA-----ATTAATTGTATTAGACCTAGCAACAATACAAGAGAA-----  
 -AGTATACGTATA-----GGACCAGGACAAGCA---TTC-----TATGCAGCAGGTGAG-----  
 -----ATAATAGGGGACATA-----AGACAAGCACATTGT---AATGTCAGTAGAACT---  
 GAATGGAATAACACTTTACAAAAGGTAGCTGGCGAATTAAAA-----AGACTTTTTTAAC---  
 -----ACAACRACAATAGTCTTTCAA-----  
 AATTCCTCAGGAGGGGATTTGGAAATTACA--ACACATAGTTTTTAATTGTGGAGGAGAA---  
 TTTAAACAGCTCCAGGCAAGAGTCCTGGCGATAGAAAGATACCTAAAGGATCAACAGCTCCTAGGAATTTGGG  
 GCTGCTCTGGAAACTCATCTGCACCACTACTGTGCCCTGGAATTTCTAGTTGGAGT-----  
 -----AATAAATCTTATGATGACATATGG-----AAT-----  
 AATATGACCTGGATGGAATGG---GATAGAGAAGTTAGTAATTACACAAACATAATATAT---  
 TCTCTGATTGAAGAATCGCAGAACCAGCAGGAA-----  
 -----  
 AAGAATGAACAAGACTTATTGYCATTGGACAAGTGGGCAAGTCTGTGGAAGTGGTTTGACATATCACACTGGC  
 TATGGTATATAAGAATATTTATAATGATAGTAGGGGGCTTGATAGGTTTAAGAATAATTTTTTGCT---  
 GTGCTTTCTGTAGTG-----AATAGAGTCAGGCAGGGATACTCACCT-----  
 CTGTCAATTTGGCTATTAGCTTGCTCAATACCACAGCAATAGCAGTAGCTGAG---  
 TGGACAGATAGGGTTATAGAAAATAGCACAAGCATTGGTAGAGCC-----  
 -----TTTATCAACATA-----CCTAGAAGAATCAGACAGGGCTTAGAAAAGGCATTGCTA---TAA  
 >DQ396400  
 -----TCA-----  
 GACAACTGTGGGTCACGGTCTATTATGGAGTACCTGTGTGG--AAAGATGCAGAT---  
 ACCACTCTATTTTGTGCATCAGATGCTAAAGCATATAGTAAAGAA--GTACATAAT-----  
 -----GTCTGGGCTACA---CATGCCTGTGTACCCACAGAC---  
 CCAAACCCACAAGAAATGAATTTGGAA-----AATGTAACAGAAAAGTTTAAAC-----  
 -----ATGTGGAAAAATGGCATGGTAGAACAAATGCATACAGATATA---  
 ATCAGTTTATGGGACCAAAGCCTA---ACACCATGTGTAAAGTTA---  
 ACCCCTCTCTGTGTTACTTTAAATTGTACTAACAGCAACTTCACTAGGAATAGCAACCTCACTGATGAT----

-----  
 -----ACTGATAACAACCCCAATAATACTATTAATATGGAAAATGAAATAAAA---  
 AATTGCTCTTTCAATGTGACTACAGAAATAAGA-----  
 GATAAGAGGCCAAAAGCATATGCACTT---TTTTATAAACTAGATGTAGTACAAATTGATAAT-----  
 -----  
 -----  
 AATAGTAGTGAGTATATACTAATAAATTGTAATACCTCAGCCATTACACAG---  
 GCTTGTCCAAAGGTAACCTTTGACCCAATTCCCATACATTATTGTGCCCCAGCTGGTTTTGCGATTCTAAAAT  
 GTAAT---GATAAGCAATTCAAT-----GGATCAGGGATATGCAAGAAT-----  
 -GTCAGC---ACAGTACAATGCACACATGGAATCAAGCCAGTAGTATCAACT---  
 CAATTGTCTGTTAAATGGCAGTCTAGCAGAGGAAGAC-----  
 ATAATGATTAGATCTGAAAATATCACAGACAAT-----ACCAAAAACATAATAGTACAGTTTAAT----  
 -----GAGTCTGTAAAGC-----ATTAATTGTACCAGACCTGGCAACAATACAAGAAAA-----  
 -AGTATACGTATA-----GGGCCAGGACAAAACA---TTC-----TTTGCAACAGGCGAC-----  
 -----ATCATTGGGGATATA-----AGACAAGCACATTGT---AATGTCAGCAAAAG----  
 GAATGGATGAAAGTTCTGCAACAGGTAGTTAGAAAATTAAGA-----AAGGAATTTGAA----  
 -----AACAAAACAATAGTCTTTGAT-----  
 AATCCCTCAGGAGGGGATTTAGAAATTACA--ATGCATAGTTTTAATTGTAAAGGAGAG---  
 TTTAAACAGCTCCAGGCAAGAGTCCTGGCTGTGGAAAGATACCTAAAGGATCAACAGCTTCTAGGAATTTGGG  
 GCTGCTCTGGAAAGATCATCTGCACCACTACTGTGCCCTGGAACCTCTAGTTGGAGT-----  
 -----AATAAATCCTATGATGACATATGG-----GAT-----  
 AACATGACCTGGATGCAATGG---GAAAAGGAAATTGGCAATTACACAGAATTAATATAT---  
 AGTCTACTTGAAGAATCGCAGGTCCAGCAGGAA-----  
 -----  
 AAGAATGAACAAGAATTATTGGCATTGGACAAGTGGGCAAGTCTATGGAATTGGTTTGACATATCAAGATGGC  
 TGTGGTATATAAAAATATTTCATAATGATAGTAGGAGGCTTAATAGGATTGAGAATAATTTTTTGCT---  
 GTACTTTCTATGCTA-----AATAGAGTTAGGCAGGGTTACTCACCT-----  
 CTGTCATTTGCTATCTCTTTGCTTGATACTATAGCAATAACAGTAGCTGGC---  
 TGGACAGGTAGGGTTATAGAAATAGGACAAAGAATTGTTAGAGCT-----  
 -----ATTCTCCACATA-----CCTAGAAGAATTAGACAGGGCTTAGAAAGAGCTTTGCAA---TAA  
 >FM165645  
 GCT---ACA-----  
 ACAAACTTGTGGGTTACTGTCTACTATGGGGTACCTGTGTGG--AAAGATGCAGAG---  
 ACCACCTTATTTTGTGCATCAGATGCTAAAGCATATGATACAGAA--GTGCATAAT-----  
 -----ACCTGGGCTACA---CATGCCTGTGTACCCACGGAC---  
 CCCAACCCACAAGAAATACAGTTGGAA-----AATGTGACAGAAAAGTTTAAC-----  
 -----ATGTGGAAAAATAACATGGTAGAACAGATGCATGAGGATATA---  
 ATCAGTCTATGGGACCAAAGCCTA--AAACCATGTGTAAAGTTA---  
 ACCCCTCTCTGTGTCACTTTAGAAATGCCATAACTACAAAGGCAATGGCACCAATAATACA-----  
 -----  
 -----TATATCAACGGAACGGATGCCATGCAAGGAGAAATAAAA---  
 AACTGCTCTTACAATATGACCACAGAATTAAGG-----  
 GATAAGAAACAGAAAGTGTATTCACCT---  
 TTTTATAGACTTGATATAGTACCAATTAGTGAGAAAAATAGTAAC-----  
 -----  
 AGTAATAGTAACAATAGTAGCAGTAAGTATAGATTAATAAATTGTAATACCTCAGCTATTACACAA---  
 GCTTGTCCAAAGGTATCCTTTGAGCCAATTCCCATACATTATTGTGCCCCAGCTGGTTTTGCGATTCTAAAGT  
 GTAAT---GATATAGATTTCAAT-----GGAACAGGACTATGCAAGAAT-----  
 -GTCAGC---ACAGTACAATGCACACATGGAATCAGGCCAGTAGTATCAACT---  
 CAACTGCTGTTAAATGGCAGTCTAGCAGAAAAAGAG-----  
 GTAAGGATTAGATCTGAAAATATCACAACAAT-----GCCAAAACCATAATAGTACAACCTTGAT----  
 -----CAGCCTGTAAAT-----ATTACTTGTATGAGACCTAACAACAATACAAGAAAA-----  
 -AGTGTACATATA-----GGACCAGGACAAGCA---TTT-----TATGCAACAGGTGAC-----  
 -----ATAATAGGGAACATA-----AGAGAAGCACATTGT---AATGTCAGTAGAGAA---  
 GATTGGAACAATACTTTACAAAAGGTAGCCACACAATTAAGA-----AAACACTTTGGG----  
 -----AACAAAACAATAATCTTTGCT-----  
 AAGTCCTCAGGGGGGGATTTAGAAATTACA--ACACATAGTTTTAATTGTGAAGGAGAA---  
 TTTAAACAGCTCCAGGCAAGAGTCCTGGCTGTGGAAAGATACCTACATGATCAGCAGCTCCTAGGAATTTGGG  
 GCTGCTCTGGAAACTCATCTGCACCACTAATGTGCCCTTGGAAACGATAGTAGGAGT-----  
 -----AATAAATCACTAAATGACATATGG-----AAT-----

AATATGACCTGGATGCAATGG---GATGAAGAAATTAGCAATTACACACAAATAATATAT---  
AATCTACTTGAAAAATCGCAGAATCAGCAGGAA-----  
-----  
AAAAATGAACAAGAGTTATTAGCATTGGACAAGTGGGCAAGTTTGTGGAATTGGTTTAACATCTCAAACCTGGC  
TATGGTATATAAGAATATTTATAATAATAGTAGGCGGCTTAATAGGGTTAAGAATAGTTTTTTTGCT---  
GTGCTTTCTATAATA-----AATAGAGTTAGGCAGGGATACTCACCT-----  
CTGTCGTTTGCTACTAGTCTGCTTGATACCATAGCAATAGTAGTAGCTGGC---  
TGGACAGATAGGGCTATAGAAATCACACAGAACATTTGTAGAGGT-----  
-----ATTCTCCACATA-----CCTAGAAGAATCAGACAAGGCTTTGAAAGGGCTTTGCTA---TAA  
>FM165628  
GCT---ACA-----  
ACAAACTTGTGGGTTACTGTCTACTATGGGGTACCTGTGTGG--AGAGATGCAGAG---  
ACCACCTTATTTTGTGCATCAGATGCTAAAGCATATGATACAGAG---GTGCATAAT-----  
-----ATCTGGGCTACA---CATGCTTGTGTACCCACAGAC---  
CCCGACCCACAAGAAATAATTTTGAAA-----AATGTGACAGAAGAGTTTAAAC-----  
-----ATGTGGAAAAATAACATGGTAGAACAGATGCATGCAGATATA---  
ATCAGTCTATGGGATCAAAGCCTA---AAACCATGTGTACAGTTA---  
ACCCCTCCCTGTGTTACTTTAGAGTGCAATGATTATAATAGCACCAAATCCAACAAT-----  
-----  
-----ACGGCTCCCACTGAAACGCCAGAAGAAGTAAAA---  
AACTGCACTTTCAATACAACCACAGAATTAAGG-----  
GGCAAGAAAAAGAAAGAGTATTCATT--TTTTATAGACTTGATATAGTACAGATTAATGAAGAC-----  
-----  
-----  
AATAGTAGTGATAGCAGGAAGTATAGATTAATAAATTGCAATACCTCAGCCATTACACAG---  
GCTTGTCCAAAGGTATCCTTTGAGCCAATCCCATACATTATTGTGCCCCAGCTGGTTTTCGATTCTAAAGT  
GTAAT---GATATAGAGTTCAAT-----GGAACAGGACCATGCAAGAAT-----  
-GTCAGC---ACAGTACAATGCACACATGGAATCAAGCCAGTAGTATCAACT---  
CAACTGCTGTTGAATGGCAGTCTAGCAGAACAAAGAC-----  
ATAAGGATTAGATCTGAAAATATCTCACAAAAT-----CACAAAACCATAATAGTACAATTTAAT---  
-----CAGCCGGTAGCA-----ATTAATTGTACCAGACTTAGAAACAATACAAGAAGA-----  
-AGTATACATATA-----GGACCAGGACAAGCA---TTC-----TATGCAACAGGAGCA-----  
-----ATAATAGGGGACATA-----AGAAGTGCACATTGT---AATACCAGTAGCAAA---  
GCTTGGAATAAGACTTTACACAGGGTAGCCACACAGTTAAGA-----AAACACTTT-----  
-----AACGGAACAATAATCTTTACT-----  
AATGCCTCAGGGGGGATTTAGAAATTACA--ACACATAGTTTTAATTGTGGAGGAGAA---  
TTTAAACAGCTCCAGGCAAGAGTCCCTGGCTATGGAAAGATACCTACATGATCAACAGCTCCTAGGAATTTGGG  
GCTGCTCTGGAAGACTCATCTGCACCACTAATGTGCCCTGGAACGCTAGTTGGAGT-----  
-----AATAGATCTCAAAATGAGATATGG-----AAT-----  
AATATGACCTGGTTGCAATGG--GATAAAGAAGTTGGCAATTACACAGACATAATATAT---  
GATCTACTTGAAAAATCGCAGAACCAGCAGGAA-----  
-----  
AAGAATGAACAAGACTTATTGGCATTAGACAAGTGGGCAAGTCTGTGGAATTGGTTTAATATCTCAAAATGGC  
TGTGGTATATAAAAAATATTTATAATGATAGTAGGCGGCTTAATAGGGTTAAGAATAGTTTTTTTGCT---  
ATGCTTTCTATAATA-----AATAGAGTTAGGCAGGGATACTCACCT-----  
CTGTCGTTTGCTACTAGTCTGCTTGATACCATAGCCATAGTAGTAGCTGGC---  
CGGACAGATAGGGTTATAGAAATAACACAAAGCCTTTGTAGAGCT-----  
-----ATTCTCAACATA-----CCTAGAAGAATCAGACAGGGCCTTGAAAGGGCTTTGCTA---TAA  
>EU191615  
GCT---ACA-----  
ACAAACTTGTGGGTTACTGTCTACTATGGGGTACCTGTGTGG--AGAGATGCAGAG---  
ACCACCTTATTTTGTGCATCAGATGCTAAAGCATATGCTACAGAG---GTGCATAAT-----  
-----GTCTGGGCTACA---CATGCTTGTGTACCCACAGAC---  
CCTGACCCACAAGAAGTAATTATGGAA-----AATGTGACAGAAGAGTTTAAAC-----  
-----ATGTGGAAAAATAACATGGTAGAACAGATGCATGCAGATATA---  
ATCAGTCTATGGGATCAAAGCTTA---AAACCATGTGTACAGTTA---  
ACCCCTCTCTGTGTTACTTTAGAGTGCGCTAACTATACTGGCACCGCCTACAATTGCACCGCCTGCAAAAAT-  
-----  
-----GGCACCAGCACCATGGTTCCCCCTATAGTTGAAACGCCAGGAGAAATACAA---  
AACTGCTCTTTCAATATAACCACAGAATTAAGG-----

GATAAGAAAAAGAAAGTACATTCACCTT---TTTTATAGAGTTGATATAGTACAGATTGATAATAGTAGT-----  
-----  
-----  
AGTAACAGTAATACCAGTAAGTATAGATTAATAAAATTGCAATACCTCAGCCATTACACAG---  
GCTTGTCCAAAGGTATCCTTTGAGCCAATCCCATACATTATTGTGCCCCAGCTGGTTTTGCGATTCTAAAGT  
GTAAT---GATATAGAGTTCAAT-----GGAACAGGACCATGCAAGAAT-----  
-GTCAGC---ACAGTACAATGCACACATGGAATCAAGCCAGTAGTATCAACT---  
CAACTGCTGTAAATGGCAGTCTAGCAGAAAAAGAG-----  
ATAAGGATTAGATTTGAAAATATCACAGACAAT-----GCCAAAGCTATAATAGTACAATTTAAT-----  
-----CAGTCGGTAGAA-----ATTAATTGTACCAGGCCTAACAACAATACAAGAACA-----  
-AGTGTACATATA-----GGACCAGGACAAGCA---TTC-----TATGCAACAGGTGAC-----  
-----ATAATAGGGGACATA-----AGAAATGCACATTGT---AATGTCAGTAGAAAG---  
AATTGGACTGAGGCTTTATACAGGGTAGCCACACAATTAAGA-----AAACACTTT-----  
-----AACAGAACAATAAACTTTACT-----  
AGTGCCTCAGGGGGGGATTTAGAACTTACA---ACACATACTTTTAATTGTGGAGGAGAA---  
TTTAAACAGCTCCAGGCAAGAGTCCTGGCTATGGAAAGATACCTACATGATCAACAGCTCCTAGGAATTTGGG  
GCTGCTCTGGAAGACTCATCTGCACCACCTAATGTGCCCTGGAACACTAGTTGGAGT-----  
-----AATAAATCTCAAGATGAGATATGG-----AAT-----  
AATATGACCTGGTTGCAATGG---GATAAAGAAGTTGGCAATTACACAGACATAATATAT---  
GATCTACTTGAAAAATCGCAGAACCAGCAGGAA-----  
-----  
AAGAATGAACAAGAATTATTGGCATTAGACAAGTGGGCAAGTCTGTGGAATTGGTTTAATATCTCAAATTGGC  
TGTGGTATATAAAAATATTTATAATGATAGTAGGTGGCTTAATAGGGTTAAGAATAGTTTTTTGCT---  
GTGCTTGCTATAATA-----AATAGAGTTAGGCAGGGATACTCACCT-----  
CTGTCGTTTGCTACTAGTCTGCTTGATACCATAGCAATAGCAGTAGCTGGC---  
TGGACAGATAGGGTTATAGAAATAACACAAAACCTTTGTAGAGCT-----  
-----ATTCTCAACATA-----CCTAGAAGAATCAGACAGGGCCTTGAAAGAGCTTTGCTA---TAA  
>MH746258  
ACT---GCA-----  
GACCACTTGTGGGTTACTGTATACTATGGGGTACCTGTGTGG---AGAGATGCAGAA---  
ACCACCCATTTTTGTGCATCAGATGCCGAAAGCATATAAAACAGAA---ATGCATAAT-----  
-----GTATGGGCTACA---CATGCCTGTGTACCTACAGAC---  
CCCAACCCACAAGAAATAAAATGGCA-----AATGTGACAGAGGAGTTTAAC-----  
-----ATGTGGAAAAATAACATGGTAGAACAGATGCATAAAGATATA---  
ATCAGTCTATGGGACCAAAGCCTA---AAGCCATGTGTACATTTA---  
ACCCCTCTCTGTGTAACCTTTGAAATGTATAGATGTCCAAAATAGCACCACCAATAGCACC-----  
-----  
-----AAGCATACTGTCTCCCCTGAAATGAACGGAGAAATAAAA---  
AACTGCTCTTTCAACGTGACCACAGTATTAAGG-----  
GACAAGCAACAGAAAGTACATTCACCT---  
TTTTATAGACTTGATGTAGTACCAATTGATAGCAATAGTAATAGTAGTAGC-----  
-----  
AATAGTAGTAATAGTGATAATAGTAAGGAGTATAGATTAATAAAATTGTGATACCTCAGCCATTACACAG---  
GCTTGTCCAAAGATATCTTTTGATCCAATTCCCATACATTATTGTGCTCCAGCTGGTTTTGCAATTCTAAAGT  
GTAAT---GATAAGGAGTTCAAT-----GGAACAGGACCATGCAGGAAT-----  
-GTCAGC---ACAGTACAATGCACACATGGAATCAGGCCAGTAGTATCAACT---  
CAGCTGCTGCTAAATGGCAGTCTAGCAGAAAATAAG-----  
ACAATGATTAGATCTGAAAATATCACAACAAT-----GCCAAAACATAATAGTACAACCTTACT-----  
-----AAGCCTGTAAAC-----ATTACTTGATCAGGCCTAACAACAACACAAGAACA-----  
-AGTGTACATATA-----GGACCAGGACAAGCA---TGG-----TATTCAACAGGTGAC-----  
-----ATAATAGGGGATATA-----AGGAAAGCATATTGT---GAAGTCAATAAGACA---  
GAATGGAATAGAACCTTGACGAGGTAGCCAACCAATTAAGA-----ACATACTTTGGG-----  
-----GAGAACAACAAATAATCTTTAAT-----  
AGCTCCTCAGGAGGAGATCTAGAAATTACA---ACACATAGTTTTAATTGTGGAGGAGAA---  
TTCAAACAGCTCCAGGCAAGAGTCCTTGCTGTGGAAAGGTATCTAAGGGATCAACAGCTCCTAGGAATTTGGG  
GCTGCTCTGGAAGAACTCATCTGCACCACCTACTGTGCCCTGGAACCTCACTTGGAGT-----  
-----AATAAATCCTATGAGTACATCTGG-----AAC-----  
AACATGACCTGGCTACAATGG---GATAGAGAAGTTAGCAATTATACACAAATAATATAT---  
GATCTAATTGAAGAATCACAGACCCAGCAGGAA-----  
-----

ATAAATGAAAAAGACTTATTGGCATTGGACAAGTGGGCAAGTCTGTGGAATTGGTTTGAGATCTCAAATTGGC  
 TGTGGTATATAAAAAATATTTATAATGATAGTAGGAGGCTTAATAGGATTAAGAATAGTTTTTTGCT---  
 GTGCTTTCTGTAATA-----AAAAGAGTTAGGCAGGGATACTCACCC-----  
 CTGTGCTTGGCTATTAGTTTGTGTTGACACCACAGCAATAGCAATAGCTGGC---  
 TGGACAGATAGAGTTATAGAAGTAGGACAAGGAATTTGTAGAGCT-----  
 -----ATTTCGAACGTA-----CCTAGAAGAATCAGACAGGGCTTAGAAAAGAGCTTTTGCTA---TAA  
 >MH746253  
 GCT---ACA-----  
 GAACAATTGTGGGTTACTGTCTACTATGGGGTGCCAGTGTGG---AGAGACGCAGAT---  
 ACCACCTTATTTTGTGCATCAGATGCTAAAGCAACCAGTGCAGAA---AAACATAAT-----  
 -----GTCTGGGCTACA---CATGCCTGTGTACCAACAGAC---  
 CCCAACCCACAAGAAGTACATCTGAAA-----AATGTGACAGAAGAGTTTAAAC-----  
 -----ATGTGGAAAAATAACATGGTAGAGCAGATGCATACAGATATA---  
 ATTAGTCTATGGGACCAAAGCCTA---AAGCCATGTGTACAATA---  
 ACCCCTCTCTGCGTCACTTTAAATTGTAGCAATGTCAATATCACTAACAGCGATGCCAAAAGCAATAGC----  
 -----  
 -----AACAAATGTCACTAGCTTAGAGGACAAGGGAGAAATAAAA---  
 AACTGCTCTTTCAATATGACCACAGAGCTAAGG-----  
 GATAAGGAAAAGAAGGTATATTCACCT---TTTTATAAACTTGACATAGTACCTCTTAATAATAATATTACT-  
 -----  
 -----  
 GATAGTAATGATAGTAGTGGGGAATATAGATTAATAAAATTGCAATACCTCAGCCATTACACAG---  
 GCTTGTCCAAAGGTATCCTTTGAGCCAATTCCCATACATTATTGTGCCCCAGCTGGTTTTCGATCCTAAAAT  
 GTAAT---GAGGAGAAGTTCAAT-----GGAACAGGGCCATGCAAAAAT-----  
 -GTTAGC---ACAGTACAGTGCACACATGGAATCAAGCCAGTAGTATCAACT---  
 CAACTGCTGCTAAATGGTAGTCTGGCAGAAAAAGAT-----  
 GTAATTATTAGATCTGAAAATATCACAAACAAT-----GTCAAAAATATAATAGTACAATTTGCC----  
 -----AAACCTGTACAA-----ATTAATTGTACCAGACCTAACAAACAATACAAGAACA-----  
 -AGTATACGTATA-----GGACCAGGACAAGCA---TTC-----TATGGAACAGGTGAC-----  
 -----ATAATAGGGGACATA-----AGAAAAGCACATTGT---AATGTCAGGAAGTCA---  
 GACTGGAATGACACTTTACAACAGGTAGTTAAGCAACTAAGG-----ACACACTTTGGG----  
 -----AACAAAGCAATAAGATTTAAT-----  
 AGCTCCTCAGGAGGAGATCTAGAAATCACA--ACACATAGTTTTAATTGTGCAGGAGAA---  
 TTTAAACAGCTCCAGGCAAGAGTCCCTGGCTGTGGAAAGATACCTAAAGGATCAACAGCTCCTAGGAATTTGGG  
 GCTGCTCTGGAAACTCATCTGCACCACTAATGTGCCTTGGAAATCAAACCTTGGAGT-----  
 -----AATAAATCTCAGACTGACATATGG-----GAC-----  
 AACATGACCTGGCTGCAATGG---GATAAAGAAGTTAGTAATTACACAGAGGTAATATAT---  
 AAACACTTTGAAGAATCACAAAACCAGCAGGAA-----  
 -----  
 AAGAATGAACAAGACTTATTGGCATTGGACAAGTGGGCAAATCTGTGGAATTGGTTTAACATATCACAAATGGC  
 TGTGGTATATAAAAAATATTTATAATGATAGTAGGAGGCTTAATAGGCTTAAGAATAGTTTTTTGCA---  
 GTGCTTGCTATAATA-----AAGAAAGTTAGGCAGGGCTACTCACCT-----  
 CTGTGCTTTGCTATTAGTTTGTGTTGATTTCTAGCAGTAACAATAGCTGGC---  
 TGGACAGATAGGATTATAGAAATAGGACAAGCAATTGGTAGAGCT-----  
 -----ATCCTCCACATA-----CCTAGAAGAATTAGACAGGGTTTTGAAAGAGCTTTTGCTA---TAA  
 >MH746251  
 GCT---GCA-----  
 GGAAAAATTGTGGGTCACAGTATACTATGGGGTACCTGTGTGG---AGAGATGCAGAC---  
 ACCACTCTATTTTGTGCATCAGATGCTAAAGCTTATGATAAAGAA---GTACACAAT-----  
 -----GTCTGGGCTACA---CATGCCTGTGTACCCACAGAC---  
 CCTGACCCACAAGAGATAATTTTGAA-----AATGTGACAGAAAGATTTGAC-----  
 -----ATGTGGAAAAATAACATGGTGGAGCAAATGCAAACAGATATA---  
 ATTAGTCTCTGGGACCAAAGCCTA---AAGCCATGTGTAAAGTTA---  
 ACCCCTCTATGCGTTACTTTAAATTGTACCACCCCAACATTCAAAAACCTTAGCCCTAACATCACTAGCTTTA  
 ACAGCAGTAGC-----  
 -----CTTAACCACAATGAAAGTGTGGTTGAAGAAATGAAA---  
 AACTGCTCTTTCAACATGACCACAGAACTTAGA-----  
 GATAAACAGAAAAAGGTATATTCACCT---  
 TTCTATAGACTTGATATAGTACCCTTGATAGTAATAGTAGTTGGCAA-----  
 -----

TCTAATGCTAGTGTGCAGTATAGACTAATAAATTGTAATACATCAACCATAACACAG ---  
GCCTGTCCTAAGGTAACCTTTGAGCCAATTCTTATACATTATTGTGCCCCAGCTGGTTTTGCGATTCTAAAGT  
GCAGG --- GATCCAAATTTTAAT --- GGAATAGGGCCATGCAAGAAT ---  
-GTCAGC --- ACAGTACAATGCACACATGGAATCAAGCCAGTAGTGTCAACT ---  
CAACTGCTGTTAAATGGCAGTCTAGCAGAGAAAGAG ---  
GTAATAATTAGATCTAAAAATATCACAGACAAT --- AGCCAAAACATAATAGTACAGCTTACT ---  
-----GAACCTGTAAAC -----ATCACTTGTATCAGACCTGGCAACAATACAAGAACA ---  
-TTTATACGTATAGGA --- CCAGGAGGACCAGGAGCAGCC --- TTC --- TATACAACAAAGGAT ---  
-----GTAATAGGGGACCCA -----AGGAAAGCACATTGT --- AATGTCAACAGCACA ---  
GCATGGAATAACACTTTACATAAGATAAGTACACAATTAAGA -----AAATACTTTAAT ---  
-----AATAGAACAATAATCTTTAAT -----  
AGCTCCTCAGGAGGGGATGTAGAAAGTTACA --- ACTCATAGTTTCAATTGTGGAGGAGAA ---  
TTTAAACAGCTCCAGGCAAGACTCCTGGCTGTGGAAAGTTACCTAAAGGATCAGCAGCTCCTAGGAATTTGGG  
GTTGCTCTGGAAACTCATCTGCACCACCTAATGTGCCTTGGAACTCTAGTTGGAGT -----  
-----AGTAAAAATCTGAGTCAAATATGG -----GAT -----  
AACATGACCTGGATGCAATGG --- GACAAGGAAGTTATCAATTACACAAACACAATATAT ---  
AATCTACTTGAACAATCGCAAAACCAGCAGGAA -----  
-----  
AAGAATGAACAAGATTTATTGGCATTAGATAAGTGGGCAAATCTGTGGAGTTGGTTTGACATATCAAATTGGT  
TATGGTATATAAAAAATATTTATAATGATAGTAGGAGGCTTAATAGGATTAAGAATAGTTTTTTGCT ---  
GTGCTTTCTCTAATA -----AATAGAGTCAGGCAGGGATACTCACCC -----  
TTGTCAATTGGCTATTAATCTGATAGATACCACAGCAATAGTAGTAGCTGGG ---  
TGGACAGATAGGGTTATAGAAGCAATACAAGGATTGTGTAGAGCT -----  
-----ATTAGTAACATA -----CCTAGGAGAATCAGACAGGGCGCAGAAAAAGCTTTGCAA --- TAA  
>KU168256  
GCT -----  
GGCCAATTGTGGGTACGGTCTACTATGGGGTACCTGCGTGG --- AAAGATGCAGTG ---  
ACCACCCATTTTTGTGCATCAGATGCCAAAGCATATGATAAAGAA --- GTGCATAAT -----  
-----GTTTGGGCCACA --- CATGCCTGTGTACCCACAGAT ---  
CCCAACCCACAAGAAATAAAATTGGTT -----AATGTAACAGAAGAGTTTAAT -----  
-----ATGTGGAAAAATCCCATGGTAGAGCAGATGCATACAGATATA ---  
ATCGGTCTATGGGATCAAAGCTTA --- AAGCCATGTGTACAGTTA ---  
ACCCCTCTCTGTGTACCTTAGATTGCCATGACAATATCACCAGTGACAATATCACCAATAATGGC -----  
-----  
-----AACACCACCAATAGTCCCAACATCACAAATGAGATGGGAGGAGAAATAAAA ---  
AACTGCTCTTTCAATATGACCACAGAACTAAGA -----  
GATAAGAGGAAGAAAGTACATTCACCTT --- TTTTATAGACTTGATATAGTAGAAATCGGTAAT -----  
-----  
AGTAGTAGTAGTAATAATCATGGCCAATATAGATTAATAAATTGTAATACCTCAGCCATTACACAG ---  
GCTTGTCCAAAGGTAACCTTTGAGCCAATTCCCATACATTTATTGTGCCCCAGCTGGTTTTGCGATTCTAAAGT  
GTACA --- GAGAAAAGGTTCAAT --- GGAACAGGGCCATGCAGGAAT ---  
-GTCAGC --- ACAGTACAATGCACACATGGAATCAAACCAGTAGTATCAACT ---  
CAGCTACTGTTAAATGGCAGTTTAGCAGAAGAAAAT -----  
GTAATATCAGATCTGAAAATATCACAGACAAT -----GCAAAAACATTAATAGTGCAGCTTGTC ---  
-----AAGCCTGTAAAT -----ATTACTTGTATCAGACCTAACAACAATACAAGAAAA ---  
-GGTATAGGTATA -----GGTCCAGGACAAACC --- TTC --- TATGCAGCAGATGCT ---  
-----ATAATAGGGAATATC -----AGACACGCATATTGT --- GTGGTCAATAAAACA ---  
GAATGGAATAAACTTTACAACAGGTAGTGCACAAATTAAGA -----GAACATTGG -----  
-----AACAGACAATAATCTTTGCT -----  
CCCTCCTCAGGGGGGATATAGAAATTACA --- ACACATAGTTTTAATTGTGGAGGAGAA ---  
TTCAAACAGCTCCAGGCACGAGTCTGGCTGTGGAAAGATACCTAAAGGATCAACAGCTCCTAGGACTTTGGG  
GCTGCTCTGGAAACTCATCTGCACCACCTGCTGTGCCTTGGAACTCTAGTTGGAGT -----  
-----AACAAATCTCAAGAGCAGATATGG -----GAA -----  
AACATGACCTGGCAGCAATGG --- GAAAAAGAAATTAGTAATTACACAAGCATAATATAT ---  
GATCTACTTGAAGACTCGCAGAACCAGCAGGAA -----  
-----  
AAGAATGAACAAGAGTTATTGGCATTGGACAAGTGGACAAATCTGTGGAATTGGTTTGACATATCAAATGGC  
TGTGGTATATTAATAATTTATAATGATAGTAGGAGGCTTAATAGGATTAAGAATAGTTTTTTGCT ---  
GTGCTTGCTATCTTA -----AATAGAGTTAGGCAGGGTTACTCACCT -----

TTGTCATTTGCTATTAATTTGCTTGATACTATAGCAGTAGCAGTAGCAGGG---  
 TGGACAGATAGGGTTATAGAAATAGGACAAAGAGCTTGTAGGGCT-----  
 -----CTTCTCAACATA-----CCTAGAAGAATAAGACAGGGCTTCGAAAGGGCTTTGCTG---TAA  
 >KU168305  
 GTT---GCA-----  
 GAAGAGCGGTGGGTTACTGTCTACTATGGAGTGCCTGTGTGG--AGAGACGCAGAG---  
 ACTACCTTATTTTGCGCCTCAGATGCTAAAGCATATGATACAGAA--ATGCATAAT-----  
 -----GTCTGGGCTACA---CATGCATGTGTGCCACAGAC---  
 CCCAACCCACAAGAAATACTTTTGGGA-----AATGTGACAGAGGATTTTAAC-----  
 -----ATGTGGAAAAATAACATGGTGGAAACAGATGCATACAGATATA---  
 ATTAGTCTATGGGATCAAAGTCTA--AAGCCATGTGTAAAGTTA---  
 ACCCCTCTCTGTGTCACTCTACATTGTAGAAACATCCCCAATGTGACTAGT-----  
 -----  
 -----ATGACA---  
 AACTGCTCTTACAATACGACCACAGAATTAAGG-----  
 GATAAGAGACAGAAAGTGTACTCACTT--TTTTATAAGCTTGACRTAGTACCAATTAATGAA-----  
 -----  
 -----  
 AATAATAGCCAGTATRTATTAATAAATTGTAATACCTCAGCCATKACACAA---  
 GCTTGTCCAAAGGTAACCTTTGAGCCAATTCCCATACATTACTGTGCCCCAGCTGGTTTTGCGATTCTAAAGT  
 GTAAG---GATCCAGAATTCAAT-----GGAACAGGGCCATGCAAGAAT-----  
 -GTCAGC---TCAGTACAATGCACACATGGGATCAAGCCAGTAGTATCAACA---  
 CAACTGCTGCTCAATGGCAGTCTAGCAGAAGACAAG-----  
 GTAATGATTAGATCTGAAAATATCACAGACAAT-----GCCAAAACCATAATAGTACAATTTAAC---  
 -----CAGTCTGTAGAA-----ATTAATTGTACCAGACCTAATAACAATACAAGGAAA-----  
 -AGTATACGTATA-----GGACCAGGACAATCA--TTC-----TATGCAACA--GAC-----  
 -----ATAATAGGGGATATA-----AGACAAGCATCTTGT--ACTGTCAAGAGAGCA---  
 GATTGGGAGAAAACCTTTACAAGAAGTAGTCAAACAACCTAGGA-----GAACATTTTAAA---  
 -----AACAGAACAACAATAAAATTTAAT-----  
 AGCTCCTCAGGAGGGGATTTAGAAAGTTACA--ACACATAGTTTTAATTGTGGAGGAGAA---  
 TTTAAACAGCTCCAGGCAAGAGTCCCTGGCTGTGGAAAGATACCTAAAGGATCAACAGCTCTTAGGAATTTGGG  
 GCTGCTCTGGAAAACCTCATCTGCACCACTAATGTGCCCTGGAACCTCTAGTTGGAGT-----  
 -----AATAAGACTCAGAATGAGATATGG-----AAT-----  
 AACATGACCTGGCTGCAATGG--GATAAAGAAATTAACAATTACACACAAGAAATATAT---  
 AGACTAATTGAAGAATCGCAGAACCAACAGGAA-----  
 -----  
 AAGAATGAACAGGACTTATTGGCATTGGACAAGTGGTCAAATTTGTGGAATTGGTTCGACATATCAAAGTGGC  
 TGTGGTATATAAGAATATTTATAATGATAGTAGGAGGCTTAATAGGATTAAGAATAGTTTTTTGCT---  
 GTGCTTTCTATAATA-----AATAGAGTTAGGCAGGGATACTCACCT-----  
 CTATCGTTTGTCTGTTAATTTGCTTGATACCATAGCAATAGCAGTAGCTGGC---  
 TGGACAGATTTGGGTTATAGAAATAGGACAGAGAATTTGCAGAGCT-----  
 -----GTGATCAACATA-----CCTACAAGAATTAGACAGGGCTTCGAAAGGGCTTTACTA---TAA  
 >KP718918  
 GTT---GCA-----  
 GAAACTTGTGGGTTACTGTCTACTATGGGGTGCCTGTATGG--AGAGATGCAGAG---  
 ACCACTTTATTTTGCGCCTCAGATGCTAAAGCATATGATACAGAA--GTGCATAAT-----  
 -----GTCTGGGCTACA---CATGCCTGTGTGCCACAGAC---  
 CCCAACCCACAAGAATACTTTGAAA-----AATGTGACAGAGGATTTTAAC-----  
 -----ATGTGGAAAAATAGCATGGTAGAGCAAATGCATACAGATATA---  
 ATCAGTTTATGGGATCAAAGTCTA--AAGCCATGTGTAAAGTTA---  
 ACCCCTCTCTGTGTTACCTTAAATTGTAGCAACATCAACAAAATGTCAACCAAT-----  
 -----  
 -----GGGACTGACATAGATATGATGAAA---  
 AACTGTTCTTTCAATATGACCACAGAAATAAGG-----  
 GATAAGAAACAGAAAGTGTATTCACTT--TTTTATAAGCTTGATATAGTACCAATTAGTGAA-----  
 -----  
 -----  
 GGTAATAGTACAAGTAATAACAGCCAGTATATATTAATAAATTGTAATACTTCAGCCATTACACAA---  
 GCCTGTCCAAAGGTAAGCTTTGAGCCAATTCCCTATACATTACTGTGCTCCAGCTGGTTTTGCGATTCTAAAGT  
 GTAGA---GATCCAAAGTTCAAT-----GGAAAAGGGCCATGCAAAAAT-----

-GTCAGC---ACAGTACAATGCACACATGGAATCAAGCCAGTAGTATCAACA---  
CAACTGTTGCTGAATGGCAGTCTAGCAGAACAAGAG-----  
GCAATGATTAGGTCTGAAAATATCACAGACAAT-----ACCAAAACCATAATAGTACAACCTTAAC----  
-----CAGTCTGTAATA-----ATTAATTGTACCAGACCTAACAACAATACAAGAAAA-----  
-AGTGTACGTATA-----GGACCAGGACAATCA---TTC-----TATGCAACAGGTGAC-----  
-----ATAATAGGGGATATA-----AGACAAGCACATTGT---AATGTCAGTAAAGGA---  
GACTGGAATAAAGCTCTACAAGAAGTAGTCACACAACCTAGGG-----GAACATTTTGGG----  
-----AACAAAACAATAAAATTCAAT-----  
AGCTCCGCAGGAGGGGATTTAGAAATCACA---ACACATAGTTTTAATTGTGGAGGAGAA---  
TTTAAACAGCTCCAGGCAAGAGTCCTGGCTATGGAAGGATACCTAAGGGATCAACAGCTCCTAGGAATTTGGG  
GCTGCTCTGGAAAACCTCATCTGCACCACTACTGTGCCCTGGAACCTCTAGTTGGAGT-----  
-----AATAAATCTTACACAGAGATATGG-----AAT-----  
AACATGACCTGGCTGCAATGG---GATAAAGAAGTTAGCAATTACACACAAGAAATATAT---  
AAACTAATTGAAGAATCGCAGAACCAACAGGAA-----  
-----  
AAGAATGAACAGGACTTATTGGCATTGGACAAGTGGGCAAATTTGTGGAATTGGTTTGACATATCAAATTGGC  
TGTGGTATATAAAAATATTTATAATGATAGTAGGAGGCTTAATAGGATTAAGAATAGTTTTTTGCT---  
GTGCTTGCTATAATA-----AATAGAGTTAGGCAGGGATACTCACCT-----  
CTGTCGTTGGCTGTTAATTTGCTTGATACCATAGCAATAGCGGTAGCTGGC---  
TGGACAGATAGGATTATAGAAGTAGGACAGAGAATTGGTAGAGCT-----  
-----ATAATCCATATA-----CCTGTAAGAATAAGACAGGGCTTAGAAAGGGCTTTGCTA---TAG  
>KP718928  
GTT---GCA-----  
GGAAACTTGTGGGTTACTGTTTACTATGGGGTGCCTGTGTGG---AGAGACGCAGAG---  
ACCACCTTATTTTGC GCCTCAGATGCTAAAGCATATGATACAGAA---ATGCATAAT-----  
-----GTCTGGGCTACA---CATGCCTGTGTGCCACAGAC---  
CCCGACCCACAAGAAATAAATTTGGAA-----AATGTGACAGAGGATTTTAAC-----  
-----ATGTGGAAAAATAGCATGGTAGAACAGATGCATACAGATATA---  
ATCAGTTTATGGGATCAAAGCCTA---AAGCCATGTGTAAAATTA---  
ACCCCTCTCTGCGTTACCTTAAATTGTAGCAGCATCATCACC AATAGCACTGTCAAT-----  
-----  
-----GAGACTAGACAAGGAATGAGA---  
AACTGCTCTTTCAATACAACCACAGCATTAAAG-----  
GATAAGAGACAGAGAGTGTATTCACCT--TTTTATAAGCTTGATATAGTACCCATTAATGGA-----  
-----  
GATAATAGTACAAATACTTATATGTTAATAAATTGTAATACCTCAGCCATTACACAA---  
GCTTGTCCAAAGGTAACCTTTGAGCCAATTCCCATACATTACTGTACCCAGCTGGTTTTGCGATTCTAAAGT  
GTAAG---GATCCAACATTCAAT-----GGAACAGGGCCATGCAGAAAT-----  
-GTCAGC---TCAGTACAATGCACACATGGAATCAAGCCAGTAGTATCAACA---  
CAACTGCTGCTAAATGGCAGTCTAGCTGAACAAAAG-----  
GTAATGATTAGGTCTGAAAATATCACAGATAAT-----ACAAAACCATAATAGTACAACCTTAAC----  
-----CAGTCTGTAGTA-----ATTAATTGCTCCAGGCCTAACAACAATACAAGAAGA----  
-AGTATACGTATA-----GGACCAGGGCAATCA---TTC-----TATGCAACAGGTGAA-----  
-----ATAATAGGGGATATA-----AGAGAAGCACGTTGC---AATGTCAATGGAACA---  
GAATGGAATAAAGCTTTACAAAAAGTAGTCATACAACCTAAGA-----GAACATTTTGGG----  
-----AACAAAACAATAAAATTTAAT-----  
AGCTCCTCAGGAGGGGATTTGGAAATAACA---ACACATAGTTTTAATTGTGCAGGAGAA---  
TTTAAACAGCTCCAGGCAAGAGTCCTGGCTGTGGAAAGATACCTAAAGGATCAACAGCTCCTAGGAATTTGGG  
GCTGCTCTGGAAAACCTCATCTGCACCACTAATGTGCCCTGGAACCTCTAGTTGGAGT-----  
-----AATAAGTCTCAAGATGATATATGG-----AAA-----  
AACATGACCTGGCTGCAATGG---GATAGAGAAATTAGTAATTACACACAAGAAATATAT---  
AAACTAATTGAAGAATCGCAGAACCAACAGGAA-----  
-----  
AAGAATGAACAGGACTTATTGGCATTGGACAAGTGGGCAAATTTGTGGAGTTGGTTTGACATATCAAATTGGC  
TGTGGTATATAAGAATATTTGTAATAATAGTAGGGGGCTTAATAGGATTAAGAATAGTTTTTTGCT---  
GTGCTTTCTATAATA-----AAGAGAGTTAGGCAGGGATACTCACCT-----  
CTGTCGTTTGTGCTGTTAATTTGCTTGATACCATAGCAATAGCAGTAGCTGGC---  
TGGACAGATTGGGTTATAGAAGTAGGACAGAGAATTTGTAGAGCT-----  
-----ATTAGAAATATA-----CCTAGAAGAATTAGACAGGGCCTCGAAAGGGCTTTGCTA---TAA

>AM279343

ACT---GCA-----  
GAAAAATTGTGGGTCACGTGTCTACTATGGGGTACCTGTGTGG---AAAGATGCAGAC---  
ACCACCTTATTTTGTGCGTCAGATGCTAAAGCATATGATACAGAA---GTGCATAAT-----  
-----GTCTGGGCTACA---CATGCCTGTGTACCCACAGAC---  
CCTGACCCACGAGAAATGCCTTTGAAA-----AATGTAACAGAAGAGTTTAACT-----  
-----ATGTGGAAAAATAACATGGTAGAGCAGATGCATACAGATATA---  
ATCAGTCTATGGGACCAGAGCCTA---AAACCATGTGTAAAGTTA---  
ACCCCTCTCTGTGTTACTTTAGATTGCCATGACTCTATATTTAAACACCACTAGCAATAGTACCACTAACAGTA  
CT-----  
-----AATAGCCCCAGGAATGACACCGCAGAAAGAATAGAAATGCAAAGAGAAATACAA---  
AACTGCTCTTACAATATGACCACAGAATTAAGG-----  
GATAAGAAAAAGAAAATGTATTCACCTT---TTTTATAGACTTGATTTAGTACAAATTAATGATGATAGCAGT-  
-----  
-----  
AATAACAGTACATATAGTAACAGTACGTATAGATTAATAAATTGTAATACCTCAGCCATTACACAG---  
GCTTGTCCAAAGGTATCCTTTGAGCCAATTCCCATACATTATTGTGCCCCAGCTGGTTTTGCATTCTAAAGT  
GTAAT---AATATAGAGTTCAAT-----GGAACAGGACCATGCACGAAT-----  
-GTCAGC---ACAGTACAATGCACACATGGAATCAGGCCAGTAATATCAACT---  
CAACTGCTGTTAAATGGCAGTCTAGCAGAAGGAGAG-----  
GTACGAATTAGATCTGAAAATATCACAACAAT-----GCCAAAACCATAATAGTACAACCTTGAT----  
-----GAGGGTGTACAT-----ATTAATTGTACCAGACCTAACACAATACAAGAAAA-----  
-AGTGTACATATA-----GCACCAGGACAGGCA---TTC-----TATGCAACAGGGGCC-----  
-----ATAATAGGGGACATA-----AGAAGAGCATATTGT---CAGATCAATGGAACA---  
AGATGGAATGAACTTTGCACAAGATAGTCAAACAATTAAGA-----AAACACTTTAAC-----  
-----AACAGAACAATAATCTTTAAT-----  
AGTTCCTCAGGAGGGGATTTAGAAATTACA--ACACATAGTTTCAATTGTGGAGGAGAA---  
TTTAAACAGCTCCAGGCAAGACTCCTGGCTGTGGAAAGATACCTAAAGGATCAACAGCTCCTAGGAATTTGGG  
GCTGCTCTGGAAGAACTCATCTGCACCACTAATGTGCCTTGGAAGCTCTAGTTGGAGT-----  
-----AATAAATCTCAGAGTGAGATATGG-----GAC-----  
AACATGACCTGGCTGCAGTGG---GATAAAGAAATTAGCAATTACACAGACATAATATAT---  
AATCTAATTGAAGAATCGCAGATCCAGCAGGAA-----  
-----  
AAGAATGAACAAGACTTATTGGCATTGGACAAGTGGGCAAATCTGTGGAATTGGTTTGACATAACAACTGGC  
TGTGGTATATAAAAAATATTTATAATGATAGTAGGAGGCTTAATAGGATTAAGAATAGTTTTTTGCT---  
GTGCTTGCTATAATA-----AATAGAGTTAGGCAGGGATACTCACCT-----  
CTGTCGTTTGCTATCAATTTGCTTGACACCATAGCAGTAGCAGTAGCTGGC---  
TGGACAGATAGGGTGATAGAAATAGGACAAAGAATTTGTAGAGCT-----  
-----ATTGCAACATA-----CCTAGAAGAATCAGACAAGGCGCTGAAAGAGCTTTAGTA--TAA

>AM279348

AAT---GCT---GCA-----  
GACAACTTGTGGGCCACGGTCTACTATGGGGTACCTGTGTGG---AAAGATGCGGAA---  
ACCACCTTATTTTGTGCATCAGATGCTAAAGCATATAAAACAGAA---ATGCATAAT-----  
-----GTCTGGGCTACA---CATGCTTGTGTACCCACAGAC---  
CCCAACCCACAAGAAATAAAGTTGGAT-----AATGTGACAGAAGAATTTAACT-----  
-----ATGTGGAAAAATAACATGGTAGAGCAGATGCATGCAGATATA---  
ATCAGCCTATGGGACCAAAGCCTA---AAACCATGTGTACAGTTA---  
ACCCCTCTCTGTGTTACTTTAAATTGTAGTGATGTCAAAGTCAATACCACCAAGAATAATGGCACTAATAGT-  
-----  
-----AGTAATGTCCTTGTCTCATCAATGGTACTGAAAACGGACAGGAAGAACTAAAA---  
AACTGCTCTTACAATGTGACTACAGAATTAAGA-----  
GATAAGAAACAGAGAGTATATTCACCTT---TTCTATAGACTTGATATAGTACCAATTAATGAAGATAATAAA-  
-----  
-----  
AGTAGTGATAATAGTAGTGGGGAATATAGACTAATAAATTGTAATACCTCAGCCATTACACAG---  
GCTTGTCCCAAGGTATCCTTTGAGCCAATTCCCATACATTTCTGTGCCCCAGCTGGTTTTGCATTCTAAAAAT  
GTAGA---GATAAAAATTACAAT-----GGAACAGGGCTATGCAAGAAT-----  
-GTCAGC---ACAGTACAATGCACACATGGAATCAAGCCAGTGGTATCAACT---  
CAATTGCTGTTAAATGGTAGTCTAGCAGAAGGAGAA-----  
ATAAAGGTTAGATCTGAGAATTTCAACAACAAT-----GCTAAACTATAATAGTACAGCTTGAC----

```

-----CAGCCTGTAATA-----ATTAATTGTACCAGACCTAACAAACAATACAAGAAGA-----
-AGTGTACGTATA-----GGACCAGGACAAGCA---TAC-----TATGCAACAGGAGAA-----
-----ATAATAGGGGATATA-----AGAAAAGCATATTGT---ACTGTCAATAAAACA---
GCATGGAATGAAACAAAACACAAGGTAATGGAAAAATTAAGA-----GGAATATAC-----
-----CACAGACCAATAAAGTTTAAT-----
AGCTCCTCAGGAGGGGATTTAGAAATTACA---ACACATATGTTTAATTGTGGGGGAGAA---
TTTAAACAGCTCCAAGCAAGAGTCCTGGCTGTGGAAAGATACCTAAGGGATCAACAGCTCCTAGGAATTTGGG
GCTGCTCTGGAAACTCATCTGCACCACTAATGTGCCCTGGAACCTCAGTTGGAGT-----
-----AATAAATCTTATGAGGATATATGG-----GAC-----
AACATGACTTGGCTGCAATGG---GATAAAGAGATTAGCAATTACACAGCACTAATATAT---
GATCTAATTGAGGAATCACAGAACCAGCAGGAA-----
-----
AAGAATGAAAAGGACTTATTAGAGTTGGACAAGTGGGCAAGTCTGTGGAATTGGTTTAGCATATCACAATGGC
TATGGTATATAAAAATATTTCATAATGGTAGTGGGGGGTTTAATAGGATTAAGAATAATTTTTTGCT---
GTGCTTTCCTTAGTA-----AATAGAGTTAGGCAGGGATACTCACCT-----
TTGTCGTTTGCTATTAACCTTGCTTGATACTATAGCAATAGCAGTAGGTGGG---
TGGACAGATAGTCTTATAGAATTAACACAAAGAATTGGTAGAGCT-----
-----ATTCTCCACATA-----CCTAGAAGAATCAGACAGGGCTTCGAAAGGGCTTTGCTA---TAA
>FJ388894
GCT---GTA-----
GAAAACACGTGGGTTACTGTCTACTATGGGGTACCTGTGTGG---AGAGATGCAGAG---
ACCACCTTATTTTGTGCATCAGATGCGAAAGCATATAAAATCAGAA---GTGCATAAT-----
-----GTCTGGGCTACG---CATGCCTGTGTACCTACAGAC---
CCTAACCACACAAGAAATAAAATTTGGAA-----AATGTGACAGAAAAATTTAAC-----
-----ATGTGGAATAACATGGTAGAGCAAATGCATATAGATATA---
ATCAGTCTATGGGACGAGAGCCTA---AAGCCATGTGTAAAGTTA---
ACCCCTCTCTGTGTACTTTAGAGTGTAGCAACCATGTGCATGAGTACCAATGCCAGTACCAAT-----
-----
-----GCCACTGCCAATATCAACTCTGACATGAGAGAAGAAATAAAA---
AACTGCTCTCACACATAACCACAGAACTAAGG-----
GATAAGAAACAGAAAGTACATTCACCT--TTTTATAGGCTTGATATAGTACCAATTAATAGTAATAAT---
-----
-----
GATAATAATAACTAGCAAGGAATATAGATTAATAAATTGTAATACCTCAGCCATTACACAA---
GCTTGTCCAAAGGTATCTTTTGAACCAATTCCCATACATTATTGTGCTCCAGCTGGTTTCGCGATTCTAAAGT
GTAAT---GATAAGATGTTCAAT-----GGAACAGGAATATGCAGGAAT-----
-GTCAGC---ACAGTACAATGCACACATGGAATCAGGCCAGTAGTATCAACT---
CAGCTGCTGTAAATGGCAGTTTAGCAGAAAAGGAG-----
ATAATGATTAGATCTGAAAATATCACAACAAT-----GCCAAAACATAATAGTACAACCTTACC---
-----AAGCCTGTAAAC-----ATTACTTGATCAGACCTAACAAACAATACAAGAAAA---
-AGTATACATATA-----GGACCAGGACAAGCG---TTC-----TATGCAACAGGTGAC-----
-----ATAATAGGGGATATC-----AGACAAGCACATTGT---AATGTCAGTGGAAACA---
GTGTGGTATGAACTTTGCAAAATGTAACCGAACAATTGAGA-----AAACACTTTATG---
-----AACAAAACAATAAACTTTACT-----
AAATCCTCAGGAGGGGATCCAGAAATTACA---ACACATAGTTTTTAATTGTGGAGGAGAA---
TTTAAACAGCTCCAGGCAAGAGTCCTGGCTGTGGAAAGGTACCTAAGGGATCAACAGCTCCTAGGAATTTGGG
GCTGCTCTGGAAACTCATCTGCACCACTAATGTACCTTGGAACCTCTACTTGGAGT-----
-----AATAAATCCCTAGATGACATATGG-----AAT-----
AACATGACCTGGCTGCAATGG---GATGAAGAGATTAACAATTATACAGAACAAATATAT---
AGACTAATTGAAGAATCGCAGAACCAGCAGGAA-----
-----
AAGAATGAAAAGAATTATTAGAATTGGACAAGTGGGCAAGTCTGTGGACTTGGTTTGACATCACAATAATGGC
TGTGGTATATAAAAATATTTATAATGATAGTAGGAGGCTTAATAGGATTAAGAATAGTTTTTTGCT---
GTGCTTTCCTATAATA-----AATAGAGTTAGGCAGGGATACTCACCT-----
CTGTCGTTGGCTATTAATTTGTTTAATACCATAGCAATAACAGTAGCTGGC---
TGGACAGATAGGGTTATAGAAAATAGGACAAAGACTTTGTAGAGCT-----
-----ATCTTCAACATA-----CCTAGAAGAATTAGACAGGGCTTAGAAAGGGCTTTGCTA---TAA
>FJ388903
ACT---GCA-----
GAAAACCTTGTGGGTTACTGTCTACTATGGGGTACCTGTATGG---AAAGAAGCAGAC---

```

ACCACTTTATTTTGTGCATCAGATGCGAAAGCATATAAGACAGAA---GTGCATAAT-----  
 -----GTCTGGGCTACA---CATGCCTGTGTACCTACAGAC---  
 CCCAACCCACAAGAAATAAATATGGAA-----AATGTGACAGAAGAGTTTAAAC-----  
 -----ATGTGGAAAAATAACATGGTAGAGCAGATGCATACAGATATA---  
 ATCAGTCTATGGGACCAAAGCCTA---AAACCATGTGTAGAGTTA---  
 ACCCCTCTCTGTGTTACTTTAGAAATGTAGAAATGTCTATACTACCAATATCACC-----  
 -----  
 -----AATATCACCAAGGAAATGCAAGGAGAAATAAAA---  
 AACTGCTCTTTCAACATGACCACAGAATTAAGG-----  
 GATAAGAGACAGAAAGTATATTCACCT---TTTTATAAACTTGATATAGTACAAATTAATAGTAACAGTAGT-  
 -----  
 -----  
 AATAGTAGTAGTGATAGTAGTGAATATAGATTAATAAAATTGTAATACCTCAGCCATTACACAG---  
 GCTTGTCCAAAGGTATCTTTTGAGCCAATTCCCATACATTATTGTGCTCCAGCTGGTTTTGCATTCTAAAGT  
 GTAAT---GACAAGGAGTTCAAT-----GGAACAGGACTGTGCAGGAAT-----  
 -GTCAGC---ACAGTACAATGCACACATGGAATCAGGCCAGTAGTATCAACT---  
 CAATTGCTGTTAAATGGCAGTCTAGCAGAAAACAAG-----  
 ACAATGATTAGATCTGAAAAATCACAACAAT-----GCTAAAAACATAATAGTACAATTTACC---  
 -----GAGCCTGTAAAC-----ATTACTTGTATCAGACCTAACACAATACAAGAAAA-----  
 -AGTGTACGTATA-----GGACCAGGACAAGCA---TTC-----TATGCAGCAGGTGAC-----  
 -----ATAATAGGGGATATA-----AGACAAGCACATTGT---AATGTCAGTAAAGAA---  
 AAATGGAATAGAACTTTGCAAGAGGTAGCCCAACAATTAGGA-----ATACACTTTGAG---  
 -----AACAAAACAATAATCTTTGCT-----  
 AACTCCTCAGGAGGGGATCTAGAAATTACA---ACACATAGTTTTAATTGTGGAGGGGAA---  
 TTTAAACAGCTCCAGGCAAGAGTCCCTGGCTCTGGAAAGATACCTAAGGGATCAACAGCTCCTAGGAATTTGGG  
 GCTGCTCTGGAAGAACTCATCTGCACCACTACTGTGCCCTGGAACCTCTACTTGGAGT-----  
 -----AATAAATCCCTAGATGAGATATGG-----GAT-----  
 AATATGACCTGGCTGCAATGG---GATAAAGAAATTAACAATTATACACAATTAATATAT---  
 ACTCTAATTGAAGAGTCGCAGAACCAGCAGGAA-----  
 -----  
 ATAAATGAAAAAGAATTATTGGAATTGGACAAGTGGGCAAATCTGTGGAATTGGTTTGACATCACAAGCTGGC  
 TGTGGTATATAAGAATATTTATAATGATAGTAGGAGGCTTAATAGGATTAAGAATAGTTTTTTGCT---  
 GTGCTTGCTATAATA-----AATAGAGTTAGGCAGGGATACTCACCT-----  
 TTGTCGTTGGCTATTAATTTGCTTGATACCATAGCAATAGCAGTAGCTGGC---  
 TGGACAGATAGGGTTATAGAAAGAGGACAAAGCATTTGTAGA-----  
 -----ACAATCAGATAGGGCTTCGAAAGGGCTTTGCTG---TAA  
 >FJ388909  
 GTT---ACA-----  
 GGAAACTTGTGGGTTACTGTCTACTATGGGGTACCTGTGTGG---AAAGATGCAGAC---  
 ACCACCTTATTTTGTGCATCAGATGCTAAAGCATATGACACAGAA---GTGCATAAT-----  
 -----GTCTGGGCTACA---CATGCCTGTGTGCCACAGAC---  
 CCCAACCCACAAGAGATAAATTTGGAG-----AATGTGACAGAAGAGTTTAAAC-----  
 -----ATGTGGAAAAATAACATGGTAGAGCAGATGCATACAGATATA---  
 ATCAGTCTATGGGACCAAAGTCTA---AAGCCATGTGTACAGTTA---  
 ACCCCTCTCTGCGTTACGTTAAATTGTAGAGATGATGACGCATCAATGTCGCCAATAGCACAGACACC---  
 -----  
 -----ACTAACGAAGTCAAAAACGGATCTGCCAATATCACAGATGAAAAA---  
 AACTGCTCTTTCACTATGACCACTGACCTAATA-----  
 GATAAGCTAATTGAAGTATTTTCTGTT---TTTTATAGACTTGATGTTGTACATATTGATAAA-----  
 -----  
 -----  
 AATAGTAATAACAGTGGGTATAGATTAATAAAATTGAAATACCACAACCGTTACACAG---  
 GCTGGTCCAAAGGTATCCTTTGATCCAATTCCCATACATTATTGGGCCCCCTGCTGGTTTTGCGATTCTAAAGT  
 GTATT---GAGAAGGACTTCAAT-----GGAACAGGAACATGCAAGAAT-----  
 -GTCAGC---TCAATACACTGTACACATGGAATCAAGCCAGTAGTATCAACT---  
 CAACTGCTGTTAAATGGCAGTCTGGCAGAAGGAGAG-----  
 GTAAAGATTAGATCTGAAAAATCTCACAACAAT-----GCCAAAACCATAATAGTACAGTTTGTT---  
 -----GAGCCTGTACAC-----ATTACTTGTATCAGACCTTACAACAATACAAGAAAA-----  
 -GGTATACATATA-----GGACCAGGGCAAGCA---TTC-----TATGCAATGAGTAAC-----  
 -----ATAATAGGAGATATA-----AGACAAGCACATTGT---AACGTCAGTAAACA---

AAATGGAATGCAACGTTATCCCAGGTAGCCAAACAATTAGGG-----AATAAGTTTAAC----  
 -----AACAGAACAATAATCTTTAAT-----  
 AGCTCCTCAGGAGGGGATATAGAACTTACA---AGACATAGTTTTTAAGTGTGGAGGAGAG---  
 TTTAAACAGCTCCAGGCAAGAGTCCTGGCTGTGGAAAGATACCTAAAGGATCAACAGCTCCTAGGAATTTGGG  
 GCTGCTCTGGAAGAACTCATCTGCACCACTACTGTGCCCTGGAAGTCTAGTTGGAGT-----  
 -----AATAGATCTCAGGAGGAAATATGG-----AAT-----  
 AACATGACCTGGCTGCAATGG---GAGAAAGAAATTGGCAATTACACAGGTATAATATAT---  
 AGACTACTTGAAGAATCGCAGAACCAGCAGGAA-----  
 -----  
 AAGAATGAACAAGACTTATTGGCATTGGACAAGTGGGCAAGTCTGTGGAATTGGTTTAGCATATCAAAGTGGC  
 TATGGTATATTAAATATTTTATAATGATAGTAGGAGGCTTAATAGGATTAAGAATAGTTTTTTACT---  
 GTGCTTTCTATAATA-----AATAGAGTTAGGCAGGGATACTCACCC-----  
 TTGTCGTTTGTCTGTTAATTTGGTTGATACTATAGCAATAGCAGTAGCTGGC---  
 TGGACAGATAGGGTTATAGAAAATAGGACAAAGAGTTGGTAGAGCT-----  
 -----ATTCTCAACATA-----CCTAGAAGAATTAGACAGGGCTTAGAAAGGGCTTTGCTA---TAA  
 >FJ388925  
 GCT---GCA-----  
 GAAAACTTGTGGGTTACTGTCTACTATGGGGTACCTGTGTGG---AAAGAAGCAAAG---  
 ACCACCTTATTTTGTGCATCAGATGCGAAAGCATATAAAACAGAA---GTGCATAAT-----  
 -----GTCTGGGCTACA---CATGCCTGTGTCCCTACAGAC---  
 CCCAACCCACAAGAAATAAATCTGGAA-----AATGTGACAGAAGAGTTTAAC-----  
 -----ATGTGGAAAAATAACATGGTAGAGCAAATGCATACAGATATA---  
 ATCAGTCTATGGGACCAAAGCCTA---AAGCCATGTGTAAAGTTA---  
 ACCCTCTCTGTGTACTTTGAATTGTAGCCATAATGTCACTAAAGTCACCAATAATGGCACT-----  
 -----  
 -----GCCACTGCTAACATAACAGGAGAAATGAAAGGAGAAATAAAA---  
 AACTGCTCTTTCAATATAACCACAGAATTAAGG-----  
 GATAAGACACAGAAAATATATTCACTT---TTTTATAGACTTGATGTAGTAGAAATTGATAAG-----  
 -----  
 -----  
 AATAGTAGTAATTATAGATTAATAAATTGTAATACCTCAGCCATTACACAA---  
 GCTTGTCCAAAGGTAACTTTTGAGCCCATTCCCATACATTATTGTGCTCCAGCTGGTTTTGCAATTTTAAAGT  
 GTAAT---GATAAGGAGTTCAAT-----GGAACAGGACCATGCAGGGAT-----  
 -GTCAGC---ACAGTACAATGCACACATGGAATCAAGCCAGTAGTATCAACT---  
 CAACTGCTGTTAATGGCAGTCTAGCAGAAAATAAG-----  
 ACAATGATTAGATCTGAAAATATCACAAACAAT-----GCCAAAAACATAATAGTACAACCTTACT---  
 -----GAGCCTGTAAAC-----ATTACTTGTATCAGACCTAACAAACAATACAAGAAAA---  
 -AGTGTACATATA-----GGACCAGGACAGGCA---TTC-----TATGCAACAGGTGAA-----  
 -----ATAATAGGGGATATA-----AGACAAGCACATTGT---AATGTCAGTGAAACA---  
 GAATGGAATAACACTTTGCAAAAGGTAACCAACCAATTAAGA-----ACATACTTTGGG---  
 -----AACAAAACAATAATCTTTGCT-----  
 AACTCCTCAGGAGGGGATCCAGAAATTATA---ACACATAGTTTTAATTGTGGAGGAGAA---  
 TTTAAACAGCTCCAGGCAAGAGTCCTGGCTGTGGAAAGATACTTAAGGGATCAACAGCTCCTAGGAATTTGGG  
 GCTGTTCTGGAGAACTCATCTGCACCACTAATGTGCCCTGGAAGTCTACCTGGAGT-----  
 -----AATAAATCCCTGAATGAGATATGG-----GAC-----  
 AACATGACCTGGCTGCAATGG---GATAAAGAAATTAGCAATTATACACAATTAATATAT---  
 GATCTAATTGAAGAATCGCAGAACCAGCAGGAA-----  
 -----  
 AAAAAATGAACAAGACTTATTGGCATTGGACAAGTGGGCAAGTCTGTGGAGTTGGTTTAACATCTCAAATGGC  
 TGTGGTATATAAAAAATATTTATAATGATAGTAGGAGGCTTAATAGGATTAAGAATAGTTTTTTGCT---  
 GTGCTTTCTATAATA-----CGTAGAGTTAGGCAGGGATACTCACCT-----  
 GTGTCGTTTGTCTATTAATTTGCTTGATACCATAGCAATAGCAGTAGCTGGC---  
 TGGACAGATAGGGTTATAGAAAATAGGACAAGGAATTGGTAGAGCT-----  
 -----ATTATCAACATA-----CCTAGAAGAATCAGACAGGGCCTTGAAAGGGCTTTGCTA---TAA  
 >FJ388932  
 GCT---ACA---GAA-----AAA---GTT---GCA---  
 GAAAAATTTGTGGGTTACTGTCTATTATGGGGTACCTGTATGG---AAAGAAGCAAAC---  
 ACCACTTTATTTTGTGCATCAGATGCAAAAGCATATAAAACAGAA---GTGCATAAT-----  
 -----GTATGGGCTACA---CATGCCTGTGTACCTACAGAC---  
 CCCAACCCACAAGAAATAGATATAAAA-----AATGTGACAGAAAAGTTTAAC-----

-----ATGTGGAAAAATAACATGGTAGAGCAGATGAATACAGATATA---  
 ATCAGTCTATGGGACCAAAGCCTA---AAGCCATGTGTAAAGTTA---  
 ACCCCTCTCTGTGTTACTTTAGAAATGTAGAGATGCCTCTAATACCACTAATGCC-----  
 -----  
 -----ACTTTCACCGAGGGAATGGATAGAGAAATAAAA---  
 AACTGCTCTTACAACATGACCACAGAATTAAGG-----  
 GATAAGAGACAGAAAGTATCTTCACTT---TTTTATAGACTTGATATAGTACCAATTGATAGTAATAGTAGG-  
 -----  
 -----  
 AATAGTAGTAGTAGTAATAGTAGTGAATATAAAATTAATAAATTGTAGTACCTCATCCATTACACAA---  
 GCTTGTCCAAAGGTATCTTTTGAGCCAATTCTCATACATTATTGTGCTCCAGCTGGTGTTCGATTCTAAAGA  
 GTAAT---GATAAGGAGGTCAAT-----GGAGCAGGACCATGCAGGAAT-----  
 -GTCGGC---ACAGTACAATGCAGACCTGGAATCAGGCCAGTAGTATCAACA---  
 CAACTGTTGTAAATGGCAGTCTAGCAGAAAGCAAG-----  
 ATAATGATTAGATCTGAAAATATCTCAACAAT-----GCTAAAAACATACTAGTACAATTTACT----  
 -----GAGCCTGTAAAC-----ATTACTTGTATCAGACCTGGCAACAATACAAGAAGA-----  
 -GGTGTACATATA-----GGACCAGGACAGGCA---TTC-----TATGCAGTAGGTGAC-----  
 -----ATAATAGGAAATATA-----AGACAAGCACATTGT---AATGTCAGTAGAAGA---  
 AAATGGGAGGAAACGTTGCAAAAGGTAGCCAGCCAATTAAGA-----ACATACTTTGTG----  
 -----AACAAAACAATAATCTTTACT-----  
 AAATCCTCAGGAGGGGATCTAGAAATTACA---ACACATAGTTTTAATTGTGGAGGAGAA---  
 TTTAAACAGCTCCAGGCAAGAGTCTGGCTCTGGAAAGATACCTAAGGGATCAACAGCTCCTAGGAATTTGGG  
 GCTGCTCTGGAAACTCATCTGCACCACTAATGTGCCCTGGAACCTCTACTTGGAGT-----  
 -----AAGAATAAATCCACGATGAGATATGG-----AAT-----  
 AATATGACCTGGCTGCAATGG---GAGAAAGAAATTGACATATATACACAAGACATATAT---  
 ACTCTAATTGAAGAGTCGCAGAACCAGCAGGAA-----  
 -----  
 ATAAATGAAAAGGAATTATTGGAATTGGACAAGTGGGCAAATCTGTGGAATTGGTTTAACATCACAACTGGC  
 TGTGGTACATAAAAATATTTATAATAATAGTAGGAGGTTAATAGGATTAAGAATAGTTTTTTGCT---  
 GTGCTTGCTGTAATA-----AATAGAGTTAGGCAGGGGTACTCACCT-----  
 TTGTCGTTTGCTATTAATTTGCTTGATACCATAGCAATAGCAGTAGCTGGC---  
 TGGACAGATAGGGTTATAGAAGTAGGACAAAGCATTTGTAGAGCT-----  
 -----ATTTTCAACATA-----CCTAGA-----  
 >FJ388938  
 GCT---GCA-----  
 GACAACTTGTGGGTTACTGTCTACTATGGGGTACCTGTGTGG---AAAGACGCAAAG---  
 ACCACTTTATTTTGTGCATCAGATGCGAAAGCATATAAAACAGAG---ATGCATAAT-----  
 -----GTCTGGGCTACA---CATGCCTGTGTACCTACAGAC---  
 CCCAACCCACAAGAAATAAATTTGGAA-----AATGTGACAGAAGAATTTAAC-----  
 -----ATGTGGAAAAATAACATGGTAGAGCAGATGCATACAGATATA---  
 ATCAGTCTATGGGACCAAAGCCTA---AAGCCATGTGTAAAGTTA---  
 ACCCCTCTCTGTGTTACTTTAAATTGCACCAATATCAAGAATATCACT-----  
 -----  
 -----GACGATGAAATGAGAAGAGAAATAAAA---  
 AACTGCTCTTTCAACATGACCACAGAACTAAGG-----  
 GATAAGCAAAAGAAAGTATATTCACCT---  
 TTTTATAGACTTGATGTAGTACCAATTAGGAATAATAAGAATAATAGT-----  
 -----  
 AGTGAGACTAATAGTAGTGAGGCTGGTGAATATAGATTAATAAATTGTAATACTTCAGCCATTACACAG---  
 GCTTGTCCAAAGGTATCTTTTGAGCCAATTCCCATACATTATTGTACTCCAGCTGGTTTTGCGATTCTAAAGT  
 GTAAT---GATAAGGAGTTCAAT-----GGAACAGGATTATGCAGGAAT-----  
 -GTCAGC---ACAGTACAATGCACACATGGAATCAGGCCAGTAGTATCAACT---  
 CACCTGCTGCTAAATGGCAGTCTAGCAGAAAATAGG-----  
 ACAATGATTAGATCTGAAAATATCACAACAAT-----GCCAAAACATAATAGTACAACCTTACT----  
 -----GAGCCTGTAAAC-----ATTACTTGTATCAGACCTAACAATAATACAAGAAAA-----  
 -AGTGTACATATA-----GGACCAGGACAAGCA---TTC-----TATGCAACAGATGAC-----  
 -----ATAATAGGGGATATA-----AGAAAAGCACATTGT---AATGTCAGTAGAACA---  
 AAATGGAATAATACTTTGAAAGAGGTAGTCAACCAATTAAGA-----AAATACTTTGGG----  
 -----AACAAACAATAATCTTTAAT-----  
 AGCTCCTCAGGAGGGGATCTAGAAATTACA---ACACATAGTTTTAACTGTGGAGGAGAA---

TTTAAACAGCTCCAGGCACGAGTCCTGGCTGTGGAAAGATACCTAAAGGATCAACAGCTCCTAGGAATTTGGG  
 GCTGCTCTGGAAACTCATCTGCACCACTAATGTGCCCTGGAAGCTCTACTTGGAGT-----  
 -----AATAAAACCCAGGAGGAGATATGG-----GAC-----  
 AACATGACCTGGCTGCAATGG---GATAAAGAAATTAGCAATTATACAAAAACCATATAT---  
 GAGTTAATTGAAAAATCGCAAACACAGCAGGAA-----  
 -----  
 ATAAATGAACAAGACTTATTAGCATTGGACAAGTGGGCAAACCTGTGGACTTGGTTTGACATCTCAAAGTGGC  
 TGTGGTATATAAGAATATTTGTAATGATAGTAGGAGGCTTAATAGGATTAAGAATAGTTTTTTGCT---  
 GTGCTCAATATAATA-----AATAGAGTTAGGAAGGGATACTCACCT-----  
 CTGTCGTTTGCTATTAGTTTGCTTGATACCATAGCAATAGCAGTAGCTGGC---  
 TGGACAGATAGGGTTATAGAAAATAGGACAAAGAATTTGTAGAGCT-----  
 -----ATTTGCAACATA-----CCTAGAAGAATCAGACAGGGCCTCGAAAGGGCTTTGCTA---TAA  
 >FJ388942  
 GCT---GCA-----  
 GAAAACTTGTGGGTTACTGTCTACTATGGGGTACCTGTGTGG--AAAGACGCAGAG---  
 ACCACCTTATTTTGTGCATCAGATGCGAAAGCATATGACACAGAA--GTGCATAAT-----  
 -----GTCTGGGCTACA---CATGCCTGTGTACCCACGGAC---  
 CCCAACCCACAAGAAATAAATTTGGAA-----AATGTGACAGAAGAGTTTAAAC-----  
 -----ATGTGGAAAAATAACATGGTAGAACAAATGCATACAGATATA---  
 GTCAGTCTATGGGACCAAAGCCTA--AAGCCATGTGTAGAGTTA---  
 ACCCCTCTCTGTGTTACTTTGAATTGTAGCCATAATGTCACTGCGAATGACACCGTT-----  
 -----  
 -----AGCATAAAAGAAGGAATGGAAGGAGAAATAAAA---  
 AACTGCTCTTTCAATGTAACCACAGAATAAGG-----  
 GATAAGACACAGAAAGTATATTCATT--TTTTATAGACCTGATGTAGAACAAATTGATAAT-----  
 -----  
 -----  
 AGTAGTAGTTATAGATTAATAAATTGTAATACCTCAGCCATTGCAAAA---  
 GCTTGTCCAAAGGTAACCTTTGAGCCAATTCCCATACATTATTGTGCTCCAGCTGGTTTTGCAATTTTAAAGT  
 GTAAT--GATAAGGAGTTTAAAT-----GGAACAGGACCATGCAGGAAT-----  
 -GTCAGC--ACAGTACAATGCACACATGGAATCAGGCCAGTAGTATCAACT---  
 CAACTGCTGTTAAATGGCAGTCTAGCAGAAAATAAG-----  
 ACAATGATTAGATCTGAAAATATCACAAGCAAT-----ACCAAAAACATAATAGTACAACCTTACC---  
 -----GAGCCTGTAAAT-----ATTACTTGTATCAGACCTAACACAATACAAGAAAA-----  
 -AGTATACATATG-----GGACCAGGACGAGCA--TTC-----TATGCAACAGGTGAA-----  
 -----ATAATAGGGGACATA-----AGGCAAGCACATTGT--AATGTCAGTAGAGCA---  
 AAATGGAATAACACTTTGCAAAAGGTAGTTGACCAATTAAGA-----ACATACTTTGGG---  
 -----AACAAAACAATAACCTTTACT---  
 AGCAACGCCCCAGGTGGGGATCTAGAAATTACA--ACACATAGTTTAACTGTGGAGGAGAA--  
 TTTAAACAGCTCCAGGCAAGAGTCCTAGCTGTGGAAAGATACCTAAGGGATCAACAGCTCCTAGGAATTTGGG  
 GCTGCTCGGGAAACTCATCTGCACCACTAATGTGCCCTGGAAGCTCTACTTGGAGT-----  
 -----AATAAATCCCTGGATGACATATGG-----GAA-----  
 AACATGACCTGGATGCAGTGG--GATAAAGAAATTAGCAATTATACACAATTAATTTAT---  
 AATCTAATTGAAGAATCGCAGAACCAGCAGGAA-----  
 -----  
 AAAAAATGAAAAAGATTTATTGGCATTGGACAAGTGGGCAAGTCTGTGGAATTGGTTTAAATCTCAAAGTGGC  
 TGTGGTATATAAAAAATATTTATAATGATAGTAGGAGGCTTAATAGGGTTAAGAATAGTTTTTTGCT---  
 GTGCTTTCTATAATA-----CGTAGAGTTAGGCAGGGATACTCACCT-----  
 CTGTCGTTTGCTATTAATTTGTTTGACACCATAGCAATAGCAGTAGCTGGC---  
 TGGACAGATAGAGTTATAGAAAATAGGACAAAGAATTTGTAGAGCT-----  
 -----ATTATCAACATA-----CCTAGAAGAATCAGACAGGGCCTTGAAAGGGCTTTGTTA---TA-  
 >FJ388946  
 GCT---ACA-----  
 GAAAAATTTGTGGGTTACTGTCTACTATGGGGTACCTGTATGG--AGAGAAGCAGAC---  
 ACCACTTTATTTTGTGCATCAGATGCGAAAGCATATGAACCAGAA--GTGCATAAT-----  
 -----GTCTGGGCTACA---CATGCCTGTGTACCTACAGAC---  
 CCCAACCCACAAGAAATAAATATGAAA-----AATGTGACAGAAGAGTTTAAAC-----  
 -----ATGTGGAAAAATAACATGGTAGAGCAAATGCATACAGATATA---  
 ATCAGTTTATGGGACCAAAGCCTA--AAGCCATGTGTAAAGTTA---  
 ACCCCTCTCTGTGTTACTTTAGAAATGTAGAGATGTAAATGTCAATAGTACCAATACTACTACCAATGCC----

-----  
 -----ACCATTGAAAGGAGAGGAGAAATAGCTGAAGAGCCAGGAGAAATAAAA---  
 AACTGCTCTTTCAACATGACCACAGAATTAAGG-----  
 GATAAGAGACAGAAAGTATACTCACTT---TTTTATAGACTTGATATAGTACCAATTAATAGTAATAGTATT-  
 -----  
 -----  
 AATAGTAGTAGTAGTGATAGTAGTGAATATAGATTAATAAATTGTAATACCTCAGCCATTACACAG---  
 GCTTGTCCAAAGGTATCTTTTGAGCCAATTCCCATACATTATTGTGCTCCAGCCGTTTTGCGATTCTAAAGT  
 GTAAT---GATAAGGAGTTCAAT-----GGAACAGGACTATGCAGGAAT-----  
 -GTCAGC---ACAGTACAATGCACACATGGAATCAGGCCAGTAGTATCAACT---  
 CAACTGCTGTAAATGGCAGCCTAGCAGAAAACAGG-----  
 ACAATGATTAGATCTGAAAATATCTCAGACAAT-----GCTAAAAACATAATAGTACAATTTACT----  
 -----GAGCCTGTAAAC-----ATTACTTGTATCAGACCTAACAACAATACAAGAAAA-----  
 -AGTGTACGTATA-----GGACCAGGACAAGCA---TTC-----TATGCAACAGGTGAC-----  
 -----ATAATAGGGAATATA-----AGACAAGCATATTGT---GAGGTCAATGGAAGT---  
 CAATGGAATAAAGCTTTGCAAAAGGTAGTCAACCAATTAATA-----ACACACTTTGAG----  
 -----AACGCAACAACAATAACCTTTAAT-----  
 AAATCCTCAGGAGGGGATCTAGAAATTACA---ACACATAGTTTCAATTGTGGAGGAGAA---  
 TTTAAACAGCTCCAGGCAAGAGTCCTGGCTCTGGAAAGATACCTAAGGGATCAACAGCTCCTAGGAATTTGGG  
 GCTGCTCTGGAAGAACTCATCTGCACCACTAATGTGCCCTGGAACCTCTACTTGGAGT-----  
 -----AATAAATCCCTAGATGAGATATGG-----AAG-----  
 AATATGACCTGGCTGCAATGG---GATAAAGAAATTAACAATTATACACAATTAATATAT---  
 AATTTAATTGAAGAATCGCAGAACCAGCAGGCA-----  
 -----  
 ATAAATGAAAAGGAATTGTTGGAATTGGACAAGTGGGCAAGTCTGTGGAGTTGGTTTGACATCACAAATTGGC  
 TGTGGTATATAAAAATATTTATAATGATAGTAGGAGGCTTAATAGGATTAAGAATAGTTTTTTGCT---  
 GTGCTTGCTGTAATA-----AATAGAGTTAGGCAGGGATACTCAGG-----  
 TTGTCGTTCACTATTAATTTTCTTGATACCATAACAATAATAGTAGCTGCC---  
 TGGACAGATAAGATTATAAAAAATAACAAAACATCTGTAGA-----  
 -----  
 >JF683737  
 GCT---ACA-----  
 AACATGTGGGTTACTGTATACTATGGGGTACCTGTGTGG---AAAGATGCAGAG---  
 ACCACCTTATTTTGTGCATCAGATGCCGAAAGCATATAAAACAGAA---GTGCATAAT-----  
 -----GTCTGGGCTACA---CATGCCTGTGTACCTACAGAC---  
 CCCAACCCACAAGAAATAAATATGGAA-----AATGTGACAGAAGAGTTTAAC-----  
 -----ATGTGGAAAAATAACATGGTAGAACAGATGCATACAGATATA---  
 ATTAGTCTATGGGACCAAAGTCTA---AAGCCATGTGTAAAGTTA---  
 ACCCTCTCTGTGTAACTTTAGAATGTAGCAATGTCAACCACCAATATCACC-----  
 -----  
 -----GGAGAAATGAAAGAGGAAATAAAC---  
 AGCTGCTCTTTTCGACGTGACCACAGTACTAAGG-----  
 GATAAAGAGAAAGAAATCTTATTCCTC---TTTTATATACTTGATATACCACCTGTTAATAGTAATAGTAAT-  
 -----  
 -----  
 AGTGATAATAAAAATAGTATGGAGTATAGATTAATAAATTGTAATACCTCAGTCATTACACAG---  
 GGTGTCCAAAGGTATCTTTTGATCCAATTCCCATACATTATTGTGCTCCTGCTGGTTTTGCGATTCTAAAGT  
 GTGAT---GATAAGGAGTTCAAT-----GGAACAGGACCATGCAATAAT-----  
 -GTCAGC---ACACAACAATGCACACATGGAATCAGGCCAGTAGTGTCAACT---  
 CAGTTGCTGTAAATGGTAGTTTAGCAGAAAATAAG-----  
 ACAATGATTAGATCTGAAAATATTACAAACAAT-----GCCAAAAACATAATAGTACAACCTTACC----  
 -----AAGCCTGTAAAC-----ATTACTTGTATCAGACCTGGCAATAATACAAGACAA-----  
 -AGTATACATATA-----GGACCAGGACAAGCC---TTC-----TATTCAAGAGATGAT-----  
 -----ATAACAGGGGACATA-----AGAAAAGCACATTGT---GAAGTCAATGGAACA---  
 GAATGGGATAAACTTTGCAAGAGGTAGCAAAACAATTAAGA-----ACATACTTTGAG----  
 -----AACAAAACAATAATCTTTAAT-----  
 GGCTCTTCAGGAGGAGATCTAGAAATTACA---ACACATAGTTTTTAATTGTAGAGGAGAA---  
 TTTAAACAGCTCCAGGCAAGAGTCCTGGCTGTGGAAAGATACCTAAAGGATCAACAGCTCCTAGGAATTTGGG  
 GCTGCTCTGGAAGAACTCATCTGCACCACTAATGTGCCCTGGAACCTCACTTGGAGT-----  
 -----AATAAATCCCTGGATGAGATATGG-----GAC-----

AACATGACCTGGCTGCAATGG---GATAGAGAAATTAGCAATTATACACAAATAATATAT---  
AATCTAATTGAAGAATCGCAGACCCAGCAGGAA-----  
-----  
ATGAATGAAAAAGACTTATTGGCATTGGACAAGTGGGCAAATCTGTGGAGTTGGTTTGACATCTCAAATTGGC  
TGTGGTATATAAAAAATATTTATAATGATAGTAGGAGGCTTAATAGGATTAAGAATAGTTTTTTGCT---  
GTGCTTTCTGTAATA-----AAGAAAGTTAGAAAGGGATACTCACCT-----  
CTGTCATTTGCTATTAGTCTGCTTAATACCACGGCAATAGTAATAGCTGGC---  
TGGACAGATAGAGTTATAGAAATAATACAAAGAATTTATACAGCT-----  
-----ATTTTCAACATA-----CCTAGAAGAATCAGACAGGGCTTAGAAAGGGCTTTGCTA---TAA  
>JF683759  
GCT---GCA-----  
GGAAACTTGTGGGTTACTGTCTACTATGGGGTACCTGTGTGG---AAAGATGCAGAC---  
ACCACCTTATTTTGTGCATCAGATGCGAAAGCAATTA AACAGAA---GTGCATAAT-----  
-----GTCTGGGCTACA---CATGCCTGTGTACCTACAGAC---  
CCCAACCCACAAGAAATAAATTTGGAA-----AATGTGACAGAAGATTTTAAAC-----  
-----ATGTGGAAGAATAACATGGTAGAGCAGATGCAGACAGATATA---  
ATCAGTCTATGGGACCAAAGCCTA---AAGCCATGTGTAAAGTTA---  
ACCCCTCTTTGTGTTACTCTAGATTGTAGCCACAATATCACTTCTAATAATACTGATAAT-----  
-----  
-----AATCCTAATAATACCAAAGTGGAAAGTGGAAATGAGA---  
AACTGCTCTTTCAACACGACCACAGAAATAAGG-----  
GATAGGACGCAGAAAGTATATTCACCT---TTTTATAAAGTTGATGTAGTAGAAATTGATAGTAAT-----  
-----  
-----  
AGTAATAATAGTAATACTAATAATTATAGATTAATAAATTGTAATACCTCAGTAATTACACAG---  
GCTTGTCCAAAGGTAACCTTTTGAGCCAATCCCATACATTATTGTGCTCCAGCTGGTTTTGCAATCCTAAAGT  
GTAAT---GATAAGGAGTTCAAT-----GGAACAGGACCATGCAAGAAT-----  
-GTCAGC---TCAGTACAATGCACACATGGAATCAAGCCAGTAGTATCAACT---  
CAACTGTTGTTAAATGGTAGTCTAGCAGAAAATAAA-----  
ACAATGATTAGATCTGAAAATATAACAAACAAT-----GCCAAAAACATAATAGTACAACCTTACT---  
-----AAGCCTGTACAA-----ATTAATTGTACCAGACCTAACAAACAATACAAGAAAA-----  
-AGTGTACGTATA-----GGACCAGGACAAGCA---TTC-----TATGCAACAGGTGAA-----  
-----ATAATAGGGGATATA-----AGACAAGCACATTGT---AATGTCAGTAAGGCA---  
GAATGGCATGGAGCTTTGCAAGAGGTAGGCAAACAATTAGGA-----ACATATTTTAAAG---  
-----AACAAAACAATAATCTTTACT-----  
AACTCATCAGGAGGGGATCTAGAAATTACT--ACACATAGTTTTAATTGTGGAGGAGAA---  
TTTAAACAGCTCCAGGCAAGAGTCCCTGGCTGTGGAAAGATACCTAAAGGATCAACAGCTCCTAGGAATTTGGG  
GCTGCTCTGGA AA ACTCATCTGCACCACTAATGTGCCCTGGA ACTCTACTTGGAGT-----  
-----AATAAATCCCAGGATGAGATATGG-----GAC-----  
AACATGACCTGGTTGCAATGG---GATAAAGAAATTAGCAATTATACACAAGCAATATAT---  
ACTCTAATTGAAGAATCTCAAAATCAGCAGGAA-----  
-----  
ATGAATGAAAAAGAATTATTGGAATTGGACAAGTGGGCAAGTCTGTGGAATTGGTTTGACATCTCAA ACTGGC  
TGTGGTATATAAAAAATATTTATAATGATAGTAGGAGGTTTAATAGGGTTAAGAATAGTTTTTTGCT---  
GTGCTTTCTATAGTA-----AATAGAGTTAGGCAGGGATACTCACCT-----  
TTGTCATTTCGCTATTAATTTGGTTGATACCATAGCAATAACAGTAGCTGGC---  
TGGACAGATAGGGTTATAGAAGTAGGACAAAGAATTTGCAGAGCT-----  
-----ATTATCAACATA-----CCTAGAAGAATCAGACAGGGCCTCGAAAGGGCTTTGCTA---TAA  
>JF683760  
GCT---GCA-----  
GAAAAACGTGGGTTACTGTCTACTATGGGGTACCTGTTTGG---AAAGATGCAGAG---  
ACCACCTTATTTTGTGCATCAGATGCAAAAGCCTATAAAACAGAA---GTGCATAAT-----  
-----GTTTGGGCTACA---CATGCCTGTGTACCTACAGAC---  
CCTAACCACACAAGAAATGCATTTGGAA-----AATGTGACAGAAGAGTTTAAAC-----  
-----ATGTGGA AAAAATAACATGGTAGAGCAGATGCATACAGATATA---  
ATCCGTCTATGGGACCCAAGCCCA---CAGCCCTGTGTAAAGTTA---  
ACCCCTCTCTGTGTTACTTTAAATTGTAGCTACAATATCACTAGTAATGTCACTGTTGAC-----  
-----  
-----ATGAATGATACCATTAAACATGAGAGAAGAAATAAAA---  
AACTGTTCTTTCTATACAACCACCGAAATAAGG-----

GATAATAGACAGAAAGTATATTTCACTT---TTTTATAGACTTGATATAGTACCAATTGGTGAT-----  
-----  
-----  
AGGAATAATAATCATAGTTATAGATTAATAAATTGTAATACCTCAGCCATTACACAG---  
GCTTGTCCAAAGGTAACCTTTTGAGCCAATTCCCATACATTATTGTGCTCCAGCTGGTTTTTGCAATTCTAAAGT  
GTAAT---GATAAGAATTTCAAT-----GGAGCAGGATCATGCAAGAAT-----  
-GTCAGC---ACAGTACAATGCACACATGGAATCAAGCCAGTAGTATCAACT---  
CAACTGCTGTAAATGGCAGTCTAGCAGAAAATGAG-----  
ACAATGATTAGATCTGAAAATATCACAACAAT-----GTCAAAAACATCATAGTACAATTTAAT----  
-----GAGTCTGTAAAA-----ATTAATTGTACCAGACCGAACAACAATACAAGAAAA-----  
-AGTGTACATATA-----GGACCAGGACAAGCA---TTC-----TATGCAACAGGTGAA-----  
-----ATAGTAGGGGATATA-----AGACAAGCACGTTGT---GAGGTCAATAAAACA---  
GAATGGAATAAAGCTTTAAAAAGGGTAGCCCACCAATTAGAA-----AAATACTTTAAG----  
-----AACAAAACAATAGCCTTTAAT-----  
AAATCCCCAGGAGGAGATCTAGAAATTACA---ACACATAGTTTTAATTGTGGAGGGGAA---  
TTTAAACAGCTCCAGGCAAGAGTCCTGGCTGTGGAAAGATACCTAGGGGATCAACAGCTCCTAGGAATTTGGG  
GCTGCTCTGGAAGAACTCATCTGCACCACCTAATGTACCCTGGAAGTCTACTTGGAGT-----  
-----AATAAGACCCGCAGAGAGATATGG-----GAC-----  
AACATGACTTGGATGCAATGG---GATAAGGAAATTAGCAATTATACACAAGTAATATAT---  
ACTCTAATTGAAGAATCGCAGAACCAGCAAGAA-----  
-----  
AAAAATGAGCAAGACTTATTGGCATTGGGCAAGTGGGACAGTCTGTGGAGTTGGTTTAGCATCACAACTGGC  
TGTGGTATATAAAAAATATTTATAATGATAGTAGGAGGCTTAATAGGATTAAGAATAGTTTTTTGCT---  
GTAATTTCTATAATA-----CATAGAGTTAGGCAGGGATACTCACCT-----  
TTGTCAATTTGATATTAGTTTGCTTGATTCCATAGCAATAGCAGTAGCTGCC---  
GGGACAGATAGGGTTATAGAAATAGGACAGAGAATTTGTAGAGCT-----  
-----ATTGTTATCATA-----CATAGTAGAATCAGATATGGCCTTGAAAGAGCTTTGCTA---TAA  
>JF683761  
GCT---GCA-----  
GATAAAATGTGGGTTACTGTCTACTATGGGGTACCTGTTTGG---AAAGATGCAGAG---  
ACCACCTTATTTTGTGCATCAGATGCAAAAGCATATAAAACAGAA---GTGCATAAT-----  
-----GTTTGGGCTACA---CATGCCTGTGTACCTACAGAC---  
CCTAACCCACAAGAAATGCATTTGGAA-----AATGTGACAGAAGAGTTTAAC-----  
-----ATGTGGAAAAATAACATGGTAGAGCAGATGCATACAGATATA---  
ATCAGTCTATGGGACCAAAGCCTA---AAGCCATGTGTAAAGTTA---  
ACCCCTCTCTGTGTACTTTAAATTGTAGCTACATCACTAGTAATGTCACTGCTGACATCACTAGTAAT---  
-----  
-----GTCAGTCTGACATGAATGATGCCATTAACATGACAGCAGAAATAAGA---  
AACTGTTCTTTCAATATAACCACAGAGATAAGG-----  
GATAAGATACAGAAAGTATATTTCACTT---TTTTATAGACTTGATATAGTACCAATTGATAGG-----  
-----  
-----  
AATGATAGTAATGCTAGTTATAGATTAATAAATTGTAATACCTCAGCCATTACACAG---  
GCTTGTCCAAAGGTAACCTTTTGAGCCAATTCCCATACATTATTGTGCTCCAGCTGGTTTTGCAATTCTAAAGT  
GTAAT---GATAAGGATTTCAAT-----GGAACAGGACCATGCAGGAAT-----  
-GTCAGC---ACAGTACAATGCACACATGGAATCAAGCCAGTAGTATCAACT---  
CAACTGCTGTAAATGGCAGTCTAGCAGAAAATGAG-----  
ACAATGATTAGATCTGAAAATATCACAACAAT-----GCCAAAACATAATAGTACAACCTTAAT----  
-----GAGCCTGTAAAA-----ATTAATTGTACCAGACCTAACAACAATACAAGAAAA-----  
-AGTATACGTATA-----GGACCAGGACAAGCA---TTC-----TATGCAACAGGTGAC-----  
-----ATAGTAGGGAATATA-----AGACAAGCACATTGT---GAGGTCAATAAAACA---  
GAATGGAATAAAGCTTTAAAAAGGGTAGCCGACCAATTAAGA-----AAATACTTT-----  
-----AACAAAACAATAGCCTTTAAT-----  
AAATCCTCAGGAGGAGATCTAGAAATTACA---ACACATAGTTTTAATTGTGGAGGGGAA---  
TTTAAACAGCTCCAGGCAAGAGTCCTGGCTGTGGAAAGATACCTAGGGGATCAACAGCTCCTAGGACTTTGGG  
GCTGCTCTGGAAGAACTCATCTGCACCACCTAATGTACCCTGGAAGTCTACTTGGAGT-----  
-----AATAAGTCCCACAAAGCCATATGG-----GAC-----  
AACATGACTTGGATGCAATGG---GATAAAGAAATTAGCGATTATACACAAGTAATATAT---  
ACTCTAATTGAAGAATCGCAGAACCAGCAAGAA-----  
-----

AAAAATGAGCAAGACTTATTGGCATTGGACAAGTGGGACAGTCTGTGGAGTTGGTTTAGCATCACAAAATGGC  
TGTGGTATATAAAAATATTTATAATGATAGTAGGAGGCTTAATAGGATTAAGAATAGTTTTTTGCT---  
GTAATTTCTATAATA-----CGTAGAGTTAGGCAGGGATACTCACCT-----  
TTGTCAATTTGCTATTAGTTTGTCTTGATACCACAGCAATAGCAGTAGCTGGC---  
TGGACAGATAGGGTTATAGAAACAGGACAGACAATTTGTAGAGCT-----  
-----ATTGTTAACATA-----CCTAGAAGAATCAGACAGGGTCTTGAAAGAGCTTTTGCTA---TAA  
>JF683767  
GCT---GCA-----  
CAAACTTGTGGGTTACTGTCTATTATGGGGTACCTGTGTGG---AAAGATGCAGAG---  
ACCACCTTATTTTGTGCATCAGATGCTAAAGCATATGAGACAGAA---AAGCATAAT-----  
-----GTCTGGGCTACA---CATGCCTGTGTGCCACAGAC---  
CCCAACCCACAAGAAATACCTTTGGAA-----AATGTGACAGAAAATTTTAACT-----  
-----ATGTGGAAAAATAATATGGTAGAGCAGATGCATACAGATATA---  
ATCAGTCTATGGGATCAAAGTCTA---CAGCCATGTGTAAAGTTA---  
ACCCCTCTCTGCGTTACTTTAAATTGTACAAATGTACAGAAATGTACAGGAAATAGCACGGGTAGCAGCTTC-  
-----  
-----ACGGGGGGGCCTGAAGAACTAAAAACGGGGGGCCTGAAGAACTAAAA---  
AACTGCTCTTTCAATATGACCACAGTACTAAGG-----  
GATAAGAAACAGAAAGTATATTCACCT---  
TTTTATAGACTTGATATAGTACAAATAGATAAGGATAATAATAGT-----  
-----  
TCTGGTAATAATAGTTATAATGAATACAGATTAATAAATTGTAATACCTCAGCCATTACACAA---  
GCCTGCCCAAAAGTAAGCTTTGAACCAATTCCCATACATTATTGTGCTCCAGCTGGTTTTCGATCCTAAAGT  
GTAGG---AATAATTCATTTCGAT-----GGAACAGGGCCATGCAATAAT-----  
-GTCAGC---ACAGACCAATGTACTCATGGAATCAAGCCAGTAGTATCAACT---  
CAACTGCTGTTAAATGGCAGTCTAGCAGAAGAAAAG-----  
ATAATGATTAGATCTGAAAACATCACAAACAAT-----GCCAAACTATAATAGTACAACCTTGTC----  
-----AAACCTGTGACA-----ATTAATTGTACCAGACCTAATAACAATACAAGAAAA-----  
-ATTGTACGTATAGGA-----CCAGGAGGACCAGGACAA---GCA-----TTCTATACAAATGAC-----  
-----ATAATAGGGGATATA-----AGACGAGCATATTGT---ACTGTCAATGCATCA---  
GAGTGGAATGAACTTTAGAACAAAGTAGTTGAACAGTTGAGA-----GTACACTTTGGG---  
-----AACAAAACAATAAACTTTACT-----  
AAACCCTCAGGAGGGGATCTAGAAATCACA--ACACATAGTTTTAATTGTGGAGGAGAA---  
TTTAAACAGCTCCAGGCAAGAGTCCCTGGCTGTGGAAAGATACCTAAAGGATCAACAGCTCCTAGGAATTTGGG  
GCTGCTCTGGAAAGCTCATCTGCCCCACTAATGTGCCTTGGAACCTCTAGTTGGAGT-----  
-----AATAAATCTATGGAGGACATATGG-----GAC-----  
AATATGACCTGGCTGCAATGG---GAGAAAGAAATTAGCAACTACACAGACATAATATAT---  
AACCTAATTGAAGAATCACAGAACCAGCAGGAA-----  
-----  
AAGAATGAACAAGACTTATTGGCATTGGACAAGTGGGCAAATTTGTGGAATTGGTTTGAAATATCAAAAATGGC  
TGTGGTATATAAAAATATTTATAATGATAGTAGGAGGCTTAATAGGATTAAGAATAGTTTTTTGCA---  
GTGCTTTCTATAATA-----AATAGAGTTAGGCAGGGATACTCACCT-----  
TTGTCAATTTGCTACTAATTTGTTTGATACCATAGCAATAGCAATAGCTGGC---  
TGGACAGATAGAATTATAGAAATAGGGCAAAGAATTGTTAGAGCT-----  
-----TTTCTCAACATA-----CCCAGAAGAATCAGACAGGGCCTTGAAAGGGCTTTATTA---TAA  
>JF683779  
GCT---GAA-----  
AATAACTTGTGGGTTACTGTCTACTATGGGGTACCTGTATGG---AAAGAAGCAGAC---  
ACCACCTTATTTTGTGCATCAGATGCGAAAGCATATAAAACAGAA---GTGCATAAT-----  
-----GTCTGGGCTACA---CATGCCTGTGTACCTACAGAC---  
CCCAACCCACAAGAAATAAATATGGCA-----AATGTGACAGAAAAGTTTAACT-----  
-----ATGTGGAAAAATAACATGGTAGAGCAGATGCATACAGATATA---  
ATCAGTCTCTGGGACCAAAGCCTG---AAGCCATGTGTAAAGTTA---  
ACCCCTCTCTGTGTTACTTTAAATTGTAACAATGTCAACAATACCAGTAATACCAATAAT-----  
-----  
-----ACCACCAATGTACCGCTGAAATGCGAGAAGAGATAAAA---  
AACTGCTCTTTCAATGCAACCACAATACTAAGG-----  
GATAAGACACAGAGAATACATTCACCT---TTTTATAGACTTGATATAGTACCAATTAATAGT-----  
-----  
-----

AATAATAGTAATAATAGTGAAAAATAGATTAAAAAATTGTAATACCTCATCCATTACTCGG---  
GATTGCTCAAACGTATCTTTTGATCGACTTCCCGTACCTTATGGTGCTCCTGCTGGTTTTGCGAGTCTTCAAT  
GTGAT---GTTAAGGATTTAAAT-----GGAACAGGAATAGGTAACAAT-----  
-GTCACC---AGAATACATTGCACCTGATGGAATCAGGCCAGTGGTATCAACT---  
CAACTGCTGTTGAATGGCAGTCTAGCAGAAAATAGG-----  
ACAATGATTAGATCTGAAAATATCACAACAAT-----GCCAAAACATAATAGTACAATTTAAC----  
-----ACGACTGTAAAC-----ATTACCTGTATCAGACCTAACAACAATACAAGAACA-----  
-AGTGTACGTATA-----GGACCAGGACAAGCA---TTC-----TATGCAACAGGTGAC-----  
-----ATAATAGGGGATATA-----AGACAAGCACATTGT---AATGTCAGTGGAGAA---  
CAATGGAATAAAGCTTTGCAAAAGGTAGTCAAAGAATTAAGA-----ATACATTTT-----  
-----AACAAAACAATAATCTTTACG-----  
AAATCCTCAGGAGGGGATCCAGAAATTACA---ACACATAGTTTTAATTGTGGAGGAGAA---  
TTTAAACAGCTCCAGGCAAGAGTCCTGGCTCTGGAAAGATACCTACAGGATCAACAGCTCCTAGGAATTTGGG  
GCTGCTCTGGAAAACCTCATCTGCACCCTAATGTGCCCTGGAACCTCTACTTGGAGT-----  
-----AATAAAAACTTGACTCAAATATGG-----GAT-----  
AACATGACCTGGCAGCAATGG---GATAAAGAAATTGACAAATTATACACAAGTAATATAT---  
AATCTACTTGAAGAATCGCAGAACCAGCAGGAA-----  
-----  
ATGAATGAAAAAGACTTATTGGAATTGGACAAATGGGCAAATCTATGGAATTGGTTTAGCATCACAACTGGC  
TGTGGTATATAAGATTATTTATAATGATAGTAGGAGGCTTAATAGGATTAAGAATAGTTTTTTGCT---  
GTGCTTTCTGTAATA-----AATAGAGTTAGGCAGGGATACTCACCT-----  
TTGTCTTTTGCTATTAGTTTGGTTGATACCATAGCAGTAGTAGTAGCTGGC---  
TGGACAGATAGGGTTATAGAAATAGGACAAAGAATTGGTAGAGCT-----  
-----ATCTTTAACATA-----CCTAGAAGAATCAGACAGGGCTTAGAAAGGGCTTTGCTA---TAA  
>JF683782  
GCT---GTA-----  
GAAAAAACGTGGGTTACTGTCTACTATGGGGTACCTGTGTGG---AAAGATGCAGAA---  
ACCACCTTATTTTGTGCATCAGATGCAAAAGCATATACAAACAGAA---ATGCATAAT-----  
-----GTCTGGGCTACA---CATGCCTGTGTACCTACGGAC---  
CCCAACCCACAGGAAATAAATTTGGAA-----AATGTGACAGAAGAATTTAAC-----  
-----ATGTGGAACTTAACATGGTAGAGCAAATGCATACAGATATA---  
ATCAGTCTATGGGATCAAAGCCTA---AAGCCATGTGTAAAGTTA---  
ACCCCTCTCTGTGTCACTTTAGATTGTGGATATAATGTCAGTATTAATAACACCTAT-----  
-----  
-----AGCATAAATGATACCATGGAAACAGATTTAAGA---  
AACTGCTCTTTCGATGTAACCACGAAATTAAGG-----  
GATAAGAGACAGAATGTATATTCACCT--TTTTATAGACTTGATATAGTACACATTGATAGT-----  
-----  
-----  
AATAGTAATAATAGCCATTATAGATTAATAAATTGTAATACCTCAGCCATTACACAA---  
GCTTGTCCAAAGGTATCTTTGAACCAATTCCTATACATTATTGTGCTCCAGCTGGTTTTGCGATTCTAAAGT  
GTAAT---GATAAGGAGTTCACT-----GGAAAAGGACCATGCAAGAAT-----  
-GTTAGC---ACGGTACATTGCACACATGGAATCAGGCCAGTAGTATCAACT---  
CAACTGCTGTTAAATGGCAGTCTAGCAGAAAATAGG-----  
ACAATGATTAGATCTGAAAATATCACAACAAT-----GCCAAAACATAATAGTACAACCTTACT----  
-----GAGCCTGTAAAC-----ATTACTTGTATCAGACCTAGCAACAATACAAGAAAA-----  
-AGTGTACATATA-----GGACCAGGACAAGCA---TTC-----TTTGCAACAGGTGAT-----  
-----ATCATAGGGGACATA-----AGAAAAGCCCATTGT---GAGGTCAATGAAACA---  
GAATGGAATAAAGCTTTAACAAAGGTAGTTGAACAATTAAGA-----ACATACTTTAGG-----  
-----AACAAAACAATAACCTTTTAA-----  
GGCCCCCTCAGGAGGGGATCTAGAAATTACA---ACACATAGTTTTAATTGTGGAGGAGAA---  
TTTAAACAGCTCCAGGCAAGAGTCCTGGCTGTGGAAAGATACCTAGGGGATCAACAGCTCCTAGGAATTTGGG  
GCTGCTCTGGAAAACCTCATCTGCACCCTAATGTGCCCTGGAACCTCTACTTGGAGT-----  
-----AATAAATCCCTGGATAAGATATGG-----AAC-----  
AACATGACCTGGATGCAATGG---GACAAAGAAATTAGCAATTATACACAATTAATATAT---  
ACTCTAATTGAACAATCGCAGAACCAGCAGGAA-----  
-----  
ATAAATGAACAAGAATTATTGGAATTGGACAAGTGGGCAAATCTGTGGAATTGGTTTGACATCTCACACTGGT  
TGTGGTATATAAAAATATTTATAATGATAGTAGGAGGCTTAATAGGATTAAGAATAGTTTTTTGCT---  
GTGCTTTCTATAATA-----CGTAGGGTTAGGCAGGGATACTCACCT-----

TTGTCATTTGCTATTAGTTTGCTTGATACCATAGCAATAGCAGTAGCTAAC---  
 TGGACAGATAGAATTATAGAAATAGGACAAGGAATTTGTAGAGCT-----  
 -----ATTATCAACATA-----CCTAGAAGAATCAGACAGGGCCTTGAAAGGGCTTTGCTA---TAA  
 >JF683783  
 GCT---GTA-----  
 GAAAAAACGTGGGTTACTGTCTACTATGGGGTACCTGTGTGG---AAAGATGCAGAG---  
 ACCACCTTATTCTGTGCATCGGATGCAAAAGCATATACAACAGAA---GCGCATAAT-----  
 -----ATCTGGGCTACA---CATGCCTGTGTACCTACGGAC---  
 CCCAACCCACAGGAAATAAATTTGGAA-----AATGTGACAGAAGAGTTTAAAC-----  
 -----ATGTGGAAACTTAACTGGTAGAGCAGATGCATACAGATATA---  
 ATCAGTCTATGGGATCAAAGCCTA---AAGCCATGTGTAAAATTA---  
 ACCCCTCTCTGTGTTACTTTAGATTGTAGACATAATGTCACCTATACATAATAATGTCACCTAATAATAAT----  
 -----  
 -----AATATCACCAGTGGCATAAAATGATACCATTGCCACAGAAGTAAAA---  
 AACTGCTCTTTCAATACAACCACAGAATTAAAA-----  
 GATAAGAGACAGAACGTATATTCACCT--TTTTATAGACTTGATATAGTACAAATTGATAGT-----  
 -----  
 -----  
 AATAGTAATAATAGTCATTATAGATTAATAAATTGTAATACCTCAACCATTACACAA---  
 GCTTGTCCAAAAGTAACTTTTAAGCCAATTCCTATACATTATTGTGCTCCAGCTGGTTTTGCAATTCTAAAGT  
 GTAAT---GATAAAAAGTTTCAGT-----GGAAAAAGACCATGCCGAAAT-----  
 -GTTAGC---ACAGTACAATGGACTCATGGAATCAGGCCAGTAGTATCAACT---  
 CAACTGCTGTTAAATGGCAGTCTAGCAGAAAATAGG-----  
 ACAATGATTAGATCTGAAAATATCACAACAAT-----GCCAAAAACATAATAGTACAACCTTACT----  
 -----GAACCTGTAAAC-----ATTACTTGTATCAGACCTAGCAACAATACAAGAAAA-----  
 -AGTATACGTATA-----GGACCAGGACAAGCA---TTC-----TATGCAACAGGTGAT-----  
 -----ATTATAGGGAATATA-----AGAAAAGCCCATTGT---GAGGTCAATGGAACA---  
 GAATGGAATAAAGCTTTAAAAGGGGTAGTTGAACAATTAAGA-----ACATACTTTAGT----  
 -----AACAAAACAATAGCCTTTAAC-----  
 GACTCCTCAGGAGGGGATCTAGAAATTACA--ACACATAGTTTTAATTGTGGAGGAGAA---  
 TTTAAACAGCTCCAGGCAAGAGTCCTGGCTGTGGAAAGATACCTAGGGGATCAACAGCTCCTAGGAATTTGGG  
 GCTGCTCTGGAAACTCATCTGCACCACTAATGTGCCCTGGAACCTTACTTGGAGT-----  
 -----AATAAATCCCTGGATAAGATATGG-----AAC-----  
 AACATGACCTGGATGCAATGG---GACAAAGAAATTAGCAATTATACACAATTAATATAT---  
 ACTCTAATTGAGGAATCGCAGAACCAGCAGGAA-----  
 -----  
 ATAAATGAACAAGACTTATTGGCATTGGACAAGTGGGCAAATCTGTGGAATTGGTTTGACATCTCACACTGGT  
 TGTGGTATATAAAAATATTTATAATGATAGTAGGAGGCTTAATAGGATTAAGAATAGTTTTTTGCT---  
 GTGCTTTCTATAATA-----CGTAGAGTTAGGCAGGGATACTCACCT-----  
 TTGTCATTTGCTATTAAATTTGTTTGACACCATAGCAATAGCAGTAGCTGGC---  
 TGGACAGATAGAGTTATAGAAATAGTACAAGGAATTGGTAGAGCT-----  
 -----ATTATCAATATA-----CCTAGAAGAATCAGACAGGGCCTTGAAAGGGCTTTGCTA---TAA  
 >JF683789  
 GCT---GCA-----  
 AGAAAGTTGTGGGTTACTGTCTACTATGGGGTACCTGTGTGG---AAAGATGCAAAA---  
 ACCACCTTATTTTGTGCATCAGATGCAAAAGCATATTCAACAGAA---AAGCATAAT-----  
 -----GTCTGGGCTACA---CATGCCTGTGTACCCACAGAC---  
 CCTAACCCACAAGAAATGCATTTGGAA-----AATGTAACAGAAGAGTTTAAAC-----  
 -----ATGTGGAAAAATAACATGGTAGAGCAGATGCATACAGATATA---  
 ATCAGTCTATGGGACCAAAGTCTA---AAGCCATGTGTAAAGTTA---  
 ACCCCTCTCTGTGTTACTTTAAATTGTAGCTACAATATCACTAGTAAGGTCAATAAGACTTTTCATC-----  
 -----  
 -----GATGACATTAATAGTACCATTGACATGAAAAACAGAAATAAAA---  
 AACTGCTCTTTCAATACAACCACAAAATAAAG-----  
 AATAAGGTTTCAGAAAGTACATTCACCT--TTTTATAAACTTGATATAGTACCAATGGGTAGT-----  
 -----  
 -----  
 GATAATAGTAGTTATAGATTAATAAATTGTAATACCTCAACCATTACACAG---  
 GCTTGTCCAAAGATAAATTTTGTGCTTATTTCCATACATTATTGTGCTCCAGCTGGTTTTGCGATTCTAAAGT  
 GTAAT---GATAATAATTTCAAT-----GGAACAGGACCATGCACGAGT-----

-GTCAGC---GCAGTACAATGCCACGTGGAATCAAGCCAGTAGTATCAACT---  
 CAATTGCTGATAAATGGCAGTCTAGCAGAAAATGAG-----  
 ACAATGATTAGATCTGAAAATATCACAAACAAT-----GCCAAAACATAATAATAACAACCTTAAG----  
 -----GAGCCTGTAAGA-----ATTAATTGTACCAGACCTAACAACAATAACAAGGAAA-----  
 -AGTGTACGTATA-----GGACCAGGACAAGCA---TTC-----TATGCAACAGATGAA-----  
 -----ATAATAGGGGATATA-----AGACAGGCACGTTGT---GAGGTCAATGAAACA---  
 GAATGGAATAGAACTTTGCATGAAGTAGTCAAACAATTAAGA-----ACATACTTTGTG----  
 -----AACAAAACAATAGCCTTTAAT-----  
 AAATCCTCAGGAGGAGATCTAGAAATTACA---ACACATAGTTTTAATTGTGGAGGAGAA---  
 TTTAAACAGCTCCAGGCAAGAGTCCTAGCTGTGGAAAGATACCTAAAGGATCAACAGCTCCTAGGAATTTGGG  
 GTTGCTCTGGAAAACCTCATCTGCACCACTAATGTGCCCTGGAACAAAACCTTGAGT-----  
 -----AATAGAACCAAGGAAGAGATATGG-----AAC-----  
 AACATGACTTGGATGCAATGG---GAAAAAGAAATTGACAAATTATACAGGATTAATATAT---  
 AACCTAATTGAAAAATCACAGAACCAGCAGGAA-----  
 -----  
 ATAAATGAAAAAGAATTATTGGAATTGGACAAGTGGGACAGTCTGTGGAGTTGGTTTAGCATCACAACTGGC  
 TGTGGTATATAAAAATATTTATAATGATAGTAGGAGGCTTAATAGGATTAAGAATAGTTTTTTGCT---  
 GTGCTTTCAATAATA-----CGTAGAGTTAGGCAGGGATACTCACCT-----  
 TTGCCGTTTGCTATTAATTTGCTTGATACCATAGCAATAGCAGTAGCTGGC---  
 TGGACAGATACGTTATAGAAATAGGACAAAGAATTGGTAGAGCT-----  
 -----ATTCTCAACATA-----CCTAGAAGAATCAGACAGGGCTTAGAAAGGGCTTTGCTA---TAA  
 >FJ670523  
 GCT---GCA-----  
 GATAACTTGTGGGTTACTGTCTATTATGGGGTACCTGTGTGG---AAAGATGCAGAC---  
 ACCACCTTATTTTGTGCATCAGATGCGAAAGCATATGACACAGAA---GTGCATAAT-----  
 -----GTTTGGGCTACA---CATGCCTGTGTACCCACAGAC---  
 CCCAACCCACAAGAAATACCATTGGTA-----AATGTGACAGAAGAGTTTAAC-----  
 -----ATGTGGAAAAATAACATGGTAGAGCAGATGCATACAGATATA---  
 ATCAGTCTATGGGACCAAAGTCTA---AAGCCATGTGTAAAGTTA---  
 ACCCTCTTTGTGTTACTTTAAACTGTGGCCATAATGACACCCTCACTAATRACACT-----  
 -----  
 -----GCCCCGTCAATAACACCATGAGAGAAGAAGTAAGA---  
 AACTGCTCTTACAATATGACCACAGAACCTAAGG-----  
 GATAAGCAAAAGAAAGTGTTTTCACTC---TTTTATAAACTTGATGTAGTATCAATTAATAAT-----  
 -----  
 -----  
 AGTAGTAGTCAGTATAGATTAATAAATTGTAATACCTCAGCCATTACACAG---  
 GCTTGTCAAAAGTATCTTTTGAGCCAATTCCCATACATTATTGTGCTCCAGCTGGTTTTGCAATTCTAAAGT  
 GTAGA---GATAACAAGTTCAAT-----GGAACAGGACCATGTAGGAAT-----  
 -GTCAGC---ACAGTACAATGCACACATGGAATCAGGCCAGTAGCATCAACT---  
 CAACTRCTGTAAATGGTAGTCTAGCAGAAGAAGAG-----  
 GTAATGATTAGATCTGAAAATATCAGCAACAAT-----GCCAAAACATAATAGTACAACCTTAAG----  
 -----GAGCCTGTAAAC-----ATTACTTGTGCCAGACCTGGCAACAATAACAAGAACA----  
 -AGTGTACGTATA-----GGACCAGGACAGGCA---TTC-----TATGCAACAGGTGAC----  
 -----ATAATAGGGGATATA-----AGACAAGCACATTGT---AATGTCAGTAGAGCA---  
 GCATGGAATAAACTTTGCAAGAGGTAGTCAAGCAATTAAGA-----AAATACTTTGTG----  
 -----AACGAAACAATAACGTTTACT-----  
 AACTCCTCAGGAGGGGATCCAGAAATTGTA---ACACATAGTTTTAATTGTGGAGGAGAA---  
 TTTAAACAGCTCCAGGCAAGAGTCCTGGCTCTGGAAAGATACCTAAAGGATCAACAGCTCCTAGGAATTTGGG  
 GATGCTCTGGGAAAATCATCTGCCCCACTGCTGTTCCCTGGAACATACTTGAGT-----  
 -----AATAATAAATCCTATGACGAGATATGG-----AAA-----  
 AACATGACCTGGCTGCAATGG---GATAAAGAAGTYAGCAGTTATACAGACCAAATATAT---  
 AATCTAATTGAAAAATCGCAGAACCAGCAGGAA-----  
 -----  
 ATAAATGAACAAGACTTATTGGCATTGGACAAGTGGGCAGACCTGTGGAATTGGTTTGACATTTCAAATGGC  
 TGTGGTATATAAGAATATTCATAATGATAGTAGGAGGCTTAATAGGATTAAGGATAGTTTTTTGCT---  
 GTGCTTTCTATAATA-----AAAAGAGTTAGGCAGGGATACTCACCT-----  
 TTGTGCTTTGCCATTAGTTTGCTTGACACCACAGCAATAGTAATAGCTGGC---  
 TGGACAGATAGGATTATAGAAATAGGACAAGGAATTGGTAGAGCT-----  
 -----ATCCTCAACGTA-----CCTAGAAGAATCAGACAGGGCCTAGAAAGGTCGTTGTTA---TAA

>AF219261

ACT---ACA-----  
GAAAACTTGTGGGTTACTGTCTATTATGGGGTACCTGTGTGG---AAAGACGCAGAG---  
ACCACCCCTATTTTGTGCATCAGATGCAAAAGCATATGATACAGAA---ATGCATAAT-----  
-----GTCTGGGCTACA---CATGCCTGTGTACCCACAGAC---  
CCCAACCCACAAGAAATATATTTGGAA-----AATGTAACAGAAGAGTTTAAAT-----  
-----ATGTGGAAAAATAACATGGTAGAGCAGATGCATACAGATATA---  
ATCAGTCTATGGGATGAAAGCCTA---AAGCCATGTGTACAGTTA---  
ACCCCTCTCTGCGTTACTTTAAATTGTAGCAATGCCAATGCCAAGCTCTATCAATGCCAATGCCACC-----  
-----  
-----TCTACCAATGCCACTGCCGAGAACGAGAAGGGAGAAATAAAA---  
AACTGCTCTTTCAATATGACCACAGAAGCTAAGG-----  
GATAAGAAAAAGAAAGTATATTCACCTT---TTTTATAGACTTGATGTAATACCACTTAATGGAACG-----  
-----  
-----  
GAGAAATGAGACTTACACTGAGTATAGGTTAATAAATTGTAATACCTCAGCCATTACACAA---  
GCTTGTCCAAAGGTATCCTTTGAGCCAATCCCATAACATTATTGTGCTCCAGCTGGTTTTGCGATCCTAAAGT  
GTAGG---GATGAGAAGTTCAAT-----GGAACAGGGCCATGCACGAAT-----  
-GTTAGC---ACAGTACAGTGCACACATGGAATCAGGCCAGTAGTATCAACT---  
CAACTGCTGTAAATGGCAGTCTGGCAAAGAAGAG-----  
GTAAGAATTAGATCTGAAAATATCACAATAAT-----GTCAAACTATAATAGTACAACCTTGTC---  
-----AAGCCTGTAAAC-----ATTACCTGTATCAGACCTAACAATAATACAAGAAAG-----  
-AGTATACATTTA-----GGACCAGGACGAGCA---TTC-----TATGCAACAGGTGAC-----  
-----ATAATAGGGAATATA-----AGAAAAGCACATTGT---ATTGTCAATGAATCA---  
GAATGGAATGAAGCTTTACAACAGGTAGCTACACAATTAGGA-----AAATACTTTGAG-----  
-----AACAAAACGATAAATTTTACT-----  
AGCCCCCTCAGGAGGGGATCTAGAAAGTCACA---ACACATAGTTTTAATTGTGGAGGAGAA---  
TTTAAACAGCTCCAGGCAAGAGTCCTGGCTGTGGAAAGATACCTAAAGGATCAACAGCTCCTAGGAATTTGGG  
GCTGCTCTGGAAGAACTCATCTGCACCACTAATGTGCCCTGGAAGCTCTACTTGGAGT-----  
-----AATAAATCTTATAGTGAGATATGG-----GAT-----  
AACATGACCTGGATGCAGTGG---GATAAAGAAATTAGCAATTACACACAAACAATATAT---  
AATCTAATTGAAAAATCACAGATCCAGCAGGAA-----  
-----  
AAGAATGAACAGGATTTATTGGCATTGGACAAGTGGACAAATCTGTGGACTTGGTTTGACATATCAAATTGGC  
TGTGGTATATAAAAAATATTTATAATGATAATAGGAGGCTTAATAGGATTAAGAATAGTTTTTTGCA---  
GTGCTTTCTGCAATA-----AATAGAGTTAGGCAGGGATACTCACCT-----  
TTGTCGTTTGCTAGTGATTTGCTTGATACCATAGCAATAGCAGTAGCTGGC---  
TGGACAGATAGGGTTATAGAAATAGGACAAAGAATTGGTAGAGCT-----  
-----ATTCTCAACATA-----CCTAGAAGAACCAGACAGGGCTTAGAAAGGGCTTTGGTA---TAA

>AF219265

GCT---GCA-----  
GAAAACTTGTGGGTTACTGTCTACTATGGGGTACCAGTGTGG---AAAGATGCAGAG---  
ACTACCTTATTTTGTGCATCAGATGCTAAAGCATATGAGACAGAA---AAGCATAAT-----  
-----GTTTGGGCTACA---CATGCCTGTGTACCCACGGAC---  
CCCAACCCACAAGAAATACATTTGGAA-----AATGTGACAGAAGAGTTTAACT-----  
-----ATGTGGAAAAATAACATGGTAGAGCAGATGCATACAGATATA---  
ATCAGTCTATGGGACCAAAGCCTA---AAGCCATGTGTAAAGCTA---  
ACCCCTCTCTGCGTTACTTTACATTGTAACAATGCCAATTTACAAGTGCCAACAACATG-----  
-----  
-----AGTACCGACATTACGAGGGATAGGGGAGAAATAAAA---A-  
CTGCTCTTTCAATATGACCACAGAGCTAAGG-----  
GATAAGCAACAGAAGGTATATTCACCTT---  
TTTTATAGGCTTGATGTAGTACAAATTAATGAGAATCAAGGTAATAGT-----  
-----  
AGTAACAATGAGTATAGATTAATAAATTGTAATACCTCAGCCATTACACAA---  
GCTTGTCCAAAGGTAACCTTTGAGCCAATTTCCATAACATTATTGTGCCCCAGCTGGTTTTGCGATCCTAAAGT  
GTAAG---GATGAGAAGTTCAAT-----GGAACAGGGCCACGCAAGAAT-----  
-GTCAGC---ACAGTACAATACACACATGGAATCAAGCCAGTAGTATCAACT---  
CAACTGCTGTAAATGGCAGTCTAGCAAAGAAAAG-----  
GTAAAAATTAGATGTGAAAATATCACAACAAT-----GCCAAAACATAATAGTACAACCTGGTC---

-----GAGCCTGTGCAA-----ATTAATTGTACCAGACCTAACAAACAATACAAGAAGA-----  
-AGTGTACGTATA-----GGACCAGGACAGGCA---TTT-----TAT---ACAACAGAC-----  
-----ATAATAGGGGATATA-----AGACAAGCCCATTGT---AATGTCAGTAGATCA---  
GCATAGAATAAACTTTACAAAAGGTAGCTGAGCAATTAGGA-----GGATACTTTGGG-----  
-----AACAAAACAATAATATTTGCT-----  
AACGCCTCAGGAGGGGATCTAGAAATCACA---ACACATAGTTTTTAATTGTGGAGGAGAA---  
TTTAAACAGCTCCAGGCAAGAGTCCTGGCTGTGGAAAGATACCTAAAGGATCAACAGCTCCTAGGAATTTGGG  
GCTGCTCTGGAAGAACTCATCTGCACCACTAATGTGCCCTGGAACCTAGTTGGAGT-----  
-----AATAAATCTGAGAGTGAGATATGG-----GAG-----  
AACATGACCTGGCTGCAATGG---GATAAAGAAATTAGCAATTACACACAGATAATATAT---  
ACCCTAATTGAAGAATCGCAGAACCAGCAGGAA-----  
-----  
AAGAATGAAC TAGACTTATTGGCACTGGACAAGTGGGCAAATCTGTGGAATTGGTTTGACATATCAAAGTGGC  
TGTGGTATATAAAAATATTTATAATGATAGTAGGAGGCTTAATAGGATTAAGAATAGTTTTTTGCA---  
GTACTTGCTGTAATA-----AATAGAGTTAGGCAGGGGTACTCACCT-----  
TTGTCGTTTGCTATTAATTTGGTTGATACCATAGCAATAGTAGTAGCTGGC---  
TGGACAGATAGGGTTATAGACATAGGACAAGGAATTGGTAGAGCT-----  
-----ATTCTCCACATA-----CCTAGAAGAATCAGACAGGGCTTAGAAAGAGCTTTGCTA---TAA  
>HM204635  
GCT---GTA-----  
GAAAACTTGTGGGTTACGGTCTATTATGGGGTACCTGTGTGG---AAAGACGCAACT---  
ACCACCTTATTTTGTGCATCAGATGCGAGAGCATATGATACAGAA---GTACATAAT-----  
-----GTCTGGGCTACA---CATGCCTGTGTACCTACAGAC---  
CCCAATCCACAAGAAATAAAGTTGGAA-----AATGTGACAGAAGAATTTAAC-----  
-----ATGTGGAAAAATAACATGGTAGAGCAGATGCATACAGATATA---  
ATCAGTCTCTGGGACCAAAGCTTA---CAGCCATGTGTAAAATTA---  
ACTCCTCTCTGCGTTACTTTAAATTGTACAAATGTCCACCAATAATTCCACCAATAATTCC-----  
-----  
-----ACTAACAATGTCACCATAGAAGACATAGGACTAACA---  
AACTGCTCTTACAATATGACCACAGAATTAAGG-----  
GATAAGAAACAGAAAGTATATTCACCT--TTTTATAAACTGGATGTAGTACAAATTAATGACAACAAT---  
-----  
-----  
AACAGTAGTAATAATTATAGTTTGTATAGATTAATAAATTGTAATACCTCAGCCATTACACAA---  
GCTTGTCCAAAGGTAACCTTTGATCCAATTCCCATACATTATTGTGCTCCAGCTGGTTTTGCGATTTTAAAGT  
GTAAT---AATAAGCAGTTCAAT-----GGAACAGGGCCATGCAAGAAT-----  
-GTCAGC---ACAGTACAATGCACACATGGAATCAAGCCAGTAGTATCAACT---  
CAACTGCTGCTAAATGGTAGTCTAACAGAAGGGGAG-----  
ATAATGATTAGATCTGAAAATATTACAAACAAT-----GCTAAAAACATAATAGTACAATTTAACACG-  
-----TCTACGGCTGTAGCA-----ATCAATTGTACCAGACCTAACAAATAACAAGAAAA-----  
-AGTGTACGTATA-----GGACCAGGACAAGCA---TTC-----TATGCAACAGGTGAT-----  
-----ATAATAGGGGATATA-----AGACAGGCACATTGT---AACGTCAGTAGAACA---  
CAATGGAATAAACTTTGCAAGAGGTAGCTAACAAACTAAGA-----GAACATTTTAAG-----  
-----AACAAAACAATAATATTTAAT-----  
ACCTCCTCAGGAGGGGATCTAGAAATAACA---ACACATAGTTTTTAATTGTGGAGGAGAA---  
TTTAAACAGCTCCAGGCGAGAATCCTGGCTGTGGAAAGATACCTAAAGGATCAACAGCTCCTAGGAATTTGGG  
GCTGCTCTGGAAGAACTCATCTGCACCACTAATGTGCCCTGGAACCTAGTTGGAGT-----  
-----AATAAAACCCAGGCTGAAATATGG-----GAA-----  
AACATGACCTGGCTGCAATGG---GATAAAGAAATTAGCAATTACACACAGATAATATAT---  
GAACTAATTGAAGAATCGCAGAACCAGCAGGAA-----  
-----  
AAGAATGAACAAGACTTGTGGCATTGGACAAGTGGGCAAAGTCTATGGACTTGGTTTGATATAACAAAATGGC  
TGTGGTATATAAAAATATTTATAATGATAGTAGGAGGCTTAATAGGATTAAGAATAGTTTTTTGCT---  
GTGCTTTCTATAATA-----AATAGAGTTAGGCAGGGGTACTCACCT-----  
TTGTCAATTCGCTGTTAGTTTGTGTTGATACCATAGCAATAGCAGTAGCTGAG---  
TGGACAGATAGGGTTATAGAAAACAGGTCACAGACTTTGTAGAGCT-----  
-----ATCTTCAACATA-----CCTAGAAGAATCAGACAGGGCCTCGAAAGGGCTTTGCTA---TAA  
>HM204648  
GCT---ACA-----  
GAGAACTTGTGGGTTACTGTCTACTATGGGGTACCTGTGTGG---AAAGATGCAGAG---

ACCACCTTATTTTGTGCATCAGATGCAAAAGGATATGATACAGAA---GTGCATAAT-----  
 -----GTCTGGGCTACA---CATGCCTGTGTACCTACAGAC---  
 CCCAACCCACAAGAAATAAATTTGGAA-----AATGTGACAGAGAATTTTAACT-----  
 -----ATGTGGAAAAATAACATGGTAGAGCAGATGCATACAGATATA---  
 ATCAGTCTTTTGGGACCAAAGCCTA---AAGCCATGTGTAAAGTTA---  
 ACCCCTATCTGTGTTACTTTAAATTGTACGGATGACGTCTTTTTCGTCAAACTACCAGCAATGACACGTACA  
 AC-----  
 -----AACACGCAACAAATGCAACAAATCAGCAATAAAATGAAAGGAGAAATAAAA---  
 AACTGCTCTTTCAATACGACCACAGTCTTAAGA-----  
 GATAAGACACAGAAAATACATTCACCT---  
 TTTTATAGACTGGATGTAATACCATTGGAACAACAGTGTATCATCTAAAAACAGCAGTGTAGTAAAAAATA  
 CAACATTAAC-----  
 ACAAGTGCACCTACAGGAAACAACAAATCAATCTACTAACAGCAGCCAGTATAGCCTGTATACATTAATAAATT  
 GTAATACCTCAACCATTACACAG---  
 GCTTGTCCAAAGGTATCCTTTGAGCCAATTCCCATACATTATTGTGCCCCAGCTGGTTTTGCGATTCTAAAGT  
 GTAAT---GATAAAGAGTTCAAT-----GGAACAGGGCTATGCAAGAAT-----  
 -GTCAGC---TCAGTACAATGCACACATGGAATCAAGCCAGTAGTGTCAACT---  
 CAGCTGCTGTTAAATGGCAGTCTAGCAGAAGGAGAA-----  
 ATAATAATTAGTTCTGAAAATCTCACAGACAAT-----ACCAAAACATAATAGTACATCTTAAT---  
 -----AAGACTGTAAAC-----ATTACTTGTATCAGGCCTAACAACAATACAAGAAAA-----  
 -AGTGACACATA-----GGACCAGGACAAGCA---TAC-----TATGCAACAGGTGAC-----  
 -----ATAATAGGAAATATA-----AGACACGCATATTGT---CTTGTCAATAAATCA---  
 GAATGGATTACTGCTTTGCGAGGGGTAGTCGAACGATTAGGA-----AGACTAGCGGAC---  
 -----ATAACATCAATAACCCTTAAT-----  
 AACTCTGCAGGAGGAGATCTAGAAATTACA---TCACATAGCTTTATTTGTGGAGGAGAA---  
 TTTAAACAGCTCCAGGCAAGAGTCCCTGGCTCTGGAAAGATACCTAAGGGATCAACAGCTCCTAGGAATTTGGG  
 GCTGCTCTGGAAGAACTCATCTGCACCACTACTGTGCCCTGGAAGCTCTAGTTGGAGT-----  
 -----AATAAATCCAGAGTGAGATATGG-----GGA-----  
 AACATGACCTGGCTACAATGG---GACAAAGAAATTAGCAATTACACAAATATAATATAT---  
 GATCTAATTGAAAAATCACAGAACCAGCAGGAA-----  
 -----  
 AAGAATGAACAAGACTTATTGGCATTGGACAAGTGGGACAGTCTGTGGAATTGGTTTGACATAACAACTGGC  
 TGTGGTATATAAAAAATATTACATAATAATAATAGGAAGCTTAATAGGATTAAGAATAGTCTTTGCT---  
 GTGCTTGCTGTAATA-----AATAGAGTTAGGCAGGGATACTCACC-----  
 TTGTCGTTGCTATTAAATTTGCTTGATACCATAGCAATAGTAGTAGCTGGG---  
 TGGACAGATAGGATTATAGAAATAGGACAAAGACTTTGTAGAGCT-----  
 -----ATCCTTAATATA-----CCTAGAAGAATCAGACAGGGCTTTGAAAGGGCTTTGCTA---TAA  
 >HQ595782  
 AAT---GCA-----  
 GACCGTTTGTGGGTAACAGTCTACTATGGGGTACCTGTGTGG---AAAGATGCAGAG---  
 ACCACTTTATTCTGTGCATCAGATGCCAAAGTATATGATAAAGAA---GTGCATAAT-----  
 -----GTCTGGGCCACA---CATGCCTGCGTACCCACAGAC---  
 CCCAACCCACAAGAAATAGGTTTAGCC-----AATGTGACAGAAGAGTTTAACT-----  
 -----ATGTGGAAAAACCACATGGTAGAGCAGATGCATACAGATATA---  
 ATCAGTCTATGGGACCAAAGCCTA---AAGCCATGTGTAAAGTTA---  
 ACCCCTCTCTGCGTTACCTTAAATTGTAGCAATTCCATAACCCCTCTCGGCGGTACCTCAAAT-----  
 -----  
 -----AATAGCAGTTCCAATAATAGTTTCAAGGAAGAAATGAAA---  
 AACTGCTCTTTCAATATGACTACAGAACCTAAGG-----  
 GATAGGAAACAGACAGTATATTCACCT---TTTCATAAGCTTGATTTAGTAGAAATTAAGGGAAAT-----  
 -----  
 -----  
 AATAATAGCAGTAATGAGACTTATATACTAACAAATTGTAATACATCAGTTATTACACAA---  
 GCTTGTCCAAAAGTGACTTTTGACCCAATACCCATACATTATTGTGCCCCAGCTGGTTTTGCGATTTTAAAAAT  
 GTAGA---GATGAAGAGTTTAAAG-----GGAACAGGGTCATGCAAGAAT-----  
 -GTTAGC---TCAGTACAATGCACACATGGAATTAACCAGTAGTCTCAACT---  
 CAACTGCTGTTAAATGGTAGTCTAGCAAAGGGAAAT-----  
 GTAAGCATCAGATCGGAAAAATATCACAGACAAC-----GCCAAGACCATAATAGTACAGCTTGCC---  
 -----ACGCCTGTAAAA-----ATTAATTGTACTAGACCTAACAACAATACCAGAAGA-----  
 -AGTATACATATA-----GGACCAGGACAAGCA---TTC-----TATGCAACT---GAC-----

-----ATAATAGGGGATATA-----AGACAAGCACACTGT---AATCTCAGTGGAGAA---  
 GAATGGCATGACGCTTTACAAAAGGTAGTAAAAAATTAAGGGAA-----GAGAAATCCTTTAAG-----  
 -----AACAAAGCAATAATCTTCACT-----  
 ACCCACTCAGGTGGGGATTTAGAAAGTTACA---ACACATACTTTTAAATTGTAGAGGAGAA---  
 TTTAAACAGCTCCAGGCAAGAGTCCTGGCTGTGGAAAGATACCTAAAGGATCAACAGCTCCTAGGAATTTGGG  
 GCTGCTCTGGAAAGCTCATCTGCACCACTGATGTGCCCTGGGAATCTGAGTGGAGT-----  
 -----AATAAATCTCAGGAAGAGATATGG-----GAT-----  
 AACATGACCTGGCTGCAATGG---GATAGAGAAATTAGCAATTACACACAAACAATATAT---  
 AGTCTAATTGAGAAATCGCAGAACCAGCAGGAA-----  
 -----  
 AAGAATGAACAAGACTTATTGGCAATGGACAAGTGGTCAACCCTGTGGAATTGGTTTGACATATCAAACCTGGT  
 TATGGTATATTAGAATATTTATAATGATAGTAGGAGGCTTAATAGGATTAAGGATAGTTTTTTGCT---  
 GTGCTTGCTGTAATA-----AATAGAGTTAGGCAGGGATACTCACCT-----  
 CTGTCGTTTTGCTATTACTTTGCTTGATGCCACAGCAGTAACAGTAGCAGGG---  
 TGGACAGATAGGATTATAGAACTAGGACACAGAGCTGGTAGAGCT-----  
 -----TTTCTCCATATA-----CCTAGAAGAATCAGACAGGGCTTTGAAAGGGCTTTACTA---TAA  
 >HQ595784  
 GTT---AAA-----  
 GCAAACTGGTGGGTACAGTCTACTATGGAGTACCTGTGTGG---AGAGATGCGGAT---  
 ACCATCCTATTTTGTGCATCAGATGCTAAAGCATATGATAAAGAA---GTGCATAAT-----  
 -----GTCTGGGCTACA---CATGCTTGTGTACCCACAGAC---  
 CCCAACCCACGAGAAATAAATTTGGAA-----AATGTGACAGAAAATTTTAAT-----  
 -----ATGTGGAAAAATAACATGGTAGAGCAAATGCACACAGATATA---  
 ATCAGCCTATGGGACCAAAGCCTA---AAGCCATGTGTACAGTTA---  
 ACCCCTCTCTGTGTTACTCTAAACTGTAGTGGTGTAAACAAACCCAACCAGACT-----  
 -----  
 -----GAAATGGTAAGGGAAATGGTAAGGGAAATGAAA---  
 AACTGCTCTTACAATATGACCACAGAACTAAAA-----  
 GATAAGAAACAACAAGTATATTCACCT---TTCTATAAACTTGATGTAGTATCAGTAGATGGTCAGAATGAT-  
 -----  
 -----  
 TCGGACCTGGTCAATGAGAGTAGCCCATATAGACTAGTAAATTGTAATACCTCAACCATTACACAG---  
 GCTTGTCCAAAGGTATCCTTTGAGCCAATTCCCATACATTATTGTGCTCCAGCTGGTTTTGCGATTCTAAAAT  
 GTAAT---GATAAGGAGTTTAAG-----GGAACAGGGCTATGCAAGAAT-----  
 -GTCAGT---ACAGTACAATGCACACATGGAATTAGACCAGTAGTATCAACC---  
 CAACTACTGTAAATGGCAGCCTAGCAGAAGGAGAG-----  
 GTAATGATTAGGTCTGAAAATTTACAAACAAT-----GCCAAAACCATAATAGTACAGTTTAAT---  
 -----GAGTCTGTACCA-----ATTAATTGTAGCAGACCCTCTAATAATACAAGGAAA-----  
 -AGTATACCTATA-----GGACCAGGAAGAGCA---TTC-----TTTGCAACAGGTGAC-----  
 -----ATAACAGGAGATATA-----CGACGGGCACATTGT---ACTGTCAATGGAACA---  
 AAATGGAAGCAAACCTTTACAACTGGTAGTTGAACAATTAAGA-----AAACAGTATAAC---  
 -----ACGAGCAAAATAATCTTTAAT-----  
 AAATCCTCTGGAGGGGATATAGAAATTACA---TCACATAGTTTTAACTGTGGAGGAGAA---  
 TTTAAACAGCTCCAGGCAAGAGTCCTGGCTGTGGAAAGATACCTACAGGATCAACAGCTCCTAGGACTTTGGG  
 GTTGCTCTGGAAGAACTCATCTGCACCACTACTGTGCCTTGGAACCTCTAGTTGGAGT-----  
 -----AGTAAACAGATCTAAAGGATATATGG-----GAA-----  
 AATATGACCTGGCTGCAATGG---GATAAAGAAATTAGCAATTACTCAGCAGTAATATAT---  
 AAACACTTTGAACAATCGCAGAACCAGCAGGAA-----  
 -----  
 AAGAATGAACAAGACTTATTGGCATTGGACGAATGGGCAAATCTATGGAATTGGTTTGACATATCACATTGGC  
 TGTGGTATATAAAAATATTTATAATGATAGTAGGAGGCTTAATAGGATTAAGAATTGTTTTTGCT---  
 GTACTTTTCAGTAATA-----AATAGAGTTAGGCAGGGATACTCACCT-----  
 GTGTCATTTGCTACTTCTTTGCTTGATGCTACAGCAATAGCAACAGCTGAG---  
 TGGACAGATAGGGCTATAGAAAATAGGACAAGGGATTTGTAGAGCT-----  
 -----ATTATCCACATA-----CCTAGAAGAATCAGACAAGGCCTCGAAAGAGCTTTACT-----  
 >Y13718  
 GCT---GCA-----  
 GGAAACTTGTGGGTTACTGTCTACTATGGGGTACCTGTGTGG---AAAGACGCAGAG---  
 ACCACCTTATTCTGTGCATCAGATGCGAAAGCATATACCACAGAG---GTGCATAAT-----  
 -----GTCTGGGCTACA---CATGCCTGTGTACCTACAGAC---

CCCAACCCACAAGAAATAAATTTGGAA-----AATGTCACAGAAAAGTTTAAAC-----  
-----ATGTGGAAAAATAACATGGTAGAGCAGATGCATACAGATATA---  
ATCAGTCTATGGGACCAAAGCCTA---CAGCCATGTGTAAAGTTA---  
ACCCCTCTCTGCGTTACTTTAAATTTGTAGCGATGTCAATGTCAATGCCACCAATTACAAT-----  
-----  
-----GTCAATGATACCATAAACATGAAAGAAGAAATAAGA---  
AACTGCTCTTTCAATATGACCACAGAATTAAGG-----  
GATAGGAAACAGAAAGTATATTCACCT--TTTTATAGACTGGATGTAGTACAAATGAATAAT-----  
-----  
-----  
AGCAATAATAGCAATCAGTATAGATTAATAAATTGTAATACCTCAGCCATTACACAA---  
GCTTGTCCAAAGGTATCCTTTGAGCCAATTCCCATACATTATTGTGCCCCAGCCGGTTATGCGATTCTAAAGT  
GTAAG---GATAAGGAGTTCAAT-----GGAACAGGGCTATGCAAGAAT-----  
-GTCAGC---ACAGTACAATGCACACATGGAATCAAGCCAGTAGTATCAACC---  
CAACTGCTGTTAAATGGCAGTCTAGCAGAAAGCAAG-----  
GTAATGATTAGATCTGAAAAATACACAAACAAT-----GCCAAAAACATACTAGTACAACCTTACC---  
-----AGTCCTGTAAAC-----ATTAGTTGTATCAGACCTAACAACAATACAAGAAAA-----  
-AGTGTAAGTATA-----GGACCAGGACAAGCA---TTC-----TATGCAACAGGTGAA-----  
-----ATCATAGGGAATATA-----AGACAAGCATATTGT---AATGTCAATAGATCA---  
GAATGGAATGAAGCTCTGCGGGAGGTAGTCAAACAATTAAGA-----ACATACTTT-----  
-----AACAAAAACAATAATCTTTGAT-----  
AACTCCTCAGGAGGGGATCTAGAAATAACA---ACACATAGTTTTAATTGTGGAGGAGAA---  
TTTAAACAGCTCCAGGCAAGAGTCCCTGGCTCTGGAAAGATACCTAAGGGATCAACAGATCCTAGGAATTTGGG  
GCTGCTCTGGAAGAACTCATCTGCACCACTAATGTGCCCTGGAAGTCTAGTTGGAGT-----  
-----AATAAATCCAGAGTGAGATATGG-----GAA-----  
AACATGACCTGGCTGCAATGG---GATAAAGAAATTAGCAATTACACACACATAATATAT---  
ACTTTACTTGAGGAATCGCAGATCCAGCAGGAA-----  
-----  
AAGAATGAACAAGACTTATTGGCATTGGACAAGTGGGCAAATCTGTGGAATTGGTTTGACATAACAACTGGC  
TGTGGTATATAAAAAATATTTATAATGATAGTAGGAGGCTTAATAGGATTAAGAATAGTTTTTTACT---  
GTGCTTTCTATAATA-----AATAGAGTTAGGCAGGGATACTCACCT-----  
TTGTCGTTTCGCTATTAATTTGCTTGATACCATAGCCATAATAATAGCTGGG---  
TGGACAGATAGGGTTATAGAAATAGGACAAAGATTTTGTAGAGCT-----  
-----ATTCTCAACATA-----CCTAGAAGAATCAGACAGGGCTTTGAAAGGGCTTTGCTA---TAA  
>Y13717  
GCT---GCA-----  
GACAACTTGTGGGTTACTGTTTACTATGGGGTACCTGTGTGG---AAAGATGCAGAG---  
ACCACCTTATTTTGTGCATCAGATGCAAAAGCATATGAGACAGAA---ATGCATAAT-----  
-----GTCTGGGCTACA---CATGCCTGCGTACCTACAGAC---  
CCCAGCCCAACAAGAAATAAATTTGGAA-----AATGTGACAGAAGAGTTTAAAC-----  
-----ATGTGGAAAAATAACATGGTAGAGCAGATGCATACAGATATA---  
ATCAGTCTATGGGACCAAAGCCTA---AAGCCATGTGTAAAGTTA---  
ACCCCTCTCTGCGTTACTTTAGAATGCTTTAATGTCCACAAGACCAATAAGACC-----  
-----  
-----AATATCACCGAGGACATGATAGGAGAAATAAAA---  
AATTGCTCTTTCAATATGACCACAGAATTAAGG-----  
GATAAGAAACAGAAAGTACATTCACCT--TTTTATAAACTGGATGTAGTAGAAATGAGTAATGGCAGC---  
-----  
-----  
GTGAGTAATGGCAGCGGTCAGTACAGACTAATAAATTGTAACACCTCAGCCATTACACAA---  
GCTTGTCCAAAGGTATCCTTTGAGCCAATTCCCATACATTATTGTGCCCCAGCTGGTTTTGCGATTCTAGAGT  
GTAAG---AATAAGAAATTCAAT-----GGAACAGGGCCATGCACGAAT-----  
-GTCAGC---ACAGTACAATGCACACATGGAATCAAGCCAGTAGTATCAACT---  
CAACTGCTGTTAAATGGCAGTCTAGCAGAAGAAGAG-----  
GTAATGATTAGATCTGAAAAATACACAAACAAT-----GCCAAAAACATAATAGTACAATTTACC---  
-----ACGTCTGTAAAA-----ATTAATTGTACCAGATTTAACAACAATACAAGAAGA-----  
-AGTATACGTATA-----GGACCAGGACAAGCA---TTC-----TATGCAACAAATGAC-----  
-----ATAATAGGGAATATA-----AGACAAGCACAAATGT---GATGTCAATAGAACA---  
GAATGGAATAAAGCTTTGCAAGGGGTAGTCAAACAATTACAA-----AAATACTTTGGG---  
-----AACAAAAACAATAATCTTTACT-----

AACTCCTCAGGAGGGGATCTAGAAATAACA---ACACATAGTTTTTAATTGTGGAGGAGAA---  
 TTTAAACAGCTCCAGGCAAGAGTCCTGGCTGTGGAAAGATACCTAAAGGATCAACAGCTCCTAGGAATTTGGG  
 GCTGCTCTGGAAGAACTCATCTGCACCACTAATGTGCCCTTGGAACTCTAGTTGGAGT-----  
 -----AATAAATCCCAGAGTGAGATATGG-----GAC-----  
 AACATGACCTGGCTGCAATGG---GATAGAGAAATTAGCAATTACACACAGATAATATAT---  
 AATCTACTTGAAGACTCGCAGAACCAGCAGGAA-----  
 -----  
 AAGAATGAACAAGACTTATTGGCATTGGACAAGTGGGCAAATCTGTGGACTTGGTTTGACATATCAAAGTGGC  
 TGTGGTATATAAAATATTTCATAATGATAGTAGGAGGCTTAATAGGATTAAGAATAGTTTTTTGCT---  
 GTGCTTTCTTTAATA-----AATAGAGTTAGGCAGGGATACTCACCT-----  
 TTGTCGTTTCGCTATTAATTTGCTTGATACCATAGCGATAGCAGTAGCTGGG---  
 TGGACAGATAGGGTTATAGAATTAGGACAAAGACTTTATAGAGCT-----  
 -----ATTCTCAACATA-----CCTAGAAGAATCAGACAGGGCTTCGAAAGGGCTTTGCTA---TAA  
 >HQ385459  
 GCT---ACA-----  
 GAAAAATTTGTGGGTACGGTCTACTATGGGGTACCGGTGTGG---AGAGACGCAGAG---  
 ACCATCCTATTCTGCGCATCAGATGCTAAAGCATATGAAAAAGAA---GTGCATAAT-----  
 -----GTTTCGGGATACA---CACGCCTGTGTACCCACAGAC---  
 CCCAACCCACAAGAAATAGAATTAGAA-----AATGTGACAGAAGAGTTTAACT-----  
 -----ATGGGGAAGAATAACATGGTGGAGCAGATGCATACAGATATA---  
 ATCAGTCTATGGGACCAAAGCTTA---AAGCCATGTGTAAAGTTA---  
 ACCCCTATCTGCGTTACTTTAACTGCCACAACATCACCACCAATGACACGGGTACGGGTAATGTC-----  
 -----  
 -----ACGGGTACGGGTAATGTACCGGATAACAACATAGGGGAAATGACA---  
 AACTGCTCATTCAATATTACCACAGAAATAAGA-----  
 GATAAGAGACAGAATGTATATTCACTT---TTTTATAAACTTGATGTAGTACCAATTAATGGAAAT-----  
 -----  
 -----  
 GGTAGTGGAATGATAGTGAGTATAGGCTAATAAATTGTAATACCTCAACCATTACACAG---  
 GCTTGTCCAAAGGTATCCTTTGAGCCAATTCCCATACATTATTGTGCCCCAGCTGGTTTTGCGATTCTAAAGT  
 GTAGG---GATAAGAACTTCAAT-----GGAACAGGGCCATGCAGAAAT-----  
 -GTCAGC---TCAGTACAATGCACACATGGAATCAAGCCAGTAGTATCAACT---  
 CAACTGCTGTTGAATGGCAGCCTAGCAGAAGGAGAT-----  
 GTAGTGATTAGATCTGAAAATCTCACAACAAT-----GCCAAAACCATAATAGTACAGCTTAAT---  
 -----GAGTCTGTACCA-----ATTAATTGTACCAGACCCAACAACAATACAAGAAAA---  
 -AGTGTACGTATA-----GGACCAGGACAAGCA---TTA-----TATGCAACA---GAC-----  
 -----ATCATAGGGAATATA-----AGACAAGCACATTGT---AATATCAGTAAACAA---  
 AATTGGAATACAGCTTTACAAAAAATAGCTGCACAGTTAAGA-----CAACACTTT-----  
 -----TACAGAACAATAAACTTTACT-----  
 AAATCCTCAGGAGGGGATTTAGAAATTACA---ACACATAGTTTTTAATTGTAGAGGAGAA---  
 TTTAAACAGCTCCAGGCAAGAGTCCTGGCGCTGGAAAGGTACCTAAGGGATCAACAGCTCCTAGGAATTTGGG  
 GTTGCTCTGGAAGAACTCATCTGCACCACTACTGTGCCCTTGGAACTCTAGTTGGAGT-----  
 -----AATAAATCTCAGAATGAAATATGG-----GAG-----  
 AATATGACCTGGCTCAATGGG---ATAAAGAAATTAAGCAATTACACAGACATAATATAT---  
 GATCTAATTGCGGAATCGCAGAACCAGCAAGAA-----  
 -----  
 AAGAATGAAAAAGACTTATTGGCATTGGACAAGTGGGCAAATCTGTGGAATTGGTTTGACATATCAAAGTGGT  
 TATGGTATATAAAATTATTTATAATGATAGTAGGGGGCTTAATAGGATTAAGAATAGTTTTTTACT---  
 GTGCTTTCTATAATA-----AATAGAGTTAGGCAGGGATACTCACCT-----  
 CTGTCATTTGCTATTACTTTGCTTAATGCTACAGCAATAGCAGTAGCTGAG---  
 GGGACAGATAGGGTTATAGAAGTAGGACAAAGGGCTGGTAGAGCT-----  
 -----CTTCTCCACATA-----CCTAGAAGAATCAGACAAGGATGGAAAAGGGCTTTGCTA---TAA  
 >HQ385452  
 GCT---ACA-----  
 GGAAAAATTTGTGGGTACAGTCTACTATGGGGTACCAAGTGTGG---AGAGACGCAGAG---  
 ACCACCCCTATTTTGTGCATCAGATGCTAAAGCATATGATACAGAA---GTGCATAAT-----  
 -----GTCTGGGCTACA---CATGCTTGTGTACCCACAGAC---  
 CCCAGCCCACAAGAAGTAGATTTTAACTA-----AATGTGACAGAAAATTTTAACT-----  
 -----ATGTGGAAAAATAACATGGTAGAGCAGATGCATACAGATATA---  
 ATCAGTCTATGGGACCAAAGTCTG---AAGCCATGTGTAAAGTTA---

ACCCTCTCTGCGTAACTCTAAATTGTTCTAACATCACCAGCACCAGCAGCAATAACAACAGCAGTAACATCA  
 CTAATGCCAGC-----  
 ---AGCAGCAGCAGCAACAACAGCAGTAACAGTACTGTAGATGAAAGAAACAAAGTAATGACA---  
 AACTGCTCTTTCAATATGACCACAGAACTAAGA-----  
 GATAAGATACAGAAAGTACATTCACTT--TTTTATAGGTCTGATGTAGTAGGAATTAATGGT-----  
 -----  
 -----  
 AATAAGGAGTATAGACTAATAAATTGTAATACCTCAACCATTACACAA---  
 GCTTGTCCTAAAAGTATCCTTTGAGCCCATTCCTATACATTATTGTGCCCCAGCTGGTTTTGCGATTCTAAAGT  
 GTAAG---GATAAGGAGTTCAAT-----GGAACAGGGCCATGCAAGAAT-----  
 -GTCAGC---TCAGTACAATGCACACATGGAATCAAGCCAGTAGTATCAACT---  
 CAACTACTGTTTAAATGGCAGTCTGGCAGAAGAAGGG-----  
 ATAAGGATTAGATCTGAAAATCTCACAATAAT-----GCCAAAATCATAATAGTACAGCTTACT----  
 -----AAGCCTGTAAGA-----ATTAATTGTACCAGACCTTACAACAATACAAGAAAA-----  
 -AGTATACGTATA-----GGACCAGGACAATCA--TGG-----TATGCAACAGGGGAC-----  
 -----ATAATAGGGAATATA-----AGACAAGCATTTTGT---AATGTCAGTAAACA---  
 GACTGGAACACAGCTTTACAACAGGTAGCTGCACAATTAGGA-----AGGCACTTTAAT----  
 -----AATAAAAAGATAACCTTTAAA-----  
 AACTCCTCAGGAGGGGATTTAGAAATTACC--ACACATAGCTTTAATTGTAGAGGAGAA---  
 TTTAAACAGCTCCAGGCACGAGTCCTGGCTGTGGAAAGATTCTAAAGGATCAACAGCTCCTAGGAATTTGGG  
 GATGCTCTGGAAGAACTCATCTGCACCACTAATGTGCCCTGGAACCTCTAGTTGGAGT-----  
 -----AATAAATCTCAGGAGCAAATATGG-----AAT-----  
 AATATGACCTGGCTGCAATGG---GATAGAGAAATTGACAATTACACACAAATAATATAT---  
 AATCTAATTGAAGAATCGCAAAACCAGCAAGAA-----  
 -----  
 AAGAATGAGCAAGACTTATTGGCATTGGACAAGTGGGCAAGTTTGTGGACTTGGTTTGACATATCAAATTGGC  
 TATGGTATATAAAGATATTCTAATGATAGTAGGAGGCTTAATAGGATTAAGAATAGTTTTTTGCT---  
 GTGCTTTCTATAATG-----AATAGGGTTAGGCAGGGATACTCACCT-----  
 CTATCATTTGCTATTTCTTTGCTTGATACTGTAGCAGTAGCAGTAGCTGGG---  
 TGGACAGATAGGGTTATAGAAATAGGACAAAGAGTTGGTAAAGCT-----  
 -----ATTATCCACATA-----CCTAGAAGAATCAGACAGGGCTTAGAAAGGGCTTTGCTA--TAA  
 >HQ385453  
 GCT---GAA-----  
 GAGTTGTGGGTACGGTCTTCTATGGAGTACCTGTGTGG--AGAGACGCAGAG---  
 ACCACCTATTTTGTGCATCAGATGCTAAAGCATATGATACAGAG--GTACATAAT-----  
 -----ATTTGGGCTACA--CATGCCTGTGTGCCACAGAT--  
 CCTAACCCACAAGAAATAGGTTTGGA-----AATGTGACAGAAGAATTTAAC-----  
 -----ATGTGGAAAAATAACATGGTGGAGCAGATGCATACAGATATA--  
 ATCAGTCTATGGGACCAAAGCTTA--AAGCCATGTGTACAGTTA--  
 ACCCTCTCTGCGTTACTCTAACTGTAGCCACAATATCAGTACCACTAATAGCACCAGTACG-----  
 -----  
 -----GGCAATATCAGTACCATTAATAGCACCAGTGCGGACATGAGA---  
 AACTGCTCGTTCAATATGACCACAGAACTAAGA-----  
 GATAAGAAACAGAATGTATATTCATT--TTTTATAAACTTGATGTAGTACAAATAGGGAAT-----  
 -----  
 -----  
 AGTAGTAGTAGTGAGTATAGACTAATAAATTGTAATATCTCAACCATTACACAG---  
 GCTTGTCCTAAAAGTATCCTTTGAGCCGATTCCCATACATTATTGTGCCCCAGCTGGTTATGCGATCCTCAAGT  
 GTAGG---GAGAAGAACTTCAAT-----GGAACAGGGCCATGCACAAAT-----  
 -GTAGC---ACAGTACAATGCACACATGGAATCAAGCCAGTAGTGTCAACT---  
 CAACTGCTGTTGAATGGCAGTCTAGCAGAAGGAGAT-----  
 GTAATGATTAGATCTGAAAATATCAGACAAAT-----GCCAAAACCATAATAGTACAGTTTAAT----  
 -----GAGTCTGTAATG-----ATTAATTGTACCAGACCTAACAACAATACAAGAAGA-----  
 -AGTGTACGTATA-----GGACCAGGGCAAACA--TTC-----TATGCAACAGGTGAA-----  
 -----ATAATAGGGGATATA-----AGACGAGCACATTGT---AATGTCAGTGGAGAA---  
 CAATGGAGGAAAGCTTTACAAAATGTAAAGGTACAGTTACGC-----AAATACTTT-----  
 -----AACACAACAATAGAATTTGCT-----  
 AATTCTTCAGGAGGGGATTTAGAAATTACA--ACACATAGCTTTAATTGTAGAGGAGAA---  
 TTCAAACAGCTTCAGGCAAGAGTCCTAGCTCTGGAAGATACCTAAGGGATCAACAGCTCCTAGGAATTTGGG  
 GCTGCTCTGGAAGAACTTATCTGCACCACTAATGTACCTTGGAACCTCTAGTTGGAGT-----

```

-----AATAAACTTATAATAGCATATGG-----GAC-----
AACATGACCTGGTTGCAATGG---GATAAAGAAATTAACAAATTACACAAACACAATATAT---
ACTCTAATTGAGAAAGCGCAGAACCAGCAGGAA-----
-----
AAGAATGAACAAGACTTATTGGCATTGGACAAATGGGCAAGTCTGTGGAATTGGTTTGACATAACAACTGGC
TGTGGTATATAAGAATATTTATAATGATAGCAGGAGGTTTAATAGGATTAAGGATAGTTTTTTGCT---
GTACTTTCTATAATA-----AATAGAGTTAGGAAGGGATACTCACCT-----
CTATCGTTTGCTATTAATTTGCTTGATACAATAGCAATAGCAGTAGCTAAC---
TGGACAGATAGAGTTATAGAAATAGGACAAAGAGTTGGTAGAGCT-----
-----ATTTGCAACATA-----CCTAGAAGAATTAGACAGGGTTTAGAAAGGCTTTTGCTA---TAA
>KT152846
GCT---GCA-----
GAAAACTTGTGGGTTACTGTCTACTATGGGGTACCTGTGTGG---AAAGATGCAGAG---
ACCACCTTATTTTGTGCATCAGATGCGAAAGCATATAGTACAGAA---AAGCATAAT-----
-----GTCTGGGCTACA---CATGCCTGTGTACCCACAGAC---
CCCAACCCACAAGAAATACATTTGGAA-----AATGTGACAGAAGACTTTAACT-----
-----ATGTGGAAAAATAACATGGTAGAGCAGATGCATACAGACATA---
ATCAGTCTATGGGACCAAAGCCTA---AAGCCATGTGTAAAGTTA---
ACCCCTCTCTGTGTACTTTAGATTGTGAACTGTCAGCTGCTCTAATTGT-----
-----
-----AGTGTGAGGGATGAAATAAAA---
AACTGCTCTTTCAATGCAACCACAGAATTAAGG-----
GATAAACACAGAAGGTACATTCACCT---TTTTATAAACTTGATATAGTACCAATTGATCAA-----
-----
GGTAATAGTAGTAATAGTAGTTATAGATTAATAAATTGTAATACCTCAGCCATTACACAG---
GCCTGCCCAAAGGTAACCTTTGAGCCAATTCCCATACATTATTGTGCCCCAGCTGGTTTTGCGATCCTAAAGT
GTAAG---GATGAGAAATTCAAT-----GGAACAGGGCCATGCAAGAAT-----
-GTCAGT---ACAGTACAATGCACACATGGGATCAAGCCAGTGGTATCAACT---
CAACTGCTGTAAATGGCAGTCTAGCAAAAGGAGAA-----
ATAAGAATTAGATCTGAAAATATCACAAACAAT-----GACAAACTATAATAGTACAGCTTGTC---
-----AATCCTGTGAGA-----ATTAATTGTACCAGACCTAACAAACAATACAAGAAAA-----
-AGTATACATATA-----GGACCAGGACAAGCA---TTC-----TAT---ACAAGTGAC-----
-----ATAATAGGGGATATA-----AGAGAAGCACATTGT---AATGTCAGTAGATCA---
GAATGGAATAAACTTTAAAAGAAGTAAGTGAACAATTAGGA-----CAATACTTTGGG---
-----AACAAAACAATAAGATTTGCT-----
AACTCCTCAGGAGGGGATATAGAAATCACA--ACACATAGTTTTAATTGTGGAGGAGAA---
TTTAAACAGCTCCAGGCAAGAGTCCCTGGCTGTGGAAAGATACCTAAGGGATCAACAGCTCCTAGGAATTTGGG
GCTGCTCTGGAAGAACTCATCTGCACCACTAATGTGCCCTGGAAGCTCTAGTTGGAGT-----
-----AATAAATCTCTAGGGGAGATATGG-----GAG-----
AACATGACCTGGCTGCAATGG---GATAAAGAAATTAGCAATTACACAAGCCTAATATAT---
AACCTAATTGATGAATCGCAGAACCAGCAGGAA-----
-----
AAGAATGAACAAGACTTATTGGCATTGGACCAAGTCTGTGGAATTGGTTTGACATATCAAAATGGC
TGTGGTATATAAAAATATTTATAATGATAATAGGAGGATTAATAGGATTAAGAATAGTTTTTTGCA---
GTGCTTTCTTTAATA-----AATAGAGTTAGGACAGGGATACTCACCT-----
TTGTCGTTTGCTATTAGTTTGCTTGATACCATAGCAATAGCAGTAGCTGGC---
TGGACAGATAGGATTATAGAAATAGGACAAAGAATTGGTAGAGCT-----
-----ATCCTCAACATA-----CCTAGAAGAATCAGACAGGGCTTTGAAAGAGCTTTTGCTT---TAA
>KT152841
GCT---GCA-----
GAAAAATTGTGGGTTACTGTTTACTATGGGGTACCTGTGTGG---RAAGACGCAGAG---
ACCACCTTATTTTGTGCATCAGATGCTAAAGCATATGATACAGAA---AAGCATAAT-----
-----GTCTGGGCTACA---CATGCCTGTGTRCCACAGAC---
CCCAACCCACAAGAAATACATTTGGAA-----AATGTGACAGAAAATTTAACT-----
-----ATGTGGAAAAATAAAATGGTAGAGCAGATGCATACAGACATA---
ATCAGTCTATGGGACCAAAGCCTA---AAGCCATGTGTAAAGTTA---
ACCCCTCTCTGTGTCACTTTAAATTGTAGCAATGTC-----
-----
-----GGTAGCACGAACATCACGGGGCGAGATGGGGAAGAAATAAAA---

```

AACTGTTCTTTCAATATGACCACAGAACTAAGG-----  
 GATAAGAGACAGAAGGTATATTCAC TT--TTCTATAGACTTGATGTAGTACCAATTGAAGAAGGTAAT----  
 -----  
 -----  
 AGTAGTAATAGTAGTTTCAAGGAGTATAGATTAATAAATTGTAATACCTCAGCCATTACACAG---  
 GCTTGTCCAAAGGTAACCTTTGAGCCAATTCCCATACATTATTGTACCCCAGCTGGTTTTGCGATCATAAAGT  
 GTAAG---GATGAGAAGTTCAAT-----GGAACAGGGCCATGCAAGAAT-----  
 -GTCAGT---ACAGTACAATGCACACATGGAATCAAGCCAGTAGTATCAACT---  
 CAACTGCTGTTAAATGGCAGTCTAGCAGAAAGAGGA-----  
 GTAAAAATTAGATCTGAAAATATCACAGACAAT-----GTCAAAACTATAATAGTACAACCTTGAC----  
 -----AAGCCTGTGAGA-----ATTATTTGTACCAGACCTAACAACAATACAAGAAAA-----  
 -AGTATACGTATA-----GGACCAGGACAAGCA---TTC-----TAT---ACAAGTGAC-----  
 -----ATAATAGGGGATATA-----AGACAAGCACATTGT---AATGTCAGTAGAYCA---  
 AAATGGAATTACACTTTACAAAAGGTAGGTGAACAATTAGAA-----AAATACTTTGTG----  
 -----AACAGAACAATAAGATTTAAT-----  
 AAATCCTCAGGAGGGGATCTAGAAATCACA---ACACATAGTTTTAATTGTGGAGGAGAA---  
 TTTAACAGACTCCAGGCAAGAGTCCTGGCTGTGGAAAGATACCTAAAGGATCAACAGCTCCTAGGAATTTGGG  
 GCTGCTCTGGAAGAACTCATCTGCACCACTAATGTGCCCTGGAACCTCTAGTTGGAGT-----  
 -----AATAAACTCAGCAGGAGATATGG-----GAT-----  
 AACATGACCTGGTTGCAATGG---GATAAAGAAATTAGCAATTACACAGAAATGATATAT---  
 CAACTAATTGAAGAATCGCAGAACCAGCAGGAA-----  
 -----  
 AAGAATGAACAAGACTTATTGGCATTGGACAAGTGGGCAAATCTGTGGAATTGGTTTGACATATCAAATTGGC  
 TGTGGTATATAAAAAATATTTATAATGATAGTAGGAGGATTAGTAGGATTAAGAATAGTTTTTTGCT---  
 GTACTTTCTGTAATA-----AATAGAGTTAGGCAGGGATACTCACCT-----  
 CTGTCAATTTGCCATTAATTTGCTTGATACCATAGCAATAGTAGTAGCTGGC---  
 TGGACAGATAGGATTATAGAAATAGGACAAGGAATTGTTAGAATT-----  
 -----ATTCTCCACATA-----CCTAGAAGA-----GGCTTAGAAGGAGCTTTGCTA---TAA  
 >KT152842  
 GCT---GCA-----  
 GGAAACTTGTGGGTCACTGTTTACTATGGGGTACCTGTGTGG---AAAGAAGCAGAG---  
 ACCACCTTATTTTGTGCATCAGATGCTAAAGCATATAAGAAAGAA---GTGCATAAT-----  
 -----GTVTGGGCTACA---CATGCCTGTGTACCCACAGAC---  
 CCCAACCCACAAGAAATACATTTGGAA-----AATGTGACAGAAGACTTTAAC-----  
 -----ATGTGGACAAATAACATGGTAGAGCAGATGCATACAGACATA---  
 ATCAGTCTATGGGATCAAAGCCTA---AAGCCATGTGTAAAGTTA---  
 ACCCCTCTCTGTGTACTCTGAATTGTAGTAATGTCAATGTCAATAAC-----  
 -----  
 -----ACGCAGAACTTCACGGGGTGGGACAGGGAACAAATAAAA---  
 AACTGCTCTTTCAATATGACCACAGAACTAAGG-----  
 GACAAGAGTCAGAAGGTATATTCAC TT--TTTTATAGACTAGATGTAGTACAAAGTCAAGGT-----  
 -----  
 -----  
 AATAGTAGTAATAGTAGTTATAGGGAGTATAGATTAATAAATTGTAATACCTCAGCCATTACGCAG---  
 GCTTGCCCAAAGGTATCCTTTGAGCCAATTCCCATACATTATTGTGCCCCAGCTGGTTTTGCGATCCTAAAGT  
 GTAAT---GATGAGAAGTTCAAT-----GGAACAGGGCCATGCAGGAAT-----  
 -GTCAGT---ACAGTACAATGCACACATGGAATCAAGCCGGTAGTATCAACT---  
 CAACTACTGTTAAATGGCAGTCTAGCAAAA---AAT-----  
 ATAACAATTAGATCTAAAAATATCACAGACAAT-----GTCAAAAATATAATAGTACAACCTTGCC----  
 -----ACTCCTGTGGAA-----ATTAATTGTACCAGACCTAACAACAATACAAGAAGA-----  
 -AGTGTACGTATA-----GGACCAGGACAAGCA---TTC-----TATACAAATAGC-----  
 -----ATAATAGGGGATATA-----AGACAAGCATATTGC---AGTGTCAATAGATCA---  
 GAATGGAATAAAACTTTAAGCCAGGTAGGTGAACAATTAGGA-----AAATACTTTAAG----  
 -----AACAAAACAATAAAATTTGAT-----  
 AAGTCCTCAGGAGGAGATCTAGAAATCACA---ACACATAGTTTTAATTGTAGAGGAGAA---  
 TTTAAACAGCTCCAGGCAAGAGTCCTGGCTGTGGAAAGATACCTAAGGGATCAACAGCTCCTAGGAATTTGGG  
 GTTGCTCTGGAAGAACTCATCTGCACCACTAATGTGCCCTGGAACCTCTAGTTGGAGT-----  
 -----AATAAGACTCAAGATGATATATGG-----AAT-----  
 AAAATGACCTGGATGCAATGG---GAGAAAGAAATTAGCAATTACACAGACATAATATAT---  
 AGCCTAATTGAAGAATCGCAGAACCAGCAGGAA-----

-----  
AAGAATGAACAAGACTTATTGGCATTGGACAAGTGGGCAAATCTGTGGAATTGGTTTGACATATCAAATTGGC  
TGTGGTATATAAAAATATTTATAATGATAGTAGGAGGATTAATAGGATTAAGAATAGTTTTTACT---  
GTGCTTTCTGTAATA-----AATAGAGTTAGGCAGGGATACTCACCT-----  
TTGTCATTTGCTATTAGTTTAAATTGATACCATAGCAATAGTAGTAGCTGGC---  
TGGACTGATAGGATTATAGAAATAGGACAAACATTTGGTAGAGCT-----  
-----ATTCTCCACATA-----CCTAGAAGAATCAGACAGGGCTTAGAAAGAGCTTTTGCTA---TAA  
>KT152844  
GCT---GCA-----  
AGCAACTTGTGGGTTACTGTCTACTATGGGGTACCTGTGTGG---AAAGAAGCAGAT---  
ACCACTTTATTTTGTGCATCAGATGCTAAAGCATATGAGACAGAA---AAGCATAAT-----  
-----GTCTGGGCTACA---CATGCCTGTGTACCCACAGAC---  
CCCAGCCCACAAGAAATACATTTGGAA-----AATGTGACAGAAAACCTTTAGC-----  
-----ATGTGGAAAAATAAAATGGTAGATCAGATGCATACAGATATA---  
ATCAGTCTATGGGACCAAAGCCTA---AAGCCATGTGTAGAGTTA---  
ACCCCTCTCTGTGTTACTTTAAGTTGTAGCAATGTCAATAACAACACG-----  
-----  
-----AACATCACAGGGTGGGGCAAGGAAGAAATAAAA---  
AACTGCTCTTTCAATATGACCACAGAACTAAGG-----  
GATAAGAGACAGAAGGCATATTCACCT---TTTTATAGACTTGATGTAGTACCAATTAATGAAGGTGAT----  
-----  
-----  
AGTAGTAATAGTAGTTATAAGGAGTATAGATTAATAAATTGTAATACCTCAGCCATTACACAG---  
GCTTGTCCTAAAAGTAACCTTTGAGCCAATTCCCATACATTATTGTGCCCCAGCTGGTTTTGCGATCCTAAAGT  
GTAAT---GATAAGGAGTTCAAT-----GGAACAGGACCATGCAAGGAT-----  
-GTCAGT---ACAGTACAATGCACACATGGAATCAAGCCAGTAGTATCAACC---  
CAACTACTGTTAAATGGCAGCCTAGCAGAAGAAAA-----  
GTAATAATTAGATCTGAAAATATCACAACAAT-----GTCAAACTATAATAGTACAACCTTGCC----  
-----ACGCCTGTAAAA-----ATTAGTTATGCCAGACCTAACACAATACAAGAAAG-----  
-AGTGTAACGTATA-----GGACCAGGACAGGCA---TTC-----TAT---ACAAGTGAC-----  
-----ATAATAGGGGATATA-----AGACAAGCACATTGT---AATGTCAGTAGATCA---  
GAATGGAATAAACTTTAAACAAGGTAGGTGAACAACTAGGA-----AGACACTTTGTG----  
-----AACAAAACAATAAAATTTACT-----  
AATTCCTCAGGAGGGGATCTAGAAATCACA--ACACATAGTTTTAATTGTGGAGGAGAA---  
TTTAAACAGCTCCAGGCAAGAGTCCCTGGCTGTGGAAAGGTACCTAAGGGATCAACAGCTCCTAGGAATTTGGG  
GCTGCTCTGGAAAGCTCATCTGCACCACTAATGTGCCTTGGAACTCTAGTTGGAGT-----  
-----AATAAATCTCTAGAAGAGATATGG-----GAC-----  
AACATGACCTGGCTACAATGG--GAAACAGAAATTAGCAATTACACAGAGCTAATATAT---  
AACCTAATTGAGGAATCGCAGAACCAGCAGGAA-----  
-----  
AAGAATGAACAAGACTTATTAGCATTGGACAAGTGGGCAAATCTGTGGAATTGGTTTGACATATCAAATGGC  
TGTGGTATATAAAAATATTTATAATGATAGTAGGAGGATTAATAGGATTAAGAATAGTTTTTGTCT---  
GTGCTTTCTGTAATA-----AATAAAGTTAGGCAGGGATACTCACCT-----  
CTCTCATTTGCTATTAGTTTGGTTGATACCATAGCAATAGTAGTAGCTGGC---  
TGGACAGATAGGATTATAGAAATAGGACAAGGAATTGGTAGAGCT-----  
-----ATTCTCCACATA-----CCTAGAAGAATCAGACAGGGCTTAGAAAGAGCTTTTGCTA---TAA  
>AY736809  
GCT---GCA-----  
GACAACCTTGTGGGTTACTGTCTATTATGGGGTACCTGTGTGG---AAAGATGCAGAG---  
ACCACCTTATTTTGTGCATCAGACGCTAAAGCATATGAGACAGAA---AAACATAAT-----  
-----GTCTGGGCTACA---CATGCCTGTGTACCCACAGAC---  
CCCAGCCCACAAGAAATACCTTTGAAA-----AATGTGACAGAAAAGTTTAAAC-----  
-----ATGTGGAAAAATAACATGGTAGAGCAGATGCATACAGATATA---  
ATCAGTCTATGGGACCAAAGCCTA---AAGCCATGTGTACAGTTA---  
ACCCCTCTCTGCGTCACTCTAAATTGTAGTGACGTCACCACCAATAACACCAAGGTCAATACCACCAGT----  
-----  
-----GCCCTACCACCACTGCCACTGTCAACAATGACAATGACATGAAA---  
AACTGCTCTTACAATATAACCACAGAACTAAGG-----  
GATAAGAAACAGAAAAGGTATTCACCTC---TTTTATAGACTTGATGTAGAACTAATAAATAAGAAT-----  
-----

-----  
 AATAGTAATAGCACTGAGTATGTATTAATAAATTGTAAAACCTCAACCCTCACACAG---  
 GCTTGTCCAAAGGTATCCTTTGAGCCAATTCCCAAACATTATTGTGCCCCAGCTGGTTTTGCGATTCTAAAAT  
 GTAAG---GATAAGGAGTTCAAT-----GGAACAGGGCTATGCAAGAAT-----  
 -GTCAGC---ACAGTACAATGCACACATGGAATCAAGCCAGTAGTGTCTACT---  
 CAACTACTATTAAATGGCAGTTTAGTGGAAAAAAGG-----  
 GTAATGATTAGATCTGCAAATATCACAGACAAT-----ACCAAAAACATAATAGTACAACCTTAAG----  
 -----GAGCCTGTAGAA-----ATTAATTGTACCAGACCTAACAACAATACAAGAAAA-----  
 -GGTGTACATATA-----GGGCTAGGAAGAAGA---TTC-----TATACAACACAA-----  
 -----GTAGTAGGGGATATA-----AGACAAGCATATTGT---AATGTCAGTAAATCA---  
 AAATGGAATGATACTTTGAAAAAAGTAGTTTACCAATTAAGA-----AAATACTTT-----  
 -----AACAAAACAATAATCTTTAAC-----  
 TCCTCCTCAGGAGGGGATGTAGAAATTACA---ACACATATGTTTACTTGTGGAGGAGAG---  
 TTTAAACAGCTCCAGGCACGAGTCCTGGCTGTGGAAAGATACCTAAGGGATCAACAGCTCCTAGGAATTTGGG  
 GCTGCTCTGAAAACTCATCTGCACCACCTAATGCGCCTTGGAACCTCAGTTGGAGT-----  
 -----ATAAGTCTCAGAGTGAGATATGG-----GAC-----  
 AACATGACCTGGTTGCAATGG---GATAGAGAAATTAACAATTATACAGACATAATATAT---  
 AGACTACTTGAAGATTCGCAAAACCAGCAGGAA-----  
 -----  
 AAGAATGAACAAGACTTATTGGCATTGGACAAGTGGTCAAGCCTGTGGACTTGGTTTGACCTATCAAACCTGGC  
 TGTGGTATATAAAAAATATTACATAATGATAGTAGGAGGTTAATAGGATTAAGAATAGTGT'TTGCT---  
 GTGCTTGCTGTAATA-----AATAGAGTTAGGCAGGGATACTCACCT-----  
 TTGTCGTTGCTGTTAGCTTGCTTGATACCATAGCAATAGTAGTAGCTGGC---  
 TGGACAGATAGGGTTTTAGAAATAGGACAAAGAATTGGTAGAGCT-----  
 -----TTTATTAAACATA-----CCTAGAAGAATTAGACAGGGCTTTGAAAGGGCTTTGCTG---TAA  
 >AY736810  
 ACT---GCA-----  
 GAAGACTTGTGGGTTACTGTCTACTATGGGGTACCTGTGTGG---AAAAACGCAGAG---  
 ACCACCCATTTTTGTGCATCAGATGCTAAGGCATATAAGACAGAA---GTGCATAAT-----  
 -----GTCTGGGCTACA---CATGCCTGTGTACCCACAGAC---  
 CCCAACCCACAAGAAATACATTTGGAA-----AATGTGACAGAAGAGTTTAAT-----  
 -----GTGTGGAAAAATAACATGGTAGAGCAGATGCATACAGACATA---  
 ATCAGTTTATGGGACCAAAGCCTA---AAGCCATGTGTAAAGTTA---  
 ACCCTCTCTGCGTTACTTTAACTGTATCAATGCCAACGTTACCAACAGCAGCATG-----  
 -----  
 -----ACCAACAGCAGCATGATGGAAGGAGAAATAAAA---  
 AACTGTTCTTACAATATGACCACAGAATAAGG-----  
 GATAAGAAAAGGAAAGTATTTTCGCTT---TTTTATAAACTTGATGTAGTACCAATGAATGAA-----  
 -----  
 -----  
 AATAATAGTGAGTATAGATTAATAAATTGTAATACCTCAGCCATTACACAG---  
 GCTTGTCCAAAGGTAACCTTTGAGCCAATTCCCATACATTATTGTGCCCCAGCTGGTTTTGCAATTCTAAAGT  
 GTAAG---GATGAGGAGTTCAAT-----GGAACAGGGTTATGCAAGAAT-----  
 -GTCAGC---ACAGTACAATGCACACATGGAATCAAGCCGGTAGTGTCAACT---  
 CAACTACTGTTAAATGGCAGTCTAGCAGAAAAAGAG-----  
 ATAAGAATTAAATCTGAAAACATCTCAGACAAT-----GCTAAAACCATAATTGTACAACCTTACC----  
 -----AAGCCTGTACTA-----ATCAATTGTGCCAGACCTAGCAACAATACAAGAAAA-----  
 -AGTGTACATATA-----GGACCAGGACAAGCA---TTC-----TATGCAACAGGTGCT-----  
 -----ATAACAGGAGATATA-----AGACAAGCATATTGT---GTAGTCAATAGAACA---  
 CAATGGAATGACACTTTAGGACAGGTAGCGATACAATTAAGA-----AAACACTGG-----  
 -----AACACAACAATAATCTTTAAT-----  
 GAACCCTCAGGAGGGGATTTGGAAATTACA---ACACATAGTTTTAATTGTGGAGGGGAA---  
 TTTAAACAGCTCCAGGCAAGAGTCCTGGCTGTGGAAAGATACCTAAAGGATCAACAGCTACTAGGAATTTGGG  
 GCTGCTCTGAAAACTCATCTGCACCACCTAATGTGCCTTGGAACCTCTAGTTGGAGT-----  
 -----AATAAATCTTACAATGAGATATGG-----GAA-----  
 AACATGACCTGGCTGCAATGG---GATAAAGAAATTAACAATTACACAGAACTAATATAT---  
 AGCCTAATTGAAGAATCGCAGAACCAGCAGGAA-----  
 -----  
 AAGAATGAACAAGACTTATTGGCATTGGACAAGTGGGCAAGTCTGTGGAATTGGTTTGACATATCCAACCTGGC  
 TGTGGTATATAAAAAATATTTATAATGATAGTAGGAGGCTTAATAGGATTAAGAATAGTTGTTGCT---

GTGCTTTCTGTAATA-----AATAGAGTTAGGCAGGGATACTCACCA-----  
 CTATCATTTTGCTATTAACCTTGCTCAATACCATAGCAATAGCAGTAGCTGGC---  
 TGGACAGATAGAGTTATAGAAATAGGACAAGGAATTGGTAGAGCT-----  
 -----ATTCTCCACATA-----CCTAGAAGAATCAGGCAGGGCTTCGAAAGGGCTTTATTA--TAA  
 >AY736812  
 GCT---GCA-----  
 GACAACTTGTGGGTTACTGTCTATTATGGGGTACCTGTGTGG--AAAGATGCAGAG---  
 ACCACCTTATTTTGTGCATCAGATGCTAAAGCATATGAGACAGAA--AAGCATAAT-----  
 -----GTTTGGGCTACA---CATGCCTGTGTGCCACAGAC---  
 CCCAACCCACAAGAAATACCTTTGGAA-----AATGTGACAGAAGAGTTTAAC-----  
 -----ATGTGGAAAAATAAAATGGTAGAACAAATGCATACAGATATA---  
 ATCAGTCTATGGGACCAAAGCCTA---CAGCCATGTGTAAAGTTA---  
 ACCCCTCTCTGTGTACTTTAAATTGTACGGATGCTACTAATGGTACGATTGGC-----  
 -----  
 -----AACATCACCGATGAAATGAAGGGAGAAATAAAA---  
 AACTGCTCTTTCAATATAACCACAGAAATAAGG-----  
 GATAAGAAACAGAAAGTATATTCACCT--TTTTATAGACTTGATGTAGTACCAATAGAGCCAGATAGTAGT-  
 -----  
 -----  
 AATAGTAGTAGAAACAGTAGTGAGTATAGATTAATAAAATTGTAATACCTCAGCCATTACACAA---  
 GCCTGCCCAAAGGTAAGCTTTGAGCCAATTCCCATACATTATTGTGCCCCAGCTGGTTTTCGATCCTGAAGT  
 GTAGG---GATAAAGAGTTCAAT-----GGAACAGGGGAAATGCAAGAAT-----  
 -GTCAGC---ACAGTCCAATGCACACATGGAATCAAGCCAGTAGTATCAACT---  
 CAACTGCTGTAAATGGCAGTCTAGCAGAAGGAGAG-----  
 GTAAGAATTAGATCTGAAAATATCACAAACAAT-----GCCAAACTATAATAGTACAACCTTGTC----  
 -----GAGCCTGTGAGA-----ATTAATTGTACTAGACCTAATAACAATACAAGAGAG-----  
 -AGTGTGCGTATA-----GGGCCAGGACAAGCA---TTC-----TTTGCAACAGGTGAC-----  
 -----ATAATAGGGGATATA-----AGACAAGCACATTGT--AATGTCAGTAGATCA---  
 CAATGGAATAAGACTTTACAACAGGTAGCTGCACAATTAGGA-----GAACACTTTAAA-----  
 -----AACAAAGCAATAACATTTAAC-----  
 AGTTCCTCAGGAGGAGATCTAGAAATCACA--ACACATAGTTTTAATTGTGGAGGAGAA---  
 TTTAAACAGCTCCAGGCAAGAGTCCTTGCTGTGGAGAGATACCTAAGGGATCAACAGCTCCTAGGAATTTGGG  
 GCTGCTCTGGAAGAACTCATCTGCACCACTAATGTGCCCTGGAACCTCTAGTTGGAGT-----  
 -----AATAAATCTCATGATGAAATATGG-----AAC-----  
 AACATGACCTGGCTGCAATGG--GATAAAGAAATTAGCAATTACACAAACCTAATATAT--  
 AGTCTAATTGAAGAATCGCAAAACCAGCAGGAA-----  
 -----  
 AAGAATGAACAAGATTTATTGGCATTGGACAAGTGGGCAAGTCTGTGGAATTGGTTTGACATATCAAAGTGGC  
 TGTGGTATATAAAAAATATTTATAATGATAGTAGGAGGTTAATAGGATTAAGAATAGTTTTTTGCT--  
 GTGCTTGCTGTAATA-----AAGAGAGTTAGGCAGGGATACTCACCT-----  
 GTGTCAATTTGCTATTAATTTGGTTGATACTATAGCAATAGCAGTAGCTGGC---  
 TGGACAGATAGGGTTATAGAAATAGGACAAGGAATTGGTAGAGCT-----  
 -----TTTCTCCACATA-----CCTAGAAGAATCAGACAGGGCTTAGAAAGGGCATTGCTG--TAA  
 >AY736815  
 GTT---GTA-----  
 GGAAACTTGTGGGTTACTGTCTACTATGGGGTACCTGTGTGG--AAAGAGGCAGAC---  
 ACCACCTTATTTTGTGCATCAAATGCTAGAGCATATGATACAGAA--GTGCATAAT-----  
 -----GTTTGGGCTACG---CATGCCTGTGTACCTACAGAC---  
 CCCAACCCACAAGAAATAGATTTGGAA-----AATGTGACAGAAGAGTTTAAC-----  
 -----ATGTGGAAAAATAACATGGTAGAGCAAATGCATACAGATATA---  
 ATTAGTCTATGGGACCAATTCCTA--AAACCATGTGTAAAGTTA---  
 ACCCCTCTCTGCGTTACTTTAGATTGTGGCTATAATGTAACCAACTTGACT-----  
 -----  
 -----TCCACCAGTAACATGAAAGAAGACATAACA---  
 AACTGCTCTTACAATATGACCACAGAAATAAGG-----  
 GATAGGAAACAGAAAGTGTATTCACCT--TTTTATAGGCTTGATATAGTACCAATTGATGAAGAAAAG----  
 -----  
 -----  
 AATAATAACAGTGTTACTAGTCCGTATAGATTAATAAAATTGTAATACCTCAGCCATTACACAG---  
 GCCTGTCTAAGGTATCCTTTGAACCAATTCCCATATATTATTGTGCCCCAGCTGGTTTTGCGATTCTAAAAAT

GTAAG---GATGCAGAGTTCAAT-----GGAACAGGGCCATGCAAGAAT-----  
 -GTCAGC---ACAGTACAATGTACACATGGAATCAGGCCAGTAATATCAACT---  
 CAACTACTGTTAAATGGCAGTCTAGCAGAGAATGGG-----  
 ACAAAGATTAGATCTGAAAACATCACAACAAT-----GCCAAAACCATAATAGTACAGCTTAAT----  
 -----GAGACTGTACAA-----ATTAATTGTACCAGACCTAACAACAATACAAGAAGA-----  
 -AGTGTACGTATA-----GGACCAGGACAAGCA---TTC-----TATGCAACAGGTGGC-----  
 -----ATAACAGGGGATATA-----AGACGAGCATATTGT---AATGTCAGTAGACAA---  
 AAATGGGAACAAGCATTAAAAGGGGTAGTCATACAATTAAGA-----AAACACTTTAAT----  
 -----AATAAAACAATAACCTTTACC-----  
 AATTCCCTCAGGAGGGGATGTAGAAATTACA--ACACATAGTTTTAATTGTGGAGGAGAA---  
 TTTAAACAGCTCCAGGCAAGAGTCCTGGCTGTGGAAAGATACCTAAGGGATCAACAGCTCCTAGGAATTTGGG  
 GCTGCTCTGGAAGAACTCATCTGCACCCTAATGTGCCCTGGAACCTCTAGTTGGAGT-----  
 -----AATAAATCTCAGGAAGAGATATGG-----GGT-----  
 AACATGACCTGGCTGCAATGG---GATAAAGAAATTAGCAAGTACACACAAACAATATAT---  
 GACTTATTTGAAGAATCGCAGAACCAGCAGGAA-----  
 -----  
 AAGAATGAACAAGACTTATTGGCATTGGACAAGTGGGCAAATTTGTGGACTTGGTTTGACATAACAAATTGGC  
 TGTGGTATATAAAAAATATTTATAATGATAGTAGGAGGCTTAATAGGATTAAGAATAGTTTTTTTCT---  
 GTGCTTTCTGTAATA-----AATAGAGTTAGGCAGGGATACTCACCT-----  
 CTGTCGTTTGCTATCAATTTGATTGATACCATAGCAATAGCAGTAGCTGGC---  
 TGGACAGATAGAATTATAGAAGCAGGACAAAGACTTTGTAGAGCT-----  
 -----ATACTTAACATA-----CCTAGAAGAATCAGACAGGGTGCCGAAAGGGCTTGGCTA---TAA  
 >AY736813  
 GCT---ACA-----  
 GACAACTTGTGGGTTACTGTCTATTATGGGGTACCAGTGTGG---AAAGACGCAGAG---  
 ACCACCTTATTTTGTGCATCAGATGCTAAAGCATATGCGACAGAA--AAGCATAAT-----  
 -----GTCTGGGCTACA---CATGCCTGTGTACCCACAGAC---  
 CCCAACCCACAAGAAATACATTTGGAA-----AATGTGACAGAAGAATTTAAC-----  
 -----ATGTGGAAAAATAACATGGTAGAACAGATGCATACAGATATA---  
 ATCAGTCTATGGGACCAAAGCCTA--AAACCATGTGTAAAGTTA---  
 ACCCTCTCTGCGTTACTTTAAATTGTAGCAATGCCAATGTAAGGTATAGCAATGCC-----  
 -----  
 -----ACTGTTAACAACACCATCAAGGATGAAATAAAA---  
 AACTGCTCTTTCAATACAACCACAGCACTAAGG-----  
 GATAAGAGACAGAAAGTATATTCACCT--TTTTATAGACTTGATATAGTACAAATTGATAATAGTAGT---  
 -----  
 -----  
 AGTGATAGTAGTAGTAGTGAGTATAGATTAATAAATTGTAATACCTCAGCCATTACACAA---  
 GCTTGTCCAAAGGTAACCTTTGAGCCAATTCCCATACATTATTGTGCCCCAGCTGGTTTTGCAATCCTAAAGT  
 GTAAA--GATGAGGAGTTCAAT-----GGAACAGGGCCATGCAAGAAT-----  
 -GTCAGC--ACAGTACAATGCACACATGGAATCAAGCCAGTAGTATCAACT---  
 CAACTGCTGCTAAATGGCAGTCTAGCAAAAAGAGAG-----  
 GTAAAAATTAGAACTGAAAATATCACAACAAT-----GCCAAAATATAATAGTACAATTTGTT---  
 -----AATCCTGTGGAA-----ATTAATTGTACCAGACCTAACAACAATACAAGAAAA---  
 -AGTATACATATA-----GGACCAGGACAAGCA---TTC-----TATGCAACAGGTGAC-----  
 -----ATAATAGGGGATATA-----AGACAAGCACATTGT---AATGTCAGTAGATCA---  
 TCCTGGAATAAGACTTTACAACAGGTAGCTAAACAATTAGGA-----ACATACTTTAAG---  
 -----AACAAAACAATAGTATTTAAT-----  
 ACATCCTCAGGAGGGGATCCTGAAATCACA--ACACATAGTTTTAACTGTGCAGGAGAA---  
 TTTAAACAGCTCCAGGCAAGAGTCCTGGCTGTGGAGAGATACCTAAGGGATCAACAGCTCCTAGGAATTTGGG  
 GCTGCTCTGGAAGAACTCATCTGCACCCTAATGTGCCCTGGAACCTCTAGTTGGAGT-----  
 -----AATAAATCTTATAATGACATATGG-----GAT-----  
 AACATGACCTGGCTGCAATGG---GATAAAGAAATTCACAATTACACACAATTAATATAT---  
 AACCTAATTGAAGAATCGCAGAACCAGCAGGAA-----  
 -----  
 AAGAATGAACAAGACTTATTGGCATTGGACAAGTGGGCAAATCTGTGGAATTGGTTTAACATAACACATTGGC  
 TGTGGTATATAAAAAATATTTATAATGGTAGTAGGAGGCTTAATAGGATTAAGAATAGTTTTTTGCT---  
 GTGCTTTTCGATAATA-----AATAGAGTTAGGCAGGGATACTCACCT-----  
 TTGTCGTTTGCTGTTAATTTAGTTGATACCATAGCAATAGCAGTAGCTGGC---

TGGACAGATAGGATTATARAAATAGGACAAGGAATTGGTAGAGCT-----  
-----ATTTCGCCACATA-----CCTAGAAGAATCAGACAGGGTTTAGAAAGAGCTTTTGCTA--TAA  
>AY736816  
GCT---ACA-----  
GAACACTTGTGGGTTACTGTCTACTATGGGGTACCAGTGTGG--AAAGACGCAGAG---  
ACCACCTTATTTTGTGCCTCAGACGCTAAACATATGAACCAGAA--AAGCATAAT-----  
-----GTCTGGGCTACA--CATGCCTGTGTACCCACAGAC---  
CCCAACCCACAAGAAATACATTTGGAA-----AATGTGACAGAAAAGTTTAAAC-----  
-----ATGTGGAAAAACAAAATGGTAGAACAAATGCATACAGATATA---  
ATCAGTCTATGGGATCAAAGCCTA--AAACCATGTGTAAAGTTA---  
ACCCCTCTCTGCGTTACTTTAAATTGTAACAACACATTCCCCAAGAATAATACC-----  
-----  
-----ATCGATGATAGCATGAAAGAAGCAATAACA---  
AACTGCTCTTTCAATATGACCACAGAATTAAGG-----  
GATAAGAGCCAGGAAGTACATTCACCT--TTTTATAAACTGGATGTAGTACCTATGAATGGC-----  
-----  
-----  
AATCAGTATAGATTAATAAAATTGTAATACCTCAGTCATTAAACAA---  
GCTTGTCCAAAAGTATCCTTTGAGCCAATTCCCATACATTATTGTGCCCCAGCTGGTTTTGCGATTCTAAAGT  
GTAAT---GATAAGGAGTTCAAT-----GGAACAGGGCCATGCAAGAAT-----  
-GTCAGC--ACAGTACAATGCACACATGGAATCAAGCCAGTGGTGTCAACT---  
CAACTGCTGTTAAATGGCAGTCTAGCAGAAGAAAAG-----  
ATAATAATTAGATCTGAAAATATCACAAATAAT-----GCCAAAAACATAATAGTACAACCTTAAA---  
-----AAGCCTGTAAGA-----ATTAATTGTACTAGACCTAGCAACAATACAAGAAAA-----  
-AGTGTACGTATA-----GGACCAGGCCAAGTA--TTC-----TATGCAACA--GAC-----  
-----ATAATAGGGAACATA-----AGACAAGCACATTGT--AATGTCAGTAAATCA---  
GAATGGAATGACACTTTACAACAGGTAGTTGAACAATTAAGA-----GGATACTTTAAG---  
-----AACAAAACAATAATATTTACT-----  
AACTCCTCAGGAGGGGATCTAGAAATCACA--ACACATAGTTTTAATTGTAGAGGAGAA--  
TTTAAACAGCTCCAGGCAAGAGTCCCTGGCTCTGGAAAGATACCTAAAGGATCAACAGCTCCTAGGAATTTGGG  
GCTGCTCTGGAAGAACTCATCTGCACCACTAATGTGCCCTGGAAGTCTAGTTGGAGT-----  
-----AATAAAACCCAGGAAGAGATATGG-----GGG-----  
AACATGACCTGGCTGCAATGG--GACAAAGAAATTAGCAATTACACACATATAATATAT--  
AATCTAATTGAAGAATCGCAGAACCAGCAGGAA-----  
-----  
AAGAATGAACAAGACTTATTGGCATTGGACAAGTGGGCAAATTTGTGGAATTGGTTTGACATAACAACTGGC  
TGTGGTATATAAAAATATTTATAATGATAGTAGGAGGCTTAATAGGATTAAGAATAGTTTTTTGCT---  
GTGCTTTCTACAATA-----AATAGAGTTAGGCAGGGATACTCACCT-----  
TTGTCGTTTCGCTATTAATTTGGTCAATACCATAGCAATAGCAGTAGCTGGC---  
TGGACAGATAGGGTTATAGAAATAGGACAAGGAATTGGTAGAGCT-----  
-----ATTCTCCACATA-----CCTAGAAGAATTAGACAGGGCTTAGAAAGGGTTTTTGCTA--TAA  
>AF457053  
GCT---GCA-----  
GAACACTTGTGGGTTACTGTCTACTATGGGGTACCTGTGTGG--AAAGAAGCAGAA---  
ACCACCTTATTTTGTGCATCAGAAGCTAAAGCATATGATCCAGAA--CAGCATAAC-----  
-----GTCTGGGCTACA--CATGCCTGTGTACCCACAGAC---  
CCCAACCCACAAGAAATAAATTTGATA-----AATGTGACAGAAAAGTTTAAAC-----  
-----ATGTGGAAAAATACCATGGTAGAGCAAATGCATACAGATATA---  
ATCAGTCTATGGGACGAAAGTCTA--AAGCCATGTGTAAAGTTA---  
ACCCCTCTCTGTGTTACTTTACGTTGTAACAATACCAATGTCAATGTCAATAACACG-----  
-----  
-----ATTGACAACAGCACGGACAGGGGGGAAATGAAA---  
AACTGCTCTTTCAAAGTGACCACAGAGCTAAGG-----  
GATAAGGAACAGAAGGTACATTCACCT--TTTTATAGACTTGACTTAGTACAATTGGATAATACAACG---  
-----  
-----  
CCAGAAAATAGTAGTAACAAGGAGTATAGATTAATAAAATTGTAATACCTCAGCCATCACACAG---  
GCTTGCCCAAAGGTATCTTTTGTAGCCAATTCCCATACATTATTGTGCCCCAGCTGGTTATGCGATCCTAAAGT  
GTAAT---GATAAGAAGTTCAAT-----GGAACAGGGCCATGCACGAAT-----  
-GTCAGC--ACAGTACAATGCACACATGGAATCAGGCCAGTAGTATCAACT---

CAACTGCTGTTAAATGGAAGTCTAGCAGAAGAAGAG-----  
 GTAATAATTAGATCTGAAAACATCACAGACAAT-----GCCAAACTATAATAGTACAACCTTACT----  
 -----GAGCCTGTAAAA-----ATTAATTGTACCAGACCTAACAAACAATACAAGAAGG-----  
 -AGTATAACTATG-----GGACCAGGAAAAGCA---TTC-----TATACAAATGAC-----  
 -----ATCATAGGAAATATA-----AGACAAGCATATTGT---ACTGTCAATAGATCA---  
 GAATGGAATAACACTTTACAAAAGGTAGCTACACAATTAAGA-----GAACACTTTGAA----  
 -----AACAAAACAATAATATTTACT-----  
 CACTCCTCAGGAGGGGATCTAGAAAGTCACA--ACACATATGTTTAATTGTGGAGGAGAA---  
 TTCAAACAGCTCCAGGCACGAGTCCTGGCTGTGGAAAGATACCTACAGGATCAACAGCTCCTAGGAATTTGGG  
 GATGCTCTGGAAGAACTCATCTGCCCACTAATGTGCCCTGGAACCTCTACTTGGAGT-----  
 -----AATAAATCTTATAGTGAGATATGG-----GAT-----  
 AACATGACCTGGCTGCAATGG---GATGAAGAAGTTAGCAATTACACACAAATAATATAT---  
 GACCTAATTGAAAAATCGCAGAACCAGCAGGAA-----  
 -----  
 AAGAATGAACAAGACTTATTGGCATTGGACAAGTGGGCAAGTCTGTGGAGTTGGTTTAGCATATCAAACCTGGC  
 TGTGGTATATAAGAATATTTATAATGGTAGTAGGAGGTTTAATAGGATTAAGAATAGTTTTTTGCT---  
 GTGTTTTCTGTAATA-----AATAGAGTTAGGCAGGGATACTCACCT-----  
 CTGTCATTTGCTACTAATTTGATAGATACTATAGCAATAGTAGTAGCTGGC---  
 TGGACAGATAGGGTGATAGAAATAGGACAGAGCATTGGTAGAGCT-----  
 -----ATCCTCCACATA-----CCTAGAAGAATCAGACAGGGCTTTGAAAGAGCTTTGCTA---TAA  
 >AF457055  
 ATG---GCA-----  
 CAAAACTTGTGGGTTACTGTCTATTATGGGGTACCTGTGTGG---AGAGATGCAGAC---  
 ACCACCCATTTTTGTGCATCAGATGCTAAAGCATATAAGACAGAA---GTGCATAAT-----  
 -----GTCTGGGCTACA---CATGCCTGTGTGCCACAGAC---  
 CCCAACCCACAAGAAATATATTTGACA-----AATGTGACAGAAAATTTTAAC-----  
 -----ATGTGGAAAAATAAAATGGTAGAGCAGATGCATGAAGACATA---  
 ATTAGTCTATGGGACCAAAGCCTA---AAGCCATGTGTACAGTTA---  
 ACCCTCTCTGCGTTACGTTAAACTGTAGCGATGTACGAATAACACCCTCAGGAATGCCACTGTGAAT---  
 -----  
 -----GCCAATGCCAATGCCACTGTCACTGGGGACATGGAAGGAGAAATGAAA---  
 AACTGCTCTTACAATATGACCACAGCAGTAAGG-----  
 GATAAGCAAAGAAAGTATACTCACTT---TTTTATAGGCTAGATGTAGTGCAAATTAGCAATAAT-----  
 -----  
 -----  
 AGTAGCAGTAGTAGTGAGTATAGATTAATAAATTGTAATACCTCAGCCATTACACAA---  
 GCTTGTCCAAAGTAACCTTTGAGCCAATTCCCATACATTATTGTGCCCCAGCTGGTTTTGCGATCCTAAAGT  
 GTAAT---GAAGAAGGGTTCAAT-----GGAACAGGACCATGCAAAAAT-----  
 -GTCAGC---ACAGTACAATGCACACATGGAATCAAGCCAGTAGTATCAACT---  
 CAACTGCTGTTAAATGGCAGTCTAGCAGAAAAAGGG-----  
 GTAATAATCAGATCTGAAAACATCTCAAACAAT-----GCTAAAACCATAATAGTACAACCTTGCC---  
 -----GAGCCTGTAAACA-----ATTAATTGTACCAGACCTAACAAACAATACAAGAAAA---  
 -GGTATACATATA-----GGACCAGGACGAGCA---TTC-----TATGCAACAGGTGAC-----  
 -----ATAATAGGGGATATA-----AGAAAAGCATATTGT---AATGTCAGTAGAACA---  
 CAATGGAATAAACTTTGGCACAGGTAGCTGCACAATTAACA-----AAATATTGG-----  
 -----AACAAAACAATAAACTTTACT-----  
 AGCTCCTCAGGAGGGGATGTAGAAATTACA--ACACATAGTTTTTAATTGTGGGGGAGAA---  
 TTTAAACAGCTCCAGGCAAGAGTCCTGGCTCTGGAAAGATACCTAAAGGATCAACAGCTCCTAGGAATTTGGG  
 GCTGCTCTGGAAGAACTCATCTGCACCACTAGTGTGCCCTGGAACCTCTAGTTGGAGT-----  
 -----AATAAATCTTTTGTAGCAAATATGG-----AAT-----  
 AACATGACCTGGTTGGAATGG---GATAAAGAAGTTAGCAATTACACACAAATAATATAT---  
 GAGCTACTTGAAGTATCGCAGAACCAGCAAGAA-----  
 -----  
 AAGAATGAACAAGACTTATTGTCATTGGACAATGGGCAAGTCTGTGGAATTGGTTTGACATATCAAATGGC  
 TGTGGTATATAAAAATATTTATAATGATAGTAGGAGGCTTAATAGGCTTAAGAATAGTTTTTTGCT---  
 GTGCTTTCTATAATA-----AATAGAGTTAGGCAGGGATACTCACCT-----  
 TTGTCATTTGCTATTAATTTGTTAGATACTATAGCAATAGCAGTAGCTGGC---  
 TGGACAGATAGGGTTATAGAAATAGGACAAAGAATTGGTAGAGCT-----  
 -----ATTCTCAACATA-----CCTAGAAGAATCAGACAGGGCGCTGAAAGAATCTTAGTA---TAA  
 >AF457070

AGT---GTT---ACA-----  
 GAAGACTTGTGGGTTACTGTCTACTATGGGGTACCTGTGTGG---AAAGATGCAGAG---  
 ACCACCCCTATTTTGTGCATCAGATGCTAAAGCATATGAGACAGAA---AAGCATAAT-----  
 -----GTATGGGCTACA---CATGCCTGTGTACCCACAGAC---  
 CCCAACCCACAAGAAATACATTTGGAA-----AATGTAACAGAAGAGTTTAAAC-----  
 -----ATGTGGAAAAATAACATGGTAGAGCAGATGCATACAGATATA---  
 ATCAGTTTATGGGACCAAAGCTTA---AAGCCATGTGTAAAGTTA---  
 ACCCCTCTCTGTGTTACTCTAAATTGTACCAATGCCAATGCCAAGAATGGCACC-----  
 -----  
 -----AACGATTTGAAGGACCAGGAAGAAATAAAA---  
 AACTGCTCTTTCAACATAACCACAGAGCTAAGG-----  
 GATAAGAGGAGGAAGGTATATTCACTT---TTTTATAAACTTGATATAGTACAGATTAATGAAAATCAA----  
 -----  
 -----  
 GGTAATAGAAGTAACAATAGTGAGTATAGATTAATAAAATTGTAATACCTCAGCAATTACACAG---  
 GCTTGCCCAAAGGTAACCTTTTGAGCCAATTCCCATACATTATTGTGCCCCAGCTGGTTTTGCGATCCTAAAGT  
 GTAAG---GATGAGGAGTTCAAT-----GGAACAGGGCCATGCAAGAAT-----  
 -GTCAGC---TCAGTCCAATGCACACATGGAATCAGGCCAGTAGTATCAACT---  
 CAACTGTTGTTAAATGGTAGTCTAGCAAAAGGAAAG-----  
 GTAAAAATTAGATCTGAAAATATCGCAGACAAT-----GTCAAACTATAATAGTACAACCTTACT----  
 -----GAGCCTGTAAAC-----ATTACTTGTATCAGGCCTAATAACAATACAAGAACA-----  
 -AGTGTACGTATA-----GGACCAGGACAAACA---TTC-----TATGCAACAGGTGAC-----  
 -----ATAATAGGGAATATA-----AGACAAGCACAGTGT---ACTGTCAATAGAACA---  
 AAATGGAATAGCGCTTTACACCAGGTAGTTACACAATTAGGA-----CACTTTGTC-----  
 -----ACCAAACTATAAAATTTAAT-----  
 GAATCCTCAGGAGGGGATTTAGAAATCATA--ACACATAGTTTTAATTGTGGAGGAGAA---  
 TTTAAACAGCTCCAGGCAAGAGTCCTTGCTGTGGAAAGATACCTAAGGGATCAACAGCTCCTAGGAATTTGGG  
 GCTGCTCTGGAAACTCATCTGCACCACTACTGTGCCCTGGAACCTCTAGTTGGAGT-----  
 -----AATAAATCTCTGGGGGAGATATGG-----GAA-----  
 AACATGACCTGGCTGCAATGG---GAAAAAGAAATTAGCAATTATACAGACATAATATAT---  
 AGCCTAATTGAAGAATCGCAGAACCAGCAGGAA-----  
 -----  
 AAGAATGAACAAGACTTATTGGCATTGGATAAGTGGGCAAGTCTGTGGAATTGGTTTGACATATCAAAGTGGC  
 TGTGGTATATAAGAATATTTATAATAATAGTAGGAGGCTTAATAGGATTAAGAATAGTTTTTGTCT---  
 GTGCTTTCTATAATA-----AATAGAGTTAGGCAGGGGTACTCACCT-----  
 TTGTCGTTTGTCTATTAGTTTGGTTGATACCATAGCAATAGTAGTAGCTGGC---  
 TGGACAGACAGGGTACTAGAA-----ATTGGTAGAGCT-----  
 -----ATCCTTCACATA-----CCTAGAAGAATTAGACAGGGTCTTGAAAGAGCTTTGCTA--TAA  
 >AF457077  
 GCT---AAA-----  
 GACAACTTGTGGGTTACTGTTTATTATGGGGTACCTGTGTGG---AAAGAAGCAGAG---  
 ACCACTTTATTTTGTGCATCAGATGCTAAAGCATATAAGACAGAA---ATGCATAAT-----  
 -----GTCTGGGCTACA---CATGCCTGTGTACCCACAGAC---  
 CCCAACCCACAAGAAATACATTTAGAA-----AATGTGACAGAAGAATTCAAC-----  
 -----ATGTGGAAAAACAACATGGTAGAACAAATGCATACAGATATA---  
 ATCAGTCTGTGGGACCAAAGCCTA---AAGCCATGTGTAAAGCTA---  
 ACCCCTCTCTGCGTTACTTTAAATTGTAGCAATATAGACAATAGCACGAATGTCAAC-----  
 -----  
 -----ATCACAAGAGAAGAGGAAGAAATAAAAACTTAAAA---  
 AATTGCTCTTTCAATATGACCACAGAACCTAAGG-----  
 GATAAAGACAGAAAGTAAATTCACTT---TTTTATAGACTTGATATAGTAAAAATTAATGAA-----  
 -----  
 -----  
 AGTAGTAAAGTAGTGAGTATAGATTAATAAAATTGTAATACCTCAGCCATTACACAG---  
 GCGTGCCCAAAGGTATCCTTTGAGCCAATTCCCTATACATTATTGTGCCCCAGCTGGTTTTGCGATCTTAAAGT  
 GTAAG---GATGAGAAATTCAAT-----GGAACAGGGCCATGCAAAAAT-----  
 -GTCAGC---ACAGTCCAATGCACACATGGAATCAAGCCAGTAGTATCAACT---  
 CAACTGTTGTTAAATGGCAGTCTAGCAGGA---GAG-----  
 GTAAAAATTAGATCTGAAAATATCACAACAAT-----GCCAAAAATATAATAGTACAACCTTGAC----  
 -----AAACCTGTGAAA-----ATTAATTGTACCAGACCTAACAAACAATACAAGAAAA-----

-AGTGTC-----TATGCA---GGTGAC-----  
-----ATAATAGGGGATATA-----AGACAGGCACATTGT---AATGTCAATGCATCA---  
GATTGGAGTGAAGCTTTACGAAAGGTAGTTCTAAC-----  
-----  
TCTTCAGGAGGAGATCTAGAAGTCACA--ACACATAGTTTTAATTGTGGAGGAGAA---  
TTTAAACAGCTCCAGGCAAGAGTCCTGGCTGTGGAAAGATACCTAAGGGATCAACAGCTCCTAGGAATTTGGG  
GCTGCTCTGGAAACTCATCTGCACCACTAATGTGCCCTGGAACCTAGTTGGAGT-----  
-----AATAAATCTCTAAATGAGATATGG-----GAT-----  
AACATGACCTGGCTGCAATGG---GATAAGGAAATTAGCAATTACACACAAATAATATAT---  
AATCTAATTGAAAAATCGCAGAACCAGCAGGAA-----  
-----  
AAGAATGAACAGGAATTATTGGCATTGGACAAGTGGGCAGGCCTGTGGAATTGGTTTGACATAACAAAGTGGC  
TGTGGTATATAAAAAATATTTATAATGATAGTAGGAGGCTTAATAGGATTAAGAATAGTTTTTTGCT---  
GTGCTTGCTATAATA-----AATAGAGTTAGGCAGGGATACTCACCT-----  
TTGTCGTTTTGCTATCAATTTGGTTAATACCATAGCAATAGTAGTAGCTGGC---  
TGGACAGATAGGGTTATAGAAATAGCACAAGGAGTTGGTAGAGCT-----  
-----ATTCTCCACATA-----CCTAGAAGAATCAGACAGGGCTTAGAAAGGGCTTTGCTA---TAA  
>AF457080  
GCT---GCA-----  
GAAAACTTGTGGGTTACTGTCTATTATGGGGTACCTGTGTGG---AAAGATGCAGAG---  
ACCACCTTATTTTGTGCATCAGAGGCTAAAGGATATGAAACAGAA---AAGCATAAT-----  
-----GTCTGGGCTACA---CATGCCTGTGTACCCACAGAC---  
CCCAACCCACAAGAAATACACCTGAAA-----AATGTGACAGAAGGGTTTAAAC-----  
-----ATATGGAAAAATAAAATGGTAGAGCAGATGCATGCAGATATA---  
ATCAGTCTATGGGACCAAAGCCTA---AAGCCATGTGTAAAGTTA---  
ACCCCTCTCTGTGTTACTTTGGATTGTGTCACTTACAATGGCACAATGCCACAGGG-----  
-----  
-----AGAGTGGACAACAGCACAATGAGGGAAGAAGTAAAA---  
AACTGCACTTTCAATGTGACCACAGAGATTAGG-----  
GATAAGAGAAAAGAAGGAACATTCACCT--TTTTATAGAGTTGATTTAGTACAAATTGATGAAATGCAA---  
-----  
-----  
GGTAATAATAGTGACAGTAAATATAGACTAATAAATTGTAATACCTCAGCCATCACACAG---  
GCCTGCCCAAAGGTATCCTTTGAGCCAATTCCCATACATTATTGTGCCCCAGCTGGTTTTGCGATCCTAAAAT  
GTAAT---GATATGAATTACAAG-----GGACAAGGGCCATGCCAGAAT-----  
-GTCAGT---ACAGTACAATGCACACATGGAATCAAGCCAGTAGTATCAACT---  
CAACTGTTGTAAATGGCAGTTTAGCAGAACAAAGAG-----  
ATAGCAATTAGATCTGAAAATATCACAGACAAT-----GCCAAACTATAATAGTACAACCTTGTC---  
-----AATCCTGTGAGA-----ATTAATTGCACCAGGCCTAACAAACAATACAAGAAGA---  
-GATATAGGTATA-----GGACCAGGACAAACA---TTC-----TATGCAGCAGGTGCC-----  
-----ATAATAGGAGATATA-----AGACAAGCATATTGT---AATGTCAGTAGAGCA---  
GCATGGAATAAACTTTACAAGAGGTAGCTAAACAATTAAGA-----CAAGAATTTAAT---  
-----AACAAAACAATAAGATTTGCT-----  
AACCCTCAGGAGGAGATCTAGAAATCACA--ACACATAGTTTTAATTGTGGAGGAGAA---  
TTTAAACAGCTCCAGGCACGAGTCCTGGCTGTGGAAGCATACCTAAGGGATCAACAGCTCCTAGGAATTTGGG  
GCTGCTCTGGAAACTCATCTGCACCACTAATGTGCCCTGGAACCTAGTTGGAGT-----  
-----AATAAATCTTATAATGAAATATGG-----GAT-----  
AACATGACCTGGCTGGAATGG---GAGAGAGAAATTAGCAATTACACAGATGTAATATAT---  
AACCTACTTGAAGCATCGCAGAACCAGCAGGAA-----  
-----  
AAGAATGAACAAGACTTATTGGCATTGGACAAGTGGGCAAGTCTGTGGAGTTGGTTTAGCATAACAAATTGGC  
TGTGGTATATAAAAAATATTTATAATGATAGTAGGAGGCTTAATAGGATTAAGAATAGTTTTTTGCT---  
GTGCTTTCTATAATA-----AAAAGAGTTAGGCAGGGATACTCACCT-----  
TTGTCAATTCGCTATTAATTTGGTTGATACTATAGCAATAGTAGTAGCTGGC---  
TGGACAGATAGAGTTATAGAAATAGGACAAAGAATTGGTAGAGCT-----  
-----ATTCTCCACATA-----CCTAGAAGAATCAGACAGGGCTTTGAAAGAGCTTTGCTA---TAA  
>AF457081  
ACT---GCA-----  
GAAAAATTTGTGGGTTACTGTTTACTATGGGGTACCTGTGTGG---AAAGATGCAGAG---  
ACCACCTTATTTTGTGCAACAGATGCTAAAGCAGTAAGTACAGAA---GCGCATAAT-----

-----GTCTGGGCTACA---CATGCCTGTGTACCCACAGAC---  
CCCGACCCACAAGAAATATATTTGGAA-----AATGTGACAGAAAATTTTAAC-----  
-----ATGTGGAAAAATAACATGGTAGAACAGATGCATACAGATATA---  
ATCAGTTTATGGGACCAAAGCCTA---AAGCCATGTGTAAAGTTA---  
ACCCCTCTCTGTGTTACTTTAAACTGTACAAATGCCAACACCACCACCACGAAT-----  
-----  
-----GGCACCATCACAAACGGGGAAGAAATAAAA---  
AACTGCTCTTATAATATAACCACAGAACTAAGG-----  
GATAAGAGACAGAAAGTATATTCACCT---  
TTTTATAAACTTGATGTAGTACAACCTTAATGAGGGTAATAGTAGT-----  
-----  
AATAATAGTAGCAATAATGAGTATAAGGAGTATAGATTAATAAATTGTAATACCTCAGCCATTACACAA---  
GCTTGTCCAAAGGTATCCTTTGAGCCAATTCCCATACATTATTGTGCACCAGCTGGTTTTGCATCCTAAAGT  
GCAAG---GATAAGAAGTTCAAT-----GGAACAGGGCCATGCAGGAAT-----  
-GTCAGC---ACAGTACAGTGCACACATGGAATCAAACCAGTAGTATCAACT---  
CAACTGCTGTTAAATGGCAGCCTAGCAGAAGAAGAG-----  
GTAATAATTAGATCTGAAAATATCACAATAAC-----GCCAAAACCATAATAGTACAATTTACC---  
-----AAGCCTGTGATA-----ATTAATTGTACCAGACCTAACAACAATACAAGAAAA-----  
-AGTATACGAATA-----GGACCAGGACAAGCA---TTC-----TATGCAACAGGTGAC-----  
-----ATAATAGGGGATATA-----AGACAGGCACATTGT---AATGTCAGTAGATCA---  
GACTGGAATGGAACCTTTAAGCAATGTAAGTGCAGAAATTAAGA-----AAACACTTTGGG---  
-----AACAAAACAATAATCTTTAAT-----  
AGCTCCTCAGGGGGGATTTAGAAATTACA--ACACATAGTTTTAATTGTGGAGGAGAA---  
TTTAAACAGCTCCAGGCAAGAGTCCCTGGCTGTGGAAAGATACCTAAAGGATCAACAGCTCCTAGGAATTTGGG  
GCTGCTCTGGAAGAACTCATCTGCACCACTACTGTGCCCTGGAATTCTAGTTGGAGT-----  
-----AATAAATCTGAGAGTGAGATATGG-----GAA-----  
AACATGACCTGGCTGCAATGG---GATAAAGAGATTAGCAATTACACAGACATAATATAT---  
AGTCTAATTGAAGAAGCGCAAAACCAGCAGGAA-----  
-----  
AAAAATGAACAAGACTTATTGTCATTGGACAGTTGGGCAACTCTATGGAATTGGTTTGACATAACAAGGTGGC  
TGTGGTATATAAAAAATATTTATAATAATAGTAGGAGGCTTAATAGGACTAAGAATAGTTTCTACT---  
ATACTTTCTGTAGTA-----AATAGAGTTAGGCAGGGATACTCACCT-----  
TTGTCATTTGCTATTAATTTGGTTGATACCATAGCAATAGCAGTAGCTGGC---  
TGGACAGATAGGATTATAGAAATAGCACAAGGAATTGGTAGAGCT-----  
-----ATTTTCTACATA-----CCTAGAAGAATCAGACAGGGCTTAGAAAGGGCATTGCTA--TAA  
>AF457083  
GCT---GCA-----  
GAAAACTTGTGGGTTACTGTCTACTATGGGGTACCTGTGTGG--AAAGACGCAGAG---  
ACCACCTTATTTTGTGCATCAGATGCGAAAGCACATGATACAGAA--GCGCATAAT-----  
-----ATCTGGGCTACA---CATGCCTGTGTACCTACGGAC---  
CCCAACCCACAAGAAATAAATTTGGAA-----AATGTGACAGAAGAGTTTAAC-----  
-----ATGTGGAAAAATAGCATGGTAGAGCAGATGCATATGGATATA---  
ATCAGTCTATGGGACCAAAGCCTA---AAGCCATGTGTAAAGTTA---  
ACCCCTCTCTGCGTTACTTTAGACTGTAGCGATGTTAGCAATGGTACCATCAAAGCCAAT-----  
-----  
-----ACCACTATAGACAGTGAAATGCAAGGAGAAATAAAA---  
AACTGCTCTTTCAATATGACCACAGAATTAAGA-----  
GATAAGAGACAGAAAATGTATTCACCT--TTTTATAGATTGGATGTAGTACAGCTTAATGACAGC-----  
-----  
TACAGCAATGACAGTCAGTATAGATTAATAAATTGTAATACCTCAGCCATTACACAG---  
GCTTGTCCAAAGGTATCCTTTCAGCCAATTCCCATACATTATTGTGCCCCAGCTGGTTTTGCATTCTAGAGT  
GTAAG---GATAAGGAGTTCAAT-----GGAACAGGGGAAATGCAAGAAT-----  
-GTCAGC---ACAGTACAATGCACACATGGAATCAAGCCAGTAGTATCAACT---  
CAACTGCTGTTAAATGGCAGTTTAGCAGAAGGAAAG-----  
GTAAGGATTAGATCTGAAAATATCACAACAAT-----GCCAAAACATAATAGTACAATTTACC---  
-----AAGCCTGTACAA-----ATTAATTGTACCAGACCTAACAACAATACAAGAAAA-----  
-AGTGTACATATA-----TGACCAGGACAAGCA---TTC-----TATGCAACAGGTGAC-----  
-----ATAATAGGGAACATA-----AGACAAGCACATTGT---AATGTCAGTAGAGGA---  
GAATGGAATAGAACCTTTGCACGAAGTAGGCCAACAATTAAGA-----ACATACTTTGGG---

```

-----AATAACACAACAATAATTTTTTGCC-----
AGCTCCTCAGGAGGGGATCTAGAAATAACA---ACACATAGTTTTTAATTGTGGAGGAGAA---
TTTAAACAGCTCCAGGCAAGAGTCCTGGCTGTGGAAAGATACCTAAAGGATCAACAGCTCCTAGGAATTTGGG
GCTGCTCTGGAAGAACTCATCTGCACCACTAATGTGCCCTGGAATCTAGTTGGAGT-----
-----AATAAATCCCAGAAGGAGATATGG-----GAC-----
AACATGACCTGGCTGCAATGG---GATAAAGAAATTAACAATTACACACAGATAATATAT---
AATCTACTTGAAGAATCGCAGAACCAGCAGGAA-----
-----
AAGAATGAACAAGACTTATTGGCATTGGACAAGTGGGCAAATCTATGGAATTGGTTTGACATATCAAACCTGGC
TGTGGTATATAAAAAATATTTATAATGATAGTAGGAGGCTTAATAGGATTAAGAATAGTTTATGCT---
GTGCTTTCTGTAATA-----AATAGAGTTAGGCAGGGATACTCACCT-----
TTGTTCGTTTCGCTATTAATTTGCTTGATACCATAGCAATAGCAGTAGCTGGG---
TGGACAGATAGGGTTATAGAAATAGGACAAAGACTTTGTAGA-----
-----GCAGGGCAGTGAAAGGGCTTTGCTA---TAA
>AF457084
GTT---GCA-----
GAAAAATCGTGGGTTACTGTCTACTATGGGGTACCTGTGTGG---AGAGATGCAGAG---
ACCACCTTGTTTTGTGCATCAGATGCGAAAGCACATGATAAGGAA---GTGCATAAT-----
-----GTTTGGGCTACA---CATGCCTGTGTACCTACAGAC---
CCCAACCCACAAGAAATGATTTTGGAA-----AATGTGACAGAAGATTTTAAAC-----
-----ATGTGGAAAAATAGCATGGTAGAGCAGATGCATACAGATATA---
ATCAGTCTATGGGACCAAAGCCTA---AAGCCATGTGTAAAGTTA---
ACCCCTCTCTGTGTTACTTTAAATTGTAGTGATAGCAATATCACCTCTAATAGCACCTCTAATAGC-----
-----
-----ACCAAGGACAGTGCCACCCTTGATATGAAAAGCGAAATACAA---
AACTGCTCTTTCAATATGACCACAGAATAAGG-----
GATAAGAAACAGAAAGTATATTCACTT---TTTTATAGACTTGATGTAGTACAAATTAATGAA-----
-----
-----
AATAGTAGTGA CTATAGATTAATAAATTGTAATACCTCAGCCATCACACAA---
GCATGCCCAAAGGTAACCTTTGAGCCAATTCCCATACATTATTGTGCCCCAGCTGGTTTTGCGATTCTAAAGT
GTAAT---GATAAGAAATTCAAT-----GGAACAGGACCATGCACTAAT-----
-GTCAGC---ACAGTCCAATGCACACATGGAATCAAGCCAGTAGTAACAAC---
CAACTGCTGTAAATGGCAGTCTAGCAGAAGAAGAA-----
GTAATGATTAGATCTGAAAAATTACAGAAAAAT-----GCCAAAAACATAATAGTACAATTTAAA-----
-----GAGCCTGTACAA-----ATTATTTGTATCAGACCTGGCAACAATACAAGAAAA-----
-AGTGTGCATATA-----GGACCAGGACAAGCA---TTC-----TATGCAACAGGTGAC-----
-----ATAATAGGGGATATA-----AGACAAGCACATTGT---AATGTCAGTAGAGAG---
TTATGGAATAAACTTTGCAAGAAGTAGCCACCCAATTAAGA-----AAACACTTTAGG---
-----AACAACACAAAGATAATCTTTACT-----
AACTCCTCAGGAGGAGATGTAGAAATAACA---ACACATAGTTTTTAATTGTGGAGGAGAA---
TTTAAACAGCTCCAAGCACGAGTCCTGGCTGTGGAAAGATACCTAAGGGATCAACAGCTCCTAGGAATTTGGG
GCTGCTCTGGAAGAACTCATCTGCACCACTAATGTGCCCTGGAATCTAGTTGGAGC-----
-----AATAAATCCCTAGATGAGATATGG-----GAA-----
AACATGACCTGGATGCAATGG---GATAAAGAAGTTAGCAATTACACACAGATGATATAT---
AATCTACTTGAAGAATCGCAGAACCAGCAGGAA-----
-----
AAGAATGAACAAGAATTATTGGCATTAGACAAGTGGGCAAATCTGTGGAATTGGTTTAACATATCAAACCTGGC
TGTGGTATATAAAAAATATTTATAATGATAGTAGGAGGCTTAATAGGATTAAGAATAGTTTTTTGCT---
GTGCTTTCTGTAATA-----AATAGAGTTAGGCAGGGATACTCACCT-----
TTGTCATTTCGCCATTAGTTTGGTTGATTCCATAGCAATAGCAGTAGCTGGC---
TGGACAGATAGGATTATAGAAATAGTACAAGCAATTGGTAGAGCT-----
-----ATTCTTCACATA-----CCTAGAAGAATCAGACAGGGCTTAGAAAGGGCTTTGATA---TAA
>AF457086
ACT---GCA-----
GACAACTTGTTGGGTTACTGTCTACTATGGGGTACCTGTGTGG---AAAGATGCAGAG---
ACCACCTTATTCTGTGCATCAGATGCTAAAGCATATGAGACAGAA---AAGCATAAT-----
-----GTCTGGGCTACA---CATGCCTGTGTACCCACAGAC---
CCCAACCCACAAGAGATACATATGGAA-----AATGTAACAGAACAGTTTAAAC-----
-----ATGTGGAAAAATAACATGGTAGAGCAGATGCATACAGATATA---

```

ATCAGTCTATGGGATCAAAGCTTA---AAGCCATGTGTAAAATTA---  
ACCCCTCTCTGTGTCACTTTAGAGTGCGGTAATGTCACCCTTGATGGCACCAAGACTAATATC-----  
-----  
-----ACTAATGCCACTACTAAATATCTGAAGGAAGAAATAACA---  
AACTGCTCTTACAATGTGACCACAGAAATAAGG-----  
GATAGGACACAGAAAGTATATTCACTT---TTTTATAGACTTGATGTAGTACCAATTGATAGCGGTAAT----  
-----  
-----  
AGTAGTGGTAATAGTAGTCAGTATAGATTAATAAAATTGTAATACCTCAGCCGTTACACAA---  
GCTTGTCCAAAGGTAACCTTTGAGCCAATTCCCATACATTACTGTGCCCCAGCTGGTTTTGCGATTCTAAAGT  
GTAAT---GATAAGGAGTTCAAT-----GGAACAGGGGATATGCAAGAAT-----  
-GTCAGC---ACAGTACAATGCACACATGGAATCAAGCCAGTGGTATCAACT---  
CAATTGCTGTTAAATGGCAGTCTAGCAGAAGGAAAG-----  
ATAAAAATTAGATCTGAAAACATCACAACAAT-----GCTAAAAACATAATAGTACAATTCAAT----  
-----GAGTCTGTAATA-----ATTAATTGTACCAGACCTAACAACAATACAAGAAAA-----  
-AGTGACGTATA-----GGACCAGGACAAGCA---TTC-----TATGCAACAGGTGCC-----  
-----ATAACAGGGGATATA-----AGACAAGCACATTGT---AATGTTAGTAGAAAA---  
GAATGGAATACCACTTTGCAAAGGGTAGTCAACCAATTAAGG-----ACATACTTTGGA----  
-----AACAGAACAATAAGATTTGCT-----  
GCCTCCTCAGGAGGGGATATAGAAGTCACA---ACACATAGTTTTAATTGTGGAGGAGAG---  
TTTAAACAGCTCCAGGCAAGAAATCCTGGCTGTGGAAAGATACCTAAGGGATCAACAGCTCCTAGGAATTTGGG  
GCTGCTCTGGAAGAACTCATCTGCACCACTAATGTGCCTTGGAAGTCCAGTTGGAGT-----  
-----AATAAAACCCTGAGTGAGATATGG-----GAT-----  
AACATGACCTGGCTAGAATGG---GATAAAGAAATTAGCAATTACACACAGATAATATAT---  
AATCTAATTGAACAATCGCAGAACCAGCAGGAA-----  
-----  
AAGAATGAACAAGACTTACTGGCATTGGACAAGTGGGCAAATCTGTGGAATTGGTTTGACATATCAAAGTGGC  
TGTGGTATATAAGAATATTTATAATGATAGTAGGAGGCTTAATAGGATTAAGAATAGTTTTTTGCA---  
GTGCTTTCTATAATA-----AATAGAGTGAGGCAGGGATACTCACCT-----  
CTGTCATTTGCTGTTAGTTTGATTGATACCATAGCAATAAGAGTAGCTAAC---  
TGGACAGATAGGATTATAGAGTTAGGACTAAGATTTTGTAGAGCT-----  
-----ATTCTCCACATA-----CCTAGAAGAATTAGACAGGGCTTCGAAAGGGCTTTGCTA---TAA  
>AF457089  
ACT---GCA-----  
GAAAAGTTGTGGGTTACTATCTACTATGGGGTACCTGTGTGG---AAAGATGCAGAT---  
ACCACCCATTTTTGTGCATCAGATGCTAAAGCATATGAGAAAGAA---GTGCATAAT-----  
-----GTCTGGGCTACA---CATGCCTGTGTGCCACAGAC---  
CCCAACCCACAAGAAATACTTTTGAAA-----AATGTGACAGAAGAGTTTAAC-----  
-----ATGTGGAAAAATAACATGGTAGAGCAGATGCATACAGATATA---  
ATCAGTTTATGGGACCAAAGTCTA---CAGCCATGTGTAAAGTTA---  
ACCCCTCTCTGTGTTACTTTAACTGTACCAATGYCAACAACCTGTACCAATGCCAACAACCTGTACC-----  
-----  
-----CATGCCAACAGCAGCATCACGAATGACATGGCAGGAGAAATAAAA---  
AACTGCTCTTTCAATATGACCACAGAATAAGG-----  
GATAAGAAACAGAAAGTATATTCACTT---TTCTATAAACTTGATATAGTACAAATTAATGGAAATAAT----  
-----  
GGTAGTGAGTATAATGGTAGTGAGTATAGATTAATAAAATTGTAATACCTCAGCCATTACACAG---  
GCTTGTCCAAAGGTATCCTTTGAGCCAATTCCCATACATTATTGTGCCCCAGCTGGTTTTGCGATCCTAAAGT  
GTAAT---GATGAGGAGTTCAAT-----GGAACAGGGGCCATGCAAAAAT-----  
-GTCAGC---ACAGTACAATGCACACATGGAATCAAGCCAGTAGTATCAACT---  
CAACTGCTGTTAAATGGCAGTCTAGCAAAAAATAAT-----  
GTAACCTATTAGATCTGCAAAATATCTCAGACAAT-----GCTAAAATCATAATAATACAACCTTAAT----  
-----ACGCCTGTAACA-----ATTAATTGTACCAGACCTAACAACAATACAAGAAAA-----  
-AGTGACGTATA-----GGACCAGGACAAGCA---TTC-----TATACAACA---GAT-----  
-----ATAATAGGGGATATA-----AGACAAGCACATTGT---AATGTCAGTAAATCA---  
GAATGGAATAAACTTTACAACAGATAGTTATACAATTAAGA-----AAGCACTGG-----  
-----AACAAAACAATAAACTTTTACT-----  
GAACCCTCAGGAGGGGATTTAGAAATTACA---ACACATAGTTTTAATTGTGGAGGAGAA---  
TTTAAACAGCTCCAGGCAAGAGTCCTGGCTGTGGAGAGATACCTAAGGGATCAACAGCTCCTGGGAATTTGGG

GCTGCTCTGGAAAGCTCATCTGCACCACTAGTGTGCCCTGGAACCTCTAGTTGGAGT-----  
-----AATAAATCTTACAATGAGATATGG-----GAT-----  
AACATGACCTGGCAGCAATGG---GAAAGAGAAATTGAAAATTACACAGACTACATATAT---  
AACCTGATTGAAGAATCGCAAACACAGCAGGAA-----  
-----  
AAGAATGAACAAGACTTATTAGCATTGGACAAGTGGGCAAGTCTGTGGAGTTGGTTTAGCATATCAAAATGGC  
TGTGGTATATAAAAAATATTTATAATGATAGTAGGAGGCTTAATAGGATTAAGGATAGTTTTTTGCT---  
GTGCTTTCTGTAATA-----AATAGAGTTAGGCAGGGATACTCACCT-----  
CTATCATTTGCTATCAATTTGCTTGATACCATAGCAATAGCAGTAGCTGGC---  
TGGACAGATAGGGTTATAGAAAATAGGACAAAGAATTGGTAGAGCC-----  
-----ATTCTCAACATA-----CCTAGAAGAGTCAGGCAGGGCTTCGAAAGGGCTTTGCTA---TAA  
>EU110088  
GCT---GAA-----  
AGAAACTTGTGGGTTACTGTCTACTATGGGGTACCTGTGTGG--AAAGACGCAGAG---  
ACCACCTTATTTTGTGCCTCGGATGCTAAAGCATATAAGACAGAA--AAGCATAAT-----  
-----GTCTGGGCTACA---CATGCTTGTGTACCCACAGAC---  
CCCAACCCACAAGAAATACATTTGGAA-----AATGTGACAGAAAATTTTAAC-----  
-----ATGTGGAAAAATAACATGGTAGAACAAATGCATACAGATATA---  
ATCAGTCTATGGGACCAAAGYCTA---AAGCCATGTGTAAAGTTA---  
ACCCCTCTCTGCGTTACTTTAAGGTGTAGTGACTATAATGGCACCAGTTATGTCAACAGTACTAGTAGTAAAC  
ATAATGCC-----  
-----ACCAGTAATGGGACACACTCCTACAATATCTCCGCAGAAATGCTAGGAGAAATAAAA---  
AACTGCTCTTACAATATGACCACAGAACTAAGG-----  
GATAAGACAAAGAAAGTATATTCACCT--TTTTATAGACCTGATATAGTACCACCTTAATGGT-----  
-----  
-----  
AATAGTAGTAGTAATAAGTATACATTAATAAATTGTAATACCTCAGCCATTAAACAA---  
GCTTGTCCAAAGGTATCCTTTGAGCCAATTCCTATRCATTATTGTGCCCCAGCTGGTTTTGCGATTCTAAAGT  
GTAAT---AATAAAACATTCAAT-----GGAACAGGGCCATGCAATAAT-----  
-GTCAGT---ACAGTACAATGCACACATGGAATCAAGCCAGTAGTATCAACT---  
CAGCTGCTGTAAATGGCAGTCTAGCAGAAGAACAG-----  
ATAATGATTAGGTCTGAAAATATCACAAATAAT-----GCTAAAAACATACTAGTACAATTTACT-----  
-----AGCCCTGTGAAA-----ATTAATTGTACCAGACCTAACAAACAATACAAGAAAA-----  
-AGTGTCACGCATA-----GGACCAGGCCAAGCA---TTC-----TATGCAACAGGTGAC-----  
-----ATAATAGGGGATATA-----AGACAAGCACATTGT--AATATCAGTCAAGCA---  
GAGTGGAATGAACTTTGGGAAADCTAACCACCCAATTAAGA-----ACACACTTTGGG-----  
-----AACAAAACAATAAATTTTACT-----  
AGTGCCTCAGGAGGGGATCTAGAAATAACA--ACACATAGTTTTAACTGTAGAGGAGAA---  
TTTAAACAGCTCCAGGCAAGAGTCCTGGCTGTGGAAAGATACCTAAAGGATCAACARCTCCTAGGAATTTGGG  
GCTGCTCTGGAAGAACTCATCTGCACCACTAATGTGCCTTGGAACTCTAGTTGGAGT-----  
-----AATAGATCCCTAAATGAGATATGG-----AAT-----  
AACATGACCTGGCTACAATGG---GATAGAGAAGTTAGCAATTACACACAGCTAATATAT---  
GATCTACTTGAAGAATCGCAGATCCAGCAGGAA-----  
-----  
AAGAATGAACAAGACTTATTGGCATTGGACAAGTGGGCAAGTCTGTGGAATTGGTTTGACATATCAAAATGGC  
TGTGGTATATAAGAATATTTATAATGATAGTAGGAGGTTTAATAGGATTAAGAATAGTTTTTTGCT---  
GTGATTTCTATAATA-----AATAGAGTTAGGCAGGGATACTCACCT-----  
TTGTCATTTCGCTATTAGTTTGGTTGATACCATAGCAGTAGTAGTAGCTGGC---  
TGGACAGATAGGGTTATAGAAAATAGGACAAACAATTGGTAGAGCT-----  
-----ATCCTCCAYATA-----CCTAGAAGAATTAGACAGGGCTTCGAAAGGGCTTTGCTA---TAA  
>EU110092  
ACT---AAA-----  
GAAAACCTTGTGGGTTACTGTCTATTATGGGGTACCTGTGTGG--AAAGATGCAGAA---  
ACCACCTTATTTTGTGCATCAGATGCTAAAGCATATGAGAAAGAA--CAGCATAAT-----  
-----GTCTGGGCTACA---CATGCCTGTGTACCCACAGAC---  
CCCAACCCACAAGAAATACATTTAGAC-----AATGTGACAGAAGACTTTTAAC-----  
-----ATGTGGGAAAAATAACATGGTAGAGCAGATGCATACAGATATA---  
ATCAGCCTATGGGACCAAAGCCTA---AAGCCATGTGTAAAATTA---  
ACCCCTCTTTGTGTTACTTTTACATTGTACAAATGTAAGTGTCACTAATGAT-----  
-----

-----AAAACGGTAAAGAACCAGCAAGAATTAAAA-----  
 AACTGTTCTTTCAATGTAAGTACAGAAATTAAGG-----  
 GATAAGAAAAAGAAAGTATATTCACCTT---TTTTATAGACTTGATGTAGTACAAATTAATGAGAAT-----  
 -----  
 -----  
 AGTAGTAGTAATAGTAGTGAGTATAGATTAATAAATTGTAATACCTCAGCCATTACCCAG---  
 GCTTGCCCCAAAGGTAAGCTTTAATCCAATTCACATACATTATTGTGCCCCAGCTGGTTTTGCGATCCTAAAGT  
 GTAGG---GATGAGGAGTTCAAT-----GGAACAGGGCCATGCAAGAAT-----  
 -GTCAGC---TCCGTCCAATGCACACATGGAATCAGGCCAGTAGTATCAACT---  
 CAATTGCTGTTAAATGGTAGTCTAGCAAATGAAAAG-----  
 ATAATAATTAGATCTAAAAATATCACAGACAAT-----GGTAAAAATATAATAGTACAACCTTGGC----  
 -----AAACCTGTGAAA-----ATTAATTGTACCAGACCCAGTAACAATACAAGAAAA-----  
 -AGTGTGCATATA-----GGGCCAGGACAGGCA---TTC-----TATGCAACAGGTGCC-----  
 -----ATAATAGGGGATATA-----AGACAAGCACATTGT---AATATCAGTAGAGCA---  
 GACTGGACTGAGACTTTACGAAATGTGAGTAAACAATTAAGA-----AAACACTTTGAG----  
 -----AATAAAACAATAAAGTTTGAA-----  
 AAATCCTCAGGAGGGGATCCAGAAAGTCACA--ACACATAGTTTTAATTGTGGAGGAGAA--  
 TTTAAACAGCTCCAGGCAAGAGTCCTGGCTGTGGAAAGATACCTAAAGGATCAACAGCTCCTAGGAATTTGGG  
 GATGCTCTGGAAGACTCATCTGCCCCACTAATGTGCCCTGGAATTCTAGTTGGAGT-----  
 -----AATAAATCTTTTGATGAGATATGG-----GAC-----  
 AACATGACTTGGCTGCAATGG---GAGAAGGAAATTAGCAATTACACACAAAAAATATAT---  
 ACACTAATTGAAGAATCGCAGAACCAGCAGGAA-----  
 -----  
 AAGAATGAACAAGACTTATTGGCATTGGACAAGTGGGCAAGTCTGTGGARTTGGTTTGACATATCAAGATGGC  
 TGTGGTATATAAAAAATATTTATAATGATAGTAGGAGGCTTAATAGGATTAAGAATAGTTTTTTGCT---  
 GTGCTTTCTATAATA-----AGGAGAGTTAGGCAGGGATACTCACCT-----  
 TTGTCAATTTGCTATTAATTTGTATGATACCATAGCAATAGCAGTAGCTGGC---  
 TGGACAGATAGGGTTATAGAAGTAGGACAAAGAGCTGGTAGAGCT-----  
 -----TTTCTTAACATA-----CCTAGAAGGATCAGACAGGGYTTAGAAAGGGCTTTGCTA---TAA  
 >EU110094  
 GCT---ACA-----  
 GACAACTTGTGGGTTACTGTCTACTATGGGGTACCTGTGTGG--AAAGACGCAAAG---  
 ACCAGCTTATTTTGTGCATCAGATGCTAAAGCCTATCAGACAGAA--AAGCATAAT-----  
 -----GTCTGGGCTACA--CATGCCTGTGTACCCACAGAC---  
 CCCAACCCACAAGAAATATATTTGGCA-----AATGTGACAGAAGAGTTTAAC-----  
 -----ATGTGGAAAAATAACATGGTAGAGCAGATGCATACAGATATA---  
 ATCAGTCTATGGGACCAAAGCCTA--AAGCCATGTGTAAAATTA--  
 ACCCCTCTCTGTGTACTTTACATTGTGAAAATGTTAATAAGAGTGTCAAC-----  
 -----  
 -----ATCACGGGGAGTGGGGAAGAAATAAAA---  
 AACTGCTCTTTCAATATGACCACAGAATAAAG-----  
 GATAAGAGACAGCAAGTATATTCACCTT---TTTTATAGACCAGATATAGTAGAAATTAATGAAAAT-----  
 -----  
 -----  
 CAGAGCAAGGATAATAACAAGTATAGATTAATAAATTGTAATACCTCAGCCATTACACAA---  
 GCGTGCCCCAAAGGTATCCTTTGAGCCAATTCCAATACATTATTGTGCTCCAGCTGGTTTTGCAATCCTAAAGT  
 GTAGA---GATGAGGAGTTCAAT-----GGAGCAGGGCCATGCAAGAAT-----  
 -GTCAGC---ACAGTCCAATGCACACATGGAATCAAGCCAGTAGTATCAACT---  
 CAACTGCTGTTAAATGGCAGTCTAGCAGAAAAAGAG-----  
 GTAAAAATTAGATCTAGAAATATCACAGATAAT-----GCCAAAAACATAATAGTACAATTTTRYT----  
 -----GAGCCTGTRRAT-----ATTRCTTGATCAGACCTAACAACAATACAAGAAAA-----  
 -AGTATACGTATA-----GGACCAGGACAAGCA---TTC-----TATGCAACAGGTGAC-----  
 -----ATAACAGGGGATATT-----AGACAGGCACATTGT---AATGTCACTGGATCA---  
 AATTGGACTAAGGCTTTACAACAGGTAGCTACACAATTAAGA-----AACTATGTG-----  
 -----AACAAAACAATAATATTTGCT-----  
 AGCCCCGCAGGAGGGGATCTAGAAATCACA--ACACATAGTTTTAATTGTGGAGGAGAA--  
 TTTAAACAGCTCCAGGCACGAGTCCTKGCTGTGGAAAGATACCTAARRGATCAACAGCTCCTAGGAATTTGGG  
 GCTGCTCTGGAAGGCTCATCTGCACCCTAATGTGCCCTGGAACCAGAGTTGGAGT-----  
 -----AATAAATCTCTAGATGAGATATGG-----AAT-----  
 AACATGACCTGGCTGCAGTGG---GATAGAGAAATTAACAATTACACACAATAATATAT---

CAACTAATTGAGGAATCACAAAACCAGCAGGAA-----  
-----  
AAGAATGAAAAAGACTTATTGGAGTTGGACAAGTGGGCAAATCTGTGGACTTGGTTTGACATATCAAACCTGGC  
TGTGGTATATAAAAATATTTATAATGATAGTAGGAGGCTTGATAGGGTTAAGAATAGTTTTTTGCT---  
GTGTTTTCTATAATA-----AATAGAGTTAGGCAGGGATACTCACCT-----  
TTGTCGTTTGCTATCAATTTACTTGATACTATAGCAGTAGCAGTAGCTGGG---  
TGGACAGATAGGGTTATAGAACTAGGACAAAGACTTTGTAGAGCT-----  
-----ATTCTCCACGTA-----CCTAGAAGAATCAGACAGGGCTTTGAAAGGGCTTTGCTA---TAA  
>KT022360  
GCT---GCA-----  
GAAAAATTGTGGGTTACTGTCTATTATGGGGTACCTGTGTGG---AAAGATGCAGAG---  
ACCACCTTATTTTGTGCATCAGATGCGAAAGCATATAAGACAGAA---GTGCATAAT-----  
-----GTATGGGCTACA---CATGCCTGTGTGCCACAGAC---  
CCCAACCCACAAGAAATAAATTTGGGA-----AATGTGACAGAAGAGTTTAAAC-----  
-----ATGTGGAAAAATAACATGGTAGAGCAAATGCACACAGATATA---  
ATCAGTCTATGGGACCAAAGCTTA---AAGCCATGTGTAAAGTTG---  
ACCCCTCTCTGCGTCACTTTAGATTGT---AACTACAATGTCACCAATATCACCAAT-----  
-----  
-----GAAATGAATGGAGAAATGAGA---  
AACTGCTCTTACAATATGACCACAGAATTAAGG-----  
GATAAGACACAGAAAGTATATTCACTT---TTTTATAAACTAGATATAGTACAAGCTAATAATAAT-----  
-----  
-----  
GATAGTAGGCAGTATAGATTAATAAACTGTAATACCTCAGCCATTACACAA---  
GCTTGTCCAAAGGTATCTTTTGAACCAATTCCCATACATTATTGTGCCCCAGCTGGTTTTGCGATTCTAAAGT  
GTAAT---GATAAGAAGTTCAAT-----GGAACAGGGCTATGCAAAAAT-----  
-GTCAGC---ACAGTACAATGCACACATGGAATCAAGCCAGTAGTATCAACT---  
CAACTGTTGTAAATGGCAGTCTGGCAGAAACAGAG-----  
ATAATGATCAGATCTGAGAATATCACAAACAAT-----GTCAAAAACATAATAGTACAATTGACT-----  
-----CAGCCTGTACCA-----ATTAATTGTACCAGACCTAACAACAATACAAGAAAA-----  
-AGTATCCGAATA-----GGACCAGGACAAGCA---TTC-----TATGCAACAGATGGC-----  
-----ATAATAGGGGATATA-----AGACAAGCACATTGT---AATGTCAGTGAAGCA---  
GCTTGGAACAGAACGTTGCATCAGATAGCCACCCAATTAAGA-----ACACACTTT-----  
-----AACAGAACAATAATCTTTGAT-----  
AAACCCATAGGAGGGGATCTAGAAATAACA--ACACATAGTTTTAATTGTGGAGGAGAA---  
TTTAAACAGCTCCAGGCAAGAGTCCTGGCTGTGGAAAAATACCTAAAGGATCAACAGCTCCTAGGAATTTGGG  
GCTGCTCTGGAAACTCATCTGCACCACTAATGTGCCTTGGAATCTAGTTGGAGT-----  
-----AATAAATCCAGAGTGAGATATGG-----GAC-----  
AACATGACCTGGCTGCAATGG---GATAAAGAAATTAGCAATTACACACAGACAATATAT---  
GAACTAATTGAACAATCGCAGAACCAGCAGGAA-----  
-----  
AAAAATGAACAAGACTTATTGGCATTGGACAAGTGGGCAAATTTGTGGAATTGGTTTGACATATCAAGATGGC  
TGTGGTATATAAGAATATTTATAATGATAGTAGGAGGCTTGATAGGATTAAGAATAGTTTTTTGCT---  
GTGCTTTCTGTAATA-----AATAGAGTTAGGCAGGGATACTCACCT-----  
CTGTCGTTTCGCTACTAGTTTGATTGACACCATAGCAATAGTAATAGCTGGG---  
TGGACAGATAGGCTTCTAGAATTAGGACAAAGACTTTGTAGAGCT-----  
-----TTTCTCAACATA-----CCTAGAAGGATCAGACAGGGCTTGGAAGGGCGTTACTA---TAA  
>KT022361  
ACT---GCA-----  
GAAAAATTGTGGGTCAGTGTCTATTATGGGGTACCTGTGTGG---AGAGATGCAGAG---  
ACTACCTTATTTTGTGCATCAGATGCTAAAGCATATGAGGCAGAA---AAGCATAAT-----  
-----GTCTGGGCTACG---CATGCCTGTGTACCCACAGAC---  
CCCAACCCACAAGAAATACATTTGGAA-----AATGTGACAGAAAATTTTAAAC-----  
-----ATGTGGACAAATTACATGGTAGAGCAGATGCATACAGATATA---  
ATCAGTCTATGGGATCAAAGCCTA---AAACCATGTGTAAAGTTA---  
ACCCCTCTCTGCGTTACTTTAAATTGTAGCGATATCACTGCCAATATCACTGCC-----  
-----  
-----TCATTTGCCAACGTCACGGACATAAAA---  
AACTGCTCTTTCAATATAACCACAGAATAAGG-----  
GATAAGACAAAGAAAGAATATTCACTT---TTTTATAGACTTGATATAGTAGAAATTAATGAA-----

-----  
-----  
AATAGTAGTGAATATAGATTAATAAATTGTAATACCTCAGCCGTTACACAG---  
GCATGCCCAAAGGTATCCTTTGAACCAATTCCCATACATTATTGTGCTCCAGCTGGTTTTGCGATCCTAAAGT  
GTAAG---GATGAGGATTTCAAT-----GGAACAGGGCCATGCAAGAAT-----  
-GTCAGC---ACAGTCCAATGCACACATGGAATCAAGCCAGTAGTATCAACT---  
CAACTGCTGTTAAATGGCAGTCTAGCAAGAACA-----  
ATAAAAAATTAGATCTGAAAATATAACAGACAAT-----GCAAAAAATATACTAGTACAACCTTGCC----  
-----CAGGCCGTTAGA-----ATTAATTGTACCAGACCTAACAATAACACAAGAAAA-----  
-AGTATACGTATA-----GGACCAGGACAAGCA---TTC-----TTTGCAACAGGTGGT-----  
-----ATAATAGGGAATATA-----AGACAAGCACATTGT---AATGTTAGTAGATCA---  
GAATGGAGGAGAAGCTTTACAAGAGGTAGCTAAAGAATTAAAG-----AAACACTTTGGG----  
-----AACGAAACAACAATAAAGTTTAAAT-----  
AAATCCTCAGGAGGGGATCTAGAAATCACA---ACACATAGTTTTAATTGTGGAGGAGAA---  
TTTAAACAGCTCCAGGCAAGAGTCCTGGCTGTGGAAAGATACCTAAAGGATCAACAGCTCCTAGGAATTTGGG  
GCTGCTCTGGAAGGCTCATCTGCACCACTAATGTGCCCTGGAAGTCTAGTTGGAGT-----  
-----AATAAATCTTACAGTGAAATATGG-----GAT-----  
AATATGACCTGGCTGCAATGG---GATAAAGAAGTTAGCAACTACACACAAATAATATAT---  
GCCCTAATTGAAGAATCGCAGAACCAGCAGGAA-----  
-----  
AAGAATGAACAAGACTTATTAGCATTGGACAAGTGGGCAAATCTGTGGAATTGGTTTGGTATATCAAAGTGGC  
TGTGGTATATAAAAAATATTTATAATGATAGTAGGAGGCTTAATAGGATTAAGAATAGTTTTTTGCT---  
ATACTTTCTGTAATA-----AATAGAGTTAGGCAGGGATACTCAGG-----  
TTGTCGTTTGTCTCTAATTTGGTTGATACTATAGCAATAGTAGTAGCTGGC---  
TGGACAGATAGGATTATAGAAATAGGACAAGCAATTGGTAGAGCT-----  
-----ATTCTCCACATA-----CCTAGAAGAATCAGACAGGGCATTGAAAGGGTATTGCTA---TAA  
>KT022363  
GCT---GCA-----  
GAAAACTTGTGGGTAAGTGTCTATTATGGGGTACCTGTGTGG---AAAGATGCAGAG---  
ACCACCTTATTTTGTGCATCAGATGCCGAAAGCATATGAGACAGAA---AAGCATAAT-----  
-----GTCTGGGCTACA---CATGCTTGTGTACCCACAGAC---  
CCCAACCCACAGGAAATAAATTTGAAA-----AATGTGACAGAAGGGTTTAAAC-----  
-----ATGTGGAAAAATAACATGGTAGAGCAGATGCATACAGATATA---  
ATCAGTCTATGGGACCAAAGCCTA---CGGCCATGTGTAAAGTTA---  
ACCCCTCTCTGTGTACTTTAGATTGTAATAATGCCACTGCCACCAAT-----  
-----  
-----ATTACCAGGATTGACAAGGACATGGAAGGAGAAATAAAG---  
AACTGCTCTTTCAATATGACCACAGAAGTGAGG-----  
GATAAAAAGCATAAAGTATATTCACCT--TTTTATAGGACAGATGTAGTAGAAATGAATAGT-----  
-----  
-----  
AGTAGTCAGTATAGATTAATAAATTGTAATACCTCAGCCATTACACAA---  
GCTTGTCCAAAGGTATCCTTTGAACCAATTCCCATACATTATTGTGCCCCAGCTGGTTTTGCAATTCTAAAAT  
GTAAG---GATAAGGAGTTCAAT-----GGAAGAGGGATATGCAAAAAAT-----  
-GTCAGC---ACAGTACAATGCACACATGGAATCAAGCCAGTAGTGTCAACT---  
CAACTGCTGTTAAATGGCAGCCTAGCAGAAGAAAAG-----  
GTAATGATTAGATCTGAAAATATCACAACAAT-----GTAAAAACATAATAGTACAATTTGCC----  
-----GAGCCTGTATGG-----ATTAATTGTACCAGACCTGGCAACAATAACAAGAAAA-----  
-AGTGTACATATA-----GGACCAGGACAAGCT---TTC-----TATGCAACAGGTGAC-----  
-----ATAATAGGAGATATA-----AGAAAGGCACATTGT---AATGTCAGTGAAGCA---  
GAATGGAAAAGAGCTTTACAGAAGGTAGCCAAACAATTAGGA-----GCACACTTTGTG-----  
-----AGTAAAACAATAATCTTTACT-----  
AAATCCTCAGGAGGAGATCTAGAAATAACA---ACACATAGTTTTAATTGTGGAGGAGAA---  
TTTAAACAGCTCCAGGCAAGAGTCCTGGCTGTGGAAAGATACCTAAAGGATCAACAGCTCCTAGGAATTTGGG  
GCTGCTCTGGAAGGCTCATCTGCACCACTAATGTGCCCTGGAAGTCTAGTTGGAGT-----  
-----AATAAATCCATGAATGAGATATGG-----AAT-----  
AACATGACCTGGCTGCAATGG---GATAAAGAAATTGACAATTATACACAGATAATATAT---  
AACCTCATTGAAGAATCGCAGAACCAGCAGGAA-----  
-----  
AAGAATGAACAAGACTTATTGGCACTGGACAAGTGGGCATCTCTGTGGAATTGGTTTGACATATCAAAGTGGC

TGTGGTATATAAAAAATATTTATAATGATAGTAGGAGGCTTAATAGGATTAAGAATAGTTTTTGCT---  
ATACTTTCTGTAATA-----AATAGAGTTAGGCAGGGATACTCACCT-----  
TTGTGCTTCGCTATTAATTTGCTTGATACCATAGCAATAGCAGTAGCTGGG---  
TGGACAGATAGGATTATAGAAATAGGACAAAGATTTTGCAGAGCT-----  
-----ATTCTCCACATA-----CCTAGAAGAATCAGACAGGGCTTTGAAAGGACTTTGCTA--TAA  
>KT022364  
ACT---GCA-----  
GAAAACTTGTGGGCTACTGTCTACTATGGGGTACCTGTGTGG--AAAGAAGCAGAG---  
ACCACCCTATTTTGTGCATCAGATGCTAAAGCATATCAGACAGAA--GTGCATAAT-----  
-----GTCTGGGCTACA--CATGCCTGTGTACCCACAGAC---  
CCCAGCCCACAAGAAATAGAATTGAAA-----AATGTAACAGAAGAGTTTAAAC-----  
-----ATGTGGAAAAATAGCATGGTAGAGCAGATGCATACAGATATA---  
ATCAGTTTATGGGACCAAAGCCTA--AAGCCATGTGTAAAGTTA---  
ACCCCTCTCTGTGTTACTTTAAACTGTACTAATGCCAAGGCCAACACGAATGACACT-----  
-----  
-----GTCAGCAGCATGGGGGACATGGAAGGAGAAATAAAA---  
AACTGCTCTTTCAATATGACCACAGAATAAGG-----  
GATAAGAAGCAGAAAGTATATTCACCT---  
TTTTATAAACTTGATGTAGTACAAATTAATGGAAATAATGGTACT-----  
-----  
AATAATGATAGCAGTGAGTATAGATTAATAAATTGTAATACCTCAGCCATTACGCAG---  
GCTTGTCCAAAGGTATCCTTTGAGCCAATTCCAATACATTATTGTGCCCCGGCTGGTTTTGCGATCCTAAAGT  
GTAAG--GATGAGGAGTTTAAAT-----GGAACAGGGCCATGCAAGAAT-----  
-GTCAGC--ACAGTACAATGCACACATGGAATCAAGCCAGTAGTATCAACT---  
CAACTGCTGTAAATGGCAGTCTAGCAAAAGAAAAG-----  
ATAATAATTAGATCTGAAAATATCTCAGACAAT-----GCTAAAACCATAATAATACAACCTTACC---  
-----ACGCCTGTAACA-----ATTGAGTGTATCAGACCCAACAACAACACAAGACAA-----  
-GGTGTACATATA-----GGGCCAGGACAGGCA--TTC-----TATACAACAGGT-----  
-----ATCATAGGGGATATA-----AGAAAAGCATATTGT--GAGGTCAATAAATCA---  
GAATGGGATCAAACCTTTACAACAGGTAGTTACACAATTAAGA-----GAACATTGG-----  
-----AACGCAACAATAATCTTTAAT-----  
AAACCCTCAGGAGGGGACTTAGAAATTACA--ACACACAGTTTTAATTGTGGAGGAGAA--  
TTTAAACAGCTCCAGGCAAGAGTCCCTGGCTATAGAAAGATACCTAAAGGATCAACAGCTCCTAGGGATTTGGG  
GCTGCTCTGGAAGAACTCATCTGCACCACTACCGTGCCCTGGAACCTTAGTTGGAGT-----  
-----AATAAATCTTATGAGGATATATGG-----GAT-----  
AACATGACCTGGCTGCAATGG--GATAAAGAAATTAGCAATTACACAGAAATAATATAT--  
AGGCTAATTGAAGAATCACAGAACCAGCAGGAA-----  
-----  
AAGAATGAACAAGACTTATTGGCATTGGGATAAGTGGGCAAGTCTGTGGAGTTGGTTTGACATAACAAGATGGC  
TGTGGTATATAAGGATATTTATAATGATAGTAGGAGGCATAATAGGCTTAAGAATAATTTTTTGCA--  
GTGCTTGCTATAATA-----AATAGAGTTAGGCAGGGATACTCACCT-----  
CTATCGTTTGCTATTAATTTGCTTGATACCATAGCAATAGCAGTAGCTGGC---  
TGGACAGATAGGGTTATAGAAATAGTACAAAGATTTGGTAGAGCT-----  
-----ATTCTCAACGTA-----CCTACAAGAATCAGGCAGGGCTTCGAAAGGGCTTTACTA--TAA  
>KT022365  
GTT---ACA-----  
GGAAACTTGTGGGTTACTGTCTACTATGGGGTACCTGTGTGG--AAAGATGCAGAG---  
ACCACCTTATTTTGTGCATCAGATGCTAAAGCATATGAGACAGAA--AAGCATAAT-----  
-----GTCTGGGCTACA--CATGCCTGTGTACCCACAGAC---  
CCCAACCCACAAGAAATACATTTGAAA-----AATGTAACAGAAGAGTTTAAAC-----  
-----ATGTGGAAAAATAACATGGTAGAACAGATGCATACAGATATA---  
ATCAGTCTATGGGATGAAAGCCTA--AAGCCATGTGTAAAGTTA---  
ACCCCTCTCTGTGTTACGTTAGAGTGTAATGACAACATCACCACCAATAGCACTAACACCATTAGCAAG---  
-----  
-----ACCAGCGCCAGCACTACTAGTAGCCCATGGAAGGAGAAATGAAA---  
AACTGCTCTTTCAATATAACCACAGAATTAAGG-----  
GATAAGAAAAAGAAAGTACATTCACCT---  
TTTTATAGACTTGATATAGTAGAAATTAAGGAAAATCAAGATAAAAGT-----  
-----  
AATAGTAGTAGTAATAGTAGTAGTCAGTATAGTCAGTATAGATTAATAAATTGTAATACCTCAGCCATTACAC

AA---  
GCTTGTCCAAAGGTAAGCTTTGAGCCAATTCCCATACATTATTGTGCCCCAGCTGGTTTTGCAATTCTAAAGT  
GTAAG---GATGTAGAGTTCAAT-----GGAACAGGACCATGTAAGAAA-----  
-GTCAGC---ACAGTACAATGCACACATGGAATCAGGCCAGTAGTATCAACT---  
CAACTGCTGTTAAATGGCAGTCTAGCAGAAGGCAAG-----  
GTAATGATTAGATCTGCAAAATATCTCAAGCAAT-----GCCAAAAACATAATAGTACAATTCAAC----  
-----GAGTCTGTAAGA-----ATTGAGTGTATTAGACCTAGTAACAATACAAGAAAA-----  
-AGTGTACGGATA-----GGACCAGGACAAACA---TTC-----TATGCAACAGGTGAC-----  
-----ATAATAGGGGATATA-----AGAAAAGCATATTGT---AATGTCAGTAGAGAA---  
AATTGGAATGAAGCATTACAAAAGGTAGTAGAACAATTAGGA-----ACACACGTT-----  
-----AACGGAACAATAAAATTTGCT-----  
AACTCCTCAGGAGGGGATCTAGAAATCACA---ACACATAGTTTTAATTGTGGAGGAGAA---  
TTTAAACAGCTCCAGGCAAGAGTCCTAGCTGTGGAAAAGTTACCTAAGGGATCAACAGCTCCTAGGAATTTGGG  
GCTGCTCTGGAAGAACTCATCTGCACCACTACTGTGCCCTTGGAACCTCTAGTTGGAGC-----  
-----AATAAATCTTATAATGAGATATGG-----GAG-----  
AACATGACCTGGCTGCAATGG---GATAAAGAGATTAGCAATTACACACAAATAATATAT---  
AACCTAATTGAAGAATCACAGAACCAGCAGGAG-----  
-----  
AAAAATGAACAAGAATTATTGGCATTGGATAAGTGGGCAAATCTGTGGAATTGGTTTAAACATATCAAATTGGC  
TGTGGTATATAAGATTATTTATAATGATAGTAGGAGGCTTAATAGGATTAAGAATAGTTTTTTGCT---  
GTGCTTTCTGTAATA-----AATAGAGTTAGGCAGGGATACTCACCT-----  
CTATCGTTTGTCTATTAAGTTAATTGATACTATAGCAATAGCAGTAGCTGGC---  
TGGACAGATAGGGTTATAGAATTAGGACAAAGACTTTGTAGAGCT-----  
-----ATTCTCCATATA-----CCTAGAAGAATCAGACAGGGCTTAGAAAGAGCTTTGCTA---TAA  
>KT022367  
ACT---GCA-----  
GAAAACTTGTGGGTTACAGTCTACTATGGGGTACCTGTGTGG---AGAGATGCAGAG---  
ACCACCTTATTTTGTGCATCAGATGCTAAAGCATATAAAACAGAA---AGGCATAAT-----  
-----GTATGGGCTACA---CATGCCTGTGTACCCACAGAC---  
CCCAACCCACAAGAAATACATTTGGAA-----AATGTGACAGAAGATTTTAAT-----  
-----ATGTGGAAAAATGGCATGGTAGAGCAGATGCATACAGATATA---  
ATCAATCTATGGGACCAAAGCCTA---AAGCCATGTATTAAATTA---  
ACCCCTCTCTGTGTACTTTAAATTGTAGCGACTTCAAGACCAATAACACCATAGGCAATGTTACC-----  
-----  
-----ACAGAAATAAAA---  
AATTGCTCTTTCAATATGACCACAGAATTAAGG-----  
GATAGGAGGCAGCAAGTATATTCACTT---TTTTATAAACTGGATGTAGTACAAATTGATGGC-----  
-----  
AATAATAGTCAGTATAGATTAATAAATTGTAATACCTCAGCCATTACACAA---  
GCTTGTCCAAAGGTATCCTTTCAACCAATTCCCATACATTATTGTGCTCCAGCTGGTTTTGCGATTCTAAAGT  
GTAAG---GAAAAAGAGTTCAAT-----GGAACAGGACCATGCAGGAAT-----  
-GTCAGC---ACAATACAATGCACACATGGAATTAAGCCAGTAGTGTCAACT---  
CAACTGCTGTTAAATGGCAGCCTAGCAGAAGGAAAG-----  
GTAATGATTAGGTCTGAAAAATATCACAAACAAT-----GCCAAAAATATAATAATACAATTTAAT----  
-----CAGACTGTACAA-----ATTAATTGCTCCAGACCTAACAACAATACAAGAAAA-----  
-AGTGTACGTATA-----GGACCAGGACAAGCA---TTC-----TATGCAACAGGTGAC-----  
-----ATAATAGGGAACATA-----AGACAGGCACATTGC---AATGTCAGTAAAGCA---  
GCATGGGAAAAAACTTTACAACAGATAGCTAAACAATTAAGA-----GGGCACTTTGAG---  
-----AATAAAACAATAATATTTGCT-----  
AACTCCTCAGGAGGGGATCTGGAAGTCACA---ACACACAGTTTTAATTGTGGAGGAGAA---  
TTTAAACAGCTCCAGGCACGAGTCCTGGCTGTGGAAAAGATACCTAAGGGATCAACAGCTCCTAGGAATTTGGG  
GTTGCTCTGGAAGAACTCATCTGCACCACTAATGTGCCCTGGAACCTCTAGTTGGAGT-----  
-----AATAAAAAATCAGAGTGAAATATGG-----GAT-----  
AACATGACCTGGCTGCAATGG---GATAAAGAAGTTAGCAATTACACATATATAATATAT---  
GATCTACTTGAAAAATCACAGAACCAGCAGGAA-----  
-----  
AAGAATGAACAAGACTTATTGGCATTGGACAAGTGGGCAAATCTGTGGAATTGGTTTGACATATCAAATGGC  
TGTGGTATATAAAAAATATTTATAATGATAGTAGGAGGCTTAATAGGATTAAGAATAGTTTTTTGCT---  
GTGCTTTCTATAATA-----AATAGAGTTAGGCAGGGCTACTCACCT-----

TTGTCATTTCGCTGTTAATTTGGTAGATAACATAGCAATAGCAGTAGCTGGC---  
 TGGACAGATAGGGTTATAGAAATAGGACAAAGAATTGGTAGAGCT-----  
 -----ATCCTCAACATA-----CCTAGAAGAATCAGACAGGGCTTGGAAGTGCTTTGCTA---TAA  
 >KT022368  
 GCT---ACA-----  
 GAAAACTTGTGGGTTACTGTCTACTATGGGGTACCAGTGTGG---AAAGATGCAGAT---  
 ACCACCTTATTTTGTGCATCAGATGCTAAAGCATATGAGTCAGAA---AAGCATAAT-----  
 -----GTCTGGGCTACA---CATGCCTGTGTACCCACAGAC---  
 CCCAACCCACAAGAAATAAATTTGGAA-----AATGTGACAGAAAATTTTAAT-----  
 -----ATGTGGAAAAATAACATGGTAGAGCAGATGCATACAGATATA---  
 ATCAGTCTATGGGATCAAAGCCTA---AAGCCGTGTGTAAAGATA---  
 ACCCCTCTCTGCGTTACTTTAAGTTGTAGCTATAATGTTACCTTCAACAGTACCAATATCACTGCT-----  
 -----  
 -----GAAGAAAGAGAAGAGATAAAA---  
 AACTGCTCTTACAATGTGACCACAGAAATAAGG-----  
 GATAAGAAACAGAAAGTATATTCCTC---TTTTATAAACTTGATATAGTACAAATTGAAAATAGTAATAAT-  
 -----  
 -----  
 AATAGTAGTAATAGTAGTATAATGTATAGATTAATAAAATTGTAATACCTCAGCCATTACACAG---  
 GCTTGCCCAAAGGTATCCTTTGAGCCAATTCCCATACATTATTGTGCTCCAGCTGGTTTTGCGATCCTAAAGT  
 GTAAG---GATGAAAAGTTCAAT-----GGAACAGGACCATGCAAGAAT-----  
 -GTCAGT---ACAGTTCAGTGCACACATGGAATCAAGCCAGTGGTATCAACT---  
 CAACTGCTGTTAAATGGCAGTCTAGCTGAAAGAGAG-----  
 ATAAAAATTAGATCTGAAAATATCACAACAAT-----GGTAAACTATAATAGTGCAACTTACC---  
 -----GAGCCTGTGGAA-----ATTGATTGTATCAGACCTTACAACAATACAAGGAAA-----  
 -AGTGTGCGTATA-----GGACCAGGACAAGCA---TTC-----TATGCAACAGGTGAC-----  
 -----ATAATAGGGGATATA-----AGAAAAGCATCTTGT---ACTGTCAATAGAACA---  
 AAATGGAATGGTACTTTACATCAAGTAGCTGACAAATTAAAG-----AACTACTTTAGG---  
 -----AACAGAACAATAAGATTTGCT-----  
 AACTCCTCAGGAGGGGATTTGGAAATCACA---ACACATAGTTTTAACTGTAGGGGAGAA---  
 TTTAAACAGCTCCAGGCAAGAGTCCCTGGCTGTGGAAAGATACCTAAAGGATCAACAGCTCCTAGGAATTTGGG  
 GCTGCTCTGGAAGAACTCATCTGCACCACTAATGTGCCCTGGAAGTCTAGTTGGAGT-----  
 -----AATAAATCCCAGAATGAGATATGG-----GAA-----  
 AACATGACCTGGCTACAATGG---GATAAAGAAATTGGCAACTACACACAGCTAATATAT---  
 AGTCTACTTGAAGAATCACAAAACCAGCAGGAA-----  
 -----  
 AAGAATGAACAAGACTTATTGTCAATTGGACAAGTGGGCAAATCTATGGAATTGGTTTGACATATCAAAGTGGC  
 TGTGGTACATAAAAAATATTTATAATGATAGTAGGAGGCTTAATAGGATTAAGAATAGTTTTTTGCT---  
 GTGCTTTCTATAATA-----AATAGAGTTAGGCAGGGATACTCACCT-----  
 TTGTCGTTTCGCTATTAATTTGTTTGATACCATAGCAATAGTAGTAGCTGGC---  
 TGGACAGATAGAGCTATAGAAATAGGACAAGTAGTTGGTAGAGCT-----  
 -----ATTCTCCACATA-----CCTAGAAGAATCAGACAGGGCCTTGAAAGAGCTTTGCTA---TAA  
 >KT022369  
 ACT---GCA-----  
 GAAAACTTGTGGGTTACTGTCTACTATGGGGTACCTGTGTGG---AAAGATGCAGAT---  
 ACCACCTTATTTTGTGCATCAGATGCGAAAGCATATAAGACAGAA---AAGCATAAT-----  
 -----GTCTGGGCTACA---CATGCCTGTGTGCCCACAGAC---  
 CCCAACCCACAAGAAATAAATTTGAAA-----AATGTGACAGAAGAGTTTAAC-----  
 -----ATGTGGAAAAATAACATGGTAGAGCAGATGCATACAGATATA---  
 ATCAGTTTATGGGACCAAAGCCTA---CAGCCATGTGTAAAGTTA---  
 ACCCCTCTCTGCGTTACATTAAAGTGCTCTGATGCCAATTTACCTCTAATAATAATGCC-----  
 -----  
 -----ACCAATATCACCGCTGAGATGAAGGAAGAAATAAAA---  
 AACTGCTCTTTCAATATGACCACAGAATTAAGG-----  
 GATAAGAAACAGAAAGTATATTCCTT---TTTTATAGACTGGATGTAGTACCAGTTGATGAA-----  
 -----  
 -----  
 GTTGATGAGAATGATACGTATAGATTAATAAAATTGTAATACCTCAGCCATTACACAA---  
 GCTTGTCCAAAGGTATCCTTTGAACCAATTCCCATACATTATTGTGCCCCAGCTGGTTTTGCAATTCTAAAGT  
 GTAAT---GATAAGAAGTTCAAT-----GGAACAGGGCCATGTAGAAAT-----

-GTCAGC---ACAGTACAATGCACACATGGAATCAAGCCAGTAGTATCAACT---  
 CAACTGCTGTTTAAATGGCAGTCTAGCAGAAGAAGAG-----  
 GTAATGATCAGATCTGAGAATATTACAAACAAT-----GCCAAGAACATAATAGTACAATTCCACC----  
 -----CAGCCTGTAAACA-----ATTAATTGTACCAGACCTCACAACAATACAAGAAAA-----  
 -GGTGTACATATA-----GGACCAGGACAAGCA---TTC-----TATGCAAGAGGGGAC-----  
 -----ATAATAGGGGATATA-----AGACAAGCACATTGT---AACCTCAGTAAAGCA---  
 GCATGGAATAACACTTTGCGCCAGGTAGCCATATCATTAGGC-----AAACACTTTAGG----  
 -----AATAAAACAATAATCTTTGCT-----  
 AACTCCACAGGGGGGATCTAGAAATAACA---ACACATAGTTTTAATTGTGGAGGAGAA---  
 TTTAAGCAGCTCCAGGCCAGAATCCTGGCTGTGGAAAGATACCTAAGGGATCAACAGCTCCTAGGAATTTGGG  
 GCTGCTCTGGAAGAACTCATCTGCACCACTAATGTGCCCTGGAATTCTAGTTGGAGT-----  
 -----AATAAATCTTACGATGAGATATGG-----GAC-----  
 AACATGACCTGGCTGCAATGG---GATAAAGAAGTTAGCAATTACACACACATAATATAT---  
 GAACTAATTGAAAAATCGCAGAACCAGCAGGAA-----  
 -----  
 AAGAATGAACAAGACTTATTGGCATTGGGCAAGTGGGCAAATCTGTGGAATTGGTTTAACATATCAAACCTGGC  
 TGTGGTATATAAGAATATTTATAATAATAGTAGGAGGCTTAATAGGATTAAGAATAGTTTTTTACT---  
 GTGCTTTCTGTAATA-----AATAGAGTTAGGCAGGGATACTCACCT-----  
 TTGTCTTTCGCTATTAATTTGCTTGATACCATAGCGATAAGAGTAGCTGGG---  
 TGGACAGATAGGGTTATAGAAATAGGACAAAGGCTTTGTAGAGCT-----  
 -----ATCCTCAACGTA-----CCTGTGAGAATCAGACAGGGCCTTGAAAGAGCTTTGCTA---TAA  
 >FJ866117  
 ACT---GCA-----  
 GAAGACTTGTGGGTTACTGTCTACTATGGGGTACCTGTGTGG---AAAGATGCAGAG---  
 ACCACCCTATTTTGTGCATCAGATGCTAAAGCCTATGAAACAGAA---AGGCATAAT-----  
 -----GTCTGGGCTACA---CATGCCTGTGTACCCACAGAC---  
 CCCAACCCACAAGAAATACCTTTGGAA-----AATGTAACAGAAGAATTTAAC-----  
 -----ATGTGGAAAAATAACATGGTAGAGCAGATGCATACAGATATA---  
 ATTAGTTTATGGGACCAAAGCCTA---AAGCCATGTGTAAAGTTA---  
 ACTCCTCTCTGTGTTACTTTAAGCTGTACCAATGCCAAGGGTACTACTTTAAAAGACACC-----  
 -----  
 -----AATAATGTTACCATCAACACGACAGAAGAAATAAAA---  
 AACTGCTCTTTCAATATGACCACAGAATTAAGG-----  
 GATAAGAAACAGAAAGTATATTCACCT--TTTTATAAACTTGATGTAGTACCAATTAATGAAAGT-----  
 -----  
 -----  
 AATAATAGTAATACCAGTGAGTATAGATTAATAAATTGTAATACCTCAGCCATTACACAG---  
 GCTTGTCCAAAGGTAACCTTTGAGCCAATTCCAATACATTATTGTGCCCAGCTGGGTTTGCATTCTAAAGT  
 GTAGA---GATAAGGAGTTCAAT-----GGAACAGGGCTATGCAAGAAT-----  
 -GTTAGC---ACAGTACAATGCACACATGGAATCAAACCAGTAGTATCAACT---  
 CAACTGCTGTTTAAATGGCAGTCTAGCAGAAAAGGAG-----  
 GTAAGAATTAGCTCTGAAGATATTTCAAACAAT-----GCTAAAACCATTATAGTACAACCTTGCC---  
 -----ACGCCTGTAGCA-----ATTAATTGTACTAGACCTAACAATAATACAAGAAAA---  
 -AGTATACGTATA-----GGACCAGGACAAGCA---TTC-----TATGCAACA---GAT-----  
 -----ATAATAGGGAACATA---AGACAAGCATATTGC---GAGGTCAATAGATCA---  
 GAATGGAATGAAGCTTTACGCAAGGTAGCTGTGCAATTAAGA-----AAGCACTACGGG---  
 -----AACACAACAATAAAATTTACT-----  
 GCACCCTCAGGAGGGGATTTAGAAATTACA---ACACATAGTTTTAATTGTGGAGGAGAA---  
 TTTAAACAGCTCCAGGCAAGGGTCCTGGCTGTGGAAAGATACCTAAAGGATCAACAGCTTCTAGGAATTTGGG  
 GCTGCTCTGGAAGAACTCATCTGCACCTACTAATGTGCCCTGGAACCTAGTTGGAGT-----  
 -----GATAAATCTTACAGTGAAATATGG-----GAT-----  
 AACATGACCTGGCTGCAATGG---GATAAAGAAATTAACAATTATACAGAAGAGATATAT---  
 AGTCTAATTGAAAAAGCGCAGACCCAGCAAGAA-----  
 -----  
 AAGAATGAACAAGACTTATTGGCATTGGACAAGTGGGCAAGTCTGTGGAATTGGTTTGACATATCAAATGGC  
 TGTGGTATATAAAAAATATTTATAATGATAGTAGGAGGCTTAATAGGATTAAGAATAGTTTTTTGCT---  
 GTGCTTGCTGTAATA-----AATAGAGTTAGGCAGGGATACTCACCA-----  
 CTATCATTTGCTATTAACCTTGGTTGATACCATAGCAATAGGAGTAGCTGGC---  
 TGGACAGATAGGGTGATAGAAAGTAGGACAAAGAATTGGTAGAGCT-----  
 -----ATTCTCCATATA-----CCTAGAAGAATAAGACAAGGCTTTGAAAGGGCTTTACTA---TAA

>KT022370

GTT---GCA-----  
GGAAACTTGTGGGTACGGTCTACTATGGCGTACCAGTGTGG---AAAGATGCAGAT---  
ACCACCTTATTTTGTGCATCAGATGCTAAAGCATATGAGACAGAA---AAGCATAAT-----  
-----GTCTGGGCTACA---CATGCCTGTGTACCCACAGAC---  
CCCAACCCACAAGAAATACCTTTGGAA-----AATGTGACAGAAGAGTTTAACT-----  
-----ATGTGGAAAAATAACATGGTAGAGCAGATGCATGCAGATATA---  
ATCAGTCTATGGGACCAAAGCCTA---AAACCATGTGTACAGTTA---  
ACCCCGCTCTGCGTTACTTTACATTGTGTCAATGTCAATGCCACAAATAGTACCACAGCC-----  
-----  
-----AAAAACATAACAGGGGACAGTGATGAACTAAGA---  
AACTGCTCTTTCAATATGACCACAGAGCTAAGG-----  
GATAAGACAAAGCAGGTATATTCACCTT---TTTTATAGACTTGATGTAGTACCAATTCAAGATAAT-----  
-----  
-----  
AGTAGTGATGAATATAGATTAATAAATTGTAATACCTCAACCATTACACAA---  
GCTTGTCCTAAGGTATCTTTTGAGCCAATTCCCATACATTATTGTGCCCCAGCTGGTTTTGCGATCCTAAAGT  
GTAGG---GATGAGGAGTTCAAT-----GGAACAGGGCCATGCAAGAAT-----  
-GTCAGC---TCAGTACAATGCACACATGGAATCAAGCCAGTAGTATCAACT---  
CAACTGCTGTAAATGGCAGCCTAGCAAAAAAGAG-----  
GTAAAAATTAGATCTGAAAATATCACAACAAT-----GTCAAACTATAATAGTACAACCTTGTT---  
-----GATCCTGTGGAA-----ATTAATTGTACCAGGCCTAATAACAATACAAGAAGA-----  
-AGTGTACGTATA-----GGACCAGGACAAACA---TTC-----TATGCAACAGGTGCA-----  
-----ATAATAGGGCCGATA-----AGAAATGCATATTGT---ACTGTCAATGAATCA---  
AAATGGAATGCAACTTTAAAAAAGGTAGCTGGACAGTTAAGA-----AAACACTTTGGG---  
-----AACAAAACAATAAGGTTTAAT-----  
AGCTCTTCAGGAGGAGATCTGGAAATCACA--ACACATAGTTTTAATTGTGGAGGAGAA---  
TTTAAACAGCTCCAGGCAAGAGTCCTGGCTGTGGAAAGATACCTAAAAGATCAACAGCTCCTAGGAATTTGGG  
GCTGCTCTGGAAGAACTCATCTGCACCACTAATGTGCCCTGGAATTCTAGTTGGAGT-----  
-----AATAAATCTCAGAATGAGATATGG-----GAG-----  
AACATGACCTGGCTACAATGG---GATAAAGAAATTAGCAATTACACTGACATAATATAT---  
AACCTAATTGAAGAATCGCAGAACCAGCAAGAA-----  
-----  
AAGAATGAACAAGAATTATTGGCATTGGACAAGTGGGCAAGTCTGTGGGATTGGTTTAAATATCAAACCTGGC  
TGTGGTATATAAAAAATATTTATAATGATAGTAGGAGGTTTAATAGGATTAAGAATAGTTTTTTGCT---  
GTGCTTTCTATAATA-----AATAGAGTTAGGCAGGGATACTCACCT-----  
TTGTCAATTTGCTATTAGTTTGCTTAATACCATAGCAATAGTAGTAGCTGGC---  
TGGACAGATAGGCTTATAGAAATAGGACAAGGAATTGGTAGAGCT-----  
-----ATTCTTCATATA-----CCTAGAAGAATCAGACAGGGTTTAGAAAGAGCTTTGCTA--TAA

>KT022372

GTT---GCA-----  
GGAAACTTGTGGGTACGGTCTACTATGGGGTACCAGTGTGG---AGAGATGCAGAT---  
ACCACCTTATTTTGTGCATCAGATGCTAAAGCATATGAGAGAGAA---GTGCATAAT-----  
-----GTCTGGGCTACA---CATGCCTGTGTACCCACAGAC---  
CCTAGCCCACAAGAAATAAATATGAAA-----AATGTGACAGAAGAGTTTAACT-----  
-----ATGTGGAAAAATAACATGGTAGAGCAGATGCATACAGATATA---  
ATCAGTCTATGGGACCAAAGCCTA---AAACCATGTGTAAAGTTA---  
ACTCCTCTCTGCGTTACTTTACATTGTGTCAATATCACCATTACCAACACCACAAAC-----  
-----  
-----AGCACCATAGACAGCGTAATGAAAGATGAAATAAAA---  
AACTGCTCTTACAATATGACCACAGAGATAAGG-----  
GATAAGAAACAGAAGATGTATTCACCTT---TTTTATAAACTTGATGTAGTACCAATTAATGAA-----  
-----  
-----  
AGTCAAGGTAATAATAGTGATGAGTATAGATTAATAAATTGTAATACCTCAGCCATTACACAG---  
GCTTGTCCAAAGGTATCCTTTGAGCCAATTCCCATACATTATTGTGCCCCAGCTGGTTTTGCGATCCTAAAGT  
GTGCA---GATGAGAATTTCAAT-----GGAACAGGGCCATGCAATAAT-----  
-GTCAGC---ACAGTACAATGCACACATGGAATCAGACCAGTAGTATCAACT---  
CAACTACTGTAAATGGCAGTCTAGCAAAAACGGGG-----  
ATAAAGATTAGATCCGAAAATATCACAATAAT-----GCCAAAAGTATAATAGTACAATTGAAC----

-----AAGTCGGTGGAA-----ATTACTTGTATCCGGCCTAACACAATAACAAGAAAA-----  
 -AGTGTACATATA-----GGACCAGGACAAGCA---TTC-----TTTGCAACAGGTGGG-----  
 -----ATAATAGGGGATATA-----AGACAAGCGCATTGT---AATGTCAGTAAATCA---  
 CGTTGGAATACAACCTACAAGGAGTAGTTGAACAATTAAGA-----AAACACTTTAGG-----  
 -----AACACAACAATAAAGTTTAAT-----  
 ACCTCCTCAGGAGGAGATCTAGAAGTCACA---ACACATAGTTTTTAATTGTGGAGGAGAA---  
 TTTAAACAGCTCCAGGCAAGAGTCCTGGCTGTGGAAAGATACCTAAGAGATCAACAGCTCCTAGGAATTTGGG  
 GCTGCTCTGGAAACTCATCTGCCCACTAATGTGCCCTGGAATTCTAGTTGGAGT-----  
 -----AACAAAACCTCAGAGTGAAATATGG-----GAG-----  
 AACATGACCTGGCTAGAATGG---GATAAAGAAATTAGCAATTACACTGAAATAATATAT---  
 AAACATAATTGAAGAATCGCAGAACCAGCAGGAA-----  
 -----  
 AAGAATGAACAAGAATTATTAGCATTGGACAAGTGGGCAAGTCTGTGGACTTGGTTTGACATATCAAAATGGC  
 TGTGGTATATAAAAATATTTATAATGATAGTAGGAGGTTTAATAGGATTAAGAATAGTTTTTTGCT---  
 GTGCTTTCTATAATA-----AATAGAGTTAGGCAGGGATACTCACCT-----  
 TTGTCAATTTGCTATTAGTTTGTGTGATACCATAGCAGTAGCAGTAGCTGGC---  
 TGGACAGATAGGATTATAGAAATAGGACAAAGAATTGGTAGAGCT-----  
 -----ATCCTCCACATA-----CCTAGAAGAATCAGACAGGGCTTCGAAAGAGCTTTGCTA---TAA  
 >KT022373  
 GCT---GCA-----  
 GAAAACTTGTGGGTTACTGTCTACTATGGGGTGCTGTGTGG---AAAGACGCAGAG---  
 ACCACCCTATTTTGTGCATCAGATGCTAAAGCATATGATACAGAA---GTGCATAAT-----  
 -----ATCTGGGCTACA---CATGCCTGTGTACCCACAGAC---  
 CCCGACCCACAAGAAATAAACTTAGAA-----AATGTGACAGAAGAGTTTAAT-----  
 -----ATGTGGAAAAATAACATGGTAGAGCAGATGCACACAGATATA---  
 ATCAGTCTATGGGACCAAGGACTA---AAGCCATGTGTAAAGTTA---  
 ACCCCTCTCTGCGTTACTCTAGATTGTAGCAATAATGTCACCAATACCACTAAT-----  
 -----  
 -----GACATGAAAGAAGAAATAAAA---  
 AACTGCTCTTTCAATGTGACCACAGTAATAAGG-----  
 GATAAGAGACAGAAAGTATATTCACCT---TTTTATAGACTTGATGTAGTACCAATTGATGGT-----  
 -----  
 -----  
 AATAGTGATAGTAATCAGTATAGATTAATAAATTGTAACACCTCAGCCATTACACAG---  
 GCTTGTCCAAAGGTAACCTTTGAGCCAATTCCCATACACTATTGTGCCCCAGCTGGTTTTGCGATTCTAAAGT  
 GTAAG---GATAAGGAGTTTAAT-----GGAACAGGGCCATGCAAGAAT-----  
 -GTCAGC---ACAGTACAATGCACACATGGAATCAGGCCAGTGGTATCAACT---  
 CAGCTGCTATTAAATGGCAGCCTAGCAGAAGACAAG-----  
 ATAATAATTAGATCTGAAAATATCACAAACAAT-----GCTAAAAACATTATAGTACAATTTAAC---  
 -----AGACCTGTAAAA-----ATTAATTGTACCAGACCTAACACAATAACAAGAAAA---  
 -GGTGTACATATA-----GGACCAGGACAAACA---TTC-----TATGCAACAGGTGAA-----  
 -----ATAATAGGGGAGATA-----AGACAAGCACATTGT---AATATTAGTGGAAACA---  
 GAATGGAATACAACCTTTGCAAAAGGTAGCCAAACAATTAAGT-----GCATACTTTAAG---  
 -----AACAAAACAATAATTTTTTGCA-----  
 AACTCCTCAGGAGGGGATTTAGAAATTACA---ACACATAGTTTTTAATTGTGGAGGAGAA---  
 TTTAAACAGCTCCAGGCAAGAGTCCTGGCTCTGGAAAGATACCTAAAGGATCAACAGCTCCTAGGAATTTGGG  
 GCTGCTCTGGAAACTCATCTGCACCACTAATGTGCCCTGGAACCTAGTTGGAGT-----  
 -----AATAAATCCCATGATGAGATATGG-----GGA-----  
 AACATGACCTGGCTACAATGG---GAGAGAGAAATTAGCAATTACACACAGACAATATAT---  
 GATCTAATTGAAGACTCGCAGAACCAGCAGGAA-----  
 -----  
 AAAAAATGAACAAGACTTATTAGCATTGGACAAGTGGGCAAGTCTGTGGAATTGGTTTGACATATCAAACTGGC  
 TGTGGTATATAAAGATATTTATAATAATAATAGGAGGCTTAATAGGATTAAGAATAGTTTTTTGCA---  
 GTGCTTTCTGTAATA-----AATAGAGTTAGGCAGGGATACTCACCT-----  
 TTGTCAATTTGCTATTAATTTGTGTGATACCATAGCAATAGCAGTAGCTGGC---  
 TGGACAGATAGGGTTATAGAACTAGGGCAAAGGCTTGGTAGAGCT-----  
 -----ATCTTGCACGTA-----CCTAGAAGAATTAGGCAGGGCGCAGAAAGAGCTTTGCTA---TAA  
 >KT022374  
 GCT---GGA-----  
 GGAAGCTTGTGGGTTACTGTCTACTATGGGGTACCTGTGTGG---AGAGACGCAGAA---

ACCACCTTATTTTGTGCATCAGATGCTAAAGCATATGATACAGAA---AAGCATAAT-----  
 -----ATCTGGGCTACA---CATGCCTGTGTACCCACAGAC---  
 CCCGACCCACAAGAAATACCTTTGAAA-----AATGTGACAGAAGATTTTAACT-----  
 -----ATGTGGAAAAATAATATGGTAGAGCAAATGCATACAGATATA---  
 ATCAGTCTATGGGATCAAAGTCTA---AAGCCTTGTGTACAGTTA---  
 ACCCCTCTCTGTGTCACTTTAAATTGTACAAATGCAGGAAATGATACTAATAACCAATACT-----  
 -----  
 -----ACCATAAATGATGACATGCGTGGAGAACTAAAA---  
 AACTGCTCTTTTAAATGTGACCACAGAAATAAGG-----  
 GATAAAAAACAGAAAGTACATGCACTT---TTTTATAAACTTGATGTAGTACAAATAGATAAGGCTAAT----  
 -----  
 -----  
 AGTAGTGATGGTAATGGTAGTGGTGACTIONACAGATTAATAAATTGTAACACCTCAGTCATTACACAG---  
 GCTTGCCCAAAGATAAAATTTGAGCCAATTCCCATACATTATTGTGCTCCAGCTGGTTTTGCATCCTAAAGT  
 GTAGG---AATACGACATTCAAT-----GGAACAGGGCCATGCAATAAT-----  
 -GTCAGC---ACAGTCCAATGCACACATGGAATCAAGCCAGTAGTAACAAC---  
 CAACTGCTATTAAATGGCAGTCTAGCAGAGGGGAGAG-----  
 GTAATAATTAGATCTGAAAATATCTCAACAAT-----GCCAAACTATAATAGTACAACCTTGCC----  
 -----GAATCTGTGACA-----ATTAATTGTACCAGACCTGGTAATAACAAAAAGA-----  
 -AGTGTACATATA-----GGACCAGGACAAGCA---CTC-----TAT---ACAAATAAC-----  
 -----ATAATAGGAAATATA-----AGAGAAGCATATTGT---AAGGTCAATGGATCA---  
 CAATGGAATAACACTCTACGACAGGTAGCTGACAAATTAAGA-----GAATACTTTAAC----  
 -----GACAAAACAATAATATTTAAG-----  
 CATTCCTCAGGAGGGGACCTAGAAATCACA---ACACATAGTTTTACTTGTGGAGGAGAA---  
 TTTAAACAGCTTCAGGCAAGAAATCCTTGCTGTGGAAAGATACCTAAGGGATCAACAGCTCCTAGGAATTTGGG  
 GCTGCTCTGGAAGAACTCATCTGCACCACTAATGTGCCGTGGAACCTCTAGTTGGAGT-----  
 -----AATAAATCTCTGCAGGACATATGG-----GAT-----  
 AACATGACCTGGCAGCAATGG---GATAAAGAAATTAGCAATTACACAGAAATAATATAT---  
 AGGCTAATTGAGGAATCGCAGAACCAGCAGGAA-----  
 -----  
 AAGAATGAACAAGACTTATTGGCATTGGACAAGTGGGCAAGTTTGTGGAATTGGTTTGACATAACAAATTGGC  
 TGTGGTATATAAAAAATATTTATAATGATAGTAGGAGGCTTAATAGGATTAAGAATAGTTTTTTACT---  
 GTGCTTTCTATAATA-----AATAAAGTTAGGCAGGGATACTCACCT-----  
 TTGTCATTTGCTATTAGTTTGATTGATACCATAGCAATAGTAGTAGCTGGC---  
 TGGACAGATAGGGTTATAGAAGTAGGACAAGGACTTGGTAGAGCT-----  
 -----TTTCTCAACATA-----CCTAGAAGAGTCAGACAGGGATTGGAAAGGGCTTTGCTT---TAA  
 >KT022375  
 GCT---GTA-----  
 GATAAGTTGTGGGTTACTGTCTATTATGGGGTACCTGTGTGG---AAAGATGCAGAG---  
 ACCACCTATTTTGTGCATCAGATGCTAAAGCATATAATAGAGAA---GCACATAAT-----  
 -----GTCTGGGCTACA---CATGCCTGTGTACCCACAGAC---  
 CCCGACCCACAAGAAATACCTTTGAAA-----AATGTGACAGAAGAGTTTAACT-----  
 -----ATGTGGAAAAATAACATGGTAGAACAATGCATACAGATATA---  
 ATCAGCCTATGGGACCAAAGCCTA---AAGCCATGTGTAAAGTTA---  
 ACCCCTCTCTGTGTACCTTAAATGCACCAATGCTAAAATTATCAATAATGAGACC-----  
 -----  
 -----AAGTTTAAACGAAGAACTAAAA---  
 AACTGCTCTTTCAATATGACCACAGAACTAAGG-----  
 GATAAGACACAGAAAGTATATTCACCT---TTTTATAGACTTGATGTAGTACAAATAAATGCT-----  
 -----  
 -----  
 AATGGTAGTAATAATGATAGTTATAGATTAATAAATTGTAATACCTCAGCTATTAAACAA---  
 GCTTGTCCAAAGGTATCCTTTGAGCCAATTCCCATACATTATTGTGCTCCAGCTGGTTTTGCATCCTAAGGT  
 GTAAT---GATAATAAGTTCAAC-----GGAACAGGAACATGCACTAAT-----  
 -GTCAGC---ACAGTACAATGCACACATGGAATCAAGCCAGTAGTATCAACT---  
 CAACTACTGTTAAATGGCAGCCTGGCAGAAGAAGAG-----  
 GTAATAATTAGATCTGAAAATATCTCAGACAAC-----GCTAAAACCATAATAGTACAACCTTGTC----  
 -----AAGCCTGTAAAG-----ATCAGATGTATCAGAGTTAGCAACAAGACAAGAACA-----  
 -AGTATACGTATA-----GGACCAGGACAAAACA---TTC-----TATGCAACAGGTGCC-----  
 -----ATAATAGGAGACATA-----AGAGAAGCACATTGT---ACGGTCAATGGATCA---

GAATGGAAAGGAACACTTCAACAGATAGTTACACAATTAAGA-----AAATATTGGAAC----  
 -----ACAACAACAATAAGCTTCAAT-----  
 AGCTCCTCAGGAGGGGATTTAGAAGTTACA---ACACATAGTTTCAATTGTGGAGGAGAG---  
 TTTAAACAGCTCCAGGCAAGAGTCCTGGCTGTGGAGAGATACCTAAGAGATCAACAGCTCCTAGGAATTTGGG  
 GTTGCTCTGGAAGAACTCATCTGCACCACTAATGTGCCCTGGAACGCTAGTTGGAGT-----  
 -----AATAAACTCAGGATGAGATATGG-----GAT-----  
 AGCATGACCTGGCTGCAATGG---GATAAAGAAATTGACAATTATACACAAACAATATAT---  
 GAGCTACTTGAAGCATCGCAGAACCAGCAGGAA-----  
 -----  
 AAGAATGAACAAGAGTTATTGGCATTGGACAAGTGGGCAAATCTGTGGAGTTGGTTTAACATAACAACTGGC  
 TGTGGTATATAAGAATATTTATAATGATAGTAGGAGGATTAATAGGCTTAAGAATAGTTTTTTGCT---  
 GTGCTTGCTTTAATA-----AATAGAGTTAGGCAGGGATACTCACCT-----  
 CTGTCGTTTGTCTATTAATTTACTTGATACCATAGCAATAGCAGTAGCTGGC---  
 TGGACAGATAGGATTATAGAAGTAGCACAAGGACTTGGTAGAGCT-----  
 -----ATCCTTAACATA-----CCTAGAAGAATCAGGCAGGGCGCCGAAAGGGCTTTATTA---TAA  
 >KT022376  
 -----ACA-----  
 GAAAACTTGTGGGTCACTGTTTACTATGGGGTACCTGTGTGG---AAAGATGCAGAA---  
 ACCACCTTGTTTTGTGCATCGGATGCTAAAGCATATGAGACAGAA---AAGCATAAT-----  
 -----GTCTGGGCTACA---CATGCCTGTGTACCCACAGAC---  
 CCCAACCCACAGGAAATACATTTGGAA-----AATGTGACAGAAGAATTTAAC-----  
 -----ATGTGGAAAAATAACATGGTAGAGCAGATGCATACAGATATA---  
 ATCAGTCTATGGGATCAAAGCCTC---AAGCCATGTGTAAAGTTA---  
 ACCCCTCTCTGTGTACTTTAAATTGTGGCGATCCGTCTGCCAACATC-----  
 -----  
 -----ACGGGGGATGGCAAGGAAGAAATAAAA---  
 AACTGCTCTTTCAATATGACCACAGAATTAAGA-----  
 GATAAGAAGCAAAAAGTATATTTCACTG---  
 TTTTATAGACTTGATATAGTAGAAATTAATGAAAGACAGGGTAATGAA-----  
 -----  
 AGTCAGAGTAATAGTAGTAGTAAGTATAGATTAATAAACTGTAATACCTCAGCCATTACACAA---  
 ACGTGCCCAAAGGTAACTTTTGACCCAATTCCTATACATTATTGTGCTCCAGCTGGTTTTGCGATCCTAAAGT  
 GTAAG---GATGAGGAGTTCACT---GGAGCAGGGCCATGCAAGAAT-----  
 -GTCAGC---ACAGTCCAATGCACACATGGAATCAAGCCAGTAGTATCAACT---  
 CAACTGCTGTTAAATGGCAGTCTAGCAGGAAAAGAG-----  
 GTAAAAATTAGATCTGAAAATATAACAAACAAT-----GCCAAAATATAATAGTACAACCTTGTC---  
 -----AAACCCGTGCCA-----ATTAATTGTACTAGACCTAGCAACAACACAAGGAAA---  
 -AGTGTATGGATA-----GGACCAGGACAAGCA---TTC-----TATGCAACAGGTGAC-----  
 -----ATAATAGGAGATATA-----AGAAAAGCACATTGT---AATGTCAGTAGATCA---  
 CAATGGAATAACACTTTACAAGAGGTAGTTATACAATTAAGG-----AAACATTTTGGG---  
 -----AACAAAACAATAAAGTTTGCT-----  
 AACTCCTCAGGAGGGGATCTAGAAATCACA---ACACACAGTTTTAATTGTAGAGGAGAA---  
 TTTAAACAGCTCCAGGCAAGAGTCCTGGCTGTGGAAAGATACCTAAAGGATCAACAGCTCCTAGGAATTTGGG  
 GCTGCTCTGGAAGACTCATCTGCACCACTAATGTGCCCTGGAACCTCTAGTTGGAGT-----  
 -----AACAAATCTTACAGTGAGATATGG-----GAT-----  
 AACATGACCTGGCTGCAATGG---GATAAAGAAGTTAGCAACTATACACAGATAATATAT---  
 AAGCTAATTGAAGAATCACAGAACCAGCAGGAA-----  
 -----  
 AAGAATGAACAAGACCTATTGGCATTGGACAAGTGGGCAAATCTGTGGACTTGGTTTGATATATCAAAATGGC  
 TGTGGTATATAAGAATATTTATAATGATAGTAGGAGGCTTAATAGGATTAAGAATAGTTTTTTGCT---  
 GTGCTTTCTATAATA-----AATAGAGTTAGGCAGGGATACTCACCT-----  
 TTGTCGTTTGTCTATTAATTTGGTTGATACCATAGCAATAGTAGTAGCTGGC---  
 TGGACAGATAGGATTATAGAAATAGGACAAATACTTGGTAGAGCT-----  
 -----ATTCTCCACATA-----CCTAGAAGAATCAGACAGGGCCTCGAAAGGGCTTTGCTA---TAA  
 >KT022377  
 GCT---GCA-----  
 AATAACTCGTGGGTTACTGTCTACTATGGGGTACCTGTGTGG---AAAGACGCAGAG---  
 ACCACCTTATTTTGTGCCTCAGATGCTAAAGCATATGAGAGGGAG---AAGCATAAC-----  
 -----GTCTGGGCTACA---CATGCCTGTGTGCCACAGAC---  
 CCCAACCCACAAGAAATACCTTTGGAA-----AATGTGACAGAAGATTTTAAC-----

-----ATGTGGAAAAATAATATGGTAGAACAGATGCATACAGATATA---  
 ATCAGTCTATGGGACCAAAGCTTA---AAGCCATGTGTAACGTTA---  
 ACTCCTCTCTGTGTTACATTAAATTGTAGCACTGCAACCCCTCTCAATGCAACTAGCAATGCC-----  
 -----  
 -----ACGGGAGGGAACGAAATGAAA---  
 AACTGCTCTTACAATATGACCACAGAACTATGG-----  
 GATAAGAAACAGAGAGTATATTCACCTC---TTTTATAGAAGCTGATGTAGTACAAATAGGTCAGGGT-----  
 -----  
 -----  
 AATAGTACTGAGTATAGATTAATAAATTGTAATACCTCAGCCACTATGCAA---  
 GCTTGTCCAAAAGTAAGCTTTGAGCCAATTCCCATACATTATTGTGCCCCAGCTGGTTTTGCAATCCTAAAGT  
 GTAGG---GATGAGGAATTCAAT-----GGAACAGGGCCATGCAAGAAT-----  
 -GTCAGC---ACAGTCCAATGCACACATGGAATCAAGCCAGTAGTATCAACT---  
 CAACTGCTGTTAAATGGCAGTCTAGCAGAAGGAAAAG-----  
 GTAAAAATTAGATCTGAGAATATCACAACAAT-----GCCAAAATATAATAGTACAACCTTATC-----  
 -----AAGCCTGTGCTA-----ATTAATTGTACCAGACCTAGTAACAATACAAGAAGA-----  
 -AGTGTACATATA-----GGACCAGGACGAGCA---TTC-----TATACGACAGGTGAA-----  
 -----ATAATAGGGGATATA-----AGACAAGCACATTGT---AATGTCAGTAGATCA---  
 GCATGGAATGAAGCGCTACAACGGGTAGTTGCACAATTAAGA-----GAACACTTTAAG-----  
 -----AATAAAACAATAATATTTACT-----  
 AACTCATCAGGAGGGGATCTGGAAATCACA---ACACATAGTTTTAATTGTGGAGGAGAA---  
 TTTAAACAGCTCCAGGCAAGAGTCCTGGCTGTGGAAAAGTACCTAAAGGATCAACAGCTCCTAGGAATTTGGG  
 GCTGCTCTGGAAGAACTCATCTGCACCACTAATGTGCCCTGGAAGCTCTAGTTGGAGT-----  
 -----AATAGAACTCTAGATGACATATGG-----GGG-----  
 AACATGACCTGGCTGCAATGG---GATAAAGAAATTAGCAATTACACAAACACAATATAT---  
 GACTTAATTGAAAAAGCGCAGAACCAGCAGGAA-----  
 -----  
 CAGAAATGAACAGGATTTATTGGCATTGGACAAGTGGGCAAATCTATGGAATTGGTTTGACATATCAAAGTGGC  
 TGTGGTATATAAAAAATATTTATAATGATAATAGGAGGCTTAATAGGATTAAGAATAGTTTTTTGCT---  
 GTGCTTTCTATAATA-----AATAGGGTTAGGCAGGGATACTCACCT-----  
 TTGTCGTTTCGCTATCAGTTTGATTGATACCATAGCAATAGTAGTAGCTGGC---  
 TGGACAGATAGGGTTATAGAAGTAGGACAAAGAATTGGTAGAGCT-----  
 -----TTTCTCAACATA-----CCTAGAAGAATCAGACAAGGCTTCGAAAGGGCTTTGCTA---TAA  
 >FJ866116  
 GTT---GCA-----  
 GGAAACTTGTGGGTTACTGTCTACTATGGGGTACCTGTGTGG---AGAGACGCAGAG---  
 ACCACCTTATTTTGTGCATCAGATGCTAAAGCATATGACACAGAA---GTGCATAAT-----  
 -----GTCTGGGCTACA---CATGCCTGTGTACCCACAGAC---  
 CCCAACCCACAAGAAATAAAGATGGAG-----AATGTGACAGAAAATTTTAAC-----  
 -----ATGTGGAAAAATAACATGGTAGAACAATGCATGCTGATATA---  
 ATCAGTCTATGGGACCAAAGCCTA---CAGCCATGTGTAAGTTA---  
 ACCCCTCTCTGCGTTACTCTAAATTGTGCCTATAATGTCACGATTTTCAATACCACGGGTGCCAATGTCACGA  
 ATAAA-----  
 -----GAGACACCAACAAACATAGGGACACCAACAAACATAGGGACAAGGGGAGAAATGAGA---  
 AACTGCTCTTTCAATGTGACCACAGAAATAAGG-----  
 GATAAGAAAAAGAAAGTATACTCACTT---  
 TTTTATAAACAGGATATAGTACAAATTAATGAAAATCAAGGTAATAGTAGTGAAAAGAATAATAGTAGTATTA  
 TTAGTGCTGAAAATAATAATACTAATAGTAATAATAGTGTAAGTAATAATAGTAGTAAGAATAGTAATAAAGA  
 TGAGTATATATTAATAAATTGTAATACCTCAGCCATTACACAG---  
 GCATGCCCAAAGGTATCTTTTGAGCCAATTCCCATACATTATTGTGCCCCAACTGGTTTTGCGATCCTAAAGT  
 GCAAT---GAGGAGGAGTTCAAT---GGAACAGGGCCATGCAACAAT-----  
 -GTCAGC---ACAGTCCAGTGCACACATGGTATCAGGCCAGTAGTGTCAACT---  
 CAACTACTGTTAAATGGCAGTCTAGCAAAAGATGAG-----  
 ATAAAAATTTAGATCTGAAAATCTCACAATAAT-----GCCAAAATATAATAGTACAACCTTAAC-----  
 -----GAAACTGTGAGC-----ATTACTTGTATGAGACCTAACAACAATACAAGAAAA-----  
 -AGTGTGCGTATA-----GGTCCAGGACAAGTA---TTC-----TATGCAACAGGTGAC-----  
 -----ATAATAGGGGATATA-----AGACAAGCACATTGT---AATGTTAGTAGATTA---  
 AACTGGACTAGTACTTTACAAAGAATAGCTACACAATTAGGG-----AACATCTTTAAC-----  
 -----AAAAACAATAACATTTGCT-----  
 AACTCCTCAGGAGGGGATCTAGAAATCACA---ATGCATAGTTTTAATTGTGGAGGAGAA---

TTTAAACAGCTCCAGGCAAGAGTCCTGGCTGTGGAAAGATACCTAAGGGATCAACAGCTCCTAGGAATTTGGG  
 GCTGCTCTGGAAGAACTCATCTGCACCACTAGTGTGCCTTGGAACTAGTTGGAGT-----  
 -----AATAATAGATCTCTGGAACAGATATGG-----GAT-----  
 AACATGACCTGGATGCAATGG---GATAAAGAAATTAGCAATTACACACAAGAAATATAT---  
 AGGCTGATTGAAATATCGCAGAACCAGCAAGAA-----  
 -----  
 GAAAAAGAAAAAGACTTATTGGAATTGGACAAGTGGGCAAGTCTGTGGAATTGGTTTGACATATCAAATTGGC  
 TATGGTATATAAGAATATTTATAATGATAGTAGGAGGCTTAATAGGATTAAGAATAGTTTTTTGCT---  
 GTGCTTTCTATAATA-----AATAGCGTTAGGCAGGGTACTCACCT-----  
 TTGTCAATTTGCTATTAAATTTGTTTAATACAATAGCAATAGCAGTAGCTGGC---  
 TGGACAGATAGGGTTATAGAAGTAGGACAAGTAGTTGGTAGAGCT-----  
 -----ATTCTCCACATA-----CCTAGAAGGATCAGACAGGGCTTTGAAAGGGCTTTGCTA---TAA  
 >FJ866118  
 GCT---ACA-----  
 AACTTGTGGGTTACTGTCTACTATGGGGTACCTGTGTGG---AAAGATGCAGAG---  
 ACCACCTTATTTTGTGCATCAGATGCTAAAGCATATGATAAAGAA---GTACATAAT-----  
 -----GTCTGGGCTACA---CATGCCTGTGTACCCACAGAC---  
 CCCAACCCACAAGAAGTACATTTGGAA-----AATGTGACAGAAGAGTTTAAAC-----  
 -----ATGTGGAAAAATTATATGGTAGAGCAGATGCATACAGATATA---  
 ATTAGTCTATGGGACCAAAGCCTA---CAGCCCTGTGTAAAGTTA---  
 ACCCCTCTCTGTGTTACTTTAAATTGTAGCCATAATATAAACCATAATGAGACCACTTTCTCT-----  
 -----  
 -----AATGACACCAATCTCCCAATATCACCGAAGAGATGAGA---  
 AACTGCTCTTTCAATATGACCACAGAAGTAAGG-----  
 GATAGGCAAAAGCAAGTATATTCACCT--TTTTATAGACTTGATATAGTACAAATTAATGAAGATCAA----  
 -----  
 -----  
 AAAGAGGGTAGTAAGGGTAGGTATAGATTGATAAATTGTAATACCTCAGCCATTACACAG---  
 GCTTGTCCAAAGGTATCCTTTGAGCCAATTCCCATACATTTTTGTGCCCCAGCTGGTTTTGCGATTCTAAAGT  
 GTAAG---GATAAAGAGTTCAAT-----GGAACAGGGCCATGTAAGAAT-----  
 -GTCAGC---ACAGTACAATGCACACATGGAATCAGGCCAGTAGTATCAACT---  
 CAGTTGCTGTTAAATGGCAGTCTAGCAGAAGGGAAG-----  
 GTAATGATTAGATCTGAAAATTTACAAACAAT-----GCCAAAAATATAATAGTACAATTTAAC-----  
 -----GAGTCTGTAGAA-----ATTGAGTGTCTCAGACCTAACAACAATACAAGAGAA-----  
 -AGTATACATCTA-----GGACCAGGACGAGCA---TTC-----TATGCAAGAGGTGGA-----  
 -----ATAATAGGAGATATA-----AGACAAGCACATTGT--ATTGTCAATAAAACA---  
 AACTGGAACAAAGCTCTGAAAGAGGTAGCCAAGCAATTAAGA-----ACAATATTT-----  
 -----AACAAAACAATAAAATTTACT-----  
 AACTCCTCAGGAGGGGATATAGAAATCACA--ACACATAGTTTTTAATTGTAGAGGAGAA---  
 TTTAAACAGCTCCAGGCAAGAGTCCTGGCTGTGGAAAGATACCTAAAGGATCAACAGCTCCTAGGACTTTGGG  
 GCTGCTCTGGAAGAATCATCTGCACCACTAATGTGCCCTGGAACCTCTAGTTGGAGT-----  
 -----AATAAATCTTATGATGAGATATGG-----GAT-----  
 AGCATGACCTGGCTGCAATGG---GATAGAGAAATTAGCAACTACTCAGACATAATATAC---  
 AACCTAATTGAAGAATCGCAGATCCAGCAGGAA-----  
 -----  
 AAGAATGAACAAGACTTATTGGCATTGGACAATTGGGCAAGTCTGTGGAATTGGTTTAACATAACAAAATGGC  
 TGTGGTATATAAAAATATTTATAATGATAGTAGGAGGCTTAATAGGATTAAGAATAGTCTTTACT---  
 GTGATATCTATGATA-----AATAGAGTTAGGCAGGGATACTCACCT-----  
 TTGTCTGTTGCTATTAGTTTGTGTTGATACCTTAGCAATAGTAGTAGCTGGC---  
 TGGACAGATAGGATTATAGAAGTAGGACAAAGATTTTGTAGAGCT-----  
 -----ATTCTCAACGTA-----CCTACAAGAATCAGACAGGGCGCAGAAAGGGCTTTGCTA---TAA  
 >FJ866120  
 GCT---GCA-----  
 GAAAACTTGTGGGTTACTGTATACTATGGGGTACCTGTGTGG---AAAGAAGCAGAT---  
 ACCACCCTATTTTGTGCATCAGATGCTAAAGCATATGCGACAGAA---AAGCACAAT-----  
 -----GTCTGGGCTACA---CATGCCTGTGTACCCACAGAC---  
 CCCAACCCACAAGAAATATATTTGGAA-----AATGTGACAGAAGAGTTTAAAC-----  
 -----ATATGGAAAAATAACATGGTAGAGCAGATGCATGCAGATATA---  
 ATCAGTCTATGGGATCAAAGCCTA---AAGCCATGTGTACAGTTA---  
 ACCCCTCTCTGTGTTACTTTAAATTGTACAAATGTCAATGGCACGGAGGACAACGTCCTAGGAGCGATAAT-

-----  
-----ACCACTAATAGCAATGCCACTGCTAGCCCAACAGTAAGGGAAGACATGAAA---  
AACTGCTCTTTCAATATAACTACAGAAGTTAGG-----  
GATAAGATACGGCAGGTATATTCCCTT---TTTTATAAAGTTGATGTAACACCAATTGATGAAAGG-----  
-----  
-----  
AAAAATGATACCACAGAGTACAGACTAATAAACTGTAATACCTCAACAATTACACAG---  
GCCTGCCCAAAGGTAACCTTTGAGCCAATTCCCATACATTATTGTGCCCCTGCTGGTTTTGCGATCCTAAAGT  
GTAGA---GATGAGGAGTTCAAT-----GGAACAGGGCCATGCAAGAAT-----  
-ATCAGC---ACAGTACAATGCACACATGGAATCAAGCCAGTAGTCTCAACT---  
CAACTGCTGTTAAATGGCAGTCTATCAGAAAAGGG-----  
ATAAAAAATTAGATCTGAAAAATACACAAACAAT-----GCCAAATCAATAATAGTACAATTTAAT-----  
-----GAGACTGTGGAA-----ATTAATTGTACTAGACCTAACAACAATACAAGAAAA-----  
-AGTATAAGTATA-----GGACCAGGACGAGCA---TTC-----TATGCAACAGGGGAC-----  
-----ATAACAGGAGACATA-----AGACAAGCACATTGT---AATGTCAGTGGAGCA---  
AAATGGAATAGAAGCTTTGAGAATGGTAGCCAACCAACTAAGA-----AAACACTTT-----  
-----AACAAAACAATAATCTTTACT-----  
AAACACTCAGGAGGAGATTTAGAAATCACA---ACACACAGTTTTAATTGTGGAGGAGAA---  
TTTAAGCAGCTCCAGGCACGAGTCCTGGCTGTGGAAAGATACCTAAAGGATCAACAGCTCCTAGGAATTTGGG  
GCTGCTCTGGAAAACATCTGCACCACTAATGTGCCCTGGAACCTAGTTGGAGT-----  
-----AATAGATCTCTGGCGGATATATGG-----AAT-----  
AACATGACCTGGTTGCAATGG---GACAAAGAAGTTAGCAATTACACAAACATAATATAT---  
ACCTTGCTTGAAGAATCACAGAACCAGCAGGAA-----  
-----  
AAGAATGAACAAGATTTATTGGCATTGGACAAATGGGCAAATCCGTGGAGTTGGTTTAGCATAACAAATTGGC  
TGTGGTATATAAAAAATATTTATAATGATAGTAGGAGGCTTAATAGGATTAAGAATAGTTTTTTGCT---  
GTGCTTTCTATAATA-----AATAGAGTTAGGCAGGGATACTCACCT-----  
CTGTCATTCGCTATTAACTTGCTTGATACCATAGCAATAGCAGTAGCTGGC---  
TGGACAGATAGGGTTATAGAGATAGCACAAAGAATTGGTAGGGCT-----  
-----ATCCGCCACATA-----CCTAGAAGAATCAGACAGGGCTTAGAAAGAATTCTGCTA---TAA  
>FJ866121  
GCT---GAC-----  
AACTGGTGGGTTACTGTCTACTATGGGGTACCTGTGTGG---AAAGATGCAAAG---  
ACCACCTTATTTTGTGCATCAGATGCTAAAGCATATGAGACAGAA---AAGCATAAT-----  
-----GTCTGGGCTACA---CATGCCTGTGTACCCACAGAC---  
CCCAACCCACAAGAAATACATTTGGTA-----AATGTAACAGAAGAGTTTAAC-----  
-----ATGTGGAAAAATGGCATGGTAGAGCAGATGCATAAAGACATA---  
ATCAGTCTATGGGACCAAAGCCTA---CAGCCATGTGTAAAGTTA---  
ACCCCTCTCTGTGTACTTTAAATTGTGGCCATAATGTCACAATCCATAATAATGTCACAATCCATAATAATG  
TCACAATCCAT-----  
---AATAACACAGCCACTAATAGCACGAGTGCCACATCCCCCTCGATCAGGGAAGAAGTAAGA---  
AACTGCTCTTTCAATGTAACCACAGAAATAAGG-----  
GATAAGACAAAGAAGGTATATTCATTG---TTTTATAGACTTGATTTAGTACAAATTAATGAAAAA-----  
-----  
-----  
CAAAGTAATAGTAGTGAGTATATATTAATAAATTGTAATACCTCAGCCATTACACAG---  
GCTTGCCCAAAGGTATCCTTTGAACCAATCCCATACACTATTGTGCTCCAGCTGGTTTTGCGATCCTAAAGT  
GTAAT---GATAAGAATTTCAAT-----GGAACAGGGCAGTGCAAGAAT-----  
-GTCAGT---ACAGTACAATGCACACATGGAATCAAGCCAGTAGTATCAACT---  
CAACTGCTGTTAAATGGCAGTCTAGCAGAAGAAAAG-----  
GTAAAAATTAGATCTGAGAATTTACAAACAAT-----GCCAAACTATAATAGTACAACCTTGCC---  
-----AAACCTGTGAAC-----ATTACTTGACCAGACCTAGCAACAATACAAGAAGA-----  
-AGTGTACGTATA-----GGACCAGGACAAGCA---TTC-----TATGCAACAGGGGAT-----  
-----ATAATAGGGGATATA-----AGAAAAGCATATTGT---ACTATCAATAGAACA---  
GAGTGGAATCAAACCTTTACAACAGGTAGCTACACAATTAGGA-----AAACAATGGGGG---  
-----AACAAAACAATAATCTTTACT-----  
AACTCCTCAGGGGGAGATCCAGAAATAACA---ACACATAGTTTTAATTGTGGAGGAGAA---  
TTTAAACAGCTCCAGGCAAGACTCCTGGCTGTGGAAAGATACCTAAAGGAACAACAGCTCCTAGGAATTTGGG  
GCTGCTCTGGGAAAGTCATCTGCACCACTAATGTGCCCTGGAACGCTAGTTGGAGT-----  
-----AATAAATCTTATAATGAAATATGG-----GAT-----

AACATGACCTGGATGCAATGG---GATAGAGAAATTAGTAATTACACAGACATAATATAT---  
GACCTACTTGAAGTATCGCAGGTCCAGCAGGAA-----  
-----  
AAGAATGAACAAGACTTATTGGCATTGGACAAATGGGCAAGTCTGTGGAGTTGGTTCAGTATAACAACTGGC  
TGTGGTATATAAGAATATTTATAATGATAGTAGGAGGATTAATAGGATCAAGAATAGTTTTTTGCT---  
GTGCTTTCTATAATA-----AATAGAGTTAGGCAGGGATACTCACCT-----  
TTGTCATTGGCTGTTAATTTGCTTGATACTGTAACAATAGTAGTAGCTGGC---  
TGGACAGATAGGGTTATAGAAATAGGACAAAGAATTGGTAGAGCT-----  
-----ATCCTCAACATA-----CCTAGGAGAATTAGACAGGGTGTAGAAAAGAGCTTTGCTA---TAA  
>KT022380  
ACT---GCA-----  
GACAACTTGTGGGTTACTGTCTACTATGGGGTACCTGTGTGG---AAAGACGCTGAC---  
ACCACCTTATTTTGTGCATCAGATGCTAAAGCATATGAGACAGAA---AAGCATAAT-----  
-----GTCTGGGCTACA---CATGCCTGTGTACCGACAGAC---  
CCCAACCCACAAGAAATAAAGTTGGAA-----AATGTGACAGAAGAGTTTAACT-----  
-----ATGTGGAAGAATGGCATGGTAGAGCAGATGCATACAGATATA---  
ATCAGTTTATGGGACCAAAGCCTA---AAGCCATGTGTACAGTTA---  
ACCCCTCTCTGTGTTACTTTAAATTGTAGCCATAATGTCACCTGTCATAAATGGCACAAGTGGTGCCAATACCA  
CAAGTGCCCCA-----  
-----ATTGTCAAAGAAGAAATGAAA---  
AACTGCTCTTTCAATACTACCACAGAAATATGG-----  
GATAAGAGAAGGAAGGAATATTCACCT---TTTTATAAACTTGATATAGTACAAATTAATGGTAAT-----  
-----  
-----  
GACAGTAGTGAGTATAGATTAAATAAATTGCAATACCTCAACCATTAAACAG---  
GCTTGTCCAAAGGTAACCTTTGAGCCAATTCCCATACATTATTGTGCTCCAGCTGGTTTTGCGATTCTAAAGT  
GTACT---GATAAAGAATTCAAG-----GGAACAGGGAAATGTGAAAAT-----  
-GTCAGC---ACAGTACAATGTACACATGGAATCAAGCCAGTAGTATCAACT---  
CAACTGCTGTTAAATGGCAGCCTAGCAGAAGGAAAG-----  
GTGATGATTAGATCTGAAAATATTACAAACAAT-----GCTAAAAACATAATAGTACAATTTAAT-----  
-----AGTTCTGTAGGG-----ATTAATTGTACCAGACCTGGCAACAATATAAGAAAA-----  
-AGTGTACGTATA-----GGACCAGGACAAGTA---TTT-----TATGCAATGGGTGAC-----  
-----ATAATAGGGGATATA-----AGAAAAGCATATTGC---AATGTCAGTAGAGCA---  
GAATGGAACAAAACCTTTGCAAGAAGTAGCCGAACAATTACAA-----ACATACTTTGAG-----  
-----AACAAAACAATAATTTTTTGAT-----  
AACTCCTCAGGAGGGGATGTAGAAATTACA--ACACATACTTTTAATTGTGGAGGAGAA---  
TTTAAACAGCTCCAGGCAAGAGTCCCTGGCTCTGGAAAGATACCTAAAGGATCAACAGCTCCTAGGAATTTGGG  
GCTGCTCTGGAACACTCATCTGCCCCACTAGTGTGCCCTGGAATTCTAGTTGGAGT-----  
-----AATAAATCTCTTAGTGAGATATGG-----GAT-----  
AACATGACCTGGCTGCAATGG---GATAAAGAAATCAGCAATTACACACAAATAATATTT---  
GACCTAATTGAAGAATCGCAGAACCAGCAGGAA-----  
-----  
AAGAATGAACAAGACTTATTGGCATTAGACAAGTGGGCAAGTCTGTGGAATTGGTTTGACATATCAAGGTGGC  
TGTGGTATATAAGAATATTTATAATGATAGTAGGAGGCTTAATAGGGTTAAGAATAGTTTTTTGCT---  
GTGCTTTCTATAATA-----AATAGAGTTAGGCAGGGATACTCACCT-----  
CTGTCGCTCTGCTATTAATTTAGTTGATACCATAGCAATAGCAGTAGCTGAC---  
TGGACAGATAGGGTTATAGAAATAGGACAACAAATTGGTAGAGGT-----  
-----ATCCTCCACATA-----CCTAGAAGAATCAGGCAGGGCTTTGAAAGAGCTTTACTA---TAA  
>KT022381  
GCT---GCA-----  
GGAAACTTGTGGGTTACTGTTTACTATGGGGTACCTGTGTGG---AAAGATGCAGAG---  
ACCACCTTATTTTGTGCATCAGATGCTAAAGCATATGTGCAAGAA---AAGCATAAT-----  
-----GTATGGGCTACA---CATGCCTGTGTACCCACAGAC---  
CCCAACCCACAAGAAATACATTTGGAA-----AATGTGACAGAAGAGTTTGAC-----  
-----ATGTGGAATAAAGATGGTAGAGCAGATGCATACCGATATA---  
ATCAGTCTATGGGACCAAAGCCTA---AAGCCATGTGTACAGTTA---  
ACCCCTCTCTGTGTTACTCTAAATTGTAGCAACGCCAACATCACAAGTAGCAATAATACCACCTTCA-----  
-----  
-----AGTAACAACACTGCCGGGGTGGAGAACAAGGAAGTAAAA---  
AACTGCTCTTTCAATATGACCACAGAGATAAGG-----

GATAAGAAGAGGAAGGTCTATTCACCTT---TTTTATAGACTTGATATAGTACCAATTAATCAAGATAAT-----  
-----  
-----  
AGTAGTAATAATGATAGTAATAGTGAGTATAGGTTAATAAATTGTAATACCTCAGTCATTACACAG---  
GCTTGCCCAAAGGTGACTTTTGAGCCAATTCCCATACATTATTGTGCCCCAGCTGGTTTTGCGATCCTAAAGT  
GTAAG---GATAAGGAGTTCAAT-----GGAACAGGGCCATGCAAAAAT-----  
-GTCAGC---ACGGTGCAGTGCACACATGGAATCAAGCCAGTAGTATCAACT---  
CAACTGCTGTTAAATGGCAGTCTAGCAGAAGGAGGG-----  
ATAAGAATTAGATCTAAAAATATTACAGACAGT-----GGCAAAAATATAATAGTACAACCTTGTT----  
-----AAGCCTGTAAAA-----ATTGATTGTACCAGACTTGGCAACAATACAAGAACA-----  
-AGTATACATATA-----GGACCAGGAAAAGCA---TTC-----TATGCAAGAGGTGAA-----  
-----GTAATAGGAGATATA-----AGACAGGCATTTTGT---AAGGTCAATAAATCA---  
GCTTGGAATGAAACTCTTCACCAGGTAGCTGAACATTTAAGA-----ACATACTTTAAG----  
-----AACAAAACGATAATATTTAAT-----  
AGCTCCACAGGAGGGGATCTAGAAATCACA---ACACATAGCTTTAATTGTGCAGGAGAA---  
TTTAAACAGCTCCAGGCAAGAGTCCTTGCTGTGGAAAGATACCTAAGGGATCAACAGCTCCTAGGAATTTGGG  
GCTGCTCTGGAAGAACTCATCTGCACCACCTAATGTGCCCTGGAACCTCTAGTTGGAGT-----  
-----AATAAATCACAGGAGGAGATATGG-----GAC-----  
AACATGACCTGGCTGCAATGG---GATAGAGAAATTAGTAATTACACAGACATAATATAC---  
AGACTAATTGAAGAATCGCAGAACCAGCAGGAA-----  
-----  
AAGAATGAACAAGACTTATTGGCATTGGACAAGTGGGCAAGTCTGTGGAATTGGTTTGACATATCACGGTGGC  
TGTGGTATATAAAAATATTTATAATGATAGTAGGAGGCTTAATAGGATTAAGAATAGTTTTTTGCT---  
GTGTTTTCAATAATA-----AATAGAGTTAGGCAGGGATACTCACCT-----  
CTGTCGTTTGCTATTAGTTTGATTGACACCATAGCAATAGTAGTAGCTGGC---  
TGGACAGACAGAATCATAGAAATAGGACAGGGAATCGGTAGAGCT-----  
-----ATTCTCCACATA-----CCTAGAAGAATCAGACAGGGCTTAGAAAGAGCTTTATTG---TAA  
>KT022382  
ACT---GCA-----  
GGAAACTTGTGGGTCACTGTCTATTATGGGGTACCTGTGTGG---AGAGACGCAGAG---  
ACCACCTTATTTTGTGCATCAGATGCTAAAGCATATGAGGAAGAA---AAGCATAAT-----  
-----GTCTGGGCTACA---CATGCCTGTGTACCCACAGAC---  
CCCAACCCACAAGAAATACATTTGGAA-----AATGTGACAGAAAATTTTAAC-----  
-----ATGTGGAAAAACAACATGGTAGAACAGATGCATACAGATATA---  
ATCAGTCTATGGGACCAAGGCCTA---AAGCCATGTGTAAAATTA---  
ACCCCTCTCTGCGTTACCTTAAATTGTACCGAGGCC-----  
-----  
-----AGTGTCAAGTTTCGATGGGGACAAGGAAGAAATAAAA---  
AACTGCTCTTTCAATATGACTACAGAGTTAAGG-----  
GATAAGAAACAGCAGGTGTATTCACCT---TTTTATAGACTTGATATAGTACCAATTAATGAAGAGAAA---  
-----  
-----  
AATATCACAGAGTATAGATTAATAAATTGTAATACCTCAGCCATTACGCAA---  
GCTTGCCCAAAGGTATCCTTTACGCCAATTCCCATACATTATTGTGCCCCGGCTGGTTTTGCGATCCTAAAGT  
GTAAG---GATGAGGAGTTCAAT-----GGAACAGGGCCATGCAAGAAT-----  
-GTCAGC---ACAGTACAATGCACACATGGAATCAAGCCAACAGTATCAACT---  
CAATTGCTGTTGAATGGTAGTCTAGCAGAAAAAGGG-----  
GTAAGAATTAGATCTGAAAACATCACAGACAAT-----GGCAAAAATATAATCGTACGACTTGAC----  
-----AAGCCTGTAATA-----ATTAATTGTACCAGACCTTACAACAATACAAGAAAA-----  
-AGTGTACGTATA-----GGACCAGGACAAGCA---TTC-----TATGCAACAGGTGAG-----  
-----GTAACAGGAGACATA-----AGAAAAGCATTTTGT---GAGATCAATAAGACA---  
AAATGGGATGAACTTTAAACAAGGTAGCTCAAGAATTAAGA-----AAATACTTTAAG----  
-----AACACAACAACAATAAAATTTACT-----  
AACTCCTCAGGAGGGGATGTAGAAATCACA---ACACATAGTTTTTAATTGTAGAGGAGAA---  
TTTAAACAGCTCCAGGCAAGAGTCCTGGCTGTGGAAAGATACCTAAAGGATCAACAGCTCCTAGGAATTTGGG  
GCTGCTCTGGAAGAACTCATTTGCACCACCTAATGTGCCCTGGAATTCTAGTTGGAGT-----  
-----AATAAACTCAGAGTGAGATATGG-----GAA-----  
AACATGACCTGGCTGCAATGG---GATAAAGAAATTAGCAATTACACAGAAATAATATAT---  
AGCCTAATTGAAGAATCGCAGAACCAGCAGGAA-----  
-----

AAGAATGAACAAGATTTATTGGCATTGGACAAGTGGGCAAATCTGTGGAATTGGTTTGACATATCAAAATGGC  
 TGTGGTATATAAAAATATTTATAATGATAGTAGGAGGCTTAATAGGATTAAGAATAATTTTTTGCT---  
 GTGCTTTCTGTAATA-----AATAGAGTTAGGCAGGGGTACTCACCT-----  
 TTGTCTGTTGCTATTAATTTAGTTGATACTATAGCAATAGTGGTAGCTGGC---  
 TGGACAGATAGGGTTATAGAAATAGGACAAAGGTTTGGTAGAGCT-----  
 -----ATTATCCACATA-----CCTAGAAGAATCAGACAGGGCCTAGAAAGAGCTTTGCAA---TAA  
 >KT022383  
 GCT---GCA-----  
 GAAAACTTGTGGGTTACTGTCCACTATGGGGTACCTGTGTGG---AAAGATGCAGAC---  
 ACCACCTTATTTTGTGCATCAGACGCTAAAGCATATGAGAGGGAA---AAGCATAAT-----  
 -----GTCTGGGCTACA---CATGCCTGTGTACCCACAGAC---  
 CCCAACCCACAAGAAATACATATGGGA-----AATGTGACAGAAGAATTTAAC-----  
 -----ATGTGGAAAAATAACATGGTAGAGCAGATGCATACAGACATA---  
 ATCAGTCTATGGGACCAAAGCCTA---CAGCCCTGTGTAAAGTTA---  
 ACCCCTCTCTGTGTTACTTTAAATTGTAGCAATGCCACGTTTACAAATGCCAATGTCACAAATGCCACC----  
 -----  
 -----GAAGAAATAAAA---  
 AACTGCTCTTTTAGTATGACCACAGAGCTAAAG-----  
 GATAAGAAACAGAAAGTATATTCACCT---TTCTATAGACTTGATGTAGTAAAAATTAATGAT-----  
 -----  
 -----  
 AAGGATGCTAGTATTGGGTATAGATTAATAAATTGTAATACCTCAGCCATTACACAA---  
 GCTTGCCCAAAAGTAACCTTTGAGCCAATTCCCATACATTATTGTGCTCCAGCTGGTTTTGCGATCCTAAAGT  
 GTAAG---GATGAAGAGTTCAAT-----GGAACAGGGCCATGCAAGAAT-----  
 -GTTAGT---ACAGTACAATGCACACATGGAATTAACCAGTAGTATCAACT---  
 CAACTGCTGTTAAATGGCAGTCTAGCAGAAAAGGAG-----  
 GTAAAAATTAGATCTGAAAATATCACAAACAGT-----GCTAAAGTTATAATAGTACAACCTGGAC----  
 -----AAGCCTGTGAAT-----ATTACTTGTATCAGACCTAACAACAATACAAGAACA-----  
 -AGTATACCGATG-----GGACCAGGAAAAGCA---TTC-----TACGCAATAGGCGAC-----  
 -----ATAATAGGGGATATA-----AGACAAGCACATTGT---AATGTCAGTAGATCA---  
 GTCTGGAATAACACTTTAGGAAAGGTAGCCCAACAATTAAGC-----AAATACTTTGGA----  
 -----AACAATACAATAAAATTTGCT-----  
 AGGTCCTCAGGAGGGGATCTAGAAATCACA--ACACATAGTTTTAATTGTGGAGGAGAA---  
 TTTAAACAGCTCCAGGCAAGAGTCCCTGGCTCTAGAAAGATACCTAAAGGATCAACAGCTCCTAGGAATTTGGG  
 GCTGCTCTGGAAACTCATCTGCACCACTAATGTGCCCTGGAACCTTAGTTGGAGT-----  
 -----AATAAATCTTACAATGAAATATGG-----GAC-----  
 AGCATGACCTGGCTACAATGG---GATAAAGAAATTAGCAATTACACACACATGATATAT---  
 ACCCTAATTGAAGAATCACAGAACCAGCAGGAG-----  
 -----  
 AAGAATGAACAAGACTTATTGGCATTGGGATAAGTGGGCAAATCTATGGAATTGGTTTGACATAACAACTGGC  
 TGTGGTATATAAGAATATTTATAATGATAGTAGGAGGATTAGTAGGATTAAGGATAGTTTTTTGCT--  
 GTGCTTGCTGTAATA-----AATAGAGTTAGGCAGGGGATACTCACCT-----  
 TTGTCAATTTGCTATTAATTTGTTTGATACCATAGCAATAGCAGTAGCTGGC---  
 TGGACAGATAGGGTTATAAAAATAGGACAGGCAATTGGTAGAGCT-----  
 -----ATTCTCCACATA-----CCTAGAAGAATCAGACAGGGCCTTAGAAAGGGCTTTGCAA---TAA  
 >FJ623487  
 AGT---GTT---GCA-----  
 GAAAACTTGTGGGTTACTGTCTACTATGGGGTACCTGTGTGG---AGAGACGCAGAA---  
 ACCACCTTATTTTGTGCATCAGATGCTAAAGCATATGAGACAGAA---AAGCATAAT-----  
 -----GTCTGGGCCACA---CATGCCTGTGTACCCACAGAC---  
 CCCAACCCACAAGAAATACGTTTGGA-----AATGTGACAGAAGAGTTTAAC-----  
 -----ATGTGGAAAAATAACATGGTAGAGCAGATGCATACAGATATA---  
 ATCAGTCTATGGGACCAAAGTCTA---AAGCCATGTGTACAGTTA---  
 ACCCCTCTCTGTGTTACTTTAAATTGTACAAATGCCATAAGACTACAAATGATACTACACAGGAT-----  
 -----  
 -----AATACTACAAATGCCACTCCAACACTCGAGCCAGGCGAAATAAAA---  
 AACTGCTCTTTCAATATGACCACAGAGCTAAGG-----  
 GATAAGAAACAGAAGGTATATGCACCT---  
 TTTTATAGACTTGATGTAGTACAAATTAATAATGATACACAAAGT-----  
 -----

ACTAATGGTACAAGTGATGGTACAGGTGAGTATAGATTAATAAATTGTAATACCTCAGCCATTACACAG---  
 GCTTGTCCAAAGGTAACCTTTTGAGCCAATTCCCATACATTATTGTGCCCCAGCTGGTTTTGCATCCTAAAGT  
 GTAAT---GATAAGAAGTTCAAT-----GGAACAGGGCCATGCAAGAAT-----  
 -GTCAGC---TCAGTACAATGCACACATGGAATCAGGCCAGTAATATCAACT---  
 CAACTGCTGTAAATGGCAGTCTAGCAGAAGAAGAG-----  
 ATAAAAATTAGATCTGAAAATATCACAAGTAAT-----AGCAAAATATCATAGTCCAATTTGTC----  
 -----AAGCCTGTGAAC-----ATTACTTGTATCAGGCCTAACAATAATACAAGAAAA-----  
 -GGTATACGGATA-----GGACCAGGACAAGCA---TTT-----TATACAACA---GAG-----  
 -----ATAATAGGGGACATA-----AGACAAGCATATTGT---ACTATCAATGGATCA---  
 GAATGGAATAACACTTTACGAGAGGTAGCTGAACAATTAAGC-----AATAGGACAAATATT-  
 -----ACAAAAATAATATTTGCT-----  
 AACCCTCAGGAGGGGATCTAGAAATCATG---ACACATACCTTTAATTGTGGAGGAGAA---  
 TTCAAACAGCTCCAGGCAAGAGTCCTGGCTGTGGAAAGATACCTAAGGGATCAACAGCTCCTAGGAATTTGGG  
 GCTGCTCTGGAAGAACTCATCTGCACCACCTAATGTGCCTTGGAACTCTAGTTGGAGC-----  
 -----ATAAAATCTCAGGAAGAGATATGG-----GAT-----  
 AACATGACCTGGTTGCAATGG---GATAAAGAAATTGACAACTATACACAATTCATATAT---  
 GACCTACTTGAGGAATCGCAGAATCAGCAGGAA-----  
 -----  
 AAGAATGAACAAGACCTATTGGCATTAGACAAGTGGGCAGGTCTGTGGAATTGGTTTAGCATATCAAATTGGC  
 TGTGGTATATAAGAATATTTATAATGATAGTAGGAGGCTTAATAGGATTAAGAATAGTCTTTACT---  
 GTGCTTGCTATAATA-----AATAGAGTTAGGCAGGGATACTCACCT-----  
 TTGTCGTTGCTATTAATTTGGTTGATACCATAGCAATAGTAGTAGCTGGT---  
 TGGACAGATAGGGCTATAGAAATAGTACAAAGAATTGGTAGAGCA-----  
 -----ATTCTCCACATA-----CCTAGAAGAATTAGACAGGGCTTTGAAAGAGCTTTGCTA---TAA  
 >FJ623481  
 GCT---GTA-----  
 GGAACTTGTGGGTTACTGTCTACTATGGGGTACCTGTGTGG---AAAGATGCAAAA---  
 ACCACCTATTTTGTGCATCAGATGCTAAAGCATATGATACAGAA---GTGCATAAT-----  
 -----GTCTGGGCTACA---CATGCCTGTGTACCCACAGAC---  
 CCCAACCCACAAGAAATACATTTGGGA-----AATGTGACAGAAGAATTTAAC-----  
 -----ATGTGGAAAAATAACATGGTAGAGCAGATGCATACAGATATA---  
 ATCAGTTTATGGGACCAAAGTCTA---AAGCCATGTGTAAAGTTA---  
 ACCCTCTCTGCGTTACTTTAAATTGTACTAATATCATGGGAAACAGTAACAGCACGGGA-----  
 -----  
 -----AACAGTAGCAACACGAAAATTGAAGAAATAGAAATGAAA---  
 AACTGCTCTTTCAATGTGACCACAGAATTAAGG-----  
 GACAAAAGAAGAAAAGAATATTCATT---  
 TTTTATAAAATTGATATAGTACCCTTGATAAAAAAGTAATAATAAT-----  
 -----  
 AATAGTAGTAGTAGTAATAGTAGTAGTGAGTATAGATTAATAAACTGTAATACCTCAGCCATTACACAA---  
 GCTTGCCCAAAGGTATCCTTTGAGCCAATTCCCATACATTATTGTGCCCCAGCTGGTTTTGCATCCTAAAGT  
 GTAAT---GATGAACAGTTCAAT-----GGAACAGGGGAATGCAAGAAT-----  
 -GTCAGT---ACAGTACAATGCGCACATGGAATCAAACCAGTAGTATCAACT---  
 CAACTGCTGTAAATGGCAGCCTAGCAGAAAAAGAA-----  
 GTAAAAATTAGATCTGAAAATATCAGAGATAAT-----GCCAAAACCATAATAGTACAACCTTAGC----  
 -----AAGCCTGTGCAA-----ATTAAATGTACCAGACCTAACAACAATAACAAGAAAA-----  
 -GGTATACATCTA-----GGACCAGGACAAGCA---TTC-----TTTGAACAGAAAAA-----  
 -----ATAACAGGGAATATA-----AGAAGCGCACATTGT---AATGTCAGTAGATCA---  
 AAATGGAATGACACTTTGAAACAGGTAGCTGAACAATTAGAA-----AAACACTTTAGG----  
 -----AACAAAACAATAAGCTTTAAT-----  
 AGCTCCTCAGGAGGGGATCTAGAAATCACA---ACACATAGTTTTAATTGTGGAGGAGAA---  
 TTTAAACAGCTCCAGGCAAGAGTCCTGGCTGTGGAAAGATACCTAAAGGATCAACAGCTCCTAGGAATTTGGG  
 GATGCTCTGGAAGAACTCATCTGCACCACCTACTGTGCCCTGGAACTCTAGTTGGAGT-----  
 -----AATAAAATCTCATGATGAGATATGG-----GGA-----  
 AACATGACCTGGCTGCAATGG---GAGAAAGAAATTAGCAACTACACAGACACAATATAT---  
 GACCTAATTGAAAAATCACAGAACCAGCAGGAA-----  
 -----  
 ATAAATGAAAAAGATTTATTGGCATTGGACAAGTGGGCAAAATCTGTGGAAGTGGTTTGACATATCAAGATGGC  
 TGTGGTATATAAAAATTTTATAATGATAGTAGGAGGCTTAATAGGATTAAGAATAATTTTTTGCT---  
 GTGCTTTCTATAATA-----AATAGAGTTAGGCAGGGATACTCACCT-----

CTGTCGTTTGGCTATTAATTTGGTTGACCACATAGCAATAGCAGTAGCTGGC---  
 TGGACAGATAGAGTTATAGAAGTAGGACGAGGGATTGGTAGAGCT-----  
 -----CTTCTTCACATA-----CCTAGAAGAATCAGACAGGGCTTAGAAAGGTTTTTGCTA---TAA  
 >FJ623475  
 GCT---GTA-----  
 GAAAACTTGTGGGTTACTGTATACTATGGGGTACCTGTGTGG---AAAGATGCAGAG---  
 ACCACCTTATTTTGTGCATCAGATGCTAAAGCATATGAGGAAGAA---CAGCATAAT-----  
 -----GTCTGGGCTACA---CATGCCTGTGTACCCACAGAC---  
 CCCAACCCACAAGAAATACATTTGGAA-----AATGTGACAGAAAATTTTAAC-----  
 -----ATGTGGAAAAATAACATGGTAGAGCAGATGCATACAGATATA---  
 ATCAGCCTATGGGACCAAAGTCTA---AAGCCATGTGTAAAGCTA---  
 ACTCCTCTCTGCGTTACTTTAAATTGCAAGGAGGTTAATGTACAGCC-----  
 -----  
 -----GCAAACAGCACGGAAGAAATGATGAAA---  
 AACTGCTCTTTCAATATAACCACAGAGATAAGG-----  
 GATAAGAGAAAGAAGGTCTATTCACCT---TTTTATAGACTTGATATAGTACCAATTAGTGCAAAT-----  
 -----  
 -----  
 AGGAATAATAGTACCACTGAGTATAGATTAATAAATTGTAATACCTCAGCCGTTACACAG---  
 GCTTGCCCAAAGGTATCCTTTTCATCCAATTCCTATACATTATTGTGCCCCTGCTGGTTTTGCGATCCTAAAGT  
 GTCAG---GATGAGGAGTTCAAT-----GGAACAGGGCCATGCAAGAAT-----  
 -GTCAGT---ACAGTACAATGCACACATGGAATCAAGCCAGTAGTATCAACT---  
 CAACTGCTGTTAAATGGCAGTCTAGCAGGAAAAGAG-----  
 GTAAAAATTAGATCTGAAAATATCACAACAAT-----GTCAAACTATAATAGTACAACCTTAAC---  
 -----GAGTCTGTGGAA-----ATTGATTGTATCAGACCTAACAACAATACAAGAACA-----  
 -AGTATACCTATA-----GGACCAGGACAGGCA---TTC-----TATGCAATAGGTGAC-----  
 -----ATAATAGGGAAAATA-----AGACAAGCACATTGC---AATGTCAGTAGGTCA---  
 AAATGGAATAAACTTTACAAAGGGTTGTAACCCAATTAAGA-----AAAACTTTAGA---  
 -----AACACAACAACAATAATATTTGAT-----  
 AAACCCTCAGGAGGGGACCTAGAAATCACA---ACACATAGTTTTAATTGTGGAGGAGAA---  
 TTTAAACAGCTCCAGGCAAGAGTCCCTGGCTGTGGAAAGATATCTAAGGGATCAACAGCTCCTAGGAATTTGGG  
 GCTGCTCTGGAAGAACTCATCTGCACCACTAATGTGCCCTGGAAGCTCTAGTTGGAGT-----  
 -----AATAAATCTCAGGAGGAGATATGG-----GGA-----  
 AACATGACCTGGCTGCAATGG---GATAAAGAAATCAGCAATTACACACAAATAATATAT---  
 AACTTAATTGAAGAATCGCAGAACCAGCAGGAA-----  
 -----  
 AAGAATGAACAAGACTTATTGGCATTGTGACAAGTGGGCAAGTCTGTGGACTTGGTTTGACATATCAAATTGGC  
 TGTGGTATATAAAAATATTTATAATGATAATAGGAGGTTGATAGGATTAAGAATAGTTTTTTGCA---  
 GTGCTTGCTTTAATA-----AATAGAGTTAGGCAGGGGTACTCACCT-----  
 TTGTCGTTTGGCTATTAATTTGGTTGATACTATAGCAATAGCAGTAGCTAAC---  
 TGGACAGATAGAGTTATAGAAATAGGACAAAGAATTGGTAGAGCT-----  
 -----ATTCTCCACATA-----CCTAGAAGAATCAGACAGGGCTTAGAAAGAGCTTTTGCTA---TAA  
 >FJ623476  
 GCT---GTA-----  
 GAAAAATTTGTGGGTTACAGTCTACTATGGGGTACCTGTATGG---AAAGATGCAGAG---  
 ACCATCTTATTTTGTGCATCAGATACTAAAGCATATGAGGTAGAA---ATGCATAAT-----  
 -----GTCTGGGCTACA---CGTGCCTGTGTACCCACAGAC---  
 CCTAACCCACAAGAAATACATCTGGAA-----AATGTGACAGAAGAGTTTAAC-----  
 -----ATATGGGAAAATGACATGGTAGAGCAGATGCATACAGATATA---  
 ATCAGTCTATGGGACGAAAGCCTA---AAGCCATGTGTAAAGTTA---  
 ACCCCTCTATGTGTCACTTTACATTGTACTAATGTCACTGACAAGAGTGGCAAT-----  
 -----  
 -----GTCAGTGTCAATGGCACGGATGAAATGAAA---  
 AACTGCTCTTTCAACATGACCACAGAGCTAAGG-----  
 GATAAGAGAAAGAAGGAATATTCACCT---TTTTATAGACTTGATATATTACAAATTAATGAAAATCAA---  
 -----  
 -----  
 GGTAATAGTAGTAAGAATGATGAGTATAGATTAATAAATTGTAATACCTCAGCCATTACACAG---  
 GCTTGTCCAAAGGTATCTTTTGTAGCCAATTCCCATACATTTTGTGCGCCCAGCTGGTTTTGCGATCCTAAAGT  
 GTAAG---GATGAGAATTTCAAT-----GGAACAGGGCCATGTAGAAAT-----

-GTCAGC---ACAGTACAATGCACACATGGGATCAAGCCAGTAGTATCAACT---  
 CAGCTGCTGTTAAATGGCAGCCTAGCAGAAAGAGAA-----  
 GTAAAAATTAGATCTCAAAATATCACAACAAT-----GCCAAAAATATAATAGTACAACCTTGTC----  
 -----ACGCCTGTGCAA-----ATTAATTGTACAAGACCTAATAATAACAAGAAAA-----  
 -AGTATACATATA-----GGACCAGGAAAAGTA---TTC-----TATGCAAGT---GAC-----  
 -----ATAATAGGGGATATA-----AGAAAAGCACATTGT---ATTGTCAATAGGTCA---  
 GAATGGAATAAGACGTTACAACAGGTAGCTACACAATTAGGA-----ACATACTTTAAG----  
 -----AATAAAACCATAATATTTGAT-----  
 AGATCCTCAGGAGGGGATATAGAAATCACA---ACACATAGTTTTAATTGTAGAGGAGAA---  
 TTTAAACAGCTCCAGGCAAGAGTCCTGGCTGTGGAAAGATACCTAAGGGATCAACAGCTCCTAGGAATTTGGG  
 GCTGCTCTGGAAGAACTCATCTGCACCACTAATGTGCCCTGGAACCTCTAGTTGGAGT-----  
 -----AATAAATCTCAGAGTGAGATATGG-----GGG-----  
 AACATGACCTGGCTGCAATGG---GATAGAGAAATTAGTAAGTACACAGACATAATATAT---  
 GGCCTAATTGAAGAATCGCAGAACCAGCAGGAA-----  
 -----  
 AAGAATGAACAAGACTTATTGGCATTGGATAAGTGGGCAAATCTGTGGAATTGGTTTGACATATCAAATTGGC  
 TGTGGTATATAAAAAATATTTATAATGATAGTAGGGGGCTTAATAGGATTAAGAATAGTTTTTTGCT---  
 GTGCTTTCTATAATA-----CGTAGAGTTAGGCAGGGCTACTCACCT-----  
 TTGTCAATTTGCTATTAATTTGATAGATACTATAGCAATAGCAGTAGCTGGA---  
 TGGACAGATAGGGTTATAGAAATAGGACAAGGAATTGGTAGAGCT-----  
 -----ATCCTCCACATA-----CCTAGAAGAATCAGACAGGGCTTCGAAAGAGCTTTGCTA---TAA  
 >FJ623485  
 GTT---GCA-----  
 GAAAACTTGTGGGTACTGTCTACTATGGGGTACCTGTGTGG---AAAGATGCAGAC---  
 ACCACCTTATTTTGTGCATCAGATGCTAAAGCTTATGAGACAGAA---AAGCATAAT-----  
 -----GTCTGGGCTACA---CATGCCTGTGTACCCACAGAC---  
 CCCAACCCACAAGAAATACATTTGGAT-----AATGTGACAGAAGAGTTTAAC-----  
 -----ATGTGGAAAAATAACATGGTAGAGCAGATGCATACAGATATA---  
 ATCAGTCTATGGGACCAAAGCCTA---AAGCCATGTGTAAAGTTA---  
 ACCCTCTCTGCGTTACTTTAAATTGTACAACCTGCCAACATCAATGCCACT-----  
 -----  
 -----GCTAACAGCACGATCAAGGAAGAAATAAAA---  
 AACTGCTCTTTCAGTGTAACCACAGAGCTAAAA-----  
 GATAAGAAACGGAAGGTATATTCACCT--TTTTATAAACTTGATATAGTAGAACTTAATGAAAATCAAGGT-  
 -----  
 -----  
 AAGAGTAGTGATAATAGTAGCAAGGAGTATAGATTAATAAAATTGTAATACCTCAGCCATTACACAG---  
 GCTTGCCCAAAGGTGACCTTTGAGCCAAATCCCATACATTATTGTGCCCCAGCTGGTTTTGCGATCCTAAAAAT  
 GTACA---GATAAAGAGTTCAAT-----GGAGCAGGGCCATGCAAGAAT-----  
 -GTCAGC---ACAGTACAATGCACACATGGAATCAAGCCAGTAGTATCAACT---  
 CAACTGCTGTTAAATGGCAGTCTAGCAGAAGAACAA-----  
 ATAAGAATTAGATCTGAAAATATCACAACAAT-----GCCAAAAATATAATAGTACAACCTTGTC----  
 -----AAGCCTGTAGAA-----ATTAATTGTACCAGACCTAGCAACAATAACAAGAAC----  
 -AGTATACGTATA-----GGACCAGGACAAGCA---TTC-----TATGCAACAGGTGAC-----  
 -----ATAACAGGGGATATA-----AGACAAGCACATTGT---AATGTCAATAAATCA---  
 CAATGGAATACAGCTTTACAAAAGGTAGTTGAACAATTAAGA-----AACCACCTT-----  
 -----AACAAAACAATAATATTTAAT-----  
 GAATCTTCAGGAGGGGATATGGAAATCACA---ACACATAGTTTTAATTGTGGAGGAGAA---  
 TTCAAACAGCTCCAGGCAAGAGTCCTGGCTGTGGAAAGCTACCTAAAGGATCAACAGCTCCTAGGAATTTGGG  
 GCTGCTCTGGAAGACTCATCTGCACCACCAATGTGCCCTGGAACACTAGTTGGAGT-----  
 -----AATAAATCTTATAATGAGATATGG-----GAA-----  
 AACATGACCTRGCTGCAATGG---GATAAAGAGATTAGCAATTACACACAAATAATATAT---  
 RACCTAATTGAAGACTCGCAGAACCAGCAGGAA-----  
 -----  
 AAGAATGAAGTAGATTTATTGGCATTGGACAAGTGGGCAAGTCTGTGGAATTGGTTTGACATAACAAATTGGC  
 TATGGTATATAAAAAATATTTATAATAATAGTAGGAGGTTTAATAGGATTAAGAATAGTTTTTTGCT---  
 GTGCTTGCTATAATA-----AATAGAGTTAGGCAGGGATACTCACCT-----  
 TTGTCAATTTGCTATTAAGTTGGTTGATGCCATAGCAATAGCAGTAGCTGGC---  
 TGGACAGACAGGGTTATAGAAATAGGACAAGAATTGGTAGAGCT-----  
 -----ATTATCAACATA-----CCAAGAAGAATCAGACAGGGCGCTGAAAGAGCTTTGCTA---TAA

>FJ623488

ACA---GCA-----  
GAAAAATTGTGGGTCACCTGTTTACTATGGGGTACCTGTGTGG---AAAGACGCAGAG---  
ACCACTTTATTTTGTGCATCAGATGCTAAAGGATATAGTACAGAA---AAGCATAAT-----  
-----GTCTGGGCTACA---CATGCCTGCGTGCCACAGAC---  
CCCAACCCACAAGAAATATCTTTGGAA-----AATGTGACTGAAAAGTTTAACT-----  
-----ATGTGGAAAAATAATATGGGTAGAACAGATGCATGAAGATATC---  
ATTAGTCTATGGGATCAAAGCCTA---AAGCCATGTGTAAAGTTA---  
ACCCCTCTCTGTGTTACTCTAAATTGTACCAATGTCAATGTCACAACCTAATGCCACT-----  
-----  
-----GATACCACTATCAATGGTGATGGTGGCATGAGG---  
AACTGCTCTTACAATATGACCACAGAGCTAAGG-----  
GATAAGAAACGGAAGGTTTATTCACTT---  
TTCTATAGGCCTGATATAGTACCAATTAATCAAGATAATAGTAGTAAT-----  
-----  
AATAATAATAGTAGTAATAGTACTAGTGAGTATAGATTAATAAATTGTAATACTTCAACCATTACACAG---  
GCTTGTCCAAAGGTATCCTTTGAGCCAATTCCCATACACTATTGTGCTCCAGCTGGTTTTGCATCCTGAAGT  
GTAAG---GAAATTAATTTCAAT-----GGAACAGGGCCATGCAAGAAT-----  
-GTCAGC---ACAGTACAATGCACACATGGAATTAAGCCAGTAGTATCAACT---  
CAGCTGCTGTTAAATGGAAGTCTAGCAGAAGGAAAG-----  
ATAGTGATTAGATCTGAAAATATCACAACAAT-----GCCAAAAACATACTAGTACAATTTGCC---  
-----AAGTCTGTGCAA-----ATTAAGTGTACCAGACCTAACAACAACACAAGAACA-----  
-AGTATACGTATA-----GGACCAGGACAATCA---TTC-----TATGCAACAGGTGGC-----  
-----ATAATAGGGGATATA-----AGACAAGCACATTGC---AATGTCAGTAGAACA---  
GCATGGAAAGAACTTTGAAAGGGGTAGTTGAACAATTAAGA-----ACATACTTTAAT-----  
-----AATAAGACAATAATATTTAAT-----  
GAATCCTCAGGAGGGGATCTAGAAGTCACA---ACACATAGTTTCAATTGTGGAGGAGAA---  
TTTAAACAGCTCCAGGCAAGAGTCCCTGGCTGTGGAAAGATACCTAAGGGATCAACAGCTCCTAGGAATTTGGG  
GCTGCTCTGGAAGAACTCATCTGCACCACTAATGTGCCCTGGAAGTCTAGTTGGAGT-----  
-----AATAAATCCCTGAATGAGATATGG-----GAC-----  
AACATGACCTGGCTGCAATGG---GATAAAGAAGTTAGCAATTACACACAGATAATATAT---  
AATTTACTTGAGGAATCACAGAACCAGCAAGAA-----  
-----  
AAGAATGAGCAAGACTTATTGGAATTGGATAAGTGGGCAAGTCTGTGGAATTGGTTTAGCATATCAAAGTGGC  
TGTGGTATATAAAAAATATTTATAATGATAGTAGGAGGCTTAATAGGATTAAGAATAGTTTTTTGCT---  
GTACTTTCTGTAATA-----AATAGAGTTAGGCAGGGATACTCACCT-----  
CTCTCGTTTGCTATTAGTTTGCTTGATACCATAGCTATAGCAGTAGCTGGG---  
TGGACAGATAGGGTTATAGAAGCAGGACAAATATTATTAGGA-----  
-----AGGGCTTAGAAAGGGCTTTGCTA---TAA

>FJ623478

GCT---GCA-----  
GACAACTTGTGGGTTACTGTCTACTATGGGGTACCTGTGTGG---AAAGATGCAAAG---  
ACCACCTTATTTTGTGCATCAGATGCTAAAGCATATGCTACAGAA---AGGCATAAT-----  
-----GTTTGGGCTACA---CATGCCTGTGTACCCACAGAC---  
CCCAACCCACAAGAAATGCCTTTAAAA-----AATGTGACAGAAGACTTTAACT-----  
-----ATGTGGAAAAACAACATGGGTAGAGCAGATGCATACAGATATA---  
ATCAGTCTATGGGACCAAAGCCTA---AAGCCATGTGTAAAGTTA---  
ACCCCTCTCTGTGTTACTTTACATTGTACCAATGTCAATGTCACTAGCAATGTCACTAGC-----  
-----  
-----AGCAATGCCACTACCGAAGGAAATGGGGAAGAAATGAAA---  
AACTGCTCTTTCAATGTGACCACAGAAGCTAAGG-----  
GATAAGAGACAGAAAGTATATTTCACTC---TTTTATAAGCTTGATATAGTACAAATTAATGCAAAT-----  
-----  
CAGGGTAATAGTAGTGACTATAGATTAATAAATTGTAATACCTCAGCCATTACACAG---  
GCATGCCCAAAAGTATCCTTTGAGCCAATTCCCATACATTATTGTACTCCAGCTGGTTTTGCATCCTAAAGT  
GTAAT---GATAAGGAGTTTAAAT-----GGAACAGGGCCATGCAAGAAT-----  
-GTCAGT---ACAGTTCAATGCACACATGGAATCAAGCCAGTAGTATCAACT---  
CAACTGCTGTTAAATGGCAGTCTAGCAGAAGAACAG-----  
ATAAGGATTAGATCTGCAAAATATCACAGACAAT-----ACCAAAACATAATAGTACAATTTACT---

-----GAGCCTGTAAAA-----ATTGATTGTACCAGACCTAACAAACAACACAAGAAGA-----  
 -AGTGTGTCTATA-----GGACCAGGACAAGCA---TTC-----TATGCAATGGGTGAC-----  
 -----GTAATAGGGGATATA-----AGAAAAGCATATTGT---CAGGTCAATAAAACA---  
 CAATGGAATATAACTTTACAACAGGTAGCTAACCAATTAAGA-----GAACACTTTAAG-----  
 -----AACAAAACAATAATATTTACT-----  
 AGCCCCTCAGGAGGGGATATAGAAATCACA---ACACATAGTTTTTAATTGTGGAGGAGAA---  
 TTCAAACAGCTCCAGGCACGAGTCCTGGCTGTGGAAAGATACCTAAGGGATCAACAGCTCCTAGGAATTTGGG  
 GCTGCTCTGGAAACTCATCTGCACCACCTAATGTGCCCTGGAACCTAGTTGGAGT-----  
 -----AATAAATCCTATAATGACATATGG-----GAC-----  
 AATATGACCTGGCTGCAATGG---GATAAAGAAATTAACAATTACACACAGATAATATAT---  
 GATTTAATTGAGGAATCGCAGAAACAGCAGGAA-----  
 -----  
 AAGAATGAACAAGAGTTACTGGCATTGGACAAGTGGGCAAGTCTGTGGAATTGGTTTGACATAACAAGATGGC  
 TGTGGTATATAAAAAATATTTATAATGATAGTAGGAGGTTTAATAGGATTAAGAATAGTTTTTTGCA---  
 GTGCTTTCTATAATC-----AATAGAGTTAGGCAGGGATACTCACCT-----  
 TTATCGTTTGTCTGTTAGTTTGGTTGATACTATAGCAATAGCAGTAGCTGGC---  
 TGGACAGATAGGGTTATAGAAATAGGACAAGCAGTTGGTAGAGCT-----  
 -----ATTATCCACATA-----CCTAGAAGAATCAGACAGGGCTTAGAAAGGGCTTTGCTA---TAA  
 >FJ623482  
 GCT---GAG-----  
 GAAAAATTTGTGGGTTACTGTCTACTATGGGGTGCTGTGTGG---AGGGACGCAGAC---  
 ACCACCCTATTTTGTGCATCAGATGCTAAAGGATATAATACAGAA---GCGCATAAT-----  
 -----ATATGGGCTACA---CATGCCTGTGTACCTACAGAC---  
 CCCAACCCACAAGAAATGAAGTTGAAA-----AATATAACAGAAAATTTTAACT-----  
 -----ATGTGGAAGAATAATATGGTAGAGCAGATGCATACAGACATA---  
 ATCAGTCTATGGGACCAAGGCCCTA---AAGCCATGTGTAAAGTTA---  
 ACCCCTCTCTGTGTTACTCTAGATTGTAGCTATAATGTCACCAGTAATTCCACCGAA-----  
 -----  
 -----AATAATATCACCGAGAGCATGAGAGGAGAAATAAAA---  
 AACTGCTCTTTCAATGTGACCACAGTATTAAGG-----  
 GATAAGAGTCAGAAAGTACATTCGCTT---TTTTATAGAGTTGATATAGTACCAATTGATGAAAAG-----  
 -----  
 -----  
 AAGAATAATAGCAGTGAGTATAGATTAATAAATTGTAACACCTCAGCCATTACACAG---  
 GCTTGTCCTAAAAGTATCCTTTGAGCCAATTCCCATACATTATTGTGCCCCAGCTGGTTTTGCGATTCTAAAGT  
 GTAAT---GATACGAATTTCAAT-----GGAACAGGGGAGTGCAAGAAT-----  
 -GTCAGC---ACAGTACAATGCACACATGGAATCAAGCCAGTAGTATCAACA---  
 CAACTGCTGTAAATGGCAGTCTAGCAGAAAAAGAG-----  
 ATAACAATTAGATCCGAAAATATCACAGACAAT-----GCTAAAAACATACTAGTACAATTTGAC---  
 -----ACACCTGTAAAA-----ATCAATTGTACCAGACCTTACAAAAATATAAGGGAA---  
 -GGTGTGCGTATA-----GGACCAGGACAAGCA---TTC-----TTTAAATGGGTGGC-----  
 -----ATAACAGGGGATATA-----AGAAAAGCATATTGT---GAGATTAATAAAACA---  
 GAGTGGAATGCAACTCTGGAAAGGGTAGCTGACAAATTAAGA-----GCACACTTTAAC---  
 -----AGCAGTATAATAAGCTTTTAA-----  
 AACGCATCAGGAGGGGATCTAGAAATTACA---ACACATAGTTTTTAATTGTGGAGGAGAA---  
 TTTAAACAGCTCCAGGCAAGAGTCCTGGCTGTGGAAAGATACCTAAAGGATCAACAGCTCCTAGGAATATGGG  
 GCTGCTCTGGAAACTCATCTGCACCACCAATGTGCCCTGGAACCTAGTTGGAGT-----  
 -----AATAAATCCTTGGATAAGATATGG-----GAC-----  
 AAAATGACCTGGCTAGACTGG---GATAAAGAAATTAGCAATTACTCAGAGTTAATATAT---  
 AATCTAATTGAAGAAGCACAGAACCAGCAGGAC-----  
 -----  
 AAAAAATGAACAAGACTTATTGGCATTAGACAAATGGGCAAGTCTGTGGAATTGGTTTGACATCACAAAATGGC  
 TGTGGTATATAAGGATATTTATAATGATAGTAGGAGGCTTAATAGGATTAAGAATAGTTTTTTGCA---  
 GTGCTTTCTGTAATA-----AATAGAGTTAGGCAGGGATACTCACCT-----  
 TTGTCAATTTGCTATTAGTTTGTCTGATACCATAGCAATAGCCGTAGCGGGT---  
 TGGACAGATAGGATTATAGAGCTAGGACTAAGACTTTGCAGAGCT-----  
 -----ATTCTCCACATA-----CCTAGAAGAATCAGACAGGGCATCGAAAGGGCTTTGATA---TAA  
 >FJ623477  
 ACT---GCA-----  
 GAAAACTTGTGGGTTACTGTCTATTATGGGGTACCTGTGTGG---AAAGACGCAGAG---

ACCACCTTATTTTGTGCATCAGATGCTAAAGGATATAAGACAGAA---ATGCATAAT-----  
-----GTTTGGGCTACA---CATGCCTGTGTACCCACAGAC---  
CCCAACCCACAAGAAATATATTTGGAA-----AATGTGACAGAAGAGTTTAAAC-----  
-----ATATGGAAAAATCACATGGTAGAGCAGATGCATACAGATATA---  
ATCAGTCTATGGGACCAAAGCCTA---AAGCCATGTGTAAAGTTA---  
ACCCCTCTCTGCGTTACTTTAAATTGTAGCAAGGTCAATGGCAAGGTCAATGTC-----  
-----  
-----ACGAACCATGACAATGCCACTGAAGAAATGAGA---  
AACTGCTCTTACAGTGTAACCACAGAAATAAGG-----  
GATAAGAAAAAGAAGGTATATTCACTT---  
TTTTATAGACTTGATATAGTACAAATTAATGAGAATCAAGGTAAC-----  
-----  
AGTAGTCAAGGTAATAGTAGTAACAATGCCTATAGATTAATAAATTGTAACACCTCAGTCATTACACAG---  
GCTTGCCCAAAGGTTTCTTTTGGAGCCAATTCCCATACATTATTGTGCCCCAGCTGGTTTTGCATCCTAAAAAT  
GTAGG---GATGAGGAGTTCAAT-----GGAACAGGGCCATGCAAAAAT-----  
-GTTAGC---TCAGTACAATGCACACATGGAATTAAGCCAGTAGTATCAACT---  
CAACTGCTGTTAAATGGCAGTCTAGCAGAAAAAGAG-----  
GTAAAGATTAGATCTGAGAATATCACAACAAT-----ATCAAGACTATAATAGTACAGTTTACC---  
-----AAGCCTGTAAGG-----ATTAATTGTACCAGACCTAACAACAATACAAGAGAA-----  
-AGTATACGTATA-----GGACCAGGACAAGCA---TTC-----TATGCAACAGGTGAC-----  
-----ATAATAGGGAAGATA-----AGAAAAGCATATTGT---AATGTCAGTAGATCA---  
GATTGGAATAGCAGTTTACAACAGGTAGCTAAACAGTTAGGC-----AAATACTTTAGG---  
-----AACAAAACAATAATATTTACT-----  
AACTCATCAGGAGGGGATATAGAAATCACA--ACACATAGTTTAAATTGTGGAGGAGAA---  
TTTAAGCAGCTCCAGGCACGAGTCCTGGCTGTGGAAAGATACCTAAGGGATCAACAGCTCCTAGGCATTTGGG  
GCTGCTCTGGAAGACTCATCTGCACCACTAATGTGCCCTGGAAGTCCAGTTGGAGT-----  
-----AATAAATCTTATAATGAGATATGG-----GAT-----  
AACATGACCTGGCTACAATGG---GATAAAGAAGTTAGCAATTACACAGACATAATATAT---  
CAACTAATTGAAGAATCGCAGAATCAGCAGGAA-----  
-----  
AAAAATGAGCAAGACTTATTGGCATTGGACAAATGGGCAAGTCTGTGGAGTTGGTTTGACATAACAAAGTGGC  
TGTGGTATATAAAAAATATTTATAATGATAGTAGGAGGCTTAATAGGATTAAGAATAATTTTTTGCT---  
GTGCTTGCTGTAATA-----AATAGAGTTAGGCAGGGATACTCACCT-----  
TTGTCATTTGCTATAAGTTTGGTTGATACCATAGCAATAGCAGTAGCTGGC---  
TGGACAGATAGGATTATAGAAATAGTGCAGGAATTGGTAGAGCT-----  
-----ATTCTGCATATA-----CCCACAAGAATTAGACAGGGCCTAGAAAGAGCTTTGCTA---TAA  
>FJ623486  
ACT---GCA-----  
GAAAACTTATGGGTTACTGTCTACTATGGGGTACCTGTATGG---AAAGACGCAGAG---  
ACCACCTTATTTTGTGCATCAGATGCTAAAGCATATAAGACAGAA---ATGCATAAT-----  
-----GTCTGGGCTACA---CATGCCTGTGTACCCACAGAC---  
CCCAACCCACAAGAAATACATTTGGAA-----AATGTGACAGAAGAATTTAAAC-----  
-----ATGTGGAAAAATAACATGGTAGAGCAGATGCATACAGATATA---  
ATCAGCTTATGGGACCAAAGCCTA---AAGCCATGTGTAAAGTTA---  
ACCCCTCTCTGCGTTACTTTACATTGTGGAAGTGTACCAAC-----  
-----  
-----GACACGGAGGGAGAAAGAAAA---  
AACTGCTCTTTCAATATGACCACAGAGCTAAGG-----  
GATAAAAAACAGAAGGTATATGCTCTT---TTTTATAGACTTGATATAGTAAAAATTAATGAAAGT-----  
-----  
CAAGGTAATAGTAGTGAATATAGATTAATAAATTGTAATACCTCAGCCATTACACAA---  
GCTTGCCCAAAGGGTATCCTTTGAGCCAATCCCATACATTATTGTGCCCCAGCTGGTTTTGCATCTTAAAGT  
GTAAG---GATGAGGAGTTCAAT-----GGAACAGGGCCATGCAAGAAT-----  
-GTCAGC---ACAGTACAATGCACACATGGAATCAAGCCAGTAGTATCAACT---  
CAACTGTTGTTAAATGGTAGTCTAGCAAAAACAAAG-----  
GACAGAATTAGCTCTGAAAAATCACAACAAT-----GCCAAAAATATAATAGTACAACCTTATT---  
-----GAGCCTGTGACA-----ATTAATTGTACCAGACTTGCCAATAATACAAGAAAA-----  
-AGTATACGTATA-----GGACCAGGACAATCA---TTC-----TATGCAATGGGTGAC-----  
-----ATAATAGGGGAGATA-----AGAAACGCACAATGT---GAGGTCAGTAAATCA---

CAGTGAACAAAACCTTACAAAGGGTAGCTAGAAGATTAGGA-----ACATACTTTTCAG----  
 -----AACAAAACAATAATATTTGAT-----  
 AAACCCTCAGGAGGGGATCTAGAAATCACA---ACACATAGTTTTTAATTGTGGAGGAGAA---  
 TTTAAACAGCTCCAGGCAAGAGTCCTGGCTGTGGAAAGCTACCTAAGGGATCAACAGCTCCTAGGAATTTGGG  
 GCTGCTCTGGAAGAACTCATCTGCACCACTAATGTGCCCTGGAAGCTCTAGCTGGAGT-----  
 -----AATAAATCTTACAATGAGATATGG-----GAT-----  
 AACATGACCTGGCTGCAATGG---GATAAAGAAGTTAGCAATTATACACAGATAATATAT---  
 ACCCTAATTGAAGAATCGCAGAACCAGCAAGAA-----  
 -----  
 AAAAAATGAACAAGACTTATTGGCATTAGACAAGTGGGCAAGTCTGTGGAATTGGTTTAGCATATCAAAATGGC  
 TGTGGTATATAAAAAATATTTTATAATGATAGTAGGAGGCTTAATAGGATTAAGAATAGTTTTTTGCT---  
 GTGCTTTCTGTAATA-----AATAGAGTTAGGCAGGGGTACTCACCT-----  
 TTATCGTTTGTCTATTAATTTGGTTGATACTATAGCAATAGTAGTAGCTGGT---  
 TGGACAGATAGGGTTATAGAAAATAGGACAAGTAATTGGTAGAGCT-----  
 -----TTTCTCCACATA-----CCTAGAAGAATCAGACAAGGCCTTGAAAGAGCTTTTGCTT---TAA  
 >FJ623479  
 GCT---GCA-----  
 GAAAAATTTGTGGGTTACTGTCTACTATGGGGTACCTGTGTGG--AAAGACGCAGAT---  
 ACCACCTTATTCTGTGCATCAGATGCTAAAGCATATGTCACAGAA--AAGCATAAT-----  
 -----GTCTGGGCTACA---CATGCTTGTGTACCCACAGAC---  
 CCCAACCCACAAGAAATACATTTGGGA-----AATGTGACAGAAGACTTTAAT-----  
 -----ATGTGGAAAAATAACATGGTAGAGCAAATGCATACAGATATA---  
 ATCAGCCTATGGGACCAAAGCCTA--AAGCCCTGTGTACAGTTA---  
 ACTCCTCTCTGTGTACCTTAAATTGTACAAATGCAAATGCCACCGTAATGCC-----  
 -----  
 -----ACTGTGCACAAAAATATGGAAGGAGAAATAAAA---  
 AACTGCTCTTACAATATGACCACAGAAGTAAGG-----  
 GATAAGCAAAAGAAAGTATATTCACCT--TTTTATAGACTTGATATAGTACAAATTAGCAAGCAA-----  
 -----  
 -----  
 AGTAGTAATGATAGTAGTAAATATAGATTAATAAATTGTAATACCTCAGCCATTACACAA---  
 GCTTGTCCAAAGGTAACCTTTGAGCCAATTCCCATACACTATTGTGCCCCAGCTGGTTTTGCGATTCTAAAC  
 GTAAT---GAGAACAACCTTCAAG-----GGGACAGGGCCATGCAATAAT-----  
 -GTCAGC--ACAGTACAATGCACACATGGAATAAAGCCAGTAGTGTCAACT---  
 CAACTGCTGTTGAATGGCAGTCTAGCAGAAGAAAAG-----  
 GTAATGATTAGATCTGAAAATATCACAAACAAT-----GCCAAGAACATAATAGTACAATTTACC---  
 -----AAACCTGTAAGG-----ATTAATTGTACCAGACCTAACAACAATACAAGAAGG---  
 -AGTATACATATA-----GGACCAGGACGAGCA--TTC-----TATGCAGCAGGTGAC-----  
 -----ATAATAGGGGATATA-----CGACAAGCACATTGT--AATGTCAATTACACT---  
 GAATGGAATGACACTTTGAAAGAAGTAGCCCAACAATTAGGA-----ACATACTTTAAT---  
 -----AACAAAACAATAATATTTAAG-----  
 AGCTCCGCAGGAGGGGATCCAGAGATCACA--ACACATAGCTTTAATTGTGGAGGAGAA---  
 TTTAAACAGCTCCAGGCAAGAGTCCTGGCTGTGGAAAGATACCTAAAGGATCAACAGCTCCTAGGACTTTGGG  
 GCTGCTCTGGAAGAACTCATCTGCACCACTAATGTGCCCTGGAAGCTCTAGTTGGAGT-----  
 -----AATAAAACTTATAAGGACATATGG-----GAC-----  
 AACATGACCTGGCTGCAATGG---GATAAAGAAATTAGCAATTACACACAGATAATATAT---  
 GACCTAATTGAAGAATCACAGAACCAGCAGGAA-----  
 -----  
 AAGAATGAACAAGACTTATTGTCATTGGACAAATGGGCAAGTTTGTGGAATTGGTTTGATATAACAAGATGGC  
 TGTGGTACATAAAAAATATTTATCATAATAGTAGGAGGCTTAATAGGATTAAGAATAGTTTTTTGCT---  
 GTAATTGCTGTAATA-----AATAGAGTTAGGCAGGGGTACTCACCT-----  
 TTGTCTTTGCTAGTAGTTTGTCTGATACCATAGCAATAGTAGTAGCTGGC---  
 TGGACAGATAGGGTTATAGAACTAGGACAAAGAATTGGTAGAGGT-----  
 -----CTTCTCCACATA-----CCTAGAAGAATCAGACAGGGTTTAGAAAGGGCCCTGTTA---TAA  
 >HM215275  
 GCT---GTA-----  
 GACAACCTGTGGGTTACTGTCTATTATGGGGTACCTGTGTGG--AAAGATGCAGAA---  
 ACCACCTTATTTTGTGCATCAGATGCTAAAGCATATGAGACAGAG--CAGCATAAT-----  
 -----GTATGGGCTACA---CATGCCTGTGTACCCACAGAC---  
 CCCAACCCACAGGAAATGCCTTTGAAA-----AATGTGACAGAACAGTTTAAC-----

-----ATGTGGAAAAATAACATGGTAGAGCAGATGCATACAGATATA---  
ATTAGTCTATGGGACCAAAGCCTA---AAGCCATGTGTGGAGTTA---  
ACCCCTCTCTGCGTCACGTTAAATTGTAGTACCATCACCTCAATAACACTGACACC-----  
-----  
-----CACAGCACCAATAACACAGACATAGACGCAATGAGA---  
AACTGCTCTTTCAATGTGACCACAGAATTAAGG-----  
GATAAGACAAAGAGAGTGTATTCACCT--TTTTATAGACTTGATATAGTACAAATAGATGGAAAT-----  
-----  
-----  
AATAGCAATGGTAGTGGTGAATATAGATTAATAAACTGTAACACCTCAGCCATTACACAG---  
GCTTGTCCAAAGGTATCCTTTGAGCCAATTCCCATACATTATTGTGCCCCAGCTGGCTTTGCGATTCTAAAGT  
GTAAT---GAAAAAGAGTTTAAAT-----GGAACAGGGCCATGCAAGAAT-----  
-GTCGCC---ACAGTACAATGCACACATGGAATCAAGCCAGTAGTATCAACT---  
CAACTACTGTTTAAATGGCAGTCTAGCAGAAGGAAAA-----  
GTAATGATCAGGTCTGAAAAATACACAGACAAT-----AGCAAAATATCATAGTACAATTTAAC-----  
-----AAGACTGTGACA-----ATTAATTGTACCAGACCTAATAACAAGACAAAATA---  
AGAAGTATACATATA-----GGACCAGGACGAGTA--TTC-----CAGGCAACACAA-----  
-----ACAGGGGATATG-----AGAAAAGCATTTTGT---ACAGTCAATAAAACA--  
-GAATGGGATAAACTTTGGAAGAAGTAGCCAAGCAATTAAGA-----GCACACTTTAAC---  
-----AACAAAGACAATAATCTTTAAG-----  
AGCTCCTCGGGAGGGGATATAGAAATCACA--ACACACAGTTTTAATTGTGGAGGAGAA---  
TTTAAACAGCTCCAGGCAAGAGTCTGACTGTGGAAAGATACCTAAGGGATCAACAGCTCCTAGGAATTTGGG  
GCTGCTCTGGAAGAACTCATCTGCACCACTAATGTGCCCTGGAATTCTAGTTGGAGT-----  
-----AATAAATCCAGACGGAGATATGG-----GAT-----  
AACATGACCTGGCTACAATGG---GATAAAGAAATTAGCAATTACACACAGCAAAATATAT---  
AAACTACTTGAGGAATCGCAGAACCAGCAGGAA-----  
-----  
CAGAAATGAACAAGACTTATTGGCATTAGACAAGTGGGCAAGTCTGTGGAATTGGTTTGAAATATCAAACCTGGC  
TGTGGTATATAAAAAATATTTATAATGATAGTAGGAGGCTTGATAGGATTAAGAATAGTTTTTTGCT---  
GTGCTTTCTATAATA-----AATAGAGTTAGGCAGGGATACTCACCT-----  
CTGTCGTTCCGTCATTAATTTGTTTGATACCATAGCAATAGTAGTAGCTGGC---  
TGGACAGATAGGGTTATAGAATTAGGACAAAGAATTGTTAGAGGT-----  
-----TTTCTACACATA-----CCTAGAAGAATTAGACAGGGCCTTGAAAGAGCTTTGCTG--TAA  
>KT252544  
GCT---ACA-----  
GAAAAATTGTGGGTACAGTCTATTATGGGGTACCTGTGTGG--AGAGATGCAGAT---  
ACCACCTTATTTTGTGCATCAGATGCTAAAGCATATGATCCAGAA--AAGCATAAT-----  
-----GTCTGGGCCACA--CATGCCTGTGTACCCACAGAC--  
CCCAACCCACAAGAGATACAGTTGAAC-----AATGTGACAGAAGAATTTAAC-----  
-----ATGTGGGAAAAATAACATGGTAGAGCAGATGCATAAAGATATA---  
ATCAGTCTATGGGACCAAAGCCTA--AAGCCATGTGTTCAGCTA---  
ACCCCTCTCTGCGTTACCTTAACTGTAGCCATAAGATTCTCATCAATTTACCGAGAAAAATGTCACT---  
-----  
-----GACATGAGA---  
AACTGCTCTTATAATATAACCACAGAATTAAGG-----  
GATAAGACACAGGAAGTATATTCACCTC---  
TTCTATAGACTTGATATAGTGCCAGTTAATGAAAAACAAAGTAAT-----  
-----  
AGTGGTAGTAATAGTAGTAATAGTGAGTATAGATTAATAAATTGTAATACCTCAGCCATTAAACAA---  
GCTTGTCCAAAGGTATCCTTTGAGCCAATTCCCATACATTATTGTGCCCCAGCAGGTTTTGCGATTCTGAAGT  
GTAAT---GATAAGGATTTCAAT-----GGAACAGGGCCATGCAAGAAG-----  
-GTCAGC---ACAGTACAATGCACACATGGAATCAAACCAGTAGTATCAACT---  
CAACTGCTGTTAAATGGCAGCCTAGCAGAAGGAAAC-----  
GTAACAATTAGATCTAAAAACATCACAGACAAT-----ACTAAAAATATAATAGTACAATTTAAA-----  
-----AAACATGTAGTA-----ATTAATTGTACCAGACCTAACAACAATACAAGGAGA-----  
-AGTGTACGTATA-----GGACCAGGACAAAACA--TTC-----TATGCAACAGGTGGC-----  
-----ATAATAGGGGACATA-----AGACAAGCACATTGT---AATGTCAGCGGATTA---  
GCATGGAATCAGACTTTTACAACAGGTAGCTAAACAGTTAAGA-----AGATACTTTGTG-----  
-----AACAAAACAATAAACTTTTACT-----  
AGCCCCCTCAGGAGGGGATCTAGAAATCACA--ACACATACTTTTAATTGTGGAGGAGAA---

TTTAAACAGCTCCAGGCAAGAGTCCTGGCTGTGGAAAGATACCTAAGAGATCAACAGCTCCTAGGAATTTGGG  
 GATGCTCTGGAAACTCATCTGCACCACTAATGTGCCCTGGAACACTAGTTGGAGT-----  
 -----AATAAATCCCAAGAACAGATATGG-----GGA-----  
 AACATGACCTGGCTGCAATGG---GATAAAGAAGTTAGCAATTACACAGACCTAATATAT---  
 ACCCTACTTGAAGAATCGCAGAACCAGCAGGAC-----  
 -----  
 AAGAATGAACAGGAATTATTGGCATTGGACAAGTGGGCAAATCTATGGAGCTGGTTTGACATATCAAATTGGC  
 TGTGGTATATAAAGATATTTATAATGATAGTAGGAGGCTTAATAGGATTAAGAATAGTTATGGCT---  
 ATAATTTCTATAATG-----AATAGAGTTAGGCAGGGATACTCACCC-----  
 TTGTCAATTTGCTATTAGTTTGTGATACCATAGCAATAGCAGTAGCTGGC---  
 TGGACAGATAGAGTTATAGAAAATAGGACAAGCAATTGGTAGAGGT-----  
 -----ATTCTCCATATA-----CCTAGAAGAATCAGACAAGGCTTTGAAAGGGCTTTGCTA---TAA  
 >HQ540689  
 CCT---GCA-----  
 GAAAACTTGTGGGTTACTGTCTACTATGGGGTACCTGTGTGG--AGAGAAGCAGAT---  
 ACCACCTTATTTTGTGCATCAGATGCTAAAGCATATGAGACAGAA--AAGCATAAT-----  
 -----GTCTGGGCTACA---CATGCCTGTGTACCCACAGAC---  
 CCCAACCCACAAGAAATACATTTGGCT-----AATGTGACAGAAAATTTTGAC-----  
 -----ATGTGGAAAAATAACATGGTAGAGCAAATGCATACAGATATA---  
 ATCAGTCTATGGGACCAAAGTTTA---CAGCCATGTGTAAAGTTA---  
 ACCCCTCTCTGCGTTACTATGAATTGTAGCGAGCCTAAATTTAACAACACAACTTTAACAGT-----  
 -----  
 -----ACAGGAAGTAACAGCACAGGAATCCAGGAAGAAATGAGA---  
 AATTGCTCTTTTAATATGACCACAGAGCTAAAG-----  
 GATAAGAAAAAGGAAGTATATTCACCT--TTCTATAGACTTGATATAGTACAAATAGATAGTAA-----  
 -----  
 -----  
 AAAGGAAATAGTAGTGATTATAGATTAATAAATTGTAATACCTCAGCCGTAAACAG---  
 GCCTGCCCAAAGGTATCCTTTAATCCAATTCCCATACATTATTGTGCTCCAGCTGGTTTTGCGATTCTAAAGT  
 GTAGG---GATGAAGATTTCAAT-----GGAACAGGGCCATGCAAGAAT-----  
 -GTTAGC---ACAGTACAATGCACACATGGAATTATGCCAGTAGTATCAACT---  
 CAACTGCTGTAAATGGCAGTCTAGCAAAAGAAAAT-----  
 GTACAAATTAGATCTGAAAATATTTCAAACAAT-----GCCAAGATAATACTAGTACAACCTTGCC---  
 -----CATCCTGTGAGA-----ATTAATTGTACCAGACCTGGCAACAATACAAGAAAA-----  
 -AGTATACATATG-----GGACCAGGACAAGCA---TTT-----TATGCAAGAGGGGAT-----  
 -----GTAATAGGAGATATA-----AGACAAGCATATTGT--AATGTCAGTAGCTCA---  
 GAGTGGAGTAACACTTTATACAAGGTAGCTGAACAATTAAGG-----AAACATTATGGG---  
 -----AATGAAACAACAATAAAATTTACT-----  
 AACCCTCAGGAGGGGATCTAGAAGTCACA--ACACATAGTTTTAATTGTGGAGGAGAA---  
 TTTAAACAGCTCCAGGCAAGAGTCCTGGCTCTGGAAAGATACCTAAAGGATCAACAGCTCCTAGGAATTTGGG  
 GCTGCTCTGGAAGACTCATCTGCACCACTAATGTGCCCTGGAACCTCTAGTTGGAGT-----  
 -----AATAAATCTTATAATGAGATATGG-----GAC-----  
 AACATGACCTGGCTACAATGG---GATAGAGAAATTGAAAATTACACACAAATAATATAT---  
 GGCCTAATTGAAGAATCGCAGAACCAGCAGGAA-----  
 -----  
 AAGAATGAACAAGACTTATTGTCCTTAAACAAATGGGCAGATCTGTGGAGTTGGTTTAACATAACAAATTGGC  
 TGTGGTATATAAAAATATTTATAATGATAGTAGGAGGCTTAATAGGATTAAGAATAGTTTTTTGCT---  
 GTGCTTTCAGTAATA-----AATAGAGTTAGGCAGGGATACTCACCT-----  
 TTGTCGTTTGTCTATTAGTTTGGTTGATACTATAGCAATAGTAGTAGCTGGC---  
 TGGACAGATAGGGCTATAGAAAATAGGACAAAGAATTGGTAGAGCT-----  
 -----ATCCTTCACATA-----CCTATAAGAATCAGACAGGGCTTAGAAAGAGCTTTGCTA---TAA  
 >KU921708  
 GCT---AAA-----  
 AAATCTTTGTGGGTGACTGTCTATTATGGGGTACCTGTGCGG--AAAGATGCAGAG---  
 ACCACCTTGTTTTGTGCCTCAGATGCTAAAGCATATGAGGCAGAG--AAGCATAAT-----  
 -----ATCTGGGCTACA---CATGCCTGTGTACCCACAGAC---  
 CCCGACCCACAAGAAATACCTTTGGAA-----AATGTGACAGAAGAGTTTAAAC-----  
 -----ATGTGGAAAAATAACATGGTAGAGCAGATGCATACAGATATA---  
 ATTAGTCTATGGGATCAAAGCCTA--AAACCATGTGTACAGTTA---  
 ACCCCTCTCTGTGTTACTTTGAATTGTTCAAGTGTGATGACAAATGTACAGAGCAATAACACGAAT-----

-----  
-----GGCCACAGTAGAATCATGGAAGACGGCAGGGAAGAAATAACA---  
AGCTGCTCTTTCAATATGACCACAGAATAAGG-----  
GATAAGAGAAAGAAAGTATATTCACCT--TTTATAAACTTGATGTAGTACAAATAAATAAT-----  
-----  
-----  
AGTAGTAGTGAGTACAGATTAATAAATTGTAATACCTCAGCCATCACACAG---  
GCTTGTCCAAAGGTAACTTTGAGCCAATTCACATACATTATTGTGCTCCAGCTGGTTATGCGATCCTAAAAT  
GTAGG---GATGAGGAATTCAAT-----GGAACAGGGCTATGCAGGAAT-----  
-GTCAGC---ACAGTCCAATGCACACATGGAATCAAGCCAGTGGTATCAACT---  
CAACTGTTGCTAAATGGCAGTCTATCAGAGAGCGGG-----  
GTAAGAATTAGATCTGAGACTATCACAGACAAT-----GGCAAAATATCATAGTACAACCTTGCC----  
-----AAGCCTGTAAAA-----ATTAATTGCACCAGACCTAATAACAATAAAAGAAGA-----  
-AGTGTGCATATA-----GGACCAGGACGAGCA--TTC-----TATGCAAAT--GAT-----  
-----ATAATAGGGGATATA-----AGAAAAGCATCTTGC---AGTGTCAATGAATCA---  
GAATGGAATGAAGCTTTAAGACAAGTAGCTAAACAATTAAGA-----ATCCACTTT-----  
-----AACAAAATAATACAATTTGTG-----  
AATCACTCAGGAGGAGATCTAGAAGTCACA--ACACATAGTTTTAATTGTAGAGGAGAA--  
TTTAAACAGCTTCAGGCAAGAGTCCTGGCTTTGGAAAGATACCTAAGGGATCAACAGCTCCTAGGAATTTGGG  
GCTGCTCTGGAAGAACTCATCTGCACCACTAATGTGCCTTGGAACTCTAGTTGGAGT-----  
-----AATAAATCTCAGGAAGAAATATGG-----CAA-----  
AGCATGACCTGGCTGCAATGG---GATAAAGAAATTAGTAATTACACAGACACAATATAT---  
AGACTAATTGAAGAATCACAGAACCAGCAGGAA-----  
-----  
AAGAATGAACAAGACTTATTGGCATTGACCAGTGGGCAAATCTGTGGAATTGGTTTGACATATCAAATTGGC  
TGTGGTATATAAAAAATATTTATAATGATAGTAGGAGGCTTAATAGGATTAAGAATAGTTTTTTGCT---  
GTGCTTTCTATAATA-----AAAAGAGTTAGGCAGGGATACTCACCT-----  
TTGTCGTTGGCTATTAGTTTGCTTGATACCATAGCAATAGTAGTAGCAGGC---  
TGGACAGATAGGGTTATAGAAGTAGGACAAAGACTTGTTAGAGCT-----  
-----ATTCTCAATATA-----CCTAGAAGAATCAGACAGGGCGCTGAAAGGGCTTTGCTA--TAA  
>KU921712  
GCT--ATA--AAA-----  
AAGGAGGACAAGTGGGTACTGTCTACTATGGGGTACCTGTATGG--AAAGACGCAGAG---  
ACTACCTTATTTTGTGCATCAGATGCTAAAGCATATAATACAGAA--GCACATAAT-----  
-----GTCTGGGCTACA--CATGCCTGTGTACCCACAGAC---  
CCCAACCCACAAGAAATACAATTGGAA-----AATGTGACAGAAAAGTTTAAC-----  
-----ATGTGGAAAAATAACATGGTAGAGCAGATGCATACAGATATA--  
ATCAGTCTGTGGGACCAAAGCCTA--AAGCCATGTGTACAGTTA--  
ACCCCTCTCTGCGTCACTTTAAATTGTAGCAATATCAATAGCACGAGTAACAATAGCACG-----  
-----  
-----AGTGGAACAGCACGGTCAGCAACAAGGAAGAACTAAAA---  
AACTGCTCTTTCAATGTGACTACAGAGATAAGG-----  
GATAAGAAAAAGAAGGAATATTCACCT--TTTATAAACTTGATGTAGTACCAATTAGTAGT-----  
-----  
-----  
ACTAATAGTAATAGTAGTAGTGGTGAGTATAGATTAATAAATTGTAATACCTCAACCATAACACAG---  
GCCTGCCCAAAAGTAACCTTTGAGCCAATTCACATACATTATTGTGCCCGAGCTGGTTTTCGATCCTAAAGT  
GTAAG---GATGAGAATTTCACT-----GGAATAGGGCTATGCAACGAT-----  
-GTCAGC---ACAGTACAATGCACACATGGAATCAGGCCAGTAGTATCAACC---  
CAGCTGCTGTTAAATGGCAGTCTAGCAAGAGAAAGG-----  
GTAAAAATTAGATCTGAAAATATCACAGACAAT-----GGCAAAAGTATAATAGTACAACCTTGTC----  
-----GACCTGTGAAC-----ATTACTTGTACCAGACCTAGTAACAATACAAGAAAA-----  
-AGTATACATATA-----GGACCAGGACAAGCA--TTC-----TATGCAACAGGAGGC-----  
-----ATAATAGGGGACATA-----AGACAAGCACACTGT---AATATCAGTGAATTA---  
GCATGGAATAAACTCTACAAGGGGTAGTTGAACAATTAAGA-----GGACACTTTAAG-----  
-----AATAAAACAATAATATTTGCT-----  
AGCTCCTCAGGGGGGATCTAGAAATCACA--ACACACAGCTTTAATTGTGCAGGAGAG--  
TTTAAACAGCTCCAGGCAAGAGTCCTTGCTGTGGAAAGATACCTAAGGGATCAACAGCTCCTAGGAATTTGGG  
GATGCTCTGGAAGAACTCATCTGCACCACTAATGTGCCCTGGAATAATAGTTGGAGT-----  
-----AATAAAACCCTGGAGGACATATGG-----GAC-----

AACATGACCTGGTTACAGTGG---GATAAAGAAATTAACAATTACACAGAAATAATATAT---  
AGACTAATTGAGGAATCGCAGAACCAGCAGGAG-----  
-----  
AAGAATGAACAAGATTTATTAGCACTGGATAAGTGGGCAAGTCTGTGGAGTTGGTTTGACATAACAAATTGGC  
TGTGGTATATAAAAAATATTTATAATGATAGTGGGAGGCTTAATAGGATTAAGAATAATTTTTTGCT---  
GTGCTTTCTATAATA-----AATAGAGTTAGGCAGGGATACTCACCT-----  
CTGTCATTTGCTGTTAGTTTGTGTTGATACCCTAGCAATAGTAATAGCTGGC---  
TGGACAGATAGGGTTATAGAAATAGGACAAAGGCTTGCTAGAGCT-----  
-----ATTCTCCACATA-----CCTAGAAGAATTAGACAGGGCATTGAAAGGGCATTGCTA---TAG  
>KU921727  
GCT---AAA-----  
GAAGACTTGTGGGTTACTGTCTACTATGGGGTACCTGTGTGG---AAAGACGCAGAG---  
ACCACCTTATTCTGTGCATCAGATGCAAAGCATATGAAAAGGAA---GTGCATAAT-----  
-----GTCTGGGCTACA---CATGCCTGTGTACCTACAGAC---  
CCCAACCCACAAGAAATAAAGTTAGAA-----AATGTGACAGAAAAATTTAAC-----  
-----ATGTGGAAAAATAACATGGTAGAGCAGATGCATGAAGATATA---  
ATCAGTCTATGGGACCAAAGCCTA---AAGCCATGTGTAAAATTA---  
ACCCCTCTCTGCGTCACTTTAGATTGTAGCAATGTCAACAACAGTACCAGTAACACCCTATCTCCCCTGCTA  
CCTCCCCT-----  
-----GACATGAGGGACGAAATAAAA---  
AACTGTTCTTTCAATATAACCACAGAATTAAGG-----  
GATAAGAAACAGAAAGTGTATTCATT---TTTTATAAACTGGATGTAGTGCAAATTGACAACAGTCAGAAC-  
-----  
-----  
AACAGTCAGAACAGTCAGTATAGATTAATAAATTGTAATACCTCAGCCATTACACAG---  
GCTTGTCCAAAGTAACTTTTGAGCCAATTCCCATACATTATTGTGCCCCAGCTGGTTATGCGATTCTAAAGT  
GTAAT---GATAAGGAGTTCAAT-----GGAACAGGGTTATGCAAAAAT-----  
-GTCAGC---ACAGTACAATGCACACATGGAATCAAGCCAGTAGCATCAACT---  
CAACTGCTGTTAAATGGCAGTCTAGCAGAATCAAAG-----  
GTAATGATTAGATCTGAAATCTCACAGACAGT-----AACAAAAACATAATAGTACAATTTAAC-----  
-----GAGTCTGTACCA-----ATTACTTGTATCAGACCTAACACAATACAAGAAAA-----  
-AGTGTACGTATA-----GGACCAGGACAAGCA---TTC-----TATGCAACAGGTGAT-----  
-----ATAATAGGGGATATA-----AGACAAGCACATTGT---AATATCACTAAAATA---  
AGATGGGATAAAGCTTTGCACCAGGTAGGCAAACAATTAAGA-----GCGGCCGCCTTTGGA---  
-----AACAAAAAATAATCTTTGAT-----  
AGCTCCACAGGGGGGGATCCAGAAATAACA--ACACATAGTTTTAATTGTGGAGGAGAA---  
TTTAAACAGCTCCAGGCAAGAGTCCCTGGCTGTGGAGAGCTATCTAAAGGATCAACAGCTCCTAGGAATTTGGG  
GCTGCTCTGGAAACTCATCTGCACCACTGCTGTGCCCTGGAACTCTAGTTGGAGT-----  
-----AATAAATCCCAGAGTGAGATATGG-----AAC-----  
AACATGACCTGGATGCAATGG---GATCGAGAAATTAGTAATTACACAGAGCTAATATAT---  
GATCTAATTGAAAAATCGCAAACCAGCAAGAA-----  
-----  
ATAAATGAACGAGAATTATTGGCATTGGACAAGTGGGCAACTCTGTGGAATTGGTTTGACATATCAAAATGGC  
TGTGGTATATAAAAAATATTTATCATGATAGTAGGAGGCTTAATAGGATTAAGAATAAGTTTTTTTGCT---  
GTGCTTTCTATCATA-----AATAGAGTTAGGCAGGGATACTCACCT-----  
TTGTCGTTTCGCTGTTAGTTTGTCTGAATACCATAGCAATAGTAGTAGCTGGG---  
TGGACAGATAGAGTTATAGAAGTAGGACAAGGATTGTTTAGAGCT-----  
-----ATTATCCACATA-----CCTAGAAGAATCAGACAAGGCTTCGAAAGAGCTTTGCTA---TAA  
>KU921732  
GCT---GCA-----  
GAAAACTTGTGGGTTACTGTCTACTATGGGGTACCTGTGTGG---AAAGACGCAAAC---  
ACCACCTTTATTTTGTGCATCAGATGCTAAAGCATATAGTACAGAG---AAGCATAAT-----  
-----GTGTGGGCTACA---CATGCCTGTGTACCCACAGAC---  
CCCAACCCACAAGAAATAAATTTGAAA-----AATGTGACAGAAGAGTTTAAC-----  
-----ATGTGGAAAAATAACATGGTAGAACAAATGCATACAGATATA---  
ATTAGCCTATGGGATCGAAGCCTA---AAGCCATGTGTAAAGTTA---  
ACTCCTCTCTGCGTTACTTTAGAGTGTAATAATGTTAATATTACTAATAATGTTACTAATAATGTTACTTAT-  
-----  
-----AATGTTGTTGACAACAGCACCGATATGAAAGAAGAAATAAAA---  
AACTGCTCTTTCAATATGACCACAGAATTAAGA-----

GATAAGCAACAGAAAGTATATTTCACTT---TTTTATAGGCTAGATATAGTACAACCTTAATAGC-----  
-----  
-----  
AGCCAGGAGAATAGCAGTCAGTATATATTAATAAATTGTAAAACCTCAACCATTACACAG---  
GCTTGTCCAAAGGTATCCTTTGAGCCAATTCCCATACATTATTGTGCCCCAGCTGGTTTTGCGATTCTAAAGT  
GTAAT---GATAAGGAGTTCAAT-----GGAACAGGGCCATGCAAGAAT-----  
-GTCAGC---ACAGTACAATGCACACATGGGATCAAACCAGTAGTATCAACT---  
CAACTGCTGTAAATGGCAGTCTAGCAGAGGGAAAG-----  
ATAATGATTAGATCTGAGAATTTACAGACAAT-----GCCAAAACATACTAGTACAACCTTAAC----  
-----CAGACTGTAAAA-----ATTAATTGTACCAGACCTAACAATAATACAAGAAAA-----  
-AGTGTACATATA-----GGACCAGGACAGGCA---TTG-----TATACAACAAATAAC-----  
-----ATAATAGGGAATATA-----AGACAAGCACATTGT---AATGTCAGTAGACAA---  
CAATGGAATAAACTTTGCAAGAGGTAAGAGAACAATTAAGA-----CAAATCTTT-----  
-----AACAAAACAATAACATTTAAT-----  
ACCTCCTCACAAGGGGATATAGAAATCATG---ACACATAGTTTTAATTGTGGAGGAGAA---  
TTTAAACAGCTCCAGGCAAGAGTCCTGGCTGTGGAAAGATACCTAAAGGATCAACAGCTCCTAGGTATTTGGG  
GCTGCTCTGGAAGAACTCATCTGCACCACCAATGTGCCCTGGAACCTCTAGTTGGAGT-----  
-----AATAAATCCAAGAAAGAGATATGG-----GAA-----  
AACATGACCTGGCTGCAATGG---GATAAAGAAATTAGCAATTACACACAGATCATATAT---  
GATCTACTTGCAGACTCGCAGATCCAGCAGGAA-----  
-----  
AAGAATGAACAAGACTTATTGGCATGGGACAAGTGGGCAAATCTGTGGACTTGGTTTGACATAACAAAATGGC  
TGTGGTATATAAAAATAGTTATAATGATAGTAGGAGGCTTAATAGGATTAAGAATAGTTTTTTGCT---  
GTACTTTCTATAATA-----AATAGAGTTAGGCAGGGATACTCACCT-----  
TTGTCAATTTGCTATTAATTTGTATGATACTATAGCAGTAGCAGTAGCTGGC---  
TGGACAGATAGGATTATAGAAATAGTACAAATAATTGGTAGAGCT-----  
-----CTTCTCCACGTA-----CCTAGAAGAATCAGGCAGGGCTTCGAAAGGGCATTGTTA---TAA  
>KU921734  
GCT---GGA-----  
GGAAACTTGTGGGTCACTGTCTACTATGGAGTACCTGTATGG---AAAGACGCAGAG---  
ACCACCTTATCTTGTGCATCAGATGCAAAGCATATGATAAGGAA---GTGCATAAT-----  
-----GTCTGGGCTACA---CATGCCTGTGTACCCACAGAC---  
CCCAACCCACAAGAAATACATTTGGAA-----AATGTGACAGAAGAGTTTAAC-----  
-----ATGTGGAAAAATAACATGGTAGAGCAGATGCAGACAGATATA---  
ATCAGCCTTTGGGACCAAAGCCTA---CAGCCATGTGTAAAATTA---  
ACCCCTCTCTGTGTACTTTACATTGTACCAATTATTATGGTAATAGCACCGAGGTCAAT-----  
-----  
-----AATAGCACTGTCAAAGCACCATGGAAGGGGAAATGAAA---  
AACTGCTCTTTCAATGCGACCACAGAATTAAGG-----  
GATAAGAAACGGAAAGTACATGCACTT---TTTTATAGACTTGATGTAACACAATTGGATGAT-----  
-----  
-----  
GATAATAGTACTTATAGATTAATAAATTGTAATACCTCAGCCATTACACAG---  
GCTTGCCCAAAGTAACCTTTGAACCAATTCCCATACACTATTGTACTCCAGCTGGTTTTGCAATTCTAAAGT  
GTAAT---GATAAAGAATTTAAT-----GGAACAGGAGTATGTAAGAAT-----  
-GTCAGC---ACAGTACAATGCACACATGGAATCAAGCCAGTAGTATCAACT---  
CAGTTGCTGTAAATGGCAGTCTAGCAGAAGGAAAG-----  
GTAATAATTAGATCTGAAAACATCACAACAAT-----GCCAAGAACATAATAGTACAATTTAGA---  
-----GAACCTGTGAAC-----ATTACGTGTATCAGACCTAACAACAATACAAGGACA-----  
-AGTATACGTATA-----GGACCAGGACAAGCA---TTC-----TATGCAACAGGTGAC-----  
-----ATAATAGGGGATATA-----AGACAAGCACATTGT---AATGTTAGTAGACAA---  
GCCTGGAATGAACTTTGGGACAGGTAGTCGAGCAATTAAGA-----ACACACTTTGGG---  
-----AACAAAACAATAAAATTTACT-----  
AGCTCCTCAGGAGGGGATTTAGAAATTACA---ACACACAGTTTTAATTGTGGAGGAGAA---  
TTTAAACAGCTCCAGGCACGAGTCCTGGCTGTGGAAAGATACCTAAAGGATCAACAGCTCCTAGGAATTTGGG  
GCTGCTCTGGAAGAACTCATCTGCACCCTACCGTGCCCTGGAACCTCTAGTTGGAGT-----  
-----AATAAAACCATGGGTGAGATATGG-----GAT-----  
AACATGACCTGGATGCAATGG---GATAAAGAAATTGACAACCTATACACAGTTGATATAT---  
AGTCTACTTGAGGAATCGCAGAACCAGCAGGAA-----  
-----

AAGAATGAACAAGATTTATTGGCATTGGACAAGTGGGCAAATCTGTGGAATTGGTTTAACATATCAAATTGGC  
TGTGGTATATAAAGATATTTATAATGATAGTAGGGGGCTTAATAGGATTAAGAATAGTTTTTACA---  
GTGCTTTCTATGGTA-----AATAGAGTTAGGCAGGGATACTCACCT-----  
TTGTCTTTTGCTACTAATTTGCTTGATACCACAGCAATAGCAACAGCTAAC---  
TGGACAGATAGGGTTATAGAAGCAATATCAAGGCTGTGTAGAGCT-----  
-----ATTTGCAACATA-----CCTGA-AGAATTAGACAGGGCTTAGAAAGGGTTTTTGCTA---TAA  
>KU921738  
ACT---GCA-----  
GAAAACTTGTGGGTTACTGTCTACTATGGGGTGCCTGTATGG---AAAGATGCAGAG---  
ACCACCTTATTCTGTGCATCAGATGCGAGAGCATATGATACAGAA---GTGCATAAT-----  
-----GTCTGGGCTACA---CATGCCTGTGTACCTACAGAC---  
CCCGACCCACAAGAAATAGATTTGGAA-----AATGTGACAGAAGAGTTTAAAC-----  
-----ATGTGGAAAAATAACATGGGTAGAACAGATGCATGAAGATATA---  
ATCAGTCTATGGGACCAAAGCCTA---AAGCCCTGTGTAAAATTA---  
ACCCCTCTCTGCGTTACTTTGAATTGCAGCAATATCAATATCACTAGAACCAACAGTACCAATAGT-----  
-----  
-----AACAGTAGTTCCATAAAATAACCAAGGAGAAAGAGAAATGACA---  
AACTGCTCGTTCAATGCAACCACAGAATTAAGG-----  
GATAAGCAACAGAGAATATATTCACTT---TTTTATAAACTAGATGTAGTACAAATTGGGAAC-----  
-----  
-----  
GACAGCCACCAGTATAGATTAATAAATTGTAATACCTCAGCCATTAAACAA---  
GCTTGTCCAAAGGTATCCTTTAAGCCAATTCCCATACATTATTGTGCCCCTGCTGGTTTTGCGATTCTAAAGT  
GTAAG---GATCAGAAGTTCAAT-----GGAACAGGACCATGCAGGAAT-----  
-GTCAGC---TCTGTACAATGCACACATGGAATCAGGCCAGTAGCATCAACT---  
CAACTGCTGTTAAATGGCAGTCTAGCAGAAGAAGAG-----  
GTAATGATTAGATCTGAAAATATCACAAACAAT-----GCCAAAAACATAATAGTACAATTTACA---  
-----AAGCCTGTAAAT-----ATTACTTGTAGCAGGCCTAACAACAATACAAGAAAA-----  
-AGTGTACGTATA-----GGACCAGGACAAGTA---TTC-----TATACAACA---GAC-----  
-----ATAATAGGAAAAATA-----AGACAAGCACATTGT---AATATCAGTAAAAAA---  
GACTGGGATGATACTTTGGGAAAGGTAGTCCAAAAATTAGGA-----ACATACTTT-----  
-----AACACAACAATAATTTTTTAAT-----  
AAATCCTCAGGAGGGGATCTAGAAATAACA--ACACATAGTTTTAATTGTGGAGGAGAA---  
TTTAAGCAGCTCCAGGCACGAGTCCCTGGCTGTGGAAAGATACCTAAAGGATCAACAGCTCCTAGGAATTTGGG  
GCTGCTCTGGAAACTCATCTGCACCACTAATGTGCCTTGGAACACGAGTTGGAGC-----  
-----AATAAAAGCTATAATGAGATATGG-----GGC-----  
AATATGACCTGGCTGCAATGG---GATAAAGAAATTAACAATTACACACAGTTAATATAT---  
AGTCTAATTGAAGAATCGCAGAACCAGCAAGAA-----  
-----  
AAGAATGAACAAGACTTATTGTCATTGGACAAGTGGGCAGATCTGTGGAATTGGTTTGACATAACAAAGTGGC  
TGTGGTATATAAAAAATATTTATAATGATAGTAGGAGGCTTAATAGGATTAAGAATAGTTTTTGCT--  
GTGCTTTCTATGATA-----AATAGAGTTAGGCAGGGATACTCACCT-----  
TTGTGCTTCGCTAGTAATTTGCTTGATACCATAGCAATAGTAGTAGCTGGC---  
TGGACAGATAGAGTTATAGAAATAGGACAAAGAATTGGTAGAGCT-----  
-----ATTCTCCATATA-----CCTAGAAGAATCAGACAGGGCTTAGAAAGCGCTTTGCTA---TAA  
>KU921746  
GCT---GCA-----  
GAAAACTTGTGGGTTACTGTTTACTATGGGGTACCTGTGTGG---AAAGATGCAATG---  
ACCACCTTGTTTTGTGCCTCAGATGCTAAAGCATATGACCTAGAA---AAACATAAT-----  
-----GTCTGGGCCACG---CATGCCTGTGTACCCACAGAC---  
CCCAACCCACAAGAAATACCTTTGGGA-----AATGTGACAGAAAAATTTAAAC-----  
-----ATGTGGAAAAATGAAATGGGTAGAACAAATGCATACAGATATA---  
ATCAGTCTATGGGACCAAAGCCTA---AAGCCATGTGTAACTGTTA---  
ACCCCTCTCTGCGTTACATTACATTGTACAAATGCCACTGTCATGAAGGCCAATACCATGAATAGC-----  
-----  
-----ACCAGCTGGGAGGAAATGAAA---  
AACTGCACTTACAATATGACCACAGAATAAGG-----  
GATAAGAAAAAGCAAGCATATTCACTT---TTTTATAAACTTGATGTAGAACCAATAGATCAGGGCAATAGT-  
-----  
-----

AGTAACAATATTAATAGTAGCAAAGAGTATAGACTAATAAAATTGTAATACCTCAGCCACTGCACAA---  
 GCTTGCCCAAAGGTAAGCTTTGAGCCAATTCCAATACATTATTGTGCCCCAGCTGGTTTTGCGATCCTAAAGT  
 GCAGG---GAGAAGGATTTCAAT-----GGAACAGGGATATGCAAGAAT-----  
 -GTCAGC---ACAGTCCAATGCACACATGGAATCAAGCCAGTAGTATCAACA---  
 CAACTACTGTTTAAATGGCAGTCTAGCAGAAGGAAAT-----  
 GTAACAATTAGATCTGAAAATATCACAGACAAT-----GCCAAAAATATACTAGTACAATTTACC----  
 -----AAGTCTGTAGTA-----ATTAATTGTACCAGACCTAGTAACAATACAAGAAGA-----  
 -AGTGTAAGGATA-----GGACCAGGACAAGCA---TTC-----TATACAACAGGTGAC-----  
 -----ATAATAGGGGATATA-----AGACAAGCACATTGT---AATGTCAGTAGGTCA---  
 GCATGGAATAAGACTCTACAACAGGTAGCTACACAATTAAGG-----GAATACTTT-----  
 -----AACAAAACAATAATATTTAAT-----  
 AGTTCCTCAGGAGGGGATCTAGAAATCACA---ACACATAGTTTTAATTGTGAAGGAGAA---  
 TTTAAACAGCTCCAGGCACGAGTCCTGGCTGTGGAAAAGATACCTAAGGGATCAACAGCTCCTAGGAATTTGGG  
 GCTGCTCTGGAAAACCTCATCTGCCCACTAATGTGCCCTGGAACCTCTAGTTGGAGT-----  
 -----AATAAGTCTTATAGTGACATATGG-----GAC-----  
 AACATGACCTGGCTGCAATGG---GATAAAGAAATTAACAATTACACAGAACAAATATAT---  
 AGATTAATTGAAGAATCGCAAAATCAGCAGGAA-----  
 -----  
 AAGAATGAACAAGACTTATTGGCATTGGACAAGTGGGCAAATCTATGGAATTGGTTTGATATATCAAATTGGC  
 TGTGGTATATAAGAATATTTATAATGATAGTAGGAGGCTTAATAGGATTAAGAATAGTTTTTTGCT---  
 GTGTTTTCTATAATA-----AATAGAGTTAGGAAGGGATACTCACCT-----  
 CTGTCAATTTGCTACTAATTTGTTTGATACCTTAGCAATAGCAGTAGCTGGC---  
 TGGACAGATAGGGTTATAGAATTAGGACTAGCACTCATTAGAGCT-----  
 -----ATTTTCCACATA-----CCTAGAAGAATCAGACAAGGCTTAGAAAGATTTTTTGCTA---TAA  
 >KU921752  
 GCT---GCA-----  
 GGAAATTTGTGGGTTACTGTCTACTATGGGGTACCAGTGTGG---AAAGATGCAGAA---  
 ACCACCTTATTTTGTGCATCAGATGCTAAAGCATATTCAACAGAA---AACATAAT-----  
 -----ATCTGGGCTACA---CATGCCTGTGTACCCACAGAC---  
 CCCGACCCACAAGAACTATATTTGGAA-----AATGTGACAGAAAAGTTTAAC-----  
 -----ATGTGGAACAATAGCATGGTAGAGCAGATGCATACAGATATA---  
 ATCAGTTTATGGGATGAAAGCTTA---AAGCCATGTGTAAAGTTA---  
 ACCCTCTCTGTGTACTTTAAATTGTAGCAATGTCACTGTACCAATAGCACTGGCAGTGGCACCAATGGCA  
 CTTTC-----  
 -----GATAGAAATTACACCAATGAAATGGGGGAAGAAATAAAA---  
 AACTGCTCTTTCAATATAACCACAGAGATAAGG-----  
 GATAGACAGCGGAAAATACATTCACCTC---TTTTATAGAATTGATATAGTACCAATTAATGAAAAAGGAAAA-  
 -----  
 GACAATAATAGTAGTGAGTATAGATTAATAAAATTGTAATACCTCAGCCATTACACAG---  
 GCTTGTCCAAAGGTATCCTTTGAGCCAATTCCCATACATTTTTGTGCCCCAGCTGGTTTTGCGATTCTAAAGT  
 GTAAT---GATAAGAACTTCAAT-----GGAACAGACACATGCAAGAAT-----  
 -GTCAGC---ACTGTACAATGCACACATGGAATCAAGCCAGTAGTATCAACT---  
 CAATTACTGTTTAAATGGCAGTCTAGCAGAAGAAAAG-----  
 GTAATGATTAGGTCTAAAAATTTCTCAGACAAT-----GCTAAAAACATAATAGTACAACCTTGTC----  
 -----CAGCCTATACTA-----ATTAATTGCACCAGACCTAACAACAATACAAGAAAG-----  
 -AGTATACATATA-----GGACCAGGACAAGCA---TTC-----TATGCAAGTGATAAA-----  
 -----ATAATAGGAGATATA-----AGACATGCATATTGT---ACTGTCAATAAAACA---  
 GAATGGAATGAAGCCTTAAGACAGGTAGCTATACAATTAAGA-----CCCACTTTAAT----  
 -----AACGGAACAATAATATTTAAT-----  
 AGCTCCTCAGGAGGGGACCTAGAAATCACA---ACACATAGCTTTAATTGTGGAGGAGAA---  
 TTTAAACAGCTCCAGGCAAGAGTCCTGGCTGTGGAAAAGATACCTAAGGGACCAACAGCTCCTAGGAATTTGGG  
 GCTGCTCTGGAAAACCTCATCTGCACCACTAATGTGCCCTGGAACCTCTAGTTGGAAT-----  
 -----AATAGATCCGAGGCTGACATATGG-----GAA-----  
 AACCTGACCTGGCTGGATTGG---GATAAAGAAATTAGCAATTACACAGGCATAATATAT---  
 GATTTACTTGAAAAATCGCAGAACCAGCAGGAA-----  
 -----  
 AAAAAATGAACAAGAATTGTTGGCATTGGACAAGTGGGCAAATCTGTGGAATTGGTTTAACATATCAAATGGC  
 TGTGGTATATAAAAAATATTTATAATGATAGTAGGAGGTTTAATAGGATTAAGAATAGTTTTTTGCT---  
 GTGCTTTCTATAATA-----AATAGAGTTAGGCAGGGATACTCACCT-----

TTGTCATTTCGCTATTAGTTTGGTTGATACCATAGCAATAGTAGTAGCTGGC---  
 TGGACAGATAGGATTATAGAAATAGGACAAAGAATTGGTAGAGCT-----  
 -----ATCCTCCACATA-----CCTAGAAGAATCAGACAGGGCTTTGAAAGGGCTTTGCTA---TAA  
 >KU921756  
 ACT---GCA-----  
 GAAAACTTGTGGGTTACTGTCTACTATGGGGTACCGGTGTGG---AAAGACGCAGAG---  
 ACCACCCTATTTTGTGCATCAGATGCTAAAGCATATAAGGCAGAA---GTGCATAAT-----  
 -----GTCTGGGCTACA---CATGCCTGTGTACCCACAGAC---  
 CCCAACCCACAAGAAATACCTTTGGAT-----AATGTGACAGAAAACCTTTAAC-----  
 -----ATGTGGAAAAATAATATGGTAGAGCAGATGCATATGGATATA---  
 ATAAGTCTATGGGACCAAAGCCTA---AAGCCATGTGTAAAGTTA---  
 ACCCCTCTCTGTGTACTTTAAACTGTTTCAATGCCACTGTTACAAATTCCACG-----  
 -----  
 -----GATGAAATGAAA---  
 AACTGCTCTTTCAACGTAACAACAGAAATAAGG-----  
 GATAAGAAACAGAACACATATTCACCT--TTTTATAAACTTGATATAGTACCAATTAATAAG-----  
 -----  
 -----  
 AGTAGCAGTAGGTATATATTAATAAATTGTAATACCTCAGCCATTACACAA---  
 GCCTGTCCAAAGGTAACCTTTGAGCCAATTCCCATACATTATTGTGCCCCAGCTGGTTTTGCGATCCTGAAGT  
 GTAGG---GATGAGGAGTTCAAT-----GGAACAGGGCCATGCAAGAAT-----  
 -GTTAGT---ACAGTACAATGTACACATGGAATCAAGCCTGTAGTATCAACT---  
 CAATTGCTGTAAATGGCAGTCTAGCAGAAAAAGAG-----  
 GTAAAAATTAGATCTGAAACATCTCAAACAAT-----GCTAAGGTTATAATAGTACAGTTTAAC---  
 -----GAGTCTGTACCA-----ATTACTTGTGTGACAGCCTAACAACAATACAAGAAGA---  
 -AGTATACATATA-----GGACCAGGACAAGCA---TTC-----TATGCAACA---GAC-----  
 -----ATAATAGGAAATATA-----AGACAGGCATATTGT---AAAGTCAATAAAACA---  
 GAATGGAATAAAGCCTTACAAAAGGTAGTTAGTCAATTACAA-----AACATTGG-----  
 -----AACAGGACAATAATCTTTGAA-----  
 GAAAACTCGGGAGGAGATTTAGAAACTGCA--ACACATAGTTTTAATTGTGCAGGAGAA---  
 TTTAAACAGCTCCAGGCAAGAGTCCCTGGCTGTGGAAAGATACCTAAGGGATCAACAGCTCCTAGGAATTTGGG  
 GCTGCTCTGGAAGACTCATCTGCACCACTAATGTGCCCTGGAACCTCTAGTTGGAGT-----  
 -----AATAAATCTTACAATGAAATATGG-----GAT-----  
 AACATGACCTGGCTGCAATGG--GACAAAGAAGTTAGCAATTACACTGACACAATATAT---  
 AGGCTAATTGAAGAATCGCAGAACCAGCAGGAA-----  
 -----  
 AAAAAATGAACAAGACTTATTAGCATTAGACAAATGGGCAAATCTGTGGAATTGGTTTGACATATCAAAATGGC  
 TGTGGTATATAAAAATATTACATAATGATAGTAGGAGGCTTAATAGGATTAAGAATAGTTATGGCT---  
 GTGCTTTCTATAATA-----AATAGAGTTAGGCAGGGATACTCACCT-----  
 TTGTCATTTCGCTACTAATTTACTTGATACCATAGCAATAGTAGTAGCTGGC---  
 TGGACAGATAGGGGTATAGAAATATTACAAAGAATTGGTAGGGCT-----  
 -----TTTCTCAACGTA-----CCTAGAAGAATCAGGCAGGGCTTAGAAAGGGCTTTACTA---TAA  
 >KU921759  
 GCT---GCA-----  
 GATAATTTGTGGGTTACTGTCTACTATGGGGTACCTGTGTGG---AAAGAAGCAGAG---  
 ACCACTTTATTTTGTGCATCAGATGCTAAAGCATATGTGGAAGAA---AAGCATAAT-----  
 -----GTCTGGGCTACA---CATGCCTGTGTACCTACAGAC---  
 CCTAGCCCACAAGAAATACTTTTGAA-----AATGTGACAGAAAAGTTTAAT-----  
 -----ATGTGGAAAAATCCCATGGTAGAGCAGATGCATACAGATATA---  
 ATCAGTCTATGGGACCAAAGTCTA---CAGCCATGTGTAAAGTTA---  
 ACCCCTCTCTGTGTCACTTTATATTGTACTAACACAAACATCACTAACACAGTACCAGTAACATC-----  
 -----  
 -----ACGGACAGTGGAGAAATGAAA---  
 AATTGCTCTTTCAATATGACCACAGAATAAGA-----  
 GATAGGCAGCGGAAAGTAACTTCACCT--TTTTATAAACTAGATATAGTAGAAATTGGTAAT-----  
 -----  
 -----  
 AGTAGTATTAGTAATAATGGTAGCGGTGAATATAGATTAATAAATTGTAATACCTCAGCCATTACACAA---  
 GCTTGCCCTAAAGTAAGCTTTGAGCCAATTCCCATACATTATTGTGCCCCAGCTGGTTTTGCGATCTTAAAGT  
 GTAAT---AATGAGAGTTTCAAT-----GGAACAGGGCCATGCAATAAT-----

-GTTAGC---ACAGTTCAGTGCACACATGGAATCAAGCCAGTAGTATCAACT---  
CAACTACTGTTTAAATGGTAGTCTAGCAAAAGGAGAG-----  
GTAATAATTAGATCTGAAAATATTACAGACAAT-----GCTAAAACTATAATAGCACAACCTTGAC----  
-----ACGCCTGTGAAC-----ATTACTTGTATCAGACCTAATAACAATACAAGAGAA-----  
-GGTGTACATATA-----GGACCTGGAAAAGCA---TTC-----TATACAACAAAC-----  
-----ATAATAGGAAATATA-----AGACAAGCACATTGT---AATGTCAGTAAGTCA---  
GACTGGAATAGAACTTTACACAAGGTAGCTACACAATTAGGA-----AAATACTTTCAA----  
-----AACAAAACAATAATATTTAAT-----  
AGCTCCTCAGGAGGAGATCTAGAAATCACA---ACACATATGTTTAATTGTAGAGGAGAA---  
TTTAAACAGCTCCAGGCAAGAGTCCTGGCTGTGGAAAGATACCTAAGGGATCAACAGCTCCTAGGAATTTGGG  
GCTGCTCTGGAAAACCTCATCTGCACCCTAATGTGCCCTGGAATTCTAGTTGGAGT-----  
-----AATAAATCTCAGAGTGATATATGG-----GAC-----  
AACATGACCTGGCAGCAATGG---GAGAAAGAAATTGAAAATTACACAGAGGAGATATAT---  
AGACTAATTGAAGACTCACAAAACCAGCAGGAA-----  
-----  
AAGAATGAACAAGACTTATTGGCATTAGACAAGTGGGCAAATCTGTGGAATTGGTTTAGCATATCAAATTGGC  
TGTGGTATATAAGAATATTTATAATGATAGTAGGAGGCTTAATAGGATTAAGAATAGTTTTTTACT---  
GTAATTTCTATAATA-----AATAGAGTTAGGCAGGGCTACTCACCT-----  
TTGTCAATTTGCTATTAATTTACTTGATACCATAGCAATAACAGTAGCTGGC---  
TGGACAGATAGGATTATAGAAATAGCACAAATAATAGGTAGAGGT-----  
-----ATCCTCCACATA-----CCTAGAAGAATCAGACAGGGTATTGAAAGGGCTTTGCTA---TAA  
>KU921772  
GCT---ACA-----  
GAAAACTTGTGGGTTACTGTTTACTATGGGGTACCTGTGTGG---AAAGATGCAGAG---  
ACCACCTTGTTTTGTGCATCAGATGCTAAACATATGAGACAGAA---AAGCATAAT-----  
-----GTCTGGGCTACA---CATGCCTGTGTACCTACAGAC---  
CCCAACCCACAAGAAATAAATTTAGAA-----AATGTGACAGAGGAGTTTAAC-----  
-----ATGTGGAAAAATAACATGGTAGAGCAGATGCATACAGATATA---  
ATCAGCCTATGGGACCAAGGCCTA---AAGCCATGTGTAAAATTA---  
ACTCCTCTCTGTGTTACTCTAAATGCAGCAATGTACCAATAATAGCACCCCA-----  
-----  
-----GACATGCAAGAAGAAATAAAA---  
AACTGCTCTTTTAATATGACCACAGAACTAAGG-----  
GATAAGAGAAAAGAAAGTATATTCACCT--TTTTATAAAATTGATATAGTGCAAATTAATGAA-----  
-----  
AATAATAGTAGTAATAATAGTGAGTATAGGTTAATAAATTGTAATACCTCAGCCATTACACAG---  
GCTTGTCCAAAGGTATCCTTTGAACCAATTCCCATACATTATTGTGCCCCAGCTGGTTTTGCGATTCTAAAGT  
GTAAG---GATAAGGAGTTCAAT-----GGAACAGGGCTATGCAAGAAT-----  
-GTCAGC---ACAGTACAGTGCACACATGGAATCAAGCCAGTAGTATCAACT---  
CAATTGTTGTTTAAATGGCAGTTTAGCAGAAGGAAAG-----  
GTAGTGATTAGATCTGAAAATTTACAAAACAAT-----GCCAAAACATACTAGTGCAATTTTCGT---  
-----CAACCTGTAGAA-----ATTAATTGTACCAGACCTAACAACAATACAAGAAAA---  
-AGCATACATATA-----GGACCAGGACAAGCC---TTC-----TATGCAACAGGGGAC-----  
-----ATAATAGGGCCAATC---AGACAAGCTCATTGT---ACGGTCAATGGAACA---  
GAATGGAATAAAGCCTTGCAAGAGGTAGTCACCCAATTAAGA-----GAAAAATTTAAT---  
-----AATAAAACAATAATCTTTAAT-----  
AGCTCCACAGGGGGGGATCCAGAAATAACA---ACACATAGTTTTTAATTGTGGAGGAGAA---  
TTTAAACAGCTCCAGGCAAGAGTCCTAGCTGTGGAAAGATACCTAAGGGATCAGCAGCTCCTAGGAATTTGGG  
GCTGCTCTGGGAAACTCATCTGCACCCTAATGTGCCCTGGAACCTAGTTGGAGT-----  
-----AATAAATCTCAGGAGGAAATATGG-----GGT-----  
AACATGACCTGGCTGCAATGG---GACAAAGAAATTGAAAATTATACACAAATAATATAC---  
ACTCTCCTTGAAGAATCGCAGAATCAGCAGGAA-----  
-----  
AAGAATGAACAAGATTTATTAGCATTAGACAAGTGGGCAAAGTCTGTGGAATTGGTTTGACATATCACACTGGC  
TGTGGTATATAAGAATATTTATCATAATAGTAGGAGGCTTAATAGGATTAAGAATAGTTTTTTGCA---  
GTGCTTTCTGTAATA-----AATAGAGTTAGGCAGGGATACTCACCT-----  
TTGTCAATTTGCTATTAATTTGCTTGATACTATAGCAATAGCAGTAGCTGGT---  
TGGACAGACAGGGCTATAAAAAATAGGACAAAGATTGTGTAGAGCT-----  
-----ATTTTACACATA-----CCTAGAAGAGTCAGACAGGACTTGGAAGGGCTTTGCAA---TAA

>KU921780

GCT---GCA-----  
GGAAAATTGTGGGTTACTGTCTACTATGGGGTGCCTGTGTGG---AAAGATGCAGAG---  
ACCATCTTGTTTTGTGCATCAGATGCTAAATCATACTCCACAGAG---AAACATAAT-----  
-----GTCTGGGCCACT---CATGCCTGTGTACCCACAGAC---  
CCCAACCCACAAGAAATACATTTGAAA-----AATGTGACAGAAGAGTTTAAAC-----  
-----ATGTGGAAAAATAAAATGGTAGATCAAATGCATACAGATATA---  
ATCAGTCTATGGGAAGAAAGTCTA---AAACCATGTGTAAAGTTA---  
ACCCCCCTCTGTGTTACTTTAAATTGTAGAAATATCAATATCAACAGCACCAAC-----  
-----  
-----ATCACACAGGGAGGAATAGATGTTAGGGAAGAAATAAAA---  
AACTGCTCTTTCAATATGACCACAGAGCTAAGG-----  
GATAAGAAAAAGAAAGAATATTTCACTG---  
TTTTATAAACTTGATATAGTACAAATTAATGAAAATCAAGGTAAT-----  
-----  
AGTAGTAGTGATAACAGTAGTGAGTATAGATTAATAAAATTGTAATACCTCAGCCATTACACAG---  
GCCTGCCCAAAGGTAACCTTTTGAGCCAATTCCCATACTATTGTGCCCCAGCTGGTTTTGCGATCCTAAAGT  
GTAAT---GATGAGGAGTTCAAT-----GGAACAGGGCCATGTAAGAAT-----  
-GTCAGC---ACAGTACAATGCACACATGGAATCAAGCCAGTAGTATCAACC---  
CAACTGCTGTTAAATGGCAGTCTGGCAAAAACAAAT-----  
GAGGTAATAATTAGATCTGAAAAATATCTCAGACAAT-----GTCAAAAACATAATAGTACAGTTTGTC-  
-----AAGCCTGTGAAA-----ATTAATTGTACCCGACCTAACACAATACAAGAAGA--  
---AGTATACATATA-----GGACCAGGACAAGCA---TTC-----TTTGCAAGGACAAAT---  
-----GTAATAGGGGATATA-----AGACAAGCATATTGT---ACTGTCAATAGATCA-  
--GAATGGAATACAACCTTTGCAAGGGGTAGCTAAACAATTAATC-----AAATACTTTAGG--  
-----AACGCAACAACAATAAAATTTAAT-----  
AGCTCCTCAGGGGGGATCCAGAAAGTCACA--ACACATGCTTTTAATTGTGGAGGAGAA---  
TTTAAACAGCTCCAGGCAAGAGTCCTGGCTGTGGAAAGATACCTAAAGGATCAACAGCTCCTAGGAATTTGGG  
GTTGCTCTGGAAAACTCATCTGCACCACTAATGTGCCCTGGAAGTCTAGTTGGAGT-----  
-----AATAAATCTCAGCAGGACATATGG-----GAG-----  
AACATGACCTGGCTGCAATGG---GACAAAGAAATTAGCAATTACACAAGCATAATATAT---  
GACCTAATTGAAGAATCGCAAAACCAGCAGGAA-----  
-----  
AAGAATGAACATGACTTATTGGCATTGGACAAGTGGGCAAATCTGTGGAATTGGTTTGATATATCAAATTGGC  
TATGGTATATAAAAAATATTTATAATGATAGTAGGAGGTTAATAGGATTAAGAATAGTTTTTTACT---  
GTGCTTTCTATAATA-----AATAGAGTTAGGCAGGGGTACTCACCT-----  
TTGTCAATTTGCTATTAATTTGGTTGATACCATAGCAATAGCAGTAGCTGGC---  
TGGACAGATAGGATTATAGAAATAGGACAAAGAATTGGTAGAGCT-----  
-----ATCCTCCACATA-----CCTGTAAGAATTAGACAGGGCTTAGAAAGAGCTTTGCTA--TAA

>KU921783

GGA---GCA-----  
GAAAACTTGTGGGTTACTGTCTACTATGGGGTACCTGTGTGG---AAAGACGCAGAG---  
ACCACCTTATTTTGTGCATCAGATGCTAAGGCATATGAGACAGAG---AAGCATAAT-----  
-----GTCTGGGCTACA---CATGCCTGTGTACCCACAGAC---  
CCCAACCCACAAGAAATACCTTTGGAA-----AATGTGACAGAAGAGTTTAAAC-----  
-----ATGTGGAAGAATAACATGGCAGAGCAAATGCATACAGATGTA---  
ATCAGTCTATGGGATCAAAGTCTA---CAGCCATGTGTAAAGTTA---  
ACCCCTCTCTGTGTTACTTTAAACTGTACCAACATCACAAGAAGCAACATCACGGGGGACAGTGTAAGCAACA  
GCACGGGGGACAGTGTAAGCAACAGC-----  
-----ACGGGGGACAGTGTAAGCAACATCACGGGGGACGGTGGATTGACA---  
AACTGCTCTTACAATGTAACCACAGACCTAAGA-----  
GATAAGAGACAGAAAGTATATTTCACTT---TTTTATAAACTTGATGTAGTACAAATGAATAAA-----  
-----  
AGTAGTAACACAGAGTATAGATTAATAAAATTGTAATACTTCAGCCATGACACAA---  
GCCTGTCCAAAGGTAACCTTTTGAGCCAATTCCCATACTATTATTGTGCCCCAGCTGGTTTTGCGATCCTAAGGT  
GTAAT---AATAAGACGTTCAAT-----GGAACAGGGCCATGCAATAAT-----  
-GTCAGC---TCAGTACAATGCACACATGGAATCAAGCCAGTAATATCAACT---  
CAACTGCTGTTAAATGGCAGTCTGGCAGAAGGAGAG-----  
GTGATAATTAGATCTGAAAAATATCACAGACAAT-----GCCAAAAACATAATAGTACAATTTAAC----

-----GATTCAGTAGCA-----ATTAATTGTACCAGACCTAACAACAATACAAGAAAA-----  
 -AGCATAAGGATA-----GGACCAGGACAAACA---TTC-----TATGCAACAGGTGGC-----  
 -----ATAATAGGGAATATA-----AGAGCAGCATATTGT---AATGTCAGTAAACA---  
 GCATGGAATGGCGCTTTAAACAGGTAGCTGCCCAATTAGGA-----AAGTACTTTAAG-----  
 -----AACAAAACAATAAGATTTGAT-----  
 AACTCCTCAGGAGGGGATCTAGAAATCACA---ACACATAGTTTTTAATTGTGGAGGAGAA---  
 TTTAAACAGCTCCAGGCAAGAGTCCTGGCTGTGGAAAGATACCTAAGGGATCAACAGCTCCTAGGAATTTGGG  
 GCTGCTCTGGAAACTCATCTGCACCACTAACGTGCCCTGGAATTCTAGTTGGAGT-----  
 -----AATAAATCTCAAAGTGAGATATGG-----GAC-----  
 AACATGACCTGGCTGCAATGG---GATAAAGAGATTAGCGCTTACACAGACACAATATAT---  
 AACCTACTTGAAAAATCGCAGAATCAGCAGGAA-----  
 -----  
 AAGAATGAACAAGACTTATTGGCATTGGATAAGTGGGCAAATCTATGGAATTGGTTTGACATATCAAGATGGC  
 TGTGGTATATAAAAAATATTTATAATGATAGTAGGAGGCTTAATAGGATTAAGAATAGTTTTTTGCT---  
 GTGCTTTCTATAATA-----AATAGAGTTAGGCAGGGATACTCACCC-----  
 TTATCGTTCACTGTTAGGTTGTTTGATACCATAGCAATAGCAGTAGCTGGC---  
 TGGACAGATAGGGTTATAGTCCTAGGACAAGGAGTTGGTAGAGCT-----  
 -----ATTTTCCACATA-----CCTAGAAGGATCAGACAGGGCCTTGAAAGAGCTTTGCTA---TAA  
 >KU921785  
 GCT---GCA-----  
 GACAACTTGTGGGTTACTGTCTATTATGGGGTACCTGTATGG---AGAGACGCAGAT---  
 ACCACCTTATTTTGTGCATCAGATGCGAAAGCATATGATCCAGAA---GTGCATAAT-----  
 -----ATCTGGGCTACA---CATGCCTGTGTGCCACAGAC---  
 CCTGACCCACAAGAAATAAATTTGGAA-----AATGTAACAGAAAAGTTCAAC-----  
 -----ATGTGGAAAAATAACATGGTAGAGCAGATGCATGTAGATATA---  
 ATCAGTCTATGGGACCAAAGCCTA---AAGCCATGTGTAAAGTTA---  
 ACCCTCTCTGCGTTACTTTAAATTGTAGCAATATCAATAACCCAGTAGCTCTACTGGT-----  
 -----  
 -----GCCAAATCCCCAGTGACATGAGAGAAGAAATAAAA---  
 AACTGCTCTTTCAATATGACTACAGAAGTAAGG-----  
 GATAAGAGACAGAAGATATATTCACTT---TTTTATAAATTGGATATAGTACAATTTAATAAC-----  
 -----  
 -----  
 AGCAATCAGTATAGACTAATAAATTGTAATACCTCAGTCATTACACAA---  
 GCTTGTCCAAAGGTATCCTTTCAGCCAATTCTTATACATTATTGTGCCCCAGCTGGTTTTGCGATTCTAAAGT  
 GTAAG---GATAAACAGTTCAAT-----GGAACAGGGTTTTGCAAGAAT-----  
 -GTCAGT---ACAGTACAATGCACACATGGAATCAAGCCAGTAGTATCAACT---  
 CAACTGCTGTAAATGGCAGTCTAGCAGAAGGACAA-----  
 GTAATGATTAGATCTGAAAATATCACAAACAAT-----GTCAAAAACATAATAGTACAGTTAGAT---  
 -----AAGCCTGTAAGA-----ATTACATGTGTGAGACCTAACAACAATACAAGAAGA---  
 -AGTGTACATATA-----GGACCAGGACAAGCA---TTC-----TATGCAACAGGTGAC-----  
 -----ATCATAGGGGATATA-----AGACAAGCACATTGT---ATTGTCAATAGAACA---  
 GACTGGAATAGAACTTTGCACAAGGTGAGCGAACAATTAAGA-----ACAACATACTTTAAG---  
 -----AACAAAACAATAATCTTTGCT-----  
 AACTCCACAGGAGGGGATCTAGAAATAACA---ACACATAGTTTTTAATTGTAGAGGAGAG---  
 TTTAAACAGCTCCAGGCAAGAATCCTGGCTGTGGAAAGATACCTAAAGGATCAACAGCTCCTAGGAATTTGGG  
 GATGCTCTGGAAACTTATCTGCACCACTAATGTGCCCTGGAACCTAGTTGGAGT-----  
 -----AATAGATCCCAGAGTGAGATATGG-----GAA-----  
 AACATGACCTGGCTGCAATGG---GATAAAGAAATTAGTAATTACACAGAGATAATATAT---  
 AAATTAATTGAAGAATCGCAGAACCAGCAGGAA-----  
 -----  
 AAGAATGAACAAGACTTATTGGCACTGGACAAGTGGGCAAATCTGTGGAATTGGTTTGACATATCAAATTGGC  
 TGTGGTATATAAAAAATATTTATAATGATAGTAGGAGGCTTAATAGGATTAAGAATAGTTTTTTGCT---  
 GTGCTTTCTGTAATA-----AATAGAGTTAGGCAGGGATACTCACCT-----  
 TTGTGCTTCGCTATCAACTTGCTTGATACCATAGCAGTAGTAGTAGCTGAG---  
 TGGACAGATAGGGTTATAGAAAGTAGGACAAAGACTTGGCAGAGCT-----  
 -----ATCCGCAACATA-----CCTAGAAGAATCAGACAGGGCGCAGAAAGGGCTTTGCTA---TAA  
 >KU921788  
 ACT---GCA-----  
 GAAAACTCGTGGGTTACTGTCTATTATGGGGTACCTGTGTGG---AAAGATGCAAAA---

ACCACTTTGTTTTGTGCATCAGATGCTAAAGCATATAAGACAGAA---AAGCATAAT-----  
 -----GTCTGGGCTACA---CATGCCTGTGTACCCACAGAC---  
 CCCAACCCACAAGAAGTACATTTGGAA-----AATGTGACAGAAAAGTTTAAT-----  
 -----ATGTGGAAAAATAACATGGTAGAGCAGATGCATACAGATATA---  
 ATCAGTCTATGGGATCAAAGCCTA---AAGCCATGTGTAAAGTTA---  
 ACTCCTCTCTGCGTTACTTTACATTGTACCAACATCACCATTTGTAACAACAGCATCAACATCACAGAAACCA  
 CACATTGTACTAACATCACCAGTACC-----  
 -----TCAAATAATACCACAAATGCCACGGTAGACACAGAAGCAATACAAAACATGAAA---  
 AACTGCTCTTTCAATGTGACCACACTATTAAGG-----  
 GATAAGCAACAGAAGGTAGCTTCACTT---TTTTATAGACTTGATATAGTACCAATTGATAAT-----  
 -----  
 -----  
 AGTGGTAGTGATGAGTATAGATTAATAAATTGTAATACCTCAGCCATTACACAA---  
 GCCTGCCCAAAGGTAACCTTTGAACCAATTCCCATACATTATTGTGCTCCAGCTGGTTTTGCATCCTAAAAT  
 GTAAT---GATAAGGAGTTCAAT-----GGAACAGGGCCATGCAAGAAT-----  
 -GTCAGC---TCAGTACAATGCACACATGGAATCAAGCCAGTAGTATCAACT---  
 CAACTGCTGTCTAAATGGCAGTCTAGCAGAAGGAGAG-----  
 ATGATGATTAGATCTGAAAATATCTCAAGTAAT-----ACCAAAATATTATAGTACAACCTTAAC---  
 -----CATGCTGTGGAA-----ATTAATTGTACCAGACCTGGTAACAATACAAGAACA---  
 -GGTATACATATA-----GGACCAGGACGAGCA---TTT-----TATGCAACAAATACC---  
 -----CCAATAGGGGATATA-----AGACAAGCACATTGT---AATATCAGTGGATCA---  
 GAATGGAATAACACTTTACAAAAGGTAGTTGACAAATTAAGA-----AAATACTTGAGA---  
 -----AATGACACAAAAATAATATTTGAG-----  
 CCCCCCTCAGGAGGGGATCTAGAAATCACA--ACACATAGTTTTAATTGTGGAGGGGAA---  
 TTTAAACAGCTCCAGGCAAGAGTCCTGGCTCTGGAAAGATACCTACAGGATCAACAACCTCCTAGGAATTTGGG  
 GCTGCTCTGGAAGAACTCATCTGCACCACTAATGTGCCTTGGAAACAACAGTTGGAGT-----  
 -----AATAAATCTCTAGATACGATATGG-----AAC-----  
 AACATGACCTGGCTAGAATGG---GATAGAGAAATTAGCAATTACACAGACATAATATAT---  
 CAACTAATTGAAGAATCACAAAACCAGCAGGAA-----  
 -----  
 AAGAATGAACAAGACTTATTGGCATTGGACAAATGGGCAAATCTATGGAATTGGTTTAACATAACACAGTGGC  
 TGTGGTATATAAAAATATTTATAATGATAGTAGGAGGCTTAATAGGATTAAGAATAGCTTTTGCT---  
 GTGCTTTCTATAGTA-----AATAGAGTTAGGCAGGGATACTCACCT-----  
 TTGTCGTTTGCTATTAGCTTGATTGATACTATAGCAATAGCAGTAGCTGGC---  
 TGGACAGATAGGGCTATAGAAATAATACAAGGAATTGGTAGAGCT-----  
 -----TTTCTTCACGTA-----CCTAGAAGGATCAGACAAGGCTTCGAAAGAGCTCTGCTA---TAA  
 >KU921804  
 AAT---GCA-----  
 GAACAGTTGTGGGTTACTGTACACTATGGGGTACCTGTGTGG---AAAGACGCAGAT---  
 GCCACTCTATTTTGTGCATCAGATGCTAAAGCATATGAGACAGAA---AAGCATAAT-----  
 -----GTCTGGGCTACC---CATGCCTGTGTACCCACAGAC---  
 CCCAGCCCACGAGAATTACCTTTGGGA-----GGTGTGAAGGAAGAATTTAAC-----  
 -----ATGTGGAAAAATAATATGGTAGAGCAGATGCATACAGATATA---  
 ATCAGTCTATGGGACCAAAGCCTA---AAGCCATGTGTAAAGTTA---  
 ACCCCTCTCTGCGTCACGTTAACTGTACCAACATCAGCACGGTGGGC-----  
 -----  
 -----AACCGCACGGTGGAAGGAAACATGATAGGAAAAATAAAA---  
 AACTGCTCTTTTGATATGACCACAGAATAATG-----  
 GATAGGAAAAAGAAAGTATATTCACCTC---TTTTATAAACTTGATATAGTGCCAATTGATGAA-----  
 -----  
 -----  
 AGGAATAGCAGCAATAGCAGCAATGAGTATAGATTAATAAATTGTAATACCTCAACCATTACACAG---  
 GCTTGTCCAAAGGTATCCTTTGAGCCAATTCCCATACATTACTGTGCCCCAGCTGGTTTTGCGATCCTAAAGT  
 GTAAT---GAGGATGAGTTCAAT-----GGAACAGGGCTTTGCACAAAT-----  
 -GTCAGT---ACAGTACAATGCACACATGGAATCAAGCCAGTAGTATCAACT---  
 CAACTGTTGTAAATGGCAGTCTAGCAGAAACGGAG-----  
 GTACAAATTAGATCTGAAAATTTCTCAGACAAT-----GCTAAAACCCTAATAGTACAACCTTAGA---  
 -----GAACCTGTAAAC-----ATTACTTGTCATCAGACCTAACAACAATAGAAGGACA---  
 -AGCATACATATG-----GGACCAGGACGAGCA---TTC-----TATGCAACT---GAT-----  
 -----ATAATAGGAGATATA-----AGAGAAGCGCGTTGT---AATGTTAATGGATCA---

GATTGGAAGGAACTTTACAAAAGGTAGCTGAACAATTAAGA-----AAACATTACAGG----  
 -----AACAAAACAATAACCTTTAGC-----  
 AACTCCTCAGGAGGGGATTTAGAAATTACA--ATGCATACTTTTAATTGTGGAGGAGAA--  
 TTTAAACAGCTCCAGGCAAGAGTCCTTGCTGTGGAAAGATACCTAAGGGATCAACAGCTCCTAGGAATTTGGG  
 GCTGCTCTGGAAGAACTCATATGCACCACTAATGTGCCCTGGAAGCTCTAGTTGGAGT-----  
 -----AATAAATCTTACGATGAAATATGG-----GGA-----  
 AACATGACCTGGCTACAATGG--GAGAGAGAAATTAGCAATTACACAGAAATAATATAT--  
 GGGCTGATTGAAGAATCGCAAAAACAGCAGGAA-----  
 -----  
 AAGAATGAACAAGACTTATAGGCATTGGACAAGTGGGCAAGTCTGTGGAATTGGTTTGACATAACACAATGGC  
 TGTGGTATATAAAAATATTTATAATGATAGTAGGAGGCTTAATAGGGTTAAGAATAGTTGTTGCT--  
 ATAAGCTCTGTAGTG-----AATAGAGTTAGGCAGGGATACTCACCT-----  
 TTGTCAATTCGCTATCAATTTGTTTGATACCATAGCAATAGCAGTAGCTGAG--  
 GGAACAGATAGAGTTATAGAAATAGTACAAAGAGCTTGCAGAGCT-----  
 -----TTTTTCAACATA-----CCTAGAAGAATCAGACAGGGCGCAGAGAAGATTTTCCTA--TAA  
 >KU921831  
 GCT--GTA-----  
 CAAAACTTGTGGGTTACTGTCTACTATGGGGTGCCTGTGTGG--CAAGATGCAGAA--  
 ACCACCTTATTTTGTGCATCAGATGCTAAAGCATATAAGACAGAA--GTGCATAAT-----  
 -----GTTTGGGCAACA--CATGCCTGTGTACCCACAGAC--  
 CCCAACCCACAAGAGGTGCATTTGAAA-----AATGTGACAGAAGAGTTTAA-----  
 -----ATGTGGAAAAATAAAATGGTAGATCAAATGCATGAAGATATA--  
 ATCAGTCTATGGGACCAAAGCCTA--AAGCCATGTGTAAAGTTA--  
 ACCCTCTCTGTGTCACTTTAAGTTGTGGCGAGAGTAATTTCAACAAC-----  
 -----  
 -----ACCATGAACGTCAGTAGGGGGGAAATGGTAGAAACAAAA--  
 AACTGCTCTTACAATATGACCACAGAATAAGG-----  
 GATAAACACAGAAAATACATTCGATC--TTTTATAGACTTGATTTAGTACAAATTAATAAACCTGAGAAT-  
 -----  
 -----  
 AATAGTAGTAGTAATTATAGTGAGTATAGATTAATAAATTGTAATACCTCAACCATTACACAG--  
 GCTTGTCCAAAGGTAACCTTTGAGCCAATTCCTATACATTATTGTGCCCCAGCTGGTTTTGCGATCCTAAAAT  
 GTAAT--GAGAAGACGTTCAAT-----GGAACAGGGCCATGTAATAAT-----  
 -GTCAGC--ACAGTACAATGCACACATGGAATCAGACCAGTAGTATCAACT--  
 CAACTGCTGTTAAATGGTAGTCTAGCAGAAGAAGAG-----  
 ATAACAATTAGATCTGAAAATATCACAGACAAT-----GGCAAAAACATATTAGTTCAACTTAAA--  
 -----GAGCCTGTGGAA-----ATTAATTGTACCAGACCTGGCAACAATACAAGAAAA--  
 -AGTATACATATA-----GGACCAGGACGATCA--TAC-----TATGCAACAGATGAC-----  
 -----ATAATAGGGGATATA-----AGGAAAGCATTTTGT--ACTGTTAAGGCAACA--  
 GTATGGAATGAACTTTACAACAGGTAGCTAGACAATTAGGC-----GAACATTTTGAG--  
 -----AACAGAACAATAACCTTTAAT-----  
 AACTCTGCAGGAGGGGATTTAGAAATCACA--ACACATAGTTTTAATTGTCAAGGAGAA--  
 TTTAAACAGCTCCAGGCAAGAGTCCTGGCTCTGGAAAGATACCTAAAGGATCAACAGCTCCTAGGAATTTGGG  
 GCTGCTCTGGAAGAACTCATCTGCACCACTAATGTGCCCTGGAAGCTCTAGTTGGAGT-----  
 -----AATAAATCTATGGATGAGATATGG-----GAC-----  
 AACATGACCTGGCTGCAATGG--GATAAAGAAATTAGCAATTACACACAGAAAATATAT--  
 AGCCTAATTGAGGAAGCGCAGAACCAGCAGGAA-----  
 -----  
 GAGAATGAAAAAGACTTATTGGCATTGGACAAGTGGGCAAGTCTGTGGAATTGGTTTGAAATATCAAAGTGGC  
 TATGGTATATAAAAATATTTATAATGATAGTAGGAGGCTTAATAGGATTAAGAATAGTTTTTTACT--  
 GTGCTTTCAGTAATA-----AATAGAGTTAGGCAGGGATACTCACCT-----  
 CTGTCTGTTGCTGTTAATTTGTTTGATACCATAGCAATAGCAGTAGCTAAC--  
 GGGACAGATAGGGTTATAGAAATAGGACAAAGATTTGGTAGAGGA-----  
 -----ATTCTCCATATA-----CCTAGAAGAATCAGACAGGGCTTAGAAGTAGCTTTGCTA--TAA  
 >KU921835  
 GTC--ACA-----  
 GGAAGGTATTGGGTACAGTTTACTATGGGGTACCTGTGTGG--AAAGATGCAGAG--  
 ACCACCTTATTTTGTGCATCAGATGCTAAAGCATATGAAAGAGAA--AAACATAAT-----  
 -----GTCTGGGCTACA--CATGCCTGTGTACCCACAGAC--  
 CCCAACCCACAAGAAGTACCTCTGGGA-----GATGTGACAGAAAACCTTTAAC-----

-----ATGTGGAAGAATGGCATGGTGGAGCAGATGCATACAGATATA---  
 ATCAGTCTATGGGACCAAAGCCTA---ACACCATGTGTAAAATTA---  
 ACCCCTCTCTGTGTGACTTTAAATTGTTCTAATGCCACGGTCACCAATGCTACTAACACT-----  
 -----  
 -----TACAATTATACCCTGGTGACAACAGACGAAGTAAAA---  
 AACTGCTCTTTCAATATGACCACAGAGATAAGG-----  
 GATAAGAAAAGGAAAGTATATTCACCT---  
 TTTTATAAGCTTGATATAGTACAAATTAATGAAAATCAAAATGAT-----  
 -----  
 AGTAGTAAAAATAATAGTAATAGCCAGGAGTATAGATTAATAAATTGTAATACCTCAGCCATTACACAG---  
 GCTTGTCCAAAAATATCATTTGAGCCAATTCCCATACATTATTGTGCCCCAGCTGGTTTTGCGATCCTAAAGT  
 GCACT---AATAAGACATTCAAT-----GGCACAGGGCCATGTAGTAAT-----  
 -GTCAGC---ACAGTACAATGTACACATGGAATTAAGCCAGTAGTATCAACT---  
 CAACTGCTGTTAAATGGCAGTCTAGCAGAAGGAGAG-----  
 GTAAGGATTAGATCTGAAAATATCTCAGACAAT-----AGCAAAACATAATAGTACAATTTACC---  
 -----AAGCCTGTCAAC-----ATTACTTGTATCAGACCTAGCAACAAGACAAGAACA-----  
 -AGTGTACATATA-----GGACCAGGACGAGCC---TTC-----TATGCAACAGGTAGC-----  
 -----ATAATAGGGGATATA-----AGAAAAGCACATTGT---AATGTTAGTAGAACA---  
 GCATGGAATAAGACTTTAGGAGAGGTAGCTACACAATTAAGC-----AAATACTTTGGA---  
 -----AACGAAACAACAATAAGATTTGAT-----  
 AAACACGCAGGAGGGGATCCAGAAATAACA---ACACATAGCTTTAATTGTGGAGGAGAA---  
 TTTAAACAGCTCCAGGCAAGAGTCCTGGCTGTGGAAAGTTACCTAAAGGATCAACAGCTCCTAGGAATTTGGG  
 GCTGCTCTGGAAACTCATCTGCACCACTAATGTGCCCTGGAACCTAGTTGGAGT-----  
 -----AATAAATCCTATGATGAGATATGG-----GGT-----  
 AATATGACCTGGCTACAATGG---GAGAAAGAGATTAGCAATTACACAGATATAATATAT---  
 GATCTACTTGAAGAATCGCAGAACCAGCAGGAA-----  
 -----  
 AAGAATGAACAAGACTTATTAGCGTTGGACAAGTGGGCAAGCCTGTGGAATTGGTTTAGCATATCAAACCTGGC  
 TGTGGTATATAAAAAATATTTATAATGATAGTAGGAGGCTTGATAGGATTAAGAATAGTTTTTTACT---  
 GTGTTTAATATGATA-----AATAGAGTTAGGCAGGGATACTCACCT-----  
 TTGTCATTTGCCATTAGTTTGTGTTGATACCATAGCAATAGCAGTAGCTGGC---  
 TGGACGGATAGGGTTATAGAAGTAGGACAAAGAATTGGTAGGGCT-----  
 -----ATCCTCCACATA-----CCTAGAAGAATTAGACAAGGCTTAGAAAGAGCATTGCTA---TAA  
 >KU921841  
 ACT---ACA-----  
 GGAAACTTGTGGGTTACAGTTTACTATGGGGTACCTGTGTGG---AAAGATGCAGAG---  
 ACTACCTTATTTTGTGCATCAGATGCCAAAGCACATGAAAAAGAA---GTGCATAAT-----  
 -----GTCTGGGCTACA---CATGCCTGTGTACCCACAGAC---  
 CCCAACCCACAAGAGATACCCCTGAAA-----AATGTGACAGAAAAGTTTAAC-----  
 -----ATGTGGAATAAACATGGTAGAGCAGATGCATACAGATATA---  
 ATCAGTCTATGGGACCAAAGCCTA---AAGCCATGTGTAAAGTTA---  
 ACCCCTCTCTGTGTACTTTAAATTGTACCAATGCCACTATTACCAATACCAATGTTACCAATGCC-----  
 -----  
 -----AATGGCACGGTGGACAGGATACCAGTGGAAGAAATAAAA---  
 AACTGCTCTTTCAATATGACCACAGAATAAGG-----  
 GATAAGAGACAGAAAGTATTTTCACTT---  
 TTTTATAGACTTGATGTAGTAAAGATTAGTGGCCAGAATGAACT-----  
 -----  
 ATTAATGGCAGTGGGCAGTATAGACTAATAAATTGTAATACCTCAGTCATTACACAG---  
 GCTTGTCCAAAGGTAACCTTTGAACCAATTCCCATACATTATTGTGCTCCAGCTGGTTTTGCGATCCTAAAGT  
 GTAGG---GAGAAGGATTTCAAT-----GGAACAGGGCCATGCAAGAAT-----  
 -GTCAGC---TCAGTACAATGCACACATGGAATCAGGCCAGTAGTATCAACT---  
 CAACTGCTGTTAAATGGCAGCCTAGCAGAAGGAAAT-----  
 GTAACAATTAGATCTGAAAATATCTCAAACAAT-----GCTAAGATCATAATAGTACAACCTTAAC---  
 -----ACATCTGTAGAA-----ATTAATTGTACCAGACCTGGCAACAACACGAGGAAA-----  
 -AGTGTACATATA-----GGACCAGGACAAGCA---TTT-----TATGCAACAGGTGAA-----  
 -----GTAATAGGGGATATA-----AGAAACGCACATTGT---AATGTCAGTAGATCA---  
 CAATGGAATGCCACTTTAGAAAAGGTAAAGGAACAGTTAAAA-----AAGCACTTTCCA---  
 -----CACAAAACAATAAAATTTGAT-----  
 AGCCCCGCAGGAGGGGATTTAGAAATTACA---ACACATACCTTTAATTGTGGAGGAGAG---

TTTAAACAGCTCCAGGCAAGAGTCCTAGCTGTGGAAAGATACCTAAAGGATCAACAGCTCCTAGGCATTTGGG  
 GCTGCTCTGGAAACTCATCTGCACCCTAATGTGCCTTGGAACTCCAGTTGGAGT-----  
 -----AATAAACTGAGAAGGAGATATGG-----AAT-----  
 AACATGACCTGGCTGCAATGG---GATAAAGAAATTGACAAATTACACAGATTTAATATAT---  
 CACTTACTTGAGGAATCGCAGAACCAGCAGGAA-----  
 -----  
 AAGAATGAACAAGATCTATTGGCATTGGACAAATGGGCAAATCTGTGGAATTGGTTTCGATATATCACGATGGC  
 TGTGGTACATAAGAATATTTATAATGATAGTAGGAGGCTTAATAGGATTAAGACTAGTTTTTTGCT---  
 ATGTTTTCTGTAATA-----AATAGAGTTAGGCAGGGATACTCACCT-----  
 TTGTCGTTTGCTATTAGTTTACTTAATGCCACAGCAATAGCAGTAGCTGAG---  
 GGGACAGATAGGATTATAGAAATAGGACAAAGAGTTGGTAGAGTT-----  
 -----ATTGCGAACGTA-----CCTAGAAGAATCAGGCAGGGCGCTGAAAGGCTTTTTGTTA---TAA  
 >KU921852  
 GCT---TCA-----  
 AATAAATTGTGGGTTACCGTCTACTATGGGGTACCTGTGTGG--AGAGACGCAGAG---  
 ACCATCTTATTTTGTGCCTCAGATGCTAAAGCATATGAGACAGAA--AAGCATAAT-----  
 -----GTCTGGGCTACA--CATGCCTGTGTACCCACAGAC---  
 CCCAACCCACAAGAAATAGATTTGGAA-----AATGTGACAGAAGATTTTAACT-----  
 -----ATGTGGAAAAATAACATGGTAGAGCAGATGCAGACAGATATA---  
 ATCAGTCTATGGGACCAAAGCCTA--AAGCCATGTGTAAGGTTA---  
 ACCCCTCTCTGTGTTACTTTAGATTGTAGCCATAATGTCAGTTATAGTAGTCTCAATAAC-----  
 -----  
 -----AGTAGCTCCAATGACACAGGGATACTAGAAGAAATAAGA---  
 AACTGCTCTTACAATACAACCACAGAATTAAGG-----  
 GATAAGAAACAGAAAGTATATTCACTT--TTTTATAAACTAGATGTAGTAAACTTGACAAAGAT-----  
 -----  
 -----  
 AGTAGCAGCAGCAAGGAGTATAGATTAATAAATTGTAATACTTCAGCCATTACACAA---  
 TCTTGTCCAAAGGTAACCTTTGAGCCAATTCCCATACATTATTGTGCCCCAGCTGGTTTTGCGATCCTAAAGT  
 GTAAA--GAAAAGAATTTCACT-----GGAATAGGGCCATGTAAGAAT-----  
 -GTCAGC--ACAGTACAATGCACACATGGAATCAAGCCAGTAGTATCAACT---  
 CAACTACTGCTAAATGGCAGTCTAGCAGAAGAAGAG-----  
 GTAATGATTAGATCTGAAAATATCACAAATAAT-----GCCAAAAACATAATAGTACAATTTATT---  
 -----AAGCCTGTGAAG-----ATTAATTGCACCAGACCTGGCAACAATACAAGAACA-----  
 -AGTATAAGAATA-----GGACCAGGACAAGCA--TTC-----TATGCAACAGGTGCC-----  
 -----ATAACAGGGGATATA-----AGGAAAGCATATTGT--ACTGTGAATAGATCA---  
 GATTGGAATAACGCTTTACAAAAGGTAGTTGGTCAACTAAAA-----AGGCATTTT-----  
 -----AACAAAACAATAATATTTGCT-----  
 AACTCATCAGGAGGGGATCTAGAAATTACA--ACACATAGTTTTTAATTGTGGAGGAGAA---  
 TTTAAACAGCTCCAGGCGAGAGTCCTGGCTGTGGAGAGATACCTAAGGGATCAACAGCTCCTAGGAATTTGGG  
 GCTGCTCTGGAAACTCATCTGCACCCTAATGTTCCCTGGAACTCCAGTTGGAGT-----  
 -----AATAAATCCCTAGATGAAATATGG-----GAC-----  
 AACATGACCTGGATGCAGTGG--GATAGAGAAATTAACAATTACACACAGATAATATAT---  
 ACTCTACTTGAAGAATCACAGAACCAGCAGGAA-----  
 -----  
 AAGAATGAACAAGACTTATTGGCATTAGACAAGTGGGCAAGTTTGTGGAATTGGTTTGACATATCAAACCTGGC  
 TGTGGTATATAAGGATATTTATAATAATAGTAGGAGGCTTAATAGGATTAAGAATAGTTTTTTGCT---  
 GTGCTTTCTGTAATA-----AATAGAGTTAGGCAGGGATACTCACCT-----  
 TTGTCGTTTCGCTATTAATTTGATTGATACCACAGCAATAGTAGTAGCTGGG---  
 GGGACAGATAGGATTATAGAAATAGTACAAAGAATTGTTAGAGCT-----  
 -----ATTCTTAACATA-----CCCACACGAATAAGACAGGGCTTTGAAAGGCTTTTGCTA---TAA  
 >KF716474  
 GCT---GCA-----  
 GAAAACTTGTGGGTTACTGTCTACTATGGGGTACCTGTGTGG--AAAGATGCAGAG---  
 ACCACCTTATTTTGTGCATCAGATGCTAAAGCCTATGAGACAGAA--AAGCATAAT-----  
 -----GTTTGGGCCACA--CATGCTTGTGTACCCACAGAC---  
 CCCAACCCACAAGAAATAGATTTGGAA-----AATGTGACAGAAGACTTTTAACT-----  
 -----ATGTGGAAAAATAACATGGTAGAGCAGATGCATACAGATATA---  
 ATCAGCCTATGGGATCAAGGCCTA--AAACCATGTGTAATAATTA---  
 ACTCCTCTCTGTGTTACCTTACATTGTGAGAAGTATATAAAGAACATTACTAACCAGAATGAA-----

-----  
-----ACCAGTAATAACCAGAGTGAAATCAGTGGAGAAGGAGAACTAAAA---  
AATTGTTCTTACAATATAACCACAGAGCTAAGG-----  
GATAAGAAACAGAAGGTATATTCACCT--TTTATAGACTTGATATAGTGAAAATTAATGAAGGTAAT----  
-----  
-----  
AGTAGTGACAATGGAAGTTATAGATTAATAAATTGTAATACCTCAGCCATTACAAAG---  
GCTTGTCCAAAAGTATCCTTTGAGCCAATTCCCATACATTATTGTGCCCCAGCTGGTTTTGCGATCCTAAAGT  
GTAAG---GATAAGGACTTCAAT-----GGAACAGGGCCATGCAAGAAT-----  
-GTCAGT---ACAGTACAATGCACTCATGGGATCAGGCCAGTAGTATCAACT---  
CAACTGCTGTTAAATGGCAGTCTAGCAGAAGGAGAG-----  
GTAAAGATTAGATCTGAAAAATACACAAACAAT-----GCCAAAACATAATAGTACAACCTTAGA----  
-----GAGCCTGTAAGA-----ATTAATTGTACCAGACCTAACAACAATACAAGAAAG-----  
-AGTGTACGTATA-----GGGCCAGGACAAGCA--TTC-----TTTGCAACAGGTGAG-----  
-----GTAATAGGAAAAATA-----AGAAAAGCATATTGT---AATGTTAGTGGAGTA---  
GAATGGAATAAACTTTGCAAAAGGTAGTTAGACAATTAATA-----GAGTATTTT-----  
-----AATAAAACAATATCATTTAAT-----  
AACTCCGCAGGAGGGGATATGGAAATAACA--ACACATAGTTTTAATTGTGGAGGAGAA---  
TTTAAGCAGCTCCAGGCAAGAGTCCTGGCGATAGAAAGATACCTAAAGGATCAACAGCTCCTAGGAATTTGGG  
GCTGCTCTGGAAACTCATCTGCACCACTAATGTGCCTTGGAACCTCAGTTGGAGT-----  
-----AATAAATCTCAGGAAGAGATATGG-----GAT-----  
AACATGACCTGGCTGCAATGG---GAGAGAGAAATTAGTAATTACACAGACTACATATAT---  
ACCCTACTTGAAGAATCACAGAACCAGCAGGAA-----  
-----  
AAGAATGAACAAGACTTATTGGCATTGGACAAGTGGGCAAATCTGTGGAATTGGTTTAACATATCAAATTGGC  
TGTGGTATATAAAAATATTTATAATGATAGTAGGAGGCTTAATAGGATTAAGAATAGTTTTTTGCT---  
GTGCTTTCTATAATA-----AATAGAGTTAGGCAGGGATACTCACCT-----  
TTGTCGTTTCGCTATTAATTTGCTTGATAATATAGCAATAGCAGTAGCTGGC---  
TGGACAGATAGGGTTATAGAACTAGGACAAAGATTTTGTAGAGCT-----  
-----ATTTTACACATA-----CCTAGAAGAATCAGACAGGGCTTAGAGAGAGCTTTTGCTA--TAG  
>KF716475  
GCT---GCA-----  
CAAACTTGTGGGTTACTGTCCACTATGGGGTACCTGTGTGG--AAAGATGCAGAC---  
ACCATCTTATTTTGTGCATCAGATGCTAAAGCATATGAAACAGAA--AAGCATAAT-----  
-----GTCTGGGCTACA--CATGCCTGCGTACCCACAGAC---  
CCCAACCCACGTGAAGTATATTTGGAA-----AATGTGACAGAAGATTTTAAT-----  
-----ATGTGAAAAATAGCATGGTAGAGCAGATGCATACAGATATA--  
ATCAGTCTATGGGACCAAAGCCTA--AAGCCATGTGTAAAGTTA--  
ACCCCACTCTGTGTTACTTTAAATTGTAGCAATGCCAATGTCAGTGTGAGTAATGTCAGTGTCACTAAT---  
-----  
-----GTCACTGTCAATAACACAGAGGTCAACTTACGGGAGGAAGGAGGAGAAATAAAA---  
AACTGTTCTTTCAATATAACCACAGAACTAAGG-----  
GATAAGAAAAAGAAGGTATATTCACCT--TTTATAGATCTGATGTAGTATCAATGAATAGCAAT-----  
-----  
-----  
GAGAGTAGTGAGTATAGATTGATAAATTGTAATACCTCAACCATTACACAA---  
GCCTGCCCAAAGGTATCCTTTAGCCAATTCCCATACATTATTGTGCCCCAGCTGGTTTTGCAATCCTAAAGT  
GTAGG---AACGAGACGTTTCGAT-----GGAACAGGATCATGCAAAAAT-----  
-GTCAGC---ACAGTACAATGCACACATGGAATCAAGCCAGTAGTATCAACT---  
CAACTGCTGTTAAATGGCAGTCTAGCAGAAGGAAAA-----  
CAGGTAATAATTAGATCTGAAAAATATCACAGACAAT-----GCCAAAATTATAATAGTACAACCTTGCC-  
-----AGTCCCGTGCAA-----ATTAATTGTACCAGGCCTAATAACAATACAAGCACA--  
----GGTATACATATA-----GGGCCAGGACAAGCA--TTC-----TATGCAAGAAATGCC---  
-----ATAATAGGGGATATA-----AGAAAAGCACATTGT---AATGTCAGCAAATCA-  
--AAATGGAATGACACTTTACGACAGGTAGCTGAACAATTAAGA-----AAATACTTTAAA--  
-----AATGATACAACAATAGTGTTTAAG-----  
AACTCCTCAGGAGGGGATCTAGAAATCACA--ACACATAGTTTTAATTGTGGAGGGGAA---  
TTTAAACAGCTCCAGGCAAGAGTCCTGGCCATGGAAAAGATACCTAAGGGATCAACAGCTCCTAGGAATTTGGG  
GCTGCTCTGGAAAGGTCATCTGCAACACTAATGTGCCCTGGAACCTAGTTGGAGT-----  
-----AATAAATCTTACAATGAGATATGG-----GAC-----

GAAATGACCTGGCAGCAATGG---GAGAAAGAAATTAGCAATTACACAGACATAATATAT---  
 AACCTACTTGAAGAATCGCAAACCAGCAGGAA-----  
 -----  
 AAGAATGAACAAGATTTATTGGCATTTCGACAAATGGGCAAATCTATGGAGTTGGTTTAAATAACAAATTGGC  
 TGTGGTATATAAAAAATATTTATAATGATAGTAGGAGGCTTAATAGGATTAAGAATAGTTTTTTGCT---  
 GTGCTCTCTGTAATA-----AATAAAGTTAGGCAGGGATACTCACCC-----  
 TTGTCATTTGCTACTAGCTTGCTTGATACTGTAGCAATAGCAGTAGCTGGC---  
 TGGACAGATAGGGTTATAGAAATAAGACAAAGAATTGGTAGAGCT-----  
 -----ATCCTCCACATA-----CCTAGAAGAATCAGACAGGGCTTTGAAAGAGCTTTGCTA---TAA  
 >AY322184  
 GCT---GCA-----  
 GAAAACTTGTGGGTTACTGTCTACTATGGGGTACCTGTGTGG--AAAGACGCAGAG---  
 ACCACCTTATTTTGTGCATCAGATGCGAAAGCATATGATACAGAA--GCACATAAT-----  
 -----GTCTGGGCTACA---CATGCCTGTGTACCTACAGAC---  
 CCCAACCCACAAGAAATAGATTTGGAA-----AATGTGACAGAAGAGTTTAAAC-----  
 -----ATGTGGGAAAATAACATGGTAGAGCAGATGCATACAGATATA---  
 ATCAGTCTATGGGACCAAAGCCTA--AAACCATGTGTAAAGTTA---  
 ACCCCTCTCTGCGTTACTTTAGATTGTAGCTATGATGTCACCATTGCCACT-----  
 -----  
 -----ATCACCAATGATGTGAGAGAAGAAATAAAA---  
 AACTGCTCTTTCAATATGACTACAGAATTAAGG-----  
 GATAAGACACAGAAAGTATATTCACTT--TTTTATAGACTTGATGTAGTACCAATTGATGAAGAG-----  
 -----  
 -----  
 AATAACAGTAGTAACAAGGAGTATAGATTAATAAAATTGTAATACCTCAGCCATTACACAA---  
 GCGTGCCCAAAGGTATCCTTTCAGCCAATTCCCATACATTATTGTGCTCCAGCTGGTTTTGCGATCCTAAAGT  
 GTAAG---GATAAGGAGTTCAAT-----GGAACAGGGCCATGCCAGAAT-----  
 -GTCAGC---ACAGTCCAATGCACACATGGAATCAAGCCAGTAGTATCAACT---  
 CAACTGCTGTAAATGGCAGTCTAGCAGAAGGAAAG-----  
 GTAATGATTAGATTTGAAAATATCACAAACAAT-----GCCAAAAACATAATAGTACAACCTTACC---  
 -----GAGCCTGTGAAA-----ATTAATTGTACCAGACCTAACAACAATACAATTACA-----  
 -AGTATACGTATA-----GGACCAGGACAAGCA--TTC-----TATGCAACAGGAAGC-----  
 -----ATAATAGGGAATATA-----AGACAAGCACATTGT--ACTGTCAATAGATCA---  
 GAATGGAATGACACTTTACAACAGGTGAAGTCACAATTAGGA-----GAATACTTTGTG---  
 -----AACAAAACAATAAAATTTGCT-----  
 AACTCCTCAGGAGGGGATCCAGAAATCACA--ACACATAGTTTTTAATTGTGGAGGAGAA---  
 TTTAAACAGCTCCAGGCAAGAGTCCTGGCTGTGGAAAGATACCTAAAGGATCAACAGCTCCTAGGAATTTGGG  
 GCTGCTCTGGAAGAACTCATCTGCACCACTAATGTGCCCTGGAACCTCTAGTTGGAGT-----  
 -----AATAAATCCCAGGAGGAGATATGG-----GAA-----  
 AACATGACCTGGCTGCAATGG--GATAAAGAAATTAGCAATTACACAGAGATAATATAT---  
 AATCTACTTGAAGAATCGCAGAACCAGCAGGAA-----  
 -----  
 AAGAATGAACAAGACTTATTGGCATTGGACAAGTGGGCAAATCTGTGGACTTGGTTTAAACATATCAAACCTGGC  
 TGTGGTATATAAAAAATATTTATAATGATAGTAGGAGGCTTAATAGGATTAAGAATAGTTTTTTGCT---  
 GTGCTTTCTGTAATA-----AATAGAGTTAGGCAGGGATACTCACCT-----  
 TTGTCGTTCACAATTAATTGGATTGATACCATAGCCATAGTAGTAGCTGGC---  
 TGGACAGATAGGGTTATAGAAATAGGACAAGAAATTGGTAGAGCT-----  
 -----ATTTTCCACATA-----CCTAGAAGAATCAGACAGGGTCTCGAAAGGGCTTTGCTA---TAA  
 >AF539405  
 ACT---GCA-----  
 GAAAACTTGTGGGTTACTGTCTACTATGGGGTACCTGTGTGG--AGAGACGCAGAG---  
 ACCACCTTATTTTGTGCATCGGATGCTAAAGCATATAAGACAGAA--ATGCATAAT-----  
 -----GTCTGGGCTACA---CATGCCTGTGTACCCACAGAC---  
 CCCAACCCACAAGAAATACATTTGGAA-----AATGTGACAGAAGAGTTTAAAC-----  
 -----ATGTGGAAAAATAACATGGTAGAGCAGATGCATACAGATATA---  
 ATCAGTCTGTGGGACCAAAGCCTA--AAGCCATGTGTAAAGTTA---  
 ACCCCTCTCTGTGTTACTTTAGATTGTAGTGACTATAATGGCACCAATATC-----  
 -----  
 -----ACCGGTGACATGACAAGGGAAATAAAA---  
 AACTGCTCTTTCAATATAACCACAGAATTAAGG-----

GATAAGAAACAGAAAGTACATTCACCTT--TTTATAGACTAGATGTAGTACAAATTAATAATAGC-----  
-----  
-----  
AGTAACAGCAATAACAGTCAGTATAGATTAATAAATTGTAATACCTCAGCCATTACACAA---  
GCTTGTCCAAAGGTATCCTTTGAGCCAATTCCCATACATTATTGTGCCCCAGCTGGTTTTGCGATTCTAAAAT  
GTAAT---GATAAGGAGTTTCAGT-----GGAACAGGGCTATGCAGGAAT-----  
-GTCAGC---ACAGTACAATGCACACATGGAATCAAGCCAGTAGTATCAACT---  
CAACTGCTGTTAAATGGCAGTCTAGCAGAAGGAAAG-----  
GCAATGATTAGATCTGAAAATATCACAACAAT-----GCCAAAACATATTAGTACAATTTACC----  
-----ACGCCTGTAGAA-----ATTAATTGTACCAGACCTAACAACAATACAAGAAAA-----  
-AGTGTACATATA-----GGACCAGGACAAGCA---TTC-----TATGCAACAGGGGAC-----  
-----ATAATAGGGGATATA-----AGACAAGCATATTGT---AATGTCAATGGAACA---  
GCATGGAAGGAAATTTGAAAGAGGTAGCCGACCAATTAAGA-----ACATATTTTAGG----  
-----AACACAACAATAAAGTTTGCT-----  
AACTCCACAGGAGGGGATCTAGAAATAACA---ACACATAGTTTTAATTGTGGAGGAGAA---  
TTTAAACAGCTCCAGGCAAGAGTCCTGGCTGTGGAAAGATACCTAAGGGACCAACAGCTCCTAGGAATTTGGG  
GCTGCTCTGGAAGAACTCATCTGCACCACTAATGTGCCCTGGAAGTCTAGTTGGAGT-----  
-----AATAAATCCCAGAGTGAGATATGG-----GAA-----  
AACATGACCTGGCTGCAATGG---GATAAAGAGATTAGCAATTACACACAGATAATATAT---  
ACTCTACTTGAAGAATCGCAGAACCAGCAGGAA-----  
-----  
AAGAATGAACAAGACTTATTGGCATTGGACAAGTGGGCAAATCTGTGGAATTGGTTTGACATAACAACTGGC  
TGTGGTATATAAAAATATTTATAATGATAGTAGGAGGCTTAATAGGATTAAGAATAGTTTTTTGCT---  
GTGCTTGCTTTAGTA-----AATAGAGTTAGGCAGGGGTACTCACCT-----  
TTGTCGTTTGCTATTAATTTGATTGATACCATAGCAATAACAGTAGCTGGC---  
TGGACAGATAGGGTTATAGAAATAGGACAAGAAATTGGTAGAGCT-----  
-----ATTCTCCACATA-----CCTAGAAGAATCAGACAGGGCTTTGAAAGGGCTTTGCTA---TAA  
>L22943  
GCT---GCA-----  
GAAAACTTGTGGGTACTGTCTACTATGGGGTACCTGTGTGG---AAAAACGCAGAG---  
ACCACCTTATTTTGTGCATCAGATGCTAAAGCATATGAAACAGAA---AACATAAT-----  
-----GTCTGGGCTACA---CATGCCTGTGTACCCACAGAC---  
CCCAACCCACAAGAAATACATTTGGAA-----AATGTGACAGAAGAGTTTAAC-----  
-----ATGTGGAAAAATAACATGGTAGAGCAGATGCATACAGATATA---  
ATCAGTCTATGGGATCAAAGCCTA---AAGCCATGTGTTAAGTTA---  
ACCCCTCTCTGCGTTACCTTAAATTGTAGCAATGTCAATGTCACTGCCACGAGT-----  
-----  
-----GGCACAACACACGGGGGACGGGGGAGAATGAAA---  
AACTGCTCTTACAATATAACCACAGAGCTAAGG-----  
GATAGGAGACAGAAGGTATATTCACCT--TTTATAGACTTGATGTAGTACCAATTAATGAAAAT-----  
-----  
-----  
AATAGCAGTAACAATGAGTATAGATTAATAAATTGTAATACCTCAGCCATTACACAA---  
GCTTGCCCAAAGGTAACCTTTGAGCCAATTCCCATACATTATTGTGCCCCAGCTGGTTTTGCGATCCTAAAGT  
GTAAG---GATAAGAAGTTCAAT-----GGAACAGGGCCATGCACGAAT-----  
-GTCAGC---ACAGTACAATGCACACATGGAATCAAGCCAGTAGTATCAACT---  
CAACTGCTGTTAAATGGCAGTCTAGCAGAAGGAGAG-----  
GTAATGATTAGATCTGAAAATATCACAACAAT-----GCCAAAATATAATAGTACAATTTGCC----  
-----GAGCCTGTAAAA-----ATTAATTGTACCAGACCTAACAACAATACAAGAATG-----  
-AGTATACGTATA-----GGACCAGGACAAGCA---TTC-----TATGCAACAGGTGAC-----  
-----ATAATAGGGAACATA-----AGACAAGCACATTGT---AATGTGAGTAGAGCA---  
GAATGGAATACAACCTTTGCAAAAGGTAGTCACAAAATTAAGG-----GAATACTTTGGG----  
-----AACACAACAATAAATTTTGCT-----  
AACTCCTCAGGAGGGGATCTAGAAATCACA---ACACATAGTTTTAATTGTGGAGGAGAA---  
TTTAAACAGCTCCAGGCAAGAGTCCTGGCTGTGGAAAGATACCTAAGGGATCAACAGCTCCTAGGAATTTGGG  
GCTGCTCTGGAAGAAATCATCTGCACCACTAATGTGCCCTGGAAGTCTAGTTGGAGC-----  
-----AATAAATCTCAGAGTGAGATATGG-----GAG-----  
AACATGACCTGGCTGCAATGG---GATAAAGAAATTAGCAATTACACAGACATAATATAT---  
AATCTACTTGAAGAATCGCAGAACCAGCAGGAA-----  
-----

AAGAATGAACAAGACTTATTGGCATTGGACAAGTGGGCAAATCTATGGAATTGGTTTGACATATCAAACCTGGC  
 TGTGGTATATAAAAATATTTATAATGATAGTAGGAGGCTTAATAGGATTAAGAATAGTTTTTACT---  
 GTGCTTTCTATAATA-----AATAGAGTTAGGCAGGGATACTCACCC-----  
 TTGTCTGTTTCGCTAGTAATTTGGTTGATACCATAGCAATAGTAGTAGCTGGC---  
 TGGACAGATAGGGTTATAGAAATAGCACAAGGAATAGGTAGAGCT-----  
 -----ATTCTCCACATA-----CCTAGAAGAATCAGACAGGGCTTTGAAAGAGCTTTTGCTA---TAA  
 >KX168075  
 GCT---GCA-----  
 GGAAACTTGTGGGTTACTGTCTACTATGGGGTGCCTGTGTGG---AAGGACGCAGAG---  
 ACCACTCTATTCTGTGCATCAGATGCTAAAGCATATGATGCAGAA---GTGCATAAT-----  
 -----ATCTGGGCTACA---CATGCCTGTGTACCTACAGAC---  
 CCCAACCCACAAGAAATAAATTTGGAA-----AATGTGACAGAAGAGTTTAAAC-----  
 -----ATGTGGAAAAATAACATGGTAGAACAGATGCATACAGATATA---  
 ATCAGTCTATGGGACCAAGGCCTA---AAGCCATGTGTAAAGTTA---  
 ACCCCTCTCTGTGTTACTTTAGATTGCCATAATGTCACCCATATCAATATCACCAGT-----  
 -----  
 -----GACATGAAGGAAGAAATAACA---  
 AACTGCTCTTACAATGTGACCACAGTAATAAGG-----  
 GATAAGAAACAGAAAGTATTCTCACTT---TTTTATAGACTTGATGTAGTACAAATTGGAGGT-----  
 -----  
 -----  
 AATAATAGGACTAATAGTCAGTATAGATTAATAAACTGTAACACCTCAGCCATTACACAG---  
 GCTTGTCCAAAGGTAACCTTTGAGCCAATTCCCATACATTATTGTGCCCCAGCTGGTTTTGCGATTCTAAAGT  
 GTAAG---GATGAGAAGTTCAAT-----GGAACAGGGCTATGTAAAAAT-----  
 -GTCAGC---ACAGTACAATGCACACATGGAATCAAGCCAGTAGTATCAACT---  
 CAACTGCTGTTAAATGGCAGTCTAGCAGAAGGAAAG-----  
 GTAAGAATTAGATCTGAAAATATCACAAACAAT-----GCCAAAAACATAATAGTACAACCTTGCC---  
 -----AGCCCTGTAACA-----ATTAATTGTATCAGACCTAACAACAATACAAGAAAA-----  
 -AGTGTACACCTA-----GGACCAGGACAAGCA---TTC-----TATGCAACAGGTGGC-----  
 -----ATAATAGGGAAGATA-----AGACAAGCACATTGT---AATGTTAGTAGAAAA---  
 GAATGGAATAACACTTTGCAAAGGGTAGCCAACCAATTAAGA-----CCATACTTTAAG---  
 -----AACAACACAATAACCTTTGCT-----  
 AGCTCATCAGGAGGGGATCTAGAAATTACA--ACTCATAGTTTTAATTGTGGAGGAGAA---  
 TTTAAACAGCTCCAGGCAAGAGTCCTAGCTGTGGAAAGATACCTAAAGGATCAACAGCTCCTAGGAATTTGGG  
 GCTGCTCTGGAAGAACTCATCTGCACCACTAATGTGCCCTGGAACCTCTAGTTGGAGT-----  
 -----AATAAATCCCAGGATGAGATATGG-----GGA-----  
 AACATGACCTGGCTGCAATGG---GATAAAGAAGTTAGCAATTACACACAGATAATATAT---  
 ACTCTAATTGAAGAATCGCAAAACCAGCAAGAA-----  
 -----  
 AAAAAATGAACAAGACTTATTAGCATTGGACAAGTGGGCAAGTCTGTGGAATTGGTTTAACATCTCACAATGGC  
 TGTGGTATATAAAGATATTTATAATAATAGTAGGAGGCTTAATAGGATTAAGAATAGTTTTTTGCA---  
 GTGCTTTCTGTGATA-----AATAGAGTTAGGCAGGGATACTCACCT-----  
 TTGTCAATTTGCTATTAATTTGTTTGATACCATAGCAATAGCAGTAGCTGGC---  
 TGGACAGATAGGGTTATAGAACTAGGACAAAGACTTTGTAGAGCT-----  
 -----ATTCTCCACATA-----CCTAGAAGAATCAGACAGGGCTTTGAAAGGGCTTTTGCTA---TAA  
 >AF004885  
 GCT---GTG-----  
 GAAAACTTGTGGGTTACTGTCTATTATGGGGTACCTGTGTGG---AGAGATGCAGAC---  
 ACCACCTTATTTTGTGCATCAGATGCTAAAGCATATGAGACAGAA---AAGCATAAT-----  
 -----GTCTGGGCTACA---CATGCTTGTGTACCCACAGAC---  
 CCCAACCCACAAGAAATACATTTGGAC-----AATGTGACAGAAAAGTTTAAAC-----  
 -----ATGTGGAAAAATAACATGGTAGAGCAGATGCACACAGATATA---  
 ATCAGTCTATGGGATCAAAGCCTA---AAGCCATGTGTAAAGTTA---  
 ACCCCTCTCTGCGTTACTTTACATTGTACAAATGTCACAAGTGTCAAC-----  
 -----  
 -----ACCCTGGAGACAGGGAAGGCTTAAAA---  
 AACTGCTCTTTCAATATGACCACAGAATAAGG-----  
 GATAAGAGACAGAAAGTATATTCACCTT---TTTTATAGACTTGATATAGTACCAATTAATGAA-----  
 -----  
 -----

AATCAGGGTAGTGAATATAGATTAATAAATTGTAATACCTCAGCCATTACACAG ---  
GCGTGCCCAAAGGTATCCTTTGAGCCAATTCCTATACATTATTGTACCCCAGCTGGTTTTGCGATCCTAAAGT  
GTAAG --- GATGAGGGGTTCAAT --- GGGACAGGGTTATGCAAGAAT ---  
-GTCAGC --- ACAGTCCAATGCACACATGGAATCAAGCCAGTAGTATCAACT ---  
CAATTGCTGTTGAATGGCAGTCTAGCAGAAAAAAT ---  
ATAACAATTAGATCTGAAAATATCACAACAAT --- GCCAAAATTATAATAGTACAACCTTGTC ---  
-----CAACCTGTGACA-----ATTAAGTGTATCAGACCTAACAACAATACAAGAAAA-----  
-AGTATACGTATA-----GGACCAGGACAAGCA---TTC-----TATGCAACAGGTGAC-----  
-----ATAATAGGGGATATA-----AGACAAGCACATTGT---AATGTCACTAGATCA---  
AGATGGAATAAGACTTTACAAGAGGTAGCTGAAAAATTAAGA-----ACATACTTTGGG-----  
-----AACAAAACAATAATATTTGCT-----  
AACTCCTCAGGAGGGGATCTAGAGATCACA---ACACATAGTTTTAATTGTGGAGGAGAA---  
TTTAAACAGCTCCAGGCAAGAGTCCTGGCTGTGGAAAGATACCTAAGGGATCAACAGCTCCTAGGAATTTGGG  
GCTGCTCTGGAAAACCTCATCTGCACCACCTAATGTGCCCTGGAACTCTAGTTGGAGT-----  
-----AATAAATCTCTGGATGAGATATGG-----AAC-----  
AACATGACCTGGCTGCAATGG---GATAAAGAAATTAACAATTACACACAACCTAATATAT---  
AGACTAATTGAAGAATCGCAGAACCAGCAGGAA-----  
-----  
AAGAATGAAAAGGAATTATTGGAGTTGGACAAGTGGGCAAATCTGTGGAGTTGGTTTGACATATCAAATTGGC  
TGTGGTATATAAAAAATATTTATAATAATAGTAGGAGGCTTAATAGGATTAAGAATAGTTTTTTGCT---  
GTGCTTTCTGTAATA-----AATAGAGTTAGGCAGGGATACTCACCT-----  
TTGTCAATTTGCTATTAATCTAGTTGATACCATAGCAATAGCAGTAGCTGGC---  
TGGACAGATAGGGTTATAGAAATAGCACAAAGAATTGGTAGAGCT-----  
-----ATCCTCCACATA-----CCTGTAAGAATCAGACAGGGCTTAGAAAGGGCTTTGCTA---TAA  
>AF407151  
GCT---GCA-----  
GAAAACTTGTGGGTTACTGTCTACTATGGGGTACCTGTGTGG---AAAGACGCAGAG---  
ACCACCCATTTTTGTGCATCAGATGCTAAACATATGATACAGAG---GTGCATAAT-----  
-----ATCTGGGCTACA---CATGCCTGTGTACCTACAGAC---  
CCCAACCCACAAGAAATAAATTTGGGA-----AATGTGACAGAAGAGTTTAAC-----  
-----ATGTGGAAAAATAACATGGTAGAGCAGATGCATACAGATATA---  
ATCAGTCTATGGGACCAAGGCCTA---AAACCATGTGTAAAGTTA---  
ACTCCTCTCTGCGTTACTTTAGATTGCTATGATGTCACTAATTTCCAC-----  
-----  
-----AATGACATGCAAGAAGGAATAAAA---  
AACTGCTCTTTCAATATAACCACAGAACCTAAGG-----  
GATAAGAAACAGAAAGTACATTCACCT--TTTTATAGGCTTGATGTAGTACAAATTGGGGAT-----  
-----  
AATAGTAGTAGTGGTCAGTATAGATTGATAAATTGTAACACCTCAGCCATTACCCAG---  
GCTTGTCCAAAGTAACCTTTGAGCCAATTCCTATACATTATTGTGCCCAGCTGGTTTTGCGATTCTAAAGT  
GTAAT---GATAAGGAGTTCAGT-----GGAACAGGGCCATGCAAGAAT-----  
-GTTAGC---TCAGTACAATGCACACATGGAATCAAGCCAGTAGTATCAACT---  
CAACTGCTGTTAAATGGCAGTCTAGCAGAAGAAAA-----  
GTAAGAATTAGATCTGAGAATATCAGACAAAT-----GGCAAAAACATAATAGTACAACCTTAAA-----  
-----ACACCTGTAAAC-----ATTAGTTGTACCAGACCTAACAACAATACAAGAAAA-----  
-AGTATACGTATA-----GGACCAGGACAAGCA---TTC-----TATGCAACAGATGAC-----  
-----ATAATAGGGAATATA-----AGACAAGCATATTGT---ACTGTTAATAGAACA---  
CAATGGGATGACACTTTGCAAGAGGTAGCCAACCAATTAAGA-----ATATACTTT-----  
-----AACAAAACAATAATTTTTTAAT-----  
AACTCAGCAGGAGGGGATCTAGAAATTACA---ACACATAGTTTTAATTGTGGAGGAGAA---  
TTTAAACAGCTCCAGGCAAGAGTCCTGGCTGTGGAAAGATACCTAGAGGATCAACAGCTCCTAGGAATTTGGG  
GCTGCTCTGGAAAACCTCATCTGCACCACCTAATGTGCCCTGGAACTCTAGTTGGAGT-----  
-----AATAAATCCCAGAGTGAGATATGG-----GAA-----  
AACATGACCTGGCTACAATGG---GATAAAGAAATTAACAATTACACACAACCTAATATAT---  
AGTCTAATTGAAAAATCGCAGACCCAGCAGGAA-----  
-----  
ATAAATGAACAAGAATTATTAGCATTGGACAAGTGGGCAAATCTGTGGAATTGGTTTGACATATCAAACCTGGC  
TGTGGTATATAAGGATATTTATAATAATAGTAGGAGGCTTAATAGGATTAAGAATAGTTTTTTGCA---  
GTGCTTTCTGTAATA-----AATAGAGTTAGGCAGGGATACTCACCT-----

CTATCATTTTGCTATTAATTTGCTTGATACCATAGCAATAGCAACAGCTAAC---  
 TGGACAGACAGGGTTATAGAACTAGGACAAAGACTTTGTAGAGCT-----  
 -----ATTTTACACATA-----CCTAGAAGAATCAGACAGGGCTTCGAAAGGGCTTTGCTA--TA-  
 >AF407162  
 GCT---GTA-----  
 GACAACTTGTGGGTTACTGTCTACTATGGGGTACCTGTGTGG--AAAGAGGCAGAA---  
 ACCACCTTATTTTGTGCATCAGATGCTAAAGCATATGAGACAGAA--AAACATAAT-----  
 -----GTCTGGGCTACA---CATGCCTGTGTACCCACAGAC---  
 CCCAACCCACAAGAAATACATTTGGAA-----AATGTGACAGAAGAGTTTAAAC-----  
 -----ATGTGGAAAAATAACATGGTAGAGCAGATGCATACAGATATA---  
 ATCAGTCTATGGGACCAAAGCCTA--AAGCCATGTGTAAAGTTA---  
 ACCCCTCTCTGTGTACTTTAGATTGTAAACAATGTCACCAATAATGGC-----  
 -----  
 -----ACCAGTGACATGAGAGAAGAAATAAAA---  
 AACTGCTCTTTCAATATGACCACAGAACTAAGG-----  
 GATAAGAGACAGAAAGTATATTCACCT--TTTTATAAACTTGATATAGTACAAATTAATGAAAATCAG----  
 -----  
 -----  
 GGTAATAGTAGTAACAATAAGTATAGATTAATAACTTGTAATACCTCAGCCATTACACAA---  
 GCATGCCCAAAGGTAACCTTTGAGCCAATTCCCATACATTATTGTGCTCCAGCTGGTTTTGCGATCCTAAAGT  
 GTAAG---GATGAGGAGTTCAAT-----GGAACAGGGCCATGCAAGAAT-----  
 -GTCAGC---ACAGTCCAATGCACACATGGAATCAAGCCAGTAGTATCAACT---  
 CAACTACTGTAAATGGCAGTCTAGCAGAAAAAGAG-----  
 GTAAAAATTAGATGTGAAAATATCACAAACAAT-----GCCAAACTATAATAGTACAACCTTGTC----  
 -----AATCCTGTGAAA-----ATTAATTGTACCAGACTTAACAACAATACAAGAAAA-----  
 -AGTATACATATA-----GGACCAGGACAAGCA--TTC-----TATACAACAGGTGAC-----  
 -----ATAATAGGGGATATA-----AGACAAGCACATTGT--AATGTCAACAGAACA---  
 GAATGGAACAACACTTTGCACCAGGTAGTCGAACAATTAAGA-----AAACACTTTAAGCAA-  
 -----TTTAAGAACAAAACAATAAGCTTTGCT-----  
 AACTCCACAGGAGGGGATCTAGAAATAACA--ACACATAGTTTTAATTGTGGAGGAGAA---  
 TTTAAACAGCTCCAGGCAAGAGTCCTGGCTGTGGAAAGATACCTAAAAGATCAACAGCTCCTAGGAATTTGGG  
 GCTGCTCTGGAAGAACTCATCTGCACCACTAGTGTGCCCTGGAATTCTAGTTGGAGT-----  
 -----AATAAATCCCAGAATGAGATATGG-----GAC-----  
 AACATGACCTGGCTGCAATGG--GATAAAGAAATTAGCAATTACACACAGATAATATAT--  
 GATCTACTTGAAGAATCGCAGAACCAGCAGGAA-----  
 -----  
 AAGAATGAACAAGACTTATTGGCATTGGACAAGTGGGCAAATCTGTGGAATTGGTTTGACATATCAAACCTGGC  
 TGTGGTATATAAAAAATATTTATAATGATAGTAGGAGGTTAATAGGATTAAGAATAGTTTTTTGCT--  
 GTGCTTTCTGTAATA-----AATAGAGTTAGGCAGGGATACTCACCT-----  
 TTGTCGTTCTGCTACTAATTTGCTTGATATCGTAGCAATAGTAATAGCTGGG--  
 TGGACAGGTAGGGTTATAGAAATAGGACAGAGACTTTGTAGAGCT-----  
 -----TTTCTCAACATA-----CCTAGAAGAATCAGACAGGGCTTCGAAAGGGCTTTGCTA--TAA  
 >AF407156  
 GTT---ACA-----GGACAG---  
 TGGGTCACAGTATACTATGGAGTACCTGTATGG--AAAGATGCAGAG---  
 ACCACCTATTTTGTGCATCAGATGCTAAAGCATATGAGACAGAA--AAGCATAAT-----  
 -----GTCTGGGCTACA---CATGCCTGTGTACCCACAGAC---  
 CCCAACCCACAAGAAATACGTTTGAA-----AATGTAACAGAAGATTTTAAAC-----  
 -----ATGTGGAAAAATAGCATGGTGGAGCAGATGAATGAGGATATA---  
 ATTAGTCTATGGGATCAAAGCCTA--AAACATGTGTAAAATTA---  
 ACCCCACTCTGTGTCACTCTAAACTGTACTGACTGGACCAATAATGCCACTAGTACGAAC-----  
 -----  
 -----CAAACCACTCCTGCCACTAGTGAGGAGACAGGAGTGAAA---  
 AACTGCTCTTTCAATATAACCACAGAACTAAGA-----  
 GATAAGAAACAGAAAGTCTATTCACCTG--TTTTATAAACTTGATGTAGTACAAATTAGTGAAAATAATAGT-  
 -----  
 -----  
 AGTAACAGTAGTAATTTTACTCAGTATAGACTAATAAAATTGTAATACCTCAGCCATCACACAG---  
 GCTTGCCCAAAGGTATCCTTTGAGCCAATTCCCTATACATTATTGTGCCCCAGCTGGATTTGCGATTCTAAAAAT  
 GTAAT---GATAGTGTATTCAAT-----GGAACAGGGCCATGCAAGAAT-----

-GTCAGC---ACAGTACAATGCACACATGGAATCAAGCCAGTAGTATCAACT---  
CAACTGNTGTTTAAATGGCAGTTTAGCAGAAAGAAAG-----  
GTAATGATTAGATCTGAAAATATTACAAACAAT-----GCCAAAAACATAATAGTACAATTTACC----  
-----AAGCCTGTGAAT-----ATTACTTGTATCAGACCTGGCAACAATACAAGAAAA-----  
-AGTGTACGCATA-----GGACCAGGACAAGCA---TTC-----TATGCAACAGGTGAC-----  
-----ATAACAGGGGACATA-----AGAAACGCACATTGT---GTTGTCAATAGAACA---  
GAGTGGAATAACACTTTACAAAAGGTAGTTGAACAATTAAGA-----GAATACTTCCCT----  
-----AATAAAACAATAATCTTTACT-----  
AACTCCTCAGGGGGGACATAGAAATTACA---ACACATAGTTTTAATTGTGGAGGAGAA---  
TTTAAACAGCTCCAGGCACGAGTCCTTGCTGTGGAAAGATACCTAAAGGATCAACAGCTCCTGGGAATTTGGG  
GCTGCTCTGGAAAACTCATCTGCACCATTCTGTGCCTTGGAACCTCTAGTTGGAGT-----  
-----AATAAAACTCAGCAGGAGATTTGG-----AAC-----  
AACACGACCTGGTTACAATGG---GATAAAGAAATTAGCAATTACACAGGCACAATATAC---  
AGGCTACTTGAAGAATCGCAGAACCAGCAGGAA-----  
-----  
AAGAATGAACAAGACTTATTGGCATTAGATAAGTGGGCAAATCTGTGGAATTGGTTTGACATATCAAAATGGC  
TGTGGTATATAAAAATATTTATCATGGTAGTAGGAGGCTTAATAGGATTAAGAATAGTGT'TTGCT---  
ATAATTTCTGTAGTG-----AATAGAGTTAGGCAGGGATACTCACCT-----  
TTGTCA'TTTGCTACTAATTTGCTTGATACCACAGCAATAGCAGTAGCTGGC---  
TGGACAGATAGGGCTATAGAAAATAGTACAAAGAATTGTTAGAGCT-----  
-----ATTCTCCACATA-----CCTAGAAGAATAAGACAGGGATTTCGAAAGGGCTTTGCTA---TAA  
>KT008652  
GCT---GCA-----  
GACAACTTGTGGGTTACTGTCTATTATGGGGTACCTGTGTGG---AGAGATGCAGAG---  
ACCACCTTATTTTGTGCATCAGATGCTAAAGCATATAAGACAGAA---ATGCATAAT-----  
-----GTCTGGGCTACA---CATGCCTGTGTACCCACAGAC---  
CCCAACCCACAAGAAATACATTTGGAA-----AACGTGACAGAAGAGTTTAAC-----  
-----ATGTGGAAAAATAACATGGTAGAGCAGATGCATACAGATATA---  
ATCAGTCTATGGGACCAAAGCCTA---AAACCATGTGTAAAGCTA---  
ACCCCTCTCTGCGTTACTTTAAATTGTGCCAATGTCAATGTCACGGGCGCCTCC-----  
-----  
-----AGGAATAACTCCCAGGGGGACGGGGGAGAAATGAAA---  
AACTGCTCTTTCAATATGACCACAGAGCTAAGG-----  
GATAAGAGACAGAAGGTATATTCACCT--TTTTATAGACTTGATATGGTACAAATTAATGGAAAT-----  
-----  
CAAGATAATAGTAGTAATAGTAGTGAGTATAGATTAATAAAATTGTAATACCTCAGCCATTACACAA---  
GCCTGCCCAAAGGTATCCTTTGAACCAATTCCCATACATTATTGTGCCCCAGCTGGTTTGGCGATCCTAAAGT  
GTAAG---GATGAAGAGTTCAAT-----GGAACAGGGCCATGCAAGAAT-----  
-GTCAGC---ACAGTACAATGCACACATGGAATCAAGCCAGTAGTATCAACT---  
CAGCTGCTATTAAATGGCAGTTTAGCAGAAAAAGAG-----  
GTAAAAATTAGATCTGAAAATATCACAAACAAT-----GCCAAAAATATAATAGTACAGCTTAAC---  
-----GAGTCTGTGATA-----ATTAATTGTACCAGACCTAACAAACAATACAAGAACA----  
-AGTATACGTATA-----GGACCAGGACAAGCA---TTT-----TATGCAACAGGTGGC-----  
-----ATAATAGGGGATATA-----AGGCAAGCACATTGT---AATGTCAGTAAATCA---  
AAATGGAATGAACTTTACAAAAGGTAGTTACCCAATTAAAG-----AAATACTTTGGG---  
-----AACAAAACAATAATATTTAAG-----  
AGCTCCTCAGGAGGGGATCTAGAAATCACA---ACACATAGTTTTAATTGTGGAGGAGAA---  
TTTAAACAGCTCCAGGCAAGAGTCCTGGCTGTGGAAAGATACCTAAGGGATCAACAGCTCCTAGGAATTTGGG  
GCTGCTCTGGAAAACTCATCTGCACCCTACGGTGCCTTGGAACCTCTAGTTGGAGT-----  
-----AATAAATCTCTGAGTGACATATGG-----GAC-----  
AACATGACCTGGCTGCAATGG---GATAAAGAAATTAGCAATTATACACAAATAATATAT---  
GACCTAATTGAAGAAGCGCAAAACCAGCAGGAA-----  
-----  
AAGAATGAACAAGACTTATTGGCATTGGACAAGTGGGCAAATCTGTGGAATTGGTTTGACATATCAAACTGGC  
TGTGGTATATAAAAATATTTATAATGATAGTAGGAGGCTTAATAGGATTAAGAATAGT'TTTTGCT---  
GTGCTTTCAGTAATA-----AATAGAGTTAGGCAGGGGTACTCACCT-----  
TTGTGCTTCGCTATTAGTTTGTATCGATACTATAGCAATAGTAGTAGCTGGC---  
TGGACAGATAGGATTATAGAAAATAGGACAAGCAGTTGGTAGAGCT-----  
-----ATTCTCCACATA-----CCTAGAAGAATCAGACAGGGCTTCGAAAGAGCTTTGCTA---TAA

>AF407157

AGT---GCT---GCA-----  
GGAAACTTGTGGGTTACTGTCTACTATGGGGTACCTGTGTGG---AGAGACGCAGAG---  
ACCACCTTATTTTGTGCATCAGATGCGAAAGCATATGATAGAGAA---GCGCATAAT-----  
-----GTCTGGGCTACA---CATGCCTGTGTACCTACAGAC---  
CCTAGCCCACAAGAAGTACCTTTGGGA-----AATGTGACAGAAGAGTTTAAAC-----  
-----ATGTGGAAAAATAACATGGTAGAGCAGATGCATACAGATATA---  
ATCAGTCTATGGGACCAAAGCCTA---CAGCCATGTGTAAAGTTA---  
ACCCCTCTCTGTGTTACTTTAAATTGTAGTAATATTAACAATATCCCCAATGTTAATGCT-----  
-----  
-----AGCAGTATCCCCAAGGACGTGAAAGAAGAAATAAAA---  
AACTGCTCTTTCAATATGACCACAGAATTAAAG-----  
GATAAGAAACAGAATGTATATTCACCTT---TTTTATAGACTGGATGTAGTACCACTTGAGACCAACCTA----  
-----  
-----  
AAACAGAATAGCAGCCACAGTCGGTATAGATTAATAAAATTGTAATACCTCAGCCATTACACAA---  
GCTTGTCCAAAGGTATCCTTTGAACCAATTCCCATACATTATTGTGCTCCAGCTGGTTTTTCGATTCTAAAGT  
GTAAT---GATAAGGAGTTCAAT-----GGAACAGGGCTATGCAAAAAT-----  
-GTCAGC---ACAGTACAATGCACACATGGAATCAAGCCAGTAGTGTCAACT---  
CAACTACTGTTTAAATGGCAGTCTAGCAGAAGGAAAG-----  
GTAATGGTCAGATCTGAAAATATCACAACAAT-----GCCAAGAACATAATAGTACAATTTAAC----  
-----AATTCTGTACAA-----ATTAATTGTATCAGACCTGGCAACAATACAAGAAAA-----  
-AGTATACATTTA-----GGACCAGGAAAAGTA---TTC-----TATGCAACAAAT-----  
-----ATAATAGGGGATATA-----AGAAAAGCACATTGT---AATGTCAATAGACAA---  
CAATGGAATAAAGCTTTGCAAGATGTAGCCACACAATTAAGA-----ACACACTTTAGA----  
-----AACAGAACAATAATCTTTAAT-----  
AATTCCTTAGGAGGAGATCTAGAAATAACA---ACACATAGTTTTAATTGTAGAGGAGAA---  
TTTAAACAGCTCCAGGCAAGAGTCCTGGCTGTGGAAAGATACCTAAAGGATCAACAGCTCCTAGGAATCTGGG  
GCTGCTCTGGAAGAACTCATCTGCACCACTACTGTGCCCTGGAACCCTAGTTGGAGT-----  
-----AATAAATCCCAAAGTGAGATATGG-----GAC-----  
AATATGACCTGGATGCAATGG---GATAAAGAAATTAACAATTACACACAGATAATATAT---  
GATCTAATTGAAGAATCGCAGAGACAGCAGGAA-----  
-----  
AAGAATGAACAAGACTTATTGGCATTGGACAAGTGGGCAAATCTGTGGAATTGGTTTGACATATCAAATTGGC  
TGTGGTATATAAAAATATTCTAATGATAGTAGGAGGCCAATAGGATTAAGAATAGCTTTTGCT---  
GTGCTTTCTGTAATA-----AATAGAGTTAGGCAGGGATACTCACCT-----  
CTCTCGTTCGCTATTAATTTGCTTGATACCATAGCGATAGCAGTAGCTGAA---  
TGGACAGATAGGATTATAGAAATAGGACAAAGACTTTGTAGAGCT-----  
-----ATTATCAACATA-----CCTAGAAGAATCAGACAGGGCTTCGAAAGGGCTTTGCTA--TAA  
>FJ866112  
GCT---GCA-----  
AACAACTTGTGGGTTACTGTCTACTATGGGGTACCTGTGTGG---AAAGACGCAGAG---  
ACCACCTTATTTTGTGCATCAGATGCGAAAGCATATGATACGGAA---GTGCATAAT-----  
-----GTCTGGGCTACA---CATGCCTGTGTGCCTACAGAC---  
CCCAACCCACAAGAAATAAATTTGGAA-----AATGTGACAGAAGAGTTTAAAC-----  
-----ATGTGGAAAAATGGCATGGTAGAGCAGATGCATACAGATATA---  
ATCGGTCTATGGGACCAAAGCCTA---AAGCCATGTGTAAAGTTA---  
ACCCCTCTCTGCGTTACTTTAGATTGTAGTAGCTATAATGTCACCACCACCAAT-----  
-----  
-----TTCACCAATGAAATGCCAGGAGAAATACAA---  
AACTGCTCTTTCAATATGACCACAGAATTAAAG-----  
GATAAGAAACAGAAAGTATATTCACCTT---TTTTATAGATCAGATGTAGTACCAATCAACAGC-----  
-----  
-----  
AGCAGTAGCAGTAGTCAGTATAGACTAATAAATTGTAATACCTCAGCCATTACACAA---  
GCTTGTCCAAAGGTAACCTTTGAGCCAATTCCCATACATTATTGTGCACCAGCTGGTTTTTCGATTCTAAAGT  
GTAAG---GATAAAGAGTTTCAGT-----GGAACAGGGTCGTGCAAGAAT-----  
-GTCAGC---ACAGTACAATGCACACATGGAATCAAGCCAGTAGTATCAACT---  
CAACTGCTGTTTAAATGGCAGTCTAGCAGAAGGAAAG-----  
GTAATGATTAGATCTGAAAATATCACAACAAT-----GCCAAAAACATAATAGTACAATTTAAC----

-----AAGCCTGTAGAA-----ATTAAGTGTACCAGACCTAACAAACAATACAAGAAAA-----  
-AGTGTACGTATA-----GGACCAGGACAAGCA---TTC-----TATGCAACAGGTGAC-----  
-----ATAATAGGGGATATA-----AGGAGAGCATATTGT---AATGTCAGTAGAACA---  
AAATGGAATCAAACCTTTGCGAGAGGTAGTCAGCCAATTAAGA-----ACACAATTTGAG-----  
-----AACAAAACAATAGTCTTTGAT-----  
AAACCCATAGGAGGGGATCTAGAAATAACA---ACACATAGTTTTAATTGTGGGGGAGAA---  
TTTAAACAGCTCCAGGCACGAGTCCTGGCTCTGGAAAGATACCTAAAGGATCAACAGCTCCTAGGAATTTGGG  
GCTGCTCTGGAAAACCTCATCTGCACCACTAATGTGCCCTGGAACCTAGTTGGAGT-----  
-----AATAAATCCCAGAGTGAGATATGG-----GAA-----  
AACACGACCTGGATGCAATGG---GATAAAGAAATTAGTAATTACACACAGATAATATAT---  
GGTCTAATTGAAGAATCGCAGAACCAGCAGGAA-----  
-----  
AAGAATGAACAAGACTTATTGGCATTGGACAAGTGGGCAAATCTGTGGAATTGGTTTGACATATCAAAATGGC  
TGTGGTATATAAAAAATATTTATCATGATAGTAGGAGGCTTAATAGGATTAAGAATAGTTTTTTGCT---  
GTGCTTTCTATAATA-----AATAGAGTTAGGCAGGGATACTCACCT-----  
TTGTCGTTTCGCTATTAATTTGCTTGATACCATAGCAATAGTAGTAGCTGGG---  
TGGACAGATAGGGTTATAGAACTAGGACAAAGGCTTTGTAGAGCT-----  
-----ATTCTCCATATA-----CCTAGAAGAATCAGACAGGGCGCCGAAAGGGCTTTGCTA---TAA  
>AY322190  
ACT---GCA---GAA-----AAC---TTA---  
GAAAAACGGTGGGTACTGTCTACTATGGGGTACCTGTGTGG---AAAGATGCAGAT---  
ACCACCTTATTTTGTGCATCAGATGCTAAAGCATATGAGACAGAA---AAGCATAAT-----  
-----GTCTGGGCTACA---CATGCCTGCGTACCCACAGAC---  
CCCAACCCACAAGAAATACATTTGGAA-----AATGTGACAGAAGAGTTTAAC-----  
-----ATGTGGAAAAATAACATGGTAGAGCAGATGCATACAGATATA---  
ATCAGTCTATGGGACCAAAACCTA---AAACCATGTGTAAAGTTA---  
ACCCCTCTCTGTGTACTTTAAATTGTAGCCAGGTCACCAATGCTAGCATCACCACCAAT-----  
-----  
-----GGTAGTAGGTTCCATGAGAACATGAAAGGAGAAATACAA---  
AACTGCTCTTACAATGTGACCACAGAATTAAGG-----  
GATAAGAGAAAGAAAGTATATTCACCT--TTTTATAGCCTTGATGTAGTAGAAATTGATAAAGACAAG---  
-----  
-----  
AATAATAGTAGGAATAGTAGTCAGTATAGATTAATAAATTGTAATACCTCAGCCATCACACAA---  
GCTTGTCCAAAGGTATCCTTTGAGCCAATTCCCATACATTATTGTGCCCCAGCTGGTTTTGCGATCCTAAAGT  
GTAAT---GATGAGAATTTCAAT-----GGAATAGGGCTATGCAAGAAT-----  
-GTCAGC---ACAGTACAATGCACACATGGAATCAAGCCAGTAGTATCAACT---  
CAACTGCTGTTTAAATGGCAGTCTAGCAGAAAACGAG-----  
GTAAAAATTAGATCTGAAAATATTACAAACAAT-----GCCAAAACATAATAGTACAATTTGCC---  
-----AGGCCTGTAACA-----ATTAATTGTACCAGACCTAATGACAATATAAGAAAA---  
-AGTGTACATATA-----GGACCAGGACAAGCA---TTC-----TATGCAACAGGGGAC-----  
-----ATAATAGGGGATATA-----AGACGAGCACATTGT---AATGTCAGTAGAGTA---  
GACTGGTATAAAACCTTACAACAGGTAGCTACACAATTAGGG-----AAACACTTTGAG---  
-----AACAAAACAATAACTTTTACT-----  
AACTCCTCAGGAGGGGATCTAGAAATTACA---ACACATAGTTTTAATTGTGGAGGAGAA---  
TTTAAACAGCTCCAGGCGAGAGTCCTGGCTCTGGAAAGATACCTAAGGGATCAACAGCTCCTAGGACTTTGGG  
GCTGCTCTGGAAAACCTCATCTGCACCACTAATGTGCTCTGGAACAATAGTTGGAGT-----  
-----AATAAAACTCAGGATGAAATATGG-----GAC-----  
AACATGACCTGGCTACAATGG---GATAAAGAAATTAGCAATTACACACAAGTAATATAT---  
ACCCTACTTGAAGACTCGCAGAACCAGCAGGAA-----  
-----  
AAGAATGAACAAGACTTATTGGCATTGGACAAGTGGGCAAATCTATGGAATTGGTTTGACATATCAAATTGGC  
TGTGGTATATAAAAAATATTTATAATGATAGTAGGAGGCTTAATAGGATTAAGAATAGTTTTTTGCA---  
GTGCTTTCTGTAATC-----AATAGAGTTAGGCAGGGATACTCACCT-----  
TTATCGTTTTGCTATTAATTTGCTTGATACCATAGCAATAGCAGTAGCTGGC---  
TGGACAGATAGGGTTATAGAAAATAGGACAAAGACTTGGCAGAGCT-----  
-----ATTCTCCACATA-----CCTAGAAGAATCAGACAGGGCTTTGAAAGAGCTTTGCTA---TAA  
>AY322193  
ACT---GCA-----  
GAAAACTTGTGGGTACTGTCTTACTATGGGGTGCCTGTGTGG---AAAGACGCAGAG---

ACCACCCTATTTTGTGCATCAGATGCTAAAGCATATGATACAGAA---GTGCATAAT-----  
 -----ATCTGGGCCACA---CATGCTTGTGTACCTACAGAC---  
 CCCGACCCACAAGAAATAAATTGGA---AATGTGACAGAAGAGTTTAA---  
 -----ATGTGGAAAAATAACATGGTAGAGCAGATGCATACAGATATA---  
 ATCAGTCTATGGGACCAAGGCCTA---AAGCCATGTGTAAAGTTA---  
 ACCCCTCTCTGCGTTACTTTAGATTGTAGCTATAATGTCACCTACCAATGTC-----  
 -----  
 -----TCCAATGACATGCAAGGAGAAATAAAA---  
 AACTGCTCTTTCAATGTGACCACAGTATTAAGG-----  
 GATAGGAAACAGCAAGTATATTCACCT---TTTTATAGACTTGATGTAGTACCAATGAGTAAT-----  
 -----  
 -----  
 GATAGTCAGTACAGATTAATAAATTGTAACACCTCAGCCATTACACAG---  
 GCTTGTCCAAAGGTAACCTTTGAGCCAATTCCCATACATTATTGTGCCCCAGCTGGTTTTGCGATCCTAAAGT  
 GTAAG---GATAAGGATTTCAAT-----GGAGCAGGGCTATGCAAGAAT-----  
 -GTCAGC---ACAGTACAATGCACACATGGAATCAAGCCAGTAGTATCAACT---  
 CAACTGCTGTTAAATGGCAGTCTAGCAGAAGGAAAT-----  
 ATAACAATTAGATCTGAAAATATCACAGACAAT-----GGCAAAACATTATAGTACAATTTACC---  
 -----AGCCCTGTAAAA-----ATTAATTGTACCAGACCTAACAACAATACAAGGAAA---  
 -AGTGTACATATA-----GGACCAGGACAAGCA---TTC-----TATGCAACAGGTGAC-----  
 -----ATAATAGGGAATATA-----AGAAAAGCACATTGT---GATGTTAATAGAACA---  
 GAATGGAATAAACTTTGCAAGAGGTAGCCAAACAATTAGCA-----ACATACTTTGAG---  
 -----AACAAAACAATAATCTTTACT-----  
 AACTCCTCAGGAGGGGATCTAGAAGTTACA---ACTCATAGTTTTAATTGTGGAGGAGAA---  
 TTTAAACAGCTCCAGGCAAGAGTCCTGGCTGTGGAAAGATACCTAAAGGATCAACAGCTCCTAGGAATTTGGG  
 GCTGCTCTGGAAGAACTCATCTGCACCACTAATGTCCCTTGGAACCTCTAGTTGGAGT-----  
 -----AATAAATCCCTGACTGAGATATGG-----GAC-----  
 AATATGACCTGGCTACAATGG---GATAAAGAAATTAGCAATTACACACAGCAAAATATAT---  
 GATCTAATTGAAAAATCGCAGAACCAGCAGGAA-----  
 -----  
 AAAAAATGAACAAGACTTATTAGCATTGGACAAGTGGACAAATCTGTGGAATTGGTTTGACATATCAAAGTGGC  
 TGTGGTATATAAAGATATTTATAATAATAGTAGGAGGCTTAATAGGATTAAGAATAGTTTTTTGCA---  
 GTGCTTTCTGTAATA-----AATAGAGTTAGGCAGGGATACTCACCT-----  
 TTGTCATTTCGCTATTAGTTTGCTTGATACCATAGCAATAGAAGTAGCTGGC---  
 TGGACAGATAGGGTTATAGAACTAGGACAAGGACTTTGTAGAGCT-----  
 -----ATTTTACACATA-----CCTAGAAGAATCAGACAGGGCTTAGAAAGGGCTTTGCTA---TAA  
 >FJ396018  
 GCT---GCA-----  
 CAAAACTTGTGGGTTACTGTCTACTATGGGGTACCTGTGTGG---CATGACGCAGAT---  
 ACCACCTTATTTTGTGCATCAGATGCTAAAGCATATGAGACAGAA---AAGCATAAT-----  
 -----GTCTGGGCTACA---CATGCCTGTGTACCCACAGAC---  
 CCCAACCCACAAGAAATACATTTGGA---AATGTGACAGAAAAATTTAA---  
 -----ATGTGGAAAAATAACATGGTAGAGCAGATGCATACAGATATA---  
 ATCAGTTTATGGGACCAAAGCCTA---AAGCCATGTGTAAAGTTA---  
 ACCCCTCTTTGTGTTACTTTTACACTGTACCAACGTCAGCAACAATGTCAGCATCAGCAACACG-----  
 -----  
 -----AACATGACAGAAGAAATAAAAAACATGAAAGAAGAAATAAAA---  
 AACTGCTCTTTCAATATGACAACAGAACTAAGG-----  
 GATAAGAAACAGGAAGTATATTCACCT---TTTTATAGACTTGATATAGTACAAATTAAGGAAAGTAAT-----  
 -----  
 -----  
 AATAGTACTAATACCAGTGAGTATAGATTAATAAATTGTAATACCTCAGCCATTACACAG---  
 GCTTGTCCAAAGGTATCCTTTGAGCCAATTCCCATACATTATTGTGCCCCAGCTGGTTTTGCGATACTAAAGT  
 GTAAG---GATAAGGAGTTCAAT-----GGAACAGGGCTATGTAAGAAT-----  
 -GTCAGC---ACAGTACAATGCACACATGGAATCAAGCCAGTAGTATCAACT---  
 CAGTTGCTGTTAAATGGCAGTCTAGCAGAAGAAAAG-----  
 ATAATGATTAGATCTGAAAATATCACAGACAAT-----GCCAAAACATAATAGTACAATTTACC---  
 -----CAGCCTGTAAAA-----ATTAATTGTACCAGACCTAACAACAATACAAGAACA---  
 -AGTATACGTATA-----GGACCAGGACAAAACA---TTC-----TATGCAACAGGTGAA-----  
 -----ATAATAGGGGATATA-----AGAAAAGCACATTGT---AATGTCAGTAGAGCA---

GAATGGAATAGCACTTTGCAAAATGTAAGTGAACAATTAAGA-----ACATACTTTAAG----  
 -----AACAAAACAATAATATTTAAT-----  
 AGCTCCTCAGGAGGGGATCCAGAAATCACG--ATGCATAGTTTTTAATTGTGGAGGAGAA--  
 TTTAAACAGCTCCAGGCAAGAGTCCCTGGCTGTGGAAAGATACCTAAAGGATCAACAGCTCCTAGGAATTTGGG  
 GCTGCTCTGGAAAGCTCATCTGCACCACTAATGTGCCTTGGAACTCTAGTTGGAGT-----  
 -----AATAAATCAGAGAGTGAGATATGG-----GAC-----  
 AACATGACCTGGCTGCAATGG--GATAAAGAAATTAGCAATTACACACAACCTAATATAT--  
 ACCCTAATTGAAGAATCGCAGAACCAGCAGGAA-----  
 -----  
 AAGAATGAACAAGACTTGTGGCATTGGACAAGTGGGCAAATCTGTGGACTTGGTTTGACATATCAAATTGGC  
 TGTGGTATATAAAAATATTTATAATGACAGTAGGAGGCTTAATAGGATTAAGAATAGTTTTTTGCT--  
 GTGCTTTTCAGTAATA-----AATAGAGTTAGGCAGGGATACTCACCT-----  
 TTGTCGTTTTGCTATTAATTTGATTAAATACCATAGCAATAGTAGTAGCTGGC--  
 TGGACAGATAGGATTATAGAAAATAGGACAAGGAATTGCTAGAGCT-----  
 -----ATTCTCCACATA-----CCTAGAAGAATCAGACAGGGCTTTGAAAGAGCTTTTGCTA--TAA  
 >AY736811  
 AAT--GCA-----  
 GAAAAATTTGTGGGTTACTGTCTATTATGGGGTACCTGTGTGG--AAAGATGCAGAC--  
 ACCACCTTATTTTGTGCATCAGATGCTAAAGCATATAAGCGAGAA--GTGCATAAT-----  
 -----GTCTGGGCTACA--CATGCCTGTGTGCCACAGAC--  
 CCCAACCCACAAGAAATAGATTTGGAA-----AATGTGACAGAAGACTTTAAC-----  
 -----ATGTGGAAAAATAAAATGGTAGAGCAGATGCATGAAGACATA--  
 ATTAGTCTATGGGACCAAAGCCTA--AAGCCATGTGTAAAGTTA--  
 ACCCTCTCTGCGTTACTTTAAACTGTAGCGATGTCTCAATGGCACT-----  
 -----  
 -----GAYGACAACATGAAAGGAGAAATGAGA--  
 AACTGCTCTTACAATATGACCACAGAACTAAGG-----  
 GATAAGAAAAAGAAAGTATACTCACTA--  
 TTTTATAGACTAGATGTAGTGCAAATTAATAATGGTAATAGTAGT-----  
 -----  
 AATGGTAATAGTAGCAGTGGTAATAGTAGCAGTAGTGAGTATAGATTAATAAATTGTAATACCTCAGCCATTA  
 CACAA--  
 GCTTGTCCTAAAAGTAACCTTTGAGCCAATTCCCATACATTATTGTGCCCCAGCTGGTTTTGCGATCCTAAAAT  
 GTAAG--GACAAGGAGTTCAAT-----GGAACAGGACCATGCAGAAAT-----  
 -GTCAGC--ACAGTACAATGCACACATGGAATCAAGCCAGTAGTATCAACT--  
 CAACTGCTGTAAATGGCAGTCTAGCAGAAGGAAAG-----  
 GTAAGAATCAGATCTGAAAATATCTCAGATAAT-----GCTAAAACCATAATAGTACAACCTTACC--  
 -----GAGCCTGTAACA-----ATTAATTGTACCAGACCTAACAACAATACAAGAAAA--  
 -GGAATACATATA-----GGACCAGGACAAGCA--TTT-----TATGCGACAGGTGAA-----  
 -----ATAATAGGGGATATA-----AGACGAGCACATTGT--AATGTCAGTAGCTCA--  
 AAATGGAATAAAACCTTGCAACAGGTAGTTACACAATTAAGG-----AATTACTGG-----  
 -----AACAAAACAATAGTCTTTACT-----  
 CCCTCCTCAGGAGGGGATATAGAAATTACA--ACACATAGTTTTTAATTGTGGGGGAGAA--  
 TTTAAACAGCTCCAGGCAAGAGTCCCTGGCTGTGGAAAGATACCTAAGGGATCAACAGCTCCTAGGAATTTGGG  
 GCTGCTCTGGAAAACCTCATCTGCACCACTAATGTGCCCTGGAACTCTAGTTGGAGT-----  
 -----AATAAATCTTATGAGCAGATATGG-----AAT-----  
 AACATGACCTGGTTGCAATGG--GATAAAGAAGTCAGCAATTACACACAATAATATAT--  
 CAGTTAATTGAAGAATCGCAGAACCAGCAAGAA-----  
 -----  
 AAGAATGAACAAGATTTATTGGCATTGGACAATGGGCAAAGTCTGTGGAATTGGTTTGACATAACAAAATGGC  
 TGTGGTATATAAGAATATTTATAATGATAGTAGGAGGCTTAATAGGGTTAAGAATAGTTTTTTGCT--  
 GTGCTTTCTATAATA-----AATAGAGTTAGGCAGGGATATTCACCC-----  
 TTGTCGTTTTGCTATTAAYTTGTTTGATACTATAGCAATAGCAGTAGCTGGC--  
 TGGACAGATAGGGTTATAGAAAATAGGACAAAGAATTGGTAGAGCT-----  
 -----ATTCTCAACATA-----CCTAGAAGAATCAGACAGGGCTTGAAAGAGCTTTTGCTA--TAA  
 >AY736814  
 GCT--ACA-----  
 GAACAATTGTGGGTTACTGTCTACTATGGGGTGCCTGTGTGG--AAAGATGCAGAG--  
 ACCACCCTATTTTGTGCATCAGATGCTAAAGCACATGAGACAGAA--GTACATAAT-----  
 -----GTCTGGGCTACG--CATGCCTGTGTACCCACAGAC--

CCCAACCCACAAGAAATAGAGTTGAAA-----AATGTGACAGAAGAGTTTAAAC-----  
 -----ATGTGGAAAAATAACATGGTAGAACAGATGCATACAGATATA---  
 ATCAGTCTATGGGACCAAAGCCTA---AAGCCATGTGTAAAGTTA---  
 ACCCCTCTCTGTGTTACTCTAAATTGTAGTAACTTTAGTGTCTACTAATAATAGCACCAATAATAGC-----  
 -----  
 -----ACCAATACTACCACCATTGACAATAATATGCAAGGAGAAATAAAA---  
 AACTGCTCTTACAATGTGACCACAGTAATAAGG-----  
 GATGAGAAACAGAAAGTATACTCGCTT---TTTTATAGAACTGATGTAGTAGAAATTGAGAAT-----  
 -----  
 -----  
 AATAGTAGTCAGTATAGATTAATAAATTGTAATACCTCAGCCATTACACAG---  
 GCTTGTCCAAAGGTAACCTTTGAGCCAATTCCCATACATTATTGTGCTCCAGCTGGTTTTGCGATTCTAAAGT  
 GTAGG---AATGAGACGTTCAAT-----GGAACAGGACCATGTAACAAT-----  
 -GTCAGC---ACAGTACAATGCACACATGGAATCAGGCCAGTAGTATCAACT---  
 CAGCTGCTGTTAAATGGTAGTCTAGCAGAAAAAGAA-----  
 ATAATGATTAGATCTGAAAAATATCTCAGACAAT-----GCCAAAAGCATACTAGTACAATTGACA----  
 -----AGGCCTGTAATA-----ATTAATTGTACTAGACCTAACAACAACACAAGAAAA-----  
 -AGTATACATATA-----GGACCAGGACAAGCA---TTC-----TATGCAACAGGTGAC-----  
 -----ATAATAGGGGATATA-----AGACAAGCATATTGT---ACTGTCAATAGAACA---  
 GAATGGAATGAACTTTGCACAATGTGACCACTCAATTAAAA-----ACATACTTT-----  
 -----AACAAAACAATAGTCTTTACT-----  
 AGCCACTCAGGAGGGGATCTAGAGATTACA---ACACATACTTTTAATTGTGGAGGAGAA---  
 TTTAAACAGCTCCAGGCAAGAGTCCTGGCTGTGGAAAGATACCTAAGGGATCAACAGCTCCTAGGACTTTGGG  
 GCTGCTCTGGAAGAACTCATCTGCACCACTACTGTGCCCTGGAACCTCTAGCTGGAGT-----  
 -----AATAAATCACAAGATGAGATATGG-----AAC-----  
 AACATGACCTGGCTGCAATGG---GATAAAGAAATTAGCAATTACACACAGATAATATAT---  
 GACCTAATTGAAGAATCGCAGAACCAGCAGGAA-----  
 -----  
 AAGAATGAACAAGACTTATTGGCATTGGACAAGTGGGCAAATCTGTGGAGTTGGTTTGACATATCAAGTTGGC  
 TGTGGTATATAAGAATATTTATAATGATAGTAGGAGGCTTAATAGGATTAAGAATAGTTTTTTGCA---  
 GTGCTTTCTATAATA-----AAGAGAGTTAGGCAGGGATACTCACCT-----  
 TTATCATTTGCTATTAATTTGTTTGATACCTTAGCAATAACAGTAGCTGGC---  
 TGGACAGATAGGGTTATAGAAGTAGGACAAAGACTTTGTAGAGCT-----  
 -----CTTTTACACATA-----CCTAGAAGAATCAGACAGGGCTTAGAAAGGGCTTTGCTA---TAA  
 >AF457075  
 GCT---GCA-----  
 GGAAACTTGTGGGTTACTGTCTACTATGGGGTACCTGTGTGG---AAAGATGCAGAG---  
 ACCACCCATTTTTGTGCATCAGATGCTAAAGCATATGAGACAGAA---AAACATAAT-----  
 -----GTCTGGGCTACA---CATGCCTGTGTACCCACAGAC---  
 CCCAACCCACAAGAAATACATTTGGAA-----AATGTGACAGAAGAATTTAAAC-----  
 -----ATGTGGAAAAATAAAATGGTAGAGCAGATGCATACAGATATA---  
 ATCAGTCTATGGGATCAAAGCCTA---AAGCCATGTGTAAAATTA---  
 ACCCCTCTCTGCGTTACTTTAAACTGTAGTGATGTCAACAACAATGTCACA-----  
 -----  
 -----ACAAATGTCACAGAGGGCGGGGAGGACATGAGA---  
 AACTGCTCTTTCAATATGACTACAGAATTAAGG-----  
 GATAAACAGAAGAAGGTATATTCACTT---TTTTATAGACTTGATGTAGTACAAATTAATGGAAGTCAA---  
 -----  
 -----  
 AGTAATAGTAATTACAGTGAGTATAGACTAATAAATTGTAATACCTCAGCCATTACACAG---  
 GCCTGCCCAAAGGTATCCTTTGAGCCAATTCCCATACATTATTGTGCTCCAGCTGGTTTTGCGATCCTAAAGT  
 GTAAT---GATGAGAATTTCAAT-----GGAACAGGGCCATGCAAAAAG-----  
 -GTCAGC---ACAGTACAATGTACACATGGAATCAAGCCAGTAGTATCAACT---  
 CAACTGCTGTTAAATGGCAGTCTAGCAGCAGGAAAT-----  
 AAAACAAAAATTAGATCTGAAAAATATCACAACAAT-----GCCAAAAATATAATAGTACAATTTACC-  
 -----GAGCCTGTGGAA-----ATTAATTGTATCAGACCTAACAACAATACAAGAAAA--  
 ---AGTATGCGTATA-----GGACCAGGACAAGCA---TTC-----TATGCAACAGGGGAT---  
 -----ATAGTAGGGGATATA-----AGAAAAGCATATTGT---AATATCTCTGAATCA-  
 ---AAATGGAATATAACTTTACAAAAGGTAGGTGAACAATTAAGA-----ACATACTTTGTG--  
 -----AACAAAGCAATAATATTTACT-----

AACTCCTCAGGAGGGGATCTAGAAATCACA---ACACATAGTTTTTAATTGTGGAGGAGAA---  
 TTTAAACAGCTCCAGGCAAGAGTCCTGGCTGTGGAAAGATACCTAAGGGATCAACAGCTCCTAGGAATTTGGG  
 GCTGCTCTGGAAGAACTCATCTGCACCACTAATGTGCCCTTGGAACTCTAGTTGGAGT-----  
 -----AATAAATCTGAAAAGGAAATATGG-----GAT-----  
 AACATGACCTGGCTGCAATGG---GATAAAGAAATTGGCAATTACACAGACATAATATAT---  
 AGGCTAATTGAAGAATCGCAGAATCAGCAGGAA-----  
 -----  
 AAGAATGAACAAGACTTATTGGCATTGGACAAGTGGGCAGGCCTGTGGAATTGGTTTAGCATAACAACTGGC  
 TGTGGTATATAAGAATATTTATAATGATAGTAGGAGGCTTAATAGGATTAAGAATAGTTTTTTGCT---  
 GTGCTTTCTATAATA-----AATAGAGTTAGGCAGGGTACTCACCT-----  
 TTGTCAATTTGCTGTTAATTTGATTGATACCATAGCAATAGTAGTAGCTGGC---  
 TGGACAGATAGGGTTATAGAAAATAGGACAAGTAGTAGGTAGAGCT-----  
 -----ATTCTCCACATA-----CCTAGAAGAATCAGACAGGGCCTCGAAAAGAAATTTTGCTA---TAA  
 >DQ208458  
 GCA---GCA-----  
 GAAAACTTGTGGGTCACTGTCTACTATGGGGTACCTGTGTGG---AAAGACGCAGAG---  
 ACCACCTTATTTTGTGCATCAGATGCTAAAGCATATGAGACAGAA---AAGCATAAT-----  
 -----GTCTGGGCTACA---CATGCCTGTGTACCCACAGAC---  
 CCCAACCCACAAGAAATACATTTGGAA-----AATGTGACTGAAGAGTTTAACT-----  
 -----ATGTGGAAAAATAACATGGTAGAGCAGATGCATACAGATATC---  
 ATCAGTCTATGGGACCAAAGCCTA---AAGCCATGTGTAAAGTTA---  
 ACCCCTCTCTGCGTTACTCTACAGTGTACCAATGTCCCAATAATATC-----  
 -----  
 -----ACTGATGACATGAGGGGAGAATTAAAA---  
 AACTGCTCTTTCAATATGACCACAGAGCTAAGG-----  
 GATAAGAAACAGAAGGTTTATTCACCT--TTTTATAGACTAGATGTAGTACAAATTAACGAGAATCAAGGT-  
 -----  
 -----  
 AATAGGAGTAATAATAGTAACAAGGAGTATAGATTAATAAATTGTAATACCTCAGCCATTACACAG---  
 GCTTGTCCAAAGGTATCCTTTGAGCCAATTCCCATACATTATTGTGCCCCAGCTGGTTTTGCGATCCTAAAGT  
 GTAAG---GATAAGAAGTTCAAT-----GGAACAGGGCCATGCCCAAGT-----  
 -GTCAGC---ACAGTACAATGCACACATGGAATCAAGCCAGTAGTATCAACT---  
 CAACTGCTGTAAATGGCAGTCTAGCAGAAGAAGAG-----  
 GTAATGATTAGATCTGAAAATATCACAAACAAT-----GCCAAAAACATACTAGTACAATTTAAC---  
 -----ACGCCTGTGCAA-----ATTAATTGTACCAGACCTAACAACAATACAAGGAAA---  
 -AGTATACGTATA-----GGACCAGGACAAGCA---TTC-----TATGCAACAGGGGAC-----  
 -----ATAATAGGGGATATA-----AGACAAGCACATTGT---ACTGTCAGTAAAGCA---  
 ACATGGAATGAACTTTGGGAAAGGTGGTCAAACAATTAAGA-----AAACACTTTGGG---  
 -----AACAACACAATAATAAGATTTGCT-----  
 AATTCCTCAGGAGGGGATCTAGAAGTCACA--ACACATAGTTTTTAATTGTGGAGGAGAA---  
 TTTAAACAGCTCCAGGCAAGGGTCCTGGCTGTGGAAAGATACCTAAGGGATCAACAGCTTCTAGGAATTTGGG  
 GCTGCTCTGGAAGAACTCATCTGCACCACTAATGTGCCCTTGGAACTCTAGTTGGAGT-----  
 -----AATAGAAACCTGAGTGAGATATGG-----GAC-----  
 AACATGACCTGGCTGCAATGG---GATAAAGAAATTAGCAATTACACACAGATAATATAT---  
 GGGCTACTTGAAGAATCGCAGAACCAGCAGGAA-----  
 -----  
 AAGAATGAACAAGACTTATTGGCATTGGGATAAGTGGGCAAGTCTGTGGAATTGGTTTGACATATCAAAGTGGC  
 TGTGGTATATAAAAATATTTATAATGATAGTAGGAGGCTTAATAGGATTAAGAATAGTTTTTTGCT---  
 GTGCTTTCTGTAATA-----CATAGAGTTAGGCAGGGATACTCACCT-----  
 TTGTGTTTTGCTATTAATTTGTTTGATACCATAGCAATAGCAGTAGCTGAG---  
 TGGACAGATAGGGTTATAGAAAATAGGACAAAGACTTTGTAGAGCT-----  
 -----TTTCTCCACATA-----CCTAGAAGAATCAGACAGGGCCTCGAAAGGGCTTTTGCTA---TAA  
 >DQ208467  
 GCT---GCA-----  
 GAACAATTGTGGGTTACTGTCTACTATGGGGTACCTGTGTGG---AAAGATGCAGAG---  
 ACCACCTTATTTTGTGCATCAGATGCCAAAGCATATGAGACAGAA---AAGCATAAT-----  
 -----GTCTGGGCTACA---CATGCCTGTGTACCCACAGAC---  
 CCCAACCCACAAGAAATACATTTGGAA-----AATGTGACAGAAGAGTTTAACT-----  
 -----ATGTGGAAAAATAACATGGTAGAGCAGATGCATACAGATATA---  
 ATCAGTCTATGGGACCAAAGCCTA---AAGCCATGTGTAAAGTTA---

ACCCCTCTCTGCGTCACTTTACATTGTAACAATGTCACTGGCACGAATAACAACACG-----  
-----  
-----GAGGGAGAAAGGAAGGCCAGGGAAGAACTAAGA---  
AATTGCTCTTTCAATATGACCACAGAGCTAAGG-----  
GATAAGAAACAGAAGGTATATTCACCT--TTTATAGACTTGATGTAGTAAAACTTAATGAAAAT-----  
-----  
CAAGATAATAGTAGTGATGAGTATAGATTAATAAATTGTAATACCTCAGCCATTACACAA---  
GCTTGTCCAAAGGTAACCTTTGATCCAATTCCCATACATTATTGTGCCCCAGCTGGTTTTGCGATCCTAAAGT  
GTAAG---GATGAGGAGTTCAAT-----GGAACAGGGCCATGCAAGAAT-----  
-GTCAGC---ACAGTACAATGCACACATGGAATCAAGCCAGTAGTATCAACT---  
CAACTACTGTTTAAATGGCAGTCTAGCAGAAACGAAG-----  
GTAAAAATTAGATCTGAAAATATCACAACAAT-----GCCAAAAGTATAATAGTACAACCTTGAC----  
-----AATCCTGTGACA-----ATTAATTGTACCAGACCCAACAACAATACAAGAACA-----  
-AGTGTAAGTATA-----GGACCAGGACAAGCA---TTC-----TATGCAACAGGTGCC-----  
-----ATAATAGGGAACATA-----AGACAAGCACATTGT---AATGTCAGTAGATCA---  
GCATGGAATCAAACCTTTACAAAAGGTAGTTACACAATTAAGA-----ACATACTTTGGG----  
-----AACAAAACAATAATATTTGCT-----  
AACTCCTCAGGAGGGGATCTAGAAATCACA---ACACATAGTTTTAATTGTGGAGGAGAA---  
TTTAAACAGCTCCAGGCAAGAGTCCTGGCTGTGGAAAAGATACCTAAGGGATCAACAGCTCCTAGGAATTTGGG  
GCTGCTCTGGAAAACCTCATCTGCACCACCTAATGTGCCCTGGAACCTCTAGTTGGAGT-----  
-----AATAAATCTCAGAATGAGATCTGG-----GAG-----  
AACATGACCTGGCTACAATGG---GATAAAGAAATTAGCAATTACACAGACATAATATAT---  
AAACTAATTGAAGAATCGCAGAACCAGCAGGAA-----  
-----  
AAGAATGAACAAGACTTGTTGGCATTGGACAAGTGGACAAGTCTGTGGACTTGGTTTGACATATCAAATTGGC  
TGTGGTATATAAAAAATATTTATAATGATAGTAGGGGGCTTGATAGGATTAAGAATAATTTTTTGCT---  
GTGCTTTCTGTAATA-----AATAGAGTTAGGCAGGGGTACTCACCT-----  
GTGTCGTTTGCTGTTAATTTGGTTGATACTATAGCAATAGCAGTAGCTGGC---  
TGGACAGATAGGATTATAGAAATAGGACAAGGAATTGGTAGAGCT-----  
-----GTTCTCCACATA-----CCTAGAAGAATCAGACAGGGCTTCGAAAGAGCTTTGCTA--TAA  
>DQ208448  
ACT---GCA-----  
GAAAACTTGTTGGGTTACTGTCTACTATGGGGTACCTGTATGG--AGAGACGCAGGG---  
ACCACCTTATTTTGTGCATCAGATGCGAAAGCATATGATACAGAA--GTACATAAT-----  
-----GTCTGGGCCACA---CATGCTTGTGTACCTACAGAC---  
CCCAACCCACAAGAAATAAATTTGGAA-----AATGTGACAGAAAAGTTTAAC-----  
-----ATGTGGAAAAATAACATGGTAGAGCAGATGCATACAGATATA---  
ATCAGTCTATGGGACCAAAGCCTA--AAGCCATGTGTAAAGTTA---  
ACCCCTCTCTGCGTTACTCTAGATTGTAGCCATAATGTCACCAATAATGTTACCAAGATCGAT-----  
-----  
-----AATAGCACCCTGACAAGGAAATAAAAGGAGAGATAAAA---  
AACTGCTCTTTCAATATAACCACAGAATTAAGG-----  
GATAAGAGACGGAGAGTATTTTCACCT--TTTTATAAACTGGATGTAGTACAATTTAATGAC-----  
-----  
AGTAAAAATAGTTGGTATAGATTAATAAATTGTAATACCTCAGCCATTACACAG---  
GCTTGTCCAAAGGTATCCTTTGAACCAATTCCAATACATTATTGTGCCCCAGCTGGTTTTGCGATTCTAAAGT  
GTAAT---GATAGGGAGTTTAAT-----GGAACAGGACTATGCAAGAAT-----  
-GTCAGC---ACAGTACAATGCACACATGGAATCAAACCAGTAGTATCAACT---  
CAACTACTGTTTAAATGGCAGTCTAGCAGAAGGAAAG-----  
GTAATGATCAGATCTGAAAATCTCACAACAAT-----GCCAAAACATAATAGTACAATTTAAC----  
-----GAGTCTGTAAAA-----ATTGATTGTATCAGGCCTAACAACAATACAAGAAAA-----  
-AGTATACATATA-----GGACCAGGACAAGCA---TTC-----TATGCAACAGGTGCC-----  
-----ATATTAGGGGATATA-----AGACAAGCACATTGT---AAAGTTAATAAAACA---  
GAATGGAATAAAGCTTTGCAAAAGGTAGTCAACCAATTAGGA-----ACATACTTTAAG----  
-----GACAAAGCAATAACCTTTTGAT-----  
AACTCCATAGGAGGGGATCTAGAAATAACA---ACACATAGTTTTAATTGTGGGGGAGAA---  
TTTAAACAGCTCCAGGCAAGAGTCCTGGCTGTGGAAAAGATACCTAAAGGATCAACAGCTCCTAGGAATTTGGG  
GCTGCTCTGGAAAACCTCATCTGCACCACCTAATGTGCCCTGGAACCTCTAGTTGGAGT-----

-----AATAAGTCCCAGAGAGAGATATGG-----GAC-----  
AACATGACCTGGCTACAATGG---GATAAAGAAATTAGCAATTACACACAGGTAATATAT---  
AGTCTAATTGAAGAATCGCAGAATCAGCAGGAA-----  
-----  
AAGAATGAACAAGACTTATTGGCATTGGACAAGTGGACAAATCTGTGGAATTGGTTTGACATATCAAGATGGC  
TGTGGTATATAAAAAATATTTATAATAATAGTAGGAGGCTTGATAGGATTAAGAATAGTTTTTTGCT---  
GTGCTTTCTATAATA-----AATAGAGTTAGGCAGGGATACTCACCT-----  
TTGTCGTTTCGCTATTAATTTGTTTGATACCATAGCAATAGTAGTAGCTGGG---  
TGGACAGATAGGGTTATAGAAGTAGTACAAAGACTTTGTAGAGCT-----  
-----ATTCTCAACATA-----CCTGTAAGAATTAGACAGGGCTTGGAAAGGGCTTTGCTA---TAA  
>KU749411  
ACT---GCA-----  
GAAAACTTGTGGGTTACTGTCTACTATGGGGTACCTGTGTGG---AAAGACGCAAG---  
ACCACCCTATTTTGTGCATCAGATGCTAAAGCATATAAGACAGAG---GTGCATAAT-----  
-----GTCTGGGCCACG---CACGCATGTGTACCCACAGAC---  
CCCAACCCACAAGAAATAGATTTAGAA-----AATGTGACAGAAATGTTTAACT-----  
-----ATGTGGAAAAATGACATGGTGGAGCAGATGCATACAGATATA---  
ATTAGTCTATGGGACCAAAGCCTA---CAACCATGTGTAAAATTA---  
ACCCCTCTCTGCGTCACCCTAAACTGTACCCATAATGTCACTGTGCGAGGACAGTACCAATGTCACTGTGTCAGCA  
ACAGTAGCMAYGAGASCAATGKC-----  
-----ACTGKCACTARTAGCACTGTCTCRSTAGCCCTGTCACTGAACAAGAAATGAAA---  
AACTGCTCTTTCAATACAACCACAGAAATAAGG-----  
GACAAGAAACAGAAAGTATATTCACCT--TTTTATAAACTTGATATAGTACCAATTAATAAA-----  
-----  
-----  
AATACTAGTGAGTATATTTTAATAAATTGTAATACCTCAGCCATTACACAG---  
GCTTGTCCAAAGGTAAGCTTTGAGCCAATTCCTATACATTATTGTGCCCCAGCTGGTTTTGCGATCCTAAAGT  
GTAAG---GATAAGAAGTTCAAT-----GGAACAGGGCTGTGCAAGAAT-----  
-GTCAGC---ACAGTACAATGCACACATGGAATCAAGCCAGTAGTATCAACT---  
CAACTACTGTAAATGGCAGTCTAGCAGAGGAAGAA-----  
ATAATAATTAGATCTGAAAATATCTCAGACAAT-----GCTAAAACCATAATAGTACAGCTTAAC-----  
-----AAGCCTGTACAA-----ATCAATTGTACCAGACCTAATAACAATACAAGAAAG-----  
-AGTATACATATA-----GGACCAGGACAAGCA---TTT-----TATGGAACAGGGACA-----  
ACAGGGGCTATAATAGGGAATATA-----AGACAAGCGCATTGT--AATGTTAGTAAATCA---  
TTATGGAATSAACTTTAAACAGGTAGCTGACAAATTAAGA-----GAACATTGG-----  
-----AACAAAACAATAATCTTTACT-----  
AAACCCTCAGGAGGAGATTTAGAAATTACA--ACACATAGTTTTAATTGTGGAGGAGAG---  
TTTAAACAGCTCCAGGCAAGAGTCCTGGCTGTGGAAAGTTACCTAAGGGATCAACAGCTCCTGGGAATTTGGG  
GTTGCTCTGGAAGAACTCATCTGCACCACTACTGTGCCCTGGAAGTCTAGTTGGAGT-----  
-----AATAAATCTTACAGTGAGATATGG-----GAT-----  
AACATGACCTGGCTGCAATGG--GACAGAGAAATTGACAATTACACAGAAGTAATATAT---  
AAGTTAATTGAAGAATCACAGAACCAGCAGGAA-----  
-----  
AGAAATGAACAAGACTTATTGGCATTGGACAAGTGGGCAAGCCTGTGGAATTGGTTTAACATATCAAATTGGC  
TGTGGTATATAAGAATATTTATAATAATAGTAGGAGGCTTAATAGGATTAAGAATAGTTTTTTGCT---  
GTGCTCTCTATAATA-----AATAGAGTTAGGCAGGGATACTCACCT-----  
CTGTCGTTTGCTATTAGCTTGTTTGATACCATAGCAATAGTAATAGCTGGC---  
TGGACAGATAGGGTTATAGAAGTAGGGCAAAGAATTGGTAGAGCT-----  
-----TTTCTCAACATA-----CCTAGAAGAATCAGACAGGGTGCCGAAAGGGCTTTAATA---TAG  
>KX232594  
GCT---GCA-----  
GGAAAAATTGTGGGTTACTGTCTACTATGGGGTACCTGTATGG---AAAGATGCAGAT---  
ACCACCCTATTTTGTGCATCAGATGCTAAAGCATATAAGACAGAA---GCGCATAAT-----  
-----GTATGGGCTACA---CACGCTTGTTACCCACAGAC---  
CCCAACCCACAAGAAATAAATTTAACA-----AATGTGACAGAAAAGTTTAACT-----  
-----ATGTGGAAAAATAACATGGTGGAGCAGATGCATTTCAGATGTA---  
ATTAGTATATGGGACCAAAGCCTA---AAGCCATGTGTAAAGTTA---  
ACCCCTCTCTGCGTCACCCTAAGCTGTAACAATAATGTCACGGTCACTCCCAATAATAGCACTGTTAATGCCA  
GT-----  
-----GCCAATGACACTGAAATGAAA---

AACTGCTCTTACAATATAACCCAGAAATAAGG-----  
 GATAAGAAAAGGAAAGTATATTCACCT--TTTATAAACTTGATATAGTACCAATTAATGAG-----  
 -----  
 AATAATAATAGTAATAGTGAGTATATCTTAATAAATTGTAATACCTCAGCCATTACGCAG---  
 GCTTGTCCAAAGATAAGCTTTGAGCCAATTCACATACATTATTGTACCCCAGCTGGTTTTGCGATCTTAAAGT  
 GTAAG---GATAAGGATTTCAAT-----GGAACAGGTCTATGTAAGAAT-----  
 -GTCAGC---ACAGTACAATGCACACATGGAATCAAGCCAGTAGTATCAACT---  
 CAACTGCTGTTAAATGGCAGCCTAGCAGAAGGAAAG-----  
 ATAATGATTAGATCTGAAAATATCTCAGACAAT-----GCTAAAACCATAATAGTACAGCTTAAC----  
 -----AAGACTGTGTCA-----ATTAATTGTACCAGACCTAACAACAATACAAGAAAG-----  
 -AGTGACCTATA-----GGACCAGGACAAGCA---TTC-----TATGCAACAGGTGAT-----  
 -----ATAATAGGGAATATA-----AGACAAGCACATTGT---AATGTCAGTAGATCA---  
 GATTGGAATAACACTTTAAGACAGGTAGCTGAAAAATTAAGA-----GAATATTGG-----  
 -----AACAAATACAATAATCTTTACT-----  
 AAACCCTCAGGAGGAGATTTAGAAATTACA--ACACATAGTTTTAATTGTGGAGGAGAA---  
 TTTAAACAGCTCCAGGCAAGAGTCCTGGCTGTGGAAAGTTACCTAAGGGATCAACAGCTCCTAGGAATTTGGG  
 GTTGCTCTGGAAACTCATCTGCACCACTAATGTGCCCTGGAACCTAGTTGGAGT-----  
 -----AATAAACTTACAATGATATATGG-----GAT-----  
 AACATGACTTGGCTGCAATGG---GATAAAGAAATTGAAAAATTACACAGGTGAAATATAT---  
 AGGTTAATTGAAGAATCGCAGAACCAGCAGGAA-----  
 -----  
 AAAAAAGAACAAGAGTTATTGGCATTGGACAAGTGGGCAAGCCTGTGGAATTGGTTTGACATATCAAAGTGGC  
 TGTGGTATATACGAATATTTATAATGATAGTAGGAGGCTTAATAGGATTAAGAATAGTTTTTTGCT---  
 GTGCTCTCTATAATA-----AAAAGAGTTAGGCAGGGATACTCACCT-----  
 CTGTCATTCGCTGTTGACTTGTATAATACCACAGCAATAGTAGTAGCTGGT---  
 TGGACAGATTGGGTTATAAACGGAGGGCAAAGAATTGTTAGAGCT-----  
 -----TTTCTCAACATA-----CCTAGAAGAATCAGGCAGGGCTTAGAAAGGGCTTTACTA---TAA  
 >KX232597  
 ACT--ACA-----  
 GAACAATTGTGGGTTACTATTTACTATGGGGTACCTGCGTGG--AAAGATGCAGAC---  
 ACCACCCATTTTTGTGCATCAGATGCTAAAGCATATAAGACGGAA--ATGCATAAT-----  
 -----GTATGGGCTACA--CACGCCTGTGTACCCACAGAC---  
 CCCAGCCCACAAGAAATAAATTTAGCA-----AATGTGACAGAAAATTTTAAC-----  
 -----ATATGGAAAAATAACATGGTGGAGCAGATGCATACAGATATA---  
 ATTAGTATATGGGACCAAAGCCTA--AAACCATGTGTAACGTTG---  
 ACCCTCTCTGCGTCACCTAAATTGTACCGATGTCAATACCAATAGTACCAATAGTGCC-----  
 -----  
 -----AATGTCACACAAGAAATGAAA---  
 AACTGCACCTACAATATAACCCAGAAATAAGA-----  
 GATAAGACAAAGAAAGTATATTCACCT--TTTATAAACTTGATATAGTACAAATTGATAAAGGGAAT---  
 -----  
 -----  
 AATAGTAATAGTAGTGAGTATATTTTAATAAATTGTAATACCTCAGCCATTACACAG---  
 GCTTGTCCAAAAGTAAGCTTTGAGCCAATTCACATACATTATTGTGCCCCAGCTGGTTTTGCAATTCTAAAGT  
 GTAAT---GATAAGAAGTTCAAT-----GGAACAGGGCCATGCAGTAAT-----  
 -GTCAGC---ACAGTACAATGCACACATGGAATCAAGCCAGTAGTATCAACT---  
 CACCTGCTGTTAAATGGCAGTCTAGCAGAAGAAGAG-----  
 ATAGTGATTAGATCTGAAAATATCTCAGACAAT-----GCTAAAACCATAATAGTGCAGCTTAAC----  
 -----CAGTCTGTATCA-----ATTAATTGTACCAGATTTAAC-ACAATACAAGAAAG-----  
 -AGTGACCTATA-----GGACCAGGACAAGCA---ATC-----TATACAACAGGTGAT-----  
 -----ATAATAGGGGATATA-----AGACAAGCACATTGT---AATATCAGTAGATCA---  
 GCATGGAATAGAACTTTAAGACAGGTAGCTAACAAATTAAGA-----AGCTATTGGAGC-----  
 -----AACAAAACAATAATCTTTACT-----  
 AAACCCTCAGGAGGTGATTTAGAAATTATG--ACACATAGTTTTAATTGTGGAGGAGAA---  
 TTTAAACAGCTCCAGGCAAGAGTCCTGGCTGTGGAAAGTTACCTAAAGGATCAACAGCTCCTAGGAATTTGGG  
 GTTGCTCTGGAAACTCATCTGCACCACTAGTGTGCCCTGGAACCTAGTTGGAGT-----  
 -----AATAAATCATATGATAATATATGG-----AAT-----  
 AACATGACCTGGCTGCAATGG---GAGAGAGAAATTGATAATTACACAGGTTTAATATAT---  
 CAATTAATTGAAGAATCACAGAACCAGCAAGAA-----

-----  
AAAAATGAACAAGAATTATTGTTCATTGGACAAGTGGGCAAGTCTGTGGAGTTGGTTTAACATAACACAATGGC  
TGTGGTATATAAGAATATTTATAATGATAGTAGGAGGCTTAATAGGATTAAGAATAATTCTTGCT---  
GTGCTTTCTATAGTA-----AATAGAGTTAGGCAGGGATACTCACCT-----  
CTGTTCGTTTCGCTATTAGCTTGTTTGATACCATAGCAGTAGCAGTAGCTGGC---  
TGGACAGATACAGTTATAGAAGCAGCACAAAGATTTGGTAGAGCT-----  
-----ATTCTCAACATA-----CCTAGAAGAATCAGGCAGGGCTTTGAAATAGCTTTACTA---TAA  
>KX232609  
ACT---GCA-----  
GAAAAATTGTGGGCTACTGTCTACTATGGGGTACCTGTGTGG---AAAGATGCAGAG---  
ACCACTCTATTTTGTGCATCAGATGCTAAAGCATATGAGACAGAA---GCACATAAT-----  
-----GTATGGGCTACA---CACGCCTGTGTACCCACAGAC---  
CCCAACCCACAAGAAATAGATTTAGAA-----AATGTGACAGAAGAGTTCAAC-----  
-----ATGTGGAAAAATAGCATGGTGGAGCAGATGCATACAGATATA---  
ATTAGTATATGGGACCAAAGCCTA---AAGCCATGTGTAAAGTTA---  
ACCCCTCTCTGCGTCACCCCTACACTGTGCCAATATCAATAGCAGCGTCAMACACTGTGCCAAT-----  
-----  
-----ATCAATAGCAGCGTCAATGCCACAAAAGAAATGAAA---  
AACTGCTCTTACAATATAACCACAGAGATAAGG-----  
GATAAGATACAGAAAGTATATTCACCT---TTCTATAAACTTGATATAGTACCAATTAATCAA-----  
-----  
-----  
AATAATGCTAGTAATGTCAGTGAGTATATTTTAATAAAATTGTAATACCTCAGCCATTACACAG---  
GCTTGTCCAAAGGTAAGCTTTGAGCCAATTCCTATACATTATTGTGCCCCAGCTGGTTTTGCGATCCTAAAAT  
GTAAG---GATACAGAGTTCAAT-----GGAACAGGGCTATGCAAGAAT-----  
-GTCAGC---ACAGTACAATGCACACATGGAATCAAGCCAGTAGTATCAACT---  
CAACTGCTGTAAATGGCAGTCTAGCAGAAAAAGAA-----  
ATAATGATTAGATCTGAAAATATCTCAGACAAT-----GCTAAAACCATAATAGTACAGCTTAAC----  
-----CAGTCTGTAACA-----ATTAATTGTACCAGATTTAACAACAATACAAGAAAG-----  
-AGTATACATATA-----GGACCAGGACAAGCG---TTC-----TATGCAACA---GAT-----  
-----ATAATAGGGGATATA-----AGACAAGCATATTGT---AATGTCAGCAGATCA---  
GCATGGAATAAACTTTAGGAGAGGTAGCTAAAAGATTAAGA-----AAATATTGG-----  
-----AACAGGACAATAATCTTTACT-----  
AAACCCTCAGGAGGAGATTTAGAAATTACA--ACACATAGTTTTAATTGTGGAGGAGAA---  
TTTAAACAGCTCCAGGCAAGAGTCCCTGGCTGTGGAGAGTTACCTAAAGGATCAACAGCTCCTAGGAATTTGGG  
GTTGCTCTGGAAACTCATCTGCCCCACTACTGTGCCCTGGAACGCTAGTTGGAGT-----  
-----AATAAATCTTACAATGAGATATGG-----GAT-----  
AGCATGACCTGGCTGCAATGG--GATAAAGAAATTGACAATTACACAAATGAAATATAT---  
AAGTTAATTGAAGAATCACAGAACCAGCAAGAA-----  
-----  
AAAAATGAACAAGATTTATTGGCATTGGACAAGTGGGCAAGTCTGTGGAATTGGTTTAACATATCAAATTGGC  
TGTGGTATATAAAAATATTTATAATGATAGTAGGAGGCTTAATAGGATTAAGAATAATTTTTTGCT---  
GTGCTTGCTATAATA-----AATAGAGTTAGGCAGGGATACTCACCT-----  
CTGTTCGTTTCGCTATTAGCTTGCTTGATACCATAGCAATAGTAGTAGCTGGA---  
TGGACAGATAGGGCTATAGAACTAGGACAAAGCATTGGTAGAGCT-----  
-----ATTCTCAACATA-----CCTAGAAGAATCAGGCAAGGTTTAGAAAGGATTTTGCTA---TAA  
>KX232613  
ACT---ACA-----  
GAAAAGGTGTGGGTTACTGTTTATTATGGGGTACCTGTGTGG---AAAGAGGCAGAC---  
ACCACCTTATTTTGTGCATCAGATGCTAGAGCATATGATACAGAA---GTGCATAAT-----  
-----GTCTGGGCTACA---CATGCCTGTGTACCCACAGAC---  
CCCAACCCACAAGAAATACATTTGGAA-----AATGTAACAGAAAATTTTAAC-----  
-----ATGTGGAAAAATAACATGGTAGAGCAGATGCATGCAGATATA---  
ATCAGTCTATGGGACCAAAGCCTA---AAGCCTTGTTAAAGTTA---  
ACCCCTCTCTGTGTTACTTTAGAGTGTACCAATGTCAACAGAAATGATAGTAAGACAAATGAC-----  
-----  
-----AGCGGTACGGTGGAAAGCACACAAAAGAGAAATAACA---  
AACTGTTCTTTCAATATGACCACAGAATAAGA-----  
GACAAGAGACAGAAAGTATATTCACCT---TTTTATAGACTTGATGTAGTACCACTTGATGGC-----  
-----

-----  
 AACAGTAGTAGTAACCAGTATAGATTAATAAACTGTAATACCTCAGCCATTACACAG---  
 GCTTGTCCAAAGGTAACCTTTTGAGCCAATTCCCATACATTATTGTGCCCCAGCTGGTTTTGCGATCCTAAAGT  
 GTAAT---GATAAAGAGTTCAAT-----GGAACAGGGCCATGCAAGAAT-----  
 -GTCAGT---ACAGTACAGTGCACACATGGAATCAGGCCAGTAGTATCAACT---  
 CAACTACTGTTAATGGCAGTTTAGCAGAACAAAGAT-----  
 ATAAGAATTAGAGTTGAAGATATCTTAGAGAAT-----ACTAAGACTATAATAGTACAATTTAAT----  
 -----GAGTCTGTAGTA-----ATTAATTGTACCAGACCTAACAATAATACAAGAAGA-----  
 -AGTGTGCGTATA-----GGACCAGGACAAACA---TTC-----TATGCA---AGTGAC-----  
 -----ATAATAGGGGATATA-----AGAGAAGCATATTGT---AATGTCAGTAGATCA---  
 GAATGGAATAAACTTTTACAAGGAGTAGCTAAACAACCTAAGA-----AGACACTGG-----  
 -----AACAAAACAATAATCTTTAGC-----  
 AACTCCTCAGGAGGAGATTTAGAAATTACA---ACACATATGTTTAATTGTCAAGGAGAA---  
 TTTAAACAGCTCCAGGCAAGAGTCCTGGCTGTGGAAAAGATACCTAAAGGATCAACAGCTCCTAGGAATTTGGG  
 GCTGCTCTGGAAAGCTCATCTGCCCCACTAATGTGCCCTGGAACCTCTAGTTGGAGC-----  
 -----AATAAACTCAGGATGAGATATGG-----GGA-----  
 AACATGACTTGGCTGCAGTGG---GATAAAGAAATTAGTAATTACACAAGCTTAATATAT---  
 CAGCTAATTGAGGAATCACAGAACCAGCAGGAA-----  
 -----  
 AAGAATGAACAAGACTTATTGGCATTGGACCAGTGGGCAAGTCTGTGGAATTGGTTTAACATATCAAACCTGGC  
 TGTGGTATATAAAGATATTTATAATGATAGTAGGAGGCTTAATAGGATTAAGAATAGTTTTTTGCT---  
 GTGCTTTCTATAATA-----AATAGAGTTAGGCAGGGATACTCACCT-----  
 TTGTCGTTTGCTATTAGTTTATTAGATACCATAGCAATAGCAGTAGCTGGC---  
 TGGACAGATAGGGTGATAGAATTAGGACAAAGAATTGGTAGAGCT-----  
 -----ASGCAGAGGGCT-----GAAAGAGSTGCTAYGCAGAGGGCTGAAAGAGCTKTGCTA---TAA  
 >KX232614  
 ACT---GCA-----  
 GAAAACTTGTGGGTCACTGTCTACTATGGGGTACCTGTGTGG---AAAGACGCAGAG---  
 ACCACCCATTTTTGTGCATCAGAGGCTAAGGCATATAAGACAGAA---GTACACAAT-----  
 -----GTATGGGCTACA---CACGCTTGTGTACCCACAGAC---  
 CCCAACCCACAAGAAATAAAATTAGAA-----AATGTGACAGAAATGTTTAA-----  
 -----ATGTGGAAAAATCCCATGGTGGAGCAGATGCATACAGATATA---  
 ATTAGTCTATGGGACCAAAGTCTA---AAGCCATGTGTAAAGTTA---  
 ACCCTCTCTGTGTACCCCTACACTGTACCAATGTCAAAGACAATGTCACTGTCCCCAGTACCAATGCCACT-  
 -----  
 -----GTCGCTCCCAATGACACTGCCACTGTCAATGAACTGACAGTGACAGGAAA---  
 AACTGCTCTTTCAATATAACCACAGAAATAAGG-----  
 GATAAGAAACAGAAAGCATATGCACTT---TTTTATAAGCTTGATTTAGTACCCATTAATACT-----  
 -----  
 -----  
 AGTAAGAATGACAGTGAGTATATTTTAATAAATTGTAATACCTCAGCCATTACACAG---  
 GCTTGTCCAAAGGTAAGCTTTGAGCCAATTCCCATACATTATTGTGCCCCAGCTGGCTTTGCAATCCTAAAGT  
 GTAAT---GATAGGAATTTCAAT-----GGGACAGGGCTATGCAGGAAT-----  
 -GTCAGC---ACAGTACAGTGCACACATGGAATCAGGCCAGTAGTATCAACT---  
 CAACTGCTATTAAATGGCAGTCTAGCAGAAGGAGAA-----  
 ACAATGATTAGATCTGAAAAATATCTCAGACAAT-----GCTAAGACCATAATAGTACAGCTTAAC----  
 -----CAGTCTGTATCA-----ATTAATTGTACCAGACCTAACAACAATAACAAGAAAG-----  
 -AGTATACATATA-----GGACCAGGACAAGCA---TTT-----TATGCAACAGGGGAG-----  
 -----GTAATAGGGGACATA-----AGACGAGCATATTGT---AATGTCAGTGGATCA---  
 GAATGGAATAAAGCTTTACAACAGGTAGTGGCCAAATTAAGA-----GAACATTGGCCC-----  
 -----AACGGAACAATAAACTTTACT-----  
 AAACCCTCAGGAGGAGATTTAGAAATTACA---ACACACAGTTTTAATTGTGGAGGAGAG---  
 TTTAAACAGCTCCAGGCAAGAGTCCTGGCTATGGAAAAGATACCTAAAGGATCAACAGCTCCTAGGAATTTGGG  
 GATGCTCTGGAAAACCTCATCTGCACCCTACTGTGCCCTGGAACCTCTAGTTGGAGT-----  
 -----AATAAATCTTACCATGAGATATGG-----GAT-----  
 AACATGACCTGGCTGCAATGG---GATAAAGAAATTAACAATTACACAGAAATAATATAT---  
 CAGTTGATTGAAGAATCGCAGAACCAGCAGGAG-----  
 -----  
 AAAAAATGAAAAAGACTTATTGGAATTGGACAAGTGGGCAAGTCTGTGGAATTGGTTTGACATATCAAACCTGGC  
 TGTGGTATATAAGAATATTTATAATGATAGTAGGAGGCTTAATAGGATTAAGAATAGTTTTTTGCT---

GTGCTCTCTATAATA-----AATAGAGTTAGGCAGGGATACTCACCT-----  
 CTGTGCTTCGCTATTAGCTTGGTTGATACCACAGCAATAGCAGTAGCTGGC---  
 TGGACAGATAGGATTATAGAAATAGGACAAGGAATTGGTAGAGCT-----  
 -----TTTCTCAACATA-----CCTAGAAGAATCAGGCAGGGCCTTGAAAGAGCTCTCCTA---TAA  
 >KX232618  
 ACT---GCA-----  
 GAAAACTTGTGGGTTACTGTCTACTATGGGGTACCTGTGTGG---AAAGACGCAGAG---  
 ACCACCCTATTTTGTGCATCAGAAGCGAAAGCATATAAGACAGAG---GTACATAAT-----  
 -----GTATGGGCTACA---CATGCATGTGTACCCACAGAC---  
 CCCAACCCACAAGAAATAGATTTAGAA-----AATGTGACAGAAGAGTTTAAAC-----  
 -----ATGTGGAGAAATAACATGGTGGAGCAGATGCATACAGATATA---  
 ATTAGTCTATGGGACCAAAGCCTA---AAACCATGTGTAAAATTA---  
 ACCCCTCTCTGTGTACCTTACACTGTACCAGTGTCACTGTCAATAACACTGTTACTGAA-----  
 -----  
 -----CAAGAAATGAAA---  
 AACTGCTCTTTCAATACAACCACAGGAATAAGG-----  
 GACAAGAAACAGAGAGTATATTCACCT---  
 TTTTATAAGCTTGATATAGTACCAATTAATAAAAAATAACTAGTCAT-----  
 -----  
 AATGACAGTGAGTACATTTTAATAAATTGTAATACCTCAGCCATTACACAA---  
 GCTTGTCCAAAGGTAAGCTTTGAGCCAATTCCTATACATTATTGTGCCCCAGCTGGTTTTGCGATCCTAAAGT  
 GTAAG---GATAAGAAGTTCAAT-----GGAACAGGGCTATGCAGGAAT-----  
 -GTCAGC---ACAGTACAATGCACACATGGAATCAAGCCAGTAGTATCAACT---  
 CAACTGCTGTAAATGGCAGTCTAGCAGAGGAAGAA-----  
 ATAATGATTAGATCTGAAAATATCTCAGACAAT-----GCTAAAACCATAATAGTACAGCTTACC---  
 -----CGGCCTGTATCA-----ATTAATTGTACCAGACCTAACAACAATACTAGAAAG-----  
 -AGTATACGTATA-----GGGCCAGGACAAGCA---TTC-----TATGCAACAGGGGAT-----  
 -----ATAATAGGGGACATA-----AGACAAGCACATTGT---AATGTCAGTAAATCA---  
 GAATGGAATACAACCTTTAAACAGGTAGCTGACAAATTAAGA-----GAACTTTAC-----  
 -----AACAACACAATAATTTTTACT-----  
 GAACCCCTCAGGAGGAGATTTAGAAATTACA--ACACATAGTTTTAATTGTGGAGGAGAG---  
 TTTAAACAGCTCCAGGCAAGAGTCCCTGGCTGTGGAAAGATACCTAAAGGATCAACAGCTCCTGGGAATTTGGG  
 GATGCTCTGGAAACTCATCTGCACCACTACTGTGCCCTGGAACCTTAGTTGGAGT-----  
 -----AATAAATCCTACAATGAGATATGG-----GAT-----  
 AACATGACCTGGCTGCAATGG---GATAAAGAAATTGACAATTACACAGACCTAATATAT---  
 AAGTTAATTGAAGAATCACAGAACCAGCAGGAA-----  
 -----  
 AAAAAAGAACAAGACTTATTGGCATTAGACAAGTGGGCAAGTCTGTGGAATTGGTTTGACATATCAAATTGGC  
 TGTGGTATATAAAAAATATTTATAATGATAGTAGGAGGCTTAATAGGGTTAAGAATAGTTTTTTGCT---  
 GTGCTCTCTATAATA-----AATAGAGTTAGGCAGGGATACTCACCT-----  
 CTGTGCTTCGCTACTAGCTTGTGTGATACCATAGCAATAGTAATAGCTGGC---  
 TGGACAGATAGGGTTATAGAAAGAGGACGAAGAATTGGTAGAGCT-----  
 -----TTTCTCAACATA-----CCTAGAAGAATCAGGCAGGGTGCCGAAAGAGCTTTAATA---TAA  
 >KX232620  
 ACT---GCA-----  
 GAAAACTTGTGGGTTACTATCTACTATGGGGTACCTGTGTGG---AAAGATGCAGAG---  
 ACCACCCTATTTTGTGCATCAGATGCTAAAGCATATAAGACAGAA---GTACATAAT-----  
 -----GTATGGGCTACA---CATGCCTGTGTACCCACAGAC---  
 CCCAACCCACAAGAAATGGATTTAAAA-----AATGTGACAGAAAGGTTTGAC-----  
 -----ATGTGGAATAATAGCATGGTGGAGCAGATGCATGCAGATATA---  
 ATTAGTTTATGGGACCAAAGCCTA---AAGCCATGTGTAAAATTA---  
 ACCCCTCTCTGCGTCACCTAAACTGTACCGATGTCCAGAAGACGACTATCAATATCAGTAACATTGCAGAAG  
 AAATGAAAACTGCTCTGCT-----  
 -----GTACCGATGTCCAGAAG-ACGACTATCAATATCAGTAACATTGCAGAAGAAATGAAA---  
 AACTGCTCTTTCAATATAACCACAGAAATAAGG-----  
 GATAAGAAACGAAAAGCATATTCACCT---TTTTATAAACTTGATTTAGTACAAATTAATAGT-----  
 -----  
 AATAATAGTAATAATAACAGTGAGTATATTTTAATAAATTGTAATACCTCAGCCATTACACAG---  
 GCTTGTCCAAAGGTGAGTTTTGAGCCAATTCCTATACATTATTGTGCTCCAGCTGGTTTTGCGATTCTAAAAAT

GTAAG---GATAAGAATTTCAAT-----GGAACAGGGCTGTGCAAGAAT-----  
 -GTCAGC---ACAGTGCAATGCACACATGGAATCAGGCCAGTAGTATCAACT---  
 CAATTGTTGTTAAATGGCAGTCTAGCAGAAGAAGAA-----  
 ATAATAATTAGATCTGAAAATATCTCAGACAAT-----GCTAAAACCATAATAGTACAGCTTACC----  
 -----AAGGCTGTCCAA-----ATTAATTGTTCCAGACTTAACAACAATACAAGACAG-----  
 -AGTATACGTATA-----GGACCAGGGCAAGCA---TTC-----TATACAACAGGTGAT-----  
 -----ATAATAGGGGATATA-----AGAAAAGCACAGTGT---TTTGTCAATGGAACA---  
 TTATGGAAGGAACTTTAAAAAAGGTAGCTGACAACTAAGA-----GAAAATTGGGCT----  
 -----AACAAAACAATAATCTTTACT-----  
 CAACCTTCAGGAGGAGATTTAGAAATTACA---ACACATAGTTTTAATTGTGGAGGAGAG---  
 TTTAAACAGCTCCAGGCGAGAGTCCTGGCTGTGGAAAGATACCTACAGGATCAACAGCTCCTAGGAATTTGGG  
 GTTGCTCTGGAAGAACTCATCTGCACCCTAATGTGCCCTGGAACCTCTAGTTGGAGT-----  
 -----AATAAATCTTACAATGAGATATGG-----AAT-----  
 AATATGACCTGGCTGCAATGG---GATAAAGAAATTGACAAATTACACAGAAACAATATAT---  
 ATGTTAATTGAAGAATCGCAGAAACAGCAGGAA-----  
 -----  
 AGAAATGAACAAGAACTATTGGCATTGGACAAGTGGGCAAGTCTGTGGAATTGGTTTGACATATCAAAGTGGC  
 TGTGGTATATAAAGATATTTATAATGATAGTAGGAGGCTTAATAGGATTAAGAATAGTTTTTTGCT---  
 GTGCTTTCTATAATA-----AATAGAGTTAGGCAGGGATACTCACCT-----  
 CTGTCGTTTCGCTATTAACTTGTATGATACCATAGCAATAGCAGTAGCTGGC---  
 TGGACAGATAGGGTTATAGAACTAGGACAACGTATTGGTAGAGCT-----  
 -----ATTCTCAACATA-----CCTAGAAGAATCAGGCAGGGCTTAGAAAGGTCCTTTACTA---TAA  
 >KX232624  
 ACT---GCA-----  
 GAAAAATTGTGGGTTACTGTTTACTATGGGGTACCTGTGTGG---AAAGATGCAGAG---  
 ACCACCCTATTTTGTGCATCAGATGCTAAAGCATATAAGACAGAA---GTACATAAT-----  
 -----GTATGGGCTACA---CATGCCTGTGTACCCACAGAC---  
 CCCAATCCACAAGAAATAGACTTAAAA-----AATGTGACAGAAAAGTTTGAC-----  
 -----ATGTGGAAAAATAACATGGTAGAGCAGATGCATACAGATATA---  
 ATTAGCATATGGGACCAAAGTCTA---AAGCCATGTGTAAAATTA---  
 ACCCTCTCTGCGTCAACCTAACTGTACCGATGTCAACAACAATGTCACTGTCAACAACAAT-----  
 -----  
 -----AGCAATGTACAAGAAATGAAA---  
 AACTGCTCTTTCAGTACAACCACAGGAATAAGG-----  
 GATAAGAAACGGAAAGCATATTCACCT--TTTTATAAACTTGATCTAGTATCAATGAATAAT-----  
 -----  
 -----  
 AATAATAATAGTAATGAGTATATTCTAATAAATTGTAATACCTCAACCATTACACAG---  
 GCTTGTCCAAAGGTGAGCTTTGAGCCAATTCCCATACACTATTGTGCTCCAGCTGGTTTTGCGATTCTAAAGT  
 GTAAG---GATAAGAATTTCACT-----GGAACAGGGCTGTGCAAGAAT-----  
 -GTCAGC---ACAGTGCAATGCACACATGGAATCAGGCCAGTAGTATCAACT---  
 CAACTGCTGTTAAATGGCAGTCTAGCAGAAGAAGAA-----  
 ATAATAATTAGATCTGAAAATATCTCAAACAAT-----GCTAAAACCATAATAGTACAGCTTACC----  
 -----AAGGCCGTCCAA-----ATTAATTGTACCAGACCTAACAACAATACAAGACAG-----  
 -AGTATACGTATA-----GGACCAGGGCAAGCA---TTC-----TATGCAACAGGGGCT-----  
 -----GTAACAGGGGATATA-----AGACAAGCACATTGT---AATGTCAGTAAATCA---  
 GCATGGAATGCAACTTTACAACAGGTGGCTGCCAAATTAGGA-----GGGTATTGG-----  
 -----AACAAAACAATAGTCTTTTGCT-----  
 AACTCCTCAGGAGGAGATTTAGAAATTACA---ACACATAGTTTTAATTGTGGAGGAGAG---  
 TTTAAACAGCTCCAGGCAAGAGTCCTGGCTGTAGAAAGCTACCTAAGGGATCAACAGCTCCTGGGAATTTGGG  
 GTTGCTCTGGAAGAACTCATCTGCACCCTACTGTGCCCTGGAACCTCTAGTTGGAGT-----  
 -----AATAAATCTTACAATGAGATATGG-----GAT-----  
 AACATGACCTGGTTGCAATGG---GACAAAGAAATTGACAAATTACACAGAAGAAATATAC---  
 AGGTTAATTGAAAATTCACAGAACCAGCAGGAG-----  
 -----  
 AAAAAATGAGCAAGACTTATTGGCATTGGACAAGTGGGCAAGTCTGTGGAATTGGTTTGACATATCACATTGGC  
 TATGGTATATAAAAAATATTTATAATGATAGTAGGAGGCTTAATAGGATTAAGAATAGTTTTTTGCT---  
 GTGCTTTCTCTAATA-----AATAGAGTTAGGCAGGGATACTCACCT-----  
 CTGTCGTTTCGCTATTAGCTTGTGTTGATACCATAGCAATAGTAATAGCTGGC---

TGGACAGATAGGGTTATAGAAGGAGGACAAAGAATTGGTAGAGCT-----  
-----ATTCTCAACATA-----CCTAGAAGAATCAGGCAGGGTGCTGAAAGAGCTTTTCTA--TAA  
>KX232626  
ACT---GCA-----  
GAAAACTTGTGGGTTACTGTCTACTACGGGGTACCTGTGTGG--AGAGATGCAGAG---  
ACCACCCTATTTTGTGCATCAGATGCTAAAGCATATGAGACAGAA--ATGCATAAT-----  
-----GTATGGGCTACA--CACGCCTGTGTACCCACAGAC---  
CCCAACCCACAAGAAATAAATTTAGAA-----AATGTGACAGAAGAGTTTAAAC-----  
-----ATGTGGAAAAATAGCATGGTGGAGCAGATGCATACAGATATA---  
ATTAGCATATGGGACCAAAGCCTA--AAGCCATGCGTGAAATTA---  
ACCCCTCTCTGCATCACCTTACACTGTACCAATGTCAATGTCACAAACAATAGCAATGTCAGCAACAATACTG  
TCACT-----  
-----GACATGAAA---  
AACTGCTCTTTCAATACAACCACAGAAATAAGG-----  
GACAAGAAACAGAAAGCATATTCACCTT--TTTTATAAACTTGATATAGTACCAATTAATAAT-----  
-----  
AATACTAGTGAGTATATTTTAATAAATTGTAATACCTCAGCCATTACTCAG---  
GCTTGTCCAAAGGTAAGCTTTGAGCCAATTCCTATACATTATTGTACCCCAGCTGGTTTTGCGATCCTGAAGT  
GTAAT---GATAAAAAGTTCAAT-----GGAACAGGGCTATGCAGGAAT-----  
-GTCAGC--ACAGTACAATGTACACATGGAATCAAGCCAGTAGTATCAACT---  
CAACTGCTGTTAAATGGCAGTCTAGCAGAGGAAGGA-----  
ATAATGATTAGATCTGAAAATATCTCAGACAAT-----GCTAAAACCATAATAGTACAGCTTAAC----  
-----CAGTCTGTATCA-----ATTAATTGTACCAGACCTAACAAACAATACAAGAAAG-----  
-AGTATACGTATA-----GGACCAGGACAAGCA--TTC-----TATGCAACAGGGGAT-----  
-----ATAATAGGGGATATA-----AGACAAGCACATTGT--AATGTCAGTAAATCA---  
GGATGGAATACAACCTTTAAATAGGGTAGCTGCCAAATTAAGA-----GAACATTGGAAC----  
-----ATCAGCACAATAATCTTTAAT-----  
AAATCCTCAGGAGGAGATTTAGAAATTACA--ACACATAGTTTTAATTGTGGAGGAGAG---  
TTCAAACAGCTCCGGGCAAGAGTCCCTGGCTGTGGAAAGATACCTAAGGGATCAACAGCTCCTGGGAATTTGGG  
GTTGCTCTGGAAACTCATCTGCACCACTACTGTGCCCTGGAACCTTAGTTGGAGT-----  
-----AATAAATCTTACAATGAAATATGG-----AAT-----  
AACATGACCTGGTTGCAATGG--GACAAAGAAGTTAACAGTTACACAAAAACAATATAT--  
CAGTTAATTGAAGAATCACAAAACCAGCAGGAA-----  
-----  
AAAAATGAACAAGACTTATTAGCATTGGACAAGTGGGCAAGTCTGTGGAATTGGTTTAACATATCAAACCTGGC  
TGTGGTATATAAAGATATTTATAATAATAGTAGGAGGCTTAATAGGATTAAGAATAGTTTTTTACT---  
GTGCTCTCTATAATA-----AATAGAGTTAGGCAGGGATACTCACCT-----  
CTGTCGTTCTGCTACTAGCTTGTGTGATACCATAGCAATAGTAATAGCTGGC---  
TGGACAGATAGGGTTATAGAAGGAGGACAAAGAATTGGTAGGGCT-----  
-----TTTCTCAACATA-----CCTAGAAGAATCAGACAGGGTGCCGAAAGGGCCTTAATA--TAA  
>KU749423  
GCT---GCA-----  
GAAAACTTGTGGGTTACTATCTATTATGGGGTACCTGTGTGG--AAAGACGCAGAG---  
ACCACCTTATTCTGTGCATCAGATGCTAAAGCATATGAAACAGAA--AAGCATAAT-----  
-----GTCTGGGCTACA--CATGCCTGTGTACCCACAGAC---  
CCCAACCCACAGGAAGTACATTTGCCT-----AATGTGACAGAAAAGTTTAAAT-----  
-----ATGTGGAAAAATAATATGGTAGAACAGATGCACACAGATATA---  
ATCAGTCTATGGGACCAAAGCCTA--AAGCCATGTGTACAGTTA---  
ACCCCTCTCTGTGTACCTTAGATTGTCAATATAACGTCACCCATAACATCAAAGATGAC-----  
-----  
-----ATCCTCAGTATCTCAAATCAGACTGACATGAAAGAAGAAATAAAA---  
AATTGCTCTTTTCGAGGTGACCACAGAATTACAG-----  
GATAGGAAACAGAGAGTGCATTCACTT---  
TTTTATAGACTTGATATAGTAAAAATGGAAAAAGATAACAGTAGTAAT-----  
-----  
CAAAAATACAAGTGATATAAAAGGACCCTTATAGATTAATAAATTGTAATACCTCAACCATTACACAA---  
GCTTGTCCAAAAGTATCCTTTGAACCAATTCCTATACATTATTGTGCCCCAGCTGGTTTTGCGATTCTAAAAAT  
GTAGG---GATGAGGAGTTCAAT-----GGAACAGGGCCATGCAAGAAT-----  
-GTCAGC---TCAGTACAGTGTACACATGGAATCAAGCCAACAGTGTCAACT---

CAACTACTGTTAAATGGCAGTATAGCAAAG---GAG-----  
 GTAATAATTAGATCTGAAAATATCACAAACAAT-----GCCAAAATCATAATAGTACACCTTAAC----  
 -----CAGACTGTAAAC-----ATTACTTGTATCAGACCTAACAACAATACAAGAACC-----  
 -AGTGTACGTATA-----GGACCAGGGCAAGCA---TTA-----TTCCATGCAGGTGAC-----  
 -----ATAATAGGAGATATA-----AGACAAGCACATTGT---AATATCAGTAGAAAA---  
 GCATGGAATGAAACTTTAGAAAAGGTAGCCATACAATTAAGA-----AAACACTTTGTG-----  
 -----AACAGTACAATAACCTTTGCT-----  
 AACTCTTCAGGAGGGGATATAGAGATTACA--ACACATAGCTTTAATTGTGGAGGAGAA---  
 TTTAAACAACCTCCAGGCAAGAGTCCTGGCTGTGGAAGGATACCTAAGGGATCAACAGCTCCTAGGAATTTGGG  
 GCTGCTCTGGAAGAACTCATCTGCACCACTACTGTGCCTTGGAACCTTAGTTGGAGT-----  
 -----AATAAATCTTATGATGACATATGG-----GGG-----  
 AACATGACCTGGATGCAATGG---GATAGAGAAATTAACAACCTACACAAAGACAATATAT---  
 AATCTAATTGAAGAATCGCAGAACCAGCAAGAA-----  
 -----  
 AAAAAATGAACAAGAATTATTGGAACCTTGACAAGTGGGCAAGTCTATGGAATTGGTTTAACATAACACAATGGC  
 TGTGGTATATAAAAAATATTTATAATAATAATAGGAGGCTTAATAGGATTAAGAATAGTTTTTTGCT---  
 GTACTATCTATAATA-----AATAGAGTTAGGCAGGGATACTCACCT-----  
 TTGTCAATTCGCTATTAGTTTGCTTGATACCTTAGCAATAACAGTAGCTGGC---  
 TGGACAGATAGGTGCATAGAGATATTACAAAGAATTGGTAGAGCT-----  
 -----ATCCTTAACATA-----CCTAGAAGAATCAGACAGGGCTTAGAAAGGGCTTTGCTA---TAA  
 >KX983643  
 GCT---GCA-----  
 GAAAAATTGTGGGTTACTGTCTACTATGGGGTACCTGTATGG---AAAGATGCAGAA---  
 ACCACCCATATTTGTGCATCAGATGCTAAAGGATATGAGACAGAA---GTGCATAAT-----  
 -----GTCTGGGCTACA---CATGCCTGTGTACCCACAGAC---  
 CCCAACCCACAAGAAATGGATTTGAAG-----AATGTAACAGAGGAGTTTAAC-----  
 -----ATGTGGAAAAATAACATGGTAGAGCAGATGCATACAGATATA---  
 ATTAGTCTATGGGACCAAAGCCTA---AAGCCATGCGTAAAGTTA---  
 ACTCCTCTCTGCGTTACCTTAAATTGTAGTGTACTGTCAACAGAACTGGTGACAGCAACAGCACG---  
 -----  
 -----GGGATACAGGGAGAAATAAAA---  
 AACTGCACTTACAATGTGACTACAGAACTAAAG-----  
 GATAAGAGAAAAACAAGTATCTTCGCTT---TTTTATAAACTTGATGTAGTACCACTGGAGCCACTGGCCAT-  
 -----  
 -----  
 AGGAACAGCACTTATACTGATTATAGATTAATAAAATTGTAATACCTCAGCCATTACACAG---  
 GCTTGTCCTCAAAAGTATCCTTTGAGCCAATTCCCATACATTATTGTGCCCCAGCTGGTTTTGGGATCCTAAAGT  
 GTAAG---GATGAGAAGTTCAAT-----GGAACAGGGCCATGCACGAAT-----  
 -GTTAGT---ACAGTACAATGCACACATGGAATCAAGCCAGTAGTATCAACT---  
 CAACTGCTGTTAAATGGCAGTCTAGCAGAAAAAGAG-----  
 GTAAGAATTAGATCTGAAAATATCACAAACAAT-----GCCAAAATCATAATAGTACAACCTTGTC---  
 -----ACGCCTGTACGA-----ATTAATTGTACCAGACCTAACAACAATACAAGAACA---  
 -AGCATACATATA-----GGGCCAGGACAAGCA---TTC-----TATGCAACAGGTGAC-----  
 -----ATAATTGGGGATATA-----AGACAAGCACATTGT---GAGGTCAACAAATCA---  
 GAATGGAATGAACTTTACAACAGGTAGCTATACAATTAGAA-----AAACACTTTCAG-----  
 -----AATAAAACAATAACCTTTAAT-----  
 AACTCCGCAGGAGGGGATCTAGAAATTACA--ACACATAGTTTTTAAGTGTGGAGGAGAA---  
 TTTAAACAGCTCCAGGCAAGGGTCCTGGCTGTGGAAGATACCTACAGGATCAACAGCTCCTAGGAATTTGGG  
 GCTGCTCTGGAAGAACTCATCTGCACCACTAATGTGCCATGGAACCTTAGTTGGAGC-----  
 -----AATAAATCTCAGAGTGAGATATGG-----AAT-----  
 AACATGACCTGGCTGCAATGG---GATAAGGAAATTAACAATTATACAAACATAATATAT---  
 ACTCTACTTGTGGAATCACAGAACCAGCAGGAA-----  
 -----  
 AAGAATGAACAAGATTTATTGGCATTAGATAAAATGGGCAAGTCTGTGGAATTGGTTTGACATATCAAAATGGC  
 TGTGGTATATAAAAAATATTTATAATGATAGTAGGAGGCTTAATAGGATTAAGAATAGTTTTTTGCA---  
 GTGCTTTCTGTAATA-----AATAGAGTTAGGCAGGGATACTCACCT-----  
 TTGTGCTTTTGCTAGTAATCTGATTGATACCATAGCAATAGCAGTAGCTGGC---  
 TGGACAGATAGGGTTATAGAGTTAGCACAAAGAGTTGGTAGAGCT-----  
 -----ATTCTTAACATA-----CCTACAAGAATTAGACAGGGGTTAGAAAGGGCTTTGCTG---TAA  
 >KX983542

GCT---GAA-----  
AACGGCTTGTGGGTTACTGTCTACTATGGGGTACCTGTGTGG---AAAGATGCAGAG---  
ACCACCTTATTTTGTGCATCAGATGCTAAAGGATATGATACAGAA---GTACATAAT-----  
-----GTCTGGGCTACA---CATGCCTGTGTACCCACAGAC---  
CCCAATCCACAAGAAATACATTTGGAA-----AATGTGACAGAAAAGTTTGAC-----  
-----ATGTGGAAAAATAACATGGTAGAGCAGATGCATACAGATATA---  
ATCAGTCTATGGGACCAAAGCCTA---AAGCCATGTGTACAATTA---  
ACCCCTCTCTGTGTACCTTAAATTGTAGTGACGTGCAAAGAAATGCCACCAATGCCACCAAT-----  
-----  
-----CCCATACAAGGAAATGCCACCAATCAGGATGGCATGCAAGGAGAAATAAAA---  
AACTGCTCTTACAATATGACCACAGTATTAAGA-----  
GATAAGACGCAGAAAGTGTATTCACTT---TTTTATAAACTTGATGTAGCACAAATTAACAAC-----  
-----  
-----  
AGTAGTAGTGAGTATAGATTAATAAATTGTAATACCTCAACCATTACACAG---  
GCTTGTCCAAAGGTAACATTTGAGCCAATTCCCATACATTATTGTGCCCCAGCTGGTTTTGCGATTTTAAAGT  
GCAGG---GATACAGAGTTCAAT-----GGAACAGGGCTATGCAAGAAT-----  
-GTCAGC---ACAGTACAATGCACACATGGAATCAAGCCAGTAGTATCAACC---  
CAACTACTGTTAAATGGCAGCCTAGCAGAAGGTGGG-----  
ATAAGGATTAGATCTGAAAATATCACAGATAAT-----GTCAAAACCATAATAGTACAGCTTGAT---  
-----GAACCTGTAAAT-----ATTACTTGTATTAGACCTAACAATAATACAAGAAAA-----  
-AGCGTGCATATA-----GGACCAGGACGAACA---TTC-----TATGCAACAGGTGAC-----  
-----ATAATAGGGGATATA-----AGACAAGCACATTGC---AATGTCAGTCAAGCA---  
GCTTGGGGTAACGCTTTATTCAAGGTAGCTCAACAATTAAC-----AACTACTTTAAC---  
-----AACAAAACATTAGACTTCAAT-----  
AAATCCTCAGGAGGGGACTTAGAAATTACA---AAACACAGTTTTAATTGTGGAGGAGAA---  
TTTAAACAGCTCCGGGCAAGAATCCTAGCTGTGCAAGATACCTAAAGGATCAACAGCTCCTAGGAATTTGGG  
GCTGCTCTGGAAGAACTCATCTGCACCACTAATGTGCCCTGGAAGTCTAGTTGGAGT-----  
-----AATAAATCTCAGAATGAAATCTGG-----GAA-----  
AACATGACCTGGCTGCAATGG---GATAGAGAAATTAGCAATTACACAAGTAAAATATAT---  
TCTCTAATTGAAGAATCGCAGAACCAGCAGGAA-----  
-----  
AAGAATGAACAAGACTTATTGGCATTAGACAAGTGGGCAAGCCTGTGGACTTGGTTTGATATATCAAATTGGC  
TGTGGTATATAAAAATATTACATAATGATAGTAGGAGGTTAATAGGATTAAGAATAGTTTTTTGCT---  
GTGCTTGCTATAATA-----AATAGAGTTAGGCAGGGATACTCACCT-----  
TTGTCATTTGCTATTAAATTTGTTTGATACCATAGCAATAGCAGTAGCTGGC---  
TGGACAGACAGGGTTATAGAAATATTACAAAGGATTTGTAGAGCT-----  
-----ATTCTCAACATA-----CCTAGAAGAGTTAGACAGGGCTTAGAAAGGGCTTTGCTA---TAA  
>KX983566  
GCT---GCA-----  
GACTTGTGGGTTACTGTCTATTATGGGGTACCTGTGTGG---GAAAACGCAGAG---  
ACTACCTTATTTTGTGCTTCAATGCTAAGGCATATGATACAGAA---GTGCATAAT-----  
-----ATCTGGGCTACA---CATGCCTGTGTACCCACAGAC---  
CCCAACCCACGAGAAATACATCTGGAA-----AATGTGACAGAAGAGTTTAAC-----  
-----ATATGGAAAAATAACATGGTAGAGCAGATGCATACAGATATA---  
ATCAGTCTATGGGACCAAGGCCTG---AAGCCATGTGTAAAGTTA---  
ACCCCTCTCTGTGTTACTCTAGATTGTCTATAACCACACCATAAATACTACGAATGAT-----  
-----GAAGAAAGAAAA---  
AACTGCTCTTTCAATGTGACCACAGAATTAAGG-----  
GATAAGAAACAGAAAGTGCATGCACTT---TTTTATAGGCTGGACATAGTACAAATTAATAATAAT-----  
-----  
-----  
GATAGTCATAGTTATAGATTAATAAATTGTAATACCTCAGCCATTACACAG---  
GCTTGTCCAAAGGTATCCTTTGAGCCAATTCCCATACATTATTGTGCTCCAGCTGGTTTTGCGATCCTAAAGT  
GTAGG---GATAGTGAATTCAT---GGAACAGGGCCATGCAAGAAT-----  
-GTCAGC---ACAGTACAATGCACACATGGAATCAAGCCAGTAGTATCAACT---  
CAGCTGCTGTTAAACGGCAGTCTAGCAGAAGGAAAG-----  
GTAATAATTAGATCTGAAAATATCAAAACAAT-----GCTAAAACCATAATAGTACAATTTAAC---  
-----GAGTCTGTAGGA-----ATTAGTTGTATCAGACCTAACAACAATACAAGAAAA-----

-GGTGTACATATA-----GGACCAGGACAAGCA---TTC-----TATGCAACAGGTGAA-----  
-----ATAATAGGGAAAATA-----AGACAAGCCCATTGT---AATGTCAGTACCCGA---  
GACTGGAATAACACTTTACAACGGGTAGCTATACGATTAGGA-----GACTACTTTCAG-----  
-----GGTAAAACAATAATCTTTGAT-----  
AACTCCACAGGAGGGGATCTAGAGATTGCG--ACACATAGTTTTAATTGTGGAGGAGAA---  
TTTAAACAGCTCCAGGCAAGAGTCCTGGCTGTGGAAAGATACCTAAAGGATCAACAGCTCCTAGGAATTTGGG  
GCTGCTCTGGAAAACTCATCTGCACCACTAATGTGCCCTGGAACCTAGTTGGAGT-----  
-----AATAAATCTCAGAATGAGATATGG-----GAT-----  
AACATGACCTGGCTGCAATGG---GATAAAGAAATTAGCAATTACACACAAATAATATAT---  
GGGCTAATAGAAGAATCGCAGAACCAGCAGGAA-----  
-----  
AAGAATGAACAGGACTTATTGGCATTGGACAAGTGGGCAAATCTGTGGAATTGGTTTGACATCTCAAATTGGC  
TGTGGTATATAAAAATATTTATAATGATAGTAGGTGGCTTAATAGGATTAAGAATAATTTTTTGCT---  
GTGCTTGCTGTAATA-----AATAGAGTTAGGCAGGGATACTCACCA-----  
TTGTCAATTTGCCATTAATTTGGTTGATACAGTAGCAATAGCAGTAGCGGGC---  
TGGACAGATAGGGTTATAGAAATAGGACAGAGCATTGGTAGGGCT-----  
-----ATCCTCCACATA-----CCTAGAAGAATTAGACAAGGCTTAGAAAAGGGCATTGCTA---TAA  
>JX236677  
GTT---GCA-----  
GGAAACTTGTGGGTTACTGTATACTATGGAGTACCTGTGTGG---AGAGACGCAGAT---  
ACCACCTTATTTTGTGCCTCAGATGCTAAAGCATATGATACAGAA---GTGCATAAT-----  
-----GTCTGGGCTACA---CATGCCTGTGTACCCACAGAC---  
CCCAGCCCACAAGAGATACATCTGGAA-----AATGTGACAGAAAAGTTTAA-----  
-----ATGTGGAAAAATAACATGGTAGAGCAAATGCATGAAGATATA---  
ATCAGTTTATGGGACCAAAGCCTA---AAACCATGTGTAAAGTTA---  
ACCCCTCTCTGCGTTACTTTAGAGTGTAAGCCCCCAACATCACTGCA-----  
-----  
-----GACATGCGAGAAGAAATAAAA---  
AACTGCTCTTTCAATATGACTACAGAATTAAGG-----  
GATAGGAGACGGAAATGTATTCACTT---TTCTATAGGCTTGATATAGTGCCAATTAATAAA-----  
-----  
AGTAGGGAAAATAATAGTGAGTATAGATTAATAAATTGTAATACCTCAGCCATTACCCAA---  
GCTTGTCCAAAGGTATCCTTTGAGCCAATTCCCATACATTATTGTGCTCCAGCTGGTTTTGCGATTCTAAAGT  
GTAAA---GATACAGAGTTCAAT-----GGAACAGGGCCATGCAAGAAT-----  
-GTCAGC---ACAGTACAATGCACACATGGAATTAAGCCAGTAGTATCAACT---  
CAACTGTTGTAAATGGCAGTCTAGCAGAAAATGGG-----  
ATAAGGATTAGATCTGAAAATATTACAAACAAT-----GCCAAAACCATAATAGTACAACCTTGAC---  
-----AGGCCTGTACAA-----ATTAATTGTACCAGACCTAACAAACAACACAAGAAAA-----  
-AGTGAACGTATA-----GGACCAGGACAGACA---TTC-----TATGCAACAAATGCC-----  
-----ATAATAGGGGATATA-----AGGAAAGCACATTGT---AATGTTAGCAAAGCA---  
GAATGGAATGAACTGTACGAAGGGTAGCCGAACAATTAGAA-----AAATATTTCAA-----  
-----AACAAAACAATAAAATTTACT-----  
AACTCCTCAGGAGGGGATTTAGAAATTACC---ACACATAGTTTTAATTGTGGAGGAGAA---  
TTTAAACAGCTCCAGGCAAGAGTCCTGGCTGTGGAAAGATACCTAAGGGATCAACAGCTCCTAGGACTTTGGG  
GCTGCTCTGGAAAACTCATCTGCACCACTAATGTGCCCTGGAACCTAGTTGGAAT-----  
-----AATAAATCTTATAGTGAGATATGG-----GAT-----  
AGCATGACCTGGCTGCAATGG---GATAAAGAAATTAACAATTACACAAGTATAATATAT---  
AGCCTAATTGAAGAATCACAGAACCAGCAAGAA-----  
-----  
AAAAATGAACAAGACTTATTGGCATTAGACAAGTGGGCAACTTTGTGGAATTGGTTTGACATAACAAATTGGC  
TGTGGTATATAAGAATAGTAATAATAATAGTAGGAGGTTTAATAGGATTAAGAATAGTTTTTGCC---  
ATGCTATCTATAATA-----AATAGAGTTAGGCAGGGATACTCACCT-----  
CTGTCGTTGGCTATTAATTTGCTTGATACCACAGCAATAGCAGTAGCTAAC---  
TGGACAGATAGGATTATAGAAATAGGACAAAGACTTTGTAGAGCT-----  
-----ATTATTCATATA-----CCTAGAAGAATCAGACAGGGATTTCGAAAGGGCTTTGCTA---TAA  
>JX236678  
GCT---ACA-----  
GAACAATTGTGGGTTACTGTCTACTATGGGGTACCTGTGTGG---AAAGACGCAGAG---  
ACCACCCTATTTTGTGCATCAGATGCTAAAGCATATAAGACAGAA---ATGCATAAT-----

-----GTCTGGGCTACA---CATGCCTGTGTACCCACAGAC---  
CCCAACCCACAAGAAATACCTTTGGAA-----AATGTAACAGAAAATTTTAAC-----  
-----ATGTGGAAAAATAACATGGTAGAGCAGATGAATACAGATATA---  
ATCAACCTATGGGATCAAAGCCTA---AAGCCATGTGTAAAGTTA---  
ACCCCGCTCTGTGTTACTTTAAATTGTAGCAAAGTCAATGGTAACAAGACAGAGGCCAACACC-----  
-----  
-----GAGGGGAGTGGGGAGGAAATGAAA---  
AACTGCTCTTTCAATATGACAACAGAACTAAGG-----  
GATAGAAGAAAGAAAGTATATTCACCTT---TTTTATAAACTTGATGTAGTACAACCTTAATAAAAAATAATAAT-  
-----  
-----  
AGTAGGAATAGTACTTACAATGAATATAGATTAATAAAATTGTAATACCTCAGCCATTACACAA---  
GCTTGTCCAAAGGTAACCTTTGAGCCAATTCTCTATACATTATTGTGCCCCAGCTGGTTTTTCGATCCTAAAGT  
GTAGG---GATGAGGAGTTTCAGT-----GGGATAGGGCTATGTAAGAAT-----  
-GTCAGC---ACAGTACAATGCACACATGGAATTAACCAGTAGTATCAACT---  
CAACTGCTATTAAATGGTAGTCTAGCAGAAAAAAG-----  
GTAAGAATTAGATCTGAAAAATATCACAACAAT-----GTCAAAACCATATTAGTACAACCTTGCC----  
-----CAGCCTGTGATA-----ATTACGTGTATTAGAACTGGCAACAATACAAGAACA-----  
-AGTATACGTATA-----GGACCAGGACAAACA---TTC-----TATGCAACAGGTGAC-----  
-----ATAATAGGGAATATA-----AGAAAAGCATATTGT---AATGTCAGTAGAACA---  
GAATGGAATGACACTTTACAACAGGTAGTTATACAATTAGGA-----GAGTACTTTAAA----  
-----AACAAAACAATAACCTTTAAT-----  
AGCTCCTCAGGAGGGGATCTAGAAATCACA--ACCCATAGTTTTAATTGTGGAGGAGAA---  
TTTAAACAGCTCCAGGCAAGAGTCCCTGGCTGTGGAAAGATACCTAAGGGATCAACAGCTCCTAGGAATTTGGG  
GCTGCTCTGGAAGAACTCATCTGCACCACTAATGTGCCCTGGAATGCTAGTTGGAGT-----  
-----AATAAATCTCAGAGTGAGATATGG-----GAC-----  
AATATGACCTGGCTGCAATGG---GATAAAGAAATTAGCAATTACACACACATAATATAT---  
AAACTAATTGAAGAATCACAGAACCAGCAGGAG-----  
-----  
AAGAATGAACAAGACTTATTGGCATTGGACAAGTGGGCAAATCTGTGGAATTGGTTTGACATATCAAATTGGC  
TGTGGTATATAAAAAATATTACATAATAATAGTAGGAGGCTTAATAGGTTTAAGAATAGTTTTTTGCT---  
GTGCTTTCTATAATA-----AATAGAGTTAGGCAGGGATACTCACCG-----  
TTGTCGTTTGCTATTAAATTTAGTAGATACCATAGCAATAGCAGTAGCTGGC---  
TGGACAGATAGAATTATAGAAATAGGACAAGGAATTGGTAGAGCT-----  
-----ATTCTCCACATA-----CCTAGAAGAATTAGACAGGGCTTCGAAAGGGCTTTGCTA---TAA  
>KU749424  
GCT---GCA-----  
GATAAAATGTGGGTTACTGTATACTATGGGGTACCTGTGTGG--AAGGATGCAGAG---  
ACCACCCATTTTTGTGCATCAGATGCTAAAGCATATGAGAAAGAA--GTGCATAAT-----  
-----GTCTGGGCTACA---CATGCCTGTGTACCCACAGAC---  
CCCAATCCACAAGAATTAAAATTGGAG-----AATGTGACAGAAGAATTTAAC-----  
-----ATGTGGAAAAATCCCATGGTAGAGCAGATGCATACAGATATA---  
ATCAGTCTATGGGACCAAAGCCTA---AAGCCATGTGTACAGTTA---  
ACCCCTCTCTGTGTACCTTAAATTGTAGCAGTGTCAACAGCAGTATCACAGCTAACAGCAGCAGTGGCAATG  
GCACAGCTAAC-----  
-----AGTACAAGTAGCTACGACAAGGAGGCAGTCGAAGAAATGAGA---  
AACTGCTCTTACAATATGACCACAGAATTAAGG-----  
GATAAAAAACAGAAAATATATTCACCTT---TTTTATAAACTTGATATAGTACCAATTAATGGTGAG-----  
-----  
GATAATAAGAGTAGTGAATATAGGTTAATAAACTGTAATACCTCAACCATTACACAG---  
GCTTGTCCAAAGGTATCCTTTGATCCAATTCCTATACATTATTGTGCTCCAGCTGGTTTTTCGATCCTAAAGT  
GCAAT---GATACGAAGTTCAAT-----GGAACAGGGCTATGCAAAAAT-----  
-GTCAGC---ACAGTTCAATGCACACATGGAATCAGACCAGTAGTATCAACT---  
CAACTACTGTTAAATGGCAGTCTAGCAGAAAAAGAG-----  
GTAATGATTAGATCTGAAAAATATCACAACAAT-----GTCAAAACATAATAGTACAATTGGTC----  
-----AACTCTGTGAAT-----ATTACTTGTATCAGACCTGCCAATAATACAAGAAAA-----  
-AGTGTACATATA-----GGACCAGGGCAAGCA---TTT-----TATGCAATGGGGGAT-----  
-----GTAATAGGGGATATA-----AGAAAAGCACATTGC---AATGTTAGTAGAACA---  
GAATGGAATGAAGCTCTAAAACAGGTAGCTAACCAATTAGGA-----AAACACTTTGGC----

-----AACAAAACAATAATATTTAAT-----  
 AACTCCTCAGGAGGAGATTTGGAAATCACA--ACACATAGTTTTTAATTGTAGAGGAGAA--  
 TTTAAACAGCTCCAGGCAAGAGTCCTGGCTGTGGAAAGATACCTAAGGGATCAACAGCTCCTAGGAATTTGGG  
 GTTGCTCTGGAAGACTCATCTGCACCACTAATGTGCCTTGGAAATGAAAGTTGGAGT-----  
 -----AATAAATCTTATGATGAAATATGG-----GGA-----  
 AACATGACCTGGCTGCAATGG--GAAAGAGAAATTGACAATTACACAGGCATAATATAT--  
 AACCTAATTGAAGAATCGCAGAACCAGCAGGAA-----  
 -----  
 AGAAATGAAAAAGACTTATTGGCATTGGATAAGTGGGCAAGTCTGTGGAATTGGTTTAGCATAACAAAATGGC  
 TGTGGTATATAAAAAATATTTATAATGATAGTAGGAGGCTTAATAGGGTTAAGAATAGTTTTTTGCA--  
 GTGCTTTCTATAATA-----AATAGAGTTAGGCAGGGATACTCACCT-----  
 TTGTCGTTTCGCTACTAGTTTGTCTTGATACCATAGCAATAGCAGTAGCTGGC---  
 TGGACAGATAGGATTATAGAACTAGGACAAAGCATTGGTAGGGCT-----  
 -----ATCCTCCACATA-----CCTAGAAGAATCAGACAGGGTTTGGAAAGGGCTTTGCTA---TAA  
 >MF565934  
 GCT---GCA-----  
 AACAACTTGTGGGTTACTGTCTACTATGGGGTACCTGTGTGG--AGAGATGCAGAG---  
 ACCACCTTATTTTGTGCATCAGATGCTAAAGCATATGACACAGAA--GTGCATAAT-----  
 -----GTCTGGGCTACA--CATGCTTGTGTACCCACAGAC---  
 CCCAGCCCGCAAGAAATACATTTGGCA-----AATGTGACAGAAAAGTTTAAAC-----  
 -----ATGTGGAAAAACAGCATGGTAGAGCAGATGCATACAGATATA---  
 ATCAGTCTATGGGACGAAAGCCTA--AAGCCATGTGTAAAATTA---  
 ACCCCTCTTTGCATTACTTTAAATTGTACTAACATCACAAGGAAGAACGTACA-----  
 -----  
 -----GGGGGGAACCTCACAGAGGATGGCAAGGAAGAATTAAAA---  
 AACTGCTCTTTCAATGCAACCACAGAATAAGG-----  
 AATAAGAGACAAAAAGTACATTCACCT--TTTTATAGACTTGATATAGTAGAACTTAATGAGGGTAAT---  
 -----  
 -----  
 AGTAGTAATAGTAATACTAGTATGTATAGATTAATAAATTGTAATACCTCAGCAATTACACAG--  
 GCTTGTCCAAAGGTATCCTTTGAGCCAATTCCCATACATTATTGTGCCCCAGCTGGTTTTGCGATTCTAAAGT  
 GTAGG--GAGGAGGAGTTTAAAT-----GGAACAGGGCCATGCAAAAAAT-----  
 -GTCAGC--ACAGTACAATGCACACATGGGATCAAGCCAGTAGTATCAACT---  
 CAGCTGCTGTAAATGGCAGTCTAGCAGAAGGAACG-----  
 GTAAAAATTAGATGTGAAAATATCTCAAACAAT-----GCCAAAACCATACTAGTCCAACTTACT---  
 -----ACGCCTGTGAGA-----ATTAATTGTACCAGGCCTAACAACAATACAAGAACA-----  
 -AGTATACGTATA-----GGACCAGGACAATCG--TTC-----TATGCAACAGGTGAC-----  
 -----ATAATAGGGGATATA-----AGAAAAGCATATTGT--AATGTTTCAGGATCA---  
 GAATGGAAGGAAGCTTTAGGGAAGGTAGTTGTACAATTAAGA-----AGCCACTTT-----  
 -----AATAAAACAATAACCTTTGCT-----  
 AGCTCCTCAGGAGGGGATTTAGAAATCACA--ACACATAGTTTTTAATTGTGGAGGAGAA--  
 TTTAAACAGCTCCAGGCAAGAGTCCTGGCTGTGGAAAGATACCTGAGTGATCAACAGCTCCTAGGAATTTGGG  
 GCTGCTCTGGAAGCTCATCTGCACCACTACTGTGCCCTGGAACCTCTAGTTGGAGT-----  
 -----AATAAATCTCAGGATGAGATATGG-----AAT-----  
 AACATGACCTGGCTACAATGG--GATAAAGAAATTAGCAATTACACAGACACAATATAT--  
 TACTTAATTGAAAAATCGCAGAATCAGCAGGAG-----  
 -----  
 GTAAATGAAAAAGACTTATTGGCATTGGACAAATGGACAAATCTGTGGAATTGGTTTGACATATCAAAGTGGC  
 TGTGGTATATAAAAAATATTTATAATGATAGTAGGAGGCTTAATAGGATTAAGGATAATTTTTTGCT--  
 GTGCTTTCTGTAATA-----AATAGAGTTAGGCAGGGATACTCACCT-----  
 GTGTCATTTGCTGTTAATCTGGTTGATACCATAGCAATAGTAGTAGCTGGC---  
 TGGACAGATAGAGTTATAGAAGTATTACAAGGAATTGGTAGAGCT-----  
 -----TTCCTTCACATA-----CCTAGAAGAATCAGACAGGGCTTAGAAAAGAGCATTGCTA---TAA  
 >KX983624  
 GTT---GCA-----  
 GAAAACTTGTGGGTTACTGTCTATTATGGGGTGCCTGTGTGG--AAAGATGCAGAG---  
 ACCACTTTATTTTGTGCATCAGATGCTAAAGCATATGATACAGAA--GCGCATAAT-----  
 -----GTCTGGGCTACA--CATGCCTGTGTACCCACAGAC---  
 CCCAACCACAGAAGAAATACATTTGGAA-----AATGTGACAGAAGAGTTTAAAC-----  
 -----ATGTGGAAAAGTAACATGGTAGAGCAGATGCATACAGACATA---

ATCAGTCTATGGGACCAGAGCCTA---AAGCCATGTGTAAAATTA---  
 ACCCCTCTCTGTGTTACTTTTAGATTGTGCATAACGTCACC-----  
 -----  
 -----AATAATTTACGGAGGGGGTCCCGGAAGAAGAAATAAAA---  
 AACTGCACTTTCAATATGACCACAGAGTTAAGG-----  
 GATAAGAAGCAGTCAGTGTATTCACCT--TTTTATAGACTTGATATAGTACAAATTGGTGGA-----  
 -----  
 -----  
 AAGAATAATAGTCAGCATTATAGATTAATAAATTGTAATACCTCAGCCATTACACAG---  
 GCTTGTCCAAAGGTATCCTTTGAGCCAATCCCTATACATTATTGTGCCCCAGCTGGTTTTGCGATTCTAAAGT  
 GTAGG---GATACAAAGTTCAAT-----GGAACAGGACCATGCAAGAAT-----  
 -GTCAGC---ACAGTACAATGCACACATGGAATCAGGCCAGTAGTATCAACT---  
 CAACTGCTGTTAAATGGCAGTCTAGCAGAAGAAGAG-----  
 GTAGTAGTGAGGTCTGAAAAATACACAAATAAT-----GTCAAACCCATAATAGTGCAATTGGTC----  
 -----AGGCCTGTAAAC-----ATTACTTGTGTGCAGACCTAACAACAATACAAGAAAA-----  
 -AGTGTACGTATA-----GGACCAGGACAAGCA---TTC-----TATGCAAGGGGTGGC-----  
 -----ATAATAGGGGATATA-----AAACAAGTATATTGT---ATTGTCAATGAAACA---  
 GAATGGAAGGGAGCTTTAAGAACTGTATCCCTACAATTAGGA-----AACTACTTTAAG----  
 -----GACAAAGCAATAAACTTTACT-----  
 AACTCCTCAGGAGGGGATGTAGAAATTACA--ACACATAGTTTTAATTGTGGAGGAGAA--  
 TTTAAACAGCTCCAGGCAAGAGTCCTGGCTGTGGAAAGATACCTAAAGGATCAACAGCTCCTAGGAATTTGGG  
 GCTGCTCTGGAAGAACTCATCTGCACCACTAATGTGCCCTGGAAGTCTAGTTGGAGT-----  
 -----AATAAATCTCAGAGTGAAATATGG-----AAT-----  
 AACATGACCTGGATGCAATGG---GATAAGGAAATTGACAATTACACACAGGAAATATAT---  
 AGACTAATTGAAGAATCGCAGAACCAGCAGGAA-----  
 -----  
 AAGAATGAACAAGACTTATTGGCATTGGACAAGTGGGCAAGTCTGTGGACCTGGTTTGACATATCAAATTGGC  
 TGTGGTATATAAGAATATTTATAATGATAGTAGGAGGCTTAATAGGATTAAGAATAGTTTTTTGCT---  
 GTGCTTTCTGTAATA-----AATAGAGTTAGGCAGGGATACTCACCT-----  
 CTGTCAATTTGCTATTAATTTGGTTGATACCATAGCAATAGCAGTAGCTGGC---  
 TGGACAGATAGGGCTATAGAAATAGGACAAGGAATTGGTAGAGCT-----  
 -----ATAATCCACATA-----CCAAGAAGAATCAGACAGGGCTTAGAAAGGGCTTTGCTA--TAA  
 >KF716472  
 GCT---ACA-----  
 GAAAACTTGTGGGTTACTGTCTACTATGGGGTACCTGTGTGG--AAGAACGCAGAG---  
 ACCACCTTATTTTGTGCATCAGATGCTAAAGCATATGATAAAGAG--GTGCATAAT-----  
 -----GTCTGGGCTACA--CATGCCTGTGTACCCACAGAC---  
 CCCAACCCACAAGAGGTATATTTAGAA-----AATGTGACAGAAGAGTTCAAC-----  
 -----ATGTGGAAAAATAACATGGTAGAGCAAATGCATACAGATATA---  
 ATCAGTCTATGGGACCAAAGCTTA--AAGCCATGTGTACAGTTA--  
 ACCCCTCTCTGCGTTACTTTAAATTGTACTAAT-----  
 -----  
 -----AACATCACCGTGAACGGTAACACAAAAGGGACAGAGATAGAAGGAATGACA---  
 AACTGTTCTTTCAATGCAACCACAGAATTAAGG-----  
 GATAAAAACCAGAAAATGTATTCACCT---  
 TTTTATAAGCTTGATATAGTACAAATTAATGAAGATAAGAATAAT-----  
 -----  
 AGTAGTAAGAATAATAGTAGTTCTCTGAATAGGTTAATAAATTGTAATACCTCAGCCATTACACAG---  
 GCTTGTCCAAAGGTATCCTTTGAGCCAATTCCTATACATTATTGTGCCCCAGCTGGTTTTGCAATTCTAAAGT  
 GTAGG---GACCCAAAGTTCAAT-----GGAACAGGACCATGCAAGAAT-----  
 -GTCAGC---TCAGTACAATGCACACATGGAATCAAGCCAGTAGTATCAACT---  
 CAACTGCTGTTGAATGGCAGTCTAGCAGAAAAGGAG-----  
 GTGATAATTAGATCTGAAAAATACCAACAAT-----GCCAAAACCATAATAGTACAACCTTGTC----  
 -----AAGCCTATAGGA-----ATTAATTGTACCAGGCCTAGCAACAATACAAGAAAA-----  
 -AGTGTACGTATA-----GGACCAGGACAAACA---TTC-----TATGCAACAGGTGAG-----  
 -----ATAATAGGGGATATA-----AGACAAGCACATTGT---AATGTCAGTAGAGAA---  
 GACTGGTTTTGAAGCTTTAAAAAATATATCCAAACAATTAGGA-----AAACACTTTGGG----  
 -----AACAAAACAATAGTCTATGAT-----  
 AAATCCTCAGGAGGGGATTTAGAAAGTTACA--ACACATAGTTTTAATTGTGGAGGAGAA--  
 TTTAAACAGCTCCAGGCAAGAAATCCTGGCTGTGGAGAGATACCTAAAGGATCAACAGCTCCTGGGAATTTGGG

GATGCTCTGGAAACTTATCTGCACCACTAGTGTACCCTGGAACCTCTAGCTGGAGT-----  
 -----AATAAATCTCAGGATGAGATATGG-----CAG-----  
 AATATGACCTGGATACAATGG---GATAAAGAAATTAACAATTACACAGAATTAATATAT---  
 AATCTAATTGAACAATCGCAAACACAGCAGGAA-----  
 -----  
 AAGAATGAACAAGAATTATTGGCATTGGACAAGTGGGCAAGTCTGTGGACTTGGTTTGACATCTCAAACCTGGC  
 TGTGGTATATAAAGATATTTATAATGATAGTAGGAGGCTTAATAGGGTTAAGAATAGTTTTTTGCT---  
 GTGCTTTCTATAATA-----AATAGAGTTAGGCAGGGATACTCACCC-----  
 TTGTCATTTGCTATTAGTTTGTGTTGATACAATAGCAATAACAGTAGCTGGC---  
 TGGACAGATAGAGTTATAGAAAATAGTGCAAAGAATTTGTAGAGCT-----  
 -----ATTCTTAACATA-----CCAACAAGAATCAGACAGGGCTTCGAAAGGGCTTTGCTA---TAA  
 >AB253421  
 GCT---ACA-----  
 GAAAACTTGTGGGTTACTGTTTACTATGGGGTACCTGTGTGG---AAAGATGCAAAAG---  
 ACCACCCTATTTTGTGCATCAGATGCTAAAGCATATGAGACAGAA---AAGCATAAT-----  
 -----GTCTGGGCTACA---CATGCCTGTGTACCCACAGAC---  
 CCCAACCCACAAGAGATACATTTGGAA-----AATGTGACAGAAGATTTTAAAC-----  
 -----ATGTGGAAAAATAACATGGTAGAACAGATGCATACAGATATA---  
 ATCAGTCTATGGGACCAAAGCCTA---AAGCCATGTGTAAAGCTA---  
 ACCCCTCTCTGTGTCACTTTACATTGTAGCAATGTACGGGTGCCAACAGC-----  
 -----  
 -----ACTGGCACGGGTGGGGAAGAAATAAAA---  
 AACTGCTCTTACAATATTACCACAGAACTAAGG-----  
 GATAAAAGAAAGAAAGTATATTCACCT---TTTTATAGACTAGACATAGTACAACCTTAGTAGCAAT-----  
 -----  
 -----  
 AATAGTAATAGTAATGAGTATAGATTAATAAATTGTAATACCTCAGCCATTACACAA---  
 GCTTGTCCAAAGGTATCCTTTGAGCCAATTCCTATACATTATTGTGCCCCAGCTGGTTTTGCGATCCTAAAGT  
 GTAAG---GATGAGGAGTTCAAT-----GGAACAGGGCCATGTAAGAAT-----  
 -GTCAGC---ACAGTACAATGCACACATGGAATCAAGCCAGTAGTGTCAACT---  
 CAACTGTTGTAAATGGCAGTCTAGCAAAAGAAAAG-----  
 GTAATAATTAGATCTGAAAATATCACAAACAAT-----GTCAAAACCATAATAGTACAACCTTGTC---  
 -----AAGCCTGTGAAA-----ATTAATTGTACCAGACCTAACAACAACACAAGAACA-----  
 -AGTATACGTATA-----GGACCAGGACAATCA---TTC-----CATGCAACAGGTGAC-----  
 -----ATAATAGGGGATATC-----AGACAAGCACATTGC---AATGTCAGTAGATCA---  
 GAATGGAATGAAGCCTTACGACAGGTAGTTGAACAACCTAAGA-----GGACACTTTGGG---  
 -----AACAAAACAATAATCTTTACT-----  
 AACTCCTCAGGAGGGGATATAGAAATCACA--ACACATAGTTTTTAATTGTGGAGGAGAA---  
 TTAAACAGCTCCAGGCAAGAGTCCTGGCTGTGGAAAGCTACCTAAGGGATCAACAGCTCCTAGGAATTTGGG  
 GCTGCTCTGGAACCTCATCTGCACCACTACTGTGCCCTGGAATGCTAGTTGGAGT-----  
 -----AATAAATCTTACAGTGAGATATGG-----GAG-----  
 AATATGACCTGGTTGCAATGG---GATAAAGAAATTAGCAATTACACAAACCTAATATAT---  
 GGCCTAATTGAAGAATCGCAGAACCAGCAGGAA-----  
 -----  
 AAGAATGAACAAGACTTATTGGCATTGGACAAGTGGGCAAATCTGTGGAGTTGGTTTGAAATATCAAATTGGC  
 TGTGGTATATAAAAATATTTATAATGATAGTAGGAGGCTTAATAGGATTAAGAATAGTTTTTTGCT---  
 GTGCTTTCTATAATA-----AATAGAGTTAGGCAGGGTACTCACCT-----  
 TTGTCGTTTGCTACCAGTTTGGTTGATACCATAGCAATAGTAGTAGCTGGC---  
 TGGACAGATAGAGTTATAGAAAATAGTACAAGGAATTGGTAGAGCT-----  
 -----ATTCTCCACATA-----CCTAGAAGAATCAGACAGGGTCTTGAAAGGGCTTTGCTA---TAA  
 >AB287377  
 ACT---GCA-----  
 GAAAACTTGTGGGTTACTGTCTACTATGGGGTACCTGTGTGG---AAAGATGCAGAA---  
 ACCACCTTATTTTGTGCATCAGATGCTAAAGCATACGACACAGAG---GCGCATAAT-----  
 -----GTCTGGGCTACA---CATGCCTGTGTACCCACAGAC---  
 CCCAACCCACAAGAAATATATTTGGAA-----AATGTGACAGAAGAGTTTAAAC-----  
 -----ATGTGGAAAAATAACATGGTAGAGCAGATGCATACAGATATA---  
 ATCAGTCTATGGGATCAAAGCCTA---AAGCCATGTGTACAGTTA---  
 ACCCCTCTCTGCGTTACTTTAAATTGTAATAACATCACCATCAATAACATCACCACC-----  
 -----

-----AACATCACTGAGGACATGAGAGGAGAAATAAAA---  
 AACTGCTCGTACAATATGACCACAGTATTAAGG-----  
 GATAAGAGAAGGAAAGTGTATTCACCT--TTTTATAGACTTGATATAGTACCACTTGATGAGGGGAAT----  
 -----  
 -----  
 AATAACTCTGCTGGGAGTAGTGACTATAGATTAATAAATTGTAATACCTCAACCATAACACAA---  
 GCCTGTCCAAAGGTCTCTTTTGACCCAATTCCCTATACATTATTGTGCTCCAGCTGGTTTTGCGATTCTAAAAT  
 GTAAG---GATCCAGATTTCAAT-----GGAACAGGGCCATGCAAGAAT-----  
 -GTCAGC---ACAGTACAATGCACACATGGAATCAAGCCAGTAGTATCAACT---  
 CAACTGCTGTTAAATGGCAGTCTAGCAGAAGGAAAG-----  
 GTAAGAATTAGATCTGAAAATATTACAAACAAT-----GCCAAAACATAATAGTACAACCTTGTC----  
 -----AAGCCTGTAAAA-----ATTAATTGTGTGTCAGACCTAACAACAATACAAGAACA-----  
 -AGTGTACGTATA-----GGACCAGGACAAAACA--TTC-----TATGCAACAGGTGAA-----  
 -----ATAATAGGGGATATA-----AGACAAGCATTTTGT---ACTGTCAATGAATCA---  
 GAATGGAATGAACTTTTACAACAGGTAGCTACGCAATTAAGA-----GAACACTTTGAG----  
 -----AACAAAACAATAAAATTTACT-----  
 AACTCCTCAGGAGGGGATTTAGAAATTACA--ACACATAGCTTTAATTGTGGAGGAGAA--  
 TTTAAACAGCTCCAGGCAAGAGTCCTTGCTGTGGAAAGATACCTGCAGGATCAACAGCTCCTAGGAATTTGGG  
 GCTGCTCTGGAAGAACTCATCTGCACCACTAATGTGCCCTGGAACCTCTAGTTGGAGT-----  
 -----AATAAATCTCAGAGTGAGATATGG-----GAG-----  
 AACATGACCTGGCTGCAATGG---GATAAAGAAATTAGCAGTTACACAGGCATAATATAT---  
 AAACCTAATTGAAGAATCGCAGAACCAGCAGGAA-----  
 -----  
 AAGAATGAACAAGACTTATTGGCATTGGACAAGTGGGCAAGTCTATGGAATTGGTTTGAAATATCAAAGTGGC  
 TGTGGTATATAAAAAATATTTATAATGATAGTAGGAGGATTAATAGGATTAAGAATAGTTTTTTGCT---  
 GTGCTTTCTATAATC-----AATAGAGTTAGGCAGGGATACTCACCT-----  
 TTGTCAATTTGCTGTTAATTTAGTTGATACCATAGCAATAGCAGTAGCTGGC---  
 TGGACAGATAGGATTATAGAAACAGGACAAAGATTTTGTAGAGCT-----  
 -----CTTCTCAACGTA-----CCTAGAAGAATCAGACAAGGATTTGAAAGGGCTCTGCTA---TAA  
 >AB287379  
 GCT---GTA-----  
 GAAAACTTGTGGGTACTGTCTACTATGGGGTACCTGTGTGG--AAAGACGCAGAG---  
 ACCACCTTATTTTGTGCATCAGACGCTAAAGCATATGATACAGAA--GTGCATAAT-----  
 -----GTCTGGGCTACA--CATGCTTGTGTACCCACAGAC---  
 CCCAACCCACAAGAAATACATTTGGAA-----AATGTGACAGAAGAGTTCAAC-----  
 -----ATGTGGAAAAATAACATGGTAGAGCAGATGCATACAGATATA---  
 ATTAGTCTATGGGATCAAAGCCTA--AAACCATGTGTAAAGTTA--  
 ACCCTCTCTGTGTACTTTAGATTGCCATAAGTATAACAGCACCTATAACGGCACC-----  
 -----  
 -----AACAGTACGGTTGACATGCGAGAAGAAATAAAA---  
 AACTGCTCTTTCAATATAACCACAGAATTAAGG-----  
 GATAAGAAAAAGAAAGAGCATTCACCT--TTTTATAGACTTGACATAGTACAAATTAATAAT-----  
 -----  
 -----  
 AGCAGTAATAGCAGTCAGTATAGATTAATAAATTGTAATACCTCAGCCATTACACAA---  
 GCTTGTCCAAAGGTAACCTTTGAGCCAATTCCTATACATTATTGTGCCCCAGCTGGTTTTGCGATTCTAAAGT  
 GTAAA---GAGATAGAGTTCAAT-----GGAACAGGACCATGCAAGAAT-----  
 -GTCAGC---ACAGTACAATGCACACATGGAATCAGGCCAGTAATATCAACT---  
 CAACTGCTGTTAAATGGCAGTCTAGCAGAACAAAAG-----  
 ATAAGGATTAGATCTGAAAATATCACAAACAAT-----GCCAAAACCATAATAGTACAACCTTGTC----  
 -----CAGCCTGTAGAA-----ATTAATTGTACAAGACCTAACAACAATACAAGAAGA-----  
 -AGTGTACATATA-----GGACCAGGACAAGCA--TTC-----TATGCAACAGGTAAA-----  
 -----ATAATAGGGGATATA-----AGACAAGCACATTGT---AATGTCAGTAGAGCA---  
 AAATGGAATGATACTTTACGAGAGGTGGCCACACAATTAAGA-----GAATACTTTAAG----  
 -----AACAAAACAATAATCTTTGAT-----  
 AAATCCTCAGGGGGGGATTTGGAAATTACA--ACACATAGTTTTTAATTGTGGAGGAGAA--  
 TTTAAACAGCTCCAGGCACGAGTCCTGGCTGTGGAAAGATACCTAAAGGATCAACAGCTCCTGGGAATTTGGG  
 GCTGCTCTGGAAGAACTCATCTGCACCACTAATGTGCCCTGGAACCTCTAGTTGGAGT-----  
 -----AATAAATCTCAGAGTAAGATATGG-----GAT-----  
 AACATGACCTGGCTGCAATGG---GATAAGGAAATTAGCAATTACACAGACATAATATAT---

AGTCTAATTGAAGAAGCGCAGAACCAGCAAGAA-----  
 -----  
 AAGAATGAACAAGACTTATTGGCATTTCGACAAGTGGGCAAGTCTGTGGAATTGGTTTGACATATCAAAATGGC  
 TGTGGTATATAAAAATATTTATAATGATAGTAGGAGGCTTAATAGGATTAAGAATAGTTTTTTGCT---  
 GTGCTTTCTATAATA-----AATAGAGTTAGGCAGGGATACTCACCT-----  
 CTGTCTGTTTGCTGTTAACTTGTGTTGATACCATAGCTATAGCAATAGCTGGC---  
 TGGACAGATAGGATTATAGAAGTAGGACAAAGAATTTGTAGAGCT-----  
 -----ATTCTCCACATA-----CCTAGAAGAATCAGACAAGGCTTCGAAAGGGCTTTACTA---TAA  
 >AY713406  
 GCT---GTA-----  
 GAAAACTTGTGGGTTACTGTCTACTATGGGGTACCGGTGTGG---AAAGATGCAGAG---  
 ACCACCCTATTTTGTGCCTCAGATGCTAAAGCATATGAGACAGAA---GTGCATAAT-----  
 -----GTCTGGGCTACA---CATGCCTGTGTGCCACAGAC---  
 CCAAAACCACAAGAAATACCTTTGGAA-----AATGTGACAGAAAAGTTTAACT-----  
 -----ATGTGGAAAAATTATATGGTAGAGCAGATGCATACAGATATA---  
 ATCAGCCTATGGGATGAAAGCCTA---AAGCCATGTGTAAAGTTA---  
 ACCCCTCTCTGCGTTACTTTAAATTGTAGCGATGCCATTGGCAACTTT-----  
 -----  
 -----ACAAATATCAAGGAAGAAATAACA---  
 AACTGCTCTTTCAATGTGACCACAGAAGCTAAGG-----  
 GATAAGACAAAGAAAGTACATTCACT---  
 TTTTATAGACTTGATATAGTACCCTTAATGAATATAGTAGTAGC-----  
 -----  
 AATAAAAGTAGTAACAATAATAATAGTAGCCAGGAATATGTATTAATAAATTGTAATACCTCAGCCATTACAC  
 AA---  
 GCCTGTCCAAAGGTAACCTTTGAGCCAATTCCCATACATTATTGTGCCCCAGCTGGTTTTGCGATCCTAAAGT  
 GTAAG---GACACAGATTACAAT-----GGAACAGGGCCATGCAGGAAT-----  
 -GTCAGC---ACAGTACAATGCACACATGGAATCAAGCCAGTAGTATCAACT---  
 CAACTGCTGTTAAATGGCAGCCTAGCAGAAAGAAAT-----  
 GTAACAATTAGATCTGAAAATATCACAAACAAT-----GCCAAAACCATACTAGTACAACCTTGTC---  
 -----AAGCCTGTGAGA-----ATTAATTGTACCAGACCTTATAACAATACATTGAGA---  
 -AGGGTACGTATA-----GGACCAGGACAATCA---TTC-----CATGCATCAGATAAC-----  
 -----ATAGTAGGGGATATA-----AGAAAAGCACATTGT---AATGTTAGTAGATCA---  
 GAATGGAATGAACTTTACAACAGGTAGTTACTCAATTAAGA-----GGGTACTTTGGG---  
 -----AACAAGACAATAGTCTTTACT-----  
 AAGCCCTCAGGAGGGGATCTAGAAATCATA--ACACATAGTTTTTAATTGTAGAGGAGAA---  
 TTTAAACAGCTCCAGGCAAGAGTCCCTGGCTGTGGAAAGATACCTAAAGGATCAACAGCTCCTAGGAATTTGGG  
 GTTGCTCTGGGAACTCATCTGCACCACTAATGTGCCCTGGAATACTAGTTGGAGT-----  
 -----AAAAATAAATCTCTGAGTGAAATATGG-----GAT-----  
 AACATGACCTGGCTGCAATGG--GATAAAGAAATTAGCAATTACACAAACCTAATATAT---  
 AACCTAATTGAAGAATCGCAGAACCAGCAGGAA-----  
 -----  
 AAGAATGAACAAGACTTATTAGCATTGGATAAGTGGGCAAATCTTTGGACTTGTTTGACATATCAAATTGGC  
 TGTGGTATATAAAAATATTTATAATGATAGTAGGAGGCTTAATAGGATTAAGAATAGTTTTTTGCT---  
 GTGCTTACTGTAATA-----AATAGAGTTAGGCAGGGATACTCACCT-----  
 TTGTCATTTGCTATTAATTTGTTTGATACCATAGCAATAGCAGTAGCTGGC---  
 TGGACAGATAGGGTTATAGAAGTAGGACAAAGAGTTGGTAGAGCT-----  
 -----TTGCTCCACGTA-----CCTAGAAGGATCAGACAGGGCTTTGAAAGGGCTTTGCTA---TAA  
 >L07082  
 GTT---GCA-----  
 GGAAACTTGTGGGTTACTGTCTACTATGGGGTACCTGTGTGG---AAAGATGCAGAA---  
 ACCACCTTATTTTGTGCATCAGATGCTAAAGCATATGATACAGAA---GCACATAAT-----  
 -----GTCTGGGCTACA---CATGCCTGTGTACCCACAGAC---  
 CCCAACCACACAAGAAATACTTTGAAA-----AATGTGACAGAAGAGTTTAACT-----  
 -----ATGTGGAAAAATGGCATGGTAGAGCAGATGCATACAGATATA---  
 ATCAGTCTATGGGACCAAAGTCTA---AAGCCTTGTGTACAGTTA---  
 ACCCCTCTCTGCGTTACCTTAGACTGTAATTATAACATCACCATCAATAGCACCAAAACCCCTTCC-----  
 -----  
 -----CCTGTCACCAATATCTCCGAGGAAATGAGAGAAGAAATAAAA---  
 AACTGCTCTTTCAATATGACCACAGAATTAAGG-----

GATAAGAAACAGAAAGTGCATTCACTT---TTTTATAAACTTGATATAGTACACCTTAATGAC-----  
-----  
-----  
AGTAAGCCTAAGCAGTATAGATTAATAAAATTGTAATACCTCAGCCATTACACAG---  
GCTTGTCCAAAGGTATCCTTTGAGCCAATTCCCATACATTATTGTGCCCCAGCTGGTTTTGCATTCTAAAGT  
GTAAA---CGTGCAAACCTTCACT-----GGAACAGGGCCATGCAAAAAT-----  
-GTCAGC---TCAGTACAATGCACACATGGAATCAGGCCAGTAATATCAACT---  
CAACTGTTGTAAATGGCAGTCTAGCAGAAGAAAA-----  
GATGTACAGATTAGATCTGAAAAATATCACAACAAT-----GCCAAAACCATAATAGTACAATTTACC-  
-----AAGGCTGTAAAA-----ATTAATTGTACCAGACCTAACAAAACCTACAAGAAAA--  
----GGTGTGCGTATA-----GGACCAGGACAAGCA---TGG-----TATGCAAGAGGTAAC---  
-----ATGATAGGAGATATA-----AGAAAAGCATATTGT---AATGTCAGTAGAACA-  
--GAATGGAATCAAACATTACAAAAGGTAGCCACACAATTAGGA-----AACACTTT-----  
-----AACAAAACAATAACCTTTTACT-----  
AAATCCTCAGGAGGGGATTTAGAAATTACA---ACACATAGTTTTAATTGTGGAGGAGAA---  
TTCAAACAGCTCCAGGCAAGAGTCCTGGCTGTGGAAAGATACCTAAAGGATCAACAGCTCCTAGGAATTTGGG  
GCTGCTCTGGAAACTCATCTGCCCCACTACTGTGCCCTGGAACCTCTAGTTGGAGT-----  
-----AATAAAACTCTGAGTGAAATATGG-----GAT-----  
AACATGACCTGGCTGCAATGG---GATAAAGAGATTAGTAATTACACAGATTTAATATAT---  
CAGCTAATTGAAGACTCGCAGAACCAGCAGGAA-----  
-----  
AAGAATGAACAAGACTTGTGGCATTGGACAAGTGGGCAAGTCTGTGGAATTGGTTTGACATATCAAATTGGC  
TGTGGTATATAAGAATATTTATAATGATAGTAGGAGGCTTAATAGGATTGAGAATAATTTTTGCT---  
GTGCTTTCTATAATA-----AATAGAGTTAGGCAGGGATACTCACCT-----  
CTGTCGTTTGCTATCAATTTGTTTGATACCATAGCAATAGTAGTAGCTGGC---  
TGGACAGATAGGGTTATAGAAGTAGGACAAAGAATTGGTAGAGCT-----  
-----TTTCTTAACATA-----CCTAGAAGAATCAGACAGGGCGCTGAAAGGGCTTTGATA---TAA  
>MF373167  
GCT---GCA-----  
GAGAACTTGTGGGTTACTGTCTACTATGGGGTACCTGTGTGG---AAAGATGCAGAG---  
ACCACCTTATTTTGTGCATCAGATGCCGAAAGCATATAAAACAGAA---GTGCATAAT-----  
-----GTCTGGGCTACA---CATGCCTGTGTACCTACAGAC---  
CCCAACCCACAAGAAATACATTTGGAA-----AATGTGACAGAAGAGTTTAAC-----  
-----ATGTGGAAAAATAACATGGTAGAGCAGATGCAGACAGATATA---  
ATCAGTCTATGGGACCAAAGCCTA---AAGCCATGTGTAAAGTTA---  
ACCCCTCTCTGTGTACTTTAGATTGTAGTGACTATAATGGCACCAATATCACCGGT-----  
-----  
-----GACATGACAAGGGAAATAAAA---  
AACTGCTCTTTCAATATAACCACAGAATTAAGG-----  
GATAAGAAACAGAAAGTACATTCACTT---TTTTATAGACTAGATGTAGTACAAATTAATAAT-----  
-----  
-----  
AGCAGTAACAGCAATAACAGTCAGTATAGATTAATAAAATTGTAATACCTCAGCCATTACACAA---  
GCTTGTCCAAAGGTATCCTTTGAGCCAATTCCCATACATTATTGTGCCCCAGCTGGTTTTGCATTCTAAAAT  
GTAAT---GATAAGGAGTTCAGT-----GGAACAGGGCTATGCAGGAAT-----  
-GTCAGC---ACAGTACAATGCACACATGGAATCAAGCCAGTAGTATCAACT---  
CAACTGCTGTTAAATGGCAGTCTAGCAGAAGGAAAG-----  
GCAATGATTAGATCTGAAAAATATCACAACAAT-----GGTAAAAACATAATAGTACAACCTTGCC---  
-----AAGCCTGTACAC-----ATTAATTGTACCAGACCTAATAACAATACAAGAAAA---  
-AGTGTACGTATA-----GGACCAGGACAAGCA---TTT-----TATGCAACAGGGGAA-----  
-----ATAATAGGGAACATA-----AGAAAGGCACATTGT---ACGGTCAATAAAACA---  
GAATGGACTAGAACTTTGCGAGAGGTAGCCAAACAATTAAGA-----AAAGAACACTTTAAG---  
-----AATAAAACAATAATTTTTTACT-----  
AACTCCTCAGGAGGGGATCTAGAAATTACA---ACACATAGTTTTAATTGTAGAGGAGAA---  
TTTAAACAGCTCCAGGCAAGAGTCCTAGCTGTGGAAAGATACCTAAGGGATCAACAGCTCCTAGGAATTTGGG  
GCTGCTCTGGAAAGCTCATCTGCACCCTAATGTGCCCTGGAACCTCTACTTGGAGT-----  
-----AATAAAACCCAGAGTGAGATATGG-----GAC-----  
AACATGACTTGGCTGCAATGG---GATAAAGAAATTAGCAATTATACACAATTAATATAT---  
AGGCTAATTGAAGAATCGCAGACCCAGCAGGAA-----  
-----

ATAAATGAAAAAGACTTATTGGCATTGGACAAGTGGGCAAATCTGTGGAGTTGGTTTGACATCTCAAATTGGC  
 TGTGGTATATAAAAATATTTGTAATGATAATAGGAGGCTTAATAGGATTAAGAATAGTATTTGCT---  
 GTGCTTTTCAGTAATA-----AATAGAGTTAGGCAGGGGTACTCACCT-----  
 TTGTGCTTTGCTGTTAATTTGTTTAATACCATAGCAATAGCAGTAGCTGGC---  
 TGGACAGATAGGGTCATAGAGACAGGACACAGACTTTGTAGAGCT-----  
 -----ATTTTCAACATA-----CCCAGAAGAATCAGACAGGGCCTCGAAAGGGCTTTGCTA---TAA  
 >MF373168  
 ACT---GCA---GAC-----  
 AACAACTTGTGGGTACGGTCTACTATGGGGTACCTGTGTGG---AGAGATGCAGAA---  
 ACCACCTATTTTGTGCATCAGATGCTAAAGCTTATAAGACAGAA---ATGCATAAT-----  
 -----GTATGGGCTACA---CATGCCTGTGTACCCACAGAC---  
 CCCAACCCACAAGAACTGCCTTTGGGA-----AATGTGACAGAAGAGTTTAAAT-----  
 -----ATGTGGAAAAATAGCATGGTAGACCAGATGCATACAGATATA---  
 ATTAGCCTATGGGACGAAAGCCTA---AAACCATGTGTAAAGTTA---  
 ACCCCTCTCTGTGTTACTTTAAATTGTAACAATGTTTCTGTTTCTACCAATAATACCAATGAT-----  
 -----  
 -----ACAGTGAAGCAAACAAAGAATTGAGA---  
 AACTGCTCTTTCAATATGACTACAATGCTAAGG-----  
 GATAAGAAACAGAAAATATATTCACTT---  
 TTTTATAAGCTTGATATAGTACAAATTAATGGTAATGATAATAAT-----  
 -----  
 AATGATACTGTTAGTAATAGTAATTATAGGTTAATAAATTGTAACACCTCAGCCATTACACAG---  
 GCTTGTCCAAAGGTATCCTTTGAGCCAATTCCCATACATTATTGTGCCCCAGCTGGTTTTCGATCCTAAAAT  
 GTAGG---GATGAGGAGTTTAAAT-----GGAACAGGGTTCATGCAAAAAT-----  
 -GTAAGC---ACAGTACAGTGCACACATGGAATCAAGCCCGTAGTATCAACT---  
 CAATTGCTATTAAATGGTAGTCTAGCAGAAAAAAG-----  
 ATAATGATTAGATCTAAAAATATCTCAGATAAT-----ACCAAACCATAATAGTACAACCTTAAG----  
 -----GAGCCTGTAAAA-----ATTGATTGTATCAGACCTAACAACAAGACAAGAAAA-----  
 -AGTATACGTATA-----GGACCAGGACAAGCA---TTC-----TATGCAGCAGGTGAC-----  
 -----ATAATAGGGGATATA-----AGACAAGCACATTGT---GTGGTCAATAGATCA---  
 AGCTGGGATAACACTCTACGAGAGATAGTTACACAATTAAGA-----GCACACTGG-----  
 -----AATGGAACAATAAGCTTTAAG-----  
 AGCTCCTCAGGAGGGGATTTAGAGATTACA--ACACATAGTTTCGATTGTGGAGGGGAA---  
 TTCAAACAGCTCCAGGCGAGAGTCCCTGGCTCTGGAAAGATACCTAAGGGATCAACAGCTCCTAGGACTTTGGG  
 GCTGCTCTGGAAACTCATCTGCACCACTAATGTGCTCTGGAACAATAGTTGGAGT-----  
 -----AATAAACTCAGGATGAAATATGG-----GAC-----  
 AACATGACCTGGCTACAATGG---GATAAAGAAATTAGCAATTACACACAAGTAATATAT---  
 ACCCTACTTGAAGACTCGCAGAACCAGCAGGAA-----  
 -----  
 AAGAATGAAAAAGACTTCCTGGAATTGGACAAATGGGCAAGTCTGTGGAATTGGTTTGATATAACAAATTGGC  
 TGTGGTACATAAAAATATTATAATGATAGTAGGAGGCTTAATAGGATTAAGAATAGTTTTTTGCT---  
 GTGCTTTCTGTTATA-----AATAAAGTTAGGCAGGGATACTCACCT-----  
 CTGTGCTTTGCTGTTAATTTGTTTGATACCATAGCAATAGCAGTAGCTGGC---  
 TGGACAGATAGGGTTATAGAAATAGGACAAAGAATTGGTAGAGCT-----  
 -----ATTCTCAACATA-----CCTAGAAGAATTAGACAGGGCTTAGAAAGGGCTTTGCTA---TAA  
 >MF373181  
 ACT---GCA-----  
 GAAAAATTTGTGGGTTACTGTTTACTATGGGGTACCTGTATGG---AGAGACGCAAAG---  
 ACCACCTGTTTTGTGCATCAGATGCTAAAGCATATAAGACAGAA---GCGCATAAT-----  
 -----ATCTGGGCTACA---CATGCCTGTGTACCCACAGAC---  
 CCCAACCCACAGGAAGTAGATTTGGAA-----AATGTGACAGAAGAGTTTAACT-----  
 -----ATGTGGAAAAATAACATGGTAGAGCAGATGCATACAGATATA---  
 ATCAACCTATGGGATCAAAGCCTA---AAGCCATGTGTAAAGTTA---  
 ACCCCTCTCTGTGTTACTTTGAATTGTACAAATAATGTAACAAGTATTAACAGTACTGCAACAGTTAATAAC-  
 -----  
 -----AGTGCCATAGAAGAAATAAAA---  
 AACTGTTCTTTCAATGTGACCACAGAAATATGG-----  
 GATAAGAGACAAAAGTGTATTCACTT---TTTTATAAACATGATATAGTACAAATTGATGAG-----  
 -----  
 -----

AATAGTACTGAGTATATATTAATAAATTGTAATACCTCAGCCATTAAACAA---  
GCTTGTCCAAAGGTGTCCTTTGAGCCGATTCCCATACATTATTGTGCCCCAGCTGGTTTTGCATCCTAAAGT  
GTAAG---GATAAGGGATACAAT-----GGAACAGGGCCATGCAAAAAT-----  
-GTCAGC---TCAGTACAATGTACACATGGGATCAAGCCAGTAGTTTCAACT---  
CAATTGCTGTTAAATGGCAGTCTAGCAGAAGAAGAG-----  
ATAAGAATTAGATCTGAAAATTTCTCAGACAAT-----GCTAAAACCATAATAGTACAACCTTGTT----  
-----GATCCTGTAATA-----ATTAATTGCACCAGACCTAACCAGAAGAAGAGCAGA-----  
-AGTATGCGTATA-----GGACCAGGACGAGTA---TTT-----TATGCAACAGAAAAA-----  
-----ATAACAGGG-----AAACAAGCATCTTGT---ACTGTCAATGGGTCA---  
GCATGGAATGAACTTTACAAAAGGTAGCTGCACAATTAAGA-----AAACACTGG-----  
-----AACAAAACAATAATCTTTACT-----  
CGCCCCCTCAGGAGGGGATCTAGAAATTACA---ATGCATAGTTTTAATTGTGGAGGAGAA---  
TTTAAACAGCTTCAGGCGAGAGTCCTGGCTATAGAAGGATACCTAAAGGACCAACAGCTCCTAGGGATTTGGG  
GCTGCTCTGGAAGAACTCATCTGCACCACCTAATGTGCCCTTGGAACCTTAGTTGGAGT-----  
-----AATAAATCTTACCGGATATATGG-----GGC-----  
AACATGACCTGGCTGCAGTGG---GATAAAGAAATTAGCAATTATACACAAACAATATAT---  
GAGTTAATTGAAGAATCGCAGAGCCAGCAGGAA-----  
-----  
AAGAATGAACAAGACTTATTGGCATTGGACAAGTGGGCAAGTCTGTGGACTTGGTTTGACATAACAAAATGGC  
TGTGGTATATAAGAATATTTATAATGATAGTAGGAGGCTTAATAGGGTTAAGAATAGTTTTTTGCT---  
GTGCTTTCTATAATA-----AATAGAGTTAGGCAGGGATACTCACCT-----  
CTGTCGTTTGCTATTAATCTGTTTGATACCATAGCAATAGCAGTAGCTGGC---  
TGGACTGATAGGGTTATAGAAATAGGACAAGGAATTTGTAGAGCT-----  
-----ATTCTCAACATA-----CCTAGAAGAATCAGACAGGGCTTGGAAGGATCCTGCTA---TAA  
>MF373182  
ACT---ACA-----  
GAGAACTTGTGGGTTACTGTCTATTATGGGGTACCTGTGTGG---AAAGATGCAAAG---  
ACCACCCATTTTTGTGCATCAGATGCAAAGCATATGATAAAGAA---GTGCATAAT-----  
-----GTCTGGGCTACA---CATGCCTGTGTACCCACGGAC---  
CCCAACCCACAAGAATTATATTTGAAA-----AATGTAACAGAAGAGTTTGAC-----  
-----ATGTGGAACAATAACATGGTAGAGCAGATGCATGCAGATATA---  
ATCAGTCTATGGGATGAAAGCCTA---AAGCCATGTGTACAATTA---  
ACCCCTCTCTGTGTTACTCTAAATTGTAGAGATGTCAATTCTTCCAAT-----  
-----  
-----GCTACCTCCCTTGTCCAGGACATAGCAGAAATCAAG---  
AACTGCTCTTTCAATATGACCGCTCATTAAAGG-----  
GATACCAACAACAAAGTGTACTCACTT---TTTAATGGATCTGACGTAACCTCAAATTAATGAA-----  
-----  
ACGCATGGGACCTATAAACTGCTGAGTTGTAATACCTCATCCATTAAAAA---  
CCTTGCCAATGGAATCCTTTGACCCAATCCCCCTACTTAATCGAGCCCAGCCGGTATTGGGCTCCTAAAGG  
GTAAG---GATACAAATTCAGT-----GGGACAAGACCTTGCAATGAAG-----  
-GTGGCC---ATAGCAAAATGGTCACCTGGAATCAAGGCACCGGTGTCAACT---  
CAGCTGCTGTTAAATGGCCCTGTGGTAAAGGGAGGG-----ATT-----  
AACTTAAGGCATATCTCGGATAAT-----ACCAAAATTATAATAGTACAACCTTGAC-----  
--AAGTCTGTAACC-----ATTAAGTGCACCAGACCTAACAATAATACAAGAAAG-----  
ACTATACGTTTTT-----GGACCAGGACACTCA---TTC-----TATGCAACAGATGGC-----  
-----ATAATAGGGAACATA-----AGGAAAGCACATTGT---AATGTCAGTAGATCA---  
GAATGGAAGGGAGCCTTACAAAAAGTAGCTACACAATTAAGA-----AAACACTTTGAG---  
-----AACAAAACAATAAATTTTACA-----  
AGCTCCTCAGGAGGGGATCTAGAAATCACA---ACACATAGTTTTAATTGTAGAGGAGAA---  
TTTAAACAGCTCCAGGCAAGACTCCTGGCTGTGGAAAGATACCTAAAGGATCAACAGCTCCTAGGAATTTGGG  
GCTGCTCTGGAAGACTCATCTGCACCACCTAATGTGCCCTGGAACCTTTACTTGGAGT-----  
-----AATAAATCTTATAATGAGATATGG-----GAT-----  
AACATGACCTGGATGCAATGG---GATAAAGAAATTAACAATTACACACAAGCAATATAT---  
GATCTAATTGAAAAATCACAAATCCAGCAGGAG-----  
-----  
CAGAAATGAACCGGATTTTTTTGGCATTGGCCAAGTGGACAAAATTTGTGGAATTGGTTTGCCATATCCAATTGGC  
TGTGGTATATAAGAATTTTTTATAATGATAGTAGGAGGCTTAATGGGATTAGGAATAGTTTTTTGCA---  
GTGCTTTCTGTAATA-----AATAGAGTTAGGCAGGGTTACTCACCT-----

CTGTCGTTTGGCATTAAATTTGCTTGATACCATAGCAATAGCAGTAGCTGGC---  
 TGGACAGATAGGGTTATAGAACTAGGACAAAGGTTTGGTAGAGCT-----  
 -----ATTCTCAACATA-----CCTAGAAGAATCAGACAGGGCTTCGAAAGGGCTTTGCTA---TAA  
 >AF069670  
 ACT---GCA-----  
 GACAACTTGTGGGTTACTGTCTACTATGGGGTACCTGTGTGG---AAAGATGCAGAG---  
 ACCACCCTATTTTGTGCATCAGATGCTCAAGCATATAAGACAGAA---ATGCATAAT-----  
 -----GTATGGGCTACA---CATGCCTGTGTACCCACAGAC---  
 CCCAACCCACAAGAACTGCATTTGAAA-----AATGTGACAGAAGAGTTTAAAC-----  
 -----ATGTGGAAAAATAGCATGGTAGAGCAGATGCATACAGATATA---  
 ATCAGTCTATGGGACGAAAGCCTA---AAGCCATGTGTAAAGTTA---  
 ACCCCTCTCTGCGTTACTTTAAATTGTACCAATGCCAACGGAACCCAGAAT-----  
 -----  
 -----GTCAACATCACGAATGTAGGAATGAGA---  
 AACTGCTCTTTCAATATGACCACAGAGCTAAGG-----  
 GATAAGAAACAGAAAGGATATTCACCT--TTTTATAAGCTTGATATAGTACAAATTAATGATAATGGT----  
 -----  
 -----  
 AATAACAGTAATAACAGTAGTGAGTATAGGTTAATAAAATTGTAATACCTCAGCCATTACACAG---  
 GCTTGTCCAAAGGTATCCTTTGAGCCAATTCCCATACACTATTGTGCCCCAGCTGGTTTTGCGATCCTAAAGT  
 GTAGG---GATAAGGAGTTCAAT-----GGAACAGGGCCATGCAACAAT-----  
 -GTAAGC---ACAGTACAGTGCACACATGGAATCAAGCCAGTAGTATCAACT---  
 CAACTGCTGTAAATGGCAGTCTAGCAGAAGAAAAG-----  
 ATAATGATTAGATCTGAAAATATCTCAGACAAT-----GCCAAAACCATAATAGTACAACCTTACC----  
 -----GAGCCTGTAAACA-----ATTAATTGTACCAGACCTAGCAACAATACAAGAACA-----  
 -AGTATACGTATA-----GGACCAGGACAAGCA---TTC-----TATGCAACAGGTGAC-----  
 -----ATAACAGGGGATATA-----AGACAAGCACATTGT---AATGTCAGTAGATCA---  
 AGCTGGAATAAACTCTACAAGACATAGTTACACAATTAAGA-----GTATACTGG-----  
 -----AATAGAACAATAATCTTTAAT-----  
 AGCTCCTCAGGAGGGGATTTAGAAATTACA--ACACATAGTTTTAATTGTGGAGGAGAA---  
 TTCAAACAGCTCCAGGCAAGAGTCCCTGGCTGTGGAAAGATACCTAAAGGATCAACAGCTCCTAGGAATTTGGG  
 GCTGCTCTGGAAGAACTCATCTGCACCACTAATGTGCCCTGGAACCTCTAGTTGGAGT-----  
 -----AATAAATCTCAGAATGAAATATGG-----GAA-----  
 GACATGACCTGGCTACAATGG---GACAGAGAAATTAGCAATTACACAGAAATAATATAT---  
 AAACATAATTGAAGAATCGCAGAACCAGCAGGAA-----  
 -----  
 AAGAATGAACAAGACTTACTGGCATTGGACAAATGGGCAAATCTGTGGAATTGGTTTGAGATAACAAAATGGC  
 TGTGGTATATAAAAATATTTATAATGATAGTAGGAGGCTTAATAGGATTAAGAATAGTTTTTTGCT---  
 GTGTTTTCTGTTATA-----AATAGAGTTAGGCAGGGATACTCACCT-----  
 TTGTCGTTTGTCTATTAGTTTGTGTGATACCCAGCAATAGCAGTAGCTGGC---  
 TGGACAGATAGGGGTATAGAATTAATACAAAGAATTGGTAGAGCT-----  
 -----ATTCTCAACATA-----CCTAGAAGAATTAGACAGGGCTTTGAAGAGGCTTTGCTA---TAA  
 >AF069671  
 GTT---GCA-----  
 GGAAACTTGTGGGTTACTGTCTACTATGGGGTACCTGTGTGG---AAAGATGCAGAG---  
 ACCACCCTATTTTGTGCATCAGATGCTAAAGCATATGAGACAGAA---AAGCATAAT-----  
 -----GTCTGGGCTACA---CATGCCTGTGTACCCACAGAC---  
 CCCAACCCACAAGAAATACATTTGAAA-----AATGTGACAGAAAAGTTTAAAC-----  
 -----ATGTGGAAAAATTACATGGTGGAGCAGATGCATACAGATATA---  
 ATCAGTCTATGGGACCAAAGCCTA---GAGCCATGTGTAAAGTTA---  
 ACCCCTCTCTGTGTTACTTTAGAGTGTCACTATAATATCACTGTCAAGAATATCACTGTCAGCAGC-----  
 -----  
 -----AACATAATATTAGTATCAGCAACAGCACGGAGGACATGAGA---  
 AACTGCTCTTTCAATATGACCACAGAATAAGA-----  
 GATAAGCAACAGAAAGTATATTCACCT--TTTTATAGACTTGATCTAGTAAAAATTGATGAAAATAAG----  
 -----  
 -----  
 AGTAATAGTAGTAATAGTAAGTATAGATTAATAAAATTGTAATACCTCAGCCATTACACAA---  
 GCTTGTCCAAAGGTAACCTTTGAACCAATTCCCATACATTATTGTGCCCCAGCTGGTTTTGCGATCCTAAAGT  
 GTAAT---GATAAAGAGTTCAAT-----GGAACAGGGCTGTGCAACAAT-----

-GTCAGC---ACAGTACAATGCACACATGGAATCAAGCCAGTAGTGTCAACT---  
 CAACTGCTGTTGAATGGCAGTCTAGCAACA---AAG-----  
 ATAATGATTAGATCTGAAAATATCACAAACAAT-----GCCAAAACCATAATAGTACAACCTTGTC----  
 -----GAGCCTGTGGAA-----ATTAATTGTACCAGACCTAACAACAATACAAGAACA-----  
 -AGTGTACCTATA-----GGACCAGGAAAAGTA---TTC-----TATGCAACAGGTGAG-----  
 -----ATAATAGGGGATATA-----AGACAAGCACATTGT---AATGTCAGTAAATCA---  
 AAATGGAATGCAACTTTACAAAAGGTAGCTATAAAATTAAGA-----GAATACTTTGAT----  
 -----GACAAAACAATAATCTTTACC-----  
 AAACCCTCAGGAGGGGATCTAGAAATCACA---ACACATAGTTTTAATTGTGGAGGAGAA---  
 TTTAAACAGCTCCAGGCAAGAGTCCTGGCTGTGGAAAGATACCTAAAGGATCAACAGCTCCTAGGAATTTGGG  
 GCTGCTCTGGAAGAACTCATCTGCACCACTACTGTGCCCTGGAACCTCTAGTTGGAGT-----  
 -----AATAAATCTTACGATGAGATATGG-----GAT-----  
 AACATGACCTGGCTGCAATGG---GATAAAGAAATTAGTAATTACACAGAAATAATATAT---  
 CAACTAATTGAAAAATCGCAGAACCAGCAGGAA-----  
 -----  
 AAGAATGAACAAGACTTAATGGCATTGGACAAATGGACAAATCTGTGGACTTGGTTTAGCATATCAAACCTGGC  
 TGTGGTATATAAGAATATTTATAATGATAGTAGGAGGCTTGATAGGTTTAAGAATAGTTTTTTGCT---  
 GTGCTTGCTATAATA-----AATAGAGTTAGGCAGGGGTACTCACCA-----  
 TTGTCATTTGCTATTAATTTGGTTGATACCATAGCAATAGCAGTAGCTGGC---  
 TGGACAGACAGGATTATAGAAATAGGACTAAGAATTGGTAGAGCT-----  
 -----TTTCTCCACATA-----CCTAGAAGAATTAGGCAGGGCTTTGAAAGGGCTTTGCTA---TAA  
 >AF069673  
 GCT---GCA-----  
 GAAAACTTGTGGGTACTGTCTATTATGGGATACCTGTGTGG---AGAGACGCAGAG---  
 ACCACCTTATTTTGTGCATCAGATGCAAAGCATATGATACAGAG---GTGCATAAT-----  
 -----GTCTGGGCCACA---CATGCCTGTGTACCTACAGAC---  
 CCCAACCCACAAGAAATAAATTTGGAA-----AATGTGACAGAAGAGTTTAAC-----  
 -----ATGTGAAAAATAACATGGTAGAGCAGATGCATACAGATATA---  
 ATCAGTCTATGGGACCAAAGCCTA---AAGCCATGTGTAAAGTTA---  
 ACCCTCTCTGCGTTACTTTAAATTGTAGCTCTGTCCCAATAGCTCTGTCACT-----  
 -----  
 -----AATATCACCAGTGACATGGCAGGAGAAATAAAA---  
 AACTGCTCTTTCAATATGACCACAGAAATAAGG-----  
 GATAAGAGGCAGAAAGTACATGCACTC---TTTTATAGACTGGATGTAGTACCAATGGACAAC-----  
 -----  
 -----  
 AATAATAGTTTGTATAGATTAATAAATTGTAATACCTCAGCCATTACACAA---  
 GCTTGTCCAAAGGTCTCCTTTGAGCCAATTCCCATACATTATTGTGCCCCAGCTGGTTTTGCGATCCTAAAGT  
 GCAAT---GATAAGGAGTTTAAT-----GGAACAGGGCCATGTAAGAAT-----  
 -GTCAGC---TCAGTACAATGCACACATGGAATCAGGCCAGTAGTATCAACT---  
 CAACTGCTGTTAAATGGCAGTTTAGCAGAAACAGAG-----  
 GTAATGATTAGAGCTGAGAATATCACAAACAAT-----ATCAAAAACATAATAGTACAATTTAAC---  
 -----AAGTCTGTAGAA-----ATTATTTGTATCAGACCTAACAACAATACAAGAAAA---  
 -AGTATACGTATA-----GGACCAGGACAAGCA---TTC-----TATGCAACAGGAGAC---  
 -----ATAATAGGGGATATA-----AGACAAGCATATTGT---GATGTCAATAGAACA---  
 GAATGGAATGAAGCTTTACAAAAGGTAGTCAACCAATTAAAA-----ACACACTTTAAG---  
 -----AACAAAACAATAATCTTTAAT-----  
 AGCTCCTCAGGAGGGGATCTAGAAATAACA---ACACATAGTTTTAATTGTGGAGGAGAA---  
 TTTAAACAGCTCCAGGCACAAGTCCTGGCTGTGGAAAGATACCTAAGGGATCAACAGCTCCTAGGAATTTGGG  
 GCTGCTCTGGAAGAACTCATCTGCACCACTACTGTGCCCTGGAACCTCTAGTTGGAGT-----  
 -----GATGTATCCCAGAGTGAGATATGG-----GAG-----  
 AACATGACCTGGCTGCAATGG---GATAAAGAAATTAGCAATTACACACAGATAATATAT---  
 AGTCTAATTGAAGAATCACAGAACCAGCAGGAA-----  
 -----  
 AAGAATGAACAAGACTTATTGGCATTGGACAAGTGGGCAAATCTGTGGAATTGGTTTGACATATCAAATGGC  
 TGTGGTATATAAAAATATTTATAATGATAGTAGGAGGCTTAATAGGATTAAGAATAGTTATTGCT---  
 GTGATTTCTATAATA-----AATAGAGTTAGGCAGGGATACTCACCT-----  
 TTGTCGTTGCTATTAATTTGCTTGATACCATAGCAATAGTAATAGCTGGG---  
 TGGACAGATAGGGTTATAGAAATAGGACAAGGATTTTGTAGAGCT-----  
 -----ATTTTCC---ATA-----CCTAGAAGAAGCAAACAGGGCTTAAAAAGGGCTTTGCAA---TAA

>AF107771

ACT---GCA-----  
GAAAACTTGTGGGTTACTGTTTACTATGGGGTACCGGTGTGG---AAAGACGCAGAG---  
ACCACCTATTTTGTGCATCAGATGCCAAAGCATATGAGAAAGAA---GTGCATAAT-----  
-----GTCTGGGCTACA---CATGCCTGTGTACCCACAGAT---  
CCCAACCCACAAGAATTATATTTGGAA-----AATGTGACAGAAGATTTTAAC-----  
-----ATGTGGAAAAATAATATGGTAGAGCAGATGCATACAGATATA---  
ATCAGTCTATGGGATCAAAGCCTA---AAGCCATGTGTACAGTTA---  
ACCCCTCTCTGCGTTACCTTAAATTGTAGCAACAATGTCAGTCCCAACACCAACAGCAG-----  
-----  
-----AGTGCCAACCTCACGGATAGCGTGAAAGGAGAAATGAGA---  
AACTGCTCTTTCAATATTACCACAGAATAAGG-----  
GATAAGAAAAAGAAAGTATACTCACTT---  
TTTTATAAACTTGATATAGTAAAAATTAATAAAAAATAAAAGCTTC-----  
-----  
AGAGGTAAAAATAGCAGTGGTAATAGTAGCAGTGATCGATATAGATTAATAAATTGTAATACCTCAGCCATTA  
CACAA---  
GCTTGTCCAAAGGTATCCTTTGAGCCAATTCCCATACATTATTGTGCCCCAGCTGGTTTTGCGATCCTAAAGT  
GTAAT---GAAGATGAGTTCAAT-----GGAAGTGGGACATGCAGGAAT-----  
-GTCAGC---ACAGTACAATGCACACATGGAATCAGGCCAGTAGTATCAACT---  
CAACTACTGTTAAATGGCAGTCTAGCAAAAGAAGAG-----  
GTAAGAATTAGATCTGAAAATATCTCAGACAAT-----GCTAAAACCATAATAGTACAATTTACC---  
-----AAACCTGTAGAA-----ATTATTTGTACCAGACCTAACAAACAATACAAGGAAA-----  
-AGTATACGTATA-----GGACCAGGACAAGCA---TTC-----TATGGAATGGGTGAC-----  
-----ATAATAGGGGATATA-----AGAAAAGCACATTGT---AATGTCAGTAGATCA---  
AAATGGAATGAACTTTAAAAAAGGTGGCTATACAATTAAGA-----AAATACTGG-----  
-----AACACAACAATAATCTTTACT-----  
AACTCCTCAGGAGGGGATTTAGAAATTACA---ACACATAGTTTTAATTGTGGAGGAGAA---  
TTTAAACAGCTCCAGGCAAGAGTCATGGCTGTGGAAAGATACCTAAAGGATCAACAGCTTCTAGGAATTTGGG  
GCTGCTCTGGAAAGATCATCTGCACCACTGCTGTGCCTTGGAACTCTACCTGGAGT-----  
-----AATAAATCTTACACTCAAATATGG-----GAT-----  
AACATGACCTGGCTGCAATGG---GATAAAGAAATTAGCAATTACACAGACATAATATAT---  
CAACTAATTGAAGAATCGCAATACCAGCAGGAA-----  
-----  
AAGAATGAAAAGGAATTATTGGAATTGGACAAGTGGGCAAATCTGTGGAATTGGTTTGACATATCCAACTGGC  
TGTGGTATATAAAAAATATTTATAATGATAGTAGGAGGCTTAATAGGCTTAAGAATAGTTTTTTGCT---  
GTGCTTACTGTAATA-----AAAAGAGTTAGGCAGGGATACTCACCT-----  
CTGTCGTTGCTATTAGTTTGTGTGACACCATAGCAATAGCAGTAGCTGGC---  
TGGACAGATAGGGTTATAGAAATAGGACAAAGAATTGGTAGAGCT-----  
-----ATTCTCCATATA-----CCTAGAAGAATTAGACAGGGCTTTGAAAGGGCTTTACTA---TAA  
>HQ659604  
GCT---ACA-----  
AGCAAATTGTGGGTTACTGTCTATTATGGGGTACCTGTGTGG---AAAGACGCAGAG---  
ACCACCTTATTTTGTGCATCAGATGCTAAAGCATATGAGAGAGAA---GTGCATAAT-----  
-----GTCTGGGCGACA---CATGCCTGTGTACCCACAGAC---  
CCCGACCCACAAGAAATATATTTGGAA-----AATGTGACAGAAGGGTTTAAC-----  
-----ATGTGGAAAAATAACATGGTAGAGCAGATGCATACAGATATA---  
ATCAGTCTATGGGACCAGAGTCTA---AAGCCATGTGTAAAGTTA---  
ACCCCTCTCTGCGTTACTTTAAATTGTAGCCATAACATCACCACCATAACATCACCACCAAC-----  
-----  
-----AACCCCAATATCACCAAATACATGGAAGGAGAAATAAAG---  
AACTGCTCTTACAATATGACCACAGAATAAGG-----  
GATAAGAAACAGAAAGTGATTCACTT---TTTTATAAACTTGATGTAGTACCAATTGATAAAAAATAAT---  
-----  
-----  
GGTAATAACAATATAAGGACTCAGTATAGATTAATAAATTGTAATACCTCAGCCATTACACAG---  
GCTTGTCCAAAAGTATCCTTTGAGCCAATTCCCATACATTATTGTGCTCCAGCTGGTTTTGCGATTCTAAAGT  
GTAAT---GATGCAGAGTTCAAT-----GGAACAGGGCCATGCAAGAAT-----  
-GTCAGC---ACAGTACAATGCACACATGGAATCAGGCCAGTAATATCAACC---  
CAACTGCTGTTAAATGGCAGTCTAGCAGAAGGAAG-----

GTAAAGATTAGATCTGAAAATATCACAAACAAC-----GCCAAAACCATAATAGTACAACCTTAAC----  
 -----AAGACTGTAGAA-----ATTAATTGTACCAGACCTAACAACAATACAAGAAAA-----  
 -AGTGTACGTATA-----GGACCAGGACAAGCA---TTC-----TATGCAACAGGTGAC-----  
 -----ATAATAGGGGATATA-----AGACAAGCATATTGT---AATGTCAGTAGAGCA---  
 GACTGGAATAAAACTTTACAAGGGGTAGCCAACCAATTAAAA-----AGTTACTTTAGT----  
 -----AACAAAACAATAATCTTTGCT-----  
 AGCTCCTCAGGAGGGGATTTAGAAATTACA--ACACATAGTTTTTAATTGTGGAGGAGAA---  
 TTTAAACAGCTCCAGGCAAGAGTCCTGGCTGTGGAAAGATACCTAAAGGATCAACAGCTCCTAGGAATTTGGG  
 GCTGCTCTGGAAAACCTCATCTGCACCACTAATGTGCCCTGGAACCTCTAGTTGGAGT-----  
 -----AATAGAACTCAGAGTGAGATATGG-----AAT-----  
 AACATGACCTGGCTGCAATGG---GATAAAGAAATTAGCAATTACACAGACATAATATAT---  
 AATCTAATTGAAGAATCGCAGATCCAGCAGGAA-----  
 -----  
 AAGAATGAACAAGAATTATTGGCATTGGACAAGTGGGCAAATCTGTGGAATTGGTTTGACATATCAAAGTGGC  
 TGTGGTATATAAGGATATTTATAATGATAGTAGGAGGCTTAATAGGATTAAGAATAGTTTTTTGCT---  
 GTGCTTTCTATAATA-----AATAGAGTTAGGCAGGGATACTCACCT-----  
 CTGTCATTTGCTATTAATTTGCTTGATACCATAGCAATAGCAGTAGCTGGC---  
 TGGACAGATAGGGTTATAGAAATAGGACAGGCAATTTGTAGAGCT-----  
 -----ATTCTCAACATA-----CCTAGAAGAATCAGACAGGGCTTCGAAAGGGCTTTGTTA---TAA  
 >HQ659597  
 ACT---GCA-----  
 GAAAAATTTGTGGGTTACTGTATACTATGGGGTGCTGTGTGG---AAAGATGCAGAG---  
 ACCACCCATTTTTGTGCATCAGATGCTCAGGCATATAACCCAGAA---GCACATAAT-----  
 -----GTCTGGGCTACG---CATGCCTGCGTACCCACAGAC---  
 CCCAACCCACAAGAAATACATTTGGAA-----AATGTGACAGAAAAGTTTGAC-----  
 -----ATGTGGAAAAATAACATGGTAGAGCAGATGCATACAGATATA---  
 ATCAGTCTATGGGATCAAAGCCTA---AAGCCATGTGTAAAGTTA---  
 ACCCCTCTCTGTGTACTTTAGAGTGTAACGATAATGTCTCAGAAATGGCTCCAAT-----  
 -----  
 -----GTCACCAATGGAATGGTAGGAGAGATAAAA---  
 AACTGCTCTTACAATGTGACCACAGTAATAAGG-----  
 GATAAGAAACAGAAAGTATCTTCACTT--TTTTATAAACTTGATGTAGTACAACCTGACAAGAAT-----  
 -----  
 -----  
 AGTAGTCAGTATTATAGATTAATAAAATTGTAATACCTCAGCCATTACACAG---  
 GCTTGTCCAAAGGTGTCTTTTGAGCCAATTCCCATACATTATTGTGCTCCAGCTGGTTTTGCGATTCTAAAGT  
 GTAAT---GATAAGCAGTTCAAT-----GGAACAGGGCTATGCAAGAAT-----  
 -GTTAGC---ACAGTACAATGCACACATGGAATCAAACCAGTAGTATCAACC---  
 CAACTGCTGTAAATGGCAGTCTAGCAGAAGAACGG-----  
 GTAATGATTAGATCTGAAAATCTCACAAACAAT-----GCCAAAACATAATAGTACAATTTACT---  
 -----AAGCCTGTAGAA-----ATTGAGTGTATCAGACCTAACAACAATACAAGACAA---  
 -AGTGTACATATA-----GGACCAGGACAAGCA---TTC-----TATGCAACAGGTGAC-----  
 -----ATAATAGGGGATATA-----AGGCAGGCACATTGT---AATGTCAGTAGAAAA---  
 AACTGGACTGACACTTTGGAACAGGTAGCCATACAATTAAAA-----ACACACTTT-----  
 -----AACAAAACAATAATCTTTGCT-----  
 AACTCCTCAGGAGGGGATATAGAAATTACA--ACACATAGTTTTTAATTGTGGAGGGGAA---  
 TTTAAACAGCTCCAGGCACGAATCCTGGCTGTGGAAAGATACCTAAGGGATCAACAGCTCCTAGGAATTTGGG  
 GCTGCTCTGGAAAACCTCATCTGCACCACTAATGTGCCCTGGAACCTCTAGTTGGAGT-----  
 -----AATAAATCCCAGGATGAGATATGG-----GGC-----  
 AACATGACCTGGCTGGACTGG---GATAAAGAAATTAGCAATTACACACAGATAATATAT---  
 GATCTAATTGAACAATCACAGAACCAGCAGGAA-----  
 -----  
 AAGAATGAACAAGATTTATTGGCATTAGACAAGTGGGCAAAGTCTGTGGAATTGGTTTGACATCTCAAATGGC  
 TGTGGTATATAAAGATATTTATAATGATAGTAGGAGGCTTAATAGGATTAAGAATAGTTTTTTGCA---  
 GTGCTTTCTATAATA-----AATAGAGTTAGGCAGGGTTACTCACCT-----  
 TTGTCATTTGCTATTAGTTTATTGGATACAATAGCAATAGGAGTAGCTGGC---  
 TGGACAGATAGGATTTTAGAATTAGGACAAAGACTTTGTAGAGCT-----  
 -----ATTTACAACATA-----CCTAGAAGAATCAGACAGGGCTTCGAAAGGGCTTTGCTA---TAA  
 >HQ697994

GTG---ATG-----  
 GGAAATTTGTGGGTCACAGTATATTATGGGGTGCCTGTGTGG---AAAGACGCAGAG---  
 ACCACCCCTATTTTGTGCATCAGATGCGAAAGCATATCATAACAGAA---GTGCATAAT-----  
 -----GTCTGGGCTACG---CATGCCTGTGTACCCACAGAC---  
 CCCAACCCACAAGAAATAAATTTGGAA-----AATGTGACAGAAGAGTTTAAAC-----  
 -----ATGTGGAAAAATAAAATGGTAGAGCAGATGCATACAGATATA---  
 ATCAGTTTATGGGATCAAAGCCTA---AAGCCATGTGTACAGTTA---  
 ACCCCTCTCTGTGTTACTTTAGATTGTCAATATAATGTCACCAATATCAATAGCACC-----  
 -----  
 -----AGTGACATGGCAAGAGAAATAAAC---  
 AACTGCTCTTACAATATAACCACAGAATTAAGG-----  
 GATAGGGAACAGAAAGTATATTCACCTT---TTTTATAGATCTGATATAGTACAAATGAATAGTGAT-----  
 -----  
 -----  
 AATAGTAGTAAGTATAGATTAATAAATTGTAATACCTCAGCCATTAAACAG---  
 GCTTGTCCAAAGGTAACCTTTGAGCCAATTCCCATACATTATTGTGCTCCAGCTGGTTTTGCAATTCTAAAGT  
 GTAAA---GATAAAGAGTTCAAT-----GGAACAGGACCATGCAAGAAT-----  
 -GTCAGC---ACAGTACAATGCACACATGGAATCAAGCCAGTAGTATCAACT---  
 CAACTGCTGTTAAATGGCAGTCTAGCAGAAGAGAAG-----  
 GTAATGATTAGATCTGAAAATATCACAGACAAT-----GCCAAAAACATCATAGTACAATTTAAG---  
 -----GAGCCTGTAAAA-----ATTAATTGTACCAGACCTAACAATAATACAAGAAAA-----  
 -AGTGTACGTATA-----GGACCAGGACAAAACA---TTC-----TATGCAACAGGTGAA-----  
 -----ATAATAGGAGATATA-----AGACAAGCACACTGC---AATGTCAGTAAAGCA---  
 CACTGGGAGAACACGTTGCAAGAGGTAGCCAACCAATTAATA-----TTAATGATACACTCT-  
 -----AACAAAACAATAATCTTTGCT-----  
 AACTCCTCAGGAGGGGATCTAGAAATTACA--ACACATAGTTTTAATTGTGGAGGAGAG---  
 TTTAAACAGCTCAAGGCACGAGTCCTGGCTGTGGAAAGATACCTAAAGGATCAACAGCTCCTAGGAATTTGGG  
 GCTGCTCTGGAAGAACTCATATGCACCACTAATGTGCCCTGGAAGTCTAGTTGGAGT-----  
 -----AATAAATCCCTGGGGGAAATATGG-----GAC-----  
 AACATGACCTGGTTGCAATGG---GATAAAGAAATCGAGAATTACACACAGATAATATAT---  
 GAGCTAATTGAAGAATCGCAGAACCAGCAGGAA-----  
 -----  
 AAGAATGAACAAGATTTATTGGCATTGGACAAGTGGGCAAGTCTGTGGAATTGGTTTGAAATATCAAGGTGGC  
 TGTGGTATATAAAAAATATTTATAATGGTAGTAGGAGGCTTAATAGGATTAAGAATAGTCTTTGCA---  
 GTGCTTTCTATAATA-----AATAGAGTTAGGCAGGGATACTCACCT-----  
 TTATCATTTGCTACTAATTTGTTTGATACCATAGCAATAGTAGTAGCTGGC---  
 TGGACAGATAGGGTTATAGAAACAGGACAAAGACTTTGTAGGGCT-----  
 -----ATTGTCAACGTA-----CCTGTAAGAATCAGACAGGGCTTAGAAAGGGCTTTGTTA--TAA  
 >HQ698029  
 GCT---GCA-----  
 GCAAACCTTGTGGGTTACTGTTTACTATGGGGTGCCTGTGTGG---AAAGATGCAGAG---  
 ACCACCCCTATTTTGTGCATCAGATGCTAAAGCATATGAGACAGAA---GCACATAAT-----  
 -----GTCTGGGCTACA---CATGCCTGTGTACCCACAGAC---  
 CCCAACCCACAAGAAATACAGTTGGAA-----AATGTGACAGAAGAGTTTAAAC-----  
 -----ATGTGGAAAAATAACATGGTAGAACAGATGCATACAGATATA---  
 ATCAGTCTATGGGACCAAAGTCTA---AAGCCATGTGTAAAGTTA---  
 ACCCCTCTCTGCGTTACTTTGGATTGTAGCCATAATGTCACCAATAATATCACCGAT-----  
 -----  
 -----AAAGATGGAATGAGAGGAGAAATAAAA---  
 AATTGCTCTTTCAATGTGACCACAGTACTAAGG-----  
 GATAAGAGACAGCAAGTATATTCACCTT---TTTTATAAACTTGATGTAGTACAAATTGGTAATGAG-----  
 -----  
 -----  
 AGTAATAATCAGTATAGATTAATAAATTGTAATACCTCAGCCATTACACAA---  
 GCTTGTCCAAAAGTATCCTTTTCAGCCAATTCCCATACATTATTGTGCTCCAGCTGGTTTTGCAATTCTAAAAAT  
 GTAGG---GAGAAGGAGTTCACT-----GGAACAGGGCCATGCAAGAAT-----  
 -GTCAGC---ACAGTACAATGCACACATGGAATCAGGCCAGTGGTATCAACT---  
 CAACTGTTATTAAATGGCAGTCTAGCAGAAAGTACG-----  
 GTAATGATTAGGGCTGAAAATATCACACACAAT-----ACCAAGAACATAATAGTTCAACTTAAA---  
 -----GAGCCTGTAAGA-----ATTAATTGTACCAGACCTAACAACAATACAAGAAAA-----

-AGTGTACCTATA-----GGACCAGGACAAGCA---TTC-----TATGCAACAGGGGAC-----  
-----ATAATAGGAAATATA-----AGACAAGCATATTGT---AATGTTAGTAAAAA---  
GAATGGAATAGAACGTTGCAACAGGTAGTCAACCAACTAAAA-----CTACACTTTGTG-----  
-----GACAAAACAATAATCTTTACT-----  
AACTCCTCAGGAGGGGATCTAGAACTTACC--ACCCATAGTTTTTAATTGTGGAGGAGAA--  
TTTAAACAGCTCCAGGCAAGAGTCCTGGCTGTGGAAAGATACCTAAGGGATCAACAGCTCCTAGGACTTTGGG  
GCTGCTCTGGAAGAACTCATCTGCACCACTAGTGTGCCCTGGAACCTAGTTGGAGC-----  
-----AATAAATCCCAGCATGAGATATGG-----GAC-----  
AACATGACCTGGCTGCAATGG---GATAAAGAAATTAGCAATTACACAGATATAATATAT---  
AGGCTAATTGAAGAATCACAGAATCAGCAGGAA-----  
-----  
AAGAATGAACAAGATTTATTAGCATTGGACAAGTGGGCAAATCTGTGGAATTGGTTTGACATATCAACATGGC  
TGTGGTATATAAAGATATTTATAATGATAGTAGGAGGCTTAATAGGATTAAGAATAGTTTTTTGCA---  
GTGCTTTCTGTAATA-----AATAGAGTTAGGCAGGGATACTCACCT-----  
TTGTCAATTTGCTATTAATTTGATTGATACCATAGCAATAGCAGTAGCTGGC---  
TGGACAGATAGGGTTATAGAAATAGGACAAAGGCTTTGTAGAGCT-----  
-----ATTCTTAATATA-----CCTGTAAGAATCAGACAGGGTTTGGAAGGGCTTTGCTA---TAA  
>AY253305  
GCT---GCA-----  
GACAACTTATGGGTTACAGTCTACTATGGGGTACCAGTGTGG---AAAGATGCAGAG---  
ACCACCTTGTTTTGTGCATCAGATGCGAAAGCATATGATGCAGAA---GTGCATAAT-----  
-----GTCTGGGCTACA---CATGCCTGTGTACCTACAGAC---  
CCCAACCCACAAGAAATACATTTGGAA-----AATGTGACAGAAGAGTTTAACT-----  
-----ATGTGGAAAAATAACATGGTAGAGCAGATGCATACAGATATA---  
ATCAGTCTATGGGACCAAAGCTTA---AAGCCATGTGTAAAGTTA---  
ACCCCTCTCTGCGTTACTTTAAATTGTAGCAATGTCTAGTAATAATACTGACAGTGACAACAGTGACAAT---  
-----  
-----GCCACCAATTCACCATCACCAGGGAAATGATTGGAGAAATAAAA---  
AACTGCTCTTTCAATATAACCACAGAAATAAGG-----  
GACAAGAAACAGAAAGTATATTCACCT--TTTTATAAACTTGATGTAGTGGAATTAGTAAT-----  
-----  
-----  
AGTAATAGTAGTCAGTATAGATTAATAAACTGTAATACCTCAGCCATTACCCAG---  
GCTTGTCCAAAGGTAACCTTTGAGCCAATTCCCATACACTATTGTGCTCCAGCTGGTTTTGCGATTCTAAAGT  
GTAAG---AATAAAACGTTCAAT-----GGAACAGGGCCATGCAATAAT-----  
-GTCAGC---TCAGTACAATGCACACATGGAATCAGGCCAGTAGTATCAACT---  
CAACTGCTGTTTAAATGGCAGTCTAGCAGAAGGAGAG-----  
ATACAAATTAGATCTGAGAATATCACAAACAAT-----GCCAAAATATAATAGTACAATTTACC---  
-----GAGCCTGTACAA-----ATTATTGCATCAGACCTAACAACAATACAAGAAAA-----  
-AGGGTACATATA-----GGACCAGGACAGACA---TTC-----TATGCAACA---GAC-----  
-----ATAATAGGGAATATA-----AGACAAGCATATTGT---ACTGTCAATAGAACA---  
GAATGGAATACAACCTTTGCAAAAGGTAGGCAACAATTAAGA-----GATTTATACTTT-----  
-----AATAACAAAACAATAATTTTTACT-----  
AGCTCCTCAGGAGGGGATCTAGAAATTACA--ACACATAGTTTTTAATTGTGGGGGAGAA--  
TTTAAACAGCTCCAGGCAAGAGTCCTGGCTGTGGAAAGATACCTAAAGGATCAACAGCTCCTAGGAATTTGGG  
GCTGCTCTGGAAGAACTCATCTGCACCACTAATGTGCCCTGGAATTCTAGTTGGAGT-----  
-----AATAAATCCCATGATGACATATGG-----AAT-----  
AACATGACCTGGCTGCAATGG---GATAAAGAGATTAGCAATTACACACAGCTAATATAT---  
AATCTAATTGAAGAATCACAGAACCAGCAGGAA-----  
-----  
AAGAATGAACAAGAGTTATTGGCATTGGACAAGTGGGCAAGTCTGTGGAATTGGTTTGATATATCAAATTGGC  
TGTGGTATATAAGGATATTTATAATGATAGTAGGAGGCTTAATAGGATTAAGAATAATTTTTTGCA---  
GTGCTTTCTATAATA-----AATAGAGTTAGGCAGGGATACTCACCT-----  
TTGTCAATTTGCTATTAATTTGCTTGATACCATAGCAATAGCAGTAGCTGGC---  
TGGACAGATAGGGTTATAGAAATAGGACAAAGAATTTGTAGAGCT-----  
-----ATTTACAACATA-----CCTAGAAGAATCAGACAGGGCTTAGAAAGGGCTTTGCTA---TAA  
>AY253314  
ACT---GCA-----  
GACAACTTGTTGGGTTACTGTCTATTATGGGGTACCTGTGTGG---AGAGACGCAGAA---  
ACCACCTTATTTTGTGCATCAGATGCTAAAGCATATAGTACAGAA---AAGCATAAT-----

-----GTCTGGGCTACA---CATGCCTGTGTACCCACAGAC---  
CCCAACCCACAAGAAATACCTTTGGAC-----AATGTGACAGAAGAGTTTAA-----  
-----ATGTGGAAAAATAACATGGTAGATCAGATGCATGAAGATATA---  
ATCAGTTTATGGGACCAAAGCCTA---AAGCCATGTGTACAGTTA---  
ACCCCTCTCTGTGTTACTTTAAATTGTAGTAATGCCAGGGTCAATGCCACTTTT-----  
-----  
-----AACAGTACGGAGGACAGGGAAGGAATGAAA---  
AACTGTTCTTTCAATATGACCACAGAATAAGG-----  
GATAAAAAACAACAAGTTTATTCACCT---TTTTATAGACTAGATATAGAAAAGATTAATAGT-----  
-----  
-----  
AGTAACAATAATAGTGAGTATAGATTGGTAAATTGTAATACCTCAGCCATTACACAG---  
GCTTGCCCAAAGGTAACCTTTGAACCAATTCCCATACATTATTGTGCCCCAGCTGGTTTTGCATCCTAAAGT  
GTAAT---GATACGGAGTTCAAT-----GGAACAGGGCCATGCAAGAAT-----  
-GTCAGC---ACAGTACAATGCACACATGGAATCAAGCCAGTAGTATCAACT---  
CAACTGCTGTTAAATGGCAGTCTAGCAGAAAGAGAG-----  
GTAAGAATCAGATCTGAAAAATATCGCAAATAAT-----GCCAAAAATATAATAGTACAGTTTGCC---  
-----AGTCCTGTGAAA-----ATTAATTGTATCAGGCCTAACAAACAATACAAGGAAA-----  
-AGTTACCGAATA-----GGACCAGGACAAACA---TTC-----TATGCAACA---GAC-----  
-----ATAGTAGGGGATATA-----AGGCAAGCACATTGT---AATGTCAGTAGAACA---  
GATTGGAATAACACTTTAAGACTGGTAGCAAATCAATTAAGA-----AAATACTTTAGT---  
-----AACAAAACAATAATATTCACCT-----  
AACTCCTCAGGAGGGGATCTAGAAATCACA--ACACATAGTTTAACTGTGGAGGGGAA---  
TTTAAACAGCTCCAGGCAAGAGTCCCTGGCTGTGGAAAGGTACCTAAGGGATCAACAGCTCCTAGGAATTTGGG  
GCTGCTCTGGAAGAACTCATCTGCACCACTAATGTGCCCTGGAACCTCTAGCTGGAGT-----  
-----AATAAATCTTACGATGACATATGG-----CAG-----  
AACATGACCTGGCTGCAATGG---GATAAGGAAATTAGCAATTACACAGACATAATATAT---  
AGCCTAATTGAAGAATCACAAAACCAGCAGGAA-----  
-----  
AAGAATGAGCAAGACTTATTGGCATTGGACAAGTGGGCAAATCTGTGGAATTGGTTTGACATATCAAAATGGC  
TGTGGTATATAAAAAATATTTATAATGATAATAGGAGGCTTAATAGGATTAAGAATAGTTTTTTGCT---  
GTGCTGTCTGTAATA-----AATAGAGTTAGGCAGGGCTACTCACCT-----  
TTGTCGTTTGCTATTAGTTTGGTGGATACCATAGCAATAGTAGTAGCTGGC---  
TGGACAGATAGGGTTATAGAAATAGGACTAAGAATTGGTAGAGCT-----  
-----CTTCTCCACATA-----CCTAGAAGAATCAGACAGGGCTTCGAAAGGGCTTTGCTA---TAA  
>KX907352  
ACT---GCA-----  
GAAAACTTGTGGGTTACTGTCTACTATGGGGTACCTGTGTGG---AAAGAGGCAGAG---  
ACCACCTTATTTTGTGCCTCAGATGCTAAAGCATATGAGACAGAA--ATGCATAAT-----  
-----GTCTGGGCTACA---CATGCTTGTGTACCCACAGAC---  
CCCAACCCACAAGAAATATATTGGGA-----AATGTGACAGAAGAGTTTAA-----  
-----ATGTGGAAAAATAAGATGGTAGAGCAGATGCATACAGATATA---  
ATCAGTCTATGGGACCAAAGCCTA---AAGCCATGTGTAAAGCTA---  
ACCCCTCTCTGCGTTACTTTAAATTGTAGCAATGTCAATGGCACGAACAGTGCCAATGGCAG-----  
-----  
-----GACAATGTCAATGTCACAGGCAGTGAAGAAATGAAA---  
AATTGCTCTTTCAATATGACCACAGAGCTAAGG-----  
GATAAGAGAAAGAGGGTCTATTCACCTA---TTTTATAGACTTGTATAGTAAAAATTGATGAT-----  
-----  
-----  
AATAGTAGTAACCATGAGTATAGATTAATAAATTGTAATACCTCAGCCATTACACAG---  
GCTTGCCCAAAGATAACTTTTGAGCCAATTCCCATACATTATTGTGCCCCAGCTGGTTTTGCATCCTAAAGT  
GTAAT---GATGAAGAGTTCAAT-----GGAACAGGGCCATGCAAAAAT-----  
-GTCAGC---ACAGTACAATGCACACATGGAATTAAGCCAGTAGTATCAACT---  
CAACTGTTGTTAAATGGTAGTCTAGCACAACAGAG-----  
GTAAAAATTTCATCTGAAAAATACACAAACAAT-----GCCAAACTATAATAGTACAATTTGTC---  
-----AAGCCTGTGCAA-----ATTAATTGTACCAGACCTAACAAACAATACAAGACAA-----  
-AGTATACGTATA-----GGACCAGGACAAAGCA---TTC-----TATGCACACGGTGAG-----  
-----ATAATAGGGGATATA-----AGACAAGCATATTGT---AATGTCAGTGGATCA---  
ACATGGAATGTAACCTTTAAACAGGTAGTTGAACAATTAAGA-----AAACACTTTGGG---

-----AACAAAACAATAATATTTACT-----  
 AACTCCTCAGGAGGGGATCTAGAAATCACA--ACACATAGTTTTTAATTGTGGAGGAGAA--  
 TTTAAACAGCTCCAGGCAAGAGTCCTGGCTGTGGAAAGATACCTAAGGGATCAACAGCTCCTAGGAATTTGGG  
 GCTGCTCTGGAAGAACTCATCTGCACCACTAATGTGCCCTGGAAGCTCTAGTTGGAGT-----  
 -----AATAAATCTCAGACTGAGATATGG-----GAC-----  
 AATATGACCTGGCTGCAATGG--GATAAAGAAATTAGCAATTACACACAATTAATATAT--  
 AACCTAATTGAAGAATCGCAGAATCAGCAGGAA-----  
 -----  
 AAGAATGAAGTAGACTTATTGGCATTGGACAAGTGGGCAGATCTGTGGAATTGGTTTGACATAACAAATTGGC  
 TGTGGTATATAAAAAATATTTATAATAATAGTAGGAAGCTTAATAGGATTAAGAATAGTTTTTTGCT--  
 GTGCTGTCAAGTTATA-----AATAGAGTTAGGCAGGGGTACTCACCT-----  
 CTATCGTTTTGCTATTAATTTGGTTGATACTATAGCAATAACAGTAGCTGGC---  
 TGGACAGATAGGGCTATAGAAAATAGGACAAAGAATTGGTAGAGCT-----  
 -----ATCCTCCACATA-----CCTAGAAGAATTAGACAGGGCTTTGAAAGAGCTTTGCAA---TAA  
 >KX907348  
 GCT-----  
 GAAAAATTTGTGGGTTACCGTCTACTATGGGGTACCTGTGTGG--AGAGACACAGAG---  
 ACCACTCTATTTTGTGCATCAGATGCTAAAGCATATAAGGCAGAA--GCGCATAAT-----  
 -----GTCTGGGCTACG--CATGCCTGTGTACCCACAGAC---  
 CCCAACCCACAAGAAATATATTTGAAA-----AATGTGACAGAAAATTTTAAAC-----  
 -----ATATGGAAAAATAACATGGTAGACCAGATGCATACAGATATA---  
 ATCAGTCTATGGGACCAAAGCCTA--AAGCCATGTGTAAAATTA---  
 ACCCTCTCTGCGTTACTTTAAATTGTAGCAACTATAATGGCACTAATGGCAATCAGAATATCACCAAT---  
 -----  
 -----GAAATGGTAGGAGAAATAAAA---  
 AACTGCTCTTACAATATAACCACAGTACTAAAG-----  
 GATAAGGTACAGAAAGTATATTCACCT--  
 TTTTATAGACTTGATGTAGTACAAATTGATGACAATAGTAATAAT-----  
 -----  
 AGTCAAAATAGTAATGGTAGTGGGCAGTATAGATTAATAAATTGTAATACCTCAGCCATTACACAG--  
 GCTTGTCCAAAGATATCCTTTGAGCCAATTCCCATACATTATTGTGCTCCAGCTGGCTTTGCGATTCTAAAAT  
 GTAAT--GATAAGGAGTTCAAT-----GGAACAGGGCCATGTAATAAT-----  
 -GTCAGC--ACAGTACAATGCACACATGGAATCAGGCCAGTAGTATCAACT--  
 CAATTGCTGTTAATGGCAGTCTAGCAGAAGAAGGT-----  
 GTAATGATTAGATCTGAAAATATCACAAACAAT-----GCCAAAAACATACTAGTACAACCTTAAG---  
 -----GAGCCTGTAATA-----ATTAATTGTACCAGACCTAACAACAATACAAGAAAA-----  
 -GGTGTACATCTA-----GGACCAGGACGAGCA--TTC-----TATGCAACAGGTAAC-----  
 -----ATAATAGGGAATATA-----AGACAAGCACATTGT--ACAGTCAATAGAACA---  
 GCATGGAATGCAACTCTGCAAACGGTAGTCGACAAATTAAGA-----GAACACTTTGGG---  
 -----AACAAAACAATAATCTTTGAT-----  
 AAACCCACAGGAGGGGATCTAGAAATTACA--ACGCATAGTTTTTAATTGTGGGGGAGAA--  
 TTTAAACAGCTCCAGGCAAGAGTCCTAGCTGTGGAAAGATACCTAAGAGATCAACAGCTCCTAGGAATTTGGG  
 GCTGCTCTGGAAGCTCATCTGCACCACTAATGTGCCCTGGAAGCTCTAGTTGGAGT-----  
 -----AATAAATCTCAGGATGAGATATGG-----AAG-----  
 AACATGACCTGGCTGCAATGG--GATAAAGAAATTAACAATTACACAGAGATAATATAT--  
 AACCTAATTGAAGAATCGCAGACTCAACAGGAA-----  
 -----  
 AGAAATGAACATGACTTATTGGCATTGGACAAGTGGGCAAGTCTGTGGAATTGGTTTGACATATCAAAGTGGC  
 TGTGGTATATAAGAATATTTATAATGATAGTAGGAGGCTTAATAGGATTAAGAATAGTTTTTTACA--  
 GTGCTTTCTATAATA-----AATAGAGTTAGGCAGGGGATACTCACCT-----  
 TTGTCGTTTGTCTATTAATTTGTTTGATACCATAGCAATAGCAACAGCTAGC---  
 TGGACAGATAGTATTATAGAAGTAGTACAAAGATTTTGTAGAGCT-----  
 -----ATTCTCAACATA-----CCTAGAAGGATCAGACAGGGCCTCGAAAGGGCTTTGTTA---TAA  
 >KX907336  
 GCT---GCA-----  
 GGAAACTTGTGGGTTACTGTCTACTATGGGGTACCTGTGTGG--AAAGAAGCAGAG---  
 ACCACCTTATTTTGTGCCTCTGAAGCTAAGGCATATGGGACAGAA--GTGCATAAT-----  
 -----GTTTGGGCTACA--CATGCCTGTGTGCCACAGAC---  
 CCCAACCCACGAGAGATATATTTGCCA-----AATGTGACAGAAGAGTTTAAAC-----  
 -----ATGTGGAAAAATAGCATGGTAGAGCAGATGCATACAGATATA---

ATTAGTCTATGGGACCAAAGCCTA---AAGCCATGTGTAAAGTTA---  
 ACCCCACTCTGTGTTACTTTTAGATTGC---CAGTATAACATCACCACGAACAACACCAAT-----  
 -----  
 -----AGGAACAATAGCTTTGACATAGGAGAAGAAATGAAA---  
 AACTGTTCTTTCAATATGACTACAGAAGTAAGG-----  
 GATAAGAAACAGAAAGTGTATTCACCTT---TTTTATAGACTGGATATAGTACCAATTAATACC-----  
 -----  
 -----  
 AATAATAGCTATAGATTAATAAATTGTAATACCTCAGCCATTACACAA---  
 GCCTGTCCAAAGGTATCCTTTGAGCCAATTCCCATACATTATTGTGCCCCAGCTGGTTTTGCGATTCTGAGGT  
 GTAAC---GATATAGAGTTCAAT-----GGAACAGGACCATGCAAGAAT-----  
 -GTCAGC---ACAGTACAATGCACACATGGAATCAGGCCAGTAATGTCAACT---  
 CAGCTGTTGTTAAATGGCAGTTTAGCAGAAAAAGAG-----  
 GTAAGGATTAGATGTGAAAAATTACAAACAAT-----GCCAAAACCATAATAGTACAACCTTAAC----  
 -----CAGTCTGTACCA-----ATTAATTGCACCAGGCCTTACAACAACACAAGAAGA-----  
 -AGTACACGTATA-----GGACCAGGACAAGCA---TTC-----TATGCTACAGGTGAC-----  
 -----ATAATAGGAGATATA-----AGACAAGCACATTGT---AATGTCAGTAGAAAA---  
 CAATGGAATGACATGTTACACATGGTAGTCACACAATTAAGA-----AAACACTTT-----  
 -----AACAAAACAATGATCTTTAAT-----  
 GAATCCTCAGGGGGAGATTTAGAAATTACA---ACACATAGTTTTAATTGTGGAGGAGAA---  
 TTTAAACAGCTCCAGGCACGAGTCCTGGCTGTGGAAAGATACCTAAGGGATCAACAGCTCCTAGGAATTTGGG  
 GCTGCTCTGGAAACTCATCTGCACCACTAATGTGCCCTGGAATTCTAGTTGGAAC-----  
 -----AATAAATCTCAGAGTGAGATATGG-----GAG-----  
 AACATGACCTGGCTGCAATGG---GATAAAGAAATTAGCAATTACACATATACAATATAT---  
 AATCTACTTGAAGAAGCACAAAACCAACAGGAA-----  
 -----  
 AAAAAATGAACAAGACTTATTGGCATTGGACAAGTGGGAAAGTCTGTGGAATTGGTTTGACATATCAAAATGGC  
 TGTGGTATATAAAAAATATTTATAATGATAGTAGGAGGCTTAATAGGATTAAGAATAGTTTTTTGCT---  
 ATACTTTCTGTAATA-----AATAGAGTTAGGCAGGGATACTCACCT-----  
 TTGTCGTTTGCTATTAATTTGCTTGATACCATAGCAATAGCAGTAGCTGGT---  
 TGGACAGATAGGGCTATAGAAATAGGACAAAGAGTTTGTAGAGCT-----  
 -----ATTCTCAACATA-----CCTAGAAGAATCAGACAGGGCTTCGAAAGGGCTTTGCTA---TAA  
 >KX907372  
 GCT---GCA-----  
 GAAAACATGTGGGTTACTGTCTATTATGGGGTACCTGTGTGG---AGAGATGCAGAG---  
 ACAACCTTATTTTGTGCATCAGATGCTAAAGGATATGAGACAGAA---AAGCATAAT-----  
 -----GTCTGGGCTACA---CATGCCTGTGTACCCACAGAC---  
 CCCAACCCACAAGAAATACATTTGGAA-----AATGTGACAGAAGAGTTTAAC-----  
 -----ATGTGGAAAAATAACATGGTAGATCAGATGCATACAGATATA---  
 ATTAGTCTATGGGACCAAAGCCTA---AAACCATGTGTAAAGTTA---  
 ACCCCTCTCTGCGTTACTTTACAGTGTAGCGATGTCACTAGCAATGGCACTAACAGCAATGTC-----  
 -----  
 -----ACTAACAGGGAAGAAATGAAA---  
 AACTGCTCTTTCAATGTAACCACAGAAATAAGG-----  
 GATAAAAAACAAAAGTATATTCACCTT---TTTTATAGACTTGATATAGTACAAATTAGTAAT-----  
 -----  
 -----  
 AGTAGTAATAGTAGTGAGTATATATTAATAAATTGTAACACCTCAACCCTTACACAG---  
 GCTTGCCCAAAGATATCTTTTGGAGCCAATTCCCATACATTATTGTGCCCCAGCTGGTTTTGCGATACTAAAGT  
 GTAAG---GATGAGGAATTCGAT-----GGAACAGGACCTTGTAAGAAT-----  
 -GTCAGC---ACAGTACAATGCACACATGGAATCAAGCCAGTGGTATCAACT---  
 CAACTGCTGCTAAATGGCAGTTTAGCAGAAAAAGGA-----  
 GTAAAAGTTAGATCTGAGAATATCACAACAAT-----GCCAAAATATAATAATACAACCTTTCC----  
 -----AAGCCTGTGGAA-----ATTAAGTGTAYCAGACCTAACAACAATACAAGAAAA-----  
 -AGTATACGTATA-----GGACCAGGACAATCA---TTC-----TATGCAACAGGTGAC-----  
 -----ATAATAGGGGATATA-----AGGGAAGCACATTGT---AATGTCAGTCAAACA---  
 GAATGGAATAACACTTTACATCAGGTAGCAGAACAATTACAA-----AAATACTTTAAT----  
 -----AACAAAACAATAATATTTAAT-----  
 GGATCCTCAGGAGGGGATCTAGAAATTACA---ACACATAGTTTTAATTGTGGAGGAGAA---  
 TTTAAACAGCTCCAGGCAAGAGTCCTGGCTGTGGAAAGATACCTAAGGGATCAACAGCTCCTAGGAATTTGGG

GCTGCTCTGGAAAGCTCATCTGCACCACTAATGTACCCTGGAACCTCTAGCTGGAGT-----  
-----AATAAATCTTACAGTGAGATATGG-----GAC-----  
AACATGACCTGGCTACAATGG---GATAAGGAAGTTAGCAATTACACACAGATAATATAT---  
CAACTAATTGAAGAATCGCAGAACCAGCAGGAA-----  
-----  
AAGAATGAACAAGACTTACTGGCGTTGGACAAGTGGGCAAGTCTGTGGAATTGGTTTAACATATCAAATTGGC  
TGTGGTATATAAAAAATATTTATAATGATAATAGGAGGCTTAATAGGATTAAGAATAGTTTTTTATT---  
GTAATCTCTGTAATA-----AATAGAGTTAGGCAGGGCTACTCACCT-----  
TTGTCATTCGCTATTAATTTGTTTGATACCATAGCAATAGCAGTAGCTGGC---  
TGGACAGATAGGATTATAGAAATAGGACAAAGAATTGGTAGAGCT-----  
-----ATTCTTAATATA-----CCTACAAGAATCAGACAGGGCTTCGAAAGGGCTTTGCTT---TAA  
>KX907383  
GCT---GCA-----  
GAAAACTTGTGGGTCACCTGTTTATTATGGGGTGCCTGTGTGG--AAAGATGCAGAA---  
ACCACCCTATTTTGTGCATCAGATGCTAGAGCATATGAGAAAGAA---GCGCATAAT-----  
-----ATCTGGGCTACG---CATGCATGTGTACCCACCGAC---  
CCCGACCCACAAGAATTATATTTGGAA-----AATGTGACAGAAGAATTTAAC-----  
-----ATGTGGAAAAATAACATGGTAGAGCAGATGCATACAGATATA---  
ATTAGTCTATGGGACCAAAGCCTA---AAACCCTGTGTACAGTTA---  
ACCCCTCTCTGCGTTACTTTAAATTGTAACGATGTCAACCAATAATGGCACCAAT-----  
-----  
-----GTTGCTAACATCAGCATTGACATGAAAGGAGAAATAAAA---  
AACTGCTCTTTCAACATGACCACAGAATTAAGG-----  
GATAAGAAACAGAAAGTATATTCACTT--TTCTATAAACTTGATGTAGTACAAATGAATAGT-----  
-----  
-----  
AGTCRGATATAGATTAATAAAATTGTAATACCTCAGCCATTAAACAA---  
GCTTGTCCAAAGGTATCCTTTGAGCCAATTCCCATACATTATTGTGCTCCAGCTGGTTTTGCGATTCTAAAAT  
GTAGG---GATGAGGAGTTTCGAT-----GGAACAGGGCCATGCACTAAT-----  
-GTCAGT---ACAGTACAATGCACACATGGAATCAAGCCAGTAGTATCAACT---  
CAACTGCTGTTAAATGGCAGTCTAGCAGAAAAAAGG-----  
GTAATGGTTAGGTCTGAAAATATCACAAACAAT-----GTCAAAACATAATAGTACAATTTAAT---  
-----GAGACTGTAAAC-----ATAACTTGTATCAGACCTAACACAATACAAGAAAA-----  
-AGTGTACATATA-----GGGCCAGGACAAGCA---TTC-----TATGCAACAGGTGAC-----  
-----ATAATAGGGAATATA-----AGAAAAGCACATTGT---CATGTTAATAAAACA---  
GAATGGAATAGAATGTTGGCAAAGGCAGCCCAACAATTAATT-----AACCCTTT-----  
-----AACAAAACAATAACCTTTAAG-----  
AACTCCTCAGGAGGGGATCTAGAAATTACA--TCACATAGTTTTAATTGTGGAGGAGAA---  
TTTAAACAGCTCCAGGCAAGAGTCCTGGCTGTGGAAAGATACCTAAAGGATCAACAGCTCCTAGGAATTTGGG  
GCTGCTCTGGAAGAACTCATCTGCACCACTAATGTGCCCTGGAACAATAGTTGGAGT-----  
-----AATAAATCCCTAGAGGATATATGG-----GAG-----  
AATATGACCTGGATGCAATGG---GACAAGGAAATTAACAATTACACACATCTGATATAT---  
AATCTAATTGAAGAATCGCAGTACCAGCAGGAA-----  
-----  
AAGAATGAAAAAGAGTTATTAGAAATTGGACAAGTGGGCTAATCTGTGGAATTGGTTTGATATATCAAACCTGGC  
TGTGGTATATAAGGATATTTATAATGATAGTAGGAGGCTTAATAGGCTTAAGAATAGTTTTTTGCA---  
GTACTTTCTGTAATA-----AATAGAGTTAGGCAGGGGTACTCACCT-----  
GTGTCATTTGCTGTTAACTTGTGTTGATACCATAGCAATAGCAGTAGCTGGC---  
TGGACAGATAGGATTATAGAACTAGGACAAAGACTTTGTAGAGCT-----  
-----TTTCTTAACATA-----CCTAGAAGAATCAGACAGGGATTGAAAGGGCTTTGCTG---TAA  
>KX907389  
GCT---GAT-----  
GAAAAACGTGGGTTACTGTCTATTATGGGGTGCCTGTGTGG--AAAGACGCGGAT---  
ACCACCCTATTTTGCATCAGATGCTAAAGCATATGATACAGAG---GTACATAAT-----  
-----GTCTGGGCTACG---CATGCCTGTGTACCCGACAGAC---  
CCCAACCCACAAGAAATACATATGGAA-----AATGTGATAGAAGAGTTTAAC-----  
-----ATGTGGAAAAATAACATGGTAGAACAGATGCATACAGATATA---  
ATTAGTTTATGGGACCAAAGCCTA---AAGCCATGTGTACAGTTA---  
ACCCCTCTCTGTGTCACTTTAAATTGTAGCACTGTCAATAATAGCACCAGTATCAAT-----  
-----

-----AGCACTCTCTATGAAGACATGAAAGGAGAACTAAAA---  
AACTGCTCTTTCAATATGACCACAGAACTAAGG-----  
GATAAGAAACAGAAAGTATATTCACCT--TTTTATAAGATTGATGTAGTACCAATTAATCAA-----  
-----  
-----  
AATAGTGGTAATAGTAGTAGTGATCAGTATAGGTTAATAAATTGTAATACCTCAGCCATTAAACAG---  
GCTTGTCCAAAGGTAACCTTTGAGCCAATTCCCATACATTATTGTGCTCCAGCTGGCTTTGCGATTCTAAAGT  
GTAAG---GATGATGAGTTCAAT-----GGAACAGGGCCATGCAAAAAT-----  
-GTCAGC---ACAGTACAATGCACACATGGAATCAAGCCAGTAATATCAACT---  
CAACTGCTGTTAAATGGCAGTCTAGCAGAAAAAGAG-----  
GTARGAATTAGATCTGAAAAATATCACAACAAT-----GCCAAAAACATACTAGTACAACCTTAAA-----  
-----GAACCTGTAAAC-----ATTAATTGTACCAGACCTAACAATAATACAAGGAAA-----  
-AGTGTAAGTATA-----GGACCAGGACAAAACA---TTC-----TATGCAACAGGTGAC-----  
-----ATAGTAGGGGATATA-----AGACAAGCATATTGT---AATATCAGTAGATCA---  
AAATGGAATGAAGCTTTGTACCATGTAGCCAAACAATTAAGA-----ACACACTTC-----  
-----AACAAAACAATAATCTTTAAA-----  
AATTCCCTCAGGGGGAGATCTAGAAATTACA--ACACATAGTTTTAATTGTGGAGGAGAA---  
TTTAAACAGCTCCAGGCAAGAGTCCTGGCTGTGGAAAAGATACCTAAAAGATCAACAGCTCCTAGGAATTTGGG  
GCTGCTCTGGAAAGCTCATCTGCACCACTAATGTGCCCTGGAACACTAGTTGGAGT-----  
-----AATAAATCCCAGGATGAGATATGGGAA-----AGC-----  
AACATGACCTGGCAGCAATGG---GAGAAAGAAATTAGCAATTACACACAGATAATATAT---  
AATCTAATTGAAGACTCGCAGAACCAGCAGGAA-----  
-----  
AAGAATGAACATGATTTATTGGCATTGGACAAGTGGGCAAGTCTGTGGAATTGGTTTGACATATCAAACCTGGC  
TGTGGTACATAAAAAATATTTATAATGATAGTAGGAGGCTTAATAGGATTAAGAATAGTTTTTTGCA---  
GTGCTTTCTATAATA-----AATAGAGTTAGGCAGGGATACTCACCT-----  
TTGTCGTTTGCTATTAATTTGCTTGATACCATAGCAATAGCAGTAGCTGGC---  
TGGACAGACAGGGTTATAGAAATAGGACAAAGGTTTTGTAGAGCT-----  
-----ATTCTCCATATA-----CCTAGAAGAATCAGACAGGGCTTAGAAAGGATTTTGCTA---TAA  
>KX907341  
GCT---GTA-----  
GGGAACCTTGTGGGTTACTGTCTACTACGGGGTGCCTGTGTGG---AAAGATGCAGAG---  
ACCACCCATTTTTGTGCATCAGACGCGAAAGCATATGATAAAGAA---GTGCATAAT-----  
-----GTCTGGGCTACG---CGTGCCTGTGTACCCACAGAC---  
CCCAACCCACAAGAAGTATTTTTTGGA-----AATGTGACAGAAGAGTTTAAC-----  
-----ATGTGGAAAAATAACATGGTAGAGCAGATGCATACAGATATA---  
ATCAGTCTATGGGATGAAAGCCTA---AAGCCATGTGTACAGTTA---  
ACCCCTCTCTGTGTACTTTAAATTGTACAGACTATAAGGGTAACTATACAAATTATGATGGCACTGGCCACA  
ATATCACCAGT-----  
-----GATATGGAAGGAGAAATAAAA---  
GACTGTTCTTTCAATGTAACCACAGAATTAAGG-----  
GATAAGAGACAGAAAGTACATTCACCT--TTTTATAGACTTGATATAGTACAAATTAATAGTAGTCAAACCT-  
-----  
-----  
AATAGTAGTGAGTATAGATTAATAAATTGTAATACTTCAGCCATTACACAG---  
GCTTGTCCAAAGATTTCTTTAATCCAATTCCCATACATTATTGTGCTCCAGCTGGTTTTGCGATTCTAAAGT  
GTAAT---GATAAAAAGTTCCAT-----GGAACAGGGCCATGCAAGAAT-----  
-GTCAGC---TCAGTACAATGCACACATGGGATCAAGCCAATAGTATCAACT---  
CAACTACTGTTAAATGGCAGTCTAGCAGAAGAAAA-----  
GTAGCGATTAGATCTGAAAAATATTACAACAAT-----GCCAAAAACATATTAGTACAACCTTAAA-----  
-----AGTCCTGTAAAC-----ATTACTTGTGTGACAGCCTAACAACAATAACAAGAACA-----  
-AGTGTAAGTATA-----GGACCAGGACAAAACA---TTC-----TATGCAACAGGTGCC-----  
-----ATAACAGGGGACATA-----AGACAAGCACATTGT---AATGTCAGTAAAGCA---  
AAATGGAATGAACTTTAAGAAAGGTAGCTGGACAATTAATA-----ACATATTTT-----  
-----AACAAAACAATAATCTTTAAT-----  
AGCTCTGCAGGAGGGGATCTAGAAATTACA---ACACATAGTTTTAATTGTGGAGGAGAA---  
TTTAAACAGCTCCAAGCAAGAGTCCTGGCTGTGGAAAAGATACCTAAGGGATCAACAGCTCCTAGGAATTTGGG  
GCTGCTCTGGAAAACCTCATCTGCACCACTAATGTGCCCTGGAACCTCTAGTTGGAGT-----  
-----AATAAATCCCAGAATGAGATATGG-----GAA-----  
AACATGACCTGGCTGCAATGG---GAGAAAGAAATTAGCAACTACACAGATGAAATTTAT---

AATCTACTTGAAAAATCACAGAACCAGCAGGAA-----  
-----  
AAGAATGAACAAGATTTACTGGCATTGGACAAGTGGGCAAGTCTGTGGAATTGGTTTGACATATCAAATTGGC  
TGTGGTATATAAAAAATATTTATAATGATAGTAGGAGGTTAATAGGATTAAGAATAATTTTTTGCA---  
GTGCTTTCTATAATA-----AATAGAGTTAGGCAGGGATACTCACCT-----  
TTGTCATTTGCTATTAATCTGCTTGATACCGTAGCAATAGCCACAGCTAAC---  
TGGACAGATAGGGTTATAGAAATAGGACAAAGACTTTGTAGAGCT-----  
-----TTTCTCAATATA-----CCTAGAAGAATCAGACAGGGCTTCGAAAGGCCTTGCTA---TAA  
>KX907347  
ACT---GCA-----  
GACAAAGTTGTGGGTTACTGTATACTATGGGGTACCTGTGTGG---AAAGATGCAGAG---  
ACCACCTTATTCTGTGCATCAGACGCTAAAGCATATGACAAAGAA---AAGCATAAT-----  
-----GTCTGGGCTACG---CATGCCTGTGTACCCACAGAC---  
CCTAACCACACAAGAAATACATTTGGAA-----AATGTGACAGAAGAGTTTAAAC-----  
-----ATGTGGAAAAATAACATGGTAGAGCAGATGCATACAGATATA---  
ATCAGTCTATGGGATCAAAGCCTT---AAGCCATGTGTAAAGCTA---  
ACCCCTCTCTGCGTTACTCTAAATTGTAGCCACAACATTACTAGGCTCAACACCAGTAGTCCCAACATCACAG  
GAAACGACACA-----  
-----AACAGTAGTCCCAACATCACAGAAAACGACACAGAAAACGAAAGGAAA---  
AACTGCTCTTTCAATATAACCACAGAATTAAGG-----  
GATAAGAGCAAACAAGTATATTCACCT---TTTTATAGACTTGATATAGTACCAATTGATGGTAGTGAC---  
-----  
-----  
AATAGCAGTGACAATAGCAATAATTATAGATTAATAAATTGTAATACCTCAGCCATTACACAG---  
GCTTGCCCAAAAGTGTCTTTGAGCCAATTCCCATACATTATTGTGCCCCAGCTGGTTTTGCGATTCTAAAAT  
GTAAG---GATGGAAATTTCACT---GGAAAAGGGCCATGCAAGAAT-----  
-GTCAGC---ACAGTACAATGCACACATGGAATCAAGCCAGTAGTATCAACT---  
CAACTGCTGTTAAATGGCAGTCTAGCAGAAGAAAAG-----  
GTAAAAATTAGATCTGAAAATATCAGTGACAAT-----ACCAAAACATAATAGTACAACCTTGTC---  
-----CAACCTGTGAAG-----ATTAAGTGTACCAGACCTGACAACAACACAAGAAAG-----  
-AGTATACATATA-----GGACCAGGACAAGCA---TTC-----TTTGCAACAGGTGCC-----  
-----ATAATAGGGAAGATA-----AGACAAGCACATTGT---AATGTCAGTAAAACA---  
GAATGGAATAAAGCTTTAAACAGGTAGTTGAACAATTAAGA-----AGAGACTTTGGA---  
-----AACAAAACAATAATATTCAAA-----  
AACTCCTCAGGAGGAGATCTAGAAATCACA--ACACATAGTTTCAATTGTGGAGGAGAA---  
TTTAAACAGCTCCAGGCGAGAGTCCCTGGCTGTGGAAAGATACCTAAGGGATCAACAGCTCCTAGGAATTTGGG  
GCTGCTCTGGAAGAACTCATCTGCACCACTACTGTGCCCTGGAAGTCTAGCTGGAGC-----  
-----AATAAATCTTACGATGATATATGG-----GAG-----  
AACATGACCTGGCAGCAATGG---GAGCGGGAAATTAGCAATTACACAGATATAATATAC---  
AGATTGATTGAAGACTCGCAGAACCAGCAGGAA-----  
-----  
ATGAATGAAAAAGACTTATTGGCATTAGACAAGTGGGCAAGTCTGTGGAATTGGTTTGACATAACAAAGTGGC  
TGTGGTATATAAAAAATATTTATAATGATAGTAGGAGGCTTAATAGGATTAAGAATAAGTTTTTTGCT---  
GTGCTTGCTATAATA-----AATAGAGTTAGGCAGGGATACTCACCT-----  
TTGTCGTTGCTATTAATTTGGTTGATACCATAGCAATAGTAGTAGCTGGC---  
TGGACAGATAGGGTTGTAGAAATAGGACAAAGATTTGGTAGGGCT-----  
-----ATCCTCTACATA-----CCTAGAAGAATAAGACAGGGCTTAGAAGGGGCTTTGCTA---TAA  
>KX907364  
GCT---ACA---ACT-----  
ACAGACAAGATGTGGGTTACGGTCTACTATGGGGTACCTGTGTGG---AAAGATGCAGAG---  
ACCACCTATTTTGTGCATCAGATGCAAAAGCATATGATCCAGAA---ATGCATAAT-----  
-----GTCTGGGCTACA---CATGCCTGTGTTTCTACAGAC---  
CCTAACCACACAAGAAATAAATTTGGAA-----AATGTGACAGAACAGTTTAAAC-----  
-----ATGTGGAAAAATAACATGGTAGAGCAGATGCATACAGATATA---  
ATCAGTCTATGGGACCAAAGCCTA---AAACCATGTGTAAAGTTA---  
ACCCCTCTCTGTGTTACTCTAGAATGTACCAATGCCAATATCACCAATAATATCACCAATGCCAATGTCACC-  
-----  
-----AATGACATGCAAGAAGTAAAA---  
AACTGCTCTTTCAATATAACCACAGAATAAGG-----  
GATAAAAGAAAGAAATATATTCACCT---

TTTTATAGACTTGATATAGTACAAATAAATGAAGGGGAGGATACT-----  
-----  
AATAATAGTAGTAATAGTAGTCAGTATAGATTAATAAACTGTAATACCTCAGCCATCACACAA---  
GCTTGTCCAAAGGTAACCTTTTCAGCCAATCCCATAACATTATTGTGCCCCAGCTGGTTTTGCGATTCTAAAGT  
GTAAT---GATGAGGATTTCAAT-----GGGACAGGACTATGTAAGAAT-----  
-GTCAGC---ACAGTACAATGCACACATGGAATCAAGCCAGTAGTATCAACG---  
CAACTGCTGTTAAATGGAAGTCTAGCAGAAGGAAAT-----  
GTAACAATTAGATCTGAAAATTTTACAAACAAT-----GCCAAAAACATACTAGTACAATTTAAA----  
-----AAGCCTGTACAA-----ATTAATTGTACTAGACCTAGCAACAATACAAGGACA-----  
-AGTGTACGTATA-----GGACCAGGACAATCA---TTC-----TATGCAACAGGTGCC-----  
-----ATAATAGGGGATATA-----AGACAAGCACATTGC---AATGTCAGTGCAGCA---  
GAATGGAATACAACCTTTGAAAAGTGTGGTTGACCAATTAAGA-----AAACACTTTGGA----  
-----GAAAACAAAACAATAATYTTTACT-----  
AACCCTCAGGAGGGGATCTAGAAATTACA---ACACATAGTTTTAATTGTGGAGGAGAA---  
TTTAAACAGCTCCAGGCAAGAGTCCTGGCTGTGGAGAGATACCTAAGGGATCAACAGCTCCTAGGAATTTGGG  
GCTGCTCTGGAAAGCTCATCTGCACCACCTAATGTGCCCTGGAACCTCTAGTTGGAAT-----  
-----AATAAATCCTTCAATGAAATATGG-----GAC-----  
AACATGACCTGGCTGCAATGG---GATAAAGAAATTAGCAATTACACACAGATAATATAT---  
GACCTAATTGAAGAATCGCAGAACCAGCAGGAA-----  
-----  
AAGAATGAACAAGATTTATTGGCATTGGACAAGTGGGCAAATCTGTGGAATTGGTTTGACATATCAAACCTGGT  
TGTGGTATATAAGAATATTTATAATAATAGTAGGAGGCTTAATAGGATTAAGAATAGTTGTTGCA---  
GTGTTTTCTATAATA-----AATAGAGTTAGGCAGGGATACTCACCT-----  
TTGTCAATTCGCTATTAATTTGCTTGATACCATAGCAATAGCAATAGCTAAC---  
TGGACAGATAGGGGTATAGAAATAGGACAAAGACTTTGTAGAGCG-----  
-----CTTTTAAACATA-----CCTAGAAGAATCAGACAGGGCTTTGAAAGGGCTTTGCTA---TAA  
>KX907412  
GCT---GCA-----  
GAAAACTTGTGGGTTACTGTCTACTATGGGGTACCTGTATGG---AAAGATGCAGAG---  
ACCACCCATTTTTGTGCATCAGATGCTAAACATATGATAAAGAA---GTGCATAAT-----  
-----GTCTGGGCTACA---CATGCCTGTGTACCTACAGAC---  
CCCAACCCACAAGAGATAAAATTTGGAA-----AATGTGACAGAAGATTTTAAC-----  
-----ATGTGGAAAAATAACATGGTAGATCAGATGCATGCAGATATA---  
ATCAGTCTATGGGATCAAGCCCTA---AAGCCATGTGTAAAGCTA---  
ACCCCTCTCTGTGTTACTCTAAATTGTAGTGTAGTGTACCCTGCTAATAACTCTATC-----  
-----  
-----CAAATGAAATGAAAGGAGAAATAAAA---  
AACTGCTCTTTCAATGTGACCACAGAACTAAGG-----  
GATAAGAGACAGAAAGTATATTCACCT--TTTTATAGACTTGATATAGTACAAATTGATAAT-----  
-----  
-----  
AATAATAGGAATAGTACACAGTATAGATTAATAAATTGTAATACATCAGCCATTACACAG---  
GCTTGTCCAAAGGTATCCTTTGATCCAATTCCCATAACATTATTGTGCTCCAGCTGGTTTTGCAATTCTAAAGT  
GTAAG---GATGAGAATTTCAACA-----GGAGTAGGACCATGTAAGAAT-----  
-GTCAGC---ACAGTACAATGCACACATGGAATCAAGCCAGTAGTATCAACT---  
CAACTACTGTTAAATGGCAGTCTAGCAGAAAAAAG-----  
GTAATGATTAGATCTGAAAATATTTCAAACAAT-----GCTAAAAACATACTAGTACAACCTTACC----  
-----ACGCCTGTAAAC-----ATTACGTGTATCAGACCTGGCAACAATACAAGAAAA-----  
-AGTGTACATATA-----GCACCAGGACAAGCA---TTC-----TATGCAACAGGTGAC-----  
-----ATAATAGGGGATATA-----AGACAAGCACATTGT---AATGTCAATAGAACA---  
CAATGGAATAATACTTTGAAAGAGGTAGCCAATCAATTAAGA-----ACATACTTTGGG----  
-----AACGAAACAGCAATAATCTTTGCT-----  
AGCTCCTCAGGAGGAGATCTAGAAATTACA---ACACATAGTTTTAATTGTAGGGGAGAA---  
TTTAAACAGCTCCAGGCAAGAGTCCTGGCTGTGGAAAGATACCTAAAGGACCAACAGCTCCTAGGAATTTGGG  
GCTGCTCTGGAAAGCTCATCTGCACCACCCTGTGCCCTGGAACCTCTAGCTGGAGT-----  
-----AATAGATCCCAGAGTGAGATATGG-----GGC-----  
AACATGACCTGGCAGCAATGG---GAAAAAGAAATTAGCAATTACACAGAGGAAATATAT---  
AGGCTAATTGAAAATTCGCAGAACCAGCAGGAA-----  
-----  
AAAAATGAACAAGACTTATTGGCATTGGACAAGTGGGCAAATCTGTGGAATTGGTTTGACATATCAAACCTGGC

TGTGGTATATAAGGCTATTTGTAATAATAGTAGGAGGCTTAATAGGATTAAGAATAGTTCTTGCA---  
GTGTTTTCTATAATA-----AATAGAGTTAGGCAGGGATACTCACCT-----  
TTGTCAATTTGCTATTAATTTGCTTGATACCTTAGCAATAGCAACAGCTAAC---  
TGGACAGATAGGGTTATAGAATTATTACAAGCACTTGGTAGAGCT-----  
-----TTTCTCAACATA-----CCCAGAAGAATCAGACAGGGTGCAGAAAGGGCTTGGCTA--TAA  
>KX907414  
GCT---GTA-----  
GGAAACCTGTGGGTTACTGTCTACTATGGGGTACCTGTGTGG--AAAGAAGCAGAG---  
ACCACCCTATTTTGTGCATCAGATGCTAAAGCATATGAGACAGAA--AAACATAAT-----  
-----GTCTGGGCTACA---CATGCCTGTGTGCCTACAGAC---  
CCCAGCCCACAAGAGATAAAATTTGGTG-----AATGTGACAGAAGATTTTAAAC-----  
-----ATGTGGAAAAATTACATGGTAGAGCAGATGCATACAGATATA---  
ATCAGTCTATGGGACCAAAGCCTA--AAGCCATGTGTAAAGTTA---  
ACCCCCCTCTGTGTTACTTTTATACTGCAAGAATGTCACCAGAGATAATAGTACCAAAAATAGCACCGAAAAACG  
AGAACACCACT-----  
-----CATATCATCAATGACAGGTCAATAACA---  
AACTGCTCTTTTAATATGACCACAGTGCTACAG-----  
GATAAGAGGCAGCAAGTCTATTCACCT--TTTTATAGGACTGATGTAGTACCAATAGAGGAT-----  
-----  
-----  
AGAAAAGAATGATAGTCAGTATAGATTAATAAATTGCAATACCTCAGCCATTACACAG---  
GCTTGTCCTAAAAGTATCCTTTGAGCCAATTCCCATACATTATTGTGCTCCAGCTGGTTTTGCGATTCTAAAGT  
GTAAT---GAGGAGGAGTTCAGT-----GGAAAAGGGCCATGTAAGAAT-----  
-GTCAGC---ACAGTACAATGTACACATGGGATCAAGCCAGTGGTGTCAACC---  
CAACTGCTATTAAATGGCAGCCTAGCAGACAAAAAG-----  
GTAATGATTAGATCTGAAAATATTACAAATAAT-----GTCAAGAATATAATAGTACAATTTAAT-----  
-----AAGACTGTAGCA-----ATTAATTGTATTAGACCTAACAACAATACAAGGAAA-----  
-AGTATAAGGATA-----GGGCCAGGACAAAAA---TGG-----TATTCATGGAATGAC-----  
-----ATAATAGGGAATATA-----AGAGAAGCACATTGT--ACTGTTAATGGAACA---  
GAATGGAATATGGCTTTGCAAGAGGTAGTCAACCAATTAAGA-----ACACACTTT-----  
-----AGTGAACAATAATCTTTAAT-----  
AGCTCCTCAGGAGGGGATCTAGAAGTTACA--ACACATAGTTTTAACTGTGGAGGAGAA---  
TTTAAACAGCTCCAGGCGAGAATCCTGGCTGTGGAAAGTTACCTAAAGGATCAACAGCTCCTAGGAATTTGGG  
GTTGCTCTGGAAGAACTCATCTGCACCACTAATGTGCCCTGGAACCTCTAGTTGGAGT-----  
-----AATAAATCCCTGGATGAGATATGG-----CAA-----  
AATATGACCTGGCTGCAATGG--GATAGAGAAATTAGCAATTACACAGATACAATATAC---  
AGCTTAATTGAAGAAGCGCAGAACCAACAGGAG-----  
-----  
AGAAATGAAAAAGATTTATTAGCATTTGACAAATGGGCAAGTCTGTGGAATTGGTTTGACATCTCGAACTGGC  
TGTGGTATATAAAGATATTTATAATAATAGTAGGAGGCTTAATAGGATTAAGAATAGTTTTTTACT--  
GTGCTTTCTGTAATA-----AATAGAGTTAGGCAGGGATACTACCA-----  
TTGTCAATTCGCTATTAGTTTGCTTGATACCATAGCAATAGTAGTAGCTGGC---  
TGGACAGATAGGGTTATAGAATTAGGACAACGCTTTTGTAGAGCT-----  
-----ATCCTCAACATA-----CCTAGAAGAATCAGACAGGGCTTTGAAAGAGCTTTGCTA--TAA  
>KX907423  
GCT---GCA-----  
GAAAACCTTGTTGGGTTACTGTCTATTATGGGGTACCTGTATGG--AAAGACGCAAAG---  
ACCACTCTATTTTGTGCATCAGATGCTAAAGCATATGATACAGAA--GTGCATAAT-----  
-----GTCTGGGCTACA---CATGCCTGTGTACCTACAGAC---  
CCCAACCCACAAGAGATAAAATTTGGTA-----AATGTGACAGAAGATTTTAAAC-----  
-----ATGTGGAAAAATAACATGGTAGATCAGATGCATGAAGATATA---  
ATCAGCCTATGGGATCAATCCCTA--AAGCCATGTGTAAAGCTA---  
ACCCCTCTTTGTGTTACTCTGAATTGTAGTGATGTCAAGAATGGCAGTAGCAGTGATGGTAAT-----  
-----  
-----AACCAGAATATTAGTGTCTCCACGGAAATGCAAGGAGAAATAAAA---  
AACTGCTCTTTCAATATGACCACAGAATTAAGG-----  
GATAAGAGACAGCAAGTACATTCACCT--TTTTATAGGCTTGATGTAGTACCAATTAATAGT-----  
-----  
-----  
GATAATAATAGTAGTTACTATAGATTAATAAATTGTAATACATCAGCCATTACACAG---

GCTTGTCCAAAGGTATCCTTTGAGCCAATTCCCATACATTATTGTGCTCCAGCTGGTTTTGCAATTCTAAAGT  
GTAAG---GAGGAAAATTTTACAC-----GGAAAAGGGCAATGTAAGAAT-----  
-GTCAGC---ACAGTACAATGCACACATGGAATCAAGCCAGTAGTATCAACT---  
CAACTACTGTTTAAATGGCAGTCTGGCAGAAAAAAG-----  
GTGATGATTAGATCTGAAAATATTACAAACAAT-----GCTAAAAACATACTAGTACAACCTTACC----  
-----AAGCCTGTAGAA-----ATTAATTGTACCAGACCTAACAACAATACAAGAAAA-----  
-AGTATACATATA-----GGACCAGGACAAGCA---TTC-----TAT---ACAAGTGGC-----  
-----ATAATAGGGGATATA-----AGACAAGCATTTTGT---ACTGTCAATAGAACA---  
CAATGGAACAGCACTTTGAAAGAGGTAGTCGATCAATTAAGA-----GCAGACTTTGAG----  
-----AACGCAACAATAATCTTTACT-----  
AACTCCTCAGGAGGAGATCTAGAAATTACA---ACACATAGTTTTAATTGTAGGGGAGAA---  
TTTAAACAGCTCCGGGCAAGAGTCTTGGCTGTGGAAAGATACCTAAAGGACCAACAGCTCCTAGGAATTTGGG  
GCTGCTCTGGAAAGCTCATCTGCACCATTTGCTGTGCCCTGGAACCTCTAGTTGGAGT-----  
-----AATAAAACCCAAAATGAGATATGG-----GAC-----  
AACATGACCTGGCAGGACTGG---GAAAAAGAAATTAGTAATTACACAGAGATAATATAT---  
AGCCTAATTGAAGAATCGCAGATCCAGCAGGAA-----  
-----  
AAGAATGAACAAGACTTATTGGCATTGGACAAATGGGCAAGTCTGTGGAATTGGTTTGACATATCAAAATGGC  
TATGGTACATAAAGATATTTATAATAATAGTAGGAGGCTTAATAGGATTAAGAATAGTTTTTTGCA---  
GTGTTTTCTATAATA-----AATAGAGTTAGGCAGGGATACTCACCT-----  
TTGTCAATTTGCTATTAATTTGCTTGATACCTTAGCAATAGCAACAGCTAAC---  
TGGACAGATAGGTTTATAGAATTAGTACAAACATTTTGTAGAGCT-----  
-----ATTCTCCACATA-----CCCAGAAGAATCAGACAGGGTGCAGAAAGGCTTTGGCTA---TAA  
>KX907431  
GCA---GCA-----  
GACAACTTGTGGGTTACTGTTTACTATGGGGTACCTGTGTGG---AGAAATGCAGAG---  
ACCACCTTATTCTGTGCATCAGATGCTAAAGCATATGATACAGAA---GTACATAAT-----  
-----GTTTGGGCTACA---CATGCCTGTGTACCCACAGAC---  
CCCAATCCACAAGAGATAAAATTTGGAG-----AATGTGACAGAAGATTTTAAC-----  
-----ATGTGGAAAAATCACATGGTAAAGCAGATGCATACAGATATA---  
ATCAGTCTATGGGATCAAAGTCTA---AAGCCATGTGTAAAGTTA---  
ACCCCTCTCTGTGTTACTTTAAATTGCAATAATAATATCACCCTAACACCACCACTGAA-----  
-----  
-----TGGGGAATGACA---  
AACTGCTCTTACAATGTGACCACAGAAATAAGG-----  
GATAAGAAAAAGAAAGAATATTCACCT--TTTTATAAGATTGATGTAGTAAAAATTGATAATAAT-----  
-----  
AATAATAGCCAGTATAGGTTGATAAATTGTAATACCTCAGCCATTACACAG---  
GCTTGTCCAAAGGTATCCTTTGAGCCAATTCCCATACATTATTGTGCCCCAGCTGGCTTTGCGATTCTAAAGT  
GCAAG---GATAAGGAGTTCAAT-----GGAACAGGGCCATGTAAAAAT-----  
-GTCAGC---ACAGTACAATGCACACATGGAATCAAGCCAGTAGTATCAACT---  
CAACTGCTGCTAAATGGCAGTCTAGCAGAAGAAGAG-----  
GTAAGAATTAGATCTGAAAACATCACAATAAT-----GGCAAAAACATAATAGTACAATTTAAC---  
-----GAGCCTGTAAGA-----ATTAATTGTACTAGACCTAACAACAATACAAGAAAA-----  
-GGTGTACATATA-----GGACCAGGACAACA---TTT-----TATGCAACAGGTGCA-----  
-----ATAATAGGAAATATA-----AGACAAGCACATTGT---AATGTCAGTAAAAAA---  
GACTGGAATGAAGCTTTGAAAAGGGTAGCCAAACAATTAAGG-----AAACACTTT-----  
-----AACAAAACAATAATCTTTAGT-----  
AACTCCTCAGGAGGGGATCTAGAAATCACA---ACACATAGTTTTAATTGTAGAGGAGAA---  
TTTAAACAGCTCCAGGCAAGAGTCTTGGCTGTGGAAAGCTACCTAAAGGATCAACAGCTCCTAGGAATTTGGG  
GCTGCTCTGGAAGCTCATCTGCACCACTAATGTGCCCTGGAACCTCTAGTTGGAGT-----  
-----AATAAAACACAGGATGAGATATGG-----AAC-----  
AACATGACTTGGCTGCAATGG---GATAAAGAAATTAGCAATTACACAAAAGTAATATAT---  
GGTTTAATTGAAGAATCGCAGAATCAGCAGGAA-----  
-----  
AAGAATGAATTAGACTTATTGGCATTGGACAAAGTGGGCAGATCTGTGGAATTGGTTTGACATATCAAAATGGC  
TGTGGTATATAAAAAATATTTGTAATGATGGTAGGAGGCTTAATAGGATTAAGAATAGTTTTTTGCA---  
GTGCTTTCTATAATA-----AATAGAGTTAGGCAGGGGTACTCACCT-----  
TTGTCAATTTGCTATTAGTTTATATGATACATTAGCAATAGCAGTAGCTGAC---

TGGACAGATTGGGTTATAGAAATAGGACAGAGATTTTGTAGAGCT-----  
-----ATTCTCAATATA-----CCTAGGAGAATCAGACAGGGTGCTGAAAGGGCTTTGCAA--TAA  
>HQ615968  
ACT---GCA-----  
GACAACTTGTGGGTTACTGTCTATTATGGGGTGCCTGTGTGG--AGAGATGCAAAAT---  
ACCACCTATTTTGTGCATCAGATGCTAAACATATGAGAGAGAA--GTGCATAAT-----  
-----GTCTGGGCTACG---CATGCCTGTGTACCCACAGAC---  
CCCAACCCACAAGAAATACATTTGGAA-----AATGTAACAGAAGAGTTTAAAC-----  
-----ATGTGGAAAAATAACATGGTAGAGCAGATGCATACAGATATA---  
ATCAGTCTATGGGATCAAAGCCTA--AAGCCATGTGTAAAGTTA---  
ACCCCTCTCTGTGTTACTTTAGAGTGTGGCGATGCCATCGTCAACAATAGCGATGCCATCGTCAACAATAGCA  
ATGCCACC-----  
-----GTCAGCAATAGCAATGCCACCGTCAATGCCACCGCCACCAATGTAGGAGAAATGACA---  
AATTGCTCTTTCAACATGACCACAGTAGTAAGG-----  
GATAAGACAAAGAAAGTATATTCGCTT--TTTTATAGACTTGATGTAGTACCAATTGATAATGAT-----  
-----  
-----  
AATAGTAGTAAGTATAGATTAATAAATTGTAATACCTCAACCATTACACAG---  
GCTTGTCCAAAGGTGTCTTTTGTAGCCAAATCCCATACATTATTGTGCTCCAGCTGGTTTTGCGATTCTAAAGT  
GTAAT---GATAAGAATTTACG-----GGAATGGGGGAATGCAAGAAT-----  
-GTCAGC---ACAGTACAGTGCACACATGGAATCAAGCCAGTAATATCAACC---  
CAGCTGTTGTTAAATGGCAGTCTAGCAGAAAAAGAG-----  
GTAATGATTAGATCTGAAAATCTCACAGACAAT-----GCCAAAAACATAATAGTACAATTTAAC---  
-----GAGTCTGTAAGG-----ATTATTTGTAGCAGACCTAGCAACAATACAAGAACA-----  
-AGTGTAAAGGATA-----GGACCAGGACAAACA--TTC-----TATGCAACAGGTGCC-----  
-----ATAACAGGGAACATA-----AGACAAGCGCATTGT--AATGTTAGTAGAGCA---  
GAATGGAACAAAACCTTTGGAAAAGGTAGCCCACCAATTAAGA-----ACAACTATAAC---  
-----AAATCAAAAATAATCTTTACT-----  
AGTTCCTCAGGAGGGGATCTAGAAATTACA--ACACATAGTTTTAATTGTGGAGGAGAA--  
TTTAAACAGCTCCAGGCAAGAGTCCCTGGCTGTGGAAAGATACCTAAGGGATCAACAGCTCCTAGGAATTTGGG  
GCTGCTCTGGAAGAACTCATCTGCACCACTAATGTGCCCTGGAAGTCTAGTTGGAGT-----  
-----AATAAATCCAGAGTGAGATATGG-----AAC-----  
AACATGACCTGGTTGAAATGG--GATAAAGAAATTAATAAGTACACAAAGACAATATAT--  
GATTTACTTGAGGAATCGCAGATCCAGCAGGAG-----  
-----  
AAGAATGAACAAGATTTATTGGCATTGGACAAGTGGGCAAGTCTGTGGAATTGGTTTGACATATCAAATTGGC  
TATGGTATATAAGAATATTTATAATGATAGTAGGAGGCTTAATAGGGTTAAGAATAGTCTTTGCA---  
GTGTTCTCTATAATA-----AATAGAGCTAGGAAGGGATACTCACCT-----  
TTATCATTTGCTATTAGTTTGCTTGATACTGTAACAATAGCAGTAGCTGGC---  
TGGACAGATAGGGTTATAGAAATAGGACAAAGATTTTGTAGAGCT-----  
-----ATTCTCCACATA-----CCTAGAAGAATCAGACAGGGCTTTGAAAGGGCTTTGCTA--TAA  
>HQ615970  
GCT---GCA-----  
GAAAACCTTGTGGGTTACTGTCTACTATGGGGTACCTGTGTGG--AAAGATGCAGAA---  
ACCACCTTATTTTGTGCATCAGATGCTAAAGCACATGAGGCAGAA--AAGCATAAT-----  
-----GTCTGGGCTACA---CATGCCTGTGTACCCACAGAC---  
CCCAACCCACAAGAAATACCTTTGGTA-----AATGTGACAGAAGAGTTTAAAC-----  
-----ATGTGGAAAAATAAAATGGTAGAGCAGATGCATACAGATATA---  
ATCAGTCTATGGGACCAAAGTCTA--AAGCCATGTGTACAGTTA---  
ACCCCTCTTTGCGTTACTCTACATTGTAACGATGTTAACACGACCAATAACACAACCAAT-----  
-----  
-----CACACCACTGTGCGCCCGGACATGGTAGAAGAAAGAAAA---  
AATTGCTCTTTCAATATGACCACAGAATAAGG-----  
GATAAGAAACAAAAGTATATTCAATT--TTTTATAGGCTTGATATAGTACCACTTAATGAG-----  
-----  
-----  
AGTCAAGTTAATAGTAGTGAGTATAGATTAATAAATTGTAATACCTCAGCCATTACACAG---  
GCCTGCCCAAAGGTATCCTTTGAGCCAATCCCATACATTATTGTGCCCCAGCTGGTTTTGCAATTCTAAAAAT  
GTAGG---GATAAGGATTTCAAT-----GGAACAGGGCTATGCAAGAAT-----  
-GTCAGC---ACAGTACAGTGCACACATGGAATCAAGCCAGTAGTATCAACA---

CAGCTGCTGTTAAATGGCAGTTTAGCAGAAGAAGAG-----  
GTAGTGATTAGATCTGAAAATATCACAGACAAT-----GTCAAACTATACTAGTACAACCTTGTC----  
-----AAGCCGGTGAAA-----ATTAATTGTACCAGACCTAGTAACAATACAAGGAAA-----  
-AGTGTACATATA-----GGACCAGGACAAGCA---TTC-----TATGCAACAGGTGAC-----  
-----ATAATAGGTGATATA-----AGACAAGCACATTGT---ATTGTCAATGGATCA---  
GAATGGAATGAACTTTACACCAGGTAGCTAAACAATTAAAC-----AAACACTTT-----  
-----AACAAAACAATAACATTTACT-----  
AAATCCTCAGGAGGGGATCTAGAAATAACA--ACACATAGCTTTAATTGTGGAGGAGAA---  
TTTAAACAGCTCCAGGCAAGAGTCCTGGCTGTGGAAAGTTACCTAAAGGATCAACAGCTCCTAGGAATTTGGG  
GCTGCTCTGGAAGAACTCATCTGCACCACTAATGTGCCCTGGAACCTAGTTGGAGT-----  
-----AATAAATCTTATGATGATATATGG-----GAG-----  
AACATGACTTGGGTAGAATGG---GAGAGAGAAATTAGCAATTACACAGAAAAAATATAT---  
GGCCTACTTGAAGAATCACAGAACCAGCAGGAA-----  
-----  
AAGAATGAACAAGACTTGTGGCATTAGACAAATGGGCAAGTCTGTGGAATTGGTTTAACATATCAAGATGGC  
TGTGGTATATAAAAAATATTTATAATGATAGTAGGAGGCTTAATAGGGTTAAGAATAGTTTCTTACT---  
GTGCTTTCTTTAATA-----AATAGAGTTAGGCAGGGATACTCACCC-----  
TTGTCGTTTCGCTGTTAGTCTGCTTGACCCATAGCAATAGCAGTAGCTGGC---  
TGGACAGATAGAATTATAGAAATAGGACAAGCAATTGGTAGAGCT-----  
-----ATCCTCCACATA-----CCTAGAAGAATCAGACAGGGCGCTGAAAGAATTTTGCTA---TAA  
>HQ615971  
GCT---GCA-----  
GAAAACTTGTGGGTCACTGTATACTATGGGGTACCTGTGTGG---AGAGACGCAGAA---  
ACCACTTTATTTTGTGCATCCGATGCTAAGGCATATGATACAGAA---GTGCATAAT-----  
-----GTATGGGCCACA---CATGCCTGTGTACCCACAGAC---  
CCCAACCCACAAGAAATACATTTGAAA-----AATGTGACAGAAGAGTTTAAAC-----  
-----ATGTGAAAAATAGCATGGTAGAGCAGATGCATACAGATATA---  
ATTAGTCTATGGGACCAAAGCCTA---AAACCATGTGTACAGTTA---  
ACCCCTCTCTGTGTCACTTTAAATTGCTCCCATATATCACCAATAACATTACCAAGATGGAC-----  
-----  
-----AACAAATACGGACAATACAATAGACATGAAAGAAGAAATAAAA---  
AACTGCTCTTTCAATATGACTACAGAATTAAGG-----  
GATAAGCAACGAAAAGTGCACTCACTT---TTTTATAGACTTGATATAGTACAAATTAATGAAAATGACAAT-  
-----  
-----  
GCTACTCAAATAATAGTGGTAAGTATAGATTAATAAATTGTAATACCTCAGCCATTACACAA---  
GCCTGTCCAAAGGTAACCTTTGAGCCAATTCCCATACATTATTGTGCCCCAGCTGGTTTTGCGATTCTAAAGT  
GTAAT---GATAAAAGTTTCAAT-----GGAACAGGACCATGCGGGAAT-----  
-GTCAGC---ACAGTACAATGTACACATGGAATCAAGCCAGTAATATCAACT---  
CAGCTGCTGTTAAATGGCAGTCTAGCAGAACAAGAG-----  
ATAATGATTAGAAGTGAAAATATCACAAACAAT-----GCCAAAACCATAATAGTACAACCTTAAC---  
-----CAGTCTGTAGAA-----ATTACTTGATCAGACCTAACAAACAATACAAGAACA-----  
-GGTATACATATA-----GGACCAGGGCAAGCA---TTC-----TATGCAACAGGTAAC-----  
-----ATAATAGGAGATATA-----AGACAAGCACATTGC---AATATCAGTAGAAAA---  
AATTGGACTGACACGTTACAAAAGGTAGCCACACAATTAAGA-----AAATACTTTAAC-----  
-----AACTCAACAATAATCTTTGAT-----  
GAACCCTCAGGGGGAGATTTAGAAATTACA---ACACATAGCTTTAATTGTGGAGGAGAA---  
TTTAAACAGCTCCAGGCACGAGTCCTGGCTGTGGAAAGATACCTAAGGGATCAACAGCTCCTAGGAATTTGGG  
GCTGCTCTGGAAGAACTCATCTGCAACACTAATGTGCCCTGGAATTCTAGTTGGAGT-----  
-----AATAAGTCTCAGGATGAGATATGG-----AAA-----  
AACATGACCTGGTTGCAATGG---GATAAAGAGATTAGCAATTACACACAAATAATATAT---  
GATCTACTTGGAGAAGCGCAAAACCAACAGGAA-----  
-----  
AACAAATGAACAAGACTTATTGGCCTTGACAAATGGGCAAATCTGTGGAATTGGTTGACATATCAAACCTGGC  
TGTGGTATATAAAAAATATTTATAATGGTAGTAGGAGGCTTAATAGGATTAAGAATAGTTTTTTGCT---  
ATATTTTCTCTAATA-----AATAGAGTTAGGCAGGGATACTCACCT-----  
TTGTCGTTTCGCTATTAATTTGTATGATACCATAGCAATAGCAGTAGCTGGC---  
TGGACAGATAGGGTTATAGAAAGTAGGACAAAGATTTGGTAGAGCT-----  
-----ATCCTCAACATA-----CCTAGAAGAATCAGACAGGGCTTCGAAAGGGCTTTGCTA---TAA  
>HM204620

GCT---GCA-----  
 GAAAAATTGTGGGTTAATGTTTACTATGGGGTGCCTGTGTGG---AAAAATGCAGAT---  
 ACCACTCTATTTTGTGCATCAGATGCTAAAGCATATAACCCAGAA---GCACATAAT-----  
 -----ATCTGGGCTACG---CATGCCTGTGTACCCACGGAC---  
 CCCAGCCCACAAGAAATATACTTGGAA-----AATGTGACAGAAGATTTTAACT-----  
 -----ATGTGGAAAAATAACATGGTAGAGCAGATGCATGCAGATATA---  
 ATCAGTCTATGGGACCAAAGTCTA---AAGCCATGTGTACAGTTA---  
 ACCCCTCTCTGTGTTACTTTAGAGTGTAAAGATCAATATCACTAATACCACTGGCAATAATGTC-----  
 -----  
 -----ACTGCCAATAATGACACTATCCTTGCCAGAGAAGAAATGAGA---  
 AACTGCTCTTACAATATGACCACAGAATAAGG-----  
 GATAAGAAACAGAAAGTACATTCACTT---  
 TTTTATAGACTTGATATAGTAGAAATTAATAATAATAATAATGGG-----  
 -----  
 AGTAGTAATAATAATAGTGATAATGATAGTAGGCCTTATAGATTAATAAATTGTAATACCTCAGCCATTACAC  
 AG---  
 GCTTGTCCAAAGATATCCTTTGAGCCAATTCCCATACATTATTGTGCCCCAGCTGGTTTTGCGATTCTAAAGT  
 GCAGG---GATAAGGAGTTCAAT-----GGAACAGGGCCATGCAAGAAT-----  
 -GTCAGT---ACAGTACAATGCACACATGGAATTAAGCCAGTAGTATCAACT---  
 CAACTACTGTTAAATGGCAGTTTAGCAGAAAAAAGG-----  
 GTAATGATTAGAAGTGAAGAACATTACAAATAAT-----GCCAAAAACATAATAGTACAATTTAAT---  
 -----GAGTCTGTAGAA-----ATTAATTGTACCAGACCTAACAACAATACAAGACAA-----  
 -AGTGTACGTATA-----GGACCAGGACAAGCA---TTC-----TAT---ACAACAGAA-----  
 -----ATAATAGGGGATATA-----AGACGAGCATATTGT---ACTGTCAATGAAACA---  
 AAATGGAATCAAACTTTGTATAGGGTAGCTGAGCAATTAAGA-----AAATATTTTAAT---  
 -----AATGATACAACAATAATCTTTGCT-----  
 AACTCCTCAGGAGGGGACGTAGAAATCACA---ACACATAGTTTTAATTGTGGAGGAGAA---  
 TTTAAACAGCTCCAGGCAAGACTCCTGGCTGTGGAAAGATACCTAAGGGATCAACAGCTCCTAGGAATTTGGG  
 GCTGCTCTGGAAGAACTCATCTGCGCCACTAATGTGCCCTGGAAGTCTAGTTGGAGT-----  
 -----AATAAATCCTATGATGAGATATGG-----GGG-----  
 AACATGACCTGGCTGCAATGG---GATAAAGAAATTGACAACCTACACACAGCTAATATAT---  
 CAATTAATTGAAGACTCGCAGAACCAGCAGGAA-----  
 -----  
 AAGAATGAACAAGAGTTATTGGCATTGGACAAGTGGGCAAATCTGTGGAATTGGTTTGAGATATCAAATTGGC  
 TGTGGTATATAAGACTATTTGTAATGATAGTAGGAGGCTTAATAGGATTAAGAATAGTTTTTGGCA---  
 GTGCTTTCTGTAATC-----AATAGAGTTAGGCAGGGATACTCACCT-----  
 TTGTCATTTGCTATTAATTTGCTTGATACCATAGCAATAGCAGTAGCTGGC---  
 TGGACAGATAGGGTTATAGAAGTAGGACAAAGACTTTGTAGAGCT-----  
 -----TTTCTTCACATA-----CCTAGAAGAATCAGACAGGGCTTCGAAAGGGCTTTGCTA---TAA  
 >HM204621  
 GCT---GCA-----  
 GAAAACTTGTGGGTTAATGTCTACTATGGGGTACCTGTGTGG---AAAGAAGCAGAG---  
 ACCACTTTATTTTGTGCATCTGATGCTAAAGCATATTCTACAGAA---GCACATAAT-----  
 -----GTTTGGGCTACA---CATGCCTGTGTACCCACAGAC---  
 CCCAACCCACAAGAAGTATATTTAGAA-----AATGTGACAGAAGAGTTCAAC-----  
 -----ATGTGGAGAAATAAAATGGTAGATCAGATGCAGGAAGATATA---  
 GCCAGTCTATGGGACCAATTCCTA---CAACCATGTGTGAAGTTA---  
 ACCCCTCTCTGTGTTACCTTAAATTGCAGTAACCCCAAGAACCCCGATAACAGTACAGATAAC-----  
 -----  
 -----AGTACAGGCATAGGCAGAGAAGACATGAAAGACATGAAA---  
 AACTGCTCTTTCAATATGACCACAGAATTAAGG-----  
 GATAAACACCAAAAAATGTATTCTCTT---  
 TTTTATAGACTTGATATAGAAGAACTCAATGAAAATAGTAATAGC-----  
 -----  
 AGTAATAGCAGTAGCAGTAATAGCAGTGAGTATAGATTAATAAATTGTAATACCTCAACCATTGCACAA---  
 GCTTGTCCAAAGGTATCCTTTGAGCCAATCCCATACATTATTGTGCCCCAGCTGGTTTTGCGATTCTAAAGT  
 GTAGG---GATAAAAAGTTCAAT-----GGAACAGGACCATGCAGGAAT-----  
 -GTCAGC---ACAGTACAATGCACACATGGAATCAAGCCAGTAGTATCAACT---  
 CAACTGCTGTTAAATGGCAGTCTAGCAGAAAAAGGG-----  
 ATAAAGATTAGATCTGAGAATATCTCAGAAAGT-----GCTAAACTATAATAGTACAACCTTGAC---

-----CAGCCTGTAGTA-----ATTAATTGTACCAGACCTAACAAACAATACAAGAACA-----  
 -AGTATACCTATG-----GGACCAGGACGAGCA---TTA-----TATGCAACAGGTGCC-----  
 -----ATAACAGGGGATCCA-----AGACAAGCACATTGT---AATATTAGTAGAGAA---  
 AAATGGAATGAACTTTAAGCAAGGTAGCTAAAAAATTAAAA-----GAATATTTTAAT-----  
 -----AATAGAACAATAATCTTTTACA-----  
 AACGCCTCAGGGGGGGATGTAGAGGTTACA---ACACATAGTTTTTAATTGTGGAGGAGAG---  
 TTTAAACAGCTCCAGGCAAGAGTCCTGGCTGTGGAAAGATACCTACAGGATCAACAGGTCCTAGGACTTTGGG  
 GCTGCTCTGGGAAAATCATCTGCGCCACTAATGTGCCCTGGAATTCTAGTTGGAGT-----  
 -----AATAAATCCTATGGGGAGATATGG-----GAT-----  
 AACATGACCTGGCTGGAATGG---GATAAAGAAGTTAGCAATTACACAGACATAATCTAT---  
 GATCTAATTGCAAAATCGCAAAATCAACAGGAA-----  
 -----  
 AAGAATGAACAAGACTTATTGGCATTGGACAAGTGGACAAGTTTTGTGGGGTTGGTTTGAAATATCAAGATGGC  
 TGTGGTATATAAAAAATATTTCATAATGATAGTAGGAGGCTTAATAGGATTAAGAATAGTTTTTTGTT---  
 ATACTGTCTATAATA-----AATAGAGTTAGGCAGGGATACTCACCT-----  
 TTGTCGTTTCGCAATTAAGTTGCTTGATACCATAGCAATAGCAGTAGCTGGC---  
 TGGACAGATAGGGTTATAGAAGTAGGACAAAGAATTGGTAGAGCT-----  
 -----ATCCTCAACATA-----CCTAGAAGAATCAGACAAGGTTTAGAAAGGCTTCTGCTA---TAA  
 >KY658695  
 GCT---ACA-----  
 GATAACTTGTGGGTTACTGTTTACTATGGGGTGCTGTATGG---AAAGATGCAGAG---  
 ACCACCTTATTTTGTGCATCAGATGCAAAAGCACATGAGACAGAA---GCGCATAAT-----  
 -----GTCTGGGCTACA---CATGCCTGTGTACCTACAGAC---  
 CCCAACCCACAAGAAATAAATTTGGGA-----AATGTGACAGAAGAGTTTAAT-----  
 -----ATGTGGAAAAATAACATGGTAGAACAGATGCATGAAGATATA---  
 ATCAGTCTATGGGACCAAAGCCTA---AAGCCATGTGTAAAGTTA---  
 ACCCTCTCTGTGTACTTTAGAGTGTAGCAATGTCAATGGCACCAATAGCACCAATAKCACC-----  
 -----  
 -----AGTGATAGTAACTGGAAGAAGAAATAGGAGAAATAAAA---  
 AACTGCTCTTTCAATATGACCACAGAATTAAGG-----  
 GATAAGCAAAGGAAAGTATATTCACCT--TTTTATAAACTAGATGTAGTACAAATGGGTGAC-----  
 -----  
 -----  
 AACAAATAGCAGTAAGTATAGATTAATAAATTGTAATACCTCAGCCATTACACAA---  
 GCTTGTCCAAAGGTAACCTTTGAGCCAATTCCCATACATTATTGTGCCCCAGCTGGTTTTGCGATTCTAAAGT  
 GTAAT---GATGAGGAGTTTAAT-----GGAACAGGGCCATGCATGAAT-----  
 -GTCAGC---TCAGTACAATGCACACATGGAATTAAGCCAGTAGTATCAACT---  
 CAACTGCTGTTTAAATGGCAGTCTAGCAGAAGGAACG-----  
 ATAAAGATTAGATCTGAAAATATCACAAACAAT-----GCCAAAACATAATAGTACAATTTACT---  
 -----GAGTCTGTAAAA-----ATTGATTGTATCAGACCTAACAAACAATACAAGGACA---  
 -AGTGTACGTATA-----GGACCAGGACAAACA---TTC-----TATGCAACAGGTGGC-----  
 -----ATAATAGGGAATATA-----AGAAAAGCACATTGT---GTGGTCAATGGAACA---  
 AAATGGAATAGAACTTTGTCTAAGGTAGTCAACCAATTAAGA-----ACATACTTTGGA-----  
 -----AATAAAACAATAATCTTTGAT-----  
 AAATCCGCAGGAGGGGATTTAGAAATAACA---ACACATAGTTTTTAATTGTGGAGGAGAA---  
 TTTAAACAGCTCCAGGCAAGAGTCCTGGCTGTGGAAAGATACCTAAAGGATCAACAGCTCCTAGGAATTTGGG  
 GCTGCTCTGGAAAACCTCATCTGCACCACTAATGTGCCCTGGAACGATAGTTGGAGTAATAGTAGT-----  
 -----AAGATACCCCTGGATCAGATATGG-----GAC-----  
 AACATGACCTGGCTGCAATGG---GATAAAGAAATTAGCAATTACACATATGTAATATAT---  
 AATCTGCTTGAAGAATCGCAGAACCAGCAGGAA-----  
 -----  
 AAGAATGAACAGGATTTATTGGCATTGGACAATGGGCAAATCTGTGGAATTGGTTTGACATATCAAACCTGGC  
 TGTGGTATATAAAAAATTTTATAATGATAGTAGGAGGCTTAATAGGATTAAGAATAGTTTTTTGCT---  
 GTGCTTTCTATAATA-----AATAGAGTTAGGCAGGGATACTCACCT-----  
 TTGTCGTTTCGCTATTAATTTGCTTGATACCATAGCAGTAGCAGTAGCTGGG---  
 TGGACAGATAGGATTATAGAAGTAGTACAAAGATTTTGTAGAGCT-----  
 -----ATTCTCAACATA-----CCTAGAAGAATTAGACAGGGCTTCGAAAGGGCTTTGCTA---TAA  
 >KY658696  
 GCT---GTA-----  
 GATAACTTATGGGTTACTGTCTACTATGGGGTACCTGTGTGG---AAAGATGCAGAG---

ACCACCTTATTTTGTGCATCAGATGCTAAAGCATATGATACAGAA---GTGCATAAT-----  
-----GTCTGGGCTACA---CATGCCTGTGTACCCACAGAC---  
CCCAACCCACAAGAAATGCCTTTGGAA-----AATGTGACAGAAGAGTTTAAAC-----  
-----ATGTGGAAAAATAACATGGTAGAGCAGATGCAGACAGATATA---  
ATCAGTCTATGGGACCAAAGTCTA---AAACCATGTGTAAAGTTA---  
ACCCCTCTCTGCGTTACTCTAGAGTGCCAGAACATCAACAGGAGCCACACCACTAACAATACAGATAACACCA  
CTACCAAT-----  
-----AACATGCAAGGAGAGAAATAAAA---  
AACTGCTCTTTCAATATGACCACAGAGCTAAGG-----  
GATCAGAAAAAGAAAGTGCATTCACTT---TTTTATAAACTTGATGTAGTACAAATTGGTGAC-----  
-----  
-----  
AACAGCAGTACGTATAGATTAATAAATTGCAATACCTCAGCCATTACACAG---  
GCTTGTCCAAAGGTATCCTTTGAGCCAATTCCCATACATTATTGTGCTCCAGCTGGTTTTGCATTCTAAAGT  
GTAGA---GATATAGAGTTCAAT-----GGAACAGGACCATGCAAGAAT-----  
-GTCAGC---ACAGTACAATGCACACATGGAATCAAGCCAGTAGTATCAACT---  
CAACTGCTGTTAAATGGCAGTCTAGCAGAACAGGGG-----  
ATAAGGATTAGATCTGAAAAATACACAGCAAAT-----CACAAAAACATAATAGTACAACCTTAAC---  
-----GAGTCTGTAGAA-----ATTTATTGTATCAGACCTAACAACAATACAAGAAAA-----  
-AGTGTACATATA-----GGACCAGGACAAGCA---TTC-----TATGCAACAGGAGAC-----  
-----ATAATAGGGGACATA-----AGACAAGCACACTGT---AATATCAGTGAAGAA---  
AAGTGGAATAGAACTTTAAGCCAGGTAGCCACACGATTAAGA-----GAATACTTT-----  
-----AATAAAACAATAATCTTTACT-----  
AGCCACTCAGGGGGGGATTTAGAAAGTTGCA---ACACATAGTTTTAATTGTAGAGGAGAA---  
TTTAAACAGCTCCAGGCGAGAGTCCCTGGCTGTGGAAAGATACCTAAAGGATCAACAGCTCCTAGGAATTTGGG  
GCTGCTCTGGAAGAACTCATCTGCACCACTAATGTGCCTTGGAATTCTAGTTGGAGT-----  
-----AATAAATCTCAGAGTGAGATATGG-----GAA-----  
AATATGACCTGGTTGCAATGG---GATAAAGAAATTAGCAATTACACAGACATAATATAT---  
AAGCTAATTGAAGACTCGCAACTCCAACAGGAA-----  
-----  
AAGAATGAACAAGACTTATTGGCATTGGACAAGTGGGCAAGCCTGTGGAATTGGTTTGACATATCAAAGTGGT  
TGTGGTATATAAAAAATATTTATAATAATAGTAGGAGGCTTAATAGGATTAAGAATAATTTTTTGCT---  
ATAGTAGCTGTAATA-----AATAGAGTTAGGCAGGGATATTCACCT-----  
TTGTCATTTGCTATTAATTTGTTGGATACCATAGCAATAGCAGTAGCTGGC---  
TGGACAGATAGGGTTATAGAAATAGGACAAAGATTTTGTAGAGCT-----  
-----ATTCTCAACATT-----CCTAGAAGAATCAGACAAGGCCTCGAAAGGGCTTTGTTA---TAA  
>AF361872  
GCT---GCA-----  
GAAAACTTGTGGGTTACTGTCTACTATGGGGTACCTGTGTGG---AAAGATGCAAAG---  
ACCACCTTATTTTGTGCATCAGATGCTAAAGCATATGAGACAGAA---AAGCATAAT-----  
-----GTTTGGGCTACA---CATGCCTGTGTACCCACAGAC---  
CCCAACCCACAAGAAATACATTTGGAC-----AATGTGACAGAAGAGTTTAAAC-----  
-----ATGTGGAAAAATGACATGGTAGAGCAGATGCATACAGATATA---  
ATCAGTCTATGGGACCAAAGCCTA---AAGCCATGTGTAAAGTTA---  
ACCCCTCTCTGCGTTACTTTACATTGTAAACGATGTTAAGGTTAACAGC-----  
-----  
-----ACGGGGGAGGACAAGGAAATGACA---  
ATCTGCACTTACAATGTAACCACAGAGATAAGG-----  
GACAAAAAGAGCAAGTATATTCCTG---TTTTATAGACTTGATGTAGTACAAATTAATGAAAGTCAA---  
-----  
-----  
GGTAGCAGTAGTAACAATAAGTATAGATTAATAAATTGTAATACCTCAGCCATGACACAG---  
GCTTGCCCAAAGGTATCCTTTGAGCCAATCCCATACATTATTGTGCCCCAGCTGGTTTTGCGATCCTCAAGT  
GTAAG---GATGAAGAGTTCAGT-----GGAACAGGGCCGTGCAAGAAT-----  
-GTCAGC---ACAGTACAATGCACACATGGAATCAAGCCAGTAGTGTCAACT---  
CAACTGCTGTTAAATGGCAGTCTAGCAGAAAATCAG-----  
ATAAAAAATTAGATCTGAAAAATACAAACAAT-----GCCAAAAACATAATAGTACAATTTGTC---  
-----AATCCTGTGCCA-----ATTATTTGTATCAGACCTAACAACAATACAAGAAAG---  
-AGTATACGTATA-----GGACCAGGGCAAAACA---TTT-----TATGCAACAGGTGAC-----  
-----ATAATAGGGGATATA-----AGACAAGCCTATTGT---AATGTCAGTAAACA---

GAGTGGAATAAACTTTACATCAGGTAGCTACACGATTAGGA-----CAATACTTTAAT----  
-----AACAAAACAATAATATTTACT-----  
AACTCCTCAGGAGGAGATCTAGAAATCACA---ACACATAGTTTTTAATTGTGGAGGAGAA---  
TTTAAACAGCTCCAGGCAAGAGTCCTGGCTGTGGAAAGATACCTAAGGGATCAACAGCTCCTAGGAATTTGGG  
GCTGCTCTGGAAGAACTCATCTGCCCACTAATGTGCCCTGGAAGCTCTAGTTGGAGT-----  
-----AATAAATCTCAGAGTGAGATATGG-----GAC-----  
AACATGACCTGGCTGCAATGG---GATAGAGAAATTAGCAATTACACAGAAATGATATAT---  
AAACTAATTGAAGAATCGCAGAACCAGCAGGAA-----  
-----  
AAGAATGAACAAGACTTATTGGCATTGGACAAGTGGGCAAATCTGTGGAATTGGTTTGACATATCAAAATGGC  
TGTGGTATATAAGAATATTTATAATGATAGTAGGAGGCTTAATAGGATTAAGAATAGTTTTTTGCT---  
GTGCTTTCTATAATA-----AATAGAGTTAGGCAGGGATACTCACCT-----  
TTGTCGTTTCGCTATTAATTTGATTGATACCATAGCAATAGTAGTAGCTGGC---  
TGGACAGATAGGGTTATAGAGATAGGACAAGGGATTGGTAGAGCT-----  
-----ATTCTCCACATA-----CCTAGAAGAATCAGACAGGGCTTAGAAAGAGCTTTGCAA---TAA  
>AF361873  
GCT---GCA-----  
AATAATTTGTGGGTTACTGTTTACTATGGGGTACCTGTGTGG---AGAGATGCAGAG---  
ACCACCTCTTTTGTGCATCAGATGCTAAAGCATATAAGACAGAA---AGGCATAAT-----  
-----GTCTGGGCTACG---CATGCCTGTGTACCCACAGAC---  
CCCAACCCACAAGAAATACATTTGAAA-----AATGTGACAGAAAACCTTTAAC-----  
-----ATGTGGAAAAATAACATGGTAGAACAAATGCATACAGATATA---  
ATCAGTCTATGGGATGAAAGCCTA---AAGCCATGTGTAAAGTTA---  
ACCCCTCTCTGTGTTACTTTAACTTGCTCTAATGCCAACTTTACTAATGTCAAC-----  
-----  
-----GTTAGCACCCTGACATGCAAGAAGTAAAA---  
AACTGCTCTTACAATATAACCACAGAATTAAGG-----  
GATAAGAAACAGCAAGTATATTCACCTC---TTTTATAGACTTGATATAGTACAACCTGAATGAAAATAAGAAG-  
-----  
-----  
AGTAGTAGTCAGAATAATAGTCAATATAGATTAATAAATTGTAATACCTCAGCCATTACACAG---  
GCTTGTCCAAAGGTATCCTTTGAGCCAATTCCCATACATTATTGTGCTCCAGCTGGTTTTGCGATTCTAAAGT  
GTAAG---GATAAAGAGTTCAAT-----GGAACAGGGCCATGCAAGAAT-----  
-GTCAGC---ACAGTACAATGCACACATGGAATCAAGCCAGTAGCATCAACT---  
CAACTGCTGTTAATGGCAGTCTAGCAGAAAGCAAG-----  
ACAATGATTAGATCTGAAAATATCACAAACAAT-----ATAAAAAACATAATAGTACAGCTCGCC---  
-----AACCCTGTAAAA-----ATTAATTGTACCAGACCTAACAACAATACAAGGAAA---  
-AGTGTACATATA-----GGACCAGGACAAGCA---TTC-----TATGCAACAGGTGCC-----  
-----ATAATAGGGGATATA-----AGACAAGCATATTGT---AATGTTAGTGAAGTA---  
GAATGGAATAAACTTTGCATGAGGTAGTCAAACAATTAAGA-----ACATACTTTAGG---  
-----AATAAAACAATAATCTTTGAC-----  
AAATCAGCAGGAGGGGATCCAGAAATTACA---ACGCATACTTTTAATTGTGGGGGAGAA---  
TTTAAACAGCTCCAGGCAAGAGTCCTGGCTGTGGAAAGATACCTAAGGGATCAACAGCTCCTAGGAATTTGGG  
GCTGCTCTGGAAGACTCATCTGCACCACTAATGTACCCTGGAAGCTCTACTTGGAGT-----  
-----AATAAATCCTATCATGACATATGG-----GAT-----  
AACATGACCTGGCTGCAATGG---GATAAAGAAATTAGCAATTACACACAGATAATATAT---  
GATCTAATTGAAGAATCGCAGAACCAGCAGGAA-----  
-----  
AAGAATGAACAAGACCTATTGGCATTGGACAAGTGGGCAAATCTGTGGAAGTGGTTTGACATAACAACTGGC  
TGTGGTATATAAAAAATATTTATAATGATAGTAGGAGGCTTAATAGGATTAAGAATAGTTTTTTGCA---  
GTGCTTTCTATAATA-----AATAGAGTCAGGCAGGGATACTCACCT-----  
TTGTCATTTGCTATTAATTTGCTTGATACCATAGCAATAGCAGTAGCTGGC---  
TGGACAGATAGGGTTATAGAAATAGGACAAAGATTTTGTAGAGCT-----  
-----ATTTACAACATA-----CCTAGAAGAATCAGACAGGGCTTTGAAAGGGCTTTGCTA---TAA  
>HM027846  
GCT---GCA-----  
AACAACTTGTGGGTTACTGTTTACTATGGGGTACCTGTATGG---AAAGATGCAGAA---  
ACCACCTTATTTTGTGCATCAGATGCGAAAGCATATGATACAGAA---GTGCATAAT-----  
-----GTTTGGGCTACA---CATGCCTGTGTACCTACAGAC---  
CCCAACCCACAAGAAATGAAGTTGGAA-----AATGTGACAGACAAGTTTAAC-----

-----ATGTGGAAAAATAACATGGTAGATCAAATGCATACCGACATA---  
 ATCAGTCTGTGGGACCAAAGTCTA---AAGCCATGTGTACAGTTA---  
 ACCCCTCTCTGCGTTACTTTAAATTGCTCTAATGTCAACACCACCGAGTCCAAAAGCTCT-----  
 -----  
 -----CCTACCATCAAGCCCACTGTCTTCTCGTCTTAAACAAAA---  
 AACTGCTCTTTCAATATGACCACAGAATTAAGG-----  
 GATAAAAAACAGCAAGTATATTCACCT--TTTTATAAACTGGATGTAGTACCAATTAATGGCAAC-----  
 -----  
 -----  
 GACAGCGATGCCAATGGTCACTATAGATTAGTGAATTGTAATACCTCAGCCATTACACAA---  
 ACTTGTCCAAAAGTAACCTTTGAGCCAATTCCCATACATTATTGTGCCCCAGCTGGTTTTGCAATTTTAAAGT  
 GTAAT---GATAAGACGTTCAAT-----GGAACAGGGGACATGCAAAAAT-----  
 -GTCAGC---ATAGTACAATGCACACATGGAATCAAGCCAGTAGTATCAACT---  
 CAACTACTGTTTAAATGGCAGTCTAGCAGAAGATGAG-----  
 GTAATGATTAGATCTGAAAAATATCACAGACAAT-----ATCAAAAACATAATAGTACAATTTAAC----  
 -----AGGTCTGTAGAA-----ATTAATTGTACCAGACCTAACAAACAATACAAGAAAA-----  
 -AGTGTACGTATA-----GGGCCAGGACAAGCA---TTC-----TATGCAACAGGTGAC-----  
 -----ATAATAGGGAATATA-----AGACAAGCACATTGT---ACTGTCAATAGGACA---  
 GAATGGAATGAAGCTTTGAAAGAGGTAGCCCCAAAATTAAGT-----ACACTCTTTGTG----  
 -----AACAAAACAATAAACTTTACT-----  
 AGCCCCCTCAGGAGGGGATGTAGAACTAATA--ACACATAGTTTTAATTGTAGAGGAGAG---  
 TTTAAACAGCTCCAGGCAAGAGTCCTGGCTGTGGAAAGATACCTAAAGGATCAACAGCTCCTAGGACTTTGGG  
 GCTGCTCTGGAAGAACTCATCTGCACCACTACTGTGCCCTGGAAGCTCTAGTTGGAGT-----  
 -----AATAAATCCAGAGTGAGATATGG-----GAT-----  
 AACATGACCTGGATGCAATGG---GATAGAGAAATTAGCAATTACACACAGGAAATATAT---  
 AGTCTAATTGAAAAATCGCAGAACCAGCAGGAA-----  
 -----  
 AAGAATGAACAAGACTTATTGGCATTGGACAAGTGGACAAATCTGTGGACTTGGTTTGACATATCAAAGTGGC  
 TGTGGTATATAAAAAATCTTTATAATGATAGTGGGAGGCTTAATAGGATTAAGAATAGTTTTTTGCT---  
 GTGCTTTCTATAATA-----AATAGAGTTAGGCAGGGATACTCACCT-----  
 TTGTCATTGCTATTAGTTTGCTTGATACCATAGCAATAGTAGTAGCTGGG---  
 TGGACAGATAGAGTTATAGAAATAGGACAAAGAATCTGTAGAGCT-----  
 -----TTTCTCCACATA-----CCTAGAAGAATTAGACAGGGCTTCGAAAGGGCTTTGCTA--TAA  
 >JX877522  
 GCT---GCA-----  
 GACAAATTGTGGGTTACTGTCTACTATGGGGTACCTGTGTGG--AGAGATGCAGAA---  
 ACCACCTTATTTTGTGCATCTGATGCAAAAGCATATGAAAGAGAA--GTGCATAAT-----  
 -----ATCTGGGCTACG---CATGCCTGTGTACCTACAGAC---  
 CCCAACCCACAAGAAATACATTTGAAA-----AATGTGACAGAAGAATTTAAC-----  
 -----ATGTGGAAAAATAACATGGTGAACAGATGCATACAGATATA---  
 ATCAGTCTATGGGACCAAAGCCTA--AAGCCATGTGTAAAGTTA---  
 ACCCCTCTCTGCGTTACTTTAAATTGTAGTGATGATGTTAGGGTTAGTAACCCTAATGGTACTGCCAGCAGCT  
 CTAATGTTAGT-----  
 -----AACCAAAATAGTAACCAAAATGACAGTATCACCGGGGACATGAAA---  
 AACTGCTCTTTCAATGCGACCACAGAATTATGG-----  
 GATAAGAAACAGAAAGTATATTCACCT--TTTTATAAGATGGATATAATATCAATTGAGAAC-----  
 -----  
 -----  
 AACATAATGACAATAATACACAGTATAGATTAATAAATTGTAATACTTCAACCATTACACAG---  
 GCTTGTCCAAAGGTAACCTTTGAGCCAATTCCATATACATTATTGTGCCCCGCTGGTTTTGCGATCTTAAAGT  
 GTAAT---GATGAGGAGTTCAAT-----GGAACAGGGGTATGCAAGAAT-----  
 -GTCAGC---ACAGTACAATGCACACATGGAATCAAGCCAGTAGTGTCAACT---  
 CAACTGCTGCTAAATGGAAGTCTAGCAGAGGGGAAAG-----  
 ATAATGATTAGATCTGAAAAATATCAAAACAAT-----GCCAAAACATACTAGTACAACCTTAAC----  
 -----GAGACTGTAACC-----ATTAATTGTACCAGACCTGGCAACAATACAAGAAAG-----  
 -AGTGTACGTATA-----GGACCAGGCCAAGCA---TTC-----CTTACAACAGGTGAG-----  
 -----ATAATAGGGGATCCA-----AGAAAAGCACATTGT---AATGTCAGTAGAGCA---  
 GATTGGAATAAACTTTTGGCAAGGGTAGCCCCAACAATTAAGA-----ACACACTTTAAA----  
 -----AACAAACACAATAATCTTTAAT-----  
 AGCTCCACAGGAGGGGATCCAGAAATAACA--ACACATAGTTTTAATTGTGGAGGAGAA---

TTTAAACAGCTCCAGGCAAGAGTCCTGGCTGTGGAAAGATACCTAAAGGATCAACAGCTCCTAGGAATTTGGG  
 GCTGCTCTGGAAGAACTCATCTGCACCACTAATGTGCCTTGGAAACGATAGTTGGAGT-----  
 -----AATAAAACCCAAAATGAGATATGG-----GAC-----  
 AACATGACCTGGCTGCAATGG---GATAAAGAAATTAACAAATTACACACAGGTAATATAT---  
 AATTTACTTGAAGAATCGCAGAACCAGCAGGAC-----  
 -----  
 AAGAATGAACAAGACTTGTTAGCATTGGACAAGTGGGCAAGCCTGTGGACTTGGTTTGACATATCAAACCTGGC  
 TGTGGTATATAAGAATATTTCTAATGGTAGTAGGAGGCTTAATAGGATTAAGAATAGTTTTTTGCT---  
 GTGCTTGCTATAATA-----AGTAGAGTTAGGCAGGGATACTCACCC-----  
 TTGTCGTTTCGCTATTAATTTGCTTGATACCATAGCAATAGTAGTGGCTGGG---  
 TGGACAGACAGGATCATAGAAGTAGGACTAGGGCTTTGTAGAGCT-----  
 -----ATTTTACACATA-----CCTAGAAGAATCAGACAAGGCTTAGAAAAGAGCATTGCTA---TAA  
 >HM215272  
 GCT---GCA-----  
 GGAAACTTGTGGGTTACAGTCTACTATGGGGTACCTGTGTGG--AAAGATGCAGAG---  
 ACCACCTTATTTTGTGCATCAGATGCTAAAGCATATAGTACAGAA--AAGCATAAT-----  
 -----ATCTGGGCTACA---CATGCCTGTGTACCCACAGAC---  
 CCCAACCCACAAGAAATAGATTTGGAA-----AATGTGACAGAAAAGTTTAAAC-----  
 -----ATGTGGAAAAATGGCATGGTAGAGCAGATGCATACAGATATA---  
 ATTAGTATATGGGACCAAAGCCTA---CAGCCATGTGTAAAGTTA---  
 ACCCCTCTCTGTGTTACTTTAATTTGTATCGATATTGCCAATGACACAAGCCGC-----  
 -----  
 -----AATGTCACTGTTGAAATGAAAAGAGAAATACAA---  
 AACTGCTCTTACAATGTGACCACAGAAGTAAGA-----  
 GATAAAAAACAGAAAGTATATTCACTT---TTTTATAAAGTTGATATAGTGCAAATTAGTAAT-----  
 -----  
 -----  
 AATAGCAGTGAGTATAGATTAATAAATTGTAATACCTCAGTCATTAAACAA---  
 GCTTGTCCAAAGGTAACCTTTGAGCCAATTCCCATACATTATTGTGCTCCAGCTGGTTATGCGATCCTAAAGT  
 GTAAG---GATGATAAGTTCAAT-----GGAACAGGGCTATGCAAAAAT-----  
 -GTCAGC---ACAGTACAATGCACACATGGAATCAAACCAGTAGTGTCAACC---  
 CAACTGCTGTTAAATGGCAGCCTAGCAGAAGAAGAG-----  
 GTAATCATTAGATCTGAAAATATTAACAACAAT-----GCCAAAACGATAATAGTGCAACTATAC---  
 -----CAGCCTGTAAAA-----ATTAATTGTACTAGACCTGGCAATAATACAAGGAAA-----  
 -AGTGTACATATA-----GGAACAGGACAAGCA---TAC-----TTTGCAACAGGTGAC-----  
 -----ATAATAGGGGATATA-----AGACAAGCATATTGT---AAGGTTAATAAATCA---  
 GAATGGAATAACACTTTACAACAGGTAGTTGCACAATTAAGA-----AAACATTGG-----  
 -----AACAAAACCTATAATCTTTAAT-----  
 AGCTCCTCAGGAGGAGATTTAGAAATTACA--ACACATCGCTTTAATTGTGGAGGAGAA---  
 TTTAAACAGCTCCAGGCAAGAATCCTGGCTGTGGAAAATTACCTAAAGGACCAACAGCTCCTAGGAATTTGGG  
 GCTGCTCTGGAAGACTCATCTGCACCACTAATGTGAAATGGAACCTACTTGGAGT-----  
 -----AATAAATCCAAGAGTGAGATATGG-----GAT-----  
 AAAATGACCTGGCTGGAATGG---GATAGAGAAATTAGCAATTACACAGACATAATATAT---  
 CAGCTAATTGAAGAATCGCAAAACCAGCAGGAA-----  
 -----  
 AAGAATGAACAAGATTTATTGGCATTGGACAAGTGGGCAAATCTATGGAATTGGTTTGACATATCAAATTGGC  
 TGTGGTATATAAAAATATTTATAATGATAGTAGGAGGCTTAATAGGATTAAGAATAGTTTTTTGCA---  
 GTGCTCTCTGTAATA-----AATAGAGTTAGGCAGGGATACTCACCT-----  
 CTGTCGTTTATTATCAACTTATATGATACCATAGCAATAGCAGTAGCTGGC---  
 TGGACAGATAGGATTATAGAAATAGGACAAAGAATTGGTAGAGCT-----  
 -----ATTCTCAACATA-----CCAAGGAGAATCAGGCAGGGTTTTTGAAAGGGCTTTACTA---TAA  
 >HM027824  
 GCT---ACA-----  
 AACAACTTGTGGGTTACTGTCTATTATGGGGTACCTGTATGG---AAAGAAGCAGAG---  
 ACCACCTTATTTTGTGCATCAGATGCGAAAGCATATGATAAAGAA---GTGCATAAT-----  
 -----GTCTGGGCTACG---CATGCCTGTGTACCTACAGAC---  
 CCTAACCCACAGGAAATAAAATTAGAA-----AATGTGACAGAAAATTTTAAAC-----  
 -----ATGTGGAACAATAGCATGGTAGAGCAAATGCATACAGATATA---  
 ATCAGTCTATGGGACCAAAGCCTA---AAGCCATGTGTAAAGTTA---  
 ACCCCTCTCTGTGTTACTTTAGAGTGCTCTAATGTCAACCAACAAGGGCACCAACAGCACTAACAGT-----

-----  
-----AGCCTCAATACCACCTTGCCAGTGACATGGTAGGAGAAATAAAA---  
AACTGCTCTTTCAATATGACCACAGAATTAAGG-----  
GATAAAAATCAGAAAGTACATTCACCT--TTTATAAACTAGATATAGTATCAATTAATGGC-----  
-----  
-----  
AGCAATAGTAGTTATAGATTAGTGAATTGTAATACCTCAACCATTAAACAG---  
GCTTGTCCAAAAGTAACCTTTGAGCCAATTCCCATACATTATTGTGCCCCAGCTGGTTTTGCGATTCTAAAGT  
GTGGT---GATACAGGGTTCAAT-----GGGACAGGATGGTGCCGCAAT-----  
-GTCAGC---ACAGTACAATGCACACATGGAATCAAGCCAGTAGTATCAACT---  
CAACTGCTGTTAAATGGCAGTCTAGCAGAAGAACAG-----  
GTAGTGATTAGATCTGAAAAATACACAAACAAT-----GCCAAAACATAATAGTACAATTTGCC----  
-----AGGCCTGTACAA-----ATTAATTGCACCAGACCTAACAACAATACAAGAAGA-----  
-GGTATACGTATA-----GGACCAGGACAATCA--TTC-----TATGCAACAGATGAC-----  
-----ATAATAGGGGATATA-----AGGCAAGCACATTGT---AATGTCAGTAGGACA---  
GAATGGAATAAACTCTGCAAGAGGTAGCCAGTCAATTAAGT-----ACACTCTTTGGG----  
-----AACAGAATAATAAACTTTACT-----  
AGCCCATCAGGAGGAGATCTAGAAATAACA--ACACATAGTTTTAATTGTAGAGGAGAA---  
TTTAAACAGCTCCAGGCAAGAGTCCTGGCTGTGGAAAGATACCTAAAGGATCAACAGCTCCTAGGAATTTGGG  
GTTGCTCTGGAAACTCATCTGCACCACTAATGTGCCCTGGAACCTCTAGTTGGAGT-----  
-----AAGAATAAATCCCTGAGTGAGATATGG-----GAC-----  
AACATGACCTGGATGGACTGG---GATAAAGAAATTGGCCAGTACACACAGGTCATATAT---  
AATCTACTTGAGAAATCGCAGAACCAACAGGAA-----  
-----  
ATGAATGAACAAGACTTATTGGCATTGGACAAGTGGGCAAGCCTGTGGAATTGGTTTGACATATCAAACCTGGC  
TGTGGTATATAAAAATATTTATAATGATAGTAGGAGGCTTAATAGGATTAAGAATAGTTTTTTGCT---  
GTGCTTTCTATAATA-----AATAGAGTTAGGCAGGGATACTCACCT-----  
TTATCATTCGCTACTAGTTTGCTTGATACCATAGCAGTAGTAGTAGCTGGG---  
TGGACAGACAGGGTTATAGAAATAGGACAAAGACTTGGTAGAGCT-----  
-----TTTCTTCACATA-----CCTAGAAGAATTAGACAGGGCTTTGAAAGGGCTTTGCTA--TAA  
>JX236669  
GCT---ACA-----  
GAAAACTTGTGGGTGACTGTCTACTATGGGGTACCTGTGTGG--AGAGATGCAGAG---  
ACCACCTTATTTTGTGCATCAGATGCTAAAGCATACGACACAGAA--ATGCATAAT-----  
-----GTCTGGGCTACA--CATGCCTGTGTGCCACAGAC---  
CCCAACCCACAAGAAATAGATTTGGAA-----AATGTGACAGAAAAGTTTAAC-----  
-----ATGTGGAAAAATAATATGGTAGAGCAGATGCATACAGATATA--  
ATCAGTCTATGGGACCAAAGCCTA--AAGCCATGTGTAAAATTA--  
ACCCCTCTCTGTGTACTTTAACTGTACTGCCATAACAAATGACACGAGAGGAAATGAAACA-----  
-----  
-----GGAATAAACAGGACAGTAGAAACAACTGAAATGACA---  
AACTGCTCTTTCAATATGACCACAGAATTAAGG-----  
GATAGGAAAAAGAAAGTAAATGCACCT--TTTATAAACTTGATATAGTACAAATTGGTGAAAAC-----  
-----  
-----  
AGTAGTAGTCAGTATAGATTAATAAATTGTAATACCTCAGTCATTACACAA---  
GCTTGTCCAAAGGTAACCTTTGAGCCAATTCCCTATACATTATTGTGCCCCAGCTGGTTTTGCGATCCTAAAGT  
GTAAG---GATAAGGAGTTCAAT-----GGAACAGGGACATGCAGGAAT-----  
-GTCAGC---TCAGTACAATGCACACATGGAATCAAGCCAGTAGTATCAACT---  
CAACTGCTGTTAAATGGCAGTCTGGCAGAAGGACAG-----  
GTAAAAATTAGATCTGAAAAATATTCAGACAAT-----GCTAAAACCATAATAGTACAACCTTAAT----  
-----GAGTCTGTACCA-----ATTAATTGTACCAGACCTAACAACAATACAAGACGA-----  
-GGTATACATTTA-----GGACCAGGACAGACA--TTC-----TTTGCAACA--GAC-----  
-----ATAATAGGGGATATA-----AGGCAAGCACATTGT---AATGTCAGTGAGTCA---  
AAATGGAATAAAGCTTTACAAGAGGTAGTTAAACAATTAAGA-----CAACACTGG-----  
-----AACAAAACAATAATCTTTAAA-----  
AGCTCCTCAGGAGGGGATCTAGAAATTACA--ACACATAGTTTTAATTGTGGAGGAGAA---  
TTTAAACAGCTCCAGGCAAGAGTCCTGGCTGTGGAAAGATACCTAAAGGATCAACAGCTCCTAGGAATTTGGG  
GCTGCTCTGGAAACTCATCTGCCCCACTACTGTGCCCTGGAACCTCTAGTTGGAGT-----  
-----AATAAATCTCAGAATGAGATATGG-----GAT-----

AACATGACCTGGTTGCAATGG---GATAAAGAAATTAGCAATTACACACAATTAATATAT---  
AGCCTAATTGAAGAATCAGACAACCAGCAGGAA-----  
-----  
AAGAATGAACAAGAGTTATTGGCATTGGACAAGTGGGCAAGTCTATGGAATTGGTTTGACATATCAAAATGGC  
TGTGGTATATAAGGATATTTATAATGATAGTAGGAGGCTTAATAGGATTAAGAATAGTTTTTACT---  
GTGCTTTCTATAATA-----AATAGAGTTAGGCAGGGATACTCACCT-----  
TTGTCGTTTGCTCTTAATTTGCTTGACACTATAGCAATAGCAGTAGCTGGC---  
TGGACAGATAGGGTCATAGAAATAGGACAAAGAATTTGCAGAGCT-----  
-----ATTGCAACATA-----CCTAGAAGAATTAGACAGGGCGCCGAAAGGGCTTTTCTA---TAA  
>JX236671  
ACT---GCA-----  
GGAAACTTGTGGGTTACTGTCTATTATGGGGTGCCTGTGTGG--AAAGATGCAGAT---  
ACCACCTTATTTTGTGCATCAGATGCCAAAGCATACGAGACAGAA--AAGCATAAT-----  
-----GTCTGGGCTACA---CATGCCTGTGTGCCACAGAC---  
CCCAACCCACAAGAAACATATTTGGAA-----AATGTGACAGAAGAGTTTAAAC-----  
-----ATGTGGAAAAATAACATGGTAGAGCAGATGCATACAGATATA---  
ATCAGCTTATGGGATCAAAGCCTA--AAGCCATGTGTAAAGTTA---  
ACCCCTCTCTGCGTTACTTTACATTGTACCGATGTCAATGTCACCAACACCAATGTCACCAACACCAATGGC-  
-----  
-----ACCAGCACCAGCAGCTCCAAGGTCACCATCAACGACAGGGAAGAAATAAAA---  
AACTGCTCTTTCAATGTAACCACAGAATTAAGG-----  
GATAAGGAAAAGAAAGTATATTCATT--TTTTATAAGCTTGATGTAGTAAAAATAGATAAG-----  
-----  
-----  
AATAAGAGTGACTATATATTAATAAATTGTAATACCTCAACCATTACACAG---  
GCTTGCCCAAAGGTATCCTTTGAACCAATTCCCATACATTATTGTGCCCCAGCTGGTTTTGCGATCCTAAAGT  
GTAGA---GATATAGACTTCAAT-----GGAACAGGGCCATGCAAGAAT-----  
-GTTAGC---ACAGTCCAATGCACACATGGAATCAAGCCAGTAGTGTCAACT---  
CAACTGCTGTAAATGGCAGTCTAGCAGAAGGAGGG-----  
ATAAGAATTAGATTTGAAAATATCACAAACAAT-----GCCAAACTATAATAGTACAATTAAAC---  
-----AGTTCTGTGCCA-----ATTAATTGTACCAGACCTAATAACAATACAAGGCAA-----  
-AGTGTGCGTATA-----GGACCAGGACAATCA--TTC-----TTTGCAACAGGGGAG-----  
-----ATAATAGGGGATATA-----AGACAAGCACATTGT--AATGTCTCTAAATCA---  
GACTGGCATAAGACTTTACAACAGGTGGCTGAACAATTAGAA-----AAACACTTTAAG---  
-----AACAAAACAATAATATTTGAT-----  
CAACCCTCAGGGGGGGATCTAGAAATCACA--ACACATAGTTTTAATTGTGGAGGAGAA---  
TTTAAACAGCTCCAGGCAAGAGTCCCTGGCTGTGGAAAGATACCTAAGGGATCAACAGCTCCTAGGAATTTGGG  
GCTGCTCTGGAAGAACTCATCTGCCCCACTAATGTGCCCTGGAAGTCTAGTTGGAGT-----  
-----AATAAAACTATGAGTGAATATGG-----GAC-----  
AACATGACCTGGCTGCAATGG--GATAAAGAAATTAGCAATTACACAAACATAATATAT---  
AATCTAATTGAAGAATCGCAGAACCAGCAAGAA-----  
-----  
AAGAATGAACAAGACTTATTGGCATTGGACAATGGGCAAGTCTTTGGAATTGGTTTGACATATCAAAGTGGC  
TGTGGTATATAAAAAATATTTATAATGATAGTAGGAGGCTTAATAGGATTAAGAATAATTTTTTGCT---  
GTGTTTTCTATAATA-----AATAGAGTTAGGCAGGGATACTCACCT-----  
CTGTCGTTTGCTATTAGCTTGTGTTGATACCCTAGCAATAGTAGTAGCTGGC---  
TGGACAGATAGAGTTATAGAAATAGGACAAAGACTTGGTAGAGGT-----  
-----TTTCTTCACATA-----CCTAGAAGAATTAGACAAGGCTTAGAAAGGGTTTTTGCTA---TAA  
>JX236676  
GCT---GCA-----  
GACAACTTGTGGGTTACTGTCTACTATGGGGTACCTGTGTGG--AGAGACGCAGAA---  
ACCACCTTATTTTGTGCATCAGATGCAAAAGCATATGAAAAAGAA--GTGCATAAT-----  
-----ATCTGGGCTACG---CATGCCTGTGTACCTACAGAC---  
CCCAACCCACAAGAAATACATTTGGAA-----AATGTGACAGAAGAGTTTAAAC-----  
-----ATGTGGAAAAATAACATGGTAGAGCAGATGCATACAGATATA---  
ATCAGTCTATGGGACCAAAGCCTA--AAGCCATGTGTAAAGTTA---  
ACCCCTCTCTGCGTTACTTTAAATTGTAGCCAGTATGTCAGTAGCCATGTCAATAACCATAATAAC-----  
-----AGTAGCCATAATGTCAGTAGCCATAGTGGCAATATCACCAGTGACATGAAA---  
ATCTGCTCTTTCAATACAACCTACAGAAGTAAGG-----

GATAAGAAACAGAAAGTATATTTCACTT---TTTTATAAGTTGGATGTAGTACCAATCAGTAAT-----  
-----  
-----  
GACAGTAGTCAGTATAGATTAATAAATTGTAATACCTCAGCCATTACACAG---  
GCTTGTCCAAAGGTAACCTTTGAGCCAATTCTTATACATTATTGTGCCCCTGCTGGTTTTGCGATTTTAAAGT  
GTAAG---GATAAGGAGTTCAAT-----GGAACAGGGCTATGCAAGAAT-----  
-GTCAGC---ACAGTACAATGCACACATGGAATCAAGCCAGTAGTATCAACT---  
CAACTGCTGTAAATGGCAGTCTAGCAGAAGGAACG-----  
GTAAGGATTAGATCTGAAAATATCACAACAAT-----GCCAAAACATACTAGTACAACCTTACC----  
-----AGGCCTGTAAAC-----ATTAATTGTACCAGACCTAACAACAATACAAGAAAA-----  
-AGTGTACATATA-----GGACCAGGACAAGCA---TTC-----TATGCAATAGGAGCT-----  
-----ATAATAGGAAATATA-----AGACAAGCACATTGT---AATGTCAGTAAAGCA---  
AGTTGGAATAGCGCTTTGCAAGAGGTAGCCCAACAGTTAAAA-----ACACACTTTGGG----  
-----AACAAAACAATAATCTTTGCT-----  
AACTCCACAGGGGGGATCCAGAAATAACA---ACACATAGTTTTAATTGTGGAGGAGAA---  
TTTAAACAGCTCCAGGCAAGAGTCCTGGCTGTGGAAAGATACCTAAGAGATCAACAGCTCCTAGGAATTTGGG  
GCTGCTCTGGAAACTCATCTGCACCCTAATGTGCCCTGGAACCTCTAGTTGGAGT-----  
-----AATAAACTCAGAGTGAGATATGG-----GAC-----  
AACATGACCTGGATGCAATGG---GATAAAGAAATTAACAATTACACACAGTTAATATAT---  
GGTCTACTTGAAGAGTCGCAGAACCAGCAGGAA-----  
-----  
AAGAATGAACAAGACTTGTGGCATTGGACAAGTGGGCAGATCTGTGGAATTGGTTTGACATATCAAAATGGC  
TGTGGTATATAAAAATATTTATAATGATAGTAGCAGGCTTAATAGGATTAAGAATAGTTTTTTGCT---  
GTGCTTGCTATAATA-----AATAGAGTTAGGCAGGGATACTCACCC-----  
TTGTCGTTGCTATTAACTTGCTTGATACCATAGCAATAGTAGTAGCTGGG---  
TGGACAGACAGGGTCATAGAAGTAGGACAAAGACTTTGTAGAGTT-----  
-----ATTTTACACATA-----CCTAGAAGAATCAGACAGGGCTTAGAAAGGGCTTTGCTA---TAA  
>KF716478  
GCT---ACA-----  
GACAAATTGTGGGTTACTGTCTACTATGGGGTACCTGTATGG---AAAGACGCAGAG---  
ACCACCTTATTTTGTGCATCAGATGCCGAAAGCATATGAGAAAGAA---ATGCACAAT-----  
-----GTCTGGGCTACA---CATGCCTGTGTACCTACAGAC---  
CCCAACCCACAAGAAGTAGCTTTGGAA-----AATGTGACAGAAGAGTTTAAT-----  
-----ATGTGGAAAAATAACATGGTAGAACAGATGCAGACAGATATA---  
ATCAGTCTATGGGACCAAAGCCTA---AAGCCATGTGTAGAGTTA---  
ACCCCTCTCTGCGTCACTTTGGAGTGTAGCAATATCAACAGCACCAATAACACCGCCACC-----  
-----  
-----AATTTACCAATTTTCATGGGAGAAGACATAAAA---  
AACTGCTCTTTCAATATGACCACAGAATTAAGG-----  
GATAAGGAGAAGAAAGTATATTTCACTT---TTCTATAAAGTGGATATAACACCATTGGAAAAC-----  
-----  
-----  
AGCAACGAACTAAGTATAGGTTAATAAATTGTAATACCTCAGCCATTAAACAA---  
GCCTGTCCAAAGGTATCCTTTGAGCCAATTCCCATACATTTATTGTGCTCCAGCTGGTTTTGCGATCCTAAAGT  
GTAGA---GATGAGGAGTTCAAT-----GGAACAGGGCCATGCAAAAAT-----  
-GTCAGC---ACAGTACAATGCACACATGGAATCAAGCCAGTAGTATCAACT---  
CAACTACTATTAAATGGCAGTCTAGCAGAAAAGAAG-----  
GTAATGATTAGATCTGAAAATTTCAACAACAAT-----GCTAAAACATCATAGTACAATTTAAT---  
-----AAGTCAGTAGAA-----ATTAATTGTACCAGACCTAACAACAACACCAGAAAA-----  
-AGTGTACATATA-----GGACCAGGACGAGCA---TTC-----TATGCAACA---GAT-----  
-----ATAATAGGGGACATA-----AGATGGGCATATTGT---AATGTCAGTAGATCA---  
GAATGGAAGGAACTTTACAACAGGTAGTCAACAATTAGGA-----AACCATTGG-----  
-----AATAAAACAATACACTTTAAT-----  
AATTCTGCAGGAGGGGATTTAGAAATTACA---ACACATAGTTTTAATTGTGGAGGAGAA---  
TTTAAACAGCTCCGGGCAAGAGTCCTGGCTGTGGAAAGGTACCTAAAGGATCAACAGCTCCTAGGAATTTGGG  
GCTGCTCTGGAAACTCATCTGCCCCACTACTGTGCCCTGGAACCTCTAGTTGGAGT-----  
-----AATAAAAGTTACAGTGAGATATGG-----GAT-----  
AACATGACCTGGCTGCAGTGG---GATAAAGAAATTAGCAATTACACAGACCTAATATAT---  
GGGCTAATTGAAGAATCGCAAAACCAGCAGGAA-----  
-----

AAGAATGAAC TAGACTTATTAGCATTAACAAGTGGGCAGAGCTGTGGAATTGGTTTGACTTATCAAAC TGGC  
 TGTGGTATATAAGAATATTTATAATGATAGTAGGAGGCTTAATAGGATTAAGAATAGTTTTTTGCT---  
 GTGCTTTCTATAATA-----AATAGAGTTAGGCAGGGATACTCACCT-----  
 TTGTCTGTTTCGCTATTAGTTTGTCTTGATACCATAGCAATAGTAGTAGCTGGC---  
 TGGACAGATAGGGCTATAGAAATAGGACAAGGAATTGGTAGAGCT-----  
 -----ATCCTCAACATA-----CCTAGAAGAATCAGGCAGGGCTTAGAAAGGGCTTTGCTG---TAA  
 >KP109490  
 GCT---GTA-----  
 GAAGACTTGTGGGTTACTGTCTATTATGGGGTACCTGTGTGG---AAAGACGCAGAG---  
 ACCACCTTATTTTGTGCATCAGATGCTAAAGCATATGAGACAGAA---AAGCATAAT-----  
 -----GTCTGGGCTACA---CATGCCTGTGTACCCACAGAC---  
 CCCAGCCCACAAGAAATACCTTTGGAA-----AATGTGACAGAAGAGTTTAAAT-----  
 -----ATGTGGAAAAATAACATGGTAGAGCAGATGCATACAGATATA---  
 ATCAGTCTATGGGACCAAAGTCTA---AAGCCATGTGTAAAGTTA---  
 ACCCCGCTCTGCGTCACTTTAAATTGTAACAATATCAATGCCACGAGCAGCAATGCCACA-----  
 -----  
 -----GTCCCGGGCAATGACACAGCTAATAACAAGGAAGAAATAACA---  
 AACTGCTCTTTCAATATGACTACAGAAGTAAGG-----  
 GATAAGAAAAAGCAAGTACATTCACTT---TTTTATAAACTTGATGTAGTACAAATAGGAAAT-----  
 -----  
 -----  
 AGTAATAGTAGCGAGTATAGATTAATAAAATTGTAATACCTCAGTCATTACACAG---  
 GCGTGCCCAAAGGTAACTTTGAGCCAATTCCCATACATTACTGTGCTCCAGCTGGTTTTGCGATCCTAAAGT  
 GTAGG---GATGAACAGTTCAAT-----GGAACAGGGCTGTGCAAGAAT-----  
 -GTCAGC---ACAGTCCAATGCACACATGGAATCAAGCCAGTAGTATCAACT---  
 CAACTGCTGTTAAATGGCAGTCTAGCACAAAAAGAG-----  
 GTACAAATTAGATCTGAAAATATCACAAACAAT-----GCCAAAAATATAATAGTACAATTTGCC---  
 -----AAGCCTGTGGAA-----ATTAATTGTACCAGACCTAGTAATAATACAAGAAAA-----  
 -AGTATACATATA-----GGACCAGGACAAGCC---TTC-----TATGCAACAGATGCC-----  
 -----ATAATAGGGGATACA-----AGACAAGCACATTGT---AACGTCAGTAAAGAA---  
 AAATGGAATAAGACTTTAGAAGAAGTAGCTAAACAATTAAAG-----AACACTTT-----  
 -----AACAAAACAATAATATTTGCT-----  
 AACTCCGCAGGAGGGGATCTAGAAATCACA--ACACATAGTTTTTAATTGCAGAGGAGAA---  
 TTTAAACAGCTCCAGGCAAGAGTCCCTGGCTGTGGAAAGATTTCTAAAGGATCAACAGCTCCTAGGAATTTGGG  
 GCTGCTCTGGAAGAACTCATCTGCACCACTAATGTGCGTTGGAAGTCTAGTTGGAGT-----  
 -----AATAAAAGTCAAAGTGAATATGG-----GAC-----  
 AACATGACCTGGCTACAATGG---GATAAAGAAATTAACAATTACACAGAAATAATATAT---  
 AAAC TACTTGAAGAATCGCAAAATCAGCAGGAA-----  
 -----  
 AAGAATGAACAAGACTTATTGGCATTGGACCAATGGGCGAGTTTGTGGAGTTGGTTTGACATAACAAAATGGC  
 TGTGGTATATAAAAAATATTTATAATGATAGTAGGAGGCTTAATAGGATTAAGAATAGTTTTTTGCT---  
 GTGCTTTCTGTACTA-----AAGAGAGTTAGGCAGGGATACTCACCT-----  
 TTGTCAATTTGCTATTAGCTTGTGTGATACCTTAGCAATAGCAGTAGCTGGC---  
 TGGACAGATAGGGTTATAGAAATAGGACAAAGAATTGGTAGAGCT-----  
 -----TTTCTCCACATA-----CCTAGAAGAATTAGACAGGGCTTTGAAAGGGCTTTGCTA---TAA  
 >JF680921  
 ACT---GCA-----  
 GAAGACTTGTGGGTTACTGTCTACTATGGGGTACCTGTATGG---AAAGAAGCAAAT---  
 GCCACCTTATTTTGTGCATCTGATGCTAAAGCATATGATCAAGAA---GTGCATAAT-----  
 -----GTCTGGGCTACA---CATGCCTGTGTACCCACAGAC---  
 CCCAACCACACAAGAAATATATTTGCAA-----AATGTGACAGAAGATTTTAACT-----  
 -----ATGTGGAAAAATAACATGGTAGAACAGATGCATACAGATATA---  
 ATTAGTCTATGGGACCAAAGCTTA---AAGCCATGTGTACAATTA---  
 ACACCTCTCTGCGTTACTTTAGATTGTAGCCATACTATCTCCTATATTAACAACACCCATAATGGCACCAGAA  
 TC-----  
 -----AATGATACCACCATGGATAACGATAACCAGAAAAATACTAGAAGAAATGAAA---  
 AACTGCTCTTTCAATATGACCACAGAATTAAGA-----  
 GATAAGAAACAGAAAGTGTATTCACTT---  
 TTCTATAGACTTGATATAATAGAAATTGATAAAGATAAGAATAGCAGAGAGAATAAT-----  
 -----

AGTAGCAGTAATAGTAATAATAGTAGTTATAGATTAATAAAATTGTAATACCTCAGCCATTACACAA---  
 GCTTGTCCAAAGGTAACCTTTGAGCCAATTCCCATACATTATTGTGCCCCAGCTGGTTTTGCAATTTTAAAGT  
 GTAAT---GAGATAGGGTTCAAT-----GGAACAGGACCATGCAAGAAT-----  
 -GTCAGC---ACAGTACAATGTACACATGGAATCAAGCCAGTAGTATCAACT---  
 CAACTGCTGTTAAATGGCAGTCTAGCAGAACAAAAT-----  
 GTAGTAATTAAATCTGAAAATATCACAGACAAT-----GCCAAAACATCATAGTACAATTTAAT----  
 -----GAGTCTGTAGTA-----ATTAATTGTACCAGACCTAACAACAATACAAGAAAG-----  
 -AGTGTACGTATA-----GGACCAGGACAATCA---TTC-----TATGCGACAGGTGAA-----  
 -----ATAATAGGGAATATA-----AGACAAGCACACTGT---ACTGTCAATAGAACA---  
 AAATGGATAAGAGCTTTACAAAAAGTAGCCACACAATTAGGC-----AAAACTTTAAG----  
 -----AACAAAACAAAATAATCTTTACT-----  
 AGCCCCCTCAGGAGGAGATGTAGAAATTACA---ACACATAGTTTTAATTGTCAAGGAGAA---  
 TTTAAACAGCTCCAGGCAAGAGTCCTGGCTATGGAAAAGATACCTACATGATCAACAGCTCCTAGGAATTTGGG  
 GCTGCTCTGGAAGAACTCATCTGCACCACTACTGTGCCCTGGAACCTCTAGTTGGAGC-----  
 -----AGTAATAAATCTCAGGATGAGATATGG-----AAC-----  
 AAAATGACCGGGCTGCAATGG---GATAAAGAAGTTAGCCAATACACAAACACAATATAT---  
 AACCTACTTGAAGAATCACAGAACCAGCAGGAA-----  
 -----  
 AAGAATGAACAAGAATTATTGGCATTAGATGAGTGGGCAAATCTATGGAATTGGTTTGACATATCAAAATGGC  
 TGTGGTATATAAAAAATATTTATAATAATAGTAGGAGGCTTAATAGGATTAAGAATAGTTTTTTGCT---  
 GTACTTTCTATAATA-----AATAGAGTTAGGCAGGGATACTCACCT-----  
 CTGTCGTTTGCTATTAGTTTGCTTGATACCATAGCAATAACAGTAGCTGGC---  
 TGGACAGATAGGATTATAGAAATAGGACAAAGATTTTGTAGAGCT-----  
 -----ATTCTCAACATA-----CCTAGAAGAATCAGACAAGGCTTTGAGAGGGCTCTGCTA---TAA  
 >KF859745  
 GTT---GCA-----  
 GGAAACTTGTGGGTTACTGTCTACTATGGGGTACCTGTGTGG---AGAGATGCAGAG---  
 ACCACCTTATTTTGTGCATCAGATGCAAAAGCATATGATACAGAA---GTGCATAAT-----  
 -----GTCTGGGCCACA---CATGCCTGTGTACCTGCAGAC---  
 CCCAACCCACAAGAAATAGAGTTGAAA-----AATGTGACAGAAAAGTTTAA-----  
 -----ATGTGGAAAAATAACATGGTAGAGCAGATGCATGCAGACATA---  
 ATCAGTCTATGGGACCAAAGCCTA---AAGCCATGTGTGAAGTTA---  
 ACCCCTCTCTGCGTTACTCTAAAGTGTACAGACCTAGACCTTAATGGCACTCAGAGT-----  
 -----  
 -----CTTAATGGCACTCAGAGGCTAAATGGCACTGAGGTAGGTATGACA---  
 AACTGCTCTTTCAATACAACCACAGAATTAAGG-----  
 GATAAGATAAGGAAAGAATATGCACTT---TTTTATAGGCTTGATATAGTACAAATTAATGGA-----  
 -----  
 -----  
 AGTGATAACAGTACATATAGATTAATAAAATTGTAATACCTCAGCCATTAAACAG---  
 GCTTGTCCAAAGGTATCCTTTGAGCCAATTCCCATACATTATTGTGCCCCAGCTGGTTTTGCGATTCTAAAGT  
 GTAAG---GATGCAGAGTTCAAT-----GGAACAGGGCCATGCAACAAT-----  
 -GTCAGC---ACAGTACAATGCACACATGGGATCAGGCCAGTAGTATCAACT---  
 CAACTGCTGTTGAATGGCAGTCTAGCAGAAAGAAAG-----  
 GTAATGATTAGATCTGAAAATATCACAACAAT-----GCCAAAACATAATAGTACAATTTAAT----  
 -----AAGTCTGTAGAA-----ATTAATTGTACCAGACCTAACAATAATACAAGAAAA-----  
 -AGTGTACGCATA-----GGACCAGGACAACA---TTC-----TATGTAACAGGTGAC-----  
 -----ATAATAGGGGATATA-----AGACAAGCACACTGT---AATGTCAGTAGAAAG---  
 AAATGGAATGACACTTTGAGAGAGGTAGTCAGCGAATTAAGG-----AAATACTTTGGG---  
 -----AACAAAACAATAATCTTTACT-----  
 AACTCCTCAGGAGGGGATCTAGAGATTACA---ACACATAGTTTTAATTGTGGAGGAGAA---  
 TTTAAACAGCTCCAGGCAAGAGTCCTGGCTCTGGAAAGTTACCTAAGGGATCAACAGCTCCTAGGAATTTGGG  
 GCTGCTCTGGAAGAACTCATCTGCACCACTAATGTGCCCTGGAACCTCTAGTTGGAGT-----  
 -----AATAAGTCCAAGATGAGATATGG-----CAA-----  
 AACATGACCTGGTTGCAATGG---GATAGAGAAATTAGCAATTACACAGATCTAATATAC---  
 ACTCTGATTGAAGAATCGCAGATCCAGCAGGAA-----  
 -----  
 AAGAATGAACAAGACTTATTAGCATTGGACAAGTGGGCAAATCTATGGAATTGGTTTGACATATCAAACTGGC  
 TGTGGTATATAAAAAATATTTATAATGATAGTAGGAGGCTTAATAGGATTAAGAATAATTTGTGCT---  
 GTGCTTGCTATAATA-----AATAGAGTTAGGCAGGGATACTCACCT-----

CTATCGTTCGCCATCAATTTGCTTGATACCATAGCAATAGCAGTAGCTGGC---  
 TGGACAGATAGGATTATAGAAATAGGACAAAGCATTGGTAGGGCT-----  
 -----ATTCTTCACATA-----CCTAGAAGAATCAGACAGGGTGCTGAAAGGGCTTTGCTA--TAA  
 >KF716486  
 GCT---GCT-----  
 CAAAACCTTGTGGGTTACTGTCTACTATGGGGTACCTGTGTGG--AAAGACGCAGAG---  
 ACCACCCTGTTTTGTGCGTCAGATGCTAAAGCATATGAAACAGAG--AAGCATAAT-----  
 -----GTCTGGGCTACA--CATGCCTGTGTACCCACAGAC---  
 CCCAACCCACAAGAAATACATTTGGAA-----AATGTAACAGAAGAATTTAAC-----  
 -----ATGTGGAAAAATAATATGGTAGAGCAGATGCATACAGATATT--  
 ATCAGTCTATGGGACCAAAGCCTA--AAGCCATGTGTAAGGTTA---  
 ACTCCTCTCTGTGTTACTTTAAGCTGTACCAATGCTAAAAGCGGCAGCACTGGGAAC-----  
 -----  
 -----AGCAGCAGCACGGTGGAAGGGGAGGGAGAAATAAAA---  
 AATTGTTCTTTCAATATGACCACAGAACTAAGG-----  
 GATAGGAAAAGGAGAATGTATGCACCT--TTTTATAAACTTGATCTACAACAAATTAATGAACT-----  
 -----  
 -----  
 AATAATAGTTACTATAGCTTAATAAATTGTAATACCTCAGCCCTTACACAG---  
 GCTTGTCCAAAGGTATCCTTTGAGCCAATTCCCATACATTATTGTGCTCCAGCTGGTTTTGCGATCCTAAAGT  
 GTAGG---GATGAGGAGTTCAAT-----GGAACAGGGCCATGCAAGAAT-----  
 -GTCAGC--ACAGTACAATGCACACATGGAATTAAGCCAGTAGTATCAACT---  
 CAATTGCTGTAAATGGCAGTCTAGTAAAAGGAGAG-----  
 GTAAGAATTAAATCTGAAAATATTTTCAGAAAAT-----CATAAAAACATAATTGTACACCTTACA----  
 -----AAGCCTGTATCA-----ATTAGGTGTATCAGACCTAACAACAATACACGAACA-----  
 -AGTGTACGTATA-----GGGCCAGGACAAGAA--TTC-----TTTACAAGTAAG-----  
 -----ATAATAGGGAATATA-----AGACAAGCATACTGT--AACGTCAGTAAATCA---  
 GAATGGGAGAACACTTTACAACAGGTAGCTACACAATTAAGA-----AAATACTGG-----  
 -----AACAAAACAATAAAATTTACT---  
 GGCCCGGTCTCAGGAGGGGATGTAGAAATTACA--ACACATAGTTTTAATTGTGGAGGAGAA--  
 TTTAAACAGCTCCAGGCAAGAGTCTTAGCTGTGGAAAGATACCTAAAGGATCAACAGCTCCTAGGAATTTGGG  
 GCTGCTCTGGAAGAACTCATCTGCACCACTACTGTGCCCTGGAAGTCTAGTTGGAGT-----  
 -----AACAAAACCTTACAATGAAATATGG-----GAC-----  
 AACATGACCTGGCTGCAATGG--GATAAAGAAATTAGCAATTACACAGAGGAGATATAC---  
 AGGCTAATTGAAGCATCACAGATCCAGCAGGAA-----  
 -----  
 AAGAATGAACAAGACTTATTGGCATTGGACAAGTGGGCAAGTCTGTGGAGTTGGTTTGACATATCAAATTGGC  
 TGTGGTATATAAAGATATTTATAATGATAGTAGGAGGCTTAATAGGATTAAGAATAGTTCTTGCT--  
 GTGCTTTCATTAATC-----AATAGAGTTAGGCAGGGATACTCACCT-----  
 CTATCGTTTGCTATTGATTTGTTTAACACCACAGCAATAGCAGTAGCTGGC---  
 TGGACAGATAGGATTATAGAAATAGGGCAAAGAATTGGTAGAGCT-----  
 -----ATCCTCAACGTA-----CCTACAAGAATCAGGCAGGGCTTAGAAAGGGCTTTACTA--TAA  
 >M62320  
 GCA---CAA-----  
 CAATTGTGGGTCACGGTCTACTATGGGGTACCTGTGTGG--AAAGATGCAGTT---  
 ACCACCCTATTTTGTGCATCAGATGCTAAAGCATATGATGCAGAA--GTGCATAAT-----  
 -----GTCTGGGCTACA--CATGCCTGTGTACCCACAGAC---  
 CCCAACCCACAAGAAATAGATTTGGTC-----AATGTGACAGAAGAATTTAAC-----  
 -----ATGTGGAAAAATAACATGGTAGATCAGATGCATGAAGATATA---  
 ATCAGTCTATGGGACCAAAGCCTA--AAGCCATGTGTAAGTTA---  
 ACCCCTCTCTGCGTTACGTTAGATTGCCATAACATCACCATTAACAACACCAATAACAAC-----  
 -----  
 -----ACCAATATCACAGATGGAGTGAGGGAAGAAATGAAA---  
 AATTGCTCTTTCAATATGACCACAGAACTAAGA-----  
 GATAAGAAACAGAAAGTATATTCACCT--TTTTATAGACTTGATATAGTACAAATCAATAAA-----  
 -----  
 -----  
 ACTGATAACAATAGTTATAGACTAATAAATTGTAATACCTCAACCATTACACAG---  
 GCTTGTCCCAAGGTGTCTTTGAGCCAATTCCCATACATTATTGTGCCCCAGCTGGTTTTGCGATTCTAAAGT  
 GTAAG---GATCCTGAGTTCAAT-----GGAAAAGGGCCATGCAGGAAT-----

-GTCAGC---ACAGTACAATGTACACATGGAATCAAGCCAGTGGTATCAACT---  
 CAACTGCTGTAAATGGCAGTCTAGCAGAAAGAGAA-----  
 ATAAGGATTAGATCTGAAATTTACAAACAAT-----GCAAAAACCATAATAGTACAGCTTGTC----  
 -----AATCCTGTAAAA-----ATCAATTGTTCCAGACCTTACAATACAAGAAAAAAT-----  
 -ATACGTAGGTATAGT-----ATAGGATCAGGACAAGCA---TTC-----TATGTAACAGGTAAA-----  
 -----ATAATAGGGGATATA-----AGACAAGCACATTGT---AATGTCAGTAGAAGG---  
 GACTGGAATAGAACTATACAACAGGTAGCTGAACAATTAAAG-----AAAAAGTTTAAT----  
 -----AACAAAACAATAATCTTTGCT-----  
 AGCTCCTCAGGAGGGGATATAGAAATTACA---ACACATAGCTTTAATTGTGGAGGAGAA---  
 TTTAAACAGCTCCAGGCAAGAGTCTGGCTGTGGAAAGATACCTACAGGATCAACAGCTCCTAGGAATTTGGG  
 GCTGCTCTGGAAAGCTCATCTGCACCACTACTGTGCCCTGGAACCTCTAGTTGGAGT-----  
 -----AATAAATCTCAGGAGGACATATGG-----AAT-----  
 AACATGACCTGGCTGCAATGG---GAGAAAGAAATTAGTAGTTACACAGGCATAATATAT---  
 CAACTAATTGAGGAATCGCAGAACCAGCAGGAA-----  
 -----  
 AAGAATGAACTAGACTTATTGGCATTGGACAAGTGGGCAAATCTGTGAAATTGGTTTAACATCTCAAATTGGC  
 TGTGGTATATTAGACTATTTGTAATAATAGTAGGAGGCTTAATAGGATTAAGAATAGTTTTTTACT---  
 GTGCTTTCTATAATC-----AATAGAGTTAGGCAGGGATACTCACCT-----  
 CTGTCGTTTGCTATTACTTTGCTTGACGCTGTAGCAGTAGCAGTAGCTGGG---  
 TGGATAGATAGGGTTATAGAAATAGGACAAACAATTGGTAGAGCT-----  
 -----ATTCTCAACATA-----CCTAGAAGAATCAGACAAGGCTTAGAAAGGGCTTTGCTA---TAA  
 >L22957  
 ACT---GCA-----  
 AAAAACTTGTGGGTACTGTATACTATGGGGTACCTGTGTGG---AGAGACGCAGAG---  
 ACCACCCTATTTTGCGCATCAGATGCTAAAGCATATGAGACAGAA---ATGCATAAT-----  
 -----GTCTGGGCTACA---CATGCCTGTGTACCCACAGAC---  
 CCTAACCCACAAGAAATACGTTTGGA---AATGTGACAGAAGAGTTTAAC-----  
 -----ATATGGAAAAATAACATGGTAGAGCAGATGCATACAGATATA---  
 ATCAGTCTATGGGACCAAAGCCTA---AAGCCATGTGTAAAGTTA---  
 ACCCTCTCTGCGTTACTTTAAATTGTACCAATGCCAACCTCACCAATGCCAATAAAAAATGCCAAGGTC---  
 -----  
 -----AACAGCGCCACGAATGGCACCATCCAGAGCATGGAAAGAGAAATAAAA---  
 AACTGCTCTTTCAATATGACCACAGAATAAGG-----  
 GATAAGACACGGAGAGTATATTCACCT--TTTTATAAACTTGATGTAGTACAAATTAAAAAT-----  
 -----  
 -----  
 AGTAGTGAGTATAGATTAATAAATTGTAATACCTCAGCCATTACACAG---  
 GCTTGTCCAAAGGTATCCTTTGAGCCAAATCCCATACATTATTGTGCCCCAGCTGGTTTTGCGATCCTAAAT  
 GTAAT---GATAAGGAGTTCAAT-----GGAACAGGGCTATGCAAGAAT-----  
 -GTCAGC---TCAGTACAATGCACACATGGAATCAGGCCAGTAGTATCAACT---  
 CAACTGCTGTAAATGGCAGTCTAGCAGAAACAGAG-----  
 GTAAAAATTAAATCTGAAATATCTCAGACAAT-----GCTAAAACCCTAATAGTACAACCTTACC---  
 -----ACGCCTGTAAAA-----ATTAATTGTACTAGACCTGGCAACAATACAAGAACA----  
 -AGTGTAAGTATA-----GGACCAGGACAAGCA---TTC-----TATGCAACAGGTGAT-----  
 -----ATAATAGGAGATATA-----AGACAAGCACATTGT---AATGTCAGTAGATCA---  
 GAATGGAAGGAACTTTGCAAAAGGTAGTCAAACAATTAAGA-----ACACACTGG-----  
 -----AACAAAACAATAATCTTTTACA-----  
 AACTCCTCAGGAGGGGATTTAGAAATTACA---ACACATAGTTTTTAATTGTGGAGGAGAA---  
 TTTAAACAACCTCCAGGCAAGACTCCTGGCTGTGGAAAGATACCTAAGGGATCAACAGCTCCTAGGAATTTGGG  
 GCTGCTCTGGAAACTCATCTGCACCACTACTGTGCCCTGGAACCTCTAGTTGGAGT-----  
 -----AATAAATCTCAAAGTGAGATATGG-----GAT-----  
 AACATGACCTGGCTGCAATGG---GATAAAGAAATTAGTAATTACACAAACATAATATAT---  
 GATCTAATTGAAGAAGCGCAGAACCAGCAGGAA-----  
 -----  
 AAGAATGAACAAGACTTATTGGCATTGGACAAGTGGGCAAATCTGTGGAGTTGGTTTGACATATCAAATTGGC  
 TGTGGTATATAAGACTATTTATAATGATAGTAGGAGGCTTAATAGGATTAAGAATAGTTCTTGCT---  
 GTGTTTTCTGTAATA-----AATAGAGTTAGGAAGGGATACTCACCT-----  
 GTGTCATTTGCTATTAATTTGCTTGATACCATAGCAATAGCAGTAGCTGGC---  
 TGGACAGATAGAGTTATAGAAATAGGACAAAGAATTGGTAGGGCT-----  
 -----TTTCTTAACATA-----CCTAGAAGAATCAGGCAGGGCTTCGAAAGAGCTTTACTA---TAA

>L22951

```
ACT---GCA-----
GAAGACTTGTGGGTTACTGTCTACTATGGGGTACCTGTATGG---AGAGACGCAGAG---
ACCACCTTATTTTGTGCATCAGATGCGAAAGCATATGATACAGAA---ATGCATAAT-----
-----GTCTGGGCTACA---CATGCCTGTGTACCTACAGAC---
CCCAACCCACAAGAAATAAATTTGGGA-----AATGTGACAGAAAAATTTAAC-----
-----ATGTGGAAAAATAACATGGTAGAGCAGATGCATGAAGATATA---
ATCAGTCTATGGGATCAAAGCCTA---AAGCCATGTGTAAAGCTA---
ACCCCTCTCTGCGTTACTTTAAATTTGTAGTGATGTCAATAATGTCACTGTCAACCAAT-----
-----CATAGTATTAGCAGTGACATGAAAGGAGAAATAAAA---
AACTGCTCTTTCAATATGACCACAGAATTAAGG-----
GATAAGCAACAGAAATACATCCACTT---TTTTATAGACTGGATGTAGTACCAATTAATGGC-----
-----
AGCAACAACAGGCAGTATAGATTAATAAATTGTAATACTTCAGCCATTACACAG---
GCTTGTCCAAAAGTATCCTTTGAGCCAATTCCCATACATTATTGCGCCCCAGCTGGTTTTGCATTCTAAAGT
GTAAT---GATCAGGAGTTCAAT-----GGAACAGGGATATGTAATAAT-----
-GTCAGC---ACAGTACAATGCACACATGGAATCAAGCCAGTAGTATCAACT---
CAGCTGCTGTTTAAATGGCAGTTTAGCAGAAGGAAAG-----
GTAAAGATTAGATCTGAAAATATCACAACAAT-----GCCAAAAATATACTGGTATAACTTACC---
-----ACGCCTGTAAACA-----ATTAATTGTACCAGACCTAACAACAATACAAGAACA-----
-AGTGTACGTATA-----GGACCAGGACAATCA---TTC-----TATGCAACAGGTGAC-----
-----ATAATAGGGGATATA-----AAACAAGCACATTGT---AATATCAGTAGAGCA---
GAATGGAATGAACTTTACAAAAGGTAGTCAGCCAATTAAGA-----ACACACTTTGGC-----
-----AACAAAACAATAATCTTTGGT-----
AACTCCTCAGGAGGGGATATAGAAATAACA---ACACATAGTTTTAATTGTGGAAGAGAA---
TTTAAACAGCTCCAGGCAAGAGTCCTGGCTGTGGAAAGATACCTAAGGGATCAACAGCTCCTAGGAATTTGGG
GCTGCTCTGGAAGAACTCATCTGCACCACTAATGTGCCCTGGAAGCTCTAGTTGGAGT-----
-----AATAAATCCCAGAGTGATATATGG-----GAC-----
AACATGACCTGGCTGCAATGG---GATAAGGAAATAAACAATTACACAGAGCTAATATAT---
AGGCTACTTGAAGAATCGCAGAACCAGCAGGAA-----
-----
AAGAATGAACAAGACTTATTGGCATTGGACAAATGGGCAAATCTGTGGAATTGGTTTGGCATATCAAAGTGGC
TGTGGTATATAAGACTATTTATAATGATAGTAGGAGGCTTAATAGGATTAAGAATAGTTTTTTGCT---
GTGCTTTCTGTAATA-----AATAGAGTTAGGCAGGGATACTCACCT-----
TTGTCGTTTCGCTATTAGTTTGTGTGACACCATAGCAGTAGTAATAGCTGGG---
TGGACAGATAGAGTTATAGAATTAGGACAAAGACTTTGTAGAGCT-----
-----ATTTTACACATA-----CCTAGAAGAATCAGACAAGGCTTCGAAAGGGCTTTGCTA---TAA
>AB253429
ACT---GCA-----
GAAAACTTGTGGGTTACTGTCTACTATGGGGTACCTATATGG---AAGGATGCAAAAT---
ACCACCTTATTTTGTGCATCAGATGCGAAAGCATATGATACAGAA---GTGCATAAT-----
-----GTCTGGGCTACG---CATGCCTGTGTACCTACAGAC---
CCCAGCCCACAAGAACTAAAAATGGAA-----AATGTGACAGAAGAGTTTAAC-----
-----ATGTGGAAAAATAACATGGTAGAGCAGATGCATACAGATATA---
ATCAGTCTATGGGACCAAAGCCTA---AAACCATGTGTACAGTTA---
ACCCCTCTCTGCGTTACTTTAGATTGTAGCTATAACATCACCAATAATATCACCAATAGC-----
-----ATCACCAATAGCTCAGTTAACATGAGAGAAGAAATAAAA---
AACTGCTCTTTCAATATGACCACAGAATTAAGG-----
GATAAGAATCGGAAGGTATATTCACTT---TTTTATAAACTTGATGTAGTACAAATTAATAATGGT-----
-----
AATAACAGTAGTAATCTGTATAGATTAATAAATTGTAATACCTCAGCCCTTACACAG---
GCTTGTCCAAAGGTAACCTTTGAGCCAATTCCCATACATTATTGTGCCCCAGCTGGTTATGCGATTCTAAAAAT
GTAAT---GATAAGGAGTTCAAT-----GGAACAGGGCTATGCAAGAAT-----
-GTCAGC---ACAGTACAATGCACACATGGAATCAGGCCAGTAGTATCAACT---
CAACTGCTGTTTAAATGGCAGTTTAGCAGAAGGAAAG-----
GTAATGATTAGATCTGAAAATATCACAACAAT-----GTCAAAAACATAATAGTACAACCTTAAC---
```

-----GAGTCTGTAACA-----ATTAATTGTACCAGACCTAACAAATAATACAAGAAGA-----  
 -AGTGTACGTATA-----GGACCAGGACAAACA---TTC-----TATGCAACAGGTGAT-----  
 -----ATAATAGGGGATATA-----AGACAAGCACATTGT---AATGTCAGTGGGTCA---  
 CAATGGAATAAACTTTACACCAGGTAGTTGAACAATTAAGA-----AAATATTGGAAC-----  
 -----AACAAATAAATAATCTTTAAT-----  
 AGCTCCTCAGGAGGGGATTTAGAAATTACA---ACACATAGTTTTTAATTGTGCAGGAGAA---  
 TTTAAACAGCTCCAGGCAAGAGTCCTGGCTGTGGAAAGATACCTAAGGGATCAACAGCTCCTAGGAATTTGGG  
 GCTGCTCTGGAAGAACTCATCTGCCCCACTAATGTGCCCTGGAACCTAGTTGGAGT-----  
 -----AATAAATCTCTAGATGAAATATGG-----GAA-----  
 AACATGACCTGGCTGCAATGG---GATAAAGAAATTAGCAATTACACAATCAAAATATAT---  
 GAGCTAATTGAAGAATCGCAGATCCAGCAGGAA-----  
 -----  
 AGGAATGAAAAAGACTTACTGGAGTTGGACAAGTGGGCAAGTCTGTGGAATTGGTTTGACATATCAAAATGGC  
 TGTGGTATATAAAAAATATTTATAATGATAGTAGGAGGCCAATAGGATTAAGAATAGTTTTTTGCT---  
 GTGCTTTCTGTAATA-----AATAGAGTTAGGCAGGGATACTCACCC-----  
 CTATCGTTTGTCTATTAATTTGCTTGATACCATAGCAATAGCAGTAGCTGGC---  
 TGGACAGATAGGGTTATAGAAACAGTACAAAGGCTTGGTAGAGCT-----  
 -----ATTCTCAACATA-----CCTAGAAGAATCAGGCAGGGCTTCGAAAGGGCTTTACTA---TAA  
 >AY494973  
 ACT---GCA-----  
 GAGAACTTGTGGGTTACTGTCTACTATGGGGTACCTGTGTGG---AGAGATGCAGAC---  
 ACCACCTTATTTTGTGCATCAGATGCTAAAGCATATGACACAGAA---GTGCATAAT-----  
 -----GTCTGGGCTACA---CATGCCTGTGTGCCACAGAC---  
 CCCAACCCACAAGAAATAAATTTGGAA-----AATGTGACAGAAGATTTTAAC-----  
 -----ATGTGGAATAACATGGTAGAGCAGATGCATACAGACATA---  
 ATCAGTCTATGGGACCAAAGCCTA---AAGCCATGTGTAAGTTTA---  
 ACCCTCTCTGTGTACTTTAAATTGTACCGATGTGAAGAACAGCACGGGTAGAGAC-----  
 -----  
 -----AACATAACGGGAATTAGTATGGCAGGAGAAATAAAA---  
 AACTGCTCTTTCAATATGACCACAGAATTAAGG-----  
 GATAAGAGACAGCAAGTACATTCACTT---TTTTATAAGCTTGATGTAGTACAAATGGATGGA-----  
 -----  
 -----  
 AATAATGGTAGTCTGTATAGATTAATAAAGTGTAACTTCAGCCATTACACAA---  
 GCTTGTCCAAAGGTATCCTTTGAACCAATTCCCATACATTATTGTGCCCCAGCTGGTTTTGCGATCCTAAAGT  
 GTAAG---GATGAGGAGTTCAAT-----GGAACAGGGCCATGCAAGAAT-----  
 -GTCAGC---ACAGTACAATGCACACATGGAATCAGGCCAGTAGTATCAACT---  
 CAATTGCTGTTTAAATGGCAGTCTAGCAGAAAAAGAG-----  
 GTAAGAATTAGATCTGAAAAATATCTCAGACAAT-----GCTAAAACCATAATAGTACAACCTTACC---  
 -----AAGCCTGTAACA-----ATTAATTGTACTAGACCTAACAAACAATATAAGCAGA---  
 -AGAAGGATACAT-----ATAGGAAGAGGACAAGCA---TTC-----TATGCAACAGGTGGC-----  
 -----ATGACAGGGAATATA-----AGACAAGCATATTGT---AATGTCAGTGGATCA---  
 GATTGGAATACAACCTTTACAACAGGTAGTTACACAGTTAAGA-----AGACACTGGCAG---  
 -----AACACAACAATAGTCTTTAAA-----  
 AGCTCCTCAGGAGGGGATGTAGAAATTACA---ACACATAGTTTTTAATTGTGGAGGGGAG---  
 TTTAAACAGCTCCAGGCAAGAGTCCTGGCTGTGGAAAGATACCTAAAGGACCAACAGCTCCTAGGAATTTGGG  
 GCTGCTCTGGAAGAACTCATCTGCACCACCAATGTGCCCTGGAACCTCAGTTGGAGT-----  
 -----AATAGATCTCAGAGTGAGATATGG-----GAT-----  
 AACATGACCTGGCTGCAATGG---GATAAAGAAATTAACAATTACACATACACAATCTAT---  
 AGGCTACTTGAAGAATCGCAAAACCAGCAGGAA-----  
 -----  
 AAGAATGAACGAGACTTATTGGCATTGGACAAGTGGGCAAATCTGTGGAATTGGTTTGACATATCAAGATGGC  
 TGTGGTATATAAAAAATATTTATCATGATAGTAGGAGGCTTAATAGGATTAAGAATAGTTTTTTGCT---  
 GTGCTTTCTATAATA-----AATAGAGTTAGGCAGGGATACTCACCT-----  
 TTGTCAATTTGCTATTAGTTTGTCTGATGCTACAGCAATAACAGTAGCTGGC---  
 TGGACAGATAGGGTTATAGAAATAGGACAGAGGCTTTGTAGAGCT-----  
 -----ATTGCAACATA-----CCTAGAAGAATTAGACAGGGCTTCGAAAGGGCTTTGCTA---TAA  
 >EU853062  
 ACT---ACA-----  
 GAAAGATTGTGGGTTACTGTTTATTATGGGGTACCTGTGTGG---AAAGATGCAGAC---

ACCACCTTATTTTGTGCATCAGATGCTAAAGCATTTGAGAGAGAA---GTGCATAAT-----  
 -----GTCTGGGCTACA---CATGCCTGTGTACCCACAGAC---  
 CCCAACCCACAAGAACTATCTTTGACA-----AATGTGACAGAAAAGTTTAACT-----  
 -----ATATGGAAAAATAACATGGTAGAGCAGATGCATGAAGATATA---  
 ATCAGTCTATGGGACCAAAGTCTA---AAGCCATGTGTAAAAGTTA---  
 ACCCCTCTCTGTGTCACTTTAAATTGTGCTGAGGTCACAGACAGAACGAATGTCTCC-----  
 -----  
 -----GTCGTCCAGGAGAACATGAAAGGAGAAATAAAA---  
 AATTGCTCTTTCAATATGACCACAGAGCTAAGA-----  
 GATAAGGTGAAGAAAGTACATTCACCT---TTTTATAAAATTTGATGTAGTACAAATTGATAAGAAT-----  
 -----  
 -----  
 AGTCCTAATAGTAGTGAGTATACATTAATAAATTGTAATACCTCAACCATTACACAG---  
 GCTTGTCCAAAGGTATCCTTTGAGCCAATTCCCATACATTATTGTGCCCCAGCTGGTTTTGCATCCTAAAGT  
 GTAGA---GATGAAGAGTTCAAT-----GGAACAGGGCTATGCCAGAAT-----  
 -GTCAGC---ACAGTACAATGCACACATGGAATCAGGCCAGTAGTATCAACT---  
 CAACTGCTGTAAATGGCAGTCTAGCAGAAGAAAAC-----  
 ATAACAATTAAATCTGAAAATATCACAATAAT-----GCTAAAACCATAATAGTGCAACTTACC---  
 -----AAGCCTGTAATA-----ATTAATTGTACCAGACCTAACAACAATACAAGAAAA-----  
 -GGTGTACACATA-----GGACCAGGACAAGCA---TTC-----TTTGCAGCAGGTGAC-----  
 -----ATAATAGGAAACATA-----AGGCAAGCATATTGT---ACGGTCAATGCATCA---  
 GAATGGAATAACACTTTACAACAGGTAGCTGAACAATTAAGG-----AAACATTGG-----  
 -----AACACAACAATAATCTTCACT-----  
 AACTCCTCAGGAGGGGATGTAGAAATTACA--ACACATAGTTTTAATTGTGGAGGAGAG---  
 TTTAAACAGCTCCAGGCAAGAGTCCCTGGCTGTGGAAAGATACCTAAGGGATCAACAGCTCCTAGGAATTTGGG  
 GCTGCTCTGGAAGAACTCATCTGCACCACTAATGTGCCTTGGAACTCTAGTTGGAGT-----  
 -----AATAAATCTCAGGAGGAGATATGG-----GAG-----  
 AACATGACCTGGCTACAATGG---GATAAAGAAATTGACAATTACACACAAATAATATAT---  
 GAGCTACTTGAAAAATCGCAGAACCAGCAGGAA-----  
 -----  
 AAGAATGAACAAGACTTATTGGCATTGGACAAGTGGGCAAGTCTGTGGACTTGGTTTGACATAACAAAATGGC  
 TGTGGTATATAAAGATATTTATAATGCTAGTAGGAGGCTTAATAGGATTAAGAATAGTTTTTTGCT---  
 GTAATTTCTATAATA-----AATAGAGTTAGGCAGGGATACTCACCT-----  
 TTGTCGTTTGCCATCAATTTGGTTGATACCATAGCAATAGCAGTAGCTGAC---  
 TGGGCAGATAGGGTTATAGAAATAGGACAAAGAATTGGTAGAGCT-----  
 -----ATTCTCCACATA-----CCTAGAAGAATCAGACAGGGCTTTGAAAGGGCTTTGCTA---TAA  
 >EU852958  
 GCT---GCA-----  
 CAAAACCTTGTGGTTACTGTCTACTATGGGGTACCAGTGTGG---AAAGAAGCAGAC---  
 ACCACCTTGTTTTGTGCGTCAGATGCGAAAGCATATGATACAGAA---ATGCATAAT-----  
 -----GTCTGGGCTACC---CATGCCTGTGTACCTACAGAC---  
 CCCAACCCACAAGAAATAAATTTAGAA-----AATGTGACAGAAGAGTTTAACT-----  
 -----ATGTGGAAAAATAACATGGTAGAGCAGATGCATACAGATATA---  
 ATCAGTCTATGGGACCAAAGCCTA---AAGCCATGTGTAAAATTA---  
 ACCCCTCTCTGCGTTACTTTAAATTGTAGTGACAAGGTCAGCTCTAATAATAATGTCACCTAT-----  
 -----  
 -----ATTGACACTGTCACCCATGTCAATATGACAGGGGAAATAAAA---  
 AACTGCTCTTTCAATATGACCACAGAATTAAGG-----  
 GATAAGCAACGGCAAGTACGTTCACT---TTTTATAAACTGGATATAGTACAAGTTAGCAAC-----  
 -----  
 -----  
 AACAGTAACAGTCTGTATAGGTTAATAAATTGTAATACCTCAGCCATTACACAG---  
 GCTTGTCCAAAGGTATCCTTTGAGCCAATTCCCATACATTATTGTGCCCCAGCTGGTTTTGCATTCTAAAGT  
 GTAAG---GATGAGGGGTTCAAT-----GGGACAGGGCTATGCAAGAAT-----  
 -GTTAGC---ACAGTACAATGCACACATGGAATCAAGCCAGTAGTGTCAACT---  
 CAACTGCTGTAAATGGCAGTCTAGCAGAAGGAGAG-----  
 GTAATGATTAGATCTGAAAATATCAGACAAAT-----ACCAAAAACATAATAGTACAATTTAACT---  
 -----CAGTCTGTACAA-----ATTATTTGTACCAGACCTAACAACAATACAAGAGAA-----  
 -AGTATACATATA-----GGACCAGGACAGGCA---TTC-----TATGCAACAGGTGAA-----  
 -----ATAATAGGGAATATA-----AGACAAGCACATTGC---AATGTCAGTGAACA---

AGATGGAATAAACTTTGCAAGAGGTAGCCAACAAATTAAGA-----ATACACTTTGGG----  
 -----AACACAACAATAAACTTTACT-----  
 AGCCCCGCAGGAGGGGATCCAGAAATAACA--ACACATAGTTTCAATTGTGGAGGAGAA--  
 TTTAAACAGCTCCAGGCAAGAGTCCTGGCTGTGGAAAGATACCTAAAGGATCAACAGCTCCTAGGAATTTGGG  
 GCTGCTCTGGA-AACTCATCTGCACCACTAATGTGCCTTGGAAATCTAGTTGGAGT-----  
 -----AATAAATCCCTGAATGAGATATGG-----GAC-----  
 AACATGACCTGGCTGCAATGG--GATAAAGAAATTAGCAACTACACACAGATAATATAT--  
 GGGCTAATTGAAGAATCACAGAACCAGCAGGAA-----  
 -----  
 AAGAATGAACTAGACTTATTGGCATTGGACAAGTGGGCAAGTCTGTGGAATTGGTTTGACATAACAAAATGGC  
 TGAGGTATATACAAATATTTATAATGATAGTAGGAGGCTTAATAGGATTAAGAATAGTTTTTTGCT--  
 GTGCTTTCTGTAATA-----AATAGAGTTAGGCAGGGATACTCACCT-----  
 GTGTCGTTTCGCTATTAGCTTGCTTGATACCATAACAATAGTAATAGCTGGG--  
 TGGACAGATAGGGTTATAGAAAATAGGACAAAGAATTGGTAGAGCT-----  
 -----ATCCTCAACGTA-----CCTACAAGAATCAGACAGGGCTTTGAAAGGGCTTTGCTA--TAA  
 >EU852954  
 GCT--GCA-----  
 CAAAACTTGTGGGTTACTGTCTACTATGGGGTACCTGTGTGG--AAAGACGCAGCC--  
 ACCACCTTGTTTTGTGCGTCAGATGCAAAGCATATGAAACAGAA--ATGCATAAT-----  
 -----GTCTGGGCTACC--CATGCCTGTGTACCTACAGAC--  
 CCCAACCCACAAGAAATAGATTTAGTA-----AATGTGACAGAAGAGTTTAACT-----  
 -----ATGTGGAAAAATAACATGGTAGAGCAGATGCATACAGATATA--  
 ATCAGTCTATGGGACCAAAGCCTA--AAGCCATGTGTAAAATTA--  
 ACCCCTCTCTGCGTTACTTTAGAGTGTTACAACAATGTCACCGCTATTAATGGCACCTTT-----  
 -----  
 -----GAGAATACCACCCATAAAATAACAAAGGAAATGATG--  
 AACTGCTCTTTCAATATGACCACAGAAGTAAGA-----  
 GATAGGCAAAGAAAGTATCTTCACTT--  
 TTCTATAGACTGGATGTAGTACCAGTTGCTGCAAATAGCAACAGC-----  
 -----  
 AGCAACAACAATAGCAACAGCAGCAACAACAATCTGCATAGATTAATAAATTGTAATACCTCAGCCATTACAC  
 AG--  
 GCTTGTCCAAAGGTATCCTTTGAGCCAATTCCCATACATTATTGTACCCCAGCTGGTTTTGCGATTCTAAAGT  
 GTAAG--GATGAGGAGTTCAAT-----GGAACAGGGCTATGCAAGAAT-----  
 -GTTAGC--ACAGTGCAATGCACACATGGAATCAAGCCAGTAGTGTCAACT--  
 CAACTGCTGTTAAATGGCAGTCTAGCAGAAGGAGAG-----  
 GTAATGATTAGATCTGAAAATATCACAGACAAT-----GCCAAAAACATAATAGTACAATTTAAC--  
 -----CAGTCTGTACCA-----ATTAATTGTACCAGACCTGGCAACAATACAAGAGAA--  
 -AGTATACACATA-----GGACCAGGACAGGCA--TTC-----TATACAACAGGTGCC-----  
 -----ATAATAGGGGATATA-----AGACAAGCACATTGC--AATGTCAGCAGAGCA--  
 AAATGGAATGAACTTTGCAAAGGGTAGTCAAAAATTAGGA-----ACACACTTTAAG--  
 -----AACAAAACAATAATCTTTACT-----  
 AAACCTGCAGGAGGAGATCCAGAAATAACA--GCACATAGTTTTAATTGTGGAGGAGAA--  
 TTTAAACAACCTCCAGGCAAGAGTCCTGGCTGTGGAAAGATACCTAAAGGATCAACAGCTCCTAGGAATTTGGG  
 GCTGCTCTGGA-AACTCATCTGCACCACTAATGTGCCTTGGAAATCTAGTTGGAGT-----  
 -----AATAAATCCCTGAATGAGATATGG-----GAC-----  
 AACATGACCTGGCTGCAATGG--GATAAAGAAATTAGCAACTACACACAGATAATATAT--  
 GGGCTAATTGAAGAATCACAGAACCAGCAGGAA-----  
 -----  
 AAGAATGAACTAGACTTATTGGCATTGGACAAGTGGGCAAGTCTGTGGAATTGGTTTGACATAACAACTGGC  
 TGAGGTATATACAAATATTTATAATGATAGTAGGAGGCTTAATAGGATTAAGAATAGTTTTTTGCT--  
 GTGCTTTCTGTAATA-----AATAGAGTTAGGCAGGGATACTCACCT-----  
 GTGTCATTTCGCTGTTAGTTTGCTTGATACCATAGCAATAGTAGTAGCTGGG--  
 TGGACAGATAGGGTTATAGAAAATAGGACAAAGAATTGGTAGGGCT-----  
 -----ATCCTTAACATA-----CCTACAAGAATCAGACAGGGCTTCGAAAGGGCTTTGCTA--TAA  
 >AF484507  
 GCT--GCA-----  
 GAAAACTTGTGGGTTACTGTCTATTATGGGGTACCTGTATGG--AAAGACGCAGGG--  
 ACCACCTTATTTTGTGCCTCAGATGCTAAAGCATATAAGAAAGAA--GCACATAAT-----  
 -----GTATGGGCTACA--CATGCCTGTGTACCCACAGAC--

CCCAACCCACAAGAAATAGACTTGGAC-----AATGTGACAGAAGATTTTAAAC-----  
 -----ATGTGGAAAAATAACATGGTAGAGCAGATGCATACAGATATA---  
 ATCAGTCTATGGGACCAAAGCCTA---AAGCCATGTGTAAAGCTA---  
 ACCCCTCTCTGCGTCACTCTAAATTGTAGCCATACCAATGTCAATGTGCGTAGCATGTAT-----  
 -----  
 -----CTCAACATCAAGGAAAGCCTGAAAGAAGAAATAAAA---  
 AACTGTTCTTTCAATATGACCACAGAAATAAGG-----  
 GATAAGGAAAAAAAAGTATATTTCACTT---  
 TTTTATAAACTTGATGTAGTAGAAATTAATGATAAAAAATAATAGT-----  
 -----  
 AGTAATAATAACAGTAACAGTAGTGAGTCTAAACTGTATAGATTAATAAATTGTAATACCTCAGCCATCACAC  
 AA---  
 GCTTGTCCAAAGGTATCCTTTGAGCCAATTCCTATACATTATTGTGCCCCAGCTGGTTTTTCGATCCTAAAGT  
 GTAAT---GATGAGGAGTTCAAT-----GGAACAGGACCATGCAAGAAG-----  
 -GTCAGC---ACAGTGCAATGCACACATGGAATCAGGCCAGTGGTTTCAACT---  
 CAACTGCTATTAAATGGCAGTCTAGCAAAAGGAGAG-----  
 GTAAAAATTAGATCTGAAAATATCTCAGACAAT-----GCTAAAACCATAATAGTACAACCTTACA----  
 -----GAGCCTGTAAAC-----ATTAGTTGTATCAGACCTAACACAATACAAGGACA-----  
 -AGTATACATATA-----GCACCAGGACAAGCA---TTC-----TATGCAACAGGTGGC-----  
 -----ATAATAGGGGATATA-----AGACAAGCACATTGT---AATGTCAGTGGAGCA---  
 AAATGGAATCAAACATTACAAAAGGTAGTTAAGCAATTAGGA-----AAGCACTGGAAC---  
 -----ACAACAACAATAATCTTTAAA-----  
 AACTCCTCGGGGGGGGATTTAGAAATTACA--ACACATAGTTTAAATTGTGGAGGAGAA---  
 TTTAAACAGCTCCAGGCAAGAGTCCCTGGCTGTGGAAAAGTACCTAAAGGATCAACAGCTCCTAGGAATTTGGG  
 GCTGCTCTGGAAACTCATCTGCACCACTAATGTGCCTTGGAACCTCTAGTTGGAGT-----  
 -----AATAAATCCAGCATGAGATATGG-----GAT-----  
 AACCTGACCTGGCTGCAATGG---GATAAAGAGATTAACAATTACACACACGAAATATAT---  
 AGGCTACTTGAAGAATCGCAGATCCAGCAGGAA-----  
 -----  
 AAGAATGAACAAGACTTATTGGCATTAGACAAGTGGGCAAGTCTGTGGAATTGGTTTGACATATCAAGATGGC  
 TGTGGTATATAAGAATATTTATAATGATAGTAGGAGGCTTAGTAGGATTAAGAATAGTTTTTTGCA---  
 GTGCTTTCTATAATA-----AATAGAGTTAGGCAGGGATACTCACCT-----  
 TTGTCGTTTGTCTATTAATTTGCTTGATACTATAGCAATAGCAGTAGCTGGC---  
 TGGACAGATAGGGTTATAGAAATAGGACAAGGAATTGGTAGAGCT-----  
 -----ATTCTCAACATA-----CCTAGAAGAATCAGACAGGGCTTAGAAAGGGCTTTGCTA--TAA  
 >AF484508  
 GCT---GCA-----  
 GAACTTGTGGGTTACTATCTACTATGGGGTACCTGTGTGG--AAAGATGCGGAG---  
 ACCACCTTATTTTGTGCATCAGATGCGAAGGCATATGAAAAAGAA--GTGCATAAT-----  
 -----GTCTGGGCTACA---CATGCCTGTGTACCTACAGAC---  
 CCCAACCCACAAGAAATAAATTTGGGA-----AATGTGACAGAAAAGTTTAAAC-----  
 -----ATGTGGAAAAATAACATGGTAGACCAGATGCATGCAGATGTA---  
 ATCAGTCTATGGGACGAAAGCCTA---AAGCCATGTGTAAAGTTA---  
 ACCCCTCTCTGCGTTACTTTAAATTGTAATCAGGTCAATGTCAACGGTGACGAGAAT-----  
 -----  
 -----CATACCCTCAGTAATATCAAAGAGGACCTAAGA---  
 AACTGCTCTTTCAATATGACCACAGTATTAAGG-----  
 GATAAGACTCAGAAAGTACATTTCACTT---TTTTATAAACTGGATATAGTAGAAATTGGGAAT-----  
 -----  
 -----  
 AGCAGTAGTCAGTATAGATTAATAAACTGTAATACCTCAGCCATTACACAA---  
 GCCTGTCCAAAGGTATCCTTTGAGCCAATTCCTATACATTATTGTGCCCCAGCTGGGTTTTCGATTCTAAAAT  
 GTAAC---GATAAGAAGTTCAAT-----GGAACAGGGCTATGCAAGAAT-----  
 -GTTAGC---ACAGTACAATGCACACATGGAATCAAGCCAGTAGTATCAACT---  
 CAACTGCTGTTAAATGGCAGTCTAGCAGAAGGAGAG-----  
 GTAATGATTAGATCTGAAAATATCACAACAAT-----GCCAAAAACATAATAGTACAATTTAAA----  
 -----GAGGCTGTACAA-----ATTAATTGTAGCAGACCTGGCAACAATACAAGAAAA-----  
 -AGTGTACCTATG-----GGACCAGGAAAAAGCA---TTC-----TATGCAACAGGTGAC-----  
 -----ATAATAGGGGATATA-----AGAAAAGCACATTGT---AATGTCAGTAGAGCA---  
 GCATGGAATAAACTTTACAGGAGGTAGCCAAACAATTAAGA-----ACATACTTTAAG---

```

-----AACAAAACAATAATCTTTACT-----
AACACCTCAGGAGGGGATCCAGAGATAACA--ACACATAGTTTTTAATTGTGGAGGAGAA---
TTTAAACAGCTCCAGGCAAGAATCCTGGCTGTGGAGAGATACCCAAAGGATCAACAGCTCCTAGGAATTTGGG
GCTGCTCTGGA AAAATCATCTGCACCACTAATGTGCCCTGGA ACTCTAGTTGGAGT-----
-----AATAAATCCCAGAGTGAGATATGG-----GAC-----
AACATGACCTGGCTGCAGTGG--GATAAAGAAATTAGCAATTACACAACCATAATATAT---
AAGCTAATTGAAGAATCGCAGACCCAGCAGGAA-----
-----
ATAAATGAAAAAGACTTATTGGCATTGGACAAGTGGGCAAATCTGTGGAATTGGTTTGAAATATCAAAATGGC
TGTGGTATATAAAAAATATTTATAATGATAATAGGAGGCTTAATAGGATTAAGAATAGTTTTTTGCT---
GTGCTTTCTATAATA-----AATAGAGTTAGGCAGGGATACTCACCT-----
TTGTCAATTCGCTATCAATTTGGTTGATACCATAGCAATAGCAGTAGCTGGG---
TGGACAGATAGGATTATAGAAGTAGGACAAAGAATTTGTAGAGCT-----
-----ATTTTACATATA-----CCTAGAAGAATCAGACAAGGCTTCGAAAGGGCTTTGCTA---TAA
>AF484509
GCT---GCA-----
GAAAACTTGTGGGTTACTGTCTACTATGGGGTACCTGTGTGG--AGAGATGCAGAG---
ACCACCTTATTTTGTGCATCAGATGCAAAATCATATGATACAGAA--ATGCATAAT-----
-----GTCTGGGCCACA--CATGCCTGTGTACCTACAGAC---
CCCAACCCACAAGAAATAAATTTGAAA-----AATGTGACAGAAGAGTTTAAAC-----
-----ATGTGGA AAAATAAAATGGTAGAGCAGATGCATACAGATATA---
ATCAGTCTATGGGACCAAAGCTTA--AAGCCATGTGTAAAGTTA---
ACCCCTCTCTGTGTTACTTTAGAGTGTAGCAACCCATCAACAGGTATCAATAAAAACC-----
-----
-----ACAGACATGAGAAATAACATCACAGACATGAAA---
AACTGCTCTTTCAATATGACCACAGAATTAAGG-----
GATAAGAAACAGAGAGTATACTCACTT--TTTTATAAACTGGATGTAGTACCAATTAATGAC-----
-----
-----
AACAGTAGCAATACCTATAGATTAATAAATTGTAATACCTCAGCCATAACACAG---
GCTTGTCCAAAGGTATCCTTTGAGCCAAATCCCATACATTACTGTGCTCCAGCTGGTTTTGCGATTCTAAAGT
GTAAT--GATAAAGAGTTCAAT-----GGAACAGGGCTATGCAAGGAT-----
-GTCAGC--ACAGTACAATGCACACATGGAATCAAGCCAGTAGTATCAACT---
CAACTGCTGTTAATGGCAGTCTAGCAAAAGAAAGG-----
GTAATAATTAGATCTGAAAATATTACAGACAAT-----ATCAAAAACATAATAGTACA ACTTAAC---
-----GAGTCTGTAGAA-----ATTAGTTGTATCAGACCTAACAACAATACAAGAAAA-----
-AGTGTACGTATA-----GGACCAGGACAAGCA--TTC-----TATGCAACA--GAC-----
-----ATAACAGGGGATATA-----AGACAAGCATATTGT--AATGTTAGTAAAAGG---
GGATGGAATAACACTTTGCAAAAGGTAGTTGAACAATTAAGA-----GTACACTTTGAG---
-----AACAAAACAATAACCTTTGCT-----
AACTCCTCAGGAGGGGATCTAGAAATAACA--ACACATAGTTTTTAATTGTGGAGGAGAA---
TTTAAACAGCTCCATGCAAGAGTCCTGGCTGTGGAAGGATACCTAAGGGATCAACAGCTCCTAGGAATTTGGG
GCTGCTCTGGA AAACTCATCTGCACCACTAATGTGCCCTGGA ACTCTAGTTGGAGT-----
-----AATAAATCCCAGAATGAGATATGG-----GGC-----
AACATGACCTGGCTGCAGTGG--GATAAAGAAATTAGCAATTACACACAGATAATATAT---
AGCCTAATTGAAGAATCACAGAACCAGCAGGAA-----
-----
AAGAATGAACAAGACTTATTGGCATTGGATAAATGGGCAAATCTGTGGAATTGGTTTGACATATCAA ACTGGC
TGTGGTATATAAAAAATATTTATAATGATAGTAGGAGGCTTAATAGGATTAAGAATAGTTTTTTGCT---
GTACTTTCTATAATA-----AATAGAGTTAGGCAGGGATACTCACCC-----
TTGTCGTTTCGCTATTAACCTGTTTGATACCATAGCAATAGCAGTAGCTGAG---
TGGACAGATAGGGTTGTAGAAATAGGACAAAGACTTTGTAGAGCT-----
-----ATTCTCCACATA-----CCTAGAAGAATCAGACAAGGCTTAGAAAGGGCTTTGCTA---TAA
>AF484512
AGT---ACA-----
GATAACTTGTGGGTTACTGTCTACTATGGGGTACCTGTGTGG--AAAGATGCAGAG---
ACCACCCTCTTTTGTGCATCAGATGCTAAAGCATATGAGAGAGAG--GTGCATAAT-----
-----GTCTGGGCTACA--CATGCTTGTGTACCCACAGAC---
CCCAACCCACAAGAAGTACATTTGAAA-----AATGTGACAGAACAATTTAAAT-----
-----ATGTGGA AAAATAACATGGTAGAGCAGATGCATACAGATATA---

```

ATCAGTCTATGGGATGAAAGCCTA---AAGCCATGTGTAAAGTTA---  
 ACCCCTCTCTGTGTTACTTTAAAGTGTAGCAATATCAGCAATATCAACAGCACGAGGGGCAGC-----  
 -----  
 -----ACAGAGGGCAACAGCACGTTAGAAAACAGGGAAGAAATAAAA---  
 AACTGCTCTTTCAATATGACCACAGAACTAAGG-----  
 GATAAGAAACAAAAGTACATGCACTT---TTTTATAGACTTGATATAGTAGAAATAGATGACAAGAAG----  
 -----  
 -----  
 AGTAATGGTAGTAACAATGAGTATAGATTAATAAAATTGTAATACCTCAACCATTACACAG---  
 GCTTGTCCAAAGGTATCCTTTGAGCCAATTCCCATACATTATTGTGCCCCAGCTGGTTTTGCGATCCTAAAGT  
 GTAAT---GATAAGAGGTTCAAT-----GGAACAGGGCCATGCAAGAAT-----  
 -GTCAGC---ACAGTACAATGCACACATGGAATCAGGCCAGTAGTATCAACT---  
 CAACTGCTGTTAAATGGCAGTCTAGCAGAAGAAGAG-----  
 ATAAGAATTAGTTCTGAAAATATCACAGACAAT-----GCCAAAACCATAATAGTACAATTTATC----  
 -----AAGCCTGTAAAC-----ATTACTTGTGTCTGACCTAACAACAATACAAGGACA-----  
 -AGCATACGTATA-----GGACCAGGACAAAACA---TTC-----TATACAACAGGTGAT-----  
 -----ATAATAGGAAATATA-----AGACAAGCACATTGT---AATGTCAGCAGATCA---  
 GAATGGAATGATAACTTAAAAAGAGGTAGCTACACGATTAAAA-----GAATACTTTAAT----  
 -----  
 -----AAAACACAAACAATAATCTTTACT-----  
 AATTCTCAGGAGGGGATCTAGAAATCACA---ACACATAGTTTTAATTGTGGAGGAGAA---  
 TTTAAACAGCTCCAGGCACGAGTCCTGGCTCTGGAGAGATACCTAAAGGATCAACAGCTCCTAGGAATTTGGG  
 GCTGCTCTGGAAGAACTCATCTGCACCACTAATGTGCCCTGGAACCTCTAGTTGGAGT-----  
 -----AATAGATCTTACAATGAAATATGG-----GAT-----  
 AACATGGCCTGGCTGCAATGG---GATAGAGAAATTAACAATTACACAGACATAATATAT---  
 AAATTAATTGAAGAATCGCAGAACCAGCAGGAA-----  
 -----  
 AAGAATGAACAAGATTTATTGGCATTGGACAAGTGGGCAAATCTGTGGAATTGGTTTGGCATATCAAATTGGC  
 TGTGGTATATAAAAATATTTATAATGATAGTAGGAGGCTTAATAGGATTAAGAATAGTGTTTACT---  
 GTGCTTTCTATAATA-----AATAGGGTTAGGCAGGGATACTCACCT-----  
 TTGTCGTTTGCTATTAGCTTGCTTGATACCACAGCAATAGCAGTAGCTGGC---  
 TGGACAGATAGGGTTATAGAAATAGGACAAAGAATTGGTAGAGCT-----  
 -----ATTCTCCACATA-----CCTAGAAGAATCAGACAGGGCTTCGAAAGAGCTTTGCTA---TAA  
 >EU853030  
 GCT---GCA-----  
 GAAAAATATGTGGGTTACTGTCTACTATGGGGTACCTGTGTGG---AGAGATGCAGAG---  
 ACCACCCATTTTTGTGCATCAGATGCTAAAGCATATGAGACAGAA---AGGCATAAT-----  
 -----GTTTGGGCTACA---CATGCTTGTGTACCCACAGAC---  
 CCCAACCCACAGGAAATACATTTGGAA-----AATGTGACAGAACAGTTTAAC-----  
 -----ATGTGGAATAATAGCATGGTAGAACAGATGCGTACAGATATA---  
 ATCAGTCTATGGGACCAAAGCCTA---AAGCCATGTGTAAAGTTA---  
 ACCCCTCTCTGTGTCACTTTAAATTGTGTCAATGTACGACGAATGCCACGAAA-----  
 -----  
 -----AACAAACAGCACGGGGGACGAGGGAGAAATGAAA---  
 AACTGCTCTTTCAATATGACCACAGAACTAAGG-----  
 GATAAGAAACAAAGAGTATATTCACCT---TTTTATAGACTTGATATAGTAAAAATTAATGAAAGTGAG----  
 -----  
 -----  
 AGTGACAGTAGTAATAGTAGTGAGTATAGATTAATAAAATTGTAATACCTCAGCCATTACACAA---  
 GCTTGCCCAAAGGTATCCTTTGAGCCAATTCCCTATACATTATTGTGCCCCAGCTGGTTTTGCGATCCTAAAGT  
 GTAAT---GATAAGGAGTTCAAT-----GGAACAGGGCTATGCCAGAAT-----  
 -GTCAGC---ACAGTACAATGCACACATGGAATCAAGCCAGTAGTATCAACT---  
 CAACTGCTGCTAAATGGCAGTCTAGCAGAAGGGACG-----  
 GTAAAAATTAGATCTGAAAACATCACAACAAT-----GTCAAAACCATAATAGTACACCTTAAC----  
 -----GAGTCTGTGGAA-----ATTAATTGTACCAGACCTAACAACAATACAAGAACA-----  
 -AGTGTACGTATA-----GGACCAGGACAAGCA---TTC-----TATGCAACA---GAC-----  
 -----ATAATAGGAGATATA-----AGGAAGGCATATTGT---AAAGTCAATCGCTCA---  
 GAATGGCATAAAGCTTTACAAAAGGTAGTCGAGCAATTAAGA-----AACACTTTAAG----  
 -----AACAAAACAATAATCTTTGCT-----  
 AGCTCCTCAGGAGGGGATCTAGAAATCACA---ACACATAGTTTTAATTGTGGAGGAGAA---  
 TTCAAACAGCTCCAGGCAAGAGTCCTGGCTGTGGAAAAGATACCTAAGGGATCAACAGCTCCTAGGAATTTGGG

GCTGCTCTGGAAACTCATTTCGACCCTAATGTGCCCTGGAACCTCTAGTTGGAGT-----  
-----AATAAATCTTTTGAAGAGATATGG-----GAT-----  
AACATGACCTGGCTGCAATGG---GATAAAGAAGTTAGCAATTACACACAAATAATATAT---  
GATCTAATTGAAGAATCGCAGAACCAGCAGGAA-----  
-----  
AAGAATGAACAGGACTTATTGGCATTAGACAAGTGGGCAAATCTGTGGAATTGGTTTGAAATATCAAAATGGC  
TGTGGTATATAAAAAATATTTATAATGGTAGTAGGAGGCTTAATAGGATTAAGAATAGTTTTTTGCT---  
GTGCTTTCTATAATA-----AATAGAGTTAGGCAGGGATACTCACCT-----  
TTATCATTTGCTACTAATTTGGTTGACACCATAGCAATAGCAGTAGCTGGC---  
TGGACAGATAGGGTTATAGAAAATAGGACAAAGAATTGGTAGGGCT-----  
-----ATCCTACACATA-----CCTAGAAGAATCAGACAGGGTTTCGAAAGGGCTTTGCTA---TAA  
>AF484478  
ACT---GCA-----  
GAAAACTTGTGGGTTACTGTCTACTATGGGGTACCTGTGTGG--AAAGACGCAGAG---  
ACCACCTTATTTTGTGCATCAGATGCGAAAGCGTATGATACAGAA--ATGCATAAT-----  
-----GTCTGGGCTACG---CATGCCTGTGTACCTACAGAC---  
CCCAACCCACAAGAAATAAATTTGAAA-----AATGTGACAGAAGAATTTAAC-----  
-----ATGTGGAAAAATAACATGGTAGAGCAGATGCATGCAGATATA---  
CTTAGTCTATGGGACCAAAGCCTA--AAGCCATGTGTAAAGTTA---  
ACCCCTCTCTGCGTTACTTTAGAAATGTCAAACTATGAAGGCACCAATTTAACTAATAGTAAC-----  
-----  
-----ACCACTGTCAACATCACCGAGGACATGAAAGGAGAAATAAAA---  
AACTGCTCTTTCAATATGACCACAGAATTAAGG-----  
GATAAGAGGCAGAAAATGCATTCGCTT--TTTTATAGACTGGATATAGTACAAATTAATGGCAAC-----  
-----  
-----  
AGAAGCAATAGTAGTGAACAGTATAGATTAATAAATTGTAATACCTCAGCCATTACACAA---  
GCTTGTCCAAAGGTATCCTTTGAGCCAATTCCCATACATTATTGTGCCCCAGCTGGTTTTGCGATTCTGAAGT  
GTAAG---GATAGAGATTTCAAT-----GGAACAGGGCCATGCAAGAAT-----  
-GTCAGC---ACAGTACAGTGCACACATGGAATCAAGCCAGTAGCATCAACT---  
CAATTGCTGTAAATGGCAGTCTAGCAGAAGGAGAG-----  
GTTATGATTAGATCTGAAAATATCACAAACAAT-----GCCAAAAACATAATAGTACAACCTTAAC---  
-----AAGCCTGTAAAC-----ATTACTTGTATCAGACCTAACAAACAATACAAGACAA-----  
-AGTGTACGTATA-----GGACCAGGACAAGCA---TTC-----TATGCAACAGGTAAC-----  
-----ATAATAGGGGATATA-----AGACAAGCATATTGT--GATGTCAATAGAACA---  
GAATGGAATAAACTTTGCAAGAGGTAGCCTACCAATTAGGA-----AAACACTTTGGG---  
-----AACAAAACAATAATCTTTGCT-----  
AACTCCACAGGAGGGGATCTAGAAATAACA--ACACATAGTTTTTAATTGTGGAGGAGAA---  
TTTAAACAGCTCCAGGCAAGAGTCCCTGGCTGTGGAAAGATACCTAAAGGATCAACAGCTCCTAGGAATTTGGG  
GCTGCTCTGGAACCTCATCTGCACCCTAATGTGCCCTGGAACCTCTAGTTGGAGT-----  
-----AATAAATCCCAGAGTGAGATATGG-----GAC-----  
AACATGACCTGGCTGCAATGG---GATAAAGAAATTAGCAATTACACACAGATAATATAT---  
AATCTAATTGAAGAATCGCAGATCCAGCAGAAA-----  
-----  
AAGAATGAACAAGACTTATTGGCATTGGACAAGTGGGCAAACCTGTGGAATTGGTTTGACATATCAAAC TGRC  
TGTGGTATATAAGAATATTTATAATGATAGTAGGAGGCTTAATAGGATTAAGAATAGTTTTTTACT---  
GTGCTTTCCATAATA-----AATAGAGTTAGGCAGGGATACTCACCT-----  
TTGTCGTTTCGCTATTAATTTGCTTGATACCATAGCAATAGCAACAGCTGAG---  
TGGACAGATAGGGTTATAGAAAATAGGACAAAGACTTTGTAGAGCT-----  
-----ATTCTCCACATA-----CCTAGAAGAATCAGACAGGCCTTAGAAAGGGCTTTGCTA---TAA  
>AF484493  
GCA---AAC-----  
CACCCTTTGTGGGTACGGTCTACTATGGGGTACCTGTGTGG--AAAGAAGCAGCT---  
ACCACCCTATTTTGTGCATCAGATGCTAAAGCACATGATACAGAA--GCGCATAAT-----  
-----GTCTGGGCTACA---CATGCCTGTGTACCCACAGAC---  
CCCAACCCACAAGAAATAAATTTGGTC-----AATGTGACAGAAAAGTTTAAC-----  
-----ATGTGGAAAAATAACATGGTAGAGCAGATGCATGAAGATATA---  
ATCAGTCTATGGGACCAAAGCCTA--CAGCCATGTGTAAAGTTA---  
ACCCCTCTCTGCGTCACGTTAGAGTGTAATCATACCACCAATAACATCACCAATGAT-----  
-----

-----ATCAATAGTACAGTTAACATGAAAGAAGAAATAAAA---  
 AACTGCTCTTTCAATATGACCACAGAATAAGA-----  
 GATAAGAAACAGAAAGTATATTCACCT---  
 TTTTATAAACTTGATATAGTACAAATGAAAGAAGATAATAGTACA-----  
 -----  
 ATGAAAGAAGATAATAGTAATACCAGTAGGTATAGATTAATAAATTGTAATACCTCAGCCATTACACAA---  
 GCTTGTCCAAAGGTAACCTTTGAGCCAATTCACATACATTATTGTGCCCCAGCTGGTTTTGCGATCCTAAAGT  
 GTAAT---GACAAGGAGTTCAAT-----GGAACAGGGCTATGCAAGAAT-----  
 -GTCAGC---ACAGTACAATGCACACATGGAATCAAGCCAGTGGTATCAACT---  
 CAACTGCTGTTAAATGGCAGTCTAGCAGAGGGTGAG-----  
 ATAAGAATTAGATCTGAAAATATCTCAGACAAT-----GCTAAAACCATAATAGTACAACCTTGTC----  
 -----AAGTCTGTACCA-----ATTAAGTGTATCAGACCTAACAACAATACAAGAAAA-----  
 -AGTATACGTATA-----GGACCAGGACAAAACA---TTC-----TATGCA---GGTGAT-----  
 -----GTAATAGGGGATATA-----AGACAAGCACATTGT---AATGTCAGTAGGTCA---  
 GATTGGAATAAACTTTACATCAGGTAGCTACACAATTAAGA-----CAATACTGGAAC----  
 -----AGCAGCATAATAATCTTTACT-----  
 AACTCCTCAGGAGGGGATTTAGAAATTACA--ACACATAGTTTTAATTGTGGAGGAGAA--  
 TTTAAACAGCTCCAGGCAAGAGTCCTGGCTGTGGAAAGATACCTAAAGGATCAACAGCTCCTAGGAATTTGGG  
 GCTGCTCTGGAAGAACTCATCTGCACCACTAATGTGCCCTGGAACGCTAGCTGGAGT-----  
 -----AATAAATCTTATGGGGAGATATGG-----GAT-----  
 AACATGACCTGGCTGCAATGG---GATAAAGAAATTAGCAATTACACAAACATAATATAT---  
 AAGCTAATTGAAGAATCGCAGAACCAGCAGGAA-----  
 -----  
 AAGAATGAACAAGACTTGTTGGCATTGGACCAGTGGGCAAGTCTGTGGAATTGGTTTGACATAACAAAATGGC  
 TGTGGTACATAAAAATATTTATAATGATAGTAGGAGGTATAATAGGATTAAGAATAGTTCTTGCT---  
 GTGCTTTCTGTAATA-----AATAGAGTTAGGCAGGGATACTCACCT-----  
 CTGTCGTTTGCTATTAGTTTGTATGATACCATAGCAATAACAGTAGCTGGC---  
 TGGACAGATAGGGTTATAGAAAGAGGACAAAGACTTGGTAGAGCT-----  
 -----CTTATCCACATA-----CCTAGAAGAATCAGGCAGGGCTTAGAAAGGGCTTTACTA---TAA  
 >AB098330  
 GCT---GCA-----  
 GAAAACTTGTGGGTTACTGTCTACTACGGGGTACCTGTGTGG--AAAGACGCAGAG---  
 ACCACCTTATTTTGTGCATCAGATGCTAAAGCATATGATACAGAA--GTACATAAT-----  
 -----GTCTGGGCGACA---CATGCCTGTGTACCCACAGAC---  
 CCCAACCCACAAGAAATACACTTGGA-----AATGTGACAGAAGATTTTAAC-----  
 -----ATGTGGAAAAATAATATGGTAGAGCAGATGCATACAGATATA---  
 ATCAGTCTATGGGATCAGAGCCTA--AAGCCATGTGTAGAATTA--  
 ACCCTCTCTGCGTTACTTTAGATTGTCTAAACGCCACCCTCAATGCCACCGCCCC-----  
 -----  
 -----AATGTCACCAATGACATGGAAGGAGAAATGAAA---  
 AACTGCTCTTACAATATAACCACAGAATTAAAG-----  
 GATAAGAAACAGCAAGTGTATTCACCT--TTTTATAAGCTTGATGTAGTACAAATTAATGAA-----  
 -----  
 -----  
 AAGAATAAAACAAACAAGTATAGATTAATAAATTGTAATACCTCAGCCATTACACAG---  
 GCTTGTCCAAAGGTATCCTTTGAGCCAATTCACATACATTATTGTGCCCCAGCTGGCTTTGCGATTCTAAAGT  
 GTAAG---GATACAGAGTTCAAT-----GGAACAGGGCCATGCAAGAAT-----  
 -GTCAGC---ACAGTACAATGCACACATGGAATCCGGCCAGTAATATCAACT---  
 CAACTGCTGTTAAATGGTAGTCTAGCAGAAGGAGGG-----  
 ATACAGATTAGATCTGAAAATATCACAACAAT-----GCCAAAACCATAATAGTACAACCTTGAT----  
 -----AAGGCTGTAAAA-----ATTAATTGTACCAGACCTAACAACAATACAAGAAAA-----  
 -AGTGTAAGGATA-----GGACCAGGACAAGCA---TTC-----TATGCAACAGGTGAT-----  
 -----ATAATAGGGGATATA-----AGACAGGCACATTGT---AATGTCAGTAGAGCA---  
 AAATGGAACGAACTTTACGAGGGATAGCCAAAAAACTAAGC-----GAACACTTTAAA-----  
 -----AACAAAATAATAATCTTTGAG-----  
 AAATCCTCAGGAGGGGATATAGAAATTACA--ACACATAGTTTTAATTGTGGAGGAGAA--  
 TTTAAACAGCTCCAGGCACGAGTCCTGGCTGTGGAAAGATATCTAAAGGATCAACAGCTCCTAGGAATTTGGG  
 GCTGCTCTGGAAGAACTCATCTGCACCACTAATGTGCCCTGGAACCTTAGTTGGAGT-----  
 -----AATAAATCTATGAATGAGATATGG-----GAT-----  
 AACATGACTTGGCTGCAATGG---GAAAAAGAAATTAGCAATTACACACAATTAATATAT---

AATCTAATTGAAGAATCGCAGAACCAGCAGGAA-----  
-----  
AAGAATGAACAAGACTTGTGGCATTGGACAAGTGGGCAAGTCTGTGGAATTGGTTTGACATATCAAGGTGGC  
TGTGGTATATAAAAAATATTTATAATGATAGTAGGAGGCTTAATAGGATTAAGAATAGTTTTTTGCT---  
GTGCTTTCTGTAATA-----AATAGAGTTAGGCAGGGATACTCACCT-----  
CTGTCATTTCGCTGTCAATTTGGTTGATACCATAGCAATAGCAGTAGCTGGC---  
TGGACAGATAGGGTTATAGAAATAGGACAAAGAATTTTTAGAGCT-----  
-----ATTCTTAACATA-----CCTAGAAGAATCAGACAGGGCCTTGAAAGGGGCTTGCTA---TAA  
>GU367412  
GCT---ACA-----  
GAAAAATTTGTGGGTACGGTCTACTATGGGGTACCAGTGTGG--AGAGACGCAGAG---  
ACCACCCTATTCTGTGCATCAGATGCTAAAGCATATGATCAAGAA---GCACATAAT-----  
-----GTTTGGGCTACA---CACGCCTGTGTACCCACAGAC---  
CCCAACCCACAAGAAATAGATTTAGAA-----AATGTGACAGAAGAGTTTAAAC-----  
-----ATGTGGAAAAATAACATGGTGGAGCAGATGCATACAGATATA---  
ATCAGTCTATGGGACCAAAGCTTA--AAGCCATGTGTAAAATTA---  
ACCCCTATCTGCGTTACTTTAAACTGTGAAAACGTCAACCATCAATGCCAATGCC-----  
-----  
-----AATGTCACGAATGAAATGGGAGAAGAAATAAAA---  
AACTGCTCATACAATACAACTACAGAGCTAAGA-----  
GATAAGAAACAAAAGGTATATTCACCT---  
TTTTATAGACTGGATATAGTACAAATGAATAGTAGTAATAGTGAT-----  
-----  
AAAAATAAGGGTAATAATAATAAAAGTAGTAGTAATAGTGAGTATAGACTAATAAAATTGTAATACCTCGGCCA  
TTACACAG---  
GCTTGTCCAAAGGTATCTTTTGAGCCAATTCCCATACATTATTGTGCCCCAGCTGGTTTTGCGATTCTAAAGT  
GTAAG---GATAAGAAATTCAAT-----GGAGCAGGGCCATGTAGAAAT-----  
-GTCAGC---ACAGTACAATGCACACATGGAATCAGGCCAGTAGCATCAACT---  
CAACTGCTGTTGAATGGCAGTCTAGCAGAAGAAGAG-----  
GTAATGATTAGATCTGAAAATTTCTCAAACAAT-----GCCAAAACCATAATAGTACAGCTTGTT---  
-----AATCCTGTAGAA-----ATTAATTGTACCAGACCCAACAACAATACAAGAAAA-----  
-AGTGTAACGCATA-----GGACCAGGACAGGCA---TTC-----TATGCAACAGGTGAC-----  
-----ATAATAGGGAATATA-----AAAAAGTCATCTTGT---ACTGTCAATAAAACA---  
GAATGGAATAAAGCTTTACAAGAGGTAGCTAAAAAGTTAAAA-----CAACACCTTAAT---  
-----AAAACAACAATAAAATTTGCT-----  
GAATCCTCAGGAGGGGATTTAGAAATTGCA--ACACATAGCTTTAATTGTGGAGGAGAA---  
TTTAAACAGCTCCAGGCAAGAGTCCTGGCTGTGGAAGGGTACCTAAAGGATCAACAGCTCCTAGGAATTTGGG  
GTTGCTCTGGAAGAACTCATCTGCACCACTAATGTGCCCTGGAAGTCTAGTTGGAGT-----  
-----AATAAATCTCAGAGTGAAATATGG-----GAT-----  
AGTATGACCTGGCTGCAATGG--GATAAAGAAATTGGCAATTACACAAACATAATATAT---  
GATCTACTTGAAGAATCGCAGATCCAGCAGGAA-----  
-----  
AAGAATGAACAAGACTTATTGGCATTGGACAATGGGCAAATCTGTGGAATTGGTTTGACATATCAAATTGGT  
TATGGTATATAAAAAATATTTATAATGATAATAGGGGGCTTAATAGGATTAAGAATAGTTTTTTACT---  
GTGCTTTCTATAATA-----AATAGAGTTAGGCAGGGATACTCACCT-----  
CTATCATTTGCTATTTCTTTGCTTGATGCTACAGCAATAGCAGTAGCTGAG---  
TGGACAGATAGGGTTATAGAAGTAGGACAAAGGGTTGGTAGAGCT-----  
-----CTTCTCCACATA-----CCTAGAAGAATCAGACAGGGCCTTCGAAAGGGCTTTGATA---TAA  
>FJ647148  
ACT---GCA-----  
GACAACTTGTGGGTTACTGTTTACTATGGGGTACCTGTGTGG--AAAGATGCAGAG---  
ACCACCCTATTTTGTGCATCAGATGCTAAAGCATATGAGAAAGAA---GTGCATAAT-----  
-----GTCTGGGCTACA---CATGCCTGTGTACCCACAGAC---  
CCCAACCCACAAGAAATACATTTGGTA-----AATGTGACAGAAAATTTTAAT-----  
-----ATGTGGAAAAATAAAATGGTAGAGCAGATGCATGCAGATATA---  
ATCAGTCTATGGGACCAAAGCCTA--AAGCCATGTGTAAAGCTA---  
ACCCCTCTCTGTGTAACCTTTAAATTGTACCAATGCCAATATCACCTATGTCAGTACCAACAGCACG-----  
-----  
-----AAGGCCTATGTCACTGTCAACGGCACAACGGAAGAAATAAAA---  
AACTGCTCTTATAATATGACCACAGAATAAGG-----

GATAAGAAACAGAAAGTATATTCACCTT---TTTTATAGACTTGATGTAGTACAGATTAATAAAAAATAATAAT-  
-----  
-----  
AGTAGAGATAATGATAGTGGTGAGTATAGATTAATAAATTGTAATACCTCAGCCATTACACAA---  
GCTTGTCCAAAGGTCTCCTTTGAGCCAATTCCCATACATTATTGTGCTCCAGCTGGTTTTGCGATCCTAAAAT  
GTAAT---GAGGAGGAGTTCAAC-----GGAACAGGGCCATGCAAGAAT-----  
-GTCAGC---TCAGTACAATGCACACATGGAATCAGGCCAGTAGTATCAACT---  
CAACTGCTGTAAATGGCAGTCTAGCCCAAGGAGAG-----  
GTAAAAATTAGATCTGAAAATATCTCAGACAAT-----GCTAAAACCATAATAGTACAATTTAAC-----  
-----CAGTCTGTAATA-----ATTAATTGTACCAGACCTAGCAACAATACAAGGAGA-----  
-AGTGTACGTATA-----GGACCAGGACAAGCA---TTC-----TATGCAACAGGTGAG-----  
-----ATAATAGGGGACATA-----AGGAAAGCACATTGT---AATGTCAGTGAATCA---  
GAATGGAATAAAGCTTTACAACAGGTAGCTACACAATTAGGA-----AGATACTGGAGT-----  
-----AACAAAACAATAATTTTTTAAT-----  
AGCTCCTCAGGAGGGGATTTAGAAATTACA---ACACATAGTTTTAATTGTGGAGGAGTA---  
TTTAAACAGCTCCAGGCAAGAGTCCTGGCTCTAGAGAGATACCTAAGGGATCAACAGCTCCTAGGAATTTGGG  
GCTGCTCTGGAAGAACTCATTTGCGCCACTAATGTGCCCTTGGAACCTTAGTTGGAGT-----  
-----AATAAATCTTATAATGAAATATGG-----GAT-----  
AACATGACCTGGCTGCAGTGG---GATAAAGAAATTGACAAATTACACAGAAACAATATAT---  
AGGCTAATTGAAGAATCGCAAAACCAGCAGGAA-----  
-----  
AGGAATGAACAAGACTTATTGGCATTGGACAAGTGGACAAATCTGTGGAGTTGGTTTGACATATCGAACTGGC  
TGTGGTATATAAAAAATATTTATAATGATAGTAGGAGGCTTAATAGGATTAAGAATAGTTTTTTGCT---  
GTGCTTTCTATAATA-----AATAGAGTTAGGCAGGGATACTCACCT-----  
TTGTCAATTTGCTATTAATTTGCTTGATACCATAGCAATAGCAGTAGCTGGC---  
TGGACAGATAGGGTTATAGAAGTAGGACAAAGATTTGGTAGAGCT-----  
-----ATTCTCCACATA-----CCTAGAAGGATCAGACAAGGACTTGAAAGAGCTTTACTA---TAA  
>KT183312  
GCT---GCA---AAT-----  
GAAAACTTGTGGGTACTGTTTACTATGGGGTGCCTGTATGG---AAGGAAGCAACT---  
ACCACCCATTTTTGTGCTTCAGATGCTAAAGCATATGATACAGAG---AAGCATAAT-----  
-----GTCTGGGCTACG---CATGCCTGTGTACCCACAGAC---  
CCCAACCCACAAGAAATGCATTTGGAA-----AATGTGACAGAAGAATTTAAC-----  
-----ATGTGGAAAAATGACATGGTAGAGCAGATGCATACAGATATA---  
ATCAGTCTATGGGACCAAAGCCTA---CAGCCATGTGTAAAGTTA---  
ACCCCTCTCTGTGTACTTTAGATTGCCATGATGTCTCAGTCTCAGCAGTAACCAGAATGGCAAT-----  
-----  
-----AGCAGCAATAATGACAGTATCAGTAACATAAAAGAAGAAATAAAA---  
AACTGCTCTTTCAATACAACCACAGAACTATGG-----  
GATAAGAAACAGAAAGTATATTCACCTC---TTTTATAAACTAGATGTAGTAGCAATGAATGAA-----  
-----  
-----  
AGCAATAATAGTAGTACTCAGTATAGATTAATAAATTGTAATACCTCAACCATCACACAG---  
GCTTGTCCAAAGGTAACCTTTGAGCCAATTCCCATACATTATTGTGCTCCAGCTGGTTTTGCGATTCTAAAAT  
GTAAT---GACAAGAAGTTCAAT-----GGAACAGGGCCATGCAAGAAT-----  
-GTCAGC---ACAGTACAATGCACACATGGAATCAAGCCAGTAGTATCAACT---  
CAACTGCTGTAAATGGCAGTCTAGCAGAAGAAGAG-----  
ACAATGGTTAGATCTGAAAATATCACAACAAT-----ATCAAAAACATAATAATACAATTTAAT-----  
-----GATTCTGTAGCA-----ATTAGTTGTATCAGACCTGGCAATAATACAAGAAAA-----  
-AGTGTACGTATA-----GGTCCAGGACAAGCA---TTC-----TATGCAACAGGTGAC-----  
-----ATAATAGGGGATATA-----AGAAAAGCATATTGT---AATGTCAGTAGAGTA---  
ACATGGAATACAACCTTTACAAAAGGTAGCCAAACAATTATCA-----AAATACTTTGAG-----  
-----AACAAAACAATAACATTTAAT-----  
AGCACCACAGGAGGGGATCTAGAAATTACA---ATGCATAGCTTTAATTGTGGGGGAGAA---  
TTTAAACAGCTCCAGGCAAGAGTCCTAGCTGTGGAAAGATACCTAAGGGATCAACAGCTCCTAGGAATTTGGG  
GCTGCTCTGGAAGAAATCATCTGCACCACCTAATGTGCCCTGGAATTATAGTTGGAGT-----  
-----AATAAATCCTATCATGAGATATGG-----GAC-----  
AACATGACCTGGCTACAATGG---GATAAAGAAATTGACAAATTACACACAGATAATATAT---  
AGTCTAATTGAAGAATCACAGATCCAGCAAGAA-----  
-----

AAAAATGAGCAAGACTTATTGGCATTGGACAAGTGGGCAAGTCTGTGGAATTGGTTTAACATAACAGAATGGC  
TGTGGTATATAAGAATATTTATAATGATAGTAGGAGGCTTAATAGGATTAAGAATAGTTTTTTGCA---  
GTGCTCTCTATAATA-----AATAGAGTTAGGCAGGGATACTCACCT-----  
TTGTCTTTTGCTATCAATTTGCTTGATACCATAGCAATAGCAGTAGCTGGC---  
TGGACAGATAGGGTTATAGAAATAGGACAAAGAGTTGCTAGAGCT-----  
-----ATTCTTAACATA-----CCTACAAGAATTAGACAGGGCTTTGAAAGGGCTTTTGCTA---TAA  
>KC863311  
GCT---GCA-----  
AACAACTTGTGGGTTACTGTCTATTATGGGGTACCTGTGTGG---AGAGATGCAGAA---  
ACCACCTTATTTTGTGCATCGGATGCTAAAGCATATGATACAGAG---GTACATAAT-----  
-----GTCTGGGCTACA---CATGCTTGTGTACCCACAGAC---  
CCCGACCCACAAGAAATAGATTTAAAA-----AATGTGACAGAAGAGTTTAAAC-----  
-----ATGTGGAAAAATAACATGGTAGAGCAAATGCATACAGATATA---  
ATTAGTCTATGGGACCAAAGCCTA---AAGCCATGTGTAAAGTTA---  
ACCCATCTCTGCGTCACTTTAAATTGTAGCACTGCTAATGTTAATGTCACCGATTAC-----  
-----  
-----AACATCACGACGGGGGACAAGGAAGAAATAAAA---  
AACTGCTCTTTCAATATGACCACAGAATAAGT-----  
GATAAGAAACAGAAAGTACATTCACCT---  
TTTTATAGACTAGATGTAGTACCAATTAAACCTGATAATAGTGATGAT-----  
-----  
AATAGAAGTAATAGTAGTTATAGTAATTATAGATTAATAAAATTGTAATACCTCAGCCATTACACAA---  
GCATGCCCAAAGGTAACCTTTGATCCAATTCCCATACATTATTGTGCTCCAGCTGGTTTTGCGATCCTAAAGT  
GTAAG---GATGATGGGTTCAAT-----GGAACAGGACCATGCAAGAAT-----  
-GTTAGC---TCAGTCCAATGCACACATGGAATCAAGCCAGTAGTATCAACT---  
CAATTGTTGTTAAATGGCAGTCTAGCAGGAAAAGGG-----  
ATAAGAATTAGATCTGAAAATATCACAGACAAT-----ACCAAACTATAATAGTACAACCTTGAC----  
-----AAGCCTGTGAGG-----ATTAATTGTACCAGACCTAACAACAATACAAGAAAA-----  
-AGTATGCGTATA-----GGACCAGGACAAACA---TTC-----TTTGCAACAGGTGAC-----  
-----ATAATAGGGGATATA-----AGAAAAGCACATTGT---AATATCAGTATATCA---  
GAATGGAATGAGACTCTATACAAGGTAGCTGAACAGTTAGGA-----GGAATTATTGGT-----  
-----AACAAAACAGTAAATTTGCT-----  
AACTCCTCAGGAGGGGATCTAGAAATCACA--ACACATAGTTTTAATTGTGGAGGAGAA---  
TTTAAACAGCTCCAGGCAAGAGTCCCTGGCTGTGGAAAGATACCTAAAGGATCAACAGCTCCTAGGAATTTGGG  
GCTGCTCTGGAAACTCATCTGCACCATAATGTGCCCTGGAACCTCTAGTTGGAGT-----  
-----AATAAAAATCAGAGTGAGATATGG-----GAT-----  
AACATGACCTGGCTGCAATGG---GATAAAGAAATTAACAATTACACACAAATAATATAT---  
GACCTACTTGAAGAATCGCAGAACCAGCAAGAA-----  
-----  
AAGAATGAACAGGAATTATTGGCATTGGACAAGTGGACAAATCTGTGGAATTGGTTTAACATAACAAACTGGC  
TGTGGTATATAAAAATATTTATAATGATAGTAGGAGGCTTAATAGGATTAAGAATAGTTTTTTGCT--  
GTGCTTTCTATAATA-----AATAGAGTTAGGCAGGGATACTCACCT-----  
TTGTCAATTTGCTATTAGTTTATTTGATACCATAGCAATAGCAGTAGCTGGC---  
TGGACAGATAGGGTTTTAGAAATAGGACAAGCAATTTGTAGAGCT-----  
-----ATCCTTCACATA-----CCTAGAAGAATCAGACAGGGCCTTGAAAGGCTTTTGCTA---TAA  
>HM623589  
GCT---AAA-----  
GAAGACTTGTGGGTTACAGTTTATTATGGGGTACCTGTGTGG---AAGGATGCAGAG---  
ACCACTCTATTTTGTGCATCAGATGCTAAAGCATATGATACAGAA---AAACATAAT-----  
-----GTCTGGGCAACA---CATGCTTGTGTACCCACAGAC---  
CCCAACCCACAAGAAATAGACCTAGAC-----AATGTAACAGAAAATTTTAAAC-----  
-----ATGTGGAAAAATGGCATGGTAGATCAGATGCATAAAGATATA---  
ATCAACCTATGGGATCAAAGTCTA---AAGCCATGTGTAAAGTTA---  
ACCCCTCTCTGCGTTACCTTGAATTGCACTAACATTAACATCAACAACAGCACTGACAAT-----  
-----  
-----GGCACTTCTATCACTAATGAGATAGGAGACGAGATAAAA---  
AACTGCTCTTACAATATTACTACAGAATTTAGA-----  
GATAAGAGACGGAGAGTGTCTTCACTG---TTTTATAGACATGATATAATGCCAATTAATGAA-----  
-----  
-----

AAGAATGATAGTAGGACTTATATACTAATAAATTGTAATACCACAACCATTACACAG---  
GCTTGTCCAAAGGTGTCCTTTGAACCAATTCCTATACACTATTGTGCCCCTGCTGGTTATGCGATTCTAAAAT  
GTAAG---GACAAAGATTTCAAT-----GGGACAGGACCATGCAAGAAT-----  
-GTCAGC---ACAGTACAATGTACACATGGAATTAAGCCAGTGGTATCAACT---  
CAACTGCTGTTAAATGGCAGTCTAGCAGAAGGAGGG-----  
ATAAAAATTAGATCTGAAAATATTACAAACAAT-----GCCAAAACATAATAGTACAGCTTGAT----  
-----ACGCCTGTAAAA-----ATTAATTGTAGCAGGCCCAACAACAATACAAGGGAC-----  
-AGGATAGGTATA-----GGACCAGGACAAGCA---TTC-----TTTGCAAGTAATAGG-----  
-----ATAATTGGGAATATA-----AGACAAGCACACTGT---AATATCAGTGCCTCA---  
ATATGGAATATGATTTTACAAAAGGTAGCTGAACAATTAGCC-----AAGCAGTTCCT---  
-----AATAAAAACATAAGCTTTACA-----  
AATCACTCAGGAGGAGACCTAGAAATTACA---TCACACACTTTTAAATTGTGGAGGAGAG---  
TTTAAGCAGCTCCAGGCAAGAGTCCTGGCTCTGGAAAGATACCTAAGGGATCAACAGCTCCTAGGAATTTGGG  
GCTGCTCTGGAAAACTATCTGCACCCTACTGTGCCTTGGAACTCTAGTTGGAGT-----  
-----AATAAATCTCAGGAGGAGATTTGG-----GGA-----  
AACATGACTTGGTTGCAGTGG---GATAAAGAAATTAGCAATTACACAGACTTAATATAC---  
GTGCTGCTTCAAGAGTCACAAAACCAGCAGGAC-----  
-----  
AGGAATGAACAAGAGCTATTGGCATTGGACAAGTGGGCAAATCTGTGGAATTGGTTTGACATATCAAATTGGC  
TATGGTACATAAGAATATTTATAATGGTAGTAGGAGGCTTAGTAGGCTTAAGAATAGTTTTTTGCA---  
GTAATTTCTATAGTA-----AATAGAGTTAGGCAGGGATACTCACCT-----  
TTGTCAATTGGCTATTAGTCTATTTGATACCACAGCAATAGCAGTAGCTAAT---  
TGGACAGATAGGGCTATAGAATTAGGACAAAGAATCTGTAGAGCT-----  
-----ATCCGTAACATA-----CCTAGAAGAATAAGACAGGGCTTTGAAACAGCTTTGCTA---TAA  
>MH705163  
GCT---ACA-----  
AATTTGTGGGTCACAGTATACTATGGAGTACCTGTATGG---AGAGATGCAGAA---  
ACCACCCATTTTTGTGCATCAGATGCCAAAGCATATGATACAGAG---GTGCATAAT-----  
-----GTCTGGGCCACA---CATGCCTGTGTACCCACAGAC---  
CCCAACCCACAAGAAGTAAACCTGGAA-----AATGTAACAGAAGATTTTAA-----  
-----ATGTGGAAAAATAGCATGGTAGAGCAGATGCATGTAGATATA---  
ATCAGTCTATGGGATCAAAGCCTA---AAGCCATGTGTAAAATTA---  
ACCCCTCTCTGCGTTACTTTAAATTGTAGCAATGCCACCGTCAATAGCACCAATAGCACCATCACT-----  
-----  
-----GAAGAAATAAAA---  
AACTGCTCTTACAAGGTTACCCAGAACTAAAA-----  
GATAAGCCACAGAGAGTCTATTCAGT---TTTTATAAACTTGATGTAGTACAAATTAGTAGT-----  
-----  
AGTACACAGAAGGATAATGGTACTCAGTATAGACTAATAAATTGTAATACCTCAGTCCTTACCCAA---  
GCTTGTCCAAAGGTATCCTTTGAGCCAATTCCTATACATTATTGTGCTCCAGCTGGTTTTGCGATTCTAAAGT  
GTAAG---GATAAGGAATTCAAT-----GGAACAGGGTCATGCAAGAAT-----  
-GTTAGC---TCAGTACAATGCACACATGGAATTAGGCCAGTAGCATCAACT---  
CAACTACTGTTGAATGGCAGCCTAGCAGAAGGAAAG-----  
ATAATGATTAGATCTGAAAATATTACAGACAAT-----GCCAAAACATAATAGTACAGTTTAAT----  
-----GAGTCTGTACCA-----ATTAATTGTAGCAGGCCCAACAACAATACAAGAAAA-----  
-AGTATACGCTTT-----GGACCAGGACAAGCC---TTC-----TAT---ACAATGAC-----  
-----ATAATAGGGGATATA-----AGACAAGCACATTGT---AATATCAGCAAAACA---  
AAATGGAATGACACTTTACAAAAGATAGTTGAACAATTAAGA-----GAACACTTCCT---  
-----AATAAAACAATAGTCTTTAAA-----  
AAACCCTCAGGAGGGGACCTAGAAATTACA---ACACATAGTTTTAATTGTGGGGGAGAA---  
TTTAAACAGCTCCAGGCAAGAGTCCTGGCTGTGGAAAGATACCTACAGGATCAACAGCTCCTGGGAATTTGGG  
GCTGCTCTGGTAAACTCATCTGCACCCTAATGTACCCTGGAACTCTAGTTGGAGT-----  
-----AATAAGACTCAGAGTGAGATTTGG-----GAC-----  
AACATGACCTGGTTGCAATGG---GATAAAGAAATTAGCAATTACACAGATACAATATAC---  
AGACTACTTGAAGACTCGCAGAACCAGCAGGAA-----  
-----  
AAAAATGAACAAGACTTATTGGCATTAGACAAATGGGCAAAGTTTGTGGAGTTGGTTTGACATAACAAAATGGC  
TGTGGTATATAAAAATATTTATAATGATAGTAGGAGGCTTAATAGGATTAAGAATAGTTGTTGCT---  
ATAATTTCTGTAGTA-----AGTAGAGTTATGGGGGATACTCACCT-----

TTGTCATTTGCTATTAGTTTATTTGATACCATAGCAGTAGCAGTAGCTGAG---  
 TGGACAGATAGAGTTATAGAAATAGGACAAAGAATTTGCAGAGCT-----  
 -----ATTTCGAACATA-----CCTAGAAGAATCAGACAGGGCTTCGAAAGGGCTTTACTA---TAA  
 >AF286241  
 GCT---ACA-----  
 GATTGGTGGGTCACAGTATACTATGGAGTACCTGTGTGG---AAAGATGCAGAA---  
 ACCACCTTATTTTGCATCAGATGATAAAGCATATGAGACAGAA---GCGCATAAT-----  
 -----GTCTGGGCCACA---CATGCCTGTGTACCCACAGAC---  
 CCCAACCCACAAGAAGTAAACCTAAAA-----AATGTGACAGAAGATTTTAAC-----  
 -----ATGTGGAAAAATAATATGGTAGAGCAGATGCATGAAGATATA---  
 ATCAGTCTATGGGATCAAAGCCTA---AAGCCATGTGTAAAATTA---  
 ACCCCTCTCTGTGTACGTTAAACTGTAGCAATGCCAACACCAATAGCACCAATAGC-----  
 -----  
 -----ACTAGCGCCCCTAGCATGGGCCCTGGAGAAATAAAA---  
 AACTGTTCTTTTAATGTTACCACAGAAGTAAGA-----  
 GATAAAGAAAAGAAAGTCTATGCACTG---TTTTATAAACTTGATGTAGTACAAATTAATGAAAGTGACAGT-  
 -----  
 -----  
 AATAGTACAAAGGATAGTACTCAGTATAGACTAATAAAATTGTAATACCTCAGCCATCACACAG---  
 GCTTGTCCAAAGGTATCCTTTGAGCCAATTCCTATACATTATTGTGCCCCAGCTGGTTTTGCATTCTAAAGT  
 GTGAG---GATCCGAGATTCAAT-----GGAACAGGACCATGCAATAAT-----  
 -GTTAGC---TCAGTACAATGTACACATGGAATTATGCCAGTAGCATCAACT---  
 CAACTGCTGTTGAATGGCAGTCTAGCAGAAAAAGAG-----  
 GTGATGATTAGATCTGAAAAATTACAAACAAT-----GCCAAAAACATAATAGTACAGTTTAAT----  
 -----GAATCGGTACCA-----ATTACTTGTATCAGACCCAACAACAATACGAGAAAA-----  
 -GGTATACCTATT-----GGACCAGGACAAGTC---TTC-----TAT---ACAAGTGAC-----  
 -----ATAATAGGGGATATA-----AGACAAGCATATTGT---AGTATCAACAAAACA---  
 AAATGGGATGCCTCTTTACAAAAGGTAGCTGAACAATTAAGA-----AAACACTTCCT---  
 -----AATAAAACAATAAATTTTACC-----  
 AAACCCCTCAGGAGGGGATCTAGAAATTACA--ACACATAGTTTTAATTGTGGAGGAGAA---  
 TTTAAACAGCTCCAGGCAAGAGTCCTGGCTCTGGAGAGATACCTACAAGATCAACAGCTCCTGGGAATTTGGG  
 GTTGCTCTGGAAACTCATCTGCACCACTACTGTGCCCTGGAACCTTAGTTGGAGT-----  
 -----AATAAGACTTACGAGGAGATTTGG-----AAC-----  
 AACATGACCTGGTTGCAATGG---GATAGAGAAATTGACAATTACACAAATATAATATAC---  
 AATCTACTTGAAGAATCGCAGAACCAGCAGGAA-----  
 -----  
 AAGAATGAACAAGACTTACTGGCATTAGATAAATGGGCAAGTTTGTGGAATTGGTTTAGCATAACAACTGGC  
 TGTGGTATATAAGAATATTACATAATGATAGTAGGAGGCTTGATAGGATTAAGAATAGTTATGGCT---  
 ATAATTTCTGTAGTG-----AATAGAGTTAGGCAGGGATACTCACCT-----  
 TTGTCATTTGCTATTAGTTTACTAAATTCCACAGCAATAGCAGTAGCTGAG---  
 TGGACAGATAGGGTTATAGAAATAGGACAAAGAGCTTGCAGAGCT-----  
 -----ATTCTCAACATA-----CCTAGAAGAATCAGACAGGGCTTCGAAAGAGCTTTACTA---TAA  
 >AF286238  
 GCT---GCA-----  
 GATTTGTGGGTCACAGTATACTATGGAGTACCTGTGTGG---AGAGATGCAGAT---  
 ACCACCTTATTTTGTGCATCAGACGCTAAAGCATATGCTACAGAA---AAGCATAAT-----  
 -----GTCTGGGCCACA---CATGCCTGTGTACCCACAGAC---  
 CCCAACCCACAAGAAGTAAACCTGGCA-----AATGTAACAGAAGATTTTAAC-----  
 -----ATGTGGAAAAATAACATGGTAGAGCAGATGCATGCAGATATA---  
 ATCAGTCTATGGGATCAAAGCCTA---AAGCCATGTGTAAAATTA---  
 ACCCCTCTCTGCGTCACTTTAAATTGTAGCAATGCCAACACCACTAAC-----  
 -----  
 -----ACCAATAGCACTGAAGAAATAAAA---  
 AACTGCTCTTACAATATGCCACAGAATAAAA-----  
 GATAAAACACAGAAAGTCTATTCCTG---TTTTATGAACTTGATGTAGTACTACTTAATAGAAGT-----  
 -----  
 -----  
 AAGAATAGTAGTTATAGTACTTATAGACTAATAAGTTGTAATACCTCAGTCATCACACAA---  
 GCTTGTCCAAAGGTATCCTTTGAGCCAATTCCTATACATTATTGTGCCCCAGCTGGTTATGCGATTCTAAAGT  
 GTAAG---GATAAGGAATTCAAT-----GGAAAAGGGTCATGCAGTAAT-----

-GTTAGC---TCAGTACAATGTGCACATGGAATTAGGCCAGTAGCATCAACT---  
CAACTGCTGCTGAATGGCAGTCTAGCAGAAGGAAAG-----  
GTAATGATTAGATCTGAAAATATTACAGACAAT-----GCCAAAAACATAATAGTACAGTTTAAT----  
-----AAACCTGTACCA-----ATTAATTGTACCAGACCCAACAACAATACAAGAAAA-----  
-AGTATACGCTTT-----GGACCAGGACAGGCC---TTC-----TATACAAATAATAAC-----  
-----ATAATAGGGGATATA-----AGACAAGCACATTGT---AATATCAGCATAACA---  
GAATGGAATGCCACTCTAAAAAAGGTAGTTGAACAATTAAGA-----GAACACTTCCCT-----  
-----AATAAAACAATAATCTTTAAT-----  
AGCTCCTCAGGAGGGGACCTAGAAATTACA---ACACATAGTTTTAATTGTGGAGGAGAA---  
TTTAAACAGCTCCAGGCAAGAGTCCTGGCTCTGGAAAGATACCTACAGGATCAACAGCTCCTAGGAATTTGGG  
GCTGCTCTGGAAAACCTCATCTGCGCCACTGATGTGAGATGGAACCTCTAGTTGGAGT-----  
-----AATAAGACTCAGGAGCAGATTTGG-----AAA-----  
AACATGACCTGGTTGCAATGG---GATAAGGAAATTAGCACTTACACAGACATAATATAT---  
ATGCTACTTGAGGAATCGCAGAACCAGCAGGAA-----  
-----  
AAGAATGAACAAGACTTATTGGCATTAGACAAATGGGCAAATTTGTGGAATTGGTTTGACATAACAAGATGGC  
TGTGGTATATAAAAAATATTTATAATGATAGTAGGAGGCTTGATAGGATTAAGAATAGTTATTGCT---  
ATAATTTCTGTAGTA-----AAAAGAGTTAGGCAGGGATACTCACCA-----  
TTGTCATTTGCTATTAGATTGCTTGATACCATAGCAGTAGCAGTAGCTGAG---  
TGGACAGATAGGGTTATAGAAATAGGACAAAGAGCTTGCAGAGCT-----  
-----ATCCGCAACATA-----CCTAGAAGAATCAGACAGGGCCTCGAAAGGGCGTTACTA---TAA  
>AF286237  
GCT---ACA-----  
GATTTGTGGGTCACAGTATACTATGGAGTACCTGTGTGG---AAAGATGCAGAT---  
ACCATCCTATTTTGTGCATCAGATGCTAAAGCATATGATACAGAA---GTGCATAAT-----  
-----GTATGGGCCACA---CATGCCTGTGTACCCACAGAC---  
CCCAACCCACAAGAAATAAACCTGGAA-----AATGTAACAGAAAATTTTAAT-----  
-----ATGTGGAATAACATGGTAGAGCAGATGCAAGAAGATATA---  
ATCAGCTTATGGGATCAAAGCCTA---AAGCCATGTGTAAAATTA---  
ACCCCGCTCTGCGTCATTTTAAATTGTAGCAATGCCAATACCAGCACCCATAGCAATAGC-----  
-----  
-----AGTAGCACCCAGAGCCCCATTAATGAAGAAATAAAA---  
AACTGCTCTTACAATACTACCACAATACTAAGA-----  
GATAAGACACAAAAAGTTTATTCACTG---TTTTATAGACTTGATGTAGTACAACCTGATGAAAGTGAAAT-  
-----  
-----  
AAGAATACATCAGGTAGTAATACTCTGTATAGACTAATAAATTGTAATACCTCAACCATCACACAA---  
GCGTGTCCAAAGGTAACCTTTGAGCCAATTCTTATACATTATTGTGCCCCAGCTGGTTTTGCGATTCTAAAGT  
GTAAG---GATCCGAGATTCAAT-----GGAACAGGGTCATGCAAGAAT-----  
-GTTAGC---TCAGTACAATGTACACATGGAATTAAACCAGTAGCATCAACT---  
CAACTGCTGTTGAATGGCAGTCTAGCAGAAGGAGGG-----  
AAAATAATGATTAGATCTGAAAATATTACAAACAAT-----GCCAAAAACATAATAGTTCAGTTTACT-  
-----AAGCCTGTACTA-----ATTACTTGTATCAGACCCAACAACAATACAAGAAAA---  
---AGTATACGCTTT-----GGACCAGGACAAGCC---TTC---TAT---ACAAATGAA---  
-----ATAATAGGGGACATA-----AGACAAGCACATTGT---AATATCAACAAAACA-  
---TTATGGAATGACACTTTACAAAAGGTAGCTGAACAATTAAGA-----GAGAAATTCCCT--  
-----AAGAAAACCATAATCTTTACT-----  
AACTCCTCAGGAGGGGACCCAGAAATTACA---ACACTTAGTTTTAATTGTGCAGGAGAA---  
TTTAAACAGCTCCAGGCGAGGGTCCTGGCTGTGGAAAGATACCTAAAGGATCAACAGCTCCTGGGAATTTGGG  
GCTGCTCTGGAAAACCTCATCTGCGCCACTACTGTGCCCTGGAACACTAGTTGGAGT-----  
-----AATAAGTCTCAGGATGAGATTTGG-----GAC-----  
AACATGACCTGGTTGCAATGG---GATAAAGAAATTAGCAATTACACAAACATAATATAT---  
AGGTTACTTGAAGAATCGCAAAACCAGCAGGAA-----  
-----  
AAGAATGAGCAAGACTTATTGGCATTAGACAAATGGGCAGATTTGTGGAGTTGGTTCAACATTTCACTGGC  
TGTGGTATATAAGAATATTTATAATGATAGTAGGAGGCTTGATAGGATTAAGAATAGTTTTTTGCT---  
ATAATTACTGTAGTA-----AATAGAGTTAGGCAGGGATACTCACCT-----  
GTGTCATTTGCTATTAGCTTATTTGATACTATAGCAGTAGCAGTAGCTGAG---  
TGGACAGATAGGGTTATAGAAATAGGGCAAAGAGCTTTTCAGAGCT-----  
-----ATTCTCAACATA-----CCTAGAAGAATCAGACAGGGCTTAGAAAGGGCTTTACTA---TAA

>AY521629

GCT---ACA-----  
GAAAACTTGTGGGTACGGTCTACTATGGGGTACCGGTGTGG---AAAGACGCAGAG---  
ACCACCCCTATTTTGTGCATCAGATGCTAAAGCATATGATCAAGAA---GTGCATAAT-----  
-----GTTTGGGCTACA---CACGCCTGTGTACCCACAGAC---  
CCCAACCCACAAGAGTTAGATTTGGAA-----AATGTGACAGAAGAGTTTAACT-----  
-----ATGTGGAAAAATAACATGGTGGAGCAGATGCATACAGACATA---  
ATCAGTCTATGGGACCAAAGCTTA---AAGCCATGTGTACAGTTA---  
ACCCCTCTCTGCGTTACTCTAAACTGTACCGACATCCCCAAGAACCTTTACCAATACC-----  
-----  
-----GAGAATGTCACCAAGGCCTATGAAGAGATGAAA---  
AACTGCTCGTTCAATATAACCACAGAACTAAGA-----  
GATAAGAAACAGAAAATATATTCACCTT---TTTTATAGACTTGATGTAGTACCAATTGAGAATGGTAGT----  
-----  
-----  
AACAGTACTGAGAACAGTACTGAATATAGATTAATAAAATTGTAACACCTCAGCCATTACACAG---  
GCTTGTCCAAAGGTATCCTTTGAGCCAATTCCCATACATTATTGTGCCCCAGCTGGTTTTGCATTCTAAAGT  
GTAAG---GAGAAGAAATTCAAT-----GGAACAGGGCCATGCAGGAAT-----  
-GTCAGC---ACGGTACAATGTACACATGGAATCAAGCCAGTAGTATCAACT---  
CAACTGCTGTTGAATGGCAGTCTAGCGGAAGAAGAG-----  
GTAATGATTAGATCTGAAAATCTCACAACAAT-----GCCAAAACCATAATAGTACAGCTTGTT----  
-----AATCCTGTGCAA-----ATTAGTTGTACCAGACCCAACAACAATACAAGAACA-----  
-AGTGTAACGCATA-----GGACCAGGACAAGCA---TTC-----TATGCAACAGGTGAC-----  
-----ATAATAGGGGATATA-----AGGCAAGCACATTGT---AATGTCAGTAGAGAA---  
AATTGGACTGAGACTTTACAACAGGTAGCTAAACAATTAAAA-----AGACACTTT-----  
-----AACAAAACAATAATCTTTACT-----  
GGGTCTCAGGAGGAGATTTAGAAATTACA--ACACATAGCTTTAATTGTGGAGGAGAA---  
TTTAAACAGCTCCAGGCAAGAGTCCTGGCTATAGAAAGATACCTAAAGGATCAACAGCTCCTAGGACTTTGGG  
GTTGCTCTGGGAAACTCATCTGCACCACTAATGTGCCCTGGAAGCTCTAATTGGAGT-----  
-----AGAAAGTCTCAGGAGGAAATATGG-----GGT-----  
AATATGACCTGGCTGCAATGG---GATAAAGAAATTAGCAATTACACAGACATAATATAT---  
AGTCTAATTGAAGAATCACAGAACCAGCAGGAA-----  
-----  
AAGAATGAACAAGACTTATTGGCATTGGACAAATGGGCAAGTCTGTGGAGTTGGTTTGACATATCAAAGTGGT  
TATGGTATATAAAAAATATTTATAATGATAGTAGGGGGCTTAATAGGATTAAGAATAGTTTTTTGCT---  
GTGCTTTCTATAATA-----AATAGAGTTAGGCAGGGTTACTCACCT-----  
CTCTCGTTTGCTATCTCTTTGCTTAATGCTACAGCAATAGTAGTAGCTGAG---  
TGGACAGATAGGGTTATAGAAATAGGACAAAGAGCTGGTAGAGCT-----  
-----CTTCTCCATATA-----CCTAGAAGAGTCAGACAGGGCTTAGAAAGGGCTTTGCTA--TAA

>AY521631

GCT---ACA-----  
GAAAAGTTGTGGGTACAGTCTACTATGGGGTACCGGTGTGG---AAAGACGCAGAG---  
ACCACCCCTATTTTGTGCATCAGATGCTAAAGCATATGAGCGAGAA---GTGCATAAT-----  
-----GTTTGGGCTACA---CACGCCTGTGTGCCACAGAC---  
CCCAACCCACAAGAAATAGATTTGGAA-----AATGTGACAGAAGAGTTTAACT-----  
-----ATGTGGAAAAATAATATGGTGGAGCAGATGCATACAGATATA---  
ATCAGTCTATGGGACCAAAGCTTA---AAGCCATGTGTAAAGTTA---  
ACCCCTCTCTGCGTTACTTTAAACTGCCACAACGTACCAAGACCAATTCCAATTCCAAT-----  
-----  
-----TCCAGTGTCAAAAATGAAATGCCTGGAGAAATAAAA---  
AACTGCTCGTACAATGTAACCACAGCAATAAGA-----  
GATAAGAGGCAGAATGTATATTCGCTT---TTTTATAGAGTTGATGTAGTACCAATTAATGAAAATAGT----  
-----  
-----  
AATAGTAGTGAGAATAGTAGTGAGTATAGACTAATAAAATTGTAATACTTCAGCCATTACACAG---  
GCTTGCCCAAAGGTAACCTTTGAGCCAATTCCCATACATTATTGTGCCCCAGCTGGTTTTGCATTCTAAAGT  
GTAAG---GATAAGGATTTCAAT-----GGAACAGGAACATGCAGGAAT-----  
-GTCAGC---ACAGTACAATGCACACATGGAATCAAGCCAGTAGTGACAACT---  
CAACTGCTGTTGAATGGCAGTCTAGCAGAAGGAAAG-----  
GTAATGATTAGATCTGAAAATCTCACAACAAT-----GCCAAAACCATAATAGTACAGCTTGAT----

```

-----GAGCCTGTATAC-----ATTAATTGTACCAGACCCAACAACAATACAAGGAAA-----
-AGTGTACATATA-----GGACCAGGACAGGCA---TTC-----TATGCAACAGGAGAC-----
-----ATAATAGGGGATATA-----AGACAAGCACATTGT---AATGTCAGTAGAGAA---
GATTGGAATAAACTTTATATAAGGTGGTTGAACAATTAAGA-----AAGCACTTTAAC-----
-----AACAGAACAATAAACTTTACT-----
GCACCCTCAGGAGGGGATTTAGAAATTACA---ACACATAGCTTTAATTGTGGAGGAGAA---
TTTAAACAGCTCCAGGCAAGAGTCCTGGCTGTGGAAAGGTACCTAAAGGATCAACAGCTCCTAGGAATTTGGG
GTTGCTCTGGAAACTCATCTGCACCACTAATGTGCCTTGGAACTCTAGTTGGAGT-----
-----AATAAATCTTATAGTGAAATATGG-----GAT-----
AATATGACTTGGCTGCAATGG---GATAAAGAAATTAGCAATTACACAGACTTAATATAT---
AATCTAATTGAAGAATCGCAGAACCAGCAGGAA-----
-----
AAGAATGAACAAGACTTATTGGCATTGGACAAGTGGGCAAGTCTATGGAATTGGTTTAAACATATCAAATTGGC
TATGGTACATAAGAATATTTATAATGATAGTAGGGGGCTTAATAGGATTAAGAATAGTTTTTTACT---
GTACTTTCTATAATA-----AATAGAGTTAGGAAGGGATACTCACCT-----
CTGTCAATTTGCTATTTCTTTGCTTGACGCTATAGCAATAACAGTAGCGGG---
TGGACAGATAGGGTTATAGAAGTAGGACAAAGAGCTGGTAGAGCT-----
-----CTTCTCCACATA-----CCTAGAAGAATTAGACAGGGCTTGAAAGGGCTTTGCTA---TAA
>AY521630
GCT---ACA-----
GAAAACTTGTGGGTCACGGTCTACTATGGGGTACCGGTGTGG---AAAGACGCAGAG---
ACCACCCTATTTTGTGCATCAGATGCTAAAGCATATGATCAAGAA---GTGCATAAT-----
-----GTTTGGGCTACA---CACGCCTGTGTACCCACAGAC---
CCCAACCCACAAGAATTAGATTTGGAA-----AATGTGACAGAAGAATTTAAC-----
-----ATGTGGAAAAATAACATGGTGGAGCAGATGCATACAGATATA---
ATCAGTCTATGGGACCAAAGCTTA---AAGCCATGTGTAAAGTTA---
ACCCCTCTCTGCGTTACTTTAAACTGTAGCAACATCAACAGCACCAGGTAT-----
-----
-----GACACCAAGGACAAGGAAGAGATGAAA---
AACTGCTCGTTCAATATAACCACAGAACTAAGA-----
GATAAGAGACAGAGTGTATATTCACTT---TTTTATAAACTTGATGTAGTACCAATTAATAATAATAGT---
-----
-----
AGTAATAATAGTAGTAATGAGTATAGACTAATAAATTGTAACACCTCAGCCATTACACAG---
GCTTGTCCAAAGGTTTCCTTTGAGCCAATTCCCATACATTATTGTGCCCCAGCTGGTTTTGCGATCCTAAAGT
GTAAG---GATAAGAAATTCAAT-----GGAACAGGGCCATGCAGGAAT-----
-GTCAGC---ACGGTACAATGTACACATGGAATCAAGCCAGTAGTATCAACT---
CAACTGTTGTTGAATGGCAGTCTAGCGGAAGAAGAG-----
GTAATGATTAGATCTGAAAATCTCACAACAAT-----GCCAAAACCATAATAGTACAGCTTGTT---
-----ACTCCTGTACAA-----ATTAATTGTACCAGACCCAACAACAATACAAGAACA-----
-AGTGACGCATA-----GGACCAGGACAAGCA---TTC-----TATGCAACAGGTGAC-----
-----ATAATAGGGAAGATA-----AGACAAGCACATTGT---ACTGTCAGAAGAGCA---
CAATGGAATACCACTTTACAACAGGTAGCTGACCAATTAAGA-----AAACACTTT-----
-----AACAAAACAATAAACTTTACT-----
AGGCCCTCAGGAGGAGATTTAGAAATTACA---ACACATAGCTTTAATTGTGGAGGAGAA---
TTTAAACAGCTCCAGGCAAGAGTCCTGGCTGTGGAAAGATACCTAAGGGATCAACAGCTCCTAGGACTTTGGG
GTTGCTCTGGGAAACTCATCTGCACCACTGCTGTGCCCTGGAACCTCTAGTTGGAGT-----
-----AATAAATCTCAGAATGAAATATGG-----GAG-----
AATATGACCTGGCTACAATGG---GATAAAGAAATTAGCAATTACACAGACATAATATAT---
AATCTAATTGAAGAATCGCAGAACCAGCAGGAA-----
-----
AAGAATGAACAAGACTTATTGGCATTGGACAATGGGCAAATCTGTGGAATTGGTTTGACATATCAAATGGT
TATGGTATATAAAAATATTTATAATGATAGTAGGGGGCTTAATAGGATTAAGAATAGTTTTTTGCT---
GTGCTTTCTATAATA-----AATAGAGTTAGGCAGGGTTACTCACCT-----
CTCTCGTTTGCTATTTCTTTGCTTAATGCTACAGCAATAGTAGTAGCTGAG---
TGGACAGATAGGGTTATAGAAGTAGGACAAAGAGCTGGTAGAGCT-----
-----CTTCTCCACATA-----CCTAGAAGAATCAGACAGGGCTTAGAAAGGGCTTTGCTA---TAA
>AM000053
GCT---GCA-----
GAAAAATTGTGGGTCACGGTCTACTATGGGGTACCCGTGTGG---AAAGATGCAGAA---

```

ACCACCCTGTTTTGTGCATCACATGCTAATGCATATGAGAAAGAA---CAACATATT-----  
 -----GTCTGGGCTACC---CATGCCTGTGTTCCACAGAC---  
 CCCAACCCACTCGAAATGGATTTAGAT-----AATGTGACAGAAGAGTTTAACT-----  
 -----ATGTGGAAAAATAATATGGTAGAGCAGATTTCATGATGATATA---  
 ATCCGTCTATGGGATCGCAGCTTA---CAGCCACGTGTAAAATTA---  
 ACCCCTCTCTGCGTTACTTTAGACTGCCAGCCAGTTAACAGCACCAACAAT-----  
 -----  
 -----ACTAAGGTAGAAGTGCCGGGAGAAATGACA---  
 AACTGCTCTTTCAATATGACCACAGAACTAAGT-----  
 GATAAGAAACAGAAAGTACGGTCTCTT---TTTTATAGGATTGATTTAGTACAGATTGGTAATAATACAAAT-  
 -----  
 -----  
 GACAGTAGTAATAGGAGTCTACAGTATAGACTAATAAAATTGTAACACCTCAACCATTACCCAG---  
 GCTTGTCCCAAGGTATCCTTTGAGCCAGTTCCCATACACTATTGTGCCCCAGCTGGTTTTGCGATTCTGAAGT  
 GTAAA---GATCAGGAGTTCAAT-----GGAACAGGGCCATGCAAAAAT-----  
 -GTCAGC---ACAGTACAATGTACACATGGAATTAACCTGTAGTATCAACT---  
 CAACTGCTGTTAAATGGCAGTTTAGCAGAAGGAGGA-----  
 ATAAAGATTAGATCTGCAAAATATCTCATACAAT-----GCCAAAAACATAATAGTACAGCTTGAC----  
 -----ATACCTGTAAAA-----ATTAATTGTAGTAGGCCCAACAACAATACAAGAACA-----  
 -AGTGTGCGTATA-----GGACCAGGGCAAACA---TTT-----TATGCAACAGGTGAT-----  
 -----ATAATAGGGAATATA-----AGACAAGCACACTGC---AACCTTAGTAGAACA---  
 GCATGGAACGATACTTTATACAATGTATCTAAAGCCTTAAGA-----GAACACTTCCCA----  
 -----AATAAAACAATAATCTTTAAT-----  
 AAATCATCAGGAGGGGACCTAGAAAGTGACA---CAACATATGTTTATTTGTGGAGGAGAA---  
 TTTAAACAGCTCCAGGCAAGAGTCCTGGCTGTGGAAAGATACCTAAAGGATCAACAGCTCCTAGGAATTTGGG  
 GCTGCTCTGGAAGAACTCATCTGCACCACTACTGTGCCTTGGAAGCTCTAGTTGGAGT-----  
 -----AATAAATCTCAGGATGAGATTTGG-----AAC-----  
 AACATGACCTGGATGCAATGG---GATAAAGAAATTAATAATTACACAGAAATAATATAC---  
 GGGCTCATTGAAGAATCGCAGAAACAGCAGGAG-----  
 -----  
 AAAAAATGAATTTGAGTTATTGGAATTGGACAAGTGGGCAAATCTGTGGAATTGGTTTGAAATATCAAATTGGC  
 TATGGTATATAAAAAATATTTATAATGATAGTAGGAGGCTTAATAGGATTAAGAATAGTTTTTTGCA---  
 GTGCTTTCTATAGTA-----AATAGAGTTAGGCAGGGATACTCACCT-----  
 TTATCGTTTGCTGTCTAGTGCATTTAATGCTTTAGCAATAACAGTTGCTGAG---  
 TGGACAGATAGGGCTATAGAAGTAGGACAAAGAATTGGTAGAGCT-----  
 -----TTTCTCAACATA-----CCTAGAAGAATCAGACAGGGCTTCGAAAGAGCTTTGCTA---TAA  
 >AM000054  
 GCT---GCA-----  
 GAAAACTTGTGGGTACGGTCTACTATGGGGTACCTGTGTGG---AAAGATGCAGAA---  
 ACCACCCTATTCTGTGCATCAGACGCCAAAGCATATGAGAGAGAA---GTGCATAAT-----  
 -----GTCTGGGCTACA---CATGCCTGTGTTCCACAGAC---  
 CCCAACCCACAAGTAATGCCTCTAGCC-----GATGTGACAGAAGTATTTAACT-----  
 -----ATGTGGATGAATGATATGGTAGAGCAGATGCATGAAGATATA---  
 ATCAGCCTATGGGATCAAAGCTTA---AAACCATGTGTACAGTTG---  
 ACCCCTCTCTGTGTTACTTTACATTGCCATTATGTCATCAACAACACAGCCCACAAG-----  
 -----  
 -----GTTTCTGTTTCTCCAGAAATGCAAGAAAAAGTAGCA---  
 AACTGCTCTTTCAACGTGACCACAGAACTAAGA-----  
 GACAGAAAACAGAAAGTATATTCTCTT---  
 TTTTATAGGGAAGATTTAGTACCTATTGATGAGGATAAAAAATAACAGTAATAGTGCTAGCATCAGTACTTCTA  
 GT-----  
 AACAGCAGTAATTGTAGTATTTCTGATAGCAACAGTACTTGTATTAACATCAGTACTTATAGACTAATAAAATT  
 GTAATACCTCAACCATTACACAG---  
 GCTTGTCCAAAGGTATCCTTTGAGCCAATTCCCATACACTATTGTGTCCCAGCTGGTTTTGCAATTCTAAAAT  
 GTAAC---GAGAAGGAGTTCAAT-----GGAACAGGGCCATGCAAGAAT-----  
 -GTTAGC---TCAGTACAATGTACACATGGAATCAAGCCAGTAGTATCAACT---  
 CAACTGCTGCTAAATGGCAGTCTAGCAAAAGAAACA-----  
 GTAATAATTAGAAGTAAAAATATTTTCAGACAAT-----GGCAAAAACATAATAGTACAGTTTGTT----  
 -----GATCCTGTAAAG-----ATTAATTGTATCAGACCCAACAACAATACAAGAACA-----  
 -AGTGTACGTATA-----GGACCAGGACAAACA---TTT-----TAT---ACAAGTGAT-----

-----ATAATAGGGGATATA-----AGACAAGCCTACTGC---GAAGTCAATAAAACA---  
 CAATGGAACATGACTTTACAAAAGGTAGCTGACCAATTAAGA-----AAATTCTTCCCG-----  
 -----AACAAAACAATAAACTTTAAT-----  
 CAAACCTCAGGAGGGGACTTAGAAGTTACA---ACACATATTTTTTAATTGTAGAGGAGAA---  
 TTTAAACAGCTCCAGGCAAGAGTCCTGGCTGTGGAAAGATACCTAAAGGATCAACAGCTCCTAGGAATTTGGG  
 GCTGCTCTGGGAAACTCATCTGCACCCTAATGTGCCTTGGAACTCTAGCTGGAGT-----  
 -----AATAAATCTCAGGGTGAAATTTGG-----GAT-----  
 AACATGACCTGGATGCAATGG---GATAGAGAAATTAGCAATTACACAGATATAATATAC---  
 AAGTTAATTGAGGAATCGCAGGAACAGCAGGAG-----  
 -----  
 AAGAATGAACCTTAAGTTATTGGCATTGGACCAGTGGGCAAGTCTGTGGAATTGGTTTGACATATCAAATTGGC  
 TATGGTATATAAGAATATTTATAATGATAGTAGGAGGCTTAATAGGATTAAGAATAGTTTTTTGCA---  
 GTGCTTTCTGTAGTA-----AATAGAGTTAGGCAGGGATACTCACCT-----  
 TTATCGTTTTGCTATTAGTTTATTTGATACTCTAGCAATAGCAGTAGCTGAG---  
 TGGACAGATAGGATTATAGAAGTAGGACACAGAATTGGTAGAGCT-----  
 -----TTTCTCAACATA-----CCTAGAAGAATCAGACAGGGCTTCGAAAAGAGCTTTGCTA---TAA  
 >FJ388892  
 GCT---ACA-----  
 GAAAACTTGTGGGTCACGGTATACTATGGGGTACCTGTGTGG---AGAGATGCAGAG---  
 ACCACCCTATTTTGTGCATCAGATGCTAAAGCATATGAGAAAGAA---GTACACAAT-----  
 -----GTCTGGGCTACA---CATGCCTGTGTACCCACAGAC---  
 CCTAACCCACAAGAAATAAATTTGGAA-----AATGTGACAGAAAATTTTAAC-----  
 -----ATGTGGAAAAACAGTATGGTAGAACAATGCAAACAGATATA---  
 ATCAGTCTCTGGGACCAAAGCCTA---AAGCCATGTGTACAGTTA---  
 ACCCCTCTCTGCGTCACTCTAAATTGTAAGTACCCCAACATCACTAGCTCTAACAACAGT-----  
 -----  
 -----AGCGTTACAATAACAGCAGCGATAGCCTGTATCAAGAAATGAAA---  
 AACTGCTCTTTCAACATGACCACAGAATAAGA-----  
 GATAAAAAGAAAAGGTACATTCACCT--TTTTATAAACTTGATATAGTATCAACTGGTAGTAATAAT---  
 -----  
 -----  
 GATAGTAGTAATGATAGTCTGTATAGACTAATAAATTGTAACACATCTGCCATGACACAG---  
 GCTTGTCCTAAGGTAACCTTTGAGCCAATTCCTATACATTATTGTGCCCCAGCTGGTTTTGCGATTCTAAAGT  
 GCAAG---GATCCAAATTTTAAT-----GGAACAGGGCCATGCAAGAAT-----  
 -GTCAGC---ACAGTACAATGCACACATGGAATCAAACCAGTAGTATCAACT---  
 CAACTGCTGTAAATGGCAGCCTAGCAGAGAAAGAG-----  
 GTAATGATTAGATCTGAAAATATCACAGACAAT-----GGCAAAATCATAATAGTGCAGCTTAAT---  
 -----GAGTCTATAAGC-----ATCACTTGTATCAGACCAACAACAACAAGAACA-----  
 -AGTATACGTATA-----GGACCAGGACAAACC---TTC-----TATGCAACAGGGGAT-----  
 -----GTAACAGGGGACATA-----AGAAAAGCATATTGT---AATGTCAGCAGAACA---  
 AACTGGACTAGCACTTTACGAAAGATAAGTACACAATTAAGG-----AACACTTTACT---  
 -----AACAAAACAATAATCTTTAAG-----  
 AACTCTGCAGGAGGGGATTTAGAAGTTACA---ACACATAGTTTCAATTGTGGAGGAGAA---  
 TTTAAACAGCTCCAGGCAAGAGTCCTGGCTGTGGAAACAATACCTAAAGGATCAGCAGCTCCTAGGAATTTGGG  
 GTTGCTCTGGGAAACTCATCTGCACCCTAATGTGCCTTGGAACTTTAGTTGGAGT-----  
 -----AATAAATCTCAGAGTGAGATATGG-----GAT-----  
 AACATGACCTGGATGCAATGG---GACAAGGAAGTTATCAATTACACAGGCATAATATAT---  
 GATCTACTTGAAAAATCGCAAAACCAGCAGGAA-----  
 -----  
 AAGAATGAACAAGATTTATTGGCATTAGATAAGTGGACAAGTCTGTGGAGTTGGTTTGACATATCAAATTGGT  
 TATGGTATATAAGAATATTTATAATAATAGTAGGAGGCTTAATAGGATTAAGAATAGTTTTTTGCT---  
 GTGCTTTCTATAATA-----AATAGAGTCAGGCAGGGATACTCACCC-----  
 TTGTCAATTGGCTATTAATCTGATAGATACCATAGCAATAGCAGTAGCTGGG---  
 TGGACAGATAGGGTTATAGAATTAGCACAAGACTTGGTAGAGCT-----  
 -----ATCCTTAACATA-----CCTAGGAGAATCAGACAGGGCGCAGAAAAGGCTTTGCAA---TAA  
 >JF683763  
 GCT---ACA-----  
 GACAACTTGTGGGTCACGGTATACTATGGGGTACCTGTGTGG---AGAGATGCAGAG---  
 ACCACCCTATTTTGTGCATCAGATGCTAAAGCATATGACAAAGAA---GTACATAAT-----  
 -----GTCTGGGCTACA---CATGCCTGTGTTCCACAGAC---

CCTAACCCACAAGAAATGGCTTTGGAA-----AATGTGACAGAAAATTTTAAAC-----  
-----ATGTGGAAAAATAACATGGTAGAACAAATGCAAACAGATATA---  
ATCAGTCTCTGGGACCAAAGCCTA---AAGCCATGTGTAAAGTTA---  
ACCCCTCTCTGCGTTACTTTAAATTGTACTGCACCCAACAGCACTAGCTCTAACAACAGTAGC-----  
-----  
-----ATTAACAGCAACAGAAACGATAGTATGTTTGAAGAAATGAGA---  
AACTGCTCTTTCAACATGACCACAGAAATAAGA-----  
GATAAAAGGAAAAGTGTACATTCACTT---TTTTATAAACTTGATATAGTATCAATTGGTAGT-----  
-----  
-----  
AATGATAGTAATGATAGTGGGCAGTATAGACTAATAAAATTGCAATACATCAGCCATGACACAG---  
GCCTGTCCTAAGGTAACCTTTTGAGCCAATTCCTATACATTATTGTGCCCCAGCTGGTTTTGCATTCTAAAGT  
GCATA---GATACAACTTTTAAAT-----GGAACAGGGGCATGCAGGAAT-----  
-GTCAGC---ACAGTACAATGCACACATGGAATCAGGCCAGTAGTATCAACT---  
CAACTGCTGTTAAATGGCAGTCTGGCAGAAAAAGAG-----  
GTAATGATTAGATCTAAAAATATCACAGACAAT-----AGCAAAATCATAATAGTACAGCTTACT----  
-----GAGCCTGTAAAC-----ATCACTTGTATCAGACCTGGCACCATAACAAGAACA-----  
-AGTATACGTATA-----GGACCAGGACAAAACC---TTC-----TATGGAACAGGTGAT-----  
-----GTAATAGGGGATATA-----AGAAAAGCACATTGT---AATGTCAACAGAACA---  
GCTTGGAATAGCACTTTACAAAAAATAAGTATACAATTAAGA-----AAATACTTTGGT----  
-----AACAAAACAATAATCTTTAAG-----  
AACTCCACAGGAGGGGATTTAGAAATTACA---ACACATAGTTTCAATTGTGGAGGAGAA---  
TTTAAACAGCTCCAGGCAAGAGTCCTGGCTGTGGAAAGATACCTAAGGGATCAGCAGCTCCTAGGAATTTGGG  
GTTGCTCTGGAAAAGTCACTCTGCACCACTAATGTGCCCTGGAACACTAGTTGGAGT-----  
-----AACAAATCTCTGGAGGACATATGG-----AAT-----  
AACATGACCTGGATGCAATGG---GACAGGGAAGTCATCAATTACACAAACACAATATAT---  
GAACTAATTGAAAAATCGCAAAACCAGCAGGAA-----  
-----  
AAGAATGAACAAGAATTATTGGCCTTGGATAAGTGGGCAAGTCTGTGGAGTTGGTTTGACATATCAAATTGGT  
TATGGTATATAAAAAATATTTATAATAATAGTAGGAGGCTTAATAGGATTAAGAATAGTTTTTTGCT---  
GTACTTTCTATAATA-----AATAGAGTCAGGCAGGGATACTCACC-----  
TTGTCATTGGCTATCAATTTAATAGATACCTTAGCAATAGCCGTAGGTAGG---  
TGGACAGATAGGATTATAGAAATAGGACAAAGACTTTGTAGAGCC-----  
-----ATTCTGAACATA-----CTTAGGAGAATCAGACAGGGCGCAGAAAAGGCTTTGCAA---TAA  
>JF683798  
GCT---GCA-----  
GAAAACTTGTGGGTACGGTATACTATGGGGTACCTGTGTGG---AGAGATGCAGAT---  
ACCACCCATTTTTGTGCATCAGATGCTAAAGCATATGAGAAAGAA---GCACACAAT-----  
-----ATCTGGGCTACA---CATGCCTGTGTACCCACAGAC---  
CCTGACCCAAACGAAATAATGTTGGAA-----AATGTGACAGAAAATTTGAC-----  
-----ATGTGGAAAAATAACATGGTAGAACAAATGCAAACAGATATA---  
ATCAGTCTCTGGGACCAAAGCCTA---AAGCCATGTGTAAAGTTA---  
ACCCCTCTCTGCGTTACTTTAAATTGTACTGACCCCATCAGCAATAACAACAAT-----  
-----  
-----ACACTTAACAACAGTAACGATGGAGAAATGACA---  
AACTGCTCTTTCAATGCGACCACAGAATAAGA-----  
GATAAACGAAAAGTGTATATTCCTT---TTTTATAAGCTTGATATAGTATCAACTAATAGT-----  
-----  
-----  
AGTGATAATAGGACATACAGACTAATAAAATTGTAACACATCAACCACGACACAG---  
GCCTGTCCTAAGGTATCCTTTGAGCCAATTCCTATACATTATTGTGCCCCAGCTGGTTTTGCATTCTTAAGT  
GCAAC---GAAAAAAGTTTAAAT-----GGAACAGGGCCATGCAAGAAT-----  
-GTCAGC---ACAGTACAATGCACACATGGAATCAAGCCAGTAGTATCAACT---  
CAACTGCTGTTAAATGGCAGTCTAGCAGAGAAAGAG-----  
GTAATGATTAGATCTGAAAAATATCACAGACAAT-----GGCAAAATCATAATAGTACAGCTTACT----  
-----GAGCCTGTAAAC-----ATCACTTGTATCAGACCTAACAAACAATACAAGAACA-----  
-AGTATACGTATA-----GGACCAGGACAAAAC---TTC-----TATGGGACA---GAT-----  
-----GTAATAGGGGACATA-----AGAAAAGCACATTGT---AATGTCAACAGAACA---  
GCATGGAATCGCACTTTTACAACAGATAAGTAAAAAATTGAGA-----GGATACTTTAAT----  
-----AACAAAACAATAATCTTTAAG-----

AACTCCTCAGGAGGGGATTTAGAAAGTTACA---ACACATAGTTTCAATTGTGGAGGAGAG---  
 TTTAAACAGCTCCAGGCAAGAGTCCTGGCTGTGGGACAATACCTAAAGGATCAGCAGCTCCTAGGAATTTGGG  
 GTTGCTCTGGAAGACTCATCTGCACCACTAATGTGCCCCGGAACCTCTAGTTGGAGT-----  
 -----AATAAATCTCAGAATGAAATATGG-----GAT-----  
 AACCTGACCTGGATGCAATGG---GACAAGGAAGTTATCAATTACACAAACATAATATAT---  
 GAGCTACTTGAAGAATCGCAAACCAGCAGGAA-----  
 -----  
 AAGAATGAACAAGATTTATTGGCATTGGATAAGTGGGCAAGTCTGTGGAGTTGGTTTGACATATCAAATTGGT  
 TATGGTATATAAAAAATATTTATAATAATAGTAGGAGGTTTAATAGGATTAAGAATAGTTTTTTGCT---  
 GTGCTTTCTATAATA-----AATAGAGTCAGGCAGGGATACTCACCC-----  
 TTGTCAATTGGCTATTAATCTGATAGATACCATAGCAATAGTAGTAGCTGGG---  
 TGGACAGATAGGGTTATAGAAAATAGGACAAAGACTTGGTAGAGCT-----  
 -----ATTTGTAACATA-----CCTAGGAGAATCAGACAGGGCGCAGAAAGGGCTTTGCAA---TAA  
 >EF545108  
 GCT---ACA-----  
 GGAAACCTGTGGGTACCGGTATACTATGGGGTACCCGTGTGG---AGAGATGCAGAG---  
 ACCACCCTATTTTGTGCATCAGATGCTAAAGCATATGATCCAGAA---GTACATAAT-----  
 -----GTCTGGGCTACA---CATGCCTGTGTACCCACAGAC---  
 CCTGACCCACAAGAAATAACTTTGGAC-----AATGTGACAGAAGAATTTAAT-----  
 -----ATGTGGAAAAATAACATGGTAGAACAGATGCAAACAGATATA---  
 ATTAGTCTATGGGACCAAAGCCTA---CAGCCATGTGTAAAGTTA---  
 ACCCCTCTCTGCGTTACTTTAAATTGTCAAGAGATCAGCAATGTCACTAACTATAACAGT-----  
 -----  
 -----AGCATGTCTAACAGCAGCAGGTATGGAGAAATGAAA---  
 AACTGCTCTTTCAATATGACCACAGAATTAAGA-----  
 GATAGGAAAAGAAAGGTACATTCACCT--TTTTATAAACTTGATATAGTATCAACTAGTAGT-----  
 -----  
 -----  
 AATGAGAGTGGACCGTATAGACTAATAAATTGTAATACATCAGCCATGACACAG---  
 GCCTGTCCTAAGGTGGTCTTTGAGCCAATTCCTATACATTATTGTGCCCCAGCTGGTTTTGCGATTCTAAAGT  
 GCAAC---CAAAAAGATTTTAAT-----GGAACAGGGCCATGCAGGAAT-----  
 -GTCAGC---ACAGTACAATGCACACATGGAATCAAGCCAGTAGTATCAACT---  
 CAACTGCTGTAAATGGCAGTCTAGCAGAGGGAAAT-----  
 GTAACGATTAGATCTGAAAATATCACAGACAAT-----ACCAAACCATAATAGTACAGCTTAGT---  
 -----AAGCCTGTAAAC-----ATTACTTGTATCAGACCTGGCAACAATACAAGAACA-----  
 -AGTATACGTATA-----GGACCAGGACAAACA---TTC-----TATGCAACAGGTGAT-----  
 -----ATAATAGGGGACACA-----AGAAAAGCACATTGT---AATGTCAGTAGAACA---  
 GAATGGGGAAACGCTACAGAAGAGATACGTAAACAATTACAA-----ACTTACTTTCCA---  
 -----AACAAAACAATAAGCTTTAAG-----  
 AACTCCTCAGGAGGAGATTTAGAAATTACA---ACACATAGTTTTTAATTGTGGAGGAGAA---  
 TTTAAACAGCTCCAGGCAAGAGTCCTGGCTGTGGAAAGATACCTAAAGGATCAACAGCTCCTAGGAATTTGGG  
 GTTGCTCTGGAAGAACTCATATGCACCACTAATGTACCCTGGAACCTCTAGTTGGAGT-----  
 -----AATAAATCTCAGAGTGATATATGG-----GAT-----  
 AATCTGACCTGGATGCAATGG---GACAGAGAAATTACAAATTATACAGACATAATATAT---  
 GATCTAATTGAAAAATCGCAAACCAGCAGGAA-----  
 -----  
 AAGAATGAGCAAGATTTATTGGCATTGGATAAGTGGGCAAGTCTGTGGAATTGGTTTGACATATCAAATTGGC  
 TATGGTATATAAACTATTTATAATGATAGTAGGAGGCTTAATAGGATTAAGAATAGTTTTTTGCT---  
 GTGCTTTCTGTAATA-----AATAGAGTCAGGCAGGGATACTCACCC-----  
 TTGTCAATTKGCTATTAATTTGGTAGATACCATAGCAATAGCAGTAGCTGGG---  
 TGGACAGATAGGGTTATAGAAAATAGGACAAAGAGTTTGTAGAGCT-----  
 -----ATYYTTCACATA-----CCTAKAAGAATCAGACAGGGCTTCGAAAAGGCTTTGCAA---TAA  
 >GU481566  
 GCT---GCA-----  
 GAAAACTTGTGGGTACAGTATACTATGGGGTACCTGTGTGG---AGAGATGCAGAG---  
 ACCACCCTATTTTGTGCATCAGATGCTAAGGCATATGATAAAGAA---GTACACAAT-----  
 -----GTCTGGGCTACA---CATGCCTGCGTACCCACAGAC---  
 CCTAACCCACAAGAAATAGCTTTTGGA-----AATATGACAGAAAATTTTAAC-----  
 -----ATGTGGAAAAATAACATGGTAGAACAAATGCAAACAGATATA---  
 ATCAGTCTCTGGGACCAAAGCCTA---AAGCCATGTGTACAGTTA---

ACCCTCTCTGCGTTACTTTAACTGTACTGAACCCACCAGCACTAACAGCACCAACAGCACTAGCGGTAACA  
 GCACTAGC-----  
 -----CTTAACAGCACTAGCGGTTACAGCAACAGCAACGATAGTTTGCTTAAAGAAATGAAA---  
 AACTGCACCTTTCAACATGACCACAGAACTAAGA-----  
 GATAAAAAGAAAAAGTACATTCACTT--TTTTATAAACTTGATATAGTGCCAACCTGATAAT-----  
 -----  
 -----  
 AATGGTAGTAGTGGGGAGTATAGACTAATAAATTGCAATACATCAACCATAACACAG---  
 GCCTGTCCTAAGGTAACCTTTGAGCCAATTCCTATACATTATTGTGCCCCAGCTGGTTTTGCGATTCTAAAGT  
 GCAAA---GATACAGAATTTAAT-----GGAACAGGGCCATGCAAGAAT-----  
 -GTCAGC---ACAGTACAATGCACACATGGAATCAAGCCAGTAGTATCAACT---  
 CAACTACTGTTTAAATGGCAGTCTAGCAGAGGGGAAAG-----  
 GTAATAATTAGAGCTGAAAAATCAGACAAAT-----AGCAAAACCATAATAGTACAGCTTACT----  
 -----AAACCTGTAAAC-----ATCACTTGTATCAGACCTGGCAACAATACAAGAACA-----  
 -GGTATACATATA-----GGACCAGGACAAACC---TTC-----TTTGCAACAGGTGCT-----  
 -----GTAATAGGGGACATA-----AGAAAAGCACATTGT---AATGTCAGCAGATCA---  
 GCATGGAATAAACTTTACAAGAGATAAGTATACAATTAAGA-----AAATACTTTGAT----  
 -----AACAAAACAATAATCTTTAAT-----  
 AGCTCCACAGGAGGGGATTTAGAAAGTTACA--ACACATAGTTTCAATTGTGGAGGAGAA---  
 TTTAAACAGCTCCAGGCAAGAGTCCTGGCTGTGGAAAAGATACCTAAAGGATCAGCAGCTCCTAGGAATTTGGG  
 GTTGCTCTGGAAAACCTCATCTGCACCACTGCTGTGCCCTGGAACCTCTAGTTGGAGT-----  
 -----AACAAATCTCTGGGTGAGATATGG-----GAT-----  
 AACATGACCTGGATGCAATGG---GACAAGGAAGTTATCAATTACACAAACATAATATAT---  
 GATCTAATTGAAGAAGCGCAAAACCAGCAGGAA-----  
 -----  
 AAGAATGAACAAGATTTATTGGCATTGGATAAGTGGGCAAGTCTGTGGAATTGGTTTGGCATATCAAAGTGGT  
 TATGGTATATAAAAAATATTTATAATAATAGTAGGAGGCTTAATAGGATTAAGAATAGTTTTTTGCT---  
 GTGCTTTCTATAATA-----AATAGAGTCAGGCAGGGATACTCACC-----  
 TTGTCATTGGCTATCAATCTAATAAACACCATAGCAATAGCAGTAGCTGGG---  
 TGGACAGATAGGGTTATAGAAATAGGACAAAGACTTTGTAGAGCC-----  
 -----ATTTGTAACATA-----CCTAGGAGAATCAGACAGGGCGCAGAAAAGGCTTTGCAA--TAA  
 >GU481615  
 GCT---GCA-----  
 GGAAACTTGTGGGTCACGGTATACTATGGGGTACCTGTGTGG--AGAGATGCAGAG---  
 ACCACCCATTTTTGTGCATCAGATGCTAAAGCTTATGATAAAGAA--GTACACAAT-----  
 -----GTCTGGGCTACA--CATGCCTGTGTACCCACAGAT--  
 CCTGACCACAGAATAATTTTGGA-----AATGTGACAGAAAATTATGAC-----  
 -----ATGTGGAAAAATAACATGGTAGAACAATGCAAACCGATATA---  
 ATCAGTCTCTGGGACCAAAGCCTA--AAGCCATGTGTAGAGTTA--  
 ACCCTCTCTGCGTTACTTTAAATTGTACTGCACCCAACAGCAATAGCTCTAGCAAC-----  
 -----  
 -----AGTAACAGCAGCGATAACATATATGAAGAAATGAAA---  
 AACTGCTCTTACAACATGACCACAGAACTAAGA-----  
 GATAAAGAAAAATTGTACATTCACTT--TTTTATAAACTTGATATAGTATCAATTGATAGTAATAGTAGT-  
 -----  
 -----  
 GAACAGTATAGACAGTATAGACTAATAAATTGTAATATGTCAACCATGACACAG---  
 GCCTGTCCTAAGGTAACCTTTGAGCCAATTCCTATATATTATTGTACCCCAGCTGGTTTTGCGATTCTAAAGT  
 GCAAG---GATCCAAATTTTAAT-----GGAACAGGGCCATGCAAGAAT-----  
 -GTCAGC---ACAGTACAATGCACACATGGAATCAAGCCAGTAGTATCAACT---  
 CAACTGCTGTAAATGGCAGTCTAGCAGAGAAAAAG-----  
 GTAATGATTAGATCTCAAAATATCAGACAAAT-----ACCAAAATCATAATAGTACAGCTTACT----  
 -----GAGCCTGTAAAC-----ATCACTTGTATCAGACCTAGTAGCAAGACAAGAGCA-----  
 -AGTATACGTATA-----GGACCAGGACGAACC---TTC-----TATGCAATGGATGGG-----  
 -----GTAGGAGGGAACCCA-----AGAAAAGCATATTGT---GAGGTCAACAAAACA---  
 GCATGGAATAGCGCTTTACAAAACATAAGTACACAATTAAGA-----GAATACTTT-----  
 -----AACAAAACAATAATCTTTAAG-----  
 AACTCCTCAGGAGGGGATTTAGAAAGTTACA--ACACATAGTTTCAATTGTGGAGGAGAG---  
 TTTAAACAGCTCCAGGCAAGAGTCCTGGCTGTGGAAAAGATACCTAAGGGACCAGCAGCTCCTAGGAATTTGGG  
 GTTGCTCTGGAAAACCTCATCTGCACCACTAATGTGCCCTGGAACCTCTAGTTGGAGT-----

-----AATAAATCTGAGATTGAGATATGG-----GGA-----  
AACATGACCTGGATGCAATGG---GACAAGGAAGTGTTCAATTACACAAACATAATATAT---  
GATTTGCTTGAAAAATCGCAAACCAGCAGGAA-----  
-----  
AAGAATGAACAAGATTTATTGGCATTGGATAAATGGGGAAGCCTGTGGAGTTGGTTTGACATATCAAATTGGT  
TATGGTACATAAAAAATATTTATAATAATAGTAGGAGGCTTAATAGGATTAAGAATAGTTTTTTGCT---  
GTGCTTTCTGTAATA-----AATAGAGCCAGGCAGGGATACTCACCT-----  
TTGTCATTGGCTATTAATTTGATAGATACCATAGCAGTAGCAGTAGCTGGG---  
TGGACAGATAGGGTTATAGAAATAGGACAAAGAGCTTGTAGAGCT-----  
-----ATTTGTAACATA-----CCTAGGAGAATCAGACAGGGCGCAGAAAAGGCTTTGCAA---TAA  
>HQ896489  
GCT---ACA-----  
GAAGACTTGTGGGTCACGGTATACTATGGGGTACCTGTGTGG--AGAGATGCAGAT---  
ACCACCCTATTTTGTGCATCAGATGCTAAAGCATATGATAAGGAA---GTACACAAT-----  
-----GTCTGGGCTACA---CATGCCTGTGTACCCACAGAC---  
CCTGACCCACGAGAAATAACTTTTGAA-----AATGTGACAGAAAATTTTAACT-----  
-----ATGTGGAAAAATAACATGGTAGAACAAATGCAAGAAGATATA---  
ATCAGTCTCTGGGACCAAAGCCTA---AAGCCATGTGTAAAGTTA---  
ACCCCTCTATGCGTTACTTTAAATTGTACTGAACCCAAAACCAACGGAACCTAAGTCTAACGACAGT-----  
-----  
-----AGTGGTAACAACAGCAGCGGTAGGTTGGTTGAAGAAATGAGA---  
AACTGCTCTTTCAAATGACCACAGAATAAGA-----  
GATAAACAGAAAAGTGTATATTCACCTT---TTTTATAAACTTGATATAGTATCAACTGATAAT-----  
-----  
-----  
AGTAATAATGATAGTGGGCAGTATAGATTAATAAATTGCAATACGTCAGCCGTGACACAA---  
GCCTGTCCTAAGGTAACCTTTGAGCCAATTCCTATACATTATTGTGCCCCAGCTGGTTTTGCGATTCTAAAGT  
GCAAG---GATACAAATTTTACT-----GGAACAGGGCCATGCAAGAAT-----  
-GTCAGC---ACAGTACAATGCACACATGGAATCAAGCCAGTAGTATCAACT---  
CAACTGCTGTTAAATGGCAGCCTAGCAGAGAAAGAT-----  
GTAGTGATTAGGTCTGAAAATATCACAGACAAT-----AGCAAAATCATAATAGTACAGCTTAAT---  
-----GAGCCTGTAAAC-----ATCAATTGTACCAGACCTGGCAACAATACAAGAACA-----  
-AGTATACGTATA-----GGACCAGGACAAACC---TTC-----TATGCAACAGGTGAT-----  
-----GTAATAGGGGACCCA-----AGAAAAGCACATTGT---AATGTCAGCAGAGCA---  
GCATGGAATAGCACTTTACAAAAGATAAGTATACAATTAGGA-----AAACTTTAAT-----  
-----AACAAAACAATAATCTTTAAG-----  
AAATCGTCAGGAGGGGATTTAGAAAGTTACA--ACACATAGTTTCAATTGTGGAGGAGAA---  
TTTAAGCAGCTCCAGGCAAGAGTCCTGGCTGTGGAAAGATACCTAAAGGATCAGCAGCTCCTAGGAATTTGGG  
GTTGCTCTGGAAGAACTCATCTGCACCACTAATGTGCCCTGGAACCTCTAGTTGGAGT-----  
-----AATAAATCTCAAATGAGATATGG-----GAT-----  
AACATGACCTGGATGCAATGG---GACAAGGAAGTTATCAATTACACAAACATAATATAT---  
GATCTAATTGAAAAATCGCAAACCAGCAGGAA-----  
-----  
AAGAATGAACAAGATTTATTGGCATTGGATAAGTGGGCAAGTCTGTGGAGTTGGTTTAACATATCAAATTGGT  
TATGGTATATAAGAATATTTATAATAATAGTAGGAGGTTTAATAGGATTAAGAATAGTTTTTTGCT---  
GTGCTTTCTATAATA-----AATAGAGTCAGGCAGGGATACTACCC-----  
TTGTCATTGGCTATCAATCTAGTAGATACCATAGCAATAGCAGTAGCTGGG---  
TGGACAGATAGGTTTATAGAGATAGTACAAAGACTTTGTAGAGCC-----  
-----ATTTGTAACATA-----CCTAGGAGAATCAGACAGGGTGCAGAAAGGCTTTGCAA---TAA  
>JQ292897  
GCT---GCA-----  
GAAAACTTGTGGGTCACGGTATACTATGGGGTACCTGTGTGG--AGAGATGCAGAG---  
ACCACCCTATTCTGTGCATCGGATGCTAAAGCATATGATAAAGAA---GTACACAAT-----  
-----GTCTGGGCCACA---CATGCCTGTGTACCCACAGAC---  
CCTAACCCGCAAGAAATAATTTTGAA-----AATGTGACAGAAGAATTTAAT-----  
-----ATGTGGAAAAATAACATGGTAGAACAAATGCAAACAGATATA---  
ATCAGTCTCTGGGACCAAAGCCTA---AAGCCATGTGTACAGTTA---  
ACCCCTCTCTGCGTTACTTTAAATTGTACTGAACCCATCAGCACTAACTCTAACCAACAGTATCTTTAACTCTA  
ACAACAGTATCTTTAAT-----  
-----AACAGTAGCGTTAACAGCAATAATAGCATGGTAGGAGAAATAAAA---

AACTGCTCTTTCAACATGACCACAGAACTAAGA-----  
 GATAAAAGGAAAAGTGTACATTCACTT---TTTTATAAACTTGATATAGTACCAATTGATAATGAT-----  
 -----  
 -----  
 AATAATAATAGTAGTCAGTATAGACTAATAAATTGTAATACATCAACCGTGACACAG---  
 GCCTGTCCCTAAGGTAACTTTGAGCCAATTCCTATACATTATTGTACCCCAGCTGGTTTTGCGATTCTAAAGT  
 GCAGG---GATCCAAACTTTACG-----GGAAAAGGGCCATGCAAGAAT-----  
 -GTCAGC---ACAGTACAATGCACACATGGAATCAGGCCAGTAGTATCAACT---  
 CAACTGCTGTTAAATGGCAGTCTAGCAGAAGAAGAA-----  
 GTAATGATTAGATCTGAAAAATATTACAGACAAT-----GGCAAGACCATAATAGTACAGCTTACT----  
 -----GAGCCTGTAAAC-----ATCACTTGTATCAGACCTGGCAACAATACAAGAACA-----  
 -AGTATACGTATA-----GGACCAGGACAAACC---TTC-----TATGCAACAGGTGAT-----  
 -----GTAATAGGGGACCCA-----AGAAAAGCACACTGT---GAAGTCAACAAAACA---  
 GCATGGAATAACACTTTACAAAAGATAAGTATGCAATTAAGA-----AAATACTTTAAT----  
 -----AACAAAACAATAATCTTTAAG-----  
 AAATCCTCAGGAGGGGATTTAGAAAGTTACA---ACACATAGTTTCAATTGTGGAGGAGAA---  
 TTTAAACAGCTCCAGGCAAGAGTCCTGGCTGTGGAAAAGATACCTAAAGGATCAGCAGCTCCTAGGAATTTGGG  
 GTTGCTCTGGAAGAACTCATCTGCACCACTACTGTGCCCTGGAACCTTAGTTGGAGT-----  
 -----AATAAATCTCAGGATGAGATATGG-----GAG-----  
 AACATGACCTGGATGCAATGG---GACAAGGAAATTATCAATTACACAAAACAAAATATAT---  
 GATCTAATTGAAAAATCGCAAAACCAGCAGGAA-----  
 -----  
 AAGAAATGAACAAGATTTATTAGCATTGGATAAGTGGGAAGGTCTGTGGAGTTGGTTTAGCATATCAAATTGGT  
 TATGGTATATAAGAATATTTATAATAATAGTAGGAGGCTTAATAGGATTAAGAATAGTTTTTTGCT---  
 GTGCTTTCTATAATA-----AATAGAGCCAGGCAGGGATACTCACCC-----  
 TTGTCATTGGCTATTAATCTGGTAGATACCATAGCAATAGTAGTAGCTGGG---  
 TGGACAGATAGGGTTTTTGGAAATAGGACAAAGATTTTGTAGAGCT-----  
 -----ATTTGTAACATA-----CCTAGGAGAATCAGACAGGGCGCAGAAAAGGCTTTGCAA---TAA  
 >JQ292899  
 GCT---GCA-----  
 GAAAACTTGTGGGTCACGGTATACTATGGGGTACCTGTGTGG---AGAGATGCAGAR---  
 ACCACYCTATTTTGTGCATCAGATGCTAARGCATATGATAAAGAA---GTACACAAT-----  
 -----GTCTGGGCTACA---CATGCCTGTGTACCCACAGAC---  
 CCTAACCCGCAAGAAATACCTTTGGAA-----AATGTGACAGAAGAATTTGAC-----  
 -----ATGTGGAAAAATAACATGGTAGAACAATGCAAACAGATATA---  
 ATCAGTCTCTGGGACCAAAGCCTA---ARGCCATGTGTAAAGTTA---  
 ACCCCTCTCTGTGTACTTTAAATTGTGCTGAACTCAACAGCAATACCTCTAACAGT-----  
 -----  
 -----GAAGAAATGAAA---  
 AACTGCTCTTTTAACACGAGCACAGAACTAAGA-----  
 GATAAAAGGAAAAGTGCATATTCCTT---TTTTATAAACTTGATGTAGTATCAATTGATAGT-----  
 -----  
 -----  
 AATGGTAGTAATGGTAGTGGGCAGTATAGACTAATAAATTGTAATACATCAACCATGACACAG---  
 GCCTGTCCCTAAGGTAACTTTGAGCCAATTCCTATATATTATTGTACCCCAGCTGGTTTTGCGATTCTAAAGT  
 GCAAG---GATACAAACTTTACT-----GGAACAGGGCCATGCCAGAAT-----  
 -GTCAGC---ACAGTACAATGCACACATGGAATCAAGCCAGTAGTATCAACT---  
 CAACTGCTGTTAAATGGCAGTCTAGCAGAAAAAGAG-----  
 GTAATGATTAGATCTAAAAATATTACAGACAAT-----AGCAAAATCATAATAGTACAGCTTACT----  
 -----GAGCCTGTAGAC-----ATCACTTGTATCAGACCTGGCAACAATACAAGAACA-----  
 -AGTGTACGTATA-----GGACCAGGACAAACC---TTC-----TATGCAACAGGT-----  
 -----GTAATAGGGGACATA-----AGAAAAGCATATTGT---AATGTCAGCAGAGCA---  
 GCATGGAATAACACTTTACAAAAGATAAGTATACAATTAAGA-----AAATACTTTAAT----  
 -----AACAAAACAATAATCTTTAAG-----  
 AACTCCTCAGGAGGGGATTTAGAAAGTTACA---ACACATAGTTTCAATTGTGGAGGAGAA---  
 TTTAAACAGCTCCAGGCAAGAGTCCTGGCTGTGGAAAAGTACCTAAAGGATCAGCAGCTCCTAGGACTTTGGG  
 GTTGCTCTGGAAGAACTCATCTGCACCACTAATGTGCCCTGGAACCTTAGTTGGAGT-----  
 -----AATAAATCTCACAAATGAGATATGG-----GAT-----  
 AACATGACCTGGATGCAATGG---GACAAGGAAATAATCAATTACACAGAAAAAATATAT---  
 AATCTAATTGAAAAATCGCAAAACCAGCAGGAA-----

```

-----
AAGAATGAACAAGATTTATTAGCATTGGATAAGTGGGCAGGTCTGTGGAATTGGTTTAGCATATCAAAGTGGT
TATGGTATATAAAAAATATTTATAATAATAGTAGGAGGCTTGATAGGCTTAAGAATAGTTTTTTGCT---
GTGCTTTCTATAATA-----AATAGAGCCAGGCAGGGATACTCACCC-----
TTGTCATTGGCTATTAATCAGATAGATAACATAGCAATAGCAGTAGCTGGG---
TGGACAGATAGGGTTTTAGAAATAGGACAAAGATTTTGTAGAGCT-----
-----ATTYGTAAACATA-----CCTAGGAGAATCAGACAGGGCGCAGAAAAGGCTTTGCAA---TAA
>HQ385841
GCT---GCA-----
GAAAAACTGTGGGTCACGGTATACTATGGGGTACCTGTGTGG---AGAGATGCAGAG---
ACCACCCTATTTTGTGCCTCAGATGCTAAAGCATATGATAAAGAA---GTACACAAT-----
-----GTCTGGGCTACA---CATGCCTGTGTACCCACAGAC---
CCTAACCACACAAGAAATAATTTTGGAA-----AATGTGACAGAAGACTTTAACT-----
-----ATGTGGAAAAATAACATGGTAGAACAAATGCAAACAGATATA---
ATCAGTCTCTGGGACCAAAGCCTA---AAGCCATGTGTACAGTTA---
ACCCCTCTCTGCGTTACTTTAAATTGTACTAAACCCACCAGCAACAGCACTAGCTCTAACAGCAGTAGCACTA
GCTCTAACAGCAGTAGCACTAGCTCTAACAGCAGT-----
-----AGCACTAGCTCTAACACAGTAGCGTTGACAGAGATAAATTGCTTGAAGAAATGAAA---
AACTGCTCTTTCAACATGACCACAGAACTAAGA-----
GATAAAAAGAAAAATGTACATTCACCTT---TTTTATAAACTTGATATAGTATCAATTGATAGTAATAGTAGT-
-----
-----
GGGCAGTATAGTAATAGTAGTGGGCTGTATAGACTAATAAATTGTAATACATCAACCGTGACACAG---
GCCTGTCCTAAGGTAACCTTTGAGCCAATTTCCTATACATTATTGTACCCCAGCTGGTTTTGCGATTCTAAAGT
GCAGG---GATCCAAAATTTAAT-----GGAACAGGGCCGTGCAAGAAT-----
-GTCAGC---ACAGTACAATGCACACATGGAATCAAGCCAGTAGTATCAACT---
CAACTGCTGTTAAATGGCAGTCTAGCAAAAGACGAG-----
GTAATGATTAGATCTGAAAATATAACAGACAAT-----GGCAAAATCATAATAGTACAGCTTAAT----
-----GAGCCTGTAAAC-----ATCACTTGTATGAGACCTGGCAACAATACCAGAACA-----
-AGTATACGTATA-----GGACCAGGACAAACC---TTC-----TATGCAACAGGTGAG-----
-----GTAATAGGGGACCCA-----AGAAAAGCACATTGT---AATGTCAGCAGCGCA---
GCATGGAATAGCACTTTACAAAAGATAAGTGAAAAATTAAGA-----AGATACTTTGAT----
-----AACAAAACAATAATCTTTAAT-----
AGCTCCTCAGGAGGGGATTTAGAAAGTTACA--ACACATAGTTTCAATTGTGGAGGAGAA---
TTTAAACAGCTCCAGGCAAGAGTCCCTGGCTGTGGAAAGATACCTAAAGGATCAGCAGCTCCTAGGAATTTGGG
GGTGCTCTGGAAACTCATCTGCACCACTGCTGTGCCCTGGAACTCTAGTTGGAGT-----
-----AATAAACTTATAATGATATATGG-----GAT-----
AACATGACCTGGATGCAATGG--GACAAGGAAATTATCAATTACACAAACAAAATATAT---
GATCTAATTGAAAAATCGCAAAACCAGCAGGAA-----
-----
AAGAATGAACAAGATTTATTAGCATTGGATAAGTGGACAGGTCTGTGGAGTTGGTTTGACATATCAAATTGGT
TATGGTATATAAGAATATTTATAATGATAGTAGGAGGATTAATAGGCCTAAGAATAGTTTTTTGCT---
GTGCTTTCTATAATA-----AATAGAGCCAGGCAGGGATACTCACCC-----
TTGTCATTGGCTATTAATCTGGTAGATACTATAGCAATAGCAGTAGCTGGG---
TGGACAGATAGGGTTTTAGAAATAGGACAAAGAGTTTGTAGAGCT-----
-----ATTCGCAACATA-----CCTAGGAGAATCAGACAGGGCGCAGAAAAGGCTTTGCAA---TAA
>HQ385843
GCT---ACA-----
GAAAACTTGTGGGTCACGGTATACTATGGGGTACCTGTGTGG---AGAGACGCAGAG---
ACCACCCTATTTTGTGCATCAGATGCTAAAGCATATGATAAAGAA---GCACACAAT-----
-----GTCTGGGCTACA---CATGCTTGTGTACCCACAGAC---
CCTAATCCACAAGAAATAGATTTGGAA-----AATGTGACAGAAGAATTTAACT-----
-----ATGTGGAAAAATAACATGGTAGAACAAATGCAAACAGATATA---
ATCAGTCTCTGGGACCAAAGCCTA---AAGCCATGTGTACAGTTA---
ACCCCTCTCTGCGTTACGTTAACTTGTACTGCACCCAACAGCACTAGCTCTAACAGCAGTGCATCCAAC---
-----
-----AGCACTAGCTCTAACAAACAGTAGTGTTAACAGCGAAAATAATGAAA---
AACTGCTCTTTCAACATGACCACAGAACTAAGA-----
GATAAAAGGAAAAAGGTATATTCACCTT---TTTTATAAACTTGATATAGTATCAATTGATAGT-----
-----

```

-----  
 AATAGTAGCCAGTATAGACTAATAAATTGTAATACATCAACTGTGACACAG---  
 GCCTGTCCTAAGACAACCTTTGAGCCAATTCCTATACATTATTGTACCCCAGCTGGTTTTGCGATTCTAAAGT  
 GCAAG---GATACCAACTTTTACA-----GGAAAAGGGCCATGCAAGAAT-----  
 -GTCAGC---ACAGTACAATGCACACATGGAATTAACCAGTAGTATCAACT---  
 CAACTGCTGTTAAATGGCAGTCTAGCAGAAGAAGAG-----  
 GTAATGATTAGATCTGAAAATATTACAGACAAT-----AGCAAAACCATAATAGTACAGCTTAAT----  
 -----AAGCCTGTAAAC-----ATCACTTGTATCAGACCTGGCAACAATACAAGAACA-----  
 -AGCATACATATA-----GGACCAGGACGAACC---TTC-----TTTGCAACAGGTGAT-----  
 -----GTAGTAGGGGACATA-----AGAAAAGCACATTGT---AATGTCAGCAGAACA---  
 GCATGGAATAACACTTTTACAAAAGATAAGTGAACAATTAAGA-----AAATACTTTAAA----  
 -----AACAAAACAATAATTTTTTAAG-----  
 AACTCCTCAGGAGGGGATTTAGAAAGTTACA---ACACATAGTTTCAATTGTGGAGGAGAA---  
 TTTAAACAGCTCCAGGCAAGAGTCCTGGCTGTGGAAAAGATACCTAAAGGATCAGCAGCTCCTAGGAATTTGGG  
 GTTGCTCTGGAAGAACTCATCTGCACCACCTAATGTGCCCTGGAACCTCTAGTTGGAGT-----  
 -----AATAAATCTCTGAATGACATATGG-----GAT-----  
 AACATGACCTGGATGCAATGG---GACAAGGAAATTATTAATTACACAAACAAAATATAT---  
 GATCTAATTGAAAAATCGCAAAACCAGCAGGAA-----  
 -----  
 AAGAATGAACAAGATTTATTAGCATTGGATAAGTGGGCAAGTCTGTGGAATTGGTTCAACATATCAAATTGGT  
 TATGGTATATAAAAAATATTTATAATAATAGTAGGAGGCTTAATAGGATTAAGAATAGTTTTTTGCT---  
 GTGCTTTCTATAATA-----AATAGAGTCAGGCAGGGATACTCAGG-----  
 TTGTCATTGGCTATTAACCTGATAGATACCATAGCAATAGTAGTAGCTGGG---  
 TGGACAGATAGGGTTTTAGAAAAGGACAAAGATTTTGTAGAGCT-----  
 -----ATTTGTAACATA-----CCTAGGAGAATTAGACAGGGCGCAGAAAGGGCTTTGCAA---TAA  
 >HQ385846  
 GCT---GCA-----  
 GAAAACTTGTGGGTCACGGTATACTATGGGGTACCTGTGTGG---AGAGATGCAGAG---  
 ACCACCCATTTTTGTGCATCAGATGCTAAAGCATATGATAAAGAA---GTACACAAT-----  
 -----GTCTGGGCTACA---CATGCCTGTGTACCCACAGAC---  
 CCTGACCCACAAGAAATAGTTTTTGAA-----AATGTAACAGAAAATTTTGAT-----  
 -----ATGTGGAAAAATAACATGGTAGAACAAATGCAACAGATATA---  
 ATCAGTCTCTGGGATCAAAGCCTA---AAACCATGTGTACAGTTA---  
 ACCCCTCTCTGCGTTACTTTAAATTGTACTAAGCCCAACAGCACTAGCTCTAACAAACAGTAGCGTTAACAGCA  
 CTAGC-----  
 -----TCTAACAAACAGTAGCGTTAACAGCAATAGCAGCAATAGTGTGTATGAAGAAATGAAA---  
 AACTGCACTTACAACATGACCACAGAATAAGA-----  
 GATAAAAGGAAAACCTGTACATTCACCT--TTTTATAAACTTGATATAGTATCAACTGATAAT-----  
 -----  
 -----  
 AATAGTAGTGGGCGAGTATAGACTAATAAATTGCAATACATCAACCATGACACAG---  
 GCCTGTCCTAAGGTAACCTTTGAGCCAATTCCTATACATTATTGTGCCCCAGCTGGTTTTGCGATTCTAAAGT  
 GCAAG---GATCCAAATTTTAAT-----GGAACAGGGCCATGCAAGAAT-----  
 -GTCAGC---ACAGTACAATGCACACATGGAATCAAGCCAGTAGTATCAACT---  
 CAATTGCTGTTAAATGGCAGTCTAGCAGAGGAAGAG-----  
 GTAATGATTAGATCTGCAAAATATCACAGACAAT-----AGCAAAACCATAATAGTACAACCTCAAA---  
 -----GAGCCTGTAAAA-----ATCACTTGTATCAGACCTAGCAGCAAGATAAGAACA-----  
 -AGTATACGTATA-----GGACCAGGACAAACC---TTC-----TATGCAACAGATGGT-----  
 -----ATAGAAGGAGATATA-----AGAAAAGCATATTGT---AATGTCAGCAGAGCA---  
 GAATGGAATAGCACTTTATACAATATAAGTATACAATTAGGA-----AAATACTTTAAT----  
 -----AACAAAACAATAATCTTTTAAG-----  
 AACTCCACAGGAGGGGATTTAGAAATTACA---ACACATAGTTTCAATTGTGGAGGAGAA---  
 TTTAAACAGCTCCAGGCAAGAGTCCTGGCTGTGGAAAAGATACCTAAAGGATCAACAGCTCCTAGGAATTTGGG  
 GTTGCTCTGGAAGAACTCATCTGCACCACCTAGTGTGCTCTGGAACCTCTAGTTGGAGT-----  
 -----AACAAATCTCAGAGTGAGATATGG-----GAC-----  
 AACATGACCTGGATGCAATGG---GACAAGGAAGTTAGCAATTACACAAAATTAATATAT---  
 GACCTACTTGAAGAATCGCAAAACCAGCAGGAA-----  
 -----  
 AAGAATGAACAAGATTTATTGGCATTAGATAAGTGGGCAAGTCTGTGGAGTTGGTTTGACATATCACATTGGT  
 TATGGTATATAAGAATATTTATAATGATAGTAGGAGGCTTAATAGGATTAAGAATAGTTTTTTGCT---

GTGCTTTCTATAATA-----AATAGAGTCAGGCAGGGATACTCACCA-----  
 TTGTCATTGGCTATCAATCTACTAGATACCATAGCAATAGCAGTAGCTGGG---  
 TGGACAGATAGGGTTATAGAAATAGGACAAAGACTTTGTAGAGCC-----  
 -----ATTAGTAACATA-----CCTAGGAGAATCAGACAGGGCGCAGAAAAGGCTTTGCAA--TAA  
 >GU481434  
 GCT---GCA-----  
 GAAAACTTGTGGGTACCGGTATACTATGGGGTACCGGTGTGG--AGAGATGCAGAG---  
 ACCACCCTATTTTGTGCATCAGATGCTAAAGCATATGATAAAGAG--GTACACAAT-----  
 -----GTCTGGGCTACA---CATGCCTGTGTACCTACAGAC---  
 CCTAACCCACAAGAAATAATTTTGGA-----AATGTGACAGAAGAATTTGAC-----  
 -----ATGTGGAAAAATAACATGGTAGAACAAATGCAAACAGATATA---  
 ATCAGCCTCTGGGACCAGAGCCTAA--AAGCCATGTGTAAAGTTA---  
 ACCCCTCTCTGCGTTACTTTAAATTGTACTGAACCCAAACAGAACTAGCTTTAACAACAGT-----  
 -----  
 -----GACGTTAGCAGCAATAATAGCTTGTATGAAGAAATGAAA---  
 AACTGCTCTTTCAACATGACCACAGAATAAGA-----  
 GATAAGAGGAAACTTGTACATTCACTT--TTTTATAAACTTGATATAGTATCTATGGATAAT-----  
 -----  
 -----  
 AATGATAGTGGGCAGTATAGACTAATAAATTGTAATACATCAACCATGACACAG---  
 GCCTGTCCTAAGGTAACCTTTGAGCCAATTCCTATATATTATTGTACTCCAGCTGGTTTTGCACCTTCTAAAGT  
 GCAAG---GATACAAATTTTACT-----GGAACAGGGCCATGCAAGAAT-----  
 -GTCAGC---ACAGTACAATGCACACATGGAATCAAGCCAGTAGTATCAACT---  
 CAACTGTTATTAAATGGCAGTCTAGCAGAAAAAGAG-----  
 GTAATGATTAGATCTCAAAATATTACAGACAAT-----AGCAAAATCATAATAGTACAGCTTACT----  
 -----GAGCCTGTAAAC-----ATCACTTGTATCAGACCTGGCAACAATACAAGAACA-----  
 -AGTGTACGTATA-----GGACCAGGACAAACC---TGG-----TATGCAACAGGTGGT-----  
 -----GTAACAGGGGACATA-----AGAAGAGCATATTGT--AATGTCAGCAGAGCA---  
 GCATGGAATAGCACTTTACATAAGATAAGTACACAATTGAAA-----AAATACTTTAAT----  
 -----AACAAAACAATAATCTTTAAG-----  
 AACTCCTCAGGAGGGGATTTAGAAAGTTACA--ACACATAGTTTCAATTGTGGAGGAGAA---  
 TTTAAACAGCTCCAGGCAAGAGTCCCTGGCTGTGGAAAGATACCTAAGGGATCAGCAGCTCCTAGGAATTTGGG  
 GTTGCTCTGGAAGAACTCATCTGCACCACTAATGTGCCCTGGAACCTCTAGTTGGAGT-----  
 -----AATAAATCTAAGGATGAGATATGG-----GAG-----  
 AACATGACCTGGATGCAATGG--GATAAGGAAATTATCAATTACACAAACAAAATATAT--  
 GATCTAATTGAAGAAGCGCAAAGCCAGCAGGAA-----  
 -----  
 AAGAATGAACAAGATTTATTGGCATTGGGATACGTGGACAGGTCTGTGGAATTGGTTTAGCATATCAAATTGGT  
 TATGGTATATAAAAATATTTATAATAATAGTAGGAGGCTTGATAGGCCTAAGAATAGTTTTTTGCT--  
 GTGCTTTCTATAATA-----AATAGAGCCAGGCAGGGATACTCACCC-----  
 TTGTCATTGGCTATTAGTCTGATAAATACCATAGCAATAGTAGTAGCTGGG---  
 TGGACAGATAGGGTTTTAGAAAGTAGGACAAAGATTTTGACAGGGCT-----  
 -----ATTCTTAACATA-----CCTAGGAGAATCAGACAGGGCGCAGAAAAGGCTTTGCAA--TAA  
 >GU481486  
 GCT---ACA-----  
 GAAAACTTGTGGGTACCGGTATACTATGGGGTACCTGTGTGG--AGAGATGCAAAG---  
 ACCACCCTATTTTGTGCATCAGATGCAAAAGCTTACGATAAAGAA--GTCCACAAT-----  
 -----GTATGGGCTACA---CATGCCTGTGTACCCACAGAC---  
 CCTAACCCGCAAGAAATAAATTTGGA-----AATGTCACAGAAGAATTTGAC-----  
 -----ATGTGGGAAAAATAACATGGTAGAACAAATGCAAACAGATATA---  
 ATCAGTCTCTGGGACCAAAGCCTA--AAGCCATGTGTAAAGTTA---  
 ACCCCTCTCTGCGTTACTTTAAATTGTACTAAACCTAGCAGCACTAGCAATAACAACAGT-----  
 -----  
 -----AGCGTTAACAGCAATAATAGCTTGTTTGAAGAAATGAAA---  
 AACTGCTCTTTCAACATGACCACAGAATTAAGA-----  
 GATAAAAGGGAAAAAGTACATTCACTT--TTTTATAAACTTGATATAGTATCAATTGATAGT-----  
 -----  
 -----  
 AATAAATAATAGTCAGTATAGACTAATAAATTGTAATACATCAACCATGACACAG---  
 GCCTGTCCTAAGGTAACCTTTGAGCCAATTCCTATATATTATTGTACCCAGCTGGTTTTGCGATTCTAAAGT

GCACG---GATCCAAACTTTAAT-----GGAACAGGGCCATGCAAGAAT-----  
-GTCAGT---ACAGTACAATGCACACATGGAATCAAGCCAGTAGTATCAACT---  
CATCTGCTGTTAAATGGCAGTCTAGCAGAAGAAGAG-----  
GTAATGATTAGATCTAAAAATATTACAGACAAT-----GGCAAAACCATAATAGTACAGCTTAAG----  
-----GAGCCTGTAAAC-----ATCACTTGTATCAGACCTGGCAACAATACAAGAACA-----  
-AGTATACGTATA-----GGACCAGGACAAACC---TTC-----TATGCAACAGGTGAT-----  
-----GTAATAGGGGACATA-----AGAAGAGCATATTGT---AATGTCAACAGAACA---  
GCATGGAATAGAACTTTACAAGAGATAAGTAAACAATTAAGA-----AAATACTTTAAT----  
-----AACAAAACAATAATCTTTAAG-----  
AGCTCCTCAGGAGGGGATTTAGAAAGTTACA--ACACATAGTTTCAATTGTGGAGGAGAA---  
TTTAAACAGCTCCAGGCAAGAGTCCTGGCTGTGGAAAGATACCTAAAGGATCAGCAGCTCTTAGGAATTTGGG  
GTTGCTCTGGAAGAACTCATCTGCACCCTAATGTGCCCTGGAACCTCTAGTTGGAGT-----  
-----AATAAATCTCAGACAGAGATATGG-----GAT-----  
AACATGACCTGGATGCAATGG---GACAAAGAAATTATAAATTACACAGACAAAAATATAT---  
GATCTAATTGAAAAATCGCAAAACCAGCAGAAA-----  
-----  
AAGAATGAACAAGATTTATTAGCATTGGATAAGTGGGCAGGTTTGTGGAATTGGTTTGACATATCAAATTGGT  
TATGGTATATAAAAAATATTTATAATAATAGTAGGAGGCTTAATAGGATTAAGAATAGTTTTTTGCT---  
GTGCTTTCTATAATA-----AATAGAGTCAGGCAGGGATACTCAGG-----  
TTGTCATTGGCTATTAATCTGATAGATAACATAGCAATAGCAGTAGCTGGG---  
TGGACAGATAGGGTTTTAGAAATAGGACAAAGATTTTGTAGAGCT-----  
-----ATTCGTAACATA-----CCTAGGAGAATCAGACAGGGCGCAGAAAAGGCTTTGCAA---TAA  
>GU481644  
GCT---GCA-----  
GACTTGTGGGTACGGTATACTATGGGGTACCTGTGTGG---AAAGATGCAGAG---  
ACCACCCTATTTTGTGCATCAGATGCTAAAGCATATGATAAAGAA--GTACACAAT-----  
-----GTCTGGGCTACA---CATGCCTGTGTACCCACAGAC---  
CCTGACCCACAAGAAATAAATTTGGAA-----AATGTGACAGAAGAATTTAAC-----  
-----ATGTGGAAAAATAACATGGTAGAACAGATGCAAACAGACATA---  
ATCAGTCTCTGGGACCAAAGCCTA--AAGCCATGTGTACGATTA---  
ACCCCTCTCTGCGTTACTTTAGATTGTAATGCACCCAACAGCCCTAGCTCTAACAACAGT-----  
-----  
-----AGCGTTAGCAACAATGATACCTTGTTTGAAGAAATGAAA---  
AACTGCTCTTTCAACATGACCACAGAATAAGA-----  
GATAAACGAAAAAAGCATATTCACCT--TTTTATAAACTTGATATAGTATCAATTGATAGTAATGGT---  
-----  
-----  
AGTAATAGTAATGGTAGTGGGCAATATAGACTAATAAATTGTAATACATCAACCACGACACAG--  
GCCTGTCCTAAGGTATCCTTTGAGCCAATTCCTATACATTATTGTACTCCAGCTGGCTTTGCGATTCTAAAGT  
GCAAG---GATCCAAAGTTTAAT-----GGAACAGGGCCATGCAAGAAT-----  
-GTCAGC---ACAGTACAATGCACACATGGAATCAAGCCAGTAGTATCAACT---  
CAACTGCTGTTAAATGGCAGTCTAGCAGAAGAAGAG-----  
GTAATGATTAGATCTGAAAAATATTACAGACAAT-----GGCAAAATCATAATAGTACAGCTTACT---  
-----GAGCCTGTAAAC-----ATCACTTGTATCAGACCTGGCAACAATACAAGAACA-----  
-AGTGTACGTATA-----GGACCAGGACAAACC---TTC-----TATGCAACAGGTGCT-----  
-----GTAATAGGGGACATA-----AGAAGAGCACATTGT---AATGTCAGCAGAACA---  
GCATGGAATAGCACTTTACAAAAGATAAGTAAACAATTAAGA-----AAATACTTT-----  
-----AACAAAACAATAATCTTTAGG-----  
AACTCCGCAGGAGGGGATTTAGAAAGTTACA--ACACATAGTTTCAATTGTGGAGGAGAA---  
TTTAAACAGCTCCAGGCAAGAGTCCTGGCTGTGGAAAGATACCTAAAGGATCAGCAGCTCCTAGGAATTTGGG  
GTTGCTCTGGAAGAACTCATCTGCACCCTAATGTGCCCTGGAACCTCTAGTTGGAGT-----  
-----AATAAATCTTATAGTGAGATATGG-----GAT-----  
AACATGACCTGGATGCAATGG---GACAGGGAAATTATCAATTACACAAACAAAAATATAT---  
GAATTAATTGAAGAATCACAAAACCAGCAGGAG-----  
-----  
AAGAATGAACAAGATTTATTGGCATTGGATAAGTGGACAGGTCTGTGGAGTTGGTTTGACATATCAAATTGGT  
TATGGTATATAAAAAATATTTATAATAATAGTAGGAGGATTAATAGGCCTAAGAATAGTTTTTTGCT---  
GTGCTTTCTATAATA-----AATAGAGCCAGGCAGGGATACTCAGG-----  
TTGTCATTGGCTATTAATCTGATAGATAACCATAGCAATAGCAGTAGGAGGG---

TGGACAGATAGGGTTTTAGAACTAGGACAAAGATTTTGTAGAGCT-----  
 -----CTTTGTAACATA-----CCTAGGAGAATCAGACAGGGCGCAGAAAAGGCTTTGCAA--TAA  
 >JQ292891  
 GCT---GCA-----  
 GATAACTTGTGGGTACGGTATACTATGGGGTACCTGTGTGG--AGAGATGCAGAG---  
 ACCACCCTATTTTGTGCATCAGATGCTAAAGCATATGATAAAGAA--GTACACAAT-----  
 -----GTCTGGGCTACA--CATGCCTGTGCACCCACAGAC---  
 CCTAACCCACAAGAAATAGCTTTTGAA-----AATGTGACAGAAAATTTTGAT-----  
 -----ATGTGGAAAAATAACATGGTAGAACAATGCAAACAGATATA---  
 ATCAGTCTCTGGGACCAAAGCCTA--CAGCCATGTGTAAAGTTA---  
 ACCCCTCTCTGCGTTACTTTAAATTGTGTTGACCCCAACAGCAACAGC-----  
 -----  
 -----AGTAGGAACAACAGTGATAATGTGCTTGAAGAAATGAGA---  
 AACTGCTCTTACAACATGACCACAGAATAAGA-----  
 GATAAAAGGAAAAATGTACATTCACCTC--TTTTATAAACTTGATATAGTATCAACTGATAGT-----  
 -----  
 -----  
 AATAGTGGGCAGTATAGACTAATAAATTGCAATACATCAGCCATGACACAG---  
 GCCTGTCCTAAGGTAACCTTTGAGCCAATTCCTATACATTATTGTGCCCCAGCTGGTTTTGCGATTCTAAAGT  
 GCAGG---GATACAAATTTTACT-----GGAAAGGGGCAATGCAACAAT-----  
 -GTCAGC--ACAGTACAATGCACACATGGAATCAAGCCAGTAGTATCAACT---  
 CAACTGCTGTTAAATGGCAGTCTAGCAGAGAAAGAG-----  
 GTAATGATTAGATCTGAAAATATCACAGACAAT-----AGCAAAATCATAATAGTACAGCTTACT----  
 -----GAGCCTGTAAAC-----ATCACTTGTATCAGACCTAGCAACAATACAAGAACA-----  
 -AGTATAAGTATA-----GGACCAGGACGAGCC--TTC-----TATGCAACAGGTGAT-----  
 -----GTAACGGGGGACACA-----AGGAAAGCATATTGT--AAGGTCAACAAAACA---  
 GCATGGAATAGCACTTTACAAAAGGTAAGCACACAATTAAGA-----AACTACTTTAAG----  
 -----ACCAAAACAATAATCTTTAAG-----  
 AACTCCTCAGGAGGGGATTTAGAAATTACA--ACACATAGTTTCAATTGTGGAGGAGAA--  
 TTTAAACAGCTCCAGGCAAGAGTCCCTGGCTGTGGAAAGATACCTGAAGGATCAGCAGCTCCTAGGAATTTGGG  
 GTTGCTCTGGAAACTCATCTGCACCACTAATGTGCCCTGGAACCTCTAGTTGGAGT-----  
 -----AACAAATCTCAGAGTGAGATATGG-----AAT-----  
 AACATGACCTGGATGCAATGG--GATAAGGAAGTTATCAATTACACAAACATAATATAT--  
 AATCTAATTGAAGAATCGCAAAACCAGCAGGAA-----  
 -----  
 AAGAATGAACAAGATTTATTGGCATTGGATAAGTGGGCAAGTCTGTGGAATTGGTTTAACATATCAAATTGGT  
 TATGGTATATAAAAATATTATCATAATGATAGTAGGAGGCTTAATAGGATTAAGAATAGTTTTTTGCT---  
 GTGCTTTCTATAATA-----AATAGAGCCAGGCAGGGATATTCACCC-----  
 TTGTCATTAGCTATCAATCTATTAGATACCATAGCAATAACAGTAGCTGGG---  
 TGGACAGATAGTATTATAGAAATAGGACAAAGACTTTGTAGAGCC-----  
 -----ATTCTTAACATA-----CCTAGGAGAATCAGACAGGGCGCAGAAAAGGCTTTGCAA--TAA  
 >HQ385820  
 GCT---GCA-----  
 GAAAACCTTGTGGGTACGGTATACTATGGGGTACCTGTGTGG--AGAGATGCAGAG---  
 ACCACCCTATTTTGTGCATCAGATGCTAAAGCATACGATAAAGAA--GTACACAAT-----  
 -----GTCTGGGCTACA--CATGCCTGTGTACCCACAGAC---  
 CCTGACCCACAAGAAATAGTTTTGAA-----AATGTGACAGAAAATTTTGAC-----  
 -----ATGTGGAAAAATAACATGGTAGAACAATGCAAACAGATATA---  
 ATCAGCCTCTGGGACCAAAGCCTA--AAGCCTTGTGTAAAGTTA---  
 ACCCCTCTCTGCGTTACTTTAAATTGTGCTGAACCCAACAGCACTAGCTCTAACAATAGT-----  
 -----  
 -----AGTGTTTACAAAAACGATAGTTTGTATGAAGAAATGAAA---  
 AACTGCTCTTTCAACATGACCACAGAAATATTA-----  
 GATAAAAGGAAAATGTACATTCACCTT--CTTTTATAAACTTGATATAGTATCAACTGGTAGT-----  
 -----  
 -----  
 AATGATAGTGGACAGTATAGACTAATAAATTGTAATACATCAGCCATGACACAG---  
 GCCTGTCCTAAGGTAACCTTTGAGCCAATTCCTATACATTATTGTGCCCCAGCTGGTTTTGCGATTTTAAAAAT  
 GCAAA--GATACAAATTTTAAAT-----GGAACAGGGCCATGCAAGAAT-----  
 -GTCAGC--ACAGTACAATGCACACATGGAATCAAGCCAGTAGTATCAACT---

CAACTGCTGTTAAATGGCAGTCTAGCAGAGAAAAAG-----  
 GTAATGATTAGATCTAAAAACATCACAGACAAT-----GGCAAAACCATAATAGTACAGCTTACT----  
 -----GAGCCTGTAAAC-----ATCACTTGTATCAGACCTGGCAACAATACAAGAACA-----  
 -AGCATACGTATA-----GGACCAGGACAAACC---TTC-----TATGCAACAGGTGCT-----  
 -----GTAGTAGGGGACATA-----AGAAGAGCACATTGT---AATGTCAGCAGAACG---  
 GCATGGGATAGAGCTTTACAAAAGATAAGTACACAATTAAGA-----AAATACTTTAAT----  
 -----AACAAAACAATAATCTTTAAG-----  
 AACAGCTCAGGAGGGGATTTAGAAAGTTACA--ACACATAGTTTCATTTGTGGAGGAGAA--  
 TTTAAACAGCTCCAGGCAAGGGTCCTGGCTGTAGAAAAGATACCTAAAGGATCAGCAGCTCCTAGGAATTTGGG  
 GTTGCTCTGGA-AACTCATCTGCACCACTAATGTGCCCTGGA-CTCTAGTTGGAGT-----  
 -----AACAAATCCCAGGAGGAGATATGG-----GAT-----  
 AACATGACCTGGATGCAATGG---GACAAGGAAATTAACAATTACACAGACTTAATATAT---  
 AATCTAATTGAAAAATCGCAAAACCAGCAGGAA-----  
 -----  
 AAGAATGAACAAGATTTATTGGCATTGGATAAGTGGGCAGGTCTGTGGAATTGGTTTGACATATCAAATTGGT  
 TATGGTATATAAGAATATTTATAATAATAGTAGGAGGCTTAATAGGATTAAGAATAGTTTTTTGCT---  
 GCGCTTTCTATAATA-----AAAAGAGCCAGGCAGGGATACTCACC-----  
 TTGTCATTTGCTATCAATCTAATAGATACCATAGCAATAGCAGTAGCTGGG---  
 TGGACAGATAGGGTTATAGAAATAGGACAAGGATTTTGTAGAGCC-----  
 -----ATTCGTAACATA-----CCTAGGAGAATCAGACAGGGCGCAGAAAGAGCTTTTGCAA---TAA  
 >JF952018  
 GCT---GCA-----  
 GAAAACTTGTGGGTACGGTATACTATGGGGTACCTGTGTGG--AGAGATGCAGAG---  
 ACCACCCATTTTTGTGCCTCAGATGCTAAAGCATATGATAAAGAA--GTACACAAT-----  
 -----GTCTGGGCTACA---CATGCCTGTGTACCCACAGAC---  
 CCTGACCCACAAGAAATAGCTTTGGGA-----AATGTGACAGAAAATTTTAAC-----  
 -----ATGTGGAATAACATGGGTAGAACAAATGCAAACAGATATA---  
 ATCAGTCTCTGGGACCAAAGCCTA--AAGCCATGTGTACAGTTA--  
 ACCCTCTCTGCGTTACTTTACTTTGTGATGAATTCAACAGCACTAGCTCTAACAACAGTAGC-----  
 -----  
 -----GTTAACAGCAGCAGCAGCGATAGTTTGGTTACAGAAATGAAA---  
 AACTGCTCTTTCAACATGACCACAGA-CTAAGA-----  
 GATAAAAAGCAAAATGTATATTCACCT--TTTTATAAACTGGATATAGTACAACTGATAGTAAT-----  
 -----  
 -----  
 GATAGCAGGCAGTATAGACTAATAAATTGTAATACATCAGCCATGACACAG--  
 GCCTGTCCTAAGGTAACCTTTGAGCCACTTCCTATACATTATTGTGCCCCAGCTGGTTTTGCGATTCTAAAT  
 GCAAT---GATACAAAATTTAAT-----GGAACAGGGCCATGTAAGAAT-----  
 -GTCAGC--ACAGTACAATGCACACATGGAATCAAGCCAGTAGTATCAACT---  
 CAACTGCTGTTAAATGGCAGTCTAGCA-AGGAAGAG-----  
 GTGATGATTAGATCTGAAAATATCACAGACAAT-----GCCAAAACCATAATAGTACAGCTTACT---  
 -----AAGCCTGTAAAC-----ATCACTTGTATCAGACCTGGCAACAATACAAGAACA-----  
 -AGTATACGTATA-----GGACCAGGACAAACC---TTC-----TGGGGAACAGGTGAT-----  
 -----GTAATAGGGGACATA-----AGAAAAGCATATTGT---AATGTCAGCAGAGCA---  
 GCATGGAATAGCACACTATATGAGATAAGTACCCAATTAAGA-----AAATACTTTAGT---  
 -----AACAAAACAATAATATTTAAC-----  
 AGCTCCTCAGGAGGGGATTTAGAAAGTTACA--ACACATAGTTTCAATTGTGGAGGAGAA--  
 TTTAAACAGCTCCAGGCAAGAGTCCTGGCTGTGGAAAGATACCTAAAGGATCAGCAGCTCCTAGGAATTTGGG  
 GTTGCTCTGGA-AACTCATCTGCACCACTAATGTGCCCTGGA-CTCTAGTTGGAGT-----  
 -----AACAAATCTCAGAAGGAGATATGG-----GAT-----  
 AACATGACCTGGATGCAATGG---GACAAGGAAGTTATCAATTACACAGGCATAATATAT---  
 GATCTAATTGAAAAATCGCAAAACCAGCAGGAA-----  
 -----  
 AAGAATGAACAAGATTTATTGGCATTAGATAAGTGGGCAAGTCTGTGGAATTGGTTTGACATATCAAGTTGGT  
 TATGGTATATAAGAATATTTATAATAATAGTAGGAGGCTTAATAGGATTAAGAATAGTTTTTTGTT---  
 GTGCTTTCTGTAATA-----AATAGAGTCAGGCAGGGATACTCACC-----  
 TTGTCATTGGCTATCAATCTAATAGATACCATAGCAATAGCAGTAGCTGGG---  
 TGGACAGATAGGGTTATAGAAATAGGACAAGATTTTGTAGAGCC-----  
 -----ATTTGTAACATA-----CCTAGGAGAATCAGACAGGGCGCAGAAAAAGCTTTTGCAA---TAG  
 >HQ338112

GCT---ACA-----  
GAAAACTTGTGGGTCACGGTATACTATGGGGTACCTGTGTGG---AGAGAGGCAGAG---  
ACCACCCCTATTTTGTGCATCAGATGCTAAAGCATATGATAAAGAA---GTACACAAT-----  
-----GTCTGGGCTACA---CATGCCTGTGTACCCACAGAC---  
CCTAACCACACAAGAAATACCTTTGGAA-----AATGTGACAGAAAATTTTAAC-----  
-----ATGTGGAAAAATAACATGGGTAGAACAAATGCAAACAGATATA---  
ATCAGTCTCTGGGACCAAAGCCTA---CAGCCATGTGTAAAGTTA---  
ACCCCTCTCTGCGTCACTTTAGAGTGTACTAAACCCAACAGCACTAGCTTTAACATCACTAGCTCTAACAAC-  
-----  
-----AGTAGCGGTAACAGCAACAGCAGTAATAGTTTGTATGAAGAAATGAGC---  
AACTGCACTTTTCAACATGACAACAGAATAAGA-----  
GATAAAAAGAAAAAGGTACACTCACTT---TTTTATAAACTTGATATAGTACCAATTGGTAATAAT-----  
-----  
AATAGTAGTCAGTATAGACTAATAAATTGCAATACATCAGCCATGACACAG---  
GCCTGTCCTAAGGTAACCTTTGAGCCAATTCCTATACATTATTGTGCCCCAGCTGGTTTTGCATTCTAAAGT  
GCAAG---GATCCAACCTTTTAAT-----GGAACAGGGCCATGCAGGAAT-----  
-GTCAGC---ACAGTACAATGCACACATGGAATCAGGCCAGTAGTATCAACT---  
CAACTGCTGTAAATGGCAGTCTAGCAGAGAAAGAT-----  
GTAATGATTAGATCTGAAAATATCACAGACAAT-----GGCAAAATCATAATAGTACAGCTTACT----  
-----GAGCCTGTAAAC-----ATCACTTGTATCAGACCTGGCAACAATACAAGAACA-----  
-AGTATACGTATA-----GGACCAGGACAAACC---TTC-----TATGCAACAGGTGAG-----  
-----GTAACAGGGGACATA-----AGGAAAGCACATTGT---AATGTCAGCAGAGCA---  
GCATGGAATAACACTTTACAAAAGATAAGTAAACAATTAGGA-----AAATACTTTAAT-----  
-----AACAAAACAATAATCTTTAAG-----  
AACTCCTCAGGAGGGGATGTAGAAGTTACA--ACACATAGTTTCAATTGTGGAGGAGAA---  
TTTAAACAGCTCCAGGCAAGAGTCCTGGCTGTGGAAAGATACCTGAAGGATCAGCAGCTCCTAGGAATTTGGG  
GTTGCTCTGGAAGAACTCATCTGCACCACTAATGTGCCCTGGAACCTCTAGTTGGAGT-----  
-----AACAAATCTCATGATGAGATATGG-----AAT-----  
AACATGACCTGGATGCAATGG---GACAGGGAAGTTATCAATTACACAGAAAAAATATAT---  
CAGCTAATTGAAGAGTCGCAAAACCAGCAGGAA-----  
-----  
AAGAATGAACAAGATTTATTGGCATTGGACAAGTGGGCAAGTCTGTGGAGTTGGTTTGGCATATCAAATTGGC  
TATGGTATATAAGAATATTTATAATAATAGTAGGAGGCTTAATAGGATTAAGAATAGTTTTTTGCT---  
GTGCTTTCTATAATA-----AATAGAGTCAGGCAGGGATACTCACC-----  
CTGTCGTTGGCTATCAATCTACTAGATACCATAGCAATAGCAGTAGCTGGG---  
TGGACAGATAGGGTTATAGAAATAGTACAAAGAATTTGTAGAGCC-----  
-----ATTCTGAACATA-----CCTAGGAGAATCAGACAGGGCGCAGAAAGGGCTTTGCAA--TAA  
>GU481277  
GCT---GCA-----  
GATAACTTGTGGGTCACGGTATACTATGGGGTACCTGTGTGG---AGAGATGCAGAA---  
ACCACCCCTATTTTGTGCATCAGATGCTAAAGCATATGATAGGGAG---GTACACAAT-----  
-----GTCTGGGCTACA---CATGCCTGTGTACCCACAGAC---  
CCTAACCACACAAGAAATAATGTTGGAA-----AATGTGACAGAAGAATTTGAC-----  
-----ATGTGGAAAAATAACATGGGTAGAACAAATGCAAGCAGACATA---  
ATCAGTCTCTGGGACCAAAGCCTA---AAGCCATGTGTAAAGTTA---  
ACCCCTCTCTGCGTTACTTTAAATTGT---GATTACCTCAACAGCACTAGCTCT-----  
-----  
-----AACACAGTAGCGATTTGTTTGAAGAAATGAAA---  
AACTGCTCTTTCAACATGACCACAGAATAAGA-----  
GATAAAGGAAAACTGTGCATTCGCTT---TTTTATAAACTTGATATAGTATCAATTGATAGT-----  
-----  
AATAATAATAGTAGGCAATATAGACTAATAAATTGTAATACATCAACCATGACACAG---  
GCCTGTCCTAAGGTAACCTTTGAGCCAATTCCTATATATTATTGTACCCCAGCTGGTTTTGCGATTCTAAAGT  
GCAGG---GATCCAACCTTTAAT-----GGAACAGGGCCATGCAAGAAT-----  
-GTCAGC---ACAGTACAATGCACACATGGAATCAAGCCAGTAGTATCAACT---  
CAACTGCTGTAAATGGCAGTCTAGCAGAAAAAGAG-----  
GTAATGATTAGATCTAAAAATATTACAGACAAT-----AGCAAAATTATAATAGTACAGCTTAAA-----  
-----GAGCCTGTAAAC-----ATCACTTGTATTAGACCTAGCAACAATACAAGAACA-----

-GGTATACGTATA-----GGACCAGGACAAACC---TTC-----TATGCAACAGGTAAT-----  
-----GTAATAGGGGACATA-----AGAAAAGCATATTGT---AATGTCAGCAGAGCA---  
AACTGGACTAGCACTTTACAAAAGATAAGTAAACAATTAAGA-----AAATACTTTTCAT-----  
-----AACAAAACAATAAGCTTTAAG-----  
AACTCCTCAGGAGGGGATTTAGAAAGTTACA--ACACATAGTTTCAATTGTGGAGGAGAA--  
TTTAAACAGCTCCAGGCAAGAGTCCTGGCTGTGGAAAGATACCTAAAGGATCAGCAGCTCCTAGGAATTTGGG  
GTTGCTCTGGAAGAACTCATCTGCACCACTGATGTGCCCTGGAACCTCTAGTTGGAGT-----  
-----AATAAATCTCAAAGTGAGATATGG-----GAT-----  
AACATGACCTGGATGCAATGG---GACAAGGAAATTATCAATTACACAGAAAAAATATAT---  
GATCTAATTGAAAAATCGCAAAACCAGCAGGAA-----  
-----  
AAGAATGAACAAGATTTATTAGCATTGGATAAGTGGGCAGGTCTGTGGAGTTGGTTTAGCATATCAAATTGGT  
TATGGTATATAAGAATATTTATAATAATAGTAGGAGGCTTAATAGGATTAAGAATAGTTTTTTGCG---  
GTGCTTTCTATAATA-----AATAGAGTCAGGCAGGGATACTCAGG-----  
TTGTCAATTGGCTGTTAATCTGATAGATACCCTAGCAATAGCAGTAGCTGAG---  
TGGACAGATAGGGTTTTAGAAATAGGACAAAGATTTGGTAGAGCT-----  
-----ATTTGTAACATA-----CCTAGGAGAATCAGACAGGGCGCAGAAAAAGCTTTGCAA---TAA  
>GU481544  
GCT---GCA-----  
GAAAACTTGTGGGTCACGGTATACTATGGGGTACCTGTGTGG---AGAGATGCAGAG---  
ACCACCCATTTTTGTGCATCAGATGCTAAAGCATATGATAAAGAA---GTACACAAT-----  
-----GTCTGGGCTACA---CATGCCTGTGTACCCACAGAC---  
CCTGACCCACAAGAAATAAATTTGGAA-----AATGTGACAGAAAACTTTAAC-----  
-----ATGTGGAAACATAACATGGGTAGAACAAATGCAAACAGATATA---  
ATCAGTCTCTGGGACCAAAGCCTA---AAGCCATGTGTAAAGTTA---  
ACCCCTCTCTGCGTTACTTTAACTTGTACTGAACCCAACATCACTAGCTCTAACGACAGTAGCATTAACAGG-  
-----  
-----AACAGCAGTGATAGCTTTAACAGGAACAGCAACGATGAAGAAATGAAA---  
AACTGCTCTTTCAACATGACCACAGAATAAGA-----  
GACAAAAGGAAAATTGTACATTCACCT--TTTTATAAACTTGATATAGTATCAATTGATAGA-----  
-----  
-----  
AATATTAGTGGGCAGTATAGACTAATAAATTGTAATACATCAACCATGACACAG---  
GCCTGTCCTAAGATAACCTTTGAGCCAATTCCTATACATTACTGTGCCCCAGCTGGTTTTGCGATTCTAAAGT  
GCAAA---GATACAGAGTTTAGT-----GGAACAGGGCCATGCAAGAAT-----  
-GTCAGC---ACAGTACAATGCACACATGGAATCAAGCCAGTAGTATCAACT---  
CAACTGCTGTTAAATGGCAGTCTAGCAGAGGAAAAG-----  
GTAATGGTTAGATCTGAAAATATCACAAACAAT-----GGCAAAAACATAATAATACAGCTTACT---  
-----GAGCCTGTAAAA-----ATCACTTGTATCAGACCTAGCAACAATACAAGAACA-----  
-AGTATACGTATA-----GGACCAGGACAAACC---TTC-----TATGCAACAGGTAAG-----  
-----GTAGTAGGGAACATA-----AGAAAAGCATATTGT---AATGTCAGCGGAGCA---  
AAATGGAATGAACTCTACAAAAGATAAGTATACAATTAAGA-----ACATACTTTAAT-----  
-----AACAAAACAATAATCTTTAAG-----  
AACTCCTCAGGAGGGGATTTAGAAAGTTACA--ACACATAGTTTCAATTGTGGAGGAGAA--  
TTTAAACAGCTCCAGGCAAGAGTCCTGGCTGTGGAAAGATACCTAAAGGATCAGCAGCTCCTAGGAATTTGGG  
GTTGCTCTGGAAGAACTCATCTGCACCACTAATGTGCCCTGGAACCTCTAGTTGGAGT-----  
-----AATAAATCTCAGAGTGAGATATGG-----AAT-----  
AACATGACCTGGATGCAATGG---GACAAGGAAGTTATCAATTACACAAACATAATATAT---  
GATCTAATTGAACAATCGCAAAACCAGCAGGAA-----  
-----  
AAGAATGAACAAGATTTATTGGCATTGGATAAGTGGACAAGTCTGTGGAATTGGTTTGACATATCAAAGTGGT  
TATGGTATATAAGAATATTTATAATAATAGTAGGAGGCTTAATAGGATTAAGAATAGTTTTTTGCT---  
GTGCTTTCTATAATA-----AATAGAGTCAGGCAGGGATACTCAGG-----  
TTGTCAATTGGCTATCAATCTGGTGGATACCATAGCAATAGCAGTAGCTGGA---  
TGGACAGATAGGGTTATAGAAATAGGACAAGGAGTTTGTAGAGCT-----  
-----ATTTGTAACATA-----CCTAGGAGAATCAGACAGGGCGCAGAAAAAGCTTTGCAA---TAA  
>GU481661  
GCT---GCA-----  
GAAAACTTGTGGGTCACAGTATACTATGGGGTACCTGTGTGG---AAAAATGCAGAT---  
ACCACCTTATTTTGTGCATCAGATGCTAAAGCATTTGATAAAGAA---GTACACAAT-----

-----GTCTGGGCTACA---CATGCCTGTGTACCCACAGAC---  
CCTGACCCGCAAGAAATACCTTTGGAA-----AATGTGACAGAAGAGTTTAA-----  
-----ATGTGGAAAAATAACATGGTAGAACAAATGCAAACAGATATA---  
ATCAGTCTCTGGGACCAAAGCCTA---AAGCCATGTGTAAAGTTA---  
ACCCCTCTCTGTGTTACTTTAAATTGTACTGAACCCAACAAACCCAACAGCACTGTCTCCAACAACACTGTCA  
CT-----  
-----GTCTCTAACAACAGTAGCTTTAACAACAATAGTAGATTGGTTGAAGAAATGAGA---  
AACTGCTCTTTCAATGTGACCACAGAATAAAA-----  
GATAAAAAGAGAAAGGTACATTCACCT--TTTTATAAACTTGATATAGTAGCAATGATAGT-----  
-----  
-----  
AATAATAGTAGGGAGTATAGACTAATAAATTGTAATACATCAACCGTGACACAG---  
GCCTGTCCTAAGGTAACCTTTGAGCCAATTCCTATATATTATTGTACCCAGCTGGTTTTGCGCTTCTAAAGT  
GCAGG---GATCCAAACTTTAAT-----GGAACAGGGCCATGCAAAAAT-----  
-GTCAGC---ACAGTACAATGCACACATGGAATCAAGCCAGTAGTATCAACT---  
CAACTGCTGTTAAATGGCAGTCTAGCAGAAAAAGAG-----  
ATAATGATTAGATCTGAAAAATTACAAACAAT-----GGCAAAACATAATAGTACAGCTTACT----  
-----GAGCCTGTAAAC-----ATCACTTGTATCAGACCTGGCAACAATACAAGAACA-----  
-AGTATACGCATA-----GGACCAGGACAAGCC---TTC-----TATGCAACAGGTGAG-----  
-----GTAACAGGGGACATA-----AGAAAAGCACATTGT---ATTGTCAACAGAGTA---  
GCATGGGAGAACACTTTAAAAAACATAAGTACACAATTAAGA-----AAATACTTT-----  
-----AACAGAACAATAATCTTTGAG-----  
AAATCCTCAGGAGGGGATTTAGAAAGTTACA--ACACATAGTTTTAATTGTGGAGGAGAA---  
TTTAAACAGCTCCAGGCAAGAGTCCCTGGCTGTGGAAAGATACCTAAAGGATCAGCAGCTCCTAGGAATTTGGG  
GTTGCTCTGGAAACTCATCTGCACCACTACTGTGCCCTGGAACCTCTAGTTGGAGT-----  
-----AATAAATCTTACAGTGACATAGGG-----GAT-----  
AACATGACCTGGATGCAATGG---GACAAAGAAATTATCAATTACACAAACAAAATATAT---  
GATCTAATTGAAGAATCGCAAAACCAGCAGGAA-----  
-----  
AAGAATGAACAAGATTTATTGGCATTGGATAAGTGGGCAAGCCTGTGGAATTGGTTTGACATATCAAATTGGT  
TATGGTATATAAAAATATTTATAATGATAGTAGGAGGCTTAATAGGATTAAGAATAGTTTTTTGCT---  
GTGTTTTCTATAATA-----AATAGAGTTAGGCAGGGATACTCAGG-----  
TTGTCATTGGCTGTTAATCTGGTAGATACCATAGCAATAGCAGTAGGTGGG---  
TGGACAGATAGGGTTTTAGAAATAGGACAAAGAATTTGTAGAGCT-----  
-----ATTGCAACATA-----CCTAGAAGAATCAGACAGGGCGCAGAAAAAGCTTTGCAA--TAA  
>KF716491  
GCT---GCA-----  
GAAAACTTGTGGGTACGGTATATTATGGGGTACCTGTGTGG--AGAGATGCAGAG---  
ACCACTCTATTTTGTGCATCAGATGCTAAGGCATATGATACAGAA--GTACACAAT-----  
-----GTCTGGGCTACA---CATGCCTGTGTACCCACAGAC---  
CCTAACCCACAAGAAATAGCTTTGGAA-----AATGTGACAGAAAATTTTAA-----  
-----ATGTGGAAAAATGGCATGGTAGAACAAATGCAAACAGATATA---  
ATCAGTCTCTGGGACCAGAGCCTA---AAGCCATGTGTAAAGTTA---  
ACCCCTCTCTGCGTTACTTTAAATTGTACTGCACCCAACAGCACTAGACCTGACAACAGC-----  
-----AGCAGGTATGAAGAAATGAAA---  
AACTGCTCTTTCAACATGACCACAGAATAAGA-----  
GATAAAAGGACAAAAGTATATTCACCT--TTTTATAAACTTGATATAGTAGCAACTGATAGTAAT-----  
-----  
AATGGTAGTAATAGTAGTGGGCAGTATAGACTAATAAATTGTAATACATCAGCCATGACACAG---  
GCCTGTCCTAAGATAACCTTTGAGCCAATTCCTATACATTATTGTGCCCCAGCTGGTTTTGCGATTCTAAAGT  
GCAGG---GATCCAAATTTTAAAT-----GGAACAGGGCCATGCGGGAAT-----  
-GTCAGC---ACAGTACAATGCACACATGGAATCAAGCCAGTAATATCAACT---  
CAACTGCTGTTAAATGGCAGTCTAGCAGAGAAAGAG-----  
ATAATAATTAGATCTGAAAAATACACAGACAAT-----GGCAAAATCATAATAGTACAGCTTAAA-----  
-----GAGCCTGTAAAA-----ATCAATTGTACCAGACCTGACAACAATACAAGAACA-----  
-AGTTATCGTATA-----GGACCAGGACAAAACC---TTC-----TATGCAACAGGTGAT-----  
-----GTAATAGGGGACCCA-----AAGAAAGCATATTGT---AATGTCAGCAGAGCA---  
ACATGGAATAACACTTTACGAAACATAAGTGCACAATTAATA-----AAACACTTT-----

-----AACAAAACAATAATCTTTAGG-----  
 AACTCCTCAGGAGGGGATTTAGAAAGTTACA--ACACATAGTTTCAATTGTGGAGGAGAA--  
 TTTAAACAGCTCCAGGCAAGAGTCCTGGCTTTGGAAAGATACCTAAAGGATCAGCAGCTCCTAGGAATTTGGG  
 GTTGCTCTGGAAGAACTCATCTGCACCACTAATGTGCCCTGGAACCTTAGTTGGAGT-----  
 -----AATAGATCTCAGAGTGACATATGG-----GAT-----  
 AACATGACCTGGATGCAATGG--GACAGGGAAGTCATCAATTACACAAACATAATATAT--  
 GATCTACTTGAAGAATCACAAAATCAGCAGGAA-----  
 -----  
 AAGAATGAACAAGATTTATTGGCATTGGATAAGTGGGCAAGTCTGTGGAATTGGTTTGACATAACAAATTGGT  
 TATGGTATATAAAAAATATTCATAATGATAGTAGGAGGCTTAATAGGATTAAGAATAGTTTTTTGCT--  
 GTGCTTTCTATAATA-----AATAGAGTCAGGCAGGGATACTCACCC-----  
 TTGTCAATTTGCTATCAATCTAATAGATACCATAGCAATAGTAGTAGCTGGG--  
 TGGACAGATAGGGTTATAGAATTAGGACAAAGACTTTGTAGAGCC-----  
 -----ATTTGTAACATA-----CCTAGAAGAATCAGACAGGGCGCAGAAAAAGCTTTGCAA--TAA  
 >KF716492  
 GCT--GCA-----  
 GAAAACTTGTGGGTACGATATACTATGGGGTACCTGTGTGG--AGAGATGCAGAG--  
 ACCACCCTATTTTGTGCCTCAGATGCTAAAGCATATGATAAAGAA--GTACACAAT-----  
 -----GTCTGGGCTACA--CATGCCTGTGTACCCACAGAC--  
 CCTGACCCACAAGAAATAATTTTGGA--AATGTGACAGAAGATTTCAAC-----  
 -----ATGTGGAAAAATAACATGGTAGAACAAATGCAAACAGATATA--  
 ATCAGTCTCTGGGACCAAAGCCTA--AAGCCATGTGTAAAGTTA--  
 ACCCCTCTCTGCGTTACTTTAAATTGTACTGAGCCCAACAGCGCTAGCTCTAACACAATAGCACT-----  
 -----  
 -----AACAGCAACAGCAGCGATAGCTTGTTTGAAGAAATGAGA--  
 AATTGCTCTTTCAACATGACCACAGAATAAGA-----  
 GATAAGAGAAAACTGTATATTCACTT--TTTTATAAACTTGATATAGTACCAACTGATAGT-----  
 -----  
 -----  
 AGTAATGGTAGTAAGCAGTATAGACTAATAAATTGTAATACATCAGCCATGACACAG--  
 GCCTGTCCTAAGGTAACCTTTGAGCCAATTCCTATACATTATTGTGCCCCAGCTGGTTTTGCGATTCTAAAGT  
 GCAAG--GATACAGATTTTATT-----GGGAAAGGGCCATGCACGAAT-----  
 -GTCAGC--ACAGTACAATGCACACATGGAATCAAGCCAGTAGTATCAACT--  
 CAACTGCTATTAAATGGCAGTCTAGCAGAGGAAAAG-----  
 GTAATGATTAGGTCTGAAAATATCACAGACAAT-----GGCAAAATCATAATAGTACAGCTTACT--  
 -----AAGCCCGTAAGC-----ATCACTTGTATCAGACCTGGCAACAATACAAGAACA--  
 -AGTATACGTATA-----GGACCAGGACAAACC--TTC-----TATGCAACAGGTGAT-----  
 -----GTAATAGGGGACATA-----AGGAAAGCATATTGT--AATGTCAGCAGAACA--  
 GAATGGAATAGCACTTTACAAAAGATAAGTACACAATTAAAA-----GAATACTTTAAT--  
 -----AACAAAACAATAATCTTTCAG-----  
 AACTCCTCAGGAGGGGATTTAGAAAGTTACA--ACACATAGTTTCAATTGTGGAGGAGAA--  
 TTTAAACAGCTCCAGGCAAGAGTCCTGGCTGTGGAAAGATACCTAAAGGATCAGCAGCTCCTAGGAATTTGGG  
 GTTGCTCTGGAAGACTCATCTGCCCCACTAATGTGCCCTGGAACCTTAGTTGGAGT-----  
 -----AATAAATCTCAGGAGGAGATATGG-----GGT-----  
 AACATGACCTGGATGCAATGG--GACAAGGAAGTTATCAATTACACAAACATAATATAT--  
 GATCTAATTGAACAATCGCAAAACCAGCAGGAA-----  
 -----  
 AAGAATGAACAAGATTTATTGGCATTAGATAAGTGGGCAGATCTGTGGAATTGGTTTAGCATATCAAATTGGT  
 TATGGTATATAAGAATATTTATAATAATAGTAGGAGGCTTAATAGGATTAAGAATAGTTTTTTGCT--  
 GTGCTTTCTATAATA-----AATAGAGTCAGGCAGGGATACTCACCC-----  
 TTGTCAATTTGGCTATTAATCTGTTAGATGTACAGCAATAGCAGTAGCTGGG--  
 TGGACAGATAGGATTATAGAAATAGGACAAAGATTTTGTAGAGCT-----  
 -----ATTTGTAACATA-----CCTAGGAGAATCAGACAGGGCGCAGAAAAGGCTTTGCAA--TAA  
 >FJ864679  
 GTT--GCA-----  
 GGAAACTTGTGGGTACGGTATACTATGGGGTACCTGTGTGG--AGAGATGCAAG--  
 ACCACACTATTTTGTGCATCAGATGCTAAAGCATATGATAAAGAA--GTACACAAT-----  
 -----GTCTGGGCTACA--CATGCCTGTGTACCCACAGAC--  
 CCTAACCACACAAGAAATAGTTTTTGGA--AATGTGACAGAAGACTTTGAC-----  
 -----ATATGGAAAAATGACATGGTAGAACAAATGCAAACAGATATA--

ATCAATCTCTGGGACCAGAGCCTA---AAGCCATGTGTAAAGTTA---  
 ACCCCTCTCTGCGTTACTTTAAATTGTTCTGACCCCACTGAATTC AACAGCACTAGCTATAGC-----  
 -----  
 -----AACATTAGCAGTAGCAGAATCAGAAATGATACTGATATGAAA---  
 AACTGCTCTTTCCAAATGACCACAGAACTAAGA-----  
 GATAGAACAAAACTGTACATTCACCT--TTTATAGACTTGATATAGTATCAACTAATGAT-----  
 -----  
 -----  
 AGTGATAATAGGCTGTATAGACTAATAAGTTGCAATACATCAGAGGTGAAACAG---  
 GCCTGTCCTAAGGTAACCTTTGAGCCAATTCCTATACATTATTGTGCCCCAGCTGGTTTTGCGATTCTAAAAT  
 GTAGG---GATGCAAATTTTACA-----GGAAAAGGGACATGCCAGAAT-----  
 -GTCAGC---ACAGTACAATGCACACATGGAATCAAGCCAGTAGTATCAACT---  
 CAACTGCTGTTAAATGGCAGTCTAGCAGAGAAAGAG-----  
 ATAATGATTAGATCTAAAAATCTCTCAACAAT-----GCCAAAAACATAATAGTACAGCTTAAT----  
 -----GAGCCTGTAAAC-----ATCACTTGTATCAGACCTAACATCAAGACAAGAAAA---  
 GGTATACATGTAGGACAT-----ACAGGACCAGGACAAGCC--ATC-----TATGTAACAGGTGCT----  
 -----GTAACAGGGGACATA-----AGAAAAGCACATTGT--AATGTCAGCAGAGCA--  
 -AAATGGAATACAACGTTACAAAACTAAGTGAAAGATTAAGA-----AAATACTTTGTA-----  
 -----AACAAAACAATAATCTTTAAG-----  
 AACCCTCAGGAGGGGATGCAGAAATTACA--ACACATAGTTTCAATTGTGGAGGAGAA---  
 TTTAAACAGCTCCAGGCAAGAGTCCTGGCTGTGGAAAGATACCTGAAGGATCAGCAGCTCCTAGGAATTTGGG  
 GTTGCTCTGGAAGAACTCATCTGCACCACTAATGTGCCCTGGAAGCTCTAGTTGGAGT-----  
 -----AACAAATCTCTGAGGGCGATATGG-----GAT-----  
 AACATGACCTGGATGGAATGG--GATAAGGAAGTTCACAATTACACAAACATAATATAT---  
 CAGCTAATTGAAGAATCGCAAAACCAGCAGGAA-----  
 -----  
 AAGAATGAACAAGAATTATTGGCATTGTGATAAGTGGGCAAGTCTGTGGAATTGGTTTGACATATCAAAGTGGT  
 TATGGTATATAAGAATATTTATAATGATAGTAGGAGGCTTAATAGGATTAAGAATAGTTTTTTACT---  
 GTGCTTTCTATAATA-----AATAGAGTCAGGCAGGGATACTCACCC-----  
 TTGTCATTGGCTATCAATCTAATAGATACCATAGCAATAGTAGTAGCTGGG--  
 TGGACAGATAGGGTTATAGAAATAGGACAAAGATTTTGTAGAGCC-----  
 -----ATTCTGAACATA-----CCTAGGAGAATCAGACAAGGAGCAGAAAGGGCTTTGCAG--TAA  
 >JQ292893  
 GCT---ACA-----  
 GAAAACTTGTGGGTCACAATATACTATGGGGTACCTGTGTGG--AGAGATGCTGAG---  
 ACCACCTTATTTTGTGCATCAGATGCTAAGGCATATGATAAAGAA--GTACACAAT-----  
 -----GTCTGGGCTACA--CATGCCTGTGTACCCACAGAC--  
 CCTAACCCACAAGAAATAGCTTTGGGA-----AATGTGACAGAAAATTTTGAC-----  
 -----ATGTGGAAAAATAACATGGTAGAACAATGCAAACAGATATA--  
 ATCAGTCTCTGGGACCAAAGCCTA--AAGCCATGTGTAAAGTTA---  
 ACCCCTCTCTGCGTTACTTTAAATTGTGCTGAACCCAACAGCACTAGATCTAACAGCACTAGCTCTAAC---  
 -----  
 -----AACAGTAGCGTTAACAGCAACAGCGGTGATAGTTTATTTGAAGAAGTGAAA---  
 AACTGCACTTTCAACATGACCACAGAATTAAGA-----  
 GATAAAAGGAAACTGTACATTCACCT--TTTATAAACTTGATATAGTGTCAACTAATAAT-----  
 -----  
 -----  
 GGTAGTGGGCAGTATAGACTAATAAACTGCAATACATCAGCCATGACACAG---  
 GCCTGTCCTAAGGTATCCTTTGAGCCAATTCCTATACATTATTGTGCCCCAGCTGGTTTTGCGATCCTAAAAT  
 GCAAG---GATATAAATTTTAAT-----GGAACAGGGCCATGCAGGAAT-----  
 -GTCAGC---ACAGTACAATGCACACATGGAATCAAGCCAGTAGTATCAACT---  
 CAACTGCTGTTAAATGGCAGTCTAGCAGAGAAAGAT-----  
 GTAATGATTAGGTCTAAGAATATCACAGACAAT-----GGCAAAATCATAATAGTACAGCTTACT----  
 -----GAGCCTGTAAAC-----ATCACTTGTATCAGACCTGGCAACAATACAAGAACA-----  
 -AGTATACGTATA-----GGACCAGGACAAACC--TTC-----TATGCAACAGGTGCT-----  
 -----GTAATAGGGAACATA-----AGAAAAGCATATTGT--TATATGAACAGAACA---  
 GCATGGAATAGAACTTTACAAAAGATAAGTATACAATTAAGA-----ACATACTTTAAA-----  
 -----AACAAAACAATAATCTTTAAG-----  
 AACTCTTCAGGAGGGGATATAGAAGTTACA--ACACATAGTTTCAATTGTGGAGGAGAA---  
 TTTAAACAGCTCCAGGCAAGAGTCCTGGCTGTGGAAAGATACCTAAAGGATCAGCAGCTCCTAGGAATTTGGG

GTTGCTCTGGAAACTCATCTGCACCACTAATGTGCCCTGGAACCTCTAGTTGGAGT-----  
 -----AACAAATCTCAGAAGGAGATATGG-----GAT-----  
 AACATGACCTGGATGCAATGG---GACAAGGAAGTTATCAATTACACAGAAATAATATAT---  
 GAGCTAATTGAAGAATCGCAAACCAGCAGGAA-----  
 -----  
 AAGAATGAACAAGATTTATTGGCATTGGATAAGTGGGCAAGTCTGTGGAGTTGGTTTGACATATCAAATTGGT  
 TATGGTACATAAGAATATTTATAATAATAGTAGGAGGCTTAATAGGATTAARAATAGTTTTTGCT---  
 GTGCTTTCTATAATA-----AATAGAGCCAGGCAGGGATACTCACCT-----  
 TTGTCATTTGCTATCAATCTAGTAGATACCATAGCAATAGCAGTAGCTGGG---  
 TGGACAGATAGGGTTATAGAAGTAGGACAAAGACTTTGTAGAGCC-----  
 -----ATTTGTAACATA-----CCTAGGAGAATCAGACAGGGCGCAGAAAAGGCTTTGCAA---TAA  
 >JF430898  
 GTT---ACA-----  
 GGAAACTTGTGGGTCACGGTATACTATGGGGTACCTGTGTGG---AGAGATGCAGAG---  
 ACCACCCTATTTTGTGCATCAGATGCTAAAGCATATGATAAAGAG---GTACACAAT-----  
 -----GTCTGGGCTACA---CATGCCTGTGTCCCCACAGAC---  
 CCTAACCCACAAGAAATAGATTTGGAA-----AATGTGACAGAAAATTTGAC-----  
 -----ATGTGGAAAAATAACATGGTAGAACAAATGCAAACAGATATA---  
 ATCAGCCTCTGGGACCAAAGCCTA---AAGCCATGTGTAAAGTTA---  
 ACCCCTCTCTGTGTTACTTTAAATTGTACTGAACCCCAACCCCAACAGCACTAGTGTTAACATCACTAGCATGA  
 ACAACACTAGA-----  
 -----GTTAGCATCAACAGCAACGATAGTTTGTATGAAGAAATGAAA---  
 AACTGCTCTTTCAACATGACCACAGAATAAGA-----  
 GATAAAAGGAAAAAGGCATATTCACCT---TTTTATAAACTTGATATAGTATCAATTGATAGT-----  
 -----  
 -----  
 AATGGTAGTAATGATAGTAGGCAGTATAGACTAATAAATTGCAATACATCAGCCATGACACAG---  
 GCCTGTCCTAAGGTAACCTTTTGTAGCCAATTCCTATACATTATTGTGCCCCAGCTGGTTTTGCGATTCTAAAGT  
 GCAAG---GATCCATATTTCAAT-----GGAACAGGACCATGCAAGAAT-----  
 -GTCAGC---ACAGTACAATGCACACATGGAATCAAGCCAGTAGTATCAACT---  
 CAACTGCTGTTAAATGGCAGTCTAGCCGAGAAAGAG-----  
 ATAATGATTAGATCTAAAAATATCACAGACAAT-----GGCAAGATCATAATAGTACAGCTTACT---  
 -----GAGCCTGTAAAA-----ATCACTTGTATCAGACCTGGCAACAATAGAAGAACA-----  
 -AGTATACATATG-----GGACCGGGACAAGCT---TTC-----TATGCAACAGGTGCT-----  
 -----ATAACAGGGGACATA-----AGAAAAGCACATTGT---CAAGTCAACAGAACA---  
 GCGTGGAATAGCACTTTACAACAGATAAGTATAAAATTAAGA-----CAATACTTTGCT---  
 -----AACAAAACAATAATCTTTAAG-----  
 AACTCCTCAGGAGGGGATTTAGAAAGTTACA--ACACATAGTTTCAATTGTGGAGGAGAA---  
 TTCAAACAGCTCCAGGCAAGAGTCCCTGGCTGTAGAAAGATACCTAAAGGATCAGCAGCTCCTAGGAATTTGGG  
 GTTGCTCTGGAAACTCATCTGCACCACTAATGTGCCCTGGAACCTCTAGTTGGAGT-----  
 -----AACAAATCTCAGAGTGAAATATGG-----AAT-----  
 AACATGACCTGGATGCAATGG---GACAGGGAAGTTATCAATTACACAAACATAATATAT---  
 GATCTAATTGAAGAATCGCAAACCAGCAGGAA-----  
 -----  
 AAGAATGAACAAGATTTATTGGCATTGGATAAGTGGGCAAGTCTGTGGAATTGGTTTGACATATCAAAGTGGC  
 TATGGTATATAAAAAATATTTATAATAATAGTAGGAGGCTTAATAGGATTAAGAATAGTTTTTGCT---  
 GTGCTTTCTATAATA-----AATAGAGTCAGGCAGGGATACTACCC-----  
 TTGTCATTGGCTATCAAGCTAATAGATACCATAGCAATAGCAGTAGCTGGG---  
 TGGACAGATAGGATTATAGAAATAGGACAAAGATTTGTAGGGCA-----  
 -----ATCTGTAACATA-----CCTAGGAGAATCAGACAGGGCGCAGAAAAGGCTTTGCAA---TAA  
 >HQ834967  
 GCT---GCA-----  
 GAAAACTTGTGGGTCACAGTATACTATGGGGTACCTGTGTGG---AGAGATGCAGAG---  
 ACCACCCTATTTTGTGCATCAGATGCTAAAGCATATGATAAAGAA---GTGCACAAT-----  
 -----GTCTGGGCTACA---CATGCCTGTGTACCCACAGAC---  
 CCTAGCCCACAAGAAATAGCTTTTGGA---AATGTGACAGAAAATTTTGAC-----  
 -----ATGTGGAAAAATAACATGGTAGAACAAATGCAAACAGATATA---  
 ATCAGTCTCTGGGACCAAAGCCTA---AAGCCATGTGTAAAGTTA---  
 ACCCCTCTCTGCGTTACTTTAGATTGTGTTAAACCTACCAGTGACAACGCTAGC-----  
 -----

-----CTTAACAACAGTAGCGTTATGAAA---  
 AACTGCTCTTTCAACATGACCACAGAACTAAGA-----  
 GATAAAAGGAAAAATGTATATTTCACTT---TTTTATAAACTTGATATAGTATCAATTAATAGT-----  
 -----  
 -----  
 AGTAATAATGGTGATGGGCCTTATAGACTAATAAATTGTAATACATCTACTGTGACACAG---  
 GCCTGTCCTAAGGTAACATTTGAGCCAATTCCTATACATTATTGTGCCCCAGCTGGTTTTGCGATTCTAAAGT  
 GCAGG---GATCCAAATTTTAAT-----GGAACAGGGCCATGCAAGAAT-----  
 -GTCAGC---TCAGTACAATGCACACATGGAATCAAGCCAGTAGTATCAACT---  
 CAACTACTGTTAAATGGCAGCCTAGCAGAGGAAAAG-----  
 GTAATGATTAGATCTCAAAAATATCACAGACAAT-----GGCAAAATCATAATAGTACAGCTTACT----  
 -----GAGCCTGTAAAC-----ATCACTTGTATCAGACCTGGCAACAATACAAGAAAA-----  
 -AGTATACGTATA-----GGACCAGGACAGACC---TTC-----TATGCAACAGGTGAT-----  
 -----GTAATAAGTGACATA-----AGAAAAGCACATTGT---AATGTCAGCAAATCA---  
 AAATGGAATAGCACTTTACAAGAGATAGGTACACAATTAAGA-----AAATACTTTAAT----  
 -----AACAAAACAATAATCTTTAAG-----  
 AGCTCCTCAGGAGGGGATTTAGAAAGTTACA--ACACATAGTTTCAATTGTGGAGGAGAA---  
 TTTAAACAGCTCCAGGCAAGAGTCCTGGCTGTGGAAAAGATACCTAAAGGATCAGCAGCTCCTAGGAATTTGGG  
 GTTGCTCTGGAAACTCATCTGCACCACTAGTGTGCCCTGGAACCTCTAGTTGGAGT-----  
 -----AACAAATCTCATAATGAGATATGG-----GAA-----  
 AACATGACCTGGATGCAATGG---GACAGGGAAATTATCAATTACACAAACCTAATATAT---  
 AATCTAATTGAAGAATCGCAAAACCAGCAGGAA-----  
 -----  
 AAGAAATGAACAGGATTTATTGGCATTGGATAAGTGGTCAAGTCTGTGGAGTTGGTTTGACATAACAAATTGGT  
 TATGGTATATAAGAATATTTATAATGATAGTAGGAGGCTTAATAGGATTAAGAATAGTTTTTTGCT---  
 GTACTTTCTATAATA-----AATAGAGTCAGGCAGGGATACTCACCC-----  
 TTGTCATTTGCTATCAATCTAGTAGATACCTTAGCAATAGCAGTAGCTGGG---  
 TGGACAGATAGGATTATAGAAATAGTACAAAGATTTTGTAGAGCC-----  
 -----ATTTGGAACATA-----CCTAGGAGAATCAGACAGGGCGCAGAAATAGCTTTGCAA---TAA  
 >JX500696  
 GCT---GCA-----  
 GAAAACTTGTGGGTCACGGTGACTATGGAGTACCTGTGTGG--AGAGATGCAGAG---  
 ACCACCCATTTTTGTGCATCAGATGCTAAAGCATATGATAAAGAA--GTACACAAT-----  
 -----GTCTGGGCTACA--CATGCCTGTGTACCCACAGAC---  
 CCTAACCCACAAGAAATAGCTTTGGAA-----AATGTGACAGAAGATTTTGAC-----  
 -----ATATGGAAAAATAACATGGTAGAACAATGCAAACAGATATA---  
 ATTAGTCTCTGGGACCAAAGTCTA--AAGCCATGTGTAAAGCTA--  
 ACCCCCTCTGTGTACTTTAAATTGTACTGACCTCAACAGCACTAGCTCTAACAACATTACC-----  
 -----  
 -----CGCAACAGCAGCGATAGTTTGTAGGAGAAATGAAA---  
 AACTGCTCTTTCAACATGACCACAGAAATCAGA-----  
 GATAAAAAGAAAATGTATACTCACTT---TTTTATAAACTTGATATAGTATCAACTGATAGAAAT-----  
 -----  
 -----  
 GATAGTAATCAGTATAGACTAATAAATTGCAATACATCAACCATGACACAG---  
 GCCTGCCCTAAGGTAACCTTTGAGCCAATTCCTATACATTATTGTGCTCCAGCTGGTTTTGCGATTCTAAAGT  
 GCAGG---GATACAAATTTTACG-----GGAAAAGGGGCATGCAGGAAT-----  
 -GTCAGC---ACAGTACAATGCACACATGGAATCAAGCCAGTAGTATCAACT---  
 CAACTGCTGTTAAATGGCAGTCTAGCAGAGAGAGAG-----  
 GTAATGATTAGATCAGAAAATATCACAGACAAT-----AGCAAAACCATAATAGTGCAGCTTACT----  
 -----AAGCCTGTAAAC-----ATCACTTGTATCAGACCTGGCAACAATACAAGAACA-----  
 -AGTATACGAATA-----GGGCCAGGACAAACC---TTC-----TATGCAACAGGTGAG-----  
 -----GTAATAGGGGACATA-----AGAAAAGCATATTGT---AATGTCAGCAAAAAA---  
 GAATGGAATGACACTTTACAAGAGATAAGTGCACAATTAAGA-----GAATACTTTAAT----  
 -----AACAAAACAATAATCTTTAAG-----  
 AACTCCACAGGAGGGGATTTAGAAAGTTACA--ACACATAGTTTCAATTGTGGAGGAGAA---  
 TTTAAACAGCTCCAGGCAAGAGTCCTGGCTGTGGAAAAGATACCTAAAGGATCAGCAGCTCCTAGGAATTTGGG  
 GTTGCTCTGGGAAACTCATCTGCACCACTAATGTGCCCTGGAACCTCTAGTTGGAGT-----  
 -----AACAAATCTCAGAGTGAGATATGG-----GAT-----  
 AACATGACCTGGATGCAATGG---GACAAGGAAATTATCAATTACACAAACATAATATAT---

AATCTAATTGAAGAATCGCAGAACCAGCAGGAA-----  
-----  
AAGAATGAACAAGATTTATTGGCATTGGATAAGTGGGCAAGTCTGTGGAGTTGGTTTGACATATCAAATTGGT  
TATGGTATATAAGAATATTTATCATAATAGTAGGAGGCTTAATAGGATTAAGAATAGTTTTTTGCT---  
GTGCTCTCTATAATA-----AATAGAGCCAGGCAGGGATACTCACCC-----  
TTGTCATTGGCTATCAATCTAATAGATACCATAGCAGTAGCAGTAGCTGGG---  
TGGACAGATAGGGTTATAGAAACAGGACAAAGACTGTGTAAAGCC-----  
-----ATTCGTAACATA-----CCTAGAAGAATCAGACAGGGCGCAGAAAAAGCTTTGCAA---TAA  
>JX500695  
GCT---GCA-----  
GAAAACTTGTGGGTCACAGTATACTATGGGGTACCTGTGTGG---AGAGATGCAGAG---  
ACCACCCTATTTTGTGCATCAGATGCTAAAGCATTTGAAAAAGAA---GTACACAAT-----  
-----GTCTGGGCTACA---CATGCCTGTGTGCCACAGAC---  
CCTAACCACACAAGAAATAGCTTTTGGA---AATGTGACAGAAAATTTTAA-----  
-----ATGTGGAAAAATAACATGGTAGAACAAATGCAAACAGATATA---  
ATCAGTCTCTGGGACCAAAGCCTA---AAGCCATGTGTAAAGTTA---  
ACCCCTCTCTGCGTTACTTTAAATTGTGCTGAGCCCTCTAACACAGGAGCGCTAACAAAC-----  
-----  
-----AACAGCAGTGATAATTTGTTTGAAGAAATGAAA---  
AACTGCTCTTTCAACATGACCACAGAATAAGA-----  
GATAGAAGGAAAAGTGTGTATTCACCT---TTTTATAAACTTAATATAGTATCAGCTGATAGTAAT-----  
-----  
-----  
AGTAGTGGGAAGTATAGACTAATAAATTGCAATACATCAACCATGACACAG---  
GCCTGTCCTAAGATAACATTTGAGCCAATTCCTATACATTATTGTGCCCCAGCTGGTTTTGCAATTCTAAAAT  
GCAAG---GATCCAAATTTTAA-----GGAACAGGGCCATGCAAGAAT-----  
-GTCAGC---ACAGTACAATGCACACATGGAATCAAGCCAGTAGTATCAACT---  
CAACTGCTGTTAAATGGCAGTCTAGCAGAGAAAGAG-----  
GTAATGATCAGATCTGAAAATATCACAGACAAT-----GGCAAAATCATAATAGTACAGCTTGCT----  
-----GATCCTGTAAAC-----ATCACTTGTATCAGACCTGGCAACAATACAAGAACA-----  
-AGTATACGTATA-----GGACCAGGACAAACC---TTC-----TATGCAACAGGTGAT-----  
-----ATAATAGGGGACATA-----AGAAAAGCATATTGT---AATATCAGCAGAGAA---  
GCATGGGATAGCGCTTTACAAAAAATAAGTACACAATTAAGA-----AAATACTTTAAT-----  
-----AACAAAACAATAATCTTTGAG-----  
AAATCCTCAGGAGGGGATTTAGAAAGTTACA--ACACATAGTTTCAATTGTGGAGGAGAG---  
TTTAAACAGCTCCAGGCAAGAGTCCCTGGCTGTGGAAAGATACCTAAAGGATCAGCAGCTCCTAGGAATTTGGG  
GTTGCTCTGGAAGAACTCATCTGCACCACTAATGTGCCCTGGAACCTAGTTGGAGT-----  
-----AACAAATCTCAGAGTGAGATATGG-----AAT-----  
AACATGACTTGGATGCAATGG---GACAGGGAAGTTATCAATTACACAAACATGATATAT---  
GATCTACTTGAAGAATCGCAAAACCAGCAGGAA-----  
-----  
AAGAATGAACAAGATTTATTGGCGTTGGATAAGTGGGCAAGTCTGTGGAATTGGTTTGACATATCACATTGGT  
TATGGTATATAAAAAATATTTATAATGATAGTAGGAAGCTTAATAGGATTAAGAATAGTTTTTTGCT---  
GTGCTTTCTATAATA-----AATAGAGTCAGGCAGGGATACTCACCC-----  
TTGTCATTGGCTATCAATCTAATAGATACCATAGCAATAGCAGTAGGTAGG---  
TGGACAGATAGTGTTATAGAAATAGGACAAAGACTTTGTGAGCC-----  
-----ATTCGTAATATA-----CCTAGGAGAATCAGACAGGGCGCAGAAAAAGCTTTGCAA---TAA  
>JX500694  
GCT---GCA-----  
GAACATTTGTGGGTCACGGTATACTATGGAGTACCTGTGTGG---AGAGATGCAGAG---  
ACCACCCTATTTTGTGCATCAGATGCTAAAGCATATGATAAAGAA---GTACACAAT-----  
-----GTCTGGGCTACA---CATGCCTGTGTACCCACAGAC---  
CCTGACCCACAAGAAATAATGTTGGA---AATGTGACAGAAAATTTTGAC-----  
-----ATGTGGAAAAATAACATGGTAGAACAAATGCAAACAGATATA---  
ATCAGTCTCTGGGACCAAAGTCTA---AAGCCATGTGTACAGTTA---  
ACCCCTCTCTGCGTTACTTTACATTGTGCTGGATCCAACAGCACTAGCTCTAACAAACAGTACTAGCTATAAC-  
-----  
-----AACAGTAGTAGCAACAGCAGCGATAGCTGGGTTGAAGTAATGAGA---  
AACTGCTCTTTCAACGTGACCACAGAGCTAAGA-----  
GATAAAAAGAAAAAAGTATATTCACCT---TTTTATAGACTTGATATAGTATCAACTGGTAGTAAT-----

-----  
-----  
GATAGTGAGCAGTATAGACTAATTAATTGTAATACATCAGCCGTGACACAG---  
GCCTGTCCCAAGGTAACCTTTGAGCCAATTCCTATACATTATTGTGCCCCAGCTGGTTTTGCGATTCTAAAGT  
GCAAG---GATACAAATTTTACT-----GGAAAAGGGCCATGCAAGAAT-----  
-GTCAGC---ACAGTACAATGCACACATGGAATCAAGCCAGTAGTATCAACT---  
CAACTGCTGTTAAATGGCAGTCTAGCAGAGAAAGAG-----  
GTAATGATTAGATCTGAAAATATCACAGACAAT-----GGCAAAATCATAATAGTACAGCTTACT----  
-----GAGTCTGTGAGC-----ATCACTTGTACCAGACCTGGCAACAATACAAGAACA-----  
-AGTATACGTATA-----GGACCAGGACAAACC---TTC-----TATGCAACAGGTGAT-----  
-----GTAAYAGGGGACATA-----AGAAGAGCATATTGT---AATGTCAGCAGAACA---  
GAATGGAATAGCACCTTACAAAAGATAAGTACACAATTAAGA-----AGATACTTTTCAT----  
-----AACAAAACAATAATCTTTAGG-----  
AACTCCTCAGGAGGGGATGTAGAAAGTTACA---ACACATAGTTTCAATTGTGGAGGAGAA---  
TTTAAACAGCTCCAGGCAAGAGTCCTGGCTGTGGAAAAGATACCTAAGGGATCAGCAGCTCCTAGGAATTTGGG  
GTTGCTCTGGAAGAACTCATCTGCACCACTAGTGTGCCCTGGAACCTCTAGTTGGAGT-----  
-----AATAAATCTCGGCAGGAGATATGG-----GAT-----  
AACATGACCTGGATGCAATGG---GACAAGGAAGTTTTCATTACACAAATCTAATATAT---  
GAGCTGCTTGAAGAATCGCAAAACCAGCAGGAA-----  
-----  
AAGAATGAACAAGATTTATTGGCATTGGATAAGTGGACAAGTCTGTGGAATTGGTTTGACATATCAAATTGGT  
TATGGTATATAAAAATATTTATAATGATAGTAGGAGGCTTGATAGGATTAAGAATAATTTTTTACT---  
GTGCTTTCTATAATA-----AATAGAGCCAGGCAGGGATACTCACCC-----  
TTGTCAATTGGCTATTAATCTGGTAGATACCATAGCAATAGTAGTAGCTGGG---  
TGGACAGATAGGGTTATAGAAATAGGACAAGGAGCTTGTAGAGCT-----  
-----ATTTGTAACATA-----CCTAGGAGAATCAGACAGGGCGCAGAAAGGGCTTTGCAA---TAA  
>MH603967  
GCT---GCA-----  
GAAAAATTTTGGGTCACAGTATATTATGGGGTACCTGTGTGG---AGAGATGCAGAG---  
ACCACTCTGTTTTGTGCATCAGATGCTAAAGCATATGAGAAAGAA---GTACACAAT-----  
-----GTCTGGGCTACA---CATGCCTGTGTACCCACAGAC---  
CCTAACCCACAAGAAATAAGTTTGGGA-----AATGTGATAGAAAATTTTGAC-----  
-----ATGTGGAACAATAACATGGTAGAACAATGCAACAGATATA---  
ATCAGTCTCTGGGATCAAAGCCTA---AAGCCATGTGTAAAGTTA---  
ACCCCTCTCTGTGTACTTTAAATTGTACTGAACCCAGAAAAAGTAATAGCTCTAAAATTAATAACAGTACAG  
ATTACAGTGGC-----  
-----AACAGTAACAGTACAGTTAACAGCAGCAGCATATATGAAGAAATGAGA---  
AACTGCTCTTTCAACATGACCACAGAATAAGA-----  
GATAAAAAGAAAAATGTCTATTCACCTC---TTTTATAAACTTGATGTAGTACCACTTGGTAGTAAT-----  
-----  
AATAGTGGAGAGTATAGATTAATAAAATTGTAATACATCAACCATGACACAG---  
GCCTGCCCTAAGGTAACCTTTGAGCCAATTCCTATATATTATTGTGCCCCAGCTGGTTTTGCAATTCTAAAAT  
GCAAG---GATCCAAAATTTAAT-----GGAACAGGGCCATGCAAGAAT-----  
-GTCAGC---TCAGTACAATGCACACATGGAATCAAGCCAGTAGTATCAACT---  
CAACTGCTGTTAAATGGCAGTCTAGCAGAGGAAAAG-----  
GTAATGATTAGATCTAAAAATATCACAGACAAT-----AGCAAAAATATAATAGTACAGCTTACT----  
-----GAGCCTGTAAAC-----ATCACTTGTATCAGAACTGGCAATAATACAAGGACA-----  
-AGTATACGTATA-----GGACCAGGACAAACC---TTC-----TATGCAACAGGTGAT-----  
-----GTAATAAGAGACATA-----AGAAAAGCACATTGT---TATGTCAACAAAACA---  
GCATGGAATAGAGCTTTACAAAATATAAGTATACAATTAAGA-----CAGCACTTT-----  
-----AATAAAACAATAATCTTTAGG-----  
AACTCCACAGGAGGGGATTTAGAAATTACA---ACACATAGTTTCAATTGTGGAGGAGAA---  
TTTAAACAGCTCCAGGCAAGAGTCCTGGCTGTGGAAAAGATTCCTAAGGGATCAGCAGCTCCTAGGAATTTGGG  
GTTGCTCTGGAAGAACTCATCTGCACCACTAATGTGCCCTGGAACCTCTAGTTGGAGT-----  
-----AATAAATCTCTGAATGAGATATGG-----GAT-----  
AACATGACCTGGTTGCAATGG---GACAGGGAAGTTAGCAATTACACAAACCTAATATAT---  
GACTTGCTTGAAAAATCGCAGAACCAGCAGGAA-----  
-----  
AAGAATGAACAAGATTTATTGGAAGTGGATAAGTGGGCAAGCCTGTGGAATTGGTTTGACATATCAAATTGGT

TATGGTATATAAAAAATATTTATAATGATAGTAGGAGGCTTAATAGGATTAAGAATAGTGTTTGCT---  
GTGCTATCTATAATA-----AGGAGAGTCAGGCAGGGATACTCACCT-----  
GTGTCAATTGGCTATTAATCTGCTAGATACCATAGCAATAGCAGTAGCTGGG---  
TGGACAGATAGAGTCATAGAAATAGGACAAAGATTTGGTAGAGCT-----  
-----ATTTGTAACATA-----CCTAGGAGAATCAGACAGGGCGCAGAAAAGGCTTTGCAA--TAA  
>MH604120  
GCT---GCA-----  
GGAAACTTGTGGGTCACGGTATACTATGGGGTACCTGTGTGG--AGAGATGCAGAA---  
ACCACCCTATTTTGTGCGTCAGATGCTAAAGCATATGACAAAGAA--GTACACAAT-----  
-----GTCTGGGCTACA---CATGCCTGTGTACCCACAGAC---  
CCTGACCCACAAGAAATAGATTTGGAA-----AATGTGACAGAAGAATTTAAC-----  
-----ATGTGGAAAAATAACATGGGTAGAACAAATGCAAACAGATATA---  
ATCAGTCTCTGGGACCAAAGCCTA--AAGCCATGTGTAAAGTTA---  
ACCCCTCTCTGCGTTACTTTAAATTGTACTGCACCCAACAGCACTAGCTCTAGCAACAGT-----  
-----  
-----AGCGTTAACAGCAATAGTAGCATGTTTGAAGAAATGAAA---  
AACTGCTCTTTCAACATGACCACAGAATAAGA-----  
GATAAAAGGAAAAGTGTATATTCACCT--TTTTATAAACTTGATATAGTATCAATTGATAGTGAT-----  
-----  
GGTAATAATAATAATAGTAATGGGCAGTATAGACTAATAAATTGTAATACATCAACCACGACACAG---  
GCCTGTCCCAAGGTATCCTTTGAGCCAATTCCTATACATTATTGTACTCCAGCTGGTTTTGCGATTCTAAAGT  
GCAAG--GATCCAAAATTTAAT-----GGAACAGGGCCATGCAAAAAT-----  
-GTCAGC--ACAGTACAATGCACACATGGAATCAGGCCAGTAGTATCAACT---  
CAACTGCTGTAAATGGTAGTCTAGCAGAAGAAAAG-----  
GTAATGATTAGATCTGAAAATATTACAGACAAT-----GGCAAAATCATAATAGTACAGCTTAAG----  
-----AACCCTGTAAAC-----ATCACTTGTGCCAGACCTGGCAACAATACAAGAACA-----  
-AGTATACGTATA-----GGACCAGGACAAACC---TTC-----TATGCAACAGGTGCT-----  
-----GTAATAGGGGACATA-----AGAAAAGCACATTGT--AATGTTAGCAGAACA---  
GAATGGAATAACACTTTAAAAGAAATAAGTAACCAATTAGGA-----GAATACTTTAAG----  
-----AACAAAACAATAATCTTTAAG-----  
AAATCCTCAGGAGGGGACTTAGAAATTACA--ACACATAGTTTCAATTGTGGAGGAGAA--  
TTTAAGCAGCTCCAGGCAAGAGTCCTGGCTGTGGAAAGATACCTAAAGGATCAGCAGCTCCTGGGAATTTGGG  
GTTGCTCTGGAAGAACTCATCTGCCCCACTAGTGTGCCCTGGAACCTCTAGTTGGAGT-----  
-----AATAAATCTTATGATGAAATATGG-----GGT-----  
AACATGACCTGGATGCAATGG--GACAGGGAAGTTATCAATTACACAAACAAAATATAT--  
GAGCTAATTGAACAATCGCAAGACCAACAGGAA-----  
-----  
AAGAATGAACAAGATTTATTGGCATTGGGATAAGTGGGAAGGTCTGTGGAATTGGTTTAACATAACAACTGGT  
TATGGTATATAAAAAATATTTATAATGATAGTAGGAGGCTTAATAGGATTAAGAATAGTTTTTTACT--  
GTGCTTTCTATAATA-----AATAGAGCCAGGCAGGGATACTCACCC-----  
TTGTCAATTGGCTATTAATCTAATAGATACCATAGCAATAGCAGTAGCTGGG---  
TGGACAGATAGGGTTTTAGAATTAGGACAAAGACTTTGTAGAGCT-----  
-----ATCCGTAACATA-----CCTAGAAGAATCAGACAGGGCGCAGAAAGGGCGTTGCAG--TAA  
>MH604308  
GCT---ATG-----  
GACAACTTGTGGGTCACGGTATACTATGGGGTACCTGTGTGG--AGAGATGCAGAG---  
ACCACCCTATTTTGTGCATCAGATGCTAAAGCATATGATAAAGAA--GTACACAAT-----  
-----GTCTGGGCTACA---CATGCCTGTGTACCCACAGAC---  
CCTAACCCGCAAGAAATAAATTTGGAA-----AATGTGACAGAAGGATTTAAC-----  
-----ATGTGGAAAAATAACATGGGTAGAACAAATGCAAACAGATATA---  
ATCAGTCTCTGGGATCAAAGCCTA--AAGCCATGTGTAAAGTTA---  
ACCCCTCTCTGCGTTACTTTAAATTGTGCTGAACCCAACAGCACTAGCTCTAACAGCAGT-----  
-----  
-----AGCGGTAACAGCAGTAATAGCTTGTTTGAAGAAATGAAA---  
AACTGCTCTTTCAACATGACCACAGAATAAGG-----  
GATAAAAGAAAAAATGTACATTCACCTC--TTTTATAAACTTGATATAGTATCAATTGATAATAAT-----  
-----  
AGTAGTGGGCAGTATAGACTAATAAATTGCAATACATCAGCCATGACACAG---

GCCTGTCCTAAGGTAACCTTTGAGCCAATTCCTATATATTATTGTACCCCCGCTGGTTTTGCGATTCTAAAGT  
 GCAAG---GATCCAAACTTTAAT-----GGAACAGGGCCATGCAAGAAT-----  
 -GTCAGC---ACAGTACAATGCACACATGGAATCAAGCCAGTAGTATCAACT---  
 CAACTGCTGTTAAATGGCAGTCTAGCACAAGAACAG-----  
 GTAATGATTAGATCTAAAAATATTACAGACAAT-----GGCAAAATCATAATAGTGCAGCTTACT----  
 -----GAGCCTGTAAAT-----ATCACTTGTATCAGACCTGGCAACAATACAAGAACA-----  
 -AGTATACGTATA-----GGACCAGGACAAACC---TTC-----TATGCAACAGGTGAT-----  
 -----GTAATAGGGGACATA-----AGAAAAGCACATTGT---AATGTCAGCAGAGCA---  
 GCATGGAGTAGCACTTTACAAAAGATAAGTACACAATTAAGA-----AAATACTTTAAT----  
 -----AACAAAACAATAATCTTTAAA-----  
 AACTCCTCAGGAGGGGATTTAGAAATTACA---ACACATAGTTTCAATTGTGGAGGAGAA---  
 TTTAAACAGCTCCAGGCAAGAGTCCTGGCTGTGGAAAAGATACCTAAGGGATCAGCAGCTCCTGGGAATTTGGG  
 GTTGCTCTGGAAAACCTCATCTGCACCCTACTGTGCCCTGGAACCTCTAGTTGGAGT-----  
 -----AATAAATCTCAGGAAGAGATATGG-----AAT-----  
 AACATGACCTGGATGCAATGG---GACAAAGAAGTTATCAATTACACAGAAAAAATATAT---  
 GATCTACTTGAAAAATCGCAAAATCAGCAGGAA-----  
 -----  
 AAGAATGAACAAGATTTATTAGCATTAGATAAGTGGGCAGGTCTGTGGAATTGGTTTGACATAACAAATTGGT  
 TATGGTATATAAAAAATATTTATAATGATAGTAGGAGGCTTGATAGGCCTAAGAATAGTTTTTTGCT---  
 GTGCTTTCTATAATA-----AATAGAGCCAGGCAGGGATACTCAGG-----  
 TTGTCATTGGCTACCAATCTAATAGATACCATAGCAATAGTAGTAGCTGGG---  
 TGGACAGATAGGGTTTTAGAAAGTAGGACAAAGACTTTGTAGAGCT-----  
 -----ATTAGTAACATA-----CCTAGGAGAATCAGACAGGGCGCAGAAAAGGCGTTGCAA---TAA  
 >MH604056  
 GCT---GCA-----  
 GACAAATTTGTGGGTCACAGTATACTATGGGGTACCTGTGTGG---AGAGATGCAGAA---  
 ACCACCCATTTTTGTGCATCAGATGCTAAAGCATATGATAAAGAG---GTACACAAT-----  
 -----GTCTGGGCCACA---CATGCCTGTGTACCCACAGAC---  
 CCTAACCCGCAAGAAATACCTTTGGGA-----AATGTGACAGAAGATTTTGAC-----  
 -----ATGTGGAAAAATAACATGGTAGAACAAATGCAACAGATATA---  
 ATTAGTCTCTGGGACCAAAGCCTA---AAGCCATGTGTAAAGTTA---  
 ACCCTCTCTGCGTTACTTTAAATTGTACTAAACCCAACAACAGTACAGATAACGGCAATTAT-----  
 -----  
 -----AGCTTGGGTGAAGAAATGAAA---  
 AACTGCTCTTTCAACATGACCACAGAAATAAGA-----  
 GATAAAAAGAAAAAGTACATTCACTT---TTTTATAAGCTTGATATAGTATCAATGGATGGT-----  
 -----  
 -----  
 AATAGTAATGATAGTAGTGGGCAGTATAGACTAATAAATTGTAATACATCAACCATGACACAG---  
 GCCTGTCCTAAGGTAACCTTTGAGCCAATTCCTATATATTATTGTACCCCCGCTGGTTTTGCGATTCTAAAGT  
 GCAAG---GATCCAGACTTTAAT-----GGAACAGGGCCATGCAAGGAT-----  
 -GTCAGC---ACAGTACAATGCACACATGGAATCAAGCCAGTAGTATCAACT---  
 CAACTGCTGTTAAATGGCAGTCTAGCAGAAAAAAG-----  
 GTAATGATTAGATCTGAAAATATTACAGACAAT-----AGCAAAACCATAATAGTACAGCTTACT----  
 -----AAGCCTGTAAAC-----ATCACTTGTGTGCAGACCTAACAACAATACAAGAACA-----  
 -GGTATACATATA-----GGACCAGGACAAACC---TTC-----TATGCAACAGGTGAT-----  
 -----GTAATAGGGGACATA-----AGACAAGCACATTGT---AATGTCAGCAAAGCA---  
 GCATGGAATAGCACTTTACAAGAGATAAGTGCACAATTAAGA-----AAATACTTTGAT----  
 -----AACAGAACAATAATCTTTAAA-----  
 AATTCCTCAGGAGGAGATTTAGAAATTACA---ACACATAGTTTCAATTGTGGAGGAGAA---  
 TTCAAACAGCTCCAGGCAAGAGTCCTGGCTGTGGAAAAGTACCTAAAGGATCAGCAGCTCCTAGGACTTTGGG  
 GTTGCTCTGGGAAACTCATCTGCACCCTAATGTGCCCTGGAACCTCTAGTTGGAAT-----  
 -----AATAAATCTTTCAATGAGATATGG-----GAT-----  
 AACATGACCTGGATGCAATGG---GACAAAGAAATTATCAATTACACAAACAAAAATATAT---  
 GATCTAATTGAAGAATCGCAAAACCAGCAGGAA-----  
 -----  
 AAGAATGAACAAGATTTATTGGCATTGGATAAGTGGGCAGATCTGTGGAGTTGGTTTAAGATAACAAATTGGT  
 TATGGTATATAAGAATATTTATAATGATAGTAGGAGGCTTAATAGGATTAAGAATAGTTTTTTGCT---  
 GTGCTTTCTATAATA-----AATAGAGCCAGGCAGGGATACTCAGG-----  
 TTGTCATTAGCTATTAATCTGCTAGATACTATAGCAATAGTAGTAGCTGGG---

TGGACAGATAGGGTTTTAGAACTAGGACAAAGATTTTGTAGAGCT-----  
 -----ATTTGTAACATA-----CCTAGGAGAATCAGACAGGGCGCAGAAAAGGCTTTGCAA--TAA  
 >MH604408  
 GCT---GCT-----  
 GACAACTTGTGGGTACCGGTATACTATGGGGTACCTGTATGG--AGAGATGCAGAG---  
 ACTACCCTATTTTGTGCATCAGATGCTAAAGCATATGATAAAGAA--GTACACAAT-----  
 -----GTTTGGGCTACA--CATGCCTGTGTACCCACAGAC---  
 CCTGACCCACAAGAAATAAATTTGGGA-----AATGTGACAGAAGAATTTAAT-----  
 -----ATGTGGAAAAATAACATGGGTAGAACAAATGCAAACAGATATA---  
 ATCAGTCTCTGGGACCAAAGCTTA--AAGCCATGTGTAAAGTTA---  
 ACCCCTCTCTGCGTTACTTTAAATTTGTACTGCACCCAACAGCACTAGCTCTAACAGCACTAGCTCT-----  
 -----  
 -----AACAGCAGCAGCAGTGATAGTTTGTGTTGAAGAAATGAAA---  
 AACTGCTCTTTCAACATGACCACAGAATAAGA-----  
 GATAAAAGGAAAAGTGTATATTCACCTT--TTTTATAAACTTGATATAGTATCAATTGATGGTAAT-----  
 -----  
 -----  
 AGTAGTGAGCAATATAGACTAATAAATTGTAATACATCAACCATGACACAG---  
 GCCTGTCCTAAGGTAACCTTTGAGCCAATTCCTATACATTATTGTACCCCAGCTGGTTTTGCGATTCTAAAAT  
 GCAAG---GATCCAAACTTTAAT-----GGAACAGGGCCATGCAAGAAT-----  
 -GTCAGC--ACAGTACAATGCACACATGGAATCAAGCCAGTAGTATCAACT---  
 CAACTACTGT'TAAATGGCAGTCTAGCAGAAAAAAG-----  
 GTAATGATTAGATCTGAAAATATTACAGACAAT-----AGCAAAACCATAATAGTACAGCTTACT----  
 -----GAGCCTGTAAAC-----ATCACTTGTACCAGACCTGGCAACAATACAAGAACA-----  
 -AGTATACGTATA-----GGACCAGGACAAACC--TTC-----TATGCAACAGGTGAT-----  
 -----GTAATAGGGGACATA-----AGAAGAGCATATTGT--GAGGTCAACAAAACA---  
 GCATGGGATAGCACTTTACAAAAGATAAGTATACAATTAAGA-----AGATACTTTAAT----  
 -----AACAAAACAATAATCTTTAGG-----  
 AACTCCTCAGGAGGAGATTTAGAAAGTTACA--ACACATAGTTTTAATTGTGGAGGAGAA--  
 TTTAAGCAGCTCCAGGCAAGAGTCCCTGGCTGTGGAAAGATACCTAAAGGATCAGCAGCTCCTAGGAATTTGGG  
 GTTGCTCTGGAAAACCTCATCTGCACCACTACTGTGCCCTGGAACCTTAGTTGGAGT-----  
 -----AACAAATCTCAGAATGAGATATGG-----GAG-----  
 AACATGACCTGGATGCAATGG--GACAAGGAAGTTAGAAATTACACAGAAGTAATATAT--  
 GATCTGATTGAAAAATCGCAAAACCAGCAGGAA-----  
 -----  
 AAGAATGAACAAGACTTATTAGCATTGGGATAAGTGGGCAAGTCTGTGGAATTGGTTTAACATAACAAATTGGC  
 TATGGTATATAAAAAATATTTATAATGATAGTAGGAGGCTTAATAGGATTAAAAATAGTTTTTTGCT---  
 GTGCTTTCTATAATA-----AATAGAGCCAGGCAGGGATACTCACCC-----  
 CTGTCAATTGGCTATTAATCTGATAGATAACTTAGCAATAGTAGTAGCTGGG---  
 TGGACAGATAGGGTTTTAGAAATAGGACAAAGATTTTGTAGAGCT-----  
 -----ATTAGCAACATA-----CCTAGGAGAATCAGACAGGGAGCAGAAAAGGCTTTGCAA--TAA  
 >MH604109  
 GCT---GCA-----  
 GGAAACTTGTGGGTACCGGTATACTATGGGGTACCTGTGTGG--AGAGATGCAGAG---  
 ACCACCTTATTTTGTGCATCAGATGCTAAAGCATATGATAAAGAG--GTACACAAT-----  
 -----GTCTGGGCCACA--CATGCCTGTGTACCCACAGAC---  
 CCTAACCACACAAGAAATAATTTTGAA-----AATGTGACAGAAGAATTTAAC-----  
 -----ATGTGGAAAAATAACATGGGTAGAACAAATGCAAACAGATATA---  
 ATTAGTCTCTGGGATCAAAGCCTA--AAGCCATGTGTAAAGATA---  
 ACCCCTCTCTGCGTCACTTTAACCTTGTACTGAACCCACCATCAACAGTACTAGCTCTAACAACAGTAGCAACA  
 GAAACAGTACT-----  
 ----AGACCTAACAACAGTAGCAGTAGCATTAGCAGCAATTATAGTTTGGGGGAAGAAATGAAA---  
 AACTGCTCTTACAACATGACCACAGAAGTAAGA-----  
 GATAAAAAGAAAAAGGTATATTCACCTT--TTTTATAAACTTGATATAGTATCACTTAATGATAATAAT-----  
 -----  
 -----  
 AATAGTAGTAATGGTAGTGACAGTATAGACTAATAAATTGTAATACATCAACCACGACACAG---  
 GCCTGTCCTAAGGTAACCTTTGAGCCAATTCCTATACATTATTGTGCCCCAGCTGGTTTTGCGATTCTAAAAT  
 GCAGG---GATCCATACTTTAAT-----GGAACAGGGCCATGCAATAAG-----  
 -GTTAGC--ACAGTACAATGCACACATGGAATCAAGCCAGTAGTATCAACT---

CAACTGCTGTTAAATGGCAGTCTAGCAGAAGATGAA-----  
 ATAATAATTAGATCTGAAAATATTACAGATAAT-----AGCAAAACCATAATAGTACAGCTTACT----  
 -----GAACCTGTAAAC-----ATCACTTGTAGCAGACCTAACAACAATACAAGAACA-----  
 -AGTGTACGTATA-----GGACCAGGACAAACC---TTT-----TATGCAACAGATGGT-----  
 -----GTAATAGGGAACATA-----AGAAAAGCATATTGT---GATGTCAACAGAGCA---  
 GCATGGAATAGAACTTTACAAAAGATAAGTGAACAATTAAGA-----AAATACTTTAAT----  
 -----AACAAAACAATAGAGTTTAAG-----  
 AACTCCTCAGGAGGGGATTTAGAAATTACA--ACACATAGTTTCAATTGTAGAGGAGAA---  
 TTTAAACAGCTCCAGGCAAGAGTCCTGGCTCTGGAAAGCTACCTAAAGGATCAGCAGCTCCTAGGAATTTGGG  
 GTTGCTCTGGAAAGCTCATCTGCACCACTAATGTGCCCTGGAACCTCTAGTTGGAGT-----  
 -----AATAAATCTCTGGATGACATATGG-----AAG-----  
 AACATGACCTGGATGCAATGG---GACAGGGAAGTTAGCAATTACACAAACCAAATATAT---  
 AATCTAATTGAAGAAGCGCAAAATCAGCAGGAA-----  
 -----  
 AAGAATGAACAAGATTTATTAGCATTAGATACGTGGGCAGGCCTGTGGAATTGGTTCACCATATCAAAGTGGT  
 TATGGTATATAAAAATATTTATAATGATAGTAGGAGGCTTAATAGGATTAAGAATAGTTTTTTGCT---  
 GTGCTTGCTATGATA-----AATAGAGCCAGGCAGGGATACTCACC-----  
 TTGTCATTGGCTATTAATCTGATAGATACCATAGCAATAGTAGTAGCTGGG---  
 TGGACAGATAGGGTTTTGGAAATAATACAAAGATTTTGTAGAGCT-----  
 -----ATTTGTAACATA-----CCTAGGAGAATCAGACAGGGCGCAGAAAGGGCTTTGCTA---TAA  
 >MH604508  
 GCT---GCA-----  
 GGAAACTTGTGGGTCACAGTATACTATGGGGTACCTGTATGG---AAAGATGCAGAG---  
 ACCACCCATTTTTGTGCATCAGATGCTAAAGCATATGATAAAGAA---GTACACAAT-----  
 -----GTCTGGGCTACA---CATGCCTGTGTACCCACAGAC---  
 CCTAACCACACAAGAAATAAATTTGGAA-----AATGTGACAGAAGAATTTGAC-----  
 -----ATGTGGAAAAATAACATGGGTAGAACAGATGCAAACAGATATA---  
 ATCAGTCTTTGGGACCAAAGCCTA---AAGCCATGTGTAAAGTTA---  
 ACCCTCTCTGTGTACTTTAAGGTGTACTGAACCCAAAAGTAATAGCTCTAATAATAGT-----  
 -----  
 -----AGCGTTACCAACAACAGCAGTATGTTTGAAGAAATGAAA---  
 AACTGCTCTTTCAACATGACCACAGAATAAGA-----  
 GATAAAAAGAAAAATGTATATTCACCT--TTTTATAAACTTGATATAGTATCAACTGGTAGT-----  
 -----  
 -----  
 AATATTATTAATGGTAGTGGAGAGTATAGATTAATAAATTGTAATACATCAACTATGACACAG---  
 GCCTGTCCATAAGTAACTTTGAGCCAATTCCTATATATTATGTGCCCCAGCTGGTTTTGCGATTCTAAAGT  
 GCAAG---GATGCAAATTTTAAT-----GGAACAGGGCCATGCAAGAAT-----  
 -GTCAGC---ACAGTACAATGCACACATGGAATCAAGCCAGTAGTATCAACT---  
 CAACTGCTGTTAAATGGCAGTCTAGCAGAGAAAGAG-----  
 GTAATGATTAGATCTAAAAACATCACAGACAAT-----AGCAAAATCATAATAGTACAGCTTACT---  
 -----GAGCCGGTAAAC-----ATCACTTGTATCAGACCTGGCAATAATACAAGAACA-----  
 -AGTATGCATATA-----GGACCAGGACAAACC---TTC-----TATGCAACAGGTGAT-----  
 -----GTAATAGGGGACATA-----AGAAAAGCATATTGT---AATGTCAGCAGAGAA---  
 GCATGGAATAGAACTTTACAAAAGTAAGTAGACAATTAAGA-----AAGCACTTTAAT----  
 -----AACAAAACAATAATCTTTAAG-----  
 AACTCCACAGGGGGGATTTAGAAATTACA--ACACATAGTTTCAATTGTGGAGGAGAA---  
 TTTAAACAGCTCCAGGCAAGAGTCCTGGCTGTGGAGAGATACCTAAGGGATCAGCAGCTCCTAGGAATTTGGG  
 GTTGCTCTGGAAACTCATCTGCACCACTAATGTGCCCTGGAACCTCTAGTTGGAGT-----  
 -----AATAAATCTCAGAATGATATATGG-----AAT-----  
 AACATGACCTGGATGCAATGG---GACAAGGAAGTTATCAATTACACAGACATAATATAT---  
 GATCTACTTGAAAAATCACAAAACCAGCAGGAA-----  
 -----  
 AAGAATGAACAGGAGTTATTGGCATTGGATAAATGGACAAGTCTGTGGAGTTGGTTTGACATATCAAGTTGGT  
 TATGGTATATAAAAATATTTATAATGATAGTAGGAGGCTTAATAGGATTAAGAATAGTTTTTTGCT---  
 GTAATGCTCTATAATA-----AATAGAGCTAGGCAGGGATACTCACC-----  
 TTGTCATTGGCTATTAATCTGGTAGATACCATAGCAATAGTAGTAGCTGGG---  
 TGGACAGATAGGGTCATAGAAAATAGGACAAAGACTTGGTAGAGCT-----  
 -----ATTTGGAACATA-----CCTAGGAGAATCAGACAGGGAGCAGAAAAGGCTTTGCAA---TAA  
 >MH604524

GCT---GCA-----  
GAAAACTTGTGGGTCACGGTATACTATGGGGTACCTGTGTGG---AGAGATGCAGAG---  
ACCACCCCTATTTTGTGCATCAGATGCTAAAGCATATGATAAAGAA---GTACACAAT-----  
-----GTCTGGGCTACA---CATGCCTGTGTACCCACAGAC---  
CCTAACCCACAAGAAATAGTTTGGAA-----AATGTGACAGAAAAATTTAAC-----  
-----ATGTGGAAAAATAACATGGGTAGAACAAATGCAAACAGATATA---  
ATCAGTCTCTGGGACCAAAGCCTA---AAGCCATGTGTAAAGTTA---  
ACCCCTCTCTGTGTCACTTTAGATTGTGCTGAACCCAACAGCCATAGCTCTAACAACAAT-----  
-----AGCGTTAACAGCAGTAATAGCTTGTTTGAAGAAATGAAA---  
AACTGCTCTTTCAACACGACTACAGAATAAGA-----  
GATAAAAGGAAAAGTGCATATTCACCTT---TTTTATAAGCTTGATATAGTACCACCTTGATAGT-----  
-----  
AGGAATAATAGTAGACAGTATAGGCTAATAAATTGTAATACATCAACTGTGACACAG---  
GCCTGTCCTAAGGTAACTTTGAGCCAATTCCTATATATTATTGTACCCACAGCTGGTTTTGCATTTTTAAAGT  
GTAAG---GAAACAAATTTTACT-----GGGAAAGGGTCATGCAAGAAT-----  
-GTCAGC---ACAGTACAATGCACACATGGAATCAGACCAGTAGTATCAACT---  
CAACTGCTGTTAAATGGCAGTCTAGCAGAAAAACAG-----  
GTAATGATTAGATCTGAAAAATTACAGACAAT-----AGCAAAATCATAATAGTACAGCTTACT---  
-----GAGCCTGTAAAC-----ATCACTTGTATCAGACCTGGCAACAATACAAGAACA-----  
-AGTACACGTATA-----GGACCAGGACAAACC---TTC-----TATGCAACAGGTGAT-----  
-----ATAATAGGGGACATA-----AGAAAAGCATATTGT---AATGTCAACAAAACA---  
GCATGGAATAGCACTTTACAAAAGATAAGTATAGAATTAGGA-----AAATACTTTAAT---  
-----AACAAAACAATAATCTTTAAG-----  
AACTCCTCAGGAGGGAATTTAGAAAGTTATA---ACACATAGTTTCAATTGTGGAGGAGAA---  
TTTAAACAGCTCCAGGCAAGAGTCCTGGCTGTGGAAAGATACCTGAAGGATCAGCAGCTCCTAGGAATTTGGG  
GTTGCTCTGGAAGAACTCATCTGCACCACTAATGTGCCCTGGAACCTCTAGTTGGAGT-----  
-----AATAAATCTCAGAATGAGATATGG-----GAT-----  
AACATGACCTGGATGCAATGG---GACAAGGAAGTTATCAATTACACAGATATAATATTT---  
GAGCTAATTGAAAAATCGCAAAACCAGCAGGAA-----  
-----  
AAGAATGAACAAGATTTATTAGCATTGGATAAGTGGACAGGTCTGTGGAATTGGTTTAGCATATCAAATTGGT  
TATGGTATATAAGAATATTTATAATAATAGTAGGAGGCTTAATAGGATTAAGAATAGTTTTTGTCT---  
GTACTTTCTATAATA-----AATAGAGTCAGGCAGGGATACTCACC-----  
TTGTCAATTGGCTATTAATCTGGTAGATACCATAGCAATAGTAGTAGCTGGG---  
TGGACAGATAGGGTTTTAGAAATAGGACAAAGAGTTTGTAGAGCT-----  
-----ATTTGTAACATA-----CCTAGGAGAATCAGACAGGGCGCAGAAAGGGCTTTGCAA---TAA  
>MH604541  
GCT---GCA-----  
GAAAACTTGTGGGTCACCGTATACTATGGGGTACCTGTGTGG---AGAGATGCAGAG---  
GCCACCCCTATTTTGTGCATCAGATGCTAAAGCATATGATAAAGAA---GTACACAAT-----  
-----GTCTGGGCTACA---CATGCCTGTGTCCCCACAGAC---  
CCTAACCCACAAGAAATAATGTTGGAA-----AATGTGATAGAAGAATTTAAC-----  
-----ATGTGGAAAAATAACATGGGTAGAACAAATGCAAACAGATATA---  
ATCAGTCTCTGGGACCAAAGCCTA---AAGCCATGTGTAAAGTTA---  
ACCCCTCTTTGCGTTACTTTAAATTGTACTGCACCCAACAGCACTAGCTCTAACAACAAT-----  
-----AGTGTTAACAGCAATAATAGCTTGTTGAAGAAATGCAA---  
AACTGCTCTTTTTACATGACCACAGAATAAGA-----  
GATAAAAGGAAAAGGTATACTCACTT---TTTTATAAAGCTTGATATAGTATCAATTGATAGT-----  
-----  
AATAACAGTAGTAATATTACTCAGTATAGACTAATAAATTGTAATACATCAACCGTGACACAG---  
GCCTGTCCTAAGGTAACTTTGAGCCAATCCCTATACATTATTGTACCCACAGCTGGTTTTGCATTCTAAAGT  
GCAAG---GATCCAAACTTTAAT-----GGAACAGGGCCATGCAAGAAT-----  
-GACAGC---ACAGTACAATGCACACATGGCATCAAACCAGTAGTATCAACT---  
CAGCTGCTGTTAAATGGCAGTCTAGCAGAAAAAGAG-----  
GTAATGATTAGATCTGCAAAATTACAGACAAT-----AGCAAAATCATAATAGTACAGCTTAAT---  
-----GAGTCTGTACCC-----ATCACTTGTATCAGACCTGGCAACAACACAAGAACA-----

-AGTATACGTATA-----GGACCAGGACAAACC---TTC-----TATGCAACAGGTGAT-----  
 -----ATAATAGGGGACATA-----AGAAAAGCACATTGT---AATGTCAGCAAAACA---  
 GCATGGAATAGAACTTTACAAAGGATAAGTACACAATTAAGC-----AAATACTTTAAA-----  
 -----AATAAAACAATAATCTTTAAG-----  
 AACTCCTCAGGGGGGATTTAGAAATTACA--ACACATAGTTTTAATTGTGGAGGAGAA---  
 TTTAAACAGCTCCAGGCAAGAGTCCTGGCTGTGGAAAGCTACCTAAAGGATCAGCAGCTCCTAGGAATTTGGG  
 GTTGCTCTGGAAAACTCATCTGCACCACTAATGTGCCCTGGAACCTCTAGCTGGAGT-----  
 -----AATAAATCTTGGAATGAAATATGG-----GAT-----  
 AACATGACCTGGATGCAATGG---GACAGGGAAATTATCAATTACACAAACATAATATGG---  
 GATCTAATTGAAGAATCGCAAAACCAGCAGGAA-----  
 -----  
 AAGAATGAACAAGATTTATTAGCATTGGATAAGTGGACAAGTCTGTGGAATTGGTTTAGCATATCAAATTGGT  
 TATGGTACATAAAAAATATTTATAATAATAGTAGGAGGCTTAATAGGATTAAGAATAGTTTTTTACT---  
 GTGCTTTCTATAATA-----AATAGGGTCAGGCAGGGATACTCACCT-----  
 TTGTCATTGGCTATTAATCTGATAGATTACATTGCAGTAGCAGTAGCTGGG---  
 TGGACAGATAGGGTTTTAGAAATAGGACAAAGATTTTGTAGAGCT-----  
 -----ATTTGTAACATA-----CCTAGGAGAATCAGACAGGGCGCAGAAAGGGCTTTGCAA---TAA  
 >MH330347  
 GCA-----  
 GGAAACTTGTGGGTCACGGTATACTATGGGGTACCTGTGTGG---AGAGATGCAGAG---  
 ACCACCCTATTTTGTGCATCAGATGCTAAAGCATATGATAAAGAA---GTACACAAT-----  
 -----GTCTGGGCTACA---CATGCCTGTGTACCCACAGAC---  
 CCTGACCCACAAGAAATAATTTTGGA-----AATGTGACAGAAACTTTAAC-----  
 -----ATGTGGAAAAATAACATGGTAGAACAATGCAGACAGATATA---  
 ATCAGTCTCTGGGACCAAAGCCTA---AAGCCATGTGTAAAATTA---  
 ACCCTCTCTGCGTTACATTAGATTGTACTACCCCCCAATTTAACAGCACTAGCTCTAACACAGTAGTGGTA  
 ACAGCAGCAGC-----  
 -----AGTGATAGCCTGTCTGAAGACCTGTCTGAAGAAATGAAA---  
 AACTGCTCTTTCAACATGACCACAGAATAAGA-----  
 GATAAAAGGAAACAAGTATATTCACCT--TTTTATAAACTTGATATAGTATCAACTGGTAGTAAT-----  
 -----  
 -----  
 GGTAGTGGACAGTATAGACTAATAAATTGTAACACATCAGCCGTGACCCAG---  
 GCTTGTCCTAAGGTAACCTTTGAGCCAATTCCTATACATTATTGTGCCCCAGCTGGTTTTGCGATTGTAAAGT  
 GCAAG---GATACAGATTTTTCT-----GGAACAGGGCTATGCAAGAAT-----  
 -GTCAGC---ACAGTACAATGCACACATGGAATCAAGCCAGTGGTATCAACT---  
 CAACTGCTGTTTAAATGGCAGTTTAGCAGAGAAAGAG-----  
 GTAGTGATTAGATCTGAAAATATCACAAACCCT-----GGAAAAACATAATAGTACAGCTTACT---  
 -----GAGCCTGTAAAA-----ATCACTTGTATCAGACCTGGCAACAATACAAGAACA---  
 -AGTATACATATA-----GGACCAGGACAAGCC---TTC-----TTTGCAACAGGTGCT-----  
 -----GTAACAGGGGACATA-----AGAAAAGCATATTGT---ACTGTCAACGAAACA---  
 GCATGGAATAGCACTTTACAAAAGATAAGTACACAATTAAGA-----AAATACTTTAAT-----  
 -----AACAAAACAATAATCTTTAAA-----  
 AACTCCTCAGGAGGGGATTTAGAAATTACA--ACACATAGTTTCAATTGTGGAGGAGAA---  
 TTTAAACAGCTCCAGGCAAGAATCCTGGCTGTGGAAAGATACCTAAAGGATCAGCAGCTCCTAGGAATTTGGG  
 GTTGCTCTGGAAAACTCATCTGCACCACTAATGTGCCCTGGAACCTCTAGTTGGAGT-----  
 -----AATAAATCTCTGAATGAGATATGG-----GAT-----  
 AACATGACCTGGATGCAATGG---GACAAGGAAGTTATTAATTACACAAACACAATATAT---  
 GAGCTAATTGAACAATCGCAAAATCCAGCAGGAA-----  
 -----  
 AAGAATGAACAAGATTTATTGGCATTGGATAAGTGGGCAAGTCTGTGGAATTGGTTTGACATATCACAGTGGT  
 TATGGTATATAAAAAATATTTATAATAATAGTAGGAGGCTTAATAGGATTAAGAATAGTTTTTTGCA---  
 GTGCTTTCCATAATA-----AATAGAGCCAGGCAGGGATACTCACCC-----  
 TTGTCATTGGCTATTAATCTGATAGATACCCTAGCAGTAGCAGTAGCTGAG---  
 TGGACAGATAGGGTTATAGAAATAGGACAAAGATTTTGTAGAGCT-----  
 -----ATTGTAATATA-----CCTAGGAGAATTAGACAGGGCGCAGAAAAAGCTTTGCAA---TAA  
 >MH330348  
 GCT---GCA-----  
 GATTTGTGGGTCACGGTATACTATGGGGTACCTGTGTGG---AGAGATGCAGAG---  
 ACCACCCTATTTTGTGCATCAGATGCTAAAGCATATGATAAAGAA---GTGCACAAT-----

-----GTCTGGGCTACA---CATGCCTGTGTACCCACAGAC---  
 CCTAACCCACAAGAAATAGCTTTGGAA-----AATGTGACAGAAAATTTTGAC-----  
 -----ATGTGGAAAAATAACATGGTAGAACAAATGCAAACAGATATA---  
 ATCAGTCTCTGGGACCAAAGCCTA---AAGCCATGTGTAAAGTTA---  
 ACCCCTCTCTGCGTTACCTTAGATTGTACTGAACCCAACAACACTAGCTCTAACAACAGTAGTACTAGC----  
 -----  
 -----TCTAACAACAGTAGTGATAGTATGTATGGAGAAATGAAA---  
 AACTGCTCTTTCAACATGACCACAGAATAAGA-----  
 GATAAAAGGAAAAGTGCATATTCACCTT---TTTTATAAACTTGATATAGTATCAACTGATACTGAT-----  
 -----  
 -----  
 AGTAATAGTAGTAGGCAGTATAGACTAATAAATTGCAATACATCAGCCATGACACAG---  
 GCCTGTCCTAAGGTCACCTTTGAGCCAATTCTCTATACATTATTGTGCCCCAGCTGGTTTTGCAATTCTAAAGT  
 GCAAG---GATCCAAATTTTAAAT-----GGAACAGGGCCATGCAATAAT-----  
 -GTCAGC---ACAGTACAATGCACACATGGAATTAAGCCAGTAGTATCAACT---  
 CAACTGCTGTAAATGGCAGTCTAGCAGAGAAAAAG-----  
 GTAATAATTAGATCTAAAAATATCACAGACAAT-----AGCAAAATCATAATAGTACAGCTTACT----  
 -----AAGCCTGTAAAC-----ATCACTTGTATCAGACCTGGCAACAACACAAGAACA-----  
 -AGTATACGTATA-----GGACCAGGACAAACC---TTC-----TATGCAACAGGTGCG-----  
 -----GTAACAGGAGACACA-----AGAAGAGCACATTGT---AATGTCAACAGAACA---  
 GAATGGAATAGAAGTGTACAAGAGATAAGGGAACAATTAAGA-----GGATACTTTAAT----  
 -----AATCGAACAATAAATTTTAAG-----  
 AACTCCTCAGGAGGGGATTTAGAAAGTTACA--ACACATAGTTTCAATTGTAGAGGAGAA---  
 TTTAAACAGCTCCAGGCAAGAAATCCTGGCTGTGGAAAGATACCTGAAGGATCAGCAGCTCCTAGGAATTTGGG  
 GTTGCTCTGGAAAAGTCTATCTGCACCACTAATGTGCCCTGGAAGTCTAGTTGGAGT-----  
 -----AACAAATCTCAGAGTGAGATATGG-----GAA-----  
 AACATGACCTGGATGCAATGG---GACAAGGAAGTTATCAATTACACAAACCTAATATAT---  
 AGTTTAATTGAAGAATCGCAAAACCAGCAGGAA-----  
 -----  
 AAGAATGAACAAGATTTATTGGCATTGGATAAATGGGCAGGTCTGTGGAATTGGTTTGACATATCAAATTGGT  
 TATGGTATATAAAAAATATTTATAATAATAGTAGGAGGCTTAATAGGATTAAGAATAGTTTTTTGCT---  
 GTGCTTTCTATAATG-----AATAGAGTCAGGCAGGGATACTCAGG-----  
 TTGTCATTGGCTATCAGTCTAATAGATACCATAGCAATAGCAGTAGCTGGG---  
 TGGACAGATAGGGTTATAGAATTAGGACAAAGATTTTGTAGAGCC-----  
 -----ATTTGTAACATA-----CCTAGGAGAATCAGGCAGGGTGCAGAAAGGGCTTTGCAA--TAA  
 >MH330349  
 GCT---ACA-----  
 GAAGACTTGTGGGTCACAGTATACTATGGGGTACCTGTGTGG--AGAGATGCAGAG---  
 ACCACCCATTTTTGTGCATCAGATGCTAAAGCATATGATAAAGAA--GTACACAAT-----  
 -----GTCTGGGCTACA---CATGCCTGTGTACCCACAGAC---  
 CCTAACCCACAAGAAATAGATTTGGAG-----AATGTGACAGAAGAGTTTGAC-----  
 -----ATGTGGAAAAATAACATGGTAGAACAAATGCAAACAGATATA---  
 ATCAGTCTCTGGGACGAAAGCCTA---AAGCCATGTGTACAGTTA---  
 ACCCCTCTCTGCGTTACTTTAAATTGTACTGAACCCAACAGCACTAGACCTAACAGCACTAGCTCTAACAACA  
 GTAACAGCACT-----  
 ----ACACCTACCAGCAGTAGTGGTTCACAGCAGCAGTAGTGATAGTTTGTATGGAGACATGAAA---  
 AACTGTTCTTTCAATATGACCACAGAATAAGA-----  
 GATAAAAAGAAAAGGTACATTCACCTT---TTTTATAAACTTGATATAGTATCCACTGATAGAAAT-----  
 -----  
 -----  
 AATAGTGGGCATTATAGACTAATAAATTGCAATACATCAACCATGACACAG---  
 GCCTGTCCTAAGGTAACCTTTGAGCCAATTCTCTATACATTATTGTGCCCCAGCTGGTTTTGCGATTCTAAAGT  
 GCAAG---GATCCAAATTTTAAAT-----GGAACAGGGCCATGTAAGAAT-----  
 -GTCAGC---ACAGTGCAATGCACACATGGAATCAAGCCAGTAGTATCAACT---  
 CAACTGCTGTAAATGGCAGTCTAGCAGAGGAAAAG-----  
 GTAATACTTAGATTTGAAAAATATCAAAACAAT-----GGCAAAACCATAATAGTACAGCTTAAG----  
 -----GAGCCTGTAAAC-----ATCACTTGTATCAGACCTGGCAACAATACCAGAACA-----  
 -AGTATACATATA-----GGACCAGGAAGAGCC---TTC-----TATGCAACAGGTGAG-----  
 -----GTAATAGGGGACATA-----AGAAGAGCACATTGT---AATGTCAACGGAACA---  
 GAATGGAATAAACTTTTACACGAAATAAGTAAACAATTAGGA-----AAACACTTT-----

-----AACAAAACAATTATCTTTAAG-----  
AGTTCCTCAGGAGGGGATTTAGAAAGTTACA--ACACATAGTTTCAATTGTGGAGGAGAA--  
TTTAAACAGCTCCAGGCAAGAGTCCTGGCTGTGGAAAGATACCTGAAGGATCAGCAGCTCCTAGGAATTTGGG  
GTTGCTCTGGAAGACTCATCTGCACCACTACTGTGCCCTGGAACACTAGTTGGAGT-----  
-----AACAAAACCTTATACTGAGATATGG-----GAT-----  
AACATGACCTGGATGCAATGG--GACAAGGAAGTTATCAATTACACAAACATAATATAT--  
AATCTAATTGAAGAATCGCAAAACCAGCAGGAA-----  
-----  
AAGAATGAACAAGATTTATTGGCATTGGATAAGTGGGCAAGTCTGTGGAATTGGTTTGACATATCAAGTTGGT  
TATGGTATATAAGAATATTTATAATGATAGTAGGAGGCTTAATAGGATTAAGAATAGTTTTTTGCT--  
GTGCTTTCTATAATA-----AATAGAGTCAGGCAGGGATACTCACCT-----  
GTGTCATTGGCTATCAATCTATTAGACACCGTAGCAGTAGCAGTAGCTGGG--  
GGGACAGATAGGGTTATAGAAATAGGACAAAGACTTTGTAGAGCC-----  
-----ATTTGTAACATA-----CCTAGGAGAATCAGACAGGGCGCAGAAAAAGCTTTGCAA--TAA  
>MH330350  
GCT--GCA-----  
GAAAACTTGTGGGTCACGGTATACTATGGGGTACCTGTGTGG--AGAGATGCAGAG--  
ACCACCCTATTTTGTGCATCAGATGCTAAAGCATATGATAAAGAA--GTACACAAT-----  
-----GTCTGGGCTACA--CATGCCTGTGTACCCACAGAC--  
CCTAACCCGCAAGAAATAATTTTGGA--AATGTGACAGAAGAATTTAAC-----  
-----ATGTGGAATAACATGGTAGAACAGATGCAAACAGATATA--  
ATCAGTCTCTGGGACCAAAGCCTA--AAGCCATGTGTAAAGTTA--  
ACCCCTCTCTGCGTTACTTTAAATTGTACTGCACCCAACATCACTAGCTCTAACAAACAGT-----  
-----  
-----ACCATCAACAGCAATAGTAGCATGGGTGAAGAAATGAAA--  
AACTGCTCTTTCAACATGACCACGGAACCTAAGT-----  
GATAAAAAGAAAAAGTACATTCACTT--TTTTATAAACTTGACATAGTATCAATTGATAGT-----  
-----  
-----  
AATAGTAGTAGTAATAGTAGTGGGCAGTATAGACTAATAAATTGTAATACATCAACCATGACACAG--  
GCCTGTCCCAAGGTAACCTTTGAGCCAATTCCTATATATTATTGTACCCAGCTGGTTTTGCGATTCTAAAGT  
GCAAC--AGTCCAGACTTTAAT-----GGAACAGGGCCATGCAAGAAT-----  
-GTCAGC--ACAGTACAATGCACACATGGAATCAAGCCAGTAGTATCAACT--  
CAACTGCTGTAAATGGCAGTCTAGCAGAAGGAAAG-----  
GTAATGATTAGATCTGAAAATATTACAGACAAT-----AGAAAAACCATAATAGTACAGCTTACT--  
-----GAGCCTGTAAAT-----ATCACGTGTATCAGACCTAGCAACAATACAAGAACA--  
-AGTATACGTATA-----GGACCAGGACAAACC--TTC-----TATGCAACAGGTGCT-----  
-----GTAACAGGGGACATA-----AGGAAAGCACATTGT--AATGTCAGCAAAGCA--  
GCATGGGACAGAAGTTTACAAAACATAAGTACACAATTAAGA-----AAATACTTTAAT--  
-----AATAAAACAATAGTCTTTAAG-----  
AACTCCTCAGGAGGGGATTTAGAAAGTTACA--ACACATAGTTTCAATTGTGGAGGAGAA--  
TTTAAACAGCTCCAGGCAAGAGTCCTGGCTGTGGAAAGATACCTAAAGGATCAGCAGCTCCTAGGAATTTGGG  
GTTGCTCTGGAAGAACTCATCTGCACCACTACTGTGCCCTGGAAGTCTAGTTGGAGT-----  
-----AATAAATCTCAGAGTGAGATATGG-----GAT-----  
AACATGACCTGGATGCAATGG--GACAAGGAAATTATCAATTACACAAACAAAATATAT--  
GAGCTAATTGAAAAATCGCAAAACCAGCAGGAA-----  
-----  
CAGAATGAACAAGAGTTATTAGCATTGGATAAGTGGGCAAGTCTGTGGAATTGGTTTGACATATCAAGTTGGT  
TATGGTATATAAAAATATTTATAATAATAGTAGGAGGCTTAATAGGATTAAGAATAGTTTTTTGCT--  
GTGCTTTTCGATAATA-----AATAGAGCCAGGCAGGGATACTCACCC-----  
TTGTCGTTGGCTATTAATCTGATAGATACCTTAGCAATAGCAGTAGCTGGG--  
TGGACAGATAGGGTTTTAGAAATAGGACAAAGATTTTGGAGAGCT-----  
-----ATTTGTAACATA-----CCTAGAAGAATCAGACAGGGCACAGAAAAGGCTTTGCAA--TAA  
>MH330351  
GCT--ACA-----  
GAAAAATTGTGGGTCACAGTATACTATGGGGTACCTGTGTGG--AGAGATGCAGAG--  
ACCACCCTATTTTGTGCATCAGATGCTAAAGCATATGATAAAGAA--GTACACAAT-----  
-----GTCTGGGCTACA--CATGCCTGTGTACCCACAGAC--  
CCCGACCCACAAGAAATAGACTTGAAA-----AATGTGACAGAAAATTTTAAC-----  
-----ATGTGGAATAACATGGTAGAACAAATGCAAACAGATATA--

ATCAGTCTCTGGGACCAAAGCCTA---AAGCCATGTGTAAAGTTA---  
 ACCCCTCTCTGCGTTACTTTAAATTGTACTGAACTCAACAGCACTAGCTCTAACAACAGTAGT-----  
 -----  
 -----GGTAACAGCAACAGCAGCAGTATGTATGAAGAAATGAGA---  
 AACTGCTCTTTCAATATGACAGCAGAACTAAGA-----  
 GATAAAAAGAAAAGTGTATATTCACCT--TTTTATAAACTTGATATAGTATCAACTGATAAT-----  
 -----  
 -----  
 AGTAGTAGTGGGTATTATAGACTAATAAAATTGTAATACATCAGCCATGACACAG---  
 GCCTGTCCTAAGATAACCTTTGAGCCAATTCCTATACATTATTGTGCCCCAGCTGGTTTTGCGATTCTAAAGT  
 GCAAG---GATGCAAATTTTAAT-----GGAACAGGGCCATGCAAGAAT-----  
 -GTCAGC---ACAGTGCAATGCACACATGGAATCAAGCCAGTAGTATCAACT---  
 CAACTGCTGTTAAATGGCAGTCTAGCAGAGGAACAG-----  
 GTAATGATTAGATCTGAAAAATACACAGACAAT-----GGCAAAATCATAATAGTACAGCTTAAG----  
 -----GAGCCTGTAAAC-----ATCACTTGTATCAGACCTGGCAACAATACAAGAACA-----  
 -AGTATACGTATA-----GGACCAGGACAAACC---TTC-----TATGCAACAGGTGGT-----  
 -----GTAATAGGGGATATA-----AGAAAAGCACATTGT---AATGTCAGCAGAAACA---  
 GCATGGAATAACACTTTACAAAAGATAAGTGCACAGTTAAGA-----CAATACTTTAAT-----  
 -----AACAAAACAATAATCTTTAAA-----  
 AACTCCTCAGGAGGGGATTTAGAAAGTTACA--ACACATAGTTTTAATTGTGGAGGAGAA---  
 TTTAAACAGCTCCAGGCAAGAGTCCTGGCTGTGGAAAGATACCTAAAGGATCAGCAGCTCCTAGGAATTTGGG  
 GTTGCTCTGGAAAAGTCTATCTGCACCACTAGTGTGCCCTGGAAGTCTAGTTGGAGT-----  
 -----AACAAATCTCAGAGTGAGATATGG-----GAT-----  
 AACATGACCTGGATGCAATGG---GACAAGGAAATTATCAATTACACAAGCATAATATAT---  
 AATCTAATTGAAGAATCGCAAAACCAGCAGGAA-----  
 -----  
 AAGAATGAACAAGAGTTATTGGCATTGGATAAGTGGGCAAGTCTGTGGACTTGGTTTGACATATCAAATTGGT  
 TATGGTATATAAGAATGTTTATAATAATAGTAGGAGGCTTAATAGGATTAAGAATAGTTTTTTGCT---  
 GTGCTTTCTATAATA-----AATAGAGCCAGGCAGGGATACTCACC-----  
 TTGTCATTCGCTATCAATCTAGTAGATACCATAGCAATAGCAGTAGCTGGG---  
 TGGACAGATAGGGTTATAGAGCTAGGACAAAGATTGTGTAGAGCC-----  
 -----ATTCTGAACGTA-----CCTAGGAGAATCAGACAGGGCGCAGAAAAAGCTTTGCAA--TAA  
 >MH330352  
 GCT---ACA-----  
 GAAAACTTGTGGGTACGGTATACTATGGGGTACCGGTGTGG--AGAGATGCAGAG---  
 ACCACCCATTTTTGTGCATCAGATGCTAATGCACCTTGATAAAGAA--GTACACAAT-----  
 -----GTCTGGGCTACA--CATGCCTGTGTACCCACAGAC---  
 CCTAACCCACAAGAAATAGATTTGGAA-----AATGTGACAGAAGATTTTGAC-----  
 -----ATGTGGAAAAATGGCATGGTAGAACAATGCAAACAGATATA--  
 ATCAGTCTCTGGGACCAAAGTCTA--AAGCCATGTGTAAAGTTA---  
 ACCCCTCTCTGTGTTACTTTATATTGTACTGAACCAACAGCACTAGCTCTAACAGCACTAGCTATAGC---  
 -----  
 -----AACAGTAGCAGTAACAGCAACAGCAGCGATAGTTTGCTTAAAGAAATGAGC---  
 AACTGCACTTACAACATGACCACAGAACTAAGA-----  
 GATAAAAGGAAAAGTGTACATTCACTC--TTTTATAAACTTGATATAGTATCAATTGATGGT-----  
 -----  
 -----  
 AATGGTAGTAATGGTAGTGGGCATTATAGACTAATAAAATTGTAATACATCAACCATGACACAG---  
 GCCTGTCCTAAGATAACCTTTGAGCCAATTCCTATACATTATTGTGCCCCAGCTGGTTTTGCGATTCTAAAGT  
 GCAAG---GATCCAGATTTTAAT-----GGAACAGGGCCATGCAACAAT-----  
 -GTCAGC---ACAGTACAATGCACACATGGAATCAAGCCAGTAGTATCAACT---  
 CAACTGCTGTTAAATGGCAGTCTAGCAGAGGAAAAG-----  
 GTAATAATTAGATCTAAAAATATTACAGACAAT-----AGCAAAATCATAATAGTACAGCTTAAT----  
 -----GAGCCTGTAAAC-----ATCACTTGTATCAGACCTGGCAACAATACAAGAACA-----  
 -AGTATACGTATA-----GGACCAGGACAAACC---TTC-----TATGCAACAGGTGAT-----  
 -----ATAATAGGGAACCCA-----AGAAAAGCATATTGT---AATGTCAGCAGAGCA---  
 AAATGGAATGAACTTTACAAAAGATAAGTAAACAATTACAG-----GAACACTTT-----  
 -----AACAAAACAATAATCTTTAAA-----  
 AGCTCCTCAGGAGGGGATTTAGAAAGTTACA--ACACATAGTTTCAATTGTGGAGGAGAA---  
 TTTAAACAGCTCCAGGCAAGAGTCCTGGCTGTGGAAAGATACCTGAAGGATCAGCAGCTCCTAGGAATTTGGG

GTTGCTCTGGAAACTCATCTGCACCACTAATGTGCCTTGGAACTCTAGTTGGAGT-----  
 -----AACAAATCTCTGGATCAGATATGG-----GAT-----  
 AACATGACCTGGATGCAATGG---GACAAGGAAGTTATCAATTACACAAACATAATATAT---  
 GGTCTAATTGAAGAATCGCAAACCAGCAGGAA-----  
 -----  
 AAGAATGAACAAGATTTATTGGCATTGGATAAGTGGGCAAGTCTGTGGAATTGGTTTGACATATCAAATTGGT  
 TATGGTATATAAGAATATTTATAATGATAATAGGAGGCTTAATAGGATTAAGAATAGTTTTTACT---  
 GTGCTTTCTATAATA-----AATAGAGCCAGGCAGGGATACTCACCC-----  
 TTGTCATTGGCTATCAATCTACTAGATACCATAGCAATAGCAGTAGCTGGG---  
 TGGACAGATAGGGTTATAGAATTAGGACAAAGACTTGGTAGAGCT-----  
 -----ATTTGTAACATA-----CCTAGGAGAATCAGACAGGGCGCAGAAAAGAGCTTTGCAG---TAA  
 >MH330353  
 GCT---ACA-----  
 GAAAACTTGTGGGTCACAGTATACTATGGGGTACCTGTGTGG--AGAGATGCAGAG---  
 ACCACCCTATTTTGTGCATCAGATGCTAAAGCATATGATAAGGAA---GTACACAAT-----  
 -----GTCTGGGCTACA---CATGCCTGTGTACCCACAGAC---  
 CCTGACCACAGAAGAAATAGATTTGGAA-----AATGTGACAGAAAATTTTAACT-----  
 -----ATGTGGAAAAATAACATGGTAGAACAAATGCAAATAGATATA---  
 ATCAGCCTCTGGGACCAAAGCCTA---AAGCCATGTGTAAAGTTA---  
 ACCCCTCTCTGCGTAACTTTAAATTGTACTGAACCCATCAGAACCAACAGAACTAGTAACAGCAGTACCAACA  
 GCACTAGCTCT-----  
 -----ACCAGCAGTAGTGTTAACGATAGTTTGTATGAGGAACTGAAA---  
 AACTGCTCTTTCAACATGACCACAGAATAAGA-----  
 GATAAAAGGAAAAAAGTATACTCACTT---TTTTATAAACTTGATATAGTATCAACTGATAGGAAT-----  
 -----  
 -----  
 AATAGTGGAGAGTATAGACTAATAAATTGCAATACATCAACCATGACACAG---  
 GCCTGTCCTAAAGTAACCTTTGAGCCAATTCCTATACATTATTGTGCCCCAGCTGGTTTTGCGATTCTAAAGT  
 GCAGG---GATCCAAAGTTTAAAT-----GGAACAGGGCCATGCACGAAT-----  
 -GTCAGC---ACAGTACAATGCACACATGGAATCAAGCCAGTAGTATCAACT---  
 CAACTGCTGTTAAATGGCAGTCTAGCAGAGAAAGAG-----  
 ATAATGATTAGATCTGAAAATATCACAGACAAT-----AGTAAAACCATAATAGTACAGCTTACT---  
 -----AAGCCTGTAGGT-----ATCACTTGTATCAGACCTAACACAATACAAGAACA-----  
 -AGTATACATATA-----GGACCAGGACAAGCC---TTC-----TATGCAAGAGGTGAT-----  
 -----GTAATAGGAGACATA-----AGGAAAGCATATTGT---ATTATCAATGGAACA---  
 GAATGGAATAACACTTTACAACAGATAAGTGA AAAAATTAAGA-----GGATACTTTGAT---  
 -----AATAAAACAATAATCTTTAAG-----  
 AACTCCTCAGGAGGGGATTTAGAAGTGGCA--ACACATAGTTTCAATTGTGGAGGAGAA---  
 TTTAAACAGCTCCAGGCAAGAGTCCCTGGCTTTGGAAAGATACCTGAAGGATCAGCAGCTCCTAGGAATTTGGG  
 GTTGCTCTGGAAACTCATCTGCCCCACTAATGTGCCTTGGAAATTCTAGTTGGAGT-----  
 -----AACAAATCCCTGAATGATATATGG-----AAT-----  
 AACATGACCTGGATGCAATGG---GACAAGGAAGTTTCAATTACACAAACATAATATAT---  
 GAACTAATTGAAGAATCACAAAACCAGCAGGAA-----  
 -----  
 AAGAATGAACAAGATTTATTGGCATTGGATAAGTGGGCAAGTCTGTGGAATTGGTTTGACATATCACATTGGT  
 TATGGTATATAAGAATCTTTATAATAATAGTAGGAGGCTTAATAGGATTAAGAATAGTTTTTACT---  
 GTGCTTTCTCTAATA-----AATAGAGTCAGGCAGGGATACTCACCC-----  
 TTGTCATTTGCTATCAATCTACTAGATACCATAGCAATAGCAGTAGCTGGG---  
 TGGACAGATAGGGTTATAGAGGTAGTACAAAGACTTTGTAGAGCC-----  
 -----ATTTGTAACATA-----CCTAGGAGAATCAGACAGGGCGCAGAAAAGCTTTGCAG---TAA  
 >MH330354  
 GCT---GCA-----  
 GAACACTTGTGGGTCACGGTATACTATGGGGTACCGGTGTGG--AGAGATGCAGAG---  
 ACCACCCTATTTTGTGCATCAGATGCTAAAGCATATGATAAAGAA---GTACACAAT-----  
 -----GTCTGGGCTACA---CATGCCTGTGTACCCACAGAC---  
 CCTAACCACAGAAGAAATAGCTTTGGAA-----AATGTGACAGAAAATTTTGAT-----  
 -----ATGTGGAAAAATAACATGGTAGAACAAATGCAAACAGATATA---  
 ATCAGTCTCTGGGACCAAAGTCTA---AAACCATGTGTACAGTTA---  
 ACCCCTCTCTGCGTCACTTTAAATTGTACTGACCCCACTTTAAATTGTACTGACCCCAACAATAATAGGAGTG  
 AAGGAATAAGC-----

-----AACAAACAGCAATAACAGCTGTATGTATGAAGAAATGAAA---  
 AACTGCACTTTTCAACATGACCACAGAACTAAGA-----  
 GATAAGAGGAAAACGTACATTCACCTC---TTTTATAAACTTGATATAGTACCAACTGATATTAAT-----  
 -----  
 -----  
 AATAGTGGAGAGTATAGACTAATAAATTGCAATACATCAACCATGACACAG---  
 GCCTGTCCTAAGGTAACCTTTGAGCCAATTCTTATACATTATTGTACCCCAGCTGGTTTTGCGATTCTAAAGT  
 GCAAG---GATACAGAGTTTAAT-----GGAACAGGGCCATGCAAGAAT-----  
 -GTCAGC---ACAGTACAATGCACACATGGAATCAAGCCAGTAGTATCAACA---  
 CAACTGCTGTTAAATGGCAGTCTAGCAGAGGAAAAG-----  
 GTAATGATTAGATCTAAAAATATCACAGACAAT-----AGCAAGATCATAATAGTACAGCTTACT----  
 -----AAGCCTGTAAAC-----ATCACTTGTATCAGACCTAACAACAATACAAGAACA-----  
 -AGTATACGTATA-----GGACCAGGACAAACC---TTC-----TATGCAACAGGTGCT-----  
 -----GTAACAGGGGACATA-----AGAAAAGCATATTGT---GAAGTCAACAGAACA---  
 GAATGGAATAGCACTTTACAAGAGATAAGTTCACAATTAAGA-----AACTACTTTAAG----  
 -----AACAAAACAATAATCTTTAAA-----  
 AACTCCACAGGAGGGGATTTAGAAATTACA---ACACATAGTTTCAATTGTGGAGGAGAA---  
 TTTAAACAGCTCCAGGCAAGAGTCCTGGCTGTGGAAAAGATACCTGAAGGATCAGCAGCTCCTAGGAATTTGGG  
 GTTGCTCTGGAAGAACTCATCTGCACCACTACTGTGCCCTGGAACCTCTAGTTGGAGT-----  
 -----AACAAATCTATGAATGAAATATGG-----GAT-----  
 AACATGACCTGGATGCAATGG---GACAAGGAAGTTATCAATTACACAAACATAATATAT---  
 GATCTAATTGAAGAATCGCAAAACCAGCAGGAA-----  
 -----  
 AAGAATGAACAAGATTTATTAGCATTGGATAAGTGGGCAAGTCTGTGGAGTTGGTTTGACATATCAAATTGGT  
 TATGGTATATAAAAAATATTACATAAATAGTAGGAGGCTTAATAGGATTAAGAATAGTTTTTTGCT---  
 GTGCTTTCTATAATA-----AATAGAGTCAGGCAGGGATACTCACCC-----  
 GTGTCATTAGCTATCAATCTAATAGATACCTTAGCAATAGCAGTAGCTGGG---  
 TGGACAGATAGGGTTATAGAAATAGGACAAAGAATTTGTAGAGCC-----  
 -----ATTCTGTAACATA-----CCTAGGAGAATCAGACAGGGCGCAGAAAAGGCTTTGCAA---TAA  
 >MH330355  
 GCT---ACA-----  
 GGAAACTTGTGGGTACGGTATACTATGGGGTACCGGTGTGG---AGAGATGCAGAA---  
 ACCACCCATTTTTGTGCATCAGATGCTAAAGCATATGATAAAGAA---GTACACAAT-----  
 -----GTCTGGGCTACA---CATGCCTGTGTACCCACAGAC---  
 CCTAACCCACAAGAAATGCCTTTGGAA-----AATGTGACAGAAAATTTTAAC-----  
 -----ATGTGGAAAAATAACATGGTAGAACAAATGCAAACAGATATA---  
 ATCAGTCTCTGGGACCAAAGTCTA---AAGCCATGTGTACAGTTA---  
 ACCCCTCTCTGTGTACTTTAAATTGTACTGAACCCATCTTTAACTCTACCATCACTAACTCTACCAACATTA  
 ACCGCAACAAC-----  
 -----AATGATAGTAGTGATAGTATG-----  
 ATCTGCACTTACAACATGACAACAGAACTAAGA-----  
 GATAAAAAGAAAAATGTACGTTCACTC---TTTACAAACTTGATATAGTATCAACTGGTAGGAAT-----  
 -----  
 -----  
 AATAGTGGGGAGTATAGACTAATAAATTGCAATACATCAACCATGACACAG---  
 GCCTGTCCTAAGGTAACCTTTGAGCCAATTCTTATACATTATTGTGCCCCAGCTGGTTTTGCGATTCTAAAGT  
 GCAGG---GATCCAAATTTTAAT-----GGAACAGGGCCATGCAAGAAT-----  
 -GTCAGC---ACAGTACAATGCACACATGGAATCAAGCCAGTAGTATCAACT---  
 CAACTGCTGTTAAATGGCAGTCTAGCAGAGAACAAG-----  
 GTAATGATTAGATCTGAAAATATCACAGACAAT-----AACAAAACATAATAGTACAGCTTACT----  
 -----AAGCCTGTAAAC-----ATCACTTGTATCAGAACTGGCAACAATACCAGAGAA-----  
 -GGTGTAGGTATA-----GGACCAGGACAAACT---TTC-----TATGCAGCAAGTCCT-----  
 -----ATAATAGGGGACATA-----AGAAAAGCATATTGT---AATGTCAGCAGAGCA---  
 GAATGGAACAACACTTTAAAAGAGGTGAGTGCACAATTAAGA-----ACATACTTTAAT----  
 -----AACAAAACAATAGTCTTTAAC-----  
 AGCTCCTCAGGAGGGGATGTAGAAATTACA---ACACATAGTTTCAATTGTGGAGGAGAA---  
 TTTAAACAGCTCCAGGCAAGAGTCCTGGCTGTGGAAAAGATACCTGAAGGATCAGCAGCTCCTAGGAATTTGGG  
 GTTGCTCTGGAAGAACTCATCTGCAACACTAATGTGCCCTTGGAACTCTAGTTGGAGT-----  
 -----AACAAATCTCTGGATTATATATATGG-----GGT-----  
 AACATGACCTGGATGCAATGG---GATAAGGAAGTTAGCAATTACACAAACATAATATAT---

AATTTAATTGAAGAATCACAAAACCAGCAGGAA-----  
-----  
AAGAATGAACAAGAATTATTGGCATTGGATCAGTGGGCAAGCCTGTGGAATTGGTTTAACATATCAAATTGGT  
TATGGTATATAAGAATATTTATAATGATAGTAGGAGGCTTAATAGGATTAAGAATAGTTTTTTGCT---  
GTGCTTTCTATAATA-----AATAGAGTCAGGCAGGGATACTCACCC-----  
TTGTCATTGGCTATCAATCTACTAGATACCATAGCAATAGCAGTAGCTGGG---  
TGGACAGATAGGGTTATAGAAGTAGGACAAAGATTTTGTAGAGCT-----  
-----ATTTGTAACATA-----CCTAGAAGAATCAGACAGGGCGCAGAAAGGCTTTGCAA---TAA  
>MH330356  
GCT---ACA-----  
GAAAAATTGTGGGTACCGGTATACTATGGGGTACCTGTATGG---AGAGATGCAGAG---  
ACCACCCTATTTTGTGCATCAGATGCTAAAGCATATGATAAAGAA---GTACACAAT-----  
-----GTCTGGGCTACC---CATGCCTGTGTACCCACAGAC---  
CCTAACCACAGGAAATAGATTTGAAA-----AATGTGACAGAAGATTTTAAAC-----  
-----ATGTGGAAAAATAACATGGTAGAACAAATGCAAACAGATATA---  
ATCAGTCTCTGGGACCAAAGCCTA---AAGCCATGTGTACAGTTA---  
ACCCCTCTCTGCGTTACTTTAGATTGTATTGACTTCAACAGCACTAGCTCTGATGACAGTAGCAATAACAGCA  
CTAGCTCTAAC-----  
-----AACAGTAGCAGTCACAGCAACAACAGCCATTGGGTTGAAGATATGAAA---  
AACTGCTCTTTCAACATGACCACAGAATAAGA-----  
GATAAAAGGAAAAGTGTATATTCACCT---TTTTATAAACTTGATATAGTACCAACTGATAGT-----  
-----  
-----  
AGTAATAGTAATAATAGTAGTAGGCATTATAGACTAATAAGTTGCAATACATCAACTGTGACACAG---  
GCCTGTCCTAAGGTATCCTTTGAGCCAATTCCTATACATTATTGTGCCCCAGCTGGTTTTGCGATTCTAAAGT  
GCAAA---GAAAAAATTTTACT-----GGAAAAGGGCAATGCAAGAAT-----  
-GTCAGC---ACAGTACAATGCACACATGGGATCAAGCCAGTAGTATCAACT---  
CAACTGCTGTAAATGGCAGTCTAGCAGAGGAAGAG-----  
GTAATGATTAGATCTGAAAATATCACAGACAAT-----AGCAAAACCATAATAGTACAGCTTAAA---  
-----GAGCCTGTAAAC-----ATCACTTGCCCTCAGACATAACAACAATACAAGAACA-----  
-AGTATACGTATA-----GGACCAGGACAAACC---TTC-----TATGCAACAGGTGAG-----  
-----GTAATAGGGGACCCA-----AGACGAGCACATTGT---AATGTCAGCAGAGCA---  
GCTTGGAATAGGACTTTACATGGGATAAGTATACAATTAAAA-----AAATACTTTTCT---  
-----AACAAAACAATAAAGTTTCAA-----  
AACTCCTCAGGAGGGGATTTAGAAATTACA--ACACATAGTTTCAATTGTGGAGGAGAA---  
TTTAAACAGCTCCAGGCAAGAGTCCCTGGCTGTGGAAAGATACCTGAAGGATCAGCAGCTCCTAGGAATTTGGG  
GTTGCTCTGGAAGAACTCATCTGCACCACTGCTGTGCCCTGGAACATTAGTTGGAGT-----  
-----AACAAATCTTATGATGATATATGG-----GGG-----  
AACATGACCTGGATGCAATGG---GACAGGGAAGTTATCAATTACACAAACATAATATAT---  
GGTCTAATTGAAGACTCGCAAAACCAGCAGGAA-----  
-----  
AAGAATGAACAAGATTTATTGGCATTGGGATAAGTGGGCAAGTCTGTGGAGTTGGTTTGACATAACAAGTTGGT  
TATGGTATATAAGAATATTTATAATAATAGTAGGAGGCTTAATAGGATTAAGAATAGTTTTTTGTT---  
GTGCTTTCTATAATA-----AAAAGAGCCAGGCAGGGATACTCACCA-----  
TTGTCATTGGCTATCAATCTAGTAGATACCATAGCAATAGCAGTAGGTGGG---  
TGGACAGATAGGGTCATAGAAATAGGACAAAGACTTTGTAGAGCC-----  
-----ATTTGTAACATA-----CCTAGGAGAATCAGACAGGGCGCAGAAAGAGCTTTGCAA---TAA  
>MG902950  
GCT---GCA-----  
GAAAACTTGTGGGTACAGTATATTATGGGGTACCTGTGTGG---AGGGATGCAGAG---  
ACCACCCTATTTTGTGCATCAGATGCTCAGGCATATAACAAAGAA---GTACACAAT-----  
-----GTCTGGGCTACA---CATGCCTGCGTACCCACAGAC---  
CCTAACCACAGAAGAAATAACTTTGGAA-----AATGTGACAGAAGATTTTAAAC-----  
-----ATGTGGAAAAATAACATGGTAGAACAAATGCACACAGATATA---  
ATCAGTCTCTGGGACCAAAGCCTA---AAGCCATGTGTACAGTTA---  
ACCCCTCTCTGTGTCACTTTAAATTGTGTTGAACAACCCAACAGCACTAGCTCTAACACAGTAGCGCTAATA  
ACAGCAGCAGC-----  
-----GTTACTAACAGCAGCGATAGTAAGTGGGGAGAAAGTAATGAGA---  
AACTGCTCTTTCAACATGACCACAGAATAAGA-----  
GATAAGAGGAAAAGTGTATATTCACCT---TTTTATAAACTTGATATAGTATCAACTGATAGT-----

-----  
-----  
AATAATAATAGTAGGCAGTATAGACTAATAAATTGCAATACATCAACCATGACACAG---  
GCCTGTCCTAAGGTGACCTTTGATCCAATTCTTATACATTATTGTGCCCCAGCTGGTTTTGCGATTCTAAAGT  
GCAAG---GATACAAATTTTACT-----GGAAAAGGGTCATGCAAGAAT-----  
-GTCAGC---ACAGTACAATGCACACATGGAATTAAGCCAGTAGTATCAACT---  
CAACTGCTGTTAAATGGCAGTCTAGCAGAGAAAGAG-----  
GTAATGATTAGATCTGAAAATATCACAGACAAT-----AGCAAAACCATAATAGTGCAGCTTACT----  
-----AAGCCTGTAAAC-----ATTACTTGTATCAGACCTGGTAACAATACAAGAACA-----  
-AGTATACGTATA-----GGACCAGGACAAACC---TTC-----TATGGAACAGGTGAA-----  
-----GTAGTAGGGGACATA-----AGAAACGCACATTGT---AATGTCAGCAGAGCA---  
GCATGGAATGAACTCTACAAAAGATAAGTATACAATTAAGA-----AAACACTTTGGT----  
-----AACAAATAAAACAATAAATTTTAAG-----  
AACTCCTCAGGAGGGGATTTAGAAATAACA---ACACATAGTTTCAATTGTGGAGGAGAA---  
TTTAAACAGCTCCAGGCAAGAACTCCTGGCTGTGGAAAAGATACCTAAAGGATCAGCAGCTCCTAGGAATTTGGG  
GTTGCTCTGGAAGAACTCATCTGCACCACTAATGTGCCCTGGAACCTTAGTTGGAGT-----  
-----AACAAATCTCAGGATGAGATATGG-----AAT-----  
AACATGACCTGGATGCAATGG---GACAAGGAAGTTCTCAATTACACAGTCTTAATATAT---  
GATCTACTTGAAGAATCGCAAAACCAGCAGGAA-----  
-----  
AAGAATGAACAAGATTTATTGGCATTAGATAAGTGGGCAAGTCTGTGGAATTGGTTTAATATATCAAATTGGT  
TGTGGTATATAAAAATATTTATAAATAGTAGGAGGCTTAATAGGATTAAGAATAGTTTTTTATT---  
GTGCTTTCTATAATA-----AATAGAGTCAGGCAGGGATACTCACCC-----  
TTGTCAATTGGCTATCAATCTGTTAGATACCATAGCAATAGCAGTAGCTGGG---  
TGGACGGATAGGATTATAGAAATAGGACGCAGACTTTGTAGAGCC-----  
-----ATCCGTAACATA-----CCTAGGAGAATCAGACAGGGCGCAGAAAGGGCTTTGCAA---TAA  
>MG902951  
GCT---ACA-----  
GAAAAATTTGTGGGTACGGTATACTATGGGGTACCTGTGTGG---AGAGATGCAGAA---  
ACCACACTATTTTGTGCATCAGATGCTAAAGCATATGATAAAGAA---GTACACAAT-----  
-----GTCTGGGCGACA---CATGCCTGTGTACCCACAGAC---  
CCTGACCCAAAAGAAATAAATTTGGAA-----AATGTGACAGAAAATTTTAAT-----  
-----ATGTGGAAAAATAACATGGTAGAACAATGCAAACAGATATA---  
ATCAGTCTCTGGGACCAAAGCCTA---AAGCCATGTGTAAAATTA---  
ACCCCTCTCTGTGTACTTTAAATTGTGTTGAACCCAACAACACTAGCTCTAGCAACAATAGCGTCAACAGTA  
GCAGCAGTGAT-----  
-----AGTTTGAACTGCACTAGCAACAATAGCGTCAGCAGTAGCAGCAGTGATAGTTTG-----  
AACTGCACCTTTCAACATGACCACAGAATAAGA-----  
GATAAAAAGAAAAGTGTACATTCACCT--TTTTATAAACTTGATATAGTATCAACTGATGAT-----  
-----  
-----  
AATAATAGTAGTGGGCAGTATAGACTAATAAATTGCAATACATCAACCGTGACACAG---  
GCTTGTCCTAAGGTAACCTTTGAGCCAATTCTTATACATTATTGTACCCCAGCTGGTTTTGCGATTCTAAAGT  
GCAAG---GATCCAAATTTTAAT-----GGAACAGGGCCATGCAAGAGT-----  
-GTCAGC---TCAGTACAATGCACACATGGAATTAAGCCAGTAGTATCAACT---  
CAACTGCTGTTAAATGGCAGTCTAGCAGAGAAACAG-----  
GTAATGATTAGATCTGAAAATATCACAGACAAT-----AGCAAAACCATAATAGTACAACCTTACT----  
-----GAGCCTGTAAAC-----ATCACTTGTATCAGACCTAACAACAATACAAGAACA-----  
-AGTATGCGTATA-----GGACCAGGACAAACC---TTC-----TATGCAAGAGGTGAT-----  
-----GTAATAGGGGACATA-----AGACAAGCACATTGT---AATGTCAGCGGAGAA---  
GCATGGAATAAAGCTTTACAAAACATAAGTACACAGTTAGGA-----AAATACTTTAAT----  
-----AACAAAACAATAATCTTTAAG-----  
AACTCCTCAGGAGGGGATTTAGAAGTTACA---ACACATAGTTTCAATTGTGGAGGAGAG---  
TTTAAACAGCTCCAGGCAAGAGTCTGGCTGTGGAAAAGATACCTAAAGGATCAGCAGCTCCTAGGAATTTGGG  
GTTGCTCTGGAAGACTCATCTGCACCACTAATGTGCTCTGGAACACTAGTTGGAGC-----  
-----AACAAATCTTACAATGAAATATGG-----GAT-----  
AACATGACCTGGATGCAATGG---GACAAGGAAGTTAACAATTACACAGACACAATATAT---  
AGGCTAATTGAAAAATCGCAAAACCAGCAGGAA-----  
-----  
AAGAATGAACAAGATTTATTGGCATTGGATAAGTGGACAAGTCTGTGGAGTTGGTTTGACATATCACATTGGT

TATGGTATATAAAAATATTTATAATGATAGTAGGGGGCTTAATAGGATTAAGAATAGTTTTTACT---  
GTGCTTTCTATAATA-----AATAGAGTCAGGCAGGGATACTCACCC-----  
TTGTCAATTGGCTATCAATCTAATAGATACCATAGCAATAGCAGTAGCTGGG---  
TGGACAGATAGGGTTATAGAAATAGTACAAAGATTTTGTAGAGCT-----  
-----ATTTGTAACATA-----CCTAGGAGAATCAGACAGGGCGCAGAAAAGAGCTTTGCAA--TAA  
>MH330337  
GCT---ACA-----  
GAAAACTTGTGGGTACCGGTATACTATGGAGTACCTGTGTGG--AGAGATGCAGAC---  
ACCACCCTATTTTGTGCATCAGATGCTAAAGCATATGATAAAGAA--GTACACAAT-----  
-----GTCTGGGCTACA--CATGCCTGTGTACCCACAGAC---  
CCTAACCCGCAAGAAATAATTTTGGAA-----AATGTAACAGAAGAATTTGAC-----  
-----ATGTGGAAAAATAACATGGGTAGAACAAATGCACACAGATATA---  
ATCAGTCTCTGGGACCAAAGCTTA--AAGCCATGTGTAAAAGTTA---  
ACCCCTCTCTGCGTTACTTTAAATTGTACTAAACCCAGCCACAACAGTACTAACAGCAGTAGT-----  
-----  
-----GGCTTGATTGAAGAAATGAAA---  
AACTGCTCTTTCAACATGACCACAGAATAAGA-----  
GATAAAAGGAAAATGTACATTCACTT--TTTTATAAACTTGATATAGTATCAATTGATAGT-----  
-----  
----  
AATGGTAGTGATAGTAATGGTAGTGGGCAGTATAGACTAATAAATTGTAATACATCAACCGTGACACAG---  
GCCTGTCCTAAGGTAACCTTTGAGCCAATTCCTATATATTATTGTACCCAGCTGGTTTTGCGATTCTAAAGT  
GCAGG--GATACAAACTTTACT-----GGAAAAGGGTTCATGCAAGAAT-----  
-GTCAGT--ACAGTACAATGCACACATGGAATCAAGCCAGTAGTATCAACT---  
CAACTGCTGTAAATGGCAGTCTAGCAGAAAAAGAG-----  
GTAATGATTAGATCTGAAAATATTACAGACAAT-----GGCAAAACCATAATAGTACAGCTTACT----  
-----GAGCCTGTAAAC-----ATCACTTGTACCAGACTTAGCAACAATACAAGAACA-----  
-AGTATACGTATA-----GGACCAGGACAAACC--TTC-----TATGCAACAGGTGAT-----  
-----GTAATAGGAGATATA-----AGAAAAGCATCTTGT--GAGGTCAACAGAACA---  
GTATGGAATAGCACTTTACAAAAGATAAGTACACAATTAAGA-----AAATACTTTAAT---  
-----AACAAAACAATAATCTTTAAG-----  
AACTCCTCAGGAGGGGATTTAGAAAGTTACA--ACACATAGTTTCAATTGTGGAGGAGAA--  
TTTAAACAGCTCCAGGCAAGAGTCCCTGGCTGTGGAAAGATACCTACAGGATCAGCAGCTCCTAGGAATTTGGG  
GTTGCTCTGGAAGAACTCATCTGCACCACTAATGTGCCCTGGAACCTTTAGTTGGAGT-----  
-----AATAAATCTCAGGATGAGATATGG-----GGA-----  
AACATGACCTGGATGCAATGG--GACAAGGAAATTAGCAATTACACAGACAAAATATAT--  
GATCTAATTGAAAAATCGCAAAATCAGCAGGAA-----  
-----  
AAAAATGAACAAGAGTTATTAGCATTGGGATAAGTGGGCAGGTCTGTGGAATTGGTTTAACATATCAAATTGGT  
TATGGTATATACAAATATTTATAATAATAGTAGGAGGCTTAATAGGATTAAGAATAGTTTTTGTCT--  
GTACTTTCTATAATA-----AATAGAGCCAGGCAGGGATACTCACCC-----  
TTGTCAATTGGCTATTAATCTGATAGATCACATAGCAATAGTAGTAGCTGGG---  
TGGACAGATAGGGTTTTAGAAATAGGACAAAGATTTTGTAGAGCT-----  
-----ATTGTAACATA-----CCTAGGAGAATCAGACAGGGCGCAGAAAAAGCGTTGCAA--TAA  
>MH330338  
GCT---GCA-----  
GAACAATTGTGGGTACCGGTATACTATGGGGTACCTGTGTGG--AGAGATGCAGAG---  
ACCACCCTATTTTGTGCATCAGATGCTAAAGCATATGATAAAGAG--GTACACAAT-----  
-----GTCTGGGCTACA--CATGCCTGTGTACCCACAGAC---  
CCTAACCCACTAGAAATGGATTGGAG-----AATGTGACAGAAGAGTTTAAT-----  
-----ATGTGGAAAAATAACATGGGTAGAACAAATGCAAACAGATATA---  
ATCAGTCTCTGGGACCAAAGCCTA--AAGCCATGTGTACAGCTA---  
ACCCCTCTCTGTGTTACTTTAAATTGTTCTGACTTCAACAACACTAGACCTAACAGCACTAGTTCTAGTACCA  
CTAGCGCTCCT-----  
-----AACAGCACTGCTAACGAAACATACAAGAATGAAGAAATGAAA---  
AACTGCTCTTTCAACATAACCACAGTACTAAGA-----  
GATAAAAAGAAAAATGTATATTCACTT---  
TTTTATAAACTTGATATAGTACCAATTGATAGTGATAGTAATGGTAGTAAG-----  
-----  
CAGGATAATGGTAGTGGGCAGTATAATGGTAGTGTGCAGTATGGGCAGTATAGACTAATAAATTGTAATACAT

CAACCATGACACAG---  
 GCCTGTCCTAAGGTATCCTTTGAGCCAATTCCTATACATTATTGTGCCCCAGCTGGTTTTGCGATTCTAAAGT  
 GCAGG---GAGACAAACTTTTACA-----GGGAAAGGGCCATGCAAGAAT-----  
 -GTCAGC---ACAGTACAATGCACACATGGAATCAAGCCAGTAGTATCAACT---  
 CAACTGCTGTTAAATGGCAGTCTAGCAGAAGAACAG-----  
 GTAATGGTTAGATCTGAAAATTTACAGACAAT-----GGCAAAATCATAATAGTACAGCTTAAT----  
 -----AAGCCTGTAAAC-----ATCACTTGTATCAGACCTAACAACAATACAAGAACA-----  
 -AGTGTACGTATA-----GGACCAGGACAAACC---TTC-----TATGCAACAGGTGAG-----  
 -----GTAATAGGGGACGTA-----AGGAAAGCATATTGT---AATATCAGCAGAACA---  
 GAATGGAATAACACTTTACAAAATGTAAGTGCACAATTAAGA-----CAACACTTTCAG-----  
 -----AACAAAACAATAATCTTTAGG-----  
 AACTCCTCAGGAGGGGATTTAGAAATTACA---ACACATAGTTTCAATTGTGGAGGAGAA---  
 TTTAAACAGCTCCAGGCAAGAGTCCTGGCTGTGGAAAAGATACCTAAGGGATCAGCAGCTCCTAGGAATTTGGG  
 GTTGCTCTGGAAAACCTCATCTGCACCCTACTGTGCCCTTGGAACCTCTAGTTGGAGT-----  
 -----AACAAATCTCATGATGAGATATGG-----AAT-----  
 AATATGACCTGGATGGAATGG---GACAAGGAAGTTATCAATTACACAAACACAATATAT---  
 AAGCTAATTGAAAAGCGCAAAACCAGCAGGAA-----  
 -----  
 AAGAATGAACAAGATTTATTGGCATTGGATAAGTGGGCAGGTCTGTGGAATTGGTTTAAACATATCAAACCTGGT  
 TATGGTATATAAAAATATTTATAATAATAGTAGGAGGCTTAATAGGATTAAGAATAGTTTTTTGCT---  
 GTGCTTTCTATAATA-----AATAGAGTCAGGCAGGGATACTCAGG-----  
 TTGTCATTTGCTATCAATCTAATAGATACCATAGCAATAGCAGTAGCTGGG---  
 TGGACAGATAGGGTTATAGAATTAGGACAAAGGCTTTGTAGAGCC-----  
 -----ATTCTTAACATA-----CCTAGAAGAATTAGACAGGGCGCAGAAAGAGCTTTGCAA---TAA  
 >MH330339  
 GCT---GCA-----  
 GACAAATTGTGGGTCACAGTATACTATGGGGTACCTGTGTGG---AGAGATGCAAAG---  
 ACCACCCATTCTGTGCATCAGATGCTAAAGCATATGATAAGGAA---GTACATAAT-----  
 -----GTCTGGGCTACA---CATGCCTGTGTACCCACAGAC---  
 CCTAACCCACAAGAAATAAGTTG-----AATGTGACAGAAAATTTTAAC-----  
 -----ATGTGGGAAAATGACATGGTAGAACAATGCAGACAGATATA---  
 GTCAGCCTCTGGGATCAAAGCCTA---AAGCCATGTGTAAAGTTA---  
 ACCCCTCTCTGCGTTACTTTAGATTGTGTTGAGCCCTTAACAACAGT-----  
 -----  
 -----AATATTACAGGCAATTATAACTTGTCTGAAGACATGAGA---  
 AACTGCTCTTTCAATATGACCACAGAACCTAAGA-----  
 GATAAAAGGAAAAATGTACATTCACCT---  
 TTTTATAAACTTGATATAGTACCAATTGATAATGGTAGTAATAGT-----  
 -----  
 AGTAGTAATGGTAGTAGGCAGTATAGACTAATAAATTGTAACACATCAACCACGACACAG---  
 GCCTGTCCTAAGGTAAGCTTTGAGCCAATTCCTATATATTATTGTACCCAGCTGGTTTTGCGATTCTAAAGT  
 GCACG---GATCCAAAATTTAAT-----GGAACAGGGCCATGCAATAAT-----  
 -GTCAGC---ACAGTACAATGCACACATGGAATCAAGCCAGTAGTATCAACT---  
 CAACTGCTGTTAAATGGCAGTCTAGCAGAAGAAGAG-----  
 GTAATGATTAGATCTGCAAAATATTACAGACAAT-----AGCAAAAACATAATAGTACAGCTTACT----  
 -----GAGCCTGTAAAC-----ATCACTTGTATCAGACATAACAACAATACAAGAACA-----  
 -AGTATACGTATA-----GGACCAGGACAAACC---TTC-----TATGCAACAGGTGAT-----  
 -----GTAATAGGGGACATA-----AGAAGAGCACAGTGT---ATTGTCAATAGAACA---  
 GCATGGAATAGCACTTTATATAAGATAAGCACACAATTAATA-----AAGTACTTTAAC-----  
 -----AACAGAACAATAATCTTTAAT-----  
 AGCTCCTCAGGAGGGGATGTAGAAGTTACA---ACACATAGTTTCAATTGTGGAGGAGAA---  
 TTTAAACAGCTCCAGGCAAGAGTCCTGGCTGTGGAAAAGATACCTAAGGGATCAGCAGCTCCTAGGAATTTGGG  
 GTTGCTCTGGAAAACCTCATCTGCACCCTAATGTGCCCTTGGAACCTCTAGTTGGAGT-----  
 -----AATAAAAATCAGAGTGAGATATGG-----GAT-----  
 AACATGACCTGGATACAATGG---GAAAAGGAAATTAGCAATTACACAAACCATATATAT---  
 GAGCTACTTTGAAGAATCACAAAACCAGCAGGAA-----  
 -----  
 AAGAATGAACAAGATTTATTAGCATTGGATAAGTGGGCAGGTCTGTGGAATTGGTTTGACATCTCAAATTGGT  
 TATGGTATATAAGAATATTTATAATAATAGTAGGAGGCTTGATAGGCCTAAGAATAGTTTTTTGCT---  
 GTGCTTTCTATAGTA-----AATAGAGTCAGGCAGGGATACTCAGG-----

TTGTCATTGGCTATTAATCTGATAGATACATTAGCAATAGCAGTAGCTGGG---  
 TGGACAGATAGAGTTTTAGAACTAGGACAAAGATTTTGTAGAGCT-----  
 -----ATTTGTAACATA-----CCTAGGAGAATCAGACAGGGCGCAGAAAGGGCTTTGCAA--TAA  
 >MH330340  
 GCT---ACA-----  
 GGAAACTTGTGGGTCACGGTATACTATGGGGTACCTGTGTGG--AGGGAGGCCAAAA---  
 ACCACCCTATTTTGTGCATCAGATGCCAAAGCATATGATAAAGAA--GTGCACAAT-----  
 -----GTCTGGGCTACA--CATGCCTGTGTGCCACAGAC---  
 CCTAGCCCACAAGAAATAATGATGGAA-----AATGTAACAGAAAATTTTAAC-----  
 -----ATGTGGAAAAATGATATGGTAGAACAAATGCATACAGATATA---  
 ATCAGTCTCTGGGACCAAAGCTTA--AAGCCATGTGTAAAGCTA---  
 ACCCCTCTCTGTGTACTTTAAATTGTACTGAACCCATCAGCAACAGTAGTATCAGCAACAAT-----  
 -----  
 -----AGTTTGGGGGACGTAATGAAA---  
 AACTGCTCTTTCAACATGACTACAGAAGTAAGA-----  
 GATAAAAGGAAAAGTGTATATTCACCTC--TTTTATAAGCTTGATATAGTATCAACTGATAGTAAT-----  
 -----  
 -----  
 AGTAGTGGGCAGTATAGACTAATAAGTTGTAATACATCAACCATGACACAG---  
 GCCTGTCCTAAGGTAACCTTTGAGCCAATTCCTATACATTATTGTGCCCCAGCTGGTTTTGCGATTCTAAAGT  
 GCAAT---GAGGCAAAATTTAAT-----GGAACAGGGCCATGCAAGAAT-----  
 -GTCAGC--ACAGTACAATGTACACATGGAATCAAGCCAGTAGTATCAACT---  
 CAACTGCTGTAAATGGCAGTCTAGCAGAAGAAGAG-----  
 GTAATGATTAGATCTGAAAAATACACAGACAAT-----GGCAAAAACATAATAGTACAGCTTAAG----  
 -----GAGGCTGTAAAC-----ATCACTTGTATCAGACCTGGCAACAATACAAGAACA-----  
 -AGTATACGTATA-----GGACCAGGACAAGCC--TTC-----TATGCAACAGGTGCT-----  
 -----GTAATAGGGGACATA-----AGAAGAGCACATTGT--AATGTCAGCAGAGCA---  
 AAATGGAATAGCACTCTACAACAGATAAGTACACAATTAAAA-----AGGTACTTTAAT----  
 -----AACAAAACAATAATCTTTAGG-----  
 AATTCCTCAGGAGGGGATTTAGAAATTACA--ACACATAGTTTCAATTGTGGAGGAGAA---  
 TTTAAGCAGCTCCAGGCAAGAGTCCCTGGCTGTGGAAAGATACCTAAGGGATCAGCAGATCCTGGGAATTTGGG  
 GTTGCTCTGGAAAACCTCATCTGCACCACTAATGTGCCCTGGAACCTCTAGTTGGAGT-----  
 -----AATAAATCTCAAGAGGAGATATGG-----GAG-----  
 AACATGACCTGGATGCAATGG--GACAAGGAAGTTTTCAATTACACAAACCTAATATAT--  
 AATCTAATTGAAGAATCGCAAAACCAGCAGGAA-----  
 -----  
 AAGAATGAACAAGATTTATTGGCATTGGATAGGTGGGCAAGTCTGTGGAATTGGTTTGACATAACAAATTGGC  
 TATGGTATATAAAAAATATTTATAATGATAGTAGGAGGCTTAATAGGATTAAGAATAGTTTTTGTCT--  
 GTGCTTTCTATAATA-----AATAGAGCCAGGCAGGGATACTCACCC-----  
 TTGTCATTGGCTATTAATCTAATAGATACCATAGCAATAGCAGTAGCTGGG---  
 TGGACAGATAGGGTTATAGAAATAGGACAAAGATTTTGTAGAGCT-----  
 -----ATTTGTAACATA-----CCTAGGAGAATCAGACAAGGCGCAGAAAGAGCTTTGCAA--TAA  
 >MH330341  
 GGT---GCA-----  
 GGAAACTTGTGGGTCACAGTATACTATGGGGTACCTGTGTGG--AGAGATGCAGAG---  
 ACCACCCTATTTTGTGCATCAGATGCTAAAGCATATGATAAGGAA--GTACACAAT-----  
 -----GTCTGGGCCACA--CATGCCTGTGTACCCACAGAC---  
 CCTAACCCGCAAGAAATAATTTTGAA-----AATGTGACAGAAGAATTTAAC-----  
 -----ATGTGGAAAAATAACATGGTGGAAACAAATGCAAACAGATATA---  
 ATCAGTCTTTGGGACCAAAGCTTA--AAGCCATGTGTAAAGTTA---  
 ACCCCTCTCTGCGTTACTTTAGATTGTGTGAACCCAACATCACTAGCTCTAACAGCAGT-----  
 -----  
 -----AGCACTAACAGCAGTATTGACCAGTATGAAGAAACGAAA---  
 AACTGCTCTTTCAACATGACCACAGAATAACA-----  
 GATAAAAGGAAAAGTGTACATTCACCTT--TTTTATAAACTTGATATAGTATCAATGGATAGT-----  
 -----  
 -----  
 AATAATAATAGTAGTAAGCAGTATAGACTAATAAATTGTAATACATCAACCACGACACAG---  
 GCCTGTCCTAAGGTAACCTTTGAGCCAATTCCTATACATTATTGTACCCCAGCTGGTTTTGCGATTCTAAAGT  
 GCAAG---GAGACAAACTTTACT-----GGAAAAGGGCCATGCAAGAAT-----

-GTCAGC---ACAGTACAATGCACACATGGAATCAAGCCAGTAGTATCAACT---  
 CAACTGCTGTTAAATGGCAGTTTAGCAGAAGAAAAG-----  
 ATAATGATTAGATCTGAAAATATTACAGACAAT-----AGCAAAATTATAATAGTACAGCTTAAG----  
 -----GAGCCTGTAAAC-----ATCACTTGTATCAGACCTGGCAACAATACAAGAACA-----  
 -AGTATACGAATA-----GGACCAGGACAAGCC---TTC-----TATGCAGCAGGTGCG-----  
 -----GTAATAGGGAACATA-----AGAAAAGCACATTGT---GAGGTCAACAGAACA---  
 GCCTGGAATAGCACTTTACAAAAGATAAGTACACAATTAAGA-----CAATACTTTAAG----  
 -----AACAAAACAATAATCTTTAAG-----  
 AACTCCTCAGGAGGGGATTTAGAAAGTTACA---GCACATAGTTTCAATTGTGGAGGAGAA---  
 TTTAAACAGCTCCAGGCAAGAGTCCTGGCTATAGAAAAGATACCTAAAGGATCAGCAGCTCCTAGGAATTTGGG  
 GTTGCTCTGGAAGAACTCATCTGCACCACTAATGTGCCCTGGAACCTCTAGTTGGAGT-----  
 -----AATAAATCTCAGAATGAGATATGG-----GAT-----  
 AACATGACCTGGATGCAATGG---GACAAGGAAATTATCAATTACACAAACAAAATATAT---  
 GATTTAATTGAAGAATCGCAAAACCAGCAGGAA-----  
 -----  
 AAGAATGAACAAGATTTACTAGCATTGGATAAGTGGACAGGTCTGTGGAATTGGTTTAACATATCAAATTGGC  
 TATGGTATATAAAAATATTTATAATAATAGTAGGAGGCTTAATAGGATTAAGAATAGTTTTTTGCT---  
 GTGCTTTCTATAATA-----AATAGAGCCAGGCAGGGATACTCAGG-----  
 TTGTCAATTGGCTATTAATCTGGTAAATAGCATAGCAATAGCAGTAGCTGAG---  
 TGGACAGATAGGGTTATAGAAAATAGGACAAATATTTTGTAGAGCT-----  
 -----ATT-----CGAGAACCAGACAGGGCATAGAAAAGGCTTTGCAA---TAA  
 >MH330342  
 GCT---ACA-----  
 GAAAACTTGTGGGTCACGGTTTACTATGGGGTACCTGTGTGG---AGAGATGCAGAG---  
 ACCACCCATTTTTGTGCATCAGATGCTAAAGCATATGATAAAGAA---GTACACAAT-----  
 -----GTCTGGGCTACA---CATGCCTGTGTACCCACAGAC---  
 CCTAACCACACAAGAAATAAAATTGGAA-----AATGTGACAGAAAACCTTTGAC-----  
 -----ATATGGAACAATAACATGGGTAGAACAAATGCAAACAGATATA---  
 ATCAGTCTCTGGGACCAAAGCCTA---AAGCCATGTGTAAAATTA---  
 ACCCTCTTTGCGTTACTCTAAATTGTACTGAAGTCAACAGCACTAGCTCTATCAAC-----  
 -----  
 -----AACTTTAGCAACAGTACCGATATCAAGAGCGAGATGAAA---  
 AACTGCTCTTTCAACATAACCACAGAATAAGA-----  
 GATAAAAGGAAAACCTGTACATTCACCT---TTTTATAAACTTGATATAGTATCAACAACCTGGT-----  
 -----  
 -----  
 AGTAATAATAGTAGTGGTAGTGGGCAGTATAGACTAATAAATTGTAATACATCAACCATGACACAG---  
 GCCTGTCCCTAAGGTAACCTTTGAGCCAATTCTTATACATTATTGTGCCCCAGCTGGTTTTGCGATTCTAAAGT  
 GCAAT---AATCCAGATTTTAAT-----GGAACAGGTCCATGCACGAAT-----  
 -GTCAGC---ACAGTACAATGCACACATGGAATCAAGCCAGTAGTAACACT---  
 CAACTACTGTTAAATGGCAGCCTAGCAGAGAACGAG-----  
 GTAATGATTAGAGCTAAAAATATCACAGACAAT-----AGCGGAAGCATAATAGTACAGCTTAAT---  
 -----GAGACCGTAAAA-----ATCACTTGTATCAGACCTGGCAACAATACAAGAACA---  
 -AGTATACGTATA-----GGACCAGGACAAACC---TTC-----TATGCAACAGGTGCT-----  
 -----GTAATAAGGGACATA-----AGAAAAGCATATTGT---AATGTCAGCAAAACA---  
 GCATGGAGCAGCACGTTACAAAAGATAAGAGAAAAAATTAAGA-----AATCACTTT-----  
 -----AACAAAACAATACTCTTTAGG-----  
 CCCTCCTCAGGAGGGGATTTAGAGGTTACA---ACACATAGTTTCAATTGTGGTGGAGAA---  
 TTTAAACAGCTCCAGGCAAGAGTCCTGGCTGTGGAAAGATACATAAAGGATCAGCAGCTCCTAGGACTTTGGG  
 GTTGCTCTGGAAGAACTCATCTGCACCACTACTGTGCCCTGGAACACTACTTGAGT-----  
 -----AATAAATCTCTTGATTACATATGG-----GGT-----  
 AACATGACCTGGATGCAATGG---GACAAGGAAGTTATCAATTACACAAACAAAATATAT---  
 GATCTAATTGAAAAATCACAAAACCAGCAGGAA-----  
 -----  
 AAGAATGAACAAGATTTATTGGCATTGGATAAGTGGGCAGGTCTGTGGAATTGGTTTAACATATCAAATTGGT  
 TATGGTACATAAGAATATTTATAATGATAGTAGGAGGCTTAATAGGATTAAGAATAGTCTTTTGCT---  
 GTGCTTTCTGTAATA-----AATAGAGCCAGGCAGGGATACTCAGG-----  
 TTGTCAATTGGCTATTAATCTGCTAGATACTATAGCAATAGCAATAGCTGGG---  
 TGGACAGATAGGGTTATAGAAAGGAGGACAAAGATTGTGTAGAGCT-----  
 -----ATTGCAACATA-----CCTAGAAGAATCAGACAGGGTGCAGAAAAGAGCTTTGCAA---TAA

>MH330344

GCT---GCA-----  
GAAAACTTGTGGGTACGGTATACTATGGGGTACCTGTGTGG---AGAGATGCAGAG---  
ACCACCCCTATTTTGTGCATCAGATGCTAAAGCATATGATAAAGAA---GTACACAAC-----  
-----GTCTGGGCTACA---CATGCCTGTGTACCCACAGAC---  
CCTAACCACACAAGAAATAGCTTTGGAG-----AATGTGACAGAAAATTTTGAC-----  
-----ATGTGGAAAAATAACATGGGTAGAACAAATGCAAACCTGATATA---  
ATCAGTCTCTGGGACCAAAGCCTA---AAGCCATGTGTAAAGCTA---  
ACCCCTCTCTGCGTTACTTTAAATTGTACTGAACCCAGCTTTAATAATACCAGCTTTAATAATAAC-----  
-----  
-----AGTAGCGTTAACGTTAGTAATAGTGAAATAGAAATGAAA---  
AACTGCTCTTTCAACATGACCACAGAACCTAAGA-----  
GATAAAAGGAAAACCTGTATATTCACCTT---TTTTATACACCAGATATAGTATCAATGGATAGT-----  
-----  
AATAGTAGTAATAGTAGTGGGCAGTATAGACTAATAAGTTGTAATACATCAACCATAACACAG---  
GCCTGTCCCTAAGGTAAGCTTTGAGCCAATTCCTATATATTATTGTACCCAGCTGGTTTTGCATTCTAAAGT  
GCAAG---GATACAAATTTTAAAT-----GGAACAGGGCCATGCAAGAAT-----  
-GTCAGC---ACAGTACAATGCACACATGGAATCAAGCCAGTAGTATCAACT---  
CAACTGCTGTTTAAATGGCAGTCTAGCAGAAAAAGAG-----  
GTAATGATTAGATCTAAAAATATCACAGACAAT-----AGCAAAACCATAATAGTACAGCTTACT---  
-----AAGCCTGTAAAC-----ATCACTTGTATCAGAACTGGCAACAATACAAGAACA-----  
-AGTATACGTATA-----GGACCAGGACAAACC---TTC-----TATGCAACAGGCGAT-----  
-----GTAATAGGGGACATA-----AGAAGAGCATATTGT---AATGTCAGCAGAGCA---  
GAATGGAATAGGACTTTACAGGAGATAAGTACACAGTTAAGA-----AAACACTTTGAG-----  
-----AACAAAACAATAATCTTTAAG-----  
CACTCCTCAGGAGGGGATTTAGAAAGTTGCA---ACACATAGTTTCAATTGTGGAGGAGAA---  
TTTAAACAGCTCCAGGCAAGAGTCCTGGCTGTGGAAAGATACCTAAAGGATCAGCAGCTCCTAGGAATTTGGG  
GTTGCTCTGGAAGAACTCATCTGCACCACTAATGTGCCCTGGAAGCTCTAGTTGGAGT-----  
-----AACAAATCTCAGAGTGAGATATGG-----GAT-----  
AACATGACCTGGATGCAATGG---GACAAGGAAGTTATCAATTACACAAACCTAATATAT---  
AATCTAATTGAAGAATCACAAAACCAGCAGGAA-----  
-----  
AAGAATGAACAAGATTTATTGGCATTAGATAAGTGGGCAAGTCTGTGGAGTTGGTTTGACATATCAAACCTGGT  
TATGGTATATAAAAAATATTTATAATAATAGTAGGAGGCTTAATAGGATTAAGAATAGTTTTTTGCT---  
GTGCTTTCTGTCTATA-----AATAGAGTCAGGCAGGGATACTCAGG-----  
TTGTCATTGGCTATCAACCTAATAGATACCCTAGCAATAGCAGTAGCTGGG---  
TGGACAGATAGGGTTATAGAAGTAGGACAAAGATTTTGTAGAACC-----  
-----ATCCGTAATATA-----CCTAGAAGAATCAGACAGGGGCGCAGAAAAGGCTTTGCAA---TAA

>MH330345

GCT---ACA-----  
GAAAACTTGTGGGTACGGTATACTATGGAGTACCTGTGTGG---AGAGATGCAGAG---  
ACCACCCCTATTTTGTGCATCAGATGCTAAAGCATATGATAAAGAG---GTACACAAT-----  
-----GTCTGGGCTACA---CATGCCTGTGTACCCACAGAC---  
CCTGAACCACAAGAAATAAATTTGGAA-----AATGTGACAGAAGATTTTAAAC-----  
-----ATGTGGAAAAATAACATGGGTAGAACAAATGCAAACAGATATA---  
ATCAGTCTCTGGGACCAAAGTCTA---AAGCCATGTGTAAAGTTA---  
ACCCCTCTCTGCGTTACTTTAAATTGTGTTGAACCCAACATCACTAGCTCTAACAGCAGTAGCGTTAACAGCA  
AC-----  
-----AACAGTAGTGTTAACAACAACAGGCTTGAAGAAATGAAA---  
AACTGCTCTTTCAACATGACCACAGAACCTAAGA-----  
GATAAAAAGGAAAAGGTACATGCACCTT---TTTTATAGACTTGATATAGTCTCACTTGGTAAGAAGGAT-----  
-----  
AGTAATAATAGTGGTAGTGAGCAGTATAGATTAATAAATTTGTAATACATCAGCCATGACACAG---  
GCCTGTCCCTAAGGTAACCTTTGAGCCAATTCCTATACATTACTGTGCCCCAGCTGGTTTTGCATTCTAAAGT  
GCAAG---GATACAACTTTTAAAT-----GGAACAGGGCCATGCAAGAAT-----  
-GTCAGC---ACAGTACAATGCACACATGGAATAAGGCCAGTAGTATCAACT---  
CAACTGCTATTAAATGGCAGTCTAGCAGAGGAACAG-----  
GTAATGATTAGATCCCAAAATATCACAGACACT-----AGTAAAACCATAATAGTACAGCTTACT---

```

-----GAGCCTGTAAAC-----ATCACTTGTATCAGAAATGGCAGCAATACGAGAACA-----
-AGTATACGTATA-----GGACCAGGACAAGCC---TTC-----TTTGCAACAGGAGCT-----
-----GTAACAGGGGACATA-----AGAAAAGCATATTGT---ATTGTCAACGGAACA---
GCATGGAATAGCACTTTACAAAAGATAAGTACACAATTAGAA-----AACCACCTTTAAA-----
-----AACAAAACAATAACCTTTAAG-----
AACTCCTCAGGAGGGGATTTAGAAAGTTACA---ACACATAGTTTCAATTGTGGAGGAGAA---
TTTAAACAGCTCCAGGCAAGAGTCCTGGCTGTGGAAAGATACCTAAAGGATCAGCAGCTCCTAGGACTTTGGG
GTTGCTCTGGAAGAACTCATCTGCACCACTACTGTGCCCTGGAACCTCTAGTTGGAGT-----
-----AATAAATCTTACAGTGATATATGG-----GAT-----
AACATGACCTGGATGCAATGG---GACAAGGAAGTTATCAATTACACAAACATAATATAT---
GATCTAATTGAAAAATCGCAAAACCAGCAGGAA-----
-----
AAGAATGAACAAGATTTATTGGCATTGGATAAGTGGGCAAGTCTGTGGAATTGGTTTACCATATCAAAGTGGT
TATGGTATATAAAAAATATTTATAATGATAGTAGGAGGCTTAATAGGATTAAGAATAGTTTTTTTGCT---
GTGCTTTCTATAATA-----AATAGAGTTAGGCAGGGATACTCAGG-----
GTGTCATTGGCTATCAATCTAATAGATACCATAGCAATAGTAGTAGCTGGG---
TGGACAGATAGGGTTATAGAAAGTAGGACACAGACTTTGTAGAGCC-----
-----CTTTGTAACATA-----CCTAGAAGAATCAGACAGGGTGCAGAAAGAGCTTTGCAA---TAA
>MH330346
GCT---GCA-----
GAAAACTTGTGGGTCACAGTATACTATGGGGTACCTGTGTGG---AGAGATGCAGAG---
ACCACCCTATTTTGTGCATCAGATGCTAAAGCATATGATAAAGAA---GTACACAAT-----
-----GTCTGGGCTACA---CATGCCTGTGTGCCACAGAC---
CCTGACCCACAAGAAATAGCTTTGAAA-----AATGTGACAGAAAATTTTAAAC-----
-----ATGTGGAAGAATAACATGGGTAGAACAAATGCAAACAGATATA---
ATCAGTCTCTGGGACCAAAGCCTA---AAGCCATGTGTAAAGTTA---
ACCCCTCTCTGTGTACTTTAAATTGCACTAACCCAAGCAGCACTAGCTTGAACAGCAATAAT-----
-----
-----AGCGATAACAGCAATGAGAGTTTGTATGAAGAGATGAAA---
AACTGCTCTTACAACATAGCCACAGAATAAGA-----
GATAGAAAGAAAAGTGTATATTCACCTT---TTTTATAAGCTTGATATAGTATTAAGTATAGT-----
-----
-----
AATAATAATAATAGTAATAGTGAAAAGTATAGACTAATAAATTGCAATACATCAACCATGACACAG---
GCCTGTCCTAAGGTAACCTTTGAGCCAATTCCTATCCATTATTGTGCCCCAGCTGGTTTTGCGATTCTAAAGT
GCAGG---GAACCAAATTTTAGT-----GGAAAAGGGCCATGCAAGAAT-----
-GTCAGC---ACAGTACAATGCACACATGGAATCAAGCCAGTAGTATCAACT---
CAACTGCTGTTTAAATGGCAGTCTAGCAGAGGGAGAG-----
AATGTAACAATTAGATCTGAAAATATCACAGACAAT-----AGCAAAATCATAATAGTACAGCTTAAG-
-----AAGCCTGTAAAC-----ATCACTTGTATCAGACCTAGCAACAATACAAGAACA--
---AGTATACGTATA-----GGACCAGGACAAACC---TTC-----TATGCAACAGGTGAT---
-----GTAATAGGGAACCCA-----AGAAAAGCACATTGT---GAGGTCAACAAAACA-
--GAATGGAATAGAGCTTTACGAGAGATAAAGGAACAATTGAGA-----AACAACTACTTTCAT--
-----AACAAAACAATAAAATTTGAA-----
AAATCCTCAGGAGGAGATTTAGAAAGTTATA---ACACATACTTTCAATTGTGGAGGAGAA---
TTTAAACAGCTCCAGGCAAGAGTCCTGGCTGTGGAAAGATACCTAAAGGATCAGCAGATCCTAGGAATTTGGG
GTTGCTCTGGAAGACTCATCTGCGCCACTAATGTGCCCTGGAACCTCTAGTTGGAGT-----
-----AATAAATCTTATGATGAGATATGG-----AAGAGT---
AACATGACCTGGATGCAATGG---GACAAGGAAGTTAACAATTACACAGGCAGAATATAT---
GAGCTAATTGAAAAATCGCAAAACCAGCAGGAA-----
-----
AAGAATGAACAAGAGTTATTGGAATTGGATAAGTGGTCAAGTCTGTGGAATTGGTTTGACATATCAAATTGGT
TATGGTATATAAAAAATATTTATAATGATAGTAGGAGGCTTAATAGGATTAAGAATAGTTTTTTTGCT---
GTGCTTTCTATAATA-----AATAGAGTCAGGCAGGGATACTCAGG-----
TTGTCAATTTGCTATCAATCTACTAGATACCATAGCAATAGCAGTAGGTGGG---
TGGACAGATAGGGTTATAGAAAATAGGACAAAGACTTTGTAGAGCC-----
-----ATTGCAACATA-----CCTAGGAGAATCAGACAGGGCGCAGAAAGAGCTTTGCAG---TAA
>HQ616082
GCT---ACA-----
GAAAACTTGTGGGTCACGGTATACTATGGGGTACCTGTATGG---AGAGATGCAGAG---

```

ACCACCCTATTTTGTGCATCAGATGCTAAAGCATATGATAAAGAG---GTACACAAT-----  
 -----GTTTGGGCTACA---CATGCCTGTGTACCCACAGAC---  
 CCTGACCCACGAGAAATAGATTTAGAA-----AATGTGACAGAAAATTTTAAC-----  
 -----ATGTGGAAAAATAACATGGTAGAACAAATGCAAACAGATATA---  
 ATCAGTCTCTGGGACCAAAGCCTA---AAGCCATGTGTAAAGTTA---  
 ACCCCTCTCTGTGTTACTTTAAATTGTTCTGACCCACCAGCAACAGCACTAGCTCTAACAACAGCACTATC-  
 -----  
 -----TCTAACAACAGCACTAGCTTTAATGACAGCAGGTATGAAGAAATGAAA---  
 AACTGCTCTTTCAACATGACCACAGAATAAGA-----  
 GATAAAAGAAGAAATGTATATTTCACTT---TTTTATAAACTTGATATAATAGCAACTAATAGTAAT-----  
 -----  
 -----  
 AATAGTAGGCTGTATAGATTAATAAATTGCAATACATCAGCCATGACACAG---  
 GCCTGTCCCAAGGTAACATTTGAGCCAATACCTATACATTATTGTGCCCCAGCTGGTTTTGCGATTCTAAAGT  
 GCAAG---GATCCAAATTTTAAT-----GGAACAGGGCCATGCAAGAAT-----  
 -GTCAGC---ACAGTGCAATGCACACATGGAATCAAGCCAGTAGTATCAACT---  
 CAACTGCTGTTAAATGGCAGTCTAGCAGAGAAAGAT-----  
 GTAATGATTAGATCTGAAAAATACACAGACAAT-----AGCAAAACCATAATAGTACAGCTCACT----  
 -----GAGCCTGTAAAC-----ATCACTTGTATCAGACCTGGCAACAATACAAGAACA-----  
 -AGTATACGTATA-----GGACCAGGACAAGCT---TTC-----TATGCAACAGGTGAG-----  
 -----ATAATAGGGGACACA-----AGAAAAGCACATTGT---ACTGTCAACAAAACA---  
 GCATGGGAGAGCACTTTACAAAAGACAAGTATGAAATTAAGA-----GAATACTTTAAG----  
 -----AACAAAACAATAGTCTTTAAG-----  
 AACTCCTCAGGAGGGGATTTAGAAAGTTACA--ACACATAGTTTCAATTGTGGAGGAGAA---  
 TTTAAACAGCTCCAGGCAAGGGTCGTGGCTGTGGAAAGATACCTAAAGGATCAGCAGCTCCTAGGAATTTGGG  
 GTTGCTCTGGAAACTCATCTGCCCCACTAATGTGCCCTGGAACTCTAGTTGGAGT-----  
 -----AACAAATCTCAGAATGAGATATGG-----AAT-----  
 AACATGACCTGGATGCAATGG---GACAAGGAAGTTATCAATTACACAAACCTAATATAT---  
 AATTTAATTGAAGAATCGCAAAACCAGCAGGAA-----  
 -----  
 AAGAATGAACAAGATTTATTGGCATTGGATAAGTGGGCAAGTCTGTGGAGTTGGTTTGACATATCAAATTGGT  
 TATGGTATATAAGAATATTTATAATAATAGTAGGAGGATTAATAGGATTAAGAATAGTTTTTGTCT---  
 GTGCTTTCTATAATA-----AATAGAGTCAGGCAGGGATACTCAGG-----  
 TTGTCATTGGCTATCAATCTGCTAGATACCACAGCAATAGTAATAGCGGGG---  
 TGGACAGATAGGGTTATAGAACTAGGACAAAGACTTTGTAGAGCA-----  
 -----ATTATTAACATA-----CCTAGGAGAATCAGACAGGGCGCAGAAAAAGCTTTGCAA--TAA  
 >DQ823357  
 GCT---ACA-----  
 GAAAACTTGTGGGTCACAGTATACTATGGGGTACCTGTGTGG--AGAGATGCAGAG---  
 ACCACTCTATTTTGTGCATCAGATGCTAAAGCATATGATAAAGAA--GTACATAAT-----  
 -----GTCTGGGCTACA---CATGCCTGTGTACCCACAGAC---  
 CCTAACCCACAAGAAATACCTTTGGAA-----AATGTGACAGAAAATTTTAAT-----  
 -----ATGTGGAAAAATAACATGGTAGAACAAATGCAAACAGATATA---  
 ATCAGTCTCTGGGACCAAAGCCTA---AAACCATGTGTAAAGCTA---  
 ACCCCTCTCTGCGTTACTTTAAATTGTACTAAACCCACGCCCCCACTTTAAATTGTACTGCATCC-----  
 -----  
 -----AACTGCACTATCTCTAACAGCAGCTTGTATGAAGAAATGAGA---  
 AACTGCTCTTTCAACATGACAACAGAATAAGA-----  
 GATAAAGAGAAAAAAGTACATTTCACTT---TTTTATAAACTTGATATAGTATCAACTGGTAGT-----  
 -----  
 -----  
 AATGATAGTGGGGAGTATAGACTAATAAATTGTAATACATCAGCCATGACACAG---  
 GCCTGTCCTAAGGTAACCTTTGAGCCAATTCCTATACATTATTGTGCCCCAGCTGGTTTTGCGATTCTAAAGT  
 GCAAT---GATACAACTTTAAAT-----GGAACAGGACCATGCAGGAAT-----  
 -GTCAGC---ACAGTACAATGCACACATGGAATCAAGCCAGTAGTATCAACT---  
 CAACTGCTGTTAAATGGCAGTCTAGCAGAAAATGAG-----  
 GTAATGATTAGATCTGAAAAATATTACAGACAAT-----GGCAAAAACATAATAGTACAGCTTACT----  
 -----GAGCCTGTAAAC-----ATCACTTGTATCAGACCTGGCAACAATACAAGAACA-----  
 -AGTATACGTATA-----GGACCAGGACAAAACC---TTC-----TATGCAACAGGTGAA-----  
 -----ATAATAGGGAACCCA-----AGAAAAGCACATTGT---AATGTCAGCAGAGTA---

GCATGGAATAACACTTTACAAAAGATAAGTATACAATTAAGA-----AAATACTTTAAT----

-----AACAAAACAATAACCTTTAAG-----

AACTCCTCAGGAGGGGATTTAGAAAGTTACA---ACACATAGTTTCAATTGTGGAGGAGAA---

TTTAAACAGCTACAGGCAAGAGTCCTGGCTGTGGAAAGATACCTAAAGGATCAGCAGCTCCTAGGAATTTGGG

GTTGCTCTGGAAGAACTCATCTGCACCACTAATGTGCCCTGGAACCTAATTGGAGT-----

-----AGTAAATCTCATGATGAGATATGG-----AAT-----

AACATGACCTGGATGCAATGG---GACAAGGAAGTTATCAATTACACAAACATAATATAT---

GGTCTAATTGAAAAATCGCAAAACCAGCAGGAA-----

-----

AAGAATGAACAAGATTTATTGGCATTGGATAAATGGGCAAGTCTGTGGAGTTGGTTTGACATATCAAATTGGT

TATGGTATATAAAAAATATTTATAATGATAGTAGGAGGCTTAATAGGATTAAGAATAGTTTTTTGCT---

GTGCTTTCTATAATA-----AATAGAGTCAGGCAGGGATACTCACCC-----

TTGTCAATTGGCTATTAATCTGCTAGATACCATAGCAATAGCAGTAGCTGGG---

TGGACAGATAGGGTTATAGAAAGTAGGACAAAGATTTTGTAGAGCT-----

-----ATTTGTAACATA-----CCTAGGAGAATCAGACAGGGCGCAGAAAAGGCTTTGCAA---TAA

>KU749399

GCT---ACA-----

GAAAACTTATGGGTCACAGTATACTATGGGGTACCTGTGTGG---AGAGATGCAGAG---

ACCACCCTATTTTGTGCATCAGATGCCAAAGCATATGATAAAGAA---GTACACAAT-----

-----GTCTGGGCTACA---CATGCCTGTGTACCCACAGAC---

CCTAATCCACAAGAAATAAGTTTGGGA-----AATGTGACAGAAAATTTTAAC-----

-----ATGTGGAAAAATAACATGATAGAACAAATGCAGACAGATATA---

ATCAGTCTCTGGGACCAAAGCCTA---AAGCCATGTGTACAGTTA---

ACCCCTCTCTGCGTTACTCTAAAGTGTACTGACCCCACTAACAACAACCTCT-----

-----

-----GAAGTAATGAAA---

AACTGCTCTTTCAACATGACCACAGAACTAAGA-----

GATAAAAAGAAAGCTGTATATTCATA--TTTTATAAACTTGATATAGTACCAACTGATGGTAAT-----

-----

GATAATAGTAGTTATAGACTAATAAATTGTAATACATCAACCGTGACACAG---

GCCTGTCCTAAGGTAACCTTTGAGCCAAATTCCTATACATTATTGTGCCCCAGCTGGTTTTGCGATTCTAAAGT

GCAAG---GATAAAAATTTTAAT-----GGAACAGGGCCATGCAAGAAT-----

-GTCAGC---ACAGTACAATGCACACATGGGATCAAGCCAGTAGTATCAACT---

CAACTGCTGTAAATGGCAGTCTAGCAGAGGATGAG-----

GTAATGATTAGATCTGAAAAATATCACAGACAAT-----GGCAAGACCATAATAGTACAGCTTAAG----

-----GAGCCTGTAAAT-----ATCACTTGTATCAGACCTGGTAATAATACAAGAACA-----

-GGTATACATATA-----GGACCAGGACAAGCC---TTC-----TTTGCAACAGGTGAC-----

-----GTAATAGGGGACATA-----AGAAACGCACATTGT---AATGTCAGCAGAGCA---

ACATGGAATAACACTTTACAACAGATAAGTGAACAATTAAGA-----AAATACTTTTCAT----

-----AACAAAACAATAATCTTTGAG-----

AGCTCCTCAGGTGGGGATTTAGAAAGTTACA---ACACATAGTTTCAATTGTGGAGGAGAA---

TTTAAACAGCTCCAGGCAAGAGTCCTGGCTGTGGAAAGATACCTAAAGGATCAGCAGCTCCTAGGAATTTGGG

GTTGCTCTGGAAGAACTCATCTGCACCACTAATGTGCCCTGGAACGTTAGTTGGAGT-----

-----AATAAATCTCAGCAGGAGATATGG-----GAT-----

AACATGACCTGGATGCAATGG---GACAAGGAAGTTATCAACTATACAGGCATAATATAT---

GATCTACTTGAAAAATCGCAAAACCAGCAGGAA-----

-----

AAGAATGAACAAGAATTATTGGCATTGGACAAGTGGGCAAGTCTGTGGAGTTGGTTTGACATAACAAATTGGT

TATGGTATATAAAAAATATTTGTAATAATAGTAGGAGGCTTAATAGGATTAAGAATAGTTTTTTGCT---

GTGCTTTCTATAATA-----AATAGAGTCAGGCAGGGATACTCACCC-----

GTGTCAATTGGCTATTAATCTGCTAAATACCACAGCAATAGTAGTAGCTGGG---

TGGACAGATAGGGTTATAGAAATAGGACAAAGATTTTGTAGAGCT-----

-----ATTTGTAACATA-----CCTAGGAGAATCAGACAGGGCGCAGAAAACGCTTTGCAA---TAA

>KU749401

GCT---ACA-----

GAAAACTTGTGGGTCACAGTATATTATGGGGTACCTGTGTGG---AGAGATGCAGAG---

ACCACCCTATTTTGTGCATCAGATGCTAAGGCTTATGATAAGGAA---GTACACAAT-----

-----GTCTGGGCTACA---CATGCCTGTGTACCCACAGAC---

CCTAACCACACAAGAAATAAATTTGAAA-----AATGTGACAGAAAACCTTTGAC-----

-----ATGTGGAATAATAGCATGGTAGAACAAATGCAAACAGATATA---  
ATCAGTCTATGGGATCAAAGCCTA---AAGCCATGTGTACAGTTA---  
ACCCCGCTCTGTGTTACTTTAAATTGTACTGAACCCAACCTCAACAGCACCAACACTACT-----  
-----  
-----ATCCCTAACAAATAGTGGTGGTAACAGCAGCGAGGTTAAAGAACTAATGAGA---  
AACTGCACCTTTCAACGTGACCACAGAATAAGA-----  
GATAAAAAGAAGAGTGTGCATTCACCT--TTTTATAAGCTTGATATAGTATCAATTGATAGT-----  
-----  
-----  
AATAGTAATAGTACACAGTATAGACTAATAAATTGTAATACATCAACCATAACACAG---  
GCCTGTCCTAAGGTAACCTTTGAGCCAATTCCTATACATTATTGTACCCCAGCTGGTTTTGCGATTCTAGAGT  
GCAAG---GAGAAAAATTTTACT-----GGAAAAGGGCCATGCAGGAAT-----  
-GTCAGC---ACAGTACAATGTACACATGGAATCAAGCCAGTAGTATCAACT---  
CAACTGCTGTTAAATGGCAGTCTAGCAGAGGGGAGAG-----  
GTAATGATTAGATCTAAAAATATCTCAGACAAT-----GGCAAATCATAATAGTACAGCTTGAT----  
-----GAGCCTGTAAAC-----ATCACTTGTATCAGACCTGGCAACAATACAAGAACA-----  
-AGTATAAGTATA-----GGACCAGGACGAGCC---TTC-----TATGCAACAGGTGAT-----  
-----GTAATAGGGGACATA-----AGGAAAGCATATTGT---AATGTCAGCAAAACA---  
GCATGGACTAACACTTTACAAAAGATAAGTATGCAATTAAGA-----AAACACTTTAAT-----  
-----AACAAAACAATAATCTTTAAG-----  
AACTCCTCAGGAGGGGATTTAGAAAGTTACA--ACACATAGTTTCAATTGTGGAGGAGAA---  
TTTAAACAGCTCCAGGCCAGAGTCCCTGGCTGTGGAAAGATACCTAAGGGATCAGCAGCTCCTAGGAATTTGGG  
GTTGCTCTGGAAGACTCATCTGCACCACTAATGTGCCCTGGAACCTCTACTTGAGT-----  
-----AATAAAAATCTGACTGAAATATGG-----GAT-----  
AACATGACCTGGATGCAATGG---GACAGGGAAGTTAGCAATTACACAGACACAATATAT---  
CAGCTAATTGAAAAATCGCAAAACCAGCAGGAA-----  
-----  
AAGAATGAACAAGATTTATTGGCATTAGATAAGTGGGCAAGTCTGTGGAATTGGTTTGACATATCACATTGGT  
TATGGTATATAAAAAATATTTATAATGATAATAGGAGGCTTAATAGGATTAAGAATAGTTTTTTGCT---  
GTGCTTTCTATAATA-----AATAGAGTCAGGCAGGGATACTACCA-----  
TTGTCGTTGGCTATTAATCTGCTAGATACCACAGCAATAGCAGTAGCTGGG---  
TGGACAGATAGGGTTATAGAAGTAGTACAAAGATTTTTTAGAGCT-----  
-----ATTTGTAACATA-----CCTAGGAGAATCAGACAGGGCGCAGAAATAGCTTTGCTA--TAA  
>KY658681  
GCT-----  
GGAGGCTTGTGGGTACAGTATACTATGGGGTACCTGTGTGG--AGAGATGCAGAG---  
ACCACTCTATTTTGTGCATCAGATGCTAAAGCATTTGATAAAGAA--GCACACAAT-----  
-----GTCTGGGCCACA--CATGCCTGTGTGCCACAGAC---  
CCTGACCACAAAGAAATAACTTTGGAC-----AATGTGACAGAAAAATTTGAC-----  
-----ATGTGGAAAAATAACATGGTAGAACAAATGCAAGCAGACATA---  
ATCAGTCTCTGGGACCAAAGCCTA--AAGCCATGTGTAAAGTTA---  
ACCCCTCTCTGTGTACCTTAAATTGTACTGCACCCAACAGCACTAGATGTAACAACAGT-----  
-----  
-----CGTGTTAACAAACAGTGATTGTGTGTTTGAAGAGATGAGA---  
AACTGCTCTTACAACATGACCACAGAATAAGA-----  
GATAAAAGGAAAAGTGTACATTCACCT--TTTTATGCACTAGATATAATATCAATTGGTAGT-----  
-----  
-----  
ACTGGTAGTAATGGTAGTGGGCAGTATAGACTAATAAATTGTAATACATCATCCATGACACAG---  
GCCTGTCCATAAGTATCCTTTGAGCCAATTCCTATACATTATTGTGCCCCAGCTGGTTTTGCAATTCTAAAAT  
GCAAG---GATGCAAATTTTACT-----GGAAAAGGGCCATGCAAGAAT-----  
-GTCAGC---ACAGTACAATGCACACATGGAATCAGGCCAGTAGTATCAACT---  
CAACTGCTATTAAATGGCAGTCTAGCAGAGGAGAAG-----  
ATAATGATTAGATCTGAAAAATACACAAACAAT-----CACAAAACCATAATAGTACAGCTTACT----  
-----GAGCCTGTAAAC-----ATCACTTGTATCAGACCTAATAACAATACAAGAACA-----  
-AGTATACGTATA-----GGACCAGGACAAAACC---TTC-----TATGCAACAGGTGAT-----  
-----ATAATAGGGAACCCA-----AGAAAAGCATATTGT---AATATCAGTAGAAAA---  
GCATGGAATAGCACTTTAGGAAAAGTAAGTATACAATTAAGA-----GAATACTTT-----  
-----AACAAAACAATAATCTTTAAG-----  
AACTCCACAGGAGGGGATTTAGAAATTACA--ACACATAGTTTCAATTGTGGAGGAGAA---

TTTAAACAGCTCCAGGCAAGAGTCTCTGGCTGTGGAAAGATACCTTAAAGGATCAGCAGCTCCTAGGAATTTGGG  
GTTGCTCTTGAAAACCTCATCTGCACCACTAATGTGCCCTGGAACCTCTAGTTGGAGT-----  
-----AATAAATCTCTGCCTGAGATATGG-----AAT-----  
AACATGACCTGGATGGAATGG--GACAAGGAAGTTTTCAATTACACAAACACAATATAT---  
GAGCTAATTGAAAAATCGCAAAACCAGCAGGAA-----  
-----  
AAGAATGAACTAGAGTTATTGGAATTGGATAAATGGGCAAGTCTGTGGAGTTGGTTTGACATAACAAATTGGT  
TATGGTATATAAAAAATATTTATAATAATAGTAGGAGGCTTAATAGGATTAAGAATAGTTTTTTGCT---  
GTGCTTTCTTTAATA-----AATAGAGTCAGGCAGGGATACTCACCC-----  
TTGTCAATTGGCTATTAATCTGATAGATACCATAGCAATAGCAGTAGCTGAA---  
GGAACAGATAGAATTATAGAAGTAGTACAAAGATTTTGTAGAGCT-----  
-----ATTTGTAACATA-----CCTAGGAGAATCAGACAGGGCGCAGAAAAGGCTTTGCAA---TAA  
>KU749402  
GCT---ACA-----  
GAAAACCTGTGGGTACACGGTATACTATGGGGTACCTGTGTGG--AGAGATGCAGAG---  
ACCACCCTATTTTGTGCATCAGATGCTAAAGCATATGATAAAGAG--GTACACAAT-----  
-----GTCTGGGCTACA---CATGCCTGTGTACCCACAGAC---  
CCTGACCCACGAGAAATACTTTTGGAA-----AATGTGACAGAAGAATTTAAC-----  
-----ATGTGGA AAAAATAACATGGTAGAACAAATGCAAATAGATATA---  
ATCAGTCTCTGGGACCAAAGTCTA--AAGCCATGTGTAAAGTTA--  
ACCCCTCTCTGTGTTACTTTAAATTGTACTAAACCCAAATTCAACAGTACCTCTAGCAACAATACCTTTTAC-  
-----  
-----AACAGTACCTTTTACAGCAACAACAGCATGTTAGAAGAAATGAAA---  
AACTGCTCTTTCAACATGACCACAGAACTAAGA-----  
GATAAAACAAAAAAGTACATTCACCT--TTTATAAGCTTGATATAGTAGCAACTGATGGTGGGCAT-----  
-----  
-----  
ACTAATGATAGTGGGCAGTATAGATTAATAAATTGTAATACATCAACCATGACACAG---  
GCCTGTCCTAAGGTAACCTTTGAGCCAATTCCTATATATTATTGTGCTCCAGCTGGTTTTTGCATTCTAAAGT  
GCAAC--GATCCAAATTTTAAK-----GGAAAAGGGCCATGCAACAAT-----  
-GTCAGC--ACAGTACAATGCACACATGGAATCAAGCCAGTAGTATCAACT---  
CAACTGCTGTTAAATGGCAGCCTAGCAAAGGAAAAG-----  
GTAATGATTAGATCTGAAAATATCTCAAAACAAT-----GCCAAAAACATAATAGTACAGCTTACT-----  
-----AAGCCTGTAAAC-----ATCTCTTGATCAGACCTAGCAACAATACAAGAACA-----  
-AGTATACATATA-----GCACCAGGACAAGCC--TTC-----TATGCAACAGGTGAG-----  
-----GTAATAGGGGACATA-----AGAAAAGCACATTGC--AATGTCAGCAGAACA---  
TTATGGAATAGCACTTTACAAGAGATAAGTAAACAATTAAGA-----GAACACTTTAAG---  
-----AACAAAACAATAATCTTTAAA-----  
AACCCTATAGGAGGGGATTTAGAAATTACA--ACACATAGTGTCAATTGTGGTGGAGAA---  
TTTAAACAGCTCCAGGCAAGAGTCCTTGCTGTGGAAAGATTCTTAAGGGATCAGCAGCTCCTAGGAATTTGGG  
GCTGCTCTGGAAGACTCATCTGCAACACTAATGTGCCCTGGAACCTCTAGTTGGAGT-----  
-----AATAAATCTCAAAGTGAAATATGG-----GAG-----  
AACATGACCTGGATGCAATGG--GACAAGGAAGTTATCAATTACACAAGCAAAATATAT---  
GAGCTACTTGAACAATCGCAAAATCAGCAGGAA-----  
-----  
AAGAATGAACAAGATTTATTGGCATTGGATGAGTGGACAAGTCTGTGGAGTTGGTTTGACATATCAAAGTGGT  
TATGGTATATAAAAAATATTTATAATGATAGTAGGAGGCTTAATAGGATTAAGAATAGTTTTTTGCT---  
GTGCTTTCTATAATA-----AATAGAGTCAGGCAGGGATACTCACCA-----  
TTGTCAATTGGCTATTAATCTGCTAGATACCATAGCAATAGCAGTAGCTGGG---  
TGCACAGACAGGGTTATAGAAGTAGTACAAAGATTTTTTTAGAGCT-----  
-----CTTCGTAATATA-----CCTAGGAGAATTAGACAGGGAGCAGAAATAGCTTTGCAA---TAA  
>KU749403  
GCT---GCA-----  
GACATGTGGGTTACGGTATACTATGGGGTACCTGTGTGG--AGAGATGCAAAG---  
ACCACCCTATTTTGTGCATCAGATGCTAAAGCACATGATACAGAA--GTACACAAT-----  
-----GTCTGGGCTACA---CATGCCTGTGTACCCACAGAT---  
CCTAACCACAAGAAATATCTTTGGAA-----AATGTGACAGAAGATTTTAAC-----  
-----ATGTGGA AAAAATGATATGGTAGAACAAATGCAAACAGATATA---  
ATCAGTCTCTGGGATGAAAGCCTA--AAGCCATGTGTACAGTTA--  
ACCCCTCTCTGTGTTACTTTAAATTGTACTGATCCCAACCCCAACAGCACTATATCTAACAGCAGT-----

-----  
-----AGTAACAGCTACAGCAATGATAGCTGGGTAAAGACATGAAA---  
AACTGCTCTTACTACATAACCACAGAACTAAGA-----  
GATAAAAAGAAAAATGTACACTCACTT---TTTTATAAACTTGATGTAGTATCACTTGGTACT-----  
-----  
-----  
AGTAATAATAGTAGTCAGTATAGACAGTATAGACTAATACATTGTAATACATCAACCATAAAGCAG---  
GCCTGTCCTAAGGTAACCTTTGAGCCAATTCCCTATACATTATTGTGCCCCAGCTGGTTTTGCGATTCTAAAGT  
GCAAA---GATCCAATGTTTAAT-----GGAACAGGGCCATGCAAGAAT-----  
-GTCAGC---ACAGTACAATGCACACATGGAATCAAGCCAGTAGCATCAACT---  
CAACTACTGTTTAAATGGCAGTCTAGCAGAGAAAGAG-----  
GTAATGATTAGATCTCAAAATATCACAGATAAT-----AGCAAAACCATAATAGTACAGCTTCAG----  
-----GAGCCTGTAAAC-----ATCACTTGTATCAAACCAGGCACCAATACAAGAACA-----  
-AGGATACATCAT-----ATAGGACCAGGACGAGCC---TTT-----TATACACATGGTGAT-----  
-----ATAATAGGAAACCCA-----AGAATAGCACATTGT---AATGTCAGCAGTGCA---  
AAATGGAATAAACTTTACAAGGGATAAGGAGACAATTAAGA-----AACTACTTTACT-----  
-----AACAAAACAATAATCTTTAGG-----  
AACTCCTCAGGAGGGGATGTAGAAATTACA--ACACATAGTTTCAATTGTGGAGGAGAA--  
TTTAAACAGCTCCAGGCAAGAGTCCTGGCTGTGGAAAGATACCTAAAGGATCAGCAGCTCCTAGGAATTTGGG  
GTTGCTCTGGAAGACTCATCTGCACCACTGCTGTGCCCTGGAATTCTAGTTGGAGT-----  
-----AATAAATCTTACAATGACATATGG-----AAT-----  
AACATGACCTGGATGCAATGG---GACAAGGAAGTTAACAATTACACACACATAATATAT---  
GATCTAATAGAACAATCGCAAAACCAGCAGGAA-----  
-----  
AAAAATGAACAAGAGTTATTGGCATTGGATAAGTGGGCAAGTCTGTGGAATTGGCTTGACATATCAAATTGGT  
TATGGTACATAAGAATATTTATAATGATAGTAGGAGGCTTAGTAGGATTAAGAATAGTTTTTTGCT---  
GTGCTTTCTATAATA-----AATAGAGTCAGGCAGGGATACTCACCT-----  
GTGTCATTGGCTATTAATCTCATAGATACCATAGCAATAGTAGTAGCTGGG---  
TGGACAGATAGAGTTATAGAAATAGGACAAAGAGTTTGTAGAGCT-----  
-----ATTTGCAACATA-----CCTAGGAGAATCAGACAGGGCGCAGAAAGGGCTTTGCAG---TAA  
>KU749404  
GCT---GGA-----  
GAAAACTTGTGGGTCACAGTATACTATGGGGTACCTGTGTGG--AGAGATGCAGAG---  
ACCACCCATTTTTGTGCATCAGATGCTAAAGCATATGATAAAGAA--GTACATAAT-----  
-----GTCTGGGCTACA--CATGCCTGTGTACCCACAGAC---  
CCTGACCACAGAAGAAATAGTTTTGGGA-----AATGTGACAGAAGAATTTGAC-----  
-----ATGTGGAAAAATAACATGGTAGAACAATGCAAACAGATATA---  
ATCAGTCTCTGGGACCAAAGCCTA--AAGCCATGTGTAAAGTTA--  
ACCCCTCTCTGCGTTACTTTAAATTGTACTGAACCCAGATCCAACAGCAATAGTTCTAGC-----  
-----  
-----ACAATAACAACAGCACTGATAGATTGTATGAGGATATGAGA---  
AACTGCTCTTTCAACATGACCACAGAACTAAGA-----  
GATAAAGGAAAAATGTATATTCACTT---TTTTATAAACTTGATATAGTAGCAATTGATAGTGAG-----  
-----  
-----  
AATAGTAGTCAGTATAGACTAATAAATTGTAATACATCAGCCATGACACAG---  
GCCTGTCCTAAGGTAACTTTGAGCCAATTCCTATACATTATTGTGCCCCAGCTGGTTTTGCGATTCTAAAGT  
GCAAT---GATCCAAGTTTACT-----GGAAAAGGGCCATGCAAGAAT-----  
-GTCAGC---ACAGTACAATGCACACATGGAATCAAGCCAGTAGTTTCAACT---  
CAACTGCTGTAAATGGCAGTCTAGCAGAAGACGAG-----  
ATAATGATTAGATCTGAAAATATCACAGACAAT-----AGCAAAAACATAATAGTACAGCTTAAT----  
-----GAGTCTGTAAAGC-----ATCACTTGTGTGACAGCCTGGCAACAATACAAGAACA-----  
-AGTATACGTATA-----GGACCAGGACAAACC---TTC-----TATGGAACAGGTGAT-----  
-----GTAATAGGGGACATA-----AGAAAAGCATATTGT---AATGTCAACGGAACA---  
GCATGGGATAGCACTTTACAAAAGATAAGAATACAATTGAGA-----AAGTACTTTGGT-----  
-----AACAGAACAATAAATTTTAGA-----  
AACTCCTCAGGAGGGGATTTAGAAAGTTAGA--ACACATAGTTTCAATTGTGGAGGAGAA--  
TTTAAACAGCTCCAGGCAAGAGTCCTGGCTATAGAAAAGATACCTAAAGGATCAGCAGCTCCTAGGAATTTGGG  
GATGCTCTGGAAACTCATCTGCACCACTAATGTGCCCTTGGAACTCTAGTTGGAGT-----  
-----AATAAATCTCTGAATGACATATGG-----GAT-----

AACATGACCTGGATGCAATGG---GACAAGGAAGTTTTCAATTACACAAACATAATATAT---  
GAGCTAATTGAAGAATCGCAAACACAGCAGGAA-----  
-----  
AAGAATGAACAAGATTTATTGGCATTAGATAAGTGGGCAGGCCTGTGGAATTGGTTTGACATAACAAATTGGT  
TATGGTATATAAAAAATATTTATAATGATAGTAGGAGGCTTAATAGGATTAAGAATAGTTTTTTGCT---  
GTACTTTCTATAATA-----AATAGAGTCAGGCAGGGATACTCACCC-----  
TTATCATTTGCTATTAATCTGTAGATACCATAGCAATAGCAGTAGCTGGG---  
GGAACAGATAGGATTATAGAAACAGTACAGAGAATTTGTAGAGCT-----  
-----ATTTGTAACATA-----CCTAGAAGAATTAGACAGGGAGCAGAAAAGGCTTTGCAA---TAA  
>KU749405  
GCT---ACA-----  
GAAAACTTGTGGGTCACGGTATATTATGGGGTACCTGTGTGG---AGAGAAGCAGAG---  
ACCACCCTATTTTGTGCATCAGATGCTAAAGCATATGAGAAAGAA---GTGCACAA-----  
-----GTCTGGGCTACA---CATGCCTGTGTACCCACAGAC---  
CCTAACCCACAAGAACTGGCTTTGGAA-----AATGTGACAGAAAATTTTAAT-----  
-----ATGTGGAAAAATAACATGGTAGAACAAATGC AACAGATGTG---  
ATCAGTCTCTGGGACCAAAGCCTA---AAGCCATGTGTACAGTTA---  
ACCCCTCTCTGCGTTACTTTAAATTGTACTGCACCCAGGTTAGATTGTATTAACAGCACC-----  
-----  
-----AGCCACTACACCCACGATAGCTTGTATGAAGAAGTGAGA---  
AACTGCTCTTATAACATGACCACAGAATTAAGG-----  
GATAAAAGGAAAAAGGTATATTCTCTT---TTTTATAAACTTGATATAATACCAACTGATAAT-----  
-----  
-----  
AATACTAATAGTGATAGTAGACAGTATAGACTAATAAAATTGTAATCATCAACTGTGACACAG---  
GCCTGTCCTAAGGTATCCTTTGAGCCAATTCCTATACATTATTGTGCCCCAGCTGGTTTTGCGATTCTAAAGT  
GCAGG---GATCCAAAGTTTAAT-----GGAACAGGGCCATGCAAGAAT-----  
-GTCAGC---ACAGTACAATGCACACATGGAATCAAGCCAGTAGTATCAACT---  
CAACTGCTGTAAATGGCAGTCTAGCAGAGGGGGAG-----  
GTAATGGTTAGATCTGAAAATTTACAGACAAT-----GCCAAGGTCATAATAGTACAGCTTAAG---  
-----GACCCTGTAAAC-----ATCACTTGTATCAGACCTAACACAATACAAGGAAA-----  
-AGTATACCTATG-----GGACCAGGACGAGCC---TTC-----TATGCAACAGGTGAG-----  
-----GTAATAGGGGACATA-----AGAAAAGCATATTGT---TTTGTCAATAAAACA---  
AAATGGAATAACACTTTAGAACAGATAAGTATAAAATTAAGA-----GAACAATTTCTCT---  
-----GACAAAACAATAGTCTTTAGG-----  
AACTCCTCAGGAGGGGATGTAGAAATTACA--ACACATAGTTTCAATTGTGGAGGAGAA---  
TTTAAACAGCTCCAGGCAAGAGTCCCTGGCTGTGGAAAGATATCTAAAGGATCAGCAGGTCCTAGGAATTTGGG  
GCTGCTCTGGA AA ACTCATCTGCACCACTAATGTGCCTTGGA ACTCTAGCTGGAGT-----  
-----AATAGATCTCTAAATGAGATATGG-----GAA-----  
AACATGACCTGGATGCAATGG---GACAAGGAAGTTAACAATTACACACAAATAATATAT---  
GAGCTAATTCAAGAATCGCAAATCCAGCAGGAA-----  
-----  
AAGAATGAACAAGATTTATTGGCATTGGATAAGTGGGCAAGTCTGTGGAATTGGTTTAACATATCAAATTGGT  
TATGGTATATAAAAAATATTTATAATGATAGTAGGAGGCTTAATAGGATTAAGAATAATTTTTTGCT---  
GTGCTTTCTATAATA-----AATAGAGTCAGGCAGGGATACTCACCC-----  
TTGTCAATTGGCTATTAATCTGATAGATACCATAGCAATAGCAGTAGCTGAG---  
TGGACAGATAGGGTTATAGAAATAGGACAAAGAATTGGTAGAGCT-----  
-----ATTTGCAACATA-----CCTAGGAGAATCAGACAGGGAGCAGAAAAGCTTTGCAA---TAA  
>KY658682  
GCT---GCA-----  
AACTTGTGGGTCACAGTATACTATGGGGTACCTGTGTGG---AGAGATGCAGAG---  
ACCACCCTATTTTGTGCCTCAGATGCCAAGGCTTATGATAAAGAA---GTACACAA-----  
-----GTCTGGGCTACA---CATGCCTGTGTACCCACAGAC---  
CCTAACCCACAAGAAATAATTTTAGAA-----AATGTGACAGAAAATTTTAAT-----  
-----ATGTGGAAAAATAACATGGTAGAACAAATGCACACAGATATA---  
ATCAGTCTCTGGGACCAAAGTCTA---AAGCCATGTGTACA ACTA---  
ACCCCTCTCTGTGTTACTTTAAATTGTACTGAACCCACTATCGACAGTAACAATAACAGCACT-----  
-----  
-----AACACCAGCTAYAATAGAAAGATTGAAGAAATGAGA---  
AACTGCTCTTTCAACATAACCACAGA ACTAAAT-----

GATAAACAGAAAAAAGTACATTCAC TT--TTT TATAAACTTGATATAGTACCAACTGATAAT-----  
-----  
-----  
GGTAGTAGTCAGTATAGACTAATAAATTGTAATACATCAACCATGACACAG---  
GCCTGTCCTAAGGTATCCTTTGAGCCAATTCCTATATATTATTGTACCCCAGCTGGTTTTGC GATTATAAAAT  
GCAAT---GATGCAAATTTTACA-----GGAATAGGGCCATGCAGGAAT-----  
-GTCAGC---ACAGTACAATGTACACATGGAATCAAGCCAGTAGTATCAACT---  
CAATTGCTGT TAAATGGTAGTCTAGCTGAGAAAGAG-----  
ATAATGATTAGATCTGAGAATATCACAGACAAT-----ACTAAAAACATAATAGTACAGCTTACT----  
-----AAGGCTGTAAAC-----ATCACTTGCTCCAGACCTGGCAACAATACAAGAACA-----  
-AGTATACCTATA-----GGACCAGGACGAGCC---TGG-----TTTGCAACAGGTGAT-----  
-----GTAACAGGGGATCCA-----AGGAAAGCACATTGT---AATGTCAGCAAAGCA---  
GATTGGACTAGCACTTTAAAAAATATAAGTATACAATTAAGA-----AAACACTTT-----  
-----AACAAAACAATAATCTTTTCAG-----  
AATTCCCTCAGGAGGGGATTTAGAA GTTACA--ACACATAGTTTCAATTGTGGGGGAGAA---  
TTTAAACAGCTCCAGGCAAGAGTCCTGGCTGTGGAAAGATACCTAAGAGATCAGCAACTCCTAGGAATTTGGG  
GTTGCTCTGGA AA ACTCATCTGCACCACTACTGTGCCCTGGA ACTCTAGTTGGAGT-----  
-----AATAGATCTCAGGATGATATATGG-----AAT-----  
AACATGACCTGGATGCAATGG---GACAGGGAAGTTAGCAATTACACAGAATTAATATAT---  
AAGCTAATTGAAGAATCGCAAAACCAGCAGGAA-----  
-----  
AAGAATGAACAAGATTTATTGGCATTGGATGAGTGGGCAAGTCTGTGGAATTGGTTTAAATAACACAGTGGT  
TATGGTATATAAAAATATTTATAATGATAGTAGGAGGCTTAATAGGATTAAGGATAGTTTTTTGCT---  
GTGCTTTCTATAGTA-----AATAGAGTCAGGCAGGGATACTCACCC-----  
TTGTCAATTGGCTATAAGTCTGATAGATACCATAGCAATAGTAGTAGCTGGG---  
TGGACAGATAGGGTTTTAGAACTAGGACAGAGAATTTGTAGAGCT-----  
-----ATTTGTAACATA-----CCTAGGAGAATCAGACAGGGCGCAGAAAGAGCTTTGCAA---TAA  
>KU749407  
GCT---GCA-----  
GAAAAACAGTGGGTCACAGTATACTATGGGGTACCTGTGTGG--AGAGATGCAGAG---  
ACCACCC TATTTTGTGCATCAGATGCTAAAGGAGTGGAAAAAGAA--GTACACAAT-----  
-----GTCTGGGCTACA---CATGCCTGTGTACCCACAGAC---  
CCTGACCCACAAGAAATAAATTTGAAA-----AATATGACAGAAGAGTTTAA C-----  
-----ATGTGGAAAAATAACATGGTAGAACA AATGCAAACAGATATA---  
ATCAGTCTCTGGGACCAAAGCCTA--AAGCCATGTGTACAGTTA---  
ACCCCTCTCTGCGTTACTTTAAATTGTACTGCACCCAAAAACAACAGCAATGATAACTTCATT-----  
-----  
-----GGAGAAATGAAA---  
AACTGCTCTTTCAACATGACCACAGAAGTAAGA-----  
GATAAAAGGAAAATTGTACATTCAC TT--TTT TATAAGCTTGATATAGTATCAATTGGTAATAACAAA---  
-----  
-----  
AATGATAATAGTAACTATAGTGAGTATAGACTAATAAATTGTAATCAAACAACCATGACACAG---  
GCCTGTCCTAAGGTAACATTTGAGCCAATTCCTATACATTATTGTGCCCCAGCTGGTTTTGC GATTCTAAAT  
GCAGG---GATGCAAATTTTACT-----GGAAAAGGGCAATGCAATAAT-----  
-GTCAGC---ACAGTACAATGCACACATGGAATCAAGCCAGTAGTGTCAACT---  
CAACTGCTGT TAAATGGTAGTCTAGCAGAGAAAAAG-----  
GTAATGATTAGATCTGAAAATATCACAGACAAT-----AGCAAAACCATAATAGTACAGCTTACT----  
-----GAGCCTGTAAAC-----ATCACTTG TATCAGACCTGGCAACAATACAAGAAAA-----  
-AGAATACATATA-----GGACCAGGACGAGCC---TTC-----ATTGCAACAGGTGCT-----  
-----GTACTAGGGGACCCA-----AGAAAAGCATATTGT---AATGTCAGCAAAACA---  
GCATGGAATAGCACTTTACAAAAGATAAGTATACAATTAAGA-----CAATACTTTGAA-----  
-----AACAGAACAATAAYCTTTAAG-----  
AACTCCTCAGGAGGGGATTTAGAA GTTGCA--ACACATAGTTTCAATTGTGGAGGAGAA---  
TTTAAACAGCTCCAGGCAAGAGTCCTGGCTGTGGAAAGATACCTAAGGGATCAGCAGCTCCTAGGAATTTGGG  
GTTGCTCTGGA AA ACTCATCTGCACCACTAATGTGCCCTGGA ACTCTAGTTGGAGT-----  
-----AATAAATCCTTGAGTGAGATATGG-----GAT-----  
AACATGACCTGGATGCAATGG---GATAAGGAAGTTGCCAATTACACAAACATAATATAT---  
AATCTAATTGAAGAATCACAAAACCAGCAGGAA-----  
-----

AAGAATGAACAAGACTTGTGGCATTGGACAAGTGGGCAAGTCTGTGGAATTGGTTTGACATATCAAATTGGT  
TATGGTATATAAAAAATATTTATAATGATAGTAGGAGGCTTAATAGGATTAAGAATAGTTTTTTGCT---  
GTGCTTTCTATAATA-----AATAGAGTCAGGCAGGGATACTCACCC-----  
GTGTCTGTTGGCTATTAATCTGCTAGATACCATAGCAATAGCAGTAGCTGGG---  
GGAACAGATAGGATTATAGAAATAGTACAGAGAATTGGTAGAGCT-----  
-----ATCTGGAACATA-----CCTAGGAGAATCAGACAGGGCGCAGAAAGGCTTTGCTA---TAA  
>AF082486

GCT---GCA-----  
GAAAACTTGTGGGTCACGGTATACTATGGGGTACCTGTGTGG---AGAGATGCAGAG---  
ACCACCTATTTTTGTGCATCAGATGCTAAAGCATATGATAAAGAA---GTACACAAT-----  
-----GTCTGGGCTACA---CATGCCTGTGTACCCACAGAC---  
CCTAACCCACAAGAAATAAGTTTGGAA-----AATGTGACAGAAAAATTTGAC-----  
-----ATGTGGAAAAATAACATGGTAGAACAAATGCAAACAGATATA---  
ATCAGTCTCTGGGACCAAAGCCTA---AAGCCATGTGTAAAAGTTA---  
ACCCCTCTCTGCGTTACTTTAAATTGTGCTGAACCCAAAAGCACTAGCTCTAACACAGTAGC-----  
-----  
-----GTTAACAGCAACAGCAGCGATAGCTTGTTTGAAGAAATGAAA---  
AACTGCTCTTTCAACATGACCACAGAATAAGA-----  
GATAAAAGGAAAAGTGTACATTCACCT---TTTTATAAACTTGATATAGTATCAACTGGTART-----  
-----  
-----

AATGGTAGTGGGCAGTATAGACTAATAAATTGTAATACATCAGCCATGACACAG---  
GCCTGTCCTAAGGTAACCTTTGAGCCAATTCCTATATATTATTGTGCCCCAGCTGGTTTTGCGATTCTAAAGT  
GCAAG---GATACAAATTTTACT-----GGAACAGGGCCATGCAAGAAT-----  
-GTCAGC---ACAGTACAATGCACACATGGAATCAAGCCAGTAGTATCAACT---  
CAACTGCTGTTAAATGGCAGTCTAGCAGAGAAAGAG-----  
GTAATGATTAGATCTGAAAATATCACAGACAAT-----AGCAAAATCATAATAGTACAGCTTACT----  
-----GAGCCTGTAAAC-----ATCACTTGTATCAGACCTGGCAACAATACAAGAACA-----  
-AGTATACGTATA-----GGACCAGGACAAACC---TTC-----TATGCAACAGGTGAT-----  
-----GTAATAGGGGACATA-----AGAAAAGCATATTGT---AATGTCAGCAGAGCA---  
GCATGGAATAGCACTTTACAAAAGATAAGTACACAATTAAGA-----AGATACTTTAAT-----  
-----AACAAAACAATAATCTTTAAG-----  
AACTCCCCAGGAGGGGATTTAGAAAGTTACA--ACACATAGTTTCAATTGTGGAGGAGAA---  
TTTAAACAGCTCCAGGCAAGAGTCCCTGGCTGTGGAAAGATACCTAAAGGATCAGCAGCTCCTAGGAATTTGGG  
GTTGCTCTGGAAGAACTCATCTGCACCACTAATGTGCCCTGGAACCTAATTGGAGT-----  
-----AATAAATCTCAGAGTGAGATATGG-----GAT-----  
AACATGACCTGGATGCAATGG---GACAGGGAAGTTATCTATTACACAGACATAATATAT---  
GATCTAATTGAGAAATCGCAAAACCCGCAGGAA-----  
-----

AAGAATGAACAAGATTTATTGGCCTTGGATAAGTGGGCAAGTCTGTGGAGTTGGTTTGACATATCAAATTGGT  
TATGGTATATAAAAAATATTTATAAATAGTAGGAGGCTTAATAGGATTAAGAATAGTTTTTTGCT---  
GTGCTTTCTATAATA-----AATAGAGCCAGGCAGGGATACTCACCC-----  
TTGTCAATTGGCTATTAATCTGATAGATACCATAGCAATAGCAGTAGCTGGG---  
TGGACAGATAGGGTTATAGAAATAGGACAAAGATTTGTAGAGCT-----  
-----ATTCTGTAACATA-----CCTARGAGAATCAGACAGGGCGCAGAAAAGGCTTTGCAA---TAA  
>KY968402

GCT---ACA-----  
GAAAAATTGTGGGTCACAGTCTATTATGGGGTACCTGTGTGG---AAAGAAACAACA---  
ACCACTCTATTTTGTGCATCAAATGCTAAAGCATATGCTACAGAG---GTACATAAT-----  
-----GTTTGGGCCACA---CATGCCTGTGTACCCACAGAC---  
CCCGACCCACAAGAACTAGTGTTATCA-----AATGTGACAGAAAAATTTGAC-----  
-----ATGTGGAAAAATAACATGGTAGAACAGATGCATGAGGATATA---  
ATCAGTTTATGGGATCAAAGCCTA---AAACCATGTGTAAAATTA---  
ACCCCACTCTGTGTTACTTTAAATTGCACTGCATTGAAGACCAATAGTACTACTAGTGATAGTACC-----  
-----  
-----AGTAATGGTACCGTTAGCCCAGCAAGAGAAGAAATGACA---  
AACTGCTCTTTCAATGTCAACCACAAACATAAGA-----  
AATAAGATACAGAAAGAATATGCACTT---TTTGATAAACTTGATGTAGTTCCAACACAGGAT-----  
-----  
-----

AATAATAACAGCTATATTTTGGAGAAATGGTAATGCCTCAGTCCTTACACAG---  
GCCTGTCAAAGGTATCCTTTGAGCCAATTCCCATACATTACTGTACCCCAGCTGGTTTTGCACCTTCTAAAAT  
GTAAC---GATAAAAAGTTCAAT-----GGAACAGGATTATGTACAAAT-----  
-GTCAGC---ACAGTACAATGTACACATGGAATTAAGCCAGTAGTATCAACT---  
CAACTGCTGTTAAATGGCAGTCTAGCAGAAGAAGAG-----  
GTAGTAATTAGATCTCAGAATTTTCAGTGACAAT-----GCTAAAATCATAATAGTACAACCTGAAT----  
-----GAATCTGTAGTA-----ATTAATTGTACAAGACCCAACAACAATACAAGAAGA-----  
-GGTATACATATG-----GGACCAGGAGGAGTA---TTT-----TATGCAACAGGAGAC-----  
-----ATAATAGGAGATATA-----AGACAAGCACATTGT---AACATTAGTAGCAAA---  
GAATGGAATAAAACCTTAGGACAGATAGCTAAAAAATTAAGA-----GAACAATTTGGG----  
-----AATAAAACAATAGCCTTTAAT-----  
CAATCCTCAGGAGGGGACCCAGAAATTGTA--ATGCACAGTTTTAATTGTGGAGGAGAA--  
TTTAAACAGCTCCAGGCAAGAGTCCTGGCTGTGGAAAGATACCTAAAGGATCAACAGCTCCTAGGGATTTGGG  
GTTGCTCTGGAAACTCATCTGCACCACTACTGTGCCTTGGAAATACTAGCTGGAGT-----  
-----AATAAATCTCTGGGTGACATTTGG-----GAT-----  
AACATGACCTGGATGGAGTGG---GAAAGACAGATTGAAAATTACACAGATTTAATATAC---  
ACCTTACTTGAAGATTCACAGAGACAACAAGAA-----  
-----  
CAGAAATGAAGTAGAATTATTAATAATTAGATACGTGGGACAGTCTGTGGAGTTGGTTTAGCATATCAAATTGGC  
TGGGGTACATAAGAATATTTCATAATAGTAGTAGGAGGCTTGATAGGCTTAAGAATAATTTTTTGCT---  
GTATTTTCTATAGTG-----AATAGAGTTAGGCAGGGATACTCACCA-----TTATCATTT-----  
TGTCTTGTTCAATGCTATAGCCATAGCAGTAGCAGGG-----ACAGAG---  
ATTATAGAAATAGTACAAAGAACTTTA--GCT-----  
ATTCTCAACATA-----CCA---AGAATAAGACAGGGCTTGGAAGGGCTTTTGCTA---TA-  
>KY968404  
ACT---GGA-----  
GAACCATTTGTGGGTCACAGTCTATTATGGGGTACCTGTGTGG--AGAGAAGCAACT---  
ACCACCCATTTTTGTGCATCAGATGCTAAAGCATATGATACAGAG--GTACACAAT-----  
-----GTTTGGGCCACA---CATGCCTGTGTACCCACAGAC---  
CCCAACCCACAAGAAATAATATTGGCA-----AATGTGACAGAAGAATTTAAC-----  
-----ATGTGGAAAAATAACATGGTGGAACAGATGCAAGAGGATATA---  
ATCAGTCTATGGGATCAAAGTCTA--AAGCCATGTGTAAAATTA--  
ACCCCACTCTGTGTTACTTTAAATTGTAGTGTATGCTAATGTTACTAGGGCCACTAATATT-----  
-----AGCTGGGGGGAAGCGATAGGGAAAGGAGAAATAAAA---  
AACTGCTCTTTCAATGTCACCACAAACATGAGA-----  
GATAAGGTGAAAAAAGCATATGCAAAT--TTTTATAATCTTGATATAGTACAAATAGATAAT-----  
-----  
GATAATACCAGCTATATATTAAGAAGTTGTAATACCTCAGTCATTACACAG---  
GCCTGTCCAAAGATAACCTTTGAGCCAATTCCCATACATTATTGTGCCCCGGCTGGATATGCGATTCTAAAGT  
GTAGA---GATAAGAAGTTTAAT-----GGAACAGGAACATGTAGAAAT-----  
-GTCAGC---TCAGTACAATGTACACATGGAATTAGGCCAGTAGTATCAACT---  
CAACTGTTGTTAAATGGCAGTCTAGCAGAAGAAGAG-----  
GTAATAATTAGATCTGAGAATTTTCAGTAACAAT-----GCTAAAACCATAATAGTACAGCTAAAC----  
-----GATCCTGTAGTA-----ATTAATTGTACAAGACCCARCAACAATACAAGAAGA-----  
-AGTATACCTATA-----GGACCAGGAAGAGCA---TTT-----TATGCAACAGGAGAC-----  
-----ATAATAGGAGATATA-----AGACAAGCACATTGT---AATGTTAGTAGAACA---  
AAATGGAATGAGACTTTAGAAAAGATAGTTAAAAAATTACAA-----GAAATAGAATTTAAG----  
-----AATAAAACAATAGTATTTAAT-----  
CACTCCACAGGAGGGGACCCAGAAATTGTA--ATGCACAGTGTTAATTGTGGAGGAGAA--  
TTTAAGCAGCTCCAGGCAAGAGTCCTGGCTATAGAAAGATACCTAAAGGATCAACAGCTCCTGGGAATTTGGG  
GTTGCTCTGGAAACTTATTTGCACCACTACTGTGCCTTGGAAATACTAGTTGGAGT-----  
-----AATAAATCTCTAAATCAGATTTGG-----GAT-----  
AACATGACCTGGATGCAGTGG---GATAAAGAAATTAACAATTACACAACCTTAATATAC---  
ACTTTGATTGAAGAATCGCAGATCCAGCAAGAA-----  
-----  
AAGAATGAACAAGAATTATTAATAATTGGATAGTTGGGCAAGTTTGTGGAATTGGTTTGACATATCAAAGTGGC  
TGTGGTATATAAAGATATTTCATAATGATAGTAGGAGGCTTAGTAGGTTTAAGAATAATTTTTTACT---  
GTACTTTCTATAGTA-----AATAGAGTTAGGCAGGGATACTCACCA-----

TTATCGTTGGCTGTTAGCTTGTTTGATACTATAGCCATAGCAGTAGCTGAG---  
 GGGACAGATAGGATTATAGAAGTAGGACAAAGAGCTTGTAGAGCT-----  
 -----ATTATCCACATA-----CCA---AGAATAAGAC-----ACT---TAA  
 >KY968408  
 GCT---ACA-----  
 GAAAAATTTGTGGGTCACAGTCTATTATGGGGTACCTGTGTGG--AAAGAAGCAACC---  
 ACCACTCTATTTTGTGCATCAGATGCTAAAGCAGTTGACAAAGAG--GTACATAAT-----  
 -----GTTTGGGCCACA---CATGCCTGTGTACCCACAGAC---  
 CCTAATCCACAAGAATTAGTATTGGAA-----AATGTGACAGAAAATTTTAAC-----  
 -----ATGTGGAAAAATGACATGGTAGAACAGATGCATGAGGATATA---  
 ATCAGCTTATGGGATCAAAGCTTA--AAGCCATGTGTAAAATTA---  
 ACCCCACTCTGTGTTATGTTAAATTGCACTGATTATACTAATAACAGCACTAATAGCACTAAT-----  
 -----  
 -----TTGGAACAGATGAAGGGAGAAATAAAA---  
 AACTGCTCTTTTAATATCACCACAAACATAAAA-----  
 AATAAGATACAAAAGAATATGCACCT--ATGTATAAACTTGATTTAATGCCAATAAGTAAT-----  
 -----  
 -----  
 GATAATACAAGCTATACATTAATAAACTGTAACACCTCAGTCATTACACAG---  
 GCCTGTCCAAAGGTATCCTTTGAACCAATTCCCATACATTATTGTGCCCCGGCTGGTTTTGCGATTCTAAAAT  
 GTAAT---GATAAGAAGTTCAAT-----GGAACAGGACCATGTACAAAT-----  
 -GTCAGC---ACAGTACAATGCACACATGGAATTAGGCCAGTAGTGTCAACT---  
 CAACTGCTGTTAAATGGCAGCCTAGCAGAGGGAGAA-----  
 ATAGTAATTAGATCTGAAAATTTACGAACAAT-----GTCAAAACCATAATAGTACAGCTGAAC---  
 -----GAATCCATAGCA-----ATTAATTGTACAAGACCCAACAACAATACAAGAAAA---  
 -GGTATACATATA-----GCATGGGGAAGAACA---TTT-----TATGCAACAGGAGAA-----  
 -----ATAATAGGAGATATA-----AGACAAGCACATTGT--AATCTTAGTGGAGCA---  
 GAATGGGAAAAGACTTTAGAACGGGTAGCTAAAAAATTAAGA-----GAACAATTTAAT---  
 -----AATAAAACAATAGTCTTTAAT-----  
 CAATCCTCAGGAGGGGACCCAGAAATTGTA--ATGCACAGTTTCAATTGTGGAGGGGAA---  
 TTTAAGCAGCTCCAGGCAAGAGTCCCTGGCCGTGGAAAGATACCTAAAGGATCAACAGCTCCTAGGGATTTGGG  
 GTTGCTCTGGAAGAACTCATTTGCACCACTGCTGTGCCTTGGAAATATTAGTTGGAGT-----  
 -----AATAAATCTCAGGATGACATTTGG-----AAC-----  
 AACCTGACCTGGATGCAGTGG--GAGAAAGAAATTGACAATTACACAGGCTTAATATAC---  
 ACCTTACTTGAAGAATCGCAGAACCAACAAGAA-----  
 -----  
 AAAAAAGAACTAGAATTATTGGAATTGGATAAGTGGGCAAGTTTGTGGAATTGGTTTGACATATCAAAGTGGC  
 TGTGGTATATAAAATTATTATAATGATAGTAGGAGGCTTAGTAGGTTTAAGGATAGTTTTTGCT--  
 GTACTTTCTATAGTG-----AATAGAGTTAGGCAGGGATACTACCA-----TTATCATTT-----  
 TGTTTTGCTCAACGCTATAGCCATAGCAGTAGCGGGG-----ACAGAG---  
 GTTATAGAATTAGTACAAAGACTTTGA--GGT-----  
 ATTCTCCACATA-----CCA---AGAATAAGACAGGGATTAGAAAGGGCTTTGCTA---TA-  
 >DQ383749  
 GCT---GGA-----  
 GAACAATTGTGGGTTACAGTCTATTATGGGGTACCTGTGTGG--AAAGAAGCAACC---  
 ACCACTCTATTTTGTGCATCAGATGCTAAAGGATATGATACAGAA--GCACATAAT-----  
 -----GTTTGGGCCACA---CATGCCTGTGTACCCACAGAC---  
 CCCAACCACACAAGAAATAGTATTGGGA-----AATGTGACAGAAAATTTTAAT-----  
 -----ATGTGGAAAAACAACATGGTAGAACAGATGCATGAGGATATA---  
 ATCAGTTTATGGGAGGAAAGCCTA--AAGCCATGTGTAAAATTA---  
 ACCCCACTCTGTGTTACTTTACATTGCACTGATGTGAATGATACTAAGGCCAATAGTAATACT-----  
 -----  
 -----ACTGGGAGTAGCTGGGACATGCCGGGGGGAGGAGAAATGACA---  
 AATTGCTCTTTCAATATCACCTCAAGCATAAGA-----  
 GATAAGTGGCAGAAAGAATATGCACCT--TTTTATAGACTTGATGTAGTACCAATAGATAATAAT-----  
 -----  
 -----  
 AATAATAGTGATAATACCAGCTATAGGTTGATAAGTTGTAATACCTCAGTCGTTACACAA---  
 GCCTGTCCTAAGACATCTTTTGAGCCAATTCCCATACATTATTGTGCCCCGGCTGGTTTTGCAATTCTAAAGT  
 GTAAT---GATAAAAAGTTCAAT-----GGAACAGGACCATGTACAAAT-----

-GTCAGC---ACAGTACAGTGTACACATGGAATCAGGCCAGTAGTATCAACC---  
CAACTGCTGTTAAATGGCAGTCTAGCAGAAGAAGAG-----  
ATAGTAATTAGGTCTGAAAATTTCAAAACAAT-----GCTAAAACCATAATAGTACAGCTGAAC----  
-----ACATCTGTAGAA-----ATAAATTGTACAAGACCCAACAACAACACAAGAAAG-----  
-AGTATACATATA-----GGACCAGGGAGATCA---TTA-----TATACAACA---GAA-----  
-----ATAATAGGAAATATA-----AGAAAGGCATATTGT---ATCATTAATAGCACA---  
AAATGGAATAATACTTTACAACAGATAAGTATAAAACTAAGA-----GAACAATTTAAG----  
-----AATAAAACAATAGTCTTTAAT-----  
CAATCCTCAGGAGGGGACCCAGAAATTATG---ATGCTCACCCCTTAATTGTGGAGGGGAA---  
TTTAAACAGCTCCAGGCAAGAGTCTGGCTGTGGAAAGATACCTATGTGATCAACAGCTCCTAGGGATTTGGG  
GTTGCTCTGGAAGAACTCATCTGCCCACTACTGTGCCTTGAATACTAGTTGGAGT-----  
-----AATAAATCTCTGGATAAGATTTGG-----AAT-----  
AACATGACATGGATGGAGTGG---GAGAGGGAAATTGACAAATTACACGAACATAATATAC---  
TCCTTACTTGAACAATCACAAATCCAACAAGAA-----  
-----  
ACGAATGAAAAAGAATTATTAGAAATTAGATAAAATGGGCAAGTTTGTGGAATTGGTTTAGCATAACAAATTGGC  
TATGGTATATAAAAATATTTCATAATGATAGTAGGAGGCTTGATAGGTTTAAGAATAGTTTTTTACT---  
GTACTTTCTATAGTG-----AATAGGGTTAGGCAGGGATACTCACCA-----  
TTATCGTTTGTCTGTTAGCTTGCTCAACGCCACAGCCATAGCAGTAGCTGAG---  
GGGACAGATAGGGTTATAGAAGTAGTGCAAAGAACTTATAGAGCT-----  
-----ATTCTCCACATA-----CCTACAAGAATAAGACAGGGCTTGGAAGGGCTTTACTA---TAA  
>MH078532  
GCT---ACA-----  
AAAGACTTGTGGGTCACAGTCTATTATGGGGTACCTGTGTGG---AAAGAAGCAACC---  
ACCACTCTATTTTGTGCATCAGATGCTAAAGCATATGACCCAGAA---GCACATAAT-----  
-----GTTTGGGCCACA---CATGCTTGTGTACCCACAGAC---  
CCTAACCACACAAGAAGTAAAATTGGAA-----AATGTGACAGAAAGTTTAAAC-----  
-----ATGTGGAATAAAATGGTAGAACAAATGCATGAGGATATA---  
ATCAGTTTATGGGATCAAAGCCTA---AAACCATGTGTAAAATTA---  
ACCCCACTCTGTGTTACGTTAAGATGCAGTAATGTCACTGATACCAATGCCACTAATACCAATACCACT---  
-----  
-----AATACCAATGTTACTAGGGGGATGAGGGAAGAAATGCAA---  
AACTGCTCTTTCAATGTCTCAGAAGGCATAAAA-----  
GATAAGATAAGGAAAGAATATGCACTC---TTTTATAAAATGGATCTAGTATCAATAGATAGT-----  
-----  
-----  
AATAGTAGTAGTGCAAAGGATAGTACAGATTATATGTTGATAAATTGTAATACCTCAGTCATTACCCAG---  
GCTTGTCCAAAGACAACCTTCGAACCAATTCCCATACATTATTGTGCCCAGCTGGTTTTGCGATTCTAAAGT  
GTACA---GATAAGAAATTCAAT-----GGAACAGGACCATGTAAAAAT-----  
-GTTAGC---ACAGTACAGTGTACACATGGAATTAGGCCAGTAGTGTCAACT---  
CATTTGTTGTTAAATGGCAGTTTAGCAGAAGAAGAG-----  
ATAGTAATTAGATCTGAAAATATCACAAACAAT-----GCTAAAACATAATAATACAGCTGAAG---  
-----GAAACTGTAAAA-----ATCACTTGTATAAGACCCGGCAACAATAACAAGGAAA---  
-AGTATAAGTTTT-----GGACCTGGGAGTACA---TGG-----TATGCAACAGGAGAC---  
-----ATAATAGGAGATATC-----AGAAAAGCATATTGT---GACATCAATGGGACA---  
GAATGGAATAATACATTAAGACAAATAGTTACAAAATTAAGA-----GAACAACACTTTAAT---  
-----AATAAAACAATAATCTTTGAA---  
CAACCTATGGCAGGAGGGGACCCAGAAATTACA---ATGCACACTTTTAATTGTGGAGGAGAA---  
TTTAAGCAGCTCCAGGCAAGACTCCTGGCTGTGGAAAGATACCTACGGGATCAACAGCTCCTAGGGATTTGGG  
GATGCTCGGGAAGAACTCATTTGCACCACTGCTGTGCCTTGAATGCTAGTTGGAGT-----  
-----AATAAATCTGTAGATTACATTTGG-----AAT-----  
AACATGACCTGGATGCAGTGG---GAGAAAAAAATTGACAACACTACACAGAATTTATATAC---  
ACCTTACTTGAAGGAATCGCAGAACCAACAAGAA-----  
-----  
AAAAATGAACAGGAATTATTGAAATTGGATAGTTGGGCAAATTTGTGGAGTTGGTTCAGCATATCAAATTGGC  
TGTGGTATATAAGAATATTTCATAATAATAATAGGAGGCTTAATAGGTTTAAGAATAATTTTTTACT---  
GTACTTTCTATAGTG-----AATAGAGTTAGGCAGGGATACTCACCA-----  
TTGTCAATTCGCTGTTAGTTTGTTTAATGCAATAGCTATAGCAGTAGCTGAG---  
GGGACAGATAGGATTATAGAAAATAGTACAAAGATTTTGTAGAGGT-----  
-----ATCCTTCACATA-----CCTACAAGAATAAGACAGGGCTTAGAAAGGGCTTTGCTA---TAA

>AF538307

GCA---GCA-----  
GAAAAATTATGGGTCACAGTCTATTATGGGGTACCTGTGTGG---AAGGAAGCAACC---  
ACCACTCTATTTTGTGCATCAGATGCTAAAGCATATGGTACAGAA---GTACATAAT-----  
-----GTTTGGGCCACA---CACGCCTGTGTACCCACAGAC---  
CCCAACCCACAAGAAGTAGAATTGAAA-----AATCTGACAGAAAACCTTTAAT-----  
-----ATGTGGAAAAATGACATGGGTAGAACAAATGCATGAGGATATA---  
ATCAGTTTATGGGATCAAAGTCTA---AAGCCATGTGTAAAATTA---  
ACCCCACTCTGTGTTACTTTAAATTGCACTGATGTCAATACTAATAACCACTACTAATGTCACCTGGTATT----  
-----  
-----AATAATAGTAGTGTCAAGTTAGAATTGGAGAAAGGAGAAATAAAA---  
AACTGCTCTTTCTACACCACCACAAGCATAACA-----  
GATAAGTATCAAAAAGTCTATGCGCTT---TTTTATAAACTTGATGTAGTGCCAATAGATGATAGT-----  
-----  
-----  
AATAACAATACTAATACTAGCTATAGGTTGATAAGCTGTAACACCTCAGTCATTACCCAG---  
GCCTGTCCAAAAGTATCCTTTGAGCCAATTCCCATACATTATTGTGCCCCGGCTGGTTTTGCGATTCTAAAAT  
GTAAT---GATAAAAAGTTCAAT-----GGAACAGGACCATGTAAAAAT-----  
-GTCAGC---ACAGTACAATGTACACATGGAATTAGGCCAGTAGTGTCAACT---  
CAACTGCTGTTAAATGGCAGCCTAGCAGAAGAAGAG-----  
GTAGTAATTAGATCTAGCAATTTCTCAGACAAT-----ACTAGAAACATAATAGTACAGCTGAAA---  
-----GACGCTGTAAAC-----ATTACTTGTATGAGGCCCAGCAACAATACAAGAAAA---  
-AGTATATCTATA-----GGACCAGGGAGAGCA---TTT-----GATGCAACAGGAGAA---  
-----ATAATAGGAGATATA-----AGACGAGCACACTGT---AACCTTAGTAGACAA---  
GATTGGAATAACACTTTAAACAGATACATAGCAAATTAAGG-----GAACAATTTGGG---  
-----AATAAAACAATAGTCTTTAAT-----  
CACTCCTCAGGAGGGGACCCAGAAATTGTA---ATGCACAGTTTTAATTGTGGAGGGGAA---  
TTTAAACAGCTCCAGGCAAGAGTCCTGGCTGTGGAAAGATACCTAAGGGATCAACAACCTCCTAGGGATTTGGG  
GTTGCTCTGGAAGAACTCATTTGCACCACTAATGTGCCTTGGAATGCTAGTTGGAGT-----  
-----AATAAATCTCTAAATGATATCTGG-----GAT-----  
AACATGACCTGGATGGAGTGG---GAAAGAGAAATTGACAATTACACAAATACCATATAC---  
ACCTTACTTGAAGAATCGCAAAACCAACAAGAA-----  
-----  
AAGAATGAACAAGAATCATTGGAATTAGATAAATGGGCAAGTTTGTGGAATTGGTTTGACATAACAACTGGC  
TGTGGTATATAAGAATATTCTAATGATAGTAGGAGGCTTGATAGGTTTAAGAATAGTTTTTTAGT---  
GTACTTTCTATAGTA-----AATAGAGTTAGGCAGGGATATTCACCA-----  
TTATCGTTTGTCTGTTAGCTTGCTCGACGCCATAGCCATAGCAGTAGCTGAG---  
GGGACAGATAGGGCTATAGAAATATTACAGAGAATCTTTAGAGCT-----  
-----ATTATCCACATA-----CCTACAAGAATAAGACAGGGCTTGGAAGGGCTTTGCTA---TAA  
>GU367404  
GCT---GCA-----  
GAAAAGTTGTGGGTCACAGTCTATTATGGGGTACCTGTGTGG---AAGGAAGCAAAAT---  
ACCACTCTATTTTGTGCATCAGATGCTAGAGCATATGATACAGAG---GTGCATAAT-----  
-----GTTTGGGCCACA---CATGCCTGTGTACCCACAGAC---  
CCCAACCCACAAGAAGTATTATTGGAA-----AATGTGACAGAAAACCTTTTAAC-----  
-----ATGTGGAAAAATAACATGGGTAGAACAGATGCATGAAGATATA---  
ATCAGTTTATGGGATCAAAGCCTA---AAGCCATGTGTAAAATTA---  
ACCCCACTCTGTGTTAGTTTAAATTGCACCGATTTGAAGAATGCCACTAAGGAG-----  
-----  
-----ATGAATACCACTAAGGAGACGATGGAAATGAAA---  
AACTGCTCTTTTAATATCAGCACAAGAATAAAA-----  
GCTAAGCTACAGGAAGAATATGCACCTT---TTTTACAACTTGATATAGTACCATTAGGTAAG-----  
-----  
-----  
GACAGTAATGATACCAGCTATAGGTTGAAACACTGTAATACCTCAGTCATTACACAG---  
GCCTGTCCAAAGGTATCCTTTGAGCCAATTCCCATACATTATTGTGCCCCGGCTGGTTTTGCGATTCTAAAGT  
GTAAG---GATAAGAAGTTCAAT-----GGAGAAGGACCATGTACAAAT-----  
-GTTAGT---ACAGTGCAATGTACACATGGAATTAGACCAGTAGTGTCAACT---  
CAACTGCTGTTAAATGGCAGTCTAGCAGAAGAAGAG-----  
ATAGTAATTAGATCTGACAATTTACCGGATAAT-----ACTAAAACCATAATAGTACAGCTGAAG---

-----GAACCTGTAGAA-----ATTAATTGTACAAGACACAACAACAATACAAGAAAA-----  
-AGTATATCTATG-----GGACCAGGGAAAGCA---TTT-----TATGCAACAGGAGAC-----  
-----ATAATAGGAAATATA-----AGAAAAGCAGATTGC---ATCATCAATGAAACA---  
AAATGGAATGACACTTTATACCAGATAGCTATGAAATTAAGA-----GCACAATTTAGG-----  
-----AATAAAACAATAGTCTTTAAT-----  
CGATCCTCAGGAGGGGACCCAGAAATTGTA--ATGCACAGTTTTTAATTGTGGAGGGGAA---  
TTTAAGCAGCTCCAGGCAAGACTCCTGGCTGTGGAAAGATACCTAAAGGATCAACAGCTCCTAGGGATTTGGG  
GTTGCTCTGGAAAACCTCATTTCACCACTGCTGTGCCTTGAATTCTAGTTGGAGT-----  
-----AATAAATCTCTGGATGAGATTTGG-----GAT-----  
AACATGACCTGGATGCAGTGG---GAAAAAGAAATTAGCAATTACACAAACTTAATATAC---  
ACCTTAATTGAAAAATCGCAGAACCAGCAAGAA-----  
-----  
AAGAATGAACAAGAATTATTGGAATTAGATAAGTGGGCAAGTTTGTGGAATTGGTTTGACATAACAAACTGGC  
TGTGGTATATAAAAATATTTCATAATGATAGTAGGAGGCTTGGTAGGTTTAAGAATAGTTTTTTGCT---  
GTACTTTCTATAGTG-----AATAGAGTTAGGCAGGGATACTCACCA-----  
TTGTCAATTTGCTGTTAGCTTGCTCAATGCCACAGCTATAGCAGTAGCTGAG---  
GGAACAGATAGGATTATAGAGGTAGTACAAAGAGTTTTTTAGAGTT-----  
-----ATTCTCCACATA-----CCTAGAAGAATAAGACAGGGCTTGGAAAAGAGTTTGCTA---TAA  
>AF146728  
GCA---ACA-----  
GAAAAATTGTGGGTCACAGTCTATTATGGGGTACCTGTGTGG---AAAGAAGCAACC---  
ACCACTCTATTTTGTGCATCAGATGCTAAAGCATATGATAAAGAG---GTACATAAT-----  
-----GTTTGGGCCACA---CATGCTTGTGTACCCACAGAC---  
CCCAACCCACAAGAAATATTACTAGAA-----AATGTGACAGAAGAGTTTAAC-----  
-----ATGTGAAAAATAACATGGTAGAACAGATGCATGAGGATATA---  
ATCAGTTTATGGGATCAAAGCCTA---AAGCCATGTGTACAATTA---  
ACCCCACTCTGTGTTACTTTAAATTGCACTGATGAGTTGACGAATGTTACTTTTACTAATAGTAGGCAT---  
-----  
-----GTGACTAATAGTAGTTATGTGGGAAGTATGGAAAAGGAGAAATGAAA---  
AACTGCTCTTTCAACATCACCAAGCATAAGA-----  
GATAAGAGGCACAAAGAATTTGCACTT---TTTTATAAACTTGATGTAGTACAAATAGATGGT-----  
-----  
-----  
AGTAATACTAGCTATAGATTAATAAATTGTAATACCTCAGTCATTACACAG---  
GCCTGTCCAAAGGTATCCTTTGAGCCAATTCCCATACATTATTGTGCCCCGGCTGGTTTTGCGATTCTAAAGT  
GTAAC---AATAAGACGTTCAAT-----GGAAAAGGACCATGTGCAAAT-----  
-ATCAGC---ACAGTACAATGTACACATGGAATTAGGCCAGTAGTGTCAACT---  
CAACTGTTGTAAATGGCAGTCTAGCAGAAAAAGAG-----  
ATAGTAATTAGATCTGACAATTTACGGACAAT-----GCTAAAAGCATAATAGTACAGCTGAAT---  
-----GAATCTGTAGAA-----ATTCATTGTATGAGACCAACAACAATACAAGAAAA-----  
-GGGATATATGTA-----GGACCAGGGAGACAC---ATC-----TATGCAACAGAGAAA-----  
-----ATAGTAGGAGATATA-----AGACAAGCACATTGT---AACATCAGTAGAACA---  
AACTGGACTAGCGTGCTAAGACAGATAGCTGTAAAATTAAGA-----GAACGATTTAAG---  
-----AATAAAACAATAGTCTTTAAT-----  
CACTCCTCTGGAGGGGACCCAGAAATTGTA---AGGCACAGTTTTTAATTGTGGAGGGGAA---  
TTTAAACAGCTCCAAGCAAGAATCCTGGCTGTGGAAAGATACCTAGAGGATCAACAGCTCCTAGGGATTTGGG  
GTTGCTCTGGAAAACCTCATTTCACCACTTCTGTGCCTTGAATGCTAGTTGGAGT-----  
-----AATAAATCTCTAAGTGACATTTGG-----GAT-----  
AACATGACCTGGATGCAGTGG---GAAAGAGAAATTGGCAATTACACAGGCTTAATATAT---  
CATTTACTTGAAGAATCGCAGAACCAACAAGAA-----  
-----  
AAGAATGAACAAGAATTATTGGCATTAGATAAGTGGGCAAGTTTGTGGAATTGGTTTAGCATAACAAATGGC  
TGTGGTATATAAAAATATTTCATAATGATAGTAGGAGGCTTAGTAGGTTTAAGAATAGTTTTTTGCT---  
GTACTTTCTCTAGTG-----AAGAAAGTTAGGGAGGGATACTCACCA-----  
TTGTCAATTGGCTATTAGCTTGCTCAACGCCACAGCTATAGCAGTAGCTGAG---  
GGAACAGATAGGGTTATAGAAAGTAGTACAAAGAGCTTGTAGAGCT-----  
-----ATTCTCCACATA-----CCTAGAAGAATCAGACAGGGCTTGGAAAGGCTTTTACTA---TAA  
>MN485974  
GCT---GCA-----  
GATCAAAGTGGGTCACAGTCTATTATGGGGTACCTGTGTGG---AAAGAAGCAAAAT---

ACCACTCTATTTTGTGCATCAGATGCTAAAGCATATGATACAGAG---GTACATAAT-----  
 -----GTTTGGGCCACA---CATGCCTGTGTACCCACAGAC---  
 CCCAGCCCACAAGAAGTAGCATTGGAA-----AATGTAACAGAGGATTTTAAAC-----  
 -----ATGTGGAAAAATAACATGGTAGAACAGATGCATGAAGATATG---  
 ATCAGTTTATGGGATCAAAGCCTA---AAGCCATGTGTAAAATTA---  
 ACCCCACTCTGTGTTACCTTAAAGTGCCTACGTATAAGAAATGCTACTAATACCACTCAGACTCCCACTGACA  
 GTCCT-----  
 -----AGAGAAGAAATAAAA---  
 AACTGCTCCTTCAATGTTAGCACAAAGTGTAAGA-----  
 GATAAGAGTAAGAGAGAACATGCACTT---TTCTATGACAGTGATATAGTACCAATAGATAAT-----  
 -----  
 -----  
 GCCACATATAGGTTGATACATTGTAATACCTCTATCATTACACAG---  
 GCCTGTCCAAAGGTATCATTTGAACCAATTCCCATACATTTCTGTGCCCCGGCTGGTTTTGCGATTCTAAAGT  
 GTAAA---GAGACAAAGTTTAAAT-----GGAACAGGACCATGTAAAAAT-----  
 -GTCAGC---ACAGTACAATGCACACATGGAATCAGACCAGTAGTGTCAACT---  
 CAACTACTGTTAAATGGCAGTCTAGCAGAAGAAGAG-----  
 ATAGTAATTAGATCTGCCAATTTACCGGACAAT-----AATAAAAACATAATAGTACAGTTGAAT----  
 -----GAAACTATAAAA-----ATTAATTGTRCAAGACCCAATAACAATACAAGGAAA-----  
 -AGTATACATATA-----GGACCAGGGAGAGCA---TTT-----TATGCAACAGGAGAA-----  
 -----ATAATAGGAAACATA-----AGACAAGCACATTGT---AACCTTAGTAGCACA---  
 CAGTGGAATAACACTTTAAAACAAATAGCTATAGAATTAAGG-----AACATATTTCCA---  
 -----AATAAAACAATAGTCTTTAAT-----  
 CATTCCTCAGGAGGAGACCCAGAAGTTGTG---ATGCACATTTTAAATTGTGGAGGGGAA---  
 TTTAAGCAGCTCCAGGCAAGAGTCCCTGGCTGTGGAGAGATACCTARTGGATCAACAGCTCCTAGGGATTTGGG  
 GTTGCTCTGGAAACTCATCTGCACCACTGCTGTACCTTGGAAATAATAGTTGGAGT-----  
 -----AATAGATCTCTAAATGACATTTGG-----GAT-----  
 AACATGACCTGGATGCAGTGG---GAAAAAGAAATTGACAATTACACAGGCTTAATATAC---  
 AAYTTACTTGAAGAATCGCAGAACCAACAAGAA-----  
 -----  
 AAGAATGAACAAGACTTATTGGCATTGGATAAGTGGGCAAGTTTGTGGAATTGGTTTRACATAACAAAMTGGC  
 TGTGGTATATAAAGATATTATAATGATAGTAGGAGGCTTRATAGGTTTAAGGATAGTTTTTTACT---  
 GTGCTCTCTATAGTG-----AATAGAGTTAGGAAGGGATACTACCA-----  
 YTATCGTTCTGCTATTAGCTTGCTCAACGCCACAGCCATAGCAGTAGCTGAG---  
 GGGACAGATAGAATTATAGAAGTAGTGCAAAGAACTGGTAGAGCT-----  
 -----ATCCGCCATATA-----CCTAGAAGAATAAGRCAGGGCCTCGAAAGGATTTTGCTA---TAA  
 >MN485990  
 GCT---CTA-----  
 GAAGAATCGTGGGTACAGTCTATTATGGAGTACCTGTGTGG---AAGGAAGCAACC---  
 ACCACTCTATTTTGTGCATCAGATGCTAAAGGGTATAAAACAGAG---GCACATAAT-----  
 -----ATTTGGGCCACG---CATGCCTGTGTACCCACAGAC---  
 CCCAATCCACAAGAAATAAAATTGGAA-----AATGTGACAGAAAATTTTAAAC-----  
 -----ATGTGGAAAAATAACATGGTAGACCAGATGCATGAGGACGTA---  
 ATCAGTTTATGGGATCAAAGCCTA---AAGCCATGTGTAAAATTA---  
 ACTCCACTCTGTGTTATTTTAAATTGCACTGAGTATGTGGGAAACAATRCSCRA-----  
 -----  
 -----GACAATGAMACTCCTAAGGAAGAAAAAGGAGAAATACAA---  
 AACTGCTCTTTTTTATACAAACCCAATAACACAA-----  
 GATAAGAAGCAGAAAGAATATGCACTT---  
 TTTTATAAACTTGATGTAGTACCAATAGATAAATAGTGCTGGAAATGAT-----  
 -----  
 AGTAATGATAGTAATATTACTAGCTATAGGTTGATAAGTTGTAATACCTCAGTCATTACACAA---  
 GCCTGTCCAAAGGTGTCTTTGAACCAATTCCCATACATTATTGTGCCCCAGCTGGTTTTGCGATTCTGAAGT  
 GTAAT---AATGAGATGTTCAAT-----GGAACAGGACCGTGTAACAAT-----  
 -GTCAGC---ACAGTACAATGTACACATGGAATTAACCAGTAGTATCAACT---  
 CAACTGCTGTTAAATGGCAGCCTAGCAAAA---GAA-----  
 GTAGTGATTAGATCTGAAAAATTTACAGACAAT-----GCTAAAACCATAATAGTGCAGCTAAAT----  
 -----GAATCTGTAGTA-----ATTAAGTGTACAAGACCCAGCAACAATACAAGAAGA-----  
 -AGTATACATATA-----GGACCAGGACAAAACA---TGG-----TATGCAACAGGAGCC-----  
 -----ATAATAGGAGATATA-----AGAAAAGCACATTGT---AACATTAGTAGAAAA---

AACTGGAATGACACTCTACAAAAGATAGTTACAAAATTAGGA-----GAACAATTTGGG----  
 -----AATAAGACAATAATCTTTAAA-----  
 AACTCCTCAGGAGGGGACCCAGAAATTGTA--ATGCACAGTTTTTAATTGTGGAGGGGAA---  
 TTTAAGCAGCTCCAGGCAAGAGTCCTGGCTGTGGAAAGATACCTAAGGGATCAACAGCTCCTAGGGATTTGGG  
 GTTGCTCTGGA-AACTCATCTGCACCACTACTGTGCCTTGAATACTAGTTGGAGT-----  
 -----AATAAATCTTTACAAGAAATTTGG-----AAT-----  
 AACATGACCTGGATGGAGTGG--GAAAGAGAAATTGAAAATTATACAGACTTAATATAC---  
 AACTTAATTGAAGGTGCACAGAACCAACAAGAA-----  
 -----  
 AAAAAATGAACAAGAATTATTGCAATTAGATAAGTGGGCAAGTTTGTGGAGTTGGTTTGACATAACAAATTGGC  
 TGTGGTATATAAAAATCTTCATAATGATAGTAGGAGGCTTGGTAGGTTTAAGAATAGTTTTTTACT---  
 ATACTTTCTCTAGTG-----AATAGAGTTAGGCAGGGTTACTCACCA-----  
 TTGTCAATTTGCTATTAGCTTGTTCAATGCTACAGCCATAACAGTAGCTGAA---  
 GGGACAGATAGGATTATAGAAGCAGCACAAGGAATTGGTAGAGCT-----  
 -----ATCCTCAACATA-----CCTAGAAGAATAAGACAAGGATTAGAAAGGCTTCTACAA---TAA  
 >MN485995  
 GCT---ACA-----  
 GGCAACTTGTGGGTACAGTCTATTATGGGGTACCTGTGTGG--AAAGAAGCAATT---  
 ACCACTCTATTTTGTGCATCAGATGCTAAGGCATATGATACAGAA--GTACATAAT-----  
 -----GTTTGGGCCACA--CATGCCTGTGTACCCACAGAC---  
 CCCCACCAACAAGAAGTAGTCATGGCA-----AATGTGACAGAAAATTTTAAT-----  
 -----ATGTGGAAAAATAACATGGGTAGAACAAATGCAGGAGGATATA---  
 ATCAGTTTATGGGATCAAAGTCTA--AAGCCATGTGTAAAATTA---  
 ACCCCACTCTGTGTTACTTTAAACTGCACGAATGCTAGG-----  
 -----  
 -----AATGCAGCGAGAAATGAAACAATAGGAGAAATGAAA---  
 AACTGCTCTTTCAATGTTACCACAGACATAAGG-----  
 GATAAGGTGCAGAAAAAATATGCACTT---  
 TTCTATGCACTTGATATAGTACCAATAGATGATGATAATACCACCAGA-----  
 -----  
 CATAATCCTAGCTCTAATTATAGGTTAACAAGTTGTAACACCTCAATCATTACACAA---  
 GCCTGTCCAAAGGTATCCTTTGAGCCAATTCCCATACATTATTGTGCCCCGGCTGGTTTTGCGATTTTACAAT  
 GTAAC--AATAAGACTTTCAAT-----GGATCAGGACCATGTACAAAT-----  
 -GTCAGC--ACAGTACAATGTACACATGGAATTAGGCCAGTAGTATCAACT---  
 CAACTGCTGTTGAATGGCAGTTTAGCAGAAGGAGAG-----  
 GTAATGATTAGATCTGCCAATTTACGGACAAT-----ACTAAAACCATAATAGTGCAGCTGAGA---  
 -----AAAGCTGTACAA-----ATTAATTGTACAAGGCCCAACAATAATACAAGAAAA-----  
 -GGTATACATATA-----GGACCAGGGAGAACA--CTC-----TATGCAACAGGAGAA-----  
 -----GTAGTAGGAGATATA-----AGACAAGCACATTGT--AATATTAGTAGAGCA---  
 AATTGGAATACCACTTTAACAGAGATAGTTAAACAATTAAGA-----AAACAATTTGGA---  
 -----AATGCAACAATAGAATTTAAA-----  
 CACCCTTCAGGAGGGGATCCAGAAATTGTA--ATGCACAGTTTTTAATTGTGGAGGAGAA---  
 TTTAAGCAGCTCCAGGCAAGAGTCCTAGCTCTGGAAAGATACCTAAAGGATCAACAGCTCCTGGGGATTTGGG  
 GTTGCTCTGGA-AACTCATTTGCACCACTGCTGTGCCTTGAATACTAGTTGGAGT-----  
 -----AATAAATCCATGGAATACATTTGG-----GAC-----  
 AACATGACCTGGATGGAGTGG--GAAAGAGAAATTGACAATTACACAGGCTTGATATAC---  
 AACTTGCTTGAAAAATCGCAAAACCAACAAGAA-----  
 -----  
 AAGAAATGAACAAGAATTATTGGAATTGGATAAATGGGCAAATTTGTGGAATTGGTTTGACATAACAAATTGGC  
 TGTGGTATATAAAAATATTTCATAATGATAGTAGGAGGCTTGATAGGTTTAAGAATAGTTTTTTACT---  
 GTACTTTCTATAGCA-----AATAGAGTTAGGCAGGGATACTCACCT-----  
 TTGTCAATTTGCTGTTAGCTTATTCAACGCCACAGCAATAGCAGTAGCTGAC---  
 GGGACAGATAGAATTTTAGAAAATATTGCAAAGAGCTTGTAGAGCT-----  
 -----ATACTCAACATA-----CCTACTAGAATAAGACAGGGTTTAGAAAGGGCTTTACAG---TAA  
 >MN486034  
 GCT---GTA-----  
 GATCAATTATGGGTACARTCTATTATGGGGTACCTGTGTGG--AAAGAAGCTACC---  
 ACCACTCTATTTTGTGCATCAGATGCTAAAGCATATAAAACAGAG--GTACATAAT-----  
 -----GTTKGGGCCACA--CATGCCTGTGTACCCACAGAC---  
 CCCAGCCCACAAGAAGTACTATTGGTA-----AATGTAACAGAAAATTTTAAC-----

-----ATGTGGACAAATAACATGGTAGAACAGATGCATGAGGATATA---  
 ATCAGTTTATGGGATCAAAGCCTA---AAGCCATGTGTGAAATTA---  
 ACCCCACTCTGTGTTACTTTAAATTGCACTGACAATTTAACACCAACACCTAGAAATGGTACT-----  
 -----  
 -----AATGTCACATTGGACAAAGGGATGGAAGGAGAAATAAAA---  
 AACTGCTCTTTCAATACTACCACAAACATACAA-----  
 AATAAGATGCAGAATGCATATGCACTT---TTTTATAAACTTGATTTAGTACCATTAGGTAATGGTAAT----  
 -----  
 -----  
 AATAATAATACTAATTATACTACTTATAGGTTGATAAGTTGTAACACTTCAGTCATTACACAG---  
 GCCTGTCCAAAGGTATCCTTTGAGCCAATTCCCATACATTATTGTGCCCCGGCTGGTTTTGCGCTTCTACAGT  
 GTAAC---GAGAAGAACTTCAGT-----GGAAAAGGAGAATGTAGAAAT-----  
 -GTCAGT---ACAGTACAATGTACACATGGAATTAGGCCAGTAGTATCAACT---  
 CAACTACTGTTTAAATGGCAGCCTAGCAGAAGGAGAG-----  
 GTAGTAATTAGATCTGCCAATTTCTCGGACAAT-----AATAAAAACATAATAGTACAACATAAAT----  
 -----GAAACTGTAAACA-----ATTACTTGTGTAAGACCCAATAACAATACAAAAGA-----  
 -AGTATACATATA-----GGACCAGGGAAAGCA---TTT-----GAT---ACAGGGGAC-----  
 -----ATAATAGGAGATATA-----AGACAAGCACATTGT---AACATTAGTGAACAA---  
 AACTGGAATAACACTTTAATTAGGGTAGCCAAAAAATTAAGA-----GAACAATTT-----  
 -----AATAAAAACAATAGTCTTTAAC-----  
 CAATCCTCAGGAGGGGACATAGAAATTGTA---ACACACAGTTTTAACTGTGGAGGAGAA---  
 TTTAAACAGCTCCAGGCAAGAGTCCTGGCTCTAGAAAGGTACCTAAGGGATCAACAGCTCCTGGGAATTTGGG  
 GTTGCTCTGGAAGAACTCATTTGCACCACTACTGTGCCGTGGAATAGTAGTTGGAGT-----  
 -----AAGAATAAAAAATTTAACAGACATATGG-----GAT-----  
 AAAATGACCTGGAATCAGTGG---GAAAGAGAAATTGAAAAATTACACAGAACTAATATAC---  
 TCCTTAATTGAAGAATCGCAAAACCAGCAAGAA-----  
 -----  
 AAGAATGAAAAAGACCTATTGGAATTAGATAAAATGGGCAAGTTTGTGGAATTGGTTTGACATAACAAATTGGC  
 TGTGGTACATAAAAAATATTACATAATGATAGTAGGAGGCTTAATAGGCTTAAGGATAGTTTTTTTCT---  
 GTACTTTCCATAGTG-----AATAGAGTTAGGCAGGGTTACTCACCA-----  
 TTGTCATTTGCTGTTAGCTTGCTCAACGCTATAGCCATAGCAGTAGCTGAG---  
 GGGACAGATAGAATTGTAGAAGTAGTACAAAGAGCTTGTTAGAGCT-----  
 -----ATCCTTCACATA-----CCTAGGAGAATAAGACARGGCTTGGAAGGCTTTTGCTT---TAA  
 >DQ358805  
 GCT---ACA-----  
 CGACAATTGTGGGTACAGTCCATTATGGGGTACCTGTGTGG---AAAGAAGCAAAT---  
 ACCACTCTATTTTGTGCATCAGATGCTAAAGCATATGACACAGAG---GTACATAAT-----  
 -----GTTTGGGCCACA---CATGCTTGTGTACCCACAGAC---  
 CCTAGCCACACAAGAAGTACCATTAGTA-----AATGTGACAGAAAATTTTAAC-----  
 -----ATGTGGAATAAACATGGTGGAAACAGATGCATGAGGATGTA---  
 ATCAGCTTGTGGGATCAAAGCCTA---AAGCCATGTGTAAAATTA---  
 ACTCCACTCTGTGTGACTTTAAATTGTACTAATTTGAAGAATGATACTAATAACCAATAGT-----  
 -----  
 -----AGTAGCGGGAGAATGATAATGGAGAAAGGAGAAATAAAA---  
 AACTGCTCTTTTAATATCACCGCAAGCATAAAA-----  
 AATAAGGTGAAACAGGAATCTGTACTT---TTTAATAGACTTGATGTAGTGCCAATAGATAAT-----  
 -----  
 -----  
 GATACTACAAGCTATATATTGATAACTTGTAACACCTCAGTCATTACACAG---  
 GCCTGTCCAAAGATAACCTTTGAACCAATTCCCATCCATTATTGTGCCCCGGCTGGTTTTGCGATTCTAAAGT  
 GTAAT---GATAAGAAGTTCAAT-----GGAACAGGACCCTGTACAAAT-----  
 -GTCAGT---ACAGTACAATGTACACATGGAATTAGGCCAGTAGTGTCAACT---  
 CAACTGCTGTTAAATGGCAGTCTAGCAGAAGAAGAG-----  
 ATAGTAATTAGATCTGAAAAATATCACGGACAAT-----ACTAAAATCATAATAATACAGCTGAAC----  
 -----GAAACTGTAGAA-----ATTAATTGTACAAGACCCAACAATAATACAAGAAAA-----  
 -AGGATAACTATG-----GGACCAGGAAGAGTA---TAT-----TATGCAACAGGAGGC-----  
 -----ATAGTAGGAGATATA-----AGACAAGCACATTGT---AACATTAGTGAACAA---  
 AAATGGAACAGCACTTTGGAAGGATAGCTAGAAAATTAAGG-----GAACACTTT-----  
 -----AATAGAACAATAGTCTTTAAT-----  
 CGATCCTCAGGAGGGGACCCAGAAATTGTA---ATGCACAGTTTTAATTGTGGAGGGGAA---

TTTAAACAGCTCCAGGCAAGAGTCCTGGCTGTAGAAAGATACCTAAGGGATCAACAGCTCCTAGGGCTTTGGG  
GTTGCTCTGGAAACTCATTTGCAACACTAATGTGCCTTGGAATACTAGTTGGAGT-----  
-----AATAAATCTTTAGAACAGATTTGG-----GGA-----  
AACATGACCTGGATAGAGTGG---GAGAGAGAAATTGACAAATTACACAGGCATAATATAC---  
ACCTTACTTGAAGAATCGCAAACCAACAGGAA-----  
-----  
AAGAATGAACAAGACTTATTAAAAATTGGATAAGTGGGCAGATTTGTGGAGTTGGTTTAACATAACAAATTGGC  
TGTGGTATATAAGAATATTCATAATGATAGTAGGAGGCTTAGTAGGCTTAAGAATAGTTTTTTACT---  
GTAATTTCTATAGTG-----AATAGAGTTAGGAAGGGATACTCACCA-----  
CTATCATTCGCTGTTAGTTTGTCTAATGCCACAGCTATAGCAGTAGCTGAG---  
GGGACAGATAGGATTATAGAATTAGCACAAAGAATTGGTAGAGCT-----  
-----TTTATCCACGTA-----CCTAGAAGAATAAGACAGGGCTTCGAAAGGGCTTTGCTA---TAA  
>JN692439  
GCT---ACA-----  
GACAAATTGTGGGTCACAGTCTATTATGGGGTACCTGTGTGG--AGAGAAGCAAAAT---  
ACCACCTTATTTTGTGCATCAGATGCTAAAGCATATGACACAGAG---GCACATAAT-----  
-----GTTTGGGCCACA---CATGCCTGTGTGCCACAGAC---  
CCTGACCACAAGAAATACTATTGCCA-----AATGTAACAGAGAATTTTAAT-----  
-----ATGTGGAAAAATGATATGGTAGAACAGATGCATAAGGATATA---  
ATCAGTTTATGGGATCAAAGCCTA---AAGCCATGTGTAAAAATA---  
ACCCCACTCTGTGTTATTTTACATTGCTCTAATTACACTAGTGCTAACACCACTAGTAATAAT-----  
-----  
-----ACCACTAGTAGATTGCTAAACATGGAGGGAGAAATAAAA---  
AACTGTACTTTCAATATCACCAAAACATAAGA-----  
AATAAGGTAAGGCAAGAATATGCAATT---TTTGATAAACTTGATATAATACAAATAGATAAGAAT-----  
-----  
-----  
GATAGTACAAGCTATATGTTGAGACATTGTAATACCTCAGTCATTACACAG---  
GCCTGTCCAAAGACATCCTTTGAACCAATTCCCATACATTTTTGTGCCCGGCTGGTTTTGCGATTCTGAAGT  
GTAAT---GATAAGACATTCAAT-----GGATCAGGACCATGTAAAAAT-----  
-GTCAGC---ACAGTACAGTGTACACATGGAATTAGGCCAGTAGTATCAACT---  
CAATTACTGTAAATGGCAGTCTAGCAGAAGGAGAT-----  
GTAATGATTAGATCTGAAAATTTACAAACAAT-----ATTAAAACCATAATAGTACAGCTGAAC-----  
-----GAAACTGTAAAA-----ATTAATTGTACAAGAACCAACAACCATACAAGAAAG-----  
-AGTATACACATG-----GGATGGGGGAGAGCA---CTT-----TATACAAACGGAGAA-----  
-----ATACTAGGAGATATA-----AGACGAGCACATTGT---AACATTAGTAGATCA---  
GAATGGGGAAAAGCTGTAAACAGATAATGGCAAAATTAAAA-----GAACAAGTGGGG-----  
-----GACAACAAGAAGACAATAATCTTTAAT-----  
CAATCCGCAGGAGGGGACCTAGAAATTGTA--ACACACAGTTTTTAATTGTGGAGGAGAA---  
TTTAAGCAGCTCCAGGCAAGAGTCCTGGCTGTAGAAAGATACCTACAGGATCAACAGCGCCTAGGGATTTGGG  
GTTGCTCAGGAAACTCATTTGCACCACCTCTGTGCCTTGGAATACTAGTTGGAGT-----  
-----AATAGATCTCTAGAACACATTTGG-----AAT-----  
AACATGACCTGGATGGAGTGG---GAGAAAGAAATTAACAAACACACAGACACAATATAC---  
CGTATACTTGAAGAGTCACAAAACCAACAAGAA-----  
-----  
AAGAATGAACAAGAATTATTAGAATTGGATAAGTGGGCAAATTTGTGGAATTGGTTTAGCATAACAAAATGGC  
TGTGGTATATAAAAATATTCATAATGATAATAGGAGGCATAGTAGCTTTAAGAATAGTTTTTTACT---  
GTATTATCTTTAGTG-----ACAAGGTTAGGCAGGGATACTCACCA-----  
TTGTCGTTTCGCTATTAGTCTGCTTAATGCCACAGCTATTGCAGTAGCTGAG---  
GGGACAGATAGGTTTATAGAAGTAGCACAAAGATTTGGTAGAGGT-----  
-----GTTATCCATATA-----CCTAGAAGAATAAGACAGGGCTTGGAAGAGCTTTGCAA---TAA  
>JN692462  
GCT---ACA---GAA-----  
CAAGAAAAAATTGTGGGTCACAGTCTATTATGGGGTACCTGTGTGG---AAAGAAGCAAAA---  
ACCACTCTATTTTGTGCATCAGATGCTAAAGCAGTTGACCCAGAG---GTACATAAT-----  
-----GTTTGGGCCACA---CATGCCTGTGTACCCACAGAC---  
CCTAAACCACAAGAAATAGTATTAGAA-----AATGTAACAGAAAAATTTAAC-----  
-----ATGTGGAAAAATGATATGGTAGAACAGATGCATGAGGATATA---  
ATCAGTTTATGGGATCAAAGCCTA---AAGCCATGTGTGAAATTA---  
ACCCCACTCTGTGTTACGTTAAATTGTACTGATATTTCTACCAATAATACTAATAGCAGTAGTAAT-----

-----  
-----ACTAATAGCAGTAGTTGGAAAAATATGGAAGCTGGGAGAAATGAAA---  
AATTGCTCTTTCAATATCACCACAAACATAGGA-----  
AATAAGATGCAGAAAGAATATGCACCT--TTTTATAAACTTGATGTACAACAAATAGATAAT-----  
-----  
-----  
ACAAGCTATACATTGATAAACTGTAACACCTCAGTCATTACACAG---  
GCCTGTCCAAAGGTAAGCTTTGATCCAATTCCCATACATTATTGTGCCCCGGCTGGTTTTGCAATTGTAAAGT  
GTAAT---GATAAGAAATTTAAT-----GGAACAGGGCCATGTAAAAAT-----  
-GTCAGC---ACAGTACAATGTACACATGGAATTAAGCCAGTAGTGTCAACT---  
CAACTATTGTTAAATGGCAGTCTAGCAGAAGAAGAG-----  
ATAGTAATTAGATCTGAAAATTTACAAACAAT-----GCTAAAATTATAATAGTACAGCTGAAT----  
-----GAATCAGTAGAA-----ATTAATTGTACAAGACCCAACAACAATACAAGAAAA-----  
-GGTATACATATG-----GGATGGGGGAGAGCA---TTT-----TATGCAACAAATGCA-----  
-----ATAGTAGGAGATATA-----AGGCAAGCACATTGT---AACCTTAGTAAGGAA---  
AATTGGGAAAGAAGCTTAAAAACAGGTAGCTGAAAAATTACAA-----AAACAATTT-----  
-----AATACCACAATAATCTTTAAT-----  
CAGTCCGCAGGAGGGGACCCAGAAATTGTA--ATGCACAAATTTAATTGTAGAGGGGAA---  
TTTAAGCAGCTCCAGGCAAGACTCCTGGCTGTGGAAAGATACCTAGGGGATCAACAGCTCCTAGGGATATGGG  
GTTGCTCTGGAAACTCATCTGCACCACTAATGTGCCTTGGAATGCTAGTTGGAGT-----  
-----AATAAATCTCTGAATGAGATTTGG-----GGA-----  
AACATGACCTGGATGGAGTGG---GAGAAAGAAATTGACAAATTACACAGGCTTAATATAC---  
ACCTTACTGCTAGAATCGCAAAACCAACAAGAA-----  
-----  
AAAAATGAGCAAGAATTATTGGCATTAGATAAGTGGGCAAATTTGTGGAATTGGTTTGATATAACAAAATGGC  
TGTGGTATATAAAAATATTACATAATGATAGTAGGAGGCTTAGTAGGTTTAAGAATAGTTTTTTGCT---  
GTACTTTCTTTAGTG-----AATAGAGTTAGGCAGGGGTACTCACCA-----  
TTGTCATTCGCTGTTAGTTTGCTTGATGCCATAGCTATAGCAGTAGCTGAG---  
GGGACAGATAGGATTATAGAAGTAATACAAAGAATTTGTAGAGGT-----  
-----ATCTTACACATA-----CCTAGAAGAATAAGACAAGGCTTAGAAAGGCTTTTACTA--TAA  
>JN692465  
GTT---GCA-----  
GGAAATTGGTGGGTCACAGTCTATTATGGGGTACCTGTGTGG--AAAGAGGCAAAT---  
ACCACTCTATTTTGTGCATCAGATGCTAAAGCATATAGTACAGAG--ATGCATAAT-----  
-----GTTTGGGCTACA--CATGCCTGTGTACCCACAGAC---  
CCCAGCCCACACGAAATACCATTTGGAA-----AATGTAACAGAAAATTTTAAC-----  
-----ATGTGGAAAAATAACATGGTAGAACAGATGCATGAGGATATA---  
ATCAGCTTATGGGATCAAAGCCTA--AAGCCATGTGTCAAATA---  
ACCCCACTCTGTGTTACTATGAATTGCACAGATGCAGAGACTAATGTTACTAAAAGT-----  
-----  
-----AATAGTAGTGATTTGGAGACCAAAGGAGAAATGAAA---  
AACTGCTCTTTCAATGTACCTCAGGCGTAAGA-----  
GACAAAGTAAAGAGAGAACATGCACCT--TTTTATGCACTTGATGTAGTACCAATAGATAAT-----  
-----  
-----  
GGTAAGAATAATACTAGCTATATGCTGATAAAATGTAATACCTCAGTCATTACGCAG---  
GCCTGTCCAAAGGTATCCTTTGAGCCAATTCCCATACATTACTGCGCCCCAGCTGGTTTTGCGATTTTAAAGT  
GTAAC---AATAAGACATTTCAAT-----GGATCAGGGCCATGTACAAAT-----  
-GTCAGC---ACAGTACAGTGTACACATGGAATTAAGCCAGTAGTGTCAACT---  
CAACTGCTGTTAAATGGCAGTTTAGCAGAAGAAGAG-----  
ATAGTAATTAGGTCTGAAAATTTACGAACAAT-----GCTAAAAGCATATTAGTACAGCTGAAG----  
-----GACCCCGTACAC-----ATTACTTGTATAAGACCCAACAACAATACAAGAAGA-----  
-GGTGTAACATATG-----GGACCAGGGAGAGTA-----TATTTTACAAAG-----  
-----ATAATAGGAGATATA-----AGAAAAGCACATTGC---AACATTAGTATGACA---  
GACTGGAATAACACTTTAACACAGATAGCTGAAAAATTAAGG-----AAACAGTATGGG-----  
-----AACAAACAAAACAATAGTCTTTAAT-----  
CAATCCTCAGGAGGAGACCCAGAAATTGTA--GAGCACAGTTTTAATTGTGGAGGGGAA---  
TTCAAGCAGCTCCAGGCAAGAGTCTGGCTGTGGAAAGATACCTAAGGGATCAACAGCTCCTAGGGATTTGGG  
GCTGCTCTGGAAACTCATCTGCACCACTGCTGTGCCCTGGAATGCTAGTTGGAGTAAGAGT-----  
-----TGGAATGGATCTCTGGATGACATTTGG-----ACT-----

AACATGACCTGGATGCAGTGG---GAAAGAGAAATTGACAACTACACACAAACAATATAT---  
AGCTTAATTGAAAAATCGCAAAACCAACAAGAA-----  
-----  
AAGAATGAACAAGATTTATTGGCATTAGATAAGTGGGCAAGTTTGTGGAATTGGTTTGACATATCAAAATGGC  
TGTGGTACATAAAAAATATTCTAATGATAGTAGGAGGCTTGATAGGTTTAAGAATATTTTTTGCT---  
GTAGTTTCTATAATA-----AATAGAGTTAGGCAGGGATATTCACCC-----  
TTGTCATTTGCTGTCAGCTTGTATAACGCTACAGCTATAGCAGTAGCTGAG---  
GGGACAGATAGGATCATAGAAGCAGTGCTAACAAATTTGGAGAGCT-----  
-----TTTCTACACATA-----CCTAGAAGAATAAGACAGGGCTTTGAAAGGGCTTTGCTA---TAA  
>JN692473  
GCT---GCT-----  
GAACAATTGTGGGTCACAGTCTATTATGGGGTGCCTGTGTGG---AAAGACGCGACC---  
ACCACTCTATTTTGTGCATCTGATGCTAAAGCATATAGCACAGAG---GCACATAAT-----  
-----GTTTGGGCCACA---CACGCCTGTGTACCCACAGAC---  
CCTAGCCCACAAGAAGTAGTATTGGCA-----AATGTGACAGAAAATTTTAACT-----  
-----ATGTGGAAAAATGACATGGTAGAGCAGATGCAGGAGGATGTA---  
ATCAGTTTATGGGATCAAAGCCTA---AAGCCATGTGTAAAATTA---  
ACCCCACTCTGTGTTACTTTACGTTGCTAATTATGCTGGGGAAAATGATACTATTGGTAATTGTACTGGGG  
GGAATAATAATAGTAGTAAT-----  
TGTACTAGGGGAATGATACTAGTACTAATAGTACCGAGTGGAGTGAGATGGTGGGAGAAATAAAA---  
AACTGCTCTTTCAATATTACCACAAGCATAAAA-----  
AATAAGGTGCGACAAGAATATGCACCTT---TTTAATAAACTTGATGTGGTACCAATAGATAAT-----  
-----  
-----  
GATAATACAAGCTATATGTTGATAAATTGTAACACCTCAGTCATTACACAG---  
GCCTGTCCAAAGATAACCTTTGAACCAATTCCCATACATTATTGTGCCCCGGCTGGTTTTGCGATTCTAAAGT  
GTAAT---GCTAAGAATTTCAAT-----GGAACAGGACCATGTACAAAT-----  
-GTCAGT---ACAGTACAATGTACACATGGAATTAAGCCAGTAGTGTCAACT---  
CAACTGCTGTTAAATGGCAGTCTAGCAGAAGAAGAG-----  
ATAGTAATTAGATCTAAAAATCTCACGGACAAT-----GCTAACAAACATAATAGTACAGCTAGAC---  
-----AAACCTGTAGAA-----ATTAATTGTACAAGACCCAACAACAATACAAGCAAA---  
-AGTATACATATG-----GCATGGGGGAGAGCA---TTT-----TATGCAACAGAAAGA---  
-----ATAATAGGAAAGATA-----AGACAAGCACATTGT---GACGTTAATGCAACA---  
GACTGGAACCACACTTTAACAAGGATAAAGGCAAACTAAAA-----GAACATTTT-----  
-----AATAAAACAATATACTTTGAT-----  
CAGCCCTCAGGAGGGGACCCAGAAATTATA---CTGCACACTTTTAAATTGTGGAGGAGAA---  
TTTAAGCAGCTCCAGGCAAGAGTCCCTGGCTGTGGAAAGATACCTAAGGGATCAACAGCTCCTGGGGATTTGGG  
GTTGCTCTGGAAACTCATCTGCACCACTGCTGTGCCTTGGAATGCCAGTTGGAGC-----  
-----AATAGATCTCAGGATGACATTTGG-----CAG-----  
AACATGACTTGGATGGAGTGG---GAAAGAGAGATTGACAATTACACAGACATAATATAC---  
AGCTTACTTGAAAAATCGCAGACCCAACAAGAA-----  
-----  
AAAAATGAACAAGACTTATTGGCATTGGATAAGTGGACAAATTTGTGGAATTGGTTTAACATAACAAATTGGC  
TGTGGTATATAAAAAATATTCTAATGATAGTAGGAGGCTTAATAGGTTTAAGAATAATTTTTACT---  
GTACTGTCTATAGTG-----AATAGAGTTAGGCAGGGATACTCACCA-----  
TTGTCATTCGCTGTTAGTTTGCTTAATACCATAGCTATAGCAGTAGCTGAG---  
GGGACAGATAGGGTTATAGAAGTAGTACAAAGAATTGGTAGAGGT-----  
-----ATTCTCCATATA-----CCTGTAAGAATAAGACAAGGCTTAGAAAGGGCTTTGCTA---TAA  
>JN692474  
GCT---ACA-----  
GACAAATTTGTGGGTCACAGTGTATTATGGGGTACCTGTGTGG---AAAGAAGCAACC---  
ACCACTCTATTTTGTGCATCAGATGCTAAATCATATGACACAGAG---GTACATAAT-----  
-----GTTTGGGCCACA---CATGCCTGTGTACCCACAGAC---  
CCTAACCACACAAGAGGTAGTATTGGAA-----AATGTGACAGAAAATTTTAACT-----  
-----ATGTGGAAAAATAGCATGGTAGATCAGATGCATGAAGATATA---  
ATCAGTTTATGGGATCAAAGCCTA---AAGCCATGTGTAAAATTA---  
ACTCCACTCTGTGTCACCTTTAAATTGCACTGATTGGAAACAGAATAATACCACTAATGGGACCCAA-----  
-----  
-----AATAGTAATAAACTATTGGGCAAAAGATGGAGGGAGAAATAAAA---  
AACTGCTCTTTCAATGTCAACCACAGGCATAGCA-----

AATAAGTATCACAGAGAATATGCGCTT---TTGTATAAACTGATGTTGTACCAATAGAAAAG-----  
-----  
-----  
GATAATACAAGTTATATGTTAATAAGTTGTAACACCTCAGTCATTACACAG---  
GCCTGTCCAAAGATATCCTTTGAACCAATTCCTACATTATTGTGCCCCGGCTGGTTTTGCGATTCTAAAGT  
GTAAT---AATAAGACATTCAAT-----GGAACAGGACCATGTACAAAT-----  
-GTCAGC---ACAGTACAATGTACACATGGAATTAGGCCAGTAGTGTCAACT---  
CAACTACTGTTAAATGGCAGTCTAGCAGAAGAAGAG-----  
GTAATAATTAGATCTGAAAACCTTACGGACAAT-----GCTAAAACCATAATAGTACAGCTGAAT----  
-----GAATCTGTAGCA-----ATTAATTGTACAAGGCCAGCAACAATACAAGAAAA-----  
-AGTATACAGTTA-----GGATGGGGAAGAGTA---TTG-----TATGCAACAGGAGAC-----  
-----ATAATAGGGGATATA-----AGACAAGCACATTGT---AACCTGAGTAGAAAA---  
GACTGGAACAGAACTTTACATCAAATAGTTATGAAATTAAGA-----GAACACTTT-----  
-----AACAAAACAATAATCTTTAAG-----  
CAATCCTCAGGAGGGGACCCAGAAATTGAA---ATGCACAGTTTTAATTGTGGAGGGGAA---  
TTTAAGCAGCTCCAGGCAAGAGTCCTGGCTGTAGAAAGATACCTAAAGGATCAACAGCTCCTAGGGATTTGGG  
GTTGCTCTGGAAGAACTCATTTGCACCACTACTGTGCCTTGGAATAAGACCTGGAGT-----  
-----AATAAATCTCTGGATGAAATTTGG-----GAT-----  
AACATGACCTGGATGCAGTGG---GAAAAAGAAATTGACAAATACACAAGCTTAATATAC---  
ACCTTAATTGAAGAATCGCAAAATCCAACAAGAA-----  
-----  
AAGAATGAACAAGAATTATTGCAATTGGATTTCATGGGCAAGTTTGTGGAATTGGTTTAGCATATCAAAGTGGC  
TGTGGTATATAAAAATATTGATAATGATAGTAGGGGGTTAGTAGGGTTAAGAATAGTTTTTACT---  
GTATTTTCTATAGTG-----AATAGAGTTAGGCAGGGATACTCACCA-----  
TTATCATTCGCTATTAGTTTGTCTTAATGCCACAGCTATAGCAGTAGCTGAG---  
GGGACAGATAGAATCATAGAAGCAGCACAAGGAATTGGTAGGGCT-----  
-----ATTCTCCACATA-----CCTGTAAGAATAAGACAGGGCTTAGAAAGGGCTTTGGTA---TAA  
>JN692480  
GCT---GCA-----  
AAGCAATTATGGGTCACAGTCTATTATGGAGTACCTGTGTGG---AAAGAAGCAAAC---  
ACCACTCTGTTTTGTGCATCAGATGCTAAAGCATATGATACAGAG---GTACATAAT-----  
-----GTTTGGGCCACA---CATGCCTGTGTACCCACAGAC---  
CCTGACCCACAAGAAGTAGTATTAAAA-----AATGTGACAGAAAATTTTAAAC-----  
-----ATGTGGAAAAATGACATGGTAAGACAGATGCATGAGGATGTA---  
ATCAGTTTATGGGATCAGAGCTTA---AAGCCATGTGTAAAATTA---  
ACCCCACTCTGTGTCACTTTGAATTGCTCCTATATCAATAGTACTTGTGGCAATAGT-----  
-----  
-----ACTGATGGTTGGCAAGATATGAGGGAAGAAATAAAA---  
AACTGCTCTTTCAATAGCACCCACAGGCATAGGA-----  
AATAAGGTGCGAAAAGAATTTGCTTTC---TTTAATAGGCTTGATATAGTACCAATAGATGAT-----  
-----  
-----  
GGTAATTCAAGCTACATGTTGAGAAGTTGTAACACCACAGTCATTACACAG---  
GCCTGTCCAAAGGTAACCTTTGAACCAATTCCTACATTATTGTGCCCCGGCTGGTTTTGCGATTCTAAAGT  
GTAAT---GATAAGAAGTTCAAT-----GGAACAGGATCATGTAACAAT-----  
-GTCAGC---ACAGTACAATGTACACATGGAATTAGGCCAGTAGTGTCAACT---  
CAACTGCTGTTAAATGGCAGTCTAGCAGAAAAAGAG-----  
ATAATAATTAGATCTGAAAATTTACGAACAAT-----GCTAAAACATACTAGTGCAGCTGAAC----  
-----GAATCTGTAGTA-----ATTAATTGTACAAGACCCAACAACAATACAAGGAAA-----  
-AGTATACATCTA-----GGACCGGGAAGAGCA---TTT-----TATGCAACAGGAGAA-----  
-----ATAATAGGAAATATA-----AGACAAGCATATTGT---ACCCTTAACGCATCA---  
CAATGGGAAAAAACTTTAGGAAAGGTAGCTATAAAATTAAGA-----  
GAACAAATTAATAACACATTA-----CACTTA-----AATAACACAAAAATAGCCTTTTACA-  
-----AACTCCTCAGGAGGGGACCCAGAAATTATA---ATGCACAGCTTTAATTGTGGAGGGGAA---  
TTTAAGCAGCTCCAGGCAAGAGTCCTGGCTGTGGAAAGATACCTAAAGGATCAACAGCTCCTAGGGATTTGGG  
GTTGCTCTGGAAGAACTCATCTGCACCACTAATGTGCCTTGGAATACTAGTTGGAGT-----  
-----AATAAATCTTTGGGGGAAATTTGG-----GAT-----  
AACATGACTTGGATGCAGTGG---GAAAAAGAAATTGACAAATACACAACTCAATATAC---  
AACTTACTTTGAAGATTGCGAAAACCAGCAAGAA-----  
-----

AAGAATGAACAAGACTTATTGGCATTGGATAAGTGGACAAATTTATGGAATTGGTTTAGCATATCAAACCTGGC  
 TGTGGTATATAAAAATATTTCATAATGATAGTAGGAGGCTTAGTAGGATTAAGAATAATTTTTTACT---  
 GTTCTTTCTATAGTA-----GATAGAGTTAGGCAGGGCTACTCACCA-----  
 TTATCTTTTCGCTGTTAGCTTGCTAAATGCCACAGCTATAGTAGTAGCTGAG---  
 GGAACAGATAGAGTTATAGAAGTAGTACAAGGATTTGTTAGAGCT-----  
 -----ATTCGCAATATA-----CCTAGAAGAATAAGACAGGGCCTAGAAAGGAGCTTACTA---TAA  
 >HQ377423  
 GCT---ACG-----  
 CAACAGATGTGGGTTACAGTCTATTATGGGGTACCTGTGTGG---AAAGAAGCAACC---  
 ACTACTCTATTTTGTGCATCAGATGCTAAAGCATATGATACAGAG---GTACATAAT-----  
 -----GTCTGGGCCACA---CATGCTTGTGTACCCACAGAC---  
 CCCAACCCGCAAGAAGTAGACTTGGTA-----AATGTGACAGAAAATTTTAAAT-----  
 -----ATGTGGAAAAATAACATGGGTAGAACAAATGCATGAGGATATA---  
 ATTAGTTTATGGGATCAAAGCCTA---AAACCATGTGTAAAATTA---  
 ACCCCGCTCTGTGTTACCTTAGATTGCAAAGATGTGAATATTACTAAAAGCAATGGTACTGTCAACATTACT-  
 -----  
 -----AACGTGAATACTACTAGCTGGCCACAAATGCAAGCAGGAGAAATAAAA---  
 AATTGCTCTTTCAATATTAGCACAGACATAAGA-----  
 GATAAGGTGCGGAAAGAATATGCACCTT---TTTTATAACCTTGATGTAGTAAAGATAGAAGGGGG---  
 -----  
 -----  
 AATAGTACTAGCTATAGGTTGGTAAGTTGTAACACCTCAGTCCTTACACAG---  
 GCCTGTCCAAAGGTATCCTTTGAGCCAATTCCCATACATTATTGTGCCCGGCTGGCTTTGCGATTCTAAAAT  
 GTAAA---GATAAGGAGTTCAAT-----GGATCAGGACCATGTACAAAT-----  
 -GTCAGC---ACAGTACAATGTACACATGGAATTAGGCCAGTAGTGTCAACT---  
 CAACTGCTACTAAATGGCAGTCTAGCAGAAGGAGGG-----  
 GTAGTAATTAGATCTGAAAATTTACAAACAAT-----GCTAAAACCATAATAGTACAGCTGAAT----  
 -----GAATCTGTAATA-----ATTAATTGCACAAGACCTAACAAACAATACAAGAAGG-----  
 -AGTATAGATATA-----GGACCAGGCAGTGCA---TTT-----TATGCAACAGGAGAT-----  
 -----ATAATAGGAGATATA-----AGACAAGCACATTGT---AATATTAGTGGACTA---  
 AAATGGAACAACACATTAAAACAAATAAGTGGAAAATTAAGA-----GAACAATTTATT---  
 -----AATAAAACAATAGTCTTTAAT-----  
 CACTCCTCAGGAGGGGACCCAGAAAGTTGTA--ATGCACAGTTTTATTTGTGGAGGGGAA---  
 TTTAAGCAACTCCAGGCAAGAGTCCCTGGCTGTGGAAAGATACCTAAAGGATCAACAGCTCCTGGGAATTTGGG  
 GTTGCTCTGGAAAGCTCATTTGCGCCACTGCTGTGCCTTGGAAATACTAGTTGGAGT-----  
 -----AATAAATCCTATGATCAGATTTGG-----GGG-----  
 AATATGACATGGATGGAATGG---GAAAGAGAAATTGATAATTACACAGGCTTAATATAC---  
 AGCTTAATTGAAGAATCGCAATCCAACAAGAA-----  
 -----  
 AAGAATGAACAAGACTTATTGTCATTAGGTCAATGGGCAAGTTTGTGGAATTGGTTTGACATATCAAACCTGGC  
 TATCGTATATAAAAATATTTCATAATGATAGTAGGGGGCTTAATAGGTTTAAAGAATAGTTTTTTGCT---  
 GTACTTTCTATAATA-----AATAGAGTTAGGCAGGGATACTCACCC-----  
 TTATCGTTTCGCTATTAGCTTGCTTAATACCACAGCAATAGCAGTGGCTGAG---  
 GGGACAGACAGAATTATAGAAGCTTTGCAAAGAATTGGAAGAGCT-----  
 -----ATCCTCAATATA-----CCTAGAAGAATAAGACAGGGCCTTGGAAGGGCCTTGCTA---TAA  
 >KT427681  
 GCT---ACA-----  
 GAAAAATTGTGGGTCACAGTATATTATGGRGTACCTGTGTGG---AAAGAAGCAAMC---  
 ACCACTTTATTTTGTGCATCAGATGCTAAAGCATATGACACAGAA---GCACATAAT-----  
 -----GTTTGGGCCACA---CATGCCTGTGTACCYACAGAC---  
 CCTAACCCACAAGAAGTAGTATTGGAA-----AATGTGACAGAAAATTTTAAAC-----  
 -----ATGTGGAAAAAYAACATGGGTAGAACAGATGCATGAGGATATA---  
 ATTAGTTTATGGGATCAAAGCCTA---AAGCCATGTGTAAAGTTA---  
 ACCCCACTCTGTGTTACCTTAAATTGCACTAAGATAAAATACTAATAGTACTGGAAATAGTAGTAGT-----  
 -----  
 -----GTTACCAATAGTACCAGCGAGGATGGTGGGGAACCAATGAGA---  
 AACTGCTCTTTCAATGTC---ACAGATGGAATA-----  
 AAGAGGAAAAAAGACTATGCACTC---TTTTATAGTGTTGATGTAGTACCAATAGAAGAT-----  
 -----  
 -----GATAATACAAGCTATATGTTAAGAAGTTGTAACACCTCAGTCATTACACAA---

GCCTGTCCAAAGATAAACTTTGACCCAATTCCCATACATTATTGTACCCCGGCTGGTTTTGCGATTCTAAAAT  
GTAAT---GATGAGAAGTTTCAGT-----GGAATAGGACCATGCACAAAT-----  
-GTCAGC---ACAGTACAATGTACACATGGAATTAGGCCAGTAGTGTCAACT---  
CAACTGCTGTTAAATGGCAGTTTAGCAAGAAAAGAG-----  
ATAATACTCAGATCTGAAAATTTACGCGACAAT-----GCTAGAAACATAATAGTCCAACTGAAT----  
-----GAATCTATAGAA-----ATTAATTGTACAAGACCCAGCAACAATACAAGGAAA-----  
-AGTATACATTTT-----GGACCGGGGCGAACA--ATG-----TATGCAACAGGAGAA-----  
-----ATAATAGGAGATATA-----AGAAAAGCATTTTGT---ACCCTGAATGGAATA---  
AAATGGAATAACACTTTAAAACAGATAGCTAGAAAATTAAAA-----GAACAATTT-----  
-----AATAAAAGCATAGTCTTTGAG---  
CCAGCCATCAAAGGAGGGGACCCAGAAATTATA--ATGCACAGTTTAAATTGTAGAGGAGAA---  
TTTAAGCAGCTCCAGGCAAGAGTCCTGGCTGTGGAAAAGATACCTAAAGGATCAACAGCTCCTAGGAATTTGGG  
GTTGCTCTGGAAAACTCATCTGCACCACCGCTGTGCCTTGGAATTCTAGTTGGAGT-----  
-----AATAAACTTATAATGACATTTGG-----AAT-----  
AACATGACCTGGATGCAGTGG---GAAAAAGAAATTGACAACTACACAGGCTTAATATAC---  
ACTTTAATTGAAAAATCGCAAAAGCAGCAGGAA-----  
-----  
AAGAATGAGCAAGAAGTATTGGAAGTGGATAAATGGGCAAACTTGTGGAATTGGTTTGACATAACAAAATGGC  
TGTGGTATATAAAAATATTATAATGATAGTAGGAGGCTTAATAGGTTTAAAAATAGTT-----  
-----TCACCA-----C-----  
GCTATTAGCTTGCTTAATACCACTGCTATAGCAGTAGCTGAA---  
GGGACAGATAGGATTATAGAAAAGTACAAAGATTTTGTAGAGGC-----  
-----ATCCTTCACATA-----CCTAGAAGAATAAGACAGGGCTTAGAAAGGAGTTTATTA---TAA  
>KT427732  
GCT---GAA-----  
GATCAAAATGTGGGTACAGTCTATTATGGGGTACCTGTGTGG---AAAGAAGCAAAA---  
ACTACCTGTTTTGTGCATCAGATGCTAAAGCATATAAGACAGAG--GCACATAAT-----  
-----ATTTGGGCCACA---CATGCCTGTGTACCCACAGAC---  
CCTAATCCACAAGAAGTAGTATTGGGA-----AATGTGACAGAAAATTTTAAAC-----  
-----ATGTGGACAAATAACATGGTGGAAACAGATGCATGAGGATATA---  
ATCAGTTTATGGGATCAAACCTA---AAGCCATGTGTAAAAATA---  
ACCCCACTCTGTGTTATTTTAACTGCACTGATTGGAAGAGGAACAMTACCMATAGTAMT-----  
-----  
-----AGCTATAATAGTACGGTGGAAGGGATGGAGAAGGGAAATTTG-----  
CTCTTTCAATATTACCACAGACATAGA-----  
GAATGGTGCACAAGACTATGCACTTT-----GATACACTTGATATAGTACCAATARAAAATAAGACAGAA-  
-----  
-  
AATCRGACATAWGTAAKCTATACATWGGTAACCTRTAACAYCATAACTTGTAGCACCACAAAARTTACACAG-  
--  
ACCTGCCCAAAGATATCCTTTGAACCAATTCCCATACATTATTGCGCCCCGGCTGGTTTTGCGATTCTAAAGT  
GTAAT---GATAAAAGGTTCAAT-----GGATCAGGACCATGTACAAAT-----  
-GTCAGC---ACAGTACAATGTACACATGGAATTAGGCCAGTAGTGTCAACT---  
CAACTGCTGTTAAATGGCAGTACTAGCAGAAGAAGA-----  
GACAGTAGTAGATCTAAAAATTTCTCAGACAAT-----GCTAAAAATATAATAGTGCAGCTAAAT----  
-----GAAACTGTAAAA-----ATTGATTGTATAAGACCCAGCAACAATACAAGAAGG-----  
-AGTATACACATG-----GGATGGGGGAGAGCA--ATT-----TATACAACAGGAGAC-----  
-----ATAATAGGAGACATA-----AGACAAGCACATTGT---AATGTTAGTGCAGGA---  
ARATGGAATAACACTTTAAGACTGATAGCTATAAAATTAATG-----GAACAATTTCCA---  
-----AATAAAACAATAATCTTTAAT-----  
GAATCCACAGGAGGGGACCCAGAAGTAGAA--CTGCACATGACTAATTGTGGAGGGGAA---  
TTTAAGCAGCTCCAGGCAAGAGTCCTGGCTGTGGAAAAGATACCTAAGGGATCAACAGCTCCTAGGGATTTGGG  
GTTGCTCTGGAAAACTCATTTGCACCACCTCTGTGCCTTGGAATGCTAGTTGGAGT-----  
-----AATAAATCTTATGATAAGATTTGG-----AAT-----  
AACATGACCTGGATGCAGTGG---GAGAGAGAAATTGACAATTACACAGACTTTATATAC---  
AATTTACTTTGAAGAATCGCAAAACCAACAAGAA-----  
-----  
AAGAATGAACAAGAATTATTGGAATTAGATAAGTGGGCAAAATTTGTGGAATTGGTTTGATATATCMACTGGC  
TGTGGTATATAAAAATATTYATAATGATAGTAGGAGGCTTAATAGGTTTAAAGAATAATTTTTTACT---  
GTACTTTCTATAGTG-----AATAGAGTTAGGCAGGGATACTACCA-----

TTGTCGTTTCGCTGTTAATTTGCTTAATTTTCATAGCTATAGCAGTAGCTGAG---  
 GGAACAGATAGGATTATAGAAGTAATACAAGGAATTGGTAGAGCT-----  
 -----TTCTCCACATA-----CCAAGAAGAATAAGACAGGGCTTAGAAAGGCTTTTGCTA---TAA  
 >KT427713  
 GCT---ACA-----  
 AAAAAATTTGTGGGTCACAGTCTATTATGGGGTACCTGTGTGG---AAAGATGCAACC---  
 ACCACCCTATTCTGTGCATCAGATGCTAAAGCATATGATACAGAG---GCACATAAT-----  
 -----GTTTGGGCCACA---CATGCCTGTGTACCCACAGAC---  
 CCCAGCCCACAAGAAGTAGWRTTARAM-----AATGTGACAGAAAATTTTAAC-----  
 -----ATGTRGAAAAATAATATRGTAGAACAGATGCAAGAGGATGTA---  
 ATTAGTTTATRRGATGAAAGCCTA---AAGCCATGTGTAAAATTA---  
 ACCCCACTCTGTGTTACCTTAAATTGCACTGATTGGGACAATAATGCCAATAGT-----  
 -----  
 -----AGTAGTGTGAATAAGATAGACAAAGGAGAAATAAAA---  
 AACTACTCTTTCAATATCTCCACAAATCTGAAA-----  
 GATAAGAAACAGAAAGAATATGCACTC---TTTTATAAACTTGATGTAGTATCAATAGATAAT-----  
 -----  
 -----  
 AGTAATACTAGCTATAGTTTAATAAGTTGTAACACCTCAGTTGTTACACAG---  
 GCCTGTCCAAAGGTATCTTTTGAGCCAATTCCCATACATTATTGTGCCCCGGCTAGTTTGCATTCTAAAGT  
 GTAAA---GATAAGAACTTCAAT-----GGAACARGATTATGTCAAAAT-----  
 -GTCAGC---ACAGTACAATGTACACATGGAATTAAACCAGTGGTATCAACT---  
 CAATTGCTGTTAAATGGCAGTCTAGCAGAAGGAGAG-----  
 ATAGTAATTAGATCTGAAAATTTCCACAAACAAT-----GCTAAAACTATAATAGTACAGCTGAAT---  
 -----GAAGCTGTAGAA-----ATTAATTGTACAAGACCCAACAACAACACAAGGAAA---  
 -AGTATAAATATA-----GGACCAGGGAGAGCC---TTT-----TATACAACAGGAGAC-----  
 -----ATAATAGGAAATATA-----AGACAAGCACATTGT---AACATTAATGGAACA---  
 AAATGGACTAACATGTTAAACAGTTAGCTACAAAATTAAGA-----GAACAATTTAAT---  
 -----AATACAACAACAATAGTCTTTAAT-----  
 AGCTCCTCAGGAGGGGACCCAGAAATTGTA---ATGCACAGTTTTAATTGTGGAGGGGAA---  
 TTTAAACAGCTCCAGGCAAGAGTCCCTGGCTGTGGAAAGATACCTAGGGGATCAACAGCTCCTGGGAATGTGGG  
 GTTGCTCTGGAAGAACTCATCTGCACCACTGCTGTGCCTTGGAAATGCTAGTTGGAGT-----  
 -----AATAAATCTCAGGATGACATTTGG-----AAT-----  
 AACATGACATGGATAGAATGG---GAAAGAGAAATTAGCAATTACACAGGCGTCATATAC---  
 AGCTTACTTGAAGAATCGCAGAACCAACAAGAA-----  
 -----  
 AAGAATGAACAAGAATTATTGGCATTAGATAAATGGGCAAGTTTATGGAATTGGTTTAACATAACAACTGGC  
 TGTGGTATATAAAAATATTATAATGATAGTAGGAGGCTTGGTAGGTCTAAGAATAGTCTTTTCT---  
 GTACTTTCTCTAGTG-----AATAGAATTAGGCAGGGATACTACCA-----  
 TTATCGTTGGCTGTTAGCTTGTTTGATGCCATAGCCATAGCAGTAGCTGAG---  
 GGGACAGATAGGGTTATAGAAGTATTACAAAGAATTGGTAGAGCT-----  
 -----ATTCTCCACATA-----CCTGTAAGAATAAGACAGGGCCTAGAAAGGGCTTTTGCTA---TAA  
 >KT427870  
 GCT---TCA-----  
 GAAAAGTTATGGGTCACAGTCTATTATGGGGTACCTGTGTGG---AGAGAAGCATCC---  
 ACCACTCTATTTTGTGCATCAGATGCTAATGCAGCTAACACAGAG---GTGCATAAT-----  
 -----GTTTGGGCCACA---CATGCCTGTGTACCCACAGAC---  
 CCTAATCCACAAGAAGTAGTATTGGAA-----AATGTGACAGAAAATTTTAAC-----  
 -----ATGTGGAAAAATAACATGGTAGAACAAATGCATGAGGATATA---  
 ATCAGTTTATGGGATGAAAGCCTA---AAGCCATGTGTAAAATTA---  
 ACCCCACTCTGTGTTACTCTAAATTGCACTAATTTGAATATTACTAATAATAATAGTACA-----  
 -----  
 -----AGTAATAGTAGTGTTTCAGGAATCGGGAGAAATGAAA---  
 AATTGCTCTTTCAATATCACCACAAGCCTAAAA-----  
 GATAAGAAGAAGAAAGAATATGCGCTT---TTTTATAAACTTGATATAGAACAAATAGATAAT-----  
 -----  
 -----  
 ACAAGCTATACATTGATAAATTGTAACACCTCAGTCATTACACAG---  
 GCCTGTCCAAAGGTATCCTTTGAACCAATTCCTATACATTATTGTACCCCAGCTGGTTTTGCGATTCTAAAGT  
 GTAAT---AATAAGACGTTCAAT-----GGAACAGGACCATGTACAAAT-----

-GTCAGC---ACAGTACAATGTACACATGGAATTAAGCCAATAGTGTCAACC---  
 CAACTGCTGTAAATGGCAGTCTAGCAGAAGAAAAG-----  
 ATAGTAATTAGGTCTGAAAGTTTAAACAAACAAT-----GCAAAAGTCATAATAGTACAGCTGAAT----  
 -----AAATCTGTAGAA-----ATTAATTGTACGAGACCCAACAACAATACAAGAAAA-----  
 -AGTATACATATG-----GGATGGGGGAGGACA---TTG-----TATGCAACAGGAGAA-----  
 -----ATAATAGGAAACATA-----AGACAAGCACATTGT---AACCTTAGCAGGGTA---  
 AATTGGAACAACACTTTAAGACAGATAGCTGGAGAATTAAGA-----GCAATATTT-----  
 -----AATAAAACAATAATCTTTAAT-----  
 CAGTCCTCAGGAGGGGACCCAGAAATTGAA---ATGCACACTTTTAATTGTGGAGGGGAA---  
 TTTAAGCAGCTCCAGGCAAGAGTCCTGGCTGTGGAAAGATACCTACAGGATCAACGGCTCCTAGGAATTTGGG  
 GTTGCTCTGGA-AACTCATCTGCACCACTGCTGTGCCTTGGAATACTAGTTGGAGT-----  
 -----AATAAATCTCTGAATGCAATTTGG-----GAA-----  
 AACATGACCTGGATGGAGTGG---GAGAGAGAAATTGACAAATTACACAACCTTAATATAC---  
 ACCTTAATTGAAGAATCGCAGAGCCAGCAGGAA-----  
 -----  
 AAGAATGAAAAGGAATTATTGGAATTGGATAAGTGGGCAAGTTTGTGGAATTGGTTTGACATAACACACTGGC  
 TGTGGTATATAAAAATATTTCATAATGATAGTAGCAGGCTTAGTAGGTTTAAGAATAGTTTTTTACT---  
 GTAATTTCCATAGTG-----AATAGAGTTAGGGAGGGATACTCACCA-----  
 TTATCATTCGCTGTTAGTTTGTCTAATACCACAGCTATAGCAGTAGCTGAG---  
 GGGACAGATAGGATCATAGAAATAGTACAAAGAATTGCTAGAGCT-----  
 -----ATCCTCCATATA-----CCTAGAAGAATAAGACAAGGATTGAAAGGGCTTTGCTA---TAA  
 >KT427707  
 GCT---GAA---GAA-----  
 GAAAAATCATGGGTACAGTCTATTATGGGGTACCTGTGTGG---AAAGAGGCAACC---  
 ACCACTCTATTTTGTGCATCAGATGCTAAGGCATATGACACAGAG---GTACATAAT-----  
 -----GTTTGGGCCACA---CATGCCTGTGTACCCACAGAC---  
 CCTAGCCCACAAGAAGTAGTATTGGAA-----AATGTGACAGAAAATTTTAAT-----  
 -----ATGTGGA AAAATGACATGGTAGATCAGATGCATGAGGATGTA---  
 ATCAGTTTATGGGATCAAAGCCTA---AAACCATGTGTAAAATTA---  
 ACCCCACTCTGTGTYACTCTAAATTGCAYTAATTGTGCCAATACTACTAATACTACTACTACTACTAATA  
 CTACTGATAGT-----  
 -----AAGATGGAGGGAGAAATAAAA---  
 AACTGCACTTTCAATGTCAACCACAAGCATAAAA-----  
 AATAGGGTGAAAAAAGAATATGCACTT---TTTAATACACTTGATTTAGTACCAATAGATAAA-----  
 -----  
 -----  
 GATAATACAAGCTATATGTTGATAAGTTGTAACACCTCAGTCATTACACAG---  
 TCTTGTCCAAAGGTGACCTTTGAACCAATTCCCATACATTATTGTGCCCCAGCTGGTTTTGCGATTCTACRAT  
 GTAAT---GATAAGAAATTCAAT-----GGAACAGGGCCATGTAGAAAT-----  
 -GTCAGC---ACAGTACAATGTACACATGGAATTAGGCCAGTAGTGTCAACT---  
 CAACTGCTGTAAATGGCAGCCTAGCAGAAGAAGAG-----  
 GTAGTAATTAAATCTGAGAATTTCTCAAACAAT-----GCTAAAACCATAATAGTACAGCTAAAT---  
 -----AGCTCTGTAACA-----ATTAATTGTACAAGACCCAACAACAATACAAGGAAA---  
 -AGTATACATATA-----RRACCGGRAAAAACA---TTT-----TATGCAACAGAAGCA-----  
 -----ATAATAAAAAATATA-----AGACAAGCACATTGT---AACCTTAGTAAAACA---  
 GAATGGGACCAAGCTTTAATGCACACAGCTACAAAATTA AAA-----GAGCAATTT-----  
 -----AATAAAACAATAATCTTTAAT-----  
 GCATCCTCAGGAGGGGACCCAGAGATTGTA---ATGCACACTTTTAATTGTGGAGGGGAA---  
 TTTAAGCAGCTCCAGGCAAGAGTCCTGGCTGTGGAAAGATACCTAAAGGATCAACAGCTCCTAGGGATTTGGG  
 GTTGCTCTGGA-AACTCATCTGCACCACTACTGTGCCCTGGAATGCTAGTTGGAGT-----  
 -----AATAAATCTCTGAGTACAATTTGG-----GAT-----  
 AACATGACCTGGATGCAGTGG---GAGAAAGAAATTGACAAATTACACAGGCTTAATATAC---  
 ACTTTACTTGAAGAATCGCAAAACCAACAAGAA-----  
 -----  
 AAGAATGAACAAGAATTACTGGCATTGGATAAGTGGGCAAGTTTGTGGAGTTGGTTCAAATATCAAACCTGGC  
 TGTGGTATATAAGAATATTTCATAATGATAGTAGGGGGCTTAATAGGTTTAAGAATAGTTTTTTGCT---  
 GTGCTTTCTATAATC-----AATAGAGTTAGGCAGGGATACTCACCA-----  
 TTGTCAATTCGCTGTTAGTCTGCTTAATGCCACAGCTATTGCAGTAGCTGAG---  
 GGGACAGATAGGATTATAGAGGTAGGACAAAGATTTGGTAGGGGT-----  
 -----ATCCTCCACGTA-----CCTAGAAGAATAAGACAGGGCTTAGAAAAGGGCTTTGCAA---TAA

>KT427873

GCT---ACA-----  
GAAAAGTTGTGGGTCACAGTCTATTATGGGGTACCTGTGTGG---AAAGACGCAAGC---  
ACCACTCTATTTTGTGCCTCAGATGCTAAAGCATATGACAGAGAG---GTACATAAT-----  
-----GTTTGGGCCACA---CATGCCTGTGTACCCACAGAC---  
CCCAACCCACAAGAAGTAGTATTGGAA-----AATGTGACAGAAGAATTTAAC-----  
-----ATGTGGAAGAATAACATGGGTAGAACAGATGCATGAGGATATA---  
ATCAGTTTATGGGATCAAAGCCTA---AAGCCATGTGTAAAATTA---  
ACCCCACTCTGTGTTACTCTAAATTGCACGGATGTGAAGAATACAAGTGTTACGGAAAAT-----  
-----  
-----GTATACAATACAGACATGAAA---  
AACTGCTCTTTCAATGTCACCGCAAGCATAAAA-----  
GATAGGATTCATCAGGAATATGCATTA---  
TTTTATAAGCTTGATATAGTGCCAATAGATAATAGAGATAATAGT-----  
-----  
AATATTACAGAGAATGGTACTAGGGAATATAGGTTGATAAATTGTAACACCTCAGTCATTACACAG---  
GCCTGTCCAAAAGTATCATTTGAACCAATTCCCATACATTATTGTACCCCGGCTGGTTTTGCGATTCTAAAGT  
GTAAT---GACAAACAGTTTCAGT-----GGAAAAGGAGACTGTAAAAAT-----  
-GTTAGC---ACAGTACAGTGCACACACGGAATTAGGCCAGTAGTGTCAACT---  
CAACTGCTGTTAAATGGCAGTCTAGCAGAAGGAAAT-----  
GTGACAATTAGATCTGACAATTTACAGACAAT-----ACTAAAACCATAATAGTACAACCTGAAT---  
-----GAAAGTATAGAA-----ATTAATTGTACAAGACCCAACAATAATACAAGAAGA---  
-AGTATACCTATA-----GGACCAGGGAGAGCA---TTT-----TATGCAACAGGAGAT-----  
-----ATAATAGGAGATATA-----AGACAAGCACATTGT---AACATTAGTAAAGGC---  
CAATGGAATGACACTTTAAAAAAGATAGTTGAACAATTAAGA-----GAAAAATTCCCA---  
-----AATAAAACAATAGTCTTTAAT-----  
CAATCTGCAGGAGGGGATCCAGAAATTGTA--ATGCACAGTTTTATCTGTGGAGGGGAA---  
TTTAAACAGCTCCAGGCGAGAGTCCTGGCTGTGGAAAGATACCTAAGGGATCAACAGCTCCTAGGGATTTGGG  
GTTGCTCTGGAAACTCATTTGCACCACTACTGTGCCTTGGAAATAATAGTTGGAAT-----  
-----AATAAATCTCTGGAAGAAATTTGG-----AAT-----  
AACAGGACATGGATGCAGTGG---GAAAAGAAATTGAAAATTACACAGACTTAATATAC---  
AACTTACTTGAAGAATCGCAGAACCAGCAAGAA-----  
-----  
AAGAATGAACAAGAATTGTTGGAATTGGATAAGTGGGCAAGTTTGTGGAATTGGTTTGATATAACAAAATGGC  
TGTGGTATATAAAAATATTCTAATGATAGTAGGAGGCTTGATAGGTTTAAAGAATAGTTTTTGTCT---  
GTACTTTCTATAGTA-----AATAGAGTTAGGCAGGGATATTCACCA-----  
TTGTCATTGGCAGTTAGCTTGCTCAATGCTACAGCTATAGCAGTAGCTGAG---  
GGAACAGATAGGATTATAGAAGTAGTACAAAGAATTGGTAGAGCT-----  
-----ATTCTCCACATA-----CCTAGAAGAGTGAGACAGGGCTTAGAAAGAGCTTTGCTA--TAA

>KT427695

GCT---GCA-----  
GATCAATCATGGGTCACAGTATATTATGGGGTACCAGTGTGG---AAAGAAGCAAGC---  
ACCACTTTATTTTGTGCATCAGATGCTAAATCATATGACACAGAG---GCACACAAT-----  
-----GTTTGGGCCTCA---CATGCCTGTGTACCCACAGAC---  
CCTAACCACACAAGAAATAGTATTGAAA-----AATGTGACAGAAAATTTTAAT-----  
-----ATGTGGAAAAATAACATGGGTAGAACAGATGCATGAGGATATA---  
ATCAGTTTATGGGATCAAAGCTTA---AAGCCATGTGTAAAATTA---  
ACCCCAMTTTGTGTTACGTTAAATTGCACAGATGYGAACAACAATGGCACGRACAACAGT-----  
-----  
-----GGCAATTTTAGCACTGAGGTGAAGGGAGAAGTAAAA---  
AATTGCTCTTTCAATGCTACCACAGGAATTGGG-----  
AACAAGGTGAAGGGACAATATGCACCT--TTTAATACAATTGATATAAAGCAACTAGGTGAG-----  
-----  
-----  
GATAATACAACCTATATGTTAACACATTGTAACACCTCAGTCATTACACAG---  
GCATGTCCAAAGGTATCCTTTTCAGCCAATTCCCATACATTATTGTACCCCGGCTGGTTTTGCGATTCTAAAGT  
GTAAC---GATGGGAAATTCAAT-----GGAACAGGACCATGTACAAAT-----  
-GTCAGC---ACAGTACAATGTACACATGGAATTAAGCCAGTGGTGTCAACT---  
CAACTACTGTTAAATGGCAGTCTAGCAGAAGGAGAG-----  
GTAGTAATTAGATCTGAAAATTTCAAAACAAT-----GTAAAACCATAATAGTACAGCTGAAT---

-----GAATCTGTAGTA-----ATTAATTGTACAAGACCCAACAACAATACAAGAAAA-----  
 -AGTATACATCTA-----GGATGGGGGAGGGCA---TTT-----TATACAACAGGAGAM-----  
 -----ATAATAGGTAATATA-----AGACAGGCACATTGT---AACCTTWCTGRAGYA---  
 GATTGGGCAAAAACCTYTAMAAACGGGTAGAAGMAAAATTAAAG-----GCAAAATTT-----  
 -----AATAAAACAATACACTTTAAC-----  
 AGTTCCTCAGGAGGAGACCCAGAACTTGTA--ATGCACACTTTTAAATTGTGGAGGGGAA---  
 TTTAAGCAGCTCCAGGCAAGACTCCTGGCTGTAGAAAGATACCTAAAGGATCAACAGCTCCTAGGGATTGGG  
 GTTGCTCTGGAAAACCTCATCTGCACCACTACTGTGCCTTGGAATGCTAGTTGGAGT-----  
 -----AATAAATCTCTGAATGAGATTTGG-----AAT-----  
 AACATGACCTGGATAGAGTGG---GAGAGAGAAATTGACAATTACACAGAATTAATATAC---  
 ACCTTACTTGAAGAATCGCAAAACCAACAAGAA-----  
 -----  
 AAGAATGAACAAGAATTATTGGCATTGGATAAGTGGGCAAGTTTGTGGAATTGGTTTGACATATCAAAATGGC  
 TGTGGTATATAAAGTTATTTCATAATGATAGTAGGAGGCTTAGTAGGTTTAAGAATAGTTTTTACT---  
 GTGCTTTCTATAGTG-----AATAGAGTTAGGCAGGGATACTCACCA-----  
 TTGTCATTTCGCTATCAGCTTGCTTAATGCTACAGCTATCACAGTAGCTGAG---  
 GGAACAGATAGGATTATAGAAGTAGTGCAAGAATTGGTAGAGCT-----  
 -----ATTCTCAACATA-----CCTACAAGAATAAGACAAGGCTTGGAAGGGCTTTGCTG---TAA  
 >KT427785  
 GCT---ACA-----  
 GAACAGTTGTGGGTCACAGTATATTATGGGGTACCTGTGTGG---AAAGAAGCAACC---  
 ACCACTCTATTCTGTGCATCAGATGCTAAAGCATATAGTCCAAAG---GCACATAAT-----  
 -----GTTTGGGCCACA---CATGCCTGTGTACCCACAGAC---  
 CCCAACCCACAAGAAATAGTATTGGAA-----AATGTGACAGAAAATTTTAAAC-----  
 -----ATGTGGAATAAACATGGTAAACAGATGCATAAAAATATA---  
 ATCAGTTTATGGAATAAAAGCCTA---AAGCCATGTGTAAAATTA---  
 ACCCCACTCTGTGTTACTTTAGAGTGCAAGAATCCTAAGCCCACTAATACTAATGCCAATAATACTGGTGCCA  
 CTATTAATAGC-----  
 -----ACAGGACAGGGAAAAATAAAA---  
 AACTGCTCTTTCAATATTACCACAAACATAAGA-----  
 GATAAGGTGCAGAAACAACGTGCACTT---  
 TTTTATAACCTAAATATAGTACAAATAAATAAAAAAAAAAGATAAT-----  
 -----  
 AGAACTAAGAATAATAATAAACTAAATATAGGTAAATAAGTTGTAATACCTCAGTCCTTACACAG---  
 GCCTGTCCAAAGGTATCCTTTAAGCCAATTCCCATACATTTTTGTGCCCCAGCTAGTTTGGCATTCTAAAGT  
 GTAAT---AATAAAAATTTCAAT-----GGGAAAGGACCGTGTACAAAT-----  
 -GTCAGC---ACAGTACAATGTACACATGAAATTAAACCAGTGGTATCAACT---  
 CAACTACTGTAAATGGCAGTCTAGCAGAAAAAAAT-----  
 GTAGTAATTAAATCTGAAAATTTACAGACAAT-----GCTAAACTATAATAGTACAGCTGAAA---  
 -----AAAAATATAACA-----ATTAAGTGTGTAAGACCCAACAATAACAAGAACA---  
 -AGTATACCTATA-----GGACCAGGGAGAGCA---TTC-----TATGCAACAGGTGAT-----  
 -----ATAATAGGAGATATA-----AGACAAGCACACTGT---AACCTTAGTAAAAAA---  
 GCATGGTATAACGCTTCAGTACAAATATTTAAAAAATTACAA-----AGACAATTTGGG---  
 -----AACAAAACAACAATAGTTTTTAAT-----  
 CAATCCTCAGGAGGGGACCCAGAAATTGTA---AAGCTTACTTTTAAATTGTGGAGGGGAA---  
 TTTAAGCAGCTCCAGGCAAGAGTCCCTGGCTGTAGAAAGATACCTAAAGGATCAACAGCTCCTGGGAATTTGGG  
 GTTGCTCTGGAAAACCTCATTTGCACCACTGCTGTGCCTTGGAATGCTAGTTGGAGT-----  
 -----AATAAGACTCTACATGAGATTTGG-----GAT-----  
 AACATGACCTGGATGCAATGG---GAAAGAGAAATTGACAATTACACAAGCTTAATATAC---  
 ACTTTAATTGAAGAATCGCAGAACCAACAGGAA-----  
 -----  
 AAGAATGAACAAGAATTATTAGAATTAGATAAATGGGCAAATTTGTGGAATTGGTTTGATATAACAACTGGC  
 TGTGGTATATAAAAATATTTCATAATGGTAGTAGGAGGTTTGATAGGGTTAAGAATAGTTTTTACT---  
 GTACTTTCTATAGTG-----AATAGAGTTAGGCAGGGATACTCACCA-----  
 TTGTCGTTTGTGTTAGCTTGCTCAACGCCACAGCCATAGCAGTAGCAGAG---  
 GGAACAGATAGGGTTATAGAGATAATCCAAAGAGCTGTTGGAGCT-----  
 -----ATCCTCAATATA-----CCTAGAAGAATAAGACAGGGCTTCGAAAGGGCTTTACTA---TAA  
 >KJ849814  
 GCA-----  
 GAAGACATGTGGGTCACAGTATATTATGGGGTACCTGTGTGG---AAAGAAGCAACC---

ACCACTCTATTTTGTGCATCAGATGCTAAAGCATATGACACAGAA---GCACATAAT-----  
 -----GTTTGGGCCACA---CATGCCTGTGTACCCACAGAC---  
 CCTAGTCCACAAGAAGTAAAATTGGTA-----AATGTGACAGAAAATTTTAAC-----  
 -----ATGTGGAAAAATAACATGGTGGACCAAATGCATGAGGATGTA---  
 ATCAGTTTATGGGATCAAAGCCTA---AAGCCATGTGTAAAATTA---  
 ACCCCACTCTGTGTCACTTTAAATTGCACTGATTATAAAAAAGAATTCAACGAGCAAT-----  
 -----  
 -----AATGCCACTAGTAGTCCAACAGACTCAGACATGAAA---  
 AACTGCTCTTTCAATGTTACTACAAGAATAGGA-----  
 AATAAGATGCAAAAAGAATATGCACTT---TTTTATAAGCTTGATGTAAACACCAATAGATAAT-----  
 -----  
 -----  
 AATGGTAATAGTACAGACTACATATTGATAAATTGTAACACCTCAGTCATTACACAG---  
 GCCTGTCCAAAGGTATCCTTTGAACCAATTCCCATACATTATTGTGCCCCGGCTGGTTTTGCATTCTAAAGT  
 GTAAT---GATAAGAACTTCAAT-----GGAACAGGACCATGTGAAAAT-----  
 -GTTAGC---ACAGTACAATGTACACATGGAATTAGGCCAGTAGTGTCAACT---  
 CAATTGTTGTAAATGGCAGTCTAGCAGAAACAGAG-----  
 ATAGTGATCAAATCTGAGAATTTCAAAATAAT-----GCTAAAACCATAATAGTGCAGCTGAAC---  
 -----GAATCTGTAGTG-----ATTAATTGTACAAGACCTAGCAACAATACAAGAAAG-----  
 -AGTATATCTTTA-----GGATTTGGGAGAGCG---CTA-----TATGCAACAGGAGAA-----  
 -----ATAATAGGAAATATA-----AGACAAGCACATTGT---AACATTAGTAAAGCA---  
 AAATGGGAAACTACTTTAAGCAGGACTGCTGAAAAATTAAGA-----AAACAATTTAGG---  
 -----GAGAACACAACAATAATCTTTAAC-----  
 AGTTCTTCAGGAGGGGACCCAGAAATTGTA---ATGCACACTTTTAATTGTGGAGGGGAA---  
 TTTAAACAGCTCCAGGCAAGAGTCCTGGCTCTGGAAAGATACCTATGGGATCAACAGCTCCTAGGGATTTGGG  
 GTTGCTCGGGAAAAATCATCTGCAACACTGCTGTGCCCTGGAATGCTAGTTGGAGT-----  
 -----AATAAATCTCTTAACACAATTTGG-----GAT-----  
 AACATGACTTGGATGCAGTGG---GAGAAAGAAATTGAAAATTACACAGGCTTAATATAC---  
 AATTTGCTTGAAGAATCGCAGAACCAGCAAGAA-----  
 -----  
 AAAAAAGAACAAGATTATTGGAATTGGATAAGTGGGCAAGTTTGTGGAATTGGTTTGACATAACAAATTGGC  
 TGTGGTATATAAAAAATATTACATAATGATAGTAGGAGGCTTAATAGGTTTAAAGAATAGTTTGTATT---  
 GTACTTTCTATAGTG-----AATAGAGTTAGGCAGGGATACTACCA-----  
 TTGTCATTCTGCTGTTAGTTTGTCTGATGCAATAGCTGTAGCAGTAGCTGAA---  
 GGAACAGATAGGGTTATTGAAATAATACAAAGATTTGTTAGGGGC-----  
 -----ATTCTCCACATA-----CCTACAAGAATCAGACAGGGCTTAGAAAGGGCTTTGCTA---TAA  
 >KT427771  
 GCT---AAG-----  
 GAAAAATTTGTGGGTACAGTCTATTATGGGGTGCTGTGTGG---AGAGACGCAAAC---  
 ACCACTCTATTTTGTGCATCAGATGCTAAGGCATATGATACAGAG---GTACATAAT-----  
 -----GTTTGGGCCACA---CATGCCTGTGTACCCACAGAC---  
 CCCAACCCACAAGAAGTACTATTGGAA-----AATGTGACAGAAAATTTTAAT-----  
 -----ATGTGGAAAAATAACATGGTGAACAGATGCAGGAGGATGTA---  
 ATCAGTTTATGGGATCAAAGTCTA---AAACCATGTGTACAATTA---  
 ACCCCACTCTGTGTTACTTTAAATTGCACTGACAATTGGAGGAATGATACCAATAGTACT-----  
 -----  
 -----AGCTTGGACATGAAAGGAGAAATAAAA---  
 AACTGCTCTTTTAATGTCACCACAGACGTAAGA-----  
 GATAAGATGCACAAAGATTATGCACTT---TTTTATAAGCTTGATGTAGTACAAATAGATACTAAT-----  
 -----  
 -----  
 GATAATACTAGCTATAGGTTGATAAGTTGTAACACCTCAGTCCTTACACAG---  
 GCCTGTCCAAAGGTATCCTTTGAGCCAATTCCCATACATTTTTGTGCCCCGGCTGGTTTTGCGATTCTAAAGT  
 GTAGA---GACAAAAGATTCAAT-----GGAACAGGACTATGCAAAAAT-----  
 -GTCAGC---ACAGTACAATGCACGCATGGAATTAGGCCAGTGGTGTCAACT---  
 CAACTGCTGTTAAATGGCAGTCTAGCAGAAGATGAG-----  
 GTAGTAATTAGGTCTGAAAAATTCACGAACAAT-----GCTAAAACCATAATAGTACAGCTGAAA---  
 -----AAGGCTGTAAAC-----ATTACTTGTGTAAGACCCAACAACAATACAAGAAGA---  
 -AGTATACCTATA-----GGACCAGGAAGAGCA---TTT-----TATACAACAGGGCAA-----  
 -----ATAATAGGAGACATA-----AGACGAGCATATTGT---AACCTTAGTAGAGCA---

GACTGGAATAAGACTTTAGAACAGATAGCTAAAGAATTAAGA-----GAACAATTTGGG----  
 -----AAAAATAAAACAATAGTCTTTACT-----  
 CAATCCTCAGGAGGGGACCTAGAAATTGTA--ACACACAGTTTTTAATTGTGGAGGAGAA--  
 TTTAAGCAGCTCCAGGCAAGAATCCTAGCTGTGGAAAGATACCTAGGGGATCAACAGCTCCTAGGGATGTGGG  
 GTTGCTCTGGAAACTCATTTGCACCACTGCTGTGCCTTGAATGCTAGTTGGAGT-----  
 -----AATAAATCTTACAATGAAATTTGG-----GAT-----  
 AACATGACCTGGATGCAGTGG--GACAAAGAAATTAACAATTACACACAGTTAATATAC--  
 ACCTTAATTGAAGTTTCACAAAACCAGCAAGAA-----  
 -----  
 CAGAATGAACAGAAATTGTTGGAATTGGATAAATGGGACAGTCTGTGGAAGTGGTTTAGTATAACAACTGGC  
 TGTGGTATATAAAAATATTCATAATGATAGTAGGAGGCTTAATAGGTTTAAGAATAGTTTTATCT--  
 GTACTTTCTATAGTG-----AACAGAGTTAGGCAGGGATACTCACCA-----  
 CTATCGTTTGTGCTGTTAGCTTGCTTAATGTACAGCTATAGCAGTAGCTGAG--  
 GGGACAGATAGGATTATAGAACTAGCACAAACAATTGTTAGA-----  
 -----GGACGAGAATGGGAA--TAA  
 >KT427753  
 GCT--ACA-----  
 GAACAATTGTGGGTCACAGTATATTATGGGGTACCTGTGTGG--AAAGAAGCAACT--  
 ACCACTCTATTTTGTGCATCAGATGCTAAGTCATATGAGACAGAG--GTACATAAT-----  
 -----GTTTGGGCCACA--CATGCCTGTGTACCCACAGAC--  
 CCCAACCCACAAGAAATGGACTTGRAA-----AATGTGACAGAAAATTTTAAC-----  
 -----ATGTGGAAAAATAACATGGTAGAACAGATGCATGAGGATATA--  
 ATCAGCTTATGGGATCAAAGCCTA--AAGCCATGTGTAAAATTA--  
 ACCCCACTATGTGTTACTTTAAATTGCACTGATAATTTGRATGRTACTAATATCAATGGTACG-----  
 -----  
 -----RRCARKGCTAATCTCACAGGAAGGATAGASAAGGGAGAAATAAAA--  
 AACTGCTCTTTCAATGTCAACCACAAGCATAAGA-----  
 GATAAGGTACAGAAACAATATGCACTT--TTTTATAATATGGATATAGTACAAATAGATGATGATAATAAA-  
 -----  
 -----  
 AATATACTAATAATTATACTAGCTATAGATTAACAAGTTGTAACACCTCAGTCATTACACAG--  
 GCCTGTCCAAAGGTATCCTTTGAACCAATTCCCATACATTATTGTGCCCCAGCTGGTTTTGCGATTCTAAAGT  
 GTAAG--GATAAGAAGTTCAAT-----GGAACAGGACCGTGTAATAAT-----  
 -GTCAGT--ACAGTACAATGTACACATGGAATTAGGCCAGTGGTATCAACT--  
 CAACTATTGTTAAATGGCAGTCTAGCAGAAGAAGAG-----  
 GTAGTAATCAGATCTGAGAATATCACAGATAAT-----GCTAAACTATAATAGTACAGCTGAAC--  
 -----AAACTGTAATA-----ATTAATTGTACAAGACCCAACAATAACAAGAAAA--  
 -AGTATACCTATA-----GGACCAGGGAAAGCA--TTT-----TATGCAACA--GAC-----  
 -----ATAATAGGAGATATA-----AGACAAGCACATTGT--AACATTAGTAGAACA--  
 AACTGGAATAACACTTTAAAGAAAAATAGTTGAAAAATTAGGA-----ACACAATTTGGG--  
 -----AAGAATAAACTATAGTCTTTCAA-----  
 CACTCCTCAGGAGGGGACCCAGAAGTTACA--ATGCACACTTTTATTTGTGGAGGGGAA--  
 TTTAAACAGCTCCAGGCAAGAGTCCTGGCTGTGGAAAGATACCTAAAAGATCAACAGCTCCTGGGGATTTGGG  
 GTTGCTCTGGAAACTCATTTGCACCACCTCTGTGCCTTGAATGCTAGTTGGAGT-----  
 -----AATAAATCTCTAGATTATATTTGG-----AGT-----  
 AACATGACGTGGATGCAGTGG--GAAAAAGAAATTGACAATTATACAGGGACAATATAC--  
 GAATTAATTGAACAATCGCAAAACCAACAAGAA-----  
 -----  
 AAGAATGAACAAGAATTATTGGAATTAGATAAATGGGCAAGTTTGTGGAATTGGTTTAATATAACACAATGGC  
 TGTGGTATATAAAAATATTCATAATGATAGTAGGAGGATTAATAGGTTTAAGAATAGTTTTTACT--  
 GTAATTTCTATAGTG-----AATAGAGTTAGGCAGGGATACTCACCA-----  
 TTATCGTTGGCTGTTAGCTTGCTAAACGCCACAGCTATAGCAGTAGCAGAG--  
 GGGACAGATAGGGTTATAGAGGCACTCCAAAGAATTGGTAGAGCT-----  
 -----ATTATCAACATA-----CCTACAAGAATAAGACAGGGCTTCGAAAGGGCTTTGCTA--TAA  
 >KT427749  
 GCT--ACA-----  
 GAACAACCTGTGGGTCACAGTATATTATGGGGTACCTGTGTGG--AAAGAAGCAACT--  
 ACCACTCTATTTTGTGCATCAGATGCTAAATCATATGATACAGAG--GTACATAAT-----  
 -----GTTTGGGCCACA--CATGCCTGTGTACCCACAGAC--  
 CCCAACCCACAAGAAATGAAATTGGAA-----AATGTGACAGAAAATTTTAAC-----

-----ATGTGGCAAAATAACATGGTAGAACAGATGCATGAGGATATA---  
 ATCAGCTTATGGGATCAAAGCCTA---AAGCCATGTGTAAAATTA---  
 ACCCCACTATGTGTTACTTTAAATTGCACTGATTGGGGGAATAGTACTGCTGCCAATGTTACG-----  
 -----  
 -----AGCAGTGCTAGTTTTCACAGGAAAGATAGAGAAGGGAGAAATAAAA---  
 AACTGCTCTTTCAATATCTCCACAAACATAGAA-----  
 GATAAGAGACAGAARCAATATGCACTT---TTTTATAAWATGGATGTAGTACAAATAAATGAT-----  
 -----  
 -----  
 GATAATAATACTAATAGCTATAGGTTAATAAGTTGTAACACCTCAGTCATTACACAG---  
 GCCTGTCCAAAGGTATCCTTTGAACCAATTCCCATACATTATTGTGCCCCAGCTGGTTTTGCATTCTAAAGT  
 GTAAA---GATAAGAAGTTCAAT-----GGAACAGGACCGTGTAAAAAT-----  
 -GTCAGC---ACAGTACAATGTACACATGGAATTAGGCCAGTGGTATCAACT---  
 CAACTACTGTAAATGGCAGCCTAGCAGAAGAAGAG-----  
 GTAGTAATTAGATCTGAGAATATCACAGATAAT-----ACTAAACTATAATAGTACAGCTGAAT----  
 -----GAAACTGTAAAG-----ATTAATTGTACAAGACCCAACAATAACAAGAAAA-----  
 -AGTATAACTATA-----GGACCAGGGAGAGCA---TTT-----TATGCAACAACAGAC-----  
 -----ATAATAGGAGATATA-----AGACAAGCACATTGT---AACATTAGTAGAACA---  
 GACTGGAATAACACTCTAAAGAAAATAGTTGAAAAATTAGGA-----ACACAATTTGGG---  
 -----AATAAACTATAGTCTTTTCGA-----  
 AACTCCTCAGGAGGGGACCCAGAAAGTTACA---ATGCATACTTTAAATTGTGGAGGGGAA---  
 TTTAAACAGCTCCAGGCAAGAGTCTGGCTGTAGAAAGATACCTACAGGATCAACGGCTCCTGGGGATTGGG  
 GTTGCTCTGGAAGAACTCATTTGCACCACTTCTGTGCCTTGGAATGCTAGTTGGAGT-----  
 -----AATAAATCCCTAGATTATATTTGG-----AGT-----  
 AACATGACCTGGATGCAGTGG---GAAAAAGAAATTGACAATTATACAGACTTAATATAC---  
 AGTTTAATTGAACAATCGCAGACCCAACAAGAA-----  
 -----  
 AAGAATGAACAAGAATTATTGGAATTAGATAAATGGGCAAGTTTGTGGARTTGGTTTAGTATAACACACTGGC  
 TGTGGTATATAAAAAATATTACATAATGATAGTAGGAGGATTAATAGGTTTAAAGAATAGTTTTTACT---  
 GTAATTTCTATAGTG-----AATAGAGTTAGGCAGGGATACTACCA-----  
 TTATCGTTTGTCTGTTAGCTTGCTCAACGCTACAGCCATAGCAGTAGCAGAG---  
 GGGACAGATAGAATTGTAGAAATACTCCAAAGGATTGGTAGAGCT-----  
 -----ATTATCAACATA-----CCTAGAAGAATAAGACAGGGCTTCGAAAGGGCTTTGCTA---TAA  
 >KT427826  
 GCT---GAC-----  
 CAACCATTTGTGGGTACAGTTTATTATGGGGTACCTGTGTGG---AAAGATGCAACC---  
 ACCACTCTATTTTGTGCATCAGATGCTGAAGCACATAGTACAGAG---AAACATAAT-----  
 -----GTTTGGGCCACA---CATGCCTGTGTACCCACAGAC---  
 CCCAGCCCACAAGAAATGAAATTGGAA-----AATGTGACAGAAAATTTTAAC-----  
 -----ATGTGGAATAATGATATGGTGGAAACAGATGCATGAGGACATA---  
 ATCAGTTTATGGGATGAAAGCCTA---AAGCCATGTGTAAAATTA---  
 ACCCCACTCTGTGTTACTTTACATTGCACTAATGCCAATGACACTAAGACTACTAATGCCACT-----  
 -----  
 -----GGCACTATTACAGAGCCAGGAGAACTGAAA---  
 AACTGCTCTTTCAATGTACCTCCAGCAGAAAT-----  
 GATAAGAAGAAAAACGAACATGCAATT---TTTAATGCACTTGATATAGTTCCAATAAGTGAGGATAAT---  
 -----  
 -----  
 ACTAATGATAATTATAGTTATATTTTGAAGAAGTTGTAATACCTCAGTCATTACACAG---  
 GCCTGTCCAAAGATATCCTTTGAGCCAATTCCCATACATTATTGTGCCCCGGCTGGTTTTGCATTCTAAAGT  
 GTAAC---AATGAAACGTTCAAT-----GGAACAGGACCATGTACAAAT-----  
 -GTTAGC---ACAATACAATGCACACATGGAATTAAGCCAGTAGTGTCAACT---  
 CAACTGCTGTAAATGGCAGCCTAGCAGAAAAAAG-----  
 ATAGTAATTAGATCTGCAACATATCAGATAAT-----GCTAAACTATAATAGTACACCTGAAT----  
 -----GCATCAGTAGAA-----ATTAATTGCACAAGACCCAACAACAATAACAAGGAAA-----  
 -AGTATAAATATA-----GGACCAGGGAGAGCA---GTG-----TATATGACAGGAGAA-----  
 -----ATAATAGGAAATATA-----AGACAAGCACACTGT---AACATTAGTGGAGCA---  
 ACATGGAAGGACACTTTACAAAAGATAGTTGGGAGAACTAAGA-----AACTCTTT-----  
 -----AATAAAACAATAATCTTTAAC-----  
 CAATCTACAGGAGGGGACCCAGAAATAACA---ATGCACAGCTTCAATTGTGGAGGGGAA---

TTTAAGCAGCTCCAGGCAAGAGTCCTGGCTTTGGAAAGATTCTTACAGGATCAACAGCTCCTGGGAATTTGGG  
 GATGCTCTGGGAAAATCATTTGCACCCTAATGTGCCTTGAATACTAGTTGGAGT-----  
 -----AATAGATCTATAAATCATATTTGG-----GAT-----  
 AACATGACCTGGATGGAGTGG---GAAAGAGAAATTGATAATCACACAGAATTAATATAC---  
 AAATTACTTGAAGAATCGCAGAACCAACAAGAA-----  
 -----  
 CAGAATGAACCTAGACTTATTGAAATTAGATACATGGGCAAGTTTGTGGAATTGGTTTAGCATAACCAACTGGC  
 TGTGGTATATAAAAAATATTCATAATGATAGTAGGAGGCTTGATAGGTTTAAGAATAGTTTTTACT---  
 ATACTTTCTATAGTG-----AATAGAGTTAGGCAGGGATACTCACCA-----  
 TTATCGTTTGTCTGTTAGCTTGCTCAACGCCACAGCTATAGCAGTAGCTGAA---  
 GGAACAGATAGGATTATAGAAAATAGCACAACAATTTTTAGAGCT-----  
 -----ATCCTCAACATA-----CCTGTAAGGATAAGACAAGGCTTGGAAAGGATTTTGCTT---TAA  
 >KJ849821  
 GCT---GCA-----  
 GATCAATTGTGGGTCACAGTTTATTATGGGGTACCTGTGTGG--AAAGATGCAACC---  
 ACCACTCTATTTTGTGCATCAGATGCTAAAGCATATGACACAGAG--GTACATAAT-----  
 -----GTTTGGGCCACA---CATGCCTGTATACCCACAGAT---  
 CCTAGCCCGCAAGAAGTACAATTG-----AATGTGACAGAAAATTTTAAT-----  
 -----ATGTGGAAAAATAACATGGTGGAAACAAATGCATGAGGATATA---  
 ATCAGTTTATGGGATCAAAGCTTA--AAGCCATGTGTAAAATTA---  
 ACCCCACTCTGTGTTACTTTAAGTTGTAGTAATTTGACCAATAGTAATAATAGTACACATAACACTAGT---  
 -----  
 -----GATTTGGGAAACAATACTGATTTGGGAAGTATGGCGGGAGAAATGAAA---  
 AACTGCTCTTTCAATATTACCACACAAATAAAA-----  
 AATAAGAATAGAAAGGAACATGCACCT--TTTAATAAGATTGATTTAGTACCAATAGATAAT-----  
 -----  
 -----  
 AATAATACAAATTATATGTTAGTAAATTGTAACACCTCAGTCATTACACAG---  
 GCCTGCCCAAAGGTAACCTTTGAACCAATTCCAATACATTACTGTACCCCGGCTGGTTTTGCGCTTCTAAAGT  
 GTAAG--GATAAGATGTTCAAT-----GGAACAGGACCATGTAAAAAT-----  
 -GTCAGC--ACAGTACAATGTACACATGGAATTAGGCCAGTAGTGTCAACT---  
 CAACTGCTGTTGAATGGCAGTCTGGCAGAAGAAGAA-----  
 GTAATAATTAGATCTGAAAATTTACAAACAAT-----GCTAAAACCATAATAGTACAGCTGAAT---  
 -----GAAACTGTACAA-----ATTAATTGTACAAGACCCAACAACAATACAAGGAAA---  
 -AGTATACACTTT-----GGACCAGGACAAGCA--TTA-----TATGCAACAGGAGAA---  
 -----ATAATAGGAGATATA-----AGAAAAGCCCATTGT--AACATTAGTAAAGAA---  
 AAATGGAACAACACTTTACAACACATAGTTAGAAAATTAGGA-----GAACAATTCAAA---  
 -----AATCTAACAACAATATCCTTTAAT-----  
 AAATCCTCAGGGGGGACCCAGAAATTACA--ATGCACAGTTTTAATTGTGGAGGGGAA---  
 TTTAAGCAGCTCCAGGCTAGAGTCCTGGCTGTGGAAGATACCTACGGGATCAACAGCTCCTAGGAATTTGGG  
 GTTGCTCTGGAAGACTCATTTGCACCCTAATGTGCCTTGAATACTAGTTGGAGT-----  
 -----AATAAACTCTGGAAAAGATTTGG-----GAT-----  
 AACATGACCTGGATGGAGTGG--GAGAGAGAAATTGACAATTACACAGGCATAATATAC---  
 AACTTAATTGAAGAATCACAGAACCAGCAGGAA-----  
 -----  
 AAGAATGAATTGGAATTATTGGAATTGGATAAATGGTCAAGTCTGTGGAGTTGGTTTGACATAACACAATGGC  
 TGTGGTATATAAGAATATTATAATAATAGTAGCAGGTTTAATAGGTTTAAGAATAGTTTTTATTT---  
 GTACTTTCTGTAGTA-----AAGAGAGTTAGGCAGGGCTACTCACCA-----  
 TTATCATTTGCTGTTAGTCTGCTTAACGCCATAGCTATAGCAGTAGCTGAG---  
 GGGACAGATAGGAGTATAGAAATAGTACAAAGAATTGGTAGAGCT-----  
 -----ATTATCCACATA-----CCTAGAAGAATAAGACAGGGTTTAGAAAGGGCTTTGCTA---TAA  
 >KT427811  
 GCT---AAT---GAA-----  
 GACAAGTGGTGGGTCACAGTCTATTATGGGGTACCTGTATGG--AAAGAAGCAACC---  
 ACCACTCTATTCTGTGCATCAGATGCTAAAGCATATAAACCAGAG--ATGCATAAT-----  
 -----GTTTGGGCCACA---CATGCCTGTGTGCCACAGAC---  
 CCTAGTCCACAAGAGTTAGTGTGGAA-----AATGTGACAGAAAATTTTAAC-----  
 -----ATGTGGAAAAATAACATGGTAGAGCAGATGCATGAGGATATA---  
 ATCAGTTTATGGGATCAGAGCCTA--AAGCCATGTGTAAAATTA---  
 ACCCCACTCTGTGTTACTTTAAATTGCACTAATGCTAATGTTACTAGGAATACCACCAGTAGTAGT-----

-----  
-----CCCACTGGGGGTAAGTGGACAGATAAAATAATACAGGAAGACGAGGGAGAAATAAAA---  
AACTGCTCTTTCAATATCACCACAAGCATAAGA-----  
GATAAGGTACAAAAACAATATGCACTT---TTTGATAGACTTGATGTAGTACCAATGGATACT-----  
-----  
-----  
AATAGTAATAATACAAGTTATATGCTAATAAATTGTAACACCTCAGTCATTACACAG---  
GCCTGTCCAAAAATATCCTTTGAACCAATTCCCATACATTATTGCACCCCGGCTGGTTTTGCGATTCTAAAGT  
GTAAT---GATAAAAAGTTCAAT-----GGAACAGGACCATGTACAAAT-----  
-GTCAGT---ATAGTACAGTGTACACATGGAATTAGGCCAGTAGTGACAACT---  
CAATTACTGCTAAATGGCAGTCTAGCAGAAGATGAG-----  
ATAGTAATTAGGTCTGAAAAATATCACGAACAAT-----GCTAAAACCATACTAGTACAGCTGAAT----  
-----AAAACCATAATA-----ATTAATTGTACAAGACCCAACAACAATACAAGAAGA-----  
-AGTATATCTGTA-----GCATGGGGGAGAGCA---TTA-----TTTACACCAGGAGAA-----  
-----ATAATAGGAGATATA-----AGAAAAGCATATTGT---ATCCTTAATGGAACA---  
GAATGGAACAACACTTTAAGACAGGTAGTTGTAAAATTAAGA-----GAGAAATTTGGT----  
-----AATAAAACAATAGTCTTTAAT-----  
CAATCCTCAGGAGGGGATCCAGAACTTACA--ATGCACACATTTAATTGTGGAGGGGAA---  
TTTAAGCAGCTCCAGGCGAGAGTCCTGGCTGTGGAAAGATACCTAAGGGACCAACAGCTCCTGGGAATTTGGG  
GTTGCTCTGGAAGAACTCATCTGCACCACTAATGTGCCTTGGGAATACTAGCTGGAGT-----  
-----AATACATCTCTGGATAAAATCTGG-----AGC-----  
AACATGACCTGGATGCAGTGG---GAGAGAGAAATTAACAATTACACAGACTTAATATAC---  
ACCTTACTTGAAGAATCGCAGAGCCAGCAAGAA-----  
-----  
AAGAATGAAAAGGAATTATTGGAATTGGATAAATGGTCAAATTTGTGGAATTGGTTCACCATATCAAAGTGGC  
TGTGGTATATAAAAAATATTGATAATGATAGTAGGAGGCTTAATAGGTTTAAGAATAGTTTTTTGCT---  
ATACTTTCTATAGTG-----AATAGAGTTAGGCAGGGATACTCACCA-----  
TTATCGTTTGCTGTTAGTTTGATTAATGCAATAGCTATAGCAGTAGCTGAG---  
GGAACAGATAGGATTATAGAAGGAATACTAACATTTGGTAGAGCT-----  
-----GTTCTTCACATA-----CCCACAAGAATAAGACAAGGTTTAGAAAGAGCTTTGCTA---TAA  
>KT427796  
GCT---AAA---GAA-----  
GATAATTTGTGGGTACAGTCTATTATGGGGTACCTGTGTGG---AAAGATGCAAAC---  
ACCACTCTATTTTGTGCATCAGATGCTAAAGGATATAGCACAGAG---ATGCATAAT-----  
-----ATTTGGGCCACA---CATGCCTGTGTACCCACAGAT---  
CCTGACCACAGAAGAAATAGTATTGGAA-----AATGTGACAGAAAATTTTAAC-----  
-----ATGTGGAAAAATAACATGGTAGATCAGATGCATGAGGATGTA---  
ATCAGTTTATGGGATCAAAGCCTA---AAACCATGTGTAAAATTA---  
ACCCCACTCTGTGTACTTTAAATTGTACTAATTTGTATAGAAATTGTAATAATTCAAATGATACCCAAAGTA  
AGAGTTGTAATAAGGGGAAT-----  
-----AAGGACACCGTAAAGGTGGAGAAACAGATGGAGGAGGGCGAAATAAAA---  
AATTGCTCTTTCAATGTCAACCACAAATGTAAAA-----  
GATAAGGTTCAAAGCAATATGGAATT---TTTAATAAATTTGATATAGTACCAATAGATAAT-----  
-----  
-----  
GATAATACAAGCTATATGCTGGTAAGTTGTAACACCTCAGTCATTACACAG---  
ACTTGTCCAAAGGTAACCTTTGAACCAATTCCCATACATTATTGTACCCCGGCTGGTTTTGCGATTCTAAAGT  
GCAAT---GATAAAAAGTTTAAT-----GGAACAGGACCATGTAAAAAT-----  
-GTCAGC---ACAGTACAATGTACACATGGGATTAAGCCAGTAGTGTCAACT---  
CAGTTGCTATTGAATGGCAGTCTAGCAGAAAAAGAG-----  
ATAGTAATTAGATCTGAAAAATTTACAAACAAT-----GCTAAAATCATAATAGTACAGCTGAAT----  
-----GAAACTGTAAAA-----ATTAATTGTACAAGACCCAATAACAATACAAGGAAA-----  
-AGTATACATATG-----GGATTTGGGAGAGCA---TTT-----CATACAACAGGGGAC-----  
-----ATAATAGGTGATATA-----AGACGAGCACATTGT---AACATTAGTAGAAAG---  
GAATGGAACAACACTTTAAAACAGGTAGCTAAAAAATTAATA-----GAACAATTTAAT-----  
-----AAAAACAGTAATAGAGTTTAAG-----  
CAATCCTCAGGAGGGGACCCAGAAATTGTA--ATGCACACTTTTAATTGTGCAGGGGAA---  
TTCAAACAGCTCCAGGCAAGAGTCCTGGCTGTAGAAAAGATACCTAAGGGATCAACAGCTCCTAGGGATTTGGG  
GTTGCTCTGGAAGAACTCATCTGCACCACTGCTGTGCCTTGGGAATACTAGTTGGAGT-----  
-----AATAAAAATCTGAGTACAATTTGG-----GAT-----

AACATGACCTGGATACAGTGG---GAGAGAGAAATTGAAAAGTACACAGGCTCAATATAC---  
CAATTGCTCGAAGAATCGCAAAACCAACAAGAA-----  
-----  
AAGAATGAACAAGAATTATTGGCATTAGATAAGTGGGCAGGTTTGTGGAATTGGTTTGACATAACAAATTGGC  
TGTGGTATATAAAAATATTTCATAATGATAGTAGGAGGCTTAATAGGATTAAGAATAGTTTTTTGCT---  
GTACTTTCTGTAGTG-----AATAGAGTTAGGAAGGGATACTCACCA-----  
TTGTCATTTCGCTATTAGTTTGCTTAATGCAACAGCTATAGCAGTAGCTGAG---  
GGAACAGATAGAATTATAGAAGTACTACAAAGATTTGGTAGAGGT-----  
-----ATTATCCACATA-----CCTAGAAGAATAAGACAGGGCTTAGAAAAGAGCTTTGCTA---TAA  
>KX181909  
GCT---GAA---GAA-----  
GAGAAAACGTGGGTACAGTCTATTTTGGGGTACCTGTGTGG--AAAGAAGCAAAAG---  
ACCACTCTATTTTGTGCATCAGATGCTAAGGGACATAGCACAGAG---GCACATAAT-----  
-----GTTTGGGCCACA---CATGCCTGTGTACCCACAGAC---  
CCCGATCCACAAGAAGTAGAATTGGTA-----AATGTAACAGAAAATTTTAAAC-----  
-----ATGTGGGACAATGACATGGTAGACCAGATGCAAGAGGATATA---  
ATCAGCTTATGGGATCAAAGCCTA--AAGCCATGTGTAAAATTA---  
ACCCCACTCTGTGTTGTTTAAAGTTGCACTAATGTGACTGTTACTGAGACCAATAGGACT-----  
-----  
-----GAGACCAATGGTACTATTTGGGAAAATATGAAGGGAGAAATAAAA---  
AACTGCTCTTTCAATGTACAGAAAAGGTAAAA-----  
AATACAGTGCGGGAAGAGCATGCACCTT--TTTAATAGACTTGATGTAGTACCAATAGATAATAAT-----  
-----  
-----  
AATAATGAAAGCTATATGTTGATAGGTTGTAATACCTCAGTCATTACACAG---  
GCCTGTCCAAAAACAACCTTTGAACCAATTCCCATACATTATTGTGCCCGGCTGGTTTTGCAATTCTAAAAT  
GTGGA---GATAAGAAGTTCAAT-----GGAACAGGACCATGTCAAAAT-----  
-GTCAGC---ACAGTACAGTGTACACATGGAATTAAGCCAGTAGTGTCAACT---  
CAATTATTGTTAAATGGCAGTCTATCAGAAGGAGAA-----  
ATAATAATTAGAAGTGAAAATATCTCAGACAAT-----GCTAAAAACATAATAGTACAGCTAAAC---  
-----CAATCTGTAGTA-----ATTAAGTGTACAAGACCCAACAACAATACAAGAAAA-----  
-GGGATAACTATA-----GGACCAGGGAGAGCA---TTT-----TTTGCAACAGGAAGT-----  
-----ATAATAGGAGATATA-----AGACAAGCACATTGT--AACCTTAGTAAAAAA---  
GATTGGGGAGACACTTTAAAAAAGATAGAAGAAAAATTAAAA-----GGTACTTT-----  
-----AATAAAACAATAGCATTTAAT-----  
CAATCCTCAGGAGGGGACCCAGAGATTGTA--ATGCACACTTTTAATTGTGGAGGGGAA---  
TTTAAGCAGCTCCAGGCCAGAGTCCCTGGCTGTGGAAAGATACCTAGAGGTTCAACAGCTCCTAGGAATTTGGG  
GTTGCTCTGAAAACTCATCTGCACCACTACTGTGCCTTGGAAATATTAGCTGGAGT-----  
-----AATAGATCTCAGAAAGAAATTTGG-----AAA-----  
AACATAACCTGGATGCAGTGG--AAGAAAAAATTGATAATTACACAGGCTTGATATAT---  
GAATTGCTTGAAAAATCGCAAAACCAGCAGAAA-----  
-----  
AAAAATGAACAAGAATTATTAAAAATTGAATAAGTGGGCAAATTTGTGGAATTGGTTTGACATATCGAACTGGC  
TGTGGTATATAAAAATATTTATAATGATAGTAGAAGGCTTAATAGGTTTAAGAATAGTTTTTTACT---  
GTACTTTCCATAGTA-----AATAAAGTTAGGCAGGGATACTCACCA-----  
TTGTCATTTCGCTGTTAGTTTGCTCAATACCATAGCTGTAGTAGTAGCTGAG---  
GGAACAGATAGGGTTATAGAAGTAGTACAAGGAATTGGTAGGGGT-----  
-----ATCCTTAATATA-----CCTAGAAGAATAAGACAGGGCTTAGAAAGAAGTTTGCTA---TAA  
>KX181908  
GCT---ACA-----  
AACCAATTGTGGGTACAGTTTATTATGGGGTACCTGTGTGG--AGAGAAGCAACC---  
ACCACTCTGTTTTGTGCATCAGATGCTAAAGCATATGACACAGAG---GTACATAAT-----  
-----GTTTGGGCCACA---CATGCCTGTGTACCCACAGAC---  
CCCAACCCACGAGAAGTAATATTGGTA-----AATGTGACAGAAAATTTTAAAC-----  
-----ATGTGGACAAATAACATGGTAGAACAGATGCATCAGGATATA---  
ATCAGTTTATGGGATGAAAGTCTA--AAGCCATGTGTAAAATTA---  
ACCCCACTCTGTGTTACTTTAAATTGTAGCAGTCCAATTTTAAATAATAGCAATAATGCTAGT-----  
-----  
-----ATCAATGGTAATTGGGTAAATATGACTACAGAAATGAAA---  
AACTGCTCATTCAATATCACCACAAGCATAAGA-----

GATAGGAGGCGTAAAGAATATGCACTT---TTTTATAAACTGATATAGTATCAGCAGATGGT-----  
-----  
-----  
GGTAATACAAGCTATACAATGATAAACTGTAACACCTCAGTCATCACACAA---  
ACTTGTCCAAAGGTAACCTTTGAACCAATTCCCATACATTATTGTACCCCAGCTGGTTTTGCGATTCTAAAGT  
GTAAT---GATAAAAAGTTCAAT-----GGAACAGGACCATGTAAAAAT-----  
-GTCAGC---TCAGTACAATGTACACATGGAATTAGGCCAGTAGTATCAACT---  
CAGCTACTGTTTAAATGGCAGTCTAGCAGAAGAAGAA-----  
GTAGTAATTAGATCCCCAAAACATCACGGACAAT-----GCTAGAACCATAATAGTACACCTGAAT----  
-----GAATCTGTACAA-----ATTAATTGTACAAGACCTGGCAACAATACCAGAAGA-----  
-AGCATACACATA-----GGACCAGGAAGCGCT---TGG-----TATACAACAGGAGAC-----  
-----ATAATAGGGGATATA-----AGACAAGCACATTGC---AACATTAGTGAAGCA---  
GCCTGGAACAGAACTTTAAAAACAGGTAGTTGCAAAATTAAGA-----GAAAAATTTGGG----  
-----AACAAAACAATAGTCTTTAAT-----  
TCATCCTCAGGAGGAGACCCAGAAATTGAA---AAGCACACTTTTAATTGTGGAGGGGAA---  
TTCAAGCAGCTCCAGGCAAGAGTCCTAGCTGTGGAAAAGTTACCTAAGGGATCAACAGCTCCTGGGGATTTGGG  
GTTGCTCTGGAAAACTCATTTGCACCACTGCTGTGCCTTGGAATGCTAGTTGGAGT-----  
-----AATAAACTCTGAACCAGATTTGG-----GAC-----  
AACATGACCTGGATAGAATGG---GAGAGAGAAATTGACAAATTACACAGACTTAATATAT---  
TCCCTAATTGAAGAATCGCAGAACCAACAGGAA-----  
-----  
AAGAATGAACAAAAATTATTGGCACTTGATAAATGGGCAAGTTTGTGGAATTGGTTTGACATATCACGATGGC  
TGTGGTATATAAGAATATTCATAATGATAGTAGGAGGCTTAATAGGTTTAAGAATAGTTTTTTACT---  
GTACTTTCTATAGTG-----AATAGAGTTAGGCAGGGATACTCACCA-----  
TTATCATTCGCTGTTAGTTTGTCTTAATGCCATAGCCATAGCAGTAGGTGAG---  
GGGACAGATAGGGTTATAGAAGCAATACAAAGAATTGGTAGAGCT-----  
-----TTTCTCAACATA-----CCTAGAAGAATAAGACAGGGCTTCGAAAGGGCTTTGCTA---TAA  
>KX181898  
GCT---ACA-----  
AAAGAATTGTGGGTCACAGTATATTATGGGGTACCTGTGTGG---AAAGAAGCAACC---  
ACCACTCTGTTTTGTGCATCAGATGCTAAAGCATATGACACAGAA---GCACATAAT-----  
-----GTTTGGGCCACA---CATGCCTGTGTACCCACAGAC---  
CCTAACCCACAAGAAGTAGAATTAAAA-----AATGTGACAGAAGATTTCAAT-----  
-----ATGTGGAAAAATAACATGGTAGAACAGATGCATGAGGATATA---  
ATCAGTTTATGGGATCAAAGCCTA---AAGCCATGTGTAAAATTA---  
ACCCCACTCTGTGTACTTTAAATTGCAGTAATTGTAATATTACTGCTGACAATACTACCAATACCAATGCCA  
ATAGCAGT-----TGTGAGGAGATGGGAATGAAA---  
AACTGCTCTTTCAATGTCACCACAGGCATAGGA-----  
AATAAGAGGCAGAAAGAATATGCGCTG---TTTTACAAGTCTGATATAGTACCAATGGATAATGAT-----  
-----  
AATAATAATAGTACAAGCTATAGGTTGACACAGTGTAACACCTCAGTCATCACACGT---  
GCCTGTCCAAAGACATCCTTTGAACCAATTCCCATACATTATTGTACTCCAGCTGGTTTTGCGATTCTAAAGT  
GTAAT---GATAAGAAGTTTAAT-----GGAACAGGAACATGTAAAAAT-----  
-GTCAGC---ACAGTACAATGTACACATGGAATTAGGCCAGTAGTGTCAACT---  
CAACTGCTGTTAAATGGTAGTCTAGCAGAGGAAGAG-----  
ATAATAGTCAGATCTGAAAATTTACAGACAAT-----GTAAAACCATAATAGTACAGCTGAAC----  
-----GAGTCGATACAA-----ATTAATTGTACAAGACCCAGCAACAATACAAGCAAA-----  
-GGTATACATCTA-----GGATGGGGGAGAGCA---TTT-----TATGCAACAGAAAGA-----  
-----ATAATAGGAGATATA-----AGAGAAGCACATTGT---AACCTTAGTAAAGCA---  
AAATGGGAAGACACTTTACAAAAAATAGCTAACAAATTAAAA-----GAACATTATAAT----  
-----AATAGAACAATATCCTTTAAT-----  
AAATCCTCAGGAGGGGACGACGAAATTGTA---AGGCACAGTTTTTAATTGTGGAGGGGAA---  
TTTAAGCAGCTCCAGGCAAGAGTCCTGGCTGTGGAAAAGCTACCTAAGGGATCAACAGCTCCTAGGGATTTGGG  
GTTGCTCTGGAAAACTCATTTGCACCACTGCTGTGCCTTGGAATGCTAGTTGGAGT-----  
-----AATAAATCTAAGGAAGAGATTTGG-----GGG-----  
AACATGACTTGGATGCAGTGG---GAAAGAGAAATTGACAAATTACACAGAATATATATAC---  
AACTTACTTTGAAAAATCGCAAAACCAACAAGAA-----  
-----

AAAAAATGAACAAGAATTATTGGAATTGGATAAGTGGGCAAGTTTGTGGAGTTGGTTTGACATAACACAATGGC  
 TGTGGTATATAAAAAATATTTCATAATGATAGTAGGAGGCTTAATAGGTTTAAGAATAGTTTTTACT---  
 GTGCTTTCTATAGTG-----AATAGAGTTAGGCAGGGATACTCACCA-----  
 TTGTCAATTCGCTGTTAGTTTGCTTAATGCCACAGCTATAGCAGTAGCTGAA---  
 GGAACAGATAGGATCATAGAAGTAATACAAAGAATTTGTAGAGCT-----  
 -----ATTCTCCACATA-----CCTACAAGAATAAGACAGGGCTTAGAAAGGGCTTTACTA---TAA  
 >MK041573  
 GCT---GCA-----  
 GAAGAATTGTGGGTCACAGTCTATTATGGGGTACCTGTGTGG---AAGGAAGCAAAT---  
 GCTACCCCTATTCTGTGCATCAGATGCTAAAGCATATGATACAGAG---GTACATAAT-----  
 -----GTTTGGGCCACA---CATGCCTGTGTACCCACAGAC---  
 CCCAACCCACAAGAAGTAGATTTGGTA-----AATGTGACAGAAAATTTTAAAC-----  
 -----ATGTGGAAAAATAACATGGGTAGAACAAATGCATGAGGATGTA---  
 ATCAGTCTATGGGACCAAAGCCTA---AAGCCATGTGTACAATTA---  
 ACCCCACTCTGTGTTACTTTAAATTGCACTGATTGGAATAATACTGCTACCAATGTTACTAAT-----  
 -----  
 -----ACCAATGTTACCCTTGCCATGGACAGAGGAGAAATAAAG---  
 AACTGCTCTTTTAATGTCAACCACACCATAAGA-----  
 GATAAGAAACAGAAAGAATATGCACCTT---TTTTATAAACTTGATGTAGTACTAATAGGTAATGAT-----  
 -----  
 -----  
 AATAGTAGCTATAGTAGCTATAGAATGATAAGTTGTAACACTTCAGTCATTACACAG---  
 GCTTGTCCAAAGATATCCTTTGAGCCAATTCCAATACATTTTTGTGCCCGGCTGGTTATGCGATTTTAAAGT  
 GTAAA---GATAAGAAGTTCAAG-----GGAACAGGACCATGTACAAAT-----  
 -GTTAGC---ACGGTACAATGTACACATGGAATTAAGCCAGTAGTATCAACT---  
 CAACTGCTGTTAAATGGCAGTCTAGCAGAAGAAGAG-----  
 GTAGTAATTAGATCTCAAAATTTACGAACAAT-----GCTAGAACCATAATAGTACAGCTAAAA-----  
 -----GAAGCTGTAAAC-----ATTACTTGTACAAGACCCAGCAACAATACAAGAAAA-----  
 -GGTATACATATA-----GGACCAGGGAGTGCA---TTT-----TATACAACAGGACAA-----  
 -----ATAATAGGGGATATA-----AGACAAGCACATTGT---AACATTAGCAAAAAA---  
 GACTGGAATAAGACTTTAGAACAGGTAGCTAAAAAATTAAGA-----GAACAATTTGGG---  
 -----AATAAAACAATAATCTTTAAT-----  
 CAGTCCTCAGGAGGGGACCTAGAAATTGTA--ACACACAGTTTTAATTGTGGAGGGGAA---  
 TTTAAGCAGCTCCAGGCAAGAGTCCTTGCTGTGGAAAGATACCTAAAGGATCAACAGCTCCTAGGAATTTGGG  
 GTTGCTCTGGAAACTCATTTGCACCACTGCTGTGCCCTGGAATGCTAGTTGGAGT-----  
 -----AATAAATCCTACAATGACATTTGG-----GAT-----  
 AACATGACCTGGATGCAGTGG---GACAGAGAAATTAACAATTACACAAAGCAAATATAC---  
 ACCTTGATTGAACAATCGCAGAACCAACAAGAA-----  
 -----  
 AAGAATGAACAGGAATTATTGGAATTGGATAAATGGGCAAGTTTGTGGAAGTGGTTTGACATATCAAATTGGC  
 TGTGGTATATAAAAAATATTTCATAATGATAGTAGGAGGCTGGTAGGTTTAAGAATAATCTTTTCT---  
 GTACTTTCTATAGTA-----AATAGAGTTAGGCAGGGATATTCACCA-----  
 TTATCGTTCGCTGTTAGTTTGCTTAATTGCACAGCTATAGCAGTAGCTGAG---  
 GGGACAGATAGGCTTATAGAAGTAGCACAAAGAATTGTTAGAGGT-----  
 -----ATTCTCCATATA-----CCTAGAAGAATAAGACAGGGCTTGGAAGGGCTTTGCAA---TAA  
 >MK041575  
 GCT---GCA-----  
 GAAAACTTGTGGGTCACAGTCTATTATGGGGTACCTGTGTGG---AAAGAAGCAACC---  
 ACCACTCTATTCTGTGCATCAGATGCTAAAGCATATGACACAGAG---GTGCATAAT-----  
 -----GTTTGGGCCACA---CATGCCTGTGTACCCACAAAC---  
 CCTGACCCACAAGAAATAAAATTGGAA-----AATGTGACAGAAAGTTTAAAT-----  
 -----ATATGGAAAAATGACATGGTAAACAGATGCATGAGGATATA---  
 ATCAGTTTATGGGATCAAAGCCTA---AAACCATGTGTAAAATTA---  
 ACCCCACTCTGTGTTACTCTAAATTGCACTGAATATACCGGAACGAATGTTAGTGTTACCAATAGT-----  
 -----  
 -----CCCGCTAATAGTAGTGTGGAAGAAAGGGAAGAAATAAAA---  
 AACTGCTCTTTTAATATCACCACAGGCATAGGA-----  
 GATAAGATGAGGAAAGAATATGCTCTC---TTTTATAAACTTGATGTAGAACCAATAGAGAAT-----  
 -----  
 -----

GATACTCACAGATATACGTTGGTAAGTTGTAATACCTCAGTCATTACACAG---  
GCCTGTCCAAAGGTATCCTTTGAACCAATTCCCATACATTATTGTGCTCCAGCTGGTTTTGCCTTCTAAAGT  
GTAGA---GATGCAAAGTTCAAT-----GGAACAGGACTATGTAAAAAT-----  
-GTCAGT---ACAGTACAATGCACACATGGAATTAGGCCAGTAGTGTCAACT---  
CAATTGCTGTTAAATGGCAGTCTAGCAGAAGAAGAG-----  
ATAGTAATTTCGATCTGAAAATATCACCGACAAT-----GCTAAAACCATAATAGTACAGCTGAAC----  
-----AAACTGTAGTA-----ATCAATTGTACAAGACCCAACAACAATACAAGAAAA-----  
-AGTATACATACA-----GGATTTGGGAGAGCA---ATT-----TTTGCAACAGGACAA-----  
-----ATAATAGGAGACATA-----AGACAAGCACATTGT---AACCTTAGTGGAGCA---  
GGCTGGGGAGAAGCTTTAATAATGGTAGCAAGAAAATTAAAA-----CAACATTTTGTG----  
-----AATAAAACAATAAGCTTTAGG-----  
AAAGCCTCAGGAGGGGACCCAGAAATTCTA---ATGCACCATTTTAATTGTGGAGGGGAA---  
TTTAAGCAGCTCCAGGCAAGAGTCCTAGCTATAGAAAAGATACCTACAGGACCAACAGCTCCTGGGGATTG  
GTTGCTCTGGAACCTTATCTGCACCCTACTGTGCCTTGGGAATAATAGTTGGAGT-----AAC-----  
-----AATAAAGCTCTAAATGATATTTGG-----GAT-----  
AATATGACCTGGATGCAGTGG---GAAAAAGAAATTAGCAATTACACGGACCAAAATATAC---  
AAATTAATTGAAGAATCGCAGAACCAGCAAGAA-----  
-----  
AAGAATGAACAAGAATTACTAGAAATTGGATAAGTGGGCAAGTTTGTGGACTTGGTTCGAAATATCAAATTGGC  
TGTGGTATATAAAAAATATTCTAATGATAGTAGGAGGCTTAGTAGGTTTAAGAATAGTTTTTTGCT---  
GTAATTTCTATAGTA-----AATAGAGTTAGGCAGGGATACTCACCA-----  
TTGTCAATTCGCTGTTAGTTTGTCTTAATGCAACAGCTATAGCAGTAGCTGAG---  
GGGACAGATAGAGTTATAGAAGCAGTACAAAGGATTGGTAGAGCT-----  
-----TTTCTCCACATA-----CCTAGAAGAATAAGACAGGGCTTCGAAAGGGCTTTGCTA---TAA  
>MG571983  
ACT---GCA-----  
AAGTTGTGGGTCACAGTCTATTATGGGGTACCTGTGTGG---AAAGAAGCAACC---  
ACCACTCTATTTTGTGCATCAGATGCTAAAGCAGTTGAGAAAGAG---GTGCATAAT-----  
-----GTTTGGGCCACA---CATGCCTGTGTACCCACAGAC---  
CCTAATCCACAAGAAATACACTTG-----AATGTGACAGAAAATTTTAAC-----  
-----ATGTGGAAAAATGACATGGTAGACCAAATGCATAAGGATATA---  
ATCAGTTTATGGGATGAAAGCCTA---AAGCCATGTGTAAAATTA---  
ACCCCGCTCTGTGTTACTTTAAATTGTACTAATTATAATGGCACTGCTAATTCAACTACTGCTAATCCA  
CT-----  
-----GATACTAACAGCCTGAAAATGGAGGAGGGAGAAATAAAA---  
AATTGTTCTTTCAATATCACCAAAATATAGGA-----  
AATAAGTTGCAGAGAGAAGATGCACTT---TTTTATAGACAGGATATAATGGCAATAGATGGA-----  
-----  
AGTAATACAAGCTATACACTAACAACTGTAACACCTCAGTCATTAAACAG---  
GCCTGTCCAAAGGTATCCTTTGAACCAATTCCCATACATTATTGTACCCCGGCTGGTTTTGCCTTCTAAAGT  
GTAAT---GATAAAAAGTTCAAT-----GGAACAGGACCTGTAAACAAT-----  
-GTCAGC---GTAGTACAATGTACACATGGAATTAAGCCAGTAGTGTCAACT---  
CAATTGCTGTTAAATGGCAGTCTAGCAGAAGAAGAG-----  
ATAGTAATTAGATCTGAAAATTTACAAATAAT-----GCTAAAATCATAATAGTACAGCTGAAC----  
-----AAATCTATAGCA-----ATTACTTGATAAGACCTAACAATAATACAAGAAAA-----  
-AGTATACATTTG-----GGACCAGGAGGAACA---TTC-----TATGCAACAGGAGAA-----  
-----ATAATAGGAAATATA-----AGACAAGCATATTGT---AGCCTTAATGGAACG---  
CAATGGAATAAACTATGGAACAGATAAGTACAAAATTAAAA-----GAACAATATAAT----  
-----AATAATAGAACAATATTATTTAAT-----  
CAATCCTCAGGAGGGGATCCAGAGATTGTC---ATGCACACTTTTAATTGTGGAGGGGAA---  
TTTAAGCAGCTCCAGGCAAGAGTCCTGGCTGTGGAAAGATACCTACAGGATCAACGGCTCCTAGGGATTG  
GTTGCTCTGGGAACTCATTTGCGCCACTAATGTGCCTTGGAAATATTAGTTGGAGT-----  
-----AATAAATCTCATGATGAGATTTGG-----GGC-----  
AACATGACCTGGATGCAGTGG---GAAAAAGAAATTGACAATTACACAGGCTTAATATAC---  
ACCTTGCTTGAAGAATCGCAAAATCCAACAAGAA-----  
-----  
AAAAATGAAAAAGAATTATTGGAATTGGATAAGTGGGCAAGTTTGTGGAATTGGTTTGATATATCAA  
TGTGGTATATAAGATTATTCTAATAATAGTAGGAGGCTTAGTAGGCTTAAGGATAATTTTTTATT---  
GTACTTTCTTTAGTG-----AATAGAGTTAGGCAGGGATACTCACCA-----

CTATCATTCGCTGTTAGTTTGTCTTAACGCCATAGCCATAGCAGTAGCTGAG---  
 GGGACAGATAGGATTTTAGAAGGAATACAAGGGATTGGTAGAGCT-----  
 -----TTTCTCCACATA-----CCTAGAAGAATAAGACAGGGCTTCGAGAGGGCTTTACTA---TAA  
 >MG571987  
 GCT---GTA-----  
 GACCAATTGTGGGTCACAGTCTATTATGGGGTGCCTGTGTGG--AAAGAAGCAAAT---  
 ACCACTTTATTTTGTGCATCAGATGCTAAAGCATATGATACAGAG--GCACATAAT-----  
 -----GTTTGGGCCACA---CATGCCTGTGTACCCACAGAC---  
 CCTAACCCACAAGAAGTAGTATTGGGA-----AATGTGACAGAAAATTTCAAT-----  
 -----ATGTGGAAAAATAACATGGTAGAACAAATGCATGAGGATGTA---  
 ATCAGTTTATGGGATCAAAGCCTA--AAGCCATGTGTAAAATTA---  
 ACCCCACTCTGTGTTGTTTTAAATTGCAGTGATATTAGTATCACTAGTACTCAGAAATGCTACTAAT-----  
 -----  
 -----AATAGTAGTGGGGAAGACATGAAGGGAGAACTAAAA---  
 AACTGCTCTTTCAATATCACTTCAGGCATAAAA-----  
 AAGAAGGTGCAAACAGAATATGCAGTG--TTTAATAGACTTGATGTAGTGCCAATTGATAATAAT-----  
 -----  
 -----  
 GATACTACAAGCTTTATGTTAATAAATTGTAACACCTCAGTCATTACACAG---  
 GCCTGTCCAAAGGTATCCTTTGAACCAATTCCAATACATTACTGTGCCCCGGCTGGTTTTGCGATTCTAAAGT  
 GTAAT---GATAAAAGTTTTAAT-----GGAACAGGACCATGTAAAAAT-----  
 -GTCAGT--ACAGTACAATGTACACATGGAATTAGGCCAGTAGTGTCAACA---  
 CAACTGCTATTAAATGGCAGTCTAGCAGAAGGAGAG-----  
 GTAGTAATTAAATCTCAAAATTTACAGACAAT-----GCTAAAACCATAATAGTACAGCTAAAT----  
 -----GAAACTGTAAAA-----ATTAAGTGTACAAGACCAGGCAACAATACAAGAAGA-----  
 -AGTATAAATATG-----GGACCAGGGAGAGTA--CTT-----TATGCAACAGGAGCC-----  
 -----ATAATAGGAGATATA-----AGAAGAGCACATTGT---AAAATTAGGAGAGAT---  
 GATTGGAATAACACTTTAAAAAAGATAGCTATAAAATTACAG-----GAACAATATAAT----  
 -----ACAACAAACATAACCTTTAAT-----  
 CAATCCTCAGGAGGGGACCCAGAAATTGTA--ATGCACAGTTTTATCTGTGGAGGGGAA---  
 TTTAAGCAGCTCCAGGCAAGAGTCCTAGCTGTGGAAAGATACCTACAGGATCAACAGCTCCTGGGGATTTGGG  
 GTTGCTCTGGAAGAACTCATCTGCACCACTGCTGTGCCTTGGAAATAGTAGTTGGAGT-----  
 -----AATAAATCTTATAATCAAATTTGG-----GAT-----  
 AACATGACCTGGATGCAGTGG--GAGAGAGAAATTGACAATTACACACAAAGCATATAC---  
 ACCTTACTTGAGGCATCGCAGAACCAGCAGGAA-----  
 -----  
 AAGAATGAACAAGAACTGTTGGAATTGGGATAAGTGGGCAAGTTTATGGAATTGGTTTGACATAACAAAATGGC  
 TGTGGTATATAAAAATATTATAATGATAGTAGGAGGCTTAGTAGGTTTAAGAATAGCTTTTACT---  
 GTACTTTCTGTAGTA-----AATAGAGTTAGGAAGGGATACTACCA-----  
 TTATCGTTCGCTATTAGTTTGTCTAATACTACAGCTATAGCAGTAGCTGAG---  
 GGGACAGATAGGATTATAGAAGCAGTACAAAGAGCTGGTAGAGCT-----  
 -----ATTCTCAACATA-----CCTAGAAGAATAAGACAGGGTGCTGAAAGGGCTTTGATA---TAA  
 >MG571990  
 GCT---GCA-----  
 GAAGAATTGTGGGTCACAGTCTATTATGGGGTACCTGTGTGG--AAGGAAGCAAAT---  
 GCTACCCATTCTGTGCATCAGATGCTAAAGCATATGATACAGAG--GTACATAAT-----  
 -----GTTTGGGCCACA---CATGCCTGTGTACCCACAGAC---  
 CCCAACCCACAAGAAGTAGATTGGTA-----AATGTGACAGAAAATTTTAAC-----  
 -----ATGTGGAAAAATAACATGGTAGAACAAATGCATGAGGATGTA---  
 ATCAGTCTATGGGACCAAAGCCTA--AAGCCATGTGTACAATTA---  
 ACCCCACTCTGTGTTACTTTAAATTGCACTGATTGGAATAATACTGCTACCAATGTTACTAATACC-----  
 -----  
 -----AATGTTACCCTTGCCATGGACAGAGGAGAAATAAAG---  
 AACTGCTCTTTTAATGTCAACCACCCATAAGA-----  
 GATAAGAAACAGAAAGAATATGCACTT--TTTTATAAACTTGATGTAGTACTAATAGGTAATGAT-----  
 -----  
 -----  
 AATAGTAGCTATAGTAGCTATAGAATGATAAGTTGTAACACTTCAGTCATTACACAG---  
 GCTTGTCCAAAGATATCCTTTGAGCCAATTCCAATACATTTTTGTGCCCCGGCTGGTTATGCGATTTTAAAGT  
 GTAAA---GATAAGAAGTTCAAG-----GGAACAGGACCATGTACAAAT-----

-GTTAGC---ACGGTACAATGTACACATGGAATTAAGCCAGTAGTATCAACT---  
 CAACTGCTGTTAAATGGCAGTCTAGCAGAAGAAGAG-----  
 GTAGTAATTAGATCTCAAAATTTACGAACAAT-----GCTAGAACCATAATAGTACAGCTAAAA-----  
 -----GAAGCTGTAAAC-----ATTACTTGTACAAGACCCAGCAACAATACAAGAAAA-----  
 -GGTATACATATA-----GGACCAGGGAGTGCA---TTT-----TATACAACAGGACAA-----  
 -----ATAATAGGGGATATA-----AGACAAGCACATTGT---AACATTAGCAAAAA-----  
 GACTGGAATAAGACTTTAGAACAGGTAGCTAAAAAATTAAGA-----GAACAATTTGGG-----  
 -----AATAAAACAATAATCTTTAAT-----  
 CAGTCCTCAGGAGGGGACCTAGAAATTGTA---ACACACAGTTTTAATTGTGGAGGGGAA---  
 TTTAAGCAGCTCCAGGCAAGAGTCCTTGCTGTGGAAAGATACCTAAAGGATCAACAGCTCCTAGGAATTTGGG  
 GTTGCTCTGGAAGAACTCATTTGCACCACTGCTGTGCCCTGGAATGCTAGTTGGAGT-----  
 -----AATAAATCCTACAATGACATTTGG-----GAT-----  
 AACATGACCTGGATGCAGTGG---GACAGAGAAATTAACAATTACACAAAGCAAATATAC---  
 ACCTTGATTGAACAATCGCAGAACCAACAAGAA-----  
 -----  
 AAGAATGAACAGGAATTATTGGAATTGGATAAATGGGCAAGTTTGTGGAAGTGGTTTGACATATCAAATTGGC  
 TGTGGTATATAAAAAATATTCATAATGATAGTAGGAGGCTGGTAGGTTTAAGAATAATCTTTTCT---  
 GTACTTTCTATAGTA-----AATAGAGTTAGGCAGGGATATTCACCA-----  
 TTATCGTTCGCTGTTAGTTTGTCTTAATTGCACAGCTATAGCAGTAGCTGAG---  
 GGGACAGATAGGCTTATAGAAGTAGCACAAAGAATTGTTAGAGGT-----  
 -----ATTCTCCATATA-----CCTAGAAGAATAAGACAGGGCTTGGAAGGGCTTTGCAA---TAA  
 >MG572002  
 ACT---ACA-----  
 GAACAACTGTGGGTCACAGTCTATTATGGAGTACCAGTGTGG---AAAGAAGCAAAA---  
 ACCACTTTATTTTGTGCATCAGATGCTAAAGCATATGACACAGAG---GCTCATAAT-----  
 -----GTTTGGGCCACA---CATGCTTGTGTACCCACAGAC---  
 CCCAATCCACAAGAAATAGTATTGGAA-----AATGTGACAGAAAATTTTAAC-----  
 -----ATGGGAAAAAATGACATGGTAGATCAGATGCATGAGGATATA---  
 ATCAGCTTATGGGACCAAAGCCTA---AAGCCATGTGTAAAATTA---  
 ACCCCACTCTGTGTTACTTTAAATTGCACTGAGCTGAATAATGATACTATAGCTAGTGCTACTTCTAGCAATA  
 CTAGCGCTACT-----  
 -----GCCGCGGAAGAATTAAGGAGAGAAATGACA---  
 AACTGCTCTTTCAATATCACCACAAAAATAGGA-----  
 AATAGGATACAGAAAGAATATGCACTT---  
 TTTTATAAATCTGATGTAGTACTAATAGGTAATAGTACAAACAAT-----  
 -----  
 GGTACAAATAGTAGTGCACTATATGTATATGTTGACAACCTGTAACACCTCAACCCTTACACAA---  
 GCCTGTCCAAAGACATCCTTTGAACCAATTCCCATACATTATTGTGCCCCAGCTGGATTTGCGATTCTAAAGT  
 GTAAT---GATAAGAAGTTCAAT-----GGAACAGGTCCATGTACAAAT-----  
 -GTCAGC---ACAGTACAATGTACACATGGAATTAGGCCAGTAGTGTCAACC---  
 CACTTGCTGTTAAATGGCAGTCTATCAGAAGAAGAA-----  
 GTAGTACTTAGATCTGAAAACCTCACAGACAAT-----GCTAAAACCATAATAGTACAACCTGAAT---  
 -----GAAACTGTGGTA-----ATTACTTGTATAAGACCCAATAACAATACAAGAAAA-----  
 -AGTATACATCTA-----GGATGGGGGAGAGCA---TTT-----TATGCAACAGGACAA-----  
 -----ATAACAGGAGATATA-----AGAAAAGCACACTGT---ATCCTTAATAGAACAA---  
 AACTGGGAGAACACTCTAGAAAAGGTAGCTAGAAAGTTATCC-----ACACAATTCAT---  
 -----AATACAAAAATAATCTTTTACA-----  
 CCACCCGCAGGAGGGGACCCAGAAATTGTA---ATGCACACTTTTAATTGTGGAGGAGAA---  
 TTTAAGCAGCTCCAGGCAAGAGTCCTGGCTCTGGAAAGATACCTAAAGGATCAACAGCTCCTAGGGATTTGGG  
 GTTGCTCTGGAAGACTCATTTGCACCACTGCTGTGCCCTTGAATACTAGTTGGAGT-----  
 -----AATAGAAATATGACTCAGATCTGG-----AAT-----  
 AACATGACATGGATGCAGTGG---GAAAGAGAAATTGACAATTACACAGAAGTAATATAC---  
 AGTCTACTTGAAGAATCGCAAAACCAACAAGAA-----  
 -----  
 AAGAATGAACAAGAATTATTAGCATTGGACAAGTGGGCAAGTTTGTGGAATTGGTTGATATATCAAAGTGGC  
 TGAGGTATATACAAATATTCATAATGATAGTAGGAGGCTTAATAGGATTAAGAATAGTTTTTGTCT---  
 GTACTTTCTATAGTG-----AATAGAGTTAGGCAGGGATACTCACCA-----  
 TTGTCAATTCGCTATCAATTTGCTTAATACAGTAGCTGTAGCAGTAGCTGAG---  
 GGGACAGATAGGATTATAGAAGTAGGACAAGGACTTGGTAGAGCT-----  
 -----ATTCTCCACATA-----CCTAGAAGAATAAGACAGGGATTAGAAAAGGGCTTTGGTA---TAA

>JF320427

ACT---GCA-----  
GAAAAATTGTGGGTCACAGTCTATTATGGGGTACCTGTGTGG---AAAGAAGCAACC---  
ACCACTCTATTTTGTGCATCTGATGCTAAAGCATATGATTTCAGAG---GTACATAAT-----  
-----GTTTGGGCCACA---CATGCCTGTGTACCCACAGAC---  
CCCAGTCCACAAGAAGTAGTTTGGGA-----AATGTGACAGAAAAGTTTAAAC-----  
-----ATGTGGAAAAATGACATGGGTAGAACAGATGCATGAGGATATA---  
ATTAGTTTATGGGATCAAAGCTTA---AAGCCATGTGTAAAATTA---  
ACCCCACTCTGTGTTACTTTAAATTGCACTGATAAAGTAACGGTGAGACACAATAAT-----  
-----  
-----ACTGTTTCTTTTAATGATACCAAAGGAGAAATACAA---  
AACTGCTCTTTCAATATCACCTCAAATATAAGA-----  
GATAAGGTGCAGAAAGCATATGCACCT---TTTTATAAACTTGATGTAGTACCAATAGATAGTAAT-----  
-----  
-----  
GATAATACCAGTTATAGGCTGATAAGTTGTAACACCTCAGTCATCACACAG---  
GCCTGTCCAAAGATAACCTTTGAACCAATTCCTATACACTATTGTGCTCCTGCTGGTTTTGCATTCTAAAAT  
GTAAT---GATAAAAAGTTCAAT-----GGAACAGGACCATGTACAAAT-----  
-GTCAGC---ACAGTACAATGTACACATGGAATTAGACCAGTAGTATCAACC---  
CAACTACTGTTAAATGGTAGTCTGGCAGAAGAAGAG-----  
ATAGTAATTAGATCTGAAAATATCACAAACAAT-----GCTAAAACCATAATAGTGCATCTGAAC---  
-----GAATCTGTAGAA-----ATTAATTGTACAAGACCCAACAACAATACAAGAAAA---  
-GGTATACATCTA-----GGACTAGGGAGGGCA---TTC-----TATACAACAGGAGAA---  
-----ATAATAGGAGATATA-----AGACAAGCACATTGC---ACCCTTAATGAGGCA---  
AAATGGAATGACACTTTAAAAAAGGTAGTTAAAAAATTAAGA-----  
GAACAATTTGAGGAATTT-----AAGAATAAAGCAATAGTTTTTAAT-  
-----CAATCTGCAGGAGGGGACCCAGAAATTACA---ATGCTCACTTTTAATTGTGGAGGAGAA---  
TTTAAGCAGCTCCAAGCAAGAGTCCTGGCTGTGGAAAGATACCTAAGGGATCAACAGCTCCTGGGAATTTGGG  
GTTGCTCTGGAAACTCATTTGCACCACTGCTGTGCCTTGGAAATGACAGTTGGAGT-----  
-----CATAATAGATCTCTAGAGCAGATTTGG-----AAC-----  
AACATGACCTGGATGGAGTGG---GACAGAGAAATTAGCAATTACACAGGCTTAATATAC---  
TCCTTAATTGAACAATCGCAAAGCCAACAGGAA-----  
-----  
AAGAATGAAAAAGAATTATTAGAAATTGGATAAATGGGCAAATTTATGGAATTGGTTTGATATAACAACTGGC  
TGTGGTATATAAAAATATTACATAATGATAGTAGGAGGCTTGATAGGTTTAAGAATAGTTTTTTACA---  
GTACTCTCTCTAGTG-----AATAGAGTTAGGCAGGGATACTACCA-----  
TTATCGTTTCGCTGTTAGCTTGCTTAACGCTATAGCCATAGCAGTAGCTGAG---  
GGAACAGATAGGATTATAGAAATAGTACAAAGAGCTGGTAGAGCT-----  
-----ATCCTCAACGTA-----CCTAGAAGAATAAGACAGGGCCTTGAAAGGGCCTTGCTG---TAA  
>GU562236  
GCT---ACA-----  
GAACGGTTGTGGGTCACAGTCTACTATGGGGTACCGGTGTGG---AAAGATGCAACC---  
ACCACTCTATTTTGTGCATCCGATGCTAAAGCATATGATACAGAG---GTACATAAT-----  
-----ATCTGGGCCACA---CATGCCTGTGTACCCACAGAC---  
CCCAACCCACAAGAAATAGTATTGCAT-----AATGTGACAGAAAATTTTAAAC-----  
-----ATGTGGAAAAATAACATGGGTAGAACAGATGCATGAGGATATA---  
CTCAGTTTATGGGATGAAAGCCTA---AAGCCATGTGTAAAATTA---  
ACCCCACTCTGTGTTTCCTTTAAATTGCACTGATGCAAAGACGAACAGT-----  
-----  
-----ACTGTGGGGAGAGAAGAAATGAAA---  
AACTGCTCTTTTCGATGTTACCACAGGCATAAGA-----  
AGTAAAGTGCAGAAAGAATATGCACCT---  
TTGTATAAACTTGATATAGTACAAATAGATAAAAATTAATGATAGTATAATT-----  
-----  
AATGGTAGTAATAGTAACTATAGTAGCTATAGTAACTATAGTAGCTATGCATTGATAAGTTGTAACACCTCAG  
TCATTAAACAG---  
GCCTGCCCAAAGGTAACCTTTGAGCCAATTCCCATACATTATTGTGCCCCAGCTGGTTATGCGATTGTAAAGT  
GTAAT---GATAAGAGGTTCAAT-----GGAACAGGACCATGTAAAAAT-----  
-GTCAGC---ACAGTACAGTGCACACATGGAATTAGGCCAGTAGTGTCAACT---  
CAACTGCTGTTGAATGGCAGTCTAGCAGAAGAAGAG-----

GTAATAATTAGGTCTGAAAATTTACGGACAAT-----GCTAAAACCATAATAGTACAGCTAAAT----  
 -----GAAACTGTAAAA-----ATTGAGTGTATAAGACCCAACAACAATACAAGAAAA-----  
 -AGTATACGTATA-----GGACCAGGGAGTACA---TTT-----TATGCAACAGGAGCC-----  
 -----GTAATAGGAGAGATA-----AGACAAGCACATTGT---AACATTAGTAGAACA---  
 AACTGGACTAACACTTTACAAAAGGTAGTTACAAAATTAAGA-----GAACAATTTGGG-----  
 -----AAGAATAAAACAATAATCTTTAAG-----  
 CCACCAGCAGGAGGAGACCCAGAGATTGTA--ACTCACAGTTTTTAATTGTGGAGGGGAG---  
 TTTAAACAGCTCCAGGCAAGAGTCCTAGCTGTGGAAAGATACCTAAAGGATCAACAGCTCCTAGGGATTTGGG  
 GCTGCTCTGGAAAACATCTGCACCACTGCTGTGCCTTGGGAATGCTAGTTGGAGT-----  
 -----AATAAATCTCTGGAGAGTATCTGG-----GAA-----  
 AACATGACCTGGATGGAGTGG---GAAAAAGAAATTGACAATTACACAGAACAAATATAC---  
 CTCTTACTTGAACAATCGCAGAGCCAGCAAGAA-----  
 -----  
 AAGAATGAACAGGAATTATTGGAATTGGATAAGTGGGCAAGTTTGTGGAATTGGTTTAGCATATCAAACCTGGC  
 TGTGGTATATAAGAATATTCATAATGATAATAGGAGGCTTGGTAGGTTTAAGAATAGTGTGTGCT---  
 GTACTTTCTGTAGTG-----AATAAAGTTAGGCAGGGATACTCACCA-----  
 TTATCATTTGCAGTTAGCTTGCTTAATGTCACAGCAATAGCAGTAGCTGAG---  
 GGGACAGATAGGATTATAGAACTAGTACAAAGAATTTTGTAGAGCT-----  
 -----TTTCTCAACATA-----CCTAGAAGAATAAGACAGGGCTTAGAAAGAGCTTTGCAA---TAA  
 >JQ403024  
 GCT---AAA-----  
 GAACAATTATGGGTACAGTCTATTATGGGGTACCTGTGTGG---AAAGAAGCAAAAC---  
 ACCACTCTATTTTGTGCATCAGATGCTAAAGCATATGATACAGAG---GTACATAAT-----  
 -----GTTTGGGCCACA---CATGCCTGTGTACCCACAGAC---  
 CCCAACCCACAAGAAATAGTAATGGAA-----AATATAACAGAAGAGTTTAAAC-----  
 -----GTGTGGAAAAATAACATGGGTAGAACAGATGCATGAGGACATA---  
 GTCAATTTATGGGATCAAAGTCTA---AAGCCATGTGTAAAATTA---  
 ACCCCACTCTGTGTTACTTTAAATTGCACTGATTATGTGAGGAATGATAATAATACCAAT-----  
 -----  
 -----AATAGTAGTGTGTTAAGGATGGAGCCAGGAGAAATAAAA---  
 AACTGCTCTTTCAATATTACCACAAACATAAGA-----  
 GATAAGATACAAAGAACATATGCATTG---TTTTATAAACTTGATGTAGTACCAATAGATAAT-----  
 -----  
 -----  
 GAGAATAATAGCTATAGGTTGATAAGTTGTAACACCTCAGTCATTACACAA---  
 GCTTGTCCAAAGGTATCCTTTCAGCCAATTCCCATACATTATTGTGCCCCGGCTGGTTTTGCGATTCTAAAGT  
 GTAAC---GAGAAGGGGTTTCACT-----GGAAAAGGAGAATGTAAAAAT-----  
 -GTCAGC---ACAGTACAATGTACACATGGAATTAGGCCAGTAGTGTCAACT---  
 CAACTGTTGTAAATGGCAGTCTAGCAGAAGAAGAG-----  
 GTAGTAATTAGATCTGAAAATTTACAGACAAT-----ACTAAAACCATAATAGTACAGCTGAAC---  
 -----AAAGCTGTAGTA-----ATTAATTGTACAAGACCCAACAACAACACAAGAAAA---  
 -GGTATACATATA-----GGACCAGGGAGTGCA---TTT-----TATACAACAGGAGAC---  
 -----ATAATAGGAGATATA-----AGACAAGCACATTGT---AACATTAGTGAAGCA---  
 GACTGGAATAATACTTTAGGACAGATAGCTGCAAAAATTAATA-----GAAAAATTT-----  
 -----AATAAAACAATAGTCTTCAAT-----  
 CAATCCTCAGGAGGGGACCCAGAAATTGTA---ATGCACAGTTTTTAATTGTGGAGGAGAA---  
 TTTAAGCAGCTCCAGGCAAGAGTCCTGGCTGTGGAAAGATACCTAAAGGATCAACAGCTCCTAGGGATTTGGG  
 GTTGCTCTGGAAAACATTTGCACCACTGCTGTGCCTTGGGAATGCTAGTTGGAGT-----  
 -----AATAAATCTCTAGATGACATCTGG-----AAT-----  
 AACATGACCTGGATACAATGG---GAAAGAGAAATTGACAATTACACAGGCTTAATATAC---  
 ACCTTACTTGAAAAATCGCAGAACCAGCAAGAA-----  
 -----  
 AAGAATGAACAAGAATTATTAGAATTGGATAAGTGGGCAAGTTTGTGGAATTGGTTTAGCATAACAAAATGGC  
 TGTGGTATATAAAAAATATTCATAATGATAGTAGGAGGCTTAATAGGTTTAAGAATAATTTTTTGCT---  
 GTGCTTTCTATAGTG-----AATAGAGTTAGGCAGGGATATTCACCA-----  
 CTATCATTTGGCTATTAGCTTGCTGAACGCCACTGCTATAGTAGTAGCTGAG---  
 GGGACAGATAGGATTATAGAAAGGAGTACAAAGGGCTTTTGTAGAGCT-----  
 -----TTTATTCACATA-----CCTGTAAGAATAAGACAGGGCTTGGAAGGGCTTTTGCTA---TAA  
 >JQ403041

GCT---GGA-----  
CAACAGTTGTGGGTCACAGTCTATTATGGGGTACCTGTGTGG---AAAGAAGCAACT---  
ACCACTCTATTCTGTGCATCAGATGCTAGAGCATATCATAACAGAG---GTACATAAT-----  
-----GTTTGGGCCACA---CATGCCTGTGTACCCACAGAC---  
CCCAGCCCACAGGAAGTAGTATTGCAA-----AATGTGACAGAAAATTTTAAAC-----  
-----ATGTGGAAAAATAACATGGTAGATCAGATGCATGAGGATATA---  
ATTAGTTTATGGGATCAAAGCCTA---AAGCCATGTGTAAAGTTA---  
ACCCCACTCTGTGTCACTTTAAATTGTGCTGATTGGAAGAATGGTACTAATACCAGGAATGATTCTAAT----  
-----  
-----GCCACTAATAGTAGCATGGGAGTGGTGGAAGGAAAAGAAATGAAA---  
AATTGCTCTTTCAATATCACCACAAGCATAAGA-----  
GATAAGGTGAAGAAGGAATATGCACCTT---TTTTATAAACTTGATGTAGTACCCATAGACAAT-----  
-----  
-----  
GAGAAATGATAGCTATAGGTTGATAAGTTGTAACACCTCAGTCATTACACAG---  
GCCTGTCCAAAGGTCTCCTTTGAGCCAATTCCCATACATTATTGTGCCCCGGCTGGTTTTGCGATTATAAAAGT  
GTAAT---AATAAGACATTCAAT-----GGAAGAGGACCATGTACAAAT-----  
-GTCAGC---ACAGTACAATGTACACATGGAATTAGGCCAGTAGTATCAACT---  
CAACTGCTGTTAAATGGCAGTCTAGCAGAAGAGGAG-----  
GTAGTAATCAGATCAGAAAATTTACGAACAAT-----GCTAAAGTCATAATAGTACAGCTGAAA---  
-----AAACCTGTAGAG-----ATTAATTGTACAAGACCCGGCAACAATACAAGAAAA---  
-AGTATAAATATA-----GGACCAGGCAGAGCA---TTT-----TATGCAACAGGAAAC-----  
-----ATAATAGGAGACATA-----AGACAAGCACATTGT---AATCTTAGTAGAGCA---  
ACATGGGATGAACTTTAAAAGAGATAGCTACAAAATTAAGA-----GAACAATTTGTG---  
-----AATAAAACAATAGTCTTTAAA-----  
GATTCCCTCAGGAGGGGATCCAGAAGTTGTG---ATGCACACTTTTAATTGTGGAGGGGAA---  
TTTAAGCAGCTCCAGGCGAGAGTCCTGGCTGTGGAAAGATACCTAAAGGATCAACAGCTCCTAGGGATTTGGG  
GTTGCTCTGGAAAGCTCATTTGCACCACTAATGTACCTTGGAAATAAGACTTGGAGT-----  
-----AATAAAACTCAGGAGCAGATTTGG-----GAT-----  
AACATGACCTGGATGCAGTGG---GAAAGAGAAATTGATAACTACACAGGTTTAATATAC---  
ACCTTACTTGAAGAATCGCAAAACCAACAAGAA-----  
-----  
AAGAATGAACAAGAATTATTGGCATTGGATAAATGGGCAAGTTTGTGGAATTGGTTTGACATAACAAAATGGC  
TGTGGTATATAAAAATATTACATAATGATAGTAGGAGGTTTGGTAGGTTTAAGAATAGTTTTTTGTT---  
GTACTTTCTATAGTG-----AATAGAGTTAGGCAGGGATACTACCA-----  
TTATCATTCGCTGTTAGCTTGCTCAACGCCCTAGCCATAGCAGTAGCTGAG---  
GGGACTGATAGGATTATAGAATTAGTGCAAAGAACTTGTAGAGCT-----  
-----ATTATCAACATA-----CCCACACGAATAAGACAGGGCTTGGAAGGGCTTTGCTA---TAA  
>KC797225  
AGT---GCT---GCA-----  
GATCAATTGTGGGTCACAGTATATTATGGGGTACCTGTGTGG---AAAGAAGCAACT---  
ACCACCTATTTTGTGCATCAGATGCTAAAGCATATGATACAGAG---GTACATAAT-----  
-----GTTTGGGCCACA---CATGCCTGTGTACCCACAGAC---  
CCCAACCCACAAGAAGTAGTATTGGGA-----AATGTGACAGAAAATTTTAAAC-----  
-----ATGTGGAAAAATAACATGGTGGGAACAGATGCATGAGGATATA---  
ATTAGTTTATGGGATCAAAGTCTA---AAGCCATGTGTAAATTA---  
ACCCCACTCTGTGTTACTCTAAATTGCACTGATGACTTGAAAAATAATAAATAGTAGTAGTAATACCAATA  
GTACT-----  
-----AGTAATGCCAATAGTACTAGTGAGGCACCAATGGAAAAAGGAGAAATAAAA---  
AACTGCTCTTTTGTATGTCGACACAGGCATAAGC-----  
AAGAAGATACAGAAAGAATATGCACCTT---  
TTTTATAAACTTGATGTAGTACCAATAGAAGATGATAACAAGACAACCT-----  
-----  
AATGGTAGCTATAATAATACAAAGTATAGTAACTATAGATTAATAAGTTGTAACACCTCAATCATTACACAG-  
--  
GCCTGTCCAAAGGTAACCTTCGAGCCAATTCCCATACATTATTGTGCCCCGGCTGGTTTTGCAATTCTCAAGT  
GTAAT---GATAAGAAGTTCAAT-----GGAACAGGACCATGTACAAAT-----  
-GTCAGT---ACAGTACAATGTACACATGGAATTAGGCCAGTAGTATCAACT---  
CAATTGTTGTTAAATGGCAGTCTATCAGAAGAGGAG-----  
GTAGTAATTAGATCTGAAAATTTTACAAATAAT-----GCTAAACTATAATAGTACAGCTGAAT----

-----GAAACCATACAA-----ATTAATTGTACAAGACCCAACAACAATACAAGAAAG-----  
-GGTATACATATA-----GGTCCAGGAAGAACA---TTT-----TTTGCAACTGGAGAT-----  
-----ATAATAGGGGATATA-----AGACAAGCACATTGT---ACCATTAATGGAGCA---  
CAATGGAATGCCACTTTACAACAGATAGTTGCAAAATTAAGA-----GAACAATTTAGG-----  
-----GGAAATAAAACAATAAAATTTGAG-----  
CCACCATCCCCAGGAGGGGATCCAGAAATTATG---ATGCACAGTTTTTAAGTGTGGAGGGGAA---  
TTTAAGCAGCTCCAGGCAAGAGTCCTTGCTGTGGAAAGATACCTAAGGGATCAACAGCTCCTAGGGATTTGGG  
GTTGCTCTGGAAACTCATCTGCACCACTGCTGTGCCTTGAATACTACCTGGAGT-----  
-----AATAAAACTCTGGAACAAATTTGG-----GGT-----  
AACATGACCTGGATGCAGTGG---GAAAAAGAAATTGACAATTACACTAACGTAATATAC---  
ACCTTAATTGAGGATGCGCAAAACCAGCAGGAA-----  
-----  
AAGAATGAACAAGAATTATTGGAATTGGATAAGTGGGCAAATTTGTGGAGTTGGTTTCGACATATCAAAGTGGC  
TGTGGTATATAAAAATATTTCATAATGATAGTAGGAGGCTTAATAGTTTTTAAGAATAATTTTTTGCT---  
GTACTTTCTATAGTG-----AGAAGAGTTAGGCAGGGATATTCACCA-----  
TTGTCAATTTGCTACTAACTTGCTTAATACCATAGCTATAGCAGTAGCTGAG---  
GGGACAGATAGGATTATAGAATTAGCACAAAGAGGTTTTAGAGCT-----  
-----TTTCTCCACATA-----CCTAGAAGAATAAGACAGGGCCTTGAAAGGGCTTTGCAA---TAA  
>HQ699978  
GCT---GCA-----  
GACAAATTGTGGGTCACAGTCTATTATGGGGTACCTGTATGG---AAAGAAGCAACT---  
ACCACTCTATTTTGTGCATCAGATGCTAAAGCATATGAGACAGAG---GTACATAAT-----  
-----ATTTGGGCTACA---CATGCCTGTGTACCCACAGAC---  
CCCAACCCACAAGAAGTAGTCTTGGGA-----AATGTGACAGAGAACTTTGAT-----  
-----ATGTGGGAAAATAACATGGGTAGAACAGATGCATGAAGATATA---  
ATCAGTTTATGGGATCAAAGCCTA---AAGCCATGTGTAAAATTA---  
ACCCCACTCTGTGTTACTTTAAATTGCACTAATTTGAATGATACTACTAAACCAGTAATACTACCAGTAATA  
ATACCACT-----  
-----GATACTACTAATACCAGTAGTACTACCAGTAGTATGATAAGGGAAGGAGAAATAAAA---  
AACTGCTCTTTCAATATCACCACAAGCATAAGG-----ACTAAGGTA---  
AAAGACTATGCATTT---TTTTATAAACTTGATATAGTACAAATAGATAAT-----  
-----  
---GATAATAGTAATACCAGCTATAGGTTGATAAATTGTAACACCTCAGTCATTACACAA---  
GCTTGTCCAAAGGTATCCTTTGAACCAATTCCCATACATTATTGTGCCCCGGCTGGTTTTGCGATTCTAAAGT  
GTAAC---AATAAAACGTTCAAT-----GGAACAGGACCATGTACAAAT-----  
-ATCAGT---ACAGTACAATGTACACATGGAATTAGGCCAGTAGTATCAACT---  
CAACTGCTGTTAAATGGCAGTTTAGCAGAAGAAGAG-----  
GTAGTAATTAGATCTAGCAATTTACGGACAAT-----CTTAAACCATAATAGTACAGTTGAAT---  
-----AAATCTGTAGAA-----ATTAATTGTACAAGACCCAACAACAATACAAGAAAA-----  
-AGTATACATCTA-----GGACCAGGGCAAGCA---TGG-----CATACAACAGGAGAA-----  
-----ATAATAGGAGATATA-----AGACAAGCACATTGT---AACATTAGTAGAGCA---  
AAATGGAATAACACTTTAGAACAGATAACTAAAAAATTAAGA-----GAAATATAC-----  
-----AACAAAACAATAAGCTTTAAG-----  
CAACATGCAGGAGGGGACCCAGAGGTTGTA---ATGCACAGTTTTTAATTGTGGAGGGGAA---  
TTTAAGCAGCTCCAGGCAAGAGTCTTGGCTGTGGAAAGATACCTAAAGGATCAACAGCTCCTAGGGATTTGGG  
GTTGCTCTGGAAACTCATTTGCACCACTTCTGTGCCTTGAATGCTAGTTGGAGT-----  
-----AATAAATCTCTGGATGAGATTTGG-----AAT-----  
AACATGACTTGGATGGAGTGG---GAAAGAGAAATTGACAATTACACAAACGAAATATAC---  
AAATTAATTGAAGAATCGCAGAACCAACAAGAA-----  
-----  
AAGAATGAAGTAGAAGTATTGGAATTGGATAAGTGGGCAAGTTTTGTGGAATTGGTTTAGCATAACAAAGTGGC  
TGTGGTATATCAAAATATTTCATAATGATAGTAGGAGGCTTGGTAGGTTTAAGAATAGTTTTTTGCT---  
GTACTTTCTATAGTA-----AATAGAGTTAGGCAGGGATACTCACCA-----  
TTGTCAATTAGCTATTAGCTTGCTTAACGCCACAGCCATAGCAGTAGCTGAG---  
GGGACAGATAGGGTTATAGAAGTAGTACAAAGAGCCTGTAGGGCT-----  
-----ATTCTCAACATA-----CCTACAAGAATCAGACAGGGCCTCGAAAGGGCTTTGCTA---TAA  
>EU131792  
GCT---GCA-----  
AAAAACTTGTGGGTCACAGTCTATTATGGGGTACCTGTATGG---AAAGAAGCAACT---  
ACTACTCTATTTTGTGCATCAGATGCTAAAGCATATGAGACAGAG---GTACATAAT-----

-----ATTTGGGCCACA---CATGCCTGTGTACCCACAGAC---  
CCCAGCCCACAAGAAGTAGTCTTGGA-----AATGTGACAGAAAACTTTAA-----  
-----ATGTGGAAAAATAACATGGTAGACCAGATGCATGAAGATATA---  
ATCAGTTTATGGGATCAAAGCCTA---AAGCCATGTGTAAAGATTA---  
ACCCCACTCTGTGTTACTTTAAATTGCACTAATTTGAAAAATACTACTAATACCAGTAAT-----  
-----  
-----AATATCAGTAGTACTACAGAGGGAGGAAAAATAAAA---  
AACTGCTCTTTCAATATCACCACAAGCACAAAA-----ACTAAGGTG---  
AGAGACTATGCACTT---TTTTATGAACTTGATATAGTATCAATAAAAAAT-----  
-----  
-----GATAGTACCAGCTATAGGTTGATAAATTGTAACACCTCAGTCATTACACAA---  
GCTTGTCCAAAGGTATCCTTTGAGCCAATTCCCATACATTATTGTGCCCCGGCTGGTTTTGCGATTCTAAAAAT  
GTAAC---AATAAAACGTTCAAT-----GGAACAGGACCATGTACAAAT-----  
-GTCAGT---ACAGTACAATGTACACATGGAATTAGGCCAGTAGTATCAACT---  
CAACTGCTGTTAAATGGCAGTTTAGCAGAAGAAGAG-----  
GTAGTAATTAGATCTAGCAATTTACGGACAAT-----ACTAAAGTCATAATAGTACAGCTTAAT---  
-----GAATCTGTAAGA-----ATTGATTGTACAAGGCCCAACAACAATACAAGAAAA-----  
-AGTATACATCTA-----GGACCAGGGAGAGCA---TGG-----TATACAACAGGACAA-----  
-----ATAATAGGAGATATA-----AGACAAGCACATTGT---AACATTAGTAGAGAA---  
AAATGGAATAACGCCTTAGGACTGATAACTGAAAAATTAAAA-----GAACAATTTGGG---  
-----AACAAAACAATAATCTTTGAT-----  
CAATCTTCAGGAGGGGACCCAGAGATTGTA---ATGCACAGTTTTAATTGTGGAGGGGAA---  
TTTAAGCAGCTCCAGGCAAGAGTCTTGGCTGTGGAAAGATACCTAAAGGATCAACAGCTCCTAGGGATTTGGG  
GTTGCTCTGGAAACTCATTTGCACCACTGCTGTGCCTTGGAATGCTAGTTGGAGT-----  
-----AATAAATCCCTGAGTGAGATTTGG-----GGC-----  
AACATGACTTGGATGGAGTGG---GAAAAAGAAATTGGCAATTACACAAGAGAAATATAC---  
ACCTTAATTGAAGATTCGCAGAACCAGCAAGAA-----  
-----  
AAAAATGAACTAGAACTATTGGAATTGGATAAGTGGGCAAGCTTGTGGAATTGGTTTGACATAACACAATGGC  
TGTGGTACATCAAAATATTATAATGGTAGTAGGGGGCTTGGTAGCTTTAAGAATAGTTTTTTGCT---  
GTACTTTCTATAGTA-----AATAGAGTTAGGCAGGGATACTCACC-----  
TTGTCGTTTGCTATTAGCTTGCTTAACGCCACAGCCATAGCAGTAGCTGAG---  
GGGACAGATAGGATCATAGAAGTAGCACAAGGAGCTTATAGGGCT-----  
-----ATTCTTAACATA-----CCTACAAGAATCAGGCAGGGCCTAGAAAGGGCTTTGTTA---TAA  
>EU131803  
GCT---GAA-----  
GAAAAGTTGTGGGTACAGTCTATTATGGGGTACCTGTATGG---AAAGAAGCAACT---  
ACCACTCTATTTTGTGCATCAGATGCTAAAGCATATGATACAGAG---GTACATAAT-----  
-----ATTTGGGCCACA---CATGCCTGTGTACCCACAGAC---  
CCCAACCCACAAGAAGTAGTCTTGGA-----AATGTGACAGAAAACTTTAA-----  
-----ATGTGGAAAAATAACATGGTAGAACAGATGCATGAAGATATA---  
ATCAGTTTATGGGATCAAAGCCTA---AAGCCATGTGTAAAATTA---  
ACCCCACTCTGTGTTACTTTAAATTGCACTAATTTGAGGAATATTACTAATACCAGTAGT-----  
-----  
-----AATACCAGTAGTACGACAGAGGGAGGAGAAATAAAA---  
AACTGCTCTTTTAATATCACCACAAAAATAAGA-----ACTAAGGTA---  
AAAGACTATGCACTT---TTTTATAAACTTGATGTAGTACCAATAGATAAT-----  
-----  
-----GATAATACCAGCTATAGGTTGATAAATTGTAACACCTCAGTCATTACACAA---  
GCTTGTCCAAAGGTATCCTTTGAGCCAATTCCCATACATTATTGTACCCCGGCTGGTTTTGCGATTCTAAAGT  
GTAAC---AATAAAACATTCAAT-----GGAACAGGACCATGTACAAAT-----  
-GTCAGT---ACAGTACAATGTACACATGGAATTAGGCCAGTAGTATCAACT---  
CAACTGCTGTTAAATGGCAGTTTAGCAGAAGAAGAG-----  
ATAGTAATTAGATCTAGCAATTTACAGACAAT-----GCTAAAGTCATAATAGTACAGTTGAAT---  
-----AAATCTGTAGAA-----ATTAATTGTACAAGACCCAACAACAATACAAGAAAA-----  
-GGTATAAATATA-----GGACCAGGGCGAGCA---TGG-----TATACAACAGGAGAT-----  
-----ATAATAGGAGATATA-----AGACAAGCACATTGT---AACCTTAGTAGGACA---  
GAATGGAATAACACTTTAAAAACAGATAGCTGAAAAATTAAAG-----GAACAATTTGGG---  
-----AACAAAACAATAATCTTTAAT-----  
CAATCTTCAGGAGGGGACCCAGAGATTGTA---ATGCGCAGTTTTAATTGTGGAGGGGAA---

TTTAAGCAGCTCCAGGCAAGAGTCCTGGCTGTGGAAAGATACCTAAAGGATCAACAGCTCCTAGGGATTTGGG  
 GTTGCTCTGGAAACTCATTTGCACCACTACTGTGCCTTGAATACTAGTTGGAGT-----  
 -----AATAAATCTCTGGATCAAATTTGG-----AAT-----  
 AACATGACTTGGATGGAGTGG---GAAAGAGAAATTGGCAATTACACAAGAGAAATATAC---  
 ACCTTAATTGAACAATCGCAGAACCAGCAGGAA-----  
 -----  
 GAGAATGAATTAGAACTATTGGAATTGGATAAGTGGTCAAGTTTGTGGAGTTGGTTTAGCATAACAAATTGGC  
 TGTGGTATATCAGAATATTCATAATGATAGTAGGAGGCTTGATAGGTTTAAGAATAGTTTTTTGCT---  
 GTACTTTCTATAATA-----AATAGAGTTAGGCAGGGATACTCACCA-----  
 TTGTCATTTGCTATTAGCTTGCTTAACGCCACAGCCATAGCAGTAGCTGAG---  
 GGAACAGATAGGGTTATAGAAGTAGCACAAAGAGCTTATAGGGCA-----  
 -----ATTCTCAATATA-----CCTACAAGAATCAGACAGGGCCTAGAAAGGGCTTTGCTA---TAA  
 >EU363829  
 GCT---GCA-----  
 GAAAACTTGTGGGTCACAGTCTATTATGGGGTACCTGTATGG---AAAGATGCAAAAT---  
 ACCACTCTATTTTGTGCATCAGATGCTAAAGCATATGAGACAGAG---GTACATAAT-----  
 -----ATTTGGGCCACA---CATGCCTGTGTACCCACAAAC---  
 CCCAACCCACAAGAAGTAGTCTTGGA-----AATGTGACAGAAAACCTTTAAC-----  
 -----ATGTGGAAAAATGACATGGCAGAACAAATGCAGGAAGATATA---  
 ATCAGTTTATGGGATCAAAGCCTA---AAGCCATGTGTAGAATTA---  
 ACCCCACTCTGTGTTACTTTAAATTGTACTAATGTTACTATTAGTGATAAAAAAT-----  
 -----  
 -----AGTACAATAGAGGGAGGAGGAGAAGTAAGA---  
 AACTGCTCTTTCAATATCACCACAAGCATAAAT-----ACTCAGGTG---  
 AAAGACCATGCAATT---TTTTATAAACATGATATAGAAAAAATAGATAAT-----  
 -----  
 -----GAGACTACCAGCTACAGGTTGACAAGATGTAACACCACAATCATTAAACAG---  
 GCTTGTCCAAAGGTATCCTTTGAGCCAATTCCCATACATTATTGTGCCCGGCTGGTTTTGCGATTCTAAAGT  
 GTAAC---AATAAACGTTTCAGT-----GGAACAGGACCATGTACAAAT-----  
 -GTCAGT---ACAGTACAATGTACACATGGAATTAGGCCAGTAGTATCAACT---  
 CAACTGCTGTTAAATGGCAGTTTAGCAGAAAAAGAG-----  
 GTAATGATTAGATCTAGCAATTTTCATGGATAAT-----GCTAAAATAATAATAGTACAGCTGAAT---  
 -----GAATCGGTAGAA-----ATTAATTGTACAAGACCCAACAATAATACAAGAAAA-----  
 -AGGGTAACTCTA-----GGACCAGGGCGAGTA---TGG-----TATACAACAGGACAA-----  
 -----ATAATAGGAGATATA-----AGAAAAGCATATTGT---AACATTAGTAGAATA---  
 AAATGGAATAACACTTTACATCAGATAACTAAAAAATTAAGA-----GAACAATTTGGG---  
 -----AACAAAACAATAATCTTTAAT-----  
 CAATCCTCAGGAGGGGACCCAGAGATTCAA---ATGCACAGTTTTTAATTGTGGAGGAGAA---  
 TTTAAGCAGCTCCAGGCAAGAGTCCTGGCTGTGGAAAGATACCTAAAGGATCAACAGCTCCTAGGGATTTGGG  
 GTTGCTCTGGAAACTCATTTGCACCACTACTGTGCCTTGAATGTTAGTTGGAGT-----  
 -----AATAAATCTCTGGATGAGATTTGG-----AAT-----  
 AACATGACTTGGATGGAGTGG---GAAAAAGAAATTGGCAACTACACAAATATAATATAC---  
 AACTTAATTGAAGAATCGCAGAACCAACAAGAA-----  
 -----  
 AAGAATGAAC TAGACCTATTGAAATTGGATCAGTGGGCAAGTTTGTGGAATTGGTTTGACATATCAAATGGC  
 TGTGGTATATTAAAATATTTCATAATGATAGTAGGAGGCTTGGTAGGTTTAAGAATAGTTTTTTGCT---  
 GTACTTTCTATAGTA-----AATAGAGTTAGGCAGGGATACTACCA-----  
 TTGTCATTAGCTATTAGCTTGCTTAACGTCACAGCCATAGCAGTAGCTGAG---  
 GGGACAGATAGGATTATAGAAGTAGTACAAAGAACTTATAGGGCA-----  
 -----ATTCTTAACATA-----CCTACAAGAATCAGACAGGGCCTCGAAAGGGCTTTGCTA---TAA  
 >HM215413  
 GCT---GAA-----  
 GAAAAATTGTGGGTCACAGTCTATTATGGGGTACCTGTATGG---AAAGAAGCAACC---  
 ACCACTCTATTTTGTGCATCAGATGCTAAAGCATATGATCCAGAG---GTACATAAT-----  
 -----ATTTGGGCCACA---CATGCCTGTGTACCCACAGAC---  
 CCCAACCCACAAGAAGTAGTCTTGGA-----AATGTGACAGAAAACCTTTAAC-----  
 -----ATGTGGAAAAATGACATGGTAGAACAGATGCAGGAAGATATA---  
 ATCAGTTTATGGGATCAAAGCTTA---CAGCCATGTGTAAAATTA---  
 ACCCCACTCTGTGTCAATTTAACTTGCCTAATGCCACAGCTACCAATGCCACAGCTACCAATAGTACGGTGG  
 CC-----

-----CCAGCTCCCAATAGTACGGCGGCCCCGCACGATGACAGACTATGAAATGAAA---  
AACTGCTCTTTCAATATCACCACCAGCACAAGC-----ACTAAGATG---  
ACAGGCTATGCAGTT---TTTATAACCTTGATGTAGTACCAATAGGTAAG-----  
-----  
---GGTAATGATACTAAAAGCTATAGGTTGCTAAAGTGTAACACCTCAGTCATTACACAA---  
GCTTGTCCAAAGGTATCCTTTGAACCAATCCCCTACATTATTGTGCCCCGGCTGGTTTTGCGATTCTAAAGT  
GTAAC---AACAAAACGTTTCAGT-----GGAACAGGACCATGTACAAAT-----  
-GTCAGT---ACAGTACAATGTACACATGGAATTAGGCCAGTAGTATCAACT---  
CAACTTCTGTTGAATGGCAGTTTAGCAGAAGAAGAG-----  
GTAGTAATTAGATCTAGCAATTTCTCGAACAAT-----GCTAAAACCATAATAGTACAGCTGAAG----  
-----GAACCTGTAGAA-----ATTAATTGTACAAGACCCAACAACAATACAAGAAAA-----  
-AGTATGACTCTA-----GGACCAGGGCGAGCA---TGG-----TATACAACAGGACAA-----  
-----ATAATAGGAGATATA-----AGAAAAGCACATTGT---AACCTTAGTAGCACA---  
AAATGGCATGACACTTTAAGACAAATAGCTAAAAAATTAAGT-----AAACAATTTGGG----  
-----AACAAAACAGTAGTCTTTAAT-----  
CAATCCTCAGGAGGAGACCCAGAGATTGTA---ATGCACAGTTTTAATTGTGGAGGGGAA---  
TTTAAGCAGCTCCAGGCAAGAGTCTTGGCTGTGGAAAGATACCTAAAGGATCAACAGCTCCTAGGGATTTGGG  
GTTGCTCCGAAAACCTCATCTGCACCACTGCTGTGCCTTGGAATGATAGTTGGAGT-----  
-----AGGAATAAAACTCTGAAGGACATTTGG-----AAT-----  
AACATGACTTGGATGCAGTGG---GAAAGAGAAATTGACAATTACACAAGTGAAATATAC---  
ACCTTAATTGAGGAATCGCAGAACCAACAAGAA-----  
-----  
AAGAAATGAAGTAGAATTATTGGAATTGGACAAGTGGGCAAGTTTGTGGAATTGGTTTGACATAACACAATGGC  
TGTGGTATATAAAAAATATTACATAATGATAGTAGGAGGCTTGGTAGGTTTAAGAATAGTTTTTTGCT---  
GTACTTTCACCTAGTA-----AATAGAGTTAGGCAGGGATACTCACCA-----  
TTGTCAATTAGCTGTTAGCTTGCTCAATGCCACAGCTATAGCAGTAGCTGAG---  
GGGACAGATAGGGTTATAGAAGTAGTACAAAGAGCTTGTAGAGCT-----  
-----ATTCTCCACATA-----CCCACAAGAATAAGACAGGGTCTTGAAAGGGCTTTGCTA---TAA  
>EU131802  
GCT---GAA-----GAAAAG---  
TGGGTCACAGTCTATTATGGGGTACCTGTATGG--AGAGATGCAAAT---  
ACCACTCTATTTTGTGCATCAGATGCTAAACATATGATACAGAG--GTACATAAT-----  
-----GTTTGGGCCACA---CATGCCTGTGTACCCACAGAC---  
CCCAACCCACAAGAAGTAGTCTTGGGA-----AATGTGACAGAAAACCTTTAAC-----  
-----ATGTGGAAAAATAACATGGTAGAACAGATGCATGAAGATATA---  
ATCAGTTTATGGGATCAAAGCCTA---AAGCCATGTGTAAAATTA---  
ACCCCACTCTGTGTTACTTTAAATTGCACTAATTTGGGGAGTACTACTAATACCAGTAGT-----  
-----  
-----AATACCAGTAGTACGACAAAGGGAGGAGAAATAAAA---  
AACTGCTCTTTCGATATCACCACAAACACAGGA-----AAGGTA---  
AGAGACTATGCACCTT--CTTTATAAACTTGATGTAGTACCAATGGGTAAA-----  
-----  
-----GTTAATACCAGCTTTAGGTTGATACATTGTAACACCTCAGTCATTACACAA---  
GCTTGTCCAAAGGTATCCTTTGAGCCAATTCCCATACATTTATTGTACCCCGGCTGGTTTTGCGCTTCTAAAGT  
GTAAC---AATAAAACATTTCAGT-----GGAACAGGACCATGTACAAAT-----  
-GTCAGT---ACAGTACAGTGTACACATGGAATTAGGCCAGTAGCATCCACT---  
CAACTGCTGTTAAATGGCAGTTTAGCAGAAGAAAGG-----  
GTAGTAATTAGGTCTAGCAATTTACGGACAAT-----GCTAAAATCATAATAGTACAGCTAAAT----  
-----GAATCTGTAGAA-----ATTAATTGTACAAGACCCAACAACAATACAAGAAAA-----  
-GGTATATATCTA-----GGACAAGGGCGAGCA---TGG-----TATACAACAAGAAGA-----  
-----ATAATAGGAGATATA-----AGACAAGCACATTGT---AACATTAGTAGAGAA---  
AAATGGAATAACACTTTAAACTGATAACTGAAAAATTAAGA-----GAACAATTTGGG----  
-----AACAAAACAATAATCTTTAAT-----  
CGATCTTCAGGAGGGGACCTAGAGGTTGTA---ATGCACAGTTTTAATTGTGGAGGGGAA---  
TTTAAGCAGCTCCAGGCAAGAGTCTTGGCTGTGGAAAGATACCTAAAGGATCAACAGCTCATGGGAATTTGGG  
GTTGCTCTGGAAAACCTATTTGCACCACTGCTGTGCCTTGGAATGCTAGTTGGAGT-----  
-----AATAAATCTCTAGATCAGATTTGG-----AAT-----  
AACATGACTTGGATGGAGTGG---GAAAGAGAAATTGACAATTACACAAGAGAAATATAC---  
AACTTAATTGAAGTATCGCAGAACCAACAAGAA-----  
-----

CAGAAATGAACAAGAACTATTGGAATTGGATAAATGGGCAAGTTTGTGGAATTGGTTTGACATAACAAAATGGC  
 TGTGGTATATCAAAATATTTCATAATGGTAGTAGGAGGCTTGGTAGGTTTAAGAATAGTTTTTTGCT---  
 GTACTTTCTATAGTA-----AATAGAGTTAGGCAGGGATACTCACCA-----  
 TTGTCATTAGCTATTAGCTTGCTTAACACCACAGCCATAGCAGTAGCTGAG---  
 GGAACAGATAGGGTTATAGAAGTAGTACAAAGAGCTTATAGGGCT-----  
 -----ATTCTCAATATA-----CCTACAAGAATCAGACAGGGCCTAGAAAGGCTTTGCTA--TAA  
 >EU131804  
 GCT---GAA-----  
 GAAAAGTTGTGGGTCACAGTCTATTATGGGGTACCTGTATGG---AAAGAAGCAACT---  
 ACCACTCTATTTTGTGCATCAGATGCTAAAGCATATGATACAGAA---GTACATAAT-----  
 -----GTTTGGGCCACA---CATGCCTGTGTACCCACAGAC---  
 CCCAGCCCACAAGAAGTAGTCTTGGAA-----AATGTGACAGAAGACTTTAAAC-----  
 -----ATGTGGAAAAATAACATGGGTAGAACAGATGCATGAAGATATA---  
 ATTAGTTTATGGGATCAAAGCCTA--AAGCCATGTGTAAAATTA---  
 ACCCCACTCTGTGTTACTTTAAATTGCGCTAAATTGAATACCCTTTGAGCAATGGTACTACTACC-----  
 -----  
 -----AGTAATAATACCAGTAGTACAGTAGAGGGAGGAGAAATGAAA---  
 AACTGCTCTTTCAATATCACCAAAACATAGGA-----ACTAAGGTA---  
 AAAGACTATGCACTT---TTTTATAACCTTGATGTAGTACCAATAGATGAG-----  
 -----  
 -----AAGGATAATACCAGCTATAGGTTGATGAATTGTAACACCTCAGTAATTACACAA---  
 ACTTGTCCAAAGGTATCCTTTGAGCCAATTCCCATACATTATTGTACCCCGGCTGGTTTTGCGCTTCTAAAGT  
 GTAAC---AATAAAACGTTTCAGT-----GGAACAGGACCATGTACAAAT-----  
 -GTCAGT---ACAGTACAATGCACACATGGAATTAGGCCAGTAGCATCCACT---  
 CAACTGCTGTTAAATGGCAGTTTATCAGAAGAAGGG-----  
 GTAGTAATTAGGTCTAGCAATTTACAGACAAT-----GCTAAAGTCATAATAGTACAGCTGAGT----  
 -----GAATCTGTAGCA-----ATTAATTATACAAGACCCAACAACAATACAAGAAAG-----  
 -AGTATACCTATA-----GGACCAGGGCAAGCA---TGG-----TATACGACAGGACAA-----  
 -----GTAATAGGAGATATA-----AGGCAAGCACATTGT---AACCTTAGTAGCACA---  
 CAATGGAATAACACTTTAAGTCAGATAACTGAAAAATTAAGA-----GAGCAATTTGAG-----  
 -----AACAAAACAATAATCTTTAAT-----  
 CAATCTTCAGGAGGGGACCCAGAAATTGTA--ATGCACAGTTTTAATTGTGGAGGGGAA---  
 TTTAAGCAGCTCCAGGCAAGAGTCTTGGCTGTGGAAAGATACCTAAAGGATCAACAGCTCCTAGGGATTTGGG  
 GCTGCTCTGGAAGAACTCATTTGCACCACTACTGTGCCTTGGAAATGTTAGTTGGAGT-----  
 -----AATAAATCTCTAAGTCAGATTTGG-----GAT-----  
 AACATGACTTGGATGCAGTGG---GAAAGAGAAATTGATAATTACACAAAAGAAATATAC---  
 ACCTTAATTGAACAATCGCAGATCCAACAAGAA-----  
 -----  
 AAGAATGAAGTAGAACTATTGGAATTGGATAAGTGGGCAAGTTTGTGGAATTGGTTTGACATATCACAATGGC  
 TGTGGTATATCAGAATATTTCATAATGATAGTAGGAGGCTTGATAGGTTTAAGAATAGTTTTTTGCT---  
 GTACTTTCTGTAGTA-----AATAGAGTTAGGCAGGGATACTCACCA-----  
 TTGTCATTTGCTACTAGCTTGCTTAACGCCGCAGCCATAGCAGTAGCTGAG---  
 GGGACAGATAGGGTTATAGAAGTAGTACAAAGAACTTATAGGGCT-----  
 -----ATTCTCAATATA-----CCTACAAGAATCAGACAGGGTCTAGAAAGAGCTTTGCTA--TAA  
 >JF932472  
 GCT---GCA-----  
 GAAAAATTGTGGGTCACAGTCTATTATGGGGTACCTGTATGG---AAAGAAGCAACT---  
 ACTACTCTATTTTGTGCATCAGATGCTAAAGCATATGATACAGAG---GTGCATAAT-----  
 -----ATTTGGGCCACA---CATGCCTGTGTACCCACAGAC---  
 CCCAGCCCACAAGAAGTAGTCTTGGGA-----AATGTGACAGAAAATTTTAAAC-----  
 -----ATGTGGAAAAATGACATGGGTAGAACAGATGCATGAAGATATA---  
 ATTAGTTTATGGGATCAAAGCATA--AAGCCATGTGTAAAATTA---  
 ACCCCACTCTGTGTTACTTTAAATTGCACTAATTTGGAGAATACTAATAATACCAGTAGT-----  
 -----  
 -----AATACCAGTAGTGTGACAGAGGGAGGAGAAATAAAA---  
 AACTGTTCTTTCAATATCACCAAGCATAAAA-----ACTAAGGTG---  
 AAAGACTATGCATTT---TTTTATAAACCCTTGATATAGTACCAATAGATAAT-----  
 -----  
 -----ACCAGCTATAGGTTGATAAGTTGTAACACCTCAGTCATTACACAG---  
 GCTTGTCCAAAGGTATCTTTTGGAGCCAATTCCTATACATTATTGTGCTCCGGCTGGTTTTGCGATTCTAAAAAT

GTAAC---AATAAAACGTTTCAGT-----GGAACAGGACCATGTACAAAT-----  
 -GTCAGT---ACAGTGCAATGTACACATGGAATTAGGCCAGTAGTATCAACT---  
 CAACTGCTGTTAAATGGCAGTTTAGCAGAAGAAGAG-----  
 GTAATAATTAGATCTAGCAATTTACGAACAAT-----GCTAAAGTCATAATAGTACAGCTGAAT----  
 -----AAAGCTGTAAAA-----ATTAATTGTATAAGACCCAACAACAATACAAGAAAA-----  
 -AGTATACCTCTA-----GGATCAGGGAAAGCA---TGG-----TATACAACAGGACAA-----  
 -----ATAATAGGAAATATA-----AGACAAGCACATTGT---AACCTTAGTAGACCA---  
 ATATGGAATAACACTTTACAACAGATAACTAAAAAATTAAGA-----GAACAATTTGGG----  
 -----AACAAAACAATAGTCTTTAAT-----  
 CAATCTTCAGGAGGGGACCCAGAGATTGTA--ATGCACAGTTTTAATTGTGGAGGGGAA--  
 TTTAAGCAGCTCCAGGCAAGAGTCCTGGCTGTGGAAAGATACCTAAAGGATCAACAGCTCCTAGGGATTTGGG  
 GTTGCTCTGGAAACTCATCTGCCCACTGCTGTGCCTTGGAATGTTAGTTGGAGT-----  
 -----AATAAATCTCTGAGTGAAATTTGG-----GAT-----  
 AACATGACTTGGATGGAGTGG---GAAAGAGAAATTGACAAATTACACAAGAGAAATATAC---  
 ACCTTAATTGAAGAATCGCAGAACCAACAAGAA-----  
 -----  
 AAGAATGAACTAGAGTTGTTGGAATTGGATAAGTGGGCAAGTTTGTGGAATTGGTTTGACATAACGAAATGGC  
 TGTGGTATATCAAAATATTCATAATGGTAGTAGGAGGCTTGATAGGCTTAAGAATAATTTTTTGCT---  
 GTACTTTCTATAGGA-----TATAGAGTTAGGCAGGGATACTCACC-----  
 TTGTCATTAGCTATTAGCTTGCTTAACGCCACAGCCGTAGCAGTAGCTGAG---  
 GGGACAGATAGAGTTATAGAAGTAGCACAAAGAGCTTATAGGGCT-----  
 -----TTTATTAAACATA-----CCTACAAGAATCAGACAGGGCCTCGAAAGGGCTTTGCTA---TAA  
 >JF932474  
 GCT---GCA-----  
 GAAAACTTGTGGGTCACAGTCTATTATGGGGTACCTGTATGG---AAAGAAGCAAAAT---  
 ACCACCTTATTTTGTGCATCAGATGCTAGAGCATATGATACAGAG---GTACATAAT-----  
 -----ATTTGGGCCACA---CATGCCTGTGTACCCACAGAC---  
 CCCAACCCACAAGAAGTAGTCTTGGGA-----AATGTGACAGAAAACTTTAAC-----  
 -----ATGTGGAACAATAACATGGTAGAACAGATGCATGAAGATATA---  
 ATCAGTTTATGGGATCAAAGTCTA---AAGCCATGTGTAAAATTA---  
 ACCCCACTCTGTGTACTCTAAATTGCACTGATTATTTGGGGAATACTAATACTACCAGTAATAATACTAGTA  
 CTGATGATACCAGAAGTACT-----  
 -AACAGTAGTACTGATAATGCCAGTAGTAATACCAGTAGTACGATAAAGAGAGGAGAAATAAAA---  
 GAATGCTCTTTCAATATCACCACAAACATAAGA-----  
 GATAAGAAGGTGAAAGACTATGCACCTT---TTTTATAAACTTGATCTAGTACAATTAAATGATGAT-----  
 -----  
 -----  
 ACTAATACCAATACCAGCTATAGGAGCTATAGGTTAATAAGTTGTAACACCTCAGTCATTACACAA---  
 GCTTGTCCAAAGGTATCCTTTGAGCCAATTCCCATACATTATTGTGCCCCGGCTGGTTTTGCGATTCTAAAGT  
 GTAAC---AATAAAACATTTCAGT-----GGAACAGGACCATGTACAAAT-----  
 -GTCAGT---ACAGTACAATGTACACATGGAATTAGGCCAGTAGTATCAACT---  
 CAACTGCTGTTAAATGGCAGCTTAGCAGAAGAAAAG-----  
 ATAGTAATTAGATCTAGCAATTTACGAACAAT-----GCTAAAGTCATAATAGTACAGCTGAAA---  
 -----GAATCTGTACAA-----ATTAATTGTACAAGACCTAACAAACAATACAAGAAAA-----  
 -AGTATATCTCTA-----GGACAAGGGCAAGCA---TGG-----TTTACAACAGGACAA-----  
 -----ATAATAGGAGATATA-----AGACAAGCACATTGT---AACCTTAGTAGAACA---  
 GCATGGAATAACACTTTAAACAGATAGCTCAAAAATTAAGA-----GAACAATTTGGG----  
 -----AACAAACAACAATAGACTTTAAG-----  
 CCATCTTCAGGAGGGGACCCAGAAATTGTA--ATGCACAGTTTTAATTGTAGAGGGGAA--  
 TTTAAGCAGCTCCAGGCAAGAGTCTTGGCTGTGGAAAGATACCTAAAGGATCAACAGCTCCTAGGGATTTGGG  
 GTTGCTCTGGAAACTCATTTGCCCACTGCTGTGCCTTGGAATGATAGTTGGAGT-----  
 -----AGTAAATCTTTGGATGAGATTTGG-----AAT-----  
 AACATGACTTGGATGGAGTGG---GAAAGAGAAATTGCCAATTACACAGGACATATATAC---  
 ACCTTAATTGAAGAATCGCAGAACCTACAAGAA-----  
 -----  
 AAGAATGAACTAGAACTATTGGAATTGGATAAGTGGGCAAGTTTGTGGAATTGGTTTGACATTTCAAAATGGC  
 TGTGGTATATCAAAATATTCATAATGATAGTAGGAGGCTTGGTAGGGTTAAGAATAGTTTTTTTGCT---  
 GTACTTTCTATAGTA-----AATAGAGTTAGGCAGGGATACTCACC-----  
 TTGTCATTGGCTATTAGCTTGCTTAACGCTACATCCATAGTAGTAGCTGAA---

GGAACAGATAGGGTTATAGAAGGAGCACAAAGAGCTTATAGGGCT-----  
 -----ATTTCGCAACATA-----CCTACAAGAATCAGACAGGGCCTCGAAAGGGCTTTTGCTA--TAA  
 >HQ215554  
 GCT---GAA-----  
 GACAAATTTGTGGGTACAGTCTATTATGGGGTACCTGTGTGG--AAAGAAGCAACT---  
 ACCACTTTATTTTGTGCATCAGATGCTAAAGCATATAGCTCAGAG--GCACATAAT-----  
 -----GTTTGGGCTACA--CATGCCTGTGTACCCACAGAT---  
 CCTAACCCACAAGAAGTAGTATTGGAA-----AATGTGACAGAAAATTTTAAT-----  
 -----ATTTGGAAAAATGATATGGTAAGACAGATGCATGAGGATGTA---  
 ATCAGTTTATGGGATGAAAGCCTA--AAGCCATGTGTAAAATTA---  
 ACCCCACTCTGTGTTACTTTAAATTGCACTGATATGGGGTGTGCTACCAATGCTACCAATAATAAT-----  
 -----  
 -----AGTAGTAACAATACTAGGTGTGATATGCCACTGGGAGAAATAAAG---  
 AACTGCTCTTTCAATATCACCACACAAATAGGA-----  
 AAGAAAAGGAAAAAAGACTATGCAATT--TTTAATAAACTTGATGTAGTACCAATAGATAAT-----  
 -----  
 -----  
 GATAACAGTAGCTATATGTTGATAAATTGTAACACCTCAGTCATCAAGCAG---  
 GCTTGTCCAAAGGTATCCTTTGAGCCAATTCCCATACATTATTGTACCCCAGCTGGTTTTGCAATTATAAAGT  
 GTAAT---GATAAGGAGTTCAAT-----GGAATAGGACCATGTAAAAAT-----  
 -GTCAGC--ACAGTACAATGTACACATGGAATTAGGCCAGTAGTGTCAACT---  
 CAATTACTGTTAAATGGCAGTCTAGCAGAAGGAGAG-----  
 ATAGTAATTAAATCTCAGAATTTCTCAAACAAT-----GCTAAAAACATAATAGTACAGCTAAAT---  
 -----GAAACTGTACCA-----ATTAATTGTACAAGACCCAACAACAATACAAGAAAG-----  
 -GGTATACATATG-----GCAGTAGGGGGAGCA--TTA-----TATGCAACAGGGGGC-----  
 -----ATAATAGGAGATATA-----AGACAAGCATATTGT--ACTGTTAATGCAACA---  
 AAATGGAGTGAACTTTAAAAAAGGTAGCTATAAAATTAAGA-----  
 GAACAATTAGAAAAAATAGGA-----CTT-----CCGAATAAAACAATAGTCTTTAAC-  
 -----CAATCCGCAGGAGGGGACCTAGAAATTGTA--ATGCACATACAAAATTGTGGAGGGGAA--  
 TTTAAGCAGCTCCAGGCAAGAGTCCTAGCTGTGGAAAGATTCCTAAGGGATCAACAGCTCCTAGGGATTTGGG  
 GTTGCTCTGGAAAGCTCATCTGCACCACTGCTGTACCTTGAATACTAGTTGGAGT-----  
 -----AATAAACTAAGGATCAGATTTGG-----GAT-----  
 AACATGACCTGGATACAGTGG--GAGAGAGAAATTGACAACCTACACAGGCTTAATATAT--  
 GACTTACTTGAAAAATCACAGATCCAGCAAGAA-----  
 -----  
 ATGAATGAACAAGACTTATTGGAATTGGATAAGTGGACAAGTTTGTGGAATTGGTTTAACATATCAAAGTGGC  
 TGTGGTATATAAAAAATATTCTAATGATAGTAGGAGGCTTAATAGGTTTAAGAATAATTTTTTACT---  
 GTACTTTCTATAGTG-----AATAGAGTTAGGCAGGGATACTACCA-----  
 TTGTCATTCTGCTGTTAGTTTGTTTAATGCAATAGCTATAGCAGTGGCTGAG---  
 GGGACAGATAGAATCATAGAAATAGCACAAAGAATTGGAAGGGCT-----  
 -----ACCCCTCCACATA-----CCTAGAAGAATAAGACAGGGTGCAGAAAGGGCTTTGCAG--TAA  
 >JF346917  
 GCT---GCA-----  
 GAAAACCTTGTGGGTACAGTCTATTATGGGGTACCTGTATGG--AAAGAAGCAACT---  
 ACCACTCTATTTTGTGCATCAGATGCTAAAGCATATGATACAGAG--GTACATAAT-----  
 -----ATTTGGGCCACA--CATGCCTGTGTACCCACAGAC---  
 CCCAACCCACAAGAGGTAGTATTGGAA-----AATGTGACAGAAAATTTTAAC-----  
 -----ATGTGGAAAAATGACATGGTAGAACAGATGCATGAAGATATA---  
 ATCAGTTTATGGGATCAAAGCCTA--AAGCCATGTGTAAAATTA---  
 ACCCCAATATGTGTTACTTTAAATTGCACTGATTTGAAGAATACTACTAATAACCAAT-----  
 -----  
 -----ATCAGTAGTACAATAGAGGGAGGAGAAATAAAA---  
 AACTGCTCTTTCAATATCACCCTAGAACAAAGA-----AAAAAGGTG---  
 GTAGACTATGCATTT--TTTTATAAACTTGATGTAGTACCAATAAATGAG-----  
 -----  
 ----GATAATGATACTACCAGCTATAGGATGATACATTGCAACACCTCAGAAAATTACACAA---  
 GCTTGTCCAAAGGTATCCTTTGAGCCAATTCCCATATTTTATTGCACCCCGGCTGGTTTTGCGATTCTAAAGT  
 GTAAC---AATAAAACATTTCAGT-----GGAACAGGACCATGTACAAAT-----  
 -GTCAGC--ACAGTACAATGTACACATGGAATTAAGCCAGTAGTATCAACT---  
 CAACTGCTGCTAAATGGCAGTTTAACAGGAGAAAAA-----

GAGGTAGTAATTAGATCTAGCAATTTCTCAGACAAT-----GCTAAAATTATAATAGTACAGCTGAAT-  
-----GAATCTGTGGTA-----ATTAATTGTACAAGACCCAACAACAACACATTGAAA--  
---AGTATACATCTA-----GGACAAGGGCGAGCA---TGG-----CATACAACAGGACAA---  
-----ATAATAGGAGATATA-----AGACAAGCACATTGT---AATCTTAGTAAATCA-  
--GACTGGGATAAACTTTAGAAAGGATAGCAAAAAAATTAAGA-----GGACAATTTGGG--  
-----AACAGAACAATAATCTTTAAT-----  
CAATCCTCAGGAGGGGACCCAGAGATTACA--ATGCATAGTTTTAATTGTGGAGGGGAA---  
TTTAAGCAACTCCAGGCAAGAGTCTTGGCTGTGGAAAGATACCTAAAGGATCAACAGCTCCTAGGGATTTGGG  
GTTGCTCTGGAAACTCATCTGCACCACTGCTGTGCCTTGAATACTAGTTGGAGT-----  
-----AATAGAACTCTGAGTGAGATTTGG-----GAT-----  
AACATGACTTGGATGCAGTGG---GAAAGAGAAATTGACAATTACACACAAGAAATATAC---  
TCCTTAATTGAAGAATCGCAGAACCAACAGGAA-----  
-----  
AAGAATGAAGTAGAAGTATTGGAATTGGATAAAATGGGCAAGTTTGTGGAGTTGGTTTGACATATCAAAGTGGC  
TGTGGTATATCAAAATATTGATAATGATAGTAGGAGGCTTGGTAGGCTTAAGAATAGTTTTTTGCT---  
GTACTTTCTATAATA-----AATAGAGTTAGGCAGGGATACTCACC-----  
TTGTCGTTAGCTATTAGCTTGCTTAACGCCACAGCCATAGCAGTAGCTGAG---  
GGAACAGATAGGATTATAGAAGTAGTACAAAGAGCTTATAGGGCT-----  
-----ATTCTCAACATA-----CCTAGAAGAATCAGACAGGGTCTAGAAAGAGCTTTGCTA---TAA  
>JX960599  
GCT---ACA-----  
GGACGATTTTGGGTTACAGTCTATTATGGGGTACCTGTGTGG---AAAGAAGCAATC---  
ACCACTTTATTTTGTGCATCAGATGCTAAAGCATATGACACAGAG---GTACATAAT-----  
-----GTTTGGGCCACA---CATGCCTGTGTACCCACAGAC---  
CCCAACCCACAAGAGATAAAATTGGAA-----AATGTGACAGAAGATTTTAAC-----  
-----ATGTGGGAAAATAACATGGGTAGAACAAATGCATGAAGATATA---  
ATTAGCTTATGGGATCAAAGCTTA---AAGCCATGTGTAAAGTTA---  
ACCCCACTCTGTGTTACTTTAAACTGCACTGATGTTAAGACCAATAGTAGTAGCACTGATGCT-----  
-----  
-----AGGACCAATAGTAGTACAGAAATGAAA---  
AACTGCACTTTCAATGTCAACCACAATATTAAGA-----  
GATAAGGTACAGAAAGAATTTGCACTT---TTTTATAGGCTTGATGTAGTACCAATAGATGATGGTAATAAT-  
-----  
-----  
AATAATAATACTAATAACCAACAGCTATAGGTTAATAAATTGTAACACCTCAACCATTACACAA---  
GCTTGTCCAAAGGTATCGTTTGAGCCAATTCCCATACACTATTGTACCCAGCTGGTTTTGCGCTTCTAAAGT  
GTAAT---GATAAGAAGTTCAGT-----GGAAACGGATCATGCACCAAT-----  
-GTCAGC---TCAGTACAATGTACACATGGAATTAGGCCAACAGTGTCAACT---  
CAACTGTTGTAAATGGCAGTCTAGCAGAAGAAGAG-----  
GTAATAATTAGATCTAAAAATTTACAAATAAT-----GCTGAAACCATAATAGTACAGCTAAAC---  
-----AACCCTGTAGGA-----ATTCATTGTATAAGACCCAACAACAACAAGAAAA---  
---GGTATCCATATG-----GGCCCAGGACGAGCA---TTC-----TATGTAACAGGAGAG---  
-----ATAATAGGAGATATA-----AGACAAGCATATTGT---AACATTAGTAGAGGA---  
GAATGGAATACCACTTTACAACAGGTAGCTATAAAATTAAGA-----GAACAATTTAAT---  
-----GCAACAACAATAGTCTTTAAT-----  
CAAAGCTCAGGAGGAGACCCAGAAATTGTA---ATGCACAATTTTAATTGTGGAGGGGAA---  
TTTAAACAGCTCCAGGCGAGAGTCCCTGGCTGTGGAAAGATACCTAAGGGATCAACAGCTCCTAGGGATTTGGG  
GCTGCTCTGGAAACTCATTTGCACCACTGCTGTGCCTTGAATAGTAGTTGGAGT-----  
-----GAAAATAAAACTCTAGATGCTATTTGG-----AAT-----  
AACATGACCTGGAACCAATGG---GAAAAAGAAATTGACAATTACACAGACTTAATATAC---  
TCCTTACTTGAAAATTCACAGATCCAACAAGAA-----  
-----  
AAGAATGAAGAAGAATTATTGAAATTAGATAGTTGGGCAAGCTTGTGGAATTGGTTTGACATATCAAGGTGGC  
TGTGGTATATAAAGATATTGATAATGATAGTAGGGGGCTTAGTAGGTTTAAGGATAATTTTTTGCT---  
GTACTTTCTATAGTA-----AATAGAGTTAGGCAGGGATACTCACC-----  
TTATCATTTTGCTATTAGCTTGCTGAATGTACAGCTGTAGCAGTAGCTGAG---  
GGGACAGATAGGATTATAGAAATAGTACAAAGGGCTTGGAGAGCT-----  
-----TTTCTTCACATA-----CCTGCTAGAATAAGACAGGGCTTAGAAAGGGCTTTGCTA---TAA  
>JF932497

GCT---GCA-----  
GAAAACTTGTGGGTCACAGTCTATTATGGGGTACCTGTATGG---AAAGAAGCAACT---  
ACCACTCTATTTTGTGCATCAGATGCTAAAGCATATGATGCAGAG---GTACATAAT-----  
-----GTTTGGGCCACA---CATGCCTGTGTACCCACAGAC---  
CCCAACCCACAAGAAGTAATCTTGGGA-----AAAAATGTGACAGAAAACCTTTAAC-----  
-----ATGTGGAAAAATAACATGGGTAGAACAGATGCATGAAGATATA---  
ATCAGTCTATGGGATCAAAGCCTA---AAACCATGTGTAAAATTA---  
ACCCACACTGCATTATTTTAAATTGCACTAATGTGACTATTACTAATACCAGTAATAATACTACTAAT----  
-----  
-----ACCAGTAGTACTACCAGTAGTACAATAGAGAGAGAAGAAATAAAA---  
AACTGCTCTTTCAATATCACCACAAGCATAAGA-----  
ACTAAAACTAAAAAGAATATGCACTC---  
TTTAATAAAATTGATATAGTACCAATAGATGATGATGATGATAAT-----  
-----  
ACCAGTAATACCAGTAATACCAGCTATAGGTTGAGACATTGTAACACCTCAGTCATTACACAA---  
GCTTGTCCAAAGGTATCCTTTGAGCCAATTCCCATACATTACTGTGCCCCGGCTGGTTTTGCGATTCTAAAGT  
GTAGA---GATAAAAAGTTCAAT-----GGAACAGGACTATGTGAAAAT-----  
-GTCAGT---ACAGTACAATGTACACATGGAATCAGGCCAGTAGTATCAACT---  
CAACTGCTGTTAAATGGCAGTTTAGCAGAAGAAGAG-----  
GTAGTAATCAGATCTAGCAATTTCTCGAACAAAT-----GCTAAAGTCATAATAGTACAGCTGAAG----  
-----GAATCTGTAGAA-----ATTAATTGTACAAGACCCAACAACAATACAAGAAAA-----  
-GGGGTAACTCTA-----GGACCAGGGCGAGTA---TGG-----TATACAACAGGACAA-----  
-----ATAATTGGAGATATA-----AGACGAGCACATTGT---AACATTAGTAGAGCA---  
AAATGGAATAATACTTTAGATCAGATACTAAAAAATTAAGA-----GAACAATTTGAG----  
-----AACAAAACAATAATCTTTAAG-----  
CAACCTTCAGGAGGGGACTCAGAGATTGTA---ATGCACAGTTTTAATTGTAGAGGAGAA---  
TTTAAGCAGCTCCAGGCAAGAGTCCTGGCTGTAGAAAGATACCTGAAGGATCAACAGCTCCTAGGGATTTGGG  
GATGCTCTGGAAGAACTCATTTGCACCACTGCTGTGCCTTGGAATGTTAGTTGGAGT-----  
-----AATAGGACTCTAGATGAGATTTGG-----AAT-----  
AACATGACTTGGATGAAGTGG---GAAAGAGAAATTGAAAATTACACAAAAGAAATATAC---  
ACCTTAATTGAAGAATCGCAAAACCAACAAGAA-----  
-----  
AAGAATGAAGTAGACCTATTGGAATTGGATAAGTGGGCAAGTTTGTGGAATTGGTTTGACATAACAAAATGGC  
TGTGGTATATCAAAATATTCTAATGATAGTAGGAGGCTTGGTAGGTTTAAAGAATAGTTTTTGTCT---  
GTACTTTCTATAGTG-----AATAGAGTTAGGCAGGGATACTACCA-----  
TTGTCATTTGCTATTAGCTTGCTTAACGCCACAGCCATAGCAGTAGCTGAG---  
GGGACAGATAGGATTATAGAAGTAGCACAAAGAGCTTATAGGGCT-----  
-----ATTCTCAACATA-----CCTACAAGAATCAGACAGGGACTCGAAAGGGCTTTGCTA--TAA  
>KX693642  
GCT---GCA-----  
GAAAACTTGTGGGTCACAGTCTACTATGGGGTACCTGTATGG---AAAGAAGCAACT---  
ACCACTCTATTTTGTGCATCAGATGCTAAAGCATATAAGACAGAG---GTACATAAT-----  
-----GTTTGGGCCACA---CATGCCTGTGTACCCACAGAC---  
CCCAACCCACAAGAAGTAGTCTTGGTA-----AATGTGACAGAAAATTTTAAC-----  
-----ATGTGGAAAAATGACATGGGTAGAACAGATGCATGAAGATATA---  
ATCAGTTTATGGGATCAAAGCCTA---AAGCCATGTGTAAAATTA---  
ACTCCACTCTGTGTTACTTTAAATTGCACTGATGTGAGTAATGCTAATAATACCTGTAATAATACCAATATTA  
CTAGAAGTAGTAATGCTACCTGTAATAATACCAGT-----  
-----AGTACTAATAGTAGTATGACAGAGGAAGGAGACATGAAA---  
AACTGCTCTTTTCGATTTTACCACAAGCATGAGT-----ACTAAGGTA---  
AAAGACTATGCACCT---TTTATAAACTTGATGTAGTACCAGTAAATAAT-----  
-----  
-----ACCAATAATACCGGTTATAGGTTGATAAGTTGTAATACCTCAGTCATTACACAA---  
GCTTGTCCAAAGATATCCTTTGAGCCAATTCCCATACATTATTGTGCCCCGGCTGGTTTTGCGATTCTAAAGT  
GTAAC---AATAAAACATTCAAT-----GGAACAGGACCATGTAAAAAT-----  
-GTTAGT---ACAGTACAATGTACACATGGAATTAGGCCAGTAGTGTCAACT---  
CAACTACTGTTAAATGGCAGTTTAGCAGAAGAAGGG-----  
GTCGTAATTAGATCTAGCAATTTCTCGGACAAT-----GCTCAAGTCATAATAGTACAGCTGACT----  
-----AACTCTGTAAAC-----ATTAGTTGTGAAAGACCCAACAACAATACAAGAAAA-----  
-AGTATAAATATA-----GGACCAGGGCGAGCA---TGG-----TATGCAACAGGAAAC-----

-----GTAATAGGAGATATA-----AGACAAGCACATTGT---AACCTTAGTAAAGCA---  
 GATTGGAATAACACTTTAAGACAGATATCTAAAAAATTAAGA-----GAACAATTTAAG-----  
 -----AACAAAACAATAATCTTTAAG-----  
 CAATCTTCAGGAGGGGACCCAGAGATTACA---ATGCACAGTTTTTAATTGTGGAGGGGAA---  
 TTTAAGCAGCTCCAGGCAAGAGTCTTGGCTGTGGAAAGATACCTAAAGGATCAACAGCTCCTAGGGATTTGGG  
 GTTGCTCTGGAAGAACTCATTTGCACCACTGCTGTGCCTTGAATGAGAGTTGGAGT-----  
 -----AATAAAACTATGGATCAGATTTGG-----AAT-----  
 AACATGACTTGGATGGAGTGG---GAAAGAGAAATTGACAATTACACAAGAGAAATATAC---  
 ACCTTAATCGAACTATCGCAGACCCAACAAGAA-----  
 -----  
 CAGAAATGAAGTAGAACTATTGGAATTGGATAAATGGGCAAGCTTGTGGAATTGGTTTGACATAACAAATTGGC  
 TGTGGTATATCAAAATATTCATAATGATAGTAGGAGGCTTGGTAGGTTTAAGAATAGTTTTTTGCT---  
 GTACTGTCTGTAGTA-----AATAGAGTTAGGCAGGGATACTCACCA-----  
 TTGTCATTTGCTATTAGCTTGTTTAACGCCACAGCCATAGCAGTAGCTGAG---  
 GGGACCGATAGGGTTATAGAAAATAGCACACAGAGCTTTTAGGGCT-----  
 -----ATTCTCAACATA-----CCTACAAGAATCAGACAAGGCCTCGAAAGGGCTTTGCTG---TAA  
 >KX693171  
 GCT---GCA-----  
 GAAAAATTGTGGGTACAGTCTATTATGGGGTACCTGTATGG---AAAGAAGCAACT---  
 ACCACTCTATTTTGTGCATCAGATGCTAAAGCATATGAGACAGAG---GTCCATAAT-----  
 -----GTTTGGGCCACA---CATGCCTGTGTACCCACAGAC---  
 CCCAACCCACAAGAAGTAGTCTTGGAG-----AATGTGACAGAAAATTTTAAC-----  
 -----ATGTGGAATAATGACATGGTAGAACAATGCATGAAGATATA---  
 ATCAGTTTATGGGATCAAAGCCTA---AAGCCATGTGTAAAATTA---  
 ACCCCACTCTGTGTTACTTTAAATTGCACTGATGATTTGACTAATTTGAGGAATACTACTAATAACAGTACTA  
 CTACTAACAGTAGTACGACAGAG-----  
 -----GGGAATGCTACTACTACTAATAACAGTAGTACGATAGAGAGAGGAGAAATAAAA---  
 AACTGCTCTTTCGATATCACCACAAGCATAACAG-----ACTAAGAGG---  
 AAAGACTATGCACCT---TTTTATAAATATGATATAGTAAAAATAGATAATGATGATATAGATAAT-----  
 -----  
 GGTAATATCAGCCATAAGGATAATACCAGCTATAGGTTGATAAATTGTAACACCTCAGTCATTACACAA---  
 GCTTGTCCAAAGATATCCTTTGAGCCAATTCCCATAACATTATTGTACCCCGGCTGGTTTTGCGATTCTAAAGT  
 GTAAC---AATAAAAGGTTCAAT-----GGAACAGGGCCATGTACAAAT-----  
 -GTCAGT---ACAGTACAATGTACACATGGAATTAGGCCAGTAGTATCAACT---  
 CAACTGCTATTAAATGGCAGTTTGGCAGAAGAAGAG-----  
 GTAGTAATTAGATCTAGCAATTTACAGACAAT-----GCTAGAATCATAATAGTACAGCTGAAT---  
 -----AAATCTGTAGAA-----ATTAATTGTACAAGACCCAACAACAATACAAGAAAA---  
 -AGTATAAATATA-----GGACCAGGGCGAGCA---TGG-----TATGCAACAGGAGAA---  
 -----ATAATAGGAGATATA-----AGACAAGCACATTGT---AACCTTAGTAGAACA---  
 GCATGGAATAACACTTTAAACAGATAACTGAAAAATTAAGA-----GAGGAATTTGGG---  
 -----AACAAAACAATAATCTTTAAT-----  
 CAATCTGCAGGAGGGGACCCAGAAATCGTA---ATGCACAGTTTTTAATTGTGGAGGGGAA---  
 TTTAAGCAGCTCCAGGCGAGAGTCTTGGCTGTGGAAAGATACCTAGGGGATCAACAGCTCCTAGGGATTTGGG  
 GTTGCTCTGGAAGAACTCATTTGCACCACTGTTGTGCCTTGAATGCTAGTTGGAGT-----  
 -----AATAGATCCCTGAATGAGATTTGG-----AAT-----  
 AACATGACTTGGATGGAGTGG---GAAAGAGAAATTGACAATTACACAAAAGAAATATAC---  
 ACCTTAATTGAAATATCGCAGAACCAACAAGAA-----  
 -----  
 AAGAAATGAAGTAGAACTATTGAAATTGGATGAGTGGGCAAGCTTGTGGAATTGGTTTGACATAACAAATGGC  
 TGTGGTATATCAAAATATTCATAATGATAGTAGGAGGCTTGGTAGGTTTAAGAATAGTTTTTTGCT---  
 GTACTTTCTATAGTA-----AATAGAGTTAGGCAGGGATATTCACCA-----  
 TTGTCATTAGCTATTAGCCTGCTTAATACCTCAGCTATAGCAGTAGCTGAG---  
 GGGACAGATAGGGTTATAGAAGTAGCACAAAGAGCTTATAGGGCC-----  
 -----ATTCTCCACATA-----CCTAGAAGAATCAGACAGGGCCTCGAAAGGGCTTTGGTA---TAA  
 >KX693309  
 GCT---GCA-----  
 GAAAACTTGTGGGTACAGTCTATTATGGGGTACCTGTATGG---AAAGAAGCAACT---  
 ACCACTCTATTTTGTGCATCAGATGCTAAAGCATATGCTACAGAG---GTACATAAT-----  
 -----GTTTGGGCCACA---CATGCCTGTGTACCCACAGAC---  
 CCCAACCCACAAGAAGTAGTCTTGGGA-----AATGTGACAGAAAATTTTAAC-----

-----ATGTGGAAAAATAACATGGTAGACCAGATGCATGAAGATATA---  
 ATCAGTTTATGGGATCAAAGCCTA---AAGCCATGTGTAAAATTA---  
 ACCCCACTCTGTGTTACTTTTATATTGCACTAATGCTACTATTACCAGTAATAATACCAGTAGTAATACT-----  
 -----  
 -----ACCAGTAGTAATACTAGTAGTACGATAGAGGGAGGACAAATGAAA---  
 AACTGCTCTTTCAATGTCAACCAAGCATAGGA-----ACTAAAGTG---  
 AGCGACTATGCACTT---TTTTATAAACTTGATGTAGAACCAATGAATAAT-----  
 -----  
 ----GATACTAATACTACCAGCTATAGGTTGATAAATTGTAACACCTCAGTCATTACACAA---  
 GCTTGTCCAAAGGTATCCTTTGAGCCAATTCCCATACATTATTGTGCCCCGGCTGGTTTTGCGATTCTAAAGT  
 GTAAC---AGTAAAAAGTTCAAT-----GGAACAGGACCATGTACAAAT-----  
 -GTCAGT---ACCGTACAGTGTACACATGGAATTAGGCCAGTAGTATCAACC---  
 CAACTGCTGTTAAATGGCAGTTTAGCAGAAGAAGAG-----  
 GTAGTGATTAGATCCAGCAATTTACCGACAAT-----GCTAAAGTCATAATAGTACAGCTAAAT----  
 -----GAATCTGTAGAA-----ATTAATTGTACAAGACCCAACAACAATACACTGAAA-----  
 -AGTATACATCTA-----GGACCAGGGCGAGCA---TGG-----TATACAACAGGACAA-----  
 -----ATAATAGGAGATATA-----AGACAAGCACATTGC---AACATTAGTAGAACA---  
 AAATGGAATAACACTTTAAGACTGGTAGCTGAAAAATTAAAA-----GAAATATAC-----  
 -----CACAAAACAATAATCTTTAAT-----  
 CGATCTTCAGGAGGGGACCCAGAGATTGTA---ATGCACAGTTTTTAATTGTGGAGGGGAA---  
 TTTAAGCAGCTCCAGGCAAGAGTCTTGCGCTGTGGAAAGATACCTAAAGGATCAACAGCTCCTAGGAATTTGGG  
 GATGCTCTGGAAACTCATCTGCACCACTGCTGTGCCTTGGAATACTAGTTGGAGT-----  
 -----AATAGATCTCTGAGTGAGATTTGG-----GAT-----  
 AACATGACTTGGATGGAGTGG---GAAAGAGAGATTGACAATTACACAAAAGAAATATAC---  
 ACATTAATTGAACAATCGCAGAACCAACAAGAA-----  
 -----  
 AAGAATGAAGTAGACCTATTGGAATTGGATAAGTGGGCAAGTTTGTGGAATTGGTTTGACATATCAAAGTGGC  
 TGTGGTATATCAAAATATTGATAATGGTAGTAGGAGGCTTAGTAGGTTTAAAGAATAGTTTTTTGCT---  
 GTACTTTCTATAGTA-----AATAGAGTTAGGCAGGGATACTACCA-----  
 TTGTCATTAGCTATTAGCTTGTTTAAACGCCACAGCAGTAGCAGTAGCTGAG---  
 GGGACAGATAGGGTTATAGAAGTAGCACAAAGAGCTTTTAGGGCT-----  
 -----GTTCTCAACGTA-----CCTAGAAGAATCAGACAGGGCTTCGAAAGGGCTTTGCTA---TAA  
 >KX693362  
 GCT---GCA-----  
 GAAAACTTGTGGGTACAGTCTATTATGGGGTACCTGTATGG---AAAGAAGCAACT---  
 ACCACTCTATTTTGTGCATCAGATGCTAAAGCATATGATACAGAG---GTACATAAT-----  
 -----GTTTGGGCCACG---CATGCCTGTGTACCCACAGAC---  
 CCCAACCCACAAGAAGTAGTCTTGGA-----AATGTGACAGAAAACCTTTAAC-----  
 -----ATGTGGAAAAATGACATGGTAGAACAGATGCATGAAGATATA---  
 ATCAGTTTATGGGATCAAAGCCTA---AAGCCATGTGTAAAATTA---  
 ACCCCACTCTGTGTTACTTTAAATTGCACTAATTTGAATACTACTATTACCAGTAGTAATACCAGTAGTACCA  
 AT-----  
 -----ACCAGTACCAGTAGTAATAACAGTAGTATGATAGAGGGAGGAGAACTAAAA---  
 AATTGCTCTTTCAATATCACCACAAGCATAAAT-----ACTAGGGTG---  
 AAAGACTATGCATTT---TTTTATAAAGTTGATATAGAACCAATGAATAAT-----  
 -----  
 ----GATACTAATACTACCAGCTATAGGTTGATGCATTGTAACACCTCAGTCATTACACAA---  
 GCTTGTCCAAAGATATCCTTTGAGCCAATTCCCATACATTATTGTACCCCGGCTGGTTTTGCGATTCTAAAGT  
 GTAAC---AATAAAACGTTCAAT-----GGAACAGGACCATGTACAAAT-----  
 -GTCAGT---ACAGTACAATGCACACATGGAATTAGGCCAGTAGTATCAACT---  
 CAACTGCTGTTAAATGGCAGCTTAGCAGAAGAAGAG-----  
 GTAGTAATTAGATCTAGCAATTTACAGACAAT-----ACTAAGATCATAATAGTACAGCTGAAT----  
 -----GAATCTGTAGCA-----ATTAATTGTACAAGACCCAACAACAATACAAGAAAA-----  
 -AGAATATCTCTA-----GGACCAGGGCGAGTG---TGG-----TATACAACAGGAGAA-----  
 -----ATAATAGGAGATATA-----AGAAAAGCATATTGT---AACCTTAGTAGAATA---  
 GCATGGAATAACACTTTAAGACAGATAACTGAAAAATTAAAA-----GGACAATTTGGG---  
 -----AACAAAACAATAATCTTTAAT-----  
 CACTCTTCAGGAGGGGACCAAGAGATTGTA---ATGCACAGTTTTTATTTGTGGAGGGGAA---  
 TTTAAGCAGCTCCAGGCAAGAGTCTTGCGCTGTGGAAAGATACCTAAAGGATCAACAGCTCCTAGGGCTTTGGG  
 GTTGCTCTGGAAACTCATCTGCACCACTGCTGTGCCTTGGAATGCTAGTTGGAGT-----

-----AATAAATCTCTGAGTGAGATTTGG-----AAT-----  
AACATGACTTGGATGGAGTGG---GAAAGAGAGATTGACAAATTACACAAGAGAAATCTAC---  
AACTTAATTGAGGAATCGCAGAACCAACAAGAA-----  
-----  
AAGAATGAACTAGAACTATTGGAATTGGATAAGTGGGCAAGTTTGTGGAATTGGTTTGACATAACACAATGGC  
TGTGGTATATCAAAATATTTATAATGATAGTAGGAGGCTTGGTAGGTTTAAGAATAGTTTTTTGCT---  
GTACTTTCTGTAGTG-----AATAGAGTTAGGCAGGGATACTCACCA-----  
TTGTCATTAGCTATTAGCTTGCTTAACGCTACAGCCATAGCAGTAGCTGAG---  
GGGACAGATAGGGTTATAGAAGTAGCACAAGAGCTTATAGGGCT-----  
-----ATTCTCAACATA-----CCTACAAGAATCAGACAGGGCCTCGAAAGGGCTTTGGTA---TAA  
>KX693411  
GCT---ACA-----  
GAAAAATTGTGGGTCACAGTCTATTATGGGGTACCTGTATGG---AAAGATGCGACT---  
ACCACTCTATTTTGTGCATCAGATGCTAAAGCATATGATACAGAG---GTTTCATAAT-----  
-----ATTTGGGCCACA---CATGCCTGTGTACCCACAGAC---  
CCCAACCCACAAGAAGTAGTTTTGGGA-----AATGTGACAGAAACTTTAACT-----  
-----ATGTGGAAAAATGAGATGGTAGAACAGATGCATGAAGATATA---  
ATCAGTTTATGGGATCAAAGCCTA---AAGCCATGTGTAAAATTA---  
ACCCCACTCTGTGTCACTTTAAATTGCACTAATGCTACCGGTAGCCATAATGTTAGTACTACCAGTACTCCTA  
CCACCAGTAGT-----  
---ACCGGTGGTAATACCAATAGTACTACCAGTAGTCCGATAGAGGGAGGAGGAGAAATAAAA---  
AAATGCTCTTTCAATATCACCACAAGCATAGGA-----ACTAAGGTG---  
AAAGACTATGCACTT---TTTAATAGACTTGATATAGTACCAATAAAAGATGATAGTACCAGCAATAAT---  
-----  
AGTACCAGCAATAATAGTACCAACAATGCCAGCTATAGGTTGATAAATTGTAACACCTCAGTCATTACACAA-  
--  
GCTTGTCCAAAGGTATCCTTTGAGCCAATTCCCATACATTATTGCACCCCGGCTGGTTATGCGATTCTAAAGT  
GTAAC---AATAAAACGTTTCACT-----GGAACAGGACCATGTACAAAT-----  
-GTCAGT---ACAGTACAATGTACACATGGAATCAGGCCAGTAGTATCAACT---  
CAACTGCTGTAAATGGCAGTCTAGCAGAAGAAGAG-----  
GTAGTAATTAGATCTAGCAATTTACGGACAAT-----GCTAAAATCATAATAGTACAGCTGAAT---  
-----GTATCTGTACAA-----ATTAATTGTACAAGACCCAACAACAATACAAGAAAA-----  
-AGAGTAACCCTA-----GGACCAGGGCGAGTA---TGG-----TATACAACAGGACAA-----  
-----ATAATAGGAGATATA-----AGACGAGCACATTGT---AACCTTAGTAGTACA---  
GCATGGAATAAACTTTAGAACAGGTAGCTAAAAAATTAGGA-----GAACAATTTAAG---  
-----AACAAAACAATAGTCTTTACT-----  
CAACCTTCAGGAGGGGACCCAGAGATTGTA--ATGCACAGCTTTAATTGTGGAGGGGAA---  
TTTAAGCAGCTCCAGGCAAGAGTCCCTGGCTGTGGAAAGATACCTAAAGGATCAACAGCTCCTAGGGATTTGGG  
GTTGCTCTGGAAGAACTCATTGCACTGCTGTGCCTTGGAAATGCTAGTTGGAGT-----  
-----AATAAATCTCTGAATGAGATTTGG-----GAT-----  
AATATGACTTGGATGGAGTGG---GAAAGAGAAATTGAAAAGTACACAGGAGAAATATAC---  
AACTTAATTGAAGAATCGCAGAACCAACAGGAA-----  
-----  
AAGAATGAGCAAGAAGTATTGGAATTGGATAAGTGGGCAAGCTTGTGGAATTGGTTTAGCATAACAACTGGC  
TGTGGTATATCAGAATATTATAATGATAGTAGGAGGCTTGGTAGGTTTAAGAATAGTTTTTTGCT---  
GTACTTTCTATAATA-----AATAGAGTTAGGCAGGGATACTCACCA-----  
TTGTCATTAGCTATTAGCTTGCTTAACGCCACAGCCATAGCAGTAGCTGAG---  
GGGACAGATAGGATTATAGAAATAGTACAAAGAGCTTGTAGGGCT-----  
-----ATTCTCAATATA-----CCTACAAGAATCAGACAAGGCCTCGAAAGGGCTTTGCTA---TAA  
>KR914676  
GCT---AAA-----  
GAACAATTGTGGGTAACAGTCTATTATGGGGTAACTGTGTGG---AAGGGGCTA-----  
CCTGTGTGGAAAAATGCAACCACCTTTATTTTGTGATACAGAG---CTACATAAT-----  
-----GTCAGGGACAAA---TGTGCCTGTGTACCCACAGAC---  
CCCAACCCACAAGAAGTAGTAATGGGA-----AATGTGACAGAATATTTTAACT-----  
-----ATGTGGAAAAATGACATGGTAGAGCAGATGCATGAGGATATA---  
ATCAGTTTATGGGATCGAAGCTTA---AAGCCATGTGTAAATATTC---  
ACCCCACTCTGTGTCACTTTAAATTGCAATGATTTGAAGAATGTTACTAATAACCAATTGT-----  
-----  
-----AGTAGCGGGAGAGGGATAGTTGAGAACTAGATATATCA---

AACTGCTCTGTCAGTATCAGCACATTTATAACA-----  
 GGTACAGTAGTGATAGCAGATGAAGTT--ATGGATACAGATGACATACTACTAGTGTCTATT-----  
 -----  
 -----  
 GATTCTATCAACAATAAGTTGACTCTCTGTAACACCTCACTCATGACACAG---  
 GCCTGTCGATCAGAACGGTGTAAGCCAATTCGCATACATTATTGTGCCCCGGCCGGTTTTGCGATTCTAAAGT  
 GTAAC---AATAAGACATTCAAT-----GGAAAAGGACCATGTAAAAAT-----  
 -GTTAGC---ACAGTACAATGTACACATGGAATTAAGCCAGTAGTTTCAACT---  
 CAACTGCTATTAAATGGCAGTCTAGCAGAAGAAGAG-----  
 GTAGTAATAAGATCTGAAAATTTACAGACAAT-----ACTAAAACCATAATAGTACAGCTGAAT----  
 -----GAATCTGTGGTA-----ATTAATTGTACTAGACCCAGCAACAATACAAGAAAA-----  
 -AGCATACGTATCCAT-----AGAGGACCAGGGCAAGCA---TTC-----TTTGCAACAGGA-----  
 -----AAAATAGGAGATATA-----AGACAAGCACATTGT---AACCTTAGTAGAGCA---  
 GAATGGAATAAACTTTAGCACAGATAGCTAAAAAATTAGGC-----AAACAATTTGGA----  
 -----GAAAATAAAACAATATCCTTTTCAG-----  
 CCATCCTCAGGAGGGGACATAGAAATTGTA--ACACACAGTTTTAATTGTGGAGGGGAA---  
 TTTAAACAGCTCCAGGCAAGAGTCCTGGCTGTGGAAAGATACCTAAAGGATCAACAGCTCCTGGGAATTTGGG  
 GGTGCTCTGGAAAACATTTGCACCACTGCTGTGCCTTGGAATGCTAGTTGGAGT-----  
 -----AATAAATCCCTGGAGTACATTTGG-----GAT-----  
 AATATGACCTGGATGGAGTGG---GAAAGAGAAATTAACAATTACACAAGATTAATATAC---  
 CACTTAATTGAAGAATCGCAGAACCAACAAGAA-----  
 -----  
 AAGAAATGAAAAGGAATTATTGGAATTGGATAAATGGGCAAGTTTGTGGAATTGGTTTGACATAACAAAATGGC  
 TGTGGTATATAAAGATATTTATAATGATAGTAGGAGGCTTAATAGGATTAAGAATAGTTTTTTGTA---  
 GTACTTTCTATAATA-----AATAGAGTTAGGCAGGGATATTCACCA-----  
 CTCTCGTTTGCTGTTAGCTTGCTCAACGCCACAGCAGTAGCAGTAGCAGAA---  
 GGGACAGATAGGATTATAGAAATAGTGCAAAGAGCTTGTAGAGCT-----  
 -----TTTCTCCACATC-----CCTAGAAGAATAAGACAGGGCTTCGAAAGGCTTTTGCTA---TAA  
 >FJ388899  
 GCT---ACA-----  
 TAAGACTTGTGGGTCACAGTCTATTATGGGGTACCTGTGTGG--AGAGAAACAAAT---  
 ACCACTCTATTTTGTGCATCAAATGCTAAAGCCTATGATACAGAG--GTACATAAT-----  
 -----GTTTGGGCCACA--CATGCCTGTGTACCCACAGAC---  
 CCCAACCCAAAAAATAAAATTGGAA-----AATGTAACAGAAGACTTTAAC-----  
 -----ATGTGGGAAAAGGGCATGGAAAAACAGATGCATAAAGACATA---  
 ATCAGTTTATGGGATCAAAGCCTA--AAGCCATGTGTAAAATTA---  
 ACCCCACTCTGTGTTACTTTAAATTGCACTGATTGTAAGTTGAATGATACTAAATCTGGTACGAATAGTACTG  
 AATCT-----  
 -----AGTTTGAATTGTCCTAATATTACTAATACCACTGATATGAAAAAGGAGAAATTAAA---  
 GAATGCTCTTTCAACGTATCAGGCATAAGA-----  
 GACAAGGTGCAGAAAAATTATGCACTT--TTTTATGACACTGATGTAACACCAATAGATAAC-----  
 -----  
 -----  
 ACCAGCTATATACTGAGAAGTTGTAACACCTCAATCATTACACAG---  
 GCCTGCCCAAAGGTAACCTTTTGAGCCAATTCGCATACATTATTGTGCCCCGGCTGGTTTTGCGATTCTAAAGT  
 GTAGA---GATAAGAAGTTCAAT-----GGAACAGGACCGTGTA AAAAT-----  
 -GTCAGT---ACAGTACAATGTACACATGGAATTAAGCCAGTAGTATCAACT---  
 CAACTGCTGTTGAATGGCAGTCTAGCAGAAGAAGAG-----  
 GTAATAATTAGATCTGAAAATATCTCGAACAAT-----GCTAAAAACATAATAGTACAGCTGAAA----  
 -----GAACCTATAGAA-----ATTAATTGTACAAGACCCAGCAACAATACAAGCAAA-----  
 -AGCATACATCTA-----GGACCAGGGGGAGCA---TTT-----TATGCAACAGAAAGA-----  
 -----ATAATAGGAGATATA-----AGACACGCATATTGT---AACATTAATAAAGGA---  
 AAATGGGAGGAACTTTAAAGCAGATAGCTGCAAAATTAGGA-----GAACAATTTGGG----  
 -----AACAGGACAATAAGCTTTAAT-----  
 CAATCCTCAGGAGGGGATCCAGAAATTGTA--CAGCACAGTTTTAATTGTGGAGGGGAG---  
 TTTAAGCAGCTCCAGGCAAGAGTCCTGGCTGTGGAGAGATACCTAAAGGATCAACAGCTCCTGGGAATTTGGG  
 GTTGCTCTGGAAAACATCTGCACCACTACTGTGCCTTGGAATGCTAGTTGGAGC-----  
 -----AATAAATCTCTAAATGACATTTGG-----GAT-----  
 AACATGACCTGGATGCAGTGG---GACAGAGAAATTAACAATTACACAAGCTTAATATAC---  
 TCCTTAATAGAAGAATCGCAAAACCAACAAGAA-----

-----  
AAGAATGAACTAGAAATTATTAGAACTAGATAAAATGGGCAAGTTTGTGGAGTTGGTTTGACATAACAAATTGGC  
TGTGGTATATAAAAATATTCATAATGATAGTAGGAGGCTTGGTAGGTTTAAGAATAGTTTTTACT---  
GTACTTTCTGTAGTG-----AATAGAGTTAGGCAGGGATACTCACCA-----  
TTATCGTTTGCTATTACCTTGCTTAACGCCACAGCAATAGCAGTAGCTGAG---  
GGGACAGATAGGGTTATAGAAGTATTACAAAGAATTTTATAGGGCT-----  
-----ATTATCCACATA-----CCTAGAAGAATAAGGCAGGGCTTGGAAGGGGTTTGCTA---TAA  
>FJ388916  
GCT---AAA---GAA-----  
GAAAAATCTGTGGGTCACAGTCTATTATGGGGTACCTGTGTGG---AAAGAAGCAACT---  
ACCACTCTATTTTGTGCATCAGATGCTCAAGCACATAACACAGAG---GCACATAAT-----  
-----GTTTGGGCCACA---CATGCCTGTGTACCCACAGAT---  
CCTAACCCACAAGAAGTAGTAATGGAA-----AATGTAACAGAAAATTTTAAAC-----  
-----ATGTGGAAAAATAACATGGTAGAACAGATGCAGGAGGATATA---  
ATTAGTTTATGGGATCAAAGCCTA---AAGCCATGTGTAAAATTA---  
ACCCCACTTTGTGTTACTTTAAATTGCACAGATGAGTTGAATATTAATGGGACTACTGGTAATGGGAATGGG-  
-----  
-----ACTACAGCCAGTAATAGTAGTATTGAAGAAGGGATGAAAGGAGAAATAAAA---  
AACTGCTCTTTCAATGTCAACAAAAGCATAGGA-----  
AATAAGCTGCAGAAAGAATATGCACTT---TTTTATAAACTTGATGTAGTACAAATAGAAGATGATAATACA-  
-----  
-----  
AAAGATAATAATACAACATAAAATATATACATTGATAAAATTGTAACACCTCAGTCATTACACAG---  
GCCTGTCCAAAGGTAACCTTTGAACCAATTCCCATACATTATTGTGCCCGGCTGGTTTTCGATTCTAAAGT  
GTAAT---GATAAAAAGTTCAAT-----GGAACAGGACCATGTAAAAAT-----  
-GTCAGC---ACAATACAATGTACACATGGAATTAAGCCAGTAGTGTCAACT---  
CAATTACTGTTTAAATGGCAGTCTAGCAGAAGAAGAG-----  
GTAGTGATCAGATCTGAAAATTTACAGACAAT-----GCTAAAAACATAATAGTACAGCTGAAG----  
-----GTACCTGTAGAA-----ATTAATTGTACAAGACCCACAACAATACAAGAAAA-----  
-AGTATACCTATA-----GGACCAGGGAGAGCA---TTT-----TATGCAACAGGAGAC-----  
-----ATAATAGGAGATATA-----AGGCAAGCACATTGT---AACATTAGTAGTAAA---  
AAATGGAATGAACTTTAGAACGTGTAGTTACAAAATTAGGA-----GAACAATTTGGG---  
-----AACAAAACAATAATTTTAAA-----  
CACTCCTCAGGAGGAGACCCAGAAATTGTA---ATGCACAGTTTTAATTGTGGAGGGGAG---  
TTTAAGCAGCTCCAGGCAAGAGTCCCTGGCTGTAGAAAGATACCTACAGGATCAACAGCTCCTAGGGATTTGGG  
GTTGCTCTGGAAGAACTCATTGCAACCACTGCTGTGCCTTGGAATGCTAGTTGGAGT-----  
-----AATAATAAATCTTATAATGACATTTGG-----GAT-----  
AACATGACCTGGATGGAGTGG---GAGAGAGAAATTGACAATTACACAGGCTTAATATAC---  
AGCTTACTTGAAAAATCACAGAACCAACAAGAA-----  
-----  
AAGAATGAACAAGAATTATTGGAATTGGATAAGTGGGCAAATTTGTGGAATTGGTTTAGCATAACAAACTGGC  
TGTGGTATATAAGAATATTACATAATGATAATAGGAGGTTAATAGGTTTAAGAATAGTTTTTGTCT---  
ATACTTTCTGTAGTG-----AATAGAGTTAGGCAGGGATACTCACCA-----  
TTATCGTTTGCTGTTAGTTTGCTTAATACCATAGCTATAGCAGTAGCTGAG---  
GGGACAGATAGGATTATAGAAGTAGCACAAAGAGCTGGTAGAGCT-----  
-----ATTCTCCACATA-----CCTAGAAGAATAAGACAAGGCTTAGAAAGGTCTTTACTA---TAA  
>JF683738  
GCT---TCA-----  
AATCTTTGGGTCACAGTCTATTATGGGGTACCTGTGTGG---AAAGAAGCAACA---  
CCCACCTTATTTTGTGCATCTGATGCTAAAGCATATGACACAGAG---GTACATAAT-----  
-----GTTTGGGCCACA---CATGCCTGTGTACCCACAGAT---  
CCTAGCCCAAGAAATGGTATTAGAA-----AATGTGACAGAAAATTTTAAAC-----  
-----ATGTGGAAAAATTATATGGTAGAACAGATGCAAGAGGATATA---  
ATCAGTTTATGGGATGAAAGCCTA---AAGCCATGTGTAAAATTA---  
ACTCCACTCTGTGTTACTTTAAATTGCACTAACGCGAATCTTACTAGTACCAAT-----  
-----  
-----AGTTCCATGGGGATGGAAGCAGGAGAAATAAAA---  
AACTGCTCTTTCAAGATCACCAACAAGCATAAAA-----  
GATAAGACAAAGAATGAATATGCACTC---TTTTATAAACTTGATGTAACACCAATAGATAAT-----  
-----

-----  
 AATAGTACAAATAGTACAAACTATACTTTGATAAATTGTAACACCTCAGCCATTACACAA---  
 GCCTGTCCAAAGGTATCCTTTGAACCAATTCCCATACATTATTGTGCCCCGGCTGGTTATGCGATTCTAAAGT  
 GTAAG---GATAAGAAGTTCAAT-----GGGACAGGACCATGTAAAAAT-----  
 -GTTAGC---ACAGTACAATGTACACATGGAATTCGGCCAGTGGTGTCAACT---  
 CAACTGCTGTTAAATGGCAGTCTAGCAGAAGAAGAG-----  
 GTAGTAATTAGATCTGAAAACCTTCACAAACAAT-----GCCAAAACCATAATAGTACAGCTGAAA----  
 -----GAACCTATAAAC-----ATTACTTGTATCAGACCCGGCAACAATACAAGAAAA-----  
 -AGTATACATATA-----GGACCGGGAAGGGCA---TTT-----TATGCAACAGGAGAC-----  
 -----ATAATAGGAAATATA-----AGACAAGCACATTGT---AACCTTAGTGAAACA---  
 AAATGGAATAACACTTTAAAAACAGATAGTTACAAAATTAAGA-----GAAAAATTTGAA----  
 -----AATAAAACAATAGCCTTTAAT-----  
 CAATCCTCAGGAGGGGACCCAGAAATTACA---ATGCACAGTTTTAATTGTGGAGGGGAA---  
 TTTAAACAGCTCCAGGCAAGAGTCCTGGCTGTGGAAAGATACCTACAGGATCGACAGCTCCTAGGGCTTTGGG  
 GTTGCTCTGGAAAGCTCATCTGCACCACCTTCTGTACCTTGGAAATGCTAGTTGGAGT-----  
 -----AATAAATCTCAGGAGGAGATTTGG-----GGT-----  
 AACATGACCTGGATGCAGTGG---GAGAGAGAAATTGGAAATTACACAGAATTAATATAC---  
 ACCTTACTTCAAGAATCGCAGTACCAACAAGAA-----  
 -----  
 AAGAATGAACAAGAATTATTGGAATTAGATAAGTGGGCAAGTTTGTGGAATTGGTTTGACATATCAAAATGGC  
 TGTGGTATATAAAAATATTACATAATGATAGTAGGAGGTTTAGTAGGTTTAAGAATAATTTTTTGCT---  
 GTACTTTCTATAGTG-----AATAGAGTTAGGAAGGGATACTCACCA-----  
 TTATCATTCGCCATTAGCTTGCTTAATACTACAGCTATAGTAGTAGCTGAG---  
 GGAACAGATAGAATTATAGAAGTAGTACAAAGATTTTGTAGAGCT-----  
 -----ATTCTCCACATA-----CCTAGAAGAATAAGACAGGGTTTAGAAAGAATTTTGCTA---TAA  
 >JF683756  
 GCT---GCA-----  
 GACAAACTGTGGGTCACAGTCTATTATGGAGTACCTGTGTGG---AAAGAAGCAACC---  
 ACCACTCTATTTTGTGCATCAGATGCTAAAGCATATGACACAGAG---GTACATAAT-----  
 -----GTTTGGGCCACA---CATGCCTGTGTACCCACAGAC---  
 CCTAGCCCACAAGAAGTAGAATTGAAG-----AATGTGACAGAGAATTTTAAC-----  
 -----ATGTGGAAAAATAACATGGTAGAACAGATGCATGAGGATATA---  
 ATCAGTTTATGGGATCAAAGCCTA---AAGCCATGTGTAAAATTA---  
 ACCCCACTCTGTGTTACTTTAAATTGCACTGATGTGAATAATACCAATAGTACCAATGTG-----  
 -----  
 -----AATAGTAGTGACCAGATAGAGGCGGGAGAAATAAAA---  
 AACTGCACCTTCAATATTACTAATAGCATAGGA-----  
 AATAAGCTGCAAAAAGAATATGCACTT---TTTTACAAGCTTGATATAATGTCATTAGATAAT-----  
 -----  
 -----  
 AATAATGGTACTTATACGTTAAGAAGTTGTAACACCTCAGTCATTACACAG---  
 GCCTGTCCAAAGGTATCCTTTGAACCAATTCCCTATACATTATTGTACCCCGGCTGGTTTTGCGATTCTAAAGT  
 GTAAT---GATAAACAGTTTAAT-----GGATCAGGGCTATGTCAAAAT-----  
 -GTCAGT---ACAGTACAATGTACACATGGAATTAGGCCAGTAGTGTCAACT---  
 CAACTACTGTTAAATGGCAGTCTAACAGAAGGGGAT-----  
 GTAGTAATTAGGTCTCAAAATTTACAAACAAT-----GCTAGAACCATAATAGTACAGCTGAAC----  
 -----GAAACTGTAAAA-----ATTAATTGTACAAGACCCAACAACAATACAAGAAGA----  
 -AGTATACATATA-----GGACCAGGGAGAGCA---TTT-----GAGACAACAGGAGCC-----  
 -----ATAATAGGAGATATA-----AGACAAGCACATTGT---AACATTAGTGGCACA---  
 GAATGGAATAACGCTTTAAAAACAAGTAGTTAGAAAATTAGGA-----GAACAATTTAGG----  
 -----AATGCGCAAAACATAACCTTTTCAG---  
 CAACCATCCCCAGGAGGGGACCCAGAAATTATA---TTGCACAGTTTTAAGTGTGGAGGGGAA---  
 TTTAAGCAGCTCCAGGCAAGAGTCCTGGCTGTGGAAAGATACCTAAAGGATCAACAGCTCCTAGGAATTTGGG  
 GTTGCTCTGGAAGAACTCATCTGCACCACCTACTGTGCCTTGGAAATACTAGTTGGAGC-----  
 -----AATAAATCTTTCAATGAGATTTGG-----AAT-----  
 AACATGACCTGGGTACAGTGG---GAGAGAGAAATTGACAATTACACAAGCACAAATATAT---  
 TCCTTGATTGAACAATCGCAAAACCAACAAGAA-----  
 -----  
 AAGAATGAACAAGAATTATTGGAATTGGATAAGTGGGACAGTTTATGGTCTTGGTTTAGTATAACACAATGGC  
 TGTGGTATATAAGAATATTACATAATGATAGTAGGAGGCTTGATAGGTTTAAGAATAGTTTTTGCT---

GTACTTTCTATAATA-----AAAAGAGTTAGGCAGGGATACTCACCA-----  
 TTGTCGTTTCGCATTTTGTAGTTTGTCTAGCT-----ATAGCAGTAACTAAG---  
 GGAACAGATAGGGTTATAGAAGTAGTACAAAGAGCTTGTAGAGCT-----  
 -----ATTCTCCACATA-----TCTGCAAAAATAAGACAGGGTTCAGAAAGGGCATAGCTA---TAA  
 >JF683764  
 GCT---GCA-----  
 GAACAATTGTGGGTCACAGTTTATTATGGGGTACCTGTGTGG---AAAGAAGCAACC---  
 ACCACTCTATTTTGTGCATCAGATGCTAAGGCATATGATACAGAG---GCCATAAT-----  
 -----GTTTGGGCCACA---CATGCCTGTGTACCCACAGAC---  
 CCCAACCCACAAGAAATAGAAATGAAA-----AATGTGACAGAAGATTTTAAAC-----  
 -----ATGTGGAAAAATAACATGGTAGAACAAATGCATGAGGATATA---  
 ATCAGTTTATGGGATCAAAGCCTA---AAGCCATGTGTAAAATTA---  
 ACCCCACTCTGTGTTACTCTAAATTGCACCGATTTACGGGAAATGATGGGAATAGTACAAC---  
 -----  
 -----AATGAGAATTGGAGAAAGGAGGAGAAAGGAGAAATGAAA---  
 AATTTCTCTTTCCATATCAACACAGGAAAGGAAAAA-----  
 ACACAACCGACACGTACAAATTATGCTATT-----  
 TTTGATGTAATAAATATAAATACAAATGGTAAT-----  
 -----  
 GGGAAATAAGTAATTATAGTTATTATAGGTTGACAAGTTGTAACACCTCAGTCATTACACAA---  
 GCCTGTCCAAAGATATCCTTTGAACCAATTCCCATACATTATTGTGCCCGGCTGGGTTTGCATTCTAAAGT  
 GTAAC---AATAAGACATTTAAT-----GGAAAAGGACCATGTACAAAT-----  
 -GTCAGC---ACAGTGCAATGTACACATGGAATTAGGCCAGTAGTATCAACT---  
 CAACTGCTGTAAATGGCAGTCTAGCAAAT---GAT-----  
 GTAGTAATTAAATCTGAAAATCTCACGGACAAT-----ACTAAAAACATAATAGTACAGCTGAAG---  
 -----GAAGCTGTAAAA-----ATTACTTGCATAAGACCCAACAACAATACAAGACAA-----  
 -AGTTTAAATCTA-----GGACCAGGGAGAGCA---CTC-----TTTATAACAGGAGAC-----  
 -----ATAATAGGAAATATA-----AGAAAAGCACATTGT---AACATTAATGGCACA---  
 CAATGGAATAAACTTTAGAACAGATAGTTGGAAAATTAAGA-----GAACAATTTAAG---  
 -----AATAAAACAATAAACTTTACT-----  
 CAATCTGCAGGAGGGGACCCAGAAATTGTA---ATGCACAGTTTTAATTGTGGAGGGGAA---  
 TTTAAGCAGCTCCAGGCAAGACTCCTGGCTGTGGAAAGATACCTAAGGGATCAGCAGATCCTAGGGATTTGGG  
 GTTGCTCTGGAAAGCTCATCTGCACCACGACTGTGCCTTGGAAATGCTAGCTGGAGT-----  
 -----AATAAATCTCTAGAGGAGATTTGG-----AAG-----  
 AACATGACCTGGATGGCTTGG---GAAAAAGAAATTGACAATTACACAAACTACATATAT---  
 GACTTACTTGA AAAATCGCAGATCCAACAAGAA-----  
 -----  
 AAGAATGAACAAGAATTATTGGAATTGGATAAGTGGGCAAGTTTGTGGAATTGGTTTGACATATCACAATGGC  
 TGTGGTATATAAGACTATTATAATGATAGTAGGAGGCTTGATAGGTTTAAGAATAGTTTTTTGCT---  
 GTGCTTTCTGTAGTG-----AATAAAGTTAGGCAGGGATACTCACCA-----  
 CTGTCAATTTGCTGTTAGCTTGTCAATACTACAGCTATAGCAGTAGCTGAG---  
 GGGACAGATAGGATTATAGAAGTAGTACAAGGAACTTTGTAGAGCT-----  
 -----ATCCTCAACATA-----CCTAGAAGAATAAGACAGGGCTTAGAAAGGGCTTTGCTA---TAA  
 >JF683773  
 ATT---GCA---GGA-----  
 GAGGAAAAAGCGTGGGTCACAGTCTATTATGGAGTACCTGTGTGG---AAAGAAGCAACC---  
 ACCACTCTATTTTGTGCATCAAATGCTAAAGGCTATGATACAGAG---GTACATAAT-----  
 -----GTTTGGGCCACA---CATGCCTGTGTACCCACAGAC---  
 CCAGACCCACAAGAAATAAAATTGGAA-----AATGTGACAGAAAATTTTGAC-----  
 -----ATGTGGAAAAATAACATGGTAGAACAGATGCATGAGGATATA---  
 ATCAGCTTATGGGATCAAAGCCTA---AAGCCATGTGTAAAATTA---  
 ACCCCACTCTGTGTTACTTTAAATTGCACTGATGATGTGAAGGTGAATGGTACCGCT-----  
 -----  
 -----GATGTCACTACTGAGGAAAAAGGAGAGATAAAA---  
 AACTGCTCTTTCAATGTTAGCACAGCATAAAA-----  
 GATAAGATACAAAAAGAATATGTTTTT---TTTTATAATGTTGATGTACTACCAATAGAGGGTAAT-----  
 -----  
 -----  
 GATAATACTAGTTATAGGTTGATAAGTTGTAATACCTCACTCCTTACACAG---  
 GCCTGTCCAAAGGTATCCTTTGAGCCAATTCCCATACATTATTGTGCCCGGCTGGTTTTGCGATTCTAAAGT

GTAAA---GATAACAATTTCAAT-----GGAACAGGACCATGTAACAAT-----  
 -GTCAGC---ACAGTACAATGTACACATGGAATTAGGCCAGTAGTGTCAACT---  
 CAACTGCTGTTAAATGGCAGTCTAGCAGAAGGGGAA-----  
 ATAGTACTTAGATCTGCCAATTTCTCGGACAAT-----AATAAAAACATAATAGTACAGCTAAAG----  
 -----GAAGGTGTAAAC-----ATTACTTGTATAAGACCCAACAACAATACAAGAAAA-----  
 -GGTATACCTATA-----GGACCAGGGAGAGCA---TTC-----TATGCAACAGGAGAC-----  
 -----ATAATAGGAGATATA-----AGACAGGCACATTGT---AACATCAGTAGAAAA---  
 TCATGGAATAACACTCTATATCAGATAGCTGAAAAATTAGGA-----AAACAATATAAG----  
 -----AATAAAACAATAGTTTTTACT-----  
 AAATCCTCAGGAGGGGACCCAGAAATTGTA--ATGCACAGTTTCAATTGTGGAGGGGAA---  
 TTTATCCAGCTCCTGCCAACAATAGTGGCGGTGGAAAGATTCTCCGGGATCATCAGCTCCTAGGGATTAGGG  
 GGGGCTCTTGAAAAATCATCATCTGCACCACTGCTCCTCGGAATAGTAGTAGGAGT-----  
 -----AATAATACATTAGTTGACATCATGAAT-----GGT-----  
 AACATGACCTGGATGCAGTGG---GAAAGAGAAATTGACAAATTACACACAAACAATATAC---  
 ACCTTAATTGAAGAATCGCAGAACCAACAAGAA-----  
 -----  
 AAGAAATGAAAAAGAATTATTGGAATTAGATAAGTGGGCAAGTTTGTGGAGTTGGTTTGACCTAACACAGTGGC  
 TGTGGTATATAAGAATATTCTAATGGTAATAGGAGGCTTAATAGGTTTAAGAATAGTTTTTTGCT---  
 GTACTTTCCATAGTA-----AAGAGAGTTAGGCAGGGATACTCACCT-----  
 TTGTCATTTGCTGTCTAGCTTGCTTAATACCACTGCTATAGTAGTAGCTGAG---  
 GGAACAGATAGGGTTATAGAAGTAGTACAAAGAATTTTATAGAGCT-----  
 -----ATTCTCCACATA-----CCTAGAAGAGTGAGACAGGGCTTGGAATTAAGCTTGCTA---TAA  
 >JQ416158  
 GCT---GCA-----  
 GACAACTGGTGGGTACAGTCTATTATGGGGTACCTGTGTGG---AAAGAAGCAACC---  
 ACCACTCTATTTTGTGCATCAGATGCTAAAGGATATGTTAAAGAG---GCACATAAT-----  
 -----GTTTGGGCCACA---CATGCCTGTGTACCCACAGAC---  
 CCTGACCCACAAGAAATACCATTTGGAA-----AATGTAACAGAAAATTTTAAAC-----  
 -----ATGTGGAAAAATAGCATGGTAGAACAGATGCAAGAGGATATA---  
 ATCAGTTTATGGGATCAAAGTCTA---AAGCCATGTGTAAACTA---  
 ACCCCACTCTGTGTTACCTTAAATTGCAGTGATTGGGAAAAGGAAAATGTTACTAGTAGTGCTAGTAATAGTC  
 CAAAT-----  
 -----AACAACTAGTAGTAGTGAATTAAGGATGGAGAAAGGAGAATTAATA---  
 AACTGCTCTTTCAATGTCAACCACAAGCATAAGA-----  
 GATAAGATACAGAAAGAATATGCACTT--TTCTATAGACTTGATGTAGTACCAATAGAGGGT-----  
 -----  
 -----  
 GATAAATACTAGCTATAGGTAAATAAATTGTAATACCTCAGTCATTACTCAA---  
 GCCTGTCCAAAGGTAACCTTTGAGCCAATTCCCATACATTTATTGTGCCCCAGCTGGTTTTGCACCTTCTAAAAT  
 GTAAG---GATGAGTTATTCAAT-----GGAACAGGACCATGTAAAAAT-----  
 -GTCAGC---ACAGTACAATGTACACATGGAATTATGCCAGTAGTGTCAACT---  
 CAACTGCTGTTAAATGGCAGCCTAGCAGAAAAAGAG-----  
 GTAGTAATTAGATCTGCCAATCTCTCAGACAAT-----ACTAAAAACATAATAGTACATCTGAAC---  
 -----GAATCTGTAAAG-----ATTAATTGTACAAGGCCCAACAACAATACAAGAAAA---  
 -AGTATAAATATA-----GGACCAGGGAGAGCA---TTT-----ATTACAACAGGAGCT-----  
 -----ATAATAGGAGATATA-----AGGCAAGCACATTGT---AACATTAGTAGAGAA---  
 AAATGGAACAAAACCTTTACAAATGGTAGTTGAAAAATTAAGA-----GAAAAATTTGAA---  
 -----AATAAAACAATAGCCTTTTAA-----  
 CCCCCCTCAGGAGGGGACCCAGAAATTGTA--ATGCATAGTTTCAATTGTGGAGGGGAA---  
 TTTAAGCAGCTCCAGGCAAGAGTCCCTGGCTGTGGAGAGATACCTAAGGGACCAACAGCTCCTAGGAATTTGGG  
 GTTGCTCGGGAAACTCATCTGCACCACTAATGTGCCTTGGAATAAACTTGAGCAACTAC---AGA-----  
 -----AATCTGACTCAGATTTGG-----GAT-----  
 AACATGACCTGGATACAGTGG---GAAAGAGAAATTGACAAATTACACAGACTTCATATAC---  
 TCTTTAATTGAACAATCGCAAAACCAACAAGAA-----  
 -----  
 AAGAAATGAACAAGAATTATTGGAATTAGATAAGTGGGCAAATTTGTGGAATTGGTTTGACATAACAAAATGGC  
 TGTGGTATATAAAAATATTCTAATGATAATAGGAGGCTTGATAGGTTTAAGAATAGTTTTTTACT---  
 ATACTTTCTATAGTG-----AATAGAGTTAGGAAGGGATACTCACCA-----  
 TTATCATTTGCTGTCTAGCTTGTTCAACACCACAGCTATAGCAGTAGCTGAG---

GGGACAGATAGAATTATAGAGTTAGCACAAAGATTTTTTTAGAGCT-----  
 -----ATCCTTCACATA-----CCTGTAAGAATAAGACAGGGCTTAGAAAGGGCTTTGCTA---TAA  
 >KT124803  
 GCT---GTA-----  
 GAACAATTTTGGGTCACAGTTTATTATGGAGTACCTGTGTGG--AAAGATGCAACC---  
 ACCACTTTATTTTGTGCATCAGATGCTAAAGCACATAATACAGAG--GTACATAAT-----  
 -----GTTTGGGCCACA---CATGCCTGTGTACCCACAGAT---  
 CCCAGCCCACAAGAAGTCCTAATGGAA-----AATGTGACAGAACTTTTGAC-----  
 -----ATGTGGAACAATAACATGGTAGAACAGATGCATGAGGATATA---  
 ATCAGTTTATGGGATCAAAGTCTA---AAGCCATGTGTAAAGTTA---  
 ACCCCACTCTGTGTTACTTTAAATTGCACTGACATGGAGAATGGGAATACTCCTAATACT-----  
 -----  
 -----ATAATAGTAGCTGGAAAAAGATGGAAAAAGGAGAATTAAAG---  
 AACTGCTCTTTCAATATCACCACAAGCTTAAGA-----  
 GATAAGATACAGAAAGAATATGCACTT---  
 TTTTATAAACTTGATGTAGTACCAATAGATGATGATAATAGTAGC-----  
 -----  
 AATAATAATTATAGTAGCTATAATAACTATAGGTTGATAAGTTGTAATACCTCAGTCATTACACAG---  
 GCCTGTCCAAAGGTATCCTTTGAGCCAATTCCCATACATTATTGTGCCCCAGCTGGTTTTGCGATTCTAAAGT  
 GTAAC---AATAAGACATTTAAT-----GGAACAGGACCATGTAAAAAT-----  
 -GTCAGT---ACAGTACAATGTACACATGGTATTAGGCCAGTAGTATCAACT---  
 CAGCTGTTGTAAATGGCAGTCTAGCAGAAGAAGAG-----  
 ATAGTAATTAGATCTGAAAATATCACGAACAAT-----GCTAAAAACATAATAGTACAGCTGAAC---  
 -----ACATCAGTAAAG-----ATTAATTGTACAAGACCCAACAACAATACAAGAAAA-----  
 -AGTATTCATATA-----GCACCAGGGAGAGCA---TTC-----TATGCAACAGGAGAA-----  
 -----ATAATAGGAGATATA-----AGACAAGCACATTGT---AACATTAGTAGAGCA---  
 AAGTGGAATAACACTTTAGAACAGGTGGCTGGAAAATTAAGA-----GAACACTTTAGG---  
 -----AATAAAACAATAGTCTTTACT-----  
 CACTCCTCAGGAGGGGATCCAGAAATTGTA--ATGCACAGCTTTAATTGTGGAGGGGAA--  
 TTTAAGCAGCTCCAGGCAAGAGTCCCTGGCTGTGGAAAGATACCTAAAGGATCAACAGCTCCTGGGAATTTGGG  
 GTTGCTCTGGAAAAATAATTTGCACCACTGCTGTGCCTTGGAAATAGTAGTTGGAGTAGTAGA--TGGAAT--  
 -----AATAAATCTCTGGGAGACATATGG-----AAT-----  
 AACATGACATGGATGGAATGG--GAAAAAGAGATTGATAATTACACAGGCTTAATATAC---  
 AGCTTACTTGAAGAATCACAGAACCAACAAGAA-----  
 -----  
 AAGAATGAACAAGAATTATTAGAATTGGATAAATGGGCAAATTTGTGGAATTGGTTTGACATAACAACTGGC  
 TGTGGTATATAAAAATATTATCATAATGATAGTAGGAGGCTTGATAGGTTTAAAGAATAGCTTTTACT---  
 GTGCTATCTATAGTG-----AATAGAGTTAGGCAGGGATACTACCA-----  
 TTATCGTTTGTCTATTAGTTTGCTTAATGCCACAGCTATAGCAGTAGCTGAG---  
 GGAACAGATAGGGTTATAGAAGTAGTACAAAGAATTGGTAGAGCT-----  
 -----TTTCTCCATATA-----CCTAGAAGAATAAGACAAGGCTTAGAAAGAATTTTGCAA--TAA  
 >KT124789  
 GCT-----  
 GGAGATTTGTGGGTCACAGTCTATTATGGAGTGCCTGTGTGG--AAAGAAGCAACC---  
 ACCACTTTATTTTGTGCATCAGATGCTAAGGCATATGATACAGAG--GCACATAAT-----  
 -----GTTTGGGCCACA---CATGCCTGTGTTCCACAGAC---  
 CCTAACCACACAAGAAGTAGTATTGGAA-----AATGTGACAGAAAATTTTAAC-----  
 -----ATGTGGAATAAATAACATGGTAGAACAAATGAATGAAGATATA---  
 ATTAGTTTATGGGATCAAAGCTTA--AAGCCATGTGTAAATTA---  
 ACCCCACTCTGTGTCACCTTAAATTGCGTTGATGCCAAGAATTGCAACGACACTGGTGCTACAAATTGTAGTA  
 GTGGAGGAACC-----  
 -----AACAGTACTACTGGTATTGGGGGATTGATGGACAAAGGGGAAATAAAA---  
 AACTGCTCTTTCAATAACACCACAAGCATAGGA-----  
 AATAAGGTAAAGAAAGAATATGCACTT---TTTTATAGACTTGATGTAGTACAAATGGATAATATG-----  
 -----  
 -----  
 GATAATACAAGCTATACATTGATAAATTGTAACACCTCAGTCATTACACAG---  
 GCCTGTCCAAAGGTATCCTTTGAACCAATTCCCATACATTATTGTGCTCCGGCTGGTTTTGCGATTCTAAAGT  
 GTAAT---GATAATAAGTTTAAAT-----GGAACAGGACCATGTAAAAAT-----  
 -GTCAGC---ACAGTACAATGTACACATGGAATTAACCAGTGGTGTCAACT---

CAACTGCTGTTGAATGGTAGTCTAGCAGAAGGAGGA-----  
 GAGGTAATAATTAAATCTGAAAATATCACAGATAAT-----ACTAAAAACATAATAGTACAGCTAAAT-  
 -----GCATCTGTAGGA-----ATTGATTGTACAAGACCCAACAACAATACAAGAAAA--  
 ---AGTATACATATA-----GGACCAGGGAGAGCA---TTC-----TATGCAACA---GAT---  
 -----ATAATAGGAGATATA-----AGACAAGCACATTGT---AATATTAGTAGAGCA-  
 --AAATGGAATGACACATTAAAAAGTATAGCTATAAAATTAAAA-----GAACAGTTT-----  
 -----AACAAAACAATAATTTTTTAAT-----  
 CGATCCTCAGGAGGGGACCCAGAAATTGAA--ATGCACAGCTTTAATTGTGGAGGGGAA---  
 TTTAAGCAGCTCCAGGCTAGAGTCCTGGCTGTGGAAAGCTACCTAAAGGATCAACAGCTCCTGGGGATTTGGG  
 GTTGCTCTGGAAGAACTCATCTGCACCACTAATGTGCCTTGAATACTAGTTGGAGT-----  
 -----AATAGAACTCTGAAAGACATTTGG-----GAT-----  
 AACATGACCTGGATGGAATGG---GACAGAGAAATTAACAATTACACAACTTAATATAC---  
 AACTTAATTGAAATATCACAGATCCAGCAGGAA-----  
 -----  
 AAGAATGAACAAGAATTGTTGGAATTGGATAAGTGGACAGGCTTGTGGAATTGGTTTGACATATCAAATTGGC  
 TGTGGTATATAAAAAATATTATAATGATAGTGGGGGGCTTAATAGGTTTAAGAATAGTTTTTTACT---  
 GTACTGTCTATAGTG-----AATAGAGTTAGGCAGGGATATTCACCA-----  
 TTATCATTTGCTGTTAGTCTGCTTAATGCCACAGCTTTAGCAGTAGCTGAG---  
 GGGACAGATAGGATTATAGAAGTAGGACAAAGACTTTGTAGAGCA-----  
 -----ATTCTCCACATA-----CCTAGAAGAATAAGACAGGGTTTAGAAAGGGCTTTGCTA---TAA  
 >KT124805  
 GCT---ACA-----  
 GAAAACTTGTGGGTCACAGTTTATTATGGGGTACCTGTATGG---AGAGAAGCAAAC---  
 ACCACTTTATTTTGTGCATCAGATGCTAAAGCATATGATACAGAG---GTCCATAAT-----  
 -----GTTTGGGCCACA---CATGCCTGTGTACCCACAGAC---  
 CCTAACCCACAAGAAATAAAATTGGAA-----AATGTGACAGAAAAGTTTGAC-----  
 -----ATATGGAAAAATAACATGGTGGAACAGATGCATGAAGATATA---  
 ATTAGTTTATGGGATCAAAGCCTA---AAACCATGTGTAAAACATA---  
 ACCCCACTCTGTGTCACTTTAAATTGTACTGATTTGAAGAATAATAGTTGTACTAATTTG-----  
 -----  
 -----GAGTCTAATAATTGTACCAATAGTAGTATAGTGGATAAAGAAGAAATGACA---  
 AACTGTTCTTTCAATGTAAACCACAATCAGGAGA-----  
 GATAAGATGCAGAAAGAATATGCATAT--TTTCATAAACTTGATGTAGTACCAATAGATAAT-----  
 -----  
 -----  
 GATAATACCAGTTATATGTTGAGAAGTTGTAATACCTCAGTCATTACACAG---  
 GCCTGTCCAAAAGTATCCTTTGAGCCAATTCCCATACATTACTGTGCCCCGGCTGGTTTTGCGATATTAAAGT  
 GTAAC---AATAAAACATTTAAT-----GGAAGAGGGCCATGTAGAAAT-----  
 -GTCAGC---ACAGTACAATGCACACATGGAATTAAGCCAGTAGTATCAACT---  
 CAACTGCTGTTAAATGGCAGTTTAGCAGAAGAAGGC-----  
 ATAGTACTTAGATCTGCCAACTTCTCAGACAAT-----GCTAAAACCATAATAGTACAATTGAAG---  
 -----GATCCTGTAAAGA-----ATTAATTGCACAAGGCCCAACAACAATACAAGAAGA---  
 -AGTATACATATA-----GCACCAGGGAGAGCA---TTC-----TATACAACAGGAGAA---  
 -----ATAATAGGGGACATA-----AGACAAGCACACTGC---AATATTACTAGAGGG---  
 GATTGGGATAAACTCTAGGGCAGATAGTTATAAAATTAAGA-----AAACAATTTGGA---  
 -----AATAAAATAATAGCCTTTAAC-----  
 AAATCCTCAGGAGGGGACCCAGAAATTGTA--ATGCACAGTTTTAATTGTGGAGGGGAA---  
 TTCAAGCAGCTCCAGGCAAGAGTCCTGGCTATAGAAAGATACCTACGGGATCAACAGCTCCTGGGAATTTGGG  
 GTTGCTCTGGAAGAACTCATCTGCCGCACTGCTGTGCCTTGAATGCTAGTTGGAGT-----  
 -----AATAAATCTTATAATGACATTTGG-----GAT-----  
 AACATGACCTGGATGGAGTGG---GATAGAGAAGTTAACAATTACACAGACCTAATATAC---  
 AATTTAATTGAACAATCGCAAAACCAGCAAGAA-----  
 -----  
 AAGAATGAACAAGACTTACTGGAATTGGATAAATGGGCAAGTTTGTGGAATTGGTTTGACATATCAAATTGGC  
 TGTGGTATATAAGAATATTATAATGATAATAGGAGGCTTGGTAGGTTTAAGAATAATTTTTTGCT---  
 GTGCTTTCTATAGTA-----AATAGAGTTAGGCAGGGATATTCACCA-----  
 TTATCGTTTTGCTGTTAGCTTGCTCAACGCCACAGCCATAGTAGTAGCTGAA---  
 GGGACAGATAGGATTATAGAAGTAGTACAAAGAACCTTTAGAGCT-----  
 -----CTCATCCATATA-----CCTAGAAGAATAAGACAGGGCTTAGAAAGGGCCTTGATA---TAA  
 >KT124763

GCT---ACA-----  
GAAGAGAAGTGGGTCACAGTCTATTATGGAGTACCTGTGTGG---AAAGAAGCAACC---  
ACTACTCTATTTTGTGCATCAGATGCTAAAGCATATGATACAGAG---GTGCATAAT-----  
-----GTTTGGGCCACA---CATGCCTGTGTACCCACAGAC---  
CCCAGCCCACAAGAAGTAGCATTGGAA-----AATGTGACAGAAGATTTTAAC-----  
-----ATGTGGAAAAATAGCATGATAGACCAGATGCACGAGGATATA---  
ATCAGTTTATGGGATCAAAGCTTA---AAGCCATGTGTAAAATTA---  
ACTCCACTCTGTGTTGCTTTAAATTGTACTACTTTTCTAAGAATTGTACTACTTTTAATAAGAATGTTACCG  
GTAACGAGACG-----  
GTGGAAAATGGAACTGCACTAATAACTGAGACACAGACAAAGGAAGTACAAGAACTGCAAGAAATAAAA-  
--AACTGTTCTTTCAAAACCTTCACAAGGATAAGA-----  
GATAAGACACAGGGAGAAGAATCTGCTCTTTTTTATAGAGATGATCTAGTACTAATAGATAATGATAATAAAA  
CTAATAAT-----  
-----  
AGCTATAATAAACTAATAAGAGCTATAGGTTGGTAAAGTTGTAACACCTCAGTCATTACACAG---  
GCCTGTCCAAAGGTATCCTTTGAGCCAATTCCCATACATTATTGTGCCCCAGCTGGTTTTGCATTCTAAAAT  
GTAAC---GATAAGAAGTTTCGAG-----GGAAAAGGATCATGTGAAAAT-----  
-GTTAGC---ACAGTACAATGTACACATGGAATTAGGCCAGTAGTATCAACT---  
CAACTGTTGTTAAATGGCAGCCTAGCAGAAGAGGAG-----  
GTAGTAATTAGATCTGAAAATTTCAAAACAAT-----GCTAAAATCATAATAGTGCAGCTAAAA---  
-----GAAGCTGTAAAA-----ATTAATTGTACAAGACCCAATAACAATACAAGAAAA---  
-AGTATACATATA-----GGACCAGGGGAAAGCA---TTT-----TATACAACAGGAGAT-----  
-----ATAATAGGAGATATA-----AGACAAGCACATTGT---AACATTAGTAGAGAA---  
CAATGGAATAACACTTTAAAAAAGGTAGTTGAAAACTAAGG-----AAAAATTTAAC---  
-----AATAAAACAATAAGCTTTAAG-----  
CAATCCTCAGGAGGAGACCCAGAAATTGTA---ATGCACAGTTTAAATTGTGGAGGGGAA---  
TTTAAGCAGCTCCAGGCAAGGCTCCTGGCTGTAGAAAGATATCTAAAGGATCAACAGCTCCTGGGGATTTGGG  
GTTGCTCTGGAAGAACTCATTTGCACCACTGCTGTGCCTTGGAAATGATAGTTGGAGT-----  
-----AATAAATCTCTGAACCAGATTTGG-----AAT-----  
AACATGACTTGGATGCAGTGG---GAGAAAGAAATCAACAATTACACAAATTTTATATAT---  
AAATTAATTGAAGAATCGCAAAACCAACAAGAA-----  
-----  
AAGAATGAACAAGAATTATTGGAGTTAGATAAATGGGCAAGTTTGTGGAATTGGTTTTCCATAACAACTGGC  
TGTGGTATATAAGACTATTCTAATGATAGTAGGAGGCTTAATAGGCTTAAGAATAGTTTTTGTCT---  
GTACTTTCTATAGTG-----AATAGAGTTAGGCAGGGATACTCAGG-----  
TTGTCGTTTGTCTGTTAACTTGCTTGACACTATAGCTATAGCAGTAGCTGAG---  
GGAACAGATAGGATTTTAGAAGGCTTACAAGGAATTGGTAGAGCT-----  
-----TTTCTCCACATA-----CCTAGAAGAATAAGACAGGGCCTCGAAAGAGCTTTGCAA--TAA  
>KT124779  
ACT---GCA-----  
GAACAATTGTGGGTAACAATCTATTATGGGGTACCTGTGTGG---AAAGAAGCAAC---  
ACCACCTCTATTTTGTGCATCAGATGCTAAAGCATATGATACAGAG---ATACATAAT-----  
-----GTTTGGGCCACA---CATGCCTGTGTACCCACAGAC---  
CCCAACCCACAAGAAGTAGTATTGGGA-----AATGTGACAGAAAATTTCAAC-----  
-----ATGTGGAAAAATAACATGGGTAGAACAGATGCATGAAGATATA---  
ATCAGTCTATGGGATCAAGGCCTA---AAGCCATGTGTAAAATTA---  
ACCCCACTCTGTGTTAAGTTAAATTGCACTAATGTGAGGAATGATACTAATACTAATATGACTGATACTAGT-  
-----  
-----ATGACA---  
AATTGCACTTTCAATATTACCACAAAATTAGGA-----GGG---  
ACTAAGCAAGAAAGGGCGATT---TTTAATAAACTTGATGTAGTACTAATAAGTAATGGGACAAAA-----  
-----  
---ATGGGTAATAGGACATATGAGATATATAGGTTAATACACTGTAACACCTCAGTCATTTACAG---  
GCCTGTCCAAAGATATCATTTGAGCCAATTCCCATACATTATTGCGCCCCGGCTGGTTTTGCGATTCTAAAAT  
GTAAT---GATAAGAAGTTCAAT-----GGAACAGGACCATGTAAAAAC-----  
-GTCAGC---ACAGTACAATGTACACATGGAATTAGACCAGTAGTGTCAACT---  
CAACTGCTGTTAAATGGCAGTCTAGCAGAAGAAGAG-----  
ATAGTAATTAGATCTGAAAATTTCAAAACAAT-----GCTAAAACCATAATAGTACAGCTGAAT---  
-----GAATCTGTACAG-----ATTAATTGTACAAGACCCAACAACAATACAAGAAAA---  
-AGTATACATATA-----GGACCAGGGGAGAGCA---TTT-----TATGCAACAGGAGAT-----

-----ATAACAGGAAATATA-----AGACAAGCACATTGT---AACCTTTCAAGAACA---  
 CAATGGAATAATACTTTAAACCGGGTAGCTATAAAATTAAGG-----GAACAATTTAGG-----  
 -----AATAAAACAATAGTCTTTAAT-----  
 CAATCCTCAGGAGGGGACCCAGAAATTGTA--ATGCATAATTTTAATTGTGGAGGGGAA---  
 TTTAAGCAGCTCCAGGCAAGAGTCCTGGCTGTGGAAAGATACCTAAAGGATCAACAGCTCCTAGGAATTTGGG  
 GTTGCTCTGGAAACTCATCTGCACCACTGCTGTGCCTTGAATGCTAGTTGGAGT-----  
 -----AATAAATCTTATTTCAGACATTTGG-----GAA-----  
 AACATGACATGGATGGAGTGG---GAAAGAGAAATCGATAATTACACAAATTTAATATAC---  
 ACCTTAATTGAAGAATCGCAGAACCAGCAAGAA-----  
 -----  
 AAGAATGAACTCGAATTATTGGAATTAGATAAGTGGGCAAGTTTGTGGAATTGGTTTAATATAACAGAATGGC  
 TGTGGTATATAAAAATATTTCATAATGGTAATAGGAGGCTTGATAGGTTTAAAAATAGTTTTTTACT---  
 GTACTTTCTATAGTG-----AACAGAGTTAGGCAGGGATACTCACCA-----  
 TTGTCAATTCGCTATTAGCTTGCTTAATGCTACAGCCATAGCAGTAGCTGAG---  
 GGGACAGATAGGATTATAGAAGTAGCACAAAGAGTTGGTAGAGCT-----  
 -----TTTCTTCACATA-----CCTAGAAGGATAAGACAAGGCGCAGAAAGGTTTTTGTCTA---TAA  
 >KT124787  
 GCA---ACA-----  
 GAAAAATTGTGGGTCACAGTTTATTATGGGGTACCTGTATGG---AAAGAAGCAGAC---  
 ACCACTTTATTTTGTGCATCAGATGCTAAGGCACAGGCAACAGAG---GTACATAAT-----  
 -----GTTTGGGCCACA---CATGCCTGTGTGCCACAGAC---  
 CCCAACCCACAAGAAGTAGTATTGGTA-----AATGTGACAGAAGATTATAAC-----  
 -----ATGTGGAAAAATAACATGGTAGAACAGATGCATGAGGATATA---  
 ATCAGTTTATGGGATCAAAGCCTA---AAGCCATGTGTAAAATTA---  
 ACCCCACTCTGTGTTACTTTACATTGCACTGATCTAAATGTTACTAATACCAATAGTAGTAGTGTCTAAG---  
 -----  
 -----AATACCAATAATAGTATGATAGATGGAGGAGAAATGAAA---  
 AACTGCTCTTTCAATGTCACCACAAACCTAAGG-----  
 GATAAGATGGAGAGAGAATTTGCACTC---CTGTATAAACTTGATATAGTACCAATAGGTAAT-----  
 -----  
 -----  
 GATAGCAACAGTAATAGCTATAGGTTGATAAGTTGTAACACCTCAATCATTACACAG---  
 GCCTGTCCAAAGGTATCCTTCGAGCCAATTCCCATACATTATTGTGCCCCGGCTGGTTTTGCGATTCTAAAGT  
 GTAAT---GATAAGGATTTTAAC-----GGAACAGGAACATGTACCAAT-----  
 -GTCAGC---ACAGTACAATGTACACATGGAATTAGGCCAGTTGTGTCAACT---  
 CAACTGCTGCTAAATGGCAGTCTAGCAGAAAAAGAG-----  
 GTAGTAATTAGATCTGAAAATTTCACTGACAAT-----ACTAAAAACATAATAGTACAGCTGAAC---  
 -----CAATCTATATAC-----ATTAATTGTACAAGACCCAACAACAATACAAGAAAA---  
 -AGTATACGTATA-----GGACCAGGACAAGCA---TTT-----TATGCAACAGGAGAT-----  
 -----ATAATAGGAGATATA-----AGACAAGCACATTGT---AACATTAGTAAGAAG---  
 GATTGGTATAACACTTTAACACAGATAGCTGCAAAATTACAA-----AAACAAGAAGAATTT---  
 -----AACAAAACAATAGTCTTTAAT-----  
 CATTCCTCAGGAGGGGACCCAGAAATAGTA--ATGCATAGTTTTAATTGTGGAGGGGAA---  
 TTTAAACAGCTCCAGGCGAGAGTCCTGGCTGTGGAAAGATACCTACATGATCAACAGCTCCTAGGGATTTGGG  
 GTTGCTCTGGAAGCTCATCTGCACCACTGCTGTGCCTTGAATACTAGTTGGAGT-----  
 -----AACAAATCTATAGATATGATTTGG-----CAA-----  
 AACATGACCTGGATGCAATGG---GAAAAGGAAATTGACAATTACACAAGCTTAATATAT---  
 ACCTTACTCGAAAAATCGCAGAACCAGCAGGAA-----  
 -----  
 AAGAATGAACAAGACTTATTGGAATTGGATAAATGGGACAGTTTGTGGAATTGGTTTAGTATATCAAATTGGC  
 TGTGGTATATAAAAATATTTCATAATGATAGTAGGAGGCTTGGTAGGTTTAAGAATAGTTTTTTGCT---  
 GTACTTTCTTTAGTA-----AATAGAGTTAGGCAGGGATATTCACCC-----  
 TTATCATTAGCTGTTAGCTTGTTCAACGCTACAGCTATTGTAGTAGCTGAA---  
 GGGACAGATAGGGTTATAGAAAATAGTACAAAGAGCTTTTAGAGCT-----  
 -----ATTCTCCACATA-----CCTAGGAGAATAAGGCAGGGCGCGGAAAGGGCTTTACAA---TAA  
 >KC596067  
 GCT---ACA-----  
 GAAAAATTGTGGGTCACAGTCTATTATGGGGTACCTGTGTGG---AAAGAAGCAACC---  
 ACCACTCTGTTTTGTGCATCAGATGCTAAAGCATATGACAGAGAG---GTGCATAAT-----  
 -----GTTTGGGCCACA---CATGCCTGTGTACCCACAGAC---

CCCAACCCACAAGAAATAGAATTGAAA-----AATGTGACAGAAAATTTTGAC-----  
 -----GTATGGAAAAATAAAATGGTAGAACAGATGCATGAAGACATA---  
 ATTAGTTTATGGGATCAAAGCCTA---AAACCATGTGTAAAATTA---  
 ACCCCACTCTGTGTTACTTTAAATTGCACTAATACTAACAATAGTATTGTAACTCCACT-----  
 -----  
 -----CAGGAGATGAAA---  
 AACTGCTCTTTCAATGTCACCACAGGCATAAGA-----  
 GATAAGGTAAAGAAAGAAAATGCATAC---TTTTATAACATTGATCTAGTACAAATAAAAGAT-----  
 -----  
 -----  
 GATAGTGATAATACTAGCTATATATTAACAAGTTGTAACACCTCAGTCATTACACAG---  
 GCCTGTCCAAAGGTATCCTTTGAGCCAATTCCCATACATTTTGTGCCCGGCTGGTTTTGCATTCTAAAGT  
 GTAAT---GATAAGAAGTTTCAGT-----GGAAAAGGATCATGTACAAGT-----  
 -GTCAGC---ACAGTACAATGTACACATGGAATTAGACCAGTAGTATCAACT---  
 CAACTGTTGTAAATGGCAGCCTAGCAGAAGAAGAG-----  
 GTAGTAATTAGATCTGAAAAATACACAAACAAT-----GCTAAGACCATAATAGTACAGTTGAAA---  
 -----GAACCAGTAAAG-----ATTAATTGTACAAGACCCGGCAACAATACAAGAAGA---  
 -AGTATATCTATA-----GGACCAGGGAGAGCA---TTT-----TATACAATGGGGCAA-----  
 -----ATAATAGGAAACATA-----AGAGAAGCACACTGT---AATATTAGTGGAACA---  
 GACTGGAATAACACTTTAAAAACAGATAGTTGGAAAATTAAGA-----GAACAATTTGGG---  
 -----AATAAAACAATTGTCTTTAAT-----  
 AAATCCTCAGGAGGGGACCCAGAAATTATA---ATGCACAGTTTTAATTGTGGAGGGGAA---  
 TTTAAACAGCTCCAGGCAAGAGTCCTGGCTGTGGAAAGATACCTAAGGGATCAACAGCTCCTAGGGATTTGGG  
 GCTGCTCTGGAAACTCATCTGTACCACTACTGTGCCTTGGAACTAGTTGGAGC-----  
 -----AATAGATCTCTGGATAGGATTTGG-----AAC-----  
 AACATGACATGGATGGAGTGG---GAAAAAGAAATTGACAATTACACAGGATTAATATAC---  
 ACATTGCTTGAAGAGTCACAAAACCAGCAGGAA-----  
 -----  
 AACAAATGAGAAAGAATTATTGGAATTGGATAAATGGGCAAATCTATGGAATTGGTTTGATATAACAAATTGGC  
 TGTGGTATATAAAAAATATTACATAATGATAGTAGGAGGCTTAATAGGTTTAAAGAATAGTTTTTTACT---  
 GTATTTTCTATAGTG-----AACAGAGTTAGGCAGGGATACTACCA-----  
 TTATCGTTTGTCTATTAGCTTGCTCAACGCCACAGCCATAGCAGTAGCTGAG---  
 GGGACAGATAGGATTATAGAAATATTACAAAGAATTGGTAGGGGT-----  
 -----ATCCTCCACATA-----CCTACAAGAATAAGACAGGGCTTGGAAAGGGCTTTGCTA---TAA  
 >EF514700  
 GCA---GCA-----  
 GAAGAATTGTGGGTACAGTCTATTATGGGGTACCTGTGTGG---AAAGAAGCAAAC---  
 ACCACTTTATTTTGTGCATCAGATGCTAAAGCATATAAAACAGAA---GTACATAAT-----  
 -----GTTTGGGCCACA---CATGCCTGTGTACCCACAGAT---  
 CCCAACCCACAAGAAGTAGTATTGGGA-----AATGTGACAGAATATTTTAAC-----  
 -----ATATGGAAAAATAACATGGTAGAACAAATGCATGAGGATATA---  
 ATCAGTCTATGGGATCAAAGTCTA---AAGCCATGTGTAAAATTA---  
 ACCCCACTCTGTGTTACTTTAAATTGCAGTAATTACATCCCACCCTGTGTTAATAGCACTAAGAGTACTAATT  
 GCACTAATAGTAAT-----  
 AGTACTAATAGTAATACTACTGAGGTGACGAATGGTACTGATACCCAAGGGGAGATAGGAATGAAA---  
 AACTGCTCTTTCAATGTCACCACAAACATAAGA-----  
 GATAAGATACAGAAAGAATATGCACTT---TTTTATAGACTTGATGTAGTACCAATAGATGAT-----  
 -----  
 -----  
 GATAATGATACTAATAGCTATAGGTTAATAAGTTGTAATACCTCAGTCATTACACAA---  
 GCCTGTCCAAAGGTATCCTTTGAGCCAATTCCCATACATTATTGTACCCCGGCTGGTTTTGCATTCTAAAGT  
 GTAAC---AATAAGACATTTGAG-----GGAAAAGGAGAATGTACAAAT-----  
 -GTCAGC---ACAGTACAATGTACACATGGAATTAGGCCAGTAGTGTCAACT---  
 CAACTGCTGTTAAATGGCAGTCTAGCAGAAGAAGAG-----  
 GTAGTGATTAGATCTGACAATTTTACAAACAAT-----GCTAAAACCATAATAGTACAGTTTAAT---  
 -----GAATCTGTAGAA-----ATTAATTGTACAAGACCAACAACAATACAAGAAAA---  
 -AGTATACATATA-----GGACCAGGAAGAGCA---TTT-----TATGCAACAGGAAAT-----  
 -----ATAATAGGAAATATA-----AGACAAGCACATTGC---AATATTAGTAAAGCA---  
 GGATGGAATAAAGTGTTAAGACAGGTAGCTGCAAAATTAAGA-----GGACAATTTGGG---  
 -----AATAAAACAATAAACTTTACT-----

CAACACTCTGGAGGGGATCCAGAAATTGTA---ATGCACAGTTTTTAATTGTGGAGGGGAA---  
 TTTAAGCAGCTCCAGGCAAGACTCCTGGCTGTGGAAAGATACCTAAGGGATCAACAGCTCCTAGGGATTTGGG  
 GTTGCTCTGGAAACTCATTTGCACCCTACTGTGCCTTGAATAGTAGTTGGAAT-----  
 -----AATAAACTCAGAAGGAGATTTGG-----GAT-----  
 AACATGACCTGGATGCAGTGG---GATAAAGAAATTAACAATTACACAACTTAATATAC---  
 AGCTTACTTGAAACATCACAGAACCAACAAGAA-----  
 -----  
 AAGAATGAACAAGACTTATTGAAATTAGATGAGTGGGCAAGTTTATGGAATTGGTTTGACATAACAAAGTGGC  
 TGTGGTATATAAAAAATATTCATAATGATAGTAGGAGGCTTGGTAGGTTTAAGAATAGTTTTTTGCA---  
 GTACTTTCTATAATA-----AATAGAGTTAGGCAGGGATACTCACCA-----  
 TTGTCAATTTGCAATTAGCTTGCTTAACGCCACAGCAATAGCAGTAGCTGAG---  
 GGGACAGATAGGATTATAGAAGTAGTACAAAGAATTTGCAGAGCT-----  
 -----TTTCGCCACGTA-----CCTAGAAGAATAAGACAGGGCTTGGAAAGGATTTTGCTA---TAA  
 >EU839598  
 GCT---AAG-----  
 GAAGATTTGTGGGTACAGTATATTATGGGGTACCTGTGTGG---AAAGAAGCATCC---  
 ACCACTCTATTTTGTGCATCAGATGCTAAAGCAGTTGAAAGAGAG---GCACATAAT-----  
 -----GTCTGGGCCACA---CATGCCTGTGTACCCACAGAC---  
 CCCAACCCACAAGAAGTAAAATTGGAC-----AATGTGACAGAATATTTTAAT-----  
 -----GTGTGGAAAAATAACATGGTAGATCAGATGCATGGGGATATA---  
 ATCAGTTTATGGGACCAAAGTCTA---AAGCCATGTGTAAAATTA---  
 ACCCCACTCTGTGTTACCTTAAATTGCACCAATTGGGAAAGGGGTAATGTCACTGAAAGGAGTAATGTC---  
 -----  
 -----ACTAATAATAACAGTACAGTGACACAGATGGGGGAAGAGGAAGTAAAA---  
 AACTGCTCTTTCAACATCACCACAGATATGAAA-----  
 GATAGGTATCAGAGAGAATATGCACCT--TTTTATAACCTTGATGTAGTACCAATAGATAATAATGTT---  
 -----  
 -----  
 ACAAATACCACATATACCACATATAGGTTGCTACAGTGTAACTTCAGTCATTACACAG---  
 GCCTGTCCAAAGACATCCTTTGAACCAATTCCTATTTATTATTGTGCCCCGGCTGGTTTTACGATTGTGAAGT  
 GTAAC---AATAAAACGTTTCAGT-----GGGAAAGGAGAATGTAACAAT-----  
 -GTCAGC---ACAGTACAATGTACACATGGAATTAGGCCAGTAGTGTCAACT---  
 CAGCTGCTGTTAAATGGCAGTCTAGCAGAAGAAGAG-----  
 GTAGTACTTAGATCTGAAAATTTACAAACAAT-----ATTAAAACCATAATAGTACAGCTGAAT---  
 -----AAACTGTAGTA-----ATTAATTGTACAAGACCCAGCAATAATACAAGAAAA---  
 -AGTATAAATATA-----GGGCCAGGAAGAGCA---TTT-----TATGCAACAGGAGCA-----  
 -----ATAATAGGAGATATA-----AGACAAGCACATTGT---AACCTTAGTAGAAAA---  
 GATTGGAATGACACTTTAAAACTGGTAGTTGCAAAATTAAAA-----GAACAATTCAAT---  
 -----ACATCAAAAATAATCTTTCAG---  
 CCACCATCCCCAGGAGGGGACCTAGAAATTGTA--ATGCACAGTTTTAATTGTGGAGGGGAG---  
 TTCAAACAGCTCCAGGCAAGAGTCCTGGCTCTGGAAAGATACCTACAGGATCAACAGCTCCTAGGGATTTGGG  
 GTTGCACTGGAAACTCATTTGCACCCTACTGTGCCTTGGAACTAGTTGGAGT-----  
 -----ACAAAAAATTATAGTCAAATTTGG-----AAT-----  
 AACATGACCTGGATGCAGTGG---GAAAAAGAAATTGACAATTACACAGAGTTAATATAC---  
 TCCTTAATTGAAAAATCGCAGACCCAGCAAGAA-----  
 -----  
 CTAATGAACAAGAAGTATTGGCATTGGATAAGTGGGCAAATCTGTGGAATTGGTTTGATATAACATACTGGT  
 TGTGGTATATAAAAAATATTTATAATGATAATAGGAGGCTTGGTAGGTTTAAGAATAATTTTTTGCT---  
 GTATTTTCTGTAGTG-----AATAGAGTTAGGCAGGGATACTCACCC-----  
 TTGTCAATTTGCTGTTAGCTTGTTTGATACCACAGCAGTAGCAGTAGCTGAG---  
 GGGACAGATAGAATTATAGAAGGAGTAAGAAGGGCTTTTAGAGCT-----  
 -----ATTTTACACATA-----CCTAGAAGAATAAGACAGGGCTTGGAAAGGGCTTTGGTA---TAA  
 >KC595194  
 GCT---GCA-----  
 GAAAAATTGTGGGTTACAGTTTATTATGGGGTACCTGTGTGG---AAAGAAGCGACC---  
 ACCACTCTATTTTGTGCATCAGATGCTAAAGCATATGATACAGAG---GTACATAAT-----  
 -----GTTTGGGCCACA---CATGCCTGTGTACCCACAGAC---  
 CCCAACCCACAAGAAGTAGTATTGGGA-----AATGTGACAGAAAATTTTAAC-----  
 -----ATGTGGAAAAATAACATGGTAGAACAAATGCATGAGGATATA---  
 ATCAGTTTATGGGATCAAAGCTTA---AAGCCATGTGTAAAATTA---

ACCCCACTCTGTGTTACTTTAAATTGCACCGATTGGAAGAATGCTACTAATACCACTACTACTAATACC----  
 -----  
 -----ACTGCTACTAATATCACTGGTAGTAGCGGGAAAAATGTGGGAGAAAGGAGAAATAAAA---  
 AACTGCTCTTTCAATGTCACCACAAACATAAGA-----  
 GATAAAATACAGAGAGAATATGGACTT--TTTTATAAACTTGATGTAGTACCAATAGGCAAT-----  
 -----  
 -----  
 AGTAATAGTAGCTATAGGTTGATAAATTGTAACACCTCAGTCATTACACAA---  
 GCCTGTCCAAAAGTATCCTTTGATCCAATTCCCATACATTATTGTGCCCCGGCTGGTTTTGCGATTCTAAAGT  
 GCAAC---GATAAGAAGTTCAAT-----GGAACAGGACCATGTACAAAT-----  
 -GTCAGC---ACAGTACAATGTACACATGGAATTAGGCCAGTAGTATCAACC---  
 CAACTGCTGTTAAATGGAAGCCTAGCAGAAGAAGAG-----  
 ATAGTAATTAGATCTGCCAATTTACGGACAAT-----GCCAAAACCATAATAGTACAGCTGAAA----  
 -----GAACCTATAACA-----ATTAATTGTACAAGGCCAGCAACAATACAAGAAGA-----  
 -AGTATACATATA-----GGACCAGGAAGAGCA---TTT-----TATGCAACAGAAGCA-----  
 -----ATAACAGGAGATATA-----AGGCAAGCATATTGT---ACCCTTAATGGAACA---  
 AAATGGAATAACACTTTACAACAGATAGCTACAAAATTAAGA-----GCACAATTAAGT----  
 -----AATATAACAACAATAGTCTTTAAC-----  
 AGATCCTCAGGAGGGGACCCAGAAATTGTA--ATGCACAGTTTTAATTGTGGAGGGGAA---  
 TTTAAGCAGCTCCAAGCAAGAGTCCTGGCTGTGGAAAGATACCTAAAGGATCAACAGCTTCTGGGGATGTGGG  
 GTTGCTCTGGAAACTCATTTGCACCACTACTGTGCCTTGGAATGCTAGTTGGAGT-----  
 -----AATAAATCTCTGAATAGTATTTGG-----GAT-----  
 AACATGACCTGGATGGAGTGG---GAAAAAGAAATTAACAATTACACAGGCTTAATATAC---  
 ACCTTAATTGAAGAATCGCAGAACCAACAAGAA-----  
 -----  
 AAGAATGAACAAGAATTGTTAGAAATTGGACAAATGGGCAAGTTTGTGGAATTGGTTTAACATAACAGAATGGC  
 TGTGGTATATAAAAAATATTCATAATGATAGTAGGAGGCTTGGTAGGGTTAAGAATAGTTTTTTACT---  
 GTACTTTCTATAGTA-----AATAGAGTTAGGCAGGGATACTCACCA-----  
 TTATCGTTTGCTATTAGCTTGCTTAATGCCACAGCCATAGCAGTAGCTGAG---  
 GGGACAGATAGGGTTATAGAATTAGTACGAAGAGCTTGTAGAGCT-----  
 -----ATTCTCCACATA-----CCTACAAGAATAAGGCAGGGCTTGGAAGAGCTTTGCTA--TAA  
 >KC595151  
 GCT---GCA-----  
 GAACAATTGTGGGTCACAGTCTATTATGGGGTACCCGTGTGG--AAAGAAGCAAAC---  
 ACCACTCTATTTTGTGCATCAGATGCTAAAGGATATGATACAGAG--GTACATAAT-----  
 -----GTTTGGGCCACA--CATGCCTGTGTACCCACAGAC--  
 CCCAACCCACAAGAAATAGAATTGAAA-----AATGTGACAGAAAATTTTAAC-----  
 -----ATGTGGAAAAATAACATGGTAGAACAGATGCATGAGGATATA---  
 ATCAGTTTATGGGATCAGAGCTTA--AAACCATGTGTAAAATTA---  
 ACCCCACTTTGTGTTACTTTACATTGCTACTAATGCTAGTGCTACTAATGCCACTGGTGATGCTACTGCT---  
 -----  
 -----GCTGGTGCCACTAGTGGTACTAATATTACAGAAGACATGAAA---  
 AACTGCTCTTTCAATATCACCACAAGCATAAGA-----  
 GATAAGATGCAGAAAGTATATGCGCTT--TTTTATAAACTTGATGTAGTACCAATAGATGAT-----  
 -----  
 -----  
 GCCAATAGTAATGCCAGCTATAGGTTGATAAATTGTAACACCTCAGTCATTACACAG---  
 GCCTGTCCAAAAGTATCCTTTGAGCCAATTCCCATACATTATTGTACCCCGGCTGGTTTTGCGATTCTAAAAT  
 GTAAT---GACAAGAAGTTCAAT-----GGAACAGGACCATGTGAAAGT-----  
 -GTCAGC---ACAGTACAATGTACACATGGAATTAGGCCAGTAGTGTCAACT---  
 CAACTGCTGTTAAATGGCAGTCTAGCAGAAGAAGAG-----  
 GTAGTAATTAGATCTGAAAATTTACGGACAAT-----GTAAAACCATAATAGTACAGCTGAAT----  
 -----GTATCTATACAA-----ATTAATTGTACAAGACCCAACAACAATACAAGAAAA-----  
 -AGTATACCTATA-----GGTCCAGGGAGAGCA---TTT-----TATACAACAGGAGAA-----  
 -----ATAATAGGAGATATA-----AGACAAGCACATTGT---AACCTTAGTGCAACA---  
 AAATGGAATAACACCTTAAAGCTGGTAGTTGCCAAATTAAGA-----GAACAATTTGGG----  
 -----AATAAAACAATAATCTTTAAT-----  
 CAATCCTCAGGAGGTGACCCAGAAATTGTA--ATGCACAGCTTTAATTGTGGAGGGGAA---  
 TTTAAGCAGCTCCAGGCAAGAGTCCTGGCTGTGGAAAGATACCTATGGGATCAACAGCTCCTGGGGATTTGGG  
 GTTGCTCTGGAAACTCATTTGCCCCACTGCTGTGCCTTGGAATAGTAGTTGGAGT-----

-----AATAAATCCCTGGAACGATTTGG-----GGA-----  
AACATGACCTGGATGCAGTGG---GAAAGAGAAATTGACAAATTACACAGGCCTAATATAC---  
ACCTTAATTGAAGAATCGCAGAACCAACAGGAA-----  
-----  
AAGAATGAACAAGAGTTATTGGCATTGGATAAAATGGGCAAGTTTGTGGAATTGGTTTGACATAACAAAATGGC  
TGTGGTATATAAAAAATATTCATAATGATAGTAGGAGGCTTGGTAGGTTTAAGAATAGTTTTTACT---  
GTACTTTCTATAGTA-----AATAGAGTTAGGCAGGGATACTCACCA-----  
TTATCGTTTGCCGTTAGCTTGCTCAACGCCACAGCCATAGCAGTAGCTGAG---  
GGGACAGATAGAGTTATAGAAGCATTACAAAGAGCTTTTAGAGCT-----  
-----ATTCTCCATATA-----CCTACAAGAATAAGACAGGGCTTAGAAAAGAGCTTTGCTA---TAA  
>EU786679  
GCG---GCA-----  
GAACAACCTGTGGGTACAGTCTATTATGGGGTACCTGTGTGG---AAAGAAGCAACC---  
ACCACTCTATTTTGTGCATCAGAGGCTAAAGCATATAAGACAGAG---GTTTCATAAT-----  
-----ATCTGGGCCACA---CATACCTGTGTACCCACAGAC---  
CCCAATCCACAAGAAGTAGTATTAGAG-----AATGTGACAGAAGATTTTAAAC-----  
-----ATGTGGAAAAATGACATGGTAGAACAGATGCAGGAGGATATA---  
ATCAGTTTATGGGATCAAAGCCTA---AAGCCATGTGTAAAATTA---  
ACCCCACTCTGTGTTACTTTAAATTGCACTGATTTGAAGAATGTTACTAGT-----  
-----  
-----AACAGCACTGATAATAGTAGTATGACA---  
AATTGCTCTTTCAATATCACCACAAGCATGAGA-----  
GATAAGATGCAGAAAGAATATGCAATC---TTTTATAAACTGATGTAGTAGCAATAGATAAT-----  
-----  
-----  
GATACCAACTATAGGTTGATAAGTTGTAATACCTCAGTCATTACACAG---  
GCCTGTCCAAAAGTATCCTTTGAGCCAATTCCCATACATTATTGTGCCCGGGCTGGTTTTGCGATTTTAAAT  
GTAAT---AATAAAAAGTTCAAT-----GGAACAGGAACATGTAAAAAT-----  
-GTCAGC---ACAGTACAATGTACACACGGAATTAGGCCAGTAGTATCAACT---  
CAACTGCTGTTAAATGGCAGTCTAGCAGAAGAAGAG-----  
GTGGTAATTAGATCTGCCAATTTCTCGGACAAT-----GCTAAAACCATAATAGTACAGCTGAAT---  
-----GAATCTGTAGCA-----ATTAATTGTACAAGACCCAATAACAATACAAGAAGA-----  
-AGTATAACTATA-----GGACCAGGGAGAGCA---TTT-----TATGCAACAGGAGAA-----  
-----ATAATAGGAGATATA-----AGAAAAGCATATTGC---AACATTAGTGGAACA---  
AAATGGAATAACACTTTAAACAGATAGCTAAAAAACTAAGA-----GAACAATTTAAG-----  
-----AATAAAACAATAGTCTTTTCAG-----  
CCGCCCTCAGGAGGGGACCTAGAAATTGTA---ATGCACAGTTTTAATTGTGGAGGGGAA---  
TTTAAGCAGCTCCAGGCAAGAGTCCGAGCTGTGGAAAGATACCTACAGGATCAACAGCTCCTGGGAATTTGGG  
GTTGCTCTGGAAGAACTCATTGCAACCACTGCTGTGCCTTGGAAATGCTAGTTGGAGT-----  
-----AATAAATCTGTAGATGATATTTGG-----AGT-----  
AACATGACCTGGATGCAGTGG---GAAAAAGAAATTGACAAATTACACAAATGTAATATAC---  
ACCTTACTTGAGCAATCGCAAAACCAACAAGAA-----  
-----  
AAGAATGAACAAGAATTATTGGAATTGGATAAAATGGGCAAGTCTGTGGAATTGGTTTGACATAACAAATTGGC  
TGTGGTATATAAAAAATATTCATAATGGTAGTAGGAGGCGTGATAGGGTTAAGAATAGTCTTTACT---  
ATACTTGCTATAGTG-----AATAGAGTTAGGCAGGGATACTCACCT-----  
TTGTCATTTGCTGTTAGCTTGCTCAACGCCACAGCCATAGCAGTAGCTGAG---  
GGGACAGATAGGGTTATAGAAGTAGTACAAGGAGCTGGTAGAGCT-----  
-----ATTCTCCACATA-----CCTAGAAGAATAAGACAAGGCGCAGAGAGGATTTTACAA---TAA  
>KC473841  
ACT---GCA---GAA-----  
GAAAAATTTGTGGGTACAGTCTATTATGGGGTACCTGTGTGG---AGAGATGCAAAAC---  
ACCACTCTATTTTGTGCATCAGATGCGAAGGCATATGATACAGAG---GTACATAAT-----  
-----GTTTGGGCCACG---CATGCCTGTGTACCCACAGAC---  
CCCAATCCACAAGAATTAGAATTGGAA-----AATGTGACAGAAAATTTTAAAC-----  
-----ATGTGGAAAAATAACATGGTAGAACAGATGCAAGAGGATATA---  
ATCAGCTTATGGGATGAAAAATTA---AAGCCATGTGTAAAATTA---  
ACACCACTCTGTGTTACTTTAAATTGCATTAATATTAATATCACCAATAATGCCAATCAGACCAATAAAACCA  
ATCAG-----  
-----ACCAATGCCAATCAGACCAGTATAGAACAAACAGACGAAGTGAAA---

AACTGCTCTTTCAATACCACCACACACATAAGG-----  
 GACAAGGTGAAGAAAGAATATGCTCTT---TTTTATAGTTCTGATGTAGTCCCAATAGGCAAT-----  
 -----  
 -----  
 AATACATCTATATTGATAAGCTGTAATACCTCAGTCACTACACAC---  
 GCCTGTCCAAAGGTATCCTTTGAACCAATTCACATACATTATTGTGCCCCGGCTGGTTTTGCAATTCTAAAGT  
 GTAAG---GATGAGACATTTAAT-----GGAACAGGACCATGTACAAAT-----  
 -GTCAGT---ACAGTACAATGCACACATGGAATTAGGCCAGTAGTCTCAACT---  
 CAATTGCTGTTAAATGGCAGCCTAGCAGAAAAAGAG-----  
 GTAGTAATTAGATCTGAAAACTTCACAGACAAT-----GCTAAAACCATAATAGTACAGCTGAAA-----  
 -----GAAGCTGTACAA-----ATTAATTGTACGAGACACAGCAATAATACAAGAAGA-----  
 -AGTATACGTATA-----GGACCAGGGCAAGCA---TTT-----TATGCAACAGGAGAA-----  
 -----ATAATAGGAGATATA-----AGGAAAGCACACTGT---AACATTAGTGGAGCA---  
 CAATGGAATAAACTTTAGAACAAATAGTAAAGAAATTAAGA-----GAACAATTTAAT-----  
 -----AATAGAACGATAATCTTTAGT-----  
 CAATCTTCAGGAGGAGACCCAGAAATTGTA---ATGCACAGTTTTTAATTGTGGAGGGGAA---  
 TTTAAGCAGCTCCAGGCAAGAGTCCTGGCTGTGGAAAGATACCTAAGGGATCAACAGCTCCTGGGGATTTGGG  
 GTTGCTCTGGAAACTCATTTGCACCACTGCTGTACCTTGGAATGCTAGTTGGAGT-----  
 -----AATAAATCTCAGGATCAAATTTGG-----AAA-----  
 AATATGACCTGGATGGAGTGG---GAAAGAGAAATTGACAAATTACACAAGCTTAATATAC---  
 ACCTTACTTGAAGAATCGCAATACCAGCAAGAA-----  
 -----  
 AAGAATGAACAAGAATTATTGGAATTGGACAAATGGGCAAGTTTGTGGAATTGGTTTGACATAACAAAATGGC  
 TGTGGTATATAAAAATATTACATAATGATAGTAGGAGGCTTGGTAGGTTTAAGAATAGTTTTTTACT---  
 GTACTTTCTATAGTG-----AATAGAGTTAGGCAGGGATACTCACCA-----  
 TTATCGTTGGCTGTTAGCTTGTTTGACACCATAGCCATAGCAGTAGCTGGG---  
 GGGACAGATAGGGTTCTAGAAGCATTGCGAAGAGCTTGCTTGGCT-----  
 -----GTTATACATATA-----CCTAGAAGAATAAGACAGGGCTTGGAAGGGCTTTGCTA---TAA  
 >KT200357  
 GCT---ACA-----  
 GAACAATTGTGGGTCACAGTCTATTATGGGGTACCTGTGTGG---AAGGAGGCTACC---  
 ACCACTCTATTCTGTGCATCAGATGCTAAAGCCTATAAAACAGAG---GCACATAAT-----  
 -----GTTTGGGCCACA---CATGCCTGTGTACCCACAGAC---  
 CCTAACCCACAAGAAGTAGAATTGGTA-----AATGTAACAGAAAATTTTAAC-----  
 -----ATGTGGAAAAATAACATGGTAGAACAGATGCATGAGGATATA---  
 ATTAGTTTATGGGATGAAAGCCTA---AAACCATGTGTGAAATTA---  
 ACCCCACTCTGTGTTACTTTAAATTGCAGTAATGCTAATTTCAATTGCAATAATACTAAT-----  
 -----  
 -----AACGCTAGTTGTCTAGAGATGCAGGCAGAAGTAAAA---  
 AATTGCTCTTTCAATATCTCCACAAGCATAAAA-----  
 AACAAAGAAAAGAAAGACATGCACTT---TTTTATAGTCTTGATGTAATGTCAATAGATAAT-----  
 -----  
 -----  
 ACAAGCTATGCATTGAGACAGTGTAACACCTCAGTCATTAAACAG---  
 GCCTGTCCAAAGGTATCCTTTACACCAATTCACATACATTATTGTGCCCCAGCTGGTTTTGCGATTCTAAAAT  
 GTAAG---GATAAGAAATTCAT-----GGAACAGGACCATGTAAAAAT-----  
 -GTCAGC---ACAGTACAATGTACACATGGAATTAAGCCAGTAGTGTCAACT---  
 CAACTGCTGTTAAATGGCAGTCTAGCAGAAGAAGAG-----  
 GTAGTGATTAGATCTGAAAATCTCACAGACAAT-----GCTAAAACCATAATAGTGCAGCTGAAT-----  
 -----GAAACTGTAAAA-----ATTAATTGTACAAGACCCAGTAACAACACAAGAAAA-----  
 -GGTATACACATA-----GGACCGGGGAGTGCA---TTT-----TATGCAACAGGAGAA-----  
 -----ATAATAGGAGATATA-----AGACAAGCACATTGT---AACGTTAGTAGAACA---  
 GAATGGAACAAAACCTTTAGGATACATAGTTGAAAAATTAAGA-----GAACAATTTAAG-----  
 -----AATACAACAATAATCTTTAAC-----  
 CAGTCCTCAGGAGGGGACCCAGAAATTGAA---ATGCACAGTTTTTAATTGTGGAGGGGAA---  
 TTTAAACAGCTCCGGGCAAGAGTCCTAGCTCTGGAAAGATACCTACAGGATCAACAGCTCCTAGGCATTTGGG  
 GTTGCTCTGGAAACTCATTTGCACCACTAATGTGCCTTGGAATGCTAGTTGGAGT-----  
 -----AACAAAACCCGTAGTGAGATTTGG-----GAA-----  
 AACATGACCTGGATGCAGTGG---GAAAGAGAAATTAGCAATTACACAGCAACAATATAC---  
 TCCTTAATTGAAGAATCGCAAAATCCAACAAGAA-----

-----  
AAGAATGAACAAGAATTATTAGAAATTAGATAAGTGGGCAAGTTTGTGGAATTGGTTTGACATAACAAAATGGC  
TGTGGTATGTAAAAATATTTCATAATGATAGTAGCAGGCTTAGTAGGTTTAAGAATAGCATTTTACT---  
ATATTTTCTTTTAGTA-----AATAGAGTTAGGCAGGGATACTCACCA-----  
TTATCATTCGCAGTTAGTTTATTTAATGCCACAGCTATAACAGTAGCCGAA---  
GGGACAGATAGGGCTATAGAATTACTTCAAAGCATTGGTAGAGCT-----  
-----ATTCTCCACATA-----CCTAGAAGAATAAGACAGGGCTTAGAAAGGCTTTGCAA---TAA  
>KP109518  
GCT---ACA-----  
GAAAAATTATGGGTCACAGTCTATTATGGAGTACCTGTGTGG---AAGGAAGCAACC---  
ACCACTCTATTTTGTGCATCAGATGCTAAAGCATATAGTACAGAA---AAACATAAT-----  
-----GTTTGGGCCACA---CATGCCTGTGTACCCACAGAC---  
CCCGATCCACAAGAAATATTATTGGTA-----AATGTGACAGAAAAGTTTAAAC-----  
-----ATGTGGAAAAATAACATGGTAGAACAAATGCATGAGGATGTA---  
ATCAGTTTATGGGATCAAAGCTTA---AAACCATGTGTAAAATTA---  
ACCCCACTCTGTGTTACTTTAAATTGCACTGATTTGAAAACCAAGAATTGCACTAATTTGGGAACCAAGAATT  
GCACTGGT-----  
-----TTGAATACCACTAATACTCAAAACAATATTAGTAGTGAGGAAAAAGGAGATATGAAA---  
AACTGCTCTTTCAATATC---ACAAACGTAAGG-----  
AATCAGATACAGAAAGAATATGCAGCT---TTTTATAAACTTGATATAACACCAATAGATACGGGTAAG----  
-----  
-----  
AATAATAGTAATACCAGCTATATATTGACAAGCTGTAACGCCTCAGTCATTACACAG---  
GCCTGTCCAAAGGTAACCTTTGAACCAATTCCCATACATTACTGTGCCCCGGCTGGCTTTGCGATTTTAAAT  
GTAAA---GATAAGAACTTCAAT-----GGAACAGGAACATGTACAAAT-----  
-GTCAGC---ACAGTACAATGTACACATGGAATTAGGCCAGTAGTATCAACT---  
CAACTGCTGTTAAATGGCAGTCTAGCAGAAGAAGAT-----  
GTAGTAATTAGATCTGAGAATTTACAGACAAT-----GCTAAAACCATCATAGTACAGTTGAAC----  
-----AATTCTGTAGAA-----ATTAATTGTACAAGACCCAATAACAATACAAGAAGA-----  
-AGTATACGTATA-----GGACCAGGGAGTGTA---TAT-----TATGCAACAGGGGAC-----  
-----ATAATAGGAGAAATA-----AGAAAAGCACAGTGT---ATCCTTAAAGCGCAA---  
CAGTGGGAGGAACTTTAAAAAAGGTAGCTATAAAATTAAGA-----GAGCAATTTAAT---  
-----AATAGAACAATAATCTTTAGT-----  
CACTCCTCAGGAGGGGACCCAGAAATTGTA---ATGCACAGTTTTAATTGTGGAGGGGAA---  
TTTAAGCAGCTCCAGGCAAGAGTCCCTGGCTGTAGAAAGATACCTAAGGGATCAACAGCTCCTGGGGATTTGGG  
GCTGCTCTGGAAGAACTCATCTGCACCACTAATGTGCCTTGGAACTACTAGTTGGAGT-----  
-----AACAAATCTCTGGATAGCATTGG-----GAT-----  
AACATGACTTGGATGGATTGG---GATAAAGAAATTAATAATTACACAAACCTAATATAT---  
AATTACTTGAAGAATCGCAGAACCAGCAAGAA-----  
-----  
AAGAATGAACAAGAATTGTTGGAATTGGATAAATGGGCAAGTTTATGGACATGGTTTGACATTACGAATTGGC  
TGTGGTATATAAAAAATATTTCATAATGATAGTAGGAGGCTTGATAGGTTTAAGAATAGTTTTTACT---  
GTGCTTTCTATAGTG-----AATAGGGTTAGGCAGGGATACTCACCC-----  
TTATCGTTTGTGCTTAGCTTGTTAATGCAATTGCCATAGCAGTAGCTGGG---  
GGGACAGATAGGGTCTTAGAATTAATACAAAGAATTTATAGAGGT-----  
-----ATTCTCCACGTA-----CCTGTAAGAATAAGACAGGGATTGGAAAGGCTTTTGCTA---TAA  
>KY465969  
GCT---ATA-----  
GAAGATTTGTGGGTCACAGTCTATTATGGGGTACCTGTGTGG---AAAGAAGCAACC---  
ACCACTCTATTTTGTGCTTCAGATGCTAAAGCATATGACACAGAG---ATACATAAT-----  
-----ATTTGGGCCACA---CATGCCTGTGTACCCACAGAC---  
CCTAACCACACAAGAACTACTTTTGAAA-----AATGTAACAGAAAACTTTAAAC-----  
-----ATGTGGAAAAATGACATGGTAGAACAGATGCATAAGGATATA---  
ATCAGTTTATGGGATGAAGGCCTA---AAGCCATGTGTAAAATTA---  
ACCCCATTTATGTGTTACTTTAGAGTGTGCTAATATAACTTGCAACAAAAATAGTACTTGC-----  
-----GAGGATGGAGGAGGAATGAAA---  
AACTGCTCGTTCAATGTCAACCACAGGCATAGGA-----  
AATAAATGGCATAAAGAATATGCACTT---TTTTATAAGCTTGATATAGTACCAGTGGAAAAAT-----  
-----

-----  
 AGTAGTACAAGCTATACATTGATAAGTTGTAACACCTCAGTCATTACACAG---  
 GCCTGTCCAAAGGTAACCTTTGAACCAATTCCCATACATTATTGTGCCCCGGCTGGTTTTGCGATTCTAAAGT  
 GTAAT---GAAAAGAAATTCAAT-----GGATCAGGATCATGTAAAAAT-----  
 -GTCAGC---ACAGTACAATGTACGCATGGAATTAGGCCAGTAGTGTCAACT---  
 CAACTGTTGCTAAATGGCAGTCTAGCAGAGGAAGAG-----  
 GTAGTAATTAGATCTGAAAATTTACGGACAAT-----GCTAAAAACATAATAGTACATCTGAAC----  
 -----GAATCTATAGTA-----ATTAATTGTACAAGACCCAACAACAATACAAGAAAA-----  
 -AGTATACAGATG-----GGATGGGGGAGAGCA---TTT-----TATGCAACAGGAGAA-----  
 -----ATAATAGGAGATATA-----AGACAAGCACATTGT---AACATTAGTAAAGCA---  
 CAATGGAACAGAACTTTAAAAACAGGTAGCTGCAAAATTAATG-----AACCAATTCAAT----  
 -----ACTACAACAATAATCTTTAAT-----  
 CCATCCTCAGGAGGGGACCTAGAAATTACA---ACACATAGTTTTAATTGTGGAGGGGAA---  
 TTTAAGCAGCTCCAGGCAAGAGTCCTGGCTGTGGAAAAGATACCTAAAGGATCAGCAGCTCCTAGGAATTTGGG  
 GTTGCTCTGGAAGAACTCATCTGCACCACTGCTGTGCCTTGGAATGCTAGTTGGAGT-----  
 -----AATAAATCTCTAAATACCATTTGG-----GAC-----  
 AATATGACCTGGATGGAATGG---GAAAGAGAAATTGACAAATTACACAGGCATAATATAC---  
 AACTTACTTGAAAAATCACAGATACAACAGGAA-----  
 -----  
 AAGAAATGAAAAGGACTTATTGGAATTGGATAGTTGGGCAAGTTTGTGGACCTGGTTTGATATAACAAGGTGGC  
 TGTGGTATATAAAAAATATTACATAAATAGTAGGAGGCTTAATAGGTTTAAGAATAGTTTTTTACT---  
 GTACTTTCTATAGTG-----AATAGAGTTAGGAAGGGATACTCACCA-----  
 TTATCATTCGCTATCAATTTGTATGATACCATAGCTATAGCAGTAGCTGAA---  
 GGGACAGATAGAGCTATAGAAACATTACAAAGAATTGGTAGAGCT-----  
 -----TTCCTCCACATA-----CCTAGAAGAATAAGACAGGGCTTTGAAAGAGCTTTGCTA---TAA  
 >KC595204  
 GTT---GCA-----  
 GGACAATTGTGGGTCACAGTCTATTATGGGGTACCTGTGTGG---AAAGAAGCAACC---  
 ACCACTCTATTTTGTGCGTCAGATGCTAAAGCATATGATCCAGAG---GTACATAAT-----  
 -----GTTTGGGCCACA---CATGCCTGTGTACCCACAGAC---  
 CCCAACCCACAAGAAGTAGTATTGGGA-----AATGTGACAGAAAATTTTAAC-----  
 -----ATGTGGAAAAATAACATGGTAGAACAGATGCATGAGGATATA---  
 GTCAGTTTATGGGATCAAAGCCTA---AAGCCATGTGTAAAATTA---  
 ACCCCACTCTGTGTTACTTTAAATTGCACTGATTATAATACCACT-----  
 -----  
 -----AGTAGAGGGAAACAGATGGAGGGAGGAGAAATAAAA---  
 AACTGCTCTTTCAATATCACCAAAGCATAAGA-----  
 GATAAGGTGCAGAAAGAATATGCAATT--TTTTATAAGCTTGATATAGTACCAATAGATAAT-----  
 -----  
 -----  
 GATAGCTATAGGTTGATAAGTTGTAACACCTCAGTCATCACACAG---  
 GCCTGTCCAAAGGTAACCTTTGAGCCAATTCCCATACATTATTGTACCCCGGCTGGTTTTGCGATTCTAAAGT  
 GTAAC---GATAAGAAGTTCAAT-----GGAACGGGACCATGCACAAAT-----  
 -GTCAGC---ACAGTACAATGTACACATGGAATTAGGCCAGTAGTATCAACT---  
 CAACTGCTGTTAAATGGCAGTCTAACAGAAGAAGAG-----  
 GTAGTAATTAGGTCTGAAAATTTACGGACAAT-----ACTAAAACCATAATAGTACAACCTGAAA----  
 -----GAATCTGTAGAA-----ATTAATTGTACAAGACCCAACAACAATACAAGAAAA-----  
 -AGTATAAATATA-----GGACCAGGGAGAGCA---TTT-----TATACAACAGGAGAC-----  
 -----ATAATAGGAGATATA-----AGACAAGCACATTGT---AACCTTAGTAGAGCA---  
 AAATGGAATGACACCTTAGAACAGATAGTTGTCAAATTAAGA-----GAACAATTCGAG----  
 -----AATAAAACAATAGTCTTTAAT-----  
 CAATCCTCAGGAGGGGACCTAGAGATTGTA---ATGCACAGTTTTAATTGTGGAGGGGAA---  
 TTTAAGCAGCTCCAGGCAAGAGTCCTGGCTGTGGAAAAGATACCTAAAGGATCAACAGCTCCTGGGGATTTGGG  
 GTTGCTCTGGAAGAACTCATCTGCACCACTGCTGTGCCTTGGAATACTAGTTGGAGT-----  
 -----AATAAATCTCTGGATAAGATTTGG-----GAT-----  
 AACATGACCTGGATGGAGTGG---GAAAGAGAAATTAATAATTACACAGACTTAATATAC---  
 AACTTACTTGAGAATCGCAAAACCAACAAGAA-----  
 -----  
 AAGAAATGAACAAGAATTATTGGAATTAGATAAATGGGCAAGTTTGTGGAATTGGTTTGACATAACAAGCTGGC  
 TGTGGTATATAAAAAATATTACATAATGATAGTAGGAGGCTTGGTAGGTTTAAGAATAGTTTTTTACT---

GTACTTTCTATAGTG-----AATAGAGTTAGGCAGGGATACTCACCA-----  
 TTATCGTTTGCTGTTAGCTTGCTCAATGCCACAGCCATAATAGTAGCTGAG---  
 GGGACAGATAGGGCTATAGAAGTATTACAAAGAGCTTATAGAGCT-----  
 -----ATTCTCCACATA-----CCTACACGAATAAGACAGGGAGCGGAAAGGGCTTTGCTA--TAA  
 >DQ141342  
 GCT---AAA---GAA-----  
 CAAGACAAATTGTGGGTCACAGTCTATTATGGGGTACCTGTGTGG---AAAGAAGCAACC---  
 ACCACTCTATTTTGTGCAGCAGATGCTAAAGCATATGATCCAGAG---GTACATAAT-----  
 -----GTTTGGGCCACA---CATGCCTGTGTACCCACAGAC---  
 CCCAACCCACAAGAATTAGTATTAGGA-----AATGTGACAGAAAATTTTAAC-----  
 -----ATGTGGAAAAATAACATGGTAGAACAGATGCATGAGGATATA---  
 ATCAGTTTATGGGATGAAGGCCCTA---AAGCCATGTGTGAAATTA---  
 ACCCCACTCTGTGTTACTCTAAATTGCACTGATGCTACTAATTCCAATAGTACAAGGAATAGTACT-----  
 -----  
 -----AATGACAATAATAGTAACATGAAAATGGAGGTAGGAGAAATAAAA---  
 AATTGCTCTTTCAATATCACCACACACATGGGA-----  
 GATAAGATGCAGAAAGAATATGCAATT---TTTTCTAAACTTGATGTAGTACCAATAGCCAAT-----  
 -----  
 -----  
 GCTAGTAAGAGCTACAGGTTGATAAGTTGTAACACCTCAGTCACTACACAG---  
 GCCTGTCCAAAAGTAACCTTTGAGCCAATTCCCATACATTATTGTGCCCGGGCTGGTTTTGCGATTCTAAAAT  
 GTAAT---AATAAGACGTTCAAT-----GGAACAGGACCATGTAAAAAT-----  
 -GTCAGC---ACAGTACAATGTACACATGGAATTAGGCCAGTAATATCAACT---  
 CAACTGCTGTTAAATGGCAGTCTAGCAGAAGAAGAG-----  
 GTAGTAATTAGATCTGAAAATTTCTCGGATAAT-----GCTAAGACCATAATAGTACAGCTGAAA---  
 -----GATCCTATAGAA-----ATCAATTGTACAAGACCCAATAACAATACAAGAAGA---  
 -AGTATACATGTA-----GGACCAGGAAGAGCA---TTG-----TATACAACA---GAC-----  
 -----ATAATAGGAGACATA-----AGAAAAGCACATTGT---AACATTAGTAGAGAA---  
 AAATGGAATAACACTTTAAGGCAGATAGTTACAAAATTAAGA-----GAACAATTAGGG---  
 -----AATCAAACAACAATAGTTTTTAAG-----  
 CAATCCTCAGGAGGAGACCCAGAAATTGTA---ATGCACAGTTTTAATTGTGGAGGGGAA---  
 TTTAAGCAGCTCCAGGCAAGAGTCCCTGGCTGTGGAAAGATATCTAAGGGATCAACAGCTCCTGGGGATTTGGG  
 GTTGCTCTGGAAACTCATTTGCACCACTGCTGTGCCTTGGAATGCTAGTTGGAGT-----  
 -----AATAAAACTCAGGATGAGATTTGG-----AAT-----  
 GAAACGACCTGGATGCAGTGG---GACAAAGAAGTTAGCAATTACACAGAATTAATATAC---  
 TCCTTAATTGAAAATCGCAGAACCAGCAGGAA-----  
 -----  
 CAGAACGAACTAGACTTATTAATAATTGGATGAATGGGCAAGTTTGTGGAATTGGTTTGACATATCAAAATGGC  
 TGTGGTATATAAGAATATTATAATGATAGTAGGAGGCTTGGTAGGTTTAAGAATAGTTTTTTGCT---  
 GTACTTTCTATAGTA-----AGTAGAGTTAGGAAGGGATACTCACCA-----  
 TTATCGTTTGCTATTAGCTTGCTCAACGCCACAGCCATAGCAGTAGCTGAA---  
 GGGACAGATAGGATTATAGAGATATTACAAAGAGCTTGTAGAGCT-----  
 -----ATTCTCCACATA-----CCTAGAAGAATAAGACAGGGCTTGGAAGAATTTTGCTA--TAA  
 >DQ141343  
 GCT---AAA-----  
 GAAGAATTGTGGGTCACAGTCTATTATGGGGTACCTGTGTGG---AAAGAAGCAACC---  
 ACCACTTTATTTTGTGCATCAGATGCTAAGGCATATGATACAGAG---GTACATAAT-----  
 -----GTTTGGGCCACA---CATGCCTGTGTACCCACAGAC---  
 CCCAACCCACAAGAATGAAATTGGGA-----AATGTGACAGAAAATTTTAAC-----  
 -----ATGTGGAAAAATAACATGGTAGAACAGATGCATGAGGATATA---  
 ATCAGTTTATGGGATCAAAGTCTA---AAGCCATGTGTAAAATTA---  
 ACCCCACTCTGCGTTACTTTAAATTGCACTAATTATTGGAAGAATGATACCAATACCACT-----  
 -----  
 -----GTGAATAACGGGGAAATAATGGAGAAAGGAGAGATGAAA---  
 AACTGCTCTTTCAATATCACCACAAACATGAGA-----  
 GATAAGATGCAAAAAGAATATGCAGTT---  
 TTTTATGAATCTGATGTAGAACCAATGAACAATAGCAATGTAGAA-----  
 -----  
 CCAAAAAACAATAGCAGTAATGAGACTATCTATAGAGAATATAGGTTGACAAGTTGTAACACCTCAATCATTA  
 CACAG---

GCCTGTCCTAAAGTATCCTTTGAGCCAATTCCCATACATTATTGTGCCCCGGCTGGCTTTGCGATTCTAAAGT  
 GTAAT---GATAAGAAGTTCAAT-----GGAACAGGACCATGTAAAAAT-----  
 -GTCAGC---ACAGTACAATGTACACATGGAATTAGGCCAATAGTATCAACT---  
 CAATTGCTGTTAAATGGCAGTCTAGCAGAA---GAG-----  
 GTAGTAATTAAATCTGAAAATATCACAATAAT-----GCTAAAACCATAATAGTACAGCTGAAC----  
 -----GAAACTATAACC-----ATTAATTGTACAAGACCCAACAACAATACAAGAAGA-----  
 -AGTATACCTATA-----GGACCAGGGAGAGCA---TTT-----TATGCAACAGGAGAC-----  
 -----ATAATTGGAGATACA-----AGAAAAGCATATTGT---ACCATTAATAAAACA---  
 AAATGGAATAACACTTTTATACCAGATAGCTACAAAGTTAGGA-----GAACAATTTAAG----  
 -----GATAAAATAATAGTCTTTAAT-----  
 AAATCCTCAGGAGGGGACCCAGAAATTGTA--ATGCACAGTTTTAATTGTGGAGGAGAA--  
 TTTAAGCAGCTCCAGGCAAGAGTCTTGGCTGTGGAAAAGATTCCTACAGGATCAACAGCTCCTGGGGATTTGGG  
 GTTGCTCTGGAAGAACTCATCTGCACCACTACTGTGCCTTGGAACTACTACTTGGAGT-----  
 -----AATAAAAATCTGAGTCAGATCTGG-----AAT-----  
 AATATGACCTGGATGGAGTGG---GAAAAAGAAATTGACAAATTACACAGGCTTAATATAC---  
 TCCTTAATTGAAGAATCGCAAAACCAGCAAGAA-----  
 -----  
 AAGAATGAACAAGACTTATTGGCATTGGATAAATGGGCAAGTTTGTGGAATTGGTTTAGCATAACAAAATGGC  
 TGTGGTATATAAAAATATTTCATAATGATAGTAGGAGGCTTGGTAGGTTTAAGAATAATTTTTTGCT---  
 GTACTTTCTATAGTG-----AATAGAGTTAGGCAGGGGTACTCACCA-----  
 TTATCGTTTGTCTGTTAGCTTGTTCAACGCCATAGCCATAGCAGTAGCTGAG---  
 GGAACAGATAGAATTTTAGAAGTATTACAAAGAATTGGTAGAGCT-----  
 -----ATTCGCCACATA-----CCTACAAGAATAAGACAGGGCTTGGAAGGGCTTTGCTA---TAA  
 >DQ448819  
 GCT---AAA---GAA-----  
 GATGATAACTTGTGGGTACAGTCTATTATGGGGTACCTGTGTGG---AAAGAAGCAAAC---  
 ACCACTCTATTTTGTGCATCAGATGCTAAAGCATATGATAAAGAG---GTACATAAT-----  
 -----GTTTGGGCCACA---CATGCCTGTGTACCCACAGAC---  
 CCCAACCCACAAGAAGTAGTATTGGGA-----AATGTGACAGAAAATTTTAAC-----  
 -----ATGTGGAAAATGATATGGTAGAACAGATGCATGAGGATATA---  
 ATCAGTTTATGGGATCAAAGCCTA---AAGCCATGTGTAAAATTA---  
 ACCCCACTCTGTGTTACTTTAAATTGCACTGATGTGAATATTACTAATACTAATAAATACTAGTGCT---  
 -----  
 -----AATAGCACTAGTGGTAACTGGACAATGATGGAGAGAGGAGAAATAAAA---  
 AATTGCTCTTTCAATATTACCACAAATATAGGA-----  
 GATAAGAGGCAGAAAGAACGTGCACCT--TTTTATAACCTTGATATAGTACCAATAGACAAT-----  
 -----  
 -----  
 AGTAGTAATTACAGGTTGCTAAGTTGTAATACCTCAGTCATTACACAG---  
 GCCTGTCCAAAAATAACCTTTGAACCAATTCCCATACATTATTGTGCCCCGGCTGGTTTTGCGATTCTAAAAT  
 GTAAT---GATAAGAAGTTCAAT-----GGAACAGGACCATGTACAAAT-----  
 -GTCAGT---ACAATACAATGTACACATGGCATTAGGCCAGTAGTATCAACT---  
 CAACTGCTGTTAAATGGCAGTCTAGCAGAAGAAGAG-----  
 ATAGTAATTAGATCTGAAAATATCACAGATAAC-----ATTAAAAACATAATAGTACAGCTGAAC----  
 -----ACAACCTATAAAA-----ATTAATTGTACAAGACCTAACAACAATACAAGAAAA-----  
 -AGTATACATATA-----GGACCAGGGAGTGCA---TTT-----TATGCAACAGGAGAC-----  
 -----ATAATAGGAGATATA-----AGGCAAGCACATTGT---ATCATTAATGGAACA---  
 GAATGGAATAACACTTTAAACAGATAGTGACAAAATTAAGA-----GAAAAATTAGGA----  
 -----GAAAATAAAACAATAGTCTTTAAT-----  
 CAATCCTCAGGAGGGGACCCAGAAATTGTA--ATGCACAGTTTTAATTGTGGAGGGGAA--  
 TTTAAGCAGCTCCAGGCAAGAATCCTGGCTGTAGAAAGATACCTACAGGATCAACAGCTCCTGGGAATTTGGG  
 GTTGCTCGGGAAACTCATCTGCACCACTGCTGTGCCCTGGAATGCTAGTTGGAGT-----  
 -----AATAAATCTCAAGATGCAATTTGG-----AAT-----  
 AACATGACCTGGATGGAGTGG---GAAAAGGAAATTGATAATTACACAGGCTTAATATAC---  
 ACCTTAATTGAAAAATCACAGAACCAGCAAGAA-----  
 -----  
 AAGAATGAAGTAGAATTATTGCAATTGGATAAATGGGCAAGTTTGTGGACTTGGTTTGACATAACAAAATGGC  
 TGTGGTATATAAAAATATTTCATAATGATAGTAGGAGGCTTGATAGGTTTAAGAATAGTCTTTACT---  
 GTACTTTCTATAGTA-----AATAGAGTTAGGAAGGGATACTCACCA-----  
 TTATCGTTTGTCTGTTAGCTTGCTCGACGCCATAGCCATAGCAGTAGCTGAG---

GGGACAGATAGAGTTCTAGAAAGGGTTACAAAGAGCTTTTAGGGCT-----  
 -----ATTCTCAATATA-----CCTAGAAGAATAAGACAGGGCTTGGAAAGGGCTTTGCTA--TAA  
 >EF531331  
 GTT---GCA-----  
 GGAAATTTATGGGTCACCGTCTATTATGGGGTACCTGTGTGG--AAAGAAGCAACC---  
 ACAACTCTATTCTGTGCATCAGATGCTAAAGCATATGATACAGAG--AAACATAAT-----  
 -----GTCTGGGCCACA---CATGCCTGTGTACCCACAGAC---  
 CCCAGTCCACAAGAAGTAGTATTGGCA-----AATGTGACAGAAAATTTTGAC-----  
 -----GTGTGGAACAATGACATGGTAGAACAGATGCATGAGGATATA---  
 ATTAGTTTATGGGATCAGAGCCTA--AAGCCATGTGTAAAATTA---  
 ACCCCACTCTGTGTTACTTTAAATTGCACTAATGTGACCACTACTAATACCAATAGCCCTACTACCACTAGTA  
 GCACC-----  
 -----AGTAGCCTTACTGCGAGTACTGCTCCTACCACTAGTAGCATCAAGGATGAAATAAAA---  
 AATTGCTCTTTCAATACCACCACAAGCATAAGC-----  
 GATAAATGGCAAAAAGCATATGCACCTT--TTTTATAAACTTGATGTAGAACCAATAGGAAAT-----  
 -----  
 -----  
 GATGATACTAGTTATAGGTTGATAAGTTGTAACACCTCAGTCATTACACAA---  
 GCCTGTCCAAAGGTAACCTTTGAGCCAATTTCCATACATTTTGTGCCCCGGCTGGTTTTGCGATTCTAAAGT  
 GTAAC--AATAAGACGTTCCAG-----GGACAAGGACCATGTAAAAAC-----  
 -GTCAGC--ACAGTGCAATGTACACATGGAATTAAGCCAGTAGTATCAACT---  
 CAACTGCTGTTAAATGGCAGTCTAGCAGAAGAAGAG-----  
 ATAGTAATTAGATCCGCCAATTTACGGACAAT-----GCTAAAGTCATAATAGTACAGCTGAAG----  
 -----GAATTTGTAGAA-----ATTAATTGTACAAGACCCAACAACAATACAAAAAGA-----  
 -AGTATACATATA-----GGACCAGGCAGCGCC--TTG-----TATACAAGAAGA-----  
 -----ATAATAGGAAATATA-----AGACAAGCATATTGT--ACCATTAATGGAACA---  
 AAATGGAATAACACTTTAAGACAAGTAGCTATAAAATTAAAA-----GAACAATTTAAG----  
 -----AATAAAACAATAGTCTTTAAT-----  
 CACTCCTCAGGAGGGGATCCAGAAATTGTA--ATGCACAGCTTTAATTGTGGAGGGGAA--  
 TTTAAACAGCTCCAGGCCAGAGTCCCTGGCTGTGGAAAGATACCTAAAGGATCAACAGCTCCTGGGGATTTGGG  
 GTTGCTCTGGAAACTCATTTGCACCACTACTGTGCCTTGGAAATACTAGTTGGAGT-----  
 -----AATAGATCTCTCGAGCACATTTGG-----AAT-----  
 AACATGACCTGGATGGAGTGG--GAAAAAGAAATTGATAATTACACAGACTTAATATAC--  
 AACTTAATTGAAAAATCGCAAAACCAGCAAGAA-----  
 -----  
 AAGAATGAGCAAGACTTATTGGCATTAGACACATGGGCAAGTTTGTGGAATTGGTTTGACATATCAAAATGGT  
 TGTGGTATATAAAAAATATTACATAATGATAGTAGGAGGCTTAATAGGTTTAAGAATAATTTTTTGCT---  
 GTACTTTCTATAGTG-----AATAGAGTTAGGCGGGGATACTCACCC-----  
 TTATCGTTCGCTGTTAGTTTGTTCACGCCACAGCCATAGCAGTAGCTGAG--  
 GGGACTGATAGGATTATAGAGGCATTGCAAAGAGCTTATAGAGCT-----  
 -----ATTCTTCACATA-----CCTAGAAGAATAAGACAGGGCTTGGAAAGGATTTTGCTA--TAA  
 >MH000288  
 GCT---ACA-----  
 GAGCAATTATGGGTCACAGTCTATTATGGGGTACCTGTGTGG--AAAGAAGCAAAAT---  
 ACCACTCTATTTTGTGCATCAGATGCTAGAGCATATGATACAGAG--GTGCATAAT-----  
 -----GTTTGGGCCACA---CATGCCTGTGTACCCACAGAC---  
 CCCAACCACACAAGAAGTAGTATTGGAA-----AATGTGACAGAAAATTTTAAC-----  
 -----ATGTGGAATAAATACATGGTAGAACAAATGCATAAGGATATA---  
 ATCAGTTTATGGGATCAAAGCCTA--AAGCCATGTGTAAAGTTA---  
 ACCCCACTCTGTGTTACTTTAGATTGCAAAGAATTG-----  
 -----  
 -----GAAATGAAA---  
 AACTGCTCTTTCAATGTACCGCAGGCATAAGA-----  
 GATAAGATACAGAAAGAACATGCATTA--TTTTATACATATGATTTAGTACCAATAACCAAT-----  
 -----  
 -----  
 TACAGGTTGATAAATTGTAATACCTCAGTCATTACACAG---  
 GCCTGTCCAAAAGTAACATTTGAACCAATCCCATACATTATTGTGCCCCAGCTGGTTTTGCGATTATAAAGT  
 GTAAT--GATAAGCAGTTCAAT-----GGAACAGGACCATGTAAAAAT-----  
 -GTTAGC--ACAGTACAATGTACACATGGAATTAGGCCAGTAGTATCAACT---

CAATTGCTGTTAAATGGCAGTTTGGCAGAAGAAGAG-----  
 GTAATAATTAGATCTGAAAATTTCAAAACAAT-----GCCAAAACCATAATAGTACAGCTAAAT----  
 -----GAAACTGTAACA-----ATCAATTGTACAAGACCCAACAACAATACAAGAAAA-----  
 -GGTATACATATA-----GGACCAGGGAGAGCA---TTT-----TATGCAACAGGAAGC-----  
 -----ATAATAGGAAACATA-----AGACAGGCATACTGT---AACATTAGTGGAAACA---  
 AAATGGAATAGCACCTTAAACACATAGCTGCAAAATTAAGA-----GAACAATTTGGG----  
 -----GAGAATAAAGCAATAGTCTTTAAT-----  
 CGCTCGTCAGGAGGGGACCCAGAAATTGTA--ATGCATAGTTTTAATTGTGGAGGGGAA---  
 TTTAAGCAGCTCCAGGCAAGAGTCCTGGCTGTGGAAAGATACCTAAAGGACCAACAGCTCCTAGGGATTTGGG  
 GTTGCTCTGGAAGAACTCATTTGCACCACTACTGTGCCTTGGAATACTAGTTGGAGT-----  
 -----AATAAATCTTATAATGAGATTTGG-----GAT-----  
 AACATGACCTGGATGCAGTGG---GAGAGAGAAATTGATAATTACACATGCTTAATATAC---  
 TCCTTAATTGAAAAATCGCAGAACCAGCAAGAA-----  
 -----  
 CAGGATGAACAAGAATTATTGGCATTAGATAAATGGGCAAGTTTGTGGAATTGGTTTGACATAACAAATTGGC  
 TGTGGTATATAAAAATATTTCATAATGATAGTAGGAGGCCAATAGGTTTAAAGAATAGTTTTTTACT---  
 GTATTTTTCATTAGTA-----AATAGAGTTAGGCAGGGATATTCACCA-----  
 TTATCGTTGGCTGTGAGCTTGCTTAACGCCACAGCTATAGCAGTAGCTGAG---  
 GGGACAGATAGGGTTATAGGAGCAGTACAAAGAGTTGGTAGAGCT-----  
 -----TTTATCCACATA-----CCTAGAAGAGTGAGACAGGGCTTGGAAGGGCTTTGCTA---TAA  
 >KC699040  
 GCT---TCA-----  
 GAAAAATTGTGGGTCACAGTCTATTATGGGGTACCTGTGTGG---AAGGAAGCAAAA---  
 ACCACTCTATTTTGTGCATCAGATGCTAAAGCATATGATACAGAG---GTGCATAAT-----  
 -----GTTTGGGCCACA---CATGCCTGTGTACCCACAGAC---  
 CCCAACCCACAAGAAGTAACATTGGAA-----AATGTAACAGAAAATTTTGAC-----  
 -----ATGTGGAATAACATGGTAGAACAGATGCATGAGGATGTA---  
 ATCAGTCTATGGGATCAAAGCTTA---AAACCATGTACAAAATA---  
 ACCCCACTCTGTGTTACTTTAAATTGCACTAATGTGACTGTTATTAGTACCAATAATGTTACTTATGCC---  
 -----  
 -----AGTGGTGGTATCAGTAATATCACGGAAAAAATGAAA---  
 AACTGCACTTTCAATATCACCACAGACGTAAGA-----  
 GATAAGATGAAAAGGGTATATTCACTT---  
 TTTTATAAAGAGGATATAGAATAATAAAGAATCCTGATGGTCCTAATACCAACAATAGTGCT-----  
 -----  
 AATAATACCAGCAATAGTACTGATAGTCCTAGTACCAGCTATAGGTTGACAAAGTGTAACACCTCAGTCATTA  
 CACAA---  
 GCCTGTCCAAAGGTATCCTTTGAGCCAATTCCCATACATTATTGTGCCCGGCTGGTTTTGCAATTCTAAAAT  
 GTAAT---GATAAGAAATTCAAT-----GGAACAGGACCATGTAAAAAT-----  
 -GTCAGC---ACAGTACAATGTACACATGGAATTAGGCCAGTAGTATCAACT---  
 CAACTATTGTTAAATGGTAGTCTAGCAGAAGAAGAG-----  
 ATAGTAATTAGAATAAAGACCTTGAAGAAAAT-----ACTAAAAACATAATAGTACAGCTGAAT---  
 -----AAAACTGTAAAA-----ATTAAGTGTACAAGACCCGGCAACAATACAAGGAAA---  
 -AGCCTACATATA-----GGACCAGGGAGAGCA---TTT-----TTTGCAACAAATGAT-----  
 -----ATAATAGGAGATATA-----AGACAAGCACATTGT---AACATTAGTGCAGAA---  
 GAATGGAATGAAACTTTAGCAAAGGTAGCTAGCAAAATAAGA-----  
 GAACTATTTAGTGAAAGAAAC-----AGCAGTTATGAG-----AATGATACAATAGTCTTTAGT-  
 --CCACCATCCCCAGGAGGGGACCCAGAAATTATA---ATGCACAGTTTTAATTGCAGAGGGGAA---  
 TTTAAGCAGCTCCAGGCAAGAGTCCTGGCTCTGGAAAGATACCTAGCGGATCAACAGCTCCTGGGACTTTGGG  
 GTTGCTCTGGAAGAACTCATCTGCACCACTGCTGTGCCTTGGAATGCTAGTTGGAGT-----  
 -----AATAGATCTCTGACAGAAATTTGG-----GAT-----  
 AACATGACCTGGATGGAGTGG---GAAAGAGAAATTAATAATTATACAGGTATAATATAC---  
 TCCTTAATTGAAGGAGCGCAGAACCAGCAAGAA-----  
 -----  
 AAGAATGAAGAAGACTTATTAATAATTAGATCAATGGGCAAATTTGTGGAATTGGTTTAACATAACACAATGGC  
 TGTGGTATATAAAAATATTTCATAATGATAGTAGGAGGTTTAATAGGTTTAAAGAATAGTTTTTTGCT---  
 GTACTTTCTATAGTG-----AATAGAGTTAGGCAGGGATACTCACC-----  
 TTGTGCTTAGCTGTTAGCTTGCTTAACGCCACAGCCATAACAGTAGCTGAG---  
 GGAACAGACAGGGTTATAGAAGCATTACTAAGAGCTTGAGGGCT-----  
 -----ATTCTCCACATA-----CCTAGAAGAATAAGACAAGGCTTAGAAAGGGCTTTGATA---TAA

>KC699032

```
GCT---GAA---GAA-----
GGAAAAATTGTGGGTACAGTCTATTATGGGGTACCTGTGTGG---AAAGAAGCAACT---
ACCACTCTATTTTGTGCATCAGATGCTAAGGCATATGAAACAGAA---GCACATAAT-----
-----GTTTGGGCCACA---CATGCCTGTGTACCCACAGAT---
CCTAGTCCACAAGAAGTATCATTGGGA-----AATGTGACAGAAAATTTTAAT-----
-----ATGTGGAAAAATAACATGGGTAGAACAAATGCATGAGGATGTA---
ATCAGTTTATGGGATCAAAGTCTA---AAGCCATGTGTAAAATTA---
ACCCCACTTTGTGTTAAGTTAACTTGCCTGATAAGTTGGATAATGATACCGATACTAATACTACT-----
-----
-----TTGAAAAATTTAGAAAGGGGAAGTAAAA---
AACTGCTCTTTCAATGTCAGCACAAACATAGTA-----
AATAAGATGCAGAGACAATATGCACCTT---CTTTATAAACTTGATGTAATGCAAATAGATGAAGAT-----
-----
GATAATACAAGCTATACATTAACAAGTTGTAACACCTCAGTCATTACACAA---
GCTTGTCCAAAGGTATCCTTTGAACCAATTCCAATACATTATTGTGCCCGGCTGGTTTTGCGATTCTAAAGT
GTAAG---GATAAGAATTTCAAT-----GGAACAGGACCATGTACAAAT-----
-GTCAGT---ACAGTACAATGCACACATGGAATTAAGCCAGTAGTGTCAACT---
CAACTACTGTTTAAATGGCAGTCTAGCAGAAGAAGAG-----
ATAGTACTCAGATCTGAGAATTTACGAACAAT-----GCAAAAAACATAATAGTACAACCTGAAG---
-----GACCCTGTAAAA-----ATTAATTGTACAAGACCCCAACAATACAAGAAAA-----
-AGTATACATATA-----ACACCAGGGAGAGCA---TTT-----TATGCAACAGGAGCT-----
-----ATAATAGGAGATATA-----AGACAAGCACATTGT---AACATTAGTAGAGAA---
AAATGGAATAACACTTTAGGGGAGATAGCAAAAAAGTTAGGA-----GAACAGTTTGGT-----
-----AAGAATAAAACAATAATCTTTACT-----
CAGCCCTCAGGAGGGGACCCAGAAATTATA---ATGCACAGTTTTAATTGTGGAGGGGAA---
TTCAAACAGCTCCAGGCAAGAGTCCCTGGCTGTAGAAAGATACCTAAAGGATCAGCAGCTCCTAGGAATCTGGG
GTTGCTCTGGAAAGCTCATTTGCACCACTGCTGTGCCTTGGAAATATTAGTTGGAGT-----
-----AATAGATCTCACGATTATATTTGG-----GAT-----
AACATGACATGGATGCAGTGG---GAGAAAGAAATTGACAATTACACAGACTTAATATAC---
AATTTACTTGAACAATCGCAGAACCAACAAGAA-----
-----
AAGAATGAACAAGACTTATTGGCATTGGATAAATGGGCAAGTTTGTGGAGTTGGTTTAGCATAACAAATTGGC
TGTGGTATATAAAAAATATTACATAATGATAGTAGGGGGCTTAGTAGGTTTAAGAATAGTTTTTTTCT---
GTATTTTCTATGGTG-----AATAGAGTTAGGCAGGGGATACTACCA-----
TTGTCATTTGCTGTTAGTCTGTTTAATGCCATAGCTATAGCAGTAGCTGAG---
GGAACAGATAGGGTTATAGAAGTAATACAAAGATTTTGTAGAGCT-----
-----ATTCTACACATA-----CCTAGAAGAATAAGACAGGGGCTTAGAAAGGCTTTTGTCTA---TAA
>KC699037
GCT---GCA-----
GAACAATTGTGGGTACAGTCTATTATGGGGTACCTGTGTGG---AAAGAAGCAACT---
ACCACTCTATTTTGTGCATCAGATGCTAAGGCATATGAGAAAGAG---GCACATAAT-----
-----GTTTGGGCCACG---CATGCCTGTGTACCCACAGAC---
CCCAACCCACAAGAAGTAATATTGGGA-----AATGTGACAGAAGATTTTAAC-----
-----ATGTGGAAAAATAACATGGGTAGAGCAGATGCATGAAGATATA---
ATCAGTTTATGGGATCAGAGCCTA---AAGCCATGTGTAAAATTA---
ACCCCACTCTGTGTTACTTTAAATTGCACTGATGTTGATGGGAATAATACCAAGGTTAATGAGAAT-----
-----
-----GCCACTTATTATACTGGGAAAATAGAACCAGGAGAAATAAAA---
AACTGCTCTTTTAATGTCACCCAGGCATAATA-----
GATAAAGTAAAGAAAGAACGTGCACCTT---TTTAATAGACTTGATGTAGTGCCAATAGATAAT-----
-----
GATAATACTAGTTATAGGCTGATAAATTGTAATACCTCAGTCATTACACAG---
GCCTGTCCAAAGGTATCCTTTGATCCAATTCCCTATACATTATTGTGCCCGGCTGGTTTTGCGATTTTGAAGT
GTAAC---AATAACACATTCAAT-----GGAAGAGGACCATGTACAAAT-----
-GTCAGT---ACAGTACAATGTACACATGGAATTAAGCCTGTAGTGTCAACT---
CAACTACTGTTTAAATGGAAGCCTAGCAGAAGGAGG-----
ATAGTAATTAGATCTGACAATTTCTCAGATAAT-----GCTAAAACCATAATAGTACATCTGAAT-----
```

-----AAACTGTAAAC-----ATTACCTGTACAAGAGTCAACAACAATACAAGACAA-----  
 -AGTATACCTATA-----GGACCAGGGAGAGCA---TTT-----TATGCGACAGGAGAT-----  
 -----ATAATAGGAGACATA-----AGACAAGCACATTGT---AACATCTCTAGAGCA---  
 GAATGGAATAGTACTTTAGAACAGATAGTTAAAAAATTAAAA-----GAACAATATAAT-----  
 -----AATAACACAATAATCTTTAAG-----  
 CCACCAGCAGGAGGAGACCCAGAAATTGTA--ATGCACAGTTTCACTTGTGGAGGGGAA---  
 TTTAAACAGCTCCAGGCAAGAGTCCTGGCTGTGGAAAGATACCTACAGGATCAGCGGCTCCTAGGGATTGTTGGG  
 GTTGCTCTGGAAACTCATCTGTACCACTACTGTGCCTTGAATGATAGTTGGAGT-----  
 -----AATAGATCTTATGATAGTATTTGG-----GAC-----  
 AATATGACCTGGATGCAGTGG---GAAAAAGAAATTGACAATTACACAGGTGTGATATAC---  
 AACTTACTTGAAAAATCGCAAAACCAACAAGAA-----  
 -----  
 AAGAATGAACAAGAATTATTAGAAATTGGATAAGTGGGCAAGTTTGTGGAATTGGTTTGACATAACAAAATGGC  
 TGTGGTATATAAAAATATTTCATAATGATAATAGGAGGCTTGATAGGTTTAAGAATAGTTTGTGCT---  
 GTGCTTTCTATAGTG-----AATAGAGTTAGGCAGGGATACTCACC-----  
 TTGTTGTTTGTGCTGTTAGCTTGCTTAATGCCACAGCTGTGCAGTAGCTGAG---  
 GGAACAGATAGGATTATAGAAGCAGTACAAAGAATCTCTAGAGCT-----  
 -----ATTATCCACATT-----CCCACAAGAGTGAGACAGGGCTTAGAAAGGGCTTTGCAA---TAA  
 >MH000292  
 GCA---ACC-----  
 CAATTGTGGGTCACAGTCTATTATGGGGTACCTGTGTGG---AAAGATGCTACT---  
 ACCACTCTATTTTGTGCATCAGATGCCAGAGCATATGATACAGAG---AAGCATAAT-----  
 -----GTCTGGGCCACA---CATGCCTGTGTGCCACAGAC---  
 CCTAACCCACAAGAAATAGTATTGGGA-----AATGTGACAGAAAATTTTAAT-----  
 -----GCGTGGAAAAATGACATGGTAGACCAGATGCATGAAGATATA---  
 ATCAGTTTATGGGATCAAAGCCTG---AAGCCATGTGTAAAATTA---  
 ACCCCACTCTGTGCTACTTTACAATGCACTAATTTG-----  
 -----  
 -----GAAATAAGA---  
 AACTGCTCTTTCAATATCACCACAGATATGAGA-----  
 GATAAAGTAAAGAAAGAACATGCACTT---TTTTATAGGCTTGATATAGTACCAATAACTAGT-----  
 -----  
 -----  
 TATAGGTTGATAAGTTGTAATACTTCAGTCCTTACACAG---  
 GCCTGTCCAAAGGTATCCTTTGAACCAATTCCCATACATTATTGTGCCCCGGCTGGTTTTCGATTCTAAAAT  
 GTAAT---GATAAGAATTTTAAT-----GGATCAGGACCATGTAACAAT-----  
 -GTCAGC---ACAGTACAATGTACACATGGAATTAAGCCAGTGGTGTCAACC---  
 CAACTGCTGTTAAACGGCAGTCTAGCAGAAGAAGGG-----  
 GTAGTAATTAGATCTGAAAATTTTACGAACAAT-----GCTAAACTATAATAGTACAGCTGAAC---  
 -----AAAGCTGTAGTA-----ATTAATTGTACAAGACCCAACAACAATACAAGAAGA---  
 -GGTATCCATATA-----GCACCAGGAAGAGCA---TTT-----TATGCAACAGGAGAC-----  
 -----ATAGTAGGAGATATA-----AGACAAGCACATTGT---AATCTTAGTGAAGGA---  
 GACTGGAATGATACTTTAAAGAAGTAGTTAAAAAATTAAAG-----GACCAATTTGGG---  
 -----AATAAAACAATACTCTTTGCA-----  
 AATTCCTCAGGAGGGGACCCAGAAATTGTG---ACACACAGTTTAAATTGTGGAGGGGAA---  
 TTTAAGCAACTCCAGGCAAGAGTCCTGGCTGTGGAAAGATACCTAAAGGATCAACAGCTCCTGGGAATTTGGG  
 GTTGCTCTGGAAAGCTCATCTGCACCACTGCTGTGCCTTGAATACTAGTTGGAGT-----  
 -----AATAAAAATTACAGTGATATTTGG-----GAT-----  
 AACATGACCTGGATGCAGTGG---GAGAAAGAAATTGATAATTACACAGATTTAATATAC---  
 ACCTTGCTTGAACAATCGCAGAACCAGCAGGAA-----  
 -----  
 AAGAATGAACAAGAATTATTGGAATTGGATAAATGGGCAAGTTTGTGGAATTGGTTTGACATAACACGATGGC  
 TGTGGTATATAAAAATATTTCATAATGATAGTAGGAGGTTTAATAGGTTTAAGAATAGTTTTTTGCT---  
 GTGCTTTCTATAGCG-----AATAGAGTTAGGCAGGGATACTCACC-----  
 TTGTCAATTCGCTGTTAGTTTGTTTAATGCAATAGCTATAGCAGTAGCTGAG---  
 GGGACAGATAGGATTATAGAAATAGTACAGAGAGCTGGTAGAGCT-----  
 -----ATCCTCCACATA-----CCTACAAGAATAAGACAGGGCTTAGAAAGGGCTTTGCAA---TAA  
 >KC699006  
 GCT---GCA-----  
 GAAAAATTGTGGGTCACAGTCTATTATGGGGTACCTGTGTGG---AAAGAAGCAACC---

ACCACTCTATTTTGTGCATCAGATGCTAAAGCATATGACACAGAG---ATACATAAT-----  
 -----GTTTGGGCCACA---CATGCCTGTGTACCCACAGAC---  
 CCCAACCCACAAGAAGTATTATTGGAA-----AATGTGACAGAAGATTTTAAAC-----  
 -----ATGTGGAAAAATAACATGGTAGAACAGATGCATGAGGATATA---  
 ATCAGTTTATGGGATCAAAGCCTA---AAGCCATGTGTAAAATTA---  
 ACCCCACTCTGTGTTACTTTAAATTGCACTGATTGGAATGCCAATGTCTACTAATACCAATGCCAATAAT----  
 -----  
 -----ACCAATAGTAGTAATTTGGAGACGATGGAAAAAGGAGAAATAAAA---  
 AACTGCTCTTTCAATATCACCTCAAACATAAGA-----  
 GATAAGATGCAGAAAGAATATGCTCTT---TTTTATAAACTTGATGTAGTACCAATAGATAATGAT-----  
 -----  
 -----  
 GATAATACTAGCTATAGGATGATACATTGTAACACCTCAGTCATTACACAA---  
 GCCTGTCCAAAGATATCCTTTGAACCAATTCCCATACACTATTGTGCCCCGGCTGGTTTTGCGATTTTAAAGT  
 GTAAC---AATAAGACGTTCAAT-----GGAACGGGACCATGTAAAAAT-----  
 -GTCAGC---ACAGTACAATGTACACATGGAATTAGGCCAGTAGTGTCAACT---  
 CAACTGCTGTTAAATGGCAGTCTAGCAGAAGAAGAG-----  
 GTAATAATTAGATCTGCCAATTTTCACAGACAAT-----GCTAAAACCATAATAGTGCAGCTGAAC----  
 -----AAATCTGTAGTA-----ATTAATTGTACAAGACCCAGCAACAACACAAGAAAA-----  
 -GGTATACATATA-----GGACCAGGGAGAGCA---TTT-----TATACAACAGGAAAC-----  
 -----ATAATAGGAGATATA-----AGACAAGCACATTGT---AACATTAGTAGAGTA---  
 GAATGGAATAACACTTTAGGACAGGTAGTTGCAAAATTAAGA-----GAACAATTTAAG----  
 -----AATAAAACAATAGTTTTTAAAT-----  
 CAATCCTCAGGAGGGGACCCAGAAATTGTA---ATGCACAGTTTTAATTGTGGAGGGGAA---  
 TTCAAGCAGCTCCAGGCAAGAGTCCTGGCTGTGGAAAGATACCTAAAGGATCAACAGCTCCTAGGGATTTGGG  
 GTTGCTCTGGAAACTCATCTGCACCACCACTGTGCCTTGGAAATACTAGTTGGAGT-----  
 -----AATAAATCTCTAGATACAATTTGG-----AAT-----  
 AACATGACCTGGATGGAGTGG---GAAAGAGAAATTGACAATTACACAGGCTTAATATAC---  
 ACCTTAATTGAACAATCGCAAAACCAACAAGAA-----  
 -----  
 AAGAATGAACAAGAATTATTGGAATTGGATAAATGGGCAAGTTTGTGGACTTGGTTTGACATAACAACTGGC  
 TGTGGTATATAAAAATATTCTAATGATAGTAGGAGGCTTGATAGGTTTAAAGAATAGTCTTTACT---  
 GTACTTTCTATAGTG-----AATAGAGTTAGGCAGGGATACTACCA-----  
 TTATCGTTGGCTATTAGCTTGCTCAATGCTACAGCTATAACAGTAGCTGAG---  
 GGAACAGATAGGGTTGCAGAAGCAGTACAAACAATTTTGTAGAGCT-----  
 -----ATTATCCACATA-----CCTAGAAGAATAAGACAGGGCTTGGAAGGGCTTTGCTA---TAA  
 >KC699007  
 GCT---GCA-----  
 GACAAATTGTGGGTACAGTCTATTATGGGGTACCTGTGTGG---AAAGAAGCAACC---  
 ACCACTCTATTTTGTGCATCAGATGCTAAAGCATATGATACAGAG---GTACATAAT-----  
 -----GTTTGGGCCACA---CATGCCTGTGTACCCACAGAC---  
 CCCAACCCACAAGAAGTAGTATTGGGG-----AATGTGACAGAAAATTTTAAAC-----  
 -----ATGTGGAAAAATAACATGGTAGAACAGATGCATGAGGATATA---  
 ATTAGTTTATGGGATCAAAGCCTA---AAGCCATGCGTAAAATTA---  
 ACCCCACTCTGTGTTACTTTAAATTGCACTGATTATTTGAAGAATGCTACTAACACCACT-----  
 -----  
 -----AATAGTAGCGGGGAATGAAGGAGGAAGGAGAAATAAAA---  
 AATTGCTCTTTCAATATCACCACAAGCATAAGA-----  
 GATAAGTTGCAGAAAGAATATGCACTT---TTTTATAAACTTGATGTAATACCAATAGATACT-----  
 -----  
 -----  
 GATAATACTAGCTATAGGTTGATAAGTTGTAACACCTCAGTCATTACACAG---  
 GCCTGTCCAAAGGTATCCTTTGAGCCAATTCCCATACATTATTGCGCCCCGGCTGGTTTTGCGATTCTAAAGT  
 GTAAC---GATAAGAAGTTCAAT-----GGAACAGGACCATGTACAAAT-----  
 -GTCAGC---ACAGTACAATGTACACATGGAATTAGGCCAGTGGTATCAACT---  
 CAACTGCTGTTAAATGGCAGTCTAGCAGAAAAAGAG-----  
 GTAGTAATTAGATCCGCCAATTTTCACGAACAAT-----GCTAAAATCATAATAGTACAGCTGAAT----  
 -----GAATCTGTAGAA-----ATTAATTGTACAAGACCCAACAACAATACAAGAAAA-----  
 -AGTATAAATATA-----GGACCAGGCAGAGCA---TTT-----CATACAACAGGAGCA-----  
 -----ATAATAGGAGATATA-----AGACAAGCACATTGT---AACATTAGTAGAGCA---

AAATGGAATGACACTTTAAAAAAGATAGTTATAAAATTAAGA-----GAACAATTTAGG----  
 -----AATAAAACAATAGTCTTTAAT-----  
 CAATCCTCAGGAGGGGACCCAGAAATTGTA--ATGCACAGTTTTTAATTGTGGAGGGGAA---  
 TTCAAGCAGCTCCAGGCAAGAGTCCTGGCTGTGGAAAGATACCTAAAGGATCAACAGCTCCTGGGGATTTGGG  
 GTTGCTCTGGAAAACCTCATTTGCACCACTGCTGTGCCTTGGGAATGGTAATTGGAGT-----  
 -----AATAAATCTCTGGATCAGATTTGG-----AAT-----  
 AACATGACCTGGATGGAGTGG--GAAAGAGAAATTAATAATTACACAGACATAATATAC---  
 ACCTTAATTGAAGAATCGCAAAATCAACAAGAA-----  
 -----  
 AAAAAATGAAAAAGAATTATTGGAATTAGATAAAATGGGCAAGTTTGTGGAATTGGTTTGACATAACAAAATGGC  
 TGTGGTATATAAAAAATATTCATAATGATAGTAGGAGGCTTGGTAGGTTTAAGAATAGTTTTTTGCT---  
 GTGCTTTCTATAGTG-----AATAGAGTTAGGCAGGGATACTCACCA-----  
 CTATCGTTAGCTGTGAACTTGCTTAATACCACAGCCATAGCAGTAGCTGAG---  
 GGGACTGATAGGGTTATAGAAGCATTACAAAGAGCTTGTAGAGCT-----  
 -----ATTCTCCACATA-----CCTGTACGAATAAGACAGGGCTTGGAAAGGGCTTTGCTA---TAA  
 >KC699025  
 GCT---GCA-----  
 GAACAATTGTGGGTCACAATCTATTATGGGGTACCTGTGTGG--AAAGATGCAACT---  
 ACCACTCTATTTTGTGCATCAGATGCTAAAGCATATGATACAGAG--GTACATAAT-----  
 -----GTCTGGGCCACA--CATGCCTGTGTACCCACAGAC---  
 CCCAACCCACAAGAAGTAGTAATGGGA-----AATGTAACAGAAGAGTTTAA-----  
 -----ATGTGGAAAAATAACATGGTAGAACAGATGCATGAGGATATA---  
 ATCAGTTTATGGGATCAAAGCCTA--AAGCCATGTGTAAAATTA---  
 ACCCCACTCTGTGTTACTTTAAATTGCACTGATTTAGCTAGGAATACCACTAATAGTAATGCCACTAATAATA  
 ATACCATTAGT-----  
 -----ACTATTGCCTCTACGATGGAACCAGTAGGAATAAAA---  
 AACTGCTCTTTCAACATCTCCACAAGCTTAGGA-----  
 GATCAGGTAAAGAAAGAATATGCATTT--TTTTATAATCTTGATATAGTACAACCTAGATGAA-----  
 -----  
 -----  
 GGTAATAATAAAAAATAATTATAGGTTGATAAGCTGTAATACCTCAGCCCTCACACAG---  
 GCCTGTCCAAAGGTATCCTTTGAACCAATTCCTATACATTATTGTGCCCCGGCTGGTTTTGCGATTCTAAAGT  
 GTAAC--AATAAAACGTTTCACT-----GGAAAAGGACAATGTACAAAT-----  
 -GTCAGC--ACAGTACAATGTACACATGGAATTAGGCCAGTAGTGTCAACT---  
 CAGCTGCTGTTGAATGGCAGTTTAGCAGAGAAAGAG-----  
 ATAGTAATGAGATCTGACAATTTCTCAGATAAT-----GTAAAACCATAATAGTACAGCTGAAT---  
 -----GCATCTGTGCCA-----ATTACTTGTGAAAGACCCAACAACAATACAAGGAAA-----  
 -AGCATAACTATA-----GGACCAGGGAGAGCA--TTT-----TATACAACAGGACAA-----  
 -----ATAATAGGAAATATA-----AGACAAGCACATTGT--AACATTACTAGAGAG---  
 AAATGGAATAACACTTTAGAACAGATAGTTAAAAAACTAAAA-----GGACAATTTAAG---  
 -----AATAAAACAATAGTCTTTAGG-----  
 CCATCCTCAGGAGGGGACCTAGAAATTGTA--ACGCATAGTTTTAATTGTGGAGGAGAA---  
 TTTAAGCAGCTCCAGGCAAGAGTCCTGGCTGTGGAAAGATACCTACAGGATCAACAGCTCCTAGGGATTTGGG  
 GTTGCTCGGGAAAACCTCATCTGCACCACTGCTGTGCCTTGGGAATAGTAGTTGGAGT-----  
 -----AATAAATCCTTGAATCAGATTTGG-----GAT-----  
 AACATGACCTGGATGCAGTGG--GAAAGAGAAATTGACAATTACACAACAGAAATATAC---  
 AACTTACTTGAAAAATCGCAGAACCAACAAGAA-----  
 -----  
 AAGAATGAACAAGAATTATTGGAATTAGATCATTGGGCAAGTTTATGGAATTGGTTCAACATAACAGAGTGGC  
 TGTGGTATATAAAAAATATTCATAATGATAGTAGGAGGCTTGATAGGTTTAAGAATAGTTTTTTGCT---  
 GTACTTTCTATAATG-----AATAGAGTTAGGCAGGGATACTCACCA-----  
 TTATCATTTTGCTGTTAGCTTGCTCAATGCCACAGCTATCGCAGTAGCTGAG---  
 GGAACAGATAGGATTATAGAAGTAGTACGAAGAGCTTATAGAGCT-----  
 -----ATCCTTCACATA-----CCTACAAGAGTGAGACAGGGCTTGGAAAGGGCTTTGCTA---TAA  
 >JF706474  
 GCT---GAA-----  
 GACAATTTGTGGGTCACAGTCTATTATGGGGTACCTGTGTGG--AAAGAAGCAACT---  
 ACCACTCTATTTTGTGCATCCGATGCTAAAGCATATGATAGAGAG--GTACATAAT-----  
 -----GTTTGGGCCACA--CATGCCTGTGTACCCACAGAC---  
 CCCAGCCCACAAGAAGTACCATTGACA-----AATGTGACAGAAAATTTTAA-----

-----ATGTGGAAAAATAATATGGTAGAACAGATGCATGAAGATATA---  
 ATCAGTTTATGGGATCAAAGTCTA---AAACCATGTGTAAAGTTG---  
 ACCCCACTCTGTGTTACTTTTAGATTGCACTGATTATAATAATACTAATGGGAATAATGTTACTAATGCCAATG  
 CTTACTAAT-----  
 -----GGGAATAGTAGTACTAATACCAATATTATCTATCCAATGGAGAAAGGAGAAATAAAA---  
 AACTGCTCTTTCAATATCACCACAAAATTAAGA-----  
 GATGATAAGGTGCAGAAAGAATATGCACTC---TTTAATAGACTTGATATAGTACCAATGGACAGTGGTAAT-  
 -----  
 -----  
 GGTACTAATACTACCAGTTACAGGTTGATAAATTGTAATACCTCAGTCATTACACAG---  
 GCCTGTCCAAAGGTAACCTTTGAACCAATTCCCATACATTATTGTGCCCCGGCTGGTTTTGCGCTTCTAAAGT  
 GTAAT---GATAAGAAGTTCAAT-----GGAACAGGACCATGTAAAAAT-----  
 -GTCAGC---ACAGTACAATGTACACATGGAATTAGGCCAGTAGTGTCAACT---  
 CAACTACTATTGAATGGCAGTCTAGCAGAAGAAGAG-----  
 GTAGTAATCAGATCTGAAAAATCTCACGGATAAT-----GCTAAAACCATAATAGTGCAGCTGAAG----  
 -----GACGCAGTAAAC-----ATTACTTGTACAAGACCCAACAACAATACAAGAAAA-----  
 -AGTATACATGTA-----GGACCAGGGCAAGCA---ATT-----TATGCAGCAGGACAA-----  
 -----ATAATAGGAAATATA-----AGACAAGCATATTGT---GACATTAATAAAGCA---  
 AAATGGAATGACACTTTAAACCAGATAGTTAAAAAATTAAGA-----GAACCATTTGGA----  
 -----AATAAAACAATAACCTTTAAG-----  
 CCACCCGCAGGAGGAGACCCAGAAAGTTGTA---ATGTTCACTACTAATTGTGGAGGAGAA---  
 TTTAAGCAGCTCCAGGCAAGAGTCCTGGCTGTGGAAAGATACCTACAGGATCAACAGCTCCTAGGGATTTGGG  
 GTTGCTCTGGAAACTCATTTGCACCACTGCTGTGCCTTGGAATGCTAGCTGGAGT-----  
 -----AATAAATCTCAGGATCAGATTTGG-----GGC-----  
 AACATGACCTGGATGGAGTGG---GAAAGAGAAATTGACAATTACACAGGCTTAATATAC---  
 AGCTTACTTGAAAAATCACAGACCCAACAAGAA-----  
 -----  
 ATGAATGAAAAAGACTTATTGGAATTAGATAAGTGGGCAAGTTTGTGGAATTGGTTTGACATAACCAATTGGC  
 TGTGGTATATAAAAAATATTCATAATGATAGTAGGAGGCTTGATAGGTTTAAGAATAGTTTTTTGCT---  
 GTACTTTCTATAGTA-----AATAGAGTTAGGCAGGGATATTCACCA-----  
 CTATCGTTTGTCTGTCTAGCTTGCTTAATGCCACAGCTATAGCAGTAGCTGAG---  
 GGAACAGACAGGGTTATAGAAGCAGTACAAAGAATTTATAGAGCT-----  
 -----TTTCTTCACATA-----CCTAGAAGAATAAGACAGGGCTTTGAAAGGGCTTTGCTA---TAA  
 >HM204630  
 GCT---GTA-----  
 GATAAACTGTGGGTACAGTCTATTATGGAGTACCTGTGTGG---AGAGAAGCCAAC---  
 ACCCACTGTTTTGTGCATCAGATGCTAAAGCATATGATACAGAG---GTACATAAT-----  
 -----GTTTGGGCCACG---CATGCCTGTGTACCCACAGAC---  
 CCCAACCCACAAGAAATAGCATTTGGAA-----AATGTGACAGAAAATTTTAAC-----  
 -----ATGTGGAAAAATAACATGGTAGAACAGATGCAGGAGGATATA---  
 ATTAGTTTATGGGATCAAAGTCTA---AAGCCATGTGTAAAATTA---  
 ACCCCACTCTGTGTTACTTTAAATTGCACTGAATTGAGGAATAGTACTGATAATGCCACTATT-----  
 -----  
 -----ATAATGCCACTTTTAGTAACGAGGAGAAAGGAGAAATAAAA---  
 AACTGCTCTTTCAATGTCAACACAGGCATAAGA-----  
 GACAGGATAAAGAAAGAATATGCACTT---CTGTATAAACTTGATTTAGTATCAATAGATGAT-----  
 -----  
 -----  
 AATGATAATACTAGTTATAGGTTAATAAGTTGTAATACCTCAGTCATCACACAG---  
 GCCTGTCCAAAGGTAACCTTTGAACCAATTCCCATACATTATTGTGCCCCGGCTGGTTTTGCGATTCTAAAGT  
 GTAAT---GACAAGAAGTTCAAT-----GGAACAGGACCATGTAAAAAT-----  
 -GTTAGT---ACAGTACAATGTACACATGGAATTAGGCCAGTAGTATCAACT---  
 CAACTGCTGTTAAATGGCAGTCTCGCAAAAGAAGAT-----  
 GTAGTAATTAGATCTGTTAATTTACAGACAAT-----GCTAAAGTCATAATAGTACAATAAAT---  
 -----GAATCTGTACAA-----ATTAATTGTACGAGACCCAACAACAATACAAGAAGA-----  
 -GGTATAAATATA-----GGACCAGGGAGGGCA---TGG-----TATGCAATGGGAGAC-----  
 -----ATAGTAGGAGATATA-----AGACAAGCACATTGT---AACATTAGTGCAACA---  
 GAATGGAATAAACTTTAGAAAAGGTAGCCAGAAAATTAATA-----GAACAATTCGGG---  
 -----AATAAAACAATAGTCTTTAAG-----  
 CAATCCTCAGGAGGGGACCCAGAAATTGTA---ATGCACAGTTTTAATTGTAAAGGGGAA---

TTTAAGCAGCTCCAGGCGAGAGTCCTGGCTGTGGAAGATACCTAAGGGATCAACAGCTCCTGGGAATTTGGG  
 GTTGCTCTGGAAACTCATTTGCACCACTGCTGTGCCTTGGAATGCTAGTTGGAGT-----  
 -----AATAGATCTCTAGAATACATTTGG-----GGG-----  
 AACATGACCTGGATGGAATGG---GAAAGAGAAATTGACAAATTACACAGAAATGATATAC---  
 AGTTTACTTGAAGAATCGCAGAACCAACAAGAA-----  
 -----  
 AAGAATGAGAAAGACTTATTGGAATTGGACAAATGGGCAAGTTTGTGGAATTGGTTTGACATAACAAATTGGC  
 TGTGGTATATAAAAAATATTCATAATGATAGTAGGAGGCCTGATAGGTTTAAGAATAGTTTTTTGCT---  
 GTACTTTCATTAGTG-----AATAGAGTTAGGCAGGGATACTCACCT-----  
 TTATCGTTTGCTATTAGCTTGCTTAATACCTCAGCCATAGCAGTAGCTGAG---  
 GGGACAGATAGGATTATAGAAGTACTACAAAGAGGTTTATAGAGCT-----  
 -----ATTATCCACATA-----CCTAGAAGAATAAGACAGGGCTTGGAAGGGCTTTGCTA---TAA  
 >HM204631  
 GCT---ACA-----  
 GAACAATTGTGGGTCACAGTCTATTATGGGGTACCTGTGTGG--AAAGAAGCAACC---  
 ACCACTCTATTTTGTGCATCAGATGCTAAAGCATATTCTACAGAG--GCACATAAT-----  
 -----GTTTGGGCCACT---CATGCCTGTGTACCCACAGAC---  
 CCCAGTCCACAAGAAGTATTCTTGAAA-----AATGTGTCAGAAAATTATAAC-----  
 -----ATGTGGGAAAATAACATGGTAGAACAAATGCATGAGGATATA---  
 ATCAGTTTATGGGATCAAAGCCTA--AAGCCATGTGTAAACATTA---  
 ACCCCACTCTGTGTTACTTTAAACTGCACTGACTGGGGGAATAGTACTAATGGTAATACT-----  
 -----  
 -----AGTAGGGGAGAAAAGATGGAAAAGGGGAAATAAAA---  
 AACTGCTCTTTCTATACCACCCCAAGCACAACA-----  
 GACAAACAACAGAAAACATTTGCACTT--TTTTATAATCTTGATATAGTGCCAATAGAGGATAATAACAAG-  
 -----  
 -----TCTTCTAACGGAACCTAACCATAGCTATAGGTTGATAACTTGTAAC-----  
 -----  
 -----AAT-----  
 ---GTCAGC--ACAGTACAATGTACACATGGAATTAGGCCAGTAGTGTGCGACT---  
 CAATTACTATTAAATGGCAGTCTAGCAGAAGAAGAG-----  
 GTAGCAATTAGATCTCAAAATTTACGGACAAT-----GCTAAAACCATAATAGTACAGCTGAAG---  
 -----ACATCTGTAAAC-----ATTACTTGTACAAGACCCAACAACAACAGAAAA-----  
 -AGTATACATATA-----GCACCAGGGAGAGCA--TTT-----TATGCAACAGGAGAC-----  
 -----ATAATAGGAGATATA-----AGACAAGCACATTGT--AACATTAGCAAAGAA---  
 GATTGGATGAATGCTTTAAACCAAACAGCTAAAAAATTAAGA-----GAACAATTTGGG---  
 -----GAGAATAAGACAATAAAGTTTGAG-----  
 CCACCCACAGGAGGGGACCCAGAAAGTTGTG--ATGTACACTTTTAATTGTGGAGGGGAA---  
 TTTAAACAGCTCCAGGCAAGAGTCCTGGCTGTGGAAGATACCTAAGGGATCAACAGCTCCTAGGGCTTTGGG  
 GTTGCTCTGGAAACTCATCTGCACCACTGCTGTGCCTTGGAATGCTAGTTGGAGT-----  
 -----AATAGATCTCTGAATGACATTTGG-----GAT-----  
 AACATGACCTGGAGGGATTGG--GAAAGAGAAATTGACAAATTACACAAATGTAATATAC---  
 GACTTGCTTCAAGAATCGCAGAACCAACAAGAA-----  
 -----  
 AAAAAATGAAAAAGAATTATTGGAATTGGATCGATGGGCAAATCTGTGGAATTGGTTTGACATATCTAACTGGC  
 TGTGGTATATAAAAAATATTCATAATGATAGTAGCAGGCTTGATAGGTTTAAGAATAGTTTTTTACT---  
 GTGCTTTCTATAGTG-----AATAGAGTCAGGCAGGGATACTACCA-----  
 TTGTCATTTGCTGTTAACTTGCTCAATACCACAGCTATAGTAGTAGGTGAA---  
 GGGACAGATAGGGTTATAGAAGTAGTACAAAGATTTTTTAGGGGT-----  
 -----ATCCTCCATATC-----CCTAGAAGAATAAGACAGGGCTTCGAAAGGCTTTTACTA---TAA  
 >HM204636  
 GCT---AAA-----  
 GAAAAATTATGGGTCACAGTCTATTATGGGGTACCTGTGTGG--AAAGAAGCAACC---  
 ACCACTCTATTTTGTGCATCAGATGCTAAAGCATATGACACAGAG--GTCCATAAT-----  
 -----GTTTGGGCCACA---CATGCCTGTGTACCCACAGAC---  
 CCTAGCCCACAAGAACTACCATTAATA-----AATGTGACAGAAAATTTTACT-----  
 -----ATGTGGAAAAATAACATGGTAGAACAGATGCATCAGGATATA---  
 ATCAGTTTATGGGATGAAAGCCTA--AAACCATGTGTGAAATTA---  
 ACCCCACTCTGTGTCATTTTAAATTGCACTAATGCTAATATTACCAATAGTACTAGTATCACT-----  
 -----

-----AGGAGTAGTATTGGGGGAAACATAACGGAAGAAATGAAA---  
 AACTGTTCTTTTAATATCACCACAAGCATAGGA-----  
 GATAAGATGCAGAAAGAATATGCACTT---TTTTATAAACTTGATATAGTACCAATAAAGGAA-----  
 -----  
 -----  
 GATAATATGAGTTATACATTGAAAAATTGTAACACCTCAGTCATTAAACAG---  
 GCCTGTCCAAAGGTATCCTTTGAACCAATTCCTATACATTATTGTGCCCCAGCTGGTTTTGCGATTCTAAAAT  
 GTAAG---GATAAGAAGTTTAGT-----GGAACGGGTCCATGTAAAAAT-----  
 -GTCAGC---ACAGTACAATGTACACATGGAATTAGGCCAGTGGTGTCAACC---  
 CAATTACTGTTAAATGGCAGTCTAGCAGAAGAAGGG-----  
 GTAGTAATTAGATCTGAAAAATTCACAAACAAT-----GCTAAAACCATAATAGTGCAGCTGAAG----  
 -----GACCCTGTAAAA-----ATTAATTGTACAAGACCCGGTAATAATACAAGAAAG-----  
 -AGTATACATCTA-----GCACAAGGAAGAGCA---TTT-----TATGCAATGGGAGAC-----  
 -----ATAATAGGAGATATA-----AGACAGGCACACTGT---AACATTAGTAGAAAA---  
 CAATGGAATGACACTTTAGGGCAGATAGTTGGAAAATTAAGA-----GAACAATTTGGA----  
 -----AATAAAACAATAGCCTTTAAT-----  
 CAATCATCAGGAGGGGACCCAGAAATTGTA--ATGCACACTTTTAATTGTGGAGGGGGAA--  
 TTTAAGCAGCTCCAGGCAAGAATCCTGGCTGTGGAGAGATTCTACAGGATCAACAGCTCCTAGGGATTGGG  
 GTTGCTCTGGAAAGCGCATTTGCACCCTAATGTGCCTTGGAAATAGTAGTTGGAGT-----  
 -----AATAATAAACCTCTGAAGGACATTTGG-----GAT-----  
 AACATGACCTGGATACAGTGG---GAGAGACAAATTGAAAAATTACACAAATACAATATAC---  
 CAATTACTTGGAGAATCGCAAAATCCAACAAGAA-----  
 -----  
 AAGAATGAACAAGAATTATTGGAATTGGATTTCATGGGACAGTTTGTGGAGTTGGTTTCAACTATCAAAGTGGA  
 TGTGGTATATAAAAAATATTACATAAATAGTAGCAGGTTTAGTAGGGTTAAGGATAGTTTTTTACT---  
 GTACTTTCTATAGTG-----AATAGAGTTAGGCAGGGATACTCACCA-----  
 TTGTCATTCGCTGTTAGTTTGCTTGATACCATAGCTATAGCAGTAGCTGAG---  
 GGGACAGATAGGGTTATAGAAGCAATACAAAGAACTTGTAGAGCC-----  
 -----ATTTGCCGCGTA-----CCTGCAAGAATAAGACAGGGCTTAGAAAGGTTTCTACTA-----  
 >HM204637  
 GCT---ACA-----  
 GAACAATTGTGGGTCACAGTTTACTATGGAGTACCTGTGTGG--AAAGAAGCAACC---  
 ACCACTTTATTTTGTGCCTCAGATGCTAAAGCAGTTGAGAGAGAG--GTGCATAAT-----  
 -----GTTTGGGCCACA--CATGCCTGTGTACCCACAGAC--  
 CCTAACCCACAAGAAATAGAATTGAAA-----AATGTGACAGAAAATTTTAAC-----  
 -----ATGTGGAAAAATAACATGGTAGAACAGATGCAGGAAGATATA--  
 ATCAGTTTATGGGATCAAAGCCTA--AAACCATGTGTAAAGATA--  
 ACCCCACTCTGTGTTACTTTAAATTGCACTAATTTGAACAAGACCAGTAACAATAACACTCATGTC-----  
 -----  
 -----ACTAATAGCAGCGGGAGAACAGTGGAAAGCTGGGAAATGACA---  
 AACTGCTCTTTTAATGTCAACCACAGAGATAAGA-----  
 GATAAGGTGAAGAAAGAATATGCACTT---TTTTATAGACTTGATGTAGTACCAATAGATAAT-----  
 -----  
 -----  
 GATAATACCAGCTATAGGTTGATAAACTGTAATTCCTCAGTCATTACACAA---  
 GCCTGTCCAAAGGTAACCTTTGAACCAATTCCTATACATTATTGTGCCCCAGCTGGTTTTGCAATTCTAAAGT  
 GTAAG---GACAAGAAGTTCAAT-----GGAACAGGATCATGTAAAAAT-----  
 -GTCAGT---ACAGTACAATGTACACATGGAATTAGGCCAGTAGTGTCAACT---  
 CAACTGCTGTTAAATGGCAGTCTAGCAGAAGAAGAG-----  
 GTAGTAATTAGGTCTGAAAAATTCACAGATAAT-----ACTAAGAACATAATAGTACAGCTAAAT----  
 -----GAATCTGTAATA-----ATTAATTGTACAAGACCCAACAACAATACAAGAAAA-----  
 -AGTATACATATA-----GGACCAGGGAGAGCA---TTC-----TATGCAACAGGAGAC-----  
 -----ATAATAGGAGATATA-----AGACAAGCACATTGT---AACCTTAGTGAGGCA---  
 CAATGGACTAGAACTTTACAACAGGTAGCTACAAAATTAATA-----GAACAGTTTAAG----  
 -----AATAAAACAATAACCTTTAAT-----  
 CAAGCCTCAGGAGGGGACCCAGAAATTGTA--ATGCACAGTTTTAATTGTGGGGGGGAA--  
 TTTAAGCAGCTCCAGGCAAGAGTCTGGCTGTGGAAAAGATACCTACAGGATCAACAGCTCCTGGGGATTGGG  
 GCTGCTCTGGAAAACCTATTTGCACCCTACTGTGCCTTGGAAATGCTAGTTGGAGT-----  
 -----AATAAATCTCTAAATGACATTTGG-----AAT-----  
 AACATGACCTGGATACAGTGG---GAGAAAGAAATTGACAATTACACAAGCTTAATATAC---

ACCTTAATTGAAACATCGCAAAACCAGCAGGAA-----  
 -----  
 AAGAATGAACAAGAATTATTGGCATTGGATAAATGGAACATTTTGTGGAGTTGGTTTGACATAACAAGCTGGC  
 TGTGGTATATAAAAATATTCCATAATGATAGTAGGAGGTTTAATAGGGTTAAGAATAGTTTTTTGCT---  
 GTACTTTCTGTAGTG-----AATAGAGTTAGGCAGGGATACTCACCA-----  
 TTGTCATTTCGCTATTAGCTTGTTCAACGCCACAGCCATAGCAGTAGCTGAG---  
 GGGACAGATAGGGTTATAGAAGGATTTCAAAGAGCTTTTAGGGCT-----  
 -----ATTCTCCACATA-----CCTAGAAGAATAAGACAGGGCTTCGAAAGGGCTTTGCTA---TAA  
 >HM204644  
 GCA---AAA---GAA-----AAA---CAA---  
 GAAGAGTTGTGGGTACAGTCTATTATGGGGTACCTGTGTGG---AAAGAAACAACC---  
 ACCACTTTATTTTGTGCAACAGATGCTAAAGCATATGAGACAGAA---AAACATAAT-----  
 -----GTTTGGGCCACA---CATGCTTGTGTACCCACAGAC---  
 CCCAACCCACGAGAATTAAATTTGGTT-----AATGTGACAGAAAATTTTAAAC-----  
 -----ATGTGGAAAAATGACATGGTAGAACAGATGCTAGGAGACATA---  
 ATCAGTTTATGGGATCAAAGCCTA---AAACCATGTGTAAAAATA---  
 ACCCCACTCTGTGTTACTTTAAATTGTACCAATGCTACTAATAAGACTGGTAGTACCAATAGT-----  
 -----  
 -----AGTGAGAGTGTTGCTCCTCCCATAGAGCCAGGAGAAATAAAA---  
 AACTGCTCTTTCAATATCACCACAAGCACAAGA-----  
 GGTAAGATGCAGAAAGAATATGCAACT---TTTTATAACATTGATATAGTAAAAATAGATAATGCTAAT---  
 -----  
 -----  
 AGTGCTAATACTAGCTATAATAACTATAGGTTGGTAAGTTGTAACACCTCAGTCATTACACAA---  
 GCCTGTCCAAAGGTATCCTTTGAACCAATTCCCATACATTATTGTGCCCGGGCTGGTTATGCGATTATAAAAT  
 GTAAT---AATAACACATTCAAT-----GGAACAGGACCATGTAATAAT-----  
 -GTCAGC---ACAGTACAATGTACACATGGAATTAGACCAGTGGTATCAACT---  
 CAACTGCTGCTAAATGGCAGTCTAGCAGAAGAAGAA-----  
 GTAGTAATTAGATCTGAAAATTTCAACAAACAAAT-----GCTAAAACTATAATAGTACAGCTGAAA---  
 -----GAACCAGTACAA-----ATTAATTGTACAAGACCCAACAACAATACAAGAAAA---  
 -GGTATACATATA-----GGACCAGGGAAAGCA---TTC-----TATACAACAGGAGAA---  
 -----ATAATAGGAGATATT-----AGACAAGCATACTGT---AACATTAGTAGGGCA---  
 AAATGGAATAACACTTTAAGTGAAATAGCTAAAAAACTAGGA-----GAACAATTTGGG---  
 -----AATAAAACAATAGTCTTTAAT-----  
 CGATCTTCAGGAGGGGACCCAGAGATCACA--ACACACAGTTTTAATTGTGGAGGGGAA---  
 TTTAAGCAGCTCCAGGCAAGAGTCCCTGGCTGTGGAAAGATACCTAAGGGATCAGCAGCTCCTGGGGATCTGGG  
 GTTGCTCTGGAAACTCATCTGCACCACTACTGTGCCTTGGAAATAATACTTGGAGT-----  
 -----AATAAATCTCTGGACCGCATATGG-----GGG-----  
 AATATGACCTGGATGCAGTGG---GAAAGAGAAATTGACAATTACACAGCAGAAATATAC---  
 TCCTTAATTGAAGAATCGCAAAACAGCAAGAA-----  
 -----  
 AAGAATGAACAAGAATTATTGGCATTAGATAAATGGGCAAGTTTGTGGAATTGGTTTGACATATCAAGTTGGC  
 TGTGGTATATAAAAATATTCCATAATGATAGTAGGAGGCTTGGTAGGTTTAAGAATAGTTTTTTTCT---  
 GTACTTTCTATAGTG-----AATAGAGTTAGGCAGGGATACTCACCA-----  
 TTATCGTTTGCAGTTAGCTTGTTTAATGCAATTAGCCATAGCAGTAGCTGAG---  
 GGGACTGATAGGATTATAGAAACATTGCAAAGAATTGGTAGAGCT-----  
 -----GTCCTTCATATA-----CCTAGAAGAATAAGACAGGGCTTAGAAAGGGCTTTGCTA---TAA  
 >JF680923  
 GCT---ACA-----  
 GAAAAACTGTGGGTACAGTCTATTATGGGGTACCTGTGTGG---AAAAATGCATCC---  
 ACCACTCTATTTTGTGCATCAGATGCTAGAGCATATGATACAGAG---GTACATAAT-----  
 -----GTTTGGGCCACA---CATGCTTGTGTCCACAGAC---  
 CCCAACCCACAGGAAATAGTATTAGAA-----AATGTGACAGAATATTTTAAAC-----  
 -----ATGTGGAAAAATGATATGGTAGACCAGATGCAAGAGGACATA---  
 GTCAATCTATGGGACCAAAGCCTA---AAGCCATGTGTAAAATTA---  
 ACCCCACTCTGTGTCACTTTAAATTGCAGTGATGTCAATGTCACTAATGTCAATGTCACTAAT-----  
 -----  
 -----ATCAATGTCACTGATATCCAGGGAGAAGGAGAAATAAAA---  
 AACTGCTCTTTCAATATCACCACAGACCTGAAA-----  
 GATAAACGGCAGAAGGAATATGCACCT---TTTTATAAACTTGATGTAGTAACAATAAGTAAT-----

-----  
-----  
GATAGCAGCAGCTATAGGTTGATAAGTTGTAACACCTCAGTCATTACACAA---  
GCCTGTCCAAAAGTATCCTTTGAGCCAATTCCCATACATTATTGTGCCCCGGCTGGTTTTGCGATTCTAAAAT  
GTAAT---AATAAGACGTTTCAGT-----GGAAAAGGATCATGTACAAAT-----  
-GTCAGC---ACAGTACAATGCACACATGGAATTAGGCCAGTAGTATCAACT---  
CAACTGCTGTTAAATGGCAGTCTAGCAGAAGAAGAG-----  
GTAGTAATTAGGTCTGACAATTTCTCGGACAAT-----GCTAAAACCATAATAGTACAGCTGAAT----  
-----GAATCTGTAGAA-----ATTAATTGTACAAGACCCAACAACAATACAAGAAAA-----  
-AGTATAAATATA-----GGACCCGGAAGGGCA---TTT-----TATACAACAGGACAA-----  
-----ATAATAGGAAATATA-----AGACAAGCACATTGT---AACATTAGTGAACAC---  
AAATGGAATAAAACTTTAAAAACAGATAGTTGAGAAATTACAA-----GAACAATATGGG----  
-----AATAAAACAATAATCTTTAAG-----  
CATTCCCTCAGGAGGGGACCCAGAAATTGTA--ATGCACAGCTTTAATTGTGAAGGGGAA---  
TTTAAGCAGCTCCAGGCAAGAGTCCTGGCTGTGGAAAAGATACCTAAGGGATCAACAGCTCCTGGGACTTTGGG  
GGTGCTCTGGGAAACTCATCTGCACCACTACTGTGCCTTGGAATGCTAGTTGGAGC-----  
-----AATAAAAATCTAAGTCAGATCTGG-----GAT-----  
AACATGACCTGGATGCAGTGG---GAAAAAGAAATTGACAAATTACACAGAATTAATATAC---  
ACCTTAATTGAACAATCGCAGAACCAGCAGGAA-----  
-----  
AAGAAATGAACAAGAACTATTGGAATTGGATAAATGGGCAAGTTTGTGGAAGTGGTTTGACATAACAACTGGC  
TGTGGTATATAAAAAATATTACATAATGATAGTAGGAGGATTGATAGGTTTAAGAATAGTTTTTTACA---  
GTACTCGCTATAGTA-----AATAGAGTTAGGAAGGGATATTCACCA-----  
TTGTCAATTTGCTATTAGCTTGCTCAATGCCACAGCTATCACAGTAGCTGAA---  
GGGACAGATAGGTTTATAGAAAATTACAAAGAATTGGCAGAGCT-----  
-----TTTCTTCATATA-----CCTAGAAGAGTAAGACAGGGCTTAGAAAGGGCTTTGCTA---TAA  
>JF680924  
GCT---ACA-----  
GAAAAATTTGTGGGTTACTGTCTATTATGGGGTGCCTGTGTGG---AAAGAAGCAACC---  
ACCACTTTATTCTGTGCATCAGATGCTAGAGCATATGATACAGAG---GTACATAAT-----  
-----GTCTGGGCTACA---CATGCCTGTGTACCCACAGAC---  
CCCAACCCACAAGAAATAGACTTGAAG-----AATGTGACAGAAGATTTTAAC-----  
-----ATGTGGAAAAATGACATGGTAGAACAGATGCATGAAGATATA---  
ATCAGTTTATGGGACCAAAGCCTG---AAGCCCTGTGTAAAATTA---  
ACTCCACTCTGTGTAACTTTAAATTGCACTGATTATGAAGGTACAAATACCACTAATCATACC-----  
-----  
-----ACTAATCATAATACTAATGTCACGGAGAAAGAAGAAATGAAA---  
AATTGCTCTTTCAATATCACCACAAGTATAAGA-----  
GATAAGGTGACAAAAGAATATGCACTT--TTCTATAGGCTTGATATAGCACAAATAAATGATGATAGTAAA-  
-----  
-----  
AATGATAGTAGCAGTAATAATAGTAGCTATAGATTGATAAATTGTAATACCTCAGTCATTACACAA---  
GCATGTCCAAAAGTATCCTTTGAACCAATTCCCATACATTTTTGTGCCCCGGCTGGTTTTGCGATTTTAAAAT  
GTAAG---GATAAGACATTCAAT-----GGAAAAGGAACATGTACAAAT-----  
-GTCAGC---ACAGTACAATGTACACATGGAATTAGACCAGTAGTGTCAACT---  
CAACTGCTGTTAAATGGCAGTCTAGCAGAAGAAGAG-----  
ATAGTAATTAGATCTGAAAATTTACAAATAAT-----GTTAAAACCATAATAGTACAGCTAAAT----  
-----AAATCTGTAGCA-----ATTGAATGTACAAGACCCAACAACAATACAATAAAA-----  
-GGTATACATATA-----GGACCAGGAAGCGCA---TTT-----TATACAACAGGACAA-----  
-----GTAGTAGGAGATATA-----AGACAAGCATATTGT---AGCTTTAACAGAACA---  
GAATGGAATAAACTTTAGAACAGGTAGTTAAAAAATTAAAG-----AAACAATTTGAG----  
-----AATAAACTATAATCTTTAGG---  
CAACCTGCGCGGGGAGGGGACCCAGAACTTGTA--ATGCACAGCTTTAATTGTGGAGGGGAA---  
TTTAAGCAGCTCCAGGCAAGAGTCCTGGCTGTGGAAAAGATACCTAAAGGATCAACAGCTCCTGGGGATTTGGG  
GTTGCTCTGGAAAACCTTATCTGCACCACTTCCGTGCCTTGGAACACTAGTTGGAGT-----  
-----AATAAATCTCAGGAGCAGATTTGG-----GAG-----  
AACATGACCTGGATGCAGTGG---GAAAAAGAGATTGATAATTACACAGACGTCATATAC---  
AACTTGCTTGAAAAATCGCAGAACCAGCAGGAG-----  
-----  
AAGAAATGAAAAAGAATTATTAGAATTGGATAAATGGGCAAGTTTGTGGAATTGGTTTGACATAACAAGATGGC

TGTGGTATATAAAAAATATTTCATAATGATAGTAGGAGGCTTGGTAGGTTTAAGAATAATTTTTTGCT---  
 GTA CTTTCTATAGTG-----AAAAAAGTTAGGCAGGGATACTCACCC-----  
 TTGTCTGTTGGCTATTAGCTTGCTTAATGCCACAGCAATTGCAGTAGCTGAG---  
 GGGACAGATAGGATTATAGAAATAGTACAAAGAACTGTTAGAGCT-----  
 -----ATTCTCAACATA-----CCTAGAAGAATAAGACAGGGCCTGGAAAGAATTTTGCTA--TAA  
 >JF680933  
 GCT---ACA-----  
 GAACAATTATGGGTCACAGTCTATTATGGGGTACCTGTGTGG--AAAGAAGCAACC---  
 ACCACTCTATTTTGTGCATCAGATGCTAAGGCATATGATACAGAG--GTACATAAT-----  
 -----GTTTGGGCCACA---CATGCCTGTGTACCCACAGAC---  
 CCCAGCCCACAAGAATTAATAATTGGAA-----AATGTGACAGAAAATTTTAAC-----  
 -----ATGTGGAAAAATAACATGGTAGACCAGATGCATGAGGATATA---  
 ATCAGTTTATGGGATCAAAGCCTA--AAGCCATGTGTAAAAGTTA---  
 ACCCCACTCTGTGTCACTCTAAATTGCAGTAATGCCACTTATGCCAATACCACTTATGCCACTAAAGCC----  
 -----  
 -----AATAATAGTAGCGAGAAAAAGGATGATAGAGGTAGAAGAAATAAAA---  
 AACTGCTCTTTCAATATCACCAAGCATAGGG-----  
 AATAAGCTGCAAAACCAATATGCAACT--TTTTCTAAACTTGATATAGTGTCAATTAAATAGT-----  
 -----  
 -----  
 AATGATACTAAGAATACTAGCTATAGGTTGATAAATTGTAACACCTCAGTCATTACACAG---  
 GCCTGTCCAAAGGTATCCTTTGAGCCAATTCCCATACATTATTGTGCCCCAGCTGGTTTTCGATTCTAAAGT  
 GTAAT---GAGAAGAATTTCAAT-----GGAACAGGACCATGTAAAAAT-----  
 -GTCAGT---ACAGTACAATGTACACATGGAATTAGGCCAGTAGTATCAACT---  
 CAACTGCTGTAAATGGCAGTCTAGCAGAAAACGAG-----  
 GTAGTAATTAAATCTGAGAATATCACAGACAAT-----ACTAAAAACATAATAGTACAGCTGAAT----  
 -----GCCTCTATAGCA-----ATTAATTGCACAAGACCCAACAACAATACAAGGAGA-----  
 -GGTATACATATG-----GGACCAGGAAGAACA---TTC-----TTTACAGCAGAT-----  
 -----ATAATAGGAGATATA-----AGACAAGCACATTGT--AACCTTAGTGGAGCA---  
 GACTGGAATAGCACCTTAGGCAAGATAGTTATAAAATTAAGA-----GAATCATTTGTG----  
 -----AATAAAACAATAATCTTTAAG-----  
 CCACCAGCAGGAGGGGACCCAGAAATTGTA--CTACACAGCTTTAATTGTGGAGGGGAA--  
 TTTAAGCAGCTCCAGGCAAGAGTCCCTGGCTGTGGAAAGATACCTACGGGATCAACAGCTCCTAGGGATTTGGG  
 GTTGCTCTGGAAACTCATCTGCCCCACTGCTGTGCCTTGGAAATGTTAGTTGGAGC-----  
 -----AATAAATCTCTGGATCAGATTTGG-----GGC-----  
 AACATGACATGGATGCAGTGG--GAAAGAGAAATTGACAATTACACAAACATAATATAC--  
 ACCTTAATTGAAGACTCGCAACTCCAACAAGAA-----  
 -----  
 AAGAATGAACAAGAATTATTGGAATTGGATAAATGGGCAAGTTTGTGGAATTGGTTTGACATATCAAAATGGC  
 TGTGGTATATAAAAAATATTTCATAATGATAGTAGGAGGCTTGATAGGTTTAAGAATAATCTTTCTT--  
 GTA CTTTCTATAGTG-----AATAGAGTTAGGCAGGGATACTACCA-----  
 TTATCGTTGGCTGTTAGCTTGTTCAACGCCATAGCCATAGCAGTAGCTGAG---  
 GGGACAGATAGAGTTATAGAAATATTACAAAGAGCTTGTAGAGCC-----  
 -----ATTGCAACATC-----CCTAGAAGAATAAGACAGGGTTTGGAAAGGTCTTTTGCTA--TAA  
 >HQ595797  
 GCT---GCA---CAA-----  
 CAAGAACAATTGTGGGTCACAGTCTATTATGGGGTACCTGTGTGG--AAAGAAGCAACC---  
 ACCACTTTATTTTGTGCCTCAGATGCTAGAGCATATGATACAGAG--GCACATAAT-----  
 -----GTTTGGGCCACA---CATGCCTGTGTGCCACAGAC---  
 CCCAACCACACAAGAAGTAGTATTGGGA-----AATGTGACAGAAAATTTTAAC-----  
 -----ATGTGGAAAAATAACATGGTAGAACAGATGAATGATGATATA---  
 ATCAGTTTATGGGATGAAAGCCTA--AAGCCATGTGTAAAATTA---  
 ACTCCACTCTGTGTTACTTTAAATTGTACTGATTTGAATATTAATATTACTAGAAGCAATGGT-----  
 -----  
 -----ACTGAGGATAATATTACTAGAATGGACCCAGGAGAAATAAAA---  
 AACTGTTCTTTCTATGTCAAACAGTCATAAAG-----  
 GATAAGGTGCTTAAAGCACATGCATCT--TTTTATAAATATGATGTAGTACAAATAGGCAAT-----  
 -----  
 -----  
 AATAATTCTAGCTATAGGTTGATAAGTTGTAACGCCTCAGTCATTACACAG---

GCCTGTCCAAAAACATCCTTTGAGCCAATTCCCATACATTATTGTGCCCCGGCTGGTTTTGCGATTCTAAAAT  
 GTAAT---GATAATAATTTCAAT-----GGAACAGGGCCATGCAAAAAT-----  
 -GTCAGC---ACAGTCCAATGTACACATGGAATTAGGCCAGTAGTGTCAACT---  
 CAACTGCTATTAAATGGCAGTCTAGCAGCAGAAAAG-----  
 GTAGTACTTAGATCTGCCAATTTCTCAGACAAT-----ACTAAAACCATAATAGTACAGCTGAAT----  
 -----AAAACAATAAAA-----TTTGATTGTACAAGACCCGGCAACAATACAAGGAGG-----  
 -AGTATAACTATA-----GGACCAGGGAGAACA---TTT-----TTTACAGGAGAA-----  
 -----ATAATAGGAGATATA-----AGAAAAGCACATTGT---AACATTAGTAGAACC---  
 CAATGGAATAACACTCTAGAAAAGGTAGTTGCAGAACTAAGA-----GGAATTGAACAATTTAAG-  
 -----AATAAAACAATAAAATTTAGT-----  
 CACTCTACAGGAGGGGACCCAGAAAGTTACG---ATGATCAATTTTAATTGTGGAGGGGAA---  
 TTTAAGCAGCTTCAGGCTAGAGTCCTGGCTCTGGAAAAGATATCTAAGGGATCAACAGCTCCTAGGGATTTGGG  
 GTTGCTCTGGAAAACCTCATCTGCACCACTGCTGTGCCTTGGAATACTAGTTGGAGT-----  
 -----AATAAATCTTACACAACGATTTGG-----GAA-----  
 AACATGACCTGGATGGAGTGG---GAGAGAGAAATTGACAAATTACACAAGTTTAATATAT---  
 TCCTTAATTGAAGACTCGCAAAACCAGCAAGAA-----  
 -----  
 AAGAATGAACAAGAATTATTGGAATTAGATAAGTGGGCAAGTTTGTGGAATTGGTTCAGCATAACACACTGGC  
 TGTGGTATATAAAATTATTCTAATGATAGTAGGAGGCTTGATAGGTTTAAGAATAGTTTTTTGCT---  
 GTATTTTCTATAGTG-----AATAGAGTTAGGCAGGGATATTCACCA-----  
 CTATCATTTGCTGTTAGCTTGCTCAACGCCACTGCTATAATAGTAGCTGAG---  
 GGAACAGATAGGATTATAGAAGTAGTACAAACAATTTATAGGGGT-----  
 -----ATCCTCCACATA-----CCTACAAGAATAAGACAGGGCTTGGAAGGCTTTACTA---TAA  
 >AJ535611  
 GCT---GCT---GCA-----  
 GGACAATTGTGGGTACAGTCTATTATGGAGTACCTGTGTGG---AAAGAAGCAACC---  
 ACCACTTTATTTTGTGCATCAGATGCTAAAGCATATGACACAGAG---GCACACAAT-----  
 -----GTGTGGGCCACA---CATGCTTGTGTACCCACAGAC---  
 CCTAACCCACAAGAAATAGTAATGGGA-----AATGTAACAGAAAATTTTAAT-----  
 -----ATGTGGAAAAATAATATGGTAGAACAGATGAATGAGGATATA---  
 ATCAGCTTATGGGATCAAAGCTTA---AAACCATGTGTAAAATTA---  
 ACCCCACTCTGTGTTGTTTAAATTGCACTGATGCGAAGGCTAACAAATAGTAGTAACAAT-----  
 -----  
 -----AGTAGTGATTGGCTAAAGATGGAGAAAGGAGAAATACAA---  
 AACTGCTCTTTCAAC---ACCACAAGAATAGGA-----  
 AATAAGATACAGAAAGAATATGCACTT---  
 TTTTACAACTTGATGTAGTACCAATAGATCAGGATAATACAAGT-----  
 -----CAGCAG---  
 AATAATACAAGTTATACAAATCAGACAAAGTATACAAGGTATACATTGATAAATTGTAATACCTCAGTCATTA  
 CACAA---  
 GCCTGTCCAAAGATATCCTTTGAACCAATTCCCATACATTATTGTGCCCCGGCTGGTTTTGCGCTTCTAAAGT  
 GTAAC---AATAAGAAGTTCAAT-----GGAACAGGACCATGTACAAAT-----  
 -GTCAGC---ACAGTACAATGTACACATGGAATTAGGCCAGTAGTGCCAAC---  
 CAATTACTGTAAATGGCAGTCTAGCAGAAGAAGAG-----  
 GTAGTAATTAGATCTGAAAATTTACAGACAAT-----GCAAAAATCATAATAGTACAGCTGAAT----  
 -----GCAACTGTAAGA-----ATTAATTGTACAAGACCCAACAACAATACAAGAAAA-----  
 -AGTATACATATA-----GGACCAGGGAGAGTA---TTT-----TATGCAACAGGAGAT-----  
 -----ATAATAGGAGATATA-----AGACAAGCACATTGT---AATATTAGTAAACA---  
 GAATGGAATAACACTTTAAGACAGATAGCTACAAAATTAGCA-----AAACAATTTAAT-----  
 -----AATAGAACAATAATCTTTAAG-----  
 CAATCCTCAGGAGGGGACCCAGAAATTGTA---ATGCACAGTTTTAATTGTGGAGGGGAA---  
 TTTAAGCAGCTCCAGGCAAGAGTCCTAGCTGTGGAAAAGATACCTAAGGGATCAACAGCTCCTAGGGATTTGGG  
 GTTGCTCTGGAAAACCTATTTGCACCACTACAGTGCCTTGGAATGCTAGTTGGAGT-----  
 -----AATAAATCCCTGAATCAGATTTGG-----GAA-----  
 AACATGACCTGGATGGAGTGG---GAGAGAGAAATTGACAAATTATACAAACACAATATAC---  
 AACTTAATTGAAAAATCACAAAACCAGCAGGAA-----  
 -----  
 AAGAATGAACAAGAATTATTGGAATTGGATAAGTGGGCAAGTTTGTGGAATTGGTTCAGCATAACAAGTTGGC  
 TGTGGTATATAAAATATTCTAATGATAATAGGAGGTTTAGTAGGTTTAAGAATAGTTTTTTGCT---  
 GTGCTTTCTATAATA-----AATAAAGTTAGGCAGGGATACTCACCA-----

TTATCATTTGCTATTAGTTTGCTTAATACTACAGCTATCGCAGTAGCTGAG---  
 GGGACAGATAGAGTTATAGAAGTAGTACAAAGAACTTGTAGAGCT-----  
 -----ATCCTCCATATA-----CCTAGAAGAATAAGACAAGGCTTAGAAAGGCTTTTACTG---TAA  
 >AJ286339  
 GCT---ACA-----  
 GAACAATTGTGGGTCACAGTCTATTATGGGGTACCTGTGTGG---AAAGAAGCAACT---  
 ACCACTCTATTCTGTGCCTCAGATGCTAAAGCATATGAAACAGAG---GCACATAAT-----  
 -----GTCTGGGCCACA---CATGCCTGTGTACCCACAGAC---  
 CCTAACCCACAAGAAGTAAAATTGGAA-----AATGTGACAGAAAACCTTTAAC-----  
 -----ATGTGGAAAAATAACATGGTAGAACAGATGCAGGAGGATATA---  
 ATCAGTTTATGGGATGAAAGCCTA---AAGCCATGTGTAGACTTA---  
 ACCCCAATCTGTGTTACTTTAAATTGCACTGATTGTTTAAAGAATGCCACCGATAATAGTACATTAGCTTGCA  
 CTAAGGCTAATAAC-----  
 -AATAATGCTACTAATATCAATAATAGTGGTTATTGGAAAAAGATGGAAGCAGGAGAAATGAAA---  
 AGATGCTCTTTCAATATCACCACAAACATAGGA-----  
 AATAAGGTGAAACAAGAATATGCCCTT--TTCAATAGACTTGATATAGTACCAATAAATACT-----  
 -----  
 -----  
 GGTAATGATAATACCAGCTATATGTTGATAAATTGTAATACCTCAGTCATTAAACAA---  
 GCCTGTCCAAAGATATCTTTTGAACCAATTCCCATACATTATTGTGCCCCGGCTGGTTTTCGATTCTAAAGT  
 GTAAG---GATAAAAATTTCAAT-----GGAACAGGACCATGTAAAAAT-----  
 -GTCAGC---ACAGTACAATGTACACATGGAATTAGGCCAGTAGTGTCAACT---  
 CAACTGCTGTTAAATGGCAGTCTATCAGAAGGAGAT-----  
 GTAGTAATTAGATCTGAAAATTTCAACAAACAT-----ATTAAAAACATAATAGTACAGCTGAAG----  
 -----GAATCTGTAGAA-----ATTACTTGTATGAGACCCAACAACAATACAAGAAAA-----  
 -GGGATAAATATA-----GGACCAGGGAGAGCA---TGG-----TATACAACAGGAGAG-----  
 -----ATAATAGGAGATATA-----AGACAAGCACATTGT---AACATTAGTAAAGGA---  
 AACTGGACTAAAACCTTTAAGACAGATAGTTGCAAAATTAAGA-----GAACAATATGGG----  
 -----GTAAATAAAACAATAATCTTTAAT-----  
 CACTCCTCAGGAGGAGACCCAGAAATTGTA--ACACACAGTTTTAATTGTGGAGGAGAA---  
 TTTAAGCAGCTCCAGGCAAGAGTCCCTGGCTGTGGAAAAATACCTAAGGGATCAACAGCTCCTAGGGATTTGGG  
 GTTGCTCTGGAAGAACTCATCTGCACCACTACTGTGCCTTGGAAATGCTAGTTGGAGT-----  
 -----AATAGAACTCTGGGAGAGATTTGG-----AAT-----  
 AATATGACTTGGATGCAGTGG---GAAAAAGAAATTGACAATTACACAGGCCTAATATAC---  
 ACCTTACTTGAAGAATCGCAAACCCAACAAGAA-----  
 -----  
 AAGAATGAACAAGAATTATTGGAATTGGATAAGTGGGCAAGTTTGTGGGATTGGTTTAGCATAACAAATTGGC  
 TGTGGTATATAAGAATATTATAATGATAGTAGGAGGCTTGGTAGGTTTAAAAATAGTTTTTGTCT---  
 GTGTTTTCTATAGTA-----AATAGAGTTAGGCAGGGATACTACCA-----  
 TTATCATTTGCAGTTAGCTTGTTCAACGCTACAGCTATAGCAGTAGCTGAG---  
 GGGACAGATAGGATTATAGAAGTAGTACAAAGAACTTGTAGAGCT-----  
 -----ATTGCCACATA-----CCTAGAAGAATAAGACAGGGGCACAGAAAGGGCTTTAGTA---TAA  
 >DQ207942  
 GCT---ACA-----  
 GAAAAATTATGGGTCACAGTCTATTATGGGGTACCTGTGTGG---AAAGATGCAACC---  
 ACCACTCTATTTTGTGCATCAGATGCTAAAGCATATGACACAGAG---ATGCATAAT-----  
 -----GTTTGGGCCACA---CATGCATGTGTACCCACAGAC---  
 CCTGACCCACAAGAGGTAAGATTGGAA-----AATGTGACAGAAAATTTTAAT-----  
 -----ATGTGGAAAAATAACATGGTAGATCAAATGCATGAGGATATA---  
 ATCAGTTTATGGGATCAAAGCTTA---AAGCCATGTGTAAAACATA---  
 ACCCCACTCTGTATCACTCTAAATTGCACTGATTGGAACAATAGTACAACCAAT-----  
 -----  
 -----AGTAGTAATAGTTGGAAAGAGGTGGAAATGAAA---  
 AATTGCTCTTTCAATGTCAACCAAGCATAGGA-----  
 AATAAGATGCACAAAGAATATGCACTT--TTGTATAAGCTCGATTTAGTACCAATAGAAGAG-----  
 -----  
 -----  
 AATAATAATACAATCTATACATTGATAAGTTGTAACACCTCAGTCATTACACAG---  
 GCTTGTCCAAAGATATCCTTTGAACCAATTCCCATACATTATTGTGCCCCGGCTGGATTTGCAATTGTAAAAAT  
 GTAAT---GATGAGAAGTTCAAT-----GGAACAGGACCATGTAAAAAT-----

-GTTAGC---ACAGTACAATGTACACATGGAATTAGGCCAACAGTGTCAACT---  
 CAACTGCTATTAAATGGCAGTCTAGCAAAAGAAGAA-----  
 GTAATAATTAGATCTGAAAATTTACAGACAAT-----GTTAAAACCATAATAGTGCAGCTGAAT----  
 -----GAATCTGTACAA-----ATTAATTGTACAAGACCTAACAACAATACAAGAAAA-----  
 -AGTATACATATA-----GGACCAGGGAGAGCA---TTT-----TATGCAACAGGAGAA-----  
 -----ATAATAGGAGATATA-----AGACAAGCACATTGT---AACCTTAGTAGTGAT---  
 CAATGGAGTAACACTTTAAAACACATAGCTACAAAATTAAGA-----GAACAATTTAAG----  
 -----AATAAAACAATAGCCTTTAAC-----  
 CAATCCTCAGGAGGGGACCCAGAAATTACA---ATGTTCAATTTTAATTGTGGAGGGGAA---  
 TTTAAGCAGCTCCAGGCAAGAGTCCTGGCTGTAGAAAGATACCTACAGGATCAACGGCTCCTAGGGCTTTGGG  
 GTTGCTCTGGA-AACTCATTTGCACCACTACTGTGCCTTGGAATGCTAGTTGGAGT-----  
 -----AATAAATCTCTAAATGAAATTTGG-----GAT-----  
 AACATGACCTGGATGCAGTGG---GAGAGAGAAATTGATAATTACACAGGCATAATATAC---  
 AATTTAATTGAAATATCACA-AAACCAACAAGAA-----  
 -----  
 AAGAATGAACATGAATTATTGGAATTAGACAAGTGGGCAAGTTTATGGAATTGGTTTGACATATCAAAGTGGC  
 TGTGGTATATAAAATATTTCATAATGATAGTAGGAGGTTTAATAGGTTTAAGAATAGTTTTTACT---  
 GTACTTTCTATAGCA-----AATAGAGTTAGGCAGGGATACTCACC-----  
 TTGTCATTCGCTGTTAATTTGCTTAATGCTGCAGCCATAGCAGTAGCTGAG---  
 GGGACAGATAGAATTGTAGAAGTAGTACAAAGAATTGGTAGAGCT-----  
 -----ATTATCCACATA-----CCTAGAAGAATAAGACAGGGCTTTGAAAGGTCCTTGCTA---TAA  
 >MH078546  
 GCT---GAA-----  
 GACAAATTGTGGGTCACAGTCTATTATGGGGTACCAGTGTGG---GAAGAAGCAACC---  
 ACCACTCTGTTTTGTGCATCAGATGCTAAAGGATATGAAACAGAG---AAACACAAT-----  
 -----GTATGGGCCACA---CATGCCTGTGTACCTACAGAC---  
 CCCAGCCCACAAGAAGTAGTATTGAAA-----AATGTAACAGAAAATTTTAAAC-----  
 -----ATGTGGAAAAATGACATGGTAGATCAGATGCATGAGGATGTA---  
 ATCAGTTTATGGGATCAAAGCCTA---AAGCCATGTGTAGAATTG---  
 ACCCCACTCTGTGTTACTTTAAATTGTACAGATATTACTAGGAATAATACTAAGTCTACT-----  
 -----  
 -----GGAACAATAGAGAGTGCAGACATGAAA---  
 AACTGCTCTTTCAATATCACCACAAGCATGAGA-----  
 GATAAGAGGGCAAAAAGAATATGCACCTT---TTTTATAAGCTTGATATAGTACCAATAGAAGATAATAAGAAT-  
 -----  
 -----  
 GATAGTATTAATAGTAATAGTAGTGAATATAGGTTGATAAGTTGTAACACCTCAGTCATTACACAG---  
 GCCTGTCCAAAAGTATCCTTTGAGCCAATTCCAATACATTATTGTGCCCCAGCTGGTTTTGCGATTCTAAAAT  
 GTAAT---AATGATACATTCAAT-----GGAACAGGACCATGTACAAAT-----  
 -GTCAGC---ACAGTACAATGTACACATGGAATTAAGCCAGTGGTATCAACT---  
 CAGCTGTTGTAAATGGCAGTCTAGCAAAAGAAGAC-----  
 ATAGTAATTAGATCTGAGAATTTACAGACAAT-----GCTAAAACCATCATAGTACATCTGAAT---  
 -----GAATCTATAATG-----ATCAATTGTACAAGACCCAACAACAATACAAGGAAG---  
 -AGTATCCATATGGGA-----CTAGGGAGATGGAGATCA---ATT-----TCTGCAACAGGAGAT---  
 -----ATAATAGGAGATATA-----AGACAAGCACATTGT---AACATTAGTGAAGAA---  
 CAATGGAAGAAAACATTAAGCAAGGTAGTTATAAAATTAAGA-----  
 GAAAAATTAACATAATCAA-----ACAAGAACAATAGTCTTTAAT-  
 -----CAATCCTCAGGAGGGGACCCAGAAATTGTA---ATGCACAGTTTTAATTGTGGAGGGGAA---  
 TTTAAACAGCTCCAGGCAAGAGTCCTGGCTGTAGAAAGATACCTACAGGATCAACAGCTCCTGGGAATTTGGG  
 GTTGCTCTGGA-AACTCATTTGCACCACTAATGTGCCTTGGAATGCCAGTTGGAGT-----  
 -----AAGAACAGAAATCTGACAGATATATGG-----GAT-----  
 AACATGACCTGGATGGAGTGG---GAAAGGGAAATTAACAATTACACAGGAGCAATATAT---  
 AGACTGATTGAAGATTCGCAAAACCAGCAAGAA-----  
 -----  
 AAGAATGAACAAGAATTATTAAAAATTTGATAAATGGGCAAGTTTGTGGAATTGGTTTGACATCTCAGCTGGC  
 TGTGGTATATAAGGCTATTTCATAATGATAGTAGGAGGCTGATAGGTTTAAGAATAGTTTTTTGCT---  
 GTGCTTTCTATAGTA-----AATAGAGTTAGGCAGGGATACTCACC-----  
 TTGTCGTTAGCTGTTAGCTTGTTCAATGCCACAGCCATAGCAGTAGCTGAG---  
 GGAACAGATAGGGTTATAGAAAATAGTACAAAGAGCTTTTAGAGCT-----  
 -----ATCCTCCACATA-----CCTGTAAGAATCAGACAGGGCCTGGAAAGATTGTTGCTA---TAA

>EU839600

GCA---GCA-----  
GAAAAATTGTGGGTCACAGTATATTATGGGGTACCTGTGTGG---AAAGATGCAACC---  
ACCACTCTATTTTGTGCATCAGATGCTAAAGCATATGATACAGAG---GCACATAAT-----  
-----GTCTGGGCCACA---CATGCCTGTGTACCCACAGAC---  
CCCAACCCACAAGAAGTAAAATTG-----AATGTGACAGAAAATTTTAAT-----  
-----ATGTGGAAAAATAACATGGTAGATCAGATGCATGAGGATGTA---  
ATCAGTTTATGGGATCAAAGCCTA---AAGCCATGTGTAAAGTTA---  
ACCCCACTCTGTGTTACTTTACATTGCATTAGTGTGAATTTGACTGCAAATTATTCT-----  
-----  
-----ACTATTGATAACAATACTGATTTCAGGGATAACA---  
AACTGCTCTTTCAATATTACCACAAACATAAGG-----  
GATAAGTTGCAAAAAGAATATGCACTC---  
TTTTATAAACCTGATGTAGTACCAATAGATGAAAGTACTGATAAT-----  
-----  
AATACTACTGTTAATAAGGATACTAAATATAGATTGATAAGTTGCAATACTTCAGTCATTACACAG---  
GCCTGTCCAAAGATAACCTTTGAGCCAATTCCCATACATTATTGTGCCCCGGCTGGTTTTGCAATTCTGAACT  
GTACA---GATAAGATGTTCAAT-----GGAACAGGGCCATGTAAAAAT-----  
-GTCAGC---ATAGTACAATGTACACATGGAATTAAGCCAGTAGTGTCAACT---  
CAACTGCTGTTAAATGGCAGTCTAGCAGAAGGTGGG-----  
GTAGTAATCAGATCTGAAAATTTACAGACAAT-----GCTAAGACCATAATAGTACAGTTGGAA---  
-----AGCTCTGTAAAA-----ATTGAGTGTACAAGACCCAATAACAATACAAGAAGA---  
-AGCCTACATATG-----GGACCAGGGAAGGCA---TTT-----TATACAACA---GAC-----  
-----ATAATAGGAGATATA-----AGACAAGCATATTGT---AACATTAGTGGAGAA---  
GAGTGGCATAAAGCTTTACAAAATGTAAGTAAAAAATTAAGA-----GAACAATATAAT---  
-----GACTCAGGAATAAATTTTGAG---  
CAACCCCCGTCAGGAGGGGACCCAGAAATTGTA--ACACATAGTTTTAATTGTGGAGGGGAA---  
TTTAAACAGCTCCAGGCAAGACTCCTGGCTGTGGAAAGATACCTAAAGGATCAACAGCTCCTGGGGATCTGGG  
GTTGCTCTGGAAAATTCATCTGCACCACTACTGTGCCTTGGAAATGTTAGTTGGAAC-----  
-----AATAGATCTGTAGATGACATTTGG-----AAT-----  
AACCTGACCTGGATGCAGTGG---GAAAGAGAAATTGACAATTACACAAGCATAATATAT---  
GGCTTACTTGAGGAATCGCAGATCCAGCAAGAT-----  
-----  
ATAAATGAACAAGAATTATTAGAATTAGATAAGTGGGCAAATTTGTGGAATTGGTTTGATATAAGCAACTGGC  
TGTGGTATATAAAAATATTACATAATGATAGTAGGAGGCTTGATAGGTTTAAGAATAGTTTTTTGCT---  
GTACTTTCTATAGTA-----AATAGAGTTAGGCAGGGGTATTCACCA-----  
TTGTCATTTGCTGTTAGCTTGCTTAATACTACAGCTATAGCAGTAGCTGAG---  
GGAACAGATAGGATTATAGAAGCAGTACAAAGAGTTTGCAGAGCT-----  
-----ATCCTTCACATA-----CCTAGAAGAGTAAGACAGGGCTTGGAAGGCTTTTGCTA--TAA  
>MK303349  
GCT-----  
GAAGACTTGTGGGTCACAGTCTATTATGGGGTACCTGTGTGG---AGAGAAGCAAAC---  
ACCTCTCTATTTTGTGCATCAGATGCTAAAGCATATGATAACGAG---GTGCACAAT-----  
-----GTTTGGGCCACA---CATGCCTGTGTGCCACAGAC---  
CCCAACCCACACGAAGTAAGATTGGAA-----AATGTGACAGAAAATTTT-----  
-----ACATGGAAAAATAACATGGTAGATCAAATGCATGAGGATATA---  
ATCAGTTTATGGGATCAAAGCCTA---AAGCCATGTGTAAAATTA---  
ACCCCACTCTGTGTCACTCTACATTGCAATAATGTTACTAATGATAGGAATACTGCTGGT-----  
-----  
-----AGCAGTAATGGTACATTGAAAAATATAGGAGAAATAAAA---  
AACTGCTCTTTTAATATCACCACAAGCACCAAG-----GAGAAGGTG---  
AAAGACTATGCACTC---TTTTATGAACTAGATATACAGCCAATAAGTAAT-----  
-----  
-----GATAGCTATAGATTACTAAAGTGTAATACCTCAGTCATTACACAA---  
GCTTGTCCAAAGGTATCCTTTGAGCCAATTCCCATACATTATTGTGCCCCAGCTGGTTTTGCGATTCTAAAAAT  
GTAAA---GATAAGAATTTCAAT-----GGAACAGGACCATGTAGAAAT-----  
-GTCAGC---ACAGTACAATGCACACATGGAATTAGGCCAGTAGTGTCAACT---  
CAGTTGCTGTTAAATGGCAGCTTAGCAGAAGACGAG-----  
GTAGTAATTAGATCTGAAAATTTCTCGGACAAT-----GCTAAAACCATAATAGTACATCTGAAT---  
-----AAATCTGTGGCA-----ATTAATTGTACAAGACCCAACAACAATACAATAAAA-----

-AGTATACACATG-----GGACCAGGGAAAGCA---TTT-----TGGGCAACAGGAAAT-----  
 -----ATAATAGGAGATATA-----AGACAAGCACATTGT---AATCTTAGCAGAACA---  
 GATTGGAATGACACTTTAAACAAGGTAGCTATAAAGTTAAGA-----GAACGATTTGGA----  
 -----GAAAACAAAACAATAGTCTTTAAT-----  
 CAATCCTCAGGAGGGGACATAGAAATTGTA--ATGCACAGTTTTTATTTGTGGAGGGGAA---  
 TTTAAGCAGCTCCAGGCAAGAGTCCTGGCTGTGGAAAGATACCTAAAGGATCAACAGCTCCTGGGGCTGTGGG  
 GCTGCTCTGGAAACTCATTTCACCACTGCTGTGCCTTGAATAGTAGTTGGAGC-----  
 -----AATAAACTCAGGAGGAGATTTGG-----GAG-----  
 AACATGACCTGGATGCAGTGG---GAAAAAGAAATTGATAATTACACAGGCTTAATATAC---  
 AGCTTAATTGAGCAATCGCAAAATCCAACAAGAA-----  
 -----  
 AAGAATGAGCAAGAATTATTGGAATTAGATAAAATGGGCAAGTTTGTGGAATTGGTTTTCAATATCAAAGTGGC  
 TGTGGTATATAAGGTTATTCATAATGATAGTAGGAGGCATAGTAGGTTTAAGAATAGTCATGACT---  
 GTATTTTCTTTAGTA-----AATAGAGTTAGGAAGGGATACTCACCA-----  
 TTGTCATTTGCTACTAGTTTGTCTTAATGCCACAGCTATAGCAGTAGGGGAA---  
 GGGACAGATAGGATTATAGAAATAGTACAAAGAGGTGTTAGGGCT-----  
 -----ATTCTCCATATA-----CCTAGAAGAATAAGACAGGGCTTAGAAAGAGCTTTGATA---TAA  
 >EF694037  
 GCT---GCA-----  
 GGCCAATTGTGGGTCACAGTCTATTATGGGGTACCTGTGTGG---AAGGAAGCAACC---  
 ACCACGCTATTTTGTGCGTCAGATGCTAAAGCATATGATACAGAG---GTACATAAT-----  
 -----GTTTGGGCCACA---CATGCCTGTGTACCCACAGAC---  
 CCCAACCCACAAGAAGTAGTATTGGAA-----AATGTGACAGAAAATTTTAAC-----  
 -----ATGTGGAAAAATAACATGGGTAGAACAGATGCATGAGGATATA---  
 ATCAGTTTATGGGATCAAAGCCTA---AAGCCATGTGTAAAATTA---  
 ACCCCACTTTGTGTCACTTTAAATTGCACTGATTGGAAGAATAATACTAATAACCAATAGT-----  
 -----  
 -----AGTAGCGGGGAAACGGTGGAGCAAGGAGAAATAAAA---  
 AACTGCTCTTTCAATATCACCACAAACATAAGA-----  
 GATAGGGTGCAGAGAGAATATGCATTA--TTTTATAAGCTTGATGTAGTACCAATAGAAAAGGAT-----  
 -----  
 -----  
 AATACCAGCTATGCCAATTATAGGTTGATAAGTTGTAACACCTCAAGCCTTACACAG---  
 GCCTGTCCAAAGGTATCCTTTGAGCCAATTCCCATACATTATTGTGCCCCGGCTGGTTTTGCGATTCTAAAGT  
 GTAAC---GATAAGAAGTTCAAT-----GGAACGGGACCATGTAAAAAT-----  
 -GTCAGC--ACAGTACAATGTACACATGGAATTAGGCCAGTAGTATCAACT---  
 CAACTGCTGTAAATGGCAGTCTAGCAGAAGAAGAG-----  
 GTAGTAATTAGATCTGAAAATTTACGAACAAT-----GCTAAAATCATAATAGTACAGCTGAAA---  
 -----GAAGCTGTAGAA-----ATTAATTGCACTAGACCCAGCAACAATACAAGAAAA---  
 -AGTATACATCTA-----GGACCAGGGGCAGCA---TTT-----TATGCAACAGGAAAC-----  
 -----ATAATAGGAGACATA-----AGACAAGCACATTGT---AACATTAGTAGAGCA---  
 AAATGGAATAACACTTTAAGCCAGATAGTTAAAAAATTAATA-----GAAATAGTTGGG---  
 -----AAGAATCAAACAGTAGTCTTTAAT-----  
 TCATCCTCAGGAGGGGATCCAGAAATTGTA--ATGCACAGTTTTTAATTGTGGAGGGGAA---  
 TTTAAGCAACTCCAGGCAAGAGTCCTGGCTGTGGAAAGGTGCCTAAAGGATCAACAGCTCCTGGGAATTTGGG  
 GTTGCACGGGAAACTCATTTCACCACTGCTGTGCCTTGAACACTAGTTGGAGT-----  
 -----AATAAATCTCTAGATGCGATTTGG-----GAT-----  
 AACATGACCTGGATGGAATGG---GAAAGAGAAATTAGCAATTACACAAGCAGAATATAC---  
 ACCTTAATTGAAGAATCGCAGAACCAACAAGAA-----  
 -----  
 AAGAATGAACAAGAATTATTGGAATTAGATAAAATGGGCTAGTTTGTGGAATTGGTTTGACGTATCAAATTGGC  
 TGTGGTATATAAAAAATATTTCATAATGGTAGTAGGAGGCTTGGTAGGTTTAAGAGTAATTTTTTACT---  
 GTACTTTCTATAGTG-----AATAGAGTTAGGCAGGGATACTCACCA-----  
 TTGTCGTTTGTCTATTAGCTTGCTTAACGCAACAGCCATAGTAGTAGCTGAG---  
 GGAACAGATAGGGCTATAGAAATATTACAAAGAGCTTTTAGA-----  
 -----GACAGGGCTTAGAAAGGGCTTTTGCTA---TAA  
 >JF680930  
 ACT---GAA-----  
 GGACAATTGTGGGTCACAGTCTATTATGGGGTACCTGTGTGG---AAAGAAGCAACC---  
 ACCACTCTATTTTGTGCATCAGATGCTAAAGCATATGATGCAGAG---GTACATAAT-----

-----GTTTGGGCCACA---CATGCCTGTGTACCTACAGAC---  
CCCAACCCACAAGAAGTAGACTTGGAA-----AATGTGACAGAAAATTTTAAAC-----  
-----ATGTGGAAAAATAACATGGTAGAACAAATGCAGGAGGATATA---  
ATCAGTTTATGGGATCAAAGCCTA---AAGCCATGTGTAAAATTA---  
ACCCCACTCTGTGTTACATTAAATTGCACTGATTATAATAGTACCAATAATGTTAATACTACC-----  
-----  
-----AGCAGTAATGTTGCTAATATGGAAAAGGGAGAAATAAAA---  
AACTGCTCTTTTAATGTCAACCACAAACATAAGA-----  
GATAAGGTAAATGAAAGAAAATGCACTT---TTTAATAAACTTGATATAGTACCAATAGATGAT-----  
-----  
-----  
GATAATGATAATACTAGCTATAGGCTGATAAGTTGTAATACCTCAGTCATTACACAG---  
GCCTGTCCAAAGGTAACCTTTGAGCCAATTCCCATACATTATTGTGCCCCGGCTGGTTTTGCATTCTAAAGT  
GTAAG---GATAACAAGTTCAAT-----GGAACAGGACCATGTAAAAAT-----  
-GTTAGC---ACAGTACAATGTACACATGGAATTAGGCCAGTGGTATCAACT---  
CAACTGCTGTTAAATGGCAGTTTAGCAGAAGAAGAG-----  
ATAGTAGTTAGGTCTGAAAATTTACCGACAAT-----GCTAAAACCATAATAGTACAGTTGAAC---  
-----GAAACTGTAGAA-----ATTAATTGTACAAGACCCAACAACAATACAAGAAAA---  
-AGTATACATATA-----GGACCAGGGAGAGCA---TTT-----TATGCAACAGGAGAA---  
-----ATAATAGGAAATATA-----AGACAAGCACATTGT---AACATTAGTGGATTA---  
AAATGGAATAATACCTTAAGACAGGTAGCTAACAAATTAAGA-----GAACAGTTTAAG---  
-----AATAAAACAATAGTCTTTAAC-----  
CAATCCTCAGGGGGGACCCAGAAATTACA--ATGCACACTTTTAATTGTGGAGGGGAA---  
TTTAAGCAGCTCCAGGCAAGAGTCCCTGGCTGTGGAAAGTTACCTAAAGGATCAACAGCTCCTGGGGATCTGGG  
GTTGCTCTGGAAGAACTCATTTGCACCACTGCTGTGCCTTGGAAATATTACTTGGAGT-----  
-----AATAAACTCTGGAGACAATTTGG-----AAT-----  
AACATGACCTGGATGGAGTGG---GAAAGAGAAATTGATAATTACACAGGTGAAATATAC---  
AAATTAATTGAACAATCGCAAAGCCAGCAAGAA-----  
-----  
AAGAATGAACAAGAATTATTGCAATTAGATCAATGGGCAAGTTTGTGGAATTGGTTTGACATAACGAAATGGC  
TGTGGTATATAAAAAATATTACATAATGATAGTAGGAGGCTTGATAGGTTTAAAGAATAGTTTTTACT---  
GTACTTTCTATAGTG-----AATAGAGTTAGGCAGGGATACTACCA-----  
CTATCGTTCGCTGTTAGCTTGCTCAACGCCACAGCCATAGCAGTAGCTGAG---  
GGGACTGATAGGGTTCTAGAAGTATTACAAAGGGCTTGATAGAGCT-----  
-----ATTCTAAACGTA-----CCTACACGCATAAGACAGGGCTTGGAAGAGCTTTGCTA---TAA  
>AB287372  
GCT---GCA-----  
GAACAATTGTGGGTCACAGTCTATTATGGGGTACCTGTGTGG--AGAGATGCAAGC---  
ACCACTCTATTTTGTGCATCAGATGCTAAAGCATATGTTACAGAA--GTACACAAT-----  
-----GTTTGGGCCACA---CATGCCTGTGTACCCATAGAC---  
CCTGACCACAAGAAATAGTATTAGAA-----AATGTGACAGAGAATTTTAAAC-----  
-----ATGTGGAAAAATAACATGGTAGAACAAATGCATGAGGATGTA---  
ATCAGTTTATGGGATCAAAGCCTA---AAGCCATGTGTAAAATTA---  
ACCCCACTCTGTGTCACTTTAAATTGCACTGATTGCACGAATACTTCGTGCGCTAAGAATGCTACTTAT---  
-----  
-----ACCAATATTGAGCAGTGCGGAAAAGGTGAAGGATGGAGAAATAAAA---  
AACTGCTCTTTCAATATCACCACAAACATAAGA-----  
GATAAGGTACAGAAAACTATGCACTG---TTTTATGATCTTGATGTAGTACCAATAGATAAAAAATAATAAT-  
-----  
-----  
ACAAGTAACAATAATTATACTAGCTATAGGATGATAAGTTGTAATACCTCAATCATTACACAG---  
GCCTGTCCAAAGGTATCCTTTGAGCCAATTCCCATACATTATTGTGCCCCGGCTGGTTTTGCATTCTAAAGT  
GTAAG---GATAAGCAGTTCAAT-----GGAACAGGACCATGTAAAAAT-----  
-GTTAGC---ACAGTACAATGTACACATGGAATTAGGCCAGTAGTGTCAACT---  
CAACTACTGTTAAATGGCAGTCTATCAGAAGGAGAG-----  
GTAGTAATTAGATCTGAAAATTTACAAACAAT-----GCTAAAACATAATAGTACAGCTAAAT---  
-----GAAACCGTAGAA-----ATTAATTGTACAAGACCCAACAACAATACTAGGAAA---  
-GGTATACATATG-----GGACCAGGGAAATTT---TAT-----GCAACAGGAGAA-----  
-----ATAATAGGAGATATA-----AGACAAGCACATTGT---AACATTACTAGAGAG---  
AAATGGAATAACACTTTACAAAAGATAGCTGAAAAATTAAGA-----GAACAATTCAAC---

-----AAAACAACAATAGTCTTTACT-----  
 AGTTCCTCAGGAGGGGACCCAGAAATTGTA--ATGCACAATTTTAATTGTGGAGGGGAA---  
 TTCAAGCAGCTCCAGGCAAGAGTCCTGGCTGTGGAAAGATACCTAAAGGATCAACAGCTCCTAGGGATTTGGG  
 GTTGCTCTGGA-AACTCATCTGCACCACTTCTGTGCCTTGAATGATACTTGGAGT-----  
 -----AATAAATCTCTGAATACAATTTGG-----GAT-----  
 AACATGACCTGGATGGAGTGG--GACAGAGAAATTGAAAATTACACAAAAGAAATATAT---  
 ATCTTACTTGAAGAATCGCAAAAACAACAGGAA-----  
 -----  
 AAGAATGAACAAGAATTATTAGCATTAGATCAGTGGGCAAATTTGTGGAATTGGTTTGACATATCAAATTGGC  
 TGTGGTATATAAAAATATTCATAATGATAGTAGGAGGCTTAATAGGTTTAAGAATAGTATTTGCT---  
 GTATTATCTATAGTG-----AATAGAGTCAGGCAGGGATATTCACCA-----  
 TTGTCAATTTGCTGTTAGCTTGCTCAACGCCACAGCTATAGCAGTAGGTGAG---  
 GGAACAGATAGGGTTATAGAAATAGCACAAAGAATCCTTAGAGCT-----  
 -----TTTATCCATATA-----CCTAGAAGAATAAGACAGGGCTTTGAAAGGGCTTTGATA---TAA  
 >AB588264  
 GCT---GTA-----  
 GAACAATTGTGGGTTACAGTCTATTATGGGGTACCTGTGTGG--AAAGAAGCAACC---  
 ACCACTTTATTTTGTGCATCAGATGCTAAAGCATATGACACAGAG--GTACATAAT-----  
 -----GTTTGGGCCACA--CATGCCTGTGTACCCACAGAC---  
 CCCAACCACAAGAAGTAGTAATGGAA-----AATGTGACAGAAGATTTTAAC-----  
 -----ATGTGGAAAAATAACATGGTAGAACAGATGCATGAAGATATA---  
 ATTAGTTTATGGGATCAAAGCTTA--AAGCCATGTGTAAAGTTA---  
 ACCCCACTCTGTGTTACTTTAAACTGCACTGATGCTAAACCCAGTAATAGTAGCACTGATGCTAACCCC---  
 -----  
 -----AATAATAGTAGTGTTACCAACAATACTGTAATAGAACAAAGAAATGAAA---  
 AACTGCTCTTTCAATGTTACCACAACATTAAGA-----  
 GATAAGGTGAACAAAGAATATGCACCT--TTTTATAAACTTGATATAGTACCAATAGATAAT-----  
 -----  
 -----  
 AATAAATACTAGCTATAGGTAAATAAGTTGTAACCTCAGTCCTTACACAG--  
 GCCTGTCCAAAGGTATCCTTTGAGCCAATTCCCATACTATTGTACCCCGGCTGGTTTTGCGCTTCTAAAGT  
 GTAAC--AATAAGACGTTTCACT-----GGAAAAGGACCATGTACCAAT-----  
 -GTCAGC--ACAGTACAATGTACACATGGAATTAAGCCAGTAGTGTCAACT---  
 CAACTGCTATTAAATGGCAGTCTAGCAGAAGAAGAG-----  
 GTAATAATTAGATCTGAAAATTTACAAATAAT-----GCTAAAACCATAATAGTACAGCTGAAC---  
 -----CAATCTGTAGTA-----ATTAATTGTACAAGACCCAACAACAACAAGAAAA---  
 -GGAATTCCTATA-----GGACCAGGACGAGCA--TTC-----TATACAACAGGAGAA---  
 -----ATAGTAGGAGAAATA-----AGACAAGCACATTGT--AACATTAGTAAAGTA---  
 GACTGGAATAACACTTTAAGACAGGTAGTTGAAAAATTAAAA-----GAAACATTTAAT---  
 -----GCAACAACAATAGCCTTTAAG-----  
 CAATCCTCAGGAGGAGACCCAGAAATTGTA--ATGCACAGTTTTTAATTGTGGAGGGGAA---  
 TTTAAGCAGCTCCAGGCAAGAGTCCTAGCTGTGGAAAGATACCTAAGGGATCAACAGCTCCTAGGGATTTGGG  
 GCTGCTCTGGA-AACTCATCTGCACCACTGCTGTGCCTTGAATAGTAGTTGGAGT-----  
 -----AATAAATCTCGAGATGAGATTTGG-----GAT-----  
 AACATGACCTGGCTACAGTGG--GAAAGAGAAATTGACAATTACACAGACTTAATATAC---  
 TCCTTACTTGAAGAATCGCAAAACCAGCAGGAA-----  
 -----  
 AAGAATGAACAAGAGTTATTGAAATTAGATAGTTGGGCAAGCCTGTGGACTTGGTTTAACATATCAAATTGGC  
 TGTGGTATATAAGGATATTCATAATGATAGTAGGAGGCTTAGTAGGTTTAAGAATAGTTTTTTGCT---  
 GTACTTTCTATAGTA-----AATAGAGTTAGGCAGGGATACTACCA-----  
 ATATCATTTGGCTGTTAGCTTGCTTAATGTTACAGCTGTAGCAGTAGCTGAG---  
 GGGACAGATAGGATTATAGAAACAGTACAAAGAGCTTGGAGAGGT-----  
 -----TTTCTTCACATA-----CCTGTAAGAATAAGACAGGGCTTAGAAAGGGCTTTGCTA---TAA  
 >AB731669  
 GCA---GCA-----  
 GATAAATTGTGGGTCACAGTCTATTATGGGGTACCTGTGTGG--AAAGAAGCAACT---  
 ACCACTCTATTTTGTGCATCAGATGCTAAAGCATATAAAACAGAG--GTGCATAAT-----  
 -----GTTTGGGCCACA--CATGCCTGTGTACCCACAGAC---  
 CCCAACCACAAGAAGTATTATTGGAA-----AATGTGACAGAAAATTTTAAC-----  
 -----ATGTGGAAAAATGACATGGTAGAACAGATGCAGGAGGATGTA---

ATCAGTTTATGGGATGAAAGCCTA---AAGCCATGTGTAAAACATA---  
 ACCCCACTCTGTGTTACTTTTAAATTGCATTGATTATAATAACAAAGAGTAATAGTACAAGTAAGACTCCTA  
 CCAATAATAGT-----AGTATGGGGGAAGAGGTGATGGAAAAAGGAGAAATAAAA---  
 AACTGCACTTTCAATATCACCACCAACATAAGA-----GGA---  
 AAGCATAAAGACTATGCACTC---TTTTATAGAAGTGATGTAGTATCAATAAATAAT-----  
 -----AGAACTAATAGTACTAGCTATAGGTTGATAAGTTGTAACACCTCAGTCATTACACAA---  
 GCCTGTCCAAAGGTATCTTTTGAGCCAATTCCCATACATTATTGTACCCCGGCTGGTTTTGCGCTTCTAAAGT  
 GTAAT---GATAAGAAATTTAAT-----GGAACAGGGCCATGTACAAAT-----  
 -GTCAGC---ACAGTACAATGTACACATGGAATTAGGCCAGTAGTGACAACT---  
 CAACTGCTGTTAAATGGCAGTCTGGCAAAAGAAGAG-----  
 ATAATAATTAGGTCTGCCAATTTCTCGGACAAT-----GCTAAAACCATAATTGTACAGCTAAAT----  
 -----GAAACTATAGAA-----ATTAATTGTACAAGACCCAACAACAATACAAGAAAA-----  
 -AGTATACCTCTA-----GGACCAGGGGAGAACA---TTT-----TATGCAACAGGAGAC-----  
 -----ATAATAGGAGATATA-----AGACAAGCACATTGT---AACATTAGTGTAGCA---  
 CAATGGGACAACACTTTAAAAACAAATAGCTGAAAAATTGAGA-----GAACAATTTGGG----  
 -----AAAAACAAAACAATAAAATTTGAG-----  
 CCATCCTCAGGAGGGGACCCAGAAATTGTA---ATGCATACTTTAAATTGTGGAGGGGAA---  
 TTTAAGCAGCTCCAGGCAAGAGTCCTGGCTGTGGAAAGATACCTAAGGGATCAACAGCTCCTAGGGATTTGGG  
 GATGCTCTGGAAGACTCATTTGCACCCTAATGTGCCTTGGGAATAGTAGTTGGAGT-----  
 -----AATAAACTTTGGATCAGATTTGG-----GAT-----  
 AACATGACTTGGATGCAGTGG---GAAAGAGAAATTGTTAATTACACAAAAGAAATATAC---  
 AACTTAATTGAAGAAGCGCAGAACCAGCAAGAA-----  
 -----  
 CAGAAATGAACATGACTTATTGGAGTTGGATAAGTGGGACAATTTGTGGAATTGGTTTAACATAACAACTGGC  
 TGTGGTACATAAGATTATTACATAATGATAGTAGGAGGCTTGATAGGTTTAAAGAATAGTTTTTTGCT---  
 GTACTTTCTATAGTA-----AATAGAGTTAGGCAGGGATATTCACCA-----  
 TTGTCAATTGGCTGTTAGCTTGCTCAACGCTACAGCTATAACAGTAGCTGGG---  
 GGGACTGATAGAATTATAGAAATAGCACAAAGAATTTATAGAGGC-----  
 -----ATTCTCCACATA-----CCTAGAAGAATAAGACAGGGCTTGGAAGGGCTTTACTA---TAA  
 >AB565478  
 GCT---GAA-----  
 GAACAATTGTGGGTACAGTTTATTATGGGGTACCTGTGTGG---AAAGAAGCAACC---  
 ACCACTCTATTTTGTGCATCAGATGCTAAAGCATATGACACAGAG---GTACATAAT-----  
 -----GTTTGGGCTACA---CATGCCTGTGTACCCACAGAC---  
 CCTAACCCACAAGAAGTAGAATTAAAA-----AATGTGACAGAAAATTTTAAC-----  
 -----ATGTGGAAAAATAATATGGTAGAACAAATGCATGAGGATATA---  
 ATCAGTTTATGGGATCAAAGCCTA---AAGCCATGTGTAAAATTA---  
 ACCCCACTCTGTGTTACTTTAAATTGCACTAATTTGAGGAATGATACTGCTAATAGCAACAGTACTGCT---  
 -----  
 -----AATGACAATAGTACTAATTGGGAATGGATAGATAAAGAAATGACA---  
 AACTGCTCTTTCAATGTCAACCACAATTATAAGA-----  
 AATAAGATGAAGAAAGAATATGCACCT---TTTTATAGACATGATGTAGTACAAATAGGTACA-----  
 -----  
 -----  
 GATAATACAAGCTATACGTTGACACATTGTAACACCTCAGTCATTACACAG---  
 GCCTGTCCAAAAGTATCCTTTGAACCAATTCCCATACATTATTGTACCCAGCTGGTTTTGCGCTTCTAAAGT  
 GTAAT---GATAAAAAGTTCAAT-----GGAAAAGGACCATGTAAAAAT-----  
 -GTCAGC---ACAGTACAATGTACACATGGAATTAGGCCAGTAGTGTCAACT---  
 CAGCTACTGTTAAATGGCAGTCTAGCAGAAGAAGAG-----  
 GTAGTAATTAGAAGTGAATAATCCACAAACAAT-----GCTAAAACCATAATAGTACAGCTGAAT----  
 -----CAAAGTGTAGAA-----ATTAATTGTACAAGACCCAACAACAATACAAGAAAA-----  
 -AGTATACATATG-----GGACCAGGGAGGTGG---AGC-----GTACTTTATGCAACA-----  
 ---GGAGCTATAGTAGGAGATATA-----AGACAAGCACATTGT---AACCTTAGTAGACAA---  
 GACTGGGAAAAGACTTTAAAAAAGATAGTTATAAAATTTAAAA-----GAACAATTTAAT----  
 -----ATAACAAAAAACATTACCTTTTAAA-----  
 GAATCCTCAGGAGGGGACCCAGAAATTACA---ATGCACAGTTTAAATTGTGGAGGGGAA---  
 TTTAAGCAGCTCCAGGCCAGAGTCCTGGCTGTGGAAAGATACCTAAGGATCAACAGCTCATGGGGATTTGGG  
 GCTGCTCTGGAAAACCTCATCTGCACCCTGCTGTGCCTTGGGAATACTAGTTGGAGT-----

-----AATAAACTCTAAATCAGATATGG-----GAT-----  
 AACATGACCTGGATGGAGTGG---GAGAGAGAAATTAACAATTACACAGGCTTGATATAC---  
 AACTTAATTGAAGAATCGCAGAACCAACAAGAA-----  
 -----  
 AAGAATGAACAAGAGTTATTGGAATTGGATAAGTGGGCAAGTTTGTGGACTTGGTTTGACATATCAAATTGGC  
 TGTGGTATATAAGAATTTTCATAATAATAGTAGGAGGCTTAATAGGTTTAAGAATAGTTTTTTGCT---  
 GTACTTTCTATAGTG-----AATAGAGTTAGGCAGGGATACTCACCA-----  
 TTATCGTTGGCTGTTAGTCTGCTTAATGCCACAGCTGTAGCAGTAGCTGGG---  
 GGGACAGATAGGATTCTAGAAGTAGTACAAAGAATTGGGAGGGGT-----  
 -----ATCCTCCACATA-----CCTAGGAGGATAAGACAGGGCTTAGAAAGGGCTTTGCTA---TAA  
 >JQ316131  
 GTT---GCA---ACA-----  
 GGAGGATTGTGGGTCACGGGCTATTATGGGGAACCTGTGTGG---AAAGAAGCGACC---  
 ACCACCCTATTTTGTGCATCTGATGCTAAAGCATATGACACAGAG---GTACATAAT-----  
 -----GTTTGGGCCGCA---CGTGCCTGTGTACCCAGAGAC---  
 CCCAACCCACAAGAAGTAGTATTGGTA-----AATGTGACAGAAAATTTTAACT-----  
 -----ATGTGGAAAAATGACATGGTAGAACAGATGCATGAGGATATA---  
 ATCAGTTTATGGGATCAAAGCCTA---AAGCCATGTGTAAAATTA---  
 ACTCCACTCTGTGTTACTTTAAATTGTAGTAATTATAATGATAGTAAAGTGAACAATGCCACT-----  
 -----  
 -----AATAGTAATGGGACAGTGGTAGGGGAAACAGAAGTAAAA---  
 AACTGCACCTTCAATGTTACCACAAGCATAAGA-----  
 GATAAGGTAAAAAAGAATATGCTCTT---TTTTATAGACTGGATGTAAAACAAATAGGTGATACA-----  
 -----  
 -----  
 GATAATACAAGCTATACAATGTAAATTGTAACCTCAGCCATTACACAG---  
 GCCTGTCCAAAGGTATCCTTTGAACCAATTCCCATACATTATTGTACCCCGGCTGGTTTTGCGATTCTCAAAT  
 GTAAT---GATAAGAAGTTCAAT-----GGAACAGGACCATGTTCAAAT-----  
 -GTCAGC---ACAGTACAATGTACACATGGAATTAGGCCAGTAGTAACAAC---  
 CAACTGCTGTTAAATGGCAGTCTAGCAGAAGAAGAG-----  
 GTAGTAATTAGATCTGAAAATTTACGAACAAT-----GCAAAAACCATAATAGTACAGCTCAAT---  
 -----GTATCTGTACAA-----ATTAATTGTACAAGACCCACAACAATACAAGAAAA---  
 -GGTATAGGGATA-----GGACCAGGGAGCATG---TTT-----TATGCAACAGGAGCC-----  
 -----ATAATAGGAGATATA-----AGACAAGCACATTGT---AACATTAGTACAACA---  
 AAATGGAATGACACTTTAAACAGGTAGTTATAAAATTAAGG-----AAACAATTTGTA---  
 -----AATAAAACAATAGTCTTTGAT---  
 CAACCATCCCCAGGAGGGGACCCAGAGATTGTA--ATGCACAGTTTAAATTGTGGAGGGGAA---  
 TTTAAGCAGCTCCAGGCGAGAGTCCCTGGCTGTGGAAAGATACCTAAGGGATCAACAGCTCCTGGGGATTTGGG  
 GATGCTCTGGAAAGCTTATCTGCACCACTAATGTGCCTTGAATACTAGTTGGAGT-----  
 -----AATAAATCTCAGGAGGAGATCTGG-----AAT-----  
 AACATGACATGGATGCAGTGG--GACAGAGAAATTGACAATTACACAACTTTATATAC---  
 AACTTACTTGAAGAATCGCAGAACCAACAAGAA-----  
 -----  
 AAGAATGAACAGGAGTTATTGGAATTGGATAAATGGGCAAGTCTGTGGAGTTGGTTTGAAATATCAAACCTGGC  
 TGTGGTATATAAAAATATTATAATGATAGTAGGAGGCTTAGTAGGTTTAAGAATAATTTTTTCT---  
 GTGCTTTCTATAGTG-----AATAGAGTTAGGCAGGGGTACTCACCG-----  
 TTATCGTTTGCTGTTAGTTTGCTTAATGCCACAGCTGTAGCAGTAGCTGAG---  
 GGGACAGATAGGATTATAGAAATATTACAAAGAGCTTATAGAGCT-----  
 -----ATTCTCAACATA-----CCTAGAAGAATAAGACAGGGCTTGGAAGGGCTTTGCTA---TAA  
 >JQ316133  
 GCC---AAT-----  
 AAATCGTGGGTCACAGTCTATTATGGGGTACCTGTATGG---AAAGAAGCAACC---  
 ACCACCCTATTTTGTGCATCAGATGCTAAAGCATATGACACAGAG---GTACATAAT-----  
 -----GTTTGGGCCACA---CATGCCTGTGTACCCATAGAC---  
 CCCAACCCACAAGAAGTAGTATTGGGA-----AATGTGACAGAAAATTTTAACT-----  
 -----ATGTGGAAGAATAACATGGTAGACCAGATGCATGAGGATATA---  
 ATCAGTTTATGGGATCAAAGCCTA---AAGCCATGTGTAAAAATA---  
 ACTCCACTATGTGTTACTTTGAATTGCAGTAATTTGAAGAATGAGACTGCCAATAGTACTAGTGCCAACAGTA  
 ATGAGACTGCCAAT-----  
 AGTACTACTGCCAACAGTAATAGTACCAGTAATAGTAGTGGGGAAGTGATGGAGGAAGTAGACATGAAA---

AACTGCTCTTTACCGTTACCACCGAATTAAAA-----  
AATACGGTGAGCAACAATATGCTCTT---TTTTATAAACTGCAAGCCCTA-----  
-----  
-----  
-----  
-----CCTAAAGATAAT-----GGAACAGGACCATGTTCAAAT-----  
----GTCAGC---ACAGTACAATGTACTCATGGAATTAGGCCAGTGGTATCAACT---  
CAACTACTGCTAAATGGCAGTCTAGCAGAAGAAGAG-----  
GTAGTAATCAGATCTGAAAATTTACGAACAAT-----GCTAAAAACATAATAGTACAGCTGAAC----  
-----GCATCTGTAGAA-----ATTAATTGTACAAGACCCGAC---AACACAATAAAA-----  
-AATATAAGAATAGGA-----CCAGGGATAGGACTAGGG---AGT-----ACATTACATGCAACA-----  
---AAAAGCATAACAGGAAGAATA-----AGACCA---CATTGC---AACATTAGTGAAGCA---  
AAATGGAACAACACTTTAAAAACAGATAGCCATAAAATTAAGA-----GAACAATTTAGG----  
-----AATAAAACAATAATCTTTAAT-----  
CACTCCTCAGGAGGGGACCCAGAGATTGAA---ATGCACAGTTTTAATTGTGGAGGGGAA---  
TTTAAGCAGCTCCAGGCAAGAGTCCTGGCTGTAGAAAAGATACCTAAAGGATCAACAGCTCCTGGGGATTTGGG  
GATGCTCTGGAAAGCTCATCTGCACCACCTAATGTGCCTTGGAATACTAGTTGGAGT-----  
-----AATAAAACTCAGGAGGATATCTGG-----ACT-----  
AACCTGACCTGGATGCAGTGG---GAAAGAGAAATTGACAAATTACACAAACGTAATATAC---  
TCCTTGCTTGAAGAATCGCAGAATCAGCAAGAA-----  
-----  
AAGAATGAACAGGAATTATTGCAATTGGATAAATGGGCAAGTTTGTGGAATTGGTTTGACATAACTAGTTGGC  
TGTGGTATATAAAAATATTGATAATGATAGTAGGAGGCTTGATAGGTTTAAGAATAATTTTTTACT---  
GTACTTTCTATAGTG-----AATAGAGTTAGGCAGGGATACTCACCA-----  
TTATCGTTTGTCTGTTAGTTTGTCTTCAAGCCACAGCTAGAGCAGTAGTTGAG---  
GGGACAGATAGGGTTATAGAAAATTACAAAGAGCTTATAGAGCT-----  
-----ATTCTCCACATA-----CCTAGAAGAATAAGACAGGGTTTGAAAGGGCTTTGCTA---TAA  
>DQ295192  
GCT---ACA---GCA-----  
GAAGACTTGTGGGTACAGTATATTATGGGGTACCTGTGTGG---AAAGAAACAACC---  
ACCACTCTATTTTGTGCATCAGATGCTAAAGCATATGACACAGAG---GTACATAAT-----  
-----GTTTGGGCTACA---CATGCCTGTGTACCCATAGAC---  
CCCAACCCACCAGAGGTAGTATTGGTA-----AATGTGACAGAAAATTTTAAC-----  
-----ATGTGGAAAAATAACATGGTAGAACAGATGCATGAGGATATA---  
ATCAGTTTATGGGATCAAAGCCTA---AAGCCATGTGTAAAATTA---  
ACTCCACTCTGTGTACTTTGAATTGTGGGGATGCGAATTTTACTAATACCAATAGTAGTAGGACTACC---  
-----  
-----AATGATAGTAGAAATGAGACAGTGATGGCGATCGGAGAAATAAAA---  
AACTGCTCTTTCAATGTTACCACAGGCATAAGA-----  
GATAAGGTGCAAAAAGAATATGCTCTT---TTTCATAAACTTGATGTAGTACAAACGGATAAT-----  
-----  
-----  
TCAAGCTATACATTGATAAGTTGTAACACCTCAGTCATTAAACAA---  
GCCTGTCCAAAGGTATCCTTTGAACCAATTTCCCATACATTATTGTACCCCGGCTGGTTTTGCGCTTCTACAGT  
GTAAT---GATAAGAAATTCAAT-----GGAACAGGACCATGTTCAAAT-----  
-GTCAGC---ACAGTACAATGTACACATGGAATTAGGCCAGTAGTATCAACT---  
CAACTACTGTTAAATGGCAGTCTAGCAGAAGAAGAG-----  
ATAGTAATTAGATCTGAGAATTTACGAACAAT-----GCTAAAACCATAATAGTACAGCTGAAT----  
-----GTATCTGTAGAA-----ATTAATTGTACAAGACCCTACAACAATACAAGAAAA-----  
-AGTATAAGAATA-----GGACCAGGGAGCGCA---TTT-----TATGCAACAGGAGAT-----  
-----GTAATAGGAGATATA-----AGAAAAGCACATTGT---AACATTAGTGAACA---  
AAATGGAATAACACTTTGAGACAGCTAGTCACAAAATTAGGA-----GAACAATTTGGG----  
-----AATAGCACAATAATCTTTAAT-----  
AAATCCTCAGGAGGGGACCCAGAGATTGTA---ATGCACAGTTTTAATTGTGGAGGGGAA---  
TTTAAGCAGCTCCAGGCAAGAGTCCTGGCTGTAGAAAAGATACCTAAAGGATCAACAGCTCCTGGGGATTTGGG  
GATGCTCTGGAAAGCTCATCTGCACCACCTAATGTGCCTTGGAATACTAGTTGGAGT-----  
-----AATAAATCTCTGAATAGAATCTGG-----GAT-----  
AACATGACCTGGATGGAGTGG---GATAGAGAAATTAACAATTACACAAACTTAATATAT---  
CACTTGCTTGAAGAATCGCAGAACCAGCAAGAT-----  
-----

AAAAATGAACAGGAATTATTGGAATTGGATAAATGGGCAAGTTTGTGGAGTTGGTTTGACATAACAAACTGGC  
TGTGGTATATAAAAATATTTCATAATGATAGTAGGAGGCTTGATAGGTTTAAGAATAGTCTTTTCT---  
GTACTTTCTATAGTA-----AATAGAGTTAGGCAGGGATACTCACCC-----  
TTATCGTTTGCTGTTAGTTTGCTTAATGCCACAACCTATAGTAGTAGCTGAG---  
GGGACAGATAGGATTATAGAACTATTGCAAAGAAGCTTATAGAGCT-----  
-----ATTATCCACATA-----CCTACAAGAATAAGACAGGGCTTGGAAGGGCTTTGCTA---TAA  
>KT878039  
GTT---GTC---ACA-----  
AAAGATTTGTGGGTCACAGTCTATTATGGGGTACCTGTGTGG---AGAGATGCAAAAC---  
ACCACCCCTATTTTGTGCATCAGATGCTAAAGCATATGTTGAAGAA---GCACATAAT-----  
-----ATTTGGGCCACA---CATGCCTGTGTACCCATAGAC---  
CCCAACCCACAAGAAGTAGCATTGGTA-----AATGTGACAGAAAATTTTAAAC-----  
-----ATGTGGAAAAATAACATGGGTAGAACAGATGCATGAGGATATA---  
ATCAATTTATGGGATCAAAGTCTA---AAGCCATGTGTAAAATTA---  
ACTCCACTCTGTGTTACCTTGAATTGTACAGATTTGACTGGTACTAATACTACTAGCCAGAATAATAGT----  
-----  
-----AGTCCAACCAATAGTAGTAGTGGGGGATGGATGGAGGCATTAGAAATGAAA---  
AACTGTTCTTTCAATGTTACCACAAGCATAAGA-----  
GATAAGGTGAAGCAAGAATATGCTCTT---TTTTATAAAGTTGATGTAACACCAACAGACAAT-----  
-----  
-----  
AGTAATACAAGCTATATATTGATAAATTGTAACCTCAACCATTACACAG---  
GCCTGTCCAAAGACATCCTTTGAACCAATTCCCATACATTATTGTGCCCCAGCTGGTTTTGCCTTCTAAAGT  
GTAAG---GATAAGAAGTTCAAT-----GGAACAGGAACATGTTCAAAT-----  
-GTCAGC---ACAGTACAATGTACACATGGAATTAGGCCAGTAGTATCAACT---  
CAGCTACTGTAAATGGCAGTCTAGCAGAAGAAGAG-----  
ATAGTAATTAGATCTGAAAATTTACGAACAAT-----GCTAAAACCATAATAGTGCAGCTGAAT----  
-----GCATCTGTAGAA-----ATCAATTGTACAAGACCCAGCAACAATACAAGAAAA-----  
-GGTATACCTATA-----GGACCAGGGAGTGTA---ATG-----TATGCAACAGGAGAA-----  
-----ATAATAGGAGATATA-----AGACAAGCACATTGT---AACATTAGTAGAGTA---  
AAATGGAACAACACTTTAGGACAGATAGCAAAAAAATTAGGA-----GAACAATTTAAA-----  
-----AATAACACAATAGCCTTTAAC-----  
CAATCCGCAGGAGGGGACCAAGAGATTACA--ATGCACAATTTTATTTGTGGAGGGGAA---  
TTTAAGCAGCTCCAGGCAAGAGTCCCTGGCTGTGGAAAGATACCTAGGGGATCAACAGCTCCTGGGGATTTGGG  
GATGCTCTGGAAAGCTCATCTGCACCACTAATGTACCTTGGAAATAATAGCTGGAGT-----  
-----AATAAATCTATAACATATATCTGG-----GAA-----  
AACATGACCTGGAGGGAGTGG---GACAGAGAAATTAATAATTACACAAACTTAATATAC---  
AACTTGCTTGAGAAGTCGAAAACCAGCAAGAA-----  
-----  
AAGAATGAACAGGAATTATTGGAATTGGATAAGTGGACAAGTTTGTGGAATTGGTTTGACATATCACACTGGC  
TGTGGTATATAAGACTATTTCATAATGATAGTAGGAGGCTTAATAGGTTTAAGAATAATTTTTTTTT---  
GTACTTTCTATAGTA-----AATAGAGTTAGGCAGGGATACTACCA-----  
TTATCGTTGGCTGTTAGTTTGCTTAACGCCATAGCTATAGCAGTAGCTGAG---  
GGGACAGATAGGGCTATAGAAATATTACGAAGAGCTATTAGAGCT-----  
-----ATTCTCAACATA-----CCTAGAAGAATAAGACAGGGCTTGGAAGGGCTTTACTA---TAA  
>KT878021  
GCT---GTA-----  
GAAAAGTTATGGGTCACAGTCTATTATGGGGTACCTGTATGG---AAAGAAGCAACC---  
ACTGTTCTATTTTGTGCATCAGATGCTAAAGCATATGACACAGAG---GCACATAAT-----  
-----GTTTGGGCCACA---CATGCCTGTGTACCCACAGAC---  
CCTAACCACACAAGAAGTAGTATTGGAG-----AATGTGACAGAAAATTTTAAAC-----  
-----ATGTGGAAAAATGACATGGGTAGAACAGATGCATGGGGACATA---  
ATTAGTTTATGGGATGAGAGTCTA---AAGCCATGTGTAAAGTTA---  
ACCCCACTCTGTGTTACTTTAAATTGCACTAATTATAATTATAATAAGACTAATTATAAT-----  
-----  
-----ACAACCTAACTGGAGGAAGGAGGCACAGACATAAAA---  
AATTGCTCTTTCAATATCACAGGAGGAATAGGA-----  
AAAGAGAAGAAAAAAGATTATGCAATT---TTTAATGCACTTGATATAATACCAGTAGATAAT-----  
-----  
-----

GATAACACAAGCTATATGTTGGTAGGTTGTAACACCTCAGTCATTACACAA---  
GCCTGTCCAAAGATATCCTTTGACCCAATTCCCATACATTATTGTACCCCGGCTGGTTTTGCGATTCTAAAGT  
GTAAT---GATAAAAAGTTCAAT-----GGAACAGGACCATGTAAAAAT-----  
-GTCAGC---ACTGTACAATGCACACATGGAATTAGGCCAGTAGTGTCAACT---  
CAACTGCTGTTAAATGGCAGTCTAGCAGAAGAAGAT-----  
ATAGTAATTAGATCTGAAAATTTACGAACAAT-----GCTAAAACCATAATAGTACAGCTAAAT----  
-----GAATCTGTAATA-----ATTAATTGTACAAGACCCAACAACAATACGAGAAAA-----  
-AGTATACATATA-----GGCCCAGGGGGAGCA---ATG-----TATGCAACAGGGGAC-----  
-----ATAATAGGAGACATA-----AGAAGAGCACATTGT---AACATTAGTAGTACA---  
CAATGGAATAACACTTTACAAAAGGTAGCTACAAAATTTAAAG-----GAACAATTTGGG----  
-----AATAAAACAATAAGCTTTAAT-----  
CAATCCTCAGGAGGGGACCCAGAAATTGTA---ATGCATAGTTTTAGTTGTGGAGGGGAA---  
TTTAAGCAGCTCCAGGCAAGAGTCCTGGCTGTAGAAAAGATACCTAAAGGATCAACAGCTCCTAGGGATTTGGG  
GTTGCTCTGGAAGAACTCATTTGCACCACCTGCTGTGCCTTGGAAATGCTAGTTGGAGT-----  
-----AATAAATCTCTGAATCAAATTTGG-----GAT-----  
AATATGACCTGGATGGAGTGG---GAGAAAGAAATTGACAAATTACACAAGCTTAATATAC---  
ACTTTAATTGAAGAATCGCAAAATCCAACAAGAA-----  
-----  
AAAAATGAACAAGAATTACTAGAAATTGGATAAGTGGGCAAGTCTGTGGAATTGGTTTGACATAACAAAATGGC  
TGTGGTATATAAAGATCTTCATAATGATAGTAGGAGGCTTAGTAGGTTTAAGAATAATTTTTTGCT---  
GTGCTTTCTATAGTG-----AATAGAGTTAGGCAGGGCTACTCACCA-----  
TTATCATTAGCTGTCTAGCTTGTATAACACCACAGCTATAGTAGTAGCTGAG---  
GGGACAGATAGAATTATAGAAGGAGTACGCAGAATTCTTAGAGCT-----  
-----TTATTCCACATA-----CCTAGAAGAATAAGACAGGGCTTAGAAAGGGCTTTGCTA---TAA  
>KT878029  
GCT---GCA---AGA-----  
GAAGACTCATGGGTACAGTCTATTATGGGGTACCTGTGTGG---AGAGATGCAAAAC---  
ACCACCCATTTTTGTGCATCAGAGGCTAAAGCATATGTCACAGAG---GCACATAAT-----  
-----GTTTGGGCCACA---CATGCCTGTGTACCCATAGAC---  
CCTGACCCACAAGAAGTAGTATTGGTA-----AATGTGACAGAAAATTTTAAC-----  
-----ATGTGGAAAAATAACATGGTAGAACAGATGCATGCGGATATA---  
ATCAGTTTATGGGACCAAAGCCTA---AAACCATGTGTAAAATTA---  
ACTCCACTCTGTGTTACTTTGAATTGTAGTAATGTGACTGATACTACTAATAGTACCAGT-----  
-----  
-----GTCCATAATAGTAGTGGGAGAGTGATGGGGGGAGGAGAAATGAAA---  
AACTGTTCTTTCAATGTTACCACAGACATAAGA-----  
AAGAAGCAAAAGAAAGAATATGCTCTT---TTTTATGACCTTGATGTAGAACCAATAGATAAT-----  
-----  
-----  
ACAAGCTATATATTGAAACATTGTAATGCCTCAGTCATTACACAG---  
GCCTGTCCAAAGGTATCTTTGAACCAATTCCAATACATTATTGTACCCAGCTGGTTTTGCGATTCTAAAAT  
GTAAT---GATAAGAAGTTCAAT-----GGATCAGGACCATGTTCAAAT-----  
-GTCAGC---ACAGTACAATGTACACATGGAATTAAGCCAGTAGTATCAACT---  
CAACTGCTGTTAAATGGCAGTCTAGCAGAAGAAGAG-----  
ATAGTAATTAGATCTGAAAATTTCTCGGATAAT-----GCTAAAATCATAATAGTACAGCTGAAT----  
-----GCATCTGTAGAA-----ATTAATTGTACAAGACCCAACAACAATACAAGAAAA-----  
-GGTATACATATA-----GGACCAGGGAGGACA---TTT-----TATGCAACAGGAGAC-----  
-----ATAATAGGAGATATA-----AGACAAGCACATTGT---AACATTAGTATAGAA---  
GAATGGAACAACACTTTAAGACAGCTAGTTATAAAAATTAAGA-----GAACAATATGGG----  
-----AATAATAAAACAATAGTCTTTAAT-----  
CAATCCTCAGGAGGGGACCCAGAGATTGTA---AGGCACAGTGTTAATTGTGGAGGGGAA---  
TTTAAGCAGCTCCAGGCAAGAATCCTGGCTGTGGAAAAGATACCTAAAGGATCAACAGCTCCTGGGGATTTGGG  
GATGCTCTGGAAGACTCATCTGCACCACCAATGTGCCTTGGAAATGCTAGTTGGAGT-----  
-----AATAAATCTATAGATGATATCTGG-----GAT-----  
AACATGACCTGGATGGAGTGG---GACAGAGAAATTAACAATTACACAAGCTTAATATAT---  
ACATTGCTTTGAAGAATCGCAGAACCAACAAGAA-----  
-----  
AAGAATGAACAGGACTTATTGGCATTGGATGACTGGGCAAGTTTGTGGAATTGGTTTGACATATCAAAGTGGC  
TGTGGTATATAAAAATATTTCATAATAATAGTAGGAGGCTTGGTAGGTTTAAGAATAATTTTTGGCT---  
GTACTTTCTATAGTG-----AATAGAGTTAGGCAGGGATACTCACCA-----

TTATCGTTGGCTGTTAGTTTGCCTTGATGCAACAGCTAGAGCAGTAGCTGAG---  
 GGGACAGATAGGGTTATAGAATTATTGCAAAGAGCTTTTAGAGCT-----  
 -----ATTCTCAACATA-----CCTAGAAGAATAAGACAGGGCTTGAAAGGGCTTTGCTA---TAA  
 >KF561441  
 GCT---GCA---ACA-----  
 GGAGGATTGTGGGTCACAGTCTATTATGGGGTACCTGTGTGG--AGAGAAGCAATC---  
 ACCACCCTATTTTGTGCATCAGATGCTAAAGCATATGAAACAGAG--ATGCATAAT-----  
 -----GTTTGGGCCACA---CATGCCTGTGTACCCATAGAC---  
 CCCAACCCACTAGAAAGTAGACTTGCCA-----AATGTGACAGAAACTTTAAC-----  
 -----ATGTGGAAAAACAACATGGTAGAACAGATGCATGAGGATATA---  
 ATCAGTTTATGGGATCAAAGCCTA--AAGCCATGTGTAAAAATA---  
 ACTCCACTCTGTGTTGTTCTAAATTGTAGTGTATGCAAAGAATAGTACTAGTACCAATAAT-----  
 -----  
 -----AGTACGGAGAAAAGTAATGGAGAAAGGAGAAATGAAA---  
 AACTGCTCTTTCAATGTCACCACAAACATAGAA-----  
 AATAAGGTGAAGGAAGCACGTGCTATT---  
 TTTGATAAACTTGATGTAGTCCAAATAGATGATAATGATACTAATACTATGATAGGGATACAA-----  
 -----  
 -----TACTACAAATGTTACTCCTCGAGCATTACACAG---  
 GCCTGTCCAATGGTATCCTTTGAACCAATTCCCATACATTATTGTACCCCGGCTGGTTTTGCGATTCTACAGT  
 GTAAA---GATAAGAAGTTCAAT-----GGAACAGGACCATGTACAAAT-----  
 -GTCAGC---ACAGTACAATGTACACATGGAATTAGGCCAGTAGTATCAACT---  
 CAACTGCTGTTAAATGGCAGTCTAGCAGAAGAAGAA-----  
 ATAGTAATTAGATCTGAAAATTTACGAACAAT-----GCTAAAACCATAATAGTACAGCTGAAC---  
 -----GCATCTGTAGAA-----ATTAATTGTACAAGACCCAACAACAATACAAGGAAA---  
 -AGTATACCTATA-----GGACCAGGGAGAGCA---TTT-----TATGCAACAGGAGAT-----  
 -----ATAATAGGAGATATA-----AGACGAGCACATTGT---AACATTAGTAAAGCA---  
 ACATGGAACAACACTTTAAGACAGCTAGCTATAAAATTAAGA-----GAACAACCTGAAGAT-  
 -----  
 -----AATACAACAACAATAATCTTTAAG-----  
 AATTCTCAGGGGGGACCCAGAGATTGAA--GCACACAGCTTTAATTGTAGAGAGGAA---  
 TTTAAACAGCTCCAGGCAAGAGTCCCTGGCTGTAGAAAGATACCTACAGGATCAACGGCTCCTGGGGATTTGGG  
 GATGCTCTGGGAAGCTCATCTGCACCACTAGTGTGCCTTGGAACTAGTGTGGAGT-----  
 -----AATAAATCTCATGATGAAATCTGG-----AAT-----  
 AACATGACCTGGATGGAGTGG--GATAGAGAAATTAACAATTACACACAGGTGATATAC---  
 GACCTGCTTGAGGAATCACAGATCCAGCAAGAA-----  
 -----  
 AAGAATGAGCAGGAATTATTGAAATTGGATTTCATGGGCAAGTCTGTGGAAGTGGTTGGACATATCAAACCTGGC  
 TGTGGTATATACAAATATTTCATGATGATGGTAGGAGGCTTGGTAGGTTTAAAGAATAATCTTTGT---  
 GTACTTTCTGTAGTG-----AATAGAGTTAGGCAGGGATACTACCA-----  
 TTACCGTTTGTCTGTTAGTTTGCCTTAATGCCACAGCTATAGCAGTAGCTGAG---  
 GGGACAGATAGAGTTATAGAAATATTACAAAGAATTTATAGAGCT-----  
 -----ATTCTCCACATA-----CCTACAAGAATAAGACAGGGCTTAGAAAGGGCTTTGCTA---TAA  
 >MN043577  
 GCT---GCA-----  
 GCAGGAGGATTGTGGGTCACAGTCTATTATGGGGTACCTGTGTGG--AAAGAAGCAACC---  
 ACCACCCTATTTTGTGCATCAGATGCTAAAGCATATGACACAGAG--GTACATAAT-----  
 -----GTTTGGGCCACA---CATGCCTGTGTACCCATAGAC---  
 CCCAACCCACAAGAAGTAGTATTGGAA-----AATGTGACAGAAAATTTAAC-----  
 -----ATGTGGAAAAATAACATGGTAGAACAGATGCATGAGGATATA---  
 ATCAGTTTATGGGATCAAAGCCTA--AAGCCATGTGTAAAATTA---  
 ACTCCACTCTGTGTTACTTTAAATTGTAGTAATTATTTCAAGAATAATACTAATACTACTACCACTACCACT-----  
 -----  
 -----ACTAATAACAATACTAGTAGTGGGAAAGTGATGGAGGAAACAGAAATGAAA---  
 AACTGCTCTTTCAATGTTACCACAAACATAAGA-----  
 GATAAGGTGAAAAAAGAATATGCTCTT---TTTTATAAACTTGATGTACAACAAATAGATAAT-----  
 -----  
 -----  
 ACAAGCTATACATTGATAAATTGTAACCTCCTCAGTCATTACACAG---  
 GCCTGTCCAAAGGTATCCTTTGAACCAATTCCCATACATTATTGTACCCCGGCTGGTTTTGCGATTCTACAAT  
 GTAAT---GATAAGAAGTTCAAT-----GGAACAGGACCATGTTCAAAT-----

-GTCAGC---ACAGTACAATGTACACATGGAATTAGGCCAGTAGTATCAACT---  
 CAACTGCTGTAAATGGCAGTCTAGCAGAAGAAGAG-----  
 GTAGTAATTAGATCTGAAAATTTACGAACAAT-----GCTAAAACCATAATAGTACAGCTGAAT----  
 -----GCATCTGTAGAA-----ATTAATTGTACAAGACCCAACAACAATACAAGAAAA-----  
 -GGTATAGGGATA-----GGACCAGGGAGCATG---TTT-----TATGCAACAGGAGAA-----  
 -----ATAATAGGAGATATA-----AGACAAGCACATTGT---AACATTAGTACAGCA---  
 AAATGGAATGACACTTTAAAACAGCTAGTTATAAAATTAAGA-----GAACAATTTGGG----  
 -----AATAAAACAATAGTCTTTAAT-----  
 CAATCCTCAGGAGGGGACCCAGAGATTGTA--ATGCACAGTTTTAATTGTGGAGGGGAA---  
 TTTAAGCAGCTCCAGGCAAGAGTCCTGGCTGTGGAAAGATACCTAAAGGATCAACAGCTCCTGGGGATTTGGG  
 GATGCTCTGGAAAGCTCATCTGCACCACTAATGTGCCTTGGAATACTAGTTGGAGT-----  
 -----AATAAATCTCAGAAGGAGATCTGG-----GAT-----  
 AACATGACCTGGATGGAGTGG---GACAGAGAAATTAACAATTACACAACTTAATATAC---  
 ACCTTACTTGAAGAATCGCAGAACCAACAAGAA-----  
 -----  
 AAGAATGAACAGGAATTATTGGAATTGGATAAATGGGCAACTTTGTGGAATTGGTTTGAAATATCACAATGGC  
 TGTGGTATATAAAAATATTTCATAATGATAGTACGAGGCTTAGTAGGTTAAGAATAATTTTTTCT---  
 GTACTTTCTATAGTG-----AATAGAGTTAGGCAGGGATACTCACC-----  
 TTATCGTTTGCTGTTAGTGTGCTTAATGCCACAGCTGTAGCAGTAGCTGAG---  
 GGGACAGATAGGGTTATAGAAAATATTACAAAGAGCTTATAGAGCT-----  
 -----ATTCTCCACATA-----CCTAGAAGAATAAGACAGGGCTTGGAAGGGCTTTGCTA---TAA  
 >MN043581  
 GCT---GCA-----  
 GCAGGAGGATTGTGGGTACAGTCTATTATGGGGTACCTGTGTGG---AAAGAAGCAATC---  
 ACCACCCATTTTTGTGCATCAGATGCTAAAGCATATGACACAGAG---GTACATAAT-----  
 -----GTTTGGGCCACA---CATGCCTGTGTACCCATAGAC---  
 CCCAACCCACAAGAAGTAGTATTGGAA-----AATGTGACAGAAAATTTTAAC-----  
 -----ATGTGGAAAAATAACATGGGTAGAACAGATGCATGAGGATATA---  
 ATCAGTTTATGGGATCAAAGCCTA---AAGCCATGTGTAAAATTA---  
 ACTCCACTCTGTGTTACTTTAAATTGTAGTGAATTTGAAAAATGATACTAATACCAATAAT-----  
 -----  
 -----AGTAGTGAGAAAGTGATGGAGAAAGGAGAAATGAAA---  
 AACTGCTCTTTCAATGTTACCACAAACATAAAA-----  
 AATAAGGTGCAGAAAGAATATGCTCTT---TTTTATAAACTTGATGTAATGCAAATAGATAAT-----  
 -----  
 -----  
 ACAAGCTATACGTTGATAAGTTGTAACCTCCTCAGTCATTACACAG---  
 GCCTGTCCAAAGGTATCCTTTGAACCAATTCCCATACATTATTGTACCCCGGCTGGTTTTGCGATTCTACAGT  
 GTAAT---GATAAGAAGTTCAAT-----GGAGCAGGACCATGTTCAAAT-----  
 -GTCAGC---ACAGTACAATGCACACATGGAATTAGGCCAGTAGTATCAACT---  
 CAACTGCTGTAAATGGCAGTCTAGCAGAAGAAGAG-----  
 GTAGTAATTAGATCTGAAAATTTACGAACAAT-----GCTAAAACCATAATAGTACAGCTGAAT----  
 -----GCATCTGTAGAA-----ATTAATTGTACAAGACCCAACAACAATACAAGAAAA-----  
 -AGTATAAGTATA-----GGACCAGGGAGAACT---TTT-----TATGCAACAGGAGAC-----  
 -----ATAATAGGAGATATA-----AGACAAGCACATTGT---AACATTAGTGCAGCA---  
 AAATGGAATAACACTTTAAGACAGATAGTTATAAAATTAAGA-----GAACAATTTGGG----  
 -----AATAAAACAATAGTCTTTAAT-----  
 CAATCCTCAGGAGGGGACCCAGAGATTGTA--ATGCACAGTTTTAATTGTGGAGGGGAA---  
 TTTAAGCAGCTCCAGGCAAGAGTCCTGGCTGTGGAAAGATACCTAAAGGATCAACAGCTCCTGGGGATTTGGG  
 GATGCTCTGGAAAGCTCATCTGCACCACTAATGTGCCTTGGAATACTAGTTGGAGT-----  
 -----AATAAATCTCAGAATGATATCTGG-----CAT-----  
 AACATGACCTGGATGGAGTGG---GACAGAGAAATTAACAATTACACAAGCTTAATATAC---  
 ACCTTACTTGAAGAATCGCAGAACCAGCAAGAA-----  
 -----  
 AAGAATGAACAGGAATTATTGGAATTGGATAAATGGGCAAGTTTGTGGAGTTGGTTTGAAATATCAAAGTGGC  
 TGTGGTATATAAAAATATTTCATAATGATAGTAGGAGGCTTGGTAGGATTAAGAATAATTTTTTCT---  
 GTACTTTCTATAGTA-----AATAGAGTTAGGCAGGGATACTCACC-----  
 TTATCGTTTGCTGTTAGTTTGTCTTAATGCCACAGCTATAGCAGTAGCTGAG---  
 GGGACAGATAGGGTTATAGAAAATATTACAAAGAGCTTATAGGGCT-----  
 -----ATTCTCCACGTA-----CCTACAAGAATAAGACAGGGCTTGGAAGGGCTTTGCTA---TAA

>HQ386180

GCT---GTA-----  
GGAAACTTGTGGGTCACAGTTTATTATGGGGTACCTGTGTGG---AAAGAAGCAACT---  
ACCACTCTATTTTGTGCATCAGATGCTAAAGCATATGATACAGAA---GTACATAAT-----  
-----GTTTGGGCCACA---CATGCCTGTGTACCCACAGAC---  
CCCAACCCACAAGAAATAATATTGGAA-----AATGTGACAGAAGAATTTAAC-----  
-----ATGTGGAAAAATAACATGGTAGACCAGATGCATGAGGATATA---  
ATCAGTTTATGGGATCAAAGCCTG---AAGCCATGTGTAAAATTA---  
ACCCCACTATGTGTCACTTTAAATTGCACTGATGATTGGAAGAATATTACTACTGCCAATGTTACTAAT----  
-----  
-----CCCAATACTACTAATACCGCTGGTTGGAAAAAGGGGAAATAAAA---  
AGTTGCTCTTTCAATGTCAACCACAGGTGTAAGA-----  
GATAAGATAAAGAGAGAAAAATGCACTA---TTTTATAAGCTTGATCTAGTACCAATAAATGAT-----  
-----  
-----  
AAAAATACTAGCAATAATACTAGCTATAGATTGATAAGTTGTAACCTCCTCAATCATTACACAG---  
GCCTGTCCAAAGGTAACCTTTGAACCAATTCCCATACATTATTGTGCCCGGCTGGGTTTGCATTCTAAAGT  
GTAAC---GATAAGAAGTTCAAT-----GGAACAGGACAATGTAAAAAT-----  
-GTCAGC---ACAGTACAATGTACACATGGAATTAGGCCAGTAGTGTCAACT---  
CAACTGCTGTTAAATGGCAGTCTAGCAGAAGAAGAG-----  
GTAATAATTAGATCTGCCAATATTACAGACAAT-----GCTAAAACCATAATAGTACAGCTAAAT----  
-----GAATCTGTCAAA-----ATTGATTGCATAAGACCCAACAACAATACAAAGAAA-----  
-AGTATATATATA-----GGACCAGGGAGAGCA---TGG-----CATACAGCAGGAAGA-----  
-----ATAGTAGGAGATATA-----AGACAAGCACATTGT---AACCTTAGTAGAACA---  
AACTGGACTAACACTTTAAACAGGTAGTTGCAAAATTAAGA-----GAACACTTTAAG-----  
-----AACAAAACAATAGTCTTTAAT-----  
TCATCCTCAGGAGGGGACCTAGAAATTGTA---ACGCACAGTTTTAATTGTGGAGGGGAA---  
TTTAAGCAGCTCCAGGCAAGACTCCTGGCTGTAGAAAGATACCTACAGGATCAACAGCTCCTAGGGATTTGGG  
GTTGCTCTGGAAGAACTCATTTGCACCACTGCTGTGCCTTGGAAATACTAGTTGGAGT-----  
-----AATAGATCTCTAAATTATATTTGG-----GAA-----  
AACATGACCTGGATGGCGTGG---GAAAGAGAAATTGACAATTACACAAGCACAATATAC---  
ACTTTAATTGAAGAATCGCAGATCCAACAGGAA-----  
-----  
AAGAATGAAAAGGAGTTATTAGAAATTAGATGAGTGGGCAAGTTTGTGGAATTGGTTCATATATCAAAATGGC  
TGTGGTATATAAAGATATTCTAATGATAGTAGGAGGATTGATAGGTTTAAGAATAGTTTTTTTCT---  
GTGCTTTCTATAGTG-----AATAGAGTTAGGAAGGGGTACTCACCA-----  
TTATCATTCGCAGTTAACTTGCTCAATACCACAGCTATAGCAGTAGCTGAG---  
GGGACAGATAGGGTTATAGAAGTAGTACAAAGAGCTTGTAGAGCT-----  
-----ATTCTCCATATA-----CCTAGAAGAATAAGACAGGGCTTGGAAAGAATTTTGCTA---TAA  
>EU744081  
GCT---ACA-----  
GACCAATTGTGGGTCACAGTCTATTATGGAGTACCTGTGTGG---AAAGATACAACC---  
ACCACTCTATTTTGTGCATCAGATGCCAAAGCATATGCTACAGAG---GTACATAAT-----  
-----GTTTGGGCCACA---CATGCCTGTGTACCCACAGAC---  
CCCAACCCACAAGAAATAGTATTGAAA-----AATGTAACAGAAGATTTTAAC-----  
-----ATGTGGAAAAATAACATGGTAGAACAGATGCATGAAGATATA---  
ATCAGTTTATGGGATCAAAGCCTA---AAGCCATGTGTAAAATA---  
ACCCCACTCTGTGTTACTTTAAATTGTACTGAGTTACAGACTAATGATACTAGTGTCACTAGTGGTAATAAGA  
CTGATACT-----  
-----ATAATAGCACTAGTGGTAATAGGACTATCGAGGATAGTATGAGGGGAGAAATAAAA---  
AACTGCTCTTTTAAATATCACCACAAGCATAAAT-----GATAAGAAG---  
AAAGACTATGCTCTT---TTTAATAGACTTGATATAGTACCAATAAATAAT-----  
-----  
-----GATAATACTAGCTATAGTTGATAAGTTGTAACACCTCAGTCATTACACAA---  
GCCTGTCCAAAGGTAACCTTTGAGCCAATTCCCATACATTATTGTACCCCGGCTGGTTTTGCATTCTAAAGT  
GTAAC---AATAAGACGTTTCAGT-----GGAAAAGGAAAATGTACAAAT-----  
-GTCAGC---ACAGTACAATGTACACATGGAATTAGGCCAGTAGTGTCAACT---  
CAACTGCTGTTAAATGGAAGTCTAGCAGAAGAAGAG-----  
ATAGTAATTAGATCTGAAAATTTCAACAACAAT-----GCTAAAACCATAATAGTACAGCTGAAT----  
-----GAATCTGTAGCA-----ATTAATTGTACAAGACTCAACAACAATACAAGAAAA-----

-AGTATAACTTTA-----GGACCAGGGAGAGCA---TTT-----TATGCAACAGGAGAC-----  
 -----ATAATAGGAAATATA-----AGGCAAGCACAGTGT---GAACCTTAATAGAACA---  
 AAATGGAATAACACTTTAAAAAAGATAGTTATAAAATTAGGA-----GAACAATTTGGG-----  
 -----AATAGAACAATAGTTTTTAAT-----  
 CACTCCTCAGGAGGGGACCCAGAAATTGTA--ATGCACAGTTTTTAATTGTGGAGGGGAA---  
 TTTAAGCAGCTCCAAGCAAGAGTCCTGGCTGTGGAAAGATACCTAAGGGATCAACAGCTCCTAGGGATTTGGG  
 GTTGCTCTGGAAACTCATTTCACCACTGCTGTGCCTTGGAATGCTAGTTGGAGT-----  
 -----AATAAATCTCTAGATCAGATTTGG-----GAG-----  
 AATATGACCTGGATGGATTGG---GAAAGAGAAATTAACAATTACACAGGCTTAATATAC---  
 ACCTTAATTGAAGAATCGCAGAACCAGCAGGAA-----  
 -----  
 AAGAATGAACAAGAATTATTGGAATTGGACAAGTGGTCAAATTTGTGGACCTGGTTTGATATAACAACTGGC  
 TGTGGTATATAAAAATATTTCATAATGATAGTAGGAGGATTGGTAGGTTTAAGAATAATTTTTTCT---  
 GTACTTTCTATAGTG-----AAAAGAGTTAGGCAGGGATACTCACCA-----  
 TTATCGTTTGTGCTGTTAGCTTGTACAATACAATAGCCATAGCAGTAGCTGAG---  
 GGGACAGATAGGATTATAGAAGGATTACAAAGAGCCTTTAGAGCT-----  
 -----TTTCTCCACATA-----CCTAGAAGAATAAGACAGGGCGCAGAAAGAGCTTTGCAA---TAA  
 >JF320244  
 GCT---ACA-----  
 GAAAACTTGTGGGTCACAGTCTATTATGGGGTACCTGTGTGG---AAAGAAGCAACC---  
 ACCACTCTATTTTGTGCATCAGATGCTAAAGCATATGATACAGAA---GTGCATAAT-----  
 -----GTTTGGGCCACA---CATGCCTGTGTACCCACAGAC---  
 CCCAACCCACAAGAAATAGAATTGGAA-----AATGTGACAGAAGATTTTAAC-----  
 -----ATGTGGAAAAATAACATGGTAGAGCAAATGCAGGAAGATGTA---  
 ATCAGTTTATGGGATCAAAGCCTA---AAGCCATGTGTAAAATTA---  
 ACCCCACTCTGTGTTACTTTGGATTGCAATGATTTTGATAAGAATAGTACTAATAGC-----  
 -----  
 -----ACTACTGAGGAAAAGATGGACAAAGGAGAAATAAAA---  
 AATTGCTCTTTCAATAGCACCCACAGACATGAGA-----  
 GACAAGGTACGGAAAGAACATGCACCT---  
 TTTTATAGCCTTGATATAGTACCAATAGATAGTAGTGATAGTAATAAT-----  
 -----  
 AGTTCTAATAGTAGTAGTTCTAATAATTATAGGTAAATAAGTTGTAACACCTCAATCATTACACAA---  
 GCCTGTCCAAAAGTAACCTTTGAGCCAATTCCCATACATTATTGTGCCCCGGCTGGTTTTGCGATTCTAAAGT  
 GTAAA---GATAAGGGATTCAAT-----GGAACAGGGACATGTAAAAAT-----  
 -GTCAGC---ACAGTACAGTGCACACATGGAATTAGGCCAGTAGTGTCAACT---  
 CAACTATTGTTGAATGGCAGTCTAGCAGAGGGAGAG-----  
 GTAGTAATTAAATCTGCCAATTCTCAGACAAT-----GCTAAAAACATAATAGTACAGTTAAAT---  
 -----GAGTCTGTACCA-----ATAACTTGTATAAGACCCAACAATAATACAAGAAGA---  
 -AGTATACCTATA-----GGGCCAGGAAGAGCA---TTT-----TATACCACAGGAGAT-----  
 -----ATAATAGGAGATATA-----AGAAAAGCACATTGT---ACCATTAGTAAAAAA---  
 GCATGGAATAATACTTTATACCAGTTAAGTAGAAAAATTAAAA-----GACCAGTATAAT---  
 -----ACGACAACAATAGTCTTTAAA-----  
 CCATCCTCAGGAGGGGACCCAGAAATTGTG--ATGCACAGTTTTTAATTGTGGAGGAGAA---  
 TTTAAGCAGCTCCGGGCGAGAGTCCTGGCTGTGGAAAGATACCTAAGGGATCAACAGCTCCTAGGGATTTGGG  
 GTTGCTCTGGAAACTCATTTCACCACTGCTGTGCCTTGGAATGCTAGTTGGAGT-----  
 -----AATAAATCTCTAGACTATATTTGG-----GAT-----  
 AACATGACCTGGATGCAGTGG---GAAAAGGAAATTGACAATTACACAGAACTTATATAC---  
 TCCTTGCTTGAAGAATCGCAGAACCAGCAGGAA-----  
 -----  
 AAGAATGAACAAGAATTATTGGAATTGGATAAGTGGGCAAGTCTGTGGAATTGGTTTAACATATCAAATTGGC  
 TGTGGTATATAAGAATATTTCATAATAATAGTAGGAGGCTTGATAGGTTTAAGAATAGTTTTTACT---  
 GTACTTTCTGTAGTG-----AATAGAGTTAGGCAGGGATACTCACCT-----  
 GTGTCTTTTGTGCTGTGAGCTTGTTCACGCAACAGCTATAGCAGTAGCTGAG---  
 GGAACAGATAGAATTATAGAAGTAGGACAAAGAATTGGTAGAGCT-----  
 -----ATTCTCCACATA-----CCTAGAAGAATAAGACAAGGCTTGGAAGGTCTTTGCTA---TAA  
 >JF320226  
 GCT---GAA-----  
 GAAAAATCGTGGGTCACAGTCTATTATGGGGTACCTGTGTGG---AAAGAAGCAACC---  
 ACCACTCTATTTTGTGCATCAGATGCTAAAGCATATGATACAGAG---GTACATAAT-----

-----GTTTGGGCTACA---CATGCCTGTGTACCCACAGAC---  
CCCAACCCACGAGAAATAGTATTGGAA-----AATGTGACAGAAGAGTTTAA-----  
-----ATGTGGAAAAATAATATGGTGGAACAGATGCATGAGGATATA---  
ATCAGTTTATGGGATCAAAGCCTA---AAGCCATGTGTAAAATTA---  
ACCCCACTCTGTGTCACTTTAAATTGCACTGATGCTAGGCATAATACCACTGATGCTAGGAATAGTAAT----  
-----  
-----GGTACTAGTACTACCACTAATAGTTCAATAGACATAGGAGAGATGAAG---  
AATTGCTCTTTCAATATCACCTCAAACATAAGA-----  
GACAAGATGAGGAAGGAAAATGCACTG---TTTTACAGACTTGATGTAGTACCAATAGGAAAT-----  
-----  
-----  
AGTACTTCTGACTATAGGTTGATAAATTGTAACACCTCAGTCATTACACAG---  
GCCTGTCCAAAGATATCCTTTGAGCCAATTCCCATACATTATTGTACCCCGGCTGGTTTTGCGATCTTAAAGT  
GCAAT---GATAAGAAGTTCAAT-----GGAACAGGAACATGTACAAAG-----  
-GTCAGC---ACAGTACAATGCACACATGGAATTAGGCCAGTAGTGTCCACT---  
CAACTGCTGTTAAATGGCAGTCTAGCAAAAGAAGAG-----  
GTAGTAATCAGATCTGCCAATTTACAGACAAT-----GCTAAAACCATAATAGTGCAGTTAAAC----  
-----CACTCTGTACAA-----ATAGATTGTGAAAGACCCAACAATAACAGAAAA-----  
-GGTATACATATA-----GGGCCAGGGAGAACA---TTT-----TATGCAACAGGAGAT-----  
-----ATAATAGGAGACATA-----AGACAAGCACACTGT---AATGTTAGTAAAGCA---  
GACTGGAATTACACTTTACAACTCATAGGTAAAAAATTAGCA-----GACCAATTT-----  
-----AATAAAACAATAGTCTTTAAC-----  
CACTCCTCAGGAGGAGACCCTGAAGTTGTG---ATGCACACTTTTAATTGTGGAGGAGAA---  
TTTAAGCAACTCCAGGCAAGAGTCCCTGGCTGTAGAAAGATACCTACAGGATCAACAGCTCCTAGGAATTTGGG  
GTTGCTCTGGAAACTCATTTGCACCACTGCTGTGCCTTGGAATGCTAGTTGGAGT-----  
-----AATAAATCTCTGGACCAAATTTGG-----CAT-----  
AACATGACCTGGATGGAGTGG---GAAAAAGAAATTGACAATTACACAGGGTTAATATAC---  
ACCTTACTTGAAACATCGCAGAACCAGCAAGAA-----  
-----  
AAGAATGAACAAGAATTATTGGAATTGGATAAGTGGGCAAGTCTGTGGAAGTGGTTTGACATAACACAATGGC  
TGTGGTATATAAAAAATATTGATAATGATAGTAGGAGGCTTGATAGGTTTAAAGATAGTTTTTTGCT---  
GTACTTTCTGTAGTA-----AATAGAGTTAGGAAGGGATACTACCA-----  
TTGTCATTCTGCTATTAGCTTGTTCAACGCCACAGCTATCGCAGTAGCCGAA---  
GGAACAGATAGGGTTATAGAAACAGGGCAAAGATTAGGTAGAGCT-----  
-----CTTCTCCACATA-----CCTAGAAGAATAAGACAGGGCTTGGAAGGATTTTGCTT---TAA  
>JF320189  
GCC---GCA-----  
GATCAAATGTGGGTACAGTCTATTATGGGGTACCTGTATGG---AAAGAAGCAACC---  
ACCACTCTATTTTGTGCATCAGATGCTAAAGCATATGATAGAGAG---GTACATAAT-----  
-----GTTTGGGCCACA---CATGCCTGTGTACCCACAGAC---  
CCCAACCCACAAGAATTAGTATTGGGA-----AATGTAACAGAAGAATTTAA-----  
-----ATGTGGAAAAATAGCATGGTAGACCAGATGCATGAGGATATA---  
ATAGAGTTATGGGATCAAAGCCTA---AAACCATGTGTAGAATTA---  
ACCCCACTCTGTGTTATTTTAAATTGCGTTGATTATAATGGTACTGCTAATAATACCACTCAGAAT-----  
-----  
-----GCCACTGAAAGTAGCAAGATAAAAAATGGAGCAAGGAGAAATACAA---  
AACTGCTCTTTCAACATCTCCACAAGCATAAGA-----  
GATAAGGTGCAGAAAGAACATGCACTT---TTCTATAAAATTGATATAGTACCAATAGATAAT-----  
-----  
-----  
GATGGTAATAATAGTAGCTATAGGTTATTAAGTTGTAACACCTCAGTCATTAAACAG---  
GCCTGTCCAAAAGTAACCTTTGAGCCAATTCCCATACATTATTGTGCCCCAGCTGGTTTTGCGATTCTACAAT  
GTAAG---GATAAAAAGTTCAAT-----GGAACAGGACAAATGTAAAAAT-----  
-GTCAGC---ACAGTACAATGTACACATGGGATTAGGCCAGTAGTATCAACT---  
CAACTGCTGTTAAATGGCAGTCTAGCAGAAGAAGAG-----  
ATAATAATTAGATCTGAGAATCTCACAATAAT-----GCTAAAACCATAATAGTACATCTGAAT----  
-----GAATCTGTAGAA-----ATTAATTGTACAAGACCAATAACAATACAAGAAGA-----  
-AGTATACATATA-----GGACCAGGGAAAAGCA---TTT-----TATGCAACAGGAGGT-----  
-----ATAATAGGAGACATA-----AGAAAAGCACATTGT---AACATTAGTGGAACA---  
AAATGGAAGAACATTTTAAAAACAGATAGTTACAAAATTAAAA-----GACAAATTTGGG-----

-----AACAAAACAATAATCTTTAAG-----  
 CCATCCTCAGGAGGGGACCAAGAAGTTATG---ATGCACACTTTTAAATTGTGGAGGAGAA---  
 TTTAAGCAGCTCCAGGCAAGAGTCCTTGCTATAGAGAGATACCTAAAGGATCAACAGCTCCTGGGGATTTGGG  
 GTTGCTCTGGAAGAACTCATTTGCACCACCTTCTGTACCTTGAATAATAGTTGGAGT-----  
 -----AATAAATCTTTCAATGATATTTGG-----GAT-----  
 AACATGACCTGGATGGAGTGG---GAAAAAGAAATTGACAATTACACAAGAATAATATAC---  
 ACCCTAATTGAAGAATCGCAGTACCAGCAAGAA-----  
 -----  
 AAGAATGAACAAGAATTATTGGCATTGGATAAATGGGCAAGTTTGTGGAATTGGTTTGACATAACAAAATGGC  
 TATGGTATATAAAAATATTCATAATGATAGTAGGAGGCTTAATAGGTTTAAGAATAGTTTTTTGCT---  
 GTACTTTATCTAGTA-----AGAAGAGTTAGGCAGGGGTACTCACCA-----  
 TTGTCAATTTGCTGTTAGTTTGTCTCAATACCACAGCCATAGTAGTAGCTGAG---  
 GGGACAGATAGGATTGTAGAAAGTAGTACAAAGAGCTTTTAGGGCT-----  
 -----ATTATCCACATA-----CCTACAAGAATAAGACAGGGCTTAGAAAAGACTTCGGCTA---TAA  
 >EF210727  
 ACT---GCA-----  
 GGAAAATTGTGGGTAACAGTCTATTATGGGGTACCTGTGTGG---AAAGAAGCAACC---  
 ACTACTCTATTTTGTGCATCAGATGCTAAAGCATATGATACAGAG---AAACATAAT-----  
 -----GTTTGGGCCACA---CATGCCTGTGTACCTACAGAC---  
 CCCAACCCACAAGAAATGGTATTGGAA-----AATGTGACAGAAGATTTTAAC-----  
 -----GTGTGGAAAAATAACATGGTAGAACAGATGCATGAGGATATA---  
 ATCAGTTTGTGGGATGAAAGCCTA---AAGCCATGTGTAAAGTTA---  
 ACCCCACTCTGTGTTAATTTAAATTGCACTGATGTTAAAAATTAATAGTACTTCCCCTAATAATACT-----  
 -----  
 -----GTTGGTTCTTCCATTAATAGTAGCATGATAGAAGAAATGAAA---  
 AACTGCTCTTTCAATATCTCCACAAAAATAAAA-----  
 GATAAGGCGCAAAAAGAATATGCACTT---TTTTATAAACTTGATATAGCACAAATAGATAAT-----  
 -----  
 -----  
 AGTACTGGATATAGGTTGATAAGTTGTAACACCTCAGTCATTACACAG---  
 GCCTGTCCAAAAGTATCTTTTGAGCCAATTCCAATACATTATTGCACCCCGGCTGGTTTTGCGCTTCTGAAAT  
 GTAAT---GATAAGAAGTTCAAT-----GGAACGGGACCATGTACAAAT-----  
 -GTCAGC---ACAGTACAATGTACACATGGAATTAGACCAGTGGTATCAACT---  
 CAATTGCTGGTAAATGGCAGTCTAGCAGAAGAAGAG-----  
 GTAGTAATTAGATCTGAAAATATCACGGACAAT-----ATTAAAACCATAATAGTACAGCTGAAT---  
 -----GAATCTGTAGAA-----ATTAATTGTACAAGACCCAGCAACAATACAAGAAAA---  
 -AGTATACAATTA-----GGACTAGGGAGAGCA---TGG-----TATGCAACAGGAGCA-----  
 -----ATAATAGGAGATATA-----AGAAAAGCATATTGT---GAGGTTAATGCAGGA---  
 AAATGGAACAAAACCTTAAAAATGGTAGCTAGAAAATTAAAC-----GAACTTATT-----  
 -----AACAAAACAATAGTCTTCAAT-----  
 CAATCTTCAGGAGGGGATCCAGAAATTGTA---ATGTACAGTTTAAATTGTGGAGGGGAA---  
 TTTAAGCAGCTCCAGGCAAGAGTCCTGGCTGTGGAAAGATACCTAAAGGATCAACAGCTCCTAGGAATTTGGG  
 GTTGCTCTGGAAGCTCATCTGCCCCACTGCTGTGCCTTGAATACTAGTTGGAGC-----  
 -----AATAAATCTCAGGATGAGATTTGG-----AAG-----  
 AACATGACCTGGATGCAGTGG---GAAAGAGAAATTGATAACTACACAAATGAAATATAT---  
 AGCTTAATTGCAGAGTCGCAAAACCAACAAGAC-----  
 -----  
 AAGAATGAACAAGAATTATTGGAATTGGATAAATGGGCAGGTTTGTGGGATTGGTTTAGCATAACAACTGGC  
 TGTGGTATATAAAAATATTCATAATAATAGTAGGAGGTTTAATAGGTTTAAGAATAGTTTTTTACT---  
 GTACTTTCTATAGTG-----AATAGAGTTAGGCAGGGATACTCACCA-----  
 TTGTCAATTCGCTATTAGCTTGCTCAATGCCACAGCCATAACAGTAGCCGAG---  
 GGGACAGATAGGGTTATAGAAGTAGCACAAAGAATTGTTAGGGCT-----  
 -----ATTCTCCACATA-----CCTAGGAGAATAAGACAGGGCTTGGAAGGGCTTTGCTA---TAA  
 >EF210729  
 GCT---GAA-----  
 GACAAATTGTGGGTCACAGTCTATTATGGGGTACCTGTGTGG---AAAGAAGCAACT---  
 ACCACTCTATTTTGTGCATCAGATGCTAAAGCATATAACACAGAG---GTACATAAT-----  
 -----GTTTGGGCCACA---CATGCCTGTGTACCCACAGAC---  
 CCTAACCCACAAGAAGTAAAAATTGGAA-----AATGTGACAGAAAATTTTAAT-----  
 -----ATGTGGAAAAATAACATGGTAGAACAAATGCATGAGGATATA---

ATCAGTTTATGGGATCAAAGCCTA---AAGCCATGTGTAAAATTA---  
 ACCCCACTCTGTGTTGCTTTAACTGCAGTGCCTTGCGCCAAGTCTTTGCACTAATAATGTTACTAATGCCA  
 ATAGTACTACA-----  
 ---TCGAATAGTACTACTAATGCCACTAATACAGATTGTGAAAACCTGAGGCGAGAAATGACA---  
 AACTGTTCTTTTAATGCTACCACAGGCATAACA-----  
 AATAAGATGAAAAAGAATATGCACTT---TTTGATAGACTTGATGTAATACCAATAGATAAT-----  
 -----  
 -----  
 AGTTCAATATATGCATTGATAAATTGTAATACCTCAGTCATTAAACAG---  
 GCCTGTCCAAAGGTAACCTTTGAACCAATTCCCATACATTATTGTGCCCCGGCTGGTTTTGCGATTCTAAAGT  
 GTAAT---GATAAGAAGTTCAAT-----GGAACAGGCATGTGTACAAAT-----  
 -GTTAGT---ACAGTACAATGTACACATGGAATTAGGCCAGTAGTATCAACT---  
 CAATTGCTGCTAAATGGCAGTCTAGCAGAAGGAGAT-----  
 GTAGTACTTAAATCTGAAAATTTCAACAAACAAAT-----GCTAAAACCATACTAGTACAGCTGAAT----  
 -----AATTCTGTAAACA-----ATTAATTGTACAAGACCCTACAACAATACGAGAAGA-----  
 -GGTGTACATATG-----GGACCGGGGCAAGCA---CTT-----TTTGCAACAGGGGCA-----  
 -----ATAATAGGAGACATA-----AGACAAGCACATTGT---AACATTAGTAGAAAA---  
 GATTGGAATGACACTTTAAACAGATAGTTACAAAATTAGGA-----GAACAATTTGGG----  
 -----AAAAGTAAAACAATAGTCTTTAAT-----  
 CAATCCTCAGGAGGAGACCCAGAGATTGTA---ATGCACAGCTTTAATTGTGGAGGGGAA---  
 TTCAAACAGCTCCAGGCAAGAGTCCTGGCTGTGGAAAGATACCTAAAGGATCAACAGCTCCTAGGGATTGGG  
 GCTGCTCTGGAACACTCATCTGCACCACTGCTGTGCCTTGGAATGCTAGTTGGAGT-----  
 -----AATAAATCTATAGAAAAAATTTGG-----AAT-----  
 AACATGACCTGGATGCAGTGG---GAGAGAGAAATTGACAATTACACAGACTTAATATAC---  
 AATTTACTTGAACAATCGCAGAACCAGCAAGAA-----  
 -----  
 AAGAATGAACAAGAATTATTGGAATTGGATAAATGGGCAAGTTTGTGGAATTGGTTTGATATATCACACTGGC  
 TGTGGTATATAAAAAATATTACATAATGATAGTAGGAGGCTTGGTAGGTTTAAGAATAGTTTGTGCT---  
 GTAATTTCTATAGCA-----AATAGAGTTAGGCAGGGATACTACCA-----  
 TTATCATTTGGCTGTTAGTTTGCTTAATGCCACAGCTATAGCAGTAGCTGAG---  
 GGAACAGATAGGGTTATAGAAACATTACAAGGAATTGGTAGAGCT-----  
 -----ATTCTAAACGTA-----CCTAGAAGAATAAGACAGGGCTTTGAGAGGGCTTTACTA---TAA  
 >EF210731  
 GCT---GCA-----  
 AAAGAATTGTGGGTACAGTCTATTATGGGGTACCTGTGTGG---AAAGATGCAACC---  
 ACTACTCTATTTTGTGCATCAGATGCTAAAGGATATGATACAGAG---GTACACAAT-----  
 -----GTTTGGGCCACA---CATGCCTGTGTACCCACAGAC---  
 CCCAACCCACAAGAAGTACTATTGGAA-----AATGTGACAGAATACTTTAAC-----  
 -----ATGTGGAATAATGACATGGTAGAACAGATGCAGGAGGATATA---  
 ATCAGCTTATGGGATCAAAGTCTA---AAACCATGTGTAAAATA---  
 ACCCCACTCTGTGTTACTTTAACTGTACTGATTGTAATGTTACTAAGACTGATTGTAATGTTACTAAG---  
 -----  
 -----ACTAATAATAGTAGTGAAACAACAATAGAAAAGGGAGAAATGAAA---  
 AACTGCTCTTTCAATGTACCAAAGACTGGAAT-----  
 GGTAGAGGGCAGAAAGAGTATGCAGTT---TTTCAAAACTTGATGTAGTACCAATAGAGAATAAT-----  
 -----  
 -----  
 AATGGTAGTAATAATACCTATAGGTTGATAAGTTGTAACACCTCAGTTGTTACGCAA---  
 GCCTGTCCAAAGATATCTTTTGATCCAATTCCCATACATTATTGTGTTCTGCTGGTTTTGCGATTGTAAAGT  
 GTAAT---GATAAAAAGTTCAAT-----GGAACAGGACCATGTAAAAAT-----  
 -GTCAGC---ACAGTACAATGTACTCATGGAATTAAGCCAGTAGTATCAACT---  
 CAACTGTTGTTAAATGGCAGCCTAGCAGAAGAAGAG-----  
 GTAGTAATTAAATCTGCCAATTTCAACAAACAAAT-----GCTAAAATCATAATAGTACAACCTGAAA----  
 -----GAAGCTGTAACC-----ATTACTTGTACAAGACCCAACAATAATACAAGAAAA-----  
 -AGTGTACATATG-----GGACCCGGGAAAGCA---TTT-----TATTTAACA---GAT-----  
 -----GTAATAGGAGATATA-----AGACAAGCATATTGT---AACATTAGCGGTAAA---  
 AAATGGAATGACACTTTAAGACAGGTAGCTGAAAAATTAAGC-----AAACAATTTAAG----  
 -----AATAAAACAATAACCTTTAAT-----  
 CAATCTTCAGGAGGGGACCCAGAAATTGTA---ATGCACAGTTTCAATTGTAGAGGGGAA---  
 TTTAAGCAGCTCCAGGCAAGGGTCCTGGCTGTGGAAAGATACCTATATGATCAACAGCTCCTGGGACTGTGGG

GTTGCTCTGGAAACTCATTTCACCACTACTGTGCCTTGAATACTAGTTGGAGT-----  
 -----AATAAATCTCGGTGGGAAATTTGG-----GAG-----  
 AACATGACCTGGATGGAATGG---GATAAAGAAATTAGCAATTACACAGAATTAATATAT---  
 AACTTACTTGAACAATCGCAAACCAACAAGAA-----  
 -----  
 AAGAATGAACAGGAATTATTGGCACTCGATAAATGGTCAAATTTGTGGAATTGGTTTGACATATCAAATTGGC  
 TATGGTATATAAAAAATATTCATAATGGTAGTAGGAGGCTTGATAGGCTTAAGAATAATTTTTTACT---  
 GTGCTATCTATAGTG-----AATAGAGTTAGGCAGGGGTACTCACCA-----  
 TTATCATTTGCTGTTAGCTTGCTTAATGCCACAGCCATAGCAGTAGCTGAG---  
 GGGACAGATAGGATTATAGAAGGCTTACAACGAATTGGTAGAGCT-----  
 -----ATCCTCCACATA-----CCTAGAAGAATAAGACAGGGCTTAGAAAGGGCTTTGCAA---TAA  
 >EF210735  
 GCT---GCA-----  
 GAAAACTTGTGGGTTACAGTCTATTATGGGGTACCTGTGTGG--AAAGAAGCAAAAC---  
 ACCACTTTATTTTGTGCATCAGATGCTAGAGCATATGATACAGAG---GTACATAAT-----  
 -----GTTTGGGCCACA---CATGCCTGTGTACCCACAGAC---  
 CCCAACCCACAAGAAATAGCATTGGGA-----AATGTGACAGAAGATTTTAACT-----  
 -----ATGTGGAAAAATAACATGGTAGAACAAATGCATGAGGATGTA---  
 ATCAGTTTATGGGATCAAAGCCTA---AAGCCATGTGTAAAATA---  
 ACCCCACTCTGTGTAACCTTTAAGTTGTACTGATGTCAATAGTACTGATACTAAGGGCAATAATACTGGT---  
 -----  
 -----AGTAATAGTACTAGTGGGGAAATGATGGAGAAAGGAGAAATAAAA---  
 AATTGCTCTTTCAATGCTACAACAAGCATGCAA-----  
 GACAAGATAAAGAAAACTATGCACTG---TTTTATAGCCTTGATATAGTACCAATAGACAAT-----  
 -----  
 -----  
 ACTAGCTATAGGTAAATCAGTTGTAACACCTCAATCATTACACAG---  
 GCCTGTCCAAAGGTATCCTTTGAGCCAATTCCCATACATTATTGTGCTCCGGCTGGTTTTGCGATTCTAAAAT  
 GTAGT---GATAAGGGATTCAAT-----GGAACAGGAAAAATGTACAAAT-----  
 -GTCAGC---ACAGTACAATGCACACATGGGATTAGGCCAGTAGTGTCAACC---  
 CAACTGCTGTTAAATGGCAGTCTAGCAGAAGAAGAG-----  
 GTAGTACTTAGATCTGCCAATTTCTCAGACAAT-----ACTAAAACCATAATAGTACAGCTAAAG---  
 -----GAGCCTGTAGAA-----ATAAATTGTACAAGACCCAACAATAATACAAGAAAA---  
 -AGTATACCTATA-----GGGCCAGGGCGAGCA---TTT-----TATGCAACAGGAGAA---  
 -----ATAATAGGAGATATA-----AGAAAAGCACATTGT---AACATTAGTAGAGCA---  
 AAATGGAATAAACTTTACACCAGATAGCTACCAAATTAAGA-----GCCCAATAT-----  
 -----AATAAAACAATAGCCTTTAAT-----  
 AAATCCTCAGGAGGGGACCTAGAAATTGTG--ATGCATACTTTTAATTGTGGAGGAGAA---  
 TTCAAACAGCTCCAGGCAAGAGTCCCTGGCTGTGGAAAGATACCTACAGGATCAACAGCTCCTAGGGATCTGGG  
 GTTGCTCTGGGAAACTCATTTCGCCACTAATGTGCCCTGGAACACTAGTTGGAGTGAGAAT--ATGACT--  
 -----AGTAATATATCTCTGAACCAAATTTGG-----GAT-----  
 ACAATGACCTGGATGCAGTGG---GAAAAAGAAATAGAAAGGTACACAGAAGACATATAC---  
 ACCTTACTTGA AAAATCGCAGAACCAGCAGGAA-----  
 -----  
 AAGAATGAACAAGAATTATTGAAATTGGATGAGTGGGCAAGCCTGTGGAATGTTTGACATATCAAATGGC  
 TGTGGTATATAAAAAATATTCATAATGATAGTAGGAGGTTTGGTAGGTTTAAGAATAATTTTTTGCT---  
 GTACTTTCTATAGTG-----AATAGAGTTAGGCAGGGATACTCACCA-----  
 ATATCATTTGGCTGTCAGCTTGCTCAATGTGCAGCAATAGCAGTAGCCGAG---  
 GGGACAGATAGGATTATAGAAGTAGTACAAATAGCTGGTAGAGCT-----  
 -----ATTCTCCACATA-----CCTAGAAGAATAAGACAAGGCTTGGAAGGTGTCTGCTA---TAA  
 >MH327746  
 GCT---ACA-----  
 GAAAAATTGTGGGTACAGTCTATTATGGAGTACCTGTGTGG--AAAGAAGCAACT---  
 ACCACTCTATTTTGTGCTTCAGATGCTAAAGCATATGATACAGAG---GTACATAAT-----  
 -----GTGTGGGCTACA---CATGCCTGTGTACCCACAGAC---  
 CCCGATCCAAAAGAGGTAGTATTAGAA-----AATGTGACAGAAAATTTTAACT-----  
 -----GTATGGAAAAATGACATGGTAGAGCAGATGCATGAGGATATA---  
 ATCAATTTATGGGATCAAAGCCTA---AAGCCATGTGTAAAATTA---  
 ACCCCACTCTGTGTTATTTTAAATTGCACTAATGCCACGATTAAACAGTACGACCCCGGAG-----  
 -----

-----ACAGAATTAAGGACCCTGAAGGAAGAAGTAAGG---

AACTGCTCTTTCAATGTCACCCAAGCATAAAA-----

AACAAGATGCAGAAGGAATATGCACTT--TTGTATAAACTTGATCTAGTAGCAATAAATAAG-----

-----

-----

ACTGATAATACTAGCTATAGGTTAATAAGTTGTAACACTTCGACCCTTACACAG---

GCCTGTCCAAAGGTATCCTTTGAGCCAATTCCCATACATTATTGTGCCCCGGCTGGTTTTGCGATTATAAAGT

GTAAT---GATAAAAAGTTCAGT-----GGAAAAGGATCATGTACAAAT-----

-GTCAGC---ACAGTACAATGTACACATGGGATTAGGCCAGTAGTATCAACT---

CAACTGCTGTTGAATGGCAGTCTAGCAGAAGATGAG-----

ATAGTAATTAGATCTGAAAATATCACAGACAAT-----GCCAAAACCATCATAGTGCACCTTAGT----

-----GAAGCTGTACAA-----ATCAATTGTACCAGACCCAATAACAATACAAGGAAA-----

-AGTATAACTATA-----GGACCAGGGAGAGCA---TTT-----TATGCAACAGGAGAA-----

-----GTAACAGGAGATATA-----AGACAAGCACATTGT---AACATTAGTGGAACA---

GAATGGAATAACACTTTAAGGCAGGTGAGTGAAAAATTAAGA-----GATAAATTTAAG----

-----AATAAAAACAATAGTCTTTAAG-----

CCATCCTCAGGAGGGGACCTAGAAATTGAA--ATGCACAGTTTTAATTGTGGAGGGGAA--

TTTAAGCAGCTCCAGGCAAGAGTCCTGGCTATGGAAAAGATACCTAAAGGATCAACAGCTCCTAGGGATTTGGG

GTTGCTCTGGAAACTCATTTGCACCACTGCTGTGCCTTGGAATGCTAGTTGGAGT-----

-----AATAAGACTCTAAATGAGATTTGG-----GAT-----

AACATGACCTGGATGCAGTGG---GAAAAAGAAATTGACAAATTACACAGCAGTAATATAC---

TCCTTACTTGAAGAATCGCAGAACCAGCAAGAC-----

-----

AAGAATGAACAAGAATTATTGGCATTGGATAAGTGGGCAAATCTGTGGAATTGGTTTGACATAACAAATTGGC

TGTGGTATATAAGAATATTCATAATGATAGTAGGAGGCTTGATAGGTTTAAGAATAGTTTTTTACT---

GTGCTTTCTTTAATA-----AATAGGGTTAGGCAGGGATACTCACCA-----

TTGTCATTGCTATTAGCTTGCTCAATGCCACAGCCATCGCAGTAGCTGAG---

GGGACAGATAGGATTATAGAAATAGTGCAAAGAATTGGTAGAGCT-----

-----ATTCTTAATATA-----CCTAGAAGAATAAGACAAGGCTTGGAAGAAGTTTGCTA---TAA

>KY658690

GCT---ACA-----

GAAAAATTGTGGGTCACAGTCTATTATGGAGTACCTGTGTGG--AAAGAAGCAACT---

ACCACTCTATTTTGTGCTTCAGATGCTAAAGCATATGATACAGAG--GTACATAAT-----

-----GTATGGGCTACA---CATGCCTGTGTACCCACAGAC---

CCCGATCCAAAAGAGGTAGTATTAGAA-----AATGTGACAGAAAATTTTAAT-----

-----GTATGGAAAAATGACATGGTAGAGCAGATGCATGAGGATATA---

ATCAATTTATGGGATCAAAGCCTA--AAGCCATGTGTAAAATTA---

ACCCCACTCTGTGTTATTTTAAATTGCACTAATGCCACGATTAACAGTACGACCCCGGAG-----

-----

-----ACAGAATTAAGGACCCTGAAGGAAGAAGTAAGG---

AACTGCTCTTTCAATGTCACCCAAGCATAAAA-----

AACAAGATGCAGAAGGAATATGCACTT--TTGTATAAACTTGATCTAGTAGCAATAAATAAG-----

-----

-----

ACTGATAATACTAGCTATAGGTTAATAAGTTGTAACACTTCGACCCTTACACAG---

GCCTGTCCAAAGGTATCCTTTGAGCCAATTCCCATACATTATTGTGCCCCGGCTGGTTTTGCGATTATAAAGT

GTAAT---GATAAAAAGTTCAGT-----GGAAAAGGATCATGTACAAAT-----

-GTCAGC---ACAGTACAATGTACACATGGGATTAGGCCAGTAGTATCAACT---

CAACTGCTGTTGAATGGCAGTCTAGCAGAAGATGAG-----

ATAGTAATTAGATCTGAAAATATCACAGACAAT-----GCCAAAACCATCATAGTGCACCTTAGT----

-----GAAGCTGTACAA-----ATCAATTGTACCAGACCCAATAACAATACAAGGAAA-----

-AGTATAACTATA-----GGACCAGGGAGAGCA---TTT-----TATGCAACAGGAGAA-----

-----GTAACAGGAGATATA-----AGACAAGCACATTGT---AACATTAGTGGAACA---

GAATGGAATAACACTTTAAGGCAGGTGAGTGAAAAATTAAGA-----GATAAATTTAAG----

-----AATAAAAACAATAGTCTTTAAG-----

CCATCCTCAGGAGGGGACCTAGAAATTGAA--ATGCACAGTTTTAATTGTGGAGGGGAA--

TTTAAGCAGCTCCAGGCAAGAGTCCTGGCTATGGAAAAGATACCTAAAGGATCAACAGCTCCTAGGGATTTGGG

GTTGCTCTGGAAACTCATTTGCACCACTGCTGTGCCTTGGAATGCTAGTTGGAGT-----

-----AATAAGACTCTAAATGAGATTTGG-----GAT-----

AACATGACCTGGATGCAGTGG---GAAAAAGAAATTGACAAATTACACAGCAGTAATATAC---

TCCTTACTTGAAGAATCGCAGAACCAGCAAGAC-----  
-----  
AAGAATGAACAAGAATTATTGGCATTGGATAAGTGGGCAAATCTGTGGAATTGGTTTGACATAACAAATTGGC  
TGTGGTATATAAGAATATTCATAATGATAGTAGGAGGCTTGATAGGTTTAAGAATAGTTTTTACT---  
GTGCTTTCTTTAATA-----AATAGGGTTAGGCAGGGATACTCACCA-----  
TTGTCATTTCGCTATTAGCTTGCTCAATGCCACAGCCATCGCAGTAGCTGAG---  
GGGACAGATAGGATTATAGAAATAGTGCAAAGAATTGGTAGAGCT-----  
-----ATTCTTAATATA-----CCTAGAAGAATAAGACAAGGCTTGGAAGAAGTTTGCTA---TAA  
>MF373127  
GCT---TCA-----  
GATCAATTGTGGGTCACAGTCTATTATGGGGTACCTGTGTGG---AAAGAAGCAAAC---  
ACCACTCTATTTTGTGCATCAGATGCTAAAGCATATGATACAGAG---GTACATAAT-----  
-----GTTTGGGCCACA---CATGCCTGTGTACCCACAGAC---  
CCCAACCCACAAGAAATAGGATTGGGA-----AATGTGACAGAAAATTTTAAAC-----  
-----ATGTGGAAAAATAACATGGTAGAACAAATGCATGAGGATATA---  
ATTAGTTTATGGGATCAAAGTCTA---AAGCCATGTGTAAAATTA---  
ACCCCACTCTGTGTTACTTTAAATTGCACTGATTGTAAAAAGGATAATGATACTTTACAATGTGATTGTAATA  
AT-----  
---GAGAGACTGATAATAATACTATCACTAGTGACTIONTACATGGGAGAGAGGAGAAATAAGA---  
AACTGCTCTGTCACTGCTACCACAGACATAGAA-----  
GATAGGAGGAAAAATGAAGATGCTTCT---TATCATAATCGTGGTATAATACAAATTAATAAT-----  
-----  
-----  
ATTAATAATACCTTATACCTTGATGTTGAGTAGTTGTACCACTTCTATCATTGCCGGT---  
CCCTGTCCATCCGTATCCCTTGATCCTATTCCCAATTGTTATTGTGCCGCGGCTGGTTTTCTATTTCGGAATG  
GTAAT---GATAACAACGTCGCT-----GGACCGGGACCAAGTGATATT-----  
-GTCACC---CCAGGACCATGTGCACTTGGGATTATGCCAGTGGCACCACCT---  
CTGCTGCTGGTAAGTGGCCCTCTAGCAGAGGAAGAA-----  
GTAATAACTACGTCTGACATTTTCACTAACAAT-----GCTAAAACCATTATAGTACAGCTGAAT----  
-----GAAACTGTAAAA-----ATTAAGTGTACAAGGCCAGCAACAATACAAGGAAA-----  
-AGTATAACTATA-----GGACCAGGGAGAGCA---TTT-----TATGCAACAGGAGAC-----  
-----ATAATAGGAGATATA-----AGACAAGCACATTGC---AACATTAGTCAAGCA---  
AAATGGAATAACACTTTAAACAGGTAGTTGTCAAATTAAGA-----GAGCAATTTGGG---  
-----ATGAATAAAACAATAATCTTTAAT-----  
CAATCCTCAGGAGGGGACCCAGAAATTGTA---ATGCACAGTTTTAATTGTGGAGGGGAA---  
TTTAAGCAGCTCCAGGCAAGAATCCTGGCTGTAGAAAGATACCTACAGGATCAGCAGTTCCTAGGGTTTTGGG  
GATGCTCTGGAACGCATCTGCACCACTGCTGTGCCTTGGAAATGCTAGTTGGAGT-----  
-----AATAAATCTCTAGATGAGATTTGG-----AAT-----  
AATATGACCTGGATGGAGTGG---GAAAAAGAAATTGACAATTACACAGGCTTAATATAT---  
AACTTACTTATAGAATCGCAGAACCAACAAGAA-----  
-----  
AAGAATGAACAAGAATTATTGGCATTGGATAAATGGGCAAGTTTGTGGAATTGGTTTGACATATCAAATTGGC  
TGTGGTATATAAGAATATTCATAATGATAGTAGGAGGCTTAGTAGGTTTAAGAATAGTTTTTACT---  
GTACTTTCTATAGTG-----AGAAGAGTTAGGCAGAGATATTCACCA-----  
ATATCGGTAGCTGTTAGTTTGTTCATGCCACAGCTATTGTAGTTGCTGAA---  
GGGACAGATAGGGTTATAGAAGCAATACAAAGAGCTTTTAGAGCT-----  
-----ATTCTCCACATA-----CCTAGAAGAATCAGACAGGGAGCGGAAAGGGCTTTTGATA---TGA  
>MF373129  
GCT---TCA-----  
GGTCAATTGTGGGTCACAGTCTATTATGGGGTACCTGTGTGG---AAAGAAGCAACC---  
ACCACTCTATTTTGTGCATCAGATGCTAAAGCATATGATACAGAG---GTACATAAT-----  
-----GTTTGGGCCACA---CATGCCTGTGTACCCACAGAC---  
CCCAACCCACAAGAAGTACTATTGGAA-----AATGTGACAGAAAATTTTGAT-----  
-----ATGTGGAAAAATGACATGGTAGAACAGATGCATGAAGATATA---  
ATCAGTTTATGGGATCAAAGTCTA---AAGCCATGTGTAAAATTA---  
ACCCCACTCTGTGTTACTTTAAATTGCACTGATTATAGTAGAAAAAATACCACTAGTAAT-----  
-----  
-----AACAGTACCATTGGTAACAACATGGAAGGAGAAATAAAA---  
AACTGCTCTTTCAATATCACCACAAACAGACAA-----  
GATAAATGGCAGAAAGAATATGCACTT---TTTTATTAATATGATATAGTACCAGTAGATGGAGAT-----

-----  
-----  
ACTAATAACTAATAATAATACCTATAGGTTGACAAGTTGTAACACCTCAGTCATCACACAG---  
GCCTGTCCAAAAACATCCTTTGAGCCAATTCCCATACATTATTGTGCCCGGCTGGTTTTGCGATTCTAAAGT  
GTAAT---GATAAGAAGTTCAAT-----GGAACAGGAAAATGTATAAAT-----  
-GTTAGC---TCAGTACAATGTACACATGGAATTAGGCCAGTAGTGTCAACT---  
CAACTGCTGTTAAATGGCAGTCTAGCAGAAGAAGAG-----  
GTAGTAATTAGGTCTGAAAATTTACGAACAAT-----ATTAAAACCATTATAGTACAGTTGAAT----  
-----GAATCTGTAGAA-----ATTAATTGTACAAGACCCAACAACAATACAAGGAAA-----  
-AGTATACATATG-----GGACAAGGGAGAGCA---TTT-----TATGCAACAGGAGAC-----  
-----ATAATAGGAGATATA-----AGACAAGCACATTGT---AACATTAGTAGAGCA---  
AAATGGAATAACACTTTAAAAACAGATAGTTGCCAAATTAAGA-----GAGCAATTTGGG----  
-----AATAAAACAATAATCTTTAAT-----  
CAATCTTCAGGAGGGGACCCAGAAATTGTA---ATGCACAGTTTTTAATTGTGGAGGGGAA---  
TTTAAGCAGCTCCAGGCAAGACTCCTGGCTGTGGAACGATACCTAAGGGATCAACAGCTCCAGGAACTTTGGG  
GGTGCTCTGGAAACTCATTTGCACCACTGCTGTGCCTTGGAATGCTAGTTGGAGT-----  
-----AATAAATCTCTAGATATGATTTGG-----CGT-----  
AACATGACCTGGAGGGAGTGG---GAAAGAGAAATTGACAAATTACACAGACTTAATATAC---  
AACTTACTTGAAGAATCGCAGAACCAGCAAGAA-----  
-----  
AAGAATGAACAAGACTTATTGGAATTGGATAAGTGGGCAAGTTTATGGAATTGGTTTACCATAACAACTGGC  
TGTGGTATATAAAAAATATTACATAATGATAGTAGGAGGCTTGGTAGGTTTAAGAATAGTTTTTTACT---  
GTACTTTCTATAGTA-----AATAGAGTTAGGCAGGGATACTCACCA-----  
ATATCGTTAGCTGTTAGTTTGTCTAACGCCACAGCTATAGCAGTTGCTGAG---  
GGGACAGATAGGATTATAGAAGCAATCCAAAGAGCTTATAGAGCT-----  
-----ATTATCCACATA-----CCTACAAGAATAAGACAGGGCGCGGAAAGGGCTTTGCTA---TAA  
>KP411829  
GCT---TTA-----  
GATCAATTGTGGGTCACAGTCTATTATGGGGTACCTGTGTGG---AAAGAAGCAACC---  
ACCACTCTATTTTGTGCATCAGATGCTAAAGCATATGATACAGAG---GTACATAAT-----  
-----GTTTGGGCCACA---CATGCCTGTGTACCCACAGAC---  
CCCAGCCCACAAGAAGTAGTACTGGGA-----AATGTGACAGAAAATTTTAAC-----  
-----ATGTGGAAAAATGACATGGTAGAACAGATGCATGAGGATATA---  
ATCAGTTTATGGGATGAAAGTCTA---AAGCCATGTGTAAAATTA---  
ACCCCGTTCTTTGTACTTTAATGTGCACTGATTTGGAAAAATGAACTAATAGTACTTTAAAAAATGAACTA  
ATAGTAATAATGCGACTATG-----  
-----GAAGATGGAGAGAGGAGAAATAAA---  
AAACTGCTCTTTCAATCTCACAAGCCTAGGAAA-----  
AAGATGCAGAAAGAATATGCAACT---TTTTATAAGCTTGATATAGTATCCATAGATAAT-----  
-----  
-----GATAATACTAGCTATAAGTTGATATTTTGTATCACCTCATTCTACTAAG---  
GCCTGCCCTAAGATCTCCTTTGAGTCAGTTTCAATACATTATACTGCCCGGCGGGTTTTGCGATTATAAAGT  
GTAGA---GATACAAAGTTCAAT-----GGAACAGGGCCATGTAAAAAT-----  
-GTCAGC---ACAGTACAATGTACACATGGAATTAAGCCAGTGGTATCAACT---  
CAACTGCTGTTGAATGGCAGTGTAGCAGAAGAAGAT-----  
ATAGTCATTAGGTCTGAAAATTTACGGACAAT-----GCTAAAACCTATAATAGTACAGCTGAAC---  
-----AAGTCTGTAGAA-----ATTCATTGTATAAGACCCAACAACAATACAAGAAAA-----  
-GGTATACATATG-----GGACTAGGGAGAGCA---TTT-----TATACAACAGGAGAA-----  
-----ATAATAGGAGATATA-----AGGCAAGCACATTGT---ATCCTTATTAGCACA---  
AATTGGACTAACACTTTAAGACAGATATCTGTCAAATTAATA-----GAACTTTTTAAG----  
-----AATAAAACAATATACTTTACT---  
CGACTCTCTGATGGGGCTACTCTAGAAATGACC---ACCATATCTTTGTTTTGGGAGGAGAA---  
TTCAAGCAGCTCCAGGCAAGAGTCTGGCTGTGGAAGATACCTAAAGGATCAACAGCTCCTGGGGATTTGGG  
GTTGCTCTGGAAACTCATTTGCACCACTACTGTGCCTTGGAATAAGACTTGGAGT-----  
-----AATAAATCTCTGGATGACATTTGG-----AAA-----  
AACATGACCTGGATGCAGTGG---GAAAGAGAAATTGATAATTACACAGACTTAATATAC---  
ACCTTACTTGCAGACTCACAGCGCCAACAAGAA-----  
-----  
AAGAATGAACAAGAATTATTGGAATTAGATAAATGGGCAAGTTTGTGGAATTGGTTTGACATAACAACTGGC  
TGTGGTATATAAAAAATATTACATAATGATAATAGGAGGCTTGGTAGGTTTAAGAATAGTTTTTTACT---

GTACTTTCTATAGTG-----AATAGAGTTAGGCAGGGATACTCACCA-----  
 TTATCGTTTGCTGTTAGCTTGTTAATGCCATAGCCATAGTAGTAGCTGAG---  
 GGAACAGATAGGGTTATAGAAGTATTACAAAGAGCTTTTAGGGCT-----  
 -----ATCCGCCATATA-----CCTACAAGAATAAGACAGGGCGCGGAAAGGGCTTTGCTA---TAA  
 >MF373151  
 GCT---AAA-----GAA-----CAA---GCT---AAA---  
 GAACAATTGTGGGTCACAGTCTATTATGGGGTGCCTGTGTGG---AAAGAAGCAACC---  
 ACCACTCTATTTTGTGCATCAGATGCTAAAGCATATGACACAGAG---GTGCATAAT-----  
 -----GTTTGGGCCACA---CATGCCTGTGTACCCACAGAC---  
 CCCAACCCACAAGAGATACATTTGGAA-----AATGTGACAGAAAATTTTAAC-----  
 -----ATGTGGAAAAATAACATGGTAGAACAAATGCATGAGGATATA---  
 ATTAATTTATGGGATGAAAGTCTA---AAACCATGTGTAAAATTA---  
 ACCCCACTCTGTGTTACTTTAAATTGTGAGCGAGGTAATAGCACTAGTATCCAGGCAATCGTTAGTAGAAGTG  
 CCCGCAGTAGT-----  
 -----GTTATTCAAGTAATAGCCATATTACGGGCAATAGGAGTTTGAATCGGGAGGAATCA---  
 ATTTGCTCTTTCAATGTCAACCACAGGTGTAAGG-----  
 GACAAAGTAATGAAAGAATATGCTCTT---TTTTATAAACTTGATGTAGTACAAATAGATAAT-----  
 -----  
 -----  
 AGTAATACTAGCTATAGGTTGATAAATTGTAATACCTCAGTCATTACACAG---  
 GCCTGTCCAAAGGTGTCTTTTGAGCCAATTCCAATACATTATTGTACCCCGGCTGGTTATGCGCTTTTAAAGT  
 GTAAT---AACAAAAAGTTCAAT-----GGAACAGGACCATGTAAAAAT-----  
 -GTCAGC---ACAGTACAATGTACACATGGAATTAGACCAGTAGTATCAACT---  
 CAATTGCTGTAAATGGCAGTCTAGCAGAAGAAGAG-----  
 GTAGTAATTAGGTATGCTAATTTCTCGGACAAT-----GCTAAAACCATAATAGTACAGCTGAAA---  
 -----GCATCTGTAAAA-----ATTGATTGTACAAGACCCAACAATAATACAAGAAAA-----  
 -AGTATACATATA-----GGACCAGGGAGGGCA---TTT-----TATGCAACAGGAGAT-----  
 -----ATAATAGGAAATATA-----AGAGAAGCACATTGT---AACATTAGTAGAGCA---  
 AAATGGAATGACACTTTAAGCCAAGTAGCTAGAAAATTAAAA-----GAACAATTT-----  
 -----AATAAAACAATAGTCTTCCAG-----  
 CCACCCTCAGGAGGGGACCCAGAAAGTTATG---ATGCTCAGCTTTAATTGTGGAGGGGAA---  
 TTTAAGCAGCTCCGGGCAAGAGTCCCTGGCTGTGGAGAGATACCTACAGGATCAACAGCTCCTAGGGATTTGGG  
 GTTGCTCTGGAAGAACTCATTTGCACCACTACTGTGCCTTGGAAATTCTAGTTGGAGT-----  
 -----AATAGATCTCTGGATAAGATTTGG-----AAT-----  
 AACATGACCTGGATGGAGTGG---GAAAGAGAGATTGACAATTACACAGATATAATATAC---  
 AGCTTAATTGAACAATCGCAAAACCAACAAGAA-----  
 -----  
 AAGAATGAACAAGACTTATTGGCATTAGATAAATGGGCAAGTTTGTGGAATTGGTTTAACATAACAAATTGGC  
 TGTGGTATATAAAAAATATTATAATGATAGTAGGAGGCTTGATAGGTTTAAAGATAGTTTTTTACA---  
 GTAATTTCTATAGTA-----AATAGAGTTAGGCAGGGGTACTCACCT-----  
 TTATCGTTTGCTGTTAGCTTGCTAGATACCACAGCTGTAATAGTAGCTGAG---  
 GGGACAGATAGGGTTATAGAATTTGTACAAAGGGCTTTTAGAGCT-----  
 -----ATCCTCCACATA-----CCTGTAAGAATAAGACAGGGCTTGGAAAGGGCTTTGCTG---TAA  
 >KP411823  
 GCT---TTA-----  
 GATCAATTGTGGGTCACAGTCTATTATGGGGTACCTGTGTGG---AAAGAAGCAACC---  
 ACCACTCTATTTTGTGCCTCTGATGCTAAAGCATATGATACAGAG---GTACATAAT-----  
 -----GTTTGGGCCACA---CATGCCTGTGTACCCACAGAC---  
 CCCAACCCACAAGAAGTAGTATTGGAA-----AATGTGACAGAAAATTTTAAC-----  
 -----ATGTGGAAAAATAACATGGTAGACCAGATGCATGAGGATATA---  
 ATCAGTTTATGGGATCAAAGTCTA---AAGCCATGTGTAAAATTA---  
 ACCCCACTCTGTGTTACTTTGAATTGTACTGATTTGAGAAATAATACTGAGAGCAATGATACT-----  
 -----  
 -----ACCAGTGAATGATACTGGGGAAAGACAAGATAAAAAATGATTCTATTC---  
 AACTGCTCTTTCAATATCACCACAAGCAGAAGA-----  
 GATAAATGGCAGCAAGAATATGCATTT---TTTTATAAGCTTGATATAATGCCAATAGATGAAGAGAAT---  
 -----  
 -----  
 AATACTAATACCTATACGTTGATAAGTTGTAATACCTCAGTCATTACACAG---  
 GCCTGTCCAAAGGTATCCTTTGAGCCAATTCCCATACATTATTGTACCCAGCTGGTTTTGCGCTTCTAAAGT

GTAAT---GATAAGAAGTTCAAT-----GGAACAGGACTATGTAAAAAT-----  
 -GTTAGC---ACAGTACAGTGTACACATGGAATTAGGCCAGTAGTATCAACT---  
 CAACTGCTGTTAAATGGCAGTCTAGCAGAAGAAGAG-----  
 GTAGTAATTAGGTCTGAAAATTTACAGACAAT-----ATTAAAACCATTATAGTACAGCTGAAT----  
 -----GAATCTGTAGAA-----ATTAATTGCACAAGACCCAACAACAATACAAGGAGA-----  
 -AGTATCCGTAACCAT-----AGAGGACCAGGGAGAGCA---TTT-----CATACAACAGGAGAA-----  
 -----ATAATAGGGAATATA-----AGACAAGCACATTGT---AACATTAGTAGAGCA---  
 AAATGGAATAACACTTTAAAACAGATAGTTGCCAAATTAAGA-----GAGCAATTTGGG----  
 -----AAGAATAAAACAATAGTCTTTAAT-----  
 CACTCCTCAGGAGGGGACCCAGAAATTGTG---ATGCACAGTTTTAATTGTGGAGGGGAA---  
 TTTAAGCAGCTCCAGGCAAGAGTCCTGGCTATAGAAGGATACCTAAAGGATCAACAGCTCCTGGGACTTTGGG  
 GATGCTCTGGAAACTCATTTGTACCCTGCTGTGCCTTGGAATGTTAGTTGGAGT-----  
 -----AATAAATCTCTAGATAAGATTTGG-----AAT-----  
 AACATGACCTGGAGGGAGTGG---GAAAGAGAAATTGACAAATTACACAGGCTTAATATAC---  
 AACTTACTTGAAACATCGCAGAACCAGCAAGAA-----  
 -----  
 AAGAATGAACAAGAATTATTGGAATTGGATAAATGGGCAAGTTTGTGGAATTGGTTTGACATAACAACTGGC  
 TGTGGTATATAAAAATATTTCATAATGATAGTAGGAGGCTTAGTAGGTTTAAGAATAGTTTTTTACT---  
 GTACTTTCTATAGTG-----AATAGAGTTAGGCAGGGATACTCACC-----  
 ATATCGTTAGCTAATGAGGTTTTCAATTGCCCCGTTAATGCCACCGGTGAA---  
 AGCACCGGTAGGGGTATAGAAACCTTTCAAAGAACCTTTAAAAGTATTTTTCAA-----  
 -----ATTCTTTCCCAA-----ATTACCCCGGGACAAACGGGCGCCAAAAGGGTTGGGTA---TAA  
 >MF373162  
 ACT---GTA-----  
 GCACAATGGTGGGTCACAGTCTATTATGGGGTACCTGTGTGG---AAAGATGCAACT---  
 ACCACTCTATTTTGTGCGTCAGATGCTAAAGCATATGAAACAGAG---GTACATAAT-----  
 -----GTTTGGGCCACA---CATGCTTGTGTACCCACAGAC---  
 CCTAACCCACAAGAAATAAGATTGGAA-----AATGTGACAGAAAATTTTAAT-----  
 -----ATGTGAAAAATAACATGGTAGACCAAATGCATGAGGATATA---  
 ATCAGTTTATGGGATCAAAGTCTA---AAGCCATGTGTAAAATTA---  
 ACCCCACTCTGTGTTACTTTGAATTGCTCTAACTTAAGAAATAATACTAATAACCAATAGTACT-----  
 -----  
 -----AGTACCAATCATACTATTGGAGGAGAGGGTGATATGAAA---  
 AACTGCTCTTTCAATACCACCACAGGGATAGAT-----  
 AATAAGATACAAAACAATATGCACTT---TTTTATACACTTGATGTAGTACAAATTAAAAAT-----  
 -----  
 -----  
 GATACTAAAAGCTATACATTGGTAAATTGTAATACCACAGTCATTTTCACAG---  
 GCCTGTCCAAAGGTAACCTTCGAACCAATTCCCATACATTATTGTGCCCCGGCTGGTTTTGCGATTCTAAAAT  
 GCAAG---GATGAAAAGTTCAAT-----GGTTCAGGACCATGTAAACAAT-----  
 -GTCAGC---ACAGTACAATGTACACATGGAATTAGGCCAGTAGTGTCAACT---  
 CAACTGCTATTAAATGGCAGTCTAGCAGAAGGAGGA-----  
 GAAGTAGTAATTAGATCTGAAAATTTACAAACAAT-----GCTAAAACCATAATAGTACAGCTGGAC-  
 -----ACACGTGTAGAA-----ATTGATTGTATAAGACCCAACAACAAGGAGA---  
 ---AGTATACATATA-----GCACCAGGGAGTGCA---TTT-----TATGCAACAGGAGAC---  
 -----ATAATAGGAGATATA-----AGACAAGCACATTGT---AACATTAGTAGAGCA-  
 ---GAATGGAATAGTACATTAGTCAAGATAGCTAAAAAATTACGA-----GAACAATTT-----  
 -----AATACAACAATAGCCTTTAAT-----  
 AAATCCTCAGGAGGGGATCTAGAAATTGTA---ATGCACAGTTTTAATTGTGGAGGAGAA---  
 TTTAAGCAGCTCCAGGCTAGAGTCCTGGCTGTAGAAAGATACCTAAGGGATCAACAGCTCCTTGGGATTGGG  
 GTTGCTCTGGAAACTCATCTGCCACACTGCTGTGCCTTGGAATAAGAGTTGGAGTGAGAAT---  
 ATATCTAGTAAG-----AATATATCTATAGACCAGATTTGG-----CAA-----  
 ---AACATGACCTGGATGCAGTGG---GAGAGAGAAATTGATAATCACACAGAATTAATATAC---  
 AATTTACTTGAACAATCGCAGATCCAGCAGGAA-----  
 -----  
 AAGAATAAACAAGAATTACTAGAAATTGGATAAGTGGACAAATTTGTTGGATTGGTTTGACATAACAAAATGGC  
 TGTGGTATATAAAAATATTTATAATGATAGTAGGAGGCTTAGTAGGCTTAAGAATAGTTTTTTACT---  
 GTACTTTCTATAGTA-----AATAGAGTTAGGCAGGGATATTCACCA-----  
 TTATCATTTGCTGTTAGCTTGCTTAATACCCTGCTATAGTAGTAGCTGAG---

GGGACAGATAGGATTATACAAGCAGCACAAATAGTTGGCAGAGCT-----  
 -----ATTCTCCATATA-----CCTAGAAGAATAAGACAGGGTCTTGAAAGGGCTTTGCAA--TAA  
 >KP411824  
 ACT---GCA-----  
 CCAAGCTTGTGGGTACAGTCTATTATGGAGTGCCTGTGTGG--AAAGAAGCAACT---  
 ACCACCTATTTTGTGCATCAGATGCTAAGGCATATGAGAAAGAG--GCACATAAT-----  
 -----ATTTGGGCCACA---CATGCCTGTGTACCCACAGAC---  
 CCCAATCCACAAGAAGTAGTATTGGAA-----AATGTGACAGAGGATTTTAAAC-----  
 -----ATGTGGAAAAATAACATGGGTAGAACAGATGCATGAGGATATA---  
 ATCAGTTTATGGGATCAAAGCTTA--AAGCCATGTGTAAAATTA---  
 ACCCCACTCTGTGTCACTTTAAATTGCACTGATCCTTGGTATGATAATACTGCTAATAGGACT-----  
 -----  
 -----ACAGAGAGAATGATAATGGAGAAAGGAGAGATAAAA---  
 AAATGCTCGATCGAGGTCAACACATGCTTGATA-----  
 GATGTGTGGATGGAGCATTGTGCACTT---CTTTCTAAACTACATTTAGTACGACTAGAGAAC-----  
 -----  
 -----  
 ACTACATTCATCTATATGCAGACAAGTCGTCACTCCTCGAAACGTACAAAA---  
 GGTGTGCCAAGGTATTCCATAGAACCGATTCCACTACAATATTCTGCCCCGGCAGGTTCTGCCATTCTAATTC  
 GTAAA---AATGATATGGTTCAT-----GGTACCGGGACATGTACTCAT-----  
 -GTCCCC---CCAGTACAATGTTTGAACGGAATCAGGCCAGTTGTATCGAGT---  
 CAACATCCCCTCGCATGACATATCAGGAGCAGCG-----GTGCTAACTAAA---  
 GACAAATTTCAAGGACACA-----GTTAGAACCATAATAGTACAGCTCAAT-----  
 GATTCTGTACCA-----ATTAATTGTACAAGACCCAATAACAATACAAGAAAA-----  
 AGTATACATATA-----GGACCAGGGAGAGCA---TTT-----TATGCAACAGGAGAC-----  
 -----ATAATAGGAGATATA-----AGACAAGCACATTGT---AACATTAGTCTAGTA---  
 AAATGGAATAACACTTTAGAAAAAATAGTTACAAAATTGAGA-----GAACAATTTAAG---  
 -----AACAGACAATAGTCTTTTCT-----  
 CCCCCCTCAGGAGGGGATCCAGAAATTGTA--TCACACAGTTTTAATTGTGGAGGAGAG---  
 TTTAAGCAGCTCCAGGCAAGAGTCCCTGGCTGTGGAAAGATACCTAAAGGATCAGCAGCTCCTAGGGATTTGGG  
 GCTGTTCTGGAAACTCATTTGCACCACCACTGTGCCTTGGAAATATTAGTTGGAGT-----  
 -----AATAAACTCTAGAGCAGATTTGG-----GAT-----  
 AACATGACCTGGATGCAGTGG--GACAAAGAAATTACAAATTACACAGAATTAATATAC---  
 ACCTTAATTGAAGAATCGCAGATCCAGCAGGAA-----  
 -----  
 AAGAACGAACAAGAATTATTAGAGTTAGATAAAATGGTCAAATTTGTGGAATTGGTTTGACATAACAACTGGC  
 TGTGGTATATAAAAAATATTACATAATGATAGTAGGAGGCTTGATAGGTTTAAGAATAGTTTTTTGTT---  
 GTGCTTTCTATAATA-----AATAGAGTTAGGAAGGGATACTACCA-----  
 TTATCGTTCGCTATTAGTATTATTAATGTTACAGCCACAGCCGTAGCCGTA---  
 GCAGCAGATACGGTTATAGATACAGTACCAGCAGCAGGTAGAGGT-----  
 -----ATCCTCCTCATA-----CTTAGACGAATAAGACAAGGACTGGAAAGGGATTTGCTA--TAA  
 >MF373185  
 GCT---GCA-----  
 GAACAATTGTGGGTACAGTCTATTATGGGGTACCTGTGTGG--AAAGAAGCAACC---  
 ACCACTCTATTTTGTGCATCAGATGCTAAAGCATATGATACAGAG--GTACATAAT-----  
 -----GTTTGGGCCACA---CATGCCTGTGTACCCACAGAC---  
 CCCAACCACACAAGAAGTAAAATTGGAA-----AATGTGACAGAAAATTTTAAAT-----  
 -----ATGTGGAAAAATAACATGGGTAGAACAGATGCATGAAGATATA---  
 ATCAGCTTATGGGATCAGAGTCTA--AAACCATGTGTAAAATTA---  
 ACCCCACTCTGTGTTACCTTAAATTGCACTAATATTACTAGTATTAATGCCACCAGAGTGATACCAATAATAG  
 CATGGGGAATGGAATGAAGACATGAAAAA-----  
 -----  
 TGCTCTTTCAATATCACCACAAACATGAGA-----  
 GATAAGCTAAAGAGAGAATATACACTT---  
 TTGTATAAAATGGATATAGTACCATTAGATGATAGTGAAAATAGC-----  
 -----  
 AATAGTAGTAATGGCAATTATAGCAGTTATAGATTGATAAGTTGTAACACCTCAGTCATTACACAG---  
 GCCTGTCCAAAGGTCTCTTTTGGAGCCAATTCCCATACATTATTGTGCCCCGGCTGGTTTTGCGATTCTAAAAAT  
 GTAAT---GATAAGGAGTTCAAT-----GGAACAGGACCATGTAATAAT-----  
 -GTCAGC---ACAGTACATTGTACACATGGAATTAGGCCAGTAGTATCAACT---

CAGCTGCTGTTAAATGGCAGTCTAGCAGAAAATGAT-----  
ACAGTAATTAGGTCTGAAAATTTACAAACAAT-----GCTAAAACTATAATAGTACAGCTGAAA----  
-----GAACCTGTAAGC-----ATTACTTGTGTAAGACCCAACAACAACACAAGAAAA-----  
-GGTATACCTATA-----GGACCAGGGAGAGCA---TGG-----TATACAACAGGACAA-----  
-----ATAGTAGGAAATATA-----AGAGCAGCATATTGT---GATGTTAATAGAGTA---  
GCGTGGAATAACACTTTAAACAGATAGCTAGCAAACCTCAGA-----GAGCAATTTAGG----  
-----AATAAGACAATAGTCTTTACT-----  
AACTCCTCAGGAGGGGACCCAGAAATTGTA--ATGCTCAGTGTTAATTGTGGAGGGGAA---  
TTTAAGCAGCTCCAGGCAAGAGTCCTGGCTCAGGAAAGATACCTAAAAGATCAACAGCTCCTAGGGATTTGGG  
GTTGCTCTGGA AAAATCATCTGCACCACTAATGTGCCTTGGAATGCTAGTTGGAGT-----  
-----AATAAATCTTATAATGACATTTGG-----GAT-----  
AACATGACCTGGAGGGATTGG---GAAAGAGAAATTGATAGTTACACAAACACAATATAC---  
AACTTACTTGAACCTCTCGCAAAATCCAACAAGAA-----  
-----  
AAGAATGAACAAGAATTATTACAATTAGATAAAATGGGCAAATTTGTGGAATTGGTTTGACATAACAAAATGGC  
TGTGGTACATAAAAATATTACATAATGATAGTAGGAGGCTTAATAGGTTTAAGAATAGTTTTTTGCT---  
GTACTTTCTATAGTG-----AATAGAGTTAGGCAGGGATACTCACCA-----  
ATATCGTTGGCTTATAGCTTGCCTAACGCTACGGCTATAGCAGTACCTGAG---CACCGA---  
TTGACTTATGAAGCATCACGAAAGTCGATA---GGT-----  
ATTCTCCATAC-----CTAGTAAGAATAAGACAGGGCTTGGAAGGGCTTTGCTA---TAA  
>MF373186  
GCT---GAA-----GAAAAG---  
TGGGTTACAGTCTATTATGGGGTACCTGTGTGG--AGAGAAGCAACC---  
ACCACTTTATTCTGTGCATCAAATGCTAAAGGATATGATACAGAG---GCACATAAT-----  
-----GTTTGGGCCACA---CATGCCTGTGTGCCCATAGAC---  
CCCAACCCACAAGAGTTAGTATTGGAA-----AATGTAACAGAAAATTTTAAC-----  
-----ATGTGGA AAAATAACATGGTAGAACAGATGCATGAGAATATA---  
ATTGAATTATGGGATCAAAGTCTA---AAGCCATGTGTAGAATTA---  
ACCCCACTCTGTGTTACTATAAACTGCACCACCATGGGGCAAATAATACCACCTCTAGCCCC-----  
-----CTTACTAATAGTACAATAGATGAAGGGATAATGACA---  
AACTGCTCTTTCAATATCACCAAGACATAAGA-----  
GATAGGAAGAAGGAGGACTATGCATTG--TTTTATAGAACTGATGTAGAAAGGATAAGTGAA-----  
-----  
GATAGTGCTAATACCACCTATAGGTTGAGAAGTTGTAATACCTCAGTCATTAGACAG---  
GCCTGTCCAAAGGTATCCTTTGAGCCAATTCCCATACATTTTTGTGCCCCAGCTGGTTTTGCGATTCTAAAT  
GTAAG---GATGAGGATTTCAAT-----GGAACAGGACCATGTAAAAAT-----  
-GTCAGC---ACAGTACAATGTACACATGGAATTAGGCCAGTAGTATCAACT---  
CAATTGCTGTTAAATGGCAGTCTAGCAGAAAAGAG-----  
ATAGTAATTAGATCTCAAAATTTCTCGGATAAT-----GCTAAAACCATCCTAGTACAGCTAAAT---  
-----GCATCTATAGAA-----ATTAATTGTACAAGACCTAACAACAATACAAGAAAA-----  
-AGCATACATATA-----GCACCAGGGAAAGCA---TTT-----TATGCAACAGGAGAA-----  
-----ATAATAGGAAATATA-----AGACAAGCACATTGT---AATCTTAGTGGAGCA---  
CAATGGAATAACACTTTAAACATATAGCTATAAAATTAAGA-----GAACAATATCCT---  
-----AATAAAACAATAAACTTTACC-----  
AAGTCCTCAGGAGGGGACCCAGAAATTGTA--CTGCATATCTTTAATTGTGGAGGGGAA---  
TTTAAGCAGCTCCAGGCGAGAGTCCTGGCTGTAGAAAGATACCTAAAGGATCAACAGCTCCTGGGAATTTGGG  
GTTGCTCTGGA AAACAAATCTGCACCACTGCTGTGTCTTGGAATGATAGTTGGAGT-----  
-----AATAAATCTCTAGATTATATTTGG-----AAC-----  
AACATGACCTGGATGCAGTGG--GATAAAGAAATTCACAATTACACAAATTTTCATATAT---  
GACTTACTTGAAGATTCGCAAAAACCTACAAAAC-----  
-----  
AAGAATGAAAAAGAATTGTTGGAATTGGATAACTGGGCAAGTTTGTGGAATTGGTTTACCATATCAAATTGGC  
TGTGGTATATAAGAATATTACATAATGATAGTAGGAGGCTTGATAGGTTTAAGAATAGTTTTTTACT---  
GTACTGTCTATAGTG-----AATAGAGTTAGGCAGGGGTACTCACCC-----  
TTATCGTTTTGCTGTTAGCCTGCTCAATGCCACGGCCATAGCAGTAGCTGAG---  
GGGACAGATAGGGTTATAGAAATAATACAAAGACCTTGTAGA-----  
-----AGAATAAGACAAGGCCTGGAAGAGGTTTGCTA---TAA  
>KY213743

GCA---GAA-----  
 GACAAATTGGTGGGTCACAGTCTATTATGGAGTACCTGTATGG---AAAAATGCAACC---  
 ACCACTCTATTTTGTGCATCAGATGCTAAAGCATATGATACAGAG---GTACACAAT-----  
 -----GTTTGGGCCACA---CATGCCTGTGTACCCACAGAC---  
 CCCAACCCACAAGAAGTAGTATTGGGA-----AATGTGACAGAATATTTTAAC-----  
 -----ATGTGGGAAAATGATATGGTAGAACAGATGCAGGAGGATGTA---  
 ATCAGTTTATGGGATCAAAGCTTA---AAGCCATGTGTGAAATTA---  
 ACCCCACTCTGTGTCACTTTAAATTGCACTGAGTTAAATACTACTAGTAATGCTACTGGG-----  
 -----  
 -----TTAAATACTACTAGTAATACTAGCACTGTGTACATAATAGTAAGGATGAAATGAAA---  
 AACTGCTCTTTCAATGTACCTCAAACATAAGA-----  
 GATAAGTTGCAGAGAGAATATGCACTT---TTCTATAAACTTGATATAGTACCAATAGATAAT-----  
 -----  
 -----  
 GATAATAGCAGCTATAGATTGATAAGTTGTAACACCTCAGTCATTACACAG---  
 GCGTGTCCAAAGGTATCTTTTACGCCAATTCCTATACATTATTGTACTCCAGCTGGTTTTGCGCTTCTAAAGT  
 GTAAC---AATAAGACATTCAAT-----GGAAAAGGACCATGTACAAAT-----  
 -GTCAGC---ACTGTACAGTGTACTCATGGGATTAGGCCAGTAGTATCAACT---  
 CAGCTGTTGTTAAATGGCAGTCTAGCAGAAGAAGAA-----  
 GTAATAATTAGAGCTGACAATTTCACTGATAAC-----GCCAAAACCATAATAGTACAGCTGAAG---  
 -----GAACCTGTAAAA-----ATTAATTGTACAAGACCCACAACAATACAAGAAAG---  
 -AGTATACATATA-----GGACCAGGGAGAGCA---TTC-----TATGCAACAACAGAT-----  
 -----ATAATAGGAGATATA-----AGACAAGCACATTGT---AACATTAGTGCAAAA---  
 GACTGGGGAAAAACTTTACAACAGGTAGCTGAAAAATTAAAA-----GAACAATTTAAG---  
 -----AACAAAACAATATACTTTAAT-----  
 CAATCCTCAGGAGGGGACCCAGAAATTGTA---ATGCATAGTGTTAATTGTGGAGGGGAA---  
 TTTAAGCAGCTCCAGGCAAGAGTCCTGGCTATAGAAAGATACCTAAGGGATCAACAGCTCCTGGGGATTTGGG  
 GCTGCTCTGGAAGAACTCATTTGCACCACTAATGTGCCTTGGAATGCTAGTTGGAGT-----  
 -----AAAAATAAAAGTATAGATGAGGTTTGG-----AAT-----  
 AACATGACCTGGATGCAGTGG---GAAAATGAGATTGACAATTACACAGGCTTAATATAT---  
 ACTTTACTTGAAGAATCGCAAAACCAGCAAGAA-----  
 -----  
 AAGAATGAGCAAGAATTATTGGAATTGGATAAATGGGCAAGTTTGTGGAATTGGTTTGACATAACAAATTGGC  
 TGTGGTATATAAAAAATATTACATAATGATAGTAGGAGGCTTGATAGGCTTAAGAATAGTTTTTGTCT---  
 GTACTTTCTATAGTG-----AATAGAGTTAGGAAGGGATACTACCA-----  
 TTGTCATTGCTGTTAGTTTGTCTTAATACCATAGCTATAGCTGTAGCTGAG---  
 GGAACAGATAGGGTTATAGAAATAGTACAAAGAGTTTGTAGAGCT-----  
 -----ATTGCAACATA-----CCTAGAAGAATAAGACAGGGCTTAGAAAGGGCTTTGCAG---TAA  
 >KY213745  
 GCT---GCA-----  
 GAACAATTGTGGGTTACAGTATATTATGGGGTACCTGTGTGG---AAAGAAGCAATC---  
 ACCACTTTATTTTGTGCATCAGATGCTAAAGCATATGACACAGAG---GTACATAAT-----  
 -----GTTTGGGCCACA---CATGCCTGTGTACCCACAGAC---  
 CCCAACCCACAAGAAGTAAGGATGGAA-----AATGTGACAGAAGATTTTAAC-----  
 -----ATGTGGGAAAATAATATGGTAGAACAGATGCATGAAGACATA---  
 ATCAGTTTATGGGATCAAAGTTTA---AAGCCATGTGTAAAATTA---  
 ACCCCACTCTGTGTTACTTTAGAGTGCGATGATTATACCACCAATAGTACTGTTACCAAT-----  
 -----  
 -----AGTAGTAGTGAGAAAACAGGGGAAAAAGGAGAAATAAAA---  
 AACTGCTCTTTCAATGTACCCACAACAATAAGA-----  
 GATAAGGTGGAAGAAACAAGCACTG---TTTTATAAACTTGATGTAGTACCAATAGAAAAT-----  
 -----  
 -----  
 AGTAGTAATAGTACCAATATAGGTTAAGAAATTGTAATACCTCAGTCATTACACAG---  
 ACTTGTCCAAAGGTATCCTTTGAGCCAATTCCTATACACTATTGTGCCCCGGCTGGTTTTGCGATTGTAAAGT  
 GTAAC---AATAAGACATTCACT---GGAAAAGGACCATGTACCAAT-----  
 -GTCAGC---ACAGTACAATGTACACATGGAATTAGGCCAGTAGTGTCAACT---  
 CAGCTGTTGTTAAATGGCAGTCTAGCAGAAGAAGAC-----  
 ATAGTAATTAGATCTAAGAATTTACAGATAAT-----TCAAAAACCATAATAGTACAACCTGAAC---  
 -----AAATCCATAGCA-----ATTAATTGTACAAGACCCAACAACAACAAGAAAA-----

-AGTATACATTTA-----GGACCAGGGCAAGCA---TGG-----TATACAACAGGAGCC-----  
-----ATAATAGGAGATATA-----AGACAAGCACATTGT---AACATTAGTAAAATA---  
GAATGGAATAATACTTTAAGACAGGTAGTTAAAAAATTAAAA-----GAAAAATTTAAT-----  
-----GCAACAACAATATTCTTTAAT-----  
CAATCCTCAGGGGGAGACCCAGAAATTGTA--ATGCACAGCTTTAATTGTGGAGGGGAA---  
TTTAAGCAGCTCCAGGCAAGGGTCCTGGCTGTGGAAAGATACCTAAGGGATCAACAGCTCCTAGGGATTTGGG  
GCTGCTCTGGAAACTCATTGTGCAACACTGCTGTGCCTTGAATACTAGTTGGAGT-----  
-----AATAAATCTCTTAATGAAATTTGG-----AAT-----  
AACATGACCTGGTTAGAGTGG---GAAAGAGAAATTGACAATTACACAGGTTTAATATAC---  
ACCTTACTTGAAAAAGCACAGAACCAGCAAGAA-----  
-----  
AAGAATGAACAAGAATTATTGAAATTGGATAGTTGGGCAAGTCTGTGGAATTGGTTTAGCATATCAAACCTGGC  
TGTGGTATATAAGGATATTCATAATAGTAGTAGGAGGCTTAGTAGGTTTAAGAATAGTTTTTTGCT---  
GTACTTTCTATAGTA-----AATAGAGTTAGGCAGGGATATTCACCA-----  
TTATCATTTGGCTATTAGCTTGCTAAATGTCACAGCTGTAGCAGTAGCTGAA---  
GGGACAGATAGAATTATAACAGTAGTACAAAGAGCTTATAGAGCT-----  
-----TTTCTTCACATA-----CCTGTAAGAATAAGACAAGGCTTGGAAGGGCTCTGCTA---TAA  
>JN248346  
ATG---GCA-----  
CAACAATTGTGGGTCACAGTCTATTATGGGGTACCTGTGTGG---AAAGAAGCAAAA---  
ACCACTCTATTTTGTGCTTCAGATGCTAAAGCATATGATACAGAG---GTACATAAT-----  
-----GTCTGGGCCACA---CATGCCTGTGTACCCACAGAT---  
CCCAACCCACAAGAAGTAGAATTGGTA-----AATGTGACAGAAGATTTTAAC-----  
-----ATGTGGAATAAACATGGTAGAACAATGCATGAGGATGTA---  
ATCAGTTTATGGGATCAAAGCCTA---AAACCATGTGTCAAATTA---  
ACCCCACTCTGTGTTACTTTAAATTGCAGTGATTGTGATACTGCAAATTGCAGTATTGGGAATAACAATACGA  
AT-----  
-----GCCACTATTAAAAATAACTCTGCTACTCATAACGCTAGTAGAGAAATAAAA---  
ATCTGCTCTTTTAATGTCAACAGATATAAGA-----  
GATAAGGTGAAGAAAGAATATGCGCTT---TTTCATAGTCTTGATGTAATATCAATAGATAAG-----  
-----  
-----  
AATAATACTAGCTATAGGTTGATAAGTTGTAATACCTCAACCCTTACACAG---  
GCCTGTCCAAAAGTATCATTCCAGCCAATTCCTATACATTATTGTACCCAGCTGGCTATGCGCTTCTGAAGT  
GTAAA---GATAAGAATTTCAAT-----GGAACAGGAAAATGTCATAAT-----  
-GTTAGC---ACAGTACAATGTACACATGGAATTAGACCAGTAGTATCAACT---  
CAACTGCTGTTTAAATGGCAGTCTATCAGAAGGAGAT-----  
GTAATAATTAGATCTGAAAATTTACAAAACAAAT-----GCCAAAACCATAATAGTACAGCTGAAT---  
-----GAAACTGTAAAA-----ATTAATTGTACAAGACCCAATAATAACAAGAAAA---  
-AGCATACATATA-----GCACCAGGGAGGACA---TTC-----TTTGCAACAGGAGAG-----  
-----ATAATAGGAGATATA-----AGACAAGCACATTGC---AACATTAGTAGAAAA---  
GAATGGAATGACACTTTAAACTGATAGCTACAAAATTAAG-----GAACAATATAAA---  
-----AACAAAACAATAGTTTTTTCAG-----  
CCACCCTCAGGAGGGGACCCAGAAATTGTA--AGGCACAGTTTTTAATTGTGGGGGGGAA---  
TTTAAGCAGCTCCAGGCAAGAGTCCTGGCTGTGGAAAGATACCTAAGGGATCAACAGCTCCTGGGGATTTGGG  
GTTGCTCTGGAAACTCATCTGCACCCTGCTGTGCCTTGAATAATAGTTGGAGT-----  
-----AAGAATAAATCTCTGAAGGAGATTTGG-----AAT-----  
AACATGACCTGGATGCAGTGG---GAAAAAGAAATTGACAATTACACAAGCTTAATATAC---  
AGCTTAATTGAAGAATCGCAGAACCAACAAGAA-----  
-----  
AAGAATGAACAAGAATTATTAGAATTAGATAAATGGGCAAATCTGTGGAGTTGGTTTGACATATCAAATTGGC  
TGTGGTATATAAGAATATTCATAATGATAGTAGGAGGCTTGATAGGTTTAAAAATAGTTTTTTGCT---  
GTACTTTCTGTAGTG-----AATAGAGTTAGGCAGGGATACTCACCA-----  
TTATCGTTTGTGTTAGCTTGCTCAACGCCACCTCCATAGCAGTAGCTGAA---  
GGGACAGATAGGATTATAGAAGTGTACAAAGAGTTTTTTAGAGCT-----  
-----ATTCTCCACATA-----CCTACTAGAATAAGACAAGGCTTCGAAAGGGCTTTGCTA---TAA  
>KJ769147  
GCT---GCA-----  
AAAAACTTGTGGGTCACAGTCTATTATGGGGTACCTGTATGG---AAAGAAACAACC---  
ACCACTCTATTTTGTGCATCAGATGCTAAAGCATACGATACAGAA---GCACATAAT-----

-----GTTTGGGCCACA---CATGCCTGTGTACCCACAGAC---  
 CCCAACCCACAAGAAGTAGAATTGGAA-----AATGTGACAGAAAACCTTTAAC-----  
 -----ATGTGGAAAAATAACATGGTAGAACAGATGCATGAAGATATA---  
 ATCAGTTTATGGGATCAAAGTCTA---AAGCCATGTGTAAAATTA---  
 ACCCCTCTCTGTGTTACTCTAAATTGCACTGATGTGAAAAATGCTACG-----  
 -----  
 -----ATGGAGGGAAAAGGAGGAGAACTAAAA---  
 AACTGCTCTTTCAATATCACCACAAGCATAAGA-----ACTGAGGTG---  
 AAAGACTATGCACTC---  
 TTTAATAAACTTGATGTAGAACCAATGACTAATGATAATACCAGTAATACCAGACCAAGCAGTACC-----  
 -----  
 AATAATACCAGTAATACCAACTATACCAGCTATAGGCTGTTGCATTGTAACACCTCAGTCATTACACAA---  
 GCTTGTCCAAAGATATCCTTTGAGCCAATTCCCATACATTATTGTACCCCAGCTGGTTTTGTGCTTCTAAAGT  
 GTAAA---GATAAAAAGTTCAAT-----GGAACGGGACCATGTAAAAAT-----  
 -GTCAGT---ACAGTACAATGTACACATGGAATTAGGCCAGTAGTATCAACT---  
 CAACTGCTGTTAAATGGCAGTTTAGCAGAAGAAGAG-----  
 GTAGTAATTAGATCTAGCAATTTCTCGGACAAT-----GCTAGAATCATAATAGTACAACCTGAAT---  
 -----GAATCTGTAGAA-----ATTAATTGTACAAGACCCAATAACAATACAAGAAAA-----  
 -CGTGTATCTCTA-----GGACCAGGGCGAGTA---TGG-----TATACAACAGGACAA-----  
 -----ATAGTAGGAGATATA-----AGACAAGCACATTGT---ACCATTAATAGCACA---  
 AAATGGAATAGAACTTTAGAAGTGTAACTAAAAAATTAAGA-----GAACAATTTGGG---  
 -----AACAAAACAATAGTCTTTAAT-----  
 CAATCCTCAGGAGGGGACCCAGAGATTGTA---ATGCACAATGTTAATTGTGGAGGGGAA---  
 TTTAAGCAGCTCCAGGCAAGAGTCCCTGGCTGTGGAAAGATACCTAAAGGATCAACAGCTCCTAGGGATTG  
 GTTGCTCTGGAAACTCATTTGCACCACTGCTGTGCCTTGGAATGCTAGTTGGAGT-----  
 -----AATAAATCTCTGGAGGAGATTTGG-----GAT-----  
 AACATGACTTGGATGCAGTGG---GAAAGAGAGATTAACAATTACACAAAAGAAATATAC---  
 ACCTTAATTGAAGAATCACAAAACCAACAAGAA-----  
 -----  
 AAAAAATGAAGTAGAATTATTAGAATTGGATAAGTGGGCAAGCTTGTGGAATTGGTTTGACATAACAAAATGGC  
 TGTGGTATATAAAAAATATTACATAATGATAGTAGGAGGCTTGATAGGTTTAAGAATAATTTTTTGCT---  
 GTACTTTCTATAGTA-----AATAGAGTTAGGCAGGGATACTACCC-----  
 TTGTCATTGGCTGTTAGCTTGCTCAACGCCACAGCTATAACAGTAGCTGAA---  
 AGGACAGATAGGGTTATAGAAATAGCACAAAGAGCTTATAGAGCA-----  
 -----ATTCTCCACATA-----CCTACAAGAATAAGACAGGGCTTAGAAAGGGCTTTGCTA---TAA  
 >KP109514  
 GCT---GAG-----  
 GAATTGTGGGTACAGTCTATTATGGGGTACCTGTGTGG---AAAGAAGCAGTC---  
 ACCACTCTATTTTGTGCATCAGATGCTAAAGCATATGACAAAGAG---GTACATAAT-----  
 -----GTTTGGGCCACA---CATGCCTGTGTACCCACAGAC---  
 CCCAACCCACAAGAAATAGAATTGGAA-----AATGTGACAGAAAATTTTGAC-----  
 -----ATGTGGAACAATAACATGGTAGACCAGATGCATGAGGATATA---  
 ATTAGTTTATGGGATCAAAGCCTA---AAACCATGTGTAAAATTA---  
 ACCCCAGTCTGTGTTACTTTACATTGCTGTAAGTTGAATGATACTAAGTGCCATGATTTGAATGTCACTAATA  
 GTACTACCCCT-----  
 -----GAAGGTAACAATACCACTAATATTACTAACAATGGTGGTGATGATTTAAGA---  
 AATTGCTCTTTCAATATGACCACAATAATGACA-----  
 GAGAAGATGCAGAAAAATTATGCACTT---TTCTATACATCTGATATAGTACCTATAGATAAT-----  
 -----  
 -----  
 ACAGATAATACTAGTGACTATAGGTTGATAAGTTGTAACACCTCAATCCTTACACAA---  
 GCGTGTCCAAAGGTATCCTTTGAGCCAATTCCAATACATTATTGTGCCCGGCTGGTTTTGCAATCTTAAAGT  
 GTAAA---GACAAGACATTCAAT-----GGAACAGGACCATGTACAAAT-----  
 -GTCAGC---ACAGTACAATGTACACATGGAATTAGGCCAGTAGTATCAACT---  
 CAATTGTTGTTAAATGGCAGTCTAGCAGAGGAAGAC-----  
 ATAGTAATTAGATCTAAAAATTTCTCGGACAAT-----GCTAAAACCATAATAGTACAGCTGAAT---  
 -----GAATCTATACCA-----ATTGTGTGTGTAAGACCCAACAACAATACAAGAAAA-----  
 -AGTATATCTATA-----GGACCAGGGGAGAACA---TGG-----TATGCAACAGGAGAC-----  
 -----ATAATAGGAGACATA-----AGACAAGCATATTGT---AACATTACTGTTGGG---  
 AATTGGAGTAACACTTTACAACGGATAGATAAAAAAATTAATA-----GAACAATTTAGA---

-----AATAAAACAATAAACTTTAAT-----  
CAATCCTCAGGAGGGGACCCAGAAATTGTA--ATGCACAGCTTTAATTGTGGAGGGGAA---  
TTTAAGCAGCTCCAGGCAAGAATCCTGGCTGTGGAAAGATACCTACAGGATCAACAGCTCCTGGGGATTTGGG  
GTTGCTCTGGA-AACTCATTTGCACCACTACTGTGCCTTGGAAATGCTAGTTGGAGT-----  
-----AATAAATCTCTGGATACCATTGG-----AAT-----  
AACATGACCTGGATGCAGTGG--GATAGAGAAATTAACAATTACACAAGCTTAATATAC---  
ACCTTACTTGAAAAATCGCAGAACCAGCAAGAA-----  
-----  
AAGAATGAACAAGAATTATTGGAATTGGATAAGTGGGCAAATCTGTGGAATTGGTTTGACATAACAAATTGGC  
TGTGGTATATAAAAAATATTCATAATGATAGTAGGAGGCTTGATAGGTTTAAGAATAGTTTTTTACT---  
GTACTTTCTATAATA-----AATGGAGTTAGGCAGGGATACTCACCA-----  
TTATCGTTTTGCAATTAGCTTGATCAACGCCGCAGCAGTAGCAGTAGCTGAG---GGGACAGGTAGG-----  
-----  
CCACGCA-----CCTAGAAGAATAAGACAGGAATTAGAAAGGGCTTTGCAA---TAA  
>EU578539  
GCT---GCA-----  
GAACAATTGTGGGTCACCGTCTATTATGGGGTACCTGTGTGG--AGAGAAGCAACC---  
ACCACTTTATTTTGTGCATCGGATGCTAAAGCATATGATGCAGAG--GCACATAAT-----  
-----GTCTGGGCCACA--CATGCCTGTGTACCCACAGAC---  
CCCAACCCACAAGAAGTATTATTGGAA-----AATGTGACAGAAAATTTTAAC-----  
-----ATGTGGAAAAATAACATGGTAGAACAGATGCATGAGGATATA---  
ATCAGTTTATGGGATCAAAGCCTA--AAGCCATGTGTAAAATTA---  
ACCCCACTCTGTGTTACTTTAAATTGCACTGATGAGTTGAGAAATAATACTAGTGGCACT-----  
-----  
-----AGCAATAGCAGCTTGGAAATTAGGGAGAGGAGAAATAAAA---  
AATTGCTCTTTCAATGTTACCACAGGCATAAGA-----  
GACCAGAGAAAGAAAGAATATGCACCT--TTCTATAAACTTGATGTGATACAAATAAATAGTGGGAAT---  
-----  
-----  
AATAATAGTAATTATAGTAGCTATAGATTGATAAATTGTAATACCTCAGTCATTACACAG---  
GCCTGTCCAAAGGTATCCTTTGAACCAATTCCCATACATTTTTGTGCCCGGCTGGTTTTGCGATTCTAAAGT  
GTAAT--GATAAAAAGTTCAAT-----GGAACAGGACCATGTACAAAT-----  
-GTCAGC--ACAGTACAATGTACACATGGAATTAGACCAGTAGTGTCAACT---  
CAACTGCTGTTAATGGCAGTCTAGCAGAAGAAGAA-----  
GTAGTAATTAGATCTGAAAATTTACAAACAAT-----GCTAAAACCATAATAGTACAGCTGAAT---  
-----GAATCTGTAGTG-----ATTAATTGTACAAGACCCAACAACAATACAAGAAGA---  
-AGCATACATCTG-----GGACCAGGGGCAGCA--TTT-----ATTACAGGAGAA-----  
-----ATAATAGGAGATATA-----AGACAAGCCTACTGT--ACCCTTAATGGAACA---  
CAATGGAATAACACTTTAAACAGGTAGTTATAAAATTAAGA-----GAACAATTTGGG---  
-----AATAAAACAATAGTCTTTAAT-----  
CGATCCTCAGGGGGGGACATAGAAATTGTA--ACGCACAGTTTTAATTGTGGAGGGGAA---  
TTTAAACAGCTCCAGGCAAGACTCCTGGCTGTGGAAAGATACCTAAGGGATCAACAGCTCCTAGGGATGTGGG  
GTTGCTCTGGA-AACTCATTTGCACCACTAGTTTGCTTGGAACGCTAGTTGGAGT-----  
-----AATAAATCTCTAAATGATATTTGG-----GAT-----  
AACATGACCTGGATGCAGTGG--GATAGAGAGATTAGCAATTACACAGACTTCATATAT---  
ACCTTACTTGAAAGACTCGCAGAACCAGCAGGAA-----  
-----  
AAGAATGAACAAGAATTATTAGAATTGGACAAATGGGCAAGTTTATGGAATTGGTTTGACATATCAAACCTGGC  
TGTGGTATATAAAAAATATTCATAATGATAGTAGGCGGCTTGATAGGTTTAAGAATAGTTTTTTGCT---  
GTACTTTCTATAGTG-----AATAGAGTTAGGCAGGGATACTCACCA-----  
TTGTCGTTTTGCTGTTGGCTTGCTTGATACAATAGCTATAGCAGTAGCTGAG---  
GGAACAGATAGGATTATAGAATCAGTAAGAAGAATTTTAGAGCT-----  
-----ATTCTCCACATA-----CCTACAAGAATAAGACAGGGCTTGGAAGGGCTTTACTA---TAA  
>HQ217760  
ACT---ACA-----  
CAACAATTGTGGGTCACAGTCTATTATGGGGTACCTGTGTGG--AAAGAAGCAACC---  
ACCACTCTATTTTGTGCATCAGATGCTAAAGCATATGATACAGAG--GTACATAAT-----  
-----GTATGGGCCACA--CATGCCTGTGTACCCACAGAC---  
CCCAACCCACAAGAAGTAGTATTGGGA-----AATGTGACAGAAAATTTTAAC-----  
-----ATGTGGAAAAATAATATGGTAGATCAGATGCATGAGGATGTA---

ATCAGTTTATGGGATCAAAGTCTA---AAGCCGTGTGTAAAATTA---  
 ACCCCACTCTGTGTTACTTTAAATTGCACTGATGTGTGGACCAATAGCACTAACAATACCACT-----  
 -----  
 -----AACAGTAGCACTTGGGGCGGGGAGGAGAGAGAGAGAAATAAAA---  
 AACTGCTCTTTTAATATCACCACAGGCATAAGA-----GGT---  
 AATAGGCAAGAGTATTCACCT---TTTTATAAACTTGATGTAATACCAATAGATAATAGCAATAAT-----  
 -----  
 -TCTAGCAATAATTCTAATAGTGGTAGCTATATATTGATAAATTGTAATACCTCAGTCATTACACAG---  
 GCCTGTCCAAAAGTGTCTTCGACCCAATTCCCATACATTATTGTGCCCCGGCTGGTTTTGCGATTCTAAAGT  
 GTAAT---GCTAAAGAGTTCAAT-----GGAACAGGACCATGCACAAAT-----  
 -GTCAGC---ACAGTACAATGTACACATGGAATTAACCAGTAGTGTCAACT---  
 CAACTGCTGTTAAATGGCAGTCTAGCAGAAGAAGAG-----  
 GTAGTAATTAGATCTGAAAATCTCACGGACAAT-----GCTAAAACCATAATAGTACAGCTGAAT----  
 -----CAGTCTGTAAAAG-----ATTACTTGTGTAAAGACCCAATAACAATACAAGAAGA-----  
 -AGTATACCTATA-----GGACCAGGGAGAGCA---TTC-----TATACAGGAGAA-----  
 -----ATAATAGGAGATATA-----AGGAAAGCACATTGT---AACCTTAGTAGAGCA---  
 GACTGGAATAACACTTTACAACGGATAGTTATAAAATTAAGA-----AAACAATTTGAG----  
 -----AATAAAACAATAGTCTTTAAT-----  
 CAATCTTCAGGAGGGGACGTAGAAATTGTA--ATGCACAGTTTTAATTGTGGAGGGGAA---  
 TTTAAACAGCTCCAGGCAAGAGTCCTGGCTGTGGAGAGATACCTAAGGGATCAACAGCTCCTAGGGATTTGGG  
 GTTGCTCTGGAAGACTCATTTGCACCCTAATGTGCCTTGGAACGCGAGTTGGAGT-----  
 -----AATAAATCTTACAATGAGATTTGG-----GAC-----  
 AACATGACCTGGATGCAGTGG---GAGAGAGAGATTGACAATTACACAAGAACCATATAT---  
 ACCTTACTTGAAGAATCGCAGAACCAGCAAGAA-----  
 -----  
 AAGAATGAACAAGAATTATTAGAATTGGATAAGTGGGCAAGTCTGTGGAATTGGTTTGACATAACAAAATGGC  
 TGTGGTATATAAAAATATTACATAATGATAGTAGGTGGCTTGATAGGTTTAAGAATAGTTTTTTGCT---  
 GTACTTTCTATAGTG-----AATAGAGTTAGGCAGGGATACTACCA-----  
 TTGTCATTTGCTGTTAGCTTGTTTGATACCATAGCTATAGCAGTAGCTGAG---  
 GGAACAGATAGGGTTCTGCAGGTAGTACGAAGCGCTTTTAGAGCT-----  
 -----ATTCTCCACATA-----CCTAGAAGAATAAGACAAGGCTTGGAAGGGCTTTACTA--TAA  
 >AF277071  
 TGT---AGT---ACT-----  
 ACAGAAAAAGGTGGGTACAGTCTATTATGGGGTACCTGTGTGG--AGAGAAGCAACC---  
 ACCACTTTATTTTGTGCATCAGATGCTAAAGCACATAATACAGAG--GTACATAAT-----  
 -----GTCTGGGCCACA--CATGCCTGTGTACCCACAGAC--  
 CCCAACCCACAAGAAGTAGTAATGGGA-----AATGTGACAGAAAAATTTAAC-----  
 -----ATGTGGAATAAACATGGTAGACCAGATGCATGAGGATATA---  
 ATCAGTTTATGGGATCAAAGCCTG--AAGCCCTGTGTAAAATTA---  
 ACTCCACTCTGTGTTACTTTAAATTGCATTGATTATGTGAAGAATGATACTAATACCAACAATAGT-----  
 -----  
 -----ACTAATACCAACAATAGTAGTGTGATGGAGACAGGAGAAATGAAA---  
 AACTGCTCTTTCAATATTACCACAAGTGTAAGA-----  
 GATAAGGTACGGAAAGAATATGCACCT--TTTTATAAACTTGATGTAACACCAATAGATGAT-----  
 -----  
 -----  
 AATAATGATAATAGTGGCTATAGATTGATAAATTGTAATACATCAGTCATTACACAA---  
 GCCTGTCCAAAGGTATCCTTTGAACCAATTCCCATACATTATTGTACCCCGGCTGGTTTTGCGATTTTAAAT  
 GTAAT---GATAAGAAATTCAAT-----GGAACAGGACCCTGTACAAAT-----  
 -GTCAGC---ACAGTACAATGTACACATGGAATTAGACCAGTAGTGTCAACT---  
 CAACTGTTATTAAATGGCAGTCTAGCAGAAGAAGAG-----  
 GTAGTAATTAGATCTGAAAATTTCAAAACAAT-----GCTAAAACCATAATAGTACAACCTGAAT----  
 -----AAATCTGTAGTA-----ATCAATTGTACAAGACCCAACAACAATACAAGAAAA-----  
 -AGTATACCTATA-----GGACCAGGGAGAGCA---TTT-----TATGCAACAGGAGAA-----  
 -----ATAATAGGAAATATA-----AGACAAGCACATTGT---AATCTTAGTAGAGCA---  
 GATTGGGATAACACTTTAACTCACATAGTTAGCAAATTAAGA-----GAACAATTTGGG----  
 -----AATAAAACAATAGTCTTTAAC-----  
 CAATCCTCTGGAGGGGACCCAGAAATTGTA--ATGCACAGTTTTAATTGTGGAGGGGAA---  
 TTTAAGCAGCTCCAGGCAAGAGTCCTGGCTGTGGAAAAGATACCTAAAGGATCAACAGCTCCTGGGGATTTGGG  
 GTTGCTCTGGAAGAACTCATTTGCACCCTAATGTGCCTTGGAATGTTAGTTGGAGT-----

-----AATAGATCTATGGATGATATTTGG-----AAT-----  
 AACATGACCTGGATGGAGTGG---GATAGAGAAGTTAACAATTACACAAGCCTCATATAC---  
 ACCTTACTTGAAGAATCGCAAACCAGCAAGAA-----  
 -----  
 AAGAATGAACAAGAATTATTAGAAATTGGATAAATGGGCAAGTTTATGGAATTGGTTTAACATAACACAATGGC  
 TGTGGTATATAAAAAATATTCATAATGATAGTAGGAGGCTTGATAGGTTTAAGAATAGTTTTTTGCT---  
 GTACTTTCTGTAGTG-----AATAGAGTTAGGCAGGGATACTTACCA-----  
 TTACCGTTCGCTGTTAGCTTGCTTAATTCCACAGCCATCGCAGTAGCTGAG---  
 GGGACAGATAGGGTTATAGAAGTAGTACAAAGAGCTTTTAGAGCT-----  
 -----ATTCTCCACATA-----CCTAGAAGAATAAGACAGGGCTTGGAAGGGCTTTGCTA---TAA  
 >EF593267  
 GCT---GCA-----  
 GAAGAATTGTGGGTCACAGTCTATTATGGGGTACCTGTGTGG---AAAGAAGCAAAAC---  
 ACCACTCTATTTTGTGCATCAGATGCTAAAGCATATAAGACAGAG---GTACATAAT-----  
 -----GTTTGGGCCACA---CACGCCTGTGTACCCACAGAC---  
 CCCAACCCACAAGAGGTAGTATTGGGA-----AATGTAACAGAAAATTTTAAAC-----  
 -----ATGTGGAAAAATAACATGGTAGATCAGATGCATGAGGATATA---  
 ATCAGCTTATGGGATCAAAGCCTA---AAGCCATGTGTAAAATTA---  
 ACCCCACTCTGTGTTACCTTAAATTGCACTGATGTGTGGGGAAATAGTAATAGTAGCACTAAC-----  
 -----  
 -----AGTAGCAGCTGGGATAAGGTAGAGAAAGGAGAAATAAAA---  
 AACTGCTCTTTCAATATCTCCACAATTACAAGA-----GGCAAGGTG---  
 AATGAATATTCCTG---TTTTATAAACTTGATGTAATACCAATAGGGAATACT-----  
 -----  
 -TCTAATAGTAATTTTAGTAACATAGATTGATAAATTGTAATACCTCAGTCATTAAACAG---  
 GCCTGTCCAAAGGTATCCTTTGAACCAGTTCCCATACATTATTGTGCCCGGCTGGTTTTCGATTCTAAAGT  
 GTAAT---GATAAAAAGTTCAAT-----GGAACAGGACCATGTACAAAT-----  
 -GTCAGT---ACAGTACAATGTACACATGGAATTAAACCAGTAGTGTCAACA---  
 CAACTGCTGTAAATGGCAGTCTAGCAGAAGAAGAG-----  
 GTAGTAATTAGATCTGAAACTTCACGAACAAT-----GCTAGAACCATAATAGTACAGTTGAAT---  
 -----GAATCTGTAGCA-----ATTAATTGTACAAGACCCAACAACAATACAAGAAGA---  
 -GGTATACATGTG-----GGACCAGGGCAAGCA---TTA-----TATACAGGAGAC-----  
 -----ATAATAGGAGATATA-----AGACAAGCACATTGT---AACATTAGTGGAGTA---  
 CAATGGAATAACACTTTAAAACTGACCGTTACAAAATTAGGA-----GAACAATTTGGG---  
 -----AATAGAACAATAGTCTTTAAT-----  
 CAATCCTCAGGAGGGGACGTAGAAATTGTA--ATGCACAGTTTTAATTGTGGAGGGGAA---  
 TTCAAACAGCTCCAGGCAAGAATCCTGGCTGTAGAGAGATACCTAAGGGATCAACAGCTCCTAGGGATTTGGG  
 GTTGCTCTGGAAAACCTCATTTGCACCACTAATGTGCCTTGGAACGCTAGTTGGAGT-----  
 -----AATAAATCTCTAAATAACATTTGG-----GAA-----  
 AACATGACCTGGATGGAGTGG---GAGAAAGAAATTGACAATTACACAAGCCTCATATAT---  
 ACCTTACTTGAGACATCGCAGAACCAGCAAGAA-----  
 -----  
 AAGAATGAACAAGAATTATTAGAGTTGGATAAGTGGGCAAATTTGTGGAATTGGTTTGACATAACAACTGGC  
 TGTGGTATATAAAAAATATTCATAATGATAGTAGGTGGCTTGATAGGTTTAAGAATAGTTTTTTGCT---  
 GTACTTTCTATAGTG-----AATAGGGTTAGGCAGGGATACTCACCA-----  
 TTGTCATTTGCTGTTAGCTTGTTAATGCCATAGCTATAGCAGTAGCTGAG---  
 GGAACAGATAGGATTATAGAAGCGGCACAAAGAATTTTAGAGCT-----  
 -----TTTATCCACATA-----CCAAGAAGAGTAAGACAAGGCTTGGAAGGGCTCTGCTA---TAA  
 >DQ853436  
 GCT---GCA-----  
 GATAACTTGTGGGTCACAGTCTATTATGGGGTACCTGTGTGG---AAAGAAGCAACC---  
 ACCACTCTATTTTGTGCCTCAGATGCTAAAGCTTATGATACAGAG---GCACATAAT-----  
 -----GTTTGGGCCACA---CATGCCTGTGTACCCACAGAC---  
 CCCAGCCCACAAGAAGTAGTATTGGAG-----AGTGTGACAGAAGATTTTGAC-----  
 -----ATGTGGAAAAATAACATGGTAGAACAGATGCATGAGGATATA---  
 ATCAGTTTATGGGATCAAAGCCTA---AAGCCATGTGTAAAATTA---  
 ACCCCACTCTGTGTTACTTTAAATTGTACTAATTTGAGAAATACTACTAAT-----  
 -----  
 -----ACCACTAAAATAGACAAAGAAGAAATAAAA---  
 AACTGCTCTTTCCAGGTCAACCACAGAAATAAGA-----

GATAAGACAAGGAAAGAATATGCACTT---TTT-  
ATAGGCTTGATGTAGTACCAATAGATAATAAAGATAATGCTGGAAATAATACT-----  
-----  
AATAATACTAGCTATAGGTTAATAAATTGTAACCTCCTCAGTCATTACACAG---  
GCTTGTCCAAAGATATCCTTTGAGCCAATTCCCATACATTATTGTGCCCCGGCTGGTTTTGCGATTATAAAGT  
GTAAT---GATAAGATGTTCAAT-----GGAACAGGACCATGCACAAAT-----  
-GTCAGC---ACAGTACAATGTACACATGGAATTAGGCCAGTAGTGTCAACT---  
CAACTGCTGTTGAACGGCAGTCTAGCAGAAGAAGAT-----  
GTAATGATTAGATCACAGAATTTACGGACAAT-----GCTAAAACCATATTAGTACAGCTGAAT----  
-----GAAACTGTACGA-----ATTAATTGTACAAGACCCAACAACAATACAAGAAAA-----  
-AGCATACATATA-----GCACCAGGGAGAGCA---TTT-----TATGCAACAGGAGAA-----  
-----ATAATAGGAGATATA-----AGACAAGCACATTGT---AACATTAGTAAAGAA---  
AAATGGAATGACACTTTAAGCAAGATAGTTACAAAATTAAGA-----GAACAATTTGAA----  
-----GGTAATAAAACAATAGTCTTTAAT-----  
TCATCCTCAGGAGGGGACCCAGAAATTGTA--ATGCATAGTTTTAATTGTGGAGGGGAA---  
TTTAAGCAGCTCCAGGCAAGAGTCCTGGCTGTGGAAAGATACCTAAGGGATCAACAGCTCCTGGGAATTTGGG  
GTTGCTCTGGAGAACTCATCTGCACCACTGCTGTGCCTTGGAATAGTAGTTGGAGC-----  
-----AATAAATCTCTAGAAAAAATTTGG-----GAT-----  
AACATGACCTGGATGCAGTGG---GAAAGAGAAATTGACAAATTACACAGGCAAAATATAT---  
GACCTACTTGAAAAATCGCAGAACCAGCAAGAA-----  
-----  
AAAAATGAACAAGAATTATTGGAGTTGGATAAATGGGCAAGTTTGTGGAATTGGTTTGACATAACAAAATGGC  
TGTGGTATATAAAAATATTACATAATGATAGTAGGAGGCTTAATAGGTTTAAGAATAGTCTTTGCT---  
GTATTTTCTATAGTG-----AATAAAGTTAGGCAGGGATACTCACCA-----  
TTGTCAATTGGCCATTAATTTGCTCAACACCACAGCTATAGTAGTAGCTGAG---  
GGGACAGATAGGATTATAGAAGTAGTGCTAAGAGCTTATAGAGCT-----  
-----ATTCTTCACATA-----CCTAGAAGAATAAGACAGGGCTTGGAAGGCTTTTGCTG---TAA  
>KT124806  
ACT---GCA-----  
GAACAGTTGTGGGTTACAGTCTATTATGGGGTACCTGTGTGG--AAAGAAGCAAAC---  
ACCACTCTATTTTGTGCATCAGATGCTAAAGCATATGATACAGAG--GTACATAAT-----  
-----GTTTGGGCCACT---CATGCCTGTGTGCCACAGAC---  
CCCAACCCACAAGAAGTAGTATTGAAA-----AATGTGACAGAAGATTTTAAC-----  
-----ATGTGGAAGAATAACATGGTAGAACAGATGCATGAGGATATA---  
ATCAGTTTATGGGATCAAAGCCTA--AAGCCATGTGTAAAATTA--  
ACCCCACTCTGTGTCACTTTAAATTGCACTGATTATTGTAAGAATAATACTAACAATGGTAATACTACTGAAA  
ATGGTACTGGT-----  
-----AACTGTAATACTACTATTAATAGCACTGATAGTAATATGAAA---  
AACTGCTCTTTCAATGTCAACCACAAGTGTAAGA-----  
GATAAGTTGCAGAAAGAATATGCACTT--TTTTATAAACTTGATGTAGTATCAATAGATGGT-----  
-----  
-----  
AATAATACTAGCTATAGGTTGATAAATTGTAACACCTCAGTCATTACACAG---  
GCCTGTCCAAAGATATCCTTTGAACCAATTCCCATACATTATTGTACCCAGCTGGTTATGCGCTTCTAAAGT  
GTAAC---AATAAGACATTCAAT-----GGATCAGGACCATGTAACAAT-----  
-GTCAGC---ACAGTACAATGTACACATGGAATTAGGCCAGTAGTTTCAACT---  
CAACTGCTGCTAAATGGCAGTCTAGCAGAGGAA-----  
GTAGTAATTAGATCTGAAAATTTCTCGGACAAT-----GCTAAAACCATAATAGTACAGCTGAAC----  
-----GAATCTGTAGTA-----ATTAATTGCACAAGACCTAACAACAATACAAGAAAA-----  
-AGTATACATATA-----GGACCAGGGAGAGCA---TTT-----TATGCAACAGGAGAA-----  
-----ATAATAGGAAATATA-----AGACAAGCACATTGT---AACCTTAGTAGAGCA---  
GCCTGGAATAACACTTTAGGAAAGGTAGTTAGAAAATTAAGA-----GAAAAGTTT-----  
-----AATAACACAATAATCTTCAAT-----  
CACTCCTCAGGAGGGGACCCAGAAATTGTA--ATGCACAGTTTTAATTGTGGAGGGGAA---  
TTTAAGCAGCTCCAGGCAAGAGTCCTGGCTGTGGAAAGATACCTAAGGGATCAACAGCTCCTAGGGATTTGGG  
GTTGCTCTGGAAAACCTATTTGCACCACTACTGTGCCTTGGAATACTAGTTGGAGT-----  
-----AATAAAAAATCTGACAGCAATTTGG-----GAT-----  
AACATGACCTGGATGCAGTGG---GAAAAAGAAATTAGCAATTACACAGATATAATATAC---  
AACTTAATTGAAGAATCACAGAACCAACAAGAA-----  
-----

AAGAATGAACAAGAATTATTGGAATTAGATAAGTGGGCAAATTTGTGGAATTGGTTTAGCATATCAAACCTGGC  
TGTGGTATATAAAAATATTTCATAATGATAGTAGGAGGCTTAATAGGTTTAAGAATAGTTTTTTGCT---  
GTGCTTTCTATAATA-----AATAGAGTTAGGCAGGGATACTCACCT-----  
TTGTCAATTCGCTATTAGCTTGTTCAATGCTACAGCTATCGCAGTAGGTGAG---  
GGGACAGATAGGGTTATAGAAGTAGTACAAAGAGCTTGGAGAGCT-----  
-----ATCCTCCACATA-----CCTAGAAGAATAAGACAGGGCTTGGAAAGGATTTTGGTG---TAA  
>EF593290  
GCA---GAA-----  
AAATTGTGGGTCACAGTTTATTATGGGGTACCTGTGTGG---AAAGAAGCAACC---  
ACCACTCTATTTTGTGCATCAGATGCTAAGGCATATAGTACAGAG---GTACATAAT-----  
-----GTTTGGGCCACG---CATGCCTGTGTACCCACAGAC---  
CCCAACCCACGGGAAGTAGAATTGACA-----AATGTGACAGAACCTTTTAACT-----  
-----ATGTGGAAAAATAACATGGTGTAGAACAGATGCATGAGGATATA---  
ATCAGTCTATGGGATCAAAGCCTA---AAGCCATGTGTAAAATA---  
ACCCCACTCTGTGTTACTTTAAACTGCACTAACGCTACTTCACACCATGTGAATGAGACTGCTTGTAAATGGTA  
CT-----  
-----AAGAATAATAATGTTAGTATGAAAACTGCTCTTTCATAAGTGAAGAAATGAAA---  
AACTGCTCTTTCATATCACCTCAGGCATAAGA-----  
GATAAGGTGCGGAAGAATATGCAGTT---TTCTATAACCTTGATATAGTACAAATAGATAAA-----  
-----  
-----  
AATGATACTCACAGTTATAGGTTGGTAAATTGTAATACCTCAGTCATTACACAG---  
GCCTGTCCAAAGGTATCCTTTGAGCCAATTCCCATACATTATTGTACCCCGGCTGGTTTTGCACTCCTAAAAT  
GTAAT---GATAAGAAGTTCAAT-----GGAACAGGGCCATGTAAAAAT-----  
-GTCAGC---ACAGTACAATGCACACATGGAATTAAGCCAGTAGTGTCAACT---  
CAATTGCTGTTAAATGGCAGTCTAGCAGAAGAGGGG-----  
ATAGTAATTAGATCTGAGAATTTCTCGAACAAAT-----GCTAAACTATAATAGTACAGCTGAAT----  
-----CAATCTGTAGCA-----ATCAACTGTACAAGACCCAACAACAATACAAGAAAA-----  
-AGTATACATATA-----GGACCAGGGAGAGCA---TTT-----TATGCAACAGGAGAC-----  
-----ATAATAGGGAATATA-----AGACAAGCACATTGT---AACCTTAGTAGAGCA---  
GCCTGGAATAACACTTTAGGACAGATAGTTATAAAATTAAGA-----GAACAATTTGGG---  
-----GAGAATAAAACAATAGTCTTTAAT-----  
CAATCCTCAGGGGGAGACCCAGAAATTGTG---AGGCACAGCTTCAATTGCGGAGGGGAA---  
TTTAAGCAGCTCCAGGCAAGAGTCCCTGGCTATAGAAAGATACCTACAGGATCAACAGCTCCTAGGAATTTGGG  
GTTGCTCTGGAAGAACTCATTTGTACCACTGCTGTGCCTTGGAAATGCTACTTGGAGT-----  
-----AATAAATCTCTGGATAGAATTTGG-----GAT-----  
AACATGACCTGGATGGAGTGG---GAGAGAGAAATTGACAATTACACAGGGGTAAATATAC---  
AACTTACTTGAAAAATCGCAAAACCAGCAAGAA-----  
-----  
AAGAATGAACAAGAATTATTGGAATTGGACAAGTGGTCAAGTCTGTGGACTTGGTTTGACATATCAAATTGGC  
TGTGGTATATAAAAATATTTCATAATGATAGTAGGAGGCTTGGTAGGTTTAAGAATAATTTTTGCT---  
GTACTTTCTATAGTG-----AATAGAGTCAGGCAGGGATACTACCA-----  
TTGTGCTTCGCTGTTAGCTTGCTCAACGCCACAGCAATAGCAGTAGCTGAG---  
GGGACAGATAGGGTTATAGAAGTAGTACTAAGAACTCTTAGAGCT-----  
-----ATACTCCACATA-----CCTAGAAGAATAAGACAGGGCTTGGAAAGGGCTTTGCTA---TAA  
>JX863967  
GCT---GCA-----  
GAAAACTTGTGGGTCACAGTCTATTATGGGGTACCTGTGTGG---AAAGAAGCAACC---  
ACCACTCTATTTTGTGCATCAGATGCTAAAGCATATGAGAGAGAA---GTACATAAT-----  
-----GTTTGGGCCACA---CATGCCTGTGTACCCACAGAC---  
CCCAACCCACAAGAAGTAGTATTGGAA-----AATGTGACAGAAAATTTTAACT-----  
-----ATGTGGAAAAATGACATGGTGTAGAACAGATGCATGAGGATATA---  
ATCAGTTTATGGGATCAAAGCCTA---AAGCCATGTGTAAAATTA---  
ACCCCACTCTGTGTTACTTTAAATTGCCCTGATAATTGGAGGAATGCTACTAATACCACT-----  
-----  
-----AGTATTGAAGCCATTAGAGAAATAACA---  
AACTGCTCTTTCACACTACCACAGGCATAAGA-----  
GATAAGATGCAGAAGGAATATGCAGTT---TTTTATAAACTTGATATAGTACAATTAAAAGAT-----  
-----  
-----

AGGGACAATACTAGCTATAGGTTGATAAATTGTAACACCTCAGTCATTACACAG ---  
 GCCTGTCCAAAGGTAACCTTTTGAACCAATTCCCATACATTATTGTACCCCAGCTGGTTTTCGCGATTCTAAAGT  
 GTAAT ---GAGGAGAATTTTCACG-----GGAAAAGGACCAATGTAAAAAT-----  
 -GTCAGC---ACAGTACAATGCACACATGGAATTAAGCCAGTAGTATCAACT---  
 CAACTGCTGTTAAATGGCAGTCTAGCAAAAGAAGAG-----  
 GTAATAATTAGATCTGACAATTTTCACGAACAAT-----GCTAAAATCATAATAGTACAGCTGAAT----  
 -----GAATCTGTAGAG-----ATTAAGTGTACAAGACCCAACAACAATACAAGGAAA-----  
 -AGTATACATATA-----GGGCCAGGAAGAGCA---TTT-----TATACTACAAGAGAC-----  
 -----ATAATAGGAGATATA-----AGACAAGCACATTGT---GAAATTAGTGAAAAA---  
 AAATGGAGGAACACTTTAAAAACAGGTAGCCAGAAAGTTAAGA-----GAACAATTTAAG----  
 -----AATAAAACAATAGCCTTTAAT-----  
 CAATCCTCAGGAGGGGATCCAGAAATTGTA--ATGCACACTTTTAAATTGTGGAGGGGAA---  
 TTTAAACAGCTCCAGGCAAGAGTCCTGGCTATGGAAAAGATACCTAAAGGATCAACAGCTCCTAGGAATTTGGG  
 GATGCTCTGGAAAACCTCATCTGCACCACCTCTGTGCCTTGGAAATGCTAGTTGGAGT-----  
 -----AACAACAAATCACTAGAACATATTTGG-----AAT-----  
 AACATGACCTGGATGGAATGG---GAAAAAGAAATTGACAAATTACACACACATAATATAC---  
 AACCTAATTGAAGAGTCGCAAAACCAACAAGAA-----  
 -----  
 AAGAATGAACAAGATTTATTGGAATTGGATAAGTGGGCAAATTTGTGGAATTGGTTTAGCATATCAAAGTGGC  
 TGTGGTATATAAAAAATATTGATAATGATAGTAGGAGGCTTAATAGGTTTAAGAATAATTTTTTGCT---  
 GTGCTTTCTATAGTG-----AATAGAGTTAGGCAGGGATACTCACCA-----  
 TTATCATTTGCAGTTAGCTTGCTCAACGCCACAGCTATAGCAGTAGCTGAG---  
 GGGACAGATAGGATAATAGAAATAGTACAGATAATTTTTTAGAGCT-----  
 -----ATCCTCAACATA-----CCTAGAAGAATAAGACAGGGCTTGGAAGGGCTTTGCTA---TAA  
 >KT124764  
 GCT---GTA-----  
 GAACAAACGTGGGTACAGTCTATTATGGGGTACCTGTGTGG--AGAGAAGCAAAC---  
 ACCACTCTATTTTGTGCATCAGATGCTCAAGCATATAATACAGAG--GTACATAAT-----  
 -----GTCTGGGCCACA---CATGCCTGTGTACCCACAGAC---  
 CCCAACCCACAAGAAGTAGAATTGGAA-----AATGTGACAGAAAATTTTAAT-----  
 -----ATGTGGAACAAACATGGTAGATCAGATGCATGAGGATATA---  
 ATCAATTTATGGGATCAAAGCCTA--AAGCCATGTGTAAAATTA--  
 ACTCCACTCTGTGTTACTTTAAATTGCACTGATATGGGGAATGATACTAGTACCAATACT-----  
 -----  
 -----AGTAGCTGGGATAAAATGGAAAAAGGAGAAATAAAG---  
 AACTGCTCTTTCAATATCACCACAAACATGAGA-----  
 AATAAGATGCAGAAACAATATGCACTT--TTCTATAAACTTGATGTAGTACCAATAGAGGAGAAT-----  
 -----  
 -----  
 ACCACCACTACCTATAGGTTGGTAAGTTGTAACACCTCAGTCATTACACAG---  
 GCCTGTCCAAAGGTAACCTTTGAACCAATTCCCATACATTATTGTGCCCAGCTGGTTTTCGCGCTTCTAAAT  
 GTAAG---GATAAGAAATTCAAT-----GGAACAGGACCATGTAAAAAT-----  
 -GTTAGC---ACAGTACAATGCACACATGGAATTAAGCCAGTAGTATCAACT---  
 CAGCTGCTATTAAATGGCAGTCTAGCAGAAGAAGAG-----  
 GTAATAATAAGATCTGAGAATTTCTCAAATAAT-----GCTAGAACCATAATAGTACAACCTGAAT----  
 -----AAATCTGTAGAA-----ATAAATTGTATAAGACCCAACAACAATACAAGAAAA-----  
 -AGTATACCTATA-----GGACCAGGGAGAGCA---TTT-----TATACAACAGGGGAT-----  
 -----ATAATAGGAGATATA-----AGACAAGCACATTGT---AACATTAGTAGACAA---  
 AATTGGAATGACACTTTAAACAGATAGTGGAAAAGTTAAGA-----GAACAATTTGGG----  
 -----AATAAAACAATAGTCTTTAAT-----  
 AAATCCTCAGGAGGGGACCCAGAAATTGTA--ATGCACACTTTTAAATTGTGCAGGGGAA---  
 TTTAAGCAGCTCCAGGCAAGAGTCCTGGCTGTGGAAAAGATACCTACGTGATCAACAGCTCCTGGGAATTTGGG  
 GTTGCTCTGGAAAACCTCATCTGCACCACCTGCTGTGCCTTGGAAATAGCAGTTGGAAC-----  
 -----AATAGATCTGTGGATGACATTTGG-----GGA-----  
 AACATGACATGGATGCAGTGG---GATAGAGAAATTAGTAATTACACAAGTTACATATAC---  
 ACCTTAATTGAAGAATCGCAGAACCAGCAAGAA-----  
 -----  
 AAGAATGAACAAGAATTATTGGCATTAGATAAATGGGCAAATTTGTGGAATTGGTTTCGACATAACAAAATGGC  
 TGTGGTATATAAAAAATATTGATAATGATAGTAGGAGGCTTGATAGGTTTAAGAATAGTTTTTTTGCT---  
 GTGCTTTCAATAGTG-----AATAGAGTTAGGCAGGGATACTCACCA-----

TTATCGTTTGGCTGTTAGCTTGCTCAACGCCATAGCCATAGCAGTAGGTGAC---  
 GGGACAGATAGGATTATAGAAGCATTTAGAATAATTTTGTAGAGCT-----  
 -----ATTGCCACATA-----CCCACAAGAATAAGACAGGGCTTGGAAGGTCTTTGCTA---TAA  
 >KT124814  
 GCA---GAC-----  
 AACAACTTGTGGGTCACAGTCTATTATGGGGTACCTGTGTGG--AGAGAAGCAGAC---  
 ACCACTCTATTTTGTGCATCAGATGCTAAAGGATATAGTGCAGAG--GTACATAAT-----  
 -----GTTTGGGCCACA---CATGCCTGTGTACCCACAGAC---  
 CCCAACCCACAAGAAGTATTATTGGCA-----AATGTAACAGAAAATTTTAAC-----  
 -----ATGTGGACAAATAACATGGTAAACAGATGCAGGAGAATATA---  
 ATCAGTTTATGGGATAAAAAGCCTA--AAGCCATGTGTAAAATTA---  
 ACCCCACTCTGTGTTACTTTAAATTGCACTGATAGTATTACTACTATTGCCACTGCTAATACTACCACT----  
 -----  
 -----GCTCCTAATATCAATGGTAGCAGTGGGAGGATGGAGATAGGAGAAATAAAA---  
 AATTGCTCTTTCTATGTACCTCAAACATAAGA-----  
 GATAAGAAACAGAGAAAATTTGCACTT--TTCTATAAACTTGATGTAGTACAAATAGATAAT-----  
 -----  
 -----  
 AATACCAGTGAGAATAGGACCAGCTATAGGTTGACAAGTTGTAACACCTCAGTCATTACACAA---  
 GCCTGTCCAAAGATATCCTTTGAGCCAATTCCCATACATTATTGTGCCCCGGCTGGTTTTGCGATTCTAAAGT  
 GTAAT---GATAAAAGGTTCAAT-----GGAACAGGACCATGTACAAAT-----  
 -GTCAGC--ACAGTACAATGTACACATGGAATCAGGCCAGTAGTATCAACT---  
 CAACTGCTGTAAATGGCAGTCTAGCAGAAGAAGAG-----  
 GTAATAATTAGATCTGAAAATTTCAACAAACAAAT-----GCTAAAATCATAATAGTACAGCTGAAC----  
 -----GAAACTGTAAAA-----ATTAATTGTATGAGACCCAACAACAATACAAGAAAA-----  
 -AGTATACATATA-----GCACCAGGAAAAGCA--TTT-----TATGCAACAGGAGAC-----  
 -----ATAATAGGAAATATA-----AGACAAGCACATTGT--AACATTAGTATGAAA---  
 GAATGGAGGAACACTTTAAATCAGACAGTTAAAAAATTAAGA-----GAACAATTTGGG---  
 -----  
 -----AATAAAACAATAAAGTTTCAG-----  
 CCATCCTCAGGAGGAGACCCAGAAATTGTA--ATGCACAGTTTTAATTGTGGAGGGGAA--  
 TTTAAGCAGCTCCAGGCAAGAGTCCCTGGCTGTGAAAAGATACCTAAGGGATCAACAGCTCCTGGGAATTTGGG  
 GCTGCTCTGGAAGACTCATCTGCACCACTAATGTGCCTTGGAAATGCTAGCTGGAGT-----  
 -----AATAAATCTTATAATGATATTTGG-----AAC-----  
 AACATGACCTGGATGCAGTGG--GATAGAGAAATTAGCAATTACACAGGCTTAATACAC--  
 AGATTACTTGAAGACTCGCAAAACCAACAAGAA-----  
 -----  
 AAGAATGAACAAGAATTATTGGAATTAGATAAATGGGCAAGTTTGTGGAGTTGGTTTGATATAACAAAATGGC  
 TGTGGTATATAAAAATATTATAAATAATAGTAGGAGGCTTGATAGGCTTAAAAATAATTTTTTACA--  
 GTACTTTCTATAGTA-----AATAAAGTTAGGCAGGGATACTACCA-----  
 ATATCGTTTGGCTGTTAGCTTGTTCAACGCCATAGCTATAGCAGTAGCTGAG--  
 GGGACAGATAGGATTATAGAGATAATACAAGCAACTTTTAGAGCT-----  
 -----ATTCTCCACATA-----CCTACAAGAATAAGACAGGGCTTAGAAAGGGCTTTGCTA---TAA  
 >EU578104  
 GCT---ACA-----  
 GAACAATTGTGGGTCACAGTCTATTATGGGGTACCTGTGTGG--AAAGAAGCAACC---  
 ACCACTCTATTTTGTGCATCAGATGCTAAAGCATATCACGCAGAG--AAGCACAAT-----  
 -----GTTTGGGCCACA---CATGCCTGTGTACCCACAGAC---  
 CCTAACCCACAAGAAGTAGTATTGGGA-----AATGTAACAGAAAATTTTAAT-----  
 -----ATGTGGAAAAATAACATGGTAGACCAGATGCATGAGGATATA---  
 ATTAGTTTATGGGATCAAAGCCTA--AAGCCATGTGTAAAAATA---  
 ACCCCACTCTGTGTTACTCTAAATTGCACTAATTTCAATGGTACTAAGACCAATAGTACTACTAGTCCCACTA  
 AT-----  
 -----AGTCCCAACAATAATAGTAGTTGGGAAAGGATGGAGGTAGGAGAAGTAAAA---  
 AACTGCTCTTTCAATGTTACCACTAGCATACAA-----  
 GATAAGATAACTAAACAATATGCACTT--TTTTATAGACTTGATGTAGTACCAATAGATAAG-----  
 -----  
 -----  
 GATAATACAAGCTATACATTGATAAATTGTAACACCTCAGTCATTACACAG---  
 GCCTGTCCAAAGGTATCCTTTGAACCAATTCCCATACATTATTGTGCCCCGGCTGGTTTTGCGATTCTAAAAAT  
 GTAAT---AATAAGACATTCAAT-----GGAAAGGGACCATGTACAAAT-----

-GTCAGC---ACAGTACAATGTACACATGGAATTAGGCCAGTAGTGTCAACT---  
CAACTACTGTTTAAATGGCAGCTTAGCAGAAGAAGGG-----  
GTAATGATTAGATCTGAAAATTTCTCGGACAAT-----GCTAAAACCATAATAGTACAGCTGAAT----  
-----GAATCTGTAAACA-----ATTAATTGTACAAGACCCAACAACAATACAAGGAGA-----  
-AGTATACCTATA-----GGACCAGGGGAGAGCA---TTT-----TATGCAACAGGAGAT-----  
-----ATAATAGGAGATATA-----AGAAAAGCATATTGT---ACCCTTAGTGGAATA---  
GCATGGCATGACACTCTAAAACAGATAGTTGTAAAATTAAAA-----GAACAATTTGGT-----  
-----GAGAATAAAACAATAGTCTTTACT-----  
AAATCTTCAGGAGGAGATCCAGAAATTGTA---ATGCACACTTTTAATTGTGGAGGGGAA---  
TTTAAGCAGCTCCAGGCAAGAGTCCTGGCTGTAGAAAGATACCTAAAGGATCAACAGCTCCTGGGAATTTGGG  
GATGCTCTGGAAAGCTCATCTGCACCACTAATGTGCCTTGGAACTACTAGTTGGAGC-----  
-----AATAAATCTCTAAATCAGATTTGG-----GAT-----  
AACATGACCTGGATGGAGTGG---GAGAGAGAGATTGACAAATTACACAAGCTTGATATAC---  
TCTTTAATTGAAGAATCGCAAAACCAACAGGAA-----  
-----  
AAGAATGAACAAGAGTTATTGGAATTGGATAAGTGGGCAAGTCTATGGAATTGGTTTAGCATATCACAATGGC  
TGTGGTACATAAAAATATTCTAATGATAGTAGGAGGTTTAATAGGTTTAAGAATAGTTTTTTACT---  
GTGCTTTCTATAGTG-----AATAGAGTTAGGCAGGGATACTCACCA-----  
TTGTCAATTGGCTGTTAGTTTATATAACGCCATAGCTATAGCAGTAGCTGAG---  
GGAACAGATAGGGTTATAGAAGTAGTACAAAGAGCTGGTAGAGCT-----  
-----GTCTCTCCACATA-----CCAAGAAGAATAAGACAGGGCTTAGAAAGGGCTTTGCTA---TAA  
>JQ403105  
GCT---GTA-----  
GAACAAACGTGGGTACAGTCTATTATGGGGTACCTGTGTGG---AAAGAAGCAAAAT---  
ACCACTTTATTTTGTGCATCAGATGCTCAAGCATATAATACAGAG---GTACATAAT-----  
-----GTTTGGGCCACA---CATGCCTGTGTACCCACAGAC---  
CCCAACCCACAAGAAGTACCATTGGAA-----AATGTGACAGAAAATTTTAAC-----  
-----ATGTGGAACCAACATGGTAGATCAGATGCATGAGGATATA---  
ATCAGTTTATGGGATCAAAGCCTA---AAGCCATGTGTAAAATTA---  
ACTCCACTCTGTGTTACTTTAAATTGCAATGATACGGTGGGGAATGATACTAATACCAAT-----  
-----  
-----AATAGTAGCTGGGATAGAATGGAAAAGGGAGAAATAAAG---  
AACTGCTCTTTCAATATCACCAAAACATGAGA-----  
GATAAGATGCAGAAACAATATGCACCT--TTTTATAAACTTGATGTAGTACCAATAGAGGAAGATGAA---  
-----  
-----  
AATAGTACCAACTATAGATTGATAAGTTGTAACACCTCAGTCATTACACAG---  
GCCTGTCCAAAGGTAACCTTTGAGCCAATTCCCATACATTATTGTGCCCCAGCTGGTTTTGCGCTTCTAAAAT  
GTAAG---GATAAGAAATTCAAT-----GGAACAGGACCATGTAAAAAT-----  
-GTTAGC---ACAGTACAATGTACACATGGAATTAAGCCAGTAGTATCAACT---  
CAGCTGTTATTAAATGGCAGTCTAGCAGAAAAAGAG-----  
GTAGTAATAAGATCTGAGAATTTCTCGAATAAT-----GCTAAAACCATAATAGTACAGCTGAAT----  
-----ACATCTGTAGCA-----ATAAATTGTACAAGACCCAACAACAATACAAGAAAA-----  
-AGTATACATATA-----GGACCAGGGGAGAGCA---TTT-----TATACAACAGGAGAT-----  
-----ATAATAGGAAATATA-----AGACAAGCACATTGT---AACATTAGTAAAAGA---  
GATTGGAATAACACTTTAAAACAGATAGCTGAAAAGTTAAGA-----GAACAATTTGAG-----  
-----AATAAAACAATAGTCTTTAAA-----  
AATTCCTCAGGAGGGGATCCAGAAATTGTC---ATGCACACTTTTAATTGTGCAGGGGAA---  
TTTAAGCAGCTCCAGGCAAGAGTCCTGGCTGTGGAAAGATACCTACGTGATCAACAGCTCCTGGGAATTTGGG  
GTTGCTCTGGAAACTCATCTGCACCACTGCTGTGCCTTGGAAATAGTAGTTGGAAC-----  
-----AATAGATCTGTGGATGACATTTGG-----GGA-----  
AACATGACATGGATGCAGTGG---GATAGGGAAATTAGTAATTACACAAGTTTAATATAC---  
ACCTTAATTGAGGAATCGCAACACCAACAAGAA-----  
-----  
AAGAATGAACAAGAATTACTGGCATTAGATAAATGGGCAAAATTTGTGGAATTGGTTTCGACATAACAAAATGGC  
TGTGGTATATAAGAATATTCTAATGATAGTAGGAGGCTTGATAGGATTAAGAATAGTTTTTTGCT---  
GTGCTTTCTATAGTG-----AATAGAGTTAGGCAGGGATACTCACCA-----  
TTATCGTTTTGCTGTTAGCTTGCTCAACACCCTAGCCATAGCAGTAGGTGAA---  
GGGACAGATAGGATTATAGAAGTATTTAGACTAATTTTTAGAGCT-----  
-----ATTCTCCGCATA-----CCTACAAGAATAAGACAGGGCTTGAAAAGGTCTTTGCTA---TAA

>EU578230

GCT---GCA---CAA-----  
CAACAAATGTGGGTACAGTCTATTATGGGGTACCTGTGTGG---AAAGAAGCAAAC---  
ACCACTTTATTTTGTGCATCAGATGCTAAAGCATATGATACAGAG---GCACATAAT-----  
-----GTTTGGGCCACA---CATGCCTGTGTACCCACAGAC---  
CCCAACCCACAAGAAGTAGTATTA-----AATGTGACAGAAAATTTTAAAC-----  
-----ATGTGGAAAAATAACATGGGTAGAACAGATGCATGAGGATATA---  
ATCAGTTTATGGGATCAAAGCCTA---AAGCCATGTGTGAAATTA---  
ACCCCACTCTGTGTCACTTTAAATTGTACTAATGCCACTGGTGGT-----  
-----  
-----AATACCACCTCTCCAGAGATAAAA---  
AACTGCACTTTCAATACCACCACAAGCATGACA-----  
AATAAGATGCAGAAACAAAATGCACCTT---TTTAATAGGCTTGATATAGTGCCAATAGATAATGATAGTGCT-  
-----  
-----  
AATCATACTAATAATAATACTAATGAATATAGGTTGATAAGTTGTAACACCTCAGTCATTACACAG---  
GCCTGTCCAAAGGTATCCTTTGAGCCAATTCCCATACATTATTGTGCTCCTGCTGGTTTTGCATTCTAAAAT  
GTAAT---GATAAGAAATTCAAT-----GGAAAAGGGCCATGTACAAAT-----  
-GTCAGC---ACAGTACAATGTACACATGGAATTAAGCCAGTAGTATCAACT---  
CAATTGTTGTAAATGGCAGTCTAGCAGAAGAAGAG-----  
ATAATAATTAGATCTGAGAATTTCTCAAACAAT-----GCTAAAACCATAATAGTACAGCTGAAT---  
-----GCATCAGTAGAA-----ATTAATTGTACAAGACCCAATAACAATACAAGAAGA-----  
-AGTATTCATATG-----GGACCAGGGAAAAACA---TAT-----TATGCAACAGGAGAC-----  
-----ATAATAGGAGATATA-----AGACAAGCACATTGT---AACATCAGTAGAGAA---  
AAATGGAATAAACTTTAGAACAGGTAGGTATAAACTAAGA-----GAACAATTTAAT---  
-----AATAAAACAATAGTCTTTACT-----  
CACTCCTCAGGAGGGGACCTAGAAATTGTA---ATGCACAGTTTTAATTGTGGAGGGGAA---  
TTCAAACAGCTCCAGGCAAGAGTCCTGGCTGTGGAAAGATACCTAAGGGATCAACAGCTCCTAGGAATTTGGG  
GCTGCTCTGGAAGAACTCATCTGCCCCACTGCTGTGCCTTGGAATATTAGTTGGAGT-----  
-----AATAAACTTATGATCAGATTTGG-----GAT-----  
AACATGACCTGGATGCAGTGG---GAAAAGAAATTGACAGTTACACAAACACAATATAC---  
AATTTAATTGAAGAATCGCAGAATCAGCAGGAA-----  
-----  
AAGAATGAACAAGACTTATTACAATTGGATAAATGGTCAAATTTGTGGAATTGGTTTAGCATATCATATTGGC  
TATGGTATATAAAAATATTCAATGATAGTAGGAGGCTTGATAGGTTTAAGAATAGTTTTTTGCT---  
GTGCTTTCTATAGTG-----AATAGAGTTAGGCAGGGATACTCACCC-----  
TTATCGTTTGTCTATTAGCTTGCTCAATACCACTGCTATAGTAGTAGCTGAG---  
GGGACAGATAGGGTTATAGAAATAGTACAAAGAGTTTTTAGAGCT-----  
-----ATCTTACATATA-----CCTAGAAGAGTAAGACAAGGCCTGGAAAGAGCTTTGCTA---TAA  
>FJ469754  
GCT---GCA-----  
GATAATTTGTGGGTACAGTCTATTATGGGGTACCTGTGTGG---AAAGAAGCAAAC---  
ACCACCTATTTTGTGCATCAGATGCTAAAGCACAGGATAAAGAG---GTACATAAT-----  
-----GTTTGGGCAACA---CATGCCTGTGTACCCACAGAC---  
CCCGACCCACAAGAAATAAAATTGAAA-----AATGTGACAGAATATTTTAAAC-----  
-----ATATGGAAAAATAACATGGGTAGACCAGATGCAGGAGGATATA---  
ATCAGTTTATGGGATCAAAGCTTA---AAGCCATGTGTAAAGCTA---  
ACTCCACTCTGTGTTGCTTTAAATTGCAGTAATTGCAATACTACAAGTTGCAATTTGAATGACGCCAATACTC  
CCACTAATGCTACT-----  
ACTAGCAGTACTACTAGTACTCCTAGTAGTCTAGTCTACCCTACTATGAGTACAGGAGAAATAAAA---  
AACTGCTCTTTCAATATCACCACAGGAATAGGA-----AAAATGGAG---  
AAAACTATGAATTA---TTATATTGTATTGATATAGTACCAATAGATAGG-----  
-----  
-----GATGATACTACCAGCTATAGGCTGATAAGTTGTAACACCTCAATCATTACACAG---  
GCCTGTCCAAAGGTATCCTTTGAACCAATTCCCATACATTATTGTGCCCCGGCTGGTTTTGCGATTCTAAAGT  
GTAAC---GATACGAAATTCAGT-----GGAAATGGCACATGTAGCAA-----  
-GTCAGC---ACAGTACAATGTACACATGGAATTAGGCCAGTAGTATCAACT---  
CAACTGCTGTTAAATGGCAGTCTAGCAGAAGAAGAG-----  
GTAGTAATTAGATCTGCCAATTTCTCAGACAAT-----GCTAAAACCATAATAGTGCAGCTGAAA---  
-----GAACCTGTAGAA-----ATTAATTGTACAAGACCCAATAACAATACAAGAAGA-----

-AGTATAAATATA-----GGACCAGGGCGAGCA---TTT-----TATGCAGCAGGACAA-----  
-----ATAATAGGAGATATA-----AGACAAGCATATTGT---AACATTAGTGAAGCA---  
AGATGGGAGAACACTTTAAACAGGTAGCTAGAAAATTAGGA-----AAACAATTTGGG---  
-----GAGAACAAAACAATGATTTTTTACT-----  
AAATCCTCAGGAGGGGACCCAGAAATTGTG---ATGCATAGTTTTTAATTGTGGAGGGGAA---  
TTTAAGCAGCTCCAGGCGAGAGTCCTGGCTATAGAAAGATACCTAAAGGATCAACAGCTCCTGGGGATTTGGG  
GTTGCTCTGGAAAGCTCATCTGCCCACTGCTGTGCCTTGAATACTAGTTGGAGT-----  
-----AATAAATCTTGGGAAACAATTTGG-----GAT-----  
AACATGACCTGGATGCAGTGG---GATAAAGAAATTAACAATTACACAGGCTTAATATAC---  
ACTTTACTTGAAGAATCGCAAAACCAACAAGAA-----  
-----  
AAGAATGAACAAGAATTATTGGCATTGGATAAATGGGCAAATTTGTGGAATTGGTTTGACATATCAAGATGGC  
TGTGGTATATTAGAATATTCATAATGATAGTAGGGGGCTTAATAGGCTTAAGAATAGTTTTTTGCT---  
GTACTTTCTATAGTG-----AATAGAGTCAGGCAGGGATACTCACCA-----  
TTGTCAATTCGCTGTTAGCTTGCTCAATACAACAGCCATAGTAGTAGCTGAG---  
GGGACAGATAGGATTATAGAAGCATCACAAAGAGCTGGTAGAGCT-----  
-----ATTCTCCACATA-----CCTAGAAGAATAAGACAGGGCTTGGAAAGGGCTTTGCTA---TAA  
>FJ469757  
GCT---ACA-----  
GAACAATTGTGGGTCACAGTATATTATGGGGTACCTGTGTGG---AAAGAAGCAACT---  
ACCACTCTATTTTGTGCATCAGATGCTAAAGCATATGATACAGAA---GTACATAAT-----  
-----GTTTGGGCCACA---CATGCCTGTGTACCCACAGAC---  
CCCAACCCACAAGAAGTAGTATTGGCA-----AATGTGACAGAAAATTTTAAT-----  
-----GTGTGGAAGAATGACATGGTAGATCAGATGCATGAGGATGTA---  
ATCAGTTTATGGGATCAAAGCCTG---AAGCCATGTGTAAAATTA---  
ACCCCACTCTGTGTTACCTTGAATTGCAGTGATTATGAGGGGAATACTACTAGACAG-----  
-----  
-----AATATAACAATGAAGGAGGAAAAAGGAGAAATAAAA---  
AATTGCACTTTCAAGATCACCAAGACATAAGA-----  
GATAAGATGCGAAAAGAATATGCACTT---  
TTTTATAAACTTGATATAACACCAATAGAGGAAGATAATAATAGT-----  
-----  
AATAATAGTAGTAGTGCTAATAGTAGTAATAGTAATGCTAATTATACTAACTATAGGTTGATAAGTTGTAACA  
CCTCAGTCATTACACAG---  
GCCTGTCCAAAGGTATCCTTTGAACCAATTCCCATACATTATTGTGCCCCAGCTGGTTTTGCGATTCTAAAGT  
GTAAT---AATAAAACATTCAAT-----GGAAAAGGACCATGTACAAAT-----  
-GTCAGC---ACAGTACAATGTACACATGGCATTAGGCCAGTAGTATCAACT---  
CAATTGCTGTTTAAATGGCAGTCTAGCAGAAGGAGAT-----  
GTAGTAATTAGATCTGTCAATTTCTCGAACAAAT-----GCTAAAACCATAATAGTACAGCTGAAT---  
-----CAGTCTTTAGAA-----ATTAATTGTACAAGACCCAACAACAATACAAGAAGA---  
-AGTATACATATG-----GGACTAGGGAGAGCA---TGG-----TATGCAGCAGGAGGA-----  
-----ATAGTAGGAGATATA-----AGAAAAGCACATTGT---AACATTAGTGGGACA---  
AAATGGAAGAACACCCTAAACAGATAGTTAAAAAATTAGGA-----GACCAATTTAAG---  
-----AATAAAACAACAATAACCTTTAAT-----  
CACTCCTCAGGAGGGGACCCAGAAATTGTA---ATGCACATGTTTATTGTGGAGGGGAA---  
TTTAAGCAGCTCCGAGCGAGAGTCCTGGCTGTGGAAAGATACCTAAAGGATCAACAGCTCCTGGGGATTTGGG  
GTTGCTCTGGAAAACCTCATTTGCACCACTACTGTGCCTTGAATACTAGTTGGAGT-----  
-----AATAAAACTATGACAGAGATTTGG-----GAG-----  
AACATGACCTGGATGCAGTGG---GAGAGAGAAATTGACAACTACACAGGCATAATATAC---  
ACCCTAATTGAAGAAGCGCAAAACCAACAAGAA-----  
-----  
CAGAAATGAACAAGAATTACTAGCATTAGATAAATGGGCAAGTTTGTGGAATTGGTTCAGCATAACAACTGGC  
TGTGGTATATAAAAATATTCATAATGATAGTAGGAGGATTAATAGGTTTAAGAATAGTTTTTACT---  
GTACTTTCTATAGTG-----AATAGAGTTAGGCAGGGATACTCACCA-----  
TTATCGTTTTGCTGTTAGCTTGCTCAACGCCATAGCCATAGCAGTAGCTGAG---  
GGGACAGATAGGGTCATAGAAGCAGTCCAAAGAGCTTTTATAGAGCT-----  
-----ATCCTTCACATA-----CCTACAAGAATAAGACAGGGCTTAGAAAAGGGCTTTGCTA---TAA  
>GU330538  
GCT---GCA-----  
GAACAATTGTGGGTCACAGTCTATTATGGAGTACCTGTGTGG---AAAGATGCAAAAC---

ACCACTCTATTTTGC GCATCAGATGCTAAGGCATATGATACAGAG---GTACATAAT-----  
 -----GTTTGGGCCACA---CATGCCTGTGTACCCACAGAC---  
 CCCAACCCACAAGCAATAGAATTAAAA-----AATGTGACAGAAGATTTTAACT-----  
 -----ATGTGGAAAAATAACATGGTAGAACAGATGCATGAGGATATA---  
 ATCAGTTTATGGGATCAAAGTCTA---AAGCCATGTGTAAAATTA---  
 ACCCCACTCTGTGTCACTTTAGATTGCAATAATACTGTGACTCCCACTAGGACCAATAGTAGTAATAATGCCA  
 CTAGTTCCTACTAACAGTCCTACCCTAGTACT-----  
 ---ACCCTAGTCCCACTACCAGTACTACCAATAATAGTAGTTGGGAAAAAGAAGAAATAAAA---  
 AACTGCTCTTTCAATATCACCACAAGCATAAGA-----  
 GATAAAGTGCAGAGGGAATATGCACTT---TTTTTATAGCCTTGATGTAGTACAAATAGATAAG-----  
 -----  
 -----  
 ACTAGCTATAGGTTAATAAAATTGTAACACCTCAGTCATTACACAG---  
 GCCTGTCCAAAGGTATCCTTTGAACCAATTCCCATACATTATTGTGCCCCGGCTGGTTTTGCGATTCTAAGGT  
 GTAAT---GATAAGAAGTTTCAGT-----GGAAAAGGAAAATGTGACAAT-----  
 -GTCAGC---ACAGTACAGTGTACACATGGAATTAAGCCAGTAGTGTCAACT---  
 CAACTGCTGTTAAATGGCAGTCTAGCAGAAGGAGAT-----  
 GTAGTGCTTAAATCTGACAATTTTTCAAACAAT-----GCTAAAACCATAATAGTACAGCTAAAC---  
 -----GAACTGTAAGA-----ATTAATTGTTCAAGACCCAACAACAACACAAGAAAA-----  
 -GGTATACATATA-----GGACCAGGGAGAGCA---TTT-----TATACAACAGGAGAA-----  
 -----ATAATAGGAGACATA-----AGAAAGGCACATTGT---AACATTAGTAGAACA---  
 AACTGGACTAACACTTTAGGGCAGATAGCAAAAAAATTAGGA-----GAACAGTTTAACT-----  
 -----ACTAGCACAGTAACTTTTAGA-----  
 CCATCCTCAGGAGGGGACCCAGAAATTGTA---ATGCACAGTTTAAATTGTAGAGGGGAA---  
 TTTAAGCAGCTCCAGGCAAGAGTCCTTGCTGTGGAGAGATACCTACGGGATCAACAGCTCCTAGGGATGTGGG  
 GTTGCTCTGGAAGAACTCATTTGCACCACTACTGTGCCTTGGAATACTAGTTGGAGT-----  
 -----GGTAAAAATCTAACTGACATTTGG-----GAT-----  
 AACATGACCTGGATGGAGTGG---GAAAAAGAAATTGACAATTACACAGACCTCATATAC---  
 ACCTTACTTGAAGCATCGCAAAACCAACAAGAG-----  
 -----  
 ATAAATGAACAAGAATTATTGGCACTAGATAAGTGGGCAAGCTTGTGGAATTGGTTTGACATAACAACTGGC  
 TGTGGTATATAAGATTATTATCATAATGATAGTAGGAGGCTTGATAGGTTTAAAGAATTATTTTTGCT---  
 GTGCTTTCTATAGTG-----AATAGAGTTAGGCAGGGATACTACCA-----  
 TTATCATTTGCTGTTAACTTGCTTAATGCCACAGCTATCGCAGTAGCTGAG---  
 GGGACAGATAGGATTATAGAAGTAGTACAAAGAGCTTATAGAGCT-----  
 -----TTTATCCACATA-----CCTAGAAGAATAAGACAGGGTTTAGAAAGAGCTTTGCAA---TAA  
 >GU330550  
 GCT---ACA-----AAAAAG---  
 TGGGTCACAGTCTATTATGGGGTACCTGTGTGG---AAAGAAGCAAGC---  
 ACCGTTCTGTTTTGTGCATCAGATGCTAAAGCATATGATACAGAG---GCACATAAT-----  
 -----GTTTGGGCCACA---CATGCCTGTGTGCCACAGAC---  
 CCTAACCCACAAGAAGTATTAATGGAA-----AATGTGACAGAATATTTCAAT-----  
 -----GTGTGGAAAAATGACATGGTAGAACAAATGCATAAGGATATA---  
 ATCAGTTTATGGGATCAAAGCCTA---AAACCATGTGTAAAATTA---  
 ACCCCACTCTGTGTTACTTTAAATTGCACTGATTATGAGGCTAATAATACTACTAAT-----  
 -----GCCAATGATACCGCTGATAGTAAACAGGAAATAAAG---  
 AACTGCTCTTTCAATGTCAACCACAGTCGTAAAA-----  
 GATAAGGTGAAAAAGAATATGCACTT---TTTTATAGCCTTGATGTAGTACCAATAGATGAT-----  
 -----  
 -----  
 GATAATACTAGCTATAGGTTAATAAGTTGTAACACCTCAGTCATTACACAG---  
 GCCTGTCCAAAAGTAACCTTTGAACCAATTCCCTATACATTATTGTGCCCCAGCTGGTTTTGCGATTCTAAAAAT  
 GTAAC---AATAAGACATTTCAGT-----GGAGAAGGAGATTGTAAAAAT-----  
 -GTCAGT---ACAGTACAATGTACACATGGAATTAGGCCAGTAGTATCCACT---  
 CAACTGCTGTTAAATGGCAGCCTAGCAGAAGAAGAG-----  
 ATAATAATTAGATCTGAGGATTTTCAAAACAAT-----GCTAAAACCATAATAGTACAGCTGAAA-----  
 -----GACCCTGTAAAA-----ATTAATTGTACAAGACCCAACAACAATACAAGAAAA-----  
 -GGCATACATATA-----GGACCAGGGAGAGCA---TTT-----TATACAACA---GAA-----  
 -----ATAGTAGGAGATATA-----AGACAAGCATATTGT---AACATTAGTAAAGAA---

GCATGGAATAAGACATTAGAACAGGTAGTTCAAAAATTAAGA-----GAACAATTTGGA----

-----AATAAAACAATAACCTTTAAT-----

CAATCCTCAGGAGGGGACCCAGAAATTGTA--CTGCACAGTTTTTAATTGTGGAGGGGAA---

TTTAAGCAGCTCCAGGCAAGAGTCCTGGCTGTGGAAAGATACCTAAAGGATCAACAGCTCCTGGGAATTTGGG

GTTGCTCTGGAAAACTCATCTGCACCACTGCTGTGCCTTGGAAACGATAGTTGGAGT-----

-----AATAGATCTCTGGATGAGATTTGG-----GAA-----

AACATGACCTGGATGCAGTGG--GAAAAAGAAATTGACAATTACACAAACGTAATATAC---

ACCCTAATTGAAAAATCGCAGAACCAGCAGGAA-----

-----

ATGAATGAAAAAGAATTATTGGAATTGGATAAATGGGCAAGTTTGTGGACTTGGTTTGACATAACAACTGGC

TGTGGTACATAAAAAATATTCATAATGATAGTAGGAGGCTTGATAGGTTTAAGAATAGTTTTTTGCT---

GTATTGTCTATAGTG-----AATAGAGTTAGGCAGGGATACTCACCA-----

TTATCGTTGGCTGTTAGCTTACTCAATGCCACAGCCATAGCAGTAGCTGAG---

GGGACAGATAGGATTATAGAAGCATTACAAAGAATTTATAGAGCT-----

-----TTTTTTCACATA-----CCTAGAAGAATTAGACAGGGCTTAGAAAGGGCTTTACTA---TAA

>KT124781

-----ACA-----

GAAAAATTGTGGGTCACAGTCTATTATGGGGTACCTGTGTGG--AAAGAAGCAACC---

ACCACTCTATTTTGTGCATCAGATGCTAAAGCATATGATACAGAG--ATGCATAAT-----

-----GTTTGGGCCACA--CATGCCTGTGTACCCACAGAC---

CCCAACCCACAAGAAGTAGTATTGGAA-----AATGTGACAGAAAATTTTAAC-----

-----ATGTGGAAAAATAACATGGTAGAACAGATGCATGAGGATATA---

ATCAGTTTATGGGATCAAAGCCTA--AAGCCATGTGTAAAATTA---

ACCCCACTCTGTGTAACCTTTAAATTGCACTGATGTTAACCCGGAGATTACTAAGACCTATAATAGTAGC----

-----

-----CAGGAAATGAAA---

AACTGCTCTTTCAAGGTCAACCCAGGCATAAAA-----

GACAAGACGCAGAGAGAACGGGCACCT--TTCTATGCACCTTGATTTAGTACCAATAAATAAT-----

-----

-----

ACAAATGGTAATGATACCAAATATATATTAATAAGTTGTAATACCTCAGTCATTACACAG---

GCCTGTCCAAAGATATCCTTTGAGCCAATTCCCATACATTATTGTGCCCCGGCTGGTTTTGCGATTCTAAAGT

GTAAT--GATAAGACATTCAAT-----GGAACAGGACCTGTACAAAT-----

-GTCAGC--ACAGTACAATGTACACATGGAATTAGGCCAGTAGTATCAACT---

CAATTGCTGTTTAAATGGCAGTCTAGCAGAAGAAGAG-----

ATAGTAATTAGATCTGAAAACCTTCACAGACCAT-----TTTAAAAACATAATAGTACAGCTGAAC----

-----GATACTGTAAAC-----ATTACTTGTATAAGACCAAATAACAATACAATAAAA-----

-AGTATACATATA-----GGACCAGGGAAAGCA--TTT-----TATGCAACAGGAAAG-----

-----ATAATAGGAGATATA-----AGACAAGCATATTGT--AGCATTAATAGAGCA---

AAATGGAATAACACTTTAAGACAGATAGCTATAAAATTAAGA-----AAACAATTAGAA----

-----CAATTTTGGAAT--AAAACAAAACAATAGTCTTTAAT-----

CCCTCCTCAGGAGGGGACTCAGAAATTGTA--ATGCACACCTTTAATTGTGGAGGGGAA---

TTTAAGCAGCTCCAGGCAAGAGTCCTGGCTCTGGAAAGATATCTAAGGGATCAACAGCTCCTGGGGATTTGGG

GTTGCTCTGGAAAACTCATTTGCACCACTGCACTACCTTGGAAATGATAGTTGGAGT-----

-----AATAAATCTTTGAATGAGATTTGG-----AAT-----

AACATGACCTGGATGGAGTGG--GAAAGAGAAATTGACAATTACACAGGCTTGATATAC---

AACTTACTTGAACAATCGCAAAACCAACAGGAC-----

-----

AAGAATGAACAAGACTTATTGGAATTAAGTAAATGGGACAGTTTGTGGAATTGGTTTGACATAACAAATTGGC

TGTGGTATATAAAAAATATTCATAATGATAGTAGGAGGCTTGATAGGTTTAAGAATAGTTTTTACT---

GTACTTTCTATAGTG-----AATAGAGTTAGGAAGGGATACTCACCA-----

TTATCGTTTGCTATTAGCTTGTTTGATGCTACAGCCATAGCAGTAGCTGAG---

GGGACAGATAGGGTTATAGAATTTTTACAAAGAGCTTGTAGAGCT-----

-----ATTCTCCACATA-----CCTACTAGAATAAGACAGGGCTTGGAAGGCTTTTGCTA---TAA

>MH060965

GCT---GCA---GAA-----

GAGAAAACGTGGGTCACAGTCTACTATGGGGTACCTGTGTGG--AAAGAAGCAAAAC---

ACCACTCTATTTTGTGCATCAGATGCTAAAGCATATATTACAGAG--GTACATAAT-----

-----GTTTGGGCCACA--CATGCCTGTGTACCCACAGAC---

CCCAGCCCACAAGAAATAGAATTGAAA-----AATGTGACAGAAAATTTTAAC-----

-----ATGTGGAAAAATAACATGGTAGAACAGATGCAGGAAGATATA---  
 ATCAGTTTATGGGATCAAAGCTTA---AAGCCATGTGTAAAATTA---  
 ACCCCACTCTGTGTTACTTTAAATTGCACTAATTATAATAACACCAGTGATAATAAGACCATTATATGAT----  
 -----GACCCTAAAAGGGGAAATAAAA---  
 AATTGCTCTTTCAATGTGCGCCACAGATATAAGT-----  
 GGTAAGATGAAGAAAGAATATGCATAT--TTTAATAGACTTGATGTAGTACCAATAGATAGT-----  
 -----  
 AATAATAATACTGATACCAGCTATATGTTGAGGGGTTGTAACACCTCAGTCATTACACAG---  
 GCCTGTCCAAAGGTATCCTTTGAGCCAATTCCCTATACATTATTGTGCCCCGGCTGGTTTTGCGATTCTAAAGT  
 GTAGA---GATAAGAAGTTCAAT-----GGAACAGGACCATGTGGAAAT-----  
 -GTCAGC---ACAGTACAATGTACACATGGAATTAGGCCAGTAGTATCAACT---  
 CAACTACTGTAAATGGCAGTCTAGCAGAAGAAGAG-----  
 GTAGTAATTAGATCTGAAAATTTCAAAATAAT-----GCTAAAAACATATTAGTACAGCTGAAG----  
 -----GAGCCTGTAGAA-----ATTAATTGTACAAGACCCAACAACAATACAAGAAAA-----  
 -AGTATACGTATA-----GGACCAGGGAGTGCA---TTT-----TTTGCAACAGGAGAA-----  
 -----ATAATAGGAGATATA-----AGACGAGCCTATTGT---AACATTAGTAGAGCA---  
 AAATGGAATGACACTTTAGAACAGGTAGTGAGAAAATTAAGA-----GAACAATTTGTG----  
 -----AATAGAACAATAATATTTAAT-----  
 TCATCCTCAGGAGGGGACCCAGAAATTGTA--ATGCACAGTTTTAATTGTGGAGGGGAA---  
 TTTAAACAGCTCCAGGCAAGAGTCCTGGCTGTGGAAAGATACCTAAGGGATCAACAGCTCCTGGGAATTTGGG  
 GTTGCTCTGGAAGAACTCATCTGCCACACTGCTGTGCCTTGGAATACTAGTTGGAGT-----  
 -----AATAAATCTCAAAGTGAAATTTGG-----GAC-----  
 AACATGACTTGGATGCAGTGG---GAGAAAGAAATTAGCAACTACACAGGAATAATATAC---  
 AGCTTAATTGAAGAATCGCAAAACCAGCAAGAA-----  
 -----  
 AAGAATGAACAAGATTTATTGGCATTAGATAAGTGGGCAAGTTTGTGGAGTTGGTTTGACATAACCAATTGGC  
 TGTGGTACATAAGAATATTCATAATGATAGTAGGAGGCTTGGTAGGTTTAAGAATAGTTTTTTGCT---  
 GTGCTTTCCATAGTG-----AATAGAGTTAGGCAGGGATACTACCA-----  
 TTGTCATTGGCTATTAGCTTATACAACGCCATAGCCATAGCAGTAGCTGAG---  
 GGGACAGATAGGGCTATAGAAGTATTACAAAGAGTTTTTAGAGCT-----  
 -----ATCCTTCACATA-----CCCAGAAGAATAAGACAGGGCTTAGAAAGGTGTTTGCTG--TAA  
 >FJ469731  
 GCT--GTT-----  
 GAAAAGACGTGGGTACAGTTTATTATGGGGTACCTGTGTGG--AAAGAAGCAACC---  
 ACCACTCTATTTTGTGCCTCAGATGCTAAATCATATGATACAGAG--GCACATAAT-----  
 -----GTTTGGGCCACA--CATGCCTGTGTACCCACAGAC---  
 CCCAACCCACAAGAAGTAGTATTGGGA-----AATGTGACAGAAAATTTTAAC-----  
 -----ATGTGGAAAAATAACATGGTAGATCAAATGCATGAGGATATA---  
 ATCAGTTTATGGGATCAAAGTCTA--AAGCCATGTGTGAAATTA---  
 ACCCCACTCTGTGTTACTTTAAATTGCACTGATTTGAATAAAAATGCCACTAACAATAGTACCACT-----  
 -----  
 -----GCTTCTACTAACAATAATAGGAAATGGAAAGCGAAAAAGAAA---  
 ATCAGATCTTTCAATATCACCACCACATAAGA-----  
 GATAAGATGCAGAGAACATATGCACAT--TTTTATAACATGATATTGATACACTACATGCTAAT-----  
 -----  
 -----  
 AATAGTAATAGTACCACATATAGGTTGATAAGTTGTAACACCTCAGTCATTACACAG---  
 GCCTGTCCAAAAGTATCCTTTGAGCCAATTCCCATACATTACTGTGCCCCGGCTGGTTTTGCGATTCTAAAGT  
 GTAAT---GATAAGAAATTCAAT-----GGAACAGGACCATGTAAAAAT-----  
 -GTCAGC---ACAGTACAATGCACACATGGAATTAGGCCAGTAGTGTCAACT---  
 CAATTGCTGTTGAATGGCAGTCTAGCAGAAGAAGAG-----  
 ATAGTAATTAGATCTGAGAATATCACAGACAAT-----GCTAAAACCATAATAGTACAGCTGAAC----  
 -----ACATCTGTAGTA-----ATTAATTGTACAAGACCCAACAACAATACAAGGAAA-----  
 -AGTATACATATA-----GCACCAGGGAGAGCA---TTT-----TATGCAACAGGAGAC-----  
 -----ATAATAGGAAAAGATA-----AGACAAGCACATTGT---AATGTTAGTAGAAGC---  
 AAATGGGAAGACACTTTAAGAAAGGTAGCTATAAAAATTAATA-----GAACAATTT-----  
 -----AATAACACAATAATCTTTTACA-----  
 AACTCCTCAGGAGGGGACCCAGAAATTGTA--ATGCACAATTTCAATTTGTGGAGGGGAA---

TTTAAGCAGCTCCAGGCAAGAATCCTGGCTGTGGAAAGATACCTAAAGGATCAACAGCTCCTAGGGATTTGGG  
 GTTGCTCTGGAAACTCATCTGCACCCTACTGTGCCTTGGGAATGCTAGTTGGAGT-----  
 -----AATAGATCTCTGGATAATATCTGG-----CAT-----  
 AACATGACTTGGATGCAATGG---GAAAGAGAAATTGACAAATTACACAGAATACATATAC---  
 TCATTGATTGAAGAATCGCAGAACCAGCAAGAA-----  
 -----  
 AAGAATGAAAAAGAATTATTGGAATTGGATAAGTGGGACAATCTGTGGAATTGGTTTACAATAACACACTGGC  
 TGTGGTATATAAAAAATATTCATAATGATAGTAGGAGGCTTGATAGGTTTAAGAATAGTTTTTGTCT---  
 GTACTTTCTATAGTG-----AATAGAGTTAGGCAGGGATATTCACCA-----  
 TTGTCGTTTGTCTGTTAGCTTGCTCAACGCCTTTGCCATAGCAGTAGCTGAG---  
 GGGACAGATAGGATTATAGAAGCAGTACAAAGAGCTTGTTAGAGCT-----  
 -----ATTCTCCACATA-----CCTAGAAGAATAAGACAGGGCTTGGAAAGGGCTTTGCTA---TAA  
 >HQ216397  
 GCT---GCA-----  
 GAACAATTGTGGGTACAGTCTATTATGGGGTACCTGTGTGG--AAAGAAGCAACC---  
 ACCACTCTATTTTGTGCATCAGATGCTAAAGCATATCACACAGAG---GTACATAAT-----  
 -----GTTTGGGCCACA---CATGCCTGTGTACCCACAGAC---  
 CCCAACCCACAAGAAGTAGTAATGGAA-----AATGTGACAGAAAATTTTAACT-----  
 -----ATGTGGAAAAACAACATGGTAGAACAGATGCAGGAGGATATA---  
 ATCAGTCTGTGGGATCAAAGCCTA---AAGCCATGTGTAAAATTA---  
 ACCCCACTCTGTGTTACTTTAAATTGCACTGACTTGGAGAATAATAGTACTAATACTACT-----  
 -----  
 -----AATGGTAACTGGGAAACGCTGGAGAGAGGAGAAGTAAAA---  
 AACTGCTCTTTCAATGTCACAATAAACAGAGGA-----  
 GAGGAGCTGAGGAAAGAATATGCACCT--CTTTATAAACTTGATATAGTACCAATGGGAGAG-----  
 -----  
 -----  
 AATAGTACCAGCTATAGGTTGATGAGTTGTAACACCTCAGTCATTACACAG---  
 GCCTGTCCAAAGGTATCCTTTGAACCAATTCCCATACATTATTGTGCCCGGCTGGTTTTGCGATTCTAAAGT  
 GTAAT--AGTAAGACATTCAAT-----GGAACAGGACCATGTAAAAAT-----  
 -GTCAGC--ACAGTACAATGCACACATGGAATTAGGCCAGTAGTATCAACT---  
 CAACTACTGCTAAATGGCAGTCTAGCAGAAGAAGAG-----  
 GTAGTAATTAGATCTGAAAATTTACAAACAAT-----GCTAAAACCATAATAGTTCAGCTGAAT---  
 -----AAACTGTAAACA-----ATTAATTGTACAAGACCCAACAACAATACAAGGAAA-----  
 -AGTATACATATG-----GGACCAGGGAAAGCA---TTT-----TATGCAACAGGAGAC-----  
 -----ATAATAGGAAATATA-----AGAAGAGCACATTGT--AATATTAGTAGAGCA---  
 GAATGGAATAGCACTTTACAAAAGGTAGTTACAAAATTACAA-----AAACAATTTGGG---  
 -----GAGAATAAAACAATAGTCTTTAAT-----  
 CACTCCTCAGGAGGGGACCCAGAAATTGTA--ATGCACAGTTTTAATTGTGGAGGGGAA---  
 TTTAAGCAGCTCCAAGCAAGACTCCTAGCTGTGGAAAGTTACCTAAGGGATCAACAGCTCCTAGGGATTTGGG  
 GTTGCTCTGGAAACTCATTTGCACCCTAATGTGCCTTGGAACTAGTTGGAGT-----  
 -----AACAGATCACTGAATAGTATTTGG-----GAT-----  
 AACATGACCTGGATGGAGTGG--GATAGAGAAATTAACAATTACACAAACATAATATAC---  
 AACTTACTTGAACAATCGCAAAACCAACAAGAA-----  
 -----  
 AAGAATGAAAAAGACTTATTGGAATTGGATAAGTGGGCAAGTTTGTGGAATTGGTTTGACATCTCAAACCTGGC  
 TGTGGTATATAAAAAATATTCATAATGATAGTAGGAGGTTTAGTAGGATTAAGAATAGTTATGGCT---  
 GTGCTTTCTATAGTG-----AATAGAGTTAGGCAGGGATACTACCA-----  
 TTGTCATTTGTCTGTTAGTTTGCTTAACGCCATCGCTATAGCAGTAGCTGAG---  
 GGAACAGATAGGGTTATAGAAGCAGTACAAAGAATTTGTAGAGCT-----  
 -----ATCCTCCACATA-----CCTAGAAGAATAAGACAGGGCTTGGAAAGGCTTTTACTA---TAA  
 >KT124758  
 GCT---GTA-----GAAAAG---  
 TGGGTTACAGTCTATTATGGGGTACCTGTGTGG--AGAGAAGCAAGC---  
 ACCACTTTATTCTGTGCATCAAAATGCTAAAGGATATAATACAGAG---GCACATAAT-----  
 -----GTTTGGGCCACA---CATGCCTGTGTGCCCATAGAC---  
 CCCAACCCACAAGAAGTAGTAATGGAA-----AATGTAACAGAAAATTTTAACT-----  
 -----ATGTGGAAAAATAACATGGTAGAACAGATGCATGAGAATATA---  
 ATCGATTTATGGGATCAAAGCCTA---AAGCCATGTGTAGAATTA---  
 ACCCCACTCTGTGTTACCTTAAATTGCACTGATTTGACTAATATCAATACCACCACGGGGACAAAT-----

-----  
-----ACCACTGTCGCTGGCAATACTAGTGGTACAATAAATGAAGGGATAATGACA---  
AACTGCTCTTTCAATATCACCACAAACATAAGA-----  
GATAAGATAAAGAAAGACTATGCATTG---TTTTATAGAAGCTGATGTAGAAAGGATAATTGAAGAAAAT----  
-----  
-----  
GATAATACCAGCTATAGGTTGAGAAGTTGTAATACCTCAGTCATTAGACAG---  
GCCTGTCCAAAGGTATCCTTTGAGCCAATTCCCATACATTTTTGTGCCCCAGCTGGTTTTGCGATTCTAAAAT  
GTAAT---GATAAGAAGTTCAAT-----GGAACAGGACCATGTAAAAAT-----  
-GTCAGC---ACAGTACAATGTACACATGGAATTAGGCCAGTAGTATCAACT---  
CAATTGCTGTTAAATGGCAGTCTAGCAGAAGAAGAG-----  
ATAGTAATTAGATCTGAAAATTTCTCGGATAAT-----GCTAAAACCATCATAGTACAGCTGAAT----  
-----GCATCTGTAGAA-----ATTAATTGTACAAGACCCAACAACAATACAAGAAAA-----  
-AGCATACATATA-----GCACCAGGGAGAGCA---TTT-----TATGCAACAGGAGAA-----  
-----ATAATAGGAAATATA-----AGACAAGCACATTGT---AATCTTAGTGGAGCA---  
CAATGGAATAACACTTTAAACATATAGCTATAAAATTAAGA-----GAACAATATCCT----  
-----AATAAAACAATAAATTTTACC-----  
CAATCCTCAGGAGGGGACCCAGAAATTGTA--ATGCATATCTTTAATTGTGGAGGGGAA---  
TTTAAGCAGCTCCAGGCGAGAGTCCTGGCTGTAGAAAGATACCTAAAGGATCAACAGCTCCTGGGAATTTGGG  
GTTGCTCTGGAAGAACTCATCTGCACCACTGCTGTGCCTTGGAATGATAGTTGGAGT-----  
-----AACAAATCTCTGAGTGATATTTGG-----GAC-----  
AACATGACCTGGTTGCAGTGG---GATAAAGAAATTACAAATTACACAACCTTTAATATAC---  
ACCTTACTTGAAGAATCGCAGAACCTACAAGAC-----  
-----  
AAGAAATGAAAAAGAATTATTGGAATTGGATAACTGGGCAAGTTTGTGGAGTTGGTTTGACATATCAAATTGGC  
TGTGGTATATAAGAATATTCATAATGATAGTAGGAGGCTTGATAGGTTTAAGAATAGTTTTTTGCT---  
GTACTGTCTATAGTG-----AATAGAGTTAGGCAGGGATACTCACCC-----  
TTATCGTTTGCTGTTAGCTTGCTTAATGCCACGGCCATAGCAGTAGCTGAG---  
GGGACAGATAGGGTTATAGAAGTAATACAAAGAACTTGTAGAGCT-----  
-----ATCCGCCATATA-----CCTAGAAGAATAAGACAGGGCCTGGAAAGAATTTTGTTA--TAA  
>JX863968  
ACA---GAA-----AAG---  
TGGGTCACAGTCTATTATGGGGTACCTGTGTGG--AAAGAAGCAACC---  
ACCACTCTATTTTGTGCATCAGATGCTAAAGCATATGATACAGAG--ATGCATAAT-----  
-----GTTTGGGCCACA--CATGCCTGCGTACCCACAGAC--  
CCAAACCCACAAGAAATAGGATTAGAA-----AATGTGACAGAAAATTTTAAC-----  
-----ATGTGGAATAAACATGGTAGAACAGATGCATGAGGATATA--  
ATTAGTTTATGGGATCAAAGCCTA--AAGCCATGTGTAAAATTA--  
ACCCCACTCTGTGTTACTTTAAATTGCACTGATTATACTGGTAATGGAAGTGTGAAAAATGCTACTGATACT-  
-----  
-----GTTAATAGAAGTGTGGAAGGGACGATGAGGGGAGAAATAAAA---  
AACTGCTCTTTCAATATCACCACAAACATAAGA-----  
GATAAGATAAAGAAAGAACATGCATTA--TTTTATAAACTTGATGTAGTGCAAATAGATGAGAAT-----  
-----  
-----  
AATACTAACAGCTATAGGTTGATAAGTTGTAACACCTCAGCCCTTACCCAG---  
GCCTGTCCAAAGGTATCCTTTGAGCCAATTCCCATACATTATTGTGCCCCGGCTGGTTTTGCGATTCTAAAAT  
GTAAT---GATACAAAGTTCAAT-----GGATCAGGACCATGTACAAAT-----  
-GTCAGC---ACAGTACAGTGTACACATGGAATTAGGCCAGTAGTATCAACT---  
CAACTGCTGTTAAATGGCAGTCTAGCAAAAGAAGAG-----  
GTAGTAATTAGATCTGAAAATTTACGAACAAT-----GCTAAGACCATAATAGTACAGCTGAAT----  
-----GAATCTGTAGTA-----ATTACTTGTACAAGACCCAACAACAATACAAGAAGA-----  
-AGTATACATATA-----GCACCAGGGAGAGCA---TTT-----TATGCAACAGGAAAT-----  
-----ATAGTAGGAGATATA-----AGACAAGCACATTGT---AACATTAGTAAAGCA---  
AACTGGACTAACACTTTAAACAGGTAGTTGAAAAATTAAGA-----GAACAATTTGGG----  
-----AATAAAACAATAGTCTTTAAT-----  
CAATCCTCAGGAGGGGACCCAGAAATTGTA--AGTCACAGTTTTAATTGTGGAGGAGAA---  
TTTAAGCAGCTCCAGGCAAGAGTCCTGGCTGTGGAAGATACCTAAGAGATCAACAGCTCCTGGGGATTTGGG  
GTTGCTCTGGAAGAACTCATTTGCACCACTGCTGTGCCTTGGAATGATACTTGAGT-----  
-----AATAAATCCCTAGATGATATTTGG-----GAT-----

AACATGACCTGGATGCAGTGG---GAAAGAGAGATTGACAATTACACAGCTACAATATAC---  
AACCTACTTGA AAAATCGCAGAACCAGCAGGAA-----  
-----  
AAGAATGAACAAGAATTATTGGAATTGGATAAATGGGCAAGCTTGTGGAATTGGTTTGACATAACAAATTGGC  
TATGGTATATAAAGATATTCATAATGATAGTAGGGGGTTTGATAGGTTTAAGACTAGTTTTTACT---  
GTACTTTCTATAGTG-----AATAGAGTTAGGCAGGGATACTCACCA-----  
TTATCGTTTGCTGTTAGCTTGCTCAACGCCACAGCCATAGCAGTAGCTGAG---  
GGGACAGATAGGGTTATAGAAGTATTACAAAGAATTGTTAGGGCT-----  
-----ATCCTTCACATA-----CCTACAAGAATAAGACAGGGTTTGGAAGGGCTTTGCTA---TAA  
>EF593190  
GCT---GGA-----  
GAACAATTGTGGGTAACAGTCTATTATGGGGTACCTGTATGG---AAAGAAGCAACC---  
ACCACTCTATTTTGTGCATCAGATACTAAAGCATATCATACAGAG---GTACATAAT-----  
-----GTTTGGGCTACA---CATGCCTGTGTACCCACAGAC---  
CCCAGCCCACAAGAAGTAGTATTGGGA-----AATGTAACAGAAAATTTTAAAC-----  
-----ATGTGGAAAAATAACATGGTAGAACAGATGCATGAGGATATA---  
ATCAGTTTATGGGATCAAAGCCTA---AAGCCATGTGTAAAATTA---  
ACCCCACTCTGTGTTACTTTAAATTGCACTGATAATTTGAGCAATTTGAACAATGTTACTCATAAACATAAC-  
-----  
-----AATAGTAATAGCGGGGAAGATCTGAAAGGAGAAATAGGAGAAATAAAA---  
AACTGCTCTTTCAATGTCAACCACAATCATAAAG-----  
GATAAGATACAGAAAGAATATGCACCTT---TTTTATAAATCTGATGTAGTACCAATAGAGAGTGAGAAT---  
-----  
-----  
AATACTAGTA ACTTATACTAGCTATAGGTTGATACATTGTAACACCTCAGTCATTACACAA---  
GCCTGTCCAAAGGTATCCTTTGAACCAATTCCCATACATTTTTCGCCCCGGCTGGTTTTCGATTCTAAAAT  
GTAAC---AATAAGACATTTCGA-----GGAAAAGGGCCATGCACAAAT-----  
-GTCAGT---ACAGTACAATGTACACATGGAATCAGGCCAGTAGTATCAACT---  
CAACTGCTGTAAATGGTAGTCTAGCAGAGAAAGAG-----  
GTAGTAATCAGAACTGAAAATTTACAGACAAT-----GCTAAAACCATAATAGTACACCTGAAT---  
-----GAATCGGTAAAC-----ATTAATTGTACAAGACCTAACACAATACAAGGAAA-----  
-GGTATACATATA-----GGACCAGGGAGAGCA---TTT-----TATGCAACAGGACAA-----  
-----ATAATAGGAGATATA-----AGACAAGCACATTGT---ACTCTTAATATAACA---  
CAATGGAATAACACTTTAAATCAGATAGTTACAAAATTAAGA-----GAAAATTTTAATTTG-  
-----GAAAATAAAACAATAATCTTTAAT-----  
CACTCCTCAGGAGGGGACCCAGAAATTATA--ATGCACAGTTTTAATTGTGCAGGAGAA---  
TTTAAGCAGCTCCAGGCAAGAGTCCCTGGCTGTGGAAAGATACCTGAAGGATCAACAGCTCCTGGGAATTTGGG  
GTTGCTCTGGAAAACCTATTGCACTACTAATGTGCCTTGGAATGCTAGTTGGAGT-----  
-----AATAAATCTCTGAATGACATCTGG-----GAC-----  
AACATGACCTGGATGCAGTGG---GAAAAAGAAATTGACAATTACACAGGCTTAATATAC---  
TCCTTAATTGAAGAATCGCAAAACCAACAAGAA-----  
-----  
AAGAATGAACAAGAATTATTGGCATTGGATAGATGGGCGAGTTTGTGGAATTGGTTTGACATAACAAGATGGC  
TGTGGTATATAAAAATATTATAATGATAGTAGGGGGCTTAATAGGGTTAAGAATAGTTTTTACT---  
GTACTTTCTATAGTG-----AATAGAGTTAGGCAGGGCTACTCACCA-----  
TTATCATTTTGCTGTTAGCTTGTTCAACGCCATAGCCATAGCAGTAGCTGAG---  
GGGACAGATAGGGTTATAGAAATAGTACAGAGAGCTGTTAGAATT-----  
-----ATTCTCAACATA-----CCTACACGAATAAGACAGGGCTTGGAATTGCCTTGCTA---TAA  
>MH060681  
GGT---AAA-----  
GAAGGCTGTGGGTACAGTCTATTATGGGGTACCTGTGTGG---AGAGAAGCAAAC---  
ACCACTCTATTTTGTGCATCAGATGCTAAAGCATATGAGACAGAG---GTGCATAAT-----  
-----GTCTGGGCCACA---CACGCCTGTGTACCCACAGAC---  
CCTAGCCCACAAGAAGTAGTATTGGAA-----AATGTAACAGAAAATTTTAAAC-----  
-----ATGTGGAAAAATAACATGGTAGAACAGATGCATGAGGATATA---  
ATCAGTTTATGGGATGAAAGCCTA---AAGCCATGTGTGAAATTA---  
ACCCCACTCTGTGTTACTCTAAATTGCACTGATATCACTAGTGCTGCCACTAATGCCACTGCCAACTCT---  
-----  
-----AATGCCACTAGTTGGACGGATGGAAGAGAAGAAATGAGA---  
AACTGCTCTTTTAATATCACCACAAACGTAAGC-----

GATAAGAAGCAGAAAGAATATGCAATC---TTTTATAAATATGATATAGTATCAACAGATAAT-----  
-----  
-----GGTACTACCAGTTAC---  
TTAACACATTGTAACACCTCAATAATTAGACAG---  
GCCTGTCCAAAAGTATCCTTTCAGCCAATTCCCATACATTATTGTGCCCCGGCTGGTTTTGCGATTCTGAAGT  
GTAAT---GATAAGAAGTTCAAT-----GGATCAGGGCCATGTACAAAT-----  
-GTCAGC---ACAGTACAATGTACACATGGAATTAAGCCAGTAGTGTCAACT---  
CAATTGCTGTTAAATGGCAGTCTAGCAGAAGAAGAC-----  
ATAGTAATCAGATCTGAAAATATCTCGGACAAT-----ACTAAACTATAATAGTACATTTGAAT----  
-----GAAACTGTACAA-----ATTAATTGTATAAGACCCAATAACAATACAAGAAAA-----  
-AGTATACATATA-----GGACCAGGGAGAGCA---TTT-----TATGCAACAGGAAAC-----  
-----ATAATAGGAGACATA-----AGACGAGCACATTGT---AATGTTAGTAGAGCA---  
AAATGGAATAGCACTTTAGAAAAGGATAGCTGCAAAATTAAGA-----GAAAAATTTGGG----  
-----AATAACAAAACAATAGTCTTTAAT-----  
TCATCCTCAGGAGGGGACCCAGAAATTGAA---ATGCACACTTTTAATTGTGGAGGGGAA---  
TTTAAGCAGCTCCAGGCAAGAGTCCTGGCTTTGGAAAGATACCTAAGGGATCAACAGCTCCTAGGGATTTGGG  
GTTGCTCTGGAAGAACTCATTTGCCCACTGCTGTGCCTTGGAATGCTAGTTGGAGT-----  
-----AATAGATCTCAGGAGACAATTTGG-----AAC-----  
AACATGACCTGGATGCAGTGG---GAAAAAGAGATTGACAAATTACACAGGCATAATATAC---  
AACTTACTTCAGGAATCGCAAAACCAGCAAGAA-----  
-----  
AAGAATGAACAAGAATTATTGGAATTAGATAAATGGGCAAGTTTGTGGAATTGGTTTAGCATAACACAGTGGC  
TGTGGTATATTAAATTATTTCATAATGATAGTAGGAGGCCCTGATAGGTTTAAGAATAGTTTTTTAGT---  
GTACTTTCTATAGTA-----AAGAGAGTTAGGCAGGGATATTCACCA-----  
TTATCGTTTGTCTGTTAGCTTGCTTAATGCCATAGCCAGAGCAATAGCTGAA---  
GGGACAGATAGGGTTATAGAATTAGCACAAGGAGTTTTTTAGAGCT-----  
-----ATCATTACATA-----CCTAGAAGAATAAGACAGGGACTTGAAATAGCTTTGCTG---TAA  
>MH060990  
GCT---ACA-----  
GAAAAATTGTGGGTCACAGTCTATTATGGGGTACCTGTGTGG---AAAGAAGCAACT---  
ACCACTCTATTTTGTGCATCAGATGCTAAAGCATATGATACAGAG---GTACATAAT-----  
-----GTTTGGGCTACA---CATGCCTGTGTGCCACAGAC---  
CCCAACCCACAAGAAGTAGTATTGGGA-----AATGTGACAGAAAACCTTTAAC-----  
-----ATGTGGAGAAATGACATGGTAGAACAGATGCATGAGGATATA---  
ATTAGTTTATGGGATCAAAGCCTA---AAGCCATGTGTAAAATTA---  
ACCCCACTCTGTGTTACTTTAAAGTGCATGATTATGGGAACAATGCTACCAATGCCAATACTACCAATACC-  
-----  
-----AATAGTAGTAGTAAAGTGGAAATGATAGGAGAAATAAAA---  
AATTGCTCTTTCAACATCACCACAAACATAAGA-----  
GATAAGATAAAGAAAGAATATGCATTG---TTTTATAAACTTGATGTAGTACCAATAGATAAT-----  
-----  
-----  
ACTAGCTATAGGTTGATAAGTTGTAATACCTCAGTCCTTACACAG---  
GCCTGCCCAAAGGTATCCTTTGAGCCAATTCCCATACATTATTGTGCCCCGGCTGGTTTTGCGATTCTAAAAT  
GTAAC---AATAAAAAGTTCAAT-----GGGACAGGATTATGTAAAAAT-----  
-GTCAGC---ACAGTACAATGTACTCATGGAATTAGACCAGTAGTATCAACT---  
CAACTGTTGTTAAATGGCAGTCTAGCAGAAGAGGAG-----  
GTAGTAATCAGATCTGAAAATTTACGAACAAT-----GCTAAAATCATAATAGTACAGCTGAAC----  
-----GAAGCTGTAGAA-----ATTAATTGTACAAGACCCAACAACAATACAAGAAAA-----  
-GATATACATATA-----GGACCAGGGAGAGCA---TTT-----TATACAACAGGAGAA-----  
-----ATAATAGGAGATATA-----AGACAAGCACATTGT---AACATTAGTAGAGAA---  
AAATGGAATAACACTTTAGGACAGATAGTTAAAAAATTAAGA-----GAACAATTTGGG----  
-----AATAAAACAATAATCTTTAAT-----  
CAATCCTCAGGAGGGGACCCAGAAGTTGTA---ATGCACACTTTTAAGTGTGGAGGGGAA---  
TTTAAGCAGCTCCAGGCAAGAGTCCTGGCTRTAGAAAGATACCTAAGGGATCAACAGCTCCTGGGAATTTGGG  
GTTGCTCTGGAAGAACTCATCTGCACCACTGCTGTGCCCTGGAATTTCTAGTTGGAGT-----  
-----AATAAATCTCTGGATCAGATTTGG-----AAT-----  
AACATGACCTGGATGGAGTGG---GAAAGAGAAATTGACAAATTACACAGGCACAATATAC---  
AGGTTAATTGAAGAATCGCAAAACCAACAAGAA-----  
-----

AAGAATGAAAAAGAATTATTGGAATTAGATAAAATGGGCAAGTTTATGGAATTGGTTTGACATAACAAGCTGGC  
TGTGGTATATAAAAATATTTCATAATGATAGTAGGAGGCATAGTAGGTTTAAGAATAATTTTTTCT---  
ATACTTTCTATAATA-----AATAGAGTTAGGCAGGGATACTCACCA-----  
TTATCGTTTGCTATTAGCTTGTTCAATGCCACAGCTATAGTAGTAGCTGAA---  
GGGACAGATAGAATTTTAGAAGCATTACAAAGAAGCTTTTAGAGCT-----  
-----ATCCTCAACATA-----CCTAGAAGAATAAGACAGGGCTTAGAAAGAATTTTGCTA---TAA  
>DQ410526  
GCT---ACA-----  
GAGCAATTGTGGGTCACAGTATATTATGGGGTATCTGTGTGG---AAAGAAGCAAAC---  
ACCACTCTATTTTGTGCATCAGATGCTAAAGGATATGATACAGAA---AAACATAAT-----  
-----GTCTGGGCCACA---CATGCCTGTGTACCCACAGAC---  
CCCAGCCCACAAGAATTAGTATTGGCA-----AATGTGACAGAAAAGCTTTAACT-----  
-----ATGTGGAAAAATAACATGGGTAGAACAGATGCATGAGGATATA---  
ATCAGTTTATGGGACCAAAGCCTA---AAGCCATGTGTAAAATTA---  
ACTCCACTCTGTGTTACTTTAACTTGCAAAAATGTGACTAAAACCAATGTGACTAATAAAGTCAATGTG----  
-----  
-----ACTAATACCACTAATAGTAGCGAGAAAACAATGAGAGAAGAAATGAAA---  
AATTGTTCTTTCAATATTACCACAAACATAAGA-----  
GATAAGATACAGAAGCAATATGCGCTT---TTTTATAAACTTGATATAGTACAAATAGATGAG-----  
-----  
-----  
AATGATAACTAGCTATAGGTTGATAAGTTGTAACACCTCAGTCATTACACAG---  
GCCTGTCCAAAGGTATCCTTTGAGCCAATTCCCATTCAATTATGTGCCCGGCTGGTTTTCGATTCTAAAGT  
GTAAT---AATGAGACTTTCAAT-----GGAACAGGACCATGTAAAAAT-----  
-GTCAGT---ACAGTACAATGCACACATGGAATTAGGCCAGTAGTATCAACT---  
CAACTACTGTAAATGGCAGTCTAGCAAAAGGAGAG-----  
GTAAGAATTAGGTCCGCCAATTTCTCGGACAAT-----GCTAAAACCATAATAGTACAGCTGAAT----  
-----GAATCTGTAATA-----ATTAATTGTACAAGACCCAACAACAATACAAGAAAA-----  
-AGTATACCCATA-----GGACCAGGCAGAGCA---TTT-----TATGCAACAGGGGAC-----  
-----ATAATAGGAGACATA-----AGACAAGCACATTGT---AATGTTAGTAGAAAA---  
CATTGGAATAACACTTTAAAGTGGGTAGCTGCAAAATTAAGA-----GAACAATTT-----  
-----AATAAAACAATAGTCTTTAGG-----  
AACTCCTCAGGAGGGGACCCAGAAATTGTA--ATGCACAGCTTTAATTGTGGAGGGGAA---  
TTTAAGCAGCTCCAGGCAAGAATCCTGGCTGTGGAAAGATACCTAAAGGATCAACAGCTCCTGGGGATTTGGG  
GATGCTCTGGAAGAACTCATTTGCCCACTACAGTGCCTTGGAATAATAGTTGGAGT-----  
-----AATAAAAAATCTGAGTGTATTTTGG-----GGA-----  
AACATGACCTGGATGCAGTGG---GAAAGAGAAATTGAGAATTACACAGGCTTAATATAC---  
AGCTTAATTGAAGAATCGCAAAACCAACAAGAA-----  
-----  
ATGAATGAAAAAGAATTATTGGAATTAGATAAAATGGGCAAGTTTGTGGAATTGGTTTGACATAACAAATTGGC  
TGTGGTATATAAGATTATTTCATAATGATAGTAGGAGGCTTAGTAGGTTTAAGAATAATTTTTTGCT---  
GTCCTTTCTATAGTG-----AATAGAGTTAGGCAGGGATACTCACCA-----  
TTATCGTTTGCTGTTAGCTTGCTCAACGCCATAGCCATAGCAGTAGCTGAG---  
GGGACAGATAGGATTTTAGAAATATTGCAAAGAGCTTTTAGAGCT-----  
-----ATTCTCCACATA-----CCTACAAGAATAAGACAGGGCTTGGAAGAGCTTTTGCTA---TAA  
>EF363127  
GCT---GCA-----  
AACAAATTTGTGGGTCACAGACTATTATGGGGTACCTGTGTGG---AAAGAAGCAAAC---  
ACCACTCTATTTTGTGCCTCAGATGCTAAAGCATATAGTACAGAG---GTACATAAT-----  
-----GTTTGGGCCACA---CATGCCTGTGTACCCACAGAC---  
CCCAACCCACAAGAAGTAGCATTGAAA-----AATGTGACAGAAAATTTTAACT-----  
-----ATGTGGAAAAATAACATGGGTAGAACAAATGCAGGAAGATATA---  
ATCAGTTTATGGGATCAAAGCCTA---AAGCCATGTGTAAAATTA---  
ACTCCACTCTGTGTTACTTTAAATTGCACTGATTGGGATAATGCTACT-----  
-----  
-----CTTGCAAATATGACGGGAGAAATAAAA---  
AACTGCACTTTTCAATATCACCACAACCATGAGA-----  
GATAAGGTGCAAAAAGCATATGCACTC---TTTTATAGCACTGATGTAGTAAAAATAAATAAT-----  
-----  
-----

AATGATAATAATAGTAGCTATAGGTTGATAAGTTGTAACACCTCAGTCATTACACAA ---  
GCCTGTCCAAAAGTATCCTTTGAGCCAATTCCCATACATTATTGTGCCCGGCTGGTTTTGCGATTCTGAAGT  
GTAGA --- GATAAAAAGTTCAAT --- GGAACAGGACCATGTACAAAT ---  
-GTTAGC --- ACTGTACAATGTACTCATGGAATTAGGCCAGTAGTATCAACT ---  
CAACTGCTGTTAAATGGTAGTCTAGCAGAAGAAGAG ---  
GTAATAATTAGATCTGCCAATATCACAGACAAT --- ACTAAAACCATAATAGTACATCTGAAC ---  
-----AACTCTGTAGGA-----ATTACATGTACAAGACCCGGCAACAATACAAGACAA-----  
-AGTATACATATA-----GCACCAGGAAGAGCA---TTT-----TATGCAACAGGTGCA-----  
-----ATAACAGGAAATATA-----AGAAAAGCACATTGT---AACATTAGTATAGTA---  
AGTTGGAATGACACCTTAAAACAGGTAGTTGAAAAATTACAA-----GAACACTTCCCA-----  
-----AATAAAACAATAGCCTTTAAA-----  
AATTCCCTCAGGAGGAGACCCAGAAATTGTA---ATGCACAGGTTTAATTGCGGAGGGGAA---  
TTTAAACAGCTCCAGGCAAGAGTCCTGGCTGTGGAGAGATACCTAAGGGATCAACAGCTCCTGGGAATTTGGG  
GTTGCTCTGGAAGAACTCATCTGCACCATAATGTGCCTTGGAATATTAGTTGGAGT-----  
-----AATAAAAATCTATCTCAGATTTGG-----GAT-----  
AACATGACCTGGATGGAGTGG---GAAAGAGAAATTGAGAATTACACACAAACAATATAC---  
AACTTAATTGAAGAATCGCAGAACCAGCAAGAA-----  
-----  
AAGAAATGAAAAAGAATTATTAGAATTAGATAAATGGGCAAGTTTGTGGAATTGGTTTGACATAACAACTGGC  
TGTGGTATATAAAAATATTTCATAATGATAGTAGGAGGCTTGATAGGTTTAAGAATAGTTTTTTACT---  
GTGCTTTCTATAGTG-----AATAGAGTTAGGCAGGGATACTCACCA-----  
TTATCGTTCGCTATCAGTTTGTTTAATGCCATAGCTATAGCAGTAGCTGAG---  
GGGACAGATAGGGTTATAGAAATAGTACAAAGAGTTTGCAGAGCT-----  
-----ATTCGCCACATA-----CCTAGAAGAATAAGACAAGGCTTGGAAGGAGTTTGCTA---TAA  
>DQ410205  
GCT---GCA-----  
GAGAAATTGTGGGTCACAGTCTATTATGGGGTACCTGTGTGG---AAAGAAGCAACC---  
ACCACTCTATTTTGTGCGTCAGATGCTAGAGCATATGATACAGAG---GTACATAAT-----  
-----GTTTGGGCCACA---CATGCCTGTGTACCCACAGAC---  
CCCGACCCACAAGAAATAGTATTGGAG-----AATGTGACAGAAAATTTTAAC-----  
-----ATGTGGAATAAACATGGTAGAACAGATGCATGAGGATATA---  
ATCAGTCTATGGGATCAAAGTCTA---AAGCCATGTGTAAAATTA---  
ACCCCACTCTGTGTACTTTAAATTGCACTGAGTTGAGGAATGCTACTAATACCAATGCTACTAAT-----  
-----  
-----ACCACTAGTAGTAGTGGGGGAATGATGGAGGGAGGAGAAATAAAA---  
AATTGCTCTTTCAATATCACCAAGCATAAAA-----  
GAAAAGATGAAGAAAGAATATGCACTT---TTTTATAGTCTTGATGTAATACCAATAGATGAT-----  
-----  
AATAAATACTAGTTATAGGTTGAGAAGTTGTAACACCTCAGTCATTACACAG---  
GCCTGTCCAAAGGTATCCTTTGAGCCAATTCCCATACATTATTGTGCCCGGCTGGTTTTGCGATTCTAAAGT  
GTA---GATAAAAAGTTCAAT---GGAATAGGACCATGTACAAAT-----  
-GTCAGC---ACAGTACAATGTACACATGGGATTAAGCCAGTAGTATCAACT---  
CAACTGCTGTTAAATGGCAGTCTAGCAGAAGGAGAG-----  
GTAGTAATTAGATCCTATAATTTACGGACAAT-----GCTAAAATCATAATAGTACAGCTGAAT---  
-----GAGTCTGTAGGA-----ATTAAGTGTACAAGACCCAACAACAATACAAGAAAA---  
-AGTATACATATA-----GGACAAGGCAGGGCA---CTT-----TATGCAACAGGAGAC-----  
-----ATAATAGGAGATATA-----AGACAAGCACATTGT---AATCTTAGTATGACA---  
AAATGGGATAACACTTTAAAACGGATAGTTGTAAAATTAAGA-----GAACAATTTAAG---  
-----AATAACACAATAGTCTTTAAT-----  
CAATCCTCAGGAGGGGACCTAGAAATTGTA---ATGCACAGTTTTAATTGTGGAGGGGAA---  
TTTAAGCAGCTCCAGGCAAGAGTCCTGGCTGTGGAAAGATACCTAAAGGATCAACAGCTCCTGGGGATTTGGG  
GTTGCTCTGGAAGAACTCATTTGTACCCTGCGGTGCCTTGGAACACTAGTTGGAGT-----  
-----AATAAATCTCTGAATCAGATTTGG-----AAT-----  
AACATGACCTGGATGGAGTGG---GAAAGAGAAATTGATAATTACACAGGCTTAATATAC---  
AACCTAATTGAAGAATCGCAGAACCAACAAGAA-----  
-----  
AAGAAATGAACAAGAATTATTGGAATTAGATAAATGGGCAAGTTTGTGGAATTGGTTTGACATAACAAAATGGC  
TGTGGTATATAAAAATATTTCATAATGATAGTAGGGGGCTTGGTAGGTTTAAGAATAGTTTTTTACT---  
GTACTTTCTATAGTG-----AATAGAGTTAGGCAGGGATACTCACCA-----

TTATCGTTTGCTGTTAGCTTGCTCAATGCCACAGCTATAGCAGTAGCTGAG---  
 GGGACAGATAGGATTATAGAAGTATTACAAAGAGTTTATAGAGCT-----  
 -----GTTCTCCACATA-----CCTACAAGAATAAGACAGGGCTTAGAAAGGGCTTTGCTA---TAA  
 >FJ469733  
 GCT---TCA-----  
 GAAAAGTTGTGGGTCACAGTATATTATGGGGTACCTGTGTGG--AAAGATGCAAAG---  
 ACCACTCTATTTTGTGCATCAGATGCTAAAGGATATGAGACAGAG--ATGCACAAT-----  
 -----GTTTGGGCCACA---CATGCCTGTGTACCCACAGAC---  
 CCCAACCCACAAGAAATAGTATTGGAA-----AATGTGACAGAAGATTTTAAC-----  
 -----ATGTGGAAAAATAACATGGTAGAACAGATGCAGGAGGATATA---  
 ATTAGTTTATGGGATCAAAGCCTC--AAGCCATGTGTACAACTA---  
 ACCCCACTCTGTGTTACTTTAGATTGCACTGATTATAAGGGGAGTAATACAACCAAGAATACTACAACAGCC-  
 -----  
 -----AATAGTACAAGTAATAATAGTAGCTTAAGGGAGGATACAGGAATGAAA---  
 AACTGCTCTTTCAATGTCAACCACAAACATAAGA-----  
 GATAAGAGGCAGAAAGAATATGCACTT--TTATATAAACTTGATTTAGTACCAATAAATGATGCT-----  
 -----  
 -----  
 AATGCTAGTAATACTAGCTATAGGTTGATAAGTTGTAACACCTCAGTCATTACACAG---  
 GCTTGTCCAAAGGTATCCTTTGAGCCAATTCCAATACATTATTGTGCCCCGGCTGGTTTTGCGATTCTAAAAT  
 GTAAT---AGCAAGACATTTAGT-----GGAAGAGGACCATGTACAAAT-----  
 -GTCAGT---ACAGTACAATGTACACATGGAATTAGACCAGTGGTATCAACT---  
 CAACTGCTATTAAATGGCAGTCTAGCAGAAAAAGAG-----  
 GTAGTAATTAGATCTGTCAATTTCTCGGACAAT-----GCTAAAACCATAATAGTACAGCTGAAC---  
 -----AAATCTGTAGAA-----ATTAATTGTACAAGACCTAATAACAATACAAGAAAG-----  
 -AGTATACATATA-----GGACCAGGGAGGGCA---TTC-----TATGCAACAGGAGAC-----  
 -----ATAATAGGAAACATA-----AGACAAGCACATTGT--AACCTTAGTGGAGTA---  
 GATTGGAATACCACTTTAAGCCTAATAGTTAAAAAATTAAGA-----GAACAATTTGGG---  
 -----GAAAATAAAACAATAAAATTTGAG-----  
 CGATCCTCAGGAGGAGACCCAGAAAGTTGAA--ATGCACAGTTTTAATTGTGGAGGGGAA---  
 TTTAAGCAGCTCCAGGCTAGAGTCCCTGGCTGTAGAAAGATACCTAAAGGATCAACAGCTCCTGGGAATTTGGG  
 GGTGCACTGGAAACTCATTTGCACCACTGCTGTGCCTTGGAAATGCTAGTTGGAGT-----  
 -----AATAAACTATGGAAAGGATTTGG-----GAT-----  
 AATATGACCTGGATGCAGTGG--GAAAAGAAATTGACAATTACACAGGAGAGATATAC---  
 AGACTGCTTGAAGATGCGCAGAACCAGCAAGAA-----  
 -----  
 AAGAATGAACAAGAATTATTGGAATTGGATAAATGGGCAAGTTTGTGGAGTTGGTTTGACATAACACAATGGC  
 TGTGGTATATAAAAATATTACATAATGATAGTAGGAGGCTTGATAGGTTTAAGAATAGTTTTTACT---  
 GTACTTTCTTTAGTA-----AATAGAGTTAGGCAGGGATATTCACCA-----  
 TTATCGTTTGCTGTTAGCTTGCTTAATGTACAGCTATAACAGTAGCTGAA---  
 GGGACAGATAGGATTATAGAAGCAATACAAAGAGTTTTTAGAGCT-----  
 -----TTTCTCAACATA-----CCTAGAAGAATAAGACAGGGCTTGAAAGGGCTTTGCTA---TAA  
 >JQ403107  
 GCT---ACA-----  
 GAACAATTGTGGGTCACAGTCTATTATGGGGTACCTGTGTGG--AAAGAGGCAACC---  
 ACCACTCTGTTTTTGTGCATCAGATGCTAAAGCATATGATACAGAG--GTGCATAAT-----  
 -----GTTTGGGCCACA---CATGCCTGTGTACCCACAGAC---  
 CCCAACCCACAAGAAGTAGTAATGGAA-----AATGTGACAGAAAATTTTAAC-----  
 -----ATGTGGAAAAATGACATGGCAGAGCAAATGCATGAGGATATA---  
 ATCAGTTTATGGGATCAAAGCCTA--AAGCCATGTGTAAAATTA---  
 ACCCCACTCTGTGTCACTTTACATTGCACTGATTATAATGGTACCCATATGAATTCTACT-----  
 -----  
 -----GGGAATAACACTGATGGTTATGGGGAACGGATGAAATCAGGAGAAATGAAA---  
 AACTGCTCTTTCAATGTCAACCACAGAAATAAGA-----  
 GATAGAGTGAAGAAACAATCTGCACTT---  
 TTTTATAAACTTGATGTAGTATCAATAGATGATGATAAAATTAGGAATACCAGTAAT-----  
 -----  
 AGTAGTACCAGTAATACTAACTATACTAGCTATAGGTTGATAAATTGTAACACCTCAGCCATTACACAA---  
 GCCTGTCCAAAGGTATCCTTTGAGCCAATTCCCATACATTATTGTGCCCCAGCTGGTTTTGCGATTGTAAAGT  
 GTAAT---GATAAGAAGTTCAAT-----GGAACAGGATCATGTAAAAAT-----

-GTCAGC---ACAGTACAATGTACACATGGAATCAGGCCAGTAGTGTCAACT---  
CAACTGCTGTTAAATGGCAGTTTAGCAGAAGAAGAT-----  
ATAGTAATTAGATCTGAAAATATCTCAGACAAT-----GCTAAAACCATAATAGTACATCTGAAT----  
-----AGATCTGTAGCA-----ATTAATTGTATAAGACCCAATAACAATACAAGAAAA-----  
-AGTATACCTATG-----GGACCAGGGAGAGCC---TTT-----TTTGCAACAGGAGAC-----  
-----GTAATAGGAGATATA-----AGACAAGCATATTGT---ACCATTAATAGAACA---  
GAATGGAATACAACCTTTAAAACAGATAGCTATAAAATTAGGA-----GAACAATTTGAG-----  
-----AATAAAAAAATAATCTTTAAT-----  
CACTCCTCAGGAGGGGACCCAGAAATTGTA--ATGCACAGTTTTAATTGTGGAGGGGAG---  
TTTAAGCAACTCCAGGCAAGAATCCTGGCTGTGGAAAGATACCTAAAGGATCAACAGCTCCTAGGAATTTGGG  
GATGCTCTGGAAAACCTCATCTGCACCACTGCTGTGCCTTGAATACTAGCTGGAGT-----  
-----AATAATAGAACTTATGATGACATTTGG-----AAT-----  
AACCTGACCTGGATGCAGTGG---GAAAAACAAATTGACAAATTACACAGACATAATATAT---  
GACTTACTTGAAAAATCGCAAAACCAACAAGAA-----  
-----  
ATAAATGAAAAGGAATTATTGGAATTGGACAAGTGGGCAAGTTTGTGGAATTGGTTTGACATCTCAAATTGGC  
TGTGGTATATAAAAATATTTCATAATGATAGTAGGAGGCTTGATAGGTTTAAGAATAGTTTTTTGCT---  
GTACTTTCTATAGTG-----AATAGGGTTAGGCAGGGATACTCACCA-----  
TTGTCAATTTGCTATTAGCTTGCTCAATGCCACAGCCATAGCAGTAGCTGAG---  
GGAACAGATAGGGTTATAGAAGTACTACAAAGAGTTTTTTAGAGCT-----  
-----ATCCTCCACATA-----CCTAGAAGAATAAGACAGGGCTTGGAAGGTCTTTGCTA---TAA  
>JN024100  
GCT---ACA-----  
GAAAAATTGTGGGTCACAGTCTATTATGGGGTACCTGTGTGG--AAAGAAGCAACT---  
ACCACTCTATTTTGTGCATCAGATGCTAAAGCATATGATACAGAG--GTACATAAT-----  
-----GTTTGGGCCACA---CATGCCTGTGTGCCACAGAC---  
CCCAACCCACAAGAAGTAGTATTGGGA-----AATGTGACAGAAAACCTTTAAC-----  
-----ATGTGGAGAAATGACATGGTAGAACAGATGCATGAGGATATA---  
ATTAGTTTATGGGATCAAAGTCTA--AAGCCATGTGTAAAATTA---  
ACCCCACTCTGTGTTACTTTAAATTGCAATGATTATAATGGTACCAATACCAATGGTACCAATACC-----  
-----  
-----AAGAATAGTAGTAACGTGGAAATGATAGGAGAAATAAAG---  
AATTGCTCTTTCAACATCACCAAAACATAAGA-----  
GATAAGATAAAGAAAGAATATGCATTG--TTTTATAAACTTGATGTAGTACCAATAGATAAT-----  
-----  
-----  
GATAAATACTAGCTATAGGTTGATAAGTTGTAATACCTCAGTCATTACACAG--  
GCCTGCCCAAAGATATCCTTTGAGCCAATTCCCATACATTTATTGTGCCCGGCTGGTTTTGCGATTCTAAAAT  
GTAAC--AATAAAAAGTTCAAT-----GGGACAGGACCATGTACAAAT-----  
-GTCAGC--ACAGTACAATGTACTCATGGAATTAGGCCAGTAGTATCAACT---  
CAACTGTTGTTAAATGGCAGTTTAGCAGAGGAAGAG-----  
GTAGTAATCAGATCTAAAAATTTACGGACAAT-----GCTAAAATCATAATAGTACAGCTGAAC---  
-----GAAGCTGTAGAA-----ATTAATTGTACAAGACCCAACAACAATACAAGAAAA-----  
-GGTATACATATA-----GGACCAGGAAGAGCA---TTT-----TATACAACAGGAGAA-----  
-----ATAATAGGAGATATA-----AGACAAGCACATTGT---AACATTAGTAAAGTA---  
AAATGGAATAACACTTTAGGACAGATAGTTAAAAAATTAAAA-----GAACAATTTGAG---  
-----GATAAAACAATAATTTTTTAAT-----  
CAATCCTCAGGAAGGGACCCAGAAGTTGTA--ATGCACACTTTTAATTGTGGAGGGGAA---  
TTTAAGCAGCTCCAGGCAAGAGTCCTGGCTATAGAAAGATACCTAAAGGATCAACAGCTCCTGGGAATTTGGG  
GTTGCTCTGGAAAACCTCATCTGCACCACTGCTGCGCCCTGGAATTCTAGTTGGAGT-----  
-----AATAAATCTCTGAATCAGATATGG-----GAT-----  
AACATGACCTGGATGGAGTGG---GAAAGAGAAATTGACAAATTACACAAGCACAAATATAC---  
AGGTTAATTGAAGAATCGCAAAACCAACAAGAA-----  
-----  
AAGAATGAACAAGAATTATTGGAATTAGATAAATGGGCAAGTTTATGGAATTGGTTTGACATAACAAAATGGC  
TGTGGTATATAAAAATATTTCATAATGATAGTAGCAGGCATAGTAGGTTTAAGAATAACTTTTTTCT---  
ATATTTTCTATAATA-----AATAGAGTTAGGCAGGGATACTCACCA-----  
TTGTGCTTTGCTGTTAGCTTGCTCGACGCCGAGCCATAGTAGTAGCTGAG---  
GGGACAGATAGGGTTATAGAAAATATTACAAAGAATTTTCAGGGCT-----  
-----ATTATCCACATA-----CCTGTTAGAATAAGACAGGGCTTAGAAAAGGCTTTGCTG---TAA

>HQ216601

GCT---ACA-----  
GAAAAATTGTGGGTCACAGTCTATTATGGGGTACCTGTGTGG---AAAGAAGCAACT---  
ACCACTTTATTTTGTGCATCAGATGCTAAAGCATATGATACAGAG---GCACATAAC-----  
-----GTCTGGGCCACA---TATGCCTGTGTGCCCACAGAC---  
CCCAACCCACAAGAAGTATTATTGGAA-----AATGTAACAGAAAACCTTTAAC-----  
-----ATGTGGAAAAATAACATGGGTAGAACAAATGCATGAGGATATA---  
ATCAGTTTATGGGATCAAAGCCTA---AAGCCATGTGTGAAATTA---  
ACCCCACTCTGTGTTACTTTAAATTGCACTGATTGGAATAATGCTACCAATACCAATGGT-----  
-----  
-----AGTGACTGGGAAAGGGTGGAGAAAGGAGAAATAAAA---  
AACTGCTCTTTCAACATCACCACAAACATAAGA-----  
GATAAGATGCAGAAAGAATATGCATTG---TTTTATAAACTTGATATAGTACCAATAGAGAAGGATAATGAT-  
-----  
-----  
AATAGGAATGATAATACTAGCTATAGGTTGATAAGTTGTAATACCTCAGTCATTACACAA---  
GCCTGTCCAAAGGTATCCTTCGAGCCAATTCCCATACATTATTGTGCCCCGGCTGGTTTTTCGCGATTCTAAAGT  
GTA---AATAAGAAGTTCAAT-----GGAACAGGACCATGTAAGAAT-----  
-GTCAGC---ACAGTACAATGTACACATGGAATTAGGCCAGTAGTATCAACT---  
CAATTGTTGTTAAATGGCAGTCTAGCAGAAGAGGAA-----  
GTAGTGATCAGATCTGAAAATTTTCATGAACAAT-----GCTAAAATCATAATAGTACAGCTGAAT---  
-----GAATCTGTAGAA-----ATTAATTGTACAAGACCCAACAACAATACAAGAAAA-----  
-AGTATACATATA-----GGACCAGGGAGAGCA---TTT-----TATGCAACAGGAGAA-----  
-----ATAATAGGAAATATA-----AGACAAGCACATTGT---AACATTAGTAGAGAA---  
AAATGGAATAACACTTTAAGACAGATAGTTGGAAAATTAAGA-----CAACAATTTGGG---  
-----AATAAAGCAATAATCTTTAAT-----  
CAATCCTCAGGAGGGGACCCAGAAAGTTGTA---AAACACAGTTTTTAATTGTGGAGGGGAG---  
TTCAAGCAGCTCCAGGCAAGAGTCCCTGGCTCTAGAAAGATACCTAGCGGATCAACAGCTCCTGGGAATTTGGG  
GCTGCTCTGGA---CACTTTGCACTGCTGTGCCTTGGAAATCTAGTTGGAGT-----  
-----AATAAATCTCTGAATCAGATTTGG-----GAT-----  
AACATGACCTGGATGGAGTGG---GAAAGAGAAATTGACAATTACACAGACACAATATAC---  
AGATTAATTGAAGACTCGCAAAACCAACAAGAA-----  
-----  
AAGAATGAACAAGAATTATTGAAATTAGATCACTGGGCAAGTTTGTGGAATTGGTTTGACATAACAACTGGC  
TGTGGTATATAAAAATATTACATAATGATAGTAGGAGGCTTAGTAGGTTTAAGAATAATTTGTTCT---  
ATACTTTCTATGGTA-----AATAGAGTTAGGCAGGGATACTACCA-----  
TTATCGTTTGTCTGTTAGCTTGCTTAACGCCACAGCCATAGCAGTAGCTGAG---  
GGGACAGATAGGGTTATAGAAATATTACAAAGAATTCTTAGGGCT-----  
-----ATTATCCACATA-----CCTGTTAGAATAAGACAGGGGCTTAGAAAGGGCTTTGCTG---TAA

>HQ216795

GTT---GCA-----  
GGACAATTGTGGGTCACAGTCTATTATGGGGTACCTGTGTGG---AAAGAAGCAACC---  
ACCACTCTATTTTGTGCATCAGATGCTAAAGCATATGACACAGAG---GCACATAAT-----  
-----GTTTGGGCCACA---CATGCCTGTGTACCCACAGAC---  
CCTAACCACACAAGAAGTAGTATTGCAA-----AATGTGACAGAAAATTTTAAC-----  
-----ATGTGGAAAAATGACATGGGTAGAACAGATGCATCAGGATGTA---  
ATCAGTTTATGGGATGAAAGCTTA---AAGCCATGTGTAAAATTA---  
ACCCCACTCTGTGTTACTTTAAGTTGCACTGATGTAAATACTACTACTACCAATAATGTAAATACTACTACTA  
CC-----  
-----AGTAATAATAGTACCAATGATCCAATGTTGGAACAGACAGGAGAAATAAAA---  
AACTGCTCTTTCAATGTACACCACAAGCATAAGA-----  
GATAAGCAAAAGAAAGAATATGCGCTT---TTTTATAGACTTGATGTAGTACCAATAGATGGG-----  
-----  
-----  
AAACAAAATAGTACAGACTATACATTGATAAATTGTAACACCTCAGTTATCACACAG---  
GCTTGTCCAAAGGTGTCTTTGAACCAATTCCTATACATTATTGTACCCCGGCTGGTTTTTCGCTTCTAAAGT  
GTA---GATAAGAAGTTCAAT-----GGAACAGGACCTTGTA---  
-GTCAGT---ACAGTACAATGTACACATGGAATTAGGCCAGTAGTGTCAACT---  
CAATTGCTGTTAAATGGCAGTCTAGCAGAAGAAGAA-----  
GTAGTACTTAGATCTGAAAATTTTACAAACAAT-----GCTAAAACCATAATAGTACAGCTGAAG---

-----GAAGCTGTAGTA-----ATGAATTGTACAAGACCCAACAACAATACAAGAAGA-----  
-AGTATACATATA-----GCACCAGGGAGAGCA---TTT-----TATGCAACAGGAGAA-----  
-----ATAATAGGAGATATA-----AGACAAGCCCATTGT---AACATTAGTATAGAA---  
AAGTGGAATAAACTTTAAGAGGGATAGCTACAAAATTAAAA-----GAACAATTTAAG-----  
-----AATAAAACAATATACTTTAAT-----  
CAATCCTCAGGAGGGGACGCGAGAAGTTGTA--ATGCACAGTTTTTAATTGTGGAGGAGAA---  
TTTAAGCAGCTCCGAGCAAGAGTCCTGGCTGTGGAAAGATACCTAAAGGATCAACAGCTCCTAGGAATTTGGG  
GTTGCTCTGGAAAACCTCATTTCACCACTACTGTGCCTTGAATGCTAGTTGGAGT-----  
-----AATAAATCTCTAGATTATATTTGG-----AAT-----  
AACATGACCTGGATGCAGTGG---GAGAGAGAAATTGACAATTATACAGGATTAATATAC---  
ACCTTACTTGAAGAATCGCAAAACCAACAAGAA-----  
-----  
AAGAATGAACAAGAATTATTGGAATTGGATAAGTGGACAAGTTTTGTTGAATTGGTTCTCTATAACAAGCTGGC  
TGTGGTACATAAAAATATTTCATAATGATAGTAGGAGGTTTAATAGGTTTAAGAATAGTTTTTTTCT---  
GTGCTTTCCATAGTG-----AATAGAGTTAGGCAGGGATACTCACCA-----  
TTATCATTTGCTGTTAGTTTGTCTTAATACCATAGCTATAGTAGTAGCTGAA---  
GGGACAGATAGGGTTATAGAAAATAGCACAAAGATTAGTTAGAGCT-----  
-----ATTATCCACATA-----CCTAGAAGAATAAGACAAGGCTTAGAAAAGGGCTTTTGCTA---TAA  
>JX863965  
GTT---GCA-----  
GGAAATTTGTGGGTCACAGTTTATTATGGAGTACCTGTGTGG---AAAGAAGCAACC---  
ACCACTCTATTTTGTGCATCAGATGCTAGAGCATATGATACAGAG---GCACATAAT-----  
-----GTTTGGGCCACA---CATGCCTGTGTACCCACAGAC---  
CCCAATCCACAAGAAATATTATTGGAA-----AATGTGACAGAAAATTTTAAC-----  
-----ATGTGGAAAAATAACATGGTAGAACAGATGCATGAGGATATA---  
ATCAGCTTATGGGATCAAAGCCTA---AAGCCATGTGTAAAATTA---  
ACCCCACTCTGTGTTACTTTAAATTGCACTAATGTGAGGAATATTACTGCCACTAATAATACTACT-----  
-----  
-----AATAATGTGACAACGATGGAAAAAGGAGAAATAAAA---  
AACTGCTCTTTTAATATCACCAACACAGAAAT-----GAGAGGCTA---  
AAAGACTATGCATTG---TTTTATAAACTTGATGTAGTACCAATGGATGAG-----  
-----  
-AATAATACTACTAGTACTCGCTATATGTTGATAAGTTGTAACACCTCAGTCATTAAACAG---  
GCCTGTCCAAAAGTAACCTTTGAGCCAATTCCCATACATTATTGTGCCCCGGCTGGTTTTGCGATTCTAAAGT  
GTAGA---GACAAGAAGTTCAAT-----GGAACAGGACCATGTAAAAAT-----  
-GTCAGC---ACAGTACAATGTACACATGGGATTAGGCCAGTAGTATCAACC---  
CAACTGCTGTTAAATGGCAGTCTAGCAGAAGAAGAG-----  
GTAGTAATTAGGTCTGCCAATTTACGGACAAT-----GCTAAAACCATAATAGTACAGCTGAAA---  
-----GACCCTGTAGTA-----ATTAATTGTACAAGACCCAACAACAATACAAGAAAA---  
-AGTATACCTATG-----GGACCAGGGAGAGCC---TTT-----TATGCAACAGGAGAT-----  
-----ATAACAGGAGATATA-----AGACAAGCACATCGT---AACCTTAGTAGAACA---  
GCATGGAATAACACTTTAAGACAGATAGTTAGCAAATTAAGA-----GGACAATTTAAG---  
-----AATAGAACAATAGTCTTTAAT-----  
CAATCCTCAGGAGGGGACCCAGAAATTGTA--ACACACAGTTTTTAATTGTGGAGGGGAA---  
TTTAAGCAGCTCCAGGCAAGAGTCCTGGCTGTGGAAAGCTACCTAAAGGATCAACAGCTCCTAGGGATCTGGG  
GTTGCTCTGGAAAACCTCATCTGCACCACTGCTGTGCCTTGAATACTAGTTGGAGT-----  
-----AATAAATCTCTAGATGATATTTGG-----AAT-----  
AACATGACCTGGATGGAGTGG---GACAGAGAAATTAGCAATTACACAAACATAATATAC---  
ACCTTAATTGAAGAATCGCAGAACCAACAGGAA-----  
-----  
AAGAATGAACAAGAATTATTGGCCTTAGATAAAATGGGCAAGTTTTGTGGAATTGGTTTGACATAACAAAGTGGC  
TGTGGTATATAAAAATATTTCATAATGATAGTAGGAGGCTTGGTAGGTTTAAGAATAGTTTTTTGCT---  
GTACTTTCTATAGTG-----AATAGAGTTAGGCAGGGATACTCACCT-----  
TTATCATTCGCTATTAGCTTGCTTAATTTCATAGCCATAGCAGTAGCTGAG---  
GGGACAGATAGGATTATAGAAGTATTACAAAGAACTGTAGAGCT-----  
-----ATTTGCAACATA-----CCTAGAAGAATAAGACAGGGCTTGAAAAGGGCTTTTGCTA---TAA  
>JF320043  
GCT---ACA---GAC-----  
AAAGATAAGTGGGTCACAGTCTATTATGGGGTACCTGTGTGG---AAAGAAGCAAAAC---  
ACTACTCTATTTTGTGCATCAGATGCTAAATCATATAGCACAGAG---GCACATAAT-----

-----GTTTGGGCCACA---CATGCCTGTGTACCCACAGAC---  
CCCAACCCACAAGAGGTAGAATTGAAA-----AATGTAACAGAAAAATTTAAC-----  
-----ATGTGGAAAAATAACATGGTTGAACAAATGCATGAGGATATA---  
ATCAGTTTATGGGATCAAAGCCTA---AAGCCATGTGTAAAATTA---  
ACCCCACTCTGTGTTACTTTAAATTGCACTGACGCGGAGAGGAATAAGACTAATGCC-----  
-----  
-----ACAGGTGTAAATCTGATAGAGAAAGGAGAAATAAAA---  
AATTGCTCTTTCAATGTCAACCACAGGAGTAAGA-----  
GATAAGATAAAGAGAGATTATGCACTT---TTTTATAGCCTTGATGTGATACAAATAAATGATACAGATGCA-  
-----  
-----  
GTAAGTAATACCAGCAATAATTATACCAGCTATATGTTGAGAAGTTGTAACACCTCAATCATTACACAA---  
GCCTGTCCAAAGGTAACCTTTGAGCCAATTCCCATACATTTTGTACCCCGGCTGGTTTTCGCTTCTACAAT  
GTAAT---GAGAAGAATTTCAAT-----GGATCAGGACTATGTACAAAT-----  
-GTCAGC---ACAGTACAATGTACACATGGAATTAGGCCAGTAGTATCAACT---  
CAACTGCTGTTAAATGGTAGTCTAGCAAAAGATGAG-----  
GTAGTAATTAGATCTCAAAATTTCTCAGACAAT-----GCTAAAACCATATTAGTACAGCTGAAC----  
-----AAACTATAGAA-----ATTAATTGTACAAGACCCAACAACAATACAAGAAGA-----  
-AGTATAACTATA-----GGACCAGGGAGGGTC---TTC-----TATCCAACA---GAC-----  
-----ATAATAGGAGATATA-----AGACAAGCACATTGT---AACATTAGTGCATCA---  
AAATGGAACGACACTTTAAGACTGGTAGTTGCAAAATTAAGA-----GAACAATATGGG----  
-----AGTAATAAAACAATAGTCTTTAAG-----  
AATTCTCAGGAGGGGACCCAGAAATTGTG---ATGCATAGTTTAAATTGTGGAGGGGAA---  
TTTAAGCAGCTCCAGGCAAGAGTCCTGGCTGTGGAAAGATACCTAAAGGATCAACAGCTCCTGGGAATTTGGG  
GATGCTCTGGAAGAACTCATCTGCACCACTGCTGTGCCTTGGAATAATAGTTGGAGT-----  
-----AATAGATCTCTAGATGACATTTGG-----AAC-----  
AACATGACCTGGATGCAGTGG---GAAAAAGAAATTGAAATTTACACAGAGTATATATAC---  
AATTTAATTGAAATATCGCAAAACCAGCAAGAA-----  
-----  
AAGAATGAACAGGAATTATTGGAATTGGACAAATGGGCAAACCTTGTGGAGTTGGTTTGACATAACAACTGGC  
TGTGGTACATAAGAATATTCATAATGATAGTAGGAGGCTTGATAGGTTTAAGGATAGTGTTTGCT---  
GTACTTTCTATAGTA-----AATAGAGTTAGGAAGGGATACTACCA-----  
TTGTCGTTTGTCTGTTAGCTTGTTCACGCCACAGCAATAGCAGTAGCTGAG---  
GGGACAGATAGGATTATAGAATTAGCACAAGGAATTGGTGGAGCT-----  
-----ATTCTCAATATA-----CCTAGAAGAATTAGACAGGGCTTGGAAGGGCTTTACTA---TAA  
>EU577873  
ACT---GAC-----  
GAAAAGATGTGGGTACAGTCTATTATGGGGTACCTGTGTGG---AAAGAAGCAACC---  
ACCACTCTATTTTGTGCATCAGATGCTAAAGCATATCATACAGAG---GTACATAAT-----  
-----GTATGGGCCACA---CATGCCTGTGTACCCACAGAT---  
CCCAACCCACAGGAAATGAAATTGGAA-----AATGTAACAGAAGAGTTTAAC-----  
-----ATGTGGAAAAATAACATGGTAGAACAGATGCATGAGGATATA---  
ATAAGTTTATGGGATCAAAGCCTA---AAGCCATGTGTAAAATTA---  
ACTCCACTCTGTGTTACTTTAAATTGCTCTGATGCTCATACTGGGAATGATACTAACTCCAACAGT-----  
-----  
-----ACTGCAAGCAACAGGACAGTAGGGGAGAAAGGAGAAATGAAA---  
AACTGTTCTTTCAATGTGCACATCAGGCATAAGA-----  
GATAAGATGCAACAGGTGTATGCACTT---TTTTATAAACTTGATGTAGTACCAATAGATAATGATAGT---  
-----  
-----  
AGTAGTAATACTAGTGCCAGTTATAGGTTGATAAATTGTAATACCTCAGTCATTACACAG---  
GCCTGTCCAAAGGTATCCTTTGAGCCAATTCCCATACATTATTGTGCCCGGCTGGTTTTGCGATTCTAAAAT  
GTAAT---GATAAGACATTTGAG-----GGAAAAGGAGAATGTAAAAAT-----  
-ATCAGC---ACAGTACAATGTACACATGGCATTAGGCCAGTAGTATCAACA---  
CAACTACTGTTAAATGGCAGTCTAGCAGAAGAAGAG-----  
GTAGTAATTAGATCTGACAATTTTCACAGACAAT-----GCTAAAACCATATAATAGTACAGTTGAAT----  
-----GAAACTGTACAG-----ATTAAGTGCACAAGACCCGGTAACAATACAAGAAAA-----  
-AGTATACATATA-----GGACCAGGGCAAGCA---TTT-----TATGCAACAGGAGAC-----  
-----ATAATAGGAGATATA-----AGACAAGCACATTGT---AACATTAGTAAACA---  
CAATGGGAGAGCACTTTAAAAAAGGTAGCTGAAAAATTAAGA-----GGAAATTTAAG-----

-----AATAAACTATAGTCTTCAAC-----  
 CACTCCTCAGGAGGGGACCCAGAGATTGTA--ATGCACAGTTTCAATTGTGGAGGGGAA---  
 TTTAAGCAGCTCCAGGCAAGAGTCCTGGCTGTGGAAAGATACCTAAGGGATCAACAGCTCCTGGGGATTTGGG  
 GATGCTCTGGAAAGCTCATCTGCCCCACTGCTGTGCCTTGGAAATGCTAGTTGGAGT-----  
 -----AATAAATCTTTCAATCAGATTTGG-----GAT-----  
 AACATGACCTGGATGCAGTGG--GAGAAAGAAATTGACAATTACACGGAAGTGATATAT---  
 AACTTAATTGAAAAATCGCAAAACCAACAAGAA-----  
 -----  
 AAGAATGAACAGGAATTATTGGAATTGGATAAATGGGCAAGTTTGTGGAATTGGTTTGACATAACACAATGGC  
 TGTGGTATATAAAAAATATTCATAATGATAGTAGGAGGCTTGATAGGCTTAAGAATAGTTTTTTACT---  
 GTACTTTCCATAGTG-----AATAGAGTTAGGCAGGGATACTCACCA-----  
 TTATCATTTGCCATTAGCTTGTTCAACGCCACAGCCATAGCAGTAGCTGAG---  
 GGGACAGATAGGGTTATAGAAGTATTACAAAGAGTTGGTAGAGCT-----  
 -----ATTCTCCACATA-----CCTACAAGAATAAGACAAGGCTTGGAAAGGCTTTTGCTA---TAA  
 >KT124778  
 -----GAA-----  
 GACAAGTTGTGGGTCACAGTCTATTATGGGGTACCTGTGTGG--AAAGATGCAAAAC---  
 ACCACTTTATTTTGTGCATCAGATGCTAAAGCATATGATACAGAG--GTACATAAT-----  
 -----GTTTGGGCCACA--CATGCCTGTGTACCCACAGAC---  
 CCCAACCACACAAGAAGTAGTATTGGGA-----AATGTGACAGAAAAATTTAAC-----  
 -----ATGTGGAAAAATAACATGGTAGAACAGATGCATGAGGATATA---  
 ATTAGTTTATGGGATCAAAGTCTA--AAGCCATGTGTAAAATTA---  
 ACCCCACTCTGTGTTACTTTAAATTGCATTGATACCAATACTACTAAAACCAAT-----  
 -----  
 -----AGTAGTATGGGGGAAATGATGGAGAAAGGAGAAATAAAA---  
 AACTGCTCTTTCAATATCACCATAAACAAATGG-----  
 GACAAGATGCAGAAAACATATGCACCT--TTTTATAAATCTGATGTAGTACCAATAAATGATACA-----  
 -----  
 -----  
 GGTAATTCTAGCTATAGGTTGATACAATGTAACACCTCAGTCATTACACAG---  
 GCCTGTCCAAAGGTATCCTTTGAGCCAATTCCCATACATTATTGTGCCCCGGCTGGTTATGCGATTATAAAGT  
 GTAAC--AATAAGCAGTTCAAT-----GGAACAGGACAATGTACAAAT-----  
 -GTCAGC--ACAATACAATGTACACATGGAATTAGGCCAGTAGTGTCAACT---  
 CAACTGCTGTTAAATGGCAGTCTAGCAGAAGAAGAG-----  
 ATAGTAATTAGATCTGAAAATTTCTCGAACAAAT-----GCTAAAACCATAATAGTACAGCTGAAG---  
 -----GAACCTGTACAA-----ATTAATTGTACAAGACCCAACAATAATACAAGAAGG---  
 -AGTATACATATA-----GGACCAGGGAGAGCA--TTT-----TATGCAACAGGAGAT-----  
 -----ATAATAGGACCCATA-----AGAAAAGCATATTGT--AACGTTAGTAAAACA---  
 AGATGGAATGACACTTTACAACAGGTAGCTACAAAATTAAGA-----GCACAATTTGGG---  
 -----AATAAAACAATAGTCTTTAAG-----  
 CACTCCTCAGGAGGGGACCCAGAAAGTGGTA--ATGCACAGTTTTTAATTGTGGAGGGGAA---  
 TTTAAACAGCTCCAGGCAAGAGTCCTGGCTGTGGAAAGATACCTAAAGGATCAACAGCTTCTAGGAATTTGGG  
 GTTGCTCTGGAAGAACTCATTGCAACCACTGCTGTGCCTTGGAAATGCTAGTTGGAGT-----  
 -----AATAAATCTATGGATGACATTTGG-----GGT-----  
 AACATGACCTGGATGGAGTGG--GAAAGAGAAATTGACAATTACACAGGCTTAATATAC---  
 ACCTTAATTGAAGAATCGCAGAACCAGCAAGAA-----  
 -----  
 AAGAATGAAC TAGAATTATTGGAATTAGATAAGTGGGCAAATTTGTGGAATTGGTTTGACATAACAAATTGGC  
 TGTGGTATATAAAAAATATTCATAATGATAGTAGGAGGCTTGATAGGTTTAAGAATAGTTTTTTACT---  
 GTGCTTTCTATAGTA-----AATAGAGTTAGGAAGGGATACTCACCA-----  
 TTATCATTTGCTGTTAGCTTGCTTAATGCTACAGCTATAGCAGTAGCTGAG---  
 GGAACAGATAGGGTTATAGAAGTAGCACAAGGAGCTTTTAGAGCT-----  
 -----ATTCTCCACATA-----CCTACACGAATAAGACAGGGCTTGGAAAGAGCTTTTGCTA---TAA  
 >DQ410562  
 GCT---GCA-----  
 GAACAATTGTGGGTCACAGTCTATTATGGGGTACCTGTGTGG--AAAGAAGCAACC---  
 ACCACTCTATTTTGTGCATCAGATGCTAAAGCATATGATACAGAG--ATGCATAAT-----  
 -----ATTTGGGCCACA--CATGCCTGTGTACCCACAGAC---  
 CCCAACCACACAAGAATTAGTATTGGAA-----AATGTGACAGAAGATTTTAAC-----  
 -----ATGTGGAAAAATAACATGGTAGAACAGATGCATGAGGATATA---

ATCAGTTTATGGGATCAAAGTCTA---AAGCCATGTGTAAAATTA---  
 ACCCCACTCTGTGTTACTTTGAATTGTAGTGATGTGGAGAATAGTACTATGACTAATAGTACTGGGACTAATG  
 CT-----  
 -----ACTAGTGCTAATAATATTACTATTAGTAAGGAGATGGAGGGGGAAATAAAA---  
 AACTGCTCTTTCAATATCACCACAAACATAAGG-----  
 GATAAGGTACAAAAGGATATGCATTC---TTTTATAACCTTGATGTAGTAAGAATAGATGATGAT-----  
 -----  
 -----  
 AGTAGTCAGGATAATACTAGTTATAGGTTGATAAGTTGTAATACCTCAGTCATTACACAA---  
 GCCTGTCCAAAGGTATCCTTTGAGCCAATTCCCATACATTATTGTGCCCCGGCTGGTTTTGCAATTCTAAAGT  
 GTAAT---GATAAGAAATTCAAT-----GGAACAGGACAAATGTAAAAAT-----  
 -GTCAGT---ACAGTACAATGTACACATGGAATTAGGCCAGTAGTGTCAACT---  
 CAACTGCTGCTAAATGGCAGTCTAGCAGAAGATGAG-----  
 GTAGTAATTAGATCTGAAAAATTTACAGACAAT-----GCTAAAACCATAATAGTGCAGCTAAAT-----  
 -----GAATCTGTAGTA-----ATTAATTGCATAAGACCCAACAACAATACAAGAAAA-----  
 -AGTATACATATG-----GGACCAGGGGGAGCA---TTT-----TATGCAACAGGACAA-----  
 -----ATAATAGGAAATATA-----AGACAAGCACATTGT---AATATTAATGAGACA---  
 ACATGGAATAACACTTTAAAAAAGGTAGCTGAAAAATTAAAA-----GAACAATTTAAT-----  
 -----GCAACAAAAGTTGTCTTTAAT-----  
 AAATCCTCAGGAGGGGACCCAGAAATTGTA---ATGCACAGTTTTAATTGTGGAGGAGAA---  
 TTTAAGCAGCTCCAGGCAAGAGTCCTGGCTGTGGAGAAATACCTAAAGGATCAACAGCTCCTAGGGATTTGGG  
 GTTGCTCTGGAAACTCATTTGCACCACTGCTGTGCCTTGAATACTAGTTGGAGT-----  
 -----AATAAAAGTTTGAATCAAATTTGG-----GAT-----  
 AACATGACCTGGATGCAGTGG---GAAAAAGAGATTGACAATTATACAGACACAATATAT---  
 AGATTAATTGAAATATCGCAAAACCAACAAGAA-----  
 -----  
 AAGAATGAACAAGAATTATTGGAATTGGATCAATGGGCAAGTCTGTGGAATTGGTTTGACATAACAAAGTGGC  
 TGTGGTATATAAAAAATATTCATAATGATAGTAGGAGGCTTGATAGGTTTAAGAATAGTTTTTTGCT---  
 GTGCTTTCTATAGTA-----AATAGAGTTAGGCAGGGATACTCACCA-----  
 TTATCGTTTGCTGTTAGCTTGCTTAACGCCACAGCCATAGCAGTAGCTGAG---  
 GGGACAGATAGGATCATAGAAATAGTACAAAGAATTTTATAGAGT-----  
 -----ATCCTCCATATA-----CCTACAAGAATAAGACAGGGCTTAGAAAGGGCTTTGCTA---TAA  
 >FJ469717  
 ACT---GCA-----  
 GGACAATTGTGGGTCACAGTCTATTATGGGGTACCTGTGTGG---AAAGAAGCAACT---  
 ACCACTCTATTCTGTGCCTCAGATGCTAAAGCATATGATACAGAG---GTACATAAT-----  
 -----GTTTGGGCCACA---CATGCATGTGTGCCACAGAC---  
 CCCAACCCACAAGAAATAGAATTGAAA-----AATGTGACAGAGAATTTTAAC-----  
 -----ATGTGGAATAATGACATGGTGGAAACAGATGCAGGAGGATATA---  
 ATTAGTTTATGGGACCAAAGCCTA---AATCCATGTGTAAAATTA---  
 ACCCCACTCTGTGTTACTTTACATTGCACTAATTATACCAGGAATCATAATAATAGCACTAGT-----  
 -----  
 -----GCTAATAGCACTAGGGTAGAAAATAAAGGAGAAATAAAA---  
 AACTGCTCTTTCAATACCACCACAGGCATAAGA-----  
 GATAAGATAAAGAAAGAACATGCACCT---TTTTATACAGATGATGTAGTACCAATAGAGGAT-----  
 -----  
 -----  
 AATAATGATAGTATTAGCTATAGGTTAATAAATTGTAATACCTCAGTCATTACACAA---  
 GCCTGTCCAAAGGTGTCTTTGAACCAATTCCCATACATTATTGTGCTCCAGCTGGTTTTGCGATGCTAAAAT  
 GTAAG---GATAAAAAATTCAAT-----GGAACAGGACCATGTAAAAAT-----  
 -GTCAGC---ACAGTACAATGTACACATGGAATTAGACCAGTAGTGTCAACT---  
 CAACTGTTATTAAATGGCAGTCTAGCAGAAAAAGAT-----  
 GTAGTAATTAGATCTGAAAAATTTACTGATAAT-----ACTAAAACATAATAGTACAGTTGAAC-----  
 -----AAAACGTACAA-----ATTACCTGTATAAGACCCAACAACAACACAAGAAAA-----  
 -AGTATAACTATA-----GGACCAGGGAGAAACA---TTC-----TTTGCAGCAGGAGAC-----  
 -----ATAATAGGAGATATA-----AGACAAGCATATTGT---AACATTAGTGAACA---  
 AAATGGAATGACACTTTAAAAACAGATAGTTATAAAATTAAAA-----  
 GAACAATTGGAGAAATTG-----GGAAT-----AAGACTAATAAGATTGCCTTTAAG-  
 -----CAATCCTCAGGAGGGGACCCAGAAATTGTA---ATACACAGTTTTAATTGTGGAGGGGAA---  
 TTTAAGCAGCTCCAGGCAAGAGTCCTGGCTGTGAAAAGATACCTAAGGGATCAACAGCTCCTAGGAATTTGGG

GTTGCTCTGGAAAGCTCATCTGCACCACTGCTGTGCCTTGAATGCTAATTGGAGT-----  
 -----GATAGATCTGTAGATGACATTTAG-----AAT-----  
 AACATAACCTGGATGCAGTGG---GAGAGAGAAATTGACAAATTACACAGAAATAATATAC---  
 AACTTAATTAAGAAATCGCAAACCAACAAGAA-----  
 -----  
 CAGAATAAAAAAGATTTATTAGAGTTAGATTCATGGGCAAATTTGTGGAATTGGTTTCACATATCAAACCTGGC  
 TGTGGTATATAAGAATATTCATAATGATAGTAGGAGGTTTAATAGGTTTAAAAATAGTTTTTTGCT---  
 GTACTTTCTATAGTA-----AATAGAGTTAGGCAGGGATACTCACCA-----  
 TTATCGTTTGCCATTAGCTTGTTCAATGCCACAGCTATAGCAGTAGCTGAA---  
 GGGACAGATAGGGTTATAGAAAATAGCAAGCAGAATTTTATAGAGCT-----  
 -----TTTCTCCACATA-----CCTAGAAGAATAAGACAGGGCTTAGAAAGG-----  
 >FJ469724  
 GCT---GCA-----  
 AATGATTTGTGGGTACAGTCTATTATGGGGTACCTGTGTGG--AAAGAAGCAACC---  
 ACCACTCTATTTTGTGCATCAGATGCTAAAGCATATGATAAAGAG---GCACATAAT-----  
 -----GTTTGGGCCACA---CATGCCTGTGTACCCACAGAC---  
 CCCAACCCACAAGAAATACTATTGGAA-----AATGTGACAGAAAATTTTAACT-----  
 -----ATGTGGAAAAATAACATGGTAGAACAAATGCATGAGGATATA---  
 ATCAGTTTATGGGATGAAAGCCTA---AAACCATGTGTAAAATTA---  
 ACCCCACTCTGTGTTACTTTAAATTGTACTGATGCCACTATTAGAAATGAAACTATTGAT-----  
 -----  
 -----AATGCTAGAGAGAACGGGACGAAGGTAGAAGAAATAAAA---  
 AATTGCTCTTTCTATGTCCCCACAAACATAAAA-----  
 GATAGGATGCGAAAGGTATATGCAACT---  
 TTTTATAAACTTGATCTAGAACCAATAGGTGATGATAGTGCTAGTAATACTAATAGT-----  
 -----  
 AGTAATAGTACCAGTAATAATAGTAGTAATTATACATTGATAAGTTGTAACACCTCAGTCATCACACAG---  
 GCCTGTCCAAAGATATCCTTTACGCCAATTCCCATACATTATTGTGCCCGGCTGGTTTTGCGCTTCTAAAGT  
 GTAAT---GATAAGAAGTTCAAT-----GGAACAGGACCATGTAAAAAT-----  
 -GTCAGC---ACAGTACAATGTACACATGGAATTAGGCCAGTAGTATCAACT---  
 CAACTACTGTTAAATGGCAGTCTAGCAGAA---GAG-----  
 GTAGTAATTAGATCTGAAAATCTCACGAAAAAT-----ACTAAAACCATAATAGTACAGCTGAAA---  
 -----GACCCTGTAAAA-----ATTAATTGCATAAGACCCGGCAACAATACAAGAAAA---  
 -AGTATACCTATG-----GGACCAGGGAGAGCA---TGG-----TTTGCAACAGGAGAC-----  
 -----ATAATAGGAGATATA-----AGACAAGCACATTGT---AACATTAGTGAAGCA---  
 GAATGGAATGACACTTTGAAACAGGTAGCTAAAAAATTAGGA-----GAACAATTGAAT---  
 -----ATTAAGACAATAATCTTTAAT-----  
 AACCCTCAGGAGGGGACCCAGAAATTGCA--ATGCACAGCTTTAATTGTGGAGGGGAA---  
 TTTAAGCAGCTCCAGGCAAGAGTCCTGGCTGTGGAAGATACCTAAAGGATCAACAGCTCCTGGGAATTTGGG  
 GTTGCTCTGGAAGAACTCATCTGCACCACTGCTGTGCCTTGAATACTAGTTGGAGT-----  
 -----AATAAATCTGTGCATGACATTTGG-----GAT-----  
 AACATGACCTGGATGGAGTGG---GAAAGAGAAATTAGCAATTACACAGACACAATATAT---  
 GACTTGATTGCAAAATCGCAGATTCAACAAGAA-----  
 -----  
 AAAAAATGAACAAGAATTATTGGAATTAGATAAAATGGGCAAACCTTGTGGAATTGGTTTGACATATCAAATTGGC  
 TGTGGTATATAAGAATATTCATAATGATAGTAGGAGGCTTGATAGGTTTAAGAATAGTTTTTTTCT---  
 GTGCTTTCTATAGTA-----AAGAGAGTTAGGCAGGGATACTCACCA-----  
 TTATCGTTTGCTGTTAGCTTGTACAACGCAATAGCCATCGCAGTAGCTGAG---  
 GGGACAGATAGGGTTATAGAAGTAGTACAAAGAGCTTTTAGGGCT-----  
 -----ATTCTCCATATA-----CCTACAAGAATAAGACAGGGTTTGGAAGAGCTTTTGCTA---TAA  
 >FJ653159  
 GCT---AAG---AAA-----GAA---GAA---GAG---  
 GAACAGTTGTGGGTTACAGTCTATTATGGGGTACCTGTGTGG--AAAGAAGCAACC---  
 ACCACTCTATTCTGCGCATCAGATGCTAAAGCATATAAGACAGAG---GTGCATAAT-----  
 -----GTATGGGCCACG---CATGCCTGTGTACCCACAGAC---  
 CCCAACCCACAGGAAGTGAACCTTGGCA-----AATGTGACAGAGAATTTTAACT-----  
 -----GTGTGGAAAAATAACATGGTTGAACAGATGCATGAGGATATA---  
 ATCAGTTTATGGGATCAAAGCCTA---AAACCATGTGTAAAGCTA---  
 ACCCCACTCTGTGTTACTTTAAATTGCATTAATGTTAATGTTACAAAGGGTAATTCACAAATGGTACT----  
 -----

-----GATCCCCTATATCCACTATACTGACAGAAACAAAAGGAGAAATAAAA---  
 AACTGCTCTTTCAATGTCACCGCAGGTATAAGG-----  
 GATAAGGTGCAGAAACAACATGCACTT---TTTTATAGCCTTGATGTAGTACCAATAGATAAT-----  
 -----  
 -----  
 AGCAACGACACCTATAGGTTGGTAAGTTGTAATACCTCAGTCATTACACAG---  
 GCCTGTCCAAAGATATCCTTTGAGCCAATTCCCATACATTTTTGTGCCCCAGCTGGTTTTGCAATTCTAAGGT  
 GTAAT---AATGAGACGTTCAAT-----GGAACAGGACCATGTACAAAT-----  
 -GTCAGC---ACAGTACAATGTACCCATGGGATTAGGCCAGTAGTGTCAACT---  
 CAACTACTGTTAAATGGTAGTCTATCAGAAGGGGAG-----  
 GTAATGATTAGATCTGAAAATTTCAACAAACAAT-----GCTAAAACCATAATAGTGCAGCTAAAT----  
 -----GAAATTGTACAG-----ATTAATTGTAGCAGACCCAACAACAATACGAGAAAA-----  
 -GGCATACATATA-----GGACCAGGGAGAGCA---TTT-----TATACCACAGGAGAC-----  
 -----ATAATAGGAGACATA-----AGAAAAGCACATTGT---AATATTAGTAGAGGA---  
 CAATGGAATAACACTCTAAAAAAGATAGTTATAAAATTAAGA-----GAGCAATTTGGG----  
 -----AATAAGACAATAAGCTTTAAT-----  
 CAATCATCAGGAGGGGACCCAGAAATTGTA--ATGCACAGTTTCAATTGTGGAGGGGAG---  
 TTCAAGCAGCTCCAGGCAAGAGTCCTGGCTGTGGAAAGATACCTAAAGGATCAACAGCTCCTAGGGATTTGGG  
 GTTGCTCTGGAAACTCATTTGCACCACTACTGTGCCTTGGAAATAAACTTGGAGC-----  
 -----AAGAAATCTTATAATGAGATTTGG-----GAT-----  
 AACATGACCTGGATGCAGTGG---GAAAAGAAATTGACAAATTACACAGACTTCATATAC---  
 TCCTTAATTGAAGATGCACAGAACCAACAAGAA-----  
 -----  
 AAGAAATGAGCAAGACTTATTAGCATTAGATAAGTGGGCAAGTCTGTGGAATTGGTTTAACATAACAACTGGC  
 TGTGGTATATAAAAATATTACATAAATAGTAGGGGGTTGATAGGTTTAAGAATAGTTTTTTACT---  
 GTATTTGCTATAATA-----AATAGAGTTAGGCAGGGATACTCACCC-----  
 TTGTCATTTGCTATTAGCTTGCTCAACGCCACAGCCATAACAGTAGCTGAA---  
 GGGACAGATAGGATTATAGAAGTATTACAAAGATTTGGTAGAGCT-----  
 -----ATTATTCACATA-----CCTAGAAGACTAAGACAGGGCTTAGAAAGGGCTTTGCTA---TAA  
 >FJ653573  
 GCT---GCA-----  
 GAAAACTTGTGGGTCACAGTATATTATGGAGTACCTGTGTGG---AAAGAAGCAAAC---  
 ACCACTCTCTTTTGTGCATCAGATGCTAAAGCATATGAGACAGAG---AAGCATAAT-----  
 -----GTCTGGGCCACA---CATGCCTGTGTACCCACAGAT---  
 CCCAACCCACAAGAAATAGTAATGGGA-----AATGTGACAGAAAATTTTAAC-----  
 -----ATATGGAAAAATAACATGGTAGATCAGATGCATGAGGATATA---  
 ATTAGCTTATGGGATCAAAGCTTA---AAGCCATGTGTAAAATTA---  
 ACCCCACTATGTGTTACTCTAAATTGCACTGATAAGTTGAGTACTACTGGGAATAATACT-----  
 -----  
 -----GTGGAAAAGAATGATACTAATATGGGAGAAATAAAA---  
 AACTGCTCTTTCAATATTACCACAGGCATAAGA-----  
 GATAAGGTGCAGAAAGAATATGCTCTT---TTATATAAACTTGATGTAGTACCAATAGAGGATAGTGGAAC-  
 -----  
 -----  
 AATAGTGATAGTAACCTATAGTAGCTATAGGTTGATAAACTGTAATACCTCAGTCATTACACAA---  
 GCCTGTCCAAAGGTATCTTTTGAGCCAATTCCCATACATTTGTGCCCCGGCTGGTTTTGCGATTCTAAAGT  
 GTAAT---GATAAGATGTTCAAT-----GGATCAGGACCATGTACAAAT-----  
 -GTCAGC---ACAGTACAATGTACACATGGAATTAGGCCAGTAGTGTCAACT---  
 CAATTGCTGCTAAATGGCAGCCTAGCAGAAGAAGAT-----  
 GTAGTAATTAGATCTGAAAATATCACAACAAT-----GCTAAAACCATAATAGTACAGCTGAAA----  
 -----GAAACTGTAGAA-----ATTAATTGCACAAGACCCAACAACAATACAAGAAAA-----  
 -GGTATACATATA-----GGACCAGGGAGAGCA---TTT-----TTTGCAACAGGAGAT-----  
 -----ATAATAGGAGATATA-----AGACAAGCATATTGT---AACATTAGTAGAGCA---  
 GAGTGGAATGACACTTTAAAACAGGTAGTGAACAAATTAAGA-----GAGAAATTTAAG----  
 -----AATAAAACAATAGCCTTTAGA-----  
 CCATCCTCAGGAGGGGACATAGAAATTGTG---ACTCACAGTTTTTAATTGTGGAGGGGAA---  
 TTCAAACAGCTCCAGGCAAGAGTCCTGGCTGTGGAAAGATACCTAAGGGATCAACAGCTCCTAGGGATTTGGG  
 GTTGCTCTGGAAACTCATCTGCACCACTAATGTGCCTTGGAACTCTAGTTGGAGT-----  
 -----AATAGATCTCTGAGTGAGATTTGG-----GAT-----  
 AACATGACCTGGATGGAGTGG---GAAAGAGAAATTGACAAAGATCTGCAGGTAATATAT---

AACTTACTTGAAGTATCACAAAACCAGCAAGAA-----  
-----  
AAGAATGAACAAGAATTATTAGAAATTGGATAAGTGGGCAAGTTTGTGGAATTGGTTCAGCATAACAAATTGGC  
TGTGGTATATAAAAATATTTCATAATGATAGTAGGAGGCTTGATAGGTTTAAGAATAGTTTTTTGCT---  
GTGCTTTCCATAGTA-----AATAGAGTTAGGCAGGGATATTCACCA-----  
TTGTCTGTTTGCTGTTAGCTTGCTTGATACCACAGCAATAGCAGTAGCTGAG---  
GGGACAGATAGGATTATAGAAGGATTAAGAACAATTGTTAGAGCT-----  
-----TTTCTCCACATA-----CCTAGAAGAATAAGACAGGGTTTGGAAGGGCTTTGCTA---TAA  
>EU578629  
GCT---GTA-----  
GAACAAACGTGGGTCACAGTCTATTATGGGGTACCTGTGTGG---AAAGAAGCAAGC---  
ACCACTCTATTTTGTGCCTCAGATGCTAAAGCATATGACACAGAG---GCGCATAAT-----  
-----GTCTGGGCCACA---CATGCCTGTGTGCCACAGAC---  
CCCAGCCCACAAGAAGTAAAATTGGAA-----AATGTGACAGAAAATTTTAAT-----  
-----ATGTGGAAAAATGACATGGTAGAACAGATGCATGAGGATATA---  
ATCAGTTTATGGGATCAAAGCCTA---AAGCCATGTGTGAAAATA---  
ACCCCACTCTGTGTTACTCTAAATTGCACTCACAAAATTAGCGTTAAAAATGTAACCTTAC-----  
-----  
-----AGCACTAATCTGAAAAATATTACTGAAGATATGAAA---  
AACTGCTCTTTCAATACCACCACAATCTTAAGA-----  
GATAAGGTGACAAAAGAATATGCGCTA---TTTTATAAATCTGATGTAGTACCATTAGATAAT-----  
-----  
-----  
GATAATACCAGCTATAGATTGATAAATTGTAACACCTCAACCATTACACAG---  
GCCTGTCCAAAAATATCCTTTGAGCCAATTCCCATACATTATTGTGCCCGGGCTGGTTTTGCGATTCTAAGAT  
GTAAC---AATAAGACATTCACT-----GGAAAGGGACCATGTACAAAT-----  
-GTCAGC---ACAGTACAATGTACACATGGAATTAGGCCAGTAGTATCAACT---  
CAACTGCTGCTAAATGGCAGTCTAACAGGAGAAGAG-----  
ATAGTAATTAGATCTGACAATTTTACAGACAAT-----GCTAAACCCATAATAGTACATCTGAAT-----  
-----GAATCTGTAGAA-----ATTAATTGTACAAGACTCAGCAACAATACAAGAAAA-----  
-GGTGTACATTTG-----GGACCAGGGAGCGCA---ATG-----TATGCAACAGGAGAA-----  
-----ATAATAGGAGATATA-----AGACAAGCACATTGT---AACATTAGTGAAGCA---  
AAATGGAATAACACTTTAAGACAGATAGCTAAAAAATTAGGA-----GAACAATATGGG-----  
-----AATAATAAAACAATAATCTTTACT-----  
AATTCCTCAGGAGGGGACCCAGAAATTGTA---ATGCACACTTTTAATTGTGGAGGGGAG---  
TTTAAGCAGCTCCGGGCAAGAGTCCCTGGCTGTGGAAAGATACCTAAAGGATCAACAGCTCTTAGGGATTTGGG  
GTTGCTCTGGAATCTATTTGCACCACTTCTGTGCCTTGGAATGCTAGTTGGAGT-----  
-----AATAAATCTTTGAATGACATTTGG-----GAG-----  
AACATGACCTGGATGGAGTGG---GACAGAGAAATTAGCAATTACACAGGTTTAATATAC---  
TCCTTAATTGGAGAAGCACAAATCCAGCAAGAA-----  
-----  
AAGAATGAACAAGAATTATTGGAATTGGATAAATGGGCAAGTCTGTGGAATTGGTTTGACATATCAAACCTGGC  
TGTGGTATATAAAAATATTTCATAATGATAGTAGGAGGCTTGATAGGTTTAAGAATAATTTTTACT---  
GTGCTTGCTATAGTG-----AATAGAGTTAGGAAGGGATACTACCA-----  
TTATCATTTGGCTGTTAGCTTGCTTAATGCCATTGCCATAGCAGTAGCTGAG---  
GGGACAGATAGGGTTATAGAATTAGGACAAAGAGCTGGTAGAGCT-----  
-----GTCCTCCACATA-----CCTAGAAGAATAAGACAGGGCGCGGAAAGGGCTTTGGTA---TAA  
>HQ217860  
GCT---GAT-----  
GAAAAATTGTGGGTCACAGTCTATTATGGGGTGCCTGTGTGG---AAAGACGCAGCC---  
ACCACTCTATTTTGTGCATCAGATGCTAAATCATATGATACAGAG---GTACATAAT-----  
-----GTTTGGGCCACA---CATGCATGTGTACCCACAGAC---  
CCCAACCCACAAGAAGTAGTATTGGAG-----AATGTGACAGAACCTTTTAAC-----  
-----ATGTGGAAAAATAATATGGTAGATCAGATGCATGAAGATATA---  
ATCAGTTTATGGGATCAAAGCCTA---AAGCCATGTGTAAAATTA---  
ACCCCACTCTGTGTTACTTTAAATTGTACTAATTACAATAATACGAGGGATGGTACTACGACCACTAGTCTCTG  
CT-----  
-----AATAATACCACTAGTTATATCTGGGGGGAAGAGATGAAAGAAGGAGAAATAAAG---  
AATTGTTCTTTCAATGTCAACCACAAACATAGTA-----  
GATAAGATAGAGAAACAATATGCACTT---TTTTATGAAGTTGATGTGGTGCCAATAGAAGAT-----

-----  
-----  
AGTAATAATAGTACCCATAACCAGCTATAGGTTAATAAGTTGTAACACCTCTGTCAATTACACAA---  
GCTTGTCCAAAGGTATCCTTTGAGCCAATTCCCATACATTATTGTGCCCCGGCTGGTTTTGCGATTCTAAAGT  
GTAAT---AACAAAACATTCAAT-----GGAAAAGGACCATGTAAAAAT-----  
-GTCAGC---ACAGTACAATGTACACATGGAATTAAGCCAGTAGTATCAACT---  
CAACTGTTGTTAAATGGCAGTCTAGCAGAAGAAGAG-----  
GTAGTAATTAGATCTGACAATTTACAGACAAT-----GCTAAAACCATAATAGTACAGCTGAAT----  
-----GAAACTGTACAA-----ATTCAGTGTGTAAGACCCAACAACAATACAAGAAAA-----  
-GGTATACATATA-----GGACCAGGGAGAGCA---TTT-----TATGCAGCAGGAGAA-----  
-----ATAATAGGAAATATA-----AGACGAGCATATTGT---AACATTAGTGAAGCA---  
AGTTGGAATAACACCTTACACAAGATAGCTAAAAAACTAAAT-----GAACAATTT-----  
-----AATAAAACAATAGTCTTTAAT-----  
CAATCCTCAGGGGGGGACCCAGAAAGTTGTA---ATGCACATTTTTAATTGTGGAGGGGAA---  
TTTAAACAGCTCCAGGCAAGAGTCCTGGCTGTAGAAAAGATACTTAAAGGATCAACAGCTCCTGGGGATTG  
GTTGCTCAGGAAACTCATTTGCACCACCTCTGTGCCTTGGAACCTAGTTGGAGT-----  
-----AATAGATCTCTGAATTACATTTGG-----CAG-----  
AACATGACCTGGATGCAGTGG---GAAAAAGAAATTGACAAATTACACAAACATAATATAC---  
AACTTAATTGAAGAATCGCAAAACCGACAAGAA-----  
-----  
AGCAATGAAAAGGAATTATTAGAGTTAGATAAAATGGGCAAGTTTGTGGAATTGGTTTGACATAACAACTGGC  
TGTGGTATATAAAAATATTACATAATGATAGTAGGAGGCTTGATAGGTTTAAGAATAGTTTTTACT---  
GTACTTTCTATAGTG-----AATAGAGTTAGGCAGGGATACTCACCA-----  
TTATCGTTTGTCTGTTAGCTTGCTCAACGCTATAGCCATAGCAGTAGCTGAG---  
GGAACAGATAGGGTTATAGAAGTATTACAAAGAGCTCTTAGGGCT-----  
-----ATTCTCCACATA-----CCTAGAAGAATAAGACAGGGCTTAGAAAGGGCTTTGCTA---TAA  
>JF689865  
GCA---GAA-----  
CAATTGTGGGTCACAGTCTATTATGGGGTACCTGTGTGG---AAAGAAGCAAAT---  
ACTACTCTATTTTGTGCATCAGATGCTAAAGCATATGATACAGAG---GTACATAAT-----  
-----GTTTGGGCCACA---CATGCCTGTGTACCCACAGAC---  
CCCAACCCACAAGAAGTAGTATTGGGA-----AATGTGACAGAAAATTTAAT-----  
-----ATGTGGAAAAATAACATGGTAGAACAAATGCATGAGGATATA---  
ATTAGTTTATGGGATCAAAGCCTA---AAGCCATGTGTAAAATTA---  
ACCCCACTCTGTGTTACTTTAGATTGCATTGATCCAACGAATAATGTTACTAAT-----  
-----  
-----ATCACGGGTGTTATAGAGAGGGGGGAAATAAAA---  
AATTGCTCTTTCAATGTCACTACAAGCATAAGA-----  
GATAAGATGCAGAAAGCATTTGCAACT--TTTAATAGACTTGATATAGTACCAATAGAAGGT-----  
-----  
-----  
AGCAATAATAGCTATAGGTTGATAAGTTGTAATACCTCAGTCATTACCCAG---  
GCCTGTCCAAAGGTATCCTTTGAGCCAATTCCCATACATCTTTGTGCCCCGGCTGGTTTTGCGATTCTAAAGT  
GTAAT---GATAAGAAATTCAAT-----GGAACAGGACCATGTAAAAAT-----  
-GTCAGC---ACAGTACAATGCACACATGGAATTAAGCCAGTGGTATCAACT---  
CAACTGCTGTTAAATGGCAGTCTAGCAGAAAAAGAA-----  
ATAGTAATTAGGTCCGCAATCTCACGGACAAT-----ACTAAAACCATAATAGTACAGCTAAAT----  
-----AAGTCTGTAGTA-----ATAAATTGTACAAGACCCAATAACAATAACAAGGAAG-----  
-AGTATACATATA-----GGACCAGGCAGAGCA---TTT-----TATGCAACAGGAGAC-----  
-----ATAATAGGAGATATA-----AGACAGGCACATTGT---AATCTGAGTAGAGCA---  
AATTGGAATAACACTTTAGGAAAGATAGCTATAAAATTAAGA-----GAACAATTC-----  
-----AATAAAACAATAGTCTTTAAT-----  
CATTCTCAGGAGGGGACCCAGAGATTGTA---ATGCTCAATTTAAATTGTGGAGGGGAA---  
TTTAAGCAGCTCCAGGCGAGAGTCCTGGCTGTGGAAAAGATACCTACAGGATCAACAGCTCCTGGGAATTTGGG  
GTTGCTCTGGAAACTCATTTGCACCCTACTGTGCCTTGGAATGCTAGTTGGAGT-----  
-----AATAAACTATAAAGTATATTTGG-----GAT-----  
AACATGACCTGGATGCAGTGG---GAAAAAGAAATTGAGAATTACACAGGCATAATATAC---  
AACTTAATTGAAGAATCGCAAAACCAACAAGAA-----  
-----  
AAGAATGAACATGAATTATTGGAATTAGATAAAATGGGCAAGTTTGTGGAATTGGTTCAACATAACAACTGGC

TGTGGTATATAAAAATATTCATAATGATAGTAGGAGGCTTGATAGGTTTAAGAGTAGTTTTTACT---  
GTA CTTTCTATAGTG-----AATAGAGTTAGGCAGGGATACTCACCA-----  
TTATCGTTTCGCTGTTAGCTTGCTCAATACCATAGCCATAGCAGTAGCTGAG---  
GGAACAGATAGGGTTATAGAAGCAATACAAAGAGTTTTTTAGAGCT-----  
-----ATTCTCCACATA-----CCTACAAGAATAAGACAGGGCTTAGAACGGGCTTTGCTA--TAA  
>JF689874  
GCT---AAA-----  
GAAAAATTTGTGGGTCACAGTCTATTATGGGGTACCTGTGTGG--ARGGAAGCAACT---  
ACCACTCTATTTTGTGCATCAGATGCTAAAGCATATGATACAGAG--GTACATAAT-----  
-----GTTTGGGCTACA--CATGCCTGTGTACCCACAGAC---  
CCCAACCCACAAGAAATAGTAATGGAA-----AATGTGACAGAAAATTTTAACT-----  
-----ATGTGGAAAAATCCTATGGGTAGAACAGATGCATGAGGATGTA---  
ATCAGTTTATGGGATCAAAGCCTA--AAGCCATGTGTAAAATTA---  
ACTCCACTATGTGTTACTTTAAATTGCACTGATTTGAAGACTAATACCAGTAAATTGAAGAGTAATACT----  
-----  
-----ACTAACACTAATAGTAGCGGGGGAACGGTAGAGGAAGAAGAAATGAAA---  
AATTGCTCTTTCAATGTCAACCACAAATGTAAAA-----  
GATAAGGTGAGAAAAGAATATGCACCTT--TTGTATAAACTTGATATAACACCAATGGATGAT-----  
-----  
-----  
GATAATACTAGCTATAGGTTGATAAGTTGTAACACCTCAGTCCTTACACAG---  
GCTTGTCCAAAAATATCCTTCGAGCCAATTCCCATACATTATTGTGCCCGGCTGGTTTTGCGATTCTAAAGT  
GTAAT--GATAAGAAGTTCAAT-----GGAACAGGATTATGTAAAAAT-----  
-GTTAGC--ACAATACAATGCACACATGGAATTAGGCCAGTGGTGTGCGACT---  
CAACTGCTGTTGAATGGCAGTCTGGCAGAAGAAGGG-----  
GTAGTAATTAGATCTGAAAATATCACGGACAAT-----GCTAAAACCATAATAGTACACTTGAAT----  
-----GAATCTGTAGAA-----ATTAATTGTACAAGACCTAACAACAATACAAGAAGA-----  
-AGTATATCTATA-----GGACCAGGGAGAGCA--TTT-----TTCGCAACAGGAGAA-----  
-----ATAATAGGAGATATA-----AGGCAAGCACATTGC--AATATTAGTAAAGCA---  
CAATGGAATAAACTTTGACACAGGTAGCTAGCAAATTAATA-----GACTATTTGGA---  
-----AATAAAACAATAATCTTTAAT-----  
CACTCCTCAGGAGGGGACCCAGAAATTACA--ATGCACAATTTTAATTGTGGAGGGGAA--  
TTTAAACAGCTCCAGGCAAGAGTCCCTGGCTGTGGAAAGATACCTACGGGACCAACAGCTCCTGGGGATTTGGG  
GTTGCTCTGGAAGAACTCATCTGCACCACTAATGTGCCTTGGAAATGCTAGTTGGAGC-----  
-----AATAAATCACAGGATATGATTTGG-----AAC-----  
AGCACGACCTGGATGCAGTGG--GAAGAAGAAATTGACAATTACACAGGCTTAATATAC--  
TCCCTACTTGAAGAATCGCAAACCCAGCAAGAA-----  
-----  
AAGAATGAACAAGAATTATTGGGATTAGATAAATGGGCAAGTTTGTGGAGTTGGTTTGACATAACAAATTGGC  
TGTGGTATATAAAGATATTATAATGATAGTAGGAGGCTTGATAGGTTTAAGAATAGTTTTTTATG--  
GTA CTTTCTATAGTA-----AATAGAGTTAGGCAGGGATRCTCACCT-----  
TTATCGTTTGTCTGTTAGCTTGCTTAGTGCCACAGCCATAGCAGTAGCTGAA---  
GGGACAGATAGGATTATAGAAGCAGTACAAAGAGCTTGGAGAGCT-----  
-----TTTCTCCACATA-----CCTAGAAGAGTCAGACAGGGCTTGGAAAGGGCTTTGCTA--TAA  
>JF689875  
GCT---GCA-----  
GAAGATTTGTGGGTCACAGTCTATTATGGGGTACCTGTATGG--AAAGAAGCAAAA---  
ACCACTCTATTTTGTGCATCAGATGCTAAAGCATATGATACTGAA--GCACATAAT-----  
-----GTTTGGGCCACA--CATGCTTGTGTACCCACAGAC---  
CCCAACCCACAAGAAGTAGTATTGGAA-----AATGTGACAGAAAATTTTAACT-----  
-----ATGTGGAAAAATAACATGGGTAGAACAGATGCATGAGGATATA---  
ATCAGTTTATGGGATCAAAGCCTA--AAGCCATGTGTAAAATTA---  
ACCCCACTCTGTGTCACTTTAAATTGCACTGATTGGAATGTACCACTAATAAT-----  
-----  
-----AGCAAGGAAAAATTAAGGGAAAAAGAAATGAAA---  
AATTGCTCTTTTGTATGTCAACCCCAAGCATAAAA-----  
GATAAAAAGCAGAGAGAATATGCACCTT--TTTTATAAACTTGATGTAACACAAATAGGAGGA-----  
-----  
-----  
GATAATACTAGCTATAGGTTAATAAGTTGTAACACCTCAGTCCTTACACAG---

GCCTGTCCAAAGATATCCTTTGAGCCAATTCCCTATACATTATTGTGCCCCGGCTGGTTTTGCGATTCTAAAGT  
 GTAAT---GATAAGAAGTTCAAT-----GGAACAGGACCATGTACAAAT-----  
 -GTCAGC---ACTGTACAATGTACACATGGGATTAGGCCAGTGGTGTCAACT---  
 CAACTACTGTTTAAATGGCAGCCTAGCAGAAGAAGAG-----  
 ATAGTAATTAGATCTGAAAATTTACGCGATAAT-----GTTAAAAGCATAATAGTACAGCTGAAT----  
 -----AAATCTATAGAA-----ATTAATTGTACAAGACCTGGCAACAATACAAGAAAA-----  
 -AGTATACATATA-----GGACCAGGGAGAGCA---TTT-----TATGCAACAGGAGGA-----  
 -----ATAATAGGAGATACA-----AGGCAGGCACATTGT---ACCATTAGTGGGGCA---  
 GATTGGAATAATACTTTAAAACAGATAGTTGACAAATTAAGA-----GAACAAAAACAATTT-  
 -----GAGAATAAAACAATAAATTTTAAT-----  
 TCATCCTCAGGAGGGGACCCAGAAATTGTA---ATGCACAGTTTTAATTGTGGAGGGGA----  
 TTTAAGCAGCTCCAAGCAAGAGTCCTAGCTGTAGAAAAGATACCTACAGGATCAACAGCTCCTTGGGATTTGGG  
 GTTGCTCTGGAAGAACTCATCTGCACCACAACCTGTGCCTTGGAACTAGTTGGAGT-----  
 -----AATAAATCTCTGGATAAAATTTGG-----CAT-----  
 AACATGACCTGGATGGAGTGG---GAAAGAGAAATTGACAAATTACACAGACTACATATAC---  
 ATCTTACTTGAAAAATCGCAGAACCAGCAGGAA-----  
 -----  
 AAGAATGAACAGGAATTATTGGAATTGGATAAATGGGCAAGTTTGTGGAATTGGTTTGACATAACACACTGGC  
 TGTGGTATATAAAAATATTGATAATGATAGTAGGAGGCTTGGTAGGTTTAAGAATAGTTTTTTATT---  
 GTACTTTCTGTAGTG-----AATAGAGTTAGGCAGGGATACTCACCA-----  
 TTATCGTTTCGCTGTTAGCTTGCTCAATGCCACAGCCATAGCAGTAGCTGAG---  
 GGGACAGATAGGGTTATAGAAGTATTACAAAGAGCTTGTAGAGCT-----  
 -----ATTCTCCATATA-----CCTAGAAGAATAAGACAGGGCTTGGAAGGGCTTTGCTA---TAA  
 >JX863990  
 GCT---ACA-----  
 GAACAATTGTGGGTCACAGTCTATTATGGGGTACCTGTGTGG---AAAGAAGCAACC---  
 ACCACTCTATTTTGTGCATCAGATGCTAAGGCATATGATACAGAG--ATACACAAT-----  
 -----GTTTGGGCCACA---CATGCCTGTGTACCCACAGAC---  
 CCCAACCCACAAGAAGTAGTATTGGAA-----AATGTGACAGAAAATTTTAAC-----  
 -----ATGTGGAATAATGACATGGTAGAACAGATGCATGAGGATATA---  
 ATCAGTTTATGGGACCAAAGCCTA---AAGCCATGTGTGAAATTA---  
 ACCCCACTCTGTGTTACTTTAAATTGCACTAATGTCTTGAGGAATGCTACTAATACCAATAGTACCAGTGAGC  
 AGAATATTACT-----  
 -----AGTGCCRCTAATAATAGTTGGATAGGGACAGAAATGAAA---  
 AATTGCTCTTTCAATGTCACCACAGAAATAAGA-----  
 GATAAGATGAAGAAAGAATATGCACTT---TTTTATAAACTTGACATAGTATCAATGAATAATGGTGAG---  
 -----  
 AATAATAATAGTAATAGTTATAGGTTGATAAATTGTAACACCTCAAGCCTTACACAA---  
 GCCTGTCCAAAGGTATCCTTTGAGCCAATTCCCATAACATTATTGTGCCCCGGCTGGTTTTGCGATTCTAAAGT  
 GTAAT---GATAAGACGTTCAAT-----GGAACAGGATCATGTACAAAT-----  
 -GTCAGC---ACAGTACAATGTACACATGGAATTAAGCCAGTAGTGTCAACT---  
 CAACTGCTGTTTAAATGGAAGCCTAGCAGAAAATGAA-----  
 ACAGTAATTAGATCTGCCAATTTCTCAGACAAT-----GCTAAAACCATAATAGTACAGCTGAAG---  
 -----ACACCTGTAAAA-----ATTAATTGTACAAGACCCGGCAACAATACAAGAAAA-----  
 -AGTATACATATA-----GCACCAGGGAGAGCA---TTT-----TATGCAACAGGAGAT-----  
 -----ATAATAGGAGATATA---AGACAAGCACATTGT---AACATTAGTAAACA---  
 GAATGGGAGAAAACTTTACAAGAGGTAGCTAAAAAATTAAAA-----GAACAATATGGG---  
 -----GAAAATAAAACAATAGCCTTTAAT-----  
 CAATCCACAGGAGGGGACCCAGAAATTGTA---ATGCACAGTTTTAATTGTGGAGGGGAG---  
 TTTAAGCAGCTCCAGGCAAGAGTCCTGGCTGTGGAAAAATACCTAAAGGATCAACAGCTCCTAGGGATTTGGG  
 GTTGCTCTGGAAGAACTCATTTGCACCACCTCTGTGCCTTGGAAATGCTAGTTGGAGT-----  
 -----AATAAACTCAGGAGGAGATTTGG-----GGA-----  
 AACATGACCTGGATGCAATGG---GAAAGAGAAATTGACAAATTACACAAGTGAAATATAC---  
 AACTTAATTGAGATAGCACAAAACCAGCAAGAA-----  
 -----  
 AAGAATGAACAAGAATTGTTGGCATTAGATCAATGGGCAAATTTGTGGAATTGGTTTGACATAACAAAGTGGC  
 TGTGGTATATAAAAATATTGATAATGATAATGGGAGGCTTGATAGGTTTAAGAATATTTTTTTGCT---  
 GTAATTTCTATAGTA-----AATAGAGTTAGGCAGGGATACTCACCA-----  
 TTATCGTTTGTGCTGTTAGCTTGCTCAACGCCACAGCCATAGCAGTAGCTGAG---

GGAACAGATAGGATCATAGAAATAGTACAAAGATTTTTTTAGGGCT-----  
-----ATCCTTCATATA-----CCTACAAGAGTGAGACAAGGCTTAGAAAGGGCTTTACTA---TAA  
>JF320363  
GCT---GCA-----GAGAAA---  
TGGGTCACAGTCTATTATGGGGTACCTGTGTGG--AAAGAAGCGACC---  
ACCACTCTCTTTTGTGCATCAGATGCTAAAGCATATGTTGCAGAG--GCACATAAT-----  
-----GTTTGGGCCACT---CATGCCTGTGTACCCACAGAC---  
CCCAACCCACAAGAAGTAGAATTGGTA-----AATGTGACAGAAAATTTTAAC-----  
-----ATGTGGAGAAATGACATGGTAGAACAGATGCATGAGGATATA---  
ATCAGTTTATGGGATCAAAGCCTG--AAGCCATGTGTAAAATTA---  
ACCCCACTCTGTGTTACTTTAAATTGCACTAATGTGACTGTGACTACTAATGAGACTGCTAATACC-----  
-----  
-----ACTATTAGTCCAGAGGAAATGATGGCAAGAGAAGAAATAAAA---  
AACTGCTCTTTCAATATCACCACAAGCATAAAA-----ACTAAGGTG---  
CAAGAATATGCATTA---TTTTATAAAATTGATATAGCACCAATAAATAAACAGCTCT-----  
-----  
---AATACCAACTATACCAACTATAGGTTGATAAGTTGTAACACCTCAGTCATTACACAG---  
GCCTGTCCAAAGGTATCCTTCGAGCCAATTCCCATACATTATTGTGCCCGGCTGGATTTGCGATTCTAAAGT  
GTAAT---GAAAAGGGATTCAAG-----GGAACAGGACCATGTAAAAAT-----  
-GTCAGT---ACAGTACAGTGTACACATGGAATTAGGCCAGTAGTATCAACT---  
CAACTGATGTTAAATGGCAGTCTAGCAGAAGGAGAG-----  
GTAGTAATTAGATCTGAAAATTTACAAACAAT-----GCTAAAACCATAATAGTACAGCTGAAC---  
-----GAAACTGTACAA-----ATTAATTGTACAAGACCCAACAACAATACAAGGAAA-----  
-GGTATACATATG-----GGACCAGGGAAAAACA---CTT-----TATGCAACAGGAGCA-----  
-----ATAATAGGAAATATA-----AGACGAGCACATTGT---AATATTAGTAAAAACA---  
AAATGGAATAACACTTTACAACAGGTAATTGCAAAATTAATA-----GAACAATATAAT---  
-----AATAAACTATACTCTTTAAT-----  
CAATCCTCAGGGGGAGACCCAGAAATTGAA--ATGCACAGTTTTAATTGTGGAGGGGAA--  
TTTAAGCAGCTCCAAGCAAGAATCCTGGCTGTGGAAAGATACCTACAGGATCAACAGCTCCTGGGAATTTGGG  
GTTGCTCTGGAAACTCATTTGCACCACTGCTGTGCCTTGGAAATGATAGTTGGAGT-----  
-----AATAAATCTCTGGATTATATTTGG-----AAT-----  
AACATGACCTGGATGGAGTGG--GAAAGAGAAGTTAATAATTACACAGGCTTAATATAC---  
ACCTTAATTGAAGACTCGCAATCCAACAAGAA-----  
-----  
AGGAATGAAAAAGATTTATTGGAATTAGATAAATGGGCAAGTTTGTGGAATTGGTTCGACATATCAAAGTGGC  
TGTGGTATATAAAAAATATTACATAATGATAGTAGGAGGCTTAGTAGGTTTAAAGAATAGTTTTTCTT---  
GTACTTTCTATAGTA-----AATAGAGTTAGGCAGGGATATTCACCA-----  
TTATCGTTGGCTGTTAGTTTGCTTAATTTACAGCTATAGCAGTAGCTGAG---  
GGGACAGATAGGGTTATAGAAATAGTACGAAGAAGTTTAGGGCT-----  
-----ATCCTCCACATA-----CCTAGAAGAATAAGACAGGGCTTAGAAAGGATTCTGATA--TAA  
>JF320036  
GCT---ACA-----  
GAAAAATTGTGGGTCACAGTCTATTATGGGGTACCTGTATGG--AAAGAAGCCACT---  
ACCACTCTATTTTGTGCATCAGAGGCTAAAGCATATGATACAGAG--GTACATAAT-----  
-----GTTTGGGCTACA---CATGCCTGTGTGCCACAGAT---  
CCCAACCCACAAGAAGTAGTATTGGAA-----AATGTGACAGAAAATTTTAAC-----  
-----ATGTGGAAAAATAACATGGTAGACCAGATGCATGAGGATATA---  
ATCAGTTTATGGGATCAAAGCCTA--AAGCCATGTGTAAAATTA---  
ACCCCACTCTGTGTTACTTTAAATTGCACTGATTATTTGAATAATACTACTAAGACTACCAATAATACTGAG-  
-----  
-----GCTACCAATACTAGTAGCGGGGAAAAGATGGAGCAAGGGGAAATAAAA---  
AACTGCTCTTTCAATATCACCACAAACATAGGA-----  
GATAAGAGGCAGAAAGAATATGCATTG--TTTTATAAACTTGATGTAGTACCAATAGATAAGGTT-----  
-----  
-----  
GATAATACTAGCTATAGGTTGATAAATTGTAATACCTCAGTCATTACACAG---  
GCCTGTCCAAAGGTATCCTTTGAGCCAATTCCCATACATTATTGTGCCCGGCTGGTTTTGCGATTCTAAAGT  
GTAAT---AATAAGACATTCAAT-----GGGACAGGGCCATGTCACAAT-----  
-GTCAGC---ACAGTACAATGTACACATGGAATTAGGCCAGTAGTATCAACT---  
CAACTGTTGTTAAATGGCAGTCTAGCAGAAGAAGAT-----

GTAGTAATTAGATCTGAAAATTTACGAACAAT-----GCTAAGATCATAATAGTACAGCTAAAT----  
 -----GAATCTGTACAA-----ATTGATTGTATAAGACCCAACAACAATACAAGAAAA-----  
 -GGTATACATATA-----GGACCAGGGAGTGCA---TTT-----TATACAACAGGAGAA-----  
 -----ATAATAGGAAATATA-----AGACAAGCACATTGT---AACATTAGTGAAGGA---  
 AAATGGAATAATACTTTAAAACAGATAGCAGAAAAATTAAGA-----GAACAATTTGGG----  
 -----AAGAATAAAACAATAGTCTTTAAT-----  
 CAATCCTCAGGAGGGGACCTAGAAATTGTA--ACACACAGTTTTTAATTGTGGAGGAGAA---  
 TTTAAACAGCTCCAGGCAAGAGTCCTGGCTGTGGAAAGATACCTACAGGATCAACAGCTCCTAGGAATTTGGG  
 GTTGCTCTGGAAACTCATTTGCACCACTGCTGTGCCCTGGAATTCTAGTTGGAGT-----  
 -----AATAAATCTCTGGATCAGATTTGG-----AAT-----  
 AACATGACCTGGATGGATTGG---GAAAAAGAAATTGACAATTACACAGGCATAATATAC---  
 AACTTACTTGAAACTCGCAAAACCAACAAGAA-----  
 -----  
 AAGAATGAACAAGAATTATTGGAATTAGATAAAATGGGCAAGTTTGTGGAATTGGTTTGACATAACACAATGGC  
 TGTGGTATATAAAAATATTTCATAATGATAGTAGGAGGCTGATAGGTCTAAGAATAGTTTTTTTCT---  
 ATACTTTCTATAGTA-----AATAGAGTTAGGCAGGGATATTCACCA-----  
 TTGTCGTTTGTCTGTTAGTTTGTCTTAATTCTACAGCTATAGCAGTAGCAGAG---  
 GGGACAGATAGGCTTATAGAAGTAGCACAAAGACTTTTTTAGAGGT-----  
 -----ATTCTCCACATA-----CCTAGAAGAATAAGACAGGGCTTGGAAGGGCTTTACAA---TAA  
 >JF320502  
 GCT---AAA-----  
 GAAAAATCATGGGTCACAGTCTATTATGGAGTACCTGTGTGG---AAAGAAGCAACC---  
 ACCACTCTATTTTGTGCATCAGATGCTAAAGCATATGATACCGAG---GCACATAAT-----  
 -----GTTTGGGCCACA---CATGCCTGTGTACCCACAGAC---  
 CCCAGTCCACAAGAAGTATTATTGGCA-----AATGTGACAGAAAATTTTAAC-----  
 -----ATGTGGAATAAACATGGTGGAAACAGATGCATGAGGATATA---  
 ATCAGTCTATGGGATCAAAGCCTA---AAGCCATGTGTAAAATTA---  
 ACTCCACTTTGTGTTACTTTAAATTGCACTAATGTCACTAGTAATGTCACTAGTAGTGCTAATAGCACT---  
 -----  
 -----AGCACTAATAATACCACCAGTGATATCAAGGACGGAGGAATGAAA---  
 AACTGCTCTTTCAATATCACCATCACAGGCAGA-----  
 AGAGATAAGATGAAAAAGAATATGCTCTT---TTTTATAGCCTTGATATAGTGCCAATAGATAATGAT---  
 -----  
 -----  
 AATAATACAAGCTATATGTTGAGAAGTTGTAACACCTCGGTCATTACACAG---  
 GCCTGTCCAAAGATATCATTTGAGCCAATTCCCATACATTATTGTGCCCCGGCTGGTTTTGCGATTCTAAAGT  
 GTAAT---GATAAAAAGTTCAAT-----GGATCAGGACTATGCAGGAAT-----  
 -GTTAGC---ACAGTACAATGTACACATGGGATTAAGCCAGTAGTATCAACT---  
 CAACTGCTGTTAAATGGCAGTCTAGCAGAAGAAGAG-----  
 GTAGTAATTAGATCTGAAAATTTACAGACAAT-----GCTAAAAATATAATAGTACAGCTGACA---  
 -----GAAGCTGTAAAC-----ATTACTTGATAAGACCCAACAACAATACAAGAAGA---  
 -AGAATATCTATG-----GGACCAGGGAGAGTA---CTT-----TATACAACAGGAGAA---  
 -----ATAATAGGAGATATA-----AGAAAAGCACACTGT---AACCTTAGTAGAACA---  
 CAGTGGAATAACACTTTAAAACAGATAGCTAAAAAATTAACA-----GAACAATTTGGG---  
 -----AATAAAACAATAATCTTTAAA-----  
 CCCCCCTCAGGAGGGGACCTGGAAATTGTA---ACGCACAGTGTTAATTGTGGAGGAGAA---  
 TTTAAACAACCTCCAGGCAAGAGTCCTGTCTGTGGAAAGATACCTAAGGGATCAACAGCTCCTGGGGATTTGGG  
 GTTGCTCTGGAAACTCATCTGCACCACTGCTGTGCCCTTGAACACTAGTTGGAGT-----  
 -----AATAAATCTGTAGATGACATTTGG---GGT-----  
 AACATGACCTGGAGGCAGTGG---GAAAGAGAAATTGACAATTACACAAGCTTAATATAC---  
 ACCCTACTTGAAGAATCGCAGAACCAGCAAGAA-----  
 -----  
 AAGAATGAACAAGAATTATTGGAATTGGATAAAATGGGCAAATTTGTGGAATTGGTTTAGTATAACAACTGGC  
 TGTGGTATATAAAATTATTTCATAATGATAGTAGGAGGCTTGATAGGTGTAAGAATAGTTTTTTACT---  
 GTACTTTCTATAGTG-----AATAGAGTTAGGCAGGGATACTCACCT-----  
 TTGTCGTTTGTCTATTAGCTTGCTCAACGCCACAGCCATAGCAGTAGCTGAG---  
 GGAACAGATAGGGTTATAGAAGTATTACAAAGAATTTTTTAGAGCT-----  
 -----ATTTGCCACATA-----CCTACACGAATAAGACAGGGCTTGGAAGGGCTTTTGCTA---TAA  
 >JF320151

GCT---ACA-----  
GAACAATTGTGGGTCACAGTCTATTATGGGGTACCTGTGTGG---AAAGAAGCAACC---  
ACCACTCTATTTTGTGCATCAGATGCTAAAGCATATGATACAGAG---GCACATAAT-----  
-----GTTTGGGCCACA---CATGCCTGTGTACCCACAGAC---  
CCTAACCCACAAGAAGTAGTATTGGGA-----AATGTGACAGAATATTTTAAT-----  
-----GCATGGAAAAATGACATGGTAGAACAGATGCATGAGGATATA---  
ATTAGTTTATGGGATCAAAGCCTA---AAGCCATGTGTCAAATTA---  
ACCCCACTTTGTGTTACTCTAAATTGCACTGATTTGAAGAATACTACTAGTACCAATGCTACTAGG-----  
-----  
-----CCCAATACTAGTCCCAATAATACTATGGAAGAAGGAGACATGAAA---  
AACTGCTCTTTCAATGTCAACCACAAGCATAAGA-----  
AATAAATTGCAAAAAGAATATGCACCTT---TTCTATAAACTTGATATAGTACCAATAGATGGT-----  
-----  
-----  
GATAATGAAAGCTATGCTTTAATAAGTTGTAACACCTCAGTCATTACACAG---  
GCCTGTCCAAAGGTATCCTTTGAACCAATTCCTATACATTATTGTGCCCCGGCTGGTTTTGCGATTCTAAAGT  
GTAAT---GAGGAGAATTTCAAT-----GGAACAGGACCATGTACAAAT-----  
-GTCAGC---ACAGTACAATGTACACATGGAATTAAGCCAGTAGTGTCAACT---  
CAGTTGTTATTAAATGGCAGCCTAGCAGAAAAGGAG-----  
GTAGTAATTAGGTCTGAAAATATCACAGACAAT-----GCTAAAACCATAATGGTGCATCTGAAT---  
-----AAATCTGTAATA-----ATTAATTGTACAAGATACAATAACAACACAAGAAGA---  
-AGTATAAATATA-----GGACCGGGGAGAGCA---TTT-----TATGCAACAGGGGAT-----  
-----ATAATAGGAGATATA-----AGAAAATCACATTGT---AATGTTAGTAAAGCA---  
GATTGGATGAGAACTTTAAAAGATGTGGCTCAAAAATTAAGA-----GAAAAATTTGGG---  
-----AATGATACAAAAATAGCCTTTAAT-----  
AAAACCTCAGGAGGAGACCCAGAAATTGTA---ATGCACAGTTTTAATTGCGGAGGGGAA---  
TTTAAGCAGCTCCAGGCAAGAGTCCTGGCTGTGGAAAGATACCTAAAGGATCAACAGCTCCTAGGAATTTGGG  
GTTGCTCTGGAAACTCATCTGCACCACTAATGTGCCTTGGAATGTTACTTGAGT-----  
-----AATAAATCTCTAGATAACATTTGG-----AAT-----  
AACATGACCTGGATGGAGTGG---GAGAGAGAAATTGACAATTACACAAGCCTAATATAC---  
TCCTTAATTGAAGAATCGCAGAACCAACAGGAA-----  
-----  
AAGAATGAACAAGAATTATTGGCATTGGATAAGTGGGCAAGTTTGTGGAATTGGTTTAACATATCAAATTGGC  
TGTGGTACATAAAAATATTACATAATGATAGTAGGAGGCTTGATAGGGTTAAGAATAGTTTTTACT---  
GTGCTTTCTATAGTG-----AATAGAGTTAGGCAGGGGTACTCACCA-----  
TTATCGTTTGTCTGTTAGTTTGTCTTAATGCTACAGCTATAGCAGTAGCTGAG---  
GGGACAGATAGGATTATAGAAATATTACAAAGATTTTGTAGGGGT-----  
-----ATCCTTCACATA-----CCTACAAGAATAAGACAGGGCTTTGAAAGAGCTTTGCTT---TGA  
>JF320145  
GCT---GAA-----  
GAAAAATTGTGGGTCACAGTCTATTATGGGGTACCTGTGTGG---AAAGAAGCAACC---  
ACCACTTTATTTTGTGCATCAGATGCTAAAGGATATGATACAGAG---GTACATAAT-----  
-----GTTTGGGCCACA---CATGCCTGTGTACCCACAGAC---  
CCCAACCCACAAGAAGTAGAATTGAAA-----AATGTGACAGAATATTTTAAC-----  
-----ATATGGAAAAATAACATGGTAGAACAGATGCATGAGGATATA---  
ATCAGTTTATGGGATCAAAGCCTA---AAGCCATGTGTAAAATTG---  
ACCCCACTCTGTGTTACTCTAAATTGCACTGATAATTGGAGGAAGGCTACTGATTGGAAGAATAATAGTAAT-  
-----  
-----GCTATTGCCAATAATGGTAGTTGGGAAAAATTAGAGAAGGGAGAAATAAAA---  
AACTGCTCTTTCAATGTCAACCACAAGCATAAAA-----  
GATAAGATAACAAAAGAACATGCACCTT---TTTTATAGACTTGATATAGTACCAATAGATAGTGAT-----  
-----  
-----  
AGTAAGAGTGATAGTAGTTATACCAGCTATAGGTTGATAAATTGTAATACCTCAGTCATTACACAG---  
GCCTGTCCAAAAGTAACCTTTGAACCAATTCCTATACATTATTGTGCCCCGGCTGGTTTTGCGATTCTAAAGT  
GCAAT---AATAAGACATTTCAGT-----GGAAAGGGAGCATGTAACAAT-----  
-GTCAGC---ACAGTACAATGTACACATGGAATTAGGCCAGTAGTATCAACT---  
CAGCTGCTATTGAATGGCAGTCTAGCAGAAGAAGAG-----  
ATAGTAATTAGGTCTGAGAATTTCTCAGACAAT-----GCTAAAATCATAATAGTACACCTGAAT---  
-----GAATCTGTAGAG-----ATTAATTGCACAAGACCCAACAATAATACAAGAAAA-----

-GGTATACATATA-----GGACCAGGGAGGGCA---TGG-----TTTGCAACAGAAAAT-----  
-----ATAATAGGAAACATA-----AGACAAGCACATTGT---AACATTAGTAGTAGA---  
AAATGGTATAGCACTTTAGAAAAGGTAGTTGAAAAATTAAGA-----GAGCAATATGGG---  
-----AATAAAACAATAGTCTTTAAA-----  
AATTCCTCAGGAGGGGACCCAGAAATGGTA--ACACACAGCTTTAATTGTGGAGGAGAA---  
TTTAAGCAGCTCCAGGCAAGAGTCCTGGCTGTAGAAAGATACCTAAGGGATCAACAGCTCCTTGGGATTTGGG  
GTTGCTCTGGAAACTCATCTGCACCACTAATGTGCCTTGAATGCTAGTTGGAGT-----  
-----AATAAAAATCTGAGCCAGATTTGG-----GAC-----  
AACATGACCTGGATGCAGTGG---GAAAAGGAAATTGACAATTACACAAGCTTAATATAC---  
ACCTTAATTGAAGAATCGCAAAACCAACAAGAA-----  
-----  
AAAAATGAAC TAGATTTATTGGAATTGGATAAATGGGCAAGTTTGTGGAATTGGTTTGACATATCAAAC TGGC  
TGTGGTATATAAGAATATTCATAATGATAGTAGGAGGCTTAATAGGTTTAAGAATAGTTTTTTGCT---  
ATGCTTTCTGTAGTG-----AATAGAGTTAGGCAGGGATACTCACCA-----  
TTGTCAATTTGCTGTTAGCTTGCTCAACGCCATAGCCATAGCAATAGCTGAG---  
GGGACAGATAGGATTATAGAAATAGTACAAAGAGCTTGTTAGAGCT-----  
-----GTTCTCAACATA-----CCTAGAAGAATAAGACAGGGCTTCGAAAGGGCTTTGCTA---TAA  
>HQ908232  
GCT---ACA-----  
AACAACTTGTGGGTCACAGTCTATTATGGGGTACCTGTATGG---AAAGATGCAACC---  
ACCACTCTATTTTGTGCATCAGATGCTAAAGCATATGACACAGAG---GCACATAAT-----  
-----ATTTGGGCCACA---CATGCCTGTGTACCCACAGAC---  
CCTAACCACACAAGAAGTAGTACTGGGA-----AATGTGACAGAAGACTTTAAT-----  
-----GTTTGAAAAATGACATGGGTAGAACAGATGCAAGAGGATATA---  
ATCAGTTTATGGGATCAAAGCCTA---AAACCATGTGTAAAATTA---  
ACCCCACTTTGTGTCACTTTTAATTGCACTAATGTAGTTAATGGTACCACCAATACCACT-----  
-----  
-----AGGGATAGTTGGCAAATGATGAAGGAAGGAGAAATAAAA---  
AACTGTTCTTTCAATGTCACCACAAACATAATA-----  
GATAAGATGCAGAAAGAATATGCATTA--TTTTATAAATCTGATATAGTACCAATAGATAAT-----  
-----  
-----  
AGTAGTAATGGCTATAGGCTAATAAGTTGTAACACCTCAGTCATTACACAG---  
GCCTGTCCAAAGACATCCTTTGATCCAATTCCCATACATTATTGTACCCCGGCTGGTTATGCGATTCTAAAGT  
GCAAC---AATAAGACGTTTCGAG-----GGGAAAGGACACTGCAAAAAT-----  
-GTTAGC---ACAGTACAGTGTACACATGGAATTAGGCCAGTAGTGTCAACT---  
CAACTGCTGCTAAATGGCAGTCTAGCAGAGGAAGAT-----  
GTAGTAATTAGATCTGACAATTTCTCAGATAAT-----GCAAAAAC TATAATAGTACAGCTGAAG---  
-----GAAGCTGTAGAA-----ATTAATTGTACAAGACCCAACAACAATACAAGAAAA---  
-AGTATACATATA-----GCACCAGGGAGAGCA---TTT-----TATGCAACAGGAGAA---  
-----ATAATAGGGGATATA-----AGACAAGCACATTGT---AACATTAGTAAGGAA---  
GCCTGGAATAACACTTTAAACAGATAGTTGAAAAATTAAGA-----GTTAAATTTGGG---  
-----AATAAAACAATAGTCTTTAAT-----  
CAATCCTCAGGAGGGGACCCAGAAATTGTA--ATGCACAGTTTTTAATTGTGGAGGGGAA---  
TTCAAGCAGCTCCAGGCAAGAGTTCTGGCTGTGGAAAGATACCTAAAGGATCAACAGCTCCTGGGAATTTGGG  
GTTGCTCTGGAAACTCATCTGCACCACTACTGTGCCTTGAATAATAGTTGGAGT-----  
-----AATAAAAATCTGAGTACAATTTGG-----GAT-----  
AACATGACCTGGATGGAATGG---GAAAGAGAAATTGACAATTATACAGACTTAATATAC---  
AGGTTACTTGAAGAATCGCAGAACCAGCAAGAA-----  
-----  
AAGAATGAACAAGACTTATTAGCATTAGATAAGTGGGCAAGTTTGTGGAATTGGTTTAACATAACACAATGGC  
TGTGGTATATAAAAATATTCATAATGATAGTAGGAGGCTTAGTAGGTTTAAGAATAGTTTTTTACT---  
GTACTTTCTATAGTG-----AATAGAGTTAGGCAGGGATACTCACCA-----  
TTATCGTTTTGCTGTTAGTTTGTTTAATGCCACGCCATAGCAGTAGCTGAG---  
GGGACAGATAGGATTATAGAAGTGATACTAAGAGTTTATAGAGCT-----  
-----ATCCTCCACATA-----CCTACAAGAATAAGACAGGGCTTGGAACGCGCTTTGCTA---TAA  
>KM353665  
ACT---GCA-----  
GAACAATTGTGGGTCACAGTCTATTATGGGGTGCCTGTGTGG---AAAGAAGCAACT---  
ACCACTCTATTTTGTGCATCAGATGCTAAAGCATATGATACAGAG---ATGCATAAT-----

-----GTTTGGGCCACA---CATGCCTGTGTCCCCACAGAC---  
CCCAGCCCACAAGAAGTAGTATTAGCA-----AATGTGACAGAAAATTTTAAC-----  
-----ATGTGGAAAAATAACATGGTAGACCAGATGCATGAAGATATA---  
ATTAGTTTATGGGAGCAAAGCCTA---AAGCCATGTGTACAGTTA---  
ACCCCACTCTGTGTTACTTTAAATTGTACTGAATATTTAGGGAATAATGCTACCAGTAAGACTAATACC----  
-----  
-----ACCAATAATACTACCAGTAGTCCTGATATCGATAAAGATGCCATGAAA---  
AGCTGCTCTTTCAATAGCACCACAAGCATGAGA-----  
GATAAGATTAAGAAAGAACATGCACCT---TTTTATACACTTGATTTAGTACCAGTAGATAAT-----  
-----  
-----  
AATAGTAATCAAACCACCTATAAGTTGACAAGTTGTAATACCTCAGTCATTACACAG---  
GCCTGTCCAAAGATATCATTTGAACCAATTCCCATACATTATTGTGCCCCAGCTGGTTTTTCGCGATTCTAAAAT  
GTAAC---AATAAGACATTCAAT-----GGAACAGGACCATGTACAAAT-----  
-GTCAGC---ACAGTACAATGTACACATGGAATTAGGCCAGCGGTGTCAACT---  
CAGCTGCTGTTAAATGGCAGTCTAGCAGAAGAAGAG-----  
GTAGTAATTAGATCTGCCAATTTTCACGGACAAT-----GCTGGAAACATAATAGTGCAGCTGAAT----  
-----GAAACTGTACCA-----ATTACTTGTATAAGACCCAACAATAATACAAGAAAA-----  
-AGTATAAATATG-----GGACCAGGGAGAGCA---TTT-----TATGCAACAGACAAA-----  
-----GTAATAGGAGATATA-----AGACAGGCACACTGT---ACACTTAATGGAACA---  
CAATGGCATAAAACCTTAGAAAATGATAGTTGAAAAATTAAAA-----GGACAATTTGGG----  
-----AATAAGACAATAGTCTTTAAC-----  
AAATCCTCAGGAGGGGATCCAGAAATTGAA--ATGCACAGTTTTAATTGTGGAGGGGAA---  
TTTAAACAACTCCAGGCAAGAGTCCTGGCTGTGGAAAGATACCTACAGGATCAACAGCTCCTAGGGATCTGGG  
GTTGCTCTGGAAGAACTCATCTGCACCACTGCTGTGCCTTGGAAATAGTAGTTGGAGT-----  
-----AATAAATCTTACAATGAAATTTGG-----AAT-----  
AACATGACCTGGATGGAATGG--GAAAGAGAAATTGACAATTACACAGGCTTAATATAC---  
AACCTACTTGAAACAACGCAGAACCAACAAGAA-----  
-----  
AAGAATGAACAAGAATTATTAGAGTTAGAAAAGTGGGCAAACCTATGGAATTGGTTTGATATATCAAACCTGGC  
TGTGGTATATAAAAATATTACATAATGGTAGTAGGAGGCTTGATAGGTTTAAGGATAATTTTTTGCT---  
GTACTTTCTGTAGTG-----AATAGAGTTAGGCAGGGATACTACCA-----  
TTGTCATTTGCTGTTAGCTTGCTTAATGCCACAGCTATAGCAGTAGCTGAG---  
GGAACAGATAGGATTATAGAAGTAGCACAAAGAGCTTATAGAGCT-----  
-----ATTCTCCACATA-----CCTAGAAGAATAAGACAGGGCGCGGAAAGGGCTTTGGTA--TAA  
>JN687750  
TCT--GCA-----  
GAAAACCTGTGGGTACAGTCTATTATGGGGTACCTGTGTGG--AAAGAAGCAACC---  
ACCACTCTATTTTGTGCATCAGATGCTAAAGCTTATGATACAGAG--GTACATAAT-----  
-----GTATGGGCCACA---CATGCCTGTGTACCCACAGAC---  
CCCAACCCACAAGAAGTAGTATTGGGA-----AATGTAACAGAAGATTTTAAC-----  
-----ATGTGGAAAAATAACATGGTAGAACAGATGCATGAGGATATA---  
ATCAGTTTATGGGATCAAAGTCTA---AAGCCATGTGTAAAATTA---  
ACCCCACTCTGTGTTACTCTACATTGCACTAATTATCCGGAATGTTATCAATGTCACCAGAAGTGGTAATA  
AT-----  
-----ACCAATAATGCCACTATTAAGATAGATGAAGAAATGAAGGGAGAAATAAAA---  
AACTGCTCTTTTAATATCACCACACCTAAGA-----  
GATAAGGTGCAGAAAGCACGTGCATTC---TTTAATAGACTTGATGTAGTACCAATAGATAAT-----  
-----  
-----  
GATAATGATAATACTAGCTATAGGTTGATAAGTTGTAACACCTCAAGCATTACACAA---  
GCCTGTCCAAAAATAACCTTTGAGCCAATTCCCATACATTTTTGTGCCCCGGCTGGTTTTGCGATTCTAAAGT  
GTAAT---AATAAAACATTTGAT-----GGAAAGGGATCATGTACAAAT-----  
-GTCAGT---ACAGTACAATGTACACATGGAATTAAGCCAGTAGTGTCAACT---  
CAACTGCTGCTAAATGGCAGTCTAGCAGAAGAAGAG-----  
ATAGTAATTAGATCTGAAAATTTTCACAAACAAT-----GCTAAAACCATAATAGTACAGCTGACG----  
-----GAACCTATAAAT-----ATTACTTGTGTGACAGCCAACAACAATAACAAGAAC-----  
-AGCATACATATG-----GGACCAGGGGAAAGCA---TTT-----TATGCAGCAGGAGAA-----  
-----GTAATAGGAGATATA-----AGGAGAGCATATTGT---AAGATTAATATAACA---  
GAATGGAATAACACTTTAGAAAAAATAGTTGGAAAATTCAGA-----GAACAATTTGGG----

-----AATAAAACAATAGTCTTTAAT-----  
CAATCCTCAGGAGGGGACCCAGAAATTGTA--ACTCACAGTTTTTAATTGTAGAGGGGAA---  
TTTAAACAGCTCCAGGCAAGAGTCCTGGCTGTGGAAAGATACCTAAGGGATCAACAGCTCCTAGGGATTTGGG  
GTTGCTCTGGAAGAACTCATTTGCACCACTACTGTGCCTTGGAAACAATAGCTGGAGT-----  
-----AAAAATAGATCTTGGGAGGAAATTTGG-----GAA-----  
AACATGACCTGGATGCAATGG--GAAAAAGAAATTGACAATTACACAGGCTTAATATAC---  
AACTTAATTGAAATATCGCAAAACCAGCAAGAA-----  
-----  
AAGAATGAACAAGACTTATTGGCATTGGATAAATGGGAAAGTTTGTGGAATTGGTTTGACATATCAAATTGGC  
TGTGGTACATAAAAAATATTCATAATGATAGTAGGAGGCTTAGTAGGTTTAAGAATAGTTTTTTACT---  
GTACTTTCTATAGTG-----AATAGAGTTAGGCAGGGATACTCACCA-----  
TTGTGCTTTTGCTGTTAGCTTGCTTAATGCTTTTTGCAATAACAGTAGCTGAA---  
GGGACAGATAGGATTATAGAACTAGCAAGAAGAATTTTTTAGAGCT-----  
-----ATCCTTCATATA-----CCTACAAGAATAAGACAAGGCTTGGAGAGGGCTTTACTA---TAA  
>HM204582  
GCT---GCA-----  
GAAAAATTTGTGGGTACAGTCTATTATGGGGTACCTGTGTGG--AAAGAAGCAAAAC---  
ACCACTCTGTTTTGTGCATCAGATGCTAAAGGATATGAGACAGAG--GTACATAAT-----  
-----GTCTGGGCCACA--CATGCCTGTGTACCCACAGAC---  
CCCAACCCACAAGAAATAGTATTGGAA-----AATGTAACAGAAAATTTTAAC-----  
-----ATGTGGAAAAATAACATGGGTAGAACAGATGCATGAGGATATA---  
ATCAGTTTATGGGATCAAAGCCTA--AAGCCATGTGTAAAATTA---  
ACTCCACTCTGTGTTACTTTAAATTGCACTAATTTAAGGAATGATACTAATACTACCAGT-----  
-----  
-----AATAATGAGACAATGCAAGCGAGAGAAGAAATAAGA---  
AATTGCTCTTTCAATGTCACTGCAGGCATAAGA-----  
GATAAGATACAAAAGAATATGCTCTC--TTCTATAAAGTTGATGTAGTACCAATAAAGGAT-----  
-----  
-----  
AATAATGATTCTACTAGCTTTAGATTGATAAGTTGTAATACCTCAGTCATTACACAG---  
GCCTGTCCAAAGGTAACCTTTGAGCCAATTCCCATACATTATTGTGCCCCAGCTGGTTTTGCGATTCTAAAGT  
GTAAC--AATAAAACATTCACT-----GGAACAGGGCCATGTACAAAT-----  
-GTTAGC--ACAGTACAATGTACACATGGAATTAAACCAGTAGTGTCAACT---  
CAACTGCTGTTGAATGGCAGTCTAGCAGAAGAAGAG-----  
ATAGTAATTAGGTCTGAAAATTTACAAACAAT-----GCTAAAACCATAATAATACAGCTGAAG---  
-----GAGCCTGTACAA-----ATTAATTGTTCAAGACCCAACAACAATACAAGAAAA-----  
-AGTATACATATA-----GGACCAGGGAGAGCA--TTT-----TATACAACAGGAGAA-----  
-----ATAATAGGGGATATA-----AGAAAAGCACATTGT--AATATTAGTGGAAACA---  
GCCTGGAATAATACGTTAAGCCAGATAGCTACAAAATTAAGA-----GGAAAACCTTAAC---  
-----AATAACACCACAATAATCTTTAAG-----  
CCATCCTCAGGAGGGGACCCAGAAATTGTA--GCTCACAGTTTTTAATTGTGGAGGAGAA---  
TTTAAACAGCTCCAAGCAAGAGTCCTGGCTGTGGAAAGATACCTAAGGATCAACAGCTCCTAGGGATTTGGG  
GTTGCTCTGGAAGAACTCATTTGCCCACTACTGTGCCTTGGAACTAGCTGGAGT-----  
-----AACAAATCTCTGAGTGAGATTTGG-----GAT-----  
AACATGACCTGGATGGAGTGG--GAAAGAGAAATTGACAATTACACAAGCTTAATATAC---  
AACTTAATTGAACAATCGCAGAACCAGCAGGAG-----  
-----  
AAAAATGAACAAGAATTATTAGAATGGGATAAGTGGGCAAGTTTGTGGAATTGGTTTAGCATACAAAGTGGC  
TGTGGTATATAAAAAATATTCATAATGATAGTAGGAGGCTTAATAGGTTTAAGAATAGTTTTTTACT---  
GTACTTTCTATAATA-----AATAGAGTTAGGCAGGGATATTCACCA-----  
ATATCATTTGCTGTTAGCTTGTTTAATGCCATAGCAATAGCAGTAGCTGAA---  
GGAACAGATAGGATTATAGAACTAGCACAAAGAATTCTTAGAGCT-----  
-----ATCCTCAACATA-----CCTACAAGAATAAGACAGGGCTTAGAAAAGAGCTTTAGTA---TAA  
>HM204589  
ACT---GCA-----  
GAAAACCTTGTGGGTACAGTCTATTATGGGGTACCTGTGTGG--AAAGAAGCAACC---  
ACCACTCTATTTTGTGCCTCAGATGCTAAAGCACATGATACAGAG--GCACATAAT-----  
-----GTTTGGGCCACA--CATGCCTGTGTACCCACAGAC---  
CCCAACCCACAAGAAATAAAATTG-----AATGTTACAGAAGATTTTAAC-----  
-----ATGTGGAAAAATAGCATGGTAGAACAGATGCATGAGGATGTA---

ATCAGTTTATGGGATCAAAGCCTA---AAGCCATGTGTAAAATTA---  
ACCCCACTCTGTGTCACTTTAAATTGCACTGATGAGTTGACCAATAAGACTTTTACTAATAGT-----  
-----  
-----ACTCCTACCGCTATTGGTAAGATAGAGAAAGGAGAAATAAAA---  
AACTGCTCTTTCAATATCACCACAACTTAAGA-----  
GATAAGATGCAAAGAGTATATGCACTT--ATGTATAAACTTGATGTAGTACCAATAGATGAG-----  
-----  
-----  
AATAATAGTAGCTATAGGTTGATAAGTTGTAACACCTCAGTCATTACACAA---  
GCCTGTCCAAAAATATCCTTTGAACCAATTCCAATACATTATTGTACCCCGCCTGGTTTTGCACTTTTAAAT  
GTAGA---GACAAGAAGTTCAAT-----GGAACAGGAGAATGTAAAAAT-----  
-GTCAGC---ACAGTACAATGTACACATGGGATTAGGCCAGTAGTATCAACT---  
CAACTGCTGTTAAATGGTAGTCTAGCAGAAGAAGAG-----  
GTAGTGATTAGGTCTGAAAATTTACAAACAAT-----GTTAAAACCATAATAGTACACCTGAAT----  
-----GTATCTGTACAA-----ATGAATTGTACAAGACCCAACAACAATACAAGAAAA-----  
-GGTATACATATA-----GGACCAGGGAGAGCA---TTT-----TATGCAACAGGAGAC-----  
-----ATAATTGGAGATATA-----AGACAAGCACATTGT---AATGTGAGCAGAGGA---  
GATTGGAATAACACTTTAAATGGGTAGTTGAAAAATTAAGA-----GAACAATTTGTG----  
-----AATAAAACAATAGTCTTTAAT-----  
CAATCTTCAGGAGGGGACCCAGAAATTGTA--ATGATCAATTTTAATTGTGGAGGGGAA---  
TTCAAACAGCTCCAGGCAAGAGTCCTGGCTCTGGAAAGATACCTAAGGGATCAACAGCTCCTGGGAATTTGGG  
GATGCTCTGGAAGAACTCATCTGCACCACTGCTGTGCCTTGGAAATGCTAGTTGGAGT-----  
-----AAAAATAAATCTTTAAATGATATTTGG-----GAT-----  
AACATGACCTGGATGCAGTGG---GAAAAAGAAATTGACAATTACACAGAGGTAATATAC---  
AGCTTACTTGAAAAGGCACAAAACCAACAAGAA-----  
-----  
AAGAATGAACAAGAATTATTAGAATTAGATAAATGGGCAAGTTTGTGGAGTTGGTTTGACATAACAACTGGC  
TGTGGTACATACAAATATTCATAATGATAGTAGGAGGCTTGATAGGTCTAAGAATAGTTTTTTGCT---  
GTGCTTTCTGTAGTA-----AATAGAGTTAGGCAGGGATACTCACCA-----  
TTATCGTTTGTCTGTTAGCTTGCTTAATGTACAGCCATAGTAGTAGCTGAG---  
GGGACAGATAGGGTTATAGAAGTAGTACAAAGAACTTTTAGAGCT-----  
-----TTTCTCCATATA-----CCTAGAAGAATAAGACAGGGCTTAGAAAGGATTTTACTA--TAA  
>KY112061  
GCT---GCA-----  
GACAACTTGTGGGTACAGTCTATTATGGGGTACCTGTGTGG--AGAGAAGCAACC---  
ACCACTCTATTTTGTGCATCAGATGCTAAGGCATATGATACAGAG--GCACATAAT-----  
-----GTTTGGGCCACA--CATGCCTGTGTACCCACAGAC--  
CCCAACCCACAAGAAGTAGAATTGGAA-----AATGTGACAGAAAATTTTAAC-----  
-----ATGTGGGAAAATAACATGGTAGAACAGATGCATGAGGATATA---  
ATCAGTTTATGGGATCAAAGCTTA--AAACCATGTGTAAAATTA---  
ACACCACTCTGTGTTACTTTAGCTTGCACTAATGCTAATTGGACAGATAGAAATCAGACT-----  
-----  
-----ATCGATAATAGTAGCCTAAAAATGGAGGAAGGAGAAGTAAAG---  
AACTGCTCTTTTAATATCACCACAGAAATAAGA-----  
GATAAGATAAGGAAAGAATATGCACTT--TTTTATAAATCTGACATAGTATCAGTGAATAAGGAT-----  
-----  
-----  
AATAATACTAGGTATAGGTTGATAAGTTGTAACACCTCAGTCCTTACACAG---  
GCCTGTCCAAAAGTATCCTTTGAGCCAATTCCCTATACATTATTGTGCCCCGGCTGGTTTTGCGATTCTAAAGT  
GTAAT---GATAAGCAATTTATT-----GGAACAGGACCATGTACAAAT-----  
-GTCAGC---ACAGTACAATGTACACATGGAATTAGGCCAGTAGTATCAACT---  
CAACTGCTGTTAAATGGCAGTTTAGCAGAAGAAGAG-----  
GTAGTAATTAGATCAGTTAATTTAGTGACAAT-----GCTAAAACCATAATAGTACAACCTGAAT----  
-----AAATCTGTAGAA-----ATTACTTGACACAAGACCCAACAACAATACAAGAAAA-----  
-AGTATACCCATG-----GGACCAGGGGAAAGCA---TTT-----TATGCAAGAGGAGAC-----  
-----ATAATAGGAGACATA-----AGAAAAGCATATTGT---GAAATTAATGGAACA---  
GAATGGCATAACACTTTAAAACTGGTAGTTGAAAAATTAAGA-----GAACAATAT-----  
-----AATAAAACAATAGTCTTTAAT-----  
CGCTCCTCAGGAGGGGACCCAGAAATTGTA--ATGTACAGTTTCAATTGCGGAGGGGAA---  
TTTAAGCAGCTCCAGGCAAGAGTCCTGGCTGTGGAAAGATACCTAAAGGATCAACAGCTCCTGGGGATTTGGG

GTTGCTCTGGAAACTCATCTGCACCACTACTGTGCCTTGAATACTAGTTGGAGT-----  
-----AATAAATCTCTGGAACAGATTTGG-----GAT-----  
AACATGACTTGGATGGAGTGG---GAAAGAGAAATTGACAAATTATACAGGCTTAATATAC---  
CAATTAATTGAAGAATCGCAGAACCAACAAGAA-----  
-----  
AAGAATGAACAAGAATTATTGGCATTGGATAAATGGGCAAGTTTGTGGAATTGGTTTGACATAACAACTGGC  
TGTGGTATATAAGACTATTTCATAATGATAGTAGGAGGCTTAATAGGTTTAAGAATAGTTTTTACT---  
GTGCTTTCTATAGTG-----AATAGAGTTAGGCAGGGATACTCACCA-----  
TTATCATTTGCTGTTAGCTTGCTCAACGCCACAGCCATAGCAGTAGCTGAG---  
GGGACAGATAGGGTTATAGAAGTAGTACAAAGAGCTTGTAGAGCT-----  
-----ATTCTCCACATA-----CCTAGAAGAATAAGACAGGGCTTGGAAAGGGCTTTGCTA---TAA  
>EU576345  
GCA---GCA---GAA-----  
ACAGGACAATTGTGGGTACAGTCTATTATGGGGTACCTGTGTGG---AAAGAAGCAACC---  
ACCACTCTATTCTGTGCATCAGATGCTAAAGCATATTCAACAGAA---AAACATAAT-----  
-----GTTTGGGCCACA---CATGCCTGTGTACCCACAGAC---  
CCCAACCCACAAGAAATAAAATTGGAA-----AATGTGACAGAAAATTTTAAC-----  
-----ATGTGGAAAAATGACATGGTAGAACAGATGCATGAAGATATA---  
GTTAGTTTATGGGATCAAAGTCTA---AAACCATGTGTAAAATTA---  
ACCCCACTCTGTGTTACCTTAGATTGCTCTCATAATGTCACTAGTAAAAATGCTACTAAT-----  
-----  
-----ACCAATAGTAGTAGGGTGGAGGGAGGAGACATGAAA---  
AACTGCTCTTTCAATGTCAACCACAAGCATAAGA-----  
GATAAGGTGAAAAACGAATATGCACTA---TTTTATAAACTTGATGTAGTACCAATAGATGGG-----  
-----  
-----  
AGTAATACTAGCTATAGGTAAATAAATTGTAATACCTCAGTCATTACCCAG---  
GCTTGTCAAAAGTAACCTTTGAACCAATTCCCATACATTATTGTACCCCGGCTGGTTTTGCGATTCTAAAGT  
GTGGA---GATAAGAAGTTCAAT-----GGAACAGGACCATGTAAAAAT-----  
-GTCAGT---ACAGTACAATGTACACATGGAATTAAACCAGTAGTGTCAACT---  
CAACTGCTGTTAAATGGCAGTCTAGCAGAAGAAGAG-----  
GTAGTAATTAGATCTGCCAATCTCTCAGACAAT-----ACTAAAACCATAATAGTACAGCTGAAA---  
-----GATTCTGTAGAA-----ATTAATTGTATAAGACCCAACAACAATACAAGAAAA---  
-AGTATAAGTATA-----GGACCAGGGAGAGCA---TTT-----TATGCAACAGGAGAT-----  
-----ATAATAGGAGATATA-----AGACAAGCACATTGT---AACATTAGTAGAAAA---  
GCATGGAATGAAACGCTAAGACAGATAGCTATAAAATTAAGA-----GAAAAATTTAAA---  
-----AATAAAACAATAGTCTTTAAT-----  
CAATCCTCTGGAGGGGATCCAGAAATTATA--ATGCACAGTTTTTAATTGTAACGGGGAA---  
TTTAAGCAGCTCCGAGCAAGAGTCCCTGGCTGTGGAAAGATACCTACAGGATCAACAGCTCCTGGGAATTTGGG  
GCTGCTCTGGAAACTCATTGCAACCACTACTGTGCCTTGAATGCTAGTTGGAGT-----  
-----AATAAATCTCTGAATGATATTTGG-----GAT-----  
AACATGACCTGGATGGAGTGG---GAAAGAGAAATTAGCAATTATACAAGCATAATATAC---  
ACCTTACTTGAAAAATCGCAAAACCAACAGGAA-----  
-----  
AAGAATGAACAAGAATTATTGGAATTGGACAAGTGGGCAAATTTGTGGAATTGGTTTGATATATCAAACCTGGC  
TGTGGTATATAAAAATATTTCATAATGATAGTAGGAGGCTTGGTAGGTTTAAGAATAGTTTTTGTCT---  
GTACTTTCTATAGTG-----AATAGAGTTAGGCAGGGATACTCACCA-----  
TTGTCAATTTGCTGTTAGCTTGCTCAACGCCACAGCAATAGCAGTAGCTGAG---  
GGGACAGATAGAATTATAGAAGTAGTACAAAGAAGCTTTTAGAGCT-----  
-----ATTCTCCACATA-----CCTACAAGAATAAGACAGGGTTTGGAAAGGGCTTTGCTA---TAA  
>EU576383  
GCT---TCA-----  
AACAAATTTGTGGGTACAGTCTATTATGGGGTGCCTGTGTGG---AGAGAAGCAACC---  
ACCACTCTATTTTGTGCATCAGATGCTAAAGCATATGATACAGAG---GTACATAAT-----  
-----GTGTGGGCCACA---CATGCCTGTGTACCCACAGAC---  
CCCAACCCACAAGAAGTAAGATTGGAA-----AATGTGACAGAAAATTTCAAC-----  
-----ATGTGGACAAATAACATGGTAGAGCAGATGCATGAGGACATA---  
ATCAGTTTATGGGATCAAAGCCTA---AAGCCATGTGTAAAATTA---  
ACCCCAATCTGTGTCACTTTAAATTGCACCGACTATAATAACTAACCTAACTCGAATACTACTAGA-----  
-----

-----AGCAATAGTACTCATGAGAAATTGATGGTCAAAGGAGAAATACAG---  
AACTGCTCTTTCAATATTGCCACAGACATAGGA-----  
GATAAGAGGCAGAAAGCATATGCACTG---  
TTTTATAAAATTGATATAGTACCAATAAGTAGTAATAATAATACT-----  
-----  
AATTATACCAGCTCTAATGATAATAGGACCAGCTCTAATTATACCAGCTATAGATTGATAAGTTGTAATACCT  
CAGTCATTACACAG---  
GCCTGTCCAAAGGTATCCTTTGAGCCAATTCCCATACATTATTGTGCCCCGGCTGGTTTTGCGATTCTAAAGT  
GTAAT---GATAAGAAGTTCAAT-----GGAAGTGGACCATGTGCAAAT-----  
-GTCAGC---ACAGTACAGTGTAACATGGAATTAGGCCAGTAGTATCAACT---  
CAACTGCTGTTAAATGGCAGTTTAGCAGAAGAAGAA-----  
GTAGTAGTTAGATCTGCCAATTTCTCAGACAAT-----GCTAAATCCATAATAGTACAGCTGAAA-----  
-----GAATCTGTTACA-----ATTAATTGTACAAGACCCAACAACAATACAAGAAAA-----  
-AGTATACATATA-----GCACCAGGGAGAGCA---TTT-----TATGCAACAGGAGAA-----  
-----ATAATAGGAGATATA-----AGACAAGCATATTGC---AACATTAGTGGAACA---  
CAATGGAATAAACTTTATACCAAATAGTTGAAAAATTAAGA-----GAAAAAATTGGG-----  
-----AATAAAACAATAATCTTTAAT-----  
CAATCAGCAGGAGGGGACCCAGAAATTGTA--ACACACAGTTTTAATTGTGGAGGGGAA---  
TTTAAGCAGCTCCAGGCAAGAGTCCTGGCTGTGGAAAGATACCTACAGGATCAACAGCTCCTAGGGATGTGGG  
GTTGCTCTGGAAGAACTCATCTGCACCACTACTGTGCCTTGGAATACTAGTTGGAGT-----  
-----AATAAAACCCAGGAAGAAATTTGG-----AAT-----  
AACATGACCTGGATGCAGTGG---GATAGAGAAATTAACAATTACACAGGCTTAATATAC---  
ACCTTAATTACAGAATCGCACATCCAGCAAGAA-----  
-----  
AAGAATGAAAAAGAATTATTGGCACTAGATAAAATGGGCAAGTTTGTGGAATTGGTTTGACATATCAAAATGGC  
TGTGGTATATAAGAATATTCATAATGATAATAGGAGGCTTGATAGGTTTAAGAATAGTTTTTTACT---  
GTACTTTCTATAGTG-----AATAGAGTTAGGCAGGGATACTCACCA-----  
TTGTCGTTGGCTGTTAGCTTGCTTAATGCCACGGCCATAGCAGTAGCTGAA---  
GGAACAGATAGGGTTATAGAAGGATTGCAAAGAGCTTTTAGGGCT-----  
-----ATTCTCCACATA-----CCTACAAGAATAAGACAGGGCTTAGAAAGGGCTTTGCTA---TAA  
>KX129209  
ACT---ACA-----  
GAGCAATTGTGGGTCACGGTCTATTATGGGGTACCTGTGTGG---AAAGAAGCAAAA---  
ACCACTCTATTTTGTGCATCAGATGCTAAAGCATATGAGACAGAG---GCCCATAA-----  
-----ATTTGGGCCACA---CATGCCTGTGTACCTACAGAC---  
CCCAACCCACAGGAAGTAGAATTAAAA-----AATGTGACAGAACAATTTGAC-----  
-----ATGTGAAAAATAACATGGTAGAACAGATGCATGAGGATATA---  
ATCAGTTTATGGGATCAAAGCCTA---AAACCATGTGTAAAATTA---  
ACTCCACTCTGTGTTACTTTAAATTGCACTGACGCTAAGAATAATGGTACTAATACCACTGCT-----  
-----  
-----AGTGGGATGGATACAGGAGAAGTAAAA---  
AACTGCTCTTTCAATGTCAACACAGAATAAGA-----  
GATAAGATGAAGAACGAGTATGCACCT--TTTTATAGACTTGATGTAGAACCAATAGATAAG-----  
-----  
-----  
AGTAATAATAATAGCTATAAGTTGAGAAGTTGTAATACCTCAGCCATTACACAG---  
GCCTGTCCAAAGATATCCTTTGAGCCAATTCCCATACATTATTGTGCCCCGGCTGGTTTTGCGATTCTAAAGT  
GTAAT---GATAAGGATTACAAT-----GGAACAGGAACGTGTACAAAT-----  
-GTCAGC---ACAGTACAATGTACACATGGAATTAGGCCAGTAGTATCAACT---  
CAATTACTGTTAAATGGTAGTCTAGCAGAAAAAGGG-----  
ATAGTACTTAGATCTGAAAATTTCAAAACAAT-----GCTAAAACCATAATAGTACAGTTGAAA-----  
-----GAAGCTGTAAAC-----ATTACTTGTGTAAAGACCCAACAACAATACAAGAAAA-----  
-AGTATACACATA-----GCACCAGGGAGCGCA---TTT-----TATGCGACAGGAGAC-----  
-----ATAATAGGAAACATA-----AGACAAGCACATTGT---AACATTAGTAGAGAA---  
CAATGGAATAATACTTTACAACAGATAGCTGAAAAATTACAA-----CAACAATTTGGG-----  
-----CATAACAGAACAGTCTTTAAT-----  
CAATCCTCGGGAGGAGACCCAGAAATTGTA--ATGTTCAATTTTAATTGTGGAGGGGAA---  
TTTAAGCAGCTCCAGGCAAGAGTCCTGGCTGTGGAAAGATACCTAAAGGATCAACAGCTCCTGGGAATTTGGG  
GTTGCTCTGGAAGAACTCATTTGCACCACTGCTGTGCCTTGGAATACTAGTTGGAGT-----  
-----AATAAATCTCTAGATAAGATTTGG-----AAT-----

AACATGACCTGGATGCAGTGG---GAAAGGGAAATTGACAATTACACAACTTAATATAC---  
AGCTTAATTGAAGACTCGCAGAACCAGCAAGAA-----  
-----  
AAGAATGAAAAAGATTTATTAGAAATTGGATAACTGGGCAAGTTTGTGGAATTGGTTTGAAATAACAACTGGC  
TGTGGTATATAAAAAATATTTCATAATGATAGTAGGAGGCTTGATAGGTTTAAGAATAGTTTTTACT---  
GTACTTTCTATAATA-----AAGAGAGTTAGGCAGGGATACTCACCA-----  
TTGTCGTTTGCTGTTAGCTTGCTCAATGCCACAGCTATAGCAGTAGCTGAA---  
GGGACAGATAGGATTATAGAAGGATTACAAAGAACTGCCAGAGCT-----  
-----ATTTGCAACATA-----CCTAGACGAATAAGACAGGGCTGGGAAAGGGCTTGGCTGCGA---  
>KM259534  
GCT---ACA-----  
CAAAAATTATGGGTCACAGTCTATTATGGGGTACCTGTGTGG---AAAGAAGCAACC---  
ACCACTCTATTTTGTGCATCAGATGCTAAAGCCTATGAGACAGAG---GTACATAAT-----  
-----GTTTGGGCCACA---CATGCCTGTGTACCCACAGAC---  
CCTAGCCCACAAGAAGTAGTATTGGAA-----AATGTGACAGAAAATTTTAACT-----  
-----ATGTGGAAAAATAACATGGTTGAACAAATGCATAAGGATATA---  
ATCAGTCTATGGGATCAAAGCCTA---AAGCCATGTGTAAAATTA---  
ACCCCACTTTGTGTTACCTTAAATTGCACTAATTATGAGGCTAATAGCACCAAGAATTCTACTAATAGCACCA  
ACAATTCCTACTCAGGCC-----  
-TCGGGAAGTAGCAATTCTACTCAGGCCTCGGGAAGTAGCGAAGAAATGATAGGGGAAATGAAA---  
AACTGCTCTTTCAATGTCAACCACAAGCATGAGA-----  
GATAAGATACAGAAAACTATGCACCTT---TTTTATGCACCTTGATCTAGTACCAATAGATGGT-----  
-----  
-----  
AGTAATAGTACTGAATATAGGTTGATAAGTTGTAATACCTCAGTCATTACACAG---  
GCCTGTCCAAAGGTATCCTTTGAGCCAATTCCCATACATTATTGTGCCCCAGCTGGTTTTGCGATTCTAAAGT  
GTAGA---GATAATAAGTTCAAT-----GGAACAGGACTATGTAAGAAT-----  
-GTCAGC---ACAGTACAATGTACACATGGAATTAGGCCAGTAGTATCAACT---  
CAACTGCTGTTAAATGGCAGTCTAGCAGAAGAAGAG-----  
GTAGTAATTAGATCTGAAAATCTCAGGAACAAT-----GCTAAAAACATCATAGTACAGCTGAAT---  
-----ACAAGTGTAAAA-----ATTAATTGTACAAGACCTAACAACAATACAAGAAGA---  
-GGTATACATATA-----GGACCAGGGCAGGTT---TTT---TAT---ACAGGAGAG-----  
-----ATAATAGGAGATATA-----AGACAAGCACATTGT---AACATTAGCAGTAAA---  
GAATGGAATACCACTCTATACCAGGTAGCTATGAAATTAAGA-----GAACAATTTAAC---  
-----AATAAAACAATAATTTTAACT-----  
CAATCCTCAGGAGGGGACCTAGAAATTCAA---ATGCACAGTTTTTAATTGTGGAGGGGAA---  
TTTAAGCAGCTCCAGGCAAGAGTCCCTGGCTGTGGAAAGATACCTACGGGATCAACAGCTCCTGGGGATTTGGG  
GTTGCTCTGGAAGAACTCATCTGCACCACTGCTGTACCTTGGAAATACTAGTTGGAGT-----  
-----AATAAATCGCTAAATGAAATATGG-----GAT-----  
AACATGACCTGGATGGAGTGG---GAAAAGGAGATTGATAATTACACAGGCTTGATATAC---  
AACTTACTCGAGAAATCGCAAAACCAACAGGAA-----  
-----  
AACAAATGAAAAAGAATTATTGGCATTAGATAAAATGGGCAAATTTGTGGACTTGTTTGACATAACAAATTGGC  
TGTGGTACATAAAAAATATTTATAATGATAGTAGGAGGCTTAATAGGTTTAAGAATAATTTTTTGCT---  
GTGCTTTCTATAGCG-----AATAGAGTTAGGCAGGGATACTCACCA-----  
ATCTCGTTGGCTGTCAGCTTGCTCAACGCCACCGCTATAGCAGTAGCTGAG---  
GGAACAGATAGGATTATAGAAGTAGTACAAAGAGTTGGCAGAGGT-----  
-----ATCCGTACATA-----CCTAGACGAATAAGACAGGGCTTGGAAAGGGCTTTGCTA---TAA  
>HQ217957  
GGT---ACA---GAA-----AAC---AAA---  
GAAAAATTTGTGGGTCACAGTCTATTATGGGGTACCTGTGTGG---AAAGAAGCAACC---  
ACCACTCTATTTTGTGCATCAGATGCTAAAGCATACAAACCAGAG---GCACATAAT-----  
-----ATCTGGGCCACA---CATGCCTGTGTACCCACAGAC---  
CCCAACCCACAAGAAGTATTACTGGAA-----AATGTGACAGAATATTTTAACT-----  
-----ATGTGGAAAAATGACATGGTAGACCAGATGCATGAGGATATA---  
ATCAGTTTATGGGATCAGAGCTTA---AAGCCATGTGTACAATTA---  
ACCCCACTCTGTGTTACTTTAAATTGCACTGATATTAATTTGAATAATGATACTTCTGCTAATTTG-----  
-----  
-----ACGGATGCTAATATGACGATAGAATCGGTAAAAAGAAATGAAA---  
AACTGTTCTTTCAATACCACCACAGAGGTAATA-----

GATAAGAGGCAGAAAACCTATGCTTTA--TTCCATAAACTTGATGTAACACAAACAGATGAA-----  
-----  
-----  
ACTAGTAGTAATACTAGCTATAGATTGATAAGTTGTAATACCTCAGTCATTACACAA---  
GCCTGTCCAAAGACAAGCTTTGAGCCAATTCCCTATACATTATTGTACCCCGGCTGGTTTTGCAATTCTAAAGT  
GTAAC---GATAAACAGTTCAAT-----GGAACAGGAGACTGTAAAAAT-----  
-GTCAGC---ACAGTACAATGCACACATGGAATCAGGCCAGTAGTGTCAACT---  
CAACTGCTATTAAATGGCAGTCTAGCAGAAGGAGAG-----  
ATAATAATTAGATCTGAAAATTTCTCGAACAAT-----GCTAAAACCATAATAGTACAGCTGAAC----  
-----CACTCTGTAGTA-----ATTAATTGTACAAGACTCAATAACAATACAAGAAAA-----  
-AGTATACATATA-----GGACCAGGAAGAGCA---TTT-----TATACAACAGGAGAC-----  
-----ATAATAGGAGATATA-----AGAAAAGCACACTGT---AACATTAGTAGAGAA---  
GACTGGAATAAACTTTAAGACAGATAGCTATAAAATTTAAAA-----GAACAATTTGTG----  
-----AATAGTACAACAATAAGTTTTTAAT-----  
TCATCCTCAGGAGGGGACCCAGAGATTGTA---CTTCACAGTTTTTAATTGTGGAGGGGAA---  
TTTAAACAGCTCCAAGCAAGAGTCCTGGCTGTGGAAAGATACCTAAGGGATCAACAGCTCCTAGGGATCTGGG  
GTTGCTCTGGAAACTCATTTGCACCACCTAATGTGCCTTGGAACTACTTGGAGT-----  
-----AATAAACTATGAGGGACATTTGG-----AAT-----  
AACCTGACCTGGGTGCAGTGG---GAAAAAGAAATTGACAAATTACACAGAAGTAATATAC---  
CACTTACTTGAGATGGCGCAAAACCAGCAAGAA-----  
-----  
AACAAATGAACAAGACTTATTGAAATTGGAGCAATGGGACAGTTTATGGAATTGGTTTAACATAACAACTGGC  
TGTGGTATATAAAAATATTCTAATGATAGTAGCAGGCTTAGTAGGTTTAAGAATAGTTTTTTACT---  
GTACTTTCTATAGTG-----AATAGAGTTAGGCAGGGATACTCACCT-----  
ATATCATTTGGCTGTTAGCTTGTTAATGCCATAGCAATAGTAGTAGCTGAG---  
GGAACAGATAGGATTATAGAAATAGCACAAAGAATTTTGTAGAGCT-----  
-----ATTATCCACATA-----CCTACAAGAATAAGACAGGGCTTTGAAAGGGCTTTACTA---TAA  
>HQ217984  
GCC---ACA-----  
GAAAAATAATGGGTACAGTTTATTATGGGGTACCTGTGTGG---AAAGAAGCAAAC---  
ACCACTCTATTTTGTGCATCAGATGCTAAAGGATATGAAACAGAG---GTACATAAT-----  
-----GTATGGGCTACA---CATGCTTGTGTACCCACAGAC---  
CCCAACCCACAAGAAGTGAAATTAGTC-----AATGTGACAGAAAAGTTTAAC-----  
-----ATGTGGAAAAATAACATGGTAGAACAGATGCATGAGGACATA---  
ATCAGTTTATGGGATCAAAGCCTA---AAGCCATGTGTAAAATTA---  
ACCCCACTCTGTGTTACTTTAACTTGCCTAATGTTACTAATGCTACTACACCTAAT-----  
-----  
-----ATCACTATGAGTGCTGCTGATGAAATAAAA---  
AATTGCTCTTTCAATGTCAACCACTGATGTAAGA-----  
GATAAGATGAAGAAAGAATATGCACTT---TTTTATAGCCTTGATATAGTAAACTGGATACT-----  
-----  
-----  
AATAATGATAGTACTGATTATAGGTTGACAAGTTGTAATACCTCAGTCATTACACAG---  
GCCTGTCCAAAGGTATCCTTTGAGCCAATTCCCATACATTTCTGTGCCCGGCTGGTTTTGCGATTCTAAAGT  
GTAAC---AATAAGACATTTAGT-----GGAAAAGGACCATGTAACAAT-----  
-GTCAGC---ACAGTACAATGCACACATGGAATTAAGCCAGTAGTATCAACT---  
CAACTGCTGTTAAATGGCAGTCTAGCAGAAGAAGAA-----  
ATAGTAATTAGATCTGACAATTTCTCAGACAAT-----GCTAAAACCATAATAGTACAGCTAGAA----  
-----ACCCCTGTAAAC-----ATTACTTGTAACAAGACCCAACAACAATACAAGAAAA-----  
-AGCATACATATA-----GCACCAGGGAGAGCA---TTT-----TATGCAACAGGAGAC-----  
-----ATAATAGGAGATATA-----AGAAAAGCATACTGT---AACATTAGTAGGGCT---  
CTGTGGAATAAACTTTACAAAAGATAGCTAACAAATTAGGA-----GAACAATTTAAT----  
-----AATATAACAAAACCTATCCTTTTAA-----  
GAATCCTCAGGGGGGATCCAGAAATTGTA---AGGTTCAACGTTAATTGTGGAGGGGAA---  
TTTAAGCAGCTCCAGGCAAGAGTCCTGGCTGTGGAAAGATACCTAAAGGATCAACAGCTCCTGGGGATTTGGG  
GTTGCTCTGGCAAACTCATTTGCACCACCTAATGTACCTTGGAAATAACAGTTGGAGT-----  
-----AACACATCTCTGGATGTGATTTGG-----AAT-----  
AACATGACCTGGATGCAGTGG---GAAAAAGAAGTTGACAAATTACACAAACATAATATAC---  
AATTTACTTTGAAGAATCGCAGAACCAACAAGAA-----  
-----

AAGAATGAACAAGAATTATTAGAAATTGGACAAATGGGCAAATTTGTGGAATTGGTTTAGCATAACAAATTGGC  
TGTGGTATATAAAAAATATTTCATAATGATAGTAGGAGGTTTGATAGGTTTAAGAATAGTTTTTGCT---  
GTGCTTTCTATAGTA-----AATAGAGTTAGGCAGGGATACTCACCA-----  
TTGTCAATTTGCTGTTAGCTTGCTTAACGCCACAGCCATAGCAGTAGCTGAG---  
GGAACAGATAGGATCATAGAAATAGTACAAAGACTTTGCAGAGCT-----  
-----ATCCGTAACATA-----CCTACAAGAATAAGACAGGGCGCAGAAAGGCTTTTGCTA---TAA  
>JF689886  
GCA---GAT-----  
CAATTGTGGGTCACAGTCTATTATGGGGTACCTGTGTGG---AAGGAAGCAACC---  
ACCACTTTATTTTGTGCATCAGATGCTAAAGCATATGTTAAAGAG---GTACATAAT-----  
-----GTCTGGGCCACA---CATGCCTGTGTACCCACAGAT---  
CCCAACCCACAAGAAGTGGTATTGAAA-----AATGTAACAGAAAATTTTAAAC-----  
-----ATGTGGAAAAATAACATGGTAGATCAGATGCATGAGGATATA---  
ATCAGCTTATGGGATGAGAGCCTA---AAGCCATGTGTAAAATTA---  
ACCCCACTCTGTGTTACTTTAAATTGCACTAGTAATATCACTACGGCCACT-----  
-----  
-----GTTAGTCCAGAGATGACAGGAGAAATAAAA---  
AACTGCTCTTTCAATATCACCAAGCAGAAGA-----  
GATAAGGTGCGGAGAGAATATGCACTC---TTTTATAGCCTTGATATACTAGCAATAGGTGAT-----  
-----  
-----  
AGTAATGATAGCTATATAATAAGAAGTTGTAATACCTCAGTCATTACACAG---  
GCCTGTCCAAAGGTATCCTTTGAGCCAATTCCCATACATTATTGTACCCCGGCTGGTTTTGCACCTTCTAAAGT  
GTAAT---GATAAGAATTTCAAT-----GGAACAGGACCATGTAAAAAT-----  
-GTCAGC---ACAGTACAATGTACACATGGAATTAAGCCAGTAGTATCAACT---  
CAACTGTTGTAAATGGCAGTCTAGCAGAAGAAGAC-----  
ATAATAATTAGATCTGAAAATTTCTCTAACAAT-----GCTAAAACCATAATAGTACAGCTGAAT---  
-----GAAACTATAGAA-----ATTAATTGTACAAGACCCAACAACAATACCAGAAAA---  
-AGTATAAATATG-----GGTCCAGGGAGGGCA---ATT-----TATGCAGCAGGACAA-----  
-----ATAATAGGAAATATA-----AGACAAGCATATTGT---ACCATTAATGGTACA---  
AAATGGAAGGATACTTTAAAAAGGATAGTTGAAAAATTAGGA-----GAACAATTTAAG---  
-----AATAATGAAACAATCTTTAGG-----  
AGTTCCTCAGGAGGGGACCCAGAAATTACA--ATGCACACTGTTAATTGTGGAGGGGAA---  
TTTAAACAGCTCCAGGCAAGAGTCCCTGGCTGTGGAAAGATACCTAAAGGATCAACAGCTCCTAGGGATCTGGG  
GTTGCTCTGGAAACTCATCTGCTCCACTAATGTGCCTTGGAATACTAGTTGGAGT-----  
-----AATAAATCTTTGAATGAAATTTGG-----GAT-----  
AACATGACCTGGATGCAGTGG---GATAAAGAAGTTAGCAATTACACAGATTTAATATAC---  
AACCTACTTGAAAAATCACAGACCCAACAGGAA-----  
-----  
AAGAATGAACAAGAATTATTAGAGTTAGACAAATGGTCAAGTCTGTGGAGTTGGTTTAGCATATCAAATTGGC  
TGTGGTATATAAGAATATTTCATAATGATAGTAGGAGGCTTGATAGGTTTAAGAATAGTCTTTTGCT---  
GTGCTTTCTATAGTG-----AATAGAGTTAGGCAGGGATACTCACCA-----  
TTATCGTTTGTCTGTCTGCTTGTCTTAATGCTACAGCAATAGCAGTAGCTGAA---  
GGGACAGATAGGATTATAGAAATAGCAAGGGGAATTTTGTAGAGCT-----  
-----ATTTGCAACATA-----CCTAGAAGAATCAGACAGGGCTTGGAAGGCTTTTGCTA---TAA  
>JF320385  
GCT---GCA-----  
CAACAATTGTGAGTCACAGTCTATTATGGGGTACCTGTATGG---AAAGAAGCTAAC---  
ACCATTCTATTTTGTGCATCAGATGCTAAAGCATATGATACAGAG---GTGCATAAT-----  
-----GTTTGGGCCACA---CATGCCTGTGTACCCACAGAC---  
CCCAACCCACAAGAAGTAGTATTGGGA-----AATGTGACAGAAAATTTTAAAC-----  
-----ATGTGGAAAAATAACATGGTAGAACAGATGCATGAGGATATA---  
ATCAGTTTATGGGATGAAAGCCTA---AAGCCATGTGTAAAATTA---  
ACCCCACTTTGTGTTACTTTAAATTGCTCTGATTGGGAGAATGCTAATAATACCATTAATAGTACTGCTACTC  
CT-----  
-----ACTACTAGTATCAATAGTAGTAGGGAGTTGGCGTTGGGGAAAGGAGAAATAAAA---  
AACTGCTCTTTCTATGTACCTCAGAG-----  
GATAAGAAGCACAAAGAACGTGCACTG---TTTTATAAACTTGATGTAGTATCAATGGATGAT-----  
-----  
-----

AATAATACTACCTATAGGCTGATAAGTTGTAATACCTCAGTCATTAAACAG---  
GCCTGTCCAAAGGTATCCTTTGAGCCAATTCTTATACATTATTGTGCCCCTGCTGGTTTTGCGATTCTAAAGT  
GTAAC---AATAAGACATTCAAT-----GGATCAGGACCATGTACAAAT-----  
-GTTAGT---ACAGTACAATGTACACATGGAATTAAGCCAGTAGTATCAACT---  
CAACTGCTGTTAAATGGCAGTCTAGCAGAAGAAGAA-----  
ATAGTAATTAGATCTGAAAATTTCTCAGATAAT-----GCTAAAACCATAATAGTGCAGCTAAAT----  
-----GAAACTGTAGAG-----ATTAATTGTACAAGACCCAGCAACAATACAAGAAAG-----  
-AGTATACATCTA-----GGACCAGGGAGCACA---TTT-----TTTGCAACAGGAGAA-----  
-----ATAATAGGAGATATA-----AGACAAGCACATTGT---AACATTAGTGGAGTA---  
AAATGGAATAACACTTTAGAAAAGGTAGTTAAAAAATTAGGA-----GGACAATTTAAT----  
-----ACTAGCAAATAATCTTTAAT-----  
CAATCCTCAGGAGGGGACCCAGAAATTGTA--ATGCACAGTTTTTAATTGTGGAGGAGAA--  
TTTAAACAGCTCCAGGCAAGAAATCCTGGCTGTAGAAAAGATACCTAAAGGATCAACAGCTCCTGGGGATTGTTGGG  
GTTGCTCTGGAAGAACTCATTTGCACCACTGCTGTGCCTTGGAAATACTAGTTGGAGT-----  
-----AGTAAAACAAATCTGAGTACAATTTGG-----GAT-----  
AACATGACCTGGATGCAGTGG---GAAAAAGAAATTAGCAATTACACAGACTTAATATAC---  
ACCCTAATTGAAGAATCGCAGAACCAACAGGAA-----  
-----  
AAGAATGAACAAGACTTACTGGCATTAGATAAAATGGGCAAGTTTGTGGAATTGGTTTGACATAACAAAATGGC  
TGTGGTATATAAAAATATTTCATAATGATAGTAGGAGGCTTGATAGGTTTAAGAATAGTTTTTTACT---  
GTATTTTCTTTAGTA-----AATAGAGTTAGGCAGGGATATTCACCA-----  
TTATCGTTTGTCTGTTAGCTTGTTCACGCCATAGCCATAGCAGTAGCTGAG---  
GGAACAGATAGGGTTATAGAAAATATTACAAAGAGCTTTTAGAGCT-----  
-----ATCCTCCACATA-----CCTAGAAGAATTAGACAGGGCTTGGAAGGGCTTTGTTG---TAA  
>JF320539  
GCA---GAA-----  
CAATTGTGGGTCACAGTCTATTATGGGGTACCTGTGTGG---AAAGAAGCAACC---  
ACCACTCTATTTTGTGCATCAGATGCTAAAGCATATGATACAGAG--GTACATAAT-----  
-----GTTTGGGCCACA---CACGCCTGTGTACCCACTGAC---  
CCCAGCCCACAAGAAATAAATTTGAAA-----AATGTGACAGAAGATTTTAAC-----  
-----ATGTGGAAGAAATGACATGGTAGATCAGATGCATGAGGATATA---  
ATCAGTTTATGGGATCAAAGCCTG---AAGCCATGTGTGAAATTG---  
ACCCCACTCTGTGTCACTTTAACTGCAGTAACTTAAATAATAGCACTAGGAATGAG-----  
-----  
-----AGTAATACTAACTTGGAGGGGAAAGAAGAAATGAAA---  
AACTGCTCTTTCAATATCACCACAAGCATAAAA-----  
GATAAGGTGCAGGGACAATATGCATTG--TTTTATAGTCTTGATATAGTACAAATAGATAAT-----  
-----  
-----  
GATAATACTAGTTATAGGTTGAGAAGTTGTAACACCTCAGTCATCACACAA---  
GCCTGCCCAAAGATGTCATTTGAGCCAATTCCCATACATTTATTGTGCCCCGGCTGGTTTTGCGATTCTAAAGT  
GTAAT---GATAAGAAGTTCAAT-----GGATCAGGACCATGTACAAAT-----  
-GTCAGC---ACAGTACAATGTACACATGGGATTAGGCCAGTAGTATCAACT---  
CAACTGCTGTTAAATGGCAGTCTAGCAGAAGAGGAG-----  
GTAGTAATTAGATCTGAAAACCTTACGAACAAT-----GCTAAAACCATAATGGTCCAGTTGAAA----  
-----GATTCTGTAAAC-----ATTACTTGTGCAAGACCCAATAACAATACAAGGAAA-----  
-AGTATAAACATA-----GGACCAGGGAGAGCA---TTT-----TATGCAACAGGAGAC-----  
-----ATAATAGGAAATATA-----AGACAAGCACATTGT---AACATTAGTGGAAACA---  
AAATGGAATAACACGTTAATGCAGGTAGTTAAAAAATTAGAA-----GAACAATTT-----  
-----AATAAAACAATAACTTTTAAG-----  
CCCTCCTCAGGAGGGGACCCAGAAATTGTA--ATGCACACTTTTAATTGTGGAGGAGAA--  
TTTAAGCAGCTCCAGGCAAGAGTCTGGCTGTGGAAGATACCTAAAGGATCAACAGCTCCTGGGGATTGTTGGG  
GTTGCTCTGGAAGAACTCATCTGCACCACTGCTGTGCCTTGGAAATGCTAGTTGGAGT-----  
-----AATAAATCTATGAATGAGATTTGG-----AAT-----  
AACATGACCTGGATACAGTGG---GAAAGAGAAATTGACAATTACACAGGCTTAATATAC---  
AGCTTAATTGAACAATCGCAAAACCAGCAAGAA-----  
-----  
AAGAATGAAGTAGATTTATTGGCATTAGATAAAATGGGCAAGTTTGTGGGATTGGTTTGATATATCAAATTGGC  
TGTGGTATATAAAAATATTTCATAATGATAGTAGGAGGCTTGATAGGTTTAAGAATAGTCTTTACT---  
ATACTTTCTATAGTG-----AATAGAGTTAGGCAGGGGTACTCACCA-----

CTGTCGTTTGGCTGTTAGCTTGCTCAATACCATAGCCATAGTAGTAGCTGAG---  
 GGAACAGATAGGGTTCTAGAAATATTGCAAAGAGCTGGTAGAGCT-----  
 -----ATCCTTAATATA-----CCCACAAGAATAAGACAGGGCTTCGAAAGGGCTTTGCTA---TAA  
 >JF320131  
 GCT---CAA-----  
 CAATTGTGGGTCACAGTCTATTATGGGGTACCTGTGTGG---AAAGAAGCAACC---  
 ACCACTCTATTTTGTGCATCAGATGCTAAGACATATGATACAGAG---GTACATAAT-----  
 -----GTTTGGGCCACA---CATGCCTGTGTACCCACAGAC---  
 CCCAGCCCACAAGAAGTAGAATTGGAA-----AATGTGACAGAAGATTTTAAT-----  
 -----ATGTGGAAAAATGATATGGTAGAACAAATGCATGAGGATATA---  
 ATCAGTTTATGGGATGAAAGCCTA---AAGCCATGTGTAAAATTA---  
 ACTCCACTCTGTGTTACTTTAAATTGTACTGATTATCAGGGAAATCAGACTAATGCC-----  
 -----  
 -----ACTGTTACTACTAATATGAAA---  
 AACTGCTCTTTCAATGTCACCACAGACAGAAGA-----  
 GATAAGATGAAAAAAGAAAAATGCACCTT---TTTTATAATCTTGATATAGTACAAGTAGAAAAAG-----  
 -----  
 -----  
 AACAGTACTAGCTATAGGTTGGTAAGTTGTAATACCTCAGTCATTACACAG---  
 GCCTGTCCAAAAGTATCCTTTGATCCAATTCCCATACATTACTGTACCCCGGCTGGTTTTGCTATTCTAAGGT  
 GTAAT---AATAAGACATTCAAT-----GGAAAAGGACCATGTACAAAT-----  
 -GTCAGT---ACAGTACAATGTACACATGGAATTAAGCCAGTAGTATCAACT---  
 CAACTGCTGTTAAATGGCAGCCTAGCAGAAGAAGAG-----  
 GTAGTAATTAGATCTGAGAATCTCACAGACAAT-----GGTAAAACCATAATAGTACAACCTGAAA---  
 -----GATCCTGTAAAT-----ATTACTTGTGTAAGGCCCAATAACAATACAAGAAAA-----  
 -GGTATACATATA-----GGACCAGGGAGAGCA---ATG-----TTTACAACAGGAGAA-----  
 -----ATAGTAGGAGATATA-----AGACAAGCACATTGT---AACCTTAGTGTGGAA---  
 AAATGGGATGCCGCTTTAGAACAGATAGTTGGAAAATTAGGA-----GCACAACCTTAAT---  
 -----ATTACATCAATAAGATTTGCT-----  
 AATTCCTCAGGAGGGGACCCAGAAATTGTA---ATGCATAGTTTTAATTGTAGAGGGGAA---  
 TTTAAACAGCTCCAGGCAAGAGTCCCTGGCTGTGGAAAGATACCTAAGAGACCAACAGCTCCTGGGAATTTGGG  
 GTTGCTCTGGAAAACCTCATCTGCACCACTGCTGTGCGTTGGAATAATAGTTGGAGT-----  
 -----AATAAATCTCAGAATGACATTTGG-----AAC-----  
 AATATGACCTGGATGCAGTGG---GAAAGAGAAATTGACAATTATACAGGCTTAATATAC---  
 AACTTACTTGAAGAAGCGCAAAATAAACAAAGAA-----  
 -----  
 AAGAATGAACAAGAATTATTGGAATTGGATAAATGGGCAAGTTTGTGGAGTTGGTTTGATATAACAACTGGC  
 TGTGGTATATAAGAATAGTCATAATGATAGTAGGAGGCTTGATAGGTTTAAGAATAGTTTTTACT---  
 GTACTTTCTATAGTG-----AATAGAGTTAGGCAGGGATACTCACCC-----  
 TTATCGTTTGGCTGTCTAGCTTGTTAACGCCATAGCCATCGCAGTAGCTGAA---  
 GGGACAGATAGGATTATAGAAGTAGTACAAAGGGCTGGTGGAGCT-----  
 -----GTTCTCCACATA-----CCTAGAAGAATAAGACAGGGCTTGGAAGGGCTTTGCTA---TAA  
 >HM638503  
 GCT---GCA-----  
 GGGAAATTTTGGGTCACAGTTTATTATGGGGTACCTGTGTGG---AAAGAAGCAAAC---  
 ACCACCTTATTTTGTGCATCAGATGCTAAAGCATATGATACAGAG---ATGCATAAT-----  
 -----GTTTGGGCCACA---CATGCCTGTGTACCCACAGAC---  
 CCCAACCACAAGAAATAGACTTAGAG-----AATGTGACAGAAGAATTTAAC-----  
 -----ATGTGGAAAAATGACATGGTAGAACAAATGCATGAGGATGTA---  
 ATCAATTTATGGGATCAAAGCCTA---AAACCATGTGTAAAATTA---  
 ACTCCACTCTGTGTTACTTTAAATTGCACTAAGTTAAATGCTACTATCTTAGCAAATCTTACTAGT-----  
 -----  
 -----AATGGCAACCATAGTATGGGGAACATGACAGAGGAAATGAAA---  
 AACTGCACCTTTTAATATCTCCACAAGTGTAATA-----  
 GATAAGATGGAGAAAAAATATGCATTT---  
 TTTTATAACCTTGATATAGTACAAATAATAGATAGTAGTAACAGACAAATAAATAGTAGTAAC-----  
 -----  
 AGACAAATAAACGATAGTAATAACAGCACTAATGACAGCACTAGCTATAGGTTGATAAGTTGTAATACCTCAG  
 TCCTTACGCAG---  
 GCCTGTCCAAAGGTATCCTTTGAACCAATTCCCATACATTATTGTGCCCGGCTGGTTTTGCGATTCTAAAAAT

GTAAG---GATGTAACATTCCAG-----GGACAAGGAAATTGTTCAAAT-----  
 -GTCAGC---ACAGTACAATGTACACATGGAATTAGGCCAGTAGTATCCACT---  
 CAATTGCTGTTAAATGGCAGTCTAGCAGAAAAGGAG-----  
 GTAGTAATTAGATCTGAAAACCTCTCTCGGACAAT-----GCTAAAACCATAATAGTACAGCTGAAT----  
 -----AAAACTGTAGTA-----ATTAAGTGTACAAGACCTAACAACAATACAAGAACA-----  
 -GGTATACATATG-----GGACCAGGGGAAAGTA---TTT-----TATGCAACAGATAAT-----  
 -----ATAATAGGAGATATA-----AGAAAAGCACACTGT---ACCATTAATAGAACA---  
 GAATGGAATAACACTTTAAGACAGGTAGCTACAAAATTAAGG-----GAACAATTTAAT----  
 -----AAAAGTGAAATAGCCTTTAAG-----  
 CCCTCCTCTGGAGGGGACCCAGAAATTGTA--ATGCACACATTTAATTGTGGAGGGGAA---  
 TTTAAGCAGCTCCAGGCAAGAGTCCTAGCTGTGGAAAGATACCTAAAGGATCAACAGCTCCTAGGGATGTGGG  
 GTTGCTCTGGAAAACCTCATCTGCACCACTGCTGTGCCTTGGAATACTAGTTGGAGT-----  
 -----AAGAATACG--AATACATCTTTAGATAAGATTTGG-----GAT-----  
 ACCATGACCTGGATGCAGTGG---GAAAAAGAAATTGATAATTACACAGGTTTAATATAC---  
 ACCTTACTTGAAGACTCGCAACTCCAACAAGAC-----  
 -----  
 AAAAAATGAACAAGAATTATTAGAAATTAGATAAAATGGGCAAGTTTGTGGAATTGGTTTAACATAACAACTGGC  
 TGTGGTATATAAAAAATATTACATAATGATAGTAGGAGGCTTGATAGGTTTAAGAATAGTTTTTTTCT---  
 ATACTTTCTATAGTG-----AATAGAGTTAGGCAGGGATACTCACCA-----  
 TTATCGTTTGTCTGTTAGCTTGTTTGATGCCATAGCCATAGCAGTAGCTGAA---  
 GGGACAGATAGGATTATAGAAGGATTACGAAGAGTTTTTTAGAGCA-----  
 -----GTTCTCCACGTA-----CCTACAAGAATAAGACAGGGCTTGGAAGGGCTTTGCTA---TAA  
 >KT124801  
 GCT---GCA-----  
 GATCAAAATGTGGGTCACAGTCTATTATGGGGTACCTGTGTGG--AGAAATGCAACC---  
 ACCGTTCTCTTCTGTGCATCAGATGCTAAAGCATATGAGACAGAG--GTACATAAT-----  
 -----GTTTGGGCCACA--CATGCCTGTGTACCCACAGAT---  
 CCCAGCCCACAAGAAATGGTATTGGAA-----AATGTGACAGAATATTATGAT-----  
 -----ATGTGGAAAAATAACATGGTAGATCAGATGCATGAGGATATA---  
 ATTAGTTTATGGGATCAAAGCCTA--AAGCCATGTGTAAAATTA---  
 ACCCCACTCTGTGTTACCTTAACTGCACTGATAATATTAACAATACCACTAATAATAAC-----  
 -----  
 -----AGGACCATTATAGAGAAAGGAGAAATAAAA---  
 AATTGCTCTTTCAATGTCACCACAAATATAAGA-----  
 GATAAGATGCAAAAAGAATATGCACTG--TTTTATAAACTTGATGTAGTACCAATAGATGGGAATAAT---  
 -----  
 -----  
 AATAATATTAGTAATTATACAAACTATAGGTTAGGAAGTTGTAACACCTCAGTCATTAGGCAG--  
 GCCTGCCCAAAAATATCCTTTGAACCAATTCCCATACATTATTGTGCCCGGCTGGTTTTGCGATTCTAAAAT  
 GTAAT---GATAAAAAATTCACT-----GGAAAAGGAGAATGTAACAAT-----  
 -GTCAGC--ACAGTTCAATGTACACATGGAATTAGGCCAGTAGTATCAACT---  
 CAACTGCTGTTAAATGGCAGCCTAGCAGAAGAGGAG-----  
 GTAGTAATTAGATCTGACAATTTCTCGAACAAT-----GCTAAAACCATAATAGTACAGTTGAAT----  
 -----CAATCTGTAGCA-----ATTAATTGTACAAGACCCAACAACAATACAAGAAAA---  
 -AGCATACATATA-----GCACCAGGGAGTGCA---TTT-----TATGCAACAGGAGAT-----  
 -----ATAATAGGAGATATA-----AGGCAAGCACATTGT---AACCTTAGTAGAAAA---  
 GCATGGAACAACACATTAAGACAGGTAGCTGAAAAAATTAGGA-----GAGGAATTTTCAG---  
 -----AATAAAACAATAATCTTTACG-----  
 AAATCCTCAGGAGGGGACCCAGAAATTGTA--ATGCACAGTTTTAATTGTGGAGGGGAA---  
 TTTAAGCAGCTCCAGGCAAGAGTCCTGGCTGTAGAAAGATACCTAAGGGATCAACAGCTCCTGGGGATTTGGG  
 GTTGCTCTGGAAAACCTCATCTGCACCACTGCTGTGCCTTGGAATGTTAGTTGGAGT-----  
 -----AATAAACTCTGGAACAGATTTGG-----GAT-----  
 AATATGACCTGGATGCAGTGG---GAAAAAGAAATTGACAATTACACAGGAATAATATAC---  
 ACTTTGCTTGAAAAATCGCAAAACCAACAAGAA-----  
 -----  
 AAGAATGAACAAGAGTTATTGGAATTGGACAAATGGGCAAGTCTGTGGGATTGGTTTGACATAACAAATTGGC  
 TGTGGTATATAAGGATATTACATAATTATAGTAGGAGGCTTGATAGGTTTAAGAATAGTTTTTTGCT---  
 GTGCTTTCCATAGTG-----AATAGAATTAGGCAGGGTTACTCACCA-----  
 TTATCGTTGGCTGTTAGCTTGCTCAACGCCACAGCAATAGCAGTAGCTGAG---

GGAACAGATAGGATTATAGAATTAGCACAAAGAATTTTTAGAGCT-----  
 -----TTTCTCCACATC-----CCTAGAAGAATAAGACAGGGCTTCGAAAGGGCTTTGCTA---TAA  
 >JN687763  
 GCT---GCA-----  
 AACCAATCGTGGGTACAGTCTATTATGGAGTGCCTGTGTGG--AAAGAAGCAGTC---  
 ACAACTCTATTCTGTGCATCAGATGCTAAAGCATATGAGACAGAA--GTGCATAAT-----  
 -----GTTTGGGCCACA---CATGCCTGTGTACCCACAGAT---  
 CCCAATCCACAAGAAGTAATGTTAGAA-----AATGTGACAGAAAATTTTAAC-----  
 -----ATGTGGAAAAATAATATGGTAGATCAGATGCATGAGGATATA---  
 ATCAGTTTATGGGATCAAAGCCTA---AAACCATGTGTAAAATTA---  
 ACCCCACTCTGTGTTACTTTGCATTGCACTAATTACAATGGTACTAAACCTAAT-----  
 -----  
 -----ATTAGTGAAGAAATGAAAGGAGAAATAAAA---  
 AACTGCTCTTTCAATGTCTCCACAGATGTAAGA-----  
 GATAAGGTAAAGAAACAAAATGCATTG---TTTTATAATCTTGATATAATACAAATAAGTGATGATACAACA-  
 -----  
 -----  
 CAAGGAAATAATAGTAATAATATTTATAGGTTGACAAGTTGTAATACCTCAGTCATTACACAG---  
 GCTTGTCCAAAGGTAACCTTTGAGCCAATTCCCATACATTATTGTGCCCCGGCTGGTTTTGCAATTCTAAAGT  
 GTAAC---AATGAAACATTCAAT-----GGAACAGGACCGTGTACAAAT-----  
 -GTCAGC---ACAGTACAATGTACACATGGAATTAAGCCAGTAGTATCAACG---  
 CAACTACTGTTAAATGGTAGTCTATCAAAGCAGGG-----  
 GTAATACTTAGATCTGAAAATTTACGGACAAT-----GTAAAAGCATAATAGTACAGTTGAAT----  
 -----GAATCTGTAACA-----ATTAATTGCACAAGACCCAACAATAATACAAGAAAA-----  
 -AGTATAAATATA-----GGACCAGGGAGGGCA---TGG-----TATGCAACAGGAGAA-----  
 -----ATAATAGGAAACATA-----AGACAAGCACATTGT---AACATTAATAAAGAA---  
 AAGTGGAATAAACTTTAGAAAAGATAGTTGAAAAATTAAGA-----GAACAATATGGG----  
 -----AATAATAAAACAATAATCTTTAAG---  
 CCACCACCTCCAGGAGGGGACCCAGAAATTGTA--ACACATAGTTTCAATTGTGCAGGGGAA--  
 TTTAAACAGCTCCAGGCAAGAGTCCTGGCTGTGGAAAGATACCTAAAGGACCAACAGCTCCTGGGAATTTGGG  
 GTTGCTCTGGAAACTCATTTGCACCACTACTGTGCCTTGAATACTAGTTGGAGT-----  
 -----AATAGATCTCTAGATTACATTTGG-----GGT-----  
 AACATGACCTGGATGGAGTGG---GAAAAAGAAATTGAAAGTTACACAAGCGAAATATAC---  
 ACCTTAATTGAAGCATCGCAGAACCAACAAGAA-----  
 -----  
 AAGAATGAGCAAGAATTATTGGAATTAGATAAATGGGCAAGTTTGTGGAATTGGTTTAACATATCAAATTGGC  
 TGTGGTATATAAGAATATTCATAATGATAGTAGGAGGCTTGATAGGTTTAAGAATAGTTTTTACT---  
 GTACTTTCTATAGTG-----AATAGAGTCAGGCAGGGATACTCACCC-----  
 TTATCGTTTGTCTGTTAGCTTGCTCAATACAGTAGCCATAGTAGTAGCTGAG---  
 GGAACAGATAGGATTATAGAAGTGTTACAAAGAATTTTTAGAGCT-----  
 -----GTTATCCACATA-----CCTGTAAGAATAAGACAGGGTTTAGAAAGGGCTTTGCTA---TAA  
 >JQ403073  
 GCT---GTA-----  
 GAACAGTTGTGGGTACAGTCTATTATGGGGTACCTGTGTGG--AAAGAAGCAACC---  
 ACCACTCTATTTTGTGCATCAGATGCTAAATCATATGACACAGAG---GTACATAAT-----  
 -----GTTTGGGCCACA---CATGCCTGTGTACCCACAGAC---  
 CCCAGCCCACAAGAAGTATTCTACCA-----AATGTGACAGAAAACCTTTAAC-----  
 -----ATGTGGAAAAATAACATGGTAGACCAAATGCATGAGGATATA---  
 ATCAGTTTATGGGATCAAAGCCTA---AAGCCATGTGTAAAATTA---  
 ACCCCACTCTGTGTCACTTTAAATTGCACTGATTTTGGGAATGCTACTAATACTGGGAATGTTACTAATGGTG  
 GGGAAAATGGT-----  
 -----ACTAATACTAATGACACATTAAGAATGGAGAAAGGAGAAATAAAA---  
 AACTGCTCTTTCAATATCACCTCAAACATAAGA-----  
 GATAAAATGCAGAAAGAAAATGCACTT---  
 TTTTATAGAGATGATCTAGTGCCAATAGCTAATGATACTGCCAGCCAGACCAATATTAGCGATAGT-----  
 -----  
 AATATTACCAGCAATAATAATACTACCAGATATAAGAAATATATATTGATAAGTTGTAACACCTCAGTCATCA  
 CACAG---  
 GCTTGTCCAAAGGTATCCTTTGAGCCAATTCCAATACATTATTGTGCCCCGGCTGGTTTTGCGATTCTAAAGT  
 GTAAC---GAAGAAGAGTTCAAT-----GGAACAGGACCATGTAAAAAT-----

-GTCAGC---ACAGTACAATGTACACATGGAATCAGGCCAGTAGTATCAACT---  
 CAACTACTGTAAATGGCAGTCTAGCAAAAGGAGAG-----  
 GTAGTAATTAGATCTGCCAACATCTCAGACAAT-----GCTAAAACCATAATAGTACAGCTGAAC----  
 -----GTATCTGTAATA-----ATTAATTGTACAAGACCCAACAACAATACAAGAAAA-----  
 -AGTATACTTATA-----TCACCAGGGGAGAGCA---TTT-----TATGCAAGAGAAGGG-----  
 -----ATAATAGGAGATATA-----AGAAAAGCACATTGT---AACATTAGTAGAACA---  
 GAATGGAATAGGACTCTAAACCAGATAGCTGAAAAATTAAAA-----TTAAGCAAAGAGTTTAAG-  
 -----AATAAAACAATAGTCTTTAAA-----  
 CCATCCTCAGGAGGGGACCCAGAGATTGTG---ATGCACAGTTTTAATTGTGGAGGGGAA---  
 TTTAAGCAGCTCCAGGCAAGAAATCCTGGCTGTGGAAAGATACCTACAGGATCAACAGCTCCTGGGGATTTGGG  
 GCTGCTCTGGAAGACTCATTTGCACCACTGCTGTGCCTTGAATACTAGTTGGAGT-----  
 -----AATAAATCTCTGAATAAGATTTGG-----GAT-----  
 AACATGACCTGGATGGAATGG---GAAAGAGAAATTGACAAATTACACAGGCTTAATATAC---  
 AACCTACTTGAAGAATCGCAGAACCAACAAGAA-----  
 -----  
 AAGAATGAACAAGAATTATTGGAATTGGATAAATGGGCAAGTTTGTGGACTTGGTTTAACATAACAAATTGGC  
 TGTGGTATATAAAATTATTCATAATGATAGTAGGAGGCTTGATAGGTTTAAGAATAATTTTTTGCT---  
 GTACTTTCTATAGTG-----AATAGAGTTAGGCAGGGATACTCACCA-----  
 TTATCGTTTGCTGTTAGCTTGCTCAATACCACAGCAATAGCAGTAGCTGAG---  
 GGAACAGATAGGATTATAGAAATAGTACAAAGGGCTTTTAGAGCT-----  
 -----ATTCTCCACATA-----CCTACAAGAATAAGACAGGGTTTGGAAGGGCTTTGCTA---TAA  
 >JQ403078  
 GCT---ACA-----  
 GAAAAATTGTGGGTCACAGTCTATTATGGGGTACCTGTGTGG---AAAGAAGCAACC---  
 ACCACTCTATTTTGTGCATCAGATGCTAAGGCATATGCTGCAGAG---GCACATAAT-----  
 -----GTTTGGGCTACA---CATGCCTGTGTACCCACAGAC---  
 CCCAACCCACAAGAAGTAGTATTGGGA-----AATGTGACAGAAAATTTTAAT-----  
 -----ATGTGGGAAAACAACATGGGTAGAACAGATGCATGAGGATATA---  
 ATCAGCTTATGGGATCAAAGCCTA---AAGCCATGTGTAAAATTA---  
 ACCCCACTCTGTGTTACTTTACATTGCACTAATTATAATAATACTAATAATACTGTTACCAATACTAATAATA  
 CT-----  
 -----GTTACCAATACTAGCAATAGTGAAATACCAATGGAGGTAGGAGAAATAAAA---  
 AACTGCTCTTTCAATATTTCTCATCAATAAAT-----  
 AAAAAGGTAAAGAAAGAATATGCACCT--TTTTATAGCATTGATGTAGTACCATCAGAAGAA-----  
 -----  
 -----  
 AATAATACAAGCTATACATTGAGAAGTTGTAACACCTCAGTCATTACACAA---  
 GCTTGTCCAAAGGTATCCTTTGAACCAATTCCCATACATTATTGTGCCCCGGCTGGTTTTGCGATTCTAAAAT  
 GTAAT---GCTGAGGATTTCAAT-----GGAACAGGACCATGTAAAAAT-----  
 -GTCAGT---ACTGTACAATGTACACATGGAATTAAGCCAGTAGTGTCAACT---  
 CAACTGCTGTAAATGGAAGCTAGCAGAAAAAGAG-----  
 GTAGTAATCAGGTCTGAAAATTTACGAACAAT-----GCTAAAACCATAATAGTACAGCTGAAG---  
 -----GACCCTATAAAA-----ATTAATTGTACAAGACCCAACAACAATACAAGAAGA---  
 -GGTATACATATA-----GGACCAGGGGGAGCA---TTG-----TATGCAACAGGACAA-----  
 -----ATAATAGGAGATATA-----AGACAAGCATATTGT---AACATTAGTAGAATA---  
 CAATGGAATAATACTTTAATACAGATAGTTAAAGTATTACAA-----GAACAATTTAAA---  
 -----AATAAAACAATAGTCTTTAAT-----  
 CGATCATCAGGAGGGGACCCAGAAATTGTA---ATGCACAGTTTTAATTGTGGAGGGGAA---  
 TTTAAACAGCTCCAGGCAAGAGTCCTGGCTGTGGAGAGATACCTAAAGGATCAACAGCTCCTGGGAATTTGGG  
 GTTGCTCTGGAAACTCATCTGCACCACTGCTGTGCCTTGAATACTAGTTGGAGT-----  
 -----AATAAATCTCTGGATGAGATTTGG-----AAT-----  
 AACATGACCTGGATGCAGTGG---GAGAAAGAAATTGACAAATTACACAGACTTAATATAC---  
 AATTTAATTGAACAATCGCAAAACCAGCAAGAA-----  
 -----  
 AAGAATGAACAAGAATTATTGGAATTGGATAAGTGGGCAAGTTTGTGGAATTGGTTTAGCATAACAAATGGC  
 TGTGGTATATAAAAATATTCATAATGATAGTAGGAGGTTTAATAGGTTTAAGAATAGTTTTTTGCT---  
 GTGCTTTCTATAGTA-----AATAGAGTTAGGCAGGGATATTCACCA-----  
 TTATCGTTGGCTGTTAGTTTGTCTTAATGCCACAGCTATAGCAGTAGCTGAG---  
 GGGACAGATAGGATTCTAGAAAGTAGTACAGAGAATTGGTAGAGCT-----  
 -----ATTATACACATA-----CCTACAAGAATAAGACAAGGCTTTGAAAGGGCTTTGCTG---TAA

>JQ610064

GCT---GCA-----  
GAAAAATTGTGGGTCACAGTCTATTATGGGGTACCTGTGTGG---AGAGATGCAAAT---  
GCTACCCCTATTTTGC GCATCTGATGCTAAAGCATATGTTACAGAG---GTACATAAT-----  
-----GTTTGGGCCACA---CATGCCTGTGTACCCACAGAC---  
CCCAACCCACAAGAATTAGTATTAGAA-----AATGTGACAGAAGATTTTAACT-----  
-----ATGTGGAAAAATAATATGGTAGACCAGATGCATGAGGATATA---  
ATCAGTCTGTGGGAACAAAGCCTA---AAACCATGTGTAAAATTA---  
ACCCCACTCTGTGTTACTTTAAATTGCACTGATCCAAAACCTTTAAATTACACTGATCTAAATAATTCAAGTT  
GCACTGATCTACAAGGCAACGAACTAGCAATAAT-----  
GGCACTGGTTCGGCTAGCAACATTAGTAATAGTTATAATAGCAGCTGGGAAGACATGAAAGGAGAAATAAAA-  
--AACTGCTCTTTCAATATCACCACAAGCATG-----  
AATAAGGTGCAACAAAAATATTCAATG---TTTAATAGACTTGATATAGTGCCAATAGATAAT-----  
-----  
GATAGTAATAGTACTAGCTATATGTTGATAAGTTGTAATACCTCAGTCATTACACAG---  
GCCTGTCCAAAGGTATCCTTTGAGCCAATTCCCATACATTATTGTGCCCCGGCTGGTTTTGCGATTCTAAAGT  
GTAAT---AATAAGACATTCAAT-----GGAACAGGGGAAATGTACAAAT-----  
-GTCAGC---ACAGTACAATGTACACATGGAATTAGACCAGTAGTATCAACT---  
CAACTGCTGTTAAATGGCAGTCTAGCAGAAGAGGAG-----  
GTAATAATTAGATCTGCCAACTTCTCGGACAAT-----GCTAAAACCATAATAGTACAGCTGAAG---  
-----GACCCTGTACAA-----ATTAATTGCACAAGACCCAACAACAATACAAGGAAA-----  
-AGTATACATATA-----GGACCAGGAAGAGCA---TTT-----TATACAACA---GAC-----  
-----ATAATAGGAGATATA-----AGACGAGCACATTGT---AACATTAGTAAAGCA---  
AGATGGAGGGAAGCTTTAAACAGACAAGTAAAAAATTAATA-----GAACAATATAAT-----  
-----ACATCAAAAATAATCTTTAAA-----  
CCATCCTCAGGAGGGGACCCAGAAATTGTA---ATGCACACCTTTAATTGTGGAGGGGAA---  
TTTAAACAGCTCCAGGCAAGAGTCCTGGCTATAGAAAGATACCTAAGGGATCAACAGATCCTAGGGATTTGGG  
GTTGCTCTGGAAGAACTCATTTGCACCACTACTGTGCCTTGGAATGCTAGTTGGAGT-----  
-----AAAAATAGATCTCTAGATGACATTTGG-----CAT-----  
AACATGACCTGGATGCAGTGG---GAAAAAGAAATTGAAATTACACAAGTACAATATAC---  
AACTTAATTGAAATATCGCAAAACCAGCAGGAA-----  
-----  
AAGAATGAACAAGAATTATTGGAATTGGATAAGTGGGACAGTTTGTGGAATTGGTTTGACATAACAACTGGC  
TGTGGTATATAAAAAATATTCAATGATAGTAGGAGGCTTAATAGGTTTAAAGAATAGTTCTTGCT---  
GTAATTTCTATAGTA-----AATAGAGTTAGGCAGGGATACTTACCA-----  
CTATCATTTGCTGTTAACTTGCTTAATACCATAGCTATAGCAGTAGGTGAG---  
GGGACAGATAGGGTTATAGAGGTAGTACAAAGAACTTGTAGAGCT-----  
-----ATTATCCACATA-----CCTAGAAGAATAAGACAGGGCTTGGAAGGGCTTTGCAA---TAG  
>HQ217713  
GCT---GCA-----  
GAACAATCGTGGGTCACAGTCTATTATGGGGTACCTGTGTGG---AGAGAAGCAACT---  
ACCACTCTATTCTGTGCATCAGATGCTAAAGCATATGACACAGAA---AAACATAAT-----  
-----GTTTGGGCCACA---CATGCCTGTGTACCCACAGAC---  
CCCAACCCACAAGAAGTACAATTA-----AATGTGACAGAAAATTTTAACT-----  
-----ATGTGGAAAAATAACATGGTAGACCAGATGCATGAGGATATA---  
ATCAGTCTATGGGATCAAAGCCTA---AAGCCATGTGTACAATTG---  
ACCCCACTCTGTGTTACTTTAAATTGCTCTGATACTATCAATGCCACTACTGCCAATAATACTATCAATGCCA  
CTACTACC-----  
-----ACTCCTACTATCAATGCCACTACTGCCAATAAGAGTATGGAAATAGGAGAAATGAGA---  
AACTGCTCTTTCAATATCACCAACATGGGA-----  
AAGAAAATGAAAGAATATGCGCTT---TTTTATAACCTTGATGTAGTGTCAATAGATGAAGAT-----  
-----  
-----AATAATAATAAAAACAAGCTATAGGTTGAAGAGTTGTAACACCTCAGTCATTACACAA---  
GCCTGTCCAAAGGTATCCTTTAAACCAATTCCCATACATTATTGTGCCCCGGCTGGTTTTGCGATTCTAAAGT  
GTAAC---GATAAGAAGTTCAAT-----GGAACAGGACCATGTGGAAAT-----  
-GTCAGC---ACAGTACAATGTACACATGGAATTAAGCCAGTAGTATCAACT---  
CAACTGCTGTTAAATGGCAGTCTAGCAGAAGAAGAG-----  
GTAGTAATTAGATCTGAAAATTTTACGAACAAT-----GTAAAACCATAATAGTACAGCTGAAA---  
-----AACCCTGTAATG-----ATTAATTGTACAAGACCCAACAACAATACAAGAAAA-----

-AGTATACATATG-----GGACCAGGGCAAGCA---TTT-----TATGCAACAGGAGCA-----  
 -----ATAATAGGAGATATA-----AGACAAGCACATTGT---AATATTAGTGAAAAA---  
 GAATGAAATAACACTTTAGAATTGATAGTTGGGAAATTAAGA-----GAACAATTTAAG-----  
 -----AATAAAACAATAGTCTTCAAT-----  
 CAATCCGCAGGAGGAGACCTAGAAATTGTA--ACGCACAGTTTTTAATTGTGGAGGGGAA---  
 TTTAAGCAGCTCCAAGCAAGAGTCCTGGCTGTGGAAAGATACCTAAAGGATCAACAGCTCCTGGGGATTTGGG  
 GTTGCTCTGGAAACTCATTTCACCACTACTGTGCCTTGAATACTAGTTGGAGT-----  
 -----AATAAATCTGTAGATTACATTTGG-----GCG-----  
 AACATGACCTGGATGCAGTGG---GAAAAAGAAATTGACAATTACACAAACGAAATATAC---  
 AGGTTAATTGAACAATCGCAAAACCAACAAGAA-----  
 -----  
 AAGAATGAACAAGAATTATTGGAATTGGATAAATGGGCAAGTTTGTGGAATTGGTTTGACATAACAACTGGC  
 TGTGGTATATAAAAATATTTCATAATGATAATAGGAGGCTTGGTAGGTTTAAGAATAGTTTTTACT---  
 GTACTTTCTATAGTA-----AATAGAGTTAGGCAGGGATATTCACCA-----  
 ATATCGTTTGTGCTGTTAGCTTGCTCAACACCACAGCCATAGCAGTAGCAGAG---  
 GGGACAGATAGAGTTATAGAAATAGTTCAAAGAGCTTGCAGAGCT-----  
 -----GTGCTACACATA-----CCTAGAAGAATAAGACAGGGCTTGGAAAGGATTTTGCTA---TAA  
 >MK383397  
 GCT---GCA-----  
 GAAAAATTTGTGGGTCACAGTATATTATGGGGTACCTGTGTGG---AAAGATGCGAAC---  
 ACCACTCTATTTTGTGCATCAGATGCTAAAGCATATGATAAAGAG---GCCCATAA-----  
 -----GTTTGGGCCACA---CATGCCTGTGTACCCACAGAC---  
 CCCAACCCACAAGAAGTAAAATTGGAA-----AATGTAACAGAAAATTTTAAC-----  
 -----ATGTGGAATAACATGGTAGAACAAATGCATGAAGATGTA---  
 ATTAGTTTATGGGATCAAAGTCTA---AAACCATGTGTAAAATTA---  
 ACCCCACTCTGTGTTACTTTAACTGCACTGATTATAATACTACTAGTACCAATAGCACTGGTGTGCTAGTA  
 ATGCTACTACC-----  
 ---ACTAGCGCTCCTGTTACTAGTACCACTAGTAGTCTAAAAATGGAGAGAGGAGAAATAAAA---  
 AACTGCTCTTTCAATGTCACTCAAACATGAGA-----  
 GATAAGGTACAGAAAGAATATGCACCT--TTTTATAGACTTGATGTAGAGCAAATAGGGAATAAT-----  
 -----  
 -----  
 GATAATAATAGTTATAGGTTGATAAGTTGCAATACCTCACGCCTTACACAG---  
 GCCTGCCCAAAAATATCCTTTGAACCAATTCCCATACATTATTGTGCCCGGCTGGTTTTGCGATTCTAAAAT  
 GTAAT---AATAAGGAGTTCAAT-----GGAACAGGACCATGTAGCAAT-----  
 -GTCAGC---ACAGTACAATGTACACATGGAATTAAGCCAGTAGTATCAACT---  
 CAGCTGCTGTTAAATGGCAGTCTAGCAGAAAGAGAG-----  
 GTAGTGATTAGATCTCAAAATTTCTCAGACAAT-----ACTAAAACCATAATAGTACAGCTGAAC---  
 -----GAAACTGTACAA-----ATTAATTGTACAAGACCCGGCAACAACACAAGAAAA---  
 -AGTATATCTCTA-----GGACCAGGGAGTGCA---ATT-----TATGCAACAGGACAA-----  
 -----ATAATAGGAGATATA-----AGACAAGCACATTGT---AACATTAGTACAGAA---  
 AAATGGAATAACACTTTAAACAGGTAGTTAAAAAATTAAG-----GGACAATATGGG---  
 -----GAAAATAAAACAATAATCTTTAGT-----  
 AGTTCCTCAGGAGGGGACCCAGAAATTGTA---ATGCACAGTTTTTACTTGTGGAGGAGAA---  
 TTTAAACAGCTCCAGGCAAGAATCCTGGCTGTGGAAAGATACCTAAGGGATCAACAGCTCCTGGGGATTTGGG  
 GCTGCTCTGGAAACTCATCTGCACCACTGCTGTGCCTTGAATAATAGTTGGAGT-----  
 -----AATAGATCTCAGGAGGACATTTGG-----CAG-----  
 AACATGACATGGATGCAGTGG---GAAAGAGAAATTGACAATTACACAGGCTTAATATAT---  
 GACTTACTTGCAAAATCGCAAGACCAACAAGAA-----  
 -----  
 AAGAATGAAAAAGAATTATTGGAATTAGATAAATGGGCAAGTTTGTGGAGTTGGTTTGACATAACACACTGGC  
 TGTGGTATATAAAAATATTTCATAATGATAGTAGGAGGCTTGGTAGGTTTAAGAATAGTTTTCTCT---  
 ATACTTTCTGTAGTA-----AATAGAGTCAGGCAGGGATACTACCA-----  
 TTATCGTTTGTCTATTAACTTGTTCAATACCACTGCTATAGCAGTAGCTGAG---  
 GGGACAGATAGGGTTATAGAAGTAGTACTAAGAATTTATAGGGCT-----  
 -----ATCCTCCACATA-----CCTAGAAGAATAAGACAGGGCTTTGAAAGAATTTTACTA---TAA  
 >KT124761  
 GCT---ACA-----  
 GAACAATGGTGGGTCACAGTATACTATGGGGTACCTGTGTGG---AAAGAAGCAACC---  
 ACCACTTTATTTTGTGCATCAGATGCTAAGGCATATGACAAAGAG---GCACATAAT-----

-----GTTTGGGCCACA---CATGCATGTGTACCCACAGAC---  
CCTGACCCACAAGAAATACCAATGCCA-----AATGTGACAGAAAATTTTAACT-----  
-----ATGTGGAAAAATGACATGGTAGAACAAATGCATGAGGATATA---  
ATCAGCTTATGGGATGAAAGCCTA---AAACCCTGTGTAAAATTA---  
ACCCCACTCTGTGTTAATTTAAGTTGTACTAATGATATTAACATTAATACTACCAATATAAATAATACTGGTA  
CCTCTACTAAT-----  
-----GTTACTACCAATAATACTAGTGATCTGGGAAAAATGTCAGAAGGAATGAAA---  
AACTGCTCTTTCAATATC---ACAAGCATAGGA-----  
AATGAGGTAAAGAAAGAATATGCACTC---TTTCATACACTTGATATAAAATCACAACATAGT-----  
-----  
-----  
GGAGGCTATATGTTGACAAGTTGTAATGCCTCAGTCATTAAACAG---  
GCCTGTCCAAAGACCTCCTTTGAACCAATTCCGATACATTATTGTGCCCCGGCTGGTTTTGCGATTTTAAAGT  
GTAAG---GATAAGAAGTTCAAT-----GGAACAGGACCATGTAAAAAT-----  
-GTCAGC---ACAGTACAATGTACACATGGAATTAAGCCAGTGGTGTCAACT---  
CAACTGCTGTTAAATGGCAGTCTAGCAGAAGAAGAG-----  
ATAGTAATTAGATCTGAAAAATTACAAACAAT-----GCTAAAAACATAATAGTACAGCTAAAA-----  
-----ACATCTGTAGAA-----ATAAATTGTACAAGACCCGGCAACAATACAAGAAGA-----  
-AGTATACGTATA-----GGACCTGGGAGTGCA---TAT-----TTCAACACAGGAGAC-----  
-----ATAATAGGAAATCCA-----AAACAAGCACATTGT---AACGTTAGTGGAGCA---  
GCATGGAAAGAACTTTAAAAACAGGTAGCTACAAAATTAAGA-----GAACAATTTATT-----  
-----AATAAAACAATTACCTTTACT-----  
AACCCTCAGGAGGAGACCCAGAAATCACA--ATGCACAGTTTTACTTGTGGAGGGGAA---  
TTTAAGCAGCTCCAGGCGAGAGTCCCTGGCTGTAGAAAGATACCTAAGGGATCAACAGCTCCTAGGAATTTGGG  
GTTGCTCTGGAAACTCATATGCCCCACCGCTGTGCCTTGGAAATGTTAGTTGGAGT-----  
-----AATAGAAGTAATCTAAGTGCTATTTGG-----GAA-----  
AACATGACCTGGATGGAGTGG---GAGAGAGAAATTGACAATCATACAGAATTAATATAC---  
ACACTATTAGAAAAATCGCAAAACCAGCAAGAA-----  
-----  
AAGAATGAACAAGAATTATTGGCATTGGATAAGTGGGCAGATTTGTGGAGTTGGTTTGATATAACAAAATGGC  
TGTGGTATATAAGAATATTCATAATGATAGTAGGAGGCTTAATAGGCTTAAGAATAGTTTTTTACT---  
GTACTTTCTATAGTG-----AATAGAGTTAGGCAGGGATACTACCA-----  
TTGTCATTTCGCTATTAGCTTGCTTAATGCCACAGCTATAACAGTAGCAGAG---  
GGGACAGATAGGGTTATAGAAGTAATACAAAGAGCTGGGAGAGCT-----  
-----ATTCTCCACATA-----CCTAGAAGAATAAGACAGGGCTTAGAAAGGGCTTTGCAA---TAA  
>KM353846  
GCT---GCA-----  
GAAAAATTTGTGGGTACAGTCTATTATGGGGTACCTGTGTGG---AAAGAAACAACC---  
ACCACTCTATTCTGTGCATCAGATGCTAAAGCATATGACACAGAG---GTACATAAT-----  
-----GTTTGGGCCACA---CATGCCTGTGTACCCACCGAC---  
CCCAACCCACAAGAAGTGAATTAATA-----AATGTGACAGAAAATTTTAACT-----  
-----ATGTGGAAAAATGACATGGTAGACCAGATGCATGAGGATATA---  
ATCAGTTTATGGGATGAAAGCCTA---AAGCCATGTGTAAAATTA---  
ACCCCACTTTGTGTTACTTTAAATTGCAGTGATGTAAGGAATGATACTACTACTAATACCAAT-----  
-----  
-----AATAGCTGGGGAAATAAAATGGAGAGGGGAGAAATGAAA---  
AATTGCTCTTTCAATGTCAACCAAGCATAAGA-----  
GATAAGGCACAGAAAGAAGCGGCACTT---TTTTATAGACTTGATATAGTACCAATAGAAGATAATAATGAT-----  
-----  
AATAGTAGCTCTAGAAATTATAGTAGCTATAGATTGATAAATTGTAATACCTCAGTCATTACACAG---  
GCCTGTCCAAAGATATCCTTTGAGCCAATTCCCATACATTATTGTGCCCCGGCTGGTTTTGCGATTCTAAAAAT  
GTACT---AATAAGACGTTCCAG-----GGAAAAGGACCATGCACAAAT-----  
-GTCAGC---ACAGTACAATGCACACATGGAATTAGGCCAGTAGTGTCAACT---  
CAACTGCTATTAAATGGCAGTCTAGCAGAAGAAGAG-----  
GTAGTAATTAGATCTGATAATTTACAGACAAT-----GCTAAAATCATAATAGTGCAGCTGAAT-----  
-----GAATCTGTAGTA-----ATTAATTGTACAAGACCCAACAACAATACAAGAAAA-----  
-AGTATATCTCTA-----GGACCAGGGAGCGCA---TGG-----TATGCAACAGGAGAT-----  
-----ATAATAGGAGATATA-----AGACAAGCACATTGT---AACATTAGTGGAGCA---  
AACTGGACTAGAGCTTTAAAACTAATAAGTGAAAAATTAATA-----GAACAATTTGTC---

-----AATAAAACAATAACCTTTTAAA-----  
 CCATCTTCAGGAGGGGACCCAGAAATTGTT--ATGCACAGCTTCAATTGTGGAGGGGAA---  
 TTTAAGCAGCTCCAGGCAAGAGTCCTGGCTGTAGAAAGATACCTAAGGGATCAACAGCTCCTAGGAATTTGGG  
 GTTGCTCTGGAAGAACTCATCTGCACCACTACTGTGCCTTGAATACTAGTTGGAGC-----  
 -----AATAAATCCCTGGATTACATTTGG-----CAA-----  
 AATATGACTTGGATGCAGTGG--GAAAGTGAAATTGAAAATTACACAGACCTAATATAT---  
 GACTTAATTGAAAAATCGCAGAACCAGCAAGAA-----  
 -----  
 AAGAATGAACAAGAATTATTGGAATTGGACAAATGGGCAAATTTGTGGTCTTGGTTTGACATAACAACTGGC  
 TGTGGTATATAAAAAATATTCATAATGATAGTAGGAGGCTTGATAGGTTTAAGAATAATTTTTTACT---  
 GTGCTTTCTATAGTA-----AATAGAGTTAGGAAGGGATACTCACCA-----  
 TTGTCAATTCGCTGTTAACTTGTTTAATACCACAGCAATAGTAGTAGCTGAA---  
 GGGACAGATAGGATTATAGAAACAGTAAGAAGAATTTTTTAGAGCT-----  
 -----TTTCTACATATA-----CCTACAAGAGTAAGACAGGGCTTAGAAAGGGCTTTGCTA---TAA  
 >KY112135  
 GCT-----  
 GAAGATATGTGGGTCACAGTCTATTATGGGGTACCTGTGTGG--AAGGAAGCAACT---  
 ACTACTCTATTTTGTGCATCAGATGCTAAAGCATATGTTACAGAG--AAACATAAT-----  
 -----GTTTGGGCCACA--CATGCCTGTGTACCCACAGAC---  
 CCCAACCCACGAGAAGTAGTATTAGGA-----AATGTGACAGAAGAATTTAAC-----  
 -----ATGTGGAAAAATAACATGGTAGAACAGATGCATGAGGATGTA---  
 ATCAGTTTATGGGAACAAAGCCTG--AAGCCATGTGTAAAATTA---  
 ACCCCACTCTGTGTTACTTTAAATTGCACTGATAATGTTGCTAGTACCACCACCAATAATAGTACTAATGCCA  
 CTGTTACTAGT-----  
 -----AAGGGAGAAATAAAA---  
 AACTGCTCTTTCAATGTTACCACTAGCATAAGA-----  
 GATAAAGTTAAGAAAGAATATGCACTC--TTTTATAAACTTGATGTAGTACCAATAGATAAT-----  
 -----  
 ACTACTGTTAATAATTATACCAATTATAGATTGATAAATTGTAACACCTCAGTCATTACACAG---  
 GCCTGTCCAAAGGTTACATTTGAGCCAATTCCTATACATTATTGTGCCCCGGCTGGTTTTGCAATACTAAAGT  
 GCAAT--GATAAGAAGTTCAAG-----GGAAAAGGACCATGTGCAAAT-----  
 -GTCAGC--ACAGTACAATGTACACATGGAATTAGGCCAGTAGTGTCAACC---  
 CAGCTGCTGTTAAATGGCAGTCTAGCAGAAGACGAT-----  
 GTAGTAATTAGATCTGACAATTTCTCGGACAAT-----GCTAAAATCATAATAGTACATCTGAAC---  
 -----GAATCTATAAAA-----ATTAATTGTACAAGACCCAATAACAATACAAGAAAA---  
 -AGTATACCTATA-----GGACCAGGGAGAGCA--TTT-----TATGCAACAGGAGAC-----  
 -----ATAATAGGAGATATA-----AGACAAGCACATTGT--AACATAAGTAAAAAA---  
 GACTGGAACAAAACCTTTACAAC TAGTAGTGGAAAAGTTACGA-----GAAGAATTTAAT---  
 -----  
 -----AAAACAACAATAATCTTTAAA-----  
 AACTCCTCAGGAGGGGACCCAGAAATTGTA--ATGCACAGTTTTTAATTGTGGAGGGGAA---  
 TTTAAGCAGCTCCAGGCAAGACTCCTGGCTGTGGAAAGATACCTAAGGGATCAACAGCTCCTAGGGATTTGGG  
 GTTGCTCTGGAAGAATCATTTGCACCACTACTGTGCCTTGAATGCTAGTTGGAGT-----  
 -----AATAAAACTTACAATGAGATTTGG-----GAG-----  
 AATATGACCTGGATGCAGTGG--GAAAGAGAAATTGACAATTACACAAGCTTAATATAC---  
 ACCTTAATTGAGGAATCACAGAACCAACAAGAA-----  
 -----  
 AAGAATGAGCAGGATTTATTGGCATTAGATCAGTGGGCAAGTTTGTGGAATTGGTTTAGCATAACACAGTGGC  
 TGTGGTATATAAAAAATATTCATAATGATAGTAGGAGGCTTGGTAGGTTTAAGAATAGTTTTTTGCT---  
 GTGCTTTCCATAGTG-----AATAGAGTTAGGCAGGGATACTCACCA-----  
 TTATCATTTGCTGTGCTGCTTAATGCCACAGCTATAGCAGTAGCTGAG---  
 GGGACAGATAGGGTTATAGAAGCAGCACGAACAATATTTAGAGCT-----  
 -----TTTATACACATA-----CCTAGAAGAATAAGACAGGGCTTGGAAGGGCTTTGCTA---TAA  
 >JQ403070  
 GCT---AAT---AAT-----GCT---AAA---  
 GAACAATTGTGGGTCACAGTCTATTATGGGGTACCTGTGTGG--AAAGAAGCGACC---  
 ACCACTCTATTTTGTGCATCAGATGCTAAGGCATATGACACTGAA--GTACATAAT-----  
 -----GTTTGGGCCACA--CATGCCTGTGTACCCACAGAC---  
 CCTAATCCACAAGAGATAGAATTGAAA-----AATGTGACAGAAAATTTTAAAC-----  
 -----ATGTGGAAAAATAATATGGTAGAACAGATGCATGAGGATATA---

ATCAGTTTATGGGATCAAAGCCTA---AAGCCATGTGTAAAATTA---  
ACCCCAGTCTGTGTTAAGTTAAATTGCACGAATGTCAATTTTACGAAGACTGATGATACAAAT-----  
-----  
-----ATCTATAATGGTACCTTGAAGGTAGAGGTAGGAGAAGTAAAA---  
AACTGCTCTTTCAATGTCAACCACAATGATAAAA-----  
AATGAGGCGCGGAAGAATATGCACTT---TTTTATAAACTTGATATAGTACCAATAGAGGGT-----  
-----  
-----  
GATAATACAAGCTATACTTTGATAAATTGTAATACCTCAGTCATTACACAA---  
GCCTGTCCAAAGGTATCCTTTGAACCAATTCCCATACATTACTGTGCCCCAGCTGGCTTTGCGATTCTAAAGT  
GTAGG---GATAAGAAGTTCAAT-----GGAACAGGACCATGTAAAGAG-----  
-GTCAGC---ACAGTACAATGTACACATGGAATTAGGCCAGTAGTGTCAACT---  
CAACTGCTGTTAAATGGCAGTCTAGCAGAAGAAGAG-----  
GTAGTACTTAGATCTGAAAAATTCACGGACAAT-----GTTAAAACCATAATAATACAGCTGAAT----  
-----AAATCTATACAA-----ATTAATTGTACAAGACCCAACAACAATACAAGCAAG-----  
-AGCATACCTATG-----GGGCCGGGGAGAGCA---TTT-----TATGCAACAGAAAGA-----  
-----ATAATAGGAGATATA-----AGACAAGCACATTGT---AACATTAGTAGAAAA---  
GATTGGAATAACACTTTAAAAATGGTAGTTGCAAAATTAAGA-----GAACAATATAAT----  
-----AATAAAACAATAATATTTAAC-----  
CAATCCTCAGGAGGGGATCCAGAAATTGTA---ATGCACAGTTTTAATTGTGGAGGGGAA---  
TTTAAACAGCTCCAGGCGAGACTCCTGGCTGTGGAAAGATACCTAAAGGATCAACAGCTCCTAGGGATTG  
GTTGCTCTGGGAAACTCATTTGCACCACTAATGTGCCTTGGAAATATTAGTTGGAGT-----  
-----AATAAATCTCTTGATCAGATTTGG-----GAT-----  
AACATGACCTGGATGCAGTGG---GAGAGAGAGATTGACAATTACACAGGTTTAATATAC---  
AGCTTAATTGAAGAATCGCAAACCCAACAAGAA-----  
-----  
AAGAATGAACAAGAATTATTGCAATTGGATACATGGGCAAGTTTGTGGACTTGGTTTTCCATAACAAATTGGC  
TGTGGTATATAAGAATATTCATAATAATAGTAGGAGGTTAATAGGTTTAAAGAATTGTTTTTACT---  
GTACTTTCTATAGTG-----AATAGAGTTAGGCAGGGATACTCACCT-----  
CTGTCATTTGCTGTTAGTTTGCTTAATGCCACAGCTATAGCAGTAGCTGAG---  
GGGACAGATAGGATTATAGGAGTAATACAAAGCATTGGCAGAGCT-----  
-----ATTCTCCATATA-----CCTAGAAGAATCAGACAGGGCTTAGAAAGGGCTTTGCTA---TAA  
>JQ403031  
GCT---GCA-----  
GAACAATTGTGGGTTGCAGTATATTATGGGGTACCTGTGTGG---AAAGATGCAAAC---  
ACCACTCTATTTTGTGCATCAGATGCTAAAGCATATTCCACAGAG---GCACATAAT-----  
-----GTTTGGGCCACA---CATGCCTGTGTACCCACAGAC---  
CCCAACCCACAAGAAGTAATGATGGAA-----AATGTGACAGAAAATTTTAAC-----  
-----ATGTGGGAAAATAATATGGTAGAACAGATGCATGAAGATATA---  
ATCAGTTTATGGGATCAAAGCTTA---AAGCCATGTGTAAAATTA---  
ACCCCACTCTGTGTTACTTTAACTGCAGTGATTATAATCCTCCTCCTATCAATAGTAGTAGTGTGACAATA  
ATAGTGTTGCC-----  
-----AGCAATATTAGTGAGGAAATGAAAAGAGAAATAAAA---  
AACTGCTCTTTCAATATCACCACAACAATAAGA-----  
GATAAGGTGACAAAAGTACAAGCTCTT---TTTTATAGACTTGATGTAGTACCAATAGATGAT-----  
-----  
-----  
AATGGTAATAATAGTAACATATATAGGTTAATAAATTGTAATACCTCAGCCATTACACAG---  
GCTTGTCCAAAGATATCCTTTGAGCCAATTCCCATACACTATTGTGCCCCGGCTGGTTTTGCGATTTTAAAGT  
GTAAC---AATAAGACATTCACT---GGAGTAGGACCATGTACCAAT-----  
-GTCAGC---ACAGTACAATGTACACATGGAATTAGGCCAGTAGTGTCAACT---  
CAGCTGTTGTTGAATGGCAGTCTAGCAGAAAAAGAG-----  
ATAGTAATTAGATCTAAAAATTTACAGATAAT-----GCTAAAACATAATAGTACAACCTGAAT----  
-----GAATCCGTAGTA-----ATTAATTGTACAAGACCTCACAACAACACAAGAAAA-----  
-GGTATACATATA-----GGACCAGGGCAAGCA---TGG-----TATGCAACAGGAGAA-----  
-----ATAATAGGAGATATA-----AGACAAGCACACTGT---AACATTAGTAAACA---  
GCATGGAATAATACTTTAAGAAAGGTAGCTGCAAAATTAAGA-----GAAATAATTAAT----  
-----GCAACAACAATAATCTTTAAT-----  
CACTCCTCAGGGGGAGACCCAGAAGTTGTA---TTGCACAGCTTTAATTGTGGAGGGGAA---  
TTTAAGCAGCTCCAGGCAAGGATCCTGGCTGTGGAAAGATACCTAAGGGATCAACAGCTCCTAGGGATTG

GCTGCTCTGGGAAAATCATCTGCAACACTGCTGTGCCTTGAATACTAGTTGGAGT-----  
-----AATAAATCTCTTGATGACATTTGG-----ACT-----  
AACATGACCTGGATAGAGTGG---GAAAAAGAAATTGGCAATTACACAAGCTTAATATAC---  
ACCTTACTTGAAACAGCGCAGAACCAGCAAGAA-----  
-----  
AAGAATGAACAAGAGTTATTGGAATTGGATAGTTGGGCAAGTCTGTGGAGTTGGTTTGACATAACAAAATGGC  
TGTGGTATATAAAGATATTCATAATGATAGTAGGAGGCTTAATAGGTTTTAGAATAGTTTTTGCT---  
GTATTTTCTATAGTA-----AATAGAGTTAGGCAGGGATATTCACCA-----  
TTATCATTTGGCTATTAGCTTGCTGAATGCCACAGCTGTAGCAGTAGCTGAA---  
GGGACAGATAGGATTATAGAAGTAGTACAAAGAGCTTATAGAGCT-----  
-----TTCATTACATA-----CCTGTAAGAGTAAGACAAGGTTTAGAAAGGGCTTTGCTA---TAA  
>JQ403085  
GGT---ACA-----  
GAAAAATTGTGGGTCACAGTCTATTATGGGGTACCTGTGTGG--AAGGAGGCAACC---  
ACCACTCTATTTTGTGCATCAGATGCTAAGGCATATGATACAGAG---GTACATAAT-----  
-----GTTTGGGCCACA---CATGCCTGTGTACCCACAGAC---  
CCCAACCCACAAGAAATAGAATTG-----AATGTGACAGAAAATTTTAAC-----  
-----ATGTGGAAAAATGACATGGTAGAACAGATGCAGGAGGATATA---  
ATCAGTCTATGGGATCAAAGCCTA---AAGCCATGTGTAAAATTG---  
ACCCCACTTTGTGTTACTTTGAATTGCAGTGATGTTGGTGGCACTAATGCTACTAATACCACTGGTGCC---  
-----  
-----ACTAACCCACTGATAGTAGCATGGGAATAATAGAGAAGGGAGAAATGAAA---  
AACTGTTCTTTCAATGTCACTAGTACCCTAAGA-----  
GATAAGGTGCAGACAGAATATGCACTG---TTTTATAAACCTGATGTAGTATCAATAAAAGAT-----  
-----  
-----  
AATAGTACTAGTTATAGGTTGATAAGTTGTAACACCTCAACCATTACACAA---  
GCCTGTCCAAAAGTATCTTTTGAGCCAATTCCCATACATTATTGTGCCCGGCTGGTTTTGCACCTTCTAAAGT  
GTAAG---GATAAGAAGTTCAAT-----GGAACAGGGCCATGTAGCAAT-----  
-GTCAGC---ACAGTACAGTGTACACATGGAATTAAGCCAGTAGTATCAACT---  
CAACTACTGTAAATGGCAGTCTAGCAGAAGAAGAG-----  
ATAGTAATTAGATCTGAAAATTTACAAACAAT-----GCTAAAACCATAATAGTACAGCTGAAG---  
-----GAACCTGTAAAA-----ATTACTTGTATAAGACCCGGTAACAATACAAGAAAA---  
-AGTATACCTATA-----GGACCAGGGAGAGCA---TTT-----TATACAACAGGACAA-----  
-----ATAATAGGAGATATA-----AGAAAAGCATATTGT---AACATTAGTAGAGCA---  
GATTGGAATAAACTTTACAAAGGGTAGCTATCAAATTTAAAG-----GAACAATTTGAA---  
-----AATAAAACAATAATCTTTAAT-----  
CAATCCTCAGGAGGGGACCCAGAAATTGTA--ATGCACAGTTTTAATTGTAGAGGGGAA---  
TTTAAGCAGCTCCAGGCAAGAGTCCCTGGCTGTAGAAAGATACCTAAAGGATCAACAGCTCTTGGGAATTTGGG  
GTTGCTCTGGAAACTCATCTGCACCACTGCTGTGCCTTGAATACTAGTTGGAATAATAAT-----  
-----AAAACAAATTTGAGTCAGATTTGG-----GAC-----  
AAAATGACCTGGATGCAGTGG---GAAAGGGAAATTGACAATTACACAGACTTAATATAC---  
AGCTTAATTGAAGAATCGCAGAACCAGCAGGAA-----  
-----  
AAGAATGAACAAGAATTATTGGAATTGGATAAATGGGACAGCTTGTGGAGTTGGTTTAGTATAACAAATTGGC  
TGTGGTATATAAAAATATTATAATGATAGTAGGAGGCTTGATAGGTTTAAGAATAGTTTTTGCT---  
GTGCTTTCTATAGTA-----AATAGAGTTAGGCAGGGATACTCACCT-----  
CTGTCGTTTGCTGTTAGCTTATTCAATGCCATAGCCATAACAGTAGCTGAG---  
GGGACAGATAGGGCTATAGAAATATTACAAAGAATTTTAGAGCT-----  
-----TTTCTTCATATA-----CCTAGAAGAGTAAGACAGGGCTTAGAAAGGGCTTTGCTA---TAA  
>JQ403094  
GCT---GCA-----  
GAAGATTTGTGGGTCACAGTCTATTATGGGGTACCTGTGTGG--AAAGAAGCAAAC---  
ACCACTCTATTTTGTGCATCAGATGCTAAAGCATATGATACAGAG---GTACATAAT-----  
-----GTTTGGGCCACA---CATGCCTGTGTACCCACAGAC---  
CCTAGCCCACAAGAAATAAAATTGGAA-----AATGTGACAGAAGAATTTGAC-----  
-----ATGTGGAAAAATAACATGGTAGAACAAATGCATGAAGATATA---  
ATTAGTATATGGGATCAAAGTTTA---AAGCCATGTGTAAAATTA---  
ACTCCACTCTGTGTCACCTTTACACTGCAATGATTCAAGAAATGAGACTAGTTCCAATAGTACTAGTACT----  
-----

-----AGATCCAATATTACTAGCGAGGAAAAGATGGATCCAGGAGAAATGAAA---  
AACTGCTCTTTCAACATCACCTCAGGCATAAGA-----  
GATAAGGTAAAGGGAGCACGTGCAGTT--TTCTATTCAATTGATCTAGTCCCAATAGATGATGATGAACAT-  
-----  
-----  
AATAGTACCAGCAACATTACCAGCTATAGGTTGAGAAGTTGTAATACCTCAGTCATTACACAG---  
GCCTGTCCAAAGGTAACCTTTGAGCCAATTCCCATACATTATTGTGCCCCGGCTGGTTATGCGATTCTACAAT  
GTAAA---GATAAAAAGTTCAAT-----GGATCGGGACTATGTCAAAAT-----  
-GTCAGC---ACAGTACAATGTACACATGGAATTAGGCCAGTAGTATCAACT---  
CAACTGCTGTTAAATGGCAGTCTGGCAGAAGAAGAT-----  
ATAGTAATTAGATCTCAAAATTTCTCAACAAT-----GCAAAAACCATAATGGTACAGCTGAAC----  
-----GAATCTGTAGAA-----ATTAATTGTACAAGGCCCAACAATAATACAAGAACA-----  
-AGCATACCTATA-----GGACCAGGGAGAGCA---TTT-----TATGCAACAGGAGAC-----  
-----GTACTAGGAGACATA-----AGAAAAGCATATTGT---AACATTAGTAGAGCA---  
GCATGGAATGAACTTTAAGAAAGATAGCTGGGAAATTACAA-----GAACACTTTAAG----  
-----AATAAACTATAATCTTTAAC-----  
CAATCCTCAGGAGGGGACCTAGAGATTGTA--ATGCACAGTTTTAATTGTGCAGGGGAA---  
TTTAAGCAGCTCCAGGCAAGAGTCCTGGCTGTGGAAAAGATACCTAAAGGATCAACAGCTCCTGGGGCTTTGGG  
GTTGCTCTGGAAAACCTATTTGCACCACTACTGTGCCTTGGAAATGCTAGTTGGAGT-----  
-----AATAGATCTCTAGACAGGATTTGG-----AAC-----  
AACATGACCTGGATGCAGTGG---GAAAAAGAAATTGACAAATTACACAGGCTTAATATAC---  
ACCTTAATTGAAGAATCGCAGAACCAACAAGAA-----  
-----  
AAGAACGAACAAGAATTATTGGAATTAGATAAATGGGCAAGTTTGTGGAATTGGTTTGACATAACAAGTTGGC  
TGTGGTATATAAAAATATTTCATAATGATAGTAGGAGGCTTAATAGGTTTAAGAATAGTTTTTTGTT---  
GTACTTTCTATAGTG-----AATAGAGTTAGGCAGGGATACTCACCA-----  
TTGTCGTTTCGCTGTTAGCTTGCTCAACGCCATAGCCATAGCAGTAGCTGAG---  
GGGACAGATAGGATTATAGAAATAGCACAAAGAATTGGTAGAGCT-----  
-----ATTATCCACATA-----CCTACAAGAATAAGACAGGGCTTGGAGAGGCTTTTGCTA---TAA  
>KR423482  
GTA---GCA-----  
GAACAATTGTGGGTCACAGTCTATTATGGGGTACCTGTGTGG--AAAGAAGCAAAC---  
ACCACTCTATTTTGTGCATCAGATGCTAAAGCATATGATACAGAG--GTCCATAAT-----  
-----GTTTGGGCCACA---CATGCCTGTGTACCCACAGAC---  
CCCAACCCACAAGAAATAGCATTGCCA-----AATGTAACAGAAAATTTTAAC-----  
-----ATGTGGAAAAATAACATGGTAGAGCAGATTCATGAGGATGTA---  
ATTAGTCTATGGGATCAAAGCCTA--AAGCCATGTGTAAACTA---  
ACCCCACTCTGTGTTACTTTAAATTGCACTGAGGCTAATAATACCACAAGTAATAGTACCACA-----  
-----  
-----AGTAATAGCACTACCACAAGGGAAGAAGGAGAAATGAAA---  
AACTGCTCTTTCAACATTACCACAAACATAAAC-----  
GATAAGTACCAGAAAACATATGCACTC---  
TTTTATAAACTTGATATAGTACCAATAAGTGAGGAAAGTCAGAAT-----  
-----  
AGTAGTACTAGTTATAGGTTAATAAGTTGTAATACCTCAGTCCTTACCCAA---  
GCCTGTCCAAAGGTAACCTTCGAACCAATTCCCATACATTATTGTGCCCCGGCTGGTTTTGCGATTCTAAAAT  
GCAGA---GATAAGAAATTCAAT-----GGAACAGGACCATGTAAGAAT-----  
-GTCAGC---ACAGTACAATGTACACATGGAATTAAGCCAGTAGTATCAACT---  
CAATTACTGTTAAATGGCAGTCTAGCAGAAGAAGAG-----  
ATAGTAATTAGATCTGCCAACTTCACAGACAAT-----ACTAAAGTCATAATAGTACAGCTAACA----  
-----GAAGCTGTGGAA-----ATTAATTGTACAAGGCCCAACAACAATAACAAGAAAG-----  
-AGTATACACATA-----GGACCAGGGAGAGCA---TTT-----TATGCAACAGGAGAC-----  
-----ATAATAGGAGATATA-----AGACAAGCACATTGT---AACATTAGTAAAGCA---  
AAATGGAATAACACTTTAAAACAGATAGCTAAAAAATTGATA-----GAACAATTT-----  
-----AATAAAACAATAAATTTTAAT-----  
CAATCCTCAGGAGGGGATCTGGAAATTGTA--ACACATAGTTTTAATTGTGGAGGGGAA---  
TTTAAGCAGCTCCAGGCAAGAGTCCTGGCTGTGGAAAAGATACCTAAGGGATCAACAGCTCCTAGGGATTTGGG  
GTTGCTCTGGAAAACCTATTTGCACCACTGCTGTGCCTTGGAACTAGTTGGAGT-----  
-----AATAAAAATTACACTCAGATTTGG-----GAT-----  
AACATGACCTGGATGCAGTGG---GAGAAAGAAATTGACAAATTACACAGACTTAATATAC---

ACCTTACTTGAAGAATCGCAAAACCAACAAGAA-----  
 -----  
 AAGAATGAACAAGAATTATTAGCATTAGATAAGTGGGCAAGTTTGTGGAATTGGTTTGATATAACAAATTGGC  
 TGTGGTATATAAAAAATATTCATAATGATAGTAGGAGGCTTGGTAGGCTTAAGAATAGTTTTTACT---  
 GTATTTTCTATAGTG-----AATAGAGTTAGGCAGGGATACTCAGG-----  
 TTATCGTTTGCTGTGCTGCTCAACACCACAGCCATAGCAGTAGCTGAG---  
 GGAACAGATAGGGTTATAGAAGTGTACAAAGAATTTGTAGAGCT-----  
 -----TTGCGCCACATA-----CCTAGAAGAATAAGACAGGGCCTCGAAAGGATTTTGCTA---TAA  
 >GU733713  
 GCT---ACA-----  
 GAACAATTGTGGGTCACAGTCTATTATGGGGTACCAGTATGG---AAAGAAGCAACC---  
 ACCACTCTATTTTGTGCATCAGATGCTAGAGCATATAAGACAGAG---GTACATAAT-----  
 -----GTTTGGGCCACA---CATGCCTGTGTACCCACAGAC---  
 CCTAGCCCACAAGAAATACCATTGATA-----AATGTGACAGAAAATTTTAAAC-----  
 -----ATGTGGGAAAATAAAATGGTAGACCAAATGCATGAGGATATA---  
 ATCAGTTTATGGGATCAAAGCCTA---AAGCCATGTGTAAAATTA---  
 ACCCCACTCTGTGTTACTTTAAATTGCATTGATGTGAATATTACTAATACCAATAGCACTAAT-----  
 -----  
 -----CCCACTAGTAGCTGGGAAACGATGGAGAAAGGAGAAATAAAA---  
 AACTGCTCTTTCAATATCACCACAAACATAAGA-----  
 GATAAGATACAGAAAGAATATGCATTG---TTTAATAGACTTGATGTAGTACCAATAAATAAT-----  
 -----  
 -----  
 AGTAATACCTACTATAGGTTGATAAGTTGTAACACCTCAGTCCTTACACAA---  
 GCCTGTCCAAAGGTATCCTTTGAGCCAATTCCCATACACTACTGTGCCCGGCTGGTTTTGCAATTCTAAAGT  
 GTAAC---GAGACAAAGTTCAAT-----GGATCAGGACCATGTAAAAAT-----  
 -GTCACC---ACAGTACAATGTACACATGGAATTAGGCCAGTAGTATCAACT---  
 CAATTGCTGTTAAATGGCAGTCTAGCAGTAGAGGAG-----  
 GTAGTAATTAGATCTGAAAATTTCTCAGACAAT-----GCTAAACTATAATAATACAGCTGAAC---  
 -----ACCTCTGTAGAA-----ATTAATTGTACAAGACCCAACAACAATACAAGAAAA---  
 -GGTATACATATA-----GGGCCAGGGAGAGCA---TTT-----TATGCAACAGGAGAC-----  
 -----ATAATAGGAGATATA-----AGACAAGCACATTGT---AACATTAGTACAGCA---  
 AAATGGAATGACACTTTAAACACATAGTTGGAAAATTGAAA-----GAACAATTTAGG---  
 -----AATGCAACAAAAATAGTCTTTAAT-----  
 CACTCCTCAGGAGGGGACCCAGAAATTGTA---ATGCACAGTTTTAATTGTGGAGGAGAA---  
 TTTAAGCAGCTCCAGGCAAGAGTCCCTGGCTGTGGAAAGATACCTAAGGGATCAACAGCTCCTGGGAATTTGGG  
 GATGCTCTGGAAAACCTCATCTGCACCACTACTGTACCTTGGAAATGCTAGTTGGAGC-----  
 -----AATAAAAAATCTAACTACAATTTGG-----AAT-----  
 AACATGACCTGGATGCAGTGG---GAAAAAGAAATTGACAATTACACAGAAATAATATAT---  
 GATTTAATTGAACAATCACAGAACCAGCAAGAA-----  
 -----  
 AAGAATGAACAAGAATTATTGGAATTGGATAAATGGGCAAGTTTGTGGAGTTGGTTTGATATAACAAATTGGC  
 TGTGGTATATAAAAAATATTCATAATGATAGTAGGAGGCTTAATAGGTTTAAGAATAATTTTTTGCT---  
 GTGCTTTCTATAGTG-----AATAGAGTTAGGCAGGGATACTCAGG-----  
 TTATCGTTTGCTGTTAGCTTGCTTGATGCCACAGCTGTAACAGTAGCTGGG---  
 GGGACAGATAGAATTTTAGAAGTATTACGAAGAATTTGGAGAGCT-----  
 -----TTTCTCCACATC-----CCTAGAAGAATAAGACAGGGCTTAGAAAGGGCTTTTGCTA---TAA  
 >MK164668  
 GCT---ACA-----  
 GAAAAATTGTGGGTCACAGTCTATTATGGGGTACCTGTGTGG---AAAGAAGCAGAC---  
 ACCACTCTATTTTGTGCATCAAATGCTAAAGCATATGATACAGAG---GTACATAAT-----  
 -----GTTTGGGCCACA---CATGCCTGTGTACCCACAGAC---  
 CCCAACCACAAAGAGATAGCATTGGAA-----AATGTGACAGAAAATTTTAAAC-----  
 -----ATGTGGAAAAACAACATGGTAGAACAGATGCAGGAGGATATA---  
 ATCAGTTTATGGGATCAAAGCCTA---AAGCCATGTGTAAAATTA---  
 ACCCCGCTCTGTGTTACTTTAAATTGTACTGATTATATGGGGAATGGCACTAGTGGGAGTGCCACTAATAGGG  
 CT-----  
 -----GTCACTAAAAATAATACTATTGACAAGGGAGAAATAAAA---  
 AACTGCTCTTTCAATGTACACCACAAATAGAAGA-----  
 AATAAAGCACAGAAAGAATATGCACCT---TTTTATAAGCTTGATGTAGTACCAATAGAGAAT-----

-----  
-----  
GATAATACTAGCTATAGGTTAATAAGTTGTAACACCTCAGTCATTACACAG---  
GCCTGTCCAAAGGTATCCTTTGAACCAATTCCCATACATTATTGTGCCCCGGCTGGTTTTGCTATTCTAAAGT  
GTAAA---GATAAGAATTTCAAT-----GGAAAAGGGTCATGTGAAAAT-----  
-GTCAGC---ACAGTACAATGTACACATGGAATTAGACCAGTAGTATCAACC---  
CAACTGCTGTTAAATGGTAGCCTAGCAGAAGAAGAC-----  
GTAGTAATTAAATCTGACAATTTCTCGGACAAT-----GCTAAAAATATAATAGTACAGCTGAAT----  
-----GAAACAGTAGAA-----ATTGATTGTGCAAGACCCAATAACAATATGAGAAAA-----  
-AGTATACCTATA-----GGACCAGGGAGAGCA---TTT-----TATGCAACAGGAGAA-----  
-----ATAATAGGAGATATA-----AGACAAGCACATTGT---AACCTTAGTAAAGCA---  
AATTGGACTCAAACCTTTAAGTAGGATAGCAGAAAAATTAAAA-----GAACAATTTAAT----  
-----ACAACAACAATAAAATTTAAT-----  
CGATCCGCAGGAGGGGACCCAGAAAGTTGAA---ATGCACAGTTTCAATTGTGGAGGGGAA---  
TTTAAGCAGCTCCAGGCGAGAGTCCTGGCTGTGGAAAGATACCTACAGGATCAACAGCTCCTGGGAATTTGGG  
GTTGCTCTGGGAAACTCATCTGCACCACTACTGTGCCTTGGAATGCTAGTTGGAGT-----  
-----AATAAATCTCTGGATTATATCTGG-----AAT-----  
AACATGACCTGGATGAAGTGG---GAAAGAGAAATTGACAAATTACACAAGTTTAATATAC---  
ACCTTAATTGCAGAATCGCAGAACCAACAAGAA-----  
-----  
AAGAAATGAACAAGACTTATTGACATTAGACAAATGGGATAGTTTGTGGAATTGGTTTAGCATAACAAAATGGC  
TGTGGTATATAAAAGTATTTCATAATGATAGTAGGAGGCTTGATAGGTTTAAGAATAGTTTTTACT---  
GTACTTTCTATAGTG-----AATAGAGTTAGGCAGGGATACTCACCA-----  
TTATCGTTTGTCTGTTAGCTTGTTCAACTACAGCTATAGTAGTAGCTGAG---  
GGAACAGATAGAATTATAGAAGCATTCCAAATAGCTTGTAGAGCT-----  
-----ATTAGCCACATA-----CCTAGAAGAATAAGACAGGGCTTAGAAAGACTCTTACTA---TAA  
>KC935959  
ACT---GCA-----  
GAGGAATTGTGGGTCACAGTTTATTATGGGGTACCTGTGTGG---AAAGAAGCAAAC---  
ACCACTCTATTTTGTGCATCAGATGCTAAATCATATGATACAGAG---GTACATAAT-----  
-----GTTTGGGCCACA---CATGCCTGTGTACCCACAGAC---  
CCCAGCCCACAAGAATTACTATTGGTA-----AATGTGACAGAAAATTTTAAC-----  
-----ATGTGGAAAAATAACATGGTAGAACAGATGCATGAGGATGTA---  
ATTAGTTTATGGGATCAAAGTCTA---AAGCCATGTGTAAAATTA---  
ACCCCTCTCTGTGTACTTTAAATTGCACAGATGTTACTAATACCACTGGCAATGCTACTCATAGTCAGAGTA  
AGGTAATGAAA-----  
-----CAAAGGG---AGAAATGAAAATGAAACAGTGGGAGAAATGAAA---  
AACTGCACTTTCAATATCACCACAAGTATGAGC-----  
AATAAGGTGAAGCGAGAATATGCACTT---TTTTATACACTTGATATAATACCAACAGAAGAA-----  
-----  
AGTGGAATACTAGTTATAGGTTGATAAGTTGCAACACCTCAGTCGTTACACAG---  
GCCTGTCCAAAGGTAACCTTTGAACCAATTCCCATACATTATTGTGCCCCGGCTGGTTTTGCAATTCTAAAGT  
GTAAT---AATAAGACATTCAAT-----GGAACAGGACCATGTACAAAT-----  
-GTTAGC---ACAGTACAATGTACACATGGAATTAGACCAGTAGTATCAACT---  
CAGCTGCTGTTAAATGGCAGTCTATCAGAAGAAGAG-----  
ATAATAATTAGATCCGCCGATCTCTCAGACAAT-----CTTAAAACCATAATAGTACAGCTGAAT----  
-----CAATCTGTACAA-----ATGACTTGTATAAGACCCAACAACAATACAAGAAAA-----  
-GGCATACATCTA-----GGACCAGGCAGAGCA---TTT-----GATGCAATAGGAGGA-----  
-----ATAATAGGAGATATA-----AGACAAGCACATTGT---AACATTAGTAAAGC---  
AAGTGGAATACTACTTTACAAAATTTAGCTGCAAAATTGAGA-----GAACAATTT-----  
-----AATAAAACAATAATTTTTTAAT-----  
CAATCCGCAGGAGGGGACCCAGAAATTACA---ATGCTCAATTTTAATTGTGGAGGGGAA---  
TTCAAGCAGCTCCAGGCAAGAGTCCTGGCTGTAGAAAGATACCTAAAGGATCAACAGCTCCTAGGGATTTGGG  
GTTGCTCTGGAAAACCTATTTGCACCACTACTGTGCCTTGGAACAATAGTTGGAGT-----  
-----GGAACAACAAAGTCTGAGTCATATTTGG-----GAC-----  
AACATGACCTGGATGCAGTGG---GAAAAAGAGATTGAGAATTACACAGACACAATATAC---  
ACGTTAATTGCAGAATCGCAAAGCCAACAAGAA-----  
-----  
AAGAAATGAAAAAGAATTATTGGAATGGGATAAATGGGCAAGTTTGTGGAATTGGTTTAACATAACAACTGGC

TGTGGTATATAAAAAATATTCATAATGATAGTAGGAGGCCTAATAGGTTTAAGAATAGTTTTTACT---  
GTATTTTCTATAGTG-----AATAGAGTTAGGCAGGGATACTCACCA-----  
TTATCGTTCACTATTAGCTTGTACAATACCATAGCCATAGCAGTAGCTGAG---  
GGGACAGATAGGATTATAGAAGCATTGCAAAGAGCTGGTAGAGCT-----  
-----ATTCTCCACATA-----CCTAGAAGAATAAGACAGGGCTTGGAAGGATTTTGATA--TAA  
>KM082006  
GTT---GCA-----  
GGACAATTGTGGGTCACAGTCTATTATGGGGTACCTGTATGG--AAAGAAGCAGAC---  
ACCACTCTATTCTGTGCATCAAATGCTAAAGCATATGACACAGAG--ACACATAAT-----  
-----GTTTGGGCCACA---CATGCCTGTGTACCCACAGAC---  
CCTAACCCACAAGAAGTAGAATTGGAA-----AATGTGACAGAGAATTTTAAC-----  
-----ATGTGGAAAAATAACATGGGTAGAACAGATGCATGCGGATATA---  
ATCAGTTTATGGGATGAAAGTCTA--AAGCCATGTGTAAAATTA---  
ACCCCACTCTGTGTTACTTTACAGTGCCTGATAATATTACTATTACTAATGGCACTAATGTTACTAGTACCA  
CT-----  
-----AGTGGCAATAGCACTTTGGGAAGTATGAAAGAAGAGATGAAA---  
AACTGCTCTTTCAATGTCAACCACAAGCATAAGA-----  
AATAAGATGCAGAAAGAATATGCACCT--TTTTATAAACTTGATGTAGTACCAATAGATAAT-----  
-----  
-----  
GATAATACAAGCTATACATTGATAAATTGTAACACCTCAGTCATTACACAG---  
GCCTGTCCAAAGGTATCCTTTGAACCAATTCCAATACATTATTGTACCCAGCTGGTTTTGCGCTTCTAAAGT  
GTAGG--GATAAGAAGTTCAAT-----GGAAAAGGACCATGTAGAAAT-----  
-GTCAGC--ACAGTACAATGTACACATGGAATTAGGCCAGTGGTGTCAACC---  
CAATTGCTGCTAAATGGCAGTCTAGCAGAAGGAGAG-----  
GTAGTAATTAGATCTGAAAATTTCAACAAACAT-----GCCAAAGTCATAATAGTACAGCTAAAT----  
-----GAATCTATAGAA-----ATTAATTGTACAAGACCCAACAACAATACAAGAAGA-----  
-AGTATCCATATA-----GCACCAGGAAGAGCA--TTC-----TATGCAACAGGAGAA-----  
-----ATAATAGGAGATATA-----AGACAAGCATATTGT--AGCATTAGTAATAGA---  
AAATGGAATGACACTTTAAGCAAGATAGCTATAAAATTAGGA-----GAACAATTT-----  
-----AATAAAACCATAATCTTTAAT-----  
CAATCCTCAGGAGGGGACCCAGAAATTGTA--ATGCACAGTTTTAATTGTGGAGGGGAA--  
TTTAAGCAGCTCCAGGCAAGAGTCCCTGGCTTTGGAAAGATACCTAAGGGATCAACAGCTCCTAGGGATTTGGG  
GATGCTCTGGAAACTCATTTGCACCACTGCTGTGCCTTGGAAATGCTAGTTGGAGT-----  
-----AATAAATCTCATGATCAGATTTGG-----CAA-----  
AACATGACCTGGTTACAGTGG--GAGAGAGAGATTGACAATTACACAGGCTTAATATAC--  
ACCTTGCTTGAAGAATCGCAAAACCAGCAAGAA-----  
-----  
AAGAATGAACAAGACCTATTGGCATTGGGATAACTGGACAAGTTTGTGGAGTTGGTTTAGCATATCAAATTGGC  
TATGGTATATAAGAATATTATAATGATAGTAGGAGGTTTAGTAGGTTTAAGAATAGTTTTTTGCT--  
GTGTTTTCTATAGTG-----AATAGAGTTAGGCAGGGATACTCACCA-----  
TTGTCGTTTCGCTATTAGTTTGCTTAATGCCACAGCTATAGCAGTAGCTGAG---  
GGGACAGATAGGATTATAGAAACAGTACAAAGAATTTGTAGAGCT-----  
-----ATTCTCAACATA-----CCTAGAAGAACAGACAGGGCTTAGAAAGGGCTTTGCTA--TAA  
>MG196775  
GCT---AAA-----  
GAACAGTTGTGGGTCACAGTCTATTATGGGGTACCTGTGTGG--AAAGAAGCAACT---  
ACCACTCTATTTTGTGCATCAGATGCTAAAGCATATAAGCCAGAG--GCACATAAT-----  
-----ATTTGGGCCACA---CATGCCTGTGTGCCACAGAC---  
CCCAACCCACAAGAAGTAGCATTGGAA-----AATGTGACAGAGAATTTTAAC-----  
-----ATGTGGAAAAATAACATGGGTAGAACAGATGCATGAAGATATA---  
ATTAGTTTATGGGATGAAAGCCTA--AAGCCATGTGTAAAATTA---  
ACCCCACTCTGTGTTACTTTAAATTGCACTAACGTAACAGTCATTAATGCCACTACTACTACT-----  
-----  
-----AGTAATGACAATAGTAGTTATTGGAAAGATGATATGAAA---  
AACTGCTCTTTCAATACCACCACAATCTTAAGA-----  
GATAAGGCTAAGAAAGAATATGCACCT---  
TTTTATAAGCTTGATATAGTACCAATAGATGAGGATAAGAATACTAAG-----  
-----  
GGTAATAATAGTAATAGTGGTAGTAGCTATAGGTTGATAAATTGTAATTCCTCAACCATCACACAA---

GCCTGTCCAAAAATAGCATTGTAACCAATTCCTACATTATTGTGCCCCGGCTGGTTTTGCGATTCTAAAGT  
 GCAGA---GATAAAAAATTTGAG-----GGAAAAGGACCATGTAAAAAT-----  
 -GTCAGC---ACAGTACAATGTACACATGGAATTAGACCAGTAGTGTCAACT---  
 CAACTACTGTTTAAATGGCAGTCTAGCAGAAGAAGAA-----  
 GTAGTAGTTAGATCTGAAAATTTCTCGGACAAT-----GTAAAAACATAATAGTACAGCTGAAC----  
 -----GCATCTGTACAA-----ATTAAGTGTACAAGACCCAACAACAATACAAGAAAA-----  
 -AGTATACATATG-----GGACCAGGGGGGAGCA---ATG-----TATGCAACAGGAGCC-----  
 -----ATAATAGGAGATATA-----AGACAAGCACACTGT---AACCTTAGCATAAAA---  
 CAGTGGTATGACACTTTAAGACAGGTAGTTATAAAATTAGGA-----  
 GAACAATTTAATAAAACAAAT-----AATTTGAATAAAACA-----GAAAATTTTACAATAGCCTTTAAG-  
 -----CCATCCTCAGGAGGGGACCCAGAAGTTGAA---ATGCACAGCCTTAATTGTGGAGGGGAA---  
 TTTAAGCAGCTCCAGGCAAGAGTCTTGGCTGTAGAAAAGTTACCTAAGGGATCAACAGCTCCTAGGGATTTGGG  
 GTTGCTCTGGAAGACTCATCTGCACCACTACTGTGCCTTGGGAATAATAGTTGGAGT-----  
 -----AGTAAAGTTATGACGACATTTGG-----GGT-----  
 AACATGACCTGGATGGAGTGG---GAAAAGAAATTAGCAATTACACAGGATTAATATAC---  
 ACCTTAATTGAAGACTCACAAAACCAGCAAGAA-----  
 -----  
 AAGAATGAACAAGAGTTATTATCACTGGATAAGTGGGCAAGTTTGTGGAATTGGTTTGACATAACAAAGTGGC  
 TGTGGTATATAAAGATATTATCATAATGATAGTAGGAGGCTTGATAGGTTTAAGAATAATTTGTGCT---  
 GTGCTTTCTATAGTG-----AATAGAGTTAGGCAGGGATACTCACCA-----  
 TTGTCGTTTCGCTGTTAGCTTGTACAACGCCATAGCTATAGCAGTAGCTGAA---  
 GGGACAGATAGCATTATAGAAGCAATACTAAGAGTTGGTAGAGCT-----  
 -----ATCCTCCACATA-----CCTAGAAGAGTAAGACAGGGCTTGGAAGGGCTTTGCAA---TAA  
 >JQ182826  
 GCT---AAA-----  
 GAACAATTGTGGGTCACAGTCTATTATGGGGTACCTGTGTGG---AAAGAAGCAACT---  
 ACCACTCTATTTTGTGCATCAGATGCTAGAGCATATGGTAAAGAA---GTACATAAT-----  
 -----ATTTGGGCCACA---CATGCCTGTGTACCCACAGAC---  
 CCCAACCCACAAGAAGTAATATTGGAA-----AATGTAACAGAAAATTTTAAC-----  
 -----ATGTGGAAAAATAACATGGTAGAACAGATGCATGAGGATATA---  
 ATCAGTTTATGGGATCAAAGTCTA---AAGCCATGTGTGAAATTA---  
 ACCCCACTTTGTGTTACTTTAAATTGCACTGATTATTTTAAGAATACTACTAATACTAGTAATAAACTAATA  
 GCACT-----  
 -----AGTCCTAACACCAACAATAGTAGCTTGGGAATAATGGATAAAGGAGAAATAAAA---  
 AACTGCTCTTTCAATATTACCTCAAGCATAAGA-----  
 GATAAAATGCAGAAAGAATATGCACTT---TTGTATAAACTTGATATAGTACCAATAGGGGGT-----  
 -----  
 -----  
 GATAAATACTAGTTATAGGTTGATAAGTTGTAACACCTCAGTCATTACACAG---  
 GCTTGTCAAAAGTATCCTTTGAGCCAATTCCTATACATTACTGTGCTCCAGCTGGTTTTGCGATTCTAAGGT  
 GTAAT---AATGAGACGTTCAAT-----GGAACAGGACCATGTACAAAT-----  
 -GTTAGC---ACAGTACAATGTACACATGGAATTAAGCCAGTAGTATCAACT---  
 CAACTGCTGTTGAATGGCAGTCTAGCAGAAAAAGAG-----  
 GTAGTAATTAGATCTGAAAATATTACAGACAAT-----GGTAAATCATAATAGTACAGCTGAAT----  
 -----GCATCTGTAGAA-----ATTAATTGTACAAGACCCAACAACAATACAAGAAGA-----  
 -GGTATAAACATA-----GGACCAGGAAGAGCA---TGG-----TATACAACAGGAGAA-----  
 -----ATAATAGGAGATATA-----AGACAAGCACATTGT---ACCATTAGTAGAGAA---  
 CAATGGAATAAACTCTACAACAGGTAGTTGAAAAATTAGGG-----GAACATTTTAAG---  
 -----AATAAAACAATAGTTTTTAAT-----  
 CACTCCTCAGGAGGAGACCCAGAAGTTGTA---ATGCACAGTTTTTAATTGTGGAGGGGAA---  
 TTTAAACAGCTCCAGGCAAGAGTCTTAGCTGTAGAAAGATACCTAAAGGATCAACAGCTCCTGGGAATTTGGG  
 GTTGTTCTGGAAACTCATCTGCACCACTACTGTGCCTTGGGAATACTAGTTGGAGT-----  
 -----AATAAAAATCTGAGTCAAATTTGG-----GAT-----  
 AACATGACCTGGATGCAATGG---GAGAAAGAAATTGATAATTACACAAATGCAATATAC---  
 TATTTACTTGAAAAAGCGCAGAACCAGCAAGAA-----  
 -----  
 AAGAATGAACAAGAATTATTGGAATTGGATAAATGGGCAAGTTTGTGGAATTGGTTTGACATATCAAAGTGGC  
 TGTGGTATATAAAAATATTATCATAATGATAGTAGGAGGCTAGTAGGTTTAAGAATAGTTTTTTGCT---  
 GTGCTTTCTATAGTG-----AATAGAGTTAGGCAGGGATACTCACCA-----  
 TTATCGTTTGTGCTGTTAGCTTGTTCATTCTACTGCCATAGTAGTAGCTGAG---

GGAACAGATCGGGTTATAGAAATATTACAGAGAGCTCTTAGAGTT-----  
 -----GTTCTCCATATA-----CCTACAAGAATAAGACAGGGTTTAGAAAGGGCTTTGCTA---TAA  
 >KM353922  
 GCT---ACA-----  
 GAAAAATTGTGGGTCACAGTCTATTATGGGGTACCAGTGTGG--AAAGAAGCAACC---  
 ACCACTTTATTTTGTGCCTCAGATGCTAAAGCATATGATACAGAG--GTACATAAT-----  
 -----GTTTGGGCCACA---CATGCCTGTGTACCCACAGAC---  
 CCTAACCCACAAGAAGTAGTATTGGGA-----AATGTAACAGAAAATTTTAAC-----  
 -----ATGTGGAAAAATAACATGGGTAGAACAGATGCATGAGGATATA---  
 ATCAGTCTATGGGATCAAAGCCTA---AAACCATGTGTAAAATTA---  
 ACCCCACTCTGTGTTACTTTAAATTGTAGTAATAATATAATTACTGTTAAT-----  
 -----  
 -----GCCACTAATGATGGGAAAGAAGACTTAAGA---  
 AACTGTTCTTTCAAATCACCACAAGCATAAGA-----  
 GATAAGATGCAGAAAGAATATGCACTC---TTTTATAAACTAGATGTAGTACAAATAAATGAT-----  
 -----  
 -----  
 AATGATACTGATAGTTATAGGTTAATAAGTTGTAATACCTCAGTCATTACTCAG---  
 GCCTGTCCAAAGATATCCTTTGAACCAATTCCCATACATTATTGTGCCCCGGCTGGTTTTCGATTCTAAAGT  
 GTAAT---AATAAGACATTCAAT-----GGAACAGGACCATGTACAAAT-----  
 -GTCAGC---ACAGTACAATGTACACATGGAATTAAGCCAGTAGTATCAACT---  
 CAACTACTGTTAAATGGCAGTCTAGCAGAAGAAGAG-----  
 ATAGTACTTAGATCTGAAAATTTCTCAAACAAT-----GCTAAAACCATAATAGTACATTTAAAT---  
 -----GAATCTGTAGTA-----ATTAATTGTACAAGACCCAACAACAATACGAGAAAA-----  
 -AGTATAAATATA-----GGGCCAGGGAGAGCA---TTT-----TATGCAGCAGGAGAA-----  
 -----ATAATAGGAGATATA-----AGACGAGCATATTGT---AACATTAGTAGAACA---  
 AAATGGAATAACACTTTAAACACATAGTTGTAAAATTAAAG-----GAACAATTTGCA---  
 -----AATAGAACAATAATCTTTAAT-----  
 CACTCCTCAGGAGGGGATCCGGAATTGTA--ATGCACAGTTTTAATTGTGGAGGAGAA---  
 TTTAAGCAGCTCCAGGCACGAGTCCCTGGCTGTGGAAAGATACCTAAAGGATCAACAGCTCCTGGGAATTTGGG  
 GTTGCTCTGGAAACTCATTTGCACCACTGCTGTGCCTTGGAAATGCTAGTTGGAGT-----  
 -----AATAAATCTTTTGGTCAGATTTGG-----GAT-----  
 AACATGACCTGGATGGAGTGG---GAAAAAGAAATTGACAATTACACAGGCTTGATATAC---  
 ACTTTAATTGAAGAATCGCAAAACCAACAAGAA-----  
 -----  
 AAGAATGAACAAGAATTATTGGCATTAGATAAATGGGCAAGTTTGTGGAATTGGTTTGACATAACAAATTGGC  
 TGTGGTATATAAAAATATTACATAATGATAGTAGGAGGTTTGGTAGGTTTAAGAATAGTTTTTACT---  
 GTGCTTTCTATAGTG-----AATAGAGTTAGGAAGGGATACTACCA-----  
 TTATCGTTCGCTGTTAGCTTGTTAATGCCACAGCTATAGCAGTAGCTGAG---  
 GGAACAGATAGGATTATAGAAGGATTACAAAGAGCTTATAGAGCT-----  
 -----ATTATCCACATA-----CCTAGAAGAATAAGACAGGGGGCGGAAAAGGCTTTGCAA---TAA  
 >KM354862  
 GCT---ACA-----  
 GGAAACTTGTGGGTCACAGTCTATTATGGGGTACCTGTGTGG--AGAGAAGCAACC---  
 ACCACTTTATTTTGTGCATCAGATGCTAAAGCACATGATACAGAG--GTACACAAT-----  
 -----GTTTGGGCCACA---CATGCCTGTGTACCCACAGAC---  
 CCCAATCCACAAGAAGTACAATTG-----AATGTAACAGAAAATTTTAAC-----  
 -----ATGTGGAAAAATAACATGGGTAGAACAAATGCATGAGGATATA---  
 ATTAATTTATGGGATGAAAGCTTA---AAGCCATGTGTAAAATTA---  
 ACCCCACTCTGTGTTAAGTTAAATTGCACTAATGTGAGGAATGATACTATCAATTTGAAGAAT-----  
 -----  
 -----AATAATTGGACTGTAGATCACCAAATGAAAGGAGAAATAAAA---  
 AACTGCTCTTTCAATGTCAACCACAGATCTGAAA-----  
 GATAAGATAAAGAAAGAACATGCACTT---TTTTATAAACTTGATATAGTACCAATAGAGAATGATAATGAT-  
 -----  
 -----  
 AATAATACTAGTAATAATACTAGCTATAGGTTGATAAGTTGTAACGCCACAACCATTACACAG---  
 GCCTGTCCAAAAGTATCCTTTGAGCCAATTCCCTATATATTATTGTGCCCCGGCTGGTTTTCGATTCTAAAAAT  
 GTAAT---AATAAGAAGTTCAAT-----GGAACAGGGCCATGTACAAAT-----  
 -GTCAGC---ACAGTACAATGTACACATGGAATTAAGCCAGTAGTATCAACT---

CAACTGCTATTAAATGGCAGCATAGCAGAAGAAGAG-----  
 GTAGTAATTAGATCTGAAAATTTCAAAACAAT-----GCTAAAATCATAATAGTACAGCTGAAT----  
 -----GACACTGTACAA-----ATTAATTGTACAAGACCCAACAATAATACAAGGAAA-----  
 -AGTATAAATATA-----GGACCAGGGAGAGCA---TTT-----TATGCAGCAGGAGAT-----  
 -----ATAATAGGAGATATA-----AGACAAGCACATTGT---AACATTAGTGGAGCA---  
 GAATGGAATAACACTTTAAAGCAGATAGCTAACAAATTAAGA-----GAACAATATGGG----  
 -----AAGAATAAAACAATAGAATTTAGG-----  
 CCATCCTCAGGAGGGGACCCAGAAATTGTA--ATGCACAATTTTAATTGTGGTGGGGAA---  
 TTTAAGCAGCTCCAGGCAAGAGTCCTGGCTCTGGAAAGATACCTAAGGGATCAACAGCTCCTGGGAATTTGGG  
 GTTGCTCTGGAAACTCATCTGCCCCACTGCTGTGCCTTGAATACTAGTTGGAGT-----  
 -----AATAAGTCTTATAATGAAATTTGG-----AAT-----  
 AACATGACCTGGATGGAATGG---GATAGAGAAATTAACAATTACACAACTTAATATAT---  
 AGCTTAATTGAAGAATCGCAGAACCAACAAGAA-----  
 -----  
 AAAAAATGAACAAGACTTATTGGCATTGGATAAATGGGCAAATTTGTGGAGTTGGTTTGACATATCAAATTGGT  
 TGTGGTATATAAGAATATTCATAATAATAGTAGGAGGCTTGATAGGATTAAGAATAGTTTTTTACT---  
 GTACTTTCTATAGTA-----AATAGAGTTAGGCAGGGATACTCACCA-----  
 TTGTCATTAGCTGTTAGCTTGCTTAACGCCACAGCCATAGTAGTAGGTGAG---  
 GGGACAGATAGGGTTTTAGAAGGATTACAAAGAGCTTTTAGAGCT-----  
 -----ATTCTCCACATA-----CCTAGAAGAATAAGACAGGGCGCAGAAAGGGCTTTGCTA---TAA  
 >KX587241  
 GCT---GCA-----  
 GAACAATTGTGGGTCACAGTCTATTATGGAGTACCTGTGTGG---AAAGAAGCAACC---  
 ACCACACTATTTTGTGCATCAGATGCTAAAGGATATGATACAGAG---GCACATAAT-----  
 -----GTTTGGGCCACA---CATGCTTGTGTACCCACAGAC---  
 CCCAATCCACAAGAAGTAGTATTGGGA-----AATGTGACAGAAGATTTTGAT-----  
 -----GTGTGGAAAAATAACATGGTGGAAACAAATGCATGAGGATATA---  
 ATCAGTTTGTGGGATCAAAGCCTA---AAGCCATGTGTAAACTA---  
 ACTCCACTCTGTGTTACTTTAAATTGTCTAACATTACAGACAATAGTACTACAACCTCT-----  
 -----  
 -----AATACAAGCATCAATGCGGCAAGCAGAGAAATGAAA---  
 AACTGCTCTTTCAACATCACCACAAATATAAGA-----  
 GATAAGATAAAGCAAGAATATGCACTT---TTTTATAGCCTTGATGTAGTACCAATAAATAAT-----  
 -----  
 -----  
 GATAAGAATAATGATACTTATAGGTTGCTAAGTTGTAACACCTCAGTCATTACACAA---  
 GCCTGTCCAAAGATATCATTTGAACCAATTCCCATACATTATTGTACCCAGCTGGTTTTACGATTCTAAAAT  
 GTAAT---AATGAGAGTTTCAAG-----GGAAAAGGACCATGCACAAAT-----  
 -GTCAGC---ACAGTACAATGTACACATGGAATTAAGCCAGTAGTGTCAACC---  
 CAACTGCTGTAAATGGCAGTCTAGCAAAAGAAAAT-----  
 ATTGTACTTAGATCTGAGAATTTCTCGGACAAT-----GCTAAAACATAATAGTACAGCTGAAA---  
 -----GAACCTGTAAAA-----ATTAATTGTACAAGACCCAATAATAACAAGAAAA---  
 -AGTATACCTATG-----GGTCCAGGGAAAGCA---TTT-----TATGCAACAGGAGAC-----  
 -----ATAATAGGAGATATA-----AGACAAGCACATTGT---AACATTAGTAAAACA---  
 GAATGGAATGATACTTTAACATATATAGCTATAAAATTAATA---GAACAATTTAAT---  
 -----AAGGAAACAATAGTCTTTAAT-----  
 CAATCCTCAGGAGGGGACCTAGAAAGTGTA--ATGCACACCTTTAATTGTGGAGGGGAA---  
 TTTAAGCAGCTCCAGGCAAGAGTCCTGGCTGTGGAAGGATACCTAAAGGATCAACAGCTCCTGGGAATTTGGG  
 GTTGCTCTGGAAACTCATCTGCACCACTGCGGTGCCTTGAATGCTAGTTGGAGT-----  
 -----AATAAATCTCTAGATAAGATTTGG-----AAT-----  
 AACATGACCTGGATGCAGTGG---GAAAAAGAAATTGACAATTACACAGGCTTAATATAC---  
 AACTTACTTGAGACATCGCAAAACCAGCAAGAG-----  
 -----  
 AAAAAATGAACAAGAATTATTAGAATTGGATAAATGGGACAGTTTGTGGAGTTGGTTCAACATAACAAATTGGC  
 TGTGGTATATAAAAATATTCATAATGATAGTAGGAGGCTTAATAGGTTTAAGAATAATTTTTTACT---  
 GTACTTTCTATAGTA-----AATAGAGTTAGGCAGGGATATTCACCA-----  
 TTATCGTTTTGCTATTAGCTTGTTCAACGCCACAGCCATAGCAATAGCTGAG---  
 GGAACAGATAGGATTATAGAAGTAGTACTAAGAATTAGTAGAGCT-----  
 -----ATCCTCCACATA-----CCTACAAGAATAAGACAGGGCTTCGAAAGGGCTTTGCAA---TAA  
 >KX587299

GCT---AAA-----  
GAAGATTGGTGGGTAACAGTTTACTATGGGGTACCTGTGTGG---AAAGAAGCTACC---  
ACCACTTTATTTTGTGCATCAGATGCTAAAGCATATGATACAGAG---GCACATAAT-----  
-----GTCTGGGCCACA---CATGCCTGTGTACCTACAGAC---  
CCCAACCCACAAGAAGTAAATTTGGAA-----AATGTGACAGAAAATTTTAAT-----  
-----ATGTGGAAAAATAACATGGTGGAAACAAATGCATGAGGATGTA---  
ATCAGTTTATGGGATCAAAGCCTA---AAGCCATGTGTAAAATTA---  
ACCCCACTCTGTGTTACTTTTAAATTGCACTGATTATGTGGGAAATGCTACTGCTGCACCACCAACTGTTACTA  
CTACCAATAATAGTAAGTCCACTACAACATCA-----  
-----ACTACTACCAAAAGTAGTCCTACTGCTAATGCCACAATTGAAATGAAA---  
AACTGCTCTTTTTTATACTACCCCAAACATAAGA-----  
GATAAGGTAAGGAAAGAATATGCACTT---  
TTTTATAGCCTTGATGTAGTTCCAATAGATAAGAAAGATAACTAGTAAT-----  
-----  
GAAAAATAACTGTTAGAAATAATACTAGCTATATGTTGATAAGTTGTAACACCTCAGTCATTACACAG---  
GCCTGTCCAAAGATATCCTTTGAACCAATTCCTATACATTATTGTGCCCCGGCTGGTTTTGCGATTCTAAAAAT  
GTAAT---GATACGAAGTTCAAT-----GGAACAGGACCATGTAAAAAT-----  
-GTCAGC---ACAGTACAATGTACACATGGAATTAAGCCAGTAGTATCAACT---  
CAACTGCTATTAAATGGCAGTCTAGCAGAAGAAGAG-----  
GTAATAATTAGATCTGCCAATCTCTCAGATAAT-----ACCAAAAACATAATAGTACATCTGAAT---  
-----GAAAGTGTAACC-----ATTAAGTGTACAAGACACAACAACAATACAAGAAAA-----  
-AGTATACCTATG-----GGACCAGGGAGAGCA---TTT-----TATGCATATGGAGAA-----  
-----ATAATAGGAGATATA-----AGACAAGCATATTGT---AACATTAGTAGAGAA---  
GAGTGGAATAAACTTTAAGACTGATAGTTGAGAAGTTAAGA-----GAAAAGTTTAAT---  
-----AAAACAACAATAATCTTTAGG-----  
AACCCTCAGGAGGGGACCTAGAAAGTTGCA---ATGCACACTTTTAATTGTGGAGGGGAA---  
TTTAAGCAGCTCCAGGCAAGAGTCCTGGCCATAGAAAGATTCCTAGGGGATCAACAGCTCCTGGGAATTTGGG  
GTTGCTCTGGAAGAACTCATTTGCACCACTACTGTGCCTTGGAATCATAGTTGGAGT-----  
-----AATAATACAAATCTAACTAAGGTTTGG-----GAA-----  
AACATGACCTGGATACAGTGG---GAAAAGAAATTGACAATTACACAGACTTAATATAC---  
AACTTAATTGAACACTCGCAGATCCAGCAAGAA-----  
-----  
AAGAATGAACAAGAACTATTGGAATTTGATAAATGGGCAAATTTGTGGAATTGGTTTAACATATCTAATTGGC  
TGTGGTATATAAAAATCTTCATAATGATAGTAGGAGGCTTGATAGGTTTAAGAATAGTTTTTTAGT---  
GTACTTTCTATAGTG-----AATAGAGTTAGGCAGGGATACTACCA-----  
CTATCGTTTGCTATTAGCTTGCTCAACGCCACAGCCATAGCAGTAGCTGAG---  
GGAACAGATAGGGTTATAGAAGCAGTACAAAGAGTTGGTAGAGCT-----  
-----ATCCTTCACATA-----CCTAGAAGAATAAGACAGGGCTTTGAAAGGGCTTTACTG--TAA  
>MG900412  
GCT---GCA-----  
GACAACTTGTGGGTCACAGTCTATTATGGGGTACCTGTGTGG---AGAGAAGCAACC---  
ACTACTCTATTTTGTGCATCAGATGCTAAAGCATATGATACAGAG---GCACATAAT-----  
-----GTTTGGGCCACA---CACGCCTGTGTACCCACAGAC---  
CCCAACCCACAAGAAGTAGAATTAAAA-----AATGTGACAGAAAATTTTAAT-----  
-----ATGGGGAAAAATAACATGGTAGAACAGATGCATGAGGATATA---  
ATCAGTTTATGGGATCAAAGCTTA---AAACCATGTGTAAAATTA---  
ACTCCACTCTGTGTTACTTTTAAATTGCACTGACAATGTTACTACTACCACTAATAGGAACGGGACAAATTGCA  
CTGATTTAAGG-----  
-----AATGTTACTACTACCACTAATAGTAACGAGACATTGATGGAGAAGGGAGAAGTAAAA---  
AACTGTTCTTTTCATGATCACCACAGACGTAAAA-----  
GATAGAATGCGAAAGGAATATGCACTT---TTTTATAAACTTGATGTAGTACCAATAAATGAT-----  
-----  
ACCAGATATAGGTTAGTAAGCTGTAACACCTCAGTCATTACACAG---  
GCCTGTCCAAAGGTATCCTTTGAGCCAATTCCAATACATTATTGTGCCCCGGCTGGTTTTGCGATTCTAAAGT  
GTAAT---GATAAGCAATTCAAT-----GGAACAGGACCATGTACAAAT-----  
-GTCAGC---ACAGTACAATGTACACATGGAATTAGGCCAGTAGTATCAACT---  
CAACTGCTGTTAAATGGCAGTTTAGCAGAAGAAGAG-----  
GTAGTAATTAGATCAGTCAATTTTCAGTGACAAT-----GCTAAAACAATAATAGTACAACCTGAAT---  
-----AAATCTGTAGAA-----ATTAATTGCACAAGACCCAACAACAATACAAGAAAA-----

-AGTATACCCATG-----GGACCAGGGAAAGCA---TTT-----TATGCAAGAGGAGCC-----  
 -----ATAATAGGAGACATA-----AGAAAAGCACATTGT---AACATTAGTAGAGCA---  
 GAATGGCATAGCACTTTAAAACTGGTAGCTGAAAAATTAAGG-----GAACAATAT-----  
 -----AATAAAACAATAGTCTTTAAT-----  
 CACTCCTCAGGAGGGGACCCAGAAATTGTA--ATGTACAGTTTCAATTGCGGAGGGGAA---  
 TTTAAGCAGCTCCAGGCAAGAGTCCTGGCTGTGGAAAGATACCTAAAGGATCAACAGCTCCTGGGGATTTGGG  
 GTTGCTCTGGAAACTCATCTGCACCACTACTGTGCCTTGAATACTAGTTGGAGT-----  
 -----AATAAATCTCTGGAACAGATTTGG-----GAT-----  
 AACATGACATGGATGGAGTGG---GAAAAAGAAATTAACAATTATACAGGCTACATATAC---  
 CAATTAATTGAAGAATCGCAGAACCAACAAGAA-----  
 -----  
 AAGAATGAACAAGAATTATTGGCATGGGATAAATGGGCAAGTTTGTGGAATTGGTTTGACATAACAACTGGC  
 TGTGGTATATAAAAATATTTCATAATGATAGTAGGAGGCTTAATAGGTTTAAGAATAGTTTTTTACT---  
 GTACTTTCTATAGTG-----AATAGAGTTAGGCAGGGATACTCACCA-----  
 TTATCATTTGCTGTTAGCTTGCTCAACGCCACAGCCATAGCAGTAGCTGAG---  
 GGGACAGATAGAGTTATAGAAGTAGTACAAAGAGCTGGTAGAGCT-----  
 -----ATTCGCCACATA-----CCTAGAAGAATAAGACAGGGCTTGGAAGGGCTTTGCTA---TAA  
 >KC473826  
 GCT---GAA-----GAAAAAG---  
 TGGGTCACAGTCTATTATGGGGTACCTGTGTGG---AAAGAAGCAAAC---  
 ACCACTCTATTTTGTGCATCAGATGCTAAAGCATATAAGAGAGAG---GTACATAAT-----  
 -----GTGTGGGCTACA---CATGCCTGCGTACCCACAGAC---  
 CCCAGTCCACAAGAAGTGAATTAAG-----AATGTGACAGAAGAGTTTAAAC-----  
 -----ATGTGGAAAAATAACATGGGTAGAACAGATGCATGAGGACATA---  
 ATCAGTTTATGGGATCAAAGCTTA---AAGCCATGTGTAAAATTA---  
 ACACCACTCTGTATTACTTTAAATTGCACTGATGTGAAGAATACTACTAATACTACCACTGCT-----  
 -----  
 -----AGCAGCGGGGATGAAATGAAA---  
 AATTGCTCTTTCAATATCTCCACAGACGTAAGA-----  
 GATAAGATGAAGAAAGAATATGCACTT---TTTTATAGCCTTGATATAGTAAACTGAATGGTAAT-----  
 -----  
 -----  
 GATAGTAACAGATATAGGTTGACAAGTTGTAATACCTCAGTCATTACACAG---  
 GCCTGTCCAAAGGTATCCTTTGAGCCAATTCCCATACATTATTGTGCCCCGGCTGGTTTTGCGATTATAAAAT  
 GTAAC---AATAAGACATTCACT-----GGAAAAGGATCATGTAACAAT-----  
 -GTCAGC---ACAGTACAATGCACACATGGAATTAAGCCAGTAGTATCAACT---  
 CAATTGCTGTTTAAATGGCAGTCTAGCAGAAGGAGAC-----  
 AACATAGTAATTAGGTCTGACAATTTCTCGAACAAT-----GCTAGGACCATAATAGTACAGCTAACA-  
 -----GAACCTGTAAAT-----ATTACTTGTACAAGACCCAACAACAATACAAGAAAA---  
 ---AGCATACATATA-----GCACCAGGGAAGGCA---TTT-----TATGCAACAGGAGAC---  
 -----ATAATAGGAAATATA-----AGACAAGCACACTGT---AACATTAGTAAAGCA-  
 ---GAGTGAATAACACTTTACAAAAGATAGTTAAAAAACTAGGA-----GAACAATATAAT--  
 -----ACAACAAATTTATCCTTTAAA-----  
 AACTCCTCAGGAGGGGATCCAGAAATTGTG---ATGCACAGCTTTAATTGTAGAGGGGAA---  
 TTCAAGCAGCTCCAGGCAAGAGTCCTGGCTGTGGAAAGATACCTAAAGGATCAGCAGCTCCTGGGGATTTGGG  
 GTTGCTCTGGAAACTCATTTGCACCACTAATGTACGTTGGAATAATAGTTGGAGT-----  
 -----AATAAATCTTATGAAACGATTTGG-----GAT-----  
 AACATGACCTGGATGCAGTGG---GAAAAAGAAATTGACAGATACACAAACACAATATAC---  
 ACTTTACTTGAAGAATCGCAGAACCAGCAGGAA-----  
 -----  
 AAGAATGAACAAGAATTATTGGAATGGGACAAATGGGCAAATCTGTGGAATTGGTTTGACATAACAACTGGC  
 TGTGGTATATAAAAATATTTCATAATGATAGTAGGAGGTTTGATAGGTTTAAGAATAATTTTTTGCT---  
 ATGCTTTCTATAGTG-----AATAGAGTTAGGCAGGGATACTCACCA-----  
 TTATCGTTTTGCTGTTAGCTTGCTCAACGCCACAGCCATAGCAGTAGCTGAG---  
 GGGACAGATAGGATTATAGAAGTAGTACAAAGAAGTTGTAGAGCT-----  
 -----ATCCTTAACATA-----CCTAGGAGAATAAGACAGGGCGCGGAAAGGGCTTTGCTA---TAA  
 >KC473828  
 GCT---GCA-----  
 AATCAAACGTGGGTCACAGTCTATTATGGGGTACCTGTGTGG---AAAGATGCAATC---  
 ACCACTCTATTTTGTGCATCAGATGCTAAATCATATACTACAGAG---GCACATAAT-----

-----GTTTGGGCCACA---CATGCCTGTGTTCTACAGAC---  
CCCAACCCACAAGAAGTAGTATTGAAA-----AATGTGACAGAAGATTTTAA-----  
-----ATGTGGAAAAATAACATGGTGGAACAGATGCATGAAGATATA---  
ATCAGTTTATGGGATCAAAGTCTA---AAGCCATGTGTAAAATTA---  
ACCCCACTCTGTGTTACTTTAAAGTGCCTGATGTGAATACCACTAGTGCCAATAACGCTAGT-----  
-----  
-----GCCACTAACAGTAGTAGTAGCGGGGAATTAATGGAGCCAGGAGAAATAAAA---  
AACTGCTCTTTCAATGTGACAACAGGCCTAAGA-----  
GATAAAAGGAAGAAAGAATATGCACCT---TTTTATAACCTTGATATAATACACTTAAGTGAT-----  
-----  
-----  
AATGAAAATGATAATACTAGCTATAGGTTAAACAAGTTGTAATACCTCAGTCATTACACAG---  
GCCTGTCCAAAAATATCCTTTGAACCAATTCCCATACATTATTGTGCCCCGGCTGGTTTTGCGATTCTAAAAAT  
GTAAT---GAAAAGGGATTCAAT-----GGAAGTGGACCATGCAAAAAT-----  
-GTCAGC---ACAGTACAATGTACACATGGAATTAGGCCAGTAGTCTCAACT---  
CAACTGCTGTTAAATGGCAGTCTAGCAGAAGAAGAG-----  
ATAGTAATTAGATCTGAAAATATCACAGACAAT-----GCAAAAACCATGATAGTACAGTTGAAT---  
-----GAGTCTGTAGCA-----ATTAATTGCACAAGACCCAACAACAATACAAGAAAA-----  
-AGCATACATATA-----GCACCAGGAGGCGCA---TTT-----TTTGCAACAGGAGAC-----  
-----ATAATAGGAGATATA-----AGAAAAGCACATTGT---AGCATTAGCAAAAAA---  
GATTGGAATAACACTTTATATAAGGTAGCAATAAAATTAAGG-----GAACAGTTT-----  
-----AATAAAACAATAATCTTTAAA-----  
AACTCCTCAGGAGGGGACCCAGAAATTGTA--ATGCACACTTTCAATTGTGGAGGGGAG---  
TTTAAGCAGCTCCAGGCAAGAGTCCTAGCTGTAGAAAGATACCTAAGAGATCAACAGCTCCTGGGAATTTGGG  
GTTGCTCTGGAAACTCATCTGCACCACTGCTGTGCCTTGGAATAGTAGTTGGAGT-----  
-----AATAGATCTCTGGATGACATTTGG-----GAT-----  
AACATGACCTGGATGATGTGG---GAAAAGGAAATTGAAAATTACACAGACTTAATATAC---  
AACTTAATTGAGAAATCGCAAGACCAACAAGAA-----  
-----  
AAGAATGAACAAGAATTATTGGCATTGGATAAATGGGCAAGTTTGTGGAATTGGTTTGACATAACAACTGGC  
TGTGGTATATAAAAAATATTGATAATGATAGTAGGGGGCTTAGTAGGCTTAAGAATAGTGTGTACT---  
GTACTTTCCATAGCA-----AATAGAGTTAGGCAGGGATACTCACCT-----  
TTATCATTTGCTGTTAGCTTGTTTGATGCCATAGCTATTGCAGTAGCTGAG---  
GGAACAGATAGGATTATAGAAATATTACAAAGAGGCTTTAGAGCT-----  
-----ATCCTCCATATA-----CCTACAAGAATAAGACAGGGTTTCGAAAGGGCTTTGCTA---TAA  
>KC473829  
GCT---GCA-----  
GAAGAGACGTGGGTACAGTCTATTATGGGGTACCTGTGTGG---AAAGATGCAGAT---  
ACCACTCTATTTTGTGCATCAGATGCTAAAGCATATGAAACAGAG---GTACATAAT-----  
-----GTTTGGGCCACA---CATGCCTGTGTACCCACAGAC---  
CCGAACCCACAAGAAGTACAATTGGAA-----AATGTGACAGAAAATTTTAA-----  
-----ATGTGGAAAAATAACATGGTGAACAGATGCATAATGATATA---  
ATCAGCTTATGGGATCAAAGCCTG---AAGCCATGTGTAAAATTA---  
ACCCCACTCTGTGTTACTTTAAATTGCACTGATGTGAAGATCAATACTACCAGCACCGAAATTAGT-----  
-----  
-----ACCAAGACCGAATATAATACCATAGAGGAAAAAGGAGAAATAAAA---  
AACTGCTCTTTCAATATCACCACAGGTATAAGA-----  
GATAAGGTAGAGAAACAATATGCAATT---  
TTTTATAAATCTGATGTAGTGCAAATAGAGAAAAATGATATAGGA-----  
-----  
AGTAATAGTAGTGATAACAAGACTAGCTATAGGTTGATAAGTTGTAACACCTCAGTCATTACACAG---  
GCCTGTCCAAAGGTAACATTTGAGCCAATTCCAATACATTATTGTACCCAGCTGGTTTTGCGCTTCTAAAGT  
GTAAT---AATGAGACGTTCAAT-----GGAACAGGACCATGTAACAAT-----  
-GTTAGT---ACAGTACAGTGTACACATGGAATTAAGCCAGTGGTATCAACT---  
CAATTGCTGTTAAATGGCAGTCTAGCAGAAAAGGAC-----  
ATAGTAATTAGATCCCAAAATATCTCAGACAAT-----ACTAAAACCATAATAGTACATCTAAAG---  
-----GAACCTGTAAAT-----ATCACTTGTATAAGACCCAACAATAATACAAGAAAA-----  
-GGTATACATATA-----GGACCAGGGAGAGCA---TTT-----TATGCAACAGGAGAC-----  
-----ATAATAGGAAATATA-----AGAAAGGCACATTGT---AACATTACTAGAGCA---  
AATTGGAATGTAACCTTAGGAAAGGTAGTTGAAAAATTAATA-----GAAAAGTTTAGG---

-----AATAAAACAATAAGATTTAGG-----  
 CCACCCTCAGGAGGGGATCAAGAAATTACA--ATGCATATTTTTTAATTGTAAAGGAGAA--  
 TTTAAACAGCTCCAGGCAAGAGTCCTAGCTGTGGAAAGATACCTAAGGGATCAACAGCTCCTGGGGATCTGGG  
 GTTGCTCTGGAAAACATTTGTACCACTGCTGTGCCTTGAATGCTAGCTGGAGT-----  
 -----AATAGATCTGTGAATGACATTTGG-----GAT-----  
 AACATGACCTGGATGGAGTGG--GAAAAGGAAATTGACAATTACACAGAGATAATATAC--  
 AACTTACTTGAGAAGTCACAGAACCAGCAAGAA-----  
 -----  
 AAGAATGAACAAGAATTATTGGAATTGGACAAATGGGCAAGTTTGTGGAATTGGTTTGACATATCAAAATGGC  
 TGTGGTATATAAAAATATTTATAATGATAGTAGGAGGCTTAATAGGTTTAAGAATAGTCTTTACT--  
 GTGCTTTCTATAGTG-----AATAGAGTTAGGCAGGGATACTCACCA-----  
 TTGTCGTTGGCTGTTAGCTTGTTCAACGCCACAGCAGTAGCAGTAGCTGAG--  
 GGGACAGATAGAATTATAGACCTATTTCAAAGAATTTTGTAGAGCT-----  
 -----ATTCTTCATATC-----CCTACAAGGATAAGACAGGGCTTGGAAGGGCTTTGCTA--TAA  
 >KC473830  
 GCT---ATA-----  
 GAAATGTGGGTCACAGTCTATTATGGGGTACCTGTATGG--AGAGAAGCAAAC--  
 ACCACTCTATTTTGTGCATCAGATGCTAAAGGATATGAGACAGAG--GTACATAAT-----  
 -----GTTTGGGCTACA--CATGCCTGTGTACCCACAGAC--  
 CCCAGTCCACAAGAAGTGAATTAATA-----AATGTGACAGAAGAATTTAAT-----  
 -----ATGTGGAAAAATAACATGGTAGAACAGATGCATGAGGACATA--  
 ATTAGCTTATGGGATCAAAGCTTA--AAGCCATGTGTAAAATTA--  
 ACACCACTCTGTGTCACTTTAACTTGCACTAATACTGAAACGAATACTACTAATGCCACTGCT-----  
 -----  
 -----AGCAACCGGAATGAAATGAGA--  
 AATTGCTCTTTCAATGTCACCACAGATGTAAGA-----  
 GATAAGGTGAAGAAAGAATATGCACCT--TTTTATAGCCTTGATATAGTAAACTGGATGGT-----  
 -----  
 -----  
 AATACCAGCTATAGGTTAACAAGTTGTAACACCTCAGTCATTACACAG--  
 GCCTGTCCAAAAATATCCTTTGAACCAATTCCCATACATTATTGTGCCCGGCTGGTTTTGCGATTTTAAAGT  
 GCAAC--AATAAGACATTCACT-----GGAAAAGGACCATGTAACAAT-----  
 -GTCAGC--ACAGTACAATGCACACATGGAATTAGGCCAGTAGTATCAACT--  
 CAATTGCTGTAAATGGTAGTCTAGCAGAAGAAGAC-----  
 ATAGTAATTAGGTCTGACAATTTCTCGAACAAT-----GCTAGAACCATAATAGTACAGCTAAAA--  
 -----GACCCTGTAAAT-----ATTAATTGTACAAGACCCAACAACAATACAAGAAAA--  
 -AGCATACATATA-----GCACCAGGGAGGGCA--TTT-----TATGCAACAGGAGCC-----  
 -----ATAACAGGAGATATA-----AGACAAGCACACTGT--AACATTAGTAGAGCA--  
 CAGTGGAATAACACTTTACAAAAGATAGCTACCAAATTAGGA-----GAACAATATACA--  
 -----GCAAACAACATATCCTTTAAA-----  
 AACTCCTCAGGAGGAGATCCAGAAATTGTA--ATGCACAGCTTTAATTGTGGAGGGGAA--  
 TTCAAGCAGCTCCAGGCAAGAGTCCTGGCTGTGGAAAGATACCTAAGGGATCAACAGCTCCTGGGGATTTGGG  
 GTTGCTCTGGTAAACTCATTTGCACCACTAATGTACGTTGGAATAATAGTTGGAGTAGTAGT--TGG-----  
 -----AGTAGTAAAAATCTGAGTGATATTTGG-----AAC-----  
 AACATGACCTGGATGCAGTGG--GAAAAGGAAATTGACAATTACACAAGCATAATATAC--  
 ACTTTACTTGAGAATCGCAGAACCAGCAGGAA-----  
 -----  
 AAGAATGAACAAGAATTATTGGAATTGGACAAATGGGCAAATTTGTGGAATTGGTTTGACATAACACACTGGC  
 TGTGGTATATAAAAATATTCATAATGATAGTAGGAGGTTTGTAGGTTTAAGAATAGTTTTTTGCT--  
 GTGCTTTCTATAGTG-----AATAGAGTTAGGCAGGGATACTCACCC-----  
 TTATCGTTTGTCTATTAGCTTGCTCAACGCCACAGCCATAGCAGTAGCTGAG--  
 GGGACAGATAGGATTATAGAATTAGTACAAAGAATTTGTAGAGCT-----  
 -----ATCTGTAATATA-----CCTAGGAGAATAAGACAGGGCGCGGAAAGGGCTTTGGTA--TAA  
 >KU677990  
 GCT---GCA-----  
 GAAAACTTGTGGGTCACAGTCTATTATGGGGTACCTGTGTGG--AAAGAAGCAACT--  
 ACCACTCTCTTTTGTGCATCAGATGCTAAAGCATATGATACAGAG--GTACATAAT-----  
 -----GTTTGGGCCACA--CATGCCTGTGTACCCACAGAC--  
 CCCAACCACACAAGAAGTACAATTGAAA-----AATGTGACAGAAAATTTTAAC-----  
 -----GTGTGGAAAAATGATATGGTAGAACAGATGCATGAGGATATA--

ATCAGTTTATGGGATCAAAGCCTA---AAGCCATGTGTAAAATTA---  
 ACCCCACTCTGTGTAACCTTTAAATTGCACTGATTTGAAGAATGTTACTAATACCAATAGTACTAATGCCACTA  
 GCACTATTGGCAAAGGTAGTAATACT-----  
 -----GCTGGTAATAATGCCAATAATAGTAGCGGGGAAATACTGGGGGGAGGAGAAATAAAA---  
 AACTGCTCTTTCAATATCACCACAAGCATAAGA-----  
 GATAAGGTGAAGAAAGAATATGCACTT---TTTTATACACTTGATATAGTGCCAATAGAGGAGGATAATACT-  
 -----  
 -----  
 GCTAATGATAGTACCAGTTATAGGTTGACAAGTTGTAATACCTCAGTCATTACACAG---  
 GCCTGTCCAAAGGTATCCTTTGAGCCAATTCCAATACATTATTGTGCCCCTGCTGGTTTTGCGATTCTAAAGT  
 GTAAT---GATAAGAATTTCACT-----GGCTCAGGGCCATGCAGAAAT-----  
 -GTCAGC---TCAGTACAATGTACACATGGAATTAGACCAGTAGTATCAACT---  
 CAACTACTGTTAAATGGCAGTCTAGCAGAAGATGAA-----  
 AAGGTAGTAATTAGATCTGAGAATTTCAAAACAAT-----GCCAAAACCATAATAGTACAGCTGAGA-  
 -----GAAGCAGTAGTA-----ATTAATTGTACAAGGCCCAACAATAATACAAGAAAA--  
 ----GGTATACATATA-----GGACCAGGGAGAGCA---TTT-----TATGCAACAGGAGCA---  
 -----ATAATAGGAGACATA-----AGACAAGCACATTGT---AACCTCAGTGCAACA-  
 --GATTGGAATACTACTTTAAAAGAGGTAGCTGAAAAATTAAGA-----GGACAATTTGGG--  
 -----AAAAATAAAACAATAGTCTTTAAT-----  
 CAATCCTCAGGAGGGGACCCAGAAATTGTA--ATGCACACTTTTAATTGTGGAGGGGAA---  
 TTTAAGCAGCTCCAGGCAAGAGTCCTGGCTGTGGAAAGATACCTAAAGGATCAACAGCTCCTAGGAATTTGGG  
 GTTGCTCTGGAAGAACTCATCTGCACCACTGCTGTGCCCTGGAATACTAGTTGGAGT-----  
 -----AATAAATCTTATGATGACATTTGG-----TAC-----  
 AACATGACCTGGCTGGAGTGG---GAAAGAGAAATTGACAATTACACAGGCATAATATAC---  
 AACTTAATTGAAAAATCGCAAAACCAACAGGAA-----  
 -----  
 AAGAATGAACAAGAATTATTGGCATTAGATAAAATGGGCAAGTTTGTGGACTTGGTTTGACATATCAAACCTGGC  
 TGTGGTATATAAAAAATATTACATAATGATAGTAGGAGGCTTGATAGGTTTAAGAATAATTTTTTACT---  
 GTGCTTTCTATAGTG-----AATAAAGTTAGGCAGGGATACTCACCA-----  
 TTATCGTTTGTCTGTTAGCTTGCTCAACGCCACAGCCATAGCAGTAGGTGAG---  
 GGGACAGATAGGATTCTAGAAATATTACAAAGAGCTTTTAGAGGT-----  
 -----GTCCTTCACATA-----CCTAGAAGAATAAGACAGGGCTTTGAAAGGGCTTTGCTT---TGA  
 >KF384800  
 GGT---ACA-----  
 GAAAAATTGTGGGTACGGTCTATTATGGGGTACCAGTGTGG---AAGGAAGCAACC---  
 ACCACTCTATTTTGTGCATCAGATGCTAAAGCATATGAGAAAGAG--GTACATAAT-----  
 -----GTTTGGGCCACA---CATGCCTGTGTACCCACAGAC---  
 CCCAACCCACAAGAAATAGAATTGAAA-----AATGTGACAGAAAATTTTAAC-----  
 -----ATGTGGAATAAACATGGTAGAACAGATGCAAGAGGATATA---  
 ATCAGTTTATGGGATGAAAGCCTA--AAGCCATGTGTAAAATTA---  
 ACCCCACTCTGTGTTACTTTAAATTGCACTGATAATATTACTGCTACTAATACCACTAATGGTACTACT---  
 -----  
 -----ACTACTGTCAGCAATGGTAATGGTACAGCGGAGGAAAAGGGGGAAATGAAA---  
 AACTGCTCTTTCAATATCACCACAGCCATAAGA-----  
 AATAAGATACAGAAAGAATATGCACTT---TTCTATAAACTTGATTTAACACCAATAGATAATGCT-----  
 -----  
 -----  
 GACAATACTAGCTATAGGTTGATAAGTTGTAACACCTCAGTCCTTACACAG---  
 GCCTGTCCAAAGGTGTCTTTGAGCCAATTCACATACATTATTGTGTCCCGGCTGGTTTTGCGATGCTAAAGT  
 GTAAA---GATAGAAATTTTAAT-----GGAACAGGACAGTGTACAAGT-----  
 -GTTAGC---ACAGTACAATGTACACATGGAATTAGGCCAGTGGTATCAACT---  
 CAACTACTGTTAAATGGCAGTCTAGCAGAAGGAGAG-----  
 GTAGTAATTAGATCTGAAAAATTCACAAACAAT-----GCTAAAATAATAATAGTACAGCTGAAC----  
 -----AATTCTGTAAAA-----ATTAATTGTACAAGACCCTACCGAGTTATAACGAAA-----  
 -AGAATAATGCAT-----ATAGGACCAGGGAGAACA---TTC-----CATACAACAGGA-----  
 -----ACAATAGGGAATATA-----AGACACGCGTATTGT---AACATTAGTAGAAAA---  
 GATTGGAATAACACTTTAGCACAGATAGTTGAAAAATTAATA-----GAACAATTTGGG----  
 -----AAAAATAAAACAATAATCTTTAAG-----  
 CCATCCTCAGGAGGGGACCCAGAAATTGTA--ACGCACAGTTTTTAATTGTGGAGGGGAA---  
 TTTAAGCAGCTCCAGGCAAGAGTCCTGGCTCTGGAAGATACCTAAGGGATCAACAGCTCCTGGGAATTTGGG

GTTGCTCTGGAAACTCATTTCACCACTACTGTGCCTTGAATGCTAGTTGGAGT-----  
-----AATAGATCTCTAGATGAGATTTGG-----GAT-----  
AACATGACCTGGATGAAATGG---GAAAGAGAAATTGACAAATTACACAGGCTTAATATAC---  
AACTTACTTGAACAATCGCAGAACCAGCAAGAA-----  
-----  
AAGAATGAACAAGAATTGTTGGAATTGGATCAATGGGCAAGTTTGTGGAATTGGTTCCACATAACAAATTGGC  
TGTGGTATATAAAAAATATTCATAATGATAGTAGGAGGCTTGGTAGGCTTAAGAATAGTTTTTGTCT---  
ATACTTTCTGTAGTG-----AATAGAGTTAGGCAGGGATACTCACCT-----  
TTATCGTTTGTCTGTTAGCTTGCTCAACGCCACAGCTATAGCAGTAGCTGAG---  
TGGACAGATAGGGTTATAGAAGTATTACAAAGAGCTGGTAGAGCT-----  
-----ATTATCCACATA-----CCTACAAGAATAAGACAGGGCTTGGAAAGGGCTTTGCAA---TAA  
>KF384801  
GCT---GCA-----  
AAACAATTGTGGGTCACAGTCTATTATGGGGTACCCGTGTGG--AAAGAGGCCCCC---  
CCCCTCTATTTTGTGCATCAGATGCTAGAGGATATGATACAGAG---GCACATAAT-----  
-----GTCTGGGCCACA---CATGCCTGTGTACCCACAGAC---  
CCCAGCCCACAAGAAGTAGTATTGGCA-----AATGTGACAGAAAATTTTAAC-----  
-----ATGTGGAAAAATAACATGGTAGAACAGATGCATGAGGATATA---  
ATCAGTTTATGGGATCAAAGTCTA---AAACCATGTGTGAAATTA---  
ACCCCACTCTGTGTTACTTTAAATTGCACTGATGCTAATAGAACCTGCGATAATGTCACTAATACTAGT---  
-----  
-----AGTACTACTATTGACTGTAAGGACATGCGAAGAGAAATAAAA---  
AACTGCTCTTTCAATATCACCTCAGGCATAAGA-----  
GATAAGATGAAAAAGGAATATGCACCT--TTTTATGCACCTTGATGTAATACCAATAGATAAT-----  
-----  
-----  
AGTAATACCAGTTATAGGTTGTTAAGATGTAACACCTCAGTCATTACACAG---  
GCCTGTCCAAAGGTATCCTTTGAGCCAATTCCCATACATTACTGTGCCCCGGCTGGTTTTGCGATTCTAAAGT  
GTAAC---AATAAGACATTCAAT-----GGAACAGGGCCATGTACAAAT-----  
-GTCAGT---ACAGTACAATGTACACATGGAATTAGACCAGTAGTGTCAACT---  
CAACTGCTGTTAAATGGCAGCCTAGCAGAAGAAGAG-----  
GTAGTCATTAGGTCTGAGAATTTACAGACAAT-----GCTAAACTATAATAGTACAGCTGAAT---  
-----GAATCTGTACAA-----ATTAAGTGTACAAGACCCAACAACAATATAAGAAAA---  
-AGAATAATACAT-----ATAGGACCAGGGAGACCA---TTT-----TATGCAACAGGAGAC-----  
-----ATAGGAAATATA-----AGACGAGCACAGTGT--ACCTCAATGGAACA---  
GCTTGGAAATAACACTTTAGAAAAGATAGTTGGAAAATTAAGA-----GAACAATTTGGG---  
-----AATAAGACAATAGTCTTTAAT-----  
TCATCCTCAGGAGGGGACCCAGAAATTGTA--ATGCACACTTTTAATTGTGGAGGAGAA---  
TTTAAGCAGCTCCAGGCAAGAGTCCTGGCTCTGGAAAGATACCTAAGGGATCAACAGCTCCTAGGGATTTGGG  
GTTGCTCTGGAAAACTCATCTGCACCACTAATGTGCCTTGAATACTAGTTGGAGT-----  
-----AACAAATCCCTAAGTTATATATGG-----GAC-----  
AACATGACATGGATGGAGTGG---GAAAGAGAAATTGACAAATTATACAGGCTTAATATAT---  
AACTTAATTGAAGAATCGCAAAACCAACAAGAA-----  
-----  
AAGAATGAAGTAGAATTATTAAAAATTAGATTTCATGGGCAAGTCTGTGGAATTGGTTTGACATATCCAAATGGC  
TGTGGTACATAAAAAATATTCATAATGATAGTAGGAGGCTTGATAGGTTTAAGAATAATCTTTACT---  
GTGCTTTCTATAGTG-----AATAGAGTTAGGCAGGGATACTACCA-----  
TTATCATTTGGCAGTTAGCTTGCTCAACGCCACAGCAATAGCAGTAGGTGAG---  
GGAACAGATAGGGTTATAGAGCTATTACAAAGAATTTATAGAGCT-----  
-----ATTCTTCACATA-----CCTACAAGAATAAGACAGGGCTTAGAAAGGGCTTTGCTA---TAA  
>KF384803  
GCT---GCA-----  
GAACAATTGTGGGTCACAGTCTATTATGGGGTACCTGTGTGG--AAAGAAGCAAAAT---  
ACTACACTATTTTGTGCATCAGATGCTAAATCATATGAGGCAGAG---GCACATAAT-----  
-----GTTTGGGCCACA---CATGCCTGTGTGCCACAGAC---  
CCTAACCACACAAGAAGTATTATTGGGA-----AATGTGACAGAAAATTTTAAC-----  
-----ATGTGGAAAAATAACATGGTAGAACAGATGCATGAGGATGTA---  
ATCAGTTTATGGGATCAAAGCCTA---AAGCCATGTGTAAAATTA---  
ACCCCACTCTGCGTTACTTTAAACTGCACTGATTATGTGAATAATGCTACTAATATCTCTAGC-----  
-----

-----AGCGGGGGAGAAGCGATGGAAAAAGGCGAAATGAAA---  
 AACTGCTCTTTCAATATCACCACAAGCCTAAGA-----  
 GATAAGGTGCAGAAAGAATATACACTT---  
 TTTTATAAACTTGATTTAGTACCAATAGAGGATGAGAATAACAAA-----  
 -----  
 ACCAATACCAGCTATAGGTTGATAAGCTGTAACACCTCAGTCCTTACACAG---  
 GCCTGTCCAAAGGTATCCTTTGAGCCAATTTCCCATACATTATTGTGCCCCAGCTGGTTTTGCGATTCTAAAGT  
 GTAAA---GATGAGAAGTTCAAT-----GGAACAGGACCGTGTACAAAT-----  
 -GTCAGC---ACCGTACAATGTACACATGGAATTAGGCCAGTAGTATCAACC---  
 CAACTGCTGTTGAATGGCAGTCTAGCAGAAAAAGAG-----  
 GTAGTAATTAGATCTAGCAACTTCACGGACAAT-----GCTAAAACCATAATAGTACAGCTGAAA-----  
 -----ACACCTGTAAAA-----ATTAATTGTACAAGACCCTACAACAAGATAATAAAA-----  
 -AGAAGAATACAT-----ATAGGACCAGGGAGAGCA---TTT-----TCTACAACAGGAGGA-----  
 -----ATAGGAGGAGAGATA-----AGAAAAGCACATTGT---AACATTAGTAGAACA---  
 GAGTGGAATAACACTCTAAAAAGAGATAGTTAACAAATTAAGA-----GAACAATTTGGG-----  
 -----AATAAAACAATAATCTTTAAT-----  
 AAATCTGCAGGAGGGGACCCAGAAATTGTA--ATGCACAGTTTTAATTGTGGAGGGGAA---  
 TTTAAACAGCTCCAGGCAAGAGTCCTGGCTGTGGAAAGATACCTAAGGGATCAACAGCTCCTGGGGATTTGGG  
 GTTGCTCTGGAAACTCATTTGCACCACTACTGTGCCTTGGAATGCTAGCTGGAGT-----  
 -----AATAAATCTCTGGAAAAGATTTGG-----GAT-----  
 AACATGACCTGGATGGAGTGG---GAAAGAGAAATTGACAAATTACACAAATTTAATATAC---  
 ACTTTACTTGAAGAATCGCAGAACCAACAAGAA-----  
 -----  
 AAGAAATGAACAAGAATTATTGGAATTAGATAAAATGGGCAAATTTGTGGAATTGGTTTGATATAACAAAATGGC  
 TGTGGTACATAAAAATATTTATAATGGTAGTAGGAGGCTTGGTAGGTTTAAGAATAGTTTTTTGCT---  
 GTATTTTCTATAGTG-----AATAGAGTTAGGCAGGGATATTCACCA-----  
 CTCTCGTTTGCTGTTAGCTTGTTCAATGCCATAGCCATAGCAGTAGCTGAG---  
 GGGACAGATAGGGTTTTAGAAAGTATTACAAAGAGCTTTTAGAGCT-----  
 -----ATTCTACACATA-----CCTAGAAGAATAAGACAGGGCTTTGAAAGGGCTTTGCTA---TAA  
 >KF384804  
 GCT---ACA-----  
 AAACCATTTGTGGGTCACAGTCTATTATGGGGTACCTGTGTGG--AAAGAAGCAACT---  
 ACCACTTTATTTTGTGCATCAGATGCTAAAGCATATAATACAGAG--AAGCACAAT-----  
 -----GTTTGGGCCACA--CATGCCTGTGTACCCACAGAC---  
 CCCAACCCACAAGAAGTAGTAATGGAA-----AATGTGACAGAAAATTTTAAC-----  
 -----ATGTGGAAAAATAACATGGTAGAACAGATGCATGAGGATATA---  
 ATTAGTTTATGGGATCAAAGCTTA--AAGCCATGTGTGAAATTA---  
 ACCCCACTCTGTGTTACTTTAAATTGCACTGATGCTACTAAGACCAAT-----  
 -----  
 -----AGTAGTAGAGGGGAAATGAAGGATGGACAAGAAATGAAA---  
 AATTGCTCTTTCAATATCACCACAAGCATAAGA-----  
 GGTAAGATGCAGAAAGAATATGCGCTT--TTTTATAAGCTTGATGTAGTACCAGTAGAAAAG-----  
 -----  
 -----  
 GATAATGCTAGCTATAGGTTGATAAGTTGTAACACCTCAGTCATTACACAG---  
 GCCTGTCCAAAGGTATCCTTTGAACCAATTTCCCATACATTATTGTACCCCGGCTGGTTTTGCGATTATAAAAT  
 GTAAT---ATAAGAAGTTCAAT-----GGAACAGGACCATGTAAAAAT-----  
 -GTCAGC---ACAGTACAGTGTACACATGGAATTAAGCCAGTAGTATCAACT---  
 CAACTGCTGTTAAATGGCAGTCTAGCAGAAGAAGAG-----  
 GTAGTAATTAGATCTGAAAACCTCACAAACAAT-----GCTAAAGTCATAATAGTACAATTGAAT-----  
 -----GAGTCTGTGTCA-----ATTAATTGTACAAGACCTGGCAACAATACAAGCAAA-----  
 -GGTATACATATA-----GGACCAGGCAGAGCA---TTG-----CATGTAACAAGAACA-----  
 AGAGGAAAAATAATAGGAGATATA-----AGACAAGCACATTGT---AACATTAGTAAAGCA---  
 GATTGGAATAACACTCTAAAGAAGATAGTGGTAAAATTAAGA-----GAACAATTTGGG-----  
 -----AATAAAACAATAGTCTTTAAT-----  
 CAATCCTCAGGAGGGGACATAGAAATTGTA--ACACACAGTTTTAATTGTGGAGGGGAA---  
 TTTAAGCAGCTCCAGGCAAGAGTCCTGGCTGTAGAAAAGATACCTAAAGGATCAACAGCTCCTGGGAATTTGGG  
 GTTGCTCTGGAAACTCATCTGCACCACTAATGTGCCTTGGAACACTAGCTGGAGT-----  
 -----AATAAATCTCTAAAACAGATTTGG-----GAC-----  
 AACATGACCTGGATGGAGTGG---GAAAGAGAAATTGACAACTACACAAGTGTAATATAC---

ACCTTAATTGAACAATCGCAAAACCAGCAAGAA-----  
 -----  
 AAGAATGAAGAAGAGTTATTATCTTTAGATAAAATGGGACAATTTATGGAATTGGTTTAACATAACAAACTGGC  
 TGTGGTATATAAAAATATTATAATGATAGTAGGAGGCTTGATAGGTTTAAGAATAGTTTTTACT---  
 GTACTTTCTATAGTA-----AATAGAGTTAGGCAGGGATATTCACCA-----  
 TTATCGTTCGCTGTAAGCTTGCTCAATTTTCATAGCTATAGCAGTAGCTGAG---  
 GGGACAGATAGGATCATAGAAGTATTACAAAGAATTGGTAGAGGC-----  
 -----ATCCTCCACATA-----CCTACAAGAATAAGACAGGGCTTAGAAAGGCTTTTGCTA---TAA  
 >KF384807  
 GCT---GCA-----  
 GAGGATATGTGGGTCACAATATATTATGGGGTACCTGTGTGG--AAAGAAGCAAAAT---  
 ACCACTCTATTTTGTGCATCAGATGCTAAAGCATATAAAACAGAG---GCACATAAT-----  
 -----GTTTGGGCTACA---CATGCCTGTGTACCCACAGAC---  
 CCCAACCCACAAGAAGTAGTATTGGAA-----AATGTGATAGAAAATTTTAAAC-----  
 -----ATGTGGAAAAATAACATGGTAGAACAGATGCATGAGGATGTA---  
 ATTAGTTTATGGGATCAAAGTCTA---AAACCATGTGTAAAATTA---  
 ACCCCACTCTGTGTTACTTTAACTTGCACTGATGCTAATGTCACTGATACTAATGCCACG-----  
 -----  
 -----AATACTAACAAGACAGGGCTGGAGGGAGAAGGAATGAAA---  
 AATTGCTCTTTTAATGTCAACCACAGACGTAAGT-----  
 GATAAAAGAAAGAAAGAATATGCACCT--TTTTATAACCTTGATGTAGTACAAATAGATGGG-----  
 -----  
 -----  
 AATAGGGATAATACTAGCTACAAGTTAATAAGTTGTAACACCTCAGTCGTTACACAA---  
 GCCTGTCCAAAGATATCCTTTGAGCCAATTCCCATACATTATTGTGCCCGGCTGGTTTTGCGATTCTAAAGT  
 GTAAT---AATAAGACATTCAAT-----GGAACAGGACCATGTACAAAT-----  
 -GTCAGC---ACAGTACAATGTACACATGGGATTAGGCCAGTAGTATCAACT---  
 CAACTACTGTAAATGGCAGTTTGGCAGAAGAAAAG-----  
 GTAGTCCTTAGATCTGAAAATTTACAGACAAT-----AGTAAGACCATAATAGTACAACCTGAAG---  
 -----GAACCAGTACAA-----ATTAATTGTACAAGACCCAGTAACAATACAATAAAA-----  
 -GGTATACATATG-----GGACCAGGAAGAGCA---TTT-----TATGCAACAGAACAG-----  
 -----GTAATAGGAGATATA-----AGGCAGGCACATTGT---AACCTTAGTAGAGAA---  
 CAATGGAATAACACTTTAAACAGATAGCTAGCAAATTAGGA-----GAACAATATGGG---  
 -----AGGAATAAAACAATAATCTTTAAA-----  
 CACTCCTCAGGAGGGGACCTAGAAATTGTA--ACGCACACTTTTAATTGTGGGGGAGAA---  
 TTTAAGCAGCTCCAGGCAAGGGTCTGGCTGTGGAAAGATACCTAAGGGATCAACAGCTCCTGGGGATCTGGG  
 GTTGCTCTGGAAGAACTCATTGCACTACTGTGCCTTGGAATGCTAGTTGGAGC-----  
 -----AATAAATCTTTAATGAAATTTGG-----GAT-----  
 AACCTGACCTGGATGCAATGG--GAAAGAGAAATTGACAATTACACAGCAATAATATAC---  
 TCCTTACTTGAAGAATCGCAGAACCAGCAAGAA-----  
 -----  
 AAGAATGAACAAGACTTATTGGCATTAGATAAAATGGTCAAATTTGTGGAATTGGTTTAACATAACAAACTGGC  
 TGTGGTATATAAAAATATTATAATGATAGTAGGGGGCATGATAGGTTTAAGGATAGTTTTTATT---  
 ATATTTTCTATAGTG-----AATAGAGTTAGGCAGGGATACTACCA-----  
 TTGTCGTTTGCCATTAGCTTGCTTAACGCTACAGCCATAACAGTAGCTGAG---  
 GGGACAGATAGGGTTATAGAAATAGTACAAAGAGCTTGGGGAGCT-----  
 -----TTTCTCCACATA-----CCTACTAGAATAAGACAGGGCTTGGAAGGGCTTTTGCTA---TAA  
 >KF384811  
 GCT---GCA-----  
 GAAAAATTTGTGGGTCACAGTCTATTATGGAGTACCTGTGTGG--AAAGAAGCAACT---  
 ACTACTCTATTTTGTGCATCAGATGCTAAAGCATACGACACAGAG--ATGCATAAT-----  
 -----GTTTGGGCCACA---CATGCCTGTGTACCCACAGAC---  
 CCCAACCCACAAGAAGTAGTACTGGAA-----AATGTGACAGAGAATTTTAAAC-----  
 -----ATGTGGAAAAATGACATGGTAGAACAGATGCATGAGGATATA---  
 ATTAGTTTATGGGATCAAAGCCTA--AAGCCATGTGTAAAATTA---  
 ACCCCACTCTGTGTTACTTTAAATTGCGCTGATGTTAATAGTACCACCAATAAT-----  
 -----  
 -----AGTAGTACGGGAGAGATGCAGGAAGGAGAAATAAAA---  
 AACTGCTCTTTCAATACCACCACAAACATAAAA-----  
 GATAGGATACGGAAGGAATATGCACCT---

TTTTATAAACTTGATGTAGTACCAATAGTGGATGATGGAACCAAC-----  
 -----  
 AATACTAATGCCACTAGTACCCACTATAGGTTGATAAGTTGTAATACCTCAGTCATTACACAG---  
 GCCTGTCCAAAGATATCCTTTGAGCCAATTCCCATACATTATTGTGCCCCGGCTGGTTTTGCGATTCTAAAGT  
 GTAAT---GATAAGAAGTTTAAT-----GGAACAGGACCATGTAAAAAT-----  
 -GTCAGC---ACAGTACAATGTACACATGGAATTAAGCCAGTAGTATCAACT---  
 CAGCTACTGTAAATGGCAGTCTAGCAGAAGGAGAG-----  
 GTAATAATTAGATCTGAGAATCTCACAACAAT-----GCTAAGACTTACTAGTACCCCTGAAT----  
 -----AAATCTGTAGAA-----ATTATTTGTGAAAGACCCAACAACAATACAAGAAGG-----  
 -AGTATACCTATA-----GGACCAGGGGAGAGTC---TTT-----TTTACATCAGAA-----  
 -----ATAATAGGAGATATA-----AGACAAGCATATTGT---ACAATTAATGGAACA---  
 ACCTGGAGTGAACTTTAAAGCAGGTAGCTATCAAATTAGGT-----GAAAAATTTCCG----  
 -----AACAAAACAATAGCCTTTAAT-----  
 CGGTCCCTCAGGAGGGGACCCAGAAATTGTA--ATGTACAGTTTTAATTGTGGAGGGGAA---  
 TTTAAGCAGCTCCAGGCAAGAGTCCTGGCTGTGGAAAGATACCTAAGAGATCAACAGCTCCTAGGAATTTGGG  
 GTTGCTCTGGAAACTCATTTGCACCACTACTGTGCCTTGGAATAATAGTTGGAGT-----  
 -----AATAAATCTTATGACCACATTTGG-----GGT-----  
 AACATGACCTGGATGGAGTGG---GAAAGAGAAATTGATAATTACACACACCTAATATAC---  
 AACTTAATTGAAGACTCGCAAAACCAACAAGAA-----  
 -----  
 AAGAAATGAAGTAGACTTATTAGAATTGGATAAGTGGGCAAGTCTGTGGAATTGGTTTGACATAACAAAATGGC  
 TGTGGTATATAAAAATATTTCATAATGATAGTAGGAGGCTTAATAGGATTAAGACTAGTTTTTTACT---  
 GTACTTTCTATAGTG-----AATAAAGTTAGGAAGGGATACTCACC-----  
 TTGTCGTTCTGCTATTAGCTTGCTCAATACCACTGCTGTAGCAGTAGCTGAG---  
 GGGACAGATAGGGTTATAGAATTTTTACAAGGAATTGGTAGAGGC-----  
 -----ATTCTCCACATA-----CCTAGAAGAATAAGACAGGGCTTGGAAGGGCTTTGCTA---TAA  
 >KX156409  
 GTT---ACA-----  
 GGAAATTTGTGGGTCACAGTCTATTATGGAGTACCTGTGTGG---AAAGAAGCAACC---  
 ACCACTCTATTTTGTGCATCAGATGCTAAAGCATATGATACAGAG---GTACATAAT-----  
 -----GTTTGGGCCACA---CATGCCTGTGTACCCACAGAT---  
 CCCAATCCACACGAAGTACCATTGGTA-----AATGTGACAGAAAAATTTAAC-----  
 -----ATGTGGAAAAATAACATGGTAGAACAGATGCATGAAGATATA---  
 ATCAGTTTATGGGATCAAAGCCTA---AAGCCATGTGCAAAATTA---  
 ACCCCACTCTGTGTTACTTTAGATTGCAAGGATGTTAATGCCACTAGAGATAATGCCAATACTAATAATACCA  
 CTAGTGCCCCT-----  
 -----AGTGGTAATAGTAGTATGATAGGAGAAATGAGA---  
 AACTGCTCTTTCAATGTCAACCACAAACATAAGA-----  
 GATAAGATACGGAAAGAATATGCTCTT---  
 TTTTATAGATATGATGTAGTACCAATAGAAGAGGAGAAAAGGCAA-----  
 -----  
 AACAAAACCACCTATAGACTAATAAATTGTAACACCTCAGAAATTACACAG---  
 GCCTGTCCAAAGGTATCCTTTGAGCCCATTCCCATACATTACTGTGCCCCGGCTGGTTTTGCGCTTCTAAAGT  
 GTGGA---GAGAAGAAGTTTAAT-----GGAACAGGAAAATGTAGAAAT-----  
 -GTCAGC---ACAGTACAATGTACACATGGAATTAAGCCAGTAGTGTCAACT---  
 CAACTGTTGTTAAATGGTAGTCTAGCAGAAGAAGAT-----  
 GTAGTACTTAAATCTGAGAACTTCACGAACAAT-----GCTAAAGTCATAATAGTACAGCTAAAT----  
 -----GAAACTATAGAA-----ATAAATGTACAAGACCCAACAACAATACAAGAAGG-----  
 -AGTATACATATA-----GCACCAGGGAGAGCA---TTC-----TATGCAACAGGAGAA-----  
 -----ATAACAGGAGACATA-----AGAAAAGCATATTGT---AATGTCAGTAAAGAA---  
 AATTGGAATAAAGCATTACAAAGGATAGCTATGAAATTAAGA-----GAACAATTTGGG----  
 -----GAAAACAAAACAATAAATTTTACT-----  
 CAATCCTCAGGGGGGACTCAGAAATTGTA--ATGCATAGTTTTAATTGTGGAGGGGAA---  
 TTTAAGCAGCTCCAGGCAAGAGTCCTGGCTCTGGAAAGATACCTACATGATCAACAGCTCCTAGGAATTTGGG  
 GTTGCTCTGGAAACTCATCTGCACCACTGCTGTGCCTTGGAATACTAGTTGGAGT-----  
 -----AATAAACTCTAGAAAGGATTTGG-----AAT-----  
 AACATGACCTGGATGCAGTGG---GAGAAAGAAATTGACAATTATACAGAAACAATATAC---  
 TCCTTACTTTGAAAAATCGCAAAACCAGCAAGAA-----  
 -----  
 AAGAAATGAACAAGAATTATTAGAATTAGATAAATGGGCAAGTCTGTGGAATTGGTTTGATATAACAAAGTGGC

TGTGGTATATACAAATATTCATAATAATAGTAGGAAGCTTAGTAGGTTTAAGAATAGTTTTTGGCT---  
 GTA CTTTCTATAGTG-----AATAGAGTTAGGCAGGGATACTCACCA-----  
 TTATCGTTTGGCTGTTAGCTTGCTAAGTGCTATTGCTACTGCTATAGCTGGG---  
 GGGACAGATAGGATTATAGAAATAGCACAAAGAATCTTTAGAGCT-----  
 -----ATCCTTAACGTA-----CCTACTAGAATAAGACAGGGCTTAGAAAGGGCTTTGCTA--TAA  
 >KY778615  
 GCT---GCA-----  
 GAAAAATTTGTGGGTCACAGTCTATTATGGGGTACCTGTGTGG--AAAGAAGCAACC---  
 ACCACTCTATTCTGTGCATCAGATGCTAAAGCATATGACACAGAG--GTACATAAT-----  
 -----GTTTGGGCCACA---CATGCCTGTGTACCCACCGAC---  
 CCCAACCCACAAGAAGTGAATTAATA-----AATGTGACAGAAAATTTTAAT-----  
 -----ATGTGGAAAAATGACATGGTAGACCAGATGCATGAGGATATA---  
 ATCAGTTTATGGGATGAAAGCCTA--AAGCCATGTGCAAAATTA---  
 ACCCCACTTTTGTGTTACTTTAAATTGCAGTGATGTAAGGAATGATACTACTACTAATACC-----  
 -----  
 -----AATAGTAGCTGGGGAAATACAATGGAGAGAGGAGAAATGAAA---  
 AATTGCTCTTTCAATGTCACCACAAGCATAAGA-----  
 GATAAGACACAGAAAGAAGCGGCACTT---  
 TTTTATAGACTTGATATAGTACCAATAGAAGATAATAATGATAAT-----  
 -----  
 AGTAGCTCTAGAAATTATGGTAGCTATAGATTGATAAATTGTAATACCTCAGTCATTACACAG---  
 GCCTGTCCAAAGATATCCTTTGAGCCAATTCCCATACATTATTGTGCCCGGCTGGTTTTGCGATTCTAAAAT  
 GTACT--AATAAGACGTTCCAG-----GGAAAAGGACCATGCACAAAT-----  
 -GTCAGC--ACAGTACAATGCACACATGGAATTAGGCCAGTAGTGTCAACT---  
 CAACTGCTATTAAATGGCAGTCTAGCAGAAGAAGAG-----  
 GTAGTAATTAGATCTGATAATTTACAGACAAT-----GCTAAAATCATAATAGTGCAGCTGAAT----  
 -----GAATCTGTAGTA-----ATTAATTGTACAAGACCCAACAACAATACAAGAAAA-----  
 -AGTATATCTATA-----GGACAAGGGAGGGCA---TGG-----TATGCAACAGGAGAT-----  
 -----ATAATAGGAGATATA-----AGACAAGCACATTGT--AACATTAGTGGAGCA---  
 AACTGGGCTAGAGCTTTAAACTAATAAGGGAAAAATTAATA-----GAACAATTTGTC---  
 -----  
 -----AATAGAACAATAACCTTTAAA-----  
 CCATCTTCAGGAGGGGACCCAGAAATTGTT--ATGCACAGTTTCAATTGTGGAGGGGAA---  
 TTTAAGCAGCTCCAGGCAAGAGTCCCTGGCTGTAGAAAGATACCTAAGGGATCAACAGCTCCTAGGAATTTGGG  
 GTTGCTCTGGAAGAACTCATCTGCACCACTACTGTGCCTTGAATACTAGTTGGAGC-----  
 -----  
 -----AATAAATCCCTGGATTACATTTGG-----CAG-----  
 AATATGACTTGGATGCAGTGG--GAAAGTGAAATTGAAAAATTACACAGACCTAATATAT---  
 GACTTAATTGAAAAATCGCAAAACCAGCAAGAA-----  
 -----  
 AGGAATGAACAAGAATTATTGGAATTGGACAAATGGGCAAATTTGTGGTCTTGGTTTGACATAACAACTGGC  
 TGTGGTATATAAAAATATTCATAATGATAGTAGGAGGCTTGATAGGTTTAAGAATAATTTTTTACT--  
 GTGCTTTCTATAGTA-----AATAGAGTTAGGAAGGGATACTCACCA-----  
 TTGTCAATTTGCTGTTAACTTGTTTAATACCACAGCAATAGTAGTAGCTGAA---  
 GGGACAGATAGGATTATAGAAGCAGGAAGAAGAATTTTAGAGCT-----  
 -----TTTCTACATATA-----CCTAGAAGAATAAGACAGGGCTTAGAAAGGGCTTTGCTA--TAA  
 >KT124768  
 GCT---ACA-----  
 AATCAATTATGGGTAACAGTCTATTATGGGGTACCTGTGTGG--AAAGAAGCAAGA---  
 ACCACTCTATTTTGTGCATCAGATGCTAAAGGATATGAGACAGAG--GCACATAAT-----  
 -----GTTTGGGCCACA---CATGCCTGTGTACCCACAGAC---  
 CCCAACCCACAAGAAGTAGAATTGGAA-----AATGTGACAGAAAATTTTAAC-----  
 -----ATGTGGAAAAATGACATGGCAGAACAGATGCATGAGGATATA---  
 ATCAGTTTATGGGATCAAAGTTTA--AAGCCATGTGTAAAATTA---  
 ACCCCACTCTGTGTTACTTTAGAGTGCAGTGATAATGTTATTATAAATGGCACTACTAATAAGACCGCTAGTA  
 CTATCAGTCCA-----  
 -----AAGAGCACTAATATACCAGAAGGGGAAATAAAA---  
 AACTGCTCTTTCAATATCACCACAACATGAGA-----  
 GATAAATATCAAAGAGAATACGCACTT--TTTTATAAACTTGATTTAGAAGAACTAATAGAT-----  
 -----  
 -----  
 AACAAATAAGACTACCTATAGGTTAATAAGTTGTAACACCTCAGTCATTACACAA---

GCCTGTCCTAAGGTATCCTTTGAGCCAATTCTTATACATTATTGTGCCCCGGCTGGTTTTGCGATTCTAAAGT  
 GTAAA---GATAATATGTTTAAAT-----GGAACAGGACCATGTTACAAT-----  
 -GTTAGC---ACAGTACAATGTACACATGGAATTAGACCAGTAGTATCAACT---  
 CAACTGTTGTAAATGGCAGCCTAGCAGAAGAAGAT-----  
 GTAGTAATTAGATCTGAAAATATCACGGACAAT-----ACTAAGAACATAATAGTACAGCTAAAA---  
 -----GATCCTGTAGAA-----ATTAAGTGCACAAGACCCAACAACAATACAAGAAGA---  
 -AGTATACATATA-----GCACCAGGGAGAGCA---TTC-----TATGCATCAGGAGGA-----  
 -----ATAATAGGAGATATA-----AGACAAGCACATTGT---AACATTAGTAGAATA---  
 AAATGGAATAACACTTTAGAACAAATAGTTAAAAAACTGAGA-----GCACAATTTGAA---  
 -----GAATTTAAACAT-----AATAAAACAATAGCCTTTAGA---  
 CAACCACCTCCAGGTGGGGACCCAGAAATTACA---ATGCATACTTTTAATTGTGGAGGGGAA---  
 TTTAAGCAGCTCCAGGCAAGAGTCCTGGCTGTGGAAAAGATACCTAAAGGATCAACAGCTCCTGGGGATTTGGG  
 GTTGCTCTGGAAAACCTCATCTGCCCACTGCTGTGCCTTGGAATAGCACTTGAGT-----  
 -----AATAGATCTCAGAGTGAAATTTGG-----GAT-----  
 AACATGACCTGGATGCAGTGG---GAGAAAGAAATTGGCAATTACACAGACTTAATATAC---  
 AACTTAATTGAAGAATCGCAAAATCCAACAAGAA-----  
 -----  
 AAGAAATGAAAAAGACTTATTGGAATTAAGTAACTGGGCAAGTTTGTGGAATTGGTTTGACATATCAAAATGGC  
 TGTGGTATATAAAAATATTCTAATGATAGTAGGAGGCTTGATAGGTTTACGAATAGTTTTTTGCT---  
 GTAATTTCTATAGTG-----AATAGAGCTAGGCAGGGATACTCACTA-----  
 CTGTCGTTTGCTGTTAGCTTGCTTGACGCCATCGCCATAGCAGTAGCTGGG---GGAACCGATAGG---  
 ACAGAGAATACAGAGAATTGGTAGAGCTAT-----  
 -----TCTCAACACATCTAAAGAGCTTTACTA---TAA  
 >MG196879  
 GCT---GCA-----  
 GATAATTTGTGGGTCACAGTCTATTATGGGGTACCTGTGTGG---AAAGAAGCAACC---  
 ACTACTTTATTTTGTGCATCAGATAGTAAAGCATATGATACAGAA---GTACATAAT-----  
 -----GTTTGGGCCACA---CATGCCTGTGTACCCACAGAC---  
 CCCAACCCACAAGAAGTAGTATTGGAA-----AATGTAACAGAAAATTTTAAC-----  
 -----ATGTGGGAAAATAACATGGTAGAACAGATGCATGGGGATATA---  
 ATCAATTTATGGGATCAAAGCCTA---AAGCCATGTGTAAAATTA---  
 ACCCCACTTTGTGTTACTTTAAATTGCACTGATTATGTAGGGAATAGTGCTAAAAATGGTACTGATTCTG---  
 -----  
 -----GGGAATAGTACTGTGGCGAATAATGCTACTATTGGGGAAATAAAA---  
 AACTGCTCTTTCAATATCACCACCAGCATAAAA-----  
 GATAAGGTGCAGAAAGAAAAAGCATTG---TTTTATAAATATGATTTAGTACAAATAACTGAAGATAAAA---  
 -----  
 -----  
 AATAGTAATACGAGCTATAGTAGCTATAGGTTGGTAGGTTGCAACACCTCAGTCATTACACAA---  
 GCCTGTCCAAAAATATCCTTTGAGCCAATTCCCATACATTTATTGTGCCCCGGCTGGTTTTGCGATTCTAAAGT  
 GTAAT---GATAAAAGGTTCAAT-----GGAAAAGGACCATGTAAAAAT-----  
 -GTCAGC---ACAGTACAATGTACACATGGAATAAGACCAGTAGTATCAACT---  
 CAACTACTGTAAATGGCAGCTTAGCAGAGAAAGAA-----  
 ATAGTAATTAGATCTGAAAATTTACGAGCAAT-----ACTAAAAACATAATAGTACAGTTAAAT---  
 -----GAATCTGTAGAG-----ATTAAGTGTACAAGACCCAACAACAATACAAGAAAA---  
 -GGTATACATTTA-----GGACCAGGAAAAGCC---TTT-----TATGCAACAACAGAC-----  
 -----ATAATAGGAGATATA-----AGACAAGCACATTGT---AACATTAGTGGAAACA---  
 AAATGGAATAACACATTAAACAGATAGCTGAAAAATTAAAA-----GAACAATATAAT---  
 -----AATAATAAAACAATAGTCTTCAAT-----  
 CAATCCTCAGGAGGGGATCCAGAAATTGTA---ATGCACAGTTTTATCTGTGGAGGGGAA---  
 TTTAAACAGCTCCAGGCAAGAGTCATGGCTGTGGAAAGATACCTGCAGGATCAACAGCTCCTGGGAATTTGGG  
 GTTGCTCTGGAAAGCTCATTTGCACCACTTCTGTGCCTTGGAATGCGAGCTGGAGT-----  
 -----AACAAATCTCTGGAGAAAATTTGG-----GAT-----  
 AACATGACCTGGATGGAGTGG---GAAAAAGAGATTGACAATTACACAAACGAAATATAC---  
 ACCTTAATTGAAATAGCGCAAAACCAACAAGAA-----  
 -----  
 AAGAAATGAACAAGAATTATTGGAATTAGATAAATGGGCAAGTTTGTGGAATTGGTTTGACATAACAACTGGC  
 TGTGGTATGTAAAAATATTCTAATGATAGTAGGAGGCTTGATAGGTTTAAGAATAGTTTTTTACT---  
 GTACTTTCTATAGTG-----AATAGAGTTAGGCAGGGATACTCACC-----  
 TTATCGTTTGCTACTAGCTTGCTCAACGCCACAGCCCTAGCAGTAGCCGAG---

GGAACAGATAGGGTTATAGAAGTAATACAAAGAATTGGTAGAGCT-----  
 -----TTTCTCCATATA-----CCTAGAAGAATAAGACAGGGCTTCGAAAGGGCTTTGCAA--TAA  
 >MG197013  
 GCT---GCA-----  
 GAACAACCTGTGGGTACAGTCTATTATGGGGTACCTGTGTGG--AAAGACGCAAAAC---  
 ACCACTCTATTTTGTGCATCAGATGCTAAAGGATACCATACAGAG--AAGCATAAT-----  
 -----GTTTGGGCCACA---CATGCCTGTGTACCCACAGAC---  
 CCCAACCCACAAGAAGTAGTATTGGAA-----AATGTGACAGAAAAATTTAAC-----  
 -----ATGTGGAAAAATAACATGGGTAGAACAGATGCATGAGGATATA---  
 ATCAATTTGTGGGATCAAAGTCTA--AAGCCATGTGTAAACTA---  
 ACCCCACTCTGTGTTACTTTACATTGCATTAATGTGACTAATACCACTGGTAATAATACCAAT-----  
 -----  
 -----GGTGTTAGGCAGGGAGAGATGATTAATAAAGGAGAAATAAAA---  
 AACTGCTCTTTCAATATCACCGCAGGCATAAGA-----  
 GATAAAGTGCAAAAAGAATATGCTCTT---  
 TTTTATAAAATTGATTTAGTACCAATAGAGAATGATAATACAAGC-----  
 -----  
 AGCTATGATAATACAAGCTATAGGTTGATAAGTTGTAACACCTCAGTCATTACACAA---  
 GCCTGTCCAAAGGTATCCTTTGAGCCAATTCCCATACATTATTGTGCCCCGGCTGGTTTTGCGATTCTAAAGT  
 GCAAT---GATAAGAAGTTCACT-----GGAAAAGGAACTGTAAAAAT-----  
 -GTCAGC---ACAGTACAATGTACACATGGAATTAGACCAGTAGTGTCAACT---  
 CAACTGCTGTTAAATGGCAGTTTAGCAGAAGAAGAG-----  
 GTAGTGGTTAGATCTGACAATTTACAGACAAT-----GTAAAACCATAATAGTGAATCTGAAT---  
 -----GAATCTGTAAACA-----ATTAATTGTACAAGACCCGGCAACAACACAAGAAAA-----  
 -AGTGTATCTATA-----GGACCAGGAAGAGCA---TTT-----TATGCAACAGGAGAC-----  
 -----ATAATAGGAGATATA-----AGACAAGCACACTGT---AACATTAGTAAAGGA---  
 GACTGGGATAAAATGTTAAAAAGGGTAGCTACAAAATTAAGA-----GAAAAATTT-----  
 -----AATAAAACAATAGCCTTTAAT-----  
 AAATCCTCAGGAGGAGACCCAGAAATTGTA--ATGCACAATTTTAATTGTGGAGGGGAA---  
 TTTAAGCAGCTCCAGGCAAGAGTCCCTGGCTGTGGAAAAATACCTAAGGGATCAACAGCTCCTAGGGATTTGGG  
 GTTGCTCTGGAAACTCATTTGCACCACTGCTGTGCCTTGGAAATTCTAGTTGGAGT-----  
 -----AATAAATCTCTAGATCAAATTTGG-----GAT-----  
 AACATGACCTGGAATGATTGG--GAAAAAGAAATTAGCAATTACACACAAAAAATATAC---  
 ACCTTAATTGAAAAATCGCAGAACCAACAAGAA-----  
 -----  
 AAGAATGAAAAAGAATTATTGGAATTGGATCAATGGGCAAATTTGTGGACTTGGTTTGATATAACAACTGGC  
 TGTGGTATATAAAAAATATTCATAATGATAGTAGGAGGCTTGATAGGTTTAAGAATAGTTTTTTGCT---  
 GTATTTTCTTTAGTG-----AATAGAGTTAGGCAGGGATATTCACCA-----  
 CTATCATTTGCTGTCTAGCTTGTCAACGCCACAGCTATAGCAGTAGCTGAG---  
 GGAACAGATAGGATTATAAAAGTAGCACAAAGAGTTGGTAGAGCT-----  
 -----TTTCTCAACATA-----CCTAGAAGAATAAGACAGGGTTTGGAAAGGGCTTTGCTA--TAA  
 >MG197046  
 GCA---ACA-----  
 GAAGGCTTGTGGGTACAGTCTATTATGGGGTACCTGTGTGG--AAAGAGGCAAAAG---  
 ACCACTCTATTTTGTGCCTCAGATGCTAAAGGATATGATACAGAG--GCACATAAT-----  
 -----ATCTGGGCCACA---CATGCCTGTGTACCCACAGAC---  
 CCCAACCCACAAGAAATAGTATTGGGA-----AATGTGACAGAAAATTTTAAC-----  
 -----GCGTGGAAAAATGACATGATAGACCAGATGCATGAGGATATA---  
 ATCAATTTATGGGATGAAAGCCTA--AAACCATGTGCAAACTA---  
 ACCCCACTCTGTGTTACTTTAGATTGCAAGGAACCTCAATAAACTAGGAATGCT-----  
 -----  
 -----ACTATAGAAGGAGAAGTAAAA---  
 AATTGTACTTTCAATACCACCACCCCGTAAGG-----  
 AATGAGGTGCAGAAGCAATATGCCCTT---TTTTATAGCACGGATATAATACCAATAGACAGT-----  
 -----  
 -----  
 AATAATAACAATACCATATATAGATTGATAAGGTGTAACACCTCAGTCATTACACAG---  
 GCCTGCCCAAAGATATCCTTTGAGCCAATTCCCATACATTATTGTGCCCCGGCTGGTTTTGCAATTCTAAAAAT  
 GTAAC---AATAAGACATTCAGT-----GGAAAAGGACCATGCACAAAT-----  
 -GTCAGC---ACAGTACAATGCACACATGGAATTAAGCCAGTAGTATCAACC---

CAACTACTGTTAAATGGCAGTCTAGCAGAAGAAGAT-----  
 GTAGTAATTAGATCTGAAAATTTACACGGACAAT-----GCAAAAACCATAATAGTACATCTAAAT----  
 -----AAATCTGTAACA-----ATTAATTGTACAAGGCCCAACAATAACAAGAAAA-----  
 -AGTATACATATA-----GCACCAGGGAGAACA---TTC-----TATGCAACAGGAGAC-----  
 -----ATAATAGGAGATATA-----AGACAAGCACATTGT---AACATTAGTGGTACA---  
 GAATGGGAACAAGCTTTAACAAATGTGGTTGGAAAACCTAAGA-----GAACAATATGGG----  
 -----GGAAATAAAACAATAATCTTTAAT-----  
 CAATCCTCAGGAGGGGACCCAGAGATTGTA--ATGCACAGTTTTTAATTGTAGGGGGGAA---  
 TTTAAACAGCTCCAGGCAAGAGTCCTGGCTGTGGAAAGATACCTAAGGGATCAACAGCTCCTGGGGATTGTTGGG  
 GTTGCTCTGGAAAACCTCATTTGCCCACTGCTGTGTCTTGGAAATGCTACTTGGAGT-----  
 -----AATAAATCTCTGGAGGAAATTTGG-----AAT-----  
 AACATGACCTGGATGGAGTGG---GATAGAGAGATTAAACAATTACACACAACACATATAC---  
 ACGTTGCTTGAAGAATCACAAAACCAGCAAGAA-----  
 -----  
 AAGAATGAAAAGGAATTATTGGAATTGGATAAATGGGCAGGTTTGTGGAATTGGTTTGACATATCAAATTGGC  
 TGTGGTATATAAAAATATTCTAATGATAGTAGGAGGCTTGATAGGTTTAAAAATAGCTTTTACT---  
 GTACTTTCTATAGTG-----AATAGAGTTAGGCAGGGATATTCACCA-----  
 CTATCGTTTGTCTGTTAGCTTGCTCAACGCTTTAGCCATAGCAGTAGCTGAG---  
 AGGACAGATAGGATCTTAGAAGTATTACAAAGAATTGGTAGGGCT-----  
 -----ATCCTTCATATA-----CCCACAAGAATAAGACAAGGCCTGGAAAGAGCTTTGCTA---TAA  
 >MG197064  
 GCT---ACA-----  
 GAAAAATTGTGGGTCACAGTCTATTATGGAGTACCTGTGTGG--AGAGAAGCAGAC---  
 ACCACTCTATTTTGTGCATCAGATGCTAAAGCATATGATACAGAG--GCCCATAAT-----  
 -----GTTTGGGCTACA---TATGCCTGTGTACCCACAGAC---  
 CCCAGTCCACAAGAAGTAGAATTAAAA-----AATGTGACAGAAAATTTTAAAC-----  
 -----ATGTGGAAAAATAACATGGTAGATCAGATGCATCAGGATATA---  
 ATCAGTTTATGGGATCAAAGCCTA--AAGCCATGTGTAAAATTA---  
 ACCCCACTCTGTGTTACTTTAAATTGCACTAATGCTACTGCTATCGTCAATAATACTATT-----  
 -----  
 -----GCCAATGCCAGTAGCGAGGGGAGAGAAGAAATAAAA---  
 AACTGCTCGTTCAATATCACACAGGGGTAAGA-----  
 GATAAGATGCAGAAAGCATATGCAACT--TTTTATAAACTTGATATAGTACCAATAGAGGAGGAC-----  
 -----  
 ATAAAACCACTAGTAGTGCTGGCAATGCCAGTCATACTAACTCCAACCTATACTAACTATAGGATAATAAAATT  
 GTAACACCTCAGTCATTACACAA---  
 GCCTGTCCAAAGGTATCCTTTGAGCCAATTCCCATACATTATTGTGCCCCGGCTGGTTTTGCGATTCTAAAAT  
 GTAAT--GACAAGGAGTTCAAT-----GGAACAGGATTATGTAAAAAT-----  
 -GTCAGC--ACAGTACAGTGTAACATGGAATTAAGCCAGTAGTATCAACT---  
 CAACTGCTATTAAATGGCAGCCTAGCAAAGGGAGAG-----  
 ATAGTAATTAGATCTGAAAATCTCACGGACAAT-----GCTAAAACCATAATAGTACACTTGAAT---  
 -----GAAACTGTAGAC-----ATTACTTGTGTAAGGCCCAACAACAATAACAAGAAAA---  
 -AGCATACATATA-----GGACCAGGGAGAACA---TTT-----TACGCAACAGGAGAC-----  
 -----ATAATAGGAGATATA-----AGAAAAGCACATTGT---AGCATTACTGCAGCA---  
 ATGTGGAATAAACTTTACAACAGGTAGCCACAAAATTAAGT-----GAAAAATTTGAG---  
 -----GGTAAAAATATAACCTTTACA-----  
 CAACACTCAGGAGGGGATCTAGAAATTGTA--ATGCACACTTTTAACTGTGGAGGGGAA---  
 TTTAAGCAGCTCCAGGCAAGAGTCTTGGCTGTGGAAAGATACCTAAGGGATCAACAGCTCCTGGGAATTTGGG  
 GTTGTTCTGGAAAACCTCATCTGCACCACTACTGTGCCTTGAATACTAGTTGGAGT-----  
 -----AATAAATCTCTGGAGCAGATTTGG-----GAT-----  
 AACATGACCTGGATGGATTGG--GAAAGAGAAATTGACAATTACACAAGTACAATATAC---  
 AGATTAATTGAAGAATCGCAAAACCAACAAGAA-----  
 -----  
 AAAAAATGAACAAGACTTATTGGCACTTGATAAATGGGACAGTCTGTGGAGTTGGTTTAATATAACAAATTGGC  
 TGTGGTATATACAAATATTCTAATGATAGTAGGAGGATTGATAGGTTTAAAGAATAGTTTGTGCT---  
 GTAATTTCTGTAGTG-----AATAAAGTTAGGCAGGGATACTCACCA-----  
 TTATCGTTTCGCTATTAGCTTGTTCAATGCCACAGCAATAACAGTAGCTGAG---  
 GGGACAGATAGGGTTATAGAAAATATTGCAAAGAGCTTGTAGGGCT-----  
 -----ATCCTCCATATA-----CCTAGAAGAGTAAGACAGGGCTTGGAAAGGGCTTTGCTA---TAA  
 >MG197113

GCA-----  
 GAACAGTTGTGGGTCACAGTCTATTATGGGGTACCTGTGTGG---AAAGAAGCAACT---  
 ACCACTCTATTTTGTGCATCAGATGCCAAAGCCTATGACACTGAG---GCACATAAT-----  
 -----GTTTGGGCCACA---CATGCCTGTGTGCCACAGAC---  
 CCTCACCCACAAGAAGTAGTATTGGGA-----AATGTGACAGAAAATTTTAACT-----  
 -----ATGTGGAAAAATTACATGGTAGATCAGATGCATGAGGATATA---  
 ATCAGTTTATGGGATGAAAGCCTA---AAGCCATGTGTAAAATTA---  
 ACTCCACTATGTGTTACTTTAACTTGCACCAACGTGAATCATACCAATGGCAATCAAACCTAAGCTTACCAAGA  
 GTAATCAAAC-----  
 -----AATAATAGTAGTGAGTTGGAAGAGATGAGGGGAGAAATAAAA---  
 AACTGCTCTTTCAATATTACCACAACCATAAGT-----  
 GATAAGAGGAAGAAAGAATATGCTCTT---TTTTATAGACTTGATGTAGTACCAATAGCTGAT-----  
 -----  
 -----  
 GATAATACAAGCTATACGTTGATAAATTGTAACACCTCAGTCATTACACAG---  
 GCCTGTCCAAAGATATCCTTTGAACCAATTCCCATACATTATTGTGCTCCGGCTGGTTTTGCGATTCTAAAGT  
 GTAAT---AATAAGAAATTCAAT-----GGAACAGGACCATGCACAAAT-----  
 -GTCAGC---ACCGTACAATGTACACATGGAATTAACCAGTAGTATCAACT---  
 CAATTGCTGTTAAATGGCAGTCTAGCAGAAGAAGAC-----  
 ATAGTAATTAGATCTGAGAATTTTACGAACAAT-----GCTAAACTATAATAGTAAATCTGAAT---  
 -----GAATCTGTAGTA-----ATTAATTGTACAAGACCCAACAACAATACAAGAAAA-----  
 -AGTATACATATA-----GGACCGGGGGGAGCA---TTT-----TATGCAACAGGACAA-----  
 -----ATAATAGGAGATATA-----AGACAAGCATACTGT---ACTGTTAATAAAAAA---  
 GGATGGGAAAACACTTTAAGACAGGTGGCTAGAAAATTAAGT-----GAGCAATTT-----  
 -----AATAAAACAATAGCTTTTAAAT-----  
 CAATCCACAGGAGGGGATCCAGAAGTTGTA---ATGCACACTTTTAAATTGTGGAGGGGAA---  
 TTTAAGCAGCTCCAAGCAAGAGTCCTGGCTGTGGAAAGATACCTAAAGGATCAACAGCTCCTAGGAATTTGGG  
 GCTGCTCTGGAAAACCTCATATGCACCACTACTGTGCCTTGGAAATAATAGTTGGAGC-----  
 -----AATAAATCTTACAATGAGATTTGG-----GAC-----  
 AACATGACCTGGATGCAGTGG---GAAAGGGAAATAGACAACCTACACAACTTAATATAAC---  
 AACTTAATTGAAGAATCGCAGAACCAACAAGCA-----  
 -----  
 AAGAATGAACTAGAATTATTGGAGTTGGACTCTTGGGCAAATTTGTGGAATTGGTTTAGCATATCAAACCTGGC  
 TGTGGTATATAAAAATCTTCATACTAGTAGTAGGAGGCTTAGTAGGTTTAAAGAATAGTTTTTTGCT---  
 GTACTTTCTATAGTA-----AATAAGGTTAGGAAGGGATACTACCA-----  
 TTATCGTTTCGCTATCAGTTTGCTTAATGCCACAGCTATAGCAGTAGCTGAG---  
 GGGACAGATAGGGTTATAGAAGTAGTACAAAGAATTGGTAGAGGT-----  
 -----ATCCTCCATATA-----CCTGTAAGAATAAGACAGGGCTTGGAAGGGCTTTACTA---TAA  
 >KM355159  
 GCT---ACA-----  
 CAAAATTTGTGGGTCACAGTCTATTATGGGGTACCTGTGTGG---AAAGAAGCAACC---  
 ACCACTCTATTTTGTGCATCAGATGCTAAAGCATATAAGACAGAG---GCGCATAAT-----  
 -----GTTTGGGCCACA---CATGCCTGTGTACCCACAGAC---  
 CCCAACCACACAAGAAGTGTTTTTAAAA-----AATGTGTCAGAATATTTTAACT-----  
 -----ATGTGGAAAAATAACATGGTAGAACAGATGCATGAGGATATA---  
 ATCAGTTTATGGGATGAGAGCTTA---AAGCCATGTGTAAAATTA---  
 ACCCCGCTCTGTGTTACTTTAAATTGCACTGATGTGAGAAATGGTACTGGGAATAGTACTGGG-----  
 -----  
 -----AATAGTAATATTACTGACAGGATAGAGAAAGGAGAAATGAAA---  
 AACTGCTCTTTCAATATCACCACAATTCTAGGA-----  
 AATAAGAAGCAGAAAAAATATACACTT---TTTGATAGGCTTGATCTAGTACCAATAGATGGT-----  
 -----  
 -----  
 GGTGATAATACAACCAACTATAGATTGATAAGTTGTAACACCTCAACTCTTACACAG---  
 GCCTGTCCAAAGACATCCTTTGAACCAATTCCAATACATTATTGTGCTCCGGCTGGTTTTGCGATTCTAAAAAT  
 GTAAT---GATAAAAGGTTTAAAT-----GGATCAGAAACAATGTAAAAAT-----  
 -GTCAGC---ACAGTACAATGTACACATGGGATCAAACCAGTAGTATCAACT---  
 CAGCTGTTGTTAAATGGCAGTCTAGCAGAAGAAGAT-----  
 GTAGTGCTTAGATCTAAAAATTTCTCGGACAAT-----AATAATATCATAATAGTACAGTTAAAA---  
 -----GAACCTGTAGAA-----ATTCTGGTGTGAAAGACCCAACAACAATACAAGAAAA-----

-AGTATAACTATA-----GGACCAGGAAAAGCA---ATG-----TTTACAACA---GAC-----  
 -----ATAATAGGAGATATA-----AGAAAGGCACATTGT---AACATTAGTAGAACA---  
 AGATGGAATAACACTCTACATAAAATAGTGGAAAAATTAAAA-----ACACAATTTAAC-----  
 -----AATAAAACAATAGTCTTTAAT-----  
 CAATCCTCAGGAGGGGATCCAGAAGTGGTA--ATGCACATGTTTAACTGTGGAGGGGAA---  
 TTTAAGCAGCTCCAGGCAAGAGTCCTGGCTGTGGAAAGATACCTAAAGGATCAACAGCTCCTGGGAATTTGGG  
 GTTGCTCTGGAAAACATCTGCACCACTGCTGTGCCTTGAATGCTAGTTGGAGT-----  
 -----AATAAAACTTATAATGACATTTGG-----GAT-----  
 AACATGACCTGGATGCAGTGG---GAAAAAGAAATTGACAATTACACAGGCTTAATATAC---  
 ACATTGCTTGAAGAATCGCAGACCCAACAGGAA-----  
 -----  
 AAGAATGAACAAGAATTATTGGAATTGGATAAATGGACAAGTTTGTGGAGTTGGTTTGACATAACAAATTGGC  
 TGTGGTATATAAACTGTTTCATAATGATAGTAGGAGGATTAGTAGGTTTAAGAATAGTTTTTTGCT---  
 GTGCTTTCTATAGTG-----AATAGAGTTAGGCAGGGATACTCACCA-----  
 TTACCGTTTGTCTATTAGCTTGTTCAACGCCACCGCCATAGCAGTAGCTGAG---  
 GGGACAGATAGGATTATAGAAGTATTACAAAGAATTGGTAGGGCT-----  
 -----ATCATCCACATA-----CCTCGAAGAGTAAGACAGGGCTTAGAAAGGGCTTTGCTA---TAA  
 >MG196745  
 ACT---AAT-----  
 CAACAATTGTGGGTCACAGTATATTATGGGGTACCTGTATGG---AAGGAAGCAACC---  
 ACAGTCCTCTTTTGTGCATCAGATGCTAAAGCACATGGTACAGAG---GCACATAAT-----  
 -----GTTTGGGCCACA---CATGCCTGTGTACCCACAGAC---  
 CCCAACCCACAAGAAATAATATTGGAA-----AATATGACAGAAAATTTTAAC-----  
 -----ATGTGGAAAAATAACATGGTAGAACAAATGCAAGAGGATATA---  
 ATCAGTTTATGGGATCAAAGCCTA---AAGCCATGTGTAGAACTA---  
 ACTCCACTCTGTGTCACTTTAAATTGCACTAAATTAAATCACAAATGCCACTCAG-----  
 -----  
 -----AGTAACGAGACAGCAGAGGAAGGAGGAGGAATGAAA---  
 AACTGCTCTTTCAATATCACCACAAGCATGAGA-----  
 GATAAACAGCAAAAAGAATATGGACTT---TTCTATGACCTTGATATAGTACAAATAGATAAT-----  
 -----  
 -----  
 AGCACCTATAGGTTGAAAAGTTGTAACACCTCAGTTATTAAACAA---  
 GCCTGTCCAAAGGTATCCTTTGAACCAATTCCCATACATTATTGTGCCCCGGCTGGTTTTGCGATTCTAAAAT  
 GTAAT---GATAAACTTTTAAT-----GGATCAGGACCATGTACAAAT-----  
 -GTCAGT---ACAGTACAATGTACACATGGAATTAGGCCAGTAGTATCAACT---  
 CACCTACTGTTTAAATGGCAGTCTAGCAGAAGGAGAA-----  
 GATATAGTAATTAGATCTGAGAATTTACAAACAAT-----GCTAAAATCATAATAGTACAGCTGAAC-  
 -----GAATCTGTAGTA-----ATTAATTGTACAAGACCTAACACAATACAAGAAGA--  
 ---GGTATAAATATA-----GGACCAGGGAGAGCA---TTT-----TATACAACAGGAGAA--  
 -----ATAATAGGAGATATA-----AGACAAGCACATTGT---AACGTTAGTATAGTA-  
 ---AAATGGAACAAAACCTTTAAATCTAGTAAAGGAAAAATTAAAA-----AAGCAGTTTAAT--  
 -----AATACAACAATACTTTTTTGAT-----  
 GAACCTCAGGAGGGGACCCAGAAATCACA--ATGCACAGTTTTAATTGTGGAGGGGAA---  
 TTCAAGCAGCTCCAGGCAAGAGTCCTGGCTGTGGAAAGATACCTAAAGGATCAACRGCTCCTGGGGATTTGGG  
 GTTGCTCTGGAAAACATTTGCACCACTGCTGTGCCTTGAATACTAGCTGGAGT-----  
 -----AATAAATCTTACAATGACATCTGG-----GAT-----  
 AATATGACATGGATGCAGTGG---GAGAGAGAAATTGACAATTACACAGAAGAAATATAC---  
 AACTTACTAGAAAAATCGCAAAACCAGCAAGAA-----  
 -----  
 AAGAATGAGCAAGAATTATTGGAATTGGATAAATGGACAAGTTTGTGGAGTTGGTTTGACATAACAACTGGC  
 TGTGGTACATAAGAATATTTCATAATGGTAGTAGGAGGCTTAATAGGTTTAAGAATAGCTTTTGCT---  
 GTACTTTCTATAGCA-----AATAGAGTTAGGCAGGGATACTCACCC-----  
 CTGTCTTTTGTGTTAGCTTGCTAAACGCCACAGCTATAGCAGTAGCTGAA---  
 GGGACAGATAGGGTTATAGAAGTAGGAAGAAGAGCTTTTAGAGCT-----  
 -----ATACTCCACATA-----CCTACAAGAATAAGACAGGGCTTTGAAAGGGCTTTGCTA---TAA  
 >MG196964  
 ACT---GCA-----  
 GATAAGTTGTGGGTTACAGTCTATTATGGGGTACCTGTGTGG---AAGGAGGCAACC---  
 ACCACTCTATTTTGTGCATCAGATGCTAAAGCATATGATACAGAG---GTACATAAT-----

-----GTTTGGGCCACA---CATGCCTGTGTACCCACAGAC---  
CCCAGCCCACAAGAGATAGTGTGGTA-----AATGTGACAGAAAATTTTAAC-----  
-----ATGTGGAAAAATAACATGGTGGAACAGATGCATGAAGATATA---  
ATCAGTTTATGGGATCAAAGCCTA---AAGCCATGTGTACAACCTC---  
ACCCCAATCTGTGTTACCTTAAATTGCACGGATTATAGTGGGAATACCACTAATCAGGCC-----  
-----  
-----AATAACAGTAGTGAGAAGGGGGTAGTGCAAGGAGAAATAAAA---  
AATTGCACTTTTCAATGTCACAGCAGCAGCACA---  
AAAAGGAAGAAGGAATATGCACTT---TTTTATAGACATGATATAGTACAAGATGATAAT-----  
-----  
-----GATAATACCAGCTATAGGTTAATAAGTTGTAACACCTCAGTCATTACACAG---  
GCTTGTCCAAAGATATCCTTTGAGCCAATTCCCATACATTATTGTGCCCCGGCTGGTTTTGCGATTCTAAAGT  
GTAAC---GATAAAAGGTTCAAT-----GGAACAGGACCATGTAAGAAT-----  
-GTCAGC---ACAGTACAATGTACACATGGAATTAGACCAGTAGTATCAACT---  
CAACTGCTGTTAAATGGCAGTCTAGCAGAAGAAGAG-----  
GTAGTGATTAGATCTGAAAATATCACGGACAAT-----GCTAAAACCATAATAGTACAGCTAAAA---  
-----GAACCTGTATGG-----ATTAATTGTACAAGACCCAACAACAATACAAGAAAA---  
-GGTATACATCTA-----GGACCAGGGAGTGTA---TTT-----TTTGCAGCAGGCGAA-----  
-----ATAATAGGAGATATA-----AGGCAAGCACATTGT---AACATTAGTAGAGCA---  
GAATGGAATCACACTTTAAGGCAGGTAGTTAATAAATTAAGA-----GAACAATTTAAC---  
-----AACAAAACAATAATCTTTAAT-----CAATCCTCA---  
-GGAGACCCAGAACTATA---ATGCACACTTTTAATTGTGGAGGGGAA---  
TTTAAGCAGCTCCAGGCAAGAGTCCTGGCTGTGGAAAGATACCTAAAGGATCAACAGCTCCTGGGAATCTGGG  
GTTGCTCTGGAAGAACTCATTTGCACCACTAATGTGCCTTGGAATGCTAGTTGGAGT-----  
-----AATAAATCCCTGCAAGATATTTGG-----GAT-----  
AACATGACCTGGATGGAGTGG---GAGAGAGAAATTGACAATTACACAAGGTTAATATAC---  
ACCTTAATTGAAGAATCGCAGAACCAGCAGGAA-----  
-----  
AAGAATGAACAAGAATTATTGGAATTGGATAAATGGGCAAGTTTGTGGAATTGGTTTAGCATAACAACTGGC  
TGTGGTATATAAGATTATTCATAATGATAGTAGGAGGCCTGATAGGGCTCAGAATAGTTTTTACT---  
GTACTTTCTATAGTA-----AATAGAGTTAGGCAGGGATACTACCA-----  
TTATCGTTTGTCTATTAGCTTGCTCAATACCACAGCCATAGCAGTAGCTGGG---  
GGAACAGATAGGATTACAGAAATATTACAAGCAGCTTGTTAGAGCT-----  
-----ATTCTCAACATA-----CCTAGAAGAATAAGACAGGGCTTGGAAGAATTTTGCTA---TAA  
>MG197035  
ATG---GTG-----ATCTGTAGTGAT---GAA---  
GAAAAACGTGGGTACAGTCTATTATGGGGTACCTGTGTGG---AAAGAAGCAACC---  
ACCACCTTGTTTTGTGCATCAGATGCTAAAGCTTATAGTAAAGAG--GTACATAAT-----  
-----GTCTGGGCCACA---CATGCCTGTGTACCCACAGAC---  
CCCAGCCCACATGAACAAAATTTGGA-----AATGTGACAGAAAATTTTAAC-----  
-----ATGTGGAAAAATGACATGGTAGAACAAATGCAGGAAGATATA---  
ATCAGTCTATGGGATCAAAGCCTA---AAGCCATGTGTAAAACCTA---  
ACCCCACTCTGTGTTACTTTAGAAATGCACTAATAATATTACTTATCATCGTGTCAATAGTACT-----  
-----  
-----AAGGTTTCATGCTACTCTTAATGACACTGAGAAAATAGGCATGAAA---  
AACTGCTCTTTCAATGCCACCACAGACATAAGA-----  
GATAAGATGCGAAAAGAATATGCACTT---TTTTATACCCTTGATATAGTACCAATAGATAATAAT-----  
-----  
GATACTAGTAGCTATAGATTGATAAGTTGTAACACCTCAGTCCTTACACAG---  
GCCTGTCCAAAGGTATCTTTTGGAGCCAATTCCCATACATTATTGTGCCCCGGCTGGTTTTGCGATTCTAAAGT  
GTAAC---GATACGGCATTCAAT-----GGAAATGGAACATGTAAAAAT-----  
-GTCAGC---ACAGTACAATGTACACATGGAATTAGGCCAGTAATATCAACT---  
CAATTACTGCTAAATGGCAGTATAGCAGAAGAAGAG-----  
ATAGTAATTAGATCTGCAAAATTTCTCAGACACT-----GGTAAAACATAATAGTGCAGCTGAAC---  
-----GAAGCTGTAAAA-----ATTAATTGCACAAGACCCAACAACAATACAAGAAGA---  
-GGTGTACATATA-----GGTCCAGGGGGAGCA---TTT-----TACACAACAGGAGAC-----  
-----ATAATAGGAGATATA-----AGGCAAGCACATTGT---AACATTAGTAGAGAA---  
CACTGGTATAATACTACCAAATGGGTAGCTGCAAAATTAAGA-----GAACAATTTGGA---  
-----AATAAAAACAATAGTCTTTAAT-----

CACTCCTCAGGAGGGGACCCAGAAGTAGAA---ATGCACACTTTTAAATTGTGGAGGGGAA---  
 TTTAAGCRGCTCCAGGCAAGAGTCCTGGCCATAGAAAGATACCTAAAGGATCAACAGCTCCTAGGGATTTGGG  
 GTTGCTCTGGAAACTCATTTGCACCACCTTCTGTGCCTTGAATACTAGTTGGAGT-----  
 -----AATAAAACACAGGAGACAATTTGG-----AAC-----  
 AACATGACCTGGATGCAATGG---GAAAAAGAAATTGACCAATACACAAATGAAATATAT---  
 GATTTACTTGAAAAATCGCAGAACCAGCAGGAA-----  
 -----  
 CAAAATGAACAAGAATTGTTGGAATTGGATAAATGGGCAAGTTTGTGGAATTGGTTTGATATAACAAGATGGC  
 TGTGGTATATAAAAAATATTCATAATGATAATAGGAGGCTTGATAGGATTAAGAATAGTTTTTTGCT---  
 GTGCTTAATATAGTG-----TATAGAGTTAGGCAGGGATATTCACCC-----  
 TTATCGTTTGTGCTGTTAGCTTGCTTAATGCCATAGCCATAGCAGTAGCTGAG---  
 GGAACAGATAGGATTATAGAAAGTATTACAAGGAGCTTTTAGAGCT-----  
 -----ATTCTCCACATA-----CCTAGAAGAATAAGACAAGGCTTAGAAAAGGCTTTTACTA---TAA  
 >MK214316  
 GCT---ACA-----  
 GGAACATTATGGGTACAGTCTATTATGGGGTACCTGTGTGG--AGAGAAGCAACC---  
 ACCACTTTATTTTGTGCATCAGATGCTAAAGCACAGGAAACAGAG---GCACACAAT-----  
 -----GTTTGGGCCACA---CATGCCTGTGTACCCACAGAC---  
 CCCAATCCACAAGAAGTACAATTG-----AATGTAACAGAAAATTTTAA-----  
 -----ATGTGGAAAAATAACATGGTAGAACAGATGCATGAGGATATA---  
 ATTAATTTATGGGATGAAAGCTTA--AAGCCATGTGTAAAATTA---  
 ACCCCACTCTGTGTTGAGTTAAATTGCACGGATTTAAGGAATGAGATTGAGACTAGCAATGAGACTCAGACTA  
 GCAATAGGAAT-----  
 -----CAGACTAGCAATAGGACTATAGAGCCACAAATGCAAGGAGAAATAAAA---  
 AACTGCTCCTTCAACGTCACCACAGATTGGAAG-----  
 GATAAGAAAAAGAAAGAACATGCACCT--TTCTATGCATTTGATTTGACAGCAATAGAGAAT-----  
 -----  
 -----  
 GATAATACTAGCTATAGGTTGACAAGTTGTAATGCCACATCCATTACACAG---  
 GCCTGTCCAAAAGTATCCTTTGAGCCAATTCCTATATATTATGTGCCCGGCTGGTTTTGCGATTCTAAAAT  
 GTAAT--AATAAAAAGTTCAAT-----GGAACAGGGCCATGTACAAAT-----  
 -GTCAGC--ACAGTGCAATGTACACATGGAATTAAGCCAGTAGTATCAACT---  
 CAACTGTTATTAAATGGCAGCATAGCAGAAGAAGAA-----  
 GTAGTAATTAGATCTGAAAATTTACAAACAAT-----GCTAAAATCATAATAGTACAGCTGAAT---  
 -----GTCTCTGTAGAA-----ATTAATTGTACAAGACCCAACAATAATACAAGAAGA---  
 -AGTATACCTATA-----GGACCAGGGAGAGCA---TTT-----TAT--ACAGGAGAG-----  
 -----ATAATAGGAGATATA-----AGACAAGCACATTGT--AACATTAGTAAAGCA---  
 GAATGGAATAACACTTTAAGGCTGATAGCTGACAAATTAATA-----GATCAATATGGA---  
 -----AAGAATAAAACAATAACAATTTAAT-----  
 TCATCCTCAGGAGGGGACCCAGAAATTGTA--ATGCACACTTTTAAATTGTGGTGGGGAA---  
 TTTAAGCAGCTCCAGGCAAGAGTCCTGGCTCTGGAAAGATACCTAAGGGATCAACAGCTCCTGGGAATTTGGG  
 GCTGCTCTGGAAGAACTCATCTGCCCCACTGCTGTGCCTTGAATACTAGTTGGAGT-----  
 -----AATAAATCTTATAATGACATTTGG-----AAT-----  
 AACATGACCTGGATGGAATGG--GATAGAGAAATTAACAATTACACAACTTAATATAT---  
 AGCTTAATTGAAGAATCGCAGAACCAACAGGAA-----  
 -----  
 AAAAAATGAACAAGACTTATTGGCATTGGATAAATGGGCAAATTTGTGGAATTGGTTTGGCATATCAAATTGGT  
 TGTGGTATATAAAAAATATTCATAATGATAGTAGGAGGCTTGATAGGATTAAGAATAGTTTTTTACT---  
 GTACTTTCTATAGTA-----AATAGAGTTAGGCAGGGATACCTACCA-----  
 TTGTCATTAGCTGTTAGCTTGCTTAACGCCACAGCCATAGCAGTAGGTGAA---  
 GGAACAGATAGGATTATAGCAATAACTCAAAGAGCTTTTAGAGCT-----  
 -----GTTCTTAACATA-----CCTAGAAGAATAAGACAGGGCTTAGAAAAGGCTTTGCTG---TAA  
 >KX505616  
 GCT---TCA-----  
 GAAAACTTGTGGGTACAGTCTATTATGGGGTACCTGTGTGG--AAAGAAGCAACC---  
 ACCACTCTATTCTGTGCATCAGATGCTAAAGCATATGATACAGAG--ATGCATAAT-----  
 -----GTTTGGGCCACA---CATGCCTGTGTACCCACAGAC---  
 CCCAACCACACAAGAAGTAGCATTGGAA-----AATGTGACAGAAAATTTTAA-----  
 -----ATGTGGAAAAATAACATGGTAGAACAGATGCATGAGGATATA---  
 ATTAGTTTATGGGATCAAAGCCTA--AAACCATGCGTAAAATTA---

ACCCCACTCTGTGTTACTTTAAATTGCACTGATTGGGAGAGGAAGAATGATACTACTAATACCACT-----  
 -----  
 -----AGTAGTAGCGGGGAAAATTTGGAGGGAGGAGAAATAAAA---  
 AACTGCTCTTTCAAGGTCACCACGAGCATAAAA-----  
 GATAAGACGCAGAGAGAGTATGCACTT---  
 TTTTATAAGCTTGATGTAGTACCAATAGATGAGGATAATAACAGGACC-----  
 -----  
 AATAGTAGTAATACCAATTATAGGTTGATAAGTTGTAACACCTCAGTCCTTACACAA---  
 GCCTGTCCAAAGGTATCCTTTGAGCCAATTCCCATACATTATTGTGCCCCGGCTGGTTTTGCGATTCTAAAGT  
 GTAAT---GATAAACAGTTTCAGT-----GGAAAAGGATCATGTAACAAT-----  
 -GTCAGC---ACAGTACAATGTACACATGGAATTAGGCCAGTAGTATCAACT---  
 CAACTGCTGTTAAATGGCAGTCTAGCAGAAAAAGAG-----  
 GTAGTAATTAGATCTGACAATTTACGGACAAT-----GCTAAAGTCATAATAGTGCAGCTGAAC----  
 -----AAATCTGTAGAA-----ATTAATTGTACAAGACCCAACAACAATACAAGAAAA-----  
 -GGTATACATATA-----GGACCAGGGGAGAGCA---TTT-----TATGCAACAGGTGAA-----  
 -----ATAACAGGAGATATA-----AGACAAGCACATTGT---AACATTAGTAGAGCA---  
 GAATGGAATAACACTTTGGAACAGATAGCTAAAAAATTAAGA-----GAACAATTTAAG----  
 -----AATACAACAACAATATCCTTTAAT-----  
 CGGTCTCAGGAGGGGACCTAGAAATTGTG---ATGCACACTTTTAATTGTGGAGGGGAA---  
 TTTAAGCAGCTCCAGGCAAGAGTCCTGGCTATAGAAAGATACCTAAGGGATCAACAGCTCCTGGGGATTG  
 GTTGCTCTGGAAAACCTCATCTGCACCACTACAGTGCCTTGGAATGCTAGTTGGAGT-----  
 -----AATAAATCTCTGAATCAGATTTGG-----GAT-----  
 AACATGACCTGGATGGAGTGG---GAAAGAGAAATTGACAATTACACAAGCGTAATATAC---  
 ACCTTACTTGAAGAATCGCAGAACCAACAGGAA-----  
 -----  
 AAGAATGAACAAGAATTATTGGAATTGGATAAATGGGCAAATTTGTGGAATTGGTTTGACATAACAAATTGGC  
 TGTGGTATATAAAAATGTTTCATAATGATAGTAGGAGGCTTGATAGGTTTAAGAATAGTTTTTTACT---  
 GTACTTTCTATAGTG-----AATAGAGTTAGGCAGGGCTACTCACCA-----  
 TTATCATTTGCTGTTAGCTTGCTCAACGCCACAGCCATAGCAGTAGCTGAG---  
 GGGACAGATAGAATTATAGAAGTAGTACAAAGAGCTGGTAGGGCT-----  
 -----ATTCTCCACATA-----CCTGTAAGAATAAGACAGGGCTTGGAAGGGCTTTGCTA---TAA  
 >KR182192  
 GCT---ACA-----  
 GAACAATTGTGGGTCACAGTCTATTATGGGGTACCTGTATGG---AAAGAAGCAACC---  
 ACCACTCTATTTTGTGCATCAGATGCCAAAGCATATGACACAGAG---GCGCATAAT-----  
 -----GTTTGGGCCACA---CATGCCTGTGTACCCACAGAC---  
 CCTAACCCACAAGAAGTAGAATTGGGA-----AATGTGACAGAAAATTTTAAC-----  
 -----ATGTGGAATAAACATGGTGGAACAGATGCATGAGGATATA---  
 ATCAGTCTATGGGATCAAAGCCTA---AAGCCATGTGTAAAATTA---  
 ACCCCACTCTGTGTTACTTTAAATTGCACTAATTTGAGTGTCTACTAAGACCAATGGTAGT-----  
 -----  
 -----GGTATTGGGGAAAAGATGGAGGAAGGAGAAGTGAAA---  
 AATTGCTCTTTCAATATCACCACACGCATAAAA-----  
 AATAAGCTGCAGAGAGAATATGCACTC---TTTTATAAACTTGATGTAGTACCAATAGATGATGAT-----  
 -----  
 -----  
 GATAATACAAGCTATATGTTGATAAATTGTAACACCTCAGTCATTACACAG---  
 GCCTGTCCAAAGGTATCCTTTGAACCAATTCCCATACATTATTGTACCCCTGCTGGTTTTGCGATTCTAAAGT  
 GTAAA---GATAAGAATTTCAAT-----GGAACAGGACCATGTAAAAAT-----  
 -GTCAGC---ACAGTACAATGTACACATGGAATCAGGCCAGTAGTATCAACT---  
 CAACTACTGTTGAATGGCAGTCTAGCAGAAGAAGAG-----  
 GTAGTAATTAGATCTGAAAAATATCACAACAAT-----GTTAAATCCATAATAGTACAGCTGAAT----  
 -----GAATCTGTAGAA-----ATTAATTGTACAAGACCCAACAACAATACAAGAAAA-----  
 -AGTATCCACATA-----GGACCAGGGGAGAGCA---TTT-----TATGCAACAGGAGAA-----  
 -----ATAATAGGAGACATA-----AGACAAGCATATTGT---AACGTTAGTGAAGCA---  
 AAATGGAATAAAACTCTAAAAATGGATAGTTATAAAATTACGA-----GAACAATTTAAG----  
 -----AATACAACAATAGTCTTTAAT-----  
 CAATCCTCAGGAGGGGACCCAGAAATTGTA---ATGCACAGTTTTTAATTGTGGAGGGGAA---  
 TTTAAACAGCTCCAGGCAAGAGTCCTGGCTGTGGAAGATACCTAAAGGATCAACAGCTCCTAGGGATTG  
 GTTGCTCTGGAAAACCTATTTGCACCACTTCTGTGCCTTGGAATGCTAGTTGGAGT-----

-----AATAAATCTCTGGATGACATTTGG-----AAT-----  
AACATGACCTGGATGGAGTGG---GAAAGAGAAATTAACAAATTACACAGACTTAATATAC---  
ACCCTAATTGAAAAATCGCAGAACCAGCAGGAA-----  
-----  
AAGAATGAACAAGAATTATTGGAATTGGATAAGTGGGCAAGTTTGTGGAATTGGTTTGACATAACAAAATGGC  
TGTGGTATATAAAGATATTCATAATGATAGTAGGAGGTTTAATAGGTTTAAGAATAGTTTTTTGCT---  
GTGCTTTCTATAGTG-----AATAGAGTTAGGCAGGGATACTCACCA-----  
TTATCATTCGCTGTTAGTTTGCTTAATGCTACAGCTATAGCAGTAGCTGAG---  
GGGACAGATAGGATTATAGAAGTAGTACAAAGACTTTGTAGGGCT-----  
-----ATCCTACACATA-----CCTGTAAGAATAAGACAGGGCTTAGAAAGGGCTTTGCTA---TAA  
>KR182242  
ACA---GAA-----  
GAAAAACGTGGGTACAGTCTATTATGGGGTACCTGTGTGG---AAAGAAGCAACC---  
ACCACTCTATTTTGTGCATCAGATGCTAAAGCATATGATACAGAA---GCACATAAT-----  
-----GTTTGGGCCACA---CATGCCTGTGTACCCACAGAC---  
CCCAGCCCACAAGAAGTAAAAATTGGCT-----AATGTAACAGAAACTTTAAT-----  
-----ATGTGGAAAAATGACATGGTAGACCAGATGCATGAGGATGTA---  
ATCAGCTTATGGGATCAAAGCTTA---AAGCCATGTGTAAAATTA---  
ACTCCACTCTGTGTTACTTTAAATTGCACTGATTGGAAGAATGACACTACCAACACTGCTAACAAA-----  
-----  
-----ACCACTAGTAGCAGCGAGGGAACGTTGGAGGGAGGAGAAGTAAAA---  
AATTGCTCTTTCAACATAACCACAAACATAAGA-----  
GATAGGTATCAGAAAGAATATGCACTG---TTTTATAAACTTGATGTAGTACCAATAGATAAT-----  
-----  
----  
AGTAGTAATAATAGTACTAACTATACTAACTATAGGTTGATAAATTGTAACACCTCAGTCATTAGACAG---  
GCTTGTCCAAAGGTATCCTTCGAGCCAATTCCCATACATTATTGTGCCCGGCTGGTTATGCGATTCTAAAGT  
GTAAC---AATAATACATTCAAT-----GGAACAGGACCATGTACAAAT-----  
-GTTAGC---ACAGTACAGTGTACACATGGAATTAAGCCAGTAGTATCAACT---  
CAACTGCTGTTAAATGGCAGTCTAGCAGAAGGAGAA-----  
GTAGCAATTAGATCTGCCAATTCTCAGACAAT-----GCTAAAATCATAATAGTACAACATAAG---  
-----AAAGCTGTAAAC-----ATTACTTGCGCAAGACCCAGCAATAATACAAGAAAA-----  
-GGTATACATATG-----GGACCAGGCAGTGCA---TGG-----TTT---ACGGGAAAA-----  
-----ATAACAGGAGATATA-----AGACAAGCACATTGT---AACCTTAGCAGGGCA---  
GACTGGAATGACACTTTAAGACAGATAGCTATAAAATTAAAA-----GAACAATTT-----  
-----AATAAAACAATAGCCTTTAAT-----  
CAATCCTCAGGAGGGGACCCAGAAATTGTA---ATGCATATGCAGAATTGTGGAGGGGAA---  
TTTAAGCAGCTCCAGGCAAGAATCCTGGCTGTAGAAAGATACCTAAGGGATCAGCAGCTCCTGGGGATTTGGG  
GTTGCTCTGGAAGAACTCATCTGCACCACTACTGTGCCTTGGAATAATAGTTGGAGT-----  
-----AGTAGATCTGTGGATGACATTTGG-----GAA-----  
AACATGACCTGGATGCAGTGG---GAAAAAGAAATTGAAAATTACACAGGCGTAATATAC---  
AACTTGCTTGGAAGAAATCGCAAAACCAACAAGAA-----  
-----  
AAGAATGAACATGAATTATTGGCATTAGATAAATGGGCAAGTTTGTGGAATTGGTTTGACATAACAAATTGGC  
TGTGGTATATAAAAATATTATAATGATAGTAGGAGGCTTAATAGGTTTAAGAATAGTTTTTTACT---  
GTGCTTTCTATAGTG-----AATAGAGTTAGGCAGGGATACTCACCC-----  
TTATCGTTTCGCTGTTAGCTTGCTCAACGCCATAGCCATAGCAGTAGCTGAG---  
GGAACAGATAGGGCTATAGAAGTATTACAAAGAATTTGCAGAGCT-----  
-----GTTCTTCACATA-----CCTACAAGAATAAGACAGGGCTTAGAAAGGGCTTTGCTA---TAA  
>KR182343  
GCT---GCA---GAA-----  
GAAGAAAAAGCGTGGGTACAGTTTATTATGGGGTACCTGTGTGG---AAAGAAGCAACC---  
ACCACACTATTTTGTGCATCAGATGCTAAAGCATATGATACAGAG---GCACATAAT-----  
-----GTTTGGGCCACA---CATGCCTGTGTACCCACAGAC---  
CCCAACCCACAAGAAATAGTAATGGAA-----AATGTGACAGAAAATTTTAAT-----  
-----ATGTGGAAAAATAACATGGTAGAACAGATGCATGAGGATGTA---  
ATCAGTTTATGGGATCAAAGCCTA---AAGCCATGTGTAAAATTA---  
ACCCCACTCTGTGTCACTCTAGAGTGCACTAAATTGAGGAATAAACTTGCACTAGTAATGACACT-----  
-----  
-----GGTTGTAATACCACTGCTGGCATCGAGGGAGGAGGAATGAAA---

AATTGCTCTTTCAATTTACCAACAGCATA-----  
AATGAGGTTAAAAAAGGACGTGCACTT---TTTTATGAACGTGATATAATACAGATAAATAGT-----  
-----  
-----  
ACAAAAAATGGTAGTACTAATCTTGGCTATAGGTTGACAAGCTGTAATACCTCAGTCATTACACAG---  
GCCTGTCCAAAAATATCCTTTGAGCCAATTCCCATACATTATTGTGCCCCGGCTGGTTTTGCAATTCTAAAGT  
GTAAC---AATGAGAGTTTCAAT-----GGAACAGGACCATGTACAAAT-----  
-GTAAGC---ACAGTACAATGTACACATGGAATTAGACCAGTAGTATCAACT---  
CAATTGCTGTTAAATGGCAGTCTAGCAGAAAAAGAG-----  
GTAGTAATTAGATCTGAAAAATTCACAAACAAT-----GCTTACAACATAATAGTACAACCTGAAT----  
-----GAGTCTGTATCA-----ATTAATTGTACAAGACCCAACAACAATACAAGAACA-----  
-AGTATATCTTTT-----GGACCAGGCAAAAGCA---TTT-----TATGCAACAGGAGAT-----  
-----ATAATAGGGGATATA-----AGACAAGCATATTGT---ACCCTTAGTGAAGCA---  
AAATGGAATAACACTTTGAAAAAGATAGTTGGAAAACTAAGA-----GAACAATTTCCA----  
-----AATAAAACAATAATCTTTAAT-----  
CACAGCACAGGAGGAGATCCAGAGGTTATA--ATGCACACTTTTAAATTGTAGAGGGGAA--  
TTTAAGCAGCTCCAGGCAAGAGTCCTGGCTGTGGAAAGATACCTAAGGGATCAGCAGCTCCTAGGGATTTGGG  
GTTGCTCTGGAAACTCATCTGCACCACCTTCTGTGCCTTGGAAATGCTAGCTGGAGC-----  
-----AATAGATCTGTGGATGACATTTGG-----GAG-----  
AACATGACCTGGATGCAGTGG---GAAAAAGAAATAGATAATTACACAGGCTTAATATAT---  
AGTTTACTTGAAAGTTCACAAATACAGCAAGAA-----  
-----  
AACAAATGAAAAAGAACTATTAGAGTTAGATAAATGGGCAAGTTTGTGGAATTGGTTTGACATATCAAATTGGC  
TATGGTATATAAAAAATATTACATAATGATAGTAGGAGGCTGATAGGTTTAAGAATAGTTTTTTACT---  
GTACTTTCTATAGTG-----AATAGAGTTAGGCAGGGATACTCACCA-----  
TTGTCGTTTCGCTATTAGCTTGCTCAACGCCACAGCAGTAGCAGTAGCTGAG---  
GGGACAGATAGGATCTTAGAAATATTACAAGCAATTTATAGAGTT-----  
-----GTTCTTCACATA-----CCTGTAAGAATAAGACAAGGCTTGGAAGGGCTTTGCTT---TAA  
>KT986555  
GCA---GGA-----  
CAACAATTGTGGGTCACAGTCTATTATGGGGTACCTGTGTGG--AAAGAAGCAACC---  
ACCACTCTATTTTGTGCATCAGATGCTAAAGCATATGATACAGAG--GCACATAAT-----  
-----GTTTGGGCCACA--CATGCCTGTGTGCCACAGAC---  
CCCAACCCACAAGAAGTAGTATTGGGA-----AATGTGACAGAAAATTTTAAT-----  
-----ATGTGGAAAAATAACATGGTGGAACAGATGCATGAGGATATA---  
ATCAGCTTATGGGATCAAAGCTTA--AAGCCATGTGTAAAGTTA--  
ACCCCACTCTGTGTTACTTTAAATTGCACTGATGCAATAATTACTGGTAATAGTAGTGCTAGCAATAAT---  
-----  
-----AGTGGTGCTAGTAATAGTAGTGCTAGTGATAGTGAATGAAA---  
AACTGCACTTTCAATGTTTCCACAGAAGTAAAC-----  
GATAAGTATCAGAAAGTATTTGCACTC--TTTTATAAAATGGATGTAGTGTCACTAGATAAC-----  
-----  
-----  
AATTCTAATTCTACTAAGTATAGGTTGATAAATTGTAACACCTCAGTCATTACACAG---  
GCCTGTCCAAAGATATCCTTTGAGCCAATTCCCATACATTATTGTGCCCCGGCTGGTTTTGCGATTCTAAAAT  
GTAAT---GAAAAGAATTTCACT-----GGAAAAGGACCATGTACAAAT-----  
-GTCAGC---ACAGTACAATGTACACATGGGATTAAGCCAGTAGTATCAACT---  
CAATTGCTGTTAAATGGCAGTATAGCTGAAAGAGAG-----  
CCAGTACTTAGATCTGACAATTTCTCAGACAAT-----GCTAAAACCATAATAGTGCAGCTGAAT----  
-----GAAACTGTAGAA-----ATTAATTGTACAAGACCCAACAACAATACAAGAAAA-----  
-AGTATACATATA-----GCACCAGGGAGAGCA---TTT-----TATGCAACAGGAGAC-----  
-----ATAATAGGAGATATA-----AGACAAGCACATTGT---AACATTACCAGAGCA---  
AAATGGAATAACACTTTTAAACAGATAGTTAACAAATTATCT-----GAACACTTTGAA----  
-----AACAAAACAAAGATAGTCTTTGAG-----  
CCACCCACAGGAGGGGACCCAGAAATTGTA--ATGCACATGTTTAAATTGTGGAGGGGAA--  
TTTAAACAGCTCCAGGCAAGAAATCCTGGCTGTAGAAAGGTACCTAAGGGATCAACAGCTCCTGGGGATTTGGG  
GTTGCTCTGGAAAGCTCATCTGCACCACCTACTGTGCCTTGGAAATGCTAGTTGGAGT-----  
-----AATAGATCTCTTGATTACATTTGG-----GAT-----  
AACATGACCTGGATGGAGTGG---GAAAGAGAAATTGGCAATTACACAGATTTAATATAC---  
ACCTTAATTGAAAATTCGCAAGTTCAGCAAGAA-----

-----  
AAGAATGAACAAGACCTATTAGCATTGGACAAATGGGCAAGTTTGTGGAATTGGTTTGACATATCAAACCTGGC  
TGTGGTATATAAAAATATTCATAATGATAGTAGGAGGCTTGATAGGTTTAAGAATAGTTTTTTGCT---  
GTACTTTCTATAGTA-----AATAGAGTTAGGCAGGGATATTCACCA-----  
CTCTCGTTGGCTGTTAGCTTGCTCGATACCATAGCTATAGCAGTAGCTGAG---  
GGAACAGATAGGATTATAGAAGCAGTAAGAAGATTTTGCAGGGCT-----  
-----ATCCTACACACA-----CCTAGAAGAATAAGACAGGGCTTAGAAATAGCTTTACTA---TAA  
>KX505508  
GCT---ACA-----  
CAAAATTTGTGGGTCACAGTCTATTATGGGGTACCTGTGTGG---AAAGAAGCAACC---  
ACCACTCTATTTTGTGCATCAGATGCTAAAGCATATAAGACAGAG---GCGCATAAT-----  
-----GTTTGGGCCACA---CATGCCTGTGTACCCACAGAC---  
CCCAACCCACAAGAAGTGTTTTTTAAAA-----AATGTGTCAGAATATTTTAAAC-----  
-----ATGTGGAAAAATAACATGGTAGAACAGATGCATGAGGATATA---  
ATCAGTTTATGGGATGAGAGCTTA---AAGCCATGTGTAAAATTA---  
ACCCCGCTCTGTGTTACTTTAAATTGCACTGATGTGAGAAATGGTACTGGGAATAGTACT-----  
-----  
-----GGGAATAGTAATATTACTGACAGGATAGAGAAAGGAGAAATGAAA---  
AACTGCTCTTTCAATATCACCACAATTCTAGGA-----  
AATAAGAAGCAGAAAAAATATACACTT---TTTGATAGGCTTGATCTAGTACCAATAGATGGT-----  
-----  
-----  
GGTGATAATACAACCAACTATAGATTGATAAGTTGTAACACCTCAACTCTTACACAG---  
GCCTGTCCAAAGACATCCTTTGAACCAATTCCAATACATTATTGTGCTCCGGCTGGTTTTGCGATTCTAAAAT  
GTAAT---GATAAAAGGTTTAAAT-----GGATCAGAAACAATGTAAAAAT-----  
-GTCAGC---ACAGTACAATGTACACATGGGATCAAACCAGTAGTATCAACT---  
CAGCTGTTGTTAAATGGCAGTCTAGCAGAAGAAGAT-----  
GTAGTGCTTAGATCTAAAAATTTCTCGGACAAT-----AATAATATCATAATAGTACAGTTAAAA---  
-----GAACCTGTAGAA-----ATTCGGTGTGAAAGACCCAACAACAATACAAGAAAA---  
-AGTATAACTATA-----GGACCAGGAAAAGCA---ATG-----TTTACAACA---GAC-----  
-----ATAATAGGAGATATA-----AGAAAGGCACATTGT---AACATTAGTAGAACA---  
AGATGGAATAACACTCTACATAAAATAGTGGAAAAATTAAAA-----ACACAATTTAAC---  
-----AATAAAACAATAGTCTTTAAT-----  
CAATCCTCAGGAGGGGATCCAGAAGTGGTA---ATGCACATGTTTAACTGTGGAGGGGAA---  
TTTAAGCAGCTCCAGGCAAGAGTCCCTGGCTGTGGAAAGATACCTAAAGGATCAACAGCTCCTGGGAATTTGGG  
GTTGCTCTGGAAACTCATCTGCACCACTGCTGTGCCTTGGAATGCTAGTTGGAGT-----  
-----AATAAAACTTATAATGACATTTGG-----GAT-----  
AACATGACCTGGATGCAGTGG---GAAAAAGAAATTGACAATTACACAGGCTTAATATAC---  
ACATTGCTTGAAGAATCGCAGACCCAACAAGAA-----  
-----  
AAGAATGAACAAGAATTATTGGAATTGGATAAATGGACAAGTTTGTGGAGTTGGTTTGACATAACAAATTGGC  
TGTGGTATATAAACTGTTTATAATGATAGTAGGAGGATTAGTAGGTTTAAGAATAGTTTTTTGCT---  
GTGCTTTCTATAGTG-----AATAGAGTTAGGCAGGGATACTACCA-----  
TTACCGTTTGTCTATTAGCTTGTTCAACGCCACCGCCATAGCAGTAGCTGAG---  
GGGACAGATAGGATTATAGAAGTATTACAAAGAATTGGTAGGGCT-----  
-----ATCATCCACATA-----CCTCGAAGAGTAAGACAGGGCTTAGAAAGGGCTTTGCTA---TAA  
>KX027971  
GCT---GCA-----  
GAAGATTTGTGGGTCACAGTCTATTATGGGGTACCTGTGTGG---AAAGAAGCAGAC---  
ACCACTCTATTCTGTGCATCAGATGCTAGAGCATATGATACAGAA---GCACATAAT-----  
-----GTCTGGGCCACA---CATGCCTGTGTACCCACAGAC---  
CCCAACCCACAAGAAGTAGTATTGGGA-----AATGTGACAGAAAATTTTAAAC-----  
-----ATGTGGAAAAATAACATGGTAGAACAGATGCATGAGGATATA---  
ATCAGCTTATGGGATGAAAGCCTA---AAGCCATGTGTAAAAATA---  
ACCCCACTCTGTGTTACTTTAGATTGCACTGATGTAAGCAATAGCACTGATCTGAATACCAAT-----  
-----  
-----CAGACCCTTGATGATAGTGAAAAAATGAGGAAAGAAATGACA---  
AATTGCTCTTTCAATGTCAACCACAATTATACAA-----  
AATAAAGTAAAGAAAGAATATGCACTT---  
TTTTATAAAATTGATGTAGTACCAATAGACAATGATAATAAAAACACATCACAA-----

-----  
AATAATAAAACCACACCACGAAATAATAGTACCATATATAGGTTAATAAATTGTAACCTCCTCAGTCATTACAC  
AG---  
ACCTGTCCAAAGGTATCCTTTGAACCAATTCCCATACATTATTGTGCCCCGGCTGGTTTTGCGATTCTAAAGT  
GTAAT---GATAAGAAGTTTAAAT-----GGAACAGGACCATGCACAAAT-----  
-GTTAGC---ACAGTACAATGTACACATGGAATTAAGCCAGTAGTGTCAACT---  
CAACTACTGTTAATGGCAGCCTAGCAGAAGAAGAG-----  
ATAGTAATTAGATTTGAGAATATCACAACAAT-----GCTAAAACCATAATAGTACAGTTAAAT----  
-----GAGTCAGTAACA-----ATTAATTGTACAAGACCCAACAATAATACAAGAAAG-----  
-AGTATACATCTA-----GGACCAGGGAAAGCA---TTT-----TATGCAACAGGAGAC-----  
-----ATAACAGGAGATATA-----AGAAAAGCATATTGT---AACATTAGTAGAGCA---  
AAATGGAATAACACTTTTACAACAGGTAAGTAAAAAATTAAGA-----GAACACTTTGAG----  
-----AATACAACAACAATAACCTTTACC-----  
AACCCTCAGGAGGAGACCCAGAAATTGAA---ATGCACAGTTTTAATTGTGGAGGGGAA---  
TTTAAGCAGCTCCAGGCAAGGCTCCTGGCTGTGGAAAGATACCTAAGGGATCAACAGCTCCTGGGGATTG  
GTTGCTCTGGAAGAACTCATCTGCACCACTACTGTGCCTTGGAATACTAGTTGGAGT-----  
-----AATAAATCTCTAGAACAGATTTGG-----AAT-----  
AACATGACATGGATGGAGTGG---GAAAATGAAATTAGCAAATACACAGGCTTAATATAC---  
ACACTAATTGAAGACTCGCAAAACCAGCAAGAA-----  
-----  
AAGAATGAACTAGAATTATTGGAATTAGATAAATGGGCAAATCTGTGGAATTGGTTTGACATAACAAGCTGGC  
TATGGTACATAAAAAATATTCATAATAATAATAGGAAGCTTGATAGGTTTAAGAATAGTTTTTTGCT---  
GTACTTTCTATAGTG-----AATAGAGTTAGGCAGGGATACTCACCA-----  
TTATCATTTGGCTGTCTAGCTTGCTTAACGCTACAGCCATAGCAGTAGGTGAG---  
GGAACAGATAGGATTATAGAAGGGTTACAAAGAATTTGTAGAGCT-----  
-----ATCTGCAACATA-----CCTAGAAGAATAAGACAGGGCTTAGAAAGGGCTTTGCTA---TAA  
>KX505446  
GCT---GCA-----  
AAACAGAAGTGGGTACAGTCTATTATGGGGTACCTGTGTGG---AAAGAAGCAACC---  
ACCACTCTCTTCTGTGCATCAGATGCTAAATCATATGAGACAGAG---AACATAAT-----  
-----GTTTGGGCCACA---CATGCTTGTGTACCCACAGAC---  
CCCAACCCACAAGAAATAGTGATGGAC-----AATGTGACAGAAGACTTTAAT-----  
-----GTGTGGAAAAATGACATGGTAGACCAGATGCATGAGGATGTA---  
ATTAATTTATGGGATCAAAGCCTA---AAGCCATGTGTAAAATTA---  
ACCCCACTCTGTGTTACTTTAAATTGTACTAATGCCACTGCTATTAATGCCACTAGTAGTAGTAAACT---  
-----  
-----AATATCACTAGTGAAATAAAG---  
AAATGCTCTTTCGATGTTACCACAGACAGAAGA-----  
GATAAAGTAAAAAAGGAGTATGCACTT---  
TTTTATAAACTTGATATAGTACAAATAGATGAGAATAACAGTAACAAG-----  
-----  
AATAAGAGTAGCAATGACACAGTCGAACAATATAGGTTGATAAGTTGTAACACCTCAGTCCTTACACAA---  
GCTTGTCCAAAGGTATCCTTTCAGCCAATTCCCATACATTATTGTGCCCCGGCTGGTTTTGCGATTCTAAAGT  
GTAAT---ACAAGAATTTTACT-----GGGTGAGGATCATGTACAAAT-----  
-GTCAGC---ACAGTACAATGTACACATGGGATTAAGCCAGTAGTGTCAACT---  
CAACTGCTGTTAAATGGCAGCCTAGCAGAGGAAGGG-----  
GTAGTAATTAGATCTGAAAACCTTCTCAAACAAT-----GCTAAAACATAATAGTACAGCTGAAA---  
-----ACATCTGTATCA-----ATTAATTGTACAAGACCCAATAACAATAACAAGAAAA-----  
-GGTATACATATA-----GGACCAGGAAGAACA---TTT-----TATGCAGCAGGAGAA-----  
-----ATAATAGGAGATATA-----AGACAAGCACATTGT---AACATTAGTAGAGAA---  
GATTGGAATAATACTCTAAACAGGTAGTGGAATAAATTGGGG-----GACCAATATAAT---  
-----ATAACAAAAATAATCTTCAAT-----  
CACTCATCAGGAGGAGACCCAGAAATTGTA---ATGCACAGTTTTAATTGTGGAGGGGAA---  
TTTAAGCAGCTCCAGGCAAGAGTCTGGCTCTGGAAAGATACCTAAGGGATCAACAGCTCCTAGGAATTTGGG  
GTTGCTCTGGAAGAACTCATTTGCACCACTAATGTGCCGTGGAATGATAGTTGGAGT-----  
-----AATACATCAGTGAAAGACATTTGG-----AAC-----  
AGCATGACCTGGATGCAGTGG---GAGAAAGAAATTGACAATTACACAGATGTAATATAC---  
CAATTACTTTGAAGAATCGCAAAACCAACAAGAA-----  
-----  
AAGAATGAACAAGAATTATTAGAATTAGATAAATGGGCAAGTTTGTGGAGTTGGTTTGACATAACACAGTGGC

TGTGGTATATAAAAAATATTCATAATGATAGTAGGAGGCTTGGTAGGTTTAAGAATAGTTTTTTCT---  
 GTA CTTTCTATAGTA-----AATAGAGTTAGGCAGGGTATTACCA-----  
 TTATCGTTTGCTGTTAGCTTGCTAAATACCACTGCTATAGTAGTAGCTGAA---  
 GGGACAGATAGGGTTATAGAAGCAGCACGAAGAGTTTGTAGAGCT-----  
 -----ATCCGCAATATA-----CCTACAAGAATAAGACAGGGTTTGAAAGGGCTTTGCTA--TAA  
 >KT986947  
 GCT---GCA-----  
 GAACAGTTGTGGGTACAGTCTATTATGGGGTACCTGTGTGG--AAAGAAGCAAAC---  
 ACCACTCTATTTTGTGCATCAGATGCTAAAGCCTATGAGACAGAA--GTACATAAT-----  
 -----GTTTGGGCCACA---CATGCTTGTGTACCCACAGAC---  
 CCCGACCCACAAGAAGTAGTATTGGGA-----AATGTGACAGAAAACCTTTAAT-----  
 -----GCATGGAAAAATGATATGGTAGACCAGATGCATGAGGATATA---  
 ATCAATTTATGGGATCAAAGCCTA--AAGCCATGTGTGAAATTA---  
 ACCCCACTCTGTGTTACTTTAAAGTGCATGATGACATTAACAGCACTGAGGTCAATAACAGGACTAACAGCA  
 CTGGGTCCAAT-----  
 ---AGCGGGACCACGAATAATGTGAACGGGACCACGAATGTGAGCGGGGTATTAGAAATGAAA---  
 AATTGCTCTTTCAATATCAGCACAGACATAAGA-----  
 GATAAGATAAAGACAGAGCATGCCTT--TTTTATAAACTTGATGTAGTGCCAATAGATAAT-----  
 -----  
 -----  
 AATAGTTCTAGCTATAGATTAATAAGTTGTAATACCTCAACCCTTACACAG---  
 GCTTGTCCAAAGGTTACCTTTGAACCAATTCCCATACATTATTGTGCCCGGCTGGTTTTGCGATTCTAAAGT  
 GTAAT--AATGAAACATTTAAT-----GGAAAAGGACCATGTACAAAT-----  
 -GTCAGC--ACAGTACAATGTACACATGGAATTAAGCCAATAGTGTCAACC---  
 CAACTGCTGTTAAATGGTAGCCTAGCAAAAGATGGG-----  
 GTAGTAATCAGATCTGAAAATTTACAGACAAT-----GCTAAAACCATAATAGTACAGCTGAAA---  
 -----GACCCTGTAAAA-----ATTAATTGTACAAGACCCTATAATAACAAGAAGA-----  
 -AGTATAACTATG-----GGACCAGGGAGAGCA--TTT-----TATGCATCAGACAAG-----  
 -----ATAATAGGAAACATA-----AGACAAGCACATTGT--AACATTAGTAAAGCA---  
 GAATGGAATGACACTTTGAAGCAGGTAGCTATAAAATTACGA-----GAGCAATATGGG---  
 -----GAAAATAAAACAATAGTCTTTAAT-----  
 CAATCTTCAGGAGGGGATCCAGAAATTGTA--ATGCACAGTTTTATTGTGCAGGAGAA---  
 TTCAAACAGCTCCAGGCAAGAATCCTAGCTGTGGAAAGATACCTAAGGGATCAACAGCTCCTGGGACTTTGGG  
 GTTGCTCTGGAAACTCATCTGCACCACTGCTGTGCCTTGAATACTAGTTGGAGT-----  
 -----AATAAATCTCTGGAGGACATTTGG-----GAC-----  
 AACATGACCTGGATGCAGTGG--GAAAAGAAATTGACAATTACACAGGCTTAATATAC---  
 ACCTTAATTGAAAATTCGCAGAACCAACAAGAA-----  
 -----  
 AAGAATGAACAGGAATTATTGGAACCTAGATAAAATGGGCAAGTTTATGGAATTGGTTTGATATAACAAAATGGT  
 TGTGGTATATAAAAAATATTCATAATGATAGTAGGAGGCTTGATAGGTTTAAGAATAGTCTTTTTTT---  
 GTA CTTTCTATAGTA-----AATAGAGTTAGGCAGGGATACTTACCA-----  
 TTGTCGTTTCGCTGTTAGCTTGCTTAATACCATAGCCATAGCAGTAGCTGAG---  
 GGGACAGATAGGATTATAGAAATATTACAAGCAGGCTTTAGAGCT-----  
 -----ATCCTCCACATA-----CCTGTAAGAATAAGACAAGGCTTGAAAGGCTTCTGCTA--TAA  
 >MH264238  
 GCT---ACA-----  
 GAAAAATTTGTGGGTAACAGTCTACTATGGGGTACCTGTGTGG--AAAGAAGCTATC---  
 ACCACTTTATTTTGTGCATCAGATGCTAAAGCATATGATACAGAG--GTACATAAT-----  
 -----GTCTGGGCCACA---CATGCCTGTGTACCTACAGAC---  
 CCCAGCCCACAAGAAGTAGTATTGAAA-----AATGTGACAGAAAATTTTAAT-----  
 -----ATGTGGAAAAATAACATGGTAGAACAGATGCATGAGGATATA---  
 ATCAGTTTATGGGATCAAAGCCTA--AAGCCATGTGTAAAATTA---  
 ACCCCACTCTGTGTTACTTTAAATTGCACTGCTTATGTGGGAGATACTACTACTACCAATAGTAGTACTACT-  
 -----  
 -----ACTAATACCAACATTAGTATGGAGGGAGAAATGAAA---  
 AACTGCTCTTTTTTATACTACCCCAAACATAAGA-----  
 GATAAGGAACAGAAAGAATATGCCTT--TTTTATAGCCTTGATGYAGTTCCAATAGATAAT-----  
 -----  
 -----  
 ACTAGCTATAGGTTGATAAGTTGTAACACCTCAGTCATTACACAG---

GCCTGTCCAAAGGTATCCTTTGAACCAATTCCCATACATTATTGTGCCCCGGCTGGTTTTGCGATTCTAAAAT  
 GTAAT---GATAAGAAGTTCAAT-----GGAACAGGACCATGTAAAAAT-----  
 -GTCAGC---ACAGTACAATGTACACATGGAATTAAGCCAGTAGTATCAACT---  
 CAACTGCTATTAAATGGCAGTCTAGCAGAAGAAGAG-----  
 GTAATAATTAGATCTGCCAATCTCTCGGATAAT-----GCTAAAACCATAATAGTACAGCTGAAT----  
 -----AAAACTGTAGAA-----ATTAATTGTGTAAGACCCAACAACAATACAAGAAAA-----  
 -AGTATACATATG-----GGACCAGGGAAAGCA---TTT-----TATGCATATGGAGAA-----  
 -----ATAATAGGAAATATA-----AGACAAGCACATTGT---AACATTAGTAAAGGA---  
 GATTGGAATAAAACTTTAGGACGGATAGTTAAGAAATTAAGA-----GAAAAGTTT-----  
 -----AATAAAACAATAACCTTTAAG-----  
 CAACACTCAGGAGGGGACCCAGAAATTGTA--ATGCACACTTTTAATTGTGGAGGGGAA--  
 TTTAAGCAGCTCCAGGCAAGAGTCCTGGCCATAGAAAAGATTCCTAAAGGATCAACAGCTCCTGGGAATTTGGG  
 GTTGCTCTGGAAACTCATTTGCACCACTACTGTGCCTTGGAATGCTAGTTGGAGT-----  
 -----AATAGATCTCTAGATTATATTTGG-----GGT-----  
 AACATGACCTGGATGCAGTGG---GAAAAAGAAATTGACAATTACACAGAATTAATATAC---  
 AGCTTAATTGAAAAATCGCAGAACCAGCAAGAA-----  
 -----  
 AAGAATGAACAAGAACTATTGGAAATGGATAAATGGGCAAATTTGTGGAATTGGTTTGACATATCTCATTGGC  
 TGTGGTATATAAAAATCTTCATAATGATAGTAGGAGGCTTGGTAGGTTTAAGAATAGTTTTTTAGT---  
 GTACTTTCTATAGTG-----AATAGAGTTAGGCAGGGATACTCACCA-----  
 CTATCGTTTGCTGTTAGCTTGCTCAACGCCACAGCCATAGCAGTAGCTGAG---  
 GGGACAGATAGGGCTATAGAAGCAGTACAAAGAGCTTGTAGAGCT-----  
 -----ATCCTCCACATA-----CCTAGAAGAATAAGACAGGGCTTTGAAAGGGCTTTACTG---TAA  
 >KX587339  
 GCT---ACA-----  
 AAACAATTGTGGGTCACAGTCTATTATGGGGTACCTGTGTGG--AAAGAAGCAACC---  
 ACCACTCTATTTTGTGCCTCAGATGCTAAATCATATGATACAGAG--GTACATAAT-----  
 -----GTTTGGGCCACA---CATGCCTGTGTACCCACAGAC---  
 CCCAACCCACAAGAAGTAGTAATGGGA-----AATGTGACAGAAGAGTTTAAC-----  
 -----ATGTGGAAAAATGACATGGTAGAACAGATGCATGAAGATATA---  
 ATCAGTTTATGGGATCAAAGCCTA--AAGCCATGTGTAAAATTA--  
 ACCCCACTCTGTGTTACTTTAAATTGCACTGATGCTATTGACAATTGCACTATTGTGAATGGTACTACCAAGT  
 GCACTAAGTATAATAATAGTAGCACTAATACT-----  
 -----ACCAGTAAGAGTAGCGTGGAAATGATGGGAGAAATAAAG---  
 AATTGCTCTTTCAATGTTACCACAGGATTAAGT-----  
 AATAAGTTGCAGCGGGAATATGCACTT---  
 TTTTATAAACTTGATGTAGTACCAATAATAGAGAGTAATGGTGGG-----  
 -----  
 AATAATAGCAGCAATAGCAGCTATAGGTTGATAAGTTGTAACACCTCAGTTATTACACAA---  
 GCCTGTCCAAAGGTAACCTTTGACCCAATTCCCATACATTATTGTGCCCCGGCTGGTTTTGCGATTCTAAAGT  
 GTAAT--AATGAGACATTCAAT-----GGGAAAGGATCATGCACAAAT-----  
 -GTCAGC---ACAGTTCAATGTACACATGGAATTAAGCCAGTAGTATCCACT---  
 CAACTGCTGTTAAATGGCAGTCTAGCAGAAAAGGAG-----  
 ATAATAATTAGATCTGAAAATTTACGGACAAT-----GCTAAAACCATAATAGTACATCTGAAT----  
 -----GAATCTGTACAA-----ATTAATTGTACAAGACCCAACAACAATACAAGAAAA-----  
 -GGTATACATTTA-----GCAGCAGGGAGAGCA---ATT-----TATACAACAGGA-----  
 -----ATAATAGGAGACATA-----AGACAAGCACATTGT---AACATTAGTAGAGAA---  
 AAATGGGAAAAAACTTTAAGACAGGTAGCTACAAAATTAAGC-----CAACAATTTAATAAG-  
 -----GATAATACAACAATAGCATTTAAA-----  
 CCATCCTCAGGAGGGGACCCAGAAATTGCA--ACACACATGTTTATTTGTAGAGGAGAA--  
 TTTAAGCAGCTCCAGGCAAGAATCCTGGCTGTGGAAAGATACCTAAAGGATCAACAGCTCCTGGGGATTTGGG  
 GTTGCTCTGGAAACTCATCTGCACCACTGCTGTGCCTTGGAATGCTAGTTGGAGT-----  
 -----AATAAACTCTGGGGGAAATTTGG-----AAT-----  
 AACATGACCTGGATGCAGTGG---GAAAAAGAAATTGACAATTACACTGACACAATATAC---  
 AGATTAATTGAGGAATCGCAAAACCAACAGGAA-----  
 -----  
 AAGAATGAACAAGACTTATTGGCATTAGACAAATGGGCAAATTTGTGGAATTGGTTTGACATAACAACTGGC  
 TGTGGTATATAAAAATATTTCATAATGATAGTAGGAGGCTTGATAGGTTTAAGAATAGTTTTTTACT---  
 GTGCTTTCTATAGTG-----AATAGAGTTAGGCAGGGATACTCACCA-----  
 TTGTCATTTGCTATTAGCTTGTTACAATACCACCGCCATAGTAGTAGCTGAG---

GGGACAGATAGGGTTATAGAAATAGTACAAAGAGCTTGTAGAGCT-----  
 -----ATTTGCCACATA-----CCTAGAAGAATAAGACAGGGCTTGGAAAGGAGCTTGCTA---TAA  
 >KX505536  
 GCT---ACA-----  
 GAACAATTGTGGGTCACAGTCTATTATGGGGTACCTGTGTGG--AAAGAGGCAACC---  
 ACTACTCTATTTTGTGCCTCAGATGCTAAAGGATATGAAACAGAG--GCACATAAT-----  
 -----GTTTGGGCCACA---CATGCCTGTGTGCCACAGAC---  
 CCCAGCCCACAAGAAATAAAAAATGGAA-----AATGTGACAGAACATTTTAAC-----  
 -----ATGTGGAAAAATTCCATGGTAGAACAATGCATGAGGATATA---  
 ATCAGTTTATGGGATCAAAGTCTA---AAGCCATGTGTAAACTA---  
 ACCCCACTCTGTGTTACTTTAAATTGCATTAAT-----  
 -----  
 -----ACTACTAGTAGTGGTGTGAACGGGACAATAGAGGATGGGGACATGAAA---  
 AACTGCTCTTTCAATATAACCACAGACATGAAA-----  
 GATAAGGTGCAGAGAGAATATGCATTT--TTCAACAAACTTGATATAGTTCCAATGGATAGT-----  
 -----  
 -----  
 AGTGGTAGTACTAATGAACTAACTATAGGTTGATAAGTTGTAACACCTCAGCCATTACACAG---  
 GCCTGTCCAAAGATATCCTTTGAGCCAATTCCAATACATTATTGTGCCCCAGCAGGTTTGCATTATAAAGT  
 GTAAT---AATAAGACATTCAAT-----GGAACAGGACCATGTACAAAT-----  
 -GTCAGC---ACAGTACAATGCACACATGGAATTAAGCCAGTAGTATCAACT---  
 CAACTACTGTAAATGGCAGTCTAGCAGAAGAAGAT-----  
 ATAATAATTAGATCTGAAAATCTCACAAATAAT-----GCTAAAACCATAATAGTGCAGCTGAAG----  
 -----GACCCTGTAGAA-----ATTACTTGTATAAGACCCAACAACAATACAAGAAAG-----  
 -AGTATAACTATG-----GGACCAGGAAGAGCA---TTC-----TATACAACA---GAC-----  
 -----ATAATAGGAAATATA-----AGGCAAGCACATTGT---AACATTAGTAGAGCA---  
 AATTGGACTGACACTCTAAAAAAGATAGCTAGCAAATTAAGA-----GAAAAATTT-----  
 -----AATAAAACAATAATCTTTGAT-----  
 CAGCCTTCAGGAGGAGACCTAGAAATTGTA--ATGCACAGCTTTAATTGTGGAGGGGAA--  
 TTTAAACAGCTCCAGGCAAGAGTCCCTGGCTATGGAAAGATACCTAAGGGACCAACAGCTCCTGGGGATTTGGG  
 GTTGCTCTGGAAACTCATCTGCACCACTGCCGTGCCTTGGAAATATTACTTGAGT-----  
 -----AATAAAAAATCTGACTACAATTTGG-----GAA-----  
 AACATGACCTGGATGGAGTGG--GAAAAAGAAATTGACAATTACACAGAGTTGATATAC---  
 AGCTTACTTGAAAATTCGCAAAACAACAAGAA-----  
 -----  
 AAGAATGAACAAGAATTATTGGCATTGGACCAATGGGCAAATTTGTGGAGTTGGTTTGACATAACAAAATGGC  
 TGTGGTATATAAAAATATTATCATGATGATAGTAGGAGGCTTGATAGGTTTAAAAATAGTTTTTGTCT---  
 GTACTTTCTATAGTA-----AATAGAGTTAGGCAGGGATACTACCA-----  
 TTATCGTTGGCTACTAGCTTGCTTAACGCTACAGCCATAGCAGTAGGTGAG---  
 GGAACAGATAGGATCATAGAGGTATTACAAAGATTTGGTAGGGGC-----  
 -----ATTCTCCACATA-----CCTAGAAGAATAAGACAGGGCTTGGAAAGGGCCTTGCTG--TAA  
 >MG196412  
 ACT---GCA-----  
 GGAAACTGGTGGGTCACAGTCTATTATGGGGTACCTGTGTGG--AAAGAAGCAACC---  
 ACCACTTTATTTTGTGCATCAGATGCTAAAGCATATGATACAGAG--GCACATAAT-----  
 -----GTTTGGGCCACA---CATGCCTGTGTACCCACAGAC---  
 CCCAACCACACAAGAAGTATTCTGGTA-----AATGTGACAGAAAATTTTAAT-----  
 -----ATGTGGAAAAATAATATGGTAGACCAGATGCATGAGGATATA---  
 ATCAGTTTATGGGATCAAAGTCTA---AAGCCATGTGTAGAATTA---  
 ACCCCACTCTGTGTTACTTTAAATTGCACTAATGCCACTAAGCCTAATGCCACTAATTCTAAT-----  
 -----  
 -----GATACTAATGATACTAGTTATAATGAGACAATAATAGAGAAGGGAGAAATAAAA---  
 AACTGCTCTTTCTATATCAACACAAACATAGGA-----  
 GATAAGACACATAAAAATTATGCACCT--TTTTATAGCATTGATATAGAACCAATAGATAAT-----  
 -----  
 -----  
 GATAGTACCAGTTATAGGTTGACGAAGTGTAACACCTCAATCATTACACAA---  
 GCTTGTCCAAAGGTATCTTTTGGAGCCAATTCCCTATACATTACTGTACCCCGGCTGGTTTTGCGATTCTAAAGT  
 GTAGA---GAGAAGGATTTTAAT-----GGAACAGGACCATGTAAAAAT-----  
 -GTTAGC---ACAGTGCAATGTACACATGGAATTAAGCCAGTAGTGTCAACT---

CAACTGCTGTTAAATGGAAGTTTAGCGGAAAACGAG-----  
 ACAGTAATTAGATCTGAGAATTTACAGACAAT-----GCTAAAACTATAATAATACAGTTAAAG----  
 -----GACCCTGTAGAA-----ATTAATTGTACAAGACCCACAACAATACAAGAAAA-----  
 -AGTATAAATACG-----GGACCAGGGAGAATA---CTT-----TATGCAACAGGAGAA-----  
 -----ATAATAGGAGACATA-----AGACAAGCACATTGT---AACATTAGTGGAGAA---  
 CAATGGAATAAAACTTTAAGTCAGATAGTTAAAAAATTAAGA-----GAACAATTTAAT-----  
 -----AATAGCGCAATAATCTTTAAG-----  
 CAATCCTCAGGAGGGGACCCAGAAATTGTA--ATGCACAGTTTTTAATTGTGGAGGGGAA---  
 TTTAAGCAGCTCCAGGCAAGAGTCCTGGCTGTGGAAAGATACCTAAAGGATCAACAGCTCCTGGGGATTGTTGGG  
 GTTGCTCTGGAAGAACTCATCTGCACCACTGCTGTGCCTTGGAATAGTAGTTGGAGT-----  
 -----AGTAGCAATGTAAATGATATTTGG-----GAC-----  
 AACATGACCTGGATGCAATGG---GAAAAAGAAATTGACCAATTACACAGAGATAATATAC---  
 ACCTTACTTTGAACAATCGCAGAACCAACAAGAA-----  
 -----  
 AAGAATGAACAAGAATTATTGGAATTGGATAAATGGGCAAGTCTGTGGAATTGGTTTGACATATCAAGTTGGC  
 TGTGGTATATAAGAACATTCATAATGATAATAGGAGGCTTAATAGGTTTAAAGAATAATTTTTTGCT---  
 GTAATTTCTATAGTG-----AAAAGAGTTAGGCAGGGATACTCACC-----  
 TTATCGTTAGCTATTAGCTTGTTCAACGCCACAGCCATAGCAGTAGCTGAG---  
 GGAACAGATAGGATTATAGAAATAGTACAAAGAACTTGTAGAGCT-----  
 -----ATTCTCAACATA-----CCTAGAAGAATAAGACAGGGCTTAGAAAGGGCTTTGCTA---TAA  
 >MK169417  
 GCT---ACA-----  
 ACAAACTTGTGGGTCACAGTCTATTATGGGGTACCTGTGTGG---AAAGATGCAAGC---  
 ACCACTCTATTCTGTGCATCAGATGCTAAAGCATATGATACAGAG---GTACATAAT-----  
 -----GTTTGGGCTACA---CACGCCTGTGTACCCACAGAC---  
 CCCAACCCACAAGAAGTAGTATTGGAA-----AATGTGACAGAACATTTTAA-----  
 -----ATGTGGAAAAATAACATGGTAGAACAGATGCATGAGGATATA---  
 ATCAGTTTATGGGATCAAAGCCTA---AAGCCATGTGTGAAATTA---  
 ACCCCACTCTGTGTTACTTTAGATTGCACTAATGTTAATGCTACTAATGTTAATGCTACTAATCCCACT---  
 -----  
 -----AATAATAGCAAGGAACTGATGGCCAAAGAAGAAATGAAA---  
 AACTGCTCTTTCAATGTTACTGCAGGCATAAGA-----  
 GATAAGATGCAAAAAGAATTTGCGCTT---TTTTATAAACTTGATATAGTGCCAATAAATAAT-----  
 -----  
 -----  
 ACTAATAATAATAGTAAAGACTATAGGCTGATAAGTTGTAACACCTCAGTCATTACACAA---  
 GCCTGTCCAAAGGTAACCTTTGAGCCAATTCCCATACATTATTGTACCCCGGCTGGTTTTGCAATTATAAAGT  
 GTAAC---AATAAAAAGTTCAAT-----GGAAAAGGACCATGTAAAAAT-----  
 -GTCAGC---ACAGTACAATGTACACATGGAATTAGGCCAATAATATCAACT---  
 CAACTGTTGTAAATGGCAGTCTAGCAGAAGAAGAA-----  
 GTAGTAATTAGATCTGACAATTTCAAGTGACAAT-----GTAAAACCATAATAGTACAGCTGAAT---  
 -----GAGTCCATACAA-----ATTAAGTGTACAAGACCCAACAATAATACAAGAAGA---  
 -AGTATAAATATA-----GGACCAGGAAGAGCA---TTC-----TTTGCAACAGGACAC---  
 -----ATAATAGGAGATATA-----AGGAAAGCACATTGT---AACCTTACTAGAACA---  
 GAATGGAATAACACTTTAAAAAGGATAGTTATAAAATTAGGA-----GAACAATTTAAT---  
 -----AATAGCAAAACAGTCTTTAA-----  
 CCACCTGCAGGTGGAGACCTAGAAATTGTA---ACGCACAGTTTTTAATTGTGGAGGGGAA---  
 TTTAAGCAGCTCCAGGCAAGAGTCCTGGCTGTGGAAAGATACCTAAAGGATCAACAGCTCCTGGGGATTGTTGGG  
 GTTGACACAGGAAACTCATTTGCACCACTGCAGTGCCTTGGAATGCTAGTTGGAGT-----  
 -----AATAAATCTCTGGATCAAATTTGG-----AAT-----  
 AACATGACCTGGATGCAGTGG---GAAAGAGAAATTAACAATTACACAGGCTTAATATAC---  
 ACCTTACTTTGAGGAATCGCAAAACCAACAAGAA-----  
 -----  
 AAAAAATGAACAAGAATTATTGGAATTGGATAAATGGGCAGATTTGTGGAATTGGTTTGACATATCAAAGTGGC  
 TGTGGTATATAAGAATATTACATAATAATAGTAGGAGGCTTGGTAGGTTTAAAAATAGCTTTTACT---  
 GTGCTTGCTATAGTG-----AATAGAGTTAGGAAGGGATACTCACC-----  
 TTATCGTTTTGCTGTTAGCTTGTTTAAATACCATAGCCATAGCAGTAGCTGAG---  
 GGGACAGATAGGATTATAGAAATATTGCAAGAGCTGGTAGAGCC-----  
 -----ATTCTGCACATA-----CCTAGAAGAATAAGACAGGGTTTGGAAGAATTTTGGTA---TAA  
 >MK169834

GCT---GCA-----  
GCACAACTTTGGGTCACAGTTTATTATGGGGTACCTGTGTGG---AGAGAAGCAAAC---  
CCCCTCTATTTTGTGCATCAGACGCTAAAGCATATGATACAGAA---GTACACAAT-----  
-----GTTTGGGCCACA---CATGCCTGTGTACCCACAGAC---  
CCCAACCCACAAGAGGTAAAATTGGAC-----AATGTAACAGAATATTTTAAC-----  
-----ATGTGGAATAATAGCATGGTAGAACAAATGCATGAGGATATA---  
ATCAGTTTATGGGATCAAAGCTTA---AAGCCTTGTGTAAAATTA---  
ACTCCACTCTGTGTCACTCTAAATTGCACTGATGTGAATAATAGGACA-----  
-----  
-----GAGAATAATAATAGAACTGTGGAGAATCCAGGGGAAATAAAA---  
AACTGCTCTTTCAATATCACTGCAGGAGTTCTGA-----  
GATAAGGTGAATAAAGAATATGCATTC---TTTTATAAATATGATGTAGTACCCTTACAAAAT-----  
-----  
-----  
GATAATACTAGCTATAGGTTGACAAGTTGTAACACCTCAGTCATTACACAG---  
ACCTGTCCAAAGGTAACCTTTGAGCCAATTCCCTATACATTATTGTGCCCCGGCTGGCTATGCAATACTAAAAT  
GTAAT---GATAAGAGATTCAAT-----GGAACAGGACCATGTACCAAT-----  
-GTTAGC---ACAGTACAATGTACACATGGGATTAAGCCAGTAGTGTCAACT---  
CAATTGCTGTTAAATGGCAGTCTCGCAGAAGAAGAG-----  
GTAGTAATTAGATCTGAAAATTTACAAACAAT-----GCTAAAAACATAATAGTACAGCTAAAT---  
-----GAATCTGTAGTA-----ATTAATTGTACAAGACCCAACAACAATACAAGAAAA-----  
-AGTATACATATA-----GGACCAGGGAGGGCA---TTT-----TATGCAGCAGGAGAT-----  
-----ATAATAGGAGATATA-----AGGCAAGCACATTGT---AACATTACTGCAAAC---  
GAATGGAATAAACTTTAGAACGGATAAAGGAAAAATTGGGA-----GAACAATTTAAG---  
-----AATAAAACAATAAAATTTAAT-----  
CAGTCCTCAGGAGGGGACCCAGAAATTACA---ATGCACAGTGTTAATTGTGGAGGGGAA---  
TTTAAACAGCTCCAGGCAAGAGTCCCTGGCTGTGGAAAGATACCTAAAGGATCAACAGCTCCTGGGGATTTGGG  
GTTGCTCTGGAAGAACTCATCTGCACCACCTCTGTGCCTTGGAAATAGTAGTTGGAGT-----  
-----AATAAATCTCTGGATATGATTTGG-----GAT-----  
AACATGACCTGGATGCAGTGG---GATAGAGAAATTAGCAAGTATTCAAAGACAATATAC---  
AACTTACTTGAAGAATCACAAAACCAACAGGAA-----  
-----  
AAGAATGAACAAGAATTATTAGCATTAGACAAGTGGGACAGTTTGTGGAGTTGGTTTGACATATCAAATTGGC  
TGTGGTATATAAGAATATTACATAATGATAATAGGAGGCTTAATAGGCTTAAGAATAGTTTTTTACT---  
GTACTTTCTATAGTG-----AATAGAGTTAGGCAGGGATACTCACCT-----  
TTATCATTTGCTGTTAGCTTGCTTAACGCCACCGCCATAGTAGTAGCTGAG---  
GGGACAGACAGGATTATAGAAGGACTACAAAGAGCTGGTAGAGCT-----  
-----ATCCTCCGCATA-----CCAACAAGAATAAGACAGGGCTTAGAAAGGGCTTTGGTG---TAA  
>AF025753  
GCT---ACA-----  
GAAAAATTGTGGGTCACAGTCTATTATGGGGTACCCGTGTGG---AAAGAAGCAACC---  
ACCCTCTATTTTGTGCATCAGATGCTAAAGCATATGATACAGAG---GTACATAAT-----  
-----GTTTGGGCCACA---CATGCCTGTGTACCCACAGAC---  
CCCAGCCCACAAGAAATGATATTGAAA-----AATGTGACAGAAAATTTTAAC-----  
-----ATGTGGAAAAATAACATGGTAGAACAGATGCATGAAGATATA---  
ATCAGTTTATGGGATCAAAGCCTA---AAGCCATGTGTAAAAATA---  
ACCCCACTCTGTGTCACTTTAAATTGCACTGATTTGAGGAATACTAATAATACCACT-----  
-----  
-----AGTAGTAGCGAGGGACTGAGAGGGGAAATGAAA---  
AACTGCTCTTTCAATATCACCACAACACTAAGA-----  
GACAAGATGCAGGAAGATTATGCACTT---TTTGATAACCTTGATATAGTACCAATAGATAAT-----  
-----  
-----  
GATAATACCAGCTATAGGTTGATAAATTGTAACACCTCAGTCATTACACAG---  
GCCTGTCCAAAGGTATCCTTTGAGCCAATTCCCATACATTTTTGTGCCCCGGCTGGTTTTGCGATTCTAAAGT  
GTAAT---GATAAGAAGTTCAAT-----GGAACAGGACCATGTAAAAAT-----  
-GTCAGC---ACAGTACAATGTACACATGGAATTAGGCCAGTAGTATCAACT---  
CAACTGCTGTTAAATGGCAGTCTAGCAGAAGAAGAG-----  
GTAGTAATTAGATCTGAAGATTTACGAACAAT-----GCTAAAACCATAATAATACAGCTGAAT---  
-----GAAACTGTAGAA-----ATTAATTGTACAAGACCCAACAACAATACAAGAAGA-----

-AGTATAAATATA-----GGACCAGGGAGAGCA---TTT-----TATGCAACAGGG-----  
 -----ATAATAGGGGATATA-----AGAGAAGCACATTGT---AACATTAGTGGAACA---  
 AAATGGAATAATACTTTAAACAGATAGCTCAAAAATTAAGA-----GAACAATTTGGG----  
 -----AATAAAACAATAGTCTTTAAC-----  
 CAATCCTTAGGAGGAGACCCAGAAATTGTA--ACGCACAGTTTTTAATTGTGCAGGGGAA---  
 TTTAAGCAGCTCCAGGCGAGAGTCCTAGCTGTGGAAAGATACCTAAAGGATCAACAGCTCCTGGGGATTTGGG  
 GTTGCTCTGGGAAACTCATTTCACCACTACTGTGCCTTGAATACTAGTTGGAGT-----  
 -----AATAAATCTCGGGATGAAATTTGG-----GAT-----  
 AACATGACCTGGATGCAGTGG---GAAAAAGAAATTAGCAATTACACAAGCCAAATATAC---  
 ACCTTAATTGGAGAATCGCAGATCCAACAAGAA-----  
 -----  
 AAGAATGAACAAGAATTATTGGAATTGGATAAATAGGCAAGTTTGTGGAATTGGTTTGACATAACACATTGGC  
 TGTGGTATATAAAAATATTTCATAATGATAGTAGGAGGCTTGGTAGGTTTAAGAATAGTTTTTTACT---  
 GTACTTTCTATAGTG-----AATAGAGTTAGGCAGGGATACTCACCA-----  
 TTATCGTTTCGCTGTTAGCTTGCTCAATGCCACAGCAATCGCAGTAGCTGAG---  
 GGGACAGATAGGGTTATAGAAGGATTACAAAGAGCTTATAGGGCT-----  
 -----ATTCTCCACATA-----CCTACAAGAATAAGACAGGGCTTGGAAAGGGCTTTGCTA---TAA  
 >MH012806  
 GCT---GCA-----  
 GACCAATTGTGGGTCACAGTCTATTATGGGGTACCTGTGTGG---AAAGAAGCTACC---  
 ACCACTCTATTTTGTGCATCAGATGCTAAGGCATATGATACAGAG---ATGCATAAT-----  
 -----GTTTGGGCCACA---CATGCTTGTGTACCCACAGAC---  
 CCCAGCCCACAAGAAATAGTATTGGAA-----AATGTGACAGAAAATTTTAAC-----  
 -----ATGTGGAAAAATAACATGGTAGAACAGATGCATGAGGATATA---  
 ATCAGTTTATGGGATCAAAGCCTA---AAGCCATGTGTAAAGTTA---  
 ACCCCACTCTGTGTCACTTTAAATTGCACCAATTTGAAGTTGAATGCTACTGATACCACTAGTAATAATACCA  
 AT-----  
 -----AGTATAGCAACAGAAATGAAA---  
 AACTGCTCTTTCAAGATCACCAAGCTTAAGA-----  
 GATAAGACACGAAAAGAATATGCACTT---TTTTATAAACTTGATGTAGTACCAATAGAAGGAAAT-----  
 -----  
 -----  
 GATAATACTAGCTATAGGTTGATAAGTTGTAACACCTCAGTCATTACACAG---  
 GCCTGTCCAAAGGTATCCTTTGAGCCAATTCCCATACATTATTGTACCCCGGCTGGTTTTGTGATCCTCAAGT  
 GTAAT---GATAAGAAGTTCAAT-----GGAACAGGAGCATGTAAAAAT-----  
 -GTCAGC---ACAGTACAATGTACACATGGAATTAGGCCAGTAGTATCAACT---  
 CAACTGCTGTTAAATGGCAGTCTAGCAGAAGATGAG-----  
 GTAGTAATTAGATCTGCCAATTTACGAACAAT-----GCTAAAATCATAATAGTACAGCTGAAT---  
 -----GAATCTGTAGAA-----ATTAATTGTACAAGACCCAACAACAATACAAGAAAA---  
 -AGTATAAGTATA-----GGACCAGGGAGAACA---TTT-----TTTACAACAGGACAA-----  
 -----ATAATAGGAGATATA-----AGACAAGCACATTGT---AACATTAGTAGTACA---  
 AAATGGAACAACACTTTAAGACTGATAGTTGGAAAATTAATA-----GAACAATTTGGG----  
 -----AATAAAACAATAGTCTTTAAT-----  
 CACTCCTCAGGAGGGGACCCAGAAATTGTA--ATGCACAGTTTTTAATTGTGGAGGAGAA---  
 TTTAAGCAGCTCCAGGCAAGAGTCCTGGCTGTGGAAAGATACCTAAAGGATCAACAGCTCCTGGGGATTTGGG  
 GTTGCTCTGGGAAACTCATTTCACCACTGCTGTGCCTTGAATACTAGTTGGAGT-----  
 -----AATAGATCTCTGGATCAGATTTGG-----AAT-----  
 AACATGACCTGGATGGAGTGG---GAAAGAGAAATTGATAATTACACAGAATTAATATAC---  
 ACTTTAATTGAAGGAGCGCAAAACCAGCAAGAA-----  
 -----  
 AAGAATGAACAAGAATTAATGGAATTAGATAAATGGGCAAGTCTGTGGAATTGGTTTGACATAACAAATTGGC  
 TGTGGTATATAAAAATGTTTCATAATGATAGTAGGAGGCTTGGTAGGTTTAAGAATAGTTTTTTACT---  
 GTACTTTCCCTAATA-----AATAGAGTTAGGCAGGGATACTCACCG-----  
 TTATCGTTTCGCTGTTAGCTTGCTCAATGTACAGCCATAGCAGTAGCTGAG---  
 AGGACAGATAGGGTTATAGAAGTATTACAAAGAGCTTTTAGAGCT-----  
 -----ATTCTCCATATA-----CCTAGAAGAATAAGACAGGGCTTGGAAAGGGCTTTGCTA---TAA  
 >MH012971  
 GCT---GCA-----  
 GAGCAATTGTGGGTCACAGTCTATTATGGGGTACCTGTGTGG---AAAGAAGCAACC---  
 ACCACTCTATTTTGTGCATCAGATGCTAAATCATATGATACAGAG---GTACATAAT-----

-----GTATGGGCCACA---CATGCTTGTGTACCCACAGAC---  
CCCAACCCACAAGAAGTAGTATTGGAA-----AATGTGACAGAAAATTTTAAC-----  
-----ATGTGGAAAAATAACATGGTAGAACAGATGCATGAGGATATA---  
ATTAGTTTATGGGATCAAAGCCTA---AAGCCTTGTGTAAAATTA---  
ACTCCACTCTGTGTTACTTTAAATTGCTCTGATGTGGAGAATCCTAAAGGGGGGAATACTACTAATACCACTA  
GTGGAAGGAAT-----  
-----AATACTAATACCAATAATAGTAGCGGAGAAATAATGGAGAAAGGAGAATTAAAA---  
AACTGTTCTTTCAATATCACCACAAACATAAGA-----  
GATAAGGTGCAAAGAGAATTTGCATAT---TTTTATAAACTTGATGTAGCACCAATAGATAAT-----  
-----  
-----  
ACTACTAACAATACTGAATATAGGTTGATAAGTTGTAACACCTCAGTCATTACACAG---  
GCCTGTCCAAAGGTATCCTTTGAGCCAATTCCCATACATTATTGTGCCCCGGCTGGTTTTGCGATTCTAAAGT  
GTAAT---GATAAGAAGTTCAAT-----GGAACAGGAACATGTACAAAT-----  
-GTCAGC---ACAGTACAATGCACACATGGAATTAGGCCAGTAGTATCAACT---  
CAGCTGCTGTTAAATGGCAGTCTAGCAGAAAAAGAG-----  
GTAGTAATTAGATCTGAAAATTTCAACAAACAAAT-----GTTAAAACCATAATAGTACAGCTAAAT---  
-----AAGTCTGTAGAA-----ATTAATTGTATAAGACCCAACAACAATACAAGGAAA-----  
-AGTATACCTATA-----GGACCAGGGAGAGCA---TTT-----TATGCAACAGGACAA-----  
-----ATAATAGGAGATATA-----AGACAAGCACATTGT---AACATTAGTAAAGCA---  
GAATGGAATAACACTTTAAGACAAGTAGCTGAAAAATTAAGA-----GAACAATTT-----  
-----AATAAAACAATAATCTTTGAT-----  
CAGTCCTCAGGAGGGGACCCAGAAATTGTA--ATGCACAGTTTTAATTGTGGAGGGGAA---  
TTTAAGCAGCTCCAGGCAAGAAATCCTGGCTGTGGAAAGATACCTAAGGGATCAACAGCTCCTGGGGATTTGGG  
GTTGCTCTGGAAAGCTCATCTGCACCACTGCTGTACCTTGGAAATGCTAGTTGGAGC-----  
-----AATAAATCTCTGAATGAGATTTGG-----GAT-----  
AACATGACCTGGATGGAGTGG---GAAAGAGAAATTGACAATTACACAGGCTTAATATAC---  
ACCTTAATTGAAGAATCGCAAAATCCAACAAGAA-----  
-----  
AAGAATGAACAAGAATTATTGAAATTAGATAAATGGACAAGTTTGTGGAATTGGTTTAACATAACAACTGGC  
TGTGGTATATAAAAAATATTGATAATGATAGTAGGAGGCTTGATAGGTTTAAGAATAGTTTTTTACT---  
GTATTTGCTATAGTG-----AATAGAGTTAGGCAGGGATACTACCA-----  
TTATCGTTTGTCTGTTAGCTTGCTCAACGCCACAGCAATAGCAGTAGCTGAG---  
GGAACAGATAGGGTTATAGAAATATTACAAAGAATTTTGTAGAGCT-----  
-----ATTCTCCACATA-----CCTACAAGAATAAGACAGGGCTTGGAAGGGCTTTGCAA---TAA  
>MH012542  
GCT---AAA-----  
GAAAAATTGTGGGTCACAGTCTATTATGGGGTACCTGTGTGG---AAAGAAGCAACC---  
ACCACTCTATTTTGTGCATCAGATGCTAAAGCATATGATACAGAG--GTACATAAT-----  
-----GTTTGGGCCACA---CATGCCTGTGTACCCACAGAC---  
CCCAACCCACAAGAAATAGTATTGAAA-----AATGTGACAGAAAATTTTAAC-----  
-----ATGTGGAAAAATAACATGGTAGAACAGATGCATGAGGATATA---  
ATCAGTTTATGGGATCAAAGCCTA---AAGCCATGTGTAAAATTA---  
ACTCCACTCTGTGTTACTTTAAATTGCACTGATTTGGGGAATGCTACTAATACCCATAGAAGT-----  
-----  
-----GAGGCTACCACTAGTAGTAGCAAGGGAACGATAGAGGAAGGAGAAATAAAA---  
AACTGCTCTTTCAATATCACCACAAACATAAGA-----  
GGTAAGGTGCAGACAGCATCTGCACTT---TTTTATAGACTTGATGTAGTACCAATAGAAAAT-----  
-----  
-----  
GAAAATACAAGCTATAGGTTGATAAGTTGTAACACCTCAGTCATTACACAG---  
GCCTGCCCAAAGGTATCCTTTGAGCCAATTCCCATACATTATTGTGCCCCGGCTGGTTTTGCGATTCTAAAGT  
GTA---GATAAGAAGTTCAAT-----GGAACAGGACCATGTACAAAT-----  
-GTCAGC---ACAGTACAATGTACACATGAAATTAACCAGTAGTATCAACT---  
CAACTGCTGTTAAATGGCAGTCTAGCAGAAAGAGG-----  
GTAGTAATTAGATCTGAGAATTTCAAGACAAT-----GCTAAAACCATAATAGTACAGCTGAAA---  
-----GAACATGTAGAA-----ATTAATTGTACAAGACCCAACAACAATACAAGAAAA-----  
-GATATACATATA-----GGACCAGGGAGAGCA---TTT-----CATGCAACAGGAGAA-----  
-----ATAATAGGAGATATA-----AGACAAGCACATTGT---AATATTAGTAAAGCA---  
AAATGGAATGACACTTTAGGACAGATAGTTACAAAATTAAGA-----GAACAATTTAAG---

-----AATAAAACAATAGTCTTTAAT-----  
 CACTCCTCAGGAGGGGACCTAGAAATTGTA--ATGCACAGTTTTTAATTGTGGAGGGGAA---  
 TTCAAGCAGCTCCAGGCAAGAGTCCTGGCTGTGGAAAGATACCTAAAGGATCAACAGCTCCTGGGGATTTGGG  
 GTTGCTCTGGAAACTCATTTGCACCACTGCTGTGCCTTGGAATGCTAGTTGGAGT-----  
 -----AATAAATCTCTGAATAACATTTGG-----GAT-----  
 AACATGACCTGGATGGAGTGG--GACAGAGAAATTAGCAATTACACAAACTCAATATAC---  
 AACTTAATTGAACAATCGCAGAACCAACAAGAA-----  
 -----  
 AAGAATGAACAAGAATTATTAGAGTTAGATAAATGGGACAGTTTGTGGAATTGGTTTAACATAACAAAGTGGC  
 TGTGGTATATAAAAAATATTCATAATGATAGTAGGAGGCTTGGTAGGTTTAAGAATAGTTTTTTACT---  
 GTACTTTCTATAGCG-----AATAGAGTTAGGCAGGGATACTCACCA-----  
 TTATCGTTTTGCTGTTAGCTTGCTCAACGCCACAGCCATAGCAGTAGCTGAA---  
 GGGACAGATAGGGTTATAGAACTAGTACAAAGAGCTTGTAGAGCT-----  
 -----ATTCTCCACATA-----CCTAGAAGAATAAGACAGGGTTTGGAAAGGGCTTTTGCTA---TAA  
 >AY835435  
 GCT---GCA-----  
 GACAAATTGTGGGTCACAGTCTATTATGGGGTACCTGTGTGG--AAAGAAACAACC---  
 ACCACTCTATTTTGTGCATCAGATGCTAGAGCATATGATACAGAG--GTGCATAAT-----  
 -----GTTTGGGCCACA--CATGCCTGTGTACCCACAGAC---  
 CCCAACCACACAAGAAGTAGTATTGGGA-----AATGTGACAGAAAATTTTAAC-----  
 -----ATGTGGAAAAATAACATGGTAGAACAGATGCATGAGGATATA---  
 ATCAGTTTATGGGATCAAAGCCTA--AAGCCATGTGTAAGACTA---  
 ACCCCACTCTGTGTTACTTTAAATTGCATTGATTATTATGGAAATACTACTAATAGCAAT-----  
 -----  
 -----AATAGTAGTGAGACAATGATGGAAAAAGGAGAAATAAAA---  
 AATTGCTCTTTCAATATCACCACAAGACTAAAA-----  
 GATAAGATGCAGAAAGAATATGCACCT--TTTTATAAATATGATATAGTACCAATAGATAATAGGGTAGGA-  
 -----  
 -----  
 AATGATACCAGTAATGCTACCAGCTATAGGTTAACAAGTTGTAACACCTCAGTCATTACCCAG---  
 GCCTGTCCAAAGGTATCCTTTGAGCCAATTCCCATACATTATTGTGCCCCGGCTGGTTTTGCGATTCTAAAGT  
 GTAAT--GATAAGAAGTTCAAT-----GGAACAGGACCTGTAAAAAT-----  
 -GTCAGC--ACAGTACAATGTACACATGGAATTAAGCCAGTAGTATCAACT---  
 CAACTGCTGTTAAATGGCAGTCTAGCAGAAGAAGAG-----  
 GTAATGATTAGATCTGAAAATTTACAGACAAT-----GCTAAAACCATAATAGTACAGCTGAAT---  
 -----GAAACTGTAGAA-----ATTAATTGTACAAGACCCAACAATAATACAAGAAAA-----  
 -AGTATACATATG-----GGACCAGGGAAAGTA--TTT-----TACACAACAGGAGAA-----  
 -----ATAATAGGAGATATA-----AGACAAGCACATTGT--AACATTAATAGAGCA---  
 AAATGGAATAACACTTTAATAAAGATAGTTGAAAAATTAAGA-----GTAAAATTT-----  
 -----AATAAAACAATAAGCTTTAAG-----  
 CAATCCTCAGGAGGGGACCCAGAAATTGAA--ATGCACAGTTTTTAATTGTGGAGGGGAA---  
 TTAAACAGCTCCAGGCAAGAGTCCTAGCTGTGGAAAGATACCTAAAGGATCAACAGCTCCTGGGGATTTGGG  
 GTTGCTCTGGAAACTCATCTGCACCACTGCTGTGCCTTGGAATGCTAGTTGGAGT-----  
 -----AATAAATCTCTGAATGAAATTTGG-----GAT-----  
 AACATGACCTGGATGGAGTGG--GAAAAAGAAATTGACAATTACACAAGCTTAATATAC---  
 ACCTTAATTGAAGAATCGCAAAACCAACAAGAA-----  
 -----  
 AAGAATGAACAAGAATTATTGGAATTAGATAAATGGGCAAGTTTGTGGAATTGGTTTAGCATAACAACTGGC  
 TGTGGTATATAAAAAATATTTATAATGATAGTAGGAGGCTCGATAGGTTTAAGAATAGTTTTTTGCT---  
 GTGCTTTCTATAGTG-----AACAGAGTTAGGCAGGGATACTCACCA-----  
 CTATCGTTTGCCATTAGCTTGCTCAATGCAACAGCCATAGCAGTAGCTGAG---  
 GGGACAGATAGAGTTATAGAAGTAGTACAAAGAACTTGTAGAGCT-----  
 -----ATTATCCACATA-----CCTAGAAGAATAAGACAGGGCTTGGAAAGGCTTTTGCTA---TAA  
 >AY331292  
 GCT---GAA-----  
 AAAGACTCGTGGGTCACAGTCTATTATGGGGTACCTGTGTGG--AAAGAAGCAATC---  
 ACCACTCTATTTTGTGCTTCAGATGCTAAAGCATATAAGACAGAG--GTACATAAT-----  
 -----GTTTGGGCCACA--CATGCCTGTGTACCCACAGAC---  
 CCCAACCACACAAGAAGTAGTATTGGCA-----AATGTGACAGAACATTTTAAT-----  
 -----ATATGGGAAAAATAACATGGTAGAACAAATGCATGAGGATATA---

ATCAGTTTATGGGATGAAAGCCTA---AAGCCATGTGTAAAATTA---  
 ACCCCACTCTGTGTTACTTTAAATTGCACTGACTATATTAATAACAGTACTGAAAGTAAG-----  
 -----  
 -----AAAACCAATGAAGGCTTGAACAGTACTATAGAAATGAAA---  
 AACTGCTCTTTCAAATAACACAGGCATGAGA-----  
 GATAAGATGCAGAAAGCATATGCACTT---  
 TTTTATAAGCTTGATATAGTACCAATAGATGATGATAATATTAAT-----  
 -----  
 AAGACTAGCACCAACCATAATTATACCAGCTATAGGTTAATAAGTTGTAACACCTCAGTCATTACACAG---  
 GCCTGTCCAAAGGTATCCTTTGAGCCCATTCCCATACATTTTTGTGCCCCGGCTGGTTTTGCGATTCTAAAGT  
 GTAAC---AACAAGAGTTACACA-----GGAAAAGGACCATGTACAAAT-----  
 -GTCAGC---ACAGTACAATGTACACATGGAATTAGGCCAGTAGTATCAACT---  
 CAACTGCTGTTAAATGGCAGTCTAGCAGAAGAAGAG-----  
 ATAGTRATTAGATCTGCCAATTTCTCTAACAAT-----GCTAAAACCATAATAGTACAGCTAAAT----  
 -----AAACTGTAGTA-----ATTAATTGTATAAGACCTAACAACAATACAAGAAAA-----  
 -AGTATACATATA-----GGACCAGGGAGAGCA---TTT-----TATGCAACAGGAGAA-----  
 -----ATAATAGGAGATATA-----AGACARGCACATTGT---ACCCTTAATGGAACA---  
 CAATGGAATAACACTTTAAGACAGATAGCTTTAAAATTTAAA-----GAACAATTTAAG----  
 -----GGTAAAACAATAGTCTTTAAT-----  
 CACTCCTCAGGAGGGGACCCAGAAATTGTA--AAGCACTCTTTTAATTGTGCAGGGGAA---  
 TTTAAGCAGCTCCAAGCAAGAGTCTTGGCTGTGGAAAGATACCTAAAGGATCAACAGCTCCTGGGGATTGGG  
 GTTGCTCTGGAAACTCATTTGCACCACTGATGTGCCTTGGAAATGATAGCTGGAGT-----  
 -----AATAAATCTCTGGATAAGATTTGG-----AAT-----  
 AACATGACCTGGATGCAGTGG---GAAAGAGAAATTGACAATTACACAGATGTAATATAC---  
 AACTTACTTGAAGAATTGCAAAACCAACAAGAA-----  
 -----  
 AAGAATGAACAAGAATTATTGCAATTAGATAAATGGGCAAGTTTGTGGACTTGGTTTGACATAACAAAATGGC  
 TGTGGTATATAAAAATAGTCATAATGATAATAGGAGGCTTAATAGGATTAAGAATAGTTTTTTGTT---  
 GTACTTTCTATAGTG-----AATAGAGTTAGGCAGGGATACTACCA-----  
 TTGTCGTTTGCTGTTAGCTTGCTTAATTCCACTGCCATAGTAGTAGCTGAG---  
 GGGACAGATAGGATTATAGAAGTAGTACTAAGAGCTTTTAGAGCT-----  
 -----GTTCTTCACATA-----CCTACAAGAATAAGACAGGGCTTAGAAAGGGCTTTGCTA--TAA  
 >EU289191  
 GCT---GAA-----  
 GAAGATACGTGGGTACAGTCTATTATGGGGTACCTGTGTGG--AAAGAAGCAACC---  
 ACCACTCTATTTTGTGCATCAGATGCTAAAGCATATGATACAGAG--GTACATAAT-----  
 -----GTTTGGGCTACA--CATGCCTGTGTACCCACAGAC--  
 CCCAACCCACAAGAAGTAGTATTGGGA-----AATGTGACAGAAAATTTTAAC-----  
 -----ATGTGGAAAAATAACATGGTAGAACAGATGCATGAGGATATA---  
 ATCAGTTTATGGGATCAAAGCCTA--AAGCCATGTGTGAAACTA---  
 ACTCCACTCTGTGTTACCTTAAATTGTACTGATTATTGGAATACTAATAACACCAATACTACTGCCAGTACTA  
 CTACT-----  
 -----ACCAGTACTCCTACTTCCAGTAATATAGGAGGAATGATGAAAAAGGGGAAATACAA---  
 CAATGCTCTTTCAATATTACCACAACCATAAAA-----  
 GATAAAGTGCAGAAAGAATATGCTCTT---  
 TTTTATAGAACAGATGTAGTACCAATAAATGATGATGTTAAAAAT-----  
 -----  
 AATAATAATGATAGTGTTAAGAATAGTACCAATATACCAACTATAGGTTGATAAATTGTAACACCTCAGTCA  
 TTACACAG---  
 GCCTGTCCAAAATAACCTTCGAGCCAATTCCCATACATTATTGTGCCCCGGCTGGTTTTGCGATTCTAAAGT  
 GTAAC---AATAAGACGTTTCGAG-----GGAAAAGGACCATGCACGAAT-----  
 -GTCAGC---ACAGTACAGTGTACACATGGAATTAGACCAGTAGTATCAACT---  
 CAACTGCTGTTAAATGGCAGTCTAGCAGAGGAAGAA-----  
 ATAGTAATTAGATCTGACAATTTCTCGAACAAT-----GCTAAAATCATAATAGTACAGTTGAAT----  
 -----GAATCTGTAGTG-----ATTGATTGTACAAGACCCAGCAACAATACAAGGAAA-----  
 -AGTATACATATG-----GGACCAGGGGGAGCA---TTT-----TATGCAACAGGGAGC-----  
 -----ATAATAGGAGATATA-----AGACAAGCACATTGT---AACATTAGTAGAGCA---  
 AAATGGAATGACACTTTAAATCAGATAGCTATAAAAATTAAGA-----AAACAATTTAAT----  
 -----AAAAACAATAATATTTAAG-----  
 CAATCCTCAGGAGGGGACCCAGAAATTGTA--ATGCACAGCTTTAATTGTGGAGGAGAA---

TTTAAGCAGCTCCAGGCAAGAGTCCTGGCTGTGGAAAGATACCTAAGAGATCAACAGCTCCTGGGAATTTGGG  
GTTGCTCTGGAAACTCATTTGCACCACTACTGTGCCTTGGGAATGCTAGCTGGAGT-----  
-----AATAGATCTATAGATCAAATTTGG-----GAT-----  
AACATGACCTGGATGCAATGG---GAAAACGAAATTAGCAACTACACTGACTTAATATAT---  
TCCTTAATTGAAAAATCGCAAAACCAACAGGAA-----  
-----  
CAGAATGAACAAGACTTATTGAAATTGGATGAATGGGCAAGTTTGTGGAATTGGTTTGACATATCAAAATGGC  
TGTGGTATATAAAAAATATTTCATAATGATAGTAGGAGGCTTGATAGGTTTAAGAATAATTTTTTACT---  
GTAGTTAATATAGTG-----TATAGAGCTAGGCAGGGATACTCACCA-----  
TTATCATTTGCTGTTAGTTTGTCTCAACGCCACAGCAGTAGCAGTAGCTGAG---  
GGAACAGATAGGGTTATAGAAGTAGTACAAAGATTCTGTAGAGGT-----  
-----GTTCTCCACATA-----CCTAGAAGAATAAGACAGGGCTTGGAAGGGCTTTACTA---TAA  
>KT124770  
GCT---GTA-----  
GATCAATTGTGGGTCACAGTTTATTATGGGGTACCTGTGTGG--AAAGAAGCAACT---  
ACCACTCTATTTTGTGCATCAGATGCTAAAGCATATGATACAGAG---GTACATAAT-----  
-----GTTTGGGCCACA---CATGCCTGTGTACCCACAGAC---  
CCCAACCCACAAGAAATAGTAATGGGA-----AATGTGACAGAAAATTTTAACT-----  
-----ATGTGGAAAAATGACATGGTAGAGCAGATGCATGAGGATATA---  
ATCAGTTTATGGGATCAAAGCCTA---AAGCCATGTGTAAAATTA---  
ACCCCACTCTGTGTCACTTTAAATTGCACTGCTGTTAATACCACTAGTGGTAACACTACTGATACCACTAGGG  
GTAATACTAGT-----  
-----ACCATCCCCACTACTAGTAGTCTTACTACTACCCCTGGTATTAGAGAGGACATGAAA---  
AACTGCTCTTTCAATATCACCAAGAGCCTAAGA-----  
GATAAAGTGCAAAGAGAATATGCATTA---CTTTATAAGCTTGATATAGCACCAATAGATAAT-----  
-----  
-----  
GATAATATTAGCTATAGATTGATAAGTTGTAACACCTCAAGCATTACACAG---  
GCCTGTCCAAAGGTATCCTTTGAGCCAATTCCCATACATTATTGTGCCCCAGCTGGTTTTGCGATTCTAAAGT  
GTAAT---AATAAGACGTTCAAT-----GGAAGTGGACCATGTACAAAT-----  
-GTTAGC---ACAGTACAATGTACTCATGGAATTAGGCCAGTAGTATCAACT---  
CAACTGCTGTTAAATGGCAGTCTAGCAGAAGAAGAG-----  
GTAGTAATTAGATCTGAAAATTTACAAACAAT-----GCTAAAACCATAATAGTACAGCTGAAT---  
-----GAACTGTAAAA-----ATTGAATGTATGAGACCCAGCAACAATACAAGAAAA-----  
-AGCATACATATA-----GGACCAGGGAGAGCA---TTT-----TATACAACAGGAGAT-----  
-----ATAATAGGAAATACA-----AGACAAGCACATTGT---AACGTTACTAGAACA---  
GAATGGAATAAGGCTTTAAACCGGATAGTTATAAAATTAGGA-----GAACAATTTGGA---  
-----AATAAAACAATAAAATTTTCAG-----  
CAACCCTCAGGAGGGGACCCAGAGATTGTA--ATGCACAGTTTTAATTGTGGAGGAGAA---  
TTTAAGCAGCTCCAGGCAAGAGTCCTGGCTGTGGAAAGATACCTAAAGGATCAACAGCTCATGGGGATTTGGG  
GCTGCTCTGGAAACTCATTTGCACCACTACTGTGCCTTGGAACTACTAGTTGGAGT-----  
-----AATAAATCTCTGAATCAGATTTGG-----GAT-----  
AACATGACTTGGATGGAGTGG---GAAAAAGAAATTGACAGTTACACAAATGAGATATAT---  
ATCTTACTTCAAGAATCGCAGATCCAACAAGAA-----  
-----  
AAGAATGAACAAGAATTATTGGCATTAGATAAGTGGGCAAGCTTGTGGAATTGGTTTGATATAACACATTGGC  
TGTGGTATATAAGAATATTTCATAATGATAGTAGGAGGCTTGATAGGTTTAAGAATAGTTTTTTGCT---  
GTACTTTCTATAGTG-----AAAAGGGTTAGGCAGGGATATTCACCA-----  
TTATCGTTTGTCTGTTAGCTTGCTCAATGCCACGGCCATAACAGTAGCTGAG---  
GGAACAGATAGGATTATAGAAGTAGCACAAAGAGCTTGGAGAGCT-----  
-----TTCTACACATA-----CCTAGAAGAATAAGACAGGGCTTGGAAGGGCTTTGCTA---TAA  
>EU575670  
GCT---ACA-----  
GAAAAATTTGTGGGTCACAGTCTATTATGGGGTACCTGTGTGG--AAAGAAGCAAACT---  
ACCACTCTGTTTTGTGCATCAGACGCTAAAGCATATGACACAGAG---GTACATAAT-----  
-----GTTTGGGCCACA---CATGCCTGTGTACCCACAGAC---  
CCCAACCCACAAGAAGTAGAATTAATA-----AATGTGACAGAAAATTTTAACT-----  
-----ATGTGGAAAAATCACATGGTAGAACAGATGCATGAGGATATA---  
ATCAGTTTATGGGATCAAAGCCTA---AAGCCATGTGTAAAATTA---  
ACCCCACTCTGTGTCACTTTAAATTGCACTGATTTGAAGAATAATACTCTTAATGTC-----

-----  
-----AATAGTAGTACCAAGGGAATAGGGGGAGAAATGACA---  
AACTGCTCTTTCAACATCACCACAAGCATAAGA-----  
GATAAGGTGACAAGAGAATATGCACTT---TTTTATAGAGTTGATGTAGTACCAATAGAAAAT-----  
-----  
-----  
GAAGATAATAGCTATAGGTTGATAAATTGTAACACCTCAGTCATTACACAA---  
GCCTGTCCAAAGACATCCTTTGAGCCAATTCCCATACATTATTGTGCCCCAGCTGGTTTTGCGATTCTAAAGT  
GTAGA---GATAATAAGTTCAAT-----GGAACAGGACCATGTACAAAT-----  
-GTTAGC---ACAGTACAATGTACACATGGAATTAAGCCAGTAGTATCAACT---  
CAACTGCTGTTAAATGGCAGTCTAGCAGAAGGAGAG-----  
GTAATGATAAGATCTGAAAATCTCACGAACAAT-----GCTAAAACCATAATAATACAGCTAAAA-----  
-----GAATCTGTAGAA-----ATTAATTGTACAAGACCCAACAACAATACAAGAAAA-----  
-AGTATACATATA-----GGACCAGGGAGAGCA---TTT-----TATGCAACAGGAGAA-----  
-----ATAATAGGAGATATA-----AGACAAGCACATTGT---AACATTAGTAGAAAA---  
AAGTGGAATGACACTTTAGCACAGATAGCTATAAAATTAGGA-----GAACAATTTAAA-----  
-----AATAAAACAATAGTATTTAAT-----  
CAATCCTCAGGAGGGGACCCAGAAATTGTA---CTGCATAGTTTTAATTGTGGAGGGGAA---  
TTTAAGCAGCTCCAGGCAAGAGTCCTGGCTGTGGAAAGATACCTAAAGGATCAACAGCTACTAGGGATTTGGG  
GCTGCTCTGGAAACTCATTTGCACCACTACTGTACCTTGAATACTAGTTGGAGT-----  
-----AATAAAAATCTGAGCACGATTTGG-----GAA-----  
AGCATGACCTGGATGGATTGG---GAAAGAGAAATTGACAAATTACACAGGCTTAATATAT---  
TCCTTAATTGAAGAATCGCAAAACCAACAAGAA-----  
-----  
AAGAATGAACAAGAATTATTGGCATTAGATAAATGGGCAAGTTTGTGGAATTGGTTTGACATAACAAATTGGC  
TGTGGTATATAAGAATATTCATAATGATAGTAGGAGGCTTGGTAGGTTTAAGAATAGTTCTTTCT---  
GTAATTGCTATAGTG-----AATAGAGTTAGGAAGGGATACTCACCA-----  
TTATCGTTCGCTGTTAGCTTGTTCAATGCCATAGCAGTAGCAGTAGCTGAG---  
GGAACAGATAGGGTTATAGGAGTAGTACAAAGAATTATTAGAGGT-----  
-----ATTATCCACATA-----CCTAGAAGGATAAGACAGGGCTTTGAAAGAGCTTTGCT-----  
>EU575927  
ACA---GAA-----  
AAATTGTGGGTCACAGTCTATTATGGGGTACCTGTGTGG---AAAGAAGCAACC---  
ACCACTTTATTTTGTGCATCAGATGCTAAAGGATATGATACAGAG---GTACATAAT-----  
-----GTTTGGGCCACA---CATGCCTGTGTACCCACAGAC---  
CCCAACCCACAAGAAGTAGTATTGGGA-----AATGTGACAGAAACTTTAAC-----  
-----ATGTGGAAAAATAACATGGTAGACCAGATGCATGAAGATATA---  
ATCAGTTTATGGGATCAAAGCCTA---AAACCATGTGTAAAATTA---  
ACTCCACTCTGTGTTACTTTAGATTGCACTGATGCTAATAGTACTAGTAATGCAACCCAGGGCAATGGGACT-  
-----  
-----ACTAAGGCCCTGATAGTAGCTGGGGAGAGATAGAGAGAGGAGAGATAAAA---  
AACTGCTCTTTCAATATCACCACAAGCATAAGA-----  
GATAAGGTGCAGAAAGAACATGCAAAAT---TTTTATAAACTTGATTTAGTATCAATAGGTAAT-----  
-----  
-----  
TCTAATACTAGCACTAGCTATAGGTTGATAAGTTGTAACACCTCAGTCATTACACAA---  
GCCTGTCCAAAGGTATCCTTTGAGCCAATTCCCTATACATTATTGTGCCCCGGCTGGTTATGCGATTCTAAAAT  
GTAAT---ATAAGACATTCAAT-----GGATCAGGACCATGTACAAAT-----  
-GTTAGC---ACAGTACAATGTACACATGGAATAAGGCCAGTAGTATCAACT---  
CAACTGCTGTTAAATGGCAGTCTAGCAGAAGAAGAT-----  
GTAATAATTAGATCTGCCAATTCTCAGACAAT-----ACTAAGACAATAATAGTTTCACTGAAT-----  
-----GAATCTGTAACA-----ATTAATTGTACAAGACTCGGCAACAATACAAGAAAA-----  
-AGCATACCTATA-----GGACCAGGGAGAGCA---TTT-----TATACAACA---GAC-----  
-----ATAATAGGAGACATA-----AGAAAAGCACATTGT---AACATTAGTAGAACA---  
CAATGGAATAACACTTTAGAACAGGTAGTTATAAAATTAGGA-----GAACAATATAAG-----  
-----AATAAAACAATAGTCTTTAAT-----  
CACTCCTCAGGAGGGGACCCAGAAATTGTA---ATGCACAGTTTTAATTGTGGAGGGGAA---  
TTTAAGCAGCTCCAGGCAAGACTCCTAGCTGTGGAAAGATACCTAAAGGATCAACAGCTCCTGGGGATTTGGG  
GATGCTCTGGAAAGCTCATTTGCACCACTGCTGTGCCTTGAATAAATAGTTGGAGT-----  
-----AATAAATCTCTAGATGATATTTGG-----GAT-----

CACATGACCTGGATGGAGTGG---GACAGAGAAATTAACAATTACACAAGTTTAATATAC---  
ACCTTAATTGAAGAATCGCAGCACCAGCAGGAA-----  
-----  
AAGAATGAAAAAGAATTATTAGAAATTGGATAAAATGGACAAGTTTGTGGAATTGGTTTACCATAACAACTGGC  
TGTGGTATGTAAAAATATTCATAATGATAGTAGGAGGCTTGGTAGGTTTAAGAATAGTTTTTTGCT---  
GTACTTTCTATAGTG-----AATAGAGTTAGGCAGGGATACTCACCA-----  
TTATCGTTTGCTGTTAGCTTGTTTAACGCCACAGCCATAGCAGTAGCTGAG---  
GGAACAGATAGAATTATAGAAATAGTGCAAAGAGCTTTTAGGGCT-----  
-----ATTCTCCACATA-----CCTAGAAGAATAAGACAGGGCTTTGAAAGGGCTTTACTA---TAA  
>AY835442  
GCT---GAA-----  
GACAAATTTGTGGGTCACAGTCTATTATGGGGTACCTGTGTGG--AAGGAAGCAACC---  
ACCACTCTATTTTGTGCATCAGATGCTAAAGCATATGATACAGAA--AAGCATAAT-----  
-----GTTTGGGCCACA---CATGCCTGTGTACCCACAGAC---  
CCCAACCCACAAGAAATAGTATTGAAA-----AATGTGACAGAAAATTTTAACT-----  
-----ATGTGGAAAAATAACATGGTAGAACAGATGCATGAGGATATA---  
ATCAGTTTATGGGATCAAAGCCTA--AAGCCATGTGTAAAATTA---  
ACCCCACTCTGTGTTACTCTAAATTGTACTGATTATTTTGGAAATACTACC-----  
-----  
-----AATAATAGTAGCAGGGAAGCGATGATGAAA---  
AAATGCTCTTTCAATATCACCACAAATATAAGA-----  
GATAAGGGGCAGAAAGAATATGCTCTT--TTTTATAAACTGATGTAGTGCCAATAGATAAT-----  
-----  
-----  
GATAATACCAGCTATAGGATGATAAGTTGTAACACCTCAGTCATTACACAG---  
GCCTGTCCAAAGATATCCTTTGAACCAATTCCCATACATTTTTGTGCCCGGCTGGTTTTGCGATTCTAAAAT  
GTTTT--AATAAGACATTCAAT-----GGAACAGGACCATGTACAAAT-----  
-GTCAGC--ACAGTACAATGTACACATGGAATTAGACCAGTAGTATCAACT---  
CAACTGCTGTTAAATGGCAGTTTGGCAGAAGAAGAG-----  
GTAGTAATTAGATCTGAAAATCTCACAGACAAT-----ACTAAAATCATAATAGTACAGCTGAAC---  
-----AAATCTGTAGTA-----ATTAATTGTACAAGACCCAACAACAATACAAGAAAA---  
-AGTATACATATA-----GGACCAGGGAGAGCA--TTT-----TATGCAACAGGAGGA-----  
-----GTAATAGGAGATATA-----AGACAAGCACATTGT--AACATTAGTAGAAAA---  
GACTGGTATGAAGCTTTACAACAGATAGCTATCAAATTAAGA-----GAGCAATTTGAG---  
-----AATAGAACAATAGCCTTTAAT-----  
CGATCCTCGGGAGGAGATCCAGAAATTGTA--ACACACAGTTTTAATTGTGCAGGGGAA---  
TTTAAGCAGCTCCAGGCAAGAGTCCCTGGCTCTGGAAAGATACCTAAGGGATCAACAGCTCCTGGGAATTTGGG  
GTTGCTCTGGAAAACCTCATTGCAACCACTTCTGTGCCTTGGAACTACTAGTTGGAGT-----  
-----AATAAATCCTATAAAGAGATATGG-----GAG-----  
AACATGACCTGGATACAATGG--GAAAGAGAAATTGACAATTACACAGGCATAATATAT---  
GAATTAATTGAAGAATCGCAGAACCAGCAAGAA-----  
-----  
AAGAATGAACAAGAATTATTGGAATTGGATAAAATGGGAAAATTTGTGGAATTGGTTTAGCATAACAAATTGGC  
TGTGGTATATAAAAATATTTATAATGGTAGTAGGAGGCTTGGTAGGTTTAAGAATAGTTTTTTTCT---  
GTACTTTCTATAGTG-----AAGAGAGTTAGGCAGGGATACTCACCC-----  
TTATCGTTTGCTGTTAGCTTGCTCAATGCCACAGCAATAACAGTAGCTGAG---  
GGGACAGATAGGATTTTAGAACTATTACAAAGAGTTTGTAGAGCT-----  
-----ATTGCCCACATA-----CCTAGAAGAATAAGACAGGGCTTGGAAAGGATTTTGCTA---TAA  
>DQ853463  
GCT---GCA-----  
GAAAACTTGTGGGTAACAGTCTATTATGGGGTACCTGTGTGG--AAAGAAGCAACC---  
ACTACTCTATTTTGTGCATCAGATGCTAAAGCTTATGAGACAGAG--GTACATAAT-----  
-----GTTTGGGCCACA---CATGCCTGTGTACCCACAGAC---  
CCCAACCCACAAGAGATAGTATTGGAG-----AATGTGACAGAAAATTTTAACT-----  
-----ATGTGGAAAAATAACATGGTAGAACAAATGCATGAAGATATA---  
ATCAGTTTATGGGATCAAAGCCTA--AAACCATGTGTAAAATTA---  
ACCCCACTCTGTGTTACTTTAAATTGTACTGATTATTTGGGGAATACTACTAAAACCAATACTACTAGTGCCC  
CT-----  
-----ACTACTAGTACCCTACTACTAATAACCCTAATAATAAGGGGAATTTAAAA---  
AACTGCTCTTTCCAGGTCACCACAGGCATAGGA-----

GATAGAACAAAGAAAGAATATGCACTT---TTTTATAAGCATGATGTAGTACCAATAGATAATGATAAT-----  
-----  
-----  
AATAAGACTAATAATAGTAACTTTATATTAATACATTGTAATAGCTCAGTCATTACACAG---  
GCTTGTCCAAAGGTGTCTTTGAGCCAATCCCATACATTATTGTGCCCCGGCTGGTTTCGCGATTCTAAAGT  
GTAAA---GATAAGAAGTTCAAT-----GGAACAGGACCATGCAAAAAT-----  
-GTCAGC---ACAGTACAATGTACACATGGAATTAGGCCAGTAGTGTCAACT---  
CAACTGCTGTTGAATGGCAGTCTAGCAGAAGAAGAG-----  
ATAGTAATTAGATCACAAAATTTTACGGACAAT-----GTTAAATCCATAATAGTACAGCTGAAT-----  
-----GAAACTGTAAAA-----ATTAATTGTACAAGACCCAACAACAATACAAGAAAA-----  
-GCTATACGTATA-----GGACGAGGGGAGAGCA---ATT-----TATGCAACAGATAGA-----  
-----ATAATAGGAGATATA-----AGACAAGCATATTGT---AACATTAGTAGAACA---  
AAATGGAATGACACTTTAGGCCAGATAGCTACAAAATTAAGA-----GAACAATTTGGG-----  
-----AACAAAACAATAGTCTTTAAT-----  
TCATCCTCAGGAGGGGACCCAGAAATTGTT---ATGCACAGTTTTAATTGTGGAGGGGAA---  
TTTAAGCAGCTCCAGGCAAGAATCCTGGCTGTGGAAAGATACCTAAGGGATCAACAGCTCCTGGGGATTG  
GTTGCTCTGGAAACTCATCTGCCCCACTGCTGTGCCTTGGAATGCTAGTTGGAGT-----  
-----AATAAATCTCTAGAAGAAATTTGG-----GAG-----  
AACATGACCTGGAGGGAGTGG---GAAAGAGAAATTGACAAATTACACAGGCAAAATATAT---  
GACCTACTTGCAAAATCGCAGAACCAGCGAGAA-----  
-----  
ATGAATGAACAAGAATTATTAATAATAGATAAATGGGCAGATTTGTGGAATTGGTTTGACATAACACAATGGC  
TGTGGTATATAAAAATATTTATAATGATAGTAGGAGGCTTGATAGGTTTAAGAATAATTTTTTGCT---  
GTAATTTCTATAGTG-----AATAGAGTTAGGCAGGGATACTCACCA-----  
TTGTCAATTGGCCATTAATTTGCTCAACACCACAGCTATAGTAGTAGCTGAG---  
GGGACAGATAGGGTTATAGAAGTAGTGCTAAGAGCTTATAGAGCT-----  
-----ATTCTCCACATA-----CCTAGAAGAATAAGACAGGGCTTGGAAGGCTTTTGCTA---TAA  
>KT124769  
GCT---GTA-----  
GAACAAACGTGGGTACAGTCTATTATGGGGTACCTGTGTGG---AAAGATGCAAAAC---  
ACCACTCTATTTTGTGCATCAGATGCTAAAGCATATGATACAGAG---GTACATAAT-----  
-----GTTTGGGCCACA---CATGCCTGTGTACCCACAGAC---  
CCCAACCCACAAGAAGTAGAATTGGCA-----AATGTGACAGAAAATTTTAAC-----  
-----ATGTGGAAAAACAACATGGTAGATCAGATGCATGAGGATATA---  
ATCAGTTTATGGGATCAAAGCCTA---AAGCCATGTGTAAAATTA---  
ACTCCACTCTGTGTTACTCTAAATTGCACTGATAATGTGGGGAATAATACTAGTACCAAT-----  
-----  
-----AATAGTAGATGGGATAAAATGGAAAAAGGAGAAATAAAG---  
AACTGCTCTTTCAATATCACCACAAACATGAGA-----  
GATAAGATGCAGAAACAATATGCACTT---TTTTATAAACTTGATGTAGTACCAATAAAGGAAGATGAG---  
-----  
-----  
AATAATACCAGTAATTATACCGACTATAGGTTGATAAGTTGTAACACCTCAGTCATTACACAG---  
GCCTGTCCAAAGGTAACCTTTGAGCCAATTCCCATACATTATTGTGCCCCAGCTGGTTTTGCGCTTCTAAAAT  
GTAAG---GATAAGAAATTCAAT-----GGAACAGGACCATGTAAAAAT-----  
-GTTAGC---ACAGTACAATGTACACATGGAATTAAGCCAGTAGTATCAACT---  
CAGCTGCTACTAAATGGCAGTCTAGCAGAAGAAGAG-----  
GTAGTAATAAGATCTGAGAATTTCTCGAACAAT-----GCTAGAACCATAATAGTACAGCTGAAT-----  
-----ACATCTGTAGAA-----ATAAAGTGTATAAGACCCAACAACAATACAAGAAAA-----  
-GGTATACATATA-----GGACCAGGGGAGAGCA---TTT-----TATACAACAGGAGAT-----  
-----ATAATAGGAGATATA-----AGACAAGCACATTGT---AACATTAGTAGACAA---  
AATTGGACTGACACTTTAAACAGATAGCTGAAAAGTTAAGA-----GAACAATTTGGG-----  
-----AAAAAACAATAGTCTTTAGT-----  
AACTCCTCAGGAGGGGATCCAGAAATTGTA---ATGCACACTTTTAATTGTGCAGGGGAA---  
TTTAAGCAGCTCCAGGCAAGAGTCTGGCTGTGGAAAGATACCTACGGGATCAACAGCTCCTGGGGATTG  
GTTGCTCTGGAAACTCATCTGCACCCTGCTGTGCCTTGGAATGTTAGTTGGAAT-----  
-----AATAGATCTGTGGATGACATTTGG-----GAA-----  
AACATGACCTGGATGCAGTGG---GATAGAGAAATCAGTAATTACACAAGTTTAATATAC---  
ACCTTAATTGAAGAATCGCAAAACCAACAAGAA-----  
-----

AAGAATGAACAAGAATTATTGGCATTAGATAAAATGGGCAGATTTTGTGGAATTGGTTCAGCATAACAAAATGGC  
 TGTGGTATATAAAAATATTTCATAATGATAGTAGGAGGCTTGGTAGGTTTAAGAATAGTTTTTTGCT---  
 GTGCTTTCTATAGTG-----AATAGAGTTAGGCAGGGATACTCACCA-----  
 TTATCGTTTGTCTGTTAGCTTGCTCAACGCCATAGCCATAGCAGTAGGTGAG---  
 GGGACAGATAGGATTATAGAAGCATTTAGAAGAATTTTATAGAGCT-----  
 -----ATTCTCCACATA-----CCTACAAGAATAAGACAGGGCTTGGAAGGGCTTTGCTA---TAA  
 >EU289196  
 GCT---GCA-----  
 GAAAACTTGTGGGTCACAGTCTATTATGGGGTACCTGTGTGG---AAAGAAGCAACC---  
 ACCACTCTATTTTGTGCATCAGATGCTAAAGCATATGATACAGAG---GTACACAAT-----  
 -----GTTTGGGCCACA---CATGCCTGTGTACCCACAGAC---  
 CCCAACCCACAAGAAATGGTATTAGAA-----AATGTGACAGAATATTTTAAAC-----  
 -----ATGTGGAAAAATAACATGGTAGAACAGATGCATGAGGATATA---  
 ATCAGTTTATGGGATCAAAGCCTA---AAGCCATGTGTAAAATTA---  
 ACCCCACTCTGTGTTACTTTAACTTGCACTGATTATGAATGGAATTGTACTGGTATCAGAAATAGTATCTGTA  
 AATATAAT-----  
 ---AATATGACTAATAATAGTAGCTCAGGGAATTATACTGGATGGGAAAGGGGAGAAATAAAA---  
 AACTGCTCTTTCAATAGCACCATCTCGGGCATA-----  
 AGAGATAAGGTGCGGAAAGAGTATGCACCT---TTGTATAAAATAGATCTAGTATCAATAGATGGA-----  
 -----  
 -----  
 AGTAATACAAGCTATAGGATGATAAGTTGTAACACCTCAGTCATTACTCAG---  
 TCCTGTCCAAAGATATCCTTCGAGCCAATTCCCTTACATTATTGTACCCCGGCTGGTTTTGCGCTTCTAAAGT  
 GTAAT---GATAAGAAGTTCAAT-----GGAACAGGGCTATGTCACAAT-----  
 -GTCAGC---ACAGTACAATGTACACATGGAATTAAGCCAGTAGTATCAACT---  
 CAACTACTGTTAAATGGCAGCCTAGCAGAAGAAGAG-----  
 GTAGTAATCAGATCTAAAAATTTACCGGACAAT-----GCTAAAATCATAATAGTACAGCTAAAT-----  
 -----GAAACTGTAGAA-----ATTAATTGTACAAGACCCGGCAACAACACAAGAAAA-----  
 -AGTATACATATA-----GCACCAGGGAGAACA---TTC-----TATGCAACAGGAGAA-----  
 -----ATAATAGGAGATATA-----AGACGAGCACATTGT---AACATTAGTAGAGAA---  
 AAATGGAATACCACTTTACATAGGATAGCTACAAAATTAAGA-----GAACAATAT-----  
 -----AATAAAACAATAGTCTTTAAT-----  
 CAATCCTCAGGAGGGGACCCAGAAATTGTA--ATGCACAGTGTCAATTGTGGAGGGGAA---  
 TTTAAGCAGCTCCAGGCAAGAGTCCCTGGCTCTGGAAAGATACCTAAGGGATCAACAGCTCATGGGGATTTGGG  
 GTTGCTCTGGAAACTCATTTGCACCACTGCTGTGCCTTGGAATGCTAGTTGGAGT-----  
 -----AATAAATCTCTGAATGATATTTGG-----AAT-----  
 AACATGACCTGGATGCAATGG---GAAAGAGAAATTGACAATTACACAGGACTAATATAC---  
 AGCTTACTTGAGGAATCGCAAAACCAACAAGAA-----  
 -----  
 AAGAATGAACAAGATTTATTGGCATTAGATAAAATGGGCAAATTTGTGGACTTGGTTTGATATATCAAATTGGC  
 TGTGGTATATAAAAATATTTCATAATGATAGTAGGAGGCTTGGTAGGTTTAAGAATAGTTTGTACT---  
 GTATTTTCTATAGTG-----AATAGAGTTAGGCAGGGATACTCACCA-----  
 CTATCGTTGGCTATTAGCTTGCTCAATGCCACAGCCATAGCAGTAGCTGAG---  
 GGGACAGATAGGATTATAGAAGTATTACAAAGACTTTTATAGAGCT-----  
 -----TTTCTCAACATA-----CCTAGAAGAATAAGACAGGGCTTAGAAAGGGCTCTTCTA---TAA  
 >EU576141  
 GCT---GCA-----AAAAAG---  
 TGGGTCACAGTCTATTATGGGGTACCTGTGTGG---AAAGAAGCAACC---  
 ACCACTCTATTTTGTGCATCAGATGCTAAAGCATATGATACAGAG---GTACATAAT-----  
 -----GTTTGGGCCACA---CATGCCTGTGTACCCACAGAC---  
 CCTAACCCACAAGAAATAGTATTGGGA-----AATGTGACAGAAAATTTTAAAC-----  
 -----ATGTGGAAAAATAACATGGTAGAACAGATGCATGAGGATATA---  
 ATCAGTTTATGGGATCAAAGCCTA---AAGCCATGTGTAAAATTA---  
 ACCCCACTCTGTGTTACTCTAAATTGTAATAATGTTAATACTAATAATACCAATAATAGTACTAAC-----  
 -----  
 -----GCCACTATTAGTGAAGTGGGAAAAGATGGAGACAGGAGAAATGAAA---  
 AATTGCTCTTTCAATGTCAACCACAAGCATAAGA-----  
 GATAAGATAAAAAAAGGAATATGCACCT---  
 GTTTTATAAGCTTGATGTAGTACCCTAGAAAATAAAAAATAATAT-----  
 -----TAATAATACT--

AATATTACTAACTATAGGTTGATAAATTGTAACACCTCAGTCATTACACAG---  
GCCTGTCCAAAGGTATCCTTTGAACCAATTCCCATACATTATTGTGCCCCGGCTGGTTTTGCGATTCTAAAAT  
GTAAC---AGTAAGACATTCAAT-----GGATCAGGACCATGTACAAAT-----  
-GTCAGT---ACAGTACAATGCACACATGGAATCAGGCCAGTGGTATCAACT---  
CAACTGCTGTTAAATGGCAGTTTAGCAGAAGAAGAG-----  
ATAGTTATTAGATCTGAAAATATCACAGACAAT-----GCTAAAACCATAATAGTACAGCTGAAT----  
-----GAAGCTGTAGAA-----ATTAATTGTACAAGACCCAACAACAATACAAGAAAA-----  
-AGTATACATATA-----GGGCCAGGGAGAGCA---TTT-----TATGCAACAGGAGAT-----  
-----ATAATAGGAAATATA-----AGACAAGCACATTGT---AACATTAGTAAAGCA---  
AGATGGAATGAACTTTAGGACAGATAGTTGCAAAATTAGAG-----GAACAATTTCCA----  
-----AATAAAACAATAATCTTTAAT-----  
CATTCCCTCAGGAGGGGACCCAGAAATTGTG---ACACACAGTTTTAATTGTGGAGGAGAA---  
TTTAAACAGCTCCAGGCAAGAGTCCTGGCTGTGGAAAGATACCTAAGGGATCAACAGCTCCTGGGAATTTGGG  
GTTGCTCTGGAAAATCATTTGCACCACATAATGTGCCTTGGAATGATAGTTGGAGT-----  
-----AATAAACTATAAATGAAATTTGG-----GAC-----  
AACATGACTTGGATGCAGTGG---GAAAAAGAAATTGACAAATTACACACAACACATATAC---  
ACCTTACTTGAAGTATCGCAAAATCCAGCAAGAA-----  
-----  
AAGAATGAACAAGAATTATTGGAATTGGATAAATGGGATAGTTTGTGGAATTGGTTCAGCATATCAAATTGGC  
TGTGGTATATAAAAATATTTCATAATGATAGTAGGAGGCTTGATAGGTTTAAGAATAGTTTTTTACT---  
GTGCTTTCTATAATA-----AGTAGAGTTAGGCAGGGATACTCACCA-----  
TTATCGTTTGTCTGTTAGCTTGCTCAACGCCACAGCCATAGCAGTAGCTGAG---  
GGAACAGATAGGGTTATAGAAGTAGTACAAAGGATTGTTAGGGGT-----  
-----ATCCTTCACATA-----CCTACAAGAATAAGACAGGGCTTGGAAGGGCTTTGCTA---TAA  
>AY835446  
GCT---GTA-----  
GAACAAACGTGGGTACAGTCTATTATGGGGTACCTGTGTGG---AAAGAAGCAAAAC---  
ACCACTTTATTTTGTGCATCAGATGCTAAAGCATATAATACAGAG---GTACATAAT-----  
-----GTTTGGGCCACA---CATGCCTGTGTACCCACAGAC---  
CCCAACCCACAAGAAGTAGAATTGGAA-----AATGTGACAGAAAATTTTAAC-----  
-----ATGTGGAAAAACAACATGGTAGATCAGATGCATGAGGATATA---  
ATCAGTTTATGGGATCAAAGCCTA---AAGCCATGTGTAAAATTA---  
ACTCCACTCTGTGTTACTTTAAGTTGCACTGATAATGTGGGAAATGATACTAGTACCAAT-----  
-----  
-----AATAGTAGATGGGATAAAATGGAAAAAGGAGAAATAAAG---  
AACTGCTCTTTCAATATCACCACAAACATGAGA-----  
GATAAGATGCAGAAACAATATGCACTT---TTTTATAAACTTGATGTAGTACCAATAGAGGAAGGTAAG---  
-----  
AATAATAACAGTAGTTTTTACCGACTATAGGTTGATAAGTTGTAACACCTCAGTCATTACACAG---  
GCCTGTCCAAAGGTAACCTTTGAGCCAATTCCCATACATTATTGTGCCCCAGCTGGTTTTGCGCTTCTAAAAT  
GTAAG---GATAAGAAATTCAAT-----GGAACAGGACCATGTAAAAAT-----  
-GTTAGC---ACAGTACAATGTACACATGGAATTAAGCCAGTAGTATCAACT---  
CAGCTGCTATTAAATGGCAGTCTAGCAGAAGAAGAG-----  
GTAGTAATAAGATCTGAGAATTTCTCGAACAAT-----GCTAGAACCATAATAGTACAGCTGAAT----  
-----ACATCTGTAGAA-----ATAAAGTGTATAAGACCCAACAACAATACAAGAAAA-----  
-GGTATACATATA-----GGACCAGGGAGAGCA---TTT-----TATACAACAGGAGAT-----  
-----ATAATAGGAGATATA-----AGACAAGCACATTGT---AACATTAGTAGACAA---  
AATTGGAATAACACTTTAAACAGATAGCTGAAAAGTTAAGA-----GAACAATTTGGG----  
-----AATAAAACAATAGTCTTTAGA-----  
AACTCCTCTGGAGGGGATCCAGAAATTGTA---ATGCACACTTTTAATTGTGCAGGGGAA---  
TTTAAGCAGCTCCAGGCAAGAGTCCTGGCTGTGGAAAGATACCTACGTGATCAACAGCTCCTGGGAATTTGGG  
GTTGCTCTGGAAAACATCTGCACCACCTGCTGTGCCTTGGAATGTTAGTTGGAAT-----  
-----AATAGATCTGTGGATGACATTTGG-----GAA-----  
AACATGACCTGGATGCAGTGG---GATAGAGAAATTAGTAATTACACAAGTTTAATATAC---  
ACCTTAATTGAAGAATCGCAGAATCAGCAAGAA-----  
-----  
AAGAATGAACAAGAATTATTGGCATTAGATAAATGGGCAAATTTGTGGAATTGGTTCACATAACAGAATGGC  
TGTGGTATATAAAAATATTTCATAATGATAGTAGGAGGCTTGGTAGGTTTAAGAATAGTTTTTTGCT---  
GTGCTTTCTATAGTG-----AATAGAGTTAGGCAGGGATACTCACCA-----

TTATCGTTTGTGCTGTTAGCTTGCTCAACGCCATAGCCATAGCAGTAGGTGAG---  
 GGGAAAGATAGGATTATAGAAGCATTTTAGAAGCATTTTTAGAGCT-----  
 -----ATTCTCCACATA-----CCTACAAGAATAAGACAGGGCTTGGAAGGTCTTTGCTA---TAA  
 >EF593282  
 GCT---ACA-----  
 GAAAAATTGTGGGTCACAGTCTATTATGGGGTACCTGTGTGG--AAAGAAGCAACC---  
 ACCACTCTATTTTGTGCATCAGATGCTAAAGCATATGATACAGAG--GTACATAAT-----  
 -----GTTTGGGCCACA---CATGCCTGTGTACCCACAGAC---  
 CCCAACCCACAAGAAGTGTATTGGGA-----AATGTGACAGAGAATTTTAAC-----  
 -----ATGTGGAAAAATAACATGGTAGAACAGATGCATGAAGATATA---  
 ATTAGTTTATGGGATCAAAGCCTA--AAGCCATGTGTAAAATTA---  
 ACCCCACTCTGTGTTACCTTACATTGCACTAATGCTAATACCACTGGTACTAATAGC-----  
 -----  
 -----ACTAGTGGTAGCGGGATGGAGAGTGAAATAAAA---  
 AACTGCTCTTTCAATGTCAACCACACCATAAGA-----  
 GATAAGGTGCAGAAAGAATTTGCATTA--TTTTATAAACTTGATGTAGTACCAATAGATAATGGTAATAAT-  
 -----  
 -----  
 AGTAATGGTAATACTAGTGCTAGATATAGGTTAATAAGTTGTAACACCTCAATTATTACACAG---  
 GCCTGTCCAAAGGTAACCTTTGAGCCAATTCCCATACATTATTGTGCCCCGGCTGGTTTTGCGATTCTAAAGT  
 GTAAT---GATAAGAAGTTCAAT-----GGAACAGGACCATGTAAAAAT-----  
 -GTCAGC--ACAGTACAATGTACGCATGGTATTAAGCCAGTAGTATCAACT---  
 CAACTGCTGTTAAATGGCAGTCTAGCAGAAAAAGAG-----  
 GTAGTAATTAGATCTAGAAATTTCTCAAACAAT-----GCTAATATCATAATAGTACAGCTGAAT----  
 -----GAACCTGTAAAA-----ATGAATTGTACAAGACCCAACAACAATACAAGAAAA-----  
 -AGTATACATATA-----GGACCAGGGAGAGCA--TTT-----TATGCAACAGGAGAA-----  
 -----ATAATGGGAGATATA-----AGGCAAGCACATTGT--AACATTAGTAGAGCA---  
 GAATGGAATAAACTTTAGAAAAGGTAGTTGAAAAATTAAGA-----GAACAATTTAAG----  
 -----AATAAAACAATAGCCTTTAAT-----  
 CCATCCTCAGGAGGGGACCCAGAAATTGTA--ATGCACAGTCTTAATTGTGGAGGGGAA--  
 TTTAAGCAGCTCCAGGCAAGAGTCCCTGGCTGTGGAAAGATACCTAAAGGATCAACAGCTCCTAGGGATTTGGG  
 GTTGCTCTGGGAAACTCATTTGCACCACTTCTGTGCCTTGGAAATGCTAGTTGGAGT-----  
 -----AATAAATCTCTGGATGCAATTTGG-----AAT-----  
 AACATGACCTGGATGGAGTGG--GAAAGAGAAATTGACAATTACACAGGTTTAATATAC--  
 ACCTTAATTGAAGAATCGCAAAACCAACAAGAA-----  
 -----  
 AAGAATGAACAAGAGTTATTGGAATTGGATAAATGGGCAAGTTTGTGGAATTGGTTTGATATAACAAAATGGC  
 TGTGGTATATAAAAATATTATAATGATAGTAGGAGGCTTGATAGGTTTAAGAATAGTTTTTACT---  
 GTACTTTCTATAGTG-----AATAGAGTTAGGCAGGGATACTCACCC-----  
 TTATCGTTTGTGCTGTTAGCTTGCTTAATGTACAGCCATAGCAGTAGCTGAG---  
 GGGACAGATAGAGTTATAGAATAATAACAAGGAGCTTTTAGAGCT-----  
 -----ATTCTCAACATA-----CCTACAAGAATAAGACAGGGCTTGGAAGGGCTTTGCTA---TAA  
 >JQ610043  
 GCT---GCA-----  
 GAAAAATTGTGGGTCACAGTCTATTATGGGGTACCTGTGTGG--AAAGAAGCAACC---  
 ACCACTCTATTCTGTGCATCAGATGCTAAAGCATATGACACAGAG--GTACATAAT-----  
 -----GTTTGGGCCACA---CATGCCTGTGTACCCACTGAC---  
 CCAAACCCACAAGAAGTAGTATTGGAA-----AATGTGACAGAAAATTTTAAC-----  
 -----ATGTGGAAAAATAACATGGTAGAACAAATGCATGAAGATGTA---  
 ATCAGCTTATGGGATCAAAGCCTA--AAGCCATGTGTAAAATTA---  
 ACCCCACTCTGTGTTACTTTAAATTGCACTGACTGTGCTACTGCAAATTGCACTGTCTGGAATTCTACTAGTA  
 CCAAT-----  
 -----AATACTACCCATAATACTAGGGAAAGAAAGATGGAGGGCTCAGAAATAAAA---  
 AAATGCTCTTTCAATGTCAACCACAGACATAGGA-----  
 AATAAGGTAAAGGAAGAATATGCATTG--TTTTATGAATCTGATATAATAACAAATAGATAGG-----  
 -----  
 -----  
 AGTACTAATACAAGCTATATGTTAAAAAATTGTAATACCACAGTCATTACCCAG---  
 GCCTGCCCAAAGTATCCTGGGAACCAATTCCCATACATTATTGTACTCCAGCTGGTTTTGCGATTCTAAAGT  
 GTAAC---GATAAAAAGTTCAAT-----GGAACAGGACCATGTACAAAT-----

-GTCAGC---ACCGTACAGTGTACACATGGAATTAGGCCAGTAGTGTCAACT---  
CAACTGCTGTTTAAATGGCAGTCTAGCAGAAGAAGAG-----  
ATAGTAATTAGATCTGAAAATTTACGAGCAAT-----GTTAAAACCATAATAGTACATCTGAAT----  
-----GAATCTGTAAAA-----ATTAATTGTACAAGACCCAACAACAATACAAGAAAA-----  
-GGTATACATATA-----GGGCCAGGGAGAGCA---TTT-----TATGCAGCAGGAGAA-----  
-----ATAGTAGGAAATATA-----AGACAAGCCCATTGT---AACCTTAGTAGAGCA---  
GCATGGAATAAGACTTTAGGACACATAGTTGTAAAATTAAGA-----  
GAACAAGCAGGGTTTAGG-----AATAAAACAATAATCTTTAAT-  
-----CAACACTCAGGAGGAGACCCAGAAATTGTA---AGCCACAGTTTAAATTGTGGAGGGGAA---  
TTTAAGCAGCTCCAGGCAAGAGTCCTGGCTGTGGAAAGATACCTAAAGGATCAACAGCTCCTAGGAATTTGGG  
GTTGCTCTGGAAACTCATTTGCACCACTGCTGTACCTTGAATACTAGTTGGAGT-----  
-----AATAAACTTATAGTGAGATTTGG-----GAA-----  
AACATGACCTGGATGGAATGG---GAGAGAGAGATTGACAAATTACACAAGCTTAATATAC---  
ACCTTAATTGAAGAATCGCAGAACCAACAGGAA-----  
-----  
AAGAATGAACAAGAATTATTGGCATTGGATGATTGGGCAGGTTTGTGAGTTGGCTTAACCTATCAAAATGGC  
TGGGGTATGTAAAAATATTATAATAGTAATAGGAGGTTTAGTAGGTTAAGGATAATATTTTTT---  
GTACTTTCTATAGTG-----AATAGAGTTAGGCAGGGATACTCACCA-----  
TTATCATTTGCTGTTAATTTGCTTAATACCATAGCTATAGCAGTAGCTGAG---  
GGGACAGATAGGGTTATAGAAGCAGTACAAAGAGTTTGTAGAGCC-----  
-----ATTCGCCACATA-----CCTAGAAGAATAAGACAGGGTGCAGAAAGGTTTTTGCTT---TAA  
>EF593212  
GCT---GCA-----  
GATCAATTGTGGGTCACAGTCTATTATGGGGTACCTGTGTGG---AAAGAAACAACC---  
ACCACTCTATTCTGTGCATCAGATGCTAAAGCCTATGACACAGAG---GTACATAAT-----  
-----GTTTGGGCCACA---CATGCCTGTGTACCCACAGAC---  
CCCAGCCCACAGGAAGTAGAATTGGGA-----AATGTGACAGAAAATTTTAAT-----  
-----ATGTGGAAAAATAACATGGTGGACCAGATGCATGAGGATATA---  
ATCAGTTTATGGGATCAAAGCCTA---AAGCCATGTGTAAAATTA---  
ACCCCACTCTGTGTTACTTTAAATTGCACTGATTGGACGAATGCTAATAATACCAGTGCTGATAATACCACT-  
-----  
-----GCTACTAATAATACCACTCCTAGTACCAAATAGAGGAAGTAGAAATAAAA---  
AACTGCTCTTTCAATATTACCACAAACATAAGA-----  
GATAAGGTGAAGAAAGAATATGCACTT---TTTTATAAACTTGATGTAGTACCAATAGAGGAT-----  
-----  
GATAGTAGGAATAATAGCTATAGGTTAATAAGTTGTAACACCTCAGTCATTACACAG---  
GCCTGTCCAAAGGTATCCTTTGAGCCAATTCCCATACATTATTGTGCCCCGGCTGGTTTTGCGATTCTAAAGT  
GTAAT---AATAAGACATTCAAT-----GGATCAGGGCCATGTAAAAAT-----  
-GTCAGC---ACAGTACAATGTACACATGGAATTAGGCCAGTAGTATCAACA---  
CAACTGCTGTTTAAATGGCAGTCTAGCAGAAGAAGAT-----  
ATAGTAATTAGATCTGAAAATTTCACTAACAAT-----GCTAAAACCATAATAGTACAGTTGAAG---  
-----GAACCTGTAATA-----ATCAATTGTACCAGACCCAACAACAATACAAGAAGA---  
-AGTATACCCATG-----GGACCAGGGAAAGTA---TTT-----TATACAGCAGAC-----  
-----ATAATAGGAGATATA-----AGACAAGCACATTGT---ACATTAGTGGAGAA---  
CAATGGAATAACACTTTAAGTGGGGTAGTTGGAAAATTAAGA-----GAACAATTTAAG---  
-----GATAAAACAATAATCTTTAAT-----  
CAATCCTCAGGAGGGGACCCAGAAATTGTA---ATGCACACTTTTAATTGTAGAGGGGAA---  
TTTAAGCAGCTCCAGGCAAGAGTCCTGGCTGTGGAAAGATACCTAAAGGATCAACAGCTCCTAGGGATTTGGG  
GTTGCTCTGGAAACTCATCTGCACCACTACTGTGCCTTGAATACTAGTTGGAGT-----  
-----AACAACTCTGTAGATGAGATTTGG-----GGT-----  
AACATGACCTGGATGCAATGG---GAAAAAGAAATTGACAAATTACACAGACTTTATATAC---  
ACTTTAATTGAACAATCGCAGATCCAGCAAGAA-----  
-----  
AAGAATGAACAAGAATTATTGGAATTGGATAAATGGGCAAGTTTGTGGAATTGGTTCACCATATCAAATTGGC  
TGTGGTACATAAAAATATTATAATGATAGTAGGAGGTTTGATAGGTTTAAGAATAGTTTTTTTCT---  
GTACTTTCTGTAGTG-----AATAGAGTTAGGCAGGGATACTCACCA-----  
TTATCATTTGCTGTTAGCTTGTTCATACACAGCCATAGCAGTAGCTGAG---  
GGAACAGATAGGATTATAGCAGTATTACGCAGGGCTTTTAGAGCT-----  
-----GTTCTTCATATA-----CCTACAAGAATAAGACAGGGCTTGGAAGGGCTTTGCTA---TAA

>EF593300

GCT---ACA-----  
GATCAATTGTGGGTCACAGTCTATTATGGGGTACCTGTATGG---AAAGAAGCAACC---  
ACCACTCTATTTTGTGCATCAGATGCTAAAGCTTATGAGACAGAG---GTACATAAT-----  
-----GTTTGGGCCACA---CATGCCTGTGTACCCACAGAC---  
CCTGACCCACAAGAATTAAAATTGGTA-----AATGTGACAGAAAATTTTAAC-----  
-----ATGTGGAAAAATAACATGGGTAGAACAGATGCATCAGGATATA---  
ATCAGTTTATGGGATCAAAGCTTA---AAGCCATGTGTAAACTA---  
ACCCCACTCTGTGTCACTTTAAATTGCACTGATTTGAGGAATGCTACTGGCACTAATACTACTAAA-----  
-----  
-----ACCTATAATATTAGCGGGGAACATAATGGAAAAAGGAGAAATGAAA---  
AACTGCTCTTTCAATGTCAACCACAAGCACAGGA-----  
GAAAAAAGGCAAAAAGAACGTGCACTG---TTTTATAAACTTGATCTAATGCAAATAGATAGTGAT-----  
-----  
AATAATAGTAGCTATAATAGTTATAGGTTGACAAGTTGTAATGCCTCAGTCATTACACAG---  
GCCTGCCCAAAAGTATCCTTTGAGCCAATTCCAATACATTTCTGTGCCCGGCTGGTTTTGCAATTCTAAAGT  
GTAAT---GATAAAAAGTTCAAT-----GGATCAGGACCATGTAAAGAT-----  
-GTCAGC---ACAGTACAATGTACCCATGGAATCAGGCCAGTAGTATCAACT---  
CAATTGCTGTTAAATGGCAGTCTAGCAGAAGAAGAG-----  
GTAGTTCTTAGGTCTGAAAATTTACAGACAAT-----GCTAAAAACATAATAGTACAACCTGAAA---  
-----ACAGCTGTAAAC-----ATTACTTGTATAAGACCCAACAACAATACAAGAACA-----  
-AGTATATCTATG-----GGACCAGGGAGAGCA---TTT-----TTTGCAACAGGAGAT-----  
-----ATAATAGGAGATATA-----AGACAAGCACATTGT---AACATTAGTAGAAAA---  
GACTGGAATAATACTTTACACGAGATAGTTATAAAATTAAGA-----GAACAATTTCAA---  
-----AATAAAACAATAATCTTTAAT-----  
CAATCCTCAGGAGGGGACCCAGAGATTGTA---ACACACAGTTTTAATTGTGGAGGGGAA---  
TTTAAGCAGCTCCAGGCAAGAGTCCTGGCTGTGGAAACATACCTAAAGGATCAACAGCTCCTGGGAATTTGGG  
GTTGCTCTGGAAGACGCATCTGCACCACTGCTGTGCCTTGGAAATACTAGTTGGAGT-----  
-----AATAAATCCCTGGGAGAGATTTGG-----GAT-----  
AACATGACCTGGATGCAGTGG---GAAAAAGAAATTCAATCACACAGAAGCAATATAT---  
GCCTTACTTGAAATAGCGCAAGGCCAGCAAGAA-----  
-----  
AAGAATGAAAAGGAATTATTGGAATTGGATAAATGGGCAAGTTTGTGGACTTGGTTTGACATATCAAATTGGA  
TGAGGTATATACAAATATTATAATGATAGTAGGAGGCTTAATAGGATTAAAAATAGTTTTTTGCT---  
GTACTTTCTATAGTG-----AAAAGAGTTAGGCAGGGATACTACCA-----  
CTATCATTTGCTGTTAGCTTGCTCAACGCCACAGCCATAGCAGTAGCTGAG---  
GGGACAGATAGGATTATAGAAGTGGGACAAACAATTTTAGGGCT-----  
-----ATCATTCACATA-----CCCAGAAGAATAAGACAGGGCTTGGAAGGGCTTTACTA---TAA  
>GQ153937  
GCT---GCA-----  
GAAAAAATGTGGGTCACAGTCTATTATGGGGTACCTGTGTGG---AAAGAAGCAACT---  
ACCACTCTATTTTGTGCATCAGATGCTAAATCTTATGATACAGAG---GTACATAAT-----  
-----GTTTGGGCCACA---CATGCCTGTGTACCCACAGAC---  
CCCAACCCACAAGAAGTAGTATTGGGA-----AATGTGACAGAAAATTTTAAT-----  
-----ATGTGGAAAAATAACATGGGTAGAACAGATGCATGAGGATGTA---  
ATCAGTTTATGGGATCAAAGCCTA---AAGCCATGTGTAAATTA---  
ACCCCTCTCTGTGTTACTTTAAATTGCACTGATAAGTTGAGAAATGACGCTTTT-----  
-----  
-----GGAGTAAATAATACAATGGAAGGGGAAATGAAA---  
AACTGCTCTTTCAATACCACCACAAGCCTAAGA-----  
GATAAGATACAGAAAGAATATGCACTT---TTTTACAAGCTTGATGTAGTACAAATAAAAAATAAT-----  
-----  
AATAATAGTAATTATACTAGCTATAGGTTAATAAATTGTAACACCTCAGTCATTACACAG---  
GCCTGTCCAAAGGTAACCTTTGAGCCAATTCCCATACATTATTGTACCCAGCTGGTTTTGCGATTCTTAAAT  
GTAAT---AATAAGACTTTCTCG-----GGGAAAGGAACATGTACAAAT-----  
-GTCAGC---ACAGTACAATGCACTCATGGAATTAGGCCAGTAGTATCAACT---  
CAACTGCTGTTAAATGGCAGTCTAGCAGAAGAAGAT-----  
GTAGTAATTAGATCAGACAATTTCTCGCAAAAT-----GCCAAATCATAATAGTACAGCTAAAT---

-----GAAGCTGTAGTA-----ATTAATTGTACAAGACCCGGCAACAATACAAGGAAA-----  
 -AGTATACCTATA-----GGACCAGGGAGAGCA---TTT-----TATGCAACAGGAGAC-----  
 -----ATAATAGGAAGTATA-----AGACAAGCACATTGT---AACGTTAGTAGTACA---  
 AAATGGAATAATACTTTACAAAAGATAGTTGAAAAATTAAGA-----GAACAATTTGGG-----  
 -----AATAAAACAATAAAATTTACA-----  
 TCACCCTCCCCAGGAGGGGACCCAGAAATTGTA--ATGCACAGTTTTTAATTGTGGAGGAGAA---  
 TTTAAACAGCTCCAGGCAAGAGTCCTGGCTGTGGAAGATACCTAAGAGATCAACAGCTCCTGGGGATTTGGG  
 GATGCTCTGGAAAACTCATCTGCACCACTGCTGTGCCCTGGAATGCTAGTTGGAGT-----  
 -----AATAAATCTTACACAGACATTTGG-----GAT-----  
 AACATGACATGGATGCAGTGG---GAAGAAGAAATAGAAAATTACACAAGTTTAATATAC---  
 ACCCTAATTGAAGACTCGCAAAACCAACGGGAA-----  
 -----  
 AAGAATGAACAAGAATTATTAGAAATTGGATAAGTGGGCAAGCCTGTGGAATTGGTTTGACATAACAAGCTGGC  
 TGTGGTATATAAAAATATTTCATAATGATAGTAGGAGGCTTGATAGGTTTAAGAATAGTTTTTTGCT---  
 GTACTTTCTATAGTA-----AATAGAGTCAGGCAGGGATACTCACC-----  
 TTATCGTTGGCAGTTAGCTTGCTCAATACAATAGCTATAGCAGTAGCTGAG---  
 GGGACAGATAGGACTATAGAATTAGCACATAGAATTTGTAGAGCT-----  
 -----ATTCTCCACATA-----CCTAGAAGAATAAGACAGGGCTTTGAAAGGGCTTTGCTA---TAA  
 >MH263520  
 GCA---ACA-----  
 ACAAATTTGTGGGTCACAGTCTATTATGGGGTACCTGTGTGG---AAAGAAGCAAAAC---  
 ACCACTCTATTTTGTGCATCAGATGCTAAAGCATATGAAACAGAG---GCACATAAT-----  
 -----GTTTGGGCCACA---CATGCCTGTGTACCCACAGAC---  
 CCCAGCCCACAAGAAATACCATTGGAA-----AATGTGACAGAAAATTTTAAC-----  
 -----ATGTGGAAAAATAACATGGTAGAACAGATGCATGAGGATATA---  
 ATCAGTTTATGGGATCAAAGCCTA---AAACCATGTGTAAAATTA---  
 ACCCCACTCTGTGTTACCCTAGATTGCACTAATTTGAATGCTACTAATTCAAATACTACTAATTCAAATGCTA  
 CTAATTCAAAT-----  
 -----ACTACCAATCATAGTAGCTGGGAAAGGATGGATAAAGAAGAAATAAAA---  
 AACTGCTCTTTTAATGTCAACCACAAACATAGGA-----  
 GATAAAATGCAGAAAGCATATGCACCT---TTCTATAGACCTGATATAGTACAATATATACCAATA-----  
 -----  
 -----  
 AATACGACCAAATATAGGTTGATAAGTTGTAACACCTCAGTCATTACACAA---  
 GCCTGTCCAAAGACATCCTTTGAACCAATTCCCATACATTATTGTGCCCCGGCTGGTTTTGCGATTCTAAAGT  
 GTAGA---GATAAGAAGTTTAAT-----GGAACAGGACCGTGTAATAAT-----  
 -GTCAGC---ACAGTACAATGCACACATGGAATTAGGCCAGTAGTATCAACT---  
 CAACTGCTGCTAAATGGCAGTCTAGCAGAAGAAGAG-----  
 GTAGTAGTTAGATCTGCCAATTTACGGACAAT-----GCTAAAACCATAATAGTACAGCTGAAA---  
 -----GAACCTGTAGAG-----ATCAATTGTACAAGACCCAACAACAATACAAGAAAA---  
 -AGTATATATATA-----GGACCAGGGAGAGCA---TTT-----CATGTAACAGGAAAA---  
 -----ATAATAGGAGATATA-----AGACAAGCACATTGT---AACATCACTAGAGCA---  
 AAATGGAATGAAACGTTAAGACAGATAGTTGAAAAATTAAGA-----GAAAAATTTAAT---  
 -----AATAGAACAATAGTTTTTAAC-----  
 CAATCTTCAGGAGGGGACCTAGAAATTGTA---ATGCACAGTTTTTATTGTGGAGGGGAA---  
 TTTAAGCAGCTCCAGGCAAGAGTCCTAGCTGTGGAAGATACCTAAAGGATCAACAGCTCCTGGGAATTTGGG  
 GTTGCTCTGGAAAACTCATCTGCACCACTACTGTGCCCTGGAATGCTAGTTGGAGT-----  
 -----AATAAATCTCTGGAGACAATTTGG-----AAT-----  
 AACATGACCTGGATGCAGTGG---GAGAAAGAAATTGACAATTACACAAGCTTAATATAC---  
 ACCTTAATTGAAGAATCGCAAAACCAGCAAGAA-----  
 -----  
 AAGAATGAAGTAGAATTATTGGAATTAGATAAATGGGCAAGTTTGTGGAATTGGTTTGACATATCAAAGCTGGC  
 TGTGGTATATAAAAATATTTCATAATGATAGTAGGAGGCTTGGTAGGTTTAAGAATAATTTTTTACT---  
 TTGCTTTCTATAGTA-----AATAGAGTTAGGCAGGGATATTCACCA-----  
 TTGTCAATTTGCTGTTAGCTTGTTCAACGCATTGCCATAGCAGTAGCTGAG---  
 GGGACAGATAGGGTTATAAACTTAGTACAAAGAGCTGGTAGAGCT-----  
 -----ATTCTTCACATC-----CCTAGAAGAATAAGACAGGGCTTGGAAGGGCTTTGCTA---TAA  
 >KX984437  
 GCT---GAA---GAA-----  
 GAAAAATTGTGGGTCACAGTCTATTATGGGGTACCTGTGTGG---AAAGACGCAACC---

ACCACTCTATTTTGTGCATCAGATGCTAAAGCATAACAAGACAGAG---GCACATAAT-----  
 -----GTCTGGGCCACA---CATGCCTGTGTACCCACAGAC---  
 CCCAACCCACAAGAAGTAGTATTGGAA-----AATGTGACAGAAAATTTCAAC-----  
 -----GCATGGAAAAATGACATGGTAGAACAGATGCATGAGGATATA---  
 ATCAGTTTATGGGATCAAAGCCTA---AAGCCATGTGTAAAATTA---  
 ACCCCACTCTGTGTTACTTTAAATTGCACTAATGTCACTACTAGTGCTACTAATAGTAGTAGCACTAAT----  
 -----  
 -----AATAATGCTACTGCTACTAACAGTAGTAGCGAGGGAGAAATGAAA---  
 AACTGCACCTTTCAATATCACCACATTCATGAGT-----  
 GATAAAAAGCAGACAGTATATGCAAAT---TTTTATAACCTTGATTTAGTACCAATAAATGATGGTAAG----  
 -----  
 -----  
 AATGATACTAAAAATAGTTTATAGGTTGATAAGTTGTAATACCTCAGTCATTACACAG---  
 GCCTGTCCAAAGATATCCTTTGAGCCAATTCCCATACATTATTGTGCCCCGGCTGGTTTTTCGATTTTTAAAAAT  
 GTAAT---GATAAGAAGTTCAAT-----GGAACAGGACCATGTACAAAT-----  
 -GTCAGC---ACAGTACAATGTACACATGGAATTATGCCAGTGGTATCAACT---  
 CAACTGCTGTTAAATGGCAGCCTAGCAGAAGAAGAG-----  
 GTAGTAATTAGTTCTGCCAATATCTCGGATAAT-----GCTAAAACCATAATAGTGCATCTGAAC----  
 -----GAATCTGTAGAA-----ATTAATTGTACAAGGCCCAACAACAATACAAGAAAA-----  
 -AGTATAAATATA-----GGACCAGGGAGAGCA---TTT-----TATGCAACAGGAGAC-----  
 -----ATAATAGGAGATATA-----AGACAAGCACATTGT---AACATCAGTAGTACA---  
 AAATGGAATAACACTTTAAAAAAGATAGTTGAAAACTAGGA-----GAACAATTTAAT----  
 -----ACTCAAACAATAATCTTTGAT-----  
 CAACCCCTCAGGAGGGGACCCAGAAATTGTA--ATGCACAGTTTTAATTGTGGAGGAGAA---  
 TTTAAGCAGCTCCAGGCAAGAGTCCTGGCTGTGGAAAGATACCTACAGGATCAACAGCTCCTAGGAATTTGGG  
 GTTGCTCTGGAAACTCATTTGCACCACCGCTGTGCCTTGGAATGCTAGTTGGAGT-----  
 -----AAGAATAGATCTCTGAAGGATATTTGG-----AAT-----  
 AACATGACCTGGATGGAATGG---GAGAGAGAAATTGACAATTACACAGGCTTAATATAC---  
 AACTTAATTGAACAATCGCAAAACCAGCAAGAA-----  
 -----  
 AAGAATGAACAAGACTTATTGGCACTAGATAAATGGGAAAGTTTATGGAATTGGTTTAACATAACAAAATGGC  
 TGTGGTATATAAAAATATTACATAATGATAGTAGGAGGCTTGGTAGGTTTAAAGAATAGTGTTTTCT---  
 GTACTTGCTTTAGTG-----AATAGAGTTAGGAAGGGATACTACCA-----  
 TTATCGTTTGCTGTTAGCTTGCTCGACGCCACAGCCATAGCAGTAGCTGAG---  
 GGGACAGATAGGATTATAGCAGTAATACAAAGAGCTTTTAGAGCT-----  
 -----GTTCTTAATATA-----CCTACAAGAGTAAGACAGGGCTTGGAAGGGCTTTGCTA---TAA  
 >KX984699  
 GCT---ACA---GAA-----  
 AAAGAAAACCTGTGGGTCACTGTCTATTATGGGGTACCTGTGTGG---AAAGATGCAAAT---  
 ACCACCTATTTTGTGCATCAGATGCTAAAGCATATAAGACAGAG---GTACATAAT-----  
 -----GTTTGGGCCACA---CACGCTTGTGTACCCACAGAC---  
 CCGGACCCACAAGAAGTAGGACTGGGA-----AATGTGACAGAAAATTTCAAC-----  
 -----ATGTGGAAAAATAACATGGTAGAACAGATGCATGAGGATATA---  
 ATCAGTTTATGGGATCAAAGCCTA---AAGCCATGTGTAAAATTA---  
 ACCCCACTCTGTGTTACTTTAAATGCTTTGATTTAATGCCACTAGTAATAGTACTAATGGGACTACCCCTA  
 GTCCTAGCCCC-----  
 -----ACTAGGCCTAGCACTGATTTGAATGATACTAGTAATGGGATGAAA---  
 AACTGCTCTTTCAATATCACCACAAGCATAAGA-----  
 GATAAGGTGAAACAAGAATATGCACTT---TTATATAAACTTGATATAGTACAAATAGATAGT-----  
 -----  
 -----  
 AATAACACCTATAGGTTAATAAGTTGTAATACCTCAGTCCTTACACAG---  
 GCCTGTCCAAAGGTAACCTTTGAGCCAATTCCCATACATTATTGTGCCCCGGCTGGTTTTTCGATTCTAAAGT  
 GTAGA---GATAAAAAGTTCAAT-----GGGACAGGATCATGCAAAAAT-----  
 -GTCAGC---ACAGTACAATGTACACATGGAATTAAGCCAGTAGTGTCAACT---  
 CAACTGCTGTTAAATGGTAGTCTATCAGAAGCAGGA-----  
 ATAGTAATTAGATCTGAAAAATTCACAAATAAT-----GCTAAAACCATAATAGTACAGCTGGAC----  
 -----AAATATGTAAAA-----ATTAATTGTACAAGACCCAACAACAATACAAGGAAA-----  
 -AGTATAACTATA-----GGACCAGGGAGAGCA---TTT-----TATACAACAGGAGAA-----  
 -----ATAATAGGAAATATA-----AGACAAGCATATTGT---ATAGTTAATGGAACA---

CAATGGAATAACACTTTAACACAGGTAGTTCATGAATTAAGA-----AAACAATTCCCA----  
 -----AATAAAACAATAGTCTTTAAT-----  
 CAATCCTCAGGAGGGGACCCAGAAATTGTA--ATGCACAGTTTTTAATTGTAGAGGGGAA---  
 TTTAAGCAGCTCCAGGCAAGAGTCCTGGCTATAGAGAGATACCTACAGGATCAACAGCTCCTGGGAATTTGGG  
 GTTGCTCTGGAAAGCTCATTTGCACCACTGCTGTGCCTTGGAAATACTAGTTGGAGT-----  
 -----AATAGATCTCTGGATGCGATTTGG-----CAA-----  
 AACATGACCTGGATGCAGTGG--GAAAAAGAAATTGAAAAGTACACAGGCACAATATAC---  
 ACATTACTTGAAGAATCGCAGAACCAGCAAGAA-----  
 -----  
 AAAAAATGAACACGAGTTATTGGAATTGGATAAATGGGCAAATTTGTGGACTTGGTTTAGCATAACAACTGGC  
 TGTGGTATATAAAAAATATTCATAATGATAATAGGAGGCTTGATAGGTTTAAGAATAGTTTTTTGCT---  
 GTACTTTCTATAGTG-----AATAGAGTTAGGCAGGGATACTCACCA-----  
 TTATCGTTTGTCTGTTAGCTTGTTTAATGCCATAGCCATAGCAGTAGCTGAG---  
 GGGACAGATAGGGTTATAGAGGTATTACAAAGAGCTTGTTAGAGCT-----  
 -----ATTCTCCATATA-----CCTACAAGAATAAGACAGGGCTTGGAAAGGGCTTTGCTA---TAA  
 >MH632763  
 GCT---GAA---AAA-----  
 CAAGAGCGAGGGTGGGTACAGTTTATTATGGGGTACCTGTGTGG--AGAGAAGCAAAC---  
 ACCACTCTATTTTGTGCATCAGATGCTAGAGCATATAATAAAGAG--GTACATAAT-----  
 -----GTTTGGGCCACA--CATGCCTGTGTACCCACAGAC---  
 CCCAACCCACAAGAGGTAATATTGGAA-----AATGTAACAGAACAGTTTAACT-----  
 -----ATATGGAAAAATAACATGGTAGAACAGATGCATGAGGATATA---  
 ATCAGTTTATGGGATCAAAGCTTA--AAACCATGTGTAAACTA---  
 ACCCCACTCTGTGTTACTTTAAATGCACTAATTTGACTAATGTCACTGAGAGT-----  
 -----  
 -----GACCAGATGAAGGAAGGAGGAATGCAA---  
 AACTGCTCTTTCAATGTCACAGCAGGCATAAAA-----  
 GATAGGATGCAGAAAGAATATGCACTT--TTTTATAAACTTGATATAGTACCAATAGCTGATGATAAGAAT-  
 -----  
 -----  
 AGTAGTGAGACTAACTATAACCACTATAGGTTGATAAGTTGTAACACCTCAGTCATTACACAG---  
 GCCTGTCCAAAAGTATCCTTTGAGCCAATTCCCATACATTATTGTGCCCCGGCTGGTTTTGCGATTCTAAAAT  
 GTAAT---GATAAGAATTTCAAT-----GGATCAGGGTCATGTACAAAT-----  
 -GTCAGC--ACAGTACAATGTACACATGGAATTAAGCCAGTAGTATCCACT---  
 CAACTGCTGCTAAATGGCAGTCTAGCAGAAGATGAG-----  
 ATAGTAGTTAGATCTGCCAACTTCTCGAACAAT-----GCTAAAATCATAATAGTACAGCTGAAT---  
 -----GAATCTGTAACA-----ATTAATTGCACAAGACCCAGCAACAATACAAGAAAA-----  
 -AGTATAACTATA-----GGACCAGGGAGAGCA--TTC-----TATGCAACAGGACAA-----  
 -----ATAATAGGAGATATA-----AGAGCAGCACATTGT--AACATTAGTGAGAAA---  
 CAATGGAATAAACTTTAAACACGTAGCTGACAAATTAAGA-----GAACAATTT-----  
 -----AACAAGAGCATAGTCTTTAAG-----  
 AACTCCTCAGGAGGGGACCCAGAAATTGTA--ATGCATACTTTTAATTGTGGAGGGGAA---  
 TTTAAACAGCTCCAGGCAAGAGTCCTGGCTGTGGAAAGATACCTAAGGGATCAACAGCTCCTAGGGATTTGGG  
 GGTGCTCTGGAAGAACTCATCTGCACCACTAATGTGCCTTGGAAATGCTAGTTGGAGT-----  
 -----AATAAATCTATAGAGGATATCTGG-----GAA-----  
 AACATGACCTGGATGCAATGG--GAAAGAGAAATTGACAATTACACAAACATAATATAC---  
 TCCTTGATTGAAGAATCGCAGAACCAGCAGGAA-----  
 -----  
 AAGAATGAACAAGAATTATTAGCATTAGATAAATGGGCAAATTTGTGGAATTGGTTTAGCATAACAAATTGGC  
 TGTGGTATATAAAAAATATTCATAATGATAATAGGAGGCTTGATAGGCTTAAGAATAATTTTTTGCT---  
 GTACTTACTGTAGTG-----AATAGAGTTAGGCAGGGATACTCACCT-----  
 TTGTCAATTCGCTGTTAGCTTGTTCAACGCCATAGTCATAGCAGTAGCTGGG---  
 GGGACAGATAGGATTATAGAAGTATTACAAAGAATTGGTAGAGCT-----  
 -----ATTCTTCACATA-----CCTACAAGAATAAGACAGGGCTTGGAAAGAGCTTTGCAA---TAG  
 >MH576107  
 GCT---GCA-----  
 GACAATTTGTGGGTACAGTCTATTATGGGGTACCTGTGTGG--AGAGAAGCAAAC---  
 ACCACTCTATTTTGTGCATCAGATGCTAAAGCATATGCTAAAGAG--GTACATAAT-----  
 -----GTTTGGGCCACA--CATGCCTGTGTACCTACAGAC---  
 CCCAACCCACAAGAAGTAGCATTAGAA-----AATGTGACAGAAAATTTTAACT-----

-----ATGTGGAAAAATAGCATGGTAGAACAAATGCATGAGGATATA---  
 ATCAGTTTGTGGGATCAAAGCCTA---AAGCCATGTGTAAAATTA---  
 ACCCCACTTTGTGTTACCTTAAATTGCACTGATGTGAATGCTACTGCTACTATGGGGAATGAT-----  
 -----  
 -----ACTAATGACAATAGTAGCAAAGGGAAATTGATGGAGATAGGAGAAATGAAA---  
 AATTGCTCTTTCAATATCACCACAAGCATAGGA-----GAGAAGAAG---  
 ACAGAAAATGCACTT---TTTATACACTTGATGTAGCACCCTAGACAGG-----  
 -----  
 -----GATAACGACAGCTATAGGTTGATAAGTTGTAATACCTCAGTCATTACACAA---  
 GCCTGTCCAAAGGTATCCTTTGAGCCAATTCCTATACATTATTGTGCCCCGGCTGGTTTTGCGATTCTAAAAT  
 GTAAT---GATAAAAAGTTCAAT-----GGAACAGGGCCATGTAAAAT-----  
 -GTCAGC---ACAGTACAATGTACACATGGAATCAGGCCAGTAGCATCAACT---  
 CAATTGCTGTTAAATGGCAGTCTAGCAGAAGGAAAG-----  
 GTAGTAATTAGATCTGCCAACTTCACAGACAAT-----ACTAAAATCATGATAGTGCAGCTGAAC----  
 -----GAACCTATAAAAT-----ATTACTTGTATAAGACCCAATAATAACAAGAAAA-----  
 -AGTATATCCATA-----GGACCAGGGGGAGCA---ATT-----TATGCAACAGGAGAC-----  
 -----ATAATAGGAGATATA-----AGACAAGCATATTGT---ACCCTTGATGGAACA---  
 AAATGGAATGAACTTTAAAAAACATATCTGACATATTACAA-----AAGCAATTTGAG----  
 -----AATAAAACAATACTCTTTAGG-----  
 CCACCCTCAGGAGGGGACCCAGAAAGTTGTA---ACACACAGTTTTAATTGTGGAGGGGAA---  
 TTTAAGCAGCTCCAGGCAAGAGTCCTGGCTGTGGAAAGATACCTAAAGGATCAACAGCTCCTGGGGATTTGGG  
 GATGCTCTGGAAGAACTCATTTGCACCCTAATGTACCTTGAATAGTAGTTGGAGT-----  
 -----AATAAATCTCTAGATATGATTTGG-----AAT-----  
 AACATGACCTGGATGGAGTGG---GAAAAAGAAATTAGCAATTACACAAGCTTAATATAC---  
 AACTTAATTGAAGAATCGCAGAACCAACAAGAA-----  
 -----  
 AAAAAATGAACAAGAATTATTGGCATTGGATAAATGGGCAAGTTTGTGGAATTGGTTTGACATATCAAATTGGC  
 TGTGGTATATAAAAAATATTACATAATGATAGTAGGAGGCTTGATAGGTTTAAGAATAGTTTTTTACT---  
 GTACTTTCTATAGTG-----AATAGAGTTAGGCAGGGATACTCACCA-----  
 TTGTCATTTGCTGTTAGCTTGCTCAACGCCACAGCCATAGCAGTAGCTGAG---  
 GGGACAGATAGGATTATAGAAGTAGTACAAAGGGCTGGTAGAGCT-----  
 -----ATTCTCCACATA-----CCTAGAAGAATAAGACAGGGCTTTGAAAGGGCTTTGCTA---TAA  
 >EU616649  
 GCT---ACA-----  
 GAAAAGTTGTGGGTACAGTCTATTATGGGGTACCTGTATGG---AAAGAAGCAACC---  
 ACCACTCTATTTTGTGCATCAGATGCTAAAGCATATGCTACAGAG---ATGCACAAT-----  
 -----GTTTGGGCCACA---CATGCCTGTGTACCCACAGAC---  
 CCTAACCCACAAGAAGTAGTATTGACA-----AATGTGACAGAAAATTTTAAC-----  
 -----ATGTGGAAAAATAACATGGTGGAAACAGATGCAGGAGGATATA---  
 ATCAGTTTATGGGACCAAAGCCTA---AAGCCATGTGTCAAATTG---  
 ACCCCACTATGTGTTACTTTAAATTGCACTGACTTGAAGAATGGTACTAATGGGAAT-----  
 -----  
 -----GTTACACTGGAAGTGGGAGCGGAAGGAGAAATAAAA---  
 AACTGCTCTTTCAATATCACCACCAACCTAAAA-----  
 GATAAGGTACAGACAGCATATGCAAAT---TTTTATAAGCTTGATGTAGTACAAATAGATAATGATAAT---  
 -----  
 -----  
 ACCAGCCATGAAATTATACAGCTATAGGTTGATAAGTTGTAACACCTCAGTCATTACACAA---  
 GCCTGTCCAAAGGTTTCCTTTGAACCAATTCCTATACATTATTGTACCCAGCTGGTTTTGTGATCATAAAGT  
 GTAAT---GATAAGAAGTTCAAT-----GGAACAGGACCATGTAAAAT-----  
 -GTCAGC---ACAGTACAGTGTACACATGGAATTAGGCCAGTAGTAACAAC---  
 CAACTGCTATTAAATGGCAGTCTAGCAGAAGAAGAG-----  
 GTAGTAATTAGATCCGCCAATTTACAGACAAT-----GCTAAAATCATAATAGTACATCTGAAT----  
 -----GAATCAGTAGAA-----ATTAAGTGTACAAGACCCAACAACAATACAAGGAAA-----  
 -GGTATACATATA-----GGACCAGGGGAGAGCA---TTT-----TATGCAGCAGGAGAA-----  
 -----ATAATAGGAAATATA-----AGAAAAGCATATTGT---ACCATTAATAGAACA---  
 AAATGGAATACCACTTTACAACGGGTAGTTGAAAAACTAAGA-----GGACAATTTGGT----  
 -----AATAAAACAATAGTCTTTAAC-----  
 CAATCCTCAGGAGGGGACCCAGAAATTGTA---ATGCACAGTTTTAATTGTAGAGGGGAA---  
 TTTAAGCAGCTCCAGGCCAGAGTCCTGGCTGTGGAAAGATACCTAAAGGATCAACAGCTCCTGGGGATTTGGG

GTTGCTCTGGAAACTCATCTGCACCACTGCTGTGCCTTGAATACTAGTTGGAGT-----  
 -----AACAAAAGTTATACAGACATTTGG-----GAC-----  
 AACATGACCTGGATGCAGTGG---GAAAAAGAAATTGATAATTACACAGAAACAATATAC---  
 ACATTACTTCAAGAATCACAAAACCAGCAAGAA-----  
 -----  
 AAGAATGAACAAGAATTATTAGAAATTAGATAAAATGGGCAAGTTTGTGGAATTGGTTTACCATAACAAAGTGGC  
 TGTGGTATATAAAAAATATTCATAATGATAGTAGGAGGCTTAATAGGGTTAAGAATAGTTTTTACT---  
 GTACTTTCTATAGTG-----AATAGGGTTAGGAAGGGATACTCACCA-----  
 TTATCGTTCGCTATTAGCTTGCTCAACGCCACCGCCATAGCAGTAGCTGAG---  
 GGGACAGATAGGATTATAGAAGTATTACAAAGAATTTGTAGAGCT-----  
 -----ATTATCCACATA-----CCTGTACGAATAAGACAGGGCTTGGAAAGGGCTTTGCTA---TAA  
 >FJ469704  
 GCT---ACA-----  
 GAAAAATTTGTGGGTCACAGTCTATTATGGGGTACCTGTGTGG--AAAGAAGCAACC---  
 ACCACTCTATTTTGTGCATCAGATGCTAAGGCATATGATACAGAG---GTACATAAT-----  
 -----GTTTGGGCCACA---CATGCCTGTGTACCCACAGAC---  
 CCCAACCCACAAGAAGTAGAATTGGAA-----AATGTGACAGAAAATTTTAACT-----  
 -----ATGTGGAAAAATAGCATGGTAGAACAGATGCATGAGGATATA---  
 ATCAGTTTATGGGATCAAAGCCTA---AAACCATGTGTAAACTA---  
 ACACCACTCTGTGTTACTTTAAACTGCACTGATGATTTGAGGAATGATACCATGAGTAGTAATGCC-----  
 -----  
 -----AGGAATAGTAGCTGGGGAATGATGGAGAAAGGAGAAATAAAA---  
 AACTGCTCTTTCAATATCACCAAGCATAAGA-----  
 GATAAGGTTTCAAGAAAGAAATATGCACCT--TTTTATAAACTTGATGTAGTACCAATAGATAGTGATAAT---  
 -----  
 -----  
 ACCAGCTATAGTAATAATACCAGCTATAGGTTGATAAGTTGTAACACCTCAGTCATTACACAG---  
 GCCTGTCCAAAGGTATCATTTGAGCCAATTCCCATACATTATTGTGCCCGGCTGGTTTTGCGATTCTAAAGT  
 GTAAA---GACAAGAAGTTCAAT-----GGAACAGGACCATGTAAAAAT-----  
 -GTCAGC---ACAGTACAATGTACACATGGAATTAAACCAGTAGTGTCAACT---  
 CAACTGCTGTTAAATGGCAGTCTAGCAGAAGAAGAG-----  
 GTAGTAATTAGATCTGAAAATTTACAAATAAT-----GCTAAAATCATAATAGTTTCAATTTGAAT---  
 -----GAATCTATAGAA-----ATTAATTGTACAAGACCCAACAATAATACAAGAAAA---  
 -GGTATACATATA-----GGACCAGGGAGAGCA---TTT-----TTTGGAAACA---GAA-----  
 -----ATAATAGGAAATATA-----AGACAAGCACATTGT--AACATTAGTGAGACA---  
 AAATGGAATAATACTTTAAAAAAGATAGTTACAAAATTAAGA-----GAACAATTTAAG---  
 -----AATAAAACAATAGTCTTTAAT-----  
 CAATCTTCAGGAGGGGACCCAGAAATTGTA--ATGCACAGTTTTTAATTGTGGAGGGGAA---  
 TTTAAGCAGCTCCAGGCAAGAGTCCTGGCTGTGGAAAGATACCTAAGGGATCAGCAGCTCCTAGGGATTTGGG  
 GTTGCTCTGGAAACTCATCTGCACCACTTCTGTGCCTTGAATGCTAGTTGGAGT-----  
 -----AACAAATCTCAGGAGGCGATTTGG-----GGG-----  
 AACATGACCTGGATGGAGTGG---GAAAGAGAAATTAACAATTATACAAACTTAATATAC---  
 AACTTACTTGAAGATTCGCAAAACCAACAAGAA-----  
 -----  
 AAGAATGAACAGGAATTATTGGAATTGGATAAGTGGGCAAATTTGTGGAATTGGTTTGACATAACACACTGGC  
 TGTGGTATATAAAAAATATTCATAATGATAGTAGGAGGTTTGGTAGGTTTAAGGATAGTTTTTTGCT---  
 ATGCTTGCTATAGTG-----AATAAAGTTAGGCAGGGATACTCACCA-----  
 TTATCGTTTTGCTGTTAGCCTGCTCAATACTACAGCCATAGCAGTAGCTGAG---  
 GGGACAGATAGGGTTATAGAAGTAGCACAAAGAATTGGTAGAGGT-----  
 -----ATCCTCCACATA-----CCTGTAAGAATAAGACAAGGCTTAGAAAGGGCTTTGCTA---TAA  
 >MN515543  
 GCT---ACA-----  
 GACAAGTTTGTGGGTCACAGTCTATTATGGAGTACCTGTGTGG--AAAGAAGCAACC---  
 ACCACTCTATTTTGTGCATCAGATGCTAGAGCATATGCTACAGAG---GTACATAAT-----  
 -----GTTTGGGCCACA---CATGCCTGTGTACCCACAGAT---  
 CCCAGCCCACTAGAAACAGAATTGGGA-----AATGTGACAGAAGATTTTAACT-----  
 -----ATGTGGAAAAATAACATGGTAGAACAGATGCATGAGGATATA---  
 ATCAGTTTATGGGATCAAAGCCTA---AAGCCATGTGTAAATTA---  
 ACCCCACTCTGTGTTACCTTAAACTGCACAGATTGGGAAAGTGCTAAGAATAATACTAATGCCACTGATGCTA  
 AGAATAATACT-----

-----GATGCCACTAATGGTACTGCTGAGTGGAACACGATAGAGAAAGGAGAAATAAAA---  
 AACTGCTCTTTCAATGTACCTCAGGTATAAGA-----  
 GATAAGATGCAGAAAGAATATGCACTT--TTCTATAAATTTGATATAGTACCAATAGATAAT-----  
 -----  
 -----  
 GCTACCAATGCTACCAGCTATAGGTTGTAAAGTTGTAATACCTCAGTCATTACACAG---  
 AAATGTCCAAAGGTAACCTTTGAGCCAATTTCCCATACATTATTGTGCCCCGGCTGGTTTTGCGATTCTAAAGT  
 GTAAC---AATAAGACATTTAAT-----GGAAAAGGATCATGTACAAAT-----  
 -GTCAGC---ACAGTACAATGTACACATGGAATTAAGCCAGTAGTATCTACT---  
 CAATTGCTGTTAAATGGCAGTCTAGCAGAAGAAGAT-----  
 GTAGTAATTAGATCTGACAATTTCTCGGACAAT-----GCTAAAACCATAATAGTACAGCTGAAG----  
 -----GATCCTGTAGTT-----ATTAATTGTACAAGACCCACAACAATACAAGAAAA-----  
 -GGTATACATATA-----GGACCAGGGAGAGCA---TTT-----TATGCAACAGGAAGC-----  
 -----ATAATAGGAGATATA-----AGACAAGCACATTGT---AACATTAGTAGAAAA---  
 GCCTGGAATAACACCTTAAAACAAATAGTAGGAAAATTAAGA-----GAACAATTTAGG----  
 -----AACAAAACAATAGTCTTTAAG-----  
 CACTCCGCAGGAGGGGACCCAGAAATTACA--ATGCACAGTTTTAATTGTGCAGGGGAA--  
 TTTAAGCAGCTCCAGGCAAGAGTCCTGGCTGTAGAAAAGATACCTACGGGATCAACAGCTCCTGGGGATCTGGG  
 GTTGCTCTGGAAACTCATCTGCACCACTGCTGTGCCTTGGAATGCTAGTTGGAGT-----  
 -----AATAAATCTCTAGATGACATTTGG-----AAT-----  
 AACATGACCTGGATGCAGTGG---GAAAAAGAAATTGACAAATTATACAGAATCAATATAC---  
 AAATTACTTGAAAAATCGCAGAACCAACAAGAA-----  
 -----  
 AAGAAATGAACAAGAATTATTGGAATTGGATAAATGGGCAAATTTGTGGAATTGGTTTGACATAACGAACTGGC  
 TGTGGTATATAAAAATATTTCATAATGATAGTAGGAGGCTTGATAGGTTTAAGAATAGTTTTTTACT---  
 GTACTTTCTATAGTA-----AATAGAGTTAGGCAGGGATATTCACCA-----  
 TTATCGTTTGTCTGTTAGCTTGCTTAATGCCACAGCCATAGCAGTAGCTGAG---  
 GGGACAGATAGGATTATAGAAATATTACAAAGAACTGTTAGAGCT-----  
 -----ATCCTCCACATA-----CCTACAAGAATAAGACAGGGCTTGAGAGGGCTTTGCTA---TAA  
 >MN515731  
 GCT---ACA-----  
 GAACAGTTGTGGGTCACAGTCTATTATGGGGTACCTGTGTGG--AGAGACGCAAAC---  
 ACCACTCTATTTTGTGCATCAGATGCTAAAGCATATGAGACAGAG--GTACACAAT-----  
 -----GTTTGGGCCACA--CATGCCTGTGTACCCACAGAC--  
 CCCAACCCACAAGAAATACCATTTGGAA-----AATGTGACAGAATATTTTAAC-----  
 -----ATGTGGAAGAATAACATGGTAGAACAGATGCATGAGGATATA---  
 ATCAGTTTATGGGATGAAAGCTTA--AAACCATGTGTAAAATTA--  
 ACCCCACTCTGTGTACTTTAAATTGTACTAATGTGAATGTTACTAATACTTGTAGGAATCATACTAAGAATA  
 GTACTGCTGAGAATGATAATAATAACTTGTAGCAATACT-----  
 -----CATAATACTACTAGTTATGATAATAGTACTTTGGAACTCCAGGAGAAATAAAA---  
 AACTGCTCTTTCAATATCACCACAAGCATAAGA-----  
 GATAAGGTGCAGAAAGAGTATGCGCTT--TTTTATAGACTTGATGTAGTACAAATAAATAAT-----  
 -----  
 -----  
 GATAATACTAGCTATAGATTGATACATTGTAATTCCTCAGTCATTACACAG---  
 GCCTGTCCAAAGGTATCCTTTGATCCAATTTCCCATACATTACTGTGCCCCGGCTGGTTTTGCGATTCTAAAAT  
 GTAAT---GATAAAAGGTTTAAT-----GGATCAGACATATGTAGAAAT-----  
 -GTCAGC---ACAGTACAATGTACACATGGAATTAGACCAGTAGTGTCAACT---  
 CAACTGTTGTTAAATGGCAGTCTAGCAGAAGAAGAG-----  
 ATAGTAATTAGATCTGCAAAATTTCAAGTACAAT-----GATGAAACCATAATAGTACAGCTGAAC----  
 -----GAATCTGTGTA-----ATTAATTGTACAAGACCCAACAACAATACAAGAAAA-----  
 -AGTATAACTAGG-----ACACCAGGGAGAGTC---ATT-----TATACAACAGGAGCC-----  
 -----ATAGTAGGAGACATA-----AGGAAAGCACATTGT---ACCATTAATGGAACA---  
 AAATGGAATAACACTTTAGCAAAGATAGTTACAAAATTAAGA-----GAACAATTTGGG----  
 -----AATAAAAACAATAGTCTTTAAT-----  
 CATTCTCAGGAGGGGACCCAGAAATTGTA--ACGCACAGTTTTAATTGTGGAGGGGAA--  
 TTCAAGCAGCTCCAGGCAAGAAATCCTGGCTGTAGAAAAGATACCTAAAGGATCAACAGCTCCTAGGGATTTGGG  
 GTTGCTCTGGAAACTCATCTGCACCACTACTGTGCCTTGGAACAATAGTTGGAGT-----  
 -----AAAAATAAATCTCTGGATGAAATTTGG-----GAT-----  
 AACATGACTTGATACAGTGG---GAAAAAGAAATTAACAAATACACAGGGGAAATATAC---

AATTTAATTGAAAAATCGCAGAACCAGCAGGAA-----  
-----  
CAAAATGAACTAGACTTATTGAAATTGGATGAGTGGGCAAGTCTGTGGAATTGGTTTGACATAACAAAATGGC  
TGTGGTATATAAAAATATTCCATAATGATAGTAGGAGGCTTGATAGGTTTAAGAATAGTTTTTACT---  
GTACTTTCTATAGTG-----AATAGAGTTAGGCAGGGATACTCACCA-----  
TTGTCATTTGCTGTTAGCTTGCTCAACGCCACAGCCATAGCAGTAGCTGAG---  
TGGACAGATAGGGTTATAGAAGTATTACAAAGAGCTGGTAGAGCT-----  
-----ATTCTCAACATA-----CCTAGAAGAATAAGACAGGGCTTGGAAGGGCTTTGCTA---TAA  
>GU728412  
GCT---ACA-----  
GAAAAATTGTGGGTCACAGTCTATTATGGGGTACCTGTGTGG--AAAGAAGCAACT---  
ACCACTCTATTTTGTGCATCAGATGCTAAAGCATATGATACAGAG---GTACATAAT-----  
-----GTTTGGGCCACA---CATGCCTGTGTGCCACAGAC---  
CCCAACCCACAAGAAGTAGTATTGGGA-----AATGTAACAGAAACTTTAAC-----  
-----ATGTGGAAAAATAACATGGTAGAACAGATGCATGAGGATATA---  
ATCAGTTTATGGGATCAAAGCCTA--AAGCCATGTGTAAAATTA---  
ACCCCACTCTGTGTTACTTTAAATTGCACTGATTTGAATACTACCAGTACCAATAGT-----  
-----  
-----AGTTGGGGAAAAATAGACCCAGGAGAAATAAAA---  
AACTGCTCTTTCAATGTCACCACAAACATAAGA-----  
GATAAGATGCAGAAAGAATATGCATTG--TTGTATAAACTGGATATAGTACCAATAGATGAT-----  
-----  
-----  
GATAATAGTAGCTATAGGTTGATAAGTTGTAATACCTCAGTCATTACACAG---  
GCCTGTCCAAAGGTATCCTTTGAGCCAATTCCTATACATTATTGTGCCCGGCTGGTTTTGCGATTATAAAGT  
GTAAT--AATAAGACATTCAAT-----GGGACAGGACCATGTCCAAAT-----  
-GTCAGC--ACAGTACAATGCACACATGGAATTAGACCAGTAGTATCAACT---  
CAACTATTGTTAAATGGCAGTCTAGCAGAAGAAGAG-----  
GTAGTAATCAGATCTGAAAATTTACGAACAAT-----GCTAAAATCATAATAGTACAGCTGAAA---  
-----GAACCTGTGAAA-----ATTAATTGTACAAGACCCAGCAACAATACAAGAAAA---  
-AGTATAAATATA-----GGACCAGGGAGAGCA---TTT-----TATACAACAGGAGAA---  
-----ATAATAGGAGATATA-----AGACAAGCACATTGT--AACATTAGTAGAGAA---  
GAGTGGAAATAAACTTTAGGACAGATAGTTGAAAAATTAAGA-----GAACAATTTGGT---  
-----AGGAATAAAACAATAATTTTAAAT-----  
CAATCCTCAGGAGGGGACCCAGAAATTGTA--ACGCACAGCTTTAATTGTGGAGGGGAA---  
TTTAAGCAGCTCCAAGCAAGAGTCCCTGGCTGTAGAAAGATACCTACGGGATCAACAGCTCCTGGGAATTTGGG  
GTTGCTCTGGAAACTCATTGCAACCACTGCTGTGCCCTGGAATTCTAGTTGGAGT-----  
-----AATAAATCTCTAGATCAGATCTGG-----AAT-----  
AACATGACCTGGATGGATTGG--GAAAAAGAAATTGACAATTACACAGGCATAATATAC---  
AGATTACTTGAAAACTCGCAAAACCAGCAAGAA-----  
-----  
AAGAATGAACAAGAATTATTGGAATTAGATAAATGGGCAAGTTTGTGGAATTGGTTTGACATAACAACTGGC  
TGTGGTATATAAAAATATTCCATAATGATAGTAGGAGGCATAGTAGGTTTAAGAATAATTTTGTCT---  
ATACTTGCTATAGTA-----AATAGAGTTAGGAAGGGATATTCACCA-----  
TTATCGTTTGCTGTTAGCTTGCTCAACGCCACAGCCATAGCAGTAGCTGAN---  
GGGACAGATAGGATTATAGAAATACTACGAAGAGCTTTTAGGGCT-----  
-----ATTATCCACATA-----CCTGTTAGAATAAGACAGGGCTTGGAAGAGCTTTGCTA---TAA  
>GU727880  
GCT---ACA-----  
CAAAACTTGTGGGTTACAGTCTATTATGGGGTACCTGTGTGG--AAAGAAGCAAC---  
ACCACTCTATTTTGTGCATCAGATGCTAAATCATATGAGACAGAG---GTACATAAT-----  
-----GTCTGGGCCACA---CATGCCTGTGTACCCACAGAC---  
CCCAACCCACAAGAAGTAGTATTGGGA-----AATGTAACAGAAAATTATAAC-----  
-----ATGTGGAAAAATCACATGGTAGAACAGATGCATGAGGATATA---  
ATCAGTTTATGGGATCAAAGCCTA--AAGCCATGTGTAAAATTA---  
ACCCCACTTTTGTGTTACYTTAAATTGCACTGATGTGAGAAATGAGACTAAGGGG-----  
-----  
-----AATAATAGTATTGGGGAAAAATGCTGACATGAAA---  
AACTGCTCTTTCRATATCACCACAAGCATGAAA-----  
GATAAGTATCAGAACGTATATGCACTT--TTTTATAAACTTGATGTAGTTCCAATAGATGATAAT-----

-----  
-----  
AATAATACTAATACTATCTATAGGTTGGTAAGTTGTAACACCTCAGTCATTACACAG---  
GCCTGTCCAAAGGTATCCTTTCAGCCAATTCCCATACATTATTGTGCCCCGGCTGGTTTTGCGATTTTAAAT  
GTAAT---GATAAGAAATTCAAT-----GGAAAAGGACCATGTACAAAT-----  
-GTCAGC---ACAGTACAATGTACACATGGAATTAGACCAGTAGTATCAACT---  
CAGCTACTGTTAAATGGCAGTCTAGCAGAAGAAGAG-----  
ATAATGATTAGATCTGAGAATTTCAAAACAAT-----GCTAAAACCATAATAGTGCAGCTGAAT----  
-----GAATCTGTAATA-----ATTAATTGTACAAGACCCAACAACAATACAAGAAAG-----  
-AGGATAACTATG-----GGACCAGGAAGAGTA---TAT-----TACACAACAGGACAA-----  
-----ATAATAGGTAAGATA-----AGACAAGCACATTGT---AACATTAGTAGAGCA---  
GCATGGAATGATACTTTAAAGAAGGTAGCTGAAAAATTAAGA-----GGACAATTTGGA----  
-----AATAAAACAATAGTCTTTAAT-----  
CAATCTTCAGGAGGAGACCTAGAAATTGTA---ATGCACAGTTTTGTTTGTGGAGGGGAG---  
TTTAAGCAGCTCCAGGCAAGAAATCCTGGCTGTAGAAAAGATACCTAAAGGATCAACAGCTCCTAGGGATTTGGG  
GCTGCTCTGGAAGAACTCATTTGCACCACTGCTGTGCCTTGGAATGCCAGTTGGAGT-----  
-----AWTAAATCTCTGGATAGTATTTGG-----GGA-----  
AACATGACCTGGATGGAGTGG---GAAAAAGAAATTGACAAATTACACAGTTTTAATATAC---  
AATTTACTTGAAAAATCGCAAAATCCAACAAGAA-----  
-----  
AAGAAATGAACAAGAATTATTGGAATTAGATAAGTGGGCAAGTCTGTGGAATTGGTTTGACATAACAACTGGC  
TGTGGTATATAAAAAATATTCAATATGATAGTAGGAGGCCAGTAGGTTTAAGAATAGTTTTTACT---  
GTACTTTCTGTAGTA-----AATAGAGTCAGGCAGGGGTACTCACCA-----  
TTATCGTTTGCTATTAGCTTGCTTAATACCACTGCTGTAGTAGTAGCTGAG---  
GGGACAGATAGGGTTATAGAAGTAGTACAAAGAACTGGTAGAGCT-----  
-----ATCTACCACATA-----CCTGTTAGAATAAGACAGGGCTTGGAAGGCTTTTGCTA---TAA  
>DQ886031  
GCT---GCA-----  
GAAAAATTGTGGGTCACAGTCTATTATGGGGTACCAGTGTGG---AAAGAAGCAAAC---  
ACCACTCTATTTTGTGCATCAGATGCTAAAGCAACTAAGGCAGAG---GTACATAAT-----  
-----GTTTGGGCTACA---CATGCCTGTGTACCCACGGAC---  
CCCAACCCACAAGAACTAGCATTTGGAA-----AATGTGACAGAAAAGTTTGAC-----  
-----ATGTGGAAAAATAACATGGTAGAACAGATGCATGAGGATATA---  
ATCAGTTTATGGGATCAAAGCCTA---AAGCCATGTGTAAAATTA---  
ACCCCACTCTGTGTTACCTTAACCTTGTAAGTATTTCGGGGAATAATAATACTAATATCACT-----  
-----  
-----GGGAAGGCTAATACCACTATTGATGATATAGAAATGAAA---  
AATTGCTCTTTCAATATTACCACAGGCATAAGA-----  
GATAAGGTGAAGAGAGAATATGCACTG---TTTTATAAAGTTGATGTAGTACCAATAGAGAAG-----  
-----  
-----  
AATACCAGTTATAGGTTGATACATTGTAACACCTCAACCATCACACAG---  
GCCTGTCCAAAGGTATCCTTTGAGCCAATTCCCATACATTACTGTGCCCCGGCTGGTTTTGCGATTCTAAAGT  
GTAAG---GATAAGAAGTTCAAT-----GGAACAGGACTATGTACAAAT-----  
-GTCAGC---ACAGTACAGTGTACACATGGAATTAGGCCAGTAGTGTCAACT---  
CAACTGCTGTTAAATGGTAGTCTAGCAGAAGAAGAG-----  
GTAGTAATTAGATCTCAGAATTTACAGACAAT-----GTCAAAACCATAATAGTACAGCTGAAT----  
-----GAATCTGTAGTG-----ATTAATTGTACAAGACCCAACAATAATAAGAAAA-----  
-AGTATACATATA-----GGACCAGGGGGAGCA---TTC-----TATACAACAGGACAA-----  
-----GTAATAGGAAATATA-----AGACAGGCATATTGC---AACATTAGTGAAGAA---  
CAATGGAATAAACTTTAAATACATAGTTGAAAAATTAAGA-----GAACAATTTGGA----  
-----AATAAAACAATAATCTTTAAT-----  
CAATCCTCAGGAGGGGATCCAGAAATTGTA---ACGCACAGTTTTAATTGTGGAGGAGAA---  
TTCAAGCAACTCCAGGCAAGAGTCTGGCTGTGGAAAGATACCTAAAGGATCAACAGCTCCTAGGGATTTGGG  
GATGCTCTGGAAGAACTCATCTGCACCACTAATGTGCCTTGGAATACTAGTTGGAGT-----  
-----AATAGATCTCTGGACTATATTTGG-----GGG-----  
AACATGACCTGGATACAGTGG---GAAAGGGAAATTGACAAATTACACAGACTTAATATAC---  
ACCTTAATTGAAGAATCGCAAGACCAACAAGAA-----  
-----  
AAGAAATGAAGTAGAATTAATGAACTAGATAAGTGGGACAGTCTGTGGAGTTGGTTTAGCATAACAACTGGC

TGTGGTATATAAGATTATTCATAATTATAGTAGGAGGCTTAGTAGGTTTAAGAATAGTTTTTACT---  
GTA CTTTCTATAGTG-----AATAGAGTTAGGCAGGGATACTCACCA-----  
TTGTCA TTTTGCTGTTAGTTTGCTCAATGCTACAGCTATAACAGTAGCTGAG---  
GGGACAGATAGGGCTATAGA ACTAATAACAAAGAGCTTTTAGGGCT-----  
-----TTTCTTCGCATA-----CCTACAAGAATAAGACAGGGCTTGGAAGGGCTTTGCTA--TAA  
>DQ886032  
GCT---GCA-----  
GAAAAATATGTGGGTCACAGTCTATTATGGGGTACCTGTGTGG--AAGGAAACAACC---  
ACCACTTTATTTTGTGCATCAGATGCTAAAGCACATGATACAGAA--GTACATAAT-----  
-----GTTTGGGCCACA---CATGCCTGTGTACCCACAGAT---  
CCCAACCCACAAGAAATAGTATTG-----AATGTGACAGAAAATTTTAAC-----  
-----ATGTGGAAAAATAACATGGTTGAACAGATGCATGAGGATGTA---  
ATCAGTTTATGGGATCAAAGCCTA--AAGCCATGTGTAAGATTA---  
ACCCCACTCTGTGTTACTCTAAATTGCACTGATGTGAAGAATGTTACTAATACCAAGACAAAG-----  
-----  
-----GATACTAATACCAATATTAGTAGTTGGGAAGACATGAAA---  
AACTGCTCTTTCAATGTCACCTCAAACATAAGA-----  
GATAAAGTACAGAAAGAATATGCACCT--TTTTATAAGCTTGATGTAGTACCAACAGATAAG-----  
-----  
-----  
GATAATACTAGCTATAGGATGATAAATTGTAATACCACAGTCATTACACAG---  
GCCTGTCCAAAAGTATCCTTTGAGCCAATTCCTATACATTACTGTGCCCCGGCTGGTTTTGCGATTCTAAAGT  
GTAAT--GAGGAGAAGTTCAAT-----GGATCAGGACCATGTGGAAAT-----  
-GTCAGC--ACAGTACAATGTACGCATGGGATTAGGCCAGTAGTGTCAACT---  
CAGCTACTGT TAAATGGCAGTCTAGCAGAAAAAGAG-----  
GTAGTAATTAGATCTGAGAATTGGACAAACAAT-----GCTAAAATCATAATAGTACAGCTGAAT----  
-----GAATCTGTAGAG-----ATTAATTGTACAAGACCCAACAACAATACAGTAAGA-----  
-GGTATACATATA-----GGACCAGGGAGAGCA---TTT-----TATGCAACAGGATCA-----  
-----GTAATAGGAGATATA-----AGACAGGCACATTGT--AACATTAGTGCAGCA---  
AAATGGAATAACACTTTAAGACTAATAGCTGATAAGTTAAGA-----GAACAATTTAGG-----  
-----AATAAAACAATAGTCTTTAAT-----  
CAATCCTCAGGAGGGGACCCAGAAATTGTA--ATGCATAGTTTTAATTGTGGAGGGGAA--  
TTTAAGCAGCTCCAGGCAAGAGTCCTAGCTGTAGAAAGATACCTAAAGGATCAACAGCTTCTAGGGATTTGGG  
GTTGCTCTGGA AA ACTCATATGCACCACTGCTGTGCCTTGGAATGTTAGTTGGAGT-----  
-----AATAAATCTTATGATCAAATTTGG-----GAC-----  
AACATGACCTGGATGCAGTGG--GAAAGAGAAATTGACAATTACACAGGCTTGATATAC--  
ACCCTAATTGAAGAATCGCAGAACCAACAGGAA-----  
-----  
AAGAATGA ACTAGAACTATTGGAATTGGATAAGTGGGGAAGTCTGTGGAATTGGTTTGACATATCAAATTGGC  
TGTGGTATATAAGAATATT CATAATGATAGTAGGGGGCTTAATAGGTTTAAGAATAGTTTTTACT--  
GTAATTTCTATAGTG-----AATAGAGTTAGGCAGGGATATTCACCA-----  
TTGTGCTTTGCTGT CAGCTTGCTCAACGCCACAGCTATAGCAGTAGCTGAG---  
GGGACAGATAGGATTATAGAAGCTTTGCAAAGAGTCTTTAGAGCG-----  
-----TGAATAAGACAGGGCTTGGAAGGGCTTTGCTA--TAA  
>GU367399  
GCT---ATA-----  
GAACAATTGTGGGTCACAGTCTATTATGGGGTACCTGTGTGG--AAAGAAGCAAAC---  
ACCACTTTATTCTGTGCATCAGATGCTAAAGCATATAATACAGAG--GTACATAAT-----  
-----GTTTGGGCCACA---CATGCCTGTGTACCCACAGAC---  
CCCGACCCACAAGAAGTAGTATTGGAA-----AATGTGACAGAAAATTTTAAC-----  
-----GCGTGGAAAAATAACATGGTAGAGCAAATGCATGAGGATATA---  
ATCAGTTTATGGGATCAAAGCCTA--AAACCATGTGTAAAATTA---  
ACTCCACTATGTGTTACCTTACATTGCACTAATTACAGTGGCACTAATGACACTGGCACTGGGACT-----  
-----  
-----ACTACTGTACCTACTACTGTACTCACCCCTAACGAAGAAGTAAAG---  
AACTGCTCTTTCAATGTTACCACAGGCATGAGA-----  
GATAAGATAAAGAAAGAATATGCGCTT--TTTTATAGATATGATATAGAAAAAATAGATGAT-----  
-----  
-----  
AATACTAATAGTACCAGCTATAGGTTGATAAGGTGCAACACCTCAGTCATTACACAA---

GCCTGTCCAAAGGTATCCTTTGAGCCAATTCCCATACATTTTGTGCCCCGGCTGGTTTTGCGATTCTAAAAT  
 GTAAG---GATAAAAGGTTCAAT-----GGAACAGGACCATGTACAAAT-----  
 -GTCAGC---ACAGTACAATGTACACATGGAATTAGGCCAGTAGTCTCAACT---  
 CAACTGCTGTTAAATGGCAGTCTAGCAGAAGAAGAG-----  
 ATAGTAATTAGATCTGAAAATATCTCGGACAAT-----GCTAAAACCATAATAGTACAGCTGAAG----  
 -----GATTCTGTAAAA-----ATTAATTGTATAAGACCCAACAACAATACAAGAAAA-----  
 -AGTATACATATG-----GGACCAGGGGCCGCA---CTT-----TATACAACAGGAGCA-----  
 -----ATAATAGGAGATATA-----AGACAAGCATATTGT---AAGCTTAATGGAACA---  
 CAATGGAACAACACTTTAAGACAGATAGCAAGAAAATTAAGT-----AACTTGTGAAT----  
 -----AAAACAACAATAGTCTTTAAT-----  
 CAATCCTCAGGAGGGGACCAAGAAATTGTA--ATGCACAGTTTTAATTGTGGAGGGGAA--  
 TTTAAGCAGCTCCAGGCAAGAGTCCTGGCTGTGGAAAGATACCTAAGGGATCAACAGCTCCTGGGAATTTGGG  
 GTTGCTCTGGGAAAATCATTTGCAACACTGCTGTGCCTTGGAATACTACTTGGAGT-----  
 -----AATAAATCTCTAGATAATATTTGG-----AAT-----  
 AACATGACCTGGATGGAATGG---GAAAGAGAAATTGACAAATTACACAGGAGTAATATAT---  
 GAGTTAATTGAAAAATCGCAAAACCAGCAAGAA-----  
 -----  
 AAGAATGAACAAGAATTATTGGAATTAGATAAATGGGCAAGTTTGTGGAATTGGTTTAGCATAACAGAATGGC  
 TGTGGTACATAAAAATATTCTAATGATAGTAGGAGGCTTAGTAGGTTTAAGAATAATTTTTTACT---  
 GTACTTTCTATAGTG-----AATAGAGTTAGGCAGGGATACTCACCA-----  
 TTATCGTTTGCTGTTAGCTTGCTCAATGCCACAGCAATAGCAGTAGCTGAG---  
 GGAACAGATAGGGTTATAGAAGTATTACAAAGAGCATATAGAGCA-----  
 -----TTTATCCACATA-----CCTAGAAGAATAAGACAGGGCTTGGAAGGGCTTTGCTA---TAA  
 >GU367403  
 GCT---AAA-----  
 GACAAAATGTGGGTCACAGTCTATTATGGGGTACCTGTGTGG--AAAGAAGCAACT---  
 ACTACTCTATTTTGTGCATCAGATGCTAAAGCATATGATACAGAG--GGTCATAAT-----  
 -----GTTTGGGCCACA---CATGCCTGTGTACCCACAGAC---  
 CCCAACCCCTCAAGAAATAGAATTG-----AATGTGTCAGAAGAGTTCAAC-----  
 -----ATGTGGAAAAATAACATGGTAGAACAGATGCAGGAGGATATA---  
 ATCAGCTTATGGGATCAAAGCCTA--AAGCCATGTGTAGAATTA---  
 ACACCACTCTGTGTTACTTTTACTGTCAGTAATTATTCAGGGAATGGTACTAATGCCACTGGTACTAATACC-  
 -----  
 -----ACTACCCTGAATACTACTAGTGACACTGTTGGTATGAAAGAAATGAAA---  
 AACTGCACTTTCAATATCTCCACAAGCGTAAGA-----  
 GATAAGATGAAGAAAGAATATGCACTT--TTTTATAAGCTTGATATAGTACCAATAGATAAT-----  
 -----  
 -----  
 AATAATAGCTATAGATTGGTAAGTTGTAACACCTCAGTCATTAAACAA--  
 GCCTGTCCCAAGGTATCCTTTGAGCCAATTCCCATACATTATTGTGCCCCGGCTGGTTTTGCAATTCTCAAGT  
 GTAGA--GACAAGAAGTTCAAT-----GGAACAGGACAGTGTA AAAAT-----  
 -GTCAGC---ACAGTGCAATGTACACATGGAATTAGACCAGTAGTATCAACT---  
 CAATTGCTGCTAAATGGCAGTCTAGCAGAAGAAGAG-----  
 GTAGACTTTAGATCTGTCAATTCTCAGACAAT-----GCTAAAACCATAATAGTACA ACTGAAT---  
 -----GAATCTGTAGTA-----ATTAAGTGTACAAGACCCGGCAATAATACAAGAAGA-----  
 -AGTATACATATA-----GCACCAGGTAGAGCA---TTT-----TATGCAACAGGAGAG-----  
 -----GTAATAGGGGATATA-----AGACAAGCATCTTGT---ACCATTAATGGGGCA---  
 AAATGGAATAACACTTTAAACAGATAGTTCAAAAATTAAGA-----GAAGAATTTAAG---  
 -----AATAAAACAATAGTCTTTAAT-----  
 CAGTCCTCAGGAGGGGATCTAGAAATTGTA--ATGCACAGTTTTAATTGTAGAGGAGAG--  
 TTTAAACAGCTCCAGGCAAGAGTCCTGGCTGTGGAAAGATACCTGCACGATCAACAGCTCCTGGGGCTTTGGG  
 GTTGCTCTGGAAACTCATTTGCACCACTGCTGTGCCTTGGAATGCTAGTTGGAGT-----  
 -----AATAAAAATCTAACTCAGATTTGG-----GAT-----  
 AACATGACCTGGATGCAGTGG---GAAAAAGAAATTGACAAATTACACAAACGTAATATAT---  
 ACCTTACTTGAAGAATCGCAGAACCAACAAGAA-----  
 -----  
 AAGAATGAACAAGAATTATTAGAATTAGATAAATGGGCAAGTTTGTGGAATTGGTTCAGCATAACACAATGGC  
 TGTGGTATATAAAAATATTCTAATGATAGTAGGAGGCTTGATAGGATTAAGAATAATTTTTTGCT---  
 GTGCTTTCTATAGTA-----AATAGAGTTAGGCAGGGATACTCACCA-----  
 TTATCGTTTGCTGTTAGCTTGTTCAATTTCTATAGCCATAGCAGTAGCTGAG---

GGGACAGATAGGGTTATAGAAGTAGTACAAGGAGCTTGTAGAGCT-----  
 -----ATTCTCAGCATA-----CCTAGAAGAATAAGACAGGGCTTAGAAAGGCTTTTGCTA--TAA  
 >KP754469  
 -----ACA-----  
 GAAAACTTGTGGGTACAGTCTATTATGGGGTACCTGTGTGG--AAAGAAGCAACC---  
 ACCACTCTATTTTGTGCATCAGATGCTAAAGCATATGATAAAGAG--GTACATAAT-----  
 -----GTTTGGGCCACA---CATGCCTGTGTACCTACAGAC---  
 CCTAACCCACAAGAAGTATTATTGGAA-----AATGTGACAGAACCTTTTAAC-----  
 -----GCATGGAAAAATGACATGGTAGAACAAATGCATGAGGATATA---  
 ATCAGTTTATGGGATCAAAGCCTA--AAACCATGTGTAAAATTA---  
 ACCCCACTCTGTGTCACTTTAAATTGCAGTGATTATAATAGCACTGGTGTGCTTCTACTACTGTTGCTACTA  
 GCACTAGTACA-----  
 -----CCTCATACTACTAGTAGTATTATAGAGAGAGAACAGATAAAA---  
 AACTGCTCTTTTAATGTTACCACAAGTATGAGA-----  
 GACAAGGTGAAAAAAGAACATGCATTG--TTTTATTCAATTGATGTAGTACCGATAGAAGAAAA-----  
 -----  
 -----  
 AATAGTAGTAGCTATATAATGAGAAGTTGTAATACCTCAGTCATTACACAA---  
 GCCTGTCCAAAAGTATCCTTTGAGCCAATTCCCATACATTTTGTGCCCCGGCTGGTTTTCGATTCTAAAAT  
 GTAAC---AATAAGACATTCACT-----GGAAAAGGAGAAATGTAAAAAT-----  
 -GTCAGC---ACAGTACAATGTACACATGGAATTAGACCAGTAGTATCAACT---  
 CAATTGCTGTTTAAATGGCAGTCTAGCAGAAGAAGAG-----  
 GTGGTACTTAGATCTGACAATTTACAAACAAT-----GCTAAAAACATAATAGTACAGCTGAAA---  
 -----GAGCCTGTAAAA-----ATTAAGTGTACAAGGCCCGGCAACAATACAAGAAAA-----  
 -AGTATACATATG-----GGACCAGGGAAAGCA--TTT-----TATGCAACAGGAGAA-----  
 -----ATAACAGGAGATATA-----AGAAGGGCATATTGT--ACACTTAATGGAACA---  
 CAATGGAACCAGACCTTAAACAGGTAGTTGGAAAATTAAGA-----GAAAAATTTAAT---  
 -----AGCACTAAAATAGCCTTTAAT-----  
 CGATCCTCAGGAGGGGACCCAGAAATTACA--ATGCACATTTTAAATTGTAGAGGGGAA--  
 TTTAAGCAGCTCCAGGCAAGAGTCCCTGGCTCTGGAAAGATACCTAAAGGATCAACAGCTCCTGGGGATTTGGG  
 GCTGCTCTGGAAACTCATCTGCACCACTACTGTGCCTTGGAAATGCTAGCTGGAGT-----  
 -----AATAAATCTTCAATGATATTTGG-----GAC-----  
 AACATGACTTGGATGCAGTGG--GAAAAAGAAATTGACAATTACACAAACACAATATAC---  
 ACCTTACTTGA AAAATCGCAGAACCAACAAGAA-----  
 -----  
 GAGAATGAACAAAAATTGTTGGAATTGGATAAATGGGACAGTTTGTGGAATTGGTTTGACATAACAAATTGGC  
 TGTGGTATATAAAAAATATTACATAATGATAGTAGGAGGCTTAATAGGTTTAAAGAATAGTTTTTTCT---  
 GTACTTGCTATAGTG-----AATAGAGTTAGGCAGGGATACTACCA-----  
 TTATCGTTTGTCTGTTAGCTTGCTCAACGCCACAGCCATAACAGTAGCTGGG---  
 GGGACAGACAGAATTCTGGAAGTATTGCAAAGGGCTTATAGAGCT-----  
 -----CTTTGTAACATT-----CCTAGAAGAATAAGACAGGGCTTGGAACGGGCTTTGCTA--TAA  
 >KP754471  
 GCT---ACA-----  
 GAGGAAAAGTGGGTACAGTCTATTATGGGGTACCTGTGTGG--AAAGAGGCAACC---  
 ACCACTCTATTTTGTGCATCAGATGCTAAAGCATATGATACAGAG--GCACATAAT-----  
 -----GTTTGGGCCACA---CATGCCTGTGTACCCACAGAC---  
 CCCAACCCACAAGAAATAAGATTGGAA-----AATGTGACAGAAAATTTTAAC-----  
 -----ATGTGGA AAAATAACATGGTAGAACAGATGCATGAGGATATA---  
 ATTAGTTTATGGGATCAAAGCCTA--AAGCCATGTGTAAAATTA---  
 ACTCCACTCTGTGTTACTTTAAATTGCACTAAGTTGAGTAGCAAAAATAGTACTAGCACCACCAATGGACCTA  
 GA-----  
 -----CCCAC TTTTGATAATGAGACAATAGCAAAAAGAGGCACTAAGA---  
 AACTGCTCTTTTAATGTTACCACAACATAAGA-----  
 GATAAGGTAAAGAAAGAATATGCATTG---  
 TTCTATAGCCTTGATATAGTACCAATAAATGAAGATAATAATAAGACT-----  
 -----  
 AATACTAGTTATGCTAGTTATAGGTTGACAAGTTGTAACACTTCAATCATTACGCAG---  
 GCCTGTCCAAAGACATCCTTTGAACCTATTCCCTATACATTTTGTGCTCCGGCTGGATTTGCGATTATAAAGT  
 GTAAC---AATAAGACATTCACT-----GTAAAAGGACCATGTAAAAAT-----  
 -GTCAGC---ACAGTACAGTGTACACATGGGATTAGGCCAGTAGTATCAACT---

CAACTGCTGCTAAATGGCAGTCTAGCAGAAGAAGAA-----  
 ATAGTAATTAGATCTGACAATTTCTCGGATAAT-----ACTAAACTATAATAGTACACCTGAAT----  
 -----GAATCTATAGTA-----ATTAATTGTACAAGACCCAACAACAACACAAGAAAA-----  
 -AGTATACATATA-----GGACCAGGGAGAGCA---TTT-----TATACAACAGGAGAC-----  
 -----ATAATAGGAGATATA-----AGACAAGCACATTGT---AACATTAGTGAAGAA---  
 AAATGGAATAAAACTCTAAACAGATAGCTAAAAAATTAAAA-----GAACAATTT-----  
 -----AATAAGACAATAATCTTTAAT-----  
 CAATCCTCAGGAGGGGACCCAGAAATTGTA--ATGTACACTTTTAACTGTGGAGGGGAA---  
 TTTAAGCAGCTTCAGGCAAGGCTCCTGGCTGTGGAAAGATACCTAAATGATCAACAGCTCCTGGGGATTG  
 GTTGCTCTGGAAGAACTCATCTGCACCACTGCTGTGCCTTGGAATAATACTTGGAGT-----  
 -----AATAAAAGTCTGAGTACAATTTGG-----AAT-----  
 AACATGACCTGGATGGATTGG---GAAAGAGAAATTGACAATTACACAGACGAAATATAC---  
 AAATTGATTGAACAATCGCAGATCCAGCAGGAA-----  
 -----  
 AAGAATGAACAAGATTTATTGGCATTGGATAATTGGGCAAGTTTGTGGAATTGGTTTAGCATATCAAAATGGT  
 TGTGGTATATAAAAATATTCTAATGATAATAGGAGGCTTGATAGGTTTAAGAATAGTTTTTTACT---  
 GTACTTTCTATAGTG-----AATAGGGTTAGGCAGGGATATTCACCA-----  
 TTATCGTTTGTCTGTGCTGCTTGTTTAATACCACAGCAATAGTAGTAGCTGAG---  
 GGGACAGATAGGATTATAGAAGTAGGACAAAGAATTTTGTAGAGCT-----  
 -----GTTCTTAATATA-----CCTAGAAGAATAAGACAGGGCTTTGAAAGGGCTTTGCTA---TAA  
 >FJ469744  
 GCT---ACA-----  
 GACAAGTTGTGGGTCACAGTTTATTATGGGGTACCTGTGTGG---AAAGAAGCAAGC---  
 ACTCCTCTATTTTGTGCATCAGATGCTAAAGCATATGATACAGAG---GCACATAAT-----  
 -----GTTTGGGCCACA---CATGCCTGTGTACCCACAGAC---  
 CCCAACCCACAAGAAATAGTATTGGAA-----AATGTGACAGAAAATTTTAACT-----  
 -----ATGTGGAAAAATAACATGGGTAGAACAGATGCATGAGGATATA---  
 ATCAGTTTATGGGATCAAAGCCTA---AAGCCATGTGTAAAGCTA---  
 ACCCCACTCTGTGTTACTATGAATTGCATTGATTATAATAATAATAGTACCAATACTACCAAT-----  
 -----  
 -----AGTGCCAATACCACTAGTAGTCCCCTAGGAGAAATAAAA---  
 AACTGCTCTTTCAATATCACCACAAACATAAGA-----  
 GACAAGGTGCAGAAAGAACATGCACCT--TTTTATAGCCTTGATATAGTACCAATAAATAAT-----  
 -----  
 -----  
 GAGGGAACTAATACAAGCTATAGGTTGGTAAGTTGTAACACCTCAGTCATTACACAA---  
 GCCTGTCCAAAGGTATCTTTTGAACCAATTCCCATACATTTGTGTGCCCGGCTGGTTTTGCGATTCTAAAT  
 GTAAC---AATAAGGAGTTCAAT-----GGAACAGGACCATGTAAAAAT-----  
 -GTAAGC---ACAGTACAGTGTACGCATGGAATTAGACCGGTAGTATCAACC---  
 CAACTACTGTTAATGGCAGTCTAGCAGAGAAAGAG-----  
 GTGGTAATTAGGTCTGCCAATTTCTCGGACAAT-----GCTAAGACCATAATAGTACAGCTGAAT---  
 -----GCATCAGTACAA-----ATTAATTGTACAAGACCAAACAACATAACAAGAAAA---  
 -GGTATACACATA-----GGACCAGGCAGAACA---TGG-----TATGCAACAGGAGGA---  
 -----ATAATAGGAGATATA-----AGACAAGCACATTGT---AACCTTAGTAGAGAA---  
 GCATGGGAGAACACTTTAAACAGGTAGCTATAAAACTAGGC-----GAACAATTTAAG---  
 -----AATAAAAAAATAGCCTTTAAT-----  
 CGATCCTCAGGAGGGGACCCAGAAATTGTA--ATGCACAGTTTAAATTGTGGAGGGGAA---  
 TTTAAACAGCTCCAGGCAAGAGTCCCTGGCTCTGGAAAGATACCTAAAGGATCAGCAGCTCCTGGGGATTG  
 GTTGCTCTGGAAGAACACATCTGCACCACTGCTGTGCCTTGGAACACTAGTTGGAGT-----  
 -----AATAAATCTTTGAATGCAATTTGG-----GAT-----  
 AACATGACCTGGATGGAGTGG---GACAGAGAAATTAGCAATTACACAACTTAATATAC---  
 TCCTTAATTGAAGAATCGCAGATCCAACAAGAT-----  
 -----  
 AAGAATGAAAAAGAACTATTAGAATTAGATAAATGGGCAAGTTTGTGGAATTGGTTTAGTATAACAAATTGGC  
 TGTGTACATAAGATTATTCTAATGATAGTAGGGGGCTTGATAGGTTTAAGAATAGTTTTTTACT---  
 GTACTTTCTATAGTG-----AATAGAGTTAGGCAGGGATACTCACCA-----  
 TTATCGTTTGTCTGTTAGTTTGTCTTAATGCCACAGCCATAGCAGTAGCTGAA---  
 GGGACAGATAGGATTATAGAAGTAGCACAAAGAGCTTTTGTAGAGCT-----  
 -----ATTATCCACATA-----CCTACAAGAATAAGACAGGGCTTGGAAGAGCTTTGCTA---TAA  
 >FJ687543

GCT---ACA-----  
GAAAAATTGTGGGTCACAGTCTATTATGGGGTACCTGTGTGG---AAGGAAGCTAAC---  
ACCACTCTATTTTGTGCATCAGATGCTAAACATATGATACAGAG---GCACATAAT-----  
-----GTTTGGGCCACA---CATGCCTGTGTACCCACAGAC---  
CCCAACCCACAAGAAGTAGTAATGACC-----AATGTGACAGAAAATTTTAAC-----  
-----ATGTGGAAAAATAACATGGTAGAACAAATGCATGAGCATATA---  
ATCAATTTATGGGATCAAAGCCTA---AAGCCATGTGTAAAATTA---  
ACCCCACTCTGTGTTACTTTAAATTGCAGTGATGTAAATGGCACTAGTAGTAATACCGCTAAA-----  
-----  
-----AACATAAGAAACGAGACAATAATGGAGAAAGGAGAAATCAAA---  
AACTGCTCTTTCAATATCACCACAGGCATAAGA-----  
GATAGGGTGCAGAAACAATATGCAACA---TTTTATAGACTTGATGTAGTACAAATAGATGAT-----  
-----  
-----  
AAGCATAAGACTAGATATAGGATGACAAGTTGTAATGCCTCAGTCATTACACAG---  
GCCTGTCCAAAGATATCCTTTGAGCCAATTCCCATACATTTTGTGCCCCGGCTGGTTTTGCGATTCTAAAGT  
GTAAA---GAAAAGGGGTTCAAT-----GGAACAGGAAAATGTAAAAAT-----  
-GTCAGC---ACAGTACAATGCACACATGGAATTAGGCCAGTAGTATCAACT---  
CAATTGCTGTTAAATGGCAGTCTAGCAGAAGAAGGG-----  
GTAGTAATTAGATCTCAAACTTCACAGACAAT-----ACTAAAACCATAATAGTACAGCTGGAC---  
-----GCAGCTATAAAA-----ATTAATTGTACAAGACCCAACAATAATACAAGAAAA-----  
-AGGATGAGTCTA-----GGTCCAGGGAAAAGTA---TTT-----TATACAACAGGACAA-----  
-----AAAATGGGAGATATA-----AGAAAAGCACATTGT---AACCTTAGTGCAGGA---  
GAGTGGTATAGCGCTTTAAAAAGGATAGCCATAAAATTAAGA-----GCACAATTTAAC---  
-----AATAAAACAATAGTCTTTAAG-----  
AACTCCTCAGGAGGGGACTCAGAAATTGTA---ACCCACAGTTTTAATTGTGGAGGGGAA---  
TTTAAGCAGCTCCAGGCGAGAGTCCTGGCTGTGGAAAGATACCTAAGGGATCAACAGCTCCTGGGGCTCTGGG  
GTTGCTCTGGAAAGCTCATTTGCACCACTTCTGTGCCTTGGAAATACTAGTTGGAGT-----  
-----AATAAATCTCTGAATGAGATTTGG-----GAT-----  
AACATGACCTGGAAGGAATGG---GACAGAGAAATTAACAAGTACACAAATATAATATAC---  
TCCTTAATTGAAGAATCGCAGAACCAGCAAGAA-----  
-----  
AAGAATGAACAAGAATTATTGGCATTAGATAAGTGGGCAAGTTTATGGAATTGGTTTGACATAACAAAATGGC  
TGTGGTATATAAAAATATTATAATAATAGTAGCAGGCTGGATAGGTTTAAGAATAGTTTTTTAGT---  
GTACTTTCTATAGTG-----AATAGAGTTAGGCAGGGATACTCACCT-----  
TTATCGTTTGTCTGTTAGCTTGCTCAATGCCACAGCCATAGCAGTAGCTGAG---  
GGGACAGATAGGGTTATAGAAGTAGTACAAGGAGCTTGTAGAGCT-----  
-----ATTCGCCACATA-----CCTAGAAGAATAAGACAGGGCTTGGAAGGATTTTGCTA---TAA  
>KF725982  
GCA---GAC-----  
CAATTGTGGGTCACAGTCTATTATGGGGTACCTGTGTGG---AAAGAAGCAACC---  
ACCACTCTCTTTTGTGCATCAGATGCTAAAGCATATGATACAGAG---GCACATAAT-----  
-----GTTTGGGCCACA---CATGCCTGCGTACCCACAGAC---  
CCCAACCCACAAGAAATAAGACTGGAC-----AATGTGACAGAAAATTTTAAC-----  
-----ATGTGGAAAAATAACATGGTAGAACAGATGCATGAGGATATA---  
ATCAGTTTATGGGATCAAAGCTTA---AAGCCATGTGTAAAATTA---  
ACCCCACTCTGTGTTACTTTAAACTGTATTAAATGCTACTCTCGATTGCAATAATACTGCCAAT-----  
-----  
-----GTCACTAATTTCAATAAACTCTTTGCAAGGAGATGGGGACGGAAATAAGA---  
AACTGCTCTTTCAATGCCAGCACAGAAATAAGA-----  
GATAAGATAAGGAAGGAATATGCACTT---TTTTATAAACTGATTTAGTATCAATAGATAACAAT-----  
-----  
-----  
GACAATACTAGCTTTAGGTTGATAAGTTGTAACACCTCAGTCATTACACAG---  
GCCTGTCCAAAGACATCCTTTGAGCCAATTCCCATACATTATTGTGCCCCGGCTGGTTTTGCGATTCTAAAAAT  
GTAGA---GATAAGAAGTTCAAT-----GGAACAGGACCATGTACAAAT-----  
-GTCAGC---ACAGTACAATGTACACATGGAATTAAGCCAGTAGTATCAACT---  
CAGCTGCTGTTAAATGGCAGTTTAGCAGAAGAAGAG-----  
GTAGTAATTAGATCTAGCAATTTACAGACAAT-----GCTAAAATCATAATAGTACAGCTGAAA---  
-----GAAGCTGTAAAA-----ATTAATTGTACAAGACCCAGTAACAATACAAGAAG-----

-AGTATACATATA-----GGACCAGGGAGAGCA---TTC-----TATGCAACAGGAGCC-----  
-----ATAATAGGAGATATA-----AGACAAGCACATTGT---AACCTTAGTATAGGG---  
GAATGGAAGAAAGCTTTAAATCAAACAGAGGAAAAATTAAAA-----GAACAATTTAAT-----  
-----AATAAAACAATACTCTTTAAA-----  
CCATCCTCAGGAGGGGACCTAGAAATTGTA--ACACACAGTTTTTAATTGTGGAGGGGAA---  
TTTAAGCAGCTCCAGGCAAGAGTCCTAGCTGTGGAAAGATACCTAAAGGATCAACAGCTCCTGGGGATTTGGG  
GTTGCTCTGGAAAACCTCATTTGCACCACTGCTGTGCCTTGGAATGCTAGTTGGAGT-----  
-----AATAAATCTCATGATCAGATTTGG-----AAT-----  
AACATGACCTGGATGGAGTGG---GAAAGAGAAATTGACAATTACACAAGCTTAATATAC---  
TCCTTAATTGAAGAATCGCAGAACCAGCAAGAA-----  
-----  
AAGAATGAACAAGAATTATTGGAATTAGATAAAATGGGCAAGTTTGTGGAATTGGTTTGATATATCAAACCTGGC  
TGTGGTATATAAGAATATTCATAATGATAGTAGGAGGCTTGATAGGCTTAAGAATAATTTTTTGCT---  
GTACTTTCTTTAGTG-----AATAGAGTTAGGCAGGGATACTCACCA-----  
TTATCGTTTGTCTGTTAGTTTGTCTCAACGCCACAGCTATAGCAGTAGCTGAG---  
GGGACAGATAGAATTATAGAATTCTTACAAAGAGTTTTTTAGAGCT-----  
-----TTTATCCACATA-----CCTAGAAGAATCAGACAGGGCTTTGAAAGGGCTTTTGCTA---TAA  
>KF725986  
GCT---GCA-----  
GAAAAATTTTGGGTCACAGTCTATTATGGGGTACCTGTGTGG---AAAGAAGCTAAC---  
ACCACTCTATTCTGTGCATCAGATGCTAAAGCATATGACACAGAG---GCCCATAA-----  
-----GTTTGGGCCACA---CATGCCTGTGTACCCACAGAC---  
CCCGACCCACAAGAAATGGTATTGGCA-----AATGTAACAGAAAATTTTAAC-----  
-----GTGTGGAAGAATGACATGGGTAGAACAGATGCATGAGGATATA---  
ATCAATTTATGGGATCAAAGCCTA---AAGCCATGTGTAAAATTA---  
ACCCCACTCTGTGTCACTTTAAACTGCACTAATATATTGAATAAGACTGATACTAATAAGAATACT-----  
-----  
-----AGTAGTAGCAATAACTCGAGAATAGATTATGAAGAAATGAAA---  
AATTGTTCTTTCAACATCACCAAGGCATAAAA-----  
GATAAAATGAGGAAGGAATATGCACCT--TTTTATAAACTTGACCTAGAACAAACAGGAGAT-----  
-----  
-----  
GATAATACAAGTTATACATTAATAAAGTGTAACACCTCAGTTATTACACAG---  
GCCTGTCCAAAGATATCCTTTGAACCAATTCCCATACACTTTTGTGCCCCAGCTGGTTTTGCGATTCTAAAAT  
GTAAC---AATAATACATTCAAT-----GGATCAGGACCATGTACAAAT-----  
-GTCAGC---ACTGTGCAATGTACACATGGAATCAGGCCAGTAGTGTCAACT---  
CAACTGCTGTTAAATGGCAGTCTATCAAAGGAGAC-----  
GTGGTAATTAGATCTGAAAATTTACAGACAAT-----GCAAAAACCATAATAGTACAGCTGAAT---  
-----GCAACTGTAAAA-----ATTAATTGTACAAGACCCAACAACAATACAAGAAAA---  
-GGTATACATATG-----GGATGGGGAAGAACA---TTT-----TATGCAACAGGAGAA---  
-----ATAATAGGAGACATA-----AGACAAGCACATTGT---AACATTAGTAAGACA---  
GAATGGAATAACACTTTAAGATGGGTAGCAGAAAAATTAGA-----GGACAGCTTAAT-----  
-----ATAACAACAATAATCTTTAAT-----  
CAATCCTCAGGAGGGGACCCAGAAATTGTA--ATGCACCATTTTATTTGTGGAGGGGAA---  
TTTAAACAGCTCCAGGCAAGAGTCCTGGCTGTGGAAAGATTCCTAAGGGATCAACAGCTCCTAGGGATTTGGG  
GTTGCTCTGGAAAACCTCATTTGCACCACTAATGTGCCTTGGAATACTAGTTGGAGT-----  
-----AGGAGT---AGTGATAATCTGAATGCAATTTGG-----AAT-----  
AACATGACCTGGATGGAGTGG---GAGAGAGAAATTGACAATTACACACAAACAATATAT---  
ACCTTACTTGAAGAATCGCAGAACCAACAAGAA-----  
-----  
AAGAATGAAAAAGATTTATTAGAAATTGGATAAGTGGGACAGTCTGTGGAATTGGTTCAACATAACAACTGGC  
TGTGGTATATAAAAAATATTCATAATGATAGTAGGGGGATTAAAGGTTTAAGGATAGTTTTTACT---  
ATAATTTCTATAGTG-----AATAGAGTTAGGCAGGGGTACTCACCA-----  
CTGTCAATTCGCTGTTAGTTTGTTTAATGCCATAGCTATAGCAGTAGCTGAA---  
GGGACAGATAGAGTAATAGAAGTAGTACTAAGAGTTGGGAGAGGC-----  
-----ATTCTCCACATA-----CCTACAAGAATAAGACAGGGTTTAGAAAGGCTTTTGCTA---TAA  
>KF725988  
GCT---GCA---AAA-----CAA---TCT---GCA---  
GAGCAGTTGTGGGTCACAGTCTATTATGGGGTACCTGTGTGG---AAAGACGCCAAC---  
ACTACTCTATTCTGTGCATCAGATGCTAAAGCATATGATACAGAG---GCACATAAT-----

-----GTTTGGGCCACA---CATGCCTGTGTACCTACAGAC---  
 CCCAACCCACAAGAAGTAGATTTGGTA-----AATGTGACAGAAGATTTTAACT-----  
 -----ATGTGGAAAAATAACATGGTAGAACAGATGCATGAGGATATA---  
 ATTAGTTTATGGGATCAAAGCCTA---AAGCCATGTGTAAAGATTA---  
 ACCCCACTCTGTGTTACTTTAAAGTGTGATAATACTACTAATAGTACCACTAGTACC-----  
 -----  
 -----CCTTTCAAAGGAGGAATGACA---  
 AACTGCTCTTTCAATATCACCACAAGCATGGGA-----  
 GATAAGATGCAAAGAGAATATGCATTG---TTTTATGAACTTGATGTAGTACCAATAGATAAT-----  
 -----  
 -----  
 AGTACCTATAGATTAATTAGTTGTAATACCTCAGTCGTTACACAA---  
 GCCTGTCAAAAAATATCTTTTGATCCAATTCCCATACATTATTGTGCCCCGGCTGGTTTTGCAATTCTAAAAAT  
 GTAAA---GATAAGAGGTTCAAT-----GGAACAGGATCATGTAAAAAT-----  
 -GTCAGT---ACAGTACAATGTACACATGGAATTAGACCAGTAGTGTCAACT---  
 CAACTGTTGCTAAATGGCAGTCTAGCAGAAGAACAA-----  
 GTAGTAATCAGATCTGAAAAATTTCTCGGACAAT-----GCTAAAAACATAATAGTACAGCTGAAG---  
 -----GAAGCTGTACAA-----ATTAATTGTACGAGACCCAACAACAACACAAGGAAA-----  
 -AGTATAAATATG-----GGACCAGGGAGGGCA---TTT-----TATACAACAGGACAA-----  
 -----ATAATAGGAGATATA-----AGACAAGCACATTGT---AACATTAGTGAGAAA---  
 AAATGGAATAGCACTTTAAAAACAGATAGCTGAAAGATTAAGA-----GAACAATTTAAG---  
 -----AATAAAACAATAGTCTTTACG-----  
 AATTCTCAGGAGGGGATCCAGAATTG-TA---ACGCACAGTTTTAATTGTGGAGGGGAG---  
 TTTAAACAGCTCCAGGCAAGAACTCTGGCTGTGGAAAGATACCTCAGGGATCAACAGCTCCTGGGGATTTGGG  
 GATGCTCTGGGAACTCATTTGCACCACTGCTGTGCCTTGGAATAATAGTTGGAGT-----  
 -----AATAGAACTCTAGAGGACATTTGG-----GGG-----  
 AACATGACCTGGAAGCAGTGG---GAAACAGAAATTGATAATTACACAAGTTTAATATAC---  
 ACCTTAATTGAAGAATCGCAGAACCAGCAAGAA-----  
 -----  
 AAGAATGAACAAGAATTATTGGCATTAGATAAATGGGCAAGTTTGTGGAATTGGTTTGACATAACAACTGGC  
 TGTGGTATATAAAAAATATTCATAATGATAGTAGGAGGCTTGATAGGTTTAAGAATAGTTTTTACT---  
 GTACTTTCTATAGTG-----AATAGAGTTAGGCAGGGATACTACCA-----  
 TTGTCGTTTGCTGTTAGTTTGCTCAATACCATAGCTATAGCAGTAGCCGAG---  
 GGGACAGATAGGATTATAGAAGTAATACAAGGAATTTTAGAGCT-----  
 -----ATTGCCACATA-----CCTAGAAGAATAAGACAGGGCTTGGAAGGATTTTGCTA---TAA  
 >KU168260  
 GCT---GCA-----  
 GATAAATTGTGGGTCACAGTCTATTATGGGGTACCTGTATGG---AAAGAAGCCAAT---  
 ACCACTCTATTTTGTGCATCAGATGCTAAAGCACATGATACAGAG---GTACATAAT-----  
 -----GTTTGGGCCACG---CATGCCTGCGTACCCACAGAC---  
 CCCAACCCACAAGAAGTGTTATTGGAA-----AATGTGACTGAAGAGTTTAACT-----  
 -----ATGTGGAAAAATAACATGGTAGACCAGATGCATGAGGATATA---  
 ATCAGTTTATGGGATGAAAGCTTA---AAGCCATGTGTAAAATTA---  
 ACCCCGCTCTGTGTTACTTTAAATTGCACTGATTTGACAAATGCTACTTTGAGGAATGCTACT-----  
 -----  
 -----GAAATGAAA---  
 AACTGCTCTTTCAAACCACCACAAGCTTAAGA-----  
 GATAAGGCTCAGAAAGAATATGCACTT---TTTTATAAACTTGATGTAGTACCAATAGATGAG-----  
 -----  
 -----  
 GCTAAGAATACTACTAACTTTAGATTGATACATTGTAACACCTCAGTCATTACACAG---  
 GCCTGTCCAAAGATATCATTTGAACCAATTCCCATATATTATTGTGCCCCGGCTGGTTTTGCGATTCTAAAGT  
 GTAGA---GATAGGAAGTTCAAT-----GGAACAGGAATATGTAAAAAT-----  
 -GTCAGC---ACAGTACAATGTACACATGGAATTAGGCCAGTAGTGTCAACT---  
 CAACTGCTGTTAAATGGCAGTCTAGCAGAAGAAGAA-----  
 GTAGTAATTAAATCTGAAAAATATCTCGGACAAT-----ACTAAAACCATAATAGTACAGCTGAAA---  
 -----AACCCTGTAAAC-----ATTACTTGTACCAGACCCAGCAACAATACAAGAAAA-----  
 -CGTATAGCGATA-----GGGCCAGGAAGAGCA---GTT-----TATACAACAGAACAA-----  
 -----ATAATAGGAGATATA-----AGACAAGCACATTGT---AACCTTAGTGAAATCA---  
 AAATGGAATAAACTTTACAACAGATAGTTGAAAAATTAAGA-----GTACACTTTAAG---

```

-----AATAAAACAATAGCCTTTAAT-----
AAATCCTCAGGAGGGGACCCAGAAATTGTA--ATGCACAGTTTTTAATTGTGGAGGGGAA---
TTTAAGCAGCTCCAGGCAAGAGTCCTAGCTGTGGAAAGATACCTAAGGGATCAACAGCTCCTAGGGATTTGGG
GATGCTCTGGGAGACTCATCTGCACCACTGCTGTGCCTTGGAAATGCTAGTTGGAGT-----
-----AATAGAAATCTGACTCAGATTTGG-----GAT-----
AACATGACCTGGATGCAGTGG--GAAAAAGAAATTGACAATTACACAGACTTAATATAC---
TCCTTACTTGAAGAATCGCAAAACCAACAAGAA-----
-----
AAGAATGAACAAGAATTATTAGAAATTGGATAAGTGGGCAAGTTTGTGGAATTGGTTTGACATATCAAATTGGC
TGTGGTATATAAAAAATATTCATAATGATAGTAGGAGGCTTGATAGGCTTAAGAATAGTTTTTTGCT---
GTATTTTCTATAGTG-----AATAGAGTTAGGCAGGGATACTCACCA-----
TTGTCAATTTGCTGTGCAGCTTGTTCAACGCCACCGCTATAGCAGTAGCTGAG---
GGAACAGATAGGGTTATAGAAATATTACTAAGAATTTTTTAGAGGA-----
-----ATCCTCCACATA-----CCTAGAAGAATAAGACAGGGCTTTGAAAGGTCTTTGCTA---TAA
>KT452481
GCA---GGG-----
GAAGATTCTGTTGGTTCACAGTCTATTATGGAGTACCTGTGTGG--AAAGAAACAACC---
ACCACTTTGTTTTGTGCATCAGATGCTAAGGCATATGACACAGAA--GTACATAAT-----
-----GTTTGGGCCACA---CATGCCTGTGTACCCACAGAC---
CCCAGTCCACAAGAAGTATCCTTGCCA-----AATGTGACAGAAAATTTTAAC-----
-----ATGTGGAAAAATAACATGGTAGAACAGATGCATGAGGATATA---
ATCAGTTTATGGGATCAAAGCTTA--ACGCCATGTGTAAAATTA---
ACCCCACTCTGTGTTACTTTAAATTGCACTGATGTGAATACCACTAGGAATGCTAATACT-----
-----
-----AATAATACATGGGGAACGGTAATGGAGAAAGGAGAAGTAAAA---
AATTGTTCTTTCAATATCACCAAGCATAAGA-----
GATAAAAGGCAGAAAGAATTTGCATTG--TTTTATAGACCTGATGTAGTACCAATAGATGGA-----
-----
-----
GATAATAATACCTATAGGTTGATAAGTTGTGACACCTCAGTCATTACTCAA---
GCCTGTCCAAAGATATCCTTTACACCAATTCCCATACATTATTGTGCTCCAGCTGGTTTTGCGATTCTAAAAT
GTAAT---GATAAGAAGTTCAAT-----GGAACAGGACCATGTAGAAAT-----
-GTTAGC--ACAGTACAATGTACACATGGAATTAAGCCAGTGGTATCAACT---
CAACTGCTGTTAAATGGCAGTCTAGCAGAAAAGGAG-----
ATAGTAATTAGATCTGCCAATTTCTCAGACAAT-----GCTAAAATCATAATAGTACAGTTGAAT----
-----GAATCTGTCCAA-----ATTGATTGTATAAGACCCAACAACAATACAAGAAAA-----
-AGTATAAACATA-----GGACCAGGGAGAGCA--TGG-----TATACAACAGGAGAC-----
-----ATAATAGGAGATATA-----AGACAAGCACACTGT--AACATTAGTGCAGCA---
AAATGGAATCAGGCATTACAAAGGATAGTTGTAAAATTAAGA-----GAACAATTTGGG---
-----GAAAATACAACAATAGCTTTTAAT-----
CAATCCTCAGGAGGAGACCCAGAAATTGTA--ACACACAGTTTTTAATTGTGGAGGGGAA---
TTTAAGCAGCTCCAGGCAAGAGTCCTGGCTGTGGAAAGATACCTAAAGGATCAACAGCTCCTGGGAATTTGGG
GTTGCTCTGGAAAGCTCATTTGCACCACTACTGTGCCTTGGAAATAGTAGTTGGAGT-----
-----AATAAACCTTGGATCAAATTTGG-----GAT-----
AACATGACCTGGATGGAATGG--GAAAGAGAAATTGACAATTACACAGACATAATATAT---
AACTTACTTGAAAAAGCACAAAACCAGCAGGAT-----
-----
AAAAATGAACAAGAATTATTGGAAC TAGATAAATGGGCAAATCTTTGGAGTTGGTTTGACATAACAACTGGC
TATGGTATATAAAAAATATTCATAATGATAGTAGGAGGCTTGGTAGGTTTAAAAATAGTTTTTTACT---
GTGCTTTCTATAGTG-----AATAGAGTTAGGCAGGGATACTCACCA-----
TTATCGTTTGTCTATTAGCTTGTTCAACGCCACAGCCATAGCAGTAGCTGAG---
GGAACAGATAGGATTATAGAAATAATACAAAGAACTTT TAGAGCT-----
-----ATTATCCACATA-----CCTAGAAGAATTAGACAGGGCTTGGAAGGGCATTTGCTA---TAA
>KT452508
ACT---GCA-----
GGAAATTTGTGGGTTCACAGTTTTATTATGGGGTACCTGTGTGG--AAAGAAGCAACT---
ACCACTCTATTCTGTGCATCAAATGCTAAAGCATATGAGAAAGAG--GCACATAAT-----
-----GTTTGGGCCACA---CATGCCTGTGTACCCACAGAC---
CCCGACCCACAAGAAATGTTCTTG-----AATGTGACAGAAAATTTTAAC-----
-----ATGTGGGAAAAATAACATGGTAGACCAGATGCATGAGGATATA---

```

ATTAGTTTATGGGATCAAAGCCTA---AAGCCATGTGTAAAATTA---  
 ACCCCACTCTGTGTTTCTTTAGAAATGCACTAATGCACTAATATAAATATTACTAAGAAT-----  
 -----ATGGAAATGAAA---  
 AATTGCTCTTTCAATATGACCACAAGCATAAGG-----  
 AATAAGCCGCAGAGAACTATGCACTT---TTTTATAGCTATGATATAATACCAATAGAAAATGATACA----  
 -----  
 GATGATGGTAATATTAGCTATAGGTTGAGAAGTTGTAACACCTCAATCATTACACAA---  
 GCCTGTCCAAAGATATCCTTTGAGCCAATTCCCATACATTATTGTGCCCCGGCTGGTTTTGCGATTCTAAAGT  
 GTAAT---AATAAGAAGTTCAAT-----GGATCAGGGCCATGTACAAAT-----  
 -GTCAGC---ACAGTACAATGTACACATGGAATTAAGCCAGTAGTATCAACC---  
 CAACTGCTGTTAAATGGCAGTCTAGCAGAAGAAGGG-----  
 GTAGTAATTAGATCCGCCAATTTCTCGGACAAT-----AAACATAACATAATAGTACAGCTGAAT----  
 -----AAACCTGTAGAA-----ATTAATTGTACAAGACCCAGCAACAATACAATAAGA-----  
 -AGTATACACATG-----GGACCAGGCAGAGCA---TTT-----TCTACAACAGGAGAT-----  
 -----ATAATAGGAGATATA-----AGGAAAGCATATTGT---AACATTAGTGAGGCA---  
 AAATGGAATAACACTTTAAAAACAGATAGCTGACAAATTAATA-----GAACAATTTAAT----  
 -----ACTACAGGTCCAATAGTCTTTAAT-----  
 CAATCCTCAGGAGGAGACCCAGAAATTGTA---ATGCACACTTTTAAATTGTGGAGGGGAA---  
 TTTAAGCAGCTCCAGGCAAGAGTCCTTGCTCTGGAAAGATACCTAAAGGATCAACAGCTCCTGGGAATTTGGG  
 GTTGCTCTGGAAACTCATCTGCACCACTAATGTGCCTTGGAATACTAGTTGGAGT-----  
 -----AATAAATCTTATGAGGATATTTGG-----GGG-----  
 AACATGACCTGGATGCAGTGG---GAAAGGGAAATTGATAATTACACAGACAAAATATAC---  
 ACATTGCTTACAGAATCGCAAAATCCAACAAGAA-----  
 -----  
 AAGAATGAGCAAGACTTATTGGCATTAGATAAAATGGGACAGTCTATGGAGTTGGTTTAACATATCAAATTGGC  
 TGTGGTACATAAGAATATTACATAATGATAGTAGGAGGCTTGATAGGTTTAAGAATAGTTTTTTACT---  
 GTACTTTCTATAGTG-----AATAGAGTTAGGCAGGGATACTCACCA-----  
 TTATCGTTCGCTGTTAGCTTGTAACAACGCTATAGCCATAGCAGTAGCTGAA---  
 GGGACTGATAGGATTTTAGAAGTATTCAGAGAGCTTATAGAGCT-----  
 -----ATTCTCCACATA-----CCTAGAAGAATAAGACAGGGCTTAGAAAGGGCTTTGCTA---TAA  
 >KT452155  
 GCT---GCA-----  
 GAACAAACGTGGGTACAGTTTATTATGGGGTACCTGTGTGG---AAAGAAGCAAAC---  
 ACCACTCTATTTTGTGCATCAGATGCTAAAGCATATGTTACAGAG---AAACATAAT-----  
 -----GTTTGGGCCACA---CATGCCTGTGTACCCACAGAC---  
 CCCAACCCACGAGAAATACAATTAGAA-----AATGTGACAGAATACTTTAAC-----  
 -----ATGTGGAAAAATAACATGGTAGAACAGATGCATGAGGATATA---  
 ATCAGTTTATGGGATCAAAGCCTA---AAGCCATGTGTAAAATA---  
 ACCCCACTTTGTGTTACTCTACAATGCGCAAATATTGTTTGCAATACCACTAATAATACCACTAATAATACCA  
 CTGATAGTAATAAGATACATTGCAAGTCTGTTAATAAT-----  
 -ACCAGTAGTGTTAAGGGGACAAATACCAGTAGTGTTACTGGGACAATAGTGGAGGGAATGAAA---  
 AACTGCTCTTTCAACATTACCACAGACTTAAGA-----  
 GATAAGGTGAGGAAAGAATATGCACTG---TTTTATAGCCTTGATATAGTACCAATAGAAAATGAC-----  
 -----  
 -----  
 AATAATAACAGTGATAGCTATAGGTTGACAAGTTGTAACACCTCAATCATTACACAG---  
 GCCTGTCCAAAGGTAACCTTTGAGCCAATTCCATATACATTATTGTACTCCGGCTGGTTTTGCACTCCTAAAAT  
 GTAAT---GATAAGAATTTCAAT-----GGGAATGGAACATGTAACAAT-----  
 -GTCAGC---TCCGTACAATGTACACATGGAATTAGACCAGTAGTGTCAACT---  
 CAGCTGCTGTTAAATGGTAGTCTAGCAGAGGAAGAG-----  
 GTAGTAATTAGGTCTGCAAAATTCACAGACAAT-----GCTAAAACCATAATAGTACAGCTAAAT----  
 -----GAATCTGTAGTA-----ATTAATTGCACAAGACCCAACAACAATACAAGAAAA-----  
 -AGTATTTCCATA-----GGAGGACCAGGGAGAGCA---TTC-----TATGCAACAGGAGAC-----  
 -----GTAATAGGAGATATA-----AGGCAAGCATATTGT---AACATTAGTAGAACA---  
 CAATGGAATAGGACTTTAGGAATGGTAGCTGCAAAATTAGGA-----AACATTTT-----  
 -----AATAAAACAATAATCTTTACT-----  
 CAATCCTCAGGAGGGGACCCAGAAATTGTA---ATGCACAGTGTTAACTGTGGAGGGGAA---  
 TTTAAGCAGCTCCAGGCAAGACTCCTGGCTGTGGAAAGATACCTAACGGACCAACAGTTCCTAGGGCTTTGGG

GATGCTCTGGAAACGCATTTGCACCACTAATGTGCCTTGAATCTTAGTTGGAGT-----  
 -----AATAAACTCAAGATCAAATTTGG-----CAG-----  
 AACATGACCTGGATGCAGTGG---GAAAAAGAAATTGAAAATTACACAGGGGTAATATAC---  
 ACCTTACTTGAAAACCTCGAAAACCAGCAGGAG-----  
 -----  
 CAGAATGAAAAGGAATTGTTGGAATTGGATAAGTGGGCAAGTTTGTGGAGTTGGTTTAACATAACACAATGGC  
 TGTGGTATATAAAAAATATTCATAATGATAGTAGGAGGCTTGATAGGTTTAAGAATAGTTTTTTGCT---  
 GTGCTTTCTATAGTG-----AATAGAGTTAGGCAGGGTTACTCACCA-----  
 TTGTCATTTGCTGTCAGCTTGCTTAACGCCACAGCTATAGCAGTAGCTGAA---  
 GGGACAGATAGGATTATAGAAGTAGCACAAAGAATTTTACAGCT-----  
 -----ATTGCGAATATA-----CCTAGGAGAATAAGACAGGGCTTGGAAGGGCTTTATTA---TAA  
 >U39243  
 GTG---ATG-----  
 GGGAACTTGTGGGTCACAGTATATTATGGGGTACCTGTGTGG---AAAGAAGCAAAA---  
 ACTACTCTATTTTGTGCATCAGATGCTAAAGCATATGATACAGAA---GTGCATAAT-----  
 -----GTCTGGGCTACA---CATGCCTGTGTACCCACAGAC---  
 CCCAGCCCACAAGAAATGCATTTGGAA-----AATGTAACAGAAAATTTTAAC-----  
 -----ATGTGGGAAAATGACATGGTGGAACAGATGCATCAGGATATA---  
 ATCAGTTTATGGGATCAAAGCCTA---AAGCCATGTGTAAAGTTG---  
 ACCCCACTCTGTGTTACTTTAAACTGTAGCAATGCTAAGAAAGATAATACTACC-----  
 -----  
 -----ATTGATAATGAAATGAAGGGAGAAATAAAA---  
 AATTGCTCTTTCAATATAACCACAGAAATAAGA-----  
 GATAAGAGGCAGAAAGTACATGCACCT---  
 TTTTATAAACTTGATATAGTACCACCTAATGAGGGGAATAACAAA-----  
 -----  
 TCTAATGGGGGTAATGACAGTTCTAATGAGTATATATTAATAAATTGTAATACCTCAGCCGTAACACAA---  
 GCCTGTCCAAAGGTCTCTTTTGACCCAATTCCTATACATTATTGTGCTCCAGCGGGTTATGCGATTCTAAAAT  
 GTAAT---AATAAGACATTCAAT-----GGAACAGGACCATGCAATAAT-----  
 -GTCAGC---ACAGTACTATGTACACATGGAATTAAGCCAGTGGTATCAACT---  
 CAACTATTGTTAAATGGTAGTTTAGCAGAA---GAG-----  
 ATCATAATTAGATCCAAAAATTTGTTCAGACAAT-----GCTAAAGTAATAATAGTACATCTTAAG---  
 -----GAACCTGTAGAA-----ACTGAGTGTACGAGACCCAACAATAACAGAGAA-----  
 -AGTATAAGGATA-----GGACCAGGACAAGCA---TTC-----TATGCAACAGGAGAC-----  
 -----ATAATAGGAGATATA-----AGACAAGCATATTGT---ACCATTAATGGAACA---  
 AAATGGAATAAGACTTTACAAGAGGTAGGTAAAAAACTAGCA-----GAGCAATTCAAC---  
 -----AGTTCAAAAATAAAATTTGCA-----  
 CCATCCTCAGGAGGGGACCTAGAAAGTTACA---ACACATAGCTTTAATTGCAGAGGAGAA---  
 TTTAAGCAGCTTCAGACACGAGTCCTGGCTATAGAAAGATACCTAAGGGATCAACGGCTCCTAGGGATTTGGG  
 GCTGCTCTGGAAGAACTCATCTGCACCACTGATGTGCCTTGGAACGCTAATTGGAGT-----  
 -----AATAAATCTCAAGAGGATATTTGG-----CAT-----  
 AACATGACCTGGATGCAATGG---GATAGAGAAATTAGTAATTACAAAGGCATAATATAC---  
 GGATTGCTTGAAAGACTCGCAGACCCAGCAGGAA-----  
 -----  
 AACAAATGAAAAAGAGTTACTAGAAATTGGACAAGTGGCAAAATCTGTGGAGTTGGTTTGACATAACAAATTGGC  
 TGTGGTATATAAAAAATATTTATAATGATAGTAGGAGGCTTGATAGGTTTAAGAATAATTTTTTGCT---  
 GTGCTCTCTATAGTG-----AATAGAGTTAGGCAGGGATACTCACCC-----  
 TTATCGTTTGCTATTAGTCTGCTTGACGCCATAGCAATAGCAGTAGGTGAA---  
 GGAACAGATAGGATTATAGAATTAATACAGAGAATTTGTAGAGCT-----  
 -----ATCTACAACATA-----CCTAGAAGAATAAGACAGGGCTTGGAAGCAGCTTTTGCAA---TAA  
 >U39240  
 GTA---ATG-----  
 GGGAACTTGTGGGTCACAGTCTATTATGGGGTACCTGTGTGGAAAGAAGCACAACCTATACCTACTCTATTTT  
 GTGCATCAGATGCTAAAGCATATGAGACAGAA---ATGCACAAT-----  
 -GTCTGGGCTACA---CATGCCTGTGTACCCACAGAC---CCCAACCCAAACGAATTGGTTTTGGGA-----  
 ---AATGTAACAGAAAATTTTAAC-----  
 ATGTGGAAAAATGACATGGTGGAACAGATGCATCAGGATATA---ATCAGTTTATGGGATCAAAGCCTA---  
 AAGCCATGTGTAAAGTTG---  
 ACCCCACTCTGTGTTACTTTAAACTGTACGAATGCTAATGCTACCCACAATGGT-----  
 -----

-----ACCATAAAGGACGGTGCCCAGGGGAGAATAAAA---  
 AACTGTACTTTCAATATGACCACAGAATAAGA-----  
 GATAAGAGACAGGCAGTACATGCACTT---TTTTATAGAATTGATCTAGTACCACTTGATAAGGGTAAC----  
 -----  
 -----  
 AATGCTAGTAATTATAGTGATTATAGATTAATAAATTGTAATACCTCAGCCATAACACAA---  
 GCCTGTCCAAAGGTCTCTTTTGAACCAATTCCTATACATTATTGTGCTCCTGCTGGTTATGCGATTCTAAAGT  
 GTAAT---AATGAGACATTCAAT-----GGAACAGGACCATGCAGTAAT-----  
 -GTCAGC---ACAGTACAATGTACACATGGAATTAACCAGTGGTATCAACT---  
 CAACTATTGTTAAATGGTAGTCTAGCAGAAGGAGAG-----  
 ATAATGATTAGATCTAAAAATCTGACAGACAAT-----GCTAAAATAATAATAGTACATCTTAAT----  
 -----GAATCTGTACAA-----ATTGATTGTATGAGACCCAACAATAATACAAGAAGA-----  
 -AGTATAAGGATA-----GGACCAGGACAAGCA---TTC-----TATGCAACAGGAGAC-----  
 -----ATAATAGGAGATATA-----AGACAAGCACATTGT---AACATTAGTGGAGAA---  
 AAATGGAATGAACTTTAAAAACGGGTGAAGGAAAAATTAGAA-----AAGCACTTCCCT----  
 -----AATAAAACAATACACTTTGCA-----  
 AATTCCCTCAGGGGGGGCCTAGAAATTACA--ACACACAGCTTTAATTGTAGAGGAGAA---  
 TTTAAGCAGCTCCAGGCAAGAATCCTGGCTATAGAAAAGATACCTACAGGATCAACAGCTCCTAGGGATGTGGG  
 GCTGCTCTGGAATCCATCTGCACCACTGCTGTGCCTTGGAACTCTAGTTGGAGT-----  
 -----AATAAATCTCAAGAGGATATTTGG-----AAT-----  
 AGAACGACCTGGATGCAGTGG---GAGAAAGAAATTAGTAATTATACACAAACAATATAC---  
 TGGTTGCTTGAAGACTCGCAAAACCAGCAGGAA-----  
 -----  
 AAGAATGAACAAGAGTTACTAGCATTAGACAAATGGCAAAATCTGTGGAATTGGTTTGACATATCAAAGTGGC  
 TGTGGTATATAAGAATATTCATAATGATAGTAGGAGGCTTGATAGGTTTAAAAATAATTTTTTGCT---  
 GTGCTTTCTATAGCG-----AACAGAGTTAGGCAGGGATACTCACCA-----  
 TTGTCGTTTGCTATTAGTCTGCTTGATACCACAGCAATAGCAGTAGCTGAG---  
 GGAACAGATAGGATTTTAGAACTATTACAGAGAATTGGGAGAGCT-----  
 -----ATCTACAACATA-----CCTAGAAGAATAAGACAGGGCTTTGAAGCAGCTTTGCAA---TAA  
 >AF443090  
 GGG---GTG-----  
 GGGGAAATGTGAGTCACAGTCTATTATGGGGTACCTGTGTGG---AAAGAAGCAAAA---  
 ACTACTCTATTCTGTGCATCAGATGCTAAGGCATATGAGAGAGAA---GTGCATAAT-----  
 -----GTTTGGGCGACA---CATGCCTGTGTACCCACAGAC---  
 CCCGACCCACAAGAAATGGTTTGGAA-----AATGTAACAGAGAATTTTAAC-----  
 -----ATGTGGAATAATGACATGGTAGATCAGATGCATGAGGATATA---  
 ATCAGTTTATGGGATCAAAGCCTA---AAGCCATGTGTAAAGTTG---  
 ACCCCACTCTGTGTCACTTTAAATTGTACAACTATAATAATACTAATACTACCCAT-----  
 -----  
 -----GGAGAAGGCAATACTACCTATGGAGGAGAAATGAGA---  
 AATTGCTCTTTCAATATAACCACAGAATTAAGA-----  
 GATAAGAAAAGGCAAGAGAGTGCCTT---TTTTATAGACTTGATATAGTACCACTTAATGGGAGTGAATCT-  
 -----  
 -----  
 AGTGATAGGAACAAATCTAGTGAGTATAGACTAATAAATTGTAATACCTCAGCCATAACACAA---  
 GCCTGTCCAAAGGTCTCTTTTGACCCGATTTCCTATACATTATTGTGCTCCAGCTGGTTATGCGATTCTTAAGT  
 GTAAT---ACAAGACATTCAAT-----GGAACAGGACCATGCAACAAT-----  
 -GTCAGC---ACAGTACAATGTACACATGGAATTAAGCCAGTGGTATCAACT---  
 CAACTACTGTTAAATGGTAGCCTAGCAGAAGAAGAG-----  
 ATAATAATCAGATCCGAAAATCTGGCAAAAAT-----GACAAAACAATAATAGTACATCTTAAT----  
 -----GAATCTGTAGAG-----ATTGTGTGTACAAGACCCTTCAATAATACAAGAAAA-----  
 -AGTATCAGAATA-----GGACCAGGACAAACC---TTC-----TATGCAACAGGAGAC-----  
 -----GTAATAGGAGATATA-----AGACAAGCACATTGT---AACACTAGTGAACAG---  
 AAATGGAACAAGACTTTAGAACAGGTAGGAAAGAAATTAGCA-----GAACACTTCCCT----  
 -----AATAAAACGATAATATTTAAT-----  
 TCATCCTCAGGAGGGGACCTAGAAATCACA---ACACATAGCTTTAATTGTGGAGGAGAA---  
 TTTAAGCAGCTCCAGGCAAGAGTCTGGCTATAGAAAAGATACCTAAAGGATCAACAGCTCCTAGGGATTTGGG  
 GCTGCTCTGGAATCACTCTGCACCACTGCTGTGCCTCGGAACAACAGTTGGAGT-----  
 -----AATAAAACTCTAGGAGATATTTGG-----GAG-----  
 AACATGACCTGGATGCAATGG---GATAGAGAAATAAGTAATTACACAGACACAATATAC---

AGGTTGCTTGAAGTCTCGCAAAACCAGCAGGAA-----  
 -----  
 AAAAAAGAAAAAGATTTATTAGCACTGGACAGTTGGAAAAATCTGTGGAGTTGGTTTGACATATCAAATTGAC  
 TGTGGTATATAAGAATATTCATAATGATAGTAGGAGGCTTGATAGGTTTAAGAATAGTTTTTTGCT---  
 GTGCTCTCTTTAGTG-----AATAGAGTTAGGCAGGGATACTCACCT-----  
 TTGTCATTTGCTATTAGTCTGCTTGATACCATAGCAATAGCAGTAGCTGAG---  
 GGAACAGATAGGATTATAGAATTAATACAAAGAATTTGTAGAGCT-----  
 -----ATCTACAACATA-----CCGAGAAGAATAAGACAGGGCTTTGAAGCAGCTTTGCAA---TAA  
 >AF443097  
 GTA---ATG-----  
 GGGAACATGTGGGTACAGTCTATTATGGGGTACCTGTGTGG--AGAGAAGCAAAA---  
 GCTCCTCTATTTTGTGCATCAGATGCTAAAGCATATGATAGAGAA---GTGCATAAT-----  
 -----GTCTGGGCTACA---CATGCCTGTGTACCCACAGAC---  
 CCCAACCCACAAGAAATGGTTTTTAAAA-----AATGTAACAGAAAATTTTAAAC-----  
 -----ATGTGGAAAAATGACATGGTGGAGCAAAATGCATGAGGATATA---  
 ATCAGTTTATGGGATCAAAGCCTA---AAGCCATGTGTAAAGTTG---  
 ACCCCACTCTGTGTCACTTTAGATTGTACGAATGCTACCATAACTGATAATAAAA-----  
 -----  
 -----ACAATAGACGAAGGAATGGGAAATGAAATAAAA---  
 AATTGCTCTTTCAATACAACCACAGAACTGAGG-----  
 GATAAGAAAAAACGTGAATATGCACCT--TTTTATAGACTTGATATAGTATCACTTGATAATGAGAAT---  
 -----  
 -----  
 AATAACAAGACGAGTGCAGAGTATAGATTAATAAATTGTAATACCTCAACCATAACACAA---  
 GCCTGTCCAAAGGTCTCTTTTGACCCAATTCCTATACATTATTGTGCTCCAGCTGGTTATGCGATTCTAAAGT  
 GTAAT---AATAAAACATTCAAT-----GGAAAAGGACCATGCAATAAT-----  
 -GTCAGC---ACTGTACAATGTACACATGGAATTAAGCCAGTAGTATCAACT---  
 CAACTACTGTTTAAATGGTAGCCTAGCAGAAGGAGGA-----  
 GAGATAATAATTAGATCTAAAAACCTGACAGATAAT-----GCCAGAACATAATAGTACATCTTAAT-  
 -----GAATCTGTACAA-----ATTGTGTGTACAAGACCCAACAATAATACAAGAAAA--  
 ---AGTGTGAGGCTA-----GGACCAGGACAAGCA---TTC-----TATGCAACAGGAGAT---  
 -----ATAATAGGAGATATA-----AGAAAAGCATATTGT---ACCATTAATGAAAGT-  
 --AAATGGATAACAACCTTTACACAGGGTAAGTGAAAAATTTAAAA-----GAACACTTCCCT--  
 -----AATAAAGCAATAAACTTTACC-----  
 CAACCCAAAGGAGGGGACTTAGAAATTACA--ACACATAGCTTTACTTGTAGAGGAGAG---  
 TTTAAGCAGCTCCAGACAAGAGTCCTGGCTATAGAAAGATACCTAAAGGATCAACAGCTCCTAGGAATTTGGG  
 GATGCTCTGGGAAACTCATCTGCACCACTGCTGTGCCTTGGAATGTTAGTTGGAGT-----  
 -----AATAAATCTTATAAGGCTATTTGG-----GAC-----  
 AACATGACCTGGATGCAGTGG--GATAGAGAGATTAGTAATTACACAGACACAATATAC---  
 AGTTTGCTTGAAGACTCGCAAAACCAGCAGGAA-----  
 -----  
 AAGAATGAAAAGGATTTATTAGCATTGGACAGTTGGAAAAATCTGTGGAATTGGTTTGACATAACAAATTGGC  
 TGTGGTATATAAAAAATATTCATAATGATAGTAGGAGGCTTGATAGGCTTAAGAATAATTTTTTGCT---  
 GTGCTGTCTATAGTA-----AATAGAGTTAGGCAGGGATACTCACCT-----  
 TTGTCATTTGCTATTAGTCTGCTTGATACCGTAGCAATAGCAGTAGCTGAA---  
 GGAACAGATAGGATTATAGAATTAATACAAAGAGGTTATAGAGCT-----  
 -----ATCTGCAACATA-----CCTACAAGAATAAGACAGGGATTTGAAGCGGCTTTGCAA---TAA  
 >AF443109  
 GTG---GCA-----  
 GGGAACTTGTGGGTACAGTATATTATGGGGTACCTGTGTGG--AAAGAAGCAAAA---  
 ACTACTCTATTCTGTGCATCAGATGCTAAAGGATATGAGACAGAA---GTGCATAAT-----  
 -----GTTTGGGCTACA---CATGCCTGTGTACCCACAGAC---  
 CCCGACCCACAAGAAATGGTCCTGGGA-----AATGTAACAGAAAATTTTAAAC-----  
 -----ATGTGGGAAAATGACATGGTGGATCAGATGCATGAGGATGTA---  
 ATCAGTTTATGGGATGAAAGCCTA---AAGCCATGTGTAAAGTTG---  
 ACCCCACTCTGTGTCACTTTAAACTGTACAACTATAATGGGACCAAGAACAATGATACCAAAAACAATGAT-  
 -----  
 -----ACCAGGAGTGATACTATCTACAATGATACCATGTATGGAGAAATAAAA---  
 AATTGCTCTTTCAATATGACCACAGAACTAAGA-----  
 GATAAGAAAGAGAAAATGCATGCACCT--

TTTTATAGACTTGATATAGTACCACTTGAGGACAACCTCTAGTAAGAAT-----  
-----  
AGCAGGGGCAACTCTAGTAATTATAGTAATTATAGATTAATAAATTGTAATACCTCAGCCATAACGCAA---  
GCCTGTCCAAAGGTCTCTTTTGACCCAATTCCTATACATTATTGTGCTCCAGCTGGTTATGCGATTATAAAGT  
GTAAT---AATAAGACATTCAAT-----GGGATAGGACCATGCCAGAAT-----  
-ATCAGC--ATAGTGCAATGTACACATGGAATTAAGCCAGTGGTATCAACT---  
CAACTACTGTAAATGGTAGCCTAGCAGAAGGAGGA-----  
GAGATAATAATTAGGTCTAAAAACCTGTCAGATAAT-----GCCAAAATAATAATAGTACATCTTAAT-  
-----GAATCTGTAGGA-----ATTGTGTGTACAAGACCCAACAATAATACAAGAAAA--  
---AGTATAAGGATA-----GGACCAGGACAAACA---TTC-----TATGCAGCAGGAGAC---  
-----ATAATAGGAAACATA-----AGACAAGCACATTGT---AACATTAGTGAAGGT-  
--AACTGGACTAAAACCTTTACAAAGGGTAAGTAGAAAAGTTAAGA-----CAAATCTTCAAT--  
-----AAAAGCAACATAGAATTTAAA-----  
CCACACTCAGGAGGGGATCCAGAAATTACA--ACACATAGCTTTAATTGTAGAGGAGAA---  
TTTAAGCAGCTCCAGGCAAGAGTCTTGGCTATCGAAAAGATACCTAAAGGATCAACAGCTCCTAGGTATTTGGG  
GATGCTCTGGAAGAACTCATCTGCACCACCTAATGTGCCTTGGAAGTCCAGTTGGAGT-----  
-----AATAAATCTCTAGAAGATATTTGG-----GAT-----  
AACATGACCTGGATGCAATGG---GATAGAGAAATTAGTAATTACACAAGAGAAATATAC---  
AAGTTGCTTGAAGAATCGCAAAACCAGCAGGAA-----  
-----  
ATAAATGAAAAGGATTTATTAGCATTGGACAGTTGGAACAGTCTGTGGAATTGGTTTGACATAACAAAATGGC  
TGTGGTATATAAAAATATTACATAATGGTAGTAGGAGGCTTGATAGGCTTGAGAATAATTTTTTGCT---  
GTGCTTTCTATAGTA-----AATAGAGTTAGGCAGGGATACTCACCT-----  
TTGTCGTTGGCTATTAGTCTGCTTGATGCCATAGCAATAGCAGTAGGTGAA---  
GGGACAGATAGGATTCTAGAATTACTACAAAGAATTGGTAGAGGT-----  
-----ATCTGCAACATA-----CCCAGAAGAATAAGACAGGGCTTTGAAGCAGCTTTGCAA---TAA  
>AF443114  
GGG---GAA-----  
GGAACTTGTGGGTCACAGTCTATTATGGGGTACCTGTGTGG---AAAGAAGCAAAA---  
ACCACTCTATTCTGTGCATCAGATGCTAAAGGATATGAGAGGGAG---GTACATAAT-----  
-----ATCTGGGCTACA---CATGCCTGTGTACCCACAGAC---  
CCCAACCCACAAGAAATGTTTTTGCAT-----AATGTAACAGAAAATTTTAAC-----  
-----ATGTGGAAAAATGACATGGTGGATCAGATGCATGAGGATATA---  
ATTAGTTTATGGGATGAAAGCCTA---AAGCCATGTGTAAAATTG---  
ACCCCACTCTGTGTCACTCTAGAATGTAAAAATGTTACCACAAATGTTACCATAAATAATGCC-----  
-----  
-----ACAAGTGTTACCGCGAATAATAATACTAGTGACATGAAA---  
AATTGCTCCTTCAATGCAACCACAGAAGTAACA-----  
GATAAAATAAGAAAAGAGAATGCACTT--TTTTATACACTTGATATAGTACCACTTGATGAG-----  
-----  
-----  
AATCAGAACAATAGTAACTATAGATTAATAAATTGTAATACCTCCAAGGTGACACAA---  
GCCTGTCCAAAGGTCTCTTTTGACCCAATTCCTCTACATTATTGTGCTCCAGCTGGTTATGCGATTCTAAAGT  
GTAAT---ACAACACATTCAAT-----GGGACAGGACCATGCAATAAT-----  
-GTCAGT--ACAATACAATGTACACATGGAATCAAGCCAGTAGTATCAACT---  
CAACTATTGTTAAATGGTAGTCGAGCAGAAAAAGAG-----  
ATAATAATTAGATCTGAAAAATATGACAAACAAT-----GCTAAAACAATAATAGTACACCTTAAT---  
-----GAATCCATAGAA-----ATTGAGTGTATAAGACCCAACAACAATAACAAGAAAA-----  
-AGTATAAGGATA-----GGACCAGGACAAACA---TTC-----TATGCAACAAATGGC-----  
-----ATGATAGGAGACATA-----AGACAAGCACATTGT---AACATTAGTGGAGCT---  
GACTGGAATAGAACTTTACAAGGGGTAGGTAGAAAAATTAGCA-----GGGTACTTCCCT---  
-----AATAAAACCATAAGCTTCCAA-----  
CCATCCTCAGGAGGGGACCTAGAAATTACA--ACACATAGCTTTAATTGTGGAGGAGAA---  
TTCAAGCAGCTCCAGGCAAGAGTCTTGGCTATAGAAAAGATACCTAAAGGATCAACAGCTCCTAGGGATTTGGG  
GCTGCTCTGGAAGAACTCATCTGCACCACCTGCTGTGCCTTGGAAGTCCAGTTGGAGT-----  
-----AATAAATCTCAAGCAGACATTTGG-----GAT-----  
AACATGACCTGGATGCAGTGG---GATAGAGAAATTAGCAATTACACAGACACAATATAT---  
AGGTTGCTTGAAGTCTCGCAAAACCAGCAGGAA-----  
-----  
CAAAATGAACAAGATTTATTAGCATTGAACAAGTGGCAACATCTGTGGAATTGGTTTGACATAACAAAGTGGC

TGTGGTATATAAAAAATATTCATAATGATAGTAGGAGGCTTGATAGGTTTGAGAATAATTTTTTGCT---  
GTGCTATCTATAGTA-----AATAGAGTTAGGCAGGGATACTCACCT-----  
TTATCATTTGGCTATTAGTCTGCTTGATAGTATAGCAATAGCAGTAGCTGAG---  
GGGACAGATAGGATTATAGCATTTCATACAAAGACTTTTTTAGAGCT-----  
-----ATCTGCAACCTA-----CCTAGAAGAATAAGACAGGGCTTTGAAGCATCTTTGCTA---TA-  
>KR861314  
GTG---GTA-----  
GGAAACTTGTGGGTCACAGTCTATTATGGGGTACCTGTGTGG--AAAGAAGCAAAA---  
ACTACTCTATTCTGTGCATCAGATGCTAAAGCATATGAGAAGGAA---GTGCATAAT-----  
-----GTCTGGGCTACA---CATGCCTGTGTACCCACAGAC---  
CCCAGCCCACAAGAAGTGGTTTTGAAA-----AATGTAAGTAAAATTTTAAT-----  
-----ATGTGGAAAAATGACATGGTGGATCAGATGCATGAGGATATA---  
ATCAGTTTATGGGATCAAAGCCTA---AAGCCATGTGTAAAGTTG---  
ACCCCACTATGTGTTACTTTAAACTGTATAAATGCTACTGCTAGTATGAATGCTACTACATAC-----  
-----  
-----AATGAAACCATGGAAATAAAA---  
AATTGCTCTTTCAATATGACCACAGAATAAGA-----  
GATAAAAAACAGAACGTGTATGCACCT--TTTTATAAACTTGATATAGTAAAACTTAATGGC-----  
-----  
-----  
AATTCGGATGAGTATAGATTAATAAATTGTAATACCTCAGCCATAACACAA---  
GCCTGTCCAAAGGTCTCTTTTGACCCAATTCTCTATACATTATTGTGCTCCAGCTGGGTATGCGATTCTAAAGT  
GTAAT---GATAAGACATTCAAT-----GGAACAGGACCATGTAATAAT-----  
-GTTAGC---ACAGTACAATGTACACATGGAATTAAGCCAGTGGTCTCAACT---  
CAATTACTGTTTAAATGGTAGTCTAGCAGAAGAAGAC-----  
ATAGTAATTAGATCTGAAAATTTGAAAGACAAT-----ATCAAAACAATAATAGTACATCTTAAT----  
-----GAATCTGTAGAA-----ATTAATTGTACAAGACCTAACAATAATACAAGGAAA-----  
-AGTATAAGGATA-----GGACCAGGACAGACC---TTC-----TATGCAACA---GAA-----  
-----ATAATAGGAGACATA-----AGAGAAGCACATTGT---AACATTAATGCAGGA---  
AAATGGAATGAACTTTAGAAAAGGTAAAAGGAAAGTTAAAA-----GAACATCACAAT---  
-----GGAAGCGAGATAATATTTAAA-----  
CCACCTTCAGGAGGGGACCTAGAAATTACA--ACACATAGTTTTAATTGTAGAGGAGAA---  
TTTAAGCAGCTCCAGGCAAGAGTCCCTGGCTATAGAAAGATACCTAAAGGATCAACAGCTCCTAGGGATTTGGG  
GTTGCTCTGGAAAGCTCATCTGCACCACTAATGTGCCTTGGAACTCCAGTTGGAGT-----  
-----AATAGATCTCAAGGAGATATTTGG-----GAG-----  
AGCATGACCTGGATGCAGTGG--GACAGAGAAATTAATAATTACACAAGCACAATATAC---  
AGTTTGCTTGAAGAATCACAAACCCAGCAGGAA-----  
-----  
AAAAATGAAAAGGATTTATTAGCATTGGACAGTTGGCAAAGTCTGTGGAGTTGGTTTAGCATAACAAACTGGC  
TGTGGTATATAAAAAATATTCATAAATAGTAGGAGGCTTGATAGGCTTAAGAATAATTTTTTGCT---  
GTGCTTTCTATAGTG-----AATAGAGTTAGGCAGGGATACTCACCT-----  
TTGTGCTTCGCTATTAATCTGCTTGATACCACAGCAATAGCAGTAGCTGAA---  
GGAACAGATAGGATTATAGAATTAATACAAAGATTTTGTAGAGCT-----  
-----ATTGCAATATA-----CCTACAAGAATAAGACAAGGCTTTGAAGCAGCTTTACAA---TAA  
>KR861341  
GTG---TGG-----  
GGGCAATTGTGGGTCACAGTCTACTATGGGGTACCTGTGTGG--AAAGAAGCAAAA---  
ACTACTCTATTCTGTGCATCAGATGCTAAGGCATATGAGAAAGAG---GTGCATAAT-----  
-----GTCTGGGCTACA---CATGCCTGTGTACCCACAGAC---  
CCCAACCCACAAGAAATAGTCTTGGGC-----AATGTAACAGAAAATTTTGAC-----  
-----ATGTGGGAAAATGACATGGTAGATCAGATGCATGAGGATATA---  
AGCAATTTATGGGATCAAAGCATA--AAGCCATGTGTAAAGTTG---  
ACCCCACTCTGTGTCACTTTAAATTGTACTGATGCTAAGACTAGTACTACAAATACTACTGCTGCAAATACTA  
CT-----  
-----AATGAGATAAAA---  
AATTGCACTTTTAAATGCAACCACAGAAATAAAA-----  
GATAAGAAAAGGAAAGTGCAAGCACTT---  
TTTTATAAACTTGATATAATACCCTTGATGAGGATAACAACAGT-----  
-----  
TCTACTAGAAACAGCAGCTATGTGAAGTATAGATTAATAAATTGTAATACCTCAGCCATAACACAA---

GCCTGTCCAAAGATCACTTTTGACCCAATTCTTATACATTATTGTGCGCCAGCTGGTTATGCGATTCTAAAGT  
 GTAAT---AACAAGACATTCAAG-----GGGACAGGACCATGCAGAAAT-----  
 -GTCAGC---ACAGTACAATGTACACATGGAATTAAGCCAATGGTAACAAC---  
 CAACTACTGTTTAAATGGTAGCCTAGCAGAAGAAGGG-----  
 ATAATAATTAGATCTAAAAATCTGAGTGACAAT-----GGCAAAATATAATAGTACAACCTTAAG----  
 -----GATGCTGTAAAA-----ATTGAGTGCATAAGACCCAACAATAATACAAGAAAA-----  
 -AGTGTAAGGATA-----GGACCAGGACAGACA---TTC-----TTTGCAACAAAT-----  
 -----ATAATAGGAGACATA-----AGAGAAGCACATTGT---AACATTAGTAGAAAG---  
 GAATGGAACAAAACCTTTACAATCTGTAGGAAGAAAATTAGCA-----GAATATTTCCCT----  
 -----AATAATACAACAATAGAATTTGCA-----  
 CCACACTCAGGAGGGGATCTAGAAATTACC---ACACATTTCTTTAACTGTAGAGGAGAA---  
 TTTAAGCAGCTCCAGGCAAGAGTCTTGGCTATAGAAAAGATACCTAAAGGATCAACAGCTCCTAGGGATGTGGG  
 GCTGCTCTGGAACACTCATCTGCACCACCTTCTGTGCCCTTGGAATTCCAGTTGGAGT-----  
 -----AATAAATCTCATACAGAAATTTGG-----AAT-----  
 AACATGACCTGGATGCAATGG---GAGAAAGAAATTAGTAATTACACAGAAATAATATAC---  
 AAGATGCTTGGAGACTCGCAAAACCAGCAGGAA-----  
 -----  
 CAAAAAGAAAAAGAGTTACTAGCATTGGACAAGTGGCAAAATCTGTGGAGTTGGTTTGACATATCAAATTGGC  
 TGTGGTATATAAAAAATATTCTAATGATAGTAGGAGGCTTGATAGGGTTAAGAATAATTTTTTGCT---  
 GTGCTTTCTATAGTA-----AATAGAGTTAGGCAGGGATACTCACCT-----  
 TTGTCGTTTGCCATTAATCTATTGGATACCACAGCAATAGCAGTAGCTGAA---  
 GGAACAGATAGGATTATAGAATTAATACAAACACTTTGTAGAGCT-----  
 -----ATCCGCAACATA-----CCTAGAAGAATAAGACAGGGCTTGGAAGCAGCGTTGCTA---TAA  
 >KR861270  
 GGG-----  
 AATAAATTGTGGGTCACAGTCTATTATGGGGTACCTGTGTGG---AAAGAAGCAAAA---  
 ACTACTCTATTTTGTGCATCAGATGCTAAAGGATATGAGAAAGAA---GTGCATAAT-----  
 -----GTTTGGGCCACA---CATGCCTGTGTACCCACAGAT---  
 CCCAACCCACAAGAAATGTTTTAGAA-----AACGTAACAGAAAATTTTAAT-----  
 -----ATGTGGAATAATGACATGGCAGATCAGATGCATGAGGATGTA---  
 ATCAGTTTATGGGATCAAAGTTA---AAGCCATGTGTAAAGTTG---  
 ACCCCACTCTGTGTCACTTTAACTGTACAGATGCTACTGTAAATGCTACAGATGCTACT-----  
 -----  
 -----GTAAATGATACCATAGAAATGAAA---  
 AATTGTACTTTCAATACGACCACAGAAATAAGA-----  
 GATAAGAAAAAGCAAGAAAGGGCACTC---TTTTATAAACTTGATATAGTACAACCTTGATGGC-----  
 -----  
 AACTCTAGTAAGTATATATTAATAAATTGTAATACCTCAGTCATAACACAA---  
 GCCTGTCCAAAGGTCTCTTTTGACCCTATTCTTATACATTATTGTGCTCCAGCTGGTTATGCGATCCTAAAGT  
 GTAAT---GATAAGACATTCAAT-----GGAACAGGACCATGCAATAAT-----  
 -GTTAGC---ACAGTACAATGTACACATGGAATTAAGCCAGTGGTATCAACT---  
 CAATTACTGTTTAAATGGTAGCCTAGCAGAAGACAGA-----  
 ATAATAATTAGATCTGAAAATCTGACAAACAAT-----GCCAAAACAATAATAGTACAGTTTAAT---  
 -----AAATCTGTTGAG-----ATTACGTGTATAAGACCCAACAACAATAACAAGGAAA-----  
 -AGTGTGAGGATA-----GGACCAGGGCAAACA---TTC-----TATGCAACAGGAGAC-----  
 -----ATAATAGGAGATATA-----AGACAAGCACATTGT---AACATTAGTAAC-----  
 ACATGGTGGGCAACTTTACAAAAGATAAGGGAAGAATTAAGG-----AAGAAACACTTCCCT----  
 -----AATAAAACCATAAAATTTGAA-----  
 CCACACTCAGGGGGGGACATAGAAATTACA---ACACATAGCTTTAATTGTAGAGGAGAA---  
 TTTAAACAGCTTCAGGCAAGAGTTTTGGCTCTAGAAAAGATACCTAAAGGATCAACAGCTCCTAGGGATTTGGG  
 GCTGCTCTGGAACACTCATTTGCAACACTAATGTGCCCTGGAACCTAGTTGGAGT-----  
 -----AATAAACTCAAGAGGATATTTGG-----GGG-----  
 AACATGACCTGGATGCAGTGG---GAGAAAGAAATTGACAATTACACAAACACAATATAC---  
 AGGTTGCTTGAAGAATCACAAAACCAGCAGGAA-----  
 -----  
 CAAAAAGAAAAGGATTTACTAGCATTGGACAGTTGGAACAATCTGTGGAATTGGTTTCACATAACAAAATGGC  
 TGTGGTATATAAAAAATATTCTAATGATAGTAGGAGGCTTGATAGGTTTAAGAATAATTTTTTGCT---  
 GTGCTCTCTATAGTG-----AATAGAGTTAGGCAGGGGTACTCACCT-----  
 CTGTCGTTTGCTATTAATCTGCTTGATACCATAGCAATAAGAGTAGCTGAA---GGAACAGATAGGATTATA-

-----GGATTTTGTAGAGCT-----  
 ATCTGCCGCATA-----CCTAGAAGAATAAGACAGGGCTTTGAAGCAATTTTGCAA---TAA  
 >KR861273  
 GTG---ATG-----  
 GGAAACATGTGGGTACAGTCTATTATGGGGTACCTGTGTGG--AAAGAAGCAAAA---  
 ACTACTCTATTCTGTGCATCAGATGCTAAAGCATATGAGAAGGAG---GTGCATAAT-----  
 -----GTCTGGGCAACA---CATGCCTGTGTACCCACAGAC---  
 CCCAACCCACAAGAAATAGAATTAAAA-----AATGTAACAGAAAATTTTAAC-----  
 -----ATGTGGAAAAATAATATGGTGGATCAAATGCATGAGGATATA---  
 ATCAGTTTATGGGATCAAAGCCTA---AAGCCATGTGTAAAGTTA---  
 ACCCCACTCTGTGTCACTTTGAAGTGCAGTGATGCTACTGTTACCGGCGGTAATAATAAC-----  
 -----  
 -----CAAATTAGCACCTTAGGTAACATAACGGAAGAAATAAAA---  
 AATTGCACTTTCAATATGACCACAGATGTAAGG-----  
 GATAAAAGAAAGAATGTAGCTGCACCTT---TTTTATACACTTGATATAGTACCACCTTAATGAG-----  
 -----  
 -----  
 AACTCCAGTGAGTATAGATTAATAAATTGTAATACCTCAGCCATGACACAA---  
 GCCTGTCCAAAGGTCTCCTTTGACCCAATTCCTATACATTATTGTGCTCCAGCTGGTTATGCGATTCTAAAGT  
 GTAAT---AATAAGACATACAAT-----GGAACAGGACCATGCAATAAT-----  
 -GTCAGC---ACAGTGCAATGTACACATGGAATTAAGCCAGTGGTATCAACT---  
 CAATTACTGTTAAATGGTAGTCTAGCAGAAGAGGGC-----  
 ATAATAGTTAGATCTGAAAATATTACAGACAAT-----GCCAAAACAATAATAGTACAGCTTAAA---  
 -----AATGCTGTAGGA-----ATTAATTGTACAAGGCCTGGCAATAATACAAGGAAA-----  
 -AGTATGAGGATA-----GGACCAGGACAAGCA---TTC-----TTTGCAACAGGAGAT-----  
 -----ATAATAGGAGATATA-----AGACAAGCACATTGT---AACATTAGTGAAGGA---  
 GATTGGAATAAACTTTAAAAGAGGTAGCTAACAAATTACGA-----GACCAATTCCT---  
 -----AATAAAACAATAGTATTTGAA-----  
 CCAACCTCAGGAGGGGACCTAGAGATTACA--ACACATAGCTTTAATTGTGGAGGAGAA---  
 TTTAAGCAGCTCCAAGCAAGAATCCTGGCTATAGAAAGATACCTACAGGATCAACAGCTCCTAGGGCTTTGGG  
 GCTGCTCTGGAAACTCATCTGCACCACTGCCGTGCCTTGGAAATGCTAGTTGGAGT-----  
 -----AATAAAAGTCACAATGACATTTGG-----CAA-----  
 AACATGACCTGGATGCAGTGG---GAAAAAGAAATTAGTAATTACACAAACACAATATAC---  
 AATTTGCTTGAAAAATCACAGAACCAGCAGGAG-----  
 -----  
 AAAAAATGAACAGGATTTACTAGCATTGGACAGTTGGAAAAATCTGTGGAATTGGTTTGACATAACACATTGGC  
 TGTGGTACATAAAAAATATTACATAATGATAGTAGGAGGACTGATAGGGTTAAGAATAGTTTTTTGCT---  
 GTGCTATCCATAGTG-----AATAGAGTTAGGCAGGGATACTCACCT-----  
 TTGTCATTTGCTATTAGTTTGCTTGATGCCACAGCAATAGTAGTAGCTGAG---  
 GGAACAGATAGAATTATAGAAGGGCTACAAAGAGGTGGTAGAGCT-----  
 -----ATCCGCAACATA-----CCTAGAAGAATAAGACAGGGCTTTGAAATAGCTTTTGCAA---TAA  
 >KY658708  
 GTG---GTG-----  
 GGAAACTTGTGGGTACAGTTTATTATGGGGTACCTGTGTGG--AAAGATGCAAAA---  
 ACTACTCTATTCTGTGCATCAGATGCTAAAGCATATGAAAAAGAA---GTGCATAAT-----  
 -----GTCTGGGCTACA---CATGCCTGTGTACCCACAGAC---  
 CCCAACCCACAAGAAATAGTTTGGAA-----AATGTAACAGAAAATTTTAAC-----  
 -----ATGTGGAAAAATGACATGGTGGATCAGATGCATGAGGATATA---  
 ATCAGTTTATGGGACCAAAGCCTA---AAGCCATGTGTAAAGTTG---  
 ACCCCACTCTGTGTCACTTTAAATGTGTAAATGTTAGTAATAAATTTAACCTA-----  
 -----  
 -----CAAAATAGCATGAATGAAGATCCGAAGGAAGAAATAAGA---  
 AATTGCTCTTTCAATGCAACCACAGAATTAAGA-----  
 GATAAGAAACAGAAAGTGCATGCACTC---TTTTATAAACTTGATATAGTACCACCTTCATGGC-----  
 -----  
 -----  
 AACAACTCTAGTGAGTATAGATTAATAAATTGTAATACCTCAACCATAACACAA---  
 GCCTGTCCAAAGGTCTCTTTTGATCCAATTCCTATACATTATTGTACTCCAGCTGGTTATGCGATTTTAAAGT  
 GTAAT---AATCAGACATTCAAT-----GGGACAGGACCATGCAATAAT-----  
 -GTCAGC---TCAGTACAATGTACACATGGAATTAGGCCAGTAGTATCAACT---

CAGTTACTGTAAATGGTAGCCTAGCAAAAGGAGAG-----  
 ATAATAATTAGATCTGAAAATCTGACAAACAAT-----GCCAAAATAATAATAGTACATCTTAAT----  
 -----AAACCTGTAAAA-----ATTGTGTGTGTAAGGCCCAACAATAATACAAGAAAA-----  
 -AGTGTAAGGATA-----GGACCAGGACAAACA---TTC-----TATGCAACAGGTGAA-----  
 -----ATAATAGGAGACATA-----AGACAAGCATATTGT---ATCATTAATAAAACT---  
 GAATGGAATAACACTTTACAAGGGGTAAGTAAAAAATTAGGA-----GAACACTTCTCT-----  
 -----AATAAAACAATAAAATTTGAA-----  
 CCGTCATCAGGAGGGGACCTAGAAATTACA--ACACATAGCTTTAATTGTAGAGGAGAA---  
 TTTAAGCAGCTCCAGACAAGAGTCTTGGCTATGGAAAGATACCTAAAGGATCAACAGCTCCTAGGGATTTGGG  
 GCTGCTCTGGAAGAACTCATCTGCACCACTGCCGTGCCTTGGAACCTCCAGTTGGAGT-----  
 -----AATAGATCTCATGATGAGATTTGG-----GAT-----  
 AACATGACCTGGATGCAGTGG---GATAGAGAAATTAATAATTACACAGACACAATATAC---  
 AGGTTGCTTGAAGAATCACAAAACCAGCAGGAG-----  
 -----  
 AAAAAATGAAAAGGATTTATTAGCATTGGACAGTTGGCAAAATCTGTGGAATTGGTTTAGCATAACAAATTGGC  
 TGTGGTATATAAAAATATTTCATAATGATAGTAGGAGGCTTGATAGGTTTAAGAATAATTTTTTGCT---  
 GTGCTTTCTATAGTG-----AATAGAGTTAGGCAGGGATACTCACCT-----  
 CTGTCGTTTGCTATTAGTCTGTTTGATACCATAGCAATAGCAGTAGCTGAA---  
 GGAACAGATAGGATTATAGAATTAATACAAAGAATTTGTAGAGCT-----  
 -----ATTCGCAACATA-----CCTAGAAGAATAAGACAGGGCTTTGAAGCAGCTTTGCAA---TAA  
 >AF443084  
 GTG---GTA-----  
 GGGAACTTGTGGGTACAGTCTATTATGGGGTACCTGTGTGG---AAAGAAGCAAAA---  
 ACTACTCTATTCTGTGCATCAGATGCTAAAGCATATGATAAAGAA---GTGCATAAT-----  
 -----GTCTGGGCTACA---CATGCCTGTGTACCCACAGAC---  
 CCCAACCCACAAGAAATAGTTTTGGAA-----AATGTAACAGAAAATTTTAAC-----  
 -----ATGTGGAAGAAATGACATGGTAGATCAGATGCATGAGGATATA---  
 ATCAGTTTATGGGATCAAAGCCTA---AAGCCATGTGTAAAGTTG---  
 ACCCCACTCTGTGTCACTTTAAATGTACAAATGTTAACGCTACAAATGTTAACGCT-----  
 -----  
 -----ACCTACAGTAATAGGACGATGACTGAGGAAATAAAA---  
 AATTGCTCTTTCAATATAACCATGGAACCTAAGA-----  
 GATAGGAAACAGAAGGTGAATGCACCT--TTTTATAAACTTGATATAGTACCACTTAATGAGAAGGCT---  
 -----  
 -----  
 AACAAATAACAGCTATAGCTACTATAGATTAATAAAATTGTAATACCTCAGCCATAACACAA---  
 GCCTGTCCAAAGGTCTCTTTTGACCCAATTTCCTATACATTATTGTGCTCCAGCTGGTTATGCGATTCTAAAGT  
 GTAAT---AATAAGACATTTAAT-----GGGACAGGACCATGCCAGAAT-----  
 -GTCAGC---ACAGTACAGTGCACACATGGAATTAAGCCAGTGGTATCAACT---  
 CAACTACTGTAAATGGTAGCCTAGCAGAAGGAGAG-----  
 ATAATAGTTAGATCTGAAAATCTGACAGACAAT-----GTCAAAACAATAATAGTACATCTTGAT---  
 -----AAACCTGTAGGA-----ATTGTGTGTATAAGACCCAACAATAATACAAGGAAA---  
 -AGTATAAGGATA-----GGGCCAGGACAAACA---TTT-----TATGCAACAGGAGAC-----  
 -----ATAATAGGAAACATA-----AAAGAAGCATATTGT---AACATTAAGGAATCT---  
 GAATGGAATAGAAGCTTTACAAAGGGTAGGAGAAAAAACTGGGA-----AAATACTTCCCT---  
 -----AGTAAAACAATAAAATTTAAC-----  
 TCATCCTCAGGAGGGGACCTAGAAATTACA--ACACATAGCTTTAATTGTAGAGGAGAA---  
 TTCAAGCAGCTTCAGGCAAGAGTCCTGGCTATAGAAAAGATACCTAAAGGATCAACAGCTCCTAGGGCTTTGGG  
 GCTGCTCTGGAAGAACTCATCTGCACCACTGCTGTGCCTTGGAACCTCCAGTTGGAGT-----  
 -----AATAAATCTAAGGAAGATATTTGG-----AAT-----  
 AACATGACCTGGATGCAGTGG---GATAGAGAAATTAGTAATTACACAAACACAATATAC---  
 AGGTTGCTTGAAGACTCGCAAAGCCAGCAGGAA-----  
 -----  
 AAAAAATGAAAAGATTTATTAGCATTGGACAGTTGGAAAAATCTGTGGAAGTTGGTTTGACATATCAAATTGGC  
 TGTGGTATATAAGAATATTTCATAATGATAGTAGGAGGCTTAATAGGCTTGAGAATAATTTTTTGCT---  
 GTACTCTCTATAGTG-----AATAGAGTTAGGCAGGGATACTCACCT-----  
 TTATCGTTTGTCTACTAGCCTGATTGATGCCATAGCAATAGCAGTAGCTGAA---  
 GGAACAGATAGAATTATAGACTTAATACAAAGAATTTGTAGAGCT-----  
 -----ATCAGAAATATA-----CCTAGAAGAATAAGACAGGGCTTTGAAGCAGCTTTGCAA---TAA  
 >KC899004

GTG---GGA-----  
 GGAAACTTATGGGTCACAGTTTATTATGGGGTACCTGTATGG---AGAGAAGCAAAA---  
 ACTACTCTATTTTGTGCATCAGATGCTAGAGCATATGATACAGAG---GTACATAAT-----  
 -----GTCTGGGCTACA---CATGCCTGTGTACCCACAGAC---  
 CCCAACCCACAAGAAATAGAGTTGAAA-----AATGTAACAGAAAATTTTAACT-----  
 -----ATGTGGAAAAATGAAATGGTGAATCAGATGCATGAGGATGTA---  
 ATCAGCTTATGGGATCAAAGCCTA---AAGCCATGTGTAAAATTG---  
 ACCCCACTCTGTGTCACTTTAGAATGTGGAAATGTTAACCGCACTAGCAATACTACCCACAGC-----  
 -----  
 -----AATGATACCTACAATGACAGTGGGAAGGAAATAAAA---  
 AATTGCTCTTTTAAATGCAACCACAGAAGTAAGA-----  
 GATAAAAAGCAGGCAGTGTATGCACCT---TTTTATAGACTTGATATAGTGCCACTTAATGAA-----  
 -----  
 -----  
 AGAAGCGGTAGGAACCTCTACTGAGTATTATAGATTAATAAAATTGTAATACCTCAGCCATAACACAA---  
 GCCTGTCCAAAGGTCACCTTTTGATCCAATTCCTATACACTATTGTGCTCCAGCTGGTTTTGCAATTCTAAAGT  
 GTAAT---GATAAGACATTCAAT-----GGGACAGGACCATGCCTTAAT-----  
 -GTTAGT---ACAGTGCAATGTACACATGGAATTAAGCCAGTGGTATCAACT---  
 CAACTACTGTTAAATGGTAGCCTAGCAGAAGGAGAA-----  
 ATAATAATTAGATCTGAAAATCTGACAGACAAT-----GTCAAAACAATAATAGTACATCTTAAT---  
 -----CAATCTGTAGAA-----ATTGTATGTACAAGACCCAACAATAATACAAGAAAA-----  
 -AGTATAAGGATA-----GGACCAGGACAAAACA---TTC-----TATGCAACAGGAGAC-----  
 -----ATAATAGGGGACATA-----AGACAAGCATATTGT---AACATTAATAAAAAA---  
 GTATGGAATGAACTTTACAAAGGGTAGGGAAAAAATTAGCA-----AAACACTTCCT---  
 -----AATAAAACAATAAATTTCAAT-----  
 TCATCCTCAGGAGGAGACCTAGAAATTACA---ACACATAGCTTTAATTGTGGAGGAGAA---  
 TTTAAGCAGCTCCAGACAAGAGTCCTGGCTATAGAAAGATACCTACAGGATCAACAGCTCCTAGGGATTTGGG  
 GCTGCTCTGGAAGAACTCATCTGCACCACTAATGTACCTTGGAACTCCAGTTGGAGT-----  
 -----AACAGATCTCAAGAAAAGATTTGG-----AAA-----  
 AACATGACCTGGATGCAGTGG---GATAAAGAAATTAGTAATTACACAGACACAATATAC---  
 GGATTGCTTGAAAAATCGCAAAACCAGCAGGAA-----  
 -----  
 AGAAATGAAAAAGATTTATTAGCATTGGACAGTTGGAAAAATCTATGGAATTGGTTTGACATAACAACTGGC  
 TGTGGTATATAAAAAATATTACATAATGATAGTAGGAGGCTTGATAGGCTTAAGAATAATTTTTTGCT---  
 GTGCTCTCTATAGTA-----AATAGAGTTAGGCAGGGGTACTCACCT-----  
 TTGTCGTTTGCTACCAGTCTGCTTGATATCACAGCCATAGCAGTAGCTAAC---  
 GGAACAGATAGGATTATAGAATTAGTACTCAGCATTGTAGAGCT-----  
 -----ATCCGCAACATA-----CCTACAAGAATAAGACAGGGCCTTGAAATAGCTTTGCAA---TAA  
 >KF835522  
 GTG---GGA-----  
 GGAAACTTGTGGGTCACAGTCTATTATGGGGTACCTGTGTGG---AAAGAAGCAAAA---  
 ACTACTCTATTCTGTGCATCAGAGGCTAAAGCATATGAGCAAGAA---GTGCATAAT-----  
 -----GTTTGGGCTACA---CATGCATGTGTACCCACAGAC---  
 CCTGACCCACAAGAAATATTTTGAAG---AATGTAACAGAAAATTTTAACT-----  
 -----ATGTGGAAAAATGACATGGTGAATCAGATGCATGAGGATGTA---  
 ATCAGTTTATGGGATCAAAGCCTA---AAGCCATGTGTAAAGTTG---  
 ACCCCACTCTGTGTCACTTTAGAATGTGGAAAGGTTAGTAATACCTAT-----  
 -----  
 -----ATTAAGATCTTCAATGAGAGTGAGGAGGAAATAAAA---  
 AACTGCACTTTTCAATGCAACCACAGTAGTAAGA-----  
 GATAGGAAGCAGTCAGCGTATGCCCTT---TTTTATAGACTTGATATAGTACCACTTAATGAG-----  
 -----  
 -----  
 TCTAGTAATTCTAGTTATTATAGATTAATAAAATTGTAATACCTCAGCCATAACACAA---  
 GCCTGTCCAAAGGTCACCTTTTGATCCAATTCCTATACACTATTGTACTCCAGCTGGTTATGCGATTCTAAAGT  
 GTAAT---GATGAGACATTCACT---GGGACAGGACCATGCTCTAAT-----  
 -GTTAGC---ACAGTACAATGTACACATGGAATTAAGCCAGTAGTATCAACT---  
 CAACTACTGTTAAATGGTAGCCTAGCAGAAGGAGAT-----  
 ATAATCATTAGATCTGAAAACCTGACAAATAAT-----GTCAAAACAATAATAGTGCATCTTAAC---  
 -----GAATCTGTAGAA-----ATTGTATGTACAAGACCCAACAATAATACAAGAAAA-----

-AGTATAAGGATA-----GGACCAGGACAAACA---TTC-----TATGCAACAGGAGGC-----  
 -----ATAATAGGAAACATA-----AGAGAAGCACATTGT---AACATTAGTGGAAAT---  
 AAATGGAATGAACTTTACAAAAGGTAGGTAAAAAATTAGCA-----GAACACTTCCCT-----  
 -----AATAAAACAATAAAATTTAAC-----  
 TCATCCTCAGGAGGGGACCTAGAAATTACA--ACACATAGCTTTAATTGTGGAGGAGAA---  
 TTTAAGCAGCTCCAGACAAGAGTCCTGGCTATAGAAAGATACCTAAAGGATCAACAGCTCCTAGGGATTTGGG  
 GCTGCTCTGGAAACTCATCTGCACTACTGCTGTACCTTGGAACCTCCAGTTGGAGT-----  
 -----AACAAATCTCAACAAGAGATTTGG-----GAT-----  
 AACATGACCTGGATGCAGTGG---GATAGAGAAATTAGTAATTACACAGACACAATATAC---  
 AGATTGCTTGAGGATTCGCAAAACCAGCAGGAA-----  
 -----  
 AAGAATGAAAAAGATTTATTAGCATTGGACAGTTGGAAAAGATCTATGGAGTTGGTTTGACATATCAAGTTGGC  
 TGTGGTATATAAGAATATTCATAATGATAGTAGGAGGCTTGATAGGTTTAAGAATAATTTTTTGCT---  
 GTGCTTTCTATAGTG-----AATAGAGTTAGGCAGGGATACTCACCC-----  
 TTGTCGTTTGCTATTAGTCTGTTTGATACCATAGCAATAGTAGTAGCTGAA---  
 GGAACAGATAGGATTATATACTTAGTAGTAAGAATTTGTAGAGCT-----  
 -----ATCTGCAACATA-----CCTAACAGAATAAGACAGGGCTTTGAAGCAGCTTTGCAA---TAA  
 >HM215403  
 GTG---GGA-----  
 GGAAACTTGTGGGTCACAGTTTATTATGGGGTACCTGTGTGG---AAAGAAGCAAAA---  
 ACTACTCTATTTTGTGCATCAGATGCTAAAGCATATGAGACAGAG---GTACATAAT-----  
 -----GTCTGGGCTACA---CATGCCTGTGTACCCACAGAC---  
 CCCAACCCACAAGAAATGGTTTTGGGA-----AATGTAACAGAAAATTTTAAT-----  
 -----ATGTGGAATAATGACATGGTGAATCAGATGCATGAGGATGTA---  
 ATTAGTTTATGGGATCAAAGCCTA---AAGCCATGTGTAAAGTTG---  
 ACCCCACTCTGTGTCACTTTAGAATGTACAGATGTAAATGTTACTAATGTAAATGTTACTATGAGCAATGGTA  
 CTATGAGCAATGATACT-----  
 ATGAGCAATAGTACACAAGTAAATGTTACTATGAACAATGGGAGTTGGATTACGGATGGGATGCAA---  
 AATTGCTCTTTCAATGCAACCACAGAATTAAGA-----  
 GATAAGAAGAATAAAGTGTTCGACTT---TTTTATAAACTTGATATAGTGCCACTTAGTGAG-----  
 -----  
 -----  
 ACAAACTCTAGTAACTATTATAGATTAATAAATTGTAATACCTCAGCCATAACACAA---  
 GCCTGTCCAAAAGTCACTTTTGATCCAATTCCTATACACTATTGCACTCCAGCTGGTTATGCGCTTCTAAAGT  
 GTAAT---GCAAAAGATTTCAAT-----GGGACAGGACCATGCAGTAAT-----  
 -GTTAGC---ACAGTACAATGTACACATGGAATTAAGCCAGTAGTATCAACT---  
 CAGCTACTGTAAATGGTAGCCTAGCAGAAGAAGAC-----  
 ATAATAATTAGATCTGAAAACCTGACAGACAAT-----GCCAAAACAATAATAGTACATCTCAAT---  
 -----AAATCTGTAGAA-----ATTGTATGTACAAGACCCAGCAATAATACAAGGAAA---  
 -AGTATAAGGATA-----GGACCAGGACAAACA---TTC-----TATGCAACAGGAGAC-----  
 -----ATAATAGGGGACATA-----AGACAAGCACATTGT---AACATTAGTAAAGGA---  
 AAATGGAATGACACTTTACAAAGGGTAGGTATAAAATTAGCA-----GAATACTTCCCG---  
 -----AATAAAACAATAAATTTTACC-----  
 TCATCCTCAGGAGGGGACCTAGAAATTACA--ACACATAGCTTTAATTGTGGAGGAGAA---  
 TTTAAGCAGCTCCAGACAAGAGTCCTGGCTATAGAAAGATACCTAAAGGATCAACAGCTCCTAGGGATTTGGG  
 GCTGCTCTGGAAACTCATCTGCACTACTGCTGTACCTTGGAACCTCCAGTTGGAGT-----  
 -----AACAGAACTCAAGATGAGATTTGG-----GAT-----  
 AACATGACCTGGATGCAGTGG---GATAAAGAAATTAATAACTACACAGACACAATATAC---  
 AGACTGCTTGAAGAATCGCAAAACCAGCAGGAG-----  
 -----  
 AAAAAATGAAAAAGATTTATTAGCATTGGACAGTTGGAAAAATCTATGGAATTGGTTTGGCATAACAAAGTGGC  
 TGTGGTATATAAAAATATTCATAATGATAGTAGGAGGCTTGATAGGCTTAAGAATAATTTTTTGCT---  
 GTGCTTTCTATAGTA-----AATAGAGTTAGGAAGGGATACTCACCT-----  
 TTGTCATTTGCTATTAGTCTGTTTGATACCATAGCCATAGCAGTAGCTGAA---  
 GGAACAGATAGGATTATAGAATTAGTACTCAGCATTTGTAGAGCT-----  
 -----ATCCGCAACATA-----CCTAGAAGAATAAGACAGGGCTTTGAATTAGCTTTGCAA---TAA  
 >HM215408  
 GGG---GAA-----  
 GGAAACTTGTGGGTCACAGTTTATTATGGGGTACCTGTGTGG---AAAGAAGCAAAA---  
 ACTACTCTATTCTGTGCGTCAGATGCTAAAGCACATGAGACAGAA---GTGCATAAT-----

-----GTCTGGGCTACA---CATGCCTGTGTACCCACAGAC---  
CCCAACCCACAAGAAATAGTTCTGGGA-----AATGTAACAGAAAATTTTAAT-----  
-----ATGTGGAATAATGATATGGCAGATCAGATGCATGAGGATGTA---  
ATCAGTTTATGGGATCAAAGCCTA---AAGCCATGTGTAAAGTTG---  
ACCCCACTCTGTGTCACTTTAAATTGTACAGATGTTAACAATAGTAGCCTTGCTAATAACAATGGTAGC----  
-----  
-----ATTGCTAATAGAACTATTGATGAGGAGGCCTTCAAAGAGATAAAA---  
AACTGCTCTTTCAATGCAACCACATTATTAAGA-----  
GATAAGAAGAAGACAGAGTATGCACTT---TTTTATAGAGTTGATATAGTACCACTTAATGAAGGGAACCTCT-  
-----  
-----  
GGTAAGAACCTTTAGTAACTTTAGTAAGTATAGATTAATAAAATTGTAATACCTCAGCCATAACACAA---  
GCCTGTCCAAAGGTTAATTTTGATCCAATTCCTATACACTATTGTACTCCAGCTGGTTATGCGATTCTAAAAAT  
GTAAG---GATAAGACATTCAAT-----GGGACAGGGCCATGCCATAAT-----  
-GTTAGC---ACAGTACAATGTACTCATGGAATTAAGCCAGTGGTATCAACT---  
CAACTACTGTTAAATGGTAGCCTAGCAGAAGAAGAG-----  
ATACTAATTAAATCTGAAAATCTGACAGACAAT-----GCCAAAACAATAATAGTACATCTTAAT----  
-----GAATCTGTAGAA-----ATTGTATGCACAAGACCCAACAATAATACAAGGAAA-----  
-AGTATAAGGATA-----GGACCAGGGCAAACA---TTC-----TATGCAACAGGAGAC-----  
-----ATCATAGGAGACATA-----AGACAAGCACATTGT---AACATTAGTAAACAT---  
AAATGGAAAGAAGCTTTACAGAACATAAGTAAAAAATTAGCA-----GAACACTTCCCT----  
-----AATAAAACAATAAACTTTTACA-----  
TCATCCTCAGGAGGGGACCTAGAAATCACA--ACACATAGCTTTAATTGTAGAGGAGAA---  
TTTAAGCAGCTACAGACAAGAGTTCTGGCTATAGAAAGATACCTAAAGGATCAACAGCTCCTAGGGATTTGGG  
GCTGCTCTGGAAGAACTCATCTGCACTACTGCTGTACCTTGGAACCTCCAGTTGGAGC-----  
-----AACAAAGTCTCAAAACAGAGATTTGG-----GAT-----  
AACATGACCTGGATGCAGTGG---GATAAGGAAATTAGTAATTACACAAACACAATATAC---  
AGTTTGCTTGAGGAATCGCAAAACCAGCAGGAA-----  
-----  
AGAAATGAAAAGGATTTATTAGCATTGGACAGCTGGAAAAATCTATGGAGTTGGTTTGACATTTCAAATTGGC  
TGTGGTATATAAAAAATATTACATAATGATAGTAGGAGGCTTGATAGGTTTAAGAATAATTTTTTGCT---  
GTGCTTTCTGTAGTG-----AATAGAGTTAGGCAGGGATACTCACCT-----  
TTGTCGTTTCGCTATTAGTCTGCTTGATACCATAGCAATAGCAGTAGCTGAA---  
GGAACAGATAGTATTATAAACATAGTGCAAAGAATTTGTAAAGCT-----  
-----ATCCGCAACATA-----CCTAGAAGAATAAGACAGGGCTTAGAAGCAGCTTTGCAA--TAA  
>HQ699950  
GTG---GGA-----  
GGAAACTTATGGGTCACAGTTTATTATGGGGTACCTGTGTGG--AAAGAAGCAAAA---  
ACTACTCTATTTTGTGCATCAGATGCTAAAGCATATGATACAGAG--GTACATAAT-----  
-----GTCTGGGCTACA---CATGCCTGTGTACCCACAGAC---  
CCCAACCCACAAGAAATATTTTGGAA-----AATGTAACAGAAAACCTTTAAC-----  
-----ATGTGGAATAATGAAATGGTGAATCAGATGCATGAAGATGTA---  
ATCAGTTTATGGGATCAAAGCCTA---AAGCCATGTGTAGAGTTG---  
ACCCCTCTGTGTCACTTTAGAAATGTAGAAATGTTACCCACAATGTTACCCACAAT-----  
-----  
-----GAGAGTGTGAAGGAAATAAAGGAAATAAAA---  
AATTGCTCTTTTAATGCAACCACAGAATTAAGA-----  
GATAGGAAGCAGGCAGTGCATGCACTT---TTTTATAGACTTGATATAGTGCCACTTGATGAGAAGAACGTT-  
-----  
-----  
AGTAAAACTCTAGTGAGTATTATAGATTAATAAAATTGTAATACCTCAGCCATAACACAA---  
GCCTGTCCAAAGGTCACCTTTTGATCCAATTCCTATACACTATTGCACTCCAGCTGGTTATGCGATTCTAAAGT  
GTAAT---GATAAGACATTCAAT-----GGGACAGGACCATGCCGTAAT-----  
-GTTAGC---ACAGTACAATGTACACATGGAATTAAGCCAGTGGTATCAACT---  
CAACTACTGTTGAATGGTAGCCTAGCAGAAGAAGAA-----  
ATAATAATTAGATCTGAAAATCTGACAGACAAT-----GTCAAAACAATAATAGTACATCTTAAT----  
-----CAACCTGTAGAA-----ATTGTATGTACAAGACCCAACAATAATACAAGAAAA-----  
-AGTATAAGGATA-----GGACCAGGACAAAACA---TTC-----TATGCAACAGGAGAC-----  
-----ATAATAGGGGACATA-----AGACAAGCACATTGT---AACATTAGTAAAGCT---  
AGATGGAATGAAACCTTACAAGGGGTAGGAAGAAAATTAGCA-----GAATACTTCCCT----

-----AATAAAAAAATAAACTTCACA-----  
TCATCCTCAGGAGGAGACCTAGAAATTGCA--ACACATAGCTTTAATTGTGGAGGAGAA---  
TTTAAGCAGCTCCAGACAAGAGTCCTGGCTATAGAAAGATACCTAAAGGATCAACAGCTCCTAGGGATTTGGG  
GCTGCTCTGGAAGAACTCGTCTGCACCACTAATGTACCTTGGAACTCCAGTTGGAGT-----  
-----AACAAAAATCAAGAAGAGATTTGG-----GGT-----  
AACATGACCTGGATGCAGTGG--GATAGAGAAATTAGTAATTTACAGACACAATATAC---  
AGATTGCTTGAAGACTCGCAAAACCAGCAGGAA-----  
-----  
AGAAATGAAAAAGATTTATTAGCATTAGACAGTTGGAAAAATCTATGGAATTGGTTTGACATAACAACTGGC  
TGTGGTATATAAAAAATATTCATAATGATAGTAGGAGGCTTGATAGGCTTAAGAATAATTTTTTGCT---  
GTGCTCTCTATAGTA-----AATAGAGTTAGGCAGGGATACTCACCT-----  
TTGTCGTTTGTCTACTAGTCTGCTTGATACCATAGCCATAGCAGTAGCTAAC---  
GGAACAGATAGGATTATAGAATTAGTACTCAGCATTGTGTAGAGCT-----  
-----ATCCGCAACATA-----CCTACAAGAATAAGACAGGGCCTTGAAATAGCTTTGCAA---TAA  
>HQ699981  
GGG---GGA-----  
GGAGACTTGTGGGTACAGTTTATTATGGGGTACCTGTGTGG--AAAGAAGCAAAA---  
ACTACTCTATTTTGTGCATCAGATGCTAAAGCATATGATACAGAG--GTACATAAT-----  
-----GTATGGGCTACA---CATGCCTGTGTACCCACAGAC---  
CCCAACCCACAAGAAATAGTTTTGAAA-----AATGTAACAGAACAGTTTAACT-----  
-----ATGTGGGAAAATGAAATGGTGAATCAGATGCATGAGGATGTA---  
ATCAGTTTATGGGATCAAAGCCTA--AAGCCATGCGTAAAGTTG---  
ACCCCACTCTGTGTCACTTTAGAAATGTAGAAATGCTAGTAGAAATGATAGTGAA-----  
-----  
-----ACCCACAATATTACCTACACGGAGGAAATAAAA---  
AATTGCTCTTTCAATACAACCACAGAAATAAGA-----  
GATAAGGTGCAGAAAGTACATGCACCT--TTTTATAGACTTGATGTAGTGCCACTTGGTAAGGAGAAC---  
-----  
-----  
CCTAGTACCAACTCTAGTGAGTATTATAGATTAATAAATTGTAATACCTCAGCCATAACACAA---  
GCCTGCCCAAAGGTCAATTTTGATCCAATTCCTATACATTATGCACTCCTGCTGGTTATGCGATTCTAAAGT  
GTAAT--AATAAGACATTCAAT-----GGGACAGGACTATGCAATAAT-----  
-GTTAGC--ACAGTACAATGTACACATGGAATTAAGCCAGTGGTGTCAACT---  
CAACTACTGTAAATGGTAGCCTAGCAGAAGAAGAA-----  
ATAATAATTAGTTCTAAAAATGTGACAGACAAT-----GGCAAAATAATAATAGTACATCTTAAT---  
-----AAACCTGTAAAA-----ATTGAATGTACAAGACCCAACAATAATACAAGAAAA-----  
-AGTGTAAGGATA-----GGACCAGGACAAGCA--TTC-----TATGCAACAGGAGAC-----  
-----ATAATAGGGAACATA-----AGAGAAGCACATTGT--AACATTAGTAAAAGT---  
AAATGGAATGACACTTTACAAAGGGTAGGTGAAAAATTAGCA-----AAACACTTCCCT---  
-----AATAAAACAATAAAATTTAAT-----  
TCATCCTCAGGAGGGGACCTAGAAATTACA--ACACATAGCTTTAATTGTAGAGGAGAA---  
TTTAAGCAGCTCCAGACAAGAGTCCTGGCTATGGAAAGATACCTACAGGATCAACAGCTCCTAGGGTTGTGGG  
GCTGCTCTGGAAGAACTCATCTGCACTACTGCTGTACATTGGAACCTCCAGTTGGAGT-----  
-----AGCAAATCTCATGATGACATTTGG-----AAA-----  
AACCTGACCTGGATGCAGTGG--GATAAGGAAATTAGTAATTACACAGACACAATATAC---  
AGATTGCTTGAAGACTCGCAAAACCAGCAGGAA-----  
-----  
GAAATGAAAAAGATTTATTAGCATTGGACAGTTGGAAAAATCTATGGAGTTGGTTTGACATAACAAAGTGGC  
TGTGGTATATAAAAAATATTCATAATGATAGTAGGAGGCTTGATAGGCTTAAGAATAATTTTTTGCT---  
GTGCTTCTATAGTA-----AATAGAGTTAGGCAGGGATACTCACCT-----  
TTGTCGTTTGTCTACTAGTCTGCTTGATAGCATAGCCATAGCAGTAGCTGAA---  
GGAACAGATAGGATTATAGAATTAATACGCAGCATTGTGAGAGCT-----  
-----ATCCGCAACATA-----CCTACAAAGATAAGACAGGGCTTTGAACTAGCTTTGCAA---TAA  
>KC807928  
ATG---GAA-----  
GAAAAATTGTGGGTACAGTCTATTATGGGGTACCTGTGTGG--AAAGATGCAAGA---  
ACTACTCTATTCTGTGCATCAGAGGCTAAAGCATATGAGACAGAA--GTGCATAAT-----  
-----GTATGGGCTACA---CATGCTTGTGTACCCACAGAC---  
CCCAACCCACAAGAGATGGTTATGGGA-----AATGTAACAGAAAATTTTAACT-----  
-----ATGTGGGATAATGATATGGTGGATCAGATGCATGAGGATGTA---

ATCAGTTTATGGGATCAAAGCCTA---AAGCCATGTGTAAAGTTG---  
 ACCCCACTCTGTGTCACTTTAGACTGTAGAAGTGTTAATATGAGAAGTGTTAATATGACC-----  
 -----  
 -----AACAAATGTGACCGTCAATGGAACCTACGATGAGATAAAA---  
 AATTGCTCTTTCAATACAACCACATTATTAACA-----  
 GATAGGAAAAAGACAGAGTATGCACTT---  
 TTTTACAACTTGATATAGTACCCCTTGATAATGAGAATCCTAGTAAG-----  
 -----  
 AACTCTAGTAACAACCTCTAGTGATTATTATAGATTAATAAATTGTAATACCTCAGCCATAAGACAA---  
 GCCTGTCCAAAGGTCACCTTTTGATCCAATTCCTATACACTATTGCACTCCAGCTGGTTTTGTGATTCTAAAGT  
 GTAAT---AATAAGACATTCAAT-----GGGACAGGACCATGCCATAAT-----  
 -GTTAGC---ACAGTACAATGTACACATGGAATTAAGCCAGTGGTATCAACT---  
 CAACTACTGTTGAATGGTAGCCTAGCAGAAGAAGAG-----  
 ATAATAATTAGATCTAAAAATCTGTCTAGACAAT-----GCCAAAACAATAATAGTACATCTTAAT----  
 -----GAATCTGTAGAA-----ATTGTATGTACAAGACCCAACAATAATACAAGAAAA-----  
 -AGTATAAGGATA-----GGACCAGGACAAAACA---TTC-----TATGCAACAGGAGAT-----  
 -----ATCATAGGAGACATA-----AGACAAGCATATTGT---AACATTACTAAAAAT---  
 AAATGGGTTGAACTTTACAGAAAAGTAAGTAAAAAATTAGCA-----GAACGCTTCCCT----  
 -----AATAGAACAATAACATTTAAC-----  
 TCATCCTCAGGAGGGGACCTAGAGATTACA---ACACATAGCTTTAATTGTAGAGGAGAA---  
 TTTAAACAGCTACAGACAAGAGTCCTGGCTCTAGAAAGATACCTAAGGGATCAACAGCTCCTAGGGATTGGG  
 GCTGCTCTGGAAGACTTATCTGCACTACTGCTGTACCTTGGAACCTCCAGTTGGAGT-----  
 -----AACAAATCTCTAAATGAGATTTGG-----GAG-----  
 AACATGACCTGGATGCAGTGG---GAAAAGGAAATTGATAATTACACAGACTACATATAC---  
 ACATTGCTTGAAGTCTCGCAAAACCAGCAGGAA-----  
 -----  
 AAGAATGAAAAAGATTTATTAGCATTGGACAGTTGGAAAAACCTATGGAGTTGGTTTAACATATCAAATTGGC  
 TGTGGTATATAAAAAATATTACATAATGATAGTAGGAGGCTTGATAGGCTTAAGAATAATTTTTTGCT---  
 GTGCTTTCTATAGTG-----AATAGAGTTAGGCAGGGATACTCACCT-----  
 TTGTCGTTTGCTATTAGTCTGTTTGATACCATAGCAATAACAGTAGCTGAA---  
 GGAACAGATAGGGTTATAGCCATAGTACAAAGAATTTGTAGAGCT-----  
 -----ATCCGCAACGGA-----CCTAGAAGAGTAAGACAGGGCTTGGAAGCATCTTTGCAA---TAA  
 >JF683757  
 GTG---GTG---GGG-----  
 AACAAAGACTTGTGGGTACAGTCTATTATGGGGTACCTGTGTGG---AAAGAAGCAAAA---  
 ACTACTCTATTCTGTGCATCAAATGCTAAAGCATATGAGAGGGAG---GTGCATAAT-----  
 -----GTTTGGGCTACA---CATGCCTGTGTACCCACAGAC---  
 CCCAACCCACAGAAAATAGATTTGGAA-----AATGTAACAGAAAATTTTAAC-----  
 -----ATGTGAAAAATGACATGGTGGATCAAATGCATGCAGATGTA---  
 ATCAGTTTATGGAAGGAAAGCCTA---AAGCCATGTGTAAAGCTG---  
 ACCCCACTCTGTGTCACTTTAAATTGTACAGAGGTTACTGTTATCAAAAATACAGGGGTTAATATGACCAATA  
 ATAGT-----  
 -----ACTAGTACCAGTATTGACACTAGTATCCTTAATGATACCAGTAATGCAGACTTGAAG---  
 AATTGCTCTTTCAATACAACCACAAAATAAGT-----  
 GATAATGAAATTTTTGAGTTTGCTGTT---AATAATACTCTTGATGTAGAACCAATTGATGGA-----  
 -----  
 -----  
 ACATACACCTCCATAACCTTTAGATTAACAAATTCGAATTCCTCCTCCATACCACAA---  
 GCTTGTCCAAAGGTTTCTTTTGACCCACTTCCTATTCTTATTGTGCTCCAGCTGGGTATACGGGTCTAAGGT  
 GTAGT---AATAATACATTCACT-----GGAACAGGACCATGCCGTAAT-----  
 -GTCAGC---ACAGTACAATGTACACATGGAATTAAGCCAGTGGTATCAACT---  
 CAGCTACTGTTAAATGGTAGCCTAGCAGAAGGAGAG-----  
 ATAATGATTAGATCTGAAAAATCTGACAAATAAT-----GCCAAAACAATAATAGTACATCTTAAT----  
 -----GAATCTGTAAAC-----ATTGTATGTACAAGACCCAACAACAATACCAGAAAA-----  
 -GGTGTAGGGATA-----GGACCAGGACAAGCA---ATC-----TATGCAACAGGAGCA-----  
 -----ATAATAGGAGACATA-----AGACAAGCACATTGT---AACATTACTAAAAGG---  
 GGATGGAATGGACTCCACAAAAAGGTAAAGGGAAAGTTAAGG-----GAACACCTCCCC----  
 -----GGTAAATTAATAATATTTCAA-----  
 CCACACTCAGGAGGGGACCTACAAATTACA---ATGCATACCTTTAATTGGGGAGGAGAA---  
 TTTAAACAGCTCCAGGCAAGAGTCTTGGCTCTGAAAAGATACCTAAAGGATCAACAGCTCCTAGGGATTGGG

GCTGCTCTGGAAACTCATCTGCACCACTACTGTACCTTGGAAACACCAGTTGGAGT-----  
-----AATAGATCCAAAGAGGAGATTTGG-----AAT-----  
AACATGACCTGGATGCAGTGG---GAGAGAGAAATTGATAATTACACAGAAATAATATAC---  
CAGTTACTTGGAGAATCGCAGATTCAGCAGGAA-----  
-----  
CAAAATGAAAAGGATTTATTAGCATTGGACAGCTGGAAAAATCTGTGGAGTTGGTTTTCATATCAAATTGGC  
TGTGGTATATAAGAATATTCATAATGATAGTAGGAGGCTTGATAGGCTTAAGAATAATTTTTTGCT---  
GTACTTTCTATAATA-----CATAGAGTTAGGCAGGGATACTCACCT-----  
TTGTCATTGGCTATTAGTCTGCTTGATACTGTAGCAATAGCAGTAGCTGGG---  
AGGACAGATAGGATTATAGAAGTAATACAAGAAATTTGTAGAGCT-----  
-----ATCTACCACATA-----CCTAGAAGAATAAGACAGGGCTTTGAAGCAGCTTTGCTA---TAA  
>L23065  
GGG---ATG-----  
GGGAACTTGTGGGTCACAGTCTATTATGGGGTACCTGTGTGG---CAAGAAGCAAAAC---  
CCTACTCTATTTTGTGCATCAGATGCTAAAGCATATGAGACAGAA---GTGCATAAT-----  
-----GTCTGGGCTACA---CATGCCTGTGTACCCACAGAC---  
CCCAGCCCACAGGAAGTAGTTATGGAA-----AATGTAACAGAAAATTTTAAAC-----  
-----ATGTGGAAAAATGGCATGGTGGATCAGATGCATCAGGATATA---  
ATCAGTTTATGGGATGAAGGCCTA---AAGCCATGTGTAAAGTTG---  
ACCCCACTCTGTGTTACTTTAAACTGTAGTAATAAGGTTACTGCTACCGGTAATGGT-----  
-----  
-----AGTGTTACCTACAATAGCACAGAAAAAGACATGAGA---  
AATTGCTCTTTCAACATAACCACAGAACTAAGA-----  
GATAAGAAACAGAAAAAATATGCACCTT---TTTTATAAACTTGATATAGTACCACCTGGGAAT-----  
-----  
-----  
GGGAATGAGGAATATCGATTAATAAATTGTAATACCTCATCCATAACACAA---  
GCCTGTCCAAAGGTCTCTTTTGAACCAATTCCTATACATTATTGTGCTCCAGCTGGTTATGCGATTCTAAAGT  
GTAGG---GATACAAAATTCAAT-----GGAACAGGACCATGCAAGAAT-----  
-GTCAGT---ACAGTACAATGTACACATGGAATTAAACCAGTGGTATCAACT---  
CAACTATTGTTAAATGGTAGTACAGCAGAGGAGGAT-----  
ATAATAATTAGATCTGAAAATCTGACAAACAAT-----GCCAAAATAATAATAGTACAGCTTAAT---  
-----CAATCTGTAGAA-----ATTAATTGTACAAGACCCAACAATAATACAAGGCAA-----  
-AGCATAAGGATA-----GGACCAGGACAAACA---TTC-----TATGCAACAGGAGAT-----  
-----ATAATAGGAGATATA-----AGACAAGCACATTGT---AACATTAGTAGACAA---  
AAGTGGAAGAACTTTACAACAGGTAAAAGGAAAATTTAAAA-----GAACACTTC-----  
-----AATAAAACAATAAAATTTGCA-----  
CCATCCTCAGGAGGAGACATAGAAATTACA--ACACATAGCTTTAATTGTGGAGGAGAA---  
TTTAAGCAGCTCCAGACAAGAGTCCTGGCTATAGAAAGATACCTGAAGGATCAACAGCTCCTAGGGATTTGGG  
GCTGCTCTGGAAACTCATCTGCACCACTGCTGTGCCTTGGAACTCTAGTTGGAGT-----  
-----AATAAATCTCAAGAGGAGATTTGG-----GAC-----  
AACATGACCTGGATGCAGTGG---GATAGAGAAATTAATAATTATACAGAAACAATATAC---  
AGGTTGCTTGAAGTCTCGAAACCCAGCAGGAG-----  
-----  
CAAAATGAAAAGATTTACTAGCATTGGACAAATGGCAAAATCTGTGGAGTTGGTTTGACATAACAAAGTGGC  
TGTGGTATATAAAAATATTCATAATGATAGTAGGGGGCTTGATAGGTTTAAGAATAATTTTTTGCT---  
GTGCTTTCTATAGTG-----AATAGAGTTAGGCAGGGATACTACCA-----  
TTATCATTTGCTGTTAGTCTGCTTGATAACCACAGCAATAGCAGTAGCTGAA---  
GGAACAGATAGGATTATAGAAATAATACAAGAATTTGGAGAGCT-----  
-----TTCTGCAACATA-----CCTAGAAGAATAAGACAGGGCTTTGAAGCAGCTTTGCAA---TAA  
>EF531335  
GTA---AAG-----  
GGCTTATGGGTCACCGTCTATTATGGGGTACCTGTGTGG---AGAGAAGCAAAT---  
ACTACTCTATTTTGTGCATCAGATGCTAAAGCATATGACAAAGAA---GTGCATAAT-----  
-----GTCTGGGCTACA---CATGCCTGTGTACCCACAGAC---  
CCCCAAACCACAAGAACAATGGTTGAAA-----AATGTAACAGAAGATTTTAAAC-----  
-----ATGTGGAAAAATAACATGGTGGAAACAAATGCATGAGGATATA---  
ATCAGTTTATGGGATCAGAGCCTA---AAGCCATGTGTAAAGTTG---  
ACCCCACTCTGTGTCACTTTAAACTGTACTAATGCTACCAGTATTGTTAATATGACTGATGTTGCCAGTAATA  
GGAGTAGGAGTAATGATACCAGTGTTGAAAATGTT-----

-----AATGGTACCAGTGTTGAAAATATGACTATTGTTAACAGTACTGATGAAATAAAA---  
AATTGCTCTTTCAATATAACCACAGGAATAGGA-----  
GATAAGCCAAAGAAAGAAAGTGCACTT---TTTTATAGCCTTGATATAGTGCCACTTAACAAA-----  
-----  
-----  
AGTGCTAATAATAGTGAGTATATATTAATAAATTGTAAAACCTCCAAGATAACACAA---  
GCCTGTCCAAAGGTCTCTTTTGAGCCAATTCCTATACATTATTGTGCTCCAGCTGGTTATGCGATTCTAAGGT  
GTGAT---AATAAGACATTCAAT-----GGAACAGGACCATGCAATAAT-----  
-GTCAGC---TCAGTACAATGTACACATGGAATTAGGCCAGTGGTAACAAC---  
CAATTACTGTTAAATGGTAGCTTAGCAGAAGAAGAT-----  
ATAATAATTAGATCTGTAAATATGTCAAACAAT-----GCCAAAACAATAATAGTACATCTTAAT----  
-----GAATCGGTAGAG-----ATTATATGTACAAGACCCAATAATAACAAGAAAA-----  
-AGTGTGGGGATG-----GGACCAGGACAAGCA---ATC-----TATACAACAGGAGCC-----  
-----ATAATAGGAAATATA-----AGACAAGCACATTGT---AACATCAGTGGAAGG---  
AACCGGAGTAGAACTTTACAAAAGGTAAGTGAAAAATTACAA-----AAATATTTTTAT----  
-----AATAAAACAATAAAATTCCAA-----  
CCCACTCAGGAGGGGACCCAGAAATTACA--ACACATAGTTTTAATTGTGGAGGAGAA---  
TTTAAGCAGCTCCAGGCGGGAGTCCTGGCTCTAGAAAAGATACCTACAGGATCAACAGATCCTAGGGATTTGGG  
GCTGCTCGGGAACCGCATCTGTACCACTGATGTGCCTTGGAACCTCTAGTTGGAGT-----  
-----AATAAACTAAAGAATACATTTGG-----GGA-----  
AATATGACCTGGATGCAGTGG---GATAAAGAAATTAGTAATTACACAGGCATAATATAC---  
GACTTGCTTGAAGAATCGCAAACCAGCAGGAA-----  
-----  
AAAAATGAACAGGAATTACTAGCATTGGACAGTTGGAAAAACCTGTGGAATTGGTTTAACATAACAACTGGC  
TGTGGTATATAAAAATATTTCATAATGATAATAGGAGGCTTGATAGGTTTAAGAATAATATTTGCT---  
GTGCTATCTATAGTG-----CATAGAGTTAGGCAGGGATACTCACCC-----  
TTGTCGTTTGCTATTAGTCTGCTTGATACCATAGCAATAGCAGTAGCTGAA---  
GGAACAGATAGGATTATAGAGTTTATACAAAGAATTTGCAGAGCT-----  
-----ATCTGCAACATA-----CCTAGAAGAATAAGACAGGGCTTGGAAGGATTTTGCTA---TAA  
>KU319529  
GTG---GGG-----  
GGGAACCTGTGGGTCACAGTTTATTATGGGGTACCTGTGTGG--AGAGAAGCAAAA---  
ACTACTCTATTTTGTGCATCAGATGCTAAAGGATATGAGAGAGAA--GTGCATAAT-----  
-----GTCTGGGCTACA--CATGCCTGTGTACCCACAAAC---  
CCCGACCCACAAGAATTGGTTTGGGA-----AATGTAACAGAAAATTTTAAC-----  
-----ATGTGGAATAATGATATGGTGGATCAGATGCATGAGGATGTA---  
ATCAGTTTATGGGATCAAGGCCTA--AAGCCATGTGTAAAATTG---  
ACCCCACTCTGTGTCACTTTAACCTGTATTAAATGCTACTATCTTCAATGGTAGCGAAATT-----  
-----  
-----GACGAAGCAAAA---  
AATTGCTCTTTCAGTATGACCGCGGAAGTAAGA-----  
GATAGCACTATCAATGTATCCTCAGTT--TATTATAGACTTGATATTGTACCCCTTGATAATAATAAGACC-  
-----  
-----  
TCTAGCAGTGATGGTGAATATAGATTAATAAATTGTAATACCTCAACTGTAACACAA---  
GCCTGTCCAAAGGTCTCTTTTGACCCATTTCTATACATTATTGTGCTCCAGCTGGTTATGCGATTCTAAAGT  
GTAAT---ACAAGACATTCAAT-----GGAACAGGACCATGCACTAAT-----  
-GTCAGT---ACAGTACAATGTACACATGGAATTAAACCAGTAGTATCAACT---  
CAACTACTGTTAAATGGGAGTCTAGCAGAAAAAGAA-----  
ATAGTAATTAGGTCTAAAAATCTGACAGACAAT-----GCCAAAATAATAATAGTCCATCTTAAA----  
-----AAATCTGTAGAA-----ATAATATGTATAAGGACTGGCAATAATAACAAGGAAG-----  
-AGTATAAGGATA-----GGACCTGGACAAACA---TTT-----TATGCAACAGGAGAA-----  
-----ATAATAGGAGACATA-----AGACAAGCATATTGT---AACATTAATGAAAAG---  
ACATGGAATGACACTTTACAAGAGGTAGCGAAAAAATTACAT-----GAACACTTCCCT----  
-----AATAGCACAAACATAAGATTTGCA-----  
CCACCCTCAGGAGGAGACCTAGAAATTACA--ACACATAGCTTTAATTGTAGAGGAGAA---  
TTTAAGCAGCTCCAGGCAAGAGTCCTGGCTATAGAAAAGATACCTAAAGGATCAACAGCTCCTGGGGATTTGGG  
GCTGCTCTGGAAAGCTCATCTGCACCCTAATGTGCCTTGGAACCTCTAGTTGGAGT-----  
-----AACAAATCTCTAGAGGATATTTGG-----AGT-----  
AATATGACTTGGATGCAGTGG---GATAGAGAAATTAATAATTACACAAACACAATATAC---

AGTTTGCTTGAAGAATCGCAAATCCAACAGGAG-----  
 -----  
 AAAAAAGAAAAAGATTTACTAGAAATTGGACAAGTGGGATAATCTGTGGAATTGGTTTAGCATAACAAATTGGC  
 TGTGGTACATAAAGGTATTCTAATGGTAGTAGGAGGCTTGATAGGTTTAAGAATAATTTTTACT---  
 GTGCTTTCTATAGTA-----AATAGAGTTAGGCAGGGATACTCACCT-----  
 TTGTCATTGGCTATTAGTCTGCTTAATACCACAGCAATAGTAGTAGCTGAA---  
 GGAACAGATAGGATTATAGAATTAGTACAAAGAACTTGGAGAGCT-----  
 -----ATCTGCAATATA-----CCAAGAAGGACAAGACAGGGCTTGGAAGCAGCTTTGCAG---TAA  
 >KU319530  
 GTG---GGG-----  
 GGGAACTTGTGGGTACAGTTTATTACGGGGTACCAGTGTGG---AAAGAGGCAAAA---  
 GCTCCTTTATTTTGTGCATCAGATGCTAAAGCACATGAGAACGAA---GTGCATAAT-----  
 -----GTCTGGGCTACA---TATGCCTGTGTACCCACAGAC---  
 CCCAACCCACAAGAAATGGTGTGGAA-----AATGTAACAGAGAAGTTTAAAC-----  
 -----ATGTGGAAAAATGACATGGTTGAACAGATGCATGAGGATATA---  
 ATCAGTTTATGGGATCAAAGCCTA---AAGCCATGTGTAAAGTTG---  
 ACCCCACTCTGTGTCACTTTAAACTGCGGTCCTGTTAGTAATAGTACTGGTGATAATGTTACT-----  
 -----  
 -----ATTACCATCAATAATACCACGAAGGAGGACATGAAA---  
 AATTGCTCTTTCAATGTAACCACAGAATTAAGA-----  
 GATAAAAGAAAGAAGGAATATGCACCT---TTTTATAAACTCGATATAGTGCAACTTAATAGAGAGAAG---  
 -----  
 -----  
 AACCCAGTGAGTATAGATTAATAAATTGTAATACCTCAGCCGTAACACAA---  
 GCCTGTCCAAAGGTCTCTTTTGACCCAATTCCTATACATTATTGTGCTCCAGCTGGTTATGCGATTCTAAAGT  
 GTAAT---ACAAGACATTCAAT-----GGAACAGGACCGTGCAATAAT-----  
 -GTCAGC---ACAGTACAATGTACACATGGAATTAAACCAGTAGTATCAACT---  
 CAACTACTATTAAATGGTAGTCTAGCAGAAGAAGAA-----  
 ATAGTAATTAGATCTGAAAATCTGACAAACAAT-----GTCAAAATAATAATAGTACATCTCCAA---  
 -----CAACCTGTAGAA-----ATTGTATGTACAAGGCCAGGCAATAATACAAGGAAA---  
 -AGTGTGAGGATA-----GGACCAGGACAAACA---TTT-----TATGCAACAGGAGAC-----  
 -----ATAATAGGAGAAATA-----AGACGAGCACATTGT---AACATTAAGGAAAAG---  
 ACATGGAATGAACTTTACAAAATGTAAGTAAAAAATTACAA-----GCACACTTCCT---  
 -----AATAAAACAATATACTTTGAA-----  
 CCATCCTCAGGAGGGGACCTAGAAATTACA--ACACATAGTTTTAATTGTAGAGGAGAA---  
 TTTAAACAGCTCCAGACAAGAGTCCTGGCTATAGAAAGATACCTAAAGGATCAACAGCTCCTAGGGATTTGGG  
 GCTGCTCTGGAAAGCTCATCTGCACCACTGCAGTACCTTGGAACTAGTTGGAGT-----  
 -----AATAAATCACAAGGGGATATTTGG-----GAT-----  
 AACAGGACTTGGATGCAGTGG---GATAAAGAAATTAGTAATTACACAGGTACAATATAC---  
 AGGTTGCTTGAAGACTCGCAAACACAGCAGGAA-----  
 -----  
 AAAAAAGAAAAAGAACTACTCGCATTAGACAGTTGGAAAAATTTATGGACTTGGTTTGACATATCAAGGTGGC  
 TGTGGTATATAAAGATATTCTAATGATAGTAGGAGGCTTGATAGGTTTAAGAATAATTTTTTGCT---  
 GTACTTTCTATAGTA-----AATAGAGTTAGGCAGGGATACTCACCT-----  
 TTGTCATTTGCTATTAGTCTGTTTGATACCATAGCAATAGCAGTAGCTGAA---  
 GGAACAGATAGAATACTAGAAATAATACAAAGAGTTTGTAGAGCT-----  
 -----ATCTACAACATA-----CCTAGAAGAATAAGACAGGGCTTTGAAGCAGCTTTGCAA---TAA  
 >KU319539  
 ATA---ATA-----  
 AGAAACGTGCTTTTCACAATTTATTATGGGGGACCTGATTGG---AAAGAAACAAAA---  
 ACTACTCTATTTTTTTTAAACAAATGCTAAACATATAAAAGAGAG---GTACATAAT-----  
 -----GTCTGGGCTACT---CACGCCTGTGGACCCGACACT---  
 CCCAACGCCCCAGAGATAATTTTGGTT-----CATGGCGCACAAAATTTTACC-----  
 -----TTGCGAAAAATTGACATGGTGGAAACAAACGCCTGATGATATA---  
 CTCAGTTTGTGTGATGAGATCCTA---AAGTCGTGTGTAAAGATG---  
 ACCCCAGTCTGTGTCACTTTAAACTGTAGCAATGCAACTGCTAATACAACTGCTAATAGAAAT-----  
 -----  
 -----ATCGGTAGAAGTGTAGAGCAT---  
 TATTGTTATTTCAATAACACTACTAGAATTCACGGC-----  
 GTAATGATAGGTATGCAGGAATATTGTAAATTT---GTTTGTCTAGTAGATATGATGCCGATAGATAAT---

-----  
-----  
GGCACTACTAGATATAGGTTGATAAGTTGTAGATCCTCAGTCAGTAAACAA---  
ACCTGTCTAATGGTCTCTTTTGCCCCAATTCCTATACATTATTGTGCTCCAGCTGGTTTGGCGATTATAAAGT  
GTAAT---GACAAGACATTCAAT-----GGAGTAGGACCATGTAATAAT-----  
-GTCAGC---ACAGTACAATGTACACATGGAATTAAGCCAGTGGTATCAACT---  
CAACTACTGTAAATGGTAGTCTAGCTGAAGAAGGG-----  
ATAGTAATTAGATCTGAAAATCTGAAAGACAAT-----GCCAAAATAATAATAGTGCATCTTAAA-----  
-----AACCTGTGAAA-----ATTGTGTGTACAAGGCCAAGCAATAATACAAGGAGA-----  
-AATATAGGGATA-----GGACCAGGACAAACA---TTC-----TTTGCACCAGGAACC-----  
-----ATAATAGGAGATATA-----AGACGAGCATATTGT---ACCATTAGGAAAAGG---  
AAATGGAATAACACTTTTACAAGAGGTAACATAAGAATTACTA-----AACTATTCCGA-----  
-----AATAGCAGCACATAAAATTTGCA-----  
CCATCTTCAGGAGGGGACCTAGAAATTACA---ACACATAGCTTTAATTGTAGAGGAGAA---  
TTTAAGCAGCTCCAGGCAAGAGTCCTGGCTATCGAAAAGATACCTAAAGGATCAACAGCTCCTAGGGATTTGGG  
GCTGCTCTGGAAGAACTCATCTGCACCACTGCTGTGCCTTGGAACCTAGTTGGAGT-----  
-----AATAAATCTAAAGATGATATCTGG-----CAT-----  
AACATGACTTGGATGGAGTGG---GATAGAGAAATTAGTAATTACACAGGCACAATATAC---  
AGGTTGCTTGAAAGATCGCAAAACCAGCAGGAA-----  
-----  
AAAAATGAAAAAGATTTACTCGAATTGGACAGTTGGGAATATTTGTGGAATTGGTTTTATTTTTCAAATTGGC  
TGCGGTATATAATGCTGTTTCATAATGATAATAGGAGGCTTGATAGGTTTAAGAATAATTTTTTGCT---  
GAGATATCTATAACA-----AATAAAATTATGCAAGGATACTCAACT-----  
ATATCATTTGGCTATTAGTATAATAGATGCTTTAGCAATAACAGTAGCAGAA---  
GGAACAGATAGAATTATAGAAGTAGTACAAAGATTTTGTAGAACT-----  
-----ATCCTTAACATC-----CCTAGAAGAATAAGACAGGGCTTTGAAGCAGCATTGCAA---TAA  
>KU319542  
GTG---GGA-----  
GGGGACTTGTGGGTACAGTGATTATGGGGTACCTGTGTGG---AGAGAAGCAAAA---  
GCCCTCTATTTTGTGCATCAGATGCTAAACATATGAGAGAGAA---GTGCATAAT-----  
-----GTTTGGGCTACA---CATGCCTGTGTACCCACAGAC---  
CCCGACCCACAAGAAATAGCTTTGAAA-----AATGTAACAGAAAGTTTAAAC-----  
-----ATGTGAAAAATGACATGGTAGATCAGATGCATGAGGATATA---  
ATCAGTTTATGGGATCAAAGCCTG---AAGCCATGTGTAAAGTTG---  
ACCCCACTCTGTGTCACTTTAACTGTAATGATACTTATAACTACTAATAATGATAAC-----  
-----  
-----GCAAGAATACTAACGCAACTAAGAGAAATGACA---  
CAGTGCTCTTTCAATATAACCACAGAATTGAGA-----  
GATAAGAAAAAGACTGAATATGCACTT---TTTTATAAACTTGATGTAGTACCACTTAATAGT-----  
-----  
-----  
AGTAATAGTAATAGTAGTGAGTATAGATTAATAAATTGTAATACCTCAGCCGTAACACAA---  
GCCTGTCCAAAGGTTTCTTTTGACCCAATTCCTATACATTATTGTGCTCCAGCTGGTTATGCGATTTTAAAGT  
GTAAT---ACAAGACATTCAAT-----GGAACAGGACCATGCGAAAT-----  
-GTCAGC---ACAGTACAATGTACACATGGAATTAACCAGTAGTATCAACT---  
CAGCTACTGTTAAATGGTAGTCTAGCAGAA---GAG-----  
ATAGTAATCAAATCTGAAAATCTGACAGACAAT-----GCCAAAACAATAATAGTACATCTTAAT---  
-----GAATCTGTAGAT-----ATTGTGTGTACAAGGCCTAACAATAATACAAGGAAA-----  
-AGTATAAGAATA-----GGACCAGGACAAACA---TTC-----TATGCAACAGGAGAT-----  
-----ATAATAGGAAATATA-----AGAGAAGCACATTGT---AACATTAGTGAAAGG---  
AAATGGAATAATACTTTACAAAAGGTAGGTAAAAAATTAAAA-----GAACTCTTCCCT-----  
-----AATAAAACAATAGCATTTGCA-----  
CCATCCTCAGGAGGGGACCTAGAAATTACA---ACACATAGCTTTAATTGTAGGGGAGAA---  
TTTAAGCAGCTCCAGACAAGAGTCCTGGCTATAGAAAAGATACCTAAAGGATCAACAGCTCCTAGGGATTTGGG  
GATGCTCTGGAAGAAATCATCTGCACCACTGCTGTGCTTTGGAACACTAGTTGGAGT-----  
-----AATAAATCTAAAGAGGAAATTTGG-----GAA-----  
AACATGACTTGGATGCAGTGG---GATAGAGAAATTAGTAATTACACAGACACAATATAC---  
AGGTTGCTTGAAATCTCGCAAAACCAGCAGGAA-----  
-----  
GAAAAATGAAAAAGATTTACTAGCATTGAACAAGTGGGACAATCTGTGGTCTTGGTTTGACATATCACATTGGC

TGTGGTATATAAGGATATTCATAATGATAGTAGGAGGCTTGATAGGTTTAAGAATAATTTTTGCT---  
GTGCTTTCTATAGTA-----AATAGAGTCAGGCAGGGATACTCACCT-----  
TTGTCAATTGGCCATTAGTCTGTTTGATACCATAGCAATAGCAGTAGCTGAG---  
GGAACAGATAGAATTATAGAAGTAGCACAAAGATTTGGTAGAGGT-----  
-----ATCAGGAATATA-----CCTAGAAGAATAAGACAGGGCTTTGAAGCAGCTTTGCAG--TAA  
>KU319543  
GTG---TGG-----  
GGGAACCTTGTGGGTACAGTCTATTATGGGGTACCTGTGTGG--AAAGAAGCAAAA---  
ACTACTCTATTTTGTGCATCAGATGCTAAAGCATATGATAAAGAA--GTGCACAAT-----  
-----GTCTGGGCTACA---CATGCCTGTGTACCCACTGAC---  
CCCAACCCACTAGAAATGGTTTTGAAA-----AATGTAACAGAAAATTTTAAAC-----  
-----ATGTGGAAAAATGATATGGTGGATCAGATGCATGAGGACATA---  
ATCAGTTTATGGGATGAAAGCCTA--AAGCCATGTGTAAAGTTG---  
ACCCCACTTTGTGTTACTTTAAACTGTAGTCATGAGATTAATGTTAACAGTAGTAACAATTTT-----  
-----  
-----GACTTTGATAGTATGCTACCTACCGTGATATTACAGATACATGGA---  
AATTGTTCTTTCAATATAACCACAGAAATAAGA-----  
GATAAGAAAAGGAAAGCATATGCACCT--TTTTATAAACTTGATGTTTTACCACCTTAATAAG-----  
-----  
-----  
AGAAGAAATAATGGGGGTGGGACTGTTAAATATAGATTCATAAGTTGTAATACCACAGCTGTAACACCA---  
GCCTGTCCAGAGGCCTCATTTGCTCCTGTTTCTTATTATTGTGCTCCTGCTGGTTATGCTATTCTAAGTT  
GTAAT--AACAATACCTTCAAT-----GGACTAGGACCATGCAATAAT-----  
-GTCACC--GCAGTACAATGTACACGTGTAATTAAACCTGTGGTATCAACT---  
CAACTACTGTTAAATGGTAGTCTAGCAGAAGAGGAG-----  
ATAGTAATTAAAAGTGAATTTATGACAAACAAT-----GCCAAAATAATAATAGTACAGCTTAAA---  
-----CAACCAGTAAAT-----ATTGTGTGTACGAGGACTGGCAGTACTACAAGGAGA---  
-AGTGTGAGGATA-----GGACCAGGGCAAGCA--TTC-----TATACAACAGGAGAA-----  
-----ATAATAGGAAATATA-----AGAGAAGCACATTGT--AATATTAATGAACAT---  
AAATGGAACCAAACCTTTAAAGAAGGTAAGGGAACAGTTACTA-----AAACACTTCCCT---  
-----AATAAGTCAATAATATTTGCC-----  
AATTCCTCAGGAGGGGACCTAGAAATTACA--ACACATAGCTTTAATTGTAGAGGAGAA--  
TTTAAGCAGCTCCAGGCAAGAGTCCCTGGCTATAGAAAGATACCTAAAGGATCAACAGCTCCTAGGGATTTGGG  
GCTGTTCTGGAAAACCTCATCTGCACCACTGCTGTGCCTTGGAACTCTAGTTGGAGT-----  
-----AATAGGTCTCAAGATGATATTTGG-----AAT-----  
AACATGACTTGGATGCAGTGG--GATAGAGAAATTAATAAGCACACAAACACAATATAC--  
AGGTTGCTTGAAGACTCGCAAAACCAGCAGGAG-----  
-----  
AAAAATGAAAAAGATTTACTAGCATTGGACAGTTGGGAAAGTTTGTGGAATTGGTTTAGCATAACAAAATGGC  
TGTGGTATATAAAAATATTATAATGATAGTAGGAGGCTTGATAGGTTTAAGAATAGTTTTTTGCT--  
GTGCTTTCTATAGTA-----AATAGAGTTAGGCAGGGATACTCACCT-----  
TTGTGCTTTGCTATTAGTCTGCTTGATACAGTAGCAATAGCAGTAGTTGAA---  
GGAACAGATTGGATTATAATCTTAGTACAAAGAATTTGGAGAGCT-----  
-----TTCTGCAACATA-----CCTAGAAGAATAAGACAGGGCTTTGAAGCAGCTTTGCAG--TAA  
>KU319548  
GGG---GGG-----  
GAAGACTTGTGGGTTACAGTCTATTATGGGGGACCTGTGTGG--AAAGAAGCAAAA---  
ACTACTCTATTTTGTGCATCAGATGCTAAAGCATATGAGAAAGAT--GTGCATAAT-----  
-----GTTTGGGCTACA---CATGCCTGTGTACCCACAGAC---  
CCCAACCCACTTGAAATGTTTTTGGAA-----GATGTAACAGACAATTTTAAAC-----  
-----ATGTGGAAAAATGACAGGGTGGATCACATGCATGCGGATATA---  
ATCAGGTTATGGGTTCAAATCATA--AAGACATGCGTCAAATTG---  
ACTACGCTCAGTATTACTATCAATAGCAGTAATGATAATCTTACC-----  
-----  
-----AGTAGAGGTAATGTGACCATGAATTGGGAAATAGTA---  
AACTGTGGTTTTAGTGTACGACTGAGATAAGA-----  
GATACGAGAAAGCATGAATATGCTCTA--ATTTCTAGTAATGATGTCGTTACATTTAATGAGGGC-----  
-----  
-----  
AATTCAGTGAGTATAGATTAATAAATTGTAATACCTCAGCTGTAACACAA---

GCCTGTCCAAAGGTCTCTTTTGATCCAATTCCTATACATTATTGTGCTCCTGCTGGTTATGCGATTCTAAAGT  
 GTAAT---AATGGAACATTCAAT-----GGAACAGGACCATGCAATAAT-----  
 -GTCAGC---ACAGTACAATGTACACATGGAATTAAACCAGTGGTATCAACT---  
 CAACTACTGCTAAATGGTAGTCTAGCAGAAAAAGAG-----  
 ATAGTAATTAGATCTGAAAATCTGACAAACAAT-----GGCAAAATAATAATAGTACATCTTAAA----  
 -----GAATCTGTACAA-----ATTAAGTGTACAAGGCCCGGTAATAATACAAGGAAA-----  
 -AGTATGAGGATA-----GGACCAGGACAAACA---TTC-----TATGCAACAGGAGAT-----  
 -----ATAACAGGAGACATA-----AGACAAGCACATTGT---AACATTAGTGGAAAG---  
 GACTGGAATGCCACTTTACAAAAGGTAAGTGATAAATTAAAA-----CAACACTTCCCT----  
 -----AGTATATCAATAATCTTTGCA-----  
 CCAGCTTCAGGAGGGGACCTAGAAATTACC---ACACTCAGCTTTAATTGTAGAGGAGAA---  
 TTCAAGCAGCTCCAGACAAGAGTCCTGGCTATAGAAAAGATACCTAAAGGATCAACAGCTCCTAGGGCTTTGGG  
 GCTGCTCTGGAAGAACTCATCTGCACCAGTCTGTGCCTTGGAAACGACAGCTGGAGT-----  
 -----AATAAATCTCAAAAGGATATTTGG-----GAT-----  
 AACATGACTTGGATGCAGTGG---GATAAGGAAATTAATAATTACACAAGCACAAATATAC---  
 AGGTTGCTTGAAGACTCACAAAGCCAGCAGGAG-----  
 -----  
 AAAAAATGAAAAAGATTTGCTAGCATTGGACAGTTGGAAAAAGCTGTGGAGTTGGTTTGACATATCAAATTGGC  
 TGTGGTATATACAAATATTGATAATGATAGTAGGAGGCTTGATAGGTGTAAGAATAATTTTTTGCT---  
 GTACTATCTATAATA-----AATAGAGTTAGGCAGGGATACTCACCT-----  
 TTGTCGCTTGCTGTTAGTCTGCTTGATACTATAGCAATAGTAGTAGCTGAA---  
 GGAACAGATAGACTTATAGAAGTAGTACAAAGATTTTGTAGAGGT-----  
 -----ATCTACAACATA-----CCTAGAAGAATAAGACAGGGCTTTGAAGCAGCATTGCAA---TAG  
 >KU319549  
 GGA---ACA-----  
 GGAAACTTGTGGGTACAGTCTATTATGGGGTACCTGTGTGGAAAGAAGCAAACCTACTCCACCTTTATTTT  
 GTGCATCAGATGCTAAAGCATATGAGACAGAG--GTGCATAAT-----  
 -GTTTGGGCTACA--CATGCCTGTGTACCCACAGAC---CCCGACCCACAAGAGCTAGAGTTGAAA-----  
 ---AATGTAACAGAAGATTTTAAC-----  
 ATGTGGAATAATGGTATGGTGGATCAGATGCATCAGGATGTA--ATCAGCTTATGGGAGCAAAGCCTA---  
 AAGCCATGTGTAAAAATG---  
 ACCCCACTCTGTGTTACCTTAAATTGTACGTATGTCACCAGTAAAAATACCACCGATAATAGTACTAGTACA-  
 -----  
 -----ATGCTACTATCTGTTAATGCCACTGATAGTGACATGAAA---  
 AATTGCTCTTTCAATGTAACCACAGAATAAAA-----  
 GATAAGCAAAAGAAGGTATATGCTCTT---  
 TTTTATTTACTTGATATTAGACAACCTTAATGACAGTTCTAACACACATACTGGAAATTCT-----  
 -----  
 AGTAATACTGGAAATTATAGTGATTATATATTAATAAATTGCAATACCTCAACCATAGCACAA--  
 GCCTGTCCAAAGGTCTCTTTTGACCCAATTCCTATACCTTATTGTGCTCCTGCTGGTTATGCTATTCTTAAGT  
 GTAAT---GATAAGAATTTTAAT-----GGAACAGGAACATGTACAAAT-----  
 -GTCAGC---ACAGTTCAATGTACACGTGGAATTAAACCAGTGGTATCAACT---  
 CCACTATTATTAAATGGTAGTATATCAGAAGGTGAT-----  
 ATAGTAATTATATCTAAAAATCTGACAGACAAT-----GCCAAAACAATAATAGTACAGCTTAAC---  
 -----CAAACCTGTAGCA-----GTTAATTGTACGAGACCCACCAATAATACTAGAACA-----  
 -GGTATAAGGATA-----GGACCAGGACGAGCC---TTC-----TATGCAACAGGAGAC-----  
 -----ATAATAAGAGATATA-----AGACAGGCACATTGT---AACATTAGTGGAGGA---  
 GATTGTAATAGAACTCTAGAAGAGGTAGAGAAAAAATTAAAT-----GAGTCCTTCTCT---  
 -----GGTAATGAAACAATAACAATTTGAA-----  
 CCAACCTCAGGAGGGGATCCAGAAATTACA---ACTCGTAGTTTTTAATTGTGGAGGGGAA---  
 TTTAAGCAGCTCCAGACAAGAGTCCTGGCTCTAGAAAGATACCTAAGGGATCAACAACCTCCTAGGGATTTGGG  
 GCTGCTCTGGAAGAAATCATCTGCACCAGTCTGTGCCTTGGAACTCTAGTTGGAGT-----  
 -----AATAAACTCATGATCAGATTTGG-----AAG-----  
 AACATGACTTGGATGCAGTGG---GAAAGAGAAATTGATAATTATACAGGCATAATATAT---  
 AATTTGCTTGAAGTCTCGCAAAATCCAGCAGGAG-----  
 -----  
 CAAAAATGAGCAAGATTTATTGGCATTGGACAAATGGCAAAATCTGTGGTCTTGGTTTGATATAACAACTGGC  
 TGTGGTATATAAAAAATATTGATAATGATAGTAGGAGGCTTGATAGGTATAAGAATAATTTTTTGCT---  
 GTGCTATCTATAGTG-----AATAGAGTTAGGCAGGGATACTCACCA-----  
 TTATCGTTTGCTGTTAGTCTGCTTGATACTGTAGCAATAGCAGTAGCTGAA---

GGAACAGATAGGATTATAGAAGTAATACAAAGAGCTTGGAGAGCT-----  
 -----TTCTGCAATATA-----CCCACAAGAATAAGACAGGGCTTTGAAATAGCTTTGCTA--TAA  
 >AF219266  
 GTG---AGA-----  
 GGGAACTTGTGGGTACAGTCTATTATGGGGTACCTGTGTGG--AAAGAAGCAAAA---  
 ACTACTCTATTCTGTGCATCAGATGCTAAAGCATATGAGAGAGAG--GTGCACAAT-----  
 -----GTCTGGGCTACA--CATGCCTGTGTGCCACGGAC---  
 CCCAACCCACAAGAAATGGTTCTGGAA-----AATGTAACAGAAAAATTTAAC-----  
 -----ATGTGGAAAAATGACATGGTGGATCAGATGCATGAGGATATA---  
 ATTAGTTTATGGGAGCAAAGCCTA--AAGCCATGTGTAAAGTTG---  
 ACCCCACTCTGTGTCACTTTAAATTGTGGTAATGCTATCTATAAT-----  
 -----  
 -----AAAAGCATAAATGAAGAAATAAAA---  
 AATTGCTCTTTCAATGCAACCACAGAACTAAAG-----  
 GATAGGAAACAAAAGTGCGTGCACTT--TTTTATAGACTTGATGTAGTACCGCTTAATAATGAA-----  
 -----  
 -----  
 ACTGGAAACAATACTCTCTATAGGTTAATAAATTGTAATACCTCAGCCATAACACAA---  
 GCCTGTCCAAAGGTCACTTTTGACCCAATTCCTATACGTTATTGTGCTCCCGCTGGTTATGCGATTCTAAAGT  
 GTAAT--AATAAGACATTCAAT-----GGGACAGGACCATGCCATAAT-----  
 -GTCAGC--ACAGTACAATGTACACATGGAATTAAGCCAGTGGTATCAACT---  
 CAACTACTGT'TAAATGGTAGCCTAGCAGAAGAAGAA-----  
 ATAATAATTAGATCTGAGAATCTGACAAACAAT-----GCCAAAACAATAATAGTACATCTTAAG----  
 -----GAAGCTGTAGAA-----ATTGTGTGTACAAGACCCAACAATAACAAGAAAA-----  
 -AGTGTAAAGGATA-----GGACCAGGACAAAACA--TTC-----TATGCAACAGGAGAC-----  
 -----ATAATAGGAAACATA-----AGACAAGCATATTGT--AACATTGATGAAGGT---  
 AAATGGAATAAAACTTTACAAAATGTAAGTAAAAAATTTAAAA-----GAACTCTTCCT---  
 -----GATAAAACTGAAATAAAATTTGCA-----  
 CCATCCTCAGGAGGGGACCTAGAAATTACA--ACACATAGCTTTAATTGTAGGGGAGAG--  
 TTTAAACAGCTTCAGACTAGAGTCCTGGCTATAGAAAGGTACCTAAAGGATCAACAGCTCCTAGGGCTTTGGG  
 GCTGCTCTGGGAAACTCATCTGCACCACTGCTGTGCCTTGGAACTCCAGTTGGAGT-----  
 -----AATAAATCTCAAACAGATATTTGG-----GAT-----  
 AACATGACCTGGATGCAGTGG--GATAGAGAAATTAGTAATTACACAAACACAATATAC--  
 AGGTTGCTTGAAGACTCGCAAATCCAGCAGGAA-----  
 -----  
 AAAAAAGAAAAAGATTTATTAGCATTGGACAGTTGGGAAAAATCTGTGGAGTTGGTTTAACATAACAAATTGGC  
 TGTGGTATATAAGAATATTACATAAATAGTAGGAGGCTTGATAGGTTTGAGAATAATTTTTGCT---  
 GTGTTCTCTATAGTG-----AATAGAGTTAGGCAGGGATACTCACCT-----  
 TTGTCGTTTGCCATTAGTCTGCTTGATACCATAGCAATAGCAGTAGCTGAA--  
 GGAACAGATAGGATTATAGAAGTAATACAAAGAATTTGTAGAGCT-----  
 -----ATCCGCAACATA-----CCTACAAGACTAAGACAGGGCTTTGAAGCAGCTTTGCTA--TAA  
 >FJ977095  
 GTG---ATA-----  
 GGGAATTTGTGGGTACAGTCTATTATGGGGTACCTGTGTGG--AAAGAAGCAAAA---  
 ACTACTCTATTTTGTGCATCAGATGCTAAAGCATATGTTACAGAA--GTGCACAAT-----  
 -----GTCTGGGCTACA--CATGCCTGTGTACCCACAGAC---  
 CCCAACCCACAAGAAATGGTTTGGAA-----AATGTAACAGAAAAATTTAAC-----  
 -----ATGTGGAAAAATGACATGGTGGATCAGATGCATCAGGATATA---  
 ATCAGTTTATGGGATCAAAGCCTA--AAGCCATGTGTACAGTTG---  
 ACCCCACTCTGTGTTACTTTAAATTGTACAAATGCTAATGTGACCAGAACCAATGCC-----  
 -----  
 -----ACAATGGAAGAAGGAATGAAAAATGAAATAAAA---  
 AATTGTTCTTTCAATATCACCACAGAAATGAGA-----  
 GATAAGAGACAGAAAGTACATGCACTT--TTTTATAGACTTGATGTAGTACTAATAAATGAA-----  
 -----  
 -----  
 ACAATAGATAATACTAGTTATAGATTAATAAATTGTAATACCTCAGCCATAACACAA---  
 GCCTGTCCAAAGGTCTCTTTTGACCCAATTCCTATACATTATTGTGCTCCAGCTGGTTATGCGATTCTAAAAAT  
 GTAAT--AATAAGACATTCAAT-----GGAACAGGACCATGCAATAAT-----  
 -GTCAGC--ACAGTGCAGTGTACACATGGAATTAACCAGTGGTATCAACT---

CAACTATTGTTAAATGGTAGTCTAGCAGAAAAAGAG-----  
 ATAGTAATTAGATCTGAAAATCTGACAAACAAT-----GCCAAAATAATAATAGTACATCTTAAT----  
 -----GAATCTGTAGAA-----ATTAATTGTACAAGACCCAACAACAATACAAGACAA-----  
 -AGTATAAGGATA-----GGACCAGGGCAAGCA---TTT-----TATGCAACAGGAGAT-----  
 -----ATAATAGGAGATATA-----AGACAAGCACATTGT---AACATTAGTGCAAAA---  
 CGATGGAACGAAACTTTAGAAAGGGTAAGACTAAAATTAAAG-----GAGCACTTCCCT-----  
 -----GATAAAGCAATAACCTTTAAT-----  
 CACTCCTCAGGAGGGGATCTAGAAATTACA--ACACATAGCTTTAATTGTAGAGGAGAA---  
 TTTAAGCAGCTCCAGACAAGAGTCCTGGCTATAGAAAGGTACCTAAAGGATCAACAGCTCCTAGGGATTTGGG  
 GCTGCTCTGGAAGAACTCATCTGCACCACTGCTGTGCCTTGGAACCTCTAGTTGGAGT-----  
 -----AATAAATCTCAAGATGAGATTTGG-----AAT-----  
 AACATGACCTGGATGCAGTGG---GATAGAGAAATTAGTAACCTATACAAACACAATATAC---  
 ACGTTGCTTGCAGACTCGCAAAACCAGCAGGAC-----  
 -----  
 AAAAAATGAAAAGGAGTTACTAGCATTAGATAGCTGGAAAAATCTGTGGAATTGGTTTAAACATAACAAATTGGC  
 TGTGGTATATAAAAAATATTCTAATGATAGTAGGGGGCTTAATAGGTTTAAAGAATAATTTTTTGCT---  
 GTGATCTCTATAGTG-----AACAGAGTTAGGCAGGGATACTCACCA-----  
 TTGTCGTTTCGCTATTAGCTTGCTTGATACCACAGCAATAGCAGTAGCTGGA---  
 GGGACAGATAGGATTATAGAAGTAGTATTAAGAATTGGTAGAGCT-----  
 -----ATCTACAACATA-----CCTAGAAGAATCAGACAGGGCTTAGAAAGGGCTTTGCTA---TAA  
 >AY255823  
 GTG---ATG---GGG-----  
 AACAGGAACCTGTGGGTACAGTCTATTATGGGGTACCTGTGTGG---AAAGAAGCAAAC---  
 CCTACTCTATTTTGTGCATCAGATGCTAAAGCATATAAGACAGAA---ATACATAAT-----  
 -----GTCTGGGCTACA---CATGCCTGTGTACCCACAGAC---  
 CCCAGCCCACAGGAAATAGCTTTGAAA-----AATGTAACAGAAAATTTTAAAC-----  
 -----ATGTGAAAAATGGCATGGTGGAGCAGATGCATCAGGATGTA---  
 ATCAGTTTATGGGATCAAGGCCTA---AAGCCATGTGTAAAGTTG---  
 ACCCCACTCTGTGTTACTTTAAACTGTAGCAAGGCTATCAATAGTAGTGCGGAT-----  
 -----  
 -----GTTGATACCTACAATGAAACCATGAAAGTGAAA---  
 AATTGTTCTTTTCGATGTAACACAGAACTAAGA-----  
 GATAAACACGGAAAGCATATGCACTT---TTTTATAAACTTGATATAGTACCACTTAATGAGACT-----  
 -----  
 -----  
 GAGGGTAATTATAGTGATTATAGATTAATAAACTGTAATGCTTCAACCATAACACAA---  
 GCCTGTCCAAAGGTCTCTTTTGACCCAATTCTCTATACATTATTGTGCTCCAGCTGGTTATGCGATTCTAAAGT  
 GTAAT---GATACAAAATTCAAT-----GGAACAGGACCATGCAATAAT-----  
 -GTCACC---ACAGTACAATGTACACATGGAATTAAACCAGTGGTATCAACA---  
 CAATTATTGTTAAATGGTAGTACAGCAGAAGAA-----  
 GTGATAATTAGATCTGAAAATCTGACAAACAAT-----GCCAAGATAATAATAGTACAGCTTAGG---  
 -----AAATCTGTATAC-----ATTAATTGTACGAGACACAACAATAATACAAGAAAA---  
 -GGTATAGGGATA-----GGACCAGGACAAACA---TTC-----TATGCAACAGAAGCC-----  
 -----ATAATAGGAAATATA-----AGACAAGCACATTGT---AACATTAGTGGAGAA---  
 GAATGGAATACAACCTGTACACGAGGTAAAAGGAAAATTAGGA-----AAGCTCTTCCAT---  
 -----AATAAAACAATAGTATTTGCA-----  
 CCATCCTCAGGAGGGGACCTAGAAATTACA---ACACATAGCTTTAATTGTAGAGGAGAA---  
 TTTAAGCAGCTCCAGGCAAGAGTCCTGGCTATAGAAAGATACCTAGGGGATCAACAGCTCCTAGGGATTTGGG  
 GCTGCTCTGGAAGAACTCATCTGCACCACCACTGTGCCTTGGAACCTCTAGTTGGAGT-----  
 -----AATAAACTCAAAAGGAAATTTGG-----GAT-----  
 AATATGACCTGGATGCAGTGG---GATAGAGAAATTAAATAATTATACAAACATAATATAC---  
 AGGTTGCTTGAAGACTCGCAAAACCAGCAGGAG-----  
 -----  
 AAAAAATGAAAAGATTTACTAGCATTGGACAAATGGCAAAATCTGTGGGGTTGGTTTCAAATATCAAGATGGC  
 TGTGGTATATAAGAATATTCTAATGATAGTAGGAGGCTTGATAGGCTTAAGAATAGTTTTTTTGCT---  
 GTGCTCTCTATAGTG-----AATAGAGTTAGGCAGGGATACTCACCG-----  
 TTATCGTTTTGCTATTAGTCTGCTTGATACCACAGCAGTAGCAGTAGCTGAA---  
 GGAACAGATAGGATATTAGAATTAATACAAAGAGTTTGGAGAGCT-----  
 -----ATCTACAACATA-----CCTAGAAGAATAAGACAGGGCTTTGAAGCAGCTTTGCTA---TAA  
 >KP109480

GGG---GGA---AGA-----  
 GAAGACTTGTGGGTACAGTCTATTATGGGGTACCTGTGTGG---AAAGAAGCAAAA---  
 ACTACTCTATTCTGTGCATCAGATGCTAAAGCACATGAAAGAGAA---GTGCATAAT-----  
 -----GTCTGGGCTACA---TATGCCTGTGTACCCACAGAC---  
 CCCAACCCACAAGAAATAGTTTGTGAAA-----AATGTAACAGAAAATTTTAACT-----  
 -----ATGTGGGAAAACGACATGGTGGATCAGATGCAGGAGGATGTA---  
 ATCAGTTTATGGGATCAAAGCCTA---AAGCCATGTATAAAGTTG---  
 ACCCCACTCTGTGTCACTTTAGAATGTACAAATGTTAATATTATAAAT-----  
 -----  
 -----GGTACTATCCACAATGAGACCTACGAGAGCATGAAA---  
 AATTGCTCTTTCAATACAACCACAGAACTAAAA-----  
 GATAAGAAGCAGTCAGTGTATGCACTT---TTTTATAGATTAGATATAGTGCCACTTAACAAC-----  
 -----  
 -----  
 TCTAATGAGTATTATAGATTAATAAATTGTAATACCTCAGCCATAAAACAA---  
 GCCTGTCCAAAGGTCACCTTTTGACCCAATTCTCTATACACTATTGTGCTCCAGCTGGTTATGCGATTCTAAAGT  
 GTAAT---GATAAGACATTCACT-----GGGACAGGACCATGCCATAAT-----  
 -GTCAGC---ACAGTACAATGTACACATGGAATTAAGCCAGTGGTATCAACT---  
 CAACTACTGTTAAATGGTAGCCTAGCAGAAGGAGAG-----  
 ATAATAATTAGATCTAAAAAACTGGACGACAAC-----GCCAACACAATAATAGTACATCTTGAT---  
 -----GAACCTGTAAAA-----ATTGAGTGTACAAGACCCAACAATAATACAAGAAAA-----  
 -AGTATAAGGATA-----GGACCAGGACAAAACA---TTC-----TATGCAACAGGAGAA-----  
 -----ATAATAGGAAACATA-----AGGCAAGCACATTGT---AACATTAGTGAAGAT---  
 CAGTGGAATGAACTTTGCAAAGGGTAGGTAAAAAATTAGCA-----GAACCTCTTCCT---  
 -----AATAAAACAATAACCTTTAAT-----  
 TCATCCTCAGGAGGGGATCTAGAAATCACA---ACACATAGCTTTAATTGTAGAGGAGAA---  
 TTTAAGCAGCTCCAGACAAGAGTCCTGGCTATAGAAAGATACCTAAAGGATCAACAGCTCCTAGGGATTTGGG  
 GCTGCTCTGGAAGAACTCATCTGCACCACTTCTGTACCTTGGAACTCTAGTTGGAGT-----  
 -----AACACAGATCTCAAGACGATATTTGG-----GAG-----  
 AACATGACCTGGATGCAGTGG---GATAGAGAAATTAGTAATTACACAAACACAATATAC---  
 AGGTTGCTTGAAGACTCGCAAAACCAGCAGGAA-----  
 -----  
 AATAATGAAAAAGATTTATTAGCATTGGACAGTTGGAAAAATCTGTGGAGTTGGTTTGATATAACAAATTGGC  
 TGTGGTATATAAGAATATTCTATAATAATAGTAGGAGGCTTGATAGGGTTAAGAATAATTTTTTGCT---  
 GTGCTTTCTATAGTG-----AATAGAGTTAGGCAGGGATACTCACCT-----  
 TTGTCGTTTGCTATTAATCTGCTTGATATCACAGCAATAGCAGTAGCTGAA---  
 GGAACAGATAGGATTATAGAATTAGTGCAAAGAATTTATAGAGCT-----  
 -----ATCCGCAACATA-----CCTAGAAGAATAAGACAGGGCTTTGAAGCAGCTTTGCAA---TAA  
 >KP109483  
 GTG---GGA-----  
 GGAAACTTGTGGGTACAGTCTATTATGGGGTACCTGTGTGG---AGAGAAGCAAAA---  
 ACTACTCTATTCTGTGCATCAGATGCTAAAGCATATGAGAAAGAA---GTGCATAAT-----  
 -----GTCTGGGCTACA---CATGCCTGTGTACCCACAGAC---  
 CCCAACCCACAAGAAATAGATTG-----AATGTAACAGAAAATTTTAACT-----  
 -----ATGTGGAAAAATGACATGGTGGAGCAGATGCATGAGGATGTA---  
 ATCAGTTTATGGGATCAAAGCCTA---AAGCCATGTGTAAAGTTG---  
 ACCCCAATTTGTGTCACTTTAGAATGTACAGATGCTAATATTACCTGCAATAGTACTACTAGCAGTAATAATT  
 GTACC-----  
 -----AGCTATGAGATCAACAAGGAGGACATGGGGGAAATAAAA---  
 AATTGCTCTTTCAATACAACCACAGAATTAATA-----  
 GATAAGCAGAAGAAAGTGCATGCACTC---  
 TTTTATAGACTTGATATAGTATCACTAGAAAAGGACAACCTCTAGTAAG-----  
 -----  
 AAGAACGACTCTAATGAGTATTATAGATTAATAAATTGTAATACCTCAGCCATAACACAA---  
 GCCTGTCCAAAGGTCACCTTTTGACCCAATTCTCTATACACTATTGTGCTCCGGCTGGTTATGCGATTCTAAAGT  
 GTA---AATAAGACATTCAAT-----GGGACGGGACCATGCAATAAT-----  
 -GTTAGC---ACAGTACAATGTACACATGGAATTAAGCCAGTGGTATCAACT---  
 CAACTACTGTTAAATGGTAGCCTAGCAGAAGAAGAG-----  
 ATAATAATTAGATCTGAAAACTGACAAACAAT-----GCCAAAATAATAATAGTACATCTTAAT---  
 -----CAAGCTGTAGAA-----ATTGTATGTACAAGACCTGGCAATAATACAAGAAAA-----

-AGTATAAGGATA-----GGGCCAGGACAAACA---TTC-----TATGCAACAGGAGAC-----  
 -----ATAATAGGAGACATA-----AGACAAGCACATTGT---AACATTAGTGAAGCT---  
 AAGTGGAATAAAACCTTGCGAGAGGTAAGTAAAAAATTAGCA-----GAACACTTCCCT-----  
 -----AATAAAACAATAATATTTAAC-----  
 TCATCCTCAGGAGGGGACCTAGAAATTACA--ACACATAGCTTTAATTGTGGAGGAGAA---  
 TTTAAACAGCTCCAGACAAGAGTCCTGGCTATAGAAAGATACCTAAAGGATCAACAGCTCCTAGGGATTTGGG  
 GCTGCTCTGGAAACTCATCTGCACTACTGCTGTACCTTGGAACCTCCAGTTGGAGT-----  
 -----AACAAATCTCAAGACCAGATTTGG-----AAT-----  
 GATACGACCTGGATGCAGTGG---GATAAAGAAATTAGTAATTACACAGACATAATATAC---  
 ACGTTGCTTGAAAAATCGCAAAACCAGCAGGAA-----  
 -----  
 ATAAATGAAAAGGATTTATTAGCATTGGACAGTTGGAACAGTCTATGGAATTGGTTTGACATAACAAAGTGGC  
 TGTGGTATATAAAAATATTTCATAATGATAGTAGGAGGCTTGATAGGTTTAAGAATAATTTTTTGCT---  
 GTGCTTTCTATAGTG-----AATAGAGTTAGGCAGGGATACTCACCT-----  
 TTGTCGTTTGCTATTAGTCTGTTTGATACCATAGCAATAGCAGTAGCTGAA---  
 GGAACAGATAGGCTTATAGAATTCATACAAAGAACTGGTAGAGCT-----  
 -----ATCTGCAACATA-----CCTAGAAGAATAAGACAGGGTTTTGAAGCAGCTTTGCAA---TAA  
 >KY929363  
 GTG---TTA-----  
 GGAAACCTGTGGGTCACAGTCTATTATGGGGTACCTGTGTGG---AAAGAAGCAAAA---  
 ACTACTCTATTCTGTGCATCAGATGCTAAAGCTTATGAAACAGAA---GTGCATAAT-----  
 -----GTCTGGGCAACA---CATGCCTGTGTACCCACAGAC---  
 CCCAACCCACAAGAAATGTTTTTGGA-----AATGTAACAGAAAATTTTAAC-----  
 -----ATGTGGGAAAATGACATGGTGGATCAGATGCATGAGGATGTA---  
 ATCAGTTTATGGGATCAAAGCCTA---AAGCCATGTGTAAAGTTG---  
 ACCCCACTCTGTGTACATTAAATTGTACACATGATATTAAATTAATAGTACCGTTAATAATAGTACT----  
 -----  
 -----GACATGAGA---  
 AATTGCTCTTTCAATTCAACCACAGAACTAAGA-----  
 GATAAGAGACAGAAAGTATATGCACTT---TTTTATAAACTTGATGTAGTACCAATTGATGGT-----  
 -----  
 -----  
 GGTAACCTCTAGTTATAGATTAATAAATTGTAATACCTCAGCCATAACACAA---  
 GCCTGTCCAAAGGTCTCATTTGACCCAATTCCTATACATTATTGTGCTCCAGCTGGTTATGCGATTTTAAAGT  
 GTAAT---AATAAGACATTTCGAT-----GGGAAAGGACCATGCAATAAT-----  
 -GTCAGC---ACAGTACAATGTACACATGGAATTAAGCCAGTAGTATCAACT---  
 CAACTACTGTTTAAATGGTAGCCTAGCAGAAGAAGAC-----  
 ATAATAATTAGAACTGAGAATCTGACAAAGAAT-----AGCAAAATAATAATAGTACATCTTAAT---  
 -----AAGTCTGTAGAA-----ATTAAGTGTATAAGACCTAACAAATAACAAGAAAA---  
 -AGTATAAGAATA-----GGACCAGGACAAACA---TTC-----TATGCAACTGGAGAC-----  
 -----ATAATAGGAGACATA-----AGAGAAGCACATTGT---ACCATTAGTAAC-----  
 ---TGGACTGAAATTTTACAAAATGTAAGTAAAAAATTAGCA-----GGACTCTTCCCT-----  
 -----AATAAAACAATAAAATTTGCA-----  
 CCATCCTCAGGAGGGGACCTAGAAGTTACA--ACACATATCTTTAATTGTAGAGGAGAA---  
 TTTAAGCAGCTCCAGACAAGAGTCCTGGCTATAGAAAGATACCTAAAGGAACAACAGCTCCTAGGGATTTGGG  
 GCTGCTCTGGAAACTCATCTGCACCACCAATGTACCTTGGAACCTCCAGTTGGAGT-----  
 -----AACAAAACCTGAAGAAGACATTTGG-----AAT-----  
 AACATGACTTGGATGCAGTGG---GATAGAGAAATTAGTAATTACACAGATACAATATAC---  
 AGGTTGCTTGAGGAATCGCAAAACCAGCAGGAA-----  
 -----  
 AGAAATGAAAAGATTTGTTAGCATTGGACAGTTGGAATAATCTATGGAGTTGGTTTAGTATAACAAACTGGC  
 TGTGGTATATAAGAATCTTCATAATAATAGTAGGAGGCTTGATAGGCTTGAGACTAATCTTTGCT---  
 GTGCTTTCCATAGTG-----AATAGAGTTAGGCAGGGTTACTCACCT-----  
 TTGTCGTTTCGCTATTAGCCTGTTGGATATTGTAGCAATAGCAGTAGCTGAG---  
 GGAACAGATAGAATTATAGAATTAATAAGAAGAATTTGTAGAGCT-----  
 -----ATCTGCAACATA-----CCTAGAAGAATAAGACAGGGTTTTGAAGCAGCTTTGCAG---TAA  
 >KY929365  
 AAG---GAA-----  
 GAAGAATTGTGGGTCACAGTCTATTATGGGGTACCTGTGTGG---AAAGAAGCTAAA---  
 ACTACTCTATTCTGTGCATCAGATGCTAAAGCATACGAGCAAGAA---GTGCATAAT-----

-----GTTTGGGCTACA---CGTGCCTGTGTACCCACAGAC---  
CCCAACCCACAAGAAGTGGTTTTGGAA-----AATGTAACAGAAAATTTTAAT-----  
-----ATGTGGAAAAATGACATGGTGGATCAGATGCATGATGATATA---  
ATTAGTTTATGGGATGAAAGCTTA---AAGCCATGTGTAAAGTTG---  
ACCCCACTTTGTGTCACTTTAGATTGTACAAATGTTAATGTTACAGGTAATGATACAACCACTGGTAATGCT-  
-----  
-----ATTGCTGAAGTAAAA---  
AATTGTACTTTCAATGCAAGCACAGAAATAAGA-----  
GATAAGAAGCAGACAGTATATGCACTA---TTTTATAAACCTGACATAGTACAACCTTGGAGAG-----  
-----  
-----  
AATAATAGCACATATAGATTAATAAGTTGCAATACCTCAACCATAACACAA---  
GCCTGTCCAAAGATCAGTTTTGATCCAATTCCTATACACTATTGTGCTCCAGCTGGTTATGCGATTCTAAAGT  
GTAAT---AACAAAACATTTAAT-----GGGACGGGACCATGCCAAAAT-----  
-GTCAGC---ACAGTACAATGTACACATGGAATTAAGCCAGTGGTATCAACT---  
CAATTACTGTTAAATGGTAGCCTAGCAGAAAAAGAG-----  
ATAGTAGTTAGATCTGAAAACTGACAAACAAT-----GTCAAAACAATAATAGAACAGCTTAAT-----  
-----CAATCTGTAACG-----ATTGTGTGTACAAGACCCAATAATAACAAGAAAA-----  
-AGTATAAGGATA-----GGACCAGGACAAACA---TTT-----TATGCAGCAGGAGCC-----  
-----ATAATAGGAGACATA-----AGACAAGCACATTGT---  
AACATTAGTAACACTAGTGACTGGAATACAACCTTTGCTAAATGTAGCTAAAAAATTAGCA-----  
--GAACACTTTCCT-----  
AATAAAACAATAAAATTTGAA-----CCACCCTCAGGAGGAGACCTAGAAATTACA---  
ACACATAGTTTTAATTGTAGGGGAGAA---  
TTTAAGCAGCTCCAGGCAAGAAATCCTGGCTATAGAAAGATACCTACAGGATCAACAGCTCCTAGGGATGTGGG  
GCTGCTCTGGAACCTTATCTGCACCACTGCTGTACGTTGGAACACCAGTTGGAGT-----  
-----AACAAATCTGAATCAGACATATGG-----AAT-----  
AACATGACCTGGATGGAGTGG---GATAGAGAAATCAATAATTACACAACAACAATATAC---  
AGGTTGCTTGAAAAATCACAAAACCAGCAGGAA-----  
-----  
AGAAATGAAAAAGATTTATTAGAATTGGACAGTTGGAAAAATCTGTGGACTTGGTTTGACATAACAACTGGC  
TGTGGTATATAAAAAATATTCATAATGATAGTAGGAGGCTTGATAGGCTTAAGAATAATTTTTTGCT---  
GTGCTCTCTATAGTG-----AATAGAGTTAGGCAGGGATACTCACCT-----  
CTGTCGTTTGCTGTTAGTCTGTTAGATACCACAGCAATAGTAGTAGCCGAA---  
GGAACAGATAGGATTTTAGAAGCAATACGAAGAATTTGTAGAGCT-----  
-----ATCTACAACATA-----CCTAGAAGAATAAGACAGGGCTTTGAAGCAGCTTTGCTA---TAA  
>KY929369  
GGG--GGA-----  
AACAACTTATGGGTCACAGTTTATTATGGGGTACCTGTGTGG---AAAGAAGCAAAT---  
CCTACTCTATTCTGTGCATCAGATGCTAAAGCATATGAGAGAGAA--GTGCATAAT-----  
-----GTTTGGGCTACA---CATGCCTGTGTACCCACAGAC---  
CCTAGCCCAACAAGAAGTAAATTTGGGA-----AATGTAACAGAAAATTTTAAT-----  
-----GTGTGGAAAAATGGCATGGTGGACCAAATGCATGAGGATGTA---  
ATCAGTTTATGGGATCAAAGCCTA---AAGCCATGTGTAAAGTTG---  
ACCCCACTCTGTGTCACTTTAGAATGTAAAGATATCAGTAATAGTAGTATCAGTAATAGTAGTGATAGCGGCA  
GTAATAGTAGT-----  
-----AATAGTATTATTAAT-----GAGATAACA---  
AATTGCTCTTTCAATGCGTCCACAGAGATAAAA-----  
GATAGGAAGCAGACAGTGTATGCACTT---TTTTATAAACTAGATATAGTACCACTTGATGATAATAATGAA-  
-----  
-----  
AATATAACCAAGTATAGGTTAATAAAGTGTAATACCTCAGTCATAACACAA---  
GCCTGTCCAAAGGTCTCTTTTGATCCAATTCCTATACACTATTGTACTCCAGCTGGTTATGCGATTCTTAGGT  
GTAAT---GATAAGACATTCAAT-----GGGACAGGACCATGCTCTAAT-----  
-GTCAGC---ACAGTACAATGTACACATGGAATTAAGCCAGTGGTATCAACT---  
CAACTACTGTTGAATGGTAGCCTAGCAGAAGAGGAG-----  
ATAATAATTAGATCTAAAAATCTGACAAACAAT-----GTCAACACAATAATAGTACATCTTAAT-----  
-----GAATCTGTAGAA-----ATTAAGTGTATAAGACCTGGCAATAATAAGAAAA-----  
-AGTATAAGGATA-----GGACCAGGACAAACA---TTC-----TATGCCACAGGAGCT-----  
-----ATAATAGGAAACATA-----AGACAAGCACATTGT---AACATTAGTAGAGAG---

AAGTGGAATGCAACTTTAGAAAGGGTAAGGAAAAAATTAGAA-----  
 GAGCACTTCCACTTCCTT-----AATAAAACAATAGAATTTGCA-  
 -----CCATCCTCAGGAGGGGACTTAGAAGTTACA---TCACATTACTTCAATTGTAGAGGAGAA---  
 TTTAAGCAGCTTCAGACAAGGGTCCTGGCTATAGAAAGATACCTAAAGGAACAACAGCTCCTAGGGATTTGGG  
 GCTGCTCTGGAAGAACTCATCTGCACCACTGCTGTACCTTGGAACCTCCAGTTGGAGT-----  
 -----AACAAAAATCTAACAGATATTTGG-----GAT-----  
 AACATGACCTGGATGCAATGG---GATAGAGAAATTAGTAATTACACAGATACCATATAC---  
 AGGTTGCTTGAAGAATCACAGAACCAGCAGGAA-----  
 -----  
 CAAAAATGAAAAGGATTTATTAGCATTGGACAGTTGGAAAAATCTGTGGAATTGGTTTGACATAACAAATTGGC  
 TGTGGTATATAAAGATATTCATAATGATAGTAGGAGGCTTGATAGGTTTAAGAATAGTTTTTTACT---  
 GTGCTATCTATAGTG-----AATAGAGTTAGGCAGGGATACTCACCT-----  
 TTGTCGTTTTGCTATTAGTCTGCTTGATGCATTAGCAATATCAGTAGCTGAA---  
 GGAACAGATAGGATTATAGAGTTAGTACAAAGATTTTTTTAGAGCT-----  
 -----ATCTACAATATA-----CCTACAAGAATAAGACAGGGCCTTGAAGCAGCTTTGCAA---TAA  
 >KY929370  
 GGG---GGA-----  
 AACAACTTATGGGTCACAGTTTATTATGGGGTACCTGTGTGG---AAAGAAGCAAAAT---  
 GCTACTCTATTCTGTGCATCAGATGCTAAAGCATATGAGAAAGAA---GTGCATAAT-----  
 -----GTTTGGGCTACA---CATGCCTGTGTACCCACAGAC---  
 CCCAACCCACAAGAAATGTTATTGAAA-----AATGTAACGGAAAATTTTAAT-----  
 -----ATGTGGGAAAATGGCATGGTGGACCAAATGCAGGAGGATGTA---  
 ATCAGTTTATGGGATCAAAGCCTA---AAGCCATGTGTAAAGTTG---  
 ACCCCACTCTGTGTCACTTTAGAATGTAAAAATATTAGCAGTAATAGTAGCAGTAATAGTAAT-----  
 -----  
 -----AATAGTGCTAGTGACCAGGAACTCTACAATGAGATAAAA---  
 AATTGCTCTTTCAATGCAACCACAGAGATAAGA-----  
 GATAGGAATCAGGCAGTGGATGCACTT---  
 TTTTATAAACTAGATATAGTACCCTTGAGAATAACAATGGAAGT-----  
 -----  
 AATGGCAATAGAAGTAACACTTATAGGTTAATAAATTGTAATACCTCAGTCATAACACAA---  
 GCCTGTCCAAAAGTCTCTTTTGATCCAATTCCTATACACTATTGTGCTCCAGCTGGTTATGCGATTCTTAAGT  
 GTAAT---AATAAGACATTCAAT-----GGGACAGGACCATGCTCTAAT-----  
 -GTCAGC---ACAGTACAATGTACACATGGAATTAAGCCAGTGGTATCAACT---  
 CAACTACTGTTGAATGGTAGCCTAGCCGAAAAGGAG-----  
 ATAATAATTAGATCTAAAAATCTGACAGACAAT-----ACCAAATAATAATAGTACATCTTAAT---  
 -----GAATCTGTAGAA-----ATTAATTGTACAAGACCCAACAATAATACAAGAAAA-----  
 -AGTATAAGGATA-----GGACCAGGACAAACA---TTC-----TATGCAACAGGAGAC-----  
 -----ATAATAGGAGACATA-----AGACAAGCACATTGT---AACATTAGTAGAAAG---  
 AAGTGGGAAGAACTTTACAAAGGGTAAGTAAAAAATTAGCA-----GAGCACTTCCTT---  
 -----AATAAAACAATAAAATTTGCA-----  
 TCATCCTCAGGAGGGGACCCAGAAATTACA---ACACATAGCTTCAATTGTAGAGGAGAA---  
 TTTAAGCAGCTCCAGACAAGAGTCCTGGCTATAGAAAGATACCTAAAGGAACAACAGCTCCTAGGGATTTGGG  
 GCTGCTCTGGAAGAACTCATCTGCACCACTGCTGTACCTTGGAACCTCCAGTTGGAGT-----  
 -----AACAAAAATCTAACAGATATTTGG-----GAT-----  
 AACATGACCTGGATGCAGTGG---GATAGAGAAATTAGTAATTACACAGATACCATATAC---  
 AGGTTGCTTGAAGAATCACAGAACCAGCAGGAA-----  
 -----  
 CAAAAATGAAAAGGATTTATTAGCATTGGACAGTTGGAAAAATCTGTGGAATTGGTTTGACATAACAAATTGGC  
 TGTGGTATATAAAGATATTCATAATGGTAGTAGGAGGCTTGATAGGTTTAAGAATAGTTTTTTGCT---  
 GTGATATCTATAGTG-----AATAGAGTTAGGCAGGGATACTCACCT-----  
 TTGTCGTTTTGCTATTAGTCTGCTTGATGCCTTAGCAATATCAGTAGCTGAA---  
 GGAACAGATAGGATTATAGAATTAGTACAAAGATTTTGTAGAGCT-----  
 -----ATCCGCAATATA-----CCTACAAGACTTAGACAGGGCCTTGAAGCAGCTTTGCAA---TAA  
 >KX756609  
 GTG---GCA-----  
 GGAAACTTGTGGGTCACAGTGTATTATGGGGTACCTGTGTGG---AGAGAAGCAAAA---  
 ACTACTCTATTTTGTGCATCAGATGCTAAAGGATATGAAAAGGAA---GTGCATAAT-----  
 -----ATCTGGGCAACA---CATGCCTGTGTACCCACAGAC---  
 CCCAGACCACAAGAAATAGAGTTGGAA-----AATGTAACAGAAAATTTTAAC-----

-----ATGTGGGAAAATGACATGGTGGATCAGATGCATGAGGATGTA---  
 ATCAGTATATGGGATCAAGGCCTA---AAGCCATGTGTAAAGTTA---  
 ACCCCACTCTGTGTCACTTTARACTGTAGAAATGTTACT-----  
 -----  
 -----AATAACAGTACGGGAATAGATAACAAGGAGGAGGTAAAA---  
 AATTGCTCTTTCAACACAACCACAGAAATCAAA-----  
 GATAGGAAGCAGAAGGTGCATGCACTT---  
 TTTTATAGGCTTGATATAGTACCACTTGATAACAATATTGAAGATTCT-----  
 -----  
 AATAAACTRAAAATTCTAAGRGGCGGTATAGATTAATAAATTGTAATACCTCAGCCATAACACAA---  
 GCCTGTCCAAAAGTCAATTTTGATCCAATTCCTATACACTATTGTGCTCCAGCTGGTTATGCGATTCTAAAGT  
 GTAGG---GATAAGAAATTCAAT-----GGGACAGGACCATGCAAGAAC-----  
 -GTTAGT---ACAGTACAATGTACACATGGAATTAAGCCAGTAGTATCAACT---  
 CAACTGCTGTTAAATGGTACCCTAGCAGAAGATGAT-----  
 ATAATAATTAGCTTTGAAAATAAGACAGACAAT-----GCTAAATCAATCATAGTACATTTTAAT----  
 -----GAATCTGTAAAA-----ATTGTGTGTACAAGACCCAGCAATAACACAAGAAAA-----  
 -AGTATAAGGATA-----GGACCAGGACAAAACG---TTC-----TATGCAACAGGAGAA-----  
 -----ATAATAGGAGACATA-----AGACAAGCACACTGT---AACATTACTAAC-----  
 --TGAATAACACTTTACAAAGGGTAAAGAGAAAATTAGGA-----GAACACTTCCCT-----  
 -----AATGCAACAATAAAATTTGCA-----  
 CCACATTCAGGAGGGGACCTAGAAATTACA--ACACATAGTTTTAATTGTAGAGGAGAA---  
 TTTAAGCAGCTCCAGGCAAGAGTCCTGGCTATAGAAAGATACCTACAGGGACAACAGCTCCTAGGGATTTGGG  
 GCTGCTCTGGAAGAACTCGTCTGCACCACTAATGTACCTTKGAACTCCAGTTGGAGT-----  
 -----AACAAATCTCAAGACAAAATTTGG-----GGA-----  
 AACATGACCTGGATGGAATGG---GATAGGGAAATTAGTAATTACACAGAAGAAATATAC---  
 AAGTTACTTGAGGAATCGCAGAACCAGCAGGAA-----  
 -----  
 ATAAATGAAAAAGATTTATTAGCATTTGGACAGTTGGAAAAATCTGTGGAATTGGTTTGATATATCAAATTGGC  
 TGTGGTATATAAAAAATATTCATAATGATAGTAGGAGGCTTAATAGGTTTGAGAATAATTTTTTGCT---  
 GTGCTATCTATAGTG-----AATAGAGTTAGGCAGGGATACTCACC-----  
 TTGTCGTTTGCTATTAGTCTGCTTGATACCTTAGCAATAGCAGTAGCTGAA---  
 GGAACAGATAGGATTATAGAAAGTAGTACTAACAATTTGTAGAGCT-----  
 -----ATCCGCAACATA-----CCTAGAAGAATAAGACAGGGTCTTGAAGCAGCTTTGCAA--TAA  
 >MK076687  
 GTA---GAA-----  
 GGAGACTCGTGGGTACAGTCTATTATGGGGTAGCTGTGTGG--AAAGAAGCAAAA---  
 ACTACACTATTCTGTGCATCAGATGCTAAAGCATATGAGAAAGAA--GTGCATAAT-----  
 -----GTCTGGGCTACA--CACGCCTGTGTACCCACAGAC---  
 CCCAGCCCACAAGAAATAAAATTGGAA-----AATGTAACAGAAAATTTTAAC-----  
 -----ATGTGGAAAAGTGACATGGTGGATCAGATGCAGGAGGATGTA---  
 ATTAGCTTATGGGATGAAAGCCTA--AAGCCATGTGTAAAGTTG---  
 ACTCCACTCTGTGTCACTTTAAATTGCACAAAT-----  
 -----  
 -----ACTACTACCCTCAATAGGACCCTTGATGGGAGTGAACGTGAACCTAAGA---  
 AATTGCTCTTTCAATACAACCACAGAAATACAT-----  
 GATAAACAGCAGAAAGTGCATGCACTT---  
 TTCTATAGACTTGATCTACAACCATTGGGTAATGAGACAGATTCCCTCTAAAAATTCC-----  
 -----  
 TCTACAAATTCCTCTACAACTCCTCTGAGTATATATTAATAAATTGTAATACCTCAGCCATAGCACAA---  
 GCCTGTCCAAAGGTCTCTTTTGATCCAATTCCTATACACTATTGTGCTCCAGCTGGTTATGCGATTCTAAAGT  
 GTAAT---GATAAGAAATTCAAT-----GGGACAGGACCATGCCATAAT-----  
 -GTTAGC---ACAGTACAATGTACACATGGAATTAAGCCAGTGGTGTCAACT---  
 CAACTACTGTTAAATGGTAGCCTAGCAGAAGAAGAG-----  
 ATAATAATTAGATTTGAAAATATAACAGACAAT-----GCCAAGACAATAATAGTACATCTTAAT----  
 -----CGATCTGTAAGA-----ATTGAGTGTACAAGACCCAACAATAATACAAGAAAA-----  
 -AGTTATAGGATA-----GGACCAGGACAAAACA---TTC-----TATGCAACAGGCGAC-----  
 -----ATAATAGGGGACATA-----AGACAAGCACATTGT---AACATTAGTGAAAAG---  
 GACTGGTATGGAACTTTAAAAAATATAAGTAAAAAATTAGCA-----  
 GAACACTTCCCTAATCCT-----AATAAAACAATAAACTTTGAA-  
 -----GAACACTCAGGAGGGGACCCAGAAATCACA--ATGCATAGCTTTAATTGCAGAGGAGAA---

TTTAAGCAGCTTCAGACAAGAGTTCTGGCTATAGAAAAATACCTGACGGATCAACAGCTCCTAGGGGTTTGGG  
 GTTGCTCTGGAAAAACCATCTGCACCACTGCTGTGCCTTGGAACCTCCAGTTGGAGT-----  
 -----AACAAATCTCAAGATGAAATTTGG-----AAA-----  
 AACATGACCTGGATGCAGTGG---GATAGAGAAATTAGTAATTACACAGACACAATCTAC---  
 TGGTTGCTTGAAAAATCGCAAACCAACAGGAG-----  
 -----  
 GAAAAATGAAAAGGATCTATTAGCATTGGACAGTTGGAAAAATCTGTGGAGTTGGTTTGATATAACAAAATGGC  
 TGTGGTATATAAAAAATATTCATAATGATAGTAGGAGGCTTAATAGGTTTAAGAATAATTTTTTGCT---  
 GTGCTTTCTATAGTG-----AATAGAGTTAGGCAGGGATACTCACCT-----  
 TTGTCTGTTTCGCTATTAGTTTGTGTTGATACCATAGCATTAGCAGTAGCAGAA---  
 GGAACAGATAGAATTATAGAATTAATATTAGGAATTGGTAGAGCT-----  
 -----ATCTGCAACATA-----CCTAGAAGAATAAGACAGGGCTTTGAAGCAGCTTTGCAA---TAA  
 >KY713231  
 GTG---GTA-----  
 GGAAACTTGTGGGTCACAGTCTATTACGGGGTACCTGTGTGG--ACAGAAGCAAAA---  
 ACTACTCTATTCTGTGCATCAGATGCTAAAGCATATGAGACAGAA---GTGCATAAT-----  
 -----GTATGGGCTACA---CATGCCTGTGTACCCACAGAC---  
 CCCAACCCACAAGAATTGGTTTTGGGA-----AATGTAACAGAAAATTTTAACT-----  
 -----ATGTGGGAAAATAACATGGTGGATCAGATGCATGAGGATGTA---  
 ATCAGTATATGGGATCAAAGCCTA---AAGCCATGTGTAAAGTTG---  
 ACCCCACTCTGTGTCACTTTAGACTGTAAAAATGTTACCTATAATGTTACCAATAGTACAGCT-----  
 -----  
 -----GGTGGAATGTTAACATTAGTACTTGGGAAGAAATGAAA---  
 AATTGCTCTTTTAATACAACCGCAGAACTAAAA-----  
 GACAAGAAGCAGAAGGCGTATGCACCT--TTTTATAGCCTTGATATAACACCCTTGATGATGGG-----  
 -----  
 -----  
 AACAGCTCTAGGTATAGATTAATAAAATGTGATACCTCAGCCATAACACAA---  
 GCCTGTCCAAAGGTTACTTTTGATCCAATACCTATACATTATTGCGCTCCAGCTGGTTATGCGATTCTAAAGT  
 GTAAT--AATAAGACATTCAAT-----GGGACAGGACCATGCCAGAAT-----  
 -GTTAGC---ACAGTACAATGTACACATGGAATTAAGCCAGTGGTATCAACT---  
 CAACTACTGTTGAATGGTAGCCTAGCAGAAGAAGAG-----  
 ATAATAATTAGATCTGAAAATCTGACAAAGAAT-----GACAGAACAATAATAGTACATCTTAAT---  
 -----GAATCTGTAGAA-----ATTGAGTGTACAAGACCCAACAATAATACAAGGAAA-----  
 -AGTATAAGGATA-----GGACCAGGACAAACA---TTC-----TATGCAACAGGAGAT-----  
 -----ATAATAGGAGACATA-----AGACAAGCACATTGT--AACATTAGTAATGAA---  
 AAATGGAATGAACTTTACGAAGGGTACGTAGAAAATTAGAA-----GAATACTTTTCT--  
 -----GGTAAAAACATAACTTTTAACT-----  
 CCATCCTCAGGAGGGGACCTAGAAAATTGCA--ACTCATAGCTTTAATTGTAGAGGAGAA---  
 TTTAAGCAACTCCAGACAAGAGTCCTGGCTATAGAAAGATACCTAAAGGATCAACAGCTCCTAGGGATTTGGG  
 GCTGCTCTGGAAAGCTCATCTGCACCACTGCAGTACCTTGGAACCTCCAGTTGGAGT-----  
 -----AATAGATCTCAAACAGATATTTGG-----GAG-----  
 AACATGACCTGGATGCAGTGG---GATAAGGAAATTAGTAATTACACAAGCACAATATAC---  
 AGGTTACTTGAGGAATCGCAAACCAAGCAGGAA-----  
 -----  
 AGAAATGAAAAAGATTTATTAGCATTGGACAGTTGGAAAAATCTGTGGAGTTGGTTTGACATATCAAATTGGC  
 TGTGGTATATAAGAATATTCATAATGATAGTGGGAGGCTTGATAGGTTTAAGAATAATTTTTTGCT---  
 GTGCTCGCTATAGTG-----AATAGAGTTAGGCAGGGATACTCACCT-----  
 TTGTCTGTTTCGCTATTAGTCTGTTTGATACTATAGCAATAGCAGTAGCTGAA---  
 GGAACAGATAGGATTATAGAAATAGTACAAAGAGGTTATAGAGCT-----  
 -----ATCTGTAACATA-----CCTAGAAGAATAAGACAGGGCTTTGAAGCAGCTCTTTGCAA-TAA  
 >KY713235  
 GTG---GGA-----  
 GGAAACTTGTGGGTCACAGTCTATTATGGGGTACCTGTGTGG--AAAGAAGCAAAA---  
 GCTACTCTATTCTGTGCATCAGATGCTAAAGCATATGATAAAGAA---ATACATAAT-----  
 -----GTATGGGCTACA---CATGCCTGTGTACCCACAGAC---  
 CCCAACCCACAAGAACTGGTTTTGGAA-----AATGTAACAGAAAATTTTAACT-----  
 -----ATGTGGAGAAATGATATGGCGGAACAGATGCATGAGGATGTA---  
 ATCAGTTTATGGGATCAAGGCCTA---AAGCCATGTGTGAAATTG---  
 ACCCCACTCTGTGTCACTTTAAATTGTACAAATGCTATTGCACATAATAGTACAAATGTTACTAGTACTGCAA

AGCCAACCACT-----  
 -----GATAGTGTGGGGGAAATAAAA---  
 AATTGCTCTTTCAATGCAACCACAGAAATAACA-----  
 GATAAAAGGAGGAAAGTGCATGCACTC---  
 TTTTATAGACTTGATATAGTACCACTTGATATAGAAAACAAATCTGCA-----  
 -----  
 AGCAACTCTAGTGAGTTTTATAGATTAATAAATTGTAATACCTCAGCCATAACACAA---  
 GCCTGTCCAAAGGTCACTTTTGATCCAATTCCTATACATTATTGTGCTCCAGCTGGTTATGCAATTCTAAAGT  
 GTAAT---AATAAGACATTCAAT-----GGGACAGGGCCATGTCAGAAT-----  
 -GTTAGC---ACAGTACAATGTACACATGGAATTAAGCCAGTGGTATCAACT---  
 CAATTCCTGTTTAAATGGTAGCCTAGCAGAAGAAGAG-----  
 ATAATAATTAGATCTGAAAATCTGACAGATAAT-----GCCAAAACAATAATAGTACATCTTAAT----  
 -----AAATCTGTAGAA-----ATTACGTGTATAAGACCCAACAATAATACAAGGACA-----  
 -AGTATAAGGATA-----GGACCAGGACAAATG---TTC-----TATACAACAGGAGAC-----  
 -----ATCATAGGAGACATA-----AGACAAGCATATTGT---ACCATTAATAGAACA---  
 AGTTGGAATGACACATTACAAAAGTGTAAAGAAATAAATTAGCA-----GAACACTTCAAT----  
 -----AATACAATAATAAAATTTGAA-----  
 CCACCCTCAGGAGGGGACCTAGAAATTACA---  
 ACACATAGCTTTAATTGTAGAGGAGAATTAGATAAGCAGCTCCAAACAAGAGTCCTGGCTATAGAAAGATACC  
 TAAAGGATCAACAGCTCCTAGGGATTGGGGCTGCTCTGGAAAACCTCATCTGCACTACTAATGTACCTTGGAA  
 CTCCACTTGGAGT-----  
 AACAAATCTCTAACAGAGATTTGG-----AGT-----AACATGACCTGGATGGAGTGG---  
 GAGAGAGAAATTGATAATTACACAAACACAATCTAC---AGGCTACTTGAAGACTCGCAAACCAGCAGGAA-  
 -----  
 ATAAATGAAAAAGATTTATTAGCATTGGATAAGTGGAACAGTCTATGGAATTGGTTTAACATAACAACTGGC  
 TGTGGTATATAAAAATATTACATAATGATAGTAGGAGGATTAATAGGTTTAAGAATAATTTTTTGCT---  
 GTGCTTTCTGTAGTA-----AATAGAGTTAGGCAGGGATACTCACCT-----  
 TTGTCATTTCGCTATTAGTTTGTATGATACCATAGCAATAGCAGTAGCTGAA---  
 GGAACAGATAGAATTATAGCAGTGATACAAGGAATTTGTAGAGCT-----  
 -----ATCTGCAACATA-----CCTAGAAGAATAAGACAGGGCTTGAAGCAGCTTTGCAA---TAA  
 >MN703343  
 GGG---GGA-----  
 GGAAACTTGTGGGTCACAGTCTATTATGGGGTACCTGTGTGG--AAAGAAGCAAAA---  
 ACTACTCTATTCTGTGCATCAGATGCCAAAGCATATGAGAAAGAA--GTGCATAAT-----  
 -----GTCTGGGCTACA--CATGCCTGTGTACCCACAGAC---  
 CCCAACCCACAAGAATTAGGGTTGACA-----AATGTAACAGAAAATTTTGAC-----  
 -----ATGTGGAAGAATGACATGGTGGATCAAATGCATGAGGATGTG--  
 ATTAGTTTATGGGATCAAAGCCTG--AAGCCATGTGTAAAGTTG--  
 ACCCCACTCTGTGCCACTTTAACTGTAGTATCGTTAAGGTTAATAATACTGGTAGCAATGGTACT-----  
 -----  
 -----GTTAGTAATGAGACCCAAATCGACGATGAAATCATGACA---  
 AATTGCACTTTCAATACAACCACAGAATTAAGA-----  
 GATAAAAAGCAGAGTAGGCGTGCACTT--TTTTATAAGCTTGATGTAGTACCAATTAATGAG-----  
 -----  
 -----  
 AACTCTAGTATGTATAGATTAATAAATTGTAATACCTCAGCCATAACACAA---  
 GCCTGTCCAAAGATCTCTTTTGATCCAATTCCTATACACTATTGTGCTCCAGCTGGTTATGCGATTCTAAAGT  
 GTAAC---AATAAGACATTCAAT-----GGGACAGGACCATGCAATAAT-----  
 -GTTAGC---ACAGTACAATGTACACATGGGATTAAGCCAGTGGTATCAACT---  
 CAACTACTGTTGAATGGTAGCTAGCAGAAAAAGAG-----  
 ATAATAATTAGATCTGAAAATCTGACAAACAAT-----GCCAAAACAATAATAGTTTCATCTTAAT----  
 -----GAATCTGTACGA-----ATTGAGTGTACAAGACCCAACAACAATAACAAGAGAA-----  
 -AGTATAAGGATA-----GGACCAGGACAAACA---TTC-----TATGCAACAGGAGAC-----  
 -----ATAATAGGAGACATA-----AGACAAGCACATTGT---AACATTAGTGAAAAA---  
 AACTGGACTATAGCTTTACACAGGGTAAGTAAAAAATTAGAA-----GAACACTCCCCT----  
 -----AATAAAAACAATAAGATTTTGAC-----  
 CAATCCTCAGGAGGGGACCTAGAAATTAGC---ACACATAGCTTTAATTGTGGAGGAGAA---  
 TTTAAGCAGCTCCAGGCAAGAGTCCTGGCTATAGAAAAGATACCTAAAGGATCAACAGCTCCTGGGAATTTGGG  
 GCTGCTCTGGAAAACCTCATCTGCACTACTGCTGTACCTTGGAACTCCAGTTGGAGT-----  
 -----AACAAATCTAAAGAGGAGATTTGG-----GAT-----

AACATGACCTGGATGCAGTGG---GATAGAGAAATTAATATTTACACAGACATAATATAC---  
AGTTTGCTTGAAAAATCACAAATCCAGCAGGAG-----  
-----  
GAAAAAGAAAAAGAGTTATTAGCATTGGACAGTTGGAATAGTTTATGGAATTGGTTTGACATAACAAATTGGC  
TGTGGTATGTAAAAATATTCATAATGATAGTAGGAGGCTTGATAGGTTTAAGAATAATTTTTTGCT---  
GTGCTTTCTATAGTA-----AATAGAGTTAGGCAGGGATACTCACCT-----  
TTGTCGTTGGCTATTAACCTTGCTTGACACCACAGCAATAGCAGTAGCTGAA---  
GGGACAGATAGGATTATAGAATTAGCACTAACAAATTATTAGAGCT-----  
-----ATAGGCAACATA-----CCTAGAAGAATAAGACAGGGCTTGGAAGGAGCTTTGCTA---TAA  
>MN703361  
GTG---GTA-----  
GGGAATTTGTGGGTCACAGTTTATTATGGGGTACCTGTGTGG--AGAGAAGCAAAA---  
ACTAATTTATTCTGTGCATCAGATGCTAAACATATGAGGCGGAA---GTGCATAAT-----  
-----GTCTGGGCAACA---TATGCCTGTGTACCCACAAAC---  
CCCGAACCACACGAAACATTTTTTGGA-----AATGTAACAGAAAATTTTAAT-----  
-----ATGTGGAATAATGATATGGTGGAGCAGATGCATGAGGATGTA---  
ATCAGTATATGGGACCAAGGCCTA---AAGCCGTGTGTAAAGTTG---  
ACCCCACTCTGTGTCACTTTAACTGTACAAATGCTACAAGTGTGGCACAAATGTTACAAGT-----  
-----  
-----GAGGAAATGAAA---  
AATTGCTCTTTCAATGCAGCCACAACAGTAAAA-----  
GACAAGAGGCAGAAAGAGTATGCAACT---  
TTTTATAACCTGGATATAGTACAACCTTAATGAGGGAACGTCTAACGAG-----  
-----  
AGCTCTAGCTATTATAGATTAATCAGTTGTAATACCTCAGCCATAACACAA---  
GCCTGTCCAAAAGTCAATTTTGATCCAATTCCTATACATTATTGTGCTCCAGCTGGTTTTGCGATTCTAAAGT  
GTAAT---ACAAGACATTCAAT-----GGGACAGGACCATGCACGAAT-----  
-GTTAGC---ACAGTACAATGTACACATGGGATTAGGCCAGTAGTATCAACT---  
CACCTACTGTAAATGGTAGCCTAGCAGAAGAAAAG-----  
ATAATGATTAGGTCTGAAAATCTGACAAACAAT-----GCTAAAACAATAATAGTGCAGTTTAAT---  
-----AAATCTGTAGAG-----ATTGTCTGTACAAGACCCAACAATAACAAGAAAA---  
-AGTATAAGAATA-----GGACCAGGACAAACA---TTC-----TATGCAACAGGAGAA---  
-----ATAATAGGAGACATA-----AGACGAGCCCATTGT---ACAGTTAATGCTAGT---  
GATTGGACTAGCACCTTAGAAAAGGTAAGAAAAGAATTAGGA-----ACACACTTC-----  
-----AATCGTACAATAATATTTAAC-----  
CAATCCTCAGGAGGGGACTTAGAAGTCACA--ACACATAGCTTTAATTGTAGAGGAGAA---  
TTTAAGCAGCTCCAGACGAGAGTCCCTGGCTATAGAAAGATACCTAAGGGATCAACAGCTCCTAGGGATTTGGG  
GCTGCTCTGGAAGAACTCATCTGCACTACTGCTGTACCTTGGAACCTCCAGTCGGAGT-----  
-----AACAGATCTGAAACAGAAATTTGG-----GGC-----  
AACATGACCTGGATGCAGTGG--GATAGAGAAATCAGTAATTACACAGTTGAAATATAC---  
AAATTGCTTGAAAGAGTCGCAAAGCCAGCAGGAA-----  
-----  
AGAAATGAAAAAGATTTATTAGCATTGGACAGTTGGAACAATTTATGGAATTGGTTTGGCATAACAAAATGGT  
TGTGGTATATAAAAAATATTCATAATGATAGTAGGAGGCTTAATAGGTTTAAGAATAATTTTTTGCT---  
GTGCTATCTATAGTA-----AATAGAGTTAGGCAGGGATACTCACCC-----  
TTGTCGTTTGCTATTAGTCTGCTTGATACCACAGCAATAGTAGTAGCTGAA---  
GGAACAGATAGGATCATAGAAGTAGCACAAAGAATTGGTAGAGCT-----  
-----ATTTGCAACATA-----CCTAGAAGAATAAGACAGGGCTTTGAAGCAGCTTTGCAA---TAA  
>AF067159  
GGG---GGA-----  
AAAGACTTGTGGGTCACAGTCTATTATGGGGTACCTGTGTGG--AAAGAAGCAAAA---  
ACTACTCTATTTTGTGCATCAGATGCTAAAGCATATGGGAAAGAA---GTGCATAAT-----  
-----GTATGGGCTACA---CATGCCTGTGTACCCACAGAC---  
CCCAACCCACAAGAAATATCTTTTGGA-----AATGTAACAGAAAATTTTAAC-----  
-----ATGTGGAATAATGATATGGTGAATCAGATGCATGAGGATGTA---  
ATCAGTTTATGGGATCAAAGCCTA---AAGCCATGTGTAAAGTTG---  
ACCCCACTCTGTGTACGTTAGAATGTGGAATGTTACCCAAAATGGTACC-----  
-----  
-----TACAATGATGAGAGCAATAAGGAAATAACA---  
AATTGCACTTTCAATACAACCACAGAAATAAGA-----

GGTAGGAAGCAGAAAGTGTATGCACTC---TTTTATAAACTTGATATAGTACCAATTAGTGAG-----  
-----  
-----  
ACTAGTAATCAGTCTAGATTAATAAGTTGTAATACCTCAGTCATAACACAA---  
GCCTGTCCAAAGGTCTGTTTGTATCCAATTCCTATACACTATTGTACTCCGGCTGGTTATGCGATTCTAAAGT  
GTAAT---GATAAGACATTCAAT-----GGGACAGGACCATGCCGTAAT-----  
-GTTAGC---ACAGTACAATGTACACATGGAATTAAGCCAGTAGTATCAACT---  
CAACTACTGTTTAAATGGTAGCCTATCAGAAGGAGAG-----  
ATAATAATTAGATCTGAAAATCTGACAAACAAT-----GTCAAAACAATAATAGTACATCTTAAT----  
-----AAATCTGTAGAA-----ATTGTGTGTACAAGACCCAACAATAATACAAGAAAA-----  
-AGTATAAGGATA-----GGACCAGGACAAACA---TTC-----TATGCAACAGGAGAA-----  
-----ATAGTAGGAAACATA-----AGACAAGCACATTGT---AACATTAGTAAAAGG---  
GATTGGAATGAACTTTACAAAAGGTAAGTGAAAAATTAGCA-----AACACTTCCT---  
-----AATAAAACAATAAAATTTGCA-----  
CCATCCTCAGGAGGGGACCTAGAAATTACA---ACACATAGCTTTAATTGTAGAGGAGAA---  
TTTAAGCAGCTACAGACAAGAGTCCTGGCTATAGAAAAGATACCTAAAGGATCAACAGCTCCTAGGGATTTGGG  
GCTGCTCTGGAAGAACTCATCTGCACTACTGCTGTACCTTGGAAGTCCAGCTGGAGT-----  
-----AACAGAACTCAAGAAGAGATTTGG-----AAT-----  
AACATGACCTGGATGCAGTGG---GATAGAGAAATTAATAATTACACAAATACAATATAC---  
AGGTTACTTGAAGACTCACAAAACCAGCAGGAG-----  
-----  
AAAAATGAAAAAGATTTATTAGCATTGGACAGTTGGAAAAATCTATGGAGTTGGTTTGACATAACAAATTGGC  
TGTGGTATATAAAAATATTTCATAATGATAGTAGGAGGCTTGATAGGTTTAAGAATAATTTTTGCT---  
GTGCTCTCTATAGTG-----AATAGAGTTAGGCAGGGATACTCACCT-----  
TTGTCGTTTGCTATCAGGCTGCTTGATATCATAGCAATAGCAGTAGCTGAA---  
GGAACAGATAGGATTATAGAAAATAACAAGGAACTTGTTAGAGCT-----  
-----ATCCGCAACATA-----CCTAGAAGAATAAGACAGGGCTTGGAAGCAGCTTTGCAA---TAA  
>FJ866133  
GGG---GTG-----  
GGGAAGTTGTGGGTTACAGTATATTATGGGGTACCTGTGTGG---AGAGATGCAAAA---  
ACCACTCTATTCTGTGCATCAGAAGCTAAAGCATATGATCCAGAA---GTGCATAAT-----  
-----GTCTGGGCTACA---CATGCCTGTGTACCCACAGAC---  
CCCAACCCACAAGAAATAGTTTTGGGA-----AATGTAACAGAAAATTTTAAC-----  
-----ATATGGGAAAATGACATGGTGGATCAAATGCATCAGGATATA---  
ATCAGTTTATGGGACCAAAGCCTA---AAGCCATGTGTAAAGTTG---  
ACCCCACTCTGTGTTACCTTAACTGTAGGGATGCTGATTTTACTAGTATCCAC-----  
-----  
-----AATAATACCATGGATATGAATGGAGAAATAAAA---  
AATTGTTCTTTTAATATGACCACAGTACTAAAA-----  
GATAAGAAACAGAAGGTACAGGCACCT--TTCTATAGACTTGATGTAGTACAACCTTAGTAAT-----  
-----  
-----  
AACAAATAGTAGTAGTGAGTATAGATTAATAAATTGTAATACCTCAGCCATTACACAA---  
GCTTGTCCAAAGGTCTCTTTTGACCCAATTCCTATATATTATTGTGCTCCAGCTGGTTATGCGATTCTAAAGT  
GTAAT---ACAAGACATTCAAT-----GGAACAGGACCATGCAGAAAT-----  
-GTCGGC---ACAGTACAATGTACACATGGAATTAAGCCAGTGGTATCAACT---  
CAATTGCTGTTAAATGGTAGTCTAGCAGAAGAGAAA-----  
ATAATAATTAGATCTAAGAATCTGACAAACAAT-----GCCAAAACAATAATAGTACATCTTAAG---  
-----GAACCTGTATCA-----ATTAATTGTACGAGACCTAATAACAATACAAGAGAA-----  
-AGTATAGGGATA-----GGACCAGGACAAATG---TTC-----TATGCAATGGGAGCG-----  
-----ATAATAGGAGATATA-----AGACAAGCACATTGT---AACATTAGTGGAGAA---  
AAATGGAATAACACTTTACAAAAGGTAAAAGAAGAATTAGAA-----AAGCACTTTCCT---  
-----AATAAAACAATACAATTTAAC-----  
AATTCAGCAGGAGGGGACCTAGAAGTTACA---ACACACAGCTTTAATTGTAGAGGAGAA---  
TTTAAGCAGCTCCAGGCAAGAGTCCTGGCTATAGAAAAGATACCTACAGGATCAACAGCTCCTAGGGATTTGGG  
GCTGCTCTGGAAGAACTCATCTGCACCACTGCTGTGCCTTGGAAGTCTAGTTGGAGT-----  
-----AATAAATCTCAGGAAGATATTTGG-----AAT-----  
AACATGACCTGGATGCAGTGG---GACAGAGAAATTAGTAATTATACAAACACAATATAC---  
AGGTTGCTTGAGGTCTCGCAGAACCAGCAGGAG-----  
-----

CAGAAATGAAAAAGATTTACTAGCATTAGACAAATGGCAAAATCTGTGGAATTGGTTTGACATATCAAAGTGGC  
TGTGGTATATAAAAAATATTTCATAATAATAGTAGGAGGCTTGATAGGTTTAAGAATAATTTTTTGCT---  
GTGCTCTCTATAGTG-----AACAGAGTTAGGCAGGGATACTCACCA-----  
TTATCGTTTGCTATTAATTTGTTAGATACAGTAGCAATAGCAACAGCTAAC---  
TGGACAGATAGGGTTATAGAAGTAGCACAAAATATTGGTAGAGCT-----  
-----ATCTACAACATA-----CCTAGAAGAATAAGACAGGGCTTTGAAGCAGCTTTGCAA---TAA  
>AB097871  
GTG---GGA-----  
GGAAACTTGTGGGTCACAGTCTATTATGGGGTACCTGTGTGG---AGAGAAGCAAAA---  
ACTACTCTATTCTGTGCATCAAATGCTAAAGCATATGAGACAGAA---GTGCATAAT-----  
-----GTCTGGGCTACA---CATGCCTGTGTACCCACAGAC---  
CCCAACCCACAAGAAATGGATTTGGAA-----AATGTAACAGAAAATTTTAAAC-----  
-----ATGTGGGACAATGATATGGTGGATCAGATGCATGAGGATGTA---  
GTCAGTTTATGGGATCAAAGCCTA---AAGCCATGTGTAAAAGTTG---  
ACCCCACTCTGTGTCACTTTAGAAATGTAAAAATGTTAAAAATTGTTAACAGTACTGGTAGAAATGTTAGCAGT-  
-----  
-----AGTAGTGGTAGTAATGGTACCTACATTGGGAACTACACTGAGATAAAA---  
AATTGCTCTTTCAATACAACCACAGTTTTTAAAA-----  
GATAGGAAGCAGTCAGTGTATGCACCT---TTTTATAGACTTGATATAGTACCACCTTAATGAGAAGAAA---  
-----  
-----  
TCTAGTGAAAACCTCTAGTGAGTATTATAGATTAATAAAATTGGAATACCTCAGCCATAACACAA---  
GCCTGTCCAAAGGTCACTTTTGACCCAATTCCTATACACTATTGCGCTCCAGCTGGTTATGCGATTCTAAAGT  
GTAAG---GATAAGAAATTCAAT-----GGGACAGGACCACGCCGTAAT-----  
-GTTAGC---ACAGTACAATGTACACATGGAATTAAGCCAGTGGTATCAACC---  
CAACTACTGTTAAATGGTAGCCTAGCAGAAGAAGAG-----  
ATAATAATTAGATCTGAAAATCTGACAGACCAT-----TTCAAAACAATAATAGTACAACCTTAAT----  
-----CAACCTGTAGAA-----ATTGAATGTACAAGACCCAACAATAATACAAGAAAA-----  
-AGTATAAGGATA-----GGACCAGGACAAACA---TTC-----TATGCAACGGGAGAA-----  
-----ATAATAGGAGACATA-----AGACAAGCACATTGT---AACATTAGTAAACAA---  
AAATGGAATGAACTTTACAAAGGGTAGGTAGAAAATTAGCA-----GAACTCTTCCT---  
-----AATAGAACAATAGTATTTAAC-----  
TCATCCCCAGGAGGGGACCTAGAAAATTGCA--ACACATAGCTTTAATTGTAGAGGAGAA---  
TTTAAGCAGCTCCAGGCAAGAGTCCCTGGCTATAGAAAGATACCTAAAGGATCAACAGCTCCTAGGGATTTGGG  
GCTGCTCTGGAAGAACTCATCTGCACTACTGCTGTACCTTGGAACCTCCAGTTGGAGT-----  
-----AACAAATCTCAAGAAGAGATTTGG-----AAC-----  
AACATGACCTGGATGGAGTGG---GATAAAGAAATTAATAATTACACAGACACAATATAC---  
AGGTTGCTTGAAGACTCGCAAAACCAGCAGGAA-----  
-----  
AGAAATGAAAAAGATTTATTAGCATTGGACAGTTGGAAAAATCTATGGAATTGGTTTAAACATAACAAATTGGC  
TGTGGTATATAAAAAATATTTCATAATGATAGTAGGAGGCTTGATAGGTTTAAGAATAATTTTTTGCT---  
GTACTCTCTGTAGTG-----AATAGAGTTAGGCAGGGATACTCACCT-----  
TTGTCGTTTGCTATTAGTCTGCTTGATAGCATAGCCATAACAGTAGCTGAA---  
GGAACAGATAGGATTATAGCAGTAGTACACAGAATTTGTAGAGCT-----  
-----ATCCGCAACATA-----CCTAGAAGAATAAGACAGGGCTTTGAAGCAGCTTTGCAG---TAA  
>KC894073  
GTG---GTG-----  
GGAAACTTGTGGGTCACAGTCTATTATGGGGTACCTGTGTGG---AAAGAAGCAAAA---  
ACTACTCTATTCTGTGCATCAGATGCTAGAGCATATGAGAGAGAA---GTGCATAAT-----  
-----GTCTGGGCTACA---CATGCCTGTGTACCCACAGAC---  
CCCAACCCACAAGAAATGGTTTGGTC-----AATGTAACAGAAAATTTTAAAC-----  
-----ATGTGGAAAAATGATATGGTGGATCAGATGCATGAGGATATA---  
ATCAGTTTATGGGACCAAAGCCTA---AAGCCATGTGTAAAATTG---  
ACCCCACTCTGTGTCACTTTTAGAGTGTAATAATGCTAATGGTACCACCAATAATGGTAGT-----  
-----  
-----GTTATTGTTGTTAATGAAAAATAGTACCATGTATGGAGAAATACAA---  
AATTGCTCTTTCAAGGTAAATTCAGAAATAAAA-----  
GGTAAGAAACAAGACGTGTATGCACCT---TTTAATAGCCTTGATATAGTAAAACTTTATAATAAT-----  
-----  
-----

GGAAGTGTGCTAGTATAGATTAATAAATTGTAATACCTCAACCTTAACACAA ---  
GCCTGTCCAAAGGTCTCTTTTGATCCAATTCCTATACATTATTGTGCTCCAGCTGGTTATGCGATTCTCAAGT  
GTAAT --- AATAAGACATTCAAT --- GGGACAGGACCATGCAATAAT ---  
-GTCAGC --- ACAGTACAATGTACACATGGAATTAAGCCAGTGGTGTCAACT ---  
CAATTACTGTAAATGGTAGCCTAGCAGAGGGAGAG ---  
ATAATAATTAGATCTAAAAATCTGACAGACAAT --- ACCAAAACAATAATAGTACATCTTAAT ---  
-----GAGTCTATAAAA-----ATTAATTGCATAAGACCCAACAATAATACAAGAAGA-----  
-AGTATAAGGATA-----GGACCAGGACAAGCA---TTC-----TATGCAGCAAATGGC-----  
-----ATAGTAGGAAATATA-----AGACAAGCACATTGT---AACATTAGCGAAGGT---  
GAATGGAATAAAACTTTATACAGGGTAAGTAGAAAATTAGCA-----GAACACTTCCCT-----  
-----GGTAAAGAAATAAAATTTAAA-----  
CCACATTCAGGAGGGGACTTAGAAATCACA---ACACATAGCTTTAATTGTAGAGGAGAA---  
TTTAAACAGCTCCAGGCAAGAGTCCTGGCTATGGAAAAGATACCTACAGGATCAACAGCTCCTAGGGATTTGGG  
GCTGCTCTGGAAACTCATCTGCACCACCTGCTGTGCCTTGGAACTCTAGTTGGAGT-----  
-----AACAAAACCTCTAGAGTATATTTGG-----GGA-----  
AACATGACTTGGATGCAGTGG---GATAGAGAAATTGACAAATTACACAGGCATAATATAC---  
GATTTACTTGAAGACTCGCAAAATCCAGCAGGAA-----  
-----  
AAAAATGAAAAAGATCTACTAGCATTGGACAGTTGGAAAAATCTATGGAGTTGGTTTAGCATAACAAATTGGT  
TGTGGTATATAAAGATATTCTAATGATAGTAGGAGGCTTGATAGGTTTAAGAATAATTTTTTGCT---  
GTGCTTTCTATAGTG-----AATAGAGTTAGGCAGGGATACTCACCT-----  
TTGTCGTTTGCTATTAGTCTGCTTGATACCATAGCAATAGCAGTAGCTGAA---  
GGAACAGATAGGATTATAGAAAGTAGTACAAAGAATTTGTAGAGCT-----  
-----ATCTATAACATA-----CCTAGAAGAATAAGACAGGGCTTTGAAGCAGCTTTGCAA---TAG  
>FJ444207  
AGT---GGA-----  
TCCTTGTGGGTACAGTCTATTATGGGGTACCTGTGTGG---AGGGAAGCAAAA---  
ACTACCTATTCTGTGCATCAGATGCTAAAGCATATGAGAAGGAA---GCGCATAAT-----  
-----GTTTGGGCTACA---CATGCCTGTGTGCCACAGAC---  
CCCAACCCACAAGAAGTAGTTTTGGAA-----AATGTAACAGAAAATTTTAAC-----  
-----ATGTGGAAAAATGACATGGTGGATCAGATGCATGAGGATATA---  
ATCAGTTTATGGGATCAAAGCCTA---AAGCCATGTGTAAAGTTG---  
ACCCCACTCTGTGTCACTTTAATTTGTAGCAATGTTAATGTTAACAATAGCAGCAAT-----  
-----  
-----GTTAATGTTAACAATAGCACTAATGAAATGAAA---  
AATTGCTCTTTCAATACAACCACAGAACTAAGA-----  
GATAAGAGAAAAGAAGGAATATGCACTC---TTTTATAGACCTGATGTAGTACCACTTAATGAG-----  
-----  
GGGAATAATGACAGTTATAGATTAATAAATTGCAATACCTCAACCATAACACAA ---  
GCCTGTCCAAAGGTCTCTTTTGACCCAATTCCTATACATTATTGTGCTCCAGCTGGTTATGCGATTCTAAAGT  
GTAAT --- AATAAGACATTCAAT --- GGAACAGGACCATGCAATAAT ---  
-GTTAGC --- ACAGTGAATGTACACATGGAATTAAGCCAGTGGTATCAACT ---  
CAACTACTGTAAATGGTAGTCTAGCAGAAGGAGAG ---  
ATAATAATTAGATCTGAAAATCTGACAAACGAT --- GTCAAAAACAATAATAGTACACCTTAAT ---  
-----GAATCTGTAAGA-----ATTGTGTGTACAAGACCCACAATAATACAAGAAAA-----  
-AGTGTGAGGATA-----GGACCAGGACAAGTA---TTC-----TATGCAACAGAAAGA-----  
-----ATAATAGGAGACATA-----AGAGAAGCACATTGT---AACATTAGTGAAGAA---  
AAATGGAACAAAACCTTTAAATGATGTAAAGAAAAAATTATTA-----GAACACTTCCCT-----  
-----AATAAACTATAAGGTTTCAA-----  
CCACATTCAGGAGGGGACCTAGAAATTACA---ACACATAGTTTTAATTGTAGAGGAGAA---  
TTTAAGCAGCTCCAGGCAAGAGTCCTGGCTCTAGAAAAGATACCTAAAGGATCAACAGCTCCTAGGGATTTGGG  
GCTGCTCTGGAAACTCATCTGCACCACCAATGTGCCTTGGAACGGGAGTTGGAGT-----  
-----AATAGATCTCAAGAGGAAATTTGG-----GGT-----  
AACATGACTTGGATGCAGTGG---GATAGAGAAATTAACAATTACACAAACACGATATAC---  
AGGTTGCTTGAAGACTCGCAAAACCAGCAGGAA-----  
-----  
CAAAATGAAAAAGATTTACTAGCATTGGACAGTTGGAATAGTTTATGGAGTTGGTTTAACATAACAAATTGGC  
TGTGGTATATAAAAATATTCTAATGATAGTAGGAGGTTTAATAGGCTTAAGAATAATTTTTTGCT---  
GTACTATCCATAGTA-----AATAGAGTTAGGAAGGGATACTACCA-----

TTATCGTTTGCTATTAATCTGCTTGATACCATAGCAATAGCAGTAGCTGAA---  
 GGAACAGATAGGATTATAGAAGTAATACAAAGAGGTTGTAGAGCT-----  
 -----ATCCTCAACATA-----CCTAGAAGAATAAGACAGGGCTTTGAAGCAGCTTTGCAA---TAA  
 >KC894078  
 GTG---ATG-----  
 GGAAACTTGTGGGTCACAGTCTATTATGGGGTACCAGTTTGG---AAAGAAGCAAAA---  
 ACTACTCTATTTTGTGCATCAGATGCTAAAGCATATGAGAGAGAA---GTGCATAAT-----  
 -----GTCTGGGCTACA---CATGCCTGTGTACCCACAGAC---  
 CCCAGCCCACAAGAAATGGAGTTAAAA-----AATGTAACAGAAAATTTTAAC-----  
 -----ATGTGGGAAAATGACATGGTGGATCAGATGCATGAGGATGTA---  
 ATCAGTTTATGGGATCAAAGCCTA---AAGCCATGTGTAAAGTTG---  
 ACCCCACTCTGTGTCACTTTAAACTGTAGTGATGTTAAGAATAATGTTACTACTAATGGTACCTCT-----  
 -----  
 -----GATAGTAGTAATATTACCTCTAATATAAAGGATGAAATGAAA---  
 AATTGCTCTTTCAATATAACCACAGAAATAAGA-----  
 GATAAGAGAAAGAAGGAATATGCACCT--TTTTATAAACTTGATATAGTACCACCTTGAGACAAAT-----  
 -----  
 -----  
 TCCAGTAGTGAATACAGATTAATAAATTGTAATACCTCAGCCGTAACACAA---  
 GCTTGTCCAAAGGTCTCTTTTGATCCAATTCCTATACATTATTGTGCTCCAGCTGGTTATGCGATTCTAAGGT  
 GTAAT---AATAAGACATTCAAT-----GGAACAGGACCATGCAATAAT-----  
 -GTCAGT---ACAGTACAATGTACACATGGAATTAAGCCAGTGGTATCAACT---  
 CAGCTACTGTAAATGGTAGCCTGGCAGAAAAAGAC-----  
 ATAATAATTAGCTCTAAAAATATATCAGACAAT-----GCCAAAACAATAATAGTACATCTTAAT----  
 -----GAATCTGTACAA-----ATTGTGTGTATAAGGCCCGGCAATAATACAAGGAAA-----  
 -AGTGTGTGGATA-----GGACCAGGACAAGCA---TTC-----TATGCAACAGGAGAC-----  
 -----ATAATAGGAGATATA-----AGACAAGCACATTGT---AACATTACTGCAGGC---  
 AAATGGAATAGAACTTTAGAAAAGGTAAGGAAAAAATTAGAA-----GAACACTTCCCT----  
 -----AATAAACTATAAACTTTGAACCA---  
 GTACCAGCCTCAGGAGGGGACCTAGAAATTACA--ACACATAGCTTTAATTGTAGAGGAGAA---  
 TTTAAGCAGCTCCGGGCAAGAGTCCTGGCTATAGAAAGATACCTACAGGATCAACAGCTCCTAGGGATTTGGG  
 GCTGCTCTGGAAGAACTCATCTGCACCACTAATGTGCCTTGGAACTCCAGTTGGAGT-----  
 -----AATAAACTCAAAACGAGATTTGG-----GAG-----  
 AACATGACCTGGATGCAGTGG---GATAGAGAAATTAGTAATTACACAGACACAATCTAT---  
 AGGTTGCTTGAAGACTCGCAAAACCAGCAGGAA-----  
 -----  
 ATTAATGAAAAGGATTTATTAGCATTGGACAGTTGGAAAAATCTGTGGAGTTGGTTTAGCATATCAAATTGGC  
 TGTGGTATATAAGAATATTATAATGATAGTAGGAGGCTTGATAGGTTTAAGAATAATTTTTTGCT---  
 GTGCTCTCTATAATA-----AATAGAGTTAGGCAGGGATACTCACCT-----  
 TTGTCAATTTGCTATTAGTCTGCTTGATACCATAGCAATAATAGTAGCTGAA---  
 GGAACAGATAGAATTATAGAATTAGTACAAGGAATTTGTAGAGCT-----  
 -----ATCCGCAACATA-----CCTAGAAGAATAAGACAGGGCTTTGAAGCAGCTTTGCTA---TAA  
 >KC894079  
 ATG---GAG-----  
 GGCTCGTGGGTCACAGTTTACTATGGAGTGCCTGTGTGG---AAAGAAGCAAAA---  
 ACTACTCTATTCTGTGCATCAGATGCTAAAGCATATGAGAAAGAA---GTGCATAAT-----  
 -----GTCTGGGCTACA---CATGCCTGTGTGCCCACAGAT---  
 CCCAACCACAAGAAATGGTTTGGCA-----AATGTAACAGAAAATTTTAAC-----  
 -----ATGTGGAATAATGATAGGTAGAGCAGATGCATGAGGATATA---  
 ATTAGTTTGTGGGATGAAAGCCTG---AAGCCATGTGTGAAGTTG---  
 ACCCCACTCTGTGTCACTTTAAATTGTACAAATGTTAAAGGGAATGAGAGTGACACCAGT-----  
 -----  
 -----GAAGTAATGAAA---  
 AATTGCTCTTTCAAGGCAACCACGGAATAAG-----  
 GATAAAAAACATAAGGTGCATGCGCTT--TTTTATAAACTTGATGTAGTACCACCTTAATGGA-----  
 -----  
 -----  
 AACAGCAGCAGCTCTGGAGAGTATAGATTAATAAATTGCAATACCTCAGCCATAACACAA---  
 GCCTGTCCAAAGGTCTCTTTTGACCCAATTCCTTTACATTACTGTGCACCAGCTGGTTTGGCGATTCTAAAGT  
 GTAAT---AATAAGACATTCAAT-----GGGACAGGACCATGTCGTAAT-----

-GTCAGC---ACAGTACAATGTACACATGGAATTAAGCCAGTGGTATCAACT---  
 CAACTACTGTTTAAATGGTAGCCTAGCAGAAGAAGAG-----  
 ATAATAATTAGATCTGAAAATCTGACAAACAAT-----GCCAAAACAATAATAGTACACCTCAAT----  
 -----GAATCTGTAAAC-----ATTGTGTGTACAAGACCCAATAATAACAAGAAAA-----  
 -AGTATAAGGATA-----GGACCAGGACAAACA---TTC-----TATGCAACAGGTGAC-----  
 -----ATAATAGGAAACATA-----AGACAGGCACATTGT---AACATTAATGAAAGT---  
 AAATGGAACAACACTTTACAAAAGGTAGGAGAAGAATTAGCA-----AAACACTTCCCT----  
 -----AGTAAAACAATAAAGTTTGAA-----  
 CCATCCTCAGGAGGGGATCTAGAAATTACA---ACACATAGCTTTAATTGTAGAGGAGAG---  
 TTTAAACAGCTCCAGGCAAGAGTCCTGGCTATAGAAAGATACCTAAAGGATCAACAGCTCCTAGGGATGTGGG  
 GCTGCTCTGGAAAACCTCATCTGCACCCTGCTGTGCCTTGGAACCTCCAGTTGGAGT-----  
 -----AACAAATCTCAAAATGAAATTTGG-----GGG-----  
 AACATGACCTGGATGCAGTGG---GACAGAGAAATTAATAATTACACAAACACAATATAT---  
 AGGTTACTTGAAGACTCACAAAACCAGCAGGAA-----  
 -----  
 AAAAAATGAGAAAGATTTGTTAGCATTGGACAGTTGGAAAAATCTGTGGAATTGGTTTGACATATCAAAGTGGC  
 TGTGGTATATAAAAATATTTCATAATGATAATAGGAGGCTTGATAGGTTTGAGGATAATTTTTTGCT---  
 GTGCTTTCTATAGTA-----AAAAGAGTTAGGCAGGGATACTCACCT-----  
 TTGTCAATTTGCTATTAGTCTAATTGATACCATAGCCATAGCAGTAGCTGAA---  
 AGGACAGATAGGATTATAGAAAATGTACAAAGAATTTGTAGAGCT-----  
 -----ATCCGCAACATA-----CCTAGAAGAATAAGACAGGGCTTTGAAACAGCTTTGCTA---TAA  
 >KC894081  
 GTG---GTG-----  
 GGAAACTTGTGGGTCACAGTTTATTATGGGGTACCTGTGTGG---AAAGAAGCAAAA---  
 ACTACTCTATTTTGTGCATCAGATGCTAAAGCATATGAGAAGGAA---GTGCATAAT-----  
 -----GTCTGGGCTACA---CATGCCTGTGTACCCACAGAC---  
 CCCAACCCACAAGAAATGGTTTGTGGAA-----AATGTAACAGAAAATTTTAAC-----  
 -----ATGTGAAAAATGATATGGTAGATCAGATGCATGAGGATGTA---  
 ATCAGTTTATGGGATCAAAGCCTA---AAGCCATGTGTAAAGTTG---  
 ACCCCACTCTGTGTCACTTTAACTTGTACAAATACTACTGTTAGTAATGGTAGCAGTAATAGTAATGCTAACT  
 TT-----  
 -----GAAGAAATGAAA---  
 AATTGCTCTTTCAATGCAACCACAGAAATAAAA-----  
 GATAAGAAAAAGAACGAGTATGCACCT--TTTTATAAACTGGATATAGTACCACTTAATAAC-----  
 -----  
 AGCTCAGGCAAGTATAGATTAATAAAATTGCAATACCTCAGCCATAGCACAA---  
 GCCTGTCCAAAGGTCACTTTTGAGCCAATTCTTATACATTATTGTGCTCCAGCTGGTTATGCGATTCTAAAGT  
 GTAAT---AATAAGACATTCAAT-----GGAACAGGACCATGCAATAAT-----  
 -GTCAGC---ACAGTACAATGTACACACGGAATTAAGCCAGTGGTATCAACT---  
 CAATTGCTGTTTAAATGGTAGCCTAGCAGAAAAAGAA-----  
 ATAATAATTAGATCTGAAAACCTGACAAACAAT-----GCCAAAACAATAATAACTACTTTAAT---  
 -----GAGTCTGTAGGG-----ATTGTGTGTACAAGACCCAGCAATAATAACAAGGAAA---  
 -AGTATAAGGATA-----GGACCAGGACAAACA---TTT-----TATGCAACAGGTGAC-----  
 -----ATAATAGGAGACATA-----AGACAAGCACATTGT---ACGTTAGTAAACAG---  
 AATTGGAACAGAACTTTACAAACAGGTAGGAAGAAAATTAGCA-----GAACATTTCCCT---  
 -----AATAGAAACATAACATTTAAC-----  
 CATTCCTCAGGAGGGGATCTAGAAATTACA---ACACATAGCTTTAATTGTAGAGGAGAA---  
 TTTAAGCAGCTCCAGGCAAGAGTCTTGCCATAGAAAAGATACCTAAAGGATCAACAGCTCCTAGGGATTTGGG  
 GCTGTTCTGGAAAACCTCATCTGCACCCTAATGTGCCTTGGAACCTCCAGTTGGAGT-----  
 -----AATAGATCTCAAGAGGATATTTGG-----AAT-----  
 AACATGACCTGGATGGAGTGG---GAAAGGGAAATTGATAATTACACACACACAATATAC---  
 AGCTTGCTTGAAGAATCACAAATCCAGCAGGAA-----  
 -----  
 AAAAAATGAAAAAGATTTATTGGCATTGGACAGTTGGCAAAATCTGTGGAGTTGGTTTAGCATAACCAAATGGC  
 TGTGGTATATAAAGATATTTCATAATGATAGTAGGAGGCTTGATAGGTTTAAGAATAATTTTTTGCT---  
 GTGCTCTCTATAGTG-----AATAGAGTTAGGCAGGGATACTCACCT-----  
 TTATCATTTGGCTACCAGTCTGCTTGATACCACAGCAATAGTAGTAGTTGAA---  
 GGAACAGATAGAATTATAGGAATAATACAAGCAATTTGTAGAGCT-----  
 -----CTCCTCAACCTA-----CCTAGAAGAATAAGACAGGGCTTTGAAGCAGCTTTGCTA---TAA

>FJ444522

GTG---GTG-----  
GGGAAC TTGTGGGT CACAGTCTATTATGGGGTACCTGTGTGG---AAAGAAGCAAAA---  
ACTACTCTATTCTGTGCATCAGATGCTAAAGCATATGAGAGAGAA---GCACATAAT-----  
-----GTCTGGGCTACA---CATGCCTGTGTACCCACAGAC---  
CCCAACCCACAAGAAATAGTTTGGAA-----AATGTAACAGAAAATTTTAAT-----  
-----ATGTGGAAAAATGACATGGTAGATCAGATGCATGAGGATATA---  
ATCAGTTTATGGGATCAAAGCCTG---AAGCCATGTGTAAAGTTG---  
ACCCCACTCTGTGTCACTTTAAATGTACAAATACAAATGGTACCAGTAGT-----  
-----  
-----AGTAATATTACCAAAGAAGGAGACATGAAA---  
AATTGCTCTTTC AATACAACCACAGAAATAAGA-----  
GATAAAAAACAGAAAGTGTATGCACCTT---TTTTATAAACTTGATGTAGTACCACCTTAATGAG-----  
-----  
-----  
AATAACAACAGCTATATATTAATAAACTGCAATACCTCAGCCATAACACAA---  
GCCTGTCCAAAGGTCTCTTTTGACCCAATTCTCTATACATTATTGTGCACCAGCTGGTTATGCGATTCTAAAGT  
GTAAC---AATAAGACATTCAAT-----GGGACAGGACCATGCCATAAT-----  
-GTCAGC---ACAGTACAATGTACACATGGAATTAGGCCAGTGGTATCAACT---  
CAACTACTGTTTAAATGGCAGCCTAGCAGAAGAAGAG-----  
ATAATAATTAGATTTGAAAACCTGACAAACAAT-----GCCAAAACAATAATAGTACATTTTAAT---  
-----GAATCTGTACAG-----ATTAATTGTACAAGACCCAACAATAATACAAGAAAA-----  
-AGTATAAGGATA-----GGACCAGGACAAAACA---TTC-----TATGCAACAAATGGC-----  
-----ATAATAGGAGACATA-----AGAGAAGCGCATTGT---AACATTAGTGCAAAG---  
CAATGGAACAAAACATTACAGCAGGTAGGGAAAAAGTTAGCA-----GAACGCTTCCCT---  
-----AATAAAAACAATAATTTTAAAC-----  
CAATCCTCAGGAGGGGATCTAGAAATTACA--ATGCATAGCTTTACTTGTAGAGGAGAA---  
TTTAAGCAGCTCCAGGCAAGAGTCCTGGCTATCGAAAGATACCTAAAGGATCAACAGCTCCTAGGGATTTGGG  
GCTGCTCTGGAAGAACTCATCTGCACCACTGCTGTGCCCTGGAAGCTCCAGTTGGAGT-----  
-----AATAAAACTCAGGACGCTATTTGG-----AAG-----  
AACATGACCTGGATGCAGTGG---GATAGAGAAATTAGTAATTATACAGACACAATATAC---  
AGATTGCTTGAAGACTCACAAAACCAGCAGGAA-----  
-----  
AGCAATGAAAAGGATTTACTAGCATTGGACAGTTGGAAAAATCTATGGACTTGGTTTGACATAACAACTGGC  
TGTGGTATATAAAAAATATT CATAATGATAGTAGGAGGCTTGATAGGTTTGAGAATAATTTTTTGCT---  
GTGCTTTCTATAGTA-----AATAGAGTCAGGCAGGGATACTCACCT-----  
TTGTCTTTTGCTATCAGTCTAATTGATACCCTAGCCATAGCAGTAGCTGAA---  
GGAACAGATAGGATTATAGAAGTAATACAAAGATTTTGTAGAGCA-----  
-----ATCCGCAACGTA-----CCTATAAGAATAAGACAGGGCTTTGAAGCAGCTTTGCTA--TAA  
>KC894089  
GGG---AAG---GAT-----  
GAGGATTTGTGGGT CACAGTCTACTATGGGGTACCTGTGTGG---AAAGAAGCAAAA---  
ACTACTCTATTCTGTGCATCAGATGCTAAAGCATATAAGAAAGAA---GTACATAAT-----  
-----GTCTGGGCCACA---CATGCCTGTGTACCCACAGAC---  
CCCAACCCACAAGAAATAGTTTGGGA-----AATGTAACAGAAAATTTTAAC-----  
-----ATGTGGGAAAATGACATGGTAGATCAGATGCATGAGGATGTA---  
ATCAGTTTATGGGATCAAAGCCTA---AAGCCATGTGTAAAGTTG---  
ACCCCCCTCTGTGTTACTTTAAATTGTACAAAGGCTACTCCTGAGAATAGGACTAATACTAATCCT-----  
-----  
-----AGTACTAATGGTACTAATATTACTGTTTCCTGGGTTATTGGACGACATAAAA---  
AATTGCTCTTTCATTGCAACCACAGAAATAAGA-----  
GATAAGAAAAAGAAAGAGTATGCACCTT---TTTTATAGACTTGATATAGTACCACCTTGATGGGGAT-----  
-----  
-----  
AAGAATGACAGCACCGAGTATAGATTAATAAATTGCAATACCTCAACCATAACACAA---  
GCCTGTCCAAAGGTCTCTTTTGACCCAATTCTCTATACATTATTGTGCTCCAGCTGGTTATGCGATCTTAAAGT  
GTAAT---AATGAGACATTCAAT-----GGGACAGGACCATGCAATAAT-----  
-GTCAGC---ACAGTACAATGTACACATGGAATTAAGCCAGTGGTATCAACT---  
CAACTACTGTTTAAATGGTAGCCTAGCAGAAAAAGAA-----  
GTAATAATTAGATCTAAAAATATATCAGACAAT-----GCCAAAACAATAATAGTACAACCTTAAT---

-----GAATCTGTAGCG-----ATTGTGTGTACAAGACCCGGCAATAATACAAGAAGA-----  
-AGTGTAAGGATA-----GGACCAGGATATGCA---TTC-----CTTACAAATAAA-----  
-----ATAATAGGAGACCCA-----AGACAAGCACATTGT---AATATTAGTGCAAAC---  
AAATGGCACGAAGCTTTACGAAGAGTAGGACAAAATTAAGC-----AAACACTTCCCT-----  
-----AATAAGACAATAGCATTTAAT-----  
TCATCCTCAGGAGGGGACCCAGAAATTACA---ACACATAGCTTCAATTGCAGAGGAGAG---  
TTTAAGCAGCTCCAGGCAAGAGTCCTGGCCATAGAAAGATACCTACAGGATCAACAGCTCCTAGGGCTGTGGG  
GCTGCTCTGGAAACTCATATGCACCACTAATGTGCCTTGGAACCTCAGTTGGAGT-----  
-----AATAAATCTCGAACAGATATTTGG-----GAT-----  
AACATGACCTGGATGCAGTGG---GATAAAGAAATTAGTAATTATACAGGCATAATATAC---  
CATTTGCTTGAAACTCGCAAAACCAGCAAGAA-----  
-----  
AATAATGAAAAGGAGTTATTAGAAATTGGACAGGTGGAGCAGTCTGTGGACTTGGTTTGACATAACAAAATGGC  
TGTGGTATATAAAAATATTTCATAATGATAGTAGGGGGCTTGATAGGTTTAAGAATAATTTTTTACT---  
GTAATCTCTCTAGTG-----AATAGAGTTAGGCAGGGATACTCACCT-----  
TTATCGTTTGCTGTTAGTTTATTTGATACCTTAGCCATAGCAGTAGCTGAA---  
GGAACAGATAGAATTTTAGAAAATAGTACAAAGAGTCTGTAGAGCT-----  
-----ATCCTCAATATA-----CCTACAAGAATAAGACAGGGCTTTGAAGCAGCTTTACTA---TAA  
>KC894084  
GTA---GGG-----GGG---AAC---TTG-----  
AACTTGTTGGGTACAGTCTATTATGGGGTACCTGTGTGG---AAAGAAGCAAAA---  
ACTACTCTATTCTGTGCATCAGATGCTAAAGCATATGAGAGAGAA---GTGCATAAT-----  
-----GTTTGGGCTACA---CATGCCTGTGTACCCACAGAC---  
CCCAACCCACTAGAAATGGTTTTGGAA-----AATGTAACAGAAAATTTTAAC-----  
-----ATGTGGAAAAATGACATGGTAGATCAGATGCATGAGGATATA---  
ATCAGTTTATGGGATCAAAGCCTA---AAGCCATGTGTAAAGTTG---  
ACTCCACTCTGTGTCACTTTAAACTGTAGCAATATTACCATAAATGGTGGTGCTACCAATAAT-----  
-----  
-----GCCATAGCTGGTAATGCTACCATAAATAGTAATATAACTGAAGAAATGAAA---  
AATTGCTCTTTCAATACAACCACAGAGATAAGA-----  
GATAAGAAGAAGAAAGAGTATGCACCT---TTTTATACACTTGATATAGTACCCTTGATAAG-----  
-----  
AATGCCAAGGAGTATAGATTAATAAGTTGTAATACCTCAGCCATAACACAA---  
GCCTGTCCAAAGGTCTCTTTTGACCCAATTCCTATACATTATTGTGCTCCAGCTGGTTATGCAATTCTAAAGT  
GTAAT---AATAAGACATTCAAT-----GGAACAGGACCATGCAGTAAT-----  
-GTTAGC---ACAGTACAATGCACACATGGAATTAAGCCAGTAGTAACAAC---  
CAACTGCTGTTTAAATGGTAGTTTAGCAGAAGAAGAG-----  
ATAATAATTAGATCTGAAAATCTGACAGACAAT-----GCCAAAACAATAATAGTACACCTTAAT---  
-----AAGTCTGTAGAA-----ATTGTGTGTACAAGGCCAACAAATAATACAAGGAAA---  
-AGTGTGAGAATA-----GGACCAGGACAAACA---TTC-----TATGCGACAGGAGAA-----  
-----GTAATAGGAAATATA-----AGACAAGCATATTGT---AGCATTAACAAAACA---  
ACATGGAATGAAGCTTTACAAAAGGTAGGTAAAAAATTAGCA-----GAACCTTCCCT-----  
-----AATAAAAAAATAGTATTTAAC-----  
CAATCTTCAGGAGGGGACCTAGAAATTACA---ACACATAGCTTTAATTGCAGAGGAGAA---  
TTTAAGCAGCTCCAGACAAGAGTCCTGGCTCTAGAAAGATACCTAAGGGATCAACAGCTCCTAGGGCTTTGGG  
GCTGCTCTGGAAACTCATCTGCACCACTACAGTGCCTTGGAACACCAGTTGGAGT-----  
-----AATAAATCTCTAGACGATATTTGG-----AAA-----  
AACATGACCTGGATGCAGTGG---GATAGAGAAATTGATAATTACACAGACACAATATAC---  
AGGTGCTTGAAACCTCACAAAACCAGCAGGAA-----  
-----  
CAAAATGAAAAGATTTACTAGCATTGGACAGTTGGAAAAATTTGTGGAATTGGTTTGACATAACAACTGGC  
TGTGGTATATAAAAATATTTCATAATGATAGTAGGGGGCTTGATAGGTTTGAGAATAATTTTTTGCT---  
GTGCTTTCTATAGTG-----AATAGAGTTAGGCAGGGATACTCACCT-----  
TTGTCAATTTGCTATTAGTCTGCTTGATACCATAGCAATAGCAGTAGCTGAA---  
GGAACAGATAGAATTATAGAATTAATACAAAGAATTGGTAGAGCT-----  
-----ATCTTCAACGTA-----CCTAGAAGAATAAGACAGGGCTTTGAAGTAGCTTTGCTA---TAA  
>KC156114  
GGG---ATG-----  
GGGCAATTGTGGGTCACAGTCTATTATGGGGTACCTGTATGG---AAGGAAGCAAAA---

ACTACTCTATTTTGTGCATCAGATGCTAAAGCATATTCCCAAGAA---GCACATAAT-----  
 -----ATCTGGGCTACA---CATGCCTGCGTACCTACAGAC---  
 CCCAACCCACAAGAAATGGTTTGTAGAA-----AATGTAACAGAAAATTTTAAC-----  
 -----ATGTGGAATAATGACATGGTAGATCAGATGCATGAGGATATA---  
 ATCAGTTTATGGGATCAAAGCCTA---AAGCCATGTGTAAAGTTG---  
 ACCCCACTCTGTGTCACTTTAAACTGTACTACTGTTAATATTACCCAGGAAAAT-----  
 -----  
 -----AATCCCCTTAATGATAGTGATAGTAATTACATGAAA---  
 AACTGCTCTTTCAATATGACCACAGAATAAAA-----  
 GATAAAAAGAAGGAAGAGAGGGCATTG---TTTCATAGACTTGATCTAGTACCACCTTAATGAGAAT-----  
 -----  
 -----  
 AGTAGCAAGTATGAGAATAGTAACAAGTATATATTAACAAATTGTAGGACCTCAACCATAGCACAG---  
 GCCTGTCCAAAGATCTCGTTTGATCCGATTCCCTATACATTATTGTGCTCCAGCTGGTTATGCGATTCTAAAAAT  
 GTAAT---AATAAGGCATTCAAT-----GGATCAGGACCATGCACTAAT-----  
 -GTCAGC---ACAGTACAATGTACACATGGAATTAAGCCAGTGGTATCAACT---  
 CAGCTACTGTTAAATGGTAGCCTAGCAGAA---GAG-----  
 ATAATAATCAGATTTGAAAATCTGACAAACAAT-----GTCAAAACAATAATAGTACACCTTAAT---  
 -----GAATCTGTAGAA-----ATTTCTGTGTACAAGACCCAACAATAATACAAGAAAA-----  
 -AGTGTGAGGATA-----GGACCAGGACAAAACA---TTC-----TATGCAACAGGAGAA-----  
 -----ATAATAGGAGATATA-----AGACAAGCATATTGT---ACCATTAATGAAGGA---  
 AAATGGAATAAACTTTAGAAAAGGATAAGGAACAAATTAGCA-----GAGTACTTCCCT---  
 -----AATAAAACAATACAATTTCAA-----  
 AGCGCCTCAGGAGGGGACCTAGAAATTACA---ACACATAGCTTTAATTGTGGAGGAGAA---  
 TTTAAACAGCTCCAGGCAAGAGTCCCTGGCTATAGAAAGATACCTAAAGGATCAACAGCTCCTAGGAATTTGGG  
 GCTGCTCTGGAAGAACTCATCTGCACCACTAATGTGCCTTGGAACCTCTAGTTGGAGT-----  
 -----AATAAACCTGAAGAAGAAATTTGG-----GGG-----  
 AACATGACCTGGATGCAATGG---GAGAGAGAAATTGATAATTATACAGACACAATATAC---  
 AGTTTGCTTGAAAAATCGCAAAACCAGCAGGAA-----  
 -----  
 CAAAATGAACAAGATTTACTAGCATTGGACAGTTGGAAAAACCTGTGGAATTGGTTTAGCATAACAAAATGGT  
 TGTGGTATATAAAAATATTCTAATGATAGTAGGAGGCTTAATAGGTTTAAGAATAATTTTTTGCT---  
 GTGCTTTCTATAGTG-----AATAGAGTTAGGCAGGGATACTCACCT-----  
 TTATCGTTCTGCTATTAACTGCTTGATACCATAGCAATAGCAGTAGCTGAA---  
 GGAACAGATAGGATCATAGAAGTAATACAAAGAATTTGTAGAGCT-----  
 -----ATCTGCAATATA-----CCTACAAGAATAAGACAGGGCTTTGAAGCAGCTTTGCAA---TAA  
 >KC156120  
 GTG---ATG-----  
 GGAAACTTGTGGGTACAGTCTATTATGGGGTACCTGTGTGG---AAAGAAGCAAAA---  
 GCTACTCTCTTCTGTGCATCAGATGCTAAAGCATATGATACAGAA---GTGCATAAT-----  
 -----GTCTGGGCTACA---CATGCCTGTGTGCCACAGAC---  
 CCCAACCCACAAGAAATAGTTTGGCCA-----AATGTAACAGAAAATTTTAAC-----  
 -----ATGTGGAAGAATGACATGGTAGATCAGATGCATAAGGACATA---  
 ATCAGTTTATGGGACCAAAGCCTA---AAACCATGTGTAAAGTTG---  
 ACCCCACTCTGTGTCACTTTAAATTGTACAAATGCTACAAGCACTAATGCTAATAGTACA-----  
 -----  
 -----GTGAATGGAGAGAGTACAAATACTAGTATTAGTAATGAAATGAAA---  
 AATTGTTCTTTCAATATGACCACAGAGTTAAGA-----  
 GATAAAAAAAGGCAAGTGTATGCACCT---TTTTATAAACTTGATATAGTGCCAATTGATGGGGAAAAT---  
 -----  
 -----  
 AATGAGAGGAATGATAGCAACTCCTATAGATTAATAAATTGCAATACCTCAGCCATAACACAA---  
 GCCTGTCCAAAGGTCTCTTTTGACCCAATCCCTATACATTATTGTGCACCAGCTGGTTATGCGATTCTAAAGT  
 GTAAT---AATAAGACATTCAAT-----GGAACAGGACCATGCAATAAT-----  
 -GTCAGC---ACAGTACAATGTACCCATGGGATTAAGCCAGTGGTATCAACT---  
 CAATTACTGTTAAATGGGAGCTTAGCAGAAGAAGAG-----  
 ATAATAATTAGATCTGAAAATCTGACAGATAAT-----ACTAAAACAATAATAGTACAGCTTAAC---  
 -----AAAGCTGTAGAA-----ATTGTGTGTACAAGACCCAATAATAATACAAGAAAA-----  
 -AGTATAAGAATA-----GGACCAGGACAAAGCA---TTC-----TTTGCAACAGGTGAC-----  
 -----ATAATAGGAGACATA-----AGAGAAGCACATTGT---AACATTAATAGA-----

```

--TGGAATGAGACTTTAGAAAGGGTAAGAGAAAAGTTAAAA-----GGACTCTTT-----
-----AACAAAACAATAAAATTTAAC-----
TCATCTTCAGGAGGGGACCTAGAAATTACA---ACACATAGCTTTAATTGTGGAGGAGAA---
TTTAAGCAGCTCCAGACAAGAATCCTGGCTGTGGAAAGATACCTAAAGGATCAACAGCTCCTAGGGATTTGGG
GCTGCTCTGGAAGAACTCATCTGCACCACTAATGTGCCTTGGAACTCCAGTTGGAGC-----
-----AATAGATCTCAACAGGATATTTGG-----GAT-----
AACCTGACCTGGATGCAGTGG---GATAGAGAAATAAGCAATTACACAAGCACAATATAT---
AAATTACTTGAAGAATCACAAAACCAGCAGGAG-----
-----
AGAAATGAAAAGGATTTATTAGCATTGGACAGTTGGCAAAATCTGTGGAATTGGTTTGACATATCAAACCTGGC
TGTGGTATATAAAAATATTTCATAATGATAGTGGGAGGCTTGATAGGTTTAAGAATAATTTTTTGCT---
GTACTCTCCATAGTG-----AATAGAGTTAGGCAGGGATACTCACCT-----
TTGTCAATTTGCTATTAGTCTGCTTGATGCTACAGCTATAGCAGTAGCTGAA---
GGAACAGATAGAATTATAGAAAGTTATACAAAGATTTTGTAGAGCT-----
-----GTCCGCAACATA-----CCTAGAAGATTAAGACAGGGCTTTGAAACAGCTTTGCTA---TAA
>HQ615984
GTG---GTG-----
GGGGAAGTTGTGGGTACAGTCTATTATGGAGTACCTGTATGG---AAAGAAGCAAAA---
ACTACTCTATTTTGTGCATCAGATGCTAAAGCATATACAACAGAA---GTGCATAAT-----
-----GTCTGGGCTACA---CATGCCTGTGTACCTACAGAC---
CCCAACCCACAAGAAATGGTTTTTGAA-----AATGTAACAGAGAATTTTAAT-----
-----ATGTGGAATAATGACATGGTGGATCAGATGCATGAGGATATA---
ATCAGTTTATGGGACGAAAGTCTG---AAGCCATGTGTAAAGTTG---
ACCCCACTCTGTGTCACTTTAAATTGTACAGCTACTAATGGTACTGCTACCATAAAAT-----
-----
-----ACTGCCAATAATGCCACCGATAATAGTACCATAAAA---
AATTGCTCTTTTGAGGTAACCACAGAAGTAAAA-----
GATAAGAAAAAGCAAGTGTATGCACCT--TTTTATAAACTTGATATAGTAGAACTTAATCAG-----
-----
ACTGAGTCTAATCAGACTATGTATAGATTAATAAATTGTAATACCTCAACCATGACACAA---
GCCTGTCCAAAGGTCTCCTTTGATCCAATTCCGATACATTATTGTGCTCCAGCTGGTTATGCGATTCTAAAGT
GTAAT---AATAAGACATTCAAT-----GGGACAGGACCATGCAATAAT-----
-GTCAGT---ACAGTACAATGCACACATGGGATTAAGCCAGTGGTATCAACT---
CAATTACTGTTTAAATGGTAGCCTATCAGAAGAAGGG-----
ATAATAATTAGATCTGAAAATCTAACAAACAAT-----GCCAAAACAATAATAGTACATCTTAAT---
-----GAATCTGTAGAC-----ATTGTGTGTACAAGACCCAACAATAATACAAGAAAG-----
-AGTATAAGGATA-----GGGCCAGGACAAACA---TTT-----TATGCAACAGGAGAA-----
-----ATAATAGGGAACATA-----AGACAAGCACATTGT---AACATTAGTGGAGAT---
AAATGGAATAGAAGTTTGCAAAGGGTAGGGGAAGAATTAAGA-----AACATTTCCAT---
-----AAGAAAACAATAGTATTCAA-----
CCACCTGCAGGAGGGGACTTAGAAATTACA---ACACATAGCTTTAATTGTAGAGGGGAA---
TTTAAGCAGCTCCAGGCAAGAGTCTTGGCTATAGAAAGATACCTAAAGGATCAACAGCTCCTAGGAATTTGGG
GCTGCTCTGGAAGAACTCATCTGCACCACTGCTGTGCCATGGAATTCAGTTGGAGT-----
-----AATAAGACTCAAGGAGAGATTTGG-----GGA-----
AACATGACCTGGATGCAGTGG---GAGAGAGAAATTAATACTTACACAGACACAATATAC---
AAGTTGCTTGAAGAATCGCAATCCAGCAGGAA-----
-----
ACAAATGAAAAAGATTTATTAGCCTTGGACAGTTGGCAAAATCTGTGGAGTTGGTTTAGCATAACAAATGGC
TGTGGTATATAAAAATATTTCATAATGGTAGTAGGAGGCTTGATAGGCTTAAGAATAATTTTTTGCT---
GTGCTTTCTATAGTA-----AATAGAGTTAGGCAGGGATACTCACCT-----
TTGTCTTTTGCTATTAGTCTGCTTGATACCATAGCAATAGCAGTAGCTGAA---
GGAACAGATAGGATTATAGAATTAATACAGAGAATTTGTAGAGCT-----
-----ATCCGCAACATA-----CCTACAAGAATAAGACAGGGCTTTGAAACAGCTTTGCTA---TAA
>KC156216
GTG---AGG-----
GGAAAGTTGTGGGTACAGTCTATTATGGGGTACCTGTGTGG---AAAGAAGCAAAA---
ACTACTCTATTTTGTGCATCAGATGCTAAAGCATATGAGAGAGAA---GTGCATAAT-----
-----GTCTGGGCTACA---CATGCCTGTGTACCCACAGAC---
CCCAGCCCACAAGAATTGGTTTTTGAA-----AATGTAACAGAAAATTTTAAC-----

```

-----ATGTGGAAAAATGATATGGTGGATCAGATGCATGAAGATATA---  
 ATCAGTTTATGGGATCAAAGCCTA---AAGCCCTGTGTAAAATTG---  
 ACCCCACTCTGCGTCACGCTAAACTGTATTAATGTCAATATTACCAACAATGCTAGTAGTGCCAATAATACTG  
 CTGAA-----  
 -----AGTGATAATACTACTGAGGCCACACAGGAAGGGGTAGAGCTAAAAAATGAGCTAAAA---  
 AATTGCTCTTTCAATATAACCACAGAACTAAAA-----  
 GATAAGAAAAGGAAAGAATATGCACTT---TTTTATAGACTTGATATAGTAGAACTTAATGGGGAG-----  
 -----  
 -----  
 AATAATAATGATACCAGTTATAGATTAATAAATTGTAATACCTCAGCCATAACACAA---  
 GCCTGTCCAAAGGTCTCTTTTGACCCAATTCTTATACATTATTGTGCTCCAGCTGGTTATGCGATTCTAAAGT  
 GTAAT---AATAAGACATTCAAT-----GGAACAGGACCATGCAATAAT-----  
 -GTCAGC---ACAGTACAATGTACACATGGAATTAAGCCAGTGGTATCAACT---  
 CAATTACTGTTTAAATGGTAGTCTAGCAGAAGAAGAG-----  
 ATAATAATTAGATCTGAAAATCTGACAGACAAT-----GCCAAAACAATAATAGTACATCTTAAC----  
 -----GAATCCGTAGGA-----ATTACGTGTACAAGGCCCAACAATAATATAAGGAAA-----  
 -AGTATGAGGATA-----GGACCAGGACAAAACA---TTC-----TATGCAACAGGAGGC-----  
 -----ATAATAGGAGACATA-----AGACAAGCACATTGT---AACATTAATGAAGAA---  
 AGTTGGAATAGAACTCTAAGACAAGTAGTGGAATAAATAAGA-----GAACACTTCCCT----  
 -----AATAAAACAATACAATTTGAA-----  
 CCACCCTCAGGAGGGGACCTAGAAAGTTACA---ACACATAGTTTTAATTGTATGGGGGAA---  
 TTTAAGCAGCTCCAGGCAAGAGTCTTGCGCTATAGAAAGATACCTAAAGGATCAACAGCTCCTAGGAATGTGGG  
 GCTGCTCTGGAAGAACTCATTTGCACCACTAATGTGCCTTGGAAGCTCTAGTTGGAGT-----  
 -----AATAAATCTCAAGAGGAAATTTGG-----GAC-----  
 AACATGACTTGGATGCAGTGG---GATAGAGAAATTAGTAATTACACAAACACAATATAC---  
 CAGTTGCTTGGAGACTCGCAGATCCAGCAGGAG-----  
 -----  
 AAAAAATGAAAAAGATTTATTAGCATTGGACAGTTGGAAAACTTGTGGAGTTGGTTTAGCATAACAACTGGC  
 TGTGGTATATAAGAATATTACATAATGATAGTAGGAGGCTTGATAGGCTTAAGAATAATCTTTGCT---  
 GTGCTTTCTATAGTG-----AATAGAGTTAGGCAGGGATACTCACCT-----  
 TTATCATTTGCTATTAGTCTGTTTGATAGCTTAGCAATAACAGTAGCTGAA---  
 GGGACAGATAGAATTCTAGAAGTATTACAAAGAATTGGTAGAGCT-----  
 -----ATCTGCAACATA-----CCTAGAAGAATAAGGCAGGGCTTTGAAGCAGCTTTGCAA---TAA  
 >KC156219  
 GGG---GTG-----  
 GAAAACTTGTGGGTACAGTCTATTATGGGGTACCTGTATGG---AAAGAAGCAAAA---  
 ACTACTTTATTCTGTGCATCAGATGCCAAAGCATATGATAGAGAA---GTGCATAAT-----  
 -----GTCTGGGCTACA---CATGCCTGTGTACCCACAGAC---  
 CCCAACCCACAAGAAATGGTTTGGCA-----AATGTAACAGAAAACCTTTAAT-----  
 -----ATGTGGAAAAATGACATGGTGGATCAGATGCATGAGGATATA---  
 ATCAGTTTATGGGACCAAAGCCTA---AAGCCATGTGTAAAGTTG---  
 ACCCCACTCTGTGTCACTTTAAATTGTAGTAATACTATCAATGGTACTGTCTCTATGAAAAT-----  
 -----  
 -----GATACCATGTATGGAGAAGTAAAA---  
 AATTGCTCTTTCAATATGACCACAGAAATAAGA-----  
 GATAAGAAAAAGGGAGTGTATGCACTT---TTTTATAAACTTGATATAGTACCAATTGATAAC-----  
 -----  
 -----  
 AGCACGTATAGATTAATAAATTGTAATACCTCAACCATAACACAA---  
 GCCTGTCCAAAGGTCTCTTGGGACCCAATTCTTATACATTATTGTGCTCCAGCTGGTTATGCGATTCTAAAGT  
 GTAAT---AATAAGACATTCAAT-----GGAACAGGACCATGCACTAAT-----  
 -GTTAGC---ACAGTACAATGTACACATGGAATAAAGCCTGTGGTATCAACT---  
 CAACTACTGTTAAATGGCAGCATAGCAGAAGAAGAG-----  
 ATAATAATTAGATCTGAAAATCTGACAGACAAT-----ACCAAAAACAATAATAGTACATCTCAAT----  
 -----AAATCTGTATGG-----ATTAATTGTACAAGACCCAACAATAATACAAGAAAA-----  
 -AGTATGAGGATA-----GGACCAGGACAAAACA---TTC-----TATGCAACAGGAGCC-----  
 -----ATAATAGGAAATATA-----AGACAAGCATATTGT---AGCATTAGTAGACAG---  
 GAATGGAAAGAACTTTAGGAAAGGTACAGGGAAAATTAGAA-----GAACACTTTAAG----  
 -----AATAAAAGTATAGTTTTTTAAT-----  
 CAATCCTCAGGAGGGGACCTAGAAATCACA---ACACATAGCTTTAATTGTGGGGGAGAA---

TTTAAGCAGCTCCAGGCAAGAGTCCTGGCCATAGAAAGATACCTAAAGGATCAACAGCTCCTAGGGATTTGGG  
 GCTGCTCTGGAAAACCTCATCTGCACCACTGCTGTGCCTTGGAAACAATAGTTGGAGT-----  
 -----AATAAAACTCAAGAGCAGATTTGG-----GAA-----  
 AACATGACTTGGATGCAGTGG---GAAAAAGAAATTAGCAATTACACAGGCATAATATAC---  
 GGGTTGCTTGAAGACTCGCAGAACCAGCAGGAA-----  
 -----  
 ATAAATGAACAAGAGTTACTAGCATTGGACAGTTGGAAAAATTTGTGGAGTTGGTTTGACATATCAAATTGGT  
 TGTGGTATATAAGAATATTCATAATGGTAGTAGGAGGCTTGATAGGCTTAAGAATAATTTTTTGCT---  
 GTGCTATCTATAGTG-----AATAGAGTTAGGCAGGGATACTCACCT-----  
 TTATCGTTTGTCTATTAGTCTGCTTGATATCATAGCAATAGCAGTAGCTGAA---  
 GGAACAGATAGGATTATAGAAGTAGTACAAAGAATTTGTAGAGCT-----  
 -----ATCTGCAACATA-----CCTAGAAGAATAAGACAGGGCTTTGAAGCAGCTTTGCAA---TAA  
 >HQ615963  
 GGA-----  
 ATGTGGGTACAGTCTACTATGGGGTACCTGTGTGG---AAAGAAGCAAAA---  
 ACTACTCTATTTTGTGCATCAGATGCTAAGGGATATGAGAAAGAA---GTGCATAAT-----  
 -----GTCTGGGCCACA---CATGCCTGTGTACCCACAGAC---  
 CCCAATCCACAAGAAATGTTCTTAAAA-----AATGTAACAGAAAATTTTAACT-----  
 -----ATGTGGAAAAATGACATGGTGGATCAGATGCATGAAGATGTA---  
 ATCAGTTTATGGGATCAAAGCCTC---AAGCCATGTGTAAAGTTG---  
 ACCCCACTCTGTGTCACTCTAATCTGTAGCAATGTTACCCTCAATGAAAGCAAGGCCTCTAAT-----  
 -----  
 -----GAAAACATGACCCTCAATGAAAGCAGAGCAGAGGAAATGAGA---  
 AATTGTTCTTTCAATGTAACCACAGAATTAAGA-----  
 GATAAGCAAGAGAAAAAGTATGCACCT--TTTTATAAACTTGATACAGTACCACTAGACAGC-----  
 -----  
 -----  
 AACTCTAACAGCTCTAGTCAGTATAGATTAATAAAATTGTAATACCTCAACCATAACACAA---  
 GCCTGTCCAAAGGTCTCTTTTGACCCAATTCCTATACATTATTGTGCTCCAGCTGGTTATGCGATTCTAAAGT  
 GTAAT---AATAAGACATTCAAT-----GGAACAGGACCATGCAATAAT-----  
 -GTCAGC---ACAGTACAATGTACACATGGAATTAAGCCAGTGGTTTCAACT---  
 CAATTATTGTTAAATGGTAGCCTAGCAGAAGGAGAG-----  
 ATAATAATTAGATCTGAAAATATAACAAACAAT-----GTCAAAACAATAATAGTACATCTCAAT---  
 -----GAATCTGTAAAG-----ATTGAGTGTGCGAGACCCGGCAATAATACAAGAACA-----  
 -AGTATAAGAATA-----GGACCAGGACAAGCA---TTT-----TATGCAACAGGAGAT-----  
 -----GTAATAGGAGACCCA-----AGAAAAGCACATTGT---AACATT-----ACG---  
 GGATGGTTTAAAACTTTATTTAGGGTAAGTAAAAAATTAAGA-----GAACACTTCCCT---  
 -----AATAAGACTATAATATTTAAC-----  
 TCATCCTCAGGAGGGGACCTAGAAATTACA--ACACATAGCTTTAATTGTGGAGGAGAA---  
 TTTAAACAGCTCCAGGCAAGAGTCCTGGCCTTGGAAAGATACCTAAAGGATCAACAGCTCCTAGGGATGTGGG  
 GCTGCTCTGGAAAACCTCATCTGCACCACTAATGTGTTTGGAACTCTAGTTGGAGT-----  
 -----AATAAAACTTATGGTGATATTTGG-----GAT-----  
 AACATGACCTGGATGCAGTGG---GAGAGAGAAATTAGCAATTATACAGGAATAATATAT---  
 GAATTGCTTGAAGAATCACAAAACCAGCAGGAA-----  
 -----  
 AAGAATGAACAAGATTTACTAGCATTGGACAGATGGAACAGTCTGTGGAATTGGTTTAACATAACAAATTGGC  
 TGTGGTATATAAAAATATTCATAATGATAGTAGGAGGCTTGATAGGTTTAAGAATAATTTTTTACT---  
 GTGCTTTCTTTAGTA-----AATAGAGTTAGGCAGGGATACTCACCT-----  
 CTGTCGTTGGCTATTAGTCTATTGGATACCTTAGCAATAGTAGGTGAA---  
 GGAACAGATAGGATTATAGGATTATATTAGGAATTTGTAGAGCT-----  
 -----ATCCGCAACATA-----CCTACAAGAATAAGACAGGGCTTTGAAGCAGCTTTGCTA---TAA  
 >HQ615964  
 GTG---ATG-----  
 GGGAGCTTGTGGGTTACAGTATATTATGGGGTACCTGTGTGG---AAAGAAGCAAAA---  
 ACTACTCTATTCTGTGCATCAGATGCTAAAGCACATGAGAAAGAA---GTACATAAT-----  
 -----GTCTGGGCTACA---CATGCCTGTGTACCCACAGAC---  
 CCCAGCCCACAAGAAATGGTTTTTGGGA-----AATGTAACAGAAAATTTTAACT-----  
 -----ATGTGGAAAAATGACATGGTAGATCAGATGCATGAGGATATA---  
 ATCAGTTTATGGGATGAAAGCCTA---AAGCCATGTGTAAAGTTG---  
 ACCCCACTCTGTGTCACTTTAGAGTGTACAAATGTTACTAAAAATGGTAGTAGTGCAAATACC-----

-----  
-----ACTAGTAGTAATGGTGCAAATACCGAGGGAGACATGAAA---  
AATTGCTCTTTCAATGCAACCACAGAAATAAGA-----  
GATAAAAAACAGAAAATGCAGGCACCT--TTTATAACTTGATATAGTACCACTTAATGAGAAT-----  
-----  
AGCACTGGGGAGTATAGATTAATAAATTGCAATACCTCAGCTGTAAACAA---  
GCCTGTCCAAAGGTCACCTTTTGACCCAATTCCAATACATTATTGTGCTCCAGCTGGTTATGCGATTCTAAAGT  
GCAAC---AATAAGACATTCAAT-----GGAAAAGGACCATGCAATAAT-----  
-GTCAGC---ACAGTACAATGTACACATGGAATTAAGCCAGTGGTATCAACT---  
CAACTACTGTTAATGGTAGTCTAGCAGAAGAAGAG-----  
ATAATAGTTAGATCTGAAAATCTGACAAACAAT-----GCCAAAACAATAATAGTGCACCTTAAT----  
-----GAATCTGTAGAA-----ATTATGTGTACAAGACCATCCAATAATACAAGGAAA-----  
-AGTATAAGGATA-----GGACCAGGACAAACA--ATC-----TATGCAACAGGAGAC-----  
-----ATAATAGGAGATATA-----AGACAAGCACATTGT---AACATAACTGAGAGT---  
AAATGGAATAAACTCTACAACAGGTGGTTAAAAAATTAAAA-----GAACACTTCCCT----  
-----AATAAAACAATAGCATTTCAA-----  
CCATCCTCAGGAGGGGATCTAGAAATTACA--ACACATAGCTTTAATTGTAGAGGAGAA---  
TTTAAGCAGCTCCAGGCAAGAGTCTTGCTATCGAAAAGATACCTAAAGGATCAACAGCTCCTAGGGATTTGGG  
GCTGCTCTGGAAGAACTCATCTGCACCACTAATGTGCCTTGGAAGTCCAGTTGGAGT-----  
-----AATAGATCAGAATCAGATATTTGG-----GAG-----  
AACATGACCTGGATGCAGTGG---GATAGAGAAATTAGTAATTACACAGACACAATATAC---  
AGGTTGCTTGAAGTCTCAGAAAACCAGCAGGAA-----  
-----  
CAAAATGAAAAAGATTTATTAGCATTGGACAGTTGGAACAATCTGTGGAGTTGGTTTAGCATAACAAAATGGC  
TGTGGTATATAAAAATATTTATAATAATAGTAGGAGGCTTGATAGGCTTAAGAATAATCTTTGCT---  
GTGCTCTCTATAGTG-----AATAGAGTTAGGCAGGGATACTCACCT-----  
TTGTCATTTGCTATTAGTCTGTTTGATACCATAGCAATAAGAGTAGCTGAA---  
GGAACAGATAGAATTATAGAAGTAGTACAAAGATTTTGTAGAGCT-----  
-----ATCTGCAGCATA-----CCTAGAAGAATAAGACAGGGCTTTGAAGCAGCTTTGCAA--TAA  
>HM204613  
GTG---GTG-----  
GGAACTTGTGGGTCACAGTCTATTATGGGGTACCTGTGTGG--AAGGATGCAAAG---  
ACCACTTTATTCTGTGCATCAGATGCTAAAGCATATGAGAGAGAG--GTGCATAAT-----  
-----GTCTGGGCTACA--CATGCCTGTGTACCCACAGAC---  
CCCAACCCACAAGAAATGTTTTTGGA-----AATGTAACAGAAAATTTCAAC-----  
-----ATGTGGGAAAATGACATGGTAGACCAGATGCATGAGGATGTA---  
ATCAGTTTATGGGACCAATTCCTA--AAGCCATGTGTAAGGTTG--  
ACCCCACTCTGTGTCACTTTAACTGTAGTGTAGCTAGG-----  
-----  
-----GATGATACAGAAAGAAAA---  
AATTGCACTTTCAGAGTAACCACAGAAATAAAA-----  
GACAAAAAAAAGAAAGAGACCGCACT---  
TTTTTATAGAGTTGATATAGTACCACTTGAGGAGGGTGAGAGTGATA-----  
-----CACCCTAGGGAAGAGAGTGATAAC--  
ACCACTAGGGAATACAGATTAATAAATTGTAATACCTCAGCCATAACACAA---  
GCCTGTCCAAAGGTTTCTTTTGATCCAATTCCCTATACATTATTGTACTCCAGCTGGTTATGCGATTCTAAAGT  
GTAAT---AATAATACATTCAAT-----GGGACAGGACCATGTAAGAAT-----  
-GTCAGC---ACAGTACAATGCACACATGGAATTAAGCCAGTGGTATCAACG---  
CAATTACTGTTAATGGTAGCCTAGCAGGAGGAGAA-----  
ATAATAATTAGATCTAAAAATCTGACAGACAAT-----ACCAAAACAATAATAGTACATCTTAAG----  
-----GACCTGTAAAA-----ATTGAGTGTATGAGACCCAACAATAATACAAGAAAA-----  
-AGTATAAGGATA-----GGACCAGGACAAGCA--TTC-----TTTGCAACAACAGGC-----  
-----ATAATAGGAAATATA-----AGGCAAGCATCTTGT---AATATTAGCAAAGAG---  
GACTGGAATAAGACCTTACAAGAGGTAGTTCAAAAATTAAAA-----GTATACTTCCCT----  
-----AATAAAATAATAATATTTAAT-----  
CACTCTTCAGGAGGGGACCTAGAAATTACA--ACACATAGCTTTAATTGTGGAGGAGAA---  
TTTAAGCAGCTCCAGGCAAGAGTCTTGCCCTAGAAAAGATACCTACAGGATCAACAGCTCCTAGGGATTTGGG  
GTTGCTCTGGAAGAACTCATCTGCACCACTACTGTGCCTTGGAAGTCCAGTTGGAGT-----  
-----AATAGATCTGAAACAGATATTTGG-----GGC-----

AACATGACCTGGATGCAGTGG---GATAGAGAAATTAGTAATTACACAGGCATAATATAC---  
GACTTGCTTGAACAATCGCAAACCAGCAGGAG-----  
-----  
AAAAATGAACAGGATTTATTAGCATTAACAGTTGGCAAAATCTGTGGACTTGGTTTGACATAACAAAGTGGC  
TGTGGTATATAAAAATATTTATAATGATAGTAGGAGGCTTGATAGGTTTGAGAATAATTTTTTGCT---  
GTGCTCTCTATAGTG-----AATAGAGTTAGGCAGGGATACTCACCC-----  
TTGTCGTTTGCTATTAGTCTGCTTGATGCCACAGCAATAACAGTAGCTGAA---  
GGAACAGATAGAATTATAGAATTAGTACAAAGAATTTGTAGGGCT-----  
-----ATCAGCAATATA-----CCTAGAAGAATAAGACAGGGCTTTGAAACAGCTTTGCTA---TAA  
>KC187578  
GTA---GGG-----  
GGGAACCTTGTGGGTACAGTCTATTATGGGGTACCTGTGTGG--AAAGAAGCAAAA---  
ACTACTCTATTCTGTGCATCAGATGCTAAAGCATATGAGAAAGAA---GTGCATAAT-----  
-----GTTTGGGCTACA---CATGCCTGTGTACCCACAGAC---  
CCCAACCCACAAGAAATAACTTTGGAA-----AATGTAACAGAAAATTTTAAAC-----  
-----ATGTGGGAAAATGACATGGTGGATCAGATGCATGAGGATATA---  
ATTAGTTTATGGGACCAAAGCCTA---AAACCATGTGTAAAGTTG---  
ACCCCGCTCTGTGTCACTTTAAATGTGGAAATGTTAATGCTACTAGTAATGGTAAT-----  
-----  
-----GTTACCTATAATAATACCATGAATGGAGAAATAAAA---  
AATTGCTCTTTCAATGCAACCACAGAATTAAGA-----  
GATAAGAAAAAGGAAAGGTATGCACCT--TTTTATAAACTTGATATATTACCACTTAAGGG-----  
-----  
-----  
GATAATGACACCTATGTATTAATAAATTGTAATACCTCAACCATAACACAA---  
GCTTGTCCAAAGGTCTCTTTTGAGCCAATTCCTATACATTATTGTGCTCCAGCTGGTTATGCGATTCTAAAGT  
GTAAT---AATAAGACATTCAAT-----GGGACAGGGCCATGCAATAAT-----  
-GTCAGC---ACAGTACAATGTACACATGGAATTAGGCCAGTGATATCAACT---  
CAATTATTATTAAATGGTAGCCTAGCAGAAGAGAAA-----  
ATAATAATTAGATCTAAAAATCTGGCAGACAGT-----GCTAAAACAATAATAGTACAATTTAAC---  
-----AAGTCTGTAGAC-----ATTGTGTGTACAAGGCCCAACAATAATACAAGGACA-----  
-AGTGTGAGAATA-----GGACCAGGACAAACA---TTC-----TATGCAACAGGAGGC-----  
-----ATAATAGGAAATATA-----AGACAAGCACATTGT---AATATTAGTGAAAAG---  
CTATGGAATGAACTCTATATGAGGTAGGGAAAAGGTTAGCA-----GAATACTTCCT---  
-----AATAGAACAATAAAATTTGAA-----  
CCACATTCAGGAGGGGACCTAGAAATTACA--ACACATAGTTTTAATTGTGGAGGAGAA---  
TTTAAGCAGCTTCAGGCAAGAGTCCTGGCTATAGAAAGATACCTAAAGGATCAACAGCTCCTAGGGATTTGGG  
GCTGCTCTGGAAGAACTCATCTGCACCACTGCTGTGCCTTGGAATGCCAGTTGGAGT-----  
-----AATAAATCTCAAGAGGAGATTGG-----GAA-----  
AACATGACTTGGATGCAGTGG--GAGAGAGAAATTAGCAATTACACAGGCATAATATAC---  
AATCTGCTTGAAGTCTCGCAAACCAGCAGGAG-----  
-----  
AAAAATGAAAAAGACTTACTAGCATTGGACAGTTGGAAGAATTTGTGGAATTGGTTTAACATAACAAATTGGC  
TGTGGTATATTAATAATTATCATGATAGTAGGAGGCTTGATAGGTTTAAGAATAATTTTTTGCT---  
GTGCTTTCTATAGTA-----AATAGAGTTAGGCAGGGATACTCACCT-----  
TTGTCGTTTGCTATTAGTCTGCTTGATGCAACAGCAATAACAGTAGCTGAA---  
GGAACAGATAGACTTATAGAGGTAGTACAAAGAATTTGTAGGGCC-----  
-----ATCCGCAACGTA-----CCTACCAGAGTAAGACAGGGTTTTGAAGCAGCATTGCAA---TAA  
>KC187323  
GTG---GTA-----  
GGGAACCTTGTGGGTACAGTCTATTATGGGGTACCTGTGTGG--AGAGAAGCAAAG---  
ACTACTCTATTCTGTGCATCAGATGCTAAAGCATATGATAGAGAA---GTGCATAAT-----  
-----GTCTGGGCTACA---CATGCCTGTGTACCCACAGAC---  
CCCAACCCACAAGAAATGGTTTTGGTA-----AATGTAACAGAAAATTTTAAAC-----  
-----ATGTGGGAAAATGACATGGTGGAAACAGATGCATGAGGATGTA---  
ATCAGTCTATGGGATCAGAGCCTA---AAGCCATGTGTAAAGTTG---  
ACCCCACTCTGTGTTACTTTAAACTGTTCCCATATAATTACTGTTAATGGTACCTCCAAT-----  
-----  
-----TTTAATACTACAGGTACCATAGCTGAGGGAATGAAA---  
AATTGCTCTTTCAAAGTAATCACAGATCTAAGA-----

GATAAGCCCAAGAAAGAAAATGCACTT--TTTATAGCCTTGATATAATAAACTTAAGGAGAAT-----  
-----  
-----  
TCCAATTCCAGTTCCAATTCCAGTAAGTATAGATTAAGAAGGTGTAATGCCTCAACCATAACACAA---  
GCCTGTCCAAAAGTCTCTTTTGATCCAATTCCCTATACATTATTGTGCTCCAGCTGGTTATGCGATTCTAAAAT  
GCAAT---ATAAGACATTCAAT-----GGAACAGGACCATGCAATAAT-----  
-GTCAGC---ACAGTACAATGTACACATGGAATTAAGCCAGTTGTGTCAACT---  
CAACTACTATTAAATGGTAGCCTAGCAGAAGGAGAG-----  
ATAATAATTAGATCTGAAAATCTGACAGATAAT-----GTCAAAACAATAATAGTACATCTTAAT----  
-----GAAACTGTAGAG-----ATTACGTGTACAAGGCCCAACAATAATACAAGAAGA-----  
-AGTGTGAGGATA-----GGACCAGGACAAGCA---TTC-----TATACAACAGGAGAA-----  
-----ATAATAGGAGATACA-----AGACAAGCACATTGT---AACATTAGTGGGAGT---  
AACTGGACTACAACATTACACAGGGTAAGTAAAAAATTAAGA-----GAACAATTCCT---  
-----AATAAAACAATAATATTTGAA-----  
TCATCCTCAGGAGGGGACTTAGAAATTCAA---ACCCATAGCTTTAATTGTGGAGGAGAA---  
TTTAAACAACCTCCAGGCAAGAGTCTTGGCTGTAGAAAAGATACCTACAGGATCAACAGCTCCTAGGGATTTGGG  
GCTGCTCTGGAAGAACTCATCTGCACCACTAACGTGCCGTGGAACAGTAGTTGGAGT-----  
-----AATAGATCTCAAGATGATATTTGG-----GGA-----  
AACATGACCTGGATGCAGTGG---GATAAAGAAATTAATAATTACACAAACACAATATAT---  
AGATTGCTTGAAGAATCGCAAAATCAGCAGGAA-----  
-----  
AAAAATGAAAAAGATTTGTTAGCATTGGACAGTTGGAACAGTCTGTGGAATTGGTTTAACATATCAAATTGGC  
TGTGGTATATAAAAATATTCTAATGATAGTAGGAGGCTTAATAGGTTTAAGAATAATTTTTACT---  
GTACTTTCTATAGTA-----AATAGAGTCAGGCAGGGATACTCACCT-----  
TTATCGTTTGCTATTAGTCTGCTTGATACCATAGCAATAACAGTAGCTGAA---  
GGAACAGATAGAATTATAGAACTGGTACAAAGAATTTGTAGAGCT-----  
-----ATCCTTAATATA-----CCTAGAAGAATAAGACAGGGCTTGGAAGCAGCTTTGCAA---TAA  
>KC186955  
GTA---ATG-----  
GGAAGCTTGTGGGTCACAGTCTATTATGGGGTACCAGTGTGG---AAAGAAGCAAAA---  
ACTACTCTATTCTGTGCATCAGATGCTAAAGCATATGAAAAAGAA---GTGCATAAT-----  
-----ATATGGGCTACA---CATGCCTGTGTACCCACAGAC---  
CCCAACCCACAAGAAATGGCTTTGGAA-----AATGTAACAGAAAATTTTAAC-----  
-----ATGTGGAAAAATGACATGGTGGATCAGATGCATGAGGATATA---  
ATCAGTTTATGGGATCAAAGCCTA---AAGCCATGTGTAAAGTTA---  
ACCCCACTCTGTGTCACTTTAAATGTAATGAGACCTATGCGAATGGGACCTATGCGAAT-----  
-----  
-----GGGACCGTGAGTAGTGACATGAAA---  
AATTGCTCTTTTAATGCAACCACAGAAGTAGGA-----  
GACAAGAGGAGGCAAGAGTATGCACTT--TTTTATAGACTTGATATAGTACCACTTGATGAGGGGAACAAC-  
-----  
-----  
TCTAGCAACTCTACGGAGTATAGATTAACAAATTGTAATACCTCAACCATAACACAA---  
GCCTGTCCAAAGGTCTCTTTTGATCCAATTCCCTATACATTATTGTACTCCAGCTGGTTATGCGATTCTAAAGT  
GTAAT---AATAGGACATTTAAT-----GGGAAAGGACCATGCAAGAAT-----  
-GTCAGC---ACAGTACAATGTACACATGGAATTAACACAGTGGTATCAACT---  
CAGTTACTGTTAAATGGTAGCCTAGCAGAAGAAGGG-----  
ATAATAATTAGATCTGAAAATCTGACAAACAAT-----GTCAAAACAATAATAGTACATCTTAAT----  
-----GAATCTGTAGCA-----ATTAATTGTATAAGACCAGGCAATAATACAAGAAAA-----  
-AGTGTAAAGAATA-----GGACCAGGACAACA---TTC-----TATGCAACAGGAGAC-----  
-----ATAATAGGAAATATA-----AGACAAGCACATTGT---AACATTAGCACAAAG---  
GACTGGAATAAACTTTAATAAGGATAAGTAAAAAATTAAGA-----GAATACTTCCT---  
-----AATAAGACAATAAAATTTGGG---  
CCACCTAATAAAGGAGGGGACCTAGAAATTACA---ATGCACAGCTTTAATTGTGGAGGAGAA---  
TTTAAGCAGCTCCAGACAAGAGTCTTGGCTATAGAAAAGTACCTAAGGGATCAACAGCTCCTAGGGATGTGGG  
GCTGCTCTGGAAGAACTCATCTGCACCACTAATGTGCCCTTGGAACCTCAGTTGGAGT-----  
-----AATAAATCTTATAAAGCTATTTGG-----GAT-----  
AACTTGACCTGGATGCAGTGG---GATAGAGAAATTGAGAATTACACAAACACAATATAC---  
TATCTGCTTGAAGACTCGCAAAATCCAGCAGGAG-----  
-----

AAAAATGAAAAGGATTTATTTGCACTAAACAGTTGGCAAAACCTGTGGACCTGGTTTGACATATCAAATTGGC  
TGTGGTATATAAGAATATTTCATAATGATAGTAGGAGGCTTAATAGGGTTAAGGATAATTTTTTGCT---  
GTGCTTTCCATAGTG-----AATAGAGTTAGGCAGGGATACTCACCT-----  
TTGTGCTTTTGCTATTAGTCTGCTTGATACCACAGCAATAGCAGTAGCTGAA---  
GGAACAGATAGGATTATAGAAATAGTACAAAGTATTTGTAGAGCT-----  
-----ATCCGTAACATA-----CCTAGAAGAATAAGACAGGGCTTTGAAGCAGCTTTGCAA---TAA  
>KC187164  
GTG---GTG-----GGA---AAC---TTA-----  
AACTTGTGGGTCACAGTCTATTATGGGGTACCTGTGTGG---AAAGAAGCAAAT---  
ACTACTCTATTCTGTGCATCAGATGCTAAGGCACATGATGAAGAA---GTGCATAAT-----  
-----ATCTGGGCTACA---CATGCCTGTGTACCCACAGAC---  
CCCAACCCACAAGAAATGGTTTTTGGTA-----AATGTAACAGAAAATTTTAAT-----  
-----ATGTGGAAAAATGACATGGTGGAAACAAATGCATGAGGATATA---  
ATCAGTTTATGGGACCAAAGCCTA---AAGCCATGTGTACAGTTG---  
ACCCCACTCTGTGTCACTTTAAACTGTAGCAATGCTAACAGAAATTTTAGCTTTGTTAATGGA-----  
-----  
-----TCTATTGATAACAATGACAGGGATAGAGAAATAAAA---  
AATTGCTCTTTCAATATGACCACAGAATTGAGA-----  
GATCAGACAAAGAGAATGTATTCCCTT---  
TTTTATAAACTTGATGTAGTACCCTTGATGAAAAGAACAAATCT-----  
-----  
AGTAATGGCTCTGGTATGTATAGATTAATAAATTGCAATACCTCAACCATAACGCAA---  
GCCTGTCCAAAGGTTTCTTTTGATCCAATTCCCTATACATTATTGTGCTCCAGCTGGGTTTGCGATTTTAAAGT  
GTAAT---AATAAGACATTCAAT-----GGAACAGGACCATGCAATAAT-----  
-GTTAGC---ACAGTACAATGTACACATGGAATCAAGCCAGTGGTATCAACT---  
CAATTACTGTTTAAATGGTAGCCTAGCAGAAGAAGAC-----  
ATAATAATTAGATCTAAGAATCTGACAGACAAT-----ACCAAAACAATAATAGTGCAGCTTAAT---  
-----AAATCTGTACCA-----ATTAATTGTACAAGACCCAACAATAATACAAGACAA-----  
-GGTGTAGGGATA-----GGACCAGGACAAATG---TTC-----TATACAACA---GAC-----  
-----ATAATAGGCGATATA-----AGACAAGCACATTGT---AACATTTCCCTATAGA---  
GAATGGAATAAACTTTACAAATGGTAGGAAAGAAATTAAGC-----AAGCACTTCCTT---  
-----AATAAAACAATAAAATTTGAA-----  
TCACCTGCAGGAGGGGACCTAGAAATTACA--ATGCATAACTTTAATTGTAGAGGAGAA---  
TTTAAGCAGCTCCAGGCAAGAGTCCCTGGCCATAGAAAGATACCTAAAGGATCAACAGCTCCTAGGGATTTGGG  
GCTGCTCTGGAAACTCATCTGCACCACTGCTGTGCCTTGGAACCTCCAGTTGGAGT-----  
-----AATAGAACTGCAGACGATATTTGG-----CAG-----  
AACATGACCTGGATGCAGTGG---GAAAAGGAAATTAGTAATTACACAGACACAATATAC---  
AATTGTCTTGTAACTCTCGCAAACCCAGCAGGAG-----  
-----  
GAAAAATGAAAAGGAATTATTAACATTAAACAGTTGGAACAATCTATGGAATTGGTTTGACATAACAAAGTGGT  
TGTGGTATATAAAGATATTTCATAATGATAGTAGGAGGCTTGATAGGTTTAAGAATAATTTTTTGCT---  
GTGCTCTCTTTAGTA-----AATAGAGTTAGGCAGGGATACTCACCT-----  
TTGTGCTTTTGCAATTAGTCTGCTTGATACCATAGCAATAGCAGTAGCTGAA---  
GGAACAGATAGAATTATAGAAATAATACAAAGAAGTTGTAGAGCA-----  
-----ATCTGTAACATA-----CCTAGAAGAATAAGACAGGGCTTTGAAGCAGCTTTACAA---TAA  
>KC187620  
GTG---TGG-----  
GGAAACTTGTGGGTCACAGTCTATTATGGAGTACCTGTGTGG---AAAGAAGCAAAA---  
ACTACTCTATTCTGTGCATCAGATGCTAAGGCATATGACCAAGAG---GTGCACAAT-----  
-----GTCTGGGCTACA---CATGCCTGTGTACCCACAGAC---  
CCCAACCCACAAGAATTAGTTTTGGAA-----AATGTAACAGAAAATTTTAAC-----  
-----ATGTGGAAAAATGACATGGTGGATCAGATGCATGAAGATATA---  
ATCAGTTTATGGGATGAAAGCCTA---AAGCCATGTGTAAAGTTG---  
ACCCCACTCTGTGTCACTTTAAATTGTACAGGTGCTAGGATTACAAATGCTACTAGTGATGGTAATGATGAGA  
GTACA-----  
-----AATACTACTGGTAATGTTACCTATAGTGAAGTAATGAAA---  
AATTGCTCTTTCAATGCCACTGCAGAACTAAGA-----  
GATAAGACAAAGAAAGAATATGCACTT---  
TTTTATAAAGTTGATATAGTACCCTTAAAAGGGTAATTAATGAG-----  
-----

AGCAATAATGATAGTTATGAGTATAGATTAATTAATTGTAATACCTCAACCATAACACAA---  
 GCCTGTCCAAAGGTCTCTTTTGATCCAATTCCTATACATTATTGTGCTCCAGCTGGTTTTGCGATTCTAAAAT  
 GTAAT---AATAAGACATTCAAT-----GGAACAGGACCATGCAATAAT-----  
 -GTCAGC---ACAGTACTATGTACACATGGAATTAAGCCAGTGGTATCAACT---  
 CAACTACTGTTTAAATGGTAGCCTAGCAGAAGAAGAG-----  
 ATAGTAATTAGATCTAAAAATCTGTCAGACAAT-----ACTAAGACAATAATAGTACATCTCAAG----  
 -----GAATCTGTAGAG-----ATTGTATGTACAAGACCCAGCAATAATACAAGAAAA-----  
 -GGTGTGAGGATA-----GGACCAGGACAAACA---TTC-----TTTGCAACAGGAGCC-----  
 -----ATAATAGGAGATATA-----AGAAAAGCATATTGT---AACATTAGCAAAACT---  
 AAATGGGAAGAACTTTATACAATGTAAGTAAAAAATTAATA-----GAACACTTCCCT----  
 -----AGTAAAGAAATAAATTTTACA-----  
 TCATCTGCAGGAGGGGACCTAGAAATTACA---ACACATAGCTTTAATTGTAGAGGAGAA---  
 TTTAAACAGCTCCAGGCAAGAGTCCTGGCTATAGAAAAGATACCTAAAGGATCAACAGCTCCTAGGACTTTGGG  
 GCTGCTCTGGAAGAACTCATCTGCACCACTACCGTGCCGTGGAACACTAGTTGGAGT-----  
 -----AATAAGTCTGTAGAAGATATTTGG-----GAC-----  
 AACATGACCTGGATGCAGTGG---GATAGAGAAATTAATAATTACACAAACACAATATAC---  
 AGTTTGCTTGAAGAATCGCAAAGACAGCAGGAG-----  
 -----  
 AAGAAATGAAAAAGATTTATTGGCATTGGACAGTTGGAACAGTCTGTGGAGTTGGTTTGACATAACAAATTGGT  
 TGTGGTACATAAGAATATTACATAATGATAGTAGGAGGCTTGATAGGTTTAAGAGTAATTTTTTGCT---  
 GTGCTTTCTATAGTA-----AATAGAGTTAGGCAGGGATACTCACCT-----  
 TTGTCAATTGGCTGTTAGTTTGTGTTGATGCCATAGCAATAGCAGTAGCTGAA---  
 GGAACAGATAGGATTATAGAATTAGTACAAAGGCTTTGGAGAGCT-----  
 -----ATCTGCAATATA-----CCTAGAAGAATAAGACAGGGCTTTGAAGTAGCTTTGATA---TAA  
 >KY111994  
 GGG---AAA-----  
 GGAAACTTGTGGGTCACAGTCTATTATGGGGTACCAGTATGG---AAAGAAGCAAAA---  
 ACTACTCTGTTTTGTGCATCAGATGCCAAAGCATATGAGAAAGAA---GTGCATAAT-----  
 -----GTCTGGGCTACA---CATGCCTGTGTACCCACAGAC---  
 CCCAGCCCACAAGAATTGGTTTTGGAA-----AATGTAACAGAAAATTTTAAC-----  
 -----ATGTGGAAAAATGATATGGTAGATCAGATGCATGAGGATATA---  
 ATCAGTCTATGGGATCAAAGCCTA---AAGCCATGTGTAAAGTTG---  
 ACCCCACTCTGTGTCACTTTAAATTGTAGTAATGCTACTGTTGACAGTAGTAAAGTTTATGATACTAGG---  
 -----  
 -----AGTAATGTTAATGTTACCAGTATCAATAATAACATAATGGGAGAAATGAAA---  
 AATTGCTCTTTCAATACAACCACAGAAATAAGA-----  
 GATAAGGTAAAGAAGGAATATGCACTT---TTTTATAGACCTGATGTAGTACCACTTGATGAA-----  
 -----  
 -----  
 ACAAGCAATACCAGTGAGTATAGATTAATAAATTGTAATACCTCAGCCGTAAACACAA---  
 GCCTGTCCAAAGGTCACTTTTGAACCAATTCCTATACATTATTGTGCTCCAGCTGGTTATGCGATTCTAAAGT  
 GTAAT---AATAAGACATTCAAT-----GGAACAGGACCATGCAAGTAAT-----  
 -GTCAGC---ACAGTACAATGTACACATGGAATTAGGCCAGTGGTATCAACC---  
 CAACTACTGTTTAAATGGTAGTCTGGCAGAAAAAGAG-----  
 ATAGTAATTAGATCTGAAAACCTGACAAACAAT-----GCCAAAATAATAATAGTCCATCTTAAC----  
 -----ACCTCTGTAGAA-----ATTGTGTGTACAAGGCCCGCAATAATACAAGGAAA-----  
 -AGTGTGAGAATA-----GGACCAGGACAAACA---TTC-----TATGCAACAGGAGAC-----  
 -----ATAATAGGAGATATA-----AGACAAGCACATTGT---AACATTAGTGAAG---  
 CAATGGAATAACACTTTACAAGAGGTAGGTAAAGAATTGCAA-----AAACACTTCCCT----  
 -----AATAAGACAATAAAGTATGAA-----  
 CGATCCGCAGGAGGAGACATGGAAATTGCA---ACACATAGCTTTAATTGTGGAGGAGAA---  
 TTTAAGCAGCTCCAGGCAAGAGTCCTGGCTCTGGAAAAGATACCTAAAGGATCAACAGCTCCTAGGGATGTGGG  
 GCTGCTCTGGAAGAACTCATCTGCACCACTACTGTGCCCTTGGAAACACTAGTTGGAGT-----  
 -----AATAAATCTGAAAAGGATATTTGG-----GAT-----  
 AACATGACATGGATGCAGTGG---GAGAGAGAAATTAGCAATTACACAGAGACAATATAC---  
 ATGTTGCTTGAAGACTCGCAACACCAGCAGGAA-----  
 -----  
 AGAAATGAAAAAGATTTACTAGCATTGGACAGTTGGAACAGTCTGTGGAATTGGTTTAACATAACAACTGGC  
 TGTGGTATATAAGAATATTCATGATGATAGTAGGGGGCTTGATAGGTTTAAGAATAATTTTTTGCT---  
 GTGCTATCTATAGTG-----AATAGAGTCAGGCAGGGATACTCACCT-----

TTGTCGTTGGCTATTAGTCTTTTAGATACCATAGCAATAGCAGTAGCTGAA---  
 GGAACAGATAGGATTATAGAAGTAATACAAAGATTTTGTAGAGCT-----  
 -----ATCCGCAACATA-----CCTACAAGAATAAGACAAGGCCTTGAAGCATCTTTGCTA---TAA  
 >KC187280  
 GTG---TTG-----  
 GGGAGCTCATGGGTCACAGTCTATTATGGGGTACCTGTGTGG--AGAGAAGCAAAA---  
 ACTACTCTATTCTGTGCATCAGATGCTAAAGCATATGAGAAAGAA--GCACATAAT-----  
 -----ATTTGGGCTACA--TATGCCTGTGTACCCACAGAC---  
 CCCAACCCACAAGAATTAAAGTTGGAA-----AATGTAACAGAAAATTTTAAC-----  
 -----ATGTGGAAAAATGATATGGTAGACCAGATGCAGGAGGATATA---  
 ATTAGCTTATGGGAACAAAGCCTA--AAGCCATGTGTAAGGATG--  
 ACCCCACTCTGTGTCACTTTGGAGTGTAGTGA AAAACATTACTGTTAATGATATCAATAGTACTTCTACT----  
 -----  
 -----TCCTTTGGTATCAATAGTACTTCTGCTCCAATGGGTAACATTACTGATAATATGAGA---  
 AATTGCTCTTTCAATGCAACCACAGAAATAAAA-----  
 GATAAAAAACGGAAGGAGTATGCACCT--TTTTATAGACTTGATATAGTATCACTTGGGAAG-----  
 -----  
 -----  
 AATAACTATTATAGACTAATAAATTGCAATACCTCAACCATAACACAA---  
 GCCTGTCCAAAGATCAATTTTGACCCAATTCCTATACATTATTGTGCGCCAGCTGGTTTTGCATTCTAAAGT  
 GTAAT---AATAAGACATTCAAT-----GGGACAGGACCATGCAATAAT-----  
 -GTCAGT--ACAGTACAATGTACACATGGAATTAAGCCAGTGGTATCAACT---  
 CATCTACTATTAAATGGTAGCCTAGCAGAAGGAGAG-----  
 ATAATAATTAGGTCTGAAAACCTGACAGTCACT-----CACAAAACAATAATAGTACACCTTAAT----  
 -----GAATCTGTAGAA-----ATTGTGTGTACAAGACCTGGCAATAATACAAGAAAA-----  
 -AGTGTAAAGAATA-----GGACCAGGACAAAACA--TTC-----TATGCAACAGGTGGA-----  
 -----ATAATAGGAGACATA-----AGACAAGCACATTGT--AACATTAGTGAAACT---  
 AAGTGGAACAGAACTCTACAACGGGTAGCGAAAAAATTAATA-----GACTATTTCCCT----  
 -----AATGCAACAATAAAATTTAAA-----  
 CAACCACCCGCAGGAGGGGATCTAGAAATTATG--ATGCATACCTTTAATTGTGGAGGAGAA--  
 TTTAAGCAGCTCCAGACAAGAGTCCTTGCTATAGAAAGATACCTAAAGGATCAACAGCTCCTAGGGATTTGGG  
 GTTGCTCTGGA AA ACTCATCTGCACCACTAATGTGCCTTGGA ACTCCAGTTGGAGT-----  
 -----AATAAATCTATAGACGATATTTGG-----GGG-----  
 AGCATGACATGGATGCAGTGG--GATAAAGAAATTAGTAATTACACAGGCATAATATAC--  
 AGTTTGCTTTTCAGACTCGCAATCCAGCAAGAA-----  
 -----  
 AAAAAAGAAAAAGATTTATTAGCCTTGGACAGTTGGCAAAATCTGTGGAATTGGTTTGACATAACAAAGTGGT  
 TGTGGTATATAAAATTATTATCATAATGATAGTAGGAGGCTTAATAGGTTTAAGAATAATTTTTTACA--  
 GTGCTTTCTATAGTA-----AATAGAGTTAGGCAGGGATACTCACCT-----  
 TTATCGTTGGCTATTAGTCTACTAGATACCATAGCCATAGCAGTAGCTGAA--  
 GGAACAGATAGGATTATAGAGATAATACAAAGAAGTTGTAGAGCT-----  
 -----ATCCTCAACATA-----CCTAGAAGAATAAGACAGGGCCTTGAAGCAGCTTTACTA---TAA  
 >KC187249  
 GGG---AGG-----  
 GAAGAGA ACTTGTGGGTTACTGTTTATTATGGGGTACCTGTGTGG--AAAGAAGCAAAA---  
 ACTACTCTATTCTGTGCATCAGATGCTAAAGCCTATGAGAAGGAA--GTGCATAAT-----  
 -----GTCTGGGCTACA--CATGCCTGTGTACCCACAGAC---  
 CCCAACCCACAAGAAATGGAGTTAAAA-----AATGTAACAGAAAATTTTAAC-----  
 -----ATGTGGAAAAATGATATGGTGGATCAGATGCATGAGGATATA---  
 ATTAGTTTATGGGACCAAAGCCTA--AAGCCATGTGTAAAGTTG--  
 ACCCCACTCTGTGTCACTTTAAATTGTAGTAATAATATTACTATCAATAATGGTAATAATGGTACTGCTAACT  
 ATAGTACTACC-----  
 -----ACAGAAATGAGA---  
 AATTGCTCTTTCAATGCAACCACAGAATTAAGA-----  
 GACAAGAAAAAGAAAGAGCATGCACCT--TTTTATAAGCTTGATTTAGAACCACTTGGTAACAGTAACTCT-  
 -----  
 -----  
 AGTGAGAACTATGGAGAGTATATATTAATAAATTGTAATACCTCAACCATAGCACAA---  
 GCCTGTCCAAAGATCTCTTTTGAACCAATTCCTATACATTATTGTGCTCCAGCTGGTTATGCGATTCTAAAGT  
 GTAAT---AATAAGACATTCAAT-----GGAACAGGACCATGCAATAAT-----

-GTCAGC---ACAGTACAATGTACACATGGAATTAAGCCAGTGGTATCAACT---  
CAACTACTGTTTAAATGGTAGCCTAGCAGAACAGGAG-----  
ATAGTAATTAGATCTGAAAATCTGACAGACAAT-----GCCAAAACAATAATAGTACATCTAAAT----  
-----GAATCTGTAAAC-----ATTGTGTGTACAAGACCCAACAATAACACAAGAAAA-----  
-AGTATAAGGATA-----GGACCAGGACAAGCA---TTC-----TTTGCAGCAGGAGAC-----  
-----ATAATAGGAGATATA-----AGACAAGCACATTGT---AACATTAGCAAAGTA---  
GGTTGGAATAGAACTTTACAAATGGTAGGAAAAAAATTAGCA-----GAACGCTTTAAT-----  
-----AAGACAAAAGTAGTATTTGCA-----  
CCACATTCAGGAGGGGACCCAGAAATTACA---ATGCATAGCTTTAATTGTGGAGGAGAA---  
TTTAAGCAGCTCCAGGCAAGAGTCTTGGCTATAGAAAGATACCTAAAGGATCAACGGCTCTTAGGGCTTTGGG  
GCTGCTCTGGAAAACCTCATCTGCACCCTAATGTACCTTGGAACTCTAGTTGGAGT-----  
-----AACAAAACCTCAAGAGGAGATTTGG-----GAA-----  
AACATGACCTGGATGCAGTGG---GAGAGAGAAATTAATAATTACACATACACAATATAC---  
AGTTTGCTTGAAGACTCACAAAGCCAGCAGGAG-----  
-----  
AAAAATGAGAAGGATTTATTAGCATTGGACAGTTGGCAAAGTCTGTGGAATTGGTTCAGCATATCAAATTGGC  
TGTGGTATATAAGAATATTCATAATGATAGTAGGAGGCTTGATAGGTTTGAGAATAATTTTTTGCT---  
GTGCTTTCTATAGTA-----AATAGAGTTAGGCAGGGATACTCACCT-----  
TTGTCCCTTTGCTATTAATCTGCTTGATACCATAGCAATAACAGTAGCTGAA---  
GGAACAGATAGAATAATAGAAAGTAGTACAAAGAATTTGTAGAGCT-----  
-----ATTCGCAACATA-----CCTAGAAGAATAAGACAGGGCTTTGAAGCAGCTTTGCTA---TAA  
>MF502153  
GTG---CTT-----  
GGAAACTTGTGGGTACAGTCTATTATGGGGTACCTGTGTGG---AGAGAAGCAAAA---  
GCTACTCTATTCTGTGCATCAGATGCTAAAGCATATGAGAAAGAA---GTGCATAAT-----  
-----GTCTGGGCTACA---CATGCCTGTGTACCCACAGAC---  
CCCAACCCACAAGAATTGGTTTTGGGA-----AATGTAATAGAAAATTTTAAT-----  
-----ATGTGAAAAATGACATGGTGGATCAGATGCATGAGGATATA---  
ATCAGTCTATGGGATCAAAGCCTA---AAGCCATGTGTAAAGTTG---  
ACCCCACTCTGCGTCACTTTAAATGTATGAATGTGAATGTTACAAGAGAAAATGCTACTGCTGAAAATAATA  
CGAATGTTACA-----  
-----AGAGAAAATGCTACTGCTGAAAATAATACCCAAAGTGAAATGAAA---  
AACTGCTCTTTCAATATAACCACAGAAATAAGG-----  
GATAAGAAAAAGACGGAATATGCACTT---  
TTTTACAACTTGATATAGTACCAATTAAGAATAATAATGATAAT-----  
-----  
AGTAATAATAGTAATAATAGTAATGAGTATATGTTAATAAATTGTAATACCTCAACTGTAACACAA---  
GCCTGTCCAAAGGTCTCGTTTGACCCAATTCTTATACATTATTGTGCTCCAGCTGGTTTTGCGATTCTAAAGT  
GTAAT---GATAAGACATTTAAT-----GGAACAGGACCATGCAATAAT-----  
-GTCAGC---ACAGTACAATGTACACATGGAATTAAGCCAGTGGTATCAACT---  
CAACTACTGTGTAATGGTAGTTTAACAGAA---GAC-----  
ATAGTAATTAGCTCTGAAAATATAACAGACAAT-----GGCAAAACAATAATAGTACATCTTAAT---  
-----GAATCTGTACAA-----ATTAATTGTACAAGGCCCAACAATAATACAAGGAAA---  
-AGTATGAGGATA-----GGACCAGGACAAACA---TTT-----TATGCAACAGGAGAA---  
-----ATAATAGGAAATATA-----AGAGAAGCACATTGT---AATATTAGTAGACAA---  
AATTGGACTAACACTTTAAAAAGGGTGGAGACAAAATTGAAA-----CAATACTTT-----  
-----AATGAAACAATAAAATTGAA-----  
CCACCTTCAGGAGGGGACCTAGAAATTACA---ACACATAGTTTTTAATTGTAGAGGAGAA---  
TTTAAGCAGCTCCAGACAAGAGTCCCTGGCTATAGAAAGATACCTAAAGGATCAACAGCTCCTAGGGCTTTGGG  
GCTGCTCTGGAAAACCTCATCTGCACCCTAATGTGCCTTGGAACTCCAGTTGGAGT-----  
-----AATAAATCTGAAAAAGATATTTGG-----GAG-----  
AACATGACCTGGATGCAGTGG---GATAGAGAAATTACTAATTACACAAACACAATATAT---  
GATTTGCTTGAAAAATCACAAAATCAGCAGGAA-----  
-----  
CAAAATGAAAAAGATTTATTAGCATTGGACAGCTGGAAAAATCTATGGAATTGGTTTAGCATAACAACTGGC  
TGTGGTATATAAAATTATTCATAATGATAGTAGGAGGACTAATAGGTTTAAGAATAATTTTTTGCT---  
GTGCTTTCTATAATA-----AATAGAGTTAGGCAGGGATACTCACCT-----  
CTATCGTTTTGCTATTAACCTGTTTGATACCATAGCAATAGTAGTAGCTGAA---  
GGAAGTGACAGAATTATAGAATTAGTACAAAGAATTTGTAGAGCT-----  
-----ATCATTAACATA-----CCTAGAAGAATAAGACAGGGCTTTGAAGCAGCGTTGCTA---TAA

>MF353063

GGG---ATG-----  
TGGGTCACAGTCTATTATGGGGTACCTGTGTGG---AAAGAAGCAAAA---  
ACTACTCTATTTTGTGCATCAGATGCTAAAGGATATGAGAAGGAA---GTGCATAAT-----  
-----GTCTGGGCTACA---CATGCCTGTGTACCCACAGAC---  
CCCAATCCACAAGAAATGGTTTTAGAA-----AATGTAACAGAAAATTTCAAC-----  
-----ATGTGGAAAAATGACATGGCAGATCAGATGCATGAAGATGTA---  
ATTAGTTTATGGGATCAAAGCCTC---AAGCCATGTGTAAAGTTA---  
ACCCCACTCTGTGTCACTCTAAACTGTACCGATGCTAAGGCTACTGCCAACAAATACCAATGCTACTAATGCTA  
CT-----  
-----GTCAGCAAGAATGACAGTATAACAGAGGAAATGAAA---  
AATTGCTCTTTCAATACAACCACAGAATTAAGA-----  
GATAAGATAGAGAAAAAGTATGCACCT---TTTTATAAACTTGATATAGTACAACACTAGAAGAC-----  
-----  
AGCTCTACTCATTATAGATTTCATAAATTGTAATACCTCAGCCATAACACAA---  
GCCTGTCCAAAGGTCTCTTTTGACCCAATTCCTATACATTATTGTGCTCCAGCTGGTTATGCGATTCTAAAGT  
GTAAT---AATAAGACATTCAAT-----GGAACAGGACCGTGTAATAAT-----  
-GTCAGC---ACAGTACAATGTACACATGGAATTAAGCCAGTGGTTTCAACT---  
CAACTATTGTTAAATGGTAGCCTAGCAGAAGGAGGG-----  
ATAATAATTAGATCTGAAAATATAACAGATAAT-----ACCAAAACAATAATAGTACATCTCAAT---  
-----GAATCTGTAGAG-----ATTGTGTGTACGAGACCCGGTAATAACACAAGAAAA-----  
-AGTATAGGAATA-----GGACCAGGACAAGCA---TTT-----TATGCAACAGGAGAA-----  
-----ATAATAGGAGACATA-----AGAAAAGCACATTGT---AACATTAGTGAAAGC---  
AAATGGAATGAACTTTACAAAGGGTAAGTGAAAAATTAAAA-----GAATACTTCCCT---  
-----GGGAAGAATATAACATTTACA-----  
CCATCCTCAGGAGGGGACCCAGAAATTGCA--ACACATAGCTTTAATTGTGGAGGAGAA---  
TTTAAACAGCTCCAGGCAAGAGTCCTGGCCCTGGAAAGATACCTAAAGGATCAACAGCTCCTAGGGATGTGGG  
GCTGCTCTGGAAGATTCATCTGCACCACTAATGTACATTGGAACCTCTAGTTGGAGT-----  
-----AATAAAAAATTATAGTGATATTTGG-----GAT-----  
AACATGACCTGGATGCAGTGG---GAGAGAGAAATTAGCAATTATACAGATATAATATAT---  
GGATTGCTTGAAGAATCACAAAACCAGCAGGAA-----  
-----  
AAGAATGAACAAGATTTACTAGCATTGGACAGATGGAACAATTTGTGGAATTGGTTTAACATAACAAAATGGC  
TGTGGTATATAAAAATATTTCATAATGATAGTAGGAGGCTTGATAGGTTTAAGAATAATTTTTTGCT---  
GTACTTTCTTTAGTA-----AATAGAGTTAGGCAGGGATACTCACCT-----  
CTGTCGTTGGCTATTAGTCTATTGGATACCCTAGCAATAGCAGTAGGTGAA---  
GGAACAGATAGGATCCTAGAATTTGTATTAAGAATTTGTAGAGCT-----  
-----ATCCGCAACATA-----CCTACAAGAATAAGACAGGGCTTTGAAACAGCTTTGCTA--TAA  
>HM638803  
GTA---TTG-----  
GGGAACAGGTGGGTACAGTCTATTATGGGGTACCTGTGTGG---ACAGAAGCAAAA---  
ACTACTCTATTCTGTGCATCAGATGCTAAAGCATATGAGAGAGAA---GTGCATAAT-----  
-----GTCTGGGCTACA---CATGCCTGTGTGCCACAGAC---  
CCCAACCCACAAGAAATGATCTTGGA-----AATGTAACAGAAAATTTTAAC-----  
-----ATGTGGGAAAATGACATGGTAGATCAGATGCATGAGGATATA---  
ATCAGTTTATGGGATCAAAGCCTA---AAGCCATGTGTAAAGTTG---  
ACCCCACTTTGTGTCACTTTAAATTGTACAGATGCTAGGGTTAATACTACCAGTAATGGTAATACTACC---  
-----  
-----ACAACCTGGTAATGCTACCCTCAAGGATAACATGAAGGGAGAAATAAAA---  
AATTGCTCTTTCAATGCAACCACAGAAATAAGT-----  
GATAAGAAAAAGAATGAATATGCACCT---TTTTATAGACTTGATATAGTACCACTTAATGAGGAG-----  
-----  
AATAACAGTTCAGTGAGTATAGGTTAATAAATTGTAATACCTCAACCGTAACACAA---  
GCCTGTCCAAAGGTCTCATTTGACCCAATTCCTATACATTATTGTGCTCCAGCTGGTTATGCGATTCTAAAGT  
GTAAT---AATAAGACATTCAAT-----GGAACAGGACCATGCAACAAT-----  
-GTCAGC---ACAGTACAATGTACACATGGAATTAAGCCAGTGGTATCAACC---  
CAACTACTGTTAAATGGTAGCCTAGCAGAAGAAGAG-----  
ATAATAATTAGATCTGAAAATCTGACAGACAAT-----GCCAGAACAATAATAGTACATCTTAAT---

-----CAATCTGTAGAA-----ATTGTATGTACAAGGCCCGCAATAATACAAGGAAA-----  
-AGTGTGAGAATA-----GGGCCAGGACAAGCA---TTC-----TATGCAACAGGAGAA-----  
-----ATAATAGGAAATATA-----AGAGAAGCACATTGT---AACATTAGTAAAGGG---  
TTATGGAACAACACTTTACAACAGGTAGGGAAGAAATTAGCA-----GAACGCTTCCCT-----  
-----AATAAAATAATAGTATTTAAC-----  
CACTCCTCAGGAGGGGATCCAGAAATTACA---ACACATAGCTTTAATTGTAGGGGAGAA---  
TTTAAGCAGCTCCAGGCAAGAGTCCTGGCTATAGAAAGATACCTAAAGGATCAACAGCTCCTAGGACTTTGGG  
GCTGCTCTGGAAGAACTCATCTGCACCACTAATGTGCCTTGAACGCCAGTTGGAGT-----  
-----AATAAATCTCAAACAGACATTTGG-----GAT-----  
AACATGACCTGGATGCAGTGG---GATAAGGAAATTAGTAATTACACAGAAACAATATAC---  
TGGTTGCTTGAAAAATCACAAAACCAGCAGGAA-----  
-----  
CAAAATGAACAGGATTTATTAGCATTGGACAGTTGGAAAAATCTGTGGGATTGGTTTAGCATATCAAATTGGC  
TGTGGTATATAAAAAATATTCATAATGATAGTAGGAGGCTTGATAGGTTTAAGAATAATTTTTTGT---  
GTGCTTTCTATAGTG-----AATAGAGTTAGGCAGGGATACTCACCT-----  
CTATCATTTGCTATTAGTCTGCTTGATACCATAGCAATAGCAGTAGCTGAA---  
GGAACAGATAGAATTATAGAAAGTAGTACAAAGAATTTGTAGAGCT-----  
-----ATCCGCAACGTA-----CCTACAAGAATAAGACAGGGCTTGGAAGCAGCTTTGCTA---TAA  
>KC894127  
GTG---GTG-----  
GGAAACTTGTGGGTCACAGTCTATTATGGGGTACCTGTGTGG---AAAGAAGCAAAG---  
ACTACTCTATTCTGTGCATCAGATGCTAAAGCATATGACAGAGAA---GTACATAAT-----  
-----GTCTGGGCTACA---CATGCCTGTGTACCCACAGAC---  
CCCAACCCACAAGAAATGGTTTTGGAA-----AATGTAACAGAAAATTTTAAC-----  
-----ATGTGAAAAATGACATGGTAGATCAGATGCATGAGGATATA---  
ATCAGTTTATGGGATCAAAGCCTA---AAGCCATGTGTAAAGTTG---  
ACCCCACTCTGTGTCACTTTAAATTGTACAGATGTTACCACAAATGGTACCGCTAGTCAAAAT-----  
-----  
-----GTTAGTGATAATGATAGTGTTAATGTTACTGAACAAATGAGA---  
AATTGCTCTTTCAATGCAACCACAGAATAAGA-----  
GATAAGAAACAGAAAGTGTATGCACCT--TTTTATAAACTTGATACAGTACCACTTGATGGG-----  
-----  
-----  
AATAATAACAGCTATATATTAATAAATTGTAATTCCTCAACCATAACACAA---  
GCCTGTCCAAAGGTCTCTTTTGACCCAATTCCTATACATTATTGTGCGCCTGCTGGTTATGCGATTCTAAAGT  
GTAAT---AATAAGACATTCAAT-----GGGACAGGACCATGCAATAAT-----  
-GTCAGC---ACAGTACAATGTACACATGGAATTAAGCCAGTGGTATCAACT---  
CAACTACTGTTAAATGGTAGCCTAGCAGAAGGAGAG-----  
ATAATAATTAGATCTGAAAATCTGACAAACAAT-----GCCAAAACAATAATAGTACACCTTAAT---  
-----AAGTCTGTAGAA-----ATTGTGTGTACAAGACCCAACAATAACACAAGAAAA---  
-AGTATAAGAATA-----GGACCAGGACAAGCG---TTC-----TATGCAACAAATGAA---  
-----ATAATAGGAGACATA-----AGACAAGCACATTGT---AACGTGAGTAAAGT---  
GACTGGAACAAAACCTTTAGAACAGGTAAAACAAAAATTAGGG-----ACATACTTCCCT-----  
-----AAGAATAAAACAATAATATTTAAC-----  
ATATCCTCAGGAGGGGATCTAGAAATTACA---ACACATAGCTTTAATTGTAGAGGAGAA---  
TTTAAGCAGCTCCAGGCAAGAGTCTTGGCTATAGAAAGATACCTAAAGGATCAACAGCTCCTAGGGATGTGGG  
GCTGCTCTGGAAGAACTCATCTGCACCACTGCTGTACTTTGGAACCTCCACTTGGAGT-----  
-----AACAAATCTTACGAAGATATTTGG-----GGT-----  
AACATGACCTGGATGCAATGG---GACATAGAAATTAGTAATTACACAAACACAATATAC---  
AATTTGCTTGAAGAATCACAAAACCAGCAGGAA-----  
-----  
AAGAATGAAAAAGATTTATTAGCATTGGACAGTTGGAAAAATCTGTGGAATTGGTTTAGCATATCAAACCTGGC  
TGTGGTATATAAAAAATATTCATAATGATAGTAGGAGGCTTGATAGGTTTGAGAATAATTTTTTGCT---  
GTGCTATCTATAGTG-----AATAGAGTTAGGCAGGGATACTCACCT-----  
TTGTCAATTTGCTATTAGTCTAATTGATGCCATAGCCATAGCAGTAGCTGAA---  
GGAACAGATAGGATTGTAGAATTAATACAAAGAATTTGTAGAGCT-----  
-----ATCTGCAACATA-----CCTAGAAGAATAAGACAGGGCTTTGAAACAGCTTTGCTA---TAA  
>HM639260  
GTG---TTG-----  
GGGAACTTGTGGGTCACAGTCTATTATGGGGTACCTGTGTGG---AGAGAAGCAAAG---

ACCACTCTATTCTGTGCATCAGATGCTAAAGCATATGAGAAAGAA---GTGCATAAT-----  
 -----GCCTGGGCTACA---TATGCCTGTGTACCCACAGAC---  
 CCCAACCCACAAGAAATAGTTTTTGGAA-----AATGTAACAGAGAATTTTAAAC-----  
 -----ATGTGGAAAAATGACATGGTAGATCAGATGCATGAGGATATA---  
 ATCAGTTTATGGGATCAAAGCCTA---AAGCCATGTGTAAAGTTG---  
 ACCCCACTCTGTGTCACTCTAAAGTGTACAAATGCTACTTCTAGTGTTAATGTTACTTCTGGTGGTACAAAT-  
 -----  
 -----GCTACTAGTGGTAATGTTACCATTAAAAACATTACTAGCGATGAAATGAAA---  
 AATTGCTCTTTCAATGCAACCACAGAAATAAGA-----  
 GATAAGAAACAGCAAGTGTATGCACTT---TTTTATAAGCTTGATATAGTACCACCTTAATGAGAAT-----  
 -----  
 -----  
 AACAGCAGCTCTGGGGAGTATAGATTAATAAATTGCAATACCTCAGCCATAACACAA---  
 GCCTGTCCAAAGGTCTCTTTTGACCCAATTCTTATACATTATTGTACACCAGCTGGTTATGCGATTCTAAAAT  
 GTAAT---AATAAGACATTCAAT-----GGAACAGGACCATGCCATAAT-----  
 -GTCAGC---ACAGTACAATGTACACATGGAATTAAGCCAGTGGTATCAACT---  
 CAACTACTGTTTAAATGGTAGCCTAGCAGAAGGAGAG-----  
 ATAATGATTAGATCTGAAAACTGACAAACAAT-----GCCAAAACAATAATAGTACACCTTAAT----  
 -----GAATCTGTAGAA-----ATTGTGTGTACAAGACCCAACAATAATACAAGAAAA-----  
 -AGTATAAGGATA-----GGACCAGGACAAGCA---TTC-----TATGCAACAGGTGAC-----  
 -----ATAATAGGAGACATA-----AGACAAGCATATTGT---AACATTAGTGAAAGT---  
 AAATGGAACAAAACCTTTATACCAGGTAAGGAAAAAATTAGAA-----GAACACTTCCTTAAT-  
 -----AACAAATATAACAAATATAACATTTGCA---  
 CAACCAAACCCAGGAGGGGATCTAGAAATTACA---ACACATAGCTTTAATTGTAGAGGAGAA---  
 TTTAAGCAGCTCCAAACAAGAGTCCCTGGCTATAGAAAGATACCTAAAGGATCAACAGCTCCTAGGGATATGGG  
 GCTGCTCTGGAAGAACTCATCTGCACCACTGCTGTGCCTTGGAACACTAGTTGGAGT-----  
 -----AATAAGTCTCAACAGATATTTGG-----GAT-----  
 AACATGACCTGGATGCAGTGG---GATAAAGAAATTAGTAATTACACAAACACAATATAC---  
 AGGTTGCTTGAAGAATCACAAAACCAGCAGGAA-----  
 -----  
 AAGAATGAAAATGATTTATTAGCATTGGACAGTTGGAACAATCTGTGGAATTGGTTTAACATAACAACTGGC  
 TGTGGTATATAAAAATATTCTATAATAATAGTAGGAGGCTTGATAGGCTTAAGAATAATTTTTTGCT---  
 GTGCTTTCTATAGTG-----AATAGAGTTAGGCAGGGATACTCACCT-----  
 TTGTCATTTGCTATTAGTTTGCTTGATACCGTAGCAGTAATAGTAGCTGAA---  
 GGAACAGATAGGATTATAGAAGTAGCACAAAGAATTTGCAGAGCT-----  
 -----ATTTGCAACATA-----CCTAGAAGAATAAGACAGGGTTTTGAAACAGCTTTTGCTA---TAA  
 >KJ541837  
 GGG---GGA-----  
 AGAGACAGGTGGGTACAGTCTATTATGGGGTACCTGTGTGG---AAAGAAGCAAAA---  
 ACTACTCTATTCTGTGCATCAGATGCTAGAGCATATGAGAGAGAA---GTGCATAAT-----  
 -----GTCTGGGCTACA---CATGCCTGTGTACCCACAGAC---  
 CCTAACCCACAAGAAATACTTATGGAA-----AATGTAACAGAAAATTTTAAAC-----  
 -----ATGTTTAAAAATGACATGGTGAATCAGATGCATGAGGATGTA---  
 ATCAGTTTATGGGATCAAAGCCTA---AAGCCATGTGTAAAGTTG---  
 ACCCCACTCTGTGGTGCAAATGTTAGCAATAATGTTACCTGCAATAATAGTAAT-----  
 -----  
 -----ACTTGCAATAATACATACAATGAAATAAAAAATGAAATAACA---  
 AATTGCTCTTTCAATGCAACCACAGAAATAAGA-----  
 GATAAGAAGCGGCAAGTGTATGCACTC---TTTTATAAACTTGATATAGTACCACCTTTTTAATGAGAAAAAC-  
 -----  
 -----  
 TCTAGTGACGGAAAACCTTTACAGCCAGTATAGATTAATAAATTGTAATACCTCAACCATAACACAA---  
 GCCTGTCCAAAGGTCACTTTTGATCCAATTCTTATACACTATTGTGCTCCAGCTGGTTATGCGATTCTAAAGT  
 GTAAT---AACAAAACATTCAAT-----GGGACAGGACCATGCAACAAT-----  
 -GTTAGC---ACAGTACAATGTACACATGGAATTAACCAGTAGTATCAACT---  
 CAACTACTGTTTAAATGGTAGCCTAGCAGAAGAGGGG-----  
 ATAATAATTAGATCTAAAAATATGACAGACAAT-----GCCAAAATAATAATAGTACATCTTAAG----  
 -----GAACCTGTAGAA-----ATTGTGTGTACAAGACCCAACAATAATACAAGAAAA-----  
 -AGTGTAAGGATA-----GGACCAGGACAAAACA---TTC-----TATGCAACAGGAGAC-----  
 -----ATAATAGGAGACATA-----AGACAAGCGTATTGC---AACATTAGTGAAGCT---

AACTGGACTAACACTTTACAAAAGGTAGGTAAAAGATTACAA-----AAATACTTCCCT----  
 -----AATAAAACAATACACTTTGCA-----  
 TCATCCTCAGGAGGGGACCTGGAAGTTACA--ACACATAGCTTTAATTGCAGAGGAGAA---  
 TTTAAGCAGCTCCAGACAAGAGTCCTGGCTGTAGAAAGATACCTAAAGGATCAACAGCTCCTAGGGATTTGGG  
 GCTGCTCTGGAAGAACTCATCTGCACCACTGATGTACCTTGGAACTCCAGTTGGAGT-----  
 -----AATAGATCTCAGGAAGAGATTTGG-----GAG-----  
 AACATGACCTGGATGCAGTGG--GATAGAGAAATTAGTAATTACACAAACATAATATAC---  
 CACTTGCTTGAAGACTCACAAAACCAGCAGGAA-----  
 -----  
 AAAAAATGAAAAAGATTTATTGGCATTGGACAGCTGGAAAAATTTATGGAATTGGTTTAGCATATCAAACCTGGC  
 TATGGTATATAAAAAATATTCATAATGATAGTAGGAGGCTTGATAGGCTTAAGAATAATTTTTTGCT---  
 GTGCTTTCTATAGTA-----AATAGAGTTAGGCAGGGATACTCACCT-----  
 TTGTCGTTTCGCTATTAGTCTGTTTGATGCCATAGCAATAGCAGTAGCTGAA---  
 GGAACAGATAGGATTATAGAATTAGTACAAAGAGTTTGTAGAGGT-----  
 -----ATCTACAACATC-----CCTAGAAGAATAAGACAGGGCTTTGAAGCAGCTTTGCAA---TAA  
 >KJ541839  
 GGG---GGA-----  
 GGAAACTTGTGGGTTACAGTCTATTATGGGGCCCCCTGTGGGA--AAAAAACCAAAAC---  
 ACTACTCTTTTTTGTGCATCAAATGCTAAAGCACAGGAAAAAAA---GTACATAAG-----  
 -----GTCGGGGCTACA---CATGCCTGTGTACCCCCAAAC---  
 CCCAGCCCCTAAAAACGTTTTTAAAA-----AATGTAACAAAAATTTTAAAC-----  
 -----ATGTGGAAAAATGATAGGGGGGAGCAAATGCATGAGGATGTA---  
 ATCAGTTTATGGAATCAAACCTA--AAGCCATGTGTAAAGTTG---  
 ACCCCCCCTCTGTGTCACTTTAAACTGTACCAGGGCTAACATAATTTTACTATTTTCCTC-----  
 -----  
 -----AAGGGGACCCCCCATGAGAGCATGAAAAAAAAAAAA---  
 ATTTGCTCTTTCATTGCACCCACCAAATTAAAT-----  
 GAAAAAAACCAAAAGGTGTATGCCCTC---  
 TTTTATAAAGTTGATGCCCCCCCCCTTGGGGGGGAAAAAACCCCT-----  
 -----  
 AGTTATAGGTTAATAAATTGTAATGTTTCGGTAATAAAATGTAATACCTCAGCCATCACACAA---  
 GCCTGTCCCTAAGGTCTCTTTTGATCCAATTCCTATACACTATTGTGCTCCAGCTGGTTTTGCAATTCTAAAGT  
 GTAAC---AATAAGACATTCAAT-----GGGACAGGACCATGTAATAAT-----  
 -GTTAGC--ACAGTACAATGTACACATGGAATTAAACCAGTGGTATCAACT---  
 CAACTACTGTTAATGGTATCCTAGCAGAAGAAGAG-----  
 ATAATAATTAGATCTAAAAATATAACAGATAAT-----GCCAAAACAATAATAGTACAGCTTAAT---  
 -----CAATCTGTAGAA-----ATTGTGTGTACAAGACCTAACAATAATACAAGAAAA-----  
 -AGTATAAGGATA-----GGACCAGGACAAGCA--TTC-----TATGCAGCAGAAAAAC-----  
 -----ATAATAGGAGATATA-----AGACAAGCACATTGT--AACATTAGTGAAAAG---  
 AATTGGACTAAAACCTTTACAAGAAGTAAGTAAAAAATTAGCA-----AAACACTTCCCT---  
 -----AATAAAACAATAAAATTTGAA-----  
 TCAACATCAGGAGGGGACCTAGAAATTACA--ACACATAGCTTTAATTGTGGAGGAGAA---  
 TTTAAACAGCTCCAGACAAGAGTCCTGGCCATCGAAAGATACCTAAGGGATCAACAGCTCCTAGGGATTTGGG  
 GATGCTCTGGAAGAACTCTTCTGCGCCACTGCTGAACCTTGGAACTCCAGTTGGAGT-----  
 -----AACAGAACTGAAATTGAGATTTGG-----GAA-----  
 AACCTGACCTGGATGGAGTGG--GATAAAGAAATTAATAACTACACAAACATAATATAC---  
 CCGCTGCTTGAACAATCGCGAAACCAGGAGGAA-----  
 -----  
 AAAAAATGAAAAGGATTTATTAGAAATTGGACAGTTGGAACAATTTATGGAGTTGGTTTGGCATATCAAATGGC  
 TGGATTATATAAAAAATATTCATAATGGTAGTAGGAGGCTTGATAGGTTTAAGAATAATTTTTTGCT---  
 GTGCTTTCTGTAGTG-----AATAGAGTTAGGCAGGGATACTCACCT-----  
 TTGTCGTTGGCTATTAGTTTGTGTTGATACCTTTGCAATAACAGTAGCTGAA---  
 GGAACAGATAGGATTATAGAATTAGGACTCAAATTTGTAGAGCT-----  
 -----ATCTTGAGCATA-----CCTAGAAAAATAAGACAGGGCTTTGAAGCATCTTTGCTA---TAA  
 >KJ541841  
 GTG---GTA-----  
 GACAACTTGTGGGTTACAGTTTATTATGGGGTTCTGTGTGG--AAAGATGCAAAAT---  
 ACCACCCTATTTTGTGCATCAGATGCCAAAGCACATAATACAGAA---GTGCATAAT-----  
 -----GTCTGGGCCACT---CATGCCTGTGTACCCACAGAC---  
 CCCAACCCACAAGAAGTACATTTGAAA-----AATGTAACAGAAAATTTTAAAC-----

-----ATGTGGAAAAATGACATGGTGAATCAGATGGATGAGGATGTA---  
 ATCAGTTTATGGGATCAAAGCCTA---AAGCCATGTGTAAAGTTG---  
 ACCCCACTCTGTGTCACTTTAGAAATGTAGAGATGTTAGCAATAAAACAGCTGATAATAAA-----  
 -----  
 -----ACAAGAACAGTTGATAAAAGTATTAAGGAAATAAGT---  
 AATTGCTCTTTCTATGCTACCACAGAATTAAAC-----  
 GATAAGCAACAGAAAATGCATGCACTT---TTTTATAGACTTGATATAGTACCACTTGATAATGAGGATAAT-  
 -----  
 -----  
 GAGAATAAGAGTAACGCAAGTATCAACTATAGATTAATAAAATTGTAATACCTCAACCATAACACAA---  
 GCCTGTCCAAAGGTCACCTTTTGATCCAATTCCTATACACTATTGTGCTCCAGCTGGTTATGCGATTCTAAAGT  
 GTAAC---AATGAGACATTCAAT-----GGGACAGGACCATGTAATAAT-----  
 -GTCAGC---ACAGTACAATGTACACATGGAATTAAGCCAGTGGTATCAACT---  
 CAATTACTGTTTAAATGGTAGCCTAGCAGAAGAAGAT-----  
 ATAATAATTAGATCTAAAAATTTAACCAGACAAT-----GCCAAAACAATAATAGTACAGCTTAAT----  
 -----CAATCTGTAGAA-----ATTGTGTGTACAAGACCCAACAATAATACAAGGAAA-----  
 -AGTATAAGGATA-----GGACCAGGACAAGCA---TTT-----TATGCAGCAGGAAAA-----  
 -----ATAATAGGAGATATA-----AGACAAGCACATTGT---AACATTAGTAAAAAG---  
 AATTGGACTGACACTTTACAAGAAGTAAGTAAAAAATTAGGA-----AAACACTTCCCT----  
 -----AATAAAACAATAAAATTTGAA-----  
 TCATCCTCAGGAGGGGACCTAGAAATTACA---ACACATAGCTTTAATTGTGGAGGAGAA---  
 TTTAAACAGCTCCAGGCAAGAGTCCTGGCCATCGAAAAGATACCTAAGGGATCAACAGCTCCTAGGGATTTGGG  
 GATGCTCTGGAAGAACTCATCTGCACCACTGCTGTACCTTGGAAGTCCAGTTGGAGT-----  
 -----AACAGAACTGAAAGTGAGATTTGG-----GAA-----  
 AACATGACCTGGATGGAGTGG---GATAAAGAAATTAATAATTACACAGACATAATATAC---  
 CAGCTGCTTGAAGAATCGCAAAACCAGCAGGAA-----  
 -----  
 AAAAAATGAAAAGGATTTATTAGCATTGGATAGTTGGAACAATTTATGGAATTGGTTTGGCATATCAAAATGGC  
 TGGGGTATATAAAAAATATTACATAATGATAGTAGGAGGCTTGATAGGTTTAAGAATAATTTTTTGCT---  
 GTGCTTTCTGTAGTA-----AATAGAGTTAGGCAGGGATACTCACCT-----  
 TTGTCGTTGGCTATTAATTTGTTTGATACCTTTGCAATAACAGTAGCTGAA---  
 GGAACAGATAGGATTATAGAATTAGGACTCAGAATTTGTAGAGCT-----  
 -----ATCCTCAGCATA-----CCTAGAAGAATAAGACAGGGCTTTGAAGGCGCTTTGCTA---TAA  
 >KJ541848  
 GGG---GTA-----  
 GGAAACTTGTGGGTACAGTCTATTATGGGGTACCTGTGTGG---AGAGAAGCAAAA---  
 ACTACTCTATTCTGTGCATCAGAAGCTAAATCATATGAAAAAGAA---GTGCATAAT-----  
 -----GTCTGGGCTACA---CATGCCTGTGTACCCACAGAC---  
 CCCAACCCACAAGAAAATGTTATGGGT-----AATGTAACAGAAAATTTTAAC-----  
 -----ATGTGGAAAAATGACATGGTGGATCAGATGCATGAGGATGTA---  
 ATCAGTTTATGGGATCAAAGCCTA---AAGCCATGTGTAAAGATG---  
 ACCCCACTCTGTGTCACTTTAACTGTACAGATGTTAGCAATAAAACAGCTGATACATAC-----  
 -----  
 -----AACAGACAGTTGATAATAGTATTAAGGAAATAAGT---  
 AATTGCTCTTTTTATGGTACCACAGAATTAAAC-----  
 GATAAGCAACAGAAAATGCATGCACTT---  
 TTTTATAGACTTGATATAGTACCACTTGATAATGAGAATAAGATTAAT-----  
 -----  
 GAGAATAAGAGTAACAGCAACGATATCAACTATAGATTAATAAAATTGTAATACCTCAACCATAACACAA---  
 GCATGTCCAAAAGTCAATTTTGATCCAATTCCTATACACTATTGTGCTCCAGCTGGTTATGCAATTCTAAGGT  
 GTAAT---AATGAGACATTCAAT-----GGGACAGGACCATGCAATAAT-----  
 -GTCAGC---ACAGTACAATGTACACATGGAATTAAGCCAGTGGTATCAACT---  
 CAATTACTGTTTAAATGGTAGCCTAGCAGAAAAAGAT-----  
 ATAATAATTAGATTTGAAAAATTTGGCCAACAAT-----GTCAAAACAATAATAGTACATCTTAAT----  
 -----CAATCTGTAGAA-----ATTGTGTGTACAAGACCCAACAATAATACAAGGAAA-----  
 -AGTATAAGGATA-----GGACCAGGACAAGCA---TTT-----TATGCAACAGGAGAC-----  
 -----ATAATAGGAGACATA-----AGACAAGCATATTGT---AACATTAATGAGGAC---  
 AAATGGAATAAACTTTACAGATGGTGGGTAAAAAGTTAAAA-----GAACACTTCCCT----  
 -----AATAAAACAATACCCTTTAAG-----  
 CCACCCTCAGGAGGGGACCTAGAAATTACA---ATGCATAGCTTTAATTGTAGAGGAGAA---

TTTAAGCAGCTCCAGGCAAGAGTCCTGGCTCTAGAAAGATACCTACAGGATCAACAGCTCCTAGGGCTTTGGG  
 GCTGCTCTGGAAAACCTCATCTGCACCACTAATGTACCTTGGAACTCCAGTTGGAGC-----  
 -----AACAGAAATCAAACAGAAATTTGG-----GAA-----  
 AAATTGACCTGGATGCAGTGG---GATAAAGAAGTTAGTAATTACACAGACACAATATAT---  
 AGGTTGCTTGAAGACTCGCAAACACAGCAGGAA-----  
 -----  
 AAGAATGAAAAAGATTTATTAGCATTGGACAGTTGGAAAAATCTGTGGAATTGGTTTGACATAACAAATTGGC  
 TGCGGTATATACAACCTATTTCATAATGATAGTAGGAGGCTTGATAGGTTTAAGAATATTTTTTGCT---  
 GTGATCTCTATAGTG-----AATAGAGTTAGGCAGGGATACTCACCT-----  
 TTGTCAATTGGCTATTAGTCTGCTTGATACCATAGCAATAACAGTAGCTGAA---  
 GGCACAGATAGGATTATAGAATTCTTCCTAAGATTTTGTAGAGCT-----  
 -----ATCTGCAGCATA-----CCTAGAAGAATAAGACAGGGCTTTGAAGCAGCTTTGCAG---TAA  
 >MF373132  
 GGG---AAG-----GGG---GAC---AAG---  
 GAGGACTTGTGGGTCACAGTATATTATGGGGTACCTGTGTGG--AGAGATGCACAA---  
 ACCTCTCTGTTTTGTGCATCAGATGCTAAAGCATATGATACAGAG---GTGCATAAT-----  
 -----GTCTGGGCTACA---CATGCCTGTGTACCCACAGAC---  
 CCCAACCCACAAGAAATGGTTTTAAAA-----AATGTAACAGAAATTTTGAC-----  
 -----ATGTGGAAAAATAACATGGTGGATCAGATGCATCAGGATATA---  
 ATCAGTTTATGGGATCAAAGCCTA---AAGCCATGTGTAAAGATG---  
 ACCCCACTCTGTGTTACTTTAAACTGTACAAATGCTACAACTGCTATGAATGCTACAATTGATAAT-----  
 -----  
 -----AACATGCAGGGAGAAATAAAA---  
 AATTGTACTTTCAATGTAACCACAGAAATAAGA-----  
 GATAAGGTAAAGAAGGTACATGCACCT---  
 TTTTATAAACTTGATATAGCACCCTTGGTAACAGTGCTAGTAGTGATAACAGTTCTAGTGGTGGTAAAGGT-  
 -----  
 ACTAGGAATAATGAGTATAATGATTATATATTAATAAAATTGTAATACCTCAGCCATAGCTCAA---  
 GCCTGTCCAAAGGTCTCTTTTGACCCAATTTCCTATACATTATTGTGCTCCAGCGGGTTATGCGATTCTAAAGT  
 GTAAT---GATAAGACATTCAAT-----GGAACAGGACCATGCAATAAT-----  
 -GTCAGC---ACAGTACAATGTACACATGGAATTAAGCCAGTGGTATCAACT---  
 CAATTACTGTTAATGGTAGCCTAGCAGAAGGAGAC-----  
 ATAATAATTAGATCTGAGAATATGACAAGCAAT-----ACTAAAACAATAATAGTACATCTTAAT---  
 -----GAATCTGTATCA-----ATTAATTGTACAAGACCCAACAATAATACAAGAGAA---  
 -AGTTTAAGGATA-----GGACCAGGACAAGCA---TTA-----TATGCAACAGGAGAT-----  
 -----ATAATAGGAGATATA-----AGACAAGCACATTGT---AATATTAGTAAAGAA---  
 AGGTGGAATAAACTTTAGAAAGAGTAAAGAAAAGATTAGCA-----GAGTACTTCCCT---  
 -----AATACAACAATACTCTTTGCA-----  
 CCACCCCAGGAGGGGACCTAGAAAGTTACA--ACACATAGCTTTAATTGTAGAGGAGAA---  
 TTTAAGCAGCTTCAGGCAAGAGTCCTGGCTATAGAAAGATACCTAAAGGATCAACAGCTCCTAGGGATTTGGG  
 GCTGCTCTGGAAAACCTCATCTGCACCACTGCTGTGCCTTGGAAATGAAAGTTGGAGT-----  
 -----AATAAGTCTCAAATGAGATTTGG-----GAT-----  
 AACATGACCTGGATGCAGTGG---GATAGGGAAATCAATAATTACACAAATGAAATATAC---  
 AGATTGCTTGGGGAAATCGCAAATCCAGCAGGAG-----  
 -----  
 AAAAAATGAACAGGATTTACTAGCGCTGGACAAGTGGCAAAATCTGTGGAGTTGGTTTGACATAACAACTGGC  
 TGTGGTATATAAAAATGTTTCATAATGATAGTAGGAGGCTTGATAGGTTTAAGAATAGTTTTTTGCT---  
 GTGCTTTCTATAGTA-----AATAGAATTAGGCAGGGATACTCACCC-----  
 TTATCGTTGGCTATTAGTCTGCTTGATACCACAGCAATAGCAGTAGGTGAA---  
 GGAACAGATAGGATTGTAGAATTATATACTACGAGTTTGTAGAGCT-----  
 -----ATCTACAACATA-----CCTCGAAGAATAAGACAGGGCTTTGAAGCAGCTTTGCAG---TAA  
 >MF373137  
 GAA---ACG-----  
 GGAAATTTGGGGGCCACAGGCTATTATGGGGAACCTGTGTGG---AAAGAACCAAAC---  
 CCTACTCTATTTTGGGCATCAGATGTTAAAGGATATGAGACTGAA---GGGCACAAT-----  
 -----GTTTGGGCCACA---CATTCCTGGGTACCCACAGAC---  
 CCCAGTCCACAAGAAATGGTTTTTGAA-----AATGTACCTGAGAATTTTGAC-----  
 -----ATGTGGAAAAATAATATGGTGGAGCATATGCATCAGGATGTA---  
 ATTAGTTTAGGGGATCAAAGTCTA---AAGCCATGTGTAAAGCTG---  
 ACCTCATTTCTGTGTTACCTTAAACTGTACGGATGCTAATGTTAATATTACTGCTATCCACAATAAC-----

-----  
-----ACCATGAAGGGAGAAGTAAAA---  
AATTGTACTTTCAATGCTACCCACAGAAATAAGA-----  
GATAAGAAAAGGAAGGAATATGCACTC---  
TTTTATAGACTGGATATAGTACCACTTGATGAGGCGGAGGATAACAAA-----  
-----  
ACTGATGATAGCAAAAACCTTTAGTGATTATAGATTAATAAATTGTAATACCTCAGCCATAACACAA---  
GCCTGTCCAAAGGTCTCTTTTAACCCAATTCCTATACATTATTGTGCTCCAGCTGGTTTTGCGATTCTAAAGT  
GTAAT---AATAAGACATTTAAT-----GGAACAGGATCATGCAATAAT-----  
-GTCAGC---ACAGTACAATGTACACATGGAATTAGACCAGTGGTATCAACT---  
CAACTATTGTTTAAATGGTAGTCTAGCAGAAGAAGAG-----  
ATAATAATTAGATCAGAAAATCTGACAGACAAT-----ACCAAAACAATAATAGTACATCTTAAT----  
-----GAATCTGTAGAA-----ATTAATTGCACAAGACCCGGCAATAACACAAGAAGG-----  
-AGTGTAAGGATA-----GGACCAGGACAAGCA--ATC-----TATGCAACAGGAGCC-----  
-----ATAATAGGAGATATA-----AGACAAGCACATTGC---AACATTAGTGAAGCA---  
AAATGGAATAAACTTTACAACAGGTAGCGGCAAAATTAAAA-----GAACACTTC-----  
-----AATAAAACAATAATCTTTAGA-----  
CCATCCTCAGGAGGGGACCCAGAAATTACA--ATGCATAGCTTTAATTGTGGGGGAGAA--  
TTTAAGCAGCTCCAGGCAAGAGTCCTGGCTATAGAAAAGATACCTAAAGGATCAACAGCTCCTAGGGATTTGGG  
GCTGCTCTGGAAGACTCATCTGCACCACTAATGTGCCTTGGAACCTCTAGCTGGAGT-----  
-----AATAAATCTAAAGAGGAGATTTGG-----GAG-----  
AACATGACCTGGATGCAGTGG---GATAGAGAAATTAATAATTATACAGGCATAATATAC---  
AGGTTGCTTGAACAATCGCAAAACCAGCAGGAA-----  
-----  
AAGAATGAACAAGATTTACTAGCATTGGACAAATGGGAAAATCTGTGGAGTTGGTTTAGCATATCAAAATGGC  
TGTGGTATATAAAAATATTTCATAATGATAGTAGGAGGATTAATAGGTTTAAGAATAATTTTTTGCT---  
GTGCTTTCTATAGTA-----AACAGAGTTAGGCAGGGATACTCACCA-----  
TTGTCATTTGCTATTAATCTATTTGATACTGTAGCAATAGCAGTAGCTGAA---  
GGAACAGATAGGATTTTAGAATTGTTACAAGGAATTGGAAGAGCT-----  
-----ATCTATAACATA-----CCTAGAAGAATAAGACAGGGCTTTGAAGCAGCTTTGCAA--TAA  
>MF373139  
GTG--ATG-----  
GGGAACCTTGTGGGTCACAGTCTATTATGGGGTACCTGTGTGG--AAAGAAGCAAAT---  
CCTACTCTATTTTGTGCATCAGATGCTAAAGCATATGAGACAGAG--GTGCATAAT-----  
-----GTCTGGGCTACA--CATGCCTGTGTACCCACAGAC--  
CCCAACCCACAAGAAATGGTCTTGGA-----AATGTAACAGAAAATTTTAAC-----  
-----ATGTGGAAAAATGCCATGGTGGATCAGATGCATCAGGATGTA--  
ATCAGTTTATGGGATCAGAGCCTA--AAGCCATGTGTAAAGTTG--  
ACCCCACTTTGTGTTACTTTAACTGTGAGAATATTACTATTACCAATACTAACAATACTGTTACCAATACTA  
CTAATACTCCC-----  
-----CGCCTCAATGACACCACAAGTGGAGAAATAAAA---  
AATTGCTCTTTCAATATAACCACAGAAGTAAGA-----  
GATAAGGAACGGAAAGCATATGCTCTT--TTTTATAGGCTTGATATAATACCACTTAATGAGGGGAGTAAT-  
-----  
AGCAATTCTAGTAATTCTAGGGATTATAGATTAATAAATTGTAATACCTCAGCCATAACACAA---  
GCCTGTCCAAAGGTCTCTTTTGACCCAATTCCTATACATTATTGTGCTCCAGCTGGTTATGCGATTCTAAAGT  
GTAAT---AATAAAACATTTCAAT-----GGAACAGGACCATGCCATAAT-----  
-GTCAGC---ACAGTACAATGTACACATGGAATCAAACCAGTGGTATCAACT---  
CAGCTATTGTAAATGGCAGTCTATCAGAAGGAGGT-----  
ATAATAATTACATCTCAAAACCTGACAAACAAT-----GCCAAAATAATAATAGTACAGCTTAAC----  
-----CAATCTGTACAA-----ATTAATTGTACAAGACCCAACAATAATACAAGAAAA-----  
-AGTATAAGGATA-----GGACCAGGACAACA--TTC-----TATGCAGCAGGAGAG-----  
-----CTAATAGGAGATATA-----AGACAAGCACATTGT---AACATTAGTAGAACG---  
AAGTGGAATCAAACCTTTAGCAGAGGTAAAGGAAAAATTAGAA-----AAGTACTTCCCT----  
-----AATAAAACAATAACATTTAAA-----  
CCATCCTCAGGAGGGGACCTAGAAATTACA--ACACATAGCTTTAATTGTAGAGGAGAA--  
TTTAAGCAGCTCCAGGCAAGAGTCCTGGCCATAGAAAAGATACCTACAGGATCAACAGCTCCTAGGGATTTGGG  
GCTGCTCTGGAAGAACTCATCTGCACCACTGCTGTGCCTTGGAACAATAGTTGGAGT-----  
-----AATAAAAATCAAACGGAAATTTGG-----GAT-----

AACATGACCTGGATGCAGTGG---GATAGAGAAATTGATAATTATACAAACACAATATAC---  
AGGTTGCTTGAAGACTCGCAAACACAGCAGGAG-----  
-----  
AAAAATGAAAAAGAGTTACTAGAAATTGGACAAATGGCAAAATCTGTGGAGTTGGTTTGAATAACAAGATGGC  
TATGGTATATAAAAAATATTTCATAATGATAGTAGGAGGCTTGATAGGTTTAAGAATAATTTTTTGCT---  
GTGCTCTCTGTAGTG-----AATAGAGTTAGGCAGGGATACTCACCA-----  
TTATCGTTTGCTATTAGTCTGCTTGATACTACAGCAATAGCAGTAGCTGAA---  
GGAACAGATAGGATTATAGAATTAATACAAAGAATTTGGAGAGCT-----  
-----ATCCGC---ATA-----CCTAACCAAATAAGACAGGGCTTTGAAGTAGCTTTACTA---TAA  
>KP411839  
GGG---GAA-----  
GGAAACTTGTGGTTCACAGTTTATTATGGGTTACCTGTGTGG--ACAGAACCACAAA---  
CCTACTCTATTTGGTGCTTCAAATGCTAAAGGATATAAAACAGAA---GTGCATATG-----  
-----GTCTGGGCTACA---CATGCTTGTGTACCCACAAAC---  
CCCAACCAACAGGACCTAGTTTTGGAA-----AATGTAACAGAAAATTTTAGC-----  
-----ATGTGGAAAAATGACATGCTGGATCAGATGCATGAGCATGTA---  
GTCATATTCAGTGATCAAGGCCTA--AAACCATATGCAAAAGTG---  
ACCTCACTCACAGTCACTGTCACTGTACTGATTTGAAAAATAGTACTTTCACTAGCACC-----  
-----  
-----AGCAGTAATGATACCTCAATGGTAACGGAGAGTGAGGAAATGAAA---  
AATTGTTCTTTCAATATAACCACAGAAATAAGG-----  
GATAAGAAAAAGAAGGAATATGCCTC--TTTTATAGACTTGATATAGTACCACTTAAGGAGAAGGAGGAC-  
-----  
-----  
AATAACAGTGATTATAGATTAATAAATTGTAATACCTCAGCCGTAACACAA---  
GCTTGTCACAAAGTTTCTTTTGACCCAATTCTTATACATTATTGTGCTCCAGCTGGTTATGCGATTCTAAAGT  
GTAAT--ACAAGACATTCAAT-----GGAACAGGACCATGCAACAAT-----  
-GTCAGC--ACGGTACAATGTACACATGGAATTAAGCCAGTGGTATCAACT---  
CAATTACTGTAAATGGTAGTCTAGCAGAAAAAGAG-----  
ATAGTAATTAGATCTGAAAATCTGACAAACAAT-----GCCAAAATAATAATAGTACATCTTAAC---  
-----GAATCTGTAGAA-----ATTGTGTGTACAAGGCCCAACAATAATACCAGGAAA---  
-AGTATGAGGATA-----GGACCAGGACAAACA--TTC-----TATGCAACAGGAGAC-----  
-----ATAATAGGAAATATA-----AGACAAGCATATTGT--AACATTAGTGAAAAA---  
AGATGGAATGAACTTTACAAAAGGTAAGTAAAAAATTAAGA-----GAACACTTCCCT---  
-----AATAAAACAATAAAATTTAAA-----  
CCATCCTCAGGAGGGGACCTAGAAATTACA--ACACATAGCTTTAATTGTGGAGGAGAG---  
TTTAAGCAGCTCCAGACCAGAGTCCCTGGCTGTAGAAGGATACCTAAAGGATCAACAGCTCCTACGGATTTGGG  
CTGCCTCTGGAAGAACTCATCTGCACCACTAACGTGCCTTGACTCCTAGTTGGAGT-----  
-----ATTAAGTCCCAGGAAGAGATCTGG-----AAT-----  
AATATGACCTGGATGCAGTGC--GATAGAGAGATTACATATACCGAAAACCTTAATACAG--TGCCTAGCT-  
----CCGCAACCGCAAAATGGAAA-----  
-----  
GATACTACTTGCAATGGCGACTTGGATTTGGACAAATGGCAAAATCTGTGGAAGTGGTTTAACATACCAAAGT  
GGCTGTGGTATATAGAATTATTCATAATGATAGTAGGAGGCTTGATAGGTTTAAGAATAATTTTTTGCT---  
GTGCTTTCTATAGTA-----AATAGAGTTAGGCAGGGATACTCACCT-----  
TTGTCATTTGCTATTAGTCTGTTTGATACCTTAGCAATAGTAGTAGCTGAA---  
GGAACAGATAGAATTATAGAAGTAGTACGAGGATTTTTTAGAGCT-----  
-----ATCTACAACATA-----CCTAGAAGAATAAGACAAGGCTTAGAAGCAGCATTGCAA---TAA  
>MF373148  
GTG---GGA-----  
GAGGACTTGTGGGTACAGTTTATTATGGGGTACCTGTGTGG--AAAGAAGCAAAA---  
ACTACTCTATTTTGTGCATCAGATGCTAGAGCATATGAGAAAGAA--GTACATAAT-----  
-----GTCTGGGCTACA---CATGCCTGTGTACCCACAGAC---  
CCCAACCCACAAGAAATGATTTGAAA-----AATGTAACAGAAAATTTTAAC-----  
-----ATATGAAAAATGACATGGTAGATCAGATGCATGAGGACATA---  
ATCAGTTTATGGGACCAAGGCCTA--AAGCCATGTGTAATAATTG---  
ACCCCGCTATGTGTCACTTTAAATTGTAGTAATGTTAATAGTAGTAGTGTGCTAATAGTACCAATAGTACCA  
ATAGTGGCAAT-----  
-----ATTACCAATGCCAATACTACCAATGTCAATATTACCGATAGTGATATGAAG---  
AATTGCTCTTTCAATATAACCACAGAACTAAGA-----

GATAAGACAAGGAAAGAATATGCACTT--TTTATAGACCTGATATAGTACCATTATCCAAT-----  
-----  
-----  
TCCAATTCCAGTGAGTATATATTAATAAATTGTAATAGCTCAACAATAACACAA---  
GCCTGTCCAAAAGTCTCTTTTGAACCAATTCCTTTGCATTATTGTGCTCCTGCTGGGTATGCGCTTTTAAAGT  
GTAGG---GATACAAAATTCAAT-----GGAACAGGACCATGCAAGAAT-----  
-GTCAGC---ACAGTACAATGTACACATGGAATTAAACCAGTGGTATCAACT---  
CAATTGTTGCTAAATGGTAGTTTAGCAGAAGATGAG-----  
ATAGTAATTAGATCTGAAAATATAACAAATAAT-----GCTAAAACAATAATAGTACAGCTTAAA-----  
-----GAGCCTGTAAACA-----ATTATGTGTACAAGGCCCAACAATAATACAAGGAAA-----  
-AGTATGAGGATA-----GGACCAGGACAAACA---TTC-----TATGCAACAGGAGCC-----  
-----ATAATAGGAAATATA-----AGACAAGCACATTGT---AACATTAGTAGAACT---  
AATTGGACTAAAACCTCTACAAGAGGTAGGTGAAAAATTACAA-----GAACAAGAACTCTTTAAG-  
-----AATAAAACAATAAAATTTTACA-----  
GAACACTCAGGAGGGGACATAGAGATTACA---ACACATAGCTTTAATTGTGGAGGAGAA---  
TTTAAGCAGCTTCAGGCAAGAGTCCTGGCTCTAGAGAGATACCTAAGGGATCAACAGCTCCTAGGAATTTGGG  
GCTGCTCTGGAAGAACTCATCTGCACCACTGCTGTACCTTGGAACTCTAGTTGGAGT-----  
-----AATAAATCTTATGATGCTATTTGG-----GAT-----  
AACATGACTTGGATGCAATGG---GAGAAAGAAATTGATAATTACACAGACACAATATAC---  
AGGTTGCTTGAAGTCTCGCAAACCAGCAGGAA-----  
-----  
CAAAAATGAAAGGGATTTACTAGCATTGGACAAGTGGAAACAATCTGTGGAGTTGGTTTAACATATCAAATTGGC  
TATGGTATATAAAGATATTCTAATGATAGTAGGAGGCTTAATAGGTTTAAGAATAATTTTTTGCT---  
GTGCTCTCTATAGTG-----AATAGAGTTAGGCAGGGATACTCACCA-----  
TTATCGTTGGCAATTAGCCTGTTTGATACCCTAGCAATAACAGTAGCTGAA---  
GGAACAGATAGAATTATAGAAATAGTACAAAGAACTTGGAGAGCT-----  
-----ATCTGCAACATA-----CCTAGAAGAATAAGACAAGGCTTTGAGGCAGCTTTGCAA---TAG  
>KP411836  
GTG---ATG-----  
GGGGGAATGTGGGTCACAGTCTATTATGGGGTACCTGTGTGG---AAGGAAGCAAAA---  
ACTACTCTATTTTGTGCATCAGATGCTAATGCACAGGAGAAAGAA---GTGCATAAT-----  
-----GTCTGGGCCACA---CATGCCTGTGTTCCACAGAC---  
CCCGACCCAAAAGAAGTAAGGTTGGAA-----AATGTAACAGAAAATTTTAAC-----  
-----ATGTGGAAAAATCACATGGTGGATCAGATGCATGAGGATATA---  
ATCAGTTTATGGGATCAAAGTCTA---AAGCCATGTGTAAAGTTG---  
ACCCCACTCTGGGTCACTTTAACTGCAGTGTGTTACTGCCAATGCTACTGTCAATAAT-----  
-----GACAGGGCAAAGGAAATGAAA---  
AACTGCTCTTTCAATATAACTACAGAAATAAGA-----  
GATAAAAAAAGGAGTGAATATGCACTT--TTTTATAAACTTGATATAGTGCCACTTGATGAG-----  
-----  
AATAAGGAGAATAATGGCAGTGAATATAGATTAATAAATTGTAATACCTCAGCTGTAACACAA---  
GCCTGTCCAAAGGTCACTTTGTATCCAATTCCTATACATTATTGTGCTCCTGCTGGTTATGCGATTCTAAAGT  
GTAAT---AACAGGACATTCAAT-----GGAACAGGACCATGCAATAAT-----  
-GTCAGC---ACAGTACAATGTACACATGGAATTAAACCAGTGGTATCAACT---  
CAACTACTGTTAAAATGTAGTCTAGCAGAAGAAGAG-----  
ATAGTAATCAGATCTGAAAATCTGACAAACAAT-----GTCAAAATAATAATAGTACATCTTAAA-----  
-----GAACCTGTACCA-----ATTGAGTGATAAGACCCGGCAATAATACAAGGAAA-----  
-AGTATGAGGATA-----GGACCAGGACAAACA---TTC-----TATGCAACAGGAGCC-----  
-----ATAATAGGAAATATA-----AGAAAAGCATATTGT---AACATTAATGAAAGT---  
AAGTGGAATGATACTTTACAAAAGGTAGGTAAGAAATTAGAA-----GAACACTTCCCT-----  
-----AATAAAACAATAAAGTTTGAA-----  
CCATCCTCAGGAGGGGACCTAGAAATTACA---ACACATAGCTTTAATTGTAGAGGAGAA---  
TTTAAGCAGCTCCAGGCAAGAGTCCTGGCTTTAGAAAAGATACCTAAGGGATCAACAGCTCCTAGGAATTTGGG  
GCTGCTCTGGAAGAACTCATCTGCACCACTAATGTGCCTTGGAAATCAGAGTTGGAGT-----  
-----AATAGAACTTATGATGAAATTTGG-----GAC-----  
AACATGACATGGATGCAGTGG---GATAAAGAAGTTAGTAATTACACAGACACAATATAC---  
AGGTTGCTTGAAGTCTCGCAAACCAGCAGGAG-----  
-----

AAAAATGAAGAGGATTTATTAGCATTGGACAGCTGGAAAAATCTGTGGAGTTGGTTCACCTATATCAAACCTGGC  
TGTGGTACATAAAAAATATTTCATAATGATAGTAGGGGGCTTGATAGGTTTAAGAATAATTTTTTGCT---  
GTGATCTCTATAGTG-----AATAGAGTTAGGCAGGGATACTCACCT-----  
TTGTCATTGGCTATTAGTCTGCTTGATACCGTAGCAATAATAGTAGCTGAG---  
GGAACAGATAGGATTATAGAATTAATACAAAGAATTTGTAGAGCT-----  
-----ATCTGCAACATA-----CCTACAAGAATAAGACAGGGCTTAGAAGCAGCTTTGCAA---TAA  
>MF373159  
GTG---AAG-----  
GGGAACCTGTGGGTCACAGTCTATTATGGGGTACCTGTGTGG---AAAGAAGCAAAC---  
CCTCCTCTATTTTGTGCATCAGATGCTAAAGGATATGAAACAGAA---GTGCATAAT-----  
-----GTCTGGGCTACA---CATGCCTGTGTACCCACAGAC---  
CCCAGCCCACAGGAACTAAAATTGGAA-----AATGTAACAGAAAATTTTAACT-----  
-----ATGTGGAAAAATGGCATGGTGGATCAGATGCATCAGGATGTA---  
ATCAGTTTATGGGATCAAAGCCTA---AAGCCATGTGTAAAGTTG---  
ACCCCACTCTGTGTTACTTTAAACTGTAGTGCTGTTAAGGTTACCAATAATAGTAGCACTGATAATGACACTT  
ACACAGCCACA-----  
-----GAAGAAATGAGA---  
AATTGTTCTTTCAATATGACCACAGAGCTAAGA-----  
GATAAGAGACAGAGGAGATATGCACTC---TTTTATAAACTTGATATAGTACAACCTTAATAATAATGATTCT-  
-----  
-----  
GGTAATGGATATAAAGAATATAGATTAATAAATTGCAATACCTCAACCATAACACAA---  
GCCTGTCCAAAGGTCTCTTTTGCTCCAATTCCTATACATTATTGTGCTCCAGCTGGTTATGCGATTCTAAAAT  
GTAAT---GATGAGAAATTCAAT-----GGAATAGGACCATGCAATAAA-----  
-GTCAGT---ACAGTACAATGTACACATGGAATTAAGCCAGTGGTATCAACT---  
CAATTCTTGTAAATGGTAGTTTAGCAAAAGAGGAA-----  
ATAATGATTAGATCTGAAAATCTAACCGACAAT-----GCCAAAATAATAATAGTACAGCTTAAT----  
-----AAATCTGTAGAA-----ATTAATTGTATGAGACCCAGCAATAATACAAGAGAA-----  
-AGTGTAAGGATA-----GGACCAGGACAAATG---TTC-----TATGCAACAGGTGAC-----  
-----ATAATAGGGGATATA-----AGACAAGCACATTGT---AACATTAGTAAAGTA---  
CAGTGGAGAGAACTTTACAGAAGGTAGCAGGACAATTAATA-----AGTCACTTCATA-----  
-----AATAAAACAATAAAATTTGAC-----  
CAATCCTCAGGAGGGGACCTAGAAATTACA--ACACATAGCTTTAATTGTAGAGGAGAA---  
TTTAAGCAGCTCCAGACAAGAGTCCCTGGCCATAGAAAGATACCTAAAGGATCAGCAGCTCCTAGGGATTTGGG  
GCTGCTCTGGAAGAACTCATCTGCACCACTAATGTACCTTGGAACTCTAGTTGGAGT-----  
-----AATAAATCTCACGAGGAGATTTGG-----AAT-----  
AACATGACCTGGGTACAGTGG---GAAAGAGAAATAGATAAATACACAGAAACAATATAT---  
CAGTTGCTTGAGATCTCGCAAAACCAGCAGGAG-----  
-----  
AAAAATGAACAGGATTTACTAGCATTGGACAAATGGAATAATCTGTGGAATTGGTTTGGCATAACAAAGTGGT  
TGGAGTATATAAGAATATTTCATAATGGTAGTAGGAGGCTTAATAGGGTTAAGAATAATTTTTTGCT--  
GTAATTTCTATAGTG-----AATAGAGTTAGGCAGGGATACTACCA-----  
TTGTCGTTTGTCTATTAGTCTGCTTGATACCACAGCAATAGCAGTAGCTGAA---  
GGAACAGATAGGATTATAGAAGTAGTGCTAGCATTTGGAAGAGCT-----  
-----ATCTACAACATA-----CCTAGAAGAATAAGACAGGGCTTTGAAGCAGCTTTGCAA---TAA  
>MF373175  
GTG---ACG-----  
GGAAACTTGTGGGTCACAGTCTATTATGGGGTACCTGTGTGG---AAAGAACCAAGC---  
ACTACTCTATTTTGTGCATCAAATGCTAAAGGATATGACACAAAA---TTACATAAT-----  
-----GTCTGGGCTACA---CATGCCTGTGTACCCACAGAC---  
CCCAGCCCACAAGAAATGGTTTGGAA-----AATGTAACAGAAAATTTAATC-----  
-----ATGTGGAAAAATGATATGGTGGAGCAGATGCATCAGGATATA---  
ATCAGTTTATGGGATCAAAGCCTA---AAGCCATGTGTAAAGTTG---  
ACCCCACTCTGTGTTACTCTAGACTGT--AAGTATAATATTACTACTACCAGTGATAGTAAT-----  
-----  
-----AAGAACTATAATAATACAGATATGAGA---  
AATTGTTCTTTCAATATAACCACAGATCTAAGA-----  
TATAAGAAAGAGAACACATATGCTCTT---TTTTATAATCGTGATATAGAAAAAGGGGGTGAT-----  
-----  
-----

GGTAATGATTCTTATATATTAACATGTTGTATCACCTCCGCTATAACAAAA---  
GCCTGTCCAAAGGTCAATTTTGACCCAATTCTTATACATTATTGTGCTCCAGCTGGTTATGCGATTTTAAAGT  
GTAGG---GATGCAAACCTTCAGT-----GGGAAAGGATTATGCAGGAAT-----  
-GTCAGC---ATAGTACAATGTACACAAGGAATTAAACCAGTAGTGTCAAAT---  
CAACTGTTGTAAATGGCAGCACAGCAGAGGAGGGG-----  
ATAATAATTAGATATGAAAATCCGACAAACAAT-----GTCAAAACAATAATAGTACAGATTAAG----  
-----GAACCTGTAAAC-----ATTACCTGTATGAGACCCAACAATAATACAAGAAAA-----  
-AGTGTAAGAATA-----GGAGCAGGACAAACA---ATT-----TATGCAACAGGAGAT-----  
-----ATAATAGGAGATATA-----AGACAAGCACATTGT---AACATTAGTAAAAAA---  
ATGAGGAATCAAACCTTTATTTGAGGTAAAGAAAAAGTTAGAA-----GAACCGAACATT----  
-----AAGAATAAAACAATACAATTGCAC-----  
CACTCCTCAGGAGGGGACCTTGGAATTCCA---ACCCATAGCTTTAATTGTAGAGGGGAA---  
TTTAAACAGCTCCAGACAAGAGTCCTGGCTATAGAAAAGATACCTAAGGGATCAACGGCTCCTAGGGATTTGGG  
GCTGCTCTGGAAGAGTCATCTGCACCACCTGCTGTGCCTTGGAACCTCTAGTTGGAGT-----  
-----AACAAATCTCAAGAGGAAATTTGG-----AAT-----  
AACATGACCTGGATGCAGTGG---GAGAAAGAAATTGATAATTATACAGAAATAATATAT---  
GGGTTGCTTGAAATATCGCAAAACCAGCAGGAG-----  
-----  
AAAAATGAAAAAGATTTGCTAGAAATTGGACAAATGGCAGAACTTGTGGAGTTGGTTTGATATAACACATTGGT  
TGTGGTATATAAGAATGTTTCATCATGATAGTAGGAGGCTTGATAGGTTTAAGAATAATTTTTTGCT---  
GTGCTTTCTATAGTG-----AATAGAGTTAGGCAGGGATACTCACCA-----  
TTATCGTTTGCTATTAGTCTGCTTAATACCACAGCAATAGTAGTAGCAGAG---  
GGAACAGATAGGATTATAGAATTAGCACAAAGAATTTGGAGAACT-----  
-----ATCTGTAACATA-----CCTAGAAGAATAAGACAGGGCTTTGAAGCAGCTTTGCAA---TAA  
>MF373179  
GTG---ATG-----  
GGGAACCTTGTGGGTACAGTCTATTATGGGGTACCTGTGTGG---AAAGAAGCAAAT---  
CCTACTCTATTTTGTGCATCAGATGCTAAAGGATATGAGAGAGAA---GTGCATAAT-----  
-----GTCTGGGCTACA---CATGCCTGTGTACCCACAGAC---  
CCCAACCCACAAGAGCTATTTTGGAA-----AATATAACAGAAAATTTTAAC-----  
-----ATGTGGAAAAATGAAATGGTGGAGCAGATGCATCAGGATATA---  
ATCAGTTTATGGGATCAAAGCCTA---AAGCCATGTGTAAAGTTG---  
ACCCCACTCTGTGTTACTCTAAGATGTAGCAACGTTACCTACAAT-----  
-----  
-----GAAACCATAAGAGAAATGACA---  
AATTGCTCTTTCAATGTAACCACAGAGCTAAGA-----  
GATAGGAGACAGGAAGTATATGCACTT---TTTTATAAACTTGATGTAGTATCACTTAATAAA-----  
-----  
AGTGGTGATTATAGATTAATAAAATTGTAATACCTCAACCATAACACAA---  
GCCTGTCCAAAGGTCTCTTTTGACCCAATTCTTATACATTATTGTGCTCCCGCTGGTTATGCGATTCTAAAGT  
GTAAT---GATGAGGAATTTAAT-----GGAACAGGACCATGCGGTAAT-----  
-GTCAGC---ACAGTACAATGTTTACATGGAATTAAGCCAGTGGTATCAACT---  
CAACTATTGTTAAATGGGAGTTTAGCAGAA---AAT-----  
GTGACAATTAGATCTGAAAATCTGACAAACAAT-----GCCAAAACAATAATAGTACAGCTTAGG----  
-----GAGCCTGTATAC-----ATTAATTGTACGAGACCCAACAATAATACAAGAAAA-----  
-AGTATAAGGATA-----GGACCAGGACAAAGCA---TTG-----TATGCAACAGGAGAA-----  
-----GTAATAGGAGATATA-----AGACATGCACATTGT---AACATCAGTAAAGAA---  
AAGTGGAAGACAGCGTTAACAGGGGTAAGAGAAAGATTAAGA-----GAGCTCTTT-----  
-----AATAGAACAATACTATTTTAAC-----  
AAGTCATCAGGAGGGGACCTAGAAAGTTACA---ACACATAGCTCTAATTGTAGAGGAGAG---  
TTTAAGCAGCTCCAGACAAGAGTCCTGGCTCTAGAAAAGATACCTAAGGGATCAACAGCTCCTAGGGATTTGGG  
GCTGCTCTGGAAGAGTCATCTGCACCACCTAATGTGCCTTGGAACGGTAGTTGGAGT-----  
-----AATAGATCTCAACAGGAAATTTGG-----GAG-----  
AACATGACCTGGATGCAATGG---GAAAGAGAAATAGATAATTACACAAACATAATATAT---  
GAGTTGCTTGAAAGTCTCGCAAAACCAGCAGGAA-----  
-----  
ACAAATGAAAGAGACCTACTAGCTTTGGACAAATGGAACAATCTGTGGAGTTGGTTTAACATATCAAATTGGC  
TGTGGTATATAAGACTATTTCATAATGATAGTAGGAGGCTTGATAGGTTTAAGAATAATTTTTTGCT---  
GTGCTTTCTATAGTG-----AATAGAGTTAGGCAGGGATACTCACCA-----

TTATCGTTTGCTACTAATATGCTTGATACCACAGCAATAGCAGTAGATGAA---  
 GTAACAGATAGCATAATAGGATTCGCACAAAGAATTTGGAGAGGT-----  
 -----ATATGCAACATC-----CGTGCAAGGATAAGACAGGGCTATGAAGCAGGGGGGCAA---TAG  
 >MF373192  
 GTG---ATG-----  
 GGAAGCTTGTGGGTCACAGTCTATTATGGGGTACCTGTGTGG--AAAGAAGCAAAT---  
 CCTACTCTATTTTGTGCATCAGATGCTAAAGCATATGAGACAGAA--GTGCATAAT-----  
 -----GTCTGGGCTACA---CATGCCTGTGTACCCACAGAC---  
 CCCGACCCACAGGAACTAGTTTTAGAA-----AATGTAACAGAAAATTTTAAT-----  
 -----ATGTGGAAAAATGACATGGTGGAAACAAATGCATCAGGATATA---  
 ATTAGTTTATGGGATGAAAGCCTA--AAGCCATGTGTAAAGTTG---  
 ACCCCACTCTGTGTTACTCTAAACTGTAGTAACTATGTTGCCAACAATAGAACC-----  
 -----  
 -----AGTAATGCCACAGTTGCCCCCAAAGATATCGAAATGAAA---  
 AATTGTTCTTTCAATACAACCGCAGACCTAAGA-----  
 GATAAGAGACAAACAGCCCATGCAGTT--TTTTCTACACTAGATATAACACCACCTTGAAGCT-----  
 -----  
 -----  
 AATGGGAGCAATTATAGAATAACAAGTTGTAATACCTCAACCATAACACAA---  
 GCCTGTCCAAAGGTCTCTTTTGACCCAATTCCTATACATTTTGTGCTCCAGCTGGGTATGCGATTCTAAAGT  
 GCAAT---AATAAAACATTCAAT-----GGAACAGGACCATGCACTAAT-----  
 -GTCAGC--ACAGTACAGTGTACACATGGAATCAAACCAGTGGTATCTACT---  
 CAACTATTATTAAATGGTAGTTTAGCAGAAGGAGAT-----  
 GTGATAATCAGATCTGAAAATCTGACAAACAAT-----GCCAAAACAATAATAGTACAGCTTAAT----  
 -----GAAACTGTACAA-----ATTAATTGTACAAGACCCAACAATAATACAAGAAAA-----  
 -AGTATAGGGATA-----GGACCAGGACAAACA--TTC-----TATGCAGCAGGAGCC-----  
 -----ATAATAGGAGATATA-----AGACAGGCACATTGT--AACATTAGTGGAGAA---  
 CAATGGAATAAACTTTAGAAAAGGTAATAGGAAAATTAAAA-----GAGCACTTTTCC---  
 -----AATAAAACAATACTGTTTAAT-----  
 CAATCCTCAGGAGGGGACCCAGAAATTACA--ACACATAGCTTTAATTGTAGAGGAGAA--  
 TTTAAGCAGCTCCAGGCAAGAGTCCCTGGCTCTGGAAAGATACCTAAGGGATCAACAACCTCCTAGGGATTTGGG  
 GCTGCTCTGGAAGAACTCATCTGCACCACTGCTGTGCCTTGGAAATTCTAGTTGGAGT-----  
 -----AATAGATCTCAAGATGAGATTTGG-----CAA-----  
 AACATGACATGGATGCAATGG--GAGAGAGAAATTGACAATTATACAGACACAATATAC--  
 AGGTTGCTTGAAGTCTCGCAAACCCAGCAGGAA-----  
 -----  
 ACAAATGAAAAGGATTTATTAGCTCTTGATAAATGGCAGAATCTGTGGAATTGGTTTGGCATAACAAAATGGC  
 TGTGGTATATAAAAATATTATAATGGTAGTAGGAGGCTTGATAGGTTTAAGAATAATTTTTTGCT--  
 GTGCTTTCTATAATA-----AATAGAGTTAGGAAGGGATACTACCA-----  
 TTATCGTTTGCTATTAATCTGTTTGATACCGCAGCAATAGCAGTAGGTGCA--  
 GGAACAGATAGGATAATAGCCTTTGCACAAGCAATTTGGAGAGCT-----  
 -----ATCCGTCACATA-----CCTACAAGGATAAGACAGGGCTTTGAAGCAGCTTTGCAA--TAA  
 >KP411835  
 GGG-----  
 AACTTGTGGGTCACAGTCTATTATGGGGTACCTGTATGG--AAAGAAGCCAAC---  
 CCTACTCTATTTTGTGCATCAGATGCTAAAGCATATAAGACAGAA--ATGCATAAT-----  
 -----GTCTGGGCTACA---CATGCCTGTGTACCTACAGAC---  
 CCTAGCCACAGGAAATAGTTTTGAAA-----AATGTATCAGAAAATTTTAAT-----  
 -----ATGTGGAAAAATGGCATGGTGGAAACAGATGCATCAGGATATA---  
 ATCAGTTTATGGGATCAAAGTCTA--AAGCCATGTGTAAAGTTG---  
 ACCCCACTCTGTGTTACCTTAGACTGTAGTAATAATATTACTAATAATGTTACTACTAACAGT-----  
 -----  
 -----AATGTTATTATCCCTACAATGAGACAATAGGAGACATGAAA---  
 AATTGTTCTTTCACTACAACCACAGTGATAAGA-----  
 GATAAGAAGCAGACAGCATATGCATTT--TATTATAGGCTTGATATAGTCCCCATTAAGGAT-----  
 -----  
 -----  
 AAGAATGAGAGTAATAGTGAATATAGATTAATAAATTGTAATATCTCAACCATGACACAA---  
 GCTTGTCCAAAGGTCTCTTTTGAGCCAATTCCTATACATTATTGTGCTCCAGCTGGTTATGCGATTCTAAAGT  
 GTAAT---AATAAGACATTCAAT-----GGAACAGGACTATGCAATAAT-----

-GTCAGC---ACAGTACAGTGTACACATGGAATTAAACCAGTGGTATCAACT---  
CAGCTATTGTTTAAATGGGAGTATAGCAGAAAGTGAC-----  
ATAATAATTAGATCTGAGAATCTGACAAACAAT-----GCCAAAATAATAATAGTACAGCTTAAT----  
-----GAATCTGTAGAA-----ATTAATTGTACAAGACCCAACAATAATACAAGAAGA-----  
-AGTGTAAGGCTA-----GGACCAGGACAAACA---TTC-----TATGCAACAGGAGAC-----  
-----ATAATAGGAGATATA-----AGACAAGCACATTGT---AACATTAGTAGAGAC---  
AAATGGAATACAACCTTTAAACCAGGTAAGGGGAAAATTAAAA-----GAGCACTTT-----  
-----AATAAAACAATAACATTTGAA-----  
CCTTCCTCAGGAGGGGACCTAGAAATTACA---ACACATAGCTTTAATTGTGGAGGAGAA---  
TTTAAGCAGCTCCAGACAAGAGTCCTGGCTATAGAAAAGATACCTAAGAGATCAACAGCTCCTAGGGATTTGGG  
GCTGCTCTGGAAGAACTCATCTGCCCACTGCTGTGCCTTGGAACAGTAGTTGGAGT-----  
-----AATAAGTCTCAAGATGAAATTTGG-----AAG-----  
AACATGACCTGGATGCAGTGG---GATAAAGAAATTGATAATTATACATCTGTTAAATGC---  
CAGTTTAGCGGAAAGTGCCATAATAATCAGGTC-----  
-----AGAAAAATACACAAACAATTACCAAATAAC---  
AATAGGACAAATCTGTGGAATTGGTTTGGCATATCAAATTGGCTGTGGTATATAAAAAATATTCATAATGATAG  
TAGGAGGCTTAATAGGTTTAAAGAATAATTTTTGCT---GTGCTTTCTATAGTG-----  
AACAAAGTTAGGCAGGGATACTCACCA-----  
TTGTCGTTTGTATTATTTTTGTTTAATACCCACCAATAGTAGTAGTGAAA---  
GAACCAGATAGGTTTATGAAATTATTCCAAAGAGTTGGAAGAGTT-----  
-----ATTTCCAACATC-----CTTAGAGAATTAAGCCAGGGTTTGGAATAGTTTTTCCAA---TAA  
>MF373198  
GTG---ATG-----  
GGGAACTTGTGGGTACAGTCTATTATGGGGTACCTGTGTGG---AGAGAAGCAAAT---  
CCTCCTCTATTTTGTGCATCAGATGCTAAGGCATATGAGACAGAA---AAACATAAT-----  
-----GTCTGGGCTACA---CATGCCTGTGTACCCACAGAC---  
CCCAAACCACAGGAATTAGTTTTGGAA-----AATGTAACAGAAAATTTTAAAC-----  
-----ATGTGGAATAATGGCATGGTGGATCAGATGCATCAGGATATA---  
ATCAGTTTATGGGATCAAAGCCTA---CAACCATGTGTAAAGTTG---  
ACCCCACTCTGTGTCACTTTAAACTGTACTAATGATATTAGTAATGATATTAGTAAT-----  
-----GGTACGTCAATAATAAGGTACCACGGAGACATGAAA---  
AATTGCTCTTTCAATATAACCACAGAATAAGA-----  
GATAAGCAAAGAAAGAATATGCACCT--TTTTATAAACTTGATATAGTATCACTTGGGAATAACAAT---  
-----  
GGTAATAACAATAAGACTGTGGAGGAGTATCGATTAATAAACTGTAATGCCTCAACCATAAAACAA---  
GCCTGTCCAAAGGTCTCTTTTGACCCAATTCTTTACATTATTGTGCTCCAGCTGGTTATGCGATTCTAAAGT  
GTAGG---GATGCAAACCTTCACT-----GGAAAGGGACCATGCAAAAAT-----  
-GTCAGC---ACAGTACAATGTACGCATGGAATTAAACCAGTGGTATCAACC---  
CAACTATTGTTTAAATGGTAGTGTAGCAGAAAATGAG-----  
ACAATAATTAGATCTGAGAATCTGACAAACAAT-----GCCAAAATAATAATAGTACAGCTTAAG---  
-----CAACCTGTACAA-----ATTAAGTGTACAAGACCCAACAATAATACAAGAAAA---  
-GGCATAGGACTA-----GGAGCAGGACACGCA---TTC-----TATGCAACAGATAGG-----  
-----ATATTAGGAAATATC-----AGACAAGCACATTGT---AACATTAGTAGTGACAA---  
GACTGGAATAAACTTTAGATGATGTAAAAACACAATTACAA-----AGACACTTCCAG---  
-----AATAAAACAATAGCATTTCAA-----  
CCAGCCTCAGGAGGGGACCTAGAAATTACA---ACACATAGTTTTTAAGTGTAGAGGAGAA---  
TTTAAGCAGCTCCAGACAAGAGTCCTGGCTATAGAAAAGATACCTACAGGATCAACAGCTCCTAGGGATTTGGG  
GTTGCTCTGGAAGAACTCATCTGCACCCTAATGTGCCTTGGAAGTCTAGTTGGAGT-----  
-----AATAAATCTGAAGAGGAGATTTGG-----GGT-----  
AACATGACCTGGATGCAGTGG---GATAGAGAAATTAAATAATTATACAGGATATATATAC---  
CAGTTACTTGAAGTCTCGCAACACCAGCAGGAG-----  
-----  
AAAAATGAAAAAGATTTACTAGCATTGGACAAATGGCAAGACCTGTGGAGTTGGTTTAGCATAACAAAATGGT  
TGTGGTATATAAAAAATATTCATAATGATAATAGGAGGCTTGATAGGTTTAAAAATAATTTTTTGCT---  
GTGCTTTCTATAGTG-----AATAGAGTTAGGCAGGGATACTCACCA-----  
TTGTCGTTTCGCTATTAATCTGCTTGATACCACAGCAATAGCAGCAGCTGAA---  
GGAACAGATAGGATAATAGCCGTAGCAAGAAGAATTTGGAGAACT-----  
-----TTCTGTAACATA-----CCTACAAGAATAAGACAGGGCATAGAAGCAGCTTTGCTA---TAA

>HM215318

GGG---GTG-----  
GGAAACTTGTGGGTCACAGTTTATTATGGGGTACCTGTGTGG---AGGGAAGCAAAA---  
ACTACTCTATTCTGTGCATCAGATGCTAAAGCATATGATAAGGAA---GTGCATAAT-----  
-----GTCTGGGCTACA---CATGCCTGTGTTCCACAGAC---  
CCCAACCCACAAGAAATGGTTATGGAA-----AATGTAACAGAAAATTTTAACT-----  
-----ATGTGGAAAAATGACATGGTGGATCAGATGCATGAGGATATA---  
ATCAGTTTATGGGATCAAAGCCTA---AAGCCATGTGTAAAGTTG---  
ACCCCACTCTGTGTTACCTTACGCTGTACTAATGTTACCAGGAATGATAATATT-----  
-----  
-----ACCCACAATGATACCGCGGATGCAGAAATGAAA---  
GATTGCTCTTTCAATGTAACCACAGAAATAAGG-----  
GATAAAACAAAGAAAGTGC GTTCACTT---TTTTATAGAGTAGATTTAGTATCACTTGATAATAGTAATAGT-  
-----  
-----  
AATGATAATAGTAATAGTAGTGAATATATATTAATAAAATTGTAATACCTCAACCATAACACAA---  
GCCTGTCCAAAGGTCACTTTTGACCCAATTCCTATACATTATTGTGCTCCAGCTGGGTATGCGATTCTAAAGT  
GCAAC---AATAAGACATTCAAT-----GGGACAGGACCATGCAATAAT-----  
-GTCAGC---ACAGTACAATGTACACATGGAATTAAGCCAGTGGTATCAACT---  
CAACTACTGTTAAATGGTAGTCTAGCAGAAAGAGAG-----  
ATAATAATTAGATCTGAAAATCTGACCAACAAT-----GCCAAAACAATAATAGTACAGTTTAAT----  
-----CAATCTGTAGAA-----ATTGTGTGTATAAGACCTGCCAATAATACAAGGAAG-----  
-AGTACCAGAATA-----GGACCAGGACAAGTA---TTC-----TATACAAATGAT-----  
-----ATAATAGGAGATATA-----AGACGAGCACATTGT---AACATTAGTAGAGGG---  
AATTGGAGTAAAACCTTTACAAGAGGTAGGTAAGAAATTAAAA-----GAATATTTTC-----  
-----CCTAAAAATATAACATTTGCA-----  
CCACACTCAGGAGGGGACCTAGAAATTACA--ACACATAGCTTTAATTGTGGAGGAGAA---  
TTTAAGCAGCTCCAGGCAAGAGTCCTGGCTATAGAAAGATACCTAAAGGATCAACAGCTCCTAGGGATTTGGG  
GCTGCTCTGGAACACATCTGCACCACTGCTGTGCCTTGGAAACCACTTGGAGT-----  
-----AATAAGACTGAAGAAGAAATTTGG-----GGT-----  
AACATGACCTGGATGCAGTGG---GATAGAGAAATTAGTAATCACACACACAATCTAC---  
AGGTTGCTTAAAGATTTCGAAACCCAGCAAGAA-----  
-----  
CAAAATGAGAAAGATTTATTAGCATTGGACAGTTGGCAAAGTCTGTGGAATTGGTTTAGCATAACAAAATGGC  
TGTGGTATATAAAAATATTTCATAATGATAGTAGGAGGCTTGATAGGGTTAAGAATAATTTTTTGCT---  
ATGCTATCTATAGTA-----AATAGAGTTAGGCAGGGATACTCACCT-----  
TTGTCATTTGCTATTAGTCTATTTGATACCATAGCAATAGCAGTAGCTGAA---  
GGAACAGATAGGATTATAGAAGTAATACAAAGAATTTGTAGAGCT-----  
-----ATCTACAACATA-----CCTAGAAGAATAAGACAGGGCTTTGAAGCAGCTTTGCTA--TAA  
>KX907415  
GGG---ATG---GGG-----  
AGGGACTTGTGGGTCACAGTCTATTATGGGGTACCTGTGTGG---AAAGAAGCAAAG---  
ACTACTCTATTCTGTGCATCAGATGCTAAAGCATATGAGAGAGAA---GTGCATAAT-----  
-----GTCTGGGCTACA---CATGCCTGTGTACCCACAGAC---  
CCCAACCCACAAGAAATGGTTTGGAAA-----AATGTAACAGAAAATTTT-----  
-----AGGTGGGAAAATGACATGGTAGATCAGATGCATGAAAATATA---  
ATCGATTTATGGGATCAAAGCCTA---AAGCCATGTGTAAAGTTG---  
ACTCCACTCTGTGTCACCTTTAAATTGTAGCAATGTTAATAGCAATGTTAATGTTACCAGTAATGGTACTGCTA  
GCCAAGGTAAT-----  
-----GCTACCTACACTAATAGAATGGAGGAAGAAATAAAA---  
AACTGCTCTTTCAATATAACCACAGAAATAAGA-----  
GGTAAGAAACAGAAAGTACATGCACCT---TTTTATAAACTTGATGTAGTACCACTTAATGGGGAT-----  
-----  
AGTAGCAACTCTAGTGAGTATAGATTAATAAATTGTAATACCTCAGCCATAACACAA---  
GCCTGTCCAAAGGTCTCTTTTGACCCAATTCCTATACATTTTGTGCTCCAGCTGGTTATGCGATTCTAAAGT  
GTAAT---GATAAGACATTCAAT-----GGAACAGGACCATGCAATAAT-----  
-GTCAGC---ACAGTACAATGTACACATGGAATTAAGCCAGTGATATCAACT---  
CAACTACTGTTGAATGGTAGCCTAGCAGAAGGAGAG-----  
ATAATAATTAGATCTAAAAATCTGACAGACAAT-----GTCCAAACAATAACGGTACATCTTAAT----

-----GAATCTATAAGC-----ATTAATTGTACAAGACCCAATAATAATACAAGAAAA-----  
 -AGTATAAGGATA-----GGTCCAGGACAAATA---TTC-----TATGCAACAGGAGAC-----  
 -----ATAATAGGAGACATA-----AGAGAGGCACATTGT---AACATTAGTGCAAGC---  
 CAATGGAATGCAGCTTTAAAAGGTGTAAAGGCAAAATTAAAA-----GAACACTTCTCT-----  
 -----AATAAAACAATAAACTTTTACA-----  
 ACATCCTCAGGAGGGGACCTAGAAATTACA---ACACATAGCTTCAATTGTAGGGGAGAA---  
 TTTAAGCAGCTCCAAGCAAGAGTCCTGGCTATAGAAAGATACCTAAAGGATCAACAGCTCCTAGGGCTTTGGG  
 GCTGCTCTGGAAGAACTCATCTGCACCACTGCTGTACATTGGAACGACAGTTGGAGT-----  
 -----AATAAATCTGTAATAGATATTTGG-----GAT-----  
 AACATGACCTGGATGCAGTGG---GATAAAGAAATTAGGAATTACACAAACACAATATAC---  
 AGGTTGCTTGAAGACTCGCAAACCCAGCAGGAG-----  
 -----  
 AAAAAATGAAAAAGATTTATTAGCATTGGACAGTTGGAAAAAGTTTGTGGAATTGGTTTGCCATATCAAAGTGGC  
 TGTGGTATGTAAAAATATTCATAATAATAATAGGAAGCTTGATAGGTTTAAGAATAATTTTTTGCT---  
 ATGCTCTCTATAGTG-----AATAGAGTTAGGCAGGGATACTCACCT-----  
 TTGTCGTTTGTCTGTTAGTCTGTTTGATACCATAGCAATAGCAGTAGCTGAA---  
 GGAACAGATAGGATTATAGAGTTAATACAAAGATTTTGTAGAGCT-----  
 -----ATCCGCCACATA-----CCTACAAGAATAAGACAAGGCTTTGAAGCAGCTTTGCAA---TAA  
 >KX907398  
 GGG-----  
 AACTTGTAGGTCACAGTCTATTATGGTGTACCTGTGTGG---AAAGAAGCAAAA---  
 ACTACTCTATTCTGTGCATCAGATGCTAAAGGATATGAGAAAGAA---GTGCATAAT-----  
 -----GTCTGGGCTACA---CATGCCTGTGTACCCACAGAC---  
 CCCAACCCACAAGAAATAGTTATGGGA-----AATGTAACAGAAAATTTTAAAC-----  
 -----ATGTGGAAGAAATGACATGGTGGATCAGATGCATGAAGATATA---  
 ATCAGTTTATGGGATCAAAGCCTA---AAGCCATGTGTAAAGTTG---  
 ACTCCACTCTGTGTCACTTTAAATTGTAGTAATATTAATAACTAGTAGTGATAGTAATGGA-----  
 -----  
 -----CAGGATACCTACAATGATAGCCTGGGGAGGGAAGAAATGAAA---  
 AAATGCTCTTTCAATATAACCACAGAAGTAAGA-----  
 GACAAGAAAAAGAGCGTGTATGCACCT---TTTTATAAACTTGATATAGTACCCTTAATGAG-----  
 -----  
 -----  
 AGTAACAGCAACTCTAGTGAGTATAGATTAATAAAATTGTAATACCTCAGTCATAACACAA---  
 GCCTGTCCAAAGGTCTCTTTTGACCCAATTCCCTATACATTATTGTGCTCCAGCTGGTTATGCGATTCTAAAGT  
 GTAAT---AATAAGACATTCAAT-----GGGACAGGACCATGCCATAAT-----  
 -GTCAGC---ACAGTACAATGTACACATGGAATTAAGCCAGTGATATCAACT---  
 CAACTACTGTTTAAATGGTAGCCTATCAGAAGAAGGG-----  
 ATAATAATTAGATCTGAAAATCTGGCAAATAAC-----GTCAAGACAATAATAGTACATCTTAAT---  
 -----AAATCTATAGAA-----ATTGTGTGTACAAGACCCAACAATAATACAAGAAAA---  
 -AGTATAAGGATA-----GGACCAGGACAAACA---TTC-----TTTGCAACAGGTGAT-----  
 -----ATAATAGGAGACATA-----AGACTAGCATATTGT---AACATTAATAGAAAA---  
 AAATGGAATGAACTTTACACAAGGTAGAAGAAAAATTAAAA-----GAACACTTCAGG---  
 -----GGTAAACTATAAGATTTCTA-----  
 CCACACTCAGGAGGGGACCTAGAAATTACA---ACACATAGCTTTAATTGTAGGGGAGAA---  
 TTTAAGCAGCTCCAGACAAGAGTCCTGGCTATAGAAAGATACCTAAAGGATCAACAGCTCCTAGGGATTTGGG  
 GCTGCTCTGGAAGAACTCATCTGCACCACTAATGTGCCTTGGAACCTCCAGCTGGAGT-----  
 -----AATAAATCTGTAGGAGATATTTGG-----GAT-----  
 AATATGACCTGGATGCAGTGG---GATAAAGAAATTAGTAATTACACAGACACAATATAC---  
 GGTTCGCTTGAAGAATCACAAAACCAGCAGGAA-----  
 -----  
 AGAAATGAACAAGATTTATTGGCATTGGACAGTTGGAAAAATCTATGGAATTGGTTTGACATAACAAATTGGC  
 TATGGTATATAAAAAATATTCATAATGATAGTAGGAGGCTTGATAGGTTTAAGAATAATTTTTTGCT---  
 ATACTTTCTATAGTG-----AATAGAGTTAGGCAGGGATACTCACCT-----  
 TTGTCGTTTGTCTGTGCTGCTTGATACCATAGCAATAACAGTAGCTGAA---  
 GGAACAGATAGGATTATAGAAAATAATACAAAGAATTTGTAGAGCC-----  
 -----ATCTGCAACGTA-----CCTAGAAGAATAAGACAGGGCTTTGAAGCAGCTTTGCAA---TAA  
 >KX907425  
 GTG---GTG-----  
 GGGAACTTGTGGGTACAGTCTATTATGGGGTACCTGTGTGG---AAAGAAGCAAG---

ACTACTCTATTCTGTGCATCAGATGCTAAAGCATATGAGAGAGAA---GTGCATAAT-----  
-----GTCTGGGCTACA---CATGCCTGTGTACCCACAGAC---  
CCCAACCCACAAGAAATAGTTTGGAA-----AATGTAACAGAAAATTTT-----  
-----AGGTGGGAAAATGACATGGTAGATCAGATGCATGAAAATATA---  
ATCAGTTTATGGGATCAAAGCTTA---AAGCCATGTGTAAAGTTG---  
ACTCCACTCTGTGTCACTTTAAATTGTAGCAATGTTACCCGTGATGAT-----  
-----  
-----GGCATGGAGAGAGAAATAAAA---  
AACTGCTCTTTCAATATAACCACAGAAATAAGA-----  
GATAAGAAACAGAAAGTGTATGCACTT---TTTTATAAACTTGATGTAGTACCACTTAATGGAGAT-----  
-----  
-----  
AATAGCAACTCTAGTGAGTATAGATTCATAAATTGTAATACCTCAGCCATAACACAA---  
GCCTGTCCAAAGGTCTCTTTTAACCCAATTCTCTACATTTTTGTGCTCCAGCTGGTTATGCGATTCTAAAGT  
GTAAT---AATAAGACATTCAAT-----GGAACAGGACCATGCAGTAAT-----  
-GTCAGC---ACAGTACAATGTACACATGGAATTAAGCCAGTGATATCAACT---  
CAGCTACTTTTAAATGGTAGCCTAGCAGAG---GAG-----  
ATAATAATTAGATCTAAAAATCTGACAGACAAT-----GCCCAAACAATAACAGTACATCTTAAG---  
-----GAATCTATAAGC-----ATTATTTGTACAAGACCCAATAATAACAAGAAAA-----  
-AGTATAAGGATA-----GGTCCAGGACAAAACA---TTC-----TATGCAACAGGAGAC-----  
-----ATAATAGGAGACATA-----AGAGAGGCACATTGT---AACATTAGTACAAAC---  
GAATGGAATACAACCTTTAGAAAAGTGTAAACGGCAAAACTAGAA-----AAACACTTCCCT---  
-----AATAAAACAATAAAATTTCAA-----  
CCATCCTCAGGAGGGGACCTAGAGATTACA--ACACATAGCTTTAATTGTAGGGGAGAA---  
TTTAAGCAGCTCCAGGCAAGAGTCTTGGCTATAGAAAGATACCTAAAGGATCAACAGCTCCTAGGGCTTTGGG  
GCTGCTCTGGAAGAACTCGTCTGCACCTCTGCTGTGCCTTGGAAACGAAAGTTGGAGT-----  
-----AATAAATCTGTAACAGATATTTGG-----GGT-----  
AACATGACCTGGATGCAGTGG---GATAAAGAAATTAGTAATTACACACACACAATATAC---  
AGGTTGCTTGAAGACTCGCAAAACCCGGCAGGAG-----  
-----  
AAAAATGAAAAAGATTTATTAGCATTGGACAGTTGGAAAAATCTGTGGAATTGGTTTAGCATATCAAATTGGC  
TGTGGTATATAAAAAATATTATAATAATAGTAGGAAGCTTAATAGGTTTAAGAATAATTTTCGCT---  
ATGCTCTCTATAGTG-----AATAGAGTTAGGCAGGGATACTCACCT-----  
TTGTCGTTTGCTGTTAATCGGTTTGATACCATAGCAATAGCAGTAGCTGAA---  
GGAACAGATAGGATCATAGAATTAATACAAAGAAGTTGTAGAGCT-----  
-----ATCTGCAACATA-----CCTACAAGAATAAGACAAGGCTTTGAAGCAGCTTTGCAA---TAA  
>KX907428  
GTG---TTG-----  
GGGAACCTTGTGGGTACAGTCTATTATGGGGTACCTGTGTGG---AAAGAAGCAAAG---  
ACTACTCTATTCTGTGCATCAGATGCTAAAGGATATGAAAAAGAA--GTACATAAT-----  
-----GTCTGGGCTACA---CATGCCTGTGTACCCACAGAC---  
CCCAACCCACAAGAAATGGTTTGAAG---AATGTAACAGAAAATTTT-----  
-----AGGTGGGAAAATGACATGGTAGATCAGATGCATGAAAATATA---  
ATTAATTTATGGGATCAAAGCCTA---AAGCCATGTGTAAAGTTG---  
ACTCCACTCTGTGTCACTTTAAATTGTAACAATGTTAATGTTACCAGTAATGGTACTGCTAACCATGGTAATG  
GTACTGCTAGC-----TATGGTAATGATACCTACACTAAGAGCATGGAGGGAGAAATAAAA---  
AATTGCTCTTTTAAACATAACCACAGAAATAAGA-----  
GACAAAAACGAAAAGTGCATGCACTC---TTTTATAAACTTGATGTAATACCACTTAATGGGGAG-----  
-----  
-----  
AATTCTAGTGAGTATAGATTCATAAATTGTAATACTTCAGCCATAACACAA---  
GCTTGTCCAAAGGTCTCTTTTGAACCAATTCTTATACATTTTTGTGCTCCAGCTGGTTATGCGATTCTAAAGT  
GTAAT---AATAAGACATTTAAT-----GGAACAGGACCATGCAATAAT-----  
-GTCAGC---ACAGTACAATGTACACATGGAATTAAGCCAGTGGTATCAACC---  
CAACTACTGTTGAATGGTAGCCTAGCAGAAGGAGAG-----  
ATAATAATTAGGACTAAAAATCTGACAGACAAT-----GCTCAAACAATAACAGTACATCTTAAT---  
-----AAATCTATAAGC-----ATTAATTGTACAAGACCCAATAATAACAAGACGA-----  
-AGTATAAGGATA-----GGTCCAGGACAAAACA---TTC-----TATGCAACAGGAGAC-----  
-----ATAATAGGAGACATA-----AGACAGGCACATTGT---AACATTAGCATGAAA---

GAATGGAATGCAACTTTAGAAAAGTGTAAGGCCAAAACCTAAAC-----GAATACTTCCAT----  
 -----GGTAACACAATAGAATTTAGA-----  
 GAACACTCAGGAGGGGACATAGAAATTACA---ACACATAGCTTTAATTGTATGGGAGAA---  
 TTTAAGCAGCTCCAGGCAAGAGTCTTGGCTATAGAAAGATACCTAAAGGATCAACAGCTCCTAGGGCTTTGGG  
 GCTGCTCTGGAAGAACTCATCTGCCCCACCGCTGTGCCTTGGAAACAACAGTTGGAGT-----  
 -----AATAAATCTGTAGAAGATATTTGG-----GAT-----  
 AACATGACCTGGATGCAGTGG---GATACAGAAATTAGTAATTACACACAGACAATATAC---  
 AAGTTGCTTGAAGACTCGCAAACCCAGCAGGAG-----  
 -----  
 AAAAAATGAAAAAGATTTATTAGCATTGGACAGTTGGAAAAAGTCTGTGGACTTGGTTTGACATATCAAACCTGGC  
 TGTGGTATATAAGAATATTCATAATAATAATAGGAGGCTTGATAAGTTTAAGAATAATTTTTTGCT---  
 GTGCTTTCTATAGTG-----AATAGAGTTAGGCAGGGATACTCACCT-----  
 CTGTCGTTTTGCTGTTAGTCTGCTTGATACCATAGCAATAGCAGTAGCTGAA---  
 GGAACAGATAGGATTATAGGAGTAATACAAAGAGTTGGTAGAGCT-----  
 -----ATCTGCAACATA-----CCTAGAAGAATAAGACAAGGCTTTGAAGCAGCTTTGCAA---TAA  
 >HQ615976  
 GGG-----  
 AACTTGTGGGTCACAGTATATTATGGGGTACCTGTGTGG---GAAGAAGCAAAT---  
 CCTGATCTATTTTGTGCATCAGATGCTAAAGCATATGATACAGAA---GTGCATAAT-----  
 -----GTCTGGGCTACA---CATGCCTGTGTACCCACAGAC---  
 CCCAACCACACAAGAAATGATTTTGGAA-----AATGTAACAGAAAAGTTTGAC-----  
 -----ATGTGGAAGAATGATATGGTGGAACAGATGCATCAGGATATA---  
 ATCAGTTTATGGGATCAAAGTCTA---AAGCCATGTGTAAAGTTG---  
 ACCCCACTCTGTGTTATTTTAAACTGTATGGATGTTAATATTACCGCAATAGT-----  
 -----  
 -----ACCTGGAGGGAAGAAATAAAA---  
 AATTGCTCTTTCAATGTAACCACAGAAATATAT-----  
 GATAAGAAACAGAGAACACATGCACCT--TTTTATAAACTTGATATAGTATCACTCAATGATAATAAG---  
 -----  
 -----  
 AGTAGTGATAATAAGAGTAGTGACTATAGATTAATAAATTGTAATACTTCAGCCATAGCACAA---  
 GCCTGTCCAAAGATCTCTTTTGACCCAATTCCTATACACTATTGTGCTCCAGCGGGTTATGCGATTCTCAAGT  
 GTAAC---AATAAAACCTTTAAT-----GGAACAGGACCATGCAATAAT-----  
 -GTCAGC---ACAGTACAGTGTAACATGGAATTAAGCCAGTGGTATCAACT---  
 CAGCTACTGTTTAAATGGTAGTTTAGCAGAAGAGGAG-----  
 ATAATAATTAGATCTGAAAACATATCAGACAAT-----GGCAAAACAATAATAGTACAGCTTAAG---  
 -----GAACCTGTAGAA-----ATTGAATGTATAAGACCCAACAATAATACAAGAAAT-----  
 -AGTATAAGGATA-----GGGCCAGGACAAGCA---TTC-----TATGCAACAGGAGAC-----  
 -----ATAATAGGAGATATA-----AGACAGGCACATTGT---AACATTAATAAAACA---  
 AAATGGAATGAACTTTACAAGGGGTAGGAGAAAAATTAGCA-----AAGTACTTCCCT---  
 -----AATAAAACAATACAATTTGCA-----  
 CCATCCTCAGGAGGAGACCTAGAAATTACA---ACACATAGCTTTAATTGTAGAGGAGAA---  
 TTTAAGCAGCTTCAGGCAAGAGTCCTGGCTATAGAAAGATACCTAAAGGATCAACAGCTCCTAGGGATTTGGG  
 GCTGCTCTGGAAGAACTCATCTGCACCACTTCTGTGCCTTGGAACTCTAGTTGGAGT-----  
 -----AACAAATCTCAGGAGGAAATTTGG-----AAT-----  
 AACATGACCTGGATGCAGTGG---GAGAAAGAAATTAGTAATTACACAGACACAATATAC---  
 AGATTGCTTGAAGACTCGCAAACCCAGCAGGAG-----  
 -----  
 AAAAAATGAAAAGGATTTACTAGCATTGGACAAATGGCAAAATTTATGGAGTTGGTTTAGTATAACAAATTGGC  
 TGTGGTATATAAAAAATATTCATAATGATAGTAGGAGGCTTAATAGGTTTAAGAATAATTTTTTGCT---  
 GTGCTCTCTATAGTG-----AATAGAGTTAGGCAGGGATACTCACCC-----  
 TTATCGTTTTGCTATTAATCTGCTGGACATCAGCAATAGCAACAGCTGAA---  
 GGAACAGATAGGATTATAGAATTAATACAAAGAATTTGTAGAGCT-----  
 -----ATCTGCAACATA-----CCTAGAAGAATAAGACAGGGTTTAGAAGCAGCTTTGCAA---TAA  
 >KF526226  
 GTG---AAG-----  
 GGGAACTTGTGGGTCACAGTCTATTATGGGGTACCTGTGTGG---AAAGAAGCAAAC---  
 CCTTCTCTATTTTGTGCATCAGATGCTAAAGCATATGAGGCAGAA---GCGCATAAT-----  
 -----GTCTGGGCTACA---CATGCCTGTGTACCCACAGAC---  
 CCCAACCACACAAGAATTGGCTTTTGAA-----AATGTAACAGAAAATTTTAAC-----

-----ATGTGGAAAAATGGCATGGTGGATCAGATGCATCAGGATATA---  
 ATCAGTTTATGGGATCAAAGCCTA---AAGCCATGTGTAAAGTTA---  
 ACCCCACTCTGTGTTACTTTAGACTGT---AACTACAATATCACCAGTAATAGTACTAATACCCACAAT-----  
 -----  
 -----GGTACCAATATCCACAATAGTACCACAGAGGGAGATATGAAA---  
 AATTGTTCTTTCAATGCAACCACAGAAATAAGC-----  
 GATAAGAAAAGGAAGGAACATGCACCT---TTTTATAAACTTGATATAGTACCACTTAAAAAC-----  
 -----  
 -----  
 AATTCTAGTGATTATAAAATTAATAAATTGTAATACCTCAGCCATAACACAA---  
 GCATGTCCAAAGATCTCTTTTGACCCAATTCTTATACATTATTGTGCTCCAGCTGGTTATGCGATTCTCAAGT  
 GTAAT---GATAAGGCATTCAAT-----GGAACAGGACCATGCAAGAAT-----  
 -GTCAGC---ACAGTACAATGCACACACGGAATTAACCAGTGGTATCAACT---  
 CAACTATTGTTAAATGGTAGTATAGCAGAAAACGGG-----  
 ACAATAATTAGATCTGAAAATCTGACAAACAAT-----GCCAAAACAATAATAGTACAGCTTGAT----  
 -----GAACCTGTAGAA-----ATTAAGTGTACGAGACCCAACAATAATACAAGAAAA-----  
 -AGTATAAGGATA-----GGACCAGGACAAAACA---TTA-----TATGCAACAGGAGAA-----  
 -----ATAATAGGAGATATA-----AGACAAGCACATTGT---AACATTAGTGGAGGA---  
 AGATGGAATGCAACTTTAGAAAAGATAAAGAAAAAATTAGAA-----GAGCACTTCCCT----  
 -----AATAAAACAATAAAATTTGCA-----  
 CCATCCTCAGGAGGGGACCCAGAAATTACA---ATGCATAGCTTTAATTGTGGAGGAGAA---  
 TTTAAGCAGCTCCAGACAAGAGTCTGGCTATAGAAAAGATACCTACAGGATCAACAGCTCCTAGGGATTTGGG  
 GCTGCTCTGGAAGAACTCATCTGCACCACTGCTGTGCCTTGGAACCTTAGTTGGAGT-----  
 -----AATAAGACTCAAGAGGAGATTTGG-----AAT-----  
 AACATGACCTGGATGCAGTGG---GAGAGAGAAATTGATAATTATACAGGAACAATATAC---  
 AGGTTGCTTGAAATCTCGCAAAACCAACAGGAA-----  
 -----A-  
 AAAAAATGAAAAAGATTTACTAGCATTGGACAAATGGCAAAATCTGTGGAATTGGTTTGACATAACACAATGGC  
 TGTGGTATATAAAAAATATTACATAATGATAGTAGAAGGCTTGATAGGTTTAAGAATAATTTTTTGCT---  
 GTGCTCTCTATAGTG-----AATAGAGTTAGGCAGGGATACTACCA-----  
 TTATCGTTTGCGATTAATCTGCTTAATACCTTAGCAATAGCAGTAGCTGAA---  
 GGAACAGATAGAATTATAGAATTTCTACAAAGAACTTGAGAGCT-----  
 -----ATCTGTAACATA-----CCTAGAAGAATAAGACAGGGCTTTGAAGCAGCTTTGCTA---TAA  
 >AY463229  
 GTG---ATG-----  
 GGAAACTTGTGGGTACAGTATATTATGGGGTACCTGTGTGG---AAAGAAGCAAAA---  
 ACTACTCTATTCTGTGCATCAGATGCTAAAGCATATGAGAGGGAG---GTGCATAAT-----  
 -----GTCTGGGCTACG---CATGCCTGTGTACCCACAAAC---  
 CCCAACCCACAAGAAATAGTCTTGGA-----AATGTAACAGAAAATTTTAAC-----  
 -----ATGTGGGAAAATGACATGGTGGATCAGATGCATGAGGATATA---  
 ATCAGTTTATGGGATCAAAGTCTA---AAACCATGTGTAAAGTTG---  
 ACCCCACTCTGTGTCACTTTAACTGTACAAAGGCAAATTTTACAAATGTAAATTAT-----  
 -----  
 -----ACCAATATAAATGAGACAAATATTGAAGAAATAAGA---  
 AATTGCACTTTTAAATACAACCACAGTAATAAGA---  
 GATAAGAAACAGGAAGCGTATGCACCT---TTCTATAGACCTGATATAGTACCACTTAGTAAG-----  
 -----  
 -----  
 AATAGCTCTGAGTATATATTAATAAATTGCAATACCTCAACCATAACACAA---  
 GCCTGTCCAAAGGTCACCTTTTGACCCAATTCTTATACATTATTGTGCTCCAGCTGGTTATGCGATTCTAAAGT  
 GTAAT---AATAAGACATTCAAT-----GGGACAGGACCATGCCAGAAT-----  
 -GTCAGC---ACAGTACAATGTACACATGGAATTAACCAGTGGTATCAACT---  
 CAACTACTGTTAAATGGTAGCCTAGCAGAAGGGGAG-----  
 ATAATAATTAGATCTGAAAATCTGACAAACAAT-----GCCAAAACAATAATAGTACAGCTTAAT----  
 -----AAATCCATAGAC-----ATTGTGTGCACAAGACCCGGCAATAATACAAGAAAA-----  
 -AGTATAAGGATA-----GGACCAGGACAAAACA---TTC-----TATGCAACAAATGAC-----  
 -----ATAATAGGAAACATA-----AGACAAGCACATTGT---AACATTAGTGCAAAT---  
 GAATGGAATAGAACTTTTACAATGGGTAGGTGAAAAAATTGGAA-----GAACACTTCCCT----  
 -----AATAAAACAATAGAATTTAAA-----  
 CCATCCTCAGGAGGAGATCTAGAAATTACA---ACACATAGTTTTAATTGTAGAGGAGAA---

TTTAAGCAGCTCCAGACAAGAGTCCTGGCTATAGAAAGATACCTAAAGGATCAACAGCTCCTAGGGCTTTGGG  
 GCTGCTCTGGAAACTCATCTGCACCACTAATGTACCTTGGAAGCTCCAGTTGGGGT-----  
 -----AATAAATCTCAAACAGATATTTGG-----GAT-----  
 AACATGACCTGGATGCAGTGG---GATAAAGAAATTAGTAATTACACAGACACAATATAC---  
 AAGTTGCTTGAAGACTCGCAAACCAGCAGGAG-----  
 -----  
 AAAAAAGAAAAAGATTTGTTAGCATTGGACAGTTGGAAAAATCTGTGGAATTGGTTTGACATAACAAAATGGT  
 TATGGTATATAAAAAATATTCATAATGATAGTAGGAGGCTTGATAGGTTTGAGAATAATTTTTTGCT---  
 GTGCTATCTATAATA-----AATAGAGTTAGGCAGGGATACTCACCT-----  
 CTATCATTTGCTATTAGTCTGCTTGATACCATAGCGATAGCAGTAGCTGAA---  
 GGAACAGATAGGATTCTAAAAATTCACACAAGGGCTTGGTAGAGCT-----  
 -----ATCCGCAACCTA-----CCTAGAAGATTAAGACAAGGTTTTGAAGCAGCTTTGCTA---TAA  
 >JX845587  
 -----AGG-----  
 GGAAATTTTTGGGTCACAGTCTATTATGGGGTACCTGTGTGG---AAAGAGGCCAAAA---  
 ACTACTCTATTCTGTGCATCAGATGCTAAAGCATATGAGAAAGAA---GTGCATAAT-----  
 -----GTATGGGCTACA---CATGCCTGTGTACCCACAGAC---  
 CCCAACCCACAAGAAATAGTTATGGGA-----AATGTAACAGAAAATTTTAACT-----  
 -----ATGTGGAATAATGACATGGTAGATCAGATGCATGAGGATATA---  
 ATCAGTTTATGGGATCAAAGTCTA---AAACCATGTGTAAAGTTG---  
 ACCCCACTCTGTGTTACTTTAAATTGTACAAATGCTAATGTTACAAATGCTAACAGTGCTAATGTTACA---  
 -----  
 -----AGTGCTAACAGTACTGCTAATTACAGTAATAGCATGTATGGAGAAATAAAA---  
 AATTGCTCTTTCAATACAACCACAGAAATAAGG-----  
 GATAAGCAACAGAAAGCGTATGCACCT---TTTTATAGACCTGATTTAGTACCACCTTAAAGAG-----  
 -----  
 -----  
 AATAACTCTAGTGGAGAGTATATATTAATAAATTGCAATTCCTCAACCATAACACAA---  
 GCCTGTCCAAAGGTCTCTTTTGACCCAATTCCTATACATTATTGTGCTCCAGCTGGTTATGCGATTCTAAAGT  
 GTAAT---AATAAGACATTCAAT-----GGGACAGGACCATGCCAAAAT-----  
 -GTCAGC---ACAGTACAATGTACACATGGAATTAAGCCAGTGGTATCAACT---  
 CAACTACTGTTAAATGGTAGCCTAGCAGAAGGGGAT-----  
 ATAATAATTAGATCTGAAAATCTGACAGACAAT-----GTCAAAACAATAATAGTCCATCTTAAT---  
 -----GAATCTGTAGCA-----ATTAATTGTACAAGACCCAACAATAATACAAGAAAA---  
 -AGTATAAGGATA-----GGACCAGGACAAACA---TTC-----TATGCAAATGAC-----  
 -----ATAATAGGAGACATA-----AGACAAGCATATTGT---AGCATTAGTGGTGGA---  
 AAATGGAACACAACCTTAGAGCAGGTAAAGAAAAAATTACAA-----GAACACTACCCT---  
 -----AATAAAACAATAACAATTTAAA-----  
 GAACCCGTAGGAGGGGATCTAGAAATTACA---ACACATAGCTTTAATTGTAGAGGAGAA---  
 TTTAAGCAGCTCCAGGCAAGAGTCTTGGCTATAGAAAGATACCTAAAGGATCAACAGCTCCTAGGACTTTGGG  
 GCTGCTCTGGAAAGCTCATCTGCACCACTAATGTACCTTGGAAGCTCCAGTTGGAGT-----  
 -----AATAAATCTCAAGAAGACATTTGG-----GAT-----  
 AACATGACCTGGATGCAGTGG---GATAGAGAAATTAGTAATTACACAGGCACAATATAC---  
 AGGTGCTTGAAGACTCGCAAAGCCAGCAGGAG-----  
 -----  
 AAAAAAGAAAAAGATTTATTAGCATTGGACAAGTGGAAAGACCTGTGGACTTGGTTTGACATATCCAATTGGC  
 TGTGGTATATAAGAATATTCATCATGATAGTAGGGGGCTTGATAGGCTTGAGAATAATTTTTTGGT---  
 GTACTCGCTATAGTG-----AAAAGAGTTAGGCAGGGATACTCACCT-----  
 TTGTCGTTTGCTATTAGTCTGCTTGATACCATAGCAATAGCAGTAGCTGAG---  
 GGAACAGATAGGATTCTTGAAGTACTACAAAGAATTGGTAGAGCT-----  
 -----ATCTGCAACATA-----CCTAGAAGAATAAGACAGGGCTTTGAAGCAGCTTTGCTA---TAA  
 >AY463235  
 GTG---ATG-----  
 GGGAACATGTGGGTCACAGTCTACTATGGGGTACCTGTGTGG---AAAGAGGCCAAAA---  
 ACTACTCTATTCTGTGCATCAGATGCTAAGGCATATGAGAAAGAA---GTGCATAAT-----  
 -----GTCTGGGCCACA---CATGCTTGTGTACCCACAGAC---  
 CCCAACCCACAAGAAATGGAGTTGGAA-----AATGTAACAGAAAATTTTAACT-----  
 -----ATGTGGAATAATGACATGGTGGATCAGATGCATGGGGATATA---  
 ATCAGTTTATGGGATCAAAGTCTA---AAGCCCTGTGTAAAGTTG---  
 ACCCCACTCTGTGTTACTTTAAACTGTGTCAATGTTAGCCGTACTGTTAATAGTAACAGTACTGGTAGTAGTA

AC-----  
-----AGTACTAGTAATAGTACCTACAATGATAACATGGATGGAGCTGGAGAAATAAAA---  
AATTGTTCTTTCAATATAACACAGAACTAAGA-----  
GATAAGAAAAAGAGGATACATGCACTT---TTTTATAGACTTGATATAGTACCACTTGATGGG-----  
-----  
-----  
AATAATAGTAGTAGTGAATATAGATTAATAAATTGTAATACCTCAGCCATAACACAA---  
GCCTGTCCAAAAGTCACTTTTGACCCAATTCCTATACATTATTGTGCTCCAGCGGGTTATGCGATTCTAAAGT  
GTAAT---GATAAAACATTCAAT-----GGAACAGGACCATGCAGTAAT-----  
-ATCAGC---ACAGTACAATGTACACATGGAATTAAGCCAGTGGTATCAACT---  
CAACTACTATTAAATGGTAGTCTAGCAGAAAAGGAG-----  
ATAATAATTAAATCTGAAAATATAACAGACAAT-----GTCAAAACAATAATAGTACATCTTACG----  
-----AAACCTGTAGAA-----ATTAATTGTACAAGACCCAACAATAATACAAGAAAA-----  
-GGTATAGGGATA-----GGGCCAGGACAAAACA---TTC-----TTTGCAACAGGAGCT-----  
-----ATAATAGGAGATATA-----AGACAAGCACATTGT---AACATTAGTAAAGGG---  
GCATGGAATAAACTTTACAAGAGGTAGGGGAAAAGTTAAAA-----AAGTGCTTCCCT-----  
-----GGTAAAGGAATACAATTTGCA-----  
AATCACTCAGGAGGGGACCTAGAAATTACA--ACACATAGCTTTAATTGTGGAGGAGAA---  
TTTAAGCAGCTTCAGGCAAGAGTCCTGGCTATAGAAAAGATACCTAAAGGATCAACAGCTCCTAGGGATTTGGG  
GCTGCTCTGGAAGAACTCATCTGCACCACTAGTGTGCCTTGGAACCTCTAGTTGGAGT-----  
-----AATAAATCTTATAATGCTATTTGG-----GAC-----  
AACATGACCTGGATGCAGTGG---GATATAGAAATTAACAATTACACAGACACAATATAC---  
AGGTTGCTTGAAGAATCGCAAAACCAGCAGGAA-----  
-----  
AGAAATGAACAGGAGTTATTAGCATTGGACAAATGGCAAAATCTGTTCAATTGGTTTAATATAACACAGTGGC  
TGTGGTATATAAAAATATTTCATAATGATAATAGGAGGATTGATAGGTTTAAGAATAATTTTTTGCT---  
GTACTCTCTATAGTG-----AATAGAGTTAGGCAGGGATACTCACCC-----  
TTATCGTTTGCTATTAGTCTGCTTAATACCATAGCAATAGCAGTAGCTGAG---  
GGAACAGATAGGATTATTGAAGTATTACAAAGAACTTGTAGAGCT-----  
-----ATTCGCAATATA-----CCTAGAAGAGTAAGACAGGGCTTTGAAACAGCTTTGCTA--TAA  
>DQ369995  
GTG---GTG-----  
GGAAACTTGTGGGTCACAGTCTATTATGGGGTACCTGTGTGG--AGAGAAGCAAAA---  
GCTACTCTATTCTGTGCATCAGATGCTAAAGCATATGAGAAGGAG--GTACATAAT-----  
-----GTCTGGGCTACA--CATGCCTGTGTACCCACAGAT---  
CCCAACCCACTAGAAAGGGTTTTGGAA-----AATGTAACAGAAAATTTTAAT-----  
-----ATGTGGAATAATGATATGGTGGATCAGATGCATGAGGATATA---  
ATCAGTTTATGGGATGAAAGCCTA--AAGCCATGTGTAAAGTTG--  
ATCCCACTCTGTGTCACTTTAAATTGTACTACTGCCAAAAAT-----  
-----  
-----AAGTCTGAAGAAATGAA---  
AATTGCTCTTTCAAAGTAACCACAGAATTAAGA-----  
GATAAGAAGCGCAAAGAGTATGCACTT---  
TTTTATAGACTTGATGTAGTACCACTTAATGAGACTAATGAAAGCTCTAATGAT-----  
-----  
ACTAATGGAGACTTTAGGGAATATAGATTAATAAATTGTAATACCTCAACCTTAACACAA---  
GCCTGTCCAAAGGTCACCTTTTGACCCAATTCCTATACATTATTGTGCTCCAGCTGGTTATGCGATTCTAAAGT  
GTAAT---ATAAGACATTCAAT-----GGGACAGGGCCATGCAATAAT-----  
-GTCAGT---ACAGTACAATGTACACATGGAATTAACCAGTGGTATCAACT---  
CAACTACTGTTAAATGGTAGCTTAGCAGAAGAGGAG-----  
ATAATAATTAAATCTGAAAATATAACAGACAAT-----GCTAAAACAATAATAGTACAGCTTAAT----  
-----AAAGCCATAGAA-----ATTGAGTGCATAAGACCCAGCAATAACACAGGAAGA-----  
-AGTGTAAGGATA-----GGACCAGGACAAAACA---TTC-----TATACAACCTGGAGAA-----  
-----ATAATAGGAGACATA-----AGACAAGCACATTGT---AACATTAGTGGG-----  
AATTGGGATAGAACTTTATACAATATAAGTAAAAAATTAGGA-----GAACACTTCCCT-----  
-----AATAAAAAATATAAGCTTTTAAA-----  
CCATCCTCAGGAGGGGACCCAGAGATTACA--ACACATAGTTTTTAATTGTGGAGGAGAA---  
TTCAAGCAGCTCCAGGCAAGAGTCCTGGCTATAGAAAAGATACCTAAAGGATCAACAGCTCCTAGGAATTTGGG  
GCTGCTCTGGAAGACAAATCTGCACCACTAATGTGCCTTGGAACACCAGTTGGAGT-----  
-----AATAAATCCCTAAATGATATTTGG-----AAT-----

AACATGACCTGGATGCAGTGG---GATAAAGAAATTAGTAATTACACAAACATAATATAC---  
CAGTTGCTTGAACATATCGCAAACCAGCAGGAA-----  
-----  
CAAAATGAAAAGGATTTATTAGCATTGGACAAGTGGCAGAATCTGTGGAGTTGGTTTGACATAACACATTGGC  
TATGGTATATAAAGATATTCATAATGATAATAGGAGGCTTGATAGGTTTAAGAATAATTTTTTGCT---  
GTGCTATCCATAGTA-----AATAGAGTTAGGCAGGGATACTCACCT-----  
TTGTCGTTTGCTATTAGTCTGCTTGATACCATAGCAATAGTAGTAGCTGAG---  
GGAACAGATAGGATTATAGAACTCATATTAGGAATTTGTAGAGCT-----  
-----ATCCGCAACCTA-----CCTAGAAGAATAAGACAGGGTTTTGAAGCAGCGTTGCTA---TAA  
>DQ351223  
GGG---GTG-----  
GGGAACTTGTGGGTACAGTCTACTATGGGGTACCTGTGTGG--AGAGAAGCAAAA---  
ACTACTCTATTCTGTGCATCAGATGCTAAAGCATATGAAAGAGAA---GTGCATAAT-----  
-----GTCTGGGCTACA---CATGCCTGTGTACCGACAGAC---  
CCCAACCCACAAGAACTAGTTTTGGGA-----AATGTAACAGAAAATTTTAAT-----  
-----ATGTGGAATAATGACATGGTAGATCAGATGCATGAGGATATA---  
ATCAGTATATGGGATCAAAGTCTA---AAACCATGTGTAAAGTTG---  
ACCCCACTATGTGTCACTTTAAACTGTATAGAGGCAAAAAGCTAATAGTACC-----  
-----  
-----AGTACTGGTGGTGTGGCTGGAGAAATAACA---  
AATTGCTCTTTCAATACAACCACAGAAATAAGA-----  
GATAAGAAACAGAACGTGTATGCACCT--TTTTATAGAAGTGTAGTACCCTCAAGAAG-----  
-----  
-----  
AACTCTAGTGAGTATATATTGATAAATTGCAATACCTCAACCATAACACAA---  
GCCTGTCCAACGGTCACTTTGATCCGATTCTTATACATTATTGTGCTCCAGCTGGATATGCGATTCTAAAGT  
GTAAT---AATAACACATTTAAT-----GGGACAGGGCCATGTTACAAT-----  
-GTCAGT---ACAGTACAATGTACGCATGGAATTAAGCCAGTGGTATCAACC---  
CAATTACTGTAAATGGTAGCCTAGCAGAAGGGGAG-----  
ATAATCATTAGATCTGAAAATCTGACAAACAGT-----ATCAAAACAATAATAGTACATCTTAAT---  
-----GAATCTTTAGAA-----ATTGTGTGTACAAGACCCAACAATAACAAGAAAA-----  
-GGTATAAGGATA-----GGACCAGGACAAGTA---TTC-----TATGCAACTGACGAT-----  
-----GTAATAGGAAACATA-----AGGCAAGCATATTGT---ACCATTAATGAAACA---  
AAATGGAACGAACTTTAGAAAGGGTAAAGGAGAAATTAGGA-----GACCACTTCCCT---  
-----AATAAAACAATAACCTTTGCA-----  
CCATCCTCAGGAGGGGACCTAGAAAGTTACA--ACACATAGTTTCAACTGTAGAGGAGAA---  
TTTAAACAGCTCCAAGCAAGAGTCTTGGCTGTAGAAAGATACCTAAAGGATCAACAGCTCCTAGGGCTTTGGG  
GATGCTCTGGAAGAACTCATCTGCACCACTACTGTGCCTTGGAAGTCCAGTTGGAGT-----  
-----AATAAATCTGAAGCAGATATTTGG-----GAT-----  
AACATGACCTGGATGCAGTGG--GACAGAGAAATTAGTAATTACACAGGCACAATATAC---  
AGGTTGCTTGAAGAATCGCAAACCAGCAGGAG-----  
-----  
AAAAATGAAAAGATTTATTAGCCTTGGACAGTTGGAAAAACCTTTGGAATTGGTTTGACATAACAAATTGGC  
TGTGGTATATAAAATATTTATCATAGTAGTAGGAGGCTTGATAGGTTTAAGAATAATTTTTTGGT---  
GTGCTCGCTATAGTG-----AAAAGAGTTAGGCAGGGATACTCACCT-----  
TAGTCGTTTGCTATTAATCTGCTTAATACCATAGCAATAGCAGTAGCTGAG---  
GGAACAGATAGGATTATAGAATTCGTACAAAGAATCTATAGAAGT-----  
-----ATCCGCAACGTA-----CCTACAAGAATAAGACAGGGCTTTGAAGCAGCTTTGCTA---TAA  
>DQ396388  
GTG---GTG-----  
GGGAACTTGTGGGTACAGTCTACTATGGGGTACCTGTGTGG--AAAGAAGCAAAA---  
ACTACTCTATTCTGTGCATCAGATGCTAAAGCATATGAGAAAGAA---GTACATAAT-----  
-----GTCTGGGCTACA---CATGCCTGTGTACCCACAGAC---  
CCCAACCCACAAGAATTGGTTTTGGAA-----AATGTAACAGAAAATTTTAAC-----  
-----ATGTGGAATAATGACATGGTGGACAGATGCATGAGGATATA---  
ATCAGTTTATGGGATCAAAGCCTA---AAGCCATGTGTAAAGTTG---  
ACCCCACTCTGTGTCACTTTAGACTGCAGAAATATTACCTACAATAATGTTACC-----  
-----  
-----ATTAAGGGTAATGATACCATTGAAGAAATGAAA---  
AGTTGCTCTTTCAATACAACCACAGAAATAATA-----

GATAAGAAAAACAAAGAGTATGCACTT--TTCTATAAACTTGATATAGTACAACCTTAATAAT-----  
-----  
-----  
GACAACTCTAGTGAGTATAGATTAATAAAATTGTAATAGCTCAACTATGACACAA---  
GCCTGTCCAAAGGTCTCTTTTGACCCAATTCCCTATACATTATTGTGCTCCAGCTGGTTATGCGATTCTAAAGT  
GTAAT---AATAAGACATTCAAT-----GGGACAGGACCATGCCATAAT-----  
-GTCAGC---ACAGTACAATGTACACATGGAATTAAGCCAGTAGTATCAACT---  
CAACTACTGTTTAAATGGTAGCCTAGCAGAAGGAGAG-----  
ATAATAATTAGATCTGAAAATCTGACAAACAAT-----GCCAAGACAATAATAGTACAGCTTAAT----  
-----CAATCTGTAGAA-----ATTGTGTGTATAAGACCCAACAATAATACAAGAAAA-----  
-AGTATAAGGATA-----GGACCAGGACAAGCA---TTC-----TATGCAACAGGAGAC-----  
-----ATAATAGGAAACATA-----AGACAAGCACATTGT---AACATTAATACAGGA---  
AACTGGAGTAAAACCTTTACAAAAGGCTAGCTAAAAAATTAAAA-----GAACACTTCCCT----  
-----AATAAAACAATAGAATTTAAA-----  
CCATCCTCAGGAGGGGACCCAGAAATTACA---ACACATAGCTTTAATTGTGGAGGAGAA---  
TTTAAGCAGCTCCAGGCGAGAGTCCTGGCTATAGAAAAGATACCTAAGGGATCAACAGCTCCTAGGGATTTGGG  
GCTGCTCTGGAAGAACTCATCTGCACCACTACTGTGCCTTGGAAGCTCCAGTTGGAGT-----  
-----AATAAATCTGAAGAAGAGATTTGG-----GGT-----  
AACATGACCTGGATGCAGTGG---GAGAGAGAAATTGATAATTACACAGAAACAATATAC---  
CAGTTGCTTGAAGTCTCGCAAAGCCAGCAGGAG-----  
-----  
CAAAAATGAAAAGGAGTTATTAGCATTTGGACAAGTGGCAAAATCTGTGGAGTTGGTTTAGCATAACAACTGGC  
TGTGGTATATAAAAATATTTATAATGATAGTAGGAGGCTTGATAGGTTTAAGAATAATTTTTTGCT---  
GTGCTTTCTATAGTG-----AATAGGGTTAGGCAGGGATACTCACCT-----  
TTGTCGTTTGCTATTAGCCTGCTTGATACCATAGCAATAGTAGTAGCTGAA---  
GGAACAGATAGGATTATACTAGTTATAACAAGGAATTTGTAGAGCT-----  
-----ATCCGCAACATA-----CCTAGAAGAATAAGACAGGGCTTTGAAACAGCGTTGCTA---TAA  
>DQ351228  
GTG---GGG-----  
GGAAACTTGTGGGTCACAGTCTATTATGGGGTACCTGTGTGG---AGAGAAGCAAAA---  
ACTACTCTATTCTGTGCATCAGATGCTAAAGGATATGAGAGGGAG---GTGCATAAT-----  
-----GTCTGGGCTACA---CATGCCTGTGTACCCACAGAC---  
CCCAACCCACTAGAAATAGTTTTGGGA-----AATGTAACAGAAAATTTTAAC-----  
-----ATGTGGAAAAATGACATGGTAGATCAGATGCATGAGGATATA---  
ATCAGTTTATGGGATCAAAGCCTA---AAGCCATGTGTAAAGTTG---  
ACCCCACTCTGCGTCACTTTAGCATGTGTTGATACTAATGATACCAATAATGTTAATGCTAATGCT-----  
-----  
-----ACCAAAAATGTTACCTACGATAATACCATGCCAGACATAAAA---  
AATTGCTCTTTCAATACAACCACAGAAATAAGA-----  
GATAAGAAACAGAAAGCGTATGCACTT--TTTTATAGACTGGATATAGTGCCACTTAATGAGAAGAACAAG-  
-----  
-----  
AATGAGGAGAGCAACAGTACAAAGTATATATTAATAAAATTGTAATACCTCAACCATAACACAA---  
GCCTGTCCAAAGGTCTCTTTTGACCCAATTCCCTATACATTATTGTGCTCCAGCTGGTTATGCGATTCTGAAGT  
GTAAT---AATAAGACATTCAAG-----GGGACAGGACCATGCCATAAT-----  
-GTCAGC---ACAGTACAATGTACACATGGAATTAACCAGTGGTATCAACT---  
CAACTACTGTTTAAATGGTAGCATAGCAGAAGAAGAG-----  
ATAATAATTAGATCTGAAAATCTGACAAACAAT-----GCTAAAACAATAATAGTACATCTTAAT----  
-----GAATCTGTGGAA-----ATTGTGTGCACTAGACCCAACAATAACACAAGAAAA-----  
-AGTGTAAGGATA-----GGACCAGGACAACA---TTC-----TATGCAACAGGTGCC-----  
-----ATAATAGGAGACATA-----AGAGAAGCACATTGT---AACATTAGTGAAGAA---  
AAATGGAATAGAACCTTACAAAGGGTAAGTGAAAAATTAAAA-----GAACACTTCCCT----  
-----AACAAAACAATAAGATTTTAAC-----  
TCATCCTCAGGAGGGGACCTAGAAATTACA---ACACATAGCTTTAATTGTAGAGGAGAA---  
TTTAAGCAGCTCCAGACAAGAGTCCTGGCTATAGAAAAGATACCTAAAGGATCAACAGCTCCTAGGACTTTGGG  
GCTGCTCTGGAAGAACTCATCTGCACCACTGCTGTGCCTTGGAAGCTCCAGTTGGAGT-----  
-----AATAAATCCCAAGAAGATATTTGG-----AAT-----  
AACATGACCTGGATGCAGTGG---GATAGAGAAATTAATAATTACACAAACACAATATAC---  
AGGTTGCTTGAAGACTCGCAAAACCAGCAGGAG-----  
-----

AAAAATGAAAAGGATTTATTAGCATTGGACAGTTGGAAGAGCCTGTGGAGTTGGTTTGACATAACAAATTGGC  
TGTGGTATATAAAAATATTTCATCATGATAGTAGGAGGCTTGATAGGTTTAAGAATAGTTTTTTTGCT---  
GTGCTATCTATAATA-----AATAGAGTTAGGCAGGGATACTCACCC-----  
TTGTCTGTTTGCCATTAATCTGCTTGATACCTTAGCAATAGCAGTAGGTGAA---  
GGAACAGATAGGATTATTGAAATAATACAAAGAGTTTGTAGAGTT-----  
-----ATCAGCAACATA-----CCTAGAAGAATAAGACAGGGCTTTGAAGCAGCTTTGCTA---TAA  
>DQ011175  
GGG---GTG-----  
GGAAACTTGTGGGTACAGTCTATTATGGGGTACCTGTGTGG---AAAGAAGCAACA---  
ACTACTCTATTCTGTGCATCAGATGCTAAAGCATATGAGAGGGAG---GTGCATAAT-----  
-----GTCTGGGCTACA---CATGCCTGTGTACCCACAGAC---  
CCCAACCCACTAGAAATGGTTTTTGGAA-----AATGTAACAGAAAATTTTAAAC-----  
-----ATGTGGAAAAATGATATGGTAGATCAGATGCATGAGGATATA---  
ATCAGTTTATGGGATCAAAGCCTA---AAGCCATGTGTAAAATTG---  
ACCCCACTCTGTGTCACTTTAAATTGTACAGAGTTTCATAGGAATGTTACCTGCATTAATAGTACTACC----  
-----  
-----TGCGATACAAAAATGAAAAATTGCTCCTGCAATACAGAAATGAAA---  
AATTGCTCTTTCAATGTAACCACAGAATTAAGA-----  
GATAAGAAGCACAACCAGTATGCACCT---  
TTTTATAGACTTGATATAATACCACTTAATGAGGATAGTTCTAAGAATAATTCT-----  
-----  
ACTAAGTCTAAGAGTAATTCTACTGAGGAGTGGGAGGAGTATAGATTAATAAATTGTAATACCTCAACCATAA  
CACAA---  
GCCTGTCCAAAGGTTAATTTTGACCCAATTCCTATACATTATTGTGCCCCAGCTGGCTATGCGATTCTAAAGT  
GTAAT---AATAAGACATTCAAT-----GGGACAGGACCATGCCAGAAT-----  
-GTCAGT---ACAGTACAATGTACACATGGAATTAAACCAGTGGTATCAACT---  
CAACCGCTGTTAAATGGTAGCCTAGCAGAAGAAGAG-----  
ATAATAATTAGATCTGAAAATCTGACAGACAAT-----GCTAAAACAATAATAGTACAGTTTAAG----  
-----GAATCCATAAAC-----ATTACGTGCACAAGACCCAACAACAACAAGAACA-----  
-AGTGTAAGGATA-----GGACCAGGACAAGCG---TTC-----TATGCAACAAATGAT-----  
-----ATAATAGGAGACATA-----AGACAAGCACATTGT---AACATTAGCGCAAAG---  
GACTGGAATAGAAGTTTACAAGAGGTAGGTAAAAAACTAGCA-----AATCACTTTAAT---  
-----CATAACAATAACACTTTAGA-----  
CCATCCTCAGGAGGGGATCTAGAAATTGTA--ACACATAGCTTTAATTGTAGAGGAGAA---  
TTTAAGCAGCTCCGGACAAGAGTCCCTGGCTATAGAAAGATACCTAAAGGATCAACAGCTCCTAGGAATTTGGG  
GCTGCTCTGGAAGAACTCATCTGCACCACTGCTGTGCCTTGGAAGTCCAGTTGGAGT-----  
-----AATAAATCTCTACATGACATTTGG-----GAT-----  
AACATGACCTGGATGCAGTGG--GATAAAGAAATTAGTAATTACACACAAACAATATAT---  
CAGTTGCTTGAAGAATCGCAATCCAGCAGGAG-----  
-----  
AAAAATGAAAAGATTTATTAGAATTGGACAGTTGGCAAAATCTGTGGAATTGGTTCAGTATAACAAATTGGC  
TATGGTATATAAAAATATTTCATAATGATAGTAGGAGGCTTGATAGGTTTAAGAATAATTTTTTGCT---  
GTACTATCTATAGTA-----AATAGAGTTAGGCAGGGATACTCACCT-----  
TTGTCTGTTTGCTATTAGTCTGCTTGATACCATAGCAATAGCAGTAGCTGGG---  
GGAACAGATAGGATTATAGAATTCATACAAGGAATTGGTAGAGCT-----  
-----ATCCGCAACCTA-----CCCAGAAGAATAAGACAGGGTTTTGAAGCAGCATTGCTA---TAA  
>AY901971  
GTG---GTG-----  
GGAAACTTGTGGGCCACAGTTTATTATGGGGTACCTGTGTGG---AGAGAAGCAAAA---  
ACTACTCTATTCTGTGCATCAGATGCTAAAGCATATGAGAGAGAA---GTGCATAAT-----  
-----GTCTGGGCTACA---CATGCCTGTGTACCCACAGAT---  
CCCAACCCACAAGAACTAGTTTTTGGGA-----AATGTAACAGAAAATTTTAAAC-----  
-----ATGTGGGAAAATGACATGGTGGATCAGATGCATGAAGATATA---  
ATCAGTCTATGGGATGAAAGCCTA---AAGCCATGTGTAAAGTTG---  
ACCCCACTCTGTGTCACTTTAAATTGTAATAATGTTAATACTACCCGAAGTGGTAAT-----  
-----  
-----AGTACCTACAATAATACCATGGATGCAGAAATGAAA---  
AATTGCTCTTTCAATGCAACCACAGAAGTAAGA-----  
GATAAGAAGCGCAGAGAGTATGCGCTT---  
TTTTATAGGCTAGATATAGTACCACCTTGATGGGAATAAGAACAAC-----

-----  
TCTGGTAATGAGAGCAACTCTATTGGGGAGTATAGATTAATAAATTGTAATGCCTCAACCACAACACAA---  
GCCTGTCCAAAGGTCACCTTTGACCCGATTCCCATACATTATTGTGCTCCAGCTGGTTATGCGATTCTAAAGT  
GTAAT---AATAAGACATTCAAT-----GGGACAGGACCATGCACTAAT-----  
-GTCAGC---ACAGTACAATGCACACATGGAATTAAGCCAGTGGTATCAACT---  
CAACTACTGTTAAATGGTAGTCTAGCAGAAGAGGAG-----  
ATAGTCATTAGATCTAAAAAGCTGACAGAAAGT-----GCCAACACAATAATAGTACATCTTAAT----  
-----GAATCTGTAAAA-----ATTGAGTGTACAAGACCCAGCAATAATACAAGAAAA-----  
-AGTATAAGGGTA-----GGACCAGGACAAACA---TTC-----TATGCAACAGGAGAA-----  
-----GTAATAGGAGACATA-----AGACAAGCACATTGT---AACATAAGTAAAAGT---  
AAATGGGATAGCACCTTACAAAGGGTAGGTAAAAAATTAAGA-----GAACACTTCCCT----  
-----AATAAAACAGTAATAATCTTTGAC-----  
GCATCCTCAGGAGGGGATCTAGAAATTGTA---ACACATAGCTTTAATTGTGGAGGAGAA---  
TTTAAGCAGCTCCAGGCAAGAGTCCTGGCTGTGGAAAAGATACCTACAGGATCAACGGCTCCTAGGAATTTGGG  
GCTGCTCTGGAACACATCTGCACCCTGCTGTGCCTTGGAACTCCAGTTGGAGC-----  
-----AATAAACTTACAATGATATTTGG-----GAT-----  
AACATGACCTGGATGCAGTGG---GATAAAGAAATTAGTAATTACACAGACACAATATAC---  
AAGTTGCTTGGGGAATCGCAAAATCCAGCAGGAA-----  
-----  
CAAAATGAAAAAGATTTATTAGCATTGGACAAGTGGCAAAATCTGTGGAGTTGGTTTGACATAACAAATTGGC  
TATGGTATATAAAAAATATTACATAATGATAGTAGGAGGCTTAATAGGTTTGAGAATAATTTTTTGCT---  
GTGCTATCTATAGTA-----AATAGAGTTAGGCAGGGATACTCACCT-----  
TTGTCGTTTGCTATTAGTCTGCTTGATACCATAGCAATAGCTGTAGCTGAA---  
GGAACAGACAGGATTATAGATTTAATACAAATAATTTGTAGAGCT-----  
-----ATCTACCACATA-----CCTAGAAGAATAAGACAGGGCTTTGAAGCATCTTTGCTA---TAA  
>DQ093597  
GTG---GTG-----  
GGAACTTGTGGGTCACAGTCTATTATGGGGTACCTGTGTGG---AAAGAAGCAAAG---  
ACTACTCTATTCTGTGCATCAGATGCTAAAGCATATGAAAGGGAG---GTACATAAT-----  
-----GTATGGGCTACC---CATGCCTGTGTACCCACAGAC---  
CCCAACCCACTAGAAATAGCTTTGGAA-----AATGTAACAGAAAATTTTAAC-----  
-----ATGTGGAAAAATGACATGGTGGATCAGATGCATGAGGATGTA---  
ATCAGTTTATGGGATCAAAGCCTA---AAGCCCTGTGTAAAGTTG---  
ACCCCACTCTGTGTCACTTTAACTGTATTAATGTTAATTTAACATGTAAAAACGACACTGTA-----  
-----  
-----GGATGTGGTGTAATGATACAATGGGGACAGTAATGAAA---  
AATTGCTCTTTCAATGCAACTACAGAGATAAAA-----  
GACAAGAAGCGCCAAGAGTATGCACTT---  
TTTTATAAAATTGATATAGTACCCTTAATGGGGCTGACAAATCT-----  
-----  
AATAAGAGTGATAACAACATAATGAGTATAGATTAATAAATTGTAATACCTCAACCATAACACAA---  
GCCTGTCCAAAGGTCTCTTTTGACCCAATTCCCTATACATTATTGTGCTCCAGCTGGATATGCGATTTTAAGGT  
GTAAT---AATGATACATTCAAT-----GGAACAGGACCATGCAAAAAT-----  
-GTCAGT---ACAGTACAATGTACACATGGAATTAAACCAGTGGTATCAACT---  
CAACTACTGTTAAATGGTAGCTTAGCAGAAAAAGAG-----  
ATAATAATTAGATCTGAAAAATATAACAAACAAT-----GTTAAAACAATAATAGTACAGCTTAAT----  
-----GAATCTATAGCA-----ATTGTGTGCGCAAGACCCGGCAATAACACAAGGAGA-----  
-AGTGTAAGGATA-----GGACCAGGACAAACA---TTC-----TATGCAACAGGAGAT-----  
-----ATAATAGGAGACATA-----AGACAAGCACATTGT---AACATTAGTAAAGAT---  
GATTGGAATAAAACCTTACAAAGGGTAAAAGAAAAATTAGGA-----GAACACTTCCCT----  
-----AATAAAACCATAATCTTTAAC-----  
TCATCCTCAGGAGGGGACCTAGAAATTACA---ACACATAGCTTTAATTGTAGAGGAGAA---  
TTTAAACAGCTCCAGACAAGAGTCCTGGCTGTGGAAAAGATACCTACAGGATCAACAGCTCCTAGGAATTTGGG  
GCTGCTCTGGAACACTCATCTGCACCCTAATGTACCTTGGAACTCCAGTTGGAGT-----  
-----AATAAATCTCAAAATGATATTTGG-----GGT-----  
AACATGACCTGGATGCAGTGG---GATAAAGAAATTAGTAATTACACATACACAATATAC---  
AGTTTGCTTGAAGAATCACAAATCCAGCAGGAA-----  
-----  
CAAAATGAAAAAGATTTATTAGCATTGGACAAGTGGCAAAAGTCTGTGGACTTGGTTTGACATAACAAAGTGGC  
TGTGGTATATAAAAAATATTACATAATGATAGTAGGAGGCTTGATAGGTTTGAGGATAATTTTTTGCT---

GTGCTATCTATAGTA-----AATAGAGTTAGGCAGGGATACTCACCT-----  
 TTGTCGTTTGCTATTAATCTGCTTGATACCATAGCAATAGCAGTAGCTGAG---  
 GGAACAGATAGGATTATAGACTTCCTACAAAGAATTTGTAGAGCT-----  
 -----ATCCGCAATATA-----CCTAGAAGAATAAGACAAGGTTTTGAAGCAGCTTTGCTA--TAA  
 >AY772692  
 GTG---GTG-----  
 GGGAACTTGTGGGTCACAGTTTATTATGGGGTACCTGTATGG--AGAGAAGCAAAA---  
 ACTACTCTATTCTGTGCATCAGATGCCAAGGCATATGAGAAAGAA--GTGCATAAT-----  
 -----GTCTGGGCTACA---CATGCCTGTGTACCCACAGAC---  
 CCCGACCCACAAGAAATAATCTTAGAA-----AATGTAACAGAAAATTTTAAC-----  
 -----ATGTGGAAAAATGACATGGTGGATCAGATGCATGAGGATATA---  
 ATCAGTTTATGGGATCAAAGTCTA--AAACCATGTGTAAAGTTG---  
 ACCCCACTCTGTGTCACTTTAAATTGTACAAAGGTTAATGCTACTACTGCTAAAGTTACCAGTATT-----  
 -----  
 -----AATGGTACCAGAATTAATGATTCCATGATTGAAGAAATGAGA---  
 AATTGCTCTTTCAATACAACCACAGAAATAAGA-----  
 GATAAGCCACAGAAAGCGTATGCACCT--TTTTATAAACTTGATCTAGTACCACCTTGGTGGG-----  
 -----  
 -----  
 AACAAACAAGATGACTATATATTAATACATTGCAATACCTCAACCATAACACAA---  
 GCCTGTCCAAAGGTCTCTTTTGACCCAATTCCTATACATTATTGTGCTCCAGCTGGTTATGCGATTCTAAAGT  
 GTAAT---AATGAGACATTCAAT-----GGGACAGGACCATGCCGGAAT-----  
 -GTCAGC--ACAGTGCAATGTACACATGGAATTAAACCTGTGGTATCAACT---  
 CAACTACTGTAAATGGCAGCCTAACAGAAAAGGAG-----  
 ATAGTAATCAGTTTTGAAAATATGACAGACAAT-----GCCAAAACAATAATAGTACACCTTAAT----  
 -----GAATCTATAAAC-----ATTGTATGTACAAGACCTGGCAATAATACAAGGAAA---  
 AATGTAAGGATTATAAGA-----ATAGGACCAGGACGAGCA--TTC-----CATGCAAATAAC-----  
 -----ATAATAGGAGACATA-----AGACAAGCACATTGT--AACATCAGTAAAGCA--  
 -GACTGGAACAAGACTATAGGAAGGATAAAGACAAAACCTAAAA-----GAACACTTCCCT---  
 -----GGTAAAGCAATAGAATTTAA-----  
 CCACACTCAGGAGGGGATCTAGAAATTACA--ACACATAGTTTTAATTGTAGAGGAGAA--  
 TTTAAGCAGCTCCAGACAAGAGTCCTGGCTATAGAAAGATACCTAAAGGATCAACAGCTCCTAGGGCTTTGGG  
 GCTGCTCTGGAACCTCATCTGCACCACTAATGTGCCTTGGAACTCCAGTTGGAGT-----  
 -----AATAAATCTGAGTCAGAGATTTGG-----AAT-----  
 AACATGACCTGGATGGAGTGG--GATAGAGAAATTAATAAGTACACAAACACAATATAC---  
 AATTGTCTTGAAGTCTCGAAAACCAGCAGGAG-----  
 -----  
 AAAAAAGAAAAGATTTATTAGCATTGGACAGTTGGAACAATCTGTGGAGTTGGTTTGACATATCAAATTGGT  
 TGTGGTATATAAAAAATATTATAATGATAGTAGGAGGCTTAATAGGTTTAAGAATAATTTTTTGCT--  
 GTGCTCTCTATAGTA-----AATAGAGTTAGGCAGGGATACTCACCT-----  
 TTGTCGTTTGCTATTAATCTGCTTGATACCATAGCAATAGCAGTAGCTGAA---  
 GGAACGGATAGGATCATAGAAGTAATACAAAGAGGTTGTAGAGCT-----  
 -----ATTGCGAACATA-----CCTACAAGAATAAGACAGGGCTTTGAATCAGCTTTGCTA--TAA  
 >DQ164107  
 GTG---ATG-----  
 GGAAACTTGTGGGTCACAGTATATTATGGGGTACCTGTGTGG--AGGGAAGCAAAT---  
 ACTACTCTATTTTGTGCATCAGATGCTAAAGCATATGAGAGAGAG--GTACATAAT-----  
 -----GTCTGGGCTACA---CATGCCTGTGTACCCACAGAC---  
 CCCAACCACACAAGAAATAATCTTGAA-----AATGTAACAGAAAATTTTAAC-----  
 -----ATGTGGAAAAATGGTATGGTGGATCAGATGCATGAGGATATA---  
 ATCAGTTTATGGGATCAAAGTCTA--AAACCATGCGTAAGGTTG---  
 ACCCCACTCTGTGTCACTTTAAAGTGTACAACCTGTTAACGTTAATGATACCATGAAGGAAGAAATA-----  
 -----  
 -----AAACTGTTAATGTTACTGATACCATGAAGGAAGAAATAAAA---  
 AATTGCTCTTTCAATACAACCACAGAGCTAAGA-----  
 GATAAGAAACAGAAAGTGTATGCACCT--TTTTATAGACCTGATATAGTACCCTTAATGAGAATAGC----  
 -----  
 -----  
 TTTAGTGAGAATAGCTCTAATGATTATATATTAATAAAATTGCAATACCTCGACCATAGCACAA---  
 GCCTGTCCAAAGATCACTTTTGACCCAATTCCTATACATTATTGTGCTCCAGCTGGTTATGCGATTCTAAAGT

GCAAT---GATAAGACATTCAAT-----GGAACAGGACCATGCCATAAT-----  
-GTCAGC---ACAGTACAATGTACACATGGAATTAAACCAGTGGTATCAACT---  
CAATTACTGTTTAAATGGTAGCCTAGCAGAAGGGGAG-----  
ATAATAATTAGATCTAAAAATCTGACAGACAAT-----GTCGGAACAATAATAGTACACCTTAAT----  
-----GAATCTATAGAG-----ATTGTGTGTACAAGACCCAACAATAATACAAGAAAA-----  
-AGTATACGGATA-----GGACCAGGACAAGCA---TTC-----TATGCAACAAATGGC-----  
-----ATAATAGGAAAAATA-----AGACAAGCACATTGT---AATATTAGTAAAGAG---  
GGCTGGAGTAGAACCCTACAATGGGTAAGAAAAAAATTAGAA-----AAACACTTCCCT----  
-----AATAAAACAATAAACTTTAAT-----  
TCATCCTCAGGAGGGGACCTAGAAATTACA---ACACATAGCTTTAATTGTGGAGGAGAA---  
TTTAAGCAGCTCCAGGCAAGAGTCCTGGCTATAGAAAGATACCTACAGGATCAACAGCTCCTAGGAATTTGGG  
GCTGCTCTGGAAGAACTCATCTGCACCCTGCTGTGCCTTGGAACTTAGTTGGAGT-----  
-----AATAAATCTGAAAATGATATTTGG-----GGT-----  
AACATGACCTGGATGCAGTGG---GATAGGGAAATTAGCAATTACACAAACACAATATAC---  
AGGTTACTTGAAGAATCGCAATCCCAGCGGGAA-----  
-----  
AAAAATGAAAAGGATTTATTAGCATTGGACAAGTGGCAAAACCTGTGGAGTTGGTTTAACATAACAAATTGGC  
TATGGTACATAAGAATATTCATAATGATAGTAGGAGGCTTGATAGGTTTGAGAATAATATTTGCT---  
GTGCTATCTATAGTG-----AATAGAGTTAGGCAGGGATACTCACCT-----  
TTGTTCGTTTGCTATTAGTCTGCTTGATAGCACAGCAGTAGCAGTAGCTGAG---  
GGAACAGATAGGATTATAGAATTTATACAAAGAATTTGTAGGGCT-----  
-----ATCCGCAACCTA-----CCTAGAAGAATAAGACAAGGTTTTGAAGCAGCTTTGCTA---TAA  
>DQ093600  
GTA---ATG-----  
GGGGACTTGTGGGTCACAGTCTACTATGGGGTACCTGTGTGG---AAAGAAGCAAAA---  
GCTACTCTATTCTGTGCATCAGATGCTAAAGCATATGAGAAAGAA---GTGCATAAT-----  
-----GTCTGGGCTACA---CATGCCTGTGTACCCACAGAC---  
CCCAACCCACAAGAATTAGTTTTGGGA-----AATGTAACAGAAAACCTTTAAC-----  
-----ATGTGGAAAAATGATATGGTGGATCAGATGCATGAGGATATA---  
ATCAGTTTATGGGATGAAAGCCTA---AAACCATGTGTAAAGTTG---  
ACCCCACTCTGTGTCACTTTAAATTGTACAAGTGTTAAGGATACCAAGAATAATACT-----  
-----  
-----ACCAAGCACAATGATAGCATGATTCAAGAAATGAGT---  
AATTGCTCTTTCTATACAACCACAGGAATAAGA-----  
GATAAGCAACAGCAAGAGTATGCACTT---TTTCATAAACCTGATATAATACCAATTAATAAT-----  
-----  
-----  
AATGATAGTGAATATATATTAATCCATTGCAATACCTCAACCATAACACAA---  
GCCTGTCCAAAGGTCTCTTTTGACCCAATTCCTATACATTATTGTGCTCCTGCTGGTTATGCGATTCTAAAT  
GCAAT---AATAGGACATTCAAT-----GGGACAGGACCATGCAAAAAT-----  
-GTCAGC---ACAGTGCAATGTACACATGGAATTAAACCAGTGGTATCAACT---  
CAACTACTGTTTAAACGGTAGCCTAGCAGAAGAGGAT-----  
ATAATAATTAAATCTGAAAATATGACAAACAAT-----ATCAAAACAATAATAGTCCACTTTAAT----  
-----GAATCTGTGCAG-----ATTATGTGTGCAAGACCTGGTAATAAGACAAGCAGA-----  
-AGTATAAGGATA-----GGACCAGGACGAGTA---TTC-----TATACAAATAAC-----  
-----ATAATAGGAGACATA-----AGACGAGCACATTGT---AATATTACTAGAAAG---  
CAATGGAACCAAACCTTTAGAACGGGTAAAGGAAAAATTAGA-----AAACATTACCCC-----  
-----AATAAAACAATAAAATTTGAC-----  
AAACCTTCAGGAGGGGATCTAGAGATTACA---ACACATAGCTTTAATTGTAGAGGAGAA---  
TTTAAGCAGCTCCAGGCAAGAGTCCTGGCTATAGAAAGATACCTAAAGGATCAACAGCTCCTAGGGCTTTGGG  
GCTGCTCTGGAAGAACTCATCTGCACCCTAATGTGCCTTGGAACTCTAGTTGGAGC-----  
-----AATAAATCTCTAACAGATATTTGG-----GAT-----  
AAAATGACCTGGATGCAGTGG---GAGAAGGAAATTGATAATTACTCACACACAATATAC---  
TGGTTGCTTGAAGAATCGCAAAGCCAACAGGAG-----  
-----  
AAAAATGAAAAGATTTATTAGCATTGGACAGTTGGAATAACCTGTGGAGTTGGTTTAGCATATCAAATTGGT  
TGTGGTATATAAGAATATTCATCATGATAGTAGGAGGCTTGATAGGTTTAAGAATAATTTTTTGGT---  
ATACTCTCTATAGTA-----AGAAGAGTTAGGCAGGGATACTCACCT-----  
TTGTTCGTTTGCTATTAATCTGCTTGATACCATAGCAATAGCAGTAGCTGAA---

GGAACAGATAGGATTATTGAAATAGTACAAAGAATTTGTAGAGCT-----  
 -----ATCAGAAACATA-----CCTACAAGAATAAGACAGGGCTTTGAAGCAGCTTTGCTA--TAA  
 >DQ011166  
 GGG---GTG-----  
 GGAAACTTGTGGGTCACAGTTTATTATGGGGTACCTGTGTGG--CAAGAAGCAAAA---  
 ACTACTCTATTCTGTGCATCAGATGCTAAAGCATATGAGAAAGAA--GCACATAAT-----  
 -----ATCTGGGCTACA--CATGCCTGTGTACCCACAGAC---  
 CCCAACCCACAAGAAGTAAGGTTAGGC-----AATGTAACAGAAAATTTTAAC-----  
 -----ATGTGGAAAAATGATATGGTGGATCAAATGCATGAGGATATA---  
 ATCAGTTTATGGGATGAAAGCCTA--AAGCCATGTGTAAAGTTG---  
 ACCCCACTCTGTGTTACTTTAAGATGCAATAATATTACCCTTGAGAATGCTACCTGGGGTAATACCAAC----  
 -----  
 -----AATACTACCACTGACTACAATGGTACCAGAAGTGAAGAAGTAAAA---  
 AATTGCTCTTTCAATACAACCGCAGAGATCAGA-----  
 GATAAGAAACAGAGAGTGCATGCACCTT--TTTTACAAACTAGATTTAGTACCACCTTCATGAGAAGAGTGAT-  
 -----  
 -----  
 AACCTTAGTGAGAACTTTGATGAGTATATATTAATAAAATTGTAATACCTCAACCATAACACAA---  
 GCCTGTCCAAAGGTCTCTTTTGACCCAATTCCTATACATTATTGTGCTCCAGCTGGTTATGCGATTCTAAAGT  
 GTAAT---AATAAGACATTTAAT-----GGGACAGGACCATGTAATAAT-----  
 -GTCAGC--ACAGTACAATGTACACATGGGATTAAGCCAGTGGTATCAACT---  
 CAACTACTGTTAAATGGTAGCCTAGCAGAAGAAGAG-----  
 ATAGTAATTAGAAGTGAAGTCTGACAAATAAT-----GCCAAAACAATAATAGTACAGCTTAAA----  
 -----GAACCTATAAAC-----ATTACGTGTATCAGACCCAGCAATAATACAAGAAAA-----  
 -AGCATAAGGATA-----GGACCAGGACAAAACA--TTC-----TTTGCAACAGGAGAC-----  
 -----ATAATAGGAGATATA-----AGAAAAGCACATTGT--AACATTAGCAAAAAT---  
 GATTGGAATAAACTTTACAAGAGGTAGGTAAAAAATTAGCA-----GAATACTTCCT---  
 -----AATAGTACAATAAAATTTGCA-----  
 CCATCTTCAGGAGGGGACCCAGAAATTACA--ACACATAGTTTTAATTGTGGAGGAGAA--  
 TTTAAGCAGCTCCAGACAAGAGTCCCTGGCTATAGAAAGATACCTAAAGGATCAACAGCTCCTAGGACTTTGGG  
 GCTGCTCTGGAAGAACTCATCTGCACCACTGCTGTGTCTTGGAAGTCCAGTTGGAGT-----  
 -----AATAAATCTAAATCAGATATCTGG-----GAT-----  
 AACATGACCTGGATGGAGTGG--GATAGAGAAATTAGTAATTACACAAACATAATATAC--  
 GGGCTGCTTGAAGAATCACAAAACCAGCAGGAG-----  
 -----  
 AAAAAAGAAAAGATTTATTAGCATTGGACAGTTGGAAAAATCTGTGGAGTTGGTTTAGCATATCAAGTTGGC  
 TGTGGTATATAAAAAATATTACATAATGATAGTAGGAGGCTTAATAGGTTTAAAGAATAATTTTTGCT---  
 GTGCTTTCTATAGTG-----AATAGAGTCAGGCAGGGATACTCACCT-----  
 TTGTCGTTTGCTATTAGTCTGCTTGATACCATAGCAATAGCAGTAGCTGAG--  
 GGAACAGATAGGATTATAGAACTAATACAAAGAATTTGTAGAGCT-----  
 -----ATCTGCAACATA-----CCTAGGAGAATAAGACAGGGCTTTGAAGCAGCTTTGCTA--TAA  
 >DQ011167  
 GTA---ATG-----  
 GGGAATTTGTGGGTCACAGTCTATTATGGAGTACCTGTGTGG--AAAGAAGCAAAA---  
 ACTACTCTATTCTGTGCATCAGATGCTAAAGCATATGAGAAAGAA--GTACATAAT-----  
 -----GTTTGGGCTACA--CATGCCTGTGTACCCACAGAC---  
 CCCAACCCACAAGAAATAGTTTGGAA-----AATGTAACAGAAAATTTTAAC-----  
 -----ATGTGG-AAAATGACATGGTGGATCAGATGCATGAAGATATA---  
 ATCAGTTTATGGGATCAAAGCCTA--AAGCCATGTGTAAAGTTG---  
 ACCCCACTCTGTGTCACTCTATATTGCACAAATGTTACCAGTAATAGTACCAGT-----  
 -----  
 -----AATATTACTGGTGACATGAGTGGAGAAATGAAG---  
 AATTGCTCTTTCAATATAACCACAGAAATAAGA-----  
 GATAGGAAAAAGCAAGTGTATGCACCTT--TTTTATAAACTGGATATAGTATCACTTGGGGAG-----  
 -----  
 -----  
 GGGGAGAATAGTACCTATAGATTAATAAACTGTAATACCTCAGCCATAACACAA---  
 GCCTGTCCAAAGGTCTCTTTTGATCCAATTCCTATACATTATTGTGCTCCAGCTGGTTATGCGATTCTAAAAAT  
 GTAAT---AATAAGACATTCAAT-----GGGACAGGACCATGTGCAAT-----  
 -GTCAGT--ACAGTACAATGTACACATGGAATTAAGCCAGTGGTATCAACT---

CAACTACTGTAAATGGTAGCCTAGCAGAAGAAGAG-----  
ATAATAATCAGATCTGAGAATCTGACAAACAAT-----GCCAAAACAATAATAGTACATCTTAAT----  
-----AGCTCTGTAGGA-----ATTGTATGTACAAGACCCAACAATAATACAAGAAAA-----  
-AGTATAAGGATA-----GGACCAGGGCAAACA---TTC-----TATGCAACAGGAGAC-----  
-----ATAATAGGAGACATA-----AGACAAGCACACTGT---AACATTAGTAGAAGG---  
AAATGGAATGAAACCTTAGAAAGGGTAAAAGAAAAATTAAGA-----AAACACTTCCTT----  
-----AATAAGACAATTGAATTTAAA-----  
CCATCCTCAGGAGGGGACCTAGAAATTACA--ACACATACCTTTAATTGTAGAGGAGAA--  
TTTAAGCAACTCCAGACAAGAGTCCTGGCTATAGAAAGATACCTAAAGGATCAACAGCTCCTAGGGATTTGGG  
GCTGCTCTGGGAAACTCATCTGCACCACTGCTGTGCCTTGGAACCTTAGCTGGAGT-----  
-----AATAAATCTTATGAAGATATTTGG-----GAT-----  
AACATGACCTGGATGCAGTGG---GATAGAGAAATCAGTAATTACACAAAAACAATATAC---  
AGGTTGCTTGAAGACTCGCAAAACCAGCAGGAA-----  
-----  
AAAAATGAAAAAGATTTATTAGCATTGGACAGTTGGAAAAATCTGTGGAGTTGGTTTACCATAACAAATTGGC  
TGTGGTATATAAGAATATTTGTAATGATAGTAGGAGGCTTAATAGGCTTAAGAATAATTTTTTGCT---  
GTGCTCTCTATAGTG-----AATAGAGTTAGGCAGGGATACTCACCT-----  
TTGTCGTTGGCTATTAGTCTGCTTGATATCATAGCAATAAGAGTAGCTGAG---  
GGAACAGATAGAATTATAGAAGTAGTACAAATATTTGGTGGAGCT-----  
-----ATCCGCAACATA-----CCTAGAAGATA-AGACAGGGCCTTGAAGCAGCTTTGCAA---TAA  
>DQ093590  
GTG---GTG-----  
GGAAACTTGTGGGTCACAGTCTATTATGGAGTACCTGTGTGG---AGAGATGCAAAA---  
GCTACTCTATTCTGTGCATCAGATGCTAAAGCATATGAGAAAGAA---GTGCATAAT-----  
-----GTCTGGGCCACA---CATGCCTGTGTACCCACAGAC---  
CCCAACCCACAAGAATTAGTTTTGGAA-----AATGTAACAGAAAATCTTAAT-----  
-----ATGTGAAAAATGATATGGTGGAACAGATGCATGAGGATGTA---  
ATTAGTTTATGGGACCAAAGCCTA---AAGCCATGTGTAAAGTTG---  
ACTCCACTTTGTGTCACTTTACACTGCACAAATGCTAATATTACCAAGAATGGTAAT-----  
-----  
-----GCTACCTATAATGATACCATGAAGGGAGAAATACAA---  
AATTGCTCTTTCAATACAACCACAGAAATAAGA-----  
GATAAGATACAAAAGGTGTATGCACTT---TTTTATAGACCTGATTTAGTACCACTTGATGGG-----  
-----  
-----  
GATAACTCTAGTTATATATTAATAAATTGCAATACCTCAACCATAACACAA---  
GCCTGTCCAAAGGTCTCTTTTGACCCGATTCTTATACATTATTGTGCTCCAGCTGGTTATGCGATTCTAAAGT  
GTAAT---AATGAGACATTCAAT-----GGGACAGGACCATGCACTAAT-----  
-GTAAGC---ACAGTACAATGTACACATGGGATTAAGCCAGTGGTATCCACT---  
CAACTCCTGTAAATGGTAGCCTAGCAAAAGAGGAG-----  
ATAATAATTAGATCTGAAAACCTGACAAACAAT-----GCCAAAACAATAATAGTACACCTTAAT----  
-----GAATCTGTAGAA-----ATTGTATGTACAAGACCCGGCAATAATACAAGAAGA-----  
-AGTATAAGGATA-----GGACCAGGACAAACG---TTC-----TATGCAACAGGAGAC-----  
-----ATAATAGGAGACATA-----AGACAAGCACATTGT---AACATTAGCGCAGAT---  
AAATGGAATAAACTTTACAAGAGGTAGGAAAAAAATTAGCA-----GGACACTTCCTT----  
-----AATAGAACAATAAAATTTGAA-----  
CCACATTGAGGCGGGGACCTAGAAATTACA--ACACATAGTTTTAATTGTAGAGGGGAA---  
TTTAAGCAGCTCCAGACAGGAGTATTGGCTATAGAAAGATACCTAAAGGATCAACAGCTCCTAGGGGTTTGGG  
GCTGCTCTGGAAAGCTCATCTGCACCACTGCTGTGCCTTGGAACCTCCAGTTGGAGT-----  
-----AATAGATCTGAAACAGATATTTGG-----AAT-----  
AACATGACCTGGATGCAGTGG---GATAGAGAAATTAGTAATTACACAGGCATAATATAC---  
AGGTTGCTTGAAGACTCACAAAACCAGCAGGAG-----  
-----  
AAAAATGAAAAGGATTTATTTGCATTGGACAGTTGAAAAATCTGTGGAATTGGTTTAACATCACAAATTGGC  
TGTGGTATATAAAAATATTTATAATGATAGTAGGAGGCTTGGTAGGTTTGAGAATAATTTTTTGCT---  
GTGCTCTCTATAGTG-----AATAGAGTCAGGCAGGGATACTCACCT-----  
TTGTCGTTTGGCTATTAGTCTGTTTGATACCATAGCAATAGCAGTAGCTGAA---  
GGAACAGATAGGATTATAGAATTAATACAAAGATTTTGTAGAGCT-----  
-----ATCTACCACATA-----CCTACAAGAATAAGACAGGGCTTTGAAGCAGCTTTGCAA---TAA  
>DQ011178

GTG---GTG-----  
GGGAACTTGTGGGTCACAGTCTATTATGGAGTACCTGTGTGG---AAAGACGCAAGT---  
ACTCCTCTATTCTGTGCATCAGAAGCTAAAGCATATGAGAAAGAA---GTGCATAAT-----  
-----GTCTGGGCTACA---CATGCCTGTGTACCCACAGAC---  
CCCAACCCACAAGAAATGGTTTGGAA-----AATGTAACAGAAAATTTTAAT-----  
-----ATGTGGAAAAATGACATGGTAGATCAGATGCAGGAAGACATA---  
ATCAGTTTATGGGATGAGAGCCTA---AAGCCATGTGTAAAGTTG---  
ACCCCACTCTGTGTCACTTTAAACTGTACAACAGTTAATAGTACAACAGCTAATAGTACAACAGCT-----  
-----  
-----AATAGTACTTTCTACAATAACACAGAGAATGAACAACTAAAA---  
AATTGCTCTTTCAATATAACCACAGAAATAAGA-----  
GATAAAAAACAGCAAGTATATGCACCTC---TTTTATAAACCTGATGTAGTACCACCTTAATGGG-----  
-----  
-----  
AATTCTAGTGAGTATATATTAATTAATTGCAATACCTCAACCACAACACAA---  
GCCTGTCCAAAGGTCTCTTTTGACCCAATTCCTATACACTATTGTGTTCCAGCTGGTTATGCGATTCTAAAGT  
GTAAT---AATAAGACATTTAAT-----GGAACAGGACCATGCCAGAAT-----  
-GTCAGT---ACAGTACAATGTACACATGGAATTAAGCCAGTGGTATCAACT---  
CAACTACTGTTTAAATGGTAGCCTATCAGAAGAAGGG-----  
GTAATAATCAGATCTGAAAATCTGACAGACAAT-----GTCAAAACAATAATAGTACATCTCAAC---  
-----AGATCTGTAGAA-----ATTAATTGTACAAGACCCAACAATAATACAAGAAAA-----  
-AGTATAAGGATA-----GGACCAGGGCAAACA---TTC-----TATGCAACAGGAGAT-----  
-----ATAATAGGAGACATA-----AGACAAGCACACTGT---GACGTTAATAGAACA---  
AAATGGAAGGAACTTTACAATGGGTAAAGAATAAATTAGGA-----GAACATTTCCCT---  
-----AATAAAACAATAGAATTTGCA-----  
CAACCCTCAGGAGGGGATCTGGAAATTACA---ACACATACCTTTAATTGTAGAGGAGAA---  
TTTAAGCAGCTCCAGGCAAGAGTCCTGGCTATAGAAAGATACCTAAAGGATCAACAGCTCCTAGGGCTTTGGG  
GCTGCTCTGGAAGAACTCATCTGCACCACTGCTGTGCCTTGGAAGTCCAGTTGGAGT-----  
-----AATAAATCTGACACAGATATTTGG-----GAT-----  
AACATGACCTGGATGCAGTGG---GATAGAGAAATTAATAATTACACAAGCACAATATAC---  
AAGTTGCTTGAAGAATCGCAAAGCCAGCAGGAA-----  
-----  
AAAAATGAAAAAGATTTATTAGCATTGGACAGTTGGAACAATCTATGGAGTTGGTTTAGCATAACAAATTGGC  
TGTGGTATATAAGAATATTTATAATGATAGTAGGAGGCTTAATAGGCTTGAGAATAATTTTTTGCT---  
ATACTCTCTATAGTG-----AAAAAGTTAGGCAGGGATACTCACCT-----  
TTGTCGTTTGCTGTTAGTCTGTTTGATACCATAGCAATAGCAGTAGCTGGA---  
GGAACAGATAGGATTCTAGAAGTATTACAAAGAATTTGTAGAGCT-----  
-----ATCTGCAACATA-----CCTAGAAGAATAAGACAGGGCTTCGAAACAGCTTTGCAA---TAA  
>AY901980  
GTG--GTG-----  
GGAAACTTGTGGGTTACAGTATATTATGGGGTACCTGTGTGG---AGAGAAGCAAAA---  
ACTACTCTATTCTGTGCATCAGATGCTAAAGCATATAAGGAGGAG---GTGCATAAT-----  
-----GTCTGGGCTACA---CGTGCCTGTGTACCCACAGAC---  
CCCAACCCACAAGAAATAGTCATGGAA-----AATATAACAGAAAATTTTAAC-----  
-----ATATGGAAAAATGACATGGTGGATCAAATGCATGAGGATATA---  
ATCAGTTTATGGGATCAAAGTCTA---AAGCCATGTGTAAAATTG---  
ACCCCACTCTGTGTCACTTTAAATGTATAGATGTAAATGTTACCAGTAATGCTAATAATACCAGTACAAATG  
AT-----  
-----ACCAGTATAAATGCAAATGCTACCAGTGAGAATAGCATGCGGGGAGAAGTAAAA---  
AATTGCTCTTTCAACATAACCACAGAAATAAGA-----  
GATAAGAAACAGAAAGCATTTGCACTT---TTTTATAGAACTGATATAGTACCACCTCAATGAAAATAAC---  
-----  
-----  
TCTAGTAAGAATAACCTTAGTGAATATATACTAATAAATTGCAATACCTCGACCATAACACAA---  
GCCTGTCCAAAGGTCTCATTTGACCCCATTCCTATACATTATTGTGCTCCAGCTGGCTTTGCGATTCTAAAAAT  
ACAAT---AATAAGACATTTCAAT-----GGGACAGGACCATGCTATAAT-----  
-GTCAGC---ACAGTACAATGTACACATGGAATTAACCAGTGGTATCAACT---  
CAATTACTGTTTAAATGGTAGCCTAGCAGAAGAGGAG-----  
ATAATAATCAAATCTGAAAATCTGACAGACAAT-----GCCAAAACAATAATAATACACCTTAAT---  
-----AAATCTATAGCA-----ATTGTGTGTACAAGACCCAACAATAATACAAGAAAA-----

-AGTATAAGGATA-----GGGCCAGGACAAACA---TTC-----TATGCAAGAGGTGAC-----  
-----ATAATAGGAGACATA-----AGACAAGCACATTGT---AACATTAGTAGGGAT---  
GAATGGAATAGAACTCTACAATTGGTAGGAAAAAATTAAAA-----GAACACTTCCCT-----  
-----AATAAAACAATAAAGTTTAAT-----  
GCATCCTCAGGAGGGGACTTAGAAATTACA--ACACATAGCTTTAATTGTAGAGGAGAA---  
TTTAAGCAGCTCCAGGCAAGAGTCCTGGCCATAGAAAGATACCTACAGGATCAACAGCTCCTAGGAATTTGGG  
GCTGCTCTGGAAAACTCATCTGCACCACTGCTGTGCCTTGGAACCTCTAGTTGGAGT-----  
-----AATAAATCTAAAACTGATATTTGG-----GAT-----  
AACATGACCTGGATGCAGTGG---GATAGAGAAATTAGCAATTACACAGACACAATATAC---  
AGGTTGCTTGAAGAATCGCAAGCCCAGCAGGAC-----  
-----  
CAAAATGAAAAAGATTTATTAGCATTGGACAAATGGCAAAATCTGTGGAATTGGTTTAGCATAACAAATTGGC  
TATGGTACATAAGAATATTCATAATGATAGTAGGGGGCTTAATAGGTTTAAGAATAATTTTTTGCT---  
GCGCTATCTATAGTA-----AATAGAGTTAGGCAGGGATACTCACCT-----  
TTGTCAATTTGCTGTTAGTCTGTTTGATACCATAGCAATAGCAGTAGCAGAG---  
GGAACAGATAGAATTATAACATTCATACAAAGAATTTGTAGAGCT-----  
-----ATCCTCAACCTA-----CCCAGAAGAATAAGACAGGGTTTTGAAGCAGCTTTGCTA---TAA  
>AY878059  
GTA---TGG-----  
GGGAACTTGTGGGTCACAGTCTATTATGGGGTACCTGTGTGG---GAAGAAGCAAAA---  
GCTCCTCTATTCTGTGCATCAGATGCTAAAGCATATGAGAGAGAA---GTGCATAAT-----  
-----ATCTGGGCTACA---CATGCCTGTGTACCCACAGAC---  
CCCAACCCACAAGAAATATGGTTGAAA-----AATGTAACAGAAAATTTTAACT-----  
-----ATGTGGA AAAATGACATGGTGGATCAAATGCATGAGGATATA---  
ATTAGTTTATGGGATCAAAGCCTA---AAACCCTGTGTAAAGTTG---  
ACCCCACTCTGTGTACCTTACAGTGTAAAGGATACTCGCAGTAATGGT-----  
-----  
-----ACTGCTGATAACCAGGAAAGAATGAAA---  
AATTGCTCTTTCAATACAACCACAGAAATAAGA-----  
GATAAGAAACAGAAAGTGTATGCACTT---TTTTATAAATCTGATGTAGTACAATTTGATAAT-----  
-----  
AGTAGTTATATATTAATAAAATTGCAATACCTCAACCATAACACAA---  
GCCTGCCCAAAGGTCTCTTTTGACCCAATTCCTATACATTATTGTGCTCCAGCTGGATATGCGATTCTAAAGT  
GTAAT---GATGTGACATTCAAT-----GGGACAGGACCATGCCATAAT-----  
-GTCCGC---ACAGTACAATGTACACATGGAATTAAGCCAGTGGTATCAACT---  
CAACTTCTGTTTAAATGGTAGCCTAGCAGAACAGGAG-----  
ATAATAATTAAATCTGAAAATCTGACAGACAAT-----ATCAAAACAATAATAGTCCACCTTAAT---  
-----GAATCTGTAGAA-----ATTAATTGTACAAGACCCAACAATAATACAAGGAAA---  
-AGTATAAGGATA-----GGACCAGGACAAACA---TTC-----TATACAAATGAG-----  
-----ATAATAGGAGACATA-----AGACAAGCATATTGT---AACATTAATGGAAGT---  
AAATGGAACAAAACCTTTAGAGCAGGTAAAGAAAAGATTAGAA-----GAACACTACCCT-----  
-----AATAAAACAATAGAATTTAAA-----  
CAACACTCAGGAGGGGATCTAGAAATTACA--ACACATAGCTTTAATTGTAGAGGAGAG---  
TTTAAGCAGCTCCAGACAAGAGTCTTGGCTATAGAAAGATACCTAAAAGATCAACAGCTCCTAGGACCTTGGG  
GCTGCTCTGGA AAAATCATCTGCACCACTGCTGTGCCTTGGAACCTCCAGTTGGAGT-----  
-----AATAAATCTGAAACAGAGATTTGG-----AAT-----  
AACATGACCTGGATGCAGTGG---GATAGAGAAATTAATAGTCACACAGGCACAATATAC---  
AGGTTACTTGAAGACTCGCAAAGCCAGCAGGAG-----  
-----  
AAAAATGAAAAAGATTTATTAGCATTGGACAGTTGGAACAACCTGTGGAATTGGTTTGGCATAACAAAATGGC  
TGTGGTATATAAAAATATTCATCATAATAGTAGGAGGCTTGATAGGTTTAAGAATAGTTTTAGGT---  
GTACTCTCTATAGTG-----AAAAGAGTTAGGCAGGGATACTCACCT-----  
TTGTGTTTTGCTATTAATCTGCTTGATACCATAGCAATAGCAGTAGCTGAA---  
GGAACAGATAGGATTATTGAAGTAATACAAAGAATTTGTAGAGCT-----  
-----ATCCTTAACATA-----CCTAGAAGAATAAGACAGGGCTTTGAAGCAGCTTTGCTA---TAA  
>DQ011174  
GTG---GTG-----  
GGGAACTTGTGGGTCACAGTCTATTATGGGGTACCTGTGTGG---ACAGAAGCAAAA---  
GCTACTCTATTCTGTGCATCAGACGCTAAAGCATATGACACAGAA---GTGCATAAT-----

-----GTCTGGGCTACA---CATGCCTGTGTACCCACAGAC---  
CCCAACCCACAAGAAATAGTTTGGAA-----AATGTAACAGAAAATTTTAAC-----  
-----ATGTGGAAAAATGATATGGTGGATCAGATGCATGAGGATGTA---  
ATCAGTATATGGGATCAAAGTCTA---AAACCATGTATAAAGTTG---  
ACCCCACTCTGTGTCACTTTAACCTGTACAAATGCTACTGTTAGTGGTGCCAGAAATAGT-----  
-----  
-----AGTGTTGCCTACAATAATAGCATAGTAGGAGAAATAAAA---  
AATTGCTCTTTCAATACAACCACAGAACTAAGA-----  
GATAAGAAGCAGAAAGCGTATGCACTT---TTTTATAAACCTGATATAGTACCACTTAAGGAG-----  
-----  
-----  
GATAATTCTAGTTATATATTAATAAATTGTAATACCTCAACCATAGCACAA---  
GCCTGTCCAAAGGTCACCTTTGACCCGATTCTTATACATTATTGTGCTCCAGCTGGTTATGCGATTCTAAAGT  
GTAAT---AATAAGACATTCAAT-----GGGACAGGACCATGCCATAAT-----  
-GTCAGC---ACAGTACAATGTACACATGGGATTAAGCCAGTGGTATCAACT---  
CGACTACTGTAAATGGTAGCTTAGCTGAAGGGGA-----  
ATAATAATTAGATCTGAAAATCTGACAAACAAT-----GCCAAAATAATAATAGTACACCTTAAT---  
-----GAATCTGTAGAC-----ATTGTGTGTACAAGACCTGGCAATAATACAAGAAGA-----  
-AGCATAAGGATA-----GGACCAGGACAAGCA---ATC-----TATGCAACAAATGAC-----  
-----ATAATAGGAGACATA-----AGACAAGCACATTGT---AACATTAATAGAACA---  
AATTGGAACAAAACCTTTAGAAAAGGTAAAGGAGAAATTAAGA-----GAACACTTCCCT---  
-----AATAAAACAATAACGTTTGCA-----  
CAACCCGCAGGAGGGGACCTAGAAAGTTACA--ACACATAGTTTTAATTGTAGAGGAGAA---  
TTTAAGCAGCTCCAGGCAAGAGTCCCTGGCTATCGAAAGATACCTAAAGGATCAACAGCTCCTAGGGCTTTGGG  
GCTGCTCTGGAAACTCACCTGCACCACTGCTGTGCCTTGGAACCTCCAGTTGGAGT-----  
-----AATAAATCTCTAGAAGATATTTGG-----ACT-----  
AACATGACCTGGATGCAGTGG--GAGAGAGAAATTAGTAATTACACAGACACAATATAC---  
AGGCTACTTGAAGACTCGCAAAGCCAGCAGGAG-----  
-----  
AAAAATGAAAAGGATTTATTAGCATTGGACAGTTGGCAAACTTGTGGAATTGGTTTAGCATAACAAAATGGC  
TGTGGTACATAAAAATATTCATCATGATAGTAGGAGGCTTGATAGGTTTAAGAATAATTTTTTGCT---  
GTGCTCTCTATAGTG-----AAAAGAGTTAGGCAGGGATACTCGCT-----  
TTGTCGTTTGCTATTAGTCTGCTTGATACCATAGCAATAGCAGTAGCTGAA---  
GGAACAGATAGGATTATAGAATTTATACAAAGAATTTGTAGAGCT-----  
-----ATCTGGAACATA-----CCTACAAGAATAAGACAGGGCTTTGAAGCAACTTTGCTA--TAA  
>GQ999986  
GTG--GTA--GGA-----  
CAAACTTGTGGGTACAGTCTATTATGGGGTACCTGTATGG--AAAGAAGCAAAA---  
ACTACTCTATTCTGTGCATCAAATGCTAAAGCATATGAGAAAGAA--GTGCATAAT-----  
-----GTCTGGGCTACA---CATGCCTGTGTACCCACAGAC---  
CCCAACCCACAAGAAATGGTTTGGGA-----AATGTAACAGAAAATTTTAAT-----  
-----ATGTGGAAAAATGATATGGTGGATCAGATGCATGAGGATATA---  
ATCAGTTTATGGGATGAGAGCCTA---AAGCCATGTGTAAAGTTG---  
ACCCCACTCTGTGTCACTTTAATTTGTACAAATGTTAATCATAGTAGTACAAATGTTAGTCATAGTAGTACAA  
ATGTTAGTCAG-----  
---AGTAGTAATAGCAGTCAGGATAATACTACCATTGATGAGAGCATGCGTGAAGAAATAAAA---  
AATTGCTCGTACAACTCAACCACAGAGCTATGG-----  
GATAAGAAACAAAAGGAGTATGCACTT---TTTTATAAACTTGATATAGTACCAATTAATGGG-----  
-----  
-----  
AATGCTAGTGAATATAGATTAATAAATTGTAATACCTCAACCATAAAACAA---  
GCCTGCCCAAAGGTCACCTTTGAACCAATTCCTATACATTATTGTGCTCCAGCTGGTTATGCGATTCTAAAGT  
GTAAT---AATCAGACATTTCGAT-----GGGACAGGACCATGTACTAAT-----  
-GTCAGC---ACAGTACAATGTACACATGGAATTAAGCCAGTGGTATCAACT---  
CAACTACTGTAAATGGTAGCCTAGCAGAAAAAGAG-----  
ATAATAATTAGCTCTGAAAATCTGACAAACAAT-----GCCAAAATAATAATAGTACACCTTAAG---  
-----GATCCTGTACGG-----ATTGTGTGTACAAGACCAATAATAATACAAGAAAG-----  
-AGTATAAGGATA-----GGACCAGGACAAAACA---TTC-----TATGCAACAGGAGAT-----  
-----ATAATAGGAGATATA-----AGACAAGCATATTGT---AACATTGATAAAGGG---  
GCCTGGAATAAAACCTTTACAACAGGTAGGGAAAAAATTACAA-----GAACATTTCCCT---

-----GGTAAAACAATAAAATTTAAC-----  
 TCATCCTCAGGAGGGGATCTAGAAATTACA--ACACATAGCTTTAATTGTAGAGGAGAA--  
 TTTAAACAGCTCCGGGCAAGAGTCGTGGCTCTAGAAAGATACCTACAGGATCAACAGCTCCTAGGGATTTGGG  
 GTTGCTCTGGAAGAACTCATCTGCACCACTAATGTGCCTTGGAACCTCAGTTGGAGT-----  
 -----AATAGATCCGCTGACATATGG-----GAT-----  
 AACTTGACATGGATGCAGTGG--GAGAAAGAAATCAATAACTACACAGATACAATATAC--  
 CAGTTGCTTGAAGAATCGCAAATCCAGCAGGAA-----  
 -----  
 AAAAAATGAACAAGATTTATTGGCATTGAACAGTTGGGACAGTCTGTGGAGTTGGTTTAGCATAACAAAATGGC  
 TGTGGTATATAAAAAATATTCATAATGATAATAGGAGGCTTGATAGGTTTAAGAATAATTTTTTGCT--  
 GTGCTTTCTATAGTA-----AATAGAGTTAGGCAGGGATACTCACCT-----  
 TTGTCGTTTGTCTGTTAGTCTGCTTGATACCATAGCAATAGCAGTAGCTGAA--  
 GGAACAGATAGGATTATAGAATTAGTACAAGCAATTGGTAGAGCT-----  
 -----ATTGCGAACATA-----CCTACAAGAATAAGACAGGGCTTTGAAGCAGCTTTGCTA--TAA  
 >GQ999987  
 AGG---GGG-----  
 AACTTGTGGGTCACAGTCTATTATGGGGTACCTGTGTGG--AAAGAAGCAAAA--  
 GCTACTCTATTCTGTGCATCAGATGCTAAAGCATATGAGAGAGAA--GTGCATAAT-----  
 -----GTCTGGGCTACA--CATGCCTGTGTACCGACAGAC--  
 CCCAACCCACAAGAATTAGTTTTGGGA-----AATGTAACAGAAAATTTTAACT-----  
 -----ATGTGGAAAAATGACATGGTGGATCAGATGCATGAGGATATA--  
 ACCAGTATATGGGATCAAAGCCTA--AAACCATGTGTAAAGTTG--  
 ACCCCACTCTGTGTCACTTTAAACTGTACAGATATAAAAAACAATAGTACCAGGGGG-----  
 -----  
 -----AATAATGGTAGTGATAGCATCAAGGAAAGCATGACA--  
 AATTGCTCTTTCAATACAACCACAGAATTAAGA-----  
 GATAAGGAAAAGCAAGCGTATGCACTG--TTTTATAGATCTGATGTAGTACCAGTTGGGAACTCT-----  
 -----  
 -----  
 AATAAGAACTATAGTGAGTATGTATTAATAAATTGCAATACCTCAACCATAACACAA--  
 GCCTGTCCAAAGGTCTCCTTTGATCCAATTCCTATACATTATTGTGCTCCAGCTGGTTATGCGATTCTAAAGT  
 GTAAT--GATAAGACATTCAAT-----GGGACAGGACCATGCACTAAT-----  
 -GTCAGC--ACAGTACAATGTACACATGGAATTAAGCCAGTGGTATCAACT--  
 CAACTACTGTTAAATGGTAGCCTAGCAGAAAAGGAG-----  
 GTAGTCATTAGATCTGAAAATCTGACAGACAAT-----GTCAAAACAATAATAGTACATCTTAAT--  
 -----GAATCTATAGAA-----ATTGTGTGTACAAGACCCAACAATAATGCAAGAAAA--  
 -AGCATAAGAATA-----GGACCAGGACAAACA--TTC-----TATGCAACAGGTGAC-----  
 -----ATAATAGGAAACATA-----AGAGAAGCACATTGT--AACGTCAGTGCAGCA--  
 AAATGGAACAGAACTTTAGGACTGGTAGCGGAAAAATTAATA-----GAACACTTCCAT--  
 -----AATAAAACCATATCCTTTAAA-----  
 CCACCCTCAGGAGGGGACTTAGAAATTACA--ACACATAGTTTTAATTGTGGAGGAGAA--  
 TTTAAGCAGCTCCAAGCAAGAGTCCTGGCTATAGAAAGATACCTAAAGGATCAACAGCTCCTAGGGCTTTGGG  
 GCTGCTCTGGAAGAACTCATCTGCACCACTAATGTGCCTTGGAACCTCAGTTGGAGT-----  
 -----AATAAATCTCAAACAGATATTTGG-----GAT-----  
 AACATGACTTGGATGCAGTGG--GATAGAGAAATTAATAATTACACAGGCATAATATAC--  
 AGATTGCTTGAAGACTCGCAAACCCAGCAGGAG-----  
 -----  
 AAAAAATGAAAAAGATTTATTAGCATTGGACAGTTGGAACAGCTTGTGGAGTTGGTTTAGCATAACAAAGTGGT  
 TGTGGTACATAAAAAATATTCATCATGATAGTAGGAGGCTTAATAGGTTTAAGAATAATTTTTTGGT--  
 GTGCTCTCTATAGTG-----AACAGAGTTAGGCAGGGATACTCACCT-----  
 TTGTCGTTTCTATTAATCTGCTTGATACCANTAGCAATAGTAGTAGCTGAG--  
 GGGACAGATAGGATTATAGAATTA-----  
 -----ATAAGAATAAGATAAGGCTTTGAAACAGCTTTGCTA--TAA  
 >GQ999977  
 GTG---AGG-----  
 GGAAACTTGTGGGTTACAGTATATTATGGGGTACCTGTGTGG--AGAGAAGCAAAA--  
 GCTACTTTATTCTGTGTATCAGATGCTAAAGCATATGAGAGGGAG--GTGCATAAT-----  
 -----ATCTGGGCTACA--CATGCCTGTGTACCCACAGAC--  
 CCCAACCCACAAGAATTAGTTCTGGAA-----AATGTAACAGAAAATTTTAACT-----  
 -----ATGTGGAAAAATGACATGGTGGATCAGATGCATGAGGATATA--

ATCAATTTATGGGATCAAAGCCTA---AAGCCATGTGTAAAGTTG---  
ACCCCACTCTGTATCACTTTAACATGCACAAATGCTATATACAAG-----  
-----  
-----AATACTAGCACGGAGGAAATGAAA---  
AATTGCTCTTTCAATGTATCCACAGAAATAAAA-----  
GATAAAAAACATAAAGAGTATGCCACT--TTTTATAGACTTGATATGGTACCACTTAATGAA-----  
-----  
-----  
TCTAGTGATAACCAGACTTATAGATTAATAAATTGTAATGCTTCAAAAGTAGCACAA---  
GCCTGTCCAAAGGTCAATTTTGACCCAATTCCTATACATTATTGTGCTCCAGCTGGTTATGCGATTCTAAAGT  
GTAAT---AATAAGACATTCAAT-----GGGACAGGACCATGCTATAAT-----  
-GTCAGT---ACAGTACAATGTACACATGGAATTAACCAGTGGTATCAACT---  
CAACTACTATTAAATGGTAGCATAGCAGAAGGAGAG-----  
ATAATAATCAGGTCTGAAAATCTGACAGACAAT-----GTTAAAACAATAATAGTGCAGCTTAAT-----  
-----GAAACTGTAGAC-----ATTGTGTGTACAAGACCCAACAATAATACAAGGAAA-----  
-AGTATAAGGATA-----GGACCAGGACAAACA---TTC-----TATGCAACAGGTGAA-----  
-----ATAATAGGAAACATA-----AGAGAAGCACATTGC---AATATTAGTAAAGGT---  
AACTGGTCTAGAACTTTACACAGGGTAAGTAAAAAATTAAAC-----GAACACCTCCCT-----  
-----AATAAAAACAATAAAATTTAGT-----  
CCATCCTCAGGAGGGGACCTAGAAATTACA--ACACATAGCTTTAATTGTAGAGGAGAA---  
TTTAAGCAGCTCCAGACAAGAGTCCTGGCTATAGAAAGATACCTACAGGATCAACAGCTCCTAGGAATTTGGG  
GCTGCTCTGGAAGAACTCATCTGCACCACTGCTGTGCCCTGGAAGTCCAGTTGGAGT-----  
-----AATAAATCTTATGATGAGATTTGG-----AAA-----  
AACATGACATGGATGCAGTGG---GGTAGAGAAATTAGTAATCACACAAATACAATATAC---  
CAGTTGCTTGAAGACTCGCAAAATCCAGCAGGAG-----  
-----  
AAAAATGAAAAGGATTTATTAGCATTGGACAAATGGCAAAATCTGTGGAATTGGTTTAGTATATCAAATTGGC  
TATGGTATATAAAAATGTTTCATAATGATAGTAGGAGGCTTGATAGGTTTAAGGATAATTTTTTGCT---  
GTGATATCTATAGTA-----AACAGAGTTAGGCAGGGATACTCACCT-----  
CTATCGTTTGCTATTAGTCTGCTTGATACCATAGCAATAGCAGTAGCTGAG---  
GGAACAGATAGAATTTTAGAATTCATACAAAGACTTTGTAGGGCT-----  
-----ATCCTCAATACA-----CCTAGAAGAGTAAGACAGGGTTTTGAAGCAGCTTTGCTA--TAA  
>JN687821  
GGA---AAT-----  
AACTTGTTGGGTCACTGTCTATTATGGGGTACCTGTGTGG---AAAGAAGCAAAA---  
ACTACTCTATTCTGTGCATCAGATGCTAAAGCATATGATAAAGAA--GTGCATAAT-----  
-----GTATGGGCTACA--CATGCCTGTGTACCCACAGAC--  
CCCAACCCACAAGAAATAGTTTGGAA-----AATGTAACAGAAAATTTTAAC-----  
-----ATGTGGAAGAAATGACATGGTGGATCAGATGCATGAGGATATA---  
ATCAGTTTATGGGATCAAAGTCTA--AAACMTGTGTAAAGTTG---  
ACCCCACTCTGTGTCACTTTAAATGTACCAATGCTACATTTAATGCT-----  
-----  
-----ACAGTTAATAGTATGGAARAAATAAAA---  
AATTGCTCTTTCAATATAACCACAGAAATAAGA-----  
GATAAAAAGAAGAATGAATATGCACTT--TTTTATAGACTTGATATAGTACCACTTGATAAGAATGAA-----  
-----  
-----  
AATAGCTCTAGTAATTATAGTGAGTATGTATTAATAAATTGTAATACCTCAGCCGTAACACAA---  
GCCTGTCCAAAGGTCTCTTTTGAACCAATTCCTATACATTATTGTGCTCCAGCTGGTTATGCGATTCTAAAAT  
GTAAT---AATAAGACATTCAAT-----GGGACAGGACCATGCAATAAT-----  
-GTCAGC---ACAGTACAATGCACACATGGAATTAAGCCAGTGGTATCAACT---  
CAACTATTGTTAAATGGTAGCCTAGCAGAAGAGGAG-----  
ATAATAATTAGATCTGAAAATCTGACAAATAAT-----ATCAAAAACAATAATAGTCCACCTTAAT-----  
-----AAATCTGTAGAA-----ATTAAGTGTATAAGACCCGGCAATAATACAAGGAAA-----  
-AGTATGAGGATA-----GGACCAGGACAAACA---TTC-----TATGCAACAGGAGCC-----  
-----ATAATAGGAAACATA-----AGACAAGCACATTGT---AACATTAGTGGGAAG---  
GATTGGAACAACACTTTAGAACAGGTGAAGAAAAAATTACAA-----GAACAGTAC-----  
-----AATAAAAACAATAATATTTGAA-----  
CAATCCTCAGGAGGGGACCTAGAAATTACA--ACACATAGCTTTAATTGTAGAGGAGAA---  
TTTAAGCAGCTCCAGACAAGAGTCCTGGCTATAGAAAGATACCTAAAGGATCAACAGCTCCTAGGGCTTTGGG

GCTGCTCTGGAAACTCATCTGCACCACTGCTGTGCCTTGGAACTCCAGTTGGAGT-----  
-----AATAAACTCAAGGGGACATTTGG-----GAC-----  
AACATGACCTGGATGCAGTGG---GATAGAGAAATTAATAATTACACAAATACCATATAC---  
AGGTTGCTTGAAGAATCACAGAACCAGCAGGAG-----  
-----  
AAAAATRAAAAAGATTTATTATCATTGGAAAGCTGGAACAATCTGTGGAATTGGTTTAGCATATCAAATTGGC  
TGAGGTATATACAAATATTTCTAATGATAGTAGGAGGCTTGATAGGTTTAAGAATAATTTTTGCT---  
GTGATTTCTATAGTR-----AATAGAGTTAGGCAGGGATACTCACCT-----  
TTGTCTTTTGCTACTAGTCTAGTTGATACCATAGCCATAGCAGTAGCTGAA---  
GGAACAGATAGGATTATAGAATTAATACAAAGAATTTGGAGAACT-----  
-----ATCCGTAACATA-----CCTACAAGAATAAGACAGGGCTTTGAAGCAGCTTTACTA---TAA  
>KC863367  
GGG---ACA-----  
GGAAACTTGTGGGTCACAGTCTATTATGGGGTACCTGTGTGG---AAAGAAGCAAAA---  
ACTACTCTATTCTGTGCATCAGATGCTAAAGCATATGAGAAAGAA---GTGCATAAT-----  
-----GTCTGGGCTACA---CATGCCTGTGTACCCACAGAC---  
CCCAGCCCAAATGAAATGGATTTGATA-----AATGTAACAGAAGATTTTAAC-----  
-----ATGTGGAAAAATGATATGGTAGATCAGATGCATGAGGATATA---  
ATCAGTTTATGGGATCAAAGCCTA---AAACCATGTGTAAAGTTA---  
ACCCCACTCTGTGTCACTTTAAACTGTACAAACCTACGCTGTGACAATAGTACAAACCCACGCTGTGTCAATG  
ATACAACAAAA-----  
-----GGCCCACTCTGTGGCAATAGTACAATAAGAGAAGAAATGAAG---  
AATTGCTCTTTCAATGCAACCACAGTAATAAAA-----  
GATAAGAAACAGAAGGTGTTTGCACCT---  
TTTTATAAACTTGATATAGTACCCTTAATAAGGAAAAAATAACAGCTCT-----  
-----  
GAGGAAAATAATAACAGCTCTGGGGAATATAGATTAATAAATTGTAATACCTCAGCCATAACACAA---  
GCCTGTCCAAAGGTCTCTTTTGACCCAATCCCTATACATTATTGTGCTCCAGCTGGTTATGCAATTCTCAAGT  
GTAAA---AATAAGACATTCAAT-----GGGACAGGACCATGCAACAAT-----  
-GTCAGC---ATAGTACAATGTACACATGGAATTAAGCCAGTGGTATCAACT---  
CAACTACTGTAAACGGTAGCCTAGCGGAAGAGGAG-----  
ATAATAGTTAGTTCTGAAAATCTGTCAAACAAT-----GCTAAAACAATAATAATACATTTTAAT---  
-----AAATCTGTAGAA-----ATTGTATGTACAAGACCCCAATAATAACAAGAAAA-----  
-GGTATAGGGATA-----GGACCAGGACAAACA---TTC-----TATGCAACAGATGCA-----  
-----ATAATAGGAGACATA-----AGACAAGCACATTGT---AACATTAGTAAGGGA---  
AATTGGAGCAGGACTATAAGAGAGGTAGCGGGAAAATTAATA-----GAACACTTCCCC---  
-----AATAAGACAATAAGATTTAGC-----  
TCATCCTCAGGAGGGGATCTAGAAATTACA---ACACATAGTTTTAATTGTAGAGGAGAA---  
TTTAAGCAGCTCCAGGCAAGAGTCCTGGCTATAGAAAGATACCTACAGGATCAACAGCTCCTAGGGATTTGGG  
GCTGCTCTGGAAACTCATCTGCACCACTGCCGTGCCTTGGAACTCCAGTTGGAGT-----  
-----AATAGAAATCTAACAGAAATTTGG-----GAT-----  
AACATGACCTGGATGCAATGG---GATAGAGAAATTAGTAATTACACAAACACAATATAT---  
CAGTTGCTTGAAGAATCGCAAATCCAGCAGGAA-----  
-----  
AAGAATGAAAAAGATTTATTATCATTGGACAAATGGAACAATCTATTTAATTGGTTTGGCATAACAAAGTGGC  
TGTGGTATATAAAAATATTATGATAGTAGGAGGCTTGATAGGGTTAAGAATAATTTTTGCT---  
GTGCTATCTATAGTA-----AATAGAGTTAGGCAGGGATACTCACCT-----  
CTGTCTTTTGCTATTAGCCTGCTTGATACCATAGCAATAGCAGTAGCTGAG---  
GGAACAGATAGGATTCTAGAATTAGTACAAAGAGTTGTTGGAGCT-----  
-----ATCCTCCACATA-----CCTAGAAGAATAAGACAGGGCTTTGAAACAGCTTTTGCTA---TAA  
>KC894137  
GTG---TGG-----  
GGAAACTTGTGGGTCACAGTCTATTATGGGGTACCTGTGTGG---AAGGAAGCAAAA---  
ACTACTCTATTTTGTGCATCAGATGCTAAAGCATATGTGAAAGAA---GTGCATAAT-----  
-----GTCTGGGCTACA---TATGCCTGTGTACCCACAGAC---  
CCCAATCCACAAGAATTGGTTTTGGAA-----AATGTAACAGAAAATTTTAAC-----  
-----ATGTGGAAAAATGACATGGTGGATCAGATGCATGAGGATGTA---  
ATCAGCATATGGGATCAAAGCCTA---AAGCCATGTGTAAAGTTG---  
ACCCCACTCTGTGTTACTTTACATTGTAGTAATAATATAACAATCAGGGATAGAAACATCACTAGAAATATCA  
CT-----

-----AGCACGACGGGAGAACTAAAAAATATCACGGAAGAAGTAAGA---  
AATTGCTCTTTCAATGCAACCACAGAAATAAG-----  
GATAGGAAACAAAAGGTGTATGCACTC---TTTTATAGGATTGATATAGTACCACTTAATGAG-----  
-----  
-----  
AATACCAATGCCAGTGGTGAGTATAGATTAATAAATTGTAATACCTCCACTATAACACAA---  
GCCTGTCCAAAGGTCACCTTTTGACCCAATTCTTATACATTATTGTGCTCCAGCTGGTTATGCGATTCTAAAGT  
GTAAT---AATAAGACATTTCAGT-----GGAACAGGACCATGTACTAAT-----  
-GTCAGC---ACAGTACAATGTACACATGGAATTAAGCCAGTAGTATCAACT---  
CAACTACTGTTAAATGGTAGCTTAGCAGAAAAAGAG-----  
ATAATAATTAGATCTGAAAACTGACAGATAAT-----GTCAAAACAATAATAGTACATCTTAAT----  
-----GAATCTGTAGAA-----ATCATGTGCACAAGACCAGGCAATAATACAAGAAAA-----  
-AGTGTAAGGATA-----GGACCAGGACAAAACA---TTC-----TATGCAACAGGAGAA-----  
-----ATAATAGGAGACATA-----AGACAAGCACATTGT---AAGATTAATGGAAGT---  
AAATGGAATGAACTTTAGAAAAAGGTAAAGAAAAAATTAAAA-----GAACATTTCCCT----  
-----ATAAC---ATAACCTTTGCA-----  
CCCACTCAGGAGGGGATCTAGAAATTACA---ACACATAGCTTTAATTGTGGAGGAGAA---  
TTTAAACAGCTCCAGGCAAGAGTCCTGGCTCTAGAAAAGATATCTAAAGGATCAACAGCTCCTAGGACTTTGGG  
GCTGCTCTGGAAGACTCATCTGCCCCACTGCTGTGCCTTGGAAACATCAGTTGGAGT-----  
-----AATAAACTTATGAAGATATTTGG-----GAT-----  
AACATGACCTGGATGCAGTGG---GAAAGAGAAATTAGTAATTACACAGGCACAATATAC---  
AGGTTGCTTGAAGACTCGCAAAACCAGCAGGAA-----  
-----  
AGAAATGAAAAAGATTTATTAGCATTGGACAGTTGGAAAAATCTGTGGAGTTGGTTTGACATATCAAAGTGGC  
TGTGGTATATAAGAATATTCATAATGATAGTAGGAGGCTTGATAGGTTTAAGAATAATTTTTGCT---  
GTGCTTTCTATAGTA-----AATAGAGTTAGGCAGGGATACTCACCT-----  
TTGTCGTTTGCTATTAGTCTATTTGATACCGTAGCAATAGTAGTAGCTGAA---  
GGAACAGATAGGATTATAGAAGCTGTACAAAGAATTGGTAGAGCT-----  
-----ATCCTCAATCTT-----CCCAGAAGAATAAGACAGGGCTTCGAGGCAGCTTTGCTA---TAA  
>FJ443911  
GTG---GGG-----  
GGAAACATGTGGGTACAGTATATTATGGGGTACCTGTGTGG---AAAGAAGCAAAA---  
ACTACTCTATTCTGTGCATCAGATGCTAAAGCATATGAGAGGGAG---GCGCATAAT-----  
-----GTCTGGGCTACA---CATGCCTGTGTACCCACAGAC---  
CCCAACCCACAAGAAATGGTGATAAATGGAACAAAAAATTTTACAGAAAATTTTAAC-----  
-----ATGTGGAAAAATGACATGGTGGATCAGATGCATGAGGATATA---  
ATCAGTTTATGGGATCAAAGCCTA---AAGCCATGTGTAAAGTTG---  
ACTCCACTCTGTGTCACTTTAAATTGTACAGAGGCCTACAAGAATGCTAGTACAAAGGCCTGCAATAATGCTA  
GTACCAATGAATCTAGCACAAAAAGCAGACTGCTAGCCCGACAAATAATAACACAGAGACCTGCAATAAAAA  
TGCTAATACTGTTGCCAGCAAGACAAATAACTGCTAACATGACAGACCATGCTAGCATGAAA---  
AATTGCTCTTTCAATGTAAACCACAGAAATAAGA-----  
GATAAGATACGCAAAGAGTATGCACCT---TTTTATAAGCTTGATATAGTACCACTTGACAATTCT-----  
-----  
-----  
ACTGACGACTATAAGGAGTATGTATTAATAAATTGTAATACCTCAACTGTAACACAA---  
GCCTGTCCAAAGGTCTCTTTGAACCAATTCTTATACATTATTGTGCTCCAGCTGGTTTTCGATTCTAAAGT  
GTAAT---GATAAGACATTCAAT-----GGGACAGGACCATGCAAGAAT-----  
-GTCAGT---ATAGTACAATGTACACATGGAATTAACCAGTGGTATCAACT---  
CAACTACTGTTAAATGGTAGCCTAGCAGAACAAAAG-----  
ATAATAATTAGATCTGAAAACTGACAAACAAT-----GCTAAACAATAATAGTACAGCTTAAT----  
-----AAATCCATAGAA-----ATTACGTGCACAAGACACGCCAATAATACAAGAAAT-----  
-AGTATAAGGATA-----GGACCAGGACAAGTA---CTC-----TTTACAAATGAG-----  
-----GTAACAGGAGACATA-----AGAAAAGCATATTGT---AACATTACTAAAGAG---  
AAATGGAATGAACTTTACAAATGGTATCTAAAGAATTACAA-----ACATACTTCCCC-----  
-----ATAAAACAATAGGGTTTAAA-----  
CCAGCCTCAGGAGGGGACTTAGAAATTACA---ACACATAGTTTTAATTGTGGAGGAGAA---  
TTTAAAGCAGCTCCGGGCAAGAGTCCTGGCTATAGAAAAGATACCTAAAGGATCAACAGCTCCTAGGACTTTGGG  
GCTGCTCTGGAAGAACTCATCTGCACCCTAATGTGCCTTGGGAATCCAGGTGGAGT-----  
-----AATAAACTGAAGACCAGATTTGG-----AAT-----  
CACACGACCTGGATGCAGTGG---GATAAAGAAATTAGCAATTACACAAACACAATATAT---

ACGTTGCTTGAAGAAGCGCAAATCCAGCAGGAA-----  
-----  
AACAAATGAAAAAGATTTATTAGCATTGGACAAGTGGCAAAATCTGTGGAATTGGTTTAAACATAACACAATGGC  
TATGGTATATAAAAAATATTTCATAATGATAGTAGGGGGCTTGATAGGTTTAAAGAATAATTTTTTGCT---  
GTGCTATCTATAGTG-----AATAGAGTTAGGCAGGGATACTCACCT-----  
TTGTCGTTTACTATTAGTCTGCTTGATTCTATCGCAATAGCAGTAGCTGAG---  
GGAACAGATAGGATTATAGACTTAACACAGAGAATTTGTAGAGCT-----  
-----ATCAGAAACCTA-----CCTAGAAGAATAAGACAGGGTTTTGAAGCAGCGTTGCTA---TAA  
>KT183265  
GTG---ATG-----  
GGAAACTTGTGGGTCACAGTCTATTATGGGGTGCCTGTGTGG---AAAGAAGCAAAA---  
ACTACTCTATTCTGTGCATCAGATGCTAAAGCATATGAGCGCGAA---GTACATAAT-----  
-----GTTTGGGCTACA---CATGCCTGTGTACCCACAGAC---  
CCCAACCCACAAGAATTGGTTTTGGAA-----AATGTAACAGAAAACTTTAACT-----  
-----ATGTGGAAAAATGACATGGTAGATCAGATGCATGAGGATATA---  
ATCAGTTTATGGGATCAAAGCCTA---AAGCCATGTGTAAAGTTG---  
ACCCCACTCTGTGTTACGTTAACCTGTACAAATGTTAGTAGTACAAATGTTAGTGCTAATAGT-----  
-----  
-----AATGAGATGACC---  
AATTGCTCTTTCAATGCAACCACAGAAGTAAGA-----  
GATAAGAAAAAGCAAGTGTGCACTT---TTTTATAAACTTGATATAGTGTCACTTGAGGGG-----  
-----  
-----  
AATAACAACAGCCAGGGTACATATAGATTAATAAATTGTAATATCTCAACCATAACACAA---  
GCCTGTCCAAAGGTCTCTTTTGACCCAATTTCCTATACATTATTGTGCACCAGCTGGTTATGCGATTCTAAAGT  
GTAAT---AATAAGACATTTAAT-----GGGACAGGACCATGCAATAAT-----  
-GTCAGC---TCAGTACAATGCACACATGGAATTAAGCCAGTGGTATCAACT---  
CAACTATTGTTAAATGGTAGCCTAGCAGAAGGAGAG-----  
ATAGTAATTAGATCTAAAAATCTGACAGACAAT-----GCTAAAACAATAATAGTACAACCTTAAT---  
-----GAGTCTGTACCA-----ATTGTGTGTATAAGACCCCAAAATAACACAAGAAAA-----  
-AGTATAAGGATA-----GGACCAGGACAAACA---CTC-----TATGCAACAGGTGAA-----  
-----ATAATAGGAGACATC-----AGACAAGCACATTGT---AACATTAGTAAGAAT---  
GGATGGAACCGTACTTTACAACAGGTAGGAAGAAAATTAGCA-----GAACACTTCCT---  
-----AATAAAACAATAAAATTTGAG-----  
GGCACTCAGGAGGGGATCTAGAAATCACA---ATGCATAGCTTTAATTGTAGAGGAGAA---  
TTTAAGCAGCTCCAGGCAAGAATCCTGGCTATAGAAAGATACCTAAAGGATCAACAACCTCCTAGGACTTTGGG  
GCTGCTCTGGAAGACTCATCTGCACCACTAATGTGCCTTGGAACTCCAGTTGGAGT-----  
-----AATAAATCTCATGAAGCTATATGG-----GAT-----  
AACATGACCTGGATGCAGTGG---GATAGGGAAATTAGTAATTACACAAACACAATATAT---  
AAGTTGCTTGAAGAATCACAAAACCAGCAAGAA-----  
-----  
AAAAATGAAAAAGATTTATTAGCATTGGACAGTTGGAATAATCTATGGGACTGGTTTAAACATAACAAAGTGGC  
TGTGGTATATAAAAAATATTATAATGATAGTAGGAGGTTTGATAGGTTTAAAGAATAATTTTTTGCT---  
GTGCTCTCTATAGTA-----AATAGAGTTAGGCAGGGATACTCACCT-----  
TTGTCGTTTGTGTTAGTCTACTTGATACCTTAGCAATAGCAGTAGCTGAG---  
GGAACAGATAGAATTATAGAATACATACAAAGAATTTGTAGAGCT-----  
-----ATCCGCAACCTA-----CCTAGAAGAATAAGACAGGGTTTTGAAGCAGCTTTGCTA---TAA  
>KC894114  
GTG---GCG-----  
GGGAACAAGTGGGTCACAGTTTATTATGGGGTACCTGTGTGG---AAAGAAGCAAAA---  
ACCACCTATTCTGTGCATCAGATGCTAAAGGATATGAGAGAGAA---GTGCATAAT-----  
-----ATCTGGGCTACA---CATGCCTGTGTACCCACAGAC---  
CCCAGCCCACAAGAAATGTTTTTGGTA-----AATGTAACAGAGAATTTTAACT-----  
-----ATGTGGAAAAATGACATGGTAGATCAGATGCATGAGGATATA---  
ATCAGTTTATGGGACCAAAGCCTA---AAGCCATGTGTAAAGTTG---  
ACACCACTCTGTGTCACTTTAAATTGTATAAATGCTAATAAGACT-----  
-----  
-----AGACTAAATGGTACAATGGAGGGAGAAATAAAA---  
AATTGCTCTTTTAAATGCAACCACAGAGTTAAGA-----  
GATAAGAAAAGCAAAGAGTATGCACTT---TTTTATAGGCTTGATATAGTACCCTTGAGGAC-----

-----  
-----  
AATAGCAACTCTAGTACTTATAGATTGATAAATTGTAATACCTCAACCATAACACAA---  
GCCTGTCCAAAGGTCTCTTTTGAGCCGATTCTTATACATTATTGTGCTCCAGCTGGTTATGCGATTCTAAAGT  
GTAAT---AATAAGACATTCAAT-----GGGACAGGACCATGCAATAAT-----  
-GTAAGT---ACAGTACAATGTACACATGGAATTAAGCCAGTGGTATCAACT---  
CAATTACTGTTAAATGGTAGCCTAGCAGAAGAAGAG-----  
ATAATAATTAGATCTGAAAATCTGACAGACAAT-----GCTAAAACAATAATAGTGCATCTTAAT----  
-----GAATCTATAGAA-----ATTGAGTGTGTAAGACCCAACAATAATACAAGAAAA-----  
-AGTGTAAGGATA-----GGACCAGGGCAAACA---TTC-----TATGCAACAGGAGAC-----  
-----ATAATAGGAGATATA-----AGAGCTGCATATTGT---GACATTAATAAAGAT---  
AAATGGAATAGAGCTTTACAAAAGGTAAGTAAAAAATTAAGA-----GAACTTTACCT-----  
-----AATACAACAACAATACACTTTAAT-----  
TCATCCTCAGGAGGGGACCCAGAAATTACA---ATGCATAGTTTCAATTGTAGAGGAGAA---  
TTTAAGCAGCTCCAGACAAGAGTCCTGGCTCTGGAAAAGATACCTAAAGGATCAACAGCTCCTAGGGATTTGGG  
GCTGCTCTGGAAGAACTCATCTGCACCACTAATGTGCCTTGGAAGTCCAGTTGGAGT-----  
-----AATAAATCTCTAGAAGAAATTTGG-----GAA-----  
AACATGACCTGGATGCAGTGG---GATAAAGAAATTAATAATTACACAAACACAATATAC---  
AATTTGCTTGAAGTATCGCAAAACCAGCAGGAA-----  
-----  
CAAAATGAAAAAGATTTATTATCATTTGGACAAGTGGCAAACTCTGTGGAATTGGTTTGACATAACAAATTGGC  
TGTGGTATATAAAAAATATTACATAATGATAGTAGGAGGCTTGATAGGTTTGAGAATAATTTTTTGCT---  
GTACTATCTATAATA-----AATAGAGTTAGGCAGGGGTACTCACCT-----  
TTGTCAATTGGCTGTTAGTCTGTTTGATGCAATAGCAATAGCAGTAGCTGAG---  
GGAACAGATAGGATTATAGAACTCATACAGAGAATTTGTAGAGCT-----  
-----ATCCGCAACCTA-----CCTAGAAGAATAAGACAGGGTTTTGAAGCATCTTTGTTA---TAA  
>KC894120  
GTG---ACA-----  
AGCTTGTGGGTCACAGTCTACTATGGGGTACCTGTGTGG---AAAGAAGCAAAA---  
ACTACTCTATTCTGTGCATCAGATGCTAAGGCATATGAAAAAGAA---GTGCATAAT-----  
-----GTATGGGCTACA---CATGCCTGTGTACCCACAGAC---  
CCCAATCCACAGGAAATAGTATTGGAA-----AATGTAACAGAAAATTTTAAC-----  
-----ATGTGGGAAAATGACATGGTGGATCAGATGCATGAAGATATA---  
ATCAGTTTATGGGATGAAAGTCTC---AAGCCATGTGTAAAGATG---  
ACCCCACTCTGTGTCACTTTAAATTGTGCAAATGCTAATATTAGTAGTACAACGTTTAAT-----  
-----  
-----GTTAGTGGTGAGATTAACATGAAGGAAGAAGTAAAA---  
AATTGCTCTTTCAATGCAACCACAGAAATAAGA-----  
GATAAGAAAAAGAAAGTTTATGCACTT---TTTTATAAACCTGATGTAGTACCACTCAATGGGAATGACTCT-  
-----  
-----  
AGTGGAATGGCTCTAGTGAGTATATATTAATAAATTGTAATACCTCAACCATAGCACAA---  
GCCTGTCCAAAGGTCTCTTTTGACCCAATTCTCTACATTATTGTGCTCCAGCTGGCTATGCGATTCTAAAGT  
GTAAT---AATAAGACATTTAAT-----GGGACAGGACCATGCCAGAAT-----  
-GTCAGC---ACAGTACAATGTACACATGGAATTAAGCCAGTGGTATCAACT---  
CAACTACTGTTAAATGGCAGCCTAGCAGAAGAAGGG-----  
ATAATAATCAGATCTAAAAACCTGACAGACAAT-----ACCAAAACAATAATAGTACACCTTAAT----  
-----GAATCTGTAGGA-----ATTAATTGTACAAGAAGTGGTAATAATACAAGGAAA-----  
-AGTATAAGGATA-----GGACCAGGACAAACC---TTC-----TATGCAACAGGAGAC-----  
-----ATAATAGGAAATATA-----AGACAAGCACATTGT---AACATTAGTAAAGAA---  
AGATGGAATACAACCTATGCAAGGGTAAGACAAAAATTAATA-----GGTAACTTC-----  
-----AATAAGACAATAGAGTTTAAG-----  
TCATCCTCAGGAGGGGATCTAGAAGTTACA---ACACATATCTTTAATTGTAGAGGAGAA---  
TTTAAGCAGCTCCAGGCAAGAGTCCTGGCCATAGAAAAGATACCTAAAGGATCAACAGCTCCTAGGACTTTGGG  
GCTGCTCTGGAAGAACTCATCTGCACCACTAATGTGCCTTGGAAGTCCAGTTGGAGT-----  
-----AATAAATCTTATACAGATATTTGG-----GAT-----  
AACATGACCTGGATGCAGTGG---GATAGAGAAATTAATAATTACACAAACACAATATAC---  
AAGTTGCTTGAAGACTCGCAAAAGCCAGCAGGAG-----  
-----  
AAAAATGAAAGGGATTTGTTAGCATTGGACAGTTGGAACAATCTGTGGAATTGGTTTAGCATATCAAATTGGC

TGTGGTATATAAAAAATATTCATCATGATAGTAGGAGGCTTAATAGGCTTAAGAATAATTTTTTGCT---  
 GTACTATCTATAGTG-----AATAGAGTTAGGCAGGGATACTCACCT-----  
 CTGTGCTTTTGCTATTAGTCTGCTTGATACCATAGCAATAGTAGTAGCTGAA---  
 GGGACAGATAGGATTATAGAATTAGCACAAAGAATTTGGAGAGCT-----  
 -----ATCCTCAACATA-----CCTACAAGAATAAGACAGGGCTTTGAAGCAGCTTTGCTA--TAA  
 >KC156115  
 GTG---CTG-----  
 GAGGACTTGTGGGTACAGTCTATTATGGAGTACCTGTGTGG--AGAGAAGCAAAA---  
 ACTACTCTATTCTGTGCATCAGATGCTAAGGCATATGAGAGAGAA--ATACATAAT-----  
 -----GTCTGGGCTACA---CATGCCTGTGTACCCACAGAC---  
 CCCAACCCACAAGAAATAGTTTTGGGA-----AATGTAACAGAAAATTTTAAAC-----  
 -----ATGTGGAAAAATGACATGGTGGATCAGATGCAGGAAGATATA---  
 GTCAGTCTATGGGATCAAGGCCTA--AAGCCGTGTGTAAAGTTG---  
 ACCCCACTCTGTGTCACTCTAAGTTGTACAAATGTTACCAGTAGTAGTAATGTTACCAGTAATAGTAATGATA  
 CCAGTATT-----  
 -----CAGGACATGAGA---  
 AATTGCTCTTTCAATGCAAGCACAGAAAGATTA-----  
 GATAAGAGACAGAAAGTGAATGCCCTT--TTTTATAAACTTGATATAGTACAACCTTAATGAGAAT-----  
 -----  
 -----  
 GACAGCTCCAGCTATAGATTAATAAATTGTAATACCTCAACCATATCACAA---  
 GCCTGTCCAAAGGTCTCTTTTGACCCAATTCCTATACATTATTGTGCTCCAGCTGGTTATGCGATTCTAAAGT  
 GTAAT--AATAAGACATTCAAT-----GGGACAGGACCATGCCAGAAT-----  
 -GTCAGC--ACAGTACAATGCACACATGGAATTAAGCCAGTGATATCAACT---  
 CAACTACTGTAAATGGTAGCCTAGCAGAAGGAAAC-----  
 ATAACAATCAGATCTGAAAATCTGACAAACAAT-----GCCAAGACAATAATAGTACACCTTAAT----  
 -----GTATCTATAGAA-----ATCATGTGTACAAGACCTAACAATAATACAAGAAAA-----  
 -AGTATAAGGATA-----GGACCAGGACAAACA--TTC-----TATGCAACAGGAGAC-----  
 -----ATAATAGGAGACATA-----AGACAAGCACACTGT--AACATTAGTGGAGAG---  
 AGATGGAATGAACTTTACTACAGGTAGGGAAAAAATTATAT-----GAACACTTCCCT---  
 -----AATAGAACAATAAAATTTGCA-----  
 AAACCCTCAGGAGGGGACCCAGAAAGTTACA--ATGCATACCTTTAATTGTAGAGGAGAA--  
 TTTAAGCAACTCCAGACAAGAGTCCCTGGCTATAGAAAGATACCTAAAGGATCAACAGCTCCTAGGGTTGTGGG  
 GCTGCTCTGGAAGAACTCATCTGCACCACTAATGTGCCTTGGAAGCTCCAGTTGGAGT-----  
 -----AATAAACTCGAGAAGAAATTTGG-----GAT-----  
 AACATGACCTGGATGCAGTGG--GATAGAGAAATTAGTAATTACACATACACAATATAC--  
 AGGTTGCTTGAAGACTCGCAAACCCAGCAGGAA-----  
 -----  
 GCAAAATGAAAAAGATTTATTAGCATTGGACAGTTGGAAAAATCTATGGAATTGGTTTGACATAACAAAATGGC  
 TGTGGTATATAAAAAATATTTATAATGATAGTAGGAGGCTTGATAGGCTTGAGAATAATTTTTTGCT--  
 GTGCTCTCTATAGTG-----AATAGAGTCAGGCAGGGATACTCACCT-----  
 CTGTGCTTGGCTATTAGTCTGCTTGATACTATAGCAATAACAGTAGCTGAG---  
 GGGACAGATAGGATTATAGAAGCAATACAAAGAATTGGTAGAGCT-----  
 -----ATCCTCAGCATA-----CCTAGAAGAATAAGACAGGGCTTTGAAGCAGCTTTGCAA--TAA  
 >KC894124  
 -----  
 GGGAACCTGTGGGTACAGTCTATTATGGGGTACCTGTGTGG--AAAGAAGCAAAA---  
 ACTACTCTATTCTGTGCATCAGATGCTAAAGCATATGAGACAGAA--GTGCATAAT-----  
 -----GCCTGGGCTACA---CATGCCTGTGTACCCACAGAC---  
 CCCAACCCACAAGAAATGGTTTTGGAA-----AATGTAACAGAAGATTTTAAAT-----  
 -----ATGTGGAAAAATGACATGGTGGATCAGATGCATGATGATATA---  
 ATCAGTTTATGGGACCAAAGCCTA--AAGCCATGTGTAAAGTTG---  
 ACACCACTCTGTGTCACTTTAAATGTGTAGAAGTTAACAACACGACA-----  
 -----  
 -----AATACAACAATTGATGATAATTACAAGGAAGAAGTAAAA---  
 AATTGCTCTTTCAATACAACCACAGCGATAAGA-----  
 GATAAGAAACAGCAAGGGTATGCATTT--TTTTATAGATCTGATATAGAACTACTTCCTAAC-----  
 -----  
 -----  
 TCTAGTGAGTATATATTAATAAGTTGTAATACCTCAACCATAACACAG---

GCCTGTCCAAAGGTCTCTTTTGACCCGATTCTTATACATTATTGTGCTCCAGCTGGTTATGCGATTCTAAAGT  
 GTAAT---AATAAGACATTTAAT-----GGGACAGGACCATGCAAAAAT-----  
 -GTCAGC---ACAGTACAATGTACACATGGAATTAAGCCAGTGGTATCAACT---  
 CAACTACTGTTTAAATGGTAGCCTGGCAGAAGAGGAC-----  
 ATAATAATTAGATCTGAAAATCTGACAAATGAT-----GCTAAAACAATAATAGTACACCTTAAT----  
 -----AAATCTGTAGCA-----ATTGTGTGTATAAGACCTGGCAATAATACAAGAAGA-----  
 -AGTATAAGGATA-----GGACCAGGACAGACA---TAC-----TATGCAAATGAC-----  
 -----ATAATAGGAGACATA-----AGACAAGCATATTGT---AACATTAGTAAAAGT---  
 CTATGGAATACAACCTTTAGAAGGGGTAAAGAAGAAATTAGAA-----AAACACTTCCCT----  
 -----AATAAAACGATAGAGTTTGAACCA---  
 CAACCACGCTCAGGAGGGGACCTAGAAATTACA--ACACATAGTTTAAATTGTAGAGGAGAA---  
 TTTAAGCAGCTCCAGGCAAGAGTCTTGGCTATAGAAAAGATACCTAAAGGATCAACAGCTCCTAGGGCTTTGGG  
 GCTGCTCTGGAAGAGTCATCTGCCCACTGCTGTGCCGTGGAACCTCAGTTGGAGT-----  
 -----AATAAATCTAAAGCAGATATTTGG-----GAT-----  
 AACATGACCTGGATGCAGTGG---GATAGAGAAATTGATAACTACACAAACACAATATAC---  
 AAGTTGCTTGAAGACTCGCAAAATCCAGCAGGAG-----  
 -----  
 AACAAATGAAAGAGATTTATTAGCATTAGACAGTTGGAACAGCCTGTGGAATTGGTTTAGCATAACAAAATGGT  
 TGTGGTATATAAAAATATTTCATAATGATAGTAGGAGGCTTGATAGGTTTAAGAATAATTTTTTGGT---  
 GTGCTTTCTATAGTG-----AAAAGAGTTAGGCAGGGATACTCACCT-----  
 TTGTCGTTTGTCTGTTAGTTTGTCTTGATACTGTAGCAATAGCAGTAGCTGAA---  
 GGAACAGATAGGATTATAGAATTAGCACAAAGAATTTGTAGAGCT-----  
 -----ATCTGCAACATA-----CCTAGAAGAATAAGACAAGGCTTTGAATCAGCTTTGCTA---TAA  
 >HM204615  
 AAT---GTG---GGG-----  
 GGGAACTTATGGGTACAGTCTATTATGGGGTACCTGTGTGG---AAGGAAGCAGAA---  
 ACTACTCTATTCTGTGCATCAGATGCTAAAGCATATGAGAGAGAA--GTACACAAT-----  
 -----GTCTGGGCTACA---CATGCCTGTGTACCCACAGAC---  
 CCCAACCCACAAGAAATGGTTTTGGAA-----AATGTAACAGAAGATTTTAAT-----  
 -----ATGTGGAAAAATAACATGGTGGATCAGATGCATGAGGATATA---  
 ATCAGTTTATGGGATCAAAGCCTA---AAGCCATGTGTAAAGTTG---  
 ACCCCACTCTGTGTAACCTTTAACTGTACTAATGTTAATAGTACTGCTACT-----  
 -----  
 -----TACAATAATGTTAGCAGGCAGGAAATGAGA---  
 AATTGCTCTTTCAATATAACTACAGAATTAAGA-----  
 GATAAGAAAAACAAGAAAGAGCACTT---TTTTATATACATGATGTAGTACAAATTGGTAAC-----  
 -----  
 -----  
 TCTAACTCTAGTGAATATAGATTAATAAATTGTAATACCTCAACCATAACACAA---  
 GCTTGTCCAAAGTCTCTTTTGATCCAATTCTTATACATTATTGTGCTCCAGCTGGTTATGCGATTCTAAAAT  
 GTAAT---AATAAGACATTTAAT-----GGAATAGGACCATGCAAGAAT-----  
 -GTCAGC---ACAGTACAATGTACACATGGAATTAAGCCAGTGGTATCAACT---  
 CAACTACTGTTTAAATGGTAGCCTAGCAGAAGAAGAG-----  
 ATAATAATTAGATCTGAAAATCTGACAGACAAT-----GTCAAAAACAATAATAGTACATCTTAAT----  
 -----GAATCTGTAGAA-----ATTGAGTGTGTAAGACCCAACAATAATACAAGGAAA-----  
 -AGTGTGAGAATA-----GGACCAGGACAAGCA---TTT-----TATGCAACA---GAT-----  
 -----ATAATAGGAGACATA-----AGGCAAGCACATTGT---AACATCAGTGCATCT---  
 ACATGGAACAAAACCTTTACAACAGGTAGAAAAAAATTAATA-----GAATACTAC-----  
 -----AATAAAACAATAAGCTTTTCAA-----  
 CCATCCTCAGGAGGGGATCTAGAAATTACA--ACACATAGCTTTAATTGTAGAGGAGAA---  
 TTTAAGCAGCTCCAGGCAAGGGTCTTGGCTATAGAAAAGATACCTAAGGGATCAACAGCTCCTAGGGATGTGGG  
 GTTGCTCTGGAAGACTCATCTGCCCACTGCTGTGCCCTTGGAACTAGTTGGAGT-----  
 -----AATAGAACTCAAGATGATATTTGG-----AAT-----  
 AACATGACCTGGATGCAGTGG---GATAAAGAAATTAGTAATTACACAGGCATAGTATAC---  
 AGATTGCTTGAAGACTCGCAAAACCAGCAGGAA-----  
 -----  
 AAAAAATGAAAAAGATTTATTAGCACTGGACAGTTGGAACAATCTGTGGAATTGGTTTAACATAACAAATTGGC  
 TGTGGTATATAAGAATATTTCATAATGATAGTAGGAGGCTTAATAGGTTTAAGAATAATTTTTTGCT---  
 GTGCTTTCTATAGTG-----AATAGAGTTAGGCAGGGATACTCACCT-----  
 TTGTCGTTGCTATTAGTTTACTTGTATGCCTTAGCCATATCAGTAGCTGAA---

GGAACAGATAGAGTTATAGAATTGCTACAAAGAATTTGTAGAGCT-----  
 -----ATCCGCAACATA-----CCTGTAAGAATAAGACAGGGCTTTGAAGCAGCTTTGCTA--TAA  
 >FJ443547  
 GTA---GAG-----  
 GAGAACTTGTGGGTAACAGTTTATTATGGGGTGCCTGTGTGG--ACAGAAGCAAAA---  
 GCTACTCTATTCTGTGCATCAGATGCTAAAGCATATGAGAAAGAA--GTGCATAAT-----  
 -----GTCTGGGCTACA---CATGCCTGTGTACCCACAGAC---  
 CCCAACCCACAAGAATTATATTTGGAA-----AATGTAATAGAAAGTTTCAAC-----  
 -----ATGTGGAAAAATGACATGGTGGATCAGATGCATGAGGATGTA---  
 ATCAGTATGTGGGATCAAAGTCTA--AAGCCATGTGTAAAGCTG---  
 ACCCCACTCTGTGTCACTTTAAACTGTACAGATGTAAATGTTACCACAAATGCAAATGTT-----  
 -----  
 -----ACCACTAATGGCACTGCTATTGGCGAGGGAGAGATAAAA---  
 AATTGCTCTTTCAATGCAACCACAGAAATAAGA-----  
 GATAAAAAACAGAAAGTGTATGCACCT--TTTTATAGACCTGATGTAGTACCACCTTGAAAAG-----  
 -----  
 -----  
 AACTCTAGTGATTATATATTAATAAACTGCAATACCTCAACCATAGCACAA---  
 GCCTGTCCAAAGGTCACCTTTGATCCGATTCTATATATTATTGTGCTCCAGCTGGTTATGCGATTCTAAAAT  
 GTAAT--AATAAGACATTCAAT-----GGGACAGGACCATGCAATAAT-----  
 -GTCAGC--ACAGTACAATGCACACATGGAATTAAGCCAGTGGTCTCAACA---  
 CAATTACTGTTTAAACGGTAGCCTGGCAGAACAAAGAG-----  
 ATAGTCATTAGATCTGAAAATATAACAGACAAT-----GCCAAAACAATAATAGTACACCTTAAT---  
 -----GGAActATAAAC-----ATTACGTGTACAAGACCCAATAATAACAAGAAAA-----  
 -AGTATAAGGATA-----GGACCAGGACAAATG--TTC-----TATGCAACAGGTGAA-----  
 -----ATAATAGGAGACATA-----AGACAAGCATATTGT--AACATCAATATCACA---  
 AAGTGGAACGCACTTTAGAGCAGGTAAAGAGAAAATTAGAA-----AAATACTTCCTT---  
 -----AATAAAACAATAAGATTTGCA-----  
 CCATCTTCAGGAGGGGATCTAGAAGTTACA--ACACATATGTTTAATTGTGGAGGAGAA--  
 TTTAAACAGCTCCAGACAAGAGTCCCTGGCTATCGAAAGATACCTAAAGGATCAACAGCTCCTAGGGCTTTGGG  
 GCTGCTCTGGAAGAACTCATCTGCACCACTGCTGTGCCTTGGAACCTCAGTTGGAGT-----  
 -----AATAAATCTCAAAACGATATTTGG-----GAT-----  
 AACATGACCTGGATGCAGTGG--GATAGAGAAATTAATAATTACACAGACACAATATAC--  
 AAGTTGCTTGAAGACTCGCAAAGCCAGCAGGAG-----  
 -----  
 AAAAAATGAAAAGGACCTATTAGCATTGGACAGTTGGAAAAACCTGTGGAATTGGTTTAACATAACAAATTGGT  
 TGTGGTATATAAAATTATTCATCATGATAGTAGGAGGCTTGATAGGTTTAAGAATAATTTTTGGT---  
 GTACTCTCTATAGTG-----AAAAGAGTTAGGCAGGGATACTCACCT-----  
 TTGTCGTTTGTCTATTAGTCTATTTGATACCACAGCAATAGCAGTAGCTGAA--  
 GGAACAGATAGGATTATAAACTTAGTACAAAGAATCTATAGAGCT-----  
 -----ATCCGCAACATA-----CCTGTAAGAATAAGACAGGGCCTTGAAGCAGCTTTACTA--TAA  
 >FJ443838  
 GTG---AGG-----  
 GGCTGGTGGGTCACAGTCTACTATGGGGTGCCTGTGTGG--AAAGAAGCAAAA---  
 ACTACTCTATTTTGTGCATCAGATGCTAAAGGATATGAGAAAGAA--GCGCATAAT-----  
 -----GTCTGGGCTACA---CATGCCTGTGTGCCCACAGAC---  
 CCCAACCCACAAGAAATAGTTTGGTA-----AATGTAACAGAAAATTTTAAC-----  
 -----ATGTGGAAAAATGACATGGTAGATCAGATGCATGAAGATATA---  
 ATCAATTTATGGGATCAAAGCCTT--AAGCCCTGTGTAAAGTTG---  
 ACCCCACTCTGTGTCACTTTAAATTGCATAAATGCAACTATATTAAATGATACACAAACAAATGCA-----  
 -----  
 -----ACTATATTAAATGGTACACAAAAGATAGAAATTGAAGAAATGAAA---  
 AATTGCTCTTTCAATGTGACCACAGAATTAAGA-----  
 GATATTAAAAGGAAAGAAAGGACAATT--TTTCATAGCCTTGATATAGTACCAATTGATGGG-----  
 -----  
 -----  
 AGGAAGGGTGAATATAGATTAATACATTGTAATACCTCAGTCATAACACAA---  
 GCCTGTCCAAAAATCTCGTTTGAACCAATTCCTATACATTTTTGTGCTCCAGCTGGTTATGCGATTCTAAAGT  
 GTAAT--AATAAGACATTCAAT-----GGAACAGGACCATGCAATAAT-----  
 -GTCAGC--ACAGTACAATGTACACATGGAATTAAGCCGGTGGTATCAACT---

CAACTACTGTAAATGGTAGCCTAGCAGAAGAAGAT-----  
 ATAATAATTAGATCTGAAAATCTGACAAACAAT-----GTCAAAACAATAATAGTACATCTTAAT----  
 -----GACCCTGTAAAG-----ATTGAGTGTATAAGATTTGCCAATAAGACAAGAAAA-----  
 -AGTGTGAGAATA-----GGACCAGGACAAGCA---TTC-----TATGCAACAGGAGAC-----  
 -----ATAATAGGAGATATC-----AGAGAAGCACATTGT---AACGTTAATGAAAGC---  
 AAATGGAACCAAACCTTTACAGAGGGTAAGTAAGAAATTAAAA-----GAATTCTTC-----  
 -----AATAAACCAATAGTATTTAAT-----  
 TCATCTTCAGGAGGGGACCTAGAAATTACT--ACACATAGCTTTAATTGTGGAGGAGAA---  
 TTTAAGCAGCTCCAGGCAAGAGTCCTGGCTATAGAAAGATACCTAAAGGATCAACAGCTCCTAGGGATATGGG  
 GCTGCTCTGGAAGAACTCATCTGCACCACTGATGTACTTTGGAACCTCTAGTTGGAGT-----  
 -----AATAAACTAAACTGAGATTTGG-----GAA-----  
 AATATGACCTGGATGGAATGG---GATAGAGAGATTAGTAATCACACAAACACAATATAC---  
 AGGTTGCTTGAAGAAGCGCAAAACCGGCAGGAA-----  
 -----  
 AACAAATGAAAAAGAGTTACTAGCATTGGACAGTTGGAACAATTTGTGGAATTGGTTTAGTATATCAAAATGGC  
 TGTGGTATATAAAAATATTTCATAATGATACTAGGAGGCTTGATAGGTTTAAGAATAATTTTTTGCT---  
 GTGCTCTCTCTAGTA-----AATAGAGTTAGGCAGGGATACTCACCT-----  
 TTGTCAATTGGCTATTAGTCTGCTTGATACCACAGCAATAGCAGTAGCTGAA---  
 GGAACAGATAGGATTATAGAGCTTATACAAAACCTTTTGTAGAGGT-----  
 -----ATCCGCAACATA-----CCTGTAAGAATAAGACAGGGCTTTGAAGCAGCTTTACAA---TAA  
 >FJ443865  
 GTG---GTG-----  
 GGAAACTTGTGGGTCACAGTCTATTATGGGGTACCTGTGTGG---AAAGAAGCAAAA---  
 ACTACTCTATTCTGTGCATCAGATGCTAAAGCATATGAGAAAGAA---GTACATAAT-----  
 -----GTCTGGGCTACA---CATGCCTGTGTACCCACAGAC---  
 CCCAACCCACAAGAAATGGTTTTGAAA-----AATGTAATAGAAAATTTTAACT-----  
 -----ATGTGAAAAATGACATGGTGGATCAGATGCATGAGGATATA---  
 ATCAGTTTATGGGATCAAAGCCTA---AAGCCATGTGTAAAGTTG---  
 ACCCCACTCTGTGTCACTTTAACTGTAGCAATGTTACTGTTACTTGTAAATAATACT-----  
 -----  
 -----GGTATCGACTGCAGTAATACCACAGATGAAATAAAA---  
 AACTGCTCTTTTATCACAACCACAGAACGAAAA-----  
 GATAGTAAAAGGAGAGAGTTTGCAAAT--TTTTATAGCCTTGATATAGTACAAATTGATAAG-----  
 -----  
 -----  
 AGTAATAAATCTGCTTATAGGTTAATAAGTTGTAACACCTCAACTATAGCACAA---  
 GCCTGTCCGAAGGTCTCTTTTGACCCAATTTCCTATACATTATTGTGCTCCAGCTGGTTATGCGATTCTAAAGT  
 GTAAT---GATGAGACATTCAAT-----GGAACAGGACCATGCCACAAT-----  
 -GTCAGC---ACAGTACAATGTACACATGGAATTAAGCCAGTGGTATCAACC---  
 CAACTACTGTAAATGGTAGCCTAGCAAAAGGAGGG-----  
 ATAATAATTAGATCTGAAAATTTGAAAGATAAT-----ACCAAAACAGTAATAGTACAGTTTAAT---  
 -----GAATCTGTAGAG-----ATTGTGTGTACAAGACCCAACAATAATACAAGGAAA---  
 -AGTTTAAGGATA-----GGACCAGGACAAGCA---TTC-----TATGCAACAGGAGAC-----  
 -----ATAATAGGAGACATA-----AGACAAGCACATTGT---AACGTTAGTAAT-----  
 AACTGGAATACAACCTTAGAAATGGTAAAGAAAAAATTAAAA-----AAAAGAATTCCC---  
 -----TGATAAAAAATATAACATTTGCA-----  
 CCATCTTCAGGAGGAGACCTAGAAATTACA---ACACATAGCTTTAATTGTAGGGGAGAA---  
 TTTAAGCAGCTCCAGGCAAGAGTCCTGGCTGTGGAAAGATACCTAAGGGATCAACAGCTCCTAGGGATTTGGG  
 GCTGCTCTGGAAGAACTCATCTGCACCACTACTGTGCCTTGGAACGCCAGTTGGAGT-----  
 -----AATAAATCTGAGAAAGAGATTTGG-----GAG-----  
 AACATGACCTGGATGCAGTGG---GAGAAAGAAATCGATAATTACACAGAAACAATATAC---  
 AGGTTGCTTGAAGTCTCGCAAAACCAGCAGGAG-----  
 -----  
 CAAAATGAAAAGGATTTATTAGCATTGGACAAGTGGCAAAATCTGTGGAGTTGGTTTAATATAACAAATTGGC  
 TGTGGTATATAAAAATATTTATAATGATAGTAGGAGGCTTGATAGGTTTAAGAATAATTTTTTGCT---  
 GTGCTTTCTATAGTG-----AATAGAGTTAGGCAGGGATACTCACCT-----  
 TTGTCAATTTGCTATTAATCTGCTTGATACTGTAGCAATAGTAGTAGCTGAG---  
 GGAACAGATAGGATTATAATAATCATACAAAGACTTTGGAGAGCT-----  
 -----ATCTGCAACATA-----CCTACTAGAATAAGACAGGGCTTTGAAGCAGCTTTGCTA---TAA  
 >KT183218

GGG---GTA-----  
 GGGAACATGTGGGTCACAGTCTATTATGGGGTGCCTGTGTGG---ACAGAAGCAAAA---  
 GCCACACTATTTTGTGCATCAGATGCTAAAGCATATGAAAAAGAA---GTGCATAAT-----  
 -----GTCTGGGCTACA---CATGCCTGTGTACCCACAGAC---  
 CCCAACCCACAAGAAATAATCTTGGA---AATGTAACAGAAAATTTTAAAC-----  
 -----ATGTGGAAAAATGACATGGTGGATCAGATGCATGAAGATATA---  
 ATCAGTATATGGGATCAAAGTTTA---AAACCATGTGTAAAGCTG---  
 ACCCCACTCTGTGTCACTCTAACATGTAAAAATATTACCAATAATGTTACTAATATCTTC-----  
 -----  
 -----AATAGTAGTGAAGGAATAAACATGAAGGAAGAAATAAAA---  
 AATTGCTCTTTCAATACAACCACAGAAATAAGA-----  
 GATAAGGAAAAGAAGGAGTATGCACCT---TTTTATAAACCTGATATAGTACAACCTTGGGGAGAGA-----  
 -----  
 -----  
 AATTCTAGTAGGTATATATTAATAAATTGCAATTCCTCAACCATAACACAA---  
 GCCTGTCCAAAGGTCACCTTTTGACCCAATTCCTATACATTATTGTGCTCCTGCTGGTTATGCAATTCCTAAAGT  
 GTAAT---AATAAAACATTCAAT-----GGGACAGGACCATGCAGTAAC-----  
 -ATCAGC---ACAGTACAATGTACACATGGAATTAAGCCAGTAGTATCAACT---  
 CAGCTACTGTTAAATGGGAGCCTATCAGAAGGGGAA-----  
 ATAATGATTAGATCTGAAAATCTGACAGACAAT-----ACCAAAACAATAATAGTGCACCTTAAT---  
 -----GAATCTGTAGAA-----ATTGTGTGTATAAGACCCGGCAATAATACAAGAAAA-----  
 -GGTATAAGGATA-----GGGCCAGGACAAGTA---TTC-----TATGCAACAGGTGAC-----  
 -----ATAATAGGAGACATA-----AGGCAAGCATATTGT---AACATT---TCAGGT---  
 AAATGGAACACAACCTTTAGAAAAGGTAAAGAAGAAGTTAAAA-----GAGCACTTCCCT---  
 -----AATAAAACAATAAACTTTAAT-----  
 TCATCATCAGGAGGAGATCTAGAAATTACA---ACACATAGTTTTAATTGTAGAGGAGAA---  
 TTTAAACAGCTCCAGACAAGAGTCCTGGCTATAGAAAGATACCTAAAGGATCAACAGCTCCTAGGGCTTTGGG  
 GCTGCTCTGGAAAAATCATCTGCACCACTAATGTACCTTGGAACTCCAGTTGGAGT-----  
 -----AATAAATCTAAAGAGGATATTTGG-----GAT-----  
 AACATGACCTGGATGCAGTGG---GATAGAGAAGTTAGTAATTACACAGAAACAATATAC---  
 AGGCTGCTTGAAGAATCGCAAACCCAGCAGGAG-----  
 -----  
 AAAAAAGAAAAGAGTTATTAGAAATTGAGCAAGTGGGACAGTCTGTGGAGTTGGTTTAACATAACAAATTGGC  
 TGTGGTATACAAAATATTATCATGATAGTAGGAGGCTTAATAGGTTTAAAGAATAATTTTTTGCT---  
 GTGCTATCTATAGTG-----AGAAGAGTTAGGCAGGGATACTCACCT-----  
 TTGTCATTTGCTATTAGTCTGCTTGATACCTTAGCAATAGCAGTAGGTGAA---  
 GGAACAGATAGGATTATTAGAAATAGTACAAAGCATTGTAGAGCT-----  
 -----ATCTATAACACA-----CCTAGAAGAATAAGACAGGGCTTTGAAACAGCTTTGCTA---TAA  
 >HM623548  
 GGG---ACA-----  
 GAGGACTCGTGGGTCACAGTTTATTATGGGGTACCTGTGTGG---AGAGAAGCAAAA---  
 ACTACCCTATTCTGTGCATCAGATGCTAAAGCATATGAGAAAGAG---GTACATAAT-----  
 -----GTCTGGGCTACA---CATGCCTGTGTACCCACAGAT---  
 CCCAATCCACAAGAATTACCTTTGAAA-----AATGTAACAGAAAATTTTAAAT-----  
 -----ATGTGGAAAAATAACATGGTGGATCAGATGCATGAGGACATA---  
 ATCAGTTTATGGGATCAAAGTTTA---AAACCATGTATAAAGTTG---  
 ACCCCACTCTGTGTCAATTTTAAATTGTACAAATGTTAATGCTACCAAAAATGATAAT-----  
 -----  
 -----ATTACCGAGATTGACATGGGGAAAGAAATAAAG---  
 AATTGCTCTTTCAATACAACCACAGAAATAAGA-----  
 GGTAAGAAACAGAAGGCATATGCACCT---TTTTATAGACCTGATGTAGTGCCACTTAATGGG-----  
 -----  
 -----  
 AATAATAGTGAGTATATATTAATAAATTGTAATTCCTCAACCATCACACAA---  
 GCCTGCCCAAAGGTCACCTTTTGATCCAATTCCTATACACTATTGTGCTCCAGCTGGTTATGCGATTCTAAAGT  
 GTAAT---AATGAGTCATTCAAT-----GGGACAGGACCATGCAATAAT-----  
 -GTCAGC---ACGGTGCAATGTACACATGGAATTAAGCCAGTGGTATCAACT---  
 CAACTACTGTTAAATGGTAGCCTAGCAGAAGGGGAG-----  
 ATAATAATTAGCTCTGAAAATCTGACAGACAAT-----ACCAAAACAATAATAGTACACCTTAAT---  
 -----AAATCTGTAGAA-----ATTAAGTGTACAAGACCCAACAATAATACAAGAAGA-----

-AGTATAAGGATA-----GGACCAGGACAAGCA---TTC-----TATACAAATGAC-----  
 -----ATAATAGGAAACATA-----AGACAAGCATTTTGT---CAAATCAATGGAAGT---  
 CAATGGAACAAAACCTTTAGAACTGGTAAGGAGAGAATTAAGA-----AAACACTAC-----  
 -----AACAAAAGAATACAATTTAAT-----  
 TCATCCTCAGGAGGGGATCTAGAAATTACA--ACACATAGCTTTAATTGTCAAGGGGAA---  
 TTTAAGCAGCTCCAGGCAAGAGTCCTGGCTATAGAAAGATACCTAAAGGATCAACAGCTCCTAGGCCTTTGGG  
 GCTGCTCTGGAACACTCATCTGCACCACTAATGTGCCATGGAACACCAGTTGGAGT-----  
 -----AATAAAACTAGGGCAGAGATTTGG-----GAT-----  
 AACATGACCTGGATGCAATGG---GATAGAGAAATTAGTAATTACACAGGCATAATATAC---  
 ATGTTGCTTGAAGAATCGCATATTCAGCAGGAG-----  
 -----  
 AAAAAATGAAAAAGATTTATTAGAAATTGGACAGCTGGAAAAATCTGTGGTCTTGGTTTGACATATCAAATTGGC  
 TGTGGTATATAAAAAATATTCATCATGATAGTAGGAGGCTTGATAGGTTTAAGAATAATTTTTTGGT---  
 GTACTCTCTATAGTA-----AAAAGAGTTAGGCAGGGATACTCACCT-----  
 TTGTCGTTTGCTATTAGTCTGTTTGATACCATAGCAATAGCAGTAGCTGAA---  
 GGAACAGATAGGATTATTGAAGTGTTACAAAGAATTTGTAGAGCT-----  
 -----ATCCGCAACATT-----CCTAGAAGAATAAGACAGGGCTTTGGAGCATCTTTGCTA---TAA  
 >HM623555  
 GAG---AAG-----  
 GAGAGCTTGTGGGTCACAGTCTATTATGGGGTACCTGTGTGG---AAAGAAGCAAAA---  
 ACCACTCTATTCTGTGCATCAGAGGCTAAAGCATATGAGAGAGAA---GTGCATAAT-----  
 -----GTCTGGGCTACA---CATGCCTGCGTACCCACAGAC---  
 CCCGACCCACAAGAAACAGTTATGGAA-----AATGTAACAGAAAATTTTAAC-----  
 -----ATGTGGAAAAATAACATGGTGGATCAGATGCATGAGGATATA---  
 ATCAGTTTATGGGATCAAAGTTTA---AAACCATGTGTAAAGTTG---  
 ACCCCACTCTGTGTCACTTTAAATTGTACAGATGTAACAAATAGAACTATAAATGGTACTGCTACCACT----  
 -----  
 -----GCTATCAATATTACCGTCGATAGTAGCATGGAGGGAGAAAGTAAAA---  
 AATTGCTCTTTCAATACAACCACAGAATAAGA-----  
 GATAAAGAACGGGAGACATATGCACCT--TTTTATAAATCTGATGTGCTGCCGCTTGCTAGGGGT-----  
 -----  
 -----  
 AGCAATGGGGAGGGCAATGGTAGCTTTATATTAATACATTGCAATACTTCAACCATAACACAA---  
 GCCTGTCCAAAGGTCTCCTTTGATCCAATTCCTATACATTATTGTGCTCCAGCTGGTTATGCGATTCTAAAGT  
 GTAAT---AATAAGACATTCAAT-----GGGACAGGACCATGCAATAAT-----  
 -GTCAGC--ACAGTACAATGCACACATGGAATTAAGCCAGTGGTATCAACT---  
 CAACTACTGTTAAATGGTAGCCTAGCAGAAGGGGAC-----  
 ATAATAATTAGATCTGAAAATCTGACAGACAAT-----AGCAAAACAATAATAGTACAACCTTAAT---  
 -----GAATCTATATCG-----ATTAAGTGTACAAGACCCAACAATAACACAAGGAAA-----  
 -GGTATAAGGATA-----GGGCCAGGACGAACA---TTC-----TATGCACATGAAAGA-----  
 -----GTAATAGGAAACATA-----AGACAAGCACATTGT---AACATCACTGGA-----  
 ---TGGAACCAAACCTTTAGAAAAGGTGAGGAAAAAGTTAAAA-----GAACACTTCCCT-----  
 -----AATAGAAACATAACCTTTAAC-----  
 TCATCAGCAGGAGGGGACCTAGAAGTTACA--ACACATAGTTTTTAATTGTAGAGGAGAA---  
 TTTAAACAGCTCCAGGCAAGAATCCTGGCTATAGAAAGATACCTAAGGGATCAACAGCTCCTAGGGCTTTGGG  
 GCTGCTCTGGAACACTCATCTGCCCCACTGCTGTGCCTTGGAACCTCCAGTTGGAGT-----  
 -----AATAAATCTTATTGATATTTGG-----GAT-----  
 AACATGACCTGGATGCAGTGG---GATAAAGAAATTAGTAATCACTCAGACATAATATAC---  
 AAGTTACTTGAAAAATCGCAAAGCCAGCAGGAG-----  
 -----  
 AAAAAATGAACAAGATTTATTAGCATTGGACAGTTGGAAAAATCTGTGGAATTGGTTTGACATCTCAAATTGGT  
 TGAGGTATATACAAATATTCATCATGATAATAGGAGGCTTAATCATTTTTAAGAATAGTTTTTGGT---  
 GTGCTATCTTTAGTA-----AAAAGAGTTAGGCAGGGATACTCACCT-----  
 TTGTCATTGCAATTAGTCTGCTTGATACCATAGCAATAGCAGTAGCTGAA---  
 GGAACAGATAGGATTATAGAAGTAATACAAAGATTTTGTAGAGCT-----  
 -----ATCCGCAATATA-----CCTACAAGAATAAGACAGGGCTTAGAAGCAGCTTTGCTA---TAA  
 >HM623562  
 GGG---ACA-----  
 GAAAACTCGTGGGTCACAGTCTATTATGGGGTACCTGTGTGG---ACAGAAGCAAAA---  
 ACTACTCTATTCTGTGCATCAGATGCTAAAGCATATGATAAAGAA---GTGCATAAT-----

-----GTTTGGGCTACA---CATGCCTGTGTACCCACAGAC---  
 CCCGACCCACAAGAACTATTCTTGAAA-----AATGTAACAGAAAATTTTAAAC-----  
 -----ATGTGGAAAAATGACATGGTGGACCAGATGCATGAGGATGTA---  
 ATCAGTTTATGGGATCAAAGTCTA---AAACCATGTGTAAAGTTG---  
 ACCCCACTCTGTGTCACTTTAAATTGTACAGATGCAAATTTTACCAATAATGCAAATGCTACCAATAAT----  
 -----  
 -----AATAGCAGGAATAGTAATACTAGCAGTGTGATAATGATATGAAA---  
 AATTGCACTTTTCAATACAACCACAGAAATAAGA-----  
 GATAAGCAACAGAAAGTGACTGCACCTT---TTTTATAGATCTGATGTAGTGCCACTTGGTAGT-----  
 -----  
 -----  
 GGGACTAACTCTAGTGATTATATATTAATAAATTGCAATACCTCAACCATAACACAA---  
 GCCTGTCCAAAGGTCTCGTTTGACCCAATTCCTATACATTATTGTGCTCCAGCTGGTTATGCGATTCTAAAGT  
 GCAAT---GACAAGACATTCAAT-----GGGACAGGACCATGCCTTAAT-----  
 -GTCAGC---ACAGTACAATGTACACATGGGATTAAACCAGTGGTATCAACT---  
 CAACTACTGTAAATGGTAGCCTAGCAGAAAAGGAG-----  
 ATAGTAATTAGATCTGAAAAATAACAGACAAT-----GCCAAAACAATAATAGCACATCTTAAT----  
 -----GAATCTGTACAA-----ATTGTGTGTACAAGACCCGGCAATAATACAAGAAAA-----  
 -AGTGTAAGGATA-----GGACCAGGACAAACA---TTC-----TTTACAAATGAA-----  
 -----ATAATAGGAGACATA-----AGACAAGCATTTTGT---AAAATTAATAAAACT---  
 GCTTGGAACATAACTTTAGAAGGGGTAAAGAAAAAATTAAAA-----GAACACTTCCCT----  
 -----AATGACACAATAATAAAATTTGGA-----  
 CCACACTCAGGAGGGGATCTAGAAGTTAGA--ACACATAGTTTAAATTGTAGAGGAGAA---  
 TTTAAGCAGCTCCAGGCAAGGGTCTGGCCATAGAAAGATACCTAAGGGATCAACAGCTCCTAAGCCTTTGGG  
 GCTGCTCTGGAAGAACTCATCTGCACCACTAATGTGCCTTGGAAGCTCCAGTTGGAGC-----  
 -----AATAAATCTAAAGAAGCTATTTGG-----GAT-----  
 AACATGACCTGGATGCAGTGG---GATAGAGAAATCAATAATTACACAGACACAATATAC---  
 AGGTTGCTTGAAGACTCGCAAAACCAGCAGGAG-----  
 -----  
 AGAAATGAAAAAGATTTATTAGCATTGGACAGCTGGAAAAATCTGTGGAGTTGGTTTGACATATCAAATTGGC  
 TATGGTACATAAAAAATATTCATCATGATAGTAGGAGGCCAATAGGTTTAAGGATAATTTTGGGT---  
 GTGCTTTCTATAGTG-----AGAAGAGTTAGGCAGGGATACTCACCT-----  
 TTGTCGTTTGCTATTAGTCTGCTTGATACCATAGCAATAGCAGTAGCTGAA---  
 GGAACAGATAGGATTATAGAATTAATACAAGGAATTGGTAGAGCT-----  
 -----ATCCGCAACATA-----CCTAGAAGAATAAGACAGGGCTTCGAAGCAGCTTTGCTA--TAA  
 >HM623568  
 GTG--GAG-----  
 GAAGACTCATGGGTACAGTCTATTATGGGGTACCTGTGTGG--AAAGAAGCCAAA---  
 ACTACTCTATTCTGTGCATCAGATGCTAAAGCATATGAGAAAGAA--GTGCATAAT-----  
 -----GCCTGGGCTACA--CGCGCCTGTGTACCCACTGAC---  
 CCCAACCCACAAGAATTGGTTTGGGA-----AATGTAACAGAAAATTTTAAAC-----  
 -----ATGTGGAAAAATGACATGGTAAATCAGATGCATGAGGATATA---  
 ATCAATTTATGGGATCAAAGTCTA---AAGCCATGTGTAAAGTTG---  
 ACCCCGCTCTGTGTCACTTTATATTGTACAGATCCAGAATTTAATAATACCAGTAATACTACCCAT-----  
 -----  
 -----GGTAATAAGACCTACAACAATAATAACATGACTGACATAAAA---  
 AATTGCTCTTTCAATACAACCACAGAAATAAGA-----  
 GATAAGCAACAGAATGTGTATGCACCTT---TTTTATAAATCTGATCTAGTACCACTAGATCAGAAGGAC----  
 -----  
 -----  
 AAGAAGAATGGGAGTGAGTTTATATTAATACATTGCAATACCTCAACCATAACACAG---  
 GCCTGTCCAAAGGTCTCTTTTGAACCAATTCCTATACATTTTGTGCTCCAGCTGGTTATGCGATTCTAAAGT  
 GTAAT---AACAGGACATTCAAT-----GGGACAGGACCATGTCAAAT-----  
 -GTCAGT---TCAGTACAATGTACACATGGAATTAAGCCAGTGGTATCAACT---  
 CAACTACTGTAAATGGTAGCCTAGCAAAAGGGGAG-----  
 ATAATGATTAGATCTGAAAACTGACAAATAAT-----GTCAAAAACAATAATAGTCCACCTTAAT----  
 -----GAATCTGTAGAC-----ATTAATTGTACAAGACCTAATAATAATACAAGGAAA-----  
 -AGCATAAGGATA-----GGACCAGGACAAAGCA---TTC-----CATGCATATAAAGGC-----  
 -----ATAATAGGAGATATA-----AGACAAGCACATTGT---AACATTAGTGGGCAG---  
 CAATGGAACACAACCTTTAGAACGGGTAAAGAAAAGATTAGAA-----AACTATTCCCT----

-----AACAAAACAATAGAATTTAAA-----  
 CCACACTCAGGAGGGGATCTAGAAGTTACA---ACACATAACTTTAATTGTAGAGGAGAA---  
 TTTAAGCAGCTCCAGGCAAGAGTCCTGGCTGTAGAAAGATACCTAAAGGATCAACAGCTCCTAGGGCTTTGGG  
 GCTGCTCTGGAAGAACTCATCTGCACCACTAATGTGCCTTGGAAGCTCCAGTTGGAGT-----  
 -----AATAAACTCAAGAACAAATTTGG-----GAG-----  
 AATATGACCTGGATGCAGTGG---GATAGAGAGATCAATAATTACACATACACAATATAC---  
 AGGTTACTTGAAGAATCGCAACACCAGCAGGAG-----  
 -----  
 GAAAAATGAAAAAGATTTATTAGCATTGGACAGTTGGAAAAACCTGTGGAGTTGGTTTGATATATCAAATTGGC  
 TGTGGTATATAAAAAATATTCATCATAATAATAGGAGGCTTGATAGGCTTGAGAATAGTTTTTTGGT---  
 GTACTCTCTATAGTG-----AATAGAGTTAGGCAGGGATACTCACCT-----  
 TTGTGCTTTTGCTATTAGTCTGCTTGATACCTTAGCAATAGCAGTAGCTGAA---  
 GCAACAGATAGGATTATTATAGTAGTACAAAGAATTTGTAGAGCT-----  
 -----ATCCTTAACATA-----CCTAGAAGAATAAGACAGGGGCTGGAAGCAGCTTTGATA---TAA  
 >HM623571  
 GGG---ATG-----  
 GAAAACTTGTGGGTCACAGTATATTATGGGGTACCTGTGTGG---AGAGAAGCAAAA---  
 ACTACTCTATTCTGTGCATCAGAGGCTAAAGCATATGAGAGGGAG---GTGCATAAT-----  
 -----GTCTGGGCTACA---CATGCCTGTGTACCCACAGAC---  
 CCCAGCCCACAAGAAATACGTATGGAT-----AATGTAACAGAAAATTTTAACT-----  
 -----ATGTGGAACAATGACATGGTGGATCAGATGCATGAGGATGTA---  
 ATCAGTTTATGGGATGAAAGCCTA---AAGCCATGTGTAAAGTTG---  
 ACCCCACTCTGCGTCACCCTAAACTGTACAAATGCTACTGTTAGCAGTACTAATACCAGT-----  
 -----  
 -----GTTACTGTTAACAATAGTAATATCAGTGACATGAGA---  
 AATTGCTCTTTCGATGTGACCACAGAAATAAGA-----  
 GATAAGACAAAGAAAGAAAGAGCTCTT---TTTTATAAACTAGATCTAGTATCACTCAATGAT-----  
 -----  
 -----  
 AGTAACTCTAATGAGTATGTATTGATAAATTATAATACCTCAAAAGTAACACAA---  
 GCCTGTCCAAAGGTCTCTTTTGACCCAATTCCTATACATTATTGTGCTCCAGCTGGTTATGCGATTCTAAAGT  
 GTAAT---AATAAGACATTCAAT-----GGAACAGGACCATGCTATAAT-----  
 -GTCAGC---ACAGTACAATGTACACATGGAATTAAGCCAGTGGTATCAACT---  
 CAACTGCTGTTTAAACGGTAGCCTAGCAGAAGAAGAC-----  
 ATAATAATTAGATCCAAAAATCTGTTCAGACAAT-----AGCAAAACAATAATAGTACATCTTAAT---  
 -----GAATCTGTACAG-----ATTGTGTGCATAAGACCCGGAATAATACAAGGAAA---  
 -AGTATAAGGATA-----GGACCAGGACAAACA---TTC-----TATGCAACAGGAGAT-----  
 -----ATAATAGGAAACATA-----AGACAAGCGCATTGT---AATATTACTGAAGCA---  
 GACTGGAATAGAACTATGCACAGAGTAAGTGAAAAATTTAAA-----GAACACTTCCCT---  
 -----AATAAAACAATAGAATTTAAA-----  
 CCACCCTCAGGAGGAGACATAGAAATTACA---ACACATAGCTTTAATTGTGGAGGAGAA---  
 TTTAAGCAGCTCCAGGCAAGAGTCCTGGCTATAGAAAGATACCTAAAGGATCAACAGCTCCTAGGAATTTGGG  
 GCTGCTCTGGAAGAACTCATCTGCACCACTAATGTGTTGTGGAAGCTCTAGTTGGAGT-----  
 -----AATAGATCCCAAGATGAAATTTGG-----GGA-----  
 AACATGACATGGATGGAGTGG---GATAGAGAAATTAATAATTACACAAACACAATATAC---  
 AATTGCTTGAGAAATCGCAAAGCCAGCAGGAA-----  
 -----  
 AATAATGAAAAAGAGCTACTAGAATTGGACAAATGGAATGATCTGTGGAGTTGGTTTGACATAACACGATGGC  
 TGTGGTATATAAGACTATTTCATAATAATAGTAGGAGACTTGATAGGGTTAAGAATAATTTTTTGCT---  
 GTGCTTTCTATAGTA-----AATAGAGTTAGGCAGGGATACTCACCT-----  
 TTGTCATTCTGCTATTAGTCTGCTTGATACTATAGCAATAGCAGTAGCTGAA---  
 GGAACAGATAGGATTATAGAAGTAATACAAAGATTTGGTAGAGCT-----  
 -----ATCCTTAATATA-----CCTAGAAGACTAAGACAGGGCTTTGAAGCAGCTTTGCTA---TAA  
 >JN687726  
 GGA---GAG-----  
 GGGAACTTGTGGGTCACCTGTCTATTATGGGGTACCTGTGTGG---AAAGAAGCAAAA---  
 ACTACTCTATTTTGTGCATCAGATGCTAAAGGATATGAGCGAGAG---GTGCATAAT-----  
 -----GTCTGGGCCACA---CATGCCTGTGTACCCACAGAC---  
 CCCAACCACAGAATTGAGGTTGCCA-----AATGTAACAGAAAATTTTAACT-----  
 -----ATGTGGAATAATGACATGGTGGATCAGATGCATGAGGATATA---

ATCAGTTTATGGGATGAAAGCCTA---AAGCCATGTGTAAAGATG---  
ACCCCACTCTGTGTCACTTTAAACTGTACTAATGCTAATGTTACCTACCTTAATAACACG-----  
-----  
-----GATAGTGTTATTGAGAACATGAAGGGAGAAATGCAA---  
AATTGCTCTTTCAATGTAACCACAGAACTAAGG-----  
GATAAAACAAAAAGGAATATGCACTT---  
TTTTATAGACTTGATATAGTACCAATTGATATAGTACCAATTGTTAACTGTAGTAGTAACTTTAGT-----  
-----  
GACTCTAGGAACTTTAGTAAGTGTAGTAACTATAGTGAGTATAGACTAATAAATTGTAATACCTCAACCATAA  
GACAA---  
GCCTGTCCAAAGGTCACCTTTTGACCCAATTCCTATACATTATTGTGCTCCAGCTGGATATGCGATTCTAAAGT  
GTAAC---AATGATACATTCAAT-----GGAACAGGACCATGTAATAAT-----  
-GTCAGC---ACAGTACAATGTACACATGGAATTAAGCCAGTGGTATCAACT---  
CAACTATTGTTAAATGGTAGCCTAGCAGGAAAAGAG-----  
ATAATAATTAGATCAGAAAATCTGACAAACAAT-----GCCAAAATAATAATAGTACATCTGAAT----  
-----GAATCTGTAGAA-----ATTAATTGTACAAGACCCGGCAATAATACAAGAAAA-----  
-AGTACAAGGATA-----GGACCAGGACAAGCA---TTC-----TTTACAGCAGAA-----  
-----ATAATAGGAGATATA-----AGACAGGCACATTGT---AACATTAGTGGAAGT---  
AAGTGGGGTACAACCTTTACATAGGGTAAAAAACAAATTAAAA-----GAACATTTCAAT----  
-----AATACAAACATA---ACATTTACAAACATAACATTTGCA-----  
CCGTCCGCAGGAGGGGACCTAGAAATTACA---ACACATAGCTTTAATTGTAGAGGAGAA---  
TTTAAACAGCTCCAGGCAAGAGTCCTGGCTATAGAAAGATACCTAGAGGATCAACAGCTCCTAGGACTTTGGG  
GCTGCTCTGGAACGCATCTGCACCACTGCAGTGCCTTGGAACACCAGCTGGAGT-----  
-----AATAAATCTCGAGCAGAAATTTGG-----AAT-----  
AACATGACCTGGATGCAGTGG---GATAGAGAGATTAGTAATTACACAGACATAATATAC---  
AATTTGCTTGAAGAATCGCAAACTCAGCAGGAG-----  
-----  
AAGAATGAAAAAGATTTATTAGCACTGGACAAGTGAATAACCTGTGGACTTGGTTTGGCATAACAAATTGGC  
TGTGGTATATAAGAATATTCATCATGATAGTAGGAGGCTTAATAGGGCTGAGAATAGTTTTTTGGT---  
GTACTTTCTATAGTG-----AAAAGAGTTAGGCAGGGATACTCACCT-----  
TTGTCGTTTGCTATTAGTTTGCTAGATACCATAGCAATAGCAGTAGCTGAA---  
GGAACAGATAGAATCATAGAATCAATACAAAGAATTTGTAGAGCT-----  
-----ATCCTCAACATA-----CCTAGAAGAATAAGACAGGGCTTTGAAGCAGCTTTGCTA---TAA  
>KC154023  
GTA---GTG-----  
GGGAACATGTGGGTACAGTCTATTATGGGGTACCGGTGTGG---AGAGAAGCAAAA---  
ACTACTCTATTCTGTGCATCAGATGCTAAAGCATATGAGAGAGAA---GTGCACAAT-----  
-----GTCTGGGCTACA---CATGCCTGTGTACCCACAGAC---  
CCCAACCCACAAGAAATAGTTTGGAA-----AATATAACAGAAAATTTTAAC-----  
-----ATGTGGAAAAATGACATGGTAGATCAGATGCATGAGGATATA---  
ATCAATTTATGGGATCAAAGCCTA---AAGCCATGTGTAAAGTTG---  
ACCCCACTGTGTGTCACTTTAAATTGTACAAATGCTACTGTTACAAATGCTACTGTTAACAATACTGGT---  
-----  
-----TGGGATGAAATGAAA---  
AATTGCTCTTTCAATACAACCACAGAATTAAGA-----  
GATAAGAAAAAGCAAGCGTATGCACTT---TTTTATAGATCTGATGTAGTACCAATTGATAATAAT-----  
-----  
-----  
AGTAGTAGTAGCTATATATTGATCAATTGCAATTCCTCAACTGTAACACAA---  
GCCTGTCCAAAGATCTCTTTTGACCCAATTCCTATACATTATTGTGCTCCAGCTGGTTATGCGATTCTAAAGT  
GTAAT---AATAGGACATTCAAT-----GGGACAGGACCATGTTATAAT-----  
-GTCAGC---ACAGTACAATGTACACATGGAATTAAGCCAGTGGTATCAACT---  
CAACTACTGTTAAATGGTAGCCTAGCAGAAGGGGAG-----  
ATAATAATTAGATCTGAAAATCTGACAAACAAT-----GCCAAAACAATAATAGTACACCTCAAT----  
-----AAATCTGTTGAG-----ATTAATTGTACAAGACCCAACAATAATACAAGAAAA-----  
-AGTGTAAGGATA-----GGACCAGGACAAAACC---TTC-----TATGCAACCGGCGAA-----  
-----ATAATAGGAGACATA-----AGACAAGCATATTGT---ACCCTTAATAAAACA---  
GAATGGAATATAACTTTAGGAAAGGTAAAGGATAAATTAGCA-----GAATACTTCCCT----  
-----AATAAAACAATAAACTTTTACA-----  
ACACCCTCAGGAGGGGACTTAGAAGTTACA---ACACATAGTTTTATTGTAGAGGAGAA---

TTTAAGCAGCTCCAGGCAAGAGTCCTGGCTATAGAAAGATACCTAAAGGATCAACAGCTCCTAGGGCTTTGGG  
GCTGCTCTGGAAACTCATCTGCACCACTAATGTGCCTTGGAAGCTCCAGTTGGAGT-----  
-----AATAATAAATCTTATGAGGAAATTTGG-----GAT-----  
AACATGACCTGGATGCAGTGG---GATAGAGAAATTAATAATTACACCAACACAATATAC---  
AGGCTACTTGAAGACTCGCAAACCCAGCAGGAG-----  
-----  
AAAAATGAAAAAGATTTATTAGCATTGGACAGTTGGAACAGTCTGTGGAATTGGTTTAGCATAACGCATTGGC  
TGTGGTATATAAAAAATATTCATCATGATAGTAGGAGGCTTAATAGGTTTAAGAATAATTTTTTGCT---  
GTGATATCTATAGTA-----AATAGGATTAGGCAGGGATACTCACCT-----  
TTGTGCTTTGCCATTAGCCTGTTAGACACCATAGCAATAGCAGTAGCTGAG---  
GGAACAGATAGGATTATAGAATTCCTACAAAGAATTTGTAGAGCT-----  
-----ATCCGCAACATA-----CCTAGAAGAATAAGACAGGGCTTTGAAGCAGCTTTGCAA---TAA  
>HM204619  
GTG---GTG-----  
GGAAACTTGTGGGTCACAGTCTATTATGGGGTACCTGTGTGG---AAAGAAGCAAAA---  
ACTACTCTATTCTGTGCATCAGATGCTAAAGCATATGAGAGAGAG---GTGCATAAT-----  
-----GTCTGGGCTACA---CATGCCTGTGTACCCACAGAC---  
CCCAACCCACAAGAAGTAGTTTTGGGA-----AATGTAACAGAAAATTTTAAT-----  
-----ATGTGGAATAATGACATGGTGGATCAGATGCATGAGGATATA---  
ATCAGTTTATGGGATCAAAGTCTA---AAACCATGTGTACAGTTA---  
ACCCCACTCTGTGTCACTTTAGAGTGTACAAATGCTAACATTACTAATGATAACAGT-----  
-----  
-----ACTACTATCGATAATAGTACCAGAGAAGAAATAAAA---  
AATTGTTCTTTCAATACGACCACAGAAATAAGA-----  
GATAAAAAAAGAAAGAGTATGCACCT---TTTTATAGGCTTGATATAGTACCACCTTGAGGGT-----  
-----  
-----  
AATAACAGCTATAGATTAATAAATTGTAATACCTCAACCATGACACAA---  
GCCTGTCCAAAGGTCTCTTTTGATCCAATTCCTATACATTATTGTACTCCAGCTGGTTATGCGATTCTAAAGT  
GTAAT---AATAAGACATTCACT---GGAGAAGGACCATGCCATAAT-----  
-GTCAGC---ACAGTACAATGTACACATGGAATTAAGCCAGTAATATCAACT---  
CAACTCCTGTTAAATGGTAGTCTAGCAGAAGAAGAG-----  
ATAGTTGTTAGATATGAAAATCTGACAAACAAT-----GCCAAAACAATAATAGTACACCTTAAT---  
-----ACATCTGTAGAA-----ATTATTTGTACAAGACCCGGCAATAACACAAGAAAA---  
-AGTGTAAGAATA-----GGACCAGGACAAACA---TTC-----TATGCAACAGGTGAC-----  
-----CCAATAGGAGACATA-----AGACAAGCACATTGT---AACATTAGCAAAGGT---  
AACTGGAGTAAAACCTTTGTATCAGGTAGCGGAAAAATTAAGA-----GAACAATTCCT---  
-----AATAGAACAATAGTATTTAAC-----  
TCGTCTTCAGGGGGGATCTAGAAATCACA---ACACATAGCTTTAATTGTGGAGGAGAA---  
TTTAAGCAGCTCCAGACAAGAGTCTTGGCCATAGAAAGATACCTAAAGGATCAACAGCTCCTAGGGATTTGGG  
GCTGCTCTGGAAACTCATCTGCACCACTGCTGTGCCTTGGAAGCTCCAGTTGGAGT-----  
-----AATAAATCTGAAACAGATATTTGG-----GAT-----  
AACATGACCTGGATGCAGTGG---GATAGAGAAATTAGTAATTACACAAGAACAATATAC---  
ACGTTGCTTGAAGAATCGCAAATCCAGCAGGAA-----  
-----  
AAAAATGAAAAGGATTTATTAGCATTGGACAGTTGGCAAAATCTGTGGAATTGGTTTAGCATAACAAAATGGC  
TGTGGTATATAAAAAATATTTATAATGATAGTAGGAGGCTTGATAGGCTTAAGAATAATTTTTTGCT---  
GTGCTCTCTATAGTG-----AATAGAGTTAGGCAGGGATACTCACCT-----  
TTGTGCTTTGCTATTAGTCTGCTTGATACTATAGCAATAGCAGTAGCTGAA---  
GGAACAGATAGAATCATAGAATTGATACAGAGAATTTGTAGAGCT-----  
-----ATCTGCAACATA-----CCTAGAAGAATTAGACAGGGCTTTGAAACAGCTTTGCTA---TAA  
>JX140666  
GTG---ATG-----  
GGAAACTTGTGGGTCACAGTCTATTATGGGGTACCTGTATGG---AGAGAAGCAAAA---  
ACTACTCTATTCTGTGCATCAGAGGCTAAAGCATTTGAGACAGAA---GTGCATAAT-----  
-----GTCTGGGCTACA---CATGCCTGTGTACCCACAGAC---  
CCCAATCCACAAGAAATAGTTTTGGGA-----AATGTAACAGAAAATTTTAAC-----  
-----ATGTGGAATAATGACATGGTGGATCAGATGCATGAAGATATA---  
ATCAGTTTATGGGATGAAAGTCTA---AAACCATGTGTAAAGTTG---  
ACCCCACTCTGTGTCACTTTAAACTGTACCAATGCAAATTTTACTAGTACCAGTAATAAGACT-----

-----GTTAACATGACGGAAGAAATAAAA---  
AATTGCTCTTTCAATACAACAACAGAAATAAGA-----  
GATAAGATACAGAAAGTGTATGCACTT---  
TTTTATAGACCTGATATAGTACCACTTAATGAGGATAATTCTAATAAT-----  
-----  
TCTAATTCTAGTTCTAATTATAGTGATTATATATTAATAAATTGTAATACCTCAACCATAACACAA---  
GCCTGTCCAAAGGTCACCTTTTGACCCAATTCCTATACATTATTGTGCTCCAGCTGGTTTTGCGATTCTAAAGT  
GTAAT---AATAAGACATTCAAT-----GGGAAAGGACCATGCACTAAT-----  
-ATCAGC---ACAGTACAGTGTTACACATGGAATTAAGCCAGTGGTATCAACC---  
CAACTATTGTTAAATGGTAGCCTAGCAGAAGGGGAT-----  
GTAATAATTAGATCTGAAAATATAACAGACAAT-----ACTAAAACAATAATAGTCCACCTTAAT----  
-----GAATCTGTAGAA-----ATTGTGTGTACAAGACCCAACAACAATACAAGAAAA-----  
-AGTATAAGAATA-----GGTCCAGGACAAAACA---TTC-----TATGCAACAAATGAC-----  
-----ATCATAGGAGACATA-----AGAGAAGCACATTGT---AACATTAGTGCAGCA---  
AAATGGAACACAACCTATAGGAAATGTAACAAAGAAATTAGAA-----GGATACTTCCCT----  
-----GGTAAATTTATAAGATTTGCC-----  
AAACATGCAGGAGGAGACCTAGAAAGTTACA--ACACATAGTTTTAATTGTGGAGGAGAA---  
TTCAAACAGCTCCAGGCAAGAGTCCTGGCTATAGAAAGATACCTAAAGGATCAACAGCTCCTAGGGCTTTGGG  
GCTGCTCTGGAAACTCATCTGCACCACTAACGTGCCTTGGAACCTCCAGTTGGAGT-----  
-----AATAATAAATCTGAAACAGATATTTGG-----GAG-----  
AACATGACCTGGATGCAGTGG---GAGAGAGAAATTAGTAATTACACAAGCACAATATAC---  
AACTTGCTTGAAGAATCGCAAAACCAGCAGGAA-----  
-----  
AAAAATGAAAAAGATTTATTAGCATTGGACAGCTGGAACAACCTGTGGAATTGGTTTAGCATATCAAATTGGT  
TGTGGTATATAAACTATTCATCATGATAGTGGGAGGCTTGATAGGTTTGAGAATAATCTTTGGT---  
GTGCTCTCTATAGTA-----AAAAGAGTTAGGCAGGGATACTCACCT-----  
TTATCGTTTGCTATTAGTCTGCTTGATTCCATAGCAATAACAGTAGCTGAA---  
GGAACAGATAGGATTCTTGAAGTATTACAAAGAAGTTGTAGAGCT-----  
-----ATCCGCAACATA-----CCTATTAGAATAAGACAAGGCTTTGAAGCAGCTTTGCTA--TAA  
>JN681255  
GGG---AAG-----  
AAAACTTGTGGGTACAGTCTACTATGGGGTACCTGTGTGG--AAAGAAGCAAAA---  
ACTACTCTATTCTGTGCATCAGATGCTAAAGCATATGAGAAAGAA--GTGCATAAT-----  
-----GTCTGGGCTACA--CACGCCTGTGTACCCACAGAC---  
CCCAACCCACAAGAAATATTTTGGAA-----AATGTAACAGAAAATTTTAAC-----  
-----ATGTGGAATAATGACATGGTGGATCAGATGCATGAGGATATA---  
ATCAGCTTATGGGATCAAAGCCTA--AAGCCATGTGTAAAGTTG--  
ACCCCACTCTGTGTTACTTTACTTTGTAAAAATGTTACTGTTACCAATAATAGTACTGAA-----  
-----  
-----AATAATAGTACTGTAAATAATAGTACTGTGGAGATGAAA---  
AATTGCTCTTTCAATGCAACCACAGAAATAAGA-----  
GATAAGAAACGACAAACGTATGCACTC--TTTTATAGACCTGATATAGTACCACTTAAGGAG-----  
-----  
-----  
AATGGGGATAGCTCTGAGTATATATTAACAAATTGCAATTCCTCAACAATAACACAA---  
GCCTGTCCAAAGGTCTCTTTTGACCCAATTCCTATACATTATTGTGCTCCAGCTGGTTATGCGATTCTAAAGT  
GTAAT---AATGAGACATTCAAT-----GGGACAGGACCATGCCTTAAT-----  
-GTCAGC---ACAGTACAATGTACACATGGAATTAAGCCAGTGGTATCAACT---  
CAACTACTGTTAAATGGTAGCTTATCAGAAAGGGGG-----  
ATAATAATTAGATCTGAAAATCTGACAGATAAT-----AGCAAAAACAATAATAGTACAGTTTAAT----  
-----GAATCTGTAACA-----ATTGAGTGCACAAGACCCACAATAACACAAGGAAA-----  
-AGTATAAGGATA-----GGACCAGGACAAAACA---ATC-----TATGCAACAGGAGCC-----  
-----ATAATAGGAGACATA-----AGACAAGCACATTGT---AACATTAGT-----  
AATTGGAATAAACTTTACAAAAGGTAACAGAAAAGTTAAAA-----GAGTACTTTCCT----  
-----AATAAAAACAATAAAATTTGAA-----  
CCATCCTCAGGAGGGGATCTAGAAATTACA--ACACATAGCTTTAATTGTGGAGGAGAA---  
TTTAAACAGCTCCAGGCAAGAGTCCTGGCTCTAGAAAAGATACCTACAGGATCAACAGCTCCTAGGAATTTGGG  
GCTGCTCTGGGAAACTCATCTGCACCACTAATGTGCCTTGGAACCTCCAGTTGGAGT-----  
-----AATAAAACCAAACGGGAGATTTGG-----GAT-----

AACATGACCTGGATGCAGTGG---GATAAAGAAATTAGTAACTACACAAACACAATATAC---  
AATTTACTTGAAGAATCGCAAATCCAGCAGGAA-----  
-----  
CAAAATGAAAAAGATTTATTAGCATTGGACAAGTGGCAAAATCTGTGGAGTTGGTTTAACATAACAAATTGGC  
TGTGGTATATAAGAATATTCTAATGATAGTAGGAGGCTTGATAGGGTTAAGAATAATTTTTTGCT---  
GTGCTATCTATAATA-----AATAGAGTTAGGCAGGGATACTCACCC-----  
TTGTCGTTTGCTATTAGTCTACTTGATGCTGTAGCGATATCAGTAGCTGAG---  
GGAACAGATAGGATTATAGCAGTAGTACAAGGATTTTGTAGAGCT-----  
-----ATCTGGAATATA-----CCTACAAGAATAAGACAGGGTATTGAAGCAGCTTTGCTA---TAA  
>HQ595752  
GTA---ATG---GGG-----  
AACAAATTTGTGGGTACAGTCTATTATGGGGTACCTGTGTGG---AAAGAAGCAAAA---  
ACTACTCTATTTTGTGCATCAGATGCTAAAGCATATGAGAAGGAA---GTGCATAAT-----  
-----GTCTGGGCTACA---CATGCCTGTGTACCCACAGAC---  
CCCAACCCACAAGAAATGTTCTTGGA-----AATGTAACAGAAAATTTTAA-----  
-----ATGTGGAATAATGACATGGTGGACCAGATGCATGAGGATATA---  
ATAAGTTTATGGGATCAAAGCCTA---AAGCCATGTGTAAAGATG---  
ACCCCACTCTGTGTCACTTTAAGCTGTAGTCAAAGTGTACCTACTATAATACCTCCAATGGTAACAAGACG-  
-----  
-----GCTATGAATACCAACAATGTTACCAGTTATATCAAAAATGAACTAAGA---  
AATTGCTCTTTCAATGTAACCACAGAATTAAGA-----  
GATAGGAAAAAGAAGGAATATGCACCT---TTTTATAAACTTGATATAGTACCAGTTGAGAAGAAG-----  
-----  
-----  
AATGACAACGAGACCCAGGAGTATAGATTAATAAACTGTAATACCTCAGCCATAACACAA---  
GCCTGTCCAAAGGTCTCTTTTGACCCAATTCCTATACATTATTGTGCTCCAGCTGGTTATGCGATTTTAAAGT  
GTAAT---AATAAGACATTCAAT-----GGAACAGGACCATGCAATAAT-----  
-GTCAGC---ACTGTACAATGTACACATGGGATTAAGCCAGTGGTATCAACT---  
CAACTACTGCTAAATGGTAGTCTAGCAGAAGAAGAG-----  
ATAATAATTAGATCTGAAAATATGTCAAATAAT-----GTCAAAACAATAATAGTACATCTTAAT---  
-----GAATCCATAGAA-----ATTAATTGTACAAGGCCGATAATAATACCAGAAAA-----  
-AGTATAAGAATA-----GGGCCAGGACAAACA---TTC-----TATGCAACAGGAGAC-----  
-----ATAATAGGAGACATA-----AGACAAGCACATTGT---AACATTAGTGAAAGT---  
AAATGGAATACAACCTTTATACAGGGTAAAGGAAAAATTAAAA-----GAATACTTCCCT---  
-----GATAATACAACAATAAGATTTGCA-----  
CCCACTCAGGAGGGGACTTAGAAATTACA---ACCCATAGCTTTAATTGTAGAGGAGAA---  
TTTAAACAGCTCCAAGCAAGAGTCCCTGGCTATAGAAAGATACCTAAAGGATCAACAGCTCCTAGGGCTTTGGG  
GCTGCTCGGGGAAAATCATCTGCACCACTGCTGTACCTTGAATAATAGTTGGAGT-----  
-----AATAAATCTGAAAGGGATATTTGG-----GAC-----  
AACATGACCTGGATGCAGTGG---GATAGAGAAATTACTAACTACACAAACATAATATAC---  
AGGTTGCTTGAGAAATCGCAAACCCAGCAGGAA-----  
-----  
AATAATGAAAAGGATTTACTAGCATTGGACAGTTGGCAAAATCTGTGGAATTGGTTTGACATAACAACTGGC  
TGTGGTATATAAGAATATTCTAATGGTAGTAGGAGGCTTAATAGGTTTAAGAATAATTTTTTGCT---  
GTGCTTTCTATAGTG-----AATAGAGTTAGGCAGGGATACTCACCT-----  
TTGTCATTTGCTATTAGTCTGCTTGATACTATAGCAATAACAGTAGCTGAA---  
GGAACAGATAGAATTATAGAACTGATACAAAGAGCTTGTGGAGCT-----  
-----ATCCGCAACATA-----CCTAGAAGAATAAGACAGGGCTTTGAAACAGCTTTGCAA---TAA  
>HQ615957  
GTG---GTG-----  
GGGAACCTTATGGGTACAGTCTATTATGGGGTACCTGTGTGG---AAAGAAGCAAAA---  
ACTACTCTATTCTGTGCATCAGATGCTAAAGCATATGAAAAGGAA---GTACATAAT-----  
-----GTCTGGGCCACA---CATGCCTGTGTACCCACAGAC---  
CCCAATCCACAAGAAATAGTCATGGAA-----AATGTAACAGAAAATTTTAA-----  
-----ATGTGGAATAATGACATGGTGGATCAGATGCATGAGGATATA---  
ATCAGTTTATGGGACCAGAGCCTA---AAGCCATGTGTAAAGTTG---  
ACCCCACTCTGTGTCACTTTAAATGTACTAATGCTACTGCTACTAGCAGTAATAGT-----  
-----  
-----ACTGATGGTGGCAATGGAGAAATAAAA---  
AATTGCTCTTTTAAATGCAACCACAGAAATGAGA-----

GATAAGAAACAACAGGTGTATGCACTT---TTTTATAAACTTGATATAGTACCACTTAATAGT-----  
-----  
-----  
AGTAGTAGTGAGTATAGATTAATAAACTGCAATACCTCAGCCGTAACACAG---  
GCCTGTCCAAAGATCTCTTTTGACCCAATTCTTATACATTATTGTGCTCCAGCTGGTTATGCGATTCTAAAGT  
GTAAT---AATAAGACATTTAAT-----GGAACAGGACCATGTAATAAT-----  
-GTCAGC---ACAGTACAATGTACACATGGAATTAAGCCAGTGGTATCAACT---  
CAGCTACTGTAAATGGTAGTCTAGCAGAAGAAGAG-----  
ATAATAATTAGATCTGAAAATATGGAACAAT-----GTCAAAACAATAATAGTACATCTTAAT----  
-----GAGTCTGTAAAA-----ATTGAGTGTACAAGACCCAACAATAACTAGAAAA-----  
-AGTATAAGGATA-----GGACCAGGACAAGCA---TTC-----TATGCAACAGGAGAC-----  
-----ATAATAGGAGATATA-----AGACAAGCACATTGC---AACATTAGTGAAAAG---  
GAATGGAATACAATGTTACAGAGAGTAAGTAAAAAGCTAAAA-----GAGCACTTCCCT----  
-----AATAAAACAATAACCTTTAAA-----  
CCATCCTCAGGAGGGGACCTAGAGGTTACA---ACACATAGCTTTAATTGTAGAGGAGAA---  
TTTAAACAGCTCCAGACAAGAGTCCTGGCTCTGGAAAGATACCTAAAGGATCAACAGCTCCTAGGGATTTGGG  
GCTGCTCTGGA AAAATCATCTGCAACACTGCTGTGCCTTGGA ACTCTAGTTGGAGT-----  
-----AATAAACTTATAGTGATATTTGG-----GAG-----  
AATCTAACCTGGATGCAGTGG---GATAAAGAAATTAGTAATTACACACACAATATAT---  
AAGTTGCTTGAAGACTCGCAAAACCAGCAGGAA-----  
-----  
AAAAATGAACAAGATTTACTAGCCTTGGACAGTTGGGAAAGTCTGTGGA ACTGGTTTAGCATAACAAAATGGC  
TGTGGTATATAAAGATATTCTAATGATAGTAGGAGGCTTAATAGGTTTAAGAATAATTTTTGCT---  
GTGCTTTCTATAGTA-----AATAGAGTTAGGCAGGGATACTCACCT-----  
TTGTCGTTTGCTATTAGTCTGCTTGATGCCACAGCAATAGCAGTGGCTGAA---  
GGTACTGATAGAATTATAGAATTGCTACAAAGAATTTATAGAGCT-----  
-----ATCCGCAACATA-----CCTAGAAGAATAAGACAGGGCTGTGAAATAGCTTTGCTA---TAA  
>HQ595760  
GGG---GAG-----  
AATTCGTGGGTCACTGTCTACTACGGGGTACCTGTGTGG---AAAGAAGCAAAA---  
ACTACTCTATTTTGTGCATCAGATGCTAAAGCATATGAGAAAGAA---GTGCATAAT-----  
-----GTCTGGGCTACA---CATGCCTGTGTACCCACAGAC---  
CCCAACCCACAAGAAATATTTATGGAA-----AATGTAACAGAAAATTTTAAC-----  
-----ATGTGGAAAAATGACATGGTGGATCAGATGCATGAGGATATA---  
ATCAGTTTATGGGATCAAAGTTTA---AAACCATGTGTAAAGTTG---  
ACCCCACTCTGTGTCACTCTAAATTGTACACCCTGTGTCAATCAA ACTTGTTCAAATAGTACAGTTAAT---  
-----  
-----AGTACTGTTACCCCTATCAACAGTACCGGGAATGAACAAATGACA---  
AATTGCTCTTTCAATGTAAACCACAGAAATAAGA-----  
GATAAGGAAAAAAGGCGTGGTCGCTT---TTTTATAGACCTGATGTGGTACCAATTAATGAG-----  
-----  
-----  
AATAGCTCTGAGTATATATTAATAAATTGCAATTCCTCAACCATAACACAA---  
GCCTGTCCAAAAGTCACTTTTGACCCAATTCTTATACATTATTGTGCTCCAGCTGGTTATGCGATTCTAAAGT  
GTAATGATAATAAGACATTCAAT-----GGGACAGGACCATGCAAAAAT-----  
-GTCAGC---ACAGTACAATGTACACATGGAATTAAGCCAGTAGTATCGACT---  
CAATTCCTGTAAATGGTAGCCTAGCAGTAGAGGAC-----  
ATAATAATTAGATCTGAAAATCTGACAGACAAT-----ATCAAAACAATAATAGTACATCTTAAT----  
-----GAATCTGTAGAA-----ATTAATTGTACAAGACCCAGCAATAATACAAGGAAA-----  
-AGTATGAGGATA-----GGACCAGGACAATA---TTC-----TATGCATACGGAGAC-----  
-----ATAATAGGAGATATA-----AGACAAGCATATTGT---AACATCAGTCAAAGT---  
CAATGGAATAAACTTTACAAAGGGTAAGAGAAAAATTAAAG-----GAACACTTCCCT----  
-----AATAAAACAATAAACTTTCAA-----  
CCATCCTCAGGAGGGGACCTAGAAATAACA---ACACATAGCTTTAATTGTAGAGGAGAG---  
TTTAAGCAGCTCCAGACAAGAGTCCTGGCTATAGAAAGATACCTAAAGGATCAACAGCTCCTGGGGCTTTGGG  
GCTGCTCTGGA AAACTCATCTGCACCACTGCTGTGCCTTGGA ACTCCAGTTGGAGT-----  
-----AATAAATCTCAAATAGATATTTGG-----GAA-----  
AACATGACCTGGATGCAGTGG---GATAAAGAAATTAGCAATTACACATATACAATATAC---  
AAGTTGCTTGAAGACTCGCAAAAGCCAGCAGGAG-----  
-----

CAAAATGAAAAGGACTTATTAGCATTGGACAGTTGGAACAATCTGTGGAGTTGGTTTAGCATAACAAATTGGC  
TGTGGTACATAAAATTATTTCATAATGATAGTAGGAGGCTTAATAGGTTTAAGAATAATTTTTTGCT---  
GTGCTTTCTATAGTA-----AATAGAGTTAGGCAGGGATACTCACCT-----  
TTGTCAATTTGCTATTAGTCTGTTTGATACCATAGCAATAAGAGTAGCTGAG---  
GGAACAGATAGCATCATAATAGTAACACAAAGAATTTTTTAGAGCT-----  
-----ATCCTCAACATA-----CCTACAAGAATAAGACAGGGCTTAGAAGCAGCTTTGCTA---TAA  
>KT183289  
GTA---ATG-----  
GGGAACCTTGTGGGTCACAGTGTATTATGGGGTACCTGTGTGG---AGAGAGGCCAAAA---  
ACTACTCTATTTTTGTGCATCAGATGCTAAAGCATATGAAACAGAA---GTGCATAAT-----  
-----GTCTGGGCTACA---CATGCCTGTGTACCCACAGAC---  
CCCAACCCACAAGAAATGTTTTTTGGAA-----AATGTAACAGAAAATTTTAAT-----  
-----ATGTGGAAAAATGACATGGTGGAGCAAATGCATCAGGATATA---  
ATCAGTTTATGGGATCAATTCCCTA---AAGCCATGTGTAAAGATG---  
ACCCCACTCTGTGTACTTTTAAACTGTAGTGATGCTAAAACTAACAGTACTGGTGGGACT-----  
-----  
-----AGTAATTTTACCCTTAGTAATAACAGTACTGATATGAAA---  
AATTGTTCTTTTAATGTACCCACAGAACTAGA-----  
GATAAGAAAAAGAAGGTACATGCATTC---TTTTATAAACTTGATATAGTACCACTTGATAAG-----  
-----  
-----  
AGTAAGAATTCTAGTGAGTACGTATTAATAAACTGTAATACCTCAGCCATAACACAA---  
GCATGTCCAAAGGTTTCTTTTGATCCAATTCCTATACATTATTGTGCTCCAGCGGGTTATGCGATTCTAAAGT  
GTAAT---GATAAAAAATTCAAT-----GGAACAGGACCATGCAATAAT-----  
-GTAAGC---ACAGTACAATGTACACATGGTATTAAGCCAGTGGTATCAACT---  
CAACTATTGTTAAATGGTAGTCTAGCAGAAAATGAA-----  
ACAATAATTAGATTTGAAAATAAAACAGACAAT-----GCCAAAGCAATAATAGTACATCTTCAG----  
-----ACACCTGTAGAA-----ATTACTTGTTACAAGACCCAACAATAATACAAGAAAA-----  
-AGTATAAGGATA-----GGGCCAGGACAAACA---CTC-----TATGCAACAGGAGAA-----  
-----ATAATAGGAGATATA-----AGACAAGCACATTGT---AACATTAGTAAAGAT---  
AAATGGAATAAAGCTTTACAAGAAGTAGGGAAAAAATTAGCA-----CAGCATTTTCCT---  
-----AACAAAACAATAAAATTTGAG-----  
CAACACTCAGGAGGAGACCTAGAAATTATG--AGACATATCTTTAATTGTAGAGAAGAA---  
TTTAAGCAGCTTCAGGCAAGAGTCCTAGCTTTAGAAAGATACCTACAGGATCAACAGCTCCTAGGGATTTGGG  
GATGCTCTGGAAGAACTCATCTGCACCACTGATGTGCCTTGGAACCTCTAGTTGGAGT-----  
-----AACAAATCTTATGATGATATTTGG-----AAC-----  
AACATGACCTGGATGCAGTGG--GAGAAAGAAATTAATAATTACACAGACACAATATAC---  
AGGTTGCTTGAAAAATCGCAAAACCAGCAGGAG-----  
-----  
AAAAATGAACAAGATTTATTAGCATTGGACAAATGGCAAAATCTGTGGAGTTGGTTTAATATAACAAAGTGGC  
TATGGTATATAAAAAATATTTCATAATGATAGTAGGAGGATTAATAGGTTTAAGAATAATTTTTTGCT---  
GTGCTTTCTATAGTG-----AATAGAGTTAGGAAGGGATACTCACCC-----  
TTATCGTTTGCTATTAGTCTGCTTGATACCACAGCAATAGTAGTAGCTGAG---  
AGAACAGATAGGATTATAGAAGTACTACAAAGAATTGGGAGAGGT-----  
-----ATCCTCCAATA-----CCTAGAAGAATAAGACAGGGCTTTGAAGCAGCTTTGCAA---TAA  
>GU080183  
GGG---GTG-----  
GAGGACTTGTGGGTCACAGTATATTATGGGGTACCTGTGTGG---AGAGAAGCAAAA---  
ACTACTCTATTCTGTGCATCAGATGCTAAAGCATATGAGAAGGAG---GTGCATAAT-----  
-----GTCTGGGCTACA---CATGCCTGCGTACCCACAGAT---  
CCCAACCCACAAGAATTGGAATTGGAA-----AATGTAACAGAAAATTTAAT-----  
-----ATGTGGAAAAATGACATGGTGGAGCAGATGCATGAGGATATA---  
ATCAGTTTATGGGATCAAAGTCTA---AAACCATGTGTAAAGTTG---  
ACCCCACTCTGTGTCACTTTAAATTGTACAAAGGCAAAAGCTAATGATAGTAGTGCACAC-----  
-----  
-----AATACTAGCATAGGGGGAGGAATGAATGGAGAAATACAA---  
AATTGCTCTTTCAATATAACCACAGAGATAAGA-----  
GATAGGAAAAAGCAAGTGTATGCATTT---TTTTATAAACCTGATATAGTTCCACTTAAGGAGGGGAATGAC-  
-----  
-----

ACCAGCAATAGTACGTATAGTACGTATATATTAATAAAATTGTAATACCTCAACCTTAACACAA---  
 GCCTGTCCAAAGGTCTCTTTTGACCCAATTCCTATACATTATTGTGCTCCAGCTGGGTATGCGATTCTAAAGT  
 GTAAT---AATAAGACATTCAAT-----GGGAAAGGATCATGCAATAAT-----  
 -GTCAGC---ACAGTACAATGTACACATGGAATTAAGCCAGTGGTATCAACT---  
 CAACTACTGTTTAAATGGTAGCCTAGCAGAAGAAGAG-----  
 GTAATAATTAGGTCTGAAAATCTGACAGACAAT-----GCCAAAACAATAATAGTACACCTTAAT----  
 -----GAATCTGTAGAA-----ATTGTGTGTACAAGACCCAACAATAATACAAGAAAA-----  
 -AGTATAAGGATA-----GGACCAGGACAAGCA---TTC-----TATGCAACAGAGGAT-----  
 -----ATAATAGGTGACATA-----AGACAAGCACATTGT---AACATCAGTAGAGGC---  
 AAATGGAATACAACCTTTACAGAGGGTAGGGGAAAAAATTGGAA-----AAACTCTTT-----  
 -----AATAAAACAATAATTTTTTAAC-----  
 TCATCCTCAGGAGGGGACCTAGAAATTACA---ACACACAGCTTTAATTGTGGAGGAGAA---  
 TTTAAGCAGCTCCAGACAAGAGTCTTGGCTCTAGAAAAGATACCTAAAGGATCAACAGCTCCTAGGGCTTTGGG  
 GCTGCTCTGGAAAACCTCATCTGCACCACCTAATGTACCTTGGAACTCCAGTTGGAGT-----  
 -----AATAAAAATTACACAGAAATTTGG-----GAT-----  
 AACATGACCTGGATGCAGTGG---GATAGAGAAATCAATAATTACACATACACAATATAC---  
 AGGCTGCTTGAAGACTCGCAAAACCAGCAGGAG-----  
 -----  
 AAAAAATGAACAAGAGTTATTAGCAATGGACAGGTGGAACAATCTGTGGAATTGGTTTAGCATAACAAATTGGC  
 TGTGGTATATAAAGATATTCATCATGATAGTAGGAGGCTTAATAGGTTTAAGGATAATTTTTTGCT---  
 GTGCTCTCTATAGTG-----AAAAGAGTTAGGCAGGGATACTCACCT-----  
 TTGTCGTTTGTCTAGTAGTCTGCTTGATACCATAGCAATAGTAGTAGCTGAA---  
 GGAACAGATAGGATTATTGAAAATAACAAGGAATTTGTAGGGCT-----  
 -----TTCCTCAACGTA-----CCTAGAAGAATAAGACAGGGTTTTGAAGCAGCTTTGCTA---TAA  
 >GU080187  
 GTG---GGG---GGA-----  
 AAGGAAAACCTGTGGGTACAGTCTATTATGGGGTACCTGTGTGG--AGAGAAGCAAAA---  
 ACTACTCTATTCTGTGCATCAGATGCTAAAGCATATGAGAGGGAG--GTGCATAAT-----  
 -----GTCTGGGCCACA---CACGCCTGTGTACCCACAGAC---  
 CCCAACCCATTAGAAATGACTTTGGAA-----AATGTAAGTGAATTTTAAC-----  
 -----ATGTGGAAAAATGACATGGTGGATCAGATGCATGAGGATATA---  
 ATCAGTTTATGGGATCAAAGCCTA---AAGCCATGTGTGAAGTTA---  
 ACCCCACTCTGTGTCACTTTACAGTGTAACTTTCAATTTGTTCTAAATTTAATGAT-----  
 -----  
 -----ACAGCCAGAAATTGCTCTGATAATACAGAAATGAGA---  
 AATTGCTCTTTCAATGCAACCACAGAAATAAAA-----  
 GATAAGGAACGCAAAGAGTATGCACTT---  
 TTCTATAAACTTGATATAATACCACTTGATGGGAAGGAGAACAAAC-----  
 -----  
 ACTAGTACACAGAACAAATCTATTGACTATAGATTAATAAAATTGCAATTCCTCAAGGATAGTACAA---  
 ACCTGTCCAAAGGTCACCTTTGACCCAATTCCTATACATTATTGTGCTCCAGCTGGTTTTGCGATTCTAAAGT  
 GTAAT---AATAAGACATTCAAT-----GGAACAGGGCCATGCAATAAT-----  
 -GTCAGT---ACAGTACAATGTACACATGGAATTAACCAGTGGTATCAACC---  
 CAATTGCTGCTAAATGGTAGCATAGCAGAAAAAGAG-----  
 ATAGTAATTAGATCTGAAAATCTGACAAACAAT-----GCTAAAATAATAATAGTACAGCTTAAT----  
 -----CAATCCATAGAA-----ATTGTGTGTACAAGACCCAACAATAACACAAGAAAA-----  
 -AGTGTAAGGCTA-----GGACCAGGACAACA---TTC-----TATGCAACAGGTGAC-----  
 -----ATAATAGGAGATATA-----AGAGAAGCACATTGT---AACATTAGTGGAAAA---  
 AATTGGACTAATACTTTAGGATGGGTCAGTAAAAAATTAGA-----GAACACTTCCAA-----  
 -----AATAAAACAATAATATTTAAT-----  
 TCATCTGCAGGAGGGGACCCAGAAATTACA---ACACATAGCTTTAATTGTAGAGGAGAA---  
 TTTAAACAGCTCCAGGCAAGAGTCTTGGCTATAGAAAAGATACCTAAGGGATCAACAGCTCCTAGGAATTTGGG  
 GCTGCTCTGGAAAACCTCATCTGCACCACCTGATGTGCCTTGGAACTCCAGTTGGAGC-----  
 -----AATAAAACTTACCGTGAAATTTGG-----GAT-----  
 AACATGACCTGGATACAGTGG---GATAGAGAAATTAGTAATTACACATACACAATACAC---  
 CAGTTGCTTGAAGACTCGCAGATCCAGCAGGAG-----  
 -----  
 AAAAAATGAAAAGGACTTATTAGAATTGGACAAGTGGCAAAATCTGTGGAGTTGGTTTAGCATATCACATTGGC  
 TATGGTACATAAAAATATTCATAATGGTAATAGGAGGCTTGATAGGTTTGAAAATAATTTTTTACT---  
 GTGCTATCTATAGTA-----AATAGAGTTAGGCAGGGATACTCACCT-----

TTGTCGTTTGCTATTAGTCTGCTTGATACCTTAGCAATAGTAGTAGGTGAG---  
 GGAACAGATAGGATTATAGCAATCATACAAAGAATTTGCAGAGCT-----  
 -----ATCCGCAACATA-----CCTAGAAGAATAAGACAGGGTTTTGAAGCAGCTTTGATA---TAA  
 >HM623598  
 GGG---ACA-----  
 GGGAACTTGTGGGTCACAGTCTATTATGGGGTACCTGTGTGG--AAAGAAGCCAAA---  
 ACTACTTTATTCTGTGCATCAGATGCTAAAGCATATGAGAAAGAA--GTGCATAAT-----  
 -----GTCTGGGCTTCA---CATGCCTGTGTACCCACAGAC---  
 CCTAACCCACAAGAAATAATGATGGAA-----AATGTAACAGAAAATTTTAAC-----  
 -----ATGTGGAAAAATGACATGGTGGATCAGATGCATGAGGATATA---  
 ATTAGTTTATGGGATCAAAGTCTA--AAACCATGTGTAAAGTTG---  
 ACCCCACTCTGTGTCACTTTAAATTGTACAGATGTTAATATTACCAGCACAAATGATAATACC-----  
 -----  
 -----ATAATAATACCTACAATGTTAGCATGGTTGGAGAACTAAAA---  
 AATTGCTCTTTCAATTCAACCACAGAAATAAGA-----  
 GATAAGATAAACAAAGAGTATGCCCTT--TTTTATAAACTTGATGTAGTACCACTTGAGGGC-----  
 -----  
 -----  
 AACAGAATGGCACATATGTATTAATAAATTGTAATACCTCAACCATATCACAA---  
 GCCTGTCCAAAGGTCTCTTTTGACCCAATTCCTATACATTATTGTGCTCCAGCTGGTTATGCGATTCTAAAGT  
 GTAAT---AATAAGACATTCAAT-----GGGACAGGACCATGCCAAAAT-----  
 -GTCAGC--ACAGTACAATGTACACATGGAATTAAGCCAGTGGTATCAACT---  
 CAACTACTGTTAAATGGTAGCCTAGCAGAAGGGGAG-----  
 ATAATAATTAGTTCTGAAAATCTGACAGACAAT-----ACCAAAACAATAATAGTACATCTTAAT----  
 -----GAGGCTGTAGAA-----ATTAATTGTACAAGACCCAGCAATAATACAAGGAAA-----  
 -GGTATAAGGATA-----GGACCAGGACAAGTA--TTC-----TATACAAATAAC-----  
 -----ATAATAGGAGACATA-----AGACAAGCATATTGT--AACATTAGTGGAACA---  
 AAATGGAATAAAACTTTAAAAGGGGTAGAGGAAAAACTAAAA-----GAACTCTACCCT----  
 -----AATAAAAGTATAACCTTTTGAA-----  
 GCATCCTCAGGAGGGGACCTAGAAAGTTACA--ACACATAGTTTTAATTGTAGAGGAGAA---  
 TTTAAGCAGCTCCAGGCGAGAGTCCCTGGCTCTAGAAAGATACCTAAAGGATCCACAGCTCCTGGGGCTTTGGG  
 GCTGCTCTGGAAGAACTCATCTGCACCACTAATGTGCCTTGGAAGTCCAGTTGGAGC-----  
 -----AATAAATCTCTAGGGGTAATTTGG-----GAG-----  
 AACATGACATGGATGCAATGG--GAGAGAGAAATTAGTAAGTACACAGGCACCATATAC---  
 ACGCTACTTGAAGAATCGCAAAACCAGCAGGAA-----  
 -----  
 ATAAATGAAAAAGATTTATTAGCATTGGACAGCTGGAAAAACCTGTGGAGTTGGTTTGACATATCAAAATGGC  
 TGTGGTATATAAGAATATTATAATGATAATAGGGGGCTTGATAGGCTTGAGAATAATTTTTTGCT---  
 GTGCTTTCTATAGTA-----AATAGAGTTAGGCAGGGATACTCACCT-----  
 TTGTCGTTTGCTATTAGTCTGCTTGATACCATAGCAATAGCAGTAGCTGAA---  
 GGAACAGATAGGATTATAGAAATTTTACAAAGAATTTGTAGAGCT-----  
 -----ATCCTTAACATA-----CCTAGAAGAGTAAGACAGGGCTTTGAAGCAGCTTTGTTA---TAA  
 >HM623604  
 GTG---ATG-----  
 GGGAACTGTGGGTCACAGTATATTATGGGGTACCTGTGTGG--AAGGAAGCAAAA---  
 ACTACTCTATTCTGTGCATCAGATGCTAAAGCATATGAGAAAGAA--GTACATAAT-----  
 -----GTCTGGGCCACA---CATGCCTGTGTACCCACAGAC---  
 CCCAGCCCACAAGAAATGGTCTTGAA-----AATGTAACAGAAAATTTTAAC-----  
 -----ATGTGGGAAAATGACATGGTGGATCAGATGCATGAGGATATA---  
 ATCAGTTTATGGGATGAAAGCCTA--AAACCATGTGTAAAGTTG---  
 ACCCCACTCTGTGTCACTTTAACATGTAACAATAATGTTACTATCAATGGTACCATT-----  
 -----  
 -----ATTAATGGTACCATCATACCCAATGATGAAATAAAA---  
 AATTGCTCTTTCAATGCAACCACAGAAATAAGA-----  
 GATAAAAAACAAGAAAGAGTATGCACTT---  
 TTTTATAAACTTGATATAGTGCAAATTGAGAATGGAAATAAATCT-----  
 -----  
 ACTGGAAAAGAATCTACTTATAGGTTAATAAATTGTAATACCTCAACCATAACACAA---  
 GCCTGTCCAAAGGTCTCTTTTGACCCAATTCCTATACATTATTGTGCTCCAGCTGGTTATGCGATCCTAAAGT  
 GTAAT---AATAAGACATTCAAT-----GGGACAGGACCATGCCATAAT-----

-GTCAGC---ACAGTACAATGTACACATGGAATTAAGCCAGTAGTATCAACC---  
 CAACTACTGTTTAAATGGTAGCCTAGCAGAAGAAGAG-----  
 ATAATAATTAGATTTGAGAATCTGACAAACAAT-----GCCAAAACAATAATAGTACAGTTTAAT----  
 -----GAATCTGTAGAG-----ATTGTGTGTACAAGACCCAACAATAATACAAGAAGA-----  
 -AGTGTAAGGATA-----GGACCAGGACAAGCC---TTC-----TATGCAACAGGAGCC-----  
 -----ATAGTAGGAGACATA-----AGACAAGCATATTGT---AACATTAGCACAGAT---  
 AATTGGAATAAAACTTTAGAAAGGGTAAAGGAAAAATTAAGA-----GAACACTTCCCT----  
 -----AACACACAATAAAATTTGCA-----  
 CCATCTTCAGGAGGGGACCTAGAAATTACA---ACACATAGCTTTAATTGTAGGGGAGAA---  
 TTTAAACAGCTCCAGGCAAGAGTCCTGGCTCTGGAAAGATACCTACAGGATCAACAGCTCCTAGGGATTTGGG  
 GCTGCTCTGGAAACTCATCTGCACCACTTCTGTGCCTTGGAAACAAACTTGGAGT-----  
 -----AATAAATCTGCAGAAGAGATTTGG-----GGT-----  
 AACATGACCTGGATGCAGTGG---GATAGAGAAATTAATAATTACACAGGAATAATATAC---  
 AATTTGCTTGAGATCTCGCAAAATCCAGCAGGAG-----  
 -----  
 CAAAAAGAAAAGGATTTATTAGCATTGGACAAGTGGCAAAATTTGTGGAATTGGTTTGACATATCAAAATGGC  
 TGTGGTATATAAAAATATTTCATAATGATAGTAGGAGACTTGATAGGTTTAAGAATAATTTTTTGCT---  
 GTGCTTTCTATAGTA-----AATAGAGTTAGGCAGGGATACTCACCT-----  
 TTGTCAATTTGCTATCAATCTGCTTGATTTCATAGCAATAGCAGTAGCTGAA---  
 GGAACAGATAGGATTATTGAAATATTGCAAGAATTGGTAGAGCT-----  
 -----TTCCTCAACATA-----CCTAGAAGAGTAAGACAGGGCTTTGAAGTTGCTTTGCTA---TAA  
 >HM623587  
 GTG---GTG-----  
 GGAAACTTGTGGGTCACAGTCTATTATGGGGTACCTGTGTGG---AGAGAAGCAAAA---  
 ACTACTCTATTCTGTGCATCAGATGCTAAAGCATATGAGACAGAA---GTGCATAAT-----  
 -----GTCTGGGCTACA---CATGCCTGTGTACCCACAGAC---  
 CCCAACCCACACGAAATAGTTTTGGGA-----AATGTAACAGAAAATTTTAAC-----  
 -----ATGTGGGAAAATGACATGGTGGATCAGATGCATGAGGATATA---  
 ATCAGCATATGGGATGAAAGTCTA---AAACCATGTGTAAAGTTG---  
 ACCCCACTCTGTGTACCTTAAATTGTACAAATAATGTTACCATAAAGGGTACAGGTACAAAT-----  
 -----  
 -----GCTACCACGCCTACGCCTAATATGAAGAGAGAAGTAAAA---  
 AATTGCTCTTTCTATGTA---ACAGAAAGAAGA-----  
 GATAAGGAAAAGAGAGAGTATGCACTT---  
 TTTAATGGACCTGATATAACACCACTTAATGAGAATGATAAGAGGGAG-----  
 -----  
 AATGGCTCTAGTAATAGCTCTAGTTTTTATATTAATACATTGCAATACCTCAACCATAACACAG---  
 GCCTGTCCAAAGGTCTCTTTTGACCCGATTCTTATATATTATTGTGCTCCAGCTGGTTATGCGATTCTAAAGT  
 GTAAT---AATGACACATTCAAT-----GGAACAGGACCATGCTATAAT-----  
 -GTCAGC---ACAGTACAATGTACACATGGAATTAAGCCAGTAGTATCAACT---  
 CAGCTACTGTTGAATGGTAGCCTAGCAGAAGGAGAT-----  
 ATAATAATTAGATCTAAAAATATGTCAGACAGT-----GCCAAAACAATAATAGTACACCTTAAT---  
 -----GAATCTGTAGCA-----ATTAATTGTACAAGACCCGGCAATACTACAAGGAGA----  
 -AGGATAAGGATGGGG-----ATAGGACCAGGACAAACA---TTC-----TATGCAACAGGTGGC-----  
 -----ATAACAAACATA-----AGACAAGCACAGTGT---ATCATTAATAAAACA---  
 GAATGGATCAAACTTTAAAAGGGGTAGTGAAGAAATTAATA-----GAACACTTCCCT----  
 -----AATAAAACAATAAACTTTAAG-----  
 TCATCCTCAGGAGGGGACATAGAAGTTGCA---ACACACAGTTTTAATTGTAGAGGAGAA---  
 TTTAAACAGCTCCAGGCAAGAGTCCTGGCTATAGAAAAGTACCTAAAGGATCAACAGCTCCTAGGGCTTTGGG  
 GCTGCTCTGCAAACTCATCTGCACCACTGCCGTGCCTTGGAACTCCAGTTGGAGT-----  
 -----AATAAATCTAAACAGATATTTGG-----GAT-----  
 AACATGACCTGGATGCAGTGG---GATAGAGAGATTAATAATTACACAAAGAAAATATAC---  
 ACGTTGCTTGAAGAATCACAAAACCAGCAGGAG-----  
 -----  
 AAAAAAGAAAACGATTTATTAGCACTGGACAGTTGGAATAACCTGTGGAATTGGTTTAGCATAACAAAATGGC  
 TGTGGTATATAAAAATATTTCATCATAATAGTAGGAGGCTTGATAGGTTTGAGAATAATTTTTTGGT---  
 GTGTTATCTATAGTG-----AAAAAGTCAGGCAGGGATACTCACCT-----  
 TTGTGCTTGGCTATTAGTCTGCTTGATACCATAGCAATAACAGTAGCTGAA---  
 GGAACAGATAGGATTATAGAATTAATACAAGGAATTTTTTAGAGCT-----  
 -----ATTTGCAATATA-----CCTAGAAGAATAAGACAAGGCTTTGAAGCATCTTTGTTA---TAA

>KF114887

GTG---GGG-----  
GGGAAATTGTGGGTCACAGTCTATTATGGGGTACCTGTGTGG---AGAGAAGCAAAA---  
ACTACTCTATTCTGTGCATCAGGTGCTAAAGCTTATGAGAGAGAA---GTACATAAT-----  
-----ATCTGGGCTACA---CATGCCTGTGTACCCACAGAC---  
CCCAACCCACAAGAAATATTTTGGAA-----AATGTAACAGAAAATTTTAAC-----  
-----ATGTGGAAAAATGATATGGTGGATCAGATGCATGAGGATGTA---  
ATCAGTATATGGGATCAAAGTCTG---AAGCCATGTGTAAAATTG---  
ACCCCACTCTGTGTCACTTTACATTGTGTACTGCTAACGGTACCAATGATAACAGGACTAATAGT-----  
-----  
-----GAGGCCAACAAGGCTGTTAGTGATATAGACAGAGAGGAAATAAAA---  
AATTGCACTTTCAATACAACCACAGAACTAAGA-----  
GATAAACAAAAGAAAGAGCGTGCACTG---TTTTATAGATCTGATGTAGAACCCTTAACGGGGGA-----  
-----  
AGCTCTAGTGAGTATATATTAATAAATTGTAATTCCTCAACCATAACACAA---  
GCTTGTCCAAAGGTCACTTTTGACCCAATTCCTATACATTATTGTGCTCCTGCTGGATATGCAATTCTAAAGT  
GTAAT---AATAAGACATTCAAT-----GGGAAAGGACCATGCAATAAT-----  
-GTCAGC---ACAGTACAATGTACACATGGAATTAAGCCAGTGGTATCAACT---  
CAACTACTGTTTAAATGGTAGCCTATCAGAAGGGGAG-----  
ATAGTCATTAGATCTGAAAATCTGACAGACAAT-----GCCAAAACAATAATAGTACACCTTAAT---  
-----GAATCTGTAGAA-----ATTATATGTGCAAGACCCAACAATAATACAAGAAAG-----  
-AGTATAAGGATA-----GGACCAGGACAAAACA---TTT-----TATGCAACAGGTGAC-----  
-----ATAATAGGAGACATA-----AGACAAGCACATTGT---AACATT-----TCA---  
AAATGGAACGCGACTTTAAAAAAGGTACAAGAGAAATTAAAA-----GAACACTTCCT---  
-----AATAGCACAATAGTGTTTAAC-----  
ATATCCTTAGGAGGGGACCCAGAAATTACA---ACACATACTTTTAATTGTGCAGGAGAA---  
TTCAAGCAGCTCCAGGCAAGAGTCCTGGCTCTAGAAAGATTCTACAGGATCAACAGCTCCTAGGAATTTGGG  
GCTGCTCTGGAAGAACTCATTTGCACCACTGCTGTGCCTTGGAAGTCCAGTTGGAGT-----  
-----AATAGATCTCTCAATGATATTTGG-----GAT-----  
AACATGACCTGGATGCAGTGG---GATATGGAAATTAGCAATTACTCAAACACAATATAC---  
AGGTTGCTTGAAGAGTCGCAGGTTCAGCAGGAA-----  
-----  
CACAATGAAAAGGATTTGTTAGCATTGGACAAATGGCAAAATCTGTGGAGTTGGTTTAGCATAACAAAATGGC  
TATGGTATATAAAAATATTTCATAATGATAATAGGAGGCTTGATAGGTTTAAGAATAATTTTTTGCT---  
GTGCTATCTATAGTC-----AATAGAGTTAGGCAGGGTTACTCACCC-----  
TTGTCGTTTGCTATTAATCTGCTTGATACCATAGCAATAGCAGTAGCTGAA---  
GGGACAGATAGGATTATAAAATTCATACAAAGACTTTGTAGAGCT-----  
-----ATAAGACAGGACTTTGAAGCAAATTTGCTA---TAA

>KF725917

GTG--GAA-----  
GGGAACCTTGTGGGTCACAGTCTATTATGGGGTACCTGTGTGG---AAAGAAGCAAAA---  
GCTCCTCTATTCTGTGCATCAGATGCTAAAGCATATGAGAAGGAA---GTGCATAAT-----  
-----ATCTGGGCTACA---CATGCCTGTGTACCCACAGAC---  
CCCAACCCACAAGAAATGCTTTTGAA-----AATGTAACAGAGAATTTTAAC-----  
-----ATGTGGAAAAATGACATGGTGGATCAGATGCATGAGGATATC---  
ATCAGTTTATGGGATCAAAGCCTA---AAGCCATGTGTAAAGTTG---  
ACCCCACTCTGTGTCACTTTAAATTGTAGTAATAATATTAATGGGACT-----  
-----  
-----GGCAAAGTTATCAATGGAAGCATGGGGGAAGAAATAAAA---  
AATTGCTCTTTCAATGCAACCTCAGAAGTAACA-----  
GATAAGATCCGAAGAGAGTATGCATTA---TTTTATAGCCTTGATATAGTACAACCTTAATAAT-----  
-----  
AAGACTGTGGATAACAGCAGTGAGTATAGATTAATAAGTTGTAATACCTCAAAAAATAACACAA---  
GCCTGTCCAAAGGTCAATTTTGACCCAATTCCTATACATTATTGTGCTCCAGCTGGTTATGCGATTCTAAAGT  
GTAAT---AAGAAAGAATTCAAT-----GGGACAGGACCATGCACTAAT-----  
-GTCAGT---ACAGTACAATGTACACATGGAATCAAGCCAGTGGTATCAACT---  
CAACTACTATTAAATGGTAGCCTATCAGAAGGAGAG-----  
ATAATAATTAGATCTGAAAATCTGACAGACAAT-----GCCAAAACAATAATAGTGCAGCTTAAT---

-----GAAACTGTAGAA-----ATTGTGTGTACAAGACCCAACAATAATACAAGAAAA-----  
-AGTACAAGAATA-----GGACCAGGACAGGTA---TTC-----TATACAAATGGTGAA-----  
-----ATAATAGGAAACGTA-----AGACAAGCACATTGT---AACATTAGTGGAAGT---  
AACTGGACTAAAACCTTTAGAAAAGGTAAGTAAAAAATTAAAA-----GAGAAATTCCT-----  
-----AATAAAACAATAATATTTAAA-----  
CCACCCGTAGGAGGGGACCTAGAAATTACA--AATGCATAGCTTTAATTGTAGAGGAGAA---  
TTTAAGCAGCTCCAGACAAGAGTCCTGGCTATAGAAAGATACCTAAAGGATCAACAGCTCCTAGGGATTTGGG  
GCTGCTCTGGAAAAGCATCTGCACCACTAATGTGCCTTGGAACCTCAGTTGGAGT-----  
-----AACAAATCTCTAACAGATATTTGG-----AAT-----  
AACATGACCTGGATGGAGTGG---GACAAAGAAATTAATAATTACACAAACACAATATAC---  
AAATTGCTTGAAGACTCGCAAACCCAGCAGGAA-----  
-----  
CAGAAATGAAAAGGATTTATTAGCATTGGACAGTTGGAACAATCTGTGGGATTGGTTTAGCATATCAAATTGGC  
TGTGGTATATAAAAATATTCATAATGATAGTAGGAGGCTTAATAGGTTTAAGAATAATTTTTTGCT---  
GTGCTTTCTATAGTG-----AATAGAGTTAGGCAGGGATACTCACCT-----  
TTGTCGTTTGCCACTAGTCTGCTTGATACTATAGCAATAGCAGTAGCTGAA---  
GGAACAGATAGGATTTTAGAAGTACTACAAAGAATTTTGTAGAGCT-----  
-----ATCTGCAATATA-----CCTACAAGAATAAGACAGGGCTTTGAAACAGCTTTGCTA---TAA  
>JN681257  
GTG---ATG-----  
GGAAACTTGTGGGTCACAGTATACTATGGGGTACCTGTGTGG---AGAGAAGCAAAA---  
ACTACTCTATTCTGTGCATCAGATGCTAAAGCATATGAGAGGGAG---GTGCATAAT-----  
-----GTCTGGGCTACA---CATGCCTGCGTACCCACAGAC---  
CCCAACCCACAAGAAATAGAGTTGGAA-----AATGTAACAGAAAATTTTAAC-----  
-----ATGTGGAAGTATGATATGGTGGATCAGATGCATGAGGATATA---  
ATCAGTTTATGGGATCAAAGTCTA---AAACCATGTGTAAAGTTG---  
ACCCCACTCTGTGTCACTTTAAATGTGTAGATGTTAATAGTACTACAAGTAGTAATAATACAACCT-----  
-----  
-----GCTAATAATGCAACTGCTAATAATAGCATAAAGGGAGAAGAAAA---  
AATTGCTCTTTCAATACAACCACAGAAATAAGA-----  
GATAAGGAAAAGAAAGTGAATGCAATT---TTTTATAGATCTGATATAGTACCACTTAATGAG-----  
-----  
AATAGTTCTGATTATAGATTAATAAATTGCAATACCTCGACCATAACACAG---  
GCCTGTCCAAAGGTCTCTTTTGATCCAATTCCTATACATTATTGTGCTCCAGCTGGTTATGCGATTCTAAAGT  
GCAAG---GATAAGGCATTCAAT-----GGGACAGGACCATGCAGAAAT-----  
-GTCAGC---ACAGTACAATGTACACATGGAATTAAGCCAGTAGTGTCAACT---  
CAACTACTATTAAATGGTAGCCTAGCAGGAAAAGAG-----  
ATAATAATTAGATCTGAAAATATAACAAACAAT-----GCCAAAACAATAATAGTACATCTTAAT---  
-----GAAACTGTGATG-----ATTAATTGCACAAGACCCAACAATAATACAAGAAAA---  
-AGTATAAGGATA-----GGACCAGGACAAACA---ATC-----TATGCATATGGTGAC-----  
-----ATAATAGGAGACATA-----AGACAAGCACATTGT---AACATTAGTACTCAG---  
GCATGGAATAAAACGCTAGAAGGAGTAAAGAAGAAATTAGAA-----GAACACTTCCT-----  
-----AATAAAACAATAAAATTTAGC-----  
CAATCCTCAGGAGGGGACCTAGAAATCACA---ACACATAGCTTTAATTGTAAAGGAGAA---  
TTTAAGCAGCTCCAGGCAAGAGTCCTGGCTCTAGAGAGATACCTACAGGATCAACAGCTCCTAGGAATTTGGG  
GCTGCTCTGGAAAATCATCTGCACCACTAATGTACCTTGGAACCTCTAGTTGGAGT-----  
-----AATAAATCCTATGATGAAATTTGG-----GGC-----  
AACATGACCTGGACGCAGTGG---GATAGAGAAATTGACAATTACACAAACACAATATAC---  
AAATTACTTGGAGACTCGCAAATCCAGCAGGAA-----  
-----  
CAAAATGAAAAAAGTTATTAGAATTGGACAAGTGGCAAAATCTGTGGAGTTGGTTTGACATAACAAATTGGC  
TATGGTACATAAAAATATTCATAATGATAGTAGGAGGCTTGATAGGTTTAAGAATAATTTTTTGCT---  
GTGCTATCTATAGTA-----AATAGAGTTAGGCAGGGATACTCACCT-----  
TTATCGTTGGCTATTAATTTGTTTGATACCATAGCAATAGCAGTAGCTGAG---  
GGAACAGATAGGATTATAGAATTCATACAAAGAATTTGTAGAGCT-----  
-----ATTCACAACCTA-----CCCAGAAGAATAAGACAGGGTTTTGAAGCAGCTTTGTTA---TAA  
>JN681259  
GGG---GAG-----  
GAGAACTTGTGGGTCACAGTCTATTATGGGGTACCTGTGTGG---AGAGAAGCAAAA---

ACTACTCTATTCTGTGCATCAGATGCTAAAGCATATGAGAAAGAA---GTGCATAAT-----  
 -----GTCTGGGCTACA---CATGCCTGTGTACCCACAGAC---  
 CCCAATCCACAAGAACTGGTTTTGGAA-----AATGTAACAGAAAATTTTAAT-----  
 -----ATGTGGGAAAATGACATGGTGGATCAGATGCATGAGGATATA---  
 ATCAGTTTATGGGATCAAAGTCTA---AAGCCATGTGTAAAAGTTG---  
 ACCCCACTCTGCGTCACCTTTAATTTGTACAAATGCCACAAATGCAGCAAATGCCACAAATGCAACA-----  
 -----  
 -----AATGCCACAAATGCAACTGTTGATAGTGGGAATGAAATAAAA---  
 AATTGCTCTTTCAATACAACCACAGAAATAAGA-----  
 GATAAGAAACAGAAAGCGTATGCACTT---TTTTATAAACCTGATATAATACCACTTAGCAAC-----  
 -----  
 -----  
 TCTAGTGAGGAGTATATATTAATAAATTGCAATGCCTCAACCATAACACAG---  
 GCCTGTCCAAAGGTCTCTTTTGACCCAATTCTCTATACATTATTGTGCTCCAGCTGGGTATGCGATTCTAAAGT  
 GTAAT---AATAAGACATTCAAT-----GGGACAGGACCATGCAATAAT-----  
 -GTCAGC---ACAGTACAATGTACACATGGAATTAAGCCAGTGGTATCTACT---  
 CAACTACTGTTGAATGGTAGCCTAGCAGAAGAAGAG-----  
 ATAATAATTAGATCTAAAAATCTGACAGACAAT-----ACCAAAACAATAATAGCACAGCTTAAT---  
 -----GAATCTGTAGAA-----ATTGTGTGTACAAGACCCAACAATAATACAAGAAAA-----  
 -AGTATAAGGATA-----GGACCAGGACAAGCA---TTC-----TATGCAACAGGAGCC-----  
 -----ATAATAGGAGATATA-----AGACAAGCACATTGT---AACATTAGCAAAGAG---  
 AAATGGAATAAACTTTACAAGGGGTAAGAGAAAAATTAGTA-----AAACTCTACTCT---  
 -----AATAGAACAATACAATTTGCA-----  
 CCACACTCAGGAGGGGATCTGGAAATTACA--ACACATAGTTTTAATTGTAGAGGAGAA---  
 TTTAAGCAGCTCCAGGCAAGAGTCCCTGGCTCTAGAAAGATACCTAAAAGATCAACAGCTCCTAGGGCTTTGGG  
 GCTGCTCTGGAAGAACTCATCTGCACCACTACTGTGCCTTGGAACTCCAGTTGGAGT-----  
 -----AATAAACTCACACAGAAATTTGG-----GAC-----  
 AACATGACCTGGATGCAGTGG---GAGAGAGAAATTAGTAATTACACAAACATAATATAC---  
 GACTTGCTTGAAGACTCGCAATCCAGCAGGAG-----  
 -----  
 AAAAAAGAAAAAGATTTACTAGCCTTGAGCAATTGGCAAAATTTGTGGAATTGGTTTAACATATCAAAGTGGT  
 TGTGGTATATAAAAAATATTCATCATGATAGTAGGAGGCTTGATAGGCTTGAGAATAATTTTTTGCT---  
 GTGCTCTCTATAGTA-----AAAAGAGTTAGGCAGGGATACTCACCT-----  
 TTGTCGTTTGCTATTAGTCTGCTTGATACCATAGCAATAGCAGTAGCTGAA---  
 GGAACAGATAGGATTATAGGATTAATACAAAGA-----  
 -----ACAAGAATAAGACAGGGCGCCGAAGTAGCTTTGCAA---TAA  
 >KC154028  
 GTG---GTG-----  
 GGAAACTTGTGGGTACAGTCTACTATGGGGTACCTGTGTGG---AAAGAAGCAAAA---  
 ACTACCTTATTCTGTGCATCAGATGCTAAGGCATATGAGAAAGAA---GTGCATAAT-----  
 -----GTTTGGGCTACA---CATGCTTGTGTACCCACAGAC---  
 CCCAACCCACAAGAAATAGTTTTGGGA-----AATGTAACAGAAAATTTTAAC-----  
 -----ATGTGGGAAAATGACATGGTGGATCAGATGCATGAAGATATA---  
 ATCAGTTTATGGGATCAAAGCCTA---AAGCCATGTGTAAAATTG---  
 ACCCCACTCTGTGTCACTTTGAAGTGCACAAATGCTAATGGTACTGATACCGACAATAAT-----  
 -----  
 -----AGTAAGTATGGAGAAATAAAA---  
 AATTGCTCTTTCAATGTCAACCACAGAACTAAGA-----  
 GATAAGAAACAGCAAGTGTATGCACTT---TTTTATAAACTTGATGTAGTACCACTTGAGGAGGAC-----  
 -----  
 -----  
 AACTCTAGTGAGTATAGGTTAATAAATTGTAATACCTCAACCATAACACAA---  
 GCCTGTCCAAAGGTCTCTTTTGACCCAATTCTCTATACATTATTGTGCTCCAGCTGGATATGCGATTCTAAAGT  
 GTAAT---AATAAAACATTCACT---GGGACAGGACCATGCAAAAAT-----  
 -GTCAGC---ACAGTACAATGTACACATGGAATTAAGCCAGTGGTATCAACT---  
 CAACTACTGTTAAATGGTAGCCTAGCAGAGGAAGAG-----  
 ATCATAATCAGATCTAAAAATCTGTCTCAGACAGT-----ACTAAAACAATAATAGTACAGTTTAAT---  
 -----AAATCTGTATCA-----ATCATATGTGTAAGACCCGGCAATAATACAAGAAAA-----  
 -AGTATAAGAATA-----GGACCAGGACAAGCA---TTC-----TATACAAATAAA-----  
 -----ATAATAGGAAATATA-----AGACAAGCACATTGT---AACATTAGTAGGAGT---

AACTGGACTGAGACTTTAAAAGGGGTAAAAGAAAAATTAAAA-----AAACACTTCTCT----  
 -----GACAAAAACATAATGTTTAAAC-----  
 TCAAGCTCAGGAGGGGATCTAGAAATTACC---ACACATAGCTTTAATTGTAGAGGAGAA---  
 TTTAAGCAGCTCCAGGCAAGAGTCCTGGCTATAGAAAGATACCTAAAGGATCAACAGCTCCTAGGGATGTGGG  
 GCTGCTCTGGAAAGTTCATCTGCACCACTGCTGTGCCTTGGAACTCCAGTTGGAGT-----  
 -----AATAAAACACAATTAGAGATTTGG-----GAT-----  
 AACATGACCTGGATGCAGTGG---GATAGAGAAATTGATAACTACACAACCACAATATAC---  
 AATTTACTTGAACAATCGCAAGTCCAGCAGGAA-----  
 -----  
 AAGAATGAAAAAGATTTATTATCATTGGAAAAATGGGACAGTCTGTGGAATTGGTTTAGTATAACAAGTTGGC  
 TGTGGTATATAAAAAATATTCATAATGATAGTAGGAGGCTTGATAGGTTTAAGAATAATTTTTTACT---  
 GTGCTCTCTCTAGTA-----AATAGAGTTAGGCAGGGATACTCACCT-----  
 TTGTCAATTGGCTATTAATCTGCTTGATACTATAGCAATAGCAGTAGCTGAA---  
 GGAACAGATAGGATTATAGAATTCATACAAAACCTTTTGTAGAGGT-----  
 -----ATCCTCAACATA-----CCTACAAGAATAAGACAGGGCTTCGAAGCAGCTTTGCAA---TAA  
 >KF725924  
 GTG---GTA-----  
 GGGAACTTGTGGGTCACAGTCTATTATGGGGTACCTGTGTGG---AAAGAAGCAAAA---  
 ACTACTCTATTCTGTGCATCAGATGCTAAAGCATATGAGAAAGAA---GTGCATAAT-----  
 -----GTCTGGGCTACA---CATGCCTGTGTACCCACAGAC---  
 CCCAACCCACAAGAAATATACTTGGCA-----AATGTAACAGAAAATTTTAAT-----  
 -----ATGTGGGAAAATGACATGGTGGAACAGATGCATGAGGATATA---  
 ACCAGTTTATGGGATCAAAGTCTA---CAACCATGTGTAAAGTTG---  
 ACCCCACTCTGTGTACCTTAAATTGTACGACAATTGTCACCAACACTTCTAGCCCGAATGCCACCCCCAGT-  
 -----  
 -----CCTAAAATGACA---  
 AATTGCTCTTTCAATGTAACCACAGAAATAAGA-----  
 GATAAGAAACAGAAAGTGTACGCACTT---  
 TTTTACAGATCTGATGTAACACCCTTAATGGATTTAATGATAGTGAT-----  
 -----  
 GAATCTAATAGGAGTGCTGAATATATGTTAATAAATTGCAATACCTCAGCCATAACACAA---  
 GCCTGCGAAAAGGTCTCTTTTGATCCAATTCCTATACATTATTGTGCTCCAGCTGGTTATGCGATTCTAAAGT  
 GTAAT---AATGAGACATTCAAT-----GGGACAGGACCATGCAATAAT-----  
 -GTCAGC---TCTGTACAGTGTAACATGGAATTAAACCAGTGGTATCAACT---  
 CAACTACTGTTAATGGTAGCCTAGCAGAAAAGGAT-----  
 ATAATAATTAGTTCTGAAAACATGACAGGCAGT-----GACACAACAATAATAGTCCACCTTAAT---  
 -----GAACCTGTAAAC-----ATTACGTGTACAAGACACAACAATAATACAAGAAGA---  
 -AGTATAAGAATA-----GGACCAGGACAAACA---TTC-----TATGCAAGTGAC-----  
 -----ATAATAGGAGACATA-----AGACAAGCACATTGT---AACGTTACAGGAGAG---  
 AAATGGAATAAACTTTTAAAAATGTAAAGGAAAAATTACAA-----GCATACTAC-----  
 -----AACAAAACAATAAAGTTTGAACCA---  
 AACTCACCTCAGGAGGGGATCCAGAAATTACA---ATGCATAGCTTTAATTGTAGAGGAGAA---  
 TTTAAGCAGCTCCAGGCAAGAGTCCTGGCCATAGAAAGATACCTAAAGGATCAACAGCTCCTAGGGCTTTGGG  
 GCTGCTCTGGAACACTCATCTGCACCACTGCTGTGCCTTGGAACTCTAGTTGGAGT-----  
 -----AATAAATCCAAGGAGACATTTGG-----GAT-----  
 AACATGACTTGGATGCAGTGG---GAGAGAGAGATTAGTAATTATACAGACACAATATAC---  
 AGGTTGCTTGAAGACTCACAAAACCAGCAGGAG-----  
 -----  
 AAAAAATGAAAAAGATTTATTAGCATTGGACAGTTGGAATAACCTGTGGAATTGGTTTGGTATAACAAAATGGC  
 TGTGGTATATAAAAAATATTCATAATAATAGTAGGAGGCTTAATAGGTTTAAGAATAATTTCTGGGT---  
 GTACTCTCTATAGTG-----AGAAGAGTTAGGCAGGGATACTCACCT-----  
 TTGTCGTTTGGCTATCAATCTGTTTGATACCTTAGCAATAGTAGTAGCTGAA---  
 GGAACAGATAGGATTATTGAAGTAATACAAAGACTTTGTAGAGCT-----  
 -----AATCCGCA-----ATAAGATAGGGCTTTGAAGTAGCTTTGCAA---TAA  
 >KF725926  
 GGG---AGA-----  
 AGAAACTTGTGGGTCACAGTATATTATGGGGTACCTGTGTGG---AGAGAAGCAAAA---  
 ACTACTCTATTCTGTGCATCAGATGCTAATGCATATGAGAAAGAG---GTACATAAT-----  
 -----GTCTGGGCTACA---CATGCCTGTGTACCCACAGAC---  
 CCCAACCCACAAGAAATGGTTTTTGAA-----AATGTAACAGAAAATTTTAAC-----

-----ATGTGGAAAAATGACATGGTGGATCAGATGCATGAAGAT-TA---  
 ATTAGTTTATGGGATCAAAGCCTA---AAGCCATGTGTAAAGTTG---  
 ACCCCACTCTGTGTCACTTTAGAAATGCAGCAATGTTACTACAACCAATCACAGCAGTGTTAATAGCACTCAGA  
 CAGGAAATGGT-----  
 -----ACCAGTGTTAATACCAATCAGACAGGAATAAAAGATGAAATAAAAGATGAAATGAGA---  
 AATTGCTCTTTCAATGCAACCAACAAGAAATAAGA-----  
 GATAAGAAGCGCAAAGAGTATGCACTT---TTTTATAAACTTGATATAGTACCACTTAATGAG-----  
 -----  
 -----  
 ACTAATAGCAGGTATAGATTAATAAATTGTAATACCTCCACTGTAACACAA---  
 GCCTGTCCAAAGGTCACGTTTGACCCAATTCTTATACATTATTGTGCTCCTGCTGGTTATGCGATTCTCAAGT  
 GTAAT---AATAAGACATTCAAT-----GGAACAGGACCATGCAATAAT-----  
 -GTCAGT---ACAGTACAATGTACACATGGAATTAAGCCAGTGGTATCAACT---  
 CAACTACTGTTAAATGGTAGCCTAGCAGAAAAAGAG-----  
 ATAATAATTAGTTCTGAAAACTAACAACAAT-----GCTAAAATAATAATAGTACATCTTAAT-----  
 -----GAATCTGTAGAA-----ATTGAGTGCACAAGACCCGGCAATAATACAAGAAAA-----  
 -AGTGTAAGGATA-----GGACCAGGACAAAACA---TTC-----TATGCAACAGGAGAG-----  
 -----ATAATAGGAGACACA-----AGAAAAGCATATTGT---AACATTTCTAAAGGG---  
 AATTGGAATAAACTCTACAATGGGTAGGTGAAAAATTGAAA-----GGATATTTCCCT-----  
 -----AATAAAACAATAGTCTTTAAC-----  
 TCATCCTCAGGAGGGGACCTAGAGATTACA---ACACATAGCTTCAATTGTGGAGGAGAA---  
 TTTAAGCAGCTCCAGGCAAGAGTCTTGGCTCTAGAAAGATACCTACAGGATCAACAGCTCCTAAGCCTTTGGG  
 GCTGCTCTGGAAGACTCATCTGCACCACTAATGTGCCTTGGAACGACAGTTGGAGC-----  
 -----AATAGAACAAAAGAGGAGATCTGG-----GAT-----  
 AACATGACCTGGATGCAGTGG---GATAAAGAAATTAGCAATTACTCAGACACAATATAC---  
 AGGCTGCTTGAAAAATCGCAAACCCAGCAGGAA-----  
 -----  
 CAAAATGAAAAAGATTTATTGGCATTGGACAAGTGGCAAAATCTGTGGAGTTGGTTTAACATATCAAATTGGC  
 TATGGTATATAAGAATATTCTAATGATAGTAGGAGGCTTGATAGGTTTGAGAATAATTTTTTGCA---  
 GTACTATCCATAATA-----AATAGAGTTAGGCAGGGATACTCACCT-----  
 TTGTCGTTTGCTGTTAGTCTGCTTGATACTATAGCAATAGCAGTAGCTGGG---  
 GGAACAGATAGGATTATAGAATTCCTACAAAGAATCTTTAGAGCT-----  
 -----TTACGCAACCTA-----CCTAGAAGAATAAGACAGGGCTTTGAAGCAGCTTTGCTA---TAA  
 >KF725934  
 ACG---AAG-----  
 GACATGTGGGTCACAGTCTACTATGGGGTACCTGTGTGG---AAAGAAGCAAAA---  
 ACTACTCTATTTTGTGCATCAGATGCTAAAGCATATGAAAAAGAG---ATACATAAT-----  
 -----GTATGGGCTACA---CATGCCTGTGTACCCACAGAC---  
 CCCGATCCACAAGAAATGCATTTGACA-----AATGTAACAGAAAACCTTTAAC-----  
 -----ATGTGGGAAAAATGATATGGTGGATCAGATGCATGAAGATATA---  
 ATCAGTTTATGGGATCAAAGCCTC---AAGCCATGTGTACAATTG---  
 ACCCCACTCTGTGTCACTCTAACTGTACACTTGCCACAAATAACACT-----  
 -----  
 -----GAAATGAGA---  
 AATTGCACTTTTAAATGTAACCACAGAATTAAGA-----  
 GATAAGCAAAAGAAAGAAAGGGCGCTT---TTTTATAACCTTGATATAATACAACTTAATGATACT-----  
 -----  
 -----  
 GATAATAGCACCTATAGATTAATAAATTGTAATACCTCAGTCATAAAACAA---  
 GCCTGTCCAAAAGTCTCGTTTGAACCAATTCTTATACATTTTTGTGCTCCAGCTGGTTATGCGATTCTAAAGT  
 GTAAT---ACTAAGACATTCAAT-----GGAACAGGAACATGCAATAAT-----  
 -GTCAGC---ACAGTACAATGTACACATGGGATTAGGCCAGTGATATCAACT---  
 CAACTACTGTTAAATGGTAGCCTAGCAGAAGGAGAG-----  
 ATAATAATTAGCTCTGAAAACTGACAAACAAT-----GCCAAGACAATAATAGCACATCTTAAT-----  
 -----GAATCTGTAGAG-----ATTACATGTATAAGACCTGGCAATAATACAAAAAA-----  
 -AGTGTAAGAATA-----GGACCAGGACAAAACA---TTC-----TTTGCAACAGGAGAT-----  
 -----GTAATAGGAGATATA-----AGACAAGCACATTGT---AACATTAGTATGAGT---  
 AAGTGGAATAATACTTTACACAGGGTGAGTAAAAAATTACAA-----GAACACTTCCCT-----  
 -----AATAAAATAATAAGATTTCAA-----  
 CCACCTTCAGGAGGGGACCTTGAAATTATT---ATGCATAGTTTTAATTGTGGAGGAGAA---

TTTAAGCAGCTCCAGGCAAGAGTCCTGGCTATAGAAAGATATCTAAAGGATCAACAGCTCCTAGGAATTTGGG  
 GCTGCTCTGGAAGAACTCATCTGCACCACTAATGTGCATTGGAAGCTCTAGTTGGAGT-----  
 -----AATAAAAGTTACACGGAGATTTGG-----GAC-----  
 AACATGACCTGGATGCAGTGG---GAGAAGAAGATTAGTAGTTACACAGATAAAATATAC---  
 TTGTTGCTTGAAGAATCACAAAACCAGCAGGAA-----  
 -----  
 AAAAAAGAAAAAGAGTTACTAGCATTGGACAGTTGGAACAATTTATGGAATTGGTTTAGCATATCAAATTGGC  
 TGTGGTATATAAAAAATATTCATAATGGTAGTAGGAGGCTTGATAAGTTTAAGAATAATTTTTTGCT---  
 GTACTCTCTATAGTG-----AATAGAGTTAGGCAGGGATACTCACCT-----  
 TTATCATTTTGCTATTAGTCTGCTTGATACCATAGCAATAGCAGTAGCTGGA---  
 GGAACAGATAGAATTATAGAATTCATACAAAGATTTTGCAGAGGT-----  
 -----ATCCGTAACATA-----CCTAGAAGAAGAAGACAGGGCTTTGAAGCAGCTTTGCAA---TAG  
 >KF725961  
 -----  
 GGGAACTTGTGGGTACAGTCTATTACGGGGTACCTGTGTGG---CAAGAAGCAAAA---  
 ACTACTCTATTCTGTGCATCAAATGCTAAAGCATATGAGAAAGAA---GTGCATAAT-----  
 -----GTCTGGGCTACA---CATGCCTGTGTACCCACAGAC---  
 CCCAGCCCACAAGAAATGGTTATGGAA-----AATGTAACAGAAAATTTTAAT-----  
 -----ATGTGGAAAAATTATATGGTGGATCAGATGCATGAGGATGTA---  
 ATTAGTTTATGGGATCAAGGCCTA---AAGCCATGTGTAAAGTTG---  
 ACCCCACTTTGTGTACCTTAAACTGTACCAATGTTAATGCTACCCAGAATAATACTGATACTAAT-----  
 -----  
 -----GAGACCATAAGGGAGGTAATAATGAAA---  
 AACTGCTCTTTCAATGCAACCACAGCAATAAAA-----  
 AATAAGAAAAAGAATGTATATGCACCT--TTTTATAAATCTGATGTAGTACCCTTAATGGG-----  
 -----  
 -----  
 AATAGCTCTAGTTATATATTAATAAATTGTAATACCTCAACCATAGCACAA---  
 GCCTGTCCAAAGGTCTCTTTTGAACCAATTCCTATACATTATTGTGCTCCAGCTGGTTATGCGATTCTAAAGT  
 GTAAT---AATAAGACATTTAAT-----GGGACAGGGCCATGCAATAAT-----  
 -GTCAGC---ACAGTACAATGCACACATGGAATTAAGCCAGTGGTGTCAACT---  
 CAACTACTGTTAAATGGTAGCCTAGCAGAAGAGGAT-----  
 ATAATAATTAGATCTGAAAATCTGACAGAACAT-----GCCAAAATAATAATAGTACACCTTAAT---  
 -----GAATCTATAGAA-----GTTGTGTGCACAAGACCCAACAATAATACAAGAAAA---  
 -AGCATAAGGATA-----GGACCAGGACAAACA---CTC-----TATGCAACAGGAGAT-----  
 -----ATAATAGGAAATATA-----AGACAAGCATATTGT--AACATTAGTGAAAGA---  
 AAATGGCATGACACTTTACAAAGGGTAAGCAAAAAATTAGCA-----AAATACTTCCT---  
 -----AATAAAACAATAAACTTTACA-----  
 CAACATTCAGGAGGGGACATGGAAGTTACA--ACACATAGCTTTAATTGTGGAGGAGAA---  
 TTTAAGCAGCTCCAGGCAAGAGTGTGGCTATAGAAAGATACCTAAAGGATCAACAGCTCCTAGGACTGTGGG  
 GCTGCTCTGGAAGAACTCATCTGCACCACTGCTGTGCCTTGGAACAACAGTTGGAGT-----  
 -----AATAAATCTCAAACAGAAATTTGG-----GAG-----  
 AACATGACCTGGATGCAGTGG---GAAAGGGAAATTAGTAATTATACAGGCATAATATAC---  
 AACTTACTTGAAGACTCACAAAGCCAGCAGGAG-----  
 -----  
 AAAAAAGAAAAGGATTTATTAGCATTAAGTAATTGGGACAGTCTGTGGAATTGGTTTGACATAACAAAATGGC  
 TGTGGTATATAAAAAATATTCATAATGATAGTAGGAGGCTTGATAGGTTTAAGAATAATTTTTTGCT---  
 GTACTCTCTATAGTG-----AATAGAGTCAGGCAGGGATACTCACCT-----  
 TTGTCATTTTGCTATTAGTCTGCTAGATACCATAGCAATAGTAGTAGCTGGC---  
 TGGACAGATAGGGTTATAGAAATAGGACAAGGACTTGGTAGAGCA-----  
 -----TTTCTCCACATA-----CCTAGAAGAATCAGACAGGGCTTCGAAAGGGCTTTGCTA---TAA  
 >KF725984  
 ACA---GAG---AAC-----  
 GAGAAATTGTGGGTTACAGTCTACTATGGGGTACCTGTGTGG---AAAGAAGCAAAA---  
 ACTACTCTATTCTGTGCATCAGATGCTAAAGCATATGAGACAGAA---GTGCATAAT-----  
 -----GTCTGGGCTACA---CATGCCTGTGTACCCACAGAC---  
 CCCAGCCCACAAGAAATAAGGTTGGAA-----AATGTAACAGAAAATTTTAAC-----  
 -----ATGTGGAAAAATGATATGGTAGACCAAAATGCATGAAGATATA---  
 ATCAGTTTATGGGATCAAAGTCTA---AAGCCATGTGTAAAGTTA---  
 ACCCCACTCTGTGTTACTTTGAATTGTAGCAATGTTAATCGTAATGTTACCAATAATGATACTACT-----

-----GTCAAGGAAGAAATGAAA---  
AATTGCTCTTTCAATGCAACTACAGAAATTCAT-----  
GATAAGAAAAAGAAACAGTATGCACTT---TTTTATAGACTTGATATAGTACCACTTAGGGAGAAT-----  
-----  
AGTACCAATGAATATAGATTAATAAATTGCAATACCTCAGCCATAACACAA---  
GCCTGTCCAAAGGTCTCTTTTGACCCGATTCTTATACATTACTGTGCTCCAGCTGGTTATGCGATTCTAAGGT  
GTAAT---AACAAGACATTCAAT-----GGGACAGGACCATGCAATAAT-----  
-GTCAGT---ACAGTACAATGTACACATGGAATTAAGCCAGTGGTATCAACT---  
CAACTACTGTTAATGGTAGCCTAGCAGAAAAAGAC-----  
ATAGTAATTAGATCTGCAAACTGACAGACAAT-----GCCAAAACAATAATAGTACATCTTAAT----  
-----GAACCTGTAAAAG-----ATTAATTGTACACGACCCAACAATAATACAAGGAAA-----  
-AGTGTAAGGATA-----GGACCAGGACAAGCA---TTA-----  
-----GACATA-----AGACAAGCACATTGT---ATCATTAGTGCAAAG---  
ACATGGAACAAAACCTTTACAAGGAATAGGTAGAAAATTAGCA-----GGACTTTTCCCT----  
-----AATAAAACAATAACATTTGCA-----  
AACAGCTCAGGAGGGGATCTAGAAATTACA--ACACATAGCTTTAATTGTAGAGGAGAA---  
TTTAAGCAGCTCCAGGCAAGAGTCTTGCTATAGAAAGATACCTAAAGGATCAACAGCTCCTAGGGATTTGGG  
GCTGCTCTGGAAGAACTCATCTGCACCACTGCTGTGCCTTGGAAGCTCCAGTTGGAGT-----  
-----AATAAATCTGAAAAAGAGATATGG-----GAG-----  
AACATGACTTGGATGCAGTGG---GAGAGAGAAATTGATAATTACACACACATAATATAT---  
GGGTTGCTTGGAGAATCGCAATCCAGCAGGAA-----  
-----  
AAGAATGAAAATGATTTATTAGCATTGGACAAGTGGAACAATCTGTGGAGTTGGTTTAGTATAACAACTGGC  
TGTGGTATATCAGAATATTCATAATGATAGTAGGAGGCTTGATAGGTTTAAGAATAATTTTTTGCT---  
GTGCTTTCTATAGTG-----AATAGAGTTAGGCAGGGATACTCACCT-----  
TTGTCATTTGCTATTAGTCTGCTTGATACCATAGCAATAGCGGTAGCTGAA---  
GGAACAGATAGGATTATAGAATTAATACAAAGAGTTAGTAGAGCT-----  
-----ATCCTCAACATA-----CCTAGAAGAATAAGGCAGGGCTTTGAAGCATCTTTGTTA--TAA  
>KF725994  
-----  
GGGAACCTTGTGGGTCACAGTCTACTATGGGGTACCTGTGTGG--AAAGAAGCAAAA---  
ACTACTCTATTCTGTGCATCAAATGCTAAAGCATATGATACAGAA--GTGCACAAT-----  
-----GTCTGGGCTACA--CATGCCTGTGTACCCACAGAC--  
CCCAACCCACAAGAAATGGTTTTGGAA-----AATGTAACAGAAAACCTTTAAC-----  
-----ATGTGGAAAAATGACATGGTAAATCAGATGCATGAGGATATA---  
ATCAGTTTATGGGATCAAAGCCTA--AAGCCATGTGTAAAGTTG--  
ACCCCACTTTGTGTACTTTAAATTGTACAAATGTAAGTGTGCTAATACTGTGAGTGGTACTACTACTACT-  
-----  
-----GTCAGTAGTAATGATACCAATAGTATCAAGGAAGAAATGCAA---  
AATTGCTCTTTCCATGCCCACACAGAAGTAAAA-----  
GATAAGAAAATTAAGGAGTATGCACTT---TTTTATAAACTTGATATAGTACCATTTAATAGA-----  
-----  
AACCATGGGAACATATAGTGAATATAGATTAATAAGGTGCAATACCTCAACCATAACACAA---  
GCCTGTCCAAAGGTCACTTTTGAACCAATTCCTATACATTACTGTGCGCCAGCTGGTTATGCGATTCTAAAGT  
GTAAT---AACAAGACATTCAAT-----GGGACAGGACCATGCCAGAAT-----  
-GTCAGC---ACAGTACAATGTACACATGGAATTAAGCCAGTGGTATCAACT---  
CAACTACTGTTAATGGCAGCCTA---GAAGAAGAG-----  
GTAATAATTAGCTCTGAAAATCTGACAAACAGT-----GTCAAAAACAATAATAGTACATCTTAAT----  
-----GAATCTGTAGAA-----ATTGTGTGTACAAGACCCGGCAATAATACAAGAAAA-----  
-AGTGTAAGGATA-----GGACCAGGACAAGCA---TTC-----TATGCAACAAATGAC-----  
-----ATAACAGGAGACATA-----AGACGAGCATATTGT---AACCTTAATGCAACT---  
AAGTGGAACAAAACCTTACAACAGGTAGGAAAAAAATTAAAA-----GAACACTTC-----  
-----CATAAAAACATAAGCTTTTCGA-----  
CCACCCTCAGGAGGAGATCTAGAAATTACA--ACACATAGCTTTAATTGTAGAGGAGAA---  
TTTAAACAGCTCCAGGCAAGAGTCTTGCCATAGAAAAGATACCTAAAGGATCAACAGCTCCTAGGGATTTGGG  
GCTGCTCTGGAAGAACTCATCTGCACCACTGCTGTGCCTTGGAAGCTCCAGTTGGAGT-----  
-----AATAAATCTGAAGCAGAGATTTGG-----AAT-----

AACATGACTTGGATGCAGTGG---GATAGAGAAATAAGTAATTACACAAACACAATATAC---  
AGGTTGCTTGAAGACTCGCAAACACAGCAGGAA-----  
-----  
AAGAATGAAAAAGATTTATTAGCATTGGACAGTTGGAACCTCTCTGTGGAGTTGGTTTAACATATCAAACCTGGC  
TGTGGTATATAAAAAATATTACATAATGATAGTGGGAGGCTTGATAGGTTTAAGAATAATTTTTTGCT---  
GTGATCTCTGTAGTA-----AATAGAGTTAGGCAGGGATACTCACCT-----  
TTATCGTTTGCTATTAGTCTGGTTGATGCCTTAGCAATAACGGTAGCTGAA---  
GGAACAGATAGGATTATAGAATTAGTGCTAAGAATTGGTAGAGCT-----  
-----ATCCTCAACATA-----CCTAGAAGAATAAGACAAGGCCTTGAAGCAGCTTTGCTA---TAA  
>KF725998  
GGG---AAT-----  
GGCTTGTGGGTACACAGTCTACTATGGGGTACCTGTGTGG---AAAGAAGCTAAA---  
ACTACTCTATTCTGCGCATCAGATGCCAAAGCACATAGTCCAGAA---GCGCATAAT-----  
-----GTCTGGGCTACA---CATGCCTGTGTACCCACAGAC---  
CCCGACCCACAAGAAATATCTTTGGGA-----AATGTAACAGAAAATTTTAAAC-----  
-----ATGTGGAAAAATGACGTGGTAGATCAGATGCATGAGGACGTA---  
ATCAGTTTATGGGATCAAAGCCTA---AAGCCATGCGTAAAGATG---  
ACCCCACTTTGTGTTACTTTAACCTGTACAAATGTCACTATAAATGACACAACCTAGCAGT-----  
-----  
-----ATAATAACACTGTCAAAAATGGTATTGATATGAAA---  
AATTGCTCTTTCAATACAACCACAGAATTAACA-----  
GATAAGAAACATAAAGAGTATGCACCT---TTTTATAGATCTGATATAGAACCCTTGATAAC-----  
-----  
-----  
AATAAGAATGAGACTGGTGACTATATTTTAATAAAATTGCAATACCTCAACCATAGCCCCAA---  
GCCTGTCCAAAGATCTCTTTTGACCCAATTCTTATACATTACTGTGCTCCAGCTGGGTATGCGCTTCTAAAGT  
GTAAG---GATGAGACATTCAAT-----GGAACAGGACCATGCAATAAT-----  
-GTCAGC---ACAGTACAATGTACACATGGAATTAAGCCAGTGGTATCAACT---  
CAACTACTGTAAATGGTAGCCTAGCAGAAAAAGAG-----  
ATAATAATTAGCTCTGAAAATCTGGCAGACAAT-----GCCAAAATAATAATAGTACATCTTAAT---  
-----GAATCTGTAAAG-----ATTAAGTGTACAAGGCCAGCAACAATACAAGAAAA-----  
-AGTATAAGGATA-----GGACCAGGACAAGCA---TTC-----TATGCAACAAATGAT-----  
-----GTAATAGGAGACATA-----AGACAAGCACATTGT---AACATTAGTGCAGAA---  
AAATGGAACAAAACCTTTAGAACAGGTAAGGGAAAAATTAAAA-----GGACTTTTCCCT---  
-----AATAAAACAATAAAATTTAAC-----  
CAATCCTCAGGAGGGGATCCAGAAATTACA--ATGCATAGTTTTAATTGTAGAGGAGAA---  
TTTAAGCAGCTCCAGGCGAGAGTCTTGGCTATAGAAAGATACCTAAAGGATCAACAGCTCCTAGGGATTTGGG  
GCTGCTCTGGAACACTCATCTGCACCACCGCTGTGCCTTGGAACCTCAGTTGGAGT-----  
-----AATAAATCTGAAACAGAAATTTGG-----GAT-----  
AACATGACTTGGATGCAGTGG---GATAGAGAAATTAGTAATTACACAGACATAATATAC---  
AAAATGCTTGAAGACTCACAACCCAGCAGGAA-----  
-----  
AAGAATGAAAAAGATTTATTAGCATTGGACAGTTGGAACACTCTGTGGAATTGGTTTAACATAACAAATTGGC  
TATGGTATATAAGAATATTACATAATGATAGTAGGAGGCTTGATAGGTTTAAGAATAATTTTTTGCT---  
GTGCTCTCTATAGTG-----AATAGAGTTAGGCAGGGATACTCACCT-----  
TTGTCATTGGCTATTAGTCTGTTTGATACCCTAGCAATAGTAGTAGCTGAA---  
GGAACAGATAGGATTATAGAATTAGCACAAAGAATTGGTAGAGCT-----  
-----ATCCTTAACATA-----CCTACAAGAATAAGACAGGGCCTTGAACAGCTTTGCTA---TAA  
>MH933706  
GTG---GTG-----  
GGAAAAGGGTGGGTACAGTCTATTATGGGGTACCTGTGTGG---AAAGAAGCAAAA---  
ACCACTTTATTCTGTGCATCAGATGCTAAAGCATATGAGAGAGAA---GTGCATAAT-----  
-----GTCTGGGCTACA---CATGCCTGTGTACCCACAGAC---  
CCCAACCCACAAGAAATAGTTTTGGAA-----AATGTAACAGAAAATTTTAAAC-----  
-----ATGTGGGAAAATGACATGGTGGATCAGATGCATGAGGATATA---  
ATCAGTTTATGGGATCAAAGTCTA---AAACCATGTGTAAAGTTG---  
ACCCCACTCTGTGTCACTTTAAATTGTACAAATACTAATGTTAGTGCTCACAATACAAATGCT-----  
-----  
-----AATGTTAGTGATTACAATGTTAGCAGGGGTGAAGAAGTAAAA---  
AATTGCTCTTTCAATATAACCACAGAATTAAGA-----

GATAAGAAACAGAAAGAGTATGCACTT---TTTTATAAACTTGATATAGTACCACTTGATAAC-----  
-----  
-----  
AAAACCAGCTATAGATTAATAAGTTGCAATACCTCAACCATAACTCAA---  
GCCTGTCCAAAGGTCTCTTTTGATCCAATTCCCTATACATTATTGTGCTCCAGCTGGTTATGCGATTCTAAAGT  
GTAAT---AATAAGACATTCAAT-----GGAACAGGACCCCTGCAATAAT-----  
-GTCAGC---ACAGTACAATGTACACATGGAATTAAGCCAGTGGTATCAACT---  
CAACTATTGTTGAATGGTAGCCTAGCAGAAGGGGAC-----  
ATAATAATTAAATCTGAAAATCTGACAGAAAAT-----ACTAAAACAATAATAGTCCACCTTAAT----  
-----GAATCTGTAGAA-----ATAGTGTGTGTAAGACCCAACAATAATACAAGGAGA-----  
-AGTGTAAGGATA-----GGACCAGGACAAACA---TTC-----TATGCAACA---GAT-----  
-----ATAATAGGAGACATA-----AGACAAGCACATTGT---AACATTAGTAAAAGA---  
GAATGGGAAAAGACTTTACATCGGGTAACCAAAAAATTAACA-----GAACACTTT-----  
-----AACAAATATAACATTTAAC-----  
TCATCCTCAGGAGGGGATCTAGAAATTACA---ACACATAGCTTTAATTGTAGAGGAGAA---  
TTTAAACAGCTCCAGGCAAGAGTCTTGCCATAGAAAAGATACCTAAAGGATCAACAGCTCCTAGGGATGTGGG  
GCTGCTCTGGAAGAACTCATCTGCACCACCTAATGTGCCTTGGAACGCCAGTTGGAGC-----  
-----AATAAATCACAAGATGAGATTTGG-----GAA-----  
AACATGACCTGGATGCAGTGG---GATAAAGAAATTAATAATTACACAAACACAATATAC---  
AGATTGCTTGAAGAGTCACAAAACCAGCAGGAA-----  
-----  
CGAAAATGAAAAAGACCTATTAGCATTGGACAGTTGGCAACATCTGTGGAGTTGGTTTAGCATAACAAATTGGC  
TGTGGTATATAAGAATATTCATCATGATAGTAGGGGGCTTAATAGGTTTAAGAATAATCTTTGCT---  
GTACTATCTGTAGTA-----AAGAGAGTTAGGCAGGGATACTCACCT-----  
TTGTCGTTTGTATTAACTGTTTGATACCGTAGCAATAGCAGTAGCTGAA---  
GGAACAGATAGGATTATAGAATTAATACAGAGAGGTTGTAGAGCT-----  
-----ATCCTCAACATA-----CCTAGAAGAATAAGACAGGGCTTTGAAACAGCATTGCTA---TAA  
>MK643550  
GTG---GTG-----  
GGAAATTTGTGGGTCACAGTTTATTATGGGGTACCTGTGTGG---CAAGAAGCAAAA---  
ACTACTCTATTCTGTGCATCAGATGCTAAGGCATATGAGAAAGAA---GTGCACAAAT-----  
-----GTTTGGGCTACA---CATGCCTGTGTACCCACAGAC---  
CCCAACCCACAAGAAATAGTGTGGAA-----AATGTAACAGAAAATTTTAAT-----  
-----ATGTGGGAAAATGATATGGTGGATCAGATGCATGAGGATATA---  
ATTAATCTATGGGACCAAAGTCTA---AAACCATGTGTAAAGTTG---  
ACCCCACTCTGTGTACGTTAAATGTGTGAGTGTGAATATGACTATTGTGAATGATACCAGGAAT-----  
-----  
-----GAAATGACC---  
AATTGCTCTTTCAATACAACCACAGAAATAAGA-----  
GATAAAAAACAGAATGTGTATTCACCT--TTTTATAGATCTGATGTAGTACCAATTGGTGAG-----  
-----  
-----  
AATGACAGCAGCTATATATTACAAAATTGCAATACCTCAACCATAACACAA---  
GCCTGTCCAAAGGTCACTTTTGATCCAATTCCCATACATTTATTGTGCTCCAGCTGGTTATGCAATTCTAAAGT  
GTAAT---AATAAGACATTTAAT-----GGGACAGGACCATGCAATAAT-----  
-GTCAGC---ACAGTACAATGTACACATGGAATTAAGCCAGTGGTATCAACT---  
CAACTACTACTAAATGGCAGCCTAGCAGAAAAGAG-----  
ATAATAATTAAAGTCTGAAAATCTGACAAACAGT-----GCCAAAACAATAATAGTCCACTTTAAT----  
-----GAATCTGTAGCA-----ATTAAGTGTACAAGACCCAATAATAATACAAGACAA-----  
-GGTATAGGGATA-----GGACCAGGACAAACA---TTC-----TATGCAAAC---AAG-----  
-----ATAATAGGAGACATA-----AGACAAGCACATTGT---AACATTAGTAGAATG---  
CTATGGAACACAGCTTTACAACGGGTAAGCAATAAATTACAT-----GAACACTTCAAA-----  
-----AATAAACTATAAAATTTCGAA-----  
CAACCCTCAGGAGGGGATCTAGAAATTACA---ACACATAGTTTTAATTGTGGAGGAGAA---  
TTTAAGCAGCTCCAGGCAAGAGTCTTGCTATAGAAAAGATACCTAAAGGATCAACAGCTCCTAGGGCTTTGGG  
GCTGCTCTGGAAGAACTCATCTGCACCACCTAATGTGCCTTGGAACAGCAGTTGGAGT-----  
-----AATAAATCTAAAGATGATATTTGG-----GAT-----  
AACATGACCTGGATGCAGTGG---GATAGAGAAATTAGCAATTACACAAAGACCATATAC---  
GAATTGCTTGAAGAGTCGCAAAGCCAGCAGGAG-----  
-----

GAAAAATGAAAAAGATTTATTAGCACTGGACCATTGGAATAGCTTGTGGAGTTGGTTTGACATATCAAAATGGC  
TGTGGTATATAAAAAATATTCATCATGATAGTAGGAGGCTTGATAGGTTTAAGAATAATTTTTTGT---  
GTAATCTCTATAGTG-----AATAGAGTCAGGCAGGGATACTCACCT-----  
TTGTCAATTTGCTATTAATCTGCTTGATACCACAGCAATAATAGTAGCTGAA---  
GGAACAGATAGGATTATTGAAGTAATACAAAGATTCTGTAGAGCT-----  
-----ATCCTTAATATA-----CCTAGCAGAATAAGACAGGGCTTTGAAGCAGCTTTGCTA---TAA  
>MN611462  
GTG---GTA-----  
GGGAACCTTGTGGGTCACAGTCTATTATGGGGTACCTGTGTGG---AGAGAAGCAAAA---  
ACTACTCTATTCTGTGCATCAGAGGCTAAAGCATATGAGAGAGAA---GTGCATAAT-----  
-----GTCTGGGCTACA---CATGCCTGTGTACCCGCAGAC---  
CCCAACCCACAAGAAATGGTATTGGAA-----AATGTAACAGAAAATTTTAAAC-----  
-----ATGTGGAAAAATGACATGGTGGATCAGATGCATGAGGATGTA---  
ATCAGTTTATGGGATCAAAGCCTA---AAACCATGTGTAAAGTTG---  
ACCCCACTCTGTGTCACTTTAAAGTGTACAGATGCAACAGTTAATGGTACCCGT-----  
-----  
-----AATAGTACTGGTACCTACCATAACACGGATGGAGTAAAA---  
AATTGCTCTTTCAATATAACCACAGAGATAAGA-----  
GACAAGAAACAGAAGGTATATGCACCT---TTTTATAGACCTGATGTAGTACCACTTGGGAAA-----  
-----  
-----  
AACTCTAGTGACTATATATTAATAAATTGCAATACCTCAATCATAACACAA---  
ACCTGTCCAAAGGTCTCTTTTGACCCAATTCTCTATACATTATTGTGCTCCAGCTGGTTATGCGATTCTAAAGT  
GTAAT---GATAAGGAATTCAAT-----GGAACAGGACCATGCAATAAT-----  
-GTCAGC---ACAGTGCAATGTACACATGGCATTAAAGCCAGTGGTATCAACT---  
CAACTATTGTTAAATGGTAGCCTAGCAGAAGGGGAG-----  
ATAATAATTGAACTGAAAGTTTGACGAGCAAT-----GTCAAAACAATAATAGTACACCTTAAT-----  
-----GAATCTGTAGAA-----ATTGTGTGTACAAGACCTGGCAACAATACAAGAAAA-----  
-AGTATAAGGATA-----GGACCAGGACAAACA---TTC-----TATGCAAAT---GAA-----  
-----GTAATAGGGGACATA-----AGAAAAGCACATTGT---AGCATTAATAAAACT---  
CTATGGGGCACAACCTTTAAACGGAGTAAGGAAAAAATTAGAA-----GAACCTCTAT-----  
-----AATAACACAGCAAAATTTGAA-----  
CCACCCTCAGGAGGAGATCTAGAAGTTACA--ACACATAGTTTTAATTGTAGAGGAGAA---  
TTTAAGCAGCTCCAGGCAAGAGTCTTAGCTATAGAAAGATACCTAAAGGATCAACAGCTCCTAGGGCTTTGGG  
GCTGCTCTGGAAGAACTCATCTGCACCACTACTGTGCCTTGGAACCTCCAGTTGGAGT-----  
-----AATAAATCTAAACAGATATTTGG-----GAT-----  
AACATGACCTGGATGCAGTGG---GACAGGGAAATTAGTAATTACACAGGTATAATATAC---  
AGTTTGCTTGAGGAATCAGAAAACAGCAGGAG-----  
-----  
AAAAATGAACAAGATTTATTAGCATTGGACAGTTGGAAAAATCTGTGGAGTTGGTTTGACATATCAAATTGGC  
TGTGGTATATAAAAAATATTCATCATGATAGTAGGAGGCTTAATAGGTTTAAGAATAGTTTTAGGT---  
GTGCTCTCTATAGTA-----AAAAGAGTTAGGCAGGGATACTCACCT-----  
CTATCGTTTGCCATTAGTCTGCTGGATGCAATAGCAATAGTAGTAGCTGAA---  
GGAACAGATAGGATTATAGAATTCATACAAAGAATTTGTAGAGCT-----  
-----ATCCTCAACGTA-----CCTAGGAGAATAAGACAGGGCTTTGAAGCAGCTTTGCTA---TAA  
>MN097669  
GGG---GTG-----  
GGGAACCTCGTGGGTCACAGTCTATTATGGGGTACCTGTGTGG---ACAGAAGCAAAA---  
ACTACTCTATTCTGTGCATCAGATGCTAAAGCATATGAGAAGGAA---GTGCATAAT-----  
-----GTATGGGCTACA---CATGCCTGTGTACCCACAGAC---  
CCCAACCCACAAGAATTAGTTTGGAA-----AATGTAACAGAAGATTTTAAAC-----  
-----ATGTGGAAAAATGACATGGTAGATCAGATGCATGAGGATATA---  
ATCAGTCTATGGGATCAAAGTCTA---AAACCATGTGTAAAGTTG---  
ACCCCGCTCTGTGTACCTTAAATTGTACAGATGCAAAGGTTAATGTTACCAGTGCTGACAATAAGACC---  
-----  
-----AAGTTAGAGGGAGAAATAAAA---  
AATTGTACTTTTCAGTACAACCACAGAAATAAAA-----  
GATAAGAAACAACAGGCGTATGCACCT---  
TTTTATAGATCTGATTTAGTACCACTTCATGAGAATAAAACTAGT-----  
-----

AATGGAAGTGACTTTATATTAATACATTGCAATACCTCAACCATCACACAA---  
GCCTGTCCAAAGGTCACCTTTTGACCCGATTCTTATACATTATTGTGCTCCAGCTGGTTATGCGATTCTAAAGT  
GTAAT---AATAAGACATTCAAT-----GGGACAGGACCATGTCAAAT-----  
-GTCAGC---TCAGTACAATGTACACATGGAATTAGGCCAGTGGTATCAACT---  
CAACTACTGTTTAAATGGTAGCCTAGCAGAAGGGGAT-----  
ATAATAATTAGATCTGAAAATCTGACAAACAAT-----GTCAAAACAATAATAGTACACCTTAAT----  
-----GAATCTGTAGAA-----  
ATTAAGTGTGTAAGACCAGGCACCTAATACAACAAGAAGAAGTATAAGGATA-----  
GGACCAGGACAAGCA---TTC-----GTT---ACAAATAAA-----ATAACAGGAAACATA-  
-----AGACAAGCACATTGT---AGCATTAAATGCATCA---  
AAATGGAGCTCAACTATAGAAAAGGTAAAGATAAAAATTTAAA-----GAACACTTCCCT----  
-----AATAGAACAATAACATTTAAA-----  
CCATCCTCAGGAGGAGACTTAGAAATTACA---ACACATAGTTTTAATTGTGGAGGAGAA---  
TTTAAACAGCTCCAGGCAAGAGTCCTGGCTATAGAAAAGATACCTAAGTGATCAACAGCTCCTAGGGCTTTGGG  
GCTGCTCTGGAAGAACTCATCTGCACCACCTAATGTGCCTTGGAACCTCCACGTGGAGT-----  
-----AATAAAACTCAAAAAGAGATTTGG-----GAG-----  
AACATGACCTGGATGCAGTGG---GATAGAGAAATTAATAATTACACAGGCATAATATAC---  
ACCTTGCTTGAAGAATCGCAAAATCCAGCAGGAT-----  
-----  
AAAAATGAAAAAGAATTATTGGCATTGGACAGTTGGAAAACTTGTGGAGTTGGTTTGCCATATCAAATTGGC  
TATGGTATATAAACTATTTCATCATGATAGTAGGAGGCTTGATAGGTTTGAGAATAATCTTTGGT---  
GTGCTCTCTATAGTG-----AAAAGAGTTAGGCAGGGATACTCACCT-----  
TTGTCGTTAGCTACTAGTCTGCTTGATACCATAGCAATAGCAGTAGCTGAA---  
GGAACAGATAGGATTTTAGAATTTCTACAAAGACTTTGTAGAGCT-----  
-----ATACGCTTAATA-----CCTACAAGAATAAGACAGGGCTTTGAAGCAGCTTTGCAA---TAA  
>MN097680  
GTG---ATG-----  
GGGAACCTTGTGGGTACAATCTATTATGGGGTACCTGTGTGG---AGAGAAGCAAAA---  
ACTACTCTGTTCTGTGCATCAGAGGCTAAAGCATATGAGAGAGAA---ATGCATAAT-----  
-----GTCTGGGCTACA---CATGCCTGTGTACCCACAGAC---  
CCCAACCCACAAGAACTGGTTTTGGAA-----AATGTAACAGAAAATTTTAAT-----  
-----ATGTGGAAAAATGACATGGTAGATCAGATGCATGAAGATATA---  
ATCAATTTATGGGATCAAAGCCTC---AAGCCATGTGTAAAGTTG---  
ACCCCGCTCTGTGTCACTTTAACTGTAGAGATGTTACCAATGCAAATGTTACCCATGCA-----  
-----  
-----AATGTTAGCTACACCAACAACATGAATGGAGAAATAAAG---  
AATTGCTCTTTCAATGTAACCACAGAAGTAAGA-----  
GATAAGAAGAAGAAAGAAAATGCACTC---TTTTATAGACTTGATATAGTACAACCTAATGAGGGA-----  
-----  
AGTACCAACTCTAGTAACAATACTATGTATAGATTAATAAACTGTAATACCTCAGTTGTAACACAA---  
GCCTGTCCAAAGGTCTCTTTTGACCCAATTCTTATACATTATTGTGCTCCGGCTGGTTATGCGATTCTAAAGT  
GTAAT---AATAAGACATTCAAT-----GGCACAGGACCATGTAATAAT-----  
-GTCAGC---ACAGTACAATGTACACATGGAATTAAACCACTGGTTTCAACT---  
CAACTATTGTTAAATGGTAGCCTAGCAGAAGAAGGC-----  
ATAATAATTAGATCTGAAAATCTGACAGACAAT-----GTCAAAACAATAATAGTACATCTCAAT----  
-----GAATCTGTAAAG-----ATTGTATGTATGAGACCAACAATAATACAAGAAAA-----  
-AGTATGAGAATA-----GGACCAGGACAAACA---TTC-----TATGCAACAGGAGAT-----  
-----ATAATAGGAGACATA-----AGACAAGCACATTGT---AACATTAGTAAAAAT---  
AAATGGGATGAACTATACAAAATGTAGGTAAAAAATTAAGA-----GAACACTTCCCT----  
-----AATAAGACAATAATATTCAAT-----  
TCATCCTCAGGAGGGGACCTAGAAATTACA---ACACATAGCTTTAATTGTGGAGGAGAA---  
TTTAAGCAGCTCCAGGCAAGAGTCCTGGCCATAGAAAAGATACCTAACGGATCAACGGCTCCTAGGGATGTGGG  
GCTGCTCTGGAAGAACTCATCTGCACCACCTAATGTGCCTTGGAACCTCCAGTTGGAGT-----  
-----AATAAATCTTACACAGATATTTGG-----GAA-----  
AACATGACATGGATGCAGTGG---GATAGAGAAATTAATAATTACACAAACACAATATAC---  
ATGTTGCTTGAAGAATCGCAAAAGCCAGCAGGAG-----  
-----  
AAGAATGAAAAGGATTTATTAGCATTGGACAGTTGGAAACAATCTGTGGAATTGGTTTAGCATAACAAAATGGC  
TGTGGTATATAAAAATATTTCATCATGATAGTAGGAGGCTTGATAGGTTTAAGAATAATTTTTGCT---

GTGCTTTCTGTAGTA-----AATAGAGTTAGGCAGGGATACTCACCT-----  
 TTGTCGTTTGCTATTAGTCTGCTTGATACCATAGCAATAGCAGTAGCTGAA---  
 GGAACAGATAGGATTATTGAAGTACTACAAAGAATTTGTAGAGCT-----  
 -----ATCCACAACATA-----CCTAGAAGAATAAGACAGGGCTTTGAAGCAGCTTTGCTA---TAA  
 >AY162225  
 GTA---ATG-----  
 GGGAACTTGTGGGTCACAGTCTATTATGGGGTACCTGTGTGG--AAAGACGCAAAA---  
 GCTACTCTATTTTGTGCATCTGATGCTAAAGCATATGAGAAAGAA--GTGCATAAT-----  
 -----GTCTGGGCTACA---CATGCCTGTGTACCCACAGAC---  
 CCCGACCCACAAGAAATAGTTTTGGAG-----AATGTAACAGAAAATTTTAAC-----  
 -----ATGTGGAAAAATAACATGGTGGACCAGATGCATGAGGATATA---  
 ATCAGCTTATGGGATCAAAGCCTA---AAGCCATGTGTAAAAGTTG---  
 ACCCCACTCTGTGTCACTTTAAACTGTAGCAATAATGTTAAAAATGCT-----  
 -----  
 -----ACCAACAGTATGAAGGAAATGAAA---  
 AATTGCACTTTCAATATAACCACAGAACTAAGA-----  
 GATAAGAGAAAGCAAGAATATGCACCT--TTTTATAAACTTGATATAGTACCACCTTGAGGAG-----  
 -----  
 -----  
 AATTCCAGTAAGTATAGATTAATAAATTGTAATACCTCAGCCATAACCCAA---  
 GCCTGTCCAAAGGTCTCTTTTGACCCAATTCCTATACATTATTGTGCTCCAGCTGGTTATGCGATTCTAAAGT  
 GTAAT---AATAAGACATTCAAT-----GGAACAGGACCATGCAATAAT-----  
 -GTCAGC---ACGGTACAATGTACACATGGAATTAAGCCAGTAGTATCAACT---  
 CAACTACTGTAAATGGTAGTCTAGCAGAAGAAGAA-----  
 ATAGTAATTAGATCTGAAAATATGACAAACAAT-----GCCAAAATAATAATAGTACATCTTAAT-----  
 -----GAATCTGTAGAA-----ATTACGTGTACAAGGCCCAACAATAACAGAAAA-----  
 -AGTATGAGGATA-----GGACCAGGACAAACA---TTC-----TATGCAACAGGAGAC-----  
 -----ATAATAGGAGATATA-----AGACAAGCACACTGT---AACATTAGTGAAAAG---  
 CAATGGGATCAGACTTTATACAGGGTAAGTGAAAAATTAAAA-----GAACACTTCCCT---  
 -----AATAAAACAATAAAGTTTAAC-----  
 TCATCCTCAGGAGGGGACTTAGAAATTACA--ACACATAGCTTTAATTGTGGAGGAGAG---  
 TTTAAGTAGCTCCAGACAAGAGTCCCTGGCTATAGAAAGATACCTAAAGGATCAACAGCTCCTAGGGATTTGGG  
 GCTGCTCTGGAAGAACTCATCTGCACCACTGCCGTGCCTTGGAAACAATAGTTGGAGT-----  
 -----AATAAATCTCAAGATTATATTTGG-----GGA-----  
 AACATGACCTGGATGCAATGG--GATAAAGAAATTAGCAATTACACAGAAACAATATAC---  
 AGGTTGCTTGGGGACGCGCAAAACCAGCAGGAG-----  
 -----  
 AAAAAAGAAAAGGAGTTACTAGAAATTGGACAGGTGGGGAAATCTGTGGAAGTGGTTTGACATAACAAAATGGC  
 TGTGGTATATAAAAATATTATAATGGTAATAGGAGGCTTGATAGGTTTAAGAATAATTTTTTGCT---  
 GTGCTTTCTATAGTA-----AATAGAGTTAGGCAGGGATACTCACCT-----  
 TTGTCATTTGCTGTTAGTCTGCTTGATAGCGTAGCAATAGCAGTAGCTGAG---  
 GGAACAGATAGAATTATAGAATTCTTACAAGGAACTGGTAGAGCT-----  
 -----ATCTACAACATA-----CCTAGAAGAATAAGACAGGGCTTTGAAGCAGCTTTGCAG---TAA  
 >AF391249  
 GTA---ATG-----  
 GGGAACTTGTGGGTCACAGTCTATTATGGGGTACCTGTGTGG--AGAGAAGCAAAA---  
 ACTACACTATTCTGGGCATCAGATGCTAAAGCATATGAGAAAGAA--GTGCATAAT-----  
 -----GTTTGGGCTACA---CATGCCTGTGTACCCACAGAC---  
 CCCAACCACACAAGAAATAGTTTTGGAA-----AATGTAACAGAAAATTTTAAC-----  
 -----ATGTGGGAAAAATAACATGGTAGACCAGATGCATGAGGATATA---  
 ATCAGTTTATGGGATCAAAGTCTA---AAACCATGTGTAAAAGTTG---  
 ACCCCACTCTGTGTCACTTTAAATTGTAGAAATGTAACGGTTACTACTAACAATGATAAT-----  
 -----  
 -----AATGTTACTTACAATAATAGCATACCTGAAGAAATAAAA---  
 AATTGCTCTTTCAATATAACCACAGAAATAAGA-----  
 GACAAGAAAAAGATAGAATATGCACCT--TTTTATAGACTTGGTATAGTACCGCTTAAGGAGAAC-----  
 -----  
 -----  
 AAACCTTAATTCCAGTGAGTATAGATTAATAAATTGTAATACCTCAGCCATAACACAA---  
 GCCTGTCCAAAGGTCTCTTTTGACCCAATTCCTATACATTATTGTGCTCCAGCTGGTTATGCGATACTAAAGT

GTAAT---AATAAGACATTCAAT-----GGAACAGGACCATGCAATAAT-----  
 -GTCAGC---ACTGTACAGTGTACACATGGAATTAAGCCAGTGGTATCAACT---  
 CAACTACTGTTAAATGGTAGTCTAGCAGAGGAAGAG-----  
 ATAATAATTAGATCTAAAAATATGACAAACAAT-----GTCAAAACAATAATAGTACATCTGAAT----  
 -----GAATCTGTAGAA-----ATTGTGTGTACAAGGCCCAACAATAATACAAGAAGA-----  
 -AGTATGAGGATA-----AGACCAGGACAAACA---TTC-----TATGCAACAGGAGAA-----  
 -----ATAATAGGAGACATA-----AGACAAGCATATTGT---AAAATTAGTGAAGAT---  
 CAATGGAATAAAACTTTACGCAGGGTAAGTGAAAAATTAAGA-----GAACACTTCCCT----  
 -----GATAAAACAATAAAATTTGAA-----  
 CCACCCTCAGGAGGAGACTTAGAAATTACA--ACACATAGCTTTAATTGTAGAGGAGAA---  
 TTTAAGCAGCTCCAGACAAGAGTCCTGGCTGTAGAAAGATACCTAAAGGATCAACAGCTCCTAGGGCTTTGGG  
 GCTGCTCTGGAAGAACTCATCTGCACCACTGCCGTGCCTTGGAAGTCCAGTTGGAGT-----  
 -----AATAAGTCTCAAACAGATATTTGG-----GAT-----  
 AACATGACATGGATGCAGTGG---GATAGAGAGATCAGTAACCTACACAGAAACAATATAC---  
 AAGTTGCTTGAAGACTCGCAAAACCAGCAGGAA-----  
 -----  
 CAAAAAGAAAAGGATTTACTAGCATTGGACAGTTGGAAAAATCTGTGGAATTGGTTTGATATAACAAAATGGC  
 TGTGGTATATAAAAAATATTCTAATGATAGTAGGAGGCTTGATAGGTTTAAGAATAATTTTTTGCT---  
 GTGCTATCTATAATA-----AATAGAGTTAGGCAGGGATACTCACCT-----  
 TTGTCATTAGCTATTAGTCTGTTGGATACAACAGCAATAGTAGTAGCTGAA---  
 GGAACAGATAGGATTTTTGAAGCAATATGCAGAATTTGTAGAGCT-----  
 -----ATCCGTAACATA-----CCTAGAAGAATAAGACGGGGCTTTGAAGCAGCTTTGCTA---TAA  
 >AY522721  
 GTG---GTA-----  
 GGAAACTTGTGGGTCACAGTCTATTATGGGGTACCTGTGTGG---AAAGAAGCAAAA---  
 ACTACTTTATTCTGTGCATCAGATGCTAAAGCATATGAGAGAGAA--GTGCATAAT-----  
 -----GTCTGGGCTACA---CATGCCTGTGTACCCACAGAC---  
 CCCAACCCACAAGAAGTGGTTTTGGAA-----AATGTAACAGAAAATTTTAAT-----  
 -----ATGTGAAAAATGACATGGTGGATCAGATGCATGAGGATATA---  
 ATCAGCTTATGGGACCAAAGCCTA--AAGCCATGTGTAAAGTTG---  
 ACCCCACTCTGTGTCACTTTAAACTGTACTAACATTATCCATAACATTACCCATAATATA-----  
 -----  
 -----ACTGTTTCCCGCAATGAGAGCATAAAGGAAGAAATAAAA---  
 AATTGCTCTTTCAATGCAACCTCAGAAATAAGA-----  
 GATAGGAAACAGAAAGTGTATGCACTT--TTTTACAAACTTGATATAGTACCCTTTCTGGGGAG-----  
 -----  
 -----  
 AGTAACAACCTCTACTGAGTACAGATTAATAAATTGTAATACCTCAGCCATAACACAA---  
 GCCTGTCCAAAGGTCTCTTTTGAGCCAATTCTTATACATTATTGCGCTCCAGCTGGTTATGCGATTCTAAAGT  
 GTAAT---AATAAGACATTCAAT-----GGGACAGGACCATGCCTTAAT-----  
 -GTCAGC--ACAGTACAATGTACACATGGAATTAAGCCAGTGGTATCAACT---  
 CAACTACTGTTAAATGGTAGCCTAGCAGAAGAAGAA-----  
 ATAATGATTAGATCTGAGAATCTGACAAACAAT-----GCCAAAACAATAATAGTACAGTTTAAT----  
 -----CAATCTATAGGA-----ATTGTGTGTACAAGACCCAACAATAATACAAGAAAA---  
 -AGTATAAGGATA-----GGACCAGGACAAACA---TTC-----TACGCAACAGGAGAC-----  
 -----ATAATAGGAAACATA-----AGAGAAGCACATTGT---AACATTAGTAAC-----  
 --TGGAATGCAACTTTAGAAGGGGTAAAGAGGAAACTAAAA-----GAACACTTCCCT----  
 -----AATAAAACAATAGAATTTCAA-----  
 CCACCCTCAGGAGGGGATCTAGAAATTACA--ACACATAGCTTTATTTGTAGAGGAGAA---  
 TTTAAACAGCTCCAGGCAAGAGTCCTGGCTGTAGAAAGATACCTAAGGGATCAACAGCTCCTAGGAATTTGGG  
 GTTGCTCTGGAAGAACTCATCTGCACCACTAATGTGCCTTGGAAGTCCAGTTGGAGT-----  
 -----AATAAATCTTACCAAGAAATTTGG-----AAT-----  
 AACATGACCTGGATGCAGTGG---GACAGAGAAGTTAGTAATTACACAGACACAATATAC---  
 AGGTTGCTTGAAGAATCACAAAACCAGCAGGAA-----  
 -----  
 AAAAAAGAACAGATTTATTAGCATTGGACAGTTGGAAAAATCTGTGGAGTTGGTTTAGCATAACAAATTGGC  
 TGTGGTACATAAAAAATATTCTAATGATAGTAGGAGGCTTAATAGGTCTGAGAATAATTTTTTGCT---  
 GTGCTCTCTATAGTG-----AATAGAGTTAGGCAGGGATACTCACCT-----  
 TTGTCGTTTGCCACTAGTCTGCTTGATACCATAGCAATAGCAGTAGCTGAA---

GGAACAGATAGAATTATAGAACTAGCACAAAGAATCTGTAGAGGT-----  
-----ATCCGCAACATA-----CCTAGAAGAATAAGACAGGGCTTTGAAGCAGCTTTGCTA--TAA  
>DQ447267  
GTG---ATG-----  
GGACAATTGTGGGTACAGTCTATTATGGGGTACCTGTGTGG--AGAGAAGCAAGA---  
ACTACTCTATTCTGTGCATCAGATGCTAAAGCATATGAAAAAGAA--GTGCATAAT-----  
-----GTCTGGGCTACA---CATGCCTGTGTACCAACAGAC---  
CCCAGCCCACAAGAAATGGTTTGGAA-----AATGTAACAGAATATTTTAAC-----  
-----ATGTGGAAAAATGATATGGTAGAGCAGATGCATGAGGATATA---  
ATCAGTTTATGGGACCAAAGCCTA--AAGCCATGTGTAAAGTTG---  
ACCCCACTCTGTGTCACTTTAAATTGTAAAAATGTTAATGTTAACATTACTGCTACCCATAAT-----  
-----  
-----TATAGTGCTATATATAATAATACCATGGATAAAAGAAATGAGA---  
AATTGCTCTTTCAATATGACCACAGAAGTAAGA-----  
GATAAGCAAAGAATGTGTATGCACCT--TTTTATAAACTTGATATAGTAGAACTTGATGACAGCTCTAAG-  
-----  
-----  
GAATCTAAGGACAACCTCTAGTGATTATAGATTAATAAAATTGTAATACCTCAGCCATAACACAA---  
GCCTGTCCAAAGGTCTCATTTGAACCAATTCCTATACATTATTGTGCTCCAGCTGGTTTTGCGATTCTAAAGT  
GTAATAATAATAAGACATTCAAT-----GGGACAGGACCGTGCCAGAAT-----  
-ATCAGC--ACAGTACAATGTACACATGGAATTAGGCCAGTGGTATCAACT---  
CAACTATTGTTAAATGGTAGCCTAGCAGAAGAA-----  
ATAATAATTAGCTCTGAAACCTGACAGATAAT-----GTCAAAACAATAATAGTACATCTTAAT----  
-----GAATCTGTACCA-----ATTGTGTGTACAAGACCCAACAATAATACAAGAAGA-----  
-AGTATGAGGATA-----GGACCAGGACAAGCA--TTC-----TATGCAACAGGAGAT-----  
-----ATAATAGGAGACATA-----AGACAAGCACATTGC--AACATCAGTGTAAGT---  
AGATGGAATAAACTTTACAAAGGGTAAGTAACAAGCTAAGA-----AAACACTTCACT----  
-----AATAGCACAATACAATTTAAG-----  
CAATCCTCAGGAGGGGACCCAGAAATTACA--ACACATAGCTTTAATTGTTATGGAGAA--  
TTTAAGCAGCTCCAGGCAAGAGTCCCTGGCTATTGAAAGATACCTAAAGGATCAACAGCTCCTAGGGATTTGGG  
GCTGCTCTGGAAGAACTCATCTGCACCACTAATGTGCCTTGGAACTCCAGTTGGAGC-----  
-----AATAAATCTCAAGATGATATTTGG-----GGT-----  
AACATGACTTGGATGCAGTGG--GATAGAGAAATTAGTAATTACACAGTAACAATATAC--  
AAGTTGCTTGAAGACTCGCAATCCAGCAGGAG-----  
-----  
AAAAATGAAAAGGATTTATTAGCATTGGACAGTTGGAAAAATCTGTGGAATTGGTTTAGCATATCAAATTGGC  
TGTGGTATATAAAGATATTACATAATGATAGTAGGAGGCTTGATAGGTTTAAAGAATAATTTTTTACT---  
GTGCTTTCTATAGTA-----AATAGAGTTAGGCGGGGATACTCACCT-----  
TTATCGTTTGTCTATTAGTCTGCTTGATACCATAGCAATAGCAGTAGCTGAA--  
GGAACAGATAGAATTATAGATTTAATACAAAGACTTTGTAGAGGT-----  
-----ATCCTCAACATA-----CCTAGAAGAATAAGACAGGGCTTTGAAGCAGCTTTGCAG--TAA  
>JX905394  
GTA---GTG---GGA-----  
GGAAACATGTGGGTACAGTATATTATGGGGTACCTGTATGG--AAAGAAGCAAAA---  
ACTACTCTATTTTGTGCATCAGATGCTAAAGCATATGAGAAAGAA--GTGCATAAT-----  
-----GTCTGGGCTACA---CATGCCTGTGTACCCACAGAC---  
CCCAACCCACAAGAAATAGTTTGGAA-----AATGTAACAGAAAATTTTAAC-----  
-----ATGTGGAAAAATGACATGGTGGATCAGATGCATGAGGATATA---  
ATCAGTTTATGGGATCAAAGCCTA--AAGCCATGTGTAAAGTTG---  
ACCCCACTCTGTGTCACTTTAACTGTACAAATGTTAATGGTACAACCTGTTAATGGTA  
CAACTGTTAATAAT-----  
-----ACAACCTGTTAAGGATATAAATGGTACTTTTCAGTGGGATAAAGGGAGAAATGAAA---  
AATTGCTCTTTCAATATAACCACAGAAATAAGG-----  
GATAGAAAAAAGAAAGAATATGCACCT--TTCTATAAACTGGATATAACACCACTTGATAAT-----  
-----  
-----  
AATAGTAGTGAGTATACATTAATAAAATTGTAATACCTCAGTCATAACACAA---  
GCCTGTCCAAAGGTCTCTTGGGACCCAATTCCTATACATTATTGTGCTCCAGCTGGTTATGCGATTCTAAAAAT  
GTAAT--AATAAAACATTCAAT-----GGAAAGGGACCGTGTAACAAT-----  
-GTCAGC--ACAGTACAATGTACACATGGAATTAAGCCAGTGGTATCAACT---

CAACTACTGTTAAATGGTAGCCTAGCAGAAGAAGAC-----  
 ATAATAATTAGATCTGAAAATCTGACAAACAAT-----GTCAAAACAATAATAGTACATTTTAAT----  
 -----GAATCTGTAAAG-----ATTGTGTGTGTAAGACCTAGCAATAATACAAGAAGA-----  
 -AGTGTGAGGATA-----GGACCAGGACAAGCA---TTC-----TATGCAACAGGAGAA-----  
 -----ATAATAGGAGATATA-----AGACAAGCACATTGT---AACATTAGTGAAGG---  
 GAGTGAATACAACCTTTAAAAAGGGTAAGAGAAAAATTACAA-----AAAATTTATAAT----  
 -----AATAAAACAATAAAATTTGCA-----  
 CCACCCTCAGGAGGGGACCTAGAAATTACA--ACACATAGCTTTATTTGTAGAGGAGAA---  
 TTTAAACAGCTCCAGACAAGAGTCCTGGCGATAGAAAAGATACCTAAAGGATCAACAGCTCCTAGGGATTTGGG  
 GCTGCTCTGGAAGAACTCATCTGCACCACTGCCGTGTCTTGAATGCTAGTTGGAGT-----  
 -----AACAAAACCTCATGATGAAATTTGG-----CAA-----  
 AACATGACCTGGATGCAGTGG---GATAGGGAAATTAGTAATTACACAGACATAATATAC---  
 AGGTTGCTTGAAGTCTCGCAAAACCAGCAGGAA-----  
 -----  
 CAAAAATGAAAAAGATTTACTAGCATTGGACAGTTGGAAAAATCTGTGGAATTGGTTTAGCATAACAACTGGC  
 TGTGGTATATAAAAAATATTACATAATGATAGTAGGAGGCTTGATAGGTTTAAGAATAATTTTTTGCT---  
 GTGCTCTCTATAGTG-----AATAGAGTTAGGCAGGGATACTCACCT-----  
 TTGTCGTTTGTCTGTTAATCTGTTAGATACCATAGCAATAGCAGTAGCTGAG---  
 GGAACAGACAGGATTATAGAATATATACTAAGAATTTGTAGAGCT-----  
 -----ATCTGCAATACA-----CCT-----CAGGGCTTTGAAGCAGCTTTGCAA---TAA  
 >HQ625577  
 GTG---TGG---GGG-----  
 GGAAATTTGTGGGTACAGTCTATTTTGGGGTACCTGTGTGG---AAAGAAGCAAAA---  
 ACTACTCTATTCTGTGCATCAGATGCTAAAGCATATGAGAGAGAA---GTGCATAAT-----  
 -----GTCTGGGCTACA---CATGCCTGTGTACCCACAGAC---  
 CCCAACCCACAAGAAATGCCTTTGGGA-----AATGTGACAGAAAATTTTAAC-----  
 -----ATTTGGGAAAATGACATGGTGGATCAGATGCATGAGGATATA---  
 ATTAGTTTATGGGACCAAAGCCTA---AAGCCATGTGTAAAGTTG---  
 ACCCCACTCTGCGTCACTTTAAAAATGT---  
 TTTAGTTTTAAAAAATGGTAATACTAGCATGGAAGGAGAAAAATACAAA-----  
 -----  
 -----ATTTGCACTTTCAATACAACCACAGAAATAAGA---  
 -----GATAAGAAAAAGAAAATGGATGCACTT---  
 TTTTATAGACTTGATATAGTGCCACTTAACCTCT-----  
 -----  
 AGTGATAATAGCAGCTATAAGGAGTATAGATTAATAAATTGTAATACTTCAACCATAACACAA---  
 GCTTGCCCAAAGGTCTCTTTTGATCCAATTCCTATACATTATTGTACTCCAGCTGGTTATGCGATGCTAAAGT  
 GTAAT---GATGAGGAATTCAAT-----GGGACAGGACCATGCAGTAAG-----  
 -GTCAGC---ACAGTACAATGTACACATGGAATTAAGCCAGTGGTATCAACT---  
 CAATTACTGTTAAATGGTAGCCTAGCAGAAAAAGAG-----  
 ATAATAATTAAATCTAAAAATCTGACAGATAAT-----ACCAAAATAATAATAGTGCATCTTAAT---  
 -----AAAACTGAAGAA-----ATTGTGTGTACAAGGCCCAACAATAATAGAAGGACA-----  
 -AGTGTAAAGGATA-----GGACCAGGACAAGCA---TTC-----TATGCAACAGGAGAC-----  
 -----ATAATAGGAGATATA-----AGAAAAGCATATTGT---AACATTAGTGAAAAG---  
 GCATGGAATAGAACATTGTTTGAGGTAGTTAAAAAATTAAGA-----GAACACTTCCCT---  
 -----AATAAGACAATAGAATTTGCA-----  
 CCATCCTCAGGAGGGGACCTAGAAATTACA--ACACATAGCTTTAATTGTAGAGGAGAA---  
 TTTAAGCAGCTTCAGACAAGAGTCCTGGCTATAGAAAAGATACCTAAGGGATCAACAGCTCCTAGGGATTTGGG  
 GCTGCTCTGGAAGAACTCATCTGCACCACTAATGTGCCTTGGAACCTCCAGTTGGAGT-----  
 -----AATAAATCTCAAGAAGAAATTTGG-----GGG-----  
 AACATGACTTGGATGCAGTGG---GATAGAGAAATTAGCAATTACACAGACACAATATAC---  
 AGGTTGCTTGAAGACTCGCAAAACCAGCAGGAA-----  
 -----  
 CAAAAATGAAAAAGATTTACTAGCATTGGACAATTGGAATAGTTTGTGGAATTGGTTTGACATATCAAATTGGC  
 TGTGGTATATAAAAAATATTACATAATGATAGTAGGTGGCTTGATAGGCTTAAGAATAATTTTTTGCT---  
 GTGCTCTCTATAGTA-----AATAGAGTTAGGCAGGGATACTCACCT---  
 TTGTCGTTTTCAGGCTATTAGTCTGTATGATACCATAGCAATAGCAGTAGCTGAA---  
 GGGACAGATAGGATTATAGAATTATTACAAAGAATTTGTAGAGCT-----  
 -----ATCTGCAACGTA-----CCTACAAGAATAAGACAGGGCGCGGAAGCAGCTTTGCAA---TAA  
 >HQ625568

-----AGG-----  
GGGAAC TTGTGGGT CACAGTCTATTATGGAGTACCTGTGTGG ---ACAGACGCAAAA ---  
ACTACTTTTATTCTGTGCATCAGATGCTAAAGCATATGATACAGAA ---GTGCATAAT-----  
-----GTTTGGGCTACA ---CATGCTTGTGTACCCACAGAC ---  
CCCAACCCACAAGAAATAGTTT TGGAA -----AATGTAACAGAAGAATTTAAC-----  
-----ATGTGGAAAAATGACATGGCAGATCAGATGCATGAGGATATA ---  
ATCAGTTTATGGGATCAAAGTCTA ---AAACCATGTGTAAAGTTA ---  
ACCCCACTCTGTGTCACTTTATATTGTAAAAATATTACTACCTGCAATAGTAAT-----  
-----  
-----GCTACCTGCAATAATAGCATGCATGGAGAAATAAAA ---  
AATTGCTCTTTCAATACAACCACAGAAATAAGA-----  
GATAAGACACAGAAAGCGTATGCACCTT ---TTTTATAAATCTGATGTGGTACCACCTTAATAATAATAGG----  
-----  
-----  
AGTGATGATAATAGTAGTGAAGAGTATATATTAATAAAATTGCAATACCTCAACCATAACACAA ---  
GCCTGTCCAAAGGTCAACTTTGACCCAATTCCCATACATTATTGTGCTCCAGCTGGT TTTGCGATTCTAAAGT  
GTAAT ---AATAAGACATTCAAT-----GGGACAGGACCATGCCATAAT-----  
-GTCAGC ---ACTGTTCAATGTACACATGGAATTAAGCCTGTAGTATCAACT ---  
CAGCTACTGTTAAATGGTAGCCTAGCAGAAGGAGAT-----  
ATAATAATTAGATCTGAAAACCTGACAGACAAT-----GTCAAAACAATAATAGTACACCTTAAT----  
-----GAATCTGTAGAA-----ATTGTGTGTACAAGACCCAACAATAACACAAGAAAA-----  
-AGTGTAAGGATA-----GGACCAGGACAAAACA---TTC-----TATGCAACAAATAAC-----  
-----ATAATAGGAAACATA-----AGACAAGCACATTGC---AACATTAGTAGAGGA---  
AATTGGACGAAAGCTTTAGAAAAGGTACAGAAAAAATTACAA-----GAACTCTACAAT----  
-----AATAGCTCAATAGAATTTGAA-----  
CCCACTCAGGAGGGGATCTAGAAGTTACA ---ACACATAGTTTTAATTGTAGAGGAGAA ---  
TTTAAACAGCTCCAGGCAAGAATCCTGGCTATAGAAAGATACCTACAGGATCAACAGCTCCTAGGACTTTGGG  
GCTGCTCTGGAAGAACTCATCTGCCCCACCGCTGTGCCTTGGAAATCCAGTTGGAGT-----  
-----AACAAATCTCTAGAAAAAATTTGG-----AAT-----  
AACATGACCTGGATGCAGTGG ---GATAGAGAAATTAGTAATTACACAGGCATAATATAC ---  
CAATTGCTTGAAGACTCACAATACCAGCAGGAG-----  
-----  
AAAAATGAAAAAGATTTATTATCATTGGACAGTTGGCAAAATCTGTGGACTTGGTTTGACATAACAAATTGGT  
TGTGGTATATAAAAAATATTCAATTATGATAGTAGGAGGCTTGATAGGTCTGAGAATAATCTTTTGT ---  
GTGCTCTCCATAGTG-----AAAGGAGTTAGGCAGGGTTACTCACCT-----  
TTGTCGTTTGCTATTAGTTTGT TTTGATACCATAGCAATAGCAGTAGCTGAA ---  
GGAACAGATAGAATTATAGAAGGAATACAAATACTTTGTAGATTT-----  
-----ATCCGTAATATA-----CCTAGAAGAATAAGACAGGGCTTTGAAGCAGCTTTGCTA ---TAA  
>HQ625588  
GCA ---GAG-----  
CAATTGTGGGTCACTGTCTATTATGGGGTACCTGTGTGG ---AAGGAAGCAAAA ---  
ACTACTCTATTTTGTGCATCAGATGCTAAAGCATATAAGAAAGAA ---GTACATAAT-----  
-----GTCTGGGCCACA ---CATGCCTGTGTACCCACAGAC ---  
CCCAACCCACGAGAAATGTTT TGTTA -----AATGTAACAGAAAATTTTAAC-----  
-----ATGTGGAAAAATGACATGGCGGATCAGATGCATGAGGATATA ---  
ATCAGTTTATGGGATCAAAGCCTA ---AAGCCATGTGTAAAGTTG ---  
ACCCCACTCTGTGTCACTTTAAACTGTACAGATGCTAATTTTACTAGTAATTTTACTAGTAATGGTAATGAAA  
CTTAC-----  
-----AATAATAATACTTACAATAATGGAAGTACAGGGAAATGAACAGAGAAATAAAA ---  
AATTGCAC TTTCAATATAACCACAGAAATAAGG-----  
GATAAAAAGAAACAAGAGTACGCACCTT ---TTTTATAGACTTGATATAGTACAACCTTAATGAGGATAGACAG-  
-----  
-----  
GATAATAATAGCTATAGATTAATAAAATTGTAACACCTCAACCATAACACAA ---  
GCCTGTCCAAAGGTTACTTTTGAACCTATTCCCTATACATTATTGTACTCCAGCTGGTTATGCGATTCTAAAGT  
GTAAT ---GATAAGAAATTCAAT-----GGAACAGGACCATGCAATAAT-----  
-GTCAGC ---ACAGTACAATGTACACATGGAATTAAGCCAGTGGTATCAACT ---  
CAACTACTGTTAAATGGTAGCCTAGCAGAAGAAGAG-----  
ATAGTAATTAGATCTGAAAATCTGACAGACAAT-----GTCAAAACAATAATAGTACATCTTAAT----  
-----CAATCTGTAAAA-----ATTGTGTGTATGAGGCCCGCAATAACACAAGAAAA-----

-AGTGTGAGGATA-----GGACCAGGACAAACA---TTC-----TATGCAATGGGAGAA-----  
 -----GTAATAGGGGATATA-----AGACGAGCATATTGT---AACATTAGTGAAAGG---  
 GATTGGAATGAACTTTATACCAGGTAAGTAAAAAATTAAAA-----GAACATTTCCAG----  
 -----AATAAAACAATAAACTTTTACA-----  
 CGATCCTCAGGAGGGGATCCAGAACTCATA--ATGCATAGCTTTAACTGTCAAGGAGAA---  
 TTTAAACAGCTCCAGGCAAGAGTCCTGGCTATAGAAAGATACCTAAAGGATCAACAGCTCCTAGGACTTTGGG  
 GATGCTCTGGAACCGTATCTGCACCACTAATGTCCCTTGGAACATCAGTTGGAGT-----  
 -----AATAAAACTAAAAAATACATTTGG-----GAA-----  
 AACATGACCTGGATGCAGTGG---GAGAGAGAAATTAGTAATTACACAGGCATAATATAT---  
 GACTTGCTTGAAGAATCGCAAACCCGGCAGGAG-----  
 -----  
 AAAAAATGAAAAAGATTTACTAGCCTTGACAGTTGGAACAGTTTGTGGAATTGGTTTGACATATCACATTGGC  
 TATGGTATATAAGATTATTCATAATGATAGTAGGAGGCTTAATAGGTTTAAGAATAGTTTTTTGCT---  
 GTGCTTTCTATAGTG-----AATAGAGTTAGGCAGGGATACTCACCT-----  
 TTGTGCTTTGCTATTAGCCTGCTTGATTCCATAGCAATAACAGTAGCTGAG---  
 GGAACAGATAGGATTCTAGAATTATTACAAAGAATTTGTAGAGCT-----  
 -----ATCCGCAATATA-----CCTAGAAGAATAAGACAGGGCTTTGAAACAGCTTTGCTA---TAA  
 >AB254156  
 ATG---GAG-----  
 GGCTTGTGGGTCACTGTACACTATGGGGTACCTGTGTGG---AAAGAAGCAAAG---  
 ACTACTCTATTTTGTGCATCAGATGCTAAAGCATATGAGACAGAA---GTGCATAAT-----  
 -----GTCTGGGCTACA---CATGCCTGTGTACCCACAGAC---  
 CCCAGCCCACAAGAAGTGATTTAAAA-----AATGTAACAGAAAATTTTAAAT-----  
 -----ATGTGGGAAAATAACATGGTGGATCAGATGCATGAGGATATA---  
 ATCAGTTTGTGGGATCAAAGCCTA---AAACCATGTGTAAAGTTA---  
 ACCCCACTCTGTGTCACTTTAGACTGTAGTCATAATATTACCATTAGGAATAGTACCTCCAGTGAGAAT---  
 -----  
 -----AATAGTACCTCCAGTACCAACAGTACAATCTTGAGTGAAATAATGAGA---  
 AATTGTACTTTCAATGTAACCACAGAATAAGG-----  
 GATAAGCAGACAAAAGAATATGCACCT--TTTTATAAACTTGATATAGTAAACTTGAGAAG-----  
 -----  
 -----  
 AACTCTAGTGAATATAGATTAATAAATTGTAATTCATCAACCGTAACACAG---  
 GCCTGTCCAAAAGTCTCTTTTGACCCAATTCCTATACATTATTGTGCTCCAGCTGGTTATGCGATTCTAAAGT  
 GTAATAATAATTATACATTCAAT-----GGAACAGGACCATGTAATAAT-----  
 -GTCAGC--ACAGTACAATGTACACATGGAATTAAACCAGTGGTGTCAACT---  
 CAACTACTGTTAATGGTAGCCTAGCAGAGGGAGGG-----  
 ATAGTAATTAGATCTAAAAATCTGACAGACAAT-----GCCAAAACAATAATAGTACATCTTAAT---  
 -----GAATCTGTAAGA-----ATTGTGTGTACAAGACCTGGCAATAATACAAGAAAA-----  
 -AGTGTAAGGATA-----GGACCAGGACAAGCA---TTC-----TTTGCAACAGGAGAA-----  
 -----GTAATAGGAGATATA-----AGAAAGGCACATTGT---AACATTACTGAGAGG---  
 ACATGGAATAACACTTTACAAAAGATAAGTAGAAAAATTAGAA-----AAACACTTTCCG----  
 -----AACAAAACATATAAAATTTGCA-----  
 CCATCCTCAGGAGGGGACCCAGAAATTACA--ACACATAGCTTTAATTGTAGAGGAGAA---  
 TTTAAACAGCTCCAGGCAAGAGTCCTGGCTATAGAAAGATACCTAAAGGATCAACAGCTCCTAGGGATTTGGG  
 GCTGCTCTGGAAGCTCATCTGCACCACTGCTGTGCCTTGGAACCTCTAGTTGGAGT-----  
 -----AATAAAACATATAATGAGATTTGG-----GAT-----  
 AATATGACCTGGATGCAGTGG---GATAGAGAAATCAATAATTACACAGATACAATATAC---  
 TGGTTGCTTGAGAAATCACAAAACCAGCAGGAA-----  
 -----  
 CAAAATGAAAAAGATTTACTAGAATTGGACAGTTGGGATAGCCTGTGGAGTTGGTTAAGCATAACAAATTGGC  
 TGTGGTATATAAGAATATTTCATAATGATAGTAGGAGGTTTGATAGGTTTAAGAATAATTTTTTGCT---  
 GTGCTTTCTATAGTA-----AAGAGAGTTAGGCAGGGATACTCACCT-----  
 TTGTGCTTTGCTATTAGCCTGCTTGATACCATAGCAATATCAGTAGCTGAG---  
 GGAACAGATAGGATTATAGAATTGCTAAGAAGAATTTGTAGAGCT-----  
 -----ATCTGTAGCATA-----CCTAGAAGAATAAGACAGGGCTTTGAAGCAGCATTGCAA---TAA  
 >KY229510  
 GTG---GTG-----  
 GGGAACCTGTGGGTCAAGTTTATTATGGGGTACCTGTGTGG---AGAGAAGCAAAA---  
 ACTACTTTATTCTGTGCATCAGATGCTAAAGCATATGAGAAAGAA---GTGCATAAT-----

-----GTCTGGGCTACA---CATGCCTGCGTACCCACAGAC---  
 CCCAACCCACAAGAAATGGTCTTGGGA-----AATGTGACAGAAAACCTTTAAC-----  
 -----ATGTGGAAAAATGACATGGTGGATCAGATGCATGAGGATATA---  
 ATCAGCTTATGGGATGAAAGCCTA---AAACCATGTGTAAAGTTG---  
 ACCCCACTCTGTGTCACTTTAAATTGTACAGATATTACTACTACTAATGAGACCTTTAGTAAT-----  
 -----  
 -----AGTACCAAGGAAGAAATGAGA---  
 AACTGCTCTTTCAATGCAACCACAGAACTAAAG-----  
 GATAAGAAAAAGAATGTGTATGCACTT---TTTTATAAACTTGATATAGTACCACTTAACCTCT-----  
 -----  
 -----  
 AGTGATAACAGCTCTAGTGAGTATAGATTGATAAAATTGCAATACCTCAGCCATAACACAA---  
 GCCTGTCCAAAGGTCACTTTTGACCCAATTCCTATCCATTATTGTGCTCCAGCTGGTTTTGCATTCTAAAGT  
 GTAAC---AATAAGACATTCAAT-----GGGACAGGACCATGCCAGAAT-----  
 -GTCAGC---ACAGTACAATGCACACATGGAATTAAGCCAGTAGTGTCAACT---  
 CAGCTACTGCTAAATGGTAGCCTAGCAGAAGGAGAT-----  
 ATAATAATTAGATCTGAAAACTGACAAATAAT-----GTCAAAACAATAATAGTACACCTTAAT----  
 -----GAATCTGTAGAA-----ATTAATTGTACAAGACCTGGCAATAATACGAGGCAA-----  
 -AGTATAAGGATA-----GGACCAGGACAAACA---TTC-----TATGCAACAGGAGAC-----  
 -----ATAATAGGAGACATA-----AGAAAAGCACATTGC---AACATTAGTGGAGAG---  
 GAATGGAATAGAAGCTTTACAAAAGGTAGGTAAAAAATTACAT-----GAACACTTC-----  
 -----AATAGAACAATAATATTTGCC-----  
 TCAGCCTCAGGAGGGGACCTAGAAATTACA--ACACATAGCTTTAACTGTAGAGGAGAA---  
 TTTAAGCAGCTCCAGGCAAGAGTCCTGGCTATAGAAAGATACCTAAAGGATCAACAGCTCCTAGGGATTTGGG  
 GCTGCTCTGGAAAGCTCATCTGCACCACTACTGTGCCTTGGAAGCTCCAGTTGGAGT-----  
 -----AATAAATCTCTAAATGATATTTGG-----GAT-----  
 AACATGACCTGGATGCAATGG---GATAGAGAAATTAGTAATTACACAGGTATAATATAC---  
 AGTTTGCTTGAGGAATCGCAAAGCCAGCAGGAA-----  
 -----  
 AGAAATGAAAAGGATCTATTAGCATTGGACAAGTGGAATAATCTGTGGAATTGGTTTGATATATCAAATTGGC  
 TGTGGTACATAAAGACATTCTAATGATAATAGGAGGCTTGATAGGCTTGAAAATAATTTTTTGCT---  
 GTGCTTTCTATAGTA-----AATAGAGTTAGGCAGGGATACTCACCT-----  
 TTGTCATTTGCTGTTAGTCTGCTTGATACCATAGCAATAGCAGTAGCTGAA---  
 GGAACAGATAGGATTATAGAAGTACTACTAAGATTTTGTAGAGCT-----  
 -----ATCCGCAACGTA-----CCTACAAGGATAAGACAGGGCTTTGAAGCAGCTTTGCAA--TAA  
 >HM036864  
 GTG---ATG-----  
 GGGAACTTGTGGGTACAGTTTATTATGGGGTACCTGTGTGG--AAAGAAGCAAAA---  
 ACTACTCTATTCTGTGCATCAGATGCTAAAGCATATGAGAGAGAA--GCACATAAT-----  
 -----GTCTGGGCTACA---CATGCCTGTGTACCCACGGAC---  
 CCCGACCCACAAGAAATATTTTGTAGAA-----AATGTAACAGAAAATTTTAAC-----  
 -----ATGTGGAAAAATGACATGGTGGATCAGATGCATGAGGATATA---  
 ATCAGTTTATGGGATGAAAGTCTA---AAGCCATGTGTAAAGTTA---  
 ACCCCACTCTGTGTCACTTTAACTGTACAGAGATCCGTAATATTACCGGTGGTGGTACTGAC-----  
 -----  
 -----AATAATAGGACCATTGATTTTAGCATGAAAGGAGAAGTAAAA---  
 AATTGCTCTTTCAATACAACCACAGAAATACAT-----  
 GATAGACAACAGAAAGTGCATGCGCTT---  
 TTCTATAGACTAGATATACAGCCACTTGAGGAGGGAAACAAAGGGGGA-----  
 -----  
 AACGATACAACCTGAGAAGGAAAACGGTACATATACATTAATAAATTGTAATACCTCATCCATAACACAA---  
 GCCTGTCCAAAGGTCTCTTGGGACCCAATTCCTATACATTATTGTGCTCCAGCTGGTTTTGCGATTCTAAAAT  
 GTAAT---GATAAAACATTCAAT-----GGAACAGGACCATGCAAGAAT-----  
 -GTCAGT---ACAGTACAATGTACACATGGAATTAAGCCAGTGGTATCAACT---  
 CAATTACTGTTAAATGGTAGCCTATCAGAAGGAGAG-----  
 ATAATAATTAGATCTGAAAACTGACAAACAAT-----GCCAAAACAATAATGGTACAGCTTAAT----  
 -----AGTTCTATACCA-----ATTGTGTGTACAAGACCAACAATAATACAAGGACA-----  
 -AGTGTAAGGATA-----GGACCAGGACAAACA---TTC-----TATGCAACAGGAGAC-----  
 -----ATAATAGGAAACATA-----AGACAAGCACATTGC---AGCCTTAATGGAAGT---  
 GCATGGCATAACACTTTATTCAAGGTGAGTGAAAAATTAAGA-----GAACATTTCCCT----

-----AATAGAACAATAATATTTCAA-----  
 TCATCTCCAGGAGGGGACCCAGAAATCACA---ACACATAGCTTTAATTGTGGAGGAGAA---  
 TTTAAGCAGCTCCAGGCAAGAGTCCTGGCTATAGAAAGATACCTAAAGGATCAACAGCTCCTAGGGATTTGGG  
 GCTGCTCTGGAAGAACTTATCTGCACCACTACTGTGCCTTGGAACTCCAGTTGGAGT-----  
 -----AATAAAACTCAAAAACAAATTTGG-----GAA-----  
 AACATGACCTGGATGGATTGG---GAAAGAGAAATTGATAATTACACTGAAATGATATAC---  
 ACGTTGCTTGAAGTATCGCAAAACCAGCAAGAA-----  
 -----  
 CAAAATGAAAAAGATTTATTAGCATTGGGCAGTTGGGAAAAGTCTGTGGAATTGGTTTAGCATATCAAATTGGC  
 TATGGTATATAAGAATATTCATAATGATAGTAGGAGGCTTGATAGGTTTGAGAATAGTTTTTTGCT---  
 ATACTTTCTATAGTG-----AATAGAGTTAGGCAGGGATACTCACCT-----  
 CTGTCGTTTTGCTATTAGTCTGCTTGATACTATAGCAATAGCAGTAGGTGAA---  
 GGAACAGATAGGATTATAGAATTAGTACAAAGAATTTGTAGAGCT-----  
 -----ATCCTCAACATA-----CCTAGAAGAATAAGACAGGGCTTTGAAGCAGCTTTGCTA---TAA  
 >DQ422948  
 GTG---GTA-----  
 GGGAACTTGTGGGTCACAGTCTATTATGGGGTACCTGTGTGG---AAAGAAGCAAAA---  
 GCTACTCTATTCTGTGCATCAGATGCGAAAGCACAGGAAACAGAA---GTGCATAAT-----  
 -----ATCTGGGCTACA---CATGCCTGTGTACCCACAGAC---  
 CCCAACCCACAAGAAATGATTTTGGAA-----AATGTAACAGAAAATTTTAAT-----  
 -----ATGTGGAAGAAATGACATGGTGGATCAGATGCATGAGGATGTA---  
 ATCAGTTTATGGGATCAAAGCCTA---AAGCCATGCATAAAGTTG---  
 ACCCCACTCTGTGTCACTTTAAACTGTACCAATGCTACCTACAAT-----  
 -----  
 -----GGTAGCACAATCGAAGATGTAAGA---  
 AATTGCTCTTTCAATGCAACCACAGAAGTAAAA-----  
 AATAAGAAACAGGAGGTGAATGCACCT--TTTAATCTTCTTGATATAGTACCAATTAAGTCT-----  
 -----  
 -----  
 AGTATATATAGATTAACAAATTGCAATACCTCAGCCATAACACAA---  
 GCCTGTCCAAAGGTCACCTTTTGACCCAAATTCCTATACATTATTGTGCTCCAGCTGGTTATGCGATTCTCAAGT  
 GTAAT---AATAAGACATTCAAT-----GGAAAAGGACCATGCAATAAT-----  
 -GTCAGC---ACAGTACAATGTACACATGGAATTAAGCCAGTGGTATCAACT---  
 CAACTATTGTTAAATGGTAGCCTAGCAGAAGAAGAC-----  
 ATAATAATCAGATCTGAAAATCTGACAAACAAT-----GTCAAAACAATAATAGTACATCTTAAG---  
 -----GAACCCGTAAGAA-----ATTGTGTGTACAAGACCAGGTAATAACAAGAAAA---  
 -AGTGTAAGGATA-----GGACCAGGACAAACA---TTT-----TATGCAACAGGTGCC-----  
 -----ATAATAGGAGACATA-----AGAAAAGCACATTGT---AACATTAGTAAAAAA---  
 GCATGGAATGATACTTTACATAAGGTAGAAGGGAAATTAAGA-----GAACCTCTAC-----  
 -----AATAAATCAATAAAATTCGAA-----  
 CCGTCTTCAGGAGGGGACCTAGAAATTACA---ACACATAGCTTTAATTGTAGAGGAGAA---  
 TTTAAGCAGCTCCAGGCAAGAGTCCTGGCTATAGAAAGATACCTACAGGATCAACAGCTCCTAGGGATTTGGG  
 GCTGCTCTGGAAGAACTCATCTGCACCACTGCTGTGCCTTGGAAATCTAGTTGGAGT-----  
 -----AATAGATCTCAAGCAGATATTTGG-----GAG-----  
 AACATGACCTGGATGCAGTGG---GAAAAAGAAATTAGTAATTATACAAACACAATATAT---  
 TGGTTGCTTGAAGACTCGCAAAATCCAGCAGGAA-----  
 -----  
 AAGAAATGAAAAAGATTTATTAGCATTGGACAGTTGGAAAAATCTGTGGAATTGGTTTAACATGACAAATTGGC  
 TGTGGTATATAAAAAATATTCATAATGATAGTAGGAGGCTTGATAGGTTTAAGAATAATTTTTTGCT---  
 GTGCTTTCTATAGTA-----AATAGAGTTAGGCAGGGATACTCACCT-----  
 TTGTCATTTGCTATTAGTCTGCTTGATACCGTAGCAATAGCAGTAGCTGAG---  
 GGAACAGATAGGATTATAGAATTAGTACAAAGAATTTGTAGAGGT-----  
 -----ATCCTCCACATA-----CCTACAAGAATAAGACAGGGCCTTGAAGCAGCTTTGCAA---TAA  
 >EU166653  
 ATA---AAG-----  
 GGCTTGTGGGTCACAGTCTACTATGGGGTACCTGTGTGG---AGAGAAGCAAAA---  
 ACTACTCTATTTTGTGCATCAGATGCTAAAGCATATGAGAGAGAA---GTGCATAAT-----  
 -----GTCTGGGCTACA---CATGCCTGTGTACCCACAGAC---  
 CCCAACCCACAAGAAATAGTTTGGAA-----AATGTAACAGAAAATTTTAAC-----  
 -----ATGTGGAGAAATGACATGGTGGATCAGATGCATGAGGATATA---

ATCAGTTTATGGGATCAAAGCCTA---AAGCCATGTGTAAAGTTG---  
 ACCCCACTCTGTGTCACTTTAACTGTACTAATAATGTTACAGGTAAA-----  
 -----  
 -----GTTATTAACAGTACCAATGAAATAAAA---  
 AATTGCTCTTTCAATATGACCACAGAATTAAGA-----  
 GATAAGAAAAAGAAAGAATATGCACTT---TTTTATAAACTGGATATAGTACCACTTGATGGGAGTGGAAGC-  
 -----  
 -----  
 AACTCTAGCAACAGCTATGAGGAGTATAGATTAATAAAATTGTAATACCTCAACCATAACACAA---  
 GCCTGTCCAAAGGTCTCTTTTGACCCAATTCCCATACATTTTTGTGCTCCAGCTGGTTATGCGATTCTAAAGT  
 GTAAT---AATAAGACATTCACT---GGAACAGGACCATGCAATAAT-----  
 -GTCAGC---ACAGTACAATGTACACATGGAATTAACCAGTAGTATCAACT---  
 CAACTAATGTTAAATGGTAGCCTAGCAGAAGAAGAT-----  
 ATAATAATTAGATCTGAAAATCTGACAAACAAT-----GTCAAAACAATAATAGTACATCTTAAT----  
 -----GAATCTATAAGA-----ATTAATTGTACAAGACCCAACAATAATACAAGGAAA-----  
 -AGTATAAGGATA-----GGACCAGGACAAACA---TTC-----TATGCAACAGGAGAC-----  
 -----ATAATAGGAGATATA-----AGACAAGCATATTGT---ATCATTAATAAGGAT---  
 GAATGGAATAAAGCTTTGCAGAAGGTAGCTGACAAATTAAGA-----GAACACTTCCAT----  
 -----AATAAAACAATAGTATTTAAT-----  
 TCATCCTCAGGAGGGGACCCAGAAATTATA---ACACATAGCTTTAATTGTAGAGGAGAG---  
 TTTAAGCAGCTCCAGGCAAGAGTCCTGGCTATAGAAAGATACCTAAGGGATCAACAGCTCCTAGGAATTTGGG  
 GCTGCTCGGGAAGAACTCATCTGCACCACTGATGTGGCATGGAACCTCTAGTTGGAGT-----  
 -----AACAAAACACAAGATGAAATTTGG-----AAG-----  
 AACATGACCTGGATGCAGTGG---GATAGGGAAATTAGTAATTACACAGACACAATATAC---  
 CAGTTGCTTGAAGTCTCGCAAAATCCAGCAGGAG-----  
 -----  
 AAAAAATGAAAAAGAGTTATTAGCATTGGACAGCTGGAAAAATCTGTGGAGTTGGTTTGACATATCAAACCTGGT  
 TGTGGTATATAAAAAATATTACATAATGATAGTAGGAGGCTTGATAGGTTTAAGAATAATTTTTTGCT---  
 GTGCTTTCTGTAGTG-----AATAGAGTTAGGCAGGGATACTCACCT-----  
 TTGTCGTTTGCTATTAGTCTGTTTGATACCATAGCAATAGCAGTAGCTGAA---  
 GGAACAGATAGGATTATAGAAGTAATACAAAGAATTTGTAGAGCT-----  
 -----ATCTGCAACATA-----CCTAGAAGAATAAGACAGGGCTTTGAAGCAGCTTTGCAA---TAA  
 >KY229617  
 GTA---ATG-----  
 GGGAACTTGTGGGTACAGTTTATTATGGGGTACCTGTGTGG---AAAGAAGCAAAA---  
 ACTACTTTATTTTGTGCATCAGATGCTAAAGCATATGAGAAAGAA---GTGCATAAT-----  
 -----GTCTGGGCTACA---CATGCTTGTGTACCCACAGAC---  
 CCCGACCCACAAGAAATATTGTTGGGA-----AATGTAACAGAAAATTTTAAC-----  
 -----ATGTGGAAAAATGACATGGTGGACCAGATGCATGAGGATATA---  
 ATCAGTTTATGGGATCAAAGCCTA---AAGCCATGTGTAAAGTTG---  
 ACCCCACTCTGTGTCACTTTAACTGTAGTAATGTTAATGTTACCAGGAATAATACTACT-----  
 -----  
 -----AATGCTACCAATCCTAATCTCATGAATGGAGAAATGAAA---  
 AATTGCTCTTTCAATATAACCACAGAATAAGA-----  
 GATAAGAAAAAGTCTGAACATGCACCT---TTTTATAGACTTGATGTAGTACCACTTAATTCT-----  
 -----  
 -----  
 AATGACGCCAATTCCAATGAGTATAGATTAATAAAATTGTAATACCTCAGCCATAACACAA---  
 GCCTGTCCAAAGGTCTCTTTTGACCCAATTCCATATACATTATTGTGCTCCAGCTGGTTATGCGATTCTAAAGT  
 GTAAT---GATAAGACATTCAAT---GGAACAGGACCATGTAATAAT-----  
 -GTCAGC---ACTGTACAATGCACACATGGAATTAAGCCAGTGGTATCAACT---  
 CAACTACTGTTAAATGGTAGTCTATCAGAAGAAGGA-----  
 ATAATAATTAGATCTGAAAATATAACAAGTAAT-----ACCAAAAATATAATAGTACATCTTAAT----  
 -----GAATCAGTAAAA-----ATTGTGTGTGCAAGGCCCAACAATAATACAAGAAAA-----  
 -GGTATGAGGATA-----GGACCAGGACAAACA---TTC-----TATGCAACAAAAGAC-----  
 -----ATAATAGGAGATATA-----AGACAAGCACATTGT---AACATTAGTAGGAAA---  
 AATTGGACGATAACTTTACAAAGGGTAAGTAAAAAATTAAGA-----GAACACTTCCCT----  
 -----AATATAACAGAAATAAAATTTCAA-----  
 CCACCCGCAGGAGGGGACTTAGAAATTACA---ACCCATAGCTTTAATTGTAGAGGAGAG---  
 TTTAAGCAGCTCCAGGCAAGAGTCCTGGCTATAGAAAGATACCTAAAGGATCAACAGCTCCTAGGGATTTGGG

GCTGCTCTGGAAACTTATCTGCACCACTGCCGTGCCTTGAATGCTAATTGGAGT-----  
-----GATAAATCCCTAGAAGAAATTTGG-----GAA-----  
AACATGACCTGGATGCAGTGG---GATAGAGAAATTAATACTACACAACCACAATATAC---  
AAGTTGCTTGAAGAATCGCAAACCCGGCAGGAA-----  
-----  
CAAAATGAAAAAGAGTTACTAGCATTGGACAGTTGGAAAAATCTGTGGAATTGGTTTGACATAACAACTGGC  
TGTGGTATATAAAAAATATTCATAATGATAGTAGGAGGCTTGATAGGGTTAAGAATAATTTTTACT---  
GTGCTCTCTATAGTA-----AATAGAGTTAGGCAGGGATACTCACCT-----  
TTGTCGTTTCGCTATTAGTCTGCTTGATACCACAGCAATAGCAGTAGCTGAA---  
GGAACAGATAGAATTATAGAATTGGTACAAAGAATTGGTAGAGCT-----  
-----ATCTGCAACGTA-----CCTAGCAGAATAAGACAGGGCTTTGAAACAGCTTTGCTA---TAA  
>HM036739  
GTA---ATG-----  
GGGAACTTGTGGGTCACAGTCTATTATGGGGTACCTGTGTGG--AGAGAAGCAAAA---  
ACTACTCTATTTTGTGCATCAGATGCTAAAGCATATGAGAAAGAA---GTGCATAAT-----  
-----GTCTGGGCTACA---CATGCTTGTGTACCCACAGAC---  
CCCAACCCACAAGAAATGTTATTGGGA-----AATGTAACAGAAAATTTTAACT-----  
-----ATGTGGAAAAATGACATGGTGGACCAGATGCATGAGGATATA---  
ATCAGTTTATGGGATCAAAGCCTA---AAGCCATGTGTAAAGTTG---  
ACCCCACTCTGTGTCACTCTAAACTGTACTGATGTTAATGTTAATGTTACCAGGAAT-----  
-----  
-----AATACCACTCCTGATCCCATGAATGGAGAACAAAA---  
AATTGCTCTTTCAATATAACCACAGAATAAGA-----  
GATAAGAAAAAGTCTGAACATGCACCT--TTTTATAGACTTGATATAGAACCCTTGATGATTCCACCGAT-  
-----  
-----  
TCCACCAATTCCACCAATGCCAGGAAGTATAGATTAATAAATTGTAATACCTCAGCCATAGCACAA--  
GCCTGTCCAAAGGTCTCTTTTGACCCAATTCCTATACATTATTGTGCTCCAGCTGGTTATGCGATTCTAAAGT  
GTAAT---GATAAGACATTCAAT-----GGAACAGGACCATGTAATAAT-----  
-GTCAGC---ACTGTACAATGCACACATGGAATTAAGCCAGTGGTATCAACT---  
CAACTACTGTAAATGGTAGTCTATCAGCAGAAGGA-----  
ATAATAATTAGATCTGAAAATATAACAAGTAAT-----ACCAAACTATAATAGTACATCTTAAT---  
-----GAATCGGTAGAA-----ATTAAATGTATGAGGCCCAACAATAACAAGAAGA-----  
-AGTGTGAGGATA-----GGACCAGGACAAGCA---TTC-----TATGCACCAGGAGAC-----  
-----ATAATAGGAGATATA-----AGACAAGCACATTGT--AACATTAGTAGAAAG---  
AATTGGACGACAACCTTTACAAAGGGTAAGTAAAAAATTAAGA-----GAATACTTCTCT---  
-----AATGAAACAAAAATAGAATTTAAA-----  
TCACCCGCAGGAGGGGACTTAGAAATTACA--ACCCATAGCTTTAATTGTAGAGGAGAG---  
TTTAAGCAGCTCCAGGCAAGAGTCCTGGCTATAGAAAGATACCTAAAGGATCAACAGCTCCTAGGGATTTGGG  
GCTGCTCTGGAAACTCATCTGCACCACTGCCGTGCCTTGGAACGCTAGTTGGAGT-----  
-----AATAAATCTCAGGAAGAAATATGG-----GAA-----  
AACATGACCTGGATGCAGTGG---GATAGGGAAATTAATACTACACAGACATAATATAC---  
GGGTGCTTGTGGACTCGCAAACCCAGCAGGAG-----  
-----  
AAAAATGAAAAAGACTTACTGGCATTGGACAGTTGGAAAAATCTGTGGAATTGGTTTAAACATAACAACTGGC  
TGTGGTATATAAAAAATATTCATAATGATAGTAGGAGGCTTGATAGGTTTAAAGAATAATTTTTACT---  
GTACTCTCTATAGTA-----AATAGAGTTTGGCAGGGATACTCACCT-----  
TTGTCGTTTGTCTATTAGTCTGCTTGATACCACAGCAATAGCAGTAGCTGAA---  
GGAACAGATAGAATTATAGAATTGATACAAAGACTTTTATAGAGCT-----  
-----ATCTGCAACATA-----CCTAGAAGAATAAGACAGGGCTTTGAAGCAGCTTTGCTA---TAA  
>GU329051  
GTG---AAA-----  
GGGAACTTGTGGGTCACAGTCTATTATGGGGTACCTGTGTGG--AAAGAAGCAAAA---  
GCTACTCTATTCTGTGCATCAGATGCTAAAGCATATGACAGAGAA---GTGCATAAT-----  
-----GTCTGGGCTACA---CATGCCTGTGTACCCACAGAC---  
CCCAACCCACAAGAAATGATATTGGAA-----AATGTGACAGAAAATTTTAACT-----  
-----ATGTGGAAAAATGACATGGTAGATCAGATGCATGAGGATATA---  
ATTAGTTTATGGGACGAAAGCCTA---AAGCCATGTGTAAAGTTG---  
ACCCCACTCTGTGTTACTTTAAATTGTACTGCTATTAATAATAATAACT-----  
-----

-----ATCCATAGTAACATAAGTGGAGAAATAAAA---  
AATTGCTCTTTCAATGCAACCACAGACCTAAGA-----  
GATAAGAACCAACAGGTGTATGCACTT---TTTTATAAGCTTGATATAGTACAGCTTGACAAA-----  
-----  
-----  
TCTAGTGAGTATAGATTAATAAATTGTAATACCTCAGTTATAAAACAA---  
GCTTGTCCAAAGGTCTCTTTTGACCCATTTCCTATACATTATTGTGCTCCAGCTGGTTATGCGATTCTAAAGT  
GTAAT---AATAAGACATTCAAT-----GGAACAGGGCCATGCAATAAT-----  
-GTCAGC---ACAGTACAATGTACACATGGAATTAAGCCAGTGGTATCAACT---  
CAACTACTGTTAAATGGTAGCCTAGCAGAGGAAGAG-----  
ATAATAATCAGATCTGAAAATCTGACAGAGAAT-----ACCAAAACAATAATAGTACATCTTAAT----  
-----GAATCCGTACAA-----ATTGTATGTACAAGACCCAACAATAATACAAGAAAA-----  
-AGTGTAAGGATA-----GGGCCAGGACAAACA---TTC-----TATGCAACAGGACAA-----  
-----ATAATAGGAGATATA-----AGACAAGCACATTGC---AACGTCAGTCAACAG---  
AACTGGACTAGAACTTTAAGATTGGTGAAGAATAAATTACAA-----AAACACTTTTCCT----  
-----GATAAAACCATAAGCTTTAAC-----  
CAATCCTCAGGAGGGGACCTAGAAATTACA---ACACACAGCTTTAATTGTAGAGGAGAA---  
TTTAAACAGCTCCAGGCAAGAGTCCTGGCTATAGAAAAGATACCTAAAGGATCAACAGCTCCTAGGGATTTGGG  
GCTGCTCTGGAAGAACTCATCTGCACCACTAATGTGCCTTGGAAGTCCAGTTGGAGT-----  
-----AATAAACTCTAGACCAGATTTGG-----GAG-----  
AACATGACCTGGATGCAGTGG---GAAAAAGAGATTGATAACTACACAAACACAATATAC---  
AGTTTACTTGAAGCCTCGCAAAACCAGCAGGAA-----  
-----  
CAAAATGAAAAAGATTTATTAGCATTGGACAAGTGGGACAGTCTGTGGAGTTGGTTTAGCATAACAAAATGGC  
TGTGGTATATAAAAATTTTCATAATGATAGTAGGAGGTTAATAGGTTTGAGAATAATTTTTTGCT---  
GTACTTTCTATAGTA-----AATAGAGTTAGGCAGGGATACTCACCT-----  
TTGTCGTTTGCTATTAGTCTGCTTGATACCATAGCAATAGCAGTAGCTGAA---  
GGAACAGATAGGATTTTAGAATTAATACAAAGATTTTTTTAGAGCT-----  
-----ATCTACAACATA-----CCCAGAAGAATAAGACAGGGCTTTGAAGCAGCTTTGCAA---TAA  
>GU329105  
GTG---ATG-----  
AGCTCGTGGGTCACAGTCTACTATGGGGTACCTGTGTGG---AGAGAAGCAAAA---  
GCTACTCTATTTTGTGCATCAGATGCTAAAGCATATGATAAAGAA---GTACATAAT-----  
-----GTATGGGCTACA---CATGCCTGTGTACCCACAGAC---  
CCCAACCCACAAGAAATGGTTTGGAA-----AATGTAACAGAAAATTTTAAC-----  
-----ATGTGGAAAAATGACATGGTGGATCAGATGCATGAGGATATA---  
ATCAGTTTATGGGATCAAAGCCTA---AAGCCATGTGTAAAGTTA---  
ACACCACTCTGTGTCACTTTAACTGTACTAATGCTACTGTTACTGTTATTAGTAATAACAGTACTAACATTA  
CTAATACTAGTAAT-----  
AACAGTACTAACATTACTAATGGTAGTAATAACAGTACTAACATTACTAAGGTAGTAGAAGAGATGAGA---  
AATTGCTCTTTTAATATAACCACAGAATTAAGA-----  
GATAGGAAAAGGAAAGAATATGCACTT---TTTTATAAAATTGATCTAGTACCACTTAATGAA-----  
-----  
-----  
AATCATAAAAACAACCTCAGAGTATAGATTAATAAATTGTAATACCTCAACCATAACACAG---  
GCCTGTCCAAAGGTCTCTTTTGACCCAATCCCTATACATTATTGTGCTCCAGCTGGATATGCGATTCTAAAGT  
GTAAT---AATAAAACATTCAAT-----GGAACAGGACCATGCAATAAT-----  
-GTTAGC---ACAGTACAATGTACACATGGAATTAAGCCAGTGGTATCAACT---  
CAATTATTGTTAAATGGTAGCCTAGCAGAAGGAGAT-----  
ATAATAATTAGATCTGAAAATCTGACAAACAAT-----GCCAAAACAATAATAGTACATCTTAAT----  
-----GAATCTGTAAG-----ATTGAGTGCTCAAGACCCAACAATAATATAAGGAAA-----  
-AGTGTGAGGATAGGG-----ATAGGAAAAGGACATGCA---TTC-----TATGCAACAGGAGAT-----  
-----GTAAGAGGAGATGTA-----AGACAAGCATATTGT---ATCATTAATAAAACT---  
GAGTGGAATGAGACTTTAGAAAAAGTAGGTGAAAAATTAAGA-----GAATACTTCCCT----  
-----AATAAAACAATAATATTTAAC-----  
TCATCCTCAGGAGGAGACCTAGAAATTACA---ACACATAGCTTTAATTGTAGAGGAGAG---  
TTTAAGCAGCTCCAGGCAAGAAATCCTGGCTATAGAAAAGATACCTAAAGGATCAACAGCTCCTAGGAATGTGGG  
GCTGCTCTGGAAGAACTCATCTGCACCACTAATGTATTGTGGAACAGTAGTTGGAGT-----  
-----AACAAATCTATGGAACACATTTGG-----GGA-----  
AACATGACCTGGATGCAATGG---GATAGGGAAATTAATAATTACACACACATAATATAT---

GGGTTGCTTGAAGAATCGCAAAGGCAGCAGGAG-----  
-----  
CAAAATGAACAAGAATTACTAGCATTGGACAAATGGGACAGTCTGTGGAATTGGTTCAACATAACAAATTGGC  
TGTGGTATATAAAGATATTCTAATGATAGTAGGAGGCTTGATAGGTTTAAGAATAATTTTTTGCT---  
GTGCTTTCTGTAGTG-----AATAGAGTTAGGCAGGGATACTCACCT-----  
TTGTCATTTGCTATTAGTCTGCTTGATTACCTAGCAATAACAGTAGGTGAG---  
GGAACAGATAGGATTATAGAATTAGTACAAGGAATTTGTAGAGCT-----  
-----ATCCGCAACATA-----CCTAGAAGAATAAGACAAGGCTTTGAAGCAGCTTTGCTA---TAA  
>GU329116  
GGG---GGG---GAA-----  
AACCCAAACCGGTGGGTACAGTTTATTATGGGGTACCTGTGTGG---AAAGAAGCAAAA---  
ACTACTCTATTTTGTGCATCAGATGCTAAAGCATATGAAAAAGAA---GTGCATAAT-----  
-----GTTTGGGCTACA---CATGCCTGTGTACCCACAGAC---  
CCCGACCCACAAGAAATAAGATTGGAA-----AATGTAACAGAAAATTTTAAT-----  
-----ATGTGGAAAAATGACATGGTGGATCAGATGCATGAGGATGTA---  
ATCAGTTTATGGGATCAAAGCCTA---AAGCCATGTGTAAAGTTA---  
ACCCCACTCTGTGTCACTTTAAGGTGTAGTAATGCTAATTTTACCCTAATACCACCACCAGAAAT-----  
-----  
-----CATACTACTACTACCCCTCCCCTGATACAAATGGACTCATAAAA---  
AATTGCTCTTTCAATACAACCACAGAAATAAGA-----  
GGTAAGAAACAAAAGGTGTATGCACCT--TTTTATAGACTTGATTTAGTACCATTTAATGAGGGG-----  
-----  
-----  
AAGAACAATTCTAATGAATATATATTAATAAATTGTAATACTTCAGCCATAACACAA---  
GCCTGTCCAAAGGTCTCTTTTGAACCAATTCCTATACACTATTGTGCTCCAGCTGGTTTTCGATTCTAAAGT  
GTAAT---AATGAGACATTTAAT-----GGAACAGGACCATGTACTAAT-----  
-GTTAGC---TCAGTACAATGCACACATGGAACCTAAGCCAGTGATATCAACT---  
CAACTACTGTAAATGGTAGTCTAGCAGAAAAGGAG-----  
ATAATAGTTAGATCTGAAAATATAACAAACAAT-----ATCAAAACAATAATAGTTCATCTCAAT-----  
-----GAATCTGTAGAA-----ATTAATTGTACAAGACCTGGCAATAATACAAGAAAA-----  
-AGTGTAAGGATA-----GGACCAGGACAAGTA---TTC-----TATGCAACAGGAGAA-----  
-----GTAATAGGAGATATA-----AGGCAGGCACATTGT---AACATTAGTGAAGGA---  
AAATGGAATAAACTTTAGAAAAGGTAAGGAGAAAATTACAA-----GAACACTTCCCT-----  
-----AATAGCACATAAAATTTGCA-----  
CCATCCTCAGGAGGGGATCTAGAAATTACA--TCACATAGCTTTAATTGTAGAGGAGAA---  
TTCAAGCAGCTCCAGGCAAGAGTCCCTGGCTATAGAAAGATACCTAAAGGATCAACAGCTCCTAGGGATTTGGG  
GCTGCTCTGGAAGAACTCATCTGCACCACCACTGTGCCTTGGAACCTCCAGTTGGAGT-----  
-----AATAAACTCAAGATGAAATTTGG-----GGT-----  
AACATGACCTGGATGGAGTGG--GATAGAGAAATTAATAATTACACAGAAACAATATAC---  
AGGTTGCTTCAAGACTCGCAAATCCAGCAGGAA-----  
-----  
AAAAATGAAAAAGACTTGTAGCATTGGACAGTTGGAACAACCTTGTGGAATTGGTTTAGTATATCAAACCTGGC  
TGTGGTATATAAAGATATTCTAATGATAGTAGGAGGCTTGATAGGTCTAAGAATAATTTTTTGCT---  
GTACTTTCTATAGTG-----AATAGAGTTAGGCAGGGATACTCACCT-----  
TTGTCATTTGCTATTAGTCTGCTTGATGCCACAGCAATAACAGTAGCTGAA---  
GGAACAGATAGAATTACAGAAATAGTACAAAGAATTTGTAGAGCT-----  
-----ATCCGCAACATA-----CCTAGAAGAATAAGACAGGGCTTTGAAACAGCTTTGCTA---TAA  
>GU329220  
GTG---GTG---GCA-----  
GAGAACTTGTGGGTACAGTCTATTATGGGGTACCTGTGTGG---AAAGAAGCAAAA---  
ACTACTTTATTCTGTGCATCAGATGCTAAAGCATATGAGAAAGAA---GTGCATAAT-----  
-----ATTTGGGCTACA---CATGCCTGTGTACCTACAGAC---  
CCCAACCCACAAGAAATGGTTTTGGAA-----AATGTAACAGAAAATTTTAAC-----  
-----ATGTGGAAAAATGATATGGTGGATCAAATGCATGAGGATATA---  
ATCAGTTTATGGGATCAAAGCCTA---AAGCCATGTGTAAAGTTG---  
ACCCCACTCTGTGTCACTTTAAATTGTACAAATGCAAATGGCACTAGAGATAACAGTACAAATGTC-----  
-----  
-----AATGACAATAGTACAATGGCCAGTAAGGGTTATGAAGAAATAAAA---  
AATTGCTCTTTCAATGCAACCACAGAACTAAGA-----  
GATAAGACTAAGAAAGAGTATGCACCTC---

TTTTATAGACTTGATGTGGTACCACTTAATAATGATGATAAACCTGAT-----  
-----  
AATTCTACTGGAAATGTTGGTAAGACTTATAGACTAATAAATTGTAATAGCTCAACCATAACACAA---  
GCCTGTCCAAAGATCACTTTTGACCCAATTCTTATACATTATTGTGCTCCTGCTGGTTATGCAATTCTAAAGT  
GTAAT---AATAAGACATTCAAT-----GGGACAGGACCATGTAGAAAT-----  
-GTCAGC---ACAGTACAATGTACACATGGGATTAAGCCAGTGGTATCAACT---  
CAACTACTGTTAAATGGTAGCCTAGCAGAAGGAGGG-----  
ATAGTGATTAGATCTGAAAATCTGACAAACAAT-----GCCAAAACAATAATAGTACATTTTAAT----  
-----GAATCTGTAGAG-----ATTAGGTGTGAAAGACCCAACAATAATACAAGGAGA-----  
-AGTGTAAGTTTC-----GGACCTGGACAAGCA---ATC-----TATGCAACAGGAGAC-----  
-----ATAATAGGAAACATA-----AGACAAGCACATTGT---AACATTAGTGAAGGG---  
AGATGGAATAGGACTTTAAAGATGGTAAGGAAAAAATTAGAA-----GAACACTTCCCG----  
-----GGTAAAAACATAACATTTAAACCA---  
CAACCACTCTCAGGAGGGGACTTAGAAATTACA---ATGCATAGCTTTAATTGTAGAGGAGAA---  
TTTAAACAGCTCCGAGCAAGAGTCCTGGCTATAGAAAAGATACCTACAGGATCAACAGCTCCTAGGGTTGTGGG  
GTTGCTCTAACAACTCATCTGCACCACTAATGTGCCTTGGAACCTCAGTTGGAGC-----  
-----AATAAAAATATGTCAAAATTTGG-----GAA-----  
AATATGACCTGGATGCAGTGG---GAAAGAGAAATTGACAAATTACACAGGCCAAATATAC---  
GAATTGCTTGAGGAATCGCAAAACCAGCAGGAG-----  
-----  
AAAAATGAAAAGGATTTATTAGAAATTGGACAAGTGGAAACAATCTGTGGAATTGGTTCAGCATATCAAATTGGT  
TGTGGTATATAAGACTATTTATAATGATAGTAGGAGGCTTAATAGGTTTAAGAATAATTTTTTGCT---  
GTGCTTTCTATAGTA-----AATAGAGTTAGGCAGGGATACTCACCT-----  
TTGTCAATTTGCTATTAGTTTGCTTGATACCATAGCAATAGCAGTAGCTAAC---  
GGGACAGATAGGATTATAGAAGTAATACAAAGCATTGTAGGGCT-----  
-----ATCTGCAACATA-----CCTAGAAGAATAAGACAGGGCTTTGAAGCAGCTTTGCAA---TAA  
>GU329240  
GCA---GGG-----  
GAAAAATTGTGGGTCACAGTCTATTATGGGGTACCTGTGTGG---AAAGAAGCAAAA---  
ACTACTCTATTCTGTGCATCAGATGCTAAAGCATATGACAAAGAA---GTGCATAAT-----  
-----GTCTGGGCTACA---CATGCCTGTGTACCCACAGAC---  
CCCAACCCACAAGAAATGTTTTTGGA---AATGTAACAGAAAATTTTAAC-----  
-----ATGTGGAAAAATGACATGGTGGATCAAATGCATGAGGACATA---  
ATTAGTTTATGGGATCAAAGCCTA---AAACCATGTGTAAAGTTG---  
ACCCCACTCTGTGTACGTTAAATTGTAAAAAGGCTACTAGTAATAGTACTGATACCAAACTAAT-----  
-----  
-----GGCAGGACTACTACTCAAAGGATAGCATGATAGAAGAAATGAAA---  
AATTGCTCTTTCAATATAACCACAGAAATAAGA-----  
GATAAGAAACAGCAAGTGAAGTGCCTC---  
TTTTATAAACTTGATATAGTACCACTTAATGGGAATGAGAGCAGT-----  
-----  
AATGGGAATGAGAGCAGTAAAGAGTATAGATTAATAAATTGCAATACCGCAACCGTAACACAA---  
GCCTGTCCAAAGGTCACTTTGAACCAATTCTTATACATTATTGTGCTCCAGCTGGTTATGCGATTCTAAAGT  
GTAAT---AATGAGACATTCAAC-----GGGACAGGGCCATGCAATAAT-----  
-GTCAGC---ACAGTACAATGTACACATGGGAATTAGGCCAGTGGTATCAACT---  
CAACTACTGTTAAATGGTAGCCTAGCAGAAGGAGAT-----  
ATAGTAATTAGATCTGAAAATCTGACAAACAAT-----GTCAAAAACAATAATAGTACATCTTAAT----  
-----GAATCTGTAAAA-----ATTATGTGTACAAGACCTGGCAATAATACAGGACAA-----  
-AGCATCAGGATA-----GGACCAGGACAATCA---TTC-----CATGCACCAGGTAAA-----  
-----ATAATAGGCGATATA-----AGACAAGCATATTGT---AACATTAGC-----  
CACTGGAAAAGAACTTTACAAAGGGTAAAGGAAAAATTAAAA-----GACCACTTCCCT----  
-----AATAAAAACATAACATTTGAT-----  
CAACATTCAGGAGGGGACCTAGAAATTACA---ACACATAGCTTTAATTGTAGAGGAGAG---  
TTTAAGCAGCTCCAGGCAAGAGTCCTGGCTATAGAAAAGATACCTACAGGATCAACAGCTCCTAGGGATTTGGG  
GCTGCTCTGGAAGAACTCATCTGCACCACTGCTGTGCCTTGGAATTCCAGTTGGAGT-----  
-----AATAAACTCAAGAACTATTTGG-----GGG-----  
AACATGACCTGGATGGAATGG---GATAGAGAAATTGGTAATTACACAGACACAATATAT---  
AGGTTGCTTGAAGACTCGCAACGCCAGCAGGAG-----  
-----  
AAAAATGAAAAGGATTTATTGGCATTGGACAAGTGGAAACAATCTGTGGAATTGGTTTGACATAACAAAATGGC

TGTGGTATATAAAAAATATTCATAATGATAGTAGGAGGCTTGATAGGTTTGAGAATAATTTTTTGCT---  
GTGCTTTCTATAGTA-----AATAGAGTTAGGCAGGGATACTCACCT-----  
TTGTGCTTTTGCTATTAGTCTGCTTGATACCATAGCAATAGCAGTAGCTGAA---  
GGAACAGATAGAATTATAGAAATAGTACAAAGAATTTGTAGAGCT-----  
-----ATCTGTAATATA-----CCTAGAAGAATAAGACAAGGCTTTGAAGCAGCTTTGCAA--TAA  
>GU329324  
GTG---ATG-----  
GGAAACTTGTGGGTCACAGTCTATTATGGGGTACCTGTGTGG--AAAGAAGCAAAA---  
ACTACTCTATTCTGTGCATCAAATGCTAAATCATATGAGACAGAA--GTGCATAAT-----  
-----GTCTGGGCTACA---CATGCCTGCGTGCCACAGAC---  
CCCAACCCACAAGAAATAATTTTGAA-----AATGTAACAGAAAATTTTAAC-----  
-----ATGTGGAAAAATGACATAGTGGATCAGATGCATGAGGATGTA---  
ATCAGTTTATGGGATCAAAGCCTA--AAGCCATGTGTGAAGTTG---  
ACCCCACTCTGTGTCACTTTAAATTGTACAAATAGGGTTATTGTTAATGCTACC-----  
-----  
-----ATTAGTAATAGTACTGGCATGAGA---  
AATTGCTCTTTCAATACAACCACAGAATAAGA-----  
GATAAGCAAAAGAAAGAGTATGCATT--TTTTATAAACTTGATGTAATACCACTTGATGGGAATGAT----  
-----  
-----  
TCTAATGAGAATAACTATTCTGATTATAGATTAATAAAATTGCAATACCTCAACCATAACACAA---  
GCTTGTCCAAAGGTCTCTTTTGATCCAATTCCTATACATTATTGTGCTCCAGCTGGTTATGCGATTCTAAAGT  
GTAAT--AATAAGACATTCAAT-----GGGACAGGACCATGCAATAAT-----  
-GTCAGC--ACAGTACAATGTACACATGGAATTAAGCCAGTGGTATCAACT---  
CAACTACTGTAAATGGTAGCCTAGCAGAGGGAGGA-----  
ATAATAATTAGATCTGAAAATCTGACAGACAAT-----GCCAAAACAATAATAGTACAGTTTAAT----  
-----GAATCTGTACAG-----ATTGTGTGTACAAGACCTGGCAATAATACAAGAAAA-----  
-AGTGTAAGGATA-----GGACCAGGACAAGCA--TTC-----TATGCAACAGGTGAA-----  
-----ATAATAGGAAACATA-----AGACAAGCACATTGT--AACATTAGTGAAAAA---  
GAATGGAGTAAAACCTTTACGTCAGGTAGGGAAAAAATTAGAA-----GCACTCTTT-----  
-----AATAAAACAATACAATTTAAA-----  
AGTTCCTCAGGAGGGGACCTAGAGATTACA--ACACATAGCTTTAATTGTGGAGGAGAA--  
TTTAAGCAGCTCCAGGCAAGAGTCCTGGCTATAGAAAGATACCTAAAGGATCAACAGCTCCTAGGAATTTGGG  
GCTGCTCTGGAACACTCATCTGCACCACTGCTGTGCCTTGGAACCTCAGTTGGAGT-----  
-----AATAAATCTCATGATGAGATTTGG-----CAG-----  
AACATGACATGGATGCAGTGG--GAAAGAGAAATTGATAATTACACAGAAACAATATAC---  
AGGTTGCTTGAAATATCGCAAAACCAGCAGGAA-----  
-----  
CAAAATGAAAAAGATTTATTAGCATTGGACAGTTGGCAAAGTTTGTGGAATTGGTTTGACATAACAAAATGGC  
TGTGGTATATAAAAAATATTCATAATGATAGTAGGAGGCTTGATAGGTTTGAAGAATAATTTTTTGCT--  
GTGCTATCCATAGTA-----AATAGAGTTAGGCAGGGATACTCACCT-----  
TTGTGCTTGGCTATTAGTTTGCTTGATACCTTAGCAATAGCAGTAGCTGAG---  
GGAACAGATAGGATTATAGAAGTAATACAAAGAATCTTTAGAGGC-----  
-----ATTCTTAACGTA-----CCTACAAGAATAAGACAGGGCTTAGAAGCAGCTTTGCTA--TAA  
>GU329333  
GGG---ATG-----  
AGGAACATGTGGGTTACAGTTTATTATGGGGTACCTGTGTGG--AGAGAAGCAAAA---  
ACTACTCTATTTTGTGCATCAGACGCTAAATCATATGAGAAAGAA--GTACATAAT-----  
-----GTTTGGGCTACA---CATGCCTGTGTACCCACAGAC---  
CCCAACCCACAAGAAGTAGTTTGAAG-----AATGTAACAGAAAATTTTAAC-----  
-----ATGTGGAAAAATGACATGGTGGATCAGATGCATGAGGATATA---  
ATCAGTTTATGGGATCAAAGCCTA--AAGCCATGTGTAAAGTTA---  
ACCCCACTCTGTGTCACTTTAAATTGTACAAATGTGAGCAATAGTACTGCTCGC-----  
-----  
-----AACATAAGTAGTAATATGTTTGGGGAAATAAAA---  
AATTGCTCTTTCAATGCAACTACAGAAATAAGA-----  
GATAAGAAACAGAAACAGTATGCATTT--TTTTATAGACTTGATGTAGTACCACTTAACAGTAATAAC----  
-----  
-----  
AGTAATAACAGTGATAGTACTGAGTATAGATTAATAAACTGTAATACCTCAACCATAACACAA---

GCCTGTCCAAAGGTCTCTTTTGATCCAATTCCTATACATTATTGTGCTCCAGCTGGTTATGCGATTCTAAAGT  
 GTAAT---AATAAAACATTCAAT-----GGGACAGGACCATGCAATAAT-----  
 -GTCAGC---ACAGTACAATGTACACATGGAATTAAGCCAGTGGTATCAACT---  
 CAACTACTATTAAATGGTAGCTTAGCAGAAGGAGAG-----  
 ATAATAATCAGATCTCAAGATCTGAGCAACAAT-----GCTAGAACAATAATAGTACATCTTAAT----  
 -----GAATCTGTGGAA-----ATTGTGTGTATAAGACCCAACAATAATACAAGAAAA-----  
 -AGTATAAGGATA-----GGACCAGGACAAACA---TTC-----TATGCAACAGGAGAA-----  
 -----ATAATAGGAAACATA-----AGAGAAGCACATTGT---AAGATCAGTGAAACT---  
 AGATGGAATCACACTTTACAGAGGGTAAGTGAAAAATTAAAA-----GAGCACTTCCCT----  
 -----AATAAAACAATACAATTTAAC-----  
 TCATCTTCAGGAGGGGACCTAGAAATTACA---TCACACAGCTTTAATTGTAGAGGAGAA---  
 TTTAAGCAGCTCCAGACAAGAGTCCTGGCTATAGAAAAGATACCTAAAGGATCAACAGCTCCTAGGACTTTGGG  
 GCTGCTCTGGAAGAACTCATCTGCACCCTGCTGTGCCTTGGAACATCAGTTGGAGT-----  
 -----AATAAATCTCAAAAAGATATCTGG-----GAC-----  
 AACATGACCTGGATGCAGTGG---GATAAAGAAATTAATAATTACACAAACACAATATAC---  
 CAGTTGCTTGAAGATTACAAAAACCAGCAGGAG-----  
 -----  
 AAAAAATGAACAGGATTTATTAGCACTGAACAGCTGGAGTAATCTGTGGAATTGGTTTGATATTTCAAACCTGGT  
 TGTGGTATATAAAAATATTTCATAATGATAGTAGGGGGCTTAATAGGTTTAAGAATAATTTTTTGCT---  
 GTGTTATCTATAGTG-----AATAGAGTTAGGCAGGGATACTCACCT-----  
 TTGTCGTTTGCTATTAGTTTATTTGATACTACAGCAATAGCAGTAGCTGAA---  
 GGAACAGATAGGATTATAGAATTCATACAAAGAATTGGTAGGGCT-----  
 -----ATCCTCAACATT-----CCTAGAAGAATAAGACAGGGCTTAGAAACAGCTTTGCTA---TAA  
 >GU329368  
 GGG---AAG-----  
 GAAAACTTGTGGGTCACAGTCTATTATGGGGTACCTGTGTGG---AAAGAAGCAAAA---  
 ACTAYTCTATTCTGTGCATCAGATGCTAAAGGATATGAGAAAGAG---GTGCATAAT-----  
 -----ATCTGGGCTACA---CATGCCTGTGTACCCACAGAC---  
 CCCAACCCACACGAAATGGTTATGGGA-----AATGTAACAGAAAATTTTAAC-----  
 -----ATGTGGAATAATGATATGGTGGATCAGATGCATGAGGACATA---  
 ATCAGTTTATGGGATGAAAGCCTA---AGGCCATGCGTAAAATTG---  
 ACCCCACTCTGTGTCACTTTAAATTGTAGTAATGCTATCAGTAAAGGTAATATTACCCGCGATGGTGTTAATT  
 TTGAG-----  
 -----TTTACCAATAGTAGTAATGCTACCTACAGTAATAGCATAACTGAAGAAATGAAA---  
 AATTGCTCTTTCAATATAACCACAGAAATAAAA-----  
 GATTGGAGACAGAAAGTGTATACAACC---TTTTATAAACTGATATAGTACCACTTAAGGAGAATGGA---  
 -----  
 AGTAACTCTAGTGAATATAGTGAATATATATTAATAAGTTGTAATACCTCAGTCGTAACACAA---  
 GCCTGTCCAAAGGTCAATTTTGACCCAATTCCTATACATTATTGTGCTCCAGCTGGATATGCGATTCTAAAGT  
 GTAAT---AATAAGACATTCAAT-----GGAAAAGGACCATGTTCATAAT-----  
 -GTTAGC---ACAGTACAATGCACACATGGAATTAAGCCAGTGGTATCAACT---  
 CAACTACTGTAAATGGTAGCCTAGCAGAGGAAGAT-----  
 ATAATAATTAGCTCTGAAAATTTGACAGACAAT-----GCCAAAACAATAATAGTACATCTTAAT----  
 -----GAATCTGTAAGA-----ATAGAGTGTACAAGACCTGGCAATAATACAAGAAAA-----  
 -AGTGTAAGGATA-----GGACCAGGACAAGTA---TTC-----TATGCAACAGGAGAC-----  
 -----ATAACAGGAGATATA-----AGACAAGCACATTGT---AACGTTAGTAGAAAA-----  
 -AAATTGGACTGAACTTTATGGAGAGTAAGTAAGAAATTA-----AAAGAACACTTT-----  
 -----AATAAAAGTATATACTTTGCA-----  
 AATTCCTCAGGAGGAGACCCAGAAATTACA---ACACATACCTTTAATTGTAGAGGAGAA---  
 TTTAAACAGCTACAGGCAAGAGTCCTGGCCATTGAAAGATACCTAAAGGATCAACAGCTCCTAGGGCTTTGGG  
 GCTGCTCTGGAAGAACACATCTGTCCCACCGCTGTGCCTTGGAACCTCAGTTGGAGT-----  
 -----AATAAATCTCTAGGACAAATTTGG-----GAT-----  
 AACATGACCTGGATGCAATGG---GACAAAGAGGTTAACAGTTACACAAGCATAATATAC---  
 AATTTGCTTGAAGAATCGCAAAACCAACAAGAG-----  
 -----  
 CAAAAATGAAAAGGAGTTATTAGCATTGGACAGTTGGAAAAAGTCTGTGGAATTGGTTTGACATATCAAAATGGC  
 TGTGGTATATAAAAATATTTCATAATGATAGTAGGAGGCTTAATAGGTTTAAGAATAATCTTTTGCT---  
 GTGCTTTCTATAGTG-----AATAGAGTTAGGCAGGGATACTCACCT-----  
 TTGTCATTTTGCTATTAGCCTGCTTGATACCATAGCAATAGCAACAGCTGAG---

GGAACAGATAGGATTATAGAAGTACTACAAAGAATTGGTAGAGCT-----  
-----ATCTGGAACATA-----CCTACAAGAATAAGACAGGGCCTAGAAGCAGCTTTGCTG--TAA  
>MK749242  
GTG---ATG-----  
GGGAACATGTGGGTACAGTTTATTATGGGGTACCTGTATGG--AAAGAAGCAAAA---  
ACTACTCTATTTTGTGCATCAGATGCTAAAGGATATGAGACAGAA--GCGCACAAT-----  
-----GTCTGGGCTACA--CATGCTTGTGTACCCACAGAC---  
CCCAACCCACAAGAAATGGTTTGGCA-----AATGTAACAGAAAATTTTAAC-----  
-----ATGTGGAAAAATGATATGGTGGATCAGATGCATGAGGATATA---  
ATCAGTTTATGGGATGAAAGCCTA--AAGCCATGTGTAAAATTA---  
ACCCCACTCTGTGTTACTTTTACACTGTGGAAAGGTCAAAAAGAACTTC-----  
-----  
-----AGTAATGATACCCTAGGTGAGGAAAAGGAGGCAATAAAA---  
AATTGCTCTTTCAATATAACCACAGAAATAAAA-----  
GATAGAAAAAGAATGAATTTGCACTT--TTTTATAAATCTGATATAGTACTATTCAATAATAAG-----  
-----  
-----  
AGTAATGAGACAGGGGAGTATAGGCTAATAAATTGTAATACCTCAACCGTGACACAA---  
GCCTGCCCAAAAGTCAACTTTGATCCAATTCCTCTACATTATTGTGCTCCAGCTGGTTATGCGATTCTAAAGT  
GTAAT--AATAAGACATTCAAT-----GGAACAGGACTATGTAATAAT-----  
-GTCAGT--GCAGTACAATGTACTCATGGAATTAAGCCAGTGGTATCAACT---  
CAACTACTGTTTAAATGGTAGCCTAGCAGAAAAGGAT-----  
ATAATAATTAGATCTGAAAATCTGACAAACAAT-----GCCAAAACAATAATAGTACAGCTTAAG----  
-----GAACCTGTAAAA-----ATTGTGTGTGTAAGACCCAACAACAATACAAGAAAA-----  
-AGTATACCGATA-----GGACCAGGAAGAGCG--TTC-----TTTGCAACAGGAGAC-----  
-----ATAACAGGAAATATA-----AGGAAAGCACATTGT--AACATTACTGAAAAG---  
GCATGGAATAACACTTTACACAAAGTAAGTGAAAAATTAATA-----GAATACTTCGGG----  
-----AGTAAAAATATTTCTTTTGAA-----  
CCATCCTCAGGAGGGGACCTAGAAATTACA--ACACATAGCTTTAATTGCCGTGGAGAA--  
TTTAAGCAGCTCCAGGCAAGAGTCTTGGCTATTGAAAGATACCTAAAAGATCAACAGATCCTAGGAATTTGGG  
GCTGCTCTGGAAGAACTCATCTGCACCACTCTAGTGCCTTGGAACTAGTTGGAGT-----  
-----AATAAACTAAAAATGAGATTTGG-----GAA-----  
AACATGACATGGATGCAGTGG--GATAAAGAAATTAGTAATTACACAGGCATAATATAC--  
AGGTTACTTGAGGACTCGCAATCCAGCAAGAA-----  
-----  
AAAAATGAAAAGGACTTATTAGCCTTGGACAGTTGGGCAAGTTTGTGGAATTGGTTTGACATATCAAATTGGC  
TGTGGTATATAAAAAATATTCATAATGATAGTAGGAGGCTTGATAGGTTTAAGAATAATCTTTACT---  
GTGCTTTCTATAGTG-----AATAGAGTTAGGCAGGGATACTCACCT-----  
TTGTCAATTTGTTATTAGTCTGTATGATTCCATAGCAATAACAGTAGCTGAA--  
GGAACAGATAGGATCATAGACTTAATACAAAGAGCTTTTAGAGCT-----  
-----ATCTGCAACATA-----CCCAGAAGAATAAGACAGGGCCTTGAAGCAGCTTTGCAA--TAA  
>KU749426  
GTA---ATA-----  
GGGAACCTGTGGGTACAGTATATTATGGAGTACCTGTGTGG--AAAGAAGCAAAA---  
ACTACTCTATTCTGTGCATCAGATGCTAAAGCATATGAGACAGAA--GTGCATAAT-----  
-----GTCTGGGCTACA--CATGCCTGTGTACCCACAGAC---  
CCCAACCCACAAGAAATATGGTTACCA-----AATGTAACAGAGGAGTTTAAC-----  
-----ATGTGGAAAAATGACATGGTGGAGCAGATGCATGAGGATGTA---  
ATCAGTTTATGGGATCAAAGCCTA--AAGCCATGTGTAAAGTTG--  
ACCCCACTCTGTGTCACTTTAACTGTACTAGTGATATTACAGTAAAGGCCACTGCCAATCCT-----  
-----  
-----GATGATAATATAACGAGTGAAATGAAA---  
AATTGCTCTTTCAATATGACCACAGAATAAGA-----  
GATAAGAAAAAGAAAGAATATGCACTT--TTTTATAAATTTGATATAGTACCACTTGATAGAGAGAATGAT-  
-----  
-----  
ACTTACAATGAGTATAGATTAATAAACTGTAATACCTCAACCATAACACAA---  
GCCTGTCCGAAGGTCACTTTTGAACCAATTCCTATACACTATTGTGCTCCGGCTGGTTATGCGATTCTAAAGT  
GTAAG--GATCAGAAATTCAAT-----GGAACAGGACCATGCAAGAAT-----  
-GTCAGC--AGTGTACAATGTACACATGGAATTAAGCCAGTGGTGTCAACT---

CAACTACTGTAAATGGTAGTCTAGCAGAAGAAGAG-----  
 ATAATAATTAGATCTGAAAATATAACAAATAAT-----GTCAAAACAATAATAGTACATCTTAAT----  
 -----AACTCTGTAGAA-----ATTACTTGTAGCAGGCCAGGCAATAATACAAGAAGA-----  
 -AGTACGAGGATA-----GGACCAGGACAAACA---TTC-----TATGCAACAGGAGAT-----  
 -----ATAATAGGAGATATA-----AGAAAAGCACATTGC---AACATTAGTGAAAGT---  
 CTATGGAATAACACTTTATACAATGTAAGTAAAAAATTAGAA-----GAATACTTCCCT-----  
 -----AATAAAACAATGAACTTTACA-----  
 TCACCTGCAGGAGGGGACATAGAAATTATG--ACACATAGCTTTAATTGTAGAGGAGAA---  
 TTTAAACAGCTCCAGGCAAGAGTCCTGGCTATCGAAAGATACCTAAAGGATCAACAGCTCCTAGGGATTTGGG  
 GCTGCTCTGGAAGAACTCATCTGCACCACTAATGTGCCTTGGAACACTAGTTGGAGT-----  
 -----AACAAATCTCAAGATGATATTTGG-----AGA-----  
 AACATGACCTGGATGCAGTGG---GATAGAGAAATTAATAATTACACAAACATAATATAC---  
 AATTTACTTGAAGAATCGCAAAACCAGCAGGAA-----  
 -----  
 AAGAATGAACAGGAGTTACTAACATTGGACAGTTGGAATAATCTGTGGAATTGGTTTAGCATATCAAATTGGC  
 TGTGGTATATAAAAATATTCTAATGATAGTAGGAGGCTTGATAGGCTTAAGAATAGTTTTTTGCT---  
 GTACTATCCATAGTG-----AATAGAGTTAGGCAGGGATACTCACCT-----  
 TTGTCAATTTGCTATTAGTCTGCTTGATACCACAGCAATAGCAGTAGCTGAA---  
 GGAACAGATAGAATTATAGAATTGCTACAAAGAATTGGTAGAGCT-----  
 -----ATCTATAACATA-----CCTAGAAGAATAAGACAGGGATTTGAAACAGCTTTGCTT---TGA  
 >KR820394  
 GGA---GTA-----  
 GGGGACTTGTGGGTACAGTTTATTATGGGGTACCTGTGTGG---AGAGATGCAAAA---  
 ACTACTCTATTCTGTGCATCAGATGCTAAAGCATATGACAAGGAA---GTGCATAAT-----  
 -----GTTTGGGCTACA---CATGCCTGTGTACCCACAGAC---  
 CCTAGTCCACAAGAGATGGTTTTGGGA-----AATGTAACAGAAAATTTTAAT-----  
 -----ATGTGGAATAATGACATGGTGGATCAGATGCATGAGGATGTA---  
 ATCAGTTTATGGGACCAAGGCCTA---AAGCCATGTGTAAAGTTG---  
 ACCCCACTCTGTGTCACTTTAACTGTATGGATGTTACTGTTATTACTACCAGTACTAATAATACTGCTACTA  
 ACAGTACTAAT-----  
 -----AGTACTAATAATAGTGCCATCAGTAAAGACAACATAAATGAACTAAAA---  
 AACTGCTCTTTCAATATAACCACAGAAATAAGA-----  
 GATAAGAAGAGGAATGAATATGCACCT--TTTTATAAACTTGATATAGTACCCTTACTGGT-----  
 -----  
 -----  
 AATAGCCATGAATATAGATTAATAAAATTGTAATACCTCAGCCATAACACAA---  
 GCCTGTCCAAAGGTCTCTTTTGACCCAATTCCTATACATTATTGTGTTCCAGCTGGTTATGCGATTCTAAAGT  
 GCAAT---AATAAGACATTCAAT-----GGGACAGGACCATGTCTATAAT-----  
 -GTCAGT--ACAGTGCAATGTACACATGGAATTAAGCCAGTGGTATCAACT---  
 CAACTATTGTAAATGGTAGCCTATCAGAAGCAGGG-----  
 ATAATAATTAGATCTGAAAATATATCAGACAAT-----GTCAAAACAATAATAGTACAGCTTAAT---  
 -----AATTCTGTAGAA-----ATTAATTGTACAAGACCCGGCAATAATACAAGAAAA---  
 -AGTATAAGGATA-----GGACCAGGACAAACA---TTC-----TATGCAACAGGAGAC-----  
 -----ATAATAGGAAATATA-----AGAGAAGCACATTGT---AACATTAGTAGAGAC---  
 AAGTGGAGTAAGACTGTACAAGCAGTAAAGGAAAAATTAAAA-----GAATACTTCCCT-----  
 -----AATAGCGCAGAAATAAAGTTTCTA-----  
 CCACCCGTAGGAGGGGACCTGGAAATTACA---ACACATAGCTTTAATTGTAGAGGAGAA---  
 TTTAAACAGCTTCAGACAAGAGTCCTGTGCTAGAAAAGATACCTAAGGGATCAACAGCTCCTAGGGCTGTGGG  
 GCTGCTCTGGAAGAACTAATCTGCACCACTACTGTGCCTTGGAACCTCCAGTTGGAGC-----  
 -----AATAAATCTAAAGATGATATTTGG-----GAA-----  
 AACATGACCTGGATGCAGTGG---GATAAAGAAATTAGTAATTACACAGGCATAATATAC---  
 CAGTTGCTTGAAGACTCGCAAAATCCAGCAGGAA-----  
 -----  
 GAAAAATGAAAAAGATTTACTAGCATTGGACAGTTGGAATAATCTGTGGAATTGGTTTGACATAACAAGATGGC  
 TGTGGTATATAAGAATATTCTAATGATAGTAGGAGGCTTGATAGGTTTAAGAATAGTTTTTTGCT---  
 GTAATCTCTTTAGTG-----AATAGAGTTAGGCAGGGATACTCACCT-----  
 TTGTCAATTCGCTATTAGTCTGCTTGATACCATAGCAATAACAGTAGCTGAA---  
 GGAACAGATAGAATTATAGAATTAGTACAAAGAATTTGTAGAGCT-----  
 -----ATTTGCAACATA-----CCTAGAAGAATAAGACAGGGCTTTGAAGCAGCTTTGCAA---TAA  
 >U88822

GCT---GCA-----  
GATAACTTGTGGGTCACAGTTTATTATGGGGTACCTGTATGG---AAAGAAGCAACC---  
ACCACGCTATTTTGTGCATCAGATGCTAAATCATATAAAACAGAG---GCACATAAT-----  
-----ATCTGGGCTACA---CATGCCTGTGTACCCACAGAC---  
CCCAACCCACAAGAAATAGAACTGAAA-----AATGTCACAGAAAATTTTAACT-----  
-----ATGTGGAAAAACAACATGGTGGACCAGATGCATGAGGATATA---  
ATTAGTTTATGGGATCAAAGTCTA---AAACCATGTGTAAAATTA---  
ACCCACGCTGTGTCACTTTAAATTGCACTGATGCATCGAGAAACAGCACTGATAATAAC-----  
-----  
-----AGCACACTGCCAACGGTGAAGCCAGGAGAAATGAAA---  
AACTGCTCTTTCAATATAACCACAGTAGTAACG-----  
GATAAGAGGAAGCAAGTACATGCACCTT---TTTTATAGACTTGATGTAGTACAAATAGATAATGAGGGTAAA-  
-----  
-----  
AATGAAATCAATGATACTTATGGTACTTATAGGTAAATAAATTGTAATACCTCAGCCATTACACAA---  
GCTTGTCCAAAAGTATCCTTTGAGCCAATTCCCATACATTATTGTGCCCCAGCTGGTTTTGCAATTCTAAAGT  
GTAAC---GATAAAAGGTTCAAT-----GGAACAGGCCCATGCAAAAAT-----  
-GTCAGC---TCAGTACAATGTACACATGGAATTAGGCCAGTGGTGTCAACT---  
CAACTGCTGTTAAATGGCAGTCTAGCAGAAGAAGAG-----  
ATCGTAATAAGATCTGAAAATCTCACAAACAAT-----GCTAAAATCATAATAGTACATCTTAAT----  
-----CAATCTGTAGAA-----ATTAATTGTACAAGGCCCTACAAAAAGGAAAGACAA-----  
-AGGACACCTATA-----GGACAAGGGCAAGCG---CTC-----TATACAACAAGGTAT-----  
ACAACAAGGATAATAGGA-----CAAGCATATTGT---AATATTAGTGGAGTA---  
AAATGGAATAACACCTTACGACAGGTAGCTAGAAAATTAGGA-----AACCTTTTGAAC----  
-----CAAACAAAAATAATTTTAAA-----  
CCATCCTCAGGAGGGGATCCAGAAATTACA--ACACACAGTTTAAATTGTGGAGGGGAA---  
TTTAAACAGCTCCAGGCAAGAATCCTGGCTGTAGAAAGATACCTGAAGGATCAACAGCTCCTAGGAATTTGGG  
GTTGCTCTGGAACACATTTGCACCACTACTGTACCCTGGAACCTCTAGTTGGAGT-----  
-----AATAGATCTGTAGAGTATATTTGG-----GGG-----  
AACATGACCTGGATGCAGTGG---GAAAGAGAAATTGACAATTACACGGGCTTAATATAC---  
AACTTGATTGAAGAATCGCAAAATCCAGCAAGAA-----  
-----  
AAGAATGAAAAAGAATTATTAGAATTGGACAAGTGGGCGAGTTTGTGGAATTGGTTTAGCATAACACAATGGC  
TGTGGTATATAAAAATATTACATAATGATAGTAGGAGGCTTGATAGGTTTAAAGAATAGTTTTTGCAG---  
GTACTTTCTATAGTA-----AATAGAGTTAGGCAGGGGTACTCACCT-----  
TTATCGTTTGTCTATTAGCTTGGTTGATGCAACAGCAATAGCAGTAGCTGAG---  
GGGACAGATAGGATTATAGACATAGTAAGGAGAGCTTGTAAAGCT-----  
-----GTGCTTCACATA-----CCCACAAGAATAAGACAGGGTTTAGAAAGGGCTTTGCTA--TAA  
>AJ277820  
GTT---GCA-----  
GAAAAATTTGTGGGTCACAGTTTATTATGGGGTACCGGTGTGG---AAAGAAGCAACC---  
ACCACCTATTCTGCGCATCAGATGCTAAATCATATGAAACAGAG---AAACATAAC-----  
-----ATCTGGGCTACA---CATGCCTGTGTACCCACGGAC---  
CCCAACCCACAAGAAATAAACTAGAA-----AATGTCACAGAGAACTTTAACT-----  
-----ATGTGGAAAAATAACATGGTGGAGCAGATGCATGAGGATATA---  
ATCAGTTTATGGGATCAAAGCCTA---AAACCATGTGTAAAATTA---  
ACCCCACTCTGTGTCACTCTAACTGCACTGATGTACAGGGGAATACTATGGAG-----  
-----  
-----ACTGGACAGATGGAGAAAGGAGAAATGAAA---  
AGCTGCTCTTTCAATATAACCACAGTATTAAGA-----  
GATAAACAGGAGAAAGTAGCTGCACCTT---TTTTATAGACTTGATATAGTACCAATAGATAAT-----  
-----  
-----  
AATAGTAGTTATAGATTAATAAATTGTAATACCTCAACCATTACACAG---  
GCTTGTCCAAAGGTAACCTTTGAGCCAATTCCCATACATTATTGTGCCCCAGCTGGGTTTGCAATCCTAAAGT  
GTACA---GATAAGAAGTTTAAAT-----GGAACAGGCCCATGCACAAAT-----  
-GTCAGC---TCAGTACAATGTACACATGGGATTAAGCCAGTGGTATCAACT---  
CAACTGCTATTAAATGGCAGTCTAGCAGAAGAAGAA-----  
ATAATAATTAGATCTGAGAATCTTACAAATAAT-----GCAAAAATCATAATAGTACAGCTTAAT----  
-----GAATCTGTAACA-----ATTAAGTGTACAAGGCCCAACAACAATACAAGACAA-----

-GGTACACATATA-----GGACCAGGGCAGGCA---CTC-----TATACAACAAGG-----  
 -----GTAATAGGAGATATA-----AGAAAAGCACATTGT---AATATTAGTGGGAAA---  
 GCATGGAATAAACTTTACAACAGATAGCTATAAAATTAAGA-----AACCTTCTTAAC----  
 -----AAGACAACAATAATTTTTTAAC-----  
 TCATCCTCGGGAGGGGACCCAGAAATTATA--ACACACAGTTTTTAATTGTGGAGGGGAA---  
 TTTAAACAGCTCCAAGCAAGAGTCCTGGCTGTGGAAAGATACCTAAAGGATCAACAGCTCCTAGGAATTTGGG  
 GTTGCTCTGGAAGACACATTTGCACCACTACTGTGCCCTGGAACCTCTAGTTGGAGT-----  
 -----AATAAATCTCTAGATGAGATTTGG-----GAA-----  
 AACATGACCTGGATGGAGTGG---GAAAGAGAAATTGACAATTACACAGGCTTAATATAC---  
 AGCTTAATTGAGGAATCGCAAACCCAGCAAGAA-----  
 -----  
 AAGAATGAAAAGGAATTATTGGCATTGGACAAGTGGGCAAGTTTGTGGAATTGGTTTGACATAACACAATGGC  
 TGTGGTATATAAAAATATTTCATAATGGTTGTAGGAGGCTTAATAGGGTTAAGAATAGTTTTTTGCT---  
 GTGCTTTCTTTAGTA-----AATAGAGTTAGGCAGGGATACTCACCT-----  
 CTATCATTTGCTATTAGCTTGTTTGATGCCACAGCAGTAGCAGTAGCTGAG---  
 GGGACAGATAGGATTTTAGAAGCAGTACAAAGAGTTTGAGAGCT-----  
 -----GTTCTTACATA-----CCCACACGAATAAGACAGGGATTGGAAAAGGGCTTTACTA---TAA  
 >AY371156  
 GTA---GCA-----  
 GGTAATTTGTGGGTCACAGTATACTATGGGGTGCCTGTATGG---AAAGAAGCAAGT---  
 ACCACTCTATTTTGTGCATCAGATGCTAAATCATATGAAACAGAG---GCACATAAT-----  
 -----ATCTGGGCTACA---CATGCCTGTGTACCCACAGAC---  
 CCCAATCCACAAGAAATAGAACTGAAA-----AACGTCACAGAAAACCTTTAAC-----  
 -----ATGTGGAAAAATAACATGGTGGAACAGATGCATGAGGATATA---  
 ATCAGTTTATGGGATCAAAGCCTA---AAACCATGTGTAAAATTA---  
 ACCCCACTATGTGTCACTTTAAACTGCATTGATTACAGTAGCACAGGAAATAAGGTT-----  
 -----  
 -----ACTTTGGACAACAGCAGCATTGGAGAAGTGAAA---  
 AACTGCTCTTTCAATATAACCACAGTAGTAAGG-----  
 GATAAGAAAAAGCAAGAATATGCACCT--TTTTATAGACCTGATATAGTAAAAATAGATAAT-----  
 -----  
 -----  
 ACGGATAATAACTTTATAGGTTAATAAATTGTAATACCTCAGCCATTACACAG---  
 GCTTGTCCAAAGGTATCCTTTGAGCCAATTCCCATACATTATTGTGCCCCAGCTGGATTTGCAATTCTAAAAT  
 GTAAT---GATAAGCTGTTCAAT-----GGAACAGGCCCATGCACAAAT-----  
 -GTCAGC---ACAGTACAATGTACACATGGAATCAGGCCAGTGGTGTCAACT---  
 CAATTGCTGTTGAATGGCAGTCTAGCAGAAAAAGAG-----  
 ATCATGATTAGATCTGAAAATCTCACAGACAAT-----ACTAAAAACATAATAGTGCAGCTTAAC---  
 -----AATTCTATAGAA-----ATTACTTGATATAAGGCCTGGCAACAATACAAGAAGA---  
 -AGTATACATTTA-----GGACCAGGGCAGGCA---TTC-----TATACAACAAG-----  
 -----ATAATAGGAGACATA-----AGAAAAGCACATTGT---AATATTAGTGGAAACA---  
 AAATGGAATAACACTCTACAACAGGTAGCCAAAAAATTAGGA-----AAGTTCTAT-----  
 -----ACCAAAACAATAATTTTTTGAA-----  
 CCACCCTCAGGAGGGGACCCAGAAGTTATA--ACACACAGTTTTTAATTGTGGAGGGGAA---  
 TTTAAACAGCTCCAGGCAAGAGTCCTGGCTGTGGAAAGATACCTGAAGGATCAACAGCTCCTAGGAATTTGGG  
 GTTGCTCTGGAAGAACACATCTGCACCACTACTGTGCCCTGGAACCTCTAGTTGGAGT-----  
 -----AATAGATCTCTAGATGATATTTGG-----CAG-----  
 AACATGACCTGGATGCAATGG---GAGAAAGAAATTGAAAATTACACAGGTGTAATATAC---  
 AACTTAATTGAAGAATCACAAATCCAGCAAGAA-----  
 -----  
 AAAAAATGAAAAGAATTATTAGAATTGGACAAGTGGGCAAGTTTGTGGAATTGGTTTAGCATAACTAACTGGC  
 TGTGGTATATAAACTATTTATCATGATAGTAGGAGGCTTAATAGGTTTAAGAATAGTTGTTGCT---  
 GTGCTTTCTATGGTA-----AATAGAGTTAGGCAGGGATACTCACCT-----  
 CTGTCAATTTGCTATTAGCTTGTTATAACGCCACAGCAATAGCAGTAGCTGAG---  
 GGGACAGATAGGGTTATAGAAAATAGTACAAAGAGCATATAGAGCT-----  
 -----GTTCTTAATATA-----CCCACAAGAATAAGACAAGGTTTCGAAAAGGGCTTTGCTA---TAA  
 >FJ388945  
 GCA---GCA-----  
 GATAAGTTGTGGGTCACAGTGTATTATGGGGTGCCTGTGTGG---AAAGAAGCAAAA---  
 GCCACTCTATTTTGTGCATCAGATGCTAAAGTAACTAAAGCAGAG---GCACATAAT-----

-----ATCTGGGCTACA---CATGCCTGTGTACCCACGGAC---  
CCCAATCCCCAAGAAATAGTATTGGGG-----GAAAATGTACAGAAAACCTTTGAC-----  
-----ATGTGGAAAAATGACATGGTGGAAACAGATGCATGAGGATATA---  
ATCAGTTTATGGGATGAAAGCCTA---AAACCATGTGTAAAATTA---  
ACCCCACTCTGTGTCACTTTAGACTGCATTGATGTTGAGACCAACAATAAGACT-----  
-----  
-----ACAGTGGACAACAGCAGCATAGGAGACCTGAAA---  
AACTGCTCTTTCAATGTAACCACAATATTAAGA-----  
AATAAGAAGAAGCAAGTACATGCCCTT---TTTTATAGACTTGACGTAGTAAAAATAGATAGTCAGAATAAT-  
-----  
-----  
AGGGCTAATCAGAGTAATGGTACTTATAGGTTAATAAAATTGTAATACTTCAGCCATTACACAG---  
GCTTGCCCAAAGGTAAGCTTTGAGCCAATTCCCATACATTATTGTGCCCCAGCTGGTTTTGCATTCTAAAAAT  
GCAAT---GATCCACGGTTTCGAG-----GGAAAAGGCACATGCAAAAAT-----  
-GTTAGC---ACAGTACAATGTACACATGGAATCAGGCCAGTGGTGTCAACT---  
CAATTGCTGATGAATGGTAGTCTAGCAGAAGACGAG-----  
ATCATAATTAGATCTGAAAATCTCACAACAAT-----ATTAAAAACATAATAGTACAACCTTAAT----  
-----AAACTGTAGAA-----ATTAATTGTATAAGGCCCAATAACAATACAAGAGAC-----  
-AGTATCCATATA-----GGACCAGGGCAGGCA---CTC-----TATGCAACAACAAAC-----  
-----ATAATAGGAAACATA-----AGAGAAGCACATTGT---AATATTAGTAGTGGA---  
GACTGGAATAACACTCTACAACAAGTAGCAAAAAAATTAGGA-----AAACTTCTT-----  
-----AACAAAACAATAGTTTTTAAA-----  
CCATCCTCAGGGGGGACCCAGAAATTACA--AAACTCAGTTTTAATTGTGGAGGGGAA---  
TTTAAACAGCTCCAGGCAAGAAATCCTGGCTGTGGAAAGATACCTAAAGGATCAACAGCTCCTAGGAATTTGGG  
GTTGCTCTGGAACACATTTGCACCACTAATGTAGCCTGGAACCTCTACTTGAGT-----  
-----AGGAATAAGTCTTTAAATGAAATTTGG-----GAT-----  
AACATGACCTGGATGCAATGG---GAGAGAGAAATTGAAAATTACACAGGTGTAATATAC---  
ACCTTACTTGAAGAATCGCAACTCCAGCAAGAA-----  
-----  
AGAAATGAAAAGACTTATTAGAATTGGACAAGTGGGCAAGTTTGCGAATTGGTTTGACATAAGTAAATGGC  
TGTGGTATATAAAAATATTCATCATGATAGTAGGAGGGTTAATACGTTTAAAAATCGTTTTTGTCT---  
GTGCTTCTCCCATA-----CATAGAGTCAGGCAGCGATACTCACCT-----  
CCCTCGTTCGCTATTAACCTTGCTTGATGCCACAGCAATAGCAGTAGCTGAG---  
GGGACAGATAGGGTTATAACAGTAGTACAAAGAACTTGTAGAGCT-----  
-----GTTCTTCGCATA-----CCCAGAAGAATAAGACAGGGTTTCGAAAGGGCTTTGCTA---TAA  
>AF219271  
GCT---GCA-----  
GGCAATCTGTGGGTACAGTGTATTATGGGGTGCTGTATGG---AAGGAAGCAACC---  
ACCACTCTATTTTGTGCATCAGATGCTAAATCATATGATACAGAG--GCACATAAT-----  
-----ATCTGGGCCACA---CATGCCTGTGTACCCACAGAC---  
CCCAACCCACAAGAAATAGAACTGGAA-----AATGTGACAGAAAACCTTTGAC-----  
-----ATGTGGAAAAATAAAATGGTGGAAACAGATGCATGAGGATATA---  
ATCAGTTATGGGATCAAAGCCTAA---AACCATGTGTAAAATTA---  
CCCCACTCTGTGTCACTTTAACTGCACTGATGTAGTGAGGAATGACACTGTGAGGAATAGCACTC-----  
-----  
-----ACCAG-TCAGGGAACCTACAGCACTAGCCAGCCAGAAGGAATGAAA---  
AACTGCTCTTTCAATGTAACCACAGTAATAAGA-----  
GATAAGAGGAAGCAAGTACAGGCACTT---TTTTATAAACTTGTATAGTACCAATAGGCAAT-----  
-----  
-----  
GATACCAATAGTACCAATTATAGGTTAATAAAATTGTAATACCTCAGCCATTACACAG---  
GCCTGTCCAAAGGTAACCTTTGAGCCAATTCCCATACATTATTGTGCCCCAGCTGGTTTTGCATTCTAAAGT  
GTAGA---GATAAGAAGTTCAAT-----GGAACAGGCCCATGCACAAAT-----  
-GTCAGC---TCAGTACAATGTACACATGGAATTAGGCCAGTAGTGTCAACT---  
CAACTGCTGTTGAATGGCAGTTTAGCAGAAGAAGAG-----  
ATCATAATTAGATCTGAAAATCTCACAACAAT-----GCTAAAAACATAATAGTACAGCTTAAT----  
-----GAATCTGTAGCA-----ATTAATTGTACAAGGCCCTACAACACTATAAGACAC-----  
-AGTACACATATA-----GGACCAGGGCAAGCA---CTC-----TATACAATCGATGGA-----  
---AGAAAGAAAACAGGAGACATA-----AGACAAGCACATTGT---AATATTAGTGAAGCA---  
GCATGGAATAAACTTTACAACAGGTAGCTATAAAATTAGGA-----ACCCTTTTAAAC---

-----AAAACAACAATAACTTTTAAA-----  
 CCATCTTCAGGAGGGGACCCAGAAATTACA--ACACACAGTTTTTAATTGTGGAGGGGAA---  
 TTCAAACAGCTCCAGGCAAGAATCCTGGCTGTGGAAAGATACCTAAAGGATCAACAGCTCCTAGGAATTCGGG  
 GTTGCTCTGGAACACATTTGCACCACTAGTGTGCCCTGGAAGCTCTAGTTGGAGT-----  
 -----AATAGATCTCTAGATGACATTTGG-----CAG-----  
 AACATGACCTGGATGGAGTGG--GAAAGAGAAATTGACAATTACACAGGCATAATATAT---  
 AGCTTAATTGAAGAATCGCAGATCCAACAAGAA-----  
 -----  
 AAAAAATGAACAAGAATTATTGGAATTGGACAAATGGGCAAGTTTGTGGAATTGGTTTAACATAACACAATGGC  
 TATGGTATATAAAAAATATTTATAATGATAGTAGGAGGCTTGATAGGTTTAAGAATAGTTTTTTACT---  
 GTGCTTTCTTTAGTG-----AATAGAGTTAGGCAGGGATACTCACCT-----  
 CTGTCAATTTGCTAGTAGCTTGTTTGATACCCTAGCAATAGCAGTAGCTGAG---  
 GGGACAGATAGGGTTATAGAAATAGTACGAACAGCTTGACAGAGCT-----  
 -----ATTCTCCACATA-----CCTAGAAGAATCAGACAGGGCTTAGAAAAGGATTTTGCTA---TAA  
 >AF219272  
 GTT---GCA-----  
 GAAGACTTGTGGGTCACAGTTTATTATGGGGTACCTGTGTGG--AAAGAAGCAACC---  
 ACCACTCTATTTTGTGCATCAGATGCTAAGTCATATAAAGAAGGG--GCACATAAT-----  
 -----ATCTGGGCCACA--CATGCCTGTGTACCCACGGAC---  
 CCCAACCACAGAAGAAATAGAATTGGAA-----AATGTCACAGAAAACCTTTAAC-----  
 -----ATGTGGAAAAATAACATGGTGGAGCAGATGCATGAGGATATA---  
 ATCAGTTTATGGGATCAAAGCCTC--AAACCATGTGTGAAATTA---  
 ACCCCACTTTGTGTCACTTTAAATTGCACTAATGCAGGGAACGGGAGC-----  
 -----  
 -----CTGGCGGAGGCAGGAGAAATGAAA---  
 AACTGTTCTTTCAATATAACCACAGTAGTAAGA-----  
 GATAAGAGGAAGCAAGTATATGCACCT--TTTTATAAACTTGATGTAGTACAAATGGATAAT-----  
 -----  
 -----  
 AGTAACCACAGTACAGACTATAGGTTAATAAATTGTAATACCTCAACCATTACACAG---  
 GCTTGTCCAAAGGTATCTTTTGAACCAATTCCCATCCATTATTGTGCTCCAGCTGGTTTTACAATTTTAAAGT  
 GTAAA--GATAAGAAGTTCAAT-----GGAACGGGCCCATGCAAAAAT-----  
 -GTCAGC--TCAGTACAATGTACACATGGAATTAGGCCAGTAGTGTCAACT---  
 CAACTGCTGTTGAATGGCAGCCTAGCAGAAGAAGAG-----  
 ATAATAATTAGATCTGAAAATATCACAAACAAT-----GCTAAAACCATAATAGTACAGCTTAAT---  
 -----GAATCTGTAGTA-----ATTAATTGTACAAGGCCCAACAACAATACAAGGAAA-----  
 -AGTATACATCTA-----GGACCAGGACAAGCA--TTC-----TATACATCAAAC-----  
 -----ATAATAGGAGATATA-----AGAAAAGCACATTGT--AACATTAGTAGAGCA---  
 CAATGGAACAAAACCTTTACAACAGGTAGTTAGAAAATTAATA-----AACCTTCTTAAC---  
 -----AAAACAACAATAAATTTTAAA-----  
 CCATCCTCAGGAGGGGACCCAGAAATTACA--ACACACAGTTTTTAATTGTGGAGGGGAG---  
 TTAAACAGCTCCAGGCAAGAGTCCTTGCTGTAGAAAGATACCTAAAGGATCAACAGCTCCTAGGAATTTGGG  
 GTTGCTCTGGAACACATTTGCACCACTACTGTGCCCTGGAACACTAGTTGGAGT-----  
 -----AATAAATCTCTAAATGAGATTTGG-----GGG-----  
 AACATGACCTGGATGGAGTGG--GAAAGAGAAATTGACAATTACACAGGCTTAATATAC---  
 AGCTTAATTGAGGCCTCGCAAGTCCAGCAGGAG-----  
 -----  
 AAGAATGAACAGGAATTATTGGAATTGGACAAGTGGGCAAGTCTGTGGAATTGGTTTAACATAACACAATGGC  
 TGTGGTATATAAAAAATATTCATAATGGTAGTAGGAGGTTTAATAGGTTTAAGAATAGTTTTTTGCT---  
 GTGCTTTCTTTAGTG-----AATAGAGTTAGGCAGGGATACTCACCT-----  
 CTGTCAATTTGCTATTAGCTTGCTTGACGCCACAGCAATAGCAGTAGCTGGG---  
 GGAACAGACAGGGTTATAGAAGCAGTACAAAGAGCTTGTAGAGCT-----  
 -----GTTCTTCACATA-----CCCAGAAGAATAAGACAGGGCTTGGAAGGGGCTTTGCTA---TAA  
 >HQ595791  
 GCT---GTA-----  
 GAACAGTTGTGGGTCACAGTTTATTATGGGGTACCTGTGTGG--AAAGAAGCAACC---  
 ACTACTCTATTTTGTGCATCAGATGCTAAATCATATGAAGCAGAG--GCACATAAT-----  
 -----ATCTGGGCTACA--CATGCCTGTGTACCAACAGAC---  
 CCCAACCACAGAGAAATAATACTAGAA-----AATGTCACAGAAAACCTTTAAC-----  
 -----ATGTGGAAAAATAACATGGTAGAGCAGATGCATGAAGATATA---

ATCAGTTTATGGGATCAAAGCCTA---AAACCATGTGTAAAAATA---  
 ACCCCACTCTGTGTCACTTTAGACTGTGTTGACTGGAATGAACTGTTGCTAGAGGGAATAGCAGTGGC----  
 -----  
 -----ACTAATGCCACTTTTGGAGACAAAGAAATGAAAAGCATAGAAGTGAAA---  
 AACTGCTCTTTCAATGTAACCACAGAATTAAGA-----  
 GATAAGAAGGAGCAAGTAAGAGCACTT---TTTTATAAACTTGATGTGGTACAAATAGATAAG-----  
 -----  
 -----  
 AATGTTAGTAATAATACTTATAGATTAATAAATTGTAATACCTCAGCCATTACCCAG---  
 GCGTGTCCAAAGGTAACCTTTGAGCCAATTCCCATATATTATTGTGCCCCAGCTGGATTTGCAATTCTGAAAT  
 GCAAT---AGTAAGAAGTTCAAT-----GGGACGGGTCCATGCAAAAAT-----  
 -GTCAGC---ACAGTACAGTGTACACATGGGATTAAGCCAGTAGTGTGCGACT---  
 CAACTGTTGTTGAATGGCAGTCTAGCAGAAGAAGAG-----  
 ATAATAATTAGATCTGAAAATCTCACAATAAT-----GCTAAAATCATAATAATACAGCTTAAT----  
 -----GAGTCTGTAACA-----ATTAATTGCACAAGGCCCTACAATAATACAAGACGA-----  
 -GGTACACATATA-----GGACCAGGGCGAGCA---TAC-----TTTACAACA---GAC-----  
 -----ATAGTAGGAGATATA-----AGACGAGCACATTGT---AAAATTAGTGAAGAA---  
 CAATGGAATAAACTCTAAGACAGGTAGCTAAAAAATTAGGA-----AACCTTTTAAAC----  
 -----AAGACAATAATACATTTTAAAT-----  
 TCATCCTCGGGAGGGGACCCAGAAATTACA---TCACATAGTTTTAATTGTGGAGGGGAA---  
 TTTAAACAGCTCCAGGCAAGGGTCTGGCTGTGGAAGGCTACCTAAGGGATCAACAGCTCCTAGGAGTTTGGG  
 GTTGCTCTGGAAGACACATTTGCACCACTAGTGTGCCCTGGAATTCTAGCTGGAGT-----  
 -----AATAAATCTCTAGATGAGATTTGG-----AAT-----  
 AACATGACCTGGATGGAGTGG---GAGAGAGAAATTGACAATTACACAGGGTTAATATAC---  
 AGATTGATTGAAGAATCGCAAACCAGCAAGAA-----  
 -----  
 AAGAATGAACAAGAATTATTGCAATGGGACCAATGGGCAAATTTGTGGAATTGGTTTAGCATAACAAAATGGC  
 TGTGGTATATAAAAATATTACATAATGATAGTAGGAGGCTTGATAGGTTTAAGAATAGTTTTTTGCT---  
 GTGCTTTCTGTAGTA-----AATAGAGTTAGGCAGGGATATTCACCT-----  
 CTGTCATTTGCTATTGACTTGTTTAATACCACAGCAATAGCAGTAGCTGAG---  
 GGGACAGATAGGGTTATAGAAGCAGCACGAGCAGCTGTTAGAGCT-----  
 -----GTTCTGAACGTA-----CCTGTACGAATAAGACAGGGCTTGGAAGGGCTTTGCTA---TAA  
 >KF716476  
 GTT---GCA-----  
 GAACAGTTGTGGGTTACAGTGTATTATGGGGTACCTGTGTGG---AAAGAAGCAACC---  
 ACTACTCTATTTTGTGCATCAGATGCTAAATCATATAAAGAAGAA---GCACATAAT-----  
 -----ATCTGGGCTACA---CATGCCTGTGTACCAACAGAC---  
 CCCAACCCACAAGAAGTACTATTAGAA-----AATGTTACAGAAAATTTTAAAC-----  
 -----ATGTGGAATAAACATGGTGGAAACAGATGCATGAGGATATA---  
 ATCAGTTTATGGGACCAAAGCCTA---AAACCATGTGTAAAGTTA---  
 ACCCCACTCTGTGTCACTTTAACTGCACTGAATGGAAGGATAATAGCACGAACAGTAATAGCACA-----  
 -----  
 -----AACAGTACAAGTATAAAAGATGAAAGTAAGGAAATAGGAATGAAA---  
 AACTGCTCTTTCAACATAACCACAGAGATAAGA-----  
 GATAGGAAAAAGAAATTCTATGCACCT---TTTTATAAGCTTGATGTGGTACAAATAGATGGT-----  
 -----  
 -----  
 AGTAATAGTACTGATAATACGAGCTATAGATTAATAAATTGTAATACCTCAGCCATTACTCAG---  
 GCATGTCCAAAGATATCCTTTGAGCCAATTCCAATACATTATTGTGCCCCAGCTGGATTTGCAATCCTAAAGT  
 GTAAC---GATAAGATGTTCAAT-----GGTACGGGTCCATGCAAAAAT-----  
 -GTCAGC---TCGGTACAGTGTACACATGGGATTAGGCCCGTAGTGTCAACT---  
 CAGCTATTGCTGAATGGCAGTCTAGCAGAGGAAGAT-----  
 ATAGTAATTAGATCTGAAAATATCAGTAGTAAT-----GCTAAAACCATAATAGTACAGCTTGAT----  
 -----AAGACTGTAGTA-----ATTAATTGCACAAGGCCCTACAATAATACAAGAAAG-----  
 -AGTGTACACATG-----GGACCAGGGCGAGCA---TTC-----TTTACAACAAAC-----  
 -----ATAGTAGGGTCCATA-----AGACAGGCACATTGT---AATCTTAGTAGAATA---  
 GAATGGAATAGAACTTTAGATAGGGTAATTGAAAAATTAAAA-----AACCTTACTAAC----  
 -----ATTACAAAATAAGTTTTTGCA-----  
 TCATCCTCGGGAGGGGACCCAGAAATTACA---CACCACAGCTTTACTTGTGGAGGAGAA---  
 TTTAAACAGCTCCAGGCAAGAAATCCTGGCTGTGGAAGGCTACCTAAAGGATCAACAGCTCCTAGGAGTTTGGG

GTTGCTCTGGAAACACATTTGCACCACTAATGTGCCCTGGAACCTCTAGCTGGAGT-----  
 -----AATAAATCTCAAAATGAGATTTGG-----GGT-----  
 AACATGACCTGGATAGAGTGG---GAAAGAGAAATTGACAAATTACACAGAGTTAATATAC---  
 AGCTTAATTGAAAGTTCACAAATCCAGCAAGAA-----  
 -----  
 GCAAAATGAACAAGAGCTATTGAAATTGGATCAATGGGCAAGTTTGTGGAATTGGTTTAGCATAACAAAATGGC  
 TGTGGTATATAAAAATATTTCATAATAATAGTAGGAGGCTTAATAGGGTTAAGAATAGTTTTTTGCT---  
 GTACTGTCTGTAGTA-----AATAAAGTTAGGCAGGGATACTCACCT-----  
 CTGTCATTTGCTGTCAGCTTGCTTGATACTATAGCAATAGTAATAGCTGAA---  
 GGGACAGATAGACTTATAGAAAATAGGGCTAAGAATTGGTAGAGCT-----  
 -----ATTATTAACATA-----CCCAGAAGAATAAGACAGGGCTTGGAAGGGCTTTACTA---TAA  
 >FJ866137  
 GTT---ACA-----  
 GGAGAGTTGTGGGTCACAGTTTATTATGGGGTACCTGTGTGG---AAAGAAGCAACC---  
 ACTACCTTATTTTGTGCATCAGATGCTAAAGCATATAAAGCAGAG---GCACATAAT-----  
 -----ATCTGGGCTACA---CATGCCTGTGTACCAACAGAC---  
 CCCAACCCACAAGAAATAGTACTAGAA-----AATGTCACAGAAAACCTTTAAC-----  
 -----ATGTGGAAAAATGACATGGTGGATCAGATGCATGAGGATATA---  
 ATCAGTTTATGGGATCAAAGCCTA---AAACCATGTGTAAAATTA---  
 ACCCCACTCTGTGTCACTTTAAACTGCACTGAATATAAAAAATAACACAAAAATT-----  
 -----  
 -----AACAAATAGCACTAGTGAGGACACAGGAATGAGA---  
 AACTGCTCTTTCAATATAACCACAGAAGTTAGA-----  
 GATAGAAAGAAGGAAGTATATGCACCT---TTTTATAAACTTGATGTGGTACAAATAAATGATAGT-----  
 -----  
 -----  
 GAGAGTACTAATACTAGCTATAGATTAATAAATTGTAATACCTCAGCCATTACACAG---  
 GCGTGCCCAAAGGTAACCTTTGAGCCAATTCCCATACATTATTGTGCCCCAGCTGGATTTGCAATTCTAAAGT  
 GTAAT---GATAAAAGGTTCAAT-----GGGACGGGACCATGCAAAAAC-----  
 -GTCAGC---ACAGTACAGTGTACACATGGGATTAAGCCAGTAGTGTCTACT---  
 CAACTGTTGTAAATGGCAGTCTAGCAGAAGAAGAG-----  
 ATAATAATTAGATCTGAAAATCTCACAAATAAT-----GCTAAAATCATAATAGTACAGCTTAGT---  
 -----GAGTCTGTATCA-----ATTAATTGTACCAGACCCAACAACAATACACGAAAA-----  
 -GGTGTACATATA-----GGACCAGGACAAGCA---TTC-----TATGCAATAGGTGGA-----  
 -----ATAGTAGGGAATATA-----AGACAAGCACATTGC---AATGTCAGTAGATCA---  
 GAATGGAATAAACTTTGCAACAGGTAGCTAAAAAATTAGGA-----GGCCTTTTTAAC---  
 -----GAGACGGCAATAATTTTTTAAA-----  
 CCATCCTCAGGAGGGGACCCAGAAATTACA--ACACACAGCTTTAATTGTGGAGGGGAA---  
 TTTAAACAGCTCCAGGCAAGAGTCCCTGGCTGTGGAAAGCTACCTAAAGGATCAACAGCTCCTAGGAGTTTGGG  
 GTTGCTCTGGAAGACACATTTGCACCACTAATGTGCCCTGGAACCTCTAGCTGGAGT-----  
 -----AATAAATCTCTAGAGGAGATTTGG-----GGT-----  
 AACATGACCTGGATGGAGTGG---GAAGGAGAAATTGACAAATTACACAGGTTAATATAC---  
 AGCTTAATTGAAGAATCGCAACCCAGCAAGAA-----  
 -----  
 AAAAAATGAACAAGAACTATTGCAATTGGACAAATGGGCAAGTCTGTGGAATTGGTTTAGCATAACAAAATGGC  
 TGTGGTATATAAAGATATTTATAATGATAGTAGGAGGCTTAATAGGTTTAAGGATAGTTTTTTGCT---  
 GTGCTTGCGTTAGTA-----AATAGAGTTAGGCAGGGATATTCACCT-----  
 CTGTCATTTGCTGTTAGCTTGTTTGATACTTTAGCAATAGCAGTAGCTGGC---  
 TGGACAGATAGAGCTATAGAAAATAGGACAAAGAATTGGTAGAGCT-----  
 -----TTTATCCACATA-----CCTAGAAGAATCAGACAGGGCTTCGAGAGAGCTTTTGCTA---TAA  
 >FJ866135  
 GTT---ACA-----  
 GGGAAATTTGTGGGTCACAGTTTACTATGGGGTACCTGTGTGG---AAAGAAGCAACC---  
 ACTACTCTATTTTGTGCATCAGATGCTAAATCATATAAAGAAGAG---GCACATAAT-----  
 -----ATCTGGGCCACA---CATGCCTGTGTGCCAACAGAC---  
 CCCAACCCACGAGAAATAAACCTAGAA-----AATGTCACAGAACATTTTGAC-----  
 -----ATGTGGAAAAATAACATGGTGGAGCAGATGCATGAGGATATA---  
 ATCAGTTTATGGGATCAAAGTCTA---AAACCATGTGTAAAATTA---  
 ACCCCACTCTGTGTCACTTTAAACTGCACTGAATGGAAGAATAATGGTAGCACT-----  
 -----

-----AACGTCCTGATCAGGACATAGGAATGAAA---  
 AACTGCTCTTTCAATATAACACAGAAGTAAGA-----  
 GATAAGAAGAAGCAAGTACAGGCCTT---TTTTATAAACTTGATGTAGTACAGATAGATAAT-----  
 -----  
 -----  
 AGTACCAGCTATAGATTAATAAGTTGTAATACCTCTGCCATTACACAG---  
 GCATGTCCAAAGGTAACCTTTGAGCCAATTCCTATACATTATTGTGCCCCAGCTGGATTTGCAATTCTAAAAT  
 GTAAT---GATAAGAAGTTCAAT-----GGGACGGGTCCATGCAAAAAC-----  
 -GTCAGC---ACAGTACAGTGTACACATGGGATTAGGCCAGTAGTGTCAACT---  
 CAGCTGTTGTTGAATGGCAGTCTAGCAGAAGAAGAG-----  
 ATAATAATTAGATCTGAAAATCTAACAATAAT-----GCAAAAATTATAATAGTACAGCTTAAT----  
 -----GAGTCTGTACCA-----ATTAATTGCACAAGGCCCTACAACAATACAAGAAAA-----  
 -GGTGAACATATG-----GGACCAGGGCGAGCA---CTC-----TTTACAGAAAGA-----  
 -----ATAGTTGGAGATATA-----AGACAAGCATATTGT---AGCATTAGTGGAATG---  
 GGATGGAATAAACTTTACAGCAGGTAGCTGACAAATTAAGA-----AACCTTCTTAAT----  
 -----AAAAACAATAATTTTTTAAA-----  
 CCACCCGCGGGAGGGGACCTAGAAATTACA--ACACACAGCTTTAATTGTGGAGGGGAA--  
 TTTAAACAGCTCCAGGCAAGAGTCCTGGCTGTGGAAAGCTACCTAAAGGATCAACAGCTCCTAGGAATTTGGG  
 GTTGCTCTGGAACACATTTGCACCACTACTGTGCCCTGGAACCTTAGCTGGAGT-----  
 -----AATAAATCTCTAGAGGAGATTTGG-----AAT-----  
 AACATGACCTGGATGGAGTGG---GAAAGGGAATTGACAATTACACAGGTTTAATATAC---  
 AGCTTAATTGAAGAATCGCAAAACCAGCAAGAA-----  
 -----  
 AAGAAATGAACAAGAACTATTGCAATTGGACAAATGGGCAAGTTTGTGGAATTGGTTTAGCATAACAAAATGGC  
 TGTGGTATATAAAAATATTACATAAATAGTAGGAGGCTTGATAGGGTTAAGAGTAGTTTTTTGCA---  
 GTACTTTCTTTAGTA-----AATAGAGTTAGGCAGGGATATTCACCC-----  
 CTGTCGTTTGCTGTTAGCTTGCTTGATACCATAGCAATAGCAGTAGCTGAG---  
 GGGACAGATAGGGCTATAGAAATAGTACAAAGAGCTGGTAGAGCT-----  
 -----GTTATTAAACATA-----CCCAGGCGAATAAGACAGGGCTTGGAAGGGCTTTACTA---TAA  
 >AY322189  
 GCT---GCA-----  
 GAAAACTTGTGGGTTACTGTCTACTATGGGGTACCTGTGTGG--AAAGAAGCAACC---  
 ACTACTCTATTTTGTGCATCAGATGCTAAATCATATGAAGCAGAG--GCACATAAC-----  
 -----ATCTGGGCTACA--CATGCCTGTGTACCAACAGAC---  
 CCCAACCCACAAGAAATAGTACTAGAA-----AATGTCACAGAAAACCTTTAAC-----  
 -----ATGTGGAAAAATAACATGGTGGAGCAGATGCATGAGGATATA---  
 ATCAGTTTATGGGATCAAAGCTTA--AAACCATGTGTAAAATTA--  
 ACCCCGCTCTGTGTCACTTTAACTGCACTGATGCGAATGCCACTAATGTCACTACTACAGAT-----  
 -----  
 -----GCTGCTGCTGATGTTACCGATAGTGACATTGGCACGAAGACC---  
 AGCTGTTCTACTGATGCCGCCACAGAAGGGAAT-----  
 AAGAGGGAGCCAGGAGTTGCACCT---CTTTCTGATCTTGTGCGGCGCCACTGGTTAATGGT-----  
 -----  
 -----AATAATAATACTGCTGCCTTTTGTTTAATAAATGGTGGTGCCCCAACCGTTACACAA---  
 GATTGTCCAAAGGGGACAATTGAGCCAATTCCTATACATTATTGTGCCCCAGCTGGATTGGCAATTCTAAAAT  
 GTAAC---GACAAGAATTTTAGT-----GGGGGGGGTGGATGCTGCAAC-----  
 -ATCAGC---ACAATACATCGTACACATGGTGGGAGGGCACCAGTCCCAACT---  
 AAACCTGTTGTTGAATGGCAGTCTAGCAGAAGAAGAC-----  
 ATAGTAATTAGATCTGAGAATATCACAATAAT-----GCTAAAATTATAATAGTACAGCTTAAG----  
 -----CAGTCTGTACCA-----ATTACTTGACAAGGCCCAACAACAATACAAGAAAA-----  
 -AGTGATACATATA-----GGACCAGGACGAGCA---CTC-----TATACAATAGAA-----  
 -----TTAGTAGGAGATATA-----AGACAAGCACATTGT---GCCATCAATGGAACA---  
 AGATGGAATGACACTTTACAGCAGGTAGCTACAAAATTAGGA-----GCCTTTTTTAAAC-----  
 -----AAGAAAGAAATAATTTTTTAAA-----  
 CCATCCTCGGGAGGGGACCCAGAAATTACA--ACACATAGCTTTAATTGTGGAGGGGAA--  
 TTTAAACAGCTCCAGGCAAGAGTCCTGGCTGTGGAAAGCTACCTAAAGGATCAACAGCTCCTAGGACTGTGGG  
 GTTGCTCTGGAACACTCATTTGCACCACTACTGTGCCCTTGGAACCTTAGCTGGAGT-----  
 -----AATAAATCTCAAGAGGAGATTTGG-----AAT-----  
 AACATGACCTGGATGCAGTGG---GAAAGAGAAATTGACAATTACACAGATTTAATATAC---  
 ACCTTAATTGAAAAATCGCAAAACCAGCAAGAA-----

-----  
CAGAAATGAACACGAACTTTTGGAAATTGGACAAATGGGCAAGTTTGTGGAATTGGTTTAGCATAACACAATGGC  
TGTGGTATATAAAAAATATTCATAATGATAGTAGGAGGCTTGATAGGTTTAAGAATAGTTTTTGTCT---  
GTGCTTTCCTTAGTA-----AATAGAGTTAGGCAGGGATATTCACCT-----  
CTGTCGTTTGTCTATTAGCTTGCTTAATACCACAGCAATAGTAGTAGCTGAG---  
GGGACAGATAGGGCTATAGAAATAATACAAAGAGCTTTTAGAGCT-----  
-----TTTCTTAACATA-----CCCACACGAATAAGACAGGGCTTGGAAGGGCTTTGCTA---TAA  
>FJ866138  
GTT---ACA-----  
GGACAGTTGTGGGTCACAGTTTATTATGGGGTACCTGTGTGG---AAAGAAGCAACC---  
ACTACTCTATTTTGTGCATCAGATGCTAAATCATATGAACCAGAG---GCACATAAT-----  
-----GTCTGGGCTACA---CATGCCTGTGTACCAACAGAC---  
CCCAACCCACAAGAAATAAACTAGAA-----AATGTCACAGAAAATTTTAACT-----  
-----ATGTGGAAAAATAACATGGTAGAGCAGATGCATGAGGATATA---  
ATCAGTTTATGGGATCAAAGCCTA---AAACCATGTGTAAAATTA---  
ACCCCACTCTGCGTCACTTTAACTGCACTGAATGGAATCAAAATAGCACTAATGCCAATAGT-----  
-----  
-----ACAGGTAGATCTAATGTCCTGATGATACAGGAATGAGA---  
AATTGCTCTTTCATATAACCACAGAAATAAGA-----  
GATAAGAAGAAGCAAGTACATGCACCTT---TTTTATAAACTTGATGTGGTACAAATGGATGGT-----  
-----  
-----  
AGTGATAATAACAGCTATAGATTAATAAATTGTAATACCTCAGCCATTACACAG---  
GCGTGTCCAAAGGTAAGCTTTGAGCCMATTCCTATACATTATTGTGCCCCAGCTGGATTTGCAATTCTAAAAT  
GTAAC---GATAAGAAGTTCAAT-----GGGACGGGCCCCATGCAAAAAT-----  
-GTCAGT---ACAGTACAGTGTACACATGGGATTAAGCCAGTAGTGTCAACT---  
CAACTGTTGTTGAATGGCAGTCTAGCAGAAGAAGAA-----  
ATAATAATTAGATCTGAAAATATCACAAATAAT-----GCTAAAATCATAATAGTACAGTTTAAT----  
-----GAGTCTGTACAA-----ATTAATTGCACAAGGCCCTCCAACAATACAAGACAA-----  
-AGTATCCGTATA-----GGACCAGGGCAAGCA---TTC-----TATACAACAAAA-----  
-----ATAATAGGAGACATA-----AGACAAGCATATTGT---AATGTTAGTGAGGAA---  
CAATGGAATAAACTTTACAACAGGTAGCTATAAAGTTAGGT-----GACCTCCTTAAT---  
-----AAGACAACAATAAAGTTTGAA-----  
AACTCCTCGGGAGGGGACCCAGAAATTACA---ACTCACAGCTTTAATTGTGGAGGAGAA---  
TTTAAGCAGCTCCAGGCAAGAATCCTGGCTGTGGAAAGATACCTAAAGGATCAACAGCTCCTAGGAATTTGGG  
GTTGCTCTGGAACACATTTGCACCACTAGTGTACCCTGGAACCTCTAGCTGGAGT-----  
-----AATAGAACTCTAGAACAGATTTGG-----GGT-----  
AACATGACCTGGATGGAGTGG---GAAAAAGAAATTGACAATTACACAGGTTTAATATAC---  
AGCTTAATTGAAGAATCGCAAACCCAGCAGGAA-----  
-----  
AAGAATGAACAAGAAGTATTGCAATTGGACACATGGGCAAGTTTGTGGAATTGGTTTAGCATAACAAAATGGC  
TGTGGTATATAAAAAATATTCATAATGATAGTAGGAGGCTTAATAGGTTTAAGAGTAGTTTTTGTCT---  
GTGCTTTCCTTAGTA-----AATAGAGTTAGGCAGGGATATTCACCT-----  
CTGTCGTTTGTCTATTAGCCTGCTCAATACCACAGCAGTAGCAGTAGCTGAG---  
GGGACAGATAGGATTATAGTACTAGTACAAAGATTTGTTAGAGGT-----  
-----GTTCTTCACATA-----CCCGCACGAATAAGACAGGGCTTGGAAGGGCTTTACTA---TAA  
>FJ866141  
GTT---ACA-----  
GGACAGTTATGGGTCACAGTTTATTATGGGGTACCTGTGTGG---AAAGAAGCAACC---  
ACTACTCTATTTTGTGCATCAGATGCTAAAGCATATAAAGCAGAG---GCACATAAT-----  
-----ATCTGGGCTACA---CATGCCTGTGTACCAACAGAC---  
CCCAACCCACAAGAAATACAATTAGAA-----AATGTCACAGAAAATTTTAACT-----  
-----ATGTGGAAAAATAACATGGTGGAACAAATGCATGAGGATATA---  
ATCAGTTTATGGGATCAAAGCCTA---AAACCATGTGTAAAATTA---  
ACCCCACTCTGTGTCACTTTAACTGCACTGAATGGGAAAATACAAATAGAACTAAC-----  
-----  
-----AACAACTCACTAATGAGGAAATAGGAATGAAA---  
AACTGCTCTTTCATACAACCACAGAAGTAAGA-----  
GATAGGAAGCAGCAAGTACATGCACCTT---TTTTATAAACTTGATGTGGTACCAATGAATGATAATAAT----

-----  
 AGTACTGATATCAATTATACCAATTATAGACTAATAAATTGTAATACCTCAGCCATTACACAG---  
 GCGTGTCCAAAGGTAACCTTTGAGCCAATTCCCATACATTATTGTGCCCCAGCTGGATTTGCAATTCTAAAGT  
 GTAAC---AATAAGAAGTTCAAT-----GGGATGGGATCATGCAACAAT-----  
 -GTCAGC---ACAGTACAGTGTACACATGGGATTAAGCCAGTAGTGTCAACC---  
 CAATTGTTGTTGAATGGTAGTCTAGCAGAGGAGGAA-----  
 ATAATAATTAGAACTGAAAATATCTCAGATAAT-----GCAAAAATCATAATAGTACAGCTTAAT----  
 -----GAGTCTGTAACA-----ATTAATTGCACAAGGCCCTACAACAATACAAGAAAA-----  
 -GGTACACACATA-----GGACCAGGGCGAGCA---TGG-----TATACAACAGGA-----  
 -----ATAGTAGGAGATATA-----AGACAAGCACACTGT---AAGGTTAATAAAACA---  
 GAATGGAATAAACTTTAGAACGGGTAGCTAAAAAATTAAGA-----GACCTTATTAAT----  
 -----AAGACAACAATAAAGTTTAGT-----  
 CCACCCTCGGGAGGGGACCTAGAAATTACA---ACACACAGCTTTAATTGTGGAGGGGAA---  
 TTTAAACAGCTCCAGGCAAGAGTCCTGGCTGTGGAAAAGATACCTAAAGGACCAACAGCTCCTAGGAATTTGGG  
 GTTGCTCTGGAAGACTCATTTGCACCACCTAATGTGCCATGGAACCTCTAGCTGGAGT-----  
 -----AATAAATCCATAGATGAGATTTGG-----AAT-----  
 AACATGACCTGGATGCAGTGG---GAAAGTGAAATTGACAATTACACAGGTTTAATATAT---  
 AAATTAATTGAAGAATCGCAAAATCCAGCAAAAC-----  
 -----  
 AAAAAATGAAAAAGAACTATTGGAATTGGACAAATGGGCAAGTTTGTGGACTTGGTTTGACATAACAACTGGC  
 TGTGGTATATAAAAAATATTGATAATGATAGTAGGAGGCTTGATAGGTTTAAGAATAGTTTTTTGCT---  
 GTGCTTTCTTTAGTA-----AATAGAGTTAGGCAGGGATATTCACCT-----  
 CTGTCTTTTGCTATTAGCTTGTTTAATACCACAGCAATAGTAGTAGCTGAG---  
 GGGACAGATAGGTTTTTAGAAATAATACAAAGAATTGGTAGAGCT-----  
 -----ATTCTTAATATA-----CCCACGCGAATAAGACAGGGCTTTGAAAGAGCTTTACTA---TAA  
 >GU204938  
 GCT---GCA-----  
 GATCAGTTATGGGTCACAGTTTATTATGGGGTACCTGTATGG---AAAGAAGCAACC---  
 ACTACTCTATTTTGTGCATCAGATGCTAAATTTTATGAAGCAGAG---GCACATAAT-----  
 -----ATCTGGGCTACA---CATGCCTGTGTGCCAACAGAC---  
 CCCAACCCACGAGAAATAACTAGAA-----AATGTCACAGAAAACCTTTAAC-----  
 -----ATGTGAAAAACAACATGGTGGAACAGATGCATGAGGATATA---  
 ATCAGTCTATGGGATCAAAGCCTA---AAACCATGTGTAAAATTA---  
 ACCCCACTTTGTGTCACTTTAACTGCACTGAATGGAAGGGAAATGCCACTAATGCC-----  
 -----  
 -----ACTAGTACCCTGGAGGGGACACAGGAATGAAA---  
 AACTGCTCTTTCAATGTAACCACAGAATTAATA-----  
 GATAAGCAGAAGCAAATACATGCACTT---  
 TTTTATAAACTTGACATGGTACCAATAGATGCTAAGAATAGTACA-----  
 -----  
 ATAGATAATAATAATAGTACTAATACCAACTATAACCAGCTATAGGTTAATAAATTGTAATACTTCAGCCATTA  
 CACAG---  
 GCGTGTCCAAAGGTAACCTTTGAACCAATTCCCATACATTATTGTGCCCCAGCTGGATTTGCAATTCTAAAAT  
 GTAAT---GATAAGAAGTTCAAT-----GGGAAAGGTCCATGCAAAAAT-----  
 -GTCAGC---TCAGTACAGTGTACACATGGGATTAGGCCAGTAGTATCAACT---  
 CAGCTGTTGTTAAATGGCAGTCTAGCAGAAGAAGAG-----  
 ATAATAATTAGATCTGAAAATCTCACAATAAT-----GCTAAAATCATAATAGTACAGCTTAAT----  
 -----GAGTCTGTAACA-----ATTAATTGCTCAAGGCCCTACAAAAATATAAGACAA-----  
 -AGGACATCTATA-----GGATTAGGGCAAGCA---CTC-----TATACAACACAA-----  
 -----AAAAGAGACTATATA-----GGACCAGCACATTGT---AACATTAGTGGAACA---  
 GGATGGAATAAAACATTACAACAGGTAGCTAAAAAATTAAGA-----GACCTTTTTTAAC----  
 -----AAGACAGCAATAATTTTTTAA-----  
 CCACCCTCAGGAGGGGACCCAGAAATTACA---ACACACAGCTTTAATTGTGGAGGAGAA---  
 TTTAAACAGCTCCAGGCAAGAATCCTGGCTGTGGAAAGCTACCTAAAGGATCAACAGCTCCTAGGAATTTGGG  
 GTTGCTCTGGAACACATTTGCACCACCTAATGTGCCCTGGAACCTCTAGTTGGAGT-----  
 -----AATAGGTCCCACGATGACATTTGG-----GGA-----  
 AACATGACCTGGATAGAGTGG---GAAAGAGAAATTGACAATTACACAGGTTTAATATAT---  
 AGCTTAATTGAAGAATCGCAAGTCCAGCAGGAA-----  
 -----  
 AAGAATGAACAAGACCTTTTGGCATTGGACAAATGGGCAAGCCTGTGGAATTGGTTTAGCATAACAAAATGGC

TGTGGTATATAAAAAATATTCATAATGATAGTAGGAGGCTTGATAGGTTTAAGAATAGTTTTTTACA---  
GTAATTTCTTTAGTC-----AATAGAGTTAGGCAGGGATATTCACCT-----  
CTGTCAATTTGTTGTTAGCTTGTTTAATGCCACAGCAATAGCAGTAGCTGAG---  
GGGACAGATAGGATTATAGAAGCAATACAAGCAGCCTTTAGAGCT-----  
-----ATTTCGTAACATA-----CCTAGAAGAATAAGACAGGGCTTAGAAAGGGCTTTACTA---TAA  
>HQ659623  
GTA---AGG-----  
GGGAAATTGTGGGTCACAGTTTATTATGGGGTACCTGTGTGG--AAAGAAGCAACC---  
ACTACTCTATTTTGTGCATCAGATGCTAAATCATATGAAGCAGAG---GCACATAAT-----  
-----ATTTGGGCTACA---CATGCCTGTGTACCTACAGAC---  
CCCAACCCACAAGAAATAAACTAGAA-----AATGTCACAGAAAACCTTTAAC-----  
-----ATGTGGAAAAATAACATGGTGGAGCAGATGCATGAGGATATA---  
ATCAGTTTATGGGATCAAAGCCTA---AAACCATGTGTAAGATTA---  
ACCCCACTCTGTGTCACTTTAAACTGTACTGAATGGAAGGCAAATGACACTATG-----  
-----  
-----ACAAATGCCACTGAGGACATAGGAATGAAA---  
AACTGCTCTTTCAATATAACCACAGAATTAAGA-----  
GATAGGAAAAAGAAAACATATGCTCTT---TTTTATAAACTTGATGTAGTACAAATAAATGAT-----  
-----  
-----  
ACTAATAGTAGTAATAACAGCAGCTATATATTAATAAAATTGTAATACCTCATCCATTACACAG---  
GCGTGTCCAAAGATATCCTTTGAGCCAATTCCTATACACTATTGTGCCCCAGCTGGATTTGCAATTCTAAAAT  
GTAAT---AATAAGACGTTCAAT-----GGAACAGGGCCATGCAAAAAT-----  
-GTCAGC---ACAGTACAGTGTACACATGGGATTAGGCCAGTAGTATCAACT---  
CAACTGTTGTTGAATGGCAGTCTAGCAGAAGAAGAG-----  
ATAATCATTAGATCTGAAAATATCACAAATAAT-----GCTAAAATTATAATAGTACAGCTTAAG-----  
-----GAGTCTGTAACA-----ATTAAGTGCACAAGGCCCTACAACAATACAAGAACA-----  
-AGTGAACATATG-----GGACCAGGGCGAGCA---TTC-----TTTACAACAAAA-----  
-----ATAACAGGAGATATA-----AGACAAGCACATTGT---AGCATTAGTGAAAGA---  
GAATGGAATAAACTTTACAACAAGTAGCTAAAAAATTAAGA-----GACATTCTTCAC-----  
-----ACAGAAAAAATAATTTTTTAAA-----  
CCATCTTCGGGAGGGGACCCAGAAATTACA--ACACACAGTTTTTAATTGTGGAGGGGAA---  
TTTAAACAGCTCCAGGCAAGAGTCCTGGCTGTGGAAAGATACCTAAGGGATCAACAGCTCCTAGGAGTTTGGG  
GTTGCTCTGGAAGAACTCATTTGCACCACTAATGTGCCCTGGAAGTCTAGCTGGAGT-----  
-----AATAAATCTGTAAAAGAGATTTGG-----GAT-----  
AAAATGACCTGGATGGAGTGG---GAGAGGGAAATTGACAATTACACAGGCTTAATATAC---  
ACCTTAATTGAGGAATCGCAAAATCCAGCAAGAA-----  
-----  
AAGAATGAACAAGAAGTATTGCAATTGGACAAATGGGCAAGTTTATGGAATTGGTTTGACATAACACAATGGC  
TGTGGTATATAAGAATATTCATAATGATAGTAGGAGGCTTGATAGGTTTAAGAATAGTTTTTTGCT---  
GTGCTTTCTTTAGTG-----AATAGAGTTAGGCAGGGATACTCACCT-----  
TTGTCAATTTGCTATTAGCTTGTTGAATGCCACAGCAATAACAGTAGCTGAG---  
GGGACAGATAGGGTTATAGAAATAGTACAAAGAGCTGGTAGAGCT-----  
-----GTTCTTAATATA-----CCCAGACGAATAAGACAGGGCTTGGAAGGGCTTTACTA---TAA  
>KX907406  
GCT---GCA-----  
AACGATCTGTGGGTCACAGTTTATTATGGGGTGCCTGTATGG--AAAGAAGCAAAA---  
ACCACTCTATTTTGTGCATCAGATGCTAAATCATATGAAACAGAG---GCACATAAT-----  
-----ATCTGGGCCACA---CATGCCTGTGTCCCTACGGAC---  
CCCAACCCACAAGAAGTAGAACTGGTA-----AATGTGACAGAAAACCTTTAAC-----  
-----ATGTGGAAAAATGATATGGTGGACCAAATGCATGAGGACATA---  
ATCAGTTTATGGGATGAAAGCCTA---AAACCATGTGTAAGATTA---  
ACCCCACTCTGTGTCACTTTACAGTGTTCTGAGATGAAAAATGGCACTAGGGGAGCAAGCAATAGTACTGGGA  
CA-----  
-----AACAAATGGCACTATAAGTAGCACTGATAGAATG-----  
AACTGCTCTTTCAATGCAACCACAGTAGTAAT-----  
GACAAGCAGAAGAAAGTACACGCACTT---TCCTATAGACTTGATATAGAACCAATAGGTAAC-----  
-----  
-----  
AATAGTACTGAGTATATGTTAATAAATTGTAATACCTCAGCCATTGCACAG---

TCTTGTCCAAAGATAACCTTTGAGCCAATTCCCATACATTATTGTGCTCCAGCTGGTTTTGCACTTCTAAAGT  
GTAGA---GATAAGCAGTTCAAT-----GGAACAGGCCCATGCACAAAT-----  
-GTCAGC---TCAGTACAATGTACACATGGAATCAAGCCAGTGGTGTCAACT---  
CAACTGTTGTTGAATGGCAGTCTAGCAGAAGAAGAG-----  
ATCATAATTAGATCTGAAAACCTCACAGACAAT-----GCTAAAACTATAATAGTACAGCTTAAT----  
-----AAATCTATAGCA-----ATTAAGTGTACAAGGCCCTACAACAATACAAGACAA-----  
-AGGGTACATATA-----GGACCAGGGCAAGCA---ATC-----TGGACAAACGATGCA-----  
---AAAGTAATAGTAGGGGACATA-----AGACAAGCACATTGT---AATGTTAGTAGAGAT---  
GAATGGAATAACATGACACAATGGGTAGCTACAAAAGTAGGA-----AGCCTTTATAAC----  
-----AGATCAACAATAATTTTTAGC-----  
AATGCCTCAGGAGGGGATCCAGAAATTACA---ACACACAGTTTTAATTGTGGAGGGGAA---  
TTCAAACAGCTCCAGGCAAGAGTCTTGGCTGTGGAAAAGATACCTAAAGGATCAACAGCTCCTAGGAATTTGGG  
GTTGCCCTGGAAAACACATTTGCACCCTAATGTGCCCTGGAAGTCTAGTTGGAGT-----  
-----AATAGATCTCTAGATGACATTTGG-----CAG-----  
AACATGACCTGGATGCAGTGG---GAAAGAGAAATCGACAATTACACAGGCTTAATATTT---  
AGTTTAATTGAAGAATCGCAGATCCAGCAAGAA-----  
-----  
AAGAATGAAAAAGAATTATTGGAATTGGACAAGTGGGCAAGTTTGTGGACTTGGTTTAGCATAACACAATGGC  
TGTGGTATATAAAAATATTATCATAATGATAGTAGGAGGCTTAATAGGTTTAAGAATAGTTTTTTGCT---  
GTGCTTTCTGTAGTA-----AATAGAGTTAGGCAGGGGTACTCACCT-----  
CTATCATTTGCTATTAGCTTGATTAATGCCATAGCAATAGCAGTAGCTGAA---  
GGGACAGATAGGGTAATAGAAAAGTACAGAGAGCTTGTAGAGCT-----  
-----GTTATCAACGTA-----CCAGTAAGAATAAGACAGGGCTTAGAAAGGCTTTTGCTT---TAA  
>HQ615975  
GCT---GCA---GAG-----  
GAGGATTTGTGGGTACAGTTTATTATGGGGTGCCTGTGTGG---AAAGAAGCAACC---  
ACTACTTTATTTTGTGCATCAGATGCTAAATCATATAAAGCAGAG---GCACATAAT-----  
-----ATCTGGGCTACC---CATGCCTGTGTGCCAACAGAC---  
CCCAACCCACAAGAAATAAGACTAGAA-----AATGTTACAGAGAACTTTAAC-----  
-----ATGTGGAAAAATAGCATGGTGGAGCAGATGCATGAAGATATA---  
ATCAGTTTATGGGATCAAAGTCTA---ACACCATGTGTAAAATTA---  
ACCCCACTCTGTGTCACTTTAACCTGTAGAGAATGGGAGAATAACAGTACCACGAATGCC-----  
-----  
-----ACGACTGGCAATAGTACTGGTAATGATTTAGGAATGAGA---  
AACTGCTCTTTCAATATAACCACAGAATAAGA-----  
GATAGGAAGAAAAGGAATTTGCACTT---TTTTATAAACTTGATGTAGTACAAATAGATAAT-----  
-----  
-----  
GATACTAGTAGTTATAGATTAATAAATTGTAATACCTCAGCCATTACACAG---  
GCGTGTCCAAAGATGTCCTTTGAGCCAATTCCCATACATTATTGCGCCCCGCTGGATTTGCAATTCTAAAAT  
GTAAT---GATAAGAATTTCACT-----GGGATGGGTCTATGCAAAAAC-----  
-GTCAGC---ACAGTACAGTGTACACATGGGATTAAGCCAGTAGTGTCAACT---  
CAACTGTTGTTGAATGGCAGTCTAGCAGAAGAAGGG-----  
ATAATAATTAGATCTGAAAATCTCACAGATAAT-----ACTAAAACTATAATAGTACAGCTAAAG---  
-----GATCCTGTACCA-----ATTAATTGCACAAGGCCCTACAAGAATGTAAGACAC-----  
-CGTGTACATATG-----GGACCAGGGCGAGCA---TTC-----GTTACAAGAAGA-----  
-----ATAACAGGAGATATA-----AGACAAGCACATTGT---AATATTAGTGGAACA---  
AAATGGAATCACACGTTGCAACAAATAACTAACAAGTTAAAA-----  
GAACTACTTAACAACACATCA-----ACTGTTTCAAAAATAATTTTTTCAA-  
-----CCATCCTCGGGAGGGGACCCAGAAATTACA---ACACACACCTTTAATTGTGGAGGGGAA---  
TTTAAACAGCTCCAGGCAAGAATCCTGGCTGTGGAAAGCTACCTAAGGGATCAACAGCTCCTAGGAATTTGGG  
GTTGCTCTGGAAAACACATTTGCACCCTAATGTGCCCTGGAAGTCCAGCTGGAGT-----  
-----AATAGATCTGTAGGTTATATTTGG-----GGG-----  
AACATGACTTGGATGGAGTGG---GAAAAGGAAATTGGCAACTACACAGATTTAATATAC---  
AGCTTGCTTGAAGACTCGCAAAATCCAGCAAGAA-----  
-----  
CAGAAATGAAAAAGAATTATTGCAATTGGACAATGGGCAAGTTTGTGGAATTGGTTTGACATAACAAAATGGC  
TGTGGTATATAAAAATATTATCATAATGATAGTAGGAGGCTTGATAGGTTTAAGAATAGTTTTTTGCT---  
GTGCTTTCTTTAGTA-----AATAGAGTTAGGCAGGGATATTCACCT-----  
CTGTCATTTGCTATTAGCTTGCTTGATACCATAGCAGTAGCAGTAGCTGAG---

GGGACAGATAGGCTAATAGAAATAGTACAAAGAATTGTTAGAGCT-----  
 -----GTTCTTAACGTA-----CCCACACGAATAAGACAGGGCTTGGAAAGGGCTTTATTG--TAA  
 >JX512899  
 GTT---ACA-----  
 GGAGAGTTGTGGGTCACAGTTTATTATGGGGTACCTGTGTGG--AAAGAAGCAACT---  
 ACTACTCTATTTTGTGCATCAGATGCTAAATCATATAAAGCAGAG--GCACATAAT-----  
 -----ATCTGGGCTACA---CATGCCTGTGTACCAACAGAC---  
 CCCAACCCACGAGAAATAGTACTAGAA-----AATGTCACAGAAACTTTAAC-----  
 -----ATGTGGAAAAATAACATGGTGGAGCAGATGCATGAGGATATA---  
 ATCAGTTTATGGGATCAAGGCTTA--AAACCATGTGTAAAATTA---  
 ACCCCATTCTGTGTAACCTTTAAACTGTACTGAATGGAAAAATGCCACTACTGGAAATGCCACT-----  
 -----  
 -----ACTGGAAATGCCACTGCTGAAAATGCCACTATTGGGGACATAGGACTGAAA---  
 AACTGTTCTTTCAATATAACCACAGAAGTAAGA-----  
 GATAAGAAGAAGCAAGTATATGCCCTT--TTTTATAAACTTGATATAGTACAAATGGATAAT-----  
 -----  
 -----  
 GATAAGGCTAGCACCAGCTATAGATTAATAAATTGTAATACCTCAGCCATTACACAG---  
 GCGTGTCCAAAGGTAACCTTTGAGCCAATTCCCATACATTATTGTGCCCCAGCTGGATTGTGCAATTCTAAAAT  
 GTAAT---GATAAGAAGTTCAAT-----GGGACAGGTCCATGCAAAAAT-----  
 -GTCAGC--ACAGTACAGTGTACACATGGAATTAGGCCAGTGGTGTCAACT---  
 CAACTGTTGTTAAATGGCAGTCTAGCAGAAGAAGAG-----  
 ATAATAGTTAGATCTGAAAATCTCACAAATAAT-----GCTAAAATCATAATAGTACAGCTTAAT----  
 -----AAGCCTGTAAACA-----ATTCATTGCACAAGGCCCTACAACAATACAAGACAA-----  
 -AGTGTGCATATA-----GGACCAGGGCGAGCA--TAC-----TATACAACAAAT-----  
 -----ATAATAGGAGATATA-----AGACAAGCATATTGT--AACATTAGTGAAACA---  
 GAATGGAATACAACCTTTACAACAGGTAGCTAACAAATTAGGA-----AATCTTCTTAAA---  
 -----CTTAACACAATAATTTTTTAGA-----  
 CCATCCTCGGGAGGGGACCCAGAAATTACA--ACACACAGCTTTAATTGTGGAGGGGAA--  
 TTTAAACAGCTCCAGGCAAGAGTTCTGGCTGTGGAAAGCTACCTAAGGGATCAACAGCTCCTAGGAATTTGGG  
 GTTGCTCTGGAACACATTTGCACCACTGCTGTGCCCTGGAACCTTAGCTGGAGT-----  
 -----AATAAATCTCTAGAGGAGATTTGG-----AAT-----  
 AACATGACTTGGATGGAGTGG--GAAAAAGAAATTGACAATTACACAGGTCTAATATAC--  
 AGCTTAATTGAAGAGTCGCAAAACCAGCAAGAA-----  
 -----  
 AAAAAAGAACAAGACCTATTGCAATTGGACAAATGGGCAAGTTTGTGGAATTGGTTTAGTATAACAACTGGC  
 TGTGGTATATAAGAATATTTATAATGATAGTAGGAGGCTTGATAGGTTTAAGGATAGTTTTTTGCT---  
 GTGCTTTCTTTAGTA-----AAGAGAGTTAGGCAGGGATATTCACCT-----  
 CTGTCGTTTGTCTATTAGCTTGCTTGATACCGCAGCAATAGTAGTAGCTGAG--  
 GGGACAGATAGGGTTATAGAAATAGTACGAAGAGCTGTTAGAGCT-----  
 -----GTTCTTCACATA-----CCCACACGAATAAGACAGGGCTTGGAAAGAGCTTTACTA--TAA  
 >KF986106  
 GTG---ACA-----  
 GGAAAATTGTGGGTCACAGTTTATTATGGGGTACCTGTATGG--AAAGAAGCAAAG---  
 ACTACTCTATTTTGTGCATCAGATGCTAAATCATATGAAACAGAG--GCACATAAT-----  
 -----ATCTGGGCTACA---CATGCCTGTGTACCAACAGAC---  
 CCCAACCCACAAGAAATAAGACTAGAA-----AATGTCACAGAGTACTTTAAC-----  
 -----ATGTGGAGAAACAACATGGTGGAGCAAATGCATGAGGATATA---  
 ATTAGTTTATGGGATCAAAGCCTA--AAACCATGTGTAAAATTA---  
 ACCCCACTCTGTGTCACTTTAAACTGCACTGAATGGGAGAATGCAACT-----  
 -----  
 -----GCCACTAATGAAACCACAGAGATGAAA---  
 AACTGCTCTTTCAATATAACCACATTATTACAA-----  
 GATAAGAAGACGCGAGAATATGCACTT--TTTTATAAACTTGATATAGTACCAATAGATAATAATAAT----  
 -----  
 -----  
 AATAGTAGTAATAGTACCACCTATAGATTAATAAACTGTAATACCTCAGCCATTACACAG---  
 GCGTGTCCAAAAGTAACCTTTGAGCCAATTCCCATACATTATTGTGCCCCAGCTGGATTGTGCAATTCTAAAAT  
 GTAAA---GATAAGGAGTTCAAT-----GGGACAGGTCCATGCAAAAAC-----  
 -GTCAGT--ACAGTACAGTGTACACATGGGATTAAGCCAGTAGTGTCAACT---

CAACTGTTGTTGAATGGCAGTCTAGCAGAAGAAAAG-----  
 ATAATAGTTAGATCTGAAAATCTCACAATAAT-----GCTAAAATCATAATAGTACAGCTTAAT----  
 -----GAGTCTGTAACA-----ATTAATTGCACAAGGCCCTACAACAATATAAGAAAA-----  
 -AGGATACATATA-----GGGCCAGGGCGAGCA---TTT-----TAT---GCA---AAC-----  
 -----GTAATAGGAGATATA-----AGACAAGCACATTGT---AACATTAGTGAAGCA---  
 GCATGGAATAAACTTTACAAAGGGTAGCTAAAAGATTAGGA-----GAGCTTTTTTAAC-----  
 -----AAGACAAAAATAGAGTTTAAA-----  
 CCATCCTCGGGAGGAGACCCAGAAATTACA--ACACACAGCTTTAATTGTGCAGGGGAA---  
 TTTAAACAGCTCCAGGCAAGAGTCCTGGCTGTGGAAAGCTATCTAAGGGATCAGCAGCTCCTAGGAATTTGGG  
 GTTGCTCTGGAAGAACTCATTTGCACCACTACTGTGCCTTGGAACCTCTAGCTGGAGT-----  
 -----AATAAATCTCTAGATGAAATTTGG-----CAC-----  
 AACATGACCTGGATGCAGTGG---GAAAGAGAAATTGACAATTATACAGAAATAATATAC---  
 AATTTAATTGAAGCATCACAACCCCAACAAGAA-----  
 -----  
 TATAATGAACAAGAACTATTGAAATTGGACACATGGGCAAATTTGTGGAATTGGTTTGACATAACAAAGTGGC  
 TGTGGTATATAAAAATATTTCATAATGATAGTAGGTGGCTTGATAGGTTTAAGGATAGTTTTTTGCT---  
 GTGCTTTCTTTAGTC-----AATAGAGTTAGGCAGGGATATTCACCT-----  
 CTGTCATTTGCTATTAGCTTGCTTAATACTACAGCAATAGTAGTAGCTGAG---  
 GGAACAGATAGGGTTCTAGAAGCTTTTAGAGCTGTTTTTAACGCG-----  
 -----GTCCTTCACATA-----CCCAGACGCATAAGACAGGGCTTGGAAGGGCTTTGCTA---TAA  
 >KF986033  
 GCT---ACA-----  
 GATCAACTGTGGGTCACAGTTTATTATGGGGTACCTGTATGG---AAAGAAGCAACC---  
 ACTACTCTATTTTGTGCATCAGATGCTAAAGCATATAGAGCAGAG---GCACATAAC-----  
 -----ATCTGGGCTACA---CATGCCTGTGTGCCAACTGAC---  
 CCCAACCCACGAGAAGTACTATTAGAA-----AATGTCACAGAAAATTTTAAC-----  
 -----ATGTGGGAAAACAACATGGTGGAGCAAATGCATGAGGATATA---  
 ATCAGTTTATGGGATCAAAGCCTA---AAACCATGTGTAAAATTA---  
 ACCCCACTCTGTGTCACTTTAAACTGCACTGATGCAAATACCACTAAAAGTGATGCAAAT-----  
 -----  
 -----ACCACTACCACTAAAAGTGATGAGAACATAGGAATGAAA---  
 AACTGCTCTTTCAATGTAACCACAATAATAAGA-----  
 GATAAGCAGAAGCAAGTATATGCACTT---CTTTATAAACTTGATGTAGTACCAATAGAAGGT-----  
 -----  
 -----  
 GAGCAGAATACTACTAGCTATAGATTAATAAATTGTAATACCTCAGCCATTACACAG---  
 GCGCGTCCAAAAGTATCCTTTGAGCCAATTCCAATACATTATTGTGCCCCAGCTGGATTTGCGATTCTAAAAT  
 GTAAT---GATAAGAAGTTCAAT-----GGGACGGGCCCATGTACAAAT-----  
 -GTCAGC---ACAGTACAGTGTACGCATGGGATTAGGCCAGTAGTATCAACT---  
 TAACTATTGTTGAATGGCAGTCTAGCAGAGAAAGAG-----  
 GTAATAGTTAGATCCGAGAATATTACAAATAAT-----GCTAAGATCATAATAGTGCAGCTTAAT---  
 -----GAATCTGTAACA-----ATTAATTGCACGAGGCCAGTAACAATACAAGAAAA-----  
 -GGTATACATATA-----GGACCAGGGCAAGCA---ATC-----TATGCAACAGGAGCC-----  
 -----ATAATAGGAGATATA-----AGACAAGCACATTGT---AATATTAGTGGAGAA---  
 CAATGGAATAGAAGCTTTACATCAGGTAGCTGAGAAATTAAGA-----GACCTTGTT-----  
 -----AACAAAGTCTGTAAAATTTAGT-----  
 CCATCCTCGGGAGGGGACCCAGAAATTACA--ACACACAGCTTTAATTGTGGAGGAGAA---  
 TTTAAGCAGCTCCAGGCAAGAGTCCTGGCTGTGGAAAGCTACCTAAGGGATCAACAGCTCCTAGGAATTTGGG  
 GGTGTGCTGGAAGACACATTTGCACAACCTAGTGTGCCCTGGAACCTCTAGCTGGAGT-----  
 -----AATAAATCTCTAGATCAAATTTGG-----AAA-----  
 AACATGACTTGGATGGAATGG---GAGAGAGAAATTGACAATTACACAGGATTAATATAC---  
 AGCTTACTTGAAGAATCGCAAACCCAGCAAGAT-----  
 -----  
 AAAAAATGAAAAAGAATTATTGGAATGGGACAAATGGGCAAATTTGTGGAATTGGTTTAGCATAACAACTGGC  
 TGTGGTATATAAGAATATTTCATAATGATAGTAGGAGGCTTGATAGGTTTAAGAATAGTTTTTTACT---  
 GTATTTTCTTTAGTA-----AATAGAGTTAGGCAGGGATATTCACCT-----  
 CTGTCATTTGCTATTAGCTTGCTTAACGCCACAGCAATAACAGTAGCTGAG---  
 GGGACAGATAGGATTATAGAAAATAGTACAGAGAGCTGCTAGAGCA-----  
 -----GTTCTTAACATA-----CCCAGAAGAATAAGACAGGGCGTGGAAGGACCTTAGTA---TAA  
 >KF716479

GTT---ACA-----  
 GGACAATTGTGGGTCACAGTTTATTATGGGGTGCCTGTGTGG---AAAGAAGCAAAA---  
 ACTACTCTATTTTGTGCATCAGATGCTAAAGCATACAAACCAGAA---GCACATAAT-----  
 -----ATCTGGGCTACA---CATGCCTGTGTACCAACAGAC---  
 CCCAACCCACAAGAAATATACTTAGAA-----AATGTCACAGAAAACCTTTAAC-----  
 -----ATGTGGAAAAATAACATGGTGGAACAGATGCATGAGGATATA---  
 ATTAGTTTATGGGATCAAAGCCTA---AAACCATGTGTTAAGCTA---  
 ACCCCATTATGTGTCACTTTGAACTGCACTAAATGGACGAGTAACACTACTAGTAACAGTACC-----  
 -----  
 -----GAGGAGGGTTTAGGAGTGAAA---  
 AACTGCTCGTTCAATGTAACCACAGAAGTAAGA-----  
 GATAAGAAGAAGCAAGTACAAGCACTT---TTTTATAGCCATGATGTAGTACAAATAAGGAAT-----  
 -----  
 -----  
 AATACCTATAGATTAATAAGTTGTAATACCTCAGCCATTACACAA---  
 GCATGTCCAAAGATAACCTTTGAACCAATTCCCATACATTATTGTGCCCCAGCTGGATTTGCGATTCTAAAAT  
 GTAAT---GATAAGAAGTTCAAT-----GGACAGGGTCGATGTACAAAT-----  
 -GTCAGC---ACAGTACAGTGTACGCATGGGATTAGGCCAGTAGTGTCAACT---  
 CAGCTATTGTTGAATGGCAGTCTAGCAGAAGAAGAA-----  
 ATGGTGAATTAGAAGTGAACCTCACAAATCAT-----TTGAAAACCATAATAGTACAGTTTAAT---  
 -----AAGTCTGTAACA-----ATTAATTGCACAAGGCCCTACAACAATACAAGACAA-----  
 -AGTACACATATA-----GGACCAGGGGCAGCA---ATC-----TATACAACAAAG-----  
 -----ACAATAGGAGATATA-----AGACAGGCACATTGT---AATATTAGTAGAGTA---  
 GACTGGGATACCACCTTACAACAGGTAGCTAAAAAATTAAGA-----  
 GACCTTCTTAACAAGACA-----AAAATAGAAATAGTCTTTGGA-  
 -----CCATCCTCGGGAGGGGACCTAGAAGTTACA---ACACACAGCTTTAATTGTGGAGGGGAG---  
 TTTAAACAGCTTCAGGCAAGAGTTCTCGCTGTGGAAAGCTACCTAAGGGATCAACAGCTCCTAGGAATTTGGG  
 GTTGCTCTGGAAGACACATTTGCACCACTGCTGTGCCCTGGAAGTCTACCTGGAGT-----  
 -----AATAAACTCTAGAGGACATTTGG-----GGT-----  
 AACATGACCTGGATGGAGTGG---GAAAAAGAAATTGACAATTACACAGAGTTAATATAT---  
 AACTTAATTGAAGTATCGCAAACCCAGCAAGAA-----  
 -----  
 AAGAATGAACAAGAACTATTGCAATTGGACCAATGGGCAAGTTTGTGGAATTGGTTTAATATATCAAACCTGGC  
 TGTGGTATATAAGAATATTACATAATGATAGTAGGAGGCTTAATAGGTTTAAGAATAGTTTTTTGCT---  
 GTGCTTTCTTTAGTT-----AATAGAGTTAGGCAGGGATATTCACCT-----  
 CTGTCGTTTGTCTATTAGCTTGTGTTGGTACCACAGCAATAGTAGTAGCTGAA---  
 GGGACAGATAGGATTATAGAAGTATTACAAAGAATTGGTAGAGCT-----  
 -----ATTCTTAACATA-----CCTACACGCATAAGACAGGGCGCGGAAAGGGCTTTTCTA--TAA  
 >AB485651  
 GTT---ACA-----  
 GGACAGTTGTGGGTCACAATATATTATGGGGTACCTGTGTGG---AAAGAAGCAACC---  
 ACTACTCTATTTTGTGCATCAGATGCTAAATCATATGAAACAGAG---GCACATAAT-----  
 -----ATCTGGGCTACT---CATGCCTGTGTGCCAACAGAC---  
 CCCAACCCACAAGAAATAATACTGGAA-----AATGTCACAGAAAACCTTTAAC-----  
 -----ATGTGGAAAAATAACATGGTGGATCAGATGCATGAGGATATA---  
 ATCAGTCTATGGGATCAAAGCCTA---AAACCATGTGTAAAGTTA---  
 ACCCCACTATGTGTCACTTTAAACTGCACTGAATGGAGGAATGACACCAATGCCACTAAGGATAAAAGG---  
 -----  
 -----AAGAATGATGCCCCCTCTGAGGGTGCCACTAATGAGGTAGGAATGAAA---  
 AACTGCTCTTTCAATATAACCACAGAATTAAGA-----  
 GATAGGAAAAAGCAAGTACATGCACCTT---TTTTACAACTTGATGTAGTACAAATAGATGATAATGATAGG-  
 -----  
 -----  
 AATAATAGCAGTAATAGTACCAGCTATAGATTGATAAATTGTAATACCTCAGCCATTACACAA---  
 GCGTGTCCAAAGATAACCTTTGAGCCAATTCCCATACATTATTGTGCCCCAGCTGGATTTGCGATTCTAAAAT  
 GTAAC---AGTAAGAAGTTCAAT-----GGGACGGGTCCATGTAAAAAT-----  
 -GTCAGC---ACAGTACAGTGTACACATGGGATCAGGCCAGTAGTGTCAACT---  
 CAACTGTTGTTGAATGGCAGTTTAGCAGAAGAAGAG-----  
 ATAATAATTAGATCTGAAAACTCACAAATAAT-----GCTAAAATCATAATAGTACAGCTTAAT---  
 -----GAGTCTGTAACA-----ATTAATTGCACAAGGCCCTACCAAAATATAAGAAAA-----

-TATACACATATG-----GGACCAGGACGAGCA---TGG-----TATACAACAAAAATA-----  
 ATAGGGATA---AATGGAGATATA-----AAACGAGCATATTGT---AATGTTACTAGAGCT---  
 GGATGGAATAAACTTTACAACAGGTAGCTAAAAAATTAGGA-----GACCTTCTTAAC-----  
 -----AAGACAACAATAATTTTTTAAA-----  
 CCATCCTCGGGAGGGGACCCAGAAATTACA--ACACACACCTTCAATTGTGGAGGGGAA---  
 TTTAAACAGCTCCAGGCAAGAATCCTGGCTGTAGAAAGATACCTAAAGGATCAACAGCTCCTAGGACTTTGGG  
 GTTGCTCTGGAAGACACATTTGCACCACTATTGTACCCTGGAACCTAGCTGGAGT-----  
 -----AATAGATCTCTAGGGGACATTTGG-----GGA-----  
 AACATGACATGGATGGAATGG---GAAAGAGAAATTGACAATTACACAGGTTTAATATAC---  
 AACTTAATTGAAGAATCGCAAAATCCAGCAAGAA-----  
 -----  
 AAGAATGAACAAGAACTATTACAATTGGACAAATGGGCAAGTTTGTGGAATTGGTTTGACATAACAACTGGC  
 TGTGGTATATAAAAATATTTCATAATGATAGTAGGAGGCTTGATAGGTTTAAGAATAGTTTTTTACT---  
 GTGCTTTCTGTAGTA-----AAGAGAGGTAGGCAGGGATATTCACCT-----  
 CTGTCGTTTGTCTATTAGCTTGTTTAATACCACAGCAATAGTAGTAGCTGAG---  
 GGAACAGATAGGGTTATAGAAATAGTACAAAGAGCTGTTAGAGCT-----  
 -----ATTCTTTCACATA-----CCCAGACGAATAAGACAGGGCTTGGAAGGGCTTTACTA---TAA  
 >AJ320484  
 GTT---GCA-----  
 GAGAAGAAGTGGGTCACAGTGTATTATGGGGTACCTGTGTGG---AAAGAAGCAACA---  
 ACCACTCTATTTTGTGCATCAGATGCTAAATCATATAAAACAGAG---GTACATAAT-----  
 -----ATCTGGGCTACA---CATGCCTGTGTACCAACAGAC---  
 CCCAACCCACGAGAAATAGAACTGGAA-----AATGTCACAGAAAACCTTTAAC-----  
 -----ATGTGGAATAACATGGTGGAGCAGATGCATGAGGATATC---  
 ATCAGTTTATGGGATCAAAGCCTA---AAACCATGTGTAAAATTA---  
 ACCCCACTCTGTGTCACTTTAAACTGCACTGATGCAAGGAGGAATGAGACTAGGAATAAT-----  
 -----  
 -----ATTACAGGAATGGAAAACAATGATCAAATAGAAATGAAA---  
 AACTGCTCTTTCAATATAACCACAAAATTAATA-----  
 GATAAGAAGAAGCAAGTACATGCACCT--TTTTATAGACTTGATGTGGTACAAATAGATAATGATACT---  
 -----  
 -----  
 AGTAATAGCAACTATAGCAACTATAGATTAATAAATTGCAATACCTCAGCCATTACACAG---  
 GCTTGTCCAAAGGTAACTTTTGAGCCAATTCCCATACATTATTGTGCCCCAGCTGGTTTTGCAATTCTAAAGT  
 GTAGA---GATAAGAAGTTCAAT-----GGAACAGGACCATGCAAAAAT-----  
 -GTCAGC---ACAGTACAATGCACACATGGAATTAGGCCAGTAGTGTCAACC---  
 CAACTGCTGTTGAATGGCAGTCTAGCAGAAGAAGAG-----  
 ATAATAATTAGATCTGAAAATCTCACAAACAAT-----GCTAAAACCCTAATAGTACAGCTTAAT---  
 -----GAGTCTGTAGAA-----ATCAATTGTACAAGGCCCTACTACAACCAGATAAGA---  
 -CAAAGAACATCT-----ATAGGACAAGGGCAAGCA---CTC-----TATACAACAAGA-----  
 -----GTAACGGGAGATATA-----AGAAAAGCATATTGC---AATATTAGTAAAGCA---  
 GGATGGAATAAACTTTACAGCAGGTAGCAAAAAAATTAGGA-----GACCTCTTAAC-----  
 -----CAGACAACAATAATTTTTTAAA-----  
 CCATCCTCGGGAGGAGACCCAGAAATTACA--ACACACAGCTTTAATTGTGGAGGGGAA---  
 TTTAAACAGCTCCAGGCAAGAATCCTGGCTGTGGAAAGATACCTACAGGATCAACAGCTCCTAGGAAGTTGGG  
 GGTGCTCTGGAAGACACATTTGCACCACTACTGTGCCCTGGAACCTAGTTGGAGT-----  
 -----AATAAATCTATAGATGACATTTGG-----AAT-----  
 AACATGACCTGGATGGAGTGG---GAAAAAGAAATTGACAATTACACAGGTGTAATATAC---  
 AGATTAATTGAGGAATCGCAAAACCAGCAAGAA-----  
 -----  
 AAGAATGAACAAGAACTATTGCAATTGGACAAATGGGCAAGTTTGTGGAATTGGTTTAGCATAACAAATGGC  
 TGTGGTATATAAAAATATTTCATAATGATAGTAGGAGGCTTAATAGGGTTAAGAATAGTTTTTTACT---  
 GTGCTTTCTTTAGTA-----AATAGAGTTAGGCAGGGATACTCACCT-----  
 CTATCGTTTGTCTATTAGCTTGTTTAACGCTACAGCAGTAGCAGTAGCTGAG---  
 GGGACAGATAGGGTTATAGAAGTAGTACAAAGATTTTTTTAGAGGT-----  
 -----ATTCTTAACGTA-----CCCACACGAATAAGACAGGGCTTGGAAGGGCGTTACTA---TAA  
 >U08805  
 GGT---ACA---GAA-----  
 GAACAATCGTGGGTCACAGTTTATTATGGGGTACCTGTGTGG---AAAGAAGCAACC---  
 ACTACTCTATTCTGTGCATCAGATGCTAAAGCATAAAAGGCAGAG---GCCCATAAT-----

-----ATCTGGGCTACA---CATGCCTGTGTACCAACAGAC---  
CCCAACCCACGAGAAATACAAC TAGAA-----AATGTCACAGAAAAC TTTAAC-----  
-----ATGTGGAAAAATAACATGGTGGAAACAAATGCATGAGGATGTA---  
ATCAGTTTATGGGATCAAAGCCTA---AAACCATGTGTAAAATTA---  
ACCCCACTCTGTGTCACTTTAAACTGCATTGAATGGAAGAATGAAAATGAAACTAAGGGG-----  
-----  
-----AATAAAACTGTGGACCCTGATAAGGACATAGGAATGAAA---  
AACTGCTCTTTCAATGTAACCACAGAAGTAAGA-----  
GATAAGAAGAAGCAAGAATATGCAC TT---TTTTATAAACTTGATGTAGTACAGATGAATGAT-----  
-----  
-----  
AATAATACTAATACCAGCTATAGATTAATAAATTGTAATACCTCAGCCATTACACAG---  
GAGTGTCCAAAGGTAACCTTTGAGCCAATTCCCATACATTATTGTGCCCCAGCTGGATTTGCAATTCTAAAAT  
GTAAC---AATAAAATGTTCAAT-----GGGACGGGTCCATGTAACAAC-----  
-GTCAGC---ACAGTACAGTGCACACATGGGATTAGGCCAGTAGTGTCAACT---  
CAACTGTTGTTGAATGGCAGTCTAGCAGAAGAAGAA-----  
ATAATAATTAGATCTGAAAAATCACAATAAT-----GCAAAAATCATAATAGTACATCTTAAT-----  
-----GAGTCTGTAGTA-----ATTAATTGCACAAGGCCCTACAACAATATAAGACAA-----  
-AGGACCCCCATA-----GGACTAGGGCAAGCA---CTC-----TATACAACAAGA-----  
-----AGAATAGAAGATATA-----AGAAGAGCACATTGT---AATATTAGTGAAGCA---  
GCATGGAAGAAAAC TTTAGAACAGGTAGCTAAAAAAT TAAAA-----GTCCTTTT TAGC-----  
-----CGGACAACAATAGATTTTAAA-----  
CCATCCTCGGGAGGGGACCCAGAAATTACA--ACACACAGCTTTAATTGTGGAGGGGAA---  
TTTAAACAGCTCCAGGCAAGAGTCC TGGCTGTGGAAAGCTACCTAAAGGATCAACAGCTCCTAGGGATTTGGG  
GTTGCTCTGGAAGACACATTTGCCCACTCAGGTGCCCTGGAAC TCTAGCTGGAGT-----  
-----AATAAATCTCTAGATACAATTTGG-----GGT-----  
AACATGACCTGGATGGAGTGG---GAAAGAGAAATTAGCAATTACACAGGGTTAATATAT---  
GATTTGATTGAAGAATCGCAATCCAGCAAGAA-----  
-----  
AAGAATGAAAAGATCTATTGGAATTGGACAAATGGGCAAGTTTGTGGAATTGGTTTGACATAACAAACTGGC  
TGTGGTATATAAGACTATT CATAATAATAGTAGGAGGCTTGATAGGTTTAAGAATAGTTTTTTGCT---  
GTGCTTTCTTTAGTA-----AATAGAGTTAGGCAGGGATATTCACCT-----  
CTGTCATTTGCTATTAGCTTGTTTAACACCACAGCAATAGTAGTAGCTGAG---  
GGGACAGATAGGATTATAGAACTAGTACAAAGAATTGGTAGAGCT-----  
-----ATTCTTAACATA-----CCCACACGAATAAGACAGGGCTTGGAAGGCTTTTGCTA--TAA  
>EU852998  
GTT--ACA-----  
GGAAATGGGTGGGTCA CAGTTTATTATGGGGTACCTGTGTGG--AGAGAAGCAACC---  
ACTACCTTATTTTGTGCATCAGATGCTAAATCATATGAAACAGAG--GCACATAAT-----  
-----ATCTGGGCTACA---CATGCCTGTGTACCAACAGAC---  
CCCAACCCACGAGAAATAATGCTAGGA-----AATGTCACAGAAAAC TTTAAC-----  
-----ATGTGGAAAAATAACATGGTGGAGCAGATGCATGAGGATATA---  
ATCAGTTTATGGGATCAAAGCCTG---AAACCATGTGTAAAATTA---  
ACCCCACTCTGTGTCACTTTAAACTGTACTGAATGGAAGAATGACACTGCC-----  
-----  
-----ACTAATGAGACGGACACGGGAGTAAAA---  
AACTGCTCTTTCAATGCAACCACAGAATTAAGA-----  
GATAAGCAGCAGAAAATACATGCAC TT---TTTTATAAACTGGATGTGGTGCAAATAGATAAT-----  
-----  
-----  
AATAGTAGTAATAGTAGCTATAGATTAATAAATTGTAATACATCAGCCATTACACAG---  
GCATGTCCAAAAATAACCTTTGAGCCAATTCCCATACATTATTGTGCCCCAGCTGGATTTGCAATTCTAAAAT  
GTAAT---GATAAAATGTTCAAT-----GGGACGGGTCCATGCAAAAAC-----  
-GTCAGC---ACAGTACAGTGTACACATGGGATTAGGCCAACAGTGTCAACT---  
CAACTGTTGTTGAATGGCAGTCTAGCAGAAGAAGAG-----  
ATAATAATTAGATCTGAAAACTCACAATAAT-----GCTAAAATTATAATAGTACAGCTTAAT-----  
-----GAGTCTGTAAACA-----ATTAATTGCATAAGGCCCTACTACAAGACAAGAGAA-----  
-CGTACACATATA-----GGATCAGGGCGAGCA---TAC-----TATATAACAAGA-----  
-----ATAAAAGGAAATGTA-----AGATACACACATTGT---AACATTAGTAGAGGA---  
GATTGGAGTAAAGCTTTACAACAGGTAAC TAACAAATTAAGA-----GGCCTTTTT-----

-----AATAAAACAATAATTTTTAGA-----  
 CCATCCTCGGGAGGGGACCCAGAAATTACA--ACACACAGCTTTAATTGTGGAGGGGAA---  
 TTTAAACAGCTCCAGGCAAGAATCCTGGCTGTGGAAAGCTACCTAAAGGATCAACAGCTCCTAGGACTTTGGG  
 GTTGCTCTGGAACACATTTGCACCACTACTGTGCCCTGGAAGCTCTAGCTGGAGT-----  
 -----AATAAGTCTATAGATGACATTTGG-----AAT-----  
 AATATGACCTGGATGGAATGG--GAAAAGGAAATTGACAATTACACAGGGTTAATATAC---  
 ACTTTAATTGAAAATTCGCAAATCCAGCAAGAA-----  
 -----  
 AAGAATGAACAAGATCTATTAGAATTGGACAAATGGGCAAATTTGTGGAATTGGTTTAGCATAACAAAATGGC  
 TGTGGTATATAAAAATATTTATAATGATAGTAGGAGGTTTGATAGGTTTAAGAATAGTTTTTTGCT---  
 GTGCTTTCTTTAGTA-----AATAGAGTTAGGCAGGGATATTCACCT-----  
 CTGTCAATTTGCTATTAGCTTGCTTAATACCACAGCAATAGTAGTAGCTGAA---  
 GGGACAGATAGGGCTATAGAAAATTGTACAAAGAGCTGGTAGAGCT-----  
 -----ATTCTTAACATA-----CCCAGAAGAATAAGACAAGGCTTTGAAAGGGCTTTACTA---TAA  
 >JX658585  
 GTT---ACA-----  
 GGACAATTGTGGGTAACAGTTTATTATGGGGTACCTGTGTGG--AAAGAAGCAACC---  
 ACTACTCTATTTTGTGCATCAGATGCTAAAGCATATAAAGAAGAG--GCACATAAT-----  
 -----ATCTGGGCTACA--CATGCCTGTGTACCAACAGAC---  
 CCCAACCCACAAGAAGTAAGACTAGAA-----AATGTCACAGAAAATTTAAT-----  
 -----ATGTGGAAAAATAATATGGTGGAGCAGATGCATGAGGATATA---  
 ATCAGCTTATGGGATCAAAGTCTA--AAACCATGTGTAAAATTA---  
 ACCCCACTCTGTGTCAATTTTACACTGCACTAATGCAAGTGTGCAGAATACAAATGCAAGTACAAATGCAAGTG  
 TGTCG-----  
 -----AGTAATACAAGCACACCTGTCACTGAGGACATAGGAATAAAA---  
 AACTGTTCTTTCAATATAACCACAGAAGTAAGA-----  
 GATAAGAAAAGGCTAGTAAATGCACCT--TTTTATAACCTTGATGTGGTACAAATAGATGGTAAT-----  
 -----  
 -----  
 GATACTAACAGCTATAGATTAACAAGTTGTAATACCTCAGTCATTACACAG---  
 GCATGTCCAAAGATAAACTTTGAGCCAATTCCCATACATTATTGTGCCCCAGCTGGATTTGCGATTCTAAAAT  
 GTAAC--AATAAGACATTCAAT-----GGGACAGGTCCATGCACAAAC-----  
 -GTCAGC--ACAGTACAGTGTACACATGGGATTAAGCCAGTAGTGTCAACT---  
 CAACTGTTGTTGAATGGCAGTCTAGCAAAAGAAGAC-----  
 ATAATAATTAGATCTGAAAATCTCACAAATAAT-----GCAAAAATCATAATAGTACAGCTTAAT---  
 -----GAGTCTGTACCA-----ATTAATTGCACAAGGCCCTTCAACAATACAAGAAAA---  
 -GGTGTACATATA-----GGACCAGGGCTAGCA--CTC-----TATGCAGACACATCA-----  
 -----GTGATAGGAGATATA-----AGACAAGCACATTGC--AACATTAGTAGAGCA---  
 GCATGGAATAAACTTTACACAGGGTAGCTGAAAAATTAAGA-----GACCTTTTTCCT---  
 -----AACAAAGACAGAAATAAATTTTAAA-----  
 CCATCCTCGGGAGGAGACCCAGAGGTTGTA--ACACACACCTTTAATTGTGGAGGGGAA---  
 TTTAAACAGCTCAAGGCAAGAATCCTGGCTGTGGAAAGATACCTAAAGGATCAACAGCTCCTAGGAGTTTGGG  
 GTTGCTCTGGAACACATTTGCACCACTACTGTGCCCTGGAAGCTCTAGCTGGAGC-----  
 -----AATAGATCTCTAGAGGATATTTGG-----GAG-----  
 AACATGACCTGGATGGAGTGG--GAAAGAGAAATTGACAATTACACAGGGTTAATATAC---  
 AACTTAATTGAAGAATCGCAACTCCAGCAAGAA-----  
 -----  
 AAGAATGAAAAAGAACTCTTGGAATTAGACAAATGGGCAAGTTTGTGGAATTGGTTTAGCATAACAAAATGGC  
 TGTGGTATATAAAAATATTCATAATGATAGTAGGAGGCTTAATAGGTTTAAGAATAGTTTTTTGCT---  
 GTACTTTCTTTAGTA-----AATAGAGTTAGGCAGGGATATTCACCT-----  
 CTGTCGTTTGTCTATTAGCTTGCTTAATACTACAGCAATAGTAGTAGCTGAG---  
 GGGACAGATAGGGTTATAGAAATAGTACAAAGAGGTGTTAGAGCT-----  
 -----GTTCTGAACATA-----CCCAGACGAATAAGACAGGGCTTGGAAGGGCTTTGCTA---TAA  
 >EU852934  
 GTT---ACA-----  
 GGAAAGCTGTGGGTACAGTTTATTATGGGGTACCTGTGTGG--AAAGAAGCAACC---  
 ACTACTCTATTTTGTGCATCAGATGCTAAAGCATATAAAGAAGAA--GCACATAAC-----  
 -----ATCTGGGCTACA--CATGCCTGTGTACCAACAGAC---  
 CCCAACCCACAAGAAATAAACTAGAA-----AATGTCACAGAATACTTTAAT-----  
 -----ATGTGGAAAAATAATATGGTGGAGCAGATGCATGAGGACATA---

ATCAGTTTATGGGATCAAAGCTTG---AAACCATGTGTAAAATTA---  
 ACCCCACTCTGTGTTACTTTAAACTGCACTGATGTACGGAGTAATGGCACTAAACAGAGTAATGGCACT----  
 -----  
 -----GAACAGAGTAATAGCACGGAATTTAGGGGGGACATAGAAATGAAG---  
 AACTGCTCTTTCAATATAACCACAGTAGTAAGA-----  
 GATAAGAAGAAGCAAGTACATGCACTT---TTTTATAGACTTGATGTAGTACAAATAGATGAT-----  
 -----  
 -----  
 AATAATAGTACTAGCTATAGATTAATAAATTGTAATACCTCAGCCATTACGCAG---  
 GCATGTCCAAAGATAACCTTCGAGCCAATTCCCATACACTATTGTGCCCCAGCTGGATTTGCAATTCTAAAAT  
 GTAAT---GATAAGAAGTTCAAT-----GGGACAGGTCAATGCAAAAAT-----  
 -GTCAGC---ACAGTACAGTGTACACATGGGATTTCGGCCAGTAGTATCAGCC---  
 CAACTGTTGCTAAATGGCAGTCTAGCAGAAGAAGAG-----  
 ATAATAGTTAGATCTGACAATCTCACAATAAT-----GCTAAAATCATAATAGTGCGGCTTAAT----  
 -----GAGACTGTAACA-----ATTAATTGCACAAGGCCCAACAACAATACAAGACAA-----  
 -AGTATACATCTA-----GGACCAGGGCAAGCA---TTC-----TATACAACAAAA-----  
 -----ATAATAGGAGATATA-----AGACAAGCATATTGT---AAGATTGGGGGAGTA---  
 CAATGGAATAGAAGTTTACAACAGGTAGCTAAAAAATTAGGA-----GACCTTCTTAAC----  
 -----AAGACAACAATAATTTTTAGA-----  
 CCATCTTCGGGAGGGGACCCAGAAATTACA---GAACACAGCTTTAATTGTGGAGGGGGAA---  
 TTTAAGCAGCTCCAGGCAAGAGTCCTGGCTCTGGAAAGCTACCTAAGGGATCAACAGCTCCTAGGAATTTGGG  
 GTTGCTCTGGAAGACACATTTGCACCACTAATGTGCCCTGGAAGCTCTAGCTGGAGT-----  
 -----AATAAATCTCTAGATGCGATTTGG-----GGT-----  
 AACATGACCTGGATGGAATGG---GAAAGAGAAATTGATAATTATACAGGGTTAATATAC---  
 AGCTTAATTGAAGAATCGCAAACCCAGCAAGAA-----  
 -----  
 AAGAATGAACAAGAATTATTGCAATTGGACAAATGGGCAAGTTTGTGGAATTGGTTTAGCATAACAAAATGGC  
 TGTGGTATATAAAATTATTGATAATGATAGTAGGAGGCTTGATAGGTTTAAGAATAGTTTTTTGCT---  
 GTGCTTTCTTTAGTA-----AATAGAGTTAGGCAGGGATATTCACCT-----  
 CTGTCATTTGCCATTAGCTTGTTTGATGCCACAGCAATAGCAGTAGCTGAG---  
 GGGACAGATAGGGTTGTAGAAATAATACAAAGAACTGTTAGGGCT-----  
 -----GTTCTTAACGTA-----CCCGTACGAATAAGGCAGGGCTTGGAAGGGCTTTGCTA---TAA  
 >EU852982  
 GTT---ACA-----  
 GGACAGTTGTGGGTACAGTTTACTATGGGGTACCTGTGTGG---AAAGAAGCAACC---  
 ACTACTCTATTTTGTGCATCAGATGCTAAATCATATAAAACAGAG---GCACATAAT-----  
 -----ATCTGGGCTACA---CATGCTTGTGTACCAACAGAC---  
 CCCGACCCACAAGAAATAGTATTGGAA-----AATGTCACAGAAAAATTTAAT-----  
 -----ATGTGGAATAATGCCATGGTGGAGCAGATGCATGAGGATATA---  
 ATCAGTTTATGGGATGAAAGCCTA---AAACCATGTGTAAAATTA---  
 ACCCCACTCTGTGTCACTTTAAACTGCATTGAAGTGACTAAAAACACCACTAACAAT-----  
 -----  
 -----AGCAGTACCACTAAAGAGGACACAGGAGTGAGA---  
 AACTGTACCTTCAACATAACCACAGAAGTACAA-----  
 GATAAGAAGAAGAAAGTACATGCACTC---TTTTATAAACTTGATCTGGTACAAATAGATGATAAT-----  
 -----  
 -----  
 AGTACTAGTAATAATAGCTATAGATTAATAAGTTGTAATACCTCAGCCCTTACACAG---  
 GCATGTCCAAAGACATCCTTTGAGCCAATTCCCATACATTATTGTGCCCCAGCTGGATTTGCAATTCTAAAAT  
 GTAAT---GATAAAAAGTTCAAT-----GGGACGGGTCCATGCAAAAAT-----  
 -GTCAGC---ACAGTACAGTGTACACATGGGATTAAGCCAGTAGTGTCAACT---  
 CAACTGTTGTTAAATGGCAGTCTAGCAGAAGAAGAA-----  
 ATAATAATTAGATCTGAAAATATCACAATAAT-----GCTAAAATCATAATAGTACAGCTTAAA----  
 -----GAGAATGTAACA-----ATTGAGTGCATAAGGCCCAACAACAACACAAGACAA-----  
 -AGTACACACATA-----GGACCAGGGCAAGCA---CTC-----TATACAACACAA-----  
 -----GTAATAGGAGATATA-----AGACAAGCACATTGT---AATATTAGTAGAACA---  
 GACTGGAATAAAAATGTTGCAAAAATGTGTCTAAAAAATTAGAA-----GACCTTTTAAAC----  
 -----AACAAAACAATAATTTTTTAAA-----  
 CCATCCTCAGGAGGGGACCCAGAAATTGAA---ATGCACAGCTTTAATTGTGGAGGGGGAA---  
 TTTAAACAGCTCCAGGCAAGAAATCCTGGCTGTGGAAAGCTACCTAAAGGATCAACAGCTCCTAGGAATTTGGG

GTTGCTCTGGAAACACATTTGCACCACTAGTGTGCCTTGAATTCTAGCTGGAGT-----  
 -----AATAAATCTCTAGATGATATTTGG-----CAT-----  
 AACATGACCTGGATGGAGTGG---GAAAGAGAAATAGCCAATTACACAGATTTAATATAC---  
 AACTTAATTGAAGAATCGCAAACCCAGCAAGAA-----  
 -----  
 AAGAATGAATTAGATTTATTGAAATTGGACAAATGGGCAAGTTTGTGGAATTGGTTTGACATAACAAGATGGC  
 TGTGGTATATAAAAATATTTCATAATGATAGTAGGAGGCTTGATAGGTTTAAGAATAGCTTGTGCT---  
 GTGTTTTCTTTAGTA-----AATAGAGTTAGGCAGGGATATTCACCT-----  
 CTGTCGTTTGCTATTAGTTTGTTCACACCACAGCAATAGTAGTAGCTGAG---  
 GGGACAGATAGGGTTATAGAAATAGTACAAAGAGCTGGTAGAGCT-----  
 -----ATCCTTCACATA-----CCCACACGAATAAGACAAGGCTTGGAAAGGGCTTTAATA---TAA  
 >EU853014  
 GCT---GTA-----  
 AGAAAAGTCATGGGTCACAGTTTATTATGGGGTACCTGTGTGG--AAAGAAGCAACT---  
 ACTACTCTATTTTGTGCATCAGATGCTAAATCATATAAAGCAGAG---GCACATAAT-----  
 -----ATCTGGGCTACA---CATGCCTGTGTACCAACAGAC---  
 CCCAACCCACGAGAAATAACACTGGAA-----AATGTCACAGAACACTTTAACT-----  
 -----ATGTGGAAAAATAGCATGGTGGAGCAGATGCATGAGGATATA---  
 ATCAGTTTATGGGATCAGAGCCTA---ACACCATGTGTAAAATTA---  
 ACCCCACTCTGTGTCACTCTAAACTGCATTGATGCAAAGAATAATAAAAATGGAACAAATACC-----  
 -----  
 -----AATGCAACATCTAGCCCTGATGAGGACACAGGAATGAAA---  
 AATTGCTCTTTCAATGTAACCACAGAAATAAGA-----  
 GATAGGAAGAAGCAAGTATATGCACCT--TTTTATAAACTTGATGTGGTACAAATAGATGATAAG-----  
 -----  
 -----  
 AATAGTACTAATACCAGCTATAGATTAATAAATTGTAATACCTCAGCCATTACACAG---  
 GCGTGTCCAAAGACATCCTTTGAGCCAATTCCCATACATTATTGTGCCCCAGCTGGGTTTGCAATTCTAAAAT  
 GTAAC---AATAAGAAGTTCAAT-----GGGACAGGTCCATGCAAAAAC-----  
 -GTCAGC---ACAGTACAGTGTACACATGGGATTAAGCCAGTAGTGTCAACT---  
 CAACTGTTGTTGAATGGCAGTCTAGCAGAAGAAGAA-----  
 ATAATGATTAGAAGTGAATAATCTCAAATAAT-----GCTAAAGTCATAATAGTACAGCTTAAT---  
 -----GAGTCTGTAGTA-----ATTAATTGCACAAGGCCCAACAACAATACAAGACAA-----  
 -GGTGTGCATATA-----GGACCAGGACAAGCA---TTA-----TATACAACA---GAT-----  
 -----ATAATAGGAGATATA-----AGACAAGCATATTGT--ACTGTTAATAAAAACA---  
 AGATGGAATAAAACCTTAGAACAGGTAGCTAAAAAATTAGGA-----GACCTTTTTAAC---  
 -----CTGACAAAATTAACCTTTTAAA-----  
 CCACCCTCGGGAGGGGATCTAGAAATTACA--ACACACAGCTTTAATTGTGGAGGGGAA---  
 TTTAAACAGCTCCAGGCAAGAATCCTGGCTGTGGAAAGATACCTAAAGGATCAACAGCTCCTAGGAATTTGGG  
 GTTGCTCTGGAAACACATTTGCACCACTACTGTGCCCTGGAACACTAGCTGGAGT-----  
 -----AATAGATCTCTAGATGAGATTTGG-----AAT-----  
 AACATGACCTGGATGGAATGG---GAAAGAGAAATTGACAATTACACAAGTTTAATATAC---  
 ACCTTAATTGAAGAATCGCAAACCCAACAAGAA-----  
 -----  
 AAGAATGAGAAAGACTTATTGGAATTGGACCAATGGGCAAGTTTGTGGAATTGGTTTAGCATAACAAAATGGC  
 TGTGGTATATAAAATTATTTCATAATGATAGTAGGAGGCTTGATAGGTTTAAGGATAGTTTTTTGCT---  
 GTGCTTTCTGTAGTA-----AATAGAGTTAGGCAGGGATACTCACCT-----  
 CTGTCGTTGGCTATTAGCTTACTTAACGCCACAGCAATAGCAGTAGCTGAG---  
 GGGACAGATAGGATTATAGAAATAGCACAAAGAATTGGTAGAGCT-----  
 -----ATTATTAACATA-----CCCACAAGAATAAGGCAGGGCGCGGAAAGGGCTTTACTA---TAA  
 >AF484506  
 GTT---ACA---GGA-----  
 GAAGACTTGTGGGTCACAGTGTATTATGGGGTACCTGTGTGG---AAAGAAACAACC---  
 ACTACTCTATTTTGTGCATCAGATGCTAAGTCATATGAAACAGAA---GCACATAAT-----  
 -----GTCTGGGCTACA---CATGCCTGTGTACCAACAGAC---  
 CCCAACCCACGAGAAATGATACTAGAA-----AATGTCACAGAAAACCTTTAACT-----  
 -----ATGTGGAAAAATGACATGGTGGAAACAGATGCATGAGGATATA---  
 ATCAGTTTATGGGATCAAAGCCTA---AAACCATGTGTAAAATTA---  
 ACCCCACTCTGTGTCACTTTAAACTGCACAACATGGAAGGGTGACAATGTCACTACTACCCTAGT-----  
 -----

-----GCCCTAATGTCACTGGTGCCACTAGTGAGAACATAGAAATGAAA---  
 AACTGCTCTTTCAATATAACCACAAGAATAAGA-----  
 GATAAGAAGAAACAAGTACATGCACTT---TTTTATAAACTTGATGTAGTGCAAATAGATAACAACAAT----  
 -----  
 -----  
 AGTACTAATACTAGTACCAGCAGCTATAGATTAATAAATTGTAATACCTCAGCCATTACACAG---  
 GCATGTCCAAAGGTATCCTTTGAGCCAATTCCCATACATTATTGTGCCCCAGCAGGATTTGCGATTCTAAAAT  
 GTAAC---GATAAGACATTCAAT-----GGAACGGGTCCATGCAAAAAC-----  
 -GTCAGC---ACAGTACAGTGTACACATGGGATTAAGCCAGTAGTGTCAACT---  
 CAACTATTGCTGAATGGCAGTCTAGCAGAAGAGGAG-----  
 ATAATAATTAGATCTGAAAAATATCACAATAAT-----GCTAAAACCATAATAGTACACCTTAAT----  
 -----GAATCTGTAACA-----ATTAATTGCACAAGGCCCTACAACAATACAAGAAAA-----  
 -AGTACACATATA-----GGACCAGGGCAAGCA---TAC-----TTTACAGCAAAG-----  
 -----ATAATAGGGGATATA-----AGACAAGCACATTGT---AACGTTAGTAGAGCA---  
 GAATGGAATAAGACTTTTACAACAGGTAGCTAAAAAATTAGGA-----GACCGTCTGAAC----  
 -----CAGACAGCAATAAATTTTAAA-----  
 CCATCCTCGGGAGGGGACCTAGAAATTACA--ACACACAGCTTTACTTGTGGAGGGGAA--  
 TTTAAACAGCTCCAGGCAAGAATCCTAGCTGTGGAAAGCTACCTAAGGGATCAACAGCTCCTAGGAATTTGGG  
 GTTGCTCTGGAACACATTTGCACCACTACTGTGCCCTGGAACCTAGCTGGAGT-----  
 -----AATAAATCTCTGGTGGAGATTTGG-----GGT-----  
 AACATGACCTGGATGGAGTGG---GAAAAAGAAATTGAAAAATACACAGGGTTAATATAC---  
 AGCTTGATTGAAGAATCGCAAACCCAGCAAGAA-----  
 -----  
 AAGAAATGAACAAGAATTATTGCAATTGGACAAATGGGCAAGTTTGTGGAATTGGTTTAGCATAACACAATGGC  
 TGTGGTATATAAAAAATATTCATAATGATAGTAGGAGGCTTGATAGGTTTAAGAATAGTTTTTTGCT---  
 GTGCTTTCAATAGTA-----AATAGAGTTAGGCAGGGATATTCACCT-----  
 CTGTCATTTGCTATTAGCTTGCTTAATACCACAGCAATAACAGTAGCTGAG---  
 GGGACAGATAGGATTATAGAAATAGTACAAAGAACTGTTAGAGCT-----  
 -----ATTCTTAACATA-----CCCAGACGAATAAGACAGGGCGCGAAAGGGCTTTGYTA---TAA  
 >AF484513  
 GTT---ACA-----  
 GGACAATTGTGGGTCACAGTTTATTATGGGGTACCTGTGTGG--AAAGAAGCAACC---  
 ACTACTCTATTTTGTGCATCAGATGCTAAAGCATATGAACCAGAG--GCACATAAT-----  
 -----GTTTGGGCTACA--CATGCCTGTGTACCAACAGAC---  
 CCCAACCCACGGGAAATAAACTAGAA-----AATGTCACAGAAGAATTTAAC-----  
 -----ATGTGGAAAAATAACATGGTGGAGCAGATGCATGAGGATGTA---  
 ATTAGTTTATGGGATCAAAGCCTA--AAACCATGTGTAAAATTA--  
 ACCCCACTCTGTGTACGTTAGACTGCATTGATTGGAATAATGTCACTGTT-----  
 -----  
 -----GTGAACGCGAGCAAGGAAATAGGAATGAAA---  
 AACTGCTCTTTCAATATAACCACAGAAGTAAGA-----  
 GATAAGAAGAAGCAAGTACACGCGCTT---  
 TTTTACAACTTGATGTGGTACAAATAGATGATGAGAATGGTAAT-----  
 -----  
 AGGACCCAGAATAGTAATGGGACCAGCTATAGATTAATAAATTGTAATACCTCAACCATTACACAG---  
 GCATGTCCAAAGGTATCCTTTGAGCCAATTCCCATACATTATTGTGCCCCAGCTGGATTTGCGATTCTAAAAT  
 GTAAT---GATAAGAAGTTCAAT-----GGGACGGGTCCATGTCACAAC-----  
 -GTCAGC---ACAGTACAGTGTACACATGGGATTAGGCCAGTAGTGTCAACT---  
 CAACTGTTGTTGAACGGCAGTCTAGCAGAAGAAGAG-----  
 ATAATAATTAGATCTGAAAACCTCACAATAAT-----GCTAAAATCATCATAGTACAGCTTAAT----  
 -----GAGTCTGTAACA-----ATCAATTGCACAAGGCCCTACAATAATACAAGACAA-----  
 -GGTATACATATA-----GGACCAGGACGAGCA---CTC-----TATACAACA---GAC-----  
 -----ATAGTAGGAGATATA-----AGACAAGCACATTGT---AATATTAGTAGAACA---  
 GAATGGAATAAACTTTTACAACAGGTAGCTAAGAAATTAAAA-----GACCTTCTTAAC----  
 -----CAGACAATAAATAAATTTTAAA-----  
 CCATCCTCGGGAGGGGACCTAGAAATTACA--ACACACAGCTTTAATTGTGGAGGGGAA--  
 TTTAAACAGCTCCAGGCAAGAGTCTGGCTGTGGAAAGCTACCTAAGGGATCAACAGCTCCTAGGAATTTGGG  
 GTTGCTCTGGAACACATTTGCACCACTACTGTACCCTGGAACCTAGCTGGAGT-----  
 -----AATAAATCTCTAGAGGAGATTTGG-----GGT-----  
 AACATGACCTGGATGGAGTGG---GAAAAAGAAATTGACAATTACACAAGTTTAATATAC---

AGCTTAATTGAAGAATCGCAAACCCAGCAAGAA-----  
 -----  
 AAGAATGAACAAGAAGCTATTGGCATTAGACAAATGGGCAAGTTTGTGGAATTGGTTTAGCATAACAAATTGGC  
 TGTGGTATATAAGAATATTCATAATGATAGTAGGAGGCTTAATAGGTTTAAGAATAGTTTTTTGCT---  
 GTGCTTTCTGTAGTA-----AATAGAGTTAGGCAGGGATATTCACCT-----  
 CTGTCGTTTGTCTATTAGCTTGCTTAATACCACAGCAATAGTAGTAGCTGAG---  
 GGGACAGATAGGGTTATAGAAATAGTACAAAGAGCTG-----  
 -----  
 >AF484518  
 GCT---ACA-----  
 GAACAGTTGTGGGTCACAGTTTACTATGGGGTACCTGTGTGG--AAAGAAGCAACC---  
 ACTACTCTATTTTGTGCATCAGATGCTAAATCATATAAAGAAGAA---GCACATAAT-----  
 -----ATCTGGGCTACG---CATGCCTGTGTACCAACAGAC---  
 CCCAACCCACGAGAATTAATAATAGAA-----AATGTCACAGAAAACCTTTAAC-----  
 -----ATGTGGAAAAATAACATGGTGGAGCAGATGCATGAGGATATA---  
 ATCAGTTTATGGGATCAAAGCCTA---AAACCATGTGTAAAATTA---  
 ACCCCACTCTGTGTCACTTTAAACTGCACTGAATGGAGGAAGAATAACACT-----  
 -----  
 -----ATCAATGCCACCGAAATAGAAATGAAA---  
 AACTGCTCTTTCAATATAACCACAGAACTAAGA-----  
 GATAGGAAAAAGCAAGTACATGCACCT--TTTTATAAACTTGATGTGGTACCAATAGATGATAAT-----  
 -----  
 -----  
 AATAGTACTAATACCAGCTATAGGTTAATAAATTGTAATACCTCAGCCATTACACAG---  
 GCGTGTCCAAAGGTAACTTTGAGCCAATTCCCATACATTATTGTGCCCCAGCTGGATATGCGATTCTAAAAT  
 GTAAC---AATAAGAAGTTCAAT-----GGGACAGGTCCATGCAATAAT-----  
 -GTCAGT---ACAGTACAGTGTACACATGGAATTAGGCCAGTAGTGTCAACT---  
 CAATTGTTATTGAATGGCAGTCTAGCAGAAGAAGAC-----  
 ATAATAATTAGATCTGAAAATCTCACAAATAAT-----GCTAAAATCATAATAGTACAGCTTAAT---  
 -----GAGTCTGTAAACA-----ATTAATTGCACAAGGCCCTACAACAATACAAGAAAA---  
 -GGTGTACATATA-----GGACCAGGGCAAGCA---TAC-----TATACAACAAAG-----  
 -----ATAATAGGAGATATA-----AGACAAGCACATTGC---AACATTAGTGGAGCA---  
 GAATGGAATAAGACTTTATATCGGGTAGCTAAAAAATTAAGA-----GACCTATTT-----  
 -----AACAAAGACAATAATTTTTTAAA-----  
 CCATCCTCCGGAGGGGACCCAGAAATTACA--ACACACAGCTTTAATTGTAGAGGGGAA---  
 TTTAAACAGCTCCAGGCAAGAGTCCCTGGCTGTGGAAAGCTACCTAAGGGATCAACAGCTCCTAGGAATTTGGG  
 GTTGCTCTGGAAGACACATTTGCACCCTAATGTGCCCTGGAACCTCTAGCTGGAGT-----  
 -----AATAAAACTCTAAATCAATTTGG-----GAG-----  
 AACATGACCTGGATGGAGTGG--GAAAGAGAAATTGACAATTACACAGGGATAATATAC---  
 AATTACTTGAAGAATCGCAAACCCAGCAAGAA-----  
 -----  
 AGAAATGAACAAGACCTATTGAAATTGGACCAATGGGCAAGTTTGTGGAATTGGTTTAGCATAACAAAATGGC  
 TGTGGTATATAAAAATATTATAATGATAGTAGGAGGCTTGATAGGCTTAAGGATAGTTTTTTGCT---  
 GTGCTTTCTATAGTA-----AATAGAGTTAGGCAGGGATATTCACCT-----  
 CTGTTCGTTTGTGCTTAGCCTGTTTAACACAGCAGCAATAGTAGTAGCTGAG---  
 GGGACAGATAGGGTTATAGAAATAGTGCAAAGAGCTGGTAGAGCT-----  
 -----GTTCTTAACATA-----CCCAGAAGAATAAGACAGGGCGCGGAAAGGGCTTTACTA---TAA  
 >AY304496  
 GTG---ACA---TGT-----AGT---GTT---ACA---  
 GGACAGTTGTGGGTTGCAGTTTATTATGGGGTACCTGTATGG--AAAGAAGCATCC---  
 ACTACTCTATTTTGTGCATCAGATGCTAAAGCATATAAAGAAGAG---GCACATAAC-----  
 -----ATCTGGGCTACA---CATGCCTGTGTACCAACAGAC---  
 CCCAACCCACAAGAAATAGAACTAGAA-----AATGTCACAGAAAACCTTTAAC-----  
 -----ATGTGGAAAAATAACATGGTGGAGCAGATGCATGAGGATATA---  
 ATTAGTTTATGGGATCAAAGTCTA---AAACCATGTGTGAAATTA---  
 ACCCCACTCTGTGTCACTTTAAACTGCGCTGAGTGGAAAGGAGACAAATGTCACTAATACAACACTACTGCTAAT-  
 -----  
 -----ACAACTGCCACTAAAACAAATACCACTGGTTTGAATGTGGGAATGAAA---  
 AACTGCTCTTTCAATGTAAACCACAGAAGTAAGA-----  
 GATAAGAAGAAGCAAGTATATGCACCT--TTTTATAACCTTGATGTGGTACAAATGAATGAT-----

-----  
-----  
AATAATAATAGCTATAGGTTAATACATTGTAATACCTCAGCCATTACACAG---  
GCATGTCCAAAGGTAACCTTTGAGCCAATTCCCTATACATTATTGTGCCCCAGCTGGATTTGCGATTCTAAAAT  
GTAAT---GATAAGAAGTTCAAT-----GGGATGGGTCCATGTAACAAT-----  
-GTCAGC---ACAATACAGTGTACACATGGGATTAAGCCAGTAGTGTCAACT---  
CAACTGCTGTTGAATGGTAGTCTAGCAGAGGAAGAT-----  
ATAATTATTAGATCTGAAAATCTCACAATAAT-----GCTAAAATTATAATAGTACAGCTTAAT----  
-----GAGTCTGTAGAA-----ATTAATTGCACAAGGCCCTACAACAATACAATACAA-----  
-AGTGTACAGATG-----GGACCAGGGCGAGCA---TGG-----TATACATCAGGTATA-----  
---ACAATA---ATAGGAGATATA-----AGACAAGCACATTGT---AACATTAGCGGAGCA---  
AAATGGAATAATACTTTTACAACAGGTAGCTAAAAAATTAGGA-----GGCCTTTTCAAT----  
-----AAGACAACAATAATTTTTTAAA-----  
CCATCCTCGGGAGGGGACCCAGAAATTACA---ACACACAGCTTTAATTGTGGAGGGGAA---  
CTTAAACAGCTCCAGGCAAGAGTCCTGGCTGTGGAAAGCTACCTAAGGGATCAACAGCTCCTAGGAATTTGGG  
GTTGCTCTGGAACACATTTGCACCCTAATGTGCCCTGGAAGTCTAGCTGGAGT-----  
-----AATAAATCTCTAGATCAGATTTGG-----GGT-----  
AACATGACCTGGATAGAGTGG---GAAAAAGAAATTGATAATTACACAGGCTTAATATAC---  
AGCTTACTTGAAGAATCGCAAGTCCAGCAAGAA-----  
-----  
AAGAAATGAGCAAGAACTATTGCAATTGGACAAATGGGCAAGTTTGTGGAGTTGGTTTTCCATAACAACTGGC  
TGTGGTATATAAGACTATTTCATAATGATAGTAGGAGGCTTAATAGGGTTAAGAATAGTTTTTTGCT---  
GTGCTTTCTATAATA-----AATAGGGTTAGGCAGGGATATTCACCT-----  
CTGTCAATTTGCCATTAGCTTGCTTGATACAACAGCAATAACAGTAGCTGAG---  
GGAACAGATAGGATTATAGAGATAGTACAAAGAGCTACTAGAGCT-----  
-----ATTCTTAACATA-----CCCACACGAATAAGACAGGGCTTGGAAGGGCTTTACTA---TAA  
>AF484480  
GTT---GCA-----  
GAAGAGCGGTGGGTACAGTGTATTATGGGGTACCTGTGTGG---AAAGAAGCAACC---  
ACTACTCTATTTTGTGCATCAGATGCTAAAGGATATAAAACAGAG---GCACATAAT-----  
-----ATCTGGGCTACA---CATGCCTGTGTACCAACAGAC---  
CCCAACCCACGAGAAATAAAATTAGAA-----AATGTCACAGAAAACCTTTAAC-----  
-----ATGTGGAAAAATAACATGGTGGAGCAGATGCATGAGGATATA---  
ATCAGTTTATGGGATCAAAGCCTA---AAACCATGTGTAAAATTA---  
ACCCCACTCTGTGTCACTTTAAATTGCACTGAATGGAAGAATAATGCCACTAAT-----  
-----  
-----AATGCCACTAATAATGAGGACATAGCAATGAGA---  
AACTGCTCTTTCAATGTAACCACAGAGGTAAGA-----  
GATAAGAAGAAGCAAATGCATGCACTT---TTTTATAAACTTGATGTGATACCAATGGATGATAAT-----  
-----  
-----  
AGTAATGATAGTACTAGCTATAGATTAATAAATTGTAATACCTCAGCCATTACACAA---  
GCGTGTCCAAAGGTAACCTTTGAGCCAATTCCCATAACATTATTGTGCCCCAGCTGGATTTGCGATTCTAAAAT  
GTAAT---AATAGGAYGTTCAAT-----GGGACGGGCCCATGCAAAAAT-----  
-GTCAGT---ACAGTGCAATGTACACATGGGATTAAACCAGTAGTGTCAACT---  
CAACTGTTGTTGAATGGCAGTCTAGCAGAGGAAGAG-----  
ATAATAATTAGATCTGAAAATCTCACAATAAT-----GCTAAAGTCATAATAGTACAGCTTAAT----  
-----GCGACTGTAAAC-----ATTACTTGATAAGGCCCTACAACAATACAAGACGA-----  
-AGTACACATATA-----GGACCAGGGCAAGCA---TTA-----TATACAAATCAC-----  
-----ATAATAGGAGATATA-----AGACAAGCACATTGT---AATATTAGTGGAAACA---  
GAATGGAATAAACTTTACAACAGGTAGCTAAAAAATTAGGA-----GGCCTTCTTAAC----  
-----AAGACAACAATAATTTTTTAAA-----  
CCATCCTCAGGAGGGGACCTAGAAATTACA---ACACACAGCTTTAATTGTGGAGGGGAA---  
TTTAAACAGCTCCAGGCAAGAGTCCTGGCTGTGGAAAGCTACCTAAGGGATCAACAGCTCCTAGGAACCTGGG  
GTTGCTCTGGAAGACACATTTGCACCCTAATGTGCCCTGGAAGTCTAGCTGGAGT-----  
-----AATAAATCTATACAGTACATTTGG-----GGT-----  
AACATGACCTGGATGGAGTGG---GAAAGAGAAATTGACAATTACACAGGGGTAATATAC---  
AACTTAATTGAAGCATCGCAAAACCAGCAAGAA-----  
-----  
AAGAAATGAACAAGACCTATTGGAATTGGACAAATGGGCAAGTTTGTGGAATTGGTTTAGCATAACAAATTGGC

TGTGGTATATAAGAATATTCATAATGATAGTAGGAGGCTTGGTAGGTTTAAGAATAGTTTTTGGCT---  
GTGCTTTCTTTAGTA-----AATAGAGTTAGGCAGGGATATTCACCT-----  
CTATCGTTTGCTATTAGCTTGTATGATACCACCGCAATAGCAGTAGCTGAG---  
GGGACAGATAGGATTATAGAAATAATACAAAGAGCTGGTAGAGCT-----  
-----ATTCTTCACATA-----CCCAGACGAATAAGACAGGGCCTGGAAAGGGCTTTACTA--TAA  
>AF484485  
GCT---ATA---GGA-----GAT---ACA---  
GGAAATTTGTGGGTACAGTTTATTATGGGGTACCTGTGTGG--AAGGAAGCAACC---  
ACTACTCTATTTTGTGCATCAGATGCTAAATCATATGAAACAGAG--GCACATAAT-----  
-----ATCTGGGCTACA---CATGCCTGTGTACCAACAGAC---  
CCCAACCCACAAGAAATAAACTAGAA-----AAGGTAACAGAAACTTTAAC-----  
-----ATGTGGAAAAATAACATGGTGGAGCAGATGCATGAGGATATA---  
ATCAGTTTATGGGATCAAAGCCTA--AAACCATGTGTAAAATTG---  
ACTCCACTCTGTGTCACTTTAAACTGCACTGAGTATAATAAAAATGCCACTGAT-----  
-----  
-----AACAAATGCCACTAATGTGCGACACAGGAATGAGA---  
AACTGCTCTTTCAATGTAACCACAGAAGTAAGA-----  
GATAAGAAGAAGCAAGTATATGCACCT--TTCTATAAACTTGATGTGGTACAAATAGATGATAAT-----  
-----  
-----  
AATAGTACTAATACCAGCTATAGATTAATAAATTGTAATACCTCAGCCATTACACAG---  
GCGTGTCCAAAGGTATCCTTTGAGCCAATTCCCATACATTATTGCGCCCCAGCGGGATTTGCGATTCTAAAAT  
GTAAT--AATAAGAAGTTCAAT-----GGGACAGGTCCATGCAACAAT-----  
-GTCAGC--ACAGTACAGTGTACACATGGGATTAGGCCAGTAGTGTGCGACT---  
CAATTGTTGTTGAATGGCAGTCTAGCAGAAGGAGAA-----  
ATAATAATTAGATCTGAAAACTCGAAGATAAT-----GCTAAAGTTATAATAGTACAGCTTAAT----  
-----GAGTCTGTAGTA-----ATTAATTGCACAAGGCCCTACAACAATACAAGAAGA-----  
-AGTACACGTATA-----GGACCAGGGCAAGCA--TTA-----TATACAACAGGAGAA-----  
-----ATAATAGGACAAATA-----AGACAAGCACATTGT--GACATTAGTAGAGCA---  
GAATGGAATAAAATTTTAGACCAAGTAGCTAAAAAATTAAGA-----GACCTTTTAAAC---  
-----  
-----AAAACAACAATAATTTTAAA-----  
CCACCCTCAGGAGGGGACCTAGAAATTACA--ACACACAGCTTTAATTGTGGAGGGGAA--  
TTTAAACAGCTTCAGGCAAGAGTCCCTGGCTGTGGAAAGGTACCTAAAGGATCAACAGCTCCTAGGAATTTGGG  
GTTGCTCTGGAAGACACATTTGCACCACTACTGTGCCTTGGAACCTCTAGCTGGAGT-----  
-----AATAAAACTCAAAGGAGATTTGG-----GAT-----  
AACATGACCTGGATGGAGTGG--GAAAAGGAAATTGACAATTACACAGGTGTAATATAC---  
AACTTACTTGGAGAATCGCAATCCAACAAGAA-----  
-----  
AAGAATGAACAAAACTATTGCAATTGGACGAATGGGCAAGTTTGTGGAATTGGTTTGACATAACACAATGGC  
TGTGGTATATAAAAATATTCATAATAATAATAGGAGGCTTGATAGGTCTAAGAATAATTTTTTGCT--  
GTGCTTTCTTTAGTA-----AATAGAGTTAGGCAGGGATATTCACCT-----  
CTGTGTTTTGCTATTAGCTTGTTCATACCACAGCAATAGTAGTAGCTGAA---  
TGGACAGATAGGGCTATAGAAGTAGTACAAAGGGCTGCTAGAGCT-----  
-----ATTCTTCACATA-----CCCAGACGAATTAGACAGGGCTTAGAAAGGGCTTTACTG--TAA  
>AF484486  
GTT---ACA-----  
GAAAATCTGTGGGTACAGTTTATTATGGGGTACCTGTGTGG--AAAGAAGCAAAAT---  
ACTACTCTCTTCTGTGCATCAGATGCTAAAGCATATAAAGAAGAA--GCACATAAT-----  
-----ATCTGGGCTACA---CATGCCTGTGTGCCAACAGAC---  
CCCAACCCACGAGAAATAACTAGAA-----AATGTTACAGAAACTTTAAC-----  
-----ATGTGGAAAAATAACATGGTGGAGCAGATGCATGAGGATATA---  
ATCAGTTTATGGGATCAAAGCCTA--AAACCATGTGTAAAATTA---  
ACCCCACTCTGTGTCACTTTAAACTGCACAAATGTAAGTAGCAGCACTGGG-----  
-----  
-----AGGAATATAAGTGGGGACATAGGAATGAAA---  
AACTGCTCTTTCAATATAACCACAGTATTAAGA-----  
AATAAGAAGAAGCAAGTACAGGCACTT--TTTTATAGACTTGATGTGGTACAAATAGATAATACT-----  
-----  
-----  
ACTAATAGTAGCTATAGTGAAGTATAGATTAATAAATTGTAATACCTCAGCCACGACCCAG---

GCGTGTTCAAAGATAAACTTTGAACCAATTCCCATACATTATTGTGCCCCAGCTGGATTTGCAATTCTAAAAT  
 GTAAT---GATAAAAAGTTCAAT-----GGGACGGGTCCATGCACAAAT-----  
 -GTCAGC---ACAGTACAGTGTACACATGGGATTAGGCCAGTAGTATCAACT---  
 CAACTATTGTTGAATGGCAGTTTAGCAGAAGGAGAA-----  
 ATAATAGTTAGATCTGAAAATCTCACAGACAAT-----GCTAAAATCATAATAGTACAGCTTAAT----  
 -----GAGACTGTAACA-----ATTAATTGCACAAGGCCCGGCAACAACACAAGACAA-----  
 -AGTATACATCTA-----GGACCAGGGCAAGCA---TTA-----TGGACAACAACAGAT-----  
 -----ATAATAGGAAACATA-----AGACAAGCACATTGT---AATATTAGTAAAGTA---  
 GCATGGAATAAACTTTAGGACAGGTAGCCGAAAAATTAAGA-----GGCCTTCTTAAT----  
 -----AAGACAACAATAGATTTTAAA-----  
 CCGTCCTCGGGAGGGGACCCAGAAATTACA---ACACACACCTTTAATTGTGGAGGGGAA---  
 TTCAAACAGCTCCAGGCAAGAAATCCTGGCTGTGGAAAACTACCTAAGGGATCAACAGCTCCTAGGAATTTGGG  
 GTTGCTCTGGAAGACACATCTGCACTACTAGTGTGCCCTGGAACCTCTAGCTGGAGT-----  
 -----AACAAATCACTAGATGAGATTTGG-----GGA-----  
 AACATGACCTGGATGGGATGG---GAAAGAGAAATTGACAAGTACACAGGTTTAATATAC---  
 AATTTAATTGAAGAATCGCAAACCCAGCAAGAA-----  
 -----  
 AAGAATGAACAGGAACTATTGCAATTGGACAAATGGGCAAGTTTGTGGAATTGGTTTAGCATAACAAAATGGC  
 TGTGGTATATAAAAATATTCTAATGGTAGTAGGAGGTTAATAGGGTTAAGAATAGTTTTTTGCT---  
 GTGCTTTCTTTAGTA-----AATAGAGTTAGGCAGGGATATTCACCT-----  
 CTGTCGTTTGCCATTAGCTTGCTTGATACCATAGCAATAGCAGTAGCTGAG---  
 GGGACAGATAGGGTTATAGAAATATTACAAAGAGGTGTTAGAGCT-----  
 -----ATTCTTAACATA-----CCCACACGAATAAGACAGGGTGCGGAAAGGATTTTACTA---TAA  
 >AF484487  
 GTT---ACA-----  
 GGAAACTTGTGGGTCACAGTTTATTATGGGGTACCTGTATGG---AAAGAAGCAACC---  
 ACTACTCTATTTTGTGCATCAGATGCTAAATCATATAAAGCAGAG---GCACATAAT-----  
 -----ATCTGGGCTACA---CATGCCTGTGTACCAACAGAC---  
 CCCAACCCACAAGAAATAATATTAGAA-----AATGTCACAGAAAATTTTAAT-----  
 -----ATGTGGAAAAACAACATGGTGGAGCAGATGCATGAGGATATA---  
 ATCAGTTTATGGGACCAAAGCCTA---AAGCCATGCGTAAAGTTA---  
 ACCCCACTCTGTGTACCTTAACTGCACTGAATATAAAAAATAAAGACCACTGGAAATAATGCC-----  
 -----  
 -----ACTAATGCCACTAATGCCACTGATCCGGACACAGGAATGAGA---  
 AACTGCTCTTTCAATGTAACCACAGAAGTAAGA-----  
 GATAGGCAGAAGAAAGTACATGCACTT---TTTTATAAACTTGATGTGGTACAAATAGATAAT-----  
 -----  
 -----  
 AATAATAATCTCAGCTATAGATTAATAAATTGTAATACCTCAGCCATTACACAA---  
 GCGTGTCCAAAGGTAACCTTTGAGCCAATTCCCATACATTATTGTGCCCCAGCTGGATATGCAATTCTAAAAT  
 GTAAT---AATAAGACATTCAAT-----GGGACGGGTCCATGCAACAAC-----  
 -GTCAGC---ACAGTACAGTGTACACATGGGATCAAGCCAGTGGTGTCAACT---  
 CAACTGTTGTTGAATGGCAGTCTAGCAGAAGAAGAT-----  
 ATAATAATTAGATCTGAAAATATCACAAATAAT-----GTAAAAACATAATAGTACAGCTTAAT----  
 -----GAGTCTGTAGTA-----ATTAATTGCACAAGGCCCTCCAACAATACAAGACAA-----  
 -AGTATACGTATA-----GGACCAGGGCTAGCA---TTC-----TATACAACAAAA-----  
 -----ATAATAGGAGATATA-----AGACAAGCACATTGT---AACATTAGTAGAGAA---  
 AATTGGACTGAAACGTTAGAACGGGTAAGGACAAAAATTAAAA-----GGCTATTTTAAC---  
 -----CAGACCACCAACATAACTTTTCAA-----  
 CCATCCTCGGGAGGGGACCCAGAACTACA---ACACACAGCTTTAATTGTGGAGGGGAA---  
 TTTAAACAGCTCCAGGCAAGAGTCCTGGCTGTGGAAAGATACCTAAAGGATCAACAGCTCCTAGGAGTTTGGG  
 GTTGCTCTGGAACACATTTGCACCACTAATGTGCCCTTGGAACCTCTAGTTGGAGT-----  
 -----AACAAATCTCTAGAAGAAATTTGG-----AAT-----  
 AACATGACCTGGAGGGAGTGG---GAACAGGAGATTGACAAGTACACAAATACAATATAC---  
 AGCTTAATTGAAGAATCGCAAACCCAGCAAGAA-----  
 -----  
 AAGAATGAACAAGACTTATTGCAATTGGACCAATGGGCAAGTTTGTGGAATTGGTTTAGCATAACAAAATGGC  
 TGTGGTATATAAAAATATTCTAATGATAGTAGGAGGCTTGATAGGATTAAGGATAGTTTTTTGCT---  
 GTGCTTTCTTTAGTA-----AATAGAGTTAGGCAGGGATATTCACCT-----  
 CTGTCGTTTGCTATTAGCTTGCTTAATACCACAGTAATAGCAGTAGCTGAA---

GGGACAGATAGGGTCATAGAAATAGTACAAGCAATTGTTAGAGCT-----  
 -----GTTATTACATA-----CCCAGACGAGTAAGACAGGGTTTGGAAAGGGCTTTACTA---TAA  
 >AF484519  
 GCT---AAA-----  
 GAACAGTTGTGGGTTACAGTGTATTATGGGGTACCTGTGTGG--AAAGAAGCAACC---  
 ACTACTCTATTCTGTGCATCAGATGCTAAATCATATGAAACAGAG--GCACATAAT-----  
 -----ATCTGGGCTACA---CATGCCTGTGTACCAACAGAC---  
 CCCAACCCACAAGAAATGAAACTAGAA-----AATGTCACAGAAAATTTTAAC-----  
 -----ATGTGGAAAAATGACATGGTGGAGCAGATGCATGAGGATATA---  
 ATCAGTTTATGGGACCAAAGCCTA---AAACCATGTGTAAGATTA---  
 ACCCCACTCTGTGTCACTTTAAACTGTACAGATTGGAGGGGCACAAATGCCACAGGTACAAAT-----  
 -----  
 -----GGCACAAATACAAGTGTACAGAGGACATAGGAATGAAA---  
 AACTGCTCTTTCAATATAACCACAGAAATAAGA-----GATAAAAAG---  
 AAAAAGTATGCACTT---TTTTATAAGCTTGATGTGGTACCAATAGGTAAG-----  
 -----  
 -----GATAATAGCAGCTATAGATTAATAAATTGTAATACCTCAGTCATTACACAG---  
 GTGTGTCCAAAGATAAGCTTTGAGCCAATTCCCATACATTATTGTGCCCCAGCTGGATATGCAATTCTAAAAT  
 GTAAC---GATAAGAAATTCAAT-----GGAACGGGTCCATGCAAAAAC-----  
 -GTCAGC---ACAGTACAGTGTACACATGGGATTAGGCCAGTAGTGTCAACT---  
 CAGCTGTTATTGAATGGCAGTCTAGCAGAAGAAGAG-----  
 ATAATAGTTAGATCTGAAAATCTCACAGATAAT-----GCTAAAACCCTAATAGTACAGCTTAAC---  
 -----GAGTCTGTAAACA-----ATCAATTGCACAAGGCCCAACAATACAAGACAA-----  
 -GGTATAAACATA-----GGACCAGGGCGAGCA---TGG-----TATACCTATTCAAAA-----  
 ---GACATA---GTAGGAGATATA-----AGACAAGCACATTGT---AATATTAGTAAAGCA---  
 GAATGGAATAAACTTTACAACATGTAGCTAAAACATTAGGA-----GACCTTTTTAAC---  
 -----CAGACAACAGTAATTTTAAA-----  
 CCATCCTCGGGAGGGGACCCAGAAATTACA--ACACACAGCTTTAACTGTGGAGGGGAA---  
 TTTAAACAGCTCCAGGCAAGAATCCTGGCTGTGGAAAGTTACCTAAAGGATCAACAGCTCCTAGGAATTTGGG  
 GTTGCGCTGGAAAACACATCTGCACCACTAATGTGCGCTGGAACCTTAGCTGGAGT-----  
 -----AATAAATCTCTAGGGGACATTTGG-----GGT-----  
 AACATGACCTGGATGGAATGG---GAAAAAGAAATTGACAATTACACAGGCTTAATATAT---  
 AGCTTAATTGAAGAATCGCAATCCAGCAAGAA-----  
 -----  
 AAGAATGAACAAGACCTATTGCAATTGGACCAATGGGCAAGTTTGTGGAATTGGTTCAGCATAACAAAATGGC  
 TGTGGTATATAAAAATATTACATAATGATAGTAGGAGGCTTAATAGGTTTAAAGATAGTTTTTTGCT---  
 GTGCTTTCTTTAGTA-----AATAGAGTTAGGCAGGGATACTCACCT-----  
 CTGTCGTTTGTCTATTAGTTTGTCTGATACCATAGCAATAGCAACAGCTGAG---  
 GGGACAGATAGGATTATAGGAATAATACAAAGAGCTATTAGAGCT-----  
 -----ATTCTACACGTA-----CCCACACGAATAAGACAGGGCTTGGAAAGGCTTTTACTA---TAA  
 >AF484494  
 GTT---ACA-----  
 GGACAGTTGTGGGTCACAGTTTATTATGGGGTACCTGTATGG--AAAGAAGCAACT---  
 ACTACTCTATTTTGTGCATCAGATGCTAAATCATATGAAACAGAA--GCACATAAT-----  
 -----ATCTGGGCTACA---CATGCCTGTGTACCAACAGAT---  
 CCCAACCCACGAGAAATAAACTAGAA-----AATGTCACAGAAAATTTTAAC-----  
 -----ATGTGGAAAAATAACATGGTGGAGCAGATGCATGAAGATATA---  
 ATCAGCTTATGGGATCAAAGCCTA---AAACCATGTGTAAAACCTA---  
 ACCCCACTCTGTGTCACTTTAGAATGTAGAGAGTTGGAAAAAT-----  
 -----  
 -----GCCACTACCCTAGGAATGACA---  
 AACTGTTCTTTCAATATGACTACAGAAGTAAGA-----  
 GATAAGAAGAAGCGAGTAGATGCACTT---TTTTATAAACTTGATGTGGTACAAATAGATGGTAATAGT---  
 -----  
 -----  
 AGTAGAAGTAATAGTAGTAATGAGTATAGATTAATAAATTGTAATACCTCAGCCATTACACAG---  
 GCGTGTCCAAAAGTAACTTTGAGCCAATTCCCATACATTATTGTGCCCCAGCTGGATATGCAATTCTAAAAT  
 GTAAC---GATAAGAAGTTCACT-----GGGACGGGTCCATGCAAAAAC-----  
 -GTCAGC---ACAGTACAGTGTACACATGGGATTAGGCCAGTAGTGTCAACT---  
 CAGCTGTTGTTGAATGGCAGTCTAGCAGAAGAAGAG-----

ATAATAATTAGATCCGAAAATCTCACAATAAT-----GCTAAAATCATAATAGTACAGCTTAAT----  
 -----GAGTCTATAACA-----ATTAATTGCACAAGGCCCAACAACAATACAAGACAA-----  
 -AGCATACATATA-----GGACCAGGGCAAGCA---CTC-----TATACAACAAAA-----  
 -----GTAATAGGAAATATC-----AGACAGGCACATTGT---AACATTAGTAAAGTA---  
 AGATGGAATAACACTTTACAACAGATAGCTAACAAATTAGGG-----GACATGCTTAAC-----  
 -----CAGACCACAATAATTTTTTAA-----  
 CCATCCTCGGGAGGGGACCCAGAAATTACA--ACACACAGCTTTAATTGTGGAGGGGAA--  
 TTTAAACAGCTCCAGGCAAGAGTCCTGGCTGTGGAAAGATACCTAAAGGATCAACAGCTCCTAGGAAGTTGGG  
 GTTGCTCTGGAAGACACATTTGCACCACTAATGTGCCCTGGAACCTAGCTGGAGT-----  
 -----AATAAATCTCTAGAGGTGATTTGG-----GGA-----  
 AACTTGACTTGGATGGAGTGG---GAAAGAGAAATTGACAATTACACAGGTTTAATATAT---  
 AGCTTAATTGAAGAATCGCAAAACCAGCAAGAA-----  
 -----  
 AAGAATGAACAAGAACTATTGCAATTGGACAAATGGGCAAGTCTGTGGAATTGGTTTAGCATAACAAAATGGC  
 TGTGGTATATAAAAATATTTCATAATGATAGTAGGAGGCTTGATAGGTTTAAGGATAGTTTTTTGCT---  
 GTGCTTTCTTTAGTA-----AATAGAGTTAGGCAGGGATATTCACCT-----  
 CTATCGTTTACTATTAGCTTGGTTAATACCACAGCAATAGCAGTAGCTGAG---  
 GGGACAGATAGAGTTATAGAAAATAACAAAGAGCTGTTAGAGCT-----  
 -----GTTCTTAACATA-----CCTAGACGAATAAGACAGGGCTTGGAAGGGCTTTACTA---TAA  
 >AF484495  
 ATT---GCA-----  
 GAAAAGATGTGGGTCACAGTTTATTATGGGGTACCTGTGTGG---AAAGAAGCAACC---  
 ACTACTCTATTTTGTGCATCAGATGCTAAATCATATAAAACAGAG---GCACATAAT-----  
 -----ATCTGGGCTACA---CATGCCTGTGTACCAACAGAC---  
 CCCAACCCACAAGAAATACAACCTAGGA-----AATGTCACAGAAAACCTTTAAC-----  
 -----ATGTGGAAAAATAAGATGGTGGAGCAAATGCAGGAGGATATA---  
 ATCAGTTTATGGGATCAAAGCTTA---AAACCATGTGTAAACTA---  
 ACCCCACTCTGTGTACTTTAAACTGCACAAATGCCACATCCCCTAATACCACATCCTCTAATATC-----  
 -----  
 -----ACAACATCCACTAATGCCACTGCTGAGGGAGAATCAAGAATGAAC---  
 AACTGCTCTTTCAATATAACCACAGAAGTAAAA-----  
 GATAAGAAAAAGAAAGTATATGCACTT---TTTTATAAACTTGATGTAGTACCAGTAGGTGGT-----  
 -----  
 -----  
 AATGATAACTAGCTATAGATTAATAAATTGTAATACCTCAGCTGTTACACAG---  
 GCTTGTCCAAAGATAACCTTTGAGCCAATTCCCATACATTATTGTGCTCCAGCTGGATTTGCGATTCTAAAAT  
 GTAAT---GATAACAATTTCAAT-----GGGACAGGTCCATGCATCAAT-----  
 -GTCAGC---TCAGTACAATGTACACATGGGATTAAGCCAGTAGTGTCAACT---  
 CAACTGTTGTTGAATGGCAGTCTAGCAGAGGAAGAC-----  
 ATAATGATTAGATCTGAGAACCTCACAATAAT-----GCTAAAATCATAATAGTACAGCTTAAT---  
 -----GAGTCTGTAACA-----ATTAATTGCACAAGGCCCGGCAATAATAACAAGACAA-----  
 -AGTACGCGTATA-----GGACCAGGGCAAGCA---TTC-----TTTACAACAAAG-----  
 -----GTAATAGGAGATATA-----AGACAAGCATATTGT---AACATTAGTGAAGCA---  
 AAATGGAACAAAATTTTACAACAGGTAGCTAGCAAATTAAG-----GACCTTCTTAAC---  
 -----ACAACAACAATAATTTTTTGAA-----  
 CCATCCTCGGGAGGAGACGTAGAAATTGAA---ACGCACAGCTTTAATTGTGGAGGGGAA---  
 TTTAAACAGCTCCAGGCAAGAATCCTGGCTGTGGAAAGATACCTAAAGGATCAACAGCTCCTAGGAATTTGGG  
 GTTGCTCTGGAACACATTTGCACCACTACTGTGCCCTGGAACCTAGCTGGAGT-----  
 -----AATAAATCTTATGATCAGATTTGGAGG-----AGT-----  
 AACATAACCTGGATGGAGTGG---GAAAGAGAAATTGACAATTACACAGGTTTAATATTC---  
 AGCTTAATTGAAGAATCGCAAGTTCAGCAGGAA-----  
 -----  
 AGGAATGAAAAGGAACTATTGGAATTGGATACATGGGCAAGCTTATGGAATTGGTTTGACATATCAAACCTGGC  
 TGTGGTATATAAGAATATTTCATAATGATAGTAGGAGGCTTGATAGGTTTAAGAATAGTTTTTTGCT---  
 GTTTTTTCTTTAGTA-----AATAGAGTTAGGCAGGGATATTCACCT-----  
 CTGTCGTTTGTCTATTAGCTTGCTTAATACCACTGCAGTAGTAGTAGCTGAG---  
 GGGACAGATAGGGTTATAGAAAGTAGTACAAAGAGCTGTTAGAGCT-----  
 -----GTTCTTCACATA-----CCTAGAAGAATAAGACAGGGCGCGGAAAGGCTTTTACTA---TAA  
 >AF484497

GTT---ACA-----  
 GGACAGTTGTGGGTCACAGTGTATTATGGGGTACCTGTGTGG---AAAGAAGCAACC---  
 ACTACTCTATTTTGTGCATCAGATGCTAAAGCATATAAAGCAGAG---GCACATAAT-----  
 -----ATCTGGGCTACA---CATGCCTGTGTACCAACAGAC---  
 CCCAACCCACGAGAAATAGAACTAGAA-----AATGTCACAGAAAGCTTTAAC-----  
 -----ATGTGGAAAAATAACATGGTGGAGCAAATGCATGAAGATATA---  
 ATCAGTTTATGGGATCAAAGCCTA---AAACCATGTGTAAAATTA---  
 ACCCCACTCTGTGTCACTTTAAACTGCACTGAATTGGGGAATGGGACTAAAGGG-----  
 -----  
 -----AATACAACATGGGAGGACATAGGAATGAAA---  
 AACTGCTCTTTCAATGTAACCACAGAAGTAAGA-----  
 GATAAGAAGAAACAAGCACATGCACCTT---TTTTATAAACTTGATATGGTAGAAATGGATGATAAGAGTAAT-  
 -----  
 -----  
 AAGAGTAGTAATACCAACTATACCAGCTATAGATTAATAAATTGTAATACCTCAGTCATTACACAG---  
 GCGTGTCCAAAGATAACCTTTGAGCCAATTCCCATACATTATTGTGCCCCAGCTGGATTTGCAATTCTAAAAT  
 GTAAC---GATAAAGAGTTCAAT-----GGGACGGGTCCATGCAAAAAC-----  
 -GTCAGC---ACAGTGCAGTGTACACATGGGATTAAGCCTGTAGTGTCAACT---  
 CAATTGTTGTTAAATGGCAGTCTAGCAGAAGGAAAG-----  
 GTAATAATTAGATCTGAAAATCTCACAAATAAT-----GCTAAAATTATAATAGTACAGCTTAAC---  
 -----AAGTCTGTAGAA-----ATTAATTGCACAAGGCCCTCCAACAATACAAAACAA-----  
 -AGTACACGTATA-----GGACCAGGGCAAAACA---TTC-----TATACAACA---GAA-----  
 -----ATAATAGGAGATATA-----AGACAAGCACATTGT---AATATTAGTAGAGTA---  
 GACTGGAATGAACTTTACAACAGGTAGCTAAAAAATTAGGA-----GACCTTCTTAAT---  
 -----  
 -----AAGACAAAAATAATTTTTTAAA-----  
 CCATCCTCGGGAGGGGACTTAGAAATTACA---ACACACAGCTTTAATTGTGGAGGGGAA---  
 TTTAAACAGCTCCAGGCAAGAGTCCTGGCTGTGGAAAGATACCTAAAGGATCAACAGCTCCTAGGAATATGGG  
 GTTGCTCTGGAAGACATATTTGCACCACTGCTGTGCCCTGGAAGTCTAGCTGGAGT-----  
 -----AATAGATCTCTAGAGGAAATTTGG-----GGT-----  
 AACATGACCTGGATGGAGTGG---GAAAGAGAAATTGACAATTACACAAATTTAATATAC---  
 AATTTAATTGAAGAATCGCAATCCAGCAAGAA-----  
 -----  
 AAGAATGAACAAGAACTATTGCAATTGGACAAATGGGCAAGTTTGTGGGATTGGTTTACCATAACACACTGGC  
 TGTGGTATATAAAAAATATTGATAATGATAGTAGGAGGTTTGATAGGTTTAAGGATAGTTTTTTGCT---  
 GTGCTTTCTTTAGTG-----AATAGAGTTAGGCAGGGATACTCACCT-----  
 CTGTCGTTTGTCTATTAGCTTGTTTGATGCCGAGCAATAGCAGTAGCTGAG---  
 GGGACAGATAGGATTATAGAAATAGTACAAAGAACTGTTAGAGCT-----  
 -----GTTCTTCATATA-----CCCACACGGATAAGACAGGGCTTGGAAGGGCTTTGCTA---TAA  
 >AF484498  
 GCT---GCA-----  
 GAACAGTTGTGGGTCACAGTTTATTATGGGGTACCTGTGTGG---AAAGAAGCAACC---  
 ACTACTCTATTTTGTGCATCAGATGCTAAATCATATATAAAAGAG---GCACATAAT-----  
 -----ATCTGGGCTACA---CATGCCTGTGTACCAACAGAC---  
 CCCAACCCACAAGAAATAAATCTAGGA-----AATGTCACAGAAAACCTTTAAC-----  
 -----ATGTGGAAGAATGACATGGTGGAGCAAGATGCATGAGGATATA---  
 ATCAGTTTATGGGATCAAAGTCTA---AAACCATGTGTAAAATTA---  
 ACCCCATTCTGTGTCACTTTAAACTGCACTGAATTGGGAGAATAAGGATGCCACGAATAAGAATGCC-----  
 -----  
 -----ACTAATAATACTAGTAATGTCACATAATGAAATAGGAATGAAA---  
 ATTTGCTCTTTCAATGTAACCACAGAAGTAAGA-----  
 GATAGGAAGAAGCAAGTATCTGCACCTT---TTTTATAAACTTGATGTGGTACAAATAGATGAT-----  
 -----  
 -----  
 ACCAATACCAGCTATAGATTAATAAATTGTAATACCTCAGCCATTACACAG---  
 GCGTGTCCAAAGGTAACCTTTGAACCAATTCCCTATACATTATTGTGCCCCAGCTGGATATGCGATTCTAAAAT  
 GTAAT---AATAAGACGTTTAAAT-----GGGACGGGTCCATGCCAAAAT-----  
 -GTCAGC---ACAGTACAGTGTACACATGGGATTAAGCCAGTAGTGTCAACT---  
 CAACTATTGTTAAATGGCAGTCTAGCAGAGGAAGAG-----  
 ATAATAATTAGATCTGAAAATCTCACAAATAAT-----GCTAAAATCATAATAGTACAGCTTAAT---  
 -----GAGTCTGTAGTA-----ATTAATTGTACAAGGCCCTACAATAATACAAGAAAA-----

-GGCATACATGTG-----GGACCAGGGCAAGCA---TTC-----TATACAAATAAC-----  
-----ATAGTAGGAGATATA-----AGACAAGCACATTGT---AACATTAGCAGAGCA---  
AAATGGAATAAAACTCTAGAACAGGTAGCTAAAAAATTAAGC-----AGCCTTTTTTAAC-----  
-----CAGACAACAATAATATTTAGA-----  
CCATCCTCGGGAGGGGACCCAGAAATTACA--ACACACAGCTTTAATTGTAGAGGGGAA---  
TTTAAACAGCTCCAGGCAAGAGTCCTGGCTCTGGAAAGCTACCTAAAGGATCAACAGCTCCTAGGAATTTGGG  
GTTGCTCTGGAAAACACATTTGCACCACTAATGTGCCCTGGAACCTCTAGTTGGAGT-----  
-----AATAAACTCTAAATAAGATTTGG-----GAT-----  
AATATGACCTGGATGGAGTGG---GAAAAAGAAATTGACAAATTACACAGAGTTAATATAC---  
AACTTAATTGAAGAATCGCAAACCCAGCAAGAA-----  
-----  
AAGAATGAACAAGAACTATTGCAATTGGACAAATGGGCAAGCTTGTGGAATTGGTTTAGCATAACAAAATGGC  
TGTGGTATATAAAAATATTTCATAATGATAGTAGGAGGCTTAATAGGTTTGAGGATAGTTTTTTGCT---  
GTGCTTTCTTTAGTA-----AATAGAGTTAGGCAGGGATATTCACCT-----  
CTGTCATTTCGCTATTAGCTTGTTTGATGCTACAGCAGTAGCAGTAGCTGAG---  
GGAACAGATAGGATCATAGAAATAGTACAAGGAGCTTTTAGAGCT-----  
-----TAACGTA-----CCCAGAAGAATAAGACAGAGCGCGGAAAGGGCTTTGCTA---TAA  
>AF484499  
GTT---GCA-----  
GGAGAATTGTGGGTCACAGTTTATTATGGGGTACCTGTGTGG---AAAGACGCAACC---  
ACTACTCTATTTTGTGCATCAGATGCTAAAGCATATAAAGCAGAG---GCACATAAC-----  
-----ATCTGGGCTACA---CATGCCTGTGTACCAACAGAC---  
CCCAACCCACAAGAAATAAACTAGAA-----AATGTCACAGAAACTTTAACT-----  
-----ATGTGGAAGAATTATATGGTGGAGCAGATGCATGAGGATATA---  
ATTAGTTTATGGGATCAAAGCCTA---AAACCATGTGTAAAATTA---  
ACCCCACTCTGTGTCACTTTAACTGTACTGACTACCAGAATGTCACAAAT-----  
-----  
-----ATCATTAATGGGGAGATCGAAATGAAA---  
AATTGCTCTTTCAATACAACCACAGAAATAAGA-----  
GATAGGAAGCAGCAAGTACATGCACCT--TTTTATAAACTTGATGTGGTAGAATTAGATAAT-----  
-----  
-----  
AGTACCAATAGTACCACCTATAGGTTAATAAATTGTAATACCTCAGTCATTACACAG---  
GCGTGTCCAAAGGTAACCTTTGAGCCAATTTCCTATACATTATTGTGCCCCAGCTGGATTTGCAATTCTAAAAT  
GTAAT---AATAAGACGTTCAAT-----GGAATGGGTCCATGCACAAAT-----  
-GTCAGC---ACAGTACAGTGTAACATGGGATTAAGCCAGTAGTGTCAACT---  
CAACTGTTATTGAATGGCAGTCTAGCAGAAGAAGAG-----  
ATAATAATTAGATCTGAAAATCTCACAATAAT-----GCTAAAACCATAATAGTACAGCTTAAG---  
-----GAGTCTGTAAAC-----ATTACTTGACACAAGGCCCTACAACAATACAAGACAA-----  
-GGTATACATATA-----GGACCAGGGCAAGCA---TTC-----TATGCAACAAGA-----  
-----ATAGTAGGAGATATC-----AGACAAGCACATTGT---AACATTAGTGAAGGA---  
CAATGGAATAGAAGCTTTACAACAGGTAGCTGAAAAATTAAGA-----GACCTTCTT-----  
-----AACAGACAATAGATTTTAAA-----  
CCCACTCAGGAGGGGACCCAGAGATTACA--ACACACAGCTTTAACTGTGGAGGGGAA---  
TTTAAACAGCTCCAGGCAAGAGTCCTGGCTGTGGAAAGATACCTAAAGGATCAACAGCTCCTAGGAATTTGGG  
GTTGCTCTGGAAAACACATTTGCACCACTAATGTGCCCTGGAACCTCTAGCTGGAGT-----  
-----AATAAATCTCTAGAAGAGATTTGG-----AAT-----  
AACATGACCTGGATGGAGTGG---GAAAGAGAAATTGACAAATTACACAGGTTTCATATAC---  
AGCTTACTTGAAGAATCGCAAACCCAGCAAGAA-----  
-----  
AAAAATGAACAAGAACTATTACAATTGGACAACCTGGGCAAGTTTGTGGAATTGGTTTAGCATAACAAAATGGC  
TGTGGTATATAAAAATATTTCATAATGATAGTAGGAGGCTTGATAGGTTTAAGAATAGTTTTTTGCT---  
GTGCTTTCTGTAGTA-----AATAGAGTTAGGCAGGGATATTCACCT-----  
CTATCCTTTGCTATTAGCTTGCTTGATATTGTAGCAATAGCAGTAGCTGAG---  
GGGACAGATAGGATTATAGCAGTAGTACTAAGAGCTTTTAGAGCT-----  
-----ATTCTTAACATA-----CCCAGAAGAATAAGACAGGGCTTGGAAGGTTTTTACTA---TAA  
>U36871  
GCT---GCA-----  
GAACAATTGTGGGTCACGTTTATTATGGGGTACCTGTGTGG---AAAGAGGCAACC---  
ACTACTCTATTCTGTGCATCAGATGCTAAATCATATAAAGCAGAG---GCACATAAT-----

-----ATCTGGGCTACA---CATGCCTGTGTGCCAACAGAC---  
CCCAACCCGCGAGAAATAATCCTAACA-----AATGTCACAGAAAACCTTTAAC-----  
-----ATGTGGAAAAATGACATGGTGGAGCAGATGCATGAGGATATA---  
ATCAGTTTATGGGATCAAAGCTTA---AAACCATGTGTAAAATTA---  
ACCCCTCTCTGTGTCACTTTAACTGCACTGAATGGAAGAATAACAATGTCACTAATAAC-----  
-----  
-----AATGCCACTAATGTCACTAATGAGGACACAGGAATGAGA---  
AACTGCTCTTTCAATATAACACAGAAGTAAGA-----  
GATAAGAAAAAGCAAGTACATGCACTT---TTTTATAAACTTGATGTGGTACAAATAGATGATGAT-----  
-----  
-----  
AATAGTACTAATACAAGCTATAGATTAATAAATTGTAATACCTCAGCCATTACACAA---  
GCGTGTCCAAAGGTATCCTTTGAGCCAATTCCCATTCAATTATTGTGCCCCAGCTGGATTTGCAATTCTAAAAT  
GTAAC---GATAAGGAGTTCAAT-----GGGACGGGTGCATGCAAAAAC-----  
-GTCAGC---ACAGTACAGTGTACACATGGGATTAGGCCAGTAGTGTCAACT---  
CAACTGTTGTTGAATGGCAGTTTAGCAGAGAAAGAA-----  
ATAATAATTAGATCTGAAAATATCACAATAAT-----GCTAAAATCATAATAGTACAGCTTAAT---  
-----GAATCTGTAACA-----ATTAATTGCACAAGGCCCTACCAAACCTACAAGACGA-----  
-AGGACACCTATA-----GGATTAGGGCAAGCA---GTC-----TATACATCAAAA-----  
-----ATAGCAGGATATGCA-----GGACCAGCATATTGT---AATATTAATGGAATA---  
GCATGGAATAAACTTTACAACAGGTAGCTAAAAAATTAGGA-----GACCTTCTTAAC---  
-----CGGACAACAATACTCTTTCAA-----  
CCACCCCTCGGGAGGGGACCCAGAAATTACA--ACACACACCTTTAATTGTGGAGGGGAA---  
TTTAAACAGCTCCAGGCAAGAAATCCTAGCTGTGGAAAGCTACCTAAAGGATCAACAGCTCCTAGGAATTTGGG  
GTTGCTCTGGAACACATTTGCACCACTACTGTGCCCTGGAACCTCTAGCTGGAGT-----  
-----AATAAATCTCTAGATGACATTTGG-----AAT-----  
AACATGACTTGGATAGAGTGG---GAAAAAGAAATTGACAAATACACAGGTGTAATATAC---  
AACTTAATTGAAGAATCGCAAACCCAGCAAGAA-----  
-----  
AAGAATGAACAAGAACTATTGGAATTGGACAACCTGGGCAAGTTTGTGGAATTGGTTTAGCATAACAAAATGGC  
TGTGGTATATAAAAATATTACATAATGATAGTAGGAGGCTTGATAGGTTTAAGAATAGTCTTTGCT---  
GTGTTTTCTTTAGTA-----AATAGAGTTAGGCAGGGATATTCACCT-----  
CTGTCGTTTGTCTATTAGCTTGCTTAATACTGTAGCAATAGCAGTAGCTGAA---  
GGGACAGATAGGATTATAGAAATAGTACAAAGAACTCTTAGAGCT-----  
-----ATTCTTAACATA-----CCCAGACGAATAAGACAGGGCTTGGAAGGGGCTTTACTA--TAA  
>EF575364  
GTT---ACA-----  
GGACAACGTGTGGGTACAGTGTATTATGGGGTACCTGTGTGG--AAAGAAGCAACC---  
ACTACTCTGTTTTGTGCATCAGATGCTAAAGCATACAAAGCAGAG--GCACATAAT-----  
-----ATCTGGGCAACA---CATGCCTGTGTGCCAACAGAC---  
CCCAACCCACAAGAAATGAACTAGAA-----AATGTCACAGAGGACTTTAAC-----  
-----ATGTGGAAAAATAACATGGTAGAGCAAATGCATGAGGATATA---  
ATTAGTTTGTGGGATCAAAGCCTA---AAACCATGTGTAAAATTA---  
ACCCCACTCTGTGTCACTTTAACTGCACTGAATGGAAGAATGACACTATC-----  
-----  
-----ATTAATGCCACTAAGGAAATAGAAATGAAA---  
AACTGCTCTTTCAATATAACACAGCAATAAGA-----  
GATAGGAAGCAGCAAGTACATGCACTT---TTTTATAAAATTGATGTGGTACCAATAGATGACAAT-----  
-----  
-----  
AATAGTACTAATACTAGCTATAGATTAATAAATTGTAATACCTCAGCCATTACACAG---  
GCATGTCCAAAGGTAACCTTTGAACCAATTCCCATACATTATTGTGCCCCAGCTGGATTTGCAATTCTAAAAT  
GTAAC---GAGAAGAAGTTCAAT-----GGGAAGGGTCTATGCAGAAAC-----  
-GTTAGC---ACAGTACAGTGTACACATGGGATTAGGCCAGTAGTGTCAACT---  
CAATTGTTGTTGAATGGCAGTCTAGCAGAAGAAGAG-----  
ATAGTAATTAGATCTGAAAATCTCACAATAAT-----GCTAAAACCATAATAGTACAGCTTGAT---  
-----AAGTCTGTAACA-----ATTAATTGCACAAGGCCCTACAACAATACAATACAA-----  
-AGTACACGTATA-----GGACCAGGGCAAGCA---TTC-----TATACATCAGGACAA-----  
-----ATAATAGGAGACATA-----AGAAGAGCACATTGT---AATATTAGTGAAGCA---  
GAATGGAATAACACTTTACAACAGGTAGCTAAAAAATTAGGA-----AACCTGCTTAAC---

```

-----AAGACAACAATAATTTTTTAAA-----
CCATCCTCGGGAGGGGACCCAGAAATTACA--ACACATAGCTTTAATTGTGGAGGGGAG---
TTTAAACAGCTCCAGGCAAGAGTCCTAGCTGTGGAAAGGTACCTAAAGGATCAACAGCTCCTAGGAATTTGGG
GTTGCTCTGGAAAACTCATTTGCACCACTACTGTGCCCTGGAACCTCTAGCTGGAGT-----
-----AATAAATCTCTAGAGGCGATTTGG-----AAT-----
AACATGACCTGGATGGAGTGG--GAAAGAGAAATTGACAATTATACAGATTTAATATAT---
AGATTAATTGAAGAATCGCAAGCCCAGCAAGAA-----
-----
AAGAATGAACAAGAGCTATTGGAATTGGACAAATGGGCAAGTTTGTGGAATTGGTTTAGCATAACACAATGGC
TGTGGTATATAAAAATATTCATAATGATAGTAGGAGGCTTGATAGGTTTAAGAATAGTTTTTTGCT---
GTGCTTTCTTTAGTA-----AATAGAGTTAGGCAGGGATACTCACCT-----
TTGTCGTTTGTCTATTAGCCTGTTAGATATTATAGCAATAGCAGTAGCTGAG---
GGGACAGATAGGATTATAGAAATAGTACAGGGAATTATTAGAGCT-----
-----TTTCTTCACGTA-----CCCAGACGAATAAGACAGGGCTTGGAAGGGCTTCGCTA---TAA
>EF575370
GTT---ACA-----
GGACAATTGTGGGTCACAGTTTATTATGGGGTACCTGTGTGG--AAAGAAGCAACC---
ACTACTCTATTTTGTGCATCAGATGCTAAATCATATGAAACAGAG--GCACATAAT-----
-----ATCTGGGCTACA--CATGCCTGTGTACCAACAGAC---
CCCAACCCACAAGAAGTAACACTAGAA-----AATGTCACAGAAAACCTTTAAC-----
-----ATGTGGAAAAATGACATGGTGAACCAGATGCATGAGGATATA---
ATTAGTTTATGGGATCAAAGCCTA--AAACCATGTGTAAACTA---
ACCCCACTCTGTGTCACTTTAAACTGCACTGATTACTATCCAAATAACACAGAAATTACC-----
-----
-----AATGGAAATGCCAGTAAAAATGACACAGGAATGAAA---
GAATGCTCTTTCAATATAACCACAGAAATAAGA-----
GATAAGAAGCAGCAAGTAAAGGCACCT--TTTTATAGACTTGATGTGGTACAACCTGGATAAT-----
-----
-----
AGTACTAATTCTAGCTATAGATTAATAAATTGTAATACCTCAGTCATTACACAG---
GCGTGTCCAAAGGTAACCTTTGAGTCAATTCCCATACATTATTGTGCCCCAGCTGGATATGCGATTCTAAAAT
GTAAA--GATAAGAAATTCAAT-----GGTACGGGTCTCTGCAACAAT-----
-GTCAGC--ACAGTACAGTGTACACATGGGATTAAGCCAGTAGTGTCAACT---
CAACTGTTGTTGAATGGCAGCCTAGCAGAAGAAGAG-----
ATAATAATTAGATCTGAAAATCTCACAATAAT-----GCTAAAATCATAATAGTACAGCTTAAT---
-----GAGTCTGTAAACA-----ATCAATTGCACAAGACCCTACAACAATACAAGACAA-----
-GGTACACATATA-----GGACCAGGGCAAGCA--CTC-----TTTACAACAACAAGA-----
-----ATAGTAGGAGATATA-----AGACAAGCACATTGT--AACATTAGCAGAACA---
GAATGGAATAAACTTTACAACAAGTAGCAAGGAAATTAGGA-----GGCCTTTTTAAC---
-----CAGACAACAATAATTTTTTAGA-----
CCATCCTCGGGAGGGGACCCAGAAATTACA--ACACACAGCTTTAATTGTGGAGGGGAA---
TTTAAACAGCTCCAGGCAAGAGTCCTGGCTGTGGAAAGCTACCTAAGGGATCAGCAGCTCCTAGGAGTTTGGG
GTTGCTCTGGAAAACACATTTGCACCACTAATGTGCCCTGGAACCTCTAGCTGGAGT-----
-----AATAAATCTGTAGATGAGATTTGG-----GAA-----
AACATGACCTGGATGCAGTGG--GAAAGAGAAATTGACAATTATACAGGTTTAATATAC---
ACCTTAATTGAAGAATCGCAAATCCAGCAAGAC-----
-----
CAGAAATGAACAAGAATTATTGAAATTGGACCAATGGGCAAGTTTGTGGAATTGGTTTAGCATAACAAAGTGGC
TGTGGTATATAAAAATATTCATAATGATAGTAGGAGGCTTAATAGGCTTAAGAATAGTTTTTTACT---
GTAGTTTCTTTAGTA-----AATAGAGTTAGGCAGGGATATTACCT-----
CTGTCGTTTGTCTATTAGCTTGTTTAATGCCACAGCAATAGCAGTAGCTGAG---
GGGACTGATAGGGTAATAGAAATAGTACAAAGAATTGCTAGAGCT-----
-----ATCCTTAACGTA-----CCCACACGAATAAGACAGGGCTTGGAAGGGCTTTACTA---TAA
>EF575429
GGT---GCA-----
GGAGAGTTGTGGGTCACAGTCTATTATGGGGTACCTGTGTGG--AGAGAAGCAACC---
ACTACTCTATTTTGTGCATCAGATGCTAAGTCATATAAAGATGAG--GCACATAAT-----
-----GTCTGGGCTACA--CATGCCTGTGTACCAACAGAC---
CCCAACCCACGAGAAATAAACTAGAA-----AATGTCACAGAAAATTTTAAC-----
-----ATGTGGAAAAATAACATGGTGAACAAATGCATGAGGATATA---

```

ATCAGTTTATGGGATCAAAGCCTA---AAACCATGTGTAAAAATG---  
ACCCCACTCTGTGTCACTTTAACTGCACTGATTTGAAAAATGGCACTAAGAATGGC-----  
-----  
-----ACTATTAGCAATAACGCTGAAAGCATAGGAATGAAA---  
AACTGCTCTTTTAATATAACCACAGAAATAAGA-----  
GACAAGAAGGAAAAAGTACATGCACTC---TTTTATAAACTCGATGTGGTACCAATAGGGAATGGT-----  
-----  
-----  
ACCAATGGGAAGTGGACCAACTATAGATTAATAAAATTGTAATACCTCAACCATTACACAG---  
GCGTGTCCAAAAGTATCCTTTGAACCAATTCCAATACATTACTGTGCCCCAGCTGGATTTGCAATTCTACAAT  
GTAAC---ACAAGAAGTTCAAT-----GGGACAGGTCCATGCAAAAAT-----  
-GTCAGC---ACAGTACAGTGTACACATGGGATTAGGCCAGTAGTGTCAACT---  
CAACTGTTGTTGAATGGCAGTCTAGCAGAAGAAGAG-----  
ATAATAATTAGATCTGAAAACTCACAATAAT-----GCTAAAATCATAATAGTACAGCTTAAT----  
-----GAGTCTGTATCA-----ATTAATTGCACAAGGCCCTACAACAATACAAGACGA-----  
-GGTACACATATA-----GGACCAGGGCAAGCA---TAC-----TTTACAACAAAA-----  
-----ATAATAGGAGATATA-----AGACAAGCACATTGT---AACATTAGTAGGACA---  
GAATGGAATAAACTTTTACAACAGGTAGCTAAAAAATTAGGA-----GACCTTTTAAAC----  
-----AAGACAACAATAATTTTTTAAA-----  
CCATCCTCGGGAGGGGACCCAGAAATTACA---ACACACAGCTTTAATTGTGGAGGGGAA---  
TTTAAACAGCTCCAGGCAAGAAATCCTGGCTGTGGAAAGCTACCTAAAGGATCAACAGCTCCTAGGAATTTGGG  
GTTGCTCTGGAACACATTTGCACCACTAATGTGCCCTGGAAGTCTAGCTGGAGT-----  
-----AATAAATCTCTAGATGAGATTTGG-----CAT-----  
AACATGACCTGGATGGAGTGG---GAAAGAGAAATTGACAATTACACAGGGTTAATATAC---  
AGCTTAATTGAAGAATCGCAAAATCCAGCAAGAC-----  
-----  
AAGGATGAACAAGAACTATTGCAATTGGACAAATGGGCAAGTTTGTGGAATTGGTTTAGCATAACAAAATGGC  
TGTGGTATATAAAAATATTGATAATGGTAGTAGGAGGCTTGATAGGTTTAAAGAATAGTTTTTTGCT---  
GTGCTTTCTGTAGTA-----AATAGAGTTAGGCAGGGATATTCGCCG-----  
CTGTCATTTGCTATTAGCTTGCTTAATACCACAGCAATAGTAGTAGCTGAG---  
GGGACAGATAGGGTAATAGAAATAGTACAAAGAATTGTTAGAGCT-----  
-----GTTCTTCACATA-----CCCAGAAGAATAAGACAGGGCTTGGAAGGGCTTTGCTA---TAA  
>EF575482  
GGT---GAA-----  
GACATGTGGGTCACAGTCTATTATGGGGTACCTGTGTGG---AAAGAAGCAAAC---  
ACCACTCTATTTTGTGCATCAGATGCTAAATCATATGAACAAGAG---GCACATAAT-----  
-----GTCTGGGCTACA---CATGCCTGTGTACCAACAGAC---  
CCCAGCCCACAAGAAATAGAACTGAAC-----AATGTCACAGAAAACCTTAACT-----  
-----ATGTGGAAAAATAACATGGTGGAGCAGATGCATGAGGATATA---  
ATCAGTCTATGGGATCAAAGCCTA---AAACCATGTGTAAAATTA---  
ACCCCACTCTGTGTCACTTTAACTGCATTGATGTGAATGGTACTAATACCACTATGAATGGTGTAGCAATG  
CCTGGTGTCTAGC-----  
AATGCCACTGGGAATGTTACTAACAAGTCCCGGAGGAAGAGATAATGGAGAAAGGAGAAATGAAA---  
AACTGCTCTTTCAATACAACCACAGTAGTAAGA-----  
GATAAGCAGAAGCAAGTATATGCACTT---TTTTATAGACTTGATGTAGTACCAATAGATAAT-----  
-----  
-----  
AATAGCAATGATAGCAGTTATAGATTAATAAAATTGCAATACCTCAGCCGTTACACAG---  
GCTTGTCCAAAGATATCCTTTGAGCCAATTCCCATACATTATTGTGCCCCAGCTGGGTTTGCGATTCTAAAGT  
GTAAT---GATAAGAAGTTCAAT-----GGAAAAGGAGAATGTAACAAT-----  
-GTCAGC---ACAGTACAATGCACACATGGAATTAGGCCAGTGGTGTCAACT---  
CAACTGCTGTTGAATGGCAGCCTAGCAGAAGAGGAG-----  
ATAATAATTAGATCTGAAAACTCACAACAAT-----GCTAAAACCATAATAGTACAGCTTAAT----  
-----GAGTCTGTAGTA-----ATTAATTGTACAAGGCCCAACAACAACACAAGACAA-----  
-GGTGTACATCTA-----GGGCCAGGGCAAGCA---TTA-----TATACAACAAGGAG-----  
-----ATAATAGGAGATATA-----AGGCAGGCACATTGT---ACTATTAACGAGACA---  
GCATGGAAGAAAACCTTTACAACAGGTAGCTGAAAAATTAAGA-----AGTCTTCTTAAT----  
-----AAGACAATAATAATTTTTTAAT-----  
TCATCCTCAGGAGGGGACCCAGAAATTACA---ACACACACCTTTAATTGTGGAGGGGAA---  
TTTAAACAGCTCCAGGCAAGAGTCCTGGCTATAGAAAAGATACCTACAGGATCAACAGCTCCTAGGAAGTTGGG

GGTGCCTGGAAACACATTTGCACCACTAGTGTACGCTGGAACCTCTACTTGGAGT-----  
-----AATAAAAAATCTAAGTCAGATTTGG-----GAA-----  
AAAATGACCTGGATGCAGTGG---GAAAAGGAAATTGACAAATTATACAGGTATAATATAT---  
AACTTAATTGAGGAATCGCAGATCCAGCAAGAA-----  
-----  
GAGAATGAAAAAGAACTATTAGAAATTGGACAAATGGGCAAGTTTGTGGAATTGGTTCAGCATAACAACTGGC  
TGTGGTATATAAAAAATATTTCATAATGATAGTAGGAGGCTTAATAGGGTTAAGAATAGTTTTTTGCT---  
GTATTTTCTTTAGTA-----AATAGAGTTAGGCAGGGATACTCACCT-----  
CTCTCGTTTGCTGTTAGCTTGCTTGATGCCACAGCAATAGCAGTAGCTGAG---  
GGGACAGATAGGATTATTGAAACAGTCCAAAGAATTTTGTAGAGCT-----  
-----ATTATTCACATA-----CCCAGACGAATAAGACAGGGCTTTGAAAGGGCTTTGCTA---TAA  
>JQ403079  
GTT---ACA-----  
GGAAATTTGTGGGTACAGTTTATTATGGGGTACCTGTTTGG---AGAGAAGCAACC---  
ACTACTCTATTCTGTGCATCAGATGCTAAATCATATAAAGAAGAA---GCACATAAT-----  
-----ATCTGGGCTACA---CATGCCTGTGTACCAACAGAC---  
CCCAACCCACAAGAAGTACTACTAGAA-----AATGTCACAGAAAACCTTTAAC-----  
-----ATGTGGAAAAATAAAATGGTGGAGCAGATGCATGAGGATATA---  
ATTAGTTTATGGGATCAAAGTCTA---AAACCATGCGTAAAATTA---  
ACCCCACTCTGTGTCACTTTAAACTGCACTGATGCCACCGCTAATGCCACTACCACTACTGCTAACCTACTA  
CCACT-----  
-----AGTAAGGACATAGGAATGAAA---  
AACTGCTCTTTTAATGTAACCACAGAAATAAGA-----  
GATAAGAAGCAGCAAGTGCAGGCACCTT---TTTTATAAACTTGATGTGGTACCGATAAATGGT-----  
-----  
-----  
AGTATTAGCAATACTAGCTATAGATTAATACATTGTAATACCTCAACCATTACACAG---  
GCGTGTCCAAAGGTATCCTTTGAGCCAATTCCCATACATTATTGTGCCCCAGCTGGATATGCAATTCTACAAT  
GTAAC---AATAAGACTTTCAAT-----GGGACGGGTCCATGTAACAAT-----  
-GTCAGC---TCAGTACAGTGTACACATGGGATTAGGCCAGTAGTGTCAACT---  
CAACTGTTGTTGAATGGCAGTCTAGCAAAA---GAG-----  
ATAATAATTAGATCTGAAAACATCACAGATAAT-----ACTAAAGTCATAATAGTACAGCTTAAT---  
-----AAGTCGGTAAAG-----ATTCATTGCACAAGGCCCTATAAATATATAGGAGTA-----  
-CAAAAGACATCC-----ATAGGAACAGGACAAGTA---CTC-----CATACAGCAAAAAA-----  
-----GCAGAAGGAATTGGA-----AGACAGCCATATTGT---AATGTTAGTAGAAAA---  
GACTGGAATGAACTTTAGACCTAGTAGCTAAAAAATTGGGA-----GGCCTTCTTAAC---  
-----AAGACAACAATAATTTTAAA-----  
CCCACTCGGGAGGGGACCCAGAAAGTTACA--ACACACAGCTTTAATTGTGGAGGAGAA---  
TTTAAACAGCTCCAGGCAAGAATCCTGGCTGTGGAAAGCTACCTAAGGGATCAACAGCTCCTAGGAATTTGGG  
GTTGCTCTGGAAGACACATTTGCACCACTACTGTGCCCTGGAACCTCTAGCTGGAGT-----  
-----AATAAATCTCACGATTATATTTGG-----GAA-----  
AACATGACCTGGATGCAGTGG---GAAAGAGAAATTGACAAATTACACAAGTACAATATAC---  
ACCTTACTTGAAGAATCGCAAACCCAGCAAGAA-----  
-----  
CAAAATGAAAAAGACTTATTGGAATTGGACAAATGGGCAAGTTTGTGGAATTGGTTTACCATAACAACTGGC  
TGTGGTATATAAAAAATATTTCATAATGATAGTAGGAGGCTTGATAGGTTTAAGAATAGTTTTTTGCT---  
GTGCTTTCTTTAGTA-----AATAGAGTTAGGCAGGGATATTCACCT-----  
CTGTCAATTTGCTGTTAGCTTGCTCAACACCACAGCAATAGCAGTAGCTGAG---  
GGGACAGATAGGATTATAGAAATAGTACTAAGAGTTGTTAGAGCT-----  
-----ATCCTTAACATA-----CCCACACGAATAAGACAAGGCTTGGAAGGGCTTTACTA---TAA  
>AY773338  
GCT---GCA-----  
GAAATTTGTGGGTACAGTTTATTATGGGGTGCCTGTATGG---AAGGAAGCAACC---  
ACTACTCTATTTTGTGCATCAGATGCTAAATCCTATGAAACAGAG---GCACATAAT-----  
-----ATCTGGGCTACA---CATGCCTGTGTACCCACGGAC---  
CCCAGCCCACAAGAAATAGAACTGGAA-----AATGTGACCGAAAACCTTTAAT-----  
-----ATGTGGAAAAATAACATGGTAGACCAGATGCATGAGGATATA---  
ATCAGTTTATGGGATCAAAGCCTA---AAACCATGTGTAAAATTA---  
ACCCCACTCTGTGTCACTTTAAACTGCAATAATAATGTTACCTTAAACAGCACTGGGGCCATCTGCAAC---  
-----

-----AAGACTACGGGCAAAGCCACTGTGGAGTCAGAACTGGAGGTAAAA---  
 AACTGCTCTTTCAATATAACTACAGTAGTAAGA-----  
 GATAAGAGAATGCAAGTACGTGCGCTT---TTTTATAGACCTGATATAGTATCAATAGACAAT-----  
 -----  
 -----  
 GATAATACCAGTTATAGGTTAATAAATTGTAATACCTCAGCCATTACACAG---  
 GCTTGTCCAAAGGTATCCTTTCAACCAATTCCAATACATTATTGTGCCCCAGCTGGTTTTGCAATTCTTAAGT  
 GTAGA---GATAAGAAGTTCAAT-----GGAACAGGCCCATGCACAAAT-----  
 -GTCAGC---ACAGTACAATGTACACATGGAATTAAGCCAGTGGTGTCAACT---  
 CAACTGCTGTTGAATGGCAGTCTAGCAGAAGAAGAG-----  
 ATCATAATTAGATCTGAAAATCTCACAACAAT-----GCTAAAAACATAATAGTACAGTTTAAT----  
 -----GCATCTGTAGAA-----ATTAATTGTACAAGGCCCTACAAATATACAATACAA-----  
 -AAAACATCAATA-----GGACAAGGGCAAGCA---TTA-----CATACAAGCAAGAGG-----  
 -----ATAATAGGAGACATA-----AGACAAGCACATTGT---AACATTAGTGGAGAA---  
 AAATGGTATGAACTCTACAACAGGTAGCTATAAAATTAGGA-----GACCTTCTTAAC----  
 -----AAAAACAATAAATTTTCGA-----  
 CCACCCTCAGGAGGGGACCCAGAAATTACA---ACACACAGTTTTAATTGTGGAGGGGAA---  
 TTTAAACAGCTCCAGGCAAGAGTCCTGGCTGTGGAAAAGATACCTTAAGGATCAACGGCTCCTGGGACTTTGGG  
 GTTGCTCTGGAACACATTTGCACCACTACTGTGCCCTGGAACCTTAGTTGGAGT-----  
 -----AATAGAACTCAAGATGAGATTTGG-----CAT-----  
 AACATGTCCTGGATGCAGTGG---GAAAGAGAAATTGACAAATTACACAGGACTATTATAC---  
 ACCTCAATTGAAAGTTCGCAGGTTGAGCAAGAA-----  
 -----  
 AAGAATGAACAAGAATTATTGGAATTGGACAAGTGGGCAAGTCTGTGGAATTGGTTTAACATCACAACTGGC  
 TGTGGTATACAAAATATTGAGAAATCATATGGGGAGGCTTACCAGGTTTTAGAAATGGTTTTTGCT---  
 GTGCTTTCTGTGGTA-----CATAGAGTTAGGCAGGGATACTCACCT-----  
 CTGTCATTTGCTATTTACTTGCTTGCTACCATCGCAATCGTACCAGCAGAG---  
 GGGACAGACAGGGTTATACAAGTTGTACGAAGAGCTTGCAGAGCT-----  
 -----ATTCTTACCATA-----CCCACAAGAATACGACAGGGCTTGGAAGGCTTTTGCTA---TAA  
 >EF633445  
 GCT---GCA-----  
 GAAAAATTTGTGGGTCACAGTTTATTATGGGGTGCCTGTATGG---AAGGAAGCAACC---  
 ACTACTCTATTTTGTGCATCAGATGCTAAAGGATATAAAAAAGAG---GCACATAAT-----  
 -----ATCTGGGCTACA---CATGCCTGTGTACCCACGGAC---  
 CCCAACCCACAAGAAGTAGGACTGGAA-----AATGTGACAGAAAACCTTTAAT-----  
 -----ATGTGGAGAAATGACATGGTAAACCAGATGCATGAGGATATA---  
 ATCAGTTTATGGGATCAAAGCCTA---AAACCATGTGTAAAATTA---  
 ACCCCGCTCTGTGTCACTTTAACTGCACTGATGCCATCTTTAACTCCACCTCCTTCAGCAGC-----  
 -----  
 -----TCCGGGAGCACCACCACTGAGAAGCCAACACTAGAGGTGCAA---  
 AACTGCTCTTTCAATGTAGCTACAGTAGTAAGA-----  
 GATAAGAGAAAGGAAGCATCTGCGCTT---TTTTATAGACCTGATATAGTACCAATAGACCAGGATAAT---  
 -----  
 -----  
 AAAAAATGGTAATAAGACCACTTATAGGTTAATAAATTGTAATACCTCATCCATTACACAG---  
 GCTTGTCCAAAGGTATCCTTTGAACCAATTCCAATACATTATTGTGCTCCAGCTGGTTTTGCAATTCTAAAAT  
 GTAGA---GATAAGAAGTTCAAT-----GGAACAGGCCCATGCACAAAT-----  
 -GTCAGC---ACAGTACAATGTACACATGGAATTAAGCCAGTGGTATCAACT---  
 CAATTGCTGTTGAATGGCAGTCTAGCAGAAGAAGAG-----  
 ATCATAATTAGGTCTGAAAATCTCACAACAAT-----GCTAAAAACATAATAGTACAGCTTAAT----  
 -----GCATCTGTAGAA-----ATTAATTGTACAAGGCCCTACAACAATACAAGACAA-----  
 -AATACACAAATA-----GGACCAGGGCAAACA---TTC-----TATGCAAGCAGGATG-----  
 -----ATAATAGGAGACATA-----AGACAAGCACATTGT---AACATTAGTGAAGAA---  
 AAATGGAAGAGAACTTTACAACAGGTAGCTATAAAATTAGGA-----AACCTTCTTAAC----  
 -----AAAAACAATAAATTTTGA-----  
 CCACCCTCAGGAGGGGACCCAGAAATTACA---TCACACAGTTTTAATTGTGGAGGGGAA---  
 TTTAAACAGCTCCAGGCAAGAGTCCTGGCTGTGGAAAAGATACCTAAGGGATCAACAGCTCCTAGGAATTTGGG  
 GTTGCTCTGGAACACATTTGCACCACTACTGTGCCCTGGGACCCTGAATGGAGT-----  
 -----AATAAACTTACGATGAGATTTGG-----GGG-----  
 AACATGACCTGGATGGAGTGG---GAAAGAGAAATTGACAAATTACACAGGATACATATAC---

ACCTTAATTGAAGAATCACAGGTCCAGCAAGAA-----  
 -----  
 AAGAATGAAAAAGAATTGTTGGAATTGGACAAGTGGGCAAGTCTGTGGAATTGGTTTAACATAACAAACTGGC  
 TATGGTATATAAAAATATTCTAATGATAGTAGGAGGCTTGATAGGTTTAAGAATAGTTTTTTGCT---  
 GTGCTTTCTGTAGTA-----AATAGAGTTAGGCAGGGATACTCACCT-----  
 CTGTGCTTTGCTATTAGCTTGCTTGATACTATAGCAATAGCAACAGCTGAG---  
 GGGACAGATAGGGTTATAGAAGTAGTACAAAGAGCTTGCAGAGCT-----  
 -----GTTCTTAACGTA-----CCCCTAAGAATCAGACAGGGCTTAGAAAGGCTTTTGCTA---TAA  
 >FJ900266  
 GCT---GCA-----  
 GAAAACTTGTGGGTCACAGTATATTATGGGGTACCTGTGTGG--AAAGAAGCAACC---  
 ACTACTTTATTTTGTGCATCAGATGCTAAAGGATATGAAAGAGAA---GTACATAAT-----  
 -----GTCTGGGCTACA---CATGCCTGTGTACCCACAGAC---  
 CCCAACCCACAGGAAATATTGCTGAAA-----AATGTAACAGAAAATTTTAAAT-----  
 -----ATGTGGCAAAATAACATGGTGTAGAACAAATGCATACAGATATA---  
 ATCAGTTTATGGGATCAAAGCCTA---AAGCCATGTGTAAAATTA---  
 ACCCCACTCTGTGTTACTTTTACACTGTAAGGATGCCAACACCAGTTCCTACTGAAAAAC-----  
 -----  
 -----AGCACCTTACCGGAAGAGGCAGGGGCAATAAAA---  
 AACTGTTCTTTTAAATATGACCACAGAAATAAGA-----  
 GATAAGAGGTTGAAAGTAAATGCACCTT--TTCTATAGACTTGATATAGTACCAATCAATAGTAGT-----  
 -----  
 -----  
 GATAGTAACAGTAATGAATATAGGTTAATAAATTGTAATACCTCAACCATTAAACAG---  
 GCTTGTCCTAAAAGTATCTTGGGATCCAATCCCAATCCACTATTGTGCTCCAGCTGGTTTTGCGATTCTAAAGT  
 GTAAT---AATAAAACATTTAAAT-----GGGACAGGGCCATGCAATAAT-----  
 -GTCAGT---ACAGTACAATGCACACATGGAATTAAGCCAGTGGTATCCACT---  
 CAATTGCTGTTTAAATGGCAGCCTAGCAGAAGAAGAT-----  
 ATAATAATCAGAACTCAGAATATCTCAGACAAC-----ACAAAAACCATAATAGTACACCTTAAT-----  
 -----GAATCTGTACAG-----ATTAATTGTACAAGACCCAACAACAATACAAGGAGA-----  
 -AGTATACATCTA-----GGACCAGGACAAGCA---TTC-----TATGCAACAGGTGAC-----  
 -----ATAATAGGAGATATA-----AGGAAGGCACATTGT---AATATTAGTGGGGAC---  
 CAATGGAATAACACCCTACAAAAGGTAAGGGCAAAGTTAAAA-----TCTCTTCTA-----  
 -----AATAAAACAATAGTATTTAAC-----  
 CAATCCTCAGGAGGGGACCTAGAAATTACA--ATGCATAGTTTTAATTGTAGAGGAGAA---  
 TTTAAACAGCTCCAGGCAAGACTCCTGGCTGTGGAAAGATACCTAAAGGATCAACGGCTCCTAGGGATTTGGG  
 GCTGCTCTGGAAGAACTCATCTGCCCCACTAATGTGCCTTGGAAGCTCTAGTTGGAGT-----  
 -----AATAAATCTCAGGCTGAGATTTGG-----GAA-----  
 AACATGACCTGGATGGAGTGG--GAAAAAGAGATTAGTAACACTACTCAAACACAATATAT---  
 GAGTTAATTGAAAAATCACAGAACCAGCAGGAA-----  
 -----  
 ATAAATGAGCAGGAATTATTGGCATTGGACAAGTGGGCAAGCCTGTGGAGTTGGTTTGACATAACAAACTGGT  
 TGTGGTATATAAAAATATTCTAATGATAGTAGGAGGCTTAATAGGCTTAAGAATAGTTTTTTGCT---  
 GTGCTTTCTATAGTA-----AATAGAGTTAGGAAGGGATACTCACCT-----  
 TTGTCAATTGGCTATTAACCTTGCTTGACACCAGCAATAGTAGTAGCTGAG---  
 GGGACAGATAGGGTTATAGAAGTTTTGCAAGAGCTGGTAGAGCT-----  
 -----GTTCTCCACATA-----CCCAGAAGAATAAGACAAGGCTTAGAAAGGATATTGCTA---TAA  
 >FJ900267  
 GCT---GAA-----  
 AACAACTTGTGGGTCACAGTCTATTATGGGGTACCTGTGTGG--AAAGAAGCAACC---  
 ACTACTTTATTTTGTGCATCAGATGCTAAAGCATATGAAGAGGAG--GTACATAAT-----  
 -----GTCTGGGCTACA---CGTGCCTGTGTACCCACAGAC---  
 CCCGACCCACAAGAAATATGGCTAAGA-----AATGTAACAGAAAATTTTAAAT-----  
 -----ATGTGGAAAAATAACATGGTGGAAACAAATGCATACAGATATA---  
 ATCAGTTTATGGGATGAAAGCCTA---AAGCCATGTGTAAAGTTG---  
 ACCCCACTCTGTGTTACTTTTAACTGTGTAATAATGCAAATGTCACCTTTTGAAAAAC-----  
 -----  
 -----GGCACCTTGAAGGAAGAGCCAGGAGCAATACAA---  
 GACTGTTCTTTCAATATGACCACAGAAGTAAGA-----  
 GATAAGAAGTTGAAAGTAAATGCACCTT--TTTTATAGACTTGATATAGTACCAATCAATATT-----

-----  
-----  
ACTAAGAATAACAGTGAATATAGGCTAATAAATTGTAATACCTCAACCATTAAACAG---  
GCTTGTCCAAAGGTATCTTGGGATCCAATCCCTATCCATTATTGTGCTCCAGCTGGTTTTGCGATTCTAAAAT  
GTAAT---AATAAAATGTTCAAT-----GGGACAGGGGCCATGCAATAAT-----  
-GTCAGT---ACAGTACAGTGCACACATGGAATCAAGCCAGTGGTATCAACT---  
CAATTGCTGTTAAATGGCAGCCTAGCAGAAGAAGAC-----  
ATAATAATCAGAACTCAGAATATCTCAGATAAT-----ACAAAAACCATAATAGTACATCTTAAT----  
-----GAATCTGTACAG-----ATTAATTGCTCAAGACCCAACAACAATACAAGAAGA-----  
-AGTATACATATA-----GGACCAGGACAAGCA---TTC-----TATGCAACAGGTGAC-----  
-----ATAATAGGAGATATA-----AGAAAGGCACATTGT---AACATTAGTGGACTA---  
CAATGGAATAAACTCTAGAACGGGTGCGTGCAAAGCTAAAA-----GCTCAATTCCCT-----  
-----AAGAAAACAATAACATTTAAC-----  
CAATCCTCAGGAGGGGACCTAGAAATTACA---ATGCATAGTTTTTAATTGTAGAGGAGAA---  
TTTAAACAGCTCCAGGCAAGAGTCTTGGCTGTAGAAAAGATACCTACAGGATCAACGGCTCCTAGGGATTTGGG  
GCTGCTCTGGAAGAACTCATCTGCACCACTAATGTGCCTTGGAAGCTCTAGTTGGAGT-----  
-----AATAAATCTCAGGAAGAGATTTGG-----GGA-----  
AACATGACTTGGATGGAGTGG---GAACGAGAGATTAGCAATTACTCATACACAATATAC---  
AAGTTACTTGAACAATCACAGGACCAGCAGGAA-----  
-----  
ATAAATGAAAAAGAATTATTGGAATTGGACAAGTGGGCAAGTCTGTGGAATTGGTTTGACATATCAAAGTGGC  
TGTGGTATATAAAAATATTATCATAATGATAGTAGGAGGCTTGATAGGCTTAAGAATAGTTTTTTGCT---  
GTGCTTGCTATAGTA-----AATAGAGTTAGGAAGGGATACTCACCT-----  
TTGTCAATTTGCTATTAGCTTGCTTGACACCACAGCAATAGTAGTAGCTGAG---  
GGGACAGATAGAATTATAGAAGCTTTACAAAGAGCTGGTAGAGCT-----  
-----TTTCTCAACATA-----CCTAGAAGAATCAGACAGGGCTTAGAAAGAGGTTTACTA---TAA  
>DQ189088  
GCT---ACA-----  
GAAAACTTGTGGTTACAGTCTATTATGGGGTACCTGTGTGG---AGAGAAGCAACC---  
ACTACTTTATTCTGTGCATCAGATGCTAAATCATATGAAAGAGAG---GTACATAAT-----  
-----GTCTGGGCTACA---CATGCCTGTGTACCCACAGAT---  
CCCGATCCACGAGAAGTAGTCCCTNGAA-----AATGTAACAGAAAATTTTGAT-----  
-----ATGTGGAAAAATAACATGGTAGAACAATGCATACAGATATA---  
ATCAGTTTATGGGATCAAAGCCTA---AAGCCATGTGTGAAGTTA---  
ACCCCACTCTGCGNTACTTTAANTTGTACTGATGCCATCAGGAACACGACAAAC-----  
-----  
-----AACACCCTGGCGGATGAGCCAGGGGCAATACAA---  
AACTGTTCTTTCAATGTGACCACAGAAGTAAGA-----  
GATAAGAAGCTGAAAGTACACGCAATT--TTTTATAGACTTGATATAGTACCAATCAGTGGCAGT-----  
-----  
-----  
AATGACAATAGTAGTACATACAGGCTAATAAATTGTAACACCTCAACCATTACACAG---  
GCTTGTCCAAAGGTATCTTGGGATCCAATTCCCATACATTTATTGTACTCCAGCTGGTTATGCGATTCTAAAGT  
GTNAT---GATAAAAGGTTCAAT-----GGGACGGGGCCATGCAGGAAT-----  
-GTCAGC---ACAGTACAATGTACACATGGAATTACACCAAGTGGTATCAACT---  
CAATCGTTGTTAAATGGTAGCCTAGCAGAAGAAGAT-----  
ATAATAATCAGATCTCACAATATCTCAGATAAT-----GCAAAAACCATAATAGTACACCTTAAT----  
-----GAATCTGTACAG-----ATTAATTGTACAAGACCTAACAACAATACAAGAAAA-----  
-AGTATACACTTA-----GGACCAGGACAAGCA---TTT-----TACGCAACAGGAGAC-----  
-----ATAATAGGAAACATC-----AGAAAGGCACATTGT---AATGTTAGTGGAAATG---  
CAATGGAATACAACGCTAGAACGGGTAAAGGCAAAATTAAAG-----CCTCTTTTCCCT-----  
-----AATGCAACAATTAAATTTAAC-----  
TCATCCTCAGGAGGGGACCTAGAAATTACA---ATGCATAGTTTTTAATTGTAGAGGAGAA---  
TTTAAACAGCTCCAGGCAAGACTCCTGGCTGTGGAAAGATACCTAAGGGATCAACAGCTCCTAGGGCTTTGGG  
GCTGCTCTGGAAGAACTCATCTGCACCACTACTGTGCCCTGGAAGCTCTAGTTGGAGT-----  
-----AATAAACTCAGAAGGAGATTTGG-----GAA-----  
AACATGACCTGGATGGAGTGG---GAAAGGAGATTAGCAATTACTCAAATGAAATATAC---  
AGGTTAATTGAAGAGGCGCAGAACCAGCAGGAA-----  
-----  
AAGAATGAACAAGAATTATTAGCATTGGACAAATGGGCAAGTCTGTGGAATTGGTTTAGCATAACAAAGTGGC

TGTGGTACATAAAATTATTCATAATAATAGTAGGAGGCTTCATAGGCTTAAGAATAGTTTTTGCT---  
 GTGCTTTCTATAGTA-----AATAGAGTTAGGAAGGGATACTCACCT-----  
 TTGTCATTAGCTATTAGCTTGTTTAATACCACAGCAATAGTAGTAGCTGAA---  
 GGAACAGATAGAGTTATAGAAGCTGTGCAAAGAGCTGTTAGAGCT-----  
 -----GTTTGTAACATA-----CCTAGAAGAATAAGACAGGGCTTGGAAGAGCTTTCCTA--TAA  
 >MH746246  
 GCT---TCA-----  
 GACAAACTGTGGGTACAGTATATTATGGGGTACCTGTGTGG--AAAGAAGCAACC---  
 ACTACTCTATTTTGTGCATCAGATGCTAAAGGATATGAAAAGAG--GTACATAAT-----  
 -----GTCTGGGCTACA---CATGCCTGTGTACCCACAGAC---  
 CCCAACCCACAGGAAATAGTTCTGGAA-----AATGTAACAGAAAATTTTGAT-----  
 -----ATGTGGAAAAATAACATGGGTAGAACAAATGCATGAAGATATA---  
 ATCAGTTTATGGGATCAAAGCCTA--AAACCATGTGTAAAGTTA---  
 ACCCCACTATGTGTTACTTTAATTTGTACTAATGTCAATGTTACTAAGGTCAATGTCACT-----  
 -----  
 -----GACAATAGCACTCTGAAGGAAGATCAAGGGGCAATAAAA---  
 AACTGTTCTTTCAATATGACCACAGAAGTAAGA-----  
 GACAAGAACCGCAAAGTACATGCACCT---  
 TTTTATAGACTTGATCTAGTACCAATAGATAATAGTGATAATAGT-----  
 -----  
 AGTACAAAGGATAATAGTAGTATAGAGTATAGGTAAATAAATTGTAATACCTCAACCATTAAACAG---  
 GCTTGTCCAAAGGTATCTTGGGATCCAATTCCTATACATTATTGTACTCCAGCTGGTTACGCGATTCTAAAGT  
 GTAAT--AATAAAACGTTCAAT-----GGGACAGGGCCATGCAGGAAT-----  
 -GTTAGC--ACAGTACAATGCACACATGGGATTAAGCCAGTGGTATCAACT---  
 CAATTGTTGTAAATGGCAGCCTAGCAGAAGAAGAT-----  
 GTAATAATCAGATCTCAAAATATCTCAGATAAT-----GCAAAAACCATAATAGTACACCTTAAT---  
 -----GAATCTGTATGG-----ATTAATTGTACAAGACCCAACAACAATACAAGAAAA-----  
 -AGTATACACTTA-----GGACCAGGACAGGCA---TTC-----TATGCAACAGGTGCC-----  
 -----ATAATAGGAGATATA-----AGAAGGGCACATTGT--AACATTAGTGAATCA---  
 CAATGGAATAGCACTATAGAAAAGGTACGTAAAAAGTTAGAG-----CTTCTTTTCCCT---  
 -----AATAAAACCATAGCATTTAAT-----  
 CAATCCTCAGGAGGGGACTTAGAAATTACA--ATGCATAGTTTTAATTGTAGAGGAGAA--  
 TTTAAACAGCTCCAGGCAAGAGTCCCTGGCTGTGGAAAGACACCTAAAGGATCAACAGCTCCTAGGGCTTTGGG  
 GCTGCTCTGGAAGAACTCATCTGCACCACTAACGTGCCTTGGAACCTCTAGTTGGAGT-----  
 -----AATAAAACCCAAAAGGAAATTTGG-----GAC-----  
 AACATGACCTGGATGGAGTGG--GAAAAGAGATTAGCAATTACACAAGCACAATATAC---  
 AGGTTGATTGAACAATCGCAGAACCAGCAGGAA-----  
 -----  
 CAGAAATGAAAAAGAATTACTAGAAATTGGACAAGTGGGCAAGTCTGTGGAATTGGTTTGACATAACAAAATGGC  
 TGTGGTATATAAAAATATTATAATGATAGTAGGTGGCTTAATAGGCTTAAGAATAATTTTTTGCT--  
 GTGCTTTCTATAGTA-----AATAGAGTTAGGAAGGGATACTCACCT-----  
 CTGTCAATTGGCTATTAGCTTGCTTAACACCACAGCAATAGTAGTAGCTGAG---  
 GGGACAGATAGAGTTATAGAATTTTGTCAAAGAGCTGGTAGAGCT-----  
 -----ATTCTCAACATA-----CCTAGACGAATAAGACAGGGTTTAGAAAGAGCTTTTGCTA--TAA  
 >FJ771008  
 GCT---GAC-----  
 AACTTGTGGGTACAGTCTATTATGGGGTACCTGTGTGG--AAAGATGCAGCC---  
 ACTACTCTATTCTGTGCATCAGATGCTAAAGCATATGAAAAGGAG--GTGCATAAT-----  
 -----GTCTGGGCTACA---TATGCCTGTGTACCCACAGAT---  
 CCCAGTCCACAAGAATTAGTCCTGGAA-----AATGTAACAGAAAATTTTGAT-----  
 -----ATGTGGAAAAATAACATGGGTAGAACAAATGCATACAGATATA---  
 ATCAGTTTATGGGATCAAAGCCTA--AAGCCATGTGTAAAGTTA---  
 ACCCCACTCTGTGTTACTTTAATTTGTACTGCTGTTAAAGCCAATATCACTGATGCTGCCACCCCC-----  
 -----  
 -----TCACCCTCTCTTGACACCCTGAAGGAAGAGTCAGGAGCAATACAA---  
 AACTGTTCTTTTAACATGACCACAGATGTAGGT-----  
 GATAAGCAGCAGAGAGTACATGCTCTT--TTTTATAAACTTGATATAGTTCCAATCAGTGGC-----  
 -----  
 -----  
 AGTAATAGTACATACAGGTAAATACATTGTAATACCTCAACCATTACACAG---

ACTTGTCCAAAGGTAACCTTGGGATCCAATTCCCATACATTATTGTGCTCCAGCTGGTTATGCGATTCTAAAGT  
 GTAAT---GATAAAAAGTTCAAT-----GGGACAGGGCCATGCACGAAT-----  
 -GTCAGC---ACAGTACAATGTACACATGGAATTAAACCAGTGGTATCAACT---  
 CAATTGTTGTAAATGGCAGCCTAGCAGAAGAAGAT-----  
 ATAATAATCAGATCTCAAAATATCTCAGATAAT-----GTAAAAACATAATAGTACACCTTAAT----  
 -----GAATCTGTACAG-----ATTAATTGTTCAAGACCCAACAACAATACAAGAAAA-----  
 -AGTATACAGTTA-----GGACCAGGACGAGCA---TTT-----TATGCAACAGGAGAT-----  
 -----ATAATAGGAGATATC-----AGAAAAGCACATTGC---AATGTTAGTAGAGAA---  
 CAATGGAATAAAACAATAGAGCAGGTAAGGGCAAAGTTAAAG-----ACTTATTTCCCTT----  
 -----AATAAGACAATACAATTTAAC-----  
 ACATCCTCAGGAGGGGACCCAGAAATTACA---ATGCATAGCTTCAATTGTGGAGGAGAA---  
 TTTAAACAGCTCCAGGCAAGAATCCTGGCTGTAGAAAAGATACCTAAAGGATCAACAGCTCCTAGGAATTTGGG  
 GCTGCTCTGGAAAGCTCATCTGCGCCACTAGTGTGCCTTGGAACTCTAGTTGGAGT-----  
 -----AATAAATCGCATGATGTGATTTGG-----GGA-----  
 AACATGACCTGGATGCAGTGG---GAAAGGGAGATTAGCAATTACTCACAAGAAATATAC---  
 AGGTTAATTGAAGAATCGCAGAGCCAGCAGGAA-----  
 -----  
 AAGAATGAACAAGACTTATTGGCATTAGACAAATGGGCAAGTCTGTGGAATTGGTTTGACATATCAAACCTGGC  
 TGTGGTATATAAAAATATTCTAATGATAGTAGGAGGCTTGATAGGCTTAAGAATAGTTTTTTACT---  
 GTGCTTTCTATAATA-----AATAGAGTTAGGAAGGGATACTCACCT-----  
 TTGTCATTAGCTATTAGCTTGCTTAATACCACTGCAATAGTAGTAGCTGAG---  
 GGGACAGATAGAGTTATAGAAGCTTTGCAAACAGCTGGCAGAGCT-----  
 -----ATTCTCAATATA-----CCTAGAAGAATAAGACAGGGCTTCGAAAGGGCTTTACTA---TAA  
 >KJ849782  
 GCT---ACA-----  
 GACAACCTCTGGGTAACAGTCTATTATGGGGTACCAGTGTGG---AAAGAAGCAGAC---  
 ACTACTCTATTCTGTGCATCAGATGCTAAAGCATATGACAAAGAG---GTGCATAAT-----  
 -----GTCTGGGCTACA---TATGCCTGTGTACCCACAGAT---  
 CCCAATCCACAAGAAATGCATCTGGAA-----AATGTAACAGAAAATTTTAAT-----  
 -----ATGTGGAAAAATAACATGGTAGAACAAATGCATACAGATATA---  
 ATCAGTCTATGGGATCAAAGCCTA---AAACCATGCGTAAAGTTA---  
 ACCCCACTCTGCGTTACTTTAAATTGTACTAATGCCCAGAGCAATGCCACTGCCTGGGCC-----  
 -----  
 -----AATGACACCCTGAAGGAAGAGTCAGGGGCAATACAA---  
 AATTGTTCTTTTAATATGACCACAGAAGTAAAA-----  
 AATAAGCAGCAGAAAGTATATGCCCTT---TTTTATAGACTTGATATAGTACCAGTCAGTGGC-----  
 -----  
 -----  
 AATAGTACTTACAGGTTAATACATTGTAATACATCAACCATTACACAG---  
 GCTTGTCCAAAGGTAACCTTGGGATCCAATTCCCATACATTATTGTGCTCCAGCTGGTTATGCGATTCTAAAGT  
 GTAAT---GAGAAAGAGTTCAAT-----GGGACGGGACCTTGTAGCAAT-----  
 -GTCAGT---ACAGTACAATGTACACATGGAATTAAACCAGTGATATCAACT---  
 CAATTATTGTTAAATGGCAGCCTAGCAGAAAAAGAT-----  
 ATAATAATCAGAGCTCAAAATCTCTCAGATAAT-----GCAAAAACCATCATAGTACACCTTAAT----  
 -----GAATCTGTACAA-----ATTAATTGTACAAGACCCAACAACAATACAAGAAAA-----  
 -AGTATACAGTTA-----GGACCAGGAAAGGCA---TTC-----TATACAACAGGAGAT-----  
 -----ATAATAGGAGATATC-----AGAAAAGCACATTGT---AACATTAGTAGAACA---  
 CAATGGAATAAAACGTTAAGCCGGGTAAAGGAAAAGTTAGGG-----TCTCATTTCCTT----  
 -----AATAAAACAATAAAATTTAAT-----  
 TCATCTGCAGGAGGGGACCTAGAAATTACA---ATGCATAGTTTTTAATTGTAGAGGGGAA---  
 TTCAAACAGCTCCAGGCAAGGATCCTGGCTGTAGAAAAGATACCTAAAGGATCAACAACCTCCTAGGGCTTTGGG  
 GCTGCTCTGGAACGCATCTGCACCACTAGTGTGCCCTGGAACCTCTAGTTGGAGT-----  
 -----AATAAAACTCAGAAGGAGATTTGG-----GAT-----  
 AACATGACCTGGATGCAATGG---GAAAAAGAGATTAGCAATTACTCAGCAGAAATATAC---  
 AGGTTAATTGAAGAATCGCAGAACCAGCAGGAC-----  
 -----  
 AAGAATGAACAAGAATTATTGGCATTGGACAAATGGGCAAGTCTATGGAATTGGTTTGACATATCAAATTGGC  
 TGTGGTATATAAAAATATTCTAATAATAGTAGGAGGCTTGATAGGCTTAAGAATAGTTTTTTACT---  
 GTGCTTTCTATAGTA-----AATAGAGTTAGGAAGGGATACTCACCT-----  
 TTGTCATTTGCTATTAGCTTGCTTAATGCCACAGCAATAACAGTAGCTGAG---

GGAACAGATAGAGTTATAAAAGCTTTGCAAAGAGCTGGTGCAGTT-----  
 -----ATTTGCCACATA-----CCCAGAAGAATAAGACAAGGCTTTGAGAGGGCTTTACTA---TAA  
 >KT427774  
 GCT---GAA---AAT-----  
 GAAAAATTTGTGGGTACAGTTTATTATGGGGTACCTGTGTGG--AAAGAAGCAACC---  
 ACTACTTTATTCTGTGCATCAAATGCTAAAGGATATGATAAAGAG--GCACATAAT-----  
 -----GTCTGGGCTACA---CATGCCTGTGTACCCACAGAT---  
 CCCAATCCACAAGAAGTAATTTTGGTA-----AATGTGACAGAAAATTTTGAT-----  
 -----ATGTGGAAAAACAACATGGGTAGAACAAATGCATACAGATATA---  
 ATCAGTTTGTGGGATCAAAGCCTA---AAGCCATGTGTGAAGTTA---  
 ACCCCACTCTGTGTTACTTTAAATTGTACCAATGCCACTGTCCATAGTAATGCCAATAGCAATAGTACT----  
 -----  
 -----CAAAACAGCACCCCTGCAGGAAGAGCCAGAGGCAATAAAA---  
 AACTGTTCTTTCAATATGACCACAGACGTAAGA-----  
 GATAAACAGAAGGAAGTACGTGCACTT---  
 TTTTATAAGCTTGATGTAATACCAATAAATGAGACAAAGGGAGAA-----  
 -----  
 TACAAAGAATACAAAGAATACAGGCTAATACATTGCAATACCTCAACCATTACACAG---  
 GCTTGTCCAAAGATATCTTGGGATCCAATTCCCATACATTATTGTGCTCCGGCTGGTTATGCGATTCTAAAGT  
 GTAAC---GATGAAACGTTCAAT-----GGGACAGGACCATGTGGGAAT-----  
 -GTCAGC---ACAGTACAATGTACACATGGAATTAAACCAGTGGTATCAACT---  
 CAACTGTTGTTAAATGGCAGCCTAGCAGAAAAAGAG-----  
 ATAGTAGTCAGATCCCAAAATATCTCAGATAAT-----GCAAAAACCATAATAGTACACCTTAAT----  
 -----GACTCTGTACAG-----ATTAGTTGTACAAGACCCAACAACAATACAAGAAAA-----  
 -AGTATACAAATA-----GGACCAGGACGAGCA---TTC-----TATGCAACAGGGGAT-----  
 -----ATAATAGGAGACATC-----AGAAAGGCACATTGT---AACATTAGTGGAGCA---  
 AAATGGAGGGAAACGTTAAACAAGGTAAAGGCAAAGTTAAAA-----GAGCACTTCCCT----  
 -----AATGCAACAATAAAATTTAAC-----  
 TCATCCTCAGGAGGGGACCTAGAAATTACA--ACGCATAGTTTCAATTGTAGAGGAGAA---  
 TTTAAACAGCTCCAGGCAAGAATCCTGGCTGTGGAAAGATACCTACAGGATCAACAGCTCCTAGGGCTTTGGG  
 GCTGCTCTGGAAACTCATCTGCACCACTAATGTGCCCTGGAACCTAGCTGGAGT-----  
 -----AATAAATCTCAGGATTTGATTTGG-----AAG-----  
 AACATGACTTGGATGCAGTGG---GAAAAAGAGATTAGCAATTACTCAGAGGAAATATAT---  
 AGGTTAATTGAAAAATCGCAGAACCAACAGGAA-----  
 -----  
 AAGAATGAACAAGAACTATTAGCATTGGACAAATGGGCAAGCCTGTGGACTTGGTTTGACATATCAAACCTGGC  
 TGTGGTATATAAAAATATTACATAATGATAGTAGGAGGCTTAATAGGCTTAAGAATAGTTTTTTGCT---  
 GTGCTTTCTATAGTA-----AATAGAGTTAGGAAGGGATACTCACCT-----  
 TTGTCATTTGCTATTAGCCTGTTTAATGCCACAGCAATAGCAGTAGCTGAG---  
 GGGACAGATAGAATAATAGAAGTTTGGCAAAGGGCGGGTAGAGCT-----  
 -----GTTATTAAACATA-----CCTAGGAGAATAAGACAGGGCTTGGAAGGGCTTTGCTA---TAA  
 >MG365764  
 GCT-----  
 GACAACTTGTGGGTACAGTCTATTATGGGGTACCTGTGTGG--AAAGAAGCAACC---  
 ACTACTCTATTCTGTGCATCAGATGCTAAAGCATATGAACAAGAG--GTACATAAT-----  
 -----GTCTGGGCTACA---CACGCCTGTGTACCCACAGAT---  
 CCCAACCCACAAGAAGTATTTCTGAAT-----AATGTAACAGAAAGTTTGTAT-----  
 -----ATGTGGAAAAATAACATGGGTAGAACAAATGCATACAGATATA---  
 ATCAGTTTATGGGATCAAAGCCTA---AAGCCATGTGTGAAGCTA---  
 ACCCCACTCTGTGTTACTCTAAATTGTACTGCTGCCAATACTGCCAATACCACCAATAGC-----  
 -----  
 -----AATTCAAACAGCACCCCTGAAGGAAGATCCAGGGGCAATACTA---  
 AACTGTACTTTCAATACGGACACAGAAGTAAGA-----  
 GATAAGCAAATGAAAGAACATGCACTT---TTTTACAACTTGATCTAGTACCAATCAATGGT-----  
 -----  
 -----  
 AGTGGTAATGAAACATACAGGCTAATACATTGTAATACCTCAACCATTACACAG---  
 GCTTGTCCAAAGGTATCTTGGGAACCAATTCCCATACATTATTGTGCTCCAGCTGGTTATGCGATTCTGAAGT  
 GTAAT---GATAAAGAGTTCACT-----GGAACGGGGCCATGCAAGAAT-----  
 -GTCAGC---ATAGTACAATGTACACATGGAATTAAACCAGTAGTATCAACT---

CAATTGTTGTTAAATGGCAGCCTATCGGAAGGAGGT-----  
 GTAATAATCAGATCTCAAAATATCTCAGATAAT-----ACAAAAACATAATAGTACACCTTAAT----  
 -----GAATCTGTACAG-----ATTAAGTGTACAAGACCTAACAACAATACAAGAAAG-----  
 -AGTATACGGATA-----GGACCAGGACGAGCA---TTT-----TATGCAACAGAAAGA-----  
 -----ATAATAGGAGATATC-----AGAAAGGCACACTGT---AACATTAGTGGAGAA---  
 AAATGGAATAAAACGATACACCAGGTAAAGGCAGAATTAAGG-----AAGCATTTCCAT----  
 -----AATAAAACAATAAAATTTAAC-----  
 TCATCCTCAGGAGGGGACCTAGAAATTACA--ATGCATAGTTTTAATTGTAGAGGAGAA---  
 TTTAAACAGCTCCAGGCAAGAGTCCTGGCTGTGGAAAGATACCTAAAGGATCAACAGCTCCTAGGAATTTGGG  
 GCTGCTCTGGAAGAACTCATCTGCACCACTAATGTGCCCTGGAACCTCTAGCTGGAGT-----  
 -----AATAAATCCCAGGAGGAAATATGG-----GAT-----  
 AACATGACCTGGATGCAGTGG---GAAAAGGAGATTAGTAATTACTCACAAGAAATATAC---  
 AAGTTACTTGGAGAATCACAAGAACGAGCAGGAA-----  
 -----  
 AAGAATGAAAAGGACTTATTGGAATTTGACAAATGGGCAAGTCTGTGGAATTGGTTTGACATATCAAACCTGGC  
 TGTGGTATATAAAAATATTTCATAATGATAGTAGGAGGCTTGATAGGCTTAAGAATAGTTTTTTGCT---  
 GTGCTTTCTATAGTA-----AATAGAGTTAGGAAGGGATACTCACCT-----  
 TTGTCATTAGCTACTAGCTTGCTTAATACCACAGCAATAGTAGGAGCTGAG---  
 TGGACAGATAGAGTTATAGAAGCTTTGCAAAGAGCTGGTAGAGCT-----  
 -----GTTCTCCACATA-----CCTAGAAGAATAAGACAGGGCTTTGAAAGAGCTTTGCTA---TAG  
 >KX181923  
 GCT---ACA-----  
 GAAAAATCGTGGGTACAGTTTATTATGGGGTACCGGTGTGG---AAAGAAGCAACC---  
 ACTACTCTATTTTGTGCATCAGATGCTAAAGCATATGACACAGAG---GTACATAAT-----  
 -----GTTTGGGCCTCA---CATGCCTGTGTACCCACAGAC---  
 CCTAACCCACAAGAAGTAAATCTGGAA-----AATGTAACAGAAAATTTTGAT-----  
 -----ATGTGGAAAAATAACATGGGTAGAACAAATGCATACAGATATA---  
 ATCAGTTTATGGGATCAAAGCCTA---AAGCCCTGTGTGAAGTTA---  
 ACCCCACTCTGTGTAACCTTTACATTGTACTAATGCCAATGCCACCAATGGCACTGCCAAT-----  
 -----  
 -----GGCCTTCACAATAGCACCTGACAGAAGAGCCAGGAGCAATACAA---  
 AACTGTTTCCTTCAATATAACCTCAGAAGTAAGA-----  
 GATAAACAGCTGAAAGCAAATGCACTC---TTTTATAAGCTTGATATAGTACCAATCAGCAAT-----  
 -----  
 -----  
 GGCGGTAATGGCAGTGGAACAAACAGGCTAATAAGTTGTAATACCTCAACTATTACACAG---  
 GCTTGTCCAAAGGTATCTTGGGATCCAATTCCCATACATTATTGTGCTCCAGCTGGTTATGCGATTCTAAAGT  
 GTAAT---GATAAAAAGTTCAAT-----GGGACGGGGCCATGCAAGAAT-----  
 -GTCAGC---ACAGTCCAATGTACACATGGCATTAAACCACTGGTATCAACT---  
 CAATTGTTGTTGAATGGCAGCTTAGCAGAAGAAAAT-----  
 ATAATAATCAGATCTCAAAATATCTCAGATAAT-----GCAAAAACCATAATAGTACATCTTAAT---  
 -----GAATCTGTACAG-----ATTAATTGTACAAGACCCAACAACAATACAAGAAAG---  
 -AGTATACATCTA-----GGACCAGGACGAGCA---TTT-----TATACAACAGGAAGA---  
 -----ATAATAGGAGACATC-----AGAAAGGCACACTGT---AATGTTAGTGGGACA---  
 CAATGGAATAAAACAATAGAACGGGTAAGGCGAGCGTTACGG-----CCTCATTTCCCT---  
 -----AATAAAACAATAAAGTTTAAC-----  
 TCATCCACAGGAGGGGACCTAGAAATTACA--ATGCATAGTTTTAATTGTAGAGGAGAA---  
 TTTAAACAGCTCCAGGCAAGAGTCCTGGCTGTGGAAAGATACCTAAAGGATCAACAGCTCCTAGGGCTTTGGG  
 GCTGCTCTGGAAGAACTCATCTGCACCACTAATGTGCCCTGGAACCTCTAGTTGGAGT-----  
 -----AATAAAACTCAGACGGAGATTGG-----GGG-----  
 AACATGACCTGGATGGAATGG---GAAAAGAGATTAGTAATTACTCAAAGGAAATATAT---  
 AAGTTAATTGAAGAATCGCAGAACCAGCAGGAA-----  
 -----  
 AAGAATGAACAAGAATTATTGGCATTGGACAAATGGGCAAGTCTGTGGAATTGGTTTGACATAACAACTGGC  
 TATGGTATATAAAAATATTTCATAATGATAGTAGGAGGTTTGATAGGCTTAAGAATAGTTTTTTGCT---  
 GTGATTTCTATAGTA-----AATAGAGTTAGGAAGGGATACTCACCT-----  
 TTGTCATTAGCCATTAGCTTGCTTAATACCATAGCAATAGTAGTAGCAGAG---  
 GGGACAGATAGAGTTATAGAAGCGTTGCAAAGAGCTGGTAGAGCT-----  
 -----ATTCTCAACATA-----CCTAGAAGAATAAGACAGGGCTTGGAAGGAGCTTTGCTA---TAA  
 >KX181926

GCT---ACA-----  
GAAAACTTGTGGGTCACAGTCTATTATGGGGTACCTGTGTGG---AAAGAAGCAAAT---  
ACTACTCTATTCTGTGCATCAGATGCTAAAGCTTATGAAAAAGAG---GTACATAAT-----  
-----GTCTGGGCTACA---CATGCCTGTGTACCCACAGAT---  
CCCAATCCACAAGAAGTATCTCTG-----AATATAACAGAAAATTTTGTAT-----  
-----ATGTGGAAGAATAACATGGTAGAACAAATGCACACAGATATA---  
ATCAGTTTATGGGATCAAAGCCTA---AAGCCATGTGTAAAGTTA---  
ACCCCACTCTGTGTTACTTTACATTGTGTTGATGCTAATGCCACCACCAATGGCACTCAA-----  
-----  
-----AGCAACCCCTTAAAGGAAGATCCAGGGGCAATACAA---  
AACTGTTCTTTCAATATGACCACAGAAGTAAGA-----  
GATAAGCAGCTGAAAGTACATTCACCT---TTTTATAGACTTGATATAGTACCAATCAATAATGTT-----  
-----  
-----  
AGTAATGGAAGTGGAGAATACAGGCTAATAAATTGTAATACCTCAACCATTACACAG---  
GCTTGTCCAAAGGTCTCTTGGGATCCAATTCCCATACATTATTGTGCTCCAGCTGGTTATGCGATTCTAAAGT  
GTAAT---GAGAAAGAGTTCAAT-----GGGACAGGGCCGTGCAAGAAC-----  
-GTCAGC---ACAGTACAATGTACACATGGAATTAAGCCAGTGGTGTCAACT---  
CAATTGTTGTTAAATGGTAGCCTAGCAGAAGAAGAT-----  
ATAATAATCAGATCTCAAAATATCTCAGATAAT-----GCAAAAACCATAATAGTACACTTTAAT---  
-----GAATCTGTACAG-----ATTAATTGTACAAGACCCAACAACAATACAAGAAGA---  
-AGTATACATTTA-----GGACCAGGACGAGCA---TTT-----TATACAACAGGAGAA-----  
-----ATAATAGGAGACATC-----AGAAAGGCACATTGT---AACGTTAGTAGATCA---  
CAATGGAATAAAACAATAGAACAGGTAAGGGCAAAGTTAAAG-----TTTTATTTCCT---  
-----AATGCCACAATAAAATTTAAC-----  
TCATCCTCAGGAGGGGACCTAGAAAGTTACA---ATGCATAGTTTCAATTGTAGAGGAGAA---  
TTTAAACAGCTCCAGGCAAGAATCCTTGCTGTGGAAAGATACCTAAAGGATCAACAGCTCCTAGGACTTTGGG  
GCTGCTCTGGAAACTCATCTGCACCACTACTGTGCCCTGGAAGTCTAGCTGGAGT-----  
-----AATAGGTCTCAGGAGGACATTTGG-----AAT-----  
AACTTGACCTGGATGCAATGG---GAAGAAGAGATTAGCAGTTACTCAAGTGAGATATAC---  
AGGTTAATTGAACAGTCGCAGAACCAGCAGGAA-----  
-----  
AAGAATGAACAAGAATTATTGGCATTGGACAAATGGGCAAGTCTGTGGAATTGGTTTGACATATCAAAGTGGC  
TGTGGTATATAAAAATATTATCATAATGATAGTAGGAGGTCTGATAGGCTTAAGAATAGTTTTTGTCT---  
GTGCTTTCTATAGTA-----AATAGAGTTAGGAAGGGATACTCACCT-----  
TTGTCGTTAGCTATTAGCTTGCTTAATACCATAGCAATAGTAGTAGCTGAA---  
GGGACAGATAGGGTTATAGAAGCTTTGCAAAGAGCGGGTAGGGCT-----  
-----GTTCTCAACATA-----CCTAGAAGAATAAGACAGGGCTTGAGAGGAGTTTGCTA---TAA  
>KX181925  
GCT-----  
GAAAAATTGTGGGTCACAGTCTATTATGGGGTACCTGTGTGG---AAAGAAGCATCC---  
ACTACTCTATTCTGTGCATCAGATGCTAAATCATATGACACAGAG---GTACATAAT-----  
-----GTCTGGGCTACA---CATGCTTGTGTACCCACAGAT---  
CCCAATCCACAAGAAGTAGATCTGAAA-----AATGTAACAGAAAATTTTAAT-----  
-----ATGTGGAAAAATGACATGGTAGAACAAATGCATACAGATATA---  
ATCAGTTTATGGGATCAAAGCCTA---AAGCCATGTGTGAAGTTA---  
ACCCCACTCTGTGTTACTTTAAATTGTAAAAATGCCAATACCAGTAGTACTCAA-----  
-----  
-----AACATCACCTGCAGGAAGATGCAAAAGAAATACAA---  
AACTGTTCTTTCAATATGACCACAGAAGTAAGA-----  
GATAAGCAGCTGAAAGTACATGCACCT---TTTTATAGGCTTGATATAGTACCAATCAATAACAAG-----  
-----  
-----  
AGTAGCAATGATAGTAGTATAAAATACAGGCTAATACATTGTAATACCTCAACCATTACACAA---  
GCTTGTCCAAAGGTATCTTGGGATCCAATTCCCATACATTATTGTGCTCCGGCTAGTTATGCGATTCTAAAGT  
GTAAG---GATAAAAAGTTCAAT-----GGGACGGGGCCATGCAGGAAT-----  
-GTCAGC---ACAGTACAATGTACACATGGAATTAACCAGTGGTATCAACT---  
CAATTGTTGTTAAATGGCAGCCTAGCAGAAGAGGAT-----  
ATAATAATCAGATCTCAAAACATCTCAGATAAT-----GCAAAAACATAATAGTACACTTTAAT---  
-----GAATCTGTGCAG-----ATTAATTGTACAAGGCCCAACAACAATACAAGAAAA---

-AGTATACCAATG-----GGACCAGGACGAGCA---TTT-----TATGCAACAGGAGAC-----  
-----ATAATAGGAGACATC-----AGAAAGGCATATTGT---AACATTAATGGAATA---  
CAATGGAATAAAAAATTAAGAGAGGTAAAGGAAAAGTTAAAG-----TCTCATTTCCCA-----  
-----GTAAACATAACATTTAAC-----  
TCATCCGCAGGAGGGGACCTAGAAATTACA--ATGCATAGTTTCAATTGTAGAGGAGAA---  
TTTAAACAGCTCCAGGCAAGAATCCTGGCTGTGGAAAGATACCTAAAGGATCAACAGCTCCTAGGGCTTTGGG  
GCTGCTCTGGAAGAACTCATCTGCACCACTAATGTGCTCTGGAACCTAGCTGGAGT-----  
-----AATAGATCTCATGGGGAGATTTGG-----GAG-----  
AACATGACCTGGATGCAGTGG---GAAAAAGAGATTAGCAATTACTCAAATGAAATATAT---  
AGGCTAATTGAAGAATCGCAGAATCAGCAGGAA-----  
-----  
AAGAAATGAAAAGGAATTATTGGAATTGGACAAATGGGCAAGTTTGTGGAGTTGGTTTGACATAACAACTGGC  
TGTGGTATATAAAAAATATTCTAATAATAGTAGGAGGCTTGATAGGCTTAAGAATAGTTTTTTACT---  
GTGCTTTCTATAGTA-----AATAGAGTTAGGAAGGGATACTCACCT-----  
TTGTCAATTAGCTATTAGCTTGCTTAATACCACAGCAATAGTAGTAGCTGAG---  
TGGACAGATAGAGTTTTAGAAAGCTTTGCAAAGAGTGGGTAGAGCT-----  
-----GTTCTTAACATA-----CCTAGAAGAATAAGACAGGGCTTAGAAAGGGCTTTGCTA---TAA  
>MK041565  
GCA-----  
GAAAAATTTGTGGGTCACGGTTTATTATGGGGTGCCTGTGTGG---AAAGAAGCAAAAT---  
ACTACTCTATTCTGTGCATCAGATGCTAAAGCACATAAAGAAGAG---GCACATAAT-----  
-----ATCTGGGCTACA---CATGCCTGTGTACCCACAGAC---  
CCCAATCCACAAGAAGTGTTTTTGGAA-----AATGTAACAGAAAATTTTAAT-----  
-----ATGTGGAAAAATAACATGGTAGACCAAATGCATGCAGATATA---  
ATTAGCTTATGGGATGAAAGCCTA---AAGCCATGTGTGAAATTA---  
ACCCCACTCTGTGTTACTTTAAATTGTACTAATGCTCATGCTGAAAGCAGCACC-----  
-----  
-----GTGAAAAACACCACCCTGAAGGAAGAGCCAGGGGTGATAAAA---  
AACTGTTCTTTCAACATGACCACAGAAGTAAGA-----  
GATAAGGAGCTAAAAGTACAAGCACTT---TTTTATAAACTTGATATAGTACAAATCAATGAACAAATCAAT-  
-----  
-----  
GACAGTAATAGTAATTTTCAAGTGAATACAGGCTAATAAATTGTAATACCTCAACCATTAAACAG---  
GCTTGTCCAAAGGTATCTTGGGATCCAATTCCCATACATTATTGTGCTCCAGCTGGGTATGCGATTCTAAAGT  
GTAAT---AATGAAAGTTTCAAT-----GGGACAGGACCATGCACGAAT-----  
-GTCAGC---ACAGTACAATGTACACATGGAATTAAACCAGTGGTTTCCACT---  
CAATTGTTATTAAATGGCAGCCTAGTAAAAGGAGAG-----  
ATAGTAATTAGATCTCAAAATATCTCAGATAAT-----GCAAAAACCATAATAGTACACCTTAAT---  
-----GAATCTGTACAA-----ATCAATTGTACAAGACCCAACAACAATACAAGGAAA-----  
-GGTATACATATA-----GGACCAGGACAAGCA---TTT-----TATGCAACAGGAGAC-----  
-----ATAATAGGAGACATC-----AGAAAGGCACATTGT---AACATTAGTAGAGAA---  
CAATGAAATAAAACATTAAGTAAGGTAAAGGCAAAGCTAAAG-----TCTCTTTTT-----  
-----AACAGTACAATAAAATTTAAC-----  
TCATCCTCAGGAGGGGACCTAAAAATTACA--ATGCATAGTTTTTAATTGTAGAGGAGAA---  
TTTAAACAGCTCCAGGCAAGAGTCCCTGGCTGTGGAAAGATACCTAAAGGATCAACAGATTCTAGGACTTTGGG  
GCTGCTCTGGAAGAACTCATCTGCACCACAGTGTGCCCTGGAACCTAGTTGGAGT-----  
-----AATAAATCTTATGAAAAGATTTGG-----CAA-----  
AACATGACCTGGATGCAGTGG---GAAAAAGAGATTAGCAATTACTCAGATGAAATATAC---  
AAGTTAATTGAACAATCGCAGACCCAGCAGGAA-----  
-----  
AAGAAATGAACAAGAATTATTGGAACCTTGACAAATGGGCAAGTCTGTTGAGTTGGTTTGACATAACACAATGGC  
TGTGGTATATAAAAAATATTCTAATAATGGTAGTAGGAGGCTTAATAGGTTTAAGAATAGTTTTTTACT---  
GTGCTTTCTATAGTA-----AATAGAGTTAGGAAGGGATACTCACCC-----  
TTGTCAATTTGCTATTAGCTTGCTTAATGCCACAGCAATAGTAGTAGGTGAA---  
GGAACAGATAGAATTATAGAAGCTTTGCAAAGGGCTGGTAGGGCT-----  
-----ATTGCGAACGTA-----CCTACAAGAATAAGACAGGGCTTTGAAAAGGGCTTTGCTA---TAA  
>AY173958  
GCT---GAA-----  
AACTTGTGGGTCACAGTCTATTATGGGGTACCTGTGTGG---AAAGATGCAACC---  
ACTACTCTATTCTGTGCATCAGATGCTAAATCATATGAGAGAGAG---GTACATAAT-----

-----GTCTGGGCTACA---CATGCCTGTGTACCCACAGAT---  
CCCAATCCACAAGAAGTAGTTCTGGAA-----AATGTAACAGAAAATTTTGAT-----  
-----ATGTGGAAAAATAGCATGGTAGAACAAATGCATACAGATATA---  
ATCAGTTTATGGGATCAAAGCCTA---AAGCCATGTGTGAAGTTA---  
ACCCCACTCTGTGTTACTTTAAATTGTACTAATGCCATTAATGCCACTGCCATTCAA-----  
-----  
-----GACGGGGACCTGAAGGAAGAACCAGGGGCAATACAA---  
AACTGTTCTTTCAATRTGACCATGGAAGTAAGA-----  
GATAAGCAGCAGAAAGTACATGCACTG---TTTTATAGACTTGATATAGTACCAATTAGCAATGGA-----  
-----  
-----  
AGAAATGGCAGTGGAGACTACTACAGGCTAATAAATTGCAATACCTCAACCATTACACAG---  
GCTTGTCCAAAAGTATCTTGGGATCCAATTCCCATACATTATTGTGCTCCAGCTGGTTATGCGATTCTAAAGT  
GTAAT---GATAAAAAGTTCAAT-----GGGACAGGACCATGCAGGAAT-----  
-GTCAGC---ACAGTACAATGTACACATGGAATTAACCAGTGGTATCAACT---  
CAATTGTTGTTAAATGGCAGCCTAGCAGAAGAAGAT-----  
ATAATAATCAGATCTCAAAATATCTCAGATAAT-----GCAAAAACCATAATAGTACACTTTAAT---  
-----GAATCTGTACAG-----ATTAATTGTACAAGACCCAACAACAATACAAGAAAA-----  
-RGTATACATWTA-----GGACCAGGACGAGCA---TTT-----TATGCAACAGGAGAC-----  
-----ATAATAGGAGACATC-----AGAAAGGCCCATTTGT---AATGTTAGTGGAACA---  
CAATGGAATAAAACATTAGAACAAGTAAGGGCAAAGTTAAAG-----TCTCATTTTCTCT---  
-----AATGCAACAATAAAATTTAAT-----  
TCATCCTCAGGAGGGGACCTAGAAATTACA--ATGCATAGTTTTAATTGTAGAGGAGAA---  
TTTAAACAGCTCCAGGCAAGAGTCCCTGGCCGTGGAAAGATACCTACAGGATCAACAGCTCCTAGGACTTTGGG  
GCTGCTCTGGAAACTCATCTGCACCACTAATGTGCCCTGGAACCTCTAGTTGGAGT-----  
-----AATAAATCTCAGGAGGAGATTTGG-----GAG-----  
AACATGACCTGGATGGAATGG---GAAAAGAGATTAGCAATTACTCAAATGAAATATAC---  
AGGTTAATTGAAAATCACAGAACCAGCAGGAA-----  
-----  
AAGAATGAACAAGAATTATTGGCATTGGACAAATGGGCAAGTCTGTGGAATTGGTTTAGCATATCAAACCTGGC  
TGTGGTATATAAAAATATTCTAATGATAGTAGGAGGCTTGATAGGCTTAAGAATAGTTTTTTGCT---  
GTGCTTTCTATAGTA-----AATAGAGTTAGGAAGGGATACTCACCT-----  
TTGTCATTTGCTATTGGCTTGTTTAACACCACAGCAATAGTAGTAGCTGAG---  
GGAACAGATAGAATTATAGCAGCTTTGCAAAGAATTGGTAGAGCT-----  
-----ATTCTGAACATA-----CCTACAAGAATAAGACAGGGCTTCGAAAGGGCTTTGCTA--TAA  
>JF683771  
GCT---GCA-----  
GACAACTTATGGGTCACAGTCTATTATGGGGTACCTGTGTGG--AAAGAAGCAACC---  
ACTACTCTATTTTGTGCATCAGATGCTAAAGGATATGAAAAGAG--GTGCACAAT-----  
-----GTCTGGGCCACA---CATGCCTGCGTACCCACAGAC---  
CCCAACCCACAGGAAATACATCTAGAA-----AATATAACAGAAGATTTTAAT-----  
-----ATGTGGAAAAATAACATGGTAGAGCAAATGCATGAAGATATA---  
ATTAGTTTATGGGATCAAAGCCTA---AAGCCATGTGTAAAATTA---  
ACCCCACTCTGCGTTACCTTAACTGTACTGCTAAAACTCCACGGAACAAAGCTCC-----  
-----CAAAGCTCCCTGGAGGAAGAGTCAGGGGCAATACAA---  
AACTGTTCTTTCAATATGACCACAGAAGTAAGA-----  
GACAAGAAGCTAAAAGTACATGCACTT---TTTTATAGACTTGATATAGTACCAATCAATAGT-----  
-----  
-----  
AGTGATAACGAGAGCAGTGAGTACAGGCTAATAAATTGTAATACCTCAACCATTACACAG---  
GCTTGTCCAAAGGTATCTTGAGATCCAATTCCCATACATTATTGTGCCCCAGCTGGTTATGCGATTCTAAGGT  
GTAAT---CAGAAAGATTTCAAT-----GGGACAGGGCCATGTCATAAT-----  
-GTCAGC---ACAGTACAATGTACACACGGAATTAAGCCAGTGGTATCAACT---  
CAATTGCTGTTAAATGGCAGCCTAGCAGAAGGAGAT-----  
ATAATAATCAGATCTCAAAATATCTCAGATAAT-----ACAAAGACCATAATAGTGCACCTCAAT---  
-----GAATCTGTACAG-----ATTAATTGCACAAGACCCAACAACAATACAAGAAAA-----  
-AGTATACATTTA-----GGACCAGGACAAGCA---TTC-----TATGCAACGGGTGCG-----  
-----ATAATAGGAGATATA-----AGAAAGGCACATTGC---AACATTAGTGGGACA---  
CAATGGAATAAACTATGGAACGGGTGCGGGAAAAGTTACGG-----TCTTATTTTAAT---

-----AATAAAACAATAACATTTAAC-----  
TCATCCTCAGGAGGAGATCTAGAAATTACA--ACGCATAGTTTTAATTGTAGAGGTGAA---  
TTTAAACAGCTCCAGGCAAGAGTCCTGGCTGTAGAAAGATACCTAAAGGATCAACAGCTCCTAGGGATTTGGG  
GCTGCTCTGGAAGAACTCATCTGCACCACTAACGTGCCTTGGAACTCTAGTTGGAGT-----  
-----AATAGATCTCAGGAGGACATTTGG-----AAA-----  
AACATGACCTGGATGGATTGG--GAAAAAGAGATTGACAATTACACAGACACAATATAC---  
AGGTTACTTGAACAATCGCAGAACCAACAGGAA-----  
-----  
CAGAATGAAAAAGAATTACTGGCATTGGACAAGTGGGCAAGCCTGTGGAATTGGTTTGACATATCAAATTGGC  
TGTGGTATATAAAAAATATTCATAATGATAATAGGAGGCTTAATAGGTTTAAGAATAGTTTTTTGCT---  
GTGCTTTCTATAGTA-----AATAGAGTTAGGAAGGGATACTCACCT-----  
TTATCATTAGCTATTAGCTTGCTTGATACCATAGCAATAGTAGTAGCTGAG---  
GGGACAGATAGAGTTATAGAAGCTTTGCAAAGAGCTGGTAGAGCT-----  
-----GTTCTCAACGTG-----CCTAGAAAAATAAGACAGGGCTTGGAAAGGATTTTGCTA---TAA  
>HM068554  
GCA---AAC-----  
AATTTGTGGGTCACAGTCTATTATGGGGTACCTGTGTGG---AAAGAAGCAACC---  
ACTACTCTATTCTGTGCATCAGATGCTAAAGCATATGACAGGGAG--GTACATAAT-----  
-----GTCTGGGCTACA---CATGCTTGTGTACCCACAGAT---  
CCCAATCCACAGGAAGTAGTTCTGGAA-----AATGTAACAGAAAATTTTGAT-----  
-----ATGTGGAAAAATAGCATGGTAGAACAAATGCATACAGATATA---  
ATCAGTTTATGGGAGCAAAGCCTA--AAGCCGTGTGTGAAGATA---  
ACCCCACTCTGTGTACCTTACATTGTGATAATGCCAATAGTGACTCTACAAAC-----  
-----  
-----AGCACCTTGGCGGAAGAGCCTGGAGTAATACAA---  
AACTGTTCTTTCAACACGACCACAGAATTAACA-----  
GATAAGAAGCAGAAAGAATATGCACCT--TTTTATAGACTTGATATAGTACCACTCAATAGT-----  
-----  
-----  
AGTAACAATAAAGAATACAGGCTAATAAATTGTAATACCTCAACCATTACACAG---  
GCTTGTCCAAAGGTGTCTTGGGATCCAATTCCCATACATTATTGTGCTCCAGCTGGTTATGCGATTCTAAAGT  
GTAAT--GAAAAAGGGTTCAAT-----GGGGCGGGGCCATGCAAGAAT-----  
-GTCAGC--ACAGTACAATGTACCCATGGAATTAAACCAGTGGTATCAACT---  
CAATTGTTGTTAAATGGCAGCCTAGCAGAGGGAGAA-----  
ATAATAATTAGATCTCAAAATATCTCAGATAAT-----GCAAAAACCATAATAGTACATCTTAAT---  
-----GAATCTGTACAG-----ATTAATTGTACAAGACCCAACAATAACACAAGGAAG-----  
-AGTATACGTTTC-----GGACCAGGACAAGCA--TTT-----TATGCAACAGGAGAA-----  
-----ATAATAGGAGACATC-----AGAAAGGCACATTGC--AACATTAGTGGAGAA---  
CAATGGAATAAAACGGTAACAAGGGTAAAAGCAAAGCTAAGG-----TCTTATTTTCT---  
-----AATCATACAATAATAAACTTTAAT-----  
TCATCATCAGGAGGGGACCTAGAAATTACA--ACGCATAGTTTTAATTGTAGAGGAGAA---  
TTTAAACAGCTCCAGGCAAGAGTCCTGGCTGTGGAAGATACCTAAAGGATCAACAGCTCCTAGGGCTTTGGG  
GCTGCTCTGGAAGAACTCATCTGCACCACTGATGTGCCCTGGAACGAGACTTGGAGT-----  
-----AATAAATCTCAGAATGAGATCTGG-----GAT-----  
AACATGACCTGGATGCAGTGG--GAAAAAGAGATTAGCAATTACTCAGACGAAATATAC---  
AGGTTAATTGAAAAATCGCAGATCCAGCAGGAA-----  
-----  
TGGAATGAACAAGAATTATTGGCATTGGACAATGGGCAAGTCTGTGGAATTGGTTTGACATATCAAAGTGGC  
TGTGGTATATAAGAATATTCATAATGATAATAGGAGGCTTGATAGGATTAAGAATAATTTTTGCT---  
GTGCTTTCCTTAGTA-----AATAGAGTTAGGAGGGGATACTCACCT-----  
TTGTCAATTAGCTATTAGCTTGCTTAATACCACAGCAATAGTAGTAGCTGAG---  
GGGACAGATAGAGGTCTAGAAGCTTTGCACAGAGTTGGTAGAGCT-----  
-----ATTCTCAACATA-----CCTAGAAGAATAAGACAGGGCTTGGAAAGGGCTTTGCTA---TAA  
>JX140671  
GCT---GAA-----  
AATTTGTGGGTCACAATCTATTATGGGGTACCTGTGTGG---AAGGAAGCAACC---  
ACTACTCTATTCTGTGCATCAGATGCTAAAGCATATGAAGAAGAG--GTACATAAT-----  
-----GTCTGGGCTACA---CATGCCTGTGTACCCACAGAT---  
CCCAATCCACGAGAAGTACTTCTAGTA-----AATGTAACAGAAAATTTTAAAC-----  
-----ATGTGGAAAAATAACATGGTAGAACAAATGCATGAAGATATA---

ATCAGTTTATGGGATCAAAGCCTA---AAACCATGTGTAAAGTTA---  
 ACCCCACTCTGTGTTACTTTTATACTGTGTGAATTACAATGCCACCAATGCCACCAGTGGC-----  
 -----  
 -----TTTAACAATAGCACCCCTAAAAGAAGAGTCAGGGGCAATACAA---  
 AACTGTTCTTTCAATATAACCACAGAAGTAAGA-----  
 GATAAGCATCAGAAAGTATTTGCACTT---TTTTATAAACTTGATATAGTATCAATTAATAAC-----  
 -----  
 -----  
 AGAAGTGAATACAGGTTAATAAATTGTAATACCTCAACCATTACACAG---  
 GCTTGTCCAAAGGTATCTTGGGATCCAATTCCCATACATTATTGTGCTCCAGCTGGTTTTGCCTTCTAAAGT  
 GTAAT---GATAAAAACCTTCACT-----GGGATGGGGATATGCAAAAAT-----  
 -GTCAGC---ACAGTACAATGTACACATGGGATTAAACCAGTGGTATCAACT---  
 CAATTATTGTTAAATGGCAGCCTAGCAGAAGGAGAG-----  
 ATAGTAATCAGGTCTCAAAAATATCTCAGATAAT-----GCAAAAACCATAATAGTACACTTTAAT----  
 -----CAATCTGTACAG-----ATTAATTGTTCAAGACCTAACAACAATACAAGAAAA-----  
 -AGTATACCCATG-----GGGCCAGGAAAAAGCA---TTC-----TATACAACAGGAGAA-----  
 -----ATAATAGGAGACATC-----AGAAAGGCACACTGT---AACATTAGTAGAACA---  
 CAATGGAATGAAACATTGGAAAAGGTAAAGGAAAAGTTAAGG-----GATCATTTTCCT----  
 -----AATAAAACAATAAAATTTAAC-----  
 TCATCCTCAGGAGGGGACCTAGAAAGTTACA---ATGCATAGTTTTAATTGTAGAGGAGAA---  
 TTCAAACAGCTCCAGGCAAGAGTCCTGGCTGTAGAAAAGATACCTAAAGGATCAACAGCTCCTAGGGCTTTGGG  
 GCTGCTCTGGAAGAACTCATCTGTACCACTAGTGTGCCTTGGAACTAGTTGGAGT-----  
 -----AATAAATCTCTGGACCAGATTTGG-----GAC-----  
 AACATGACCTGGATGCAGTGG---GAAAAGAGATTAGCAATTACTCAAATGAAATATAC---  
 AGGTTAATTGACCAATCGCAGAACCAGCAGGAA-----  
 -----  
 AAGAATGAACAAGAATTGTTGGCATTGGACAAATGGACAAGTCTGTGGAATTGGTTTAACATATCAAATTGGC  
 TGTGGTATATAAAAATATTCTAATGATAGTAGGAGGCTTGATAGGCTTAAGAATAGTTTTTTGCT---  
 GTGCTTTCTATAGTA-----AATAGAGTTAGGAAGGGATACTCACCT-----  
 CTGTCTTTTGCTATAAGCTTGTTTAACACCACAGCAGTAGTAGTAGCTGAG---  
 GGGACAGATAGAATTCTAGAAGTTTTGCAAGGAGCTGGTAGAGCT-----  
 -----GTTCTCAACATA-----CCTAGAAGAATAAGACAGGGCTTTGAAAGGGCTTTGCTA---TAA  
 >KJ883138  
 GCT---GAA-----  
 AATTTGTGGGTCACAGTCTATTATGGGGTACCGGTGTGG---AAGGAAGCAACC---  
 ACTACTCTATTCTGTGCATCAGAAGCCAAAGCATATGAGGAAGAG---GTACATAAT-----  
 -----GTCTGGGCTACA---CATGCCTGTGTACCCACAAAT---  
 CCCAATCCACAAGAAGTATTTCTAGAA-----AATGTAACAGAAAAGTTTAAC-----  
 -----ATGTGGAAAAATAACATGGTAGAACAATGCATGAAGATATA---  
 ATCAGTTTATGGGATCAAAGCCTA---AAACCATGTGTAAAGTTA---  
 ACCCCACTCTGTGTTACTTTAACTGTGTGAATTACAATACCACCAATGCCACCAGTAGC-----  
 -----  
 -----GATAACAATAGCACCCCTAAAAGAAGAGTCAGGGGCAATACAA---  
 AACTGTTCTTTCAATATGACCACAGAAGTAAGA-----  
 GATAAGCAGAAGCAAGTATCTGCACTT---TTTTATAAACTTGATATAGTGCCAATTAATAGT-----  
 -----  
 -----  
 AACACAGTACTTTCTACAGGTTAATAAATTGTAATACCTCAACCATGACGCAG---  
 GCTTGTCCAAAGGTATCTTGGGATCCAATTCCCATACATTATTGTGCTCCAGCTGGTTATGCGATTTTAAAGT  
 GTAAT---GATAAAAACCTTCAAT-----GGGACGGGGCCATGCACAAAT-----  
 -GTCAGC---ACAGTACAATGTACACATGGGATTAAACCAGTAGTATCAACT---  
 CAATTATTGTTAAATGGCAGCCTAGTAGAAAAAGAT-----  
 ATAGTAATTAGTTCTCAAAAATATCTCAGATAAT-----GCAAAAATAATAATAGTACACTTTAAT----  
 -----CAATCTGTACAG-----ATTAATTGTACAAGACCTAACAACAATACAAGAAAA-----  
 -GGTATACATATG-----GGACCAGGGAGAAACA---TTT-----TATGCAACAGGAGAA-----  
 -----ATAATAGGAGACATC-----AGAAAGGCACATTGT---AACATTAGTAAACA---  
 CAATGGAATCACACGTTAAGCCAGGTAAAGAAAAAGTTAAGG-----GATCATTTCCCT----  
 -----AATAAAACAATAACATTTAAC-----  
 TCATCCTCAGGAGGGGACCTAGAAAGTTACA---ATGCATAGTTTTAATTGTAGAGGAGAG---  
 TTCAAACAGCTCCAGGCAAGAGTCCTGGCTGTAGAAAAGATACCTAAAGGATCAACAGCTTCTAGGGCTTTGGG

GCTGCTCTGGAAACTCATCTGCACCACTAATGTGCCTTGGAAACGCTAGCTGGAGT-----  
-----AATAAATCTCTGGAAAAGATTTGG-----GAG-----  
AACATGACCTGGATGGAATGG---GAAACAGAGATTAGCAATTACTCAAATGAAATATAC---  
AAGTTAATTGAACAATCGCAGAACCAGCAGGAA-----  
-----  
AAGAATGAACAAGAATTGTTGGCATTGGACAAATGGGCAAGTCTGTGGAGTTGGTTTGACATATCAAACCTGGC  
TGTGGTATATAAGACTATTCTAATGATAGTAGGAGGCTTGATAGGCTTAAGAATAGTTTTTTGCT---  
GTGCTTTCTATAGTA-----AATAGAGTTAGGAAGGGATACTCACCT-----  
CTGTCTTTTGCTATTAGCTTGCTTAACACCACAGCAATAGTAGTAGCTGAG---  
GGGACAGATAGACTTCTAGAAGTTTTGCAAGGAGCTGGTAGAGCT-----  
-----GTTCTCAACATA-----CCTAGAAGAATAAGACAGGGCTTAGAAAGGCTTTTTGCTA---TAA  
>DQ979023  
GCT---ACA-----  
AAGGACTTGTGGGTACAGTTTATTATGGGGTACCTGTGTGG--AAGGAAGCAACC---  
ACTACTCTATTTTGTGCATCAGATGCAAAGGATATGTACAAGAG---GCACATAAT-----  
-----GTCTGGGCTACA---CATGCCTGTGTACCCACAGAC---  
CCCAACCCACAGGAAATATATCTGGAA-----AATGTAACAGAAAATTTTAAT-----  
-----ATGTGGGAAAATAACATGGTAGAACAAATGCATGAAGATATA---  
ATCAGTCTATGGGATCAAAGCCTA---AAGCCATGTGTAAAGTTA---  
ACCCCACTCTGTGTTACTCTAAATTGTACTAATGCCAAGGGCAATTTCACTAGCCAAAGCAGCACT-----  
-----  
-----GAGCAAAACAGCACCCCTGAAGGAAGAGGAAGGAGCAATAAAA---  
AACTGTTCTTTCAATATGACCACAGTAGTAAAT-----  
GACAAGAAGTTAAAAGTACAGTCACTT---  
TTTTATAGACTTGATATCGTACCCTCAACAATAATAATAAGAATATTAGCAACAATGACACT-----  
-----  
ACTAGTAACAATACTAGTAGCTATGAGGAATATAGACTAATAAATTGTAATACCTCAACCATTAAACAG---  
GCTTGTCCAAAGGTGTCTCTGGGATCCAATTCCCATACATTATTGTGCTCCAGCTGGTTATGCGATTCTAAAAT  
GTAAT---GAGGAAGAGTTCAAT-----GGGACGGGGCCATGCAGGAAT-----  
-GTCAGC---ACAGTACAATGTACACATGGAATTAAGCCAGTTGTATCAACT---  
CAACTGCTATTAAATGGCAGCCTAGCAGGAGAAGAT-----  
ATAATAATCAGATTTCAAACATCTCAGATAAT-----ACAAAGACCATAATAGTACACCTTAAT---  
-----GAATCTGTACAG-----ATTAATTGTACAAGACCCAACAACAATACAAGGAAA-----  
-AGTATACGCATA-----GGGCCAGGACAAGCA---TTC-----TATGCAACAGGTGAT-----  
-----ATAATAGGAGATATA-----AGAAAGGCACATTGT---AACGTTAGTGGAGCA---  
CAATGGAATAAACTGTAGAACGGATAAGTGCAAAGTTAAAG-----TCTTATTTCCCA-----  
-----AATAAAACAATACAATTTAAC-----  
TCATCCTCAGGAGGGGATCTAGAAATTACA--ATGCATAGTTTTAATTGTAGAGGAGAA---  
TTTAAACAGCTCCAGGCACGAGTCCCTGGCTCTGGAAAGATACCTAAAGGATCAACAGCTCCTAGGGATTTGGG  
GCTACTCTGGAAACTCATCTGCACCACTAATGTCCCCTGGAACTCTAGTTGGAGT-----  
-----AATAAAACCTATGACCAGATTTGG-----GAC-----  
AACATGACCTGGATGGAATGG---GAAAAGAGATTGGTAATTACTCAAACACAATCTAC---  
CGGTTACTTGAACAATCGCAAAACCAGCAGGAA-----  
-----  
ATAAATGAACAAGAATTATTATCCTTGGACAAGTGGGCAAGTCTGTGGAGTTGGTTTGACATAACAAATTGGC  
TGTGGTACATAAGAATATTCTAATGATAGTAGGAGGCTTGATAGGCTTAAGGATAGTTTTTTGCT---  
GTATTTTCTATATTA-----AATAGAGTTAGGAAGGGATACTCACCT-----  
CTATCATTTGGCTATTAGCTTGTTTAATACCATAGCAATAGTAGTAGCTGAG---  
GGGACAGACAGAGTTATAGAAGTTTTGCAAGAATTGGTAGGGCT-----  
-----ATTATCAACGTA-----CCTAGAAGAATCAGACAGGGCTTTGAAAGATCTTTGCTA---TAA  
>DQ979024  
GCT---GCA-----  
GACAACTTGTGGGTACAGTATATTATGGGGTACCTGTGTGG--AAAGAAGCAACC---  
ACTACTCTATTTTGTGCATCAGATGCTAAAGGATATGTACAAGAG---GCACATAAT-----  
-----GTCTGGGCTACA---CATGCCTGTGTACCCACAGAC---  
CCCAACCCACGGGAAATATTTCTGGAA-----AATGTAACAGAAGATTTTAAT-----  
-----ATGTGGAAAAATAACATGGTAGAACAAATGCATGAAGATGTA---  
ATCAGTTTATGGGATCAAAGCTTA---AAGCCATGTGTAAAGTTA---  
ACCCCACTCTGTGTTACTTTAAACTGTACTGATGCAAGCCAAAACAGCACCGACCTCTAACAGC-----  
-----

-----ACCACCCCCAACACCCTGGTAGAAGAGAAAGGGGAAATAAAA---  
 AACTGTTCTTTTAATATGACCACAGAAATAAGA-----  
 GACAAGAGGCAGCAAGTACATGCACTT---TTTTATAGACTTGATATAGTACCAATAGATGGCAAC-----  
 -----  
 -----  
 AATAACAGTAGTAGTGAATATAGGCTAATAAATTGCAATACCTCAACCATTAAACAG---  
 GCTTGTCCAAAGGTATCTTGGGATCCAATTCACATACATTATTGTACTCCAGCTGGTTATGCGATTCTAAAGT  
 GTAGA---GATATAAAGTTCAAT-----GGAACAGGGCCATGCAAAAAT-----  
 -GTCAGC---ACAGTACAATGTACACATGGAATCAAGCCAGTGGTGTCCACT---  
 CAATTGTTGTTAAATGGCAGCCTAGCAGTAGGAGAT-----  
 ATAATAATCAGATCTCAAAATATCTCAGACAAT-----GCAAAAACCATAATAGTACACCTTAAT----  
 -----GAATCTGTACAA-----ATTAATTGTACAAGACCCAACAACAATACAAGAAGT-----  
 -ATA---CCTATA-----GGACCAGGACAAGCA---TTC-----TATGCAACAGGTGAC-----  
 -----ATAATAGGAGACATA-----AGAAAGGCACATTGT---AACATTAGTGGATTA---  
 CAATGGGGTAACACTCTAAAAGGGGTACGTGAAAAATTACAG-----CCTTATTTTCCT----  
 -----AATAAGACAATAGCTTTTAAAC-----  
 TCATCCTCAGGAGGGGACCTAGAAATTACA--ATGCATAGTTTTAATTGTAGAGGAGAA--  
 TTTAAGCAGCTCCAGGCAAGAGTCCTGGCTGTGGAAAGATACCTAAAGGATCAACAGCTCCTAGGGATTTGGG  
 GCTGCTCTGGAAGAACTCATCTGCACCACTAGTGTGCCCTGGAACCTAGTTGGAGT-----  
 -----AATAGATCTCAGGAGGAGATTTGG-----GAA-----  
 AACATGACATGGATGGAATGG---GAAAGAGAGGTTGGCAATTACACAGACATAATATAC---  
 AGTTTACTTGAACAATCGCAGAACCAACAGGAA-----  
 -----  
 AAGAAATGAGAAAGACTTGTTGGAATTTGACAAGTGGGCAAGCCTGTGGAATTGGTTTGACATAACAAAATGGC  
 TGTGGTATATAAAAATATTTCATAATGATAGTAGGAGGCTTAATAGGATTAAGAATAGTTTTTTGCT---  
 GTGCTTTCTATAGTA-----AATAGAGTTAGGAAGGGATACTCACCT-----  
 TTGTCATTAGCTATTAGCTTGCTTAATACTACAGCAATTGTAGTAGCTGAG---  
 GGGACAGATAGAGTTATAGAAGTCTTGCAAAGAGCTGGTAGAGCT-----  
 -----ATTCTCCACATA-----CCTAGAAGAATAAGACAGGGCTTAGAAAGGGCTTTGCTA---TAA  
 >AF075703  
 GCT---GCG-----  
 GATGACTTGTGGGTCACAATCTATTATGGGGTACCTGTGTGG---AAAGAAGCAAAC---  
 ACCACTTTATTCTGTGCATCAGATGCTAAATCATATGAAAAAGAA--GTACATAAT-----  
 -----GTCTGGGCTACA---CATGCCTGTGTACCCACAGAC---  
 CCCAATCCACAAGAAGTAGCTCTA-----AATGTGACAGAAAATTTTAAT-----  
 -----ATGTGGGAAAATGACATGGTAGAACAATGCATAAAGATATA---  
 ATCAGTTTATGGGATCAAAGTCTA--AAGCCATGTGTAAAGCTA--  
 ACCCCACTCTGTGTTACTTTAAATTGTACTAATGCCACTACCACCAATGACACTCTCTCTGAC-----  
 -----  
 -----CAAAGCAGTACCCTGAAGGAAGAACCAGGGGCAATACAA---  
 AACTGTTCTTTCAATATGACCACAGAAGTAGAA-----  
 GATAAGAAGCAGAAAGTACATGCGCTT---TTTTATAGACTTGATATAGAACCAATCAGCAAT-----  
 -----  
 -----  
 AATAATAGCAGGGAAGAATATAGGCTAATAAATTGTAATACCTCAACCATTACACAG---  
 GCTTGTCCAAAGGTATCTTGGGATCCAATTCACATACATTATTGTGCTCCAGCTGGTTATGCGATTCTAAAGT  
 GTAAG---GATAAAAGGTTCAAT-----GGGACGGGGCCATGTAGGAAT-----  
 -GTCAGC---ACAGTACAATGTACACATGGAATTAGGCCAGTGGTATCAACT---  
 CAATTGTTGTTAAATGGCAGCCTATCAGAAGGAGGT-----  
 ATAATAATCAGATCTCAAAATCTCTCAGATAAT-----GCAAAAACCTATAATAGTACACCTTAAT----  
 -----GAATCTGTACAG-----ATCAATTGTACAAGACCCAACAACAATACAAGAAAA-----  
 -AGTATACGTATA-----GGACCAGGACAATCA---TTT-----TATGCAACAGGAGAA-----  
 -----ATAATAGGAGACATA-----AGAAAGGCACATTGT---AACATTAGTGGAGAA---  
 CAATGGAATAAACTTTAGACCGAGTAAAGGCAGAGTTAAAG-----CTTCATTTT-----  
 -----AATAAAACAATACAATTTAAC-----  
 TCATCCTCAGGAGGGGACCTAGAAATTACA--ATGCATAGTTTTAATTGTAGAGGAGAA--  
 TTTAAACAGCTCCAGGCAAGAGTCCTGGCTGTGGAAAGATACCTAAAGGATCAACAGCTCCTAGGGCTTTGGG  
 GATGCTCTGGAAGAACTCATCTGCACCACTAATGTGCCCTGGAACCTAGTTGGAGT-----  
 -----AATAAATCTCAGGATGAGATTTGG-----AAT-----  
 AACATGACCTGGATGCAGTGG---GAAAAAGAGATTAGCAATTACTCAAAAACAATATAC---

ATGTTAATTGAAAAATCGCAGAGCCAGCAGGAA-----  
 -----  
 CGGAATGAACAAGAATTGTTGGAATTGGACAAGTGGGATAGTCTGTGGAGTTGGTTTGATATAACAACTGGT  
 TATGGTATATAAAAAATATTCATAATGATAGTAGGAGGCTTGATAGGCTTAAGAATAGTTTTTTGCT---  
 GTGCTTTCTATAGTA-----AATAGAGTTAGGAAGGGATACTCACCT-----  
 TTGTCATTAGCTATTAGCTTGTTTAATACCACAGCAATAGTAGTAGCTGAG---  
 GGGACAGATAGAGTTATAGAAGCTTTGCAAAGAGCTGTTAGAGCT-----  
 -----GTTCTCAACATA-----CCTAGAAGAATAAGACAGAGAGTAGAAAGGGCTTTGATA---TAA  
 >KU168276  
 GCT---AAA-----  
 GACAACTTGTGGGTCACAGTCTATTATGGGGTACCTGTGTGG---AAAGAAGCAACC---  
 ACTACTCTATTTTGTGCATCAGATGCTAAAGCATATGAAAGAGAG---GTACATAAT-----  
 -----GTCTGGGCTACA---CATGCCTGTGTACCCACAGAC---  
 CCCAATCCACAAGAAGTAGATCTGACA-----AATGTAGCAGAAAATTTTGAT-----  
 -----ATGTGGAAAAATAACATGGTAGAACAAATGCATACAGATATA---  
 ATCAGTTTATGGGATCAAAGTCTA---AAGCCATGTGTGAAGTTA---  
 ACCCCACTCTGTGTTACTTTAAACTGTACTAGTGCCACCAATGACACTGGCCCAACAGCACC-----  
 -----  
 -----CTGAAGGAAGATCCAGGGGCAATACAA---  
 AACTGTTCTTTTAATATGACCATAGAAGTAAGA-----  
 GATAAAAAGCAGAAGGTACATGCACCT--TTTTATAGGCTTGATATAGTACCAATCAGTAATAATAATAAC-  
 -----  
 -----  
 AGCAGTAACAGTACAGAATATAGGCTAATAAATTGTAATACCTCAACAATTACACAG---  
 GCTTGTCCAAAGGTATCTTGGGATCCAATTCCCATACATTATTGTGCTCCAGCTGGTTATGCGATTCTAAAAT  
 GTAAA---GATAAAAGGTTCAAT-----GGGACGGGGACATGTAAGAAT-----  
 -GTCAGC---ACAGTACAATGTACACACGGAATTAAACCAGTGGTGTCAACT---  
 CAATTGTTGTTAAATGGCAGTTTAGCAGAGGAAAGT-----  
 ATAATAATCAGATCTCAAAATATCTCAAATAAT-----GCAAAAACCATAATAGTACACCTTAAT----  
 -----GAATCTGTACAG-----ATTAATTGTACAAGACCCAACAATAATACAAGAAAG-----  
 -AGTATACATATA-----GGACCAGGACAAGCA---TTT-----TATACAACAGGAGAA-----  
 -----ATAATAGGAGACATC-----AGAAAGGCACATTGT---AACGTTAGTGGACAA---  
 CAATGGAATAAACTTTAGAACAGGTAAAAGTAGAGTTAAGG-----TCTCACTTCCCT---  
 -----AATAGAACAATACAATTTAAC-----  
 TCATCCTCAGGAGGGGACCTGGAAATTACA--ATGCATAGTTTTAATTGTAGAGGAGAG---  
 TTTAAACAGCTCCAGGCAAGAGTCCCTGGCTGTGGAAAGATACCTACAGGATCAACAGCTCCTAGGGATTTGGG  
 GCTGCTCTGGAAGAACTCATCTGCACCACTAATGTGCCCTGGAACCTCTAGTTGGAGT-----  
 -----AATAAATCTCGGAAGGAGATTGG-----GAA-----  
 AATATGACCTGGATGGAGTGG--GAAAAAGAGATTAGCAATTACTCAAACGAAATATAC---  
 AGGTTACTTGAAACATCACAGAACCAGCAGGAC-----  
 -----  
 AAGAATGAACAAGAATTATTGGCATTGGACAAGTGGGCAAGTCTGTGGAATTGGTTTGACATATCAAACCTGGC  
 TGTGGTATATAAGAATATTATAATGATAGTAGGAGGCTTGATAGGCTTAAGAATAGTTTTTTGCT---  
 ACGCTGTCTATAGTA-----AATAGAGTTAGGAAGGGATACTCACCT-----  
 TTGTCATTAGCTATTAGCTTGCTTGATACCACAGCAATAGTAGTAGCTAGG---  
 GGGACAGATAGAGTTATAGAAATTTGCAAAGAATTGGTAGAGCT-----  
 -----GTTCTCAACGTA-----CCTAGAAGAATAAGACAGGGCTTCGAAAGGGCTTTGCTA---TAA  
 >AJ249238  
 GCT---GCA-----  
 GACAACTTGTGGGTTACAGTCTATTATGGGGTACCTGTGTGG---AAAGAAGCAACT---  
 ACTACGTTATTTTGTGCATCAGATGCTAAAGGATATGAAAGAGAA---GTGCATAAT-----  
 -----GTCTGGGCCACA---CATGCCTGCGTACCCACAGAC---  
 CCCAACCACAGGAAATATGGCTGAAA-----AATGTAACAGAAAATTTTGAT-----  
 -----ATGTGGAAAAATAACATGGTAGAACAAATGCATGAAGATATA---  
 ATCAGTTTATGGGATCAAAGCCTA---AAGCCATGTGTAAAGTTA---  
 ACTCCACTCTGTGTTACTTTTACACTGTAGTGATGTCAATATCACTAGTAATGCCACTACCACT-----  
 -----  
 -----AATGACACCAGCACCCCGGAAGAGTCAGGGGCAATACAA---  
 AACTGTTCTTTCAATATGACCACAGAAGTAAAA-----  
 GACAAGAAGCTGAGAGTAAATGCACTC---TTTTATAAACTTGATATAATACCAATCAATAAC-----

-----  
-----  
AGCAGTAGTAGTGACTATAGGCTAATAAATTGTAATACCTCAACCATTAAACAG---  
GCTTGTCCAAAGGTATCTTGGGATCCAATTCCCATACATTATTGTGCTCCAGCTGGTTATGCGATTCTAAAGT  
GTAGG---GATCCAAGGTTCAAT-----GGGACAGGGGCCATGCAAGAAT-----  
-GTCAGC---ACAGTACAATGTACACATGGAATTAGGCCAGTGGTATCAACT---  
CAATTGCTGTTAAATGGCAGCCTGGCAGAAGAAGAT-----  
ATAATAATCAGATCTCAAAATATCTCAGATAAT-----GCAAAAACCATAATAGTACACCTTAAT----  
-----GAAAGTGTACAG-----ATTAATTGTACAAGACCCAACAACAATACAAGAAAA-----  
-AGTATACATTTA-----GGACCAGGACAAGCA---TTC-----TATGCAACAGGTGAT-----  
-----ATAATAGGAGATATA-----AAAAAGGCATATTGT---GAAATTAATGGAACA---  
CAATGGAGTAAAACTAAAAACACAGGTACAAGAAAAGTTACGG-----GCTCTTTTT-----  
-----AATAAAACAATAAAATTTAAC-----  
CAATCCTCAGGAGGGGACCTAGAAATTACA---ATGCATAGTTTTAATTGTAGAGGAGAG---  
TTCAAACAGCTCCAGGCAAGAGTCCTTGCTGTAGAAAAGATACCTAAAGGATCAACAGCTCCTAGGGATTTGGG  
GCTGCTCTGGAAGAACTCATCTGCACCACTAACGTGCCTTGGAACACTAGTTGGAGT-----  
-----AATAAATCTCATGATGAGATTTGG-----AAC-----  
AACATGACCTGGATGCAGTGG---GAAAAAGAGATTAACAATTACTCAAACACAATATAC---  
AGGTTAATTGAAGAATCGCAGAACCAACAGGAA-----  
-----  
AAGAATGAACAAGAATTATTGGCATTGGACAAATGGGCAAGTCTGTGGAGTTGGTTTGACATATCAAATTGGC  
TGTGGTATATAAAAATATTCTAATGATAGTAGGAGGAATGATAGGCTTAAGAATAGTTTTTTGCT---  
GTGCTTTCTATAGTA-----AATAGAGTTAGGAAGGGATACTCACCT-----  
TTGTCAATTAGCTATTAGCTTGCTTAATACCACAGCAATAGTAGTAGCTGAG---  
GGAACAGATAGAGTTATAGAAGTTTTGCAAAGAGCTGGTAGAGCT-----  
-----GTTCTCAACGTA-----CCTAGAAGGATAAGACAGGGCTTAGAAAGGAGTTTGCTA---TAA  
>AY231157  
GCT---GCA-----  
GACAACTTGTGGGTCACAGTCTATTATGGGGTACCTGTGTGG---AAAGAAGCAACC---  
ACTACCTTATTCTGTGCATCAGATGCTAAAGCATATGACAGAGAA---GTACATAAT-----  
-----GTCTGGGCTACA---CATGCCTGTGTACCCACAGAC---  
CCCAACCCACAAGAAATAACTCTGGTA-----AATGTAACAGAAAATTTTAAT-----  
-----ATGTGGAAAAATGATATGGTAGAACAAATGCATACAGATATA---  
ATCAGTTTATGGGATCAAAGCCTA---AAGCCATGTGTGAAGTTA---  
ACCCCACTCTGTGTTACTTTAAGCTGTACTAATGCCAATGTCTCTAATGCCTCTAATCAAAACAATGCC---  
-----  
-----ACTGCCTCTAATCAAAACAGCACCCCTGGAGGAACCAGGGGCAATACAA---  
GACTGTTCTTTCAATATGACCACAGAAGTAAGA-----  
GATAAGAAGCAGAAAGTACATGCACTT---TTTTATAGCCTTGATATAGTACCAATCAGCAAT-----  
-----  
-----  
GGCAAAAACAGTAGCGAATATAGGCTGATAAATTGTAATACCTCAACCATTACACAG---  
GCTTGTCCAAAGGTATCTTGGGATCCAATTCCCATACATTATTGTGCTCCAGCTGGTTATGCGATTCTAAAGT  
GTAAT---AATAAAATGTTCAAT-----GGGACGGGGCCATGCAACAAT-----  
-GTCAGC---ATAGTACAATGTACACATGGAATTAAACCAGTGGTATCAACT---  
CAATTGTTGTTAAATGGCAGCCTAGCAGAAGAAAGT-----  
ATAATAATCAGATCTCAAAATATCTCAGATAAT-----GTAAAAACCATAATAGTACACCTTAAT----  
-----GAATCTGTACAG-----ATTAATTGTACAAGACCCAACAACAATACAAGAAAA-----  
-AGTATACATTTA-----GGACCAGGACAAGCA---TTC-----TATGCAACAGGAGAT-----  
-----ATAATAGGAGACATA-----AGAAAGGCATATTGT---AACATTAGTGAACA---  
CAATGGAATAAACTTTAGAACAGGTAAAGGGAGAGTTACAG-----TCTAAGTTCCT---  
-----AATAAAACAATACTATTTTAAC-----  
TCATCCTCAGGAGGGGACCTAGAAATTACA---ATGCATAGTTTTAATTGTAGAGGAGAA---  
TTTAAACAGCTCCAGGCAAGAGTCCTGGCTGTGGAAAAGATACCTAAAGGATCAACAGCTCCTAGGGCTTTGGG  
GCTGCTCTGGAAGAACTCATCTGCACCACTGATGTGCCCTGGAACCTAGTTGGAGT-----  
-----AATAGATCTCAGGATGAGCTTTGG-----AAT-----  
AACATGACCTGGATGGAGTGG---GAAAAAGAGATTAGTAATTACTCAAACACAATATAC---  
AGGTTAATTGAAAAGTCGCAGAACCAGCAGGAA-----  
-----  
ATGAATGAAAAAGACTTATTGTCATTGGACAAGTGGGCAAGTCTGTGGAGTTGGTTTGATATAACAAACTGGC

TGTGGTATATAAAAAATATTTCATAATGATAGTAGGAGGCTTGATAGGCTTAAGAATAGTTTTTTGCT---  
 GTGCTTACTATAGTA-----AAAAGAGTTAGGAAGGGATACTCACCT-----  
 TTGTCAATTAGCTATTAGCTTGCTTAATACCACAGCAATAGTAGTAGCTGAG---  
 GGGACAGATAGAATTATAGAAGCTTTGCAAAGAGCTGGTAGAGCT-----  
 -----GTTCTCAACATA-----CCTAGAAGAATAAGACAGGGCGCAGAAAGGGCTTTGCTA--TAA  
 >KU168274  
 GCT---GCA-----  
 GACAACTTGTGGGTTACAGTTTATTATGGGGTACCTGTGTGG--AAAGAAGCGACC---  
 ACTACTCTATTTTGTGCATCAGATGCTAAAGGATATGAACAAGAG--GTACATAAT-----  
 -----GTCTGGGCTACA---CATGCCTGTGTACCCACAGAC---  
 CCCAATCCACAGGAAATAAGATTGAAA-----AATGTAACAGAAAATTTTGAT-----  
 -----ATGTGGAAAAATAACATGGTAGAACAAATGCATGAAGATATA---  
 ATCAGTCTATGGGATCAAAGCCTA--AAGCCATGTGTAAAGTTA---  
 ACCCCACTCTGTGTTACTCTAAATTGTACTGATTTCAATGGCAATTCACCACTCAAAACAGCACCTACCCAA  
 ACAGCACCGTC-----  
 -TCTCCAACCAATAGCACTTCTGCCAACCAAACCACCTGAAAGAAGACACAGGGGTGATACAA---  
 AACTGTTCTTTTCGATGTGACCACAGAAACAAAT-----  
 GACAGGAAGTCAAAGTACATGCACCT--TTTTATAAACTTGATATAGTACCACTCAAAGAT-----  
 -----  
 -----  
 AACAGTAAGAATAGCAGTAGGGAATATAGGCTAATACATTGTAATACCTCAACCATTAAACAA---  
 GCTTGTCCAAAGGTATCTTGGGATCCAATTCCCATACATTATTGTGCTCCAGCTGGTTATGCGATTCTAAAGT  
 GCAAT--GACAAAAAGTTCAAT-----GGGACAGGGCCATGCAAGGAT-----  
 -GTTAGT--ACAGTACAATGTACACATGGAATTAGGCCAGTAGTATCAACT---  
 CAATTGCTATTAAATGGTAGCCTAGCAGAAGAAGAT-----  
 ATAATAATCAGATTTCAAATATCTCAGATAAT-----GCAAAAACCATAATAGTACACCTTAAT----  
 -----GAAACTGTACAG-----ATTAATTGTACAAGACCTAACAACAATACAAGGAAA-----  
 -AGTATATCTATA-----GGACCAGGACGAGCA--TTC-----TATGCAACAGATAGG-----  
 -----ATAATAGGAGATATA-----AGAAGGGCACATTGT--AACGTGAGTGGAGCA---  
 CAATGGAATAAACTGTACAACGGGTAATTGCAAAGTTAGCA-----TCCCATTTCCT---  
 -----AATGCAACAATAAACTTAAC-----  
 TCATCCTCAGGAGGGGATCTAGAAATTACA--ATGCATAGTTTTAATTGTAGAGGAGAA--  
 TTTAAACAGCTCCAGGCAAGAGTCCCTGGCTGTGGAAAGATACCTAAAGGATCAACAGCTCCTAGGGATTTGGG  
 GCTGCTCTGGAAGAACTCATCTGCACCACTAATGTGCCCTGGAACCTCAGTTGGAGT-----  
 -----AATAGATCCCAGGAGGATATTTGG-----GGT-----  
 AACATGACCTGGATGGAATGG--GAAAGAGAGATTGGCAATTACTCAACCACAATATAC---  
 AGGTTACTTGAACAATCGCAAAACCAACAGGAG-----  
 -----  
 AAAAAATGAACAAGAATTATTGGCCTTGGACAAGTGGGCAAGTCTGTGGAATTGGTTTGACATATCAAACCTGGC  
 TGTGGTATATAAAAAATATTTCATAATGATAGTAGGAGGCTTAATAGGCTTAAGAATAATTTTTTGCT--  
 GTGCTTTCTATAGTA-----AATAGAGTTAGGAAGGGATACTCACCT-----  
 TTATCATTTGGCTATTAGCTTGCTGAATACCATAGCAATAGTAGTAGCTGAG---  
 GGGACAGATAGAATTATAGAAGCTTTGCAAAGAGCTGGTAGAGCT-----  
 -----GTTCTCAACGCA-----CCCAGAAGAATCAGACAGGGCTTAGAAAGGGCTTTGCTA--TAA  
 >AB485659  
 GCT---ACA-----  
 GATAAATTGTGGGTTACAGTTTATTATGGGGTACCTGTGTGG--AAGGAAGCGACC---  
 ACTACTCTATTTTGTGCCTCAGATGCTAAAGGATATGAAAAAGAG--GTACATAAT-----  
 -----GTCTGGGCTACA---CATGCCTGTGTACCCACAGAC---  
 CCCAATCCACAGGAAATAGATTTGGTA-----AATGTAACAGAAAATTTTAAT-----  
 -----ATGTGGAAAAATAACATGGTAGAACAAATGCATGAAGATATA---  
 ATCAGTCTATGGGATGAAAGCCTA--AAGCCATGTGTAAAGTTA---  
 ACCCCACTCTGTGTTACTCTAAATTGTACTAATGCCAATGGCACTCTGTCTGCTAACCAAAGCAGCCCCATTT  
 CC-----  
 -----CCCGCCCCACCCCAAACGACACCCTGAAGGAAGACACAGGGGCAATACAA---  
 AACTGCTCTTTCAATATAACCACAGAAGTAGGA-----  
 GACAAGAAGCTAAGAGCACAGGCACCT--TTTTATAAACTTGATATAGTACCACTCAGCAATACTAATGGG-  
 -----  
 -----  
 CCACTCAACAATACTAGTGGGGAATATAGGCTAATACATTGTAATACCTCAACCATTAAACAG---

GCTTGTCCAAAGGTATCTTGGGATCCAATTCCCATACATTATTGTGCTCCAGCTGGTTATGCGATTCTAAAGT  
GTAAG---GATAAAGAGTTCAAT-----GGGACAGGGCCATGCAAGAAT-----  
-GTCAGC---ACAGTACAATGTACACATGGAATTAAGCCAGTAGTATCAACT---  
CAATTGCTATTAAATGGCAGCCTAGCAGAAAAAGAT-----  
ATAATAATCAGATCTCAAAATATCTCAGATAAT-----ACAAAAACCATAATAGTGCACCTTAAT----  
-----GAATCTGTACAG-----ATTAAGTGTACAAGACCCAACAACAATACAAGGAGA-----  
-AGTATATATTTA-----GGACCAGGACACGCA---TTC-----CATACAACAGACAGG-----  
-----ATAATAGGAGATATA-----AGAAAAGCACATTGT---ATCGTTAATGGAACA---  
CAATGGAATACCACTGTACAACGGGTACAAGCAAAGTTAAAG-----GCTTATTTCCAG-----  
-----GGTAAAACAATAACATTTAAC-----  
CCATCCTCAGGAGGGGACCTAGAAATTACA---ATGCATAGTTTTAATTGTAGAGGAGAA---  
TTTAAACAGCTCCAGGCCAGAGTCTTGGCTGTGGAAAGATACCTAAAGGATCAACAGCTCCTAGGGATTTGGG  
GCTGCTCTGGAAGAACTCATCTGCACCACTAATGTGCCCTGGAACCTCTAGTTGGAGT-----  
-----AATAAATCCCAGGATCAGATTTGG-----GAC-----  
AACATGACCTGGATGGAATGG---GACAAAGAGATTAGCAATTACTCAAACATAATATAC---  
AACTTACTTGAACAATCGCAAAATCCAACAGGAA-----  
-----  
AAAAATGAACAAGAATTATTGGCCTTGGACAAGTGGGCAAGCCTGTGGACTTGGTTTGACATAACAAAGTGGC  
TGTGGTATATAAGAATATTCTAATGATAGTAGGAGGCTTGATAGGCTTAAGAATAGTTTTTTGCT---  
GTGCTTTCTATAGTA-----AATAGAGTTAGGAAGGGATACTCACCT-----  
TTGTCAATTGGCTATTAGCTTGCTTAATACCATAGCAATAGTAGTAGCTGAG---  
GGGACAGATAGAGTTATAGAAGCTTTACAAGGAGTGCTTACAGCT-----  
-----ATTCTCAACATA-----CCTAGAAGAATCAGACAGGGCTTAGAAAGGGCTTTGCTA---TAA  
>HQ236605  
GCT---ACA-----  
GGCAACTTGTGGGTCACAGTCTATTATGGGGTACCTGTGTGG---AGAGATGCAGAG---  
ACTACTCTATTTTGTGCATCAGATGCTAAAGCATATGACGCAGAG---GCCCATAA-----  
-----ATTTGGGCCACA---CATGCCTGTGTACCCACAGAT---  
CCCAACCCACAAGAATTAGTTATGGGA-----AATGTAACAGAAAATTTTAAT-----  
-----ATGTGGAAAAATAACATGGTAGAACAAATGCATACAGATATA---  
ATAAGTTTATGGGATCAAAGCCTA---AAGCCATGTGTAAAGCTA---  
ACCCCACTCTGTGTTACTTTAGAAATGTAAGAGTTATAACGGCACTGGGAATGTCACTCAG-----  
-----  
-----CCAAATAGCACCCCGAGGGAAGAGATGGGGGAAGTACAA---  
AATTGCTCTTTCAATATGACCACAGAGTTAAAT-----  
GATAAGAAGGCGCAAGTACATGCACCT--TTCTATAGACTTGATATAGTGCCACTCAGCAATACT-----  
-----  
AGTAGGAACACAAATGATAGTACAGAGTATAGGCTAATAAATTGTAATACCTCAACCATTACACAG---  
GCTTGTCCAAAGATATCTTTTGAGCCAATTCTTATACATTATTGTGCTCCAGCTGGTTATGCGATTCTAAAGT  
GTAAT---GCTAAGGATTTCAAT-----GGGACAGGGCCATGCACTAAT-----  
-GTCAGC---ACAGTACAATGTACACATGGAATTAAGCCAGTGGTATCAACT---  
CAACTGCTGTTTAAATGGCAGCTTAGCAGAAGAAGAG-----  
ATAATAATCAGGTCTGAAAATATCACAGATAAT-----GCAAAAACCATAATAGTACACCTGAAT----  
-----GAGTCTGTACAG-----ATTAATTGTACAAGACCCAATAACAACACAAGAAAA-----  
-AGTGTAAGTATA-----GGACCAGGACAAGCA---TTC-----TATACAACAGGTGAA-----  
-----ATAATAGGAGACATA-----AGAAAGGCACATTGT---AACATTAGTGGAGAA---  
CTATGGAATAAACTTTAGCAAGGGTAAGTGCAAAGTTAGGG-----TCTCATTTCAG-----  
-----AATAAAACAATAAAATTTAAC-----  
TCATCCTCAGGAGGGGACCTAGAAATTACA---ATGCATAGTTTTAATTGTGGAGGAGAA---  
TTTAAACAGCTCCAGGCAAGAATCCTGGCTGTGGAAAGATACCTACAGGATCAACGGCTCCTAGGGATTTGGG  
GTTGCTCTGGAAGAACTCATCTGCACCACTGCTGTGCCCTGGAACCTCTAGTTGGAGT-----  
-----AATAAATCTTATGACAAAATTTGG-----GAT-----  
AACATGACATGGATGCAGTGG---GAAAAAGAGATTGGCAATTACTCAGACACAATATAC---  
AGGTTGCTTGAGGAATCGCAGATCCAGCAGGAG-----  
-----  
CGGAATGAAAAAGAATTATTAGAGCTGGATAGGTGGGCAAGTCTGTGGAGTTGGTTTGACATAACAAATTGGC  
TGTGGTATATAAAGATATTCTAATGATAGTAGGAGGCTTGATAGGCTTAAGAATAGTTTTTTGCT---  
GTGCTTTCTATAGTA-----AGTAGAATTAGGAAGGGATACTCACCT-----  
TTGTCAATTGGCTATTAGCTTGCTTAATACCACTGCAATAGTAGTAGCTGAA---

GGGACAGATAGGGTTATAGAAGTTTGTGCAAAGAGCTGGTAGAGCT-----  
 -----GTTATCCACATA-----CCTAGAAGAATAAGACAGGGCTTAGAAAGAGCTTTGCAA--TAA  
 >KU168275  
 GCT---AAT-----  
 GACAACTTGTGGGTACAGTCTATTATGGGGTACCTGTGTGG--AAAGAAGCAACC---  
 ACTACTCTATTCTGTGCTTCAGATGCTAAATCATATGACAAAGAG--GCACATAAT-----  
 -----GTCTGGGCTACA--CATGCCTGTGTACCCACAGAC---  
 CCCAATCCACAAGAAGTAGATCTGACA-----AATGTAACAGAAAATTTTAAT-----  
 -----ATGTGGAAAAATAACATGGTGGAAACAAATGCATACAGATATA---  
 ATCAGTTTATGGGATCAAAGCCTA--AAGCCATGTGTGAAGTTA---  
 ACCCCACTCTGTGTTACTTTAAACTGTACTAGTGCCAGCTACAATAGCACTGGCCAAAAC-----  
 -----  
 -----AGCACCTTGACAGAAGAGCCAGGGGCAATACAA---  
 AACTGTTCTTTTAGAATGACCACAGAAGTAAGA-----  
 GATAAAAAGCAGAAGGTACATGCACCTT--TTTTATAGGCTTGATATAGTACCAATCAGTAATAAAAAAAC-  
 -----  
 -----  
 AGAAGTAACAGTACAACTATAGACTAATAAATTGTAATACCTCAACCATTACACAG---  
 GCTTGTCCAAAGGTCTCTTGGGATCCAATTCCCATACATTATTGTGCTCCAGCTGGTTATGCGATTCTAAAAT  
 GTAAA--GATAACAGGTTCAAT-----GGGACGGGGCCATGCAAGAAT-----  
 -GTCAGC--ACAGTACAATGTACACATGGAATTAAACCCGTGGTATCAACT---  
 CAATTGTTGTTAAATGGCAGCTTAGCAGAGGGAGGT-----  
 ATAATAATCAGATCTCAAAATCTCTCAAATAAT-----GCAAAAACCATAATAGTACACCTTAAT---  
 -----GAATCTGTACAG-----ATTAAGTGTACAAGACCCAACAACAATACAAGAAAG-----  
 -AGTATACGCATA-----GGACCAGGACAAGCA--TTT-----TATGCAACAGGAGAA-----  
 -----ATAATAGGAGACATC-----AGAAAGGCACATTGT--AATGTTAGTGGAGCA---  
 CAATGGAATAAGACTTTAACACGGGTAAGGGAAGAGTTAAGG-----TCTCGTTTC-----  
 -----AATAAAACAATACAATTTAAC-----  
 TCATCCTCAGGAGGGGACCTGGAAATTACA--ATGCATAGTTTTAATTGTAGAGGAGAA--  
 TTTAAACAGCTCCAGGCAAGAGTCCCTGGCTGTGGAAAGATACCTACAGGATCAACGGCTCCTAGGGATTTGGG  
 GCTGCTCTGGAAACTCATCTGCACCACTAATGTGCCATGGAACCTAGTTGGAGT-----  
 -----AATAAATCTCAGAAGCAAATTTGG-----GAG-----  
 AATATGACCTGGATGGAGTGG--GAAAAAGAGATTAGCAATTACTCAAGCATAATATAT--  
 GACTTACTTGAAACATCGCAGAACCAGCAGGAA-----  
 -----  
 AAGAATGAACAGGAATTATTGGCATTGGACAAGTGGGCAAGTCTGTGGAATTGGTTTGACATAACAACTGGT  
 TGTGGTATATAAAAATATTACATAATGATAGTAGGAGGCTTGATAGGTTTAAAGAATAATTTTTTGCT---  
 ATGCTTTCTATAGTA-----AATAGAGTTAGGAAGGGATACTCACCT-----  
 TTGTCATTAGCTAGTAGCTTGCTTGATACCACAGCAATAGTAGTAGCTGCG--  
 GGAACAGATAGAGTTATAGAAATTTTGTGCAAAGAGCTGGTAGAGCT-----  
 -----GTTCTCAACATA-----CCTAGAAGAATAAGACAGGGCTTTGAAAGGGCTTTGCTA--TAA  
 >MH705144  
 GCT---ACA-----  
 GATAACTTGTGGGTACAGTCTATTATGGAGTACCTGTTTGG--AAAGAAGCAACC---  
 ACTACTCTATTTTGTGCATCAAATGCTAAAGCACAGGAAAGCGAG--GTACATAAT-----  
 -----GCCTGGGCTATA--TATGCCTGTGTACCTACAGAC---  
 CCCAGCCCACAAGAAATAGTTCTGAAA-----AATGTAACAGAAGATTTTAAC-----  
 -----ATGTGGAAAAATAACATGGTAGACCAGATGCATGAAGACATA---  
 ATCAGTTTATGGGATCAAAGCCTA--AAGCCATGTGTAAAGTTG--  
 ACCCCACTCTGTGTTACTTTAAACTGTACTGATGTTAATAGCACAGAAGACTACTAACAAGGAAACAATACTACTA  
 CCCCGGGTCCA-----  
 -----GTTAACTTCACCCTGGAAGAAGATGGGGAATTAATA---  
 AACTGTTCTTTCAATATAACCACAGAGATAAGA-----  
 GATAAGAAGAGGAAAGAATATGCACCTT--TTTTATAGACTTGATGTAGTACCACTTGATGAC-----  
 -----  
 -----  
 AACATCAATAGTACTACTAGGGATTATAGGTTACTAAATTGTAACACCTCAACCATTACACAG---  
 GCTTGTCCAAAGGTGTCTTTGATCCAATTCCCATACATTATTGTGCTCCTGCTGGTTTTGCGATTCTACAGT  
 GTAAT--GAGAAAAATTTCACT-----GGGAAAGGGGAATGCAAAAAT-----  
 -GTCAGC--ACAGTACAATGTACACATGGAATTAAACCAAGTGGTGTCAACT---

CAACTACTGTAAATGGCAGCCTAGCAGAAGGAGAT-----  
ATAATAATTAGATCTGAAAATATCACAGACAAT-----GCAAAAACATAATAGTACAGTTTAAT----  
-----AGGTCTATAGAA-----ATTAAGTGTATAAGACCCAATAACAATACAAGAAAA-----  
-GGTATACATATA-----GGACCAGGACAAGTA---TTC-----TATGCAACAGGTGAA-----  
-----ATAATAGGAGACATA-----AGAAAGGCATATTGT---GAAATTAATGCAACA---  
TTGTGGAATACCACTTTAAATGAGATAGGAGGAAAGGTCAAA-----GAACTCCTTAAT----  
-----AAATCAAACATA--AATATATCAGAAATAATCTTTTCGG-----  
CCATCATCAGGAGGGGACCTAGAAATTACA--ACACATAGTTTTATTTGTGGAGGAGAG---  
TTTAAACAGCTCCAGTCGAGACTCCTGGCTGTGGAAAGATACCTAAAGGACCAACAGCTCCTAGGGCTTTGGG  
GCTGCTCTGGAAGCTCATCTGCACCACTAATGTGCCCTGGAATTCTAGTTGGAGT-----  
-----AATAAATCTCAAAATGAAATTTGG-----GAG-----  
AACATGACCTGGATGCAGTGG---GAAAGAGAGATTGGCAATTACACAGACACAATATAC---  
AGTTTAATTGAAAATGCACAAAACCAGCAGGAA-----  
-----  
AAGAATGAACAGGAATTATTGGCATTGGACAAGTGGAAACAGTCTGTGGAGTTGGTTTTCTATAACAACTGGT  
TGTGGTACATAAAAATATTCTAATGATAGTAGGAGGCTTAATAGGATTAAGAATAGTTTTTTGCT---  
ATGCTTTCTATAATA-----AATAGGGTTAGGCAGGGATACTCACCT-----  
TTATCGTTAGCTATTAGTCTGCTTAATACCACAGCAATAGTAGTAGCTGAA---  
GGGACAGATAGAATCCTAGAAGTTTGGCAAAGAGCTGGTAGAGCT-----  
-----ATCCTCCACATA-----CCTAGAAGAATAAGACAAGGTTTTGAAAGGGCTTTGCTA---TAA  
>AY371158  
GCT---GCA-----  
GATAACTTGTGGGTCACAGTCTATTATGGAGTACCAGTGTGG---AAAGAAGCAACC---  
ACTACTCTATTTTGTGCATCGGATGCTAAAGCATATGAAAAAGAG---GCACATAAT-----  
-----GTCTGGGCTACA---CATGCCTGTGTACCTACAGAC---  
CCTGACCCACAAGAAATATTTCTGGAC-----AATGTAACAGAAAATTTTAAC-----  
-----ATGTGGAAAAATAACATGGTAGACCAGATGCATGAAGATATA---  
ATCAGTTTATGGGATCAAAGCCTA---AAACCATGTGTAAAGATA---  
ACCCCACTCTGTGTTACCTTACACTGTAGTGTGTTAATATTACGGCTAATAATACCAATCAG-----  
-----  
-----CCTAATAACATCACCTGGAAGAGCAAGGGGAAATAAAA---  
AACTGTTCTTTCAATATCACACAGAGATAAAA-----  
GATAAGAGGAAAAATGAATTTGCAACT--TTTTATAAACATGATATAGTACCAATTGAAAA-----  
-----  
-----  
AATACGACATCCTATAGGCTAACAAGTTGTAATACCTCAACCGTTACACAG---  
GCTTGTCGGAAGGTGTCTTTGATCCAATTCCTATATATTATTGTGCTCCTGCTGGTTATGCGATTCTAAAGT  
GTAAT---GATAAAAGGTTCAAT-----GGGAAAGGGTTATGCACGAAT-----  
-GTCAGC---ACAGTACAATGTACACATGGAATTAAACCAGTGGTATCAACT---  
CAACTACTGTAAATGGCAGCTTAGCAGAAAAAAAT-----  
ATAATAATTAGATCTGAAAATATCACAGATAAT-----GCAAAAACATAATAGTACAGTTTAAT---  
-----GAATCAGTAAAA-----ATTAAGTGTACAAGACCCAACAACAATACAAGAAAA-----  
-AGTATACGTATA-----GGACCAGGACAAGTA---TTT-----TATGCAACAGGTGAG-----  
-----ATAATAGGAGACATA-----AGAAAGGCACATTGT---ACCATTAATGGAACA---  
CTGTGGAATGCAACTTTAAATAGGGTAGCTGCAGAGGTCAAA-----AACCTCACT-----  
-----AATATTACAATAAAATTTGAG-----  
CCATCATCAGGAGGGGACCTAGAAGTTACA--ACACATAGTTTTAGTTGTGGAGGAGAG---  
TTTAAACAGCTCCAGGCGAGAATCCTGGCTGTGGAAAGATACCTAAAGGACCAACAGCTCCTAGGGATTTGGG  
GCTGCTCTGGAAGCTCATCTGCACCACTAATGTGCCCTGGAATTCTAGTTGGAGT-----  
-----AATAAATCTCAGGAAGAAATTTGG-----GGA-----  
AACATGACGTGGATGCAGTGG---GAAAAAGAGATCGATAATTACACAGACACAATATAC---  
AGATTAATAGAGGAGGCGCAAAACCAGCAGGAA-----  
-----  
AAGAATGAACAGGACTTATTGGCATTGGACAAGTGGGACAGTCTGTGGAGTTGGTTTACTATAACAACTGGT  
TGTGGTACATAAGAATATTCATCATGGTAGTAGGAGGCTTGATAGGATTAAGAATAGTTTTTTGCT---  
GTGCTTTCTATAATA-----AATAGGGTTAGGCAGGGTTATTCACCT-----  
TTGTCAATTAGCTATTAGTCTGCTTAACACCACAGCAATAGTGGTAGCTGAA---  
GGGACAGATAGAGTCATAGAAAATCTGCAAAGAGCTGGTAGAGCT-----  
-----ATTCTCCACATA-----CCTAGAAGAATAAGACAGGGTTTTGAAAGGGCTTTGCTA---TAA  
>JX140672

GCT---ACA-----  
GAGAACTTGTGGGTACAGTCTATTATGGAGTACCAGTGTGG---AGAGAAGCAAAC---  
ACAGTTCATTTTTGTGCATCAGATGCTAAAGGATATGAAAGAGAG---GTACATAAT-----  
-----GTCTGGGCTACA---CATGCCTGTGTACCTACAGAC---  
CCCAACCCACAAGAAATGGTTCTAGCA-----AATGTAACAGAAAGTTTAAAC-----  
-----ATGTGGGAAAATAACATGGTAAACCAGATGCATGAAGACATA---  
ATCAGTTTATGGGATCAAAGTCTA---CAGCCATGTGTGAAGTTA---  
ACTCCACTCTGTGTTACTTTAAACTGTACTAATGTTACTACTACTAACAATACTACCTATGCTAAGAACCAT-  
-----  
-----ACTACCCCTAATATCACCATGGAGGAGCGAGAGGAAGTAAAA---  
AACTGCTCTTTCAATGTAACCACAGAAATAAGA-----  
GACAAACAGAAGAAAGAATATGCACCTT---TTTTATAGACTTGATGTAGTACCGATTGGTGTAT-----  
-----  
-----  
AACAAATAATGCTGATAGTGGTGAATATAGGCTAATAAAATTGTAATACCTCAACCGTTACACAG---  
GCTTGTCCAAAGGTGTCTTTGAGCCAATTCCCATACACTATTGTGCTCCTGCTGGTTTTGCATTCTAAAAT  
GTAAT---GATAAAAAGTTTAAAT-----GGAACAGGGCTGTGCAAGAAT-----  
-GTCAGT---ACAGTACAATGTACACATGGAATTAGACCAGTGGTAACAAC---  
CAGCTATTGTTAAATGGCAGCCTATCAGAAGATGGC-----  
ATAATACTTAGATCTAAAAATCTCACAGATAAC-----ACAAAGAACATAATAGTACAGCTTAAC---  
-----AGATCTATAGAA-----ATTAATTGTACAAGACCCAACAACAATACAAGAAAA-----  
-AGCATACATCTG-----GGACCAGGAAGAGCA---TTC-----TTTGCCACAGGTGAC-----  
-----ATAATAGGAGATATA-----AGAAAGGCATATTGT---ACCATTAATGGAACA---  
CTGTGGAATGACACTTTAAACAAAGATAATTGCAGAGTACAAA-----  
GACAAAAGCAATAGCTCC-----AAAAATATATCGTTTAGC-  
-----CCATCATCAGGAGGGGACCTAGAAATTGCA---ACGCATAGTTTAAATTGTAGAGGGGAA---  
TTTAAACAGCTCCAGGCAAGACTCCTGGCTGTGGAAAGATACCTAAAGGACCAACAGCTCCTAGGGATTTGGG  
GATGCTCTGGAAGAACTCATCTGCACCACTACTGTGCCCTGGAATTCTAGTTGGAGC-----  
-----AGTAAACCTCATGATGACATTTGG-----CAA-----  
AACATGACCTGGATGCAGTGG---GAAAAAGAGATTGCCAATTACACAGGCACCATATAC---  
CAATTAATTGAAGAAGCACAAGACCAGCAGGAA-----  
-----  
AAGAATGAACAAGACTTATTGTCATTGAGCCAGTGGGACAGTCTGTGGAATTGGTTTAGCATAACACAATGGT  
TGTGGTACATAAAAAATATTATAATGATAGTAGGAGGCTTAATAGGATTAAGAATAGTTTTTTGCT---  
GTGCTTTCAATAGTA-----AGAAGAGTTAGGCAGGGATACTCACCT-----  
GTGTCTTTAGCTATTAGTCTGTTTGATACCACAGCAATAGTAGTAGCTGAA---  
GGGACAGATAGAATCATAGAAGTTTGGCAAAGAGCTGGTAGAGCT-----  
-----ATTCTCCACATA-----CCTAGAAGGATAAGACAGGGTGCAGAAAGGGCTTTGCTA--TAA  
>KU749420  
GCT---AAA-----  
GAAAACTTGTGGGTACAGTCTATTATGGAGTACCTGTGTGG---AAAGAGGCCAAAA---  
ACTACTCTATTTTGTGCATCAGATGCTAAGGCATATGACACAGAG---GTACATAAT-----  
-----GTCTGGGCTACA---CATGCCTGTGTACCTACAGAC---  
CCTAGCCCACAAGAAGTACACCTACCA-----AATGTAACAGAAAACCTTAAAC-----  
-----ATGTGGAAAAATGACATGGTAGACCAGATGCATGAAGATATA---  
ATCAGCTTATGGGATGAGAGCTTA---AAGCCATGTGTAAAATTA---  
ACCCCACTCTGTGTTACTTTAGATTGTAATGATGTTAATATTACTAAACTAGTAATAATACT-----  
-----  
-----CAAAATAGTAATGATACTCTAATGGAAAAATAAGGGGAAATAAAA---  
AACTGTACTTTCAATATAACCACAGAGATAAGA-----  
GATAAGGCGAAGAAAGAACATGCACTG---TTTTATAGACTTGATGTAGTACCAATTGGTGAC-----  
-----  
-----  
AATATTAATGGTAGTAATGAATATAGGCTAATAAAATTGTAATACCTCAACCATTACACAG---  
GCTTGTCCAAAAGTGTCTTTGAACCAATTCCCATACATTATTGTGCTCCTGCTGGCTTTGTGATTCTAAGGT  
GTAAT---GAGAAAAATTTCACT-----GGGATAGGGATATGCAACAAT-----  
-GTCAGC---ACAGTACAATGTACACATGGAATTAACCAGTGGTGTCAACT---  
CAGCTACTGTTAAATGGCAGCTTAGCAGAAGAAAA-----  
ATAATGATTAGATCTGAAAAATCACAATAAT-----TTGAAGACCATAATAGTACAGTTTAAAT---  
-----AAATTTGTAGAA-----ATTAATTGTACAAGACCCAACAACAATACAAGAAGA-----

-GGTATACATATA-----GGACCAGGAAGGGCA---TTC-----TTTGCAACAGATGCC-----  
-----ATAATAGGAGACATA-----AGAAAGGCACATTGT---ACCATTAATAGAACA---  
CTGTGGAAGGAACTTTAGAAGAGGTAATTGAAGAGCTCAAA-----AGCCACTTTAAT-----  
-----AATAGAACCATCATCTTTGAG-----  
CAACCAGTAGGAGGGGACCTAGAAAGTTACA--ACACATATTTTTAATTGTGGAGGAGAA---  
TTTAAACAGCTCCAGGCGAGAGTCCCTAGCTGTGGAACATTACCTAAAGGACCAACAGCTCCTAGGGATTTGGG  
GATGCTCTGGAAACTCATCTGCACCACTACTGTGCCCTGGAATGCTAGTTGGAGT-----  
-----AATAAGTCTCAGGATGAAATTTGG-----AAC-----  
AACATGACCTGGATGCAGTGG---GAAGAGGAGATTAGCAATTACACAGACATAATATAC---  
AGATTAATTGGAAAGGCACAAGACCAGCAGGAA-----  
-----  
ATTAATGAAAAGGAATTATTGGAATTGGACAAGTGGGACAGTCTGTGGAATTGGTTTGATATAACAAATTGGC  
TGTGGTATATAAAAATATTTCATAATGATAGTAGGAGGCTTGATAGGATTAAGAATAATTTTTTGCT---  
GTGCTTTCTATAATA-----AATAGGGTTAGGCAGGGATACTCACCT-----  
TTATCATTAGCTGTTAGTCTGCTTAATAGCACAGCAATAGTAGTAGCTGAA---  
GGGACAGATAGGATCATAGAAGTGTGCAAAGAGCTGGTAGAGCT-----  
-----ATTATTAACATA-----CCTACAAGAATAAGACAGGGTTTTGAAAGAGCTTTGCTA---TAA  
>AJ277824  
GCT---GCA-----  
GATAAATTGTGGGTCACAGTCTATTATGGAGTACCTGTGTGG---AAAGAAGCAACC---  
ACTACTCTATTTTGTGCATCAGATGCTAAAGCATACGAAAGGGAG---GTACATAAT-----  
-----GTTTGGGCTACA---TATGCCTGTGTACCTACAGAT---  
CCAAGCCCACAAGAAGTGGTTCTGGGA-----AATGTAACAGAAAATTTTAAC-----  
-----ATGTGGAAAAATAACATGGTAGACCAGATGCATGAAGATATA---  
ATCAGTTTATGGGATGAAAGCCTA---AAGCCATGTGTAAAGTTA---  
ACCCCACTCTGTGTTACTTTAAACTGTGCTGATGTTAACGTCACCCTA-----  
-----  
-----GAAGAAGAAAGAGGGGAAATAAAA---  
AACTGTTCTTTCAATATAACCACAGAGATAAAA-----  
GATAAGAAGAAGAAAGAATATGCGCTT---TTTTATAGACTTGATGTAGTACCAATCAATAGT-----  
-----  
-----  
AATAATAGTGACTATAGGTAAATAAATTGTAATACCTCAGCCATTACACAG---  
GCTTGTCCAAAGGTGTCTTTGAGCCAATTCCCATACATTTTTGTGCTCCTGCTGGGTTTGCAATTCTAAAGT  
GTAAT---GATAAAAAGTTCAAT-----GGGACAGGGCCATGCAGGAAT-----  
-ATCAGC---ACAGTACAATGCACACATGGTATTAGACCAGTGGTGTCAACT---  
CAACTACTGTTTAAATGGCAGCCTAGCAGAAGAAGAT-----  
ATAATAATTAGATCTGAAAATATCTCAGATAAT-----ACAAAAACCATAATAGTACAGTTTAAT---  
-----AGATCTGTAGAA-----ATTAATTGTACAAGACCCAACAACAATACAAGAAAA-----  
-AGTATACATATA-----GGACCAGGAAGAGCA---TTC-----TATGCAACAGGTGAC-----  
-----ATAATAGGAGATATA-----AGAAAGGCATACTGT---GTCATTAATAGAACA---  
CTGTGGAATGATACTTTAAACAAGGTAGTTGAGGCGTTCCAA-----CGCAAAGC-----  
-----AACCTTACTGTAACCTTTAAT-----  
AGATCAGCAGGAGGGGACCTAGAAATTACA--ACACATAGTTTTTAATTGTAGAGGAGAA---  
TTTAAACAGCTCCAGGCGAGACTCCTGGCTGTGGAAGATACCTAAAGGACCAACAGCTCCTAGGGATTTGGG  
GATGCTCTGGGAAAATCATCTGCACCACTACTGTGCCCTGGAATACTAGTTGGAGT-----  
-----AATAAACTCAGGAAGAAATTTGG-----AAA-----  
AACATGACCTGGATACAATGG---GAAAAAGAGATTAGCAATTACACAGACACAATATAC---  
AGATTAATTGAAGGTGCACAAAACCAGCAGGAA-----  
-----  
AAGAATGAACAGAACTTATTGGCATTGGACAAGTGGGACATTCTGTGGAGTTGGTTTAGTATAACAACTGGC  
TGTGGTACATAAGAATATTTCATAATGGTAGTAGGAGGATTGATAGGATTAAGAATAGTTTTTGCT---  
GTGCTTTTCAGTAGTA-----AAAAGAGTTAGGCAGGGATACTCACCT-----  
TTGTCAATTGGTTATTAGTCTGCTTAATACCACAGCAATAGTAGTAGCTGAA---  
GGGACAGATAGAATTGTAGAAGTGTGCAAAGAGCTGGTAGAGCT-----  
-----GTTCTCCACATA-----CCTAGAAGAATAAGACAGGGTTTTGAAAGGGCTTTGCTA---TAA  
>AJ249237  
GCT---GCA-----  
GATAAGTTGTGGGTCACAGTCTATTATGGAGTACCTGTGTGG---AAAGAAGCAACC---  
ACTACTCTATTTTGTGCATCAGATGCTAAAGCATATGAAAGAGAG---GTACATAAT-----

-----GTCTGGGCTACA---TATGCCTGTGTACCTACAGAC---  
CCAAGCCCACAAGAATTGGTTCTTGGA-----AATGTATCAGAAAAATTTAAC-----  
-----ATGTGGAAAAATAACATGGTAGACCAAATGCATGAAGATATA---  
ATCAGTTTATGGGATGAGAGCCTA---AAGCCATGTGTAAAGTTA---  
ACCCCACTCTGTGTTACTTTAAATTGTACTAAGGCTATCATTAATGTCACCTCTTCTAATAAT-----  
-----  
-----ACCACCTTGGCTCCTAATGTTACCATCTCGGAGGAAATGAAA---  
AACTGTTCTTTCAATATAACCACAGAGATAAGA-----  
GATAAGCAGAAAAAGAATATGCACTT---TTTTATAAACTTGATGTAGTACAAATCAATAAC-----  
-----  
-----  
AGTAATACTAGTTATAGGCTAATAAATTGTAATACCTCAACCCTTACACAG---  
GCTTGTCCCAAGGTGTCTTTGACCCAATTCCCATACATTATTGTGCTCCTGCTGGCTTTGCGATTCTAAAGT  
GTAAT---AATAAAACATTCAAT-----GGGACAGGATTATGCAGGAAT-----  
-GTTAGC---ACAGTACAATGTACACATGGAATTAACCAGTGGTATCAACT---  
CAACTACTGTTAAATGGCAGCCTAGCAGAAGAAAAG-----  
ATGATAATTAGATCTGAAAAATATCTCAGATAAT-----ACAAAAACCATAATAGTACAGTTTAAA---  
-----AATCCTGTAAAA-----ATTAATTGTACAAGACCCAACAACAATACAAGAAGA---  
-AGTATACATATA-----GGACCAGGACGAGCA---TTC-----TATGCAACAGGTGAG-----  
-----ATAATAGGAGATACA-----AGAAAGGCACATTGT---AACATTAGTGAAAAA---  
CAGTGGTATGACACTTTAATAAAGATAGCTACAGAGTTCAAA-----GACCAATAT-----  
-----AATAAAACAGTAGGGTTTCAA-----  
CCATCAGCAGGAGGGGATCTAGAAATTACA--ACACATAGTTTTAATTGTAGAGGAGAA---  
TTTAAACAGCTCCAGGCGAGAAATCCTGGCTGTGGAAAGATACCTAAAGGACCAACAGCTCCTAGGGATTGGG  
GCTGCTCTGGAAGAACTCATCTGCCAACTACTGTGCCTTGGAAATCTTAGTTGGAGT-----  
-----AATAAATCTCAAGATGAAATTTGG-----GGA-----  
AACATGACATGGATGGAATGG---GAAAAGGAGATTGGCAATTACACAGACACAATATAC---  
AGATTAATTGAAAGTGCAAAAATCAGCAGGAA-----  
-----  
AAGAATGAACAGGACTTATTGGCATTGGACAAGTGGGACAATCTGTGGAATTGGTTTTCTATAACAAGATGGT  
TGTGGTACATAGAAATATTCTAATGATAATAGGAAGCTTGATAGGATTAAGAATAGTTTTTTACT---  
GTGCTTTCTATAATA-----AATAGAGTTAGGCAGGGATACTCACCT-----  
TTGTCATTGGCTATTAGTCTGTTGGATAGAACAGCAATAGCAGTAGCTGAA---  
GGAACAGATAGAATCATAGAAATTTTGCAAAGAGCTGGTAGAGCT-----  
-----GTTCTCAACATA-----CCTAGAAGAATAAGACAGGGTCTTGAAAGAGCTTTGCTA--TAA  
>AF377956  
GCT---GCA-----  
GATAACTTGTGGGTCACAGTCTATTATGGAGTACCTGTGTGG--AAAGAAGCAACC---  
ACTACTCTATTTTGTGCATCAGATGCTAAAGCATATGAAAGAGAG--ATACATAAT-----  
-----GTCTGGGCTACA---TATGCCTGTGTACCTACAGAC---  
CCCAACCCACAAGAATTAGTTCTGGGA-----AATGTAACAGAAAATTTTAAAC-----  
-----ATGTGGAAAAATAACATGGTAGACCAGATGCATGAAGATATA---  
ATCAGTTTATGGGATCAAAGCCTA---AAGCCATGTGTACAGATA---  
ACCCCACTCTGTGTAACCTTAAATTGTACTGATGTTCTGTTAACATCACTAATGGGAACAGC-----  
-----  
-----ACCCTGGATAACATCACCTGGAAGAACAAGGGGAAATAAAA---  
AACTGTTCTTTCAATATCACCACAGAGATAAAC-----  
GATATTAAGAAAAAGAATCTGCAATT---TTTTATAGGCTTGATGTAGTACCAATCAATAAT-----  
-----  
-----  
AGTACTAGTGAATATAGGCTACTAAGTTGTAATACCTCAACCGTTACACAG---  
GCTTGTCCAAAGGTGTCTTTGATCCAATTCCAATACATTATTGTGCTCCTGCTGGTTTTGCGATTCTAAAGT  
GTAAT---GATAAAGAGTTCAAT-----GGGACAGGGTTATGTAGGAAT-----  
-GTCAGC---ACAGTACAATGTACACATGGAATTAACCAGTAGTGTCAACT---  
CAACTACTGTTAAATGGCAGCCTAGCAGAAGGAGAT-----  
ATAGTAATTAGATCTGAAAAATATCTCAGATAAT-----GCAAAAACCATAATAGTACAGTTTAAAT---  
-----AGATCTGTAGCA-----ATTAAGTGTACAAGACCCACCAACATTACAAGAAGA---  
-AGTATGCGTATA-----GGACCAGGACGAGTA---TTT-----TATGCAACAGGTACC-----  
-----GTACTAGGAGATATA-----AGAAAGGCATATTGT---ACCATTAATGGAACA---  
CTGTGGAATAAACTTTAGAAGGAGTAGCTAAAGAGGTCCAA-----AGCCACCTT-----

-----AATAAATCAATAACATTTGCG-----  
 CCATCATCAGGAGGGGACCTAGAAAGTTACA--ACACATAGTTTTTAATTGTAGAGGAGAG---  
 TTTAAACAGCTCCAGGCGAGAATCCTGGCTGTGGAAAGATACCTAAAGGACCAACAGCTCCTAGGGATTTGGG  
 GATGCTCTGGAAAACCTCATCTGCACCACTAATGTGCCCTGGAATTCTAGTTGGAGT-----  
 -----AATAAATCTCAGAATGAAATTTGG-----GAG-----  
 AACATGACCTGGATGCAGTGG--GAAAAAGAGATCAGTAATTACACAGGCACAATATAC---  
 AAATTAATAGAAAATGCACAAAACCAGCAGGAA-----  
 -----  
 AAGAATGAACAGGACTTATTGGCATTGGACAAATGGGACAACTCTGTGGAGTTGGTTTACTATAACAAATTGGT  
 TGTGGTACATAAAATTATTTCATAATGATAGTAGGAGGCTTGATAGGATTAAGAATAGTTTTTTGCT---  
 GTGCTTGCTGTAATA-----AATAGGGTTAGGCAGGGATACTCACCT-----  
 TTGTCGTTAGCTATTGATCTGCTTAATACCACAGCAATAGTGGTAGCTGAA---  
 GGGACAGATAGAATCATAGAAAGTTCTGCAAAGAGCTGGTAGAGCT-----  
 -----ATTCTCCACATA-----CCTAGAAGAATAAGACAGGGTGCAGAAAGGGCTTTGCTA---TAA  
 >JN054264  
 GCT---ACA-----  
 GATGACTTGTGGGTCACAGTCTATTATGGAGTACCTGTGTGG--AAAGAAGCAACC---  
 ACGACTCTATTTTGTGCATCAGATGCTAAAGCATATGAAAAAGAG--GTACATAAT-----  
 -----GTTTGGGCTACA--CATGCCTGTGTACCTACAGAC---  
 CCCAACCCACAAGAAGTATCTCTGGGA-----AATGTATCAGAAAATTTTAAAC-----  
 -----ATGTGGAAAAATAGCATGGTAGACCAGATGCATGAAGATATA---  
 ATCAGTTTATGGGATGAAAGCCTA--AAGCCATGTGTAAAGTTA---  
 ACTCCACTCTGTGTTGTTCTAAACTGTACTGATGTTGCTGTTAACAACACTAGTACAACCTAGCAGTTTAAACA  
 ACACGAGTACA-----  
 -----AGTGATAACAGTACCCCTGGAACAGAAAGGGGAAATAAAA---  
 AACTGTTCTTTCAATGTACCCACTGAGATACAA-----  
 GGGACGAAGAAGAAGGAACGTGCACTT---  
 TTTTATAGACTTGATGTAGCACCCTCCCTGATGCGACTTGTAAT-----  
 -----  
 AGTAGTGATAATAATAGTAATTGTAGTCAGTATAGGTTACTAAGTTGTAATACCTCAACCGTTACACAG---  
 GCCTGTCCAAAGGTGTCTTTGAGCCAATTCCCATACATTATTGTGCTCCTGCTGGTTATGCGATTCTAAAGT  
 GGAAT--GATAAAAGGTTCAAT-----GGAACAGGGTCATGCAGTAAT-----  
 -GTCAGC--ACAGTACAATGTACACATGGAATTAGACCAGTAGTGTGCGACT---  
 CAATTACTGTTTAAATGGTAGCCTAGCAGAAGAAGAT-----  
 ATAATAATTAGATCTGAAAATATCTCAGATAAT-----GCAAAAATTATAATAGTGCAGCTTAAT---  
 -----AGATCTGTAGAA-----ATTAATTGTACAAGACCTAACAACAATACAAGAAAA-----  
 -GGTATACATCTG-----GGACCAGGACAAGCA--ATC-----TATGCAACAGGTGAC-----  
 -----ATAATAGGAGATATA-----AGAAGGGCACATTGC--AGCATTAATGGAACA---  
 CTGTGGAGGGGACACTTTAAGAAAGGTAGCTGCAGAATTCCAA-----AGCAAAAGCAAC---  
 -----ATTAGTGAGATATACTTTAAG-----  
 CCATCATCAGGAGGGGACCTAGAAAGTTACA--ATGCATAGTTTTTAATTGTAGAGGAAAA---  
 TTTAAACAACCTCCAGGCAAGAATCCTGGCTGTGGAAAGATACCTAAGGGACCAACAGCTCCTAGGAATTTGGG  
 GTTGCTCTGGGAAATTCATCTGCACCACTACTGTGCCCTGGAATTCTAGTTGGAGT-----  
 -----AATAAATCTCAGAATGAAATTTGG-----GAA-----  
 AACATGACTTGGCTGCAGTGG--GAAAGAGAAATTGACAATTACACAGACACAATATAC---  
 AGATTACTAGAAGAGGCACAAAACCAGCAGGAA-----  
 -----  
 GCGAATGAACAGGACTTATTGGCATTGGACAAATGGGACAGTCTGTGGAGTTGGTTTCTATAACAAATGGC  
 TGTGGTACATAAAAAATATTCATAATGATAATAGGAGGCTTGATAGGATTAAGAATAGTTTTTTGCT---  
 GTGCTTTCTGTAATA-----AATAGGGTCAGGCAGGGCTACTCACCT-----  
 TTGTCGTTAGCTATAAGTTTGTCTGATACCATAGCAATAGCAGTAGCTGGA---  
 GGGACAGATAGGATCATAGAAAGTTTACAAAGAGCCGGTAGAGCT-----  
 -----ATTCTCAACATA-----CCCAGGAGAATAAGACAAGGTTTTTGAAAGAGCTTTGCTA---TAA  
 >KF725967  
 GCT---GCA-----  
 AATAACAACCTTATGGGTTACAGTCTATTATGGAGTACCAGTGTGG--AAAGAAGCAACC---  
 ACTACTCTATTCTGTGCATCAGATGCTAAAGCATATAGCAGAGAG--GTACATAAT-----  
 -----GTCTGGGCAACA--TATGCCTGTGTACCTACAGAT---  
 CCCAGCCCACAAGAATTGGTTCTAGCA-----AATGTAACAGAAAGTTTAAAC-----  
 -----ATGTGGGAAAAATAACATGGTAGACCAGATGCATGAAGACATA---

ATCAGTTTATGGGATCAAAGCCTA---AAGCCATGTGTAAAGATA---  
ACCCCACTCTGTGTTACTTTAACTGTACTGATGTTAATGTTACTGAGAGTACTGCTGTTACT-----  
-----  
-----AAGAACATGAGTATTGCTAATGATAGTATTGCTAATGATATGAAA---  
AACTGTTCTTTCAATATAACCACAGAAATAAAA-----  
GATAAAAAGAAGAAAGAATATGCACTT---TTTTATAGGCTTGATTTAGTACCAATCAATGAAACA-----  
-----  
-----  
GGCAAGACTAGTGGTGAATATAGGCTAATAAGTTGTAATACCTCAACCGTTACACAG---  
GCTTGTCCAAAGGTATCCTTTGATCCAATTCCCATACATTATTGTGCTCCTGCTGGTTTTGCGATTTTAAAGT  
GTAAT---GATAAAAAGTTCAAC-----GGAACAGGGTTATGCAAGAAT-----  
-GTCAGC---ACAGTACAATGTACACATGGAATTAGACCAGTAGTGACAACT---  
CAACTGCTGATAAATGGCAGCCTATCAGAAGATGGT-----  
ATAATAATTAGATCTAAAAATATCTCAGATAAT-----ACAAAAACATAATAGTACAGTTTAAT-----  
-----AGCTCTGTAGAA-----ATTAATTGTACAAGACCCAACAACAATACAAGAAGA-----  
-AGTATACATATA-----GGACCAGGACAAGCA---CTC-----TATGCAACAGGTGAC-----  
-----ATAATAGGAGATATA-----AGAAAGGCATTTTGT---GTCATTAATAGAGCA---  
CAGTGGAATGACACTTTAAACAAAGGTAATTGAAGAGTTCAAA-----AGCAGCCAC-----  
-----AATATGTCAGTAAATTTTAGC-----  
TCACCAGCAGGAGGGGACCTAGAAATTACA---ATGCATAGTTTTATTTGTGGAGGAGAA---  
TTTAAACAGCTCCAGGCGAGACTCCTGGCTGTAGAAAGATACCTAAAGGACCAACAGCTCCTAGGGATTTGGG  
GATGCTCTGGAAGAACTCATCTGTACCACTAATGTGCCCTGGAATTCTAGTTGGAGT-----  
-----AATAGAACTCAGGAGGAAATTTGG-----GAA-----  
AACATGACCTGGATGCAGTGG---GAAAAGGAAATTAACAATTACACAGACACAATATAC---  
CAATTGATTGAAAAAGCACAAAACCAGCAGGAA-----  
-----  
AAGGATGAAAAGGACTTATTGGCATTGGACAAGTGGACCAATCTGTGGAGTTGGTTTGATATATCAAACCTGGT  
TGTGGTACATAAAAATCTTCATAATGATAGTAGGAGGCTTAATAGGCTTAAGAATAGTTTTTTGCT---  
GTGCTTTCTGTAGTA-----AGAAGAGTTAGGCAGGGATACTCACCT-----  
TTGTCATTAGCTATTGATCTGTTTAATACCACAGCAGTAGTAGTAGCTGAA---  
GGGACAGATAGAATCATAGAAGTTTTGCAAAGAGCTGGTAGAGCT-----  
-----GTTATCCATATA-----CCTACAAGAATAAGACAGGGTTTGAAAGAGCGTTGCTA---TAA  
>AY371121  
GCC---TCA-----  
AATAACTTGTGGGTCACAGTCTATTATGGGGTCCCTGTGTGG---GAAGAAGCAAAT---  
CCCCTCTATTCTGCGCATCTGATGCTAAAGCATATAGTTCTGAA---AAACATAAT-----  
-----GTCTGGGCTACA---CATGCCTGTGTACCCACAGAC---  
CCCAACCCACAAGAAATAGTTATGGAA-----AATGTAACAGAAAATTTTAAC-----  
-----ATGTGGAAAAATAACATGGTAGAACAGATGCATCAGGATATA---  
ATTAGTTTATGGGATGAAAGCCTA---AAGCCATGTGTAAAGCTA---  
ACCCCTCTCTGTGTTACGCTAACTGTACTAATGTCAACCACCACCACTAATGGTACTATAGAT-----  
-----  
-----AATAGCAATAATATCACGGTGGATGGTAAAGAAGAAATAACC---  
AATTGTTTCCTTCAATATAACCACAGAAATAAGA-----  
GACAAAATAAGGCAGGAATACGCGCTT---TTCTATAAACTTGATGTAGTACCAATTAATAAT-----  
-----  
-----  
GATAATAGAAGTTATATGCTAATAAATTGTAATGTCTCATCCATTAAACAG---  
GCTTGTCCAAAAGTAGATTTTGAACCAATTCCCATACATTATTGTGCTCCGGCTGGTTTTGCGATTTTAAAGT  
GTAGA---GATAAGAATTTCAAT-----GGAACAGGATCATGTAGAAAT-----  
-GTCAGT---ACAGTACAATGTACACATGGAATTAAGCCAGTGGTATCAACT---  
CAACTACTGCTGAATGGCAGTTTAGCAGAAGAAAA-----  
ATAAGAATTAGATCTGAAAATTTACAGACAAT-----ACCAAATCATAATAGTGCAGCTTAAT-----  
-----GAAACTATAGAA-----ATTGATTGTATCAGACCCAACAACAATACAAGAAAA-----  
-AGTATAACATTC-----GGACCAGGACAAGCG---TTC-----TATGCAACAGGTGAC-----  
-----ATAATAGGAGGCATA-----AGACAAGCACATTGT---AATGTTAGTAAGGCA---  
AAATGGAAGACAATGTTAAAAAATGTCACAACACTTCTACAT-----AAGAAATAT-----  
-----AATAAGACCATAATCTTTAAG-----  
TCATCCGCAGGAGGGGACCTGGAAATTACC---ACACATAGCTTCAATTGTAGAGGAGAA---  
TTTAAACAGCTCCAGGCAAGAGTCCTGGCTGTGGAAAGATTCTAAAGGATCAACAGCTCCTAGGGATTTGGG

GCTGCTCTGGAAACTCATCTGCACCACTAATGTGCCCTGGAACACTAGTTGGAGT-----  
-----AACAAATCTTTTGATGAAATTTGG-----AAT-----  
AACATGACTTGGATAGAATGG---GAAAGGGAAATTAATAATTACACACAACAAATATAC---  
AACCTAATTGAAATATCGCAGAGCCAGCAGGAA-----  
-----  
AAGAATGAACAAGAATTATTGGCATTGGACAAGTGGGACAGTCTGTGGAGTTGGTTTGACATAACAAAATGGC  
TATGGTATATAAAAAATATTTATAATGATAGTAGGAGGGTTAATAGGTTTAAGAATAGTTTTTTGCT---  
GTGCTTTCTATAGTG-----AATAGGATTAGGCAGGGATACTCACCT-----  
TTGTCATTTCGCCATTAATTTGCTTGATACACTAGCAATAGCAGTAGCTAAT---  
TGGACAGATAGGGTTATAGAAGTAGCACAAGGAGCTGGTAGAGCT-----  
-----ATTCTCCACATA-----CCTAGAAGAATAAGACAAGGCTTAGAAAAGAGCTTTGCTA---TAA  
>FJ389367  
GCC---TCA-----  
AATACCTTGTGGGTCACAGTCTATTATGGAGTACCTGTGTGG---GAAGATGCAGAT---  
ACCACCCTATTTTGTGCATCTGATGCTAAATCATATAGTACTGAA---GGCCATAAT-----  
-----GTCTGGGCTACA---CATGCCTGTGTACCCACAGAC---  
CCCAACCCACAAGAGATATCTCTGATA-----AATGTAACAGAAAATTTTAACT-----  
-----ATGTGGAAAAATAACATGGTAGAACAGATGCATGAGGATATA---  
ATCAGTTTATGGGACGAAAGCCTA---AAGCCATGTGTACAGCTA---  
ACCCCTCTCTGTGTTACTTTAAACTGTGTGCCAGCAAAATGGCACTAACATAACTGGC-----  
-----  
-----TCTGGCACTGTGAATATAACCGAACAGATGAAA---  
AACTGCTCGTTCAATATAACCACAGAAATAAGG-----  
GATAGGAAGAAGCARGAATACGCGCTT---TTTTATAAACTTGATATAGTACCAATAGAGGATAAT-----  
-----  
-----  
AGTAATAGTAATAATAATAGTTATAGGATGATAAATTGTAATGTCTCAACCATTAAACAA---  
GCTTGTCCAAAGATGTCTTTGACCCAATTCCCATACATTATTGTGCTCCAGCTGGTTTTGCGATTTTAAAGT  
GTAGG---GACGAGGAGTTCAAT-----GGAACAGGAACATGTAAAAAT-----  
-GTCAGT---ACAGTACAATGTACACATGGAATTAAGCCAGTGGTATCAACT---  
CAATTACTGCTGAATGGCAGTTTGGCAGAAGGAGAC-----  
ATAATGATTAGATCTAAAAACATCACAGACAAT-----GCCAAAATCATAATAGTGCAGCTTAAT---  
-----AAATCTATAGAA-----ATTAATTGTACCAGACCTGGCAATAATACAAGAAAA-----  
-AGTGTAAGAATC-----GGACCAGGACAAGTG---TTC-----TATACAACAGGTGAA-----  
-----ATAATAGGAGATATA-----AGACAAGCATACTGT---AATATTGCAAAAAAA---  
GACTGGGATAATATGCTAAGGGAAGTGGCTATAAACTAAGG-----AAAAGCCTTAAC-----  
-----AGCAACAAGACCATAACCTTTAAC-----  
TCATCTGCAGGAGGGGACCTAGAAATTGCA--ACACATAGTTTTAATTGTAGAGGAGAA---  
TTTAAACAGCTCCAGGCAAGACTCCTGGCTGTGGAAAGATACCTAAAGGATCAACAGCTCCTAGGGATCTGGG  
GCTGCTCTGGAAGAACTCATCTGCACCACTAATGTGCCCTGGAATGCTAGTTGGAGT-----  
-----AATAAATCTTATGAGGCCATTTGG-----GAG-----  
AACATGACCTGGATAGAATGG---GAAAGGGAAATTAACAATTATACTCAACAAATATAC---  
AGCCTAATTGAAGAATCGCAGAACCAGCAGGAA-----  
-----  
AAGAATGAACAAGACTTATTAGCATTAGACCAATGGGCAAGTTTGTGGAATTGGTTTGACATATCAAGATGGC  
TATGGTATATAAAAAATATTTATAATGATAATAGGAGGTTAATAGGTTTAAGAATAGTTTTTTGCT---  
GTGCTTGCTATAATA-----AATAGAGTTAGGCAGGGATACTACCC-----  
TTGTTGTTTCGCTATTAATTTGCTTGATACGGTAGCAATAGCAGTAGCTAAT---  
TGGACAGATAGGGTTATAGAAGTAGTACAAAGAGCTTGTAGGGCT-----  
-----TTTCTCAACATA-----CCTAGAAGGATAAGACAAGGCGTAGAAAGAGCATTTGCCA---TAA  
>FJ389365  
GCT---TCC-----  
TCAGACTTGTGGGTCACAGTCTATTATGGGGTACCAGTGTGG---GAAGATGCAGAT---  
ACTCCTCTATTTTGTGCATCTGATGCTCAAGCACATAGTACTGAA---AGCCATAAT-----  
-----GTCTGGGCCACA---CATGCCTGTGTACCCACAGAT---  
CCCAACCCACAAGAAATGCTTCTGAAA-----AACGTAACAGAACCTTTTAACT-----  
-----ATGTGGAAAAATAACATGGTAGAACAGATGAATGATGATATA---  
ATCAGTTTATGGGATGAAAGCCTA---AAGCCATGTGTACAGCTA---  
ACCCCTCTCTGTGTTACTTTAAACTGTGCTGATGTTTGTCTTAAGAACAGCACTGCTACTAATGATTGTCTTA  
AG-----

-----AACAGCACTGGGAATAACACTGTGAGTAATAGTATTACAAAAGAAATGACA---  
AACTGCTCTTTCAATATAACCACAGAAATAAAA-----  
GATAAGCAGAAGAAAGAATACGCGCTT--TTTTATAAACTTGATATGGTGCAACTGGATGGT-----  
-----  
-----  
AGAAATGACTCTTATGGGTAAATAAACTGTAATGTCTCAGCCATTAAACAA---  
GCTTGTCCAAAGGTGTCTTTTGACCCAATTCCCATACATTATTGTGCTCCAGCTGGGTTTGCGATTTTAAAGT  
GCAAG---GATAAGAATTTCAAT-----GGAACAGGAACATGTAAAAAT-----  
-GTTAGT---TCAGTACAATGCACACATGGAATTAAGCCAGTGGTATCAACT---  
CAATTACTACTGAATGGTAGTCTAGCAGAAGAAGAA-----  
ATAGTAATTAGAAGTGAACCATCTCAGACAAT-----GCCAAAATCATAATAGTGCAGCTTAAT----  
-----AAATCCATAGAA-----ATTAATTGTACCAGACCCAGTAACAATACAAGAAGA-----  
-AGTATAAGTCTT-----GGACCTGGACGGGCG--TTC-----TATGCAACAGGTGAT-----  
-----GTAGTAGGAGATATA-----AGACAAGCACACTGT---AATGTAAGTAGACAA---  
CAATGGAATGACACGGTACAGAAAGTAACTGCATCACTACAA-----AAGATCTTTAAA-----  
-----AAAGGCAATATAACCTTTAAG-----  
CCACCCACAGGAGGGGACCTAGAAATGACA--ACACATAGTTTTAATTGTAGAGGGGAA--  
TTTAAGCAGCTCCAGGCAAGAGTCCTGGCTCTGGAAAAGATACCTAAAGGATCAACAGCTCCTAGGGATTTGGG  
GCTGCTCTGGAAGAACTCATCTGCACCACTAATGTGCGCTGGAACACTAGTTGGAGT-----  
-----AATARATCTTTTRATGAGATTTGG-----GAT-----  
AACATGACCTGGATACAATGG---GAAAGGGAAGTCAGCAATTACACACAAGAAATATAC---  
AGACTAATTGAAGAATCGCAAAACCAGCAGGAA-----  
-----  
AAGAATGAACAAGACTTATTAGCACTGGACCAGTGGGCAAGCTTGTGGAATTGGTTTGACATATCAAGGTGGC  
TGTGGTATATAAGAATATTACATAATGATAGTAGGAGGGTTAATAGGTTTAAAGAATAGTTTTTTGCT---  
GTGCTTTCTATAGTA-----AATAGAGTTAGGCAGGGATACTCACCT-----  
TTATCTTTCGCCATTAGTTTGCTTGATACAATTGCAATAGCAGTAGCTAAC---  
TGGACAGATAGGGTTATAGAAGTAGCACAAGCAGCTGGTAGAGCT-----  
-----TTTCTTCACATA-----CCTAGAAGGATAAGACAAGGCTTTGAAAGAGCTTTGCTA---TAA  
>AY231156  
GCC---TCA-----  
AATAACTTGTGGGTCACAGTTTATTATGGGGTACCTGTGTGG--GAAGACGCAGAT---  
ACCCCTCTATTCTGTGCATCTGATGCTAAAGCATATAGTACTGAA--AGCCATAAT-----  
-----ATCTGGGCTACA--CATGCCTGTGTACCCACAGAC---  
CCCAACCCACAAGAGATACCCCTGAAC-----AATGTAACAGAAAATTTTAAC-----  
-----ATGTGGAAAAATAACATGGTAGAGCAGATGCATGAGGATATA---  
ATCAGTTTATGGGATGAAAGCCTG--AAGCCATGTGTAAAACTA---  
ACCCCTCTCTGTGTACTTTAACCTGTAATAATGTAACCAACAATAGTACTGTAACCAAC-----  
-----  
-----AATAGTGCTGTGGAAAAAGACAAAGTAGAAATAAAA---  
AACTGCTCTTTCAATATAACCACAGAAATAAAA-----  
GATAAGAAGAAGCAAGAATATGCGCTT--TTCTATAGACTTGATATAGTACCAATTGAGGATAAT-----  
-----  
-----  
AACAAATAGTAGTGCAAATAATTATAGGCTAATAAATTGTAATGTCTCAGCCATTAAAGCAG---  
GCTTGTCCAAAGGTAAATTTTGACCCAATTCCCATACATTACTGCACTCCAGCTGGTTTTCGATTTTAAAGT  
GTAGG---GATGAGGACTTCAAT-----GGAACAGGACCATGTACAAAT-----  
-GTCAGT---ACAGTACAATGTACAGATGGAATTAAGCCAGTGGTATCAACA---  
CAATTACTGCTGAATGGCAGTTTAGCAAAAGGACAA-----  
ATAAAGATTAGATCTGAAAACCTCACAGACAAT-----GCCAAAATCATAATAGTACAGCTTAAT----  
-----AAATCTATAGAA-----ATTAAGTGTACCAGACCCAACAACAATACAAGAAAA-----  
-AGTATAAGATTCT-----GGACCAGGACAAGCG--TTC-----TATGCAACAGGTGAC-----  
-----ATAATAGGAGATATA-----AGACAAGCACATTGC---AATGTTAGTAGAACA---  
GAATGGAATAATACAATACGAAATGTAAGTGAAGAACTAAAA-----AAGATCTTTACT-----  
-----AACAGACCATAAGCTTTAAA-----  
CCATCTGTAGGAGGGGACCTAGAAATTACA--ACACATAGTTTTAATTGTAGAGGAGAA--  
TTTAAACAGCTCCAGGCAAGAGTCCTGGCTGTGGAAAAGATACCTAAAGGATCAACAGCTCCTAGGGATTTGGG  
GCTGCTCTGGAAGAACTCATCTGCACCACTAATGTGCCCTGGAATGCTAGTTGGAGT-----  
-----AATAAACTTATGAGGAAATCTGG-----GAG-----  
AACATGACCTGGATAGAATGG---GAAAGGGAAATTAACAATTATACACAACAGATTTAC---

AGCCTAATTGAAGAATCGCAGAACCAGCAGGAA-----  
 -----  
 AAAAAATGAACAAGACTTATTGGCATTGGACAAGTGGGCAAGTTTGTGGAATTGGTTTGACATATCAAACCTGGT  
 TATGGTATATAAGAATATTTATAATGATAGTAGGAGGTTTAATAGGTTTAAGAATAGTTTTTTTGCT---  
 GTGCTTTCTATAATA-----AATAGAGTTAGGCAGGGATACTCACCC-----  
 TTGTCATTTCGCTATTAATTTGGTTGATACAATAGCAATAGCAGTAGCTAAC---  
 TGGACAGATAGGGTTATAGAAGGAATACAAAGAATTGGTAGAGCT-----  
 -----TTGCTTAATATA-----CCTAGAAGGATAAGACAAGGCTTTGAAAGAGCTTTGCAA---TAA  
 >EF033660  
 GCC---TCA-----  
 AGTAACTTGTGGGTCACAGTCTATTATGGGGTACCTGTGTGG--GAAGATGCAGAT---  
 ACCCCTCTATTTTGTGCATCTGATGCTAAATCATATAGTACTGAA---AGCCATAAT-----  
 -----GTCTGGGCTACA---CATGCATGTGTACCCACAGAC---  
 CCCAACCCACAAGAGATACCCCTGGTA-----AATGTAACAGAAAATTTTAAAC-----  
 -----ATGTGGAAAAACAACATGGTAGAGCAGATGCATGAGGACATA---  
 ATCAGTTTATGGGATGAAAGTCTA--AAACCATGTGTAAAGCTA---  
 ACCCCTCTCTGTGTTACTTTAAACTGTACTGATGTAAATGTAAATGTAAACCCACAATAACTGACCACAAG-  
 -----  
 -----AATACTAACGGAACCTCCAATCATACTGGATTGGACGGAATGAAATGAAA---  
 AACTGCTCTTTCAATATAACCACAGAACTACAA-----  
 GATAAGAAGAAGAAAGAATACGCGATT--TTCTATAAACTTGATATAGTACCAATTAATGATAACAGC---  
 -----  
 -----  
 AACCAAGGATAATAAAAGTGGTAGTTATAGGCTAATAAATTGTAATGTCTCAACCATTAACAG---  
 GCTTGTCCAAAGGTAAGTTTTGATCCAATTCCCATACATTACTGTGCTCCGGCTGGTTTTGCGATTTTAAAGT  
 GTAGG---GATGAGAAATTCAAT-----GGAACAGGACTATGTAAAAAT-----  
 -GTCAGT---ACAGTACAATGTACACATGGAATTAAGCCAGTGGTATCAACT---  
 CAATTACTGCTGAATGGCAGTTTAGCAGAAGGGGAA-----  
 ATAATGATTAGATCTGAAAACCTCACAGACAAT-----GCCAAAGTCATAATAGTACAGCTCAAT----  
 -----AAATCTGTAGAA-----ATTAAATGTACCAGACCCAACAACAATACAAGAAGA-----  
 -AGTATAAGCCTC-----GGACCAGGACGAGCG---TTC-----TATGCAACAGGGGGC-----  
 -----ATAATAGGAGATATA-----CGACAAGCACATTGT---AATGTTAGTAGAAAA---  
 GAATGGGAGAATATGATACAGAATGTGACTAAAGAACTAGAA-----AGACTCTTCCCG-----  
 -----AGAAAGAACATAACCTTTAAC-----  
 TCATCCGCAGGAGGGGACCTAGAAATTACA--ACACATAGTTTTAATTGTAGAGGAGAA---  
 TTTAAACAGCTCCAGGCAAGAGTCCCTGGCTGTGGAAAGATACCTAAAGGATCAACAGCTCCTAGGGATTTGGG  
 GCTGCTCTGGCAAACCTCATCTGCACCACTAATGTGCCCTGGAATAATAGTTGGAAT-----  
 -----AATAAATCTTATGATGACATTTGG-----GGG-----  
 AACATGACCTGGATACAATGG--GAAAGGGAAATTAGCAATTATACAGGACAAATATAC---  
 AGGCTTATTGAAGAATCACAAAACCAGCAGGAA-----  
 -----  
 AAAAAATGAACAAGAATTATTGGCATTGGACCAATGGGCAAGTTTGTGGACTTGGTTTGACATATCACACTGGT  
 TATGGTATATAAAAAATATTTATAATGATAGTAGGAGGTTTAATAGGTTTAAGAATAGTTTTTTTGCT---  
 GTGCTTTCTATAATA-----AATAGAGTTAGGCAGGGATACTCACCC-----  
 TTGTCATTTCGCTATTAATTTGCTTGATACAGTAGCAGTAGCAGTAGCCAAC---  
 TGGACAGATAGGGTGATAGAAGTAGTACAAAGAATTTGTAGGGCT-----  
 -----TTTCTTAACATA-----CCTAGAAGAATAAGACAAGGCTTTGAAAGGGCTTTGCTA---TAA  
 >KT022379  
 GCC---TCA-----  
 AATACATTGTGGGCCACAGTCTATTATGGGGTACCTGTGTGG--GAAGATGCAAAAT---  
 CCCATTCTATTTTGTGCATCTGATGCTAAAGCATATAGTACTGAG--AGCCATAAT-----  
 -----ATCTGGGCTACA---CATGCCTGTGTACCCACAGAT---  
 CCCAGCCCACAAGAGCTATCCCTGGAA-----AATGTAACAGAAAATTTTAAAC-----  
 -----ATGTGGAAAAATAACATGGTAGACCAGATGAATGAGGATATA---  
 ATCAGTCTATGGGATGAAAGCCTA--AAGCCATGTGTAAAGGATA---  
 ACCCCTCTCTGTGTTACCTTAAACTGTACTACTGTAACCAATGTAACCAACAATAACTACA-----  
 -----  
 -----GGAAACAACAGTAGCATTGTAAGTGACCAAGCAGAAATGAAA---  
 AATTGCTCTTTCAATATAACCACAGAAATAAAA-----  
 GATAAAAAGAAGAAAGAAAATGCGCTT--TTCTATAAACTTGATGTAGTACCAATTACTGATGATGGTAAT-

-----  
-----  
AGTAGTAAAGATAGTTATAGTAATTATAGGCTAATAAATTGTAATGTCTCAACCATTAAACAA---  
GCTTGTCCAAAGATGTCTTTTGAACCAATTCCCATACATTATTGTGCTCCAGCTGGTTTTGCGATTTTAAAGT  
GTAAT---GATAAGAAGTTCAAT-----GGAACAGGTCCATGTAAAAAG-----  
-GTCAGT---ACAGTACAATGTACACATGGAATTAGGCCAGTGGTATCAACT---  
CAATTACTGCTGAATGGCAGTTTAGCAGAAGAGAAA-----  
ATAATAATTAGAACTGAAAACCTCCTCAAACAAT-----GCCAAAATCATAATAGTGCAGCTTAAT----  
-----AAAACCTGTAGAA-----ATTACGTGTACCAGACCCGGTAACAATACAAGAAAA-----  
-AGTATAAGAATC-----GGGCCAGGACAAGTG---TTC-----TATGCAACA---GAC-----  
-----ATAATAGGAGACATA-----AGAAAGGCATTTTGT---CATGTAAATGAAACA---  
AAGTGGAGGGACATGATACAAAAGGTAAAAGCACAACCTAGAG-----ATAGTCTTTAAC-----  
-----AAAACAAACATATCCTTTTCAC-----  
TCATCCTCAGGAGGGGACATAGAACTCACA---ACACATAGTTTTAATTGTAGGGGAGAA---  
TTTAAACAGCTCCAGGCAAGAGTCCTGGCTATAGAAAAGATACCTAAAGGATCAACAGCTCCTAGGGATTTGGG  
GCTGCTCTGGAAGAACTCATCTGCACCACCTAATGTGCTTTGGAATACTAGTTGGAGT-----  
-----AATAAAACTTATGATGAGATTTGG-----AAG-----  
AACATGACCTGGATACAATGG---GACAGGGAAATTAACAATTACACACAACAAATATAC---  
AGCTTACTTGAGGAATCGCAGTACCAGCAAGAA-----  
-----  
AAGAATGAGCAAGAATTATTAGCATTGGATAAGTGGACAAGTTTGTGGAGTTGGTTTGACATATCAAACCTGGC  
TATGGTATATAAAAAATATTTATAATGATAGTAGGAGGTTTAATAGGTTTAAGAATAATTTTTTGCT---  
GTACTTTCTATAGTA-----AATAGAGTTAGGCAGGAATACTCACCT-----  
TTGTCTTTCGCTATAAATTTGTTTGATACAGTAGCAATAGCAGTAGCTAAC---  
TGGACAGATAGGGTTATAGAAGCAATACAAAGAACTTGTAGGGCT-----  
-----GTGCTTAATATA-----CCTAGAAGGATAAGACAAGGTGCAGAAAGAGCTTTGCTA---TAA  
>JN248582  
GCC---TCA-----  
AATAACTTGTGGGTCACAGTCTATTATGGGGTACCAGTGTGG---GAAGATGCAGAT---  
ACCCCTCTATTTTGTGCATCTGATGCTAAAGCATATAGTAATGAA---AAGCATAAT-----  
-----GTATGGGCCACA---CATGCTTGTGTGCCACAGAC---  
CCCAACCCACAAGAAATAACTCTGGAA-----AATATAACAGAACCTTTTAAC-----  
-----ATGTGGAAAAATAACATGGTAGAACAGATGCATGAGGATATA---  
ATCAGTTTATGGGATGAAAGCCTA---AAGCCATGTGTAAAGCTA---  
ACCCCTCTCTGTGTACCTTAACTGTACTAATGTCAATTGTAACAGTACTGGGACCAACAGTACTGGGACCA  
AC-----  
-----AGTACTAGGACCAACGCTACGTGTGACCAAGAAGCAGCAGGAACTTACGA---  
AACTGCTCTTTCAATGTAAACCACAGAAATAAGA-----  
GATAGGAAGAAGATAGAATATGCGCTT--TTCTATAAGGTTGATGTAGTGCCAATTGATAATAAT-----  
-----  
AATAGTAGTGAATATAGGCTAATAAATTGTAATGTCTCAACCATTAAACAG---  
GCTTGTCCAAAGGTGTCTTTTGAACCAATTCCCTATACATTATTGTGCTCCAGCTGGGTTTGCATTTTAAAGT  
GTAGG---GATAAGAATTTTAAT-----GGAAAAGGACAATGTAAAAAT-----  
-GTCAGT---TCAGTACAATGTACACATGGAATTAAACCAAGTGGTATCAACT---  
CAATTACTACTAAATGGTAGTTTAGCAGAGGGAGAA-----  
ATAGTAATTAGATCTGAAAACCTCACAGACAAT-----GCCAAAACCATAATAGTGCAGCTTAAT----  
-----GAAACTATAGAA-----ATTAATTGTACCAGACCCAACAACAATACAAGAAGA-----  
-AGTATAGGAATC-----GGACCTGGACAAACA---TTC-----TATGCAACAGGTGCT-----  
-----ATAATAGGAGATATA-----AGACAAGCACACTGT---AAGGTAAGTGGAGCA---  
AAATGGTGGGAGATGTTACAGAAAGTAAAAGTACAACCTACAA-----  
GTACAACCTACAAAAGGTCTTG-----GGC-----AATAATAAAAAATATAACCTTTAAC-  
-----TCATCTGCAGGAGGGGACCTAGAAATTACA---TCCCATAGTTTTTAATTGTGGAGGAGAA---  
TTTAAACAGCTTCAGGCAAGAGTCCTGGCTCTAGAAAAGATACCTAAAGGATCAACAGCTCCTAGGGATTTGGG  
GCTGCTCTGGAAGAACTCATCTGCACCACCTAATGTGCCTTGGAACACTAGTTGGAGT-----  
-----AATAAATCTTATAATGAGATTTGG-----GAT-----  
AACATGACCTGGATACAATGG---GAAAGGGAAGTCAGCAATTACACACAACAAATATAT---  
AACCTAATTGAAGAATCGCAGAACCAGCAGGAA-----  
-----  
AAAAATGAACAAGACTTATTGGCATTGGATCAGTGGGCAAGCTTGTGGAAGTGGTTTGACATATCAAATGGC

TATGGTATATAAGAATATTCATAATGATAGTAGGAGGCTTAATAGGTTTAAGAATAGTTTTTTGCT---  
GTGCTTTCTATAGTA-----AATAGAGTTAGGAAGGGATACTCACCT-----  
TTGTCAATTCGCTATTAATTTGTTTGATACAACAGCAATAGTAGTAGCTAAC---  
TGGACAGATAGGGTTATAGAAGTAGTACAAAGAGCTTGTAGAGCT-----  
-----ATTTCGAATATA-----CCTAGAAGAATAAGACAAGGGGCAGAAAGAGCTTTTGCTA--TAA  
>AF069947  
GCC---TCA-----  
AATAACTTGTGGGTCACAGTCTATTATGGGGTACCCGTGTGG--GAAGAAGCAGAT---  
ACCCCTCTATTTTGTGCATCTGATGCTAAAGCATATAGTACTGAA--AAACATAAT-----  
-----GTATGGGCCACA---CATGCCTGTGTCCCCACAGAC---  
CCCAACCCACAAGAGATATATCTGGAA-----AATGTAACAGAAAATTTTAAC-----  
-----ATGTGGAAAAATAACATGGGTAGAACAGATGCATGAGGACATA---  
ATCAGTTTATGGGATGAAAGCCTA--AAGCCATGTGTAAAGCTA---  
ACCCCTCTTTTGTGTTACTTTAAACTGTACTGATGTAAAAATGCAATAATGTAACCTGTAAT-----  
-----  
-----AATGTAATCAATGTAAGTGAACAGCAGCAGAAATGAAA---  
AACTGCACTTTCAATATAACCTCAGAAATACAA-----  
GATAAGAAGAAGGCAGAATATGCGCTT--TTCTATAAACTCGATGTGGTACCACCTTAATGAT-----  
-----  
-----  
AATAATAATTTAAGTACTTATAGGCTAATAAATTGTAATGTCTCAACCATAAAACAG---  
GCTTGTCCAAAGGTGACTTTTGAACCAATTCCCATACATTATTGTGCTCCAGCTGGTTTTGCAATTTTAAAGT  
GTAGG--GATAAGAATTTCAAT-----GGAACAGGAACATGTAAAAAT-----  
-GTCAGT--ACAGTACAATGTACACATGGAATTAAGCCAGTGGTATCAACT---  
CAATTACTACTGAATGGCAGTTTAGCAGAAGAAGAA-----  
ATAGTAATTTAGGACTGAAAACCTCACAACAAT-----GCCAAAGTCATAATAGTGCAGCTTAAT----  
-----GAAACTATAGAA-----ATTAATTGTACCAGACCCAGTAACAATACAAGAAGA-----  
-AGTATAAGATTC-----GGACCTGGACAGGCA---TTT-----TATGCAACAGGGGAT-----  
-----ATAATAGGAAATATA-----AGACAAGCATATTGT--AATGTAAGTGGAGAA---  
AAATGGAATAAGATGGTACAGAAGGTAAAAGCACAGCTAAAT-----  
AAACTAGAGTTATTTAAG-----AACAAACTATAGTATTTAAC-  
-----TCATCCACAGGAGGGGACTTAGAAATTACA--ACACATAGTTTTAATTGTAGAGGGGAA--  
TTTAAGCAGCTCCAGGCAAGAGTCCCTGGCTGTGGAAAGATACCTAAAGGATCAACAGCTCCTAGGGATTTGGG  
GCTGCTCTGGAAGAACTCATCTGCACCACTACTGTGCCCTGGAACACTAGTTGGAGT-----  
-----AATAAATCTTATGAGGAGATTTGG-----GAT-----  
AACATGACCTGGATACAATGG--GACAGGGAAGTTAGCAATTACACACAACAAATATAC---  
AGCCAGATTGAAGAATCGCAAAACCAGCAGGAA-----  
-----  
AAGAATGAACAAGACTTATTGGCATTGGACAAGTGGGCAAGCTTGTGGACTTGGTTTGACATATCAAAGTGGC  
TATGGTATATAAGAATATTTATAATAATAGTAGGAGGTTAATAGGTTTAAGAATAGTTTTTTGCT--  
GTGCTTTCTATAGTA-----AATAGAGTTAGGCAGGGATACTCACCT-----  
TTGTCAATTCGCTATTAATTTGATTGATACAATAGCAATAGCAGTAGCTAAC---  
TGGACAGATAGGGTCATAGAAGTAGCACAAAGAGCTTGTAGAGCT-----  
-----ATCCTCAACATA-----CCTAGAAGGATAAGACAAGGCTTGGAAAGAGCTTTTGCTA--TAA  
>KY229519  
GTC---TCA-----  
GGAAATTTATGGGCCACAGTTTATTATGGGGTACCTGTGTGG--GAAGATGCAGAT---  
ACTCCTTTATTTTGTGCATCTGATGCTAAAGCATATAGTACTGAA--AGCCATAAT-----  
-----GTCTGGGCTACA---CATGCCTGTGTACCCACAGAC---  
CCCAACCCACAAGAAATACTCCTGAAA-----AATGTAACAGAAAATTTTAAC-----  
-----ATGTGGAAAAATAACATGGGTAGAACAGATGCATGAGGATATA---  
ATTAGTTTATGGGATGAAAGCCTA--AAGCCATGTGTAAAGGCTA---  
ACACCTCTCTGTGTTACCTTAGATTGTAGTAATAATTCAACCAATAAT-----  
-----  
-----GGGACTCTGGATAGCAAAGGAGAAATGAAA---  
AACTGCTCTTTCAATGTAACCACAGAACTAAAA-----  
GATAAAAAGAAGAAAGAGTCCGCGCTT--TTTTATAAACTTGATATAGTACAACCTTAATAGCAACAACCCC-  
-----  
-----  
AACTCTAGTGAGTATAGATTAATAAATTGCAATGTCTCAACCATTAAACAG---

GCTTGTCCAAAGGTGAGTTTTGAACCAATTCCTATACATTACTGTGCTCCAGCTGGCTTTGCGATTTTAAAGT  
GTAAT---GATAAAAATTTCACT-----GGAACAGGACCAATGTAAAAAT-----  
-GTCAGT---TCAGTACAATGTACACATGGAATTAGGCCAGTGATATCAACT---  
CAATTACTGCTGAATGGCAGTTTA---GAAGAAAAC-----  
ATAGTGGTTAGGTCTGAAAACATCTCAAACAAT-----GTCAAAACCATAATAGTACAGCTTAAT----  
-----CAAGCTGTACCA-----ATTAATTGTACCAGACCCAGCAACAATACAAGAAAA-----  
-AGTATAAGAATA-----GGACCAGGACAAATG---TTC-----TATGCAACAGGGGAA-----  
-----ATAATAGGAGATATA-----AGACAAGCACATTGT---AATGTTTCGTAGAGGA---  
GAATGGAGCAACACAATGCAGAAGGTAGAAGAACAATTAAAA-----AGTTTATTTTCCT----  
-----AACAGGAGAATAAACTTTTACC-----  
TCCCCAGCAGGAGGGGACCTAGAAATTACA---AGCCATAGTTTTAATTGTGGAGGAGAA---  
TTTAAACAGCTCCAGGCAAGAGTCCTGGCTGTAGAAAAGATACCTACAGGATCAACAGCTCCTAGGGATTTGGG  
GCTGCTCTGGAAGAACTCATCTGCACCCTAATGTGCCCTGGAACAGTAGTTGGAGT-----  
-----AATAAACTTATGAGGAGATTTGG-----AAT-----  
AACATGACCTGGATACAATGG---GAAAGGGAAATTAGCAATTACACAGAGCAAAATATAC---  
AGCCTGATTGAAAAATCGCAGAACCAGCAAGAG-----  
-----  
AAAAATGAACAAGAATTATTATCATTAAACAAATGGGCAAGTTTGTGGAATTGGTTTGACATATCAAATTGGC  
TATGGTATATAAAAATATTATCATAATGATAGTAGGAGGCTTGATAGGTTTAAGAATAGTTTTTTGCT---  
GTGCTTGCTATAGTA-----AATAGAGTTAGGCAGGGATACTCACCT-----  
TTGTCAATTCGCTATTAATTTGCTAGATACAACAACAATAGCAGTAGCTAAT---  
TGGACAGATTGGGTTATAGAAATAGCACAAAGAATTGGTAGGGCT-----  
-----ATTATCCACATA-----CCTAGAAGAATAAGACAAGGTGCTGAAAGAGCTTTGCAA---TAA  
>KU168273  
GCT---GAA-----  
GAAAACTTGTGGGTTACAGTATATTATGGGGTGCCTGTGTGG---AAAGAAGCAAAG---  
ACCACTTTATTTTGTGCATCAGATGCTAAAGCATATGAGACAGAA---AAGCATAAT-----  
-----GTCTGGGCTACA---CATGCCTGTGTGCCACAGAC---  
CCCAGCCCACAAGAGATACGCCTGGAC-----AATGTAACAGAAAATTTTAAT-----  
-----ATGTGGGAAAATGATATGGTAGACCAAATGCATGAGGATATA---  
ATCAGTTTATGGGATCAGAGCTTA---AAGCCATGTGTAAAGTTA---  
ACCCCACTCTGTGTTACTCTAAATTGTACTAAGGTAAGTAACAATACCCATGCCAATGTA-----  
-----  
-----AGTAGCAGTATCATTTCTGATGTCAATGACCGTTTG-----  
AACTGCTCTTTCAATACAACCTACAATAATAAGA-----  
GATAAGCAACAGAGAGTAACTGCAATC---TTCTATAAGGTTGATGTAGTACCAATGGAGGGAGAGGAT---  
-----  
AATAATACAATGTATAGGCTAATAAATTGCAATACCTCAGCCATTACACAG---  
GCTTGCCCAAAGGTAAACTTTGACCCAATTCCCATACATTATTGTGCTCCAGCTGGTTTTGCGATTCTAAAGT  
GCAAC---AATAAACTTTTAAT-----GGAACAGGGCCATGTAAGAAT-----  
-GTCAGC---ACAGTACAGTGCACACATGGAATTAAACCAGTAGTGTCAACC---  
CAACTACTGTTTAAATGGAAGCTTGGCAGAAGAAAAG-----  
GTAATAATTAGATCTAAAAATATCTCAGATAGT-----ACCAAAAACATAATAATACAACTTAAA---  
-----GAACCTGTAGAA-----ATCAACTGTATCAGAACTGGTAATAATAACAAGAAAG-----  
-AGTATACGTTTTT-----GGGCCAGGACAAGCA---TTC-----TATGCATCAGATGAC-----  
-----ATCATAGGAGATATA-----AGAAGAGCACATTGT---AATATTAGTGGAGAA---  
AGATGGAATGAGACTTTAGACAGCATAGTTAAACAGCTAAGA-----AACTATTG-----  
-----AACCAAACAATAGTTTTTTAAC-----  
TCATCCTCAGGAGGGGACATAGAGATTACA---ACACATAGTTTTAATTGTAGAGGAGAA---  
TTCAAACAGCTCCAGGCAAGAGTCCTAGCTGTGGAAAGATACCTAAAGGATCAACAGCTCCTAGGGATTTGGG  
GCTGCTCTGGAAGAAATTATCTGCACCCTAATGTGCCCTGGAATGCTAGTTGGAGT-----  
-----AATAAAACAAGGGAAGAGATTTGG-----GAG-----  
AACATGACCTGGATGGAATGG---GAGAGACAAATAGATAATTACACAGATGAAATCTAC---  
AAGTTGCTTGAAAAATCACAGAACCAGCAGGAA-----  
-----  
CAGAAATGAACAGGAATTATTAGAATTGGACAAATGGGCAAGTCTATGGAATTGGTTTAGCATATCAAATTGGC  
TGTGGTATATAAGACTATTATCATAATGATAGTAGGAGGTTTAATAGGTTTAAGAATAGTTTTTTGCA---  
GTGCTTTCTATAATA-----AATAGAGTTAGGCAGGGATACTCACCT-----  
CTGTCTTTCGCTATTAGTTTGTCTTAACACCACCGCAATAGCAGTAGCTGAA---

GGAACAGATAGGATTATAGAAATAGGACAAAGAATTTGTAGAGCC-----  
-----ATTCTCAACATA-----CCTAGAAGAATAAGACAGGGCTTGGAAGGGCTTTGCTA--TAA  
>AF005496  
GCT---GCA-----  
CAAAACTTGTGGGTACAGTATATTATGGGGTACCTGTGTGG--AAAGAGGCCAAA---  
ACCACTCTATTCTGTGCATCAGATGCTAAGGCATATGAGACAGAA--AAGCATAAT-----  
-----GTCTGGGCTACA--CATGCATGTGTACCCACAGAC---  
CCCAACCCACAAGAGATGGTCATGGAG-----AATGTAACAGAGAGCTTTAAT-----  
-----ATGTGGGAAAATAACATGGTGGAGCAGATGCATACAGACATA---  
ATCAGTTTATGGGATCAAAGCTTG--AAACCATGTGTAAAATTA---  
ACCCCACTCTGTGTTACTCTAAACTGTACTAATGTCAGAAACAATACCTCTAACAGC-----  
-----  
-----ACTAGCAGTATGGAGGCAGGAGGGGAACCTAACA---  
AATTGCTCTTTCAATGTAACCTACAGTACTAAGA-----  
GATAAGCAGCAGAAAGTACATGCCTC--TTTTATAGACTTGATGTAGTACCAATTGATAAC-----  
-----  
-----  
AATAGTACTCAGTATAGGCTAATAAATTGTAATACCTCAGTCATTACACAG---  
GCTTGCCCAAAGGTGTCTTTGAACCTATTCCCATACATTATTGTGCTCCAGCTGGCTTTGCGATTCTAAAGT  
GTAAC--AATAAAACATTCAAT-----GGAACAGGATTATGTACAAAT-----  
-GTCAGT--ACAGTACAATGTACACATGGAATTAGACCAGTGGTATCAACT---  
CAACTGCTATTAAATGGAAGCCTAGCAGAAGAACAG-----  
ATCATAATTAGAATAAAAAATATCTCAGACAAT-----ACCAAAAACATAATAGTACAGCTTAAG----  
-----ACACCAGTAAAC-----ATTACATGTACCAGGCCTAACAATAATACGAGAACA-----  
-AGTATACATTTA-----GGGCCAGGACGAGCA--TTC-----TATGCAACAGGTGAC-----  
-----ATCATAGGAGATATA-----AGACAAGCACATTGT--AATATTAGTAGAACA---  
GACTGGAATAAGACTTTACACCAGGTAGTTACACAATTAGGA-----ATACACTTGAAC----  
-----AATAGAACAATAAGCTTTAAG-----  
CCAAACTCAGGAGGGGACATGGAAGTTAGA--ACACATAGTTTTAATTGTAGAGGAGAA--  
TTTAAACAGCTCCAGGCAAGAGTCCTCGCTGTGGAAAGATACCTAAGGGATCAACAGCTCCTGGGGATTTGGG  
GCTGCTCTGGAAACTCATCTGCACCACTAATGTGCCTTGGAACTCTAGTTGGAGT-----  
-----AATAAATCACAGAGTGAAATCTGG-----GAC-----  
AACATGACTTGGATGGAATGG--GATAAACAAATTAGCAATTACACAGAGGAAATATAC---  
AGGTTGCTTGAAGTCTCGCAAACCCAGCAGGAA-----  
-----  
AAGAATGAACAGGACTTATTAGCATTGGACAAATGGGCAAGTCTGTGGACTTGGTTTGACATATCACATTGGC  
TGTGGTATATAAAAAATATTACATAATGATAGTAGGAGGTTAATAGGTTTAAAGAATAATTTTTTGCT---  
GTGCTTTCTATAGTA-----AATAGAGTTAGGCAGGGATACTCACCT-----  
TTGTCTTTTGCTATTGATTTGCTTAACACCACAGCAATAGCAGTAGCTGAG---  
GGAACAGATGGGATTATAGTAATAGTGCAAAGAGCTTGGAGAGCT-----  
-----ATTCTCCACATA-----CCTAGAAGAATAAGACAGGGCTTTGAAAGAAGCTTGCTA--TAA  
>KY392776  
GCT---ACA-----  
GGAAAATTGTGGGTACAGTATATTATGGGGTACCTGTGTGG--AGAGATGCAAAG---  
ACCACTTTATTTTGTGCATCTGATGCCAATCATATAGTACTGAA--GGCCATAAT-----  
-----ATCTGGGCTACA--CATGCTTGTGTACCCACAGAT---  
CCAAACCCACAAGAAATAGTTATGGAA-----AATGTAACAGAAAATTTTAAC-----  
-----ATGTGGGAAAATGACATGGTAGATCAGATGCATGAGGATATA---  
ATCAGTGTATGGGATGAAAGTTTG--AAACCATGTGTGAAAATA---  
ACCCCTCTCTGTGTTACTTTAAATTGTACTGATATAAGAGTCAATAGCACTGCTACTAGAAACTCC-----  
-----  
-----AGCAATGGCATTGCTGAGCCTCCTCTTGAGATGAAA---  
AACTGCTCTTTCAATATAACCACAGAAATAGGA-----  
GATAAGAGAAAGAAAGATTACGCGCTT--TTCTATAGACAAGATGTAGTGAGAATTAGTGATAATGATAAT-  
-----  
-----  
AGTACTAGTAATAATTATAGTGAGTATATTTTAATAAACTGTAATACCTCAGTCATTAAACAG---  
GCTTGTCCAAAGGTATCTTTTCAACCAATTCCCATACATTATTGTGCTCCAGCTGGTTTTGCGATTCTAAAAAT  
GTAAT--GATAAGAAGTTTAAAT-----GGAACAGGACCATGCAAAAAT-----  
-GTTAGT--ACAGTACAATGTACACATGGAATTAAGCCGGTAGTGTCAACT---

CAACTACTGCTAAATGGTAGCATAGCAGAAGAGGAC-----  
 ATAATAATTAGATCTAAAAATATCTCAGATAAT-----GCTAAAAACATAATAGTACAATTTAAT----  
 -----GAAACTGTAGAA-----ATTGAGTGTATCAGACTTGCCAACAATACAAGGAAA-----  
 -GGTATACACATG-----GGACCAGGGCAAGTG---CTC-----TATGCAACAGGAGAA-----  
 -----ATAATAGGGAATATA-----AGAGCAGCATATTGT---GAAATTAATGGAAC---  
 AAATGGAATAACACTTTAAAAAGGGTAGCTGCAGAACTAAGA-----AAACACTATCCG----  
 -----AATAATACAATAGTCTTTCAA---CCAGCAAACCCA--  
 -GGGGACCCAGAAATTATG---CAACATACTTTTAATTGTGGAGGAGAA---  
 TTTAAACAGCTCCAGGCAAGAGTCTTAGCTGTGGAAAGATACCTAAAGGATCAACAGCTCCTAGGGATATGGG  
 GCTGCTCTGGAAGAACTCATCTGCACCACTACTGTGCCCTGGAACCTAGTTGGAGT-----  
 -----AATAAATCTTATGATGATATTTGG-----GGT-----  
 AACATGACCTGGATACAATGG---GAGAGGGAAATTGACAACTACACAAACACAATATAC---  
 ACTCTAATAGAAGAAGCACAAAACCAGCAGGAA-----  
 -----  
 AAGAATGAACAAGAGTTATTATCATTGGACAATTGGTCAAGTCTGTGGAATTGGTTTAGCATATCAAATTGGC  
 TGTGGTATATAAGACTCTTCATAATGATAGTAGGAGGCTTAATAGGTTTAAAGAATAGTTTTTTGCT---  
 TTGATTGCAATAGTA-----AATAGAGTTAGGCAGGGATACTCACCT-----  
 TTATCATTTAGCTGTTAGTTTGTCTTGATGCCACAGCAATAGCAGTAGCTGAA---  
 GGAACAGATAGGATCATAGAAGTAGCACAAGTAATTTTTAGAGCT-----  
 -----ATTCTTCATATA-----CCTAGAAGAATAAGACAGGGTTTGGAAAGGGCTTTGCAA---TAA  
 >KU168280  
 GCT---ACA-----  
 GAAAACTTGTGGGTCACAGTCTATTATGGGGTACCTGTGTGG---AAAGATGCAAAAT---  
 ACCACATTATTTTGTGCATCAGATGCTAAAGCATATAGTACTGAA---AAGCACAAT-----  
 -----ATCTGGGCTACA---CATGCTTGTGTACCCACAGAC---  
 CCCAACCCACAAGAAATAGAATTGAAA-----AATGTAACAGAAGAATTTAAC-----  
 -----ATGTGGAAAAATGGCATGGTAGAACAGATGCATGAAGATATA---  
 ATCAGTGTATGGGATGAAAGCTTA---AAGCCATGTGTAAAGATG---  
 ACCCTCTCTGTGTCACTTTAACTTGTAGCAATAATGTAACCATTAAAGGAACTAGTAACGATGCTAGTAACA  
 CT-----  
 -----GAAACTAGTATCAATGGTAATAACAGTAGTCTTGGGATGAGA---  
 AACTGCTCTTTCAATATAACTACAGAAATAAGA-----  
 GATAAACAAAAGAGAGAATACGCGCTT--TTCTATAGACAAGATATAGTACCACTTAATAGAGATAAT---  
 -----  
 -----  
 TCTAGTGATAATAGTTCTGATGATTATATTCTAATAAACTGTAATACCTCAGTCATTAAACAG---  
 GCTTGTCCAAAGGTGTCTTTTCAACCAATTCCCTATACATTATTGTGCCCCAGCTGGTTTTGCAATTCTAAAT  
 GTAAA---AATAAGACTTTCAAT-----GGAACAGGACCATGCAACAAT-----  
 -GTCAGT---ACAGTACAATGTACACATGGAATTAAGCCAGTAGTATCAACT---  
 CAACTACTGTTTAAATGGCAGTATATCAGAAGAAGGA-----  
 ATAATAATTAGATCTGAAAAATATCTCAGACAAT-----GCTAAAAACATAATAGTACAACCTTGAT---  
 -----AAACCTGTAAAC-----ATCACGTGTACCAGACCTAACAACAATACAAGAAAA---  
 -GGTATACACATG-----GGACCAGGACAAGTG---CTC-----TATGCAACAGGTGAA-----  
 -----ATAGTAGGAAACATA-----AGAGCAGCTCATTGT---AACATTAGTGGAAAA---  
 GATTGGAATGACACTTTATCTAAAGTAGCTACAAAACCTAAGA---GAGTACTTTCCA---  
 -----AATAAGACAATAAATTTTGAC---  
 TCACCCCCCTCAGGAGGGGACATAGAAATTGTG---ACACATAGTTTTAATTGTAGAGGAGAA---  
 TTTAAGCAACTCCAGGCAAGAGTCTTGGCTGTGGAAAGATACCTGAGGGATCAACAGCTCCTAGGGATTTGGG  
 GCTGCTCTGGAAGAACTCATCTGCACCACTACTGTGCCCTGGAACCTAGTTGGAGT-----  
 -----AATAAACTTATGATGAGATTTGG-----GGA-----  
 AACATGACTTGGATGCAATGG---GAAAAGGAAGTTAACCAGTACACAGGAATAATCTAT---  
 GATCTAATTGAAAAAGCACAAAGACCAGCAAGAA-----  
 -----  
 AATAATGAAAAAGACTTATTGGAATTGAACAGTTGGGCAAGTCTGTGGAGTTGGTTTGACATAACAAATTGGC  
 TGTGGTATATAAAAAATATTCTAATGATAGTAGGAGGCTTAATAGGTTTAAAGAATAATTTTTTGCT---  
 GTGATTGCTGTAGTA-----AATAGAGTTAGGCAGGGATACTCACCT-----  
 TTATCATTTGCTATTAGTTTGTTTAATGCCACAGCAATAGCAGTAGCTGAA---  
 GGAACAGATAGGATCATAGAAGTAGTACAAAGAGCCGCTAGAGCT-----  
 -----GTTCTTAACATA-----CCTAGAAGAATAAGACAAGGTTTTGAAATAGCTTTGCTG---TAA  
 >GU237072

GCT---GCA-----  
GACAAAATGTGGGTCACAGTCTACTATGGGGTACCTGTGTGG---AAAGAGGCCAAAG---  
ACCACTTTATTTTGTGCATCTGATGCTAAATCATATAGTACTGAA---AGTCATAAT-----  
-----GTCTGGGCTACA---CATGCTTGTGTACCCACAGAT---  
CCAAACCCACAAGAGATGATTATAGCA-----AATGTAACAGAAAATTTTAAC-----  
-----ATGTGGAAAAATGACATGGTAGATCAGATGCATGAAGATATA---  
ATCAGTGTATGGGATGAAAGTTTA---AAGCCATGTGTAAAGATG---  
ACCCCTCTCTGTGTCACTTTAAATTGTAGTCACAACATCAGTACCAATAGTACAAACAGCAGGACCACCCCC-  
-----  
-----GCTAGTCCAACCAGTGATGCCGGTAGGGTAAACATCAGTGAAATTATGAAA---  
AACTGTTCTTTTAAGATGACCACGGAAATAAGA-----  
GATAAAACAAGGAGAGAATATGCACCTT---TTCTATAGACAAGATATAGTACCAATTAGTGGC-----  
-----  
-----  
AGACCTAATGATAGTTATATTTTAATAAACTGTAATACCTCAGTCATTAAACAA---  
GCTTGTCCAAAGGTGAATTTTCGAACCAATTCCCATACATTATTGTGCCCCAGCTGGTTTTGCGATTCTCAAAT  
GTAAT---GATAGGAATTTCAAT-----GGAACAGGACCATGCACAAAT-----  
-GTCAGT---ACAGTACAATGTACACATGGAATTAAGCCAGTGGTATCAACT---  
CAACTACTGCTAAATGGCAGCAAAATCAGAAGGAGAT-----  
ATAATAATTAGATCTGAAAATATCACAACAAT-----GCTAAAAACATACTAGTGCAATTTAAT----  
-----GAAACTGTAAAC-----ATTACGTGTTTCAGACCTAACAACAATACAAGAAAG-----  
-GGTATACACATG-----GGTCCAGGACAAGTG---CTC-----TTTGCAACAGAGAGA-----  
-----GTAGTAGGGGATATA-----AGAAGAGCATACTGT---AATGTTAGTAGC-----  
AACTGGAACAGAGTTTTAGGTACAGTAGCTGCAAACTAAGA-----GGATATTTTAAT----  
-----GAGAGTACAACAATAAACTTTTACA-----  
TCACCCCTCAGGAGGGGACTTAGAAATTATG---ACACATACTTTTAATTGTGGAGGAGAA---  
TTTAAGCAGCTCCAGGCAAGAGTCTTGGCTGTGGAAAGATACCTAAAGGATCAACAGCTCCTAGGAATTTGGG  
GTTGCTCTGGAAGAACTCATCTGCACCACTACTGTGCCTTGGAACTACTTGGAGT-----  
-----AATAGATCTCATGATGACATTTGG-----GGA-----  
AACATGACCTGGATACAATGG---GAGAGGGAAATTAACAATTACACAGGAATAATATAC---  
ACTCTAATTGAAGAAGCACAAAACCAGCAAGAA-----  
-----  
AAAAATGAACAAGAATTATTGGCATTGGACCAATGGGGAAATTTGTGGAATTGGTTTGACATATCAAAATGGC  
TGTGGTATATAAGAATATTCTAATGATAGTAGGAGGCTTAATAGGTTTAAGAATAATTTTTTGCT---  
GTGTTTGCTATAGTA-----AATAGAGTTAGGCAGGGATACTCACCT-----  
TTGTCATTTGCTATTAGTTTGCTTGATACCACAGCAATAGTAGWAGCTGAA---  
GGAACAGATAGGATCATAGAAATAWTAAGAAGAGCTTTTAGAGCT-----  
-----GTACTTCATATA-----CCTAGAAGAATAAGACAGGGTTTTGAAAGGGCTTTGCTA--TAA  
>AJ249239  
AAT---GCA-----  
GACAAATTGTGGGTCACAGTCTATTATGGGGTACCTGTGTGG---AAAGAAGCAACA---  
CCCACCTCTATTCTGTGCATCAGATGCTAAAGCATATGAGAAGGAG---GTACATAAT-----  
-----GTCTGGGCTACC---CATGCCTGTGTACCCACGGAC---  
CCCAACCCACAAGAAGTAGAGATGGAA-----AATGTAACAGAAAATTTTAAC-----  
-----ATGTGGAAAAATAACATGGTAGAGCAGATGCATACAGATATA---  
ATCAGTTTATGGGATGAAAGCCTA---AAACCTTGTGTAGAGTTA---  
ACCCCTCTCTGTGTCACTTTAAATTGTACTGATTACAAAGGAACCAATAGCACCAATAAT-----  
-----
[truncated: 4,615,874 more chars]
