# Supplementary material for: Extending the Coding Potential of Viral Genomes with Overlapping Antisense ORFs: A Case for the De Novo Creation of the Gene Encoding the Antisense Protein ASP of HIV-1
Source: Viruses. 2022 Jan 14;14(1):146. doi: 10.3390/v14010146 (PMC8781085; doi:10.3390/v14010146)
Supplement: Supplementary file 1 [file viruses-14-00146-s001.zip › Supplementary File S3.pdf]

## Supplementary File S3

Supplementary File S3 contains a sample set of 637 additional *env/asp* overlaps, all belonging to the group M of HIV-1. For details, see Materials and methods, paragraph 2.4: *Assembly of an enlarged sample set of 4362 env/asp overlaps*. This dataset is an extension of the sample set in Supplementary File S1. Briefly, it contains the *env/asp* in which the anti-sense ORF is not delimited by ATG and stop codons at canonical nucleotide positions. However, the anti-sense ORF retains the ability to encode a functional anti-sense protein asp. The nucleotide sequence of each *env/asp* overlap is reported both in the alignment format with gaps and in the format without gaps.

>MH078531

TCTCAGCTGTTTAAATGGGACTGCAAAACAGATGAGAAATAACACAGAAATA-----

-----

TATAACAAAACAATCATACTCCCATGCAGAATAAAACAAATTGTAAACAGGTGGCAGGAAGTAGGAAAAGCAA

TGTATGCCCCCTCCCATCCAAGGAATAATTAGCTGTTTCATCAAAT---

ATTACAGGGCTACTATTAACAAGAGATGGTGGGAACAGCAATACAAGT-----

-----

AGAAACAATGAGACCTTCAGACCTGGGGGAGGAGATATGAGGGACAATTGGAGAAGTGAATTATATAAAATATA

AAGTAGTGAGAATTGAGCCATTA---GGAATAGCACCCACCAAGGCAAAGAGAAGAGTGGTG-----

-----CAGAGAGAAAAAAGAGCA---GTGGGAACACTAGGAGCT-----

---ATGTTCCCTTGGGTTTCTGGGAACA---GCAGGAAGCACTATG---GGCGCAGCGGCA---

GTGACGCTGACGGTACAA---GCCAGGCAA---TTATTG---TCTGGTATAGTGCAACAGCAGAAC---

AACCTG---CTGAGA---GCTATTGAGGCGCAACAGCATCTGTTGCAACTCACAGTCTGGGGCATC

>MN486020

ACTCAAGGAAATAGTACTGGGAGTAATAAT-----

-----

AACAATGAGACCATCACACTCCCATGCAGAATAAAACAAATTGTAAACATGTGGCAGGAAGTGGGAAAAGCGA

TGTATGCCCCCTCCCATCGGAGGACTAATTAGGTGTACATCAAAT---

ATTACAGGGTTACTATTAACAAGAGATGGTGGTGGGAACAGATAACACCACTGAG-----

-----

-----

ACATCTGAGACATTTCAGACCAGGAGGGGGAAATATGAAGGACAATTGGAGAAGTGAATTATATAAAATACAAAG

TAGTAAAAAATTGAACCATTA---GGAGTAGCACCCACCAAGGCAAGGAGAAGAGTGGTG-----

-----CAGAGAGAAAAAAGA-----ATTGGAACACTAGGAGCC-----

ATGTTCCCTTGGATTCTTGGGAGCA---GCAGGAAGCACTATG---GGCGCAGCGTCA---

ATAACGGTGACGGTACAG---GCCAGACAA---TTACTG---TCTGGGATAGTGCAAGCAGCAGAAC---

AATCTG---CTGAGG---GCTATTGAGGCGCAACAGCATATGTTGCAACTCACAGTCTGGGGCATC

>EF637053

ACTCAGAACAGTACTTGGCACAAGAATGAAACT-----

ACTTGGCAA---ATGAATGGAAATACTGGAGAG-----

AGGACTAATGATACTATCACACTCCCATGCAGAATAAAACAAATTATAAACAGGTGGCAGGAAGTAGGAAAAG

CAATGTATGCCCCCTCCCATCAGAGGACTAATTAGATGTTTCATCAAAT---

ATCACAGGGCTGCTATTAACAAGAGATGGTGGTGGGGACAACGGG-----

-----

-----

TCTGAGTCTGAGACCTTCAGACCTGGAGGAGGAAATATGAGGGATAATTGGAGAAGTGAATTATATAAAATATA

AAGTAGTAAGAATTGAGCCATTA---GGAGTAGCACCCACCAAGGCAAAGAGAAGAGTGGTG-----

-----CAGAGAGAAAAAAGAGCA---GTGGGAACAATAGGAGCT-----

---ATGTTCCCTTGGGTTCTTGGGAGCA---GCAGGAAGCACTATG---GGCGCAGCGTCA---

CTGACGCTGACGGTACAG---GCCAGACAA---TTATTG---TCTGGTATAGTGCAACAGCAAAAC---

AATTTG---CTGAGA---GCTATTGAGGCGCAACAACATCTGTTGCAACTCACAGTCTGGGGCATC

>JN692454

ACTCAGCTGTTTAAATAATACTTGAATACAACACAGCTTGATGATGATGAGCAGGAT-----

-----

-----

GACAATGGCACCCCTCACCCCTCCCATGCAGAATAAAACAAATCATAAACAAGTGGCAGGAAGTAGGAAAAGCAA

TATATGCCCCCTCCCATCAAAGGCTTAATTAGCTGTAACCTCAACA---  
ATTACAGGGCTGATATTAACAAGAGATGGTAATGGAACCGACCATGAC-----  
-----  
-----  
AATGAGTCTGAAATTTTCAGACCTGGAGGAGGAAACATGAAGGACAATTGGAGAAGTGAATTATATAAATATA  
AAGTAGTAAGAATTGAGCCATTA---GGAATAGCACCCCTCCAAGGCAAAGAGAAGAGTGGTG-----  
-----CAAAGAGAGAAAAGAGCA---GTGGGAATGATAGGAGCT-----  
---ATGTTCCCTTGGGTTCTTGGGAGCA---GCAGGAAGCACTATG---GGCGCAGCGTCA---  
GTAACGCTGACGGTACAG---GCCAGACTA---TTATTG---TCTGGTATAGTGCAACAGCAAAAC---  
AACTTG---CTGAGA---GCTATTGAGGCGCAACAGCATATGTTGCAACTCACAGTCTGGGGCATT  
>JN692455  
AATTATACTTTTGAAAATGATACTTTCAAAAATGATACTAGGCAT-----  
-----  
-  
AAAACTGAGAATATCACACTCCAATGCAGAATAAAACAAATTATAAACAGGTGGCAGAAAGCAGGAAAGGCAA  
TGTATGCCCCCTCCCATCAAAGGACAGATTAGATGTTTCATCAAAC---  
ATTACAGGGATATTATTAACAAGAGATGGTGGCATAACAACAACAGTAGT-----  
-----  
-----  
GACAACAATACAGAGATCTTCAGACCTGGAGGAGGAGACATGAGGGACAATTGGAGAAGTGAATTATATAAAT  
ATAAAGTAGTAAAAATTGAGCCATTA---GGAGTAGCACCCACCAAGGCAAGGAGAAGAGTGGTG-----  
-----CAGAGAGAAAAAAGAGCA---GTGGGAACGATAGGAGCT---  
-----ATGTTCCCTTGGGTTCTTGGGAGCA---GCAGGAAGCACTATG---GGCGCAGCATCA---  
CTGACGCTGACGGTACAG---GCCAGACAA---TTATTG---TCTGGTATAGTGCAACAGCAGAAC---  
AATCTG---CTGAGG---GCCATTGAGGCGCAACAGCATCTGTTGCAGCTTACAGTCTGGGGCATC  
>FJ195086  
GGTCAGTGGGATGGTACTATTGGGCCA-----  
-----  
GATGAGAATGGCAATATCACACTCCCATGCAGAATAAAACAAATTATAAACAGGTGGCAGGAAGTAGGAAAAG  
CAATATATGCCCCCTCCCATCAGAGGACAAATTAGCTGTTCCCTCAAAT---  
ATTACAGGGCTGCTACTACAAGAGATGGTGGTAGTAATAACACG-----  
-----  
-----  
AGCAATAATGAGACCTTCAGACCGGGAGGAGGAAATATGAAGGACAATTGGAGAAGTGAATTATATAAATATA  
AAGTAGTACAAATTGAGCCATTA---GGAATAGCACCCACCAAGGCAAAAAGAAGAGTGGTG-----  
-----CAGAGAGAGAAAAAGAGCA---GTAATA-----GGAGCT-----  
---ATGTTCCCTTGGGTTCTTGGGAGCA---GCAGGAAGCACTATG---GGCGCAGCATCA---  
CTGACGCTGACGGTACAG---GCCAGACTA---TTATTG---TCTGGTATAGTGCAACAGCAGAGC---  
AATCTG---CTGAGG---GCTATTGAGGCGCAACAGCATCTGTTGCAACTCACAGTCTGGGGCATC  
>JN692468  
AGTTACAACAACACTAGCAAAACTTGGAATAAACTGAAGAGAAC-----  
-----CATACT-----  
GGAGTAAATAACACAATCACACTCCCATGTAGAATAAAGCAAATTATAAACAGGTGGCAGGAAGTAGGAAAAG  
CAATGTATGCCCCCTCCCATAGGGGACTAATTAAATGTACATCAAAT---  
ATTACAGGGATAATATTAACAAGAGATGGTGGTAATGAGACTGGG-----  
-----  
-----  
ACCGAGACCTTCAGACCTGGAGGAGGAGATATGAGGGACAACCTGGAGAAGTGAATTATATAAATATAAAGTAG  
TAAAAATTGAGCCATTA---GGAATAGCACCCACCAAGGCAAGGAGAAGAGTGGTG-----  
-----CAGAGAGAAAAAAGAGCA---GTGGGAACAATAGGAGCT-----  
ATGTTCCCTTGGGTTCTTGGGAACA---GCAGGAAGCACTATG---GGCGCAGCGTCA---  
ATCACGCTGACGGTACAG---GCCAGACAA---TTATTG---TCTGGTATAGTGCAAGCAGCAGAAC---  
AATTTG---CTGAAG---GCTATTGAGGCGCAACAACATCTGTTGCAACTCACAGTCTGGGGCATC  
>KT427737  
ACTCATAGTACTTGGAATACGAATACAAC-----  
-----  
GGAAATGACAATATCACACTCCAGTGCAGAATAAAACAAATTATAAACAGGTGGCAAGAAGTAGGAAAAGCAA  
TATATGCCCCCTCCCATCAAAGGAAAAATTAATTGTCTATCAAAT---  
ATTACAGGGCTGCTGTTAGTAAGAGATGGTGGTAGGAACACAAGT-----  
-----

-----  
GGGTCCGAAACCTTCAGACCTGGAGGAGGAAATATGAGGGACAATTGGAGAAGTGAATTATATAAATATAAAG  
TAGTAAAAAATTGAACCACTA---GGAATAGCACCCACCAAGGCAAAGAGAAGAGCGGTG-----  
-----CAGAGAGAGAGAAGAGCA---GTGGGAACACTGGGAGCT-----  
ATGTTTCCTTGGGTTCTTGGGAGCA---GCAGGAAGCACTATG---GGCGCAGCGGCA---  
ACAACGCTGACGGTACAG---GCCAGACTA---TTATTG---TCTGGTATAGTGCAACAGCAAAAT---  
AATTTG---CTGAGG---GCTATTGAGGCGCAACAGCACATGTTGCAACTCACAGTCTGGGGCATC  
>KT427704  
AATTATACTCCCAAT-----  
-----  
ACTACAGGAAATATTACACTCCCATGCAGAATAAAACAAATTATAAACAGATGGCAGGAAGTAGGAAAAGCAA  
TGTATGCCCCCTCCCATCGGAGGACAAATTAAATGTTTCATCAAAT---  
ATTACAGGGATGATATTAACATGGGATGGGGGGAACGAAACCAGG-----  
-----  
-----  
GACAATGAGACCTTCAGACCTGGAGGAGGAGATATGAGGGACAATTGGAGAAGTGAATTATATAAATATAAAG  
TAGTAAAAAATTGAGCCAATA---GGAGTAGCACCCACCAAGGCAAAGAGAAGAGTGGTG-----  
-----CAGAGAGAAAAAAGAGCG---GTAACG---CTAGGAGCC-----  
ATGTTTCCTTGGGTTCTTAGGAGCA---GCAGGAAGCACTATG---GGCGCAGCGTCA---  
ATGACGCTGACGGTACAG---GCCAGACAA---TTATTG---TCTGGTATAGTGCAACAGCAAAGC---  
AATTTG---CTGAGG---GCTATTGAGGCGCAACAGCATCTGTTGCAACTCACAGTCTGGGGCATT  
>KT427872  
ACTCACTGGTCATTAAATATAACT-----  
-----  
GGCACTGGCAATATCACACTTCCATGCAGAATAAAACAAATTATAAACAGTGGCAGGAAGTAGGAAGAGCAA  
TATACGCCCCCTCCCATCCAAGGATTAATTAGATGCTCATCAAAT---  
ATTACAGGGCTGCTACTGACACGGGATGGTGGTATCACAACTCT-----  
-----  
-----  
AGCAACCCTGAGGTCTTCAGACCTGGGGGAGGAGATATGAGAGACAATTGGAGAAGTGAAGTATATAAATATA  
AGGTAGTAAAAATTGAGCCAGTA---GGAATAGCACCCACCAAGGCAAAGAGAAGAGTGGTG-----  
-----CAAAGAGAAAAAAGAGCA---GTGGGGACATTAGGAGCT-----  
---ATGTTTCCTTGGGTTCTTGGGAGCA---GCAGGAAGCACTATG---GGCGCAGCGTCA---  
TTGACGCTGACGGTACAG---GCCAGACTA---TTATTG---TCTGGTATAGTGCAACAGCAAAAC---  
AATTTG---CTGAGA---GCTATTGAGGCGCAACAGCATATGTTGCAACTCACAGTCTGGGGCATC  
>KJ849818  
AGTTACCTT-----  
-----AATGAA-----  
ACTAACGAAACAAATATCACACTCCCATGCAGAATTAACAAATTATAAACATGTGGCAGAGAGTAGGAAAAG  
CAATGTATGCCCCCTCCCATTCAGGACCAATTAAGTGTTCATCAAAT---  
ATTACAGGGCTGCTCTTAGTAAGAGACGGTGGT-----  
-----  
-----  
AATAATAATACAAATGAGACCTTCAGACCTGGAGGAGGAAATATGAAGGACAATTGGAGAAGTGAATTATATC  
GATATAAAGTAGTAAAAATTGAACCACTA---GGACTAGCACCTACCACGGCAAAGAGAAGAGTGGTG-----  
-----CAGAGAGAAAGAAGAGCA---GTGGGA---  
CTAGGAGCG-----TTGTTTCCTTGGGTTCTTAGGAGCA---GCAGGAAGCACTATG---  
GGCGCAGCGTCA---CTGACGCTGACGGTACAA---GCCAGACAA---TTATTG---  
TCTGGTATAGTGCAACAGCAGAAC---AACCTG---CTGATG---  
GCTATTGAGGCGCAACAACATATGTTGCAACTCACAGTCTGGGGCATC  
>KT427751  
TTTCATTGGCCTGTCAATGACACTAATAGTAATAGT-----  
-----  
-----  
ACAAATGATATAGTTACCATCCCATGCAGAATAAAACAAATTATAAACAGATGGCAGGAAGTAGGAAAAGCAA  
TGTATGCCCCCTCCCATCAGAGGGCAGATTAAATGTTTCATCAAAT---  
ATTACAGGGCTGCTATTGACAAGGGATGGTGGTAACAACAACACG-----  
-----  
-----  
GAGAACAAATACAGAGGTCTTCAGACCTGAAGGAGGAGATATGAGGGACAATTGGAGAAGTGAAGTATATAAAT

ATAAAGTAGTAAAAATTGAGCCATTA---GGAGTAGCACCCACCAAGCAAAGAGAAGAGTGGTG-----  
 -----CAGAGGGAAAAAAGAGCA---GTGGGAGTGATAGGAGCT---  
 -----ATGTTTCCTTGGGTTCTTGGGAGCA---GCAGGAAGCACTATG---GGCGCAGCGTCA---  
 CTGACGCTGACGGTACAG---GCTAGACAA---TTATTG---TCTGGTATAGTGCAACAGCAAAAC---  
 AATTTG---CTGAGA---GCTATTGAGGCGCAACAGCATCTGTTGCAACTCACAGTCTGGGGCATC  
 >KT427803  
 TTTCACAGTTCCTTGAATGCAAGTAATTTGAATACAACACAGAATGGGACT-----  
 -----  
 ----  
 GATAATAGTAATATCACACTCCCATGCAGAATAAAACAAATTATAAATAGGTGGCAGGAAGTAGGAAAATCAA  
 TGTATGCCCCCTCCCGTCCAAGGACTAATTAAATGTTTCATCAAAT---  
 ATTACAGGGCTGCTATTAAACAAGAGATGGTGGTAGCAACACCACG-----  
 -----  
 -----  
 GAGAAGGAAGTGTTTCAGACCTGGGGGAGGAAATATGAAGGACAATTGGAGAAGTGAATTATATAAATATAAAG  
 TAGTAAAAATTGAGCCATTA---GGAGTAGCACCCACCAAGGCAAGGAGAAGAGTGGTG-----  
 -----CAGAGAGAAAAAAGAGCA---GTGACA---CTAGGAGCT-----  
 ATGTTTCCTTGGGTTCTTGGGAGCA---GCAGGAAGCACTATG---GGCGCAGCGTCA---  
 CTAACGCTGACGGTACAG---GCCAGACAA---TTATTG---TCTGGTATAGTGCAAGCAGCAGAAC---  
 AATTTG---CTGAGG---GCTATTGAGGCGCAACAACATATGTTGCAACTCACAGTCTGGGGCATC  
 >KT427797  
 TTTTATAGTAACTGGACTACAAATTCAACTAACGAAGGGAACTGGACTACAAATTCA-----  
 -----ACTAAC-----  
 -  
 AATGGGAATAACACCATCACACTCCCATGCAGAATAAAACAAATTGTAAACATGTGGCAGGAAGTAGGAAAAG  
 CAATGTATGCCCCCTCCCATCAGTGGAATAATTAAATGTTTCATCAAAT---  
 ATTACAGGGATACTGTTAAACAAGAGATGGTGGTAATAATAGTACG-----  
 -----  
 -----  
 AACGAGACCTTCAGACCAGCAGGAGGAGATATGAGGGACAATTGGAGAAGTGAATTATATAAATATAAAGTAG  
 TAAAAATTGAACCATTA---GGATTAGCACCTACCAAGGCAAGGAGAAGAGTGGTG-----  
 -----CAGAGAGAAAAAAGAGCA---GTGGGAACACTAGGAGCT-----  
 ATGTTTCCTTGGGTTCTTGGGAGCA---GCGGGAAGCACTATG---GGCGCAGCGTCA---  
 ATGGCGCTGACGGTACAG---GCCAGACTA---TTATTG---TCTGGTATAGTGCAACAGCAAAAT---  
 AATTTG---CTGAAG---GCTATTGAGGCGCAACAACACCTGTTGCAACTCACGGTCTGGGGCATT  
 >KX181894  
 AGTTATTGGCTGAATAATACTTGGGTGAATACGACTCTGGAA-----  
 -----  
 ATCAATGGTACTATCACACTCCCATGCAGAATAAAACAGATTATAAACAGGTGGCAAGAAGTAGGAAAAGCAA  
 TGTATGCCCCCCCCCATCAGAGGACACATTAATTGTTTATCAAAC---  
 ATTACAGGGCTGATATTAGCAAGGGATGGTGGTATTAATGTGACC-----  
 -----  
 -----  
 AACGATAGCGAGACCTTCAGACCTGGAGGAGGAGACATGAGGGACAATTGGAGAAGTGAATTATACAAATATA  
 AAGTAGTAAAAATTGAGCCATTA---GGAGTAGCACCCACCAAGGCAAGGAGAAGAGTGGTG-----  
 -----CAAAGAGAAAAAAGAGCA---GTGGGAACGCTAGGAGCC-----  
 ---ATGTTTCCTTGGGTTCTTGGGAGCA---GCAGGAAGCACTATG---GGCGCAGCGGCA---  
 ACAACGCTGACGGTACAG---GCCAGACTA---TTGTTG---TCTGGTATAGTGCAACAGCAGAAC---  
 AATCTG---CTGAGG---GCTATTGAGGCGCAACAGCATATGTTGCAACTCACAGTCTGGGGCATC  
 >KX181903  
 ATTTACGGATGGAATGGAACA-----  
 -----  
 ATCCCCGCTAACATCACACTTCCATGTAGAATAAAACAAATTATAAACAGGTGGCAGGAAGTAGGAAAAGCAA  
 TGTATGCCCCCTCCCGTCAGCGGGCTAATTAAGTGTACATCAAAT---  
 ATTACAGGACTACTATTAACAAGAGATGGTGGTATCAATGAAAAT-----  
 -----  
 -----  
 AATATATCTGAAACCTTCAGACCTGGAGGAGGAGATATGAGGGACAATTGGAGAAGTGAATTATATAAATATA  
 AAGTAGTAAAAATTGAACCATTA---GGAATAGCACCCCTCCAAGGCACAGAGAAGAGTGGTG-----  
 -----CAGAGAGAAAAAAGAGCA---GTGGGAACGCTGGGAGCC-----

---ATGTTCCCTTGGGTTCTTGGGAGCA---GCAGGAAGCACTATG---GGCGCAGCGGCA---  
 GCAACGCTGACGGTACAA---GCCAGACTA---TTGTTG---TCTGGTATAGTGCAGCAGCAGAAC---  
 AATCTG---CTGAGG---GCTATTGAGGCGCAACAGCATATGTTGCAACTCACAGTCTGGGGCATC  
 >KX181914  
 AATCAGACGTCTAAT-----  
 -----  
 GGGAAATAGGACCATTACACTCCCATGCAGAATAAAACAAATCATAAACAGATGGCAAGAAGTAGGACAAGCAA  
 TGTATGCCCCCTCCCATTAGAGGACAGATTAGATGTACATCAAAT---  
 ATTACAGGGTTACTATTAACAAGAGATGGTGGTAACAGGAACACCACAGAC-----  
 -----  
 -----  
 AACAACTACTGAGGTTTTTCAGACCTGGAGGAGGAGATATGAGGGACAATTGGAGAAGTGAATTATATAAAATATA  
 AAGTAGTAAAAATTGAGCCATTA---GGAATAGCACCCACTAGGGCAAAGAGGAGAGTGGTG-----  
 -----CAAAGAGAGAAAAAGAGCA---GCGGGA---CTAGGAGCT-----  
 ---TTGTTTCATTGGGTTCTTGGGAGCA---GCAGGAAGCACTATG---GGCGCAGCGTCA---  
 GTGACGCTGACGGTACAG---GCCAGACAA---TTATTG---TCTGGAATAGTGC AACAGCAGAAC---  
 AATTTG---CTGAGA---GCTATTGAGGCGCAACAACATCTGTTGCAACTCACAGTCTGGGGCATC  
 >MG571982  
 ACTCATAAACTTGGGAAAATGGTAAT-----  
 -----  
 GATAATGAACTATCACACTCCCATGCAGAATAAAACAAATTATAAACAGGTGGCAGGAAGTAGGAAGAGCAA  
 TGTATGCCCCCTCCCATTCAGAGACAAATTAAGTGTACATCAAAT---  
 ATAACAGGGATGATATTAACAAGAGATGGGGGTAATGAGAGCGCA-----  
 -----  
 -----  
 CCTGAAGAAATCTTCAGGCCTGGGGGAGGAGATATGAGGGACAATTGGAGAAGTGAATTATATAAAATATAAGG  
 TAGTAAAAATTGAGCCATTA---GGAGTAGCACCCACCAAGGCAAAGAGAAGAGTGGTG-----  
 -----CAGAGAGAAAAAAGAGCG---ATAACG---CTGGGAGCT-----  
 ATGTTCCCTTGGGTTCTTGGGAGCA---GCAGGAAGCACTATG---GGCGCAGCGTCG---  
 CTGACGCTGACGGTACAG---GCCAGACTA---TTATTG---TCTGGTATAGTGCAGCAGCAGAAC---  
 AATCTG---CTGAGA---GCTATTGAGGCGCAACAGCATATATTGCAACTCACAGTCTGGGGCATT  
 >MG571991  
 AATTATACAGG-----  
 -----  
 TCTAATGACACCATCACACTCCCATGCAAAATAAAACAAATTGTAAACAAGTGGCAGGAAGTAGGAAAAGCAA  
 TATACGCCCCCTCCCATCAGTGGAAACATTAGCTGTTTCATCAAAT---  
 ATTACAGGGCTGATATTAACAAGAGATGGAGGCGAT-----  
 -----  
 -----  
 AATGAGTCTGAACTTTTCAGACCTGGAGGAGGAAATATGAAAGACAATTGGAGAAGTGAATTATATAAAATATA  
 AAGTAGTAAAAATTGAGCCATTA---GGAGTAGCACCCACCAAGGCAAAGAGAAGAGTGGTG-----  
 -----CAGAGAGAAAAAAGAGCA---GTGGGAACAATAGGAGCT-----  
 ---ATGTTCCCTTGGGTTCTTGGGAGCA---GCAGGAAGCACTATG---GGCGCAGCGGCA---  
 GTAACGCTGACGGTACAG---GCCAGACAA---TTATTG---TCTGGTATAGTGC AACAGCAGAAC---  
 AACCTG---CTGAGG---GCTATTGAGGCGCAGCAGCATATGTTGCAGCTCACAGTCTGGGGCATC  
 >FJ653506  
 GATCAAAGTAATAGTACTTGGCATACTAATAATACT-----  
 -----TGGAAT-----  
 AATACTGAAGGCGTTATCACACTCCACTGCAGAATAAAACAAATTATAAACCTGTGGCAGGAAGTAGGAAAAG  
 CAATGTATGCCCCCTCCCATCCAAGGACAAATTAAGTGTACATCAAAT---  
 ATTACAGGACTGCTTTTAACAAGAGATGGTGGGAATAACAATGGTAGTAAT-----  
 -----  
 -----  
 AACAGTGAGACCGAGACCTTTAGACCTGGAGGAGGAGATATGAGGGACAATTGGAGAAGTGAATTATATAAAAT  
 ATAAAGTAGTAAGAATTGAACCATTA---GGAATAGCACCCACCAAGGCAAAAAGAAGAGTGGTG-----  
 -----CAAAGAGAGAAAAAGAGCA---GTGGGA---CTGGGAGCT---  
 -----ATATTCCTTGGGTTCTTGGGAGCA---GCCGGAAGCACTATG---GGCGCAGCGTCG---  
 ATAACGCTGACGGTACAG---GCCAGACAA---GTATTG---TCTGGTATAGTGC AACAGCAGAAC---  
 AATTTG---CTGAAG---GCTATTGAGGCGCAACAGCATTTGCTGCAACTCACAGTCTGGGGCATT  
 >EU023932

ACTCATTTGAGTAATACTACGGAGTCAAAT-----  
 -----  
 GAAAATGACACAATCACACTCCAATGTAGAATAAAACAAATTATAAACATGTGGCAGGAAGTAGGAAAAGCAA  
 TGTATGCCCCCTCCCATTCAGGACAAATTAAGTGTTCATCAAAA---  
 ATTACAGGGCTACTTTTAACAAGAGATGGTAGTAGCACAAATGAGACA-----  
 -----  
 -----  
 AATGGGACTGAGATCTTCAGACCTGGAGGAGGAGATATGAGGGACAATTGGAGAAGTGAATTATATAAATATA  
 AAGTAGTAGGAATTGAACCAATA---GGAATAGCACCCACCAAGGCAAAGAGAAGAGTGGTG-----  
 -----CAGAGAGAAAAAAGAGCA---GTGGGAACATTAGGAGCT-----  
 ---ATGTTCCCTTGGGTTCTTGGGAGCG---GCAGGAAGCACTATG---GGCGCAGCGTCA---  
 ATGACGCTGACGGTACAG---GCCAGACAA---TTATTG---TCTGGTATAGTGCAACAGCAGCAAAAT---  
 AATTTG---CTGAGG---GCTATTGAGGCGCAACAACATGTGTTGCAACTCACAGTCTGGGGCATC  
 >JF932469  
 AATTATACTTGGGAAGTCACTAATACTTGGGAATGATACTGCA-----  
 -----  
 -  
 GGAAAATGACAATATCACGCTCCCTTGCAGAATAAAACAAATTGTAAATATGTGGCAGGAAGTAGGGAGAGCAA  
 TGTATGCCCCCCCCATTGAAGGACAAATTAGATGTTTCATCAAAT---  
 ATTACAGGGTTGCTATTAACAAGAGATGGTGGTAATACTACGAAC-----  
 -----  
 -----  
 GGGACCGAGATCTTCAGACCTGGAGGAGGAAATATGAGGGACAATTGGAGAAGTGAATTATATAAATATAAAG  
 TAGTAAAAAATTGAACCATTA---GGAGTAGCACCCACCAAGGCAAAGAGAAGAGTGGTG-----  
 -----CAGAGAGAAAAAAGAGCA---GTGGGAACGATAGGAGCT-----  
 ATGTTCCCTTGGGTTCTTGGGAGCA---GCAGGAAGCACTATG---GGCGCAGCGTCA---  
 ATAACGCTGACGGTACAG---GCCAGACAA---TTGTTG---TCTGGTATAGTGCAACAGCAGAGA---  
 AATTTG---CTGAGG---GCTATTGAGGCGCAACAGCAGCTGTTGCAACTCACAGTCTGGGGCATC  
 >KM218138  
 AATTATACTTGAATAATGGCACCTGGCTAGCGCCAAATATC-----  
 -----  
 -  
 ACTGGAAATAACATCACCATCCATTGCAGAATAAAACAAATTATAAACAGGTGGCAGGAAGTAGGAAAAGCAA  
 TGTATGCCCCCTCCCATCGCGGGACAACTTAATTGCACATCAAAT---  
 ATTACAGGGCTGCTATTAGTAAGAGATGGTGGTAACACCACCAACACCATCGAG-----  
 -----  
 -----  
 AACAAACACCGAAATCTTCAGACCTGGAGGAGGAGATATGAGGGACAATTGGAGAAGTGAAGTATATAAATATA  
 AAGTAGTAAAAATTGAGCCATTA---GGACTAGCACCCACCAAGGCAAAGAGAAGAGTGGTG-----  
 -----CAGAGAGAAAAAAGAGCA---GTGGGAACAATAGGAGCT-----  
 ---ATGTTCCCTTGGGTTCTTGGGAGCA---GCAGGAAGCACTATG---GGCGCAGCGTCA---  
 CTCACGCTGACGGTACAG---GCCAGACTA---TTACTG---TCTGGGATAGTGCAACAGCAGCAAAAC---  
 AATTTG---CTGAAG---GCTATTGAGGCGCAACAGCACCTGTTGCAACTCACAGTCTGGGGCATC  
 >KM218195  
 AATCATACTTGGCTGGCTAATAATACTTGGCAAGAGTCTTGGCAA-----  
 -----  
 -  
 GGGTCAGATACTATTACTCTCCAATGCAGAATAAAACAAATTATAAACAGATGGCAGGAAGTAGGAAAAGCAA  
 TGTATAACCCTCCCATCAGGGGACAAATTAGATGTTTCATCAAAT---  
 ATTACAGGGCTTCTGTTAACAAGAGATGGTGGTAACACGAATGGGTCCAGA-----  
 -----  
 -----  
 AATGGGCCTGAAACCTTCAGACCTGGAGGAGGAGATATGAGAGACAATTGGAGAAGTGAATTATATAAATATA  
 AAGTAGTAAAAATTGAGCCACTA---GGAATAGCACCCACCAAGGCAAAGAGAAGAGTGGTG-----  
 -----CAGAGAGAAAAAAGAGCA---GTGGGAACAATAGGAGCT-----  
 ---ATGTTCCCTTGGGTTCTTGGGAGCA---GCAGGAAGCACTATG---GGCGCAGCGTCA---  
 GTGACGCTGACGGTACAG---GCCAGACTA---TTACTG---TCTGGTATAGTGCAACAGCAGAAC---  
 AATCTG---CTGAAA---GCTATTGAGGCGCAACAGCACCTGTTGCAACTCACAGTCTGGGGCATC  
 >JF932478

ACTTATAATGGTACTTGGGAAGGTACTACA-----  
 -----  
 GGAAATGACACTATCACGCTCCCTTGCAGAATAAAACAAATTATAAACATGTGGCAGGAAGTAGGGAAAGCAA  
 TGTATGCCCCCTCCCATTAGAGGACAAATTAGATGTTTCATCAAAT---  
 ATTACAGGGTTACTATTAACAAGAGATGGTGGTACTAATGAGACC-----  
 -----  
 -----  
 AATACCAACGAGACCTTCAGACCTGGAGGAGGAGATATGAGAGACAATTGGAGAAGTGAATTATATAAATATA  
 AAGTAGTACAAATTGAACCATTA---GGAGTAGCACCCACCAAGGCAAAAAGGAGAGTGGTG-----  
 -----CAGAGAGAAAAAAGAGCA---GTGGGAACAATAGGAGCT-----  
 ---ATGTTCCCTTGGGTTCTTGGGAGCA---GCAGGAAGCACAATG---GGCGCAGCGTCA---  
 ATAACGCTGACGGTACAG---GCCAGACAA---TTGTTG---TCTGGCATAGTGCAACAGCAGAGA---  
 AATTTG---CTGAGG---GCTATTGAGGCGCAACAGCATCTGTTGCAACTCACAGTCTGGGGCATC  
 >JF346918  
 ACTTATGCTTGAATGATACTAGG-----  
 -----AAT---  
 ACAGTAAATGACACTATCACGCTCCCTTGCAGAATAAAGCAAATTATAAACATGTGGCAGGGAGTAGGGAAAAG  
 CAATGTATGCCCCCTCCCATTAGAGGACAAATTAGGTGTGTATCAAAT---  
 ATTACAGGGTTGCTATTAACAAGAGATGGTGGTATTAATAAGAAC-----  
 -----  
 -----  
 AGCACCCCCGAGACCTTCAGACCTGGAGGAGGAGATATGAGGGACAATTGGAGAAGTGAATTATATAAATATA  
 AAGTAGTAAGAATTGAACCATTA---GGAGTAGCACCCACCAAGGCAAAGAGAAGAGTGGTG-----  
 -----CAGAGAGAAAAAAGAGCA---GTGGGAACGTTCCGAGCT-----  
 ---ATGTTCCCTTGGGTTCTTGGGAGCA---GCAGGAAGCACTATG---GGCGCAGCGTCA---  
 CTAACGCTGACGGTACAG---GCCAGACAA---TTGTTG---TCTGGTATAGTGCAACAGCAGAGA---  
 AATCTG---CTGAGG---GCTATTGAGGCGCAACAGCACATGTTGCAACTCACAGTCTGGGGCATC  
 >KC596066  
 ACTTATCTGGCTAATGATACTAGATCAGAGAAGAAT-----  
 -----  
 -----  
 ACTACTGGTGTTCATCAGCTCCCATGCAGAATAAAACAAATTATAAACAGGTGGCAAGAAGTAGGGAGAGCAA  
 TGTATGCCCCCTCCCATCATGGGAAAAATTAACTGTTTCATCAAAT---  
 ATTACAGGGATACTATTAACAAGAGATGGTGGTGAAACAAATGAGTCC-----  
 -----  
 -----  
 AGAAATGGGTCCGAAACCTTCAGACCGGGAGGAGGAAATATGAAAGATAATTGGAGAAGTGAATTATATAAAT  
 ATAAAGTAGTAAAAATTGAGCCACTA---GGAATAGCACCCACCAAGGCAAGGAGAAGAGTGGTG-----  
 -----CAGAGAGAAAAAAGAGCA---GTAACA---CTAGGAGCT---  
 -----GTATTTCTCGGGTTCTTGGGAGCA---GCAGGAAGCACTATG---GGCGCAGCGTCA---  
 ATGACGCTGACGGTACAG---GCCAGACTA---TTACTG---TCTGGTATAGTGCAACAGCAGAAC---  
 AATCTG---CTGAGA---GCTATTGAGGCGCAACAGCACATGTTGCAACTCACAGTCTGGGGCATC  
 >KX693556  
 CCTCAGATT-----  
 -----GCTACT-----  
 ACAGGAAATGACACTATCACGCTCCCTTGCAGAATAAGACAAATTGTAAACATGTGGCAGCAAGTAGGGAAAG  
 CAATGTATGCCCCCTCCCATAGCAGGACAAATTAGATGTTTCATCAAAT---  
 ATTACAGGGGTGCTATTAACAAGAGATGGTGGTAATAATGAGAGC-----  
 -----  
 -----  
 AAGGCCAACGCCAACGAGACCTTCAGACCTGCGGGAGGAGATATGAGAGACAATTGGAGAAGTGAATTATATA  
 AATATAAAGTAGTAAAAATTGAACCATTA---GGAGTAGCACCCACCAAGGCAAAGAGAAGAGTGGTG-----  
 -----CAGAGAGAAAAAAGAGCA---  
 GTGGGAACACTAGGAGCT-----ATGTTCCCTTGGGTTCTTGGGAGCA---GCAGGAAGCACTATG---  
 GGCGCAGCGTCA---ATAACGCTGACGGTACAG---GCCAGACAA---TTGTTG---  
 TCTGGTATAGTGCAACAGCAGAGAGA---AATTTG---CTGAGA---  
 GCTATTGAGGCGCAACAGCATCTGTTGCAACTCACAGTCTGGGGCATC  
 >KX693136  
 ACTCAGACAGGTACTACA-----  
 -----  
 -----  
 GGAAACAGCACTATCACGCTCCCTTGCAGAATAAAACAAATTGTAAACATGTGGCAGGAAGTAGGGAAAGCAA

TGTATGCCCCCTCCCATTCAGAGAAAAATTAGATGTTTCATCAAAT ---  
 ATTACAGGGCTGCTATTAACAAGAGATGGTGGTAATGAGAGCAAGACC-----  
 -----  
 -----  
 ACCAACACAGAAACCTTCAGACCTGGAGGAGGAGATATGAGAGACAATTGGAGAAGTGAATTATATAAAATATA  
 AAGTAGTAAAAATTGAACCATTA---GGAGTAGCACCCACCAAGGCAAAGAGAAGAGTGGTG-----  
 -----CAGAGAGAAAAAAGAGCA--GTGGGAACAATAGGAGCT-----  
 ---ATGTTCCCTTGGGTTCTTGGGAGCA--GCAGGAAGCACTATG--GGCGCAGCGTCA---  
 ATAACGCTGACGGTACAG---GCCAGACAA---TTGTTG---TCTGGTATCGTGCAACAGCAGAGA---  
 AATTTG---CTGAGA---GCTATTGAGGCGCAACAGCATCTGTTGCAACTCACAGTCTGGGGCATC  
 >KX693292  
 AATTATACTAAA-----  
 -----  
 GAAGATGACAATCTCACGCTCCCTTGCAGAATAAAACAAATTGTAAACATGTGGCAGGGAGTAGGGAGAGCAA  
 TGTATGCCCCCTCCCATTCAGAGGACAAATTAGATGTTTCATCAAAT ---  
 ATTACAGGGTTGATATTAACAAGAGATGGTGGCAAAAATGGTAAAAATGAGAGC-----  
 -----  
 -----  
 AACACCAATGAGACCTTCAGACCTATAGGAGGAAATATGAAAGACAATTGGAGAAGTGAATTATATAAAATATA  
 AAATAGTAAAAATTGAACCATTA---GGAGTAGCACCCACCAAGGCAAAGAGAAGAGTGGTG-----  
 -----CAGAGAGAAAAAAGAGCA--GTGGGAACGCTGGGAGCT-----  
 ---ATGTTCCCTTGGGTTCTTGGGAACA--GCAGGAAGCACTATG--GGCGCAGCGTCA---  
 CTAACGCTGACGGTACAG---GCCAGACAA---TTGTTG---TCTGGTATAGTGCAACAGCAGAGA---  
 AATCTG---CTGAGG---GCTATTGAGGCGCAACAGCATATGTTGCAACTCACAGTCTGGGGCATC  
 >KP109511  
 AATTATACTCTCCTGGCTAATGGTACTTGGCAAGGGCCAAACAGTACTAAT-----  
 -----  
 -  
 GGAAATGGCACACTCACACTCCCATGCAGAATAAAACAAATCATAAACAGGTGGCAGGAAGTAGGAAAAGCAA  
 TGTATGCCCCCTCCCATCGCGGGAAACATTAGCTGTTTATCAAAT ---  
 ATTACAGGGCTGCTATTAACAAGAGATGGTGGTATCAACATGACGAAT-----  
 -----  
 -----  
 AATGGGTCCGAAATCTTCAGACCTGAAGGAGGAGATATGAGGAACAATTGGAGAAGTGAATTATATAAAATATA  
 AAGTAGTAAAAGTTGAGCCACTA---GGAATAGCACCCACCAGGGCAAAGAGAAGAGTGGTG-----  
 -----CAGAGAGATAAAAAGAGCA--GTGGGAACAATAGGAGCT-----  
 ---ATGTTCCCTCGGGTTCTTGGGAGCA--GCAGGAAGCACTATG--GGCGCAGCGTCA---  
 GTGACGCTGACGGTACAG---GCCAGACTA---TTACTG---TCTGGTATAGTGCAACAGCAGAAC---  
 AATCTG---CTGAGA---GCTATTGAGGCGCAACAGCACATGTTGCAACTCACAGTCTGGGGCATC  
 >KU724105  
 AATTATACTTTGTTTAATAATGGTACTTGGAAAGAGGGTACT-----  
 -----  
 -  
 AACAAAAGTGTCATCACACTCCCATGCAGAATAAAACAAATTATAAACAGGTGGCAGGAAGTAGGAAAAGCAA  
 TGTATGCCCCCTCCCATCAGGGGACAAATTAAGTGTACATCAAAT ---  
 ATTACAGGGCTGCTATTAACAAGAGATGGTGGTAATAGTGGTACTGGGTCCAAA-----  
 -----  
 -----  
 AATGGGAACGAAACCTTCAGACCTGGAGGGGGAAATATGAGAGACAATTGGAGAAGTGAATTATATAAAATATA  
 AAGTAGTAAAAATTGAGCCACTA---GGAATAGCCCCCACCACGGCAAGGAGAAGAGTGGTG-----  
 -----CAGAGAGAAAGAAGAGCA--GTGGGAACATTAGGAGCT-----  
 ---ATGTTCCCTCGGGTTCTTGGGAGCA--GCAGGAAGCACTATG--GGCGCAGCGTCG---  
 CTGACGCTGACGGTACAG---GCCAGACTA---TTACTG---TCTGGTATAGTGCAACAGCAGAAC---  
 AATCTG---CTGAGA---GCTATTGAGGCGCAACAGCATATGTTGCAACTCACAGTCTGGGGCATC  
 >AY561238  
 ACTCAGTGGAAAGGAAATAGCACA-----  
 -----  
 CTCCCAGAAAATGTTACACTCCCATGCAGAATAAAACAAATTGTAAACATGTGGCAGGAAGTAGGAAAAGCAA  
 TGTATGCCCCCTCCCATCAGCGGACAAATTAGATGCTCATCAAAT ---  
 ATTACAGGGCTGCTATTAACAAGAGATGGTGGTGCCAATGGTACCCT-----

-----  
-----  
GATATAGACGAGATCTTCAGGCCTGGAGGAGGAGATATGAGGGACAATTGGAGAAGTGAATTATATAAATATA  
AAGTAGTAAAAATTGAACCATTA---GGAATAGCACCCACCAAGGCAAAGAGAAAAGTGGTG-----  
-----CAAAGAGAAAAAAGAGCA---GTGGGA---CTAGGAGCT-----  
---TTGTTCCCTTAGGTTCTTAGGAGCA---GCAGGAAGCACTATG---GGCGCAGCGTCA---  
GTGACGCTGACGGTACAG---GCCAGACAA---TTATTG---TCTGGTATAGTGCAACAGCAGAAC---  
AATCTG---CTGAGA---GCTATTGATGCGCAACAGCATCTGTTGCAACTCACAGTCTGGGGCATT  
>FJ388940  
TTTCAATATAATAGTACTTGAATGATACTGGAGAG-----  
-----  
-----  
ATGAATGGCACTATCATGCTCCCATGCAGAATAAGACAAATCATAAACCTGTGGCAGGAAGTAGGAAAAGCAA  
TGTATGCCCCCTCCCATCAAAGGACTAATCAGATGTTTCATCAAAT---  
ATTACAGGACTGCTATTACTAAGAGATGGTGGTAATAATAGCAGTGGG-----  
-----  
-----  
AGTAATAACACCGAGATCTTCAGACCTGGAGGAGGAGATATGAGGGACAATTGGAGAAGTGAATTATATAAAT  
ATAAAGTAGTAAAAATTGAACCATTA---GGAATAGCACCTACCAAGGCAAAGAGAAGAGTGGTG-----  
-----CAGAGAGAAAAAAGAGCA---GTGGGA---TTCGGAGCC---  
-----GTGTTCCCTGGGTTCTTGGGAGCA---GCAGGAAGCACTATG---GGCGCAGCGTCA---  
ATAACGCTGACGGTACAG---GCCAGACAA---TTATTG---TCTGGTATAGTGCAAGCAGCAAAAT---  
AACTTG---CTGAGG---GCTATTGAGGCGCAGCAGCATCTGTTACAACCTCACAGTTTGGGGCATT  
>JF683749  
AATCACACGGGAAATAAT-----  
-----  
GATAATGATACAATCACACTCCAATGCAGAATAAAGCAAATTATAAACATGTGGCAGGAAGTAGGAAAAGCAA  
TGTATGCCCCCTCCCATCCAAGGAATAATTAGCTGTTTCATCAAAC---  
ATTACAGGGCTGCTATTAAACAAGAGATGGTGGTGATGACAATAGC-----  
-----  
-----  
AGCAGTACAGAGATCTTCAGACCTGGAGGAGGGGATATGAGGGACAATTGGAGAAGCGAATTATATAAATATA  
AAGTAGTAAGAATTGAACCATTA---GGGGTAGCACCCACCAAGGCAAAGAGAAGAGTGGTG-----  
-----CAGAGAGAAAAAAGAGCA---ATAGGA---ATAGGAGCT-----  
---TTGTTCCCTCGGGTTCTTGGGAACA---GCAGGAAGCACTATG---GGCGCAGCGTCA---  
TTGACGCTGACGGTACAG---GCCAGACAA---TTATTG---TCTGGTATAGTGCAACAGCAGAAC---  
AATTTG---CTGAGG---GCTATTGAGGCGCAACAGCATATGTTGCAACTCACAGTCTGGGGCATC  
>JF683765  
AATCATACTTGAATGGTACTGCAATGACTGCTTGAATGGTACTGTAGTGACTACT-----  
-----TGGAAT---GGTACTGCAGTGATTAATAGT-----  
ACTACGGAGTCAAATATCACACTCCAATGCAGGATAAAACAAATAGTAAACATGTGGCAGGAAGTAGGAAAAG  
CAATGTATGCCCCCTCCCATCAGAGGACAGATTAGATGTTTCATCAAAT---  
ATTACAGGCCTATTATTAAACAAGAGATGGTGGTCTTAACAGCAGC-----  
-----  
-----  
AATATCAACGAGACTTTCAGACCAGGAGGAGGAGATATGAGGGACAATTGGAGAAGTGAATTATATAAATATA  
AAGTAGTAAAAATTGAACCATTA---GGGGTAGCACCCACCAGGGCAAGGAGAAGAGTGGTG-----  
-----CAGAGAGAAAAAAGAGCA---ATAGGA---CTAGGAGCT-----  
---GTGTTCCCTTGGGTTCTTGGGAGCA---GCAGGAAGCACTATG---GGCGCAGCGTCA---  
ATAACGCTGACGGCACAG---GCCAGGCAA---TTGATG---TCTGGTATAGTGCAACAGCAGAAC---  
AATCTG---CTGAGA---GCTATTGAGGCGCAACAGCATCTGTTGCAACTCACAGTCTGGGGCATC  
>JF683784  
ACTCATAATGATACT-----  
-----  
AAAGGAATATATATCACACTCCCATGCAGAATAAGACAAATTGTAAATCTGTGGCAGGAAGTAGGGAAAGCAA  
TGTATGCCCCCTCCCATCAGGGGACAAATTAAGTGTTCCTCAAAT---  
ATTACAGGGCTGATATTAAACAAGAGATGGTGGTCTGAATAATGAT-----  
-----  
-----  
ACTAATGAGATCTTCAGACCTGGAGGAGGAGATATGAGGGATAATTGGAGAAGTGAATTATATAAATATAAAG

TAGTAAAAATTGAACCATTA---GGAGTAGCACCCACCAAGGCAAAGAGAAGAGTGGTG-----  
 -----CAAAGAGAGAGAAGAGCA---GTGGGA---ATAGGAGCT-----  
 CTGTTTCCTTGGGTTCTTGGGAGCA---GCAGGAAGCACTATG---GGCGCAGCATCA---  
 ATAACGCTGACGGTACAG---GCCAGACAA---TTACTG---TCTGGTATAGTGCAACAGCAGAAC---  
 AATCTG---CTGAGG---GCTATTGAGGCGCAACAAAATCTGTTGCAACTCACAGTCTGGGGCATT  
 >JF683793  
 AATCATACTGGT-----  
 -----  
 GCTGAAAGCAATATCACACTCCCATGCAGAATAAGACAAATTATAAATATGTGGCAGAGAGTAGGAAAAGCAA  
 TGTATGCCCCCTCCCATCGAAGGAGAAATTAGATGCTCATCAAAA---  
 ATTACAGGGCTGCTATTAACAAGAGATGGTGGTAGTAGCGGCAACAAC-----  
 -----  
 -----  
 ACCAACGACACAGAGATCTTCAGACCTGCAGGAGGAGATATGAGGGACAATTGGAGAAGTGAATTATATAAAT  
 ATAAAGTAGTAAGAATTGAACCTTTA---GGAATAGCACCCACTAAGGCAAAGAGAAGAGTGGTG-----  
 -----CAAAGAGAGAAAAGAGCA---GTGGGA---ATAGGAGCT---  
 -----CTATTCCTTGGGTTCTTGGGAGCA---GCAGGAAGCACTATG---GGCGCAGCGTCA---  
 TTGACGCTGACGGTACAG---GCCAGACAG---TTAATG---TCTGGTATAGTGCAACAGCAGAAC---  
 AATTTG---CTGAGA---GCTATTGAGGCGCAACAACATATGTTGCAACTCACAGTCTGGGGCATC  
 >JF683796  
 ACTCAC-----  
 -----  
 AATAGCAATAACATCACACTCTCATGCAGAATAAGACTAGTTATAAACAGGTGCCGGGAAGTAGGAATAGCAA  
 TGTCTGCCCCCTCCCCTCAAAGGCATAGTCAGCTGCTCATCCAAT---  
 ATTACAGGTCTAGTATTAACAAGGGCTGGTGGCAGTAACAGTGAGTCC-----  
 -----  
 -----  
 GACTCCAACGAGACCTTCAGACCTGGAGGGGGAGACATGAGAGATAATTGGAGAAGTGAAGTATATAAATATA  
 AAGTAGTAAAAATTGAGCCATTA---GGAATAGCACCCACCACGGCAAAGAGAAGAGTGGTG-----  
 -----CAGAGAGAAAAAGAGCA---ATAACG---CTAGGAGCT-----  
 ---ATGTTTCCTTGGGTTCTTGGGAACA---GCAGGAAGCACTATG---GGCGCAGCGTCA---  
 CTGACGCTGACGGTACAG---GCCAGACAA---TTATTG---TCTGGTATAGTGCAACAGCAGAGC---  
 AATCTG---CTGAGG---GCTATTGAGGCGCAACAGCATATGTTGCAACTCACAGTCTGGGGCATC  
 >JF683805  
 ACT-----  
 -----  
 CAAGAAGAGACCATCATACTCCCATGTAGAATAAGGCAAATTGTAACTTGTGGCAGGAAGTAGGAAAGGCAA  
 TGTATGCCCCCTCCCATAAAGGGAAACATTAGCTGTCCATCAAC---  
 ATTACAGGGCTGCTATTAATAAGAGATGGTGAAGATGAGAGTAAT-----  
 -----  
 -----  
 AATAGCGAGATCTTCAGACCTGGAGGAGGAGATATGAGGGATAATTGGAGAAGTGAATTATATAAATATAAAG  
 TAGTAAAAATTGAACCATTA---GGGATAGCACCCACCAAGGCAAAGAGAAGAGTGGTG-----  
 -----CAGAGAGAAAAAGAGCA---GTGGGAGCACTAGGAGCT-----  
 ATGTTTCCTTGGGTTCTTGGGAGCA---GCAGGAAGCACTATG---GGCGCAGCGTCA---  
 ATGACACTGACGGTACAG---GCCAGACAA---TTATTG---TCTGGTATAGTGCAACAGCAGAAC---  
 AATTTG---CTGAAG---GCTATTGAGGCGCAACAGCATCTGTTGCAACTCACAGTCTGGGGCATC  
 >KT124762  
 ACTCACAACAATGAGAGT-----  
 -----  
 ACCCCTGAGAATATCACACTCCAATGCAGAATAAAACAAATTATAAACATGTGGCAGGGAGTAGGAAAAGCAA  
 TGTATGCCCCCTCCCATCAGCGGGCTAATTAGATGTTTCATCAAAT---  
 ATTACAGGGCTGTTACTAACAAGGGATGGTGGTACGAATAGCACA-----  
 -----  
 -----  
 GATGAGATCTTCAGGCCCGGAGGAGGGGATATGAAGGATAATTGGAGAAGTGAATTATACAAATATAAAGTAG  
 TAAAAATTGAGCCATTA---GGAGTAGCACCCACCAAGGCAAAGAGAAGAGTGGTG-----  
 -----CAGAGAGAAAAAGAGCA---GTGGGA---TTCGGAGCT-----  
 TTGTTTCCTTGGGTTCTTGGGAGCA---GCAGGAAGCACTATG---GGCGCAGCGTCA---

TTGACGCTGACGGTACAG---GCCAGACAA---TTATTG---TCTGGTATAGTGCAACAGCAGAAC---  
 AATTTG---CTGAGA---GCTATTGATGCGCAACAGCATCTGTTGCAGCTCACAGTCTGGGGCATC  
 >KT124788  
 AGTTATAATAGTACTGAG-----  
 -----  
 AATAATGGTACAATCACACTCCCATGCAGAATAAAACAAATTATAAACATGTGGCAGGAAGTAGGAAAAGCAA  
 TGTACGCCCCCTCCCATCAGAGGACAGATTAGTTGTTTCATCAAAT---  
 ATCACAGGGCTGTTATTAACAAGAGATGGCGGTAAAGGGAATAAT-----  
 -----  
 -----  
 GGCAGCAATACTGAGATCTTCAGACCTGGAGGAGGAAATATAAAGGACAATTGGAGGAGTGAATTATATAAAT  
 ATAAAGTAGTAAAAATTGAACCATTA---GGAGTAGCACCCACCAAGGCAAAGAGAAGAGTGGTG-----  
 -----CAGAGAGAAAAAAGAGCA---ATAACA---TTAGGAGCT---  
 -----GTGTTCTTGGGGTTCTTGGGAGCA---GCAGGAAGCACTATG---GGCGCAGCGTCA---  
 ATAACGCTGACGGTACAG---GCCAGACAA---TTATTG---TCTGGTATAGTGCAACAGCAAAAC---  
 AACTTG---CTGAAG---GCTATTGAGGCACAACAACATCTGTTGCAACTCACAGTCTGGGGCATT  
 >KT124782  
 AATTATACTAAT-----  
 -----  
 AACAGCGAAAATATCACACTCCCATGCAGAATAAAGCAAATTATAAACCTATGGCAGGGAGTAGGAAAAGCAA  
 TGTATGCCAATCCAGTCAAAGGACTAATTAACTGTCTATCAAAT---  
 ATTACAGGACTGATATTAACAAGAGATGGTGGTGTAAATAATAGC-----  
 -----  
 -----  
 AACAAATGAGACCTTTAGGCCTGGGGGAGGAGATATGAGGGACAATTGGAGGAGTGAATTATATAAATATAAAG  
 TAGTAAAAATTGAACCATTA---GGATTGGCACCCACTACGGCAAAGAGAAGAGTGGTG-----  
 -----CAAAGAGAAAAAAGAGCA---GTGGGA---ATAGGAGCT-----  
 GTGTTCTTGGGGTTCTTGGGAGCA---GCAGGAAGCACTATG---GGCGCAGCGTCA---  
 ATGACGCTGACGGTACAG---GCCAGACTA---TTACTG---TCTGGTATAGTGCAAGCAGCAAAAC---  
 AATTTG---CTGAGG---GCTATTGAGGCGCAACAGCATCTGTTGCAACTCACAGTCTGGGGCATC  
 >KT124760  
 AAT-----  
 -----  
 -----  
 TATACTAGCACAACTAGGCTCCCATGCAGGATAAAACAAATTGTAAACATGTGGCAGGAAGTAGGAAAAGCAA  
 TGTATGCCCCCTCCCATCAGAGGGCGAATCAATTGTTTATCAAAT---  
 ATCACCGGGTTGCTATTAACAAGAGATGGTGGTAACAGTAACAGC-----  
 -----  
 -----  
 AGCAACGAGACTTTTCAGACCAGGAGGAGGAAATATGAAGGATAATTGGAGAAGTGAGTTATATAAATACAAAG  
 TAGTAAACTTGAACCATTA---GGAATAGCACCCACCACGGCAAAAAGAAGAGTGGTG-----  
 -----CAGAGAGAAAAAAGAGCA---GTGGGA---ATAGGAGCC-----  
 ATGCTCTTTGGGGTTCTTGGGAGCA---GCAGGAAGCACTATG---GGCGCAGCATCA---  
 ATATCGCTGACGGTACAA---GCCAGGCAA---TTATTG---TCTGGTATAGTGCAACAGCAGAGT---  
 AATCTG---CTGAGG---GCTATTGAGGCGCAACAACATATGTTGCAACTCACAGTCTGGGGCATC  
 >KT124780  
 TATCATAATAGTACTTGAATAATACTAGGAATAATACTGAA-----  
 -----  
 -----  
 GGGTCAAATGATATAATCACACTCCCATGCAGAATAAAACAAATTATAAACATGTGGCAGGAAGTAGGAAAAG  
 CAATGTATGCCCCCTCCTATCAAAGGACGAATTAGATGTTTCATCAAAT---  
 ATTACAGGGATGATATTAACAAGAGATGGTGGTAATAATGGGACT-----  
 -----  
 -----  
 GACACAGAGATAGAGATCTTCAGACCCCAAGGAGGAAATATGAAGGACAATTGGAGAAGTGAATTGTTTATAGAT  
 ATAAAGTAGTAAGAGTTGAACCATTA---GGAGTAGCTCCCACTAAGGCAAAGAGAAGGGTGGTG-----  
 -----CAGAGAGAAAAAAGAGCA---GTAGGA---ATGGGAGCC---  
 -----TTGTTCTTGGGGTTCTTGGGAGCA---GCAGGAAGCACTATG---GGCGCAGCGTCA---  
 ATGACGCTGACGGTACAG---GCCAGGCAA---TTATTG---TCTGGTATAGTGCAACAGCAGAAC---  
 AATCTG---CTGAGG---GCTATTGAGGCGCAGCAGCACCTGTTGCAACTCACAGTCTGGGGCATC  
 >AY173959

AATTACAATACA-----  
 -----  
 AGTGGAGTAAATATCACACTCCCATGTAGATAAAACAAATCATAAACATGTGGCAGGAAGTAGGAAAAGCAA  
 TGTATGCCCCCTCCCATTAGAGGACAAATTAGATGCATATCAAAT---  
 ATTACAGGACTGCTATTAACAAGAGATGGTGGTGCTAACCAGACC-----  
 -----  
 -----  
 AATGGGACCGAAATCTTCAGACCTGCAGGGGGAGATATGAGGGACAATTGGAGAAGTGAACCTATATAAATATA  
 AAGTAGTAAAAATTGAACCATTA---GGAGTAGCACCCACCAAGGCAAAAAGAAGAGTGGTG-----  
 -----CAGAGAGAAAAAAGAGCA---GTGGGG---TTAGGAGCT-----  
 ---GTGTTCTTGGGTTCTTGTCAGCA---GCAGGAAGCACTATG---GGCGCAGCGTCA---  
 ATGACGCTGACGGTACAG---GCCAGGCAA---TTATTG---TCTGGTATAGTGCAACAGCAGAAC---  
 AATCTG---CTGAGG---GCTATTGAGGCGCAACAGCATCTGTTGCAACTCACAGTCTGGGGCATT  
 >KC595166  
 ACTCAAGAA-----  
 -----  
 AGTGACACATTAATCACACTCCCATGCAGAATAAAACAAATTGTAAGAATGTGGCAGGAAGTAGGAAAAGCAA  
 TGTATGCCCCCTCCCATCAGAGGACAAATTAGATGTTTCATCAAAT---  
 ATTACAGGGCTGATATTAACAAGAGATGGAGGTAATGACACGGAC-----  
 -----  
 -----  
 GAGAACGGGACCGAGATCTTTAGACCTGGAGGAGGAGATATGAGGGACAATTGGAGAAGTGAATTATATAAAT  
 ATAAAGTAATACAAATTGAACCATTA---GGAGTAGCACCCACCAAGGCAAAGAGAAGAGTGGTG-----  
 -----CAAAGAGAAAAAAGAGCA---GCAATA---ATAGGAACT---  
 -----GTGTTCTTGGGTTCTTGGGAGCA---GCAGGAAGCACTATG---GGCGCAGCGTCA---  
 ATAACGCTGACGGCACAG---GCCAGACAA---TTATTG---TCTGGTATAGTGCAACAGCAGAGC---  
 AATTTG---CTGAAG---GCCATTGAGGCGCAACAGCATCTGTTGCAACTCACAGTCTGGGGCATC  
 >JN054257  
 CCCTATACTAATGCAAGTATA-----  
 -----  
 -----  
 GAAAAATATCACACTCACACTCCCATGTAGATAAAACAAATCATAAACATGTGGCAGGAAGTAGGAAAAGCAA  
 TGTATGCCCCCTCCCATCCCGGAATAATCCAATGTACATCAAAT---  
 ATTACAGGACTACTATTAACAAGAGATGGGGGTAACCAAACCAAT-----  
 -----  
 -----  
 GGGATTGAGATCTTCAGACCTGCAGGGGGAGATATGAAGGACAATTGGAGAAGTGAATTATATAAATATAAAG  
 TAGTAAAAATTGAACCATTA---GGAATAGCACCCACCAAGGCAAAAAGAAGAGCGGTG-----  
 -----CAAAGAGAAAAAAGAGGA-----ATAGGAGCT-----  
 GTGATCTTTGGGTTCTTGGGAGCA---GCAGGAAGCACTATG---GGCGCAGCGTCG---  
 GTAACGCTGACGGTACAG---GCCAGACAA---TTATTG---TCTGGTATAGTGCAACAGCAGAGC---  
 AACTTG---CTGAGA---GCTATTGAGGCGCAACAGAATCTGTTGCAGCTCACAGTCTGGGGCATT  
 >KT200348  
 AGTCATGATGCTTGAATTGGACTTGGAGTAATGGTACT-----  
 ---TGGGGGGGTAGT---ACTAAAGAAACAAATAAACT-----  
 GAAGGAAATGTCACCCTCACCTCCAATGTAGATAAAACAAATTATAAACATGTGGCAGGAAGTAGGGAAAG  
 CAATGTATGCCCCCTCCCATCAGTGGACCAATTAGATGTAAATCAAAC---  
 ATTACAGGGATGATATTAACAAGAGATGGGGGTAATGATGACGGTACT-----  
 -----  
 -----  
 GACAACAGCAGTGAGACCTTCAGACCTGGGGGAGGAGATATGAGGGATAATTGGAGAAGTGAATTATACAAAT  
 ATAAAGTAGTAAAAATTGAACCATTA---GGAGTAGCACCCACCAAGGCAAAAAGAAGAGTGGTG-----  
 -----CAGAGAGAAAAAAGAGAT---TTAGGA---TTTGGAGCT---  
 -----TTGTTCTTGGGTTCTTGGGAGCA---GCAGGAAGCACTATG---GGCGCAGCGTCA---  
 ATAACGCTGACGGCACAG---GCCAGACAA---TTATTG---TCTGGTATAGTGCAACAGCAAAGT---  
 AATTTG---CTGATG---GCTGTTGAGGCGCAACAGAAGCTGTTGCAACTCACAGTCTGGGGCATC  
 >KC699038  
 ACTCAGAATAAC-----  
 -----  
 ATTACAGAAAATATCACACTCCCATGCAGAATAAAACAGTTTATAAACATGTGGCAGGAAGTAGGAAAAGCAA  
 TGTATGCCCCCTCCCATCAAAGGACAAATTAGATGTTTCATCAAAT---

ATTACAGGGCTGATATTAACAAGAGATGGTGGTAATAATGATAAC-----  
-----  
-----  
ACAACAGAGACCTTCAGACCTGGAGGAGGAAATATGAAGGACAATTGGAGAAGTGAATTATATAAATATAAAG  
TAGTAAAAATTGAACCATTA---GGAGTAGCACCCACCAAGGCAAAGAGAAGAGTGGTG-----  
-----CAGAGAGAAAAAAGAGCA--GCG-----ATAGGAGCT-----  
GTGTTTCCTTGGGTTCTTGGGAGCA--GCAGGAAGCACTATG--GGCGCAGCGTCA---  
GTGACGCTGACGGTACAG---GCCAGACAA--TTATTG---TCTGGTATAGTGCAACAGCAAAAC---  
AACTTG---CTGAAG---GCTATTGATGCGCAACAGCATATGTTGCAACTCACAGTCTGGGGCATC  
>HQ595780  
TCTCATAATAACACTGAAGGGGTAAGAAATAATAAC-----  
-----ACT---  
GAAGGGGAAAAAATATCATCCTCCCATGCAGAATAAAACAAGTTATAAACATGTGGCAGGAAGTAGGAAAAG  
CAATGTATGCCCCCTCCCATCAGAGGACAAATCAGATGTTTCATCAAAT---  
ATCACAGGGCTGGTATTAACAAGAGATGGTGGCACTAATAATGGCACA-----  
-----  
-----  
AACCAGGCCGAGGAGGTCTTCAGACCTGCAGGAGGAAATATGAGGGACAATTGGAGAAGTGAATTATATAGAT  
ATAAGGTAGTCAAAATTGAACCATTA---GGAGTAGCACCCACCAAGGCAAAGAGAAGAGTGGTG-----  
-----CAGAGAGAAAAAAGAGCA--GTGGGA--ATAGGAGCT---  
-----GTATTCCTTGGGTTCTTGGGAGCA--GCAGGAAGCACTATG--GGCGCAGCGTCA---  
ATAACGCTGACGGTACAG---GCCAGACAA--TTACTG---TCTGGTATAGTGCAACAGCAGAAC---  
AATTTG---CTAAGG---GCTATTGACGCGCAACAGCATCTGTTGCAGCTCACAGTCTGGGGCATC  
>HQ595781  
TTTCATAGTACTTGGGTAAATGGTAATTGGAGTAATGGCACTTGGGAATGGT-----  
-----  
-----  
ACTGAAGAAATTATCACACTTCCATGCAGAATAAAACAATTTATAAACATGTGGCAGGAAGTAGGAAAAGCAA  
TGTATGCTCCTCCCATCAAAGGACAAATTAAGTGTACATCAAAT---  
ATTACAGGGCTGCTATTAACAAGAGATGGTGGTAACATAACAAACAAC-----  
-----  
-----  
AACAAACACCGAGACCTTCAGACCTGGAGGAGGAGATATGAGGGACAATTGGAGAAGTGAATTATATAAATATA  
AAGTAGTAAAAATTGAACCACTA---GGAATAGCACCCAATAAGGCACAGAGAAGAGTGGTG-----  
-----CAGAGAGAAAAAAGAGCA--GTGGGA--TTAGGAGCT-----  
---ATGTTTCCTTGGGTTCTTGGGAGCA--GCAGGAAGCACTATG--GGCGCAGCGTCA---  
ATAACGCTGACGGTACAG---GCCAGGCGA--TTATTG---TCTGGTATAGTGCAACAGCAGAAC---  
AATTTG---CTGAAA--GCTATTGAGGCGCAACAGCATCTGTTGCAACTCACAGTCTGGGGCATC  
>HQ595805  
AATCATACTTGGACAGGTCCAAATAGA-----  
-----  
ACTGACACAAATATCACACTCCAATGCAAAATAAAGCAAATTATAAATATGTGGCAGAAAGTAGGAAAAGCAA  
TGTATGCCCCCTCCCATCAGAGGACAAATTAATGTTTCATCAAAT---  
ATTACAGGGCTGCTATTAACAAGAGATGGTGGAAATGGTGATAATAGT-----  
-----  
-----  
ACAAACGGGACTGAGACCTTCAGACCTGGAGGAGGAGATATGAGGGACAATTGGAGAAGTGAATTATACAAAT  
ACAAAGTAGTAAAAATTGAACCATTA---GGAGTAGCACCCACCGAGGCAAAAAGAAGAGTGGTG-----  
-----CAGAGAGAAAAAAGAGCA--GTGGGA--TTTGGAGCT---  
-----CTGTTTCCTTGGTTTCTTGGGAGCA--GCAGGAAGCACTATG--GGCGCAGCATCA---  
ATAACGCTGACGGTACAG---GCCAGACAA--TTATTG---TCTGGTATAGTGCAACAGCAAAAC---  
AATTTG---CTGAGG---GCTATTGAGGCGCAACAGCATCTGTTGCAACTCACAGTCTGGGGCATT  
>AJ535618  
TTTCATAGTACTTGGGTGTTTAATAGAACTGGGGGGAATGATACTGAATAC-----  
-----  
-----  
ACTGAAAAAATATCACACTTCCATGCGGAATAAAACAATTTATAAACATGTGGCAGGGAGTAGGAAAAGCAA  
TGTATGCCCCCTCCCATCCAAGGACAAATTAATTGCACATCAAAT---  
ATTACAGGGCTGTTATTAACAAGAGATGGTGGTAATGGTGATAAC-----  
-----

-----  
 ACAACTGAGATCTTCAGACCTGGAGGAGGAGATATGAGGGACAATTGGAGAAGTGAATTATATAAATATAAAG  
 TAGTAAAAATTGAGCCATTA---GGAGTAGCACCCACCAAGGCAAAGAGAAGAGTGGTG-----  
 -----CAGAGGGAAAAAAGAGAA---GTGGGC---CTAGGAGCT-----  
 TTGTTTCATTGGGTTCTTGGGAGCA---GCAGGAAGCACTATG---GGCGCAGCGTCA---  
 GTGACGCTGACGGTACAG---GCCAGACAA---TTATTG---TCTGGTATAGTGCAACAGCAGAAC---  
 AATTTG---CTGAGA---GCTATTGATGCGCAACAGCATCTGTTGCAACTCACAGTCTGGGGCATC  
 >U36877  
 AGTCAGGACGGTACTGAA-----  
 -----  
 GGATATAACATTATCACACTCCCATGCAGAATAAAACAAATTATAAACATGTGGCAGGAAGTAGGAAAAGCAA  
 TGTATGCCCCCTCCCATCAAAGGACAAATTAGATGTTTCATCAAAT---  
 ATTACAGGACTGCTATTAACAAGAGATGGTGGTAATAGTAGTAGC-----  
 -----  
 -----  
 ACCACCGAGACCTTCAGACCTGGAGGAGGAGACATGAGGGACAATTGGAGAAGTGAATTATATAAATATAAAG  
 TAGTAAAAATTGAACCATTA---GGAGTAGCACCCACCAAGGCAAAGAGAAGAGTGGTG-----  
 -----CAAAGAGAAAAAAGAGCA---GTGGGA---ATAGGAGCT-----  
 TTGTTTCCTTGGGTTCTTGGGAGCA---GCAGGAAGCACTATG---GGCGCAGCATCA---  
 ATGACGCTGACGGTACAG---GCCAGACTA---TTATTG---TCTGGTATAGTGCAACAGCAGAAC---  
 AATTTG---CTGAGA---GCTATTGAGGCGCAACAGCATCTGTTGCAACTCACAGTCTGGGGCATC  
 >FJ460501  
 AGTTATATTTTGAATGGTACTAGCTGGAGTAACAATACTAAT-----  
 -----  
 GGGGTAAATGATATAATCACACTCCCATGCAGAATAAGACAAATTATAAACATGTGGCAAGAAGTAGGAAAAG  
 CAATGTATGCCCCGCCCATCATGGGACAAATTAAGTGTTCATCAAAT---  
 ATTACAGGGCTGCTATTAACAAGAGATGGTGGTAATAACACAGACACA-----  
 -----  
 -----  
 AACCAAACAGAGATCTTCAGACCTGGAGGAGGAGATATGAGGGACAATTGGAGAAGTGAATTATATAAATATA  
 AAGTAGTAAGAATTGAACCATTA---GGAATAGCACCCACCAAGGCAAGAAGAAGAGTGGTG-----  
 -----CAGAGAGAGAAAAAGAGCA---GTGGGA---ATAGGAGCT-----  
 ---CTGTTCCCTTGGATTCTTGGGAGCA---GCAGGAAGCACTATG---GGCGCAGCGTCA---  
 CTGACACTGACGGTACAA---GCCAGACAA---TTATTG---TCTGGTATAGTGCAACAGCAGAAAT---  
 AATCTG---CTGAGA---GCTATTGAGGCGCAACAGCATATGTTGCAACTCACAGTCTGGGGCATT  
 >EU839602  
 ATTTACCCTTGAAT-----  
 -----  
 AAGACTGAAAATATCACACTCCCATGCAGAATAAAACAAATTATCAATATGTGGCAGGGAGTAGGAAAAGCAA  
 TGTATGCCCCCTCCCATCAGCGGACCAATAAGATGTGAATCAAAT---  
 ATTACAGGGCTGCTATTAACAAGAGATGGTGGTGACCAGAACGGGGACG-----  
 -----  
 -----  
 GACGCTACCAATGAGACCTTTAGACCTGGAGGAGGAGATATGAGGGACAATTGGAGAAGTGAAGTATATAAAT  
 ATAAAGTAGTAAGAATTGAACCATTA---GGAGTAGCACCCACCGAGGCAAAGAGAAGAGTGGTG-----  
 -----CAGAGAGAAAAAAGAGCA---GTGGGA---CTAGGAGCT---  
 -----ATGTTCCCTTGGGTTCTTAGGAGCA---GCAGGAAGCACTATG---GGCGCAGCGTCA---  
 ATAGCGCTGACGGCACAG---GCCAGGCAA---TTGTTG---TCTGGTATAGTGACGAGCAGAAC---  
 AATCTG---CTGAGG---GCTATTGAGGCGCAACAGCATCTGTTGCAACTCACGGTCTGGGGCATC  
 >EU839604  
 GAT-----  
 -----  
 TATAATGACACTATCATACTCCAATGTCGATAAGACAAATTATAAACATGTGGCAGAAAGTAGGAAAAGCAA  
 TGTATGCCCCCTCCATAAGTGAATAATTAAATGTACATCAAAT---  
 ATTACAGGGCTACTATTAACAAGAGATGGTGGTAATAATACAGGA-----  
 -----  
 -----  
 GGGAAATGAGACCTTCAGACCTACAGGAGGAAATATGAAGGACAATTGGAGAAGTGAATTATATAAATATAAAG  
 TAGTACAAATTGACCCAATA---GGAGTAGCACCCACCAAGGCAAAAAGGAGAGTGGTG-----  
 -----CAGAGAGAAAAAAGAGCA---GTGGGAGTAGTAGGAGCT-----

ATGTTTCCTTGGTTTCTTGGGAGCA---GCAGGAAGCACTATG---GGCGCAGCGTCA---  
 GTGACGCTGACGGTACAG---GCCAGACAA---TTATTG---TCTGGTATAGTGCAACAGCAGAAT---  
 AATCTG---CTGAGA---GCTATTGAGGCGCAACAGCATCTGTTGCAACTCACAGTCTGGGGCATC  
 >HM030560  
 ACTCAGGAT-----  
 -----  
 GATACTAATGACACTATCACACTCCCATGCAGAATAAAACAAATTGTAAACATGTGGCAGGAAGTAGGCAAAG  
 CAATATATGCCCCCTCCCATTAGTGGACTAATTAGATGTAACTCAAGT---  
 ATTACAGGGCTAATGTTAACAAGAGATGGTGGTGGTGGGAATACT-----  
 -----  
 -----  
 AGTAATAATGAGACCTTCAGACCGGGAGGAGGAAATATGAAGGACAATTGGAGAAAGTGAATTATATAAAATATA  
 AAGTAGTGAAAATTGAACCATTA---GGAGTAGCACCCACCAGGGCAAGGAGAAGGGTGGTG-----  
 -----CAAAGAGAAAAAAGAGCA---GTGGGAGTAATAGGAGCT-----  
 ---ATGTTTCCTTGGGTTCTTGGGAACA---GCAGGAAGCACTATG---GGCGCAGCGTCA---  
 GTGACGCTGACGGTACAG---GCCAGACAA---TTATTG---TCTGGTATAGTGCAACAGCAAAAC---  
 AATTTG---CTGAGG---GCTATTGAGGCGCAACAGCATCTGTTGCAACTCACAGTCTGGGGCATC  
 >AB588243  
 AATCAGTCTGCTTGAAGAGAAATGATACTGAAGGG-----  
 -----TTAAAT-----  
 AATACTGAGGACAAAATTACACTCCCATGCAAAATAAAACAAATCATAAACATGTGGCAGAAAGTAGGAAAAG  
 CAATATATGCCCCCTCCCATCAGAGGAGTAATTAGATGTGCATCAAAT---  
 ATTACAGGGCTGCTATTAACAAGAGATGGTGGTGGTGATGAGAAC-----  
 -----  
 -----  
 AGAACCACCGAGACCTTCAGACCTGGAGGAGGGGATATGAGGGACAATTGGAGAAAGTGAATTATATAAAATATA  
 AAGTAGTAAAAATTGAACCATTA---GGAGTAGCACCCACTAAGGCAAAGAGAAGAGTGGTG-----  
 -----CAGAGAGAAAAAAGAGCA---GTGGGA---TTTGGAGCT-----  
 ---GTATTCCTTGGGTTCTTGGGAGCA---GCAGGAAGCACTATG---GGCGCAGCGTCA---  
 GTGACGCTGACGGTACAA---GCCAGACAA---TTGCTG---TCTGGTATAGTGCAACAGCAGAGC---  
 AATCTG---CTGAGA---GCTATTGAGGCGCAGCAACAAATGTTGAAACTCACAGTCTGGGGCATC  
 >AB588255  
 AATCATGGA-----  
 -----  
 GAGTCAAATGACACTATCACACTCCCATGTAGAATAAAACAAATTGTAAACATGTGGCAGGAAGTAGGAAAAG  
 CAATGTATAACCCTCCCATCGAAGGACAAATTAGATGTTTCATCAAAT---  
 ATTACAGGACTATTATTAATAAGAGATGGTGGTAACAGTAACAACACA-----  
 -----  
 -----  
 AACACCACCGAAATCTTCAGACCCGGGGGAGGAAATATGAAGGACAATTGGAGGAGTGAATTATATAAAATATA  
 AAATAGTAAAAATTGAACCATTA---GGAGTAGCACCCACCAAGGCAAAGAGAAGAGTGGTG-----  
 -----CAAAGAGAAAAAAGAGCA---GTGGGA---ATAGGAGCT-----  
 ---GTGCTCTTTGGATTCTTGGGAGCA---GCAGGAAGCACTATG---GGCGCAGCGTCA---  
 ATAGCGCTGACGGCACAG---GCCAGACAA---TTATTG---TCTGGTATAGTGCAACAGCAGAAC---  
 AATATG---CTGAGA---GCCATTGAGGCGCAACAGCACCTGTTGCAACTCACAGTCTGGGGCATC  
 >AB588271  
 CTTTATACTTTGAATAGCTCT-----  
 -----  
 GAAGATAAAAATATCACACTCCAATGCAGAATAAAACAGATTATAAACATGTGGCAGGAAGTAGGAAAAGCAA  
 CGTATGCCCCCTCCTATCAAAGGACAGATTAGATGTTTCATCAAAC---  
 ATTACAGGGCTGCTATTAACAAGAGATGGTGGTACTAATAAAACA-----  
 -----  
 -----  
 AGCGATCCCGAGATCTTCAGACCTACAGGAGGTAATATGAAGGACAATTGGAGAAAGTGAATTATATAAAATATA  
 AAGTAGTAAAAATTGAACCATTA---GGAGTAGCACCTACCAGGGCAAAGAGAAGAGTGGTG-----  
 -----CAGAGAGAAAAAAGAGCA---GTGGGA---CTAGGAGCT-----  
 ---GTGTTTCCTTGGGTTCTTGGGAGCA---GCAGGAAGCACTATG---GGCGCAGCGTCA---  
 TTAACGCTGACGGTACAG---GCCAGACAA---TTGTTG---TCTGGTATAGTGCAACAGCAAAAC---  
 AATTTG---CTGAGA---GCTATTGAGGCGCAACAGAAATCTGTTGCAACTCACAGTCTGGGGCATC  
 >AB262961

AGTTATACTTGGGAATGGTACAGGACTGTCTAATAATACTGAGAATAGT-----  
 -----  
 -  
 TCAAATAATACTATCACACTCCAATGCAGAATAAAGCAAATTATAAACATGTGGCAGGAAGTAGGAAAAGCAA  
 TGTATGCCCCCTCCCATCAGCGGACAAATTAGATGTTTCATCAAAT---  
 ATTACAGGGCTGCTATTAACAAGAGATGGTGGTAATGGCACGAAC-----  
 -----  
 -----  
 GGGACCGAGACCTTCAGACCTGGAGGAGGAGATATGAGGGACAATTGGAGAAGTGAATTATATAAATATAAAG  
 TAGTAAAAAATTGAACCATTA---GGAGTAGCACCCACTAGGGCAAGGAGAAGAGTGGTG-----  
 -----  
 -----CAGAGAGAAAAAAGAGCA---GTGGGA---ATAGGAGCT-----  
 TTGTTTCCTTGGGTTCTTGGGAGCA---GCAGGAAGCACTATG---GGCGCAGCGTCA---  
 ATGACGCTGACGGTACAG---GCCAGACAA---TTATTG---TCTGGTATAGTGCAACAGCAAAAC---  
 AATTTG---CTGAGG---GCTATTGAGGCGCAACAGCATCTGTTGCAACTCACAGTCTGGGGCATT  
 >KJ140264  
 TGTATACAACAAAACCTGTTTAATAGTACTTGGGAATGATACAACACTGTTT-----  
 -----  
 AATAGTACCTGGAATAGT-----  
 AGTAGTAAAGGAAGTATCACACTCCGATGCAGAATACAACATATTATCAACAGGTGGCAGGAAGTAGGAAAAG  
 CGATGTATGCCCCCTCCCATTTGGAGGAAAAATTAGATGTTTCATCAAAT---  
 ATTACAGGGCTGCTAATAACAAGAGATGGGGGG-----  
 -----  
 -  
 ACTGAGACTGGGACTACTGAGACCTTCAGACCTGGGGGAGGAAATATGAAGGACAATTGGAGAAGTGAATTAT  
 AATAATATAAAGTAGTAAGAATTGAGCCATTA---GGGATAGCACCCACCAAGGCAAAGAGAAGAGTGGTG--  
 -----  
 -----CAGAGAGAAAAAAGAGCA---  
 GTGGGGACGATAGGAGCT-----GTGTTTCCTTGGGTTCTTGGGAGCA---GCAGGAAGCACTATG---  
 GGCGCAGCGTCA---TTGACGCTGACGGTACAG---GCCAGACAA---TTATTG---  
 TCTGGTATAGTGCAACAGCAGAAT---AATTTG---CTGAAA---  
 GCTATTGATGCGCAACAGCATATGTTGCAACTCACAGTCTGGGGCATC  
 >KJ140265  
 ACT-----  
 -----CATACTGGTACTGAAGGA-----  
 GTAAATGGAACATATTTCACTCCCATGCAGAATAAGACAAATTGTAAACAGGTGGCAGGAAGTAGGAAAAG  
 CAATGTATGCCCCCTCCCATCGGAGGACGAATTAGATGTTTCATCAAAT---  
 ATTACAGGGCTGCTATTAACAAGAGATGGGGGG-----  
 -----  
 AATGAGAATAACGAGACTGAGACGACTGAGACCTTCAGACCTGGGGGAGGAAATATGAAGGACAATTGGAGAA  
 GTGAATTATATAAATATAAAGTAGTAAAAATTGAGCCATTA---  
 GGGATAGCACCCACCGAGGCAAGGAGAAGAGTGGTG-----  
 ---CAGAGAGAAAAAAGAGCA---GTGGGAGTGATAGGAGCT-----  
 ATGTTTCCTTGGGTTCTTGGGAGCA---GCAGGAAGCACTATG---GGCGCAGCGTCA---  
 ATGGCGCTGACGGTACAG---ACCAGACAA---TTATTG---TCTGGTATAGTGCAACAGCAGAAT---  
 AATTTG---CTGAGA---GCCATTGAGGCGCAACAGCATATATTGCAACTCACAGTCTGGGGCATC  
 >MN043600  
 TTTCATAGTACTTGGGAATGCTACGTTGAATGATACTGAAAGGGTAAATAATAGT-----  
 -----  
 ----  
 GCAACAAAAAACATTACACTCCAATGCAGAATAAAACAAATTATAAACAGGTGGCAGGAAGTGGGACAAGCAA  
 TGTATGCCCCCTCCCATCAGCGGACTAATTAGATGTTTCATCAAAT---  
 ATTACAGGGCTGATATTAACAAGAGACGGGGGGGTTAACGAGACT-----  
 -----  
 -----  
 ACTGAGACCTTCAGACCTGGAGGAGGCGATATGAGGGACAATTGGAGAAGTGAATTATATAAATATAAAGTAG  
 TAAGGATTGAGCCATTA---GGGATAGCACCCACCAAGGCAAGGAGAAGAGTGGTG-----  
 -----  
 -----CAGAGAGAAAGAAGAGCA---GTGGGAATGTTAGGAGCT-----  
 ATGTTTCCTTGGGTTCTTGGGAGCA---GCAGGAAGCACTATG---GGCGCAGCGTCA---  
 ATGACGCTGACGGTACAG---GCCAGACAA---TTATTG---TCTGGTATAGTGCAACAGCAGAAT---  
 AATCTG---CTGAAA---GCTATTGAGGCGCAACAGCATCTGTTGCAACTCACAGTCTGGGGCATC  
 >KJ140260

AATCATACTAGAGCG-----  
-----AACATTTCGGAATAAT-----  
CCTGGAAATGGAACCTATTATCCTCCCATGCAGAATAAAACAAATTATAAACAGGTGGCAGGAAGTAGGAAAAG  
CAATGTATGCCCCCTCCCATCGAAGGACAAATTAGATGTACATCAAAT---  
ATTACAGGGTTGCTAATAACAAGAGATGGGGGG-----  
-----  
ATAAATGAGACCAAC---  
GGGACTGAGACCTTCAGACCTGGGGGAGGAGATATGAGGGACAATTGGAGAAGTGAATTATATAAATATAAAG  
TAATAAAAATTGAGCCATTA---GGGATAGCACCCACCAAGGCAAAGAGAAGAGTGGTG-----  
-----CAGAGAGAAAAAAGAGCA---GTGGGAGCGATAGGAGCT-----  
ATGTTTCCTTGGGTTCTTGGGAGCA---GCAGGAAGCACTATG---GGCGCAGCGTCA---  
TTGACGCTGACGGTACAG---GCCAGACAA---TTATTG---TCTGGTATAGTGCAACAGCAGAAT---  
AATTTG---CTGAGA---GCTATTGAGGCGCAACAGCATCTATTGCAACTCACAGTCTGGGGCATC  
>KT878035  
ACTTACAATGACACTGGA-----  
-----  
GTTAATGAAACTATCACCTCCCTTGCAGAATAAGACAAATTGTAAACAGGTGGCAGGAAGTGGGAAAGGCCAA  
TGTATGCCACTCCCATCAGTGGACTAATTAGATGTTTCATCAAAT---  
ATTACAGGGTTACTATTAACAAGAGATGGGGGGACAGGGAACAATAAACTGGG-----  
-----  
-----  
AATGGAACCTGAGACCTTCAGACCTGGGGGAGGAGACATGAAGGACAATTGGAGGAGTGAATTATACAAATATA  
AAGTAGTAAAGATTGAGCCATTA---GGAGTAGCACCCACCAAGGCAAGGAGAAGAGTGGTG-----  
-----CAGAGAGAAAAAAGAGCA---GTGGGAACAATAGGAGCT-----  
---ATGTTTCCTTGGGTTCTTGGGAGCA---GCAGGAAGCACTATG---GGCGCAGCGTCA---  
CTGACGCTGACGGTACAG---GCCAGACTA---TTATTG---TCTGGTATAGTGCAACAGCAACAG---  
AACTTG---CTGAGA---GCTATTGAGGCGCAACAGCATCTGTTGCAACTCACAGTCTGGGGCATC  
>KT878026  
ACTCATTGGAATGAGACTTGG-----  
-----  
GATAATGAAACAATCATACTCCCATGCAGAATAAAACAAATTATAAACAGATGGCAGGAAGTAGGAAAGGCCAA  
TGTATGCCCCCTCCCATCAGAGGAAATATTAGTTGTACATCAAAT---  
ATTACAGGGCTGCTATTATCAAGAAATGGAGGTGGCAACGGGACT-----  
-----  
-----  
AACGGGACTGAGACCTTTAGACCTGGGGGAGGAGATATGAGGGACAATTGGAGAAGTGAATTATATAAATATA  
AGGTAATAAGAATTGAGCCATTA---GGATTAGCACCCACCAGGGCAAGGAGAAGAGTGGTG-----  
-----CAGAGAGAAAAAAGAGCA---GTAACG---ATAGGAGCT-----  
---ATGTTTCCTTGGGTTCTTGGGAGCA---GCAGGAAGCACTATG---GGCGCAGCATCA---  
CTGACGCTGACGGTACAG---GCCAGGCTA---CTATTG---TCTGGTATAGTGCAACAGCAGAAT---  
AATTTG---CTAAGA---GCTATTGAGGCGCAACAGCATCTGTTGCGACTCACAGTCTGGGGCATT  
>KT878028  
AATCAAAATGGTACCAGGAATGATACTAGT-----  
-----  
ACTAATGCAACTATCACACTTCCATGCAGAATAAAACAAATTATAAACAGGTGGCAGGAAGTAGGAAGAGCAA  
TGTATGCCCCCTCCCATCGAAGGACAAATCAGATGCTCATCAAAT---  
ATTACAGGGCTGCTATTATAACAAGAGATGGGGGGAAT-----  
-----  
-----  
AATGAACTGAGACCTTCAGACCTGGGGGAGGAAATATGAAAGATAATTGGAGAAGTGAATTATATAAATATA  
AAGTAGTAAAAATTGAGCCATTA---GGGATAGCACCCACCAAGGCAAGGAGAAGAGTGGTG-----  
-----CAGAGAGAAAAAAGAGCA---ATAGGAACAATAGGAGCT-----  
---CTGTTTCCTTGGGTTCTTGGGAGCA---GCAGGAAGCACTATG---GGCGCAGCGGCA---  
ATGACGCTGACGGTACAG---ACCAGACAA---TTGTTG---TCTGGTATAGTGCAACAGCAGAAT---  
AATCTG---CTGAGA---GCTGTTGAGGCGCAACAGCATCTGTTGCAACTCACAGTCTGGGGCATC  
>AJ417422  
ACTCAACTGTTTAAATAGTACTTGGGGGGAACATGATGTTGAAGCAAGTAACACTGAA-----  
-----  
-----  
AATAATGAAAATATCACACTCCCATGCAGAATAAAGCAAATTGTAAACCATGTGGCAGAAAGTAGGAAAAGCAA

TGTATGCCCCCTCCCATCGAAGGAAAAATTAGCTGTTTATCAAAT---  
 ATTACAGGGCTACTGTTAATGAGAGATGGTGGTAATATAAACAACAAAACAAAT-----  
 -----  
 -----  
 GGGACCACCCCCCTTGAGATCTTCAGACCTGGAGGAGGAAATATGAAGGATAATTGGAGAAGTGAATTATATA  
 AATATAAAGTAATAGAAATTGAACCATTA---GGAGTAGCACCCACCAGAGCAAAGAGAAGAGTGGTG-----  
 -----CAAAGAGAAAAAAGAGCG-----GGA---  
 ATAGGAGCT-----GTGCTCGTTGGGTTCTTGGGAGCA---GCAGGAAGCACTATG---  
 GGCGCAGTGTCA---GTGGCGCTGACGGTACAG---GCCAGAAAG---TTAATG---  
 TCTGGTATAGTGCAACAGCAAAAC---AAGTTG---CTGATG---  
 GCTATTGAGGCGCAACAGCATATGTTGCAACTCACTGTCTGGGGCATC  
 >JQ316129  
 ACTCAAAGGTTAGATGAAATTAATAAA-----  
 -----  
 AATAGCACAAATTATCACACTTCCATGCAGAATAAAACAAATTATAAACAGGTGGCAGGAAGTAGGAAAAGCAA  
 CGTATGCCCCCTCCCATCAGAGGACAAATTACATGTTTCATCAAAT---  
 ATTACAGGGTTGCTATTAACAAGAGATGGAGGGAATGAGAGCAGC-----  
 -----  
 -----  
 AGTACTGAGACCTTCAGACCTGGGGGAGGAGACATGAGGGACAATTGGAGAAGTGAATTATATAAATATAAAG  
 TAGTAAAAATTGAGCCATTA---GGGGTAGCACCCACCAAGGCAAGGAGAAGAGTGGTG-----  
 -----CAGAGAGAAAAAAGAGCA---GTGGGAACAATAGGAGCT-----  
 ATGTTCCCTTGGGTTCTTGGGAGCA---GCAGGAAGCACTATG---GGCGCAGCGTCA---  
 CTGACGCTGACGGTACAG---GCCAGACAA---TTGTTG---TCTGGTATAGTGCAACAGCAGAAT---  
 AATCTG---CTGAGA---GCTATTGAGGCGCAACAGCATCTGTTGCAACTCACAGTCTGGGGCATC  
 >HQ386198  
 AATCATAATGGGACTTGGAGTACAAATAGTACTGGGAATGAT-----  
 -----ACCAAC-----  
 AACACAAGTACACTATCACACTCCCATGCAGAATAAAGCAAATTATAAACATGTGGCAGGAAGTAGGGAAAG  
 CAATGTATGCCCCCTCCCATCAGTGGACAAATTAAGTGTTCATCAAAT---  
 ATTACAGGGCTGATATTAACAAGAGATGGTGGTAATAAGACCGAGAAT-----  
 -----  
 -----  
 GAGAATGGGACCGAGACCTTCAGACCTGGAGGAGGAGATATGAGGGATAATTGGAGAAGTGAATTATATAAAT  
 ATAAAGTAGTAAAAATTGAACCATTA---GGACTAGCACCCACCAGGGCAAAGAGAAGAGTGGTG-----  
 -----CAAAGAGAAAAAAGAGCA---GTGGGAATGCTAGGAGCT---  
 -----ATGTTCCCTTGGGTTCTTGGGAGCA---GCAGGAAGCACTATG---GGCGCAGCGTCG---  
 ATGGCGCTGACGGTACAG---ACCAGACAA---TTAATG---TCTGGGATAGTGCAACAGCAGGAC---  
 AGTCTG---CTGAGG---GCTATTGAGGCGCAACAGCATCTGTTGCAACTCACAGTCTGGGGCATC  
 >JF320191  
 GATCAGGAT-----  
 -----  
 AAAAAATGATACTATTACCCTTCCATGCAGGATAAAACAAATTATAAACATGTGGCAGGAAGTAGGAAAAGCAA  
 TGTATGCCCCCTCCCATCCAAGGACAAATTAGTTGTTTCATCAAAT---  
 ATTACAGGGCTACTCTTAACAAGAGATGGTGGTAATAGCAGTAACACT-----  
 -----  
 -----  
 AATGGAAGTGAATCTTCAGACCTGGAGGAGGAGATATGAGAGACAATTGGAGAAGTGAATTATATAAGTACA  
 AAGTAGTAAAAATTGAACCATTA---GGAATAGCACCCACCAAGGCAAAGAGAAGAGTGGTA-----  
 -----CAAAGAGAAAAAAGAGCA---GTGGGAACGCTGGGAGCT-----  
 ---GTGTTCCCTTGGGTTCTTGGGAGCA---GCAGGAAGCACTATG---GGCGCAGCGTCA---  
 ATAACGCTGACGGCACAG---GCCAGACAA---TTACTG---TCTGGTATAGTGCAACAGCAGAAC---  
 AATATG---CTGAAG---GCTATTGAGGCGCAACAGCATCTGTTGCAACTCACAGTCTGGGGCATT  
 >MH078554  
 AATTATAATTGGAATAGTAATAAT-----  
 -----AGC---  
 ACTGATAGCAGAAATATCACGCTCCCATGTAGAATAAGACAAATTATAAACATGTGGCAGAGAGTAGGAAAAG  
 CTATGTATGCCTCTCCCATCAAAGGACCAATTAAGTGTACATCAAAC---  
 ATTACAGGGCTGCTATTGACAAGAGATGGGGGTAATGGCAAAAGCAGCAGT-----  
 -----

-----  
 AATGAGACTGAGACCTTCAGACCTATAGGAGGAGACATGAAGGACAATTGGAGAAGTGAATTATATAAAATATA  
 AAGTAGTACAAATCAAACCGTTA---GGAATAGCACCCACCAGGGCAAAAAGAAGAGTGGTG-----  
 -----CAGAGAGAAAAAAGAGCA---GTAACA---CTAGGAGCT-----  
 ---ATGTTCCCTTGGGTTCTTGGGAGCA---GCAGGAAGCACTATG---GGCGCAGCGTCA---  
 ATAGCGCTGACGGCACAG---GCCAGACAA---TTATTG---TCTGGTATAGTGCAGCAGCAGAAC---  
 AATCTG---CTGAGG---GCTATTGAGGCGCAACAACATCTGTTGCAACTCACAGTCTGGGGCATC  
 >EF210725  
 AACTATACA-----  
 -----  
 ACAAATGGAATATCACTCTCCCATGTAGAATAAAACAAGTTATAAACATGTGGCAGGAAGTAGGAAAAGCAA  
 TGTATGCCCCCTCCCATCAAAGGACAAATTAGTTGTTTGTCAAAT---  
 ATCACAGGGTTGCTATTAAACAAGAGATGGAGGTAAGCGCAATGACAGT-----  
 -----  
 -----  
 AATGAGACAGAGGTCTTTAGACCTGGAGGAGGAGATATGAGGGACAATTGGAGAAGTGAATTATATAAAATATA  
 AAGTAGTAAAAATTGAACCAATA---GGAATAGCACCCACCAAGGCAAAGAGAAGAGTGGTG-----  
 -----CAAAGAGAAAAAAGAGAG---CTGGGAACGCTAGGAGCT-----  
 ---ATGTTCAATTGGGTTCTTGGGAGCA---GCAGGAAGCACTATG---GGCGCAGCGTCA---  
 GTGACGCTGACGGTACAA---GCCAGACAA---TTATTG---TCTGGTATAGTGCAACAGCAGAAC---  
 AATCTG---CTGAAG---GCTATTGATGCGCAACAGCATCTGTTGCAACTCACAGTCTGGGGCATC  
 >EF210734  
 ACTCAA-----  
 -----  
 GAAAAATGAAAATATCACACTCCCATGTAGAATAAAACAATTTATAAACATGTGGCAGGAGGTAGGAAAAGCAA  
 TGTATGCCCCCTCCCATCAAAGGAATAATTAAATGTTTCATCAAAC---  
 ATTACAGGACTGCTCCTAATAAGAGATGGTGGTAATAGTAATGGTAATGGA-----  
 -----  
 -----  
 AGTAACAATAGCGAGACCTTCAGACCTGGAGGAGGAGATATGAAGGACAATTGGAGAAGTGAATTATATAAAAT  
 ATAAAGTAGTAAAAGTTGAACCAGTA---GGACTAGCACCCACCAAGGCAAAGAGAAGAGTGGTG-----  
 -----CAGAGAGAAAAAAGAGCA---GTGACA---CTAGGAGCT---  
 -----GTGTTCCCTTGGGTTCTTGGGAGCA---GCAGGAAGCACTATG---GGCGCAGCGTCA---  
 GTGACGCTGACGGTACAG---GCCAGACAA---TTACTG---TCTGGTATAGTGCAACAGCAGAGC---  
 AATATG---CTGAAG---GCTATTGAGGCGCAACAACATCTGTTGCAACTCACAGTCTGGGGCATC  
 >KY658689  
 AATTAC-----  
 -----  
 ACAAATGGAATATCACGCTCCCATGCAGAATAAAACAATTTATAAACATGTGGCAGAGAGTAGGAAAAGCAA  
 TGTATGCCCCCTCCCATTCAGGACAACCTTAATGTTTCATCAAAT---  
 ATTACGGGGATACTATTAAACAAGAGATGGGGGTAATGGTAATGTGACA-----  
 -----  
 -----  
 AATGACACAGAGATCTTCAGACCTGCAGGAGGAGATATGAGGGACAATTGGAGAAATGAACATATACAAATATA  
 AAGTAGTAAAGATTGAACCATTA---GGAATAGCACCCACCAAGGCAAGGAGAAGAGTGGTG-----  
 -----CAGAGAGAAAAAAGAGCA---GTGACA---CTGGGAGCT-----  
 ---CTGTTCCCTTGGGTTCTTGGGAGCT---GCAGGAAGCACTATG---GGCGCAGCGTCA---  
 GTGACGCTGACGGTACAG---GCCAGGCTA---TTATTG---GCTGGTATAGTGCAACAGCAGAAC---  
 AATTTG---CTGAGA---GCTATTGAGGTGCAACAGCACATGTTGCAACTCACAGTCTGGGGCATT  
 >KP411827  
 ACTCAAAGGCAAGTAACACA-----  
 -----  
 GAAAAATGAAAATATCACTCTCCCATGCAAAATAAAACAAGTTATAAATATGTGGCAGGAAGTAGGAAAAGCAA  
 TGTATGCCCCCTCCCATCGAAGGACAGATTAAATGTTTCATCAAAT---  
 ATTACAGGGCTACTATTAAACAAGAGATGGTGGTAAACATAACAGTAGCGAT-----  
 -----  
 -----  
 ACTAACAAAACCTGAGATCTTCAGACCTGGAGGAGGAGATATGAGGGACAATTGGAGAAGTGAATTATATAAAAT  
 ATAAGGTAGTAAAATTGAACCATTA---GGAATAGCACCCACCAGGGCAAAGAGAAGAGTGGTG-----  
 -----CAGAGAGAAAAAAGAGCA---GTGGGA---TTAGGAGCT---

-----ATGTTTCCTTGGGTTCTTGGGAGCA---GCAGGAAGCACTATG---GGCGCAGCATCA---  
 TTGACGCTGACGGTACAG---GCCAGACAA---TTAATG---TCTGGTATAGTGCAACAGCAAAAC---  
 AACTTG---CTAAGA---GCTGTTGAGGCGCAACAGCATATGTTGCAACTCACAGTCTGGGGCATC  
 >MF373174  
 AATCAAACAACCTACC-----  
 -----  
 GGTAATGATACCATCCCACTCCAATGCAGGATAAAGCAAATTATAAACATGTGGCAGGAAGTGGGAAAAGCAA  
 TGTATGCCCCCTCCCATTAAGGACCAATTAATTGTTTATCAAAT---  
 ATTACAGGGTTGTTATTAACAAGAGATGGTGGAATAATAATACC-----  
 -----  
 -----  
 AATGAAACAGAGACCTTCAGACCTGGAGGAGGAGACATGAGAGACAATTGGAGAAGTGAATTATATAAATACA  
 AAGTAGTAAAAATTGAACCATTA---GGAGTAGCACCCACCAAGGCAAGGAGAAGAGTGGTG-----  
 -----CAGAGAGAAAAAAGAGCA---GTGGGA---CTAGGAGCT-----  
 ---TTGTTCCCTTGGGTTCTTAGGAGCA---GCAGGAAGCACTATG---GGCGCAGCGTCA---  
 ATGACGCTGACGGTACAG---GCCAGACAA---TTATTG---TCTGGTATAGTGCAACAGCAGAAC---  
 AACTTG---CTGAGG---GCTATTGAGGCGCAACAGCACCTGTTGAAACTCACGGTCTGGGGCATT  
 >JN860769  
 AATCATACGTTTAATAATACTGAAGGCGAAAATATAACTGAAAGCATA-----  
 -----  
 -  
 AATACAACAATTATCAAGCTCCCATGCAGAATAAAACAAATTATAAACATGTGGCAGGAAGTAGGAAAAGCAA  
 TGTATGCCCCCTCCCATCAGTGACAAATTAGCTGTTTCATCAAAT---  
 ATTACAGGAATACTATTAACAAGAGATGGTGGTGGTAATAATACG-----  
 -----  
 -----  
 GGAAATGAGACCTTCAGACCTGGGGGAGGAAATATGAAAGACAATTGGAGAAGTGAATTATATAAATATAAAG  
 TAGTAAAAATTGAGCCATTA---GGAATAGCACCCACCAAGGCAAAGAGAAGAGTGGTG-----  
 -----CAGAGAGAAAAAAGAGCA---GTGGGAGTGATAGGAGCT-----  
 ATGTTCCCTTGGGTTCTTGGGAGCA---GCAGGAAGCACTATG---GGCGCAGCGTCA---  
 CTGACGCTGACGGTACAG---GCCAGACAA---TTGTTG---TCTGGTATAGTGCAACAGCAGAAC---  
 AATTTG---CTGAGA---GCTATTGAGGCGCAACAGCATCTGTTGCAACTCACAGTCTGGGGCATC  
 >MG989583  
 AATTATAATATTGAAAAG-----  
 -----  
 TCAAATGACACTATTGTACTCCCGTGCAGAATAAAACAAATTATAAACAGGTGGCAGGAAGTAGGAAGAGCAA  
 TGTATGCCCCCTCCCATCAGAGGACAACTTAAGTGTACATCAAAT---  
 ATTACAGGGCTACTATTATTAAGAGATGGTGGGAATAACATTACG-----  
 -----  
 -----  
 AACGAAACCTTCAGACCTGGAGGAGGAAATATGAAGGACAATTGGAGAAGTGAATTATATAAATATAAGGTAG  
 TAAAAATAGAGCCATTA---GGACTAGCACCCACCAAGGCAAAGAGAAGAGTGGTG-----  
 -----CAGAGAGAAAAAAGAGCA---GCA-----CTCGGAGCT-----  
 ATGTTCCCTTGGGTTCTTGGCAACA---GCAGGAAGCACTATG---GGCGCAGCATCG---  
 GTGACGCTGACGGTACAG---GCCAGACAA---TTGTTG---TCTGGTATAGTGCAACAGCAAAAC---  
 AACTTG---CTGAGG---GCTATTGAGGCGCAACAGCATATGTTGCAACTCACAGTCTGGGGCATC  
 >AF277065  
 TTTTCATGGTAATTGGACAAGGTCAAATTTACAGAA-----  
 -----  
 TCAAATAGCACAACTATCACACTCCCATGTAGAATAAAACAAATTGTAAACATGTGGCAGGAAGTAGGCAAAG  
 CAATGTATGCCCCCTCCCATCAGAGGACAAATTAGATGTTTCATCAAAT---  
 ATCACGGGGCTGCTATTAACAAGAGATGGTGGCGTGAACGGGACC-----  
 -----  
 -----  
 CGCGAGACCTTTAGACCTGGAGGAGGAGATATGAGGGACAATTGGAGAAGTGAATTATATAAATATAAAGTGG  
 TAAAAATTGAGCCATTA---GGAGTAGCACCCACCAAGGCAAAGAGAAGAGTGGTG-----  
 -----CAGAGAGAAAAAAGAGCA---GTGGGAACAATAGGAGCT-----  
 ATGTTCCCTTGGGTTCTTGGGAGCA---GCAGGAAGCACTATG---GGCGCAGCGTCA---  
 ATAACGCTGACGGTACAG---GCCAGACAA---TTATTG---TCTGGTATAGTGCAACAGCAAAAC---  
 AATTTG---CTGAGA---GCTATTGAGGCGCAACAGCATATGTTGCAACTCACGGTCTGGGGCATC

>AF277067

AATCATACTGGGAGTAATAATATAAGATCA-----

GAAGACAATGACAATATCACACTTCCATGCAGAATAAAACAAATAGTAAACATGTGGCAGGAAGTAGGCAAAG  
CAATGTATGCCCCCTCCCATTAGAGGACAAATTAGATGTTTCATCAAAT---

ATTACAGGATTACTATTAACAAGAGATGGTGGTAATGACACGAGC-----

GACACCGAGATCTTCAGACCTGGAGGAGGAAATATGAGGGACAATTGGAGAAGTGAATTATATAAATATAAAAG  
TAGTAAGAATTGAACCATTA---GGAGTAGCACCCACCAAGGCAAAGAGAAGAGTGGTG-----

-----CAGAGAGAAAAAAGAGCA---GTGGGAACATTAGGAGCT-----

ATGTTCCCTTGGGTTCTTGGGAACA---GCAGGAAGCACTATG---GGCGCAGCGTCA---

CTGACGCTGACGGTACAG---GCCAGACAA---TTATTG---TCTGGTATAGTGCAACAGCAAAAC---

AATTTG---CTGAGA---GCTATTGAGGCGCAACAGCATCTGTTGCAACTCACGGTCTGGGGCATC

>JN786692

ACTCAGAATGTTACT-----

GGAGGAAATGAGACAATCATACTCCCGTGCAGAATAAAACAAATTATAAACATGTGGCAGCAAGTAGGAAAAAG  
CAATGTATGCCCCCTCCCATCAGTGGACTACTTAATTGTACATCAAAT---

ATTACAGGACTACTAATAACAAGAGATGGTGGTACTGGGAACAGG-----

ACCAATGAGACCTTCAGACCTGGAGGAGGAGATATGAGGGACAATTGGAGAAGTGAATTATATAAATATAAAAG  
TAGTAAGAATTGAACCAATA---GGCATAGCACCCACCGAGGCAAAGAGAAGAGTGGTG-----

-----CAGAGAGAAAAAAGAGCA---GTGGGA---ATAGGAGCT-----

TTGTTCCCTTGGGTTCTTGGGAGCA---GCAGGAAGCACTATG---GGCGCAGCGTCG---

ATAACGCTGACGGTACAG---GCCAGACAA---TTATTG---TCTGGTATAGTGCAACAGCAGAAC---

AACTTG---CTGAGG---GCTATTGAGGCGCAACAGCATCTGTTGCAACTCACAGTCTGGGGCATC

>DQ869028

ACTTAT-----

ACTAATGGAATATCACAATCCCATGCAGAATAAGACAGATTGTAAACAGGTGGCAGGAAGTAGGAAAAGCAA  
TGTATGCCCCCTCCCATCAGAGGATACATTAAATGTTTCATCAAAT---

ATTACAGGGCTGCTATTAAACGAGAGATGGTGGTAGTAATGCCACG-----

AATGAGACCTTCAGACCTGGAGGAGGAGATATGAGGGACAATTGGAGAAGTGAATTATATAAATATAAAGTAG  
TAAAAATTGAACCATTA---GGAGTAGCACCCACCAAGGCAAAGAGAAGAGTGGTG-----

-----CAGAGAGAAAAAAGAGCA---ATAGGGGGATTAGGAGCT-----

TTGTTCCCTTGGGTTCTTGGGAGCA---GCAGGAAGCACTATG---GGCGCAGCGTCA---

TTGACGCTGACGGTACAG---GCCAGACAA---TTATTG---TCTGGTATAGTGCAACAGCAGAAC---

AATTTG---CTGAGA---GCTATTGAGGCGCAACAGCATCTGTTGCAACTCACAGTCTGGGGCATC

>JN944911

ACTCAAGGGCCAAGT-----

GAAAATAACACAATCATACTCCCATGCAGAATAAAACAAATTATAAACATGTGGCAGAGAGTAGGAAAAGCAA  
TATATGCCCCCTCCCATCAGTGGACAAATTAGATGTTTATCAAAT---

ATTACAGGGCTGATATTAACAAGAGATGGTGGTAATAGTAGCCTA-----

AGCAGCCCCGAGATCTTCAGACCTGGAGGAGGAGATATGAGGGACAAGTGGAGAAGTGAATTATATAAATATA  
AAGTAGTACAAATTGAACCATTA---GGAATAGCACCCACCAGGGCAAAGAGAAGAGCGGTG-----

-----CAGAGGGAAAAAAGAGCA---GTGGGA---ATAGGAGCT-----

---CTGTTCCCTTGGGTTTCTGAGGAGCA---GCAGGAAGCACTATG---GGCGCAGCGTCA---

GTGACGCTGACGGTACAG---GCCAGACAG---TTGTTG---TCTGGTATAGTGCAACAGCAGAGC---

AATCTG---CTGAGA---GCTATTGAGGCGCAACAGCATCTGTTGCAACTCACAGTCTGGGGCATT

>FJ469751

AGTCATAATACTGCTATGAATGTT-----

-----ACT---

GCAGGGAATGATAATATCACACTCCCGTGCAGAATAAAACAAATTATAAACAGGTGGCAGGAAGTAGGAAAAG

CAATGTATGCCCCCTCCCATCAGTGGATTTCATTAAGTCTCATCAAAT---  
ATTACAGGGATAATGTTAATTAGAGATGGT---ATTAATGAAACT-----  
-----  
-----  
GATGGGAACGAGACCTTCAGACCAGAAGGAGGAAATATGAAGGACAATTGGAGAAATGAATTATACAAATATA  
AAGTAGTAAAAATAGAGCCCTTA---GGAGTAGCACCCACCAAGGCAAAGAGAAGAGTGGTG-----  
-----CAGAGAGAAAAAAGAGCA---GTGGGA---ATAGGAGCT-----  
---CTGTTCCCTTGGGTTCTTGGGAGCA---GCAGGAAGCACTATG---GGCGCAGCGTCG---  
ATCACGCTGACGGTACAG---GCCAGACAA---TTATTG---TCTGGTATAGTGCAACAGCAGAGC---  
AATTTG---CTGAGA---GCTATTGAGGCGCAACAGCATCTGTTGCAACTCACAGTCTGGGGCATC  
>DQ869032  
ACTTATAACACAACAGATAATAGTACTGAT-----  
-----  
AATGGGAATGAAATTATCACAATCCCATGCAGAATAAAACAGATTATAAACATGTGGCAGGAGGTAGGAAAAG  
CAATGTATGCCCCCTCCCATTAGAGGACTAATTAGATGTACATCAAAT---  
ATTACAGGGCTACTATTAGTAAGAGATGGTGGTACTACTAATACT-----  
-----  
-----  
AGTACTAATGAGACCTTCAGACCTGGAGGAGGAGATATGAGGGACAATTGGAGAAGTGAATTATATAAAATATA  
AAGTAGTAAAAATTGAACCATTA---GGAGTAGCACCCACCAAGGCAAAGAGAAGAGTGGTG-----  
-----CAGAGAGAAAAAAGAGCA---ATAGGA---TTTGGAGCT-----  
---ATGTTCCCTTGGGTTCTTGGGAGCA---GCCGGAAGCACTATG---GGCGCAGCGTCA---  
CTGACGCTGACGGTACAG---GCCAGACAA---TTATTG---ACTGGTATAGTGCAACAGCAAAAC---  
AATTTG---CTGAGG---GCTATTGAGGCGCAACAGCACTTGTGCAACTCACAGTCTGGGGCATC  
>FJ469742  
ACTCAGAATGGTACTACATGGTCAAATGAC-----  
-----  
AGTGACCCAATCATCATACTCCCATGCAGAATAAAACAAATTGTAAATAGGTGGCAGGAAGTAGGAAAAGCAA  
TGTATGCCCCCTCCCATCAGTGGACAAATTAGATGCTCATCAAAT---  
ATAACAGGACTGCTATTAAACAAGAGATGGTGGTAACACAAATAGC-----  
-----  
-----  
ACTATTGAAACCTTCAGACCTGGAGGAGGAGATATGAGGGACAATTGGAGAAGTGAAGTATATAAAATATAAGG  
TAGTACAAATTGAACCATTA---GGAGTAGCACCCACCAAGGCAAAGAGAAGGGTGGTG-----  
-----CAGAGAGAAAAAAGAGCA---GTAGTAGGACTAGGAGCT-----  
TTGGTCCTTGGGTTCTTGGGAGCA---GCAGGAAGCACTATG---GGCGCAGCGTCA---  
CTGGCGTTGACGGTACAG---ACCAGACAA---TTATTG---TCTGGTATAGTGCAACAGCAGAAT---  
AATATG---CTGAGA---GCTATTGAGGCGCAACAACACCTGTTGCAACTCACAGTCTGGGGCATC  
>FJ469764  
AATTACACA-----  
-----GAA---  
AATGGAAATGACACACTCACAATCCCATGCAGAATAAAACAAATTATAAACATGTGGCAGGAAGTAGGAAAGG  
CAATGTATGCCCCCTCCCATCAGAGGACAAATTAAATGTTTCATCAAAT---  
ATTACAGGGCTGCTATTAAACAAGAGATGGTGGTAATAGCAACAAC-----  
-----  
-----  
ACTAGCAATGAGACCTTCAGACCTGTAGGGGGAGATATGAGGGACAATTGGAGAAGTGAATTATATAAAATATA  
AAGTGGTAAAAATTGAACCATTA---GGAGTAGCGCCACCAGGGCAAAGAGAAGAGTGGTG-----  
-----CAAAGAGAAAAAAGAGCA---GTGGGA---ATAGGAGCT-----  
---CTGTTCCCTTGGGTTCTTGGGAGCA---GCAGGAAGCACTATG---GGCGCAGCATCA---  
CTGACGCTGACGGTACAA---GCCAGACAA---TTATTG---TCTGGTATAGTGCAACAGCAGAAC---  
AATCTG---CTGAGG---GCTATTGAGGCGCAACAGCATCTGTTGCAACTCACAGTCTGGGGCATC  
>EF593298  
TATTACAATGGTACCTGGAATAATACTGAAGAG-----  
-----  
TCAAAATGAAACTATCACACTCCCATGCAGAATAAAACAAATTATAAACATGTGGCAGGAAGTAGGAAGAGCAA  
TGTATGCCCCCTCCCATCAGAGGAATAATTAGATGTTTCATCAAAT---  
ATAACAGGGCTGCTATTAAACAAGAGATGGTACTCCTACTAATAGCACAGAA-----  
-----  
-----

AGCAATGACACAGAAATCTTCAGACCGGGAGGAGGAAATATGAGAGACAATTGGAGAAGTGAATTATATAAAT  
 ATAAAGTAGTACAAATTGAACCAATA---GGACTAGCACCCACAAAGGCAAAGAGAAGAGTGGTG-----  
 -----CAGAGAGAAAAAAGAGCA---GTGGGAACAATAGGAGCT---  
 -----ATGTTTCCTTGGGTTCTTGGGAACA---GCAGGAAGCACTATG---GGCGCAGCGTCA---  
 ATAACGCTGACGGTACAG---GCCAGACAA---TTATTG---TCTGGTATAGTGCAACAGCAGAAC---  
 AATCTG---CTGAAG---GCTATTGAGGCGCAACAACATCTGTTGCAACTCACAGTCTGGGGCATC  
 >HQ216485  
 CATTACAAGGAA-----  
 -----  
 AAAAAATGACACAATCACACTCCCATGCAGAATAAAACAAATTATAAACAGGTGGCAGGAGGTAGGAAAAGCAA  
 TGTATGCCCCCTCCCATCAGAGGACAAATTAAGTGTTCATCAAAT---  
 ATTACAGGGCTTCTATTATTAAAGAGATGGTGGACATGATAGTGGAATAAATAGT-----  
 -----  
 ----  
 ACAACGAACCAGAACGAGACCTTCAGGCCTGGGGGGGGGAAATATGAAGGACAATTGGAGAAGTGAATTATATA  
 AATATAAAGTAGTACAAATTGAACCACTA---GGAGTAGCACCCACCAAGGCAAAGAGAAGAGTGGTG-----  
 -----CAGAGAGAAAAAAGAGCA---  
 ATAGGGGGAAGTAGGAGCT-----GTGTTTCCTTGGGTTCTTGGGAGCA---GCAGGAAGCACTATG---  
 GGCGCAGCATCA---GTGATGCTGACGGTACAG---GCCAGACAA---TTACTG---  
 TCTGGAATAGTGCAACAGCAGAAC---AATTTG---CTGAGG---  
 GCTATTGAGGCGCAACAACATTTGTTGCAACTCACAGTCTGGGGCATC  
 >JX863970  
 CACTACACCTGGGATGGTACTAATGGTACTTGGGGGAATAATGCA-----  
 -----  
 -  
 TCGAAGGGCAATATCACACTCCACTGCAGAATAAAACAAATTGTAAACATGTGGCAGAGAGTAGGAAGAGCAA  
 TGTATGCCCCCTTATCAGTGGACCAATTAGCTGTTTCATCAAAT---  
 ATTACAGGGTTACTATTAAACAAGAGATGGGGGTGGTATCAACGAGACC-----  
 -----  
 -----  
 AACACCACTGAGACCTTTAGACCTGGAGGAGGAGATATGAAGGACAATTGGAGAAGTGAATTATATAAATATA  
 AAGTAGTACAAATTGAACCAATA---GGAATAGCACCCACCAAGGCAAAAAGAAGAGTGGTG-----  
 -----CAGAGAGAGAAAAAGAGCA---GTGGGAGTATTTGGAGCT-----  
 ---ATGTTTCCTTGGGTTCTTGGGAGCA---GCAGGAAGCACTATG---GGCGCAGCATCA---  
 ATAACGCTGACGGCACAG---GCCAGACAA---TTATTG---TCTGGTATAGTGCAACAGCAGAGC---  
 AATCTG---CTGAGG---GCTATTGAGGCGCAACAACACATGTTGCAACTCACAGTCTGGGGCATC  
 >EU578047  
 AATTACACAGAA-----  
 -----  
 GGAAATGGCACAATCACACTCCCATGCAGAATAAAACAAATTATAAACATGTGGCAGGAAGTAGGAAAAGCAA  
 TGTATGCCCCCTCCCATCAGAGGACCAATTAATTGTACATCAAAT---  
 ATTACAGGGTTACTATTAAACAAGAGATGGTGGTATACAGAATGGCACT-----  
 -----  
 -----  
 GAGAACACCACTGAGACCTTCAGACCTGGAGGAGGAGATATGAGGGACAATTGGAGAAGTGAATTATATAAAT  
 ATAAAGTAGTAAGAATTGAACCATTA---GGAGTAGCACCCACCAAGGCAATGAGAAGAGTGGTG-----  
 -----CAAAGAGAAAAAAGAGCA---GTGGGA---ATAGGAGCT---  
 -----TTGTTTCCTTGGGTTCTTAGGAGCA---GCAGGAAGCACTATG---GGCGCAGCGTCG---  
 CTGACGCTGACGGTACAA---GCCAGACAA---TTATTG---TCTGGTATAGTGCAACAGCAGAAC---  
 AATTTG---CTGAGA---GCTATTGAGGCGCAACAGCATCTGTTGCAACTCACAGTCTGGGGCATC  
 >MH060746  
 CCTCAGAATGAAAGTAGGCCA-----  
 -----  
 GAAAAATGACACTATCACACTCCCATGCAAAATAAGACAAATTGTAAACCTGTGGCAGGAAGTAGGAAAAGCAA  
 TGTATGCCCCCTCCCATCAGAGGACCAATTAAGTGTTCATCAAAC---  
 ATTACAGGGCTGTTATTAAACAAGGGATGGTGGTATGAACGTGAGC-----  
 -----  
 -----  
 AACACCAACGAGACCTTCAGACCTGGAGGGGGGGATATGAGGGACAATTGGAGAAGTGAATTATATAAATATA  
 AAGTAGTAAAAATAGAACCATTA---GGAGTAGCACCCACCAAGGCAAAGAGAAGAGTGGTG-----

-----CAGAGAGAAAAAGAGCA---GTGACA---CTAGGAGCT-----  
---ATGTTCCCTTGGGTTCTTGGGAGCA---GCAGGAAGCACTATG---GGCGCAGCGTCA---  
ATGGCGCTGACGGTACAG---GCCAGACAA---TTATTG---TCTGGTATAGTGCAACAGCAGAAC---  
AATTTG---CTGAGA---GCTATTGAGGCGCAACAGCATCTGTTGCAACTCACAGTCTGGGGCATC  
>FJ469695  
ACTCAGAATAAT-----  
-----  
ACTGACACAATTATCACACTCCCATGCAGAATAAAACAGATAATAAACATGTGGCAAGAAGTAGGAAAAGCAA  
TGTATGCCCCCTCCCATCCAAGGACAAATTAGATGTTTCATCAAAT---  
ATTACAGGGTTACTATTAACAAGAGATGGTGCTGGTGCTAATAAA-----  
-----  
-----  
AGCGAGAATGAGACCTTCAGACCTGGAGGAGGAAATATGAGGGACAATTGGAGAAGTGAATTATATAAATATA  
AAGTAGTAAAAATTGAACCATTA---GGAGTAGCACCCACCAAGGCAAGAAGAAGAGTGGTG-----  
-----CAGAGAGAAAAAGAGCA---CTAGTAGGACTAGGAGCT-----  
---GTGTTCCCTTGGGTTCTTGGGAGCA---GCAGGAAGCACTATG---GGCGCAGCGTCA---  
ATGGCGCTGACGGTACAG---GCCAGACAA---TTATTG---TCTGGTATAGTGCAACAGCAGAAC---  
AATTTG---CTGAGA---GCTATTGAGGCGCAACAGCATATGTTGCAACTCACAGTCTGGGGCATC  
>FJ469732  
AATCAAACTACTAATGAATGGAATGGTACTAAAGGGTTA-----  
-----GATGACAGG-----  
GGAGAAAATGACACAATCACACTCCCATGCAGAATAAAACAAATTGTAAACATGTGGCAGGGAGTAGGAAGAG  
CAATGTATGCCCCCTCCCATCAGTGGACAAATTAGATGCTTATCAAAT---  
ATTACAGGGCTGCTATTAACAAGAGATGGTGCTAATACAAAATGGCACG-----  
-----  
-----  
AATGGGACTGAAACCTTCAGACCTGGAGGAGGAGATATGAGGGACAATTGGAGAAGTGAATTATATAAATATA  
AAGTAGTAAAAATTAAACCATTA---GGAGTAGCACCCACCAAGGCAAAGAGAAGAGTGGTG-----  
-----CAGAGAGAAAAAGAGCA---GTGGGA---ATAGGAGCT-----  
---GTGTTCCCTTGGATTCTTGGGAGCA---GCAGGAAGCACTATG---GGCGCAGCGTCA---  
GTGACGCTGACGGTACAG---GCCAGACAA---TTATTG---TCTGGTATAGTGCAACAGCAGAAC---  
AATTTG---CTGAGG---GCTATTGAGGCGCAACAACATCTGTTGCAACTCACAGTCTGGGGCATA  
>DQ410403  
AAT-----  
-----  
TACACTAGCACTATCACACTCCCATGCAGAATAAAACAAGTTATAAACATGTGGCAGGAAGTAGGAAAAGCAA  
TGTATGCCCCCTCCCATCAGAGGACAAATTAAATGTTTCATCAAAT---  
ATTACAGGGCTGATACTAACAAGAGATGGTGCTACAAACAACACC-----  
-----  
-----  
AACACCACCGAGACCTTTAGACCTGGAGGAGGAGATATGAGGGACAATTGGAGAAGTGAATTATATAAATACA  
AAGTAGTAAAAATTGAACCAATA---GGAATAGCACCCACCAAGGCAAAGAGAAGAACGGTG-----  
-----CAGAGAGAAAGAAGAGCA---ATAGGA---ATAGGAGCT-----  
---GTGTTCCCTTGGGTTCTTGGGAACA---GCTGGAAGCACTATG---GGCGCAGCGTCA---  
CTGACGCTGACGGTACAG---GCCAGACAA---TTATTG---TCTGGTATAGTGCAACAGCAAAAC---  
AATTTG---CTGAAG---GCTATTGAGGCGCAACAGCATCTGTTGCGACTCACAGTCTGGGGCATC  
>EU547186  
AGTCAACTTTTTAATAGTACTTGAATGGTACCGACGGGTCAGATAACACA-----  
-----  
-----  
ATGGACAAAGATATCTCACTTCCATGCAGAATAAGACAAATTGTAAACATGTGGCAGGAAGTAGGAAAAGCAA  
TGTATGCCCCCTCCTATCCAAGGACAAATTAGATGTTTCATCAAAT---  
ATTACAGGGCTACTATTAGTAAGAGATGGTGCTAGTAATACAACC-----  
-----  
-----  
AATAATGAGACCTTCAGACCTGGAGGAGGAGACATGAGGGACAACCTGGAGAAGTGAATTATATAAATATAAAG  
TAGTAAAAATTGAACCAGTA---GGAATAGCACCCACCAAGGCAAAGAGAAGAGTGGTG-----  
-----CAGAGAGAAAAAGAGCA---GTGGGAACACTAGGAGCT-----  
ATGTTCCCTTGGGTTCTTGGGAACA---GCAGGAAGCACTATG---GGCGCAGCGTCA---

GTGACGCTGACGGTACAG---GCCAGACAA---TTATTG---TCTGGTATAGTGCAACAGCAAAGC---  
 AATATG---CTGAGG---GCTATTGAGGCGCAACAGCATCTGTTGCAACTCACAGTCTGGGGCATC  
 >JF689852  
 AATCACACT-----  
 -----  
 AAAGGAAATGGCACAATCACAATTCCATGCAGAATAAAACAAATTATAAACATGTGGCAGGAAGTAGGAAAAG  
 CAATGTATGCCCCCTCCCATCAGAGGACAAATTAGATGTTTCATCAAAT---  
 ATTACAGGGCTGTTATTAACAAGAGATGGTGGCAATGACGGGGAC-----  
 -----  
 -----  
 AATACCACCGAAACCTTCAGACCTGGAGGAGGAGATATGAGGGACAATTGGAGAAGTGAATTATATAAATATA  
 AAGTAGTAAAAATTGAACCATTA---GGAGTAGCACCTACCAAGGCAAAGAGAAGAGTGGTG-----  
 -----CAGAGAGGAAAAAGAGCA---GTAGGA---ATAGGAGCT-----  
 ---GTGTTCCCTTGGGTTCTTGGGAGCA---GCAGGAAGCACTATG---GGCGCAGCGTCA---  
 TTAACGCTGACGGTACAG---GCCAGACTA---TTATTG---TCTGGTATAGTGCAACAGCAGAAC---  
 AATTTG---CTGAGG---GCTATTGAGGCGCAACAGCATCTGTTGCAACTCACAGTCTGGGGCATC  
 >HQ216634  
 GATTACACTACAGCAGAGAAT-----  
 -----GAT---  
 ACTAAAGAAGAAAATATCACACTCCCATGCAGAATAAAACAAATTATAAACATGTGGCAGAAAGTAGGAAAAG  
 CAATGTATGCCCCCTCCCATCAGAGGACAGATTAGATGTTTCATCAAAT---  
 ATTACAGGGCTGCTATTAACAAGAGATGGTGGTAATGGTGATACC-----  
 -----  
 -----  
 ACAAACAATGAGACCTTCAGACCTGGAGGAGGAGATATGAGGGATAATTGGAGAAGTGAATTATATAGATATA  
 AAGTAGTAAGAATTGAACCATTA---GGAATAGCACCCACTAAGGCAAAGAGAAGAGTGGTG-----  
 -----CAGAGAGAAAAAGAGCA---ATAGGGGGAATAGGAGCT-----  
 ---ATGTTCCCTTGGGATCTTAGGAGTA---GCAGGAAGCACTATG---GGCGCAGCGTCA---  
 TTGACGCTGACGGTACAG---GCCAGACAA---TTATTG---TCTGGTATAGTGCAACAGCAGAAC---  
 AATTTG---CTGAGG---GCTATTGAGGCGCAACAGCATCTGTTGCAACTCACAGTCTGGGGCATC  
 >HQ216874  
 GTTCATAATAATAACTGAAAGGTTA-----  
 -----AAT---  
 ACCACTAACAGTACTATCATACTCCCATGCAAAATAAAACAAATTATAAACATGTGGCAGGGAGTAGGAAAAG  
 CAATGTATGCCCCCTCCCATTCAGGAATAATTAATTGTGTATCAAAT---  
 ATTACAGGGCTGCTATTAACAAGAGATGGTGGTGGTAGTGGTAATGGCACA-----  
 -----  
 -----  
 AGAAGGGATAACGAAACCTTCAGACCTGAAGGGGGAAATATGAAGGATAATTGGAGAAGTGAATTATACAAAT  
 ACAAAGTAGTAAAAATTGAACCATTA---GGAGTAGCACCCACTAGGGCAAAGAGAAGAGTGGTG-----  
 -----CAGAGAGAAAAAGAGCG---ATAGGAGGACTAGGAGCT---  
 -----TTGTTCCCTTGGGTTCTTGGGAATG---GCAGGAAGCACTATG---GGCGCAGCGTCG---  
 CTGACGCTGACGGTACAG---GCCAGGCTG---TTATTG---TCTGGTATAGTGCAACAGCAAAC---  
 AATTTG---CTGAGG---GCTATTGAGGCGCAACAGCACCTGTTGCAACTCACAGTCTGGGGCATC  
 >FJ653571  
 TCTCATTGGTCTGATAGTACTTGAATGATACTACAGG-----  
 -----CCAAAT-----  
 AACACTACAGAAACAATCATACTCCCATGTAGACTAAACAAATTATAAACATGTGGCAAGGAGTAGGAAGAG  
 CAATGTATGCCCCCTCCCATCAGAGGACAAATTAGATGTTTCATCAAAT---  
 ATTACAGGGCTGTTATTAACAAGAGATGGTGGTGGTAGTAATAGCAGC-----  
 -----  
 -----  
 GGCAGTAACGAGACCTTCAGACCAGAAGGAGGAAATATGAAGGACAATTGGAGAAGTGAATATATAAATATA  
 AAGTAGTAAAAATTGAACCATTA---GGAATAGCACCCACTAAGGCAAAAAGAAGAGTGGTG-----  
 -----CAAAGAGAAAAAGAGCA---GTGGGA---CTAGGAGCT-----  
 ---CTGTTCCCTTGGGTTCTTGGGAGCA---GCAGGAAGCACTATG---GGCGCAGCGGCA---  
 GTAACGCTGACGGTACAG---GCCAGACAA---TTATTG---TCTGGTATAGTGCAACAGCAAAC---  
 AATTTG---CTGAGA---GCTATTGAGGCGCAACAGCATATGTTGCAACTCACAGTCTGGGGCATC  
 >KC312435

GATCATATTACTGAG-----  
 -----  
 GAGAACACAACACTATCACACTCCAATGCAGAATAAAACAAATTATAAACATGTGGCAAAAAGTAGGAAAAGCAA  
 TGTATGCCCCCTCCCATCAAAGGACAAATTAGCTGTGTATCAAAT---  
 ATTACAGGGCTGCTATTAACAAGAGATGGTGGTCTAAACCAGTCAGGT-----  
 -----  
 -----  
 AACAGTTCCGAGACCTTCAGACCTGGAGGAGGAGATATGAGGGACAACCTGGAGAAGTGAATTATATAAATATA  
 AAGTAGTAAGAATTGAACCATTA---GGAGTAGCACCCACCAAGGCAAAGAGAAGAGTGGTG-----  
 -----CAGAGAGAAAAAAGAGCA---GTGGGAGTTCTAGGAGCT-----  
 ---ATGTTCCCTTGGGTTCTTGGGAGCA---GCAGGAAGCACTATG---GGCGCAGCGTCA---  
 ATGACGCTGACGGTACAA---GCCAGACAA---TTATTG---TCTGGTATAGTGCAACAGCAGAAC---  
 AATCTG---CTGATG---GCTATTGAGGCGCAACAGCATATATTGCGACTCACAGTCTGGGGCATC  
 >HQ216949  
 AATTAC-----  
 -----  
 ACTGATGGAACACTATCACACTCCCATGCAGAATAAGACAAATTATAAACATGTGGCAGGAAGTAGGAAAAGCAA  
 TGTATGCCCCCTCCCATCGGAGGGCAAATTAGATGTTTCATCAGAT---  
 ATTACAGGGCTACTCTTAACAAGAGATGGTGGCAGAGGAAATAACAAT-----  
 -----  
 -----  
 AATGAACTGAGATCTTCAGACCTGGAGGAGGAGATATGAGGGACAATTGGAGAAGTGAATTATATAAATACA  
 AAATAGTAAAAATTGAACCATTA---GGAATAGCACCCACCAAGGCGAAGAGAAGAGTGGTG-----  
 -----CAGAGAAAAGAAAAAGAGCA---GTGGGA---ATAGGAGCT-----  
 ---GTGTTCCCTTGGGTTCTTGGGAGCA---GCAGGAAGCACGATG---GGCGCAGCGTCA---  
 GTGACGCTGACGGTACAG---GCCAGACAA---TTACTG---TCTGGTATAGTGCAACAGCAGAAC---  
 AATCTG---CTGAGG---GCTATTGAGGCGCAACAACATCTGTTGCAACTCACAGTCTGGGGCATC  
 >JX863989  
 CATCAGAATAATACTAAT-----  
 -----ATTACTACA-----  
 GAGTCAAATGGCATCATCACACTCCCATGCAGAATAAAACAAATTATAAACAGGTGGCAGGAAGTAGGAAAAG  
 CAATGTATGCCCCCTCCCATCAGAGGACCAATCAGGTGTAGATCAAAT---  
 ATTACAGGGGTGCTATTAACAAGAGATGGTGGTAGTACTAATGCC-----  
 -----  
 -----  
 ACCAACGAGACCTTCAGACCTGGAGGAGGAGATATGAGGGATAATTGGAGAAGTGAATTATATAAATATAAAG  
 TAGTAAAAATTGAGCCATTA---GGAATAGCACCCACCAAGGCACAGAGAAGAGTGGTG-----  
 -----CAGAGAGAAAAAAGAGCA---GCA---ATTGGAGCT-----  
 ATGCTCATTGGGTTCTTGGGAATG---GCAGGAAGCACTATG---GGCGCAGCGTCA---  
 GTGACGCTGACGGTACAA---GCCAGGCTA---TTACTG---TCTGGTATAGTGCAACAGCAGAGAA---  
 AATTTG---CTGAGA---GCTATTGAGGTGCAACAACATATGTTGCAACTCACAGTCTGGGGCATC  
 >JX863993  
 AATTACAAC-----  
 -----  
 ATTACAGGAAATATCACACTCCCATGCAGAATAAAACAAATTATAAACATGTGGCAGGAAGTAGGAAAAGCAA  
 TGTATGCTCCTCCCATCGCAGGACTACTTAGATGTTTCATCAAAT---  
 ATTACAGGGCTGCTATTAACACGAGATGGAGGTCTACACCCGGAC-----  
 -----  
 -----  
 AATGGGACCGAGATTTTCAGACCTGGAGGAGGAGATATGAGGGACAATTGGAGAAGTGAATTATATAAATATA  
 AAGTAGTAAAAATTGAACCATTA---GGAATAGCACCCACCAAGGCAAAGAGAAGAGTGGTG-----  
 -----CAGAGAGAAAAAAGAGCA---ATAGGA---CTAGGAGCT-----  
 ---TTGTTCTTTGGGTTCTTGGGAGCA---GCAGGAAGCACTATG---GGCGCAGCGTCA---  
 GTGACGCTGACGGTACAG---GCCAGACAG---TTACTG---TCTGGTATAGTGCAACAGCAGAAC---  
 AATTTG---CTGAGA---GCTATTGAGGCGCAACAACATATGTTGCAACTCACAGTCTGGGGCATC  
 >JF320263  
 AATTATACTGATCCTTTAAATGATACTTTGAATAAT-----  
 -----  
 GATACTGAAGAAAATATCACACTCCAATGCAGAATAAAACAAATTTATAAACATGTGGCAGAAAGTAGGAAAAG  
 CAATGTATGCCCCCTCCCATTAGTGGACAAATTAAGTGTTCATCAAAT---

ATTACAGGGCTGCTATTAATGAGAGATGGTGGTATTAACCAGAGC-----  
-----  
-----  
GAGAGCAGCGAGACCTTCAGACCTGGAGGAGGAGATATGAGGGACAATTGGAGAAGTGAATTATATAAAATATA  
AAGTAGTAAAAAATTGAACCTTTA---GGAGTAGCACCCACTAAAGCAAAGAGAAGAGTGGTG-----  
-----CAGAGAGAAAAAAGAGCA--GCA-----ATAGGAGCT-----  
---CTGGTCCTTGGGTTCTTGGGAGCA--GCAGGAAGCACTATG--GGCGCAGCGTCA---  
CTGACGCTGACGGTACAG---GCCAGACTA---TTATTG---TCTGGTATAGTGCAGCAGCAAAAC---  
AATTTG---CTGAGA---GCTATTGAGGCGCAACAGCATATGTTGCAACTCACAGTCTGGGGCATC  
>JF320011  
AATCATACTTGAATAGTACTAATGATACTTGAAT-----  
-----  
-  
GGTACTGAGACCATAACACTTCCATGCAGAATAAAACAAATTATAAACATGTGGCAAGAAGTAGGAAAAGCAA  
TGTATGCCCCCTCCCATCAGAGGACAGATTAACTGCTCGTCAAAT---  
ATTACAGGGCTGCTATTAACAAGAGATGGTGGTAACACCACAAAC-----  
-----  
-----  
ACCACCGAGATCTTCAGACCTGGAGGGGGAAATATGAAGGACAATTGGAGAAGTGAATTATATAAAATACAAAG  
TAGTAAAAAATTGAACCATTA---GGAGTAGCACCCACCAAGGCAAAGAGGAGAGTGGTG-----  
-----CAGAGAGAAAAAAGAGCA--GCA-----ATAGGAGCT-----  
TTGTTCCCTTGGGTTCTTGGGAGCA--GCAGGAAGCACTATG--GGCGCAGCGTCA---  
GTGACGCTGACGGTACAG---GCCAGACTA---TTATTG---TCTGGTATAGTGCAACAGCAGAGC---  
AATCTG---CTGAGG---GCTATTGAGGCGCAACAGCATCTGTTGCAACTCACAGTCTGGGGCATC  
>JF320126  
AGTCATAATGATACCAGGCATAATAGTACTAAA-----  
-----  
GGGACAGATAATATCATACTCCCATGTAAATAAGACAAATTGTAAACATGTGGCAGGAAGTAGGAAAGGCAA  
TGTATGCCCCCTCCCATTCAGAGACAAATTAAATGTTTCATCAAAT---  
ATTACAGGGCTGATATTAACAAGAGATGGTGGTAATAATAATAGCACA-----  
-----  
-----  
AACGAGACTGAGACATTTCAGACCTGGAGGAGGAAATATGAGGGACAATTGGAGAAGTGAATTATATAAAATACA  
AAGTAGTAGAAATTGAACCATTA---GGAATAGCACCCACCAAGGCAAAGAGGAGAGTGGTG-----  
-----CAAAGAGAAAAAAGAGCA--GTGGGAACGATAGGAGCT-----  
---ATGTTCCCTTGGGTTCTTGGGAGCA--GCAGGAAGCACTATG--GGCGCAGCGTCG---  
ATAACGCTGACGGTACAG---GCCAGACAA---TTATTG---TCTGGTATAGTGCAGCAGCAGAAC---  
AATCTG---CTGAGG---GCTATTGAGGCGCAACAACATCTGTTGCAACTCACGGTCTGGGGCATC  
>FJ469723  
ACTCAGCTGTTTAATAGTACTAATAATAAT-----  
-----  
ACTGCAGAAAACATCACACTCCCATGCAGAATAAGACAAATTATAAACAGGTGGCAAGAAGTAGGAAAAGCAA  
TGTATGCCCCCTCCCATCAGCGGACTAATTAACTGCTTATCAAAT---  
ATTACAGGGCTGCTATTAACAAGAGATGGAGGGAACAATACAGAG-----  
-----  
-----  
AGTAAGACTGAGACCTTCAGACCTGGAGGAGGGGATATGAGGGACAATTGGAGAAGTGAATTATACAAGTATA  
AAGTAGTAAAAAATTGAACCATTA---GGAGTAGCACCCACCAGGGCAAGGAGAAGAGTGGTG-----  
-----CAAAGAGAAAAAAGAGCA--GTGGGAGTGATAGGAGCT-----  
---ATGTTCCCTTGGATTCTTGGGAGCA--GCAGGAAGCACTATG--GGCGCAGCGGCA---  
GTGACGCTGACGGTACAG---GCCAGACAA---TTATTG---TCTGGTATAGTGCAACAGCAAAAC---  
AATTTG---CTGCAG---GCTATTGAGGCGCAACAACATCTGTTGCAACTCACAGTCTGGGGCATT  
>JQ403097  
ACTCATTGGAATGATACTAAT-----  
-----GAC---  
ACCAATAATGACACCATTACACTCCCATGCAGAATAAAACAAATTATAAACTTGTGGCAGGAAGTAGGAAAAG  
CAATGTATGCCCCCTCCCATCAAAGGACAAATTAGATGTTTCATCAAAT---  
ATTACAGGGCTGCTATTAACAAGAGATGGTGGTTGTAACACGACC-----  
-----  
-----

AATGGGACTGAGGTCTTCAGACCTGGAGGAGGAGATATGAGGGACAATTGGAGAAGTGAATTATATAAAATATA  
AAGTAGTAAAAATTGAACCATTA---GGAGTAGCACCCACCAAGGCAAAGAGAAGAGTGGTG-----  
-----CAGAGAGAAAAAAGAGCA---GTGGGAGTAATAGGAGCT-----  
---ATGTTCCCTTGGGTTCTTGGGAGCA---GCAGGAAGCACTATG---GGCGCAGCGTCA---  
GTGACGCTGACGGTACAG---GCCAGACAA---TTATTG---TCTGGTATAGTGCAACAGCAGAAC---  
AATTTG---CTGAGA---GCTATTGAGGCGCAACAGCATCTGTTGCAACTCACAGTCTGGGGCATC  
>EU578223  
AATTACACA-----  
-----  
GGAGAAAATGACACAATTACACTCCCATGCAGAATAAAACAAATCATAAATATGTGGCAGGAAGTAGGAAAAG  
CAATGTATGCCCCCTCCCATCAGAGGAATAATTAGGTGTTTCATCTAAT---  
ATTACAGGGTTGTTATTAACAAGAGATGGGGGTAGCGGTAACGAG-----  
-----  
-----  
AGCGACGCCGAGATCTTCAGACCTGGGGGAGGGAATATGAAGGATAATTGGAGAAGTGAATTATATAAAATATA  
AAGTAGTAAAAATTAAACCATTA---GGGATAGCACCCACCAAGGCAAAAAGAAGAGTGGTG-----  
-----CAGAGAGAAAAAAGAGCA---GTGGGA---CTAGGAGCT-----  
---TTGTTCCCTTGGGTTCTTGGGAGCA---GCGGGAAGCACTATG---GGCGCAGCGTCA---  
GTGACGCTGACGGTACAG---GCCAGAAAC---TTATTG---TCTGGTATAGTGCAACAGCAGAAC---  
AATCTG---CTGAGG---GCTATTGAGGCGCAACAGCACCTGTTGCAACTCACAGTCTGGGGCATA  
>JF689892  
AATTACACTGAA-----  
-----  
GGAAAATGATACAATCACACTCCCATGCAAAATAAAACAAATTGTAAACATGTGGCGGGAGGTAGGAAAGGCCAA  
TGTATGCCCCCTCCTATCAGAGGACTAATTAGATGCTCATCAAAT---  
ATTACAGGACTGATCTTAACAAGAGATGGTGGTAATATTAATAATGGTACC-----  
-----  
-----  
ACGGGGAACAGGACTGAGATCTTTAGACCTGGAGGAGGAGATATGAGGGACAATTGGAGAAGTGAATTATATA  
AATATAAGGTAGTAAGAATTGAACCATTA--GGAATAGCACCCACCAGGGCAAAGAGAAGAGTGGTG-----  
-----CAAAGAGAAAAACGAGCA---GTGGGA---  
GTAGGAGCT-----CTGTTCCCTTGGGTTCTTGGGAGCA---GCAGGAAGCACTATG---  
GGCGCAGCGTCA---ATAACGCTGACGGTACAG---GCCAGACAA---TTATTG---  
TCTGGTATAGTGCAACAGCAGAAC---AATCTG---CTGAAG---  
GCAATTGATGCGCAACAGCATCTGTTGCAACTCACAGTCTGGGGCATT  
>JF320315  
ACTCAAGAAAGT-----  
-----AACACT-----  
GAAGGAAATGACACAATTATACTACCATGCAGAATAAAACAAATTGTAAACATGTGGCAGGAAGTAGGAAAAG  
CAATGTATGCCCCCTCCCATTAGTGACAAATTAAGTTCATCAAAT---  
ATTACAGGGCTAATATTAGCAAGAGATGGTGGTAATGAGACATAC-----  
-----  
-----  
AGGAACGAGACCTTCAGACCTATAGGAGGAGATATGAGGGACAATTGGAGAAGTGAATTATATAAAATATAAAG  
TAGTAAAAATTGAACCATTA---GGAGTAGCACCCACCAAGGCAAAGAGAAGAGTGGTG-----  
-----CAAAGAGAAAAAAGAGCA---GTGGGA---TTAGGAGCT-----  
ATGTTCCCTTGGGTTCTTGGGAGCA---GCAGGAAGCACTATG---GGCGCGGCGTCA---  
GTGACGCTGACGGTACAA---GCCAGACAA---TTATTG---TCTGGTATAGTGCAACAGCAGAAC---  
AATCTG---CTGAGA---GCTATTGAGGCGCAACAGCATCTGTTGCAACTCACAGTCTGGGGCATC  
>JF320394  
ACTCAGAAGATTAAAGGGTTTGAT-----  
-----  
AATAATGGCAATATCACACTCCCCTGTAGAATAAAACAAATTATAAACAGGTGGCAGGAAGTAGGAAAAGCAA  
TGTATGCCCCCTCCCATTCAGAGACAAATTAATGTACATCAAAT---  
ATTACAGGGCTGCTATTAAACATGGGATGGTGGTAATGATGGTGAAACGGCACT-----GGA-----  
-----  
-----  
ACAAAAAATAACGAAACAGAGGTTTTTTAGACCATCAGGAGGAAATATGAGGGACAATTGGAGAAGTGAATTAT  
ATAAGTATAAAGTAGTAAAAAGTTGAACCATTA---GGAATAGCACCCACCAAGGCAAAGAGAAGAGTGGTG--  
-----CAGAGAGAAAGAAGAGCA---GTGGGA---

ATAGGAGCT-----GTGTTCTTGGGTTCTTGGGAGCA---GCAGGAAGCACTATG---  
 GGCGCAGCGTCA---TTAACGCTGACGGTACAA---GCCAGACTA---TTGTTG---  
 TCTGGTATAGTGCAACAGCAGAAC---AATCTG---CTGAGA---  
 GCTATTGAGGCGCAACAGCATCTGCTGCAACTCACAGTCTGGGGCATC  
 >JF320279  
 ACTCAATTATTCAATAGTACTTGGCTACTCAATGGATCAAGTAACACTGAA-----  
 -----  
 -----  
 GGAAATGACACAATCACGATCCCATGCAGAATAAAACAAATTGTAAACATGTGGCAAAAAGTAGGAAAAGCAA  
 TGTATGCCCCCTCCCATCAGAGGAAATATTAGTTGTATATCAAAT---  
 ATTACAGGAATACTATTAATAAGAGATGGGGGTGTTAGCAACGAGAGTGCT-----  
 -----  
 -----  
 AACGAGACCAGGAACGAGACCTTCAGACCAGCAGGAGGAGATATGAGGGACAATTGGAGAAGTGAATTATATA  
 AATATAAAGTAGTAAAAATTGAACCATTA---GGAATAGCACCCACTAAGGCAAAAGAGAAGAGTGGTG-----  
 -----CAGAGAGAAAAAAGAGCA---GTGGGA---  
 CTAGGAGCT-----GTGTTCTTGGGTTCTTGGGAGCA---GCAGGAAGCACTATG---  
 GGCGCAGCGTCA---GTGACGCTGACGGTACAA---GCCAGACAA---TTATTG---  
 TCTGGTATAGTGCAACAGCAGAAC---AATTTG---CTGAAG---  
 GCTATTGAGGCGCAACAGCACCTGTTGCAACTCACAGTCTGGGGCATC  
 >HQ908109  
 ACTCAAAATGATACT-----  
 -----  
 -----  
 GCTAACAGTACCATTATGCTCCCATGCAGAATAAAACAAGTTATAAACAGGTGGCAGGAAGTAGGAAAAGCAA  
 TGTATGCCCCCTCCCATCAGAGGACCAATTAGCTGTTTCATCAAAT---  
 ATTACAGGGCTGATATTAACAAGGGATGGTGGTATTATTAATGCC-----  
 -----  
 -----  
 ACCAATGAGACCTTCAGACCTGGAGGAGGAGATATGAGGGACAATTGGAGAAGTGAATTATACAAATATAAAG  
 TAGTAAAAATTGAACCATTA---GGAGTAGCACCCACCAGGGCAAAGAGAAGAGTGGTG-----  
 -----CAAAGAGAAAAAAGAGCA---GTGGGA---ATAGGAGCT-----  
 CTGTTCTTGGGTTCTTGGGAGCA---GCAGGAAGCACTATG---GGCGCAGCGTCA---  
 GTGACGCTGACGGTACAG---GCCAGACAA---TTATTG---TCTGGTATAGTGCAACAGCAGAGC---  
 AATTTG---CTGAGG---GCTATTGAGGCGCAACAGCATCTGTTGCAACTCACAGTCTGGGGCATC  
 >FJ469713  
 TGTATACATCACGACTGTTTAATAGAACTTTTGGTAATGAGACTATAAATCCTACTAAGATTAATGAA---  
 -----  
 -----  
 AACACTACAGAAGTCATCACACTCCCATGTAGAATAAGACAAATTATAAATATGTGGCAGGAAGTAGGAAAAG  
 CAATGTATGCCCCCTCCCATCAGAGGACAAATTAAGTGTATATCAAAC---  
 ATTACAGGACTGTTATTAACAAGAGATGGTGGCGATGACGATACC-----  
 -----  
 -----  
 ACCAACACTGAGACCTTCAGACCTACAGGGGGAAATATGAAAGACAATTGGAGAAGTGAATTATATAAATATA  
 AAGTAGTAAGAATTGAACCATG---GGACTGGCACCCCTCCAAGGCAAAGAGAAGAGTGGTG-----  
 -----CAGAGAGAAAAAAGAGCA---GTGGGA---CTAGGAGCT-----  
 ---TTGTTCAATTGGGTTCTTGGGAGCA---GCAGGAAGCACTATG---GGCGCAGCGTCG---  
 ATGACGCTGACGGTACAG---GCCAGACTA---TTATTG---TCTGGTATAGTGCAACAGCAGAAC---  
 AATCTG---CTGAGA---GCTATTGAGGCGCAACACATCTGTTGCAACTCACAGTCTGGGGCATC  
 >JQ403071  
 AGTCATATAGAGTCA-----  
 -----AAT---  
 GACAAATGAAGAAAATATCACACTCCCCTGTAGAATAAGACAAATTGTAAACATGTGGCAGGAAGTAGGAAAAG  
 CAATGTATGCCCCCTCCCATCAGTGGACAAATTAGATGTGTATCAACT---  
 ATTACAGGGCTGCTATTAACAAGAGATGGTGGGAACGGGACTAAC-----  
 -----  
 -----  
 AATACTGAGACCTTTAGACCTGGAGGAGGAGATATGAGGGACAACCTGGAGAAGTGAATTATATAAATATAAAG  
 TAGTAAGAATTGAACCATTA---GGAGTAGCACCCACCAAGGCACAGAGAAGAGTGGTG-----  
 -----CAGAGAGAAAAAAGAGCA---GTGGGAATGTTAGGAGCT-----

ATGTTTCCTTGGGTTCTTGGGAGCA---GCAGGAAGCACTATG---GGCGCAGCGTCG---  
 ATAACGCTGACGGTACAA---GCCAGACAA---TTAATG---TCTGGTATAGTGCAACAGCAGAAC---  
 AATCTG---CTGAAG---GCTATTGAGGCGCAACAACATATGTTGCAACTCACAGTCTGGGGCATC  
 >KM259279  
 AGTTATTGGAAT-----  
 -----ACT---ACTGAAGGGTCCAATAACACT-----  
 GAAGGAAATGACACCATCACAATACCATGCAGAATAAAACAAATTATAAACATGTGGCAGGAAGTAGGAAAAG  
 CAATGTATGCCCCCTCCCATCAAAGGAATAATTAATTGTTTCATCAAAT---  
 ATCACAGGGCTGTTATTAACAAGAGATGGTGGT-----  
 -----  
 AACACAACCAACAACAGCACA-----  
 GAGACCGAGACCTTCAGACCTGGAGGAGGAGATATGAGGGACAATTGGAGAAGTGAATTATATAAGTATAAAG  
 TAGTAAAAATTGAACCATTA---GGACTAGCACCCACCAAGGCAAAGAGAAGAGTGGTG-----  
 -----CAGAGAGAAAAAAGAGCA---ATAGGA---ATAGGAGCT-----  
 ATGTTTCCTTGGGTTCTTGGGAGCA---GCAGGAAGCACTATG---GGCGCAGCATCA---  
 TTGACGCTGACGGTACAG---GCCAGACAA---TTATTG---TCTGGTATAGTGCAACAGCAGAAC---  
 AATTTG---CTGAGA---GCTATTGAGGCGCAACAGCATATGTTGCAACTCACAGTCTGGGGCATC  
 >MK383753  
 AGTCAC-----  
 -----  
 ACTGAAGAAAATATCACACTCCCATGCAGAATAAAACAAATTATAAACATGTGGCAGGAAGTAGGAAAAGCAA  
 TGTATGCCCCCTCCCATTAGAGGAAACATTAGCTGTTTCATCAAAT---  
 ATTACAGGGCTGCTATTAACAAGAGATGGTGGTAATAACGAGAGC-----  
 -----  
 -----  
 CAGACCGAGACCTTCAGACCTGGAGGAGGAAATATGAAGGATAATTGGAGAAGTGAATTATATAAATATAAAG  
 TAGTAAAAATTGAACCATTA---GGAGTAGCACCCACCAGGGCAAAGAGAAGAGTGGTG-----  
 -----CAGAGAGAAAAAAGAGCA---GTGGGA---ATAGGAGCT-----  
 GTGTTTCCTTGGGTTCTTGGGAGCA---GCAGGAAGCACTATG---GGCGCAGCGTCA---  
 ATGACGCTGACGGTACAG---GCCAGACTA---TTACTG---TCTGGTATAGTGCAACAGCAGAGC---  
 AATTTG---CTGAGG---GCTATTGAGGCGCAACAGCGTTTGTGCAACTCACAGTCTGGGGCATC  
 >HQ615981  
 ACTCAGGAGACTAAC-----  
 -----  
 AGGGACAATGACACTATCACGCTCCCATGCAGAATAAAACAAATTATAAACATGTGGCAGGAAGTAGGAAGAG  
 CAATGTATGCCCCCTCCCATCAAAGGACTAATTAGGTGTTTCATCAAAT---  
 ATCACAGGGCTGCTACTACTAAGAGATGGTGGAAATACCAGTAAC-----  
 -----  
 -----  
 AATAATGAGACCTTCAGACCTGGAGGAGGAGATATGAGGGACAATTGGAGAAGTGAATTATATAAATATAAAG  
 TAGTAAAAGTTGAACCATTA---GGAATAGCACCCACCAAGGCAAAGAGAAGAGTGGTG-----  
 -----CAGAGAGAAAAAAGAGCA---GTGGGT---TTTGGAGCT-----  
 ATGTTTCCTTGGGTTCTTGGGAGCA---GCAGGAAGCACTATG---GGCGCAGCATCA---  
 CTAACGCTGACGGTACAG---GCCAGACAA---TTGTTG---TCTGGTATAGTGCAACAGCAAAAC---  
 AATTTG---CTGAGA---GCTATTGAGGCGCAACAACATATGTTGCAACTCACAGTCTGGGGCATC  
 >JQ403080  
 ACTCAACTGTTTAAATAGTACTTGGGTGGTTAATAGTAGTACTGGGGAAGTTAATAGTAGTACTGGG-----  
 -----  
 GGGTTT-----  
 ACAGGAAATGGCATAATCACACTTCCATGCAGGATAAAACAAATTATAAACATGTGGCAGGAAGTAGGAAAAG  
 CCATGTATGCCCCCTCCCATCGCAGGACAAATTAAGTGTTCATCAAAT---  
 ATTACAGGACTACTACTAATAAGAGATGGTGGTAAAAATGTCAGC-----  
 -----  
 -----  
 AACACCACCGAGACCTTTAGACCTGGAGGAGGAAATATGAGGGACAATTGGAGAAGTGAATTATATAAATATA  
 AGGTAGTAAGACTTGAGCCATTA---GGAATAGCACCCACCAAGGCAAAGAGAAGAGTGGTG-----  
 -----CAAAGAGAAAAAAGAGCA---GTGGGAACAATAGGAGTT-----  
 ---ATGTTTCCTTGGGTTCTTGGGAGCA---GCAGGAAGCACTATG---GGCGCAGCGTCA---  
 GTGACGCTGATGGTACAG---GCCAGACAA---TTACTG---TCTGGTATAGTGACAGCAGCAAAGC---  
 AATTTG---CTGAAG---GCTATTGAAGCGCAACACCATCTGTTGCAGCTCACAGTCTGGGGCATC

>KM082128

CATTATAATAATGATACTGGTACTTGAATACTACTTGGATT-----  
-----GGGAATGGTACTGAAGGG-----

AATGAAAATAGCACCATCACCCCTCCCATGCAGAATAAAACAAATAATAAACATGTGGCAGGAAGTAGGAAAGG  
CAATGTATGCCCCCTCCCATTAAGGAATAATTAGCTGTTTCATCAAAT---  
ATTACAGGGCTGCTATTAACAAGAGATGGTGGTAACAGTAATACC-----  
-----  
-----

ACCGAGAATGAGACCTTCAGACCTGGAGGAGGAGATATGAGGGACAATTGGAGAAGTGAATTATATAAAATATA  
AAGTAGTAAGAATTGAACCATTA---GGAGTAGCACCCACCCATGCAAAGAGAAGAGTGGTG-----  
-----CAGAGAGCAGCAAGAGCA---GTGGGA---TTCGGAGCT-----  
---TTGTTCCCTTGGGTTCTTGGGAGCA---GCAGGAAGCACTATG---GGCGCAGCGTCA---  
ATAACGCTGACGGCACAG---GCCAGACAA---CTGTTG---TCTGGTATAGTGCAACAGCAGAAC---  
AATCTG---CTGAGG---GCTATTGAGGCGCAACAACACCTGTTGCAACTCACAGTCTGGGGCATT

>MH666207

TTTCATAGTAATTGGACTAAAAACAGGGAACGTTACATACATTCCAGAAAAT-----  
-----  
----

AACTCCACTAACATCACACTCCAATGTAGAATAAAACAAATTATAAACATGTGGCAGAAAGTAGGCAAAGCAA  
TGTATGCCCCCTCCCATCAGTGGACAAATTAGATGTTTCATCAAAC---  
ATTACAGGGCTGCTATTAACAAGAGATGGTGGTAAGAAGAACGAATCT-----  
-----  
----

GAAGGGAACGAGACTGAGGTCTTCAGACCTGGAGGAGGGGATATGAGGGACAATTGGAGAAGTGAATTATATA  
AATATAAAGTAGTGAAAATTGAGCCATTA---GGAGTAGCACCCACCAAGGCAAAGAGAAGAGTGGTG-----  
-----CAAAGAGAAAAAAGAGCA---GTGGGA---  
CTAGGAGCT-----TTGTTCCCTTGGATTCTTGGGAGCA---GCAGGAAGCACTATG---  
GGCGCAGCGTCA---ATAACGCTGACGGTACAG---GCCAGACAA---GTATTG---  
TCTGGTATAGTGCAAGCAGCAACAC---AATTTG---CTGAGG---  
GCTATTGAGGCGCAACAGCATCTGTTGCAACTCACAGTCTGGGGCATC

>KR423423

ACTTATACTTGAATAATACAGAT-----  
-----

ATCAATGGTACTATCACACTCCAATGCAGAATAAAACAAATTGTAAATAGGTGGCAGGAAGTAGGAAAAGCAA  
TGTATGCCCCCTCCCATCAGTGGAAAGATTAGTTGCTCATCAAAT---  
ATTACAGGGCTGCTATTAATGAGAGATGGTGGAAAGCAGCAATGAGACT-----  
-----  
-----

AAAAATAATACTGAGATCTTCAGACCTGGAGGAGGAAATATGAGGGACAATTGGAGAAGTGAATTATATAAAT  
ATAAGTAGTGAGAATTGAACCATTA---GGAATAGCACCCACCAAGGCAAAGAGAAGAGTGGTG-----  
-----CAGAGAGAAAAAAGAGCA---GTGGGA---TTAGGAGCC---  
-----ATGTTCCCTTGGGTTCTTAGGAGCA---GCAGGAAGCACTATG---GGCGCAGCATCA---  
ATAACGCTGACGGTACAA---GCCAGACTA---TTATTG---TCTGGTATAGTGCAACAGCAAAAC---  
AATCTG---CTGAGA---GCTATTGAGGCGCAACAGCATCTGTTGCAACTCACAGTCTGGGGCATC

>KR423436

AATTACACTGATACTTGAATAATACTGAAGAG-----  
-----

ACAAATGAACTATCACACTCCCATGCAGAATAAAACAAATTATAAACATGTGGCAGGAAGTAGGAAAAGCAA  
TGTATGCCCCCTCCCATTAGAGGAGCAATTAAGTCTCATCAAAC---  
ATAACGGGGCTGCTATTAACAAGAGATGGTAGTACTGATGGCCCA-----  
-----  
-----

GACAATACCACTGAAATCTTCAGACCGGGAGGAGGAGATATGAGGGACAATTGGAGAAGCGAATTATATAAAT  
ATAAAGTAGTACAAATTGAACCAATA---GGACTAGCACCCACAAAGGCAAGGAGAAGAGTGGTG-----  
-----CAGAGAGAAAAAAGAGCA---GTAACA---ATGGGAGCT---  
-----ATGTTCCCTTGGGTTCTTGGGAGCA---GCAGGAAGCACTATG---GGCGCAGCGTCA---  
ATAACGCTGACGGTACAG---GCCAGACAA---TTATTG---TCTGGTATAGTGCAACAGCAGAAC---  
AATCTG---CTGAAG---GCTATTGAGGCGCAACAGCATCTGTTGCAACTCACAGTCTGGGGCATC

>KR423444

TTTCAGGGTACTTGAATGGTACTACTTGAATACTAATGATACTTGGAGGCAT-----  
 -----TGGAGGCATAGTAAT-----  
 -  
 TCATCGAATGACACTGTACACTCCAATGCAGAATAAGACAAATTGTAAACATGTGGCAGAGAGTAGGAAAAG  
 CAATATATGCTCCTCCTATCCAAGGAAAAATTAGATGCTCATCAAAT---  
 ATTACAGGGTTGCTATTACAAGAGATGGTGGTAATAGCAACGATACC-----  
 -----  
 AACAGCACTGAGACCTTCAGACCTGGAGGAGGAAATATGAAGGACAATTGGAGAAGTGAATTATATAAAATATA  
 AAGTAGTACAAATTGAACCAGTA---GGAATAGCACCCACCAGGGCAAAAAGAAGAGTGGTG-----  
 -----CAGAGAGAGAAAAAGAGCA---GTGGGA---ATAGGAGCT-----  
 ---CTGTTCCCTTGGGTTCTTGGGAGCA---GCAGGAAGCACTATG---GGCGCAGCATCA---  
 ATAACGCTGACGGTACAG---GCCAGACAA---TTATTG---TCTGGTATAGTGCAACAGCAGAAC---  
 AATCTG---CTGAGA---GCTATTGAGGCGCAACAGCATATGTTGCAACTCACAGTTTGGGGCATC  
 >MG197136  
 ACTTACAGTACTTGGCAGTTTAAAAGTACT-----  
 TGGAAATGGTACTAACA---TGGAAATAGTACTGTT-----  
 ACAGGAAATGACACTATTACACTCCAATGCAGAATAAAACAAATTATAAACTTGTGGCAGGAAGTAGGAAAAG  
 CAATGTATGCCCCCTCCCATCAGAGGACCAATTAGATGTTTCATCAAAT---  
 ATTACAGGACTACTCTTAACAAGAGATGGTGGTATTACAAATGGGAATAATACT-----  
 AATACTACTGAGAAC---AGTGAT-----  
 -----  
 AATAAATACTGAGATCTTCAGACCTGGAGGAGGAAATATGAAGGACAATTGGAGAAGTGAATTATATAAAATATA  
 AAGTAGTACAAGTTGAACCATTA---GGAATAGCACCCACCAAGGCAAAGAGAAGAGTGGTG-----  
 -----CAAAGAGAAAAAAGAGCA---GTGGGAACACTAGGAGCT-----  
 ---ATGTTCCCTTGGGTTCTTGGGAGCA---GCAGGAAGCACTATG---GGCGCAGCGTCA---  
 TTGACGCTGACGGTACAA---GCCAGACTA---CTATTG---TCTGGTATAGTGCAACAGCAAAAC---  
 AACTTG---CTGAGA---GCTATTGAGGCGCAACAACATCTGTTGCAACTCACAGTCTGGGGCATT  
 >KM354740  
 ACTCAGCAG-----  
 -----GTGCAGTTCAACAAT-----  
 ACTGGGAATGATACTATCATACTCCCATGCAGAATAAAACAGATTATAAACAGTGGCAGGGAGTAGGAAAAG  
 CAATGTATGCCCCCTCCTATCAGAGGACCAATTAAGTGCACATCAAAC---  
 ATTACAGGGCTGATATTACAAGAGATGGTGGT-----  
 -----  
 AATGGTAATGGGAGTGAC---  
 ACGGAAGAGATCTTCAGACCTGGAGGAGGAGATATGAGGGACAATTGGAGAAGTGAAGTATATAAAATATAAAG  
 TAGTACAAATTGAACCAATA---GGAGTAGCACCCACCAAGGCAAAGAGAAGAGTGGTG-----  
 -----CAAAGAGAAAAAAGAGCA---GCG-----TTGGGAGCT-----  
 ATGTTCCCTTGGGTTCTTGGGAGCA---GCAGGAAGCACTATG---GGCGCAGCGTCA---  
 GTGGCGCTGACGGTACAG---GCCAGACAA---TTGTTG---TCTGGTATAGTGCAACAGCAGAAC---  
 AATCTG---CTGAGG---GCTATTGAGGCGCAACAACATTTGTTGCAACTCACAGTCTGGGGCATC  
 >KM354821  
 ACTCATTTG-----  
 -----AATGATACTGAAGACTCA-----  
 AAAACCAATGACACAATCACACTCCCATGCAGAATAAAACAAATTATAAACCTGTGGCAGGAAGTAGGAAAAG  
 CAATGTATGCCCCCTCCCATCAGAGGACAGATTAAATGTTTCATCAAAC---  
 ATTACAGGGCTGCTATTACAAGGGATGGTGGT-----  
 -----  
 -  
 CCTAATAGCACGACCAACGAAACCTTTAGACCTGCAGGAGGAGATATGAGGGATAATTGGAGAAGTGAATTGT  
 ATAAATATAAAGTAGTAGAAATTGAACCATTA---GGAGTAGCACCCACCAAGGCAAAAAGAAGAGTGGTG---  
 -----CAGAGAGAAAAAAGAGCA---GTGGGA---  
 CTAGGAGCT-----TTGTTCCCTTGGGTTCTTGGGAGCA---GCAGGAAGCACTATG---  
 GGCGCAGCATCA---ATGGTGCTGACGGTACAG---GCCAGGCAA---TTATTG---  
 TCTGGTATAGTGCAACAGCAGAAC---AATTTG---CTGAGA---  
 GCTATTGAGGCGCAACAGCATCTGTTGCAACTCACAGTCTGGGGCATC  
 >KM082106  
 CATCAGAATAGTACTAGGAATGAGAGT-----  
 -----

AGTAATAACCTTATCGAACTCCCATGCAGAATAAAACAAATCATAAACATGTGGCAGGAAGTAGGAAAAGCAA  
 TGTATGCCCCCTCCCATCAGAGGAGAAATTAAATGTGTATCAAAT ---  
 ATTACAGGGCTGCTATTAACAAGAGATGGTGGCCAGTCTAATGACACC-----  
 -----  
 -----  
 AAAAAACGACACAGAGATCTTCAGACCTGGAGGAGGAGATATGAGGGACAATTGGAGAAGTGAATTATACAAAT  
 ATAAAGTAGTAAAGATTGAACCATTA --- GGAATAGCACCCACAGGGCAAAGAGAAGAGTGGTG-----  
 -----  
 -----CAAAGAGAAAAAAGAGCA---GTGGGA---ATAGGAGCT---  
 -----ATGATCTTTGGGTTCTTGGGAGCA---GCAGGAAGCACTATG---GGCGCAACGTCA---  
 CTGACGTTGACGGTACAA---GCCAGACTA---TTATTG---TCTGGTATAGTGCAACAGCAGAAC---  
 AATTTG---CTGAGG---GCTATTGAGGCGCAACAGCATATGTTGCAACTCACAGTCTGGGGCATA  
 >MK384040  
 AATCACACTGGAAGA-----  
 -----  
 -----  
 AATATCACACTCATCACACTCCCATGCAGAATAAAACAAATTATAAACATGTGGCAGGAAGTAGGAAAAGCAA  
 TGTATGCCCCCTCCCATTAGAGGAAACATTAGCTGTTTCATCAAAT ---  
 ATTACAGGGCTGCTATTAACAAGAGACGGTGGTGATAACCAGAGC-----  
 -----  
 -----  
 CAGACTGAGATCTTCAGACCTGGAGGAGGAAATATGAAGGATAATTGGAGAAGTGAATTATATAAATATAAAG  
 TAGTAAAAAATTGAACCATTA---GGAGTAGCACCCACCAGGGCAAGGAGAAGAGTGGTG-----  
 -----  
 -----CAGAGAGAAAAAAGAGCA---GTGGGA---ATAGGAGCT-----  
 GTGTTCCCTTGGGTTCTTGGGAGCA---GCAGGAAGCACTATG---GGCGCAGCGTCA---  
 ATGACGCTGACGGTACAG---GCCAGACTA---TTACTG---TCTGGTATAGTGCAACAGCAGAAC---  
 AATTTG---CTGAGG---GCTATTGAGGCGCAACAGCGTCTGTTGCAACTCACAGTCTGGGGCATC  
 >MG196642  
 TCCTATAATGATACCGGGGAACATGAGGTAGAAAATGGC-----  
 -----  
 -----  
 ACAAGTAAAAACATCACACTTCCATGCAGAATAAAACAAATTTATAAACATGTGGCAGGAAGTAGGAAAAGCAA  
 TGTATGCCCCCTCCTATTAGAGGACAAATTAAATGTAAATCAAAT ---  
 ATTACAGGGCTGCTATTAACAAGAGATGGCGGTAAGAATACCACA-----  
 -----  
 -----  
 AAACATAATGAGACCTTCAGACCTGGAGGAGGAAATATGAAGGACAATTGGAGAAGTGAATTATATAAATATA  
 AAGTAGTAAGAATTGAACCATTA---GGAGTGGCGCCCAACGCTAAGAGAAGAGTGGTG-----  
 -----  
 -----CAGAGAGAGAAAAAGAGCA---GTGACA---CTAGGAGCT-----  
 ---CTGTTCCCTTGGGTTCTTGGGAGCA---GCAGGAAGCACTATG---GGCGCAGCGTCA---  
 ATGACGCTGACGGTACAG---GCCAGACTA---TTATTG---TCTGGTATAGTGCAACAGCAGAAC---  
 AATCTG---CTGAGA---GCTATTGAGGCGCAACAGCACCTGTTGCAACTCACGGTCTGGGGCATT  
 >MG196653  
 AATTATACTTTCAATAGTACTGCATGGTCAAATAATACTAAT-----  
 -----  
 -----  
 AGCACTGAAAAAATCACACTCCAATGTAGAATAAAGCAATTTATAAACATGTGGCAGGAAGTAGGAAAGGCAA  
 TATATGCCCCCTCCCATCAAAGGACAAATTAGCTGCTCATCAAAT ---  
 ATTACAGGGCTACTACTAACAAGAGATGGTGGTAACAACAATGACACCAATGGC-----  
 -----  
 -----  
 AACGATACTGAGGTCTTCAGACCTGCAGGGGGAGATATGAGGGACAATTGGAGAAGTGAAGTATATAAATATA  
 AAGTAGTAAAAAATTGAACCATTA---GGAATAGCACCCACCAAGGCAAAGAGAAGAGTGGTG-----  
 -----  
 -----CAAAGAGAAAAAAGAGCA---GTGGGA---TTAGGAGCT-----  
 ---ATGTTCCCTTGGGTTCTTGGGAGCA---GCAGGAAGCACTATG---GGCGCAGCGCA---  
 GTGACGCTGACGGTACAG---GCCAGGCA---TTATTG---TCTGGTATAGTGCAACAGCAGAAC---  
 AATCTG---CTGAGG---GCTATTGAGGCGCAACAGCATATGTTGCAACTCACAGTCTGGGGCATC  
 >MG196831  
 AATTATACTACAGGGAATTTTACTACAGAGTCAAATAGC-----  
 -----  
 -----  
 TCAATAGGAAACATCACACTCCCATGCAGAATAAAACAAATTATAAACATGTGGCAGGAAGTAGGAAAAGCAA  
 TGTATGCCCCCTCCCATCAAAGGACAAATCAGCTGCACATCAAAT ---  
 ATTACAGGGCTGCTGATAACAAGAGATGGTGGTAATGATACCGGG-----

-----  
-----  
AGCAAGGAGACCTTCAGACCTGGAGGAGGAGATATGAGGGACAATTGGAGAAGTGAATTATATAAATATAAAG  
TAGTAAAAAATTGAACCATTA---GGAGTAGCACCCACCAAGGCAAGGAGAAGAGTGGTG-----  
-----CAGAGAGAAAAAAGAGCA--GTGGGA---ATAGGAGCT-----  
GTGTTCCCTTGGGTTCTTGGGAGCA--GCAGGAAGCACTATG--GGCGCAGCGTCG---  
CTAACGCTGACGGTACAG---GCCAGACTA--CTATTG---TCTGGTATAGTGCAACAGCAGAAC---  
AACTTG---CTGAGG---GCTATTGAGGCGCAACAGCGTATGTTGCAACTCACAGTCTGGGGCATC  
>MG197199  
TTTCATAGTGCTTGGCTGGTTAATGGTACTTGGAATAACACTTGGAATGAC-----  
-----ACCATT-----  
-  
GAAACAAATGGGACAATTACACTCCCATGTAGAATAAAACAAATTATAAACATGTGGCAGGAAGTAGGAAAAG  
CAATGTATGCCCTCCCATCAGAGGAAGAATTAGATGTGAATCAAAT---  
ATTACAGGGCTGCTACTAATAAGAGATGGGGGTGTTAACGGGACC-----  
-----  
-----  
AATGATACAGAGACCTTCAGACCTGGAGGAGGAAATATGAGGGACAATTGGAGAAGTGAATTATATAAATATA  
AAGTAGTAAAAAATTGAACCATTA---GGAGTAGCACCTACCAAGGCAAAGAGAAGAGTGGTG-----  
-----CAGAGAGAAAAAAGAGCA--GTGGGA---CTAGGAGCT-----  
---TTGTTCAATTGGGTTCTTGGGAGCA--GCAGGAAGCACTATG--GGCGCAGCGTCA---  
ATGACGCTGACGGTACAA---GCCAGACAA---TTATTG---TCTGGTATAGTGCAACAGCAAAAT---  
AACTTG---CTGAGA---GCTATTGAGGCGCAACAACATCTGTTGCAACTCACAGTCTGGGGCATC  
>KT124784  
AACTATACTGAGCTAAACACCACT-----  
-----  
GAAAGGGAAAACATCACACTCCAATGCAGAATAAAACAAATTATAAACATGTGGCAAGAAGTAGGAAAAGCAA  
TATATGCCCCCTCCCATCGAAGGAATAATTAGATGCACATCAAAT---  
ATTACAGGGCTGCTAATAACAAGAGATGGTGGTGGGAACGGAACAGGG-----  
-----  
-----  
AACAAATGAAACCTTCAGACTTGCAGGAGGGGAGATGAGGGACAATTGGAGAAGTGAGTTATATAAATACAAAG  
TAGTAAAAGTTGAACCATTA---GGAATAGCACCCACCAAGGCAAAGAGAAGAGTGGTG-----  
-----CAGAGAGAAAAGAGAGCA--GTGGGA---ATAGGAGCT-----  
GTGTTCCCTTGGGTTCTTGGGAGCA--GCAGGAAGCACTATG--GGCGCAGCGTCA---  
ATGACGCTGACGGTACAG---GCCAGACTA--TTATTG---TCTGGTATAGTGCAACAGCAAAAC---  
AATTTG---CTGAGG---GCTATTGAGGCGCAGCAGCATCTGTTGCAACTCACAGTCTGGGGCATT  
>KU901858  
ACTCACGTGTCAAGC-----  
-----  
GACAAATGAAAATATCACACTCCCATGCAGAATAAAACAAATTATAAACATGTGGCAGGAAGTAGGAAAAGCAA  
TGTATGCTCCTCCCATCAGCGGGCCAATTGAGTGTTTCATCAGAT---  
ATCACAGGGCTGCTATTGGTAAGAGATGGTGGTGATAATAATGAAGGTAGG-----  
-----  
-----  
AACGAAACCGAAATCTTCAGACCTGGAGGAGGAGATATGAGGGACAATTGGAGAAGTGAATTATATAAATATA  
AAGTAGTAAAAAATTGAACCATTA---GGAATAACACCCACCAAGGCAAGGAGAAGAGTGGTG-----  
-----CAGAGAGAAAAAAGAGCA--GTGACT---CTAGGAGCT-----  
---ATGTTCCCTTGGGTTCTTGGGAGCA--GCAGGAAGCACTATG--GGCGCAGCATCA---  
ATAACGCTGACGGTACAG---GCCAGACAA---TTATTG---TCTGGAATAGTGCAACAGCAAAAC---  
AATTTA---CTGAGA---GCTATTGAGGCGCAACAGCATATGTTGCAACTCACAGTCTGGGGCATC  
>MH843742  
AGTCATGATAGTACTACTGAG-----  
-----  
TCAAATGATAATATCACACTCATATGCAAAATAAGACAAATTATAAACAGGTGGCAGGAAGTAGGAAAAGCAA  
TGTATGCCCCCTCCCATCCAAGGACAAATTAGATGTTTCATCAAAT---  
ATTACAGGACTGATATTAACAAGAGATGGTGGTGGTAATAGCAG-----  
-----  
-----  
GACGGGAACGAGACCTTCAGACCTGGAGGAGGAAATATGAAGGACAATTGGAGAAGTGAATTATATAAATATA

AAGTAGTAAGAATTGAGCCATTA---GGAGTAGCACCCACCAAGGCAAAGAGAAGAGTGGTG-----  
-----CAGAGAGAAAAAAGAGCA---CTAGGAACGATAGGAGCT-----  
---ATGTTCCCTTGGGTTCTTGGGAGCA---GCCGGAAGCACTATG---GGCGCAGCGTCA---  
ATGGCGCTGACGGTACAG---GCCAGACAA---TTATTG---TCTGGTATAGTGCAACAGCAGAAC---  
AATTTG---CTGAGG---GCTATTGAGGCGCAACAGCATCTGTTGCAACTCACAGTCTGGGGCATT  
>KX505589  
ACTCAGTCAAATAAT-----  
-----  
GGAAGTAAACAATCACACTCCCATGCAGAATAAAACAAGTTATTAACATGTGGCAGGGAATAGGAAGAGCAA  
TGTATGCCCCCTCCCATCGAAGGACACATTAGATGTTTCATCAAAT---  
ATTACTGGGCTGCTATTAACAAGCGATGAGGGTGACAAAGGGAAC-----  
-----  
-----  
AGTTCCAATGTGACCTTCAGACCTGGAGGAGGAAATATGAAGGACAATTGGAGAAGTGAATTATATAAATATA  
AAGTAGTACAAGTTGAACCATTA---GGAATAGCACCCACCAAGGCAAAAAGAAGAGTGGTG-----  
-----CAAAAAGAGAAAAAGAGCATTAGTGGGA---TTCGGAGCT-----  
---TTGTTCCCTTGGGTTCTTGGGAGCA---GCAGGAAGCACTATG---GGCGCAGCGTCA---  
ATAACGCTGACGGTACAG---GCCAGACAA---TTATTG---TCTGGTATAGTGCAACAGCAGAAC---  
AACCTG---CTGAAG---GCTATTGAAGCGCAACAGCATATATTGCAACTCACAGTCTGGGGCATC  
>KX505695  
AGTTATGATTTTAATAATAGTAGTAATTCTAGTAGTAGTGTT-----  
-----  
TCAAAATGGCACTATCATACTCCCATGCAGAATAAAGCAAATTATAAACATGTGGCAGAAGGTGGGAAGAGCAA  
TATATGCCCCCTCCCATTAGAGGACAACTTAATTGTTTCATCAAAT---  
ATTACAGGGCTGATATTAACAAGAGATGGTGATAAGCCTAATAGC-----  
-----  
-----  
ACCAACGAGACCTTCAGACCTATAGGAGGAAATATGAAGGACAATTGGAGAAGTGAATTATATAAATATAAAG  
TAGTAAAAAATTGAACCATTA---GGACTAGCACCCACCAAGGCAAAGAGAAGAGTGGTG-----  
-----CAAAGAGAAAAAAGAGCA---GTGGGA---ATAGGAGCT-----  
CTGTTCCCTTGGGTTCTTGGGAGCA---GCAGGAAGCACTATG---GGCGCAGCATCA---  
ATGACGCTGACGGTACAG---GCCAGACTA---TTATTG---TCTGGTATAGTGCAACAGCAGAAC---  
AATCTG---CTGAGG---GCTATTGAGGCGCAACAACATCTGTTGCAACTCACAGTCTGGGGCATC  
>KX027840  
TTTTATGGGACCTTGAATGATACTGGGTGGACAAGTAAAATTGATAAC-----  
-----  
-----  
AGTAACGAAAATATTACACTCCAATGCAGAATAAAGCAAATTATAAACATGTGGCAGAAAGTAGGAAAAGCAA  
TGTATGCCCCCTCCCATCAGCGGACAAATTAGATGTGTATCAAAT---  
ATCACAGGGCTAATATTAACAAGAGATGGGGGTAATGGTACAAAC-----  
-----  
-----  
AACACTGAGATCTTCAGACCTGAAGGAGGAGATATGAGAGACAATTGGAGAAGTGAATTATATAAATATAAAG  
TAGTAAAAAATTGAACCATTA---GGAATAGCACCCACCAAGGCAAGGAGAAGAGTGGTG-----  
-----CAGAGAGAAAAAAGAGCA---GTGGGA---ATGGGAGCT-----  
TTGTTCCCTTGGGTTCTTGGGAGCA---GCAGGAAGCACTATG---GGCGCAGCGTCA---  
GTGACGCTGACGGTACAG---GCCAGACAA---TTATTG---TCTGGTATAGTGCAACAGCAGAAC---  
AACTTG---CTGAAG---GCTATTGAGGCGCAACAACATCTGTTGCAACTCACTGTCTGGGGCATT  
>KY658693  
AATTACACTGAGACAACAAAT-----  
-----AGCACT-----  
AATGGAAGTACACAATCATACTCCCATGCAGAATAAAACAATTTATAAACATGTGGCAGAAAGTAGGAAAAG  
CAATGTATGCCCCCTCCCATCAAAGGAATAATTAAGTGAATTTCAAGT---  
ATTACAGGATTGCTATTAACAAGAGATGGTGGTATTACCAACGATAGT-----  
-----  
-----  
AACAGCAATGAGACTTTTAGACCTGGAGGAGGGAATATGAAAGATAATTGGAGAAGTGAATTATATAAATACA  
AAGTAGTAAGAATTGAACCATTA---GGAATAGCCCCCACCAGGGCAAAAAGAAGAGTGGTG-----  
-----CAGAGAGAAAAAAGAGCA---ATAGGA---ATGGGAGCT-----  
---GTGTTCAATTGGGTTCTTGGCAACA---GCAGGAAGCGCTATG---GGCGCAGCGTCA---

TTGACGCTGACGGTACAA---GCCAGACAA---TTATTG---TCTGGTATAGTGCAACAGCAGAAC---  
AATCTG---CTGAGG---GCTATTGAGGCGCAACAGCATTTGTTGCAACTCACAGTCTGGGGCATT  
>KU678026  
TTTTATAGTAATTGGACTAAAGAAAATGCTACTGGAGAA-----  
-----  
AATGACACTGACACAATCATACTCCCATGCAGAATAAAACAAATTATAAACATGTGGCAGGAAGTAGGAAAAG  
CAATGTATGCCCCCTCCTATCAAAGGACAAATTAGATGTTTCATCAAAT---  
ATCACAGGGCTGCTGATAACAAGGGATGGTGGTATGAACAACACC-----  
-----  
-----  
AACAAACGACACTGAGATCTTCAGACCAGGAGGAGGAGATATGAGGGACAATTGGAGAAGTGAATTATATAAAAT  
ATAAAGTAGTACAAATTGAACCATTA---GGAGTAGCACCCACCAAGGCAAAGAGAAGAGTGGTG-----  
-----CAGAGAGAAAAAAGAGCAGCACTAGGGGGACTAGGAGCT---  
-----TTGTTCTTGGGTTCTTGGGAGCA---GCAGGAAGCACTATG---GGCGCAGCGGCA---  
GTGACGCTGACGGTACAG---GCCAGACAA---TTATTG---ACTGGTATAGTGCAACAGCAGAAC---  
AATTTG---CTGAGG---GCTATTGAGGCGCAACAGCACCTGTTGCAACTCACAGTCTGGGGCATC  
>KY323815  
GCTTATGAAGAG-----  
-----  
TCAAAATGACACTATCACTCTCCCATGCAGAATAAAACAAATTATAAACATGTGGCAGGAAGTAGGAAAAGCAA  
TGTATGCCCCCTCCCATCAGAGGACAAATTAGCTGTAAATCAAAT---  
ATTACAGGGCTGCTATTAACAAGAGATGGTGGTAATGGAAC TGAC-----  
-----  
-----  
ATGAAAGAGACCTTCAGGCCTGGAGGAGGAGATATGAGGGACAATTGGAGAAGTGAATTATATAAAATATAAAG  
TAGTTAGAATTGAACCATTA---GGAATAGCACCCACCAAGGCACAGAGAAGAGTGGTG-----  
-----CAGAGAGAAAAAAGAGCA---GTGGGAGTGCTAGGAGCT-----  
ATGTTCTCTCGGGTTCTTGGGAGCA---GCAGGAAGCACTATG---GGCGCAGCGTCA---  
ATGGCGCTGACGGTACAG---GCCAGACAA---TTATTG---GCTGGTATAGTGCAACAACAGAAC---  
AATCTG---TTGAGA---GCTATTGAGGCGCAACAGCATATGTTGCAACTCACAGTCTGGGGCATC  
>KY324245  
CATCAAAAACA-----  
-----  
TCAAAATGGTACATACATACTTCCATGCAGAATAAAACAAATTATAAACATGTGGCAGGAAGTAGGAAAAGCAA  
TGTATGCCCCCTCCCATCAGAGGAAACATTAGCTGTTTCATCAAAT---  
ATTACAGGACTGCTATTGGCAAGAGATGGGGGTAGTGGTAGTGATAATAATGGC-----  
-----  
-----  
ACAAATAATAACACA---  
AATGAAGAGATCTTCAGACCTGCAGGAGGAGATATGAGGGACAATTGGAGAAGTGAATTATATAAAATACAAAG  
TAGTAAAAATAGAGCCATTA---GGATTAGCACCCACCTCGGCAAAGAGAAGAGTGGTG-----  
-----CAGAGAGAAAAAAGAGCA---GTGGGA---ATAGGAGCT-----  
CTGTTCTTGGGTTCTTGGGAGCA---GCAGGAAGCACTATG---GGCGCAGCGTCA---  
ATGACGCTGACGGTACAG---GCCAGACTA---TTACTG---TCTGGTATAGTGCAACAGCAAAAC---  
AATTTG---CTGAGA---GCTATTGAGGCGCAACAACATCTGTTGCAACTCACAGTCTGGGGCATT  
>KY113882  
TATCACAATGAGACTACGAGTGTACCGGAG-----  
-----  
GGAATGAAACAATCACACTTCCATGCAGAATAAAACAAATTATAAACATGTGGCAGGAAGTAGGGAGAGCAA  
CGTATGCCCCCTCCCATCAAAGGACAAATTAGATGTTTCATCAAAT---  
ATTACAGGGCTGCTACTAACAAGGGATGGAGGTATTGGGAATGAGACTGAT-----  
-----  
-----  
AATAATACTGAGATCTTCAGACCTGGAGGAGGAGATATGAGGGACAATTGGAGAAGTGAATTATATAAAATATA  
AAGTAGTAAGAATTGAACCATTG---GGAGTAGCACCCACCAAGGCAAAGAGGAGAGTGGTG-----  
-----CAAAGAGAAAAAAGAGCA---GTGGGA---ATAGGAGCT-----  
---ATGTTCTTGGGATCTTAGGAGCA---GCAGGAAGCACTATG---GGCGCAGCGTCA---  
TTGACGCTGACGGTACAG---GCCAGACTA---TTATTG---TCTGGTATAGTGCAACAGCAGAAC---  
AACTTG---CTGAGG---GCTATTGAGGCGCAACAGCATCTGTTGCAACTCACTGTCTGGGGCATC  
>K02007

AATCACACTGAAGGAACTAAA-----  
-----  
GGAAATGACACAATCATACTCCCATGTAGATAAAACAAATTATAAACATGTGGCAGGAAGTAGGAAAAGCAA  
TGTATGCCCCCTCCCATTTGGAGGACAAATTAGTTGTTTCATCAAAT---  
ATTACAGGGCTGCTATTAACAAGAGATGGTGGTACAAATGTAAC-----  
-----  
-----  
AATGACACCGAGGTCTTCAGACCTGGAGGAGGAGATATGAGGGACAATTGGAGAAGTGAATTATATAAATATA  
AAGTAATAAAAAATTGAACCATTA---GGAATAGCACCCACCAAGGCAAAGAGAAGAGTGGTG-----  
-----CAGAGAGAAAAAAGAGCA---GTGGGAATAGTAGGAGCT-----  
---ATGTTCTTTGGGTTCTTGGGAGCA---GCAGGAAGCACTATG---GGCGCAGTGTC---  
TTGACGCTGACGGTACAG---GCCAGACAA---TTATTG---TCTGGTATAGTGCAACAGCAGAAC---  
AATTTG---CTGAGG---GCTATTGAGGCGCAACAACATCTGTTGCAACTCACAGTCTGGGGCATC  
>HQ110679  
ACTCAGGGGTAAATAAC-----  
-----ACT---  
GGAAGAAATGACACAATCACACTCCCATGCAGAATAAAACAAATTGTAAACATGTGGCAGGAAGTAGGAAAAG  
CAATGTATGCCCCCTCCCATCAAAGGAAATATTAGCTGTTTCATCAAAT---  
ATTACAGGGCTGCTATTAACAAGAGATGGTGGTAGTGATGGTGGTAATAAC-----  
-----  
-----  
ACGAACGGGAATGAGACCTTCAGACCTGGAGGGGGAGATATGAGGGACAATTGGAGAAGTGAATTATATAAAT  
ATAAAGTAGTAAGAATTGAACCATTA---GGAGTAGCACCCACCAAGGCAAAGAGAAGAGTGGTG-----  
-----CAAAGAGAAAAAAGAGCG---GTGGGA---CTAGGAGCT---  
-----ATGTTTCATTGGGTTCTTGGGAGCA---GCAGGAAGCACTATG---GGCGCAGCGTCA---  
GTGACGCTGACGGTACAG---GCCAGGCAA---TTATTG---TCTGGTATAGTGCAACAGCAGAGC---  
AATTTG---CTGAGA---GCTATTGAGGCGCAACAGCATCTGTTGCAACTCACAGTCTGGGGCATC  
>AY713410  
ACTCAAGGG-----  
-----  
AACACTGGAAATATCACACTCCCATGCAGAATAAAACAAATTATAAACAGGTGGCAGGAAGTAGGAAAAGCAA  
TGTATGCCCCCTCCCATCGAAGGAAAAATTAGATGTTTCATCAAAT---  
ATTACAGGGTTACTATTAACAAGAGATGGTGGTAAGAATAACGAGACC-----  
-----  
-----  
AATAACACCGAGACCTTCAGACCTGGAGGAGGAGATATGAAGGACAATTGGAGAAGTGAATTATATAAATATA  
AAGTAGTAAAAATTGAGCCATTA---GGAGTAGCACCCACCAAGGCAAAGAGAAGAGTGGTG-----  
-----CAGAGAGAAAAAAGAGCA---GTGACA---CTAGGAGCT-----  
---ATGTTCTTTGGGTTCTTGGGAGCA---GCAGGAAGCACTATG---GGCGCAGCGTCA---  
GTGACGCTGACGGTACAG---TCCAGACAA---TTATTG---TCTGGTATAGTGCAACAGCAAAAC---  
AATTTG---CTGAGA---GCTATTGAGGCGCAACAGCATCTGTTGCAACTCACAGTCTGGGGCATT  
>EU575593  
AATTATTTTGATAAACAATAAGATGAT-----  
-----GGGGCTAATGGGACTGCT-----  
AATGGGACTGGAGTTATCATACTTCCATGCAGAATAAAACAAATTGTAAACATGTGGCAGGAAGTAGGAAAAG  
CAATGTATGCCCCCTCCCATCAGGGGACGAATTAAATGTTTATCAAAT---  
ATTACAGGACTGATGTTAACAAGAGATGGTGGTAATAATGGTGGTAACACAAC-----  
-----  
-  
GAAAACGCCACCGAGACCGAGACCTTCAGACCTGGAGGAGGAGATATGAGGGACAATTGGAGAAGTGAATTAT  
ATAAATATAAAGTAGTAAAAATTGAACCATTA---GGAGTAGCACCTACCAAGGCAAAGAGAAGAGTGGTG---  
-----CAAAGAGAAAAAAGAGCA---GTAGGA---  
ATAGGAGCT-----TTGTTCTTTGGGTTCTTGGGAGCA---GCAGGAAGCACTATG---  
GGCGCAGCGTCA---GTGACGCTGACGGTACAA---GCCAGACAG---TTATTG---  
TCTGGTATAGTGCAACAGCAGAGC---AATCTG---CTGAGG---  
GCTATTGAGGCGCAACAGCATCTGTTGCAACTCACAGTCTGGGGCATC  
>AY331289  
ACTCAGACTAAT-----  
-----AGC---  
TGGCCAAATGCCACTATCACACTTTCATGCAGAATAAAACAGTTTATAAACATGTGGCAGGAAGTAGGAAAAG

CAATGTATGCCCCCTCCCATTAGGGGACCAATAAGTTGTTTCATCAAAT---  
 ATTACAGGGTTGCTATTAACAAGAGATGGTGGTAACGGGAACGGCACC-----  
 -----  
 -----  
 AACACAACACCGAGGTCTTCAGACCTACAGGAGGAGATATGAGGGACAATTGGAGAAGTGAATTATATAAAT  
 ATAAAGTAGTAAGAATTGAACCAATA---GGAGTAGCACCCACCAAGGCAAAGAGAAGAGTGGTG-----  
 -----CAGAGAGAAAAAAGAGCA---GTGGGAACAATAGGAGCT---  
 -----ATGTTTCCTTGGGTTCTTGGGAGCA---GCAGGAAGCACTATG---GGCGCAGCGTCA---  
 ATAACGCTGACGGTACAG---GCCAGACTA---TTACTG---TCTGGTATAGTGCAACAGCAGAAC---  
 AATCTG---CTGAGA---GCTATTGAGGCACAACAACATCTGTTGCAACTCACAGTCTGGGGCATC  
 >EU575697  
 ACTCAACTGTTTAATAGTACTTGGAATGGTAATGATACTGAAGGGTCAAATACC-----  
 -----  
 -----  
 ACTGAAGAAAATATCACACTCCCATGCAGAATAAAACAAATCATAAACATGTGGCAGGAAGTAGGAAAAGCAA  
 TGTATGCCCCCTCCCATCAGAGGACAAATTAGCTGTTTCATCAAAT---  
 ATTACAGGGCTGTTGTTAACAAGAGATGGTGGCGCAGATAGTACA-----  
 -----  
 -----  
 AACGAGACCTTCAGACCTGGAGGAGGAGATATGAGGGACAATTGGAGAAGTGAATTATATAAATATAAAGTAG  
 TAAGAATTGAACCATTA---GGAATAGCACCCCTCCAAGGCAAAGAGAAGAGTGGTG-----  
 -----CAGAGAGAAAAAAGAGCA---GTGGGA---ATAGGAGCT-----  
 GTGTTTCCTTGGGTTCTTGGGAGCA---GCAGGAAGCACTATG---GGCGCAGCGTCA---  
 ATGGCGCTGACGGTACAG---GCCAGACAA---TTATTG---TCTGGTATAGTGCAACAGCAGAAC---  
 AATTTG---CTGAGG---GCTATTGAGGCGCAACAGCATATGTTGCAACTCACAGTCTGGGGCATC  
 >EU577469  
 ACTCAA-----  
 -----  
 -----  
 GGAAATGACACAATCATACTCCCATGCAGAATAAAACAAATTATAAACATGTGGCAGAGAGTAGGGAAAGCAA  
 TGTATGCCCCCTCCTATCGGAGGACACCTTAATTGTTTCATCAAAT---  
 ATTACAGGGCTGCTATTACAAGAGATGGTGGCAACAGTAGTGAT-----  
 -----  
 -----  
 AACAGTGAGACCTTCAGACCTGGAGGAGGAGATATGAGGGATAATTGGAGAAGTGAATTATATAAATATAAAG  
 TAGTAAACTTGAACCCTTA---GGAGTAGCCCCCACCAAGGCCAAGAGAAGAGTGGTG-----  
 -----CAAAGAGAAAGAAGAGCA---GTGGGT---TTAGGAGCT-----  
 ATGTTTCCTTGGGTTCTTGGGAGCC---GCAGGAAGCACTATG---GGCGCAGCGTCA---  
 ATAACGCTGACGGTACAG---GCCAGACAA---TTATTG---TCTGGTATAGTGCAACAGCAGAAC---  
 AATCTG---CTGAGG---GCTATTGAGGCGCAACAGCATATGTTGCAACTCACAGTCTGGGGCATC  
 >MN516274  
 GATCAAAAATATACTGCATGGGCAAATAGCACTGAGTCAAAT-----  
 -----  
 -----  
 GACACTGAAGTAATCACACTCCCATGCAGAATAAAACAAATTATAAACCTGTGGCAGGAAGTAGGGAAAGCAA  
 TGTATGCCCCCTCCCATCAAAGGACAGATTAGATGTTTCATCAAAT---  
 ATTACAGGGCTGCTACTAACAAGAGATGGTGGTAAGAACGAGAGTAGA-----  
 -----  
 -----  
 GAGAATGAGACCTTCAGACCTGGAGGAGGAGATATGAGGGACAATTGGAGAAGTGAATTATATAAATATAAAG  
 TAGTAAAAATTGAACCATTG---GGAGTAGCCCCCACCAAGGCAAAGAGAAGAGTGGTG-----  
 -----CAAAGAGAAAAAAGAGCA---GTGGGA---ATAGGAGCT-----  
 TTGTTTCCTTGGGTTCTTGGGAGCA---GCAGGAAGCACTATG---GGCGCAGCGTCA---  
 GTGACGCTGACGGTACAG---GCCAGACTA---TTATTG---TCTGGTATAGTGCAACAGCAGAAC---  
 AACTTG---CTGAGA---GCTATTGAGGCGCAACAGCATCTGTTGCAACTCACAGTCTGGGGCATC  
 >GU728005  
 AATCAAACCTGGG-----  
 -----  
 -----  
 AGCAATGATACAATTATACTCCCATGTAGAATAAAGCAAATTATAAACCTGTGGCAGGAAGTAGGAAAAGCAA  
 TGTATGCCCCCTCCCATCAGTGGAGTAATTAATTGCACATCAAAT---  
 ATTACAGGGCTACTATTGACAAGAGATGGTGGTAATAATATTACT-----  
 -----

-----  
 AACGGGAGCGAGATCTTCAGACCTGGAGGAGGAGATATGAGGGATAATTGGAGAAGTGAATTATATAAAATATA  
 AAGTAGTAAGACTTGAACCATTA---GGAGTAGCACCCACCAGGGCAAAGAGAAGAGTGGTG-----  
 -----CAGAGAGAAAAAAGAGCA---GTGGGA---CTAGGAGCT-----  
 ---TTGTTCCCTTGGGTTCTTGGGAGCA---GCAGGAAGCACTATG---GGCGCAGCGTCA---  
 CTGACGCTGACGGTACAG---GCCAGACTA---CTACTG---TCTGGTATAGTGCAACAGCAGAAC---  
 AATCTG---CTGAGG---GCTGTTGAAGCGCAACAACATCTGTTGCAACTCACAGTCTGGGGCATC  
 >GU367405  
 ACTCAAGGA-----  
 -----  
 AATGATACTACTATCACACTCCAATGCAAAATAAAACAAATTATAAATATGTGGCAGGAAGTAGGAAAAGCAA  
 TGTATGCCCCCTCCCATCAGAGGATCAATTAAATGCCTATCAAAT---  
 ATTACAGGGCTGATATTAACAAGAGATGGT---AACGGGACCGAGAGC-----  
 -----  
 -----  
 ACAAACGAGACCGAGATCTTCAGGCCTGGAGGAGGAGATATGAGGGACAATTGGAGGAGTGAATTATATAAAAT  
 ATAAAGTAGTAAGAATTGAACCATTA---GGAGTAGCACCCACCAAGGCAAAGAGAAGAGTGGTG-----  
 -----CAGAGAGAAAAAAGAGCA---GTGGGA---CTAGGAGCT---  
 -----TTGTTCCCTTGGGTTCTTGGGAGCA---GCAGGAAGCACTATG---GGCGCAGCGTCG---  
 GTGACGCTGACGGTACAG---GCCAGACTA---TTGCTG---TCTGGTATAGTGCAACAGCAAAAT---  
 AATTTG---CTGAGG---GCTATTGAGGCGCAACAGCATCTGTTGCAACTCACAGTCTGGGGCATC  
 >AY795904  
 ACTCAAATGTTA-----  
 -----  
 GATAATATCACACTCACACTCCCATGCAGAATAAAACAAATCATAAACATGTGGCAAGAAGTAGGAAAAGCAA  
 TGTATGCCCCCTCCCATTCAGGAAAAATTAGCTGTTTCATCAAAT---  
 ATTACAGGGATACTATTAACAAGGGATGGTGGTAACGAGAACCAG-----  
 -----  
 -----  
 ACCACCCCCGAGGTCTTCAGACCTGCAGGAGGAGATATGAGGGACAATTGGAGAAGTGAATTATATAAAATATA  
 AAGTAGTAAGAGTTGAGCCATTA---GGAATAGCACCCACCAAGGCAAAGAGAAGAGTGGTG-----  
 -----CAGAGAGAAAAAAGAGCA---ATAGGA---ATGGGAGCT-----  
 ---GTGTTCCCTTGGGTTCTTGGGAGCA---GCAGGAAGCACTATG---GGCGCAGCGTCA---  
 ATAACGCTGACGGTACAG---GCCAGACAA---TTATTG---TCTGGTATAGTGCAACAGCAAAGT---  
 AATTTG---CTGAGA---GCTGTTGAGGCGCAACAACATCTGTTGCAACTCACAGTCTGGGGCATC  
 >KF725981  
 AATTATACTTGGAAATAATACTACTGAGAGT-----  
 -----  
 GATAACGGTACTATCATACTCCAGTGCAGAATAAAGCAAATTGTAAACAGGTGGCAGGAAGTAGGAAAAGCAA  
 TGTATGCCCCCTCCCATCAGTGGACAAATTAATTGTTTCATCAAAT---  
 ATTACAGGGCTACTACTAACAAGAGATGGTGGTATCAGTAACACAAGTAGT-----  
 -----  
 -----  
 GATAACACAAGTGAGACCTTTAGACCTGCAGGAGGAAATATGAAGGACAATTGGAGAAGTGAATTATATAAAAT  
 ATAAAGTAGTAAAAATTGAGCCATTA---GGAATAGCACCCACCAAGGCAAAGAGAAGAGTGGTG-----  
 -----CAGAGAGAAAAAAGAGCA---GTGGGAACATTAGGAGCT---  
 -----ATGTTCCCTTGGGTTCTTGGGAGCA---GCAGGAAGCACTATG---GGCGCAGCGTCA---  
 TTGACGTTGACGGTACAA---GCCAGACTA---CTATTG---TCTGGTATAGTGCAACAGCAAAAC---  
 AATTTG---CTGAGA---GCTATTGAGGCGCAACAGCATATGTTGCAACTCACAGTCTGGGGCATC  
 >MH234639  
 AATCATACTAAA-----  
 -----  
 GGAGAAGATATCATCACACTCCCATGTAGAATAAAGCAAATTATAAACATGTGGCAGCAAGTGGGAAAAGCAA  
 TGTATGCCCCCTCCCATCAGTGGACAAATTAGATGTTTCATCAAAT---  
 ATTACAGGGCTGCTATTAACAAGAGATGGTGGTAATAACAATGAC-----  
 -----  
 -----  
 ACCACCGAGGTCTTCAGACCTGGAGGAGGAGATATGAGGGACAATTGGAGAAGTGAATTATATAAAATATAAAA  
 TAGTAAAAATTGAACCATTA---GGAGTAGCACCCACCAGGGCAAAGAGAAGAGTGGTG-----  
 -----CAGAGAGAAAAAAGAGCA---GTAACA---TTAGGAGCT-----

ATGTTTCCTTGGGTTCTTGGGAGCA---GCAGGAAGCACTATG---GGCGCAGCGTCA---  
 ATGACGTTGACGGTACAG---GCCAGACGA---CTATTG---TCTGGTATAGTGCAACAGCAGAAC---  
 AATTTG---CTGAGG---GCTGTTGAGGCGCAACAGCATATGTTGCAACTCACAGTCTGGGGCATC  
 >MH746247  
 AAT-----  
 -----  
 CATAATAATACTATCATACTCCCATGCAGAATAAAACAATTTATAAACATGTGGCAGAGAGTAGGACAAGCAA  
 TGTATGCCCCCTCCCATTTGAAGGAAACATAACATGTGAATCAAAT---  
 ATCACAGGACTACTCTTGGTACGTGATGGAGGCAACACAACAGAAACT-----  
 -----  
 -----  
 AACAAAGAGACATTTCAGACCCGGGAGGAGGAGATATGAGGGACAATTGGAGAAGTGAACCTATATAAATATAAAG  
 TGGTAGAAATTAAGCCATTG---GGAATAGCACCCACCAAGGCAAAAAGGAGAGTGGTG-----  
 -----GAGAGAGAAAAAAGAGCA---GTGACA---CTAGGAGCT-----  
 ATGTTTCCTTGGGTTCTTGGGAACA---GCAGGAAGCACTATG---GGCGCAGCGTCA---  
 ATAACGCTGACGGTACAG---GCCAGACAA---TTGCTG---TCTGGGATAGTGCAACAGCAAAGC---  
 AATTTG---CTGAGA---GCTATAGAGGCGCAACAGCATATGTTGCAACTCACGGTCTGGGGCATT  
 >KX181928  
 ACTTACTGTCCTAATAATCCTAATGCAACATATAATGCAACA-----  
 -----  
 GAAAAATCAACCATCACAATCCAATGCAAAATAAAACAAATTGTAAACATGTGGCAGGAGGTAGGACGAGCAA  
 TGTATCCCCCTCCCATTAAGGACCAATAACATGTGCATCAAAT---  
 ATCACAGGACTATTGCTGACACGTGATGGAGGAGCAAACTCAAAT-----  
 -----  
 -----  
 AACACAGAGACATTTCAGACCTGGAGGAGGAGATATGAAGGACAATTGGAGAAGTGAATTATATAAATATAAAG  
 TGGTAGAAATTAACCATTA---GGAATAGCACCCACCAAGGCAAAAAGGAGAGTGGTG-----  
 -----GAGAGAGAAAAAAGAGCA---GTGGGA---ATAGGAGCT-----  
 GTGTTTCCTTGGGTTTTTGGGAGCA---GCCGGAAGCACTATG---GGCGCAGCGTCA---  
 ATAACGCTGACGGTACAG---GCCAGGCAA---TTATTG---TTTGGGATAGTGCAACAGCAAAGC---  
 AATTTG---TTGAGG---GCTATAGAGGCGCAACAGCATATGTTGCAACTCACGGTCTGGGGCATT  
 >KX181936  
 AATTATCCAAACATAGGAAACAGCACATATAATGATACAGAAAACAGAAACAGC-----  
 -----ACATAT-----  
 AATGATACAGAAAACATCACAATCCCATGCAAAATAAAACAATTTATAAACATGTGGCAGGAGGTAGGGCGAG  
 CCATGTATGCCTCTCCCATTTGAAGGAGTGATAACATGTAAATCAAAT---  
 ATCACAGGATTTCTACTGACCCGGGATGGGGGCAAAACCACAAAG-----  
 -----  
 -----  
 AACGAGACATTTCAGGCCCGAAGGAGGAAATATGAGGGACAATTGGAGAAGTGAATTATATAAGTATAAAGTGG  
 TAGAAATTAACCATTA---GGAATAGCACCCACTAAAGCAAAAAGGAGAGTGGTG-----  
 -----GAGAGAGAAAAAAGAGCA-----GGA---ATAGGAGCT-----  
 GTGTTTCCTTGGGTTCTTGGGAGCA---GCAGGAAGCACTATG---GGCGCAGCATCA---  
 ATAACGCTGACGGTACAG---GCCAGACAA---TTATTG---TCTGGGATAGTGCAACAGCAAAGC---  
 AATTTG---CTGAGG---GCTATAGAGGCGCAACAGCATATGTTGCAACTCACGGTCTGGGGCATT  
 >KX181937  
 CCTCATAGTACAAGTACAAGCAGTACTCCTGGA-----  
 -----  
 GCAGAAAACGACACACTCACAATCCAATGCAGAATAAAACAAATTGTAAACATGTGGCAGGAGGTAGGACGAG  
 CAATGTATGCCCCCTCCCATTTGCAGGAAACATAACATGTAACCTCAAGT---  
 ATCACAGGGCTATTACTGACACGTGATGGGGGAGAAAATAGAACA-----  
 -----  
 -  
 GAGAAAGGCACAAAGGAGGAGGAATTTCAGGCCTGGGGGGGAGATATGAGGGACAATTGGAGAAGTGAATTAT  
 ATAAATACAAAGTAGTAGAAATTAAACCCTTT---GGAATAGCCCCCCCCAAGGCAAAAAGGAGGGTGGTG--  
 -----GAGAGAGAAAAAAGCA---GCA-----  
 TTAGGAGCT-----GTGTTTCCTTGGGTTTTTGGGAGCA---GCAGGAAGCAATATG---  
 GGGGCAGCGTCA---GTAGCGCTGACGGTACAG---GCCAGACAA---TTATTG---  
 TCTGGGATAGTGCAACAGCAAAGC---AATTTG---CTGAAG---  
 GCTATAGAGGCGCAACAGCATATGTTGCAACTCACAGTCTGGGGCATT

>KX181941

AATTACAAGGTTAATAGTGCAAACAAGGATACAAAA-----

AGTAATGGAACAATCACAATCCCATGCAGAATAAAACAAATTATAAATATGTGGCAGGGGGTGGGACGGGCAA  
TGTATGCCCCCTCCCATTCAGGAATAATATCATGTAACCTCAAGT---  
ATCACAGGATTACTACTGACCCGGGATGGCGGCAACAATAACAACACA-----

GACACAGAGATATTCAGGCCTGGAGGAGGAAATATGAGGGACAATTGGAGAAGTGAGTTATATAAATATAAAG  
TAGTAGAAATTAAGCCATTA---GGAATAGCACCCACTAAGGCAAAAAGGAGAGTGGTG-----  
-----GGGAGAGAAAAAAGAGCA---GCGGGA---ATAGGAGCT-----  
GTGTTTCCTTGGGTTCTTGGGAGCA---GCAGGAAGCACTATG---GGCGCAGCATCA---  
ATGATGCTGACGGTACAG---GCCAGACAA---TTATTG---TCTGGGATAGTGCAACAGCAAAGC---  
AATTTG---CTGAGG---GCTATAGAGGCGCAACAGCATATGTTGCAACTCACGGTCTGGGGCATA

>MK041572

TGCTATACATCAGGCCTGTTTAATAGTACATACAATAGTAATAGTGCAAAAAACAGTAATGAGACA-----

GGCAATTCAACCATCACAATCCCATGCAGAATAAAACAAATTATAAACATGTGGCAGGAGGTAGGACGAGCAA  
TGTATGCCCCCCCCATTAGTGGAACATAACATGTAGATCAAAT---  
ATCACAGGATTACTGCTGACACGGGATGGAGGTAATACTGGCTCG-----

AATGAGACAGAGATATTCAGGCCTGGAGGAGGAGATATGAGGGAGAATTGGAGAAGTGAATTATATAAGTATA  
AAGTGGTAGAAATTAACCATTA---GGAATAGCACCCACTGAGGCAAAAAGGAGAGTGGTG-----  
-----GAGAGAGAAAAAAGAGCA---GTGGGA---ATAGGAGCT-----  
---GTGTTTCCTTGGGTTCTTGGGAGCA---GCAGGAAGCACTATG---GGCGCAGCATCA---  
ATAACGCTGACGGTACAG---GCCAGACAA---TTATTG---TCTGGGATAGTGCAACAGCAAAGC---  
AATTTG---CTGAGG---GCTATAGAGGCGCAACAGCATATGTTGCAACTCACGGTCTGGGGCATT

>AF443091

TGCTATACAACAAAACCTGTTTAATAGTACATACAATAGTACATACAATGATACAGGA-----

AGTGAGTCAAACATCACGATTCCATGCAGAATAAAACAAATTATAAACATGTGGCAGGGGGTAGGACAAGCAA  
TGTATGCCCCCTCCCATTCAGGAACATAACATGTAGATCAAAC---  
ATCACAGGACTACTATTGACACGTGATGGAGGAATAGGATTAAATGAAGAT-----

GATAATAACACAGAGATATTCAGACCTGGAGGAGGAAATATGAGGGACAATTGGAGAAGTAAATTATATAAAT  
ATAAAGTAGTAGAAATTAACCATTA---GGAGTAGCACCCAATAAGGCAAAGAGGAGAGTGGTG-----  
-----GAGAGAGAAAAAAGAGCA---GTGGGA---CTAGGAGCT---  
-----GTGTTTCCTTGGATTCTTAGGAGCA---GCAGGAAGCACTATG---GGCGCAGCATCA---  
ATAACGCTGACGGTACAG---GCCAGACAA---TTATTA---TCTGGTATAGTGCAACAGCAAAAC---  
AATCTG---ATGAGA---GCTATAGAGGCGCAACAACATATGTTGCAACTCACAGTCTGGGGCATT

>AF443102

AGTTAT-----

AATAGTACAGCAAACATCACACTCCCATGCAGACTAAAACAAATTATAAACATGTGGCAGAAGGTAGGACGAG  
GAATATATGCCCCCTCCCATTCAGGGAAGCATAACATGTAACCTCAAAT---  
ATCACAGGACTACTCTTGGTACGGGATGGAGGCATAAATACGAGT-----

ACAGTGGAGACATTTCAGACCAGAAGGAGGAAATATGAGGGACAATTGGAGAAGTGAAGTATATAAATATAAAG  
TGGTAGAAATTAAGCCATTG---GGAGTAGCGCCCACTGAGGCACAAAGGAGAGTGGTG-----  
-----GAGAAACAAAAAAGAGCA---GTGGGA---ATGGGAGCT-----  
GTGTTTCCTTGGGTTCTTGGGAGCA---GCAGGAAGCACTATG---GGCGCGGCGTCA---  
ATAACGCTGACGGTACAG---GCCAGACAA---CTGTTG---TCTGGAATAGTGCAACAGCAAAGC---  
AATTTG---CTGAGA---GCTATAGAGGCGCAACAGCATATGTTGCAACTCACAGTCTGGGGCATT

>AF443103

AGCTATTTCAGAACGGCATAATAACACA-----  
 -----  
 TCAAATTCAACCATCACACTCCCATGCAATATAAAACAAATTATAAACATGTGGCAGGGGGTAGGACGAGCAA  
 TGTACGCCCCCTCCCATTCAGGAAACATAACATGTACATCAAAT---  
 ATCACAGGACTAATATTGACACGTGATGGAGGAGGAGGAAATGAAACT-----  
 -----  
 AATGAAACAGAGACATTTCAGACCTGCAGGAGGAGATATGAGGGACAATTGGAGAAGTGAATTATATAAATATA  
 AAGTGGTAGAAATTAAGCCATTA---GGACTAGCACCCACTAAGGCAAAAAGGAGAGTGGTG-----  
 -----GAGAGAGAAAAAAGAGCA---GTAGGA---ATAGGAGCT-----  
 ---GTGTTCTTGGGTTCTTGGGAGCA---GCAGGAAGCACTATG---GGCGCGGCGTCA---  
 ATAACGCTGACGGTACAG---GCCAGACAA---CTGTTG---TCTGGTATAGTGCAACAGCAAAGC---  
 AATTTG---CTGAGG---GCTATAGAGGCGCAACAGCATATGTTGCAACTCACGGTCTGGGGCATT  
 >AF443105  
 TACTATCCTAATGCTACAAAAAGCGAT-----  
 -----  
 ACTACAGAAACCATCACACTCCCATGCAGAATAAAACAAATTGTAAACATGTGGCAGGGGGTAGGACGGGCAA  
 TATATGCCCCCTCCCATTCAGGAAACATAACATGTAACCTCAAGT---  
 ATCACAGGATTACTATTGCTACGTGATGGAGGGACAGATAACGAGACAGAG-----  
 -----  
 AACAACAGGACAGAGACATTTCAGACCTGGAGGAGGGGATATGAGAGATAATTGGAGAAGTGAATTATATAAAT  
 ATAAAGTGGTAGAAATTAAGCCATTA---GGAGTAGCACCCACTAAGGCAAAAAGGAGAGTGGTG-----  
 -----GAGAGAGAAAAAAGAGCA---GTAGGA---ATGGGAGCT---  
 -----GTGATCCTTGGGTTCTTGGGAGCA---GCAGGAAGCACTATG---GGCGCGGCGTCA---  
 ATAACGCTGACGGTACAG---GCCAGACAA---CTGTTG---TTTGGTATAGTGCAACAGCAAAC---  
 AATTTG---CTGAGG---GCTATAAAAGCGCAACAGCATCTGTTGCAGCTCACGGTCTGGGGCATT  
 >AF443107  
 AACTACAATACAAGCTCAAACTCATCC-----  
 -----  
 AACAACTCAAACATCACACTCCCATGCAGAATAAAACAAATTATAAATATGTGGCAGGGGGTAGGAAGAGCAA  
 TATATGCCCTCTCCCATGGAAGGAAGCATAACATGTAAATCAAAT---  
 ATCACAGGACTACTGTTGGTACATGATGGAGGTAACAGTAACACG-----  
 -----  
 AGTACAGAGATATTTCAGACCTGGAGGAGGAGATATGAGGGACAATTGGAGAAGTGAATTATATAAATATAAAG  
 TGGTAGAAGTTAAGCCATTG---GGAATAGCACCCACTGAGGCAAAAAGGAGAGTGGTG-----  
 -----GAGAGAGAAAAAAGAGCA---GTGGGA---ATAGGAGCT-----  
 GTGTTCTTGGGTTCTTGGGAGCA---GCAGGAAGCACTATG---GGCGCGGCGTCA---  
 ATAACGCTGACGGTACAG---GCCAGACAA---CTGTTG---TTTGGTATAGTGCAACAGCAAAGC---  
 AATTTG---CTGAGG---GCTATAGAGGCGCAACAGCATATGTTGCAACTCACGGTCTGGGGCATT  
 >AF443108  
 CCTTACAATGATAATGAT-----  
 -----  
 ACAGACTCAGACATCACACTTCCATGTAAATAAAACAAATTATAAACATGTGGCAGGAGGTAGGACGGGCAA  
 TATATGCCCCCTCCCATTCAGGAAACATAACATGCACATCAAAC---  
 ATTACAGGACTACTATTGACACGTGATGGAGAGCCAAACAACTCC-----  
 -----  
 ACAGAGACATTTCAGACCTGGAGGAGGAGATATGAGAGACAATTGGAGAAGTGAATTATATAAATATAAAGTGG  
 TAGAAGTTAAACCATTG---GGAATAGCACCCACTGGAGCAAAAAGGAGAGTGGTG-----  
 -----GAGAGAGAGAAAAGAGCA---GTAGGA---ATAGGAGCG-----  
 GTGTTCTTGGGTTCTTGGGAGCA---GCAGGAAGCACTATG---GGCGCGGCGTCA---  
 ATAACGCTGACGATACAG---GCCAGACAA---CTGTTG---TCTGGTATAGTGCAACAGCAAAGC---  
 AATTTG---CTGAGG---GCTATAGAGGCGCAACAGCATCTGTTGCAACTCACGGTCTGGGGCATT  
 >KC154012  
 TGCTATACAACAACTTGTTTAATACTAGTCTGATTAATACTAATAAACT-----  
 -----  
 GATAATGGCACAATCATACTCCCATGCAAAATAAAACAGATTATAAACATGTGGCAAGAGGTAGGACGAGCAA

TGTATGCCCCCTCCCATTTGAAGGAAACATAACATGCAACTCAACT---  
 ATCACAGGACTACTATTGCTACGTGATGGAGGCAATGGCAATGAGACC-----  
 -----  
 -----  
 AAAGGGAATGAGACATTGAGACCTGGAGGAGGAAATATGAAAGATAATTGGAGAAGTGAATTATATAAAATATA  
 AAGTGGTAGAAATTAAACCATTTG---GGAATAGCACCCACTGAGGCAAAAAGGAGAGTGGTG-----  
 -----GAGAGAGAAAAAAGAGCA--GCTACA--ATAGGAGCT-----  
 ---GTGCTCCTTGGGTTCTTGGGAGCG--GCAGGAAGCACTATG--GGCGCGGCGTCA---  
 ATAACGCTGACGGTACAG---GCCAGACAA---TTGTTG---TCTGGTATAGTGCAACAGCAAAGC---  
 AATTTG---CTGAGA---GCCATAGAGGCGCAACAGCACATGTTGCAACTCACAGTCTGGGGCATT  
 >KC154014  
 AATCAGATTAACAGTACAGGAAATACT-----  
 -----  
 TCAGATTCAAACATCACACTCCCATGTCAGAATAAAACAAATTATAAACATGTGGCAGGGAGTAGGACGAGCAA  
 TGTATGCCCCCTCCCATTTGCAGGAAACATAACATGTAAATCAAAT---  
 ATCACAGGACTAATATTGACACGTGATGGAGGAACCCATAACACTAATGATACT-----  
 -----  
 -----  
 GATACCCAGAGATATTGAGGCTGCAGGAGGAGATATGAGGGACAATTGGAGAAGTGAATTATATAAAATATA  
 AAGTGGTAGAAATTAAAGCCATTA---GGACTAGCACCCACTAAGGCAAAAAGGAGAGTGGTG-----  
 -----GAGAGAGAAAAAAGAGCA--GTGGGA--ATAGGAGCT-----  
 ---GTGTTCTTGGGTTCTTGGGAGCA--GCAGGAAGCACTATG--GGCGCGGCGTCA---  
 ATAACGCTGACGGTACAA---GCCAGACAA---CTGTTG---TCTGGTATAGTGCAACAGCAAAGC---  
 AATTTG---CTGAGG---GCTATAGAGGCGCAACAGCATATGTTGCAACTCACGGTCTGGGGCATT  
 >KF114881  
 AGTTACCCTAACATTGGTGATACAGAAAAGAAT-----  
 -----  
 TCAAGCTCAATCATCACACTCCCATGTCAGAATAAAACAAATTATAAACATGTGGCAGGGGGTAGGACGAGCAA  
 TATATGCACCTCCCATTTGCAGGAAAAATAACATGTAAATCAAAT---  
 ATCACAGGACTCCTGTTGACACGTGATGGAGGAAATAGTAATGAGACA-----  
 -----  
 -----  
 AATACTACAGAGATATTGAGACCTGGAGGAGGAAATATGAAAGATAATTGGAGGAGTGAATTATATAAAATATA  
 AAGTGGTAGAAATTAAACCATTA---GGATTAGCACCCAATAAGGCAAAAAGGAGAGTGGTG-----  
 -----GAGAGACAAAAAAGAGCA--GTAGGA--ATAGGAGCT-----  
 ---GTGTTCTTGGGTTCTTGGGAGCA--GCAGGAAGCACTATG--GGCGCGGCGTCA---  
 ATAACGCTGACGGTACAG---GCCAGACAA---TTATTG---TCTGGTATAGTGCAACAGCAAAGC---  
 AATTTG---CTGAGA---GCTATAGAGGCGCAACAGCATCTGTTGCAACTCACAGTCTGGGGCATT  
 >KR861329  
 CCTCAGGCAAATGTAAGTGAG-----  
 -----  
 TCAAATTCAACCATCACACTCCCTGTCAGAATAAAGCAAATTATAAACATGTGGCAGAGGGTGGGAGGAGCAA  
 TATATGCCCCCTCCCATTTGCAGGAAACATAACATGTAAATCAAAT---  
 ATCAGGGACTGCTTTTGGTACGTGATGGAGGTACAAATAAGACA-----  
 -----  
 -----  
 GAGCCAGAGACATTGAGACCTGGAGGAGGAGATATGAGGGACAATTGGAGAAGTGAATTGTATAAAATATAAAG  
 TGGTAGAAATTAAAGCCATTA---GGAGTAGCACCCACTAAGGCAAGAAGGAGAGTGGTG-----  
 -----GAAAGAGAAAAAAGAGCA--GTGGGA--ATAGGAGCT-----  
 GTGTTCTTGGGTTCTTGGGAGCA--GCAGGAAGCACTATG--GGCGCGGCGTCA---  
 ATAACGCTGACGGTACAA---GCCAGACAG---TTATTG---TCTGGTATAGTGCAACAGCAAAGC---  
 AATTTG---CTGAGG---GCTATAGAGGCGCAACAGCATTTGTTGCAACTCACAGTCTGGGGCATT  
 >KR861340  
 AGTCATAACAGTACAAACAGTAATGAATATAATGTAGATAATGGT-----  
 -----  
 ACAGACAGAAACATCACACTCCCATGTCAGAATAAAACAAATTATAAACATGTGGCAGAAGGTAGGAAGAGCAA  
 TGTATGCCCCCTCCTATTAGTGGACTAATAACATGTACCTCAAAT---  
 ATCACAGGACTACTCTTGGTACGTGATGGG---AACACAAGTGTC-----  
 -----  
 -----

ACAAATGAGACATTTCAGACCAGGAGGAGAGATATGAGGGACAATTGGAGAAGTGAACCTATATAAATATAAAG  
TGGTAGAAATTAAGCCATTG---GGAGTAGCGCCCACTGGAGCTAAAAGGAGAGTGGTGGAA-----  
-----AGAAGAGAAAAAAGAGCA---GTGGGA---ATAGGAGCT-----  
GTA CTCTTTGGGTTCTTGGGAGCA---GCAGGAAGCACTATG---GGCGCAGCGTCA---  
ATAGCGCTGACGGCACAG---GCCAGACAA---GTGCTG---TCTGGAATAGTGCAACAGCAAAAC---  
AATTTG---CTGAGG---GCTATAGAGGCGCAACAGCATATGTTGCAACTCACAGTCTGGGGCATT  
>KR861320  
GACTACTGGGATAATGGTACCATATCTGGTAAC-----  
-----  
AGTTCAAACATCACCATAATCTCATGCAGAATAAAGCAAATTATAAACATGTGGCAGGGGGTAGGACGAGCAA  
TGTATGCCCCCTCCCATTCAGAGGAAAAATAACATGTAAATCAAAT---  
ATCACAGGACTACTATTGTACAGTGATGGGGGTCCAAATGGCACA-----  
-----  
-----  
GAAGAAGTATTTCAGACCTGGAGGAGGAGATATGAGGGACAATTGGAGAAGTGAATTATATAAATATAAAGTGG  
TAGAAATTAAGCCATTA---GGAATAGCACCCACTACTGCAAAAAGGAGAGTGGTG-----  
-----GAAAGAGAAAAAAGAGCA---GTGGGA---ATAGGAGCT-----  
GTGCTCCTTGGGTTCTTGGGAGCA---GCAGGAAGCACTATG---GGCGCGGCGTCA---  
ATAACGCTGACGGTACAG---GCCAGGCAA---TTGCTG---TCTGGCATAGTGCAACAGCAAAGC---  
AATTTG---CTGAAA---GCTATAGAGGCGCAACAGCATCTGTTGCAACTCACGGTCTGGGGCATT  
>KR861321  
AATTATACACACAATGCAACTGAAAGTGCTATAAAT-----  
-----  
-  
TCAACAAACATCACCACACTCCATTGCAGAATAAAACAAATTATAAACATGTGGCAGGGGGTAGGGCGGGCAA  
TGTATGCCCCCCCCCATTCAGAGAAACATAACATGTAGGTCAAAT---  
ATCACAGGACTAATATTGACACGTGATGGAGGTAATAAGAATAATAATGAA-----  
-----  
-----  
ACAACTGGGACAGAGATATTTCAGACCTGGAGGAGGAAATATGAGGGACAATTGGAGAAGTGAATTATATAAAT  
ATAAAGTGGTGGAGGTTAATCCATTA---GGAGTGGCACCCACTACGGCAAAAAGGAGAGTGGTG-----  
-----GAGAGAGAGAAAAAGAGCA---GTGGGA---ATAGGAGCT---  
-----GTGCTCCTTGGGTTCTTGGGAGCA---GCAGGAAGCACTATG---GGCGCGGCATCA---  
ATAACGCTGACGGTACAG---GCCAGACAA---TTATTG---TCTGGTATAGTGCAACAGCAAAAC---  
AATTTG---CTGAAG---GCTATAGAGGCGCAACAACATATGTTGCAACTCACAGTCTGGGGCATT  
>KR861323  
GGTCATAATAGTACAGATAATAGTACAGATAATGGA-----  
-----  
AAGTCAAACAAAACCATCACAATACAATGCAAAATAAAACAATTCATAAACCTGTGGCAGGAGGTAGGGCGAG  
CAATATATGCCCCCTCCCATTCAGAGGAAACATAACATGTAAATCAAAT---  
ATCACAGGATTACTCTTGACATGGGATGGAGGAGATGATCCAAAA-----  
-----  
----  
GAGTCAAATGACACAGAGATATTTCAGACCAGGAGGAGGAGATATGAAGGACAATTGGAGAAGTGAACCTATATA  
AATATAAAGTGGTAGAAATTAAGCCCTTG---GGAATAGCACCCACTGAGGCAAAAAGGAGAGTGGTG-----  
-----CAGAGAGAAAAAAGAGCA---GTGGGA---  
ATGGGAGCT-----GTGCTCCTTGGGTTCTTGGGAGCA---GCTGGAAGCACTATG---  
GGCGCAGCGTCA---ATAGCGCTGACGGCACAG---GCCAGACAA---CTGTTG---  
TCTGGAATAGTGCAACAGCAAAGC---AATTTG---CTGAGG---  
GCTATAGAGGCGCAACAGCATATGTTGCAACTCACGGTCTGGGGCATT  
>KR861332  
ACCTACCAGGTAAATATTACAAAAGATACTTCAAGTTCA-----  
-----  
GACAGTAAAAACATCACACTCCAATGCAGAATAAAACAGATTATAAACATGTGGCAGGGAGTAGGACGAGCAA  
TGTATGCTCCTCCCATTCAGAGGAAACATAACATGTAAATCAAAC---  
ATCACAGGACTATTATTGACACGTGATGGAGGAAAACCTAATAAT-----  
-----  
-----  
AGTGAATATTTCAGACCTGGAGGAGGGGATATGAGAGATAATTGGAGAAGTGAATTATATAAATATAAAGTGG  
TAGAAATTAAGCCATTA---GGGGTAGCACCCACTAAGGCAAAAAGGAGAGTGGTG-----

-----GAGAGAGAAAAAGAGCA---GTGGGA---ATAGGAGCT-----  
 GTGTTCTTGGGTTCTTGGGAGCA---GCAGGAAGCACTATG---GGCGCGGCGTCA---  
 ATAACGCTGACGGTACAA---GCCAGACAA---CTGCTG---TCTGGTATAGTGACAGCAGCAAAGC---  
 AATTTG---CTGAGG---GCTATAGAGGCGCAACAGCATTTGTTGCAACTCACAGTCTGGGGCATT  
 >KR861334  
 ACTTACACGCAGCCTAACAGTACAGAAAATACT-----  
 -----  
 ACAGAGCCAACCATCACACTCAAATGCAGAATAAAACAAATTATAAACATGTGGCAGGAGGTAGGACGAGCAA  
 TGTATGCCCCCTCCCATTCAGGAAACATAACATGTAGATCAAAT---  
 ATCACAGGATTAATATTGACACGTGATGGAGGAATTAGTAATGAAGGAAAT-----  
 -----  
 -----  
 AGGACTAATGAGACATTGAGACCTATAGGAGGAGATATGAGGGACAATTGGAGAAAGTGAATTATATAAATATA  
 AAGTAGTAGAAATTAAGCCATTA---GGACTAGCACCCACTACGGCAAAAAGGAGAGTGGTG-----  
 -----GAAAGAGAAAAAGAGCA---GTGGGA---ATAGGAGCT-----  
 ---GTGTTCTTGGGTTCTTGGGAGCA---GCAGGAAGCACTATG---GGCGCGGCGTCA---  
 ATAACGCTGACGGTACAG---GCCAGACAA---CTGTTG---TCTGGTATAGTGCAACAGCAAAGT---  
 AATTTG---CTGAGG---GCTATAGAGGCGCAACAGCATATGTTGCAACTCACGGTCTGGGGCATT  
 >KR861339  
 TCCTAC-----  
 -----  
 CCTAATGACACCATCACCTCCCATGCAGGATAAAACAAATTATTAACCTGTGGCAGAAGGTAGGACGGGCAA  
 TGTATGCCCCACCCATTGCAGGAAACATAACATGTAAATCAAAT---  
 ATCACAGGACTACTATTGACAAGTGATGGAGGTGTAAAAGACAATAAT-----  
 -----  
 -----  
 ACTAATAATATTAATACATTGAGACCTGGAGGAGGAAATATGAGGGACAATTGGAGAAAGTGAATTATATAAAT  
 ATAAAGTGGTGGAAGTTAAGCCATTA---GGAATAGCACCCACTGAGTCAAAAAGGAGAGTGGTG-----  
 -----GAGAGAGCAAAAAGAGCA---GTGGGA---CTGGGAGCT---  
 -----GTGTTCTTTGGGTTCTTGGGAGCA---GCAGGAAGCACTATG---GGCGCGGCGTCA---  
 ATAACGCTGACGGTACAG---GCCAGACAA---CTATTG---TCTGGTATAGTGCAACAGCAAAGC---  
 AATTTG---CTGAGA---GCTATAGAGGCGCAACAACATATGTTGCAACTCACAGTCTGGGGCATT  
 >KR861342  
 AGTTATAATGCAACA-----  
 -----  
 AGCAATAGAACCATCACACTCCCATGCAGAATAAAACAAATTATAAACATGTGGCAGAGGGTAGGACAAGCAA  
 TATATGCCCCCTCCCATTCAGGAAAGAATAACATGTAACTCAAAT---  
 ATCACAGGAATACTCTTGACACGTGATGGAGGAACAATAATGACACAGGG-----  
 -----  
 -----  
 AATGGCACAGAGATATTGAGACAGGAGGAGGAGACATGAGGGATAATTGGAGAAAGTGAATTATATAAATATA  
 AAGTAGTAGAAATTAAGCCATTG---GGAGTAGCACCCACCAAGGCAAAAAGGAGAGTGGTG-----  
 -----GAGAGAGAAAAAGAGCA---GTAGGA---ATAGGAGCT-----  
 ---GTGCTCTTTGGGTTCTTGGGAGCA---GCAGGAAGCACTATG---GGCGCAGCGTCA---  
 ATAGCGCTGACGGCACAG---GCCAGACAA---GTGCTG---TCTGGAATAGTGCAACAGCAAAGC---  
 AATTTG---CTGAGG---GCTATAGAGGCGCAACAGCATATGTTGCAACTCACAGTCTGGGGCATT  
 >KR861328  
 AGTTATAAT-----  
 -----  
 GATACAAGAAACATCACACTCCCATGCAGAATAAAACAAATTGTAAATATGTGGCAGGGGGTAGGAAGGGCAA  
 TATATGCCGCTCCCATTCAGGACAAATAATGTGCACATCAAAT---  
 ATTACAGGACTAATATTGACACGTGATGGAGGAAATGGAAATTCT-----  
 -----  
 -----  
 ACCCATGAGACATTGAGACCTGAAGGAGGAAATATGAGGGACAATTGGAGAAAGTGAATTATATAAATATAAAG  
 TGGTAGAAATTAACCATTA---GGAATAGCACCCACTGAGGCAAAAAGGAGAGTGGTG-----  
 -----GAGAGAGAAAAAGAGCA---GTAGGC---CTAGGAGCT-----  
 GTGTTACTTGGGTTCTTGGGAGCA---GCAGGAAGCACTATG---GGCGCGGCGTCC---  
 ATGACGCTGACGGTACAG---GCCAGACAA---CTGTTG---TCTGGTATAGTGCAACAGCAAAGC---  
 AATTTG---CTGAGA---GCTATAGAGGCGCAACAGCATATGTTGCAACTCACAGTCTGGGGCATT

>KR861257

AATCATACG-----  
-----  
TCAAATTCAAACATCACGCTCCCATGCAGAATAAAACAAATTATAAACATGTGGCAGGAGGTAGGACGAGCAA  
TGTATGCCCCGCCCATTCGAGGAAACATAACATGTAAATCAAAT---  
ATCACAGGACTACTATTGGTATATGATGGAGGCATGCATAATAGA-----  
-----

AGCAACGAGACATTCAGACCGGGAGGAGGAAATATGAAGGACAATTGGCGAAGTGAACCTATATAAATATAAAG  
TGGTAGAAATTAACCATTA---GGAATAGCACCCACGAAAGCAAAAAGAAGAGTGGTG-----  
-----GAGAGAGAAAAAAGAGCA---GTGGGA---GTAGGAGCT-----  
ATGTTTCCTTGGGTTCTTGGGAGCA---GCAGGAAGCACTATG---GGCGCGGCGTCA---  
ATAACGCTGACGGTACAG---GCCAGACAA---CTATTG---TCTGGTATAGTGCAACAGCAAAGC---  
AATTTG---CTGAGA---GCTATAGAGGCGCAACAACATATGTTGCAACTCACAGTCTGGGGCATT

>KR861259

AATTATACAAATAGCACTACA-----  
-----  
GATAATTCAACCATCACAATCCAATGCAGAATAAAACAAATCATAAACATGTGGCAGGAGGTAGGACGAGCAA  
TGTATGCCCCCTCCCATTCGAGGAAACATAACATGTAGATCAAAT---  
ATCACAGGACTACTATTAGTACGTGATGGAGGAAACGGAAACGACACC-----  
-----

AATAATACAGAGACATTCAGACCTGGAGGAGGAAATATGAAGGACAATTGGAGAAGTGAATTATACAAATATA  
AAGTGGTAGAAGTAAAACCATTA---GGAATAGCACCCACTGGGGCAAAAAGGAGAGTGGTG-----  
-----GAGAGAGAAAAAAGAGCA---GTGGGA---ATAGGAGCT-----  
---GTGTTTCCTTGGATTCTTGGGAGCA---GCAGGAAGCACTATG---GGCGCGGCGTCA---  
ATAACGCTGACGGTACAG---GCCAGACAA---TTATTG---TCTGGTATAGTGCAACAGCAAAGC---  
AATTTG---CTGAGG---GCTATAGAGGCGCAACAGCATCTGTTGCAACTCACAGTCTGGGGCATT

>KR861264

GATTATAATGATACAGAA-----  
-----  
AGTAATGAGACCATCATACTCCAATGCAGAATAAAACAAATTATAAACATGTGGCAGAAGGTAGGAGGAGCAA  
TATATGCCCCCTCCCATTCGAGGAAACATAACATGTAAATCAAAT---  
ATCACAGGACTACTCTTGGTACGGGATGGAGGCAATACCACTAAC-----  
-----

ACATCAGAGATATTCAGACCAGGAGGAGGAAATATGAAGGACAATTGGAGAAGTGAACCTATATAAATATAAAG  
TGGTAGAAATTAAGCCATTG---GGAATAGCGCCCACCAAGGCAAGAAGGAGAGTGGTG-----  
-----GAGAGAGAAAAAAGAGCA---GTGGGA---ATAGGAGCT-----  
GTGTTTCCTTGGGTTCTTGGGAGCA---GCAGGAAGCACTATG---GGCGCAGCGTCA---  
ATAACGCTGACGGTACAG---GCCAGACAA---TTGTTG---TCCGGTATAGTGCAACAGCAAAGT---  
AATTTG---CTGAGA---GCTATAGAGGCGCAGCAGCATATGTTGCAACTCACAGTCTGGGGCATT

>KR861269

TGCTATACATCAAACCTGTTTAATGATAGCAATAGGGCAAACATGTCTGAT-----  
-----  
AACAGTACAGTCATCACACTCTCATGCAGGATAAAACAAATTATAAATATGTGGCAGAAGGTAGGACGAGCAA  
TGTATGCCCCCTCCCATTCGAGGGAACATAACATGTAAATCAAAT---  
ATCACAGGACTACTATTGGTACGTGATGGAGGAACAGGTAACAAA-----  
-----

ACAGAGATATTCAGACCTGGAGGGGGAGATATGAGGGACAATTGGAGAAGTGAATTATATAAATATAAAGTGG  
TAGAAATAAAGCCATTG---GGAATAGCACCCACTGAGGCAAAAAGGAGAGTGGTG-----  
-----GAGAGAGAAAAAAGAGCA---GTGGGA---ATAGGAGCT-----  
GTGTTTCCTTGGGTTCTTGGGAGCA---GCAGGAAGCACTATG---GGCGCAGCGTCA---  
ATAACGCTGACGGTACAG---GCCAGACAA---TTGTTG---TCTGGAATAGTGCAACAGCAAAGC---  
AATTTG---CTGAGG---GCTATAGAGGCGCAACAGCATATGTTGCAACTCACGGTCTGGGGCATT

>KR861276

ACTTAC-----  
-----

ATCACACTCCCATGCAGAATAAAGCAAATTATAAACATGTGGCAGGGGGTAGGACAAGCAATGTATGCCCCCTC  
 CCATTGCAGGGAACATAACATGTACCTCAAAT---  
 ATCACAGGAATACTGTTGACACGTGATGGAGGAAATGAGGAAAAG-----  
 -----  
 -----  
 GAAGAGGAGATATTCAGACCTGGAGGAGGAGATATGAGGGACAATTGGAGAAGTGAGTTGTATAAATATAAAG  
 TGGTAGAAGTTAAACCATTA---GGAATAGCACCCACTGAGGCAAAAAGAAGAGTAGTG-----  
 -----GAGAGACAAAAAAGAGCA---GCGGGA---CTAGGAGCT-----  
 GTGTTCTAGGGTTCTTGGGAGCA---GCAGGAAGCACTATG---GGCGCGGCGTCA---  
 ATAACGCTGACGGTACAG---GCCAGACAA---TTATTG---TCTGGTATAGTGCAACAGCAAAGC---  
 AATTTG---CTGAGA---GCTATAGAGGCGCAACAACATATGTTGCAACTCACAGTCTGGGGCATT  
 >KR861281  
 AATTACATCAAT-----  
 -----  
 TCATCAGATCTAATCACCTCCAATGCAGAATAAAACAAATTATAAACTTGTGGCAGAGGGTAGGACGAGCAA  
 TGTATGCCTCCCCCATTAACGGAATCATAAAATGTAGATCAAAT---  
 ATCACAGGACTACTATTGACACGTGATGGAGGTAATACAACAAAC-----  
 -----  
 -----  
 AGTAGTGAAGAAATATTCAGACCTGAAGGAGGAAATATGAGGGACAATTGGAGAAGTGAATTATATAAATATA  
 AAGTGGTAGAAATTAAGCCATTA---GGGATAGCACCCACTAGGGCAAAAAGAAGAGTGGTG-----  
 -----GAGAGAGAAAAAAGAGCA---GTGGGA---ATAGGAGCT-----  
 ---GTGTTCTTGGGTTCTTGGGAGCA---GCAGGAAGCACTATG---GGCGCGGCGTCA---  
 ATCACGCTGACGGTACAG---GCCAGACAA---TTATTG---TCTGGTATAGTGCAACAGCAAAGC---  
 AATTTG---CTGAGA---GCTATAGAGGCGCAACAACATATGTTGCAACTCACAGTCTGGGGCATT  
 >AF110973  
 AGTTATAGGGGTACAGAAAGT-----  
 -----  
 AATAGTTCAATCATCACACTCCCATGCAGAATAAAACAAATTATAAACATGTGGCAGAAGGTAGGACGAGCAA  
 TATATGCCCCCTCCCATCGAAGGGAACATAACATGTAGCTCGAGT---  
 ATCACAGGACTACTCTTGGCACGTGATGGAGGCTTAGATAATGTC-----  
 -----  
 -----  
 ACCACAGAGATATTCAGACCACAAGGAGGAGATATGAAGGACAATTGGAGAAATGAATTATATAAATATAAAG  
 TAGTAGAAATTAAGCCATTG---GGAGTAGCGCCCACTGAGGCAAAAAGGAGAGTGGTG-----  
 -----GAGAGAGAAAAACGAGCA---GTGGGA---ATAGGAGCT-----  
 GTGATCTTTGGGTTCTTGGGAGCA---GCAGGAAGCACTATG---GGCGCAGCGTCA---  
 ATAACGCTGACGGCACAG---GCCAGACAA---TTGTTG---TCTGGAATAGTGCAACAGCAAAGC---  
 AATTTG---CTGAGG---GCTATAGAGGCGCAACAGCATATGTTGCAACTCACAGTCTGGGGCATT  
 >KY658707  
 ACCTACAGGTCTAATAGT-----  
 -----  
 ACAAATGCAACCATCACACTCCCATGCAGAATAAAACAAATTATAAACATGTGGCAAGGGGTAGGACGAGCAA  
 TGTATGCCCCCTCCCATTCAGGAAACATAACATGTAAATCAAAT---  
 ATCACAGGACTACTATTGACACGTGACGGAGGAGTTGGTGAGGATAGTGAT-----  
 -----  
 -----  
 AATGAAACAGAAATATTCAGACCTGGAGGAGGAGATATGAGAGACAATTGGAGAAGTGAATTATATAAATATA  
 AAGTGGTAGAAATTAACCATTAA---GGAATAGCACCCACTGAGGCAAGAAGGAGAGTGGTG-----  
 -----GAGAGAGAAAAAAGAGCA---GTGGGA---ATAGGAGCT-----  
 ---GTGTTCTTGGGTTCTTGGGAGCA---GCAGGAAGCACTATG---GGCGCAGCGTCA---  
 ATAACGCTGACGGTACAA---GCCAGGCAA---TTATTG---TCTGGTATAGTGCAACAGCAAAGC---  
 AATTTG---CTGAGA---GCTATAGAGGCGCAACAGCATATGTTGCAACTCACGGTCTGGGGCATT  
 >AF443077  
 AGTCAGCCTAACAGTACAGGAAACACT-----  
 -----  
 CCACATTCAAACATCACACTCCCATGCAAAATAAAACAAATTATAAACATGTGGCAGGGGTAGGGCGAGCAA  
 TGTATGCCCCCTCCCATTCAGGAAACATAACATGTATATCAAAT---  
 ATCACAGGACTAATATTGACACGGGATGGAGGAGTAAATAGAAGT-----  
 -----

-----  
 GACACAGAAATATTCAGACCTGCAGGAGGAGATATGAGGGATAATTGGAGAAGTGAATTATATAAATATAAAG  
 TGGTAGAAATTAACCATTA---GGACTAGCACCCACTAAGGCCAAAAGGAGAGTGGTG-----  
 -----GAGAGAGAAAAAAGAGCG---GTGGGA---ATAGGAGCT-----  
 GTGTTTCCTTGGGTTCTTGGGAGCA---GCAGGAAGCACTATG---GGCGCGGCGTCA---  
 ATAACGCTGACGGTACAG---GTCAGACAA---CTGTTG---TCTGGTATAGTGCAACAGCAAAGC---  
 AATTTG---CTGAGG---GCTATAGAGGCGCAACAGCATATGTTGCAACTCACGGTATGGGGCATT  
 >AF443081  
 TATTATAGTAACAAGACAAGCAGTAATATGACT-----  
 -----  
 ACAAATGAAATCATCACAATTCCATGCAAAATAAAACAAATTATAAACATGTGGCAGGAGGTAGGACGAGCAA  
 TGTATGCCCCCTCCCATTCGAGGAAACATAACATGTAAATCAAAT---  
 ATCACAGGACTACTATTAGTACGTGATGGAGGCAACAACAATACC-----  
 -----  
 -----  
 ACAGAAACATTCAGACCTGGAGGAGGAAATATGAAGGACAATTGGAGAAGTGAATTATATAAATATAGAGTGG  
 TAGAAATTAAGCCATTA---GGAATAGCACCCACTGGAGCAAAAAGGAGAGTGGTG-----  
 -----GAGAGAGAAAAAAGAGCA---GTGACA---CTAGGAGCT-----  
 ATGTTTCCTTGGGTTCTTGGGAGCA---GCCGGAAGCACTATG---GGCGCGGCGTCA---  
 ATAACGCTGACGGTACAG---GCCAGACAA---CTGTTG---TCTGGTATAGTGCAACAGCAAAGC---  
 AATTTG---CTGAGG---GCTATAGAGGCGCAACAGCATATGTTGCAACTCACGGTCTGGGGCATT  
 >AF443087  
 TACTATCCAAACATGACCAATGTCACTGATACAAAG-----  
 -----  
 AGTAATTTAACCATCACACTGCCATGCAGAATAAAACAAATTATAAACAGGTGGCAGGAGGTAGGACGAGCAA  
 TGTATGCCCCCTCCCATTCGAGGAAACATAACATGTACGTCAAAT---  
 ATCACAGGACTACTATTGGTACGTGATGGAGGCCGTACAAGTGAC-----  
 -----  
 -----  
 TCTACAAAAGAGATATTCAGACCTGGAGGAGGAGATATGAGGGACAATTGGAGAAGTGAATTATATAAATATA  
 AAGTGGTAGAAATTAACCATTG---GGAATAGCACCCACTGAAGCAAAAAGGAGAGTGGTG-----  
 -----GAGAGAGAAAAAAGAGCA---GTGACA---ATAGGAGCT-----  
 ---ATGTTTCCTTGGGTTCTTATCAGCA---GCAGGAAGCACTATG---GGCGCAGCATCA---  
 ATAACGCTGACGGTACAG---GCCAGACAA---TTATTG---TCTGGTATAGTGCAACAGCAAAGC---  
 AATTTG---CTGAGA---GCTATAGAGGCGCAACAGCATATGTTGCAACTCACAGTTTGGGGCATT  
 >KR861318  
 GACTATAATGTA-----  
 -----  
 AGCAACATCAACATCACACTCCCATGCAGAATAAAACAAATTTATAAACATGTGGCAGGGGGTAGGACGAGCAA  
 TGTATGCCCCCTCCCATTCGAGGAAACATAACATGTATATCAAGT---  
 ATCACAGGATTAATATTGACACGTGATGGAGGAAGAGGGAATGAGACTGAG-----  
 -----  
 -----  
 AATAATACTGAGATATTCAGACCTGCAGGAGGAGATATGAGGGACAATTGGAGAAGTGAATTATATAAATATA  
 AAGTAGTAGAAATTAAGCCATTA---GGACTAGCACCCACTATGGCAAAAAGGAGAGTGGTG-----  
 -----GAGAGAGAAAAAAGAGCA---GTGGGA---ATAGGAGCT-----  
 ---GTACTCCTTGGGTTCTTGGGAGCA---GCAGGAAGCACTATG---GGCGCGGCGTCA---  
 ATCACGCTGACGGTACAG---GCCAGACAA---TTGCTG---TCTGGTATAGTGCAACAGCAAAGC---  
 AATTTG---CTGAGA---GCTATAGAGGCGCAACAGCATATGTTGCAACTCACAGTCTGGGGCATT  
 >HQ699999  
 TACTATCCTAATGGTACACTAGTTAAT-----  
 -----  
 TCAACCTTAACATCACACTCCAATGCAGAATAAAGCAAATTATAAACATGTGGCAGGAGGTAGGAAAAGCAA  
 TGTATGCCCCCTCCCATTCGAGGAAACATAACATGTAGATCAAAT---  
 ATCACAGGACTACTATTGGTACGTGATGGAGGGATAACAAATAATACAAACCCA-----AGT-----  
 -----  
 -----  
 GAGATCAAGAATGATACAGAGATATTCAGACCTGGAGGAGGAAACATGAAAGACAATTGTAGAAGTGAATTAT  
 ATAAATATAAAGTGGTAGAAATTAAGCCATTG---GGAGTAGCACCCACTCCAGCAAAAAGGAGAGTAGTG--  
 -----GAGAGAGAAAAAAGAGCA---GCA-----

ATAGGAGCT-----GTGTTCTTGGGTTCTTGGGAGCA---GCAGGAAGCACTATG---  
 GGCGCGGCGTCA---CTAACGCTGACGGTACAG---GCCAGACAA---TTGTTG---  
 TCTGGTATAGTGACAGCAGCAAAGC---AATTTG---CTGAGA---  
 GCTATAGAGGCGCAACAGCATCTGTTGCAACTCACGGTCTGGGGCATT  
 >EF514713  
 TCTCAGTCTAATAATATAAGCATA-----  
 -----  
 CTTACTAATGAAACCATCACGCTCCCATGCAGAATAAAACAAATTATAAACATGTGGCAGGAGGTAGGACGAG  
 CAATGTATGCCCCCTCCATTGCAGGAAACATAACATGTAAATCAAAT---  
 ATCACAGGACTACTATTGGTACGGGATGGAGGAAACCAGGAAAGG-----  
 -----  
 -----  
 AACCAACGAGACATTTAGACCTGAGGGAGGAAATATGAAGGACAATTGGAGAAGTGAATTATATAAATATAAAG  
 TGGTAGAAATTAAGCCATTG---GGAATAGCACCCACTGAGGCAAAAAGGAGAGTGGTG-----  
 -----GAGAGAGAGAAAAAGAGCA---GTGGGA---ATAGGAGCT-----  
 GTACTCCTTGGGTTCTTGGGAGCA---GCCGGAAGCACTATG---GGCGCGGCGTCA---  
 ATAACGCTGACGGTACAG---GCCAGACAA---GTATTG---TCTGGTATAGTGCAACAGCAAAGC---  
 AATTTG---CTGAGA---GCCATAGAGGCGCAACAGCATATGTTGCAACTCACGGTCTGGGGCATT  
 >KX228820  
 AGTTATGATTCTAAT-----  
 -----  
 AGTACAGCAAACATCACACTCCCATGCAAAATAAAACAGATTATAAACTTGTGGCAGGAGGTAGGACGAGCGA  
 TGTACGCTCCTCCCATTCAGGAAACATAACATGTAAGTCAACC---  
 ATCACAGGATTACTATTGGTGCGTGATGGAGGACAAGGAAACAAC-----  
 -----  
 -----  
 TCAAATGAGACATTCAGACCTGGAGGAGGAGATATGAGGGATAATTGGAGAAGTGAATTGTATAAGTATAAAG  
 TGGTAGAAATTAAGCCATTG---GGAGTAGCACCCACTGAGGCAAAAAGGAGAGTGGTG-----  
 -----GAGAGAGAAAAAAGAGCA---GTGGGA---CTAGGAGCT-----  
 GTGATCTTTGGGTTCTTAGGAGCA---GCAGGAAGCACTATG---GGCGCGGCGTCA---  
 ATAACGCTGACGGTACAG---GCCAGACAA---CTGTTG---TCTGGTATAGTGCAACAGCAAAGC---  
 AATTTG---CTGAAG---GCTATAGAGGCACAACAGCATATGTTGCAACTCACGGTCTGGGGCATT  
 >KU319533  
 ACCTATAAAGGTACAAACATGTCTGAT-----  
 -----  
 GGTCTGAATTCATCACACTCCAATGCAGAATAAAACAAATTATAAATATGTGGCAAGGGGTAGGACGAGCAA  
 TGTATGCCCCCTCCCATTCAGGAAACATAACATGTATATCAAAT---  
 ATCACAGGAATACTACTGACACGTGATGGA---AAAAATGATGGT-----  
 -----  
 -----  
 GCAGATACATTCAGACCTGGAGGAGGAGATATGAGGGATAATTGGAGAAGTGAATTATATAAATACAAAGTAG  
 TAGAAATTAACCATTA---GGAATAGCACTCACTAAGGCAAAGAGGAGAGTGGTG-----  
 -----GAGAGAGAAAAAAGAGCAGTATTGGGAGGACTAGGAGCT-----  
 GTGTTCTTGGGTTCTTGGGGGCA---GCAGGAAGCACTATG---GGCGCAGCATCA---  
 ATGACGCTGACGGTACAG---GCCAGAAAA---TTGTTG---TCTGGTATAGTGCAACAGCAAGGC---  
 AATTTG---CTGAGG---GCTATAGAGGCGCAACAGCATATGTTGCAACTCACAGTCTGGGGCATT  
 >KU319536  
 AATCATAGTTTTTACAACTCAACCCTGTTTAATAGTAGTAATAAT-----  
 -----  
 -  
 GCAAACTCAACTATCACACTCCCATGCAAAATAAAACAAATTATAAACATGTGGCAGAGGGTAGGGCGAGCAA  
 TATATGCCCCCTCCCATTTGAAGGAAATATAACATGTAAATCAGGT---  
 ATCACAGGGCTACTATTGACACGTGATGGAGGAAATGACACAGAGATA-----  
 -----  
 -----  
 AATGGCACAGAGACATTCAGACCTGGAGGAAGAGATATGAGGGACAATTGGAGAAGTGAATTATATAGATATA  
 GGGTGGTAGAAATTAAGCCATTG---GGAATAGCACCCACCAAGGCAAAAAGGAGAGTGGTG-----  
 -----GAGAGAGAAAAAAGAGCA---GTGGGA---ATAGGAGCT-----  
 ---GTGTTCTTGGGTTCTTGGGAGCA---GCAGGAAGCACTATG---GGCGCGGCGTCA---

ATAACGCTGACGGTACAG---GCCAGACAA---TTGCTG---TCTGGTATAGTGCAACAGCAAAGC---  
 AATTTG---CTGAGG---GCTATAGAGGCGCAACAGCATATGTTGCAACTCACAGTTTGGGGCATT  
 >FJ653288  
 AGCTACATGTCTAATACTACAAACAGTACAATCAGT-----  
 -----  
 GAAAATTCAACTATCACACTTTCATGCAGAATAAAACAAATTATAAACATGTGGCAGGGGGTAGGACAAGCAA  
 TATATGCCCCGCCATTGCAGGAAACATAACATGTATATCAAAT---  
 ATCACAGGACTACTGTTAACACGTGATGGAGGAAATGAGGGTAAT-----  
 -----  
 -----  
 GATACAACAGAGACATTGAGACCTGGAGGGGGAGATATGAGAGACAATTGGAGAAGTGAATTATATAAATATA  
 AAGTGGTAGAAGTTAAACCATT---GGAATAGCACCCCAATAAGGCAAAAAGGAGAGTGGTG-----  
 -----  
 -----GAGAGAGAAAAAGAGCA---GTGGGA---ATAGGAGCT-----  
 ---GTGCTCCTTGGGTTCTTGGGAGCA---GCAGGAAGCACTATG---GGCGCGGCGTCA---  
 ATAACGCTGACGGTACAG---GCCAGACAA---TTATTG---TCTGGTATAGTGCAACAGCAAAGC---  
 AATTTG---CTGAGA---GCTATAGAGGCGCAACAGCATTTGTTGCAACTCACAGTCTGGGGCATT  
 >DQ207941  
 AACTACACTGAG-----  
 -----  
 GCAAAATCAAGCATCACACTCCCATGCAGAATAAAACAAATTATAAACATGTGGCAGGAGGTAGGACGAGCAA  
 TGTATGCCCCCTCCCATTCAGGATACATAACATGTAATTCAAAT---  
 ATCACAGGACTACTCTTGACACGTGATGGAGGCAATGGTAGTAGT-----  
 -----  
 -----  
 AATTGCACAGAGACATTGAGACCGGGAGGAGGAGACATGAGGGACAATTGGAGAAGTGAATTATATAAATACA  
 AAGTGGTAGAAATTAAGCCATT---GGAGTAGCACCCACCAAGGCAAAAAGGAGAGTGGTG-----  
 -----  
 -----GAGAAAGAAAAAGAGCA---GTGGGA---ATAGGAGCT-----  
 ---GTACTCCTTGGGTTCTTGGGAGCA---GCAGGAAGCACTATG---GGCGCAGCGTCA---  
 ATAACGCTGACGGTACAG---GCCAGACAA---GTGTTG---TCTGGAATAGTGCAACAGCAAAT---  
 AATTTG---CTGAGG---GCTATAGAGGCGCAACAGCATATGTTGCAACTCACAGTCTGGGGCATT  
 >KF766541  
 AATTATACATACATGCTTAATGGTACACTTACAGGAAGTAATTCA-----  
 -----  
 -  
 AGCTCAGACATTATCACACTCCCATGTAGAATAAAACAATTTATAAACATGTGGCAGGAGGTAGGACGAGCAA  
 TGTATGCTCCTCCCATTCAGGAAACATAACATGTTTCATCAAAA---  
 ATCACAGGACTACTATTGGTACGTGATGGAGGAAATACAAATAGT-----  
 -----  
 -----  
 ACTACAGAGATATTTAGACCTGGAGGAGGAGACATGAGGAACAATTGGAGAAGTGAATTATATAAATACAAAG  
 TAGTAGAAATTAGACCATTG---GGAGTAGCACCCACTACAGCAAAAAGGAGAGTGGTG-----  
 -----  
 -----GAGAGAGAAAAAGAGCA---GTGGGA---ATAGGAGCT-----  
 GTGTTCTTGGGTTCTTGGGAGCA---GCCGGAAGCACTATG---GGCGCGGCGTCA---  
 ATGACGCTGACGGTACAG---GCCAGACAA---TTGTTG---TCTGGTATAGTGCAACAGCAAAGC---  
 AATTTG---CTGAGG---GCTATAGAGGCGCAACAGCATCTGTTGCAACTCACGGTCTGGGGCATT  
 >MH899155  
 AGTCATGATGGT-----  
 -----  
 -----  
 TTAAACTCAACCATCACACTCCCATGCAAAATAAAGCAGATTATAAATATGTGGCAGGAGGTAGGAAGAGCAA  
 TGTATGCCCCCTCCCATGGAAGGAAACATAACATGTAAATCAAAT---  
 ATCACAGGCATACTATTGGTACGTGATGGAGGGAATGATAACAGCTCA-----  
 -----  
 -----  
 AATGATACAGAAACAGAGACATTGAGACCTGGAGGGGGAGATATGAGAGATAATTGGAGAAGTGAATTATACA  
 AATATAAAGTGGTAGAAATTAAGCCACTG---GGAGTAGCACCCACTACAGCAAAAAGGAGAGTGGTG-----  
 -----  
 -----GAGAGAGGAAAAAGAGCA---GTGGGC---  
 ATAGGAGCT-----GTGTTCTTGGGTTCTTGGGAGCA---GCAGGAAGCACTATG---  
 GGCGCGGCGTCA---ATAACGCTGACGGTACAG---GCCAGACAA---TTGTTG---  
 TCTGGTATAGTGCAACAGCAAAGC---AATTTG---CTGAGA---  
 GCTATAGAGGCGCAACAACATCTGTTGCAACTCACGGTCTGGGGCATT

>KX069220

ACCTACGTGAATGATACCAACCGG-----

-----  
GATAACTCAAACATCACTTTACCATGCCGAATAAAACAAATTATAAACATGTGGCAGGAGGTAGGACGAGCAA  
TGTATGCCCCCTCCCATTCGAGGAAACATAACATGTAAATCAAAT---  
ATTACAGGACTACTATTGGTACGTGATGGAGGGAAAGAGACAAAT-----  
-----

GGCACAGAGACATTTCAGACCTGGAGGAGGAGATATGAGAGACAATTGGAGAAGTGAATTATATAAATATAAAG  
TGGTAGAAATTAAGCCATTG---GGAGTAGCACCCACTAAAGCAAAAAGAAGAGTAGTG-----  
-----GAGAGAGAAAAAAGAGCA---GCA-----CTAGGAGCT-----  
GTGTTCCCTTGGGTTCTTAGGAGCA---GCAGGAAGCACTATG---GGCGCGGCGTCA---  
ATAGCGCTGACGGCACAG---GCCAGACAA---TTGTTG---TCTGGTATAGTGCAACAGCAAAGC---  
AATTTG---CTGAGG---GCTATAGAGGCGCAACAGCATCTGTTGCAACTCACAGTCTGGGGCATT

>KY713228

TACTACTTTAATAGTAGTAAAAACAGAGGGGGCACA-----

-----  
GAAAGTGATGAAACCATCATCCCATGCAAAATAAAGCAAATCATAAACATGTGGCAGGAGGTAGGAAGAGCAA  
TGTATGCCCCCTCCCATTCGAGGAAACATAACATGTAAATCAAAC---  
ATCACAGGGCTACTATTGGTACGTGATGGAGGAATAAAATACTACA-----  
-----

GAGGCTACAGAGACATTTAGACCAGGAGGAGGAGATATGAGGGACAATTGGAGAAGTGAATTATATAAATATA  
AAGTGGTAGAAATTAAGCCACTG---GGAGTAGCACCAACTGGAGCAAAAAGGAGAGTGGTG-----  
-----GAGAGAGAAAAAAGAGCA---GTGGGG---CTAGGAGCT-----  
---GTGTTCCCTTGGGTTCTTGGGAGCA---GCAGGAAGCACTATG---GGCGCGGCGTCA---  
ATAACGCTGACGGTACAG---GCCAGACAA---CTGTTG---TCTGGTATAGTGCAACAGCAAAGT---  
AATTTG---CTGAGA---GCTATAGAGGCGCAACAGCATCTGTTGCAACTCACAGTCTGGGGCATT

>KY713233

AATTACATGGGTACATACAATGAGACAAATGGTACATACAAT-----

-----  
TCAAACCTCGACCATCACAATCCCATGCAGAATAAAACAAATTATAAACATGTGGCAGGAGGTAGGACGAGCAA  
TATATGCCCCCTCCCATTCGAGGAAACATAACATGTAAATCAAAT---  
ATCACAGGACTACTATTGGTACGTGATGGAGGAAGAAACAATACA-----  
-----

-----  
CATAAAAATGAGACATTTAGACCTGGAGGAGGAGATATGAAAGACAATTGGAGAAGTGAATTATATAAATACA  
AGGTGGTGGAAATTAAGCCATTA---GGAATAGCACCTACTACAGCAAAAAGGAGAGTGGTG-----  
-----GAGAGAGAAAAAAGAGCA---GTGGGA---CTAGGAGCT-----  
---ATGTTCCCTTGGGTTCTTGGGAGCA---GCCGGGAGCACTATG---GGCGCGGCGTCA---  
ATAACGCTGACGGTACAG---GCCAGACAA---TTGTTG---TTTGGTATAGTGCAAGCAGCAAAGC---  
AATTTG---CTGAGA---GCTGTAGAGGCGCAACACCATCTGTTGCAACTCACGGTCTGGGGCATT

>KY713248

AATTACACTGAGACAAATAGTACATACAATGAG-----

-----  
GCAAACCTTGACCATCACAATCCCATGCAGAATAAAACAAATTATAAACATGTGGCAGAAGGTAGGAAAAGCAA  
TATATGCCCCCTCCCATTCGAGGAAACATAACATGTAAATCAAAT---  
ATCACAGGACTACTACTGGTACGTGATCGTGGTGGAAACAATACA-----  
-----

-----  
AATAAGAATGAGACATTTAGACCTGGAGGAGGAAATATGAAAGACAATTGGAGAAGTGAATTATATAAATATA  
AAGTGGTGGAAATTAAGCCATTA---GGAATAGCACCTACTACAGCAAAAAGGAGAGTGGTG-----  
-----GAGAGAGAAAAAAGAGCA---GTGGGA---CTAGGAGCT-----  
---ATGTTCCCTTGGGTTCTTGGGAGCA---GCTGGGAGCACTATG---GGCGCGGCGTCA---  
ATAACGCTGACGGTACAA---GCCAGACAA---CTGTTG---TCTGGTATAGTGCAAGCAGCAAAGC---  
AATTTG---CTGAAA---GCTGTAGAGGCGCAACAGCATCTGTTGCAACTCACTGTCTGGGGCATT

>MK076659

AGTCATGATAGTTTT-----

-----CTAGACTCAACCAACAAC-----

TCAAACCTCAAAAAGATCACACTCCCATGCAGAATAAAGCAGATTATAAATATGTGGCAGGAGGTAGGAAGAG

CAATGTATGCCCCCTCCCATTTGCAGGAAAAATAACATGTAAATCAAAT---  
ATCACAGGCATACTATTGACACGTGATGGAGGGCATGATAACAAT-----  
-----  
-----  
GTTACAGAGACATTTCAGACCTGGAGGGGGAGATATGAGAGATAATTGGAGAAGTGAATTATACAAATATAAAG  
TGGTAGAAGTTAAGCCACTG---GGAGTAGCACCCACTGCAGCAAAAAGGAGATTGGTG-----  
-----GAAAGAAACAAAAGAGAC---GTGGGC---CTAGGAGCT-----  
GTGTTACTTGGGTTCTTGGGAGCA---GCAGGAAGCACTATG---GGCGCGGCGTCA---  
ATAACGCTGACGGTACAG---GCCAGACAA---TTGTTG---TCTGGTATAGTGCAACAGCAAAGC---  
AATTTG---CTGAGA---GCTATAGATGCGCAACAACATATGTTGCAACTCACGGTCTGGGGCATT  
>AY049708  
AGTTATAATGGT-----  
-----  
CCAAGCCCAAATATCACAATCCCATGCAGAATAAAACAAATTATAAACATGTGGCAGGAGGTAGGACGAGCAA  
TGTATGCCCCCTCCCATTTGCAGGAAACATAACATGTAAATCAAAT---  
ATCACAGGAATACTATTGGTACGTGATGGGGGAAAAACAAAGGAT-----  
-----  
-----  
AATGACACAGAGATATTTCAGACCTGGAGGAGGAGATATGAGGGACAATTGGAGAAGTGAATTATATAAAATATA  
AAGTGGTAGAAATTAAGCCATTG---GGAGTAGCACCCACTGAAGCAAAAAGGAGAGTGGTG-----  
-----GAGAGAGAAAAAAGAGCA---GCG-----CTAGGAGCT-----  
---ATGATCCTTGGGTTCTTGGGAGCA---GCAGGAAGCACTATG---GGCGCAGCGTCA---  
ATAACGCTGACGGTACAG---GCCAGACAA---TTGTTG---TCTGGTATAGTGCAACAGCAAAGC---  
AATTTG---CTGAAG---GCTATAAATGCGCAACAGCATATGTTGCAACTCACGGTCTGGGGCATT  
>EF694036  
TTTTATAGGCCTGATGGTAAT-----  
-----  
TCAAGCACAGACATCATAATCCTATGCAGAATAAAACAAATTATAAACATGTGGCAGGAGGTAGGACAAGCAA  
TGTATAACCCTCCCATTTGCAGGAAACATAACATGTAGATCAAAT---  
ATCACAGGACTACTATTGTTACGTGATGGAGGAACAGGAAATACTACA-----  
-----  
-----  
GATAATAAAACAGAAATATTTCAGACCTGGAGGAGGAGATATGAGGGACAATTGGAGAAGTGAATTATATAAAAT  
ATAAAGTGGTAGAGATTAAACCATTG---GGGATAGCACCCACTACAGCAAAAAGGAGAGTGGTG-----  
-----GAGAGAGAAAAAAGAGCA---GTGGGA---ATAGGAGCT---  
-----GTGTTCTTGGGTTCTTGGGAGCA---GCAGGAAGCACTATG---GGCGCGGCGTCA---  
ATAACGCTGACGGTACAG---GCCAGACAA---CTGTTG---TCTGGTATAGTGCAACAGCAAAGC---  
AATTTG---CTGAGG---GCTATAGAGGCGCAACAGCATCTGTTGCAACTCACGGTCTGGGGCATT  
>AY945738  
AACTATACAAAC-----  
-----  
AATACATCAGAGAACATCACACTCCCATGCAGAATAAAACAAATTATAAATATGTGGCAGGGGGTAGGACAAG  
CAATATATGCCCCCTCCCATTAAGGGAAGATAATATGTAAATCAAAT---  
ATCACAGGGCTACTGCTGACACGTGATGGAGGCAATACAAATAACACA-----  
-----  
-----  
AATAACACAGAAATATTTCAGACCTGCAGGAGGAGATATGAAGGACAATTGGAGAAGTGAATTATATAAATACA  
AAGTGGTAGAAATTAACCATTG---GGAGTAGCACCCACCAAGGCAAAAAGGAGAGTGGTG-----  
-----GAGAGAGAAAAAAGAGCA---GTGGGA---ATAGGAGCT-----  
---GCGTTCCTTGGGTTCTTGAGTGCA---GCAGGAAGCACTATG---GGCGCAGCGTCA---  
ATAACGCTGACGGTACAG---GCCAGACAA---TTATTG---TCTGGTATAGTGCAACAGCAAAGC---  
AATTTG---CTGAGG---GCTATAGAGGCGCAACAGCATATGTTGCAACTCACGGTCTGGGGCATT  
>KC894074  
TTTTACAAAACAGAGTTTAATAGTACA-----  
-----  
-----  
ACAAATTCAACCATCACACTCCAATGTAGAATAAAACAAATTATAAACATGTGGCAAGGGGTAGGGCGGGCAA  
TGTATGCCCCCTCCCATTTGAAGGAAACATAACATGTAAATCAAAC---  
ATCACAGGACTACTATTGACACGTGATGGAGGAACAAATGACAGT-----  
-----

-----  
ATGACAGAGACATTTCAGACCTGGAGGAGGAGATATGAGGGATAATTGGAGAAGTGAATTATATAAATATAAAG  
TGGTAGAAATTAAGCCATTA---GGAGTAGCACCCACTGAGGCAAAAAGGAGAGTGGTG-----  
-----GAGAGAGAAAAAAGAGCA---TTGACA---CTAGGAGCT-----  
TTGTTTCCTTGGGTTCTTGGGAACA---GCAGGAAGCACTATG---GGCGCGGCGTCA---  
ATAACGCTGACGGTACAG---GCCAGACAA---TTGTTG---TCTGGTATAGTGCAACAGCAGAGC---  
AATCTG---CTGAAG---GCTATAGAGGCGCAACAGCATCTGTTGCAACTCACGGTCTGGGGCATA  
>KC894086  
AGCTACATGATTAATGATACAGAAAGCACTAATAAAAAGT-----  
-----  
GCAAAATTCAACCATCATACTCCCATGCAGAATAAAACAAATTATAAACATGTGGCAGGGGGTAGGACGAGCAA  
TGTATGCCCCCTCCCATTCAGGAACCATAACATGCAACTCAAAT---  
ATCACAGGATTACTATTGACCCATGATGGAGACCCTAATAGCAAT-----  
-----  
-----  
GGCACAGAGATATTTCAGACCTGGAGGAGGAAATATGAAGGACAATTGGAGAAGTGAATTATATAAATATAAGG  
TGGTAGAAATTAAGCCATTA---GGAATAGCACCCACTAATGCAAGAAGGAGAGTGGTG-----  
-----GAGAGAGGAAAAAAGAGCA---GTGGGA---ATAGGAGCT-----  
GTGTTTCCTTGGGTTCTTGGGAGCA---GCAGGAAGCACTATG---GGCGCGGCGTCA---  
CTAACGCTGACGGTACAA---GCCAGACAA---CTGTTG---TCTGGTATAGTGCAACAGCAAAGC---  
AATTTG---CTGAGG---GCTATAGAGGCGCAACAGCATATGTTGCAACTCACGGTCTGGGGCATT  
>KC894092  
AATTATACAGCAAGTACAAATAAT-----  
-----  
TCAAGTGAGACCATCACACTCCCATGCAGAATCAAACAAATTATAAGAATGTGGCAGGGGGTAGGGCAAGCAA  
TGTATGCCCCCTCCCATTCAGGAAACATAACATGTACATCAAAC---  
ATCACAGGAATATTATTGGTACGTGATGGAGGAGACAATAATAGC-----  
-----  
-----  
ACAAAAGAGATATTTCAGACCTGGAGGAGGAGATATGAGGGACAATTGGAGAAGTGAATTATACAAATATAAAG  
TAGTAGAAATTAAGCCATTG---GGAATAGCTCCCACTGGAGCAAAAAGGAGAGTGGTG-----  
-----GAGAGAGAAAAAAGAGCA---GTAGGA---ATAGGAGCT-----  
GTGCTCCTTGGGTTCTTGGGAGCA---GCAGGAAGCACTATG---GGCGCAGCGTCA---  
ATAACGCTGACGGTACAG---GCCAGACAA---TTGTTG---TCTGGTATAGTGCAACAGCAAAGC---  
AATTTG---CTGAGG---GCTATAGAGGCGCAACAGCACATGTTGCAACTCACTGTCTGGGGCATT  
>KC862923  
AATTATACCTTTAATGGTACAGAGCTGTTGAATAGTACCTCAAAT-----  
-----  
-  
ACCACAGAGATCATCACACTCCCATGCAGAATAAAACAAATTATAAACATGTGGCAGAGGGTAGGACAAGCAA  
TGTATGCCCCCTCCCATTAAGGAAACATAACATGTATATCCAAT---  
ATCACAGGACTACTGCTGACACGTGATGGAGGAGGGGACAAAATGGC-----  
-----  
----  
AAAGAGAATAAAACAGAGACATTTCAGACCTGGAGGAGGAAATATGAGGGATAATTGGAGAAGTGAAGTATACA  
AATATAAAGTGGTAGAAATTAAGCCATTA---GGAATAGCACCCACTAAGGCAAAAAGGAGAGTGGTG-----  
-----GAGAGAGAAAAAAGAGCA---GTGGGA---  
ATAGGAGCT-----GTGTTTCCTTGGGTTCTTGGGGGCA---GCAGGAAGCACTATG---  
GGCGCAGCATCA---ATAACGCTGACGGTACAG---GCCAGACAA---TTATTG---  
TCTGGTATAGTGCAACAGCAAAGC---AATTTG---CTGAGG---  
GCTATAGAGGCGCAACAGCATATGTTGCAACTCACAGTCTGGGGCATA  
>KC894103  
TACTATCCTAATAATACAGGAAGTAATTCA-----  
-----  
ACAGACAACATCATCACACTTCCATGCAGAATAAAACAAATTATAAATATGTGGCAGGAAGTAGGAAGAGCAA  
TATATGCCCCCTCCCATTTGAAGGAAGCATAACATGCACATCAAAT---  
ATCACAGGACTACTATTGGTACGTGATGGAGGCACTGATAATAGCACA-----  
-----  
-----  
AATAACACAGAGACATTTCAGACCTGGAGGAGGAGATATGAGGGACAATTGGAGGAGTGAATTATATAAATATA

AAGTGGTAGAGATTAAGCCATTA---GGAGTAGCACCCACTGAGTCAAAAAGGAGAGTGGTG-----  
-----GAGAGACAAAAAAGAGCA---GTGGGA---ATGGGAGCT-----  
---GTGATCTTTGGGTTCTTGGGAGCA---GCAGGAAGCACTATG---GGCGCGGCGTCA---  
ATAACGCTGACGGTACAG---GCCAGACAA---CTGTTG---TCTGGTATAGTGCAACAGCAAAGT---  
AATTTG---CTGAAG---GCTATAGAGGCGCAACAGCATCTGTTGCAACTCACGGTCTGGGGCATT  
>KC894106  
AACTATAATGATACAGGAGGGAAT-----  
-----  
TCAAGCTCAAACATCAGACTCTCATGCAGAATAAAACAATTTATAAACATGTGGCAGAAAGTAGGAAGAGCAA  
TGTATGCCCCCTCCCATTTGAAGGAAACATAACATGTAGATCAAAT---  
ATCACAGGACTGCTATTGGTACGAGATGGAGGTATCAGTAGCACC-----  
-----  
-----  
ACCGAGACATTCAGACCTGGAGGAGGAAATATGAAGGACAATTGGAGAAGTGAATTATATAAATATAAAGTAG  
TAGAAATTAAGCCATTA---GGAATAGCACCCACTAAAGCAAAAAGGAGAGTGGTG-----  
-----GAGAGAGAAAAAAGAGCA---GTGGGA---ATAGGAGCT-----  
GTGTTCTTGGGTTCTTGGGAGCA---GCCGGAAGCACTATG---GGCGCGGCGTCA---  
ATAACGCTGACGGTACAG---GCCAGACAA---CTGTTG---TCTGGTATAGTGCAACAGCAAAGC---  
AATTTG---CTGAGG---GCCATAGAGGCGCAACAGCATATGTTGCAACTCACAGTCTGGGGCATT  
>HM070477  
AATTACAGT-----  
-----  
GGGAATGGTACCATCACCATACCATGCAGAATAAAACAATTTATAAATATGTGGCAGGAGGTAGGAAAGGCAA  
TATATGCCCCCTCCCATTTGCAGGAAACATAACATGTAAATCAAAT---  
ATCACAGGACTACTACTGACACGTGATGGAGGACAAGGACCAGATAAA-----  
-----  
-----  
GATAACACAACAGAGACATTCAGACCTGGAGGAGGAGACATGAGGGACAATTGGAGAAGTGAATTATATAAAT  
ATAAAGTAGTAGAAATTAAGCCATTG---GGAATAGCACCCACTACGGCAAAAAGAAGAGTGGTG-----  
-----GAGAGAGAAAAAAGAGCA---GTGGGA---ATAGGAGCT---  
-----GTGTTCTTGGGTTCTTGGGAGCA---GCAGGAAGCACTATG---GGCGCAGCGTCA---  
ATAACGCTGACGGTACAG---GCCAGACAA---CTGTTG---TTTGGCATAGTGCAACAGCAAAGC---  
AATTTG---CTGAGA---GCCATAGAGGCGCAACAGCATATGTTGCAACTCACAGTCTGGGGCATT  
>HM070526  
TTTCAGAAATCAACAGAAGATAAT-----  
-----  
-----  
TCAACCAACATCATCACACTCCCATGCAAAATAAAACAATTTATAAGAATGTGGCAGAGGGTAGGGCAAGCAA  
TGTATGCCCCCTCCCATTTGAAGGAAACATAACATGTAATTCACAA---  
ATCACAGGAATACTGTTGACAAGGGATGGAGGGAATAATGGGAATAAT-----  
-----  
-----  
GAAGAAAGTGAGACATTCAGGCCTGGAGGAGGAGATATGAGGGACAATTGGAGAAGTGAATTATATAAGTACA  
AAGTGGTAGAAGTTAAGCCATTG---GGAATAGCACCCACTGGGGCAAAAAGGAGAGTGGTGGAC-----  
-----AGAGACAGAGAAAAAAGAGCA---GTAGGA---ATGGGAGCT-----  
---GTGTTCTTGGGTTCTTGGGAGCA---GCAGGAAGCACTATG---GGCGCGGCGTCA---  
ATAACGCTGACGGTACAG---GCCAGACAA---CTGTTG---TCTGGCATAGTGCAACAGCAAAGC---  
AATTTG---CTGAAG---GCTATAGAGGCGCAACAGCATCTGTTGCAACTCACAGTCTGGGGCATT  
>HQ615982  
TACTATCCTAATAGTACTGATACAAACAATACAGGAAGT-----  
-----  
AACTCAAGCTTAATGATCACAATCCCATGCAGAATAAAACAATTTATAAACATGTGGCAGGGGGTAGGAAGAG  
CAATATATGCCTCTCCCGTTGCAGGAAACATAACGTGTGTATCAAAA---  
ATCACAGGACTCCTATTGACACGTGATGGAGGTACAGATAATAAT-----  
-----  
-----  
ATCACAGAGATATTCAGACCTGGAGGAGGAGATATGAAGGACAATTGGAGGAGTGAATTATATAAATATAAAG  
TGGTAGAAATTAAGCCATTA---GGAATAGCACCCACTCCGGCAAAAAGGAGAGTGGTG-----  
-----GAGAGAGAAAAAAGAGCA---GTGGGAGTAGTAGGAGCT-----  
ATGATCCTTGGGTTCTTGGGAACA---GCAGGAAGCACTATG---GGCGCGGCGGCC---

GTGACGCTGACGGTACAG---GCCAGACAA---CTGTTG---TCTGGTATAGTGCAACAGCAAAGC---  
 AATTTG---CTGAGG---GCTATAGAGGCGCAACAACACATGTTGCAACTCACGGTCTGGGGCATT  
 >KC149493  
 AATTACACATTTAATAATATAAGT-----  
 -----  
 AAGAATGCAACCATCAAACCTCCATGCAGAATAAAACAAATTATTAACATGTGGCAGGAGGTAGGACGAGCAA  
 TGTATGCTCCTCCCATTGAAGGAAACATAACATGTAAATCAAAT---  
 ATCACAGGACTACTACTGGTACGTGATGGAGGCCCAAGTACTGAGAATGGCACA-----AAC----  
 -----  
 -----  
 ACAACTGCTGAGGAGATATTCAGGCCTGGAGGAGGAAATATGAAAGACAATTGGAGAAGTGAATTATATAAAAT  
 ATAAAGTGGTAGAAATTAAGCCATTG---GGAATAGCACCCACTAGAGCAAAAAGGAGAGTGGTG-----  
 -----GAGAGAGAAAAAGAGCA---GTGGGA---ATAGGAGCT---  
 -----GTGTTCTTTGGGTTCTTGGGAGCA---GCAGGAAGCACTATG---GGCGCGGCGTCA---  
 ATAACGCTGACGGTACAG---GCCAGACAA---TTGTTG---TCTGGTATAGTGCAACAGCAAAGC---  
 AATTTG---CTGAGG---GCTATAGAGGCGCAACAGCATATGTTGCAGCTCACGGTCTGGGGCATT  
 >KY112254  
 ACCTACAATATTACTAATAGTACTAGTGCAGAT-----  
 -----  
 TTAAATTCAACCATCACACTCCCATGCAGAATAAAGCAAATTATAAACATGTGGCAGGAAGTAGGACGAGCAA  
 TGTATGCCCCCTCCCATTGAAGGAAACATAACATGTAAATCAAAT---  
 ATCACAGGAATACTATTGGTACGTGATGGAGGA-----  
 -----  
 -----  
 GACAACACATCTGAGACATTCAGACCTGGAGGAGGAGATATGAGAGATAATTGGAGAAGTGAATTATATAAAAT  
 ATAAAGTGGTAGAAATTAAGCCATTA---GGAATAGCACCCACTAAGGCAAAAAGAAGAGTGGTGGAG-----  
 -----AGGAGGGAAAAAGAGCA---GTGGGA---ATAGGAGCT---  
 -----GTGTTCTTTGGGTTCTTGGGGGCA---GCAGGAAGCACTATG---GGCGCGGCGTCA---  
 ATAACGCTGACGGTACAG---GCCAGACAA---TTATTG---TCTGGTATAGTGCAACAGCAAAAC---  
 AATTTG---CTGAGG---GCTATAGAGGCGCAACAGCATATGTTGCAACTCACAGTCTGGGGCATT  
 >KY112386  
 ACCTATAATAGTACAGAAAGTGAGTTAGATGCAAACAGC-----  
 -----  
 ACAAAGGAAAACATCACACTCCCATGCAGAATAAAACAAATTATAAACATGTGGCAGGAAGTAGGAAAAGCAA  
 TGTATGCCCCCTCCCATTGCAGGAAACATAACATGTAAATCAAAC---  
 ATCACAGGAATACTATTGGTACGTGATGGAGGAAACACAGATAAC-----  
 -----  
 -----  
 ACATCTGAGACATTCAGACCTGGAGGAGGAGATATGAAAGACAATTGGAGAAGTGAATTATATAAAATATAAAG  
 TGGTAGAAATTAAACCATTA---GGAATAGCACCCACCAAGGCAAAAAGAAGAGTGGTGGAG-----  
 -----GGGAGAGAAAAAGAGCA---GTGGGA---ATAGGAGCT-----  
 GTGTTCTTTGGGTTCTTGGGGGCT---GCAGGAAGCACTATG---GGCGCAGCGTCA---  
 ATAACGCTGACGGTACAG---GCCAGACAA---TTATTG---TCTGGTATAGTGCAACAGCAAAGC---  
 AATTTG---CTGAGA---GCTATAGAGGCGCAACAGCATATGTTGCAACTCACGGTCTGGGGCATT  
 >HQ595814  
 AAT-----  
 -----  
 CATACAGACATCATCACACTCCAATGCAGAATAAAACAAATTATAAACATGTGGCAGAAGGTAGGAAGAGCAA  
 TGTATGCCAATCCCATTGCAGGAAACATAACATGTAGATCAAAT---  
 ATCACAGGACTACTATTGACACGTGATGGAGGTGTTAGAGGGAATACAACAAAT-----  
 -----  
 -----  
 AATGAGACTGAGACAGAGACATTCAGACCTGGAGGAGGAGATATGAGGGATAATTGGAGAAGTGAATTGTATA  
 AATATAAAGTGGTGGAAATTAAGCCATTG---GGAATAGCACCCACTACGGCAAAAAGGAGAGTGGTG-----  
 -----GAGAGAGAGAAAAGAGCA---GTGGGA---  
 ATAGGAGCT-----GTATTCCTTGGGTTCTTAGGAGCA---GCAGGAAGCACTATG---  
 GGCGCGGCGTCA---ATAACGCTGACGGTACAG---GCCAGACAA---CTACTG---  
 TCTGGTATAGTGCAACAGCAAAGC---AATTTG---CTGAGA---  
 GCTATAGAGGCGCAACAGCATATGTTGCAACTCACGGTCTGGGGCATT  
 >KC186976

ACCTATGGGGATAATGATACAAATGATAATGCAAATACAACCTAAT-----  
 -----  
 GCAAATAGAACTATCATACTCCAATGCAGAATAAAACAAATTATAAACATGTGGCAAGAGGTAGGAAGGGCAA  
 TGTATGCCCCCTCCCATTCGAGGAAACATAACATGTAAATCAAAT---  
 ATCACAGGACTACTATTGACATGGGATGGAGGAATTAATAATAGG-----  
 -----  
 -----  
 ACAAATGAGACATTTCAGACCTGGAGGAGGAGATATGAGGGACAATTGGAGAAGTGAATTATATAAATATAAAG  
 TGGTAGAAATTAACCATTA---GGGATAGCACCCAATAAGACAAAAAGGAGAGTGGTG-----  
 -----GAGAGAGAAAAAAGAGCA---GTGGGA---ATAGGAGCT-----  
 GTGTTTCCTTGGGTTCTTGGGAGTA---GCCGGAAGCACTATG---GGCGCAGCGTCA---  
 ATAGCGCTGACGGGACAA---GCCAGACAA---TTACTG---TCTGGTATAGTGCAACAGCAAAGC---  
 AATTTG---CTGAGA---GCTATAGAGGCGCAACAGCATATGTTGCAACTCACGGTCTGGGGCATT  
 >KC187128  
 AATTACACGGCTAATAGTACAGAAAGTACTTCA-----  
 -----  
 AATTCAACCAACATCACAATCCAATGTAGAATAAAACAGATTATAAACCTGTGGCAGGGGGTAGGACGAGCAA  
 TGTATGCCCCCTCCCATTCGAGGAAATATAACATGTAACTCAAAC---  
 ATCACAGGACTACTATTGACACGTGATGGAGGAAAAAGAGGAGAAAAAT-----  
 -----  
 -----  
 AATAATACAGAGATATTTCAGGCCTGCAGGAGGAAATATGAAGGACAATTGGAGAAGTGAATTATATAAATATA  
 AAGTGGTAGAAATTAAGCCATTA---GGAATAGCACCCACTAGTGCATCAAGGAGAGTGGTG-----  
 -----CAGAGAGAAAAAAGAGCA---GTGGGA---CTGGGAGCC-----  
 ---ATGTTTCCTTGGGTTCTTGGGAGCA---GCAGGAAGCACTATG---GGCGCAGCATCA---  
 ATAACGCTGACGGTACAG---GCCAGACAA---TTATTG---TCTGGTATAGTGCAACAGCAAAGC---  
 AATTTG---CTGAGG---GCCATAGAGGCGCAACAGCATATGTTGCAACTCACGGTCTGGGGCATA  
 >KC187665  
 TACTATCCTAATGGTACAAGAAGTAATTCTTCAAAC-----  
 -----  
 TTAAACCCAAACATCACGCTTCCATGCAGAATAAAACAAATTATAAACAGGTGGCAGGAGGTAGGAAGAGCAA  
 TGTATGCTCCTCCCATTCGAGGAAACATAACATGTAACTCAAGT---  
 ATCACAGGATTATTATTGACACGTGATGGAGGAAAAAATAATAATGGA-----  
 -----  
 -----  
 ACAAATGATACAGAGACATTTCAGACCTGGAGGAGGAAATATGAGGGACAATTGGAGAAGTGAATTATATAAAT  
 ATAAAGTGGTAGAAATCAGGCCATTA---GGAATAGCACCCACTGGTGCAAAAAGGAGAGTGGTG-----  
 -----GAGAGAGAGAAAAGAGCA---GTGGGA---ATAGGAGCT---  
 -----GTGTTTCCTTGGGTTCTTGGGAGCA---GCAGGAAGCACTATG---GGCGCAGCGGCA---  
 GTGACGCTGACGGTACAG---GTCAGACAA---CTATTG---TCTGGTATAGTGCAACAGCAAAGC---  
 AATTTG---CTGAGA---GCTATAGAGGCGCAACAGCATATGTTGCAACTCACAGTCTGGGGCATT  
 >KC186377  
 AACTAC-----  
 -----  
 ACCAACACCACACTCACACTCCAATGCAGAATAAGACAAATTGTAAACATGTGGCAAGGGGTAGGACGAGCAA  
 TGTATGCCCCCTCCCATTCGAGGAAACATAACATGTAAATCAAAT---  
 ATCACAGGACTACTATTGACACGTGATGGAGGAAAAAATAATGGTACT-----  
 -----  
 -----  
 AATAACACAGAGATATTTCAGACCTGGAGGAGGAGATATGAGGAACAATTGGAGAAGTGAATTATATAAATATA  
 AAGTGGTAGAAATTAAGCCATTG---GGAATAGCACCCACTAAAGCAAAAAGGAGAGTGGTG-----  
 -----GAGAGAGAGAAAAAAGAGCA---GTGGGA---ATAGGAGCT-----  
 ---GTGTTTCCTTGGGTTCTTGGGAGCA---GCAGGAAGCACTATG---GGCGCGGCGTCA---  
 ATAACGCTGACGGTACAA---GCCAGACAA---CTATTG---TCTGGTATAGTGCAACAGCAAAGC---  
 AATTTG---CTGAGG---GCTATAGAGGCGCAACAGCATATGTTGCAACTCACGGTCTGGGGCATT  
 >KC186388  
 AATTATACA-----  
 -----  
 GATAATTCAACCATCACACTCCAATGCAGAATAAAGCAAATTATAAACATGTGGCAGGAGGTAGGAAAAGCAA  
 TGTATGCCCCCTCCCATTCGAGGAAACATAACATGTGTATCAAGT---

ATTACAGGAATACTATTGACACGTGATGGAGGAGATATAAAATAGT-----  
-----  
-----  
AGCATAGAGACATTTCAGGCCTGGAGGAGGAGATATGAGAGACAATTGGAGAAGTGAATTATATAAAATATAAAG  
TGGTAGAAGTTAAGCCATTG---GGAATAGCACCCACGGGAGCAAAAAGGCGAGTGGTG-----  
-----GAAAGAGAGAGAAGAGCA--GTGGGA--ATAGGAGCT-----  
GTGTTTCCTTGGAATCTTGGGAGCG--GCAGGAAGCACTATG--GGCGCGGCGTCA---  
ATAACGCTGACGGTACAG---GCCAGACAA--TTGTTG---TCTGGTATAGTGCAACAGCAAAGT---  
AATTTG---CTGAGA---GCTATAGAGGCGCAACAGCATATGTTGCAACTCACAGTCTGGGGCATT  
>KP109525  
TTTCATTCCAATGATACATTAACAGGAGGTAAC-----  
-----  
TTAACCGGGAACATCACACTCCCATGTAGAATAAAACAAATTATAAACATGTGGCAGGAGGTAGGAAGAGCAA  
TGTATGCCCCCTCCTATTGCAGGAAACATAACATGTAAATCAAAT---  
ATCACAGGACTACTCTTGACACGTGATGGAGGAAATGGAAATGGC-----  
-----  
-----  
AGCAATAACGAGACATTTAGGCCTGGAGGAGGAGACATGAGGGACAATTGGAGAAGTGAATTATACAAATACA  
AAGTGGTAGAAATTAAACCATTA---GGAATAGCACCCACTAAGGCAAAAAGGAGAGTGGTG-----  
-----GAGAGAGAAAAAAGAGCA--GTGGGT---CTAGGAGCT-----  
---ATGTTTCCTTGGGTTCTTGGGAGCG--GCAGGAAGCACTATG--GGCGCGGCGTCA---  
CTAACGCTGACGGTACAG---GCCAGACAA--TTATTG---TCTGGTATAGTGCAACAGCAAAGC---  
AATTTG---CTGAGG---GCTATAGAGGCGCAACAGCATTTGTTGCAACTCACAGTCTGGGGCATT  
>KC186502  
AATTATACATTTAACAAG-----  
-----  
ACAGAAGGTAACATCACACTCCCATGCAAAATAAGACAAATTATTAACCTGTGGCAGGAGGTAGGACGAGCAA  
TGTATGCCCCCTCCCATTGAAGGAAACATAACATGTAGATCAGAC---  
ATCACAGGATTACTATTGACACGTGATGGAGGAGAAAAATAGTACA-----  
-----  
-----  
AGGAATGAGACATTTCAGACCTGGAGGAGGAGATATGAGGGACAATTGGAGAAGTGAATTATATAAAATATAAAG  
TAGTAGAAATTAAGCCATTA---GGAATAGCACCCACTGAGGCAAGAAGGAGAGTGGTG-----  
-----GAGAGAGAAAAAAGAGCA--ATTGGA--ATAGGAGCT-----  
GTGTTTCCTTGGGTTCTTGGGAGCA--GCAGGAAGCACTATG--GGCGCAGCATCA---  
ATAACGCTGACGGTACAG---GCCAGACAA--TTATTG---TCTGGTATAGTGCAACAGCAAAGC---  
AATTTG---CTGAGG---GCTATAGAGGCGCAACAGCATATGTTGCAACTCACAGTCTGGGGCATT  
>MF500628  
AATCATACAAACAGTAATAGTACAAGTAATAGT-----  
-----ACAAGT-----  
AATCCAAATGCAACCATCACCATCCAATGCAGAATAAAACAAATTATAAACATGTGGCAGGGGGTAGGACAAG  
CAATATATGCCCCCTCCCATTAAGGAAACATTACATGTAGATCAAAT---  
ATCACAGGACTACTATTGACACGTGATGGAGGTAATAATAACT-----  
-----  
-----  
AATGAGACATTTCAGACCTGGAGGAGGAGATATGAGAGACAATTGGAGAAGTGAATTATATAAGTATAAAGTAG  
TAGAAATTAAGCCACTA---GGAGTAGCACCCACCAAGGCGAAAAGACGAGTGGTG-----  
-----GAGAGAGAAAAAAGAGCA--GTGGGA--ATAGGAGCT-----  
GTACTCCTTGGGTTCTTGGGCGCA--GCAGGAAGCACTATG--GGCGCGGCGTCG---  
CTGACGCTGACGGTACAA---GCCAGACAA--TTATTG---TCTGGTATAGTGCAACAGCAAAC---  
AATTTG---CTGAGG---GCTATAGAGGCGCAACAGCACATGTTGCAACTCACAGTCTGGGGCATT  
>KC863183  
TGCTATACATCAACACTGTTTAATAGTACATACAATGCTGAGTATAATTCAAACCTCAACCAAT-----  
-----  
-----  
TCAAGCTCAACCATCACACTCCAATGCAGAATAAAGCAAATTATAAACATGTGGCAGGGGGTAGGACGAGCAA  
TATATGCCCCCTCCCATTGAAGGAAACATAACATGTGAGTCAAAT---  
ATCACAGGACTATTATTGACACGGGATGGAGGAAAAGATGGAAAT-----  
-----  
-----

AACACCGAGATATTCAGACCTGGAGGAGGAGATATGAGGGACAATTGGAGAAGTGAATTATACAAATATAAAG  
TGGTAGAAATTAAGCCATTA---GGAATAGCACCCACTAAGGCCAAAAGGAGAGTGGTG-----  
-----GAGAGAGAAAAAAGAGCA---GTAGGA---ATAGGAGCT-----  
GTGTTTCCTTGGGTTCTTGGGAGCA---GCAGGAAGCACTATG---GGCGCAGCGTCA---  
ATAACGCTGACGGTACAG---GCCAGACAA---TTGTTG---TCTGGTATAGTGCAACAGCAAAGC---  
AATTTG---CTGAGA---GCTATAGAGGCGCAACAGCATATGTTGCAACTCACGGTCTGGGGCATT  
>KJ158421  
AATTATACA-----  
-----AGAAATAGTACAGGAAAT-----  
GATTCAAAAGTAGTCATTACGATCCCATGCAGAATAAAACAAATTATAAACATGTGGCAGGGAGTAGGGCGAG  
CAATGTATGCCCCCTCCCATTCAGGAAACATAAATTGTAAATCCAAT---  
ATCACAGGACTACTATTGGTACCTGATGTAGGAGAA-----  
-----  
GATGGAGGGAACACATTAAATACT-----  
ACAGAAGAGACATTCAGACCTGTAGGAGGAAATATGAGGGACAATTGGAGAAGTGAATTATACAAATATAAAG  
TGGTAGAAATTAAGCCATTG---GGGGTAGCACCCACTGAAGCAAGAAGGAGAGTGGTG-----  
-----GAAAGAGAAAAAAGAGCA---GTGGGA---GTAGGAGCT-----  
ATGTTTCCTTGGGTTCTTGGGAGCA---GCAGGAAGCACTATG---GGCGCGGCGTCA---  
CTAATGCTGACGGTACAG---GCCAGACAA---TTGTTG---TCTGGTATAGTGCAACAGCAAAGC---  
AATTTG---CTGAGA---GCTATAGAGGCGCAACAGCATCTGTTGCAACTCACAGTCTGGGGCATT  
>KJ158424  
TGCTATACATCAAGACTGTTTAATGGAACATATAAGGATACTGATACC-----  
-----  
CTAAATAATACAAGCAGT-----  
AACGCAATATCAAACATCACAATCCCATGCAGAATAAAACAGTGTGTGAACATGTGGCAACAGGTAGGACAGG  
GGGGGGATGCCCCCTCCCATTTGAAGGAGCACGTGAAGCTGCTATCAAA---  
TACAAAGGACTACGATTGGTACGTGATGGAGGAGAA-----  
-----  
GACAAAAATAATACAGACAGCAAT-----  
GAGACAGAGACATTCAGACCTGGGGGAGGAGATATGAGGGACAATTGGAGAAGTGAATTATATAAATATAAAG  
TGGTGGAATTAAGCCATTG---GGAGTAGCACCCACTGCAGCAAGAAGGAGAGTGGTG-----  
-----GAAAGAGAAAAAAGAGCA---GTGGGA---ATAGGAGCT-----  
GTGTTTCCTTGGGTTCTTGGGAGCA---GCAGGAAGCACTATG---GGCGCGGCATCA---  
ATAACGCTGACGGTACAG---GCCAGACAA---TTGTTG---TCTGGTATAGTGCAACAGCAAAAC---  
AATTTG---CTGAGG---GCTATAGAGGCGCAACAGCATCTGTTGCAACTCACGGTCTGGGGCATT  
>KJ158434  
AATTATACA-----  
-----AGAAATAGTACAGGAAAT-----  
GATTCAAACGTAGTCATTACGATCCCATGCAGAATAAAACAAATTATAAACATGTGGCAGGGAGTAGGGCGAG  
CAATGTATGCCCCCTCCCATTCAGGAGACATAACATGTATCTCTAAG---  
ATCACAGGATTACTATTGGTACGTGATGGGGGAGAA-----  
-----  
AACATACAAAGAAATAATGATGCA-----  
GGGACAGAGACATTCAGACCTGGAGGAGGAGATATGAGGAACAATTGGAGAAGTGAATTATATAAATATAAAG  
TGGTAGAAATTAAGCCATTG---GGGGTAGCACCCACTAAAGCAAAAAGGAGAGTGGTG-----  
-----GAGAGAGAAAAAAGAGCA---ATGGGA---ATAGGAGCT-----  
TTGTTTCCTTGGGTTCTTGGGAACA---GCAGGAAGCACTATG---GGCGCGGCGTCA---  
ATAACGCTGACGGTACAG---GCCAGACAA---TTGTTG---TCTGGTATAGTGCAACAGCAAAAT---  
AATTTG---CTGAAG---GCTATAGAGGCGCAACAGCATCTGTTGCAACTCACGGTCTGGGGCATT  
>KJ158438  
GTTTATAATGGTACA-----  
-----GAAAGTAATAGTAACAGT-----  
AATAGTAATGCAACCATCACCCCTCCCATGCAAAATAAAACAAATTATAAACATGTGGCAGGAGGTAGGACGGG  
CAATGTATGCCCCCTCCTATTGAAGGAAACATAACATGTAACCTCAAAT---  
ATCACAGGATTACTCTTGGTACGTGATGGAGGCAAT-----  
-----  
GAAAAATAATAACAATAATAAAC-----  
TTTCGACAGAGACATTCAGACCAGGAGGAGGAGATATGAGGGACAATTGGAGAAGTGAATTATATAAATATAAAG  
TAGTAGAAATTAAGCCATTG---GGAGTAGCACCCACTGCAGCAAAAAGGAGAGTGGTG-----  
-----GAGAGAGAAAAAAGAGCGCAGCGG-----CTAGGAGCT-----

GTGTTTCCTTGGGTTCTTGGGAGCA---GCAGGAAGCACTATG---GGCGCGGCGTCA---  
 ATAACGCTGACGGTACAA---GCTAGACAA---TTGTTG---TCTGGTATAGTGCAACAGCAAAGC---  
 AATTTG---CTGAGG---GCTATCGAGGCGCAACAGCATCTGTTGCAACTCACAGTCTGGGGCATT  
 >KJ158439  
 ACC-----  
 -----TACATTAATGAAACAAAT-----  
 AGTAATGCTACATCCACCACCCACCCTGCAGAATAAAACAAATTATAAACATGTGGCAAGAGGTAGGACGAG  
 CAATGTATGCCCCTCCCATTTGCAGGAAATATAACATGTAAATCAAAT---  
 ATCACAGGAATACTATTGGTACGGGATGGAGGAAAC-----  
 -----  
 AATGATAATGATGATAATGATAAT-----  
 GATACAGAGACATTCAGACCTGGAGGAGGAGACATGAAGGACAATTGGAGAAGTGAATTATATAAATATAAAG  
 TGGTAGAAATTAAGCCATTG---GGATTAGCACCCACTACAGCAAAAAGGAGAGTGGTG-----  
 -----GAGAGAGAAAAAAGAGCA---GTAGGAACCTTAGGAGCT-----  
 GTGTTTCCTTGGGTTCTTGTGAGCA---GCCGGAAGCACTATG---GGCGCGGCGTCA---  
 ATAACGCTGACGGTACAG---GCCAGACAA---TTGTTG---TCTGGTATAGTGCAACAGCAAAGC---  
 AATTTG---CTGAGG---GCTATAGAGGCGCAACAGCATCTGTTGCAACTCACGGTCTGGGGCATT  
 >KJ541846  
 TTTTATGATAGT-----  
 -----ACGAGAAAGGCAAACATC-----  
 ACAGGAAATTCAACCATCACACTCCCATGCAGAATAAAGCAAATTATAAACATGTGGCAGGAGGTAGGACGAG  
 CAATGTATGCTCCTCCCATTTGCAGGAAACATAACATGTAGATCAAAT---  
 ATCACAGGACTACTATTGGTACGTGATGGAGGAGAA-----  
 -----  
 GATAACACCAAATCAGAGACCTGG-----  
 AAGACTGAAACATTTAGACCGGGAGGAGGAGATATGAGGGACAATTGGAGAAGTGAATTATATAAATATAAAG  
 TGGTAGAAGTTGAGCCAGTG---GGAATAGCACCCACTAAAGCAAAAAGGAGAGTGGTG-----  
 -----GAGAGAGAAAAAAGAGCA---GTAGGA---ATGGGAGCT-----  
 TTGTTTCCTTGGGTTCTTGGGAGCA---GCAGGAAGCACTATG---GGCGCGGCGTCA---  
 ATAACGCTGACGGTACAG---GCCAGACAA---TTGCTG---TCTGGTATAGTGCAACAGCAAAGC---  
 AATTTG---CTGAGA---GCTATAGAGGCGCAACAGCATCTGTTGCAACTCACAGTCTGGGGCATT  
 >KP411831  
 TCTTATAATAGTACCTCTAATACTACTTGCTCGACTAATAACT-----  
 -----  
 ACAACTTCAACCTTTACCCTCCAATGCAGAAGAATACATATTATAATCATGTGCCTTGAACCAGGACTAGCAA  
 TAGATGCCCTCTCCCACTGCCGGAGAAATAATCAGTAAATCCAAT---  
 ACCACTGACCTACTATTGACACGTGCAGGAGGA-----  
 -----  
 -----  
 TCGAATAGAACAGAGATATTCAGACCTGGAGGAGGAGATATGAGGGATAATTGGAGAAGTGAGTTATATAAAT  
 ATAAAGTGGTAGAAATTAAACCATTA---GGGATAGCACCCACTAAGGCAAAAAGGAGAGTGGTG-----  
 -----GAGAGAGAAAAAAGAGCA---GTGGGA---ATAGGAGCT---  
 -----GTGTTTCCTTGGGTTCTTGGGAGTA---GCAGGAAGCACTATG---GGCGCAGCATCA---  
 ATAACGCTGACGGTACAG---GCCAGGCAA---TTGTTG---TCTGGTATAGTGCAACAGCAAAGC---  
 AATTTG---CTGAGG---GCTATAGAGGCGCAACAGCATATGTTGCAACTCACGGTCTGGGGCATT  
 >MF373158  
 ACCTACATGTCTAACAGTACTAACAGTATTAAT-----  
 -----  
 AGTACTGAATCCATCACACTCAAATGCAAAATAAAACAAATTATAAACATGTGGCAAGGGGTAGGACGAGCAA  
 TGTATGCCCCTCCCGTTGAAGGAAACATAACATGTACCTCAAAT---  
 ATTACAGGACTACTATTGACACGTGATGGAGGAGGAAATGGCACA-----  
 -----  
 -----  
 GAGGAGATATTCAGACCGGGAGGAGGAAATATGAGGGACAATTGGAGAAGTGAATTATATAAATATAAAGTGG  
 TAGAAGTTAAACCATTA---GGAGTAGCACCCACTAAAGCAAAAAGGAGAGTGGTG-----  
 -----GAAAGAGAAAAAAGAACA---GTA-----CTAGGAGCT-----  
 GCATTCCTTGGGTTCTTGGGAACA---GCAGGAAGCACTATG---GGCGCAGCGTCA---  
 CTAACGCTGACGGTACAG---GCCAGAAAA---TTGTTG---TCTGGTATAGTGCAACAGCAAAGT---  
 AATTTG---CTGAGG---GCTATAGAGGCGCAACAGCATATGTTGCAACTCACGGTCTGGGGCATT  
 >MF373164

AACTAC-----  
-----  
ACAATAATCCCATGTAGAATAAAACAAATTATAAATATGTGGCAGGCGGTAGGACGAGCAATGTATGCCCCCTC  
CCATTGCAGGAAACATAACGTGTGCATCAAAC---  
ATCACAGGACTACTATTGTCACGTGATGGAGGAAACACAAATACAAATGGCACA-----  
-----  
-----  
AGTAACACAGAGACTTTCAGACCTGGAGGAGGAGATATGAGAGACAATTGGAGAAGTGAATTATATAAATATA  
AGGTGGTAGAAATTAAACCATTA---GGAATAGCACCCACTGGGGCAAAAAGGAGAGTGGTG-----  
-----GAGAGAGAAAAAGAGCA---GTGGGA---ATAGGAGCT-----  
---GTGTTCCCTTGGGTTCTTGGGAGCA---GCAGGAAGCACTATG---GGCGCGGCGTCA---  
GTGACGCTGACGGTACAG---GCCAGACAG---CTGTTG---TCTGGTATAGTGCAACAGCAAAAC---  
AACTTG---CTGAAA---GCTATAGAGGCGCAACAGCATATGTTGCAACTCACGGTCTGGGGCATT  
>MF373197  
AGTTATTCCGCCAATGGC-----  
-----  
AGCAATGGAAGCATTCCCCTCATATGCCGAATTATACAAATTTTTAACATGTGGCAGCGGGTGGTACGAGCAA  
TATATGCTGCTCGTATTGTAGGAAGTATAACATGTATCTCATGT---  
ATCACAGGACTACTGTTGACACGTGCTGGAGGAACAAATAATGAT-----  
-----  
-----  
ACCACAAGAGAAATATTTCAGACCTGGAGGAGGAAATATGAAGGACAATTGGAGAAGTGAATTATACAAATATA  
AAGTGGTAGAAGTTAAACCATTA---GGAATAGCACCTACTGAGGCAAAAAGGAGAGTGGTG-----  
-----GGGAGAGACAAAAGAGCA---GTGGGA---ATAGGAGCT-----  
---GTGTTCCCTTGGGTTCTTGGGAGCA---GCAGGAAGCACTATG---GGCGCGGCGTCA---  
ATAACGCTGACGGTACAG---GCCAGACAA---TTACTA---TCTGGTATAGTGCAAGCAGCAAAGC---  
AATTTG---CTGAGA---GCTATAGAGGCGCAACAGCATATGTTGCAACTCACAGTCTGGGGCATT  
>AY734556  
AGCTATACA-----  
-----GGAAAAGATTCAAACCTCAATC---  
ATCAGAATAAGACAATTTATAAACACATGGCAGAAGGTAGGACGAGCAATGTATGCCCCCTCCCATAGCAGGAA  
ACATAACATGTAACCTCAAGC---ATTACAGGACTACTATTGACATGGGATGGAGGCAGTAGTAAAGAAACA---  
-----  
-----  
AGCAACACCACAGAGACATTTCAGACCTTTAGGAGGAGACATGAGGGATAATTGGAGACGTGAATTATATAAAT  
ATAAAGTGGTAGAAATTAAGCCATTG---GGAATAGCACCCACTGGGGCAAAAAGGAGAGTGGTG-----  
-----GAGAGAGAAAAAGAGCA---GTGGGA---CTAGGAGCT---  
-----ATGTTCCCTTGGGTTCTTGGGAGCA---GCAGGAAGCACTATG---GGCGCAGCGTCG---  
ATAACGCTGACGGCACAG---GCCAGACAA---GTGCTG---TCTGGTATAGTGCAACAGCAAAGC---  
AATTTG---CTGAGG---GCCATAGAGGCGCAACAGCATCTGTTGCAACTCACGGTCTGGGGCATT  
>KX907339  
AATTATACT-----  
-----  
ATAAATTCAACCATCACACTCCCATGCAGAATAAAACAAATTATAAATATGTGGCAGGGGGTAGGACGAGCAA  
TGTATGCCCCCTCCCATTTGCTGGAAACATAACATGCAGATCAAAT---  
ATCACAGGAATACTATTGACACGTGATGGTGGTGAAACAAATGATGGTAATACAAATGAAACAGGGACAAAGA  
CATTCAAATCTAAT-----  
-----  
GAAACAGAGACAGAGATATTTCAGACCTGGAGGAGGAGATATGAGGGACAATTGGAGAAGTGAATTATATAAAT  
ATAAAGTGGTAGAAATTAAGCCATTAA---GGAATAGCACCCACCAAGGCAAAAAGGAGAGTGGTG-----  
-----GAGAGAGAGAAAAGAGCA---GTGGGA---ATAGGAGCT---  
-----ATGTTCCCTTGGGATCTTGGGAGCA---GCAGGAAGCACTATG---GGCGCGGCGTCA---  
ATAACGCTGACGGTACAG---GCCAGACAA---TTATTG---TCTGGTATAGTGCAACAGCAAAGC---  
AATTTG---CTGAGA---GCTATAGAGGCGCAACAGCATATGTTGCAACTCACGGTCTGGGGCATT  
>KX907433  
TACTATCCTAATGGT-----  
-----  
ACAAATTCAACCCTCATCATCCCATGTAGAATTAAAACAAATTATAAACATGTGGCAGGGAGTAGGAAAAGCAA  
TATATGCCTCTCCCATTTGCTGAGGAAACATAACATGTAGATCAAAT---  
ATCACAGGACTACTATTGACACGTGATGGAGGAGACACAAATGAT-----

-----  
-----  
ACAGAGATATTCAGACCGGCAGGAGGAGATATGAGGGATAATTGGAGAAGTGAATTATATAAAATATAAAATAG  
TAGAAATTAAACCATTA---GGAGTAGCACCCACTGAGGCAAAAAGGAGAGTGGTG-----  
-----AAGAGAGAAAAAAGAGCA---GTGACA---ATAGGAGCT-----  
GTATTCCTTGGGTTCTTGGGAGCA---GCAGGAAGCACTATG---GGCGCGGCGTCA---  
ATAACGCTGACGGTACAG---GCCAGACAA---TTACTG---TCTGGTATAGTGCAGCAGCAAAGT---  
AATTTG---CTGAGA---GCTATAGAGGCGCAACAGCATATGTTGCAACTCACAGTCTGGGGCATT  
>KX907382  
ATT-----  
-----  
CAAAATGGAACCACCATACTCCCATGCAGAATAAAACAAATTATAAACATGTGGCAGGAGGTAGGACGAGCAA  
TGTATGCCCCCTCCCATTGCAGGAAACATAACATGTACATCAAAC---  
ATCACAGGACTACTATTGACACGAGATGGAGGCAAAAAATAACACA-----  
-----  
GGAGGCAAAAATAACACAAAT-----  
GGCATAGAGATATTCAGACCTGAAGGAGGAAATATGAGGGATAATTGGAGAAGTGAATTATATAAAATACAAGG  
TGGTAGAAATTAAGCCATTG---GGAATAGCACCCACTGAGGCAAAAAGGAGAGTGGTG-----  
-----GAGAGAGAGAAAAAGAGCA---GTGGGA---ATAGGAGCT-----  
GTGTTCCCTTGGGTTCTTGGGAGCA---GCAGGAAGCACTATG---GGCGCGGCGTCA---  
ATAACGCTGACGGTACAG---GCCAGACAA---CTGTTG---TCTGGTATAGTGCAACAGCAAAGC---  
AATTTG---CTAAGA---GCTATAGAGGCGCAACAGCATCTGTTGCAACTCACGGTTTGGGGCATT  
>KX907385  
AACTATAATGGTACA-----  
-----  
TCAAATGACACCATCACACTCCGGTGTAGAATAAAACAAATTATAAACATGTGGCAGGGGGTAGGACAAGCAA  
TGTATGCCCCCTCCCATTGCAGGAAACATAATATGTGCATCAAAT---  
ATCACAGGACTACTATTGACACGTGATGGAGGAGACGAAAAATAGG-----  
-----  
-----  
ACAGATGAGATATTCAGGCCGGAAGGAGGAAATATGAGAGATAATTGGAGAAGTGAATTATATAAAATATAAAG  
TGGTAGAAATTAAGCCATTA---GGGATAGCACCCACTAAGGCAAAAAGGAGAGTGGTG-----  
-----GAGAGAGAGAAAAAGAGCA---GTAGGA---ATAGGAGCT-----  
GTGTTCCCTTGGGTTCTTAGGAGCA---GCAGGAAGCACTATG---GGCGCAGCATCA---  
ATAACGCTGACGGTACAG---GCCAGACAA---TTATTG---TCTGGTATAGTGCAACAGCAAAGC---  
AATTTG---CTGAGG---GCTATAGAGGCGCAACAGCATCTGTTGCAACTCACAGTCTGGGGCATT  
>KX907368  
AACTATACAGAGTTTAAAAATATCTCAACAAACGGTACT-----  
-----  
-  
TCGAATTCAAACATCACACTCCCATGCAGAATAAAACAAATTATAAACATGTGGCAAGGGGTAGGACGAGCAA  
TGTATGCCCCCTCCAGGGAAGGAAACATAACATGTGAATCGAAC---  
ATCACAGGACTACTATTGACACGAGATGGAGGAAATAGTACAAAA-----  
-----  
-----  
AAGGAGATATTCAGACCTGGAGGAGGAGATATGAGGGATAATTGGAGAAGTGAATTATATAAGTATAAAGTGG  
TAGAAATTAAGCCATTA---GGAATAGCACCCACTGAGGCAAAAAGGCGAGTGGTG-----  
-----GAGAGAGAGAAAAAGAGCA---GTGGGA---ATAGGAGCT-----  
GTGTTCCCTTGGGTTCTTAGGAGCA---GCAGGAAGCACTATG---GGCGCAGCGTCA---  
ATAACGCTGACGGTACAG---GCCAGACAA---TTATTG---TCTGGTATAGTGCAACAGCAAAGC---  
AATTTG---CTGAGG---GCTATAGAGGCGCAACAGCATATGTTGCAACTCACAGTCTGGGGCATT  
>KT982201  
ACTCATGATACAGGAAGTAAT-----  
-----  
TCAACCTCAAACATCACCTTCCAATGCAAAATAAAACAAATTATCAACATGTGGCAGGAGGTAGGACGAGCAA  
TGTATGCCCCCTCCCATTGCAGGAAACATAACATGTAGATCAAAT---  
ATCACAGGACTACTATTGGTACGGGATGGAGGCACAGATAATAGCACAAAT-----  
-----  
-----  
AAGAGTGACCCAGAGGAGACATTTAGACCTGGAGGAGGAGATATGAGGGACAATTGGAGAAGTGAATTATATA

AATATAAAGTGGTAGAAATTAAGCCATTA--GGGATAGCACCAACTGAGGCAAGGAGGAGAGTGGTG-----  
-----CAGAGAGAAAAAAGAGCA---GTGGGA---  
ATAGGAGCT-----CTGTTCTTGGGTTCTTGGGAGCT---GCAGGAAGCACTATG---  
GGCGCGGCGTCA---ATAACGCTGACGGCACAG---GCCAGACAA---GTATTG---  
TCTGGTATAGTGCAACAGCAAAGC---AATTTG---CTGAGA---  
GCTATAGAGGCGCAACAGCATATGTTGCAACTCACAGTCTGGGGCATT  
>AY585266  
GAT-----  
-----  
TACAACACAACACTAACACTCCCATGCAGGATAAAACCAGATTATAAACATGTGGCAGGAGGTAGGACGAGCAA  
TGTATGCTCCTCCCATTGCAGGAAACATAACATGTAACCTCAAAT---  
ATCACAGGACTACTATTGACACGTGATGGAGGAAACAATGGAGGA-----  
-----  
AACAAATGAAACATTTCAGACCTGGAGGAGGAAATATGAAAAGACAATTGGAGAAGTGAATTATACAAATATAAAG  
TGGTAGAGATTAAGCCATTG---GGAATAGCACCCAATAAGGCAAAAAGGAGAGTGGTG-----  
-----GAGAGAGAAAAAAGAGCA---GTGGGA---ATAGGAGCT-----  
GTGTTCTTGGGTTCTTGGGAGCA---GCAGGAAGCACTATG---GGCGCGGCGTCA---  
ATAACGCTGACGGCACAG---GCCAGACAA---CTGTTG---TCTGGTATAGTGCAACAGCAAAGT---  
AATTTG---CTGAGA---GCTATAGAGGCGCAACAGCATTTGTTGCAACTCACAGTCTGGGGCATT  
>AY463224  
GTTCAA-----  
-----  
AGCAACGGAAGCATCATACTCCCATGCAAGATAAAACAAATTATAAACATGTGGCAGGGGGTAGGACGAGCAA  
TGTATGCCCCCTCCCATCGCAGGAAACATAACATGTAACCTCAAGT---  
ATCACAGGACTACTATTAACGAGGGATGGAGGCATAAGTGAGAAC-----  
-----  
ATGACAGAGACATTTCAGACCTGGAGGGGGAAATATGAAGGACAATTGGAGAAGTGAATTATATAAATATAAAG  
TAGTAGAAATTAAGCCATTG---GGAATAGCACCCACTAAGGCAAAAAGGAGAGTGGTG-----  
-----GAGAGAGAAAAAAGAGCA---GCA-----ATAGGAGCT-----  
ATGTTCTTGGGTTCTTGGGAGCA---GCAGGAAGCACTATG---GGCGTGGCGTCA---  
ATAACGCTGACGGTACAG---GCCAGAAAT---CTGTTG---TCTGGTATAGTGCAACAGCAAAGC---  
AATTTG---CTGAGA---GCTGTAGAAGCGCAACAACATATGTTGCAACTCACGGTCTGGGGCATT  
>JX845593  
GATCAAAAT-----  
-----  
GATTCAACAAACATCACACTCCCATGCAGAATAAAACAAATTATAAACATGTGGCAGGAGGTGGGACGAGCAA  
TGTATGCCCCCTCCCATTGCAGGAAACATAACATGTACATCAAAT---  
ATTACAGGACTATTATTGACACGTGATGGAGGAAACGCAACACAAACGGATGGT-----  
-----  
AAGAATGACACAGAGACATTTCAGACCTGGAGGAGGAAATATGAAGGACAATTGGAGAAGTGAATTATATAAAT  
ATAAAGTGGTAGAAATTAACCATTG---GGAGTAGCACCCACAAAGGCAAAAAGGAGAGTGGTG-----  
-----GAGAGAGAAAAAAGAGCA---GTGGGA---ATGGGAGCT---  
-----GTGTTCTTGGGCTCTTGGGAGCA---GCAGGAAGCACTATG---GGCGCGGCGTCA---  
ATAACGCTGACGGTACAG---GCCAGACAA---CTGCTG---TCTGGTATAGTGCAACAGCAAAGC---  
AATTTG---CTGAGA---GCTATAGAGGCGCAACAGCATATGTTGCAACTCACAGTCTGGGGCATT  
>JX845600  
AAT-----  
-----  
CACACTCTCAATCTCACTCTCCCATGCAGAATAAAACAAATTATAAACATGTGGCAGGAGGTAGGAAGAGCAA  
TGTATGCCCCCTCCCATTGCAGGAAACATAACATGTAAATCAAAT---  
ATCACAGGACTACTATTGACACGTGATGGAGGAATAAATATTACA-----  
-----  
ACAGAAATATTTCAGACCTGCAGGAGGAAATATGAAGGACAATTGGAGAAGTGAATTATATAAATATAAAGTGG  
TAGAAATTAAGCCATTA---GGAATAGCACCTACTAAGGCAAAAAGGAGAGTGGTG-----  
-----GACAAAGAAAAAAGAGCA---GTAGGA---ATAGGAGCT-----  
GTGTTCTTGGGTTCTTGGGAGCA---GCAGGAAGCACTATG---GGCGCGGCGTCA---

ATAACGCTGACGGTACAG---GCCAGACAA---CTGTTG---TTTGGTATAGTGCAACAGCAAAAC---  
 AATTTG---CTGAGA---GCTATAGAGGCGCAACAGCATATGTTGCAACTCACGGTCTGGGGCATT  
 >AY228557  
 ACTTATAATAATACAGATAATACAGAT-----  
 -----  
 AATCCAACCCAAATCACACTCCCATGCAGAATAAAACAAATTATCAACATGTGGCAGGAGGTAGGACGAGCAA  
 TATATGCCCCCTCCCATTCGAGGAAACATAACATGTAAATCGAAT---  
 ATCACAGGACTACTATTAACATGGGATGGAGGTAGTGGTGAAAAC-----  
 -----  
 -----  
 AATACAGAGACATTTAGACCAGGAGGAGGAGATATGAGGGACAATTGGAGAAGTGAATTATATAAATATAAAG  
 TGGTAGAAATTAAGCCATTA---GGAATAGCACCCACTGAGGCAAAAAGGAGAGTGGTG-----  
 -----GAGAGAGAAAAAAGAGCA---ATAGGA---ATAGGAGCT-----  
 GTGTTCCCTTGGGTTCTTGGGAGCA---GCAGGAAGCACTATG---GGCGCAGCGTCA---  
 ATAACGCTGACGGTACAG---GCCAGACAA---TTGTTG---TCTGGTATAGTGCAACAGCAAAGC---  
 AATTTG---CTGAGG---GCTATAGAGGCGCAACAGCATCTGTTGCAGCTCACTGTCTGGGGCATT  
 >DQ275647  
 CTTCAAATAATAGTACA-----  
 -----  
 GGAAATTCAACCATCAAAATCAAATGCAGAATAAAACAAATTATAAACATGTGGCAGGAGGTAGGACGAGCAA  
 TGTATGCCCCCTCCCATTCGAGGAAACATAACATGTAGATCAAAC---  
 ATCACAGGACTACTATTAGTACGTGATGGAGGCATAAAACAACACA-----  
 -----  
 -----  
 GAAGAAATATTCAGACCTGGAGGAGGAAATATGAAGGACAATTGGAGAAGTGAATTATATAAATATAAAGTAG  
 TAGAAATTAAGCCATTG---GGAATAGCACCCACTCCAGCAAAAAGGAGAGTGGTG-----  
 -----GAGAGAGAAAAAAGAGCA---GTGGGA---ATAGGAGCT-----  
 TTGTTCCCTTGGGTTCTTGGGAGCA---GCAGGAAGCACTATG---GGCGCAGCGTCA---  
 ATGACGCTGACGGTACAG---GCCAGACAA---GTGTTG---TCTGGTATAGTGCAACAGCAAAT---  
 AATTTG---CTGAAG---GCTATAGAGGCGCAACAGCGTATGTTGCAACTCACAGTCTGGGGCATT  
 >DQ351224  
 TCTTATAATGCTACAGGA-----  
 -----  
 -----  
 GATAATACAACCATCACACTGCCATGCAAAATAAAACAAATTATAAACATGTGGCAGACGGTAGGAAAAGCGA  
 TGTATGCCCCCTCCCATTCGAGGAAACATAACATGTAAATCAAAT---  
 ATCACAGGACTACTATTAACACGTGATGGAGGCGAAACTAACAGTACGAAT-----  
 -----  
 -----  
 GACACAGAGACAGAGATATTCAGACCTGGAGGAGGAAATATGAAGGACAATTGGAGAAGTGAATTATATAAAT  
 ACAAAGTGGTAGAAATTAAGCCATTG---GGAATAGCACCCACTGAAGCAAAAAGGCGAGTGGTG-----  
 -----GAGAGAGAAAAAAGAGCA---GTGGGA---ATAGGAGCT---  
 -----GTGCTCCTTGGGTTCTTGGGAGCA---GCAGGAAGCACTATG---GGCGCAGCGTCA---  
 ATAACGCTGACGGTACAG---GCCAGACAA---CTGTTG---TCTGGTATAGTGCAACAGCAAAGT---  
 AATTTG---CTGAGA---GCTATAGAGGCGCAACAGCATCTGTTGCAACTCACGGTCTGGGGCATT  
 >DQ369977  
 AGTTATAATAATAGTAAG-----  
 -----  
 -----  
 GATAATGAGACCATCACACTCCAATGCAGAATAAAACAAATTATAAACATGTGGCAGAAAGTAGGACGAGCAA  
 TGTATGCACCTCCCATTTGAAGGAAACATAACATGTAACCTCAAAT---  
 ATCACAGGACTACTATTGCTACGTGATGGAGGAAAAGAGAACAAT-----  
 -----  
 -----  
 TCCACAGAAATATTCAGACCTGGAGGAGGAAATATGAAGGACAATTGGAGAAGTGAATTATACAAATATAAAG  
 TGGTAGAAATTAAGCCATTG---GGAATAGCACCCACGAGGCAAAAAGGAGAGTGGTG-----  
 -----GAGAGAGAAAAAAGAGCA---GTAGGA---ATAGGAGCT-----  
 GTGTTCCCTTGGGTTCTTGGGAGCA---GCAGGAAGCACTATG---GGCGCGGCGTCA---  
 ATAACGCTGACGGTACAG---GCCAGACAA---CTGTTG---TCTGGTATAGTGCAACAGCAAAGC---  
 AATTTG---CTGAGA---GCTATAGAGGCGCAACAACATATGTTGCAACTCACGGTCTGGGGCATT  
 >DQ275649

ACTCAGAGTACAAACAGT-----  
 -----  
 ACAAATTCAACCATCACACTCCAATGCAGAATAAAACAAATTATAAACATGTGGCAGGAGGTGGGACGAGCAA  
 TGTATGCCCCCTCCCATTCAGGAAACATAACATGTAAATCAAAT---  
 ATCACAGGACTACTATTGACACGTGATGGAGGAGGAAGAGAAGGAAATAATACA-----  
 -----  
 ----  
 GAAGGAAATAATACAGAGACATTTCAGACCTGGAGGAGGAGATATGAGGGACAATTGGAGAAGTGAATTATATA  
 AATATAAAGTGGTAGAAATTAAGCCATTG---GGAATAGCACCCACTGAGGCAAGAAGGAGAGTGGTG-----  
 -----CAGAGAGAGAAAAGAGCA---  
 ATAATGGGACTAGGAGCT-----GCGTTCCTTGGGTTCTTGGGAGCA---GCAGGAAGCACGATG---  
 GGCGCAGCGTCA---ATAACGCTGACGGTACAG---GCCAGACAA---TTATTG---  
 TCTGGTATAGTGCAACAGCAAAGC---AATTTG---CTGAAG---  
 GCTATAGAGGCGCAACAGCATATGTTGCAACTCACAGTCTGGGGCATT  
 >DQ396377  
 ATTCATAATGGGACAGGA-----  
 -----  
 AGTAATTCAACCATCACACTTAATTGTAAAATAAAGCAAATTATAAACATGTGGCAGGAGGTAGGACGAGCAA  
 TGTACGCTCCTCCCATTCAGGAAGCATAACATGTAACCTCAAGT---  
 ATCACAGGACTACTATTGACACGTGATGGAGGACAAGGCCAGGAAAAG-----  
 -----  
 -----  
 GATAATGACACAGAGGTATTCAGGCCTGGAGGAGGAAAACATGAAGGACAATTGGAGAAGTGAATTATATAAAAT  
 ATAAAGTGGTAGAAGTTAAACCATTG---GGAATAGCACCCACTAAAGCAAAAAGGAGAGTGGTG-----  
 -----GAGAGAGAAAAAAGAGCA---GTGGGA---ATAGGAGCT---  
 -----GTGTTTCCTTGGGTTCTTGGGAGTA---GCAGGAAGCACTATG---GGCGCGGCGTCA---  
 ATGACGCTGACGGTACAG---GCCAGACAA---CTGTTG---TCTGGTATAGTGCAACAGCAAAT---  
 AATTTG---CTGAGA---GCTATAGAGGCGCAACAGCATATGTTGCAACTCACGGTCTGGGGCATT  
 >DQ369990  
 ATTCAGAATAGTTCAACCATCACG-----  
 -----  
 -----  
 GATAATTCAACCATCACCATCCCATGCAGGATAAAACAAATTATAAACATGTGGCAGGAGGTGGGACGAGCAA  
 TGTATGCCCCCTCCCATTCAGGAAACATAACATGTAACCTCAAGT---  
 ATCACAGGAATACTATTGACACGTGATGGTGGCGATAACGACACA-----  
 -----  
 -----  
 AAAGAGAATGAGACATTTCAGACCGGGAGGAGGAAATATGAAGGACAATTGGAGAAGTGAATTATATAAAATATA  
 AAGTGGTAGAAATTAAGCCATTG---GGAGTAGCACCCACGAAGGCCAAAAGGAGAGTGGTG-----  
 -----GAGAGAGAAAAAAGAGCA---GTGGGA---ATAGGAGCT-----  
 ---GTGTTTCCTTGGGTTCTTGGGAGCA---GCAGGAAGCACTATG---GGCGCGGCGTCA---  
 ATAACGCTGACGGTACAG---GCCAGACAG---CTGTTG---TCTGGTATAGTGCAACAGCAGAGC---  
 AATTTG---CTGAGA---GCTATAGAGGCGCAACAGCATCTGTTGCAACTCACGGTCTGGGGCATT  
 >DQ275658  
 AATTACAGTAAGTCAAACATCACCAAGGGCAGT-----  
 -----  
 -  
 GATCCAAACATCACCACCATCCAATGCAGGATAAAACAAATTATAAACATGTGGCAGGGGGTAGGACGAGCAA  
 TGTATGCCCCCTCCCATTCAGGAAACATAACATGTAACCTCAAGT---  
 ATCACAGGACTACTATTGACACGTGATGGTGGGAATGAAACGAAT-----  
 -----  
 -----  
 GGCACAGAGACATTTCAGACCTGGAGGAGGAAATATGAAGGACAACCTGGAGAAGTGAATTATATAAAATATAAAG  
 TGCTAGAAATTAAGCCATTA---GGAGTAGCACCCACTGGAGCAAAAAGGAGAGTGGTG-----  
 -----GAGAGAGAAAAAAGAGCA---GTGGGA---ATAGGAGCT-----  
 GTGCTCCTTGGGTTCTTGGGAGCA---GCAGGAAGCACTATG---GGCGCGGCGTCA---  
 ATAACGCTGACGGTACAG---GCCAGACAA---CTGTTG---TCTGGTATAGTGCAACAGCAAAGC---  
 AATTTG---CTGAGA---GCTATAGAGGCGCAACAGCATATGTTGCAACTCACGGTCTGGGGCATT  
 >DQ396391  
 AGTTATTTAAACATAACTGATGCAAACACAACAAAG-----  
 -----

GCAAACGAAACCATCACACTCCCATGCAGAATAAAACAAATTATAAACATGTGGCAGGAGGTAGGACGAGCAA  
TGTATGCCCCCTCCCATTGCAGGAAACATAGAATGTAAATCAAAT---  
ATCGCAGGACTACTATTGGTACGTGATGGAGGACTAAATAGAACAGAT-----  
-----  
-----  
AATAACACAGAGATATTCAAACCTGAAGGAGGAAATATGAAGGACAATTGGAGAAGTGAATTATATAAATATA  
AAGTGGTGGAAATTAACCCATTG---GGAGTAGCACCCACGAAGGCAAAAAGGAGAGTGGTG-----  
-----GAGAGAGAAAAAAGAGCA---GTGGGA---ATAGGAGCT-----  
---GTGTTCCCTTGGGTTCTTGGGAGCA---GCAGGAAGCACTATG---GGCGCGGCGTCA---  
TTAACGCTGACGGTACAG---GCCAGACAA---CTGTTG---TCTGGTATAGTGCAGCAGCAAAGC---  
AATTTG---CTGAGA---GCTATAGAGGCGCAACAGCATATGTTGCAACTCACGGTCTGGGGCATT  
>AY878056  
ACTTATAATGCTAGTGAG-----  
-----  
GGAAACAGGACCATCACCATCCTATGCAGGATAAAACAAATTATAAACATGTGGCAGGGGGTAGGACAAGCAA  
TGTACGCCCCCTCCCATTGCAGGAAACATAACATGTAACCTCAAAT---  
ATCACAGGACTACTATTGACACGTGATGGTGGTACCAACAACAAC-----  
-----  
-----  
AACACAGAGACATTCAGACCTGGAGGAGGAAATATGAAGGACAGTTGGAGAAGTGAATTATATAAATATAAAG  
TGGTAGAAATTAAGCCATTG---GGAGTAGCACCCACCAAGGCAAAAAGGAGAGTGGTG-----  
-----GAGAGAGAAAAAAGAGCA---GCGGGA---ATAGGAGCT-----  
GTGATCTTTGGGTTCTTGGGAGCA---GCAGGAAGCACTATG---GGCGCGGCGTCA---  
TTAACGCTGACGGTACAG---GCCAGACAA---CTGTTG---TCTGGTATAGTGCAACAGCAAAGC---  
AATTTG---CTGAGA---GCTATAGAGGCGCAACAGCATATGTTGCAACTCACGGTCTGGGGCATT  
>DQ164104  
TTTTATAATGAAAGTAAAGATAATAGA-----  
-----  
-----  
AGTGAGAACATCACACAATCCCATGTAAGATAAAACAAATTATAAACATGTGGCAGGGGGTAGGACGAGCAA  
TGTATGCCCCCTCCCATTGAAGGAAACATAACATGTAACCTCAAGT---  
ATCACAGGACTACTATTGACACGTGATGGAGGATCCTTAGACAAC-----  
-----  
-----  
AAAACAGAGATATTTAGACCTGGAGGAGGAAATATGAAGGACAATTGGAGAAGTGAATTATATAAATATAAAG  
TGGTAGAAATTAAGCCATTG---GGAGTAGCACCCACTGAGGCAAAAAGGAGAGTGGTG-----  
-----GAGAGAGAAAAAAGAGCA---GTGGGA---ATAGGAGCT-----  
GTGCTCCTTGGGTTCTTGGGAGCA---GCAGGAAGCACTATG---GGCGCGGCGTCA---  
ATAACGCTGACGGTACAG---GCCAGACAA---CTGTTG---TCTGGTATAGCGCAACAGCAAAGC---  
AATTTG---CTGAGA---GCTATAGAGGCGCAACAGCATATGTTGCAACTCACAGTCTGGGGCATT  
>DQ011165  
AATTACAGTTCTGAATATAATAGTACAGGAAGTAATTCAACC-----  
-----  
AACAGTAGTTCAACCATCACACTTCCATGCAGAATAAAACAAATTATAAACATGTGGCAGGAGGTAGGACGAG  
CAGTGTATGCCCCCTCCCATTGCAGGAAACATAACATGTAATTCAAAT---  
GTCACAGGATTACTATTAGTACGTGATGGAGGAAACGACAGCACA-----  
-----  
-----  
CCAACAGAAACATTTCAGACCTGAAGGAGGAAATATGAAGGATAATTGGAGAAGTGAATTATATAAATATAAAG  
TGGTAGAAGTTAAGCCACTA---GGAATAGCTCCCACTGGAGCAAAAAGGAGAGTGGTG-----  
-----GAGAGAGAAAAAAGAGCA---GTAGGA---ATAGGAGCT-----  
GTGTTCCCTTGGGTTCTTGGGATTA---GCAGGAAGCACTATG---GGCGCAGCGTCA---  
ATAACGCTGACGGCACAG---GCCAGACAA---GTGTTG---TCTGGTATAGTGCAACAGCAAAGC---  
GATTTG---CTGAAG---GCTATAGAGGCGCAACAGCATATGTTGCAACTCACGGTCTGGGGCATT  
>AY901966  
ACCTACAATCCTACATACAATGGTACAAGGAATGAT-----  
-----  
-----  
GAGGACACAACCATCACACTCCCATGCAAAATAAAACAAATTATAAATATGTGGCAGAAGGTAGGAAGAGCAA  
TGTATGCCCCCTCCCATTGCAGGAAACATAACATGTAAGTCAAAT---

ATCACAGGACTACTATTAGTACGTGATGGAGGCAACACAAATAAC-----  
 -----  
 -----  
 ATAACAGAGATATTCAGACCTGGAGGAGGAAATATGAAAGACAATTGGAGAAGTGAATTATATAAATACAAAG  
 TGGTAGAAATTAAGCCATTA---GGAATAGCACCCACTGAAGCAAAAAGGAGAGTGGTG-----  
 -----AAGAAAGAGAAAAGAGCA--GTGGGA--ATAGGAGCT-----  
 GTGTTCTTGGGTTCTTGGGAGCA--GCAGGAAGCACTATG--GGCGCGGCGTCA---  
 ATGACGCTGACGGTACAG---GCCAGACAA--GTATTG---TCTGGTATAGTGCAACAGCAAAGC---  
 AATTTG---CTGAGA---GCTATAGAGGCGCAACAGCATATGTTGCAACTCACGGTCTGGGGCATT  
 >AY901975  
 AATTAT-----  
 -----  
 ACAAATGGAATCATCACACTCCCATGCAAGATAAAACAATTTATAAACATGTGGCAAGAGGTAGGACGAGCAA  
 TGTATGCCCCCTCCCATTCAGAGAAACATAACATGCAAAATCAAAT---  
 ATCACAGGACTACTATTGACATGGGATGGAGGAGACACGAATGGGACA-----  
 -----  
 -----  
 AAAAAATAATAACATTTAGACCTGGAGGAGGAAATATGAAAGACAATTGGAGAAATGAATTATATAAATATA  
 AAGTGGTAGAAATTAAGCCATTG---GGAATAGCACCCACTGATTCAAAAAGGAGAGTGGTG-----  
 -----GAGAGAGAAAAAAGAGCA--GTGGGA--CTGGGAGCT-----  
 ---ATGCTCGTTGGGTTCTTGGGAGCA--GCAGGAAGCACTATG--GGCGCGGCGTCA---  
 ACGACGCTGACGGTACAG---GCCAGACAA--CTGTTG---TCTGGTATAGTGCAACAGCAAAGC---  
 AATTTG---CTGAGA---GCTATAGAGGCGCAACAGCATATGTTGCAACTCACAGTCTGGGGCATT  
 >AY878070  
 AATTATAGTAGCAGCCACAAG-----  
 -----  
 CAAAATACAACCATCACAATCCCATGTAAATAAAACAAATTATAAATATGTGGCAAGGGGTAGGACGGGCAA  
 TGTATGCCCCCTCCCATTCAGAGAAACATAACATGTAAATCAAAT---  
 ATCACAGGATTACTATTGACACGTGATGGAGGACCCGATAGCAAAAAG-----  
 -----  
 -----  
 CCTAATGGGACAGAGACATTCAGACCTGGAGGAGGAGATATGAGGGACAATTGGAGGAGTGAATTATATAAAT  
 ATAAAGTGGTAGAAATCAGGCCATTA---GGGATAGCACCCACCAAGGCAAAAAGAAGAGTGGTG-----  
 -----GAGAGAGAAAAAAGAGCA--GTGACA--ATGGGAGCT---  
 -----ATGTTCTTGGGTTCTTGGGAGCA--GCAGGAAGCACTATG--GGCGCAGCGTCA---  
 ATAACGCTGACGGTACAG---GCCAGACAA--CTGTTG---TCTGGTATAGTGCAACAGCAGAAC---  
 AATTTG---CTGAGA---GCTATAGAGGTGCAACAGCATATGTTGCAGCTCACAGTCTGGGGCATT  
 >DQ275664  
 TACTATCCTAATGGTACAAACAGTACTTCAAAGGGT-----  
 -----  
 ACAAATGTAACCATCACACTCCAATGCAGAATAAAACAAATTATAAACATGTGGCAGGGGATAGGACAGGCAA  
 TGTATGCCCCCTCCCATTAAGGGAAACATAACATGTAAGTCAAAT---  
 ATCACAGGACTACTATTGACACGTGATGGGGGAGAAAATACAAAT-----  
 -----  
 -----  
 GGAACAGAAATCTTCAGACCTGGAGGAGGAGATATGAGAGACAATTGGAGAAGTGAATTATATAAATATAAAG  
 TGGTGGAAATTAAGCCATTA---GGAGTAGCACCCACTACGGCAAAAAGGAGAGTGGTG-----  
 -----GAGAGAGAAAAAAGAGCA--GTAGGA--ATAGGAGCT-----  
 GTGTTCTTGGGTTCTTGGGAGCA--GCAGGAAGCACTATG--GGCGCAGCATCA---  
 ATAACGCTGACGGTACAG---GCCAGACAA--TTGTTG---TCTGGTATAGTGCAACAGCAAAGC---  
 AATTTG---CTGAGG---GCTATAGAGGCGCAACAGCATATGTTGCAACTCACAGTCTGGGGCATT  
 >DQ093589  
 AGTCACCTG-----  
 -----  
 GAAAAATACAACCATCACACTTCCATGCAGAATAAAACAAATTATAAACATGTGGCAAGGGGTAGGACGAGCAA  
 TGTATGCCCCCTCCCATTCAGAGAAACATAGAATGTAAATCAAAT---  
 ATCACAGGAATACTATTGGCACATGATGGAGGAGGAGAGCAGAAT-----  
 -----  
 -----  
 GGTACAAATGAGATATTCAGACCTGGAGGAGGAGATATGAGGGACAATTGGAGAAAGTGAATTATATAAATATA

AAGTGGTAGAAATTAAACCATTA---GGAATAGCACCTACTAAGGCAAAAAGGAGAGTGGTG-----  
-----GAGAGAGAAAAAAGAGCA---GCGGGA---ATAGGAGCT-----  
---GTGTTCCCTTGGGTTCTTAGGAGCA---GCAGGAAGCACTATG---GGCGCGGCGTCA---  
ATAGCGCTGACGGTACAG---GCCAGACAA---TTACTG---TCTGGTATAGTGCAACAGCAAAGC---  
AATTTG---CTGAGA---GCCATAGAGGCGCAACAGCATATGTTGCAACTCACAGTCTGGGGCATT  
>KC863250  
AATTATCCTAATGGTACAGAAAGTCTTAATAGTACAGAAAGTAAT-----  
-----  
-  
TCAAGCTTACCAATCACGATCCCATGCAGAATAAAACAAATTATAAACATGTGGCAGGGGGTAGGACGAGCAA  
TGTATGCCCCGCCCATTCAGAGAAACATAACATGTAACCTCAAGT---  
ATCACAGGACTACTATTGACACGGGATGGAGGAGTGAATACACAG-----  
-----  
GAGGGAGGAGTGAATACAACA-----  
AGGACAGAGATATTCAGACCTGGAGGAGGAAATATGAAGGACAATTGGAGAAGTGAATTATATAAATATAAAG  
TGGTAGAAATTAAGCCATTA---GGAATAGCACCCACTGAGGCAAAAAGGAGAGTGGTG-----  
-----GAGAGAGAAAAAAGAGCA---GTGACA---CTAGGAGCT-----  
GTGTTCCCTTGGGTTCTTGGGAGCA---GCAGGAAGCACTATG---GGCGCGGCGTCA---  
ATCACGCTGACGGTACAG---GCCAGACAA---CTGCTG---TCTGGTATAGTGCAACAGCAAAGC---  
AATTTG---CTGAGA---GCTATAGAGGCGCAACAGCATATGTTGCAACTCACGGTCTGGGGCATT  
>DQ275659  
TTTCAGAATAATGGTACAAACAGTGAA-----  
-----  
----  
AGTAATTCAACCATCACACTCCCATGCAGAATAAGACAAATTGTAAACATGTGGCAGGAGGTAGGACGAGCAA  
TGTATGCCCCCTCCCATTCAGAGAAACATAACATGTAAATCAAAT---  
ATCACAGGGCTACTATTGCAACGTGATGGAGGCACGAGTAACAATAGC-----  
-----  
-----  
AGCAATAACATAGAGATATTCAGGCCTGGAGGAGGAAATATGAAGGACAATTGGAGAAGTGAATTATATAAAT  
ATAAAGTGGTAGAAATTAACCATTG---GGAATAGCACCCACAACGGCAAAAAGGAGAGTGGTG-----  
-----GAGAGAGAAAAAAGAGCA---GTGGGAATCATAGGAGCT---  
-----ACGATCCTTGGGATCTTGGGAGCA---GCAGGAAGCACTATG---GGCGCAGCATCA---  
ATAACGCTGACGGTACAG---GCCAGACAC---CTGCTG---TCTGGTATAGTGCAACAGCAAAGC---  
AACTTG---CTGAGA---GCTATAGAGGCGCAACAGCATATGTTGCAACTCACGGTTTGGGGCATT  
>DQ093602  
TTTCATGATAATTCAAATTTT-----  
-----  
AATAATTCAACCATCACACTCCCATGCAGAATAAAACAAATTTATAAACATGTGGCAGGGGGTAGGACGAGCAA  
TGTATGCCCCGCCCATTCAGAGAAACATAACATGTACATCAAAT---  
ATCACAGGACTACTATTGACACGTGATGGAGGAGTAGGTAATGGGACA-----  
-----  
-----  
GATAATACGATAGAAATATTCAGACCTGAAGGAGGAGACATGAGGGACAATTGGAGAAGTGAATTATATAAAT  
ATAAAGTGGTGGAAATTAAGCCATTG---GGAGTAGCACCCACTGGGGCAAAAAGGAGAGTGGTG-----  
-----CAGAGAGAAAAAAGAGCA---GTGGGA---ATGGGAGCT---  
-----ATGATCCTTGGGTTCTTGGCAACA---GCAGGAAGCACTATG---GGCGCGGCGTCA---  
ATAACGCTGACGGTACAG---GCCAGACAA---GTGTTG---TCTGGTATAGTGCAACAGCAAAGC---  
AATTTG---CTGAGG---GCTATAGAGGCGCAACAGCATATGTTGCAACTCACGGTCTGGGGCATT  
>AY901974  
ACCTACAAGGAGAAG-----  
-----  
ATAAATAGTACTATCACACTCCAATGCAGAATAAAACAAATTATAAACATGTGGCAGGGGGTAGGACAAGCAA  
TGTATGCCCCCTCCCATTCAGAGAAACATAACATGTAGATCAAAT---  
ATCACAGGACTACTATTAACACGTGATGGAGGAAATGATAAAGGAAAA-----  
-----  
-----  
GATAATGACACAGAGATATTCAGACCTGGAGGAGGAGATATGAAGGACAATTGGAGAAGTGAATTGTATAAAT  
ATAAAGTGGTAGAAATTAACCATTA---GGAGTAGCACCCACCAAGGCAAAAAGGAGAGTGGTG-----  
-----GAGAGAGAAAAAAGGACA---GTGGGA---ATGGGAGCT---

```

-----GTGTTTCCTTGGGTTCTTGGGAGCA---GCAGGAAGCACTATG---GGCGCAGCATCA---
ATAACGCTGACGGTACAG---GCCAGACAA---TTGCTG---TCTGGTATAGTGCAACAGCAAAGC---
AATTTG---CTGAGA---GCTATAGAGGCGCAACAGCATATGTTGCAACTCACGGTCTGGGGCATT
>DQ011172
AGTTATTCAAGCACA-----
-----
GCCAACACAACCATCACGCTCCCATGCAGAATCAGACAGATCATAAACATGTGGCAGCAGGTAGGACGAGCAA
TGTATGCCCCCTCCCATTCAGAGAAACATAACATGTAAATCAAAT---
ATCACAGGACTACTATTGCTACGTGATGGAGGAAATGAAGACAAT-----
-----
AGAACAGAGACATTTCAGACCTGGAGGAGGAAATATGAAGGACAATTGGAGAAGTGAATTATATAAATATAAAG
TGGTAGAACTTAAGCCTTTG---GGAGTAGCACCCACTAAGGCAAAAAGGAGAGTGGTG-----
-----GAGAGAGAAAAAAGAGCA---GTGGGA---ATAGGAGTT-----
GCGCTCCTTGGGTTCTTGGGAGCA---GCAGGAAGCACTATG---GGCGCGGCGTCA---
ATAACGCTGACGGTACAG---GCCAGACAA---CTGTTG---TCTGGTATAGTGCAACAGCAAAGC---
AATTTG---CTGAGA---GCTATAGAGGCGCAACAGCATATGTTGCAACTCACAGTCTGGGGCATT
>DQ093594
CCTCAGAATGATACAAAA-----
-----
GATGATTTAACCATCACACTTCCATGCAAAATAAAACAAATTATAAACATGTGGCAGGGGGTAGGACGAGCAA
TGTATGCCCCCCTATTGACAGGAAACATAACATGTAACTCAAGT---
ATCACAGGACTATTATTGACACGTGATGGAGGAAATAACACAACA-----
-----
GGGACAGAGATATTTCAGACCTGGAGGAGGAAACATGAAAGACAATTGGAGAAGTGAATTATATAAGTATAAAG
TGGTAGAAATTAAGCCATTG---GGAGTAGCTCCCACTGAAGCAAAAAGGAGAGTGGTG-----
-----GAGAGAGAAAAAAGAGCA---GTGGGA---ATAGGAGCT-----
GTACTCCTTGGGTTCTTGGGAGCA---GCAGGAAGCACTATG---GGCGCGGCGTCA---
ATAACGCTGACGGTACAG---GCCAGACAA---CTGTTG---TCTGGTATAGTGCAACAGCAAAAC---
AATTTG---CTGAGG---GCTATAGAGGCGCAACAGCATATGTTGCAACTCACGGTCTGGGGCATT
>DQ351217
AACTACACATGTACTGCTCCAGAA-----
-----
GGGAATGGAACCATCATACTTCCATGCAGAATAAAACAAATTGTAAACATGTGGCAGGAGGTAGGACGAGCAA
TGTATGCCCCCTCCCATTAAGGAAACATAACATGTAACTCAAAC---
ATCACAGGACTACTATTAGTACGGGATGGAGGCGAGAATATCACG-----
-----
GAGGAGACATTTCAGGCCTGGAGGAGGAAATATGAAGGACAATTGGAGAAGTGAATTATATAAATATAAAGTGG
TAGAAATTAAGCCATTG---GGAATAGCACCCACTACGGCAAAAAGGAGAGTGGTG-----
-----GAGAGAGAAAAAAGAGCA---GTGGGA---ATAGGAGCT-----
GTACTCCTTGGGTTCTTGGGAGCG---GCAGGAAGCACTATG---GGCGCGGCGTCA---
ATAACGCTGACGGTACAG---GCCAGACAA---CTGTTG---TCTGGTATAGTGCAACAGCAAAGC---
AATTTG---CTGAAA---GCCATAGAGGCGCAACAGCACATGTTGCAACTCACGGTCTGGGGCATT
>DQ093604
AGTTACAAT-----
-----
AGTACAGGAGACATCACACTCCCATGCAGAATAAAACAAATTATAAACATGTGGCAGAAGGTAGGACGAGCAA
TATATGCCCCCTCCCATTCAGAGAAACATAACATGTAAATCAACT---
ATCACTGGACTACTCTTGGTAAGAGATGGAGGCAACTCAAATAAC-----
-----
CTAAGTGAGACATTTCAGACCAGCAGGAGGAAATATGAAGGATAATTGGAGAAGTGAAGTATATAAATATAAAG
TGGTAGAAATTAAGCCATTG---GGAATAGCACCCACTAAGGCAAAAAGGCGAGTGGCG-----
-----GAGAGAGAAAAAAGGGCA---GTAGGA---ATAGGAGCT-----
GTGTTTCCTTGGGTTCTTGGGAGCA---GCAGGAAGCACTATG---GGCGCAGCGTCA---
ATAGCGCTGACGGCACAG---GCCAGACAA---GTGTTG---TCTGGAATAGTGCAACAGCAAAGC---
AATTTG---CTGAGG---GCTATAGAGGCGCAACAGCATATGTTGCAACTCACAGTCTGGGGCATT
>AY901973

```

TGTTATACAACACAGCTGTTTAAATAGTACATACAATAGTACATACAGGCCTAATGGTACAGAA-----  
-----  
-----  
AGTAATTCAAACATCACACTCCCATGCAGAATAAAGCAAGTTATAAACATGTGGCAGCAGGTAGGACGAGCAA  
TGTATGCTCCTCCCATTGCAGGAAACATAACATGTAAATCAAAT---  
ATCACAGGATTACTATTGGTGCGTGATGGAGGAATAAATAACAGT-----  
-----  
-----  
ACCAAAGAGACATTTCAGACCTGGAGGAGGAGATATGAAGGACAATTGGAGAAGTGAATTATACAAATATAAAG  
TAGTAGAAATTAACCATTG---GGAATAGCACCTACTGAGGCAAAAAGGAGAGTGGTG-----  
-----GAGAGGGAAAAAAGAGCA---GTGGGA---ATAGGAGCT-----  
GTGTTTCCTTGGGTTCTTGGGAGCA---GCAGGAAGCACTATG---GGCGCGGCGTCA---  
ATAACGCTGACGGTACAG---GCCAGACAA---TTGTTG---TCTGGTATAGTGCAACAGCAAAGC---  
AATTTG---CTGAGG---GCCATAGAGGCGCAACAGCATATGTTGCAACTCACGGTCTGGGGCATT  
>DQ382374  
ACTCATCTGCCTAATGGTACACAGGTTAATGGG-----  
-----  
ACTGATGCAAATATCACACTTCCATGCAGAATAAAACAATTTATAAACATGTGGCAGAAGGTAAGACTAGCAA  
TGTATGCCCCCTCCCATTGCAGGAGACATAACATGTGAATCAGAT---  
ATTACAGGACTACTGTTAACGCGGGATGGAGGAGATAGTACAAATAGT-----  
-----  
-----  
AATAATAATACAGAGACATTTCAGACCTGAAGGAGGAAACATGAAAGACAATTGGAGAAGCGAATTATATAAAT  
ATAAAGTGGTAGAAATTAAGCCATTA---GGAATAGCACCCACTACTGCAAAAAGGAGAGTGGTG-----  
-----GAAAGAGAGAAAAAGAGCA---GTGGGA---CTAGGAGCT---  
-----GTGTTTCCTTGGGTTCTTGGGAGCA---GCAGGAAGCACTATG---GGCGCAGCATCA---  
ATAACGCTGACGGTACAG---GCCAGACAA---TTATTG---TCTGGTATAGTGCAACAGCAAAGT---  
AATTTG---CTGAGA---GCTATAGAGGCGCAACAGCATATGTTGCAACTCACGGTCTGGGGCATT  
>DQ382376  
TCCTATCCTCCTTCCTGCCCCCTAGTACTGCA-----  
-----  
GATAATTCTTCCATCATCCTTCCTTGCTGCATAATACAACTTATTAACCTGTGGCGGGAGGTAGGACGACCAG  
TGTTGGCCGCTCCCCTTGTGGAAGCATCATATGTTGCTCCTCT---  
ATCACCGGAATACTATTATCAACGGATGGAGGCCCCGACGATGAC-----  
-----  
-----  
GCAGAGACATTTCAGACCTGGAGGAGGAAATATGAAGGACAATTGGAGAAGTGAATTATATAAATATAAAGTGG  
TAGAAGTTAAGCCATTG---GGAATAGCACCCACTAAAGCAAAAAGGAGAGTGGTG-----  
-----GAGAGAGAAAAAAGAGCA---GTGGGA---ATAGGAGCT-----  
GTGTTTCCTTGGGTTCTTGGGAACA---GCAGGAAGCACTATG---GGCGCAGCGTCA---  
ATAACGCTGACGGTACTG---GCCAGACAA---TTATTG---TCTGGTATAGTGCAACAGCAAAGC---  
AATTTG---CTGAGG---GCTATAGAGGCGCAACAACATCTGTTGCAACTCACGGTCTGGGGCATT  
>DQ382379  
TGCTATACAAATGAAACAAGCAAT-----  
-----  
CCAAATAATACCATCACACTCCCATGCAGAATAAGACAAATTATAAACATGTGGCAGAAGGTAGGACGAGCAA  
TGTATGCCCCCTCCCATTGCAGGAAACATAAATTGTAAATCAAAT---  
ATCACAGGAATACTGTTGACACGTGATGGAGGTAACGAAACAGAGGGTGAC-----  
-----  
-----  
GGAACAAAGGTAGAGATATTTCAGACCTGGAGGAGGAAATATGAGGGACAATTGGAGAAGTGAATTATATAAAT  
ATAAAGTGGTAGAAATTAAGCCATTA---GGAGTAGCACCCACTAAGGCAAAAAGGAATGTGGTG-----  
-----CAGAGAGAAAAAAGAGCA---GTGGGA---ATAGGAGTT---  
-----GTGCTCCTTGGGTTCTTGGGAGCA---GCAGGAAGCACTATG---GGCGCGGCGTCA---  
ATAACGCTGACGGTACAG---GCCAGACAA---CTGTTG---TCTGGTATAGTGCAACAGCAAAGC---  
AATTTG---CTGAGA---GCCATAGAGGCGCAACAACATATGTTGCAACTCACGGTCTGGGGCATT  
>DQ382363  
GATTATAATGGTGCAGGAAAT-----  
-----AGT---  
TCATCAGACTCCTTCATCACCATCCTCTGCAGAATAAAACAATTTATAATCATGTGGCAGAGGGTAGGACGAG

CAATGTATGCCCCCTCCCATTTGTTGGAAGCGTCACATGTTGTTTCATTT---  
ATCACAGGGCTACTATTGACGCGTGATGGAGGAAGTAACACAACA-----  
-----  
-----  
GAGACATTCAGACCTGTAGGAGGAGATATGAGGGACAATTGGAGAAGTGAATTATATAAATATAAAGTGGTAG  
AAGTTAGGCCATTA---GGAATAGCACCCACTAGGGGCACAAAGGAGAGTGGTG-----  
-----GAGAGAGTAAAAAGAGCA---GTGGGA---ATAGGAGCT-----  
GTGTTCTTGGGTTCTTGGGAGCA---GCAGGAAGCACTATG---GGCGCAGCATCA---  
ATAACGCTGACGGTACAG---GCCAGACAA---TTGCTG---TCTGGTATAGTGCAACAGCAAAGC---  
AATTTG---CTGAAG---GCTATAGAGGCGCAACAGCACCTGTTGCAACTCACAGTCTGGGGCATT  
>HQ615953  
TTTCATAATAATACAAATGAGACAACCATC-----  
-----  
-----  
ACAAATGAGACCATCATGCTCCCATGCAGGATAAAACAAATTATAAACATGTGGCAGAAGGTAGGACGAGCAA  
TGTATGCTCCTCCCATTTGAGGGAAACATAACATGTAATTCAAAT---  
ATCACAGGACTACTATTACTACGTGATGGAGGCCTCTTCAATGGGACA-----  
-----  
-----  
GCAGAAGTAGAGACATTCAGACCTGGAGGGGGAGATATGAGAGACAATTGGAGAAGTGAATTATACAAATATA  
AAGTGGTAGAAGTTAAGCCATTG---GGAATAGCACCCACTGGGGCAAGAAGGATAGTGGTG-----  
-----AAGAGAGAAAAAGAGCA---GTGGGA---ATAGGAGCT-----  
---GTGTTCTTGGGTTCTTGGGAGCA---GCAGGAAGCACTATG---GGCGCGGCGTCA---  
ATGACGCTGACGGTACAG---GCTAGACAA---CTGTTG---TCTGGTATAGTGCAACAGCAAAGC---  
AATTTG---CTGAAG---GCTATAGAGGCGCAGCAACATCTGCTGCAACTCACGGTCTGGGGCATC  
>GQ999982  
AATTATACACTGAGCAATAAC-----  
-----  
-----  
AATAATGAAACAATCATACTCCCATGTAGAATGAAACAAATTATAAATATGTGGCAGGGGGTAGGACGAGCAA  
TGTATGCCCCCTCCCATTTGCAGGAAACATAACATGTAACTCAAGT---  
ATCACAGGACTGTTATTGACGCGTGACAAAGACCCAGGGCAGAAGAAC-----  
-----  
-----  
AGCAACACAGAGACATTCAGACCTACAGGAGGAAATATGAAGGACAATTGGAGAAATGAATTATACAAATGTA  
AAGTGGTAGAAATTAAACCATTA---GGAGTAGCACCCACTAATGCAAAAAGGAGAGTGGTG-----  
-----GAGAGAGAAAAAGAGCA---GTAGGA---ATAGGAGCT-----  
---GTGCTCCTTGGGTTCTTGGGAGCA---GCAGGAAGCACTATG---GGCGCGGCGTCA---  
ATAACGCTGACGGTACAG---GCCAGACAA---CTGTTA---TCTGGTATAGTGCAACAGCAAAGT---  
AATTTG---CTGAGA---GCTATAGAGGCGCAACAGCACATGTTGCAACTCACAGTCTGGGGCATT  
>GQ999988  
TTTTATGAACCT-----  
-----  
-----  
TTAAATTTAACCATCACACTCCAATGCAGAATAAAACAAATTATAAACATGTGGCAGGAGGTGGGACGAGCAA  
TGTATGCCCCCTCCCATTTGCAGGAAACATAACATGTGAATCAAAG---  
ATCACAGGGCTAATATTGACACGTGATGGAGGAAGTGACAAATGGG-----  
-----  
-----  
ACAGAGACATTCAGACCTGGAGGAGGAGATATGAGGGACAACCTGGAGAAGTGAATTATATAAATATAAAGTGG  
TAGAAATTAAGCCATTG---GGAATAGCACCCACTAATGGAAGAAGGAGAGTGGTG-----  
-----CAGAGAGAGAAAAGAGCA---GTGGGA---ATAGGAGCT-----  
GTATTCCTTGGGTTCTTGGGAGCA---GCAGGAAGCACTATG---GGCGCGGCATCA---  
ATAACGCTGACGGTACAG---GCCAGACAA---TTATTG---TCTGGTATAGTGCAACAGCAAAAC---  
AATTTG---CTGAGG---GCTATAGAGGCGCAACAGCATATGTTGCAACTCACGGTCTGGGGCATT  
>HQ615952  
AATCAGACTACAAAT-----  
-----  
-----  
AATTCTACTAACATCACACTCCCATGCAGAATAAAACAAATTATCAACATGTGGCAGGAGGTAGGACGAGCAA  
TGTATGCCCCCTCCTATTGCAGGAAACGTAACATGTAACTCGAGT---  
ATCACAGGACTACTACTGACCCGTGATGGGGGAAAAGGAAATGACACA-----

-----  
-----  
GGAAATGGCACAGAGATATTCAGACCTGGAGGAGGAAATATGAAAGACAATTGGAGAAGTGAATTATTTAAAT  
ATAAAGTGGTAGAAGTTAGGCCATTG---GGAATAGCACCCACTACGGCAAAAAGGAGAGTGGTG-----  
-----GAGAGAGAAAAAAGAGCA---GTGGGA---ATAGGAGCT---  
-----GTACTCCTTGGGTTCTTGGGAGCA---GCAGGAAGCACTATG---GGCGCGGCGTCA---  
ATAACGCTGACGGTACAG---GCCAGACAA---CTGTTG---TCTGGTATAGTGCAACAGCAAAGC---  
AATTTG---CTGAGG---GCTATAGAGGCGCAACAGCATATGTTGCAACTCACGGTCTGGGGCATT  
>HQ595762  
GCTTATAATACACCAAAT-----  
-----  
GCTTCAGAAAACATAACCCCTCCCATGTAGATAAAAACAAATTATAAACATGTGGCAGAGGGTAGGACGAGCAA  
TGTATGCCCCCTCCCATTCAGAGAAACATAACATGTAAATCAAAT---  
ATCACAGGACTACTCTTGACACGTGATGGAGGGAGCAATAGTACA-----  
-----  
-----  
GGGACAGAAATATTCAGACCTGGAGGAGGAGATATGAGGGATAATTGGAGAAGTGAATTATATAAATATAAAG  
TAGTAGAAGTTAAACCATTA---GGAATAGCACCCACTACTGCAAGAAGGAGAGTGGTG-----  
-----CAGAGAGAAAAAAGAGCA---GCA-----TTGGGAGCT-----  
GTGCTCTTGGGGTTCTTAGGAGCA---GCAGGAAGCACTATG---GGCGCGGCGTCG---  
GTGGCGCTGACGGTACAG---GCCAGGCAA---TTATTG---TCTGGTATAGTGCAACAGCAAAGC---  
AATTTG---CTGAGA---GCTATAGAGGCACAACACCATTTGTTGCAACTCACAGTCTGGGGCATT  
>HQ595758  
AATTATAATGATACA-----  
-----  
GAAAGTAATTCAACCATCACACTTCCATGCAGGATAAAAACAAATTATAAACATGTGGCAGGAGGTAGGACGAG  
CAATGTATGCTCCTCCCATTCAGGAAACATAACATGTAAATCAAAT---  
ATCACAGGATTACTATTGACGCGTGATGGAGGCACAAATGACACA-----  
-----  
-----  
AATAACACAGAAATATTCAGACCTGGAGGAGGAAATATGAAGGACAATTGGAGAAGTGAATTGTATAAATATA  
AAGTGGTAGAAATTAAACCATTA---GGGATAGCTCCCACTGGAGCAAAAAGGAGAGTGGTG-----  
-----GAGAGAGAGAAAAAGAGCA---GTAGGA---ATAGGAGCT-----  
---ATGATCCTTGGGTTCTTGGGAGCA---GCAGGAAGCACTATG---GGCGCAGCGTCA---  
ATAACGCTGACGGTACAC---GCTAGACAA---TTGTTG---TCTGGTATAGTGCAACAGCAAAGC---  
AATTTG---CTGAGA---GCTATAGAGGCGCAACAGCATATGTTGCAACTCACGGTCTGGGGCATT  
>KT183064  
AATCATACAGACAGGTCTAATGATACAGGA-----  
-----  
AGTAATAAAACCATCACACTCCCATGTAAATAAAAACAAATTATAAACATGTGGCAGGAGGTAGGACGAGCAA  
TGTATGCCCCCTCCCATTCAGGAAACATAACATGTAAATCAAAT---  
ATCACAGGTCTACTATTAGTACGTGATGGAGGAGAAAGTAACTCA-----  
-----  
-----  
ACAACGGAGATATTCAGACCTGGAGGAGGAAATATGAAGGACAATTGGAGAAGTGAATTATATAAATATAAAG  
TGGTAGAAATTAAACCACTG---GGAATAGCACCCACTGAGGCAAAAAGGAGAGTGGTG-----  
-----GAGAGAGAAAAAAGAGCA---GTTGGC---ATAGGAGCT-----  
GTGTTCTTGGGTTCTTGGGAGCA---GCAGGAAGCACTATG---GGCGCGGCGGCA---  
GTGACGCTGACGGTACAG---GCCAGACAA---TTGTTG---TCTGGTATAGTGCAACAGCAAAGC---  
AATTTG---CTGAGG---GCTATAGAGGCGCAACAGCATATGTTGCAACTCACAGTCTGGGGCATT  
>KT183094  
TACTATCCTAATGGTACTGTT-----  
-----  
ACAACAAGTAATATTACACTCCCATGCAAAATAAAAACAAATTATAAACATGTGGCAAGGGGTGGGACGAGCAA  
TGTATGCCCCCTCCCATTCAGGAAACATAACATGTAAATCAAAC---  
ATCACAGGATTACTATTGCTACGTGATGGGGGAAACATGAATAAC-----  
-----  
-----  
ACAACAGAAATATTCAGACCTGGAGGAGGAGATATGAAGGACAATTGGAGAAGTGAATTATATAAATATAAAG  
TAGTAGAAATTAAACCATTA---GGAATAGCACCCACTGGGGCAAAAAGGAGAGTGGTG-----

-----GAAAGAGAAAAAAGAGCA---GTGGGA---ATAGGAGCT-----  
 GTGATCTTTGGGTTCTTGGGAGCA---GCAGGAAGCACTATG---GGCGCAGCGTCA---  
 ATAGCGCTGACGGTACAG---GCCAGACAA---CTGTTG---TCTGGTATAGTGCAACAGCAAAGC---  
 AATTTG---CTGAGA---GCTATAGAGGCGCAACAGCATATGTTGCAACTCACGGTCTGGGGCATT  
 >KT183148  
 ACTTATAATGGTCCAGAA-----  
 -----  
 GGAAACTCAAACATCACACTCCCATGCAGAATAAAACAAATTATAAACATGTGGCAGAAAGTAGGACGAGCAA  
 TATATGCCCCCTCCATTAGAGGAAACATAACATGTAACCTCAAGT---  
 ATCACAGGACTAGTCTTGGTACGTGATGGAGGTATATATAATAATACCAAAAAT-----  
 GAAAAATGAGACATTTCAGA---CCT-----  
 -----  
 GAAAAATGAGACATTTCAGACCGGGAGGAGGAGATATGAGGGACAATTGGAGAAGTGAACTATATAAATATAAAG  
 TGGTAGAAATTAACCATTG---GGAATAGCGCCCACTGAAGCAAAAAGGAGAGTGGTG-----  
 -----CAGAGAGAAAAAAGAGCA---GTGGGA---ATAGGAGCT-----  
 TTGTTCTTGGGTTCTTGGGAGCA---GCAGGAAGCACTATG---GGCGCAGCGTCA---  
 ATAACGCTGACGGTACAA---GTCAGACAA---TTGTTG---TCTGGAATAGTGCAACAGCAAAGC---  
 AATTTG---CTGAGA---GCTATAGAGGCGCAACAGCATATGTTGCAACTCACAGTCTGGGGCATT  
 >KT183196  
 ATTCAA-----  
 -----  
 AACAGCACAAATATCACACTCCCATGCAAAATAAAACAATTTGTAAATATGTGGCAGGAGGTAGGACGAGCAA  
 TGTATGCCCCCTCCATTGCAGGAAACATAACATGTAGATCAAAT---  
 ATCACAGGACTACTATTGGTGCGTGATGGGGGCAACCAAAGCGGA-----  
 -----  
 -----  
 AATGATATAGAGACATTTCAGACCTGGAGGAGGAAATATGAAAGACAATTGGAGAAGTGAATTATATAAATATA  
 AAGTGGTAGAAATTAACCATTG---GGAATAGCACCCACTAAGGCAAAAAGGAGAGTGGTG-----  
 -----GAGAGAGAAAAAAGAGCA---GTGGGA---ATAGGAGCT-----  
 ---GTGTTCTTGGGTTCTTGGGAACA---GCAGGAAGCACTATG---GGCGCGGCGTCA---  
 ATAGCGCTGACGGTACAG---GCCAGACAA---GTATTG---GCTGGTATAGTGCAACAGCAAAGC---  
 AATTTG---CTGAGG---GCTATAGAGGCGCAACAGCATATGTTGCAACTCACGGTTTGGGGCATT  
 >KC156123  
 GCCTACAATAAAACAGGTGATAATTCA-----  
 -----  
 ACCATCACAACCATCACACTCCAATGCAGAATAAAACAAGTTATAAACATGTGGCAGGAGGTAGGACGAGCAA  
 TATATGCCCCCTCCATTGCAGGAAACATAACATGTAGCTCAAAT---  
 ATCACAGGACTACTGTTGACACGTGATGGAGGAAATAATAATAGTAGT-----  
 -----  
 -----  
 AATGAGACAGAGACATTTCAGGCCTGGAGGAGGAGATATGAGAGACAATTGGAGAAGTGAATTATATAAATATA  
 AAACAGTAGAAATTAACCATTAT---GGAATAGCACCCACTACGGCAAAAAGGAGAGTGGTG-----  
 -----GAGAGAGAAAAAAGAGCA---GTGGGA---ATAGGAGCT-----  
 ---GTGTTCTTGGGTTCTTGGGAGCA---GCAGGAAGCACTATG---GGCGCGGCGTCA---  
 ATAACGCTGACGGTACAG---GCCAGACAA---TTGTTG---TCTGGTATAGTGCAACAGCAAAGC---  
 AATTTG---CTGAGA---GCTATAGAGGCGCAACAACATCTGTTGCAACTCACGGTCTGGGGCATA  
 >KC156125  
 TTTTATGCTAATAGCAGT-----  
 -----  
 -----  
 GATCCCAATGCAACTATCACACTCCCATGCAAAATAAAACAATTTATAAACATGTGGCAGGAGGTAGGACGAG  
 CAATGTATGCCCCCTCCATTGAAGGAAACATAACATGTAAATCAAAT---  
 ATCACAGGGCTACTATTGGAACGTGATGGAGACATAAAAGAAAAC-----  
 -----  
 -----  
 AATACAGAGACATTTCAGACCTATAGGAGGAAATATGAAGAACAATTGGAGAAGTGAATTATATAAATATAAAG  
 TGGTAGAGATTAAACCATTG---GGAGTAGCACCCACAGAATCAAAAAGGAGAGTGGTG-----  
 -----GAGAGAGAAAAAAGAGCA---GTGGGATTAGGCGGAGCT-----  
 TTGTTCTTGGGTTCTTGGCAACA---GCAGGAAGCACTATG---GGCGCGGCGTCA---

ATAACGCTGACGGTACAG---GCCAGACAA---CTGTTG---TCTGGTATAGTGCAACAGCAAAAC---  
 AATTTG---CTGAGA---GCTATAGAGGCGCAACAGCATCTGTTGCAACTCACAGTCTGGGGCATT  
 >KC156127  
 AGTCAT-----  
 -----  
 AATGGTACGAACATCACACTCTCATGCAGAATAAAACAAATTATAAACATGTGGCAGGAGGTAGGAAGGGCAA  
 TATATAACCTCCCATTGCAGGAAACATAACATGTAAATCAAAC---  
 ATCACAGGACTACTATTGGTACGTGATGGAGGTATCACAAATAAC-----  
 -----  
 -----  
 AACACAGAGACATTTCAGACCTGGAGGAGGAGATATGAGGGACAATTGGAGAAGCGAATTATATAAATATAAAG  
 TGGTAGAAATTAATCCCTTA---GGAGTAGCACCCACTAAGGCAAAAAGGAGAGTGGTG-----  
 -----GAGAGAGAAAAAAGAGCA---GTGGGA---GTAGGAGCT-----  
 ATGTTCCCTTGGGTTCTTGAGTGCA---GCAGGAAGCACTATG---GGCGCGGCGTCA---  
 ATAACGCTGACGGTACAG---GCCAGACAA---CTGTTG---TCTGGCATAGTGCAACAGCAAAGC---  
 AATTTG---CTGAGG---GCTATAGAGGCGCAACAGCATATGTTGCAACTCACAGTCTGGGGCATT  
 >JN687717  
 ATTCATAAGAATGAAAGTGGT-----  
 -----  
 TCAAAATGACACCATTACAATCCCATGCAGAATAAAACAAATTATAAACATGTGGCAGGAGGTAGGAAAAGCAA  
 TGTATGCCCCCTCCCATTGCAGGAAACATAACATGTGAGTCAAAT---  
 ATCACAGGACTACTATTAGAACGTGATGGAGGCACAAACATTAACACAGGCAATAACACAGGCAATAACACCA  
 CAGGC-----  
 CATAACACAGGCAATAGCACAGATAACAGAAATGAAACATTCAGACCTGGAGGAGGAAATATGAAGGATAATT  
 GGAGAAGTGAAGTATATAAATATAAAGTGGTAGAAATTAAGCCATTG---  
 GGAGTAGCACCCACGAAGGCAAGAAGGAGAGTAGTG-----  
 ACGGGGAAAGAAAAAAGAGCA---GTGGGA---CTAGGAGCT-----  
 GTGATCTTTGGGTTCTTGGGAGCA---GCAGGAAGCACTATG---GGCGCGGCGTCA---  
 GTGGCGCTGACGGTACAG---GCCAGACAA---CTGTTG---TCTGGTATAGTGCAAGCAGCAAAGC---  
 AATTTG---CTGAGA---GCTATAGAAGCGCAACAGCATATGTTGCAACTCACAGTCTGGGGCATT  
 >KC863629  
 AATCAT-----  
 -----  
 TCAAAATCAAACATCACACTCAAATGCAGAATAAAACAAATTATAAACATGTGGCAGGGGGTAGGACAAGCAA  
 TGTATGCCCCCTCCTATTGCAGGAAACATAACATGTAACTCAACC---  
 ATCACAGGACTACTATTGACACGTGATGGAGGAAGCACAAACAAAT-----  
 -----  
 -----  
 AGCTCGACAGAAATATTCAGACCTGGAGGAGGAGATATGAGGGACAATTGGAGAAGTGAATTATATAAATATA  
 AAGTGGTAGAAGTTAAGCCATTA---GGGATAGCACCCACTGAGGCAAAAAGGAGAGTGGTG-----  
 -----GAGAGAGAAAAAAGAGCA---GTGGGA---ATAGGAGCT-----  
 ---GTGTTCCCTTGGGATCTTGGGAGCA---GCAGGAAGCACTATG---GGCGCAGCATCA---  
 ATAACGCTGACGGTACAG---GCCAGACAA---TTGTTG---TCTGGTATAGTGCAACAGCAAAGC---  
 AATTTG---CTGAGG---GCTATAGAGGCGCAACAGCATATGTTGCAACTCACGGTCTGGGGCATT  
 >KC863647  
 ACCTACAACCATAATGACACATCAAATGCAACCAGCAACAAC-----  
 -----  
 ACATCAGATATCATCACCTCCAATGCAGAATAAAACAAATCATAAACATGTGGCAGGGGGTAGGAAAAGCAA  
 TATATGCCCCCTCCCATTGAAGGAAATATAACCTGTAGATCAGAG---  
 ATCACAGGACTACTATTGACAAGGGATGGAGGAGATGAAGGTAAA-----  
 -----  
 -----  
 AATGATACAGAGATATTCAGACCTGGAGGAGGAGATATGAGAGACAATTGGAGAAGTGAATTATATAAATATA  
 AAGTAGTAGAAATTAAACCATTA---GGAATAGCACCCACCAAGGCAAAAAGGAGAGTGGTGGAG-----  
 -----AGGAGAGGAAAAAAGAGCA---GTAGGA---ATAGGAGCT-----  
 ---ATGTTCCCTTGGGTTCTTAGGAGCA---GCAGGAAGCACTATG---GGCGCAGCGTCA---  
 ATAACGCTGACGGTACAG---GCCAAACAA---TTATTG---TCTGGTATAGTGCAACAGCAAAGC---  
 AATTTG---CTGAGG---GCTATAGAGGCGCAACAACATATGTTGCAACTCACGGTCTGGGGCATT  
 >HM204598

GATTATAAACCAACAAATGAT-----  
-----  
ACTGGTGATACCATAATACTTCCATGCAGAATAAAACAAATTATAAACATGTGGCAGGAGGTAGGACGAGCAA  
TGTATGCCCCCTCCCATTCAGGAAACATAACATGTAATTCAAGT---  
ATCACAGGACTACTATTAGAACATGATGGAGAAACAGATGGAGAT-----  
-----  
AATGTGACATTCAGACCTATAGGAGGAAATATGAAGGACAATTGGAGAAGTGAATTATATAAATATAAAGTGG  
TAGAAATTAAGCCATTG---GGAATAGCACCCACTGAGGC AAAAAGGAGAGTGGTG-----  
-----GAGAGAGAGAAAAGAGCA---GCAGTGGGAATAGGAGCT-----  
GTGTTCTTGGGTTCTTGAGCGCA---GCAGGAAGCACTATG---GGCGCGGCGTCA---  
ATAACGCTGACGGTACAG---GCCAGACAA---CTGTTG---TTTGGTATAGTGCAACAGCAAAGC---  
AATTTG---CTGAAG---GCTATAGAGGCGCAACAGCATATGTTGCAACTCACAGTCTGGGGCATT  
>HM204601  
AGCTAT-----  
-----  
TCAAAACAACACCATCACACTCCCATGCAGGATAAAACAAATTGTAAATATGTGGCAGAAGGTAGGACAAGCAA  
TGTATGCCCCCTCCCATTCAGGAAACATAACATGTAACTCAAGT---  
ATCACAGGACTAATATTGACACGTGATGGGGGGAACACAGAGAATAACACA-----  
-----  
GGGAATAACACAGAGGTATTCAGACCTGGAGGAGGAGATATGAAGAATAATTGGAGAAGTGAATTATATAAAT  
ATAAAGTGGTAGAAATTAACCATTG---GGAATAGCACCCACCACGGCAAAAAGGAGAGTGGTG-----  
-----GAGAGAGAAAAAAGAGCA---GCA-----ATAGGAGCT---  
-----GTGCTCCTTGGGTTCTTGGAACA---GCAGGAAGCACTATG---GGCGCGGCGTCG---  
GTAGCGCTGACGGTACAG---ACCAGACAA---CTGCTG---TCTGGTATAGTGCAACAGCAAAGC---  
AATTTG---CTGAGA---GCTATAGAGGCGCAACAGCATATGTTGCAACTCACAGTCTGGGGCATT  
>HM204605  
AATTACTCGTTTAATGAGACAGACAATGTGACAACAAGCGAG-----  
-----  
-  
CAAGATGCAAACATCACACTCCAATGCAGAATAAAACAAATTATAAACATGTGGCAGGAGGTGGGGCGAGCAA  
TGTATGCCTCCCCCATTGCAGGAGAAATAACATGTAACTCAAGT---  
ATCACAGGACTACTATTGACACGTGATGGAGGAAGAAAAGAGAATAATACA-----  
-----  
-----  
GAGAGTAATACAGAAATATTCAGACCTGGAGGAGGAAATATGAGGGACAATTGGAGAAGTGAATTATATAAAT  
ATAAAGTGGTAGAAGTTAATCCATTA---GGAATAGCACCCACTAAGGCACGAAGGAGAGTGGTG-----  
-----CAGAAAGAGAAAAGAGCA---ATAACA---CTGGGAGCT---  
-----ATGTTCTTGGGTTCTTG GGGGCA---GCAGGAAGCACTATG---GGCGCAGCATCA---  
ATAACGCTGACGGTACAG---GCCAGACAA---TTATTG---TCTGGTATAGTGCAACAGCAAAGC---  
AATTTG---CTGAGG---GCTATAGAGGCGCAACAGCATATGTTGCAACTCACAGTCTGGGGCATT  
>HM204610  
CCTCAGGGTTCTAAT-----  
-----  
AGTACAAAAAACATCACAATATATTGCAGAATAAAACAAATTATAAACATGTGGCAGAGGGTAGGACGAGCAA  
TGTATGCCCCCTCCCATTCAGGAAACATAACATGTATATCAAAT---  
ATCACAGGACTACTATTGGTACGTGATGATCCATCAAATGCT-----  
-----  
-----  
ACATTAGACCGGGAGGAGGAGATATGAGGGATAACTGGAGAAGTGAATTATATAAATATAAAGTGGTAGAAA  
TTAAGCCATTG---GGAATAGCACCCCTCTAAGGC AAAAAGGAGAGTGGTG-----  
-----GAGAGAGAAAAAAGAGCA---GCGGGA---CTAGGAGCT-----  
GTGTTCTTGGGTTCTTG GAGCA---GCAGGAAGCACTATG---GGCGCGGCGTCA---  
ATAACGCTGACGGTACAG---GCCAGACAA---TTGCTG---TCTGGTATAGTGCAACAGCAAAAC---  
AACTTG---CTGAGG---GCTATAGAGGCGCAACAGCATTTGTTGCAACTCACAGTCTGGGGCATT  
>FJ444091  
AACTATAATGGTACAGAA-----  
-----  
AGTAATTCAAGCATCATCACACTCCCATGCAGAATAAAACAAATTGTAAACATGTGGCAGGAGGTAGGAAGAG

CAATATATGCCCCCTCCTATTGCAGGAAACATAACATGTAACTCAAGT---  
ATCACAGGATTACTATTGCTGCGTGATGGAGGCTTAGGCTTGAAT-----  
-----  
GAAACAGGAGAGACATTTAGACCTATAGGAGGAGATATGAGGAACAATTGGAGAAGTGAATTATATAAATATA  
AGGTGGTAGAAATTAAGCCATTG---GGAGTAGCACCCACTAAGGCAAAAAGGAGAGTGGTG-----  
-----GAGAGAGAAAAAAGAGCA---GTGGGA---CTGGGAGCT-----  
---GTGTTCTTGGGTTCTTGGGAGCA---GCAGGAAGCACTATG---GGCGCGGCGTCA---  
ATAACGCTGACGGTACAG---GCCAGACAA---CTGTTG---TCTGGTATAGTGCAACAGCAAAGC---  
AATTTG---CTGAGG---GCTATAGAGGCGCAACAGCATATGTTGCAACTCACAGTCTGGGGCATT  
>JX140664  
AATTATACTTCTAATGATACA-----  
-----  
GAAAAATCACAACCTCACAACCTCCCATGCAAAATAAAACAGATTATAAACTTGTGGCAGGAGGTAGGACGAGCGA  
TGTACGCTCCTCCCATTGCAGGAAACATAACATGTAAGTCAACC---  
ATCACAGGATTACTATTGGTGCCTGATGGAGGACAAGGAAACAGC-----  
-----  
TCAAAATGAGACATTTCAGACCTGGAGGAGGAGATATGAGGGATAATTGGAGAAGTGAATTGTATAAGTATAAAG  
TGGTAGAAATTAAGCCATTG---GGAGTAGCACCCACTGAGGCAAAAAGGAGAGTGGTG-----  
-----GAGAGAGAAAAAAGAGCA---GTGGGA---CTAGGAGCT-----  
GTGATCTTTGGGTTCTTGGGAGCA---GCAGGAAGCACTATG---GGCGCGGCGTCA---  
ATAACGCTGACGGTACAG---GCCAGACAA---CTGTTG---TCTGGTATAGTGCAACAGCAAAGC---  
AATTTG---CTGAAG---GCTATAGAGGCAACAGAAATATGTTGCAACTCACGGTCTGGGGCATT  
>KT183083  
ACTTATGTAAATATAAGTGAA-----  
-----  
ACAAACAAAACCTTCATACTCCCATGCAGAATAAAACAAATTATAAACATGTGGCAGGGGGTAGGACGAGCAA  
TGTATAACCCTCCCATTGCAGGAACCATAACATGTAAGTCAAGT---  
ATCACAGGACTACTATTGGTACGTGATGGAGGAAACGGGGATACCACAAGT-----  
-----  
AATAACAGTAATAACGAGACATTTCAGACCTGGAGGGGGAAATATGAAGGACAATTGGAGAAGTGAATTATATA  
AATACAAGGTGGTAGAAGTTAAGCCATTG---GGAATAGCACCCACTGAGGCAAAAAGGAGAGTGGTG-----  
-----GAGAGAGAAAAAAGAGCA---GCAGGA---  
ATAGGAGCT-----GTACTCCTTGGGTTCTTGGGAGCA---GCAGGAAGCACTATG---  
GGCGCAGCATCA---ATAACGCTGACGGTACAG---GCCAGGCAA---TTATTG---  
TCTGGTATAGTGCAACAGCAAAGC---AATTTG---CTGAGG---  
GCTATAGAGGCGCAACAGCATATGTTGCAACTCACGGTCTGGGGCATT  
>KT183155  
GAT-----  
-----  
TATAATGAAATCATCACACTCCAATGCAGGATAAAACAAATTATAAACATGTGGCAGGGGGTAGGACGAGCAA  
TGTATGCCCCCTCCCATTGAAGGAATCATAACATGTAAGTCAAAAT---  
ATCACAGGACTACTATTGACACGAGATGGAGGCAACAGCAACAAC-----  
-----  
AACGACACAGAGGTATTTCAGACCTGGAGGAGGAAATATGAAAGACAATTGGAGAAGTGAATTATATAAATATA  
AGGTGGTAGAAATTAAGCCATTG---GGAATAGCTCCCACTGAAGCAAAAAGGAGAGTGGTG-----  
-----GAGAGAGAAAAAAGAGCA---GTGGGA---ATAGGAGCT-----  
---GTGCTCCTTGGGTTCTTGGGAGCA---GCAGGAAGCACTATG---GGCGTGGCGTCA---  
ATAACGCTAACGGTACAG---GCCAGACAA---TTGTTG---TCTGGTATAGTGCAACAGCAAAGC---  
AATTTG---CTGAGA---GCTATAGAGGCGCAACAACATATGTTGCAACTCACGGTCTGGGGCATT  
>KT183168  
ACTTATAATGATACAAAGCATAAT-----  
-----  
GGAACCAAAGTCATCACACTCCCATGCAGAATAAAACAAATTATAAACATGTGGCAGGAGGTAGGACGAGCAA  
TGTATGCTCCTCCCATTGCAGGCAACATAACATGTACGTCAAAT---  
ATCACAGGACTACTATTGACAAGGGATGGAGGGAATAATAGCACA-----  
-----

-----  
GAGACAGAGACATTTCAGACCTGGAGGAGGAGATATGAGGGACAATTGGAGAAGTGAATTATATAAATACAAAG  
TAGTAGAAATTAAGCCATTG---GGAATAGCACCCACTGGAGCAAAAAGGAGAGTGGTG-----  
-----GAGAGAGAAAAAAGAGCA---GTGGGA---ATAGGAGCT-----  
GTGTTCCCTTGGGTTCTTGGGAGCA---GCAGGAAGCACTATG---GGCGCGGCGTCA---  
ATAACGCTGACGGTACAG---GCCAGACAA---CTGTTG---TCTGGTATAGTGCAACAGCAAAGC---  
AATTTG---CTGAAG---GCTATAGAGGCGCAACAACACCTGTTGCAACTCACAGTCTGGGGCATT  
>KT183188  
TCTCATGAGGGGTCAGGC-----  
-----  
AACATCACAAACATCACAATCCCATGCAGGATAAAAACAAATCATAAACATGTGGCAGAAGGTAGGACGAGCAA  
TGTATGCCCCCTCCCATTCGAGGAAGCATAACATGTAAGTCAAGT---  
ATCACAGGAATACTGTTGACACGTGATGGAGGAAACATAACAAAT-----  
-----  
-----  
AGCACAAAGGAGATATTTCAGACCTGGAGGAGGAGATATGAAGGACAATTGGAGAAGTGAATTATATAAATATA  
AAGTGGTAGAAATTAAGCCATTG---GGAATAGCACCCACTGAATCAAAAAGGAGAGTGGTG-----  
-----GAGAGAGAAAAAAGAGCA---GTGGGA---ATAGGAGCT-----  
---GTGCTCCTTGGGTTCTTGGGAGCA---GCAGGAAGCACTATG---GGCGCGGCGTCA---  
ATAACGCTGACGGCACAG---GCCAGACAA---CTGTTG---TCTGGTATAGTGCAACAGCAAAGC---  
AATTTG---CTGAGA---GCCATAGAGGCGCAACAGCATATGTTGCAACTCACGGTCTGGGGCATT  
>HM623550  
AATCAGACA-----  
-----  
GGAAATGATTCATTCATCATACTTCCATGTAAAATAAAAACAAATTATAAATATGTGGCAGAAGGTAGGACGAG  
CAATGTATGCTCCTCCCATTCGAGGAAATATAACATGTAAGTCAAAT---  
ATCACAGGAATACTATTAGTACGTGATGGAGGCCAGATAACAGT-----  
-----  
-----  
ACAGAAACATTTAGACCTGGAGGAGGAAATATGAAGGACAATTGGAGAAGTGAATTATATAAATATAAAGTGG  
TAGAAATTAAGCCATTG---GGAATAGCACCCACTGAAGCAAAAAGGAGAGTGGTG-----  
-----GAGAGAGAAAAAAGAGCA---GTGGGA---ATAGGAGCT-----  
GTGTTCCCTTGGGTTCTTGGGAGCT---GCAGGAAGCACTATG---GGCGCGGCGTCA---  
ATAACGCTGACGGTACAG---GCCAGACAA---CTGTTG---TCTGGTATAGTGCAACAGCAAAGC---  
AATTTG---CTGAGA---GCTATAGAGGCGCAACAGCATATGTTGCAACTCACAGTCTGGGGCATT  
>HM623567  
TGCTATACATCAAGACTGTTTAATAGTACATACAATGGTACACTTAGTATACATAATACATAATGATACA-  
-----  
-----  
GGAAACGAAACACACATCACACTTCCATGCAGAATAAAAACAAATTATAAACATGTGGCAGGGGGTAGGGCGAG  
CAATGTATGCCCCCTCCCATTCGAGGAAACATAACATGTAATTCAAGT---  
ATCACAGGTCTACTATTGACACGGGATGGAGGAAACACAACACAT-----  
-----  
-----  
AATGACACAGAGACATTTCAGACCTGGAGGAGGAAATATGAAGGACAATTGGAGAAGTGAATTATATAAATATA  
AAGTAATAGAAATTAAGCCATTG---GGAATAGCTCCCACTGGGGCAAAAAGGAGAGTGGTG-----  
-----GAGAGAGAAAAAAGAGCA---GTGGGA---ATAGGAGCT-----  
---GTGTTCCCTTGGGTTCTTGGGAGCA---GCAGGAAGCACTATG---GGCGCAGCGTCA---  
ATAACGCTGACGGTACAG---GCCAGACAA---CTGTTG---TCTGGTATAGTGCAACAGCAAAGT---  
AATTTG---CTGAGG---GCTATAGAGGCGCAACAGCATATGTTGCAACTCACAGTCTGGGGCATT  
>HM623573  
AATTAT-----  
-----  
ACTAATAACACCATCACACTCCCATGCAGAATAAAAACAAATTATAAACATGTGGCAGGAGGTAGGAAGAGCAA  
TGTATGCCCCCTCCCATTCGAGGAAACATAACATGTAAGTCAAGT---  
ATCACAGGAATACTATTGACACGTGATGGAGGACAAGATAATAATACA-----  
-----  
-----  
AAGAATAATAAGAGATATTTCAGACCTGGAGGAGGAGATATGAGAGACAATTGGAGAAGTGAATTATATAAAT  
ACAAAAGTGGTAGAAATTAAGCCATTG---GGAGTAGCACCCACTGATGCAAAAAGGAGAGTGGTG-----

-----GAGAGAGAAAAAAGAGCA---GTAGGA---CTAGGAGCT---  
 -----GTATTCCTTGGGTTCTTGGGAGCA---GCAGGAAGCACTATG---GGCGCGCGTCA---  
 ATAGCGCTGACGGTACAG---GCCAGACAA---CTGTTG---TCTGGTATAGTGCAACAGCAAAGC---  
 AATTTG---CTGAGG---GCTATAGAGGCGCAACAGCATATGTTGCAACTCACAGTCTGGGGCATT  
 >KC154017  
 TTTTCATCCAGACAACCTCAACCAAAGGCAAA-----  
 -----  
 -----  
 GACAAATGAAACCATCACACTCCCATGCAGGATAAAACAATTTATAAACATGTGGCAGGGAGTAGGACGAGCAA  
 TGTATGCCTCTCCCATTTGAAGGAAACATAACATGTAACCTCAAGT---  
 ATCACAGGGATAATATTGACACGTGATGGAGGAAACACCACAAAC-----  
 -----  
 -----  
 AAAACAGAGGTATTCAGACCTGAAGGAGGAAATATGAAGGACAATTGGAGAAGTGAATTATATAAATATAAAG  
 TGGTAGAAATTAAGCCATTG---GGAGTAGCTCCAACCTGAGGCAAAAAGGAGAGTGGTG-----  
 -----GAGAGAGGAAAAAAGAGCA---GTGGGA---ATAGGAGCT-----  
 GTACTCCTTGGGTTCTTGGGAGCA---GCAGGAAGCACTATG---GGCGCAGCATCA---  
 ATAACGCTGACGGTACAG---GCCAGACAA---CTGTTG---TCTGGTATAGTGCAACAGCAAAGC---  
 AATTTG---CTAAGA---GCTATAGAGGCGCAACAACATATGTTGCAACTCACAGTCTGGGGCATT  
 >KC154019  
 GGTCTAATGGTACAGGA-----  
 -----  
 GATAATTCAACCATCACAATTTTCATGCAGAATAAAACAATTTATAAACATGTGGCAGGGGGTAGGGCGAGCAA  
 TGTATGCCCCCTCCCATTTGCAGGAAACATAACATGTAACCTCAAGT---  
 ATTACAGGACTACTATTAGTACGTGATGGAGGTGGAAATAGCACA-----  
 -----  
 -----  
 GAAGAGATATTCAGACCTGGAGGAGGAGATATGAGAGACAATTGGAGAAGTGAATTATACAAATATAAAGTAG  
 TAGAAATTAAGCCCTTA---GGAGTAGCACCCACTAAGGCAAAAAGGAGAGTGGTG-----  
 -----GAGAGAGAAAAAAGAGCA---GTGGGA---ATAGGAGCT-----  
 GTGTTCTTGGGTTCTTGGGAGCA---GCAGGAAGCACTATG---GGCGCAGCGTCA---  
 ATAACGCTGACGGTACAG---GCCAGACAA---TTATTG---TCTGGTATAGTGCAACAGCAAAGC---  
 AATTTG---CTGAGG---GCTATAGAGGCGCAACAGCATATGTTGCAACTCACGGTCTGGGGCATT  
 >KC154020  
 GACTATAAT-----  
 -----  
 -----  
 TCAACTAAGAACATCACACTCCCATGCAGGATAAAACAATTTATAAACATATGGCAGGGGGTAGGACAAGCAA  
 TGTATGCCCCCTCCCGTTGCAGGAAAAATAATATGTACATCAAAT---  
 ATCACAGGACTACTATTGACACGTGATGGAGGCGACGACACAAAT-----  
 -----  
 -----  
 GACACAGAGATATTCAGACCTGGAGGAGGAAATATGAAGGACAATTGGAGAAGTGAATTATATAAATATAAAG  
 TAGTAGAAATTAAGCCATTA---GGACTAGCACCCACTGCAGCAAGAAGGAGAGTGGTG-----  
 -----CAGAGAGAAAAAAGAGCA---ATAGGA---ATAGGAGCT-----  
 GTGTTCTTGGGTTCTTGGGAGCA---GCAGGAAGCACTATG---GGCGCAGCATCA---  
 ATAACGCTGACGGTACAG---GCCAGACAA---TTGTTG---TCTGGTATAGTGCAACAGCAAAGC---  
 AATTTG---CTGAGG---GCTATAGAGGCGCAACAGCATATGTTGCAACTCACAGTCTGGGGCATT  
 >HM204617  
 TTTTCATGGA-----  
 -----  
 -----  
 AATGAGACAGAAATCATACTCCAATGCAGACTAAAACAATTTATAAATATGTGGCAGGGAGTAGGACAAGCAA  
 TGTATGCCCCCTCCTATTGAAGGAAACATAACATGTACATCAAAT---  
 ATCACAGGACTATTATTGACACGTGATGGAGGCAAAGATGATAAC-----  
 -----  
 -----  
 ACAACAGAGATATTCAGACCTATAGGAGGAGACATGAAGAACAATTGGAGAAGTGAATTATATAAATATAAAG  
 TGGTAGAAATTAAGCCATTG---GGAATAGCACCCACTGCTGCAAAAAGGAGAGTGGTG-----  
 -----GACAGAGAAAAAAGAGCA---GTGGGA---ATGGGAGCT-----  
 GTGTTCTTGGGTTCTTGGGAGCA---GCAGGAAGCACTATG---GGCGCAGCGTCA---

ATAACGCTGACGGTACAG---GCCAGACAA---CTGTTG---TCTGGTATAGTGCAGCAGCAAAGC---  
 AATTTG---CTGAGA---GCTATAGAGGCGCAACAGCATCTGTTGCAACTCACGGTCTGGGGCATT  
 >KF114894  
 AAT-----  
 -----  
 CATAATGGCACCATCACACTCCCATGTAGAATAAAACAAATTATAAACATGTGGCAGAGGGTAGGACGAGCAA  
 TGTATGCCCCCTCCCATTCGAGGAAACATAACATGTAAATCTAAT---  
 ATCACAGGATTACTATTGGTACGTGATGGAGGGAATGGGAATAAT-----  
 -----  
 -----  
 AGCAGAAATGAGACATTGAGACTTGGAGGGGGAGATATGAGAGACAATTGGAGAAGTGAATTATATAAATATA  
 AAGTGGTAGAAATTAAGCCATTA---GGAGTAGCACCCACCGAGGCAAAAAGGAGAGTGGTG-----  
 -----GAGAGAGAAAAAAGAGCA---GTGGGA---ATAGGAGCT-----  
 ---GTGTTCCCTTGGGTTCTTGGGAGCA---GCAGGAAGCACTATG---GGCGCGGCGTCA---  
 ATAACGCTGACGGTACAG---GCCAGACAA---TTGTTG---TCTGGTATAGTGC AACAGCAAAC---  
 AATTTG---CTGAGG---GCTATAGAGGCGCAACAGCATCTGTTGCAACTCACAGTCTGGGGCATT  
 >HQ595756  
 TATCATGCTAATGGTACAGCAAATCTACAGATTCAAAA-----  
 -----  
 AATGATACATACATCACACTCCCATGCAGAATAAAACAAATTATAAACATGTGGCAAGGGGTGGGACAAGCAA  
 TGTATGCCCCCTCCCATTCGAGGAAACATAACATGTAACTCAAAT---  
 ATCACAGGACTGCTATTGCTACGTGATGGAGGTCCAGAAAAACAAT-----  
 -----  
 -----  
 ACAGAGACATTGAGACCTGGAGGAGGAAATATGAAGGACAATTGGAGAAGTGAATTGTATAAATATAAAGTAG  
 TAGAAATTAATCCATTA---GGAATAGCACCCACTAAGGCAAAAAGGAGAGTGGTG-----  
 -----GAGAGAGAAAAAAGAGCA---GTGGGA---CTAGGCGCT-----  
 ATGTTCCCTTGGGTTCTTGGGAGCA---GCAGGAAGCACTATG---GGCGCAGCATCA---  
 ATGACGCTGACGGTACAA---GCCAGACAA---TTGCTG---TCTGGTATAGTGC AACAGCAAAGC---  
 AATTTG---CTGAAG---GCTATAGAGGCGCAACAGCATATGTTGCAACTCACGGTCTGGGGCATT  
 >HQ615941  
 GACTATATTA AAAACAGTACATTAAAC-----  
 -----CTGGATAATAAT-----  
 ACAAACAGTACAGACATCATACTCCAATGCAGAATAAAACAAATTATAAACATGTGGCAGGGGGTAGGAAAAG  
 CAATGTATGCCCCCTCCCATTCGAGGAAATATAACATGTAACTCAACT---  
 ATCACAGGACTACTATTGACACGTGATGGAGGCAATGCTAAAGGCAATGAT-----  
 -----  
 ----  
 ACAGACAATAAGACAGAGACATTGAGACCTGCAGGAGGAGATATGAGGGACAATTGGAGAAGTGAATTATATA  
 AATACAAGGTGGTAGAAATTAAGCCATTA---GGAGTAGCACCCACTGAGGCAAAAAGGAGAGTGGTG-----  
 -----GAGAGAGAAAAAAGAGCA---GTAGGA---  
 CTAGGAGCT-----ATGTTCCCTTGGGTTCTTGGGAGCA---GCAGGAAGCACTATG---  
 GGCGCAGCATCA---ATAACGCTGACGGTACAA---GCCAGACAA---TTACTG---  
 TCTGGTATAGTGCAACAGCAAAGC---AATTTG---CTGAGG---  
 GCTATAGAGGCGCAACAACATATGTTGCAACTCACGGTCTGGGGCATT  
 >GU080194  
 ACCTACACGCCTAATGCTACAGAAAGTATT-----  
 -----  
 TCCAATAAAACCATCCCACTTTCATGCAGAATAAAACAAATAATAAATATGTGGCAGGAAGTAGGACGGGCAA  
 TGTATGCCCCCTCCCATTCGAGGAAACATAACATGTAGATCAAAT---  
 ATCACAGGACTATTATTAGTACGTGATGGAGGCAGCAATAACAAT-----  
 -----  
 -----  
 ACCAACGAGACATTGAGACCTGGAGGAGGAAATATGAAGGACAATTGGAGAAGTGAATTATACAAATATAAAG  
 TGGTAGAAATTAAGCCATTG---GGAATAGCACCCACGAAGGCAAAAAGGAGAGTGGTG-----  
 -----GAGAGAGAAAAAAGAGCA---GTGGGA---ATAGGAGCT-----  
 GTGTTCCCTTGGGTTCTTGGGAGCA---GCAGGAAGCACTATG---GGCGCGGCGTCA---  
 ATAACGCTGACGGTACAG---GCCAGACAA---TTGTTG---TCTGGTATAGTGC AACAGCAAAGC---  
 AATTTG---CTGAGG---GCTATAGAGGCGCAACAGCATATGTTGCAACTCACGGTCTGGGGCATT  
 >GU080199

AGTTATACAAGTATTAATAAGACAGGTGAAAACAGCACAAGT-----  
-----  
GATTCAAACAGCACACTCACACTCCCATGCGAGGATAAAACAAATTATAAACATGTGGCAGGAGGTAGGACGAG  
CGATGTACGCTCCTCCCATTCGAGGAAATATAACATGTAGATCAAAT---  
ATCACAGGACTACTATTGACACGTGATGGAGGAAACACAACAAACAAC-----  
-----  
-----  
ACAAACAAAGAGATATTCAGACCTGGAGGAGGAAATATGAAAGACAATTGGAGAAGTGAATTATATAAATATA  
AAGTGGTAGAAATTAAGCCATTG---GGAGTAGCACCCACTAAGGCAAAAAGGAGAGTGGTG-----  
-----GAGAGAGAAAAAAGAGCAGTACTGGGA---ATGGGAGCT-----  
---GTGTTCTTGGGTTCTTGGGAGCA---GCAGGAAGCACTATG---GGCGCAGCGTCA---  
CTAACGCTGACGGTACAG---GCCAGACAA---CTGTTG---TCTGGCATAGTGCAACAGCAAAGC---  
AATTTG---CTGAGA---GCTATAGAGGCGCAACAGCATCTGTTGCAACTCACAGTCTGGGGCATT  
>HM623585  
AACTATACAGATAACAAC-----  
-----  
CAAACAGGTACCATCACACTTCCATGCAAAATAAAACAAATTATAAACATGTGGCAGGGGGTGGGACAAGCAA  
TGTATGCCTCTCCCATTCGAGGAAACATAACATGTAGATCAAAT---  
ATCACAGGACTACTATTAGTACGTGATGGAGGCAATACAAGTGAGACA-----  
-----  
-----  
AATGGAACAGAGACATTTCAGACCTGCAGGAGGAGATATGAGGGACAATTGGAGAAGTGAATTATATAAGTATA  
AAGTGGTAGAAATTAAGCCATTG---GGAATAGCACCCACTAAAGCAAAAAGGAGAGTGGTG-----  
-----GAGAGAGAAAAAAGAGCA---GTGGGA---ATAGGAGCT-----  
---GTGTTCTTGGGTTCTTGGGAGCA---GCAGGAAGCACTATG---GGCGCGGCGTCA---  
ATAACGCTGACGGTACAG---GCCAGACAA---CTGTTG---TCTGGTATAGTGCAACAGCAAAT---  
AATTTG---CTGAGG---GCTATAGAGGCGCAACAGCATATGTTGCAACTCACAGTCTGGGGCATT  
>KF725903  
AATCAC-----  
-----  
-----  
TCAACCGATATAACCACCATCCAATGCAGGATAAAACAAATTTATAAACATGTGGCAGGAGGTAGGACGAGCAA  
TGTATGCCCCCTCCCATAGCAGGAAACATAACATGTAAATCAAAT---  
ATCACAGGACTACTATTGACAAGTGATTCTGGAAATAGAACTAAT-----  
-----  
-----  
GGAGCAGAGATATTCAGACCTGGAGGAGGAAATATGAAGGACAATTGGAGAAGTGAATTATATAAATATAAAG  
TGGTAGAAATTAAGCCATTA---GGAGTAGCACCCACTGGGGCAAAAAGGAGAGAGGTG-----  
-----GGGAGAGGAAAAAGAGCA---GCAGGA---ATAGGAGCT-----  
ATGATCTTTGGGTTCTTGGGAGCA---GCAGGAAGCACTATG---GGCGCGGCGTCA---  
ATAACGCTGACGGTACAG---GCCAGACAA---CTATTG---TCTGGGATAGTGCAACAGCAAAC---  
AATTTG---CTGAGA---GCTATAGATGCGCAACAGCATATGTTGCAGCTCACAGTCTGGGGCATT  
>KF725921  
GATCAT-----  
-----  
-----  
TCAAACCTTAACCATCACACTCCCATGCAGAATAAAACAAATTATAAACCTGTGGCAGGAGGTAGGAAGGGCAA  
TATATGCCCCCTCCCATTCGAGGAAACATAACATGTACATCAAAT---  
ATCACAGGATTACTATTGCTACGAGATGGAGGTCTCTTAAACAGC-----  
-----  
-----  
ACAAACGAAACATTTCAGACCTGGAGGAGGAGACATGAGGAACAATTGGAGAAGTGAATTATATAAATATAAAG  
TGGTAGAAATTAAGCCATTG---GGGGTAGCACCCACTAATGCAAAAAGGAGAGTGGTG-----  
-----GAGAGAGAAAAAAGAGCA---GTAGGA---ATAGGAGCT-----  
GTGTTCTTGGGTTCTTGGGAGCA---GCAGGAAGCACTATG---GGCGCGGCGTCA---  
ATGACGCTGACGGTACAG---GCCAGACAA---CTGTTG---TCTGGTATAGTGCAACAGCAAAC---  
AATTTG---CTGAGG---GCTATAGAGGCGCAACAGCATATGTTGCAACTCACGGTCTGGGGCATT  
>JX140669  
AATTATACTGAGACAACA-----  
-----  
GGTAATGGGACTATCATACTTCCATGCAGAATAAAACAAATCATAAACATGTGGCAGAAAGTAGGACGAGCAA  
TGTATGCCCCCTCCCATTCGAGGAAACATAACATGTAGTTCAAAT---

ATCACAGGACTACTATTGACACGTGATGGAGGAAATACAACAGATAATACA-----  
 -----  
 ----  
 ACAAATAATAACACAGAGGTATTTCAGACCTGGAGGAGGAAATATAAAAGACAATTGGAGAAGTGAATTATATA  
 AATATAAAGTGGTAGAAATTAAACCATTA--GGAATAGCTCCAACTAAAGCAAAAAGGAGAGTGGTG-----  
 -----GAGAGAGAAAAAAGAGCA--GTGGGA---  
 ATAGGAGCT-----ATGTTTCCTTGGATTCTTGGGAGCA--GCAGGAAGCACTATG---  
 GGCGCGGCGTCA--ATAACGCTGACGGTACAG--GCCAGACAA--CTGCTG---  
 TCTGGTATAGTGCAACAGCAAAGT--AATTTG--CTGAGA---  
 GCTATAGAGGCGCAACAGCATATGTTGCAACTCACAGTCTGGGGCATT  
 >KF725937  
 AGCTATACATACAAT-----  
 -----  
 GGTAACCTCAACCATCACACTTCCATGCAGAATAAAGCAAATTATAAACATGTGGCAGGAGGTAGGACGAGCAA  
 TGTATGCCCCCTCCCATTGCAGGAAACATAACATGTGAATCAAAC---  
 ATCACAGGATTACTGTTGACACGTGATGGAGGAAACAATAGTACA-----  
 -----  
 ----  
 AATGGAACAGAGATATTTCAGACCTGAAGGAGGAGATATGAGGGACAATTGGAGAAGTGAATTGTATAAATATA  
 AAGTGGTGGAAATTAAGCCATTG--GGAGTAGCACCCCTAAGGCAAAAAGGAGAGTGGTG-----  
 -----GAGAGAGAAAAAGAACA--GTGGGA--ATAGGAGCT-----  
 ---GTGTTTCCTTGGGTTCTTGGGAGCA--GCAGGAAGCACTATG--GGCGCGGCGTCA---  
 ATAACGCTGACGGTACAG--GCCAGACAA--TTGTTG--TCTGGTATAGTGCAACAGCAAAGC---  
 AATTTG--CTGAGG--GCTATAGAGGCGCAACAGCATATGTTGCAACTCACGGTCTGGGGCATA  
 >KF725945  
 AACTACAATATAAGTAAT-----  
 -----ATA---  
 AATTCAACCTCAAATATCACACTCCAATGCAGAATAAAACAAATTGTAAACATGTGGCAAGGGGTAGGACGAG  
 CAATGTATGCTCCTCCCATTCAGGAAACATAACATGTAGATCAAAT---  
 ATCACAGGACTACTATTGACACGTGATGGAGGAAGCAATATTACT-----  
 -----  
 ----  
 AATACTACAGAGATATTTCAGACCTGCAGGAGGAAATATGAAGGATAATTGGAGAAGTGAGTTATATAAATATA  
 AAGTGGTAGAAGTTAAACCATTA--GGAATAGCACCCCTGGGGCAAAAAGGAGAGTGGTG-----  
 -----GAGAGAGAAAAAAGAGCA--GTGGGA--ATAGGAGCT-----  
 ---GTGTTTCCTTGGGTTCTTGGGAGCA--GCAGGAAGCACTATG--GGCGCGGCGTCA---  
 ATAACGCTGACGGTACAG--GCCAGACAA--TTACTG--TCTGGTATAGTGCAACAGCAAAGC---  
 AATTTG--CTGAGG--GCCATAGAGGCGCAACAGCATATGTTGCAACTCACGGTCTGGGGCATT  
 >KF725958  
 AATCATACAGACCTGTTTAATGATACAGAAAGTAATAGCACAAAAGAG-----  
 -----  
 -  
 GATAACGCAAACATCACACTCCCATGCAGAATAAAACAAATTATAAACCTGTGGCAGCAAGTGGGACGAGCAA  
 TGTATGCCCCCTCCCATTGCAGGAAACATAACATGTACATCAAAT---  
 ATTACAGGGATATTATTGACACGTGATGGAGGAGAGAATACAACAGAGGGG-----  
 -----  
 ----  
 AAGGACACAGAGACATTTCAGACCTGCAGGAGGAGACATGAGGGACAATTGGAGAAGTGAATTATATAAATATA  
 AAGTGGTAGAAATCAGGCCATTG--GGAATAGCACCCCTGGGGCAAAAAGGAGAGTGGTG-----  
 -----GGGAGAGAAAAAAGAGCA--GTAGGA--ATAGGAGCT-----  
 ---GTGTTTCCTTGGATTCTTGGGAGCT--GCAGGAAGCACTATG--GGCGCAGCGTCA---  
 TTAACGCTGACGGTACAA--GCCAGACAA--TTGTTG--TCTGGTATAGTGCAACAGCAAAGC---  
 AATTTG--CTGAAG--GCTATAGAGGCGCAACAGCATCTGTTGCAACTCACAGTCTGGGGCATT  
 >KF725962  
 TTTTATAGTCCCTAATACTACAAATGGTACAGAAGAAAAT-----  
 -----  
 ----  
 ACAAACCTCCTCCATCACGATACCATGCAGAATAAAACAGATAATAAACATGTGGCAGGAAATAGGACGGGCAA  
 TGTATGCCCCCTCCCGTGGAAAGGAAACATAACATGCAACTCAAAC---  
 ATCACAGGACTGCTACTGGTACGTGATGGAGGAGATAATAATAAACAGAT-----

-----  
-----  
AATAATAAAACAGAGATATTTAGACCTGGAGGAGGAGATATGAGGGATAATTGGAGAAGTAAATTATATAAAT  
ATAAAGTGGTAGAAATTAAACCATTTG---GGAATAGCACCCACTAAGGCAAAAAGGAGAGTGGTG-----  
-----GAGAGAGAAAAAAGAGCA---GTGGGA---ATAGGAGCT---  
-----GTGTTTCCTTGGGTTCTTGGGAGCA---GCAGGAAGCACTATG---GGCGCAGCGTCA---  
GTGACGCTGACGGTACAG---GCCAGACAA---TTGTTG---TCTGGTATAGTGCAACAGCAAAGC---  
AATTTG---CTGAGG---GCTATAGAGGCGCAACAGCACATGTTGCAGCTCACAGTCTGGGGCATT  
>KF726010  
AATTATACAAGAAATGCTTCAGATACAAC-----  
-----  
ACAAATAAAACCATCACACTTCCATGTAGAATAAAACAAATTATAAATATGTGGCAGGGGGTAGGAAGAGCAA  
TGTATGCCCCCTCCCATTTGCAGGAAAGATAGCATGTAACTCAAGT---  
ATCACAGGATTACTATTATTACGTGATGGAGGTATAAGCAATGAC-----  
-----  
-----  
AGTGAGACCGAAATATTCAGACCTGGAGGAGGAAATATGAAAGACAATTGGAGGAGTGAACATATAAATATA  
AAGTGGTAGAAATTAAGCCATTA---GGAATAGCACCCACTGAGGCAAAAAGGAGAGTGGTG-----  
-----GAGAGACAAAAAAGAGCA---GTAGGA---CTAGGAGCT-----  
---GTGTTTCCTTGGGTTCTTGGGAGCA---GCAGGAAGCACTATG---GGCGCAGCGTCA---  
ATAACGCTGACGGTACAG---GCCAGACAA---TTATTG---TCTGGTATAGTGCAACAGCAAAGC---  
AATTTG---CTGAGG---GCTATAGAGGCGCAACAGCATATGTTGCAACTCACGGTCTGGGGCATT  
>MG901120  
GGCTACCAGCAAAATAGTACAGCA-----  
-----  
AATGAGGCAAACATCACACTTCCATGCAGGATAAAACAAATTATAAACATGTGGCAAGGGGTAGGACGAGCAA  
TGTATGCCCCCTCCTATTGCAGGAACCATACAATGTACATCCAAT---  
ATTACAGGACTACTATTAGAACGTGATGGAGGTCTTGATAATAATGGAAGTGAAGT---AATGGAAGT---  
-----  
-----  
GAAAAAATGGAAGTGAATATTCAGACCTACAGGAGGAAATATGAGGGACAATTGGAGAAGTGAATTATATA  
AATATAAAGTGGTGGAAATTAAGCCATTA--GGAATAGCACCCACTGGAGCAAAAAGGAGAGTGGTG-----  
-----GAGAGACAAAAAAGAGCA---TTGGGA---  
ATAGGAGCT-----ATGTTTCCTTGGGTTCTTGGGAGCA---GCAGGAAGCACTATG---  
GGCGCAGCGTCA---ATAGCGCTGACGGCACAG---ACCAGACAA---CTGATG---  
GCTGGTATAGTGCAACAGCAAAGC---AATTTG---CTGAGG---  
GCTATAGAGGCGCAACAGCATATGTTGCAACTCACGGTCTGGGGCATT  
>KP109516  
TACTACCTGTTTAATGGTACGGTTGTTAATACCACA-----  
-----  
GATAGTAACACAAATATCACACTACCATGCAGAATAAAACAAATTGTAAACATGTGGCAGGGGGTAGGACGAA  
CAATGTATGCTCCTCCCATTTGCAGGAGTCATAAACTGTACATCAAAC---  
ATAACAGGATTACTATTGACACGTGATGGAGGAATAAATAGCACA-----  
-----  
-----  
GGCAATGAGACATTTCAGACCTGGAGGAGGAGATATGAGGGACAATTGGAGAAGTGAAGTTATATAAATATAAAG  
TGGTAGAAATTAAGCCATTA---GGGATAGCACCCACTGAGGCAAAAAGGAGAGTGGTG-----  
-----GAGAGAGAGAAAAAGAGCA---GCG-----ATAGGAGCT-----  
GTACTCCTTGGGTTCTTGGGAGTG---GCCGGAAGCACTATG---GGCGCAGCATCA---  
ATAACGCTGACGGCACAG---GCCAGACAA---TTGCTG---TCTGGTATAGTGCAACAGCAAAGC---  
AATTTG---CTGAGG---GCTATAGAGGCGCAACAGCATATGTTGCAGCTTACAGTCTGGGGCATT  
>MN611466  
TTTTATAACACTAGCAGGTTTAATAGCAGCATGACAAAC-----  
-----  
-----  
AGTACAAACAACATCACACTCCCATGCAGAATAAAACAAATTATAAACATGTGGCAGGAGGTAGGACGAGCTA  
TGTATGCCCCCTCCCATTTGCAGGAAACATAACATGTATATCAAAT---  
ATCACAGGACTACTATTGACACGTGATGGAGGAATAAACAATGGGACA-----  
-----  
-----

AATGAGACAGGTAATGAGACATTCAGACCTGCAGGAGGGAATATGAAGGACAATTGGAGAAGTGAATTATATA  
AATATAAAGTGGTGGAGATCAAGCCATTA---GGAGTAGCACCCACTAAAGCAAAAAGGAGAGTGGTG-----  
-----GAGAGAGAAAAAAGAGCA---GTGGGA---  
ATAGGAGCT-----GTGTTCCCTTGGGTTCTTGGGAGCA---GCAGGAAGCACTATG---  
GGCGCGCGCTCA---ATAACGCTGACGGTACAG---GCCAGACAA---CTGTTG---  
TCTGGTATAGTGCAACAGCAAAGC---AATTTG---CTGAGG---  
GCTATAGAGGCGCAACAGCATATGTTGCAACTCACAGTCTGGGGCATT  
>MN611467  
ACTTATGCTAATAGAACA-----  
-----  
GGCAATGGTACCTTCACACTCCCATGCAGAATAAAACAAATTATAAACATGTGGCAGGAGGTAGGAAGAGCAA  
TGTATGCCCCCTCCCATTCAGGAAACGTAACATGTAGATCAAAT---  
ATCACAGGACTACTATTGACACGTGATGGAGGAAAAAAACAATACT-----  
-----  
-----  
GAAGAGATATTTAGACCTGGAGGAGGAAATATGAGGGACAATTGGAGAAGTGAATTATATAAATATAAAGTGG  
TAGAAATTAAGCCATTA---GGAGTAGCACCCACTAATGCACAAAGGAGAGTGGTG-----  
-----AAGAGAGAAAGAAGAGCA---GTGGGA---ATAGGAGCT-----  
GTGTTCCCTTGGGTTATTGGGAGCA---GCAGGAAGCACTATG---GGCGCAGCGTCA---  
ATAACGCTGACGGTACAG---GCCAGACAA---CTGTTG---TCTGGTATAGTGCAACAGCAAAAC---  
AATTTG---CTGAGA---GCTATAGAGGCGCAACAGCATATGTTGCAACTCACAGTCTGGGGCATT  
>DQ411853  
TGCTATACATCAGACTTGTTTAATAGTACATACATGTCTAATAATACA-----  
-----  
-----  
GGAGGAGCAAATATCACACTCCAATGCAGAATAAAACAAATTATAAGAATGTGGCAGGGGGTAGGACAAGCAA  
TGTATGCCCCCTCCCATTCAGGAAACATAACATGCAAATCAAAT---  
ATCACAGGACTACTATTGACACGTGATGGAGGAAAGGAAAAAAAT-----  
-----  
-----  
GACACAGAAACATTTAGACCTGGAGGGGGAGATATGAGAGACAATTGGAGAAGTGAATTATATAAATACAAGG  
TGGTAGAAATTAAGCCATTA---GGAATAGCACCCGATAAGGCAAAAAGGAGAGTGGTG-----  
-----GAGAGAGAAAAAAGAGCA---GTGGGA---ATAGGAGCT-----  
GTGTTCCCTTGGGTTCTTGGGAGCA---GCAGGAAGCACCATG---GGCGCAGCATCA---  
ATGACGCTGACGGTACAG---GCCAGACAA---TTGTTG---TCTGGTATAGTGCAACAGCAAAGC---  
AATTTG---CTGAGG---GCTATAGAGGCGCAACAGCATATGTTGCAACTCACGGTCTGGGGCATT  
>AY162223  
TACTACCCTAAGAATGGTACATACAAATACAATGGTAAT-----  
-----  
TCAAGCTTACCCATCACACTCCAATGCAAAATAAAACAAATTGTACGCATGTGGCAAGGGGTAGGACAAGCAA  
TGTATGCCCCCTCCCATTCAGGAAACATAACATGTAGATCAAAC---  
ATCACAGGAATACTATTGACACGTGATGGGGGATTTAACAACACAAAC-----  
-----  
-----  
AACGACACAGAGGAGACATTCAGACCTGGAGGAGGAGATATGAGGGATAACTGGAGAAGTGAATTATATAAAT  
ATAAAGTGGTAGAAATTAAGCCATTG---GGAATAGCACCCACTAAGGCAAAAAGAAGAGTGGTG-----  
-----CAGAGAAAAAAAAGAGCA---GTGGGA---ATAGGAGCT---  
-----GTGTTCCCTTGGGTTCTTGGGAGCA---GCAGGAAGCACTATG---GGCGCAGCGTCA---  
ATAACGCTGACGGTACAG---GCCAGACAA---CTGTTG---TCTGGTATAGTGCAACAGCAAAGC---  
AATTTG---CTGAAG---GCTATAGAGGCGCAACAGCATATGTTGCAACTCACAGTCTGGGGCATT  
>AF391235  
AGTTATAATACATCAGACCTGTTTAATAGTAAT-----  
-----  
AATGGTTCAGCCATCACACTCCCATGCAGAATAAAACAAATTGTAAACATGTGGCAGGGGGTAGGACGAGCAA  
TATATGCCCCCTCCCATTCAGGAAACATAACATGTAACCTCAAGT---  
ATCACAGGACTACTCTTGGTACGTGATGGAGGAAACACAACCAAC-----  
-----  
-----  
TCAACTGAGATATTCAGACCAGAAGGAGGAAATATGAGGGACAATTGGAGAAGTGAATCATATAAATACAAAG  
TGGTAGAAATTAAGCCCTTG---GGAATAGCGCCCACTAATGCAAAAAGGAGAGTGGTG-----

-----GAGAGAGAAAAAAGAGCA---GTGACA---CTAGGAGCT-----  
ATGTTTCCTTGGGTTCTTGGGAGCA---GCAGGAAGCACTATG---GGCGCAGCGTCA---  
ATAACGCTGACGGCACAG---GCCAGACAG---TTGTTG---TCTGGAATAGTGCAACAGCAAAGC---  
AATTTG---CTGAGA---GCTATAGAGACGCAACAGCATATGTTGCAACTCACAGTTTGGGGCATT  
>AF391240  
AATCATACATACCTGTTTAAATGGTACAGGCGTGCCTAATAATACCACA-----  
-----  
CCTTCTAATGAGACCATCATACTTCCATGCAGAATAAAACAAATTATAAACATGTGGCAGGAGGTAGGGCGAG  
CAATGTATGCCCCCTCCATTGTCAGGAAACATCACATGTACATCAAAC---  
ATCACAGGACTACTATTAGTACGTGATGGAGGCAACAGTGGCAAAAAT-----  
-----  
-----  
ACCACAGAAGAGATATTGAGACCTGGGGGAGGAAATATGAAGGACAATTGGAGAAGTGAATTATATAAAATATA  
AAGTGGTAGAAATTAAGCCATTA---GGAATAGCTCCCACTGCGGCAAAAAGGAGAGTGGTG-----  
-----GAGAGAGAAAAAAGAGCA---GTGGGA---ATAGGGGCT-----  
---GTGTTTCCTTGGGTTCTTGGGAGCA---GCAGGAAGCACTATG---GGCGCGGCGTCA---  
ATAACGCTGACGGTACAG---GCCAGACAA---TTGTTG---TCTGGTATAGTGCAACAGCAAAGC---  
AATTTG---CTGAGG---GCTATAGAGGCGCAACAGCATCTGTTGCAACTCACAGTCTGGGGCATT  
>AY529668  
AATTATATAGCAACAAATACTTCA-----  
-----  
GAGACTTCACCCATCATGATCCAGTGCAGAATAAAGCAAATTATAAACATGTGGCAGAGGGTAGGACGAGCAA  
TGTATGCCCCCTCCATTGCTGGAAGCCTAACATGTAACCTCAAGT---  
ATCACAGGACTAATATTGACACGTGATGGAGGAGAAAAATACAAGT-----  
-----  
-----  
ATAGAGACATTGAGACCTGGAGGAGGAAATATGAAGGACAATTGGAGAAGTGAATTATATAAAATATAAAGTGG  
TAGAAGTTAAGCCATTA---GGAATAGCACCCACTGATGCAAAAAGGAGAGTGGTG-----  
-----GAGAGAGAGAAAAAGAGCA---GTGGGA---ATAGGAGCT-----  
GTGTTTCCTTGGGTTCTTGGGAGCA---GCAGGAAGCACTATG---GGCGCGGCGTCA---  
ATAACGCTGACGGTACAG---GCCAGACAA---TTATTG---TCTGGTATAGTGCAACAGCAAAGC---  
AATTTG---CTGAGG---GCTATAGAGGCGCAACAGCATATGTTGCAACTCACGGTCTGGGGCATT  
>AY529670  
GATTACACGCTAATAAGACAGAAAATGATTCA-----  
-----  
AATGCAACTTCAAATATCACACTCCAATGTAGAATAAAGCAAATTGTAAACATGTGGCAGGGGGTAGGACAAG  
CAATGTATGCCCCCTCCATTAAAGGATACATAGAATGTATATCAAAT---  
ATCACAGGACTACTATTGACACGTGATGGAGGAAAAAGAAAAGAAT-----  
-----  
-----  
AACACAGAGACATTGAGACCTGGAGGAGGAGATATGAGGGACAATTGGAGAAGTGAATTATATAAAATATAAAG  
TAGTAGAAGTTGAACCATTA---GGAATAGCACCCACTAAGGCAAAAAGGAGAGTGGTG-----  
-----GAGAGAGAGAAAAAGAGCA---GTGGGA---ATAGGAGCT-----  
GTGTTTCCTTGGGTTCTTGGGAGCA---GCAGGAAGCACTATG---GGCGCGGCATCA---  
ATAACGCTGACGGTACAG---GCCAGACAA---TTGTTG---TCTGGTATAGTGCAACAGCAAAGC---  
AATTTG---CTGAGG---GCTATAGAGGCGCAACAGCATATGTTGCAACTCACGGTCTGGGGCATT  
>DQ447272  
AATTACAATGGTACAAAAAT-----  
-----  
AGTACAGAAAACATCACACTCCCATGCAGAATAAAACAAATTATAAACATGTGGCAGAAGGTAGGACGAGCAA  
TGTATGCTCCTCCCATTTGAAGGAAAAATAACATGTTCTCAAAC---  
ATCACAGGATTACTAGTGACATATGATGGAGGAACATCAGACAACGAGACA-----  
-----  
-----  
ACAAAAAACACAGAGACATTGAGACCTGGAGGAGGAGATATGAGGGACAATTGGAGAAGTGAATTATATAAAAT  
ATAAAGTGGTAGAAATTAAGCCATTG---GGAATAGCACCCACTAAGGCAAAAAGGAGAGTGGTG-----  
-----GAGAGAGAGAAAAAGAGCA---GTGGGA---ATAGGAGCT---  
-----GTGTTTCCTTGGGTTCTTGGGAGCA---GCAGGAAGCACTATG---GGCGCGGCGTCA---  
ATAACGCTGACGGTACAG---GCCAGACAA---TTGTTG---TCTGGTATAGTGCAACAGCAAAGC---  
AATTTG---CTGAGG---GCTATAGAGGCGCAACAGCATATGTTGCAACTCACGGTTTGGGGCATT

>AY522726

AATTACACATCAAAACAGGATAATAGTACAAAAGAAAT-----  
-----  
-  
TCAAGCTCAATCATCACAATCCCATGCAAAATAAAACAATTTATAAACATGTGGCAGGAGGTAGGACGAGCAA  
TGTATGCCCCCTCCCATTTGAAGGAATCATAAAATGTACATCAAAC---  
ATCACAGGATTACTATTACTACGTGATGGAGGGACCAATAATGATACT-----  
-----  
-----

AATGACACAGAGATATTCAGACCTGGAGGAGGGGACATGAGGGACAATTGGAGAAGTGAATTATATAAAATATA  
AAGTAGTAGAAATTAAGCCATTG---GGAATAGCTCCCACTGAAGCAAAAAGGAGAGTGGTG-----  
-----GAGAGAGAAAAAGAGCA---GTAGGA---ATAGGAGCT-----  
---GTGCTCCTTGGGTTCTTGGGAGCA---GCAGGAAGCACTATG---GGCGCGGCGTCA---  
ATAACGCTGACGGTACAG---GCCAGACAA---GTGTTG---TCTGGTATAGTGCAACAGCAAAGC---  
AATTTG---CTGAGG---GCCATAGAGGCGCAACAGCATATGTTGCAACTCACGGTCTGGGGCATT

>AY522728

ACTCATTTGCCTAATGATACCAAT-----  
-----AGT---  
GAGTCCAATATAAACCTCACGATCCAATGCAGAATAAAACAAATTATAAATATGTGGCAGGAGGTGGGAAGGG  
CAATGTATGCCCCCTCCCATTTGAAGGAAACATAACATGTAAATCAAAT---  
ATCACAGGACTACTATTGACGCGTGATGGAGGAAGAAGTAATAAC-----  
-----  
-----

ACAGAAGAGATATTTAGACCTGGAGGAGGAAATATGAAGGATAATTGGAGAAGTGAATTATATAAAATATAAAG  
TGGTAGAAATTAAGCCATTG---GGAGTAGCACCCACTGAGGCAAAAAGGAGATTGGTG-----  
-----GGGAAAGAAAAAGAGCA---GTGGGA---ATAGGAGCT-----  
GTGCTCTTTGGGTTCTTGGGAGCA---GCAGGAAGCACTATG---GGCGCGGCGTCA---  
ATAGCGCTGACGGTACAG---GCCAGACAA---TTGCTG---TCTGGTATAGTGCAACAGCAAAAC---  
AATTTG---CTGAGG---GCTATAGAGGCGCAACAGCATCTGTTGCAACTCACGGTCTGGGGCATT

>AY522731

AGTTATACAAAACCTAAATGGAAGTGAG-----  
-----  
TTAAACAAAACCATCACACTCCCATGCAGGATAAAACAAATTATAAACATGTGGCAGGAGGTAGGACGAGCAA  
TGTATGCCCCCTCCCATTTGCAGGGAAAATAACATGTAACTCAAGT---  
ATCACAGGACTACTATTGACACGTGATGGAGGAGGAAACAAAACG-----  
-----  
-----

AATGGCACAGAGGTATTCAGACCTGGAGGAGGAAATATGAAGGACAATTGGAGAAGTGAATTATATAAAATATA  
AAGTAGTAGAAATTAAGCCATTG---GGAATAGCACCCACTGAGGCAAAAAGGAGAGTGGTG-----  
-----GAGAGAGAAAAAGAGCA---GTGGGA---ATAGGAGCT-----  
---GTACTCCTTGGGTTCTTGGGAGCA---GCAGGAAGCACTATG---GGCGCGGCGTCA---  
ATAACGCTGACGGTACAG---GCCAGACAA---CTGTTG---TCTGGTATAGTGCAACAGCAAAGC---  
AATTTG---CTGAGA---GCTATAGAGGCGCAACAGCATATGTTGCAACTCACAGTCTGGGGCATT

>AY522733

GCTTACAGCAACACTGACAACAACAATAGTACTGGA-----  
-----  
AACGCAACCACCATCACACTGCCATGCAGAATAAAACAAATTATAAACATGTGGCAGGAGGTAGGACGAGCAA  
TGTATGCCCCCTCCCATTTGCAGGAAACATAACATGTAACTCAAGT---  
ATCACAGGACTAATATTGACACGTGATGGAGGAAGCAATATGACAGAA-----  
-----  
-----

GTAATACACAGAGATATTCAGACCTGGAGGAGGAAATATGAAGGACAATTGGAGAAGTGAATTATATAAAAT  
ATAAAGTGGTAGAAATTAAGCCATTG---GGAATAGCACCCACTGAGGCAAAAAGGAGAGTGGTG-----  
-----GAGAGAGAAAGAAGAGCA---GTGGGA---CTAGGAGCT---  
-----ATGTTCTTGGGATCTTGGGAGCG---GCAGGAAGCACTATG---GGCGCGGCGTCA---  
ATAACGCTGACGGTACAG---ACGAGACAA---CTGTTG---TCTGGTATAGTGCAACAGCAAAGT---  
AATTTG---CTGAAG---GCTATAGAGGCGCAACAGCATCTGTTGCAACTCACGGTCTGGGGCATT

>AY522735

TGCTATACCTCAAAGCTGTTTAATAGAACATACAGGCCAAATTCAACCAGTTCAAATTCAAATTCAAATTCA-  
-----

-----ACC-----  
AGTTTAAATTCAACCATCACAATTCCATGCAGAATAAAACAAATTATAAACATGTGGCAGAGGGTAGGACGAG  
CAATGTATGCCCCCTCCCATTCAGGAAACATAACATGTAATTCAGT---  
ATCACAGGACTACTATTAGTACGTGATGGAGGAGAAAACAATAGT-----  
-----  
-----  
ACAGAAGAGATATTCAGACCTGGAGGAGGAGATATGAGGGACAATTGGAGAAGTGAATTATATAAATATAAAG  
TGGTAGAGATTAAGCCATTG---GGAATAGCACCCACTAAGGCAAAAAGGAGAGTGGTG-----  
-----GAGAGAGAAAAAAGAGCAGTAGTGGGA---CTAGGAGCT-----  
GTGTTCTTTGGGTTCTTGGGAGCA---GCAGGAAGCACTATG---GGCGCGGCGTCA---  
ATAACGCTGACGGTACAG---GCCAGACAA---TTGCTG---TCTGGTATAGTGCAACAGCAAAGC---  
AATTTG---CTGAGG---GCTATAGAGGCGCAACAGCATATGTTGCAACTCACGGTCTGGGGCATT  
>DQ447268  
AATCATAATAATACATACAATACAAGT-----  
-----  
GACAACTCCAACATCACACTCCCATGCAGAATAAAACAAATTATAAACATGTGGCAGGAGGTAGGAAAAGCAA  
TATATGCCCCCTCCCATTCAGAGGAAACATAACATGTAACCTCAAGT---  
ATCACAGGACTACTATTGGTACGTGATGGGGGTAACCTCAAATAATAACTCA-----  
-----  
-----  
AATGAGACCACAGAGATATTCAGACCTGGAGGAGGAGATATGAGAGATAATTGGAGAAGTGAATTATATAAAT  
ATAAAGTGGTAGAAATTAAGCCATTG---GGAGTAGCACCCACTGGGGCAAAAAGGAGAGTGGTG-----  
-----GAGAGAGAAAAAAGAGCA---GTGGGA---ATAGGAGCT---  
-----GTGTTCTTGGGTTCTTGGGAGCA---GCTGGAAGCACTATG---GGCGCGGCGTCA---  
ATGACGCTGACGGTACAG---GCCAGACAA---CTGTTG---TCTGGCATAGTGCAACAGCAAAGC---  
AATTTG---CTGAGG---GCTATAGAGGCGCAACAACATATGTTGCAACTCACAGTCTGGGGCATT  
>GU216739  
AATTATACTGGCAGTGGA-----  
-----  
AAAAACATAACCACCACCATCCAATGCAAGATAAAACAAATTGTAAATCTGTGGCAAGAGGTAGGACGAGCAA  
TGTATGCCCCCTCCCATTCAGGAAACATAACGTGTAACCTCAAGT---  
ATTACAGGACTACTATTGACACGTGATGGCGGTAGCAACAGCAGC-----  
-----  
-----  
AGCCAGAGACATTCAGACCTGGAGGAGGAAATATGAAGGACAATTGGAGAAGTGAATTATATAAATATAAAG  
TGGTAGAAATTAAGCCATTG---GGAGTAGCACCCACTGAGGCAAAAAGGAGAGTGGTG-----  
-----GAGAGAGAAAAAAGGGCA---GTGGGA---ATAGGAGCT-----  
GTGTTCTTGGGTTCTTGGGAGCT---GCAGGAAGCACTATG---GGCGCGGCGTCA---  
ATAACGCTGACGGTACAG---GCCAGACAA---CTGTTG---TCTGGTATAGTGCAACAGCAAAGC---  
AATTTG---CTGAGA---GCCATAGAGGCGCAACAGCATATGTTGCAACTCACGGTCTGGGGCATT  
>GU216844  
TCTTATGATACAGAA-----  
-----  
AGTAATGGAAATATCATACTCCCATGCAGAATAAAACAAATTATAAACCTGTGGCAGGGGGTAGGACGAGCAA  
TATATGCACCTCCCATTCAGGAAATATAAATGTACATCAGAT---  
ATCACAGGACTACTATTGACACGTGATGGAGGGAATAACACAATT-----  
-----  
-----  
AATGAGACATTCAGACCTATAGGAGGAAATATGAGGGACAATTGGAGAAGTGAATTGTATAAATATAAAGTGG  
TAGAAATCAGGCCATTG---GGAGTAGCACCCACTGCAGCAAAAAGGAGAGTGGTG-----  
-----GAGAGAGAAAAAAGAGCA---GTGGGC---ATAGGAGCT-----  
GTGTTCTTGGGTTCTTGGGAGCA---GCAGGAAGCACTATG---GGCGCAGCGTCA---  
ATGACGCTGACGGTACAG---GCCAGACAA---CTGTTG---TCTGGTATAGTGCAACAGCAAAGC---  
AATTTG---CTGAGG---GCTATAGAGGCGCAACAGCATATGTTGCAACTCACGGTCTGGGGCATT  
>HQ625580  
ACCTATAATGTTACCAGAACAAGTAATACAAC-----  
-----  
AATAGTAGTATAATTACACTCCAATGCAGAATAAAACAGATTATAAACATGTGGCAAGGGGTAGGACAAGCAA  
TGTATGTCCCTCCCATTCAGGAAACATAATATGCAAAATCAAAT---  
ATCACAGGACTACTATTGACACGTGATGGAGGCAATAATACAGAAAAC-----

-----  
-----  
AATAATACAGAGATATTGACACCTGCAGGAGGAGACATGAGGGACAATTGGAGAAGTGAATTATATAGATATA  
AAGTGGTAGAAATTAAGCCATTA---GGAATAGCACCCACAAAAGCAAGAAGGAAAGTGGTG-----  
-----CAGAGAGAAAAAAGAGCA--GTGGGA--ATAGGAGCT-----  
---GTACTCCTTGGGTTCTTGGGAGCA--GCAGGAAGCACTATG--GGCGCGGCGTCA---  
ATAACGCTGACGGTACAG---GCCAGACAA---CTGTTG---TCTGGTATAGTGACAGCAGCAAAAC---  
AATTTG---CTGAGA---GCTATAGAGGCGCAACAGCATATGTTGCAACTCACAGTCTGGGGCATT  
>HQ625591  
ACCTATTTAAACACAACCAATGTA-----  
-----  
AACGAAACCGACATCACACTCCAATGCAGGATAAAGCAAATTATAAACATGTGGCAGGGGGTGGGACGAGCAA  
TGTATGCCCCCTCCCATTCAGGAAACATAACATGTAACCTCAAAT---  
ATCACAGGACTACTGCTGACACGTGATGGAGGCTTGAATAACACG-----  
-----  
AATAACGAGACATTGACACCTGGAGGGGGAAATATGAAGGACAATTGGAGAAATGAATTATATAAATACAAAG  
TGGTAGAAATTAAGCCATTG---GGAGTAGCACCCACTGCTGCAAAAAGGAGAGTGGTG-----  
-----GAGAGAGAAAAAAGGGGA-----CTAGGAGCT-----  
GTGTTCTTGGGTTCTTGGGAGCA---GCAGGAAGCACTATG--GGCGCGGCGTCA---  
ATAACGCTGACGGTACAG---GCCAGACAA---CTGTTG---TCTGGTATAGTGCAACAGCAAAGC---  
AATTTG---CTGAGA---GCTATAGAGGCGCAACAGCATATGTTGCAACTCACAGTCTGGGGCATT  
>HQ625582  
CATCATAAAGGAAGTAATGAA-----  
-----  
AATGAAAGCAGCATCATACTTCCATGCAGAATAAAACAAATTATAAACATGTGGCAGGAGGTAGGACGAGCAA  
TGTATGCATCTCCCATTCAGGAAGGATAACATGTACATCAAAT---  
ATCACAGGACTATTATTAGTACGAGATGGAGGCACAGGCAATACC-----  
-----  
AGTAAACCAGAAATATTGACACCTGGAGGAGGAAACATGAAGGACAATTGGAGAAGTGAATTATATAAATATA  
AAGTAGTAGAAATTAAGCCATTA---GGAATAGCACCCACTGGAGCAAAAAGGAGAGTGGTG-----  
-----GAGAGAGAAAAAAGAGCA--GTGGGA--ATAGGAGCT-----  
---GTACTCCTTGGGTTCTTGGGAGCA--GCAGGAAGCACTATG--GGCGCGGCGTCA---  
ATAACGCTGACGGTACAG---GCCAGACAA---CTGTTG---TCTGGTATAGTGCAACAGCAAAGC---  
AATTTG---CTGAGG---GCTATAGAGGCGCAACAGCAGATGTTGCAACTCACAGTCTGGGGCATT  
>GU939049  
TTTTATAAGTTCAATAGGACAGAAAATGGTTCAAATACAGAAAAT-----  
-----  
AGTTCAGGCATCATCACACTCCCATGCAAAATAAAACAAATTATAAACATGTGGCAGGAGGTAGGACGAGCAA  
TGTATGCCCCCTCCCATTCAGGAAGGAAACATAACATGTAAATCAGAG---  
ATTACAGGACTCCTATTGACACGTGACGGA---AAAAATGGAACA-----  
-----  
GAGGAGATAGTTAGACCTATAGGAGGAAATATGAAGGATAATTGGAGAAGTGAATTATATAAATATAAAGTGG  
TAGAAATTAAGCCATTA---GGAATAGCACCCACTGAGGCAAAAAGGAGAGTGGTG-----  
-----GAGAGAGAAAAAAGAGCA--GTAGGA--ATAGGAGCT-----  
GTGCTCCTTGGGTTCTTGGGAGCA---GCAGGAAGCACTATG--GGCGCGGCGTCA---  
ATAACGCTGACGGTACAG---GCCAGACAA---TTGTTG---TCTGGTATAGTGCAACAGCAAAGC---  
AATTTG---CTGAGG---GCTATAGAGGCGCAACAGCATCTGTTGCAACTCACAGTCTGGGGCATT  
>AB254146  
TACTATTGGAACAGTACAACAGGGAAT-----  
-----  
TCAAGCTCAAACATCACAATCCCATGCAAAATAAAACAAATTATAAACATGTGGCAGGAGGTAGGACGAGCAA  
TGTATGCCCCCTCCCATTCAGGGAATAACATGTGCATCAAAT---  
ATCACAGGACTACTATTGACACGTGATGGAGGAGTATCAAATAAGACAGAT-----  
-----  
GCAAAATAAGACAGAGACATTGACACCTATAGGAGGAAATATGAGGGACAATTGGAGAAGTGAATTATATAAAT

ACAAAGTGGTAGAAATTAATCCATTA---GGACTGGCACCCACTAAGGCAAAAAGGAGAGTGGTG-----  
-----GAGAGAGAAAAAAGAGCA---GTGGGA---CTAGGAGCT---  
-----GTGCTCTTTGGGTTCTTGGGAGCA---GCAGGAAGCACTATG---GGCGCAGCATCA---  
CTAACGCTGACGGTACAG---GCCAGACAA---TTATTG---TCTGGTATAGTGCAACAGCAAAGC---  
AATTTG---CTGAGA---GCTATAGAGGCGCAACAGCATATGTTGCAACTCACGGTCTGGGGCATT  
>KY229291  
AATTATACAGTA-----  
-----  
GACAATTCTACCATCACACTCCAATGCAGAATAAAACAAATTATAAACACATGGCAGGAGGTAGGACGAGCAA  
TATACGCCCCCTCCCATTTGAAGGAAACATAAAATGTACATCAAAA---  
ATCACAGGACTACTCTTGGTACGTGATGGAGGGGGGAATGACACA-----  
-----  
AGGGAAGAGATATTCAGACCTGGAGGAGGAAATATGAGGGACAATTGGAGAAGTGAATTATATAAATATAAAG  
TGGTAGAAATTAACCATTG---GGAATAGCACCCACTAAGGCAAAACGGAGAGTGGTG-----  
-----GAGAGAGAAAAAAGAGCA---GTCGGA---ATGGGAGCT-----  
GTGATCCTTGGGTTCTTGGGAGCA---GCAGGAAGCACTATG---GGCGCGGCGTCA---  
ATAACGCTGACGGCACAG---GCCAGACAA---GTATTG---TCTGGTATAGTGCAACAGCAAAGC---  
AATTTG---CTGAGA---GCTATAGAGGCGCAACAGCATATGTTGCAACTCACAGTCTGGGGCATT  
>KY229453  
AATCACACAAATAAT-----  
-----  
AGTACATATAATATCACACTCCCATGCAGAATAAGACAGATTGTAAGGATGTGGCAGGGAGTAGGACAAGCAA  
TGTATGCCCCCTCCCATTTGCAGGAAACATAACATGTAGATCAAAAT---  
ATCACAGGACTACTATTGACACGTGATGGAGGAAAGGGAGATAAC-----  
-----  
AACACAACAGAAACATTTCAGACCTGGAGGAGGAGATATGAGGGACAATTGGAGAAGTGAATTATATAAATATA  
AAGTGGTAGAGATTAAGCCATTA---GGAATAGCACCCACCAAGGCAAAAAGGAGAGTGGTG-----  
-----GAGAGAGAAAAAAGAGCA---GTGGGA---ATGGGAGCT-----  
---GTACTCCTTGGGTTCTTGGGAGCT---GCAGGAAGCACTATG---GGCGCGGCGTCA---  
ATAACGCTGACGGTACAG---GCCAGACAA---TTGTTG---TCTGGTATAGTGCAACAGCAAAGC---  
AATTTG---CTGAGA---GCTATAGAGGCGCAACAGCATATGTTGCAACTCACAGTCTGGGGCATT  
>EU166359  
TTTCATGGTACATACCTGCCTAATAGTACAGTCATGCTTAATGATACT-----  
-----  
----  
TCAAACAAAACCATCACACTGCTATGCAGAATAAAACAAATTATAAATATGTGGCAGGAGGTAGGGCGAGCAA  
TGTATGCCCCACCCATTGCAGGAAGCATAATATGCAACTCAAGT---  
ATTACAGGGCTACTATTGACACGTGATGGAGGAGATGGAAATGGAAAGAATACT-----  
-----  
----  
ACAGGTAAGGATACAGAGACATTTCAGACCTGCAGGAGGAGATATGAGGGACAATTGGAGAAGTGAATTATATA  
AATATAAGGTGGTAGAAATTAACCCATTA---GGAATAGCACCCACTAAGCAAAAAGGAGAGTGGTG-----  
-----GAGAGAGAGAAAAGAGCA---GTGGGA---  
ATAGGAGCT-----GTACTCCTTGGGTTCTTGGGAGCA---GCAGGAAGCACTATG---  
GGCGCAGCATCA---ATAACGCTGACGGTACAG---GCCAGACAA---TTATTG---  
TCTGGTATAGTGCAACAGCAAAGC---AATTTG---CTGAGG---  
GCTATAGAGGCGCAACAACATATGTTGCAACTCACGGTCTGGGGCATT  
>EU166432  
AATTATAACATTACAAACAATAATGTTACAAACATTACAGAC-----  
-----  
-  
GAGAATGTAAACATCACACTCAAATGCAGAATAAAACAGATTATAAACATGTGGCAGGGGGTAGGACAAGCAA  
TATATGCCCCCTCCCATTTGCAGGAAACATAACATGTAAATCAAAT---  
ATCACAGGAATACTATTGACACGCGATGGAGGCGACGAAACAAAG-----  
-----  
-----  
AATAACACAGAAATATTTCAGACCTGGAGGAGGAAATATGAAGAACAATTGGAGAAGTGAATTATATAAATATA  
AAGTGGTAGAAATTAAGCCATTA---GGAATAGCACCCACTGAGGCAAAAAGGAGAGTGGTG-----

-----GAGAGAGAAAAAGAGCA---GTGGGA---ATAGGAGCT-----  
---GTGTTCTTGGGTTCTTGGGAGCA---GCAGGAAGCACTATG---GGCGCGGCATCA---  
ATAACGCTGACGGTACAG---GCCAGACAA---TTGTTG---TCTGGTATAGTGCAACAGCAAAGC---  
AATTTG---CTGAGA---GCTATAGAGGCGCAACAGCATATGTTGCAACTCACTGTCTGGGGCATT  
>DQ388516  
ACCTACACGAATGGAAGTAATTCAAATGTAAACATC-----  
-----  
ACAAGTGCAACCATCACCTCCCATGCAGAATAAAACAAATTATAAACATGTGGCAAGAAGTAGGACGGGCAA  
TGTATGCCCCCTCCATTGCAGGAAACATAACATGTATATCAAAT---  
ATCACAGGACTACTCCTGACAAGGGATGGAGGAAATGGAAATGATACA-----  
-----  
-----  
AATGACACAGAGACATTTAGACCTGCAGGAGGAGATATGAGGGACAATTGGAGAAAGTGAATTATATAAATATA  
AAGTGGTAGAAATTAACCATTAA---GGAATAGCACCCACTAAAGCAAAAAGGAGAGTGGTG-----  
-----GGGAGAGAAAAAGAGCA---GTGGGA---ATAGGAGCT-----  
---GTGTTCTTGGGTTCTTGGGAGCA---GCAGGAAGCACTATG---GGCGCGGCGTCA---  
ATAACGCTGACGGTACAG---GCCAGACAA---TTATTG---TCTGGTATAGTGCAACAGCAAAC---  
AATTTG---CTGAGA---GCTATAGAGGCGCAACAGCATCTGTTGCAACTCACGGTCTGGGGCATT  
>GU939124  
AATTATACATACATGAATGAGACAAGC-----  
-----  
-  
ACTAACTCAACGATCAGACTCCCATGTAAGATAAGACAAATTATAAACATGTGGCAGGAGGTAGGACGAGCAA  
TATATGCCCCCTCCATTGAAGGAAACATAACATGCAACTCAAGT---  
ATCACAGGACTACTATTGGTACGGGATGGAGGCAACACTAGCAGTACC-----  
-----  
-----  
GGCACAGAGATAGAGATATTTAGACCTGGAGGGGGAGATATGAGGGACAATTGGAGAAAGTGAATTATATAAAT  
ATAAAGTGGTAGAAATTAAGCCATTG---GGAGTAGCTCCCCTAAGGCAAAAAGAGAGTGGTG-----  
-----GAAAGAGAAAAAGAGCA---GTGGGA---ATAGGAGCT---  
-----GTACTCCTTGGGTTCTTGGGAGCA---GCAGGAAGCACTATG---GGCGCAGCGTCA---  
ATAACGCTGACGGCACAG---GCCAGACAA---GTGCTG---TCTGGTATAGTGCAACAGCAAAGC---  
AATTTG---CTGAGG---GCTATAGAGGCGCAACAGCACCTGTTGCAACTCACAGTCTGGGGCATC  
>JX213407  
AATTATACATTTAATGATACATTTAATGATATAGGAAGTAAGTCA-----  
-----  
-  
AATACAGGAAATATCACACTCCAATGCAGAATAAAACAAATTGTAAACATGTGGCAGAGGGTAGGACGAGCAA  
TATATACCCCTCCCATTAAGGGACAGATAACATGTGTATCAAAT---  
ATCACAGGAATACTATTGGTACGTGATGGAGGAAACAACAATGGATCAGAG-----  
-----  
-----  
AATAACTCAGAGATATTCAGACCTGGAGGAGGAGATATGAGGGACAATTGGAGAAATGAATTGTATAAATATA  
AAGTAGTAGAAATTAAGCCATTG---GGAATAGCACCCACTGGGGCAAAAAGGAGAGTGGTG-----  
-----GAGAGAGAAAAAGAGCA---GTGGGA---ATAGGAGCT-----  
---GTGTTCTTTGGGTTCTTGGGAGCA---GCAGGAAGCACTATG---GGCGCGGCGTCA---  
ATAACGCTGACGGTACAG---GCCAGACAA---TTATTG---TCTGGTATAGTGCAACAGCAAAGC---  
AATTTG---CTGAGG---GCTATAGAGGCGCAACAGCATATGTTGCAACTCACGGTCTGGGGCATT  
>JX213435  
AATCATACACTGGATGTTAATGGTACATTATCTCAAATTCA-----  
-----  
-  
TCTTCTTTAAACATCACACTCCCATGCAAAATAAAACAAATCATAAACATGTGGCAGGGGGTGGGACGAGCAA  
TGTATGCCCCCTCCATTGCAGGAAACATAACATGTAGATCAAAT---  
ATCACGGGAATAATATTGACACGTGATGGTGGAAGTGGAAGTGGA-----  
-----  
-----  
TCATCTAATGACACAGAGATATTCAGACCTGGAGGAGGAGATATGAGAGACAATTGGAGAAAGTGAATTATATA  
AATACAAAGTGGTAGAAATTAAGCCATTAA---GGAATAGCACCCAACAAGGCAAAAAGGAGAGTGGTG-----  
-----GAAAGAGAAAAAGAGCA---GTGGGA---

ATAGGAGCT-----GTGTTCTTGGGTTCTTAGGAGCA---GCAGGAAGCACTATG---  
 GGCGCGCGTCA---ATGGCGCTGACGGTACAG---GCCAGACAA---GTGTTG---  
 TCTGGTATAGTGCAACAGCAAAGC---AATTTG---CTGAGA---  
 GCTATAGAGGCGCAACAGCATATGTTGCAACTCACAGTCTGGGGCATT  
 >JX213454  
 AGTTACAAATGCATGCCTAATATGCCTAATGACACATGTAATAGCACAATCACA-----  
 -----GAT---  
 AACAGCACAGGATTCATCATACTCCCATGCAGAATAAAACAAATTGTAAACATGTGGCAGGGGGTAGGACGAG  
 CAATGTATGCCGCTCCCATTTGCCGGGAACATAACATGTAGATCAAAC---  
 ATCACAGGACTACTATTGACACGTGATGGAGGTACCCCAAGTAAAAATGAG-----  
 -----  
 ACCAAGGAGACATTCAGACCTGGAGGAGGGAATATGAAGGACAATTGGAGAAGTGAATTATATAAGTATAAAAG  
 TGGTAGAAATTAAGCCACTG---GGACTAGCACCCACTGGAGCAAAAAGGAGAGTGGTG-----  
 -----GAGAGAGAAAAAAGAGCA---GTGGGA---ATAGGAGCT-----  
 GTGTTCTTGGGTTCTTGGGAGCA---GCAGGAAGCACTATG---GGCGCGCGTCA---  
 ATGACGCTGACGGTACAG---GCTAGACAA---CTGTTG---TCTGGTATAGTGCAACAGCAAAGC---  
 AATTTG---CTGAGG---GCCATAGAGGCGCAACAGCATATGTTGCAGCTCACAGTCTGGGGCATT  
 >GU329195  
 AGTTACTCAAATGAG-----  
 -----  
 ACAAACTCAACCATCACACTCCAGTGTAATAAAACAAATTATAAACATGTGGCAGGGGGTAGGACGAGCAA  
 TGTATGCCGCCCCCATTCAGGAAACATAACATGTATATCAAAC---  
 ATCACAGGAATACTACTGACACGGGATGGAGGAAACAGTAATAGTAAT-----  
 -----  
 GAGAGTACAGAAACATTTAGACCAGGAGGGGGAAATATGAAAGACAATTGGAGAAGTGAATTATATAAATATA  
 AAGTGGTAGAGGTTAAGCCATTG---GGAATAGCACCCACTGAGGCAAAAAGGAGAGTGGTG-----  
 -----GAGAGAGAAAAAAGAGCA---GTGGGA---CTAGGAGCT-----  
 ---GTGTTCTTGGGTTCTTGGGAGCA---GCAGGAAGCACTATG---GGCGCAGCATCA---  
 ATAACGCTGACGGTACAG---GCCAGAAAT---CTGTTG---TCTGGCATAGTGCAACAGCAAAC---  
 AATTTG---CTGAGG---GCTATAGAGGCGCAACAGCATATGTTGCAACTCACAGTCTGGGGCATT  
 >GU329205  
 AATCACACAGACATGTCTAACATGACTAAT-----  
 -----  
 AATAACATCACACTCACACTCCCATGCAGAATAAAACAAATTATAAACATGTGGCAGGAGGTAGGACGAGCAA  
 TATATGCACCTCCCATTTGTAGGAAACATAATCTGTACATCAAAT---  
 ATCACAGGACTACTATTGACACGTGATGGAGGAACAGATAACAAC-----  
 -----  
 AGAACAGAGGAGACGTTTCTGACCTGGGGGAGGAGATATGAGAGACAATTGGAGAAGTGAATTATATAAATATA  
 AGGTGGTAGAAATTAAGCCATTG---GGCATAGCACCCACTAAGGCAAAAAGGAGAGTGGTG-----  
 -----GAGAGAGAAAAAAGAGCA---GTGGGA---ATAGGAGCT-----  
 ---GTGTTCTTGGGTTCTTGGGAGCA---GCAGGAAGCACTATG---GGCGCGCGTCA---  
 GTGACGCTGACGGTACAG---GCCAGACAA---CTATTG---TCTGGTATAGTGCAACAGCAAAGC---  
 AATTTG---CTGAAG---GCTATAGAGGCGCAACAGCATATGTTGCAACTCACGGTCTGGGGCATC  
 >GU329282  
 CACTATAGTAATGGTACAGACATATTTAATGATAAT-----  
 -----  
 AGTACAAGCAACATCACACTCCCATGCAAAATAAAACAAATTATAAACATGTGGCAGAAAGTAGGACAAGCAA  
 TGTATGCCCCCTCCCATTCAGGAAACATAAAATGTGAATCAAAT---  
 ATCACAGGGCTACTATTGACACGTGATGGAGGAGGAGGCTCAGATAATACA-----  
 -----  
 ACAGATAATACAACAGAGACATTCAGACCTGGAGGAGGAGATATGAGGGACAATTGGAGAAGTGAATTATATA  
 AATATAAAGTGGTAGAAGTTAAGCCATTA---GGAATAGCACCCACTGAGGCAAGAAGGAGAGTGGTG-----  
 -----CAGAGAGAAAAAAGAGCA---GTGGGA---  
 ATAGGAGCA-----ATGTTCTTGGGTTCTTGGGAGTA---GCAGGAAGCACTATG---  
 GGCGCAGCGTCA---ATGGCGCTGACGGTACAG---GCCAGACAA---TTGTTG---

TCTGGTATAGTGCAACAGCAAAGT---AATTTG---CTGAGA---  
GCCATAGAGGCGCAACAGCATATGTTGCAACTCACGGTCTGGGGCATT  
>GU329289  
CATTATACAAGAGAGAAT-----  
-----  
GTCTCAAACATCGAGCTGCTCCCATGTAAATAAAACAGATTATAAACATGTGGCAGGAAGTAGGACGAGCAA  
TGTATGCCCCCTCCCATTCGAGGAAGCATAACATGTAAATCAAGT---  
ATCACAGGACTACTATTGACACGTGATGGAGGAAACAATAGCACC-----  
-----  
-----  
GAGACAGAAATATTCAGACCTGGAGGAGGAGATATGAGGGACAATTGGAGAAGTGAATTATATAAATATAAGG  
TGGTAGAAATTAAGCCATTA---GGAGTAGCACCCACTACTGCAAAAAGGAGAGTGGTG-----  
-----GAGAGAGAGAAAAAGAGCA---GTGGGA---ATAGGAGCT-----  
GTGTTCCCTTGGGTTCTTAGGAGCA---GCAGGAAGCACTATG---GGCGCAGCATCA---  
ATAACGCTGACGGTACAG---GCCAGACAA---CTATTG---TCTGGTATAGTGCAACAGCAAAGC---  
AATTTG---CTGAGG---GCTATCGAGGCGCAACAGCATATGTTGCAACTCACAGTCTGGGGCATT  
>GU329439  
AACTACACGAATGGTGAATACAAGCATAACAGGAATGGTACAGAG-----  
-----GTGCATATTAATGAG-----  
ACTAGCAAACAGAATATCACAATCCAATGCAGAATAAAACAAATTATAAACATGTGGCAGGAGGTAGGGCGAG  
CAATGTATGCCCCGCCCATTGCAGGAAACATAACATGTGCATCAAAT---  
ATCACAGGACTACTATTGACATGGGATGGAGGAAAAAATAGAAGC-----  
-----  
-----  
GAAACAGAGGAGATATTCAGGCCTGGAGGAGGAGATATGAGGGACAATTGGAGAAGTGAATTATACAAATATA  
AAGTGGTAGAAATTAAGCCATTA---GGAGTAGCACCCCTCTAAGGCAAAAAGGAGAGTGGTG-----  
-----GAGAGAGAAAAAAGAGCA---GTGGGA---ATAGGAGCT-----  
---GTACTCCTTGGGTTCTTGGGAGCA---GCAGGAAGCACTATG---GGCGCAGCATCA---  
TTGACGCTGACGGTACAG---GCCAGACAA---TTATTG---TCTGGTATAGTGCAACAGCAAAGC---  
AATTTG---CTGAGG---GCTATAGAGGCGCAACAGCATATGTTGCAACTCACGGTCTGGGGCATT  
>KX983735  
CCTCAGGATAACAAT-----  
-----ACAAAA-----  
AATGATGAGACGACCATCAGCCTGCCATGCAGAATAAAACAAATCATAAACATGTGGCAGGAGGTAGGACGAG  
CAATATATGCCCCCTCCCATTTGAAGGAAGCATAACATGTGAATCAAAC---  
ATCACAGGACTACTATTGACAAGTGTGTTGGAGGAAAAGGTAAA-----  
-----  
-----  
AATGAGACATTTCAGACCTGCAGGAGGAGATATGAGGGACAATTGGAGAAGTGAATTATATAAATATAAAGTGG  
TAGAAATTAAACCATTA---GGAGTAGCACCCACTAGAGCAAAAAGGAGAGTGGTG-----  
-----GAGAGAGAAAAAAGAGCA---GTGGGA---ATAGGAGCT-----  
GTGTTCCCTTGGGTTCTTGGGAGCA---GCAGGAAGCACTATG---GGCGCGGCGTCA---  
ATAACGCTGACGGCACAG---GCCAGACAA---GTGCTG---TCTGGTATAGTGCAACAGCAAAGC---  
AATTTG---CTGAGG---GCTATAGAGGCGCAACAGCATATGTTGCAACTCACGGTTTGGGGCATT  
>KX983891  
TGCTATACATCGAAACTGTTTAATAGAACACATAATGGTACAGATGATAATGAAACA-----  
-----  
-----  
AGTAGAAACATCACCCTATCCCATGCAGAATAAAACAAATTATTAACATGTGGCAGACAGTGGGACGAGCAA  
TGTATGCCCCCTCCCATTTGAAGGAAACATAACATGTAAATCAAAT---  
ATCACAGGAATAATATTAACACGTGATGGAGGAATTACAGAGGAGTCA-----  
-----  
-----  
AATAACACAGAAATATTCAGACCTGGAGGAGGAGATATGAGAGATAATTGGAGAAGTGAATTATATAAATATA  
AAGTGGTAGAGATTAAACCATTG---GGAATAGCACCCCTCCAAGGCAAAAAGGCGAGTGGTG-----  
-----GAGAGAGAAAAAAGAGCA---GTGGGA---ATAGGAGCT-----  
---GTGTTCCCTTGGGTTCTTGGGAGCA---GCAGGAAGCACTATG---GGCGCGGCGTCA---  
CTCACGCTGACGGTACAG---GCCAGACAA---TTGTTG---TCTGGTATAGTGCAACAGCAAAC---  
AATTTG---CTGAGA---GCTATTGAGGCGCAACAACATCTGTTGCAACTCACGGTCTGGGGCATT  
>AF286224

AATTATACAGAAAATAATACA-----  
-----  
GATGGTACACCCATCACACTCCCATGCAGAATAAGACAAATTATAAATATGTGGCAGGAAGTAGGACGAGCAA  
TGTACGCCCCCTCCCATTTGAAGGAAACATAGCATGTAAATCAGAT---  
ATCACAGGGCTACTATTGGTTTCGGGATGGAGGAAGCACAAATGATAGCACA-----  
-----  
-----  
AATAATAACACAGAGATATTCAGACCTGCAGGAGGAGATATGAGGGACAATTGGAGGAGTGAATTGTATAAGT  
ATAAAGTGGTAGAAATTAAGCCATTG---GGAATAGCACCCACTGAGGCAAAAAGGAGAGTGGTG-----  
-----GAGAGAGAAAAAAGAGCA---GTGGGA---ATAGGAGCT---  
-----GTGTTCTTGGGTTCTTGGGAGCA---GCAGGAAGCACTATG---GGCGCAGCGTCA---  
ATAACGCTGACGGCACAG---GCCAGACAA---GTGTTG---TCTGGTATAGTGCAACAGCAAAGC---  
AATTTG---CTGAGG---GCTATAGAGGCGCAACAGCATCTGTTGCAACTCACGGTCTGGGGCATT  
>KU168262  
TTTCATAGTACATACAATAGTACATACAATAGTACAGACAAGGGTAACAGC-----  
-----  
-----  
ACAGACGATACCATCACACTCCCATGCAGAATAAAACAAATTATAAACATGTGGCAGGAGGTAGGAAAAGCAA  
TATATGCCCCCTCCTATTCCAGGAAAAATAACATGTAACTCAAGC---  
ATCACGGGGCTACTACTGACACGTGATGGAGGGCAAAAATAATACA-----  
-----  
-----  
AATGAGACATTCAGGCCTGGAGGAGGAGATATGAGAGATAATTGGAGAAGTGAATTATACAAATATAAGGTGG  
TAGAAATTAGACCATTA---GGAGTAGCACCCACTGATGCAAAAAGGAGAGTGGTG-----  
-----GAGAGAGAAAAAAGAGCA---GTGGGA---ATAGGAGCT-----  
GTGCTCTTAGGGTTCTTGGGAGCA---GCAGGAAGCACTATG---GGCGCAGCGTCA---  
GTGGCGCTGACGGTACAG---GCCAGACAA---TTATTG---TCGGGTATAGTGCAACAGCAAAGC---  
AATTTG---CTGAGG---GCTATAGAGGCGCAACAGCATATGTTGCAACTCACAGTCTGGGGCATT  
>JQ361079  
ACTTATAATGCCTTCAATAGAA-----  
-----  
-----  
AATAATACTATAATCACGCTCCCGTGCAGAATAAAACAAATTATAAACATGTGGCAAGGAGTAGGAAAAGCAA  
TATATGCCCCCTCCCATTTGAAGGACTAATTAAGTGTACATCAAAT---  
ATTACAGGAATATTATTAACAAGAGATGGTGGTAGAGATAATAGT-----  
-----  
-----  
AGTAGTAACGAGACCTTCAGACCTGGAGGAGGAGATATGAGAGATAATTGGAGAAGTGAATTATACAAATATA  
AAGTAGTAAAAATTGAACCAATA---GGTCTAGCACCCACCAAGGCAAAGAGAAGAGTGGTG-----  
-----GAAAGAGAAAAAAGAGCA---ATAGGA---CTAGGAGCT-----  
---ATGTTCTTGGGTTCTTGGGAGCA---GCAGGAAGCACGATG---GGCGCAGCGTCA---  
GTGACGCTGACGGTACAG---GCCAGACAG---TTATTG---TCTGGTATAGTGCAACAGCAAAT---  
AATTTG---CTGAGG---GCTATAGAGGCGCAACAGCATCTGTTGCAACTCACAGTCTGGGGCATT  
>HM215270  
AATTATACTGGA-----  
-----  
-----  
AATGAGAGTGTAATCAACCTACCATGCAGAATAAAACAAATTATAAACATGTGGCAGGGAGTAGGAAAAGCAA  
TGTATGCCCCCTCCCATTTGAAGGGCTAATCAACTGTTTCAATCAAAT---  
ATTACAGGACTATTGCTGACAAGAGATGGTGGTATAAATAGTAATACG-----  
-----  
-----  
AGTAGTTCTGAGACCTTCAGACCTGGAGGAGGAGATATGAGAGACAATTGGAGAAGTGAATTATACAAATATA  
AAGTAGTAAGACTTGAACCACTA---GGTCTAGCACCCACCAAGGCAAAAAGAAGAGTGGTG-----  
-----GAAAGAGAAAAAAGAGCA---ATAGGA---CTAGGAGCT-----  
---GTGTTCTTGGGTTCTTGGGAGCA---GCAGGAAGCACGATG---GGCGCAGCGTCA---  
CTGACGCTGACGGTACAG---GCCAGACAG---TTACTG---TCTGGTATAGTGCAACAGCAAAT---  
AATTTG---CTGAAG---GCTATAGAGGCGCAACAGCATCTGTTGCAACTCACAGTCTGGGGCATT  
>L22949  
AGTTATAATACATCAGCATTAATAGTACACAGGGAAAT-----  
-----  
GAGAGTGAAAACATCACACTCCCATGCAGAATAAAACAAATTATAAACATGTGGCAGGAAGTAGGAAAAGCAA

TGTATGCCCCCTCCCATTTGAAGGGATAATCAGATGTTTCATCAAAT ---  
 ATTACAGGACTATTGTTGACAAGAGATGGTGGTATAACTAACAAT -----  
 -----  
 -----  
 AGTAATGAGACCTTCAGACCTGGAGGAGGAAATATGAGAGACAATTGGAGAAGTGAATTATACAAATATAAAG  
 TAGTAAGAATTGAACCACTA --- GGTCTAGCACCCACCACGGCAAAGAGAAGAGTGGTG -----  
 -----GAAAGAGAAAAAAGAGCA --- ATAGGA --- CTGGGAGCT -----  
 CTGTTCCCTTGGGTTCTTGGGAGCA --- GCAGGAAGCACAATG --- GGCGCAGCGTCA ---  
 CTGACGCTGACGGTACAG --- GCCAGACAA --- GTATTG --- TCCGGCATAGTGCAACAGCAAAAC ---  
 AATTTG --- CTGAGG --- GCTATAGAGGCGCAACAACATCTGTTGCAACTCACAGTCTGGGGCATT  
 >L22950  
 AATTATAATATATCAAATAGTACAGGG -----  
 -----  
 GGAAATGAGACAATCAGACTCCAATGCAGAATAAAACAAATTATAAACATGTGGCAGGAAGTAGGAAAAGCAA  
 TGTATGCCCCCTCCCATTTATAGGACAAATCAAATGTTTCATCAAAT ---  
 ATCACAGGACTATTGTTAAACAAGAGATGGTGGTGTAAATAATAGTAGTAATGAG -----  
 -----  
 ----  
 ACTAGCAGTAAAAATGAGATCTTCAGACCTGGAGGAGGAGATATGAGAGACAATTGGAGAAGTGAATTATACA  
 AATATAAAGTAGTAAGAATTGAACCACTA --- GGTCTGGGCACCCACCAGGGCAAAAAGGAGAGTGGTG ----  
 -----GAAAGAGAAAAAAGAGCA --- ATAGGA ---  
 CTGGGAGCT ----- TTGTTCCCTTGGGTTCTTGGGAACA --- GCAGGAAGCACGATG ---  
 GGCGCAGCGTCA --- ATGACGCTGACGGTACAG --- GCCAGACAG --- GTATTG ---  
 TCTGGTATAGTGCAACAGCAAAAC --- AATTTG --- CTGAGG ---  
 GCTATAAAGGCGCAACAGCATCTGTTGCAACTCACAGTCTGGGGCATT  
 >AY623599  
 ACTTATAATACATCAGGTAGTACAGGGGTA -----  
 -----  
 AATAACAGTACAATCAAACCTCCCATGCAGAATAAAACAAATTATAAACATGTGGCAGGGAGTAGGAAAAGCAA  
 TGTATGCCCCCTCCCATTTGAAGGACTAATCAAATGTTTCATCAAAC ---  
 ATTACAGGACTATTGTTGACAAGAGATGGGGGAAATAATACTAGG -----  
 -----  
 -----  
 CAGAATGAAACCTTCAGGCCTGGAGGAGGGGATATGAGAGACAATTGGAGAAGTGAATTATACAAATATAAAG  
 TAGTAAGAATTGAACCACTA --- GGTCTAGCACCCACTGAGGCAAAGAGAAGAGTGGTG -----  
 -----GAAAGAGAAAAAAGAGCA --- ATAGGA --- CTAGGAGCT -----  
 ATGTTCCCTTGGGTTCTTGGGAGCA --- GCAGGAAGCACGATG --- GGCGCAGCGTCA ---  
 ATGACGCTGACGGTACAG --- GCCAGACAG --- TTAATG --- TCTGGTATAGTGCAACAGCAAAAC ---  
 AATTTG --- CTGAGG --- GCTATAGAGGCGCAACAGCATCTGTTGCAACTCACAGTCTGGGGCATT  
 >AY713418  
 AATTATAATATATCA -----  
 -----  
 AATACAGAGGTAATCAGACTCCCATGCAGAATAAAACAAATTATAAACATGTGGCAGGGAGTAGGCAAAGCAA  
 TGTATGCCCCCTCCCATTTGAAGGAATAATCAAATGTTTCATCAAAT ---  
 ATTACAGGACTATTGTTAAACAAGGGATGGTGGTGGTAATAACACT -----  
 -----  
 -----  
 CGGAAGAATGAGACCTTCAGGCCTGGAGGGGGAGATATGAGAGACAATTGGAGAAGTGAATTATACAAATATA  
 AAGTAGTAAGAATTGAACCATTA --- GGTCTAGCACCCACCAAGGCAAAGAGAAGAGTGGTG -----  
 -----GAAAGAGAAAAAAGAGCA --- ATAGGA --- CTGGGAGCT -----  
 --- CTGTTCCCTTGGGTTCTTGGGAGCA --- GCAGGAAGCACGATG --- GGCGCAGCGTCA ---  
 ATAACGCTGACGGTACAG --- GCCAGACAA --- GTATTG --- TCTGGTATAGTGCAACAGCAAAAC ---  
 AATTTG --- CTGAGG --- GCTATAGAGGCGCAACAACACTTGTGCAACTCACAGTCTGGGGCATT  
 >EU853046  
 AATTATAGTAGTATGTTTAATAGTAGTACATCAAATAGTAGTATAGGG -----  
 -----  
 -  
 GAAAAATGAAACAATCACACTCCAATGCAGAATAAAGCAAATTATAAACATGTGGCAGGGAGTAGGAAAAGCAA  
 TGTATGCACCTCCCGTTGCAGGACAAATCAGATGTTTCATCAAAT ---  
 ATTACAGGCCTATTGTTGACAAGAGATGGAGGTGAAAAATACTAGT -----

-----  
-----  
GAGGAGATCTTCAGACCTGCAGGAGGAGATATGAGAGACAATTGGAGAAGTGAATTATACAAATATAAAGTAG  
TAAGAATTGAACCACTA---GGTCTAGCACCCACCAAGGCAAAGAGAAGAGTGGTG-----  
-----GAAAGAGAAAAAAGAGCA--ATAGGA--CTAGGAGCT-----  
GTGTTCCCTTGGGTTCTTGGGAGCA--GCAGGAAGCACGATG--GGCGCAGCGTCA---  
CTGACGCTGACGGTACAG---GCCAGACAA--TTATTG---TCTGGTATAGTGCAACAGCAAAAC---  
AATTTG---CTGAGG---GCTATAGAGGCGCAGCAGCATCTGTTGCAACTCACAGTCTGGGGCATT  
>AF484489  
ACTTATGATACATCGAATGGTACA-----  
-----  
GGGAGTGAAAATATCACACTCCAATGCAGAATAAAACAAATGATAAACATGTGGCAAGGAGTAGGCAAAGCAA  
TGTATGCCCCCTCCCATTGAAGGAACAATCAACTGTTTATCAAAT---  
ATTACAGGACTATTGTTGACAAGAGATGGTGGTGTAAAAAATAGT-----  
-----  
-----  
ACTAATGAGACCTTCAGACCTGGAGGAGGAGATATGAGAGACAATTGGAGAAGTGAATTATATAAGTATAAAG  
TAGTAAGACTTGAACCACTA---GGCCTAGCGCCACAGAGGCAAGAAGAAGAGTGGTG-----  
-----GAAAGAGAAAAAAGAGCA--ATAGGCCTACTAGGAGCT-----  
ATGTTCCCTTGGGTTCTTGGGAGCA--GCAGGAAGCACGATG--GGCGCAGCGTCA---  
CTGACGCTGACGGTACAG---GCCAGACAG--TTAATG---TCTGGTATAGTGCAACAGCAAAAC---  
AATCTG---CTGAGG---GCTATAGAGGCGCAACAGCATATGTTGCAACTCACAGTCTGGGGCATT  
>JX140673  
AGTCAGTCTGAGAAGGCGGGA-----  
-----  
AATAATGGCAGTATCTTCCTTCCATGCAGAATAAGACAAATTGTAAACATGTGGCAAAAGGTAGGACGAGCAA  
TGTATGCCCCCTCCCATTGCTGGAGTAATTCGGTGTAACCTCAAGT---  
ATCACAGGTCTGTTATTAACAAGAGATGGTGGGGAAGATAATAGT-----  
-----  
-----  
AGCACTGACACCCTCAGACCTGGAGGGGGAGATATGAAAGATAATTGGAGAAGTGAAGTGTATAAATATAAGG  
TAGTAAAAATTGAACCACTA---GGTGTGGCACCCACCAGGGCAAAAAGACAAGTGGTG-----  
-----AACAGAGAAAAAAGAGCA--GTGGGA--ATAGGAGCT-----  
GTGTTCCCTTGGATTCTTGGGAACA--GCAGGAAGCACTATG--GGCGCGGCGTCA---  
ATAACGCTGACGGTACAG---GTCAGACAA--TTATTG---TCTGGTATAGTGCAACAGCAAAGC---  
AATTTG---CTGAGG---GCTATAGAAGCGCAACAGCATATGTTGCAGCTCACAGTCTGGGGCATT  
>AJ249236  
TACTACAACACATCAGGACTGTTTAATGAAACAGAGGTGGCTAATAAC-----  
-----  
-----  
ACAAACGAAAATATCACTCTCCCATGTAGAATAAGACAATTTGTAAACATGTGGCAAAGAATAGGAAGAGCAA  
TGTATGCTCCTCCCATTGAAGGAGAAATCCAGTGTACCTCAAAT---  
ATCACAGGTCTACTATTGACAAGAGATGGTAGTAAGGATATTGAC-----  
-----  
-----  
GGGAAAGAGATTCTCAGACCTATAGGAGGAGATATGAGAGACAATTGGAGAAGTGAAGTATATAAATATAAGG  
TAGTAAGAATTGAACCAGTA---GGAGTAGCACCCACCAAGGCAAAAAGACGAGTGGTG-----  
-----CAGAGAGCAAAAAGAGCA--GTGGGA--ATGGGAGCT-----  
GTGCTCTTTGGGTTCTTGGGAGCA--GCAGGAAGCACTATG--GGCGCGGCGGCA---  
ATCACGCTGACGGCACAG---GCCAGACAA--TTATTG---TCTGGTATAGTGCAACAGCAAAGC---  
AATCTG---CTGAAG---GCTATAGAAGCGCAACAGCATCTGTTGCAGCTCACAGTCTGGGGCATT  
>MH746240  
GCTCAGTCTAATAATAGTAGT-----  
-----  
GGAAATGAGACCATCAGACTCTCATGTAAAATAAAACAAATTGTGAGAATGTGGCAGAAAGTGGGACAAGCAA  
TGTATGCCCCCTCCCATTGCAGGAGAAATTACATGTAGATCAAAC---  
ATTACAGGACTACTGCTAACAAGAGATGGTGGAAAGAATATTAGT-----  
-----  
-----  
AAAGGAGATGAGATCTTCAGGCCTATAGGAGGAGATATGAGGAACAATTGGAGAAGTGAATTATATAAGTATA

AAGTAGTAAAAATCAAACCACTA---GGGGTAGCACCCACCAAAGCAAGGAGAAGAGTGGTG-----  
-----GAGAGAGAAAAAAGAGCA---GTTGGA---CTGGGAGCT-----  
---GCCTTCCTTGGGTTCTTAGGAGCA---GCAGGAAGCACTATG---GGCGCGGCGTCA---  
ATAACGCTGACGGTACAA---GCCAGACAA---TTACTG---TCTGGGATAGTGCAACAGCAAAGC---  
AATTTG---CTGAGA---GCTATAGAAGCGCAGCAGCATCTGTTGCAGCTCACAGTCTGGGGCATT  
>KR051445  
CTTTATGAA-----  
-----  
CTCCCATGTAGAATAAAGCAAATTGTGAGAATGTGGCAGAGAGTGGGACAAGCAATGTATGCCCCCTCCCATCA  
AAGGAAACATTACTTGTAGATCAAAC---  
ATTACAGGACTACTATTAACAAGAGATGGTGGGAGAAATAGGAGT-----  
-----  
-----  
AATGACAGAGAGATCTTCAGACCTACAGGAGGAGACATGAGGAACAATTGGAGAAAGTGAATTATATAAGTATA  
AAATAGTAAAAATAAAACCATTA---GGAGTAGCACCCACCAAGGCAAGGAGAAGAGTGGTG-----  
-----GGGAGAGAAAAAAGAGCA---GCTGGC---CTGGGAGCT-----  
---GTTTTCTTGGGTTCTTAGGAGCA---GCAGGAAGCACTATG---GGCGCGGCGTCA---  
ATAACGCTGACGGTACAG---GTCAGACAA---CTATTG---TCTGGCATAGTGCAACAGCAAAGC---  
AATTTG---CTGAGA---GCTATAGAGGCACAGCAACATCTGCTGCAACTCACAGTCTGGGGCATT  
>KR051437  
AGTCAAGAA-----  
-----  
AATAAACAGTTATCACAATCCCATGTAGGATAAAACAAATTGTAAGAATGTGGCAGAGAACGGGACAAGCAA  
TATATGCCCCCTCCCATTCAGGAAACATTACATGTATATCAAAC---  
ATTACAGGACTATTATTAACAAGAGATGGTGGGAATGACAATAATAACAAT-----  
-----  
AATACCAATGACAAT---  
GACACTGAGGTCTTCAGACCTACAGGAGGAGATATGAGGGACAATTGGAGAAAGTGAATTATATAAGTACAAAG  
TAGTAAAGATTAAATCACTA---GGAGTAGCACCCACCAAGGCAAGGAGAAGAGTAGTG-----  
-----GGAAGAGAAAAAAGAGCA---GTTGGA---ATAGGAGCT-----  
GTCTTCTTGGGTTCTTAGGAGCA---GCCGGGAGCACTATG---GGCGCGGCGTCA---  
CTAACGCTGACGGTACAG---GTCAGACAA---TTATTG---TCTGGCATAGTGCAACAGCAAAGC---  
AATTTG---CTGAGA---GCTATAGAGGCGCAACAGCATATGTTGCAACTCACAGTCTGGGGCATT  
>KY658701  
AGTTATATTAATAGGACATCAACT-----  
-----  
TCTAATGGGACTATCACACTCCCATGTAGAATAAAACAAATTGTAAGGATGTGGCAGAGAGTGGCACAAGCAA  
TGTACGCCCCCTCCCATTCAGGAAAACCTGAATGTAACCTCAAGC---  
ATTACAGGATTAATATTAACAAGAGATGGTGGGAACAATGACAATAACACA-----  
-----  
-----  
CAGAACGAGACCTTCAGACCTGGAGGAGGAAATATAAGGGACAATTGGAGAAAGTGAATTATATAAATATAAAA  
CAGTAAAAATCAAATCATTA---GGAATAGCACCCACCAGGGCAAGGAGAAGAGTGGTG-----  
-----GAAAGACAAAAAAGAGCA---GTGGGA---ATGGGAGCT-----  
GTCTTCCTTGGGTTCTTAGGAGCA---GCAGGAAGCACTATG---GGCGCGGCGTCA---  
ATAACGCTGACGGTACAG---GTCAGACAA---TTATTG---TCTGGCATAGTGCAACAGCAAAGC---  
AATTTG---CTGAGA---GCTATAGAGGCGCAACAGCATATGTTGCAACTCACAGTCTGGGGCATT  
>FJ817370  
AGTCATCTGTTTAAATGGTAGTACTCTGTCT-----  
-----  
ACTAATGGTACTATCACACTTCCATGTAGGATAAAACAGATTGTAAGAATGTGGCAGAGAGTGGGACAAGCAA  
TGTATGCCCCCTCCTATCGCAGGAAACATTACATGTAGGTCAAAC---  
ATTACAGGACTACTATTAACAAGAGATGGTGGAAACAAATAAAGATACA-----  
-----  
-----  
AATGAGGCTGAGACTTTTCAGACCTGGAGGAGGAGATATGAGGGACAATTGGAGAAAGTGAATTATATAAGTATA  
AAGTAGTAAAAATTAAACCATTA---GGAGTAGCACCCACCAGGGCAAGGAGAAGAGTGGTG-----  
-----GAGAGAGAAAAAAGAGCA---ATTGGA---CTGGGAACT-----  
---GTCCTCCTTGGGTTCTTAGGAACA---GCAGGAAGCACTATG---GGCGCAGCGTCA---

ATAACGCTGACGGTACAG---GTCAGACAA---TTATTG---TCTGGCATAGTGCAACAGCAAAGC---  
 AATTTG---CTGAGG---GCTATAGAGGCGCAGCAGCATCTGTTGCAACTCACAGTCTGGGGCATT  
 >EU885764  
 AATCATAACAGAT-----  
 -----  
 ACAAATGAAAATATCACACTCCAGTGTAGGATAAAAACAAATTGTGAGAATGTGGCAGAGAGTGGGACAAGCAA  
 TGTATGCCCCCTCCCATCGCTGGAAACATTACATGTATCTCAAAC---  
 ATTACAGGACTGCTATTAACAAGAGATGGTGTGAATGATACCCATGAC-----  
 -----  
 -----  
 AAGGAGAATGAGACCTTCAGACCTACAGGAGGAGATATGAGGGATAATTGGAGAAGTGAATTATATAAGTATA  
 AAGTAATAAAACTTAAACCACTA---GGAGTAGCACCCACCAGGGCAAGGAGAAGAGTGGTG-----  
 -----GAGAGAGGAAAAAGAGAA---GTCACA---CTAGGAGCT-----  
 ---TTGTTCCCTTACGTTCTTAGGAGCA---GCAGGAAGCACTATG---GGCGCGGCGTCA---  
 TTAACGCTGACGGTACAG---GCCAGACAA---TTATTG---TCTGGCATAGTGCAACAGCAAAGC---  
 AATTTG---CTGAGA---GCTATAGAAGCGCAGCAGCATCTGTTGCAGCTCACAGTCTGGGGCATT  
 >EU885765  
 AGTTATGGGCCT-----  
 -----  
 AATGAGACACACATCATACTCCCATGTAGGATAAGACAAATTGTGAGAATGTGGCAGAGAGTAGGACAAGCAA  
 TGTATGCCCCCTCCCATCGCAGGAAACATAACATGTAAATCAAAT---  
 ATTACAGGACTACTATTAACAAGAGATGGTGGAGAGGATGGCAAT-----  
 -----  
 -----  
 AATAGCACTGAGACCTTCAGACCTGCAGGAGGAGACATGAGGGACAATTGGAGAAGTGAATTATATAAGTATA  
 AAGTAGTAAAAATTAAACCATT---GGAGTAGCACCCACCAGGGCAAGAAGAAGAGTGGTG-----  
 -----AGGAGAGAAAAAGAGCA---GTTGGA---CTGGGAGCT-----  
 ---GTCTTCCTTGGGTTCTTAGGAGCA---GCAGGAAGCACTATG---GGCGCGGCGTCA---  
 TTAACGCTGACGGTACAG---GCCAGACAA---TTATTG---TCTGGCATAGTGCAACAGCAAAGC---  
 AATTTG---CTGAGG---GCTATAGAGGCGCAGCAGCATCTGCTGCAACTCACAGTCTGGGGCATT  
 >HQ236608  
 AGCTATAATAGTGGCAGTAATAATAATACCACACATAATAGT-----  
 -----  
 GGTAATGAGACTATCACAATTCCATGTAGGATAAAAACAAATAGTGAGAATGTGGCAGAGAGTGGGACAAGCAA  
 TGTATGCCCCCTCCCGTCGCAGGAAACATTACATGTAGGTCAGAA---  
 ATTACAGGACTACTATTAACAAGAGATGGT---AATGCAAGTGAA-----  
 -----  
 -----  
 AATGAAATTGTCAGACCTGGAGGAGGAGACATGAGGGACAATTGGAGAAGTGAATTATATAAGTATAAAGTAG  
 TAAAAATTAAACCACTG---GGAGTAGCACCCACCAGGGCAAGGAGAAGAGTGGTG-----  
 -----GGGAGAGAAAAAGAGCA---GTTGGA---CTGGGAGCT-----  
 GTCTTCCTTGGGTTCTTAGGAACA---GCAGGAAGCACTATG---GGCGCAGCGTCA---  
 ATAACGCTGACGGTACAG---GTCAGACAA---TTATTG---TCTGGCATAGTGCAACAGCAAAGC---  
 AATTTG---CTGAGG---GCTATAGAGGCGCAGCAGCATATGTTGCAACTCACAGTCTGGGGCATT  
 >KX389641  
 GAT-----  
 -----  
 TATGAGAGTAATATCACACTCCCATGTAAATAAAAACAAATTGTGAGAATGTGGCAGAGAGTAGGACAAGCAA  
 TGTATGCCCCCTCCCATCGCAGGAAATATTACATGTAGATCAAAC---  
 ATTACAGGGCTATTATTAACAAGAGATGGTGGTGGGAACAATAAT-----  
 -----  
 -----  
 AGCAATGAGACCTTCAGACCTGGAGGAGGAGATATGAGGGACAACCTGGAGAAGTGAGTTATATAAGTATAAAA  
 TAGTAAAAATTAAACCACTA---GGAATAGCACCCACCAAGGCAAGAGAAGAGTGGTG-----  
 -----CAGAGAGAGAAAAAGGCGAGTAGTTGGA---CTGGGAGCT-----  
 GTCTTCCTTGGGTTCTTAGGAGCA---GCAGGAAGCACTATG---GGCGCGGCGTCA---  
 ATAACGCTGACGGTACAG---GCCAGACAA---TTATTG---TCTGGCATAGTGCAACAGCAAAGC---  
 AATTTG---CTGAGG---GCTATAGAGGCACAGCAACATCTGTTGCAACTCACAGTCTGGGGCATT  
 >KY953202

AGTTATATAAATGCTACAAAGGATAATACA-----  
-----  
ACAGGGGATAACATCACGCTCCCATGTAGGATAAAACAGATTGTAAGAATGTGGCAGAGAGTAGGACAAGCAA  
TGTATGCCCCCTCCCATCGCAGGAAACATTACATGTATATCAAAC---  
ATTACAGGGATAATATTAACAAGAGATGGTGGAAATAATAATAAATCA-----  
-----  
AATAATGAAACCTTCAGACCTGGAGGAGGAGATATGAGAGACAATTGGAGAAGTGAGTTATATAAGTATAAAA  
TAGTTAAAATTAAACCACTA---GGAATAGCACCCACCAGGGCAAGGAGAAGAGTGGTG-----  
-----CAGAGAGAAAAAAGGGCA---GTTGGA---CTGGGAGCT-----  
TTCTTCTTTGGGTTCTTAGGAGCA---GCAGGAAGCACTATG---GGCGCGGCGTCA---  
ATAACGCTGACGGTACAG---GTCAGACAA---TTATTG---TCTGGCATAGTGCAACAGCAAAGC---  
AATTTG---CTGAGG---GCTATAGAGGCGCAACAACATATGTTGCAACTCACAGTCTGGGGCATT  
>FR846409  
AGTTAT-----  
-----  
GAAAAATGATACTATCACACTTCCATGTAGGATAAAACAAATTGTGAGAATGTGGCAGAGAGTGGGACAAGCAA  
TGTATGCCCCCTCCCATAGCAGGAAACATTACATGTGTGTCAAAC---  
ATTACAGGATTACTATTAGAAAAGAGATGGTGGGAATCTTAATAATAGTATAAAT-----ACAACTGAG---  
CCT-----  
-----  
AAAAATGAAATTTTCAGACCTGTAGGAGGAGACATGAAGAACAATTGGAGAAGTGAATTATATAAATATAAAG  
TAGTAAGAATTAAACCACTA---GGAGTAGCACCTACCAGGGCAAGGAGAAGAGTGGTG-----  
-----GGAAGAGAAAAAAGAGCA-----GGA---ATAGGAGCT-----  
GTCATCTTTGGGTTCTTAGGAGCA---GCAGGAAGCACTATG---GGCGCGGCGTCA---  
ATAACGCTGACGGTACAG---GTCAGACAA---TTATTG---TCTGGCATAGTGCAACAGCAAAGC---  
AATTTG---CTGAGA---GCAATAGAGGCGCAGCAGCATCTGTTGCAACTCACAGTCTGGGGCATT  
>HQ236615  
AATTATACTGAGAGTAGA-----  
-----  
AATGATACTATCATCTCAATTCCATGTAGGATAAAACAAATTGTGAGAATGTGGCAGAGAGTGGGACAAGCAA  
TGTATGCCCCCTCCCATCGCAGGAAACATTACATGTAGGTCAAAT---  
ATTACAGGACTATTATTAGTAAGAGATGGTGGCATAAATAATGAG-----  
-----  
-----  
ACAACTGAGATTTTCAGACCTGCAGGAGGAGATATGAAGGACAATTGGAGAAGTGAATTATATAAGTATAAAG  
TAGTAAAAATTAAACCACTA---GGAGTAGCACCCACCAGGGCAGAG-----ATGGTG-----  
-----GGGAGAGAA---AGAGCA---GTTGGA---CTGGGAGCT-----  
GCCATCCTTGGGTTCTTAGGAACA---GCAGGAAGCACTATG---GGCGCAGCGTCA---  
ATAGCGCTGACGGTACAG---GTCAGACAA---TTATTG---TCTGGCATAGTGCAACAGCAAGGC---  
AATTTG---CTGAGG---GCTATAGAGGCGCAGCAGCATCTGTTGCAACTCACAGTCTGGGGCATT  
>MH746234  
ACTTACACAGGGAGGGGGAATGACACACAGGAG-----  
-----  
AATAACAGCACTATCATACTTCCATGCAGGATAAAACAAATTATAAACATGTGGCAAGGAGCAGGACAAGCAA  
TGTATGCTCCTCCCATCAGTGGAAAAATTAATTGTGTATCAAAT---  
ATTACAGGAATACTATTGACAAGAGATGGTGGTAATAATGCTACT-----  
-----  
-----  
AATGAGACCTTCAGACCTGGAGGAGGAAATATAAAGGACAATTGGAGAAGTGAATTATATAAATATAAAGTAG  
TACAAATTGAACCACTG---GGAATAGCACCCACCAAGGCAAAGAGAAGAGTGGTG-----  
-----GAGAGAGAAAAAAGAGCA---GTGGGA---ATAGGAGCT-----  
ATGATCTTTGGGTTCTTAGGAGCA---GCAGGAAGCACTATG---GGCGCGGCGTCA---  
ATAACGCTGACGGTACAA---GCCAGACAA---TTATTG---TCTGGTATAGTGCAACAGCAAAGC---  
AATTTG---CTGAGG---GCTATAGAGGCGCAGCAGCATCTGTTGCAACTCACAGTCTGGGGCATT  
>KU600817  
ACTTACACAGGAAATGGAACATGGGAGAATAATAGCACT-----  
-----  
ATTAATGGCACTATCATACTTCCATGCAAGATAAAGCAAATCATAAACATGTGGCAGGGAGCAGGACAAGCAA  
TGTATGCTCCTCCCATCAGTGGAAATAATTAATTGTGCGTCAAAT---

ATTACAGGACTACTATTGACAAGAGATGGTGGTTTTAGTAATGCAAGTGGT-----  
-----  
GGTGGTAGTAATGCA---  
AATGAAGAGATCTTCAGACCTGGAGGAGGAAATATAAAAGACAATTGGAGAAGTGAATTATATAAATATAAAG  
TAGTACAAATTGAACCATTA---GGAATAGCACCCACCAGGGCAAAGAGAAGAGTGGTG-----  
-----GAGAGAGAAAAAAGAGCA--GTGGGA--ATAGGAGCT-----  
ATGATCTTTGGGTTCTTAGGAGCA--GCAGGAAGCACTATG--GGCGCGGCATCA---  
ATAACGCTGACGGTACAG---GCCAGACAA--TTATTG---TCTGGTATAGTGCAACAGCAAAGC---  
AATTTG---CTGAAA---GCTATAGAGGCGCAACAGCATTTGTTGCAACTCACAGTCTGGGGCATT  
>JX112866  
ACTTACATGGGAAATGAAACCAAGGGGAAG-----  
-----  
TATAATGGCACTATTATACTTCCATGCAGGATAAAGCAAATTATAAACATGTGGCAGGAAACAGGACAAGCAA  
TGTATGCTCCTCCCGTCAGTGGAAGAATTAAGTGTAGATCAAAT---  
ATTACAGGAATACTATTGACAAGAGATGGTGGTAATACAACCTAAC-----  
-----  
GGGGAAGAGACCTTCAAACCTGGAGGAGGAGATATGAGGGACAATTGGAGAAATAAATTATATAAATATAAAG  
TAGTACAAATTGAACCACTA---GGAATAGCACCCACCAGGGCAAAGAGAAGAATGGTG-----  
-----GAGAGAGAAAAAAGAGCA--GTGGGA--ATAGGAGCT-----  
ATGATCTTTGGGTTCTTAGGAGCA--GCAGGAAGCACTATG--GGCGCGGCGTCA---  
ATAACGCTGACGGTACAG---GCCAGACAA--TTATTG---TCTGGTATAGTGCAACAGCAAAGC---  
AATTTG---CTGAGG---GCTATAGAGGCGCAGCAGCATCTGTTGCAACTCACAGTCTGGGGCATT  
>GU564225  
ACTTACAATGGAAATGAAACCATA-----  
-----  
GGTAATAAACTATCATACTTCCATGCAGGATAAAGCAAATTATAAACATGTGGCAGGGAGTAGGACAAGCAA  
TGTATGCTCCTCCCGTCAGTGGAAGAATTAATTGTGTATCAAAT---  
ATTACAGGAATACTATTAACAAGAGATGGTGGTAGTAATAGTACT-----  
-----  
AATGAGACCTTCAGACCTGAAGGAGGAAATATAAAGGACAATTGGAGAAGTGAATTACATAAATATAAAGTAG  
TACAAATTGAACCACTA---GGAATAGCACCCACCAGGGCAAAAAGAAGAGTGGTG-----  
-----GAGAGAGAAAAAAGAGCA--GTGGGA--ATAGGAGCT-----  
ATGATCTTTGGGTTCTTAGGAGCA--GCAGGAAGCACTATG--GGCGCGGCGTCA---  
ATAACGCTGACGGTACAG---GCCAGACAA--TTATTG---TCTGGTATAGTGCAACAGCAAAGC---  
AATTTG---CTGAGG---GCTATAGAGGCGCAGCAGCATCTGTTGCAACTCACAGTCTGGGGCATT  
>GQ845124  
ACTTACACAGAAAATGGAACCATAGAG-----  
-----  
GGGAATAAACTATCATACTTCCATGTAGGATAAAGCAAATTATAAACATGTGGCAGGGAGTAGGACAAGCAA  
TGTATGCTCCTCCCATCAGGGGAAGAATTAATTGTATATCAAAT---  
ATTACAGGAATACTATTAACAAGAGATGGTGGTAATAGTAATGCTACCGAT-----  
-----  
AGTAATACTAACGAAATCTTCAGACCTGGAGGAGGAAATATAAAGGACAATTGGAGAAGTGAATTATATAAAT  
ATAAAGTAGTACAAATTGAACCACTA---GGAGTAGCACCCACCAGGGCAAGGAGAAGAGTGGTG-----  
-----CAGAAAGAAAAAAGAGCA--GTGGGA--ATAGGAGCT---  
-----ATGATCTTTGGGTTCTTAGGAGCA--GCAGGAAGCACTATG--GGCGCGGCGTCA---  
ATAACGCTGACGGTACAG---GCCAGACAA--TTATTG---TCTGGTATAGTGCAACAGCAAAGC---  
AATTTG---CTGAGG---GCTATAGAGGCGCAGCAGCATCTGTTGCAACTCACAGTCTGGGGCATT  
>GQ845126  
ACTCACAAGGAAAATGAAACCATAGGGAGG-----  
-----  
AGAAAATGACACTATCATACTTCCATGCCGATAAAGCAAATTATAAACATGTGGCAGGAAGTAGGACAAGCAA  
TGTATGCTCCTCCCATCAGTGGAATAATTAATTGTGTATCAAAT---  
ATTACAGGAATACTATTAACAAGAGATGGTGGTAATAATGATACT-----  
-----  
AACGAGACCTTCAGACCTGGAGGAGGAAATATAAAGGACAATTGGAGAAGTGAATTATATAAATATAAAGTAG

TACAAATTGAACCACTA---GGAATAGCACCCACCAGGGCAAAGAGAAGAGTGGTG-----  
-----GAGAGAGAAAAAAGAGCA---GTGGGA---ATAGGAGCT-----  
ATGATCTTTGGGTTCTTAGGAGCA---GCAGGAAGCACTATG---GGCGCAGCGTCA---  
ATAACGCTGACGGTACAG---GCCAGACAA---TTATTG---TCTGGTATAGTGCAACAGCAAAGC---  
AATTTG---CTGAGG---GCTATAGAGGCGCAGCAGCATCTGTTGCAACTCACAGTCTGGGGCATT  
>GU564229  
ACTCAAACCACAGAG-----  
-----  
GGGAAAGACAATATCACACTTCCATGCAGAATAAAGCAAAGTTATAAAAATGTGGCAGAGAGTAGGACAAGCAA  
TGTATGCTCCTCCCATCAGTGGAATAATTAATTGTGTATCAAAT---  
ATTACAGGTATACTATTAACAAGAGATGGTGGTGATAATGATAGT-----  
-----  
-----  
ACTAACGAGACCTTCAGACCTGGAGGAGGAGATATGAGGGACAATTGGAGAAGTGAATTATATAAATATAAAG  
TAGTACAAATTGAACCACTA---GGAATAGCACCCACCAAGGCAAAGAGAAGAGTGGTG-----  
-----GAGAGAGAAAAAAGAGCA---GTGGGA---ATAGGAGCT-----  
TTGATCTTTGGGTTCTTAGGAGCA---GCCGGAAGCACTATG---GGCGCGGCGTCA---  
ATAACGCTGACGGTACAG---GCCAGACAA---TTGTTG---TCCGGTATAGTGCAACAGCAAAGC---  
AATTTG---CTGAGG---GCTATAGAGGCGCAGCAGCATATGTTGCAACTCACAGTCTGGGGCATT  
>EF036531  
ACTTACAATGGAACCCTGAACGAGGAG-----  
-----  
TACAAATGGCACTATCATACTTCCATGCAGAATAAAGCAAATTATAAACATGTGGCAGGAAGTAGGACAAGCAA  
TGTATGCTCCTCCCATCAGTGGAAGAATTAATTGTGTATCAAAT---  
ATTACAGGGATACTATTGACAAGAGATGGTGGTACGAATGAGACT-----  
-----  
-----  
AACGAGACCTTCAGACCTGGAGGAGGAAATATAAAGGACAATTGGAGAAATGAATTATATAAATATAAAGTAG  
TACAAATTGAACCACTA---GGAATAGCACCCACCAGGGCAAAGAGAAGAGTGGTG-----  
-----GAAAGAGAAAAAAGAGCA---GTGGGA---ATAGGAGCT-----  
ATGATCTTTGGGTTCTTAGGAGCA---GCAGGAAGCACTATG---GGCGCGGCGTCA---  
ATAACGCTGACGGTACAG---GCCAGACAA---TTATTG---TCTGGTATAGTGCAACAGCAAAAC---  
AATTTG---CTGAGG---GCTATAGAGGCGCAGCAGCCTCTGTTTCTTCTCACAGTCTGGGGCATT  
>KF835499  
AATTACACAGGAAATGGAACA-----  
-----  
-  
ACGAGTGGCACTATCATACTTCCATGTAGGATAAAGCAAATTATAAACATGTGGCAGGGAGTAGGACAAGCAA  
TGTATGCTCCTCCCATCAGTGGAAGCATTAAATTGTGTATCAGAT---  
ATCACAGGAATACTATTGACAAGAGATGGTGGTAATAATACAGGTAATAATAAT-----  
-----  
-----  
AGTGCTAATACAAATGAGATCTTCAGACCTGGAGGAGGAAATATGAAAGACAATTGGAGAAGTGAATTATATA  
AATATAAAGTAGTAGAAATTGACCCACTA---GGAGTAGCACCCACCAGGGCAAAAAGAAGAGTGGTG-----  
-----GAGAGAGAAAAAAGAGCA---GTGGGA---  
ATAGGAGCT-----ATGATCTTTGGGTTCTTAGGAGCA---GCCGGGAGCACTATG---  
GGCGCAGCGTCA---ATAACGCTGACGGTACAG---GCCAGACAA---TTATTG---  
TCTGGTATAGTGCAACAGCAAAGC---AATTTG---CTGAGG---  
GCTATAGAGGCGCAACAACATATGTTGCAACTCACAGTCTGGGGCATT  
>KF835523  
ACTCACACGGAAAATGACACC-----  
-----  
ACAAAGGAAAGGATCATACTTCCATGCAGGATAAAGCAAATTATAAACATGTGGCAGAGAGTAGGACAAGCAA  
TATACAATCCTCCCATCAGTGAGCAATTAATTGTCTATCAAAT---  
ATTACAGGAATAATATTGACAAGAGATGGTGGTGCTAGTACTAATAATGATACT-----  
-----  
-----  
AGTACTAACAATGAAACCTTCAGACCTGGAGGAGGAAATATAAAGGACAATTGGAGAAGTGAATTATATAAAT  
ATAAAGTAGTACAAATTGAGCCACTA---GGGGTAGCACCCACCAGGGCAAAGAGAAGAGTGGTG-----  
-----GAGAGAGAGAAAAAGAGCA---GTGGGA---ATAGGAGCT---

-----ATGATCTTTGGGTTCTTGGGAGCA---GCAGGAAGCACTATG---GGCGCGGCGTCA---  
 ATAACGCTGACGGTACAG---GCCAGACAA---TTATTG---TCTGGTATAGTGCAACAGCAAAGC---  
 AATTTG---CTGAGG---GCTATAGAGGCGCAGCAGCATGCTGCAACTCACAGTCTGGGGCATT  
 >GU475020  
 ACTTATAAAGGAAATGAAACCATA-----  
 -----  
 GGAATGGAACCTATCATAATTCCATGCAGGATAAAGCAAATTATAAACATGTGGCAGGGAGTAGGACAAGCAA  
 TGTATGCTCCTCCCATCAGTGGAATAATTAATTGTATATCAAAT---  
 ATTACAGGAATACTATTAACAAGAGATGGTGGTAGTACTAATAGC-----  
 -----  
 -----  
 ACTAATGAGACCTTCAGACCTGGAGGAGGAAATATAAAGGACAATTGGAGAAGTGAATTATATAAATATAAAG  
 TAGTACAAATTGAACCACTA---GGAGTAGCACCCACCAGGGCAAAGAGAAGAGTGGTG-----  
 -----GAGAGAGAAAAAAGAGCA---GTGGGA---ATAGGAGCT-----  
 ATGATCTTTGGGTTCTTAGGAGCA---GCAGGAAGCACTATG---GGCGCAGCGTCA---  
 ATAACGCTGACGGTACAG---GCCAGACAA---TTATTG---TCTGGTATAGTGCAACAGCAAAGC---  
 AATTTG---CTGAGG---GCTATAGAGGCGCAGCAGCATATGTTGCAACTCACAGTCTGGGGCATT  
 >HQ699988  
 ACTTATAATGGAATGGAACGTGACCAAG-----  
 -----  
 TATAATGACACTATTATACTTCCATGCAGGATAAAGCAAATTATAAACATGTGGCAGGAAACAGGACAAGCAA  
 TGTATGCTCCTCCCGTCAGTGAGTAATAAATTGTAGATCAAAT---  
 ATTACAGGAATACTATTGACAAGAGATGGGGTAATAATGGGGTAATACA-----  
 -----  
 -----  
 ACTAACGGGGAAGAGACCTTCAGACCTGGAGGAGGAGATATGAGGGACAATTGGAGAAATGAATTATATAAAT  
 ATAAAGTAGTACAAATTGAACCACTA---GGAATAGCACCCACCAAGGCAAAGAGAAGAGTGGTG-----  
 -----CAGAGAGAAAAAAGAGCA---GTGGGA---ATAGGAGCT---  
 -----ATGATCTTTGGGTTCTTAGGAGCA---GCAGGAAGCACTATG---GGCGCGGCGTCA---  
 ATAACGCTGACGGTACAG---GCCAGACAA---TTATTG---TCTGGTATAGTGCAACAGCAAAGC---  
 AATTTG---CTGAGA---GCTATTGAGGCGCAGCAGCATCTGTTGCAACTCACAGTCTGGGGCATT  
 >JX112811  
 ACTTACTCAGGAAATGAAACCACAGGAAATGAAACCACAGGG-----  
 -----  
 AAGAATACAAGTATCATACTTCCATGCAAGATAAAGCAAATTATAAACATGTGGCAGGGAGTAGGACAAGCAA  
 TGTATGCTCCTCCCATCAGTGGAAGTTAATTGTATATCAAAT---  
 ATTACAGGAATACTATTAACAAGAGATGGTGGTGGTAATAATAGT-----  
 -----  
 -----  
 GCTAATGAGACTTTTCAGACCGGGAGGAGGAAATATAAAGACAATTGGAGAAGTGAATTATATAAATATAAAG  
 TAGTACAAATTGAACCACTA---GGAATAGCACCCACCAGGGCAAAGAGAAGAGTGGTG-----  
 -----GAGAGAGAAAAAAGAGCA---GTGGGA---ATAGGAGCT-----  
 ATGATCTTTGGGTTCTTAGGAGCA---GCAGGAAGCACTATG---GGCGCGGCGTCA---  
 ATAACGCTGACGGTACAG---GCCAGACAA---TTATTG---TCTGGTATAGTGCAACAGCAAAGC---  
 AATTTG---CTGATG---GCTATAGAGGCGCAGCAGCATCTGCTGCAACTCACAGTCTGGGGCATT  
 >JX112817  
 ACTTACATCAGTAAATTAACACTACAGGGGGG-----  
 -----  
 AGTAATGGCACTATCATACTTCCATGCAAGATAAAGCAAATTATAAACATGTGGCAGGGAGTAGGACAAGCAA  
 TGTATGCTCCTCCCATCAGTGGAATAATTAATTGTGTAACAAAT---  
 ATTACAGGAATACTATTAACAAGAGATGGTGGTAATGATAATAGC-----  
 -----  
 -----  
 ATTAATGAGACCTTTAGACCTGGAGGAGGAAATATAAAGGACAATTGGAGAAATGAATTATATAAATATAAAG  
 TAGTACAAATTGAACCACTA---GGACTAGCACCCACCAGGGCAAAGAGAAGAGTGGTG-----  
 -----GAGAGAGAAAAAAGAGCA---GTGGGA---ATAGGAGCT-----  
 ATGATCTTTGGGTTCTTAGGAGCA---GCAGGAAGCACTATG---GGCGCGGCGTCA---  
 ATAACGCTGACGGTACAG---GCCAGACAA---TTATTG---TCTGGTATAGTGCAACAGCAAAGC---  
 AATTTG---CTGAGG---GCTATAGAGGCGCAGCAGCATCTGTTGCAACTCACAGTCTGGGGCATT  
 >JX112824

ACTTATTTTAAATAAAACCACAAGGGAG-----  
 -----  
 AGTAATGGCACTATCATACTTCCATGCAGGATAAAGCAAATTATAAACATGTGGCAGGGAGTAGGACAAGCAA  
 TGTATGCTCCTCCCATCAGTGGAAGCATTAAATTGTGTATCAAAT---  
 ATTACAGGAATACTATTAACAAGAGATGGTGGTAATAATGGTACT-----  
 -----  
 -----  
 AGTGATAAAGAGACCTTCAGACCTGGAGGAGGAAATATAAAGGACAATTGGAGAAGTGAATTATATAAATATA  
 AAGTAGTAGAAATTGAACCACTA---GGAATAGCACCCACCAGGGCAAAGAGAAGAGTGGTG-----  
 -----GAGAGAGAAAAAAGAGCA---GTGGGA---ATAGGAGCT-----  
 ---ATGATCTTTGGGTTCTTAGGAGCA---GCAGGAAGCACTATG---GGCGCGGCGTCA---  
 ATAACGCTGACGGTACAG---GCCAGACAA---TTATTG---TCTGGTATAGTGCAACAGCAAAGC---  
 AATTTG---CTGAGG---GCTATAGAGGCGCAGCAGCATCTGTTGCAACTCACAGTCTGGGGCATT  
 >JX112825  
 ACTTACAATGAACTGGAACCACAGGGGAGAATAATGGC-----  
 -----  
 ACTAATGGCAATATCACACTTCCATGCAGGATAAAGCAAATTATAAACATGTGGCAGGAAGTAGGACAAGCAA  
 TGTATGCTCCTCCCATCAATGGAATAATTAATTGTGTATCAAAT---  
 ATTACAGGAATACTATTAACAAGAGATGGTAGTAATGAACTAGC-----  
 -----  
 -----  
 CCTAACGAGACCTTCAGACCTGGAGGAGGAAATATAAAGGACAATTGGAGAAGTGAATTATATAAATATAAAG  
 TAATACAAATTGAACCACTA---GGAATAGCACCCACCAAGGCAAAGAGAAGAGTGGTG-----  
 -----GAGAGAGAAAAAAGAGCA---GTGGGA---ATAGGAGCT-----  
 TTGATCTTTGGGTTCTTAGGAGCA---GCAGGAAGCACTATG---GGCGCGGCGTCA---  
 ATAACGCTGACGGTACAG---GCCAGACAA---TTATTG---TCTGGTATAGTGCAACAGCAAAGC---  
 AATTTG---CTGAGG---GCTATAGAGGCGCAGCAGCATATGTTGCAACTCACAGTCTGGGGCATT  
 >JX112831  
 AATTACACAGGAAATAAAACAGGGGGGAATAAT-----  
 -----  
 AACACTGAACTATCACACTTCCATGCAACATAAAGCAAATTATAAACATGTGGCAGGGAGTAGGACAAGCAA  
 TGTATGCTCCTCCCGTCAGTGGAAGAATTAATTGTGTAAGTAAT---  
 ATTACAGGAATACTATTAACAAGAGATGGTGGTAAACTAGTGCT-----  
 -----  
 -----  
 GACGAGACCTTCAGACCTGGAGGAGGAAATATAAAGGACAATTGGAGAAGTGAATTATATAAATATAAAGTAG  
 TACAAATTGAACCACTA---GGAATAGCACCCACCAGGGCAAAGAGAAGAGTGGTG-----  
 -----GAGAGAGAAAAAAGAGCA---GTGGGA---ATAGGAGCT-----  
 ATGATCTTTGGGTTCTTAGGAGCA---GCCGGAAGCACTATG---GGCGCGGCGTCA---  
 ATAACGCTGACGGCACAG---GCTAGACAA---TTATTG---TCTGGTATAGTGCAACAGCAAAGC---  
 AATTTG---CTGAGG---GCTATAGAGGCGCAACAGCATCTGTTGCAACTCACAGTCTGGGGCATT  
 >JX112836  
 ACTTACACAGAAAATGGAACCATAGGGGAA-----  
 -----  
 AGAAATGACACTATCACACTTCCATGCAAAATAAAGCAAATTATAAACATGTGGCAGGAAATAGGACAAGCAA  
 TGTATGCTCCCCCGTCAGTGGAATAATTAATTGTGTATCAAAT---  
 ATTACAGGAATACTATTAACAAGAGATGGTGGTAATAATGGTACT-----  
 -----  
 -----  
 AGTGCTAACGAGACCTTCAGACCTGGAGGAGGAAATATAAAGGACAATTGGAGAAGTGAATTATATAAATATA  
 AAGTAGTACAAATTGAACCACTA---GGAATAGCACCCACCAGGGCAAAGAGAAGAGTGGTG-----  
 -----GACAGAGAAAAAAGAGCA---GTGGGA---ATAGGAGCT-----  
 ---ATGATCTTTGGGTTCTTAGGAGCA---GCAGGAAGCACTATG---GGCGCGGCGTCA---  
 ATAACGCTGACGGTACAG---GCCAGACAA---TTATTG---TCTGGTATAGTGCAACAGCAAAGC---  
 AATTTG---CTGAGG---GCTATAGAGGCGCAGCAGCATCTGTTGCAACTCACAGTCTGGGGCATT  
 >JX112837  
 TATTATGAAAATGGAACCATAGGGGGG-----  
 -----  
 AGTAATGGCACTATCATACTTCCATGTAGGATAAAGCAAATTATAAACATGTGGCAGGGAGTAGGACAAGCAA  
 TGTATGCTCCTCCCATCAGTGGAAGCATTAAATTGTGTATCAAAT---

ATTACAGGAATACTATTAACAAGAGATGGTGGTGGTAATAATAGA-----  
-----  
-----  
ACTAACGAGACCTTCAGACCTGGAGGAGGAAATATAAAGGACAATTGGAGAAGTGAATTATATAAATATAAAG  
TAGTAGAAATTGAGCCACTA---GGAGTAGCACCCACCAAGGCAAAGAGAAGAGTGGTG-----  
-----GAGAGAGAAAAAAGAGCA--GTGGGA--ATAGGAGCT-----  
ATGATCTTTGGGTTCTTAGGAGCA--GCAGGAAGCACTATG--GGCGCGGCGTCA---  
ATAACGCTGACGGTACAG---GCCAGACAA--TTATTG---TCTGGTATAGTGCAACAGCAAAGC---  
AATTTG---CTGAGG---GCTATAGAGGCGCAGCAGCATCTGTTGCAACTCACAGTCTGGGGCATT  
>JX112838  
ATTTACAATGGAATGAAACCAATATTCCT-----  
-----  
GACAATAAACTATCATACTTCCATGCAAGATAAAGCAAATTGTAACTTGTGGCAGGAAGTAGGACAAGCAA  
TGTATGCTCCTCCCATCAGGGGAAAAATTAATTGTGTATCAAAC---  
ATTACAGGAATACTATTAACAAGAGATGGTGGTAATATTAGTAAT-----  
-----  
-----  
ACTAGTACCGAGACCTTCAGACCTGCAGGAGGAGATATGAGGGACAATTGGAGAAATGAATTATATAAATATA  
AAGTAGTACAAATTGAACCACTA---GGAATAGCACCCACCAGGGCAAAAAGAAGAGTGGTG-----  
-----AAGAGAGAAAAAAGAGCA--GTGGGA--ATAGGAGCT-----  
---ATGATCTTTGGGTTCTTAGGAGCA--GCAGGAAGCACTATG--GGCGCGGCGTCA---  
ATAACGCTGACGGTACAG---GCCAGACAA--TTATTG---TCTGGTATAGTGCAACAGCAAAGC---  
AATTTG---CTGAGG---GCTATAGAGGCGCAGCAGCATATGTTGCAACTCACAGTCTGGGGCATT  
>JX112839  
CATTACGAAAATGGAACCATAAAGGGGGGTAAT-----  
-----  
AACACTAGCGAGATCACACTTCCATGCAGGATAAAGCAAATTATAAACATGTGGCAGGAAGTAGGACAAGCAA  
TGTATGCTCCTCCCGTCAGTGGAAGAATTAATTGTGTATCAAAT---  
ATCACAGGAATACTATTAACAAGAGATGGTGGTAATAATAATAGT-----  
-----  
-----  
ACTAATGAGACCTTCAGACCTGGAGGAGGAGATATAAAGGACAATTGGAGAAGTGAATTATATAAATATAAAG  
TAGTACAAATTGAACCACTA---GGAATAGCACCCACCAGGGCAAAGAGAAGAGTGGTG-----  
-----GAGAGAGAAAAAAGAGCA--GTGGGA--ATAGGAGTT-----  
ATGATCTTTGGGTTCTTAGGAGCA--GCTGGAAGCACTATG--GGCGCGGCGTCA---  
ATAACGCTGACGGTACAG---GCCAGACAA--TTATTG---TCTGGTATAGTGCAAGCAGCAAAGC---  
AATTTG---CTGAGA---GCTATTGAGGCGCAACAGCATCTGTTGCAACTCACAGTTTGGGGCATT  
>GU475031  
ACTTACAAAGGAAATGAAACCATAGGGGAG-----  
-----  
AGGAATGACACTATCATACTTCCATGCAGGATAAAGCAGATTGTAAACATGTGGCAGGAAGTAGGACAAGCAA  
TGTATGCTCCTCCCGTCAGTGGAAGAATTAATTGTGTATCAAAT---  
ATTACAGGAATACTATTAACAAGAGATGGTGGTAATAATAACT-----  
-----  
-----  
AACGAGACCTTCAGACCTGGAGGAGGAAATATAAAGGACAATTGGAGAAGTGAATTATATAAATATAAAGTAG  
TACAAATTGAACCACTA---GGAATAGCACCCACCAGGGCAAAGAGAAGAGTGGTG-----  
-----GAGAGAGAAAAAAGAGCA--GTGGGA--ATAGGAGCT-----  
ATGATCTTTGGGTTCTTAGGAGCA--GCAGGAAGCACTATG--GGCGCGGCGTCA---  
ATAACGCTGACGGTACAG---GCCAGACAA--TTATTG---TCTGGTATAGTGCAACAGCAAAGC---  
AATTTG---CTGAGA---GCTATAGAGGCGCAGCAGCACATGTTGCAACTCACAGTCTGGGGCATT  
>GU475030  
ACTTACCAAGGAAATGAAACAGGGGGGAAT-----  
-----  
ACTAGCAGCACTATCACACTTCCATGCAAGATAAAGCAAATTATAAACATGTGGCAGGGAGTAGGACAAGCAA  
TGTATGCTCCTCCCATCAGTGGAATAATTAATTGTGTATCAAAT---  
ATTACAGGAATACTATTAACAAGAGATGGTGGTAATAATAATGCT-----  
-----  
-----  
ACTAACGAGACCTTCAGACCTGGAGGAGGAAATATAAAGGACAATTGGAGAAATGAATTATATAAGTATAAAG

TAGTACAAATTGAACCACTA---GGAATAGCACCCACCAGGGCAAAGAGAAGAGTGGTG-----  
-----GAGAGAGAAAAAAGAGCA---GTGGGA---ATAGGAGCT-----  
ATGATCTTTGGGTTCTTAGGAGCA---GCTGGAAGCACTATG---GGCGCGGCGTCA---  
ATAACGCTGACGGTACAG---GCCAGACAA---TTATTG---TCTGGTATAGTGCAACAGCAAAGC---  
AATTTG---CTGAGG---GCTATAGAGGCGCAGCAGCATCTGTTGCAACTCACAGTCTGGGGCATT  
>JX112840  
ACTTACACAAGAAATGGAACCATAGGGGGG-----  
-----  
AGTAATGGCACTATCATACTGCCATGCAAGATAAAGCAAATTATAAACATGTGGCAGGGAGTAGGACAAGCAA  
TGTATGCTCCTCCCATCAGTGGAAGAATTAATTGTGTATCAAAT---  
ATCACAGGAATACTATTAACAAGAGATGGTGGTAATAGTAGTGCT-----  
-----  
AACGAGACCTTCAGACCTGGAGGAGGAAATATAAAGGACAATTGGAGAAGTGAATTATATAAATATAAAGTAG  
TACAAATTGAACCACTA---GGAATAGCACCCACCAGGGCAAAGAGAAGAGTGGTG-----  
-----GAGAGAGAAAAAAGAGCA---GTGGGA---ATAGGAGCT-----  
ATGATCTTTGGGTTCTTAGGAGCA---GCAGGAAGCACTATG---GGCGCGGCGTCA---  
ATAACGCTGACGGTACAG---GCCAGACAA---TTATTG---TCTGGTATAGTGCAACAGCAAAGC---  
AATTTG---CTGAGG---GCTATAGAGGCGCAGCAGCATCTGTTGCAACTCACAGTCTGGGGCATT  
>JX112845  
AATTACACAAGAAATGAAACCATGAGTAAG-----  
-----  
GACAAGGACACTCTCATACTTCCATGCAGGATAAAGCAAATTATAAACATGTGGCAGGGAGTAGGACAAGCAA  
TGTATGCTCCTCCCATCAGGGGAGTAATTAATTGTTTATCAAAT---  
ATTACAGGAATACTATTAACAAGAGATGGTGGTAATAATAGGACT-----  
-----  
AACGAGACCTTCAGACCTGAAGGAGGAAATATAAAGGACAACCTGGAGAAATGAATTATATAAATATAAAGTAG  
TGCAAATTGAACCACTA---GGAATAGCACCTACCAGGGCAAAGAGAAGAGTGGTG-----  
-----GAGAGAGAAAAAAGAGCA---GTGGGA---ATAGGAGCT-----  
ATGATCTTTGGGTTCTTAGGAGCA---GCAGGAAGCACTATG---GGCGCGGCGTCA---  
ATAACGCTGACGGTACAG---GCCAGACAA---TTATTG---TCTGGTATAGTGCAACAGCAAAGC---  
AATTTG---CTGAGG---GCTATAGAGGCGCAGCAGCATATGTTGCAACTCACAGTCTGGGGCATT  
>JX112851  
ACTTATGGAATGAAACCATAGGGGAG-----  
-----  
AGAAATGACAGTATCATACTTCCATGCAAGATAAAGCAAATTATAAACATGTGGCAGGGAGTAGGACAAGCAA  
TGTATGCTCCTCCAATCAGTGGAAGAATTAATTGTGTATCAAAT---  
ATTACAGGGATACTCTTAACAAGAGATGGTGGTAATAATAAATAT-----  
-----  
ACTAATGAGATCTTCAGACCTGGAGGAGGAAATATAAAGGACAATTGGAGAAGTGAATTATATAAATATAAAG  
TAGTACAAATTGAACCACTA---GGAATAGCACCCACCAAGGCAAAGAGAAGAGTGGTG-----  
-----GAGAGAGAAAAAAGAGCA---GTGGGA---ATAGGAGCT-----  
ATGATCTTTGGGTTCTTAGGAGCA---GCTGGAAGCACTATG---GGCGCGGCGTCA---  
ATAACGCTGACGGTACAG---GCCAGACAA---TTATTG---TCTGGTATAGTGCAACAGCAAAGC---  
AATTTG---CTGAGG---GCTATAGAGGCGCAGCAGCATCTGTTGCAACTCACAGTCTGGGGCATT  
>GU475023  
ACTTACTCAGGAAATGAAAGCACAGGGGGG-----  
-----  
AATGAGAGCACTATCATACTTCCATGCAGGATAAAGCAAATTATAAACATGTGGCAGGGAGTGGGACAAGCAA  
TGTATGCTCCTCCCATCAGGGGAAGAATTAATTGTGTAACAAAC---  
ATTACAGGAATACTATTAACAAGAGATGGTGGTAATAATACTAAC-----  
-----  
GAGACCTTCAGACCTGGAGGAGGAAATATAAAGGACAATTGGAGAAGTGAATTATATAAATATAAAGTAGTAC  
AAATTGAACCACTA---GGAGTAGCACCCACCAGGGCAAAGAGAAGAGTGGTG-----  
-----CAGAGAGAAAAAAGAGCA---GTGGGA---ATAGGAGCT-----  
ATGATCTTTGGGTTCTTAGGAGCA---GCAGGAAGCACTATG---GGCGCGGCGTCA---

ATAACGCTGACGGTACAG---GCCAGACAA---TTATTG---TCTGGTATAGTGCAACAGCAAAGC---  
 AATTTG---CTGAGG---GCTATAGAGGCGCAGCAGCATATGTTGCAACTCACAGTCTGGGGCATT  
 >GU475027  
 ACTTACGGAAATGGAACACAGGGGAGAAG-----  
 -----  
 AATAGCAGCACTATCATACTTCCATGCAGGATAAAGCAAATTATAAACATGTGGCAGGGAGTAGGACAAGCCA  
 TGTATGCTCCTCCCATCAGAGGAAACATTAATTGTGTATCAAAT---  
 ATTACAGGAATACTATTAACAAGAGATGGTGGTGGTGATAATAGT-----  
 -----  
 -----  
 ACTAACGAGATCTTCAGACCTGGAGGAGGAAATATGAAGGACAATTGGAGAAATGAATTATATAAATATAAAG  
 TAGTACAAATTGAACCACTA---GGAATAGCACCCACCAGGGCAAAGAGAAGAGTGGTG-----  
 -----GAGAGACAAAAAAGAGCA---GTGGGA---ATAGGAGCT-----  
 ATGATCTTTGGGTTCTTAGGAGCA---GCAGGAAGCACTATG---GGCGCGGCGTCA---  
 ATAACGCTGACGGTACAT---GCCAGACAA---TTATTG---TCTGGTATAGTGCAACAGCAAAGC---  
 AATTTG---CTGAGG---GCTATAGAGGCGCAGCAGCATCTGTTGCAACTCACAGTCTGGGGCATT  
 >MG655196  
 ACTTATACAGAAGGAAATGAAACCATAGAGGAA-----  
 -----  
 AGTAATGGCAATATCACACTTCCATGCAGGATAAAGCAAATTATAAACATGTGGCAGGGAGTAGGACAAGCAA  
 TGTATGCTCCTCCCGTCAGTGGAAAAATTAATTGTGTATCAAAT---  
 ATTACAGGAATACTATTAACAAGAGATGGTGGTGGTACTGGG-----  
 -----  
 -----  
 GATAACAATACTGAGACCTTCAGACCTGCAGGAGGAAATATGAAGGACAATTGGAGAAGTGAATTATATAAAT  
 ATAAAGTAGTGCAAATTGAACCACTA---GGACTAGCACCCACCAGGGCAAAGAGAAGAGTGGTG-----  
 -----GAGAGAGAAAAAAGAGCA---GTGGGA---ATAGGAGCT---  
 -----ATGATCTTTGGGTTCTTAGGAGCA---GCCGGAAGCACTATG---GGCGCGGCGTCA---  
 ATAACGCTGACGGTACAG---GCCAGACAA---TTATTG---TCTGGTATAGTGCAACAGCAAAGC---  
 AATTTG---CTGAGG---GCTATAGAGGCGCAGCAGCATATGTTGCAACTCACAGTCTGGGGCATT  
 >MG655197  
 ACTTACAATGAAAGTGAAACACAGGGGAA-----  
 -----  
 AGTAATGGCACTATCATACTTCCATGCAGGATAAAGCAAATTATAAACATGTGGCAGAGAGTAGGACAAGCAA  
 TGTATGCTCCTCCCATCAGTGGGAAGAATTAATTGTATATCAAAT---  
 ATTACAGGAATACTATTAACAAGAGATGGTGGTAATAATAAAT-----  
 -----  
 -----  
 GATACTGAGATCTTCAGACCTGGAGGAGGAAATATGAAGGACAATTGGAGAAGTGAATTATATAAATATAAAG  
 TAGTAGAAATTGAACCACTA---GGAATAGCACCCACCAGGGCAAAGAGAAGAGTGGTG-----  
 -----GAGAGAGAAAAAAGAGCA---GTGGGA---ATAGGAGCT-----  
 CTGATCTTTGGGTTCTTAGGAGCA---GCAGGAAGCACTATG---GGCGCAGCGTCA---  
 ATAACGCTGACGGTACAG---GCCAGACAA---TTATTG---TCTGGTATAGTGCAACAGCAAAGC---  
 AATTTG---CTGAGA---GCTATAGAGGCGCAGCAGCATATGTTGCAACTCACAGTCTGGGGCATT  
 >MG655200  
 ACTTACGGAAATGAAACCATAGGAAATAAAACCGAAGGGGAG-----  
 -----  
 AGGAATGGTACTATCACACTTCCATGCAAGATAAAGCAAATTGTAAGAATGTGGCAGGAAGTAGGACAAGCAA  
 TGTATGCTCCTCCCATTAGTGGAAGCATTAAATTGTGTATCAAAT---  
 ATTACAGGAATACTATTAACAAGAGATGGTGGTAATGGTACTAAC-----  
 -----  
 -----  
 GAGACCTTCGAGACCTTCAGACCTGCAGGAGGAGATATAAAGGACAATTGGAGAAGTGAATTATATAAATATA  
 AAGTAGTACAAATTGAACCACTA---GGAATAGCACCCACCAGGGCAAAGAGAAGAGTGGTG-----  
 -----GAGAGAGAAAAAAGAGCA---GTGGGA---ATAGGAGCT-----  
 ---ATGATCTTTGGGTTCTTAGGAGCA---GCAGGAAGCACTATG---GGCGCGGCGTCA---  
 ATAACGCTGACGGTACAG---GCCAGACAA---TTATTG---TCTGGTATAGTGCAACAGCAAAGT---  
 AATTTG---CTGAGG---GCTATAGAGGCGCAGCAGCATCTGTTGCAACTCACAGTCTGGGGCATT  
 >JX960603

ACTTACCAAATGGAACCATAAATGGAGAGAAG-----  
 -----  
 TATAAGGAAAATATTATACTTCCATGCAGGATCAAGCAAATTATAAACATGTGGCAGAGAGCAGGACAAGCAA  
 TGTATGCTCCTCCCATCAAGGGAAGAATTAATTGTGTATCAAAT---  
 ATTACAGGAATACTATTAACAAGAGATGGTGGTGATAATAGCACA-----  
 -----  
 -----  
 GCTAACGAGACCTTCAGACCGGGAGGAGGAAATATAAAAGACAATTGGAGAAATGAATTATATAAATATAAGG  
 TAGTACAAATTGAACCACTA---GGAATAGCACCCACCAGGGCAAAGAGAAGAGTGGTG-----  
 -----CAGAGAGAAAAAAGAGCA---GTGGGA---ATAGGAGCT-----  
 ATGATCTTTGGGTTCTTAGGAGCA---GCAGGAAGCACTATG---GGCGCAGCATCA---  
 ATAACGCTGACGGTACAG---GCCAGACAG---TTATTG---TCTGGTATAGTGCAACAGCAAAGC---  
 AATTTG---CTGAGG---GCTATAGAGGCGCAGCAGCATCTGTTGCAACTCACAGTCTGGGGCATT  
 >KP109508  
 GATCAT-----  
 -----  
 GGTAATGGCACTATCACACTTCCATGCAGGATAAAGCAAATTATAAACATGTGGCAAAGAGCAGGACAAGCAA  
 TGTATGCTCCTCCCATCAGTGGAGTAATTAATTGTGTATCAAAT---  
 ATTACAGGAATACTATTGACAAGAGATGGTGGTAATACTAGTAGT-----  
 -----  
 -----  
 AGTAACGAGACTTTTCAGACCTGGAGGAGGAAATCTAAAGGACAATTGGAAAAATGAATTATATAAATATAAAG  
 TAGTACAAATAGAACCACTA---GGAGTAGCACCCACCAAGGCAAAGCGAAGAGTGGTG-----  
 -----GATAGAGAAAAAAGAGCA---GTGGGA---ATAGGAGCT-----  
 ATGATCTTTGGGTTCTTGGGAGCA---GCAGGAAGCACTATG---GGCGCGGCGTCA---  
 ATAACGCTGACGGTACAG---GCCAGGCAA---TTATTG---TCTGGTATAGTGCAACAGCAAAGC---  
 AATTTG---CTGAGA---GCTATAGAGGCGCAGCAGCATATGTTGCAACTCACAGTCTGGGGCATT  
 >MH327760  
 AATCACACCGAGGGTAAT-----  
 -----  
 GGCCTGGCAATATCATACTTCCATGCAAGATAAAGCAAATTATAAACATGTGGCAGGGAGTAGGACAAGCAA  
 TGTATGCTCCTCCCGTCAGGGGAGTAATTAATTGTGTATCAAAC---  
 ATTACAGGAATAATATTGACAAGGGATGGTGGGACAAATAGCACG-----  
 -----  
 -----  
 AACGATACCGAGATCTTCAGACCTGAAGGAGGAAATATAAAAGACAATTGGAGAAGTGAATTATATAAATATA  
 AAGTAGTACAAATTGAACCACTA---GGAGTGGCACCCACCAGGGCAAAGGAGAAGAGTGGTG-----  
 -----GAAAGAGAAAAAAGGGCA---GTGGGA---ATAGGAGCT-----  
 ---ATGATCTTTGGGTTCTTAGGAGCA---GCAGGAAGCACTATG---GGCGCGGCGTCA---  
 ATAACGCTGACGGTACAG---GCCAGACAA---TTATTG---TCTGGTATAGTGCAACAGCAAAGC---  
 AATTTG---CTGAGG---GCTATAGAGGCGCAACAGCATATGTTGCAACTCACAGTCTGGGGCATT  
 >KY213720  
 ACTTATAATAAACTGAGTTAACTGTAGGTAATAATACT-----  
 -----  
 GATAATGATACTATCACGCTTCCATGCAGGATAAAGCAAATTATAAACATGTGGCAGGGAGCAGGACAAGCAA  
 TGTATGCTCCTCCCATCAGTGGAAAAATTAATTGTATATCAAAT---  
 ATTACAGGAATATTATTGACAAGAGATGGTGGTAATAATGCAACA-----  
 -----  
 -----  
 AATGAAGAGATCTTCAGACCTGAAGGAGGAAATATAAAAGACAATTGGAGAAGTGAATTATATAAATATAAAG  
 TAGTACAAATTGAACCACTA---GGAATAGCACCCACCAGGGCAAAGAGAAGAGTGGTG-----  
 -----GAGAGAGAAAAAAGAGCA---GTGGGA---ATAGGAGCT-----  
 ATGATCTTTGGGTTCTTAGGAGCA---GCCGGAAGCACTATG---GGCGCAGCGTCA---  
 ATAACGCTGACGGTACAG---GCCAGACAA---TTATTG---TCTGGTATAGTGCAACAGCAAAAC---  
 AATTTG---CTGAGG---GCTATAGAGGCGCAGCAGCATATGTTGCAACTCACAGTCTGGGGCATT  
 >KY213739  
 AATTATACAGAAAATGAAGCCACGAAGGG-----  
 -----  
 -  
 GATAATACAACTATCAGACTTCCATGTAAGATAAAGCAAATTATAAACATGTGGCAGGGAGTAGGACAAGCAA

TGTTATGCTCCTCCCATCAGTGGAGGACATTAGTTGTATATCAAAT---  
ATTACAGGAATACTATTGACAAGAGATGGTGGTGATAATAATGTT-----  
-----  
-----  
AATGAGACCTTCAGACCTGGAGGAGGAAAATATAAAGGACAATTGGAGAAGTGAATTATATAAAATATAAAGTAG  
TACAAATTGAACCACTA--GGAATAGCACCCACCAAGGCAAAGAGAAGAGTGGTG-----  
-----GAGAGAGAGAAAAGAGCA--GTGGGA--ATAGGAGCT-----  
ATGATCTTTGGGTTCTTAGGAGCA--GCCGGAAGCACTATG--GGCGCGGCGTCA---  
ATAACGCTGACGGTACAA--GCCAGACAA--TTATTG--TCTGGGATAGTGCAACAGCAAAGC---  
AATTTG--CTGAGG--GCTATAGAGGCGCAGCAGCATCTGTTGCAACTCACAGTCTGGGGCATC  
>KY213717  
AATTACACAGCAAATGAAACTGTG-----  
-----  
-----  
TGGAATGACACTATCATACTTCCATGCAGGATAAAACAAATTGTAAACATGTGGCAGGGAGTAGGACAAGCAA  
TGTATGCTCCTCCCGTCAGGGGAATAATTAGTTGTGTATCAAAG---  
ATTACAGGATTACTATTGACAAGAGATGGTGGTAATAATAATACT-----  
-----  
-----  
AACGAGACCTTCAGACCTGGGGGAGGAAAATATGAAGGACAATTGGAGAAGTGAATTATATAAAATATAAAGTAG  
TACAAATTGAACCACTA--GGAGTAGCACCCACCAGGGCAAGGAGAAGAGTGGTG-----  
-----CAGAGAGAAAAAGAGAGCA--GTGGGA--ATAGGAGCT-----  
ATGATCTTTGGGTTCTTAGGAGCA--GCAGGAAGCACTATG--GGCGCAGCGTCA---  
ATAACGCTGACGGTACAG--GCCAGACAA--TTGTTG--TCTGGTATAGTGCAACAGCAAAGC---  
AATTTG--CTGAGA--GCTATTGAGGCGCAGCAGCATATGTTGCAACTCACAGTCTGGGGCATT  
>AY945721  
ACTTACAGAAAAAATGAAACCAGGGAGAG-----  
-----  
-----  
AATGATAGCACTATCATAATTCCATGCAAGATAAAACAAATTATAAACATGTGGCAGGGAACAGGACAAGCAA  
TGTATGCTCCTCCCATCAGTGGAACATTAATTGTGTATCAAAT---  
ATTACAGGAATACTATTGACAAGAGATGGTGGTAATAATAGTGCG-----  
-----  
-----  
GATAACGAGACTTTCAGACCTGGAGGAGGAAAATATAAAGGACAATTGGAGAAGTGAATTATATAAAATATAAAG  
TAGTAGAAATTGAGCCACTA--GGAATAGCACCCACCAGGGCAAAGAGAAGAGTGGTG-----  
-----GAGAGAGAAAAAAGAGCA--GTGGGA--ATAGGAGCT-----  
ATGATCTTTGGGTTCTTAGGAGCA--GCAGGAAGCACTATG--GGCGTGGCGTCA---  
ATAACGCTGACGGTACAG--GCCAGACAA--TTATTG--TCTGGTATAGTGCAACAGCAAAGC---  
AATTTG--CTGAGG--GCTATAGAGGCGCAACAGCATATGTTGCAACTCACAGTCTGGGGCATT  
>AY945722  
AATCACAAGGAG-----  
-----  
-----  
TGTAATGGCACTATCACACTTCCATGCAGGATAAAGCAAATTATAAACATGTGGCAGGGAGCAGGACAAGCAA  
TGTATGCTCCTCCCATCAGTGGAATAATTAATTGTGTATCAAAT---  
ATTACAGGAATACTATTGACAAGAGATGGTGGTACTAATAATAATACA-----  
-----  
-----  
AATAGCAGCGAGATATTCAGACCTGGAGGAGGAAAATATAAAGATAATTGGAGAAGTAAATTATATAAAATATA  
AAGTAGTACAAATTGAACCACTA--GGAATAGCACCCACCAGGGCAAAAAGAAGAGTGGTG-----  
-----GAGAGAGAAAAAAGAGCA--GTGGGA--ATAGGAGCT-----  
---ATGATCTTTGGGTTCTTAGGAGCA--GCAGGAAGCACTATG--GGCGCGGCGTCA---  
CTAACGCTGACGGTACAG--GCCAGACAA--TTATTG--TCTGGTATAGTGCAACAGCAAAGC---  
AATTTG--CTGAGG--GCTATAGAGGCGCAGCAGCATCTGTTGCAACTCACAGTCTGGGGCATT  
>KJ952852  
GCTTACAGTGGAATGAAACCATGAATGAAACCATGGATAG-----  
-----  
-----  
TATAATGACACGATCATACTTCCATGCAGGATAAAGCAAATTATAAACATGTGGCAGGGAGTAGGACAAGCAA  
TGTATGCTCCTCCCATCAGTGGAAGCATTAATTGTGTATCAAAT---  
ATTACAGGAATACTATTGACAAGAGATGGTGGTAATAATCTGAAT-----

-----  
 AACAGTAACGAGACCTTCAGACCTGGAGGAGGAAATATAAAGGATAATTGGAGAAGTGAATTATATAAATATA  
 AAGTAGTACAAATTGAACCACTA---GGAATAGCACCCACCAGGGCAAAGAGAAGAGTGGTG-----  
 -----GAGAGAGAAAAAAGAGCA---GTGGGA---ATAGGAGCT-----  
 ---ATGATCTTTGGGTTTTTAGGAGCA---GCAGGAAGCACTATG---GGCGCGGCGTCA---  
 ATAACGCTGACGGTACAG---GCCAGACAA---TTATTG---TCTGGTATAGTGCAACAGCAAAGC---  
 AATTTG---CTGAGG---GCTATAGAGGCGCAGCAGCATCTGTTGCAACTCACAGTCTGGGGCATT  
 >KJ953555  
 ACTTACAGGGAATGAAACCATAGGG-----  
 -----  
 GGTAAATGGCACTATCATACTTCCATGCAAGATAAAGCAAATTATAAACATGTGGCAGGGAGTAGGACAAGCAA  
 TGTATGCTCCTACCGTCCGTGGAACAATTAATTGTGTATCAAAC---  
 ATTACAGGAATGTTATTAACAAGAGATGGTGGTGTTAATAAGGAT-----  
 -----  
 -----  
 GATAATACTAGCGAGACCTTCAGACCTGGAGGAGGAAATATAAAGGACAATTGGAGAAGTGAATTATATAAAT  
 ATAAAGTAGTACAAATTGAACCACTA---GGAATAGCACCCACCAGGGCAAAGAGAAGAGTGGTG-----  
 -----GAGAGAGAAAAAAGAGCA---GTGGGA---ATAGGAGCT---  
 -----ATGATCTTTGGGTTCTTAGGAGCA---GCAGGAAGCACTATG---GGCGCGGCGGCA---  
 ATAACGCTGACGGTACAG---GCCAGACAA---TTATTG---TCTGGTATAGTGCAACAGCAAAGC---  
 AATTTG---CTGAGG---GCTATAGAGGCGCAGCAGCATATGTTGCAACTCACAGTCTGGGGCATT  
 >KJ953646  
 AGTTACACAAAAGAAAAGGGA-----  
 -----  
 TGTAATGGCACTATCATACTTCCATGCAAGATAAAGCAAATTATAAACATGTGGCAGGGAGTAGGACAAGCAA  
 TGTATGCTCCTCCCGTCAGAGGAGTAATTAATTGTGTATCAAAT---  
 ATTACAGGAATACTATTGACAAGAGATGGTGGTGAGGAGAATAAT-----  
 -----  
 -----  
 GGGAGTGAAACCTTCAGACCTGGAGGAGGAAATATAAAGGACAATTGGAGAAGTGAATTATATAAATATAAAG  
 TAGTACAAATTGAACCACTA---GGAGTAGCACCCACCAAGGCAAAGAGAAGAGTGGTG-----  
 -----GAAAGACAAAAAAGAGCA---GTGGGA---ATAGGAGCT-----  
 ATGATCTTTGGGTTCTTAGGAGCA---GCAGGAAGCACTATG---GGCGCGGCGTCA---  
 ATAACGCTGACGGTACAG---GCCAGACAA---TTATTG---TCTGGTATAGTGCAACAGCAAAGT---  
 AATTTG---CTGAGG---GCTATAGAGGCGCAGCAACATCTGCTGCAACTCACAGTCTGGGGCATT  
 >AY358052  
 ACTTACACAGGAAATGAAACCATGGAAGGG-----  
 -----  
 TGTAATGGCACTATCATACTTCCATGCAAGATAAAGCAAATTATAAACATGTGGCAGGGAGTAGGACAAGCAA  
 TGTATGCTCCTCCCATCAGTGGAATATTAGTTGTGTATCAAAT---  
 ATTACAGGAATACTATTGACAAGAGATGGTGGTATTAATGAGGAT-----  
 -----  
 -----  
 AACAGACCGAGATCTTCAGACCTGGAGGAGGAAATATAAAGGACAATTGGAGAAGTGAATTATATAAATATA  
 AAGTAGTACAAATTGAACCACTA---GGAATAGCACCCACCAGGGCAAAGAGAAGAGTGGTG-----  
 -----GAGAGAGAAAAAAGAGCA---GTGGGA---ATAGGAGCT-----  
 ---ATGATCTTTGGGTTCTTGGGAGCA---GCAGGAAGCACTATG---GGCGCGGCGTCA---  
 ATAACGCTGACGGTACAT---GCCAGACAA---TTATTG---TCTGGTATAGTGCAACAGCAAAGC---  
 AATTTG---CTGAGG---GCTATAGAGGCGCAGCAGCATCTGTTGCAACTCACAGTCTGGGGCATT  
 >AY945719  
 AATCATACTTTCAAAAATAATGAAACCACGGAGGG-----  
 -----  
 -----  
 TATAATGGCACTATCACAATTCATGCAAGATAAAGCAAATTATAAACATGTGGCAAGGAGTGGGACAAGCAA  
 TGTATGCTCCTCCCATCAGGGGAAACATTAGTTGTGTATCAAAT---  
 ATTACAGGCATACTGTTGACAAGAGATGGTGGTAGTAGAGATGCG-----  
 -----  
 -----  
 CCTAATGAGACCTTCAGACCTGGAGGAGGAAATATAAAGGACAATTGGAGAAATGAATTATATAAATATAAAG  
 TAGTACAAATTGAACCACTA---GGAATAGCACCCACCAGGGCAAAGAGAAGAGTGGTG-----

-----GAGAGAGAAAAAAGAGCA---GTGGGA---ATAGGAGCT-----  
ATGATCTTTGGGTTCTTAGGAGCA---GCAGGAAGCACTATG---GGCGCAGCGTCA---  
ATAACGCTGACGGTACAT---GCCAGACAA---TTATTG---TCTGGTATAGTGCAACAGCAAAGC---  
AATTTG---CTGAGG---GCTATAGAGGCGCAGCAGCATCTGTTGCAACTCACAGTCTGGGGCATT  
>AY358038  
AGTTACCTAAAAAATAAAACCCCTTGAC-----  
-----  
GGGAATGGCACTATCATAATCCCATGCAGAATAAAGCAAATTGTAAACATGTGGCAGGGAGTAGGACAAGCAA  
TGTATGCTCCTCCCATCAATGGAATAATTAATTGTGTATCAAAT---  
ATTACAGGAATATTATTAACAAGAGATGGTGGTAACAGTACGAAT-----  
-----  
-----  
AACGAGACTTTCAGACCTGGAGGAGGAAATATAAAGGATAATTGGAGAAGTGAATTATATAAATATAAAGTAG  
TACAAATTGAACCACTA---GGAATAGCACCCACCAGGGCAAAGAGAAGAGTGGTG-----  
-----GAGAGAGAAAAAAGAGCA---GTGGGA---ATAGGAGCT-----  
ATGCTCTTTGGGTTCTTAGGAGCA---GCCGGAAGCACTATG---GGCGCGGCGTCA---  
ATAACGCTGACGGTACAG---GCCAGACAA---TTATTG---TCTGGTATAGTGCAACAGCAAAGC---  
AATTTG---CTGAGG---GCTATAGAGGCGCAGCAGCATCTGTTGCAACTCACAGTCTGGGGCATT  
>AY358064  
ACTTATGGAGAAAATGAAACCATGGAGGGTAAT-----  
-----  
AACCAATAGCACTATCATACTTCCATGCAAGATAAAACAAATTGTAAACATGTGGCAGGGAGCAGGACAAGCAA  
TGTATGCTCCTCCCATCAGTGGGAACAATTAATTGTGTATCAAAT---  
ATTACAGGAATACTATTAACAAGAGATGGTGGTAATAATAATAGT-----  
-----  
-----  
ACTAATGAGACCTTCAGACCTGGAGGAGGAAATATAAAAGACAATTGGAGAAGTGAATTATATAAATATAAAG  
TAGTACAAATTGAACCACTA---GGACTAGCACCCACCAGGGCAAAGAGAAGAGTGGTG-----  
-----GAGAGAGAAAAAAGAGCA---GTGGGA---ATAGGAGCT-----  
ATGATCTTTGGGTTCTTAGGAGCA---GCAGGAAGCACTATG---GGCGCGGCGTCA---  
ATAACGCTGACGGTACAG---GCCAGACAA---TTATTG---TCTGGTATAGTGCAACAGCAAAGC---  
AATTTG---CTGAGG---GCTATTGAGGCGCAGCAGCATCTGATGCAACTCACAGTCTGGGGCATT  
>JN248324  
ACTTACCTAAAAAATGAGACAACGTGTAATGGCACA-----  
-----  
TGTAATGGCACTATCATACTTCCATGCAAGATAAAACAAATTATAAACATGTGGCAGGGAACAGGACAAGCAA  
TGTATGCTCCTCCCATCAGTGGGAAGAATTAATTGTGTATCAAAT---  
ATTACAGGAATACTATTGACAAGAGATGGCGGTAATGAAAGTAGT-----  
-----  
-----  
GATACTGAGATCTTCAGACCTGAAGGAGGAAATATAAAGGACAATTGGAGAAGTGAATTATATAAATATAAAG  
TAGTACAAATTGAACCACTA---GGAGTAGCACCCACCAGGGCAAAGAGAAGAGTGGTG-----  
-----GAGAAAGAAAAAAGAGCA---GTGGGA---ATAGGAGCT-----  
GTGATCTTTGGGTTCTTAGGAGCA---GCAGGAAGCACTATG---GGCGCGGCATCA---  
ATAACGCTGACGGTACAG---GCCAGACAA---TTATTG---TCTGGTATAGTGCAACAGCAAAGC---  
AATTTG---CTGAGG---GCTATAGAGGCGCAACAGCATCTGTTGCAACTCACAGTCTGGGGCATT  
>JN248330  
ACTTACATGAGAAATGGAACGTGAATAAATGAAGCT-----  
-----  
GTGAATGGCACTATCTTTCTTCCATGCAGGATAAAGCAAATTATAAACATGTGGCAGGGAGCAGGACAAGCAA  
TGTATGCTCCTCCCATCAGGGGAACAATTAATTGTGTCTCAAAT---  
ATTACAGGAATACTATTGACAAGAGATGGTGGTACTAATACAAC-----  
-----  
-----  
AATGAGACCTTCAGACCTGAGGGAGGAGATATGAAGGACAATTGGAGAAGTGAATTATATAAATATAAAGTAG  
TAGAAATTGAACCACTA---GGAATAGCACCCACCAAGGCAAAGAGAAGAGTGGTG-----  
-----GAAAGAGAAAAAAGAGCA---GTGGGA---ATAGGAGCT-----  
ATGATCTTTGGGTTCTTAGGAGCA---GCAGGAAGCACTATG---GGCGCAGCGTCA---  
ATAACGCTGACGGTACAG---GCCAGACAA---TTATTG---TCTGGTATAGTGCAACAGCAAAGC---  
AATTTG---CTGAGA---GCTATAGAGGCGCAACAGCATATGTTGCAACTCACAGTCTGGGGCATT

>JN248334

ACTTACTCA-----

GGAAATGGAACCATCATACTTCCATGCCGGATAAAGCAAATTATAAACATGTGGCAGGGAGTAGGACAGGCAA  
TGTATGCTCCTCCCATCAGTGGAGCAATTAAGTGTGTATCAAAT---  
ATTACAGGAATACTATTGACAAGAGATGGTGGTACTAATAGGACT-----

AACGAGACTTTCAGACCTGGAGGAGGAAATATAAAGGACAACTGGAGAAGTGAATTATATAAATATAAGGTAG  
TAGAAATTGAACCACTA---GGAATAGCACCCACCAGGGCAAAGAGAAGAGTGGTG-----  
-----GAAAGAGAAAAAAGAGCA---GTGGGA---ATAGGAGCT-----  
ATGATCTTTGGGTTCTTAGGAGCA---GCAGGAAGCACTATG---GGCGCGGCGTCG---  
ATAACGCTGACGGTACAG---GCCAGACAA---TTATTG---TCTGGTATAGTGCAACAGCAAAGC---  
AATTTG---CTGAGA---GCTATAGAGGCGCAGCAGCATCTGTTGCAACTCACAGTCTGGGGCATT

>JX447529

GGTCAGGAG-----

CATAATGGCACTATCACACTTCCATGCAGGATAAAGCAAATTATAAACATGTGGCAGGGAGTAGGACAAGCAA  
TGTATGCTCCTCCCATCAGTGGACAAATTAATTGTGTATCGAAT---  
ATTACAGGAATACTATTGACAAGAGATGGTGGTAAGGATAATGAAACG-----

AATGGCACAGAGACCTTCAGACCTGGAGGAGGAAACATGAAGGACAATTGGAGGAGTGAATTATATAAATATA  
AAGTAATACAAATTGAACCACTA---GGAGTAGCACCCACCAGGGCAAGGAGAAGAGTGGTG-----  
-----GCGAGAGAAAAAAGAGCA---GTGGGA---ATAGGAGCT-----  
---ATGATCTTTGGGTTCTTAGGAGCA---GCAGGAAGCACTATG---GGCGCGGCGTCA---  
ATAACGCTGACGGTACAG---GCCAGACAA---TTATTG---ACTGGTATAGTGCAACAGCAAAGC---  
AATTTG---CTGAGA---GCTATAGAGGCGCAACAGCATCTGTTGCAACTCACAGTCTGGGGCATT

>JN248341

ACTTACACAGGAAATGAAACCGGAGAGGGGGGTAAT-----

GGTAATGGCACTATCATAATTCCATGCAGAATAAAGCAAATTATAAACATGTGGCAGGGAGTAGGACAAGCAA  
TGTATGCTCCTCCCATCAGTGGGAAGCATTAATTGTGTATCAAAT---  
ATTACAGGAATACTATTGACAAGAGATGGTGGTAATAACAACATGACT-----

AACGATAACGAGACCTTCAGACCTGGAGGAGGAGATATAAGGGACAATTGGAGAAGTGAATTGTATAAATATA  
AAGTAGTACAAATTGAACCACTA---GGAGTAGCACCCACCAAGGCAAAGAGAAGAGTGGTG-----  
-----GAGAGAGAAAAAAGAGCA---GTGGGA---ATAGGAGCT-----  
---ATGATCTTTGGGTTCTTAGGAGCA---GCAGGAAGCACTATG---GGCGCAGCGTCA---  
ATAACGCTGACGGTACAG---GCCAGACAA---TTATTG---TCTGGTATAGTGCAACAGCAAAGC---  
AATTTG---CTGAGG---GCTATAGAGGCGCAGCAGCATATGTTGCAACTCACTGTCTGGGGCATT

>JN248342

AATTATAATGGCACAAGAAATGAAACG-----

TGTAATGACACTATCATACTACCATGCAGGATAAAGCAAATTATAAACATGTGGCAGGGAGTAGGACAAGCAA  
TATATGCTCCTCCAATCAGAGGAACACTTAAGTGTGTATCAAAT---  
ATTACAGGAATACTATTGACAAGAGATGGTGGTAGTAATGAGACTAAA-----

AATGGGACCGAGATATTTCAGACCTGGAGGGGGAAATATAAAGGACAATTGGAGAAATGAATTATATAAATATA  
AAGTAGTACAAATTGAACCACTA---GGAATAGCACCCACCAGGGCAAAGAGAAGAGTGGTG-----  
-----GAGAGAGAAAAAAGAGCA---GTGGGA---ATAGGAGCT-----  
---ATGATCTTTGGGTTCTTAGGAGCA---GCAGGAAGCACTATG---GGCGCGGCGTCA---  
ATAACGCTGACGGTACAG---GCCAGACAA---TTATTG---TCTGGTATAGTGCAACAGCAAAGC---  
AATTTG---CTGAGG---GCTATAGAGGCGCAGCAGCATCTGTTGCAACTCACAGTCTGGGGCATT

>JN944654

AATCAAATCATGGGGCAG-----

CATGATGACACTATGGTACTTCCATGCAAGATAAAGCAAATTATAAATATGTGGCAGGGAGCAGGACAAGCAA  
TGTATGCTCCTCCCGTCAGTGGAATAATTAATTGTAGGTCAAAT ---  
ATTACAGGAATACTATTGACAAGAGATGGTGGTGGTGGTGTCTAAC -----  
-----  
-----  
AATACAAATGAGACCTTCAGACCTGGGGGAGGAAATATAAAGGATAATTGGAGAAGTGAATTATATAAATATA  
AAGTAGTAAAAATTGAACCACTA --- GGATTAGCACCCACCAGGGCAAAGAGAAGAGTGGTG -----  
-----  
-----GAGAAAGAAAAAAGAGCA --- GCGGGA --- ATAGGAGCT -----  
---ATGATCTTTGGGTTCTTAGGAGCA --- GCAGGAAGCACTATG --- GGCGCGGCGTCA ---  
ATAACGCTGACGGTACAG --- GCCAGACAA --- TTATTG --- TCTGGTATAGTGCAACAGCAAAGC ---  
AATTTG --- CTGAGA --- GCTATAGAGGCGCAACAGCATCTGTTGCAACTCACAGTCTGGGGCATT  
>JX447268  
ACTTACATAGGAAATGAAACCAGAGAGATATTTAATGGAACTGATGAA -----  
-----  
-----  
ACTAATGGAACATATCATACTTCCATGCAAAATAAAGCAAATTATAAACATGTGGCAGGGAGTAGGACAAGCAA  
TGTATGCTCCTCCCATCAGTGGAATAATTAATTGTGTATCAAAT ---  
ATTACAGGAATACTATTGACAAGAGATGGTAGTTCTAGAAATAAT -----  
-----  
-----  
ACGAACGAAACCTTCAGACCTGGAGGGGGAAATATAAAGGATAATTGGAGAAGTGAATTATATAAATATAAAG  
TAGTACAAATTGAACCACTA --- GGAATAGCACCCACCAGGGCAAAGAGAAGAGTGGTG -----  
-----  
-----GAGAGAGAAAAAAGAGCA --- GTGGGA --- ATAGGAGCT -----  
ATGATCTTTGGGTTCTTAGGAGCA --- GCAGGAAGCACTATG --- GGCGCGGCGTCA ---  
ATAACGCTGACGGTACAG --- GCCAGACAA --- TTATTG --- TCTGGTATAGTGCAACAGCAAAGC ---  
AATTTG --- CTGAGG --- GCTATAGAGGCGCAGCAGCATCTGTTGCAACTCACAGTCTGGGGCATT  
>JX447579  
GTTTATAATAATGACACAAAGAATAGAACCAGGGGG -----  
-----  
-----  
AGTAATGACACTATCACAATTCCATGCAAAATAAAGCAAATTATAAACATGTGGCAGGGGATAGGACAAGCAA  
TGTATGCTCCTCCCATCAGTGGAACAATTAATTGTGTATCAAAT ---  
ATTACAGGAATACTATTGACAAGAGATGGTGGTGATAGTACTAAC -----  
-----  
-----  
GAGACCTTCAGACCTGGAGGAGGAAATATAAAGGACAATTGGAGAAGTGAATTATATAAATACAAAGTAGTAC  
AAATTGAACCACTA --- GGAATAGCACCCACCAGGGCAAAGAGAAGAGTGGTG -----  
-----  
-----GAAAGAGAAAAAAGAGCA --- GTGGGA --- ATAGGAGCT -----  
ATGATCTTTGGGTTCTTAGGAGCA --- GCAGGAAGCACTATG --- GGCGCGGCGTCA ---  
ATAACGCTGACGGTACAG --- GCCAGACAA --- TTATTG --- TCTGGTATAGTGCAACAGCAAAGC ---  
AATTTG --- CTGAGG --- GCTATAGAGGCGCAGCAGCATATGTTGCAACTCACAGTCTGGGGCATT  
>JX447592  
ACTCATATGATAAATGGAACCATGAAGGGGAGTAATGGCACTAATGGC -----  
-----  
-----  
ACTAATGGCACTTTTCACTTCCATGCAGGATAAAGCAAATTATAAACATGTGGCAGGGAGTAGGACAAGCAA  
TGTATGCTCCTCCCATCAAGGGAATAATTAATTGTGTATCAAAC ---  
ATTACAGGAATATTATTGACAAGGGATGGTGGTAATAACAACACA -----  
-----  
-----  
AATAACGAGACCTTCAGACCTATAGGAGGAAATATAAAGGACAATTGGAGAAGTGAATTATATAAATATAAAG  
TAGTACAAATTGAACCACTA --- GGAATAGCACCCACCAAGGCAAAGAGAAGAGTGGTG -----  
-----  
-----GAGAGAGAAAAAAGAGCA --- GTGGGA --- ATAGGAGCT -----  
ATGATCTTTGGGTTCTTGGGAGCA --- GCAGGAAGCACTATG --- GGCGCGGCGTCA ---  
ATAACGCTGACGGTACAG --- GCCAGACAA --- TTATTG --- TCTGGTATAGTGCAACAGCAAAGC ---  
AATTTG --- CTGAGG --- GCTATAGAGGCGCAGCAGCATATGTTGCAACTCACAGTCTGGGGCATT  
>JX448256  
TCTTACCCAGAAAACGAGACTGAGGGGAATACT -----  
-----  
-----  
ACCACTACCACTATCATACTTCCATGCAAGATAAAGCGAATTATAAACATGTGGCAGGGAGTAGGACAAGCAA  
TGTATGCTCCTCCCATTAGGGGAAAAATTAAGTGTGTATCAAAT ---  
ATTACAGGAATACTATTGACAAGTGATGGTGGTGGTAAGGGTAATAAT -----  
-----

-----  
 AGTAATAGCGAGACCTTCAGACCTGGAGGAGGAAATATAAGGGACAATTGGAGAAGTGAATTATATAAAATATA  
 AAGTAGTGCAAATTGAACCACTA---GGAATAGCACCCACCAAGCAAAGAGAAGAGTGGTG-----  
 -----GAGAGAGAAAAAAGAGCA---GTGGGA---ATAGGAGCT-----  
 ---ATGATCTTTGGGTTCTTAGGAGCA---GCAGGAAGCACTATG---GGCGCGGCGTCA---  
 ATAACGCTGACGGTACAG---GCCAGGCAA---TTATTG---TCTGGTATAGTGCAACAGCAAAGC---  
 AATTTG---CTGAGG---GCTATAGAGGCGCAGCAGCATATGTTGCAACTCACAGTCTGGGGCATT  
 >EU743792  
 GGC-----  
 -----  
 TATATCATACTTCCATGCAGAATAAAGCAAATTATAAACATGTGGCAGGGAGTAGGACAAGCAATATATGCCC  
 CTCCTATCAGTGGAAGAATTAGTTGTGTATCAAAT---  
 ATTACAGGAATCCTATTGACAAGAGATGGTGGTAATAATAATACC-----  
 -----  
 -----  
 GAGACCGAGATCTTCAGACCTGGAGGAGGAAATATAAAGGACAATTGGAGAAGTGAATTATATAAAATATAAAG  
 TAGTACAAATTGAACCACTG---GGAATAGCACCCACCAAGGCAAGGAGAAGAGTGGTG-----  
 -----GACAGAGAAAAAAGAGCA---GTGGGA---ATAGGAGCT-----  
 ATGATCTTTGGGTTCTTGGGAGCA---GCAGGAAGCACTATG---GGCGCAGCGTCA---  
 CTAACGCTGACGGTACAG---GCCAGACAA---TTATTG---TCTGGTATAGTGCAACAGCAAAGC---  
 AATTTG---CTGAGA---GCTATAGAGGCGCAGCAGCATCTGTTGCAACTCACAGTCTGGGGCATT  
 >EU743759  
 CATCAAAACACGACAGGG-----  
 -----  
 TGTAATGGAAGTATCACACTCCCATGCAAGATAAAGCAAATTATAAACATGTGGCAGGAAGTAGGACAAGCAA  
 TGTATGCTCCTCCCATCAGTGGAAGAAATTAAGTGTGTATCAAAT---  
 ATTACAGGAATACTATTGACAAGAGATGGT--AATAATGAGACT-----  
 -----  
 -----  
 GGGGCTAATGAGACCTTCAGACCTGAAGGAGGAAATATGAAGGACAATTGGAGAAATGAATTATATAAAATATA  
 AAGTAGTGCAAATTGAACCACTA---GGAATAGCACCTCCAGGGCAAAAAGAAGAGTGGTG-----  
 -----GAGAGACAAAAAAGAGCA---GTGGGA---ATAGGAGCT-----  
 ---ATGATCTTTGGGTTCTTAGGAGCA---GCTGGAAGCACTATG---GGCGCGGCGTCA---  
 ATAACGCTGACGGTACAG---GCCAGACAA---TTATTG---TCTGGTATAGTGCAACAGCAAAGC---  
 AATTTG---CTGAGG---GCTATAGAGGCGCAGCAGCATCTGTTGCAACTCACAGTCTGGGGCATT  
 >EU743768  
 ACTTACATAAATGGAACCATAAATGAAACCATGGAGGGG-----  
 -----  
 CTTAATGACACTATCATACTTCCATGCAAAATAAAGCAAATTATAAACATGTGGCAGAGAGCAGGACAAGCAA  
 TGTATGCTCCTCCCATCAGGGGAAGCATTAAATGTGTATCAAAT---  
 ATTACAGGAATACTACTAACAAGGGATAGTGGTGATAATGATACT-----  
 -----  
 -----  
 GAGACCTTCAGACCTGAAGGAGGAAATATGAAGGACAATTGGAGAAGTGAATTATATAAAATATAAAATAGTAC  
 AAATTGAACCACTA---GGAATAGCACCCACCATGGCAAAGAGAAGAGTGGTG-----  
 -----GAGAGAGAAAAAAGAGCA---GTGGGA---ATAGGAGCT-----  
 ATGATCTTTGGGTTCTTGGGAGCA---GCAGGAAGCACTATG---GGCGCGGCGTCA---  
 ATAACGCTGACGGTACAG---GCCAGACAA---TTATTG---TCTGGTATAGTGCAACAGCAAAGC---  
 AATTTG---CTGAGA---GCTATAGAGGCGCAGCAGCATCTGTTGCAACTCACAGTCTGGGGCATT  
 >EU743770  
 AACTACACGGAAAGG-----  
 -----  
 GTTAATGAAACTATCATACTTCCATGCAAGATAAAGCAAATTATAAATATGTGGCAGAGAGTAGGACAAGCAA  
 TGTATGCTCCTCCCATCAGGGGAAGAATTGGGTGTATATCAAAT---  
 ATTACAGGAATACTACTGACAAGGGATAATGGTGGTACCAATAGG-----  
 -----  
 -----  
 AGTAGTGAGACCTTCAGACCTGGAGGAGGAGATATAAAGGACAATTGGAGAAGTGAATTATATAAAATATAAAG  
 TAGTAGAAATTGAACCACTA---GGAATAGCACCCACCAAGGCAAGAGAAGAGTGGTG-----  
 -----GAGAGAGAAAAAAGAGCA---GTGGGA---ATAGGAGCT-----

ATGATCTTTGGGTTCTTAGGAGCA---GCAGGAAGCACTATG---GGCGCGGCGTCA---  
 ATAACGCTGACGGTACAG---GTCAGACAA---TTATTG---TCTGGTATAGTGCAACAGCAAAAC---  
 AATTTG---CTGAGG---GCTATAGAGGCGCAGCAGCATCTGTTGCAACTCACAGTCTGGGGCATT  
 >EU743777  
 AATCAAACCATGCTT-----  
 -----  
 ----  
 AATAAACTACCATACTTCCATGCAGAATAAAGCAAATTATAAACATGTGGCAGGGAACAGGACAAGCAATGT  
 ATGCTCCTCCCATCCAGGGAAGAAATTAATTGTGTATCAAAT---  
 ATTACAGGAATACTATTGACAAGAGATGGAGGTAATACTAATGAGAAT-----  
 -----  
 -----  
 AATAAACTGAAATCTTCAGACCTGGAGGAGGAAATATGAAGGATAATTGGAGAAGTGAATTATATAAATATA  
 AAGTAGTACAAATTGAACCATTA---GGAATAGCACCCACCAGGGCAAAGAGAAGAGTGGTG-----  
 -----GAGAGAGAAAAAAGAGCA---GTGGGA---ATAGGAGCT-----  
 ---ATGATCTTTGGGTTCTTGGGAGCA---GCAGGAAGCACTATG---GGCGCGGCGTCA---  
 ATAACGCTGACGGTACAG---GCCAGACAA---TTATTG---TCTGGTATAGTGCAACAGCAAAGC---  
 AATTTG---CTGAGG---GCTATAGAGGCGCAGCAGCATCTGTTGCAACTCACAGTCTGGGGCATT  
 >EU743780  
 AATCAAACCCAG-----  
 -----  
 TGTAAGGGCAATATCACACTTCCATGCAGGATAAAGCAAATTATAAACATGTGGCAGGAAGTAGGAAAAGCAA  
 TATATGCTCCTCCCGTCAGTGGAGTATTAATTGTTTATCAAAT---  
 ATTACAGGGATAATACTGACAAGAGATGGTGGTACTCCTGGTAATGTTACTAAT-----  
 -----  
 ----  
 AATGGTACTGAAACCGAGATCTTCAGACCTACAGGAGGAAATATGGAGGACAATTGGAGAAGTGAATTATATA  
 AATATAAAGTAGTACAAATTGAACCACTA---GGAATAGCACCCACCAAGGCAAAGAGAAGAGTGGTG-----  
 -----GAGAGAGAAAAAAGAGCA---GTGGGA---  
 ATAGGAGCT-----ATGATCTTTGGGTTCTTAGGAGCA---GCTGGAAGCACTATG---  
 GGCGCGGCGGCA---GTAACGCTGACGGTACAG---GCCAGACAA---TTATTG---  
 TCTGGTATAGTGCAACAGCAAAGC---AATTTG---CTGAGA---  
 GCTATAGAGGCGCAACAGCATCTGTTGCAACTCACAGTCTGGGGCATT  
 >JX446961  
 ACTTACAGAAATGAAACC-----  
 -----  
 AGTAATAGCACTATCATACTTCCATGCAGAATAAAGCAAATTATAAACATGTGGCAGGAAGTAGGACAAGCAA  
 TGTATGCTCCTCCCATCAGGGGAAGAATAAATTGTGTATCAAAT---  
 ATTACAGGAATACTATTGACAAGAGATGGTGGTAATAGTACAAGT-----  
 -----  
 -----  
 AATAATGAGACCTTCAGACCTGGAGGAGGAAATATGAAGGACAATTGGAGAAGTGAATTATATAAATATAAAG  
 TAGTACAAATTGAACCATTA---GGAATAGCACCCACCAGGGCAAAGAGAAGAGTGGTG-----  
 -----GACAGAGAAAAAAGAGCA---GTGGGA---ATAGGAGCT-----  
 ATGATCTTTGGGTTCTTAGGAGCA---GCAGGAAGCACTATG---GGCGCGGCGTCA---  
 ATAACGCTGACGGTACAG---GCCAGACAA---TTATTG---TCTGGTATAGTGCAACAGCAAAGC---  
 AATTTG---CTGAGG---GCTATAGAGGCGCAACAGCATCTGTTGCAACTCACAGTCTGGGGCATT  
 >JX447515  
 ACTTACACAAATACAACCATACAG-----  
 -----  
 GGTAATGGTACTATTATACTTCCATGCAAGATAAAGCAAATTATAAATATGTGGCAGGAAGTAGGACGAGCAA  
 TGTATGCTCCTCCTGTCTAGTGGGAAGAAATTAATTGTATATCAAAT---  
 ATTACAGGAATACTATTAATAAGAGATGGTGGTAATACTAGTGAG-----  
 -----  
 -----  
 TCTAACGAGATCTTCAGACCTGGAGGAGGAAATATGAAAGACAATTGGAGAAATGAATTATATAAATATAAAG  
 TAGTAGAAATTGAACCACTA---GGAATAGCACCCACCAAGGCAAAAAGAAGAGTGGTG-----  
 -----GAGAGAGAAAAAAGAGCA---GTGGGA---ATAGGAGCT-----  
 TTGATCTTTGGGTTCTTGGGAGCA---GCAGGAAGCACTATG---GGCGCAGCGTCA---

ATAACGCTGACGGTACAG---GCCAGACAA---TTATTG---TCTGGTATAGTGCAACAGCAAAGC---  
 AATTTG---CTGAGG---GCTATAGAGGCGCAGCAGCATATGTTGCAACTCACAGTCTGGGGCATT  
 >JX448039  
 AATTATACTTGCATAAATAATACGTGCATAAATAATGCAACCATGGAT-----  
 -----  
 -  
 GATAATGGCACTATCATACTTTCATGCAAAATAAAGCAAATTATAAACATGTGGCAGGGAGTAGGACAAGCAA  
 TGTATGCTCCTCCCATCAGTGGAACATTAGTTGTGTATCAAAT---  
 ATTACTGGAATACTATTGACAAGAGATGGTGGTAATAATAGGACTACG-----  
 -----  
 -----  
 ACTACCGAGACCTTCAGACCTGCAGGAGGAGATATGAAGGACAATTGGAGAAGTGAATTATATAAATATAAAG  
 TAGTACAAATTGAACCACTA---GGAATAGCACCCACCAGGGCAAAGAGAAGAGTGGTG-----  
 -----GAGAGAGAAAAAAGGGCA---GTGGGA---ATAGGAGCT-----  
 ATGATCTTTGGGTTCTTAGGAGCA---GCAGGAAGCACTATG---GGCGCGGCGTCA---  
 ATAACGCTGACGGTACAG---GCCAGACAA---TTATTG---TCTGGTATAGTGCAACAGCAAAGC---  
 AATTTG---CTGAGG---GCTATAGAGGCGCAGCAGCATCTGTTGCAACTCACAGTCTGGGGCATT  
 >JX448198  
 ACTTACAATGGAACCATGGGGGGATGGAATGGCACTATCAATGGCACT-----  
 -----  
 -  
 ATCAATGACACTATCATAATTCCATGCAGAATAAAGCAAATTATAAATATGTGGCAGGGAGTAGGACAAGCAA  
 TATATGCTCCTCCCATCAGAGGAATAATTAATTGTGTATCAAAT---  
 ATCACAGGAATACTATTGACAAGAGATGGTGGTGATAATAATGCTACT-----  
 -----  
 -----  
 AAAGATACCGAGATCTTCAGACCTGGAGGTGGAAATATAAAGGACAATTGGAGAAGTGAATTATATAAATATA  
 AAGTAGTACAAATTGAACCACTA---GGAATAGCACCCACCAGGGCAAAGAGAAGAGTGGTG-----  
 -----GAAAGAGAAAAAAGAGCA---GTGGGA---ATAGGAGCT-----  
 ---ATGATCTTTGGGTTCTTAGGAGCA---GCAGGAAGCACTATG---GGCGCGGCGTCA---  
 CTAACGCTGACGGTACAG---GCCAGACAA---TTATTG---TCTGGTATAGTGCAACAGCAAAGC---  
 AATTTG---CTGAGG---GCTATAGAGGCGCAGCAGCATCTGTTGCAACTCACAGTCTGGGGCATT  
 >JX446877  
 ACTTACAAAGATAAAGCCATAGAGGGG-----  
 -----  
 -----  
 AATAATGGCACTATCATACTTCCATGCAGGATAAAACAAATTATAAACATGTGGCAGGGAGTAGGACAAGCAA  
 TGTATGCTCCTCCCATCAGGGGAAACATTAGTTGTGTCTCAAAT---  
 ATTACAGGAATACTATTGACAAGAGATGGTGGTCTGGTAATGATACAAGA-----  
 -----  
 -----  
 AATGATACAGAGACCTTCAGACCTGGAGGAGGGAATATAAAGGACAATTGGAGAAGTGAATTATATAAATATA  
 AAGTAGTACAAATTGAACCACTA---GGACTAGCACCCACCAAGGCAAAGAGAAGAGTGGTG-----  
 -----GAGAGACAAAAAAGAGCA---GTGGGA---ATAGGAGCT-----  
 ---ATGATCTTTGGGTTCTTAGGAGCA---GCAGGAAGCACTATG---GGCGCGGCGTCA---  
 ATAACGCTGACGGCACAG---GCCAGACAA---TTATTG---TCTGGTATAGTGCAACAGCAAAGC---  
 AATTTG---CTGAGA---GCTATAGAGGCGCAGCAGCATCTGTTGCAACTCACAGTCTGGGGCATT  
 >JX446918  
 ACTTACGTAAGAAATGAAACCAAG-----  
 -----  
 -----  
 GAAAATGATACTATCATACTTCCATGCAAGATAAAGCAAATTATAAACATGTGGCAGGGAGTAGGACAAGCAA  
 TGTATGCTCCTCCCATCAGTGGAACATTAGTTGTGTATCAAAT---  
 ATTACAGGAATAATATTGACAAGAGATGGTGGTCTTGTAATAAT-----  
 -----  
 -----  
 AGTGGAGAGACCTTCAGACCTGGAGGAGGAAATATAAAGGACATTTGGAGAAGTGAATTATATAAATATAAAG  
 TAGTACAAATAGAACCACTA---GGAATAGCACCCACCAGGGCAAAGAGAAGAGTGGTG-----  
 -----GAGAGAGAAAAAAGAGCA---GTGGGA---ATAGGAGCT-----  
 ATGATCTTTGGGTTCTTAGGAGCA---GCAGGAAGCACTATG---GGCGCGGCGTCA---  
 ATAACGCTGACGGTACAG---GCCAGACAA---TTATTG---TCTGGTATAGTGCAACAGCAAAGC---  
 AATTTG---CTGAGG---GCTATAGAGGCGCAGCAGCATATGTTGCAACTCACAGTCTGGGGCATT

>JX447381

ACTTACCTAGGAAATGAAACCACAGGGAGG-----

TATAATGACACTATCATAATTCCATGCAAGATAAAGCAAATTATAAGAATGTGGCAGGGGGTAGGACAAGCAA  
TGTATGCTCCTCCCATCAGGGGAGTCATTAAGTGTAGATCAAAT---

ATTACAGGAATATTATTGACAAGAGATGGTGATAAAATTAATGCT-----

ACTGAAGAGATTTTCAGACCTGGAGGAGGAAATATAAAGGATAATTGGAGAAGTGAATTATATAAATATAAAG  
TAGTACAAATTGAACCACTA---GGAATAGCACCCACCAGGGCAAAGAGAAGAGTGGTG-----

-----GAGAGAGAAAAAAGAGCA---GTGGGA---ATAGGAGCT-----

ATGATCTTTGGGTTCTTAGGAGCA---GCAGGAAGCACTATG---GGCGCGGCGTCA---

ATAACGCTGACGGTACAG---GCCAGACAA---TTATTG---TCTGGTATAGTGCAACAGCAAAGC---

AATTTG---CTGAGG---GCTATAGAGGCGCAGCAGCATCTGTTGCAACTCACAGTCTGGGGCATT

>JX447773

ACTCACATGCCTAATGGTACTATCATA-----

GGAAAAGACAATATCACACTTCCATGCAGGATAAAGCAAATCATAAACATGTGGCAGGGAGCAGGACAAGCAA  
TGTATGCTCCTCCCATCAGTGAATAATTAATTGTGTATCAAAT---

ATTACAGGAATACTATTGACAAGAGATGGTGGTGGTAATAGTAGT-----

AATGAGAACGAGACCTTCAGACCTGGAGGAGGAAATATAAAGGACAATTGGAGGAGTGAATTATATAAATATA  
AAGTAGTACAAATTGAACCACTA---GGAATAGCACCCACCAAGGCACAGAGAAGAGTGGTG-----

-----CGGATAGAAAAAAGAGCA---GTGGGA---TTAGGAGCT-----

---ATGATCTTTGGGTTCTTAGGAGCA---GCAGGAAGCACTATG---GGCGCGGCGTCA---

ATAACGCTGACGGTACAG---GCCAGACAA---TTATTG---TCTGGTATAGTGCAACAGCAAAGC---

AATTTG---CTGAGA---GCTATAGAGGCGCAGCAGCATCTGTTGCAACTCACAGTCTGGGGCATT

>HQ690985

ACTTACCCAGGAAATGAAACC-----

ATGGAGGACCATATCATACTTCCATGCAGGATAAAGCAAATTATAAACATGTGGCAGGGAGCAGGACAAGCAA  
TGTATGCTCCTCCCATCAGTGGGAGAATTAATTGTGTATCAAAT---

ATTACAGGCATACTACTGACAAGAGATGGTGGTAATAATACTAAT-----

GAGACTAAAGAAATCTTCAGACCTGGAGGAGGAAATATGAAGGACAATTGGAGAAGTGAATTATATAAATATA  
AAGTAGTACAAATTGAACCACTA---GGAATAGCACCCACCAGGGCAAAGAGAAGAGTGGTG-----

-----CAGAGAGAAAAAAGAGCA---GTGGGA---ATAGGAGCT-----

---ATGATCTTTGGGTTCTTAGGAGCA---GCAGGAAGCACTATG---GGCGCAGCGTCA---

ATAACGCTGACGGTACAG---GCCAGACAA---TTATTG---TCTGGTATAGTGCAACAGCAAAGC---

AATTTG---CTGAGG---GCTATAGAGGCGCAGCAACATCTGTTGCAACTCACAGTCTGGGGCATT

>HQ691052

TGCTACACAACAAAACGTGTTAATGATACTTGCACAGGAAATGAAACCAGCACAGGAAATGAAACCAATAAGG  
AATGT-----

---AACTGTCT-----

AATGGTAATGGCACTATCATACTTCCATGCAAGATAAAGCAAATTATAAACATGTGGCAGGGAGTAGGACAAG  
CAATGTATGCTCCTCCCATCAGTGAAGAATTAATTGTGTATCAAAT---

ATTACAGGAATACTATTGACAAGAGATGGAGGTACTAACACGATC-----

AACAATGAGACTTTTCAGACCTGGAGGGGGAAATATAAAGGACAATTGGAGAAGTGAATTATATAAATATAAAG  
TAGTACAAATTGAACCACTA---GGAATAGCACCTCCAGGGCAAAGAGAAGAGTGGTG-----

-----GAAAGAGAAAAAAGAGCA---GTGGGA---ATAGGAGCT-----

ATGATCTTTGGGTTCTTGGGAGCA---GCAGGAAGCACTATG---GGCGCGGCGTCA---

ATAACGCTGACGGTACAG---GCCAGACAA---TTATTG---TCTGGTATAGTGCAACAGCAAAGC---

AATTTG---CTGAAG---GCTATAGAGGCGCAGCAGCATATGTTGCAACTCACAGTCTGGGGCATT

>HQ691073

ACCTATAATGAC-----

ACTAATGACCCTATCATACTTCCATGCAGGATAAAGCAAATTATAAACATGTGGCAGGGAGTAGGACAAGCAA  
 TGTATGCTCCTCCCATCCGTGGAAGCGTTAATTGTTTCATCAAAT ---  
 ATTACAGGAATACTATTGACAAGAGATGGGGGTAATAATAGTAAT -----  
 -----  
 -----  
 ACGCAAGAGACTTTTCAGACCTGGAGGAGGAAATATAATGGATAATTGGAGAAATGAATTATATAAATATAAAG  
 TAGTACAAATTGAACCATTA --- GGAATAGCACCCACCAGGGCAAAGAGAAGAGTGGTG -----  
 -----GAGAGAGAAAAAAGAGCA --- GTGGGA --- ATAGGAGCT -----  
 ATGATCTTTGGGTTCTTAGGAGCA --- GCAGGAAGCACTATG --- GGCGCGGCGTCA ---  
 ATAACGCTGACGGTACAG --- GCCAGACAA --- TTATTG --- TCTGGTATAGTGCAACAGCAAAGC ---  
 AATTTG --- CTGAGG --- GCTATAGAGGCGCAGCAGCATCTGTTGCAACTCACGGTCTGGGGCATT  
 >GQ916574  
 ACTTACACAGGAAATGAAACCAAGGAGAT -----  
 -----  
 GAAACCAAGAATATCACACTTCCATGCAGGATAAAGCAAATTATAAACATGTGGCAGGAAGTAGGACAAGCAA  
 TGTATGCTCCTCCCATCAGTGGACAAATTAAGTGTGTATCAAAT ---  
 ATTACAGGAATACTATTGACAAGAGATGGTGGTGGTAATGCTAATGAT -----  
 -----  
 -----  
 ACTAATAATACCGAGACCTTCAGACCTGGAGGAGGAAATATAAAGGACAACCTGGAGAAGTGAATTATATAAAT  
 ATAAAGTAGTACAAATTGAACCACTA --- GGAATAGCACCCACCAAGGCAAAGAGAAGAGTGGTG -----  
 -----GAGAGACAGAAAAGAGCA --- GTGGGA --- ATAGGAGCT ---  
 -----ATGATCTTTGGGTTCTTAGGAGCA --- GCAGGAAGCACTATG --- GGCGCGGCGTCA ---  
 ATAACGCTGACGGTACAG --- GCCAGACAA --- TTATTG --- TCTGGTATAGTGCAAGCAGCAAAGA ---  
 AATTTG --- CTGAGG --- GCTATAGAGGCGCAGCAGCATCTGTTGCAACTCACAGTCTGGGGCATT  
 >JX446888  
 GCTTACACAGGAAATGAAACCATGAAA -----  
 -----  
 GGAATAAAACCATCATACTTCCATGCAGGATAAAGCAAATTATAAACATGTGGCAGGGAGTAGGACAAGCAA  
 TATATGCTCCTCCCGTCAGGGGAATGATTAATTGTGTATCAAAT ---  
 ATTACAGGAATATTATTGACAAGGGATGGTGGTAATGGTACGACC -----  
 -----  
 -----  
 GAGGAGATTTTCAGACCAGGAGGAGGAAATATAAAGACAATTGGAGAAGTGAATTATATAAATATAAAGTAG  
 TACAAATTGAACCACTA --- GGCATAGCACCCACCAGGGCAAAGAGAAGAGTGGTG -----  
 -----GAGAGAAACAAAAGAGCA --- GTTGA --- ATAGGAGCT -----  
 ATGATCTTTGGGTTCTTAGGAGCA --- GCAGGAAGCACTATG --- GGCGCGGCGTCA ---  
 ATAACGCTGACGGTACAG --- GCCAGACAA --- TTATTG --- TCTGGTATAGTGCAACAGCAAAGC ---  
 AATTTG --- CTGAGG --- GCTATAGAGGCGCAGCAGCATCTGTTGCAACTCACAGTCTGGGGCATT  
 >JX448072  
 ACTTACATGGAAAATGGAACCATGCAGAATAGTACGCAGAATAACACG -----  
 -----  
 CAAAATGACACTATCATACTCCCATGCAGGATAAAGCAAATTATAAACATGTGGCAGGGAGCAGGACAAGCAA  
 TGTATGCTCCTCCAGTTAGGGGAAGCATTAAAGTGTGTATCAAAT ---  
 ATTACAGGAATACTATTGACAAGAGATGGTGGTGCTAATAATACC -----  
 -----  
 -----  
 GAGATCTTCAGACCGGCAGGAGGAAATATAAAGGATAATTGGAGAAGTGAATTATATAAATATAAAGTAGTAC  
 AAATTGAACCACTA --- GGAATAGCACCCACCAGGGCAAAAAGAAGAGTGGTG -----  
 -----GAGAGACAGAAAAGAGCA --- GTGGGA --- ATAGGAGCT -----  
 ATGATCTTTGGGTTCTTAGGAGCA --- GCAGGAAGCACTATG --- GGCGCGGCGTCA ---  
 ATAACGCTGACGGTACAG --- GCCAGACAA --- TTATTG --- TCTGGTATAGTGCAACAGCAAAGC ---  
 AATTTG --- CTGAGG --- GCTATAGAGGCGCAGCAGCATATGTTGCAACTCACAGTCTGGGGCATT  
 >JX448086  
 AATTACACAAATGGTACTTTAACAACACCACGGAGGGGGGT -----  
 -----  
 AGCGACACTACTATCATCCTTCCATGCAAGATAAAGCAAATTATAAACATGTGGCAGGGAATAGGACAAGCAA  
 TGTATGCTCCTCCCATCAGGGGATATATTAATTGTACATCAAAT ---  
 ATTACAGGAATACTATTGACAAGAGATGGTGACGGTAATATTAATATT -----  
 -----

-----  
AATGACAGCGAGATCTTCAGACCTGGAGGAGGAAATATGAAGGACAATTGGAGAAGTGAATTATATAAAATATA  
AAGTAGTACAAATTGAACCACTA---GGAATAGCACCTACCAGGGCAAAGAGAAGAGTGGTG-----  
-----GAGAGAGAAAAAAGAGCA---GTGGGA---ATAGGAGCT-----  
---ATGATCTTTGGGTTCTTAGGAACA---GCAGGAAGCACTATG---GGCGCAGCGTCA---  
ATAACGCTGACGGTACAG---GCCAGACAA---TTATTG---TCTGGTATAGTGCAACAGCAAAGC---  
AATTTG---CTGAGG---GCTATAGAGGCGCAGCAGCATCTGTTGCAACTCACAGTCTGGGGCATT  
>JX448312  
AATTATACTTGCTCGGACAATGGGTGTAATGGCATT-----  
-----  
-  
ATCAATGGCACTATCATACTTCCATGCAGGATAAAGCAAATTATAAACATGTGGCAAGGAGCAGGACAAGCAA  
TGTATGCTCCTCCCATCAGGGGAAGCATTAATTGTGTATCAAAT---  
ATTACAGGAATATTATTGACAAGAGATGGTGGTAATGGTGATGATACT-----  
-----  
-----  
AATAATACTGAGATCTTCAGACCTGGAGGAGGAAATATAAAGGACAATTGGAGAAGTGAATTATATAAAATATA  
AAGTAGTACAAATTGAACCACTA---GGAATAGCACCTCCAGGGCAAAGAGAAGAGTGGTG-----  
-----GAGAGAGAAAAAAGAGCA---GTGGGA---ATAGGAGCT-----  
---ATGATCTTTGGGTTCTTAGGAGCA---GCAGGAAGCACTATG---GGCGCGGCGTCA---  
ATAACGCTGACGGTACAG---GCCAGACAA---TTATTG---TCTGGTATAGTGCAACAGCAAAGC---  
AATTTG---CTGAGG---GCTATAGAGGCGCAACAGCATATGTTGCAACTCACAGTCTGGGGCATT  
>JN388191  
ACTCATACTACT-----  
-----  
TTTAATAAACTATCAGACTTCCATGCAAGATAAAGCAAATTATAAACATGTGGCAGAGAACAGGACAAGCAA  
TGTATGCTCCTCCCATCAGTGGAAACATTAAGTGTGTATCAAAT---  
ATTACAGGAATACTATTGACAAGGATGGTGGTAATAATACTAAT-----  
-----  
-----  
GAAACCTTTAGACCTGGAGGAGGAAACATAAAAGACAATTGGAGAAGTGAATTATATAAAATATAAAGTAGTAG  
AAATTGAACCACTA---GGAATAGCGCCCACCAGGGCAAAGAGAAGAGTGGTG-----  
-----GAGAGAGAAAAAAGAGCA---GTGGGA---ATAGGAGCT-----  
ATGATCTTTGGGTTCTTAGGAGCA---GCAGGAAGCACTATG---GGCGCGGCGTCA---  
ATAACGCTGACGGTACAG---GCCAGACAA---TTATTG---TCTGGTATAGTGCAACAGCAAAGC---  
AATTTG---CTGAGG---GCTATAGAGGCGCAGCAGCATATGTTGCAACTCACAGTCTGGGGCATC  
>JN388201  
ACTTACAATGGAACCTACATGATGATAAT-----  
-----  
AACAGTACCAATATCACATTTCCATGCAGGATAAAGCAGATTATAAACATGTGGCAGGGAGTAGGACAAGCCA  
TGTATGCTCCTCCCATCAGTGGAGAATTAATTGTGTATCAAAT---  
ATTACAGGAATACTATTGACAAGAGATGGTGGTGATAGTAATAAG-----  
-----  
-----  
AAAAACGAGACCTTCAGACCTGGAGGAGGAAATATAAAGGACAATTGGAGAAATGAATTATATAAAATATAAAG  
TAGTAGAAATTGAACCATTA---GGAATAGCACCCACCAGGGCAAAGAGAAGAGTGGTG-----  
-----GAGAGAGAAAAAAGAGCA---GTGGGA---ATAGGAGCT-----  
ATGATCTTTGGGTTCTTAGGAGCA---GCAGGAAGCACTATG---GGCGCGGCGTCA---  
ATAACGCTGACGGTACAG---GCCAGACAA---TTATTG---TCTGGTATAGTGCAACAGCAAAGC---  
AATTTG---CTGAGG---GCTATAGAGGCGCAGCAGCATATGTTGCAACTCACAGTCTGGGGCATT  
>GQ916585  
TGCTATACAACAAAACCTGTTTAATAATACTTGCATGGAAAATGGAACCAAG-----  
-----  
-----  
TGTAATGACACTATCACACTTCCATGCAAGATAAAGCAAATTATAAACATGTGGCAGGGAATAGGACAAGCAA  
TGTATGCTCCTCCCATCAGTGGAAACAATTAATTGTGCATCAAAT---  
ATTACAGGAATACTATTGACAAGAGATGGTGGTAAGAATACTTCAGTT-----  
-----  
-----  
AACGGGACCGAGATCTTCAGACCTGGAGGAGGAAATATGAAGGACAATTGGAGAAGTGAATTATATAAAATATA

AAGTAGTACAAATTGAACCACTA---GGAATAGCACCCACCAAGGCAAAGAGAAGAGTGGTG-----  
-----AAGAGACAAAAAAGAGCAGTAGTAGGA---ATAGGAGCT-----  
---ATGATCTTTGGGTTCTTAGGAGCA---GCAGGAAGCACTATG---GGCGCAGCGTCA---  
ATAACGCTGACGGTACAG---GCCAGACAA---TTATTG---TCTGGTATAGTGCAACAGCAAAGC---  
AATTTG---CTGAGG---GCTATAGAGGCGCAGCAGAATATGTTGCAACTCACAGTCTGGGGCATT  
>GQ916588  
TGC-----  
-----  
TATAATAACACTCTCATACTTCCATGTAAGATAAAACAAATTATAAACATGTGGCAGGGAGTAGGACAAGCAA  
TGTATGCTCCTCCCATCAATGGAAGAATTAATTGTGTATCAAAT---  
ATTACAGGAATACTATTGACAAGAGATGGTGGTGTTAATAATGGGACT-----  
-----  
AACGACACCGAGATCTTCAGACCTGGAGGAGGAAATATAAAGGACAATTGGAGAAAGTGAATTATATAAATATA  
AAGTAGTACAAATTGAACCACTA---GGAATAGCACCCACCAAGGCAAAGAGAAGAGTGGTG-----  
-----GCGAGAGAAAAAAGAGCA---GTGGGA---ATAGGAGCT-----  
---GTGATCTTTGGGTTCTTAGGAGCA---GCAGGAAGCACTATG---GGCGCGGCGTCA---  
ATAACGCTGACGGTACAG---ACCAGACAA---TTATTG---TCTGGTATAGTGCAACAGCAAAGC---  
AATTTG---CTGAGA---GCTATAGAGGCGCAGCAGCATCTGTTGCAACTCACAGTCTGGGGCATT  
>GQ916592  
AGTTACTTAGAAAATGGAACCATGTGG-----  
-----  
GAAAAAATACAGTATCATACTTCTATGCAGGATAAAGCAAATTATAAATATGTGGCAGGGAGTAGGACAAGCAA  
TGTATGCTCCTCCCATCAGTGGCTTAATTAAGTGTGTATCGAAT---  
ATTACAGGAATACTATTGACAAGAGATGGTGGTAATAGTAATGAGACTAAT-----  
-----  
AGTACTGATACTGAGATCTTCAGACCTACAGGAGGAAATATAAAGGACAATTGGAGAAAGTGAATTATATAAAT  
ACAAAGTAGTACAAATTGACCCACTA---GGAATAGCACCCACCAAGGCAAAGAGAAGAGTGGTG-----  
-----GAAAGAGAAAAAAGAGCA---GTGGGA---CTAGGAGCT---  
-----ATGATCTTTGGGTTCTTAGGAGCA---GCAGGGAGCACTATG---GGCGCGGCGTCA---  
ATAGCGCTGACGGGACAG---GCCAGACAA---TTATTG---TCTGGTATAGTGCAACAGCAAAGC---  
AATTTG---CTGAGG---GCTATAGAGGCGCAGCAGCATATGTTGCAACTCACTGTCTGGGGCATT  
>GQ916580  
ACCTACAGAAATGAA-----  
-----  
AACACGGGCAGTATCATACTCCCATGCAAAATAAAGCAAATTATAAACATGTGGCAGGGAGTAGGACGAGCAA  
TGTATGCTCCTCCCATCAGTGGAAACAATTAATTGTGTATCAAAT---  
ATTACAGGAATACTATTGACAAGAGATGGGGGTGGTGGTGTATGAGGTG-----  
-----  
AATAACGAGACCGAGATCTTTAGACCTGGAGGAGGAAACATAAAGGACAATTGGAGAAATGAATTATATAAAT  
ATAAAGTAGTACAAATTGAACCACTA---GGAATAGCACCCACCAAGGCAAAGAGAAGAGTGGTG-----  
-----GAGAGAGAAAAAAGAGCA---GTGGGA---ATAGGAGCT---  
-----ATGATCTTTGGGTTCTTAGGAGCA---GCAGGAAGCACTATG---GGCGCGGCGTCA---  
ATAACGCTGACGGTACAG---GCCAGACAA---TTATTG---TCTGGTATAGTGCAACAGCAAAGC---  
AATTTG---CTGAGG---GCTATAGAGGCGCAGCAGCATCTGTTGCAACTCACAGTCTGGGGCATT  
>KT185994  
AATTACACAGAGAATAATACCACGGAGGGG-----  
-----  
-  
TGGAAATGGCACTATCATACTTCCATGCAGGATAAAGCAAATTGTAAACATGTGGCAGGGAGCAGGACAAGCAA  
TGTATAATCCTCCCATCAGTGGAAAAATTAATTGTGTATCAAAT---  
ATTACAGGAATACTATTGACAAGAGATGGTGGTAATAATAATGAGACT-----  
-----  
-----  
AATGGGACTGAGACTTTTCAGACCTGGAGGAGGAAATATAAAGGACAATTGGAGAAATGAATTATATAAGTATA  
AAGTAGTACAAATTGAACCACTA---GGAATAGCACCCACCAAGGCAAAGAGAAGAGTGGTG-----  
-----GAGAGAGAGAAAAAGAGCA---GTGGGA---ATAGGAGCT-----  
---ATGATCTTTGGGTTCTTGGGAGCA---GCAGGAAGCACTATG---GGCGCGGCGTCA---

ATAACGCTGACGGTACAG---GCCAGACAA---TTATTG---TCTGGTATAGTGCAGCAGCAAAGC---  
AATTTG---CTGAGG---GCTATAGAGGCGCAGCAGCATATGTTGCAACTCACAGTCTGGGGCATT  
>KY580553  
AATCATACTTGCGAAGGAAATGAAGGGTGTAAATGGCACTAGC-----  
-----  
-  
AGTAATGGCACTATCATACTTCCATGCAGGATAAAGCAAATTATAAACATGTGGCAGGGAGCAGGACAAGCAA  
TGTATGCTCCTCCCATCAGAGGAACAATTAATTGTGTATCAAAT---  
ATTACAGGACTACTATTGACAAGAGATGGTGGTAAAGATAATAGTACT-----  
-----  
-----  
AGTGGTAACGAGACCTTCAGACCTGGAGGAGGAAATATAAAAGACAATTGGAGAAGTGAATTATATAAAATATA  
AAGTAGTACAGATTGAACCACTA---GGAATAGCACCTACCAGGGCAAAGAGAAGAGTGGTG-----  
-----CAGAGAGAAAAAAGAGCA---GTGGGA---ATAGGAGCT-----  
---ATGCTCTTTGGGTTCTTAGGAGCA---GCAGGAAGCACTATG---GGCGCGGCGTCA---  
ATAACGCTGACGGTACAG---GCCAGACAA---TTATTG---TCTGGTATAGTGC AACAGCAAAGC---  
AATTTG---CTGAGG---GCTATAGAGGCGCAGCAGCATCTGTTGCAACTCACAGTCTGGGGCATT  
>JX447238  
ACTTACACAGGAAAAGAAAATGACACCAGGGAAGGGAAG-----  
-----  
AATGACAATGAAATCATTCTTCCATGCAGAATAAAGCAAATTATAAACATGTGGCAGAGAGTAGGACAAGCAA  
TGTATGCTCCTCCCATTAGAGGAAGAATTAATTGTGTATCAAAT---  
ATTACAGGAATACTATTGACAAGAGATGGTGGTAAATAATGTAAATATG-----  
-----  
-----  
ACTAATGAGACCTTCAGGCCTGGAGGAGGACATATAAAGGACAATTGGAGAAGTGAATTGTACAAATATAAAG  
TAGTAGAAATTGAACCATTA---GGAATAGCACCCACCAAGGCAAAGAGAAGAGTGGTG-----  
-----GAAAGACAAAAAAGAGCA---GTGGGA---ATAGGAGCT-----  
ATGATCTTTGGGTTCTTAGGAGCA---GCAGGAAGCACTATG---GGCGCAGCGTCA---  
ATAACGCTGACGGTACAG---GCCAGACAA---TTATTG---TCTGGTATAGTGC AACAGCAAAGC---  
AATTTG---CTGAGG---GCTATAGAGGCGCAACAGCACATGTTGCAACTCACAGTCTGGGGCATT  
>JN388224  
TTTCAGACCAATGTCTGCAATGGGACG-----  
-----  
----  
TGTAATGGCAATATCACACTTCCATGCAGGATAAAGCAAATTATAAACATGTGGCAGGAAGTAGGACAAGCAA  
TGTATAACCCTACCAAAAGAGGAGAAATTAAGTGTGTATCAAAT---  
ATTACAGGAATACTATTGACAAGAGATGGTGGTAGTAATAATAGG-----  
-----  
-----  
TCCAACGAGACCTTCAGACCTGGAGGAGGAAATATGAAGGACAATTGGAGAAGTGAATTATATAAAATATAAAG  
TAGTAGAAATTGAACCACTA---GGAATAGCACCCACCAGGGCAAAGAGAAGAGTGGTG-----  
-----GAGAGAGAAAAAAGAGCA---ATAGCA---ATAGGAAT-----  
ATGCTCTTTGGGTTCTTAGGAGCA---GCCGGAAGCACTATG---GGCGCGGCGTCA---  
CTAACGCTGACGGTACAG---GCCAGACAA---TTATTG---TCTGGTATAGTGC AACAGCAAAGC---  
AATTTG---CTGAGG---GCTATTGAGGCGCAGCAGCATCTGTTGCAACTCACAGTCTGGGGCATT  
>JX512901  
ACTTACACAGGAAATGAACCTATGGGGAATAGGACCGAGGG-----  
-----  
AATAATACCAATATCATACTTCCATGTAAGATAAAGCAAATTATAAACATGTGGCAGGGAGTAGGACAAGCAA  
TGTATGCTCCTCCCATCAGAGGAGCTATTACATGTGTATCAAAT---  
ATTACAGGAATACTATTGACAAGAGATGGTGGTAAATAGTCCTAAT-----  
-----  
-----  
GAGACCTTCAGACCTGAAGGAGGAAATATAAAGGACAATTGGAGAAGTGAATTATATAAAATATAAAGTAGTAC  
AAATTGAACCACTA---GGAGTAGCACCTACCAGGGCAAAGAGAAGAGTGGTG-----  
-----GAGAGAGAAAAAAGAGCA---GTGGGA---ATAGGAGCT-----  
ATGATCTTTGGGTTCTTAGGAGCA---GCAGGAAGCACTATG---GGCGCAGCGTCA---  
ATAACGCTGACGGTACAG---GCCAGACAA---TTGTTG---TCTGGTATAGTGC AACAGCAAAGC---  
AATTTG---CTGAGG---GCTATAGAGGCGCAGCAGCATCTGTTGCAACTCACAGTCTGGGGCATT

>KU230434

TCTTACATAAATGAAACCACACCTGGG-----

TATAATGGCACTATCATACTCCCATGCAGGATAAAACAAATTATAAACATGTGGCAGGGAGTAGGACAAGCAA  
TGTATGCTCCTCCCATCAGGGGAATCATTAGTTGTGTATCAAAT---  
ATTACAGGAATATTATTGACAAGAGATGGTGGTAATAATAGCACG-----

AATGAGACTGAGACCTTCAGACCTGGAGGAGGAAATATAAAGGACAATTGGAGAAGTGAATTATATAAAATATA  
AGGTAGTACAAATTGAACCACTA---GGACTAGCACCCACCAAGGCAAAGAGAAGAGTGGTG-----  
-----GAGAGAGAAAAAAGAGCA---GTGGGA---ATAGGAGCT-----  
---ATGATCTTTGGGTTCTTAGGAGCA---GCAGGAAGCACTATG---GGCGCGGCGTCA---  
ATAACGCTGACGGTACAG---GCCAGACAA---TTATTG---TCTGGTATAGTGCAACAGCAAAGC---  
AATTTG---CTGAGA---GCTATAGAGGCGCAACAGCATATGTTGCAACTCACAGTCTGGGGCATT

>KU230435

AATCATAATTGCACCGAGGAGAGGTGTAATAGCACTACCAATAGCACT-----

AGCACTGGCAATATCACACTTCCATGTAGAATAAAGCAGATAATAAACATGTGGCAGGGAGTAGGACAAGCAA  
TGTACGCTCCTCCCATTAAGGGAAATGTTAGTTGTCTATCAAAT---  
ATCACAGGAATACTATTGACAAGAGATGGTGATAATGCCAGTGAT-----

AGTGAGACCTTCAGACCGGGAGGAGGAAATATAAAAGACAATTGGAGAAGTGAATTATATAAAATATAAAGTAG  
TACAAATTGAACCACTA---GGAATAGCACCCACCAGGGCAAAGAGAAGAGTGGTG-----  
-----GAGAGAGAAAAAAGAGCA---GTGGGA---ATAGGAGCT-----  
ATGATCTTTGGGTTCTTGGGAGCA---GCAGGAAGCACTATG---GGCGCGGCGTCA---  
ATAACGCTGACGGTACAG---GCCAGACAA---TTATTG---TCTGGTATAGTGCAACAGCAAAGC---  
AATTTG---CTGAGA---GCTATAGAGGCGCAACAACATATGTTGCAACTCACAGTCTGGGGCATT

>KU230437

ACTTACACAGACGTGAATAATAAAACCAAT-----

AAGAATGACACAATCATAATTCCATGCAGAATAAAGCAAATTATAAACATGTGGCAGAGAGTAGGACAAGCAA  
TGTATGCTCCTCCCATCAAGGGAAGGATTAGTTGTGTATCAAAT---  
ATTACAGGAATACTCTTGACAAGAGATGGTGGTAATAATACTGAT-----

GCTAATGAGACCTTCAGACCTGAAGGAGGAAATATGAAGGACAATTGGAGAAATGAATTATATAAAATATAAAG  
TAGTACAAATTGAACCACTA---GGAATAGCACCCACCAGGGCAAAGAGAAGAGTGGTG-----  
-----GACAGAGAAAAAAGAGCA---GTGGGA---ATAGGAGCT-----  
TTGATCTTTGGGTTCTTAGGAGCA---GCCGGAAGCACTATG---GGCGCGGCGTCA---  
ATAACGCTGACGGTACAG---GCCAGACAA---TTATTG---TCTGGTATAGTGCAACAGCAAAGC---  
AATTTG---CTGAGG---GCTATAGAGGCACAGCAGCATCTGCTGCAACTCACAGTCTGGGGCATT

>MG989575

ACTTACCTAAATGAAACAAATGAA-----

TATAATGACACTATCATACTTCCATGCAGGATAAAGCAAATGATAAACATGTGGCAGGGAGCAGGACAAGCAA  
TGTATGCTCCTCCCATCAGTGGAATAATTAATTGTACATCAAAT---  
ATTACAGGAATACTATTGACAAGAGATGGTGGTGTAAATGAAAGT-----

AATGGGACCGAGACCTTCAGACCTGGAGGAGGAAATATAAAGGACAATTGGAGAAATGAATTATATAAAATATA  
AAGTAGTACAAATTGAACCACTA---GGAATAGCACCCACCAGGGCAAAGAGAAGAGTGGTG-----  
-----GAGAGAGAAAAAAGAGCA---GTGGGA---ATAGGAGCT-----  
---ATGCTCTTTGGGTTCTTAGGAGCA---GCAGGAAGCACTATG---GGCGCGGCGTCA---  
ATAACGCTGACGGTACAA---GCCAGACAA---TTATTG---TCTGGTATAGTGCAACAGCAAAAC---  
AATTTG---CTGAGA---GCTATAGAGGCGCAGCAGCATCTGCTGCAACTCACAGTCTGGGGCATT

>MG989515

AATTACACCAAGGAAGGG-----

TGTAATGAAACTATCACACTTCCATGCAAGATAAAGCAAATAGTACGCATGTGGCAGGAAGCAGGACAGGCAA  
TGTATGCTCCTCCCATCAGGGGAATGATTAATTGTGTATCAAAT---  
ATTACAGGAATACTACTGACAAGAGATGGTGGTAGAAATAGTAGC-----  
-----  
-----  
AATGAGACCTTCAGACCTGAGGGAGGAAAATATAAAGGACAATTGGAGAAATGAATTGTATAAAATATAAGGTAG  
TACAAATTGAACCACTA---GGAATAGCACCCACCAGGGCAAAGAGAAGAGTGGTG-----  
-----GAGAGAGAAAAAAGAGCA---GTGGGA---ATAGGAGCT-----  
ATGATCTTTGGGTTCTTAGGAGCA---GCAGGAAGCACTATG---GGCGCGGCGTCA---  
ATAACGCTGACGGTACAA---GCCAGACAA---TTATTG---TCTGGTATAGTGCAACAGCAAAGC---  
AATTTG---CTGAGA---GCTATAGAGGCGCAGCAACATCTGCTGCAACTCACAGTCTGGGGCATC  
>MG989597  
AATTATACAGGAAATGAAACCGAGGGGGAGTATAATGGCACT-----  
-----  
-  
AATAATGGCACTATCACACTTCCATGCAGGATAAAGCAAATAATAAACATGTGGCAGAAAAATAGGACAAGCAA  
TGTATGCTCCTCCCATCAGGGGAAGTATTAATTGTTTATCAAAT---  
ATCACAGGAATACTATTGACAAGAGATGGTGGTGATGGTGGTGCT-----  
-----  
-----  
AATGAAAATGATACAGAGACCTTCAGACCTGGAGGAGGAAATATAAAGGACAATTGGAAAAATGAATTATATA  
AATATAAAGTAGTACAAATTGAACCACTA---GGAATAGCACCCACCAGGGCAAAGAGAAGAGTGGTG----  
-----GAGAGAGAAAAAAGAGCA---GTGGGA---  
ATAGGAGCC-----ATGATCTTTGGGTTCTTAGGAGCA---GCAGGAAGCACTATG---  
GGCGCGGCGTCA---ATAACGCTGACGGTACAG---GCCAGACAA---TTATTG---  
TCTGGCATAGTGCAACAGCAAGGT---AACTTG---CTGAGG---  
GCTATAGAGGCGCAGCAGCATCTGTTGCAACTCACAGTCTGGGGCATT  
>MG989530  
ATTTACGTAAGAAATGAAACG-----  
-----  
TATAATGACACTATCATACTCCCATGCAAGATAAAGCAAATTATAAACATGTGGCAGGGAGTAGGACAAGCAA  
TGTATGCTCCTCCCATTAGAGGAAGCATTAAGTGTGCATCAAAT---  
ATTACAGGAATATTATTGACAAGAGATGGTGGTGACGAAAATAGA-----  
-----  
-----  
AGCAAAGAGATCTTCAGGCCTGAAGGAGGAAACATAAAGGACAATTGGAGAAATGAATTATATAAAATATAAAG  
TAGTACAAATTGAACCACTA---GGGGTAGCACCCACCAGGGCAAAGAGAAGAGTGGTG-----  
-----GAGAGAGAAAAAAGAGCA---GTGGGA---ATAGGAGCT-----  
ATGATCTTTGGGTTCTTAGGAGCA---GCAGGAAGCACTATG---GGCGCAGCGTCA---  
CTAACGCTGACGGTACAG---GCTAGACAA---TTATTG---TCTGGTATAGTGCAACAGCAAAGC---  
AATTTG---CTGAGG---GCTATAGAGGCGCAGCAGCATCTGTTGCAACTCACAGTCTGGGGCATT  
>MG989559  
AATCATAATTGCACCGAGGAGAGGTGTAATAGCACTACCAATAGCACT-----  
-----  
-  
AGCACTGGCAATATCACACTTCCATGTAGAATAAAGCAGATAATAAACATGTGGCAGGGAGTAGGACAAGCAA  
TGTACGCTCCTCCCATTAAGGGAAATGTTAGTTGTCTATCAAAT---  
ATCACAGGAATACTATTGACAAGAGATGGTGATAATGCCAGTGAT-----  
-----  
-----  
AGTGAGACCTTCAGACCGGGAGGAGGAAAATATAAAAGACAATTGGAGAAGTGAATTATATAAAATATAAAGTAG  
TACAAATTGAACCACTA---GGAATAGCACCCACCAGGGCAAAGAGAAGAGTGGTG-----  
-----GAGAGAGAAAAAAGAGCA---GTGGGA---ATAGGAGCT-----  
ATGATCTTTGGGTTCTTGGGAGCA---GCAGGAAGCACTATG---GGCGCGGCGTCA---  
ATAACGCTGACGGTACAG---GCCAGACAA---TTATTG---TCTGGTATAGTGCAACAGCAAAGC---  
AATTTG---CTGAGA---GCTATAGAGGCGCAACAACATATGTTGCAACTCACAGTCTGGGGCATT  
>MG989562  
TCTTACATAAATGAAACCACACCTGGG-----  
-----  
TATAATGGCACTATCATACTCCCATGCAGGATAAAACAAATTATAAACATGTGGCAGGGAGTAGGACAAGCAA

TGTATGCTCCTCCCATCAGGGGAATCATTAGTTGTGTATCAAAT ---  
 ATTACAGGAATATTATTGACAAGAGATGGTGGTAATAATAGCACG-----  
 -----  
 -----  
 AATGAGACTGAGACCTTCAGACCTGGAGGAGGAAATATAAAGGACAATTGGAGAAGTGAATTATATAAATATA  
 AGGTAGTACAAATTGAACCACTA---GGACTAGCACCCACCAAGGCAAAGAGAAGAGTGGTG-----  
 -----GAGAGAGAAAAAAGAGCA--GTGGGA--ATAGGAGCT-----  
 ---ATGATCTTTGGGTTCTTAGGAGCA--GCAGGAAGCACTATG--GGCGCGGCGTCA---  
 ATAACGCTGACGGTACAG---GCCAGACAA---TTATTG---TCTGGTATAGTGCAACAGCAAAGC---  
 AATTTG---CTGAGA---GCTATAGAGGCGCAACAGCATATGTTGCAACTCACAGTCTGGGGCATT  
 >KT185904  
 ACTTACATAAATAACAATGGCACT-----  
 -----  
 ATCAATGGCACTATCATACTTCCATGCAGGATAAAGCAAATTATAAACATGTGGCAGGAAGTAGGACAAGCAA  
 TGTATGCTCCCCCATCAGGGGAAGCATTAAATGTAGCTCAAAT---  
 ATTACAGGAATATTATTAACAAGAGATGGTGGTAGCAGTAATGGC-----  
 -----  
 -----  
 AGTAATGAGATCTTCAGACCTACAGGAGGAAATATAAAAAGACAATTGGAGAAATGAACTATATAAATATAAAG  
 TAGTACAAATTGAACCACTA---GGAGTAGCACCCACCAAGGCAAAAAGAAGAGTGGTG-----  
 -----GAGAGAGAAAAAAGAGCA--GTGGGA--ATAGGAGCT-----  
 ATGATCTTTGGGTTCTTAGGAGCA--GCAGGAAGCACTATG--GGCGCGGCGTCA---  
 ATAACGCTGACGGTACAA---GCCAGACAA---TTATTG---TCTGGTATAGTGCAACAGCAAAGC---  
 AATTTG---CTGAGG---GCTATAGAGGCGCAGCAGCATATGTTGCAACTCACAGTCTGGGGCATT  
 >MG989527  
 ACTTACACCCAGGAG-----  
 -----  
 AATAATGGCACTATCATACTTCCATGCAAGATAAAACAAATTGTAAGAATGTGGCAAGGAGCAGGACAAGCAA  
 TGTATGCTCCTCCCATCAAGGGAATAATTAAATTGTGTATCAAAT---  
 ATTACAGGAATACTATTGACAAGAGATGGTGGGAGGGGTAACCATACTGCT-----  
 -----  
 -----  
 GATAACGAGACCTTCAGACCTGAAGGAGGAGACATGAAGGACAATTGGAGAAGTGAATTATATAAATATAAAG  
 TAGTACAGATTGAACCACTA---GGAATAGCACCCACCAGGGCAAGGAGAAGAGTGGTG-----  
 -----GAGAGAGAAAAAAGAGCA--GTGGGA--ATAGGAGCT-----  
 ATGATCTTTGGGTTCTTAGGAGCA--GCAGGAAGCACTATG--GGCGCGGCGTCG---  
 ATAACGCTGACGGTACAG---GCCAGACAA---TTATTG---TCTGGTATAGTGCAACAGCAAAGC---  
 AATTTG---CTGAGA---GCTATAGAGGCGCAGCAGCATCTGTTGCAACTCACAGTCTGGGGCATT  
 >MG989617  
 ACTCACAGAGGAAATGAAACCATGGAG-----  
 -----  
 GGGAAATGGCAATATCACAAATTCATGCAGGATAAAACAAATCATAAACATGTGGCAGGAAACAGGACAAGCAA  
 TGTATGCTCCTCCCGTCAGGGGAGTAATTAGGTGTGTATCAAAT---  
 ATTACAGGAATACTATTGACAAGAGATGGTGGTGGTTCTAATAATGCC-----  
 -----  
 -----  
 ACTAATGAGACCTTCAGACCTGGGGGAGGAAATATAAAAAGACAACCTGGAGAAGTGAATTATATAAATATAAAG  
 TAGTACAAATTGAACCATTA---GGAATAGCACCCACCAAGGCAAAGAGGAGAGTGGTG-----  
 -----GAGAGAGAAAAAAGAGCA--GTGGGA--ATAGGAGCT-----  
 ATGATCTTTGGGTTCTTAGGAGCA--GCAGGAAGCACTATG--GGCGCGGCGTCA---  
 ATAACGCTGACGGTACAG---GCCAGACAA---TTATTG---TCTGGTATAGTGCAACAGCAAAGC---  
 AATTTG---CTGAGA---GCTATAGAGGCGCAACAGCATATGTTGCAACTCACAGTCTGGGGCATT  
 >MF957454  
 AATCATAGTTGCACAGAGGGACATGGGTGTAACAGTACTACCAAAGAT-----  
 -----  
 -  
 GCTAACGGTACTATCACACTTCCATGCAGGATAAAGCAAATTATAAAAATGTGGCAGGGAGTAGGACAAGCAA  
 TGTATGCTCCTCCCATCAGTGGAAGTATTAATTGTAGATCAAAT---  
 ATTACAGGAATATTATTGACAAGAGATGGTGGTAAT-----  
 -----  
 -----

-----  
 AGTTCAAATGAGACCTTCAGACCTGAAGGAGGAAATATAAAAGACAACCTGGAGGAGTGAATTATATAAAATATA  
 AAGTAGTGCAAATTGAACCACTA---GGAGTAGCACCCACCAAGGCCAAAAGAAGAGTGGTG-----  
 -----GACAGACAAAAAAGAGCA---GTGGGA---CTAGGAGCT-----  
 ---CTGATCTTTGGATTCTTAGGAGCA---GCAGGAAGCACTATG---GGCGCGGCGTCA---  
 ATAACGCTGACGGTACAG---GCCAGACAA---TTATTG---TCTGGTATAGTGCAACAGCAAAGC---  
 AATTTG---CTGAGG---GCTATAGAGGCGCAGCAGCATATGTTGCAACTCACAGTCTGGGGCATT  
 >MG989509  
 AATTATAATTGCTCAAAGAATAATACTTGCAGAGGGAAATGAGGGAAATAAT-----  
 -----  
 -  
 CCTAATGGAACCATCATACTTCCATGCAGATAAAAGCAAATTATAAACATGTGGCAGAGAACAGGACAAGCAA  
 TGTATGCTCCTCCCATCGGGGGATGGATTAATTGTACATCAAAT---  
 ATTACAGGAATATTACTGACAAGAGATGGGGGTGAGAATAACAAGACTAAC-----  
 -----  
 ----  
 GAAACCGAGACCCCCGAGACCTTCAGACCTGGAGGAGGGAATATAAAGGACAATTGGAGAAGTGAATTATATA  
 AATATAAAGTAGTACAAATTGAACCACTA---GGAATAGCACCCACCAGGGCAAAGCGAAGAGTGGTG-----  
 -----GACAGAGAAAAAAGAGCA---GTGGGA---  
 ATAGGAGCT-----TTGATCTTTGGGTTCTTAGGAGCA---GCAGGAAGCACTATG---  
 GGCGCGGCGTCA---ATAACGCTGACGGTACAG---GCCAGACAA---TTATTG---  
 TCTGGTATAGTGCAACAGCAAAGC---AATTTG---CTGAGA---  
 GCTATAGAGGCGCAGCAGCATATGTTGCAACTCACAGTCTGGGGCATT  
 >MG989603  
 AATTATACAAATGGAACCATACAGGGG-----  
 -----  
 -  
 GGTAATGATACTATCACACTTCCATGCAGAATAAAACAAATAATAAGAATGTGGCAGAGAACAGGACAAGCAA  
 TATATGCTCCTCCTGTCTAGTGAATAATTAATTGTGTATCAAAT---  
 ATTACAGGAATACTATTGACAAGAGATGGTGGTGGT-----  
 -----  
 -----  
 AACGAGACCGAGACCTTCAGACCAGGAGGAGGAAATATGAAGGATAATTGGAGAAATGAATTATATAAAATATA  
 AAGTAGTACGAATTGAACCACTA---GGGGTAGCACCCACAAGGGCAAAGAGAAGAGTGGTG-----  
 -----GAGAGAGAAAAAAGAGCA---GTGGGA---CTAGGAGCT-----  
 ---ATGATCTTTGGGTTCTTAGGAGCA---GCAGGAAGCACTATG---GGCGCAGCGTCA---  
 ATAACGCTGACGGTACAG---GCCAGACAA---TTATTG---TCTGGTATAGTGCAACAGCAAAGC---  
 AATTTG---CTGAGG---GCTATAGAGGCGCAACAGCGTCTGTTGCAACTCACAGTCTGGGGCATT  
 >MG989564  
 ACTTATGGGGTTAATAATACAAATGAAACCAACAAG-----  
 -----  
 TATAATGACACTATCACACTCCCATGCAGGATAAAAGCAAATTATAAACATGTGGCAGAGAACAGGACAGGCAA  
 TGTATGCTCCTCCCATCAGGGGAGCAATAAATTGTGTATCAAAT---  
 ATTACAGGAATACTATTGGTAAGAGATGGTGGTCCTAACAGGACT-----  
 -----  
 -----  
 AACGAGACTTTTCAGACCTGGAGGAGGAAACATGAAGGACAATTGGAGGAGTGAATTATATAAAATATAAAGTAG  
 TACAAATTGAACCACTA---GGAATAGCACCCACCAGGGCAAAGAGAAGAGTGGTG-----  
 -----GACAGAGAAAAAAGAGCA---GTGGGA---ATAGGAGCT-----  
 ATGATCTTTGGGTTCTTAGGAGCA---GCAGGAAGCACTATG---GGCGCGGCGTCA---  
 ATAACGCTGACGGTACAG---GCCAGACAA---TTATTG---TCTGGTATAGTGCAACAGCAAAGC---  
 AATTTG---CTGAGA---GCTATAGAGGCGCAACAGCATATGTTGCAACTCACAGTCTGGGGCATT  
 >MG989572  
 ACTTACCCGTTAAATAGTACTAACATAGAAAATAATACCACGAAGGGG-----  
 -----  
 TATAATGACCCTATCATACTTCCATGCAGAATAAAAGCAAATCATAAACTTGTGGCAGGGAGTAGGACAAGCAA  
 TGTATGCTCCTCCCATCAGGGGAAGCATTAATTGTGTATCAAAT---  
 ATTACAGGACTACTATTGATAAGGGATGGTGGTATGCATAATGGGACCGAT-----  
 -----  
 -----

AATACCAAGGAGATCTTCAGACCTGGAGGAGGAAATATGAAGGACAATTGGAGAAATAAATTATATAAATATA  
AAATAGTACAAATTGAACCGCTA---GGAGTAGCACCCACCAGGGCAAAGAGAAGAGTGGTG-----  
-----GGGAGAGAAAAAAGAGCA---GTGGGA---ATAGGAGCT-----  
---TTGATCTTTGGGTTCTTGGGAGCA---GCAGGAAGCACTATG---GGCGCGGCGTCA---  
ATAACGCTGACGGTACAG---GCCAGACAA---TTACTG---TCTGGTATAGTGCAACAGCAAAGC---  
AATTTG---CTGAGA---GCTATAGAGGCGCAGCAGCATCTGTTGCAACTCACAGTCTGGGGCATT  
>MG989538  
AATTATACGTGGGCTAATAATACATTTAATGGAACCACG-----  
-----  
-  
GAAAAATGGGACTATCATACTTCCATGCAGGATCAAGCAAATTGTAAACATGTGGCAGGGAGCAGGACAAGCAA  
TATATGCTCCTCCCATCAGGGGAAATATTAGTTGTGCATCAAAT---  
ATTACAGGAATACTATTAACAAGAGATGGTGGTAATAATAATGAAACA-----  
-----  
-----  
AACGGGACAGAGATCTTCAGACCTGGAGGAGGAAATATAAAGGACAATTGGAGAAGGGAATTATATAAATATA  
AAGTAGTACAAATTGAACCACTA---GGAGTAGCACCCACCAAGGCAAAGAGAAGAGTGGTG-----  
-----GAGAGAGAAAAAAGAGCA---GTGGGA---CTAGGAACT-----  
---ATGATCTTTGGGTTCTTAGGAGCA---GCAGGAAGCACTATG---GGCGCAGCGTCA---  
ATAACGCTGACGGTACAA---GCCAGACAA---TTATTG---TCTGGTATAGTGCAACAGCAAAGC---  
AATTTG---CTGAGG---GCTATAGAGGCGCAGCAGCATATGTTGCAACTCACAGTCTGGGGCATT  
>MG989614  
ACTTACAATGGAACCCTGGTGAAAAACAATACT-----  
-----  
GGAAGTGGAATATCACACTTCCATGTAGGATAAAGCAAATTATAAACATGTGGCAAGGAGCAGGACAAGCAA  
TGTATGCTCCTCCCGTTAGTGGAATATTAATTGTACATCAAAT---  
ATTACAGGAATACTATTAACAAGAGATGGTGGTAATAATAATACA-----  
-----  
-----  
GCTAACGAGACCTTCAGACCTGGAGGAGGAAATATAAAGGACAATTGGAGAAGTGAATTATATAAATATAAAG  
TAGTACAAATTGAACCACTA---GGAATAGCACCCACCAGGGCAAAGAGAAGAGTGGTG-----  
-----GAGAGAGAAAAAAGAGCA---GTGGGA---ATAGGAACT-----  
ATGATCTTTGGGTTCTTGGGAGCA---GCAGGAAGCACTATG---GGCGCGGCGTCA---  
ATAACGCTGACGGTACAA---GCCAGACAA---TTATTG---TCTGGTATAGTGCAACAGCAAAGC---  
AATTTG---CTGAGA---GCTATAGAGGCGCAGCAGCATATGTTGCAACTCACAGTCTGGGGCATT  
>MG989496  
AGCTACTTAAATAGAACTTAAGTGAAATCGCAGTA-----  
-----  
GAGAACAAAACACTTATACTTCCATGTAGAATAAAGCAAATTATAAACATGTGGCAGGGAGTAGGACAAGCAA  
TGTATGCTCCTCCCATCAGTGGGCCAATTAATTGTAAATCAAAT---  
ATTACAGGAATACTGTTAACAAGAGATGGTGGTAATGTTACTGGG-----  
-----  
-----  
AATAATGAGACCTTCAGACCTACAGGAGGAAACATAAAGGACAATTGGAGAAGTGAATTATATAAATACAAAG  
TAGTACAAATTGAACCACTA---GGAATAGCACCCACCAGGGCAAAGAGAAGAGTGGTG-----  
-----GAGAGAGAAAAAAGAGCA---GTGGGA---ATAGGAGCT-----  
ATGATCTTTGGGTTCTTAGGAGCA---GCAGGAAGCACTATG---GGCGCGGCGTCA---  
ATAACGCTGACGGTACAG---GCCAGACAA---TTATTG---TCTGGTATAGTGCAACAGCAAAGC---  
AATTTG---CTGAGA---GCTATAGAGGCGCAACAGCATATGTTGCAACTCACAGTCTGGGGCATT  
>MG989539  
AATTATAATTGCACAGATGGAAAATGTAATGTCTACTAAGGAC-----  
-----  
-  
AATAATGGCACTATCATACTTCCATGCAGAATAAAACAAATTATAAACATGTGGCAAGGAGTAGGACAAGCAA  
TGTATGCTCCTCCCATCAGTGGGAATAATTAATTGTGTATCAGAC---  
ATTACAGGAATACTATTGACAAGAGATGGTGGTAATAATAATAATAATACTAAT-----  
-----  
-----  
AGTTCGGAAGAGATCTTCAGACCTGAAGGAGGAAACATAAAGGACAATTGGAGAAGTGAATTATATAAATATA  
AAGTAGTACAAATTGAACCACTG---GGAATAGCACCCACCAAGGCAAAGAGAAGAGTGGTG-----

-----GAGAGAGAAAAAGAGCA--GTGGGA--ATAGGAGCT-----  
---ATGATCTTTGGGTTCTTAGGAGCA--GCAGGAAGCACTATG--GGCGCGGCGTCA---  
ATAACGCTGACGGTACAG--GCCAGACAA--TTATTG--TCTGGTATAGTGCAACAGCAAAGC---  
AATTTG--CTGAGA--GCTATAGAGGCGCAGCAGCATATGTTGCAACTCACGGTCTGGGGCATT  
>AY713424  
ACTTACAGAGGAAATGAAACCATGGAGAGG-----  
-----  
AGTAATGGCACTATCATACTTCCATGCAAGATAAAGCAAATTATAAACATGTGGCAGGAAACAGGACAAGCAA  
TGTATGCTCCTCCCATCAATGGAGAAATTAAGTGTATATCAAAT---  
ATTACAGGAATACTATTGACAAGAGATGGTGGTATTAATAGAACG-----  
-----  
-----  
TATAACGAGACCTTCAGACCGGGAGGAGGAAATATGAAGGACAATTGGAGAAATGAATTATATAAATATAAAG  
TAGTACAAATTGAACCACTA--GGAGTAGCACCCACCAGGGCAAAGAGAAGAGTGGTG-----  
-----GAGAGAGAAAAAGAGCA--GTGGGA--ATAGGAATT-----  
ATGATCTTTGGGTTCTTAGGAGCA--GCAGGAAGCACTATG--GGCGCGGCGTCA---  
ATAACGCTGACGGTACAG--GCCAGACAA--TTATTG--TCTGGTATAGTGCAACAGCAAAGC---  
AATTTG--CTGAGG--GCTATAGAGGCGCAGCAGCATCTGTTGCAACTCACAGTCTGGGGCATT  
>JN944664  
ACTTACAAAGGAAATGAAACCATAGAGGAG-----  
-----  
GGTGATAGCACTATTACAATTCCATGCAAGATAAAGCAAATTATAAACATGTGGCAGGGAACAGGACAAGCAA  
TGTATGCTCCTCCCATCAGTGGAGTATTAATTGTGTATCAAAT---  
ATCACAGGAATACTATTGACAAGAGATGGTGGTAATAGTAATGAT-----  
-----  
-----  
AACAAGACCGAGACCTTCAGACCTGGAGGAGGAAATATAAAGACAATTGGAGAAGTGAATTATATAAATATA  
AAGTAGTACAAATTGAACCACTA--GGAGTAGCACCCACCAAGGCAAAGAGAAGAGTGGTG-----  
-----GAGAGAGAAAAAGAGCA--GTGGGA--ATAGGAGCT-----  
---ATGATCTTTGGGTTCTTAGGAGCA--GCAGGAAGCACTATG--GGCGCGGCGTCA---  
ATAACGCTGACGGTACAG--GCCAGACAA--TTATTG--TCTGGTATAGTGCAACAGCAAAGC---  
AATTTG--CTGAGG--GCTATAGAGGCGCAGCAGCATCTGTTGCAACTCACAGTCTGGGGCATT  
>KJ953503  
ACTTACAATGGCACT-----  
-----  
-----  
ATCATACTTCCATGCAAGATAAAGCAAATTATAAACATGTGGCAGGGAGTAGGACAAGCAATGTATGCTCCTC  
CCATCAGGGGAAGAATTAATTGTGTATCAAAT---  
ATTACAGGAATACTATTGACAAGAGATGGTGGTAAGACTAATGAGACT-----  
-----  
-----  
AACGTGACTGAGATTTTCAGACCTGGAGGAGGAAATATGAAGGATAATTGGAGAAATGAATTATATAAATATA  
AAGTAGTACAAATTGAACCACTA--GGAATAGCACCCACCAGGGCAAAGAGAAGAGTGGTG-----  
-----GAGAGAGAAAAAGAGCA--GTGGGA--ATAGGAGCT-----  
---ATGATCTTTGGGTTCTTAGGAGCA--GCAGGAAGCACTATG--GGCGCGGCGTCA---  
ATAACGCTGACGGTACAG--GCCAGACAA--TTATTG--TCTGGTATAGTGCAACAGCAAAGC---  
AATTTG--CTGAGG--GCTATAGAGGCGCAACAGCATCTGTTGCAACTCACAGTCTGGGGCATT  
>KJ952288  
AATCACACCATGGAG-----  
-----  
GGGTGTAACAATATCACACTTCCATGCAGGATAAAGCAGATTGTAAACATGTGGCAAGGAGTAGGACAAGCAA  
TGTATGCTCCTCCCATCAGTGGACTCATTAATTGTTTCATCAAAT---  
ATTACAGGAATACTATTGACAAGAGATGGTGGTATTAATAACGAGACTGAA-----  
-----  
-----  
GTGACTGAGACCTTTAGACCTGGAGGAGGAGATATAAGGGCCAATTGGAGAAGTGAATTATATAAATATAAAG  
TAGTACAAATTGAACCACTA--GGCATAGCACCCACCAGGGCAAAGAGAAGAGTGGTG-----  
-----GAGAGAGAAAAAGAGCA--GTGGGA--ATAGGAGCT-----  
ATGATCTTTGGGTTCTTAGGAGCA--GCAGGAAGCACTATG--GGCGCGGCGTCA---

ATAACGCTGACGGTACAG---GCCAGACAA---TTATTG---TCTGGTATAGTGCAACAGCAAAGC---  
 AATTTG---CTGAGA---GCTATAGAGGCGCAGCAGCATATGTTGCAACTCACAGTCTGGGGCATT  
 >KJ952992  
 GATCATACTGGCATAGAAAATGAAACCATAGGG-----  
 -----  
 -  
 AATGACACTACTATCATACTCCCATGCAAGATAAAGCAAATTATAAACATGTGGCAGGGAGTAGGACAAGCAA  
 TGTATGCTCCTCCCATCAGTGGAATAATTAATTGTGTATCAAAT---  
 ATTACAGGAATACTATTGACAAGAGATGGTGGAGATGGTGATACTAAT-----  
 -----  
 -----  
 AACGGGACTGAGACCTTCAGACCTGGAGGAGGAAAATATGAAGGACAATTGGAGAAGTGAATTATATAAAATATA  
 AAGTAGTAGAAATTGAACCACTA---GGAATAGCACCCACCAGGGCAAAGAGAAGAGTGGTG-----  
 -----GAGAGACAAAAAAGAGCA---GTGGGA---ATAGGAGCT-----  
 ---ATGATCTTTGGGTTCTTAGGAGCA---GCAGGAAGCACTATG---GGCGCGGCGTCA---  
 ATAACGCTGACGGTACAG---GCCAGACAA---TTATTG---TCTGGTATAGTGCAACAGCAGAGC---  
 AATCTG---CTGAGG---GCTATAGAGGCGCAGCAGCATCTGCTGCAACTCACAGTCTGGGGCATT  
 >KJ953319  
 TCTTATGACCCAGAAAATGAAACCATGAAGGAGTATAATGGC-----  
 -----  
 ACTAATGGCAATATCACACTTCCATGCAGGATAAAGCAAATTATAAACATGTGGCAGAGAACAGGACAAGCAA  
 TGTACGCTCCTCCCATCAGTGGAAGTATTAATTGTGTATCAAAT---  
 ATTACAGGAATACTATTGACAAGAGATGGTGGGGATAATGATGAT-----  
 -----  
 -----  
 AACGAGACCTTCAGACCTGGAGGAGGAAACATAAAGGACAATTGGAGAAGTGAATTATATAAAATATAAAGTAG  
 TACAAATTGAACCACTA---GGAATAGCACCCACCAGGGCAAAGAGAAGAGTGGTG-----  
 -----GAGAGAGAAAAAAGAGCA---GTGGGA---ATAGGAGCT-----  
 ATGATCTTTGGGTTCTTAGGAGCA---GCAGGAAGCACTATG---GGCGCGGCGTCA---  
 ATAACGCTGACGGTACAG---GCCAGACAA---TTATTG---TCTGGTATAGTGCAACAGCAAAGC---  
 AATTTG---CTGAGG---GCTATAGAGGCGCAGCAGCATATGTTGCAACTCACAGTCTGGGGCATT  
 >FJ185244  
 ACTTACCCAATAAATGGAACCATGGAGGGGTATAATGGCACT-----  
 -----  
 ATTAATGACACTATCATACTTCCATGCAGGATAAAGCAAATTATAAACATGTGGCAGGAAGTAGGACAAGCAA  
 TGTATGCTCCTCCCATCAGGGGAAGAATTAATTGTGTATCAAAT---  
 ATTACAGGAATACTATTGACAAGAGATGGTGGTGCTAATAATACG-----  
 -----  
 -----  
 AACGAGACCTTCAGACCTGGAGGAGGAAAATATAAAGGACAATTGGAGAAGTGAATTATATAAAATATAAAGTAG  
 TACAAATTGAGCCACTA---GGAATAGCACCCACCAGGGCAAAAAGAAGAGTGGTG-----  
 -----GAGAGAGAAAAAAGAGCA---GTGGGA---ATAGGAGCT-----  
 GTGATCTTTGGGTTCTTAGGAGCA---GCAGGAAGCACTATG---GGCGCGGCGTCA---  
 ATAACGCTGACGGTACAG---GCCAGACAA---TTATTG---TCTGGTATAGTGCAACAGCAAAGC---  
 AATTTG---CTGAGG---GCTATAGAGGCGCAGCAGCATATGTTGCAACTCACAGTCTGGGGCATT  
 >KX389609  
 AATCAATCA-----  
 -----  
 -----  
 CAGGATGGAAATATCACACTCCCATGTAGGATAAAACAAATTGTAAGAATGTGGCAGAGAGTGGGACAGGCAA  
 TGTATGCCCCCTCCCATTCAGGAAACATTACATGTACACCAAAC---  
 ATTACAGGATTAATATTAACAAGAGATGGGGGGAACAAGAACAAT-----  
 -----  
 -----  
 GAGACTGAGGTCATCAGACCAGGAGGAGGAGATATGAGGGACAACCTGGAGAAGTGAAGTATATAAGTATAAAG  
 TAGTAAAAATTAAACCACTA---GGAATAGCACCCACCAAGGCAAGGAGACGAGTAGTG-----  
 -----GGGAGAGAAAAAAGAGCA---GTTGGA---ATGGGAGCT-----  
 GTTCTCCTTGGGTTCTTGGGAACG---GCAGGAAGCACTATG---GGCGCAGCGTCA---  
 ATAACGCTGACGGTACAG---GTCAGACAA---TTATTG---TCTGGCATAGTGCAACAGCAAGGC---  
 AACTTG---CTGAGA---GCTATAGAGGCGCAGCAGAATCTGCTGAAACTCACAGTCTGGGGCATT  
 >KY346462

ACCTACAATGGTACAAGTAAT-----  
-----  
TCAAAACACAACCATCACGATCCCATGTAGAAATAAAGCAAATTATAAATATGTGGCAGCAGGTAGGACGAGCAA  
TGTATGCCCCCTCCCATTCAGGAAACATAACATGTAAATCAAAT---  
ATCACAGGACTACTATTGGTACGTGATGGAGGAAAGGGTGAAAAT-----  
-----  
GGTACAGAGATATTCAGACCTGGAGGAGGAGATATGAGGGACAATTGGAGAAGTGAATTATATAAATATAAAG  
TGGTAGAAATTAAGCCATTG---GGAATAGCACCCAGTAAAGCAAAAAGGAGAGTGGTG-----  
-----GAGAGAGAAAAAAGAGCA---GTGGGA---ATAGGAGCT-----  
GTGTTCTTGGGTTCTTGGGAGCA---GCAGGAAGCACTATG---GGCGCGGCGTCA---  
CTGACGCTGACGGTACAG---GCCAGACAA---TTGTTG---TCTGGTATAGTGCAACAGCAGAGC---  
AATTTG---CTGAAG---GCTATAGAGGCGCAACAGCATTTGTTGCAACTCACAGTCTGGGGCATT  
>HQ326137  
TTTCATAGTACACAA-----  
-----  
AATAATTCAACCATCACAATCCCATGCAGAATAAAGCAAATTATAAATATGTGGCAGGAGGTAGGAAGAGCAA  
TGTATGCCCCCTCCCATTCAGGAAATATAACATGTAGATCAAAT---  
ATCACAGGACTACTATTGGCACGTGATGGAGGAGAAGGCAATGAGACA-----  
-----  
GAGAATGATACAGAGATATTCAGACCTGGAGGAGGAAATATGAGGGACAATTGGAGAAGTGAATTATATAAAT  
ATAAAGTGGTAGAAATTAACCATTG---GGAATAGCACCCACTAAAGCAAAAAGGAGAGTGGTG-----  
-----GAGAGAGAGAAAAAGAGCA---GTGGGA---ATAGGAGCT---  
-----GTGTTCTTGGGTTCTTGGGAGCA---GCAGGAAGCACTATG---GGCGCGGCGTCA---  
ATAACGCTGACGGTACAG---GCCAGACAA---TTGCTG---TCTGGTATAGTGCAACAGCAAAGC---  
AATTTG---CTGAGG---GCTATAGAGGCGCAACAGCATCTGTTGCAACTCACAGTCTGGGGCATT  
>KP718937  
AATTAC-----  
-----  
ACAGAGTACAATATAACTCTCCCATGCAAAATAAAGCAAATTGTAAGGATGTGGCAGAGAGTAGGACAAGCAA  
TGTACGCCCCCTCCTATCCAAGGAGAAATAAGGTGTGACTCAAAC---  
ATTACAGGACTACTATTAACAAGAGATGGTGGGAATAATAGTACA-----  
-----  
AATGAAACCTTCAGACCTACAGGAGGAGATATGAAGGATAATTGGAGAAGTGAGTTATATAAGTATAAAGTGG  
TGGAAATTAACCACTA---GGAGTAGCACCCACCAAGGCAAAAAGAAGAGTGGTG-----  
-----GAGAGAGAAAAAAGAGCA---GTGGGA---ATAGGAGCT-----  
GTGCTCTTTGGGTTCTTGGGAGCA---GCAGGAAGCACTATG---GGCGCAGCGTCA---  
ATAACGCTGACGGTACAG---GCCAGACAA---TTATTG---TCTGGCATAGTGCAACAGCAAAGC---  
AATTTG---CTGAAG---GCTATCGAGGCACAACAACATATGTTGAAACTCACTGTCTGGGGCATT  
>AJ277823  
AATTACCCAGGGTCA-----  
-----  
AATGACAATGACACTATAACTCTCCCATGCAGAATAAAGCAAATTGTACATATGTGGCAGAGAGTAGGACAAG  
CAATGTATGCCCCCTCCCATCCAAGGAAAAATAGAGTGTAATCAAAC---  
ATTACAGGACTACTATTAACAAGAGATGGTGGGAATAAAACACAA-----  
-----  
AATGAAACCTTCAGACCTACAGGAGGAGACATGAGGGACAATTGGAGAAGTGAATTATATAAGTATAAAGTAG  
TGGAAATTAGACCACTA---GGAGTAGCACCCACCAAGGCAAAAAGAAGAGTGGTG-----  
-----CAGAGAGAAAAAAGAGCA---GTGGGA---ATAGGAGCT-----  
GTGCTCTTTGGGTTCTTGGGAGCA---GCAGGAAGCACTATG---GGCGCGGCGTCA---  
ATAACGCTGACGGTACAA---GCCAGACAA---TTATTG---TCTGGCATAGTGCAACAGCAAAGC---  
AATTTG---CTGAAG---GCTATCGAGGCGCAACAGCAACTGTTGAAACTCACTGTCTGGGGCATT  
>JF683802  
AATTACACTGACATATATAAATTCAACAGATAACAGC-----  
-----  
ACAAATGACGCAAATCTCACTCTCCCATGCAGAATAAAGCAGATTGTACACATGTGGCAGAGAGTAGGGCAAG  
CAATATATGCCCCCTCCCATCCAGGGAGTAATAAGGTGTGAGTCAAAC---

ATTACAGGGCTACTGTTAACAAGAGATGGTGGGAATAATGTCACT-----  
-----  
-----  
AATGAGACCTTTAGACCCACAGGAGGAAATATGAAGGACAATTGGAGAAGTGAATTATATAAGTATAAGGTGG  
TGGAGATTAAACCACTA---GGAGTAGCACCCACCAAGGCAAAAAGAAGAGTGGTG-----  
-----GAGAGAGAAAAAAGAGCA--GTGGGA--ATAGGAGCT-----  
GTGCTCTTTGGGTTCTTGGGAGCA--GCAGGAAGCACTATG--GGCGCAGCGTCA---  
ATAACGCTGACGGTACAG---GCCAGACAA--TTATTG---TCTGGTATAGTGCAACAGCAAAGC---  
AATTTG---CTGAAA---GCTATCGAGGCACAACAGCATCTGTTGAAACTCCCTGTCTGGGGCATT  
>KU168270  
AATTACACAGAAACAAATAGCACA-----  
-----  
AATAATGAGACTATAACTCTCTCATGCAGAATAAAGCAAATTGTAAATATGTGGCAGAGAGTAGGACGAGCAA  
TGTATGCCCCCTCCCATCCAGGAGAAATAAGGTGTGACTCAAAC---  
ATTACAGGACTATTATTAACAAGAGATGGTGGGAACAAGACCAAT-----  
-----  
-----  
GACGGTGAGGTCTTCAGACCTATAGGAGGAAATATAAGGGACAATTGGAGAAGTGAATTGTATAGGTATAAAG  
TGGTGGCAATTGAACCACTA---GGAGTAGCACCCACCAGGGCAAAAAGAAGAGTGGTG-----  
-----GAGAGAGAAAAAAGAGCA--GTGGGA--ATAGGAGCT-----  
GTGCTCCTTGGGTTCTTGGGAGCA--GCAGGAAGCACTATG--GGCGCGGCGTCA---  
ATAACGCTGACGGTACAA---GCCAGACAA--TTATTG---TCTGGCATAGTGCAACAGCAAGGC---  
AATTTG---CTGAAG---GCTATTGAGGCACAACAGCAACTGTTGAGACTCACTGTCTGGGGCATT  
>AF516184  
TTTCAGAATGGTAATAGTACTTGGAATGATACTGCA-----  
-----  
GGAAATGGCACTATCACGCTCCCTTGCAGAATAAGACAAATTGTAAACATGTGGCAGGAAGTAGGAAGAGCAA  
TGTATGCCCCCTCCCATCAAAGGACAAATTAGATGTTTCATCAAAT---  
ATTACAGGGTTGCTATTAACAAGAGATGGTGGTAAAAATGAGAATACC-----  
-----  
-----  
ACGAATACCACCGAGATCTTCAGACCTGCAGGAGGAGATATGAGGGACAATTGGAGAAGTGAATTATATAAAT  
ATAAAATAGTAAAAATTGAACCATTA---GGAGTAGCACCCACCAAGGCAAAGAGAAGAGTGGTG-----  
-----CAGAGAGAAAAAAGAGCA--GTGGGAACGATAGGAGCT---  
-----ATGTTCTTGGGTTCTTGGGAACA--GCAGGAAGCACTATG--GGCGCAGCGTCA---  
ATAACGCTGACGGTACAG---GCCAGGCAA--TTGTTG---TCTGGTATAGTGCAACAGCAGAGA---  
AATCTG---CTGAGG---GCTATTGAGGCACAACAGCATCTGTTGCAACTCACAGTCTGGGGCATC  
>AF457072  
AGTCAAAC TAATAGTACAGAGTCAGAA-----  
-----  
AATGATACAATAATCACACTCCCATGCAGAATAAAACAAATTATAAATATGTGGCAAGAAGTAGGAAAAGCAA  
TGTATGCCCCCTCCCATCGCAGGATTCATTAATTGTGCATCAAAT---  
ATTACAGGGCTACTATTGACAAGAGATGGTGGGATAACTAATAGG-----  
-----  
-----  
TCTAACGAGACCTTCAGACCTGGAGGAGGAGATATGAGGGACAATTGGAGAAGTGAATTATATAAGTATAAGG  
TAGTAAGAATTGAACCACTG---GGAGTAGCACCCACCAAGGCAAGGAGAAGAGTGGTG-----  
-----GAAAGAGAAAAAAGAGCA--ATAGGA--CTAGGAGCT-----  
ATGTTCTTGGGTTCTTGGGAGCA--GCAGGAAGCACGATG--GGCGCAGCGTCA---  
GTGACGCTGGCGGTACAG---GCCAGACAG--TTATTG---TCTGGTATAGTGCAACAGCAAAT---  
AATTTG---CTGAGG---GCTATAGAGGCGCAACAACATCTGTTGCAACTCACGGTCTGGGGCATT  
>JF804812  
ATCTACAATGATACTAAGACT-----  
-----  
GAGAAATGGTACTATCACACTCCCATGCAGAATAAAACAAATTTATAAACAGGTGGCAGGAAGTAGGAAAAGCAA  
TGTATGCCCCCTCCCATCAGAGGACTAATTAGATGTTTCATCAAAC---  
ATTACAGGGCTATTAATAACAAGAGATGGTGGTAATAATGAGAGC-----  
-----  
-----  
CATCCCCCTGAACGAGACCTTCAGACCTGGGGGAGGAGATATGAGGGACAATTGGAGAAGTGAATTATATAAAT

ATAAAGTAGTAAAAATTGAGCCATTA---GGAGTAGCACCCACCAAGGCAAAGAGAAGAGTGGTG-----  
 -----CAGAGAGAAAAAAGAGCA---GTGGGAACAATAGGAGCT---  
 -----ATGTTTCCTTGGGTTCTTGGGAGCA---GCAGGAAGCACTATG---GGCGCAGCGTCA---  
 TTGACGCTGACGGTACAA---GCCAGACAA---TTATTG---TCTGGTATAGTGCAACAGCAAAGC---  
 AATTTG---CTGAGA---GCTATTGAGGCGCAACAGCATCTGTTGCAGCTCACAGTCTGGGGCATC  
 >AY727526  
 AATTATACATATAATAGTACAGAAAACATTAATGAA-----  
 -----  
 -  
 ACAGGAGCAAACATTACAATCCCATGCAGAATAAAACAATTTATAAATATGTGGCAGGAGGTAGGACGAGCAA  
 TGTATGCCCCCTCCCATTAAGGAATAATAACATGTAAATCAAAT---  
 ATCACAGGAATATTACTGACACGGGATGGAGGCAGGACTGATACT-----  
 -----  
 -----  
 AACACAGAAACATTTCAGGCCTGGAGGAGGAGATATGAGGGACAATTGGAGAAGTGAATTATATAAATATAAAG  
 TGGTAGAAATTAAACCATTA---GGAATAGCACCCACCAAGGCAAAAAGGAGAGTGGTG-----  
 -----GAGAGAGAAAAAAGAGCA---GTGGGA---ATAGGAGCT-----  
 GTGTTTCCTTGGGTTCTTGGGAGCA---GCAGGAAGCACTATG---GGCGCAGCGTCA---  
 ATAACGCTGACGGTACAG---GCCAGACAA---TTATTG---TCTGGGATAGTGCAACAGCAAAGC---  
 AATTTG---CTGAGG---GCTATAGAGGCGCAACAGCATATGTTGCAACTCACAGTCTGGGGCATT  
 >AY727527  
 TACTATAGTACATACAATAGTACAGTTAGTAATACAACA-----  
 -----  
 GCAGATGTAAACATAACAATCCCATGCAGAATAAAACAAATTATAAATATGTGGCAGGAGGTAGGAAGAGCAA  
 TGTATGCCCCCTCCCATTAAGGAGCAATAACATGTATATCAAAC---  
 ATCACAGGATTATTACTGACACGGGATGGA---GACAAGAATGAC-----  
 -----  
 -----  
 ACAGAGACATTTCAGGCCTGGAGGAGGAGATATGAGGGACAATTGGAGAAGTGAATTATATAAATATAAAGTGG  
 TAGAAATTAAACCATTA---GGAATAGCACCCACTAAGGCAAAAAGGAGAGTGGTG-----  
 -----GAGAGAGAAAAAAGAGCA---GTGGGA---CTAGGAGCT-----  
 TTGTTCTTTGGGTTCTTGGGAGCA---GCAGGAAGCACTATG---GGCGCAGCATCA---  
 ATAACGCTGACGGTACAG---GCCCGACAA---TTGTTG---TCTGGGATAGTGCAACAGCAAAGC---  
 AATTTG---CTGAGA---GCTATAGAGGCGCAACAGCATATGTTGCAACTCACGGTCTGGGGCATT  
 >DQ366662  
 ACTCACAGAGAAAATGAAACCGAGGGAAAG-----  
 -----  
 GATAATGACACTATCATACTTCCATGCAAAATAAAGCAAATTATAAACATGTGGCAGAGAACAGGACAAGCAA  
 TGTATGCTCCTCCCATTTAGGGGAAAAATTAATTGTGTATCAAAT---  
 ATTACAGGAATATTATTGACAAGAGATGGTGGTGGTATTAATGATACT-----  
 -----  
 -----  
 AGGGAAAACGAGACCTTCAGACCTGGAGGAGGAAATATGGAGGACAATTGGAGAAGTGAATTATATAAATATA  
 AAGTAGTACAAATTGAACCACTA---GGAATAGCACCCACCAGGGCAAAGAGAAGAGTGGTG-----  
 -----GAGAGGGAAAAAAGAGCA---GTGGGA---ATAGGAGCT-----  
 ---TTGATCTTTGGGTTCTTAGGAGCA---GCAGGAAGCACTATG---GGCGCGGCGTCC---  
 ATAACGCTGACGGTACAG---ACCAGACAA---TTATTG---TCTGGGATAGTGCAACAGCAAAGC---  
 AATTTG---CTGAGG---GCTATAGAGGCGCAGCAGCATCTGTTGCAACTCACAGTCTGGGGCATT  
 >AB845349  
 ACTTACTGGATAAATGGAAGTAGGGAGGAGAGTAATGGCACT-----  
 -----  
 ACCAATGGCAATATCACTATCCCATGCAAAATAAAACAAATCATAAACATGTGGCAGGGAGTAGGACAAGCAA  
 TGTATGCTCCCCCATCAAAGGAAGACTTAATTGTATATCAAAT---  
 ATTACAGGACTACTATTAACAAGAGATGGTGGTGTATGTTAAAGAT-----  
 -----  
 -----  
 AACGAGACCTTCAGACCTGCAGGAGGAGAGATGAAGGACAATTGGAGAAGTGAATTATATAAATATAAAGTAG  
 TACAAATTGAACCACTA---GGAATAGCACCCACCAGGGCAAAGAGAAGAGTGGTG-----  
 -----GAGAGAGAAAAAAGAGCA---GTGGGA---ATAGGAGCT-----  
 ATGATCTTTGGGTTCTTGGGAGCA---GCAGGAAGCACTATG---GGCGCGGCGTCA---

ATAACGCTGACGGTACAG---GCCAGACAA---TTATTG---TCTGGTATAGTGCAACAGCAAAGC---  
 AATTTG---CTGAGG---GCTATAGAGGCGCAGCAGCATCTGTTGCAACTCACAGTCTGGGGCATT  
 >KJ671533  
 AACTACTCAGAACAAAAATTAAAT-----AATAAACGTCC-----  
 TCTCCCAATGACACTATCACTATCCCATGTCTGAATAAAACAAATTGTAAATATGTGGCAGGAAGTAGGACGAG  
 CAATGTATACCGCTCCCATTTGCAGGAAACATTACCTGTAACCTCAAAT---  
 ATTACAGGTATACTGTTGACAAGAGATGGTGGT-----  
 -----  
 -  
 AATATAACTAATGGGACTGAGACATTCAGACCTGGGGGAGGAAATATGAAAGACAATTGGAGAAGTGAATTAT  
 ATAAATATAAAGTAGTAGAAATTAAACCACTA---GGAGTAGCACCCACCAGGGCAAAAAGACAAGTGGTG--  
 -----AAGAGAGAAAAAAGAGCA---GCAGGA---  
 ATAGGAGCT-----TTGTTCTTGGGTTCTTGGGGGCA---GCAGGAAGCACTATG---  
 GGCGCAGCGTCA---GTGACGCTGACGGTACAG---GCCAGACAA---TTATTG---  
 TCTGGTATAGTGCAACAGCAGAAC---AATCTG---CTGAGA---  
 GCTATTGAGGCGCAACAGCATATGTTGCAACTCACAGTCTGGGGCATT  
 >KU161145  
 TATTAT-----  
 -----  
 AATGACACTATCAGACTTCCATGCAGGATAAAGCAGATTATAAACATGTGGCAAGGAGTAGGACAAGCAATGT  
 ATGCCCCCTCCCGTCAGGGGAAGGATTAATTGTGTATCAAAC---  
 ATTACAGGAATACTATTGACAAGAGATGGTGGTAATACTACTGCA-----  
 -----  
 -----  
 GATGCTAGTGAGACCTTCAGACCTGCAGGAGGAAATATGAAGGACAATTGGAGAAGTGAATTATATAAATATA  
 AAGTAGTAGAAATTGAACCACTA---GGAATAGCACCCACCAAGGCAAAAAGAAGAGTGGTG-----  
 -----CAGAGAGAAAAAAGAGCA--GTGGGA---ATAGGAGCT-----  
 ---ATGATCTTTGGGTTCTTAGGAGCA--GCCGGAAGCACTATG--GGCGCGGCGTCA---  
 ATAACGCTGACGGTACAA---GCCAGACAG---TTACTG---TCTGGTATAGTGCAACAGCAAAGC---  
 AATTTG---CTGAGG---GCTATAGAGGCGCAGCAGCATATGTTGCAACTCACAGTCTGGGGCATT  
 >KY216147  
 AATTATACATACAAGACTAATGATAGTAGGACTAATAATACAGCTGAGGATACT-----  
 -----  
 -  
 AATTCGACCGTCATCACAATCCCATGCAAAATAAAGCAGATTATAAATATGTGGCATGAGGTGGGACGAGCAA  
 TGTATGCTCCTCCCATTTGCAGGAAACATAACATGTAAGTCAAAC---  
 ATCACAGGAATACTATTAGTACGTGATGGAGGAACAAAGTCAAAT-----  
 -----  
 -----  
 AGTACAGAGACATTCAGGCCTGGAGGAGGAGATATGAGGAATAATTGGAGAAGTGAATTATATAAATATAAAG  
 TGGTAGAAATTAAGCCAGTG---GGAGTAGCACCCACTGAAGCAAAAAGGAGAGTGGTG-----  
 -----GAGAGAGAAAAAAGAGCA---GTGGGA---ATAGGAGCT-----  
 GTGTTCTTGGGTTCTTGGGAGTA---GCAGGAAGCACTATG---GGCGCGGCGTCA---  
 GTGACGCTGACGGTACAG---GTCAGACAA---TTGCTG---TCTGGTATAGTGCAACAGCAAAC---  
 AATTTG---CTGAGG---GCTATAGAGGCGCAACAGCATATGTTGCAACTCACGGTCTGGGGCATT  
 >KU820831  
 TACTATCTTAATAGTACATACAATCCTAATGATACA-----  
 -----  
 GCAAACTCAAACATCACCATCCCATGCAGAATAAAACAGATTGTAAACATGTGGCAGGAGGTAGGACGAGCAA  
 TGTATGCTCCTCCCATTTGCAGGAAAAATAACATGTAAATCAAAT---  
 ATCACAGGACTACTATTGGTACGTGATGGGGGAATTAATCTAAATACA-----  
 -----  
 -----  
 ACAAATAATACCGAAACATTCAGGCCTGGAGGAGGAGATATGAGGGACAATTGGAGAAGTGAATTATATAAAT  
 ATAAAGTGATAGAAATTAGGCCATTG---GGAATAGCACCCACTAAAGCAAAAAGGAGAGTGGTG-----  
 -----GAGAGAGAAAAAAGAGCA---GTGGGA---CTAGGAGCT---  
 -----GTGTTCTTGGGGTCTTGGGAGCA---GCAGGAAGCACTATG---GGCGCGGCGTCA---  
 ATAACGCTGACGGTACAA---GCCAGACAA---TTGTTG---TCTGGTATAGTGCAACAGCAAAGT---  
 AATTTG---CTGAGG---GCTATAGAGGCGCAACAGCATATGTTGCAACTCACGGTCTGGGGCATC

>KU992937

TTCTATACTAATGATACAGGAGGCAGT-----

TTAAAATCAAACATCACGATTCCATGTAGAATAAAGCAAATTATAAATATGTGGCAGGAGGTAGGGCGAGCAA  
TATATGCCCCCTCCCATTTGAAGGAAATATAACATGTAAATCAAAG---  
ATCACAGGACTACTATTGGTACGTGATGGAGGAAAAGGAAATAAT-----

AATACAGAGACATTTAGACCTGGAGGAGGAGATATGAGGGACAATTGGAGAAGTGAATTATATAAATATAAAG  
TGGTAGAAGTTAAGCCATTG---GGAGTAGCACCTACTAAAGCAAAAAGGAGAGTGGTG-----  
-----GAGAGAGAAAAAAGAGCA---GTGGGA---ATAGGAGCT-----  
GTGTTTCCTTGCGTTCTTGGGAGCA---GCAGGAAGCACTATG---GGCGCGGCGTCA---  
ATAACGCTGACGGTACAA---GCCAGACAA---TTGTTG---TCTGGTATAGTGCAACAGCAAAGC---  
AATTTG---CTGAGA---GCCATAGAGGCGCAACAGCATATGTTGCAACTCACGGTCTGGGGCATT

>KC899012

ACCTATAATGCTACTAGTACAAAAGGTAAT-----

TCAAGCTCAGTTATCACACTCCCATGCAGAATAAAGCAAATTATAAACATGTGGCAGGAGGTAGGGCGAGCAA  
TGTATGCCCCCTCCCATTTGCAGGAAACATAACATGTAAATCCAAT---  
ATCACAGGAATACTATTGGAATGGGATGGAGGAAATTCAAATAGT-----

TCTAATGCTACATTCAGACCTGGAGGAGGAGATATGAAAAACAATTGGAGAAGTGAATTATATAAATATAAAG  
TGGTAGAAATAAAGCCATTA---GGAATAGCACCCACTGCAGCAAAAAGGAGAGTGGTG-----  
-----GAGAGAGAAAAAAGAGCA---GTGGGA---ATAGGAGCT-----  
GTGTTTCCTTGCGTTCTTAGGCGCG---GCAGGAAGCACTATG---GGCGCGGCGTCA---  
ATAACGCTGACGGTACAG---GCCAGACAA---TTGCTG---TCTGGTATAGTGCAACAGCAAAGC---  
AATTTG---CTGAGG---GCCATAGAGGCGCAACAGCATATGTTGCAACTCACGGTCTGGGGCATT

>MN044632

ACCTACATGCCTAATGGTACATTCAAGTTTAATGATACAGACCTGAATGTT-----

-----ACAAGT-----  
AATTCAGATTCACCCATCACAAATACCATGCAGAATAAAGCAAATTATAAACATGTGGCAGGAGGTAGGACGAG  
CAATGTATGCTCCTCCCATTTGAAGGAAACATAACATGTAAATCAAAT---  
ATCACAGGACTACTATTGGTACGTGATGGAGGAGAGACAGAGACA-----

AACATGACAGAGACATTCAGACCTGGAGGAGGGGATATGAGAGACAATTGGAGAAATGAATTATATAAATATA  
AAGTGGTAGAAATTAAGCCATTA---GGAGTAGCACCCACTGAAGCGAAAAGGAGAGTGGTG-----  
-----CAGAGAGAAAAAAGAGCA---GTGGGA---ATAGGAGCT-----  
---GTGTTTCCTTGCGTTCTTGGGAGCA---GCAGGAAGCACTATG---GGCGTGCGTCA---  
ATAACGCTGACGGTACAG---GCCAGGCAA---CTGCTG---TCTGGTATAGTGCAACAGCAAAGC---  
AATTTG---CTGAGA---GCTATAGAGGCGCAACAACATGTGTTGCAACTCACTGTCTGGGGCATT

>MK397789

ACTTACCAAAGTGGAACCATAAATGGG-----

GATAATGGAACTATTATAATTCCATGTAAATCAAACAAATTATAAACATGTGGCAGAGAACAGGACAAGCAA  
TATATGCTCCTCCCATCAAGGGAAAAATTAATTGTATATCAAAT---  
ATTACAGGAATACTATTAACAAGAGATGGTGGTGTAAATAGCACA-----

GTTAATGAGACCTTCAGACCGGGAGGAGGAAATATAAAAGACAACCTGGAGAAGTGAATTATATAAATATAAAG  
TAGTACAAATTGAACCACTA---GGAGTAGCACCCACCAGGGCAAGAAGAAGAGTGGTG-----  
-----CAGAGAGAAAAAAGAGCA---GTGGGA---ATAGGAGCT-----  
ATGATCTTTGGGTTCTTAGGAGCA---GCAGGAAGCACTATG---GGCGCGGCGTCA---  
ATAACGCTGACGGTACAG---GCCAGACAA---TTATTG---TCTGGTATAGTGCAACAGCAAAGC---  
AATTTG---CTGAGA---GCTATAGAGGCGCAGCAGCATCTGTTGCAGCTAACAGTCTGGGGCATT

>EU131799

AATCATAATTTGACTGAGAATAATACTTGGCAAGAGAATGCT-----

-

AGCGAAAGTACCATCACACTCCCATGCAGAATAAAACAAATTATAAACAGGTGGCAGGAAGTAGGAAGAGCAA  
 TGTATGCCCCCTCCCATCAGTGGACAAATTAAATGCTCATCAAAT---  
 ATTACAGGGCTGCTATTAACAAGAGATGGTGGTAAACGAATGGGTCC-----  
 -----  
 -----  
 GAAATGGGTCCGAAATCTTCAGACCTGGAGGAGGAGATATGAGAGACAATTGGAGAAGTGAATTATATAAAT  
 ATAAAGTAGTAAAAATTGAGCCACTA---GGAATAGCACCCACCAAGGCCAAAAGAAGAGTGGTG-----  
 -----CAGAGAGAAAAAAGAGCA---GTGGGAACAATAGGAGCT---  
 -----ATGTTCTCGGGTTCTTGGGAGCA---GCAGGAAGCACTATG---GGCGCAGCGTCA---  
 ATGACGCTGACGGTACAG---GCCAGACTA---TTACTG---TCTGGTATAGTGCAACAGCAGAAC---  
 AATCTG---CTGAGA---GCTATTGAGGCGCAACAGCACATGTTGCAACTCACAGTCTGGGGCATC  
 >KM111555  
 ACTTACAGAGAAAAT-----GGAACCATGGAA-----  
 -----  
 GGGAGTAATGGCACTATCATACTTCCATGCAAAATAAAGCAAATAATAAACATGTGGCAGGGAGTAGGACAAG  
 CAATGTATGCTCCTCCCGTCAGTGAACAATTAATTGTGTATCAAAT---  
 ATTACAGGAATACTATTAACAAGAGATGGTGGT-----  
 -----  
 GGTAAGTACCAATGCGACTAAC-----  
 GAGACCGAGATCTTCAGACCTGGAGGAGGAAATATAAAGGACAATTGGAGAAGTGAATTATATAAATATAAAG  
 TAGTAGAACTTGAACCACTA---GGAATAGCACCCACCAAGGCCAAGAGAAGAGTGGTG-----  
 -----GCGAGAGAAAAAAGAGCA---GTGGGA---ATAGGAGCT-----  
 ATGATCTTTGGGTTCTTAGGAGCA---GCAGGAAGCACTATG---GGCGCAGCGTCC---  
 ATAACGCTGACGGTACAG---GCCAGACAA---TTATTG---TCTGGTATAGTGCAACAGCAAAGC---  
 AATTTG---CTGAGG---GCTATAGATGCGCAGCAGCATCTGTTGCAACTCACAGTCTGGGGCATT  
 >KP418805  
 AATTATACTTTCCAGGCTAATGATACTAGGCAAAGG-----  
 -----  
 -  
 TCAAAACAAAATATCACACTCCCATGCAGAATAAAACAAATTATAAACAGGTGGCAGGAAGTAGGAAGAGCAA  
 TGTATGCCCCCTCCCATCAGGGGACAAATTAAATGTTTCATCAAAT---  
 ATTACAGGAATACTATTAACAAGAGATGGTGGTGACAAGAGTAGTACTGCA-----  
 -----  
 -----  
 ACTAATGAAACCTTCAGACCGGGAGGAGGAGATATGAGGGACAATTGGAGAAGTGAATTGTATAAATATAAAG  
 TAGTAAAGATTGAACCACTA---GGAATAGCACCCACCAAGGCCAAGAGAAGAGTGGTG-----  
 -----CAGAGAGAAAGAAGAGCA---GTGGGA---GTAGGAGCT-----  
 ATGTTCTCTCGGGTTCTTGGGAGCA---GCAGGAAGCACTATG---GGCGCAGCATCA---  
 ATGACGCTGACGGTACAG---GCCAGACTA---TTACTG---TCTGGTATAGTGCAACAGCAGAAC---  
 AATCTG---CTGAGA---GCTATTGAGGCGCAACAACACATGTTGCAACTCACAGTCTGGGGCATC  
 >AB097867  
 ACTCATAGTATTTGGAATGGTACTATTTGGAATGGT-----ACT---  
 -----  
 CGGAATGATACTAATATCACGCTCCCTTGCGAGAATAAAACAAATTGTAAACATGTGGCAGGAAGTAGGAAAAG  
 CAATGTATGCCCCCTCCCATCAGAGGACAAATTAGATGTTTCATCAAAT---  
 ATTACAGGGTTGCTATTAACAAGAGATGGTGGTAATGATAAGAAC-----  
 -----  
 -----  
 GAGACCACCGAGACCTTCAGACCAGGAGGAGGAGATATGAGGGACAATTGGAGAAGCGAATTATATAAATATA  
 AAATAGTAAAAATTGAACCATTA---GGAGTAGCACCCACCAAGGCCAAGAGAAGAGTGGTG-----  
 -----CAGAGAGAAAAAAGAGCA---GTGGGAACGATAGGAGCT-----  
 ---ATGTTCTCTGGGTTCTTGGGAGCA---GCAGGAAGCACTATG---GGCGCAGCGTCA---  
 ATAACGCTGACGGTACAG---GCCAGACAA---TTGTTG---TCTGGTATAGTGCAAGCAGCAGAGA---  
 AATTTG---CTGATG---GCTATCGAGGCGCAACAGCATCTGTTGCAACTCACAGTCTGGGGCATC  
 >KT438784  
 AGTTACAAA-----  
 -----  
 GGAGATGAAACCATCATACTTCCATGTAAATAAAGCAAATTATAAATATGTGGCAGAGAGTAGGACAAGCAA  
 TGTATGCTCCTACCATCAGGGGAAAAATTAATTGTGTATCAAAT---  
 ATTACAGGAATACTATTGACAAGAGATGGTGGAAATGGTAGTGGC-----

-----  
-----  
GAGACCTTCAGACCTGGAGGAGGAGATATGAAGGACAATTGGAGAAGTGAATTATATAAAATATAAAGTAGTAC  
AAATTGAACCACTA---GGATTAGCACCCACCAAGGCAAAGAGAAGAGTGGTG-----  
-----GAAAGAGAAAAAAGAGCA---GTGGGA---ATAGGAGCT-----  
ATGATCTTTGGGTTCTTAGGAGCA---GCTGGAAGCACTATG---GGCGCGGCGTCC---  
ATAACGCTGACGGTACAG---GCCAGGCAA---TTATTG---TCTGGTATAGTGCAACAGCAAAGC---  
AATTTG---CTGAGG---GCTATAGAGGCGCAGCAGCATATGTTGCAACTCACAGTCTGGGGCATT  
>JN248316  
ACTTACCTAGGAAATGAAACCTTGGAGAGGTATACTGGCAATAGC-----  
-----  
ACTAATGGCACTATCATACTTCCATGCAGGATAAAGCAAATTGTAAGAATGTGGCAGGGAGTAGGACAAGCAA  
TGTATGCTCCTCCCGTCAAGGGAATAATTAATTGTGTATCAAAT---  
ATTACAGGAATACTATTGACAAGAGATGGTGGTAATAGAACGAAA-----  
-----  
-----  
AATGAGACCTTCAGACCTGAAGGAGGAAATATGAAGGACAATTGGAGAAATGAATTATATAAAATATAAAGTAG  
TACAAATTGAACCACTA---GGAATAGCACCCACCAAGGCAAAAAGAAGAGTGGTG-----  
-----GAGAGAGAAAAAAGAGCA---GTGGGA---ATAGGAGCT-----  
ATGATCTTTGGGTTCTTAGGAGCA---GCAGGAAGCACTATG---GGCGCGGCGTCA---  
ATAACGCTGACGGTACAG---GCCAGACAA---TTATTG---TCTGGTATAGTGCAACAGCAAAGC---  
AATTTG---CTGAGG---GCTATAGAGGCGCAGCAGCATCTGTTGCAACTCACAGTCTGGGGCATT  
>JN248320  
ACTTATGACATAGGAAATGAAACCACAGGGGAGGGTAATGGC-----  
-----  
ACTATTGGCAATATCACACTTCCATGCAAGATAAAGCAAATTATAAACATGTGGCAGGGAGCAGGGCAAGCAA  
TGTATGCTCCTCCCATCAGTGGAGTAATTAATTGTGTATCAAAT---  
ATTACAGGTATACTATTGACAAGAGATGGTGGTGTAAATAATACGAGTGAG-----  
-----  
-----  
GAGACCTTCAGACCTGGAGGAGGAAATATAAAGGACAATTGGAGGAGTGAATTATATAAAATATAAAGTAGTAC  
AAATTGAACCACTA---GGAGTAGCACCCACCAGGGCAAAGAGAAGAGTGGTG-----  
-----GAGAGAGAAAAAAGAGCA---GTGGGA---ATAGGAGCT-----  
ATGATCTTTGGGTTCTTGGGAGCA---GCAGGAAGCACTATG---GGCGCAGCGTCA---  
ATAACGCTGACGGTACAG---GCCAGACAA---TTATTG---TCTGGTATAGTGCAACAGCAAAGC---  
AATTTG---CTGAGG---GCTATAGAGGCGCAACAGCATCTGTTGCAACTCACAGTCTGGGGCATT  
>JN248349  
AATTATAATGGTACTTGAATAATAATAATCCTTGAAT-----  
-----GATACT-----  
ACAGAAAATGGCACTATCATACTCCCTTGCGAGAATAAGACAAATAGTAAACATGTGGCAGCAAGTAGGAAGAG  
CAATGTATGCCCTCCCATTCAGGACAAATTACATGTGCATCAAAT---  
ATTACAGGAATACTATTGACAAGAGATGGTGGTGCTAAGAATGAT-----  
-----  
-----  
AGTGGCACCGAGACCTTCAGACCTGCAGGAGGAGATATGAGGGACAATTGGAGAAGTGAATTATATAAAATATA  
AGGTAGTAAAAATTGAACCATTA---GGAGTAGCACCCACCAAGGCAAAGAGAAGAGTGGTG-----  
-----CAGAGAGAAAAAAGAGCA---GTGGGA---ATGGGAGCT-----  
---ATGTTCCCTTGGGTTCTTGGGAGCA---GCAGGAAGCACTATG---GGCGCAGCGTCA---  
ATAACGCTGACGGTACAG---GCCAGACAA---TTGTTG---TCTGGTATAGTGCAACAGCAGAGA---  
AATTTG---CTGAGG---GCTATTGAGGCGCAACAGCATCTGTTGCAACTCACAGTCTGGGGCATT  
>EU743760  
ACTCACATCAATGGCACTAGCAACAGCACTGCGAGGGAG-----  
-----  
TATAATGGCACTATCACACTTCCATGCAGGATAAAGCAAATTATAAATATGTGGCAGGAAGCAGGACAAGCAA  
TGTATACTCCTCCCATCAGTGGGAATAATTAAGTGTATATCAAAT---  
ATTACAGGAATACTATTGACAAGAGATGGTGGTGCTAATAATGGG-----  
-----  
-----  
ACTATCAATGAGACCTTTAGACCTGGAGGAGGAGATATGAGGGACAATTGGAGAAAGTGAATTATATAAAATATA  
AAGTAGTAAAAATTGAACCATTA---GGAGTAGCACCCACCAAGGCAAAGAGAAGAGTGGTG-----

-----CAGAGAGAAAAAGAGCA---ATAGGA---ATAGGAGCT-----  
 ---GTGTTCTTGGGTTCTTGGGAGCA---GCAGGAAGCACTATG---GGCGCGGCGTCA---  
 ATAACGCTGACGGTACAA---GCCAGACAA---TTATTG---TCTGGTATAGTGCAACAGCAGAAC---  
 AACTTG---CTGAGA---GCTATTGAGGCGCAACAGCATATGTTGCAACTCACTGTCTGGGGCATC  
 >JN860765  
 ACTTATAAC-----  
 -----  
 AGTACTGGCAATATCACAATTCCATGTAGGATAAAGCAGATTATAAACATGTGGCAGGAAACAGGACAAGCAA  
 TGTATGCTCCTCCCATTAGTGGAATAATTGTTGTATCAAAT---  
 ATTACAGGAATACTATTGACAAGAGATGGAGGTACTAATAATAATAAT-----  
 -----  
 -----  
 AATGGAAGTGAACCTTCAGACCTGGAGGAGGAAATATAAAGGACAATTGGAGAAAGTGAATTATATAAATATA  
 AAGTAGTACAAATTGAACCACTA---GGAGTAGCACCCACCAAGGCAAAGAGAAGAGTGGTG-----  
 -----GAGAGAGAAAAAGAGCA---GTAGGA---ATAGGAGCT-----  
 ---ATGATCTTTGGGTTCTTAGGAGCA---GCCGGAAGCACTATG---GGCGCGGCGTCA---  
 ATAACGCTGACGGCACAG---GCCAGACAA---TTACTG---TCTGGTATAGTGCAACAGCAAAGC---  
 AATTTG---CTGAGG---GCTATAGAGGCGCAGCAGCATATGTTGCAACTCACAGTCTGGGGCATT  
 >MG989494  
 AATCATACCAAGGGTGAG-----  
 -----  
 TGTAACAACACTATCATACTTCCATGTAAGATAAAGCAAATTATAAACATGTGGCAGAGAGTAGGACAAGCAA  
 TGTATGCTCCTCCCATCAGGGGAAACATTACTTGTGTATCAAAT---  
 ATTACAGGAATATTATTGACAAGAGATGGTGGTAATGGGACTAAC-----  
 -----  
 -----  
 GGGACTGAAACCTTCAGACCTGGAGGAGGAGATATAAAGGACAATTGGAGAAATGAATTATATAAATATAAAG  
 TAGTACAAATTGATCCACTA---GGAATAGCACCCACCAGGGCAAGAAGAAGAGTGGTG-----  
 -----GAGAGGGAAAAAGAGCA---GTGGGA---ATAGGAGCT-----  
 ATGATCTTTGGGTTCTTAGGAGCA---GCAGGAAGCACTATG---GGCGCGGCGTCA---  
 ATAACGCTGACGGTACAG---GCCAGACAA---TTATTG---TCTGGGATAGTGCAACAGCAAAGT---  
 AATTTG---CTGAGG---GCTATAGAGGCGCAGCAGCATCTGTTGCAACTCACAGTCTGGGGCATT  
 >MG989490  
 AATTATACCAAG-----  
 -----  
 GATAAGGAAAATATCACACTTCCATGCAGGATAAAGCAAATTATAAACATGTGGCAGAGAGTAGGACAAGCAA  
 TGTATGCTCCTCCCATCAAGGGAAACATTACTTGTGCATCAAAT---  
 ATTACAGGAATAGTATTGACAAGAGATGGTGGTGGTAATAATGAGAAT-----  
 -----  
 -----  
 AGAAACAACGAGACCTTCAGACCAACAGGAGGAAATATAAAGGACAATTGGAGAAATGAATTATATAAATATA  
 AAGTAGTACAAATTGATCCACTA---GGAATAGCACCCACCAAGGCAAAAAGAAGAGTGGTG-----  
 -----GAGAGAGAAAAAGAGCA---GTGGGA---ATAGGAGCT-----  
 ---ATGATCTTTGGGTTCTTAGGAGCA---GCAGGAAGCACTATG---GGCGCGGCGTCA---  
 ATAACGCTGACGGTACAG---GCCAGACAA---TTATTG---TCTGGGATAGTGCAACAGCAAAGT---  
 AATTTG---CTGAGG---GCTATAGAGGCGCAGCAGCATATGCTGCAACTCACAGTCTGGGGCATT  
 >MG989520  
 TTTATAATAATGGCACA-----  
 -----AAT---  
 -  
 GGCACAAGTGAATCATCACAATCCCATGCAGGATAAAGCAAATTATAAACATGTGGCAGAGAGTAGGACAAG  
 CAATGTATGCTCCTCCCATCAGTGGGGCAATCAGTTGTGTCTCAAAT---  
 ATTACAGGAATACTATTGACAAGAGATGGTGGTGTATGCAAATAACACAAATAACTCTAATACA---ACT---  
 -----  
 -----  
 GATCCTAAAGAAATCTTCAGACCTGCAGGAGGAGATACAAGGGACAATTGGAGAAAGTGAATTATATAAATATA  
 AAGTAGTACAAATTGAACCACTA---GGAATAGCACCCACCAAGGCAAAGAGAAGAGTGGTG-----  
 -----GACAGAGAAAAAGAGCA---GTGGGA---ATAGGAGCT-----  
 ---ATGATCTTTGGGTTCTTAGGAGCA---GCAGGAAGCACTATG---GGCGCAGCGTCA---

ATAACGCTGACGGTACAG---GCCAGACAA---TTATTG---TCTGGTATAGTGCAACAGCAAAGC---  
 AATTTG---CTGAGG---GCTATAGAGGCGCAGCAACATCTGTTGCAACTCACAGTCTGGGGCATT  
 >MG989573  
 AAT-----  
 -----  
 TATAATGGCACCATCATACTTCCATGCAGGATAAAGCAAATTATAAACATGTGGCAGAGAGTAGGACAAGCAA  
 TGTATGCTCCTCCCATTAGGGGAAACATTACATGTACATCAAAT---  
 ATTACAGGAATATTATTGACAAGAGATGGCAAAGGTGAAAACGATACA-----  
 -----  
 -----  
 GGGAAAGAGATCTTCAGACCTGGAGGAGGAGATATGAAGGACAATTGGAGAAATGAATTATATAAATATAAAG  
 TAGTACAAATTGAGCCACTA---GGAATAGCACCCACCAGGGCAAGGAGAAGAGTGGTG-----  
 -----CAGAGAGAAAAAAGAGCA---GTAGGA---ATAGGAGCT-----  
 ATGATCTTTGGGTTCTTAGGAGCA---GCAGGAAGCACTATG---GGCGCGGCGTCA---  
 ATAACGCTGACGGTACAG---GCCAGACAA---TTATTG---TCTGGTATAGTGCAACAGCAAAGC---  
 AATTTG---CTGAGG---GCTATAGAGGCGCAACAGCATATGTTGCAACTCACAGTCTGGGGCATT  
 >MG989599  
 ACTTATGAC-----  
 -----  
 AGTAATGACACTATCATAATTCCATGTAGGATAAAGCAAATTATAAACATGTGGCAGGAAACAGGACAAGCAA  
 TGTATGCTCCTCCTGTGTCAGTGGAGCAATTAATTGTGTATCAAAT---  
 ATTACAGGAATACTATTGACAAGAGATGGTGGTAATAATAGAACT-----  
 -----  
 -----  
 AATGAGACCTTCAGACCTGGAGGAGGAAATATAAAGGACAATTGGAGAAGTGAATTATATAAATATAAAGTAG  
 TACAAATTGAACCATTA---GGAATAGCACCCACCAGGGCAAGGAGAAGAGTGGTG-----  
 -----GAGAGACAAAAAAGAGCG---GTGGGA---ATAGGAACT-----  
 CTGATCTTTGGGTTCTTAGGAGCA---GCCGGAAGCACTATG---GGCGTGGCGTCA---  
 ATGACGCTAACGGTACAG---GCCAGACAA---TTATTG---TCTGGTATAGTGCAACAGCAAAGC---  
 AATTTG---CTGAGA---GCTATAGAGGCACAGCAGCATATGTTGCAACTCACAGTCTGGGGCATT  
 >MK697709  
 TTTTACTTTAATGGTACAAAAAGA-----  
 -----AATATATTTAATGATACA-----  
 GAAAGTAATTCGACCATCACAATCCCATGCAGGATAAAGCAAATTATAAACATGTGGCAGGAAGTGGGACGAG  
 CAATGTATGCTCCTCCCATTGCAGGAAACATAACATGTAAGTCAAAT---  
 ATCACAGGACTGATATTAGTACGTGATGGAGGAAATAGGGCCACA-----  
 -----  
 -----  
 AATGATACAGAAATATTAGGCCTGGAGGAGGAAATATGAGGGATAATTGGAGAAGTGAATTATATAAATATA  
 AAGTGGTAGAAATTAAGCCATTG---GGAATAGCACCCACTACATCAAAAAGGAGAGTGGTG-----  
 -----GAGAGAGAAAAAAGAGCA---GTGGGA---ATAGGAGCT-----  
 ---GTGTTCCCTTGGGTTCTTGGGAGTA---GCAGGAAGCACTATG---GGCGCGGCGTCA---  
 GTGGCGCTGACGGTACAG---GCCAGACAA---TTATTG---TCTGGTATAGTGCAACAGCAAAGC---  
 AATTTG---CTGAGG---GCTATAGAGGCGCAGCAGCATATGTTGCAACTCACAGTCTGGGGCATT  
 >MN336527  
 TATCATACAGAA-----  
 -----  
 GACAATTTCGACCATCACACTCCCATGCAAAATAAAGCAAATTATAAATATGTGGCAGGAGGTGGGAAGAGCAA  
 TGTATGCTCCTCCCATTGCAGGAAACATAACATGTAGGTCAAGT---  
 ATCACAGGACTACTATTAGTACGTGATGGAGGAAATGCAAAATGATACA-----  
 -----  
 -----  
 AATAATACAGAGATATTAGGCCTGGAGGAGGAAATATGAGGGATAATTGGAGAAGTGAATTATATAAATATA  
 AAGTGGTAGAAATTAAGCCATTG---GGAGTAGCACCAACTGGGGCAAAAAGGAGAGTGGTG-----  
 -----GAAAGAGAAAAAAGAGCA---GTAGGA---ATAGGAGCT-----  
 ---GTGTTCCCTTGGGTTCTTGGGAGCA---GCAGGAAGCACTATG---GGCGCGGCGTCA---  
 GTGACGCTGACGGTACAG---GCCAGACAA---TTGCTG---TCTGGTATAGTGCAACAGCAAAC---  
 AATTTG---CTGAGG---GCTATAGAGGCGCAACAGCATATGTTGCAACTCACGGTCTGGGGCATC  
 >JN864056

GAC-----  
-----  
TATATACTTCCATGTAAGATAAAACAAATTGTGAGAATGTGGCAGAAAGTGGGACAAGCAATGTATGCCCCCTC  
CCATCGAAGGAAACATTACATGTACGTCAAAC---  
ATCACAGGACTAATATTAACAAGAGATGGTGGGAATAAGAACAGT-----  
-----  
-----  
ACAAATGAGACCTTTAGACCTGGGGGAGGAGATATGAGGGACAATTGGAGAAGTGAATTATATAAATATAAAG  
TAGTAAAAATTGAGCCAGTA---GGAATAGCTCCCACTAAGGCAAGACGAAGAGTGGTG-----  
-----CAGAGAGAAAAAAGAGCA---GTTGGA---CTAGGAGCT-----  
GTCCTCCTTGGGTTCTTAGGAGCA---GCAGGAAGCACTATG---GGCGCGGCGTCA---  
ATAACGCTGACGGTACAG---GTCAGACAA---TTATTG---TCTGGCATAGTGCAACAGCAAAGC---  
AATTTG---CTGAGG---GCTATAGAGGCGCAGCAGCATCTGTTGCAACTCACAGTCTGGGGCATT  
>KT276254  
TATCAGAATGATACTGGGAATAGTGTGAATAAC-----  
-----  
ACTGAAGACCTAATTACACTCCCATGTAAAATAAGACAAATTGTAAACATGTGGCAGGAAGTAGGAAAAGCAA  
TGTATGCCCCCTCCCATCAGAGGGCTGATTAATTGTTTCATCAAAT---  
ATTACAGGGTTGCTATTAACAAGAGATGGTGGTAATGATACATCT-----  
-----  
-----  
GATAAGGAGACCTTCAGACCTGGAGGAGGAGATATGAGAGACAATTGGAGAAGTGAATTATACAAATATAAAG  
TAGTAAAAATTGAACCATTA---GGAGTAGCACCCACCAAGGCAAAGAGAAGAGTGGTG-----  
-----CAGAGAGAAAAAAGAGCA---ATAGGA---ATGGGAGCT-----  
CTGTTCCCTTGGGTTCTTGGGAGCA---GCAGGAAGCACTATG---GGCGCAGCGTCG---  
GTAACGCTGACGGTACAG---GCCAGACAA---TTATTG---TCGGGTATAGTGCAACAGCAGAAC---  
AACTTG---CTGAGA---GCTATTGAGGCGCAACAGCACCTGTTGCAACTCACAGTCTGGGGCATT  
>JN882652  
AACTACTCAGG-----  
-----  
GAAAAATGACACTATAACTCTCCAATGCAAAATAAAGCAAATTATAAAAAATGTGGCAGAAAGTAGGACAAGCAA  
TGTATGCCCCCTCCCATCCAAGGAGAAATAAGGTGTAACTCAAAC---  
ATTACTGGAATACTATTAACAAGAGATGGTGGCAATAATAATGCCACAAACACG-----  
-----  
-----  
AGCAAGGCCGAGATCTTCAGACCTGGAGGAGGAGATATGAGGGACAATTGGAGAAGTGAATTATATAAATATA  
AAGTAGTAAAAATTGAGCCATTA---GGAATAGCACCCACCAAGGCAAAGAGAAGAGTGGTG-----  
-----CAGAGAGAAAAAAGAGCA---GTGGGAGTAATAGGAGCT-----  
---ATGTTCCCTTGGGTTCTTAGGAGCA---GCAGGAAGCACTATG---GGCGCGGCGTCA---  
ATAACGCTGACGGTACAG---GCCAGACAA---TTATTG---TCTGGTATAGTGCAACAGCAGAAC---  
AATTTG---CTGAGA---GCTATTGAGGCGCAACAGCATCTGTTGCAACTCACAGTCTGGGGCATC  
>AJ276595  
AGCTATAATAGTACAGAAAGTGTT-----  
-----  
AATGAAACAACCATCATACTCCCATGTAAAATAAAACAAATTATAAACATGTGGCAAGAGGTAGGACGAGCAA  
TGTATGCCAATCCCATTGCAGGAAACATAACATGTAACTCAAAT---  
ATCACAGGATTACTACTGACACGTGATGGAGGAGTAAATGAGACA-----  
-----  
-----  
ACAGAGACAGAGATATTAGGCCTGGAGGAGGAAATATGAAAGACAATTGGAGAAGTGAATTATATAAATATA  
AAGTGGTAGAAATTAAACCATTG---GGAGTAGCACCCACTAAAGCAAAAAGAAGAGTGGTG-----  
-----GAGAGAGAAAAAAGAGCA---GTGGGA---ATAGGAGCT-----  
---GTGTTCCCTTGGGTTCTTGGGAGCA---GCAGGAAGCACTATG---GGCGCAGCGTCA---  
ATAACGCTGACGGTACAA---GCCAGACAA---CTATTG---TCGGGTATAGTGCAACAGCAAAGC---  
AATTTG---CTGAGG---GCTATAGAGGCGCAACAGCATATGTTGCAACTCACGGTCTGGGGCATT  
>HQ225812  
AATTATACATACATGCCTAATGGTACCATGCATAATGATACAACAGAT-----  
-----  
-----  
AATTCAACCTTAATCACAATCCCATGCAGAATAAAACAAATTATAAATATGTGGCAGGAGGTAGGACGAGCAA

TGTATGCCCCCTCCCATTTGAAGGAAACATAACATGTAAATCAAAG---  
 ATCACAGGACTACTATTGGTACGTGATGGAGGCCCAATAGGACA-----  
 -----  
 -----  
 GAAGAGATATTCAGACCTGGAGGAGGAGATATGAAAAACAATTGGGGAAATGAATTATATAAATATAAAGTGG  
 TAGAAATTAAGCCATTG---GGAGTAGCACCAACTGAAGCAAAAAGGAGAGTAGTG-----  
 -----GAGAGAGAAAAAAGAGCA---GTGGGA---ATAGGAGCT-----  
 GTGTTCTTGGGTTCTTGGGAGCA---GCAGGAAGCACTATG---GGCGCGGCGTCA---  
 ATGACGCTGACGGTACAG---GCCAGACAG---TTGTTG---TCTGGTATAGTGCAACAGCAAAGC---  
 AATTTG---CTGAGA---GCTATAGAGGCGCAACAGCATATGTTGCAACTCACAGTCTGGGGCATT  
 >KY557336  
 ACTTACAGTAATTGGAAGTCTAATAGTACT-----  
 -----  
 GGGAAATGATAATATCACACTCCCATGTAGAATAAGACAAATTGTAAACATGTGGCAAGAAGTAGGAAAAGCAA  
 TGTATGCCCCCTCCTATCAGCGGACAAATTAGATGCTCATCAAAT---  
 ATTACAGGGTTACTATTGACAAGAGATGGTGGTAATAATAAGGAAAGT-----  
 -----  
 -----  
 AATAATGCTGAGACCTTCAGACCTGGAGGAGGAAACATGAAGGACAATTGGAGGAGTGAATTGTATAAATATA  
 AAGTAGTAAAAATTGAACCATTA---GGAGTAGCACCCACCAAGGCAAAGAGAAGAGTGGTG-----  
 -----CAGAGAGAAAAAGAGAGCA---GTGGGA---ATAGGAGCT-----  
 ---TTGCTCGTTGGGTTCTTGGGAGCA---GCAGGAAGCACTATG---GGCGCAGCGTCA---  
 ATGACGTTGACGGTACAG---GCCAGACAA---CTACTG---TCTGGTATAGTGCAACAGCAGAAC---  
 AATCTG---CTGAGA---GCTATTGAGGCGCAACAGCATATGTTGCAACTCACAGTCTGGGGCATA  
 >KM606633  
 AACTATAGCTCATCAAGC-----  
 -----  
 AATAAGGAGCCTATCACACTCCCATGTAGAATAAGACAAATTGTAGAATGTGGCAAAAGGTAGCACAAGCAA  
 TGTATGCCCCCTCCCATTTGCAGGAAACATTACATGTAGAACAAAC---  
 ATTACAGGACTACTATTAAACAAGAGATGGGCCTACTACGGAGGAT-----  
 -----  
 -----  
 AATAATACTGAGGTTTTTCAGACCTGGAGGAGGAAATATGAAGGACAATTGGAGAAGTGAATTATATAAGTATA  
 AGGTAGTAAAAATTAAACCACTA---GGCATAGCACCTCCAAGGCAAGGAGAAGAGTAGTG-----  
 -----GGCAGAGAGAAAAAGAGGA---ATTGGA---CTAGGAGCT-----  
 ---GTTTTCTTGGTTTCTTAGGAACG---GCAGGAAGCACGATG---GGCGCAGCGTCA---  
 ATAACGCTGACGGTACAG---GTCAGACAA---TTATTG---TCTGGCATCGTGCAACAGCAAAGC---  
 AATTTG---CTGAGA---GCTATAGAGGCGCAACAGCATTTGTTGCAACTCACAGTCTGGGGCATT  
 >KJ541851  
 AATTATACA-----  
 -----AGAAATAGTACAGGAAAT-----  
 GATTCAAACGTAGTCATTACGATCCCATGCAGAATAAAACAAATTATAAACATGTGGCAGGGAGTAGGGCGAG  
 CAATGTATGCCCCCTCCCATTTGCAGGAGAAACCGCATCTATCTCTAAT---  
 ATCACAGGATTACTATTGGTACGTGATGGAGGAGAA-----  
 -----  
 -----  
 GACAAAAATAATGAGAATGATAAT-----  
 GATACAGAGACATTTCAGACCTGGAGGAGGAGACATGAAGGACAATTGGAGAAGTGAATTATATAAATATAAAG  
 TGGTAGAAATTAAGCCATTG---GGATTAGCACCCACTACAGCAAAAAGGAGAGTGGTG-----  
 -----GAGAGAGAAAAAAGAGCA---GTAGGA---ATAGGAGCT-----  
 GTGTTCTTGGGTTCTTGTTCAGCA---GCCGGAAGCACTATG---GGCGCGGCGTCA---  
 ATAACGCTGACGGTACAG---GCCAGACAA---TTGTTG---TCTGGTATAGTGCAACAGCAAAGC---  
 AATTTG---CTGAGG---GCTATAGAGGCGCAACAGCATCTGTTGCAACTCACGGTCTGGGGCATT  
 >AF484510  
 AATTATAGTATGTCAAATAGTACA-----  
 -----GGGGTA-----  
 AATGAGAATGCAACCATCATACTCCCATGCAGAATAAAACAAATTATAAACATGTGGCAGGGAGTAGGAAAAG  
 CAATGTATGCCCCCTCCCATTTGAAGGACTGATCAATTGTACATCAAAT---  
 ATTACAGGACTATTGTTGACAAGAGATGGTGGTATAACTAATGAT-----  
 -----  
 -----

AGTAGGAATGGGACCTTCAGACCTGGAGGGGGAGATATGAGAGATAATTGGAGAAGTGAATTATACAAGTATA  
 AAGTAGTAAGAGTTGAACCACTA---GGTCTAGCACCCACCAGGGCAAAGAGAAGAGTGGTG-----  
 -----GAAAGAGAAAAAAGAGCA---ATAGGA---CTGGGAGCT-----  
 ---CTGTTCCCTTGGGTTCTTGGGAGCA---GCAGGAAGCACGATG---GGCGCAGCGTCA---  
 CTGACGCTGACGGTACAG---GCCAGACAA---GTATTG---TCTGGTATAGTGCAACAGCAAAAC---  
 AATTTG---CTGAGG---GCTATAGAGGCGCAACAGCATCTGTTGCAACTCACAGTCTGGGGCATT  
 >DQ208433  
 AATCACACTGACAGCACGTGCGAGGTCAGATAGCAAT-----  
 -----  
 ATGACTGGCAATATAACTCTCCTATGCAAAATAAAACAAATTATAAACATGTGGCAGGAAGCAGGAAAAGCAA  
 TGTATGCCCCCTCCCATTCAGAGGACTAATCAATTGTTTCATCAAAT---  
 ATTACAGGACTATTACTAACAAGAGATGGTGGGGATAATAGCAGT-----  
 -----  
 -----  
 ACAAATGAAACCTTCAGACCTGGAGGAGGAGATATGAGAGACAATTGGAGAAGTGAATTATACAAGTATAAAG  
 TAGTAAGAATTGAACCACTA---GGTCTAGCACCCACCAGGGCAAAGAGAAGAGTGGTG-----  
 -----GAAAGAGAAAAAAGAGCA---ATAGGA---CTGGGAGCT-----  
 ATGTTCCCTTGGGTTCTTGGGAGCA---GCAGGAAGCACGATG---GGCGCAGCGTCA---  
 CTGGCGCTGACGGTACAG---GCCAGACAG---TTATTG---TCTGGTATAGTGCAACAGCAAAAC---  
 AATTTG---CTGAGG---GCTATAGAGGCGCAACAACATCTGTTGCAACTCACAGTCTGGGGCATT  
 >GQ365651  
 TACTACTTTAATGGTAACAGTACATACAATGATACCAAT-----  
 -----  
 ACTGGACCAAATATCACACTCCCATGCAGAATAAAACAAATTATAAACATGTGGCAGGAAGTAGGAAAAGCAA  
 TGTATGCCCCCTCCCATCAGAGGACAAATTAGATGTTTCATCAAAT---  
 ATTACAGGGCTGATATTAACGAGAGATGGTGGTGTGAACAACGCTGAG-----  
 -----  
 -----  
 AACAACTGAGACCTTCAGACCTGGAGGAGGAGATATGAGGGACAATTGGAGAAGTGAAGTATATAAATATA  
 AAGTGGTAGAAATAAAACCATTA---GGAATAGCACCACTAAGGCAAAAAGGAGAGTGGTG-----  
 -----GAGAGAGAAAAAAGAGCA---GCA-----CTAGGAGCT-----  
 ---ATGTTCCCTTGGGTTCTTGGGAGCA---GCAGGAAGCACTATG---GGCGCAGCGTCA---  
 ATAACGCTGACGGTACAG---GCCAGACAA---TTACTG---TCTGGGATAGTGCAACAGCAAAGC---  
 AATTTG---CTGAGA---GCTATAGAGGCGCAACAGCATATGTTGCAACTCACAGTCTGGGGCATT  
 >KF835524  
 AATTACAATGAG-----  
 -----  
 AATTCAAGCCTCATCACAATTCATGCAAAATTAAGCAAATTATAAACATGTGGCAGGAGGTAGGACGAGCAA  
 TGTATGCCCCCTCCCATTCAGGAAATATAACATGTAAATCAAAT---  
 ATCACAGGACTACTATTGGTGCGTGATGGAGGAGTGACAAATACA-----  
 -----  
 -----  
 AATGAGACAGAGATATTCAGACCTGGAGGAGGAGATATGAGGAATAATTGGAGAAGTGAATTATATAAATATA  
 AAGTAGTAGAAATTAAGCCATTG---GGAATAGCACCCACTGAAGCAAAAAGGAGAGTGGTG-----  
 -----GAGAGAGAAAAAAGAGCA---TTAGGGGGAATAGGAGCT-----  
 ---GCGTTCCTTGGGTTCTTGAGTTTA---GCCGGAAGCACTATG---GGCGCGGCGTCA---  
 CTAACGCTGACGGTACAG---GCCAGACAA---TTGCTG---TCTGGTATAGTGCAACAGCAAAGC---  
 AATTTG---CTGAGG---GCTATAGAGGCGCAACAGCATATGTTGCAACTCACGGTCTGGGGCATT  
 >KC898982  
 GATCAAGATGAG-----  
 -----  
 TCAAACCCAACCATCATAATCCCATGCAGAATAAAGCAAATTATAAACATGTGGCAGGAGGTAGGACGAGCAA  
 TGTATGCCCCCCCCATTGCAGGAAACATAACATGTAAATCAAAT---  
 ATCACAGGACTACTATTGGTACGTGATGGAGGAGACAGAAATGACACA-----  
 -----  
 -----  
 AATAATACAGAGAAATTCAGACCTGGAGGAGGAGATATGAGGGACAATTGGAGAAGTGAATTATATAAATATA  
 AAGTGGTAGAAATTAAGCCATTG---GGAATAGCACCCACTGAAGCAAAGAGGAGAGTAGTG-----  
 -----GAGAGAGAAAAAAGAGCA---GTGGGA---ATAGGAGCT-----  
 ---GTGTTCCCTTGGGTTCTTGGGAGCA---GCAGGAAGCACTATG---GGCGCGGCGTCA---

ATAACGCTGACGGTACAA---GCCAGACAA---TTGTTG---TCTGGTATAGTGCAACAGCAAAGC---  
 AATTTG---CTGAGG---GCTATAGAGGCGCAACAGCATATGTTGCAACTCACAGTCTGGGGCATT  
 >HM215402  
 AGTCAT-----  
 -----  
 TCAAATTCAATCATCAGGCTCCCATGCAGAATAAAACAAATTATAAACATGTGGCAGAAGGTAGGCCGAGCAA  
 TGTATGCCCCCTCCCATTTGAAGGAAACATAACATGTAAATCAAAC---  
 ATCACAGGACTACTATTGGTACGTGATGGAGGAGAACCTAATAAT-----  
 -----  
 ATAGAGATATTCAGACCTGGAGGAGGAGATATGAGGGACAATTGGAGAAGTGAATTATATAAATATAAAGTAG  
 TGAAAAATTGAACCATTA---GGAGTAGCACCCACCAAGGCAAAAAGAAGAGTGATG-----  
 -----CAGAAAGAAAAAGAGCA---GTGGGA---ATAGGAGCT-----  
 GTGTTCCCTTGGGTTCTTGGGAGCA---GCAGGGAGCACTATG---GGCGCGGCGTCA---  
 GTAACGCTGACGGTACAA---GCCAGACAA---TTGTTG---TCTGGTATAGTGCAACAGCAAAGC---  
 AATTTG---CTGAGG---GCTATAGAGGCGCAACAGCATATGTTGCAACTCACAGTCTGGGGCATT  
 >KC899013  
 ACCTACAATGGTACAAGAAGTAAT-----  
 -----  
 TCAAGCTCAATCATCACTATCCCATGCAGAATAAAGCAAATTATAAACATGTGGCAGGGGGTAGGACGAGCAA  
 TGTATGCCCCCTCCCATTTGAAGGAAACATAACATGTAAATCAAAT---  
 ATCACAGGACTACTCTTGGTACGTGATGGAGGAATAGGGACACAT-----  
 -----  
 GGTAAAGAGACATTTCAGACCTGGAGGAGGAAATATGAGGGACAATTGGAGAAGTGAATTATATAAATACAAAG  
 TAGTAGAAATTAAGCCATTG---GGAATAGCGCCCACTACAGCAAAAAGGAGAGTAGTG-----  
 -----GAGAGAGAAAAAGAGCA---GTGGGA---ATAGGAGCT-----  
 GTGTTCCCTTGGGTTCTTGGGAGCA---GCAGGAAGCACTATG---GGCGCAGCGTCA---  
 ATAACGCTGACGGTACAG---GCCAGGCAA---TTGTTG---TCTGGTATAGTGCAACAGCAAAGC---  
 AATTTG---CTGAAG---GCTATAGAGGCGCAACAGCATATGTTGCAACTCACGGTCTGGGGCATT  
 >KC899014  
 AATCATAAGACTAATAGTACAGAAAGTAAT-----  
 -----  
 TCAAGCCCAGACATCATAATCCCATGCAGAATAAAACAAATTATAAACATGTGGCAGGAGGTAGGACGAGCCA  
 TGTATGCCCCCTCCTATTGCAGGAAACATAACATGTAAATCAAAT---  
 ATCACAGGACTACTATTAGTACGGGATGGAGGACTATATCCAAAT-----  
 -----  
 AAGACTGAGACATTTCAGACCTGGAGGAGGAGATATGAGGGACAATTGGAGAAGTGAATTATATAAATATAAAG  
 TGGTAGAAATTAAGCCATTG---GGAGTAGCACCCACTAAAGCAAAAAGGAGAGTGGTG-----  
 -----GAGAGAGAAAAAGGGGA-----ATAGGAGCT-----  
 GTGTTCCCTTGGGTTCTTGGGAGTA---GCAGGAAGCACTATG---GGCGCGGCGTCA---  
 ATAACGCTGACGGTACAG---GCCAGACAA---TTGTTG---TCTGGTATAGTGCAACAGCAAAGC---  
 AATTTG---CTGAGG---GCTATAGAGGCGCAACAGCATATGTTGCAACTCACGGTCTGGGGCATT  
 >KC807958  
 TACTACCGCCTTAATGGTACATACGAGCCTAATGATATAAGC-----  
 -----  
 AATGAGTCAGACATCACACTCCCATGCAGAATAAAGCAAATTATAAATATGTGGCAGGAGGTAGGACGAGCAA  
 TGTATGCCCCCTCCCATTTGCAGGAAACATAACATGTAGATCAAAT---  
 ATCACAGGACTACTATTGGTACGGGATGGAGGAAATGTTACAGGA-----  
 -----  
 GATACAGAGATATTCAGACCGGGAGGAGGAGATATGAGGGACAATTGGAGAAGTGAATTATATAAATATAAAG  
 TAGTAGAAATTAAGCCATTG---GGAGTAGCACCCACTGCAGCAAAAAGGAGAGTGTTGGAG-----  
 -----AGAGAGAGACAAAAAGAGCA---GTGGGA---CTAGGAGCT-----  
 GTGTTCCCTTGGGATCTTGGGAGTA---GCAGGAAGCACTATG---GGCGCGGCGTCA---  
 GTGACGCTGACGGTACAG---GCCAGAAAA---TTGCTG---TCTGGTATAGTGCAACAGCAAAGC---  
 AATTTG---CTGAGG---GCTATAGAGGCGCAACAGCATCTGTTGCAACTCACGGTCTGGGGCATT  
 >MK792289

TACTACAATAGTACATACCATACATACATAAATGATACAAAA-----  
-----  
AGTAATGAGACCATCACGATCCCATGCAAAATAAAGCAAATTATAAATATGTGGCAGGAGGTGGGACGAGCAA  
TGTATGCTCCTCCCATTGCCGAAACATAACATGTAGGTCAGAT---  
ATCACAGGACTGCTATTAGTACGTGATGGAGGAAATGAGCCAAATAGT-----  
-----  
-----  
ACAAATGGTGCAGAAGAAATATTTCAGGCCTGGAGGAGGAAATATGAAGGATAATTGGAGAAGTGAACCTATATA  
AATATAAAGTAGTAAAAATTGAACCATTA---GGAGTAGCACCCACCAAGGCAAGGAGGAGAGTGGTG-----  
-----CAGAGAGAAAAAAGAGCA---  
GTGGGAACGATAGGAGCT-----ATGTTCTTTGGGTTCTTGGGAGCA---GCAGGAAGCACTATG---  
GGCGCAGCATCA---ATAACGCTGACGGTACAG---GCCAGACAA---TTGTTG---  
TCTGGTATAGTGCAACAGCAGAGA---AATCTG---CTGAGA---  
GCTATTGAGGCGCAACAGCATCTGTTGCAACTCACAGTCTGGGGCATC  
>FJ388961  
AATCATACTAGGCCAATTAACACAGGTGACACTGAA-----  
-----  
GGAGGAATTATCACCACACCTACATGCAGAATAAAACAAATTATAAACCTGTGGCAGGAAGTAGGAAAAGCAA  
TGTATGCCCCCTCCCATCGAAGGACAAATTAGTTGTTTCATCAAAT---  
ATTACCGGGTTGCTATTAACAACAGATGGGGGTACTAACGGGAGC-----  
-----  
-----  
AACGAGACCGAGGTCTTCAGACCTGCAGGAGGAAATATGAAGGACAATTGGAGAAGTGAATTATACAAATATA  
AAGTGGTACAAATTGAACCATTA---GGAATAGCACCCACCACGGCAAAGAGAAGAGTGGTG-----  
-----CAGAGAGAAAAAAGAGCA---GTGGGA---ATAGGAGCT-----  
---ATGTTCTTTGGGTTCTTGGGAGCA---GCAGGAAGCACTATG---GGCGCAGCATCA---  
GTGATGCTGACGGTACAG---GCCAGACAA---TTATTG---TCTGGCATAGTGCAACAGCAAAAC---  
AATTTG---CTGAGG---GCTATTGAGGCGCAACAACATCTGTTGCAACTCACAGTCTGGGGCATC  
>KU820850  
AATTATACAACAGGTAAT-----  
-----  
TCAAGCTCAGTCATCACACTCCCATGCAGAATAAAGCAAATTATAAACATGTGGCAGGAGGTAGGACGAGCAA  
TGTATGCCCCCTCCCATTGCAGGAAACATAACATGTAAATCAAAT---  
ATCACAGGATTACTATTGGTACGTGATGGAGGAGACACAAGTAAT-----  
-----  
-----  
ACAACTGAAACATTTCAGACCTGGAGGAGGAAATATGAAGGACAATTGGAGAAATGAATTATATAAATACAAAG  
TAGTAAAAATTGAACCATTA---GGAGTAGCACCCACCAAGGCAAAGAGAAGCGTGGTG-----  
-----CAGAGAGAAAAAAGAGCA---GTGGGA---ATGGGAGCT-----  
GTGTTCTTTGGGTTCTTAGGAGCA---GCAGGAAGCACTATG---GGCGCGGCGTCA---  
ATAACGCTGACGGTACAG---GCCAGACAA---TTGCTG---TCTGGTATAGTGCAACAGCAAAGT---  
AATTTA---CTGAGG---GCTATAGATGCGCAACAGCATATGTTGCAACTCACAGTCTGGGGCATC  
>KF725906  
AGTTATAAT-----  
-----  
TCAAATGAGACCATCACACTCCCATGCAGAATAAAACAAATTATAAACAGGTGGCAGGAAGTAGGAAAAGCAA  
TGTACGCCCCCTCCCATCCAAGGAGTAATTAGGTGTGCATCAAAT---  
ATTACAGGGCTGCTATTAACAAGAGATGGGGGCAGTAATATTAAG-----  
-----  
-----  
AACACGGTACTGAAACCTTCAGACCTGGAGGAGGAAATATGAGGGACAATTGGAGGAGTGAATTATATAAAT  
ATAAAGTAGTAAGAATTGAACCATTA---GGAGTAGCACCCACCAAGGCAAAGAGAAGAGTGGTG-----  
-----CAGAGAGAAAAAAGAGCA---GCG-----ATAGGAGCT---  
-----ATGATCCTTGGGTTCTTGGGAACA---GCAGGAAGCACTATG---GGCGCAGCGTCA---  
GTGACGCTGACGGTACAG---GCCAGACTA---TTATTG---TCTGGTATAGTGCAACAGCAAAAT---  
AATTTG---CTGAGA---GCTATTGAGGCGCAACAACATCTGTTGCAACTCACAGTCTGGGGCATC  
>KY496623  
AGTCATCTGTTTAATAGTAGTCTGTCTAATAGTAGTAAT-----  
-----  
AGTAGTAAGTATATCACAATTCATGTAAGATAAAACAAATTGTAAGAATGTGGCAGAGAGTGGGACAAGCAC

TGTATGCCCCCTCCCATCGAAGGAAACATTACATGTAGCTCAAAC ---  
 ATTACAGGACTACTATTAGTTAGAGATGGAGGAAGCAATATAACA -----  
 -----  
 ATCAATGAGACTTTTCAGACCTGCAGGAGGAGACATGAGGGATAATTGGAGAAGTGAATTATATAAATATAAAG  
 TAGTAAAAATTAAACCACTA --- GGAGTAGCACCCACCAGGGCAAGGAGAAGAGTGGTG -----  
 -----GGGAGAGAAAAAAGAGCA --- GTTGGA --- CTGGGAGCT -----  
 GTCCTCCTTGGGTTCTTAGGAACA --- GCAGGAAGCACTATG --- GGCGCAGCGGCA ---  
 GTAACGCTGACGGTACAG --- GTCAGACAA --- CTATTG --- TCTGGCATAGTGCAACAGCAAAGC ---  
 AATTTG --- CTGAGG --- GCTATAGAGGCGCAGCAGCATATGTTGCAACTCACCGTCTGGGGCATT  
 >DQ383755  
 AACTACAG -----  
 -----  
 AAAGAAAATGACACAATCAGACTCCCATGTAGAATAAAACAGATTATAAACATGTGGCAGGAAGTAGGAAAAG  
 CCATGTATGCCCCCTCCCATCAGAGGACTAATTAGGTGTTTCATCAAAT ---  
 ATTACAGGGCTGCTATTAACAAGAGATGGTGGTAATGATAACACCACG -----  
 -----  
 AACGAGTCTGAAATTTTCAGACCTGGAGGAGGAGATATGAGGGACAATTGGAGAAGTGAATTATATAAATACA  
 AGGTAGTAAGAATTGAGCCAGTA --- GGAGTAGCACCCACCAAGGCAAAGAGAAGAGTGGTG -----  
 -----CAGAGAGAAAAAAGAGCA --- GTGGGAGTGATAGGAGCT -----  
 ---ATGTTCCCTTGGGTTCTTGGGAGCA --- GCAGGAAGCACTATG --- GGCGCAGCGTCA ---  
 ATGACGCTGACGGTACAG --- GCCAGACAA --- TTATTG --- TCTGGTATAGTGCAACAGCAAAAC ---  
 AATTTG --- CTGAGA --- GCTATTGAGGCGCAACAGCATCTGTTGCAACTCACAGTCTGGGGCATC  
 >KT427679  
 GGTCAGTGGAATAGCACTGGGAAT -----  
 -----ATACTGAA -----  
 GGGTCAAATGGAACCATCACAATCCCATGCAGAATAAAACAAATTATAAACAGATGGCAGGAAGTAGGAAGAG  
 CAATGTACGCCCTCCCATCGCAGGACAAATTAAGTGTTCATCACAA ---  
 ATTACAGGGTTACTGTTAACAAGAGATGGTGGTACCAATACTACC -----  
 -----  
 AGTCCTGAAGAAATCTTCAGACCTGCAGGAGGAGATATGAGGGACAATTGGAGAAGTAAATTATATAAATATA  
 AAGTAGTAAAAATTGAGCCATTA --- GGAATAGCACCCACCAAGGCAAAGAGAAGAGTGGTG -----  
 -----CAGAGAGAAAAAAGAGCA --- ATGGGAGTACTAGGAGCT -----  
 ---GCGGTCCTTGGGTTCTTGGGAGCA --- GCAGGAAGCACTATG --- GGCGCAGCGTCA ---  
 CTGACGCTGACGGTACAG --- GCCAGACTA --- TTATTG --- TCTGGTATAGTGCAACAGCAGAGC ---  
 AATCTG --- TTGAGA --- GCTATTGAGGCGCAGCAGCATATGTTGCAACTCACAGTCTGGGGCATC  
 >KT427801  
 AATTACAAT -----  
 -----  
 AGCACTGAGAATATCACTCTCCCATGTCTGAATAAAACAAATTGTAAACATGTGGCAGGAAGTGGGGCGAGCAA  
 TGTATGCCGCTCCCCTTGCGAGGAAACATTAACTGTAGTTCAAGT ---  
 ATTACAGGGCTACTATTAAACAAGAGATGGTGGTAACAAGAAAGACAATGAAACA -----  
 -----  
 GAAAAAGAGACCTTCAGACCTGGAGGAGGAAATATGAAAGATAATTGGAGAAGTGAATTATATAAATATAAAG  
 TAGTAGAAATTAAGCCATTA --- GGAATAGCACCCACCAAGGCACAGAGAAGAGTGGTG -----  
 -----CAGAGGGAAAAAAGAGCA --- GTGACA --- TTCGGAGCT -----  
 ATGTTCCCTTGGGTTCTTGGGAGCA --- GCAGGAAGCACTATG --- GGCGCAGTGTCA ---  
 ATGACGCTGACGGTACAG --- GCCAGACAA --- TTATTG --- TCCGGTATAGTGCAACAGCAGAAC ---  
 AATCTG --- CTGAGG --- GCTATTGAGGCGCAACAGCATATGTTGCAACTCACAGTCTGGGGCATC  
 >MG365765  
 ACT -----  
 -----  
 CATAATGACACTATCACTCTCCCATGTCTGAATAAAACAAATTGTAAACCTGTGGCAGGAAGTAGGACGGGCTA  
 TGTATGCCAATCCCATTGCAGGACAAATTAAGTGTACATCAAAT ---  
 ATTACAGGTCTACTATTGACAAGAGATGGTGGTAATAGTAGTAAG -----  
 -----  
 -----

ACTGAAATCTTCAGACCTGAGGGAGGAAATATGAAAGACAATTGGAGAAGTGAATTATATAAAATACAAAGTAG  
 TAGAAATTGAACCACTA---GGAATAGCACCCACCAGGGCAAAAAGGCGAGTGGTG-----  
 -----GAGAGAGAAAAAGAGCA---GTGGGA---CTAGGAGCT-----  
 TTGTTCTTGGGTTCTTGGGAACA---GCAGGAAGCACTATG---GGCGCAGCGTCA---  
 ATAACGCTGACGGTACAA---GCCAGACAA---TTATTG---TCTGGAATAGTGCAACAGCAGAGC---  
 AATTTG---CTGAGG---GCTATTGAAGCGCAACAGCATCTGTTGCAGCTCACAGTCTGGGGCATT  
 >DQ085870  
 GCTCACACTTGGGAATAGAAATGGG-----  
 -----AAT---  
 GGTACTAATAGTACTATCACACTCCCATGCAGAATAAAACAAATTATAAACAGGTGGCAGGAAGTAGGAAAAG  
 CAATGTATGCCCCCTCCCATCCAAGGACAAATTAGATGTTTCATCAAAT---  
 ATTACAGGGTTGTTATTAACAAGAGATGGAGGTAACAACAACGGGACC-----  
 -----  
 -----  
 GAGAACAAATACCGAGATCTTCAGACCTGGAGGAGGGAATATGAGGGATAATTGGAGAAGTGAATTATACAAAT  
 ATAAAGTAGTAAGAATTGAGCCATTA---GGAGTAGCACCCACCAAGGCAAAGAGGAGAGTGGTG-----  
 -----CAGAGAGAAAAAGAGAGCA---GTGGGA---ATAGGAGCT---  
 -----GTGTTCTTGGGTTCTTGGGAGCA---GCAGGAAGCACTATG---GGCGCAGCGTCA---  
 ATAACGCTGACGGTACAG---GCCAGACAA---TTATTG---TCTGGTATAGTGCAACAGCAGAAC---  
 AATCTG---CTGAGA---GCTATTGAGGCGCAACAACATATGTTGCAACTCACAGTCTGGGGCATC  
 >AB253430  
 AATTATAACAATGGGAAT-----  
 -----  
 AATACTGGTGGTAATATCACACTCCCATGCAGAATAAAACAAATTGTAAACAGGTGGCAGGAAGTAGGAAAAG  
 CAATGTATGCCCCCTCCCATCAGAGGAAACATTACCTGTTTCATCAAAT---  
 ATCACAGGGCTGCTATTAACAAGAGATGGTGGTAACAACGTTACC-----  
 -----  
 -----  
 AACGAGTCCGAGATTTTCAGACCTGGAGGAGGAAATATGAAGGACAATTGGAGAAGTGAATTATATAAAATATA  
 AAGTAGTAAAAATTGAACCATTA---GGAGTAGCACCCACCAGGGCAAAGAGAAGAGTGGTG-----  
 -----CAGAGAGAAAAAGAGCA---GTGGGAACAATAGGAGCT-----  
 ---ATGTTCTTGGGTTCTTGGGAGCA---GCAGGAAGCACTATG---GGCGCAGCGTCT---  
 TTGACGCTGACGGTACAA---GCCAGACAA---TTATTG---TCTGGTATAGTGCAACAGCAAAAC---  
 AATTTG---CTGAGA---GCTATTGAGGCGCAACAGCATCTGTTGCAACTCACAGTCTGGGGCATC  
 >KC699033  
 AATCAT-----  
 -----  
 ACTGAGCAAAATATCACACTACAATGTAGAATAAAACAAATTGTAAACCTGTGGCAGACAGTAGGAAGAGCAA  
 TATATGCCCCCTCCCATCAAAGGACAAATTAGGTGTTTATCAAAC---  
 ATTACAGGGCTGCTATTAACAAGAGATGGTGGTAACGAGAACTCCACC-----  
 -----  
 -----  
 GACAATGACACCGAGACCTTCAGACCTATAGGAGGGAATATAAGGGACAATTGGAGAAGTGAATTATATAAAT  
 ATAAAGTAGTAAAAATTGAACCATTA---GGAGTGGCACCCACCAGGGCAAGGAGAAGAGTGGTG-----  
 -----CAGAGAGAAAAAGAGCA---GCAGGA---CTAGGAGCT---  
 -----GTGTTCAATTGGGTTCTTAGGAGCA---GCAGGAAGCACTATG---GGCGCAGCATCA---  
 ATAACGCTGACGGTACAG---GCCAGACAA---TTATTG---TCTGGTATAGTGCAACAGCAGAAC---  
 AATCTG---CTGAGA---GCTATTGAGGCGCAACAGCATCTGTTGCAACTCACAGTCTGGGGCATC  
 >KX907421  
 GACTATCCT-----  
 -----  
 AATGGTACAATCATCACACTTCCATGCAAAATAAAACAAATTATAAACATGTGGCAGGCGATAGGAAAAGCAA  
 TATATGCCCCCTCCCATTCAGAGAAACATAACATGTGTATCAAAT---  
 ATCACAGGACTATTATTGACACGAGATGGAGGAAGTGGAATGGTACG-----  
 -----  
 -----  
 GACCCAGAGATATTCAGACCTGCAGGAGGAGACATGAGGGATAATTGGAGAAGTGAATTATATAAATATAAAG  
 TAGTAGAAATTAAGCCATTA---GGAGTAGCACCCACTAAGGCACAAAGGAGAGTGGTG-----  
 -----AAGAGAGAGAGAAGAGCA---GTGGGA---ATAGGAGCT-----  
 GTGCTCTTTGGGTTCTTGGGAGCA---GCAGGAAGCACTATG---GGCGCAGCGTCA---

ATAACGCTGACGGTACAG---GCCAGACAA---TTATTG---TCTGGTATAGTGCAACAGCAAAGC---  
 AATTTG---CTGAGA---GCTATAGAGGCGCAACAGCATATGTTGCAACTCACAGTCTGGGGCATT  
 >KX907359  
 AATTATACATGGAATAATAGTACAGGGCTAGGTAAT-----  
 -----  
 -  
 ATCACAAGTAATATCACACTACCATGTAGAATAAAACAAATTATAAACATGTGGCAGGGAGTAGGAAAAGCAA  
 TGTATGCCCCCTCCCATTTGAAGGACAAATTAAATGTTTCATCAAAT---  
 ATTACAGGGCTAATATTGACAAGAGATGGTGGTAATACAAGTGAT-----  
 -----  
 -----  
 GATCCTGAGACCTTCAGACCTGGAGGAGGAAATATGAAGGACAATTGGAGAAGTGAATTATATAAATATAAGG  
 TAGTAAGAATTGAACCAATA---GGCCTAGCACCCACCAAGGCAAAGAGAAGAGTGGTG-----  
 -----GAAAGAGAAAAAAGAGCA---ATAGGA---CTAGGAGCT-----  
 ATGTTCCCTTGGGTTCTTGGGAGCA---GCAGGAAGCACGATG---GGCGCAGCGTCA---  
 GTGGCGCTGACGGCACAG---GCCAGACAG---TTATTG---TCTGGTATAGTGCAACAGCAAAAC---  
 AATTTG---CTGAGG---GCTATAGAGGCGCAACAGCATCTGTTGCAACTCACGGTCTGGGGCATT  
 >DQ054367  
 AATCAGACAGGGTTA-----  
 -----  
 AATAATAGTACAATCACACTCCAATGCAGAATAAAACAAATTATAAACATGTGGCAAGAAGTAGGAAGAGCAA  
 TGTATGCCCCCTCCCATTTGAAGGAGTAATCAAATGTTTCATCAAAC---  
 ATTACAGGGCTAATATTGACAAGAGATGGTGCAAATAATAATACG-----  
 -----  
 -----  
 AATGAGACTTTCAGACCTGGAGGAGGAAATATGAAAGACAATTGGAGAAGTGAAGTATATAAATATAAAGTAG  
 TACAAGTTGAACCAATA---GGACTAGCACCTACCAAGGCAAAGAGAAGAGTGGTG-----  
 -----GAAAGGGAAAAAAGAGCA---ATAGGG---CTAGGAGCT-----  
 ATGTTCCCTTGGGTTCTTGGGAGCA---GCAGGAAGCACAATG---GGCGCAGCGTCA---  
 GTGACGCTGACGGTACAG---GCCAGACAG---TTATTG---TCTGGTATAGTGCAACAGCAAAAC---  
 AATTTG---CTGAGG---GCTATAGAGGCGCAACAGCATCTGTTGCAACTCACGGTCTGGGGCATT  
 >AY352654  
 AGCTATGACATAAGTAACACA-----  
 -----  
 ACAGATAAGAATATTACACTGCCATGTAGAATAAAACAAATTGTACACATGTGGCAGAGAGTAGGACAAGCAA  
 TGTATGCCCCCTCCCATTTGAAGGAAAGATTACATGTACATCAAAT---  
 ATTACAGGACTAATATTGACAATTGACCATGTTAATCTGACAGGAAAC-----  
 -----  
 -----  
 AATGATAATGTTACCCCTCAGACCTGGAGGAGGAGATATGAGGGACAATTGGAGAAGTGAAGTATATAAATATA  
 AAGTAGTAAAAATTGAACCACTA---GGAATAGCACCCCTCCGAGGCAAGGAGAAGAGTGGTG-----  
 -----CAGAGAGAAAAAAGAGCA---GTGGCA---CTGGGAGCT-----  
 ---ATGATCTTTGGGTTCTTGGCAGCG---GCAGGAAGCACTATG---GGCGCGGCGTCA---  
 TTAACGCTGACGGTACAG---GCCAGACAA---TTATTG---TCTGGTATAGTGCAACAGCAAAGC---  
 AATTTG---CTGAGA---GCTATACAAGCGCAACAGCATATGTTGCAGCTTACTGTCTGGGGCATT  
 >AY231154  
 AATTATAGGAGTTTG-----  
 -----  
 -  
 ATTAAGGCTAATATCATACTCTCATGTAGAATAAAACAAATTGTAAGAATGTGGCAGAGGGTAGGACAAGCAA  
 TATATGCCCCCTCCCATCGCAGGGAACCTTACATGTACATCAAAT---  
 ATTACAGGAATGATACTAACATGGGATGGTGGTAGTAATAATAGTAGT-----  
 -----  
 -----  
 AAAAAATGAATCTGAGACCTTCAGACCTGGAGGAGGAGACATGAAGGACAATTGGAGAAGTGAATTGTATAAAT  
 ATAAAGTAGTAAAGATTGAACCACTA---GGAATAGCACCCACCAGGGCAAGAAGAAGAGTGGTG-----  
 -----CAGAGAGAAAAAAGAGCA---GTGGGA---ATAGGAGCT---  
 -----TTGTTCCCTTGGGTTCTTGGGAACA---GCAGGAAGCACTATG---GGCGCGGCGTCA---  
 ATAACGCTGACGGTACAA---GCCAGACAA---TTATTG---TCTGGCATAGTGCAACAGCAAAGC---  
 AATTTG---CTGAGA---GCTATAGAAGCGCAACAACAACCTGTTGCAGCTCACGGTCTGGGGCATT

>MN617383

TTTCATAAGAGAACTTGGTTGTCTAATAATACTGGGCAA-----  
-----  
GATACAGAGAACATCACACTCCAATGTAGAATAAAACAAGTTATAAACATGTGGCAGGAAGTAGGAAAAGCAA  
TGTATGCCCCCTCCCATCAGTGGACAAATTAGCTGTTTCATCAAAT---  
ATTACAGGGCTGCTATTAACAAGAGATGGTGGTAACAAGAACGAGTCC-----  
-----

AATGGAAGTGAACCTTCAGACCTGGAGGAGGAGATATGAGGGACAATTGGAGAAGTGAATTATATAAAATATA  
AAATAGTAAAAATTGAGCCATTA---GGACTAGCACCCACCAAGGCAAGGAGAAGAGTGGTG-----  
-----CAGAGGGAAAAAAGAGCA---GTGGGAGCATTAGGAGCT-----  
---ATGTTCCCTTGGGTTCTTGGGAACA---GCAGGAAGCACTATG---GGCGCAGCGTCA---  
CTCACGCTGACGGTACAA---GCCAGAATA---CTACTG---TCTGGTATAGTGCAACAACAGAAC---  
AATTTG---CTGAAA---GCTATTGAGGCGCAACAGCGTCTGTTGCAACTCACAGTCTGGGGCATC

>MN617384

AATCAACTGAATAGCAGTGAAACTGAA-----  
-----  
GGCAATGACACAATCACACTCCCATGTAGAATAAAGCAAATTGTAAACATGTGGCAGGAAGTAGGAAAAGCAA  
TGTATGCCCCCTCCCATCAAAGGACAACTTAACTGCTCATCACAG---  
ATTACAGGGCTAATATTAGTAAGAGATGGTGGTAGTAGTGGCAAT-----  
-----

AATACCACTGAGATCTTCAGACCTGGAGGAGGAGACATGAGGGACAATTGGAGAAGTGAATTATATAAAATATA  
AAGTAGTAAAAATTGAACCGTTA---GGAATAGCACCCACCAAGGCAAAAAGAAGAGTGGTG-----  
-----CAAAGAGAAAAAAGAGCA---GCGGGA---ATAGGAGCT-----  
---CTGTTCCCTTGGGTTCTTGGGAGCA---GCAGGAAGCACTATG---GGCGCAGCATCG---  
ATGACGCTGACGGTACAG---GCCAGACAA---TTATTG---TCTGGTATAGTGCAACAGCAAAAC---  
AACTTG---CTGAGG---GCTATTGAGGCGCAACAACATATGTTGCAACTCACAGTCTGGGGCATC

>MN617386

AATCAGACCGTCAAT-----  
-----  
GGAAGTATGTCATCACACTCCCATGCAGAATAAAACAAATTATAAACAGATGGCAGGAAGTAGGAAAAGCAA  
TGTATGCTCCTCCCATCAGGGGACAAATTAACTGTACATCAAAT---  
ATTACAGGGCTGCTATTAACAAGAGATGGTGGTAACGGTAACGAGACCGGCTCC-----  
-----

AACAGGTCCGAAATCTTCAGACCTGGAGGAGGAGATATGAGGGACAATTGGAGAAGTGAATTATATAAAATATA  
AAGTAGTAAAAATTGAGCCATTA---GGAATAGCACCCACCAAGGCTAAGAGAAGAGTGGTG-----  
-----CAGAGAGAAAAAAGAGCA---GTGGGAAGTATAGGAGCT-----  
---ATGTTCCCTTGGGTTCTTGGGAGCA---GCAGGAAGCACTATG---GGCGCAGCGTCA---  
CTCACGCTGACGGTACAG---GCCAGACTA---TTACTG---TCTGGTATAGTGCAACAGCAGAAC---  
AATTTG---CTGAAA---GCTATTGAGGCGCAACAGCACCTGTTGCAACTCACAGTCTGGGGCATT

>MN617388

AATTATAATTTGACTAATGGTACTTGGCAATGGTCAAAT-----  
-----

-

AACGAAAGTGTATCATCACACTCCCATGCAGAATAAAACAAATTATAAACAGGTGGCAGGAAGTAGGAAAAGCAA  
TGTATGCCCCCTCCCATCAGGGGACAAATTAACTGTACATCAAAT---  
ATTACAGGGCTGCTATTAACAAGAGATGGTGGTGGTAATGAGTCC-----  
-----

AGTGAGTTCGAAATCTTCAGACCTGGAGGGGGAGATATGAGAGACAATTGGAGAAGTGAATTATATAAAATATA  
AAGTAGTAAAAATTGAGCCACTA---GGGATAGCCCCACCAAGGCAAGAGAAGAGTGGTG-----  
-----CAGAGAGAAAGAAGAGCA---GTGGGAACAATAGGAGCT-----  
---ATGTTCCCTCGGGTTCTTGGGAGCA---GCAGGAAGCACTATG---GGCGCAGCGTCG---  
ATGACGCTGACGGTACAG---GCCAGACTA---TTACTG---TCTGGTATAGTGCAACAGCAGAAC---  
AATCTG---CTGAGA---GCTATTGAGGCGCAACAGCAACTGTTGCAACTCACAGTCTGGGGCATC

>AJ401043

GATCACTCTGGAAAGTCAAATGAAACAAAT-----  
-----

-  
TCAAATGACACTATTGTACTCCCATGTAAATAAAACAAATTGTAAGAATGTGGCAGGGAGTAGGACAAGCAA  
TGTATGCCCCCTCCAATTAAAGGAAAGATTTCTGTAACTCAAAT---  
ATTACAGGACTAATATTGACAAGGGATGGTGGTAATACTACTAAT-----  
-----  
-----  
ACTATTGAGACCTTTAGACCTGGAGGAGGAGATATGAGGGACAATTGGAGAAGTGAACCTATATAAATATAAGG  
TAGTAAGAATTGAACCACTA---GGAATAGCACCCACTAAGGCAAGGAGACGAGTGGTGGAGAGA-----  
-----GAAAAAATTAGACAAAAAAGAGCA---GTGGGA---ATGGGAGCC-----  
TTGTTCTTGGGTTCTTGGGAGCA---GCAGGAAGCACTATG---GGCGCGGCGTCA---  
CTGACGCTGACGGTACAT---GATAGACAA---GTATTG---TCTGGTATAGTGCAACAGCAAAAC---  
AATTTG---CTGAGA---GCTATAGAGGCGCAACAGCATCTGTTGCAACTCACAGTCTGGGGCATT  
>HQ595767  
TTCTATTGTAACACATCAGCTCTGTTTAATGGCACTTGGGGGGACAATACCACCATGCAGGGAAATAGCACAG  
AG-----  
-----  
TTAAATGGAACCTATAACTCTCCCATGCAGAATAAAGCAAATCATAAATATGTGGCAGAAAACAGGAAAAGCAA  
TGTATGCCCCCTCCCATCCAAGGAGTAATAAGGTGTGAGTCAAAC---  
ATTACAGGACTTATATTAACAAGAGATGGTGGGGATACTAACAGA-----  
-----  
-----  
ACAAATGAAACCTTTAGACCTGAAGGAGGAAATATGAAGGACAATTGGAGAAGTGAATTATATAAGTATAAAG  
TAGTAAAAATTGAACCACTA---GGAGTAGCACCTACCGAGGCAAGGAGGAGAGTGGTG-----  
-----CAGAGAGAAAAAAGAGCA---TTTGGA---CTGGGAGCT-----  
GTTTTTCATTGGGTTCTTAGGAGCA---GCAGGAAGCACTATG---GGCGCGGCGTCA---  
ATGACGCTGACGGTACAG---GCTAGACAA---TTATTG---TCTGGCATA  
>MF373125  
TTCTACTGTAATACATCAAACTGTTTAACAATACTTGGTTTAATGGTACTTGGGTTAATGATACTTGGGATA  
CT-----  
-----  
GAGGGTGATAATATCATACTCCCTTGTAGAATAAAACAAATTATAAACATGTGGCAGGAAGTAGGAAAAGCAA  
TGTACGCCCCCTCCCATTAGAGGACAAATTAGTTGTTTCATCAAAT---  
ATTACAGGGCTACTATTAACAAGAGATGGTGGTAACACAGCGAGAGTAAT-----  
-----  
-----  
AATACCTCAGAGATCTTCAGACCTGGAGGAGGAGATATGAGGGACAATTGGAGAAGTGAATTATATAAATATA  
AAGTAGTAAAAATTGAACCATTA---GGAATAGCACCCACCAAGGCAAAGAGAAGAGTGGTG-----  
-----CAGAGAGAAAAAAGAGCG---GTGACA---CTAGGAGCT-----  
---ATGTTCTTGGGTTCTTGGGAGCA---GCAGGAAGCACTATG---GGCGCAGCGTCG---  
ATGACGCTGACGGTACAG---GCCAGACTA---TTATTG---TCTGGTATAGTGCAACAGCAAAAC---  
AATTTG---CTGAGA---GCTATTGAGGCGCAGCAACACATG  
>JN024344  
TTCTACTGTAATGCATCACAACCTGTTTAATAGTAGTTGGAGTGGGAATGACTCTACTTGGGAATATAGAG---  
-----  
-----  
GCAAATGAACTATCACACTCCGATGTAATATAAGACAAATTATAAACATGTGGCAGGAAGTAGGGAAAGCAA  
TGTATGCCCCCTCCCATCAGAGGACTAATTAGATGTTTCATCAAAC---  
ATTACAGGGCTGTTATTAACAAGAGATGGTGGTAATGGTAATAACACCAAT-----  
-----  
-----  
AATGACACCGAAATCTTTAGACCTGGAGGAGGAGATATGAGGGACAATTGGAGAAGTGAATTATATAAATATA  
AAGTAGTAAGAATTGAACCATTA---GGAATAGCACCCACTAAGGCAAAGAGAAGAGTGGTG-----  
-----CAGAGAGAAAAAAGAGCA---GTGGGA---CTAGGAGCT-----  
---ATGTTCTTGGGTTCTTGGGAGCA---GCAGGAAGCACTATG---GGCGCAGCATCA---  
ATAACGCTGACGGTACAG---GCCAGACTA---TTATTGCTCTGGTATAGTGCAACAGCAGAACAAAT---  
CTGCTG---AGGGCT---ACTGAGGCGCAACAGCATCTGTTGCAACTCACAGTCTGGGGCATC  
>KC894082  
TTCTATTGCAATACATCAGAACTGTTTAATGGTACATACAATGGTACATCAGAAAAATAAT-----  
-----  
-----

ACTAACGAGGTGATCACACTCCAATGCAAAATAAAACAATTATATAAACATGTGGCAGGAGATAGGAAGAGCAA  
 TGTATGCCCCCTCCCATTGAAGGAAACATAACATGTAAATCAAAC ---  
 ATCACAGGGCTACTATTGACACGTGATGGAGGAGGGGACACAAAC -----  
 -----  
 -----  
 GAGACTGAGACATTGAGACCTGGAGGAGGAGATATGAGGGACAATTGGAGAAGTGAATTATATAAAATATAAAG  
 TGGTAGAAATTAAGCCATTA --- GGAGTAGCACCCACTAATGCAAAAAGGAGAGTGGTA -----  
 -----  
 -----CAGAGAGAGAAAAGAGCA --- GTGGGA --- TTAGGAGCT -----  
 GTGTTTCCTTGGGTTCTTGGGAGTG --- GCAGGAAGCACTATG --- GGCGCGGCGTCA ---  
 ATAACGCTGACGGTACAG --- GCCAGACAA --- TTATTG --- TCTGGTATAGTGCAACAGCAAAGT ---  
 AATTTG --- CTGAGG --- GCCATA  
 >FJ444500  
 TTCTATTGCAATACATCAAGACTGTTTAATGGTAATAGCACATCCATGAATGAGACATACACAAAAGTGTGG  
 AC -----  
 -----  
 AAAAGTGAGGACATCACACTCCAATGCAGAATAAAACAAATTATCAATATGTGGCAGGGGGTAGGACGAGCAA  
 TGTATGCCCCCTCCCATTGAAGGAAACATAATATGTAACCTCAAGT ---  
 ATCACAGGACTATTATTGACACGTGATGGAGGAATAGCAGAAAAG -----  
 -----  
 -----  
 AATGGCACAGAGACATTTAGACCTGGAGGAGGAGATATGAGGGATAATTGGAGAAGTGAATTATATAAAATATA  
 AAGTGGTAGAAATTAAGCCATTG --- GGAATAGCACCCACTAGGGCAAAAAGGAGAGTGGTG -----  
 -----  
 -----GAGAGAGAGAAAAGAGCA --- GTGGGA --- ATAGGAGCT -----  
 --- GTGTTTCCTTGGGTTCTTGGGAGCA --- GCAGGAAGCACTATG --- GGCGCAGCGTCA ---  
 CTAGCGCTGACGGGACAG --- GCCAGACAA --- CTGTTG --- TCTGGTATAGTGCAACAGCAAAGC ---  
 AACTTG --- CTGAAG --- GCCATA  
 >KC894101  
 TTCTATTGCAATACAACAAAGCTGTTTAATAGTCCTAATGATACTAGTCCTAATGGT -----  
 -----  
 -----  
 ACTAACTCCACCATCACACTCCCATGCAGAATAAAACAAATTATATAAACATGTGGCAGGAGGTGGGAAGAGCAA  
 TGTATGCCCCCTCCCATTGCAGGAAACATAACATGCACGTCAAAT ---  
 ATTACAGGACTGCTATTGACACGTGATGGAGGTTTACAGGTCACA -----  
 -----  
 -----  
 AATGACTCAGAGACATTGAGACCTGGAGGAGGAAATATGAAGGACAATTGGAGAAGTGAATTATATAAAATATA  
 AAGTGGTGGAAATTAAGCCATTG --- GGGATAGCACCCACTGAGGCAAAAAGGAGAGTGGTG -----  
 -----  
 -----GAGAGAGAAAAAGAGCA --- GTGGGA --- ATAGGAGCT -----  
 --- GTGTTTCCTTGGGTTCTTGGGAGCG --- GCAGGAAGCACTATG --- GGCGCGGCGTCA ---  
 ATGACGCTGACGGTACAG --- GCCAGACAA --- CTGTTG --- TCTGGCATA  
 >KP411834  
 TTCTATTGTTGTACATCATACCTGTTGAATAATACACTAGACAATAATACTATAAAATGATACTACTAATAATG  
 GCGGC -----  
 -----  
 -----  
 ACAAATGATAGCATCATACTGCAATGCAGAATAAAGCAAATTATCAACGTGGGGCAGGAAGTAGGACGAGCAA  
 TGTATGCCCCCTCCAATAAAAGGCAACATAACATGTAGATCAAAT ---  
 ATCACAGGAATATTGCTGGCAGAAGATGGAGGACCTATCAACGAA -----  
 -----  
 -----  
 ACGGAAACATTGAGACGTGGAGGAGGAGATATGAGAGACAATTGGAGAAGTGAATTATATAAAATATAAAGTGG  
 TAGAAATTAAGCCATTA --- GGAATAGCACCCACCAAGGCAAAAAGGAGAGTGGTG -----  
 -----  
 -----GGGAGAGAAAAAGAGCG --- GCA --- CTAGGAGCT -----  
 ATGTTTCCTTGGGTTCTTGGGAGCA --- GCCGGAAGCACTATG --- GGCGCAGCGTCA ---  
 ATAACGCTGACGGTACAG --- GCCAGACAA --- TTATTG --- TCTGGTATAGTGCAACAGCAAAGC ---  
 AATTTG --- CTGAGG --- GCCATA  
 >HM215317  
 TTCTACTGCAATACATCAAACCTGTTTACATACAATGGTACATACAATGGTACATACAATGGTACT -----  
 -----  
 -----  
 AAAAAATTCAACCATCACACTCCAATGCAGAATAAAACAAATTATATAAACATGTGGCAGGAGGTAGGGCGAGCAA

TGTATGCCCCCTCCCATTCAGAGAAACATAACATGTAAATCAAAT ---  
 ATCACAGGACTACTATTGCTACGTGATGGAGGAAACACAACAGGAGGAAAC-----  
 -----  
 -----  
 GAAACAGAAGAAAAAGAGATATTCAGACCTGGAGGAGGAAATATGAGGGACAATTGGAGAAGTGAATTATATA  
 AATATAAAGTGGTGGAGATTAAGCCATTG---GGACTAGCACCCACTAAGGCCAAAAGGAGAGTGGTG-----  
 -----GAGAGAGAGAAAAGAGCA---GTGGGA---  
 ATAGGAGCT-----GTGTTCCCTTGGGTTCTTGGGAGCA---GCAGGAAGCACTATG---  
 GGCGCAGCGTCA---ATAACGCTGACGGTACAG---GCCAGACAA---CTGTTG---  
 TCTGGTATAGTGCAACAGCAAAGC---AATTTG---CTGAGA---GCCATA  
 >AY253321  
 TTCTATTGCAATACATCAAAACTGTTTAATGGTACATACAATGGTACAGACACGACAGGAAGTACT-----  
 -----  
 -----  
 CCAAATTCAAACATCACACTCCAATGCAGAATAAAACAAATTATAAACAGGTGGCAGGGGGTAGGGCAAGCAA  
 TGTATGCCCCCTCCCATTCAGAGAAACATAACATGTAAAGTCAAAT ---  
 ATCACAGGACTCCTATTGACGCGTGATAGAGAAAACACAACCGGC-----  
 -----  
 -----  
 AACGAGACATTCAGACCTGGAGGAGGAGATATGAGGGACAATTGGAGAAGTGAATTATATAAATATAAAGTGG  
 TAGAAATTAAGCCATTG---GGACTAGCACCCACAGAGGCCAAAAGGAGAGTGGTG-----  
 -----GAGAGAGAGAAAAGAGCA---GTGGGA---ATAGGAGCT-----  
 GTGTTCCCTTGGGTTCTTGGGAGCA---GCAGGAAGCACTATG---GGCGCAGCGTCA---  
 ATAACGCTGACGGTACAG---GCCAGACAA---CTGTTG---TCTGGTATAGTGCAACAGCAAAGC---  
 AATTTG---CTGAGG---GCCATA  
 >HQ615958  
 TTCTATTGCAATACATCAAGCCTGTTTAATGGTACATATAATAACACAGGAAGTAAT-----  
 -----  
 -----  
 GCAAATTCAAACATCACACTCCAATGCAGAATAAAACAAATTATAAACATGTGGCAGGAGGTGGGACGAGCAA  
 TGTATGCTCCGCCCATTCAGAGAGAGATAACATGTAAATCAAAT ---  
 ATCACAGGACTACTATTGACACGGGATGGGGGAGAAAAGACAATGAG-----  
 -----  
 -----  
 ACAAATAATGCAGAGGTATTCAGACCTGCAGGAGGAGATATGAGGGACAATTGGAGAAGTGAATTATATAAAT  
 ATAAAGTAGTAGAAATTAAACCATTA---GGATTAGCACCCACTAAAGCAAGAAGGAGAGTGGTG-----  
 -----CAGAGGGAGAAAAGAGCA---GTGGGA---CTAGGAGCT---  
 -----GTGCTCTTTGGGTTCTTGGGAGCA---GCAGGAAGCACTATG---GGCGCAGCATCA---  
 ATAACGCTGACGGTACAG---GCCAGACAA---TTACTG---TCTGGTATAGTGCAACAGCAGAGC---  
 AATTTG---CTGAGG---GCTATAGAGGCGCAACAGCACATG  
 >KT183336  
 TTCTATTGCAATACATCAGGGCTGTTTAATGGGACATACAATCCTAATGCTACAAACAGTAATTCAAGTACT-  
 -----  
 -----  
 GTAAATTCAACCATCACACTCCAGTGCAGAATAAAACAAATTATAAACATGTGGCAGGGAGTAGGACAAGCAA  
 TGTATGCCCCCTCCCGTTGCAGGTAACATAACATGTAAATCAAAT ---  
 ATCACAGGAATACTATTGGTAAGGGATGGGGGTAATGACAATAAC-----  
 -----  
 -----  
 AGTACCACAGAGACATTCAGACCTGGAGGAGGAGATATGAGGGACAATTGGAGAAGTGAATTGTATAAATATA  
 AAGTGGTAGAGATTAGGCCATTA---GGAGTAGCACCCACCAAGGCCAAAAGGAGAGTGGTG-----  
 -----GAGAGAGAAAAAAGAGCA---GTGGGA---ATAGGAGCT-----  
 ---GTACTCCTTGGGTTCTTGGGAGCA---GCCGGAAGCACTATG---GGCGCAGCATCA---  
 ATAACGCTGACGGTACAG---GCCAGACAA---TTGTTG---TCTGGTATAGTGCAAGCAGCAAAGC---  
 AATTTG---CTGAGG---GCTATAGAGGCGCAGCAACACATG  
 >JN687734  
 TTCTATTGCAATACAACAAAACCTGTTTAATGAAACACTGTTTAAGTCAGAC-----  
 -----  
 -----  
 AATGGTTCAGACATCATACTCCCATGCAGAATAAAACAAATCATAAACATGTGGCAGGGGGTAGGACGAGCAA

TGTATGCCCCCTCCCATTCAGAGAAACATAACATGCAACTCAAAT ---  
 ATCACAGGACTATTATTGACACGTGATGGAGGAGGTGGCAACAGC -----  
 -----  
 -----  
 ACAGAAACATTTCAGACCTGGAGGAGGAAATATGAAAGATAATTGGAGAAGTGAATTATATAAAATATAAAGTGG  
 TAGAAATTAAGCCATTG --- GGAGTAGCACCCACCAAGGCAAAAAGGAGAGTGGTG -----  
 ----- GAGAGAGAAAAAAGAGCA --- GTGGGA --- ATAGGAGCT -----  
 GTA CTCTTGGGTTCTTGGGAGCA --- GCAGGAAGCACTATG --- GGCGCGGCGTCA ---  
 ATAACGCTGACGGTACAG --- GCCAGACAA --- CTGTTG --- TCTGGTATAGTGCAACAGCAAAGT ---  
 AATTTG --- CTGAGA --- GCTATAGAGGCGCAACAGCACATG  
 >AY529669  
 TTCTATTGCAATACATCAAAGCTGTTCAATGATACAAGCCTGCTTAATTATACAGAAGGGAATGCAAAC ----  
 -----  
 -----  
 AATAATGAGACCATCATACTCCCATGCAAAATAAAACAAATTATAAACAGGTGGCAAGGGGTAGGACAAGCAA  
 TATATGCCCCCTCCCATTCAGAGAAACATAACATGTAAATCAAAG ---  
 ATCACAGGACTACTATTGACACGTGATGGAGGTAATACCACAAAT -----  
 -----  
 -----  
 AACACAGAGACATTTCAGACCAGGAGGAGGCGATATGAGGGACAATTGGAGAAGTGAATTATATAAAATATAAAG  
 TGGTAGAAATTAAGCCATTG --- GGAGTAGCACCCACTGAGGCAAAAAGGAGAGTGGTG -----  
 ----- GAGAGAGAAAAAAGAGCA --- GTAGGA --- ATAGGAGCT -----  
 GTGTTCTTGGGATCTTGGGAGCA --- GCAGGAAGCACTATG --- GGCGCAGCATCA ---  
 ATAACGCTGACGGTACAG --- GCCAGACAA --- TTGCTG --- TCTGGAATAGTGCAACAGCAAAGT ---  
 AATTTG --- CTGAGG --- GCCATA  
 >JX213443  
 TTCTATTGCAATACATCAAACTGTTTAATGGTACATACGAGCAGCCTAACAGTAGTG TAGGA -----  
 -----  
 -----  
 TCAGATTCAACCATCACACTCCCATGCAGAATAAAACAAATTATAAACTTGTGGCAGGAGGTAGGACGAGCCA  
 TGTATGCCCCCTCCCATTCAGGAACCATAACATGTAACTCAAGT ---  
 ATCACAGGACTAATATTGACACGTGATGGAGGAAACGAAACTAAGCGC -----  
 -----  
 -----  
 AAGGACACAGAGATATTTCAGACCTATAGGAGGAGATATGAGGATTAATTGGAGAAGTGAATTATATAAAATATA  
 AAGTGGTAGAAATTAACCATTA --- GGATTAGCACCCACTACGGCAAAAAGGAGAGTGGTG -----  
 ----- GAGAGAGAAAAAAGAGCA --- GTGGGA --- ATAGGAGCT -----  
 --- GTGTTCTTGGGTTCTTAGGAGCA --- GCAGGAAGCACTATG --- GGCGCAGCATCA ---  
 ATAACGCTGACGGTACAG --- GCCAGACAA --- CTGTTG --- TCTGGTATAGTGCAACAGCAAAGT ---  
 AATTTG --- CTGAGA --- GCCATA  
 >KF716480  
 TTCTACTGCAATACATCAGAACTGTTTAATAGTATATGGCTTAATAATACTGGTAACTGGACAGGGAATACAA  
 CAAACAGT -----  
 ----- ACAGAG -----  
 AAAAAATAATGGTACAATCACACTTCCATGCAGAATAAAACAAATTATAAACATGTGGCAGGGAGTAGGAAAAG  
 CAATGTATGCCCCCTCCCATTTGAAGGAGAAATCAAATGTATATCAAAT ---  
 ATTACAGGACTATTGTTGACAAGGGATGGTGGTAATAATAATGCT -----  
 -----  
 -----  
 ACCAATGAGACCTTCAGACCTGGAGGAGGAGATATGAGAGACAATTGGAGAAGTGAATTATACAAATATAAAG  
 TAGTAACAATTGAACCACTG --- GGTATAGCACCCACCAAGGCAAGAGAGGAGTGGTG -----  
 ----- GAAAGAGAAAAAAGAGCA --- ATAGGA --- CTAGGAGCT -----  
 ATGTTCTTGGGTTCTTGGGAGCA --- GCAGGAAGCACGATG --- GGCGCAGTGTC ---  
 TTGACGCTGACGGTACAG --- GTCAGACAG --- CTATTG --- TCTGGCATA  
 >KP411843  
 TTCTATTGTAATACTTCAGGCCCTGTTTAACAGCACTTGGGAATGGCACGAAATCTAAAGCGTCAAATGACAATG  
 ACACTATCCTT -----  
 ----- CGC ----- CCGAGA ---  
 AAAAAAATAAAATTATGTGGAAGAGACAAAGACTAGGACTACAAGCACCTGCCCCCTCTAGCCCCAAGAACGA  
 GAAGGTGTAGCACTACC --- AGTACAGGATTACTATTAGATGGAGATGGT --- ACGAATACTAAT -----

-----  
-----  
AATGAGACCTTCACGCCGGGACGAGGAGATATAAAATATGAATTGCAGAAGTGAAGTAGATCTATATAAAATTAG  
TAGTAATTGAACTTGTACCAGTA---GGAGCCACCCCTCCCGATCAAGA-----GTGGTG-----  
-----CTGATGCAAAAAAAGCA--GTTGCA--ATGGGAGCT-----  
---TCGCTCGTTTTCTTCTTATCAGCA--GCAGCAGGAAGTAAT--GACGCGGCGTCG---  
ACGACACTGACGGTGCAG---GTCAGGCCA---TTATTG---TCTGGTACAGTGCTACTGCAGCAG---  
CATCTG---CTGATG---CCCAT  
>HM215265  
TTCTATTGTAATACATCAGGACTGTTTAATGGTACTATATCA-----  
-----  
-----  
AATAGTACTAATATCACACTCCCATGTAAGATAAAACAAATTGTAAGAATGTGGCAAAAAGTGGGACAAGCAA  
TGTATGCCCCCTCCCATTCAGGAAACATTACATGTACATCAAAC---  
ATTACAGGACTACTATTAACAAGAGATGGGGGGAGTAATGGAACC-----  
-----  
-----  
CATGATGATGAGGTCTTCAGACCTGGAGGAGGAGATATGAGGGACAATTGGAGAAGTGAATTATATAAGTATA  
AAGTAGTAAAAATTAAACCACTA---GGAATAGCACCCACCAAGGCAAGGAGAAGAGTAGTG-----  
-----GGAAGAGAGAAAAGAGCA--GTCGGA---TTTGGAGCT-----  
---GTTCTCCTTGGGTTCTTAGGAACA--GCAGGAAGCACTATG--GGCGCGGCGTCA---  
ATAACGCTGACGGTACAG---GTCAGACAA---TTATTG---TCTGGCATA  
>KT022403  
TTCTATTGTAATACAACAAGCCTGTTTAATAGCACGTGGGGAAATGACACTGTTAACACACCAAAGAATGCCA  
CGGGT-----  
-----  
TCAATGACACTATAACAATCCTATGCAGAATAAAACAAATTGTAAATATGTGGCAAAGAGTAGGAAGAGCAA  
TGTATGCCCCCTCCCATTCAGGAAAAATACAGTGTATATCAAAC---  
ATTACAGGTATGATATTAACAAGAGATGGTGGGAATGAGAATATC-----  
-----  
-----  
AGTGAGATCTTCAGACCTGGAGGAGGAAATATGAGGGACAATTGGAGAAGTGAATTATATAAGTATAAAGTAG  
TAAAAATTGAACCACTA---GGAGTAGCACCCACCCAGGCAAGGAGAAGAGTGGTG-----  
-----GAGAGAGGAAAAAGGGCA--GTTGGA--CTGGGAGCT-----  
GTTTTCCTTGGGTTCTTGGGAGCA---GCAGGAAGCACTATG--GGCGCGGCGTCA---  
CTGACGCTGACGGTACAG---GCCAGAAAC---TTATTG---TCTGGCATA  
>DQ020274  
TTCTATTGTAATACATCAGGACTGTTTAATAGTAGTAGTGAAAATAAGACTAGTAGTGAA-----  
-----  
-----  
AATAAGACTAATATCACACTCCCATGCAGAATCAAACAGATTGTGAGAATGTGGCAGAGAGTAGGACAAGCAA  
TGTATGCCCCCTCCCATCGCAGGAAAAATTACATGCATATCAAAC---  
ATTACAGGACTAATACTAACAAGAGATGGTGGGACTAATAGTACT-----  
-----  
-----  
AATGAGACCTTCAGACCTGCAGGGGGAGACATGAGGGACAATTGGAGAAGTGAATTATATAAGTATAAAGTAG  
TAAAGATTAAACCACTA---GGAGTAGCACCCACCAAGGCAAGGAGAAGAGTGGTG-----  
-----CAGAGAGAGAAAAGAGCA--GTTGGA--ATAGGAGCT-----  
GTCCTCCTTGGGTTCTTAGGAGCA---GCAGGAAGCACTATG---GGCGCGGCGTCA---  
ATAACGCTGACGGTACAG---GCCAGGCAA---TTATTG---TCTGGCATA  
>FM87777  
TTCTATTGTAATACAACAAACTGTTTAATAGCACTTGGCTTAATAGCACTTGAATGACACGACCCAGGCAA  
AT-----  
-----  
AATACAAATGAAAACATAACACTCCCATGCAGGATAAAACAAATTGTAAACATGTGGCAGGGAGTAGGACAAG  
CAATGTATGCCCCCTCCTATCGCAGGAATGATACAGTGTGTATCAAAT---  
ATTACAGGACTGATATTGACAAGAGATGGGGGAGACAATAGTAGT-----  
-----  
-----  
AATAATGAGACCTTCAGGCCTGGAGGAGGAAATATGAAGGACAACCTGGAGAAGTGAATTATATAAATATAAAG

TAGTACAAATTGAACCACTA---GGGGTAGCACCCAACAAGGCAAAGAGAAGAGTGGTG-----  
 -----GAGAGAGAAAAAAGAGCA---GTTGGA---ATAGGAGCT-----  
 ATGTTCTTGGGTTCTTAGGAACA---GCAGGAAGCACTATG---GGCGCGGCGTCA---  
 ATAACGCTGACGGTACAG---GCCAGGCAA---TTATTG---TCTGGCATA  
 >KJ849769  
 TTCTACTGTAACCAACACAACCTGTTTCATAGTACTTGGGGGAATAATCAGACT-----  
 -----  
 AAATCAGATAGCAATGGA-----  
 ACAAGTAATGGAACAATAACACTCCCATGCAGAATAAAACAAATTATAAATATGTGGCAGGGAGTAGGAAAAG  
 CAATGTATGCCCCCTCCCATCAAAGGACAAATTAGCTGTTTCATCAAAC---  
 ATTACAGGACTGTTATTAGTAAGAGATGGTGGT-----  
 -----  
 -  
 AATAGTACCAGCAATGAAGAGATCTTCAGACCTACAGGAGGAAATATGAAGGACAATTGGAGAAGTGAATTAT  
 AATAATATAAAGTAGTAAAAATTGAACCCTTA---GGAGTAGCACCCACCAAGGCAAAGAGAAGAGTGGTG--  
 -----CAGAGAGAAAAAAGAGCA---GTAGGA---  
 ATAGGAACT-----ATGTTCTTGGGTTCTTGGGAGCA---GCAGGAAGCACTATG---  
 GGCGCAGCGTCA---ATGACGCTGACGGTACAG---GCCAGACAA---TTATTG---  
 TCTGGTATAGTGCAACAGCAAAAT---AATTTG---CTGAGG---GCCATT  
 >MG989549  
 TTCTATTGTAATACAACAAAACTGTTTAATAGTACTTGGACAGGAAATGAAACCAGTGAAGGG-----  
 -----  
 -----  
 AATAATAGCACTATCATACTTCCCTGTAAGATAAAGCAAATCATAAACATGTGGCAGGAAGTAGGACAAGCAA  
 TGTATGCTCCTCCCATCAGTGGAAGCATTAATTGTGTATCAAAT---  
 ATTACAGGAATACTATTGACAAGAGATGGTGGTGTAAACAATACG-----  
 -----  
 -----  
 GGAAATGAGACCTTCAGACCTGGAGGAGGAAATACAAAAGACAATTGGAGAAGTGAATTATATAAATATAAAG  
 TAGTAGAAATTGAACCACTA---GGAGTAGCACCCACCAGGGCAAAGAGGAGAGTGGTG-----  
 -----GAAAGAGAAAAAAGAGCA---GTGGGA---ATAGGAGCT-----  
 ATGATCTTTGGGTTCTTAGGAGCA---GCAGGAAGCACTATG---GGCGCGGCGTCA---  
 ATAACGCTGACGGTACAG---GCCAGACAA---TTATTG---TCTGGTATAGTGCAACAGCAAAGC---  
 AATTTG---CTGAGG---GCTATAGAGGCGCAGCAGCACATG  
 >MF373150  
 TTCTATTGCAATACATCAGCACTGTTTAATAGAACTTGAATAGCAATAGCACTTGAATAGCACTGGGGAG-  
 -----  
 -----  
 AATATCACTGATATACATCTCCCATGCAGAATAAAGCAAATTGTAAATATGTGGCAGAGAGTAGGACAAGCCA  
 TGTATGCCCCCTCCTATCCAGGAATAATAAGGTGTGATTCAAAC---  
 ATTACAGGAATACTATTAAACAAGAGATGGAGGGAAAAACAATAGT-----  
 -----  
 -----  
 AGTAATGAAACCTTCAGACCTGGAGGAGGAGACATGAGGGATAATTGGAGAAGTGAATTATATAAGTATAAAG  
 TAGTAGAAATTGAACCACTA---GGTGTAGCACCCGCCAGGGCAAGATCAACAGTGGTG-----  
 -----GAGAGAGAGACCATAGCA---GTCGGA---CTGGTAGCT-----  
 GTCGTCCTTGGGGTCTTAGGAGCA---GCAGGAAGAACTATG---GGCGCAGCATCA---  
 CTAACGCTGACGGTACGA---GCCATACTA---TCAGTG---TCTGGGATACTGCAGCAGCAGATC---  
 >KU921769  
 TTCTATTGCAATACAACAGGCCTGTTTAATCACACGTTTAATAGCACGTGGGGAAATGCCACTATTACAGAGA  
 AT-----  
 -----  
 GCAAAATGAACTATAATTCTTCCATGCAGAATAAAACAAATTATAAATATGTGGCAGGAAGTAGGACAAGCAA  
 TGTATGCCCCCTCCATTGAAGGAGTAATAAAGTGTATATCAAAC---  
 ATTACAGGAATAATATTGACAAGAGATGGTGGGCACATGAGCAATGGCAGC-----  
 -----  
 -----  
 AATGACAGTATTGAGACCTTCAGACCTGGGGGAGGAAATATGAGGGACAATTGGAGAAGTGAATTATATAAGT  
 AATAAAGTAGTAAACTTGAACCACTA---GGAGTAGCACCAACCAGGGCAAAGGAGAAGAGTGGTGTA-----  
 -----GAGAGAGAAAAAAGAGCA---GTTGGA---CTGGGAGCT---

-----GTCTTCCTTGGGTTCTTGGGAGCA---GCAGGAAGCACTATG---GGCGCAGCGTCA---  
 ATAACGCTGACGGTACAG---GCCAGACAA---TTATTG---TCTGGCATA  
 >KF725943  
 TTCTATTGCGATACATCAGACTTGTTTAATAGTACATACGATCTTACTAATAATTCTACTAATATAAGCAAAG  
 AG-----  
 -----  
 TCAAACGAAACAATCACGCTCAAATGCAGAATAAAACAGATCATAAACATGTGGCAGGAGGTAGGAAGAGCAA  
 TATATGCCCCCTCCCATTCGAGGAAACATAACATGTAAATCAAAC---  
 ATCACAGGACTACTATTAGTACGTGATGGAGGTAATAGCCATGGCACAAATGAC-----ACAAATAGC---  
 ACA-----  
 -----  
 AATGAAGAGATATTCAGACCTGAAGGAGGAGATATGAGGGACAATTGGAGAAGTGAATTATATAAATACAAAAG  
 TAGTAAACCTTGAACCACTA---GGATTAGCACCCACCAGGGCAAGGAGAAGAGTGGTG-----  
 -----GAGAGAGAAAAACGAGCA---GTTGGA---CTGGGAGCT-----  
 GTCTTCCTTGGGTTCTTGGGAACA---GCAGGAAGCACTATG---GGCGCGGCGTCA---  
 GTGGCGCTGACGGTACAG---GCCAGACAA---TTATTG---TCTGGCATA  
 >JX236675  
 TTCTATTGTAATACATCAGACCTGTTTAATAACATTTGGATAGGAAATGAGACTACAGAAACAAATGAGACTG  
 AAACAAAT-----  
 -----  
 TCAAGTAAGCCTATAACGCTCCAGTGCAGAATAAAGCAAATTATAAACATGTGGCAGAGAGTAGGGCAAGCAA  
 TATATGCCCCCTCCCATCCAAGGAAAATTAGAATGTAATTCAAAC---  
 ATTACAGGACTGCTATTAACAAGAGATGGTGGAAAAAATAATGAC-----  
 -----  
 -----  
 AGTAAAGAAATCTTCAGACCTGGAGGAGGAGATATGAGGGATAATTGGAGAAGTGAATTATATAAGTACAAAAG  
 TAGTAAAAATTGAACCACTA---GGAGTAGCACCCACCAGGGCACAGAGAAGAGTGGTA-----  
 -----AAGAGAGAAAAAAGAGCAGTCATTGGA---ATGGGAGCG-----  
 ATGTTCTTGGGTTCTTAAGTGCA---GCAGGAAGCACTATG---GGCGCAGCGTCA---  
 CTAACGCTGACGGTACAG---GCCAGACAA---TTATTG---TCTGGCATA  
 >JN054260  
 TTCTATTGTAATACATCAGGACTGTTTAATAATAGTGATAATAGTAGTGGTAGTAATAATAGTAGT-----  
 -----  
 -----  
 AGGAATGGGAATATCATACTCCCATGCAAGCTCAAACAGATTGTGAGAATGTGGCAGAGAGTAGGACAAGCAA  
 TGTATGCCCCCTCCCATCGCAGGAAAACCTCACATGTATATCAAAC---  
 ATTACAGGACTATTAATAACAAGAGATGGTGGAACTAACAGTACT-----  
 -----  
 -----  
 AATGGGACTGAGATCTTCAGACCTGCAGGGGGAGACATGAGGGACAATTGGAGAAGTGAATTATATAAGTATA  
 AAGTAGTAAAAATTAAACCACTA---GGAGTAGCACCCACCAGGGCAAGGAGAAGAGTGGTG-----  
 -----GAGAGAGAAAAAAGAGCA---GTTGGA---ATAGGAGCT-----  
 ---GTTTTCTTTGGGTTCTTAGCAGCA---GCAGGAAGCACTATG---GGCGCGGCGTCA---  
 ATAACGCTGACGGTACAG---GTCAGGCAA---TTATTG---TCTGGCATA  
 >KT124783  
 AGTTACTCAAATGAAACG-----  
 -----  
 GAAGACGATAATATCACACTCCCATGCAGAATAAAACAAATTATAAACATGTGGCAGGAAGTAGGAAAAGCAA  
 TGTATGCTCCTCCCATCAGAGGACAAATTAGATGTTTCATCAAAT---  
 ATTACAGGGATACTATTAACAAGGGATGGTGGTAAGAACGAGAAC-----  
 -----  
 -----  
 AACCAACTGAGATCTTCAGACCTGGAGGAGGAAATATGAGGGACAATTGGAGAAGTGAATTATATAAATATA  
 AAGTAGTAAAGATTGAGCCATTA---GGAGTAGCACCCACCAAGGCAAAACGAAGAGTGGTG-----  
 -----CAGAGAGAAAAAAGAGCA---GTAGGA---CTAGGAGCT-----  
 ---GTGTTCTTGGGTTCTTGGGAGCA---GCAGGAAGCACTATG---GGCGCAGCGGCA---  
 GTGACGCTGACGGCACAG---GCCAGACAA---TTATTG---TCTGGGATAGTGCAACAGCAGAAC---  
 AATCTG---CTAAGA---GCTATTGAGGCGCAACAGCATCTGTTGCAACTCACAGTCTGGGGCATC  
 >KJ698288

AATTATAAT-----  
 -----AGTACTGAGAATAATACTGAA-----  
 ACGTCAAATGAGCCTATTATACTCCCATGCAGAATAAAACAAATTATAAACATGTGGCAGGAAGTAGGAAAAG  
 CAATGTATGCCCCCTCCCATTAAGGACAAATTAGATGCTCATCAAAT---  
 ATTACAGGGCTGCTATTAACAAGAGATGGTGGA-----  
 -----  
 -----  
 AACAAACAACACGAACGAGACCTTCAGACCTGGAGGAGGAGATATGAGGGACAATTGGAGAAGTGAATTATATA  
 AATACAAAATAGTAAAAATAGAACCATTA---GGTGTAGCACCCACCAGGGCAAAGAGAAGAGTGGTG-----  
 -----CAGAGAGAAAAAAGAGCA---GTGGGA---  
 ATAGGAGCT-----GTGCTCTTTGGGTTCTTGGGGGCA---GCAGGAAGCACTATG---  
 GGCGCAGCGTCA---ATGACGTTGACGGTACAG---GCCAGACAA---TTAATG---  
 TCTGGTATAGTGCAACAGCAGCAG---AATTTG---CTGAGG---  
 GCTATTGAGGCGCAGCAGCATCTGTTGCAACTCACAGTCTGGGGCATC  
 >KU901765  
 TACTATAGTAGT-----  
 -----AATAGTAGTGGGAGTGGT-----  
 ACAAATAATAACACAATCATACTCCAATGCAGAATAAAACAAATTATAAACATGTGGCAGACAGTAGGAAAAG  
 CAATGTATGCCCCCCCCCATCAGAGGAAAGATTAGCTGTGTATCAAAT---  
 ATCACAGGGCTATTATTAGTCAGAGATGGAGGTGATAACAGGAGT-----  
 -----  
 -----  
 AACAAAGAGATCTTCAGACCTGCAGGAGGAGATATGAGAGACAATTGGAGAAGTGAATTATATAAATATAAAG  
 TAGTAAAAATTGAACCATTA---GGAATAGCACCCACTAAGGCAAGGAGAAGAGTGGTG-----  
 -----CAAAGAGAAAAAAGAGCA---GTGGGA---ATAGGAGCT-----  
 TTGTTCCCTTGGGTTCTTGAGGAGCA---GCAGGAAGCACTATG---GGCGCAGCGTCA---  
 ATGGCGCTGACGGTACAG---GCTAGACAA---TTATTG---TCTGGTATAGTGCAACAGCAGAAT---  
 AATTTG---CTGAGA---GCTATTGAGGCGCAACAGCATATGTTGCAACTCACAGTCTGGGGCATC  
 >EU576268  
 TATCAGAATAATACT-----  
 ---GAAGGGTCAAATAACACT-----  
 AAAGCAAATAGCACAAATCCTACTCCTATGCAGAATAAAACAAATTATAAACATGTGGCAGGAAGTAGGAAAAG  
 CAATGTATGCCCCCTCCCATCAGAGGCAAATCAGATGTTTATCAAAT---  
 ATTACAGGGCTGCTACTAACAAGAGATGGTGGTGAGCCTAATAAC-----  
 -----  
 -----  
 AAAACCAACGATACCTTCAGACCAGGAGGAGGAGATATGAGGGACAATTGGAGAAGTGAATTATATAAATATA  
 AAGTAGTACAAATTGAGCCAATA---GGACTAGCACCCACCAAGGCAAAGAGAAGAGTGGTG-----  
 -----CAAAGAGAAAAAAGAGCA---GTGGGC---ATAGGAGCT-----  
 ---TTGTTCCCTTGGGTTCTTGAGGAGCA---GCAGGAAGCACTATG---GGCGCAGCGTCA---  
 TTGACGCTGACGGTACAG---GCCAGACAA---TTATTG---TCTGGTATAGTGCAACAGCAGAAC---  
 AACTTG---CTGAGA---GCTATTGAGGCGCAACAGCATCTGTTGCAACTCACAGTCTGGGGCATC  
 >HQ699991  
 GACTACATGCCTAATGGTACAGCAAGTAAT-----  
 -----  
 TCAAGCTCAAACATCACACTCCCATGCAGAATAAAGCAAATTATAAACATGTGGCAGGAGGTAGGACGAGCAA  
 TGTATGCCCCCTCCCATTTGAAGGAAACATAACATGTAAATCAAAT---  
 ATCACAGGTCTACTATTGGTCCGTGATGGAGGAAGTACAAATAAT-----  
 -----  
 -----  
 ACAGAAGAGACATTTCAGACCTATAGGAGGAAATATGAAGGACAATTGGAGAAATGAATTATATAAGTATAAAG  
 TAGTGGAATTAAGCCATTG---GGACTAGCACCCACTGGAGCAAAAAGAAGAGTAGTG-----  
 -----GAGAGAGAAAAAAGAGCG-----GGA---ATAGGAGCT-----  
 GTGTTCCCTTGGGTTCTTAGGAGCA---GCCGGAAGCACTATG---GGCGCGGCGTCA---  
 ATAACGCTGACGGTACAG---GCCAGACAA---TTGTTG---TCTGGTATAGTGCAACAGCAAAGC---  
 AATTTG---CTGAAG---GCTATAGAGGCGCAACAGCATATGTTGCAACTCACGGTCTGGGGCATT  
 >KU319545  
 TGTCAATAAATCCAACATCCGAACCGTCTAAAAATCGT-----  
 -----  
 GCTGCAAATCCAACATTCAATATCCCATGCAGGGTGAAGCAAGTTCTAAGCATGCGCCTCGTATTGCGGGAAG

CAATGTATGCCCATCCTATATCAGGAGACGTACTATTGACATCGGAT---  
GTCGGAGGACTGATATCCACACGA-----GATAACGCTAAT-----  
-----  
-----  
AGCGCGAACGAGATATTTAGACCTGGAGGAGGAGATATGAGGGACAATTGGAGAAGTGAATTATACAAATATA  
AAGTGGTAGAAATTAAACCATTA---GGAATAGCACCCACCAAGGCAAAAAGGAGAGTGGTG-----  
-----GAGAGAGAAAAAAGAGCA--GTGGGA--ATAGGAGCT-----  
---GTATTCCTTGGGTTCTTGGAACA--GCCGGAAGCACTATG--GGCGCAGCATCA---  
ATAACGCTGACGGTACAG---GCCAGGCAA---TTGTTG---TCTGGTATAGTGCAACAGCAAAGC---  
AATTTG---CTGAAG---GCTATAGAGGCGCAACAGCATATGTTGCAACTCACGGTCTGGGGCATT  
>KJ158423  
TGTTACCTGTTTAATAGATTATACACTGCAGCCAATACA-----  
-----  
AAGAGTAATTCATGGATT-----  
GATATCAACTGCACAGTTGCAATCCCATGCAGAATAAAGCAAATTATAAACATGTGGCAGGAGGTAGGGCGAG  
CAATGTATGCCAATCCCATTTGAAGGAAATATAACATGTAAATCAGAT---  
ATCACAGGGATGCTATTAGAACGTGATTGTGAAAA-----  
-----  
GAACGTGATAAACGATATCAACT-----  
ACGAAAGAGATATTCAGACCTATAGGAGGAAATATGAGGGACAATTGGAGAAGTGAATTATACAAATATAAAG  
TGGTAGAAATTAAGCCATTA---GGAGTAGCACCCACGGAAGCAAAAAGGAGAGTGGTG-----  
-----GAGAGAGAAAAAAGAGTA--GCGGGA--CTAGGAGCT-----  
GTGTTCTTGGGTTCTTGGAACA--GCAGGAAGCACTATG--GGCGCGGCGTCA---  
ATAACGCTGACGGTACAG---GCCAGACAA---TTGTTG---TCTGGTATAGTGCAACAGCAAAGC---  
AATTTG---CTGAGA---GCTATAGAGGCGCAACAGCATCTGTTGCAACTCACGGTCTGGGGCATT  
>MF373165  
GCTCAAGATAAACGACTGGGGGTAGTGGT-----  
-----  
AATAATGAAACCATTCCCCTCCCCTGCAGGATAAAACAAATTGTCAACATGTGGCAAGTAGTAGGACCAGCAA  
TGTATGCTCCCCTCATTGCAGGAAACATAACAAGTAACTCATCT---  
ATCACAGGACTACTATTGACACGTGATGGAGGAATCGTAACCAAT-----  
-----  
-----  
GCCACCGACACAGAGACATTTAGACCTGGAGGAGGAAATATGAAAGACAATTGGAGAAGTGAATTATATAAAT  
ATAAAGTGGTAGAAATTAAGCCATTA--GGAGTAGCACCCACTAAGGCACAGAGGAAAGTGGTGAAG-----  
-----AGAGAAAGAGAAAAAAGAGCA--GTGGGA--ATGGGAGCT---  
-----GTTCTCCTTGGGTTCTTGGAACA--GCAGGAAGCACTATG--GGCGCAGCGTCA---  
ATAACGCTGACGGTACAG---GCCAGACAA---CTGTTG---TCTGGTATAGTGCAACAGCAAAGC---  
AATTTG---CTGAAA--GCTATAGAGGCGCAACAACATCTGTTGCAACTCACAGTCTGGGGCATT  
>GU080195  
AATCATGATAGTGGGACAGAA-----  
-----  
GATAATTCAACCATCACACTTCCATGCAGAATAAAACAAATTGTAAACATGTGGCAGGAGGTAGGACGAGCAA  
TGTACGCTCCTCCCATTGAAGGAAACATAACATGTATCTCAAAT---  
ATCACAGGATTACTATTGACACGTGATGGGGGAGAAACAAACAGA-----  
-----  
-----  
ACAAATGACACATTGACACCTGGAGGAGGAAATATGAAGGACAATTGGAGAAGTGAATTATATAAATATAAAG  
TGGTAGAAATTAAGCCATTG---GGAATAGCACCCACTGGAGCAAAAAGGAGAGTGGTG-----  
-----GAGAGAGAAAAAAGAGCA--GTGGGA--CTAGGAGCT-----  
GTGATCTTTGGGTTCTTGGAACA--GCAGGAAGCACTATG--GGCGCAGCGTCA---  
ATAACGCCGACGGTACAG---GCCAGACAA---CTGTTG---TCTGGTATAGTGCAACAGCAAAT---  
AATTTG---CTGAGG---GCTATAGAGGCGCAACAGTATATGTTGCAACTCACGGTCTGGGGCATT  
>MF285011  
AATTATACAGATAATAGTACAACCTGATGAT-----  
-----  
ACCCAGACAAACATCACACTCCAATGTAGAATAAAACAAATTATAAACATGTGGCAGGAGGTAGGACGAGCAA  
TGTATGCTCCTCCCATTGCAGGAAACATAACATGCAACTCAAAC---  
ATCACAGGATTACTATTGACATATGATGGAGGTGAAACAGGTAAT-----  
-----

-----  
GGTACACCAGAGATATTCAGGCCTGGAGGAGGAAATATGAAGGACAATTGGAGAAGTGAATTATATAAAATATA  
AAGTGGTAGAAATTAAGCCATTG---GGAATAGCACCCACTGGAGCAAAAAGGAGAGTGGTG-----  
-----GAGAGAGAAAAAAGAGCA---GTAGGA---ATAGGAGCT-----  
---GTGTTCCCTTGGGTTCTTGGGAGCA---GCAGGAAGCACTATG---GGCGCGGCGTCA---  
ATAACGCTGACGGTACAG---GCCAGACAA---CTGTTG---TCTGGTATAGTGCAACAGCAAAGC---  
AATTTG---CTGAGA---GCTATAGAGGCGCAACAGCATATGTTGCAACTCACGGTCTGGGGCATT  
>KF725969  
ACCTATCTT-----  
-----  
AGTAATGAAACCTTTAGACTCCAATGCAAAATAAAACAAATTATAAACATGTGGCAGACGGTAGGACGAGCAA  
TGTATGCCCCCTCCCATTCGAGGAAACATAACATGTAATTC AAGC---  
ATCACAGGATTACTATTGACACGGGATGGAGGTTCCACAGATAAT-----  
-----  
-----  
AATAAAACAGAAACGTTTCAGACCTGGAGGAGGAGATATGAGAGACAATTGGAGAAGTGAATTATATAAAATATA  
AAGTGGTGGAAATTAAGCCATTG---GGAATAGCACCCACTAAAGCAAAAAGGAGAGTGGTG-----  
-----CAGAGAGAAAAAAGAGCA---GCA-----ATAGGAGCT-----  
---ATGATCCTTGGGTTCTTGGGAGCA---GCAGGAAGCACTATG---GGCGCGGCGTCA---  
ATGGCGCTGACGGTACAG---GTCAGACAA---TTGTTG---TCTGGTATAGTGCAACAGCAAAGT---  
AATTTG---CTGAGG---GCCATAGAGGCGCAACAGCATATGTTGCAACTCACGGTCTGGGGCATT  
>AY322187  
TATTATACTGGATGCACCACCAACGTACAACAG-----  
-----AAA---  
ACAATGCTTCCCATCAGACTACAACCTCATAATAAGTAATGTATGCCCTTGTCATGGCAAGGAGTGTGAGCAG  
CAACATCTGCTGCTACCATCCTA-----TTATCAACA---  
ATAACAGGAGGATCATTGACAACAAGAGGAGTGTTCACAACTGGT-----  
-----  
-----  
GGAGGTGATACCTTCAGACCTGGAGGAGGAGATATGAGGGACAATTGGAGAAGTGAATTATACAAATATAAAG  
TAGTAAGAATTGAACCACTA---GGTTTAGCACCCACCAGGGCAAAGAGAAGAGTGGTG-----  
-----GAAAGAGAGAAAAGAGCA---ATAGGA---CTAGGAGCT-----  
ATGTTCCCTTGGGTTCTTGGGAGCA---GCAGGAAGCACGATG---GGCGCAGCGTCA---  
CTGACGCTGACGGTACAG---GCCAGACAG---TTATTG---TCTGGTATAGTGCAACAGCAAAAC---  
AATTTG---CTGAGG---GCTATAGAGGCGCAACAGCATCTGTTGCAACTCACAGTCTGGGGCATT  
>KX587434  
TTCTAATCAAACCTGAGAGTAACACTACTGAAGGT-----  
-----  
AATGACACAGTAATTACACTCCCATGCAGAATAAAGCAAATTATAAACATGTGGCAGCAAGTAGGAAAAGCAA  
TGTATGCCCCCTCCCATCGCAGGGCAACTTAATTGCTCATCAAC---  
ATTACAGGGATATTATTAAACAAGAGATGGTGGTAGCGAGAACCATAACC-----  
-----  
-----  
AAGGGTAATGAGACCTTCAGACCAGTAGGAGGAGACATGAGGGACAATTGGAGAAGTGAATTATATAAAATATA  
AAATAGTAAAAATTGAACCCCTTA---GGAATAGCACCCACCAATGCAAAAAGAAGAGTGGTG-----  
-----CAGAGAGAAAAAAGAGCA---GTGGGA---CTAGGAGCC-----  
---TTGTTCCCTTGGGTTCTTGGGAATG---GCAGGAAGCACTATG---GGCGCAGCGTCA---  
GTGACGCTGACGGTACAG---GCCAGACAA---TTACTGTCTGGTATAGTGACAGCAGCAAAACAAC---  
TTGCTG---AGGGCT---ATTGAGGCGCAACAACACATGTTGCAGCTCACAGTCTGGGGCATC  
>MH078531  
TCTCAGCTGTTTAAATGGGACTGCAAAACAGATGAGAAATAACACAGAAATATATAACAAAACAATCATACTCC  
CATGCAGAATAAAACAAATTGTAAACAGGTGGCAGGAAGTAGGAAAAGCAATGTATGCCCCCTCCCATCCAAGG  
AATAATTAGCTGTTTCATCAAATATTACAGGGCTACTATTAACAAGAGATGGTGGGAACAGCAATACAAGTAGA  
AACAAATGAGACCTTCAGACCTGGGGGAGGAGATATGAGGGACAATTGGAGAAGTGAATTATATAAAATATAAAG  
TAGTGAGAATTGAGCCATTAGGAATAGCACCCACCAAGGCAAAGAGAAGAGTGGTGCAGAGAGAAAAAAGAGC  
AGTGGGAACACTAGGAGCTATGTTCCCTTGGGTTTCTGGGAACAGCAGGAAGCACTATGGGCGCAGCGGCAGTG  
ACGCTGACGGTACAAGCCAGGCAATTATTGTCTGGTATAGTGCAACAGCAGAAACAACCTGCTGAGAGCTATTG  
AGGCGCAACAGCATCTGTTGCAACTCACAGTCTGGGGCATC  
>MN486020

ACTCAAGGAAATAGTACTGGGAGTAATAATAACAATGAGACCATCACACTCCCATGCAGAATAAAACAAATTG  
TAAACATGTGGCAGGAAGTGGGAAAAGCGATGTATGCCCCCTCCCATCGGAGGACTAATTAGGTGTACATCAAA  
TATTACAGGGTTACTATTAACAAGAGATGGTGGTGGAAACAGATAACACCACTGAGACATCTGAGACATTGAGA  
CCAGGAGGGGGAAATATGAAGGACAATTGGGAGAAGTGAATTATATAAATACAAAGTAGTAAAAAATTGAACCAT  
TAGGAGTAGCACCCACCAAGGCAAGGAGAAGAGTGGTGCAGAGAGAAAAAGAATTGGAACACTAGGAGCCAT  
GTTCTTGGATTCTTGGGAGCAGCAGGAAGCACTATGGGCGCAGCGTCAATAACGGTGACGGTACAGGCCAGA  
CAATTACTGTCTGGGATAGTGCAGCAGCAGAACAACTCTGCTGAGGGCTATTGAGGCGCAACAGCATATGTTGC  
AACTCACAGTCTGGGGCATC

>EF637053

ACTCAGAACAGTACTTGGCACAAGAATGAAACTACTTGGCAAATGAATGGAAATACTGGAGAGAGGACTAATG  
ATACTATCACACTCCCATGCAGAATAAAACAAATTATAAACAGGTGGCAGGAAGTAGGAAAAGCAATGTATGC  
CCCTCCCATCAGAGGACTAATTAGATGTTTCATCAAATATCACAGGGCTGCTATTAACAAGAGATGGTGGTGGG  
GACAAACGGGTCTGAGTCTGAGACCTTCAGACCTGGAGGAGGAAATATGAGGGATAATTGGAGAAGTGAATTAT  
ATAAATATAAAGTAGTAAGAATTGAGCCATTAGGAGTAGCACCCACCAAGGCAAGAGAGAAGAGTGGTGCAGAG  
AGAAAAAAGAGCAGTGGGAACAATAGGAGCTATGTTCTTGGGTTCTTGGGAGCAGCAGGAAGCACTATGGGC  
GCAGCGTCACTGACGCTGACGGTACAGGCCAGACAATTATTGTCTGGTATAGTGCAACAGCAAAACAATTTGC  
TGAGAGCTATTGAGGCGCAACAACATCTGTTGCAACTCACAGTCTGGGGCATC

>JN692454

ACTCAGCTGTTTAATAATACTTGGGAATACAACACAGCTTGATGATGATGAGCAGGATGACAATGGCACCCCTCA  
CCCTCCCATGCAGAATAAAACAAATCATAAACAAGTGGCAGGAAGTAGGAAAAGCAATATATGCCCCCTCCCAT  
CAAAGGCTTAATTAGCTGTAACCTCAACAATTACAGGGCTGATATTAACAAGAGATGGTAATGGAACCGACCAT  
GACAAATGAGTCTGAAATTTTCAGACCTGGAGGAGGAAACATGAAGGACAATTGGAGAAGTGAATTATATAAAT  
ATAAAGTAGTAAGAATTGAGCCATTAGGAATAGCACCCCTCCAAGGCAAGAGAGAAGAGTGGTGCAAAGAGAGAA  
AAGAGCAGTGGGAATGATAGGAGCTATGTTCTTGGGTTCTTGGGAGCAGCAGGAAGCACTATGGGCGCAGCG  
TCAGTAACGCTGACGGTACAGGCCAGACTATTATTGTCTGGTATAGTGCAACAGCAAAACAACCTTGCTGAGAG  
CTATTGAGGCGCAACAGCATATGTTGCAACTCACAGTCTGGGGCATC

>JN692455

AATTATACTTTGGAAAATGATACTTTCAAAAATGATACTAGGCATAAAACTGAGAATATCACACTCCAATGCA  
GAATAAAACAAATTATAAACAGGTGGCAGAAAGCAGGAAAGGCAATGTATGCCCCCTCCCATCAAAGGACAGAT  
TAGATGTTTCATCAAACATTACAGGGATATTATTAACAAGAGATGGTGGCATAACAACAACAGTAGTGACAAC  
AATACAGAGATCTTCAGACCTGGAGGAGGAGACATGAGGGACAATTGGAGAAGTGAATTATATAAATATAAAG  
TAGTAAAAAATTGAGCCATTAGGAGTAGCACCCACCAAGGCAAGGAGAAGAGTGGTGCAGAGAGAAAAAGAGC  
AGTGGGAACGATAGGAGCTATGTTCTTGGGTTCTTGGGAGCAGCAGGAAGCACTATGGGCGCAGCATCACTG  
ACGCTGACGGTACAGGCCAGACAATTATTGTCTGGTATAGTGCAACAGCAGAACAACTCTGCTGAGGGCCATTG  
AGGCGCAACAGCATCTGTTGCAGCTTACAGTCTGGGGCATC

>FJ195086

GGTCAGTGGGATGGTACTATTGGGCCAGATGAGAATGGCAATATCACACTCCCATGCAGAATAAAACAAATTA  
TAAACAGGTGGCAGGAAGTAGGAAAAGCAATATATGCCCCCTCCCATCAGAGGACAAATTAGCTGTTCTCATAA  
TATTACAGGGCTGCTACTACAAGAGATGGTGGTAGTAATAACACGAGCAATAATGAGACCTTCAGACCGGGA  
GGAGGAAATATGAAGGACAATTGGAGAAGTGAATTATATAAATATAAAGTAGTACAAATTGAGCCATTAGGAA  
TAGCACCCACCAAGGCAAAAAGAAGAGTGGTGCAGAGAGAGAAAAGAGCAGTAATAGGAGCTATGTTCTTGG  
GTTCTTGGGAGCAGCAGGAAGCACTATGGGCGCAGCATCACTGACGCTGACGGTACAGGCCAGACTATTATTG  
TCTGGTATAGTGCAACAGCAGAGCAATCTGCTGAGGGCTATTGAGGCGCAACAGCATCTGTTGCAACTCACAG  
TCTGGGGCATC

>JN692468

AGTTACAACAACACTAGCAAAACTTGGGAATAAACTGAAGAGAACCATACTGGAGTAAATAACACAATCACAC  
TCCCATGTAGAATAAAGCAAATTATAAACAGGTGGCAGGAAGTAGGAAAAGCAATGTATGCCCCCTCCATTAG  
GGGACTAATTAAATGTACATCAAATATTACAGGGATAATATTAACAAGAGATGGTGGTAATGAGACTGGGACC  
GAGACCTTCAGACCTGGAGGAGGAGATATGAGGGACAACCTGGAGAAGTGAATTATATAAATATAAAGTAGTAA  
AAATTGAGCCATTAGGAATAGCACCCACCAAGGCAAGGAGAAGAGTGGTGCAGAGAGAAAAAGAGCAGTGGG  
AACAAATAGGAGCTATGTTCTTGGGTTCTTGGGAACAGCAGGAAGCACTATGGGCGCAGCGTCAATCACGCTG  
ACGGTACAGGCCAGACAATTATTGTCTGGTATAGTGACAGCAGCAGAACAAATTTGCTGAAGGCTATTGAGGCGC  
AACACATCTGTTGCAACTCACAGTCTGGGGCATC

>KT427737

ACTCATAGTACTTGGGAATACGAATACAACCTGGAAATGACAATATCACACTCCAGTGCAGAATAAAACAAATTA  
TAAACAGGTGGCAAGAAGTAGGAAAAGCAATATATGCCCCCTCCCATCAAAGGAAAAAATTAATTGTCTATCAAA  
TATTACAGGGCTGCTGTTAGTAAGAGATGGTGGTAGGAACACAAGTGGGTCCGAAAACCTTCAGACCTGGAGGA  
GGAAATATGAGGGACAATTGGAGAAGTGAATTATATAAATATAAAGTAGTAAAAAATTGAACCACTAGGAATAG  
CACCCACCAAGGCAAGAGAGAAGAGCGGTGCAGAGAGAGAGAAGAGCAGTGGGAACACTGGGAGCTATGTTCTT  
TGGGTTCTTGGGAGCAGCAGGAAGCACTATGGGCGCAGCGGCAACAACGCTGACGGTACAGGCCAGACTATTA

TTGTCTGGTATAGTGCAACAGCAAAATAATTTGCTGAGGGCTATTGAGGCGCAACAGCACATGTTGCAACTCA  
CAGTCTGGGGCATC

>KT427704

AATTATACTCCCAATACTACAGGAAATATTACACTCCCATGCAGAATAAAACAAATTATAAACAGATGGCAGG  
AAGTAGGAAAAGCAATGTATGCCCCCTCCCATCGGAGGACAAATTAAATGTTTCATCAAATATTACAGGGATGAT  
ATTAACATGGGATGGGGGGAACGAAACCAGGGACAATGAGACCTTCAGACCTGGAGGAGGAGATATGAGGGAC  
AATTGGAGAAGTGAATTATATAAAATATAAAGTAGTAAAAATTGAGCCAATAGGAGTAGCACCCACCAAGGCAA  
AGAGAAGAGTGGTGCAGAGAGAAAAAGAGCGGTAACGCTAGGAGCCATGTTCTTGGGTTCTTAGGAGCAGC  
AGGAAGCACTATGGGCGCAGCGTCAATGACGCTGACGGTACAGGCCAGACAATTATTGTCTGGTATAGTGCAA  
CAGCAAAGCAATTTGCTGAGGGCTATTGAGGCGCAACAGCATCTGTTGCAACTCACAGTCTGGGGCATT

>KT427872

ACTCACTGGTCATTAAATATAAAGTGGCACTGGCAATATCACACTTCCATGCAGAATAAAACAAATTATAAAACA  
AGTGGCAGGAAGTAGGAAGAGCAATATACGCCCTCCCATCCAAGGATTAATTAGATGCTCATCAAATATTAC  
AGGGCTGCTACTGACACGGGATGGTGGTATCACAACTCTAGCAACCCTGAGGTCTTCAGACCTGGGGGAGGA  
GATATGAGAGACAATTGGAGAAGTGAAGTATATAAAATATAAGGTAGTAAAAATTGAGCCAGTAGGAATAGCAC  
CCACCAAGGCAAGGAGAAGAGTGGTGCAGAGAAAAAGAGCAGTGGGGACATTAGGAGCTATGTTCTTGG  
GTTCTTGGGAGCAGCAGGAAGCACTATGGGCGCAGCGTCATTGACGCTGACGGTACAGGCCAGACTATTATTG  
TCTGGTATAGTGCAACAGCAAAACAATTTGCTGAGAGCTATTGAGGCGCAACAGCATATGTTGCAACTCACAG  
TCTGGGGCATC

>KJ849818

AGTTACCTTAATGAAACTAACGAAACAAATATCACACTCCCATGCAGAATTAAACAAATTATAAACATGTGGC  
AGAGAGTAGGAAAAGCAATGTATGCCCCCTCCCATTCAGGACCAATTAAGTTCATCAAATATTACAGGGCT  
GCTCTTAGTAAGAGACGGTGGTAATAATAACAAATGAGACCTTCAGACCTGGAGGAGGAAATATGAAGGAC  
AATTGGAGAAGTGAATTATATCGATATAAAGTAGTAAAAATTGAACCACTAGGACTAGCACCTACCACGGCAA  
AGAGAAGAGTGGTGCAGAGAGAAAGAAGAGCAGTGGGACTAGGAGCGTTGTTCTTGGGTTCTTAGGAGCAGC  
AGGAAGCACTATGGGCGCAGCGTCACTGACGCTGACGGTACAAGCCAGACAATTATTGTCTGGTATAGTGCAA  
CAGCAGAACAACCTGCTGATGGCTATTGAGGCGCAACAACATATGTTGCAACTCACAGTCTGGGGCATC

>KT427751

TTTCATTGGCCTGTCAATGACACTAATAGTAATAGTACAAATGATATAGTTACCATCCCATGCAGAATAAAAC  
AAATTATAAACAGATGGCAGGAAGTAGGAAAAGCAATGTATGCCCCCTCCCATCAGAGGGCAGATTAAATGTTT  
ATCAAATATTACAGGGCTGCTATTGACAAGGGATGGTGGTAACAACAACACGGAGAACATACAGAGGTCTTC  
AGACCTGAAGGAGGAGATATGAGGGACAATTGGAGAAGTGAAGTATATAAAATATAAAGTAGTAAAAATTGAGC  
CATTAGGAGTAGCACCCACCAAAGCAAAGAGAAGAGTGGTGCAGAGGGAAAAAGAGCAGTGGGAGTGATAGG  
AGCTATGTTCTTGGGTTCTTGGGAGCAGCAGGAAGCACTATGGGCGCAGCGTCACTGACGCTGACGGTACAG  
GCTAGACAATTATTGTCTGGTATAGTGCAACAGCAAAACAATTTGCTGAGAGCTATTGAGGCGCAACAGCATC  
TGTTGCAACTCACAGTCTGGGGCATC

>KT427803

TTTCACAGTTCCTTGAATGCAAGTAATTTGAATACAACACAGAATGGGACTGATAATAGTAATATCACACTCC  
CATGCAGAATAAAACAAATTATAAATAGGTGGCAGGAAGTAGGAAAATCAATGTATGCCCCCTCCCGTCCAAGG  
ACTAATTAAATGTTTCATCAAATATTACAGGGCTGCTATTACAAGAGATGGTGGTAGCAACACCACGGAGAAG  
GAAGTGTTCAGACCTGGGGGAGGAAATATGAAGGACAATTGGAGAAGTGAATTATATAAAATATAAAGTAGTAA  
AAATTGAGCCATTAGGAGTAGCACCCACCAAGGCAAGGAGAAGAGTGGTGCAGAGAGAAAAAGAGCAGTGAC  
ACTAGGAGCTATGTTCTTGGGTTCTTGGGAGCAGCAGGAAGCACTATGGGCGCAGCGTCACTAACGCTGACG  
GTACAGGCCAGACAATTATTGTCTGGTATAGTGACAGCAGCAGAACAATTTGCTGAGGGCTATTGAGGCGCAAC  
AACATATGTTGCAACTCACAGTCTGGGGCATC

>KT427797

TTTTATAGTAAGTGGACTACAAATTCAACTAACGAAGGGAAGTGGACTACAAATTCAACTAACAAATGGGAATA  
ACACCATCACACTCCCATGCAGAATAAAACAAATTGTAAACATGTGGCAGGAAGTAGGAAAAGCAATGTATGC  
CCCTCCCATCAGTGGAAATAATTAAATGTTTCATCAAATATTACAGGGATACTGTTAACAAGAGATGGTGGTAAT  
AATAGTACGAACGAGACCTTCAGACCAGCAGGAGGAGATATGAGGGACAATTGGAGAAGTGAATTATATAAAT  
ATAAAGTAGTAAAAATTGAACCATTAGGATTAGCACCTACCAAGGCAAGGAGAAGAGTGGTGCAGAGAGAAAA  
AAGAGCAGTGGGAACACTAGGAGCTATGTTCTTGGGTTCTTGGGAGCAGCGGGAAGCACTATGGGCGCAGCG  
TCAATGGCGCTGACGGTACAGGCCAGACTATTATTGTCTGGTATAGTGCAACAGCAAAATAATTTGCTGAAGG  
CTATTGAGGCGCAACAACACCTGTTGCAACTCACGGTCTGGGGCATT

>KX181894

AGTTATTGGCTGAATAATACTTGGGTGAATACGACTCTGGAAATCAATGGTACTATCACACTCCCATGCAGAA  
TAAAAACAGATTATAAACAGGTGGCAAGAAGTAGGAAAAGCAATGTATGCCCCCCCCCATCAGAGGACACATTAA  
TTGTTTATCAAACATTACAGGGCTGATATTAGCAAGGGATGGTGGTATTAATGTGACCAACGATAGCGAGACC  
TTCAGACCTGGAGGAGGAGACATGAGGGACAATTGGAGAAGTGAATTATACAAATATAAAGTAGTAAAAATTG  
AGCCATTAGGAGTAGCACCCACCAAGGCAAGAGAAGAGTGGTGCAGAGAAAAAGAGCAGTGGGAACGCT

AGGAGCCATGTTCTTGGGTTCTTGGGAGCAGCAGGAAGCACTATGGGCGCAGCGGCAACAACGCTGACGGTA  
CAGGCCAGACTATTGTTGTCTGGTATAGTGCAACAGCAGAACAACTCTGCTGAGGGCTATTGAGGCGCAACAGC  
ATATGTTGCAACTCACAGTCTGGGGCATC

>KX181903

ATTTACGGATGGAATGGAACAATCCCCGCTAACATCACACTTCCATGTAGAATAAAACAAATTATAAACAGGT  
GGCAGGAAGTAGGAAAAGCAATGTATGCCCCCTCCCGTCAGCGGGCTAATTAAGTGTACATCAAATATTACAGG  
ACTACTATTAACAAGAGATGGTGGTATCAATGAAAATAATATATCTGAAACCTTCAGACCTGGAGGAGGAGAT  
ATGAGGGACAATTGGAGAAGTGAATTATATAAATATAAAGTAGTAAAAATTGAACCATTAGGAATAGCACCCCT  
CCAAGGCACAGAGAAGAGTGGTGCAGAGAGAAAAAAGAGCAGTGGGAACGCTGGGAGCCATGTTCTTGGGTT  
CTTGGGAGCAGCAGGAAGCACTATGGGCGCAGCGGCAGCAACGCTGACGGTACAAGCCAGACTATTGTTGTCT  
GGTATAGTGCAGCAGCAGAACAACTCTGCTGAGGGCTATTGAGGCGCAACAGCATATGTTGCAACTCACAGTCT  
GGGGCATC

>KX181914

AATCAGACGTCTAATGGGAATAGGACCATTACACTCCCATGCAGAATAAAACAAATCATAAACAGATGGCAAG  
AAGTAGGACAAGCAATGTATGCCCCCTCCCATTAGAGGACAGATTAGATGTACATCAAATATTACAGGGTTACT  
ATTAACAAGAGATGGTGGTAACAGGAACACCACAGACAACAATACTGAGGTTTTTCAGACCTGGAGGAGGAGAT  
ATGAGGGACAATTGGAGAAGTGAATTATATAAATATAAAGTAGTAAAAATTGAGCCATTAGGAATAGCACCCA  
CTAGGGCAAAGAGGAGAGTGGTGCAAAGAGAGAAAAAGAGCAGCGGGACTAGGAGCTTTGTTTCATTGGGTTCTT  
GGGAGCAGCAGGAAGCACTATGGGCGCAGCGTCAGTGACGCTGACGGTACAGGCCAGACAATTATTGTCTGGA  
ATAGTGCAACAGCAGAACAAATTTGCTGAGAGCTATTGAGGCGCAACAACATCTGTTGCAACTCACAGTCTGGG  
GCATC

>MG571982

ACTCATAAACTTGGGAAAATGGTAATGATAATGAACTATCACACTCCCATGCAGAATAAAACAAATTATAA  
ACAGGTGGCAGGAAGTAGGAAGAGCAATGTATGCCCCCTCCCATTCAGGACAAATTAAGTGTACATCAAATAT  
AACAGGGATGATATTAACAAGAGATGGGGGTAATGAGAGCGCACCTGAAGAAATCTTCAGGCCTGGGGGAGGA  
GATATGAGGGACAATTGGAGAAGTGAATTATATAAATATAAGGTAGTAAAAATTGAGCCATTAGGAGTAGCAC  
CCACCAAGGCAAAGAGAAGAGTGGTGCAGAGAGAAAAAGAGCGATAACGCTGGGAGCTATGTTCTTGGGTT  
CTTGGGAGCAGCAGGAAGCACTATGGGCGCAGCGTCGCTGACGCTGACGGTACAGGCCAGACTATTATTGTCT  
GGTATAGTGCAGCAGCAGAACAACTCTGCTGAGAGCTATTGAGGCGCAACAGCATATATTGCAACTCACAGTCT  
GGGGCATT

>MG571991

AATTATACAGGGTCTAATGACACCATCACACTCCCATGCAAAATAAAACAAATTGTAAACAAGTGGCAGGAAG  
TAGGAAAAGCAATATACGCCCCCTCCCATCAGTGGAACATTAGCTGTTTCATCAAATATTACAGGGCTGATATT  
AACAGAGATGGAGGCGATAATGAGTCTGAACTTTTCAGACCTGGAGGAGGAAATATGAAAGACAATTGGAGA  
AGTGAATTATATAAATATAAAGTAGTAAAAATTGAGCCATTAGGAGTAGCACCCACCAAGGCAAAGAGAAGAG  
TGGTGCAGAGAGAAAAAAGAGCAGTGGGAACAATAGGAGCTATGTTCTTGGGTTCTTGGGAGCAGCAGGAAG  
CACTATGGGCGCAGCGGCAGTAACGCTGACGGTACAGGCCAGACAATTATTGTCTGGTATAGTGCAACAGCAG  
AACAACTGCTGAGGGCTATTGAGGCGCAGCAGCATATGTTGCAGCTCACAGTCTGGGGCATC

>FJ653506

GATCAAAGTAATAGTACTTGGCATACTAATAATACTTGAATAATACTGAAGGCGTTATCACACTCCACTGCA  
GAATAAAACAAGTTATAAACCTGTGGCAGGAAGTAGGAAAAGCAATGTATGCCCCCTCCCATCCAAGGACAAAT  
TAACTGTACATCAAATATTACAGGACTGCTTTTAAACAAGAGATGGTGGGAATAACAATGGTAGTAATAACAGT  
GAGACCGAGACCTTTAGACCTGGAGGAGGAGATATGAGGGACAATTGGAGAAGTGAATTATATAAATATAAAG  
TAGTAAGAATTGAACCATTAGGAATAGCACCCACCAAGGCAAAAAGAAGAGTGGTGCAAAGAGAGAAAAAGAGC  
AGTGGGACTGGGAGCTATATTCTTGGGTTCTTGGGAGCAGCCGGAAGCACTATGGGCGCAGCGTCGATAACG  
CTGACGGTACAGGCCAGACAAGTATTGTCTGGTATAGTGCAACAGCAGAACAACTTGTCTGAAGGCTATTGAGG  
CGCAACAGCATTTGCTGCAACTCACAGTCTGGGGCATT

>EU023932

ACTCATTTGAGTAATACTACGGAGTCAAATGAAAATGACACAATCACACTCCAATGTAGAATAAAACAAATTA  
TAAACATGTGGCAGGAAGTAGGAAAAGCAATGTATGCCCCCTCCCATTCAGGACAAATTAAGTGTTCATCAA  
AATTACAGGGCTACTTTTAAACAAGAGATGGTAGTAGCACAAATGAGACAAATGGGACTGAGATCTTCAGACCT  
GGAGGAGGAGATATGAGGGACAATTGGAGAAGTGAATTATATAAATATAAAGTAGTAGGAATTGAACCAATAG  
GAATAGCACCCACCAAGGCAAAGAGAAGAGTGGTGCAGAGAGAAAAAAGAGCAGTGGGAACATTAGGAGCTAT  
GTTCTTGGGTTCTTGGGAGCGGCAGGAAGCACTATGGGCGCAGCGTCAATGACGCTGACGGTACAGGCCAGA  
CAATTATTGTCTGGTATAGTGCAGCAGCAAAATAAATTTGCTGAGGGCTATTGAGGCGCAACAACATGTGTTGC  
AACTCACAGTCTGGGGCATC

>JF932469

AATTATACTTGGGAAGTCACTAATACTTGAATGATACTGCAGGAAATGACAATATCACGCTCCCTTGCAGAA  
TAAAACAAATTGTAAATATGTGGCAGGAAGTAGGGAGAGCAATGTATGCCCCCCCCATTGAAGGACAAATTAG  
ATGTTTCATCAAATATTACAGGGTTGCTATTAACAAGAGATGGTGGTAATACTACGAACGGGACCGAGATCTTC

AGACCTGGAGGAGGAAATATGAGGGACAATTGGAGAAGTGAATTATATAAATATAAAGTAGTAAAAATTGAAC  
CATTAGGAGTAGCACCCACCAAGGCAAAGAGAAGAGTGGTGCAGAGAGAAAAAGAGCAGTGGGAACGATAGG  
AGCTATGTTTCCTTGGGTTCTTGGGAGCAGCAGGAAGCACTATGGGCGCAGCGTCAATAACGCTGACGGTACAG  
GCCAGACAATTGTTGTCTGGTATAGTGCAACAGCAGAGAAAATTTGCTGAGGGCTATTGAGGCGCAACAGCAGC  
TGTTGCAACTCACAGTCTGGGGCATC

>KM218138

AATTATACTTGGGAATAATGGCACCTGGCTAGCGCCAAATATCACTGGAAATAACATCACCATCCATTGCAGAA  
TAAAACAAATTATAAACAGGTGGCAGGAAGTAGGAAAAGCAATGTATGCCCCCTCCCATCGCGGGACAACCTTAA  
TTGCACATCAAATATTACAGGGCTGCTATTAGTAAGAGATGGTGGTAACACCACCAACACCATCGAGAACAAC  
ACCGAAATCTTCAGACCTGGAGGAGGAGATATGAGGGACAATTGGAGAAGTGAACCTATATAAATATAAAGTAG  
TAAAAATTGAGCCATTAGGACTAGCACCCACCAAGGCAAAGAGAAGAGTGGTGCAGAGAGAAAAAGAGCAGT  
GGGAACAATAGGAGCTATGTTTCCTTGGGTTCTTGGGAGCAGCAGGAAGCACTATGGGCGCAGCGTCACTCACG  
CTGACGGTACAGGCCAGACTATTACTGTCTGGGATAGTGCAACAGCAAAACAATTTGCTGAAGGCTATTGAGG  
CGCAACAGCACCTGTTGCAACTCACAGTCTGGGGCATC

>KM218195

AATCATACTTGGCTGGCTAATAATACTTGGCAAGAGTCTTGGCAAGGGTCAGATACTATTACTCTCCAATGCA  
GAATAAAACAAATTATAAACAGATGGCAGGAAGTAGGAAAAGCAATGTATAACCCCTCCCATCAGGGGACAAAT  
TAGATGTTTCATCAAATATTACAGGGCTTCTGTTAACAAGAGATGGTGGTAACACGAATGGGTCCAGAAATGGG  
CCTGAAACCTTCAGACCTGGAGGAGGAGATATGAGAGACAATTGGAGAAGTGAATTATATAAATATAAAGTAG  
TAAAAATTGAGCCACTAGGAATAGCACCCACCAAGGCAAAGAGAAGAGTGGTGCAGAGAGAAAAAGAGCAGT  
GGGAACAATAGGAGCTATGTTTCCTTGGGTTCTTGGGAGCAGCAGGAAGCACTATGGGCGCAGCGTCAGTGACG  
CTGACGGTACAGGCCAGACTATTACTGTCTGGTATAGTGCAACAGCAGAAACAATCTGCTGAAAGCTATTGAGG  
CGCAACAGCACCTGTTGCAACTCACAGTCTGGGGCATC

>JF932478

ACTTATAATGGTACTTGGGAAGGTACTACAGGAAATGACACTATCACGCTCCCTTGCAGAATAAAACAAATTA  
TAAACATGTGGCAGGAAGTAGGGAAAGCAATGTATGCCCCCTCCCATTAGAGGACAAATTAGATGTTTCATCAAA  
TATTACAGGGTTACTATTAACAAGAGATGGTGGTACTAATGAGACCAATACCAACGAGACCTTCAGACCTGGA  
GGAGGAGATATGAGAGACAATTGGAGAAGTGAATTATATAAATATAAAGTAGTACAAATTGAACCATTAGGAG  
TAGCACCCACCAAGGCAAAGAGAGTGGTGCAGAGAGAAAAAGAGCAGTGGGAACAATAGGAGCTATGTT  
CCTTGGGTTCTTGGGAGCAGCAGGAAGCAATGGGCGCAGCGTCAATAACGCTGACGGTACAGGCCAGACAA  
TTGTTGTCTGGCATAGTGCAACAGCAGAGAAAATTTGCTGAGGGCTATTGAGGCGCAACAGCATCTGTTGCAAC  
TCACAGTCTGGGGCATC

>JF346918

ACTTATGCTTGGGAATGATACTAGGAATACAGTAAATGACACTATCACGCTCCCTTGCAGAATAAAGCAAATTA  
TAAACATGTGGCAGGGAGTAGGGAAAGCAATGTATGCCCCCTCCCATTAGAGGACAAATTAGGTGTGTATCAAA  
TATTACAGGGTTGCTATTAACAAGAGATGGTGGTATTAATAAGAACAGCACCCCCGAGACCTTCAGACCTGGA  
GGAGGAGATATGAGGGACAATTGGAGAAGTGAATTATATAAATATAAAGTAGTAAGAAATTGAACCATTAGGAG  
TAGCACCCACCAAGGCAAAGAGAAGAGTGGTGCAGAGAGAAAAAGAGCAGTGGGAACGTTCCGAGCTATGTT  
CCTTGGGTTCTTGGGAGCAGCAGGAAGCACTATGGGCGCAGCGTCACTAACGCTGACGGTACAGGCCAGACAA  
TTGTTGTCTGGTATAGTGCAACAGCAGAGAAAATCTGCTGAGGGCTATTGAGGCGCAACAGCACATGTTGCAAC  
TCACAGTCTGGGGCATC

>KC596066

ACTTATCTGGCTAATGATACTAGATCAGAGAAGAATACTACTGGTGTTCATCACACTCCCATGCAGAATAAAAC  
AAATTATAAACAGGTGGCAAGAAGTAGGGAGAGCAATGTATGCCCCCTCCCATCATGGGAAAAATTAACTGTTTC  
ATCAAATATTACAGGGATACTATTAACAAGAGATGGTGGTGAAACAAATGAGTCCAGAAATGGGTCCGAAACC  
TTCAGACCGGGAGGAGGAAATATGAAAGATAATTGGAGAAGTGAATTATATAAATATAAAGTAGTAAAAATTG  
AGCCACTAGGAATAGCACCCACCAAGGCAAGGAGAAGAGTGGTGCAGAGAGAAAAAGAGCAGTAACACTAGG  
AGCTGTATTTCTCGGGTTCTTGGGAGCAGCAGGAAGCACTATGGGCGCAGCGTCAATGACGCTGACGGTACAG  
GCCAGACTATTACTGTCTGGTATAGTGCAACAGCAGAAACAATCTGCTGAGAGCTATTGAGGCGCAACAGCACA  
TGTTGCAACTCACAGTCTGGGGCATC

>KX693556

CCTCAGATTGCTACTACAGGAAATGACACTATCACGCTCCCTTGCAGAATAAGACAAATTGTAAACATGTGGC  
AGCAAGTAGGGAAAGCAATGTATGCCCCCTCCCATAGCAGGACAAATTAGATGTTTCATCAAATATTACAGGGGT  
GCTATTAACAAGAGATGGTGGTAATAATGAGAGCAAGGCCAACGCAACGAGACCTTCAGACCTGCGGGAGGA  
GATATGAGAGACAATTGGAGAAGTGAATTATATAAATATAAAGTAGTAAAAATTGAACCATTAGGAGTAGCAC  
CCACCAAGGCAAAGAGAAGAGTGGTGCAGAGAGAAAAAGAGCAGTGGGAACACTAGGAGCTATGTTTCCTTGG  
GTTCTTGGGAGCAGCAGGAAGCACTATGGGCGCAGCGTCAATAACGCTGACGGTACAGGCCAGACAATTGTTG  
TCTGGTATAGTGAGCAGCAGAGAAAATTTGCTGAGAGCTATTGAGGCGCAACAGCATCTGTTGCAACTCACAG  
TCTGGGGCATC

>KX693136

ACTCAGACAGGTACTACAGGAAACAGCACTATCACGCTCCCTTGCAGAATAAAACAAATTGTAAACATGTGGC  
AGGAAGTAGGGAAAGCAATGTATGCCCCCTCCATTGACAGGAAAAATTAGATGTTTCATCAAATATTACAGGGCT  
GCTATTAACAAGAGATGGTGGTAATGAGAGCAAGACCACCAACACAGAAACCTTCAGACCTGGAGGAGGAGAT  
ATGAGAGACAATTGGAGAAGTGAATTATATAAAATATAAAGTAGTAAAAATTGAACCATTAGGAGTAGCACCCA  
CCAAGGCAAAGAGAAGAGTGGTGCAGAGAGAAAAAAGAGCAGTGGGAACAATAGGAGCTATGTTTCCTTGGGT  
CTTGGGAGCAGCAGGAAGCACTATGGGCGCAGCGTCAATAACGCTGACGGTACAGGCCAGACAATTGTTGTCT  
GGTATCGTGCAACAGCAGAGAAATTTGCTGAGAGCTATTGAGGCGCAACAGCATCTGTTGCAACTCACAGTCT  
GGGGCATC

>KX693292

AATTATACTAAAGAAGATGACAATCTCACGCTCCCTTGCAGAATAAAACAAATTGTAAACATGTGGCAGGGAG  
TAGGGAGAGCAATGTATGCCCCCTCCATTAGAGGACAAAATTAGATGTTTCATCAAATATTACAGGGTTGATATT  
AACAAAGAGATGGTGGCAAAAAATGGTAAAAATGAGAGCAACACCAATGAGACCTTCAGACCTATAGGAGGAAAT  
ATGAAAAGACAATTGGAGAAGTGAATTATATAAAATATAAAGTAGTAAAAATTGAACCATTAGGAGTAGCACCCA  
CCAAGGCAAAGAGAAGAGTGGTGCAGAGAGAAAAAAGAGCAGTGGGAACGCTGGGAGCTATGTTTCCTTGGGT  
CTTGGGAACAGCAGGAAGCACTATGGGCGCAGCGTCACTAACGCTGACGGTACAGGCCAGACAATTGTTGTCT  
GGTATAGTGCAACAGCAGAGAAATCTGCTGAGGGCTATTGAGGCGCAACAGCATATGTTGCAACTCACAGTCT  
GGGGCATC

>KP109511

AATTATACTCTCCTGGCTAATGGTACTTGGCAAGGGCCAAACAGTACTAATGGAAATGGCACACTCACACTCC  
CATGCAGAATAAAACAAATCATAAACAGGTGGCAGGAAGTAGGAAAAGCAATGTATGCCCCCTCCCATCGCGGG  
AAACATTAGCTGTTTATCAAATATTACAGGGCTGCTATTAACAAGAGATGGTGGTATCAACATGACGAATAAT  
GGGTCCGAAATCTTCAGACCTGAAGGAGGAGATATGAGGAACAATTGGAGAAGTGAATTATATAAAATATAAAG  
TAGTAAAAGTTGAGCCACTAGGAATAGCACCCACCAGGGCAAAGAGAAGAGTGGTGCAGAGAGATAAAAGAGC  
AGTGGGAACAATAGGAGCTATGTTCTCGGGTTCTTGGGAGCAGCAGGAAGCACTATGGGCGCAGCGTCAGTG  
ACGCTGACGGTACAGGCCAGACTATTACTGTCTGGTATAGTGCAACAGCAGAACAAATCTGCTGAGAGCTATTG  
AGGCGCAACAGCACATGTTGCAACTCACAGTCTGGGGCATC

>KU724105

AATTATACTTTGTTTAATAATGGTACTTGGAAAGAGGGTACTAACAAAAGTGTCATCACACTCCCATGCAGAA  
TAAAACAAATTATAAACAGGTGGCAGGAAGTAGGAAAAGCAATGTATGCCCCCTCCCATCAGGGGACAAATTAA  
CTGTACATCAAATATTACAGGGCTGCTATTAACAAGAGATGGTGGTAATAGTGGTACTGGGTCCAAAAATGGG  
AACGAAACCTTCAGACCTGGAGGGGGAAATATGAGAGACAATTGGAGAAGTGAATTATATAAAATATAAAGTAG  
TAAAAATTGAGCCACTAGGAATAGCCCCCACCACGGCAAGGAGAAGAGTGGTGCAGAGAGAAAGAAGAGCAGT  
GGGAACATTAGGAGCTATGTTCTCGGGTTCTTGGGAGCAGCAGGAAGCACTATGGGCGCAGCGTCGCTGACG  
CTGACGGTACAGGCCAGACTATTACTGTCTGGTATAGTGCAACAGCAGAACAAATCTGCTGAGAGCTATTGAGG  
CGCAACAGCATATGTTGCAACTCACAGTCTGGGGCATC

>AY561238

ACTCAGTGGAAAGGAAATAGCACACTCCCAGAAAATGTTACACTCCCATGCAGAATAAAACAATTTGTAAACA  
TGTGGCAGGAAGTAGGAAAAGCAATGTATGCCCCCTCCCATCAGCGGACAAATTAGATGCTCATCAAATATTAC  
AGGGCTGCTATTAACAAGAGATGGTGGTGCCAATGGTACCCTGATATAGACGAGATCTTCAGGCCTGGAGGA  
GGAGATATGAGGGACAATTGGAGAAGTGAATTATATAAAATATAAAGTAGTAAAAATTGAACCATTAGGAATAG  
CACCCACCAAGGCAAAGAGAAAAAGTGGTGCAAAGAGAAAAAAGAGCAGTGGGACTAGGAGCTTTGTTCTTAG  
GTTCTTAGGAGCAGCAGGAAGCACTATGGGCGCAGCGTCAGTGACGCTGACGGTACAGGCCAGACAATTATTG  
TCTGGTATAGTGCAACAGCAGAACAAATCTGCTGAGAGCTATTGATGCGCAACAGCATCTGTTGCAACTCACAG  
TCTGGGGCATT

>FJ388940

TTTCAATATAATAGTACTTGAATGATACTGGAGAGATGAATGGCACTATCATGCTCCCATGCAGAATAAGAC  
AAATCATAAACCTGTGGCAGGAAGTAGGAAAAGCAATGTATGCCCCCTCCCATCAAAGGACTAATCAGATGTTT  
ATCAAATATTACAGGACTGCTATTACTAAGAGATGGTGGTAATAATAGCAGTGGGAGTAATAACACCGAGATC  
TTCAGACCTGGAGGAGGAGATATGAGGGACAATTGGAGAAGTGAATTATATAAAATATAAAGTAGTAAAAATTG  
AACCATTAGGAATAGCACCTACCAAGGCAAAGAGAAGAGTGGTGCAGAGAGAAAAAAGAGCAGTGGGATTTCG  
AGCCGTGTTTCCTTGGGTTCCTTGGGAGCAGCAGGAAGCACTATGGGCGCAGCGTCAATAACGCTGACGGTACAG  
GCCAGACAATTATTGTCTGGTATAGTGACAGCAGCAAAATAACTTGCTGAGGGCTATTGAGGCGCAGCAGCATC  
TGTTACAACCTCACAGTTTGGGGCATT

>JF683749

AATCACACGGGAAATAATGATAATGATACAATCACACTCCAATGCAGAATAAAGCAAATTATAAACATGTGGC  
AGGAAGTAGGAAAAGCAATGTATGCCCCCTCCCATCCAAGGAATAATTAGCTGTTTCATCAAACATTACAGGGCT  
GCTATTAACAAGAGATGGTGGTGATGACAATAGCAGCAGTACAGAGATCTTCAGACCTGGAGGAGGGGATATG  
AGGGACAATTGGAGAAGCGAATTATATAAAATATAAAGTAGTAAAGAATTGAACCATTAGGGGTAGCACCCACCA  
AGGCAAAGAGAAGAGTGGTGCAGAGAGAAAAAAGAGCAATAGGAATAGGAGCTTTGTTCTCGGGTTCTTGGG  
AACAGCAGGAAGCACTATGGGCGCAGCGTCATTGACGCTGACGGTACAGGCCAGACAATTATTGTCTGGTATA

GTGCAACAGCAGAACAATTTGCTGAGGGCTATTGAGGCGCAACAGCATATGTTGCAACTCACAGTCTGGGGCA  
TC

>JF683765

AATCATACTTGGAATGGTACTGCAATGACTGCTTGAATGGTACTGTAGTGACTACTTGGAATGGTACTGCAG  
TGATTAATAGTACTACGGAGTCAAATATCACACTCCAATGCAGGATAAAACAAATAGTAAACATGTGGCAGGA  
AGTAGGAAAAGCAATGTATGCCCCCTCCCATCAGAGGACAGATTAGATGTTTCATCAAATATTACAGGCCTATTA  
TTAACAAGAGATGGTGGTCTTAACAGCAGCAATATCAACGAGACTTTCAGACCAGGAGGAGGAGATATGAGGG  
ACAATTGGAGAAGTGAATTATATAAATATAAAGTAGTAAAAATTGAACCATTAGGGGTAGCACCCACCAGGGC  
AAGGAGAAGAGTGGTGCAGAGAGAAAAAGAGCAATAGGACTAGGAGCTGTGTTCTTGGGTTCTTGGGAGCA  
GCAGGAAGCACTATGGGCGCAGCGTCAATAACGCTGACGGCACAGGCCAGGCAATTGATGTCTGGTATAGTGC  
AACAGCAGAACAATCTGCTGAGAGCTATTGAGGCGCAACAGCATCTGTTGCAACTCACAGTCTGGGGCATC

>JF683784

ACTCATAATGATACTAAAGGAATATATATCACACTCCCATGCAGAATAAGACAAAATTGTAAATCTGTGGCAGG  
AAGTAGGGAAAAGCAATGTATGCCCCCTCCCATCAGGGGACAAATTAAGTGTTCCTCAAATATTACAGGGCTGAT  
ATTAACAAGAGATGGTGGTCTGAATAATGATACTAATGAGATCTTCAGACCTGGAGGAGGAGATATGAGGGAT  
AATTGGAGAAGTGAATTATATAAATATAAAGTAGTAAAAATTGAACCATTAGGAGTAGCACCCACCAAGGCAA  
AGAGAAGAGTGGTGCAGAGAGAGAAGAGCAGTGGGAATAGGAGCTCTGTTCTTGGGTTCTTGGGAGCAGC  
AGGAAGCACTATGGGCGCAGCATCAATAACGCTGACGGTACAGGCCAGACAATTACTGTCTGGTATAGTGCAA  
CAGCAGAACAATCTGCTGAGGGCTATTGAGGCGCAACAAAATCTGTTGCAACTCACAGTCTGGGGCATT

>JF683793

AATCATACTGGTGTCTGAAAGCAATATCACACTCCCATGCAGAATAAGACAAAATTATAAATATGTGGCAGAGAG  
TAGGAAAAGCAATGTATGCCCCCTCCCATCGAAGGAGAAAATTAGATGCTCATCAAAAATTACAGGGCTGCTATT  
AACAAAGAGATGGTGGTAGTAGCGGCAACAACACCAACGCACAGAGATCTTCAGACCTGCAGGAGGAGATATG  
AGGGACAATTGGAGAAGTGAATTATATAAATATAAAGTAGTAAAGAAATTGAACCTTTAGGAATAGCACCCACTA  
AGGCAAAGAGAAGAGTGGTGCAGAGAGAGAAAAGAGCAGTGGGAATAGGAGCTCTATTCCTTGGGTTCTTGGG  
AGCAGCAGGAAGCACTATGGGCGCAGCGTCATTGACGCTGACGGTACAGGCCAGACAGTTAATGTCTGGTATA  
GTGCAACAGCAGAACAATTTGCTGAGAGCTATTGAGGCGCAACAACATATGTTGCAACTCACAGTCTGGGGCA  
TC

>JF683796

ACTCACAATAGCAATAACATCACACTCTCATGCAGAATAAGACTAGTTATAAACAGGTGCCGGAACTAGGAA  
TAGCAATGTCTGCCCCCTCCCCTCAAAGGCATAGTCAGCTGCTCATCCAATATTACAGGTCTAGTATTAACAAG  
GGCTGGTGGCAGTAACAGTGAGTCCGACTCCAACGAGACCTTCAGACCTGGAGGGGGAGACATGAGAGATAAT  
TGGAGAAGTGAATATATAAATATAAAGTAGTAAAAATTGAGCCATTAGGAATAGCACCCACCACGGCAAAGA  
GAAGAGTGGTGCAGAGAGAAAAAGAGCAATAACGCTAGGAGCTATGTTCTTGGGTTCTTGGGAACAGCAGG  
AAGCACTATGGGCGCAGCGTCACTGACGCTGACGGTACAGGCCAGACAATTATTGTCTGGTATAGTGCAGCAG  
CAGAGCAATCTGCTGAGGGCTATTGAGGCGCAACAGCATATGTTGCAACTCACAGTCTGGGGCATC

>JF683805

ACTCAAGAAGAGACCATCATACTCCCATGTAGAATAAGGCAAATTGTAACTTGTGGCAGGAAGTAGGAAAGG  
CAATGTATGCCCCCTCCCATAAAGGGAAACATTAGCTGTCCATCAAACATTACAGGGCTGCTATTAATAAGAGA  
TGGTGAAGATGAGAGTAATAATAGCGAGATCTTCAGACCTGGAGGAGGAGATATGAGGGATAATTGGAGAAGT  
GAATTATATAAATATAAAGTAGTAAAAATTGAACCATTAGGGATAGCACCCACCAAGGCAAAGAGAAGAGTGG  
TGCAGAGAGAAAAAGAGCAGTGGGAGCACTAGGAGCTATGTTCTTGGGTTCTTGGGAGCAGCAGGAAGCAC  
TATGGGCGCAGCGTCAATGACACTGACGGTACAGGCCAGACAATTATTGTCTGGTATAGTGCAACAGCAGAAC  
AATTTGCTGAAGGCTATTGAGGCGCAACAGCATCTGTTGCAACTCACAGTCTGGGGCATC

>KT124762

ACTCACAACAATGAGAGTACCCCTGAGAATATCACACTCCAATGCAGAATAAAACAAATTATAAACATGTGGC  
AGGGAGTAGGAAAAGCAATGTATGCCCCCTCCCATCAGCGGGCTAATTAGATGTTTCATCAAATATTACAGGGCT  
GTTACTAACAAGGGATGGTGGTACGAATAGCACAGATGAGATCTTCAGGCCCGGAGGAGGGATATGAAGGAT  
AATTGGAGAAGTGAATTATACAAATATAAAGTAGTAAAAATTGAGCCATTAGGAGTAGCACCCACCAAGGCAA  
AGAGAAGAGTGGTGCAGAGAGAAAAAGAGCAGTGGGATTTCGAGCTTTGTTCTTGGGTTCTTGGGAGCAGC  
AGGAAGCACTATGGGCGCAGCGTCATTGACGCTGACGGTACAGGCCAGACAATTATTGTCTGGTATAGTGCAA  
CAGCAGAACAATTTGCTGAGAGCTATTGATGCGCAACAGCATCTGTTGAGCTCACAGTCTGGGGCATC

>KT124788

AGTTATAATAGTACTGAGAATAATGGTACAATCACACTCCCATGCAGAATAAAACAAATTATAAACATGTGGC  
AGGAAGTAGGAAAAGCAATGTACGCCCTCCCATCAGAGGACAGATTAGTTGTTTCATCAAATATCACAGGGCT  
GTTATTAACAAGAGATGGCGGTAAAGGGAATAATGGCAGCAATACTGAGATCTTCAGACCTGGAGGAGGAAAT  
ATAAAGGACAATTGGAGGAGTGAATTATATAAATATAAAGTAGTAAAAATTGAACCATTAGGAGTAGCACCCA  
CCAAGGCAAAGAGAAGAGTGGTGCAGAGAGAAAAAGAGCAATAACATTAGGAGCTGTGTTCTTGGGGTTCTT  
GGGAGCAGCAGGAAGCACTATGGGCGCAGCGTCAATAACGCTGACGGTACAGGCCAGACAATTATTGTCTGGT

ATAGTGCAACAGCAAAACAACCTTGCTGAAGGCTATTGAGGCACAACAACATCTGTTGCAACTCACAGTCTGGG  
GCATT

>KT124782

AATTATACTAATAACAGCGAAAAATATCACACTCCCATGCAGAATAAAGCAAATTATAAACCTATGGCAGGGAG  
TAGGAAAAGCAATGTATGCCAATCCAGTCAAAGGACTAATTAAGTCTATCAAATATTACAGGACTGATATT  
AACAAGAGATGGTGGTGTTAATAATAGCAACAATGAGACCTTTAGGCCTGGGGGAGGAGATATGAGGGACAAT  
TGGAGGAGTGAATTATATAAAATATAAAGTAGTAAAAATTGAACCATTAGGATTGGCACCCACTACGGCAAAGA  
GAAGAGTGGTGCAGAGAGAAAAAAGAGCAGTGGGAATAGGAGCTGTGTTCTTGGGTTCTTGGGAGCAGCAGG  
AAGCACTATGGGCGCAGCGTCAATGACGCTGACGGTACAGGCCAGACTATTACTGTCTGGTATAGTGCAGCAG  
CAAAACAATTTGCTGAGGGCTATTGAGGCGCAACAGCATCTGTTGCAACTCACAGTCTGGGGCATC

>KT124760

AATTATACTAGCACAACTAGGCTCCCATGCAGGATAAAAACAAATTGTAAACATGTGGCAGGAAGTAGGAAAAG  
CAATGTATGCCCTCCCATCAGAGGGCGAATCAATTGTTTATCAAATATCACCGGGTTGCTATTAACAAGAGA  
TGGTGGTAACAGTAACAGCAGCAACGAGACTTTTCAGACCAGGAGGAGGAAATATGAAGGATAATTGGAGAAGT  
GAGTTATATAAATACAAAGTAGTAAACCTTGAACCATTAGGAATAGCACCCACCACGGCAAAAAGAAGAGTGG  
TGCAGAGAGAAAAAAGAGCAGTGGGAATAGGAGCCATGCTCTTTGGGTTCTTGGGAGCAGCAGGAAGCACTAT  
GGGCGCAGCATCAATATCGCTGACGGTACAAGCCAGGCAATTATTGTCTGGTATAGTGCAACAGCAGAGTAAT  
CTGCTGAGGGCTATTGAGGCGCAACAACATATGTTGCAACTCACAGTCTGGGGCATC

>KT124780

TATCATAATAGTACTTGGAAATAACTAGGAATAATACTGAAGGGTCAAATGATATAATCACACTCCCATGCA  
GAATAAAACAAATTATAAACATGTGGCAGGAAGTAGGAAAAGCAATGTATGCCCTCCTATCAAAGGACGAAT  
TAGATGTTTCATCAAATATTACAGGGATGATATTAACAAGAGATGGTGGTAATAATGGGACTGACACAGAGATA  
GAGATCTTCAGACCCCAAGGAGGAAATATGAAGGACAATTGGAGAAGTGAATTGTTTAGATATAAAGTAGTAA  
GAGTTGAACCATTAGGAGTAGCTCCCACTAAGGCAAAGAGAAGGGTGGTGCAGAGAGAAAAAAGAGCAGTAGG  
AATGGGAGCCTTGTTCTTGGGTTCTTGGGAGCAGCAGGAAGCACTATGGGCGCAGCGTCAATGACGCTGACG  
GTACAGGCCAGGCAATTATTGTCTGGTATAGTGCAACAGCAGAACAATCTGCTGAGGGCTATTGAGGCGCAGC  
AGCACCTGTTGCAACTCACAGTCTGGGGCATC

>AY173959

AATTACAATACAAGTGGAGTAAATATCACACTCCCATGTAGAATAAAACAAATCATAAACATGTGGCAGGAAG  
TAGGAAAAGCAATGTATGCCCTCCCATTAGAGGACAAATTAGATGCATATCAAATATTACAGGACTGCTATT  
AACAAGAGATGGTGGTGTCAACCAGACCAATGGGACCGAAATCTTCAGACCTGCAGGGGGAGATATGAGGGAC  
AATTGGAGAAGTGAATATATAAATATAAAGTAGTAAAAATTGAACCATTAGGAGTAGCACCCACCAAGGCAA  
AAAGAAGAGTGGTGCAGAGAGAAAAAAGAGCAGTGGGGTTAGGAGCTGTGTTCTTGGGTTCTTGTGAGCAGC  
AGGAAGCACTATGGGCGCAGCGTCAATGACGCTGACGGTACAGGCCAGGCAATTATTGTCTGGTATAGTGCAA  
CAGCAGAACAATCTGCTGAGGGCTATTGAGGCGCAACAGCATCTGTTGCAACTCACAGTCTGGGGCATT

>KC595166

ACTCAAGAAAGTGACACATTAATCACACTCCCATGCAGAATAAAACAAATTGTAAGAATGTGGCAGGAAGTAG  
GAAAAGCAATGTATGCCCTCCCATCAGAGGACAAATTAGATGTTTCATCAAATATTACAGGGCTGATATTAAC  
AAGAGATGGAGGTAATGACACGGACGAGAACGGGACCGAGATCTTTAGACCTGGAGGAGGAGATATGAGGGAC  
AATTGGAGAAGTGAATTATATAAATATAAAGTAATACAAATTGAACCATTAGGAGTAGCACCCACCAAGGCAA  
AGAGAAGAGTGGTGCAGAGAGAAAAAAGAGCAGCAATAATAGGAACTGTGTTCTTGGGTTCTTGGGAGCAGC  
AGGAAGCACTATGGGCGCAGCGTCAATAACGCTGACGGTACAGGCCAGGCAATTATTGTCTGGTATAGTGCAA  
CAGCAGAGCAATTTGCTGAAGGCCATTGAGGCGCAACAGCATCTGTTGCAACTCACAGTCTGGGGCATC

>JN054257

CCCTATACTAATGCAAGTATAGAAAATATCACACTCACACTCCCATGTAGAATAAAACAAATCATAAACATGT  
GGCAGGAAGTAGGAAAAGCAATGTATGCCCTCCCATCCCGGGAATAATCCAATGTACATCAAATATTACAGG  
ACTACTATTAACAAGAGATGGGGGTAACCAAACCAATGGGATTGAGATCTTCAGACCTGCAGGGGGAGATATG  
AAGGACAATTGGAGAAGTGAATTATATAAATATAAAGTAGTAAAAATTGAACCATTAGGAATAGCACCCACCA  
AGGCAAAAAGAAGAGCGGTGCAAGAGAGAAAAAAGAGGAATAGGAGCTGTGATCTTTGGGTTCTTGGGAGCAGC  
AGGAAGCACTATGGGCGCAGCGTCGGTAACGCTGACGGTACAGGCCAGACAATTATTGTCTGGTATAGTGCAA  
CAGCAGAGCAACTTGCTGAGAGCTATTGAGGCGCAACAGAATCTGTTGAGCTCACAGTCTGGGGCATT

>KT200348

AGTCATGATGCTTGGAAATTGGACTTGGAGTAATGGTACTTGGGGGGTAGTACTAAAGAAACAAATAAACTG  
AAGGAAATGTACCCCTCACCCCTCCAATGTAGAATAAAACAAATTATAAACATGTGGCAGGAAGTAGGGAAAAGC  
AATGTATGCCCTCCCATCAGTGGACCAATTAGATGTAAATCAAACATTACAGGGATGATATTAACAAGAGAT  
GGGGGTAATGATGACGGTACTGACAACAGCAGTGAGACCTTCAGACCTGGGGGAGGAGATATGAGGGATAATT  
GGAGAAGTGAATTATACAAATATAAAGTAGTAAAAATTGAACCATTAGGAGTAGCACCCACCAAGGCAAAAAG  
AAGAGTGGTGCAGAGAGAAAAAAGAGATTTAGGATTTGGAGCTTTGTTCTTGGGTTCTTGGGAGCAGCAGGA  
AGCACTATGGGCGCAGCGTCAATAACGCTGACGGTACAGGCCAGACAATTATTGTCTGGTATAGTGCAACAGC  
AAAGTAATTTGCTGATGGCTGTTGAGGCGCAACAGAAGCTGTTGCAACTCACAGTCTGGGGCATC

>KC699038

ACTCAGAATAACATTACAGAAAATATCACACTCCCATGCAGAATAAAACAGTTTATAAACATGTGGCAGGAAG  
TAGGAAAAGCAATGTATGCCCCCTCCCATCAAAGGACAAATTAGATGTTTCATCAAATATTACAGGGCTGATATT  
AACAGAGATGGTGGTAATAATGATAACACAACAGAGACCTTCAGACCTGGAGGAGGAAATATGAAGGACAAT  
TGGAGAAGTGAATTATATAAATATAAAGTAGTAAAAATTGAACCATTAGGAGTAGCACCCACCAAGGCAAAGA  
GAAGAGTGGTGCAGAGAGAAAAAAGAGCAGCGATAGGAGCTGTGTTCCCTTGGGTTCTTGGGAGCAGCAGGAAG  
CACTATGGGCGCAGCGTCAGTGACGCTGACGGTACAGGCCAGACAATTATTGTCTGGTATAGTGCAACAGCAA  
AACAACTTGCTGAAGGCTATTGATGCGCAACAGCATATGTTGCAACTCACAGTCTGGGGCATC

>HQ595780

TCTCATAATAACACTGAAGGGGTAAGAAATAATAACACTGAAGGGGAAAAAATATCATCCTCCCATGCAGAA  
TAAAAACAAGTTATAAACATGTGGCAGGAAGTAGGAAAAGCAATGTATGCCCCCTCCCATCAGAGGACAAATCAG  
ATGTTTCATCAAATATCACAGGGCTGGTATTAACAAGAGATGGTGGCACTAATAATGGCACAAACCAGGCCGAG  
GAGGTCTTCAGACCTGCAGGAGGAAATATGAGGGACAATTGGAGAAGTGAATTATATAGATATAAGGTAGTCA  
AAATTGAACCATTAGGAGTAGCACCCACCAAGGCAAGAGAAGAGTGGTGCAGAGAGAAAAAAGAGCAGTGGG  
AATAGGAGCTGTATTCCTTGGGTTCTTGGGAGCAGCAGGAAGCACTATGGGCGCAGCGTCAATAACGCTGACG  
GTACAGGCCAGACAATTACTGTCTGGTATAGTGCAACAGCAGAACAATTTGCTAAGGGCTATTGACGCGCAAC  
AGCATCTGTTGCAGCTCACAGTCTGGGGCATC

>HQ595781

TTTCATAGTACTTGGGTAAATGGTAATTGGAGTAATGGCACTTGGGAATGGTACTGAAGAAATTATCACACTTC  
CATGCAGAATAAAACAAATTATAAACATGTGGCAGGAAGTAGGAAAAGCAATGTATGCTCCTCCCATCAAAGG  
ACAAATTAAGTGTACATCAAATATTACAGGGCTGCTATTAACAAGAGATGGTGGTAACATAACAAACAAC  
AACACCGAGACCTTCAGACCTGGAGGAGGAGATATGAGGGACAATTGGAGAAGTGAATTATATAAATATAAAG  
TAGTAAAAATTGAACCACTAGGAATAGCACCCAATAAGGCACAGAGAAGAGTGGTGCAGAGAGGAAAAAGAGC  
AGTGGGATTAGGAGCTATGTTCCCTTGGGTTCTTGGGAGCAGCAGGAAGCACTATGGGCGCAGCGTCAATAACG  
CTGACGGTACAGGCCAGGCGATTATTGTCTGGTATAGTGCAACAGCAGAACAATTTGCTGAAAGCTATTGAGG  
CGCAACAGCATCTGTTGCAACTCACAGTCTGGGGCATC

>HQ595805

AATCATACTTGGACAGGTCCAAATAGAAGTACACAAAATATCACACTCCAATGCAAAATAAAGCAAATTATAA  
ATATGTGGCAGAAAGTAGGAAAAGCAATGTATGCCCCCTCCCATCAGAGGACAAATTAAATGTTTCATCAAATAT  
TACAGGGCTGCTATTAACAAGAGATGGTGGAAATGGTGATAATAGTACAAACGGGACTGAGACCTTCAGACCT  
GGAGGAGGAGATATGAGGGACAATTGGAGAAGTGAATTATACAAATACAAAGTAGTAAAAATTGAACCATTAG  
GAGTAGCACCCACCGAGGCAAAAAGAAGAGTGGTGCAGAGAGAAAAAAGAGCAGTGGGATTTGGAGCTCTGTT  
CCTTGGTTTTCTTGGGAGCAGCAGGAAGCACTATGGGCGCAGCATCAATAACGCTGACGGTACAGGCCAGACAA  
TTATTGTCTGGTATAGTGCAACAGCAAAACAATTTGCTGAGGGCTATTGAGGCGCAACAGCATCTGTTGCAAC  
TCACAGTCTGGGGCATT

>AJ535618

TTTCATAGTACTTGGGTGTTTAATAGAAGTGGGGGGAATGATACTGAATACACTGAAAAAATATCACACTTC  
CATGCGGAATAAAACAAATTATAAACATGTGGCAGGGAGTAGGAAAAGCAATGTATGCCCCCTCCCATCCAAGG  
ACAAATTAATTGCACATCAAATATTACAGGGCTGTTATTAACAAGAGATGGTGGTAATGGTGATAACACAAC  
GAGATCTTCAGACCTGGAGGAGGAGATATGAGGGACAATTGGAGAAGTGAATTATATAAATATAAAGTAGTAA  
AAATTGAGCCATTAGGAGTAGCACCCACCAAGGCAAGAGAAGAGTGGTGCAGAGGGAAAAAAGAGAAGTGGG  
CCTAGGAGCTTTGTTTCATTGGGTTCTTGGGAGCAGCAGGAAGCACTATGGGCGCAGCGTCAGTGACGCTGACG  
GTACAGGCCAGACAATTATTGTCTGGTATAGTGCAACAGCAGAACAATTTGCTGAGAGCTATTGATGCGCAAC  
AGCATCTGTTGCAACTCACAGTCTGGGGCATC

>U36877

AGTCAGGACGGTACTGAAGGATATAACATTATCACACTCCCATGCAGAATAAAACAAATTATAAACATGTGGC  
AGGAAGTAGGAAAAGCAATGTATGCCCCCTCCCATCAAAGGACAAATTAGATGTTTCATCAAATATTACAGGACT  
GCTATTAAACAAGAGATGGTGGTAATAGTAGTAGCACCACCGAGACCTTCAGACCTGGAGGAGGAGCATGAGG  
GACAATTGGAGAAGTGAATTATATAAATATAAAGTAGTAAAAATTGAACCATTAGGAGTAGCACCCACCAAGG  
CAAAGAGAAGAGTGGTGCAGGAGAAAAAAGAGCAGTGGGAATAGGAGCTTTGTTCCCTTGGGTTCTTGGGAGC  
AGCAGGAAGCACTATGGGCGCAGCATCAATGACGCTGACGGTACAGGCCAGACTATTATTGTCTGGTATAGTG  
CAACAGCAGAACAATTTGCTGAGAGCTATTGAGGCGCAACAGCATCTGTTGCAACTCACAGTCTGGGGCATC

>FJ460501

AGTTATATTTTGAATGGTACTAGCTGGAGTAACAATACTAATGGGGTAAATGATATAATCACACTCCCATGCA  
GAATAAGACAAATTATAAACATGTGGCAAGAAGTAGGAAAAGCAATGTATGCCCCGCCCATCATGGGACAAAT  
TAACTGTTTCATCAAATATTACAGGGCTGCTATTAACAAGAGATGGTGGTAATAACACAGACACAAACCAACA  
GAGATCTTCAGACCTGGAGGAGGAGATATGAGGGACAATTGGAGAAGTGAATTATATAAATATAAAGTAGTAA  
GAATTGAACCATTAGGAATAGCACCCACCAAGGCAAGAGAAGAGTGGTGCAGAGAGAGAAAAAGAGCAGTGGG  
AATAGGAGCTCTGTTCCCTTGGATTCTTGGGAGCAGCAGGAAGCACTATGGGCGCAGCGTCACTGACACTGACG

GTACAAGCCAGACAATTATTGTCTGGTATAGTGCAACAGCAGAATAATCTGCTGAGAGCTATTGAGGCGCAAC  
AGCATATGTTGCAACTCACAGTCTGGGGCATT

>EU839602

ATTTACCCTTGGAATAAGACTGAAAATATCACACTCCCATGCAGAATAAAACAAATTATCAATATGTGGCAGG  
GAGTAGGAAAAGCAATGTATGCCCCCTCCCATCAGCGGACCAATAAGATGTGAATCAAATATTACAGGGCTGCT  
ATTAACAAGAGATGGTGGTGACCAGAACGGGACGGACGCTACCAATGAGACCTTTAGACCTGGAGGAGGAGAT  
ATGAGGGACAATTGGGAGAAGTGAACCTATATAAATATAAAGTAGTAAGAATTGAACCATTAGGAGTAGCACCCA  
CCGAGGCAAAGAGAAGAGTGGTGCAGAGAGAAAAAAGAGCAGTGGGACTAGGAGCTATGTTCCCTTGGGTTCTT  
AGGAGCAGCAGGAAGCACTATGGGCGCAGCGTCAATAGCGCTGACGGCACAGGCCAGGCAATTGTTGTCTGGT  
ATAGTGCAGCAGCAGAACAATCTGCTGAGGGCTATTGAGGCGCAACAGCATCTGTTGCAACTCACGGTCTGGG  
GCATC

>EU839604

GATTATAATGACACTATCATACTCCAATGTCTGGATAAGACAAATTATAAACATGTGGCAGAAAGTAGGAAAAG  
CAATGTATGCCCCCTCCCATAAAGTGGAATAATTAAATGTACATCAAATATTACAGGGCTACTATTAACAAGAGA  
TGGTGGTAATAATACAGGAGGGAATGAGACCTTCAGACCTACAGGAGGAAATATGAAGGACAATTGGGAGAAGT  
GAATTATATAAATATAAAGTAGTACAAATTGACCCAATAGGAGTAGCACCCACCAAGGCAAAAAGGAGAGTGG  
TGCAGAGAGAAAAAAGAGCAGTGGGAGTAGTAGGAGCTATGTTCCCTTGGTTTCTTGGGAGCAGCAGGAAGCAC  
TATGGGCGCAGCGTCAGTGACGCTGACGGTACAGGCCAGACAATTATTGTCTGGTATAGTGCAACAGCAGAAT  
AATCTGCTGAGAGCTATTGAGGCGCAACAGCATCTGTTGCAACTCACAGTCTGGGGCATC

>HM030560

ACTCAGGATGATACTAATGACACTATCACACTCCCATGCAGAATAAAACAAATTGTAAACATGTGGCAGGAAG  
TAGGCAAAGCAATATATGCCCCCTCCCATTAGTGAGACTAATTAGATGTAACCTCAAGTATTACAGGGCTAATGTT  
AACAAAGAGATGGTGGTGGTGGGAATACTAGTAATAATGAGACCTTCAGACCCGGGAGGAGGAAATATGAAGGAC  
AATTGGAGAAGTGAATTATATAAATATAAAGTAGTGAAAAATTGAACCATTAGGAGTAGCACCCACCAGGGCAA  
GGAGAAGGGTGGTGC AAAGAGAAAAAAGAGCAGTGGGAGTAATAGGAGCTATGTTCCCTTGGGTTCTTGGGAAC  
AGCAGGAAGCACTATGGGCGCAGCGTCAGTGACGCTGACGGTACAGGCCAGACAATTATTGTCTGGTATAGTG  
CAACAGCAAAACAATTTGCTGAGGGCTATTGAGGCGCAACAGCATCTGTTGCAACTCACAGTCTGGGGCATC

>AB588243

AATCAGTCTGCTTGAAGAGAAATGATACTGAAGGGTTAAATAATACTGAGGACAAAATTACACTCCCATGCA  
AAATAAAACAAATCATAAACATGTGGCAGAAAGTAGGAAAAGCAATATATGCCCCCTCCCATCAGAGGAGTAAT  
TAGATGTGCATCAAATATTACAGGGCTGCTATTAACAAGAGATGGTGGTGGTGTATGAGAACAGAACCACCGAG  
ACCTTCAGACCTGGAGGAGGGGATATGAGGGACAATTGGAGAAGTGAATTATATAAATATAAAGTAGTAAAAA  
TTGAACCATTAGGAGTAGCACCCACTAAGGCAAAGAGAAGAGTGGTGCAGAGAGAAAAAAGAGCAGTGGGATT  
TGGAGCTGTATTCTTGGGTTCTTGGGAGCAGCAGGAAGCACTATGGGCGCAGCGTCAGTGACGCTGACGGTA  
CAAGCCAGACAATTGCTGTCTGGTATAGTGCAACAGCAGAGCAATCTGCTGAGAGCTATTGAGGCGCAGCAAC  
AAATGTTGAAACTCACAGTCTGGGGCATC

>AB588255

AATCATGGAGAGTCAAATGACACTATCACACTCCCATGTAGAATAAAACAAATTGTAAACATGTGGCAGGAAG  
TAGGAAAAGCAATGTATAACCTCCCATCGAAGGACAAATTAGATGTTTCATCAAATATTACAGGACTATTATT  
AATAAGAGATGGTGGTAACAGTAACAACACAAACACCACCGAAATCTTCAGACCCGGGGGAGGAAATATGAAG  
GACAATTGGAGGAGTGAATTATATAAATATAAATAGTAAAAATTGAACCATTAGGAGTAGCACCCACCAAGG  
CAAAGAGAAGAGTGGTGC AAAGAGAAAAAAGAGCAGTGGGAATAGGAGCTGTGCTCTTTGGATTCTTGGGAGC  
AGCAGGAAGCACTATGGGCGCAGCGTCAATAGCGCTGACGGCACAGGCCAGACAATTATTGTCTGGTATAGTG  
CAACAGCAGAACAATATGCTGAGAGCCATTGAGGCGCAACAGCACCTGTTGCAACTCACAGTCTGGGGCATC

>AB588271

CTTTTACTTTTGAATAGCTCTGAAGATAAAAATATCACACTCCAATGCAGAATAAAACAGATTATAAACATGT  
GGCAGGAAGTAGGAAAAGCAACGTATGCCCCCTCCTATCAAAGGACAGATTAGATGTTTCATCAAACATTACAGG  
GCTGCTATTAAACAAGAGATGGTGGTACTAATAAAACAAGCGATCCCGAGATCTTCAGACCTACAGGAGGTAAT  
ATGAAGGACAATTGGGAGAAGTGAATTATATAAATATAAAGTAGTAAAAATTGAACCATTAGGAGTAGCACCTA  
CCAGGGCAAAGAGAAGAGTGGTGCAGAGAGAAAAAAGAGCAGTGGGACTAGGAGCTGTGTTCCCTTGGGTTCTT  
GGGAGCAGCAGGAAGCACTATGGGCGCAGCGTCATTAACGCTGACGGTACAGGCCAGACAATTGTTGTCTGGT  
ATAGTGCAACAGCAAAACAATTTGCTGAGAGCTATTGAGGCGCAACAGAATCTGTTGCAACTCACAGTCTGGG  
GCATC

>AB262961

AGTTATACTTGAATGGTACAGGACTGTCTAATAATACTGAGAATAGTTCAAATAATACTATCACACTCCAAT  
GCAGAATAAAGCAAATTATAAACATGTGGCAGGAAGTAGGAAAAGCAATGTATGCCCCCTCCCATCAGCGGACA  
AATTAGATGTTTCATCAAATATTACAGGGCTGCTATTAACAAGAGATGGTGGTAATGGCACGAACGGGACCGAG  
ACCTTCAGACCTGGAGGAGGAGATATGAGGGACAATTGGAGAAGTGAATTATATAAATATAAAGTAGTAAAAA  
TTGAACCATTAGGAGTAGCACCCACTAGGGCAAAGGAGAAGAGTGGTGCAGAGAGAAAAAAGAGCAGTGGGAAT  
AGGAGCTTTGTTCCCTTGGGTTCTTGGGAGCAGCAGGAAGCACTATGGGCGCAGCGTCAATGACGCTGACGGTA

CAGGCCAGACAATTATTGTCTGGTATAGTGCAACAGCAAAACAATTTGCTGAGGGCTATTGAGGCGCAACAGC  
ATCTGTTGCAACTCACAGTCTGGGGCATT

>KJ140264

TGTTATACAACAAAACCTGTTTAATAGTACTTGGAATGATACAACACTGTTTAATAGTACCTGGAATAGTAGTA  
GTAAAGGAACATATCACACTCCGATGCAGAATACAACATATTATCAACAGGTGGCAGGAAGTAGGAAAAGCGAT  
GTATGCCCTCCCATTTGGAGGAAAAATTAGATGTTTCATCAAATATTACAGGGCTGCTAATAACAAGAGATGGG  
GGGACTGAGACTGGGACTACTGAGACCTTCAGACCTGGGGGAGGAAATATGAAGGACAATTGGAGAAGTGAAT  
TATATAAATATAAAGTAGTAAGAATTGAGCCATTAGGGATAGCACCCACCAAGGCAAAGAGAAGAGTGGTGCA  
GAGAGAAAAAAGAGCAGTGGGGACGATAGGAGCTGTGTTCTTGGGTTCTTGGGAGCAGCAGGAAGCACTATG  
GGCGCAGCGTCATTGACGCTGACGGTACAGGCCAGACAATTATTGTCTGGTATAGTGCAACAGCAGAATAATT  
TGCTGAAAGCTATTGATGCGCAACAGCATATGTTGCAACTCACAGTCTGGGGCATC

>KJ140265

ACTCATACTGGTACTGAAGGAGTAAATGGAACATATTTTCACTCCCATGCAGAAATAAGACAAATTGTAAACA  
GGTGGCAGGAAGTAGGAAAAGCAATGTATGCCCTCCCATCGGAGGACGAATTAGATGTTTCATCAAATATTAC  
AGGGCTGCTATTAACAAGAGATGGGGGGAATGAGAATAACGAGACTGAGACGACTGAGACCTTCAGACCTGGG  
GGAGGAAATATGAAGGACAATTGGAGAAGTGAATTATATAAATATAAAGTAGTAAAAATTGAGCCATTAGGGA  
TAGCACCCACCGAGGCAAGGAGAAGAGTGGTGCAGAGAGAAAAAAGAGCAGTGGGAGTGATAGGAGCTATGTT  
CCTTGGGTTCTTGGGAGCAGCAGGAAGCACTATGGGCGCAGCGTCAATGGCGCTGACGGTACAGACCAGACAA  
TTATTGTCTGGTATAGTGCAACAGCAGAATAATTTGCTGAGAGCCATTGAGGCGCAACAGCATATATTGCAAC  
TCACAGTCTGGGGCATC

>MN043600

TTTCATAGTACTTGGAATGCTACGTTGAATGATACTGAAAGGGTAAATAATAGTGCAACAAAAACATTACAC  
TCCAATGCAGAAATAAACAAATTATAAACAGGTGGCAGGAAGTGGGACAAGCAATGTATGCCCTCCCATCAG  
CGGACTAATTAGATGTTTCATCAAATATTACAGGGCTGATATTAACAAGAGACGGGGGGGTTAACGAGACTACT  
GAGACCTTCAGACCTGGAGGAGGCGATATGAGGGACAATTGGAGAAGTGAATTATATAAATATAAAGTAGTAA  
GGATTGAGCCATTAGGGATAGCACCCACCAAGGCAAGGAGAAGAGTGGTGCAGAGAGAAAAGAAGAGCAGTGGG  
AATGTTAGGAGCTATGTTCTTGGGTTCTTGGGAGCAGCAGGAAGCACTATGGGCGCAGCGTCAATGACGCTG  
ACGGTACAGGCCAGACAATTATTGTCTGGTATAGTGCAACAGCAGAATAATCTGCTGAAAGCTATTGAGGCGC  
AACAGCATCTGTTGCAACTCACAGTCTGGGGCATC

>KJ140260

AATCATACTAGAGCGAACATTCGGAATAATCCTGGAAATGGAACATTATCTCTCCCATGCAGAAATAAACAAA  
TTATAAACAGGTGGCAGGAAGTAGGAAAAGCAATGTATGCCCTCCCATCGAAGGACAAATTAGATGTACATC  
AAATATTACAGGGTTGCTAATAACAAGAGATGGGGGGATAAATGAGACCAACGGGACTGAGACCTTCAGACCT  
GGGGGAGGAGATATGAGGGACAATTGGAGAAGTGAATTATATAAATATAAAGTAATAAAAATTGAGCCATTAG  
GGATAGCACCCACCAAGGCAAAGAGAAGAGTGGTGCAGAGAGAAAAAAGAGCAGTGGGAGCGATAGGAGCTAT  
GTTCTTGGGTTCTTGGGAGCAGCAGGAAGCACTATGGGCGCAGCGTCATTGACGCTGACGGTACAGGCCAGA  
CAATTATTGTCTGGTATAGTGCAACAGCAGAATAATTTGCTGAGAGCTATTGAGGCGCAACAGCATCTATTGC  
AACTCACAGTCTGGGGCATC

>KT878035

ACTTACAATGACACTGGAGTTAATGAACTATCACCTCCCTTGCAGAATAAGACAAATTGTAAACAGGTGGC  
AGGAAGTGGGAAAGGCAATGTATGCCACTCCCATCAGTGGAATAATTAGATGTTTCATCAAATATTACAGGGTT  
ACTATTAACAAGAGATGGGGGGACAGGGAACAATAAACTGGGAATGGAACCTGAGACCTTCAGACCTGGGGGA  
GGAGACATGAAGGACAATTGGAGGAGTGAATTATACAAATATAAAGTAGTAAAGATTGAGCCATTAGGAGTAG  
CACCCACCAAGGCAAGGAGAAGAGTGGTGCAGAGAGAAAAAAGAGCAGTGGGAACAATAGGAGCTATGTTCTT  
TGGGTTCTTGGGAGCAGCAGGAAGCACTATGGGCGCAGCGTCACTGACGCTGACGGTACAGGCCAGACTATTA  
TTGTCTGGTATAGTGCAACAGCAACAGAACTTGCTGAGAGCTATTGAGGCGCAACAGCATCTGTTGCAACTCA  
CAGTCTGGGGCATC

>KT878026

ACTCATTGGAATGAGACTTGGGATAATGAAACAATCATACTCCCATGCAGAAATAAACAAATTATAAACAGAT  
GGCAGGAAGTAGGAAAGGCAATGTATGCCCTCCCATCAGAGGAAATATTAGTTGTACATCAAATATTACAGG  
GCTGCTATTATCAAGAAATGGAGGTGGCAACGGGACTAACGGGACTGAGACCTTTAGACCTGGGGGAGGAGAT  
ATGAGGGACAATTGGAGAAGTGAATTATATAAATATAAGGTAATAAGAATTGAGCCATTAGGATTAGCACCCA  
CCAGGGCAAGGAGAAGAGTGGTGCAGAGAGAAAAAAGAGCAGTAACGATAGGAGCTATGTTCTTGGGTTCTT  
GGGAGCAGCAGGAAGCACTATGGGCGCAGCATCACTGACGCTGACGGTACAGGCCAGGCTACTATTGTCTGGT  
ATAGTGCAACAGCAGAATAATTTGCTAAGAGCTATTGAGGCGCAACAGCATCTGTTGCGACTCACAGTCTGGG  
GCATT

>KT878028

AATCAAAATGGTACCAGGAATGATACTAGTACTAATGCAACTATCACACTTCCATGCAGAAATAAACAAATTTA  
TAAACAGGTGGCAGGAAGTAGGAAGAGCAATGTATGCCCTCCCATCGAAGGACAAATCAGATGCTCATCAAA  
TATTACAGGGCTGCTATTAACAAGAGATGGGGGGAATAATGAAACTGAGACCTTCAGACCTGGGGGAGGAAAT

ATGAAAGATAATTGGAGAAGTGAATTATATAAAATATAAAGTAGTAAAAATTGAGCCATTAGGGATAGCACCCA  
CCAAGGCAAGGAGAAGAGTGGTGCAGAGAGAAAAAGAGCAATAGGAACAATAGGAGCTCTGTTCTTGGGTT  
CTTGGGAGCAGCAGGAAGCACTATGGGCGCAGCGGCAATGACGCTGACGGTACAGACCAGACAATTGTTGTCT  
GGTATAGTGCAACAGCAGAATAATCTGCTGAGAGCTGTTGAGGCGCAACAGCATCTGTTGCAACTCACAGTCT  
GGGGCATC

>AJ417422

ACTCAACTGTTTAAATAGTACTTGGGGGGAACATGATGTTGAAGCAAGTAACACTGAAAATAATGAAAATATCA  
CACTCCCATGCAGAATAAAGCAAATTGTAACCATGTGGCAGAAAGTAGGAAAAGCAATGTATGCCCCCTCCCAT  
CGAAGGAAAAATTAGCTGTTTATCAAATATTACAGGGCTACTGTTAATGAGAGATGGTGGTAATATAAAACAAC  
AAAACAAATGGGACCACCCCCCTTGAGATCTTCAGACCTGGAGGAGGAAATATGAAGGATAATTGGAGAAGTG  
AATTATATAAAATATAAAGTAATAGAAATTGAACCATTAGGAGTAGCACCCACCAGAGCAAAGAGAAGAGTGGT  
GCAAAGAGAAAAAGAGCGGGAATAGGAGCTGTGCTCGTTGGGTTCTTGGGAGCAGCAGGAAGCACTATGGGC  
GCAGTGTCAGTGGCGCTGACGGTACAGGCCAGAAAGTTAATGTCTGGTATAGTGCAACAGCAAAACAACCTTGC  
TGATGGCTATTGAGGCGCAACAGCATATGTTGCAACTCACTGTCTGGGGCATC

>JQ316129

ACTCAAAGGTTAGATGAAATTAATAAAAAATAGCACAAATTATCACACTTCCATGCAGAATAAAACAAATTATAA  
ACAGGTGGCAGGAAGTAGGAAAAGCAACGTATGCCCCCTCCCATCAGAGGACAAATTACATGTTTCATCAAATAT  
TACAGGGTTGCTATTAACAAGAGATGGAGGGAATGAGAGCAGCAGTACTGAGACCTTCAGACCTGGGGGAGGA  
GACATGAGGGACAATTGGAGAAAGTGAATTATATAAAATATAAAGTAGTAAAAATTGAGCCATTAGGGGTAGCAC  
CCACCAAGGCAAGGAGAAGAGTGGTGCAGAGAGAAAAAGAGCAGTGGGAACAATAGGAGCTATGTTCTTGG  
GTTCTTGGGAGCAGCAGGAAGCACTATGGGCGCAGCGTCACTGACGCTGACGGTACAGGCCAGACAATTGTTG  
TCTGGTATAGTGCAACAGCAGAATAATCTGCTGAGAGCTATTGAGGCGCAACAGCATCTGTTGCAACTCACAG  
TCTGGGGCATC

>HQ386198

AATCATAATGGGACTTGGAGTACAAATAGTACTGGGAATGATACCAACAACAACACTGACACTATCACACTCC  
CATGCAGAATAAAGCAAATTATAAACATGTGGCAGGAAGTAGGGAAGCAATGTATGCCCCCTCCCATCAGTGG  
ACAAATTAAGTGTTCATCAAATATTACAGGGCTGATATTAACAAGAGATGGTGGTAATAAGACCGAGAATGAG  
AATGGGACCGAGACCTTCAGACCTGGAGGAGGAGATATGAGGGATAATTGGAGAAGTGAATTATATAAAATATA  
AAGTAGTAAAAATTGAACCATTAGGACTAGCACCCACCAGGGCAAAGAGAAGAGTGGTGCAAAGAGAAAAAAG  
AGCAGTGGGAATGCTAGGAGCTATGTTCTTGGGTTCTTGGGAGCAGCAGGAAGCACTATGGGCGCAGCGTCG  
ATGGCGCTGACGGTACAGACCAGACAATTAATGTCTGGGATAGTGCAACAGCAGGACAGTCTGCTGAGGGCTA  
TTGAGGCGCAACAGCATCTGTTGCAACTCACAGTCTGGGGCATC

>JF320191

GATCAGGATAAAAAATGATACTATTACCCTTCCATGCAGGATAAAACAAATTATAAACATGTGGCAGGAAGTAG  
GAAAAGCAATGTATGCCCCCTCCCATCCAAGGACAAATTAGTTGTTTCATCAAATATTACAGGGCTACTCTTAAC  
AAGAGATGGTGGTAATAGCAGTAACACTAATGGAACCTGAGATCTTCAGACCTGGAGGAGGAGATATGAGAGAC  
AATTGGAGAAGTGAATTATATAAGTACAAAGTAGTAAAAATTGAACCATTAGGAATAGCACCCACCAAGGCAA  
AGAGAAGAGTGGTACAAAGAGAAAAAGAGCAGTGGGAACGCTGGGAGCTGTGTTCTTGGGTTCTTGGGAGC  
AGCAGGAAGCACTATGGGCGCAGCGTCAATAACGCTGACGGCACAGGCCAGACAATTACTGTCTGGTATAGTG  
CAACAGCAGAACAATATGCTGAAGGCTATTGAGGCGCAACAGCATCTGTTGCAACTCACAGTCTGGGGCATT

>MH078554

AATTATAATTGGAATAGTAATAATAGCACTGATAGCAGAAATATCACGCTCCCATGTAGAATAAGACAAATTA  
TAAACATGTGGCAGAGAGTAGGAAAAGCTATGTATGCCTCTCCCATCAAAGGACCAATTAAGTACATCAAA  
CATTACAGGGCTGCTATTGACAAGAGATGGGGGTAATGGCAAAGCAGCAGTAATGAGACTGAGACCTTCAGA  
CCTATAGGAGGAGACATGAAGGACAATTGGAGAAGTGAATTATATAAAATATAAAGTAGTACAAATCAAACCGT  
TAGGAATAGCACCCACCAGGGCAAAAAGAAGAGTGGTGCAGAGAGAAAAAGAGCAGTAACACTAGGAGCTAT  
GTTCTTGGGTTCTTGGGAGCAGCAGGAAGCACTATGGGCGCAGCGTCAATAGCGCTGACGGCACAGGCCAGA  
CAATTATTGTCTGGTATAGTGCAGCAGCAGAACAACTCTGCTGAGGGCTATTGAGGCGCAACAACATCTGTTGC  
AACTCACAGTCTGGGGCATC

>EF210725

AACTATACAAACAATGGAACCTATCACTCTCCCATGTAGAATAAAACAAGTTATAAACATGTGGCAGGAAGTAG  
GAAAAGCAATGTATGCCCCCTCCCATCAAAGGACAAATTAGTTGTTTGTCAAATATCACAGGGTTGCTATTAAC  
AAGAGATGGAGGTAAGCGCAATGACAGTAATGAGACAGAGGTCCTTTAGACCTGGAGGAGGAGATATGAGGGAC  
AATTGGAGAAGTGAATTATATAAAATATAAAGTAGTAAAAATTGAACCAATAGGAATAGCACCCACCAAGGCAA  
AGAGAAGAGTGGTGCAAAGAGAAAAAGAGAGCTGGGAACGCTAGGAGCTATGTTTCATTGGGTTCTTGGGAGC  
AGCAGGAAGCACTATGGGCGCAGCGTCAGTGACGCTGACGGTACAAGCCAGACAATTATTGTCTGGTATAGTG  
CAACAGCAGAACAATCTGCTGAAGGCTATTGATGCGCAACAGCATCTGTTGCAACTCACAGTCTGGGGCATC

>EF210734

ACTCAAGAAAATGAAAATATCACACTCCCATGTAGAATAAAACAAATTATAAACATGTGGCAGGAGGTAGGAA  
AAGCAATGTATGCCCCCTCCCATCAAAGGAATAATTAAATGTTTCATCAAACATTACAGGACTGCTCCTAATAAG

AGATGGTGGTAATAGTAATGGTAATGGAAGTAACAATAGCGAGACCTTCAGACCTGGAGGAGGAGATATGAAG  
GACAAATTGGAGAAGTGAATTATATAAATATAAAGTAGTAAAAGTTGAACCAGTAGGACTAGCACCCACCAAGG  
CAAAGAGAAGAGTGGTGCAGAGAGAAAAAAGAGCAGTGACACTAGGAGCTGTGTTCTTGGGTTCTTGGGAGC  
AGCAGGAAGCACTATGGGCGCAGCGTCAGTGACGCTGACGGTACAGGCCAGACAATTACTGTCTGGTATAGTG  
CAACAGCAGAGCAATATGCTGAAGGCTATTGAGGCGCAACAACATCTGTTGCAACTCACAGTCTGGGGCATC  
>KY658689

AATTACACAAATGGAACCTATCACGCTCCCATGCAGAATAAAACAAATTATAAACATGTGGCAGAGAGTAGGAA  
AAGCAATGTATGCCCCCTCCCATTCAGGACAACCTTAAGTTCATCAAATATTACGGGGATACTATTAACAAG  
AGATGGGGGTAATGGTAATGTGACAAATGACACAGAGATCTTCAGACCTGCAGGAGGAGATATGAGGGACAAT  
TGGAGAAATGAACTATACAAATATAAAGTAGTAAAGATTGAACCATTAGGAATAGCACCCACCAAGGCAAGGA  
GAAGAGTGGTGCAGAGAGAAAAAAGAGCAGTGACACTGGGAGCTCTGTTCTTGGGTTCTTGGGAGCTGCAGG  
AAGCACTATGGGCGCAGCGTCAGTGACGCTGACGGTACAGGCCAGGCTATTATTGGCTGGTATAGTGCAACAG  
CAGAACAAATTTGCTGAGAGCTATTGAGGTGCAACAGCACATGTTGCAACTCACAGTCTGGGGCATT  
>KP411827

ACTCAAAGGCAAGTAACACAGAAAATGAAAATATCACTCTCCCATGCAAAAATAAAACAAGTTATAAATATGT  
GGCAGGAAGTAGGAAAAGCAATGTATGCCCCCTCCCATCGAAGGACAGATTAAATGTTTCATCAAATATTACAGG  
GCTACTATTAAACAAGAGATGGTGGTAAACATAACAGTAGCGATACTAACAAAACCTGAGATCTTCAGACCTGGA  
GGAGGAGATATGAGGGACAATTGGAGAAGTGAATTATATAAATATAAGGTAGTAAAAATTGAACCATTAGGAA  
TAGCACCCACCAGGGCAAAGAGAAGAGTGGTGCAGAGAGAAAAAAGAGCAGTGGGATTAGGAGCTATGTTCTT  
TGGGTTCTTGGGAGCAGCAGGAAGCACTATGGGCGCAGCATCATTGACGCTGACGGTACAGGCCAGACAATTA  
ATGTCTGGTATAGTGCAACAGCAAAACAACCTTGCTAAGAGCTGTTGAGGCGCAACAGCATATGTTGCAACTCA  
CAGTCTGGGGCATC  
>MF373174

AATCAAACAACCTACCGGTAATGATACCATCCCACTCCAATGCAGGATAAAGCAAATTATAAACATGTGGCAGG  
AAGTGGGAAAAGCAATGTATGCCCCCTCCCATTAAGGACCAATTAATTGTTTATCAAATATTACAGGGTTGTT  
ATTAACAAGAGATGGTGGAAATAATAATACCAATGAAACAGAGACCTTCAGACCTGGAGGAGGAGACATGAGA  
GACAAATTGGAGAAGTGAATTATATAAATACAAAGTAGTAAAAATTGAACCATTAGGAGTAGCACCCACCAAGG  
CAAGGAGAAGAGTGGTGCAGAGAGAAAAAAGAGCAGTGGGACTAGGAGCTTTGTTCTTGGGTTCTTAGGAGC  
AGCAGGAAGCACTATGGGCGCAGCGTCAATGACGCTGACGGTACAGGCCAGACAATTATTGTCTGGTATAGTG  
CAACAGCAGAACAACCTTGCTGAGGGCTATTGAGGCGCAACAGCACCTGTTGAAACTCACGGTCTGGGGCATT  
>JN860769

AATCATACGTTTAATAATACTGAAGGCGAAAATATAACTGAAAGCATAAATACAACAATTATCAAGCTCCCAT  
GCAGAATAAAACAAATTATAAACATGTGGCAGGAAGTAGGAAAAGCAATGTATGCCCCCTCCCATCAGTGGACA  
AATTAGCTGTTTCATCAAATATTACAGGAATACTATTAAACAAGAGATGGTGGTGGTAATAACGGGAAATGAG  
ACCTTCAGACCTGGGGGAGGAAATATGAAAGACAATTGGAGAAGTGAATTATATAAATATAAAGTAGTAAAAA  
TTGAGCCATTAGGAATAGCACCCACCAAGGCAAAGAGAAGAGTGGTGCAGAGAGAAAAAAGAGCAGTGGGAGT  
GATAGGAGCTATGTTCTTGGGTTCTTGGGAGCAGCAGGAAGCACTATGGGCGCAGCGTCACTGACGCTGACG  
GTACAGGCCAGACAATTGTTGTCTGGTATAGTGCAACAGCAGAACAATTTGCTGAGAGCTATTGAGGCGCAAC  
AGCATCTGTTGCAACTCACAGTCTGGGGCATC  
>MG989583

AATTATAATATTGAAAAGTCAAATGACACTATTGTACTCCCGTGCAGAATAAAACAAATTATAAACAGGTGGC  
AGGAAGTAGGAAGAGCAATGTATGCCCCCTCCCATCAGAGGACAACCTTAAGTGTACATCAAATATTACAGGGCT  
ACTATTATTAAGAGATGGTGGGAATAACATTACGAACGAAACCTTCAGACCTGGAGGAGGAAATATGAAGGAC  
AATTGGAGAAGTGAATTATATAAATATAAGGTAGTAAAAATAGAGCCATTAGGACTAGCACCCACCAAGGCAA  
AGAGAAGAGTGGTGCAGAGAGAAAAAAGAGCAGCACTCGGAGCTATGTTCTTGGGTTCTTGGCAACAGCAGG  
AAGCACTATGGGCGCAGCATCGGTGACGCTGACGGTACAGGCCAGACAATTGTTGTCTGGTATAGTGCAACAG  
CAAAACAACCTTGCTGAGGGCTATTGAGGCGCAACAGCATATGTTGCAACTCACAGTCTGGGGCATC  
>AF277065

TTTCATGGTAATTGGACAAGGTCAAATTTACAGAATCAAATAGCACAACTATCACACTCCCATGTAGAATAA  
AACAAATTGTAAACATGTGGCAGGAAGTAGGCAAAGCAATGTATGCCCCCTCCCATCAGAGGACAATTAGATG  
TTCATCAAATATCACGGGGCTGCTATTAAACAAGAGATGGTGGCGTGAACGGGACCCGCGAGACCTTTAGACCT  
GGAGGAGGAGATATGAGGGACAATTGGAGAAGTGAATTATATAAATATAAAGTGGTAAAAATTGAGCCATTAG  
GAGTAGCACCCACCAAGGCAAAGAGAAGAGTGGTGCAGAGAGAAAAAAGAGCAGTGGGAACAATAGGAGCTAT  
GTTCTTGGGTTCTTGGGAGCAGCAGGAAGCACTATGGGCGCAGCGTCAATAACGCTGACGGTACAGGCCAGA  
CAATTATTGTCTGGTATAGTGCAACAGCAAAACAATTTGCTGAGAGCTATTGAGGCGCAACAGCATATGTTGC  
AACTCACGGTCTGGGGCATC  
>AF277067

AATCATACTGGGAGTAATAATATAAGATCAGAAGACAATGACAATATCACACTTCCATGCAGAATAAAACAAA  
TAGTAAACATGTGGCAGGAAGTAGGCAAAGCAATGTATGCCCCCTCCCATTAGAGGACAATTAGATGTTTCATC  
AAATATTACAGGATTACTATTAAACAAGAGATGGTGGTAATGACACGAGCGACACCGAGATCTTCAGACCTGGA

GGAGGAAATATGAGGGACAATTGGAGAAGTGAATTATATAAAATATAAAGTAGTAAGAATTGAACCATTAGGAG  
TAGCACCACCAAGGCAAAGAGAAGAGTGGTGCAGAGAGAAAAAGAGCAGTGGGAACATTAGGAGCTATGTT  
CCTTGGGTTCTTGGGAACAGCAGGAAGCACTATGGGCGCAGCGTCACTGACGCTGACGGTACAGGCCAGACAA  
TTATTGTCTGGTATAGTGCAACAGCAAAACAATTTGCTGAGAGCTATTGAGGCGCAACAGCATCTGTTGCAAC  
TCACGGTCTGGGGCATC

>JN786692

ACTCAGAATGTTACTGGAGGAAATGAGACAATCATACTCCCGTGCAGAATAAAACAAATTATAAACATGTGGC  
AGCAAGTAGGAAAAGCAATGTATGCCCCCTCCCATCAGTGGACTACTTAATTGTACATCAAATATTACAGGACT  
ACTAATAACAAGAGATGGTGGTACTGGGAACAGGACCAATGAGACCTTCAGACCTGGAGGAGGAGATATGAGG  
GACAATTGGAGAAGTGAATTATATAAAATATAAAGTAGTAAGAATTGAACCAATAGGCATAGCACCACCGAGG  
CAAAGAGAAGAGTGGTGCAGAGAGAAAAAGAGCAGTGGGAATAGGAGCTTTGTTCTTGGGTTCTTGGGAGC  
AGCAGGAAGCACTATGGGCGCAGCGTCGATAACGCTGACGGTACAGGCCAGACAATTATTGTCTGGTATAGTG  
CAACAGCAGAACAATTGCTGAGGGCTATTGAGGCGCAACAGCATCTGTTGCAACTCACAGTCTGGGGCATC

>DQ869028

ACTTATACTAATGGAATATCACAATCCCATGCAGAATAAGACAGATTGTAAACAGGTGGCAGGAAGTAGGAA  
AAGCAATGTATGCCCCCTCCCATCAGAGGATACATTAATGTTTCATCAAATATTACAGGGCTGCTATTAACGAG  
AGATGGTGGTAGTAATGCCACGAATGAGACCTTCAGACCTGGAGGAGGAGATATGAGGGACAATTGGAGAAGT  
GAATTATATAAAATATAAAGTAGTAAAAATTGAACCATTAGGAGTAGCACCACCAAGGCAAAGAGAAGAGTGG  
TGCAGAGAGAAAAAGAGCAATAGGGGGATTAGGAGCTTTGTTCTTGGGTTCTTGGGAGCAGCAGGAAGCAC  
TATGGGCGCAGCGTCATTGACGCTGACGGTACAGGCCAGACAATTATTGTCTGGTATAGTGCAACAGCAGAAC  
AATTTGCTGAGAGCTATTGAGGCGCAACAGCATCTGTTGCAACTCACAGTCTGGGGCATC

>JN944911

ACTCAAGGGCCAAGTGAAAAATAACAATCATACTCCCATGCAGAATAAAACAAATTATAAACATGTGGCAGA  
GAGTAGGAAAAGCAATATATGCCCCCTCCCATCAGTGGACAAATTAGATGTTTATCAAATATTACAGGGCTGAT  
ATTAACAAGAGATGGTGGTAATAGTAGCCTAAGCAGCCCCGAGATCTTCAGACCTGGAGGAGGAGATATGAGG  
GACAATCTGGAGAAGTGAATTATATAAAATATAAAGTAGTACAAATTGAACCATTAGGAATAGCACCACCGAGG  
CAAAGAGAAGAGCGGTGCAGAGGGAAAAAGAGCAGTGGGAATAGGAGCTCTGTTCTTGGGTTTCTGGGAGC  
AGCAGGAAGCACTATGGGCGCAGCGTCAGTGACGCTGACGGTACAGGCCAGACAGTTGTTGTCTGGTATAGTG  
CAACAGCAGAGCAATCTGCTGAGAGCTATTGAGGCGCAACAGCATCTGTTGCAACTCACAGTCTGGGGCATT

>FJ469751

AGTCATAACTGCTATGAATGTTACTGCAGGGAATGATAATATCACACTCCCGTGCAGAATAAAACAAATTA  
TAAACAGGTGGCAGGAAGTAGGAAAAGCAATGTATGCCCCCTCCCATCAGTGGATTCAATTAAGTCTCATCAA  
TATTACAGGGATAATGTAAATTAGAGATGGTATTAATGAACTGATGGGAACGAGACCTTCAGACCAGAAGGA  
GGAAATATGAAGGACAATTGGAGAAATGAATTATACAAATATAAAGTAGTAAAAATAGAGCCCTTAGGAGTAG  
CACCCACCAAGGCAAAGAGAAGAGTGGTGCAGAGAGAAAAAGAGCAGTGGGAATAGGAGCTCTGTTCTTGG  
GTTCTTGGGAGCAGCAGGAAGCACTATGGGCGCAGCGTCGATCACGCTGACGGTACAGGCCAGACAATTATTG  
TCTGGTATAGTGCAACAGCAGAGCAATTTGCTGAGAGCTATTGAGGCGCAACAGCATCTGTTGCAACTCACAG  
TCTGGGGCATC

>DQ869032

ACTTATAACACAACAGATAATAGTACTGATAATGGGAATGAAATTATCACAAATCCCATGCAGAATAAAACAGA  
TTATAAACATGTGGCAGGAGGTAGGAAAAGCAATGTATGCCCCCTCCCATCAGTGGACAAATTAGATGTACATC  
AAATATTACAGGGCTACTATTAGTAAGAGATGGTGGTACTACTAATACTAGTACTAATGAGACCTTCAGACCT  
GGAGGAGGAGATATGAGGGACAATTGGAGAAGTGAATTATATAAAATATAAAGTAGTAAAAATTGAACCATTAG  
GAGTAGCACCACCAAGGCAAAGAGAAGAGTGGTGCAGAGAGAAAAAGAGCAATAGGATTTGGAGCTATGTT  
CCTTGGGTTCTTGGGAGCAGCCGGAAGCACTATGGGCGCAGCGTCACTGACGCTGACGGTACAGGCCAGACAA  
TTATTGACTGGTATAGTGCAACAGCAAAACAATTTGCTGAGGGCTATTGAGGCGCAACAGCACTTGTGCAAC  
TCACAGTCTGGGGCATC

>FJ469742

ACTCAGAATGGTACTACATGGTCAAATGACAGTGACCCAATCATCATACTCCCATGCAGAATAAAACAAATTG  
TAAATAGGTGGCAGGAAGTAGGAAAAGCAATGTATGCCCCCTCCCATCAGTGGACAAATTAGATGCTCATCAA  
TATAACAGGACTGCTATTAACAAGAGATGGTGGTAACACAAATAGCACTATTGAAACCTTCAGACCTGGAGGA  
GGAGATATGAGGGACAATTGGAGAAGTGAACATATATAAAATATAAGGTAGTACAAATTGAACCATTAGGAGTAG  
CACCCACCAAGGCAAAGAGAAGGGTGGTGCAGAGAGAAAAAGAGCAGTAGTAGGACTAGGAGCTTTGGTCTT  
TGGGTTCTTGGGAGCAGCAGGAAGCACTATGGGCGCAGCGTCACTGGCGTTGACGGTACAGACCAGACAATTA  
TTGTCTGGTATAGTGCAACAGCAGAATAATATGCTGAGAGCTATTGAGGCGCAACAACACCTGTTGCAACTCA  
CAGTCTGGGGCATC

>FJ469764

AATTACACAGAAAATGGAATGACACACTCACAATCCCATGCAGAATAAAACAAATTATAAACATGTGGCAGG  
AAGTAGGAAAGGCAATGTATGCCCCCTCCCATCAGAGGACAAATTAAATGTTTCATCAAATATTACAGGGCTGCT  
ATTAACAAGAGATGGTGGTAATAGCAACAACACTAGCAATGAGACCTTCAGACCTGTAGGGGGAGATATGAGG

GACAATTGGAGAAGTGAATTATATAAATATAAAGTGGTAAAAATTGAACCATTAGGAGTAGCGCCACCAGGG  
CAAAGAGAAGAGTGGTGCAAAGAGAAAAAAGAGCAGTGGGAATAGGAGCTCTGTTCTTGGGTTCTTGGGAGC  
AGCAGGAAGCACTATGGGCGCAGCATCACTGACGCTGACGGTACAAGCCAGACAATTATTGTCTGGTATAGTG  
CAACAGCAGAACAATCTGCTGAGGGCTATTGAGGCGCAACAGCATCTGTTGCAACTCACAGTCTGGGGCATC  
>EF593298

TATTACAATGGTACCTGGAATAATACTGAAGAGTCAAATGAACTATCACACTCCCATGCAGAATAAAACAAA  
TTATAAACATGTGGCAGGAAGTAGGAAGAGCAATGTATGCCCTCCCATCAGAGGAATAATTAGATGTTTCATC  
AAATATAACAGGGCTGCTATTAACAAGAGATGGTACTCCTACTAATAGCACAGAAAGCAATGACACAGAAATC  
TTCAGACCGGGAGGAGGAAAATATGAGAGACAATTGGAGAAGTGAATTATATAAAATATAAAGTAGTACAAATTG  
AACCAATAGGACTAGCACCCACAAAGGCAAAGAGAAGAGTGGTGCAGAGAGAAAAAAGAGCAGTGGGAACAAT  
AGGAGCTATGTTCTTGGGTTCTTGGGAACAGCAGGAAGCACTATGGGCGCAGCGTCAATAACGCTGACGGTA  
CAGGCCAGACAATTATTGTCTGGTATAGTGCAACAGCAGAACAAATCTGCTGAAGGCTATTGAGGCGCAACAAC  
ATCTGTTGCAACTCACAGTCTGGGGCATC

>HQ216485

CATTACAAGGAAAAAATGACACAATCACACTCCCATGCAGAATAAAACAAATTATAAACAGGTGGCAGGAGG  
TAGGAAAAGCAATGTATGCCCTCCCATCAGAGGACAAATTAAGTGTATCAAAATATTACAGGGCTTCTATT  
ATTAAGAGATGGTGGACATGATAGTGGAAATAATAGTACAACGAACCAGAACGAGACCTTCAGGCCTGGGGGG  
GGAAATATGAAGGACAATTGGAGAAGTGAATTATATAAAATATAAAGTAGTACAAATTGAACCACTAGGAGTAG  
CACCCACCAAGGCAAAGAGAAGAGTGGTGCAGAGAGAAAAAAGAGCAATAGGGGAACTAGGAGCTGTGTTCTT  
TGGGTTCTTGGGAGCAGCAGGAAGCACTATGGGCGCAGCATCAGTGATGCTGACGGTACAGGCCAGACAATTA  
CTGTCTGGAATAGTGCAACAGCAGAACAAATTTGCTGAGGGCTATTGAGGCGCAACAACATTTGTTGCAACTCA  
CAGTCTGGGGCATC

>JX863970

CACTACACCTGGGATGGTACTAATGGTACTTGGGGGAATAATGCATCGAAGGGCAATATCACACTCCACTGCA  
GAATAAAACAAATTGTAAACATGTGGCAGAGAGTAGGAAGAGCAATGTATGCCCCCTTATCAGTGGACCAAT  
TAGCTGTTTCATCAAATATTACAGGGTTACTATTAACAAGAGATGGGGTGGTATCAACGAGACCAACACCACT  
GAGACCTTTAGACCTGGAGGAGGAGATATGAAGGACAATTGGAGAAGTGAATTATATAAAATATAAAGTAGTAC  
AAATTGAACCAATAGGAATAGCACCCACCAAGGCAAAAAGAAGAGTGGTGCAGAGAGAGAAAAGAGCAGTGGG  
AGTATTTGGAGCTATGTTCTTGGGTTCTTGGGAGCAGCAGGAAGCACTATGGGCGCAGCATCAATAACGCTG  
ACGGCACAGGCCAGACAATTATTGTCTGGTATAGTGCAACAGCAGAGCAATCTGCTGAGGGCTATTGAGGCGC  
AACAAACATGTTGCAACTCACAGTCTGGGGCATC

>EU578047

AATTACACAGAAGGAAATGGCACAATCACACTCCCATGCAGAATAAAACAAATTATAAACATGTGGCAGGAAG  
TAGGAAAAGCAATGTATGCCCTCCCATCAGAGGACCAATTAATTGTACATCAAATATTACAGGGTTACTATT  
AACAGAGATGGTGGTATACAGAATGGCACTGAGAACCCACTGAGACCTTCAGACCTGGAGGAGGAGATATG  
AGGGACAATTGGAGAAGTGAATTATATAAAATATAAAGTAGTAAGAATTGAACCATTAGGAGTAGCACCCACCA  
AGGCAATGAGAAGAGTGGTGCAAAAGAGAAAAAAGAGCAGTGGGAATAGGAGCTTTGTTCTTGGGTTCTTAGG  
AGCAGCAGGAAGCACTATGGGCGCAGCGTCGCTGACGCTGACGGTACAAGCCAGACAATTATTGTCTGGTATA  
GTGCAACAGCAGAACAAATTTGCTGAGAGCTATTGAGGCGCAACAGCATCTGTTGCAACTCACAGTCTGGGGCA  
TC

>MH060746

CCTCAGAATGAAAGTAGGCCAGAAAATGACACTATCACACTCCCATGCAAAATAAGACAAATTGTAAACCTGT  
GGCAGGAAGTAGGAAAAGCAATGTATGCCCTCCCATCAGAGGACAAATTAGATGTTTCATCAAACATTACAGG  
GCTGTTATTAACAAGGGATGGTGGTATGAACGTGAGCAACACCAACGAGACCTTCAGACCTGGAGGGGGGGAT  
ATGAGGGACAATTGGAGAAGTGAATTATATAAAATATAAAGTAGTAAAAATAGAACCATTAGGAGTAGCACCCA  
CCAAGGCAAAGAGAAGAGTGGTGCAGAGAGAAAAAAGAGCAGTGAACACTAGGAGCTATGTTCTTGGGTTCTT  
GGGAGCAGCAGGAAGCACTATGGGCGCAGCGTCAATGGCGCTGACGGTACAGGCCAGACAATTATTGTCTGGT  
ATAGTGCAACAGCAGAACAAATTTGCTGAGAGCTATTGAGGCGCAACAGCATCTGTTGCAACTCACAGTCTGGG  
GCATC

>FJ469695

ACTCAGAATAAATACTGACACAATTATCACACTCCCATGCAGAATAAAACAGATAATAAACATGTGGCAAGAAG  
TAGGAAAAGCAATGTATGCCCTCCCATCCAAGGACAAATTAGATGTTTCATCAAATATTACAGGGTTACTATT  
AACAGAGATGGTGCTGGTGGTAATAAAAGCGAGAATGAGACCTTCAGACCTGGAGGAGGAAATATGAGGGAC  
AATTGGAGAAGTGAATTATATAAAATATAAAGTAGTAAAAATTGAACCATTAGGAGTAGCACCCACCAAGGCAA  
GAAGAAGAGTGGTGCAGAGAGAAAAAAGAGCACTAGTAGGACTAGGAGCTGTGTTCTTGGGTTCTTGGGAGC  
AGCAGGAAGCACTATGGGCGCAGCGTCAATGGCGCTGACGGTACAGGCCAGACAATTATTGTCTGGTATAGTG  
CAACAGCAGAACAATTTGCTGAGAGCTATTGAGGCGCAACAGCATATGTTGCAACTCACAGTCTGGGGCATC

>FJ469732

AATCAACTACTAATGAATGGAATGGTACTAAAGGGTTAGATGACAGGGGAGAAAAATGACACAATCACACTCC  
CATGCAGAATAAAACAAATTGTAAACATGTGGCAGGGAGTAGGAAGAGCAATGTATGCCCTCCCATCAGTGG

ACAAATTAGATGCTTATCAAATATTACAGGGCTGCTATTAACAAGAGATGGTGGTAATACAAATGGCACGAAT  
GGGACTGAAACCTTCAGACCTGGAGGAGGAGATATGAGGGACAATTGGAGAAGTGAATTATATAAATATAAAG  
TAGTAAAAATTAAACCATTAGGAGTAGCACCCACCAAGGCAAAGAGAAGAGTGGTGCAGAGAGAAAAAGAGC  
AGTGGGAATAGGAGCTGTGTTCTTGGATTCTTGGGAGCAGCAGGAAGCACTATGGGCGCAGCGTCAGTGACG  
CTGACGGTACAGGCCAGACAATTATTGTCTGGTATAGTGCAACAGCAGAACAATTTGCTGAGGGCTATTGAGG  
CGCAACAACATCTGTTGCAACTCACAGTCTGGGGCATA

>DQ410403

AATTACACTAGCACTATCACACTCCCATGCAGAATAAAACAAGTTATAAACATGTGGCAGGAAGTAGGAAAAG  
CAATGTATGCCCCCTCCCATCAGAGGACAAATTAAATGTTTCATCAAATATTACAGGGCTGATACTAACAAGAGA  
TGGTGGTACAAACAACACCAACACCACCGAGACCTTTAGACCTGGAGGAGGAGATATGAGGGACAATTGGAGA  
AGTGAATTATATAAATACAAAGTAGTAAAAATTGAACCAATAGGAATAGCACCCACCAAGGCAAAGAGAAGAA  
CGGTGCAGAGAGAAAGAAGAGCAATAGGAATAGGAGCTGTGTTCTTGGGTTCTTGGGAACAGCTGGAAGCAC  
TATGGGCGCAGCGTCACTGACGCTGACGGTACAGGCCAGACAATTATTGTCTGGTATAGTGCAACAGCAAAAC  
AATTTGCTGAAGGCTATTGAGGCGCAACAGCATCTGTTGCGACTCACAGTCTGGGGCATC

>EU547186

AGTCAACTTTTTAATAGTACTTGGAATGGTACCGACGGGTCAGATAACACAATGGACAAAGATATCTCACTTC  
CATGCAGAATAAGACAAATTGTAAACATGTGGCAGGAAGTAGGAAAAGCAATGTATGCCCCCTCCTATCCAAGG  
ACAAATTAGATGTTTCATCAAATATTACAGGGCTACTATTAGTAAGAGATGGTGGTAGTAATACAACCAATAAT  
GAGACCTTCAGACCTGGAGGAGGAGACATGAGGGACAACCTGGAGAAGTGAATTATATAAATATAAAGTAGTAA  
AAATTGAACCAAGTAGGAATAGCACCCACCAAGGCAAAGAGAAGAGTGGTGCAGAGAGAAAAAGAGCAGTGGG  
AACACTAGGAGCTATGTTCTTGGGTTCTTGGGAACAGCAGGAAGCACTATGGGCGCAGCGTCAGTGACGCTG  
ACGGTACAGGCCAGACAATTATTGTCTGGTATAGTGCAACAGCAAAGCAATATGCTGAGGGCTATTGAGGCGC  
AACAGCATCTGTTGCAACTCACAGTCTGGGGCATC

>JF689852

AATCACACTAAAGGAAATGGCACAATCACAATTCCATGCAGAATAAAACAAATTATAAACATGTGGCAGGAAG  
TAGGAAAAGCAATGTATGCCCCCTCCCATCAGAGGACAAATTAGATGTTTCATCAAATATTACAGGGCTGTTATT  
AACAAAGAGATGGTGGCAATGACGGGGACAATACCACCGAAACCTTCAGACCTGGAGGAGGAGATATGAGGGAC  
AATTGGAGAAGTGAATTATATAAATATAAAGTAGTAAAAATTGAACCATTAGGAGTAGCACCTACCAAGGCAA  
AGAGAAGAGTGGTGCAGAGAGGAAAAAGAGCAGTAGGAATAGGAGCTGTGTTCTTGGGTTCTTGGGAGCAGC  
AGGAAGCACTATGGGCGCAGCGTCATTAAACGCTGACGGTACAGGCCAGACTATTATTGTCTGGTATAGTGCAA  
CAGCAGAACAATTTGCTGAGGGCTATTGAGGCACAACAGCATCTGTTGCAACTCACAGTCTGGGGCATC

>HQ216634

GATTACACTACAGCAGAGAATGATACTAAAGAAGAAAATATCACACTCCCATGCAGAATAAAACAAATTATAA  
ACATGTGGCAGAAAGTAGGAAAAGCAATGTATGCCCCCTCCCATCAGAGGACAGATTAGATGTTTCATCAAATAT  
TACAGGGCTGCTATTAACAAGAGATGGTGGTAATGGTGATACCACAAACAATGAGACCTTCAGACCTGGAGGA  
GGAGATATGAGGGATAATTGGAGAAGTGAATTATATAGATATAAAGTAGTAAGAATTGAACCATTAGGAATAG  
CACCCACTAAGGCAAAGAGAAGAGTGGTGCAGAGAGAAAAAGAGCAATAGGGGGAATAGGAGCTATGTTCTT  
TGGGATCTTAGGAGTAGCAGGAAGCACTATGGGCGCAGCGTCATTGACGCTGACGGTACAGGCCAGACAATTA  
TTGTCTGGTATAGTGCAACAGCAGAACAATTTGCTGAGGGCTATTGAGGCGCAACAGCATCTGTTGCAACTCA  
CAGTCTGGGGCATC

>HQ216874

GTTCATAATAATACTGAAAGGTTAAATACCACTAACAGTACTATCATACTCCCATGCAAAATAAAACAAA  
TTATAAACATGTGGCAGGGAGTAGGAAAAGCAATGTATGCCCCCTCCCATTCAGGAATAATTAATTGTGTATC  
AAATATTACAGGGCTGCTATTAACAAGAGATGGTGGTGGTAGTGGTAATGGCACAAGAAGGGATAACGAAACC  
TTCAGACCTGAAGGGGGAAATATGAAGGATAATTGGAGAAGTGAATTATACAAATACAAAGTAGTAAAAATTG  
AACCATTAGGAGTAGCACCCACTAGGGCAAAGAGAAGAGTGGTGCAGAGAGAAAAAGAGCGATAGGAGGACT  
AGGAGCTTTGTTCTTGGGTTCTTGGGAATGGCAGGAAGCACTATGGGCGCAGCGTCGCTGACGCTGACGGTA  
CAGGCCAGGCTGTTATTGTCTGGTATAGTGCAACAGCAAAACAATTTGCTGAGGGCTATTGAGGCGCAACAGC  
ACCTGTTGCAACTCACAGTCTGGGGCATC

>FJ653571

TCTCATTTGGTCTGATAGTACTTGGAATGATACTACAGGGCCAAATAACACTACAGAAACAATCATACTCCCAT  
GTAGACTAAAACAAATTATAAACATGTGGCAAGGAGTAGGAAGAGCAATGTATGCCCCCTCCCATCAGAGGACA  
AATTAGATGTTTCATCAAATATTACAGGGCTGTTATTAACAAGAGATGGTGGTGGTAGTAATAGCAGCGGCAGT  
AACGAGACCTTCAGACCAGAAGGAGGAAATATGAAGGACAATTGGAGAAGTGAACATATATAAATATAAAGTAG  
TAAAAATTGAACCATTAGGAATAGCACCCACTAAGGCAAAGAGAAGAGTGGTGCAGAGAGAAAAAGAGCAGT  
GGGACTAGGAGCTCTGTTCTTGGGTTCTTGGGAGCAGCAGGAAGCACTATGGGCGCAGCGGCAGTAACGCTG  
ACGGTACAGGCCAGACAATTATTGTCTGGTATAGTGCAACAGCAAAACAATTTGCTGAGAGCTATTGAGGCGC  
AACAGCATATGTTGCAACTCACAGTCTGGGGCATC

>KC312435

GATCATATTACTGAGGAGAACACAACCTATCACACTCCAATGCAGAATAAAACAAATTATAAACATGTGGCAAA  
AAGTAGGAAAAGCAATGTATGCCCCCTCCCATCAAAGGACAAATTAGCTGTGTATCAAATATTACAGGGCTGCT  
ATTAACAAGAGATGGTGGTCTAAACCAGTCAGGTAACAGTTCCGAGACCTTCAGACCTGGAGGAGGAGATATG  
AGGGACAACCTGGAGAAGTGAATTATATAAATATAAAGTAGTAAGAATTGAACCATTAGGAGTAGCACCCACCA  
AGGCAAAGAGAAGAGTGGTGCAGAGAGAAAAAGAGCAGTGGGAGTTCTAGGAGCTATGTTCCCTTGGGTTCTT  
GGGAGCAGCAGGAAGCACTATGGGCGCAGCGTCAATGACGCTGACGGTACAAGCCAGACAATTATTGTCTGGT  
ATAGTGCAACAGCAGAACAACTCTGCTGATGGCTATTGAGGCGCAACAGCATATATTGCGACTCACAGTCTGGG  
GCATC

>HQ216949

AATTACACTGATGGAACCTATCACACTCCCATGCAGAATAAGACAAATTATAAACATGTGGCAGGAAGTAGGAA  
AAGCAATGTATGCCCCCTCCCATCGGAGGGCAAATTAGATGTTTCATCAGATATTACAGGGCTACTCTTAACAAG  
AGATGGTGGCAGAGGAAATAACAATAATGAACTGAGATCTTCAGACCTGGAGGAGGAGATATGAGGGACAAT  
TGGAGAAGTGAATTATATAAAATACAAAATAGTAAAAATTGAACCATTAGGAATAGCACCCACCAAGGCGAAGA  
GAAGAGTGGTGCAGAGAAAAGAAAAGAGCAGTGGGAATAGGAGCTGTGTTCCCTTGGGTTCTTGGGAGCAGCAGG  
AAGCACGATGGGCGCAGCGTCAGTGACGCTGACGGTACAGGCCAGACAATTACTGTCTGGTATAGTGCAACAG  
CAGAACAACTCTGCTGAGGGCTATTGAGGCGCAACAACATCTGTTGCAACTCACAGTCTGGGGCATC

>JX863989

CATCAGAATAATACTAATATTACTACAGAGTCAAATGGCATCATCACACTCCCATGCAGAATAAAACAAATTA  
TAAACAGGTGGCAGGAAGTAGGAAAAGCAATGTATGCCCCCTCCCATCAGAGGACCAATCAGGTGTAGATCAAA  
TATTACAGGGGTGCTATTAACAAGAGATGGTGGTAGTACTAATGCCACCAACGAGACCTTCAGACCTGGAGGA  
GGAGATATGAGGGATAATTGGAGAAGTGAATTATATAAAATATAAAGTAGTAAAAATTGAGCCATTAGGAATAG  
CACCCACCAAGGCACAGAGAAGAGTGGTGCAGAGAGAAAAAGAGCAGCAATTGGAGCTATGCTCATTGGGTT  
CTTGGGAATGGCAGGAAGCACTATGGGCGCAGCGTCAGTGACGCTGACGGTACAAGCCAGGCTATTACTGTCT  
GGTATAGTGCAGCAGCAGAGAAATTTGCTGAGAGCTATTGAGGTGCAACAACATATGTTGCAACTCACAGTCT  
GGGGCATC

>JX863993

AATTACAACATTACAGGAAATATCACACTCCCATGCAGAATAAAACAAATTATAAACATGTGGCAGGAAGTAG  
GAAAAGCAATGTATGCTCCTCCCATCGCAGGACTACTTAGATGTTTCATCAAATATTACAGGGCTGCTATTAAC  
ACGAGATGGAGGTCTACACCCGGACAATGGGACCGAGATTTTCAGACCTGGAGGAGGAGATATGAGGGACAAT  
TGGAGAAGTGAATTATATAAAATATAAAGTAGTAAAAATTGAACCATTAGGAATAGCACCCACCAAGGCAAAGA  
GAAGAGTGGTGCAGAGAGAAAAAGAGCAATAGGACTAGGAGCTTTGTTCTTTGGGTTCTTGGGAGCAGCAGG  
AAGCACTATGGGCGCAGCGTCAGTGACGCTGACGGTACAGGCCAGACAGTTACTGTCTGGTATAGTGCAACAG  
CAGAACAAATTTGCTGAGAGCTATTGAGGCGCAACAACATATGTTGCAACTCACAGTCTGGGGCATC

>JF320263

AATTATACTGATCCTTTAAATGATACTTTGAATAATGATACTGAAGAAAATATCACACTCCAATGCAGAATAA  
AACAAATTTATAAACATGTGGCAGAAAGTAGGAAAAGCAATGTATGCCCCCTCCCATTAGTGGACAAATTAAGT  
TTCATCAAATATTACAGGGCTGCTATTAATGAGAGATGGTGGTATTAACCAGAGCGAGAGCAGCGAGACCTTC  
AGACCTGGAGGAGGAGATATGAGGGACAATTGGAGAAGTGAATTATATAAAATATAAAGTAGTAAAAATTGAAC  
CTTTAGGAGTAGCACCCACTAAAGCAAAGAGAAGAGTGGTGCAGAGAGAAAAAGAGCAGCAATAGGAGCTCT  
GGTCTTTGGGTTCTTGGGAGCAGCAGGAAGCACTATGGGCGCAGCGTCACTGACGCTGACGGTACAGGCCAGA  
CTATTATTGTCTGGTATAGTGACGAGCAAAACAATTTGCTGAGAGCTATTGAGGCGCAACAGCATATGTTGC  
AACTCACAGTCTGGGGCATC

>JF320011

AATCATACTTGAATAGTACTAATGATACTTGAATGGTACTGAGACCATAACACTTCCATGCAGAATAAAAC  
AAATTATAAACATGTGGCAGGAAGTAGGAAAAGCAATGTATGCCCCCTCCCATCAGAGGACAGATTAAGTCTC  
GTCAAATATTACAGGGCTGCTATTAACAAGAGATGGTGGTAAACACCACAAACACCACCGAGATCTTCAGACCT  
GGAGGGGAAATATGAAGGACAATTGGAGAAGTGAATTATATAAAATACAAAGTAGTAAAAATTGAACCATTAG  
GAGTAGCACCCACCAAGGCAAAGAGGAGAGTGGTGCAGAGAGAAAAAGAGCAGCAATAGGAGCTTTGTTCCCT  
TGGGTTCTTGGGAGCAGCAGGAAGCACTATGGGCGCAGCGTCAGTGACGCTGACGGTACAGGCCAGACTATTA  
TTGTCTGGTATAGTGCAACAGCAGAGCAATCTGCTGAGGGCTATTGAGGCGCAACAGCATCTGTTGCAACTCA  
CAGTCTGGGGCATC

>JF320126

AGTCATAATGATAACCAGGCATAATAGTACTAAAGGGACAGATAATATCATACTCCCATGTAAAATAAGACAAA  
TTGTAAACATGTGGCAGGAAGTAGGAAAAGCAATGTATGCCCCCTCCCATTCAGAGACAAATTAATGTTTCATC  
AAATATTACAGGGCTGATATTAACAAGAGATGGTGGTAAATAATAATAGCACAAACGAGACTGAGACATTCAGA  
CCTGGAGGAGGAAATATGAGGGACAATTGGAGAAGTGAATTATATAAAATACAAAAGTAGTAGAAATTGAACCAT  
TAGGAATAGCACCCACCAAGGCAAAGAGGAGAGTGGTGCAGAGAGAAAAAGAGCAGTGGGAACGATAGGAGC  
TATGTTCCCTTGGGTTCTTGGGAGCAGCAGGAAGCACTATGGGCGCAGCGTCGATAACGCTGACGGTACAGGCC  
AGACAATTATTGTCTGGTATAGTGACGAGCAGAACAACTCTGCTGAGGGCTATTGAGGCGCAACAACATCTGT  
TGCAACTCACGGTCTGGGGCATC

>FJ469723

ACTCAGCTGTTTAAATAGTACTAATAATAATACTGCAGAAAACATCACACTCCCATGCAGAATAAGACAAATTA  
TAAACAGGTGGCAAGAAGTAGGAAAAGCAATGTATGCCCCCTCCCATCAGCGGACTAATTAAGTCTTATCAAA  
TATTACAGGGCTGCTATTAACAAGAGATGGAGGGAACAATACAGAGAGTAAGACTGAGACCTTCAGACCTGGA  
GGAGGGGATATGAGGGACAATTGGAGAAGTGAATTATACAAGTATAAAGTAGTAAAAATTGAACCATTAGGAG  
TAGCACCCACCAGGGCAAGGAGAAGAGTGGTGCAAAGAGAAAAAAGAGCAGTGGGAGTGATAGGAGCTATGTT  
CCTTGGATTCTTGGGAGCAGCAGGAAGCACTATGGGCGCAGCGGCAGTGACGCTGACGGTACAGGCCAGACAA  
TTATTGTCTGGTATAGTGCAACAGCAAAACAATTTGCTGCAGGCTATTGAGGCGCAACAACATCTGTTGCAAC  
TCACAGTCTGGGGCATT

>JQ403097

ACTCATTGGAATGATACTAATGACACCAATAATGACACCATTACACTCCCATGCAGAATAAAACAAATTATAA  
ACTTGTGGCAGGAAGTAGGAAAAGCAATGTATGCCCCCTCCCATCAAAGGACAAATTAGATGTTTCATCAAATAT  
TACAGGGCTGCTATTAACAAGAGATGGTGGTTGTAACACGACCAATGGGACTGAGGTCTTCAGACCTGGAGGA  
GGAGATATGAGGGACAATTGGAGAAGTGAATTATATAAAATATAAAGTAGTAAAAATTGAACCATTAGGAGTAG  
CACCCACCAAGGCAAAGAGAAAGAGTGGTGACAGAGAGAAAAAAGAGCAGTGGGAGTAATAGGAGCTATGTTCCCT  
TGGGTTCTTGGGAGCAGCAGGAAGCACTATGGGCGCAGCGTCAGTGACGCTGACGGTACAGGCCAGACAATTA  
TTGTCTGGTATAGTGCAACAGCAGAACAATTTGCTGAGAGCTATTGAGGCGCAACAGCATCTGTTGCAACTCA  
CAGTCTGGGGCATC

>EU578223

AATTACACAGGAGAAAATGACACAATTACACTCCCATGCAGAATAAAACAAATCATAAATATGTGGCAGGAAG  
TAGGAAAAGCAATGTATGCCCCCTCCCATCAGAGGAATAATTAGGTGTTTCATCTAATATTACAGGGTTGTTATT  
AACAAAGAGATGGGGGTAGCGGTAACGAGAGCGACGCCGAGATCTTCAGACCTGGGGGAGGGAATATGAAGGAT  
AATTGGAGAAGTGAATTATATAAAATATAAAGTAGTAAAAATTAAACCATTAGGGATAGCACCCACCAAGGCAA  
AAAGAAGAGTGGTGACAGAGAGAAAAAAGAGCAGTGGGACTAGGAGCTTTGTTCCCTTGGGTTCTTGGGAGCAGC  
GGGAAGCACTATGGGCGCAGCGTCAGTGACGCTGACGGTACAGGCCAGAACTTATTGTCTGGTATAGTGCAA  
CAGCAGAACAATCTGCTGAGGGCTATTGAGGCGCAACAGCACCTGTTGCAACTCACAGTCTGGGGCATA

>JF689892

AATTACACTGAAGGAAATGATACAATCACACTCCCATGCAAAATAAAACAAATTGTAAACATGTGGCGGGAGG  
TAGGAAAGGCAATGTATGCCCCCTCCTATCAGAGGACTAATTAGATGCTCATCAAATATTACAGGACTGATCTT  
AACAAAGAGATGGTGGTAATATTAATAATGGTACCACGGGGAACAGGACTGAGATCTTTAGACCTGGAGGAGGA  
GATATGAGGGACAATTGGAGAAGTGAATTATATAAAATATAAAGTAGTAAGAATTGAACCATTAGGAATAGCAC  
CCACCAGGGCAAAGAGAAGAGTGGTGCAAAGAGAAAAACGAGCAGTGGGAGTAGGAGCTCTGTTCCCTTGGGTT  
CTTGGGAGCAGCAGGAAGCACTATGGGCGCAGCGTCAATAACGCTGACGGTACAGGCCAGACAATTATTGTCT  
GGTATAGTGCAACAGCAGAACAATCTGCTGAAGGCAATTGATGCGCAACAGCATCTGTTGCAACTCACAGTCT  
GGGGCATT

>JF320315

ACTCAAGAAAGTAACACTGAAGGAAATGACACAATTATACTACCATGCAGAATAAAACAAATTGTAAACATGT  
GGCAGGAAGTAGGAAAAGCAATGTATGCCCCCTCCCATTAGTGACAAATTAACTGTTTCATCAAATATTACAGG  
GCTAATATTAGCAAGAGATGGTGGTAATGAGACATACAGGAACGAGACCTTCAGACCTATAGGAGGAGATATG  
AGGGACAATTGGAGAAGTGAATTATATAAAATATAAAGTAGTAAAAATTGAACCATTAGGAGTAGCACCCACCA  
AGGCAAAGAGAAGAGTGGTGCAAAGAGAAAAAAGAGCAGTGGGATTAGGAGCTATGTTCCCTTGGGTTCTTGGG  
AGCAGCAGGAAGCACTATGGGCGCGGCGTCAGTGACGCTGACGGTACAAGCCAGACAATTATTGTCTGGTATA  
GTGCAACAGCAGAACAATCTGCTGAGAGCTATTGAGGCGCAACAGCATCTGTTGCAACTCACAGTCTGGGGCA  
TC

>JF320394

ACTCAGAAGATTAAAGGGTTTGATAATAATGGCAATATCACACTCCCCTGTAGAATAAAACAAATTATAAACA  
GGTGGCAGGAAGTAGGAAAAGCAATGTATGCCCCCTCCCATTGACAGGACAAATTAAATGTACATCAAATATTAC  
AGGGCTGCTATTAACATGGGATGGTGGTAATGATGGTGGAAACGGCACTGGAACAAAAAATAACGAAACAGAG  
GTTTTTAGACCATCAGGAGGAAATATGAGGGACAATTGGAGAAGTGAATTATATAAAGTAGTAAAAG  
TTGAACCATTAGGAATAGCACCCACCAAGGCAAAGAGAAGAGTGGTGACAGAGAGAAAGAGCAGTGGGAAT  
AGGAGCTGTGTTCCCTTGGGTTCTTGGGAGCAGCAGGAAGCACTATGGGCGCAGCGTCATTAAACGCTGACGGTA  
CAAGCCAGACTATTGTTGTCTGGTATAGTGCAACAGCAGAACAATCTGCTGAGAGCTATTGAGGCGCAACAGC  
ATCTGCTGCAACTCACAGTCTGGGGCATC

>JF320279

ACTCAATTATTCAATAGTACTTGGCTACTCAATGGATCAAGTAACACTGAAGGAAAATGACACAATCACGATCC  
CATGCAGAATAAAACAAATTGTAAACATGTGGCAAAAAGTAGGAAAAGCAATGTATGCCCCCTCCCATCAGAGG  
AAATATTAGTTGTATATCAAATATTACAGGAATACTATTAATAAGAGATGGGGGTGTTAGCAACGAGAGTGCT  
AACGAGACCAGGAACGAGACCTTCAGACCAGCAGGAGGAGATATGAGGGACAATTGGAGAAGTGAATTATATA  
AATATAAAGTAGTAAAAATTGAACCATTAGGAATAGCACCCACTAAGGCAAAGAGAAGAGTGGTGACAGAGAGA  
AAAAAGAGCAGTGGGACTAGGAGCTGTGTTCCCTTGGGTTCTTGGGAGCAGCAGGAAGCACTATGGGCGCAGCG

TCAGTGACGCTGACGGTACAAGCCAGACAATTATTGTCTGGTATAGTGCAACAGCAGAACAATTTGCTGAAGG  
CTATTGAGGCGCAACAGCACCTGTTGCAACTCACAGTCTGGGGCATC

>HQ908109

ACTCAAAATGATACTGCTAACAGTACCATTATGCTCCCATGCAGAATAAAACAAGTTATAAACAGGTGGCAGG  
AAGTAGGAAAAGCAATGTATGCCCCCTCCCATCAGAGGACCAATTAGCTGTTTCATCAAATATTACAGGGCTGAT  
ATTAACAAGGGATGGTGGTATTATTAATGCCACCAATGAGACCTTCAGACCTGGAGGAGGAGATATGAGGGAC  
AATTGGAGAAGTGAATTATACAAATATAAAGTAGTAAAAATTGAACCATTAGGAGTAGCACCCACCAGGGCAA  
AGAGAAGAGTGGTGCAAAGAGAAAAAAGAGCAGTGGGAATAGGAGCTCTGTTCCCTTGGGTTCTTGGGAGCAGC  
AGGAAGCACTATGGGCGCAGCGTCAGTGACGCTGACGGTACAGGCCAGACAATTATTGTCTGGTATAGTGCAA  
CAGCAGAGCAATTTGCTGAGGGCTATTGAGGCGCAACAGCATCTGTTGCAACTCACAGTCTGGGGCATC

>FJ469713

TGTTATACATCACGACTGTTTAAATAGAACTTTTGGTAATGAGACTATAAATCCTACTAAGATTAATGAAAAA  
CTACAGAAGTCATCACACTCCCATGTAGAATAAGACAAAATTATAAATATGTGGCAGGAAGTAGGAAAAGCAAT  
GTATGCCCCCTCCCATCAGAGGACAAATTAAGTGTATATCAAACATTACAGGACTGTTATTAACAAGAGATGGT  
GGCGATGACGATACCACCAACACTGAGACCTTCAGACCTACAGGGGGAAATATGAAAGACAATTGGAGAAGTG  
AATTATATAAATATAAAGTAGTAAGAATTGAACCATTGGGACTGGCACCCCTCCAAGGCAAAGAGAAGAGTGGT  
GCAGAGAGAAAAAAGAGCAGTGGGACTAGGAGCTTTGTTTCATTGGGTTCTTGGGAGCAGCAGGAAGCACTATG  
GGCGCAGCGTCGATGACGCTGACGGTACAGGCCAGACTATTATTGTCTGGTATAGTGCAACAGCAGAACAATC  
TGCTGAGAGCTATTGAGGCGCAACAACATCTGTTGCAACTCACAGTCTGGGGCATC

>JQ403071

AGTCATATAGAGTCAAATGACAATGAAGAAAATATCACACTCCCCTGTAGAATAAGACAAATTGTAAACATGT  
GGCAGGAAGTAGGAAAAGCAATGTATGCCCCCTCCCATCAGTGGACAAATTAGATGTGTATCAACTATTACAGG  
GCTGCTATTAACAAGAGATGGTGGGAACGGGACTAACAACTGAGACCTTTAGACCTGGAGGAGGAGATATG  
AGGGACAACCTGGAGAAGTGAATTATATAAATATAAAGTAGTAAGAATTGAACCATTAGGAGTAGCACCCACCA  
AGGCACAGAGAAGAGTGGTGCAAGAGAAAAAAGAGCAGTGGGAATGTTAGGAGCTATGTTCCCTTGGGTTCTT  
GGGAGCAGCAGGAAGCACTATGGGCGCAGCGTCGATAACGCTGACGGTACAAGCCAGACAATTAATGTCTGGT  
ATAGTGCAACAGCAGAACAATCTGCTGAAGGCTATTGAGGCGCAACAACATATGTTGCAACTCACAGTCTGGG  
GCATC

>KM259279

AGTTATTGGAATACTACTGAAGGGTCCAATAACACTGAAGGAAATGACACCATCACAATACCATGCAGAATAA  
AACAAATTATAAACATGTGGCAGGAAGTAGGAAAAGCAATGTATGCCCCCTCCCATCAAAGGAATAATTAATTG  
TTCATCAAATATCACAGGGCTGTTATTAACAAGAGATGGTGGTAACACAACCAACAACAGCACAGAGACCGAG  
ACCTTCAGACCTGGAGGAGGAGATATGAGGGACAATTGGAGAAGTGAATTATATAAGTATAAAGTAGTAAAAA  
TTGAACCATTAGGACTAGCACCCACCAAGGCAAAGAGAAGAGTGGTGCAGAGAGAAAAAAGAGCAATAGGAAT  
AGGAGCTATGTTCCCTTGGGTTCTTGGGAGCAGCAGGAAGCACTATGGGCGCAGCATCATTGACGCTGACGGTA  
CAGGCCAGACAATTATTGTCTGGTATAGTGCAACAGCAGAACAATTTGCTGAGAGCTATTGAGGCGCAACAGC  
ATATGTTGCAACTCACAGTCTGGGGCATC

>MK383753

AGTCACACTGAAGAAAATATCACACTCCCATGCAGAATAAAACAATTATAAACATGTGGCAGGAAGTAGGAA  
AAGCAATGTATGCCCCCTCCCATTAGAGGAAACATTAGCTGTTTCATCAAATATTACAGGGCTGCTATTAAACAAG  
AGATGGTGGTAATAACGAGAGCCAGACCGAGACCTTCAGACCTGGAGGAGGAAATATGAAGGATAATTGGAGA  
AGTGAATTATATAAATATAAAGTAGTAAAAATTGAACCATTAGGAGTAGCACCCACCAGGGCAAAGAGAAGAG  
TGGTGCAGAGAGAAAAAAGAGCAGTGGGAATAGGAGCTGTGTTCCCTTGGGTTCTTGGGAGCAGCAGGAAGCAC  
TATGGGCGCAGCGTCAATGACGCTGACGGTACAGGCCAGACTATTACTGTCTGGTATAGTGCAACAGCAGAGC  
AATTTGCTGAGGGCTATTGAGGCGCAACAGCGTTTGTGCAACTCACAGTCTGGGGCATC

>HQ615981

ACTCAGGAGACTAACAGGGACAATGACACTATCACGCTCCCATGCAGAATAAAACAATTATAAACATGTGGC  
AGGAAGTAGGAAGAGCAATGTATGCCCCCTCCCATCAAAGGACTAATTAGGTGTTTCATCAAATATCACAGGGCT  
GCTACTACTAAGAGATGGTGGAAATACCAGTAACAATAATGAGACCTTCAGACCTGGAGGAGGAGATATGAGG  
GACAATTGGAGAAGTGAATTATATAAATATAAAGTAGTAAAAAGTTGAACCATTAGGAATAGCACCCACCAAGG  
CAAAGAGAAGAGTGGTGCAGAGAGAAAAAAGAGCAGTGGGTTTTGGAGCTATGTTCCCTTGGGTTCTTGGGAGC  
AGCAGGAAGCACTATGGGCGCAGCATCACTAACGCTGACGGTACAGGCCAGACAATTGTTGTCTGGTATAGTG  
CAACAGCAAAACAATTTGCTGAGAGCTATTGAGGCGCAACAACATATGTTGCAACTCACAGTCTGGGGCATC

>JQ403080

ACTCAACTGTTTAAATAGTACTTGGGTGGTTAATAGTAGTACTGGGGAAGTTAATAGTAGTACTGGGGGGTTTA  
CAGGAAATGGCATAATCACACTTCCATGCAGGATAAAAACAAATTATAAACATGTGGCAGGAAGTAGGAAAAGC  
CATGTATGCCCCCTCCCATCGCAGGACAAATTAAGTGTTCATCAAATATTACAGGACTACTACTAATAAGAGAT  
GGTGGTAAAAATGTCAGCAACACCACCGAGACCTTTAGACCTGGAGGAGGAAATATGAGGGACAATTGGAGAA  
GTGAATTATATAAATATAAGGTAGTAAGACTTGAGCCATTAGGAATAGCACCCACCAAGGCAAGGAGAAGAGT  
GGTGCAAAGAGAAAAAAGAGCAGTGGGAACAATAGGAGTTATGTTCCCTTGGGTTCTTGGGAGCAGCAGGAAGC

ACTATGGGCGCAGCGTCAGTGACGCTGATGGTACAGGCCAGACAATTACTGTCTGGTATAGTGCAGCAGCAAA  
GCAATTTGCTGAAGGCTATTGAAGCGCAACACCATCTGTTGCAGCTCACAGTCTGGGGCATC

>KM082128

CATTATAATAATGATACTGGTACTTGGAACTACTCTTGGATTGGGAATGGTACTGAAGGGAATGAAAATAGCA  
CCATCACCCCTCCCATGCAGAATAAAACAAATAATAAACATGTGGCAGGAAGTAGGAAAGGCAATGTATGCCCC  
TCCCATTAAGGAATAATTAGCTGTTTCATCAAATATTACAGGGCTGCTATTAACAAGAGATGGTGGTAACAGT  
AATACCACCGAGAATGAGACCTTCAGACCTGGAGGAGGAGATATGAGGGACAATTGGAGAAGTGAATTATATA  
AATATAAAGTAGTAAGAATTGAACCATTAGGAGTAGCACCCACCCATGCAAAGAGAAGAGTGGTGCAGAGAGC  
AGCAAGAGCAGTGGGATTTCGGAGCTTTGTTTCCTTGGGTTCTTGGGAGCAGCAGGAAGCACTATGGGCGCAGCG  
TCAATAACGCTGACGGCACAGGCCAGACAACCTGTTGTCTGGTATAGTGCAACAGCAGAACAATCTGCTGAGGG  
CTATTGAGGCGCAACAACACCTGTTGCAACTCACAGTCTGGGGCATT

>MH666207

TTTCATAGTAATTGGACTAAAAACAGGGAACGTTACATACATTCCAGAAAATAACTCCACTAACATCACACTCC  
AATGTAGAATAAAACAAATTATAAACATGTGGCAGAAAAGTAGGCAAAGCAATGTATGCCCCCTCCCATCAGTGG  
ACAAATTAGATGTTTCATCAAAACATTACAGGGCTGCTATTAACAAGAGATGGTGGTAAGAAGAACGAATCTGAA  
GGGAACGAGACTGAGGTCTTCAGACCTGGAGGAGGGGATATGAGGGACAATTGGAGAAGTGAATTATATAAAAT  
ATAAAGTAGTGAAAATTGAGCCATTAGGAGTAGCACCCACCAAGGCAAAGAGAAGAGTGGTGCAAAGAGAAAA  
AAGAGCAGTGGGACTAGGAGCTTTGTTCTTGGATTCTTGGGAGCAGCAGGAAGCACTATGGGCGCAGCGTCA  
ATAACGCTGACGGTACAGGCCAGACAAGTATTGTCTGGTATAGTGACAGCAGCAACACAATTTGCTGAGGGCTA  
TTGAGGCGCAACAGCATCTGTTGCAACTCACAGTCTGGGGCATC

>KR423423

ACTTATACTTGGAAATAATACAGATATCAATGGTACTATCACACTCCAATGCAGAATAAAACAAATTGTAAATA  
GGTGGCAGGAAGTAGGAAAAGCAATGTATGCCCCCTCCCATCAGTGGAAAGATTAGTTGCTCATCAAATATTAC  
AGGGCTGCTATTAATGAGAGATGGTGGAAAGCAGCAATGAGACTAAAAATAATACTGAGATCTTCAGACCTGGA  
GGAGGAAATATGAGGGACAATTGGAGAAGTGAATTATATAAAATATAAAGTAGTGAGAATTGAACCATTAGGAA  
TAGCACCCACCAAGGCAAAGAGAAGAGTGGTGCAGAGAGAAAAAAGAGCAGTGGGATTAGGAGCCATGTTCTT  
TGGGTTCTTAGGAGCAGCAGGAAGCACTATGGGCGCAGCATCAATAACGCTGACGGTACAAGCCAGACTATTA  
TTGTCTGGTATAGTGCAACAGCAAAACAATCTGCTGAGAGCTATTGAGGCGCAACAGCATCTGTTGCAACTCA  
CAGTCTGGGGCATC

>KR423436

AATTACACTGATACTTGGAAATAACTGAAGAGACAAATGAACTATCACACTCCCATGCAGAATAAAACAAA  
TTATAAACATGTGGCAGGAAGTAGGAAAAGCAATGTATGCCCCCTCCCATTAGAGGAGCAATTAAGTCTCATC  
AAACATAACGGGGCTGCTATTAACAAGAGATGGTAGTACTGATGGCCCAGACAATACCACTGAAATCTTCAGA  
CCGGGAGGAGGAGATATGAGGGACAATTGGAGAAGCGAATTATATAAATATAAAGTAGTACAAATTGAACCAA  
TAGGACTAGCACCCACAAAGGCAAGGAGAAGAGTGGTGCAGAGAGAAAAAAGAGCAGTAACAATGGGAGCTAT  
GTTCTTGGGTTCTTGGGAGCAGCAGGAAGCACTATGGGCGCAGCGTCAATAACGCTGACGGTACAGGCCAGA  
CAATTATTGTCTGGTATAGTGCAACAGCAGAACAACTCTGCTGAAGGCTATTGAGGCGCAACAGCATCTGTTGC  
AACTCACAGTCTGGGGCATC

>KR423444

TTTCAGGGTACTTGGAAATGGTACTACTTGGAACTAATGATACTTGGAGGCATTGGAGGCATAGTAATTCAT  
CGAATGACACTGTACACTCCAATGCAGAATAAGACAAATTGTAAACATGTGGCAGAGAGTAGGAAAAGCAAT  
ATATGCTCCTCCTATCCAAGGAAAAATTAGATGCTCATCAAATATTACAGGGTTGCTATTAACAAGAGATGGT  
GGTAATAGCAACGATACCAACAGCACTGAGACCTTCAGACCTGGAGGAGGAAATATGAAGGACAATTGGAGAA  
GTGAATTATATAAATATAAAGTAGTACAAATTGAACCAGTAGGAATAGCACCCACCAGGGCAAAAAGAAGAGT  
GGTGCAGAGAGAGAAAAAGAGCAGTGGGAATAGGAGCTCTGTTCTTGGGTTCTTGGGAGCAGCAGGAAGCACT  
ATGGGCGCAGCATCAATAACGCTGACGGTACAGGCCAGACAATTATTGTCTGGTATAGTGCAACAGCAGAAC  
ATCTGCTGAGAGCTATTGAGGCGCAACAGCATATGTTGCAACTCACAGTTTGGGGCATC

>MG197136

ACTTACAGTACTTGGCAGTTTAAAAGTACTTGGAAATGGTACTAACAATTGGAATAGTACTGTTACAGGAAATG  
ACACTATTACACTCCAATGCAGAATAAAACAAATTATAAACTTGTGGCAGGAAGTAGGAAAAGCAATGTATGC  
CCCTCCCATCAGAGGACCAATTAGATGTTTCATCAAATATTACAGGACTACTCTTAACAAGAGATGGTGGTATT  
ACAAATGGGAATAATACTAATACTACTGAGAACAGTGATAATAATACTGAGATCTTCAGACCTGGAGGAGGAA  
ATATGAAGGACAATTGGAGAAGTGAATTATATAAATATAAAGTAGTACAAGTTGAACCATTAGGAATAGCACC  
CACCAAGGCAAAGAGAAGAGTGGTGCAAAGAGAAAAAAGAGCAGTGGGAACACTAGGAGCTATGTTCTTGGG  
TTCTTGGGAGCAGCAGGAAGCACTATGGGCGCAGCGTCATTGACGCTGACGGTACAAGCCAGACTACTATTGT  
CTGGTATAGTGCAACAGCAAAACAACCTTGGCTGAGAGCTATTGAGGCGCAACAACATCTGTTGCAACTCACAGT  
CTGGGGCATT

>KM354740

ACTCAGCAGGTGCAGTTCAACAATACTGGGAATGATACTATCATACTCCCATGCAGAATAAAACAGATTATAA  
ACCAGTGGCAGGGAGTAGGAAAAGCAATGTATGCCCCCTCCTATCAGAGGACCAATTAAGTGCACATCAAAACAT

TACAGGGCTGATATTAACAAGAGATGGTGGTAATGGTAATGGGAGTGACACGGAAGAGATCTTCAGACCTGGA  
GGAGGAGATATGAGGGACAATTGGAGAAGTGAAGTATATAAATATAAAGTAGTACAAATTGAACCAATAGGAG  
TAGCACCCACCAAGGCAAAGAGAAGAGTGGTGCAAAGAGAAAAAAGAGCAGCGTTGGGAGCTATGTTCTTGG  
GTTCTTGGGAGCAGCAGGAAGCACTATGGGCGCAGCGTCAGTGGGCGTGACGGTACAGGCCAGACAATTGTTG  
TCTGGTATAGTGCAACAGCAGAACAATCTGCTGAGGGCTATTGAGGCGCAACAACATTTGTTGCAACTCACAG  
TCTGGGGCATC

>KM354821

ACTCATTGGAATGATACTGAAGACTCAAAAACCAATGACACAATCACACTCCCATGCAGAATAAAACAAATTA  
TAAACCTGTGGCAGGAAGTAGGAAAAGCAATGTATGCCCCCTCCCATCAGAGGACAGATTAAATGTTTCATCAA  
CATTACAGGGCTGCTATTAACAAGGGATGGTGGTCCTAATAGCACGACCAACGAAACCTTTAGACCTGCAGGA  
GGAGATATGAGGGATAATTGGAGAAGTGAATTGTATAAATATAAAGTAGTAGAAATTGAACCATTAGGAGTAG  
CACCCACCAAGGCAAAGAGAAGAGTGGTGAGAGAGAAAAAAGAGCAGTGGGACTAGGAGCTTTGTTCTTGG  
GTTCTTGGGAGCAGCAGGAAGCACTATGGGCGCAGCATCAATGGTGCTGACGGTACAGGCCAGGCAATTATTG  
TCTGGTATAGTGCAACAGCAGAACAATTTGCTGAGAGCTATTGAGGCGCAACAGCATCTGTTGCAACTCACAG  
TCTGGGGCATC

>KM082106

CATCAGAATAGTACTAGGAATGAGAGTAGTAATAACCTTATCGAACTCCCATGCAGAATAAAACAAATCATAA  
ACATGTGGCAGGAAGTAGGAAAAGCAATGTATGCCCCCTCCCATCAGAGGAGAAATTAAATGTGTATCAAATAT  
TACAGGGCTGCTATTAACAAGAGATGGTGGCCAGTCTAATGACACCAAAAACGACACAGAGATCTTCAGACCT  
GGAGGAGGAGATATGAGGGACAATTGGAGAAGTGAATTATACAAATATAAAGTAGTAAAGATTGAACCATTAG  
GAATAGCACCCACAGGGCAAAGAGAAGAGTGGTGCAAAGAGAAAAAAGAGCAGTGGGAATAGGAGCTATGAT  
CTTTGGGTTCTTGGGAGCAGCAGGAAGCACTATGGGCGCAACGTCACTGACGTTGACGGTACAAGCCAGACTA  
TTATTGTCTGGTATAGTGCAACAGCAGAACAATTTGCTGAGGGCTATTGAGGCGCAACAGCATATGTTGCAAC  
TCACAGTCTGGGGCATA

>MK384040

AATCACACTGGAAGAAATATCACACTCATCACACTCCCATGCAGAATAAAACAAATTATAAACATGTGGCAGG  
AAGTAGGAAAAGCAATGTATGCCCCCTCCCATTAGAGGAAACATTAGCTGTTTCATCAAATATTACAGGGCTGCT  
ATTAACAAGAGACGGTGGTGATAACCAGAGCCAGACTGAGATCTTCAGACCTGGAGGAGGAAATATGAAGGAT  
AATTGGAGAAGTGAATTATATAAATATAAAGTAGTAAAAATTGAACCATTAGGAGTAGCACCCACCAGGGCAA  
GGAGAAGAGTGGTGAGAGAGAAAAAAGAGCAGTGGGAATAGGAGCTGTGTTCTTGGGTTCTTGGGAGCAGC  
AGGAAGCACTATGGGCGCAGCGTCAATGACGCTGACGGTACAGGCCAGACTATTACTGTCTGGTATAGTGCAA  
CAGCAGAACAATTTGCTGAGGGCTATTGAGGCGCAACAGCGTCTGTTGCAACTCACAGTCTGGGGCATC

>MG196642

TCCTATAATGATACCGGGGAACATGAGGTAGAAAATGGCACAAGTAAAAACATCACACTTCCATGCAGAATAA  
AACAAATTTATAAACATGTGGCAGGAAGTAGGAAAAGCAATGTATGCCCCCTCCTATTAGAGGACAAATTAAATG  
TAAATCAAATATTACAGGGCTGCTATTAACAAGAGATGGCGGTAAGAATACCACAAAACATAATGAGACCTTC  
AGACCTGGAGGAGGAAATATGAAGGACAATTGGAGAAGTGAATTATATAAATATAAAGTAGTAAGAATTGAAC  
CATTAGGAGTGGCGCCACCAACGCTAAGAGAAGAGTGGTGAGAGAGAGAAAAAGAGCAGTGACACTAGGAGC  
TCTGTTCTTGGGTTCTTGGGAGCAGCAGGAAGCACTATGGGCGCAGCGTCAATGACGCTGACGGTACAGGCC  
AGACTATTATTGTCTGGTATAGTGACGAGCAGAACAATCTGCTGAGAGCTATTGAGGCGCAACAGCACCTGT  
TGCAACTCACGGTCTGGGGCATT

>MG196653

AATTATACTTTCAATAGTACTGCATGGTCAAATAATACTAATAGCACTGAAAAAATCACACTCCAATGTAGAA  
TAAAGCAATTTATAAACATGTGGCAGGAAGTAGGAAAAGCAATATATGCCCCCTCCCATCAAAGGACAAATTAG  
CTGCTCATCAAATATTACAGGGCTACTACTAACAAGAGATGGTGGTAACAACAATGACACCAATGGCAACGAT  
ACTGAGGTCTTCAGACCTGCAGGGGGAGATATGAGGGACAATTGGAGAAGTGAGCTATATAAATATAAAGTAG  
TAAAAATTGAACCATTAGGAATAGCACCCACCAAGGCAAAGAGAAGAGTGGTGCAAAGAGAAAAAAGAGCAGT  
GGGATTAGGAGCTATGTTCTTGGGTTCTTGGGAGCAGCAGGAAGCACTATGGGCGCAGCGGCAGTGACGCTG  
ACGGTACAGGCCAGGCAATTATTGTCTGGTATAGTGCAACAGCAGAACAATCTGCTGAGGGCTATTGAGGCGC  
AACAGCATATGTTGCAACTCACAGTCTGGGGCATC

>MG196831

AATTATACTACAGGGAATTTTACTACAGAGTCAAATAGCTCAATAGGAAACATCACACTCCCATGCAGAATAA  
AACAAATTTATAAACATGTGGCAGGAAGTAGGAAAAGCAATGTATGCCCCCTCCCATCAAAGGACAAATCAGCTG  
CACATCAAATATTACAGGGCTGCTGATAACAAGAGATGGTGGTAATGATACCGGGAGCAAGGAGACCTTCAGA  
CCTGGAGGAGGAGATATGAGGGACAATTGGAGAAGTGAATTATATAAATATAAAGTAGTAAAAATTGAACCAT  
TAGGAGTAGCACCCACCAAGGCAAGGAGAAGAGTGGTGAGAGAGAAAAAAGAGCAGTGGGAATAGGAGCTGT  
GTTCTTGGGTTCTTGGGAGCAGCAGGAAGCACTATGGGCGCAGCGTCGCTAACGCTGACGGTACAGGCCAGA  
CTACTATTGTCTGGTATAGTGCAACAGCAGAACAATTTGCTGAGGGCTATTGAGGCGCAACAGCGTATGTTGC  
AACTCACAGTCTGGGGCATC

>MG197199

TTTCATAGTGCTTGGCTGGTTAATGGTACTTGGGAATAACACTTGGGAATGACACCATTGAAACAAATGGGACAA  
TTACACTCCCATGTAGAAATAAAACAAATTATAAACATGTGGCAGGAAGTAGGAAAAGCAATGTATGCCCCCTCC  
CATCAGAGGAAGAATTAGATGTGAATCAAATATTACAGGGCTGCTACTAATAAGAGATGGGGGTGTTAACGGG  
ACCAATGATACAGAGACCTTCAGACCTGGAGGAGGAAATATGAGGGACAATTGGAGAAGTGAATTATATAAAT  
ATAAAGTAGTAAAAATTGAACCATTAGGAGTAGCACCTACCAAGGCAAAGAGAAGAGTGGTGCAGAGAGAAAA  
AAGAGCAGTGGGACTAGGAGCTTTGTTTCATTGGGTTCTTGGGAGCAGCAGGAAGCACTATGGGCGCAGCGTCA  
ATGACGCTGACGGTACAAGCCAGACAATTATTGTCTGGTATAGTGCAACAGCAAAAATAACTTGCTGAGAGCTA  
TTGAGGCGCAACAACATCTGTTGCAACTCACAGTCTGGGGCATC

>KT124784

AACTATACTGAGCTAAACACCACTGAAAGGGAAAAACATCACACTCCAATGCAGAATAAAACAAATTATAAAACA  
TGTGGCAAGAAGTAGGAAAAGCAATATATGCCCCCTCCCATCGAAGGAATAATTAGATGCACATCAAATATTAC  
AGGGCTGCTAATAACAAGAGATGGTGGTGGGAACGGAAACAGGGAACAATGAAACCTTCAGACTTGCAGGAGGG  
GAGATGAGGGACAATTGGAGAAGTGAAGTTATATAAAATACAAAGTAGTAAAAGTTGAACCATTAGGAATAGCAC  
CCACCAAGGCAAAGAGAAGAGTGGTGCAGAGAGAAAAAGAGAGCAGTGGGAATAGGAGCTGTGTTTCCTTGGGTT  
CTTGGGAGCAGCAGGAAGCACTATGGGCGCAGCGTCAATGACGCTGACGGTACAGGCCAGACTATTATTGTCT  
GGTATAGTGCAACAGCAAAAACAATTTGCTGAGGGCTATTGAGGCGCAGCAGCATCTGTTGCAACTCACAGTCT  
GGGGCATT

>KU901858

ACTCACGTGTCAAGCGACAATGAAAATATCACACTCCCATGCAGAATAAAACAATTTATAAACATGTGGCAGG  
AAGTAGGAAAAGCAATGTATGCTCCTCCCATCAGCGGGCCAATTGAGTGTTTCATCAGATATCACAGGGCTGCT  
ATTGGTAAGAGATGGTGGTGATAAATGAAGGTAGGAACGAAACCGAAATCTTCAGACCTGGAGGAGGAGAT  
ATGAGGGACAATTGGAGAAGTGAATTATATAAATATAAAGTAGTAAAAATTGAACCATTAGGAATAACACCCA  
CCAAGGCAAGGAGAAGAGTGGTGCAGAGAGAAAAAAGAGCAGTGAAGTCTAGGAGCTATGTTTCCTTGGGTTCTT  
GGGAGCAGCAGGAAGCACTATGGGCGCAGCATCAATAACGCTGACGGTACAGGCCAGACAATTATTGTCTGGA  
ATAGTGCAACAGCAAAAACAATTTACTGAGAGCTATTGAGGCGCAACAGCATATGTTGCAACTCACAGTCTGGG  
GCATC

>MH843742

AGTCATGATAGTACTACTGAGTCAAATGATAATATCACACTCATATGCAAAAATAAGACAAATTATAAACAGGT  
GGCAGGAAGTAGGAAAAGCAATGTATGCCCCCTCCCATCCAAGGACAAATTAGATGTTTCATCAAATATTACAGG  
ACTGATATTAACAAGAGATGGTGGTGGTAATAGCACGGACGGGAACGAGACCTTCAGACCTGGAGGAGGAAAT  
ATGAAGGACAATTGGAGAAGTGAATTATATAAATATAAAGTAGTAAAGATTGAGCCATTAGGAGTAGCACCCA  
CCAAGGCAAAGAGAAGAGTGGTGCAGAGAGAAAAAAGAGCACTAGGAACGATAGGAGCTATGTTTCCTTGGGTT  
CTTGGGAGCAGCCGGAAGCACTATGGGCGCAGCGTCAATGGCGCTGACGGTACAGGCCAGACAATTATTGTCT  
GGTATAGTGCAACAGCAGAACAATTTGCTGAGGGCTATTGAGGCGCAACAGCATATGTTGCAACTCACAGTCT  
GGGGCATT

>KX505589

ACTCAGTCAAATAATGGAAGTAAACAATCACACTCCCATGCAGAATAAAACAAGTTATTAACATGTGGCAGG  
GAATAGGAAGAGCAATGTATGCCCCCTCCCATCGAAGGACACATTAGATGTTTCATCAAATATTACTGGGCTGCT  
ATTAACAAGCGATGAGGGTGACAAAGGGAACAGTTCCAATGTGACCTTCAGACCTGGAGGAGGAAATATGAAG  
GACAAATTGGAGAAGTGAATTATATAAATATAAAGTAGTACAAGTTGAACCATTAGGAATAGCACCCACCAAGG  
CAAAAAGAAGAGTGGTGCAAAAGAGAGAAAAGAGCATTAGTGGGATTTCGAGCTTTGTTTCCTTGGGTTCTTGGG  
AGCAGCAGGAAGCACTATGGGCGCAGCGTCAATAACGCTGACGGTACAGGCCAGACAATTATTGTCTGGTATA  
GTGCAACAGCAGAACAACCTGCTGAAGGCTATTGAAGCGCAACAGCATATATTGCAACTCACAGTCTGGGGCA  
TC

>KX505695

AGTTATGATTTTAATAATAGTAGTAATTCTAGTAGTAGTGTTCCTCAAATGGCACTATCATACTCCCATGCAGAA  
TAAAGCAAATTATAAACATGTGGCAGAAGGTGGGAAGAGCAATATATGCCCCCTCCCATTAGAGGACAACCTTAA  
TTGTTTCATCAAATATTACAGGGCTGATATTAACAAGAGATGGTGATAAGCCTAATAGCACCAACGAGACCTTC  
AGACCTATAGGAGGAAATATGAAGGACAATTGGAGAAGTGAATTATATAAATATAAAGTAGTAAAAATTGAAC  
CATTAGGACTAGCACCCACCAAGGCAAAGAGAAGAGTGGTGCAAAGAGAAAAAGAGCAGTGGGAATAGGAGC  
TCTGTTTCCTTGGGTTCTTGGGAGCAGCAGGAAGCACTATGGGCGCAGCATCAATGACGCTGACGGTACAGGCC  
AGACTATTATTGTCTGGTATAGTGCAACAGCAGAACAATCTGCTGAGGGCTATTGAGGCGCAACAACATCTGT  
TGCAACTCACAGTCTGGGGCATC

>KX027840

TTTTATGGGACCTTGAATGATACTGGGTGGACAAGTAAAAATTGATAACAGTAACGAAAATATTACACTCCAAT  
GCAGAATAAAGCAAATTATAAACATGTGGCAGAAAGTAGGAAAAGCAATGTATGCCCCCTCCCATCAGCGGACA  
AATTAGATGTGTATCAAATATCACAGGGCTAATATTAAACAAGAGATGGGGGTAATGGTACAAACAACACTGAG  
ATCTTCAGACCTGAAGGAGGAGATATGAGAGACAATTGGAGAAGTGAATTATATAAATATAAAGTAGTAAAA  
TTGAACCATTAGGAATAGCACCCACCAAGGCAAAGGAGAAGAGTGGTGCAGAGAGAAAAAAGAGCAGTGGGAAT  
GGGAGCTTTGTTTCCTTGGGTTCTTGGGAGCAGCAGGAAGCACTATGGGCGCAGCGTCAGTGACGCTGACGGTA

CAGGCCAGACAATTATTGTCTGGTATAGTGCAACAGCAGAACAACTTGCTGAAGGCTATTGAGGCGCAACAAC  
ATCTGTTGCAACTCACTGTCTGGGGCATT

>KY658693

AATTACACTGAGACAACAAATAGCACTAATGGAAGTACACAATCATACTCCCATGCAGAATAAAACAAATTA  
TAAACATGTGGCAGAAAGTAGGAAAAGCAATGTATGCCCCCTCCCATCAAAGGAATAATTAAGTGAATTCAG  
TATTACAGGATTGCTATTAACAAGAGATGGTGGTATTACCAACGATAGTAACAGCAATGAGACTTTTAGACCT  
GGAGGAGGGAATATGAAAGATAATTGGAGAAGTGAATTATATAAATACAAAGTAGTAAGAATTGAACCATTAG  
GAATAGCCCCCACCAGGGCAAAAAGAAGAGTGGTGCAGAGAGAAAAAGAGCAATAGGAATGGGAGCTGTGTT  
CATTGGGTTCTTGGCAACAGCAGGAAGCGCTATGGGCGCAGCGTCATTGACGCTGACGGTACAAGCCAGACAA  
TTATTGTCTGGTATAGTGCAACAGCAGAACAACTCTGCTGAGGGCTATTGAGGCGCAACAGCATTGTGTGCAAC  
TCACAGTCTGGGGCATT

>KU678026

TTTTATAGTAATTGGACTAAAGAAAATGCTACTGGAGAAAATGACACTGACACAATCATACTCCCATGCAGAA  
TAAAACAAATTATAAACATGTGGCAGGAAGTAGGAAAAGCAATGTATGCCCCCTCCTATCAAAGGACAAATTAG  
ATGTTTCATCAAATATCACAGGGCTGCTGATAACAAGGGATGGTGGTATGAACAACACCAACAACGACACTGAG  
ATCTTCAGACCAGGAGGAGGAGATATGAGGGACAATTGGAGAAGTGAATTATATAAAATATAAAGTAGTACAAA  
TTGAACCATTAGGAGTAGCACCCACCAAGGCAAGAGAGAAGTGGTGCAGAGAGAAAAAGAGCAGCACTAGG  
GGGACTAGGAGCTTTGTTCTTGGGTTCTTGGGAGCAGCAGGAAGCACTATGGGCGCAGCGGCAGTGACGCTG  
ACGGTACAGGCCAGACAATTATTGACTGGTATAGTGCAACAGCAGAACAAATTTGCTGAGGGCTATTGAGGCGC  
AACAGCACCTGTTGCAACTCACAGTCTGGGGCATC

>KY323815

GCTTATGAAGAGTCAAATGACACTATCACTCTCCCATGCAGAATAAAACAAATTATAAACATGTGGCAGGAAG  
TAGGAAAAGCAATGTATGCCCCCTCCCATCAGAGGACAAATTAGCTGTAAATCAAATATTACAGGGCTGCTATT  
AACAAAGAGATGGTGGTAATGGAACAGCATGAAAGAGACCTTCAGGCCTGGAGGAGGAGATATGAGGGACAAT  
TGGAGAAGTGAATTATATAAAATATAAAGTAGTTAGAATTGAACCATTAGGAATAGCACCCACCAAGGCACAGA  
GAAGAGTGGTGCAGAGAGAAAAAGAGCAGTGGGAGTGCTAGGAGCTATGTTCTCGGGTTCTTGGGAGCAGC  
AGGAAGCACTATGGGCGCAGCGTCAATGGCGCTGACGGTACAGGCCAGACAATTATTGGCTGGTATAGTGCAA  
CAACAGAACAATCTGTTGAGAGCTATTGAGGCGCAACAGCATATGTTGCAACTCACAGTCTGGGGCATC

>KY324245

CATCAAAAACATCAAATGGTACATACATACTTCCATGCAGAATAAAACAAATTATAAACATGTGGCAGGAAG  
TAGGAAAAGCAATGTATGCCCCCTCCCATCAGAGGAAACATTAGCTGTTTCATCAAATATTACAGGACTGCTATT  
GGCAAGAGATGGGGGTAGTGGTAGTGATAATAATGGCACAAATAATAACACAAATGAAGAGATCTTCAGACCT  
GCAGGAGGAGATATGAGGGACAATTGGAGAAGTGAATTATATAAATACAAAGTAGTAAAAATAGAGCCATTAG  
GATTAGCACCCACCTCGGCAAAGAGAAGAGTGGTGCAGAGAGAAAAAGAGCAGTGGGAATAGGAGCTCTGTT  
CCTTGGGTTCTTGGGAGCAGCAGGAAGCACTATGGGCGCAGCGTCAATGACGCTGACGGTACAGGCCAGACTA  
TTACTGTCTGGTATAGTGCAACAGCAAAACAATTTGCTGAGAGCTATTGAGGCGCAACAACATCTGTTGCAAC  
TCACAGTCTGGGGCATT

>KY113882

TATCACAATGAGACTACGAGTGTACCGGAGGGAAATGAAACAATCACACTTCCATGCAGAATAAAACAAATTA  
TAAACATGTGGCAGGAAGTAGGGAGAGCAACGTATGCCCCCTCCCATCAAAGGACAAATTAGATGTTTCATCAA  
TATTACAGGGCTGCTACTAACAAGGGATGGAGGTATTGGGAATGAGACTGATAATAACTGAGATCTTCAGA  
CCTGGAGGAGGAGATATGAGGGACAATTGGAGAAGTGAATTATATAAATATAAAGTAGTAAGAATTGAACCAT  
TGGGAGTAGCACCCACCAAGGCAAAGAGGAGAGTGGTGCAAAGAGAAAAAGAGCAGTGGGAATAGGAGCTAT  
GTTCTTGGGATCTTAGGAGCAGCAGGAAGCACTATGGGCGCAGCGTCATTGACGCTGACGGTACAGGCCAGA  
CTATTATTGTCTGGTATAGTGCAACAGCAGAACAACTTGCTGAGGGCTATTGAGGCGCAACAGCATCTGTTGC  
AACTCACTGTCTGGGGCATC

>K02007

AATCACACTGAAGGAACTAAAGGAAATGACACAATCATACTCCCATGTAGAATAAAACAAATTATAAACATGT  
GGCAGGAAGTAGGAAAAGCAATGTATGCCCCCTCCCATTTGGAGGACAAATTAGTTGTTTCATCAAATATTACAG  
GCTGCTATTAAACAAGAGATGGTGTAACAATGTAACATAATGACACCGAGGTCTTCAGACCTGGAGGAGGAGAT  
ATGAGGGACAATTGGAGAAGTGAATTATATAAATATAAAGTAATAAAAAATTGAACCATTAGGAATAGCACCCA  
CCAAGGCAAAGAGAAGAGTGGTGCAGAGAGAAAAAGAGCAGTGGGAATAGTAGGAGCTATGTTCTTGGGTT  
CTTGGGAGCAGCAGGAAGCACTATGGGCGCAGTGTCATTGACGCTGACGGTACAGGCCAGACAATTATTGTCT  
GGTATAGTGCAACAGCAGAACAAATTTGCTGAGGGCTATTGAGGCGCAACAACATCTGTTGCAACTCACAGTCT  
GGGGCATC

>HQ110679

ACTCAGGGGTTAAATAACACTGGAAGAAATGACACAATCACACTCCCATGCAGAATAAAACAAATTGTAAACA  
TGTGGCAGGAAGTAGGAAAAGCAATGTATGCCCCCTCCCATCAAAGGAAATATTAGCTGTTTCATCAAATATTAC  
AGGGCTGCTATTAAACAAGAGATGGTGGTAGTGATGGTGGTAATAACACGAACGGGAATGAGACCTTCAGACCT  
GGAGGGGGAGATATGAGGGACAATTGGAGAAGTGAATTATATAAATATAAAGTAGTAAGAATTGAACCATTAG

GAGTAGCACCCACCAAGGCAAAGAGAAGAGTGGTGCAAAGAGAAAAAAGAGCGGTGGGACTAGGAGCTATGTT  
CATTGGGTTCCTTGGGAGCAGCAGGAAGCACTATGGGCGCAGCGTCAGTGACGCTGACGGTACAGGCCAGGCAA  
TTATTGTCTGGTATAGTGCAACAGCAGAGCAATTTGCTGAGAGCTATTGAGGCGCAACAGCATCTGTTGCAAC  
TCACAGTCTGGGGCATC

>AY713410

ACTCAAGGGAACACTGGAAATATCACACTCCCATGCAGAATAAAACAAATTATAAACAGGTGGCAGGAAGTAG  
GAAAAGCAATGTATGCCCCCTCCCATCGAAGGAAAAATTAGATGTTTCATCAAATATTACAGGGTTACTATTAAC  
AAGAGATGGTGGTAAGAATAACGAGACCAATAACACCGAGACCTTCAGACCTGGAGGAGGAGATATGAAGGAC  
AATTGGAGAAGTGAATTATATAAATATAAAGTAGTAAAAATTGAGCCATTAGGAGTAGCACCCACCAAGGCAA  
AGAGAAGAGTGGTGCAGAGAGAAAAAAGAGCAGTGACACTAGGAGCTATGTTCCCTTGGGTTCCTTGGGAGCAGC  
AGGAAGCACTATGGGCGCAGCGTCAGTGACGCTGACGGTACAGTCCAGACAATTATTGTCTGGTATAGTGCAA  
CAGCAAAACAATTTGCTGAGAGCTATTGAGGCGCAACAGCATCTGTTGCAACTCACAGTCTGGGGCATT

>EU575593

AATTATTTTGTATAACACTAAAGATGATGGGGCTAATGGGACTGCTAATGGGACTGGAGTTATCATACTTCCAT  
GCAGAATAAAACAAATTGTAAACATGTGGCAGGAAGTAGGAAAAGCAATGTATGCCCCCTCCCATCAGGGGACG  
AATTAAATGTTTATCAAATATTACAGGACTGATGTTAAACAAGAGATGGTGGTAATAATGGTGGTAACACAAC  
GAAAAAGCCACCGAGACCGAGACCTTCAGACCTGGAGGAGGAGATATGAGGGACAATTGGAGAAGTGAATTAT  
ATAAATATAAAGTAGTAAAAATTGAACCATTAGGAGTAGCACCTACCAAGGCAAAAGAGAAGAGTGGTGCAAAG  
AGAAAAAAGAGCAGTAGGAATAGGAGCTTTGTTCCCTTGGGTTCCTTGGGAGCAGCAGGAAGCACTATGGGCGCA  
GCGTCAGTGACGCTGACGGTACAAGCCAGACAGTTATTGTCTGGTATAGTGCAACAGCAGAGCAATCTGCTGA  
GGGCTATTGAGGCGCAACAGCATCTGTTGCAACTCACAGTCTGGGGCATC

>AY331289

ACTCAGACTAATAGCTGGCCAAATGCCACTATCACACTTTCATGCAGAATAAAACAGTTTATAAACATGTGGC  
AGGAAGTAGGAAAAGCAATGTATGCCCCCTCCCATTAGGGGACCAATAAGTTGTTTCATCAAATATTACAGGGTT  
GCTATTAACAAGAGATGGTGGTAACGGGAACGGCACCAACAACAACACCGAGGTCTTCAGACCTACAGGAGGA  
GATATGAGGGACAATTGGAGAAGTGAATTATATAAATATAAAGTAGTAAGAATTGAACCAATAGGAGTAGCAC  
CCACCAAGGCAAAGAGAAGAGTGGTGCAGAGAGAAAAAAGAGCAGTGGGAACAATAGGAGCTATGTTCCCTTGG  
GTTCTTGGGAGCAGCAGGAAGCACTATGGGCGCAGCGTCAATAACGCTGACGGTACAGGCCAGACTATTACTG  
TCTGGTATAGTGCAACAGCAGAACATCTGCTGAGAGCTATTGAGGCACAACAACATCTGTTGCAACTCACAG  
TCTGGGGCATC

>EU575697

ACTCAACTGTTTAAATAGTACTTGGAATGGTAATGATACTGAAGGGTCAAATACCACTGAAGAAAATATCACAC  
TCCCATGCAGAATAAAACAAATCATAAACATGTGGCAGGAAGTAGGAAAAGCAATGTATGCCCCCTCCCATCAG  
AGGACAAATTAGCTGTTTCATCAAATATTACAGGGCTGTTGTTAAACAAGAGATGGTGGCGCAGATAGTACAAAC  
GAGACCTTCAGACCTGGAGGAGGAGATATGAGGGACAATTGGAGAAGTGAATTATATAAATATAAAGTAGTAA  
GAATTGAACCATTAGGAATAGCACCCCTCCAAGGCAAAGAGAAGAGTGGTGCAGAGAGAAAAAAGAGCAGTGGG  
AATAGGAGCTGTGTTCCCTTGGGTTCCTTGGGAGCAGCAGGAAGCACTATGGGCGCAGCGTCAATGGCGCTGACG  
GTACAGGCCAGACAATTATTGTCTGGTATAGTGCAACAGCAGAACAAATTTGCTGAGGGCTATTGAGGCGCAAC  
AGCATATGTTGCAACTCACAGTCTGGGGCATC

>EU577469

ACTCAAGGAAATGACACAATCATACTCCCATGCAGAATAAAACAAATTATAAACATGTGGCAGAGAGTAGGGA  
AAGCAATGTATGCCCCCTCCTATCGGAGGACACCTTAATTGTTTCATCAAATATTACAGGGCTGCTATTACAAAG  
AGATGGTGGCAACAGTAGTGATAACAGTGAGACCTTCAGACCTGGAGGAGGAGATATGAGGGATAATTGGAGA  
AGTGAATTATATAAATATAAAGTAGTAAACTTGAACCTTAGGAGTAGCCCCACCAAGGCCAAGAGAAGAG  
TGGTGCAAAGAGAAAGAAGAGCAGTGGGTTTAGGAGCTATGTTCCCTTGGGTTCCTTGGGAGCCGCAGGAAGCAC  
TATGGGCGCAGCGTCAATAACGCTGACGGTACAGGCCAGACAATTATTGTCTGGTATAGTGCAACAGCAGAAC  
AATCTGCTGAGGGCTATTGAGGCGCAACAGCATATGTTGCAACTCACAGTCTGGGGCATC

>MN516274

GATCAAAAATATACTGCATGGGCAAATAGCACTGAGTCAAATGACACTGAAGTAATCACACTCCCATGCAGAA  
TAAAACAAATTATAAACCTGTGGCAGGAAGTAGGGAAAGCAATGTATGCCCCCTCCCATCAAAGGACAGATTAG  
ATGTTTCATCAAATATTACAGGGCTGCTACTAACAAGAGATGGTGGTAAGAACGAGAGTAGAGAGAATGAGACC  
TTCAGACCTGGAGGAGGAGATATGAGGGACAATTGGAGAAGTGAATTATATAAATATAAAGTAGTAAAAATTG  
AACCATTGGGAGTAGCACCCACCAAGGCAAAGAGAAGAGTGGTGCAAAGAGAAAAAAGAGCAGTGGGAATAGG  
AGCTTTGTTCCCTTGGGTTCCTTGGGAGCAGCAGGAAGCACTATGGGCGCAGCGTCAGTGACGCTGACGGTACAG  
GCCAGACTATTATTGTCTGGTATAGTGCAACAGCAGAACAACTTGCTGAGAGCTATTGAGGCGCAACAGCATC  
TGTTGCAACTCACAGTCTGGGGCATC

>GU728005

AATCAAACTGGGAGCAATGATACAATTATACTCCCATGTAGAATAAAGCAAATTATAAACCTGTGGCAGGAAG  
TAGGAAAAGCAATGTATGCCCCCTCCCATCAGTGAGGTAATTAATTGCACATCAAATATTACAGGGCTACTATT  
GACAAGAGATGGTGGTAATAATATTACTAACGGGAGCGAGATCTTCAGACCTGGAGGAGGAGATATGAGGGAT

AATTGGAGAAGTGAATTATATAAAATATAAAGTAGTAAGACTTGAACCATTAGGAGTAGCACCCACCAGGGCAA  
AGAGAAGAGTGGTGCAGAGAGAAAAAGAGCAGTGGGACTAGGAGCTTTGTTCTTGGGTTCTTGGGAGCAGC  
AGGAAGCACTATGGGCGCAGCGTCACTGACGCTGACGGTACAGGCCAGACTACTACTGTCTGGTATAGTGCAA  
CAGCAGAACAATCTGCTGAGGGCTGTTGAAGCGCAACAACATCTGTTGCAACTCACAGTCTGGGGCATC  
>GU367405

ACTCAAGGAAATGATACTACTATCACACTCCAATGCAAAATAAAACAAATTATAAAATATGTGGCAGGAAGTAG  
GAAAAGCAATGTATGCCCCCTCCCATCAGAGGATCAATTAAATGCCTATCAAATATTACAGGGCTGATATTAAC  
AAGAGATGGTAACGGGACCGAGAGCACAACGAGACCGAGATCTTCAGGCCTGGAGGAGGAGATATGAGGGAC  
AATTGGAGGAGTGAATTATATAAAATATAAAGTAGTAAGAATTGAACCATTAGGAGTAGCACCCACCAAGGCAA  
AGAGAAGAGTGGTGCAGAGAGAAAAAGAGCAGTGGGACTAGGAGCTTTGTTCTTGGGTTCTTGGGAGCAGC  
AGGAAGCACTATGGGCGCAGCGTCGGTGACGCTGACGGTACAGGCCAGACTATTGCTGTCTGGTATAGTGCAA  
CAGCAAAATAATTTGCTGAGGGCTATTGAGGCGCAACAGCATCTGTTGCAACTCACAGTCTGGGGCATC  
>AY795904

ACTCAAATGTTAGATAATATCACACTCACACTCCCATGCAGAATAAAACAAATCATAAACATGTGGCAAGAAG  
TAGGAAAAGCAATGTATGCCCCCTCCCATTCAGGAAAAAATTAGCTGTTTCATCAAATATTACAGGGATACTATT  
AACAAAGGATGGTGGTAACGAGAACCAGACCACCCCGAGGTCTTCAGACCTGCAGGAGGAGATATGAGGGAC  
AATTGGAGAAGTGAATTATATAAAATATAAAGTAGTAAGAGTTGAGCCATTAGGAATAGCACCCACCAAGGCAA  
AGAGAAGAGTGGTGCAGAGAGAAAAAGAGCAATAGGAATGGGAGCTGTGTTCTTGGGTTCTTGGGAGCAGC  
AGGAAGCACTATGGGCGCAGCGTCAATAACGCTGACGGTACAGGCCAGACAATTATTGTCTGGTATAGTGCAA  
CAGCAAAGTAATTTGCTGAGAGCTGTTGAGGCGCAACAACATCTGTTGCAACTCACAGTCTGGGGCATC  
>KF725981

AATTATACTTGGAAATAATACTACTGAGAGTGATAACGGTACTATCATACTCCAGTGCAGAATAAAGCAAATTG  
TAAACAGGTGGCAGGAAGTAGGAAAAGCAATGTATGCCCCCTCCCATCAGTGGACAAATTAATTGTTTCATCAA  
TATTACAGGGCTACTACTAACAAGAGATGGTGGTATCAGTAACACAAGTAGTGATAACACAAGTGAGACCTTT  
AGACCTGCAGGAGGAAATATGAAGGACAATTGGAGAAGTGAATTATATAAAATATAAAGTAGTAAAAATTGAGC  
CATTAGGAATAGCACCCACCAAGGCAAAGAGAAGAGTGGTGCAGAGAGAAAAAGAGCAGTGGGAACATTAGG  
AGCTATGTTCTTGGGTTCTTGGGAGCAGCAGGAAGCACTATGGGCGCAGCGTCATTGACGTTGACGGTACAA  
GCCAGACTACTATTGTCTGGTATAGTGCAACAGCAAAACAATTGCTGAGAGCTATTGAGGCGCAACAGCATA  
TGTTGCAACTCACAGTCTGGGGCATC  
>MH234639

AATCATACTAAAGGAGAAGATATCATCACACTCCCATGTAGAATAAAGCAAATTATAAACATGTGGCAGCAAG  
TGGGAAAAGCAATGTATGCCCCCTCCCATCAGTGGACAAATTAGATGTTTCATCAAATATTACAGGGCTGCTATT  
AACAAAGAGATGGTGGTAATAACAATGACACCACCGAGGTCTTCAGACCTGGAGGAGGAGATATGAGGGACAAT  
TGGAGAAGTGAATTATATAAAATATAAAATAGTAAAAATTGAACCATTAGGAGTAGCACCCACCAGGGCAAAGA  
GAAGAGTGGTGCAGAGAGAAAAAGAGCAGTAACATTAGGAGCTATGTTCTTGGGTTCTTGGGAGCAGCAGG  
AAGCACTATGGGCGCAGCGTCAATGACGTTGACGGTACAGGCCAGACGACTATTGTCTGGTATAGTGCAACAG  
CAGAACAATTTGCTGAGGGCTGTTGAGGCGCAACAGCATATGTTGCAACTCACAGTCTGGGGCATC  
>MH746247

AATCATAATAACTATCATACTCCCATGCAGAATAAAACAATTTATAAACATGTGGCAGAGAGTAGGACAAG  
CAATGTATGCCCCCTCCCATTTGAAGGAAACATAACATGTGAATCAAATATCACAGGACTACTCTTGGTACGTGA  
TGGAGGCAACACAACAGAACTAACAAAGAGACATTAGACCGGGAGGAGGAGATATGAGGGACAATTGGAGA  
AGTGAACATATAAAATATAAAGTGGTAGAAATTAAGCCATTGGGAATAGCACCCACCAAGGCAAAAAGGAGAG  
TGGTGGAGAGAGAAAAAGAGCAGTGACACTAGGAGCTATGTTCTTGGGTTCTTGGGAACAGCAGGAAGCAC  
TATGGGCGCAGCGTCAATAACGCTGACGGTACAGGCCAGACAATTGCTGTCTGGGATAGTGCAACAGCAAAGC  
AATTTGCTGAGAGCTATAGAGGCGCAACAGCATATGTTGCAACTCACGGTCTGGGGCATT  
>KX181928

ACTTACTGTCTTAATAATCCTAATGCAACATATAATGCAACAGAAAATTCAACCATCACAATCCAATGCAAAA  
TAAACAAATTTGTAACATGTGGCAGGAGGTAGGACGAGCAATGTATCCCCCTCCCATTTAAAGGACCAATAAC  
ATGTGCATCAAATATCACAGGACTATTGCTGACACGTGATGGAGGAGCAAACCTCAAATAACACAGAGACATTC  
AGACCTGGAGGAGGAGATATGAAGGACAATTGGAGAAGTGAATTATATAAAATATAAAGTGGTAGAAATTAAC  
CATTAGGAATAGCACCCACCAAGGCAAAAAGGAGAGTGGTGGAGAGAGAAAAAGAGCAGTGGGAATAGGAGC  
TGTGTTCTTGGGTTTTTGGGAGCAGCCGGAAGCACTATGGGCGCAGCGTCAATAACGCTGACGGTACAGGCC  
AGGCAATTATTGTTTGGGATAGTGCAACAGCAAAGCAATTTGTTGAGGGCTATAGAGGCGCAACAGCATATGT  
TGCAACTCACGGTCTGGGGCATT  
>KX181936

AATTATCCAAACATAGGAAAACAGCACATATAATGATACAGAAAACAGAAACAGCACATATAATGATACAGAAA  
ACATCACAATCCCATGCAAAAATAAAACAATTTATAAAACATGTGGCAGGAGGTAGGGCGAGCCATGTATGCCTC  
TCCCATTGAAGGAGTGATAACATGTAAATCAAATATCACAGGATTTCTACTGACCCGGGATGGGGGCAAAACC  
ACAAAAGAACGAGACATTAGGCCCGAAGGAGGAAATATGAGGGACAATTGGAGAAAGTGAATTATATAAGTATA  
AAGTGGTAGAAATTAACCATTAGGAATAGCACCCACTAAAGCAAAAAGGAGAGTGGTGGAGAGAGAAAAAAG

AGCAGGAATAGGAGCTGTGTTCTTGGGTTCTTGGGAGCAGCAGGAAGCACTATGGGCGCAGCATCAATAACG  
CTGACGGTACAGGCCAGACAATTATTGTCTGGGATAGTGCAACAGCAAAGCAATTTGCTGAGGGCTATAGAGG  
CGCAACAGCATATGTTGCAACTCACGGTCTGGGGCATT

>KX181937

CCTCATAGTACAAGTACAAGCAGTACTCCTGGAGCAGAAAACGACACACTCACAATCCAATGCAGAATAAAAC  
AAATTGTAAACATGTGGCAGGAGGTAGGACGAGCAATGTATGCCCCCTCCCATTCAGGAAACATAACATGTAA  
CTCAAGTATCACAGGGCTATTACTGACACGTGATGGGGGAGAAAATAGAACAGAGAAAAGGCACAAAGGAGGAG  
GAATTCAGGCCTGGGGGGGAGATATGAGGGACAATTGGAGAAGTGAATTATATAAAATACAAAGTAGTAGAAA  
TTAAACCCCTTTGGAATAGCCCCCCCCAAGGCAAAAAGGAGGGTGGTGGAGAGAGAAAAAAGCAGCATTAGG  
AGCTGTGTTCTTGGGTTTTTGGGAGCAGCAGGAAGCAATATGGGGGCAGCGTCAGTAGCGCTGACGGTACAG  
GCCAGACAATTATTGTCTGGGATAGTGCAACAGCAAAGCAATTTGCTGAAGGCTATAGAGGCGCAACAGCATA  
TGTTGCAACTCACAGTCTGGGGCATT

>KX181941

AATTACAAGGTTAATAGTGCAAAACAAGGATACAAAAAGTAATGGAACAATCACAATCCCATGCAGAATAAAAC  
AAATTATAAATATGTGGCAGGGGGTGGGACGGGCAATGTATGCCCCCTCCCATTCAGGAAATAATATCATGTAA  
CTCAAGTATCACAGGATTACTACTGACCCGGGATGGCGGCAACAATAACAACACAGACACAGAGATATTCAGG  
CCTGGAGGAGGAAATATGAGGGACAATTGGAGAAGTGAAGTTATATAAATATAAAGTAGTAGAAATTAAGCCAT  
TAGGAATAGCACCCACTAAGGCAAAAAGGAGAGTGGTGGGGAGAGAAAAAAGAGCAGCGGGAATAGGAGCTGT  
GTTCTTGGGTTCTTGGGAGCAGCAGGAAGCACTATGGGCGCAGCATCAATGATGCTGACGGTACAGGCCAGA  
CAATTATTGTCTGGGATAGTGCAACAGCAAAGCAATTTGCTGAGGGCTATAGAGGCGCAACAGCATATGTTGC  
AACTCACGGTCTGGGGCATA

>MK041572

TGCTATACATCAGGCCTGTTTAATAGTACATACAATAGTAATAGTGCAAAAAACAGTAATGAGACAGGCAATT  
CAACCATCACAATCCCATGCAGAATAAAACAAATTATAAACATGTGGCAGGAGGTAGGACGAGCAATGTATGC  
CCCCCCCATTAGTGGAACATAACATGTAGATCAAATATCACAGGATTACTGCTGACACGGGATGGAGGTAAT  
ACTGGCTCGAATGAGACAGAGATATTAGGCCTGGAGGAGGAGATATGAGGGAGAATTGGAGAAGTGAATTAT  
ATAAGTATAAAGTGGTAGAAATTAAACCATTAGGAATAGCACCCACTGAGGCAAAAAGGAGAGTGGTGGAGAG  
AGAAAAAAGAGCAGTGGGAATAGGAGCTGTGTTCTTGGGTTCTTGGGAGCAGCAGGAAGCACTATGGGCGCA  
GCATCAATAACGCTGACGGTACAGGCCAGACAATTATTGTCTGGGATAGTGCAACAGCAAAGCAATTTGCTGA  
GGGCTATAGAGGCGCAACAGCATATGTTGCAACTCACGGTCTGGGGCATT

>AF443091

TGCTATACAACAAAACCTGTTTAATAGTACATACAATAGTACATACAATGATACAGGAAGTGAGTCAAACATCA  
CGATTCCATGCAGAATAAAACAAATTATAAACATGTGGCAGGGGGTAGGACAAGCAATGTATGCCCCCTCCCAT  
TGCAGGAAACATAACATGTAGATCAAACATCACAGGACTACTATTGACACGTGATGGAGGAATAGGATTAAAT  
GAAGATGATAATAACACAGAGATATTAGACCTGGAGGAGGAAATATGAGGGACAATTGGAGAAGTAAATTAT  
ATAAATATAAAGTAGTAGAAATTAAACCATTAGGAGTAGCACCCAATAAGGCAAAAGAGGAGAGTGGTGGAGAG  
AGAAAAAAGAGCAGTGGGACTAGGAGCTGTGTTCTTGGATTCTTAGGAGCAGCAGGAAGCACTATGGGCGCA  
GCATCAATAACGCTGACGGTACAGGCCAGACAATTATTATCTGGTATAGTGCAACAGCAAACAATCTGATGA  
GAGCTATAGAGGCGCAACAACATATGTTGCAACTCACAGTCTGGGGCATT

>AF443102

AGTTATAATAGTACAGCAAACATCACACTCCCATGCAGACTAAAACAAATTATAAACATGTGGCAGAAGGTAG  
GACGAGGAATATATGCCCCCTCCCATTTAGGGGAAGCATAACATGTAACCTCAAATATCACAGGACTACTCTTGGT  
ACGGGATGGAGGCATAAATACGAGTACAGTGGAGACATTCAGACCAGAAGGAGGAAATATGAGGGACAATTGG  
AGAAGTGAACATATATAAATATAAAGTGGTAGAAATTAAAGCCATTGGGAGTAGCGCCACTGAGGCACAAAGGA  
GAGTGGTGGAGAAACAAAAAAGAGCAGTGGGAATGGGAGCTGTGTTCTTGGGTTCTTGGGAGCAGCAGGAAG  
CACTATGGGCGCGCGTCAATAACGCTGACGGTACAGGCCAGACAACCTGTTGTCTGGAATAGTGCAACAGCAA  
AGCAATTTGCTGAGAGCTATAGAGGCGCAACAGCATATGTTGCAACTCACAGTCTGGGGCATT

>AF443103

AGCTATTCAGAACGGCATAATAACACATCAAATTCAACCATCACACTCCCATGCAATATAAAACAAATTATAA  
ACATGTGGCAGGGGGTAGGACGAGCAATGTACGCCCCCTCCCATTTGCAGGAAACATAACATGTACATCAAATAT  
CACAGGACTAATATTGACACGTGATGGAGGAGGAGGAAATGAACTAATGAAACAGAGACATTCAGACCTGCA  
GGAGGAGATATGAGGGACAATTGGAGAAGTGAATTATATAAATATAAAGTGGTAGAAATTAAGCCATTAGGAC  
TAGCACCCACTAAGGCAAAAAGGAGAGTGGTGGAGAGAGAAAAAAGAGCAGTAGGAATAGGAGCTGTGTTCTT  
TGGGTTCTTGGGAGCAGCAGGAAGCACTATGGGCGCGCGTCAATAACGCTGACGGTACAGGCCAGACAACCTG  
TTGTCTGGTATAGTGCAACAGCAAAGCAATTTGCTGAGGGCTATAGAGGCGCAACAGCATATGTTGCAACTCA  
CGGTCTGGGGCATT

>AF443105

TACTATCCTAATGCTACAAAAAGCGATACTACAGAAACCATCACACTCCCATGCAGAATAAAACAAATTGTAA  
ACATGTGGCAGGGGGTAGGACGGGCAATATATGCCCCCTCCCATTTGCAGGAAACATAACATGTAACCTAAGTAT  
CACAGGATTACTATTGCTACGTGATGGAGGGACAGATAACGAGACAGAGAACAACAGGACAGAGACATTCAGA

CCTGGAGGAGGGGATATGAGAGATAATTGGAGAAGTGAATTATATAAATATAAAAGTGGTAGAAATTAAGCCAT  
TAGGAGTAGCACCCTAAGGCAAAAAGGAGAGTGGTGGAGAGAGAAAAAGAGCAGTAGGAATGGGAGCTGT  
GATCCTTGGGTTCTTGGGAGCAGCAGGAAGCACTATGGGCGCGGCGTCAATAACGCTGACGGTACAGGCCAGA  
CAACTGTTGTTTTGGTATAGTGCAACAGCAAAACAATTTGCTGAGGGCTATAAAAGCGCAACAGCATCTGTTGC  
AGCTCACGGTCTGGGGCATT

>AF443107

AACTACAATACAAGCTCAAACCTCATCCAACAACCTCAAACATCACACTCCCATGCAGAATAAAACAAATTATAA  
ATATGTGGCAGGGGGTAGGAAGAGCAATATATGCCTCTCCCATTTGAAGGAAGCATAACATGTAAATCAAATAT  
CACAGGACTACTGTTGGTACATGATGGAGGTAACAGTAACACGAGTACAGAGATATTCAGACCTGGAGGAGGA  
GATATGAGGGACAATTGGAGAAGTGAATTATATAAATATAAAAGTGGTAGAAGTTAAGCCATTGGGAATAGCAC  
CCACTGAGGCAAAAAGGAGAGTGGTGGAGAGAGAAAAAGAGCAGTGGGAATAGGAGCTGTGTTCTTGGGTT  
CTTGGGAGCAGCAGGAAGCACTATGGGCGCGGCGTCAATAACGCTGACGGTACAGGCCAGACAACCTGTTGTTT  
GGTATAGTGCAACAGCAAAAGCAATTTGCTGAGGGCTATAGAGGCGCAACAGCATATGTTGCAACTCACGGTCT  
GGGGCATT

>AF443108

CCTTACAATGATAATGATACAGACTCAGACATCACACTTCCATGTAAAATAAAACAAATTATAAACATGTGGC  
AGGAGGTAGGACGGGCAATATATGCCCTCCCATTGCAGGAAACATAACATGCACATCAAACATTACAGGACT  
ACTATTGACACGTGATGGAGAGCCAAACAACCTCCACAGAGACATTGAGACCTGGAGGAGGAGATATGAGAGAC  
AATTGGAGAAGTGAATTATATAAATATAAAAGTGGTAGAAGTTAAACCATTGGGAATAGCACCCTGAGCAA  
AAAGGAGAGTGGTGGAGAGAGAGAAAAGAGCAGTAGGAATAGGAGCGGTGTTCTTGGGTTCTTGGGAGCAGC  
AGGAAGCACTATGGGCGCGGCGTCAATAACGCTGACGATACAGGCCAGACAACCTGTTGTCTGGTATAGTGCAA  
CAGCAAAGCAATTTGCTGAGGGCTATAGAGGCGCAACAGCATCTGTTGCAACTCACGGTCTGGGGCATT

>KC154012

TGCTATACAACAACTTGTTTAATACTAGTCTGATTAATACTAATAACACTGATAATGGCACAATCATACTCC  
CATGCAAAATAAAACAGATTATAAACATGTGGCAAGAGGTAGGACGAGCAATGTATGCCCCCTCCCATTGAAGG  
AAACATAACATGCAACTCAACTATCACAGGACTACTATTGCTACGTGATGGAGGCAATGGCAATGAGACCAAA  
GGGAATGAGACATTGAGACCTGGAGGAGGAAATATGAAAAGATAATTGGAGAAGTGAATTATATAAATATAAAG  
TGGTAGAAATTAACCATTGGGAATAGCACCCACTGAGGCAAAAAGGAGAGTGGTGGAGAGAGAAAAAGAGC  
AGCTACAATAGGAGCTGTGCTCCTTGGGTTCTTGGGAGCGGCAGGAAGCACTATGGGCGCGGCGTCAATAACG  
CTGACGGTACAGGCCAGACAATTGTTGTCTGGTATAGTGCAACAGCAAAAGCAATTTGCTGAGAGCCATAGAGG  
CGCAACAGCACATGTTGCAACTCACAGTCTGGGGCATT

>KC154014

AATCAGATTAACAGTACAGGAAATACTTCAGATTCAAACATCACACTCCCATGCAGAATAAAACAAATTATAA  
ACATGTGGCAGGGAGTAGGACGAGCAATGTATGCCCCCTCCCATTGCAGGAAACATAACATGTAAATCAAATAT  
CACAGGACTAATATTGACACGTGATGGAGGAACCCATAACACTAATGATACTGATACCCAGAGATATTGAGG  
CCTGCAGGAGGAGATATGAGGGACAATTGGAGAAGTGAATTATATAAATATAAAAGTGGTAGAAATTAAGCCAT  
TAGGACTAGCACCCTAAGGCAAAAAGGAGAGTGGTGGAGAGAGAAAAAGAGCAGTGGGAATAGGAGCTGT  
GTTCTTGGGTTCTTGGGAGCAGCAGGAAGCACTATGGGCGCGGCGTCAATAACGCTGACGGTACAAGCCAGA  
CAACTGTTGTCTGGTATAGTGCAACAGCAAAAGCAATTTGCTGAGGGCTATAGAGGCGCAACAGCATATGTTGC  
AACTCACGGTCTGGGGCATT

>KF114881

AGTTACCCTAACATTGGTGATACAGAAAAGAATTCAAGCTCAATCATCACACTCCCATGCAGAATAAAACAAA  
TTATAACATGTGGCAGGGGGTAGGACGAGCAATATATGCACCTCCCATTGCAGGAAAAATAACATGTAAATC  
AAATATCACAGGACTCCTGTTGACACGTGATGGAGGAAATAGTAATGAGACAAATACTACAGAGATATTGAGA  
CCTGGAGGAGGAAATATGAAAGATAATTGGAGGAGTGAATTATATAAATATAAAAGTGGTAGAAATTAACCAT  
TAGGATTAGCACCCAATAAGGCAAAAAGGAGAGTGGTGGAGAGACAAAAAGAGCAGTAGGAATAGGAGCTGT  
GTTCTTGGGTTCTTGGGAGCAGCAGGAAGCACTATGGGCGCGGCGTCAATAACGCTGACGGTACAGGCCAGA  
CAATTATTGTCTGGTATAGTGCAACAGCAAAAGCAATTTGCTGAGAGCTATAGAGGCGCAACAGCATATGTTGC  
AACTCACAGTCTGGGGCATT

>KR861329

CCTCAGGCAAAATGTAAGTGAGTCAAATTCAACCATCACACTCCCCTGCAGAATAAAGCAAATTATAAACATGT  
GGCAGAGGGTGGGAGGAGCAATATATGCCCTCCCATTGCAGGAAACATAACATGTAAATCAAATATCACGGG  
ACTGCTTTTTGGTACGTGATGGAGGTACAAATAAGACAGAGCCAGAGACATTGAGACCTGGAGGAGGAGATATG  
AGGGACAATTGGAGAAGTGAATTGTATAAATATAAAAGTGGTAGAAATTAAGCCATTAGGAGTAGCACCCCTA  
AGGCAAGAAGGAGAGTGGTGGAAAAGAGAAAAAGAGCAGTGGGAATAGGAGCTGTGTTCTTGGGTTCTTGGG  
AGCAGCAGGAAGCACTATGGGCGCGGCGTCAATAACGCTGACGGTACAAGCCAGACAGTTATTGTCTGGTATA  
GTGCAACAGCAAAAGCAATTTGCTGAGGGCTATAGAGGCGCAACAGCATTTGTTGCAACTCACAGTCTGGGGCA  
TT

>KR861340

AGTCATAACAGTACAAACAGTAATGAATATAATGTAGATAATGGTACAGACAGAAACATCACACTCCCATGCA  
GAATAAAACAAATTATAAACATGTGGCAGAAGGTAGGAAGAGCAATGTATGCCCCCTCCTATTAGTGGACTAAT  
AACATGTACCTCAAATATCACAGGACTACTCTTGGTACGTGATGGGAACACAAGTGTCACAAATGAGACATT  
AGACCAGGAGGAGAGATATGAGGGACAATTGGAGAAGTGAACATATATAAATATAAAGTGGTAGAAATTAAGC  
CATTGGGAGTAGCGCCCACTGGAGCTAAAAGGAGAGTGGTGGAAAGAAGAGAAAAAAGAGCAGTGGGAATAGG  
AGCTGTACTCTTTGGGTTCTTGGGAGCAGCAGGAAGCACTATGGGCGCAGCGTCAATAGCGCTGACGGCACAG  
GCCAGACAAGTGCTGTCTGGAATAGTGCAACAGCAAAACAATTTGCTGAGGGCTATAGAGGCGCAACAGCATA  
TGTTGCAACTCACAGTCTGGGGCATT

>KR861320

GACTACTGGGATAATGGTACCATATCTGGTAACAGTTCAAACATCACCATAATCTCATGCAGAATAAAGCAAA  
TTATAAACATGTGGCAGGGGGTAGGACGAGCAATGTATGCCCCCTCCCATTCAGGAAAAATAACATGTAAATC  
AAATATCACAGGACTACTATTGTACGTGATGGGGGTCCAAATGGCACAGAAGAAAGTATTACAGACCTGGAGGA  
GGAGATATGAGGGACAATTGGAGAAGTGAATTATATAAAATATAAAGTGGTAGAAATTAAGCCATTAGGAATAG  
CACCCACTACTGCAAAAAGGAGAGTGGTGGAAAGAGAAAAAAGAGCAGTGGGAATAGGAGCTGTGCTCCTTGG  
GTTCTTGGGAGCAGCAGGAAGCACTATGGGCGCGGCGTCAATAACGCTGACGGTACAGGCCAGGCAATTGCTG  
TCTGGCATAGTGCAACAGCAAAAGCAATTTGCTGAAAGCTATAGAGGCGCAACAGCATCTGTTGCAACTCACGG  
TCTGGGGCATT

>KR861321

AATTATACACACAATGCAACTGAAAGTGCTATAAAATTCACCAAACATCACCACACTCCATTGCAGAATAAAAC  
AAATTATAAACATGTGGCAGGGGGTAGGGCGGGCAATGTATGCCCCCCCCATTGCAGGAAACATAACATGTAG  
GTCAAATATCACAGGACTAATATTGACACGTGATGGAGGTAATAAGAATAATAATGAAACAACTGGGACAGAG  
ATATTCAGACCTGGAGGAGGAAATATGAGGGACAATTGGAGAAGTGAATTATATAAAATATAAAGTGGTGGAGG  
TTAATCCATTAGGAGTGGCACCCACTACGGCAAAAAGGAGAGTGGTGGAGAGAGAGAAAAGAGCAGTGGGAAT  
AGGAGCTGTGCTCCTTGGGTTCTTGGGAGCAGCAGGAAGCACTATGGGCGCGGCATCAATAACGCTGACGGTA  
CAGGCCAGACAATTATTGTCTGGTATAGTGCAACAGCAAAACAATTTGCTGAAGGCTATAGAGGCGCAACAAC  
ATATGTTGCAACTCACAGTCTGGGGCATT

>KR861323

GGTCATAATAGTACAGATAATAGTACAGATAATGGAAAGTCAAACAAAACCATCACAAATACAATGCAAAATAA  
AACAAATTCATAAACCTGTGGCAGGAGGTAGGGCGAGCAATATATGCCCCCTCCCATTTGAAGGAAACATAACATG  
TAAATCAAATATCACAGGATTACTCTTGACATGGGATGGAGGAGATGATCCAAAAGAGTCAAATGACACAGAG  
ATATTCAGACCAGGAGGAGGAGATATGAAGGACAATTGGAGAAGTGAACATATATAAAATATAAAGTGGTAGAAA  
TTAAGCCCTTGGGAATAGCACCCACTGAGGCAAAAAGGAGAGTGGTGCAGAGAGAGAAAAAAGAGCAGTGGGAAT  
GGGAGCTGTGCTCCTTGGGTTCTTGGGAGCAGCTGGAAGCACTATGGGCGCAGCGTCAATAGCGCTGACGGCA  
CAGGCCAGACAACCTGTTGTCTGGAATAGTGCAACAGCAAAAGCAATTTGCTGAGGGCTATAGAGGCGCAACAGC  
ATATGTTGCAACTCACGGTCTGGGGCATT

>KR861332

ACCTACCAGGTAAATATTACAAAAGATACTTCAAGTTCAGACAGTAAAAACATCACACTCCAATGCAGAATAA  
AACAGATTATAAACATGTGGCAGGAGGTAGGACGAGCAATGTATGCTCCTCCCATTTGAAGGAACATAACATG  
TAAATCAAACATCACAGGACTATTATTGACACGTGATGGAGGAAAACCTAATAATAGTGAATATTACAGACCT  
GGAGGAGGGGATATGAGAGATAATTGGAGAAGTGAATTATATAAAATATAAAGTGGTAGAAATTAAGCCATTAG  
GGGTAGCACCCACTAAGGCAAAAAGGAGAGTGGTGGAGAGAGAAAAAAGAGCAGTGGGAATAGGAGCTGTGTT  
CCTTGGGTTCTTGGGAGCAGCAGGAAGCACTATGGGCGCGGCGTCAATAACGCTGACGGTACAAGCCAGACAA  
CTGCTGTCTGGTATAGTGACAGCAGCAAAGCAATTTGCTGAGGGCTATAGAGGCGCAACAGCATTGTTGCAAC  
TCACAGTCTGGGGCATT

>KR861334

ACTTACACGCAGCCTAACAGTACAGAAAATACTACAGAGCCAACCATCACACTCAAATGCAGAATAAAACAAA  
TTATAAACATGTGGCAGGAGGTAGGACGAGCAATGTATGCCCCCTCCCATTCAGGAAACATAACATGTAGATC  
AAATATCACAGGATTAATATTGACACGTGATGGAGGAATTAGTAATGAAGGAAATAGGACTAATGAGACATT  
AGACCTATAGGAGGAGATATGAGGGACAATTGGAGAAGTGAATTATATAAAATATAAAGTAGTAGAAATTAAGC  
CATTAGGACTAGCACCCACTACGGCAAAAAGGAGAGTGGTGGAAAGAGAAAAAAGAGCAGTGGGAATAGGAGC  
TGTGTTCTTGGGTTCTTGGGAGCAGCAGGAAGCACTATGGGCGCGGCGTCAATAACGCTGACGGTACAGGCC  
AGACAACTGTTGTCTGGTATAGTGCAACAGCAAAAGTAATTTGCTGAGGGCTATAGAGGCGCAACAGCATATGT  
TGCAACTCACGGTCTGGGGCATT

>KR861339

TCCTACCCTAATGACACCATCACCCCTCCCATGCAGGATAAAACAAATTATTAACCTGTGGCAGAAGGTAGGAC  
GGGCAATGTATGCCCCACCCATTGCAGGAAACATAACATGTAAATCAAATATCACAGGACTACTATTGACAAG  
TGATGGAGGTGTAAAGACAATAATACTAATAATATTAATACATTACAGACCTGGAGGAGGAAATATGAGGGAC  
AATTGGAGAAGTGAATTATATAAAATATAAAGTGGTGGAAAGTGAAGCCATTAGGAATAGCACCCACTGAGTCAA  
AAAGGAGAGTGGTGGAGAGAGCAAAAAGAGCAGTGGGACTGGGAGCTGTGTTCTTTGGGTTCTTGGGAGCAGC

AGGAAGCACTATGGGCGCGGCGTCAATAACGCTGACGGTACAGGCCAGACAACCTATTGTCTGGTATAGTGCAA  
CAGCAAAGCAATTTGCTGAGAGCTATAGAGGCGCAACAACATATGTTGCAACTCACAGTCTGGGGCATT  
>KR861342

AGTTATAATGCAACAAGCAATAGAACCATCACACTCCCATGCAGAATAAAACAAATTATAAACATGTGGCAGA  
GGGTAGGACAAGCAATATATGCCCCCTCCCATTCAGGGAAGAATAACATGTAACCTCAAATATCACAGGAATACT  
CTTGACACGTGATGGAGGAACAACCTAATGACACAGGGAATGGCACAGAGATATTCAGACCAGGAGGAGGAGAC  
ATGAGGGATAAATTGGAGAAGTGAACCTATATAAATATAAAGTAGTAGAAATTAAGCCATTGGGAGTAGCACCCA  
CCAAGGCAAAAAGGAGAGTGGTGGAGAGAGAAAAAAGAGCAGTAGGAATAGGAGCTGTGCTCTTTGGGTTCTT  
GGGAGCAGCAGGAAGCACTATGGGCGCAGCGTCAATAGCGCTGACGGCACAGGCCAGACAAGTGCTGTCTGGA  
ATAGTGCAACAGCAAAGCAATTTGCTGAGGGCTATAGAGGCGCAACAGCATATGTTGCAACTCACAGTCTGGG  
GCATT

>KR861328

AGTTATAATGATACAAGAAAATCACACTCCCATGCAGAATAAAACAAATTGTAAATATGTGGCAGGGGGTAG  
GAAGGGCAATATATGCCGCTCCCATTCAGGACAAATAATGTGCACATCAAATATTACAGGACTAATATTGAC  
ACGTGATGGAGGAAATGGAAATTTCTACCCATGAGACATTCAGACCTGAAGGAGGAAATATGAGGGACAATTGG  
AGAAGTGAATTATATAAATATAAAGTGGTAGAAATTAACCATTAGGAATAGCACCCACTGAGGCAAAAAGGA  
GAGTGGTGGAGAGAGAAAAAAGAGCAGTAGGCCTAGGAGCTGTGTTACTTTGGGTTCTTGGGAGCAGCAGGAAG  
CACTATGGGCGCGGCGTCCATGACGCTGACGGTACAGGCCAGACAACCTGTTGTCTGGTATAGTGCAACAGCAA  
AGCAATTTGCTGAGAGCTATAGAGGCGCAACAGCATATGTTGCAACTCACAGTCTGGGGCATT

>KR861257

AATCATACGTCAAATTCAAACATCACGCTCCCATGCAGAATAAAACAAATTATAAACATGTGGCAGGAGGTAG  
GACGAGCAATGTATGCCCCGCCCATTCAGGAAACATAACATGTAAATCAAATATCACAGGACTACTATTGGT  
ATATGATGGAGGCATGCATAATAGAAGCAACGAGACATTCAGACCGGGAGGAGGAAATATGAAGGACAATTGG  
CGAAGTGAACCTATATAAATATAAAGTGGTAGAAATTAACCATTAGGAATAGCACCCACGAAAGCAAAAAGAA  
GAGTGGTGGAGAGAGAAAAAAGAGCAGTGGGAGTAGGAGCTATGTTCTTTGGGTTCTTGGGAGCAGCAGGAAG  
CACTATGGGCGCGGCGTCAATAACGCTGACGGTACAGGCCAGACAACCTATTGTCTGGTATAGTGCAACAGCAA  
AGCAATTTGCTGAGAGCTATAGAGGCGCAACAACATATGTTGCAACTCACAGTCTGGGGCATT

>KR861259

AATTATACAAATAGCACTACAGATAATTCAACCATCACAATCCAATGCAGAATAAAACAAATCATAAACATGT  
GGCAGGAGGTAGGACGAGCAATGTATGCCCCCTCCCATTCAGGAAACATAACATGTAGATCAAATATCACAGG  
ACTACTATTAGTACGTGATGGAGGAAACGGAAACGACACCAATAATACAGAGACATTCAGACCTGGAGGAGGA  
AATATGAAGGACAATTGGAGAAGTGAATTATACAAATATAAAGTGGTAGAAGTAAAACCATTAGGAATAGCAC  
CCACTGGGGCAAAAAGGAGAGTGGTGGAGAGAGAAAAAAGAGCAGTGGGAATAGGAGCTGTGTTCTTTGGATT  
CTTGGGAGCAGCAGGAAGCACTATGGGCGCGGCGTCAATAACGCTGACGGTACAGGCCAGACAATTATTGTCT  
GGTATAGTGCAACAGCAAAGCAATTTGCTGAGGGCTATAGAGGCGCAACAGCATCTGTTGCAACTCACAGTCT  
GGGGCATT

>KR861264

GATTATAATGATACAGAAAGTAATGAGACCATCATACTCCAATGCAGAATAAAACAAATTATAAACATGTGGC  
AGAAGGTAGGAGGAGCAATATATGCCCCCTCCCATTCAGGAAACATAACATGTAAATCAAATATCACAGGACT  
ACTCTTGGTACGGGATGGAGGCAATACCACTAACACATCAGAGATATTAGACAGGAGGAGGAAATATGAAG  
GACAATTGGAGAAGTGAACCTATATAAATATAAAGTGGTAGAATTAAGCCATTGGGACTAGCGCCACCAAGG  
CAAGAAGGAGAGTGGTGGAGAGAGAAAAAAGAGCAGTGGGAATAGGAGCTGTGTTCTTTGGGTTCTTGGGAGC  
AGCAGGAAGCACTATGGGCGCAGCGTCAATAACGCTGACGGTACAGGCCAGACAATTGTTGTCCGGTATAGTG  
CAACAGCAAAGTAATTTGCTGAGAGCTATAGAGGCGCAGCAGCATATGTTGCAACTCACAGTCTGGGGCATT

>KR861269

TGCTATACATCAAACCTGTTTAATGATAGCAATAGGGCAAACATGTCTGATAACAGTACAGTCATCACACTCT  
CATGCAGGATAAAACAAATTATAAATATGTGGCAGAAGGTAGGACGAGCAATGTATGCCCCCTCCCATTCAGG  
GAACATAACATGTAAATCAAATATCACAGGACTACTATTGGTACGTGATGGAGGAACAGGTAACAAAACAGAG  
ATATTAGACCTGGAGGGGGAGATATGAGGGACAATTGGAGAAGTGAATTATATAAATATAAAGTGGTAGAAA  
TAAAGCCATTGGGAATAGCACCCACTGAGGCAAAAAGGAGAGTGGTGGAGAGAGAAAAAAGAGCAGTGGGAAT  
AGGAGCTGTGTTCTTTGGGTTCTTGGGAGCAGCAGGAAGCACTATGGGCGCAGCGTCAATAACGCTGACGGTA  
CAGGCCAGACAATTGTTGTCTGGAATAGTGCAACAGCAAAGCAATTTGCTGAGGGCTATAGAGGCGCAACAGC  
ATATGTTGCAACTCACGGTCTGGGGCATT

>KR861276

ACTTACATCACACTCCCATGCAGAATAAAGCAAATTATAAACATGTGGCAGGGGGTAGGACAAGCAATGTATG  
CCCCCTCCCATTCAGGGAACATAACATGTACCTCAAATATCACAGGAATACTGTTGACACGTGATGGAGGAAA  
TGAGGAAAAGGAAGAGGAGATATTCAGACCTGGAGGAGGAGATATGAGGGACAATTGGAGAAGTGAGTTGTAT  
AAATATAAAGTGGTAGAAGTTAAACCATTAGGAATAGCACCCACTGAGGCAAAAAGAGAGTAGTGAGAGAGAC  
AAAAAAGAGCAGCGGGACTAGGAGCTGTGTTCTTAGGGTTCTTGGGAGCAGCAGGAAGCACTATGGGCGCGGC

GTCAATAACGCTGACGGTACAGGCCAGACAATTATTGTCTGGTATAGTGCAACAGCAAAGCAATTTGCTGAGA  
GCTATAGAGGCGCAACAACATATGTTGCAACTCACAGTCTGGGGCATT

>KR861281

AATTACATCAATTCATCAGATCTAATCACCCCTCCAATGCAGAATAAAACAAATTATAAACTTGTGGCAGAGGG  
TAGGACGAGCAATGTATGCCCTCCCCATTAAACGGAATCATAAAATGTAGATCAAATATCACAGGACTACTATT  
GACACGTGATGGAGGTAATACAACAAACAGTAGTGAAGAAATATTAGACCTGAAGGAGGAAATATGAGGGAC  
AATTGGAGAAGTGAATTATATAAAATATAAAAGTGGTAGAAATTAAGCCATTAGGGATAGCACCCACTAGGGCAA  
AAAGAAGAGTGGTGGAGAGAGAAAAAGAGCAGTGGGAATAGGAGCTGTGTTCTTGGGTTCTTGGGAGCAGC  
AGGAAGCACTATGGGCGCGGCGTCAATCACGCTGACGGTACAGGCCAGACAATTATTGTCTGGTATAGTGCAA  
CAGCAAAGCAATTTGCTGAGAGCTATAGAGGCGCAACAACATATGTTGCAACTCACAGTCTGGGGCATT

>AF110973

AGTTATAGGGGTACAGAAAAGTAATAGTTCAATCATCACACTCCCATGCAGAATAAAACAAATTATAAACATGT  
GGCAGAAGGTAGGACGAGCAATATATGCCCTCCCATCGAAGGGAACATAACATGTAGCTCGAGTATCACAGG  
ACTACTCTTGGCACGTGATGGAGGCTTAGATAATGTCAACACAGAGATATTAGACCCACAAGGAGGAGATATG  
AAGGACAATTGGAGAAATGAATTATATAAAATATAAAAGTAGTAGAAATTAAGCCATTGGGAGTAGCGCCCACTG  
AGGCAAAAAGGAGAGTGGTGGAGAGAGAAAAACGAGCAGTGGGAATAGGAGCTGTGATCTTTGGGTTCTTGGG  
AGCAGCAGGAAGCACTATGGGCGCAGCGTCAATAACGCTGACGGCACAGGCCAGACAATTGTTGTCTGGAATA  
GTGCAACAGCAAAGCAATTTGCTGAGGGCTATAGAGGCGCAACAGCATATGTTGCAACTCACAGTCTGGGGCA  
TT

>KY658707

ACCTACAGGTCTAATAGTACAAATGCAACCATCACACTCCCATGCAGAATAAAACAAATTATAAACATGTGGC  
AAGGGGTAGGACGAGCAATGTATGCCCTCCCATTCAGGAAACATAACATGTAAATCAAATATCACAGGACT  
ACTATTGACACGTGACGGAGGAGTTGGTGAGGATAGTGATAATGAAACAGAAATATTAGACCTGGAGGAGGA  
GATATGAGAGACAATTGGAGAAAGTGAATTATATAAAATATAAAAGTGGTAGAAATTAAAACCATTAGGAATAGCAC  
CCACTGAGGCAAGAAGGAGAGTGGTGGAGAGAGAAAAAGAGCAGTGGGAATAGGAGCTGTGTTCTTGGGTT  
CTTGGGAGCAGCAGGAAGCACTATGGGCGCAGCGTCAATAACGCTGACGGTACAAGCCAGGCAATTATTGTCT  
GGTATAGTGCAACAGCAAAGCAATTTGCTGAGAGCTATAGAGGCGCAACAGCATATGTTGCAACTCACGGTCT  
GGGGCATT

>AF443077

AGTCAGCCTAACAGTACAGGAAACACTCCACATTCAAACATCACACTCCCATGCAAAATAAAACAAATTATAA  
ACATGTGGCAGGGGGTAGGGCGAGCAATGTATGCCCTCCCATTCAGGAAACATAACATGTATATCAAATAT  
CACAGGACTAATATTGACACGGGATGGAGGAGTAAATAGAAGTGACACAGAAATATTAGACCTGCAGGAGGA  
GATATGAGGGATAATTGGAGAAAGTGAATTATATAAAATATAAAAGTGGTAGAAATTAAAACCATTAGGACTAGCAC  
CCACTAAGGCAAAAAGGAGAGTGGTGGAGAGAGAAAAAGAGCGGTGGGAATAGGAGCTGTGTTCTTGGGTT  
CTTGGGAGCAGCAGGAAGCACTATGGGCGCGGCGTCAATAACGCTGACGGTACAGGTCAGACAACCTGTTGTCT  
GGTATAGTGCAACAGCAAAGCAATTTGCTGAGGGCTATAGAGGCGCAACAGCATATGTTGCAACTCACGGTAT  
GGGGCATT

>AF443081

TATTATAGTAACAAGACAAGCAGTAATATGACTACAAATGAAATCATCACAATTCCATGCAAAATAAAACAAA  
TTATAAACATGTGGCAGGAGGTAGGACGAGCAATGTATGCCCTCCCATTCAGGAAACATAACATGTAAATC  
AAATATCACAGGACTACTATTAGTACGTGATGGAGGCAACAACAATACCACAGAAACATTAGACCTGGAGGA  
GGAAATATGAAGGACAATTGGAGAAGTGAATTATATAAAATATAGAGTGGTAGAAATTAAGCCATTAGGAATAG  
CACCCACTGGAGCAAAAAGGAGAGTGGTGGAGAGAGAAAAAGAGCAGTGACACTAGGAGCTATGTTCTTGG  
GTTCTTGGGAGCAGCCGGAAGCACTATGGGCGCGGCGTCAATAACGCTGACGGTACAGGCCAGACAACCTGTTG  
TCTGGTATAGTGCAACAGCAAAGCAATTTGCTGAGGGCTATAGAGGCGCAACAGCATATGTTGCAACTCACGG  
TCTGGGGCATT

>AF443087

TACTATCCAAACATGACCAATGTCACTGATACAAAGAGTAATTTAACCATCACACTGCCATGCAGAATAAAAC  
AAATTATAAACAGGTGGCAGGAGGTAGGACGAGCAATGTATGCCCTCCCATTCAGGAAACATAACATGTAC  
GTCAAATATCACAGGACTACTATTGGTACGTGATGGAGGCCGTACAAGTGACTCTACAAAAGAGATATTGAGA  
CCTGGAGGAGGAGATATGAGGGACAATTGGAGAAGTGAATTATATAAAATATAAAAGTGGTAGAAATTAACCAT  
TGGGAATAGCACCCACTGAAGCAAAAAGGAGAGTGGTGGAGAGAGAAAAAGAGCAGTGACAATAGGAGCTAT  
GTTCTTGGGTTCTTATCAGCAGCAGGAAGCACTATGGGCGCAGCATCAATAACGCTGACGGTACAGGCCAGA  
CAATTATTGTCTGGTATAGTGCAACAGCAAAGCAATTTGCTGAGAGCTATAGAGGCGCAACAGCATATGTTGC  
AACTCACAGTTTGGGGCATT

>KR861318

GACTATAATGTAAGCAACATCAACATCACACTCCCATGCAGAATAAAACAAATTTATAAACATGTGGCAGGGG  
TAGGACGAGCAATGTATGCCCTCCCATTCAGGAAACATAACATGTATATCAAGTATCACAGGATTAATATT  
GACACGTGATGGAGGAAGAGGGAATGAGACTGAGAATAATACTGAGATATTAGACCTGCAGGAGGAGATATG  
AGGGACAATTGGAGAAGTGAATTATATAAAATATAAAAGTAGTAGAAATTAAGCCATTAGGACTAGCACCCACTA

TGGCAAAAAGGAGAGTGGTGGAGAGAGAAAAAGAGCAGTGGGAATAGGAGCTGTACTCCTTGGGTTCTTGGG  
AGCAGCAGGAAGCACTATGGGCGCGGCGTCAATCACGCTGACGGTACAGGCCAGACAATTGCTGTCTGGTATA  
GTGCAACAGCAAAGCAATTTGCTGAGAGCTATAGAGGCGCAACAGCATATGTTGCAACTCACAGTCTGGGGCA  
TT

>HQ699999

TACTATCCTAATGGTACACTAGTTAATTCAACCTTAAACATCACACTCCAATGCAGAATAAAGCAAATTATAA  
ACATGTGGCAGGAGGTAGGAAAAGCAATGTATGCCCCCTCCCATTCAGGAAACATAACATGTAGATCAAATAT  
CACAGGACTACTATTGGTACGTGATGGAGGGATAACAAATAATACAAACCCAAGTGAGATCAAGAATGATACA  
GAGATATTCAGACCTGGAGGAGGAAACATGAAAGACAATTGTAGAAGTGAATTATATAAAATATAAAGTGGTAG  
AAATTAAGCCATTGGGAGTAGCACCCACTCCAGCAAAAAGGAGAGTAGTGGAGAGAGAAAAAGAGCAGCAAT  
AGGAGCTGTGTTCTTGGGTTCTTGGGAGCAGCAGGAAGCACTATGGGCGCGGCGTCACTAACGCTGACGGTA  
CAGGCCAGACAATTGTTGTCTGGTATAGTGCAGCAGCAAAGCAATTTGCTGAGAGCTATAGAGGCGCAACAGC  
ATCTGTTGCAACTCACGGTCTGGGGCATT

>EF514713

TCTCAGTCTAATAATATAAGCATACTTACTAATGAAACCATCACGCTCCCATGCAGAATAAAACAAATTATAA  
ACATGTGGCAGGAGGTAGGACGAGCAATGTATGCCCCCTCCCATTCAGGAAACATAACATGTAAATCAAATAT  
CACAGGACTACTATTGGTACGGGATGGAGGAAACCAGGAAAGGAACAACGAGACATTTAGACCTGAGGGAGGA  
AATATGAAGGACAATTGGAGAAGTGAATTATATAAAATATAAAGTGGTAGAAATTAAGCCATTGGGAATAGCAC  
CCACTGAGGCAAAAAGGAGAGTGGTGGAGAGAGAGAAAAAGAGCAGTGGGAATAGGAGCTGTACTCCTTGGGTT  
CTTGGGAGCAGCCGGAAGCACTATGGGCGCGGCGTCAATAACGCTGACGGTACAGGCCAGACAAGTATTGTCT  
GGTATAGTGCAACAGCAAAGCAATTTGCTGAGAGCCATAGAGGCGCAACAGCATATGTTGCAACTCACGGTCT  
GGGGCATT

>KX228820

AGTTATGATTCTAATAGTACAGCAAACATCACACTCCCATGCAAAATAAAACAGATTATAAACTTGTGGCAGG  
AGGTAGGACGAGCGATGTACGCTCCTCCCATTGCAGGAAACATAACATGTAAGTCAACCATCACAGGATTACT  
ATTGGTGCGTGATGGAGGACAAGGAAACAACCTCAAATGAGACATTCAGACCTGGAGGAGGAGATATGAGGGAT  
AATTGGAGAAGTGAATTGTATAAGTATAAAGTGGTAGAAATTAAGCCATTGGGAGTAGCACCCACTGAGGCAA  
AAAGGAGAGTGGTGGAGAGAGAAAAAGAGCAGTGGGACTAGGAGCTGTGATCTTTGGGTTCTTAGGAGCAGC  
AGGAAGCACTATGGGCGCGGCGTCAATAACGCTGACGGTACAGGCCAGACAACCTGTTGTCTGGTATAGTGCAA  
CAGCAAAGCAATTTGCTGAAGGCTATAGAGGCACAACAGCATATGTTGCAACTCACGGTCTGGGGCATT

>KU319533

ACCTATAAAGGTACAAACATGTCTGATGGTCCTGAATTCATCACACTCCAATGCAGAATAAAACAAATTATAA  
ATATGTGGCAAGGGGTAGGACGAGCAATGTATGCCCCCTCCCATTCAGGAAACATAACATGTATATCAAATAT  
CACAGGAATACTACTGACACGTGATGGAAAAATGATGGTGCAGATACATTCAGACCTGGAGGAGGAGATATG  
AGGGATAATTGGAGAAGTGAATTATATAAATACAAAGTAGTAGAAATTAACCATTAGGAATAGCACTCACTA  
AGGCAAAGAGGAGAGTGGTGGAGAGAGAAAAAGAGCAGTATTGGGAGGACTAGGAGCTGTGTTCTTGGGTT  
CTTGGGGGCAGCAGGAAGCACTATGGGCGCAGCATCAATGACGCTGACGGTACAGGCCAGAAAATTGTTGTCT  
GGTATAGTGCAACAGCAAGGCAATTTGCTGAGGGCTATAGAGGCGCAACAGCATATGTTGCAACTCACAGTCT  
GGGGCATT

>KU319536

AATCATAGTTTTACAACTCAACCCTGTTTAATAGTAGTAATAATGCAAACTCAACTATCACACTCCCATGCA  
AAATAAAACAAATTATAAAACATGTGGCAGAGGGTAGGGCGAGCAATATATGCCCCCTCCCATTCAGGAAATAT  
AACATGTAAATCAGGTATCACAGGGCTACTATTGACACGTGATGGAGGAAATGACACAGAGATAAATGGCACA  
GAGACATTCAGACCTGGAGGAAGAGATATGAGGGACAATTGGAGAAGTGAATTATATAGATATAGGGTGGTAG  
AAATTAAGCCATTGGGAATAGCACCCACCAAGGCAAAAAGGAGAGTGGTGGAGAGAGAAAAAGAGCAGTGGG  
AATAGGAGCTGTGTTCTTGGGTTCTTGGGAGCAGCAGGAAGCACTATGGGCGCGGCGTCAATAACGCTGACG  
GTACAGGCCAGACAATTGCTGTCTGGTATAGTGCAACAGCAAAGCAATTTGCTGAGGGCTATAGAGGCGCAAC  
AGCATATGTTGCAACTCACAGTTTGGGGCATT

>FJ653288

AGCTACATGTCTAATACTACAAACAGTACAATCAGTGAAAATTCAACTATCACACTTTTCATGCAGAATAAAAC  
AAATTATAAACATGTGGCAGGGGGTAGGACAAGCAATATATGCCCCGCCCATTCAGGAAACATAACATGTAT  
ATCAAATATCACAGGACTACTGTTAACACGTGATGGAGGAAATGAGGGTAATGATACAACAGAGACATTCAGA  
CCTGGAGGGGGAGATATGAGAGACAATTGGAGAAGTGAATTATATAAATATAAAGTGGTAGAAGTTAAACCAT  
TAGGAATAGCACCCAATAAGGCAAAAAGGAGAGTGGTGGAGAGAGAAAAAGAGCAGTGGGAATAGGAGCTGT  
GCTCCTTGGGTTCTTGGGAGCAGCAGGAAGCACTATGGGCGCGGCGTCAATAACGCTGACGGTACAGGCCAGA  
CAATTATTGTCTGGTATAGTGCACAGCAAAGCAATTTGCTGAGAGCTATAGAGGCGCAACAGCATTTGTTGC  
AACTCACAGTCTGGGGCATT

>DQ207941

AACTACACTGAGGCAAAATTCAGCATCACACTCCCATGCAGAATAAAACAAATTATAAACATGTGGCAGGAGG  
TAGGACGAGCAATGTATGCCCCCTCCCATTCAGGATACATAACATGTAATTCAAATATCACAGGACTACTCTT

GACACGTGATGGAGGCAATGGTAGTAGTAATTGCACAGAGACATTTCAGACCGGGAGGAGGAGACATGAGGGAC  
AATTGGAGAAGTGAATTATATAAAATACAAAGTGGTAGAAATTAAGCCATTAGGAGTAGCACCCACCAAGGCAA  
AAAGGAGAGTGGTGGAGAAAGAAAAAGAGCAGTGGGAATAGGAGCTGTACTCCTTGGGTTCTTGGGAGCAGC  
AGGAAGCACTATGGGCGCAGCGTCAATAACGCTGACGGTACAGGCCAGACAAGTGTGTCTGGAATAGTGCAA  
CAGCAAAATAATTTGCTGAGGGCTATAGAGGCGCAACAGCATATGTTGCAACTCACAGTCTGGGGCATT

>KF766541

AATTATACATACATGCTTAATGGTACACTTACAGGAAGTAATTCAAGCTCAGACATTATCACACTCCCATGTA  
GAATAAAACAATTTATAAACATGTGGCAGGAGGTAGGACGAGCAATGTATGCTCCTCCCATTCAGGAAACAT  
AACATGTTTCATCAAAAATCACAGGACTACTATTGGTACGTGATGGAGGAAATACAAATAGTACTACAGAGATA  
TTTAGACCTGGAGGAGGAGACATGAGGAACAATTGGGAGAAGTGAATTATATAAAATACAAAGTAGTAGAAATTA  
GACCATTTGGGAGTAGCACCCACTACAGCAAAAAGGAGAGTGGTGGAGAGAGAAAAAGAGCAGTGGGAATAGG  
AGCTGTGTTTCCTTGGGTTCTTGGGAGCAGCCGGAAGCACTATGGGCGCGGCGTCAATGACGCTGACGGTACAG  
GCCAGACAATTGTTGTCTGGTATAGTGCAACAGCAAAACAATTGCTGAGGGCTATAGAGGCGCAACAGCATC  
TGTTGCAACTCACGGTCTGGGGCATT

>MH899155

AGTCATGATGGTTTTAACTCAACCATCACACTCCCATGCAAAATAAAGCAGATTATAAATATGTGGCAGGAGG  
TAGGAAGAGCAATGTATGCCCCCTCCCATTTGAAGGAAACATAACATGTAAATCAAATATCACAGGCATACTATT  
GGTACGTGATGGAGGGAATGATAACAGCTCAAATGATACAGAAACAGAGACATTCAGACCTGGAGGGGGAGAT  
ATGAGAGATAATTGGAGAAGTGAATTATACAAATATAAAGTGGTAGAAATTAAGCCACTGGGAGTAGCACCCA  
CTACAGCAAAAAGGAGAGTGGTGGAGAGAGGAAAAAGAGCAGTGGGCATAGGAGCTGTGTTCTTGGGTTCTT  
GGGAGCAGCAGGAAGCACTATGGGCGCGGCGTCAATAACGCTGACGGTACAGGCCAGACAATTGTTGTCTGGT  
ATAGTGCAACAGCAAAGCAATTTGCTGAGAGCTATAGAGGCGCAACAACATCTGTTGCAACTCACGGTCTGGG  
GCATT

>KX069220

ACCTACGTGAATGATACCACCAACGGGGATAACTCAAACATCACTTTACCATGCCGAATAAAACAAATTATAA  
ACATGTGGCAGGAGGTAGGACGAGCAATGTATGCCCCCTCCCATTCAGGAAACATAACATGTAAATCAAATAT  
TACAGGACTACTATTGGTACGTGATGGAGGGAAGAGACAAATGGCACAGAGACATTCAGACCTGGAGGAGGA  
GATATGAGAGACAATTGGAGAAGTGAATTATATAAAATATAAAGTGGTAGAAATTAAGCCATTGGGAGTAGCAC  
CCACTAAAGCAAAAAGAAGAGTAGTGGAGAGAGAAAAAGAGCAGCACTAGGAGCTGTGTTCTTGGGTTCTT  
AGGAGCAGCAGGAAGCACTATGGGCGCGGCGTCAATAGCGCTGACGGCACAGGCCAGACAATTGTTGTCTGGT  
ATAGTGCAACAGCAAAGCAATTTGCTGAGAGCTATAGAGGCGCAACAGCATCTGTTGCAACTCACAGTCTGGG  
GCATT

>KY713228

TACTACTTTAATAGTAGTAAAAACAGAGGGGGCACAGAAAGTGATGAAACCATCATCCCATGCAAAATAAAGC  
AAATCATAAACATGTGGCAGGAGGTAGGAAGAGCAATGTATGCCCCCTCCCATTCAGGAAACATAACATGTAA  
ATCAAACATCACAGGGCTACTATTGGTACGTGATGGAGGAATAAATACTACAGAGGCTACAGAGACATTTAGA  
CCAGGAGGAGGAGATATGAGGGACAATTGGAGAAGTGAATTATATAAATATAAAGTGGTAGAAATTAAGCCAC  
TGGGAGTAGCACCAACTGGAGCAAAAAGGAGAGTGGTGGAGAGAGAAAAAGAGCAGTGGGGCTAGGAGCTGT  
GTTCTTGGGTTCTTGGGAGCAGCAGGAAGCACTATGGGCGCGGCGTCAATAACGCTGACGGTACAGGCCAGA  
CAACTGTTGTCTGGTATAGTGCAACAGCAAAGTAATTTGCTGAGAGCTATAGAGGCGCAACAGCATCTGTTGC  
AACTCACAGTCTGGGGCATT

>KY713233

AATTACATGGGTACATACAATGAGACAAATGGTACATACAATTCAAACCTCGACCATCACAATCCCATGCAGAA  
TAAACAAATTATAAACATGTGGCAGGAGGTAGGACGAGCAATATATGCCCCCTCCCATTCAGGAAACATAAC  
ATGTAAATCAAATATCACAGGACTACTATTGGTACGTGATGGAGGAAGAAACAATACATAAAAATGAGACA  
TTTAGACCTGGAGGAGGAGATATGAAAGACAATTGGAGAAGTGAATTATATAAATACAAGGTGGTGGAAATTA  
AGCCATTAGGAATAGCACCTACTACAGCAAAAAGGAGAGTGGTGGAGAGAGAAAAAGAGCAGTGGGACTAGG  
AGCTATGTTTCCTTGGGTTCTTGGGAGCAGCCGGGAGCACTATGGGCGCGGCGTCAATAACGCTGACGGTACAG  
GCCAGACAATTGTTGTTTGGTATAGTGCAACAGCAAAGCAATTTGCTGAGAGCTGTAGAGGCGCAACACCATC  
TGTTGCAACTCACGGTCTGGGGCATT

>KY713248

AATTACACTGAGACAAATAGTACATACAATGAGGCAAACTTGACCATCACAATCCCATGCAGAATAAAACAAA  
TTATAAACATGTGGCAGAAGGTAGGAAAAGCAATATATGCCCCCTCCCATTCAGGAAACATAACATGTAAATC  
AAATATCACAGGACTACTACTGGTACGTGATCGTGGTGGAAACAATACAAATAAGAATGAGACATTTAGACCT  
GGAGGAGGAAATATGAAAGACAATTGGAGAAGTGAATTATATAAATATAAAGTGGTGGAAATTAAGCCATTAG  
GAATAGCACCTACTACAGCAAAAAGGAGAGTGGTGGAGAGAGAAAAAGAGCAGTGGGACTAGGAGCTATGTT  
CCTTGGGTTCTTGGGAGCAGCTGGGAGCACTATGGGCGCGGCGTCAATAACGCTGACGGTACAAGCCAGACAA  
CTGTTGTCTGGTATAGTGCAAGCAGCAAAGCAATTTGCTGAAAGCTGTAGAGGCGCAACAGCATCTGTTGCAAC  
TCACTGTCTGGGGCATT

>MK076659

AGTCATGATAGTTTTCTAGACTCAACCAACAACCTCAACTTCAAAAAAGATCACACTCCCATGCAGAATAAAGC  
AGATTATAAATATGTGGCAGGAGGTAGGAAGAGCAATGTATGCCCCCTCCCATTCAGGAAAAATAACATGTAA  
ATCAAATATCACAGGCATACTATTGACACGTGATGGAGGGCATGATAACAATGTTACAGAGACATTCAGACCT  
GGAGGGGGAGATATGAGAGATAATTGGAGAAGTGAATTATACAAATATAAAGTGGTAGAAGTTAAGCCACTGG  
GAGTAGCACCCACTGCAGCAAAAAGGAGATTGGTGGAAAAGAAACAAAAGAGACGTGGGCCTAGGAGCTGTGTT  
ACTTGGGTTCTTGGGAGCAGCAGGAAGCACTATGGGCGCGGCGTCAATAACGCTGACGGTACAGGCCAGACAA  
TTGTTGTCTGGTATAGTGCAACAGCAAAGCAATTTGCTGAGAGCTATAGATGCGCAACAACATATGTTGCAAC  
TCACGGTCTGGGGCATT

>AY049708

AGTTATAATGGTCCAAGCCCCAAATATCACAATCCCATGCAGAATAAAACAAATTATAAACATGTGGCAGGAGG  
TAGGACGAGCAATGTATGCCCCCTCCCATTCAGGAAAAATAACATGTAAATCAAATATCACAGGAATACTATT  
GGTACGTGATGGGGGAAAAACAAAGGATAATGACACAGAGATATTCAGACCTGGAGGAGGAGATATGAGGGAC  
AATTGGAGAAGTGAATTATATAAATATAAAGTGGTAGAAATTAAGCCATTGGGAGTAGCACCCACTGAAGCAA  
AAAGGAGAGTGGTGGAGAGAGAAAAAGAGCAGCGCTAGGAGCTATGATCCTTGGGTTCTTGGGAGCAGCAGG  
AAGCACTATGGGCGCAGCGTCAATAACGCTGACGGTACAGGCCAGACAATTGTTGTCTGGTATAGTGCAACAG  
CAAAGCAATTTGCTGAAGGCTATAAATGCGCAACAGCATATGTTGCAACTCACGGTCTGGGGCATT

>EF694036

TTTTATAGGCCTGATGGTAATTCAAGCACAGACATCATAATCCTATGCAGAATAAAACAAATTATAAACATGT  
GGCAGGAGGTAGGACAAGCAATGTATAACCCTCCCATTCAGGAAACATAACATGTAGATCAAATATCACAGG  
ACTACTATTGTTACGTGATGGAGGAACAGGAAATACTACAGATAATAAAACAGAAATATTCAGACCTGGAGGA  
GGAGATATGAGGGACAATTGGAGAAGTGAATTATATAAATATAAAGTGGTAGAGATTAAACCATTGGGGATAG  
CACCCACTACAGCAAAAAGGAGAGTGGTGGAGAGAGAAAAAGAGCAGTGGGAATAGGAGCTGTGTTCTTGG  
GTTCTTGGGAGCAGCAGGAAGCACTATGGGCGCGGCGTCAATAACGCTGACGGTACAGGCCAGACAACCTGTTG  
TCTGGTATAGTGCAACAGCAAAGCAATTTGCTGAGGGCTATAGAGGCGCAACAGCATCTGTTGCAACTCACGG  
TCTGGGGCATT

>AY945738

AACTATACAAACAATACATCAGAGAACATCACACTCCCATGCAGAATAAAACAAATTATAAATATGTGGCAGG  
GGGTAGGACAAGCAATATATGCCCCCTCCCATTAAGGGGAAGATAATATGTAAATCAAATATCACAGGGCTACT  
GCTGACACGTGATGGAGGCAATACAAATAACACAAATAACACAGAAATATTCAGACCTGCAGGAGGAGATATG  
AAGGACAATTGGAGAAGTGAATTATATAAATACAAAGTGGTAGAAATTAACCATTAGGAGTAGCACCCACCA  
AGGCAAAAAGGAGAGTGGTGGAGAGAGAAAAAGAGCAGTGGGAATAGGAGCTGCGTTCCTTGGGTTCTTGAG  
TGCAGCAGGAAGCACTATGGGCGCAGCGTCAATAACGCTGACGGTACAGGCCAGACAATTATTGTCTGGTATA  
GTGCAACAGCAAAGCAATTTGCTGAGGGCTATAGAGGCGCAACAGCATATGTTGCAACTCACGGTCTGGGGCA  
TT

>KC894074

TTTTACAAAACAGAGTTTAATAGTACAACAAATTCAACCATCACACTCCAATGTAGAATAAAACAAATTATAA  
ACATGTGGCAAGGGGTAGGGCGGGCAATGTATGCCCCCTCCCATTTGAAGGAAACATAACATGTAAATCAAACAT  
CACAGGACTACTATTGACACGTGATGGAGGAACAAATGACAGTATGACAGAGACATTCAGACCTGGAGGAGGA  
GATATGAGGGATAATTGGAGAAGTGAATTATATAAATATAAAGTGGTAGAAATTAAGCCATTAGGAGTAGCAC  
CCTGAGGGCAAAAAGGAGAGTGGTGGAGAGAGAAAAAGAGCATTGACACTAGGAGCTTTGTTCTTGGGTT  
CTTGGGAACAGCAGGAAGCACTATGGGCGCGGCGTCAATAACGCTGACGGTACAGGCCAGACAATTGTTGTCT  
GGTATAGTGCAACAGCAGAGCAATCTGCTGAAGGCTATAGAGGCGCAACAGCATCTGTTGCAACTCACGGTCT  
GGGGCATA

>KC894086

AGCTACATGATTAATGATACAGAAAGCACTAATAAAAAGTGCAATTCAACCATCATACTCCCATGCAGAATAA  
AACAAATTATAAACATGTGGCAGGGGGTAGGACGAGCAATGTATGCCCCCTCCCATTCAGGAAACCATAACATG  
CAACTCAAATATCACAGGATTACTATTGACCCATGATGGAGACCCTAATAGCAATGGCACAGAGATATTCAGA  
CCTGGAGGAGGAATATGAAGGACAATTGGAGAAGTGAATTATATAAATATAAAGTGGTAGAAATTAAGCCAT  
TAGGAATAGCACCCACTAATGCAAGAAGGAGAGTGGTGGAGAGAGGAAAAAGAGCAGTGGGAATAGGAGCTGT  
GTTCTTGGGTTCTTGGGAGCAGCAGGAAGCACTATGGGCGCGGCGTCAATAACGCTGACGGTACAAGCCAGA  
CAACTGTTGTCTGGTATAGTGCAACAGCAAAGCAATTTGCTGAGGGCTATAGAGGCGCAACAGCATATGTTGC  
AACTCACGGTCTGGGGCATT

>KC894092

AATTATACAGCAAGTACAAATAATTCAAGTGAGACCATCACACTCCCATGCAGAATCAAACAAATTATAAGAA  
TGTGGCAGGGGGTAGGGCAAGCAATGTATGCCCCCTCCCATTCAGGAAACATAACATGTACATCAAACATCAC  
AGGAATATTATTGGTACGTGATGGAGGAGACAATAATAGCACAAAAGAGATATTCAGACCTGGAGGAGGAGAT  
ATGAGGGACAATTGGAGAAGTGAATTATACAAATATAAAGTAGTAGAAATTAAGCCATTGGGAATAGCTCCCA  
CTGGAGCAAAAAGGAGAGTGGTGGAGAGAGAAAAAGAGCAGTAGGAATAGGAGCTGTGCTCCTTGGGTTCTT  
GGGAGCAGCAGGAAGCACTATGGGCGCAGCGTCAATAACGCTGACGGTACAGGCCAGACAATTGTTGTCTGGT

ATAGTGCAACAGCAAAGCAATTTGCTGAGGGCTATAGAGGCGCAACAGCACATGTTGCAACTCACTGTCTGGG  
GCATT

>KC862923

AATTATACCTTTAATGGTACAGAGCTGTTGAATAGTACCTCAAATACCACAGAGATCATCACACTCCCATGCA  
GAATAAAACAAATTATAAACATGTGGCAGAGGGTAGGACAAGCAATGTATGCCCCCTCCCATTAAGGAAACAT  
AACATGTATATCCAATATCACAGGACTACTGCTGACACGTGATGGAGGAGGGGACAAAAATGGCAAAGAGAAT  
AAAACAGAGACATTAGACCTGGAGGAGGAAATATGAGGGATAATTGGAGAAGTGAACATATACAAATATAAAG  
TGGTAGAAATTAAGCCATTAGGAATAGCACCCACTAAGGC AAAAAGGAGAGTGGTGGAGAGAGAAAAAGAGC  
AGTGGGAATAGGAGCTGTGTTCTTGGGTTCTTGGGGGCAGCAGGAAGCACTATGGGCGCAGCATCAATAACG  
CTGACGGTACAGGCCAGACAATTATTGTCTGGTATAGTGCAACAGCAAAGCAATTTGCTGAGGGCTATAGAGG  
CGCAACAGCATATGTTGCAACTCACAGTCTGGGGCATA

>KC894103

TACTATCCTAATAATACAGGAAGTAATTCAACAGACAACATCATCACACTTCCATGCAGAATAAAACAAATTA  
TAAATATGTGGCAGGAAGTAGGAAGAGCAATATATGCCCCCTCCCATTTGAAGGAAACATAACATGCACATCAAA  
TATCACAGGACTACTATTGGTACGTGATGGAGGCACTGATAATAGCACAAATAACACAGAGACATTAGACCT  
GGAGGAGGAGATATGAGGGACAATTGGAGGAGTGAATTATATAAATATAAAGTGGTAGAGATTAAGCCATTAG  
GAGTAGCACCCACTGAGTCAAAAAGGAGAGTGGTGGAGAGACAAAAAGAGCAGTGGGAATGGGAGCTGTGAT  
CTTTGGGTTCTTGGGAGCAGCAGGAAGCACTATGGGCGCGCGTCAATAACGCTGACGGTACAGGCCAGACAA  
CTGTTGTCTGGTATAGTGCAACAGCAAAGTAATTTGCTGAAGGCTATAGAGGCGCAACAGCATCTGTTGCAAC  
TCACGGTCTGGGGCATT

>KC894106

AACTATAATGATACAGGAGGGAATTCAAGCTCAAACATCAGACTCTCATGCAGAATAAAACAATTTATAAAACA  
TGTGGCAGAAAGTAGGAAGAGCAATGTATGCCCCCTCCCATTTGAAGGAAACATAACATGTAGATCAAATATCAC  
AGGACTGCTATTGGTACGAGATGGAGGTATCAGTAGCACCACCGAGACATTAGACCTGGAGGAGGAAATATG  
AAGGACAATTGGAGAAGTGAATTATATAAATATAAAGTAGTAGAAATTAAGCCATTAGGAATAGCACCCACTA  
AAGCAAAAAGGAGAGTGGTGGAGAGAGAAAAAGAGCAGTGGGAATAGGAGCTGTGTTCTTGGGTTCTTGGG  
AGCAGCCGGAAGCACTATGGGCGCGCGTCAATAACGCTGACGGTACAGGCCAGACAACCTGTTGTCTGGTATA  
GTGCAACAGCAAAGCAATTTGCTGAGGGCCATAGAGGCGCAACAGCATATGTTGCAACTCACAGTCTGGGGCA  
TT

>HM070477

AATTACAGTGGGAATGGTACCATCACCATACCATGCAGAATAAAACAAATTATAAATATGTGGCAGGAGGTAG  
GAAAGGCAATATATGCCCCCTCCCATTTGCAGGAAACATAACATGTAAATCAAATATCACAGGACTACTACTGAC  
ACGTGATGGAGGACAAGGACCAGATAAAGATAACACAACAGAGACATTAGACCTGGAGGAGGAGACATGAGG  
GACAAATTGGAGAAGTGAATTATATAAATATAAAGTAGTAGAAATTAAGCCATTGGGAATAGCACCCACTACGG  
CAAAAAGAAGAGTGGTGGAGAGAGAAAAAGAGCAGTGGGAATAGGAGCTGTGTTCTTGGGTTCTTGGGAGC  
AGCAGGAAGCACTATGGGCGCAGCGTCAATAACGCTGACGGTACAGGCCAGACAACCTGTTGTTTGGCATAGTG  
CAACAGCAAAGCAATTTGCTGAGAGCCATAGAGGCGCAACAGCATATGTTGCAACTCACAGTCTGGGGCATT

>HM070526

TTTCAGAAATCAACAGAAGATAATTCAACCAACATCATCACACTCCCATGCAAAAATAAAACAAATTATAAGAA  
TGTGGCAGAGGGTAGGGCAAGCAATGTATGCCCCCTCCCATTTGAAGGAAACATAACATGTAATTCACAAATCAC  
AGGAATACTGTTGACAAGGGATGGAGGGAATAATGGGAATAATGAAGAAAGTGAGACATTAGGCCTGGAGGA  
GGAGATATGAGGGACAATTGGAGAAGTGAATTATATAAGTACAAAGTGGTAGAAGTTAAGCCATTGGGAATAG  
CACCCACTGGGGCAAAAAGGAGAGTGGTGGACAGAGACAGAGAAAAAGAGCAGTAGGAATGGGAGCTGTGTT  
CCTTGGGTTCTTGGGAGCAGCAGGAAGCACTATGGGCGCGCGTCAATAACGCTGACGGTACAGGCCAGACAA  
CTGTTGTCTGGCATAGTGCAACAGCAAAGCAATTTGCTGAAGGCTATAGAGGCGCAACAGCATCTGTTGCAAC  
TCACAGTCTGGGGCATT

>HQ615982

TACTATCCTAATAGTACTGATACAAACAATACAGGAAGTAACCTCAAGCTTAATGATCACAATCCCATGCAGAA  
TAAACAAATTAATAACATGTGGCAGGGGGTAGGAAGAGCAATATATGCCTCTCCCGTTGCAGGAAACATAAC  
GTGTGTATCAAAAATCACAGGACTCCTATTGACACGTGATGGAGGTACAGATAATAATATCACAGAGATATTC  
AGACCTGGAGGAGGAGATATGAAGGACAATTGGAGGAGTGAATTATATAAATATAAAGTGGTAGAAATTAAGC  
CATTAGGAATAGCACCCACTCCGCAAAAAGGAGAGTGGTGGAGAGAGAAAAAGAGCAGTGGGAGTAGTAGG  
AGCTATGATCCTTGGGTTCTTGGGAACAGCAGGAAGCACTATGGGCGCGCGCCGTGACGCTGACGGTACAG  
GCCAGACAACCTGTTGTCTGGTATAGTGCAACAGCAAAGCAATTTGCTGAGGGCTATAGAGGCGCAACAACACA  
TGTTGCAACTCACGGTCTGGGGCATT

>KC149493

AATTACACATTTAATAATATAAGTAAGAATGCAACCATCAAACCTCCATGCAGAATAAAACAAATTATTAACA  
TGTGGCAGGAGGTAGGACGAGCAATGTATGCTCCTCCCATTTGAAGGAAACATAACATGTAAATCAAATATCAC  
AGGACTACTACTGGTACGTGATGGAGGCCAAGTACTGAGAATGGCACAACACAACCTGCTGAGGAGATATTC  
AGGCCTGGAGGAGGAAATATGAAAGACAATTGGAGAAGTGAATTATATAAATATAAAGTGGTAGAAATTAAGC

CATTGGGAATAGCACCCACTAGAGCAAAAAGGAGAGTGGTGGAGAGAGAAAAAGAGCAGTGGGAATAGGAGC  
TGTGTTCTTTGGGTTCTTGGGAGCAGCAGGAAGCACTATGGGCGCGGCGTCAATAACGCTGACGGTACAGGCC  
AGACAATTGTTGTCTGGTATAGTGCAACAGCAAAGCAATTTGCTGAGGGCTATAGAGGCGCAACAGCATATGT  
TGCAGCTCACGGTCTGGGGCATT

>KY112254

ACCTACAATATTACTAATAGTACTAGTGCAGATTTAAATTCAACCATCACACTCCCATTGCAGAATAAAGCAAA  
TTATAAACATGTGGCAGGAAGTAGGACGAGCAATGTATGCCCCCTCCCATTTGAAGGAAACATAACATGTAAATC  
AAATATCACAGGAATACTATTGGTACGTGATGGAGGAGACAACACATCTGAGACATTCAGACCTGGAGGAGGA  
GATATGAGAGATAATTGGAGAAGTGAATTATATAAAATATAAAGTGGTAGAAATTAAGCCATTAGGAATAGCAC  
CCACTAAGGCAAAAAGAAGAGTGGTGGAGAGGAGGGAAAAAGAGCAGTGGGAATAGGAGCTGTGTTCTTTGG  
GTTCTTGGGGGCGAGCAGGAAGCACTATGGGCGCGGCGTCAATAACGCTGACGGTACAGGCCAGACAATTATTG  
TCTGGTATAGTGCAACAGCAAAACAATTTGCTGAGGGCTATAGAGGCGCAACAGCATATGTTGCAACTCACAG  
TCTGGGGCATT

>KY112386

ACCTATAATAGTACAGAAAGTGAGTTAGATGCAAAACAGCACAAAGGAAACATCACACTCCCATTGCAGAATAA  
AACAAATTATAAACATGTGGCAGGAAGTAGGAAAAGCAATGTATGCCCCCTCCCATTTGCAGGAAACATAACATG  
TAAATCAAACATCACAGGAATACTATTGGTACGTGATGGAGGAAACACAGATAACACATCTGAGACATTCAGA  
CCTGGAGGAGGAGATATGAAAGACAATTGGAGAAGTGAATTATATAAAATATAAAGTGGTAGAAATTAACCAT  
TAGGACTAGCACCCACCAAGGCAAAAAGAAGAGTGGTGGAGGGGAGAGAAAAAGAGCAGTGGGAATAGGAGC  
TGTGTTCTTTGGGTTCTTGGGGGCTGCAGGAAGCACTATGGGCGCAGCGTCAATAACGCTGACGGTACAGGCC  
AGACAATTATTGTCTGGTATAGTGCAACAGCAAAGCAATTTGCTGAGAGCTATAGAGGCGCAACAGCATATGT  
TGCAACTCACGGTCTGGGGCATT

>HQ595814

AATCATACAGACATCATCACACTCCAATGCAGAATAAAACAATTTATAAACATGTGGCAGAAGGTAGGAAGAG  
CAATGTATGCCAATCCCATTTGCAGGAAACATAACATGTAGATCAAATATCACAGGACTACTATTGACACGTGA  
TGGAGGTGTTAGAGGGAATACAACAAATAATGAGACTGAGACAGAGACATTCAGACCTGGAGGAGGAGATATG  
AGGGATAATTGGAGAAGTGAATTGTATAAAATATAAAGTGGTGGAAATTAAGCCATTGGGAATAGCACCCACTA  
CGGCAAAAAGGAGAGTGGTGGAGAGAGAGAAAAGAGCAGTGGGAATAGGAGCTGTATTCCTTGGGTTCTTAGG  
AGCAGCAGGAAGCACTATGGGCGCGGCGTCAATAACGCTGACGGTACAGGCCAGACAACACTACTGTCTGGTATA  
GTGCAACAGCAAAGCAATTTGCTGAGAGCTATAGAGGCGCAACAGCATATGTTGCAACTCACGGTCTGGGGCA  
TT

>KC186976

ACCTATGGGGATAATGATACAAATGATAATGCAAATACAACCTAATGCAAATAGAACTATCATACTCCAATGCA  
GAATAAAACAAATTATAAACATGTGGCAAGAGGTAGGAAGGGCAATGTATGCCCCCTCCCATTTGCAGGAAACAT  
AACATGTAAATCAAATATCACAGGACTACTATTGACATGGGATGGAGGAATTAATAATAGGACAAATGAGACA  
TTCAGACCTGGAGGAGGAGATATGAGGGACAATTGGAGAAGTGAATTATATAAAATATAAAGTGGTAGAAATTA  
AACCATTAGGGATAGCACCCAAATAAGACAAAAAGGAGAGTGGTGGAGAGAGAAAAAGAGCAGTGGGAATAGG  
AGCTGTGTTCTTGGGTTCTTGGGAGTAGCCGGAAGCACTATGGGCGCAGCGTCAATAGCGCTGACGGGACAA  
GCCAGACAATTACTGTCTGGTATAGTGCAACAGCAAAGCAATTTGCTGAGAGCTATAGAGGCGCAACAGCATA  
TGTTGCAACTCACGGTCTGGGGCATT

>KC187128

AATTACACGGCTAATAGTACAGAAAGTACTTCAAATTCAACCAACATCACAAATCCAATGTAGAATAAAACAGA  
TTATAAACCTGTGGCAGGGGGTAGGACGAGCAATGTATGCCCCCTCCCATTTGCAGGAAATATAACATGTAACTC  
AAACATCACAGGACTACTATTGACACGTGATGGAGGAAAAGAAGGAGAAAATAATAACAGAGATATTTCAGG  
CCTGCAGGAGGAAATATGAAGGACAATTGGAGAAGTGAATTATATAAAATATAAAGTGGTAGAAATTAAGCCAT  
TAGGAATAGCACCCACTAGTGCAATCAAGGAGAGTGGTGCAGAGAGAAAAAGAGCAGTGGGACTGGGAGCCAT  
GTTCTTGGGTTCTTGGGAGCAGCAGGAAGCACTATGGGCGCAGCATCAATAACGCTGACGGTACAGGCCAGA  
CAATTATTGTCTGGTATAGTGCAACAGCAAAGCAATTTGCTGAGGGCCATAGAGGCGCAACAGCATATGTTGC  
AACTCACGGTCTGGGGCATA

>KC187665

TACTATCCTAATGGTACAAGAAGTAATTCTTCAAACCTTAAACCCAAACATCACGCTTCCATGCAGAATAAAAC  
AAATTATAAACAGGTGGCAGGAGGTAGGAAGAGCAATGTATGCTCCTCCCATTTGCAGGAAACATAACATGTAA  
CTCAAGTATCACAGGATTATTATTGACACGTGATGGAGGAAAAATAATAATGGAACAAATGATACAGAGACA  
TTCAGACCTGGAGGAGGAAATATGAGGGACAATTGGAGAAGTGAATTATATAAAATATAAAGTGGTAGAAATCA  
GGCCATTAGGAATAGCACCCACTGGTGCAAAAAGGAGAGTGGTGGAGAGAGAGAAAAAGAGCAGTGGGAATAGG  
AGCTGTGTTCTTGGGTTCTTGGGGACAGCAGGAAGCACTATGGGCGCAGCGGCAGTGACGCTGACGGTACAG  
GTCAGACAACCTATTGTCTGGTATAGTGCAACAGCAAAGCAATTTGCTGAGAGCTATAGAGGCGCAACAGCATA  
TGTTGCAACTCACAGTCTGGGGCATT

>KC186377

AACTACACCAACACCACACTCACACTCCAATGCAGAATAAGACAAATTGTAAACATGTGGCAAGGGGTAGGAC  
GAGCAATGTATGCCCCCTCCCATTCAGGAAACATAACATGTAAATCAAATATCACAGGACTACTATTGACACG  
TGATGGAGGAAAAAATAATGGTACTAATAACACAGAGATATTCAGACCTGGAGGAGGAGATATGAGGAACAAT  
TGGAGAAGTGAATTATATAAATATAAAGTGGTAGAAATTAAGCCATTGGGAATAGCACCCACTAAAGCAAAAA  
GGAGAGTGGTGGAGAGAGAAAAAGAGCAGTGGGAATAGGAGCTGTGTTTCCTTGGGTTCTTGGGAGCAGCAGG  
AAGCACTATGGGCGCGGCGTCAATAACGCTGACGGTACAAGCCAGACAACCTATTGTCTGGTATAGTGCAACAG  
CAAAGCAATTTGCTGAGGGCTATAGAGGCGCAACAGCATATGTTGCAACTCACGGTCTGGGGCATT

>KC186388

AATTATACAGATAATTCAACCATCACACTCCAATGCAGAATAAAGCAAATTATAAACATGTGGCAGGAGGTAG  
GAAAAGCAATGTATGCCCCCTCCCATTCAGGAAACATAACATGTGTATCAAGTATTACAGGAATACTATTGAC  
ACGTGATGGAGGAGATATAAATAGTAGCATAGAGACATTCAGGCCTGGAGGAGGAGATATGAGAGACAATTGG  
AGAAGTGAATTATATAAATATAAAGTGGTAGAAGTTAAGCCATTGGGAATAGCACCCACGGGAGCAAAAAAGGC  
GAGTGGTGGAAAGAGAGAGAAAGAGCAGTGGGAATAGGAGCTGTGTTTCCTTGGAACTCTTGGGAGCGGCAGGAAG  
CACTATGGGCGCGGCGTCAATAACGCTGACGGTACAGGCCAGACAATTGTTGTCTGGTATAGTGCAACAGCAA  
AGTAATTTGCTGAGAGCTATAGAGGCGCAACAGCATATGTTGCAACTCACAGTCTGGGGCATT

>KP109525

TTTCATTCCAATGATACATTAAACAGGAGGTAACCTTAACCGGGAACATCACACTCCCATGTAGAATAAAACAAA  
TTATAAACATGTGGCAGGAGGTAGGAAGAGCAATGTATGCCCCCTCCTATTGCAGGAAACATAACATGTAAATC  
AAATATCACAGGACTACTCTTGACACGTGATGGAGGAAAATGGAAATGGCAGCAATAACGAGACATTTAGGCCT  
GGAGGAGGAGACATGAGGGACAATTGGAGAAGTGAATTATACAAATACAAAGTGGTAGAAATTAACCATTAG  
GAATAGCACCCACTAAGGCAAAAAAGGAGAGTGGTGGAGAGAGAAAAAGAGCAGTGGGTCTAGGAGCTATGTT  
CCTTGGGTTCTTGGGAGCGGCAGGAAGCACTATGGGCGCGGCGTCACTAACGCTGACGGTACAGGCCAGACAA  
TTATTGTCTGGTATAGTGCAACAGCAAAGCAATTTGCTGAGGGCTATAGAGGCGCAACAGCATTGTTTGCAAC  
TCACAGTCTGGGGCATT

>KC186502

AATTATACATTAAACAAGACAGAAGGTAACATCACACTCCCATGCAAAATAAGACAAATTATTAACCTGTGGC  
AGGAGGTAGGACGAGCAATGTATGCCCCCTCCCATTTGAAGGAAACATAACATGTAGATCAGACATCACAGGATT  
ACTATTGACACGTGATGGAGGAGAAAATAGTACAAGGAATGAGACATTCAGACCTGGAGGAGGAGATATGAGG  
GACAATTGGAGAAGTGAATTATATAAATATAAAGTAGTAGAAATTAAGCCATTAGGAATAGCACCCACTGAGG  
CAAGAAGGAGAGTGGTGGAGAGAGAAAAAGAGCAATTGGAATAGGAGCTGTGTTTCCTTGGGTTCTTGGGAGC  
AGCAGGAAGCACTATGGGCGCAGCATCAATAACGCTGACGGTACAGGCCAGACAATTATTGTCTGGTATAGTG  
CAACAGCAAAGCAATTTGCTGAGGGCTATAGAGGCGCAACAGCATATGTTGCAACTCACAGTCTGGGGCATT

>MF500628

AATCATACAAACAGTAATAGTACAAGTAATAGTACAAGTAATCCAAATGCAACCATCACCATCCAATGCAGAA  
TAAACAAATTATAAACATGTGGCAGGGGGTAGGACAAGCAATATATGCCCCCTCCCATTAAGGAAACATTAC  
ATGTAGATCAAATATCACAGGACTACTATTGACACGTGATGGAGGTAATAATAATACTAATGAGACATTCAGA  
CCTGGAGGAGGAGATATGAGAGACAATTGGAGAAGTGAATTATATAAGTATAAAGTAGTAGAAATTAAGCCAC  
TAGGAGTAGCACCCACCAAGGCGAAAAGACGAGTGGTGGAGAGAGAAAAAGAGCAGTGGGAATAGGAGCTGT  
ACTCCTTGGGTTCTTGGGCGCAGCAGGAAGCACTATGGGCGCGGCGTCGCTGACGCTGACGGTACAAGCCAGA  
CAATTATTGTCTGGTATAGTGCAACAGCAAACAATTTGCTGAGGGCTATAGAGGCGCAACAGCACATGTTGC  
AACTCACAGTCTGGGGCATT

>KC863183

TGCTATACATCAACACTGTTTAATAGTACATACAATGCTGAGTATAATTCAAACCTCAACCAATTCAAGCTCAA  
CCATCACACTCCAATGCAGAATAAAGCAAATTATAAACATGTGGCAGGGGGTAGGACGAGCAATATATGCCCC  
TCCCATTTGAAGGAAACATAACATGTGAGTCAAATATCACAGGACTATTATTGACACGGGATGGAGGAAAAGAT  
GGAAATAACACCGAGATATTAGACCTGGAGGAGGAGATATGAGGGACAATTGGAGAAGTGAATTATACAAAT  
ATAAAGTGGTAGAAATTAAGCCATTAGGAATAGCACCCACTAAGGCCAAAAGGAGAGTGGTGGAGAGAGAAAA  
AAGAGCAGTAGGAATAGGAGCTGTGTTTCCTTGGGTTCTTGGGAGCAGCAGGAAGCACTATGGGCGCAGCGTCA  
ATAACGCTGACGGTACAGGCCAGACAATTGTTGTCTGGTATAGTGCAACAGCAAAGCAATTTGCTGAGAGCTA  
TAGAGGCGCAACAGCATATGTTGCAACTCACGGTCTGGGGCATT

>KJ158421

AATTATACAGAAATAGTACAGGAAATGATTCAAAAGTAGTCATTACGATCCCATGCAGAATAAAACAAATTA  
TAAACATGTGGCAGGGAGTAGGGCGAGCAATGTATGCCCCCTCCCATTCAGGAAACATAACTTGTAAATCCAA  
TATCACAGGACTACTATTGGTACCTGATGTAGGAGAAGATGGAGGGAACACATTAAATACTACAGAAGAGACA  
TTCAGACCTGTAGGAGGAAATATGAGGGACAATTGGAGAAGTGAATTATACAAATATAAAGTGGTAGAAATTA  
AGCCATTGGGGGTAGCACCCACTGAAGCAAGAAGGAGAGTGGTGGAAAGAGAAAAAGAGCAGTGGGAGTAGG  
AGCTATGTTTCCTTGGGTTCTTGGGAGCAGCAGGAAGCACTATGGGCGCGGCGTCACTAATGCTGACGGTACAG  
GCCAGACAATTGTTGTCTGGTATAGTGCAACAGCAAAGCAATTTGCTGAGAGCTATAGAGGCGCAACAGCATC  
TGTTGCAACTCACAGTCTGGGGCATT

>KJ158424

TGCTATACATCAAGACTGTTTAAATGGAACATATAAGGATACTGATACCCTAAATAATACAAGCAGTAACGCAA  
TATCAAACATCACAATCCCATGCAGAATAAAACAGTGTGTGAACATGTGGCAACAGGTAGGACAGGGGGGGA  
TGCCCCCTCCCATTGAAGGAGCACGTGAAGCTGCTATCAAATACAAAGGACTACGATTGGTACGTGATGGAGGA  
GAAGACAAAAATAATACAGACAGCAATGAGACAGAGACATTGAGACCTGGGGGAGGAGATATGAGGGACAATT  
GGAGAAGTGAATTATATAAAATATAAAGTGGTGGAAATTAAGCCATTGGGAGTAGCACCCACTGCAGCAAGAAG  
GAGAGTGGTGGAAAGAGAAAAAGAGCAGTGGGAATAGGAGCTGTGTTCTTGGGTCTTGGGAGCAGCAGGA  
AGCACTATGGGCGCGGCATCAATAACGCTGACGGTACAGGCCAGACAATTGTTGTCTGGTATAGTGCAACAGC  
AAAACAATTTGCTGAGGGCTATAGAGGCGCAACAGCATCTGTTGCAACTCACGGTCTGGGGCATT

>KJ158434

AATTATACAAGAAATAGTACAGGAAATGATTCAAACGTAGTCATTACGATCCCATGCAGAATAAAACAAATTA  
TAAACATGTGGCAGGGAGTAGGGCGAGCAATGTATGCCCCCTCCCATTGCAGGAGACATAACATGTATCTCTAA  
GATCACAGGATTACTATTGGTACGTGATGGGGGAGAAAAACATACAAAGAAATAATGATGCAGGGACAGAGACA  
TTCAGACCTGGAGGAGGAGATATGAGGAACAATTGGAGAAGTGAATTATATAAAATATAAAGTGGTAGAAATTA  
AGCCATTGGGGGTAGCACCCACTAAAGCAAAAAGGAGAGTGGTGGAGAGAGAAAAAGAGCAATGGGAATAGG  
AGCTTTGTTTCCTTGGGTCTTGGGAACAGCAGGAAGCACTATGGGCGCGGCGTCAATAACGCTGACGGTACAG  
GCCAGACAATTGTTGTCTGGTATAGTGCAACAGCAAAATAATTTGCTGAAGGCTATAGAGGCGCAACAGCATC  
TGTTGCAACTCACGGTCTGGGGCATT

>KJ158438

GTTTATAATGGTACAGAAAGTAATAGTAACAGTAATAGTAATGCAACCATCACCCCTCCCATGCAAAATAAAAC  
AAATTATAAACATGTGGCAGGAGGTAGGACGGGCAATGTATGCCCCCTCCTATTGAAGGAAACATAACATGTAA  
CTCAAATATCACAGGATTACTCTTGGTACGTGATGGAGGCAATGAAAATAATAACAATAATAAATTAACCTTCGCA  
GAGACATTCAGACCAGGAGGAGGAGATATGAGGGACAATTGGAGAAGTGAATTATATAAAATATAAAGTAGTAG  
AAATTAAGCCATTGGGAGTAGCACCCACTGCAGCAAAAAGGAGAGTGGTGGAGAGAGAAAAAGAGCGCAGCG  
GCTAGGAGCTGTGTTCTTGGGTCTTGGGAGCAGCAGGAAGCACTATGGGCGCGGCGTCAATAACGCTGACG  
GTACAAGCTAGACAATTGTTGTCTGGTATAGTGCAACAGCAAAAGCAATTTGCTGAGGGCTATCGAGGCGCAAC  
AGCATCTGTTGCAACTCACAGTCTGGGGCATT

>KJ158439

ACCTACATTAATGAAACAAATAGTAATGCTACATCCACCACCCACCCCTGCAGAATAAAACAAATTATAAACA  
TGTGGCAAGAGGTAGGACGAGCAATGTATGCCCCCTCCCATTCAGGAAATATAACATGTAAATCAAATATCAC  
AGGAATACTATTGGTACGGGATGGAGGAAACAATGATAATGATGATAATGATAATGATACAGAGACATTGAGA  
CCTGGAGGAGGAGACATGAAGGACAATTGGAGAAGTGAATTATATAAAATATAAAGTGGTAGAAATTAAGCCAT  
TGGGATTAGCACCCACTACAGCAAAAAGGAGAGTGGTGGAGAGAGAAAAAGAGCAGTAGGAACCTTAGGAGC  
TGTGTTCTTGGGTCTTGTCTAGCAGCCGGAAGCACTATGGGCGCGGCGTCAATAACGCTGACGGTACAGGCC  
AGACAATTGTTGTCTGGTATAGTGCAACAGCAAAAGCAATTTGCTGAGGGCTATAGAGGCGCAACAGCATCTGT  
TGCAACTCACGGTCTGGGGCATT

>KJ541846

TTTTATGATAGTACGAGAAAGGCAAACATCACAGGAAATCAACCATCACACTCCCATGCAGAATAAAGCAAA  
TTATAAACATGTGGCAGGAGGTAGGACGAGCAATGTATGCTCCTCCCATTCAGGAAACATAACATGTAGATC  
AAATATCACAGGACTACTATTGGTACGTGATGGAGGAGAAGATAACACCAAATCAGAGACCTGGAAGACTGAA  
ACATTTAGACCGGGAGGAGGAGATATGAGGGACAATTGGAGAAGTGAATTATATAAAATATAAAGTGGTAGAAG  
TTGAGCCAGTGGGAATAGCACCCACTAAAGCAAAAAGGAGAGTGGTGGAGAGAGAAAAAGAGCAGTAGGAAT  
GGGAGCTTTGTTCTTGGGTCTTGGGAGCAGCAGGAAGCACTATGGGCGCGGCGTCAATAACGCTGACGGTA  
CAGGCCAGACAATTGCTGTCTGGTATAGTGCAACAGCAAAAGCAATTTGCTGAGAGCTATAGAGGCGCAACAGC  
ATCTGTTGCAACTCACAGTCTGGGGCATT

>KP411831

TCTTATAATAGTACCTCTAATACTACTTGCTCGACTAATAATACTACAACCTTCAACCTTTACCCTCCAATGCA  
GAAGAATACATATTATAATCATGTGCCTTGAACCAGGACTAGCAATAGATGCCTCTCCCACTGCCGGAGAAAT  
AATCAGTAAATCCAATACCACTGACCTACTATTGACACGTGCAGGAGGATCGAATAGAACAGAGATATTCAGA  
CCTGGAGGAGGAGATATGAGGGATAATTGGAGAAGTGAATTATATAAAATATAAAGTGGTAGAAATTAACCAT  
TAGGGATAGCACCCACTAAGGCAAAAAGGAGAGTGGTGGAGAGAGAAAAAGAGCAGTGGGAATAGGAGCTGT  
GTTCTTGGGTCTTGGGAGTAGCAGGAAGCACTATGGGCGCAGCATCAATAACGCTGACGGTACAGGCCAGG  
CAATTGTTGTCTGGTATAGTGCAACAGCAAAAGCAATTTGCTGAGGGCTATAGAGGCGCAACAGCATATGTTGC  
AACTCACGGTCTGGGGCATT

>MF373158

ACCTACATGTCTAACAGTACTAACAGTATTAATAGTACTGAATCCATCACACTCAAATGCAAAATAAAACAAA  
TTATAAACATGTGGCAAGGGGTAGGACGAGCAATGTATGCCCCCTCCCGTTGAAGGAAACATAACATGTACCTC  
AAATATTACAGGACTACTATTGACACGTGATGGAGGAGGAAATGGCACAGAGGAGATATTCAGACCGGGAGGA  
GGAAATATGAGGGACAATTGGAGAAGTGAATTATATAAAATATAAAGTGGTAGAAGTTAAACCATTAGGAGTAG  
CACCCACTAAAGCAAAAAGGAGAGTGGTGGAAAGAGAAAAAGAACAGTACTAGGAGCTGCATTCTTGGGT  
CTTGGGAACAGCAGGAAGCACTATGGGCGCAGCGTCACTAACGCTGACGGTACAGGCCAGAAATGTTGTCT

GGTATAGTGCAACAGCAAAGTAATTTGCTGAGGGCTATAGAGGCGCAACAGCATATGTTGCAACTCACGGTCT  
GGGGCATT

>MF373164

AACTACACAATAATCCCATGTAGAATAAAACAAATTATAAATATGTGGCAGGCGGTAGGACGAGCAATGTATG  
CCCCCTCCCATTCGAGGAAACATAACGTGTGCATCAAACATCACAGGACTACTATTGTACGTGATGGAGGAAA  
CACAAATACAAATGGCACAAGTAACACAGAGACTTTCAGACCTGGAGGAGGAGATATGAGAGACAATTGGAGA  
AGTGAATTATATAAATATAAGGTGGTAGAAATTA AACCATTAGGAATAGCACCCACTGGGGCAAAAAGGAGAG  
TGGTGGAGAGAGAAAAAGAGCAGTGGGAATAGGAGCTGTGTTCCCTTGGGTTCTTGGGAGCAGCAGGAAGCAC  
TATGGGCGCGGCGTCAGTGACGCTGACGGTACAGGCCAGACAGCTGTTGTCTGGTATAGTGCAACAGCAAAC  
AACTTGCTGAAAGCTATAGAGGCGCAACAGCATATGTTGCAACTCACGGTCTGGGGCATT

>MF373197

AGTTATTCCGCCAATGGCAGCAATGGAAGCATTCCCCCTCATATGCCGAATTATACAAATTTTTAACATGTGGC  
AGCGGGTGGTACGAGCAATATATGCTGCTCGTATTGTAGGAAGTATAACATGTATCTCATGTATCACAGGACT  
ACTGTTGACACGTGCTGGAGGAACAAATAATGATACCACAAGAGAAATATTCAGACCTGGAGGAGGAAATATG  
AAGGACAATTGGAGAAGTGAATTATACAAATATAAAGTGGTAGAAGTTAAACCATTAGGAATAGCACCTACTG  
AGGCAAAAAGGAGAGTGGTGGGGAGAGACAAAAGAGCAGTGGGAATAGGAGCTGTGTTCCCTTGGGTTCTTGGG  
AGCAGCAGGAAGCACTATGGGCGCGGCGTCAATAACGCTGACGGTACAGGCCAGACAATTACTATCTGGTATA  
GTGCAGCAGCAAAGCAATTTGCTGAGAGCTATAGAGGCGCAACAGCATATGTTGCAACTCACAGTCTGGGGCA  
TT

>AY734556

AGCTATACAGGAAAAGATTCAAACCTCAATCATCAGAATAAGACAATTTATAAACACATGGCAGAAGGTAGGAC  
GAGCAATGTATGCCCCCTCCCATAGCAGGAAACATAACATGTAACCTCAAGCATTACAGGACTACTATTGACATG  
GGATGGAGGCAGTAGTAAAGAAA CAAGCAACACCACAGAGACATTCAGACCTTTAGGAGGAGACATGAGGGAT  
AATTGGAGACGTGAATTATATAAATATAAAGTGGTAGAAATTAAGCCATTGGGAATAGCACCCACTGGGGCAA  
AAAGGAGAGTGGTGGAGAGAGAAAAAGAGCAGTGGGACTAGGAGCTATGTTCCCTTGGGTTCTTGGGAGCAGC  
AGGAAGCACTATGGGCGCAGCGTCGATAACGCTGACGGCACAGGCCAGACAAGTGCTGTCTGGTATAGTGCAA  
CAGCAAAGCAATTTGCTGAGGGCCATAGAGGCGCAACAGCATCTGTTGCAACTCACGGTCTGGGGCATT

>KX907339

AATTATACTATAAATTCAACCATCACACTCCCATGCAGAATAAAACAAATTATAAATATGTGGCAGGGGGTAG  
GACGAGCAATGTATGCCCCCTCCCATGTGCTGGAACATAACATGCAGATCAAATATCACAGGAATACTATTGAC  
ACGTGATGGTGGTGAACAAATGATGGTAATACAAATGAAACAGGGACAAAGACATTCAAATCTAATGAAACA  
GAGACAGAGATATTCAGACCTGGAGGAGGAGATATGAGGGACAATTGGAGAAGTGAATTATATAAATATAAAG  
TGGTAGAAATTAAGCCATTAGGAATAGCACCCACCAAGGCAAAAAGGAGAGTGGTGGAGAGAGAGAAAAAGAGC  
AGTGGGAATAGGAGCTATGTTCCCTTGGGATCTTGGGAGCAGCAGGAAGCACTATGGGCGCGGCGTCAATAACG  
CTGACGGTACAGGCCAGACAATTATTGTCTGGTATAGTGCAACAGCAAAGCAATTTGCTGAGAGCTATAGAGG  
CGCAACAGCATATGTTGCAACTCACGGTCTGGGGCATT

>KX907433

TACTATCCTAATGGTACAAATTCAACCCTCATCATCCCATGTAGAATTA AACAAATTATAAACATGTGGCAGG  
GAGTAGGAAAAGCAATATATGCCTCTCCCATTCGAGGAAACATAACATGTAGATCAAATATCACAGGACTACT  
ATTGACACGTGATGGAGGAGACACAAATGATACAGAGATATTCAGACCGGCAGGAGGAGATATGAGGGATAAT  
TGGAGAAGTGAATTATATAAATATAAATAGTAGAAATTA AACCATTAGGAGTAGCACCCACTGAGGCAAAAA  
GGAGAGTGGTGAAGAGAGAAAAAGAGCAGTGACAATAGGAGCTGTATTCCCTTGGGTTCTTGGGAGCAGCAGG  
AAGCACTATGGGCGCGGCGTCAATAACGCTGACGGTACAGGCCAGACAATTACTGTCTGGTATAGTGACAGCAG  
CAAAGTAATTTGCTGAGAGCTATAGAGGCGCAACAGCATATGTTGCAACTCACAGTCTGGGGCATT

>KX907382

ATTCAAAATGGAACCACCATACTCCCATGCAGAATAAAACAAATTATAAACATGTGGCAGGAGGTAGGACGAG  
CAATGTATGCCCCCTCCCATTCGAGGAAACATAACATGTACATCAAACATCACAGGACTACTATTGACACGAGA  
TGGAGGCAAAAATAACACAGGAGGCAAAAATAACACAAATGGCATAGAGATATTCAGACCTGAAGGAGGAAAT  
ATGAGGGATAAATTGGAGAAGTGAATTATATAAATACAAGGTGGTAGAAATTAAGCCATTGGGAATAGCACCCA  
CTGAGGCAAAAAGGAGAGTGGTGGAGAGAGAGAAAAAGAGCAGTGGGAATAGGAGCTGTGTTCCCTTGGGTTCTT  
GGGAGCAGCAGGAAGCACTATGGGCGCGGCGTCAATAACGCTGACGGTACAGGCCAGACA ACTGTTGTCTGGT  
ATAGTGCAACAGCAAAGCAATTTGCTAAGAGCTATAGAGGCGCAACAGCATCTGTTGCAACTCACGGTTTGGG  
GCATT

>KX907385

AACTATAATGGTACATCAAATGACACCATCACACTCCGGTGTAGAATAAAACAAATTATAAACATGTGGCAGG  
GGGTAGGACAAGCAATGTATGCCCCCTCCCATTCGAGGAAACATAATATGTGCATCAAATATCACAGGACTACT  
ATTGACACGTGATGGAGGAGACGAAAATAGGACAGATGAGATATTCAGGCCGGAAGGAGGAAATATGAGAGAT  
AATTGGAGAAGTGAATTATATAAATATAAAGTGGTAGAAATTAAGCCATTAGGGATAGCACCCACTAAGGCAA  
AAAGGAGAGTGGTGGAGAGAGAAAAAGAGCAGTAGGAATAGGAGCTGTGTTCCCTTGGGTTCTTAGGAGCAGC

AGGAAGCACTATGGGCGCAGCATCAATAACGCTGACGGTACAGGCCAGACAATTATTGTCTGGTATAGTGCAA  
CAGCAAAGCAATTTGCTGAGGGCTATAGAGGCGCAACAGCATCTGTTGCAACTCACAGTCTGGGGCATT  
>KX907368

AACTATACAGAGTTTAAAAATATCTCAACAAACGGTACTTCTGAATTCAAACATCACACTCCCATGCAGAATAA  
AACAAATTATAAACATGTGGCAAGGGGTAGGACGAGCAATGTATGCCCCCTCCAGGGAAGGAAACATAACATG  
TGAATCGAACATCACAGGACTACTATTGACACGAGATGGAGGAAATAGTACAAAAAAGGAGATATTCAGACCT  
GGAGGAGGAGATATGAGGGATAATTGGAGAAGTGAATTATATAAGTATAAAGTGGTAGAAATTAAGCCATTAG  
GAATAGCACCCACTGAGGCAAAAAGGCGAGTGGTGGAGAGAGAGAAAAAGAGCAGTGGGAATAGGAGCTGTGTT  
CCTTGGGTTCTTAGGAGCAGCAGGAAGCACTATGGGCGCAGCGTCAATAACGCTGACGGTACAGGCCAGACAA  
TTATTGTCTGGTATAGTGCAACAGCAAAGCAATTTGCTGAGGGCTATAGAGGCGCAACAGCATATGTTGCAAC  
TCACAGTCTGGGGCATT

>KT982201

ACTCATGATACAGGAAGTAATTC AACCTCAAACATCACCCCTCCAATGCAAAATAAAACAAATTATCAACATGT  
GGCAGGAGGTAGGACGAGCAATGTATGCCCCCTCCCATTGCAGGAAACATAACATGTAGATCAAATATCACAGG  
ACTACTATTGGTACGGGATGGAGGCACAGATAATAGCACAAATAAGAGTGACCCAGAGGAGACATTTAGACCT  
GGAGGAGGAGATATGAGGGACAATTGGAGAAGTGAATTATATAAATATAAAGTGGTAGAAATTAAGCCATTAG  
GGATAGCACCAACTGAGGCAAGGAGGAGAGTGGTGCAGAGAGAAAAAAGAGCAGTGGGAATAGGAGCTCTGTT  
CCTTGGGTTCTTGGGAGCTGCAGGAAGCACTATGGGCGCGGCGTCAATAACGCTGACGGCACAGGCCAGACAA  
GTATTGTCTGGTATAGTGCAACAGCAAAGCAATTTGCTGAGAGCTATAGAGGCGCAACAGCATATGTTGCAAC  
TCACAGTCTGGGGCATT

>AY585266

GATTACAACACAACACTAACACTCCCATGCAGGATAAAACCAGATTATAAACATGTGGCAGGAGGTAGGACGAG  
CAATGTATGCTCCTCCCATTCAGGAAACATAACATGTAACCTCAAATATCACAGGACTACTATTGACACGTGA  
TGGAGGAAACAATGGAGGAAACAATGAAACATTCAGACCTGGAGGAGGAAATATGAAAGACAATTGGAGAAGT  
GAATTATACAAATATAAAGTGGTAGAGATTAAGCCATTGGGAATAGCACCCAATAAGGCAAAAAGGAGAGTGG  
TGGAGAGAGAAAAAAGAGCAGTGGGAATAGGAGCTGTGTTCTTGGGTTCTTGGGAGCAGCAGGAAGCACTAT  
GGGCGCGGCGTCAATAACGCTGACGGCACAGGCCAGACAACTGTTGTCTGGTATAGTGCAACAGCAAAGTAAT  
TTGCTGAGAGCTATAGAGGCGCAACAGCATTTGTTGCAACTCACAGTCTGGGGCATT

>AY463224

GTTCAAAGCAACGGAAGCATCATACTCCCATGCAAGATAAAACAAATTATAAACATGTGGCAGGGGGTAGGAC  
GAGCAATGTATGCCCCCTCCCATCGCAGGAAACATAACATGTAACCTCAAGTATCACAGGACTACTATTAACGAG  
GGATGGAGGCATAAGTGAGAACATGACAGAGACATTCAGACCTGGAGGGGGAAATATGAAGGACAATTGGAGA  
AGTGAATTATATAAATATAAAGTAGTAGAAATTAAGCCATTGGGAATAGCACCCACTAAGGCAAAAAGGAGAG  
TGGTGGAGAGAGAAAAAAGAGCAGCAATAGGAGCTATGTTCTTGGGTTCTTGGGAGCAGCAGGAAGCACTAT  
GGGCGTGGCGTCAATAACGCTGACGGTACAGGCCAGAAATCTGTTGTCTGGTATAGTGCAACAGCAAAGCAAT  
TTGCTGAGAGCTGTAGAAGCGCAACAACATATGTTGCAACTCACGGTCTGGGGCATT

>JX845593

GATCAAAATGATTCAACAAACATCACACTCCCATGCAGAATAAAACAAATTATAAACATGTGGCAGGAGGTGG  
GACGAGCAATGTATGCCCCCTCCCATTCAGGAAACATAACATGTACATCAAATATTACAGGACTATTATTGAC  
ACGTGATGGAGGAAACGCAACACAACGGATGGTAAGAATGACACAGAGACATTCAGACCTGGAGGAGGAAAT  
ATGAAGGACAATTGGAGAAGTGAATTATATAAATATAAAGTGGTAGAAATTAACCATTGGGAGTAGCACCCA  
CAAAGGCAAAAAGGAGAGTGGTGGAGAGAGAAAAAAGAGCAGTGGGAATGGGAGCTGTGTTCTTGGGCTCTT  
GGGAGCAGCAGGAAGCACTATGGGCGCGGCGTCAATAACGCTGACGGTACAGGCCAGACAACTGCTGTCTGGT  
ATAGTGCAACAGCAAAGCAATTTGCTGAGAGCTATAGAGGCGCAACAGCATATGTTGCAACTCACAGTCTGGG  
GCATT

>JX845600

AATCACACTCTCAATCTCACTCTCCCATGCAGAATAAAACAAATTATAAACATGTGGCAGGAGGTAGGAAGAG  
CAATGTATGCCCCCTCCCATTCAGGAAACATAACATGTAAATCAAATATCACAGGACTACTATTGACACGTGA  
TGGAGGAATAAATATTACAACAGAAATATTAGACCTGCAGGAGGAAATATGAAGGACAATTGGAGAAGTGAA  
TTATATAAATATAAAGTGGTAGAAATTAAGCCATTAGGAATAGCACCTACTAAGGCAAAAAGGAGAGTGGTGG  
ACAAAGAAAAAAGAGCAGTAGGAATAGGAGCTGTGTTCTTGGGTTCTTGGGAGCAGGAGCAAGCACTATGGG  
CGCGGCGTCAATAACGCTGACGGTACAGGCCAGACAACTGTTGTTTGGTATAGTGCAACAGCAAACAATTTG  
CTGAGAGCTATAGAGGCGCAACAGCATATGTTGCAACTCACGGTCTGGGGCATT

>AY228557

ACTTATAATAATACAGATAAATACAGATAATCCAACCCAAATCACACTCCCATGCAGAATAAAACAAATTATCA  
ACATGTGGCAGGAGGTAGGACGAGCAATATATGCCCCCTCCCATTCAGGAAACATAACATGTAAATCGAATAT  
CACAGGACTACTATTAACATGGGATGGAGGTAGTGGTGGAAACAATACAGAGACATTTAGACCAGGAGGAGGA  
GATATGAGGGACAATTGGAGAAGTGAATTATATAAATATAAAGTGGTAGAAATTAAGCCATTAGGAATAGCAC  
CCACTGAGGCAAAAAGGAGAGTGGTGGAGAGAGAAAAAAGAGCAATAGGAATAGGAGCTGTGTTCTTGGGTT  
CTTGGGAGCAGCAGGAAGCACTATGGGCGCAGCGTCAATAACGCTGACGGTACAGGCCAGACAAATGTTGTCT

GGTATAGTGCAACAGCAAAGCAATTTGCTGAGGGCTATAGAGGCGCAACAGCATCTGTTGCAGCTCACTGTCT  
GGGGCATT

>DQ275647

CTTCAAAATAATAGTACAGGAAATTCAACCATCAAAATCAAATGCAGAATAAAACAAATTATAAACATGTGGC  
AGGAGGTAGGACGAGCAATGTATGCCCTCCCATTTGCAGGAAACATAACATGTAGATCAAACATCACAGGACT  
ACTATTAGTACGTGATGGAGGCATAAACACACAGAAGAAATATTAGACCTGGAGGAGGAAATATGAAGGAC  
AATTGGAGAAGTGAATTATATAAAATATAAAGTAGTAGAAATTAAGCCATTGGGAATAGCACCCACTCCAGCAA  
AAAGGAGAGTGGTGGAGAGAGAAAAAGAGCAGTGGGAATAGGAGCTTTGTTCTTGGGTTCTTGGGAGCAGC  
AGGAAGCACTATGGGCGCAGCGTCAATGACGCTGACGGTACAGGCCAGACAAGTGTTGTCTGGTATAGTGCAA  
CAGCAAAATAATTTGCTGAAGGCTATAGAGGCGCAACAGCGTATGTTGCAACTCACAGTCTGGGGCATT

>DQ351224

TCTTATAATGCTACAGGAGATAATACAACCATCACACTGCCATGCAAAATAAAACAAATTATAAACATGTGGC  
AGACGGTAGGAAAAGCGATGTATGCCCTCCCATTTGCAGGAAACATAACATGTAAATCAAATATCACAGGACT  
ACTATTAACACGTGATGGAGGCGAACTAACAGTACGAATGACACAGAGACAGAGATATTAGACCTGGAGGA  
GGAAATATGAAGGACAATTGGAGAAGTGAATTATATAAAATACAAAGTGGTAGAAATTAAGCCATTGGGAATAG  
CACCCACTGAAGCAAAAAGGCGAGTGGTGGAGAGAGAAAAAGAGCAGTGGGAATAGGAGCTGTGCTCCTTGG  
GTTCTTGGGAGCAGCAGGAAGCACTATGGGCGCAGCGTCAATAACGCTGACGGTACAGGCCAGACAACCTGTTG  
TCTGGTATAGTGCAACAGCAAAGTAATTTGCTGAGAGCTATAGAGGCGCAACAGCATCTGTTGCAACTCACGG  
TCTGGGGCATT

>DQ369977

AGTTATAATAATAGTAAGGATAATGAGACCATCACACTCCAATGCAGAATAAAACAAATTATAAACATGTGGC  
AGAAAAGTAGGACGAGCAATGTATGCACCTCCCATTTGAAGGAAACATAACATGTAAATCAAATATCACAGGACT  
ACTATTGCTACGTGATGGAGGAAAAGAGAACAAATTCACAGAAATATTAGACCTGGAGGAGGAAATATGAAG  
GACAAATTGGAGAAGTGAATTATACAAATATAAAGTGGTAGAAATTAAGCCATTGGGAATAGCACCCACGGAGG  
CAAAAAGGAGAGTGGTGGAGAGAGAAAAAGAGCAGTAGGAATAGGAGCTGTGTTCTTGGGTTCTTGGGAGC  
AGCAGGAAGCACTATGGGCGCGCGTCAATAACGCTGACGGTACAGGCCAGACAACCTGTTGTCTGGTATAGTG  
CAACAGCAAAGCAATTTGCTGAGAGCTATAGAGGCGCAACAACATATGTTGCAACTCACGGTCTGGGGCATT

>DQ275649

ACTCAGAGTACAAACAGTACAAATTCACCATCACACTCCAATGCAGAATAAAACAAATTATAAACATGTGGC  
AGGAGGTGGGACGAGCAATGTATGCCCTCCCATTTGCAGGAAACATAACATGTAAATCAAATATCACAGGACT  
ACTATTGACACGTGATGGAGGAGGAAGAGAAGGAAATAATACAGAAGGAAATAATACAGAGACATTAGACCT  
GGAGGAGGAGATATGAGGGACAATTGGAGAAGTGAATTATATAAAATATAAAGTGGTAGAAATTAAGCCATTGG  
GAATAGCACCCACTGAGGCAAGAAGGAGAGTGGTGCAGAGAGAGAAAAGAGCAATAATGGGACTAGGAGCTGC  
GTTCTTGGGTTCTTGGGAGCAGCAGGAAGCACGATGGGCGCAGCGTCAATAACGCTGACGGTACAGGCCAGA  
CAATTATTGTCTGGTATAGTGCAACAGCAAAGCAATTTGCTGAAGGCTATAGAGGCGCAACAGCATATGTTGC  
AACTCACAGTCTGGGGCATT

>DQ396377

ATTCATAATGGGACAGGAAGTAATTCACCATCACACTTAATTGTAAAATAAAGCAAATTATAAACATGTGGC  
AGGAGGTAGGACGAGCAATGTACGCTCCTCCCATTTGCAGGAAGCATAACATGTAAATCAAGTATCACAGGACT  
ACTATTGACACGTGATGGAGGACAAGGCCAGGAAAAGGATAATGACACAGAGGTATTAGGCCTGGAGGAGGA  
AACATGAAGGACAATTGGAGAAGTGAATTATATAAAATATAAAGTGGTAGAAGTTAAACCATTTGGGAATAGCAC  
CCACTAAAGCAAAAAGGAGAGTGGTGGAGAGAGAAAAAGAGCAGTGGGAATAGGAGCTGTGTTCTTGGGTT  
CTTGGGAGTAGCAGGAAGCACTATGGGCGCGCGTCAATGACGCTGACGGTACAGGCCAGACAACCTGTTGTCT  
GGTATAGTGCAACAGCAAATAATTTGCTGAGAGCTATAGAGGCGCAACAGCATATGTTGCAACTCACGGTCT  
GGGGCATT

>DQ369990

ATTCAGAATAGTTCAACCATCACGGATAATTCAACCATCACCATCCCATGCAGGATAAAACAAATTATAAACA  
TGTGGCAGGAGGTGGGACGAGCAATGTATGCCCTCCCATTTGCAGGAAACATAACATGTAACTCAAGTATCAC  
AGGAATACTATTGACACGTGATGGTGGCGATAACGACACAAAAGAGAATGAGACATTCAGACCGGGAGGAGGA  
AATATGAAGGACAATTGGAGAAGTGAATTATATAAAATATAAAGTGGTAGAATTAAGCCATTGGGAGTAGCAC  
CCACGAAGGCAAAAAGGAGAGTGGTGGAGAGAGAAAAAGAGCAGTGGGAATAGGAGCTGTGTTCTTGGGTT  
CTTGGGAGCAGCAGGAAGCACTATGGGCGCGCGTCAATAACGCTGACGGTACAGGCCAGACAGCTGTTGTCT  
GGTATAGTGCAACAGCAGAGCAATTTGCTGAGAGCTATAGAGGCGCAACAGCATCTGTTGCAACTCACGGTCT  
GGGGCATT

>DQ275658

AATTACAGTAAGTCAAACATCACCAAGGGCAGTGATCCAAACATCACACCATCCAATGCAGGATAAAACAAT  
TTATAAACATGTGGCAGGGGGTAGGACGAGCAATGTATGCCCTCCCATTTGCAGGAAACATAACATGTAACTC  
AAGTATCACAGGACTACTATTGACACGTGATGGTGGGAATGAAACGAATGGCACAGAGACATTAGACCTGGA  
GGAGGAAATATGAAGGACAACCTGGAGAAGTGAATTATATAAAATATAAAGTGCTAGAAATTAAGCCATTAGGAG  
TAGCACCCACTGGAGCAAAAAGGAGAGTGGTGGAGAGAGAAAAAGAGCAGTGGGAATAGGAGCTGTGCTCCT

TGGGTTCTTGGGAGCAGCAGGAAGCACTATGGGCGCGGCGTCAATAACGCTGACGGTACAGGCCAGACAACTG  
TTGTCTGGTATAGTGCAACAGCAAAGCAATTTGCTGAGAGCTATAGAGGCGCAACAGCATATGTTGCAACTCA  
CGGTCTGGGGCATT

>DQ396391

AGTTATTTAAACATAACTGATGCAAACACAACAAAGGCAAACGAAACCATCACACTCCCATGCAGAATAAAAC  
AAATTATAAACATGTGGCAGGAGGTAGGACGAGCAATGTATGCCCCCTCCCATTCAGGAAACATAGAATGTAA  
ATCAAATATCGCAGGACTACTATTGGTACGTGATGGAGGACTAAATAGAACAGATAATAACACAGAGATATTC  
AAACCTGAAGGAGGAAATATGAAGGACAATTGGAGAAGTGAATTATATAAATATAAAGTGGTGGAAATTAACC  
CATTGGGAGTAGCACCCACGAAGGCAAAAAGGAGAGTGGTGGAGAGAGAAAAAGAGCAGTGGGAATAGGAGC  
TGTGTTCTTGGGTTCTTGGGAGCAGCAGGAAGCACTATGGGCGCGGCGTCATTAACGCTGACGGTACAGGCC  
AGACAACTGTTGTCTGGTATAGTGACGAGCAGCAAAGCAATTTGCTGAGAGCTATAGAGGCGCAACAGCATATGT  
TGCAACTCACGGTCTGGGGCATT

>AY878056

ACTTATAATGCTAGTGAGGGAAACAGGACCATCACCATCCTATGCAGGATAAAAACAAATTATAAACATGTGGC  
AGGGGGTAGGACAAGCAATGTACGCCCCCTCCCATTCAGGAAACATAACATGTAACTCAAATATCACAGGACT  
ACTATTGACACGTGATGGTGGTACCAACAACAACAACACAGAGACATTAGACCTGGAGGAGGAAATATGAAG  
GACAGTTGGAGAAGTGAATTATATAAATATAAAGTGGTAGAAATTAAGCCATTGGGAGTAGCACCCACCAAGG  
CAAAAAGGAGAGTGGTGGAGAGAGAAAAAGAGCAGCGGGAATAGGAGCTGTGATCTTTGGGTTCTTGGGAGC  
AGCAGGAAGCACTATGGGCGCGGCGTCATTAACGCTGACGGTACAGGCCAGACAACTGTTGTCTGGTATAGTG  
CAACAGCAAAGCAATTTGCTGAGAGCTATAGAGGCGCAACAGCATATGTTGCAACTCACGGTCTGGGGCATT

>DQ164104

TTTTATAATGAAAGTAAAGATAATAGAAGTGAGAACATCACAAACAATCCCATGTAAGATAAAACAAATTATAA  
ACATGTGGCAGGGGGTAGGACGAGCAATGTATGCCCCCTCCCATTCAGGAAACATAACATGTAACTCAAGTAT  
CACAGGACTACTATTGACACGTGATGGAGGATCCTTAGACAACAAAACAGAGATATTTAGACCTGGAGGAGGA  
AATATGAAGGACAATTGGAGAAGTGAATTATATAAATATAAAGTGGTAGAAATTAAGCCATTGGGAGTAGCAC  
CCACTGAGGCAAAAAGGAGAGTGGTGGAGAGAGAAAAAGAGCAGTGGGAATAGGAGCTGTGCTCCTTGGGTT  
CTTGGGAGCAGCAGGAAGCACTATGGGCGCGGCGTCAATAACGCTGACGGTACAGGCCAGACAACTGTTGTCT  
GGTATAGCGCAACAGCAAAGCAATTTGCTGAGAGCTATAGAGGCGCAACAGCATATGTTGCAACTCACAGTCT  
GGGGCATT

>DQ011165

AATTACAGTTCTGAATATAATAGTACAGGAAGTAATTCAACCAACAGTAGTTCAACCATCACACTTCCATGCA  
GAATAAAACAAATTATAAACATGTGGCAGGAGGTAGGACGAGCAGTGTATGCCCCCTCCCATTCAGGAAACAT  
AACATGTAATTCAAATGTACAGGATTACTATTAGTACGTGATGGAGGAAACGACAGCACACCAACAGAAACA  
TTCAGACCTGAAGGAGGAAATATGAAGGATAATTGGAGAAGTGAATTATATAAATATAAAGTGGTAGAAGTTA  
AGCCACTAGGAATAGCTCCCACTGGAGCAAAAAGGAGAGTGGTGGAGAGAGAAAAAGAGCAGTAGGAATAGG  
AGCTGTGTTCTTGGGTTCTTGGGATTAGCAGGAAGCACTATGGGCGCAGCGTCAATAACGCTGACGGCACAG  
GCCAGACAAGTGTGTCTGGTATAGTGCAACAGCAAAGCGATTGCTGAAGGCTATAGAGGCGCAACAGCATA  
TGTTGCAACTCACGGTCTGGGGCATT

>AY901966

ACCTACAATCCTACATACAATGGTACAAGGAATGATGAGGACACAACCATCACACTCCCATGCAAAATAAAAC  
AAATTATAAATATGTGGCAGAAGGTAGGAAGAGCAATGTATGCCCCCTCCCATTCAGGAAACATAACATGTAA  
GTCAAATATCACAGGACTACTATTAGTACGTGATGGAGGCAACACAAATAACATAACAGAGATATTCAGACCT  
GGAGGAGGAAATATGAAAGACAATTGGAGAAGTGAATTATATAAATACAAAGTGGTAGAAATTAAGCCATTAG  
GAATAGCACCCACTGAAGCAAAAAGGAGAGTGGTGAAGAAAGAGAAAAGAGCAGTGGGAATAGGAGCTGTGTT  
CCTTGGGTTCTTGGGAGCAGCAGGAAGCACTATGGGCGCGGCGTCAATGACGCTGACGGTACAGGCCAGACAA  
GTATTGTCTGGTATAGTGCAACAGCAAAGCAATTTGCTGAGAGCTATAGAGGCGCAACAGCATATGTTGCAAC  
TCACGGTCTGGGGCATT

>AY901975

AATTATACAATGGAATCATCACACTCCCATGCAAGATAAAACAATTTATAAACATGTGGCAAGAGGTAGGAC  
GAGCAATGTATGCCCCCTCCCATTCAGGAAACATAACATGCAATCAAATATCACAGGACTACTATTGACATG  
GGATGGAGGAGACACGAATGGGACAAAAAATAATAATACATTTAGACCTGGAGGAGGAAATATGAAAGACAAT  
TGGAGAAATGAATTATATAAATATAAAGTGGTAGAAATTAAGCCATTGGGAATAGCACCCACTGATTCAAAAA  
GGAGAGTGGTGGAGAGAGAAAAAGAGCAGTGGGACTGGGAGCTATGCTCGTTGGGTTCTTGGGAGCAGCAGG  
AAGCACTATGGGCGCGGCGTCAACGACGCTGACGGTACAGGCCAGACAACTGTTGTCTGGTATAGTGCAACAG  
CAAAGCAATTTGCTGAGAGCTATAGAGGCGCAACAGCATATGTTGCAACTCACAGTCTGGGGCATT

>AY878070

AATTATAGTAGCAGCCACAAGCAAAATACAACCATCACAAATCCCATGTAAAATAAAACAAATTATAAATATGT  
GGCAAGGGGTAGGACGGGCAATGTATGCCCCCTCCCATTCAGGAAACATAACATGTAAATCAAATATCACAGG  
ATTACTATTGACACGTGATGGAGGACCCGATAGCAAAAAGCCTAATGGGACAGAGACATTAGACCTGGAGGA  
GGAGATATGAGGGACAATTGGAGGAGTGAATTATATAAATATAAAGTGGTAGAAATCAGGCCATTAGGGATAG

CACCCACCAAGGCCAAAAAGAAGAGTGGTGGAGAGAGAAAAAGAGCAGTGACAATGGGAGCTATGTTCTCTTGG  
GTTCTTGGGAGCAGCAGGAAGCACTATGGGCGCAGCGTCAATAACGCTGACGGTACAGGCCAGACAACCTGTTG  
TCTGGTATAGTGCAACAGCAGAACAATTTGCTGAGAGCTATAGAGGTGCAACAGCATATGTTGCAGCTCACAG  
TCTGGGGCATT

>DQ275664

TACTATCCTAATGGTACAAACAGTACTTCAAAGGGTACAAATGTAACCATCACACTCCAATGCAGAATAAAAC  
AAATTATAAACATGTGGCAGGGGATAGGACAGGCAATGTATGCCCCCTCCCATTAAGGGAAACATAACATGTAA  
GTCAAATATCACAGGACTACTATTGACACGTGATGGGGGAGAAAATACAAATGGAACAGAAATCTTCAGACCT  
GGAGGAGGAGATATGAGAGACAATTGGAGAAGTGAATTATATAAAATATAAAGTGGTGGAAATTAAGCCATTAG  
GAGTAGCACCCACTACGGCAAAAAGGAGAGTGGTGGAGAGAGAAAAAGAGCAGTAGGAATAGGAGCTGTGTT  
CCTTGGGTTCCTTGGGAGCAGCAGGAAGCACTATGGGCGCAGCATCAATAACGCTGACGGTACAGGCCAGACAA  
TTGTTGTCTGGTATAGTGCAACAGCAAAGCAATTTGCTGAGGGCTATAGAGGCGCAACAGCATATGTTGCAAC  
TCACAGTCTGGGGCATT

>DQ093589

AGTCACCTGGAAAATACAACCATCACACTTCCATGCAGAATAAAACAAATTATAAACATGTGGCAAGGGGTAG  
GACGAGCAATGTATGCCCCCTCCCATTTGCAGGAAACATAGAATGTAAATCAAATATCACAGGAATACTATTGGC  
ACATGATGGAGGAGGAGAGCAGAATGGTACAAATGAGATATTCAGACCTGGAGGAGGAGATATGAGGGACAAT  
TGGAGAAGTGAGTTATATAAAATATAAAGTGGTAGAAATTAAACCATTAGGAATAGCACCTACTAAGGCAAAAA  
GGAGAGTGGTGGAGAGAGAAAAAGAGCAGCGGGAATAGGAGCTGTGTTCTTGGGTTCCTTAGGAGCAGCAGG  
AAGCACTATGGGCGCGGCGTCAATAGCGCTGACGGTACAGGCCAGACAATTACTGTCTGGTATAGTGCAACAG  
CAAAGCAATTTGCTGAGAGCCATAGAGGCGCAACAGCATATGTTGCAACTCACAGTCTGGGGCATT

>KC863250

AATTATCCTAATGGTACAGAAAGTCTTAATAGTACAGAAAGTAATTCAAGCTTACCAATCACGATCCCATGCA  
GAATAAAACAAATTATAAACATGTGGCAGGGGGTAGGACGAGCAATGTATGCCCCGCCCATTTGCAGGAAACAT  
AACATGTAACCTCAAGTATCACAGGACTACTATTGACACGGGATGGAGGAGTGAATACACAGGAGGGAGGAGTG  
AATACAACAAGGACAGAGATATTCAGACCTGGAGGAGGAAAATATGAAGGACAATTGGAGAAGTGAATTATATA  
AATATAAAGTGGTAGAAATTAAGCCATTAGGAATAGCACCCACTGAGGCAAAAAGGAGAGTGGTGGAGAGAGA  
AAAAAGAGCAGTGACACTAGGAGCTGTGTTCTTGGGTTCCTTGGGAGCAGCAGGAAGCACTATGGGCGCGGCG  
TCAATCACGCTGACGGTACAGGCCAGACAACCTGCTGTCTGGTATAGTGCAACAGCAAAGCAATTTGCTGAGAG  
CTATAGAGGCGCAACAGCATATGTTGCAACTCACGGTCTGGGGCATT

>DQ275659

TTTCAGAATAATGGTACAAACAGTGAAAGTAATTCAACCATCACACTCCCATGCAGAATAAGACAAATTGTAA  
ACATGTGGCAGGAGGTAGGACGAGCAATGTATGCCCCCTCCCATTTGAAGGAAACATAACATGTAAATCAAATAT  
CACAGGGCTACTATTGCAACGTGATGGAGGCACGAGTAACAATAGCAGCAATAACATAGAGATATTCAGGCCT  
GGAGGAGGAAATATGAAGGACAATTGGAGAAGTGAATTATATAAAATATAAAGTGGTAGAAATTAACCATTGG  
GAATAGCACCCACAACGGCAAAAAGGAGAGTGGTGGAGAGAGAAAAAGAGCAGTGGGAATCATAGGAGCTAC  
GATCCTTGGGATCTTGGGAGCAGCAGGAAGCACTATGGGCGCAGCATCAATAACGCTGACGGTACAGGCCAGA  
CACCTGCTGTCTGGTATAGTGCAACAGCAAAGCAACTTGCTGAGAGCTATAGAGGCGCAACAGCATATGTTGC  
AACTCACGGTTTGGGGCATT

>DQ093602

TTTCATGATAATTCAAATTTTAATAATTCAACCATCACACTCCCATGCAGAATAAAACAAATTTATAAACATGT  
GGCAGGGGGTAGGACGAGCAATGTATGCCCCGCCCATTTGAAGGAAACATAACATGTACATCAAATATCACAGG  
ACTACTATTGACACGTGATGGAGGAGTAGGTAATGGGACAGATAATACGATAGAAATATTTCAGACCTGAAGGA  
GGAGACATGAGGGACAATTGGAGAAGTGAATTATATAAAATATAAAGTGGTGGAAATTAAGCCATTGGGAGTAG  
CACCCACTGGGGCAAAAAGGAGAGTGGTGCAGAGAGAAAAAGAGCAGTGGGAATGGGAGCTATGATCCTTGG  
GTTCTTGGCAACAGCAGGAAGCACTATGGGCGCGGCGTCAATAACGCTGACGGTACAGGCCAGACAAGTGTTG  
TCTGGTATAGTGCAACAGCAAAGCAATTTGCTGAGGGCTATAGAGGCGCAACAGCATATGTTGCAACTCACGG  
TCTGGGGCATT

>AY901974

ACCTACAAGGAGAAGATAAATAGTACTATCACACTCCAATGCAGAATAAAACAAATTATAAACATGTGGCAGG  
GGGTAGGACAAGCAATGTATGCCCCCTCCCATTTGAAGGAAACATAACATGTAGATCAAATATCACAGGACTACT  
ATTAACACGTGATGGAGGAAATGATAAAGGAAAAGATAATGACACAGAGATATTCAGACCTGGAGGAGGAGAT  
ATGAAGGACAATTGGAGAAGTGAATTGTATAAAATATAAAGTGGTAGAAATTAACCATTAGGAGTAGCACCCA  
CCAAGGCAAAAAGGAGAGTGGTGGAGAGAGAAAAAGGACAGTGGGAATGGGAGCTGTGTTCTTGGGTTCCTT  
GGGAGCAGCAGGAAGCACTATGGGCGCAGCATCAATAACGCTGACGGTACAGGCCAGACAATTGCTGTCTGGT  
ATAGTGCAACAGCAAAGCAATTTGCTGAGAGCTATAGAGGCGCAACAGCATATGTTGCAACTCACGGTCTGGG  
GCATT

>DQ011172

AGTTATTCAAGCACAGCCAACACAACCATCACGCTCCCATGCAGAATCAGACAGATCATAAACATGTGGCAGC  
AGGTAGGACGAGCAATGTATGCCCCCTCCCATTTGCAGGAAACATAACATGTAAATCAAATATCACAGGACTACT

ATTGCTACGTGATGGAGGAAATGAAGACAATAGAACAGAGACATTTCAGACCTGGAGGAGGAAATATGAAGGAC  
AATTGGAGAAGTGAATTATATAAAATATAAAGTGGTAGAACTTAAGCCTTTGGGAGTAGCACCCTAAGGCAA  
AAAGGAGAGTGGTGGAGAGAGAAAAAGAGCAGTGGGAATAGGAGTTGCGCTCCTTGGGTTCTTGGGAGCAGC  
AGGAAGCACTATGGGCGCGGCGTCAATAACGCTGACGGTACAGGCCAGACAACCTGTTGTCTGGTATAGTGCAA  
CAGCAAAGCAATTTGCTGAGAGCTATAGAGGCGCAACAGCATATGTTGCAACTCACAGTCTGGGGCATT

>DQ093594

CCTCAGAATGATACAAAAGATGATTTAACCATCACACTTCCATGCAAAATAAAACAAATTATAAACATGTGGC  
AGGGGGTAGGACGAGCAATGTATGCCCCCTTATTGCAGGAAACATAACATGTAACTCAAGTATCACAGGACT  
ATTATTGACACGTGATGGAGGAAATAACACAACAGGGACAGAGATATTTCAGACCTGGAGGAGGAAACATGAAA  
GACAAATTGGAGAAGTGAATTATATAAGTATAAAGTGGTAGAAATTAAGCCATTGGGAGTAGCTCCCACTGAAG  
CAAAAGGGAGAGTGGTGGAGAGAGAAAAAGAGCAGTGGGAATAGGAGCTGTACTCCTTGGGTTCTTGGGAGC  
AGCAGGAAGCACTATGGGCGCGGCGTCAATAACGCTGACGGTACAGGCCAGACAACCTGTTGTCTGGTATAGTG  
CAACAGCAAAACAATTTGCTGAGGGCTATAGAGGCGCAACAGCATATGTTGCAACTCACGGTCTGGGGCATT

>DQ351217

AACTACACATGTACTGCTCCAGAAGGGAATGGAACCATCATACTTCCATGCAGAATAAAACAAATTGTAAACA  
TGTGGCAGGAGGTAGGACGAGCAATGTATGCCCTCCCATTAAGGAAACATAACATGTAACTCAAACATCAC  
AGGACTACTATTAGTACGGGATGGAGGCGAGAATATCACGGAGGAGACATTTCAGGCCTGGAGGAGGAAATATG  
AAGGACAATTGGAGAAGTGAATTATATAAAATATAAAGTGGTAGAAATTAAGCCATTGGGAATAGCACCCTA  
CGGCAAAAAGGAGAGTGGTGGAGAGAGAAAAAGAGCAGTGGGAATAGGAGCTGTACTCCTTGGGTTCTTGGG  
AGCGGCAGGAAGCACTATGGGCGCGGCGTCAATAACGCTGACGGTACAGGCCAGACAACCTGTTGTCTGGTATA  
GTGCAACAGCAAAGCAATTTGCTGAAAGCCATAGAGGCGCAACAGCACATGTTGCAACTCACGGTCTGGGGCA  
TT

>DQ093604

AGTTACAATAGTACAGGAGACATCACACTCCCATGCAGAATAAAACAAATTATAAACATGTGGCAGAAGGTAG  
GACGAGCAATATATGCCCTCCCATTCAGGAAACATAACATGTAACTCAACTATCACTGGACTACTCTTGGT  
AAGAGATGGAGGCAACTCAAATAACCTAAGTGAGACATTCAGACCAGCAGGAGGAAATATGAAGGATAATTGG  
AGAAGTGAATATATAAAATATAAAGTGGTAGAAATTAAGCCATTGGGAATAGCACCCTAAGGCAAAAAGGC  
GAGTGGCGGAGAGAGAAAAAGGGCAGTAGGAATAGGAGCTGTGTTCTTGGGTTCTTGGGAGCAGCAGGAAG  
CACTATGGGCGCAGCGTCAATAGCGTGACGGCACAGGCCAGACAAGTGTTGTCTGGAATAGTGCAACAGCAA  
AGCAATTTGCTGAGGGCTATAGAGGCGCAACAGCATATGTTGCAACTCACAGTCTGGGGCATT

>AY901973

TGTTATACAACACAGCTGTTTAATAGTACATACAATAGTACATACAGGCCTAATGGTACAGAAAGTAATTCAA  
ACATCACACTCCCATGCAGAATAAAGCAAGTTATAAACATGTGGCAGCAGGTAGGACGAGCAATGTATGCTCC  
TCCCATTCAGGAAACATAACATGTAAATCAAATATCACAGGATTACTATTGGTGCGTGATGGAGGAATAAAT  
AACAGTACCAAAGAGACATTCAGACCTGGAGGAGGAGATATGAAGGACAATTGGAGAAGTGAATTATACAAAT  
ATAAAGTAGTAGAAATTAACCATTGGGAATAGCACCTACTGAGGCAAAAAGGAGAGTGGTGGAGAGGGAAAA  
AAGAGCAGTGGGAATAGGAGCTGTGTTCTTGGGTTCTTGGGAGCAGCAGGAAGCACTATGGGCGCGGCGTCA  
ATAACGCTGACGGTACAGGCCAGACAATTGTTGTCTGGTATAGTGCAACAGCAAAGCAATTTGCTGAGGGCCA  
TAGAGGCGCAACAGCATATGTTGCAACTCACGGTCTGGGGCATT

>DQ382374

ACTCATCTGCCTAATGGTACACAGGTTAATGGGACTGATGCAAATATCACACTTCCATGCAGAATAAAACAAT  
TTATAACATGTGGCAGAAGGTAAGACTAGCAATGTATGCCCTCCCATTCAGGAGACATAACATGTGAATC  
AGATATTACAGGACTACTGTTAACGCGGGATGGAGGAGATAGTACAAATAGTAATAATAACAGAGACATTC  
AGACCTGAAGGAGGAAACATGAAAGACAATTGGAGAAGCGAATTATATAAAATATAAAGTGGTAGAAATTAAGC  
CATTAGGAATAGCACCCCTACTGCAAAAAGGAGAGTGGTGGAAAGAGAGAAAAGAGCAGTGGGACTAGGAGC  
TGTGTTCTTGGGTTCTTGGGAGCAGCAGGAAGCACTATGGGCGCAGCATCAATAACGCTGACGGTACAGGCC  
AGACAATTATTGTCTGGTATAGTGCAACAGCAAAGTAATTTGCTGAGAGCTATAGAGGCGCAACAGCATATGT  
TGCAACTCACGGTCTGGGGCATT

>DQ382376

TCCTATCCTCCTTCCCTGCCCCCTTAGTACTGCAGATAATTCTTCCATCATCCTTCTTGTCTGCATAATACAAC  
TTATTAACCTGTGGCGGGAGGTAGGACGACAGTGTTGGCCGCTCCCTTGTGGGAAGCATCATATGTTGCTC  
CTCTATCACCGGAATACTATTATCAACGGATGGAGGCCCGACGATGACGCAGAGACATTCAGACCTGGAGGA  
GGAATATGAAGGACAATTGGAGAAGTGAATTATATAAAATATAAAGTGGTAGAAGTTAAGCCATTGGGAATAG  
CACCCTAAAGCAAAAAGGAGAGTGGTGGAGAGAGAAAAAGAGCAGTGGGAATAGGAGCTGTGTTCTTGG  
GTTCTTGGGAACAGCAGGAAGCACTATGGGCGCAGCGTCAATAACGCTGACGGTACTGGCCAGACAATTATTG  
TCTGGTATAGTGCAACAGCAAAGCAATTTGCTGAGGGCTATAGAGGCGCAACAACATCTGTTGCAACTCACGG  
TCTGGGGCATT

>DQ382379

TGCTATACAAATGAAACAAGCAATCCAAATAATACCATCACACTCCCATGCAGAATAAGACAAATTATAAAACA  
TGTGGCAGAAGGTAGGACGAGCAATGTATGCCCTCCCATTCAGGAAACATAAAATTGTAAATCAAATATCAC

AGGAATACTGTTGACACGTGATGGAGGTAACGAAACAGAGGGTGACGGAACAAAGGTAGAGATATTCAGACCT  
GGAGGAGGAAATATGAGGGACAATTGGAGAAGTGAATTATATAAATATAAAGTGGTAGAAATTAAGCCATTAG  
GAGTAGCACCCACTAAGGCCAAAAAGGAATGTGGTGACAGAGAGAAAAAGAGCAGTGGGAATAGGAGTTGTGCT  
CCTTGGGTTCCTTGGGAGCAGCAGGAAGCACTATGGGCGCGGCGTCAATAACGCTGACGGTACAGGCCAGACAA  
CTGTTGTCTGGTATAGTGCAACAGCAAAGCAATTTGCTGAGAGCCATAGAGGCGCAACAACATATGTTGCAAC  
TCACGGTCTGGGGCATT

>DQ382363

GATTATAATGGTGCAGGAAATAGTTCATCAGACTCCTTCATCACCATCCTCTGCAGAATAAAACAATTTATAA  
TCATGTGGCAGAGGGTAGGACGAGCAATGTATGCCCCCTCCCATTTGTTGGAAGCGTCACATGTTGTTTCATTTAT  
CACAGGGCTACTATTGACGCGTGATGGAGGAAGTAACACAACAGAGACATTCAGACCTGTAGGAGGAGATATG  
AGGGACAATTGGAGAAGTGAATTATATAAATATAAAGTGGTAGAAGTTAGGCCATTAGGAATAGCACCCACTA  
GGGCACAAAGGAGAGTGGTGGAGAGAGTAAAAAGAGCAGTGGGAATAGGAGCTGTGTTCTTGGGTTCTTGGG  
AGCAGCAGGAAGCACTATGGGCGCAGCATCAATAACGCTGACGGTACAGGCCAGACAATTGCTGTCTGGTATA  
GTGCAACAGCAAAGCAATTTGCTGAAGGCTATAGAGGCGCAACAGCACCTGTTGCAACTCACAGTCTGGGGCA  
TT

>HQ615953

TTTCATAATAATACAAATGAGACAACCATCACAAATGAGACCATCATGCTCCCATGCAGGATAAAACAAATTA  
TAAACATGTGGCAGAAGGTAGGACGAGCAATGTATGCTCCTCCCATTGAGGGAAACATAACATGTAATTCAAA  
TATCACAGGACTACTATTACTACGTGATGGAGGCCTCTTCAATGGGACAGCAGAAAGTAGAGACATTCAGACCT  
GGAGGGGGGAGATATGAGAGACAATTGGAGAAGTGAATTATACAAATATAAAGTGGTAGAAGTTAAGCCATTGG  
GAATAGCACCCACTGGGGCAAGAAGGATAGTGGTGAAGAGAGAAAAAGAGCAGTGGGAATAGGAGCTGTGTT  
CCTTGGGTTCTTGGGAGCAGCAGGAAGCACTATGGGCGCGGCGTCAATGACGCTGACGGTACAGGCTAGACAA  
CTGTTGTCTGGTATAGTGCAACAGCAAAGCAATTTGCTGAAGGCTATAGAGGCGCAGCAACATCTGCTGCAAC  
TCACGGTCTGGGGCATC

>GQ999982

AATTATACACTGAGCAATAACAATAATGAAACAATCATACTCCCATGTAGAATGAAACAAATTATAAATATGT  
GGCAGGGGGTAGGACGAGCAATGTATGCCCCCTCCCATTCAGGAAACATAACATGTAACCTCAAGTATCACAGG  
ACTGTTATTGACGCGTGACAAAAGACCCAGGGCAGAAGAACAGCAACACAGAGACATTCAGACCTACAGGAGGA  
AATATGAAGGACAATTGGAGAAATGAATTATACAAATGTAAAGTGGTAGAAATTAACCATTAGGAGTAGCAC  
CCACTAATGCAAAAAGGAGAGTGGTGGAGAGAGAAAAAGAGCAGTAGGAATAGGAGCTGTGCTCCTTGGGTT  
CTTGGGAGCAGCAGGAAGCACTATGGGCGCGGCGTCAATAACGCTGACGGTACAGGCCAGACAACCTGTTATCT  
GGTATAGTGCAACAGCAAAGTAATTTGCTGAGAGCTATAGAGGCGCAACAGCACATGTTGCAACTCACAGTCT  
GGGGCATT

>GQ999988

TTTTATGAACCTTTAAATTTAACCATCACACTCCAATGCAGAATAAAACAAATTATAAACATGTGGCAGGAGG  
TGGGACGAGCAATGTATGCCCCCTCCCATTCAGGAAACATAACATGTGAATCAAAGATCACAGGGCTAATATT  
GACACGTGATGGAGGAAGTGACAAATGGGACAGAGACATTCAGACCTGGAGGAGGAGATATGAGGGACAACCTGG  
AGAAGTGAATTATATAAATATAAAGTGGTAGAAATTAAGCCATTGGGAATAGCACCCACTAATGGAAGAAGGA  
GAGTGGTGCAGAGAGAGAAAAAGAGCAGTGGGAATAGGAGCTGTATTCTTGGGTTCTTGGGAGCAGCAGGAAG  
CACTATGGGCGCGGCATCAATAACGCTGACGGTACAGGCCAGACAATTATTGTCTGGTATAGTGCAACAGCAA  
AACAAATTTGCTGAGGGCTATAGAGGCGCAACAGCATATGTTGCAACTCACGGTCTGGGGCATT

>HQ615952

AATCAGACTACAAATAATTCTACTAACATCACACTCCCATGCAGAATAAAACAAATTATCAACATGTGGCAGG  
AGGTAGGACGAGCAATGTATGCCCCCTCCTATTGCAGGAAACGTAACATGTAACTCGAGTATCACAGGACTACT  
ACTGACCCGTGATGGGGGAAAAGGAAATGACACAGGAAATGGCACAGAGATATTCAGACCTGGAGGAGGAAAT  
ATGAAAGACAATTGGAGAAGTGAATTATTTAAATATAAAGTGGTAGAAGTTAGGCCATTGGGAATAGCACCCA  
CTACGGCAAAAAGGAGAGTGGTGGAGAGAGAAAAAGAGCAGTGGGAATAGGAGCTGTACTCCTTGGGTTCTT  
GGGAGCAGCAGGAAGCACTATGGGCGCGGCGTCAATAACGCTGACGGTACAGGCCAGACAACCTGTTGTCTGGT  
ATAGTGCAACAGCAAAGCAATTTGCTGAGGGCTATAGAGGCGCAACAGCATATGTTGCAACTCACGGTCTGGG  
GCATT

>HQ595762

GCTTATAATACACCAAATGCTTCAGAAAAACATAACCCCTCCCATGTAGAATAAAACAAATTATAAACATGTGGC  
AGAGGGTAGGACGAGCAATGTATGCCCCCTCCCATTCAGGAAACATAACATGTAAATCAAATATCACAGGACT  
ACTCTTGACACGTGATGGAGGGAGCAATAGTACAGGGACAGAAATATTAGACCTGGAGGAGGAGATATGAGG  
GATAATTGGAGAAGTGAATTATATAAATATAAAGTAGTAGAAGTTAAACCATTAGGAATAGCACCCACTACTG  
CAAGAAGGAGAGTGGTGCAGAGAGAAAAAGAGCAGCATTTGGGAGCTGTGCTCCTTGGGTTCTTGGGAGCAGC  
AGGAAGCACTATGGGCGCGGCGTGGTGGCGCTGACGGTACAGGCCAGGCAATTATTGTCTGGTATAGTGCAA  
CAGCAAAGCAATTTGCTGAGAGCTATAGAGGCACAACACCATTGTTGCAACTCACAGTCTGGGGCATT

>HQ595758

AATTATAATGATACAGAAAGTAATTCAACCATCACACTTCCATGCAGGATAAAACAAATTATAAACATGTGGC  
AGGAGGTAGGACGAGCAATGTATGCTCCTCCCATTTGCAGGAAACATAACATGTAAATCAAATATCACAGGATT  
ACTATTGACGCGTGATGGAGGCACAAATGACACAAATAACACAGAAATATTAGACCTGGAGGAGGAAATATG  
AAGGACAATTGGAGAAGTGAATTGTATAAATATAAAGTGGTAGAAATTAAACCATTAGGGATAGCTCCCACTG  
GAGCAAAAAGGAGAGTGGTGGAGAGAGAGAAAAGAGCAGTAGGAATAGGAGCTATGATCCTTGGGTTCTTGGG  
AGCAGCAGGAAGCACTATGGGCGCAGCGTCAATAACGCTGACGGTACACGCTAGACAATTGTTGTCTGGTATA  
GTGCAACAGCAAAGCAATTTGCTGAGAGCTATAGAGGCGCAACAGCATATGTTGCAACTCACGGTCTGGGGCA  
TT

>KT183064

AATCATACAGACAGGTCTAATGATACAGGAAGTAATAAAACCATCACACTCCCATGTAAAATAAAACAAATTA  
TAAACATGTGGCAGGAGGTAGGACGAGCAATGTATGCCCCCTCCCATTTGCAGGAAACATAACATGTAAATCAAA  
TATCACAGGTCTACTATTAGTACGTGATGGAGGAGAAAAGTAACTCAACAACGGAGATATTAGACCTGGAGGA  
GGAAATATGAAGGACAATTGGAGAAGTGAATTATATAAAATATAAAGTGGTAGAAATTAAACCACTGGGAATAG  
CACCCACTGAGGCAAAAAGGAGAGTGGTGGAGAGAGAAAAAAGAGCAGTTGGCATAGGAGCTGTGTTCTTGG  
GTTCTTGGGAGCAGCAGGAAGCACTATGGGCGCGGCGGCAGTGACGCTGACGGTACAGGCCAGACAATTGTTG  
TCTGGTATAGTGCAACAGCAAAGCAATTTGCTGAGGGCTATAGAGGCGCAACAGCATATGTTGCAACTCACAG  
TCTGGGGCATT

>KT183094

TACTATCCTAATGGTACTGTTACAACAAGTAATATTACACTCCCATGCAAAAATAAAACAAATTATAAACATGT  
GGCAAGGGGTGGGACGAGCAATGTATGCCCCCTCCCATTTGCAGGAAACATAACATGTAAATCAAACATCACAGG  
ATTACTATTGCTACGTGATGGGGGAAACATGAATAACACAACAGAAATATTAGACCTGGAGGAGGAGATATG  
AAGGACAATTGGAGAAGTGAATTATATAAATATAAAGTAGTAGAAATTAAACCATTAGGAATAGCACCCACTG  
GGGCAAAAAGGAGAGTGGTGGAAAAGAGAAAAAAGAGCAGTGGGAATAGGAGCTGTGATCTTTGGGTTCTTGGG  
AGCAGCAGGAAGCACTATGGGCGCAGCGTCAATAGCGCTGACGGTACAGGCCAGACAACCTGTTGTCTGGTATA  
GTGCAACAGCAAAGCAATTTGCTGAGAGCTATAGAGGCGCAACAGCATATGTTGCAACTCACGGTCTGGGGCA  
TT

>KT183148

ACTTATAATGGTCCAGAAGGAAACTCAAACATCACACTCCCATGCAGAATAAAACAAATTATAAACATGTGGC  
AGAAAGTAGGACGAGCAATATATGCCCCCTCCCATTTAGAGGAAACATAACATGTAACTCAAGTATCACAGGACT  
AGTCTTGGTACGTGATGGAGGTATATATAATAATACCAAAAATGAAAATGAGACATTCAGACCTGAAAATGAG  
ACATTCAGACCGGGAGGAGGAGATATGAGGGACAATTGGAGAAGTGAATATATAAATATAAAGTGGTAGAAA  
TTAAACCATTTGGGAATAGCGCCCACTGAAGCAAAAAGGAGAGTGGTGCAGAGAGAAAAAAGAGCAGTGGGAAT  
AGGAGCTTTGTTCTTGGGTTCTTGGGAGCAGCAGGAAGCACTATGGGCGCAGCGTCAATAACGCTGACGGTA  
CAAGTCAGACAATTGTTGTCTGGAATAGTGCAACAGCAAAGCAATTTGCTGAGAGCTATAGAGGCGCAACAGC  
ATATGTTGCAACTCACAGTCTGGGGCATT

>KT183196

ATTCAAAACAGCACAAATATCACACTCCCATGCAAAAATAAAACAATTTGTAAATATGTGGCAGGAGGTAGGAC  
GAGCAATGTATGCCCCCTCCCATTTGCAGGAAACATAACATGTAGATCAAATATCACAGGACTACTATTGGTGC  
TGATGGGGGCAACCAAAGCGGAAATGATATAGAGACATTCAGACCTGGAGGAGGAAATATGAAAGACAATTGG  
AGAAGTGAATTATATAAATATAAAGTGGTAGAAATTAAACCATTTGGGAATAGCACCCACTAAGGCAAAAAGGA  
GAGTGGTGGAGAGAGAAAAAAGAGCAGTGGGAATAGGAGCTGTGTTCTTGGGTTCTTGGGAACAGCAGGAAG  
CACTATGGGCGCGGCGTCAATAGCGCTGACGGTACAGGCCAGACAAGTATTGGCTGGTATAGTGCAACAGCAA  
AGCAATTTGCTGAGGGCTATAGAGGCGCAACAGCATATGTTGCAACTCACGGTTTGGGGCATT

>KC156123

GCCTACAATAAAACAGGTGATAATTCAACCATCACAACCATCACACTCCAATGCAGAATAAAACAAGTTATAA  
ACATGTGGCAGGAGGTAGGACGAGCAATATATGCCCCCTCCCATTTGCAGGAAACATAACATGTAGCTCAAATAT  
CACAGGACTACTGTTGACACGTGATGGAGGAAATAATAATAGTAGTAATGAGACAGAGACATTCAGGCCTGGA  
GGAGGAGATATGAGAGACAATTGGAGAAGTGAATTATATAAATATAAAACAGTAGAAATTAAACCATTAGGAA  
TAGCACCCACTACGGCAAAAAGGAGAGTGGTGGAGAGAGAAAAAAGAGCAGTGGGAATAGGAGCTGTGTTCTT  
TGGGTTCTTGGGAGCAGCAGGAAGCACTATGGGCGCGGCGTCAATAACGCTGACGGTACAGGCCAGACAATTG  
TTGTCTGGTATAGTGCAACAGCAAAGCAATTTGCTGAGAGCTATAGAGGCGCAACAACATCTGTTGCAACTCA  
CGGTCTGGGGCATA

>KC156125

TTTTATGCTAATAGCAGTGATCCCAATGCAACTATCACACTCCCATGCAAAAATAAAACAATTTATAAACATGT  
GGCAGGAGGTAGGACGAGCAATGTATGCCCCCTCCCATTTGAAGGAAACATAACATGTAAATCAAATATCACAGG  
GCTACTATTGGAACGTGATGGAGACATAAAAGAAAAACAATACAGAGACATTCAGACCTATAGGAGGAAATATG  
AAGAACAAATTGGAGAAGTGAATTATATAAATATAAAGTGGTAGAGATTAAACCATTTGGGAGTAGCACCCACAG  
AATCAAAAAGGAGAGTGGTGGAGAGAGAAAAAAGAGCAGTGGGATTAGGCGGAGCTTTGTTCTTGGGTTCTT  
GGCAACAGCAGGAAGCACTATGGGCGCGGCGTCAATAACGCTGACGGTACAGGCCAGACAACCTGTTGTCTGGT

ATAGTGCAACAGCAAAACAATTTGCTGAGAGCTATAGAGGCGCAACAGCATCTGTTGCAACTCACAGTCTGGG  
GCATT

>KC156127

AGTCATAATGGTACGAACATCACACTCTCATGCAGAATAAAACAAATTATAAACATGTGGCAGGAGGTAGGAA  
GGGCAATATATAACCCTCCCATTGCAGGAAACATAACATGTAAATCAAACATCACAGGACTACTATTGGTACG  
TGATGGAGGTATCACAATAACAACACAGAGACATTAGACCTGGAGGAGGAGATATGAGGGACAATTGGAGA  
AGCGAATTATATAAATATAAAGTGGTAGAAATTAATCCCTTAGGAGTAGCACCCACTAAGGCAAAAAGGAGAG  
TGGTGGAGAGAGAAAAAGAGCAGTGGGAGTAGGAGCTATGTTCCCTTGGGTTCTTGAGTGCAGCAGGAAGCAC  
TATGGGCGCGGCGTCAATAACGCTGACGGTACAGGCCAGACAACCTGTTGTCTGGCATAGTGCAACAGCAAAGC  
AATTTGCTGAGGGCTATAGAGGCGCAACAGCATATGTTGCAACTCACAGTCTGGGGCATT

>JN687717

ATTCATAAGAATGAAAGTGGTTCAAATGACACCATTACAATCCCATGCAGAATAAAACAAATTATAAACATGT  
GGCAGGAGGTAGGAAAAGCAATGTATGCCCCCTCCCATTGCAGGAAACATAACATGTGAGTCAAATATCACAGG  
ACTACTATTAGAACGTGATGGAGGCACAAACATTAACACAGGCAATAACACAGGCAATAACACCACAGGCCAT  
AACACAGGCAATAGCACAGATAACAGAAATGAAACATTAGACCTGGAGGAGGAAAATATGAAGGATAATTGGA  
GAAGTGAACTATATAAATATAAAGTGGTAGAAATTAAGCCATTGGGAGTAGCACCCACGAAGGCAAGAAGGAG  
AGTAGTGACGGGGAAAGAAAAAGAGCAGTGGGACTAGGAGCTGTGATCTTTGGGTTCTTGGGAGCAGCAGGA  
AGCACTATGGGCGCGGCGTCAGTGGCGCTGACGGTACAGGCCAGACAACCTGTTGTCTGGTATAGTGACGCAGC  
AAAGCAATTTGCTGAGAGCTATAGAAGCGCAACAGCATATGTTGCAACTCACAGTCTGGGGCATT

>KC863629

AATCATTCAAATTCAAACATCACACTCAAATGCAGAATAAAACAAATTATAAACATGTGGCAGGGGGTAGGAC  
AAGCAATGTATGCCCCCTCCTATTGCAGGAAACATAACATGTAACTCAACCATCACAGGACTACTATTGACACG  
TGATGGAGGAAGCACAAACAAATAGCTCGACAGAAATATTCAGACCTGGAGGAGGAGATATGAGGGACAATTGG  
AGAAGTGAATTATATAAATATAAAGTGGTAGAAGTTAAGCCATTAGGGATAGCACCCACTGAGGCAAAAAGGA  
GAGTGGTGGAGAGAGAAAAAGAGCAGTGGGAATAGGAGCTGTGTTCCCTTGGGATCTTGGGAGCAGCAGGAAG  
CACTATGGGCGCAGCATCAATAACGCTGACGGTACAGGCCAGACAATTGTTGTCTGGTATAGTGCAACAGCAA  
AGCAATTTGCTGAGGGCTATAGAGGCGCAACAGCATATGTTGCAACTCACGGTCTGGGGCATT

>KC863647

ACCTACAACCATAATGACACATCAAATGCAACCAGCAACAACACATCAGATATCATCACCCCTCCAATGCAGAA  
TAAACAAATCATAAACATGTGGCAGGGGGTAGGAAAAGCAATATATGCCCCCTCCCATTGAAGGAAATATAAC  
CTGTAGATCAGAGATCACAGGACTACTATTGACAAGGGATGGAGGAGATGAAGGTAAAAATGATACAGAGATA  
TTCAGACCTGGAGGAGGAGATATGAGAGACAATTGGAGAAGTGAATTATATAAATATAAAGTAGTAGAAATTA  
AACCATTAGGAATAGCACCCACCAAGGCAAAAAGGAGAGTGGTGGAGAGGAGAGGAAAAAGAGCAGTAGGAAT  
AGGAGCTATGTTCCCTTGGGTTCTTAGGAGCAGCAGGAAGCACTATGGGCGCAGCGTCAATAACGCTGACGGTA  
CAGGCCAAACAATTATTGTCTGGTATAGTGCAACAGCAAAGCAATTTGCTGAGGGCTATAGAGGCGCAACAAC  
ATATGTTGCAACTCACGGTCTGGGGCATT

>HM204598

GATTATAAACCAACAAATGATACTGGTGATACCATAATACTTCCATGCAGAATAAAACAAATTATAAACATGT  
GGCAGGAGGTAGGACGAGCAATGTATGCCCCCTCCCATTGCAGGAAACATAACATGTAAATCAAGTATCACAGG  
ACTACTATTAGAACATGATGGAGAAACAGATGGAGATAATGTGACATTAGACCTATAGGAGGAAATATGAAG  
GACAATTGGAGAAGTGAATTATATAAATATAAAGTGGTAGAAATTAAGCCATTGGGAATAGCACCCACTGAGG  
CAAAAAGGAGAGTGGTGGAGAGAGAGAAAAAGAGCAGCAGTGGGAATAGGAGCTGTGTTCCCTTGGGTTCTTGAG  
CGCAGCAGGAAGCACTATGGGCGCGGCGTCAATAACGCTGACGGTACAGGCCAGACAACCTGTTGTTTGGTATA  
GTGCAACAGCAAAGCAATTTGCTGAAGGCTATAGAGGCGCAACAGCATATGTTGCAACTCACAGTCTGGGGCA  
TT

>HM204601

AGCTATTCAAACAACACCATCACACTCCCATGCAGGATAAAACAAATTGTAAATATGTGGCAGAAGGTAGGAC  
AAGCAATGTATGCCCCCTCCCATTGCAGGAAACATAACATGTAACTCAAGTATCACAGGACTAATATTGACACG  
TGATGGGGGGAACACAGAGAATAACACAGGGAATAACACAGAGGTATTAGACCTGGAGGAGGAGATATGAAG  
AATAATTGGAGAAGTGAATTATATAAATATAAAGTGGTAGAAATTAACCATTGGGAATAGCACCCACCACGG  
CAAAAAGGAGAGTGGTGGAGAGAGAGAAAAAGAGCAGCAATAGGAGCTGTGCTCCTTGGGTTCTTGGGAACAGC  
AGGAAGCACTATGGGCGCGGCGTCCGTTAGCGCTGACGGTACAGACCAGACAACCTGCTGTCTGGTATAGTGCAA  
CAGCAAAGCAATTTGCTGAGAGCTATAGAGGCGCAACAGCATATGTTGCAACTCACAGTCTGGGGCATT

>HM204605

AATTACTIONTTAATGAGACAGACAATGTGACAACAAGCGAGCAAGATGCAAAACATCACACTCCAATGCAGAA  
TAAACAAATTATAAACATGTGGCAGGAGGTGGGGCGAGCAATGTATGCCTCCCCCATTCAGGAGAGAAATAAC  
ATGTAACTCAAGTATCACAGGACTACTATTGACACGTGATGGAGGAAGAAAAGAGAATAATACAGAGAGTAAT  
ACAGAAATATTAGACCTGGAGGAGGAAATATGAGGGACAATTGGAGAAGTGAATTATATAAATATAAAGTGG  
TAGAAGTTAATCCATTAGGAATAGCACCCACTAAGGCACGAAGGAGAGTGGTGCAGAAAGAGAAAAAGAGCAAT  
AACACTGGGAGCTATGTTCCCTTGGGTTCTTGGGGGCAGCAGGAAGCACTATGGGCGCAGCATCAATAACGCTG

ACGGTACAGGCCAGACAATTATTGTCTGGTATAGTGCAACAGCAAAGCAATTTGCTGAGGGCTATAGAGGCGC  
AACAGCATATGTTGCAACTCACAGTCTGGGGCATT

>HM204610

CCTCAGGGTTCTAATAGTACAAAAACATCACAATATATTGCAGAATAAAACAAATTATAAACATGTGGCAGA  
GGGTAGGACGAGCAATGTATGCCCCCTCCCATTCAGGAAACATAACATGTATATCAAATATCACAGGACTACT  
ATTGGTACGTGATGATCCATCAAATGCTACATTAGACCGGGAGGAGAGATATGAGGGATAACTGGAGAAGT  
GAATTATATAAAATATAAAGTGGTAGAAATTAAGCCATTGGGAATAGCACCCCTCTAAGGCAAAAAGGAGAGTGG  
TGGAGAGAGAAAAAAGAGCAGCGGGACTAGGAGCTGTGTTCCCTTGGGTTCTTGGGAGCAGCAGGAAGCACTAT  
GGGCGCGGCGTCAATAACGCTGACGGTACAGGCCAGACAATTGCTGTCTGGTATAGTGCAACAGCAAAACAAC  
TTGCTGAGGGCTATAGAGGCGCAACAGCATTTGTTGCAACTCACAGTCTGGGGCATT

>FJ444091

AACTATAATGGTACAGAAAAGTAATTCAAGCATCATCACACTCCCATGCAGAATAAAACAAATTGTAAACATGT  
GGCAGGAGGTAGGAAGAGCAATATATGCCCCCTCCTATTGCAGGAAACATAACATGTAACCTCAAGTATCACAGG  
ATTACTATTGCTGCGTGATGGAGGCTTAGGCTTGAATGAAACAGGAGAGACATTTAGACCTATAGGAGGAGAT  
ATGAGGAACAATTGGAGAAGTGAATTATATAAAATATAAAGTGGTAGAAATTAAGCCATTGGGAGTAGCACCCA  
CTAAGGCAAAAAGGAGAGTGGTGGAGAGAGAAAAAAGAGCAGTGGGACTGGGAGCTGTGTTCCCTTGGGTTCTT  
GGGAGCAGCAGGAAGCACTATGGGCGCGGCGTCAATAACGCTGACGGTACAGGCCAGACAACCTGTTGTCTGGT  
ATAGTGCAACAGCAAAGCAATTTGCTGAGGGCTATAGAGGCGCAACAGCATATGTTGCAACTCACAGTCTGGG  
GCATT

>JX140664

AATTATACTTCTAATGATACAGAAAACATCACACTCACACTCCCATGCAAAAATAAAACAGATTATAAACTTGT  
GGCAGGAGGTAGGACGAGCGATGTACGCTCCTCCCATTCAGGAAACATAACATGTAAGTCAACCATCACAGG  
ATTACTATTGGTGCGTGATGGAGGACAAGGAAACAGCTCAAATGAGACATTCAGACCTGGAGGAGGAGATATG  
AGGGATAATTGGAGAAGTGAATTGTATAAGTATAAAGTGGTAGAAATTAAGCCATTGGGAGTAGCACCCACTG  
AGGCAAAAAGGAGAGTGGTGGAGAGAGAAAAAAGAGCAGTGGGACTAGGAGCTGTGATCTTTGGGTTCTTGGG  
AGCAGCAGGAAGCACTATGGGCGCGGCGTCAATAACGCTGACGGTACAGGCCAGACAACCTGTTGTCTGGTATA  
GTGCAACAGCAAAGCAATTTGCTGAAGGCTATAGAGGCACAACAGAATATGTTGCAACTCACGGTCTGGGGCA  
TT

>KT183083

ACTTATGTAAATATAAGTGAAACAAACAAAACCTTCATACTCCCATGCAGAATAAAACAAATTATAAACATGT  
GGCAGGGGGTAGGACGAGCAATGTATAACCCTCCCATTCAGGAAACATAACATGTAACCTCAAGTATCACAGG  
ACTACTATTGGTACGTGATGGAGGAAACGGGGATACCACAAGTAATAACAGTAATAACGAGACATTCAGACCT  
GGAGGGGGAAATATGAAGGACAATTGGAGAAGTGAATTATATAAATACAAGGTGGTAGAAGTTAAGCCATTGG  
GAATAGCACCCACTGAGGCAAAAAGGAGAGTGGTGGAGAGAGAAAAAAGAGCAGCAGGAATAGGAGCTGTACT  
CCTTGGGTTCTTGGGAGCAGCAGGAAGCACTATGGGCGCAGCATCAATAACGCTGACGGTACAGGCCAGGCAA  
TTATTGTCTGGTATAGTGCAACAGCAAAGCAATTTGCTGAGGGCTATAGAGGCGCAACAGCATATGTTGCAAC  
TCACGGTCTGGGGCATT

>KT183155

GATTATAATGAAATCATCACACTCCAATGCAGGATAAAACAAATTATAAACATGTGGCAGGGGGTAGGACGAG  
CAATGTATGCCCCCTCCCATTCAGGAATCATAACATGTAACTCAAATATCACAGGACTACTATTGACACGAGA  
TGGAGGCAACAGCAACAACGACACAGAGGTATTAGACCTGGAGGAGGAAATATGAAAGACAATTGGAGA  
AGTGAATTATATAAATATAAGGTGGTAGAAATTAAGCCATTGGGAATAGCTCCCACTGAAGCAAAAAGGAGAG  
TGGTGGAGAGAGAAAAAAGAGCAGTGGGAATAGGAGCTGTGCTCCTTGGGTTCTTGGGAGCAGCAGGAAGCAC  
TATGGGCGTGGCGTCAATAACGCTAACGGTACAGGCCAGACAATTGTTGTCTGGTATAGTGCAACAGCAAAGC  
AATTTGCTGAGAGCTATAGAGGCGCAACAACATATGTTGCAACTCACGGTCTGGGGCATT

>KT183168

ACTTATAATGATACAAAGCATAATGGAACCAAAGTCATCACACTCCCATGCAGAATAAAACAAATTATAAACA  
TGTGGCAGGAGGTAGGACGAGCAATGTATGCTCCTCCCATTCAGGCAACATAACATGTACGTCAAATATCAC  
AGGACTACTATTGACAAGGGATGGAGGGAATAATAGCACAGAGACAGAGACATTCAGACCTGGAGGAGGAGAT  
ATGAGGGACAATTGGAGAAGTGAATTATATAAATACAAAGTAGTAGAAATTAAGCCATTGGGAATAGCACCCA  
CTGGAGCAAAAAGGAGAGTGGTGGAGAGAGAAAAAAGAGCAGTGGGAATAGGAGCTGTGTTCCCTTGGGTTCTT  
GGGAGCAGCAGGAAGCACTATGGGCGGCGTCAATAACGCTGACGGTACAGGCCAGACAACCTGTTGTCTGGT  
ATAGTGCAACAGCAAAGCAATTTGCTGAAGGCTATAGAGGCGCAACAACACCTGTTGCAACTCACAGTCTGGG  
GCATT

>KT183188

TCTCATGAGGGGTGAGGCAACATCACAACATCACAATCCCATGCAGGATAAAACAAATCATAAACATGTGGC  
AGAAGGTAGGACGAGCAATGTATGCCCCCTCCCATTCAGGAAACATAACATGTAACCTCAAGTATCACAGGAAT  
ACTGTTGACACGTGATGGAGGAAACATAACAAATAGCACAAAGGAGATATTAGACCTGGAGGAGGAGATATG  
AAGGACAATTGGAGAAGTGAATTATATAAATATAAAGTGGTAGAAATTAAGCCATTGGGAATAGCACCCACTG  
AATCAAAAAGGAGAGTGGTGGAGAGAGAAAAAAGAGCAGTGGGAATAGGAGCTGTGCTCCTTGGGTTCTTGGG

AGCAGCAGGAAGCACTATGGGCGCGGCGTCAATAACGCTGACGGCACAGGCCAGACAACCTGTTGTCTGGTATA  
GTGCAACAGCAAAGCAATTTGCTGAGAGCCATAGAGGCGCAACAGCATATGTTGCAACTCACGGTCTGGGGCA  
TT

>HM623550

AATCAGACAGGAAATGATTCATTCATCATACTTCCATGTAAAATAAAACAAATTATAAATATGTGGCAGAAGG  
TAGGACGAGCAATGTATGCTCCTCCCATTCAGGAAATATAACATGTAAGTCAAATATCACAGGAATACTATT  
AGTACGTGATGGAGGCCAGATAACAGTACAGAAACATTTAGACCTGGAGGAGGAAATATGAAGGACAATTGG  
AGAAGTGAATTATATAAATATAAAGTGGTAGAAATTAAGCCATTGGGAATAGCACCCACTGAAGCAAAAAGGA  
GAGTGGTGGAGAGAGAAAAAGAGCAGTGGGAATAGGAGCTGTGTTCTTGGGTTCTTGGGAGCTGCAGGAAG  
CACTATGGGCGCGGCGTCAATAACGCTGACGGTACAGGCCAGACAACCTGTTGTCTGGTATAGTGCAACAGCAA  
AGCAATTTGCTGAGAGCTATAGAGGCGCAACAGCATATGTTGCAACTCACAGTCTGGGGCATT

>HM623567

TGCTATACATCAAGACTGTTTAATAGTACATACAATGGTACACTTAGTATACATAATACACATAATGATACAG  
GAAACGAAACACACATCACACTTCCATGCAGAATAAAACAAATTATAAACATGTGGCAGGGGGTAGGGCGAGC  
AATGTATGCCCCCTCCCATTCAGGAAACATAACATGTAATTCAAGTATCACAGGTCTACTATTGACACGGGAT  
GGAGGAAACACAACACATAATGACACAGAGACATTCAGACCTGGAGGAGGAAATATGAAGGACAATTGGAGAA  
GTGAATTATATAAATATAAAGTAATAGAAATTAAGCCATTGGGAATAGCTCCCACTGGGGCAAAAAGGAGAGT  
GGTGGAGAGAGAAAAAGAGCAGTGGGAATAGGAGCTGTGTTCTTGGGTTCTTGGGAGCAGCAGGAAGCACT  
ATGGGCGCAGCGTCAATAACGCTGACGGTACAGGCCAGACAACCTGTTGTCTGGTATAGTGCAACAGCAAAGTA  
ATTTGCTGAGGGCTATAGAGGCGCAACAGCATATGTTGCAACTCACAGTCTGGGGCATT

>HM623573

AATTATACTAATAACACCATCACACTCCCATGCAGAATAAAACAAATTATAAACATGTGGCAGGAGGTAGGAA  
GAGCAATGTATGCCCCCTCCCATTCAGGAAACATAACATGTAACTCAAGTATCACAGGAATACTATTGACACG  
TGATGGAGGACAAGATAATAACAAAGAATAATAAGAGATATTCAGACCTGGAGGAGGAGATATGAGAGAC  
AATTGGAGAAGTGAATTATATAAATACAAAGTGGTAGAAATTAAGCCATTGGGAGTAGCACCCACTGATGCAA  
AAAGGAGAGTGGTGGAGAGAGAAAAAGAGCAGTAGGACTAGGAGCTGTATTCTTGGGTTCTTGGGAGCAGC  
AGGAAGCACTATGGGCGCGGCGTCAATAGCGCTGACGGTACAGGCCAGACAACCTGTTGTCTGGTATAGTGCAA  
CAGCAAAGCAATTTGCTGAGGGCTATAGAGGCGCAACAGCATATGTTGCAACTCACAGTCTGGGGCATT

>KC154017

TTTCATCCAGACAACCTCAACCAAAGGCAAAGACAATGAAACCATCACACTCCCATGCAGGATAAAACAATTTA  
TAAACATGTGGCAGGGAGTAGGACGAGCAATGTATGCCTCTCCCATTCAGGAAACATAACATGTAACTCAAG  
TATCACAGGGATAATATTGACACGTGATGGAGGAAACACCACAAACAAAACAGAGGTATTTCAGACCTGAAGGA  
GGAAATATGAAGGACAATTGGAGAAGTGAATTATATAAATATAAAGTGGTAGAAATTAAGCCATTGGGAGTAG  
CTCCAACCTGAGGCAAAAAGGAGAGTGGTGGAGAGAGGAAAAAGAGCAGTGGGAATAGGAGCTGTACTCCTTGG  
GTTCTTGGGAGCAGCAGGAAGCACTATGGGCGCAGCATCAATAACGCTGACGGTACAGGCCAGACAACCTGTTG  
TCTGGTATAGTGCAACAGCAAAGCAATTTGCTAAGAGCTATAGAGGCGCAACAACATATGTTGCAACTCACAG  
TCTGGGGCATT

>KC154019

GGTCATAATGGTACAGGAGATAATTCAACCATCACAATTTTCATGCAGAATAAAACAAATTATAAACATGTGGC  
AGGGGGTAGGGCGAGCAATGTATGCCCCCTCCCATTCAGGAAACATAACATGTAACTCAAGTATTACAGGACT  
ACTATTAGTACGTGATGGAGGTGGAATAGCACAGAAGAGATATTTCAGACCTGGAGGAGGAGATATGAGAGAC  
AATTGGAGAAGTGAATTATACAAATATAAAGTAGTAGAAATTAAGCCCTTAGGAGTAGCACCCACTAAGGCAA  
AAAGGAGAGTGGTGGAGAGAGAAAAAGAGCAGTGGGAATAGGAGCTGTGTTCTTGGGTTCTTGGGAGCAGC  
AGGAAGCACTATGGGCGCAGCGTCAATAACGCTGACGGTACAGGCCAGACAATTATTGTCTGGTATAGTGCAA  
CAGCAAAGCAATTTGCTGAGGGCTATAGAGGCGCAACAGCATATGTTGCAACTCACGGTCTGGGGCATT

>KC154020

GACTATAATTCAACTAAGAACATCACACTCCCATGCAGGATAAAACAAATTATAAACATATGGCAGGGGGTAG  
GACAAGCAATGTATGCCCCCTCCGTTGCAGGAAAAATAATATGTACATCAAATATCACAGGACTACTATTGAC  
ACGTGATGGAGGCGACGACACAAATGACACAGAGATATTTCAGACCTGGAGGAGGAAATATGAAGGACAATTGG  
AGAAGTGAATTATATAAATATAAAGTAGTAGAAATTAAGCCATTAGGACTAGCACCCACTGCAGCAAGAAGGA  
GAGTGGTGCAGAGAGAAAAAGAGCAATAGGAATAGGAGCTGTGTTCTTGGGTTCTTGGGAGCAGCAGGAAG  
CACTATGGGCGCAGCATCAATAACGCTGACGGTACAGGCCAGACAATTGTTGTCTGGTATAGTGCAACAGCAA  
AGCAATTTGCTGAGGGCTATAGAGGCGCAACAGCATATGTTGCAACTCACAGTCTGGGGCATT

>HM204617

TTTCATGGAAATGAGACAGAAATCATACTCCAATGCAGACTAAAACAATTTATAAATATGTGGCAGGGAGTAG  
GACAAGCAATGTATGCCCCCTCCTATTGAAGGAAACATAACATGTACATCAAATATCACAGGACTATTATTGAC  
ACGTGATGGAGGCAAAGATGATAACACAACAGAGATATTTCAGACCTATAGGAGGAGACATGAAGAACAATTGG  
AGAAGTGAATTATATAAATATAAAGTGGTAGAAATTAAGCCATTGGGAATAGCACCCACTGCTGCAAAAAGGA  
GAGTGGTGGACAGAGAAAAAGAGCAGTGGGAATGGGAGCTGTGTTCTTGGGTTCTTGGGAGCAGCAGGAAG

CACTATGGGCGCAGCGTCAATAACGCTGACGGTACAGGCCAGACAACCTGTTGTCTGGTATAGTGCAGCAGCAA  
AGCAATTTGCTGAGAGCTATAGAGGCGCAACAGCATCTGTTGCAACTCACGGTCTGGGGCATT

>KF114894

AATCATAATGGCACCATCACACTCCCATGTAGAATAAAACAAATTATAAACATGTGGCAGAGGGTAGGACGAG  
CAATGTATGCCCCCTCCCATTCAGGAAACATAACATGTAAATCTAATATCACAGGATTACTATTGGTACGTGA  
TGGAGGGAATGGGAATAATAGCAGAAATGAGACATTTCAGACTTGGAGGGGGAGATATGAGAGACAATTGGAGA  
AGTGAATTATATAAATATAAAGTGGTAGAAATTAAGCCATTAGGAGTAGCACCCACCGAGGCAAAAAGGAGAG  
TGGTGGAGAGAGAAAAAGAGCAGTGGGAATAGGAGCTGTGTTCCCTTGGGTTCTTGGGAGCAGCAGGAAGCAC  
TATGGGCGCGGCGTCAATAACGCTGACGGTACAGGCCAGACAATTGTTGTCTGGTATAGTGCAACAGCAAAAC  
AATTTGCTGAGGGCTATAGAGGCGCAACAGCATCTGTTGCAACTCACAGTCTGGGGCATT

>HQ595756

TATCATGCTAATGGTACAGCAAATTTCTACAGATTCAAAAAATGATACATACATCACACTCCCATGCAGAATAA  
AACAAATTATAAACATGTGGCAAGGGGTGGGACAAGCAATGTATGCCCCCTCCCATTCAGGAAACATAACATG  
TAACTCAAATATCACAGGACTGCTATTGCTACGTGATGGAGGTCCAGAAAACAATACAGAGACATTTCAGACCT  
GGAGGAGGAAATATGAAGGACAATTGGAGAAGTGAATTGTATAAATATAAAGTAGTAGAAATTAATCCATTAG  
GAATAGCACCCACTAAGGCAAAAAGGAGAGTGGTGGAGAGAGAAAAAGAGCAGTGGGACTAGGCGCTATGTT  
CCTTGGGTTCTTGGGAGCAGCAGGAAGCACTATGGGCGCAGCATCAATGACGCTGACGGTACAAGCCAGACAA  
TTGCTGTCTGGTATAGTGCAACAGCAAAGCAATTTGCTGAAGGCTATAGAGGCGCAACAGCATATGTTGCAAC  
TCACGGTCTGGGGCATT

>HQ615941

GACTATATTAAAAACAGTACATTAAACCTGGATAATAATACAAACAGTACAGACATCATACTCCAATGCAGAA  
TAAAACAAATTATAAACATGTGGCAGGGGGTAGGAAAAGCAATGTATGCCCCCTCCCATTCAGGAAATATAAC  
ATGTAACCTCACTATCACAGGACTACTATTGACACGTGATGGAGGCAATGCTAAAGGCAATGATACAGACAAT  
AAGACAGAGACATTTCAGACCTGCAGGAGGAGATATGAGGGACAATTGGAGAAGTGAATTATATAAATACAAGG  
TGGTAGAAATTAAGCCATTAGGAGTAGCACCCACTGAGGCAAAAAGGAGAGTGGTGGAGAGAGAAAAAGAGC  
AGTAGGACTAGGAGCTATGTTCCCTTGGGTTCTTGGGAGCAGCAGGAAGCACTATGGGCGCAGCATCAATAACG  
CTGACGGTACAAGCCAGACAATTACTGTCTGGTATAGTGCAACAGCAAAGCAATTTGCTGAGGGCTATAGAGG  
CGCAACAACATATGTTGCAACTCACGGTCTGGGGCATT

>GU080194

ACCTACACGCCTAATGCTACAGAAAGTATTTCCAATAAAACCATCCCCTTTTCATGCAGAATAAAACAAATAA  
TAAATATGTGGCAGGAAGTAGGACGGGCAATGTATGCCCCCTCCCATTCAGGAAACATAACATGTAGATCAAA  
TATCACAGGACTATTATTAGTACGTGATGGAGGCAGCAATAACAATACCAACGAGACATTTCAGACCTGGAGGA  
GGAAATATGAAGGACAATTGGAGAAGTGAATTATACAAATATAAAGTGGTAGAAATTAAGCCATTGGGAATAG  
CACCCACGAAGGCAAAAAGGAGAGTGGTGGAGAGAGAAAAAGAGCAGTGGGAATAGGAGCTGTGTTCCCTTGG  
GTTCTTGGGAGCAGCAGGAAGCACTATGGGCGCGGCGTCAATAACGCTGACGGTACAGGCCAGACAATTGTTG  
TCTGGTATAGTGCAACAGCAAAGCAATTTGCTGAGGGCTATAGAGGCGCAACAGCATATGTTGCAACTCACGG  
TCTGGGGCATT

>GU080199

AGTTATACAAGTATTAATAAGACAGGTGAAAACAGCACAAAGTGATTCAAACAGCACACTCACACTCCCATGCA  
GGATAAAACAAATTATAAACATGTGGCAGGAGGTAGGACGAGCGATGTACGCTCCTCCCATTCAGGAAATAT  
AACATGTAGATCAAATATCACAGGACTACTATTGACACGTGATGGAGGAAACACAACAAACAACACAAACAAA  
GAGATATTTCAGACCTGGAGGAGGAAATATGAAAGACAATTGGAGAAGTGAATTATATAAATATAAAGTGGTAG  
AAATTAAGCCATTGGGAGTAGCACCCACTAAGGCAAAAAGGAGAGTGGTGGAGAGAGAAAAAGAGCAGTACT  
GGGAATGGGAGCTGTGTTCCCTTGGGTTCTTGGGAGCAGCAGGAAGCACTATGGGCGCAGCGTCACTAACGCTG  
ACGGTACAGGCCAGACAACCTGTTGTCTGGCATAGTGCAACAGCAAAGCAATTTGCTGAGAGCTATAGAGGCGC  
AACAGCATCTGTTGCAACTCACAGTCTGGGGCATT

>HM623585

AACATACAGATAACAACCAAACAGGTACCATCACACTTCCATGCAAAATAAAACAAATTATAAACATGTGGC  
AGGGGGTGGGACAAGCAATGTATGCCTCTCCCATTTGAAGGAAACATAACATGTAGATCAAATATCACAGGACT  
ACTATTAGTACGTGATGGAGGCAATACAAGTGAGACAAATGGAACAGAGACATTTCAGACCTGCAGGAGGAGAT  
ATGAGGGACAATTGGAGAAGTGAATTATATAAGTATAAAGTGGTAGAAATTAAGCCATTGGGAATAGCACCCA  
CTAAAGCAAAAAGGAGAGTGGTGGAGAGAGAAAAAGAGCAGTGGGAATAGGAGCTGTGTTCCCTTGGGTTCTT  
GGGAGCAGCAGGAAGCACTATGGGCGCGGCGTCAATAACGCTGACGGTACAGGCCAGACAACCTGTTGTCTGGT  
ATAGTGCAACAGCAAATAAATTTGCTGAGGGCTATAGAGGCGCAACAGCATATGTTGCAACTCACAGTCTGGG  
GCATT

>KF725903

AATCACTCAACCGATATAAACCACCATCCAATGCAGGATAAAACAAATTTATAAACATGTGGCAGGAGGTAGGAC  
GAGCAATGTATGCCCCCTCCCATAGCAGGAAACATAACATGTAAATCAAATATCACAGGACTACTATTGACAAG  
TGATTCTGGAAATAGAATAATGGAGCAGAGATATTTCAGACCTGGAGGAGGAAATATGAAGGACAATTGGAGA  
AGTGAATTATATAAATATAAAGTGGTAGAAATTAAGCCATTAGGAGTAGCACCCACTGGGGCAAAAAGGAGAG

AGGTGGGGAGAGGAAAAAGAGCAGCAGGAATAGGAGCTATGATCTTTGGGTTCTTGGGAGCAGCAGGAAGCAC  
TATGGGCGCGGCGTCAATAACGCTGACGGTACAGGCCAGACAACCTATTGTCTGGGATAGTGCAACAGCAAAAC  
AATTTGCTGAGAGCTATAGATGCGCAACAGCATATGTTGCAGCTCACAGTCTGGGGCATT

>KF725921

GATCATTTCAAACCTTAACCATCACACTCCCATGCAGAATAAAACAAATTATAAACCTGTGGCAGGAGGTAGGAA  
GGGCAATATATGCCCCCTCCCATTCAGGAAACATAACATGTACATCAAATATCACAGGATTACTATTGCTACG  
AGATGGAGGTCTCTTAAACAGCACAAACGAAACATTTCAGACCTGGAGGAGGAGACATGAGGAACAATTGGAGA  
AGTGAATTATATAAATATAAAGTGGTAGAAATTAAGCCATTGGGGGTAGCACCCACTAATGCAAAAAGGAGAG  
TGGTGGAGAGAGAAAAAGAGCAGTAGGAATAGGAGCTGTGTTTCCTTGGGTTCTTGGGAGCAGCAGGAAGCAC  
TATGGGCGCGGCGTCAATGACGCTGACGGTACAGGCCAGACAACCTGTTGTCTGGTATAGTGCAACAGCAAAAC  
AATTTGCTGAGGGCTATAGAGGCGCAACAGCATATGTTGCAACTCACGGTCTGGGGCATT

>JX140669

AATTATACTGAGACAACAGGTAATGGGACTATCATACTTCCATGCAGAATAAAACAAATCATAAACATGTGGC  
AGAAAAGTAGGACGAGCAATGTATGCCCCCTCCCATTCAGGAAACATAACATGTAGTTCAAATATCACAGGACT  
ACTATTGACACGTGATGGAGGAAATACAACAGATAATACAACAAATAATAACACAGAGGTATTCAGACCTGGA  
GGAGGAAATATAAAAGACAATTGGAGAAGTGAATTATATAAATATAAAGTGGTAGAAATTAACCATTAGGAA  
TAGCTCCAACATAAGCAAAAAGGAGAGTGGTGGAGAGAGAAAAAGAGCAGTGGGAATAGGAGCTATGTTTCCT  
TGGATTCTTGGGAGCAGCAGGAAGCACTATGGGCGCGGCGTCAATAACGCTGACGGTACAGGCCAGACAACCTG  
CTGTCTGGTATAGTGCAACAGCAAAGTAATTTGCTGAGAGCTATAGAGGCGCAACAGCATATGTTGCAACTCA  
CAGTCTGGGGCATT

>KF725937

AGCTATACATACAATGGTAACTCAACCATCACACTTCCATGCAGAATAAAGCAAATTATAAACATGTGGCAGG  
AGGTAGGACGAGCAATGTATGCCCCCTCCCATTCAGGAAACATAACATGTGAATCAAACATCACAGGATTACT  
GTTGACACGTGATGGAGGAAACAATAGTACAAATGGAAACAGAGATATTCAGACCTGAAGGAGGAGATATGAGG  
GACAATTGGAGAAGTGAATTGTATAAATATAAAGTGGTGGAAATTAAGCCATTGGGAGTAGCACCCACTAAGG  
CAAAAAGGAGAGTGGTGGAGAGAGAAAAAGAACAGTGGGAATAGGAGCTGTGTTTCCTTGGGTTCTTGGGAGC  
AGCAGGAAGCACTATGGGCGCGGCGTCAATAACGCTGACGGTACAGGCCAGACAATTGTTGTCTGGTATAGTG  
CAACAGCAAAGCAATTTGCTGAGGGCTATAGAGGCGCAACAGCATATGTTGCAACTCACGGTCTGGGGCATA

>KF725945

AACTACAATATAAGTAATATAAATTCAACCTCAAATATCACACTCCAATGCAGAATAAAACAAATTGTAAACA  
TGTGGCAAGGGGTAGGACGAGCAATGTATGCTCCTCCCATTCAGGAAACATAACATGTAGATCAAATATCAC  
AGGACTACTATTGACACGTGATGGAGGAAGCAATATTACTAATACTACAGAGATATTCAGACCTGCAGGAGGA  
AATATGAAGGATAATTGGAGAAGTGAGTTATATAAATATAAAGTGGTAGAAGTTAAACCATTAGGAATAGCAC  
CCACTGGGGCAAAAAGGAGAGTGGTGGAGAGAGAAAAAGAGCAGTGGGAATAGGAGCTGTGTTTCCTTGGGTT  
CTTGGGAGCAGCAGGAAGCACTATGGGCGCGGCGTCAATAACGCTGACGGTACAGGCCAGACAATTACTGTCT  
GGTATAGTGCAACAGCAAAGCAATTTGCTGAGGGCCATAGAGGCGCAACAGCATATGTTGCAACTCACGGTCT  
GGGGCATT

>KF725958

AATCATACAGACCTGTTTAAATGATACAGAAAGTAATAGCACAAAAGAGGATAACGCAAACATCACACTCCCAT  
GCAGAATAAAACAAATTATAAACCTGTGGCAGCAAGTGGGACGAGCAATGTATGCCCCCTCCCATTCAGGAAA  
CATAACATGTACATCAAATATTACAGGGATATTATTGACACGTGATGGAGGAGAGAATACAACAGAGGGGAAG  
GACACAGAGACATTTCAGACCTGCAGGAGGAGACATGAGGGACAATTGGAGAAGTGAATTATATAAATATAAAG  
TGGTAGAAATCAGGCCATTGGGACTAGCACCCACTGGGGCAAAAAGGAGAGTGGTGGGGAGAGAAAAAGAGC  
AGTAGGAATAGGAGCTGTGTTTCCTTGGATTCTTGGGAGCTGCAGGAAGCACTATGGGCGCAGCGTCATTAAACG  
CTGACGGTACAAGCCAGACAATTGTTGTCTGGTATAGTGCAACAGCAAAGCAATTTGCTGAAGGCTATAGAGG  
CGCAACAGCATCTGTTGCAACTCACAGTCTGGGGCATT

>KF725962

TTTTATAGTCCTAATACTACAAATGGTACAGAAGAAAATACAAACTCCTCCATCACGATACCATGCAGAATAA  
AACAGATAATAAACATGTGGCAGGAAATAGGACGGGCAATGTATGCCCCCTCCCGTGAAGGAAACATAACATG  
CAACTCAAACATCACAGGACTGCTACTGGTACGTGATGGAGGAGATAATAATAAAACAGATAATAATAAAACA  
GAGATATTTAGACCTGGAGGAGGAGATATGAGGGATAATTGGAGAAGTAAATTATATAAATATAAAGTGGTAG  
AAATTAACCATTGGGAATAGCACCCACTAAGGCAAAAAGGAGAGTGGTGGAGAGAGAAAAAGAGCAGTGGG  
AATAGGAGCTGTGTTTCCTTGGGTTCTTGGGAGCAGCAGGAAGCACTATGGGCGCAGCGTCAGTGACGCTGACG  
GTACAGGCCAGACAATTGTTGTCTGGTATAGTGCAACAGCAAAGCAATTTGCTGAGGGCTATAGAGGCGCAAC  
AGCACATGTTGCAGCTCACAGTCTGGGGCATT

>KF726010

AATTATACAAGAAATGCTTCAGATACAACTACAAATAAAACCATCACACTTCCATGTAGAATAAAACAAATTA  
TAAATATGTGGCAGGGGGTAGGAAGAGCAATGTATGCCCCCTCCCATTCAGGAAAAGATAGCATGTAACCTCAAG  
TATCACAGGATTACTATTATTACGTGATGGAGGTATAAGCAATGACAGTGAGACCGAAATATTCAGACCTGGA  
GGAGGAAATATGAAAGACAATTGGAGGAGTGAACCTATATAAATATAAAGTGGTAGAAATTAAGCCATTAGGAA

TAGCACCCACTGAGGCAAAAAGGAGAGTGGTGGAGAGACAAAAAAGAGCAGTAGGACTAGGAGCTGTGTTCCCT  
TGGGTTCTTGGGAGCAGCAGGAAGCACTATGGGCGCAGCGTCAATAACGCTGACGGTACAGGCCAGACAATTA  
TTGTCTGGTATAGTGCAACAGCAAAGCAATTTGCTGAGGGCTATAGAGGCGCAACAGCATATGTTGCAACTCA  
CGGTCTGGGGCATT

>MG901120

GGCTACCAGCAAAATAGTACAGCAAATGAGGCAAACATCACACTTCCATGCAGGATAAAACAAATTATAAACA  
TGTGGCAAGGGGTAGGACGAGCAATGTATGCCCCCTCTATTGCAGGAACCATAACAATGTACATCCAATATTAC  
AGGACTACTATTAGAACGTGATGGAGGTCCTGATAATAATGGAAC TGAAATAATGGAAC TGAAATAATGGA  
ACTGAAATATTCAGACCTACAGGAGGAAATATGAGGGACAATTGGAGAAGTGAATTATATAAATATAAAGTGG  
TGGAAATTAAGCCATTAGGAATAGCACCCACTGAGAGCAAAAAGGAGAGTGGTGGAGAGACAAAAAAGAGCATT  
GGGAATAGGAGCTATGTTCCCTTGGGTTCTTGGGAGCAGCAGGAAGCACTATGGGCGCAGCGTCAATAGCGCTG  
ACGGCACAGACCAGACAACCTGATGGCTGGTATAGTGCAACAGCAAAGCAATTTGCTGAGGGCTATAGAGGCGC  
AACAGCATATGTTGCAACTCACGGTCTGGGGCATT

>KP109516

TACTACCTGTTTAATGGTACGGTTGTTAATACCACAGATAGTAACACAAATATCACACTACCATGCAGAATAA  
AACAAATTGTAAACATGTGGCAGGGGGTAGGACGAACAATGTATGCTCCTCCCATTCAGGAGTCATAAACTG  
TACATCAAACATAACAGGATTACTATTGACACGTGATGGAGGAATAAATAGCACAGGCAATGAGACATTCAGA  
CCTGGAGGAGGAGATATGAGGGACAATTGGAGAAGTGAGTTATATAAATATAAAGTGGTAGAAATTAAGCCAT  
TAGGGATAGCACCCACTGAGGCAAAAAGGAGAGTGGTGGAGAGAGAGAAAAGAGCAGCGATAGGAGCTGTACT  
CCTTGGGTTCTTGGGAGTGGCCGGAAGCACTATGGGCGCAGCATCAATAACGCTGACGGCACAGGCCAGACAA  
TTGCTGTCTGGTATAGTGCAACAGCAAAGCAATTTGCTGAGGGCTATAGAGGCGCAACAGCATATGTTGCAGC  
TTACAGTCTGGGGCATT

>MN611466

TTTTATAACACTAGCAGGTTTAATAGCAGCATGACAAACAGTACAAACAACATCACACTCCCATGCAGAATAA  
AACAAATTATAAACATGTGGCAGGAGGTAGGACGAGCTATGTATGCCCCCTCCCATTCAGGAAACATAACATG  
TATATCAAATATCACAGGACTACTATTGACACGTGATGGAGGAATAACAATGGGACAAATGAGACAGGTAAT  
GAGACATTCAGACCTGCAGGAGGGAATATGAAGGACAATTGGAGAAGTGAATTATATAAATATAAAGTGGTGG  
AGATCAAGCCATTAGGAGTAGCACCCACTAAAGCAAAAAGGAGAGTGGTGGAGAGAGAAAAAAGAGCAGTGGG  
AATAGGAGCTGTGTTCCCTTGGGTTCTTGGGAGCAGCAGGAAGCACTATGGGCGCGGCGTCAATAACGCTGACG  
GTACAGGCCAGACAACCTGTTGTCTGGTATAGTGCAACAGCAAAGCAATTTGCTGAGGGCTATAGAGGCGCAAC  
AGCATATGTTGCAACTCACAGTCTGGGGCATT

>MN611467

ACTTATGCTAATAGAACAGGCAATGGTACCTTCACACTCCCATGCAGAATAAAACAAATTATAAACATGTGGC  
AGGAGGTAGGAAGAGCAATGTATGCCCCCTCCCATTCAGGAAACGTAACATGTAGATCAAATATCACAGGACT  
ACTATTGACACGTGATGGAGGAAAAACAATACTGAAGAGATATTTAGACCTGGAGGAGGAAATATGAGGGAC  
AATTGGAGAAGTGAATTATATAAATATAAAGTGGTAGAAATTAAGCCATTAGGAGTAGCACCCACTAATGCAC  
AAAGGAGAGTGGTGAAGAGAGAAAGAAGAGCAGTGGGAATAGGAGCTGTGTTCCCTTGGGTTATTGGGAGCAGC  
AGGAAGCACTATGGGCGCAGCGTCAATAACGCTGACGGTACAGGCCAGACAACCTGTTGTCTGGTATAGTGCAA  
CAGCAAAACAATTTGCTGAGAGCTATAGAGGCGCAACAGCATATGTTGCAACTCACAGTCTGGGGCATT

>DQ411853

TGCTATACATCAGACTTGTTTAATAGTACATACATGTCTAATAATACAGGAGGAGCAAATATCACACTCCAAT  
GCAGAATAAAACAAATTATAAGAATGTGGCAGGGGGTAGGACAAGCAATGTATGCCCCCTCCCATTCAGGAAA  
CATAACATGCAAATCAAATATCACAGGACTACTATTGACACGTGATGGAGGAAAGGAAAAAATGACACAGAA  
ACATTTAGACCTGGAGGGGGAGATATGAGAGACAATTGGAGAAGTGAATTATATAAATACAAGGTGGTAGAAA  
TTAAGCCATTAGGAATAGCACCCGATAAGGCAAAAAGGAGAGTGGTGGAGAGAGAAAAAAGAGCAGTGGGAAT  
AGGAGCTGTGTTCCCTTGGGTTCTTGGGAGCAGCAGGAAGCACCATGGGCGCAGCATCAATGACGCTGACGGTA  
CAGGCCAGACAATTGTTGTCTGGTATAGTGCAACAGCAAAGCAATTTGCTGAGGGCTATAGAGGCGCAACAGC  
ATATGTTGCAACTCACGGTCTGGGGCATT

>AY162223

TACTACCCTAAGAATGGTACATACAAATACAATGGTAATTCAAGCTTACCCATCACACTCCAATGCAAAATAA  
AACAAATTGTACGCATGTGGCAAGGGGTAGGACAAGCAATGTATGCCCCCTCCCATTCAGGAAACATAACATG  
TAGATCAAACATCACAGGAATACTATTGACACGTGATGGGGGATTTAACAACACAAACAACGACACAGAGGAG  
ACATTCAGACCTGGAGGAGGAGATATGAGGGATAACTGGAGAAGTGAATTATATAAATATAAAGTGGTAGAAA  
TTAAGCCATTGGGAATAGCACCCACTAAGGCAAAAAGAGAGTGGTGCAGAGAAAAAAGAGCAGTGGGAAT  
AGGAGCTGTGTTCCCTTGGGTTCTTGGGAGCAGCAGGAAGCACTATGGGCGCAGCGTCAATAACGCTGACGGTA  
CAGGCCAGACAACCTGTTGTCTGGTATAGTGCAACAGCAAAGCAATTTGCTGAAGGCTATAGAGGCGCAACAGC  
ATATGTTGCAACTCACAGTCTGGGGCATT

>AF391235

AGTTATAATACATCAGACCTGTTTAATAGTAATAATGGTTTCAGCCATCACACTCCCATGCAGAATAAAACAAA  
TTGTAAACATGTGGCAGGGGGTAGGACGAGCAATATATGCCCCCTCCCATTCAGGAAACATAACATGTAACTC

AAGTATCACAGGACTACTCTTGGTACGTGATGGAGGAAACACAACCAACTCAACTGAGATATTCAGACCAGAA  
GGAGGAAATATGAGGGACAATTGGAGAAGTGAATCATATAAATACAAAGTGGTAGAAATTAAGCCCTTGGGAA  
TAGCGCCCACTAATGCAAAAAGGAGAGTGGTGGAGAGAGAAAAAAGAGCAGTGACACTAGGAGCTATGTTCCCT  
TGGGTTCTTGGGAGCAGCAGGAAGCACTATGGGCGCAGCGTCAATAACGCTGACGGCACAGGCCAGACAGTTG  
TTGTCTGGAATAGTGCAACAGCAAAGCAATTTGCTGAGAGCTATAGAGACGCAACAGCATATGTTGCAACTCA  
CAGTTTGGGGCATT

>AF391240

AATCATACATACCTGTTTAAATGGTACAGGCGTGCCTAATAATACCACACCTTCTAATGAGACCATCATACTTC  
CATGCAGAATAAAACAAATTATAAACATGTGGCAGGAGGTAGGGCGAGCAATGTATGCCCCCTCCATTGCAGG  
AAACATCACATGTACATCAAACATCACAGGACTACTATTAGTACGTGATGGAGGCAACAGTGGCAAAAATACC  
ACAGAAGAGATATTCAGACCTGGGGGAGGAAATATGAAGGACAATTGGAGAAGTGAATTATATAAATATAAAG  
TGGTAGAAATTAAGCCATTAGGAATAGCTCCCACTGCGGCACAAAAGGAGAGTGGTGGAGAGAGAAAAAGAGC  
AGTGGGAATAGGGGCTGTGTTCCCTTGGGTTCTTGGGAGCAGCAGGAAGCACTATGGGCGCGGCGTCAATAACG  
CTGACGGTACAGGCCAGACAATTGTTGTCTGGTATAGTGCAACAGCAAAGCAATTTGCTGAGGGCTATAGAGG  
CGCAACAGCATCTGTTGCAACTCACAGTCTGGGGCATT

>AY529668

AATTATATAGCAACAAATACTTCAGAGACTTCACCCATCATGATCCAGTGCAGAATAAAGCAAATTATAAACA  
TGTGGCAGAGGGTAGGACGAGCAATGTATGCCCCCTCCCATTTGCTGGAAGCCTAACATGTAACCTCAAGTATCAC  
AGGACTAATATTGACACGTGATGGAGGAGAAAATACAAGTATAGAGACATTCAGACCTGGAGGAGGAAATATG  
AAGGACAATTGGAGAAGTGAATTATATAAATATAAAGTGGTAGAAGTTAAGCCATTAGGAATAGCACCCACTG  
ATGCAAAAAGGAGAGTGGTGGAGAGAGAGAAAAGAGCAGTGGGAATAGGAGCTGTGTTCTTGGGTTCTTGGG  
AGCAGCAGGAAGCACTATGGGCGCGGCGTCAATAACGCTGACGGTACAGGCCAGACAATTATTGTCTGGTATA  
GTGCAACAGCAAAGCAATTTGCTGAGGGCTATAGAGGCGCAACAGCATATGTTGCAACTCACGGTCTGGGGCA  
TT

>AY529670

GATTACACGCCTAATAAGACAGAAAATGATTCAAATGCAACTTCAAATATCACACTCCAATGTAGAATAAAGC  
AAATTGTAAACATGTGGCAGGGGGTAGGACAAGCAATGTATGCCCCCTCCCATTTAAAGGATACATAGAATGTAT  
ATCAAATATCACAGGACTACTATTGACACGTGATGGAGGAAAAGAAAAGAATAACACAGAGACATTCAGACCT  
GGAGGAGGAGATATGAGGGACAATTGGAGAAGTGAATTATATAAATATAAAGTAGTAGAAGTTGAACCATTAG  
GAATAGCACCCACTAAGGCAAAAAGGAGAGTGGTGGAGAGAGAAAAAAGAGCAGTGGGAATAGGAGCTGTGTT  
CCTTGGGTTCTTGGGAGCAGCAGGAAGCACTATGGGCGCGGCATCAATAACGCTGACGGTACAGGCCAGACAA  
TTGTTGTCTGGTATAGTGCAACAGCAAAGCAATTTGCTGAGGGCTATAGAGGCGCAACAGCATATGTTGCAAC  
TCACGGTCTGGGGCATT

>DQ447272

AATTACAATGGTACAAAAAATAGTACAGAAAACATCACACTCCCATGCAGAATAAAACAAATTATAAACATGT  
GGCAGAAGGTAGGACGAGCAATGTATGCTCCTCCCATTTGAAGGAAAAATAACATGTTCCCTCAACATCACAGG  
ATTACTAGTGACATATGATGGAGGAACATCAGACAACGAGACAACAAAAACACAGAGACATTCAGACCTGGA  
GGAGGAGATATGAGGGACAATTGGAGAAGTGAATTATATAAATATAAAGTGGTAGAAATTAAGCCATTGGGAA  
TAGCACCCACTAAGGCAAAAAGGAGAGTGGTGGAGAGAGAAAAAAGAGCAGTGGGAATAGGAGCTGTGTTCCCT  
TGGGTTCTTGGGAGCAGCAGGAAGCACTATGGGCGCGGCGTCAATAACGCTGACGGTACAGGCCAGACAATTG  
TTGTCTGGTATAGTGCAACAGCAAAGCAATTTGCTGAGGGCTATAGAGGCGCAACAGCATATGTTGCAACTCA  
CGGTTTGGGGCATT

>AY522726

AATTACACATCAAAACAGGATAATAGTACAAAAAGAAATTCAGCTCAATCATCACAATCCCATGCAAAATAA  
AACAAATTTATAAACATGTGGCAGGAGGTAGGACGAGCAATGTATGCCCCCTCCCATTTGAAGGAATCATAAAATG  
TACATCAAACATCACAGGATTACTATTACTACGTGATGGAGGGACCAATAATGATACTAATGACACAGAGATA  
TTCAGACCTGGAGGAGGGGACATGAGGGACAATTGGAGAAGTGAATTATATAAATATAAAGTAGTAGAAATTA  
AGCCATTGGGAATAGCTCCCACTGAAGCAAAAAGGAGAGTGGTGGAGAGAGAAAAAAGAGCAGTAGGAATAGG  
AGCTGTGCTCCTTGGGTTCTTGGGAGCAGCAGGAAGCACTATGGGCGCGGCGTCAATAACGCTGACGGTACAG  
GCCAGACAAGTGTGTTGTCTGGTATAGTGCAACAGCAAAGCAATTTGCTGAGGGCCATAGAGGCGCAACAGCATA  
TGTTGCAACTCACGGTCTGGGGCATT

>AY522728

ACTCATTTGCCTAATGATACCAATAGTGAGTCCAATATAAACCTCACGATCCAATGCAGAATAAAACAAATTA  
TAAATATGTGGCAGGAGGTGGGAAGGGCAATGTATGCCCCCTCCCATTTGAAGGAAACATAACATGTAAATCAA  
TATCACAGGACTACTATTGACGCGTGTGAGGGAAGAAAGTAATAACACAGAAGAGATATTTAGACCTGGAGGA  
GGAAATATGAAGGATAATTGGAGAAGTGAATTATATAAATATAAAGTGGTAGAAATTAAGCCATTGGGAGTAG  
CACCCACTGAGGCAAAAAGGAGATTGGTGGGGAAAGAAAAAAGAGCAGTGGGAATAGGAGCTGTGCTCTTTGG  
GTTCTTGGGAGCAGCAGGAAGCACTATGGGCGCGGCGTCAATAGCGCTGACGGTACAGGCCAGACAATTGCTG  
TCTGGTATAGTGCAACAGCAAACAAATTTGCTGAGGGCTATAGAGGCGCAACAGCATCTGTTGCAACTCACGG  
TCTGGGGCATT

>AY522731

AGTTATACAAAACCTAAATGGAAGTGAGTTAAACAAAACCATCACACTCCCATGCAGGATAAAACAAATTATAA  
ACATGTGGCAGGAGGTAGGACGAGCAATGTATGCCCCCTCCCATTCAGGGAAAATAACATGTAACCTCAAGTAT  
CACAGGACTACTATTGACACGTGATGGAGGAGGAAAACAAAACGAATGGCACAGAGGTATTTCAGACCTGGAGGA  
GGAAATATGAAGGACAATTGGAGAAGTGAATTATATAAATATAAAGTAGTAGAAATTAAGCCATTGGGAATAG  
CACCCACTGAGGCAAAAGGAGAGTGGTGGAGAGAGAAAAAGAGCAGTGGGAATAGGAGCTGTACTCCTTGG  
GTTCTTGGGAGCAGCAGGAAGCACTATGGGCGCGGCGTCAATAACGCTGACGGTACAGGCCAGACAACCTGTTG  
TCTGGTATAGTGCAACAGCAAAGCAATTTGCTGAGAGCTATAGAGGCGCAACAGCATATGTTGCAACTCACAG  
TCTGGGGCATT

>AY522733

GCTTACAGCAACACTGACAACAACAATAGTACTGGAAAACGCAACCACCATCACACTGCCATGCAGAATAAAAC  
AAATTATAAACATGTGGCAGGAGGTAGGACGAGCAATGTATGCCCCCTCCCATTCAGGAAACATAACATGTAA  
CTCAAGTATCACAGGACTAATATTGACACGTGATGGAGGAAGCAATATGACAGAAAGTAAATACCACAGAGATA  
TTCAGACCTGGAGGAGGAAAATATGAAGGACAATTGGAGAAGTGAATTATATAAATATAAAGTGGTAGAAATTA  
AGCCATTGGGAATAGCACCCACTGAGGCAAAAGGAGAGTGGTGGAGAGAGAAAAGAGCAGTGGGACTAGG  
AGCTATGTTCCCTTGGGATCTTGGGAGCGGCAGGAAGCACTATGGGCGCGGCGTCAATAACGCTGACGGTACAG  
ACCAGACAACCTGTTGTCTGGTATAGTGCAACAGCAAAGTAATTTGCTGAAGGCTATAGAGGCGCAACAGCATC  
TGTTGCAACTCACGGTCTGGGGCATT

>AY522735

TGCTATACCTCAAAGCTGTTTAATAGAACATACAGGCCAAAATTCAACCAGTTCAAAATTCAAATTCAAATTCAA  
CCAGTTTAAATTC AACCATCACAAATCCATGCAGAATAAAACAAATTATAAACATGTGGCAGAGGGTAGGACG  
AGCAATGTATGCCCCCTCCCATTCAGGAAACATAACATGTAATTCAGTATCACAGGACTACTATTAGTACGT  
GATGGAGGAGAAAACAATAGTACAGAAGAGATATTTCAGACCTGGAGGAGGAGATATGAGGGACAATTGGAGAA  
GTGAATTATATAAATATAAAGTGGTAGAGATTAAGCCATTGGGAATAGCACCCACTAAGGCAAAAGGAGAGT  
GGTGGAGAGAGAAAAAGAGCAGTAGTGGGACTAGGAGCTGTGTTCTTTGGGTTCTTGGGAGCAGCAGGAAGC  
ACTATGGGCGCGGCGTCAATAACGCTGACGGTACAGGCCAGACAATTGCTGTCTGGTATAGTGCAACAGCAAA  
GCAATTTGCTGAGGGCTATAGAGGCGCAACAGCATATGTTGCAACTCACGGTCTGGGGCATT

>DQ447268

AATCATAATAATACATACAATACAAGTGACAACTCCAACATCACACTCCCATGCAGAATAAAACAAATTATAA  
ACATGTGGCAGGAGGTAGGAAAAGCAATATATGCCCCCTCCCATCAGAGGAAACATAACATGTAACCTCAAGTAT  
CACAGGACTACTATTGGTACGTGATGGGGGTAACCTCAAATAATAACTCAAATGAGACCACAGAGATATTGAGA  
CCTGGAGGAGGAGATATGAGAGATAATTGGAGAAGTGAATTATATAAATATAAAGTGGTAGAAATTAAGCCAT  
TGGGAGTAGCACCCACTGGGGCAAAAAGGAGAGTGGTGGAGAGAGAAAAAGAGCAGTGGGAATAGGAGCTGT  
GTTCTTGGGTTCTTGGGAGCAGCTGGAAGCACTATGGGCGCGGCGTCAATGACGCTGACGGTACAGGCCAGA  
CAACTGTTGTCTGGCATAGTGCAACAGCAAAGCAATTTGCTGAGGGCTATAGAGGCGCAACAACATATGTTGC  
AACTCACAGTCTGGGGCATT

>GU216739

AATTATACTGGCAGTGGAaaaaacataaccaccaccatccaatgcaagataaaaacaaattgtaaatctgtggc  
AAGAGGTAGGACGAGCAATGTATGCCCCCTCCCATTCAGGAAACATAACGTGTAACCTCAAGTATTACAGGACT  
ACTATTGACACGTGATGGCGGTAGCAACAGCAGCAGCCAGAGACATTTCAGACCTGGAGGAGGAAATATGAAG  
GACAATTGGAGAAGTGAATTATATAAATATAAAGTGGTAGAAATTAAGCCATTGGGAGTAGCACCCACTGAGG  
CAAAAAGGAGAGTGGTGGAGAGAGAAAAAGGGCAGTGGGAATAGGAGCTGTGTTCTTGGGTTCTTGGGAGC  
TGCAGGAAGCACTATGGGCGCGGCGTCAATAACGCTGACGGTACAGGCCAGACAACCTGTTGTCTGGTATAGTG  
CAACAGCAAAGCAATTTGCTGAGAGCCATAGAGGCGCAACAGCATATGTTGCAACTCACGGTCTGGGGCATT

>GU216844

TCTTATGATACAGAAAGTAATGGAAATATCATACTCCCATGCAGAATAAAACAAATTATAAACCTGTGGCAGG  
GGGTAGGACGAGCAATATATGCACCTCCCATTCAGGAAATATAAATGTACATCAGATATCACAGGACTACT  
ATTGACACGTGATGGAGGGAATAACACAATTAATGAGACATTTCAGACCTATAGGAGGAAATATGAGGGACAAT  
TGGAGAAGTGAATTGTATAAATATAAAGTGGTAGAAATCAGGCCATTGGGAGTAGCACCCACTGCAGCAAAAA  
GGAGAGTGGTGGAGAGAGAAAAAGAGCAGTGGGCATAGGAGCTGTGTTCTTGGGTTCTTGGGAGCAGCAGG  
AAGCACTATGGGCGCAGCGTCAATGACGCTGACGGTACAGGCCAGACAACCTGTTGTCTGGTATAGTGCAACAG  
CAAAGCAATTTGCTGAGGGCTATAGAGGCGCAACAGCATATGTTGCAACTCACGGTCTGGGGCATT

>HQ625580

ACCTATAATGTTACCAGAAACAAGTAATACAACCTAATAGTAGTATAATTACACTCCAATGCAGAATAAAACAGA  
TTATAAACATGTGGCAAGGGGTAGGACAAGCAATGTATGTCCTCCCATTCAGGAAACATAATATGCAAAATC  
AAATATCACAGGACTACTATTGACACGTGATGGAGGCAATAATACAGAAAACAATAATACAGAGATATTGAGA  
CCTGCAGGAGGAGACATGAGGGACAATTGGAGAAGTGAATTATATAGATATAAAGTGGTAGAAATTAAGCCAT  
TAGGAATAGCACCCACAAAAAGCAAGAAGGAAAGTGGTGCAGAGAGAAAAAGAGCAGTGGGAATAGGAGCTGT  
ACTCCTTGGGTTCTTGGGAGCAGCAGGAAGCACTATGGGCGCGGCGTCAATAACGCTGACGGTACAGGCCAGA

CAACTGTTGTCTGGTATAGTGCAGCAGCAAAACAATTTGCTGAGAGCTATAGAGGCGCAACAGCATATGTTGC  
AACTCACAGTCTGGGGCATT

>HQ625591

ACCTATTTAAACACAACCAATGTAAACGAAACCGACATCACACTCCAATGCAGGATAAAGCAAATTATAAACA  
TGTGGCAGGGGGTGGGACGAGCAATGTATGCCCCCTCCCATTCAGGAAACATAACATGTAACCTCAAATATCAC  
AGGACTACTGCTGACACGTGATGGAGGCTTGAATAACACGAATAACGAGACATTCAGACCTGGAGGGGGAAAT  
ATGAAGGACAATTGGAGAAATGAATTATATAAATACAAAGTGGTAGAAATTAAGCCATTGGGAGTAGCACCCA  
CTGCTGCAAAAAGGAGAGTGGTGGAGAGAGAAAAAAGGGGACTAGGAGCTGTGTTCCCTTGGGTTCTTGGGAGC  
AGCAGGAAGCACTATGGGCGCGCGTCAATAACGCTGACGGTACAGGCCAGACAACCTGTTGTCTGGTATAGTG  
CAACAGCAAAGCAATTTGCTGAGAGCTATAGAGGCGCAACAGCATATGTTGCAACTCACAGTCTGGGGCATT

>HQ625582

CATCATAAAGGAAGTAATGAAAATGAAAGCAGCATCATACTTCCATGCAGAATAAAACAAATTATAAACATGT  
GGCAGGAGGTAGGACGAGCAATGTATGCATCTCCCATTCAGGAAGGATAACATGTACATCAAATATCACAGG  
ACTATTATTAGTACGAGATGGAGGCACAGGCAATACCAGTAAACCAGAAATATTCAGACCTGGAGGAGGAAAC  
ATGAAGGACAATTGGAGAAAGTGAATTATATAAATATAAAGTAGTAGAAATTAAGCCATTAGGAATAGCACCCA  
CTGGAGCAAAAAGGAGAGTGGTGGAGAGAGAAAAAAGAGCAGTGGGAATAGGAGCTGTACTCCTTGGGTTCTT  
GGGAGCAGCAGGAAGCACTATGGGCGCGCGTCAATAACGCTGACGGTACAGGCCAGACAACCTGTTGTCTGGT  
ATAGTGCAACAGCAAAGCAATTTGCTGAGGGCTATAGAGGCGCAACAGCAGATGTTGCAACTCACAGTCTGGG  
GCATT

>GU939049

TTTTATAAGTTCAATAGGACAGAAAATGGTTCAAATACAGAAAATAGTTCAGGCATCATCACACTCCCATGCA  
AAATAAAACAAATTATAAACATGTGGCAGGAGGTAGGACGAGCAATGTATGCCCCCTCCCATTTGAAGGAAACAT  
AACATGTAAATCAGAGATTACAGGACTCCTATTGACACGTGACGGAAAAAATGGAACAGAGGAGATAGTTAGA  
CCTATAGGAGGAAATATGAAGGATAATTGGAGAAAGTGAATTATATAAATATAAAGTGGTAGAAATTAAGCCAT  
TAGGAATAGCACCCACTGAGGCAAAAAGGAGAGTGGTGGAGAGAGAAAAAAGAGCAGTAGGAATAGGAGCTGT  
GCTCCTTGGGTTCTTGGGAGCAGCAGGAAGCACTATGGGCGCGCGTCAATAACGCTGACGGTACAGGCCAGA  
CAATTGTTGTCTGGTATAGTGCAACAGCAAAGCAATTTGCTGAGGGCTATAGAGGCGCAACAGCATCTGTTGC  
AACTCACAGTCTGGGGCATT

>AB254146

TACTATTGGAACAGTACAACAGGGAATTCAAGCTCAAACATCACAATCCCATGCAAAATAAAACAAATTATAA  
ACATGTGGCAGGAGGTAGGACGAGCAATGTATGCCCCCTCCCATTCAGGGAAAAATAACATGTGCATCAAATAT  
CACAGGACTACTATTGACACGTGATGGAGGAGTATCAAATAAGACAGATGCAATAAGACAGAGACATTGAGA  
CCTATAGGAGGAAATATGAGGGACAATTGGAGAAAGTGAATTATATAAATACAAAGTGGTAGAAATTAATCCAT  
TAGGACTGGCACCCACTAAGGCAAAAAGGAGAGTGGTGGAGAGAGAAAAAAGAGCAGTGGGACTAGGAGCTGT  
GCTCTTTGGGTTCTTGGGAGCAGCAGGAAGCACTATGGGCGCAGCATCACTAACGCTGACGGTACAGGCCAGA  
CAATTATTGTCTGGTATAGTGCAACAGCAAAGCAATTTGCTGAGAGCTATAGAGGCGCAACAGCATATGTTGC  
AACTCACGGTCTGGGGCATT

>KY229291

AATTATACAGTAGACAATTCTACCATCACACTCCAATGCAGAATAAAACAAATTATAAACACATGGCAGGAGG  
TAGGACGAGCAATATACGCCCCCTCCCATTTGAAGGAAACATAAAATGTACATCAAAAATCACAGGACTACTCTT  
GGTACGTGATGGAGGGGGGAATGACACAAGGGAAGAGATATTCAGACCTGGAGGAGGAAATATGAGGGACAAT  
TGGAGAAGTGAATTATATAAATATAAAGTGGTAGAAATTAACCATTGGGAATAGCACCCACTAAGGCAAAAC  
GGAGAGTGGTGGAGAGAGAAAAAAGAGCAGTCGGAATGGGAGCTGTGATCCTTGGGTTCTTGGGAGCAGCAGG  
AAGCACTATGGGCGCGCGTCAATAACGCTGACGGCAGGCCAGACAAGTATTGTCTGGTATAGTGCAACAG  
CAAAGCAATTTGCTGAGAGCTATAGAGGCGCAACAGCATATGTTGCAACTCACAGTCTGGGGCATT

>KY229453

AATCACACAAATAATAGTACATATAATATCACACTCCCATGCAGAATAAGACAGATTGTAAGGATGTGGCAGG  
GAGTAGGACAAGCAATGTATGCCCCCTCCCATTCAGGAAACATAACATGTAGATCAAATATCACAGGACTACT  
ATTGACACGTGATGGAGGAAAGGAGATAACAACACAACAGAAACATTGAGACCTGGAGGAGGAGATATGAGG  
GACAATTGGAGAAGTGAATTATATAAATATAAAGTGGTAGAGATTAAGCCATTAGGAATAGCACCCACCAAGG  
CAAAAAGGAGAGTGGTGGAGAGAGAAAAAAGAGCAGTGGGAATGGGAGCTGTACTCCTTGGGTTCTTGGGAGC  
TGCAGGAAGCACTATGGGCGCGCGTCAATAACGCTGACGGTACAGGCCAGACAATTGTTGTCTGGTATAGTG  
CAACAGCAAAGCAATTTGCTGAGAGCTATAGAGGCGCAACAGCATATGTTGCAACTCACAGTCTGGGGCATT

>EU166359

TTTCATGGTACATACCTGCCTAATAGTACAGTCATGCTTAATGATACTTCAAACAAAACCATCACACTGCTAT  
GCAGAATAAAACAAATTATAAATATGTGGCAGGAGGTAGGGCGAGCAATGTATGCCCCACCCATTGCAGGAAG  
CATAATATGCAACTCAAGTATTACAGGGCTACTATTGACACGTGATGGAGGAGATGGAAATGGAAAGAATACT  
ACAGGTAAGGATACAGAGACATTCAGACCTGCAGGAGGAGATATGAGGGACAATTGGAGAAGTGAATTATATA  
AATATAAGGTGGTAGAAATTAACCATTAGGAATAGCACCCACTAAAGCAAAAAGGAGAGTGGTGGAGAGAGA  
GAAAAGAGCAGTGGGAATAGGAGCTGTACTCCTTGGGTTCTTGGGAGCAGCAGGAAGCACTATGGGCGCAGCA

TCAATAACGCTGACGGTACAGGCCAGACAATTATTGTCTGGTATAGTGCAACAGCAAAGCAATTTGCTGAGGG  
CTATAGAGGCGCAACAACATATGTTGCAACTCACGGTCTGGGGCATT

>EU166432

AATTATAACATTACAAACAATAATGTTACAAACATTACAGACGAGAATGTAAACATCACACTCAAATGCAGAA  
TAAACAGATTATAAACATGTGGCAGGGGGTAGGACAAGCAATATATGCCCCCTCCCATTCAGGAAACATAAC  
ATGTAAATCAAATATCACAGGAATACTATTGACACGCGATGGAGGCGACGAAACAAAGAATAACACAGAAATA  
TTCAGACCTGGAGGAGGAAATATGAAGAACAATTGGAGAAGTGAATTATATAAAATATAAAAGTGGTAGAAATTA  
AGCCATTAGGAATAGCACCCACTGAGGCAAAAAGGAGAGTGGTGGAGAGAGAAAAAGAGCAGTGGGAATAGG  
AGCTGTGTTTCCTTGGGTTCTTGGGAGCAGCAGGAAGCACTATGGGCGCGGCATCAATAACGCTGACGGTACAG  
GCCAGACAATTGTTGTCTGGTATAGTGCAACAGCAAAGCAATTTGCTGAGAGCTATAGAGGCGCAACAGCATA  
TGTTGCAACTCACTGTCTGGGGCATT

>DQ388516

ACCTACACGAATGGAAGTAATTCAAATGTAAACATCACAAAGTGCAACCATCACCCCTCCCATGCAGAATAAAAC  
AAATTATAAACATGTGGCAAGAAGTAGGACGGGCAATGTATGCCCCCTCCCATTCAGGAAACATAACATGTAT  
ATCAAATATCACAGGACTACTCCTGACAAGGGATGGAGGAAATGGAATGATACAAATGACACAGAGACATTT  
AGACCTGCAGGAGGAGATATGAGGGACAATTGGAGAAGTGAATTATATAAAATATAAAAGTGGTAGAAATTAAC  
CATTAGGAATAGCACCCACTAAAGCAAAAAGGAGAGTGGTGGGGAGAGAAAAAGAGCAGTGGGAATAGGAGC  
TGTGTTCTTGGGTTCTTGGGAGCAGCAGGAAGCACTATGGGCGCGGCGTCAATAACGCTGACGGTACAGGCC  
AGACAATTATTGTCTGGTATAGTGCAACAGCAAAACAATTTGCTGAGAGCTATAGAGGCGCAACAGCATCTGT  
TGCAACTCACGGTCTGGGGCATT

>GU939124

AATTATACATACATGAATGAGACAAGCACTAACTCAACGATCAGACTCCCATGTAAGATAAGACAAATTATAA  
ACATGTGGCAGGAGGTAGGACGAGCAATATATGCCCCCTCCCATTTGAAGGAAACATAACATGCAACTCAAGTAT  
CACAGGACTACTATTGGTACGGGATGGAGGCAACACTAGCAGTACCGGCACAGAGATAGAGATATTTAGACCT  
GGAGGGGGAGATATGAGGGACAATTGGAGAAGTGAATTATATAAAATATAAAAGTGGTAGAAATTAAGCCATTGG  
GAGTAGCTCCCACTAAGGCAAAAAGAAGAGTGGTGGAAAAGAGAAAAAGAGCAGTGGGAATAGGAGCTGTACT  
CCTTGGGTTCTTGGGAGCAGCAGGAAGCACTATGGGCGCAGCGTCAATAACGCTGACGGCACAGGCCAGACAA  
GTGCTGTCTGGTATAGTGCAACAGCAAAGCAATTTGCTGAGGGCTATAGAGGCGCAACAGCACCTGTTGCAAC  
TCACAGTCTGGGGCATC

>JX213407

AATTATACATTTAATGATACATTTAATGATATAGGAAGTAAGTCAAATACAGGAAATATCACACTCCAATGCA  
GAATAAAACAAATTGTAAACATGTGGCAGAGGGTAGGACGAGCAATATATACCCCTCCCATTAAGGGACAGAT  
AACATGTGTATCAAATATCACAGGAATACTATTGGTACGTGATGGAGGAAACAACATGGATCAGAGAATAAC  
TCAGAGATATTCAGACCTGGAGGAGGAGATATGAGGGACAATTGGAGAAATGAATTGTATAAAATATAAAGTAG  
TAGAAATTAAGCCATTGGGAATAGCACCCACTGGGGCAAAAAGGAGAGTGGTGGAGAGAGAAAAAGAGCAGT  
GGGAATAGGAGCTGTGTTCTTTGGGTTCTTGGGAGCAGCAGGAAGCACTATGGGCGCGGCGTCAATAACGCTG  
ACGGTACAGGCCAGACAATTATTGTCTGGTATAGTGCAACAGCAAAGCAATTTGCTGAGGGCTATAGAGGCGC  
AACAGCATATGTTGCAACTCACGGTCTGGGGCATT

>JX213435

AATCATACACTGGATGTTAATGGTACATTATCTCCAAATTCATCTTCTTTAAACATCACACTCCCATGCAAAA  
TAAACAAATCATAAACATGTGGCAGGGGGTGGGACGAGCAATGTATGCCCCCTCCCATTCAGGAAACATAAC  
ATGTAGATCAAATATCACGGGAATAATATTGACACGTGATGGTGGAAAGTGGAAAGTGGATCATCTAATGACACA  
GAGATATTCAGACCTGGAGGAGGAGATATGAGAGACAATTGGAGAAGTGAATTATATAAAATACAAAGTGGTAG  
AAATTAAGCCATTAGGAATAGCACCCAACAAGGCAAAAAGGAGAGTGGTGGAAAGAGAAAAAGAGCAGTGGG  
AATAGGAGCTGTGTTCTTGGGTTCTTAGGAGCAGCAGGAAGCACTATGGGCGCGGCGTCAATGGCGCTGACG  
GTACAGGCCAGACAAGTGTGTCTGGTATAGTGCAACAGCAAAGCAATTTGCTGAGAGCTATAGAGGCGCAAC  
AGCATATGTTGCAACTCACAGTCTGGGGCATT

>JX213454

AGTTACAAATGCATGCCTAATATGCCTAATGACACATGTAATAGCACAAATCACAGATAACAGCACAGGATTCA  
TCATATCCCATGCAGAATAAAACAAATTGTAAACATGTGGCAGGGGGTAGGACGAGCAATGTATGCCGCTCC  
CATTGCCGGGAACATAACATGTAGATCAAACATCACAGGACTACTATTGACACGTGATGGAGGTACCCCAAGT  
AAAAATGAGACCAAGGAGACATTCAGACCTGGAGGAGGGAATATGAAGGACAATTGGAGAAGTGAATTATATA  
AGTATAAAGTGGTAGAAATTAAGCCACTGGGACTAGCACCCACTGGAGCAAAAAGGAGAGTGGTGGAGAGAGA  
AAAAAGAGCAGTGGGAATAGGAGCTGTGTTCTTGGGTTCTTGGGAGCAGCAGGAAGCACTATGGGCGCGGCG  
TCAATGACGCTGACGGTACAGGCTAGACAACCTGTTGTCTGGTATAGTGCAACAGCAAAGCAATTTGCTGAGGG  
CCATAGAGGCGCAACAGCATATGTTGCAGCTCACAGTCTGGGGCATT

>GU329195

AGTTACTCAAATGAGACAAACTCAACCATCACACTCCAGTGTAATAAATAAAACAAATTATAAACATGTGGCAGG  
GGGTAGGACGAGCAATGTATGCCGCCCCCATTCAGGAAACATAACATGTATATCAAACATCACAGGAATACT  
ACTGACACGGGATGGAGGAAACAGTAATAGTAATGAGAGTACAGAAACATTTAGACCAGGAGGGGGAAATATG

AAAGACAATTGGAGAAGTGAATTATATAAATATAAAGTGGTAGAGGTTAAGCCATTGGGAATAGCACCCACTG  
AGGCAAAAAGGAGAGTGGTGGAGAGAGAAAAAGAGCAGTGGGACTAGGAGCTGTGTTCCCTGGGTTCTTGGG  
AGCAGCAGGAAGCACTATGGGCGCAGCATCAATAACGCTGACGGTACAGGCCAGAAATCTGTTGTCTGGCATA  
GTGCAACAGCAAAACAATTTGCTGAGGGCTATAGAGGCGCAACAGCATATGTTGCAACTCACAGTCTGGGGCA  
TT

>GU329205

AATCACACAGACATGTCTAACATGACTAATAATAACATCACACTCACACTCCCATGCAGAATAAAACAAATTA  
TAAACATGTGGCAGGAGGTAGGACGAGCAATATATGCACCTCCCATTTGTAGGAAACATAATCTGTACATCAAA  
TATCACAGGACTACTATTGACACGTGATGGAGGAACAGATAACAACAGAACAGAGGAGACGTTTACAGACCTGGG  
GGAGGAGATATGAGAGACAATTGGAGAAGTGAATATATAAATATAAAGTGGTAGAAATTAAGCCATTGGGGCA  
TAGCACCCACTAAGGCAAAAAGGAGAGTGGTGGAGAGAGAGAAAAGAGCAGTGGGAATAGGAGCTGTGTTCCCT  
TGGGTTCTTGGGAGCAGCAGGAAGCACTATGGGCGCGGCGTCAGTGACGCTGACGGTACAGGCCAGACAACTA  
TTGTCTGGTATAGTGCAACAGCAAAGCAATTTGCTGAAGGCTATAGAGGCGCAACAGCATATGTTGCAACTCA  
CGGTCTGGGGCATC

>GU329282

CACTATAGTAATGGTACAGACATATTTAATGATAATAGTACAAGCAACATCACACTCCCATGCAAAATAAAAC  
AAATTATAAACATGTGGCAGAAAAGTAGGACAAGCAATGTATGCCCCCTCCCATTTGCAGGAAACATAAAATGTGA  
ATCAAAATATCACAGGGCTACTATTGACACGTGATGGAGGAGGAGGCTCAGATAATACAACAGATAATACAACA  
GAGACATTCAGACCTGGAGGAGGAGATATGAGGGACAATTGGAGAAGTGAATTATATAAATATAAAGTGGTAG  
AAGTTAAGCCATTAGGAATAGCACCCACTGAGGCAAGAAGGAGAGTGGTGCAGAGAGAAAAAGAGCAGTGGG  
AATAGGAGCAATGTTCCCTTGGGTTCTTGGGAGTAGCAGGAAGCACTATGGGCGCAGCGTCAATGGCGCTGACG  
GTACAGGCCAGACAATTGTTGTCTGGTATAGTGCAACAGCAAAGTAATTTGCTGAGAGCCATAGAGGCGCAAC  
AGCATATGTTGCAACTCACGGTCTGGGGCATT

>GU329289

CATTATACAAGAGAGAATGTCTCAAACATCGAGCTGCTCCCATGTAAAATAAAACAGATTATAAACATGTGGC  
AGGAAGTAGGACGAGCAATGTATGCCCCCTCCCATTTGCAGGAAGCATAACATGTAAATCAAGTATCACAGGACT  
ACTATTGACACGTGATGGAGGAAACAATAGCACCGAGACAGAAATATTCAGACCTGGAGGAGGAGATATGAGG  
GACAATTGGAGAAGTGAATTATATAAATATAAAGTGGTAGAAATTAAGCCATTAGGAGTAGCACCCACTACTG  
CAAAAAGGAGAGTGGTGGAGAGAGAGAAAAGAGCAGTGGGAATAGGAGCTGTGTTCCCTTGGGTTCTTAGGAGC  
AGCAGGAAGCACTATGGGCGCAGCATCAATAACGCTGACGGTACAGGCCAGACAACTATTGTCTGGTATAGTG  
CAACAGCAAAGCAATTTGCTGAGGGCTATCGAGGCGCAACAGCATATGTTGCAACTCACAGTCTGGGGCATT

>GU329439

AACTACACGAATGGTGAATACAAGCATAACAGGAATGGTACAGAGGTGCATATTAATGAGACTAGCAAAACAGA  
ATATCACAATCCAATGCAGAATAAAACAAATTATAAACATGTGGCAGGAGGTAGGGCGAGCAATGTATGCCCC  
GCCCATTTGCAGGAAACATAACATGTGCATCAAATATCACAGGACTACTATTGACATGGGATGGAGGAAAAAAT  
AGAAGCGAAACAGAGGAGATATTCAGGCCTGGAGGAGGAGATATGAGGGACAATTGGAGAAGTGAATTATACA  
AATATAAAGTGGTAGAAATTAAGCCATTAGGAGTAGCACCCCTCTAAGGCAAAAAGGAGAGTGGTGGAGAGAGA  
AAAAAGAGCAGTGGGAATAGGAGCTGTACTCCTTGGGTTCTTGGGAGCAGCAGGAAGCACTATGGGCGCAGCA  
TCATTGACGCTGACGGTACAGGCCAGACAATTATTGTCTGGTATAGTGCAACAGCAAAGCAATTTGCTGAGGG  
CTATAGAGGCGCAACAGCATATGTTGCAACTCACGGTCTGGGGCATT

>KX983735

CCTCAGGATAACAATACAAAAAATGATGAGACGACCATCAGCCTGCCATGCAGAATAAAACAAATCATAAACA  
TGTGGCAGGAGGTAGGACGAGCAATATATGCCCCCTCCCATTTGAAGGAAGCATAACATGTGAATCAAACATCAC  
AGGACTACTATTGACAAGTGAATGGTGGAGGAAAAGGTAAAAATGAGACATTCAGACCTGCAGGAGGAGATATG  
AGGGACAATTGGAGAAGTGAATTATATAAATATAAAGTGGTAGAAATTAACCATTAGGAGTAGCACCCACTA  
GAGCAAAAAGGAGAGTGGTGGAGAGAGAGAAAAGAGCAGTGGGAATAGGAGCTGTGTTCCCTTGGGTTCTTGGG  
AGCAGCAGGAAGCACTATGGGCGCGGCGTCAATAACGCTGACGGCACAGGCCAGACAAGTGTCTGTCTGGTATA  
GTGCAACAGCAAAGCAATTTGCTGAGGGCTATAGAGGCGCAACAGCATATGTTGCAACTCACGGTTTGGGGCA  
TT

>KX983891

TGCTATACATCGAACTGTTTAAATAGAACACATAATGGTACAGATGATAATGAAACAAGTAGAAACATCACCA  
CTATCCCATGCAGAATAAAACAAATTATTAACATGTGGCAGACAGTGGGACGAGCAATGTATGCCCCCTCCCAT  
TGAAGGAAACATAACATGTAAATCAAATATCACAGGAATAATATTAACACGTGATGGAGGAATTACAGAGGAG  
TCAAAATAACACAGAAATATTCAGACCTGGAGGAGGAGATATGAGAGATAATTGGAGAAGTGAATTATATAAAT  
ATAAAGTGGTAGAGATTAAACCATTGGGAATAGCACCCCTCCAAGGCAAAAAGGCGAGTGGTGGAGAGAGAAAA  
AAGAGCAGTGGGAATAGGAGCTGTGTTCCCTTGGGTTCTTGGGAGCAGCAGGAAGCACTATGGGCGCGGCGTCA  
CTCACGCTGACGGTACAGGCCAGACAATTGTTGTCTGGTATAGTGCAACAGCAAAACAATTTGCTGAGAGCTA  
TTGAGGCGCAACAACATCTGTTGCAACTCACGGTCTGGGGCATT

>AF286224

AATTATACAGAAAATAATACAGATGGTACACCCATCACACTCCCATGCAGAATAAGACAAATTATAAATATGT  
GGCAGGAAGTAGGACGAGCAATGTACGCCCCCTCCCATTTGAAGGAAACATAGCATGTAAATCAGATATCACAGG  
GCTACTATTGGTTTCGGGATGGAGGAAGCACAAATGATAGCACAAATAATAACACAGAGATATTCAGACCTGCA  
GGAGGAGATATGAGGGACAATTGGAGGAGTGAATTGTATAAGTATAAAGTGGTAGAAAATTAAGCCATTGGGAA  
TAGCACCCACTGAGGCAAAAAGGAGAGTGGTGGAGAGAGAAAAAAGAGCAGTGGGAATAGGAGCTGTGTTCTT  
TGGGTTCTTGGGAGCAGCAGGAAGCACTATGGGCGCAGCGTCAATAACGCTGACGGCACAGGCCAGACAAGTG  
TTGTCTGGTATAGTGCAACAGCAAAGCAATTTGCTGAGGGCTATAGAGGCGCAACAGCATCTGTTGCAACTCA  
CGGTCTGGGGCATT

>KU168262

TTTCATAGTACATACAATAGTACATACAATAGTACAGACAAGGGTAACAGCACAGACGATACCATCACACTCC  
CATGCAGAATAAAACAAATTATAAACATGTGGCAGGAGGTAGGAAAAGCAATATATGCCCCCTCCTATTCCAGG  
AAAAATAACATGTAACTCAAGCATCACGGGGCTACTACTGACACGTGATGGAGGGCAAAATAATACAAATGAG  
ACATTCAGGCCTGGAGGAGGAGATATGAGAGATAATTGGAGAAGTGAATTATACAAATATAAGGTGGTAGAAA  
TTAGACCATTAGGAGTAGCACCCACTGATGCAAAAAGGAGAGTGGTGGAGAGAGAAAAAAGAGCAGTGGGAAT  
AGGAGCTGTGCTCTTAGGGTTCTTGGGAGCAGCAGGAAGCACTATGGGCGCAGCGTCAGTGGCGCTGACGGTA  
CAGGCCAGACAATTATTGTCTGGGTATAGTGCAACAGCAAAGCAATTTGCTGAGGGCTATAGAGGCGCAACAGC  
ATATGTTGCAACTCACAGTCTGGGGCATT

>JQ361079

ACTTATAATGCTTCAATAGAAAATAACTATAATCACGCTCCCGTGCAGAATAAAACAAATTATAAACATGT  
GGCAAGGAGTAGGAAAAGCAATATATGCCCCCTCCCATTTGAAGGACTAATTAAGTGTACATCAAATATTACAGG  
AATATTATTAACAAGAGATGGTGGTAGAGATAATAGTAGTAGTAACGAGACCTTCAGACCTGGAGGAGGAGAT  
ATGAGAGATAATTGGAGAAGTGAATTATACAAATATAAAGTAGTAAAAATTGAACCAATAGGTCTAGCACCCA  
CCAAGGCAAAGAGAAGAGTGGTGGAAAGAGAAAAAAGAGCAATAGGACTAGGAGCTATGTTCTTTGGGTTCTT  
GGGAGCAGCAGGAAGCACGATGGGCGCAGCGTCAGTGACGCTGACGGTACAGGCCAGACAGTTATTGTCTGGT  
ATAGTGCAACAGCAAATAATTTGCTGAGGGCTATAGAGGCGCAACAGCATCTGTTGCAACTCACAGTCTGGG  
GCATT

>HM215270

AATTATACTGGAAATGAGAGTGTAAATCAACCTACCATGCAGAATAAAACAAATTATAAACATGTGGCAGGGAG  
TAGGAAAAGCAATGTATGCCCCCTCCCATTTGAAGGGCTAATCAACTGTTTCATCAAATATTACAGGACTATTGCT  
GACAAGAGATGGTGGTATAAATAGTAATACGAGTAGTTCTGAGACCTTCAGACCTGGAGGAGGAGATATGAGA  
GACAATTGGAGAAGTGAATTATACAAATATAAAGTAGTAAGACTTGAACCACTAGGTCTAGCACCCACCAAGG  
CAAAAAGAAGAGTGGTGGAAAGAGAAAAAAGAGCAATAGGACTAGGAGCTGTGTTCTTTGGGTTCTTGGGAGC  
AGCAGGAAGCACGATGGGCGCAGCGTCACTGACGCTGACGGTACAGGCCAGACAGTTACTGTCTGGTATAGTG  
CAACAGCAAATAATTTGCTGAAGGCTATAGAGGCGCAACAGCATCTGTTGCAACTCACAGTCTGGGGCATT

>L22949

AGTTATAATACATCAGCATTAATAGTACACAGGGAAATGAGAGTGAAAACATCACACTCCCATGCAGAATAA  
AACAAATTATAAACATGTGGCAGGAAGTAGGAAAAGCAATGTATGCCCCCTCCCATTTGAAGGGATAATCAGATG  
TTCATCAAATATTACAGGACTATTGTTGACAAGAGATGGTGGTATAACTAACAATAGTAATGAGACCTTCAGA  
CCTGGAGGAGGAAATATGAGAGACAATTGGAGAAGTGAATTATACAAATATAAAGTAGTAAGAATTGAACCAC  
TAGGTCTAGCACCCACCACGGCAAAGAGAAGAGTGGTGGAAAGAGAAAAAAGAGCAATAGGACTGGGAGCTCT  
GTTCTTTGGGTTCTTGGGAGCAGCAGGAAGCACAAATGGGCGCAGCGTCACTGACGCTGACGGTACAGGCCAGA  
CAAGTATTGTCCGGCATAGTGCAACAGCAAACAATTTGCTGAGGGCTATAGAGGCGCAACAACATCTGTTGC  
AACTCACAGTCTGGGGCATT

>L22950

AATTATAATATATCAAATAGTACAGGGGGAAATGAGACAATCAGACTCCAATGCAGAATAAAACAAATTATAA  
ACATGTGGCAGGAAGTAGGAAAAGCAATGTATGCCCCCTCCCATTTAGGACAAATCAAATGTTTCATCAAATAT  
CACAGGACTATTGTTAACAAGAGATGGTGGTGTAAATAATAGTAGTAATGAGACTAGCAGTAAAAATGAGATC  
TTCAGACCTGGAGGAGGAGATATGAGAGACAATTGGAGAAGTGAATTATACAAATATAAAGTAGTAAGAATTG  
AACCCTAGGTTCGGGCACCCACCGGCAAAAAGGAGAGTGGTGGAAAGAGAAAAAAGAGCAATAGGACTGGG  
AGCTTTGTTCTTTGGGTTCTTGGGAACAGCAGGAAGCACGATGGGCGCAGCGTCAATGACGCTGACGGTACAG  
GCCAGACAGGTATTGTCTGGTATAGTGCAACAGCAAACAATTTGCTGAGGGCTATAAAGGCGCAACAGCATC  
TGTTGCAACTCACAGTCTGGGGCATT

>AY623599

ACTTATAATACATCAGGTAGTACAGGGGTAAATAACAGTACAATCAAACCTCCCATGCAGAATAAAACAAATTA  
TAAACATGTGGCAGGGAGTAGGAAAAGCAATGTATGCCCCCTCCCATTTGAAGGACTAATCAAATGTTTCATCAA  
CATTACAGGACTATTGTTGACAAGAGATGGGGGAAATAATACTAGGCAGAATGAAACCTTCAGGCCTGGAGGA  
GGGGATATGAGAGACAATTGGAGAAGTGAATTATACAAATATAAAGTAGTAAGAATTGAACCACTAGGTCTAG  
CACCCACTGAGGCAAAGAGAAGAGTGGTGGAAAGAGAAAAAAGAGCAATAGGACTAGGAGCTATGTTCTTTGG  
GTTCTTTGGGAGCAGCAGGAAGCACGATGGGCGCAGCGTCAATGACGCTGACGGTACAGGCCAGACAGTTAATG

TCTGGTATAGTGCAACAGCAAAACAATTTGCTGAGGGCTATAGAGGCGCAACAGCATCTGTTGCAACTCACAG  
TCTGGGGCATT

>AY713418

AATTATAATATATCAAATACAGAGGTAATCAGACTCCCATGCAGAATAAAACAAATTATAAACATGTGGCAGG  
GAGTAGGCAAAGCAATGTATGCCCCCTCCCATTTGAAGGAATAATCAAATGTTTCATCAAATATTACAGGACTATT  
GTTAACAAGGGATGGTGGTGGTAATAACACTCGGAAGAATGAGACCTTCAGGCCTGGAGGGGGAGATATGAGA  
GACAAATTGGAGAAGTGAATTATACAAATATAAAGTAGTAAGAATTGAACCATTAGGTCTAGCACCCACCAAGG  
CAAAGAGAAGAGTGGTGGAAAGAGAAAAAAGAGCAATAGGACTGGGAGCTCTGTTCCCTTGGGTTCTTGGGAGC  
AGCAGGAAGCACGATGGGCGCAGCGTCAATAACGCTGACGGTACAGGCCAGACAAGTATTGTCTGGTATAGTG  
CAACAGCAAAACAATTTGCTGAGGGCTATAGAGGCGCAACAACACTTGTGTCAACTCACAGTCTGGGGCATT

>EU853046

AATTATAGTAGTATGTTTAAATAGTAGTACATCAAATAGTAGTATAGGGGAAAATGAAACAATCACACTCCAAT  
GCAGAATAAAGCAAATTATAAACATGTGGCAGGGAGTAGGAAAAGCAATGTATGCACCTCCCGTTGCAGGACA  
AATCAGATGTTTCATCAAATATTACAGGCCTATTGTTGACAAGAGATGGAGGTGAAAAATACTAGTGAGGAGATC  
TTCAGACCTGCAGGAGGAGATATGAGAGACAATTGGGAGAAGTGAATTATACAAATATAAAGTAGTAAGAATTG  
AACCCTAGGTCTAGCACCCACCAAGGCAAAGAGAAGAGTGGTGGAAAGAGAAAAAAGAGCAATAGGACTAGG  
AGCTGTGTTCCCTTGGGTTCTTGGGAGCAGCAGGAAGCACGATGGGCGCAGCGTCACTGACGCTGACGGTACAG  
GCCAGACAATTATTGTCTGGTATAGTGCAACAGCAAAACAATTTGCTGAGGGCTATAGAGGCGCAGCAGCATC  
TGTTGCAACTCACAGTCTGGGGCATT

>AF484489

ACTTATGATACATCGAATGGTACAGGGAGTGAAAATATCACACTCCAATGCAGAATAAAACAAATGATAAACA  
TGTGGCAAGGAGTAGGCAAAGCAATGTATGCCCCCTCCCATTTGAAGGAACAATCAACTGTTTATCAAATATTAC  
AGGACTATTGTTGACAAGAGATGGTGGTGTAAAAAATAGTACTAATGAGACCTTCAGACCTGGAGGAGGAGAT  
ATGAGAGACAATTGGAGAAGTGAATTATATAAGTATAAAGTAGTAAGACTTGAACCACTAGGCCTAGCGCCCA  
CAGAGGCAAGAAGAAGAGTGGTGGAAAGAGAAAAAAGAGCAATAGGCCTACTAGGAGCTATGTTCCCTTGGGTT  
CTTGGGAGCAGCAGGAAGCACGATGGGCGCAGCGTCACTGACGCTGACGGTACAGGCCAGACAGTTAATGTCT  
GGTATAGTGCAACAGCAAAACAATCTGCTGAGGGCTATAGAGGCGCAACAGCATATGTTGCAACTCACAGTCT  
GGGGCATT

>JX140673

AGTCAGTCTGAGAAGGCGGGAAATAATGGCAGTATCTTCCTTCCATGCAGAATAAGACAAATTGTAAACATGT  
GGCAAAAGGTAGGACGAGCAATGTATGCCCCCTCCCATTTGCTGGAGTAATTCGGTGTAACCTCAAGTATCACAGG  
TCTGTTATTAACAAGAGATGGTGGGGAAGATAATAGTAGCACTGACACCCTCAGACCTGGAGGGGGAGATATG  
AAAGATAATTGGAGAAGTGAACGTATATAAATATAAGGTAGTAAAAATTGAACCACTAGGTGTGGCACCACCA  
GGGCAAAAAGACAAGTGGTGAACAGAGAAAAAAGAGCAGTGGGAATAGGAGCTGTGTTCCCTTGGATTCTTGGG  
AACAGCAGGAAGCACTATGGGCGCGGCGTCAATAACGCTGACGGTACAGGTACAGACAATTATTGTCTGGTATA  
GTGCAACAGCAAAGCAATTTGCTGAGGGCTATAGAAGCGCAACAGCATATGTTGCAGCTCACAGTCTGGGGCA  
TT

>AJ249236

TACTACAACACATCAGGACTGTTTAAATGAAACAGAGGTGGCTAATAACACAAACGAAAATATCACTCTCCCAT  
GTAGAATAAGACAATTTGTAAACATGTGGCAAAGAATAGGAAGAGCAATGTATGCTCCTCCCATTGAAGGAGA  
AATCCAGTGTACCTCAAATATCACAGGTCTACTATTGACAAGAGATGGTAGTAAGGATATTGACGGGAAAGAG  
ATTCTCAGACCTATAGGAGGAGATATGAGAGACAATTGGAGAAGTGAACCTATATAAATATAAGGTAGTAAGAA  
TTGAACCAGTAGGAGTAGCACCCACCAAGGCAAAAAGACGAGTGGTGCAGAGAGCAAAAAGAGCAGTGGGAAT  
GGGAGCTGTGCTCTTTGGGTTCTTGGGAGCAGCAGGAAGCACTATGGGCGCGGCGGCAATCACGCTGACGGCA  
CAGGCCAGACAATTATTGTCTGGTATAGTGCAACAGCAAAGCAATCTGCTGAAGGCTATAGAAGCGCAACAGC  
ATCTGTTGCAGCTCACAGTCTGGGGCATT

>MH746240

GCTCAGTCTAATAATAGTAGTGGAATGAGACCATCAGACTCTCATGTAAATAAAACAAATTGTGAGAATGT  
GGCAGAAAGTGGGACAAGCAATGTATGCCCCCTCCCATTTGCAGGAGAAATTACATGTAGATCAAACATTACAGG  
ACTACTGCTAACAAGAGATGGTGGAAAGAATATTAGTAAAGGAGATGAGATCTTCAGGCCTATAGGAGGAGAT  
ATGAGGAACAATTGGAGAAGTGAATTATATAAGTATAAAGTAGTAAAAATCAAACCACTAGGGGTAGCACCCA  
CCAAAGCAAGGAGAAGAGTGGTGGAGAGAGAAAAAAGAGCAGTTGGACTGGGAGCTGCCTTCCTTGGGTTCTT  
AGGAGCAGCAGGAAGCACTATGGGCGCGGCGTCAATAACGCTGACGGTACAAGCCAGACAATTACTGTCTGGG  
ATAGTGCAACAGCAAAGCAATTTGCTGAGAGCTATAGAAGCGCAGCAGCATCTGTTGCAGCTCACAGTCTGGG  
GCATT

>KR051445

CTTTATGAACTCCCATGTAGAATAAAGCAAATTGTGAGAATGTGGCAGAGAGTGGGACAAGCAATGTATGCCC  
CTCCCATCAAAGGAAACATTACTTGTAGATCAAACATTACAGGACTACTATTAACAAGAGATGGTGGGAGAAA  
TAGGAGTAATGACAGAGAGATCTTCAGACCTACAGGAGGAGACATGAGGAACAATTGGAGAAGTGAATTATAT  
AAGTATAAAATAGTAAAAATAAAACCATTAGGAGTAGCACCCACCAAGGCAAGGAGAAGAGTGGTGGGGAGAG

AAAAAAGAGCAGCTGGCCTGGGAGCTGTTTTCTTGGGTCTTTAGGAGCAGCAGGAAGCACTATGGGCGCGGC  
GTCAATAACGCTGACGGTACAGGTACAGACAACCTATTGTCTGGCATAGTGCAACAGCAAAGCAATTTGCTGAGA  
GCTATAGAGGCACAGCAACATCTGCTGCAACTCACAGTCTGGGGCATT

>KR051437

AGTCAAGAAAATAAAACAGTTATCACAATCCCATGTAGGATAAAACAAATTGTAAGAATGTGGCAGAGAACGG  
GACAAGCAATATATGCCCCCTCCCATTCAGGAAACATTACATGTATATCAAACATTACAGGACTATTATTAAC  
AAGAGATGGTGGGAATGACAATAATAACAATAATACCAATGACAATGACACTGAGGTCTTCAGACCTACAGGA  
GGAGATATGAGGGACAATTGGAGAAGTGAATTATATAAGTACAAAGTAGTAAAGATTAAATCACTAGGAGTAG  
CACCCACCAAGGCAAGGAGAAGAGTAGTGGGAAGAGAAAAAAGAGCAGTTGGAATAGGAGCTGTCTTTCTTGG  
GTTCTTAGGAGCAGCCGGGAGCACTATGGGCGCGGCGTCACTAACGCTGACGGTACAGGTACAGACAATTATTG  
TCTGGCATAGTGCAACAGCAAAGCAATTTGCTGAGAGCTATAGAGGCGCAACAGCATATGTTGCAACTCACAG  
TCTGGGGCATT

>KY658701

AGTTATATTAATAGGACATCAACTTCTAATGGGACTATCACACTCCCATGTAGAATAAAACAAATTGTAAGGA  
TGTGGCAGAGAGTGGCACAAGCAATGTACGCCCTCCCATTCAGGAAAACCTTGAATGTAACCTCAAGCATTAC  
AGGATTAATATTAACAAGAGATGGTGGGAACAATGACAATAACACACAGAACGAGACCTTCAGACCTGGAGGA  
GGAAATATAAGGGACAATTGGAGAAGTGAATTATATAAAATATAAAACAGTAAAAATCAAATCATTAGGAATAG  
CACCCACCAGGGCAAGGAGAAGAGTGGTGGAAAGACAAAAAAGAGCAGTGGGAATGGGAGCTGTCTTCTTGG  
GTTCTTAGGAGCAGCAGGAAGCACTATGGGCGCGGCGTCAATAACGCTGACGGTACAGGTACAGACAATTATTG  
TCTGGCATAGTGCAACAGCAAAGCAATTTGCTGAGAGCTATAGAGGCGCAACAGCATATGTTGCAACTCACAG  
TCTGGGGCATT

>FJ817370

AGTCATCTGTTTAATGGTAGTACTCTGTCTACTAATGGTACTATCACACTTCCATGTAGGATAAAACAGATTG  
TAAGAATGTGGCAGAGAGTGGGACAAGCAATGTATGCCCCCTCCTATCGCAGGAAAACATTACATGTAGGTCAAA  
CATTACAGGACTACTATTAACAAGAGATGGTGGAAACAAATAAAGATACAAATGAGGCTGAGACTTTCAGACCT  
GGAGGAGGAGATATGAGGGACAATTGGAGAAGTGAATTATATAAGTATAAAGTAGTAAAAATTAAACCATTAG  
GAGTAGCACCCACCAGGGCAAGGAGAAGAGTGGTGGAGAGAGAAAAAAGAGCAATTGGACTGGGAACCTGTCTT  
CCTTGGGTTCTTAGGAACAGCAGGAAGCACTATGGGCGCAGCGTCAATAACGCTGACGGTACAGGTACAGACAA  
TTATTGTCTGGCATAGTGCAACAGCAAAGCAATTTGCTGAGGGCTATAGAGGCGCAGCAGCATCTGTTGCAAC  
TCACAGTCTGGGGCATT

>EU885764

AATCATACAGATACAAATGAAAATATCACACTCCAGTGTAGGATAAAACAAATTGTGAGAATGTGGCAGAGAG  
TGGGACAAGCAATGTATGCCCCCTCCCATCGCTGGAAACATTACATGTATCTCAAACATTACAGGACTGCTATT  
AACAAGAGATGGTGTGAATGATACCCATGACAAGGAGAATGAGACCTTCAGACCTACAGGAGGAGATATGAGG  
GATAATTGGAGAAGTGAATTATATAAGTATAAAGTAATAAACTTAAACCACTAGGAGTAGCACCCACCAGGG  
CAAGGAGAAGAGTGGTGGAGAGAGGAAAAAGAGAAGTCACACTAGGAGCTTTGTTCTTACGTTCTTAGGAGC  
AGCAGGAAGCACTATGGGCGCGGCGTCATTAACGCTGACGGTACAGGCCAGACAATTATTGTCTGGCATAGTG  
CAACAGCAAAGCAATTTGCTGAGAGCTATAGAAGCGCAGCAGCATCTGTTGCAGCTCACAGTCTGGGGCATT

>EU885765

AGTTATGGGCCTAATGAGACACACATCATACTCCCATGTAGGATAAGACAAATTGTGAGAATGTGGCAGAGAG  
TAGGACAAGCAATGTATGCCCCCTCCCATCGCAGGAAACATAACATGTAAATCAAATATTACAGGACTACTATT  
AACAAGAGATGGTGGAGAGGATGGCAATAATAGCACTGAGACCTTCAGACCTGCAGGAGGAGACATGAGGGAC  
AATTGGAGAAGTGAATTATATAAGTATAAAGTAGTAAAAATTAAACCATTAGGAGTAGCACCCACCAGGGCAA  
GAAGAAGAGTGGTGGAGAGAGAAAAAAGAGCAGTTGGACTGGGAGCTGTCTTCTTGGGTTCTTAGGAGCAGC  
AGGAAGCACTATGGGCGCGGCGTCATTAACGCTGACGGTACAGGCCAGACAATTATTGTCTGGCATAGTGCAA  
CAGCAAAGCAATTTGCTGAGGGCTATAGAGGCGCAGCAGCATCTGCTGCAACTCACAGTCTGGGGCATT

>HQ236608

AGCTATAATAGTGGCAGTAATAATAATACCACACATAATAGTGGTAATGAGACTATCACAATTCATGTAGGA  
TAAAACAAATAGTGAGAATGTGGCAGAGAGTGGGACAAGCAATGTATGCCCCCTCCCGTCGCAGGAAACATTAC  
ATGTAGGTGAGAAATTACAGGACTACTATTAACAAGAGATGGTAATGCAAGTGAAAAATGAAATTGTCAGACCT  
GGAGGAGGAGACATGAGGGACAATTGGAGAAGTGAATTATATAAGTATAAAGTAGTAAAAATTAAACCCTGG  
GAGTAGCACCCACCAGGGCAAGGAGAAGAGTGGTGGGAGAGAAAAAAGAGCAGTTGGACTGGGAGCTGTCTT  
CCTTGGGTTCTTAGGAACAGCAGGAAGCACTATGGGCGCAGCGTCAATAACGCTGACGGTACAGGTACAGACAA  
TTATTGTCTGGCATAGTGCAACAGCAAAGCAATTTGCTGAGGGCTATAGAGGCGCAGCAGCATATGTTGCAAC  
TCACAGTCTGGGGCATT

>KX389641

GATTATGAGAGTAATATCACACTCCCATGTAAAATAAAACAAATTGTGAGAATGTGGCAGAGAGTAGGACAAG  
CAATGTATGCCCCCTCCCATCGCAGGAAATATTACATGTAGATCAAACATTACAGGGCTATTATTAACAAGAGA  
TGGTGGTGGGAACAATAATAGCAATGAGACCTTCAGACCTGGAGGAGGAGATATGAGGGACAACCTGGAGAAGT  
GAGTTATATAAGTATAAAATAGTAAAAATTAAACCACTAGGAATAGCACCCACCAAGGCAAAGAGAAGAGTGG

TGCAGAGAGAGAAAAGGGCAGTAGTTGGACTGGGAGCTGTCTTCCTTGGGTTCTTAGGAGCAGCAGGAAGCAC  
TATGGGCGCGGCGTCAATAACGCTGACGGTACAGGCCAGACAATTATTGTCTGGCATAGTGCAACAGCAAAGC  
AATTTGCTGAGGGCTATAGAGGCACAGCAACATCTGTTGCAACTCACAGTCTGGGGCATT

>KY953202

AGTTATATAAATGCTACAAAGGATAATACAACAGGGGATAACATCACGCTCCCATGTAGGATAAAACAGATTG  
TAAGAATGTGGCAGAGAGTAGGACAAGCAATGTATGCCCCCTCCCATCGCAGGAAACATTACATGTATATCAAA  
CATTACAGGGATAATATTAACAAGAGATGGTGGAAATAATAATAAATCAAATAATGAAACCTTCAGACCTGGA  
GGAGGAGATATGAGAGACAATTGGAGAAGTGAGTTATATAAGTATAAAATAGTTAAATTAACCACCTAGGAA  
TAGCACCCACCAGGGCAAGGAGAAGAGTGGTGCAGAGAGAAAAAAGGGCAGTTGGACTGGGAGCTTTCTTCTT  
TGGGTTCTTAGGAGCAGCAGGAAGCACTATGGGCGCGGCGTCAATAACGCTGACGGTACAGGTACAGACAATTA  
TTGTCTGGCATAGTGCAACAGCAAAGCAATTTGCTGAGGGCTATAGAGGCGCAACAACATATGTTGCAACTCA  
CAGTCTGGGGCATT

>FR846409

AGTTATGAAAATGATACTATCACACTTCCATGTAGGATAAAACAAATTGTGAGAATGTGGCAGAGAGTGGGAC  
AAGCAATGTATGCCCCCTCCCATAGCAGGAAACATTACATGTGTGTCAAACATTACAGGATTACTATTAGAAAAG  
AGATGGTGGGAATCTTAATAATAGTATAAATACAACCTGAGCCTAAAAATGAAATTTTCAGACCTGTAGGAGGA  
GACATGAAGAACAATTGGAGAAGTGAATTATATAAATATAAAGTAGTAAGAATTAACCACCTAGGAGTAGCAC  
CTACCAGGGCAAGGAGAAGAGTGGTGGGAAGAGAAAAAAGAGCAGGAATAGGAGCTGTCTCTTTGGGTTCTT  
AGGAGCAGCAGGAAGCACTATGGGCGCGGCGTCAATAACGCTGACGGTACAGGTACAGACAATTATTGTCTGGC  
ATAGTGCAACAGCAAAGCAATTTGCTGAGAGCAATAGAGGCGCAGCAGCATCTGTTGCAACTCACAGTCTGGG  
GCATT

>HQ236615

AATTATACTGAGAGTAGAAATGATACTATCATCTCAATTCCATGTAGGATAAAACAAATTGTGAGAATGTGGC  
AGAGAGTGGGACAAGCAATGTATGCCCCCTCCCATCGCAGGAAACATTACATGTAGGTCAAATATTACAGGACT  
ATTATTAGTAAGAGATGGTGGCATAAATAATGAGACAACTGAGATTTTCAGACCTGCAGGAGGAGATATGAAG  
GACAAATTGGAGAAGTGAATTATATAAGTATAAAGTAGTAAAAATTAACCACCTAGGAGTAGCACCCACCAGGG  
CAGAGATGGTGGGAGAGAAAAGAGCAGTTGGACTGGGAGCTGCCATCCTTGGGTTCTTAGGAACAGCAGGAAG  
CACTATGGGCGCAGCGTCAATAGCGCTGACGGTACAGGTACAGACAATTATTGTCTGGCATAGTGCAACAGCAA  
GGCAATTTGCTGAGGGCTATAGAGGCGCAGCAGCATCTGTTGCAACTCACAGTCTGGGGCATT

>MH746234

ACTTACACAGGGAGGGGAATGACACACAGGAGAATAACAGCACTATCATACTTCCATGCAGGATAAAACAAA  
TTATAAACATGTGGCAAGGAGCAGGACAAGCAATGTATGCTCCTCCCATCAGTGGAAAAATTAATTGTGTATC  
AAATATTACAGGAATACTATTGACAAGAGATGGTGGTAATAATGCTACTAATGAGACCTTCAGACCTGGAGGA  
GGAAATATAAAGGACAATTGGAGAAGTGAATTATATAAATATAAAGTAGTACAAATTGAACCACTGGGAATAG  
CACCCACCAAGGCAAAGAGAAGAGTGGTGGAGAGAGAAAAAAGAGCAGTGGGAATAGGAGCTATGATCTTTGG  
GTTCTTAGGAGCAGCAGGAAGCACTATGGGCGCGGCGTCAATAACGCTGACGGTACAAGCCAGACAATTATTG  
TCTGGTATAGTGCAACAGCAAAGCAATTTGCTGAGGGCTATAGAGGCGCAGCAGCATCTGTTGCAACTCACAG  
TCTGGGGCATT

>KU600817

ACTTACACAGGAAATGGAACATGGGAGAATAATAGCACTATTAATGGCACTATCATACTTCCATGCAAGATAA  
AGCAAATCATAAACATGTGGCAGGGAGCAGGACAAGCAATGTATGCTCCTCCCATCAGTGGAAATAATTAATTG  
TGCGTCAAATATTACAGGACTACTATTGACAAGAGATGGTGGTTTTAGTAATGCAAGTGGTGGTGGTAGTAAT  
GCAATGAAGAGATCTTCAGACCTGGAGGAGGAAATATAAAAGACAATTGGAGAAGTGAATTATATAAATATA  
AAGTAGTACAAATTGAACCATTAGGAATAGCACCCACCAGGGCAAAGAGAAGAGTGGTGGAGAGAGAAAAAAG  
AGCAGTGGGAATAGGAGCTATGATCTTTGGGTTCTTAGGAGCAGCAGGAAGCACTATGGGCGCGGCATCAATA  
ACGCTGACGGTACAGGCCAGACAATTATTGTCTGGTATAGTGCAACAGCAAAGCAATTTGCTGAAAGCTATAG  
AGGCGCAACAGCATTGTGTTGCAACTCACAGTCTGGGGCATT

>JX112866

ACTTACATGGGAAATGAAACCAAGGGGAAGTATAATGGCACTATTATACTTCCATGCAGGATAAAGCAAATTA  
TAAACATGTGGCAGGAAACAGGACAAGCAATGTATGCTCCTCCCGTCAGTGGAGAATTAAGTGTAGATCAAA  
TATTACAGGAATACTATTGACAAGAGATGGTGGTAATACAACCTAACGGGAAGAGACCTTCAAACCTGGAGGA  
GGAGATATGAGGGACAATTGGAGAAATAAATTATATAAATATAAAGTAGTACAAATTGAACCACTAGGAATAG  
CACCCACCAGGGCAAAGAGAAGAAATGGTGGAGAGAGAAAAAAGAGCAGTGGGAATAGGAGCTATGATCTTTGG  
GTTCTTAGGAGCAGCAGGAAGCACTATGGGCGCGGCGTCAATAACGCTGACGGTACAGGCCAGACAATTATTG  
TCTGGTATAGTGCAACAGCAAAGCAATTTGCTGAGGGCTATAGAGGCGCAGCAGCATCTGTTGCAACTCACAG  
TCTGGGGCATT

>GU564225

ACTTACAATGGAAATGAAACCATAGGTAATAAACTATCATACTTCCATGCAGGATAAAGCAAATTATAAAACA  
TGTGGCAGGGAGTAGGACAAGCAATGTATGCTCCTCCCGTCAGTGGAGAATTAATTGTGTATCAAATATTAC  
AGGAATACTATTAAACAAGAGATGGTGGTAGTAATAGTACTAATGAGACCTTCAGACCTGAAGGAGGAAATATA

AAGGACAATTGGAGAAGTGAATTACATAAATATAAAGTAGTACAAATTGAACCACTAGGAATAGCACCCACCA  
GGGCAAAAAGAAGAGTGGTGGAGAGAGAAAAAGAGCAGTGGGAATAGGAGCTATGATCTTTGGGTTCTTAGG  
AGCAGCAGGAAGCACTATGGGCGCGGCGTCAATAACGCTGACGGTACAGGCCAGACAATTATTGTCTGGTATA  
GTGCAACAGCAAAGCAATTTGCTGAGGGCTATAGAGGCGCAGCAGCATCTGTTGCAACTCACAGTCTGGGGCA  
TT

>GQ845124

ACTTACACAGAAAATGGAACCATAGAGGGGAATAAACTATCATACTTCCATGTAGGATAAAGCAAATTATAA  
ACATGTGGCAGGGAGTAGGACAAGCAATGTATGCTCCTCCCATCAGGGGAAGAATTAATTGTATATCAAATAT  
TACAGGAATACTATTAACAAGAGATGGTGGTAATAGTAATGCTACCGATAGTAATACTAACGAAATCTTCAGA  
CCTGGAGGAGGAAATATAAAAGGACAATTGGAGAAGTGAATTATATAAATATAAAGTAGTACAAATTGAACCAC  
TAGGAGTAGCACCCACCAGGGCAAGGAGAAGAGTGGTGCAGAAAGAAAAAGAGCAGTGGGAATAGGAGCTAT  
GATCTTTGGGTTCTTAGGAGCAGCAGGAAGCACTATGGGCGCGGCGTCAATAACGCTGACGGTACAGGCCAGA  
CAATTATTGTCTGGTATAGTGCAACAGCAAAGCAATTTGCTGAGGGCTATAGAGGCGCAGCAGCATCTGTTGC  
AACTCACAGTCTGGGGCATT

>GQ845126

ACTCAAGGAAAATGAAACCATAGGGAGGAGAAATGACACTATCATACTTCCATGCCGGATAAAGCAAATTA  
TAAACATGTGGCAGGAAGTAGGACAAGCAATGTATGCTCCTCCCATCAGTGGAAATAATTAATTGTGTATCAAA  
TATTACAGGAATACTATTAACAAGAGATGGTGGTAATAATGATACTAACGAGACCTTCAGACCTGGAGGAGGA  
AATATAAAGGACAATTGGAGAAGTGAATTATATAAATATAAAGTAGTACAAATTGAACCACTAGGAATAGCAC  
CCACCAGGGCAAAGAGAAGAGTGGTGGAGAGAGAAAAAGAGCAGTGGGAATAGGAGCTATGATCTTTGGGTT  
CTTAGGAGCAGCAGGAAGCACTATGGGCGCAGCGTCAATAACGCTGACGGTACAGGCCAGACAATTATTGTCT  
GGTATAGTGCAACAGCAAAGCAATTTGCTGAGGGCTATAGAGGCGCAGCAGCATCTGTTGCAACTCACAGTCT  
GGGGCATT

>GU564229

ACTCAAACCACAGAGGGGAAAGACAATATCACACTTCCATGCAGAATAAAGCAAGTTATAAAAATGTGGCAGA  
GAGTAGGACAAGCAATGTATGCTCCTCCCATCAGTGGAAATAATTAATTGTGTATCAAAATATTACAGGTATACT  
ATTAACAAGAGATGGTGGTGATAATGATAGTACTAACGAGACCTTCAGACCTGGAGGAGGAGATATGAGGGAC  
AATTGGAGAAGTGAATTATATAAATATAAAGTAGTACAAATTGAACCACTAGGAATAGCACCCACCAAGGCAA  
AGAGAAGAGTGGTGGAGAGAGAAAAAGAGCAGTGGGAATAGGAGCTTTGATCTTTGGGTTCTTAGGAGCAGC  
CGGAAGCACTATGGGCGCGGCGTCAATAACGCTGACGGTACAGGCCAGACAATTGTTGTCCGGTATAGTGCAA  
CAGCAAAGCAATTTGCTGAGGGCTATAGAGGCGCAGCAGCATATGTTGCAACTCACAGTCTGGGGCATT

>EF036531

ACTTACAATGGAACCCTGAACGAGGAGTACAATGGCACTATCATACTTCCATGCAGAATAAAGCAAATTATAA  
ACATGTGGCAGGAAGTAGGACAAGCAATGTATGCTCCTCCCATCAGTGGGAAGAATTAATTGTGTATCAAATAT  
TACAGGGATACTATTGACAAGAGATGGTGGTACGAATGAGACTAACGAGACCTTCAGACCTGGAGGAGGAAAT  
ATAAAGGACAATTGGAGAAATGAATTATATAAATATAAAGTAGTACAAATTGAACCACTAGGAATAGCACCCA  
CCAGGGCAAAGAGAAGAGTGGTGGAAAGAGAAAAAGAGCAGTGGGAATAGGAGCTATGATCTTTGGGTTCTT  
AGGAGCAGCAGGAAGCACTATGGGCGCGGCGTCAATAACGCTGACGGTACAGGCCAGACAATTATTGTCTGGT  
ATAGTGCAACAGCAAAACAATTTGCTGAGGGCTATAGAGGCGCAGCAGCCTCTGTTTCTTCTCACAGTCTGGG  
GCATT

>KF835499

AATTACACAGGAAATGGAACAACGAGTGGCACTATCATACTTCCATGTAGGATAAAGCAAATTATAAACATGT  
GGCAGGGAGTAGGACAAGCAATGTATGCTCCTCCCATCAGTGGGAAGCATTAAATTGTGTATCAGATATCACAGG  
AATACTATTGACAAGAGATGGTGGTAATAATACAGGTAATAATAATAGTGCTAATAACAAATGAGATCTTCAGA  
CCTGGAGGAGGAAATATGAAAGACAATTGGAGAAGTGAATTATATAAATATAAAGTAGTAGAAATTGACCCAC  
TAGGAGTAGCACCCACCAGGGCAAAAAGAAGAGTGGTGGAGAGAGAAAAAGAGCAGTGGGAATAGGAGCTAT  
GATCTTTGGGTTCTTAGGAGCAGCCGGGAGCACTATGGGCGCAGCGTCAATAACGCTGACGGTACAGGCCAGA  
CAATTATTGTCTGGTATAGTGCAACAGCAAAGCAATTTGCTGAGGGCTATAGAGGCGCAACAACATATGTTGC  
AACTCACAGTCTGGGGCATT

>KF835523

ACTCACACGAAAATGACACCACAAAGGAAAGGATCATACTTCCATGCAGGATAAAGCAAATTATAAACATGT  
GGCAGAGAGTAGGACAAGCAATATACAATCCTCCCATCAGTGGAGCAATTAATTGTCTATCAAATATTACAGG  
AATAATATTGACAAGAGATGGTGGTGCTAGTACTAATAATGATACTAGTACTAACAAATGAAACCTTCAGACCT  
GGAGGAGGAAATATAAAGGACAATTGGAGAAGTGAATTATATAAATATAAAGTAGTACAAATTGAGCCACTAG  
GGGTAGCACCCACCAGGGCAAGAGAAGAGTGGTGGAGAGAGAGAAAAAGAGCAGTGGGAATAGGAGCTATGAT  
CTTTGGGTTCTTGGGAGCAGCAGGAAGCACTATGGGCGCGGCGTCAATAACGCTGACGGTACAGGCCAGACAA  
TTATTGTCTGGTATAGTGCAACAGCAAAGCAATTTGCTGAGGGCTATAGAGGCGCAGCAGCACATGCTGCAAC  
TCACAGTCTGGGGCATT

>GU475020

ACTTATAAAGGAAATGAAACCATAGGGAATGGAAGTATCATAATTCATGCAGGATAAAGCAAATTATAAACA  
TGTGGCAGGGAGTAGGACAAGCAATGTATGCTCCTCCCATCAGTGGGAATAATTAATTGTATATCAAATATTAC  
AGGAATACTATTAACAAGAGATGGTGGTAGTACTAATAGCACTAATGAGACCTTCAGACCTGGAGGAGGAAAT  
ATAAAGGACAATTGGAGAAGTGAATTATATAAATATAAAGTAGTACAAATTGAACCACTAGGAGTAGCACCCA  
CCAGGGCAAAGAGAAGAGTGGTGGAGAGAGAAAAAAGAGCAGTGGGAATAGGAGCTATGATCTTTGGGTTCTT  
AGGAGCAGCAGGAAGCACTATGGGCGCAGCGTCAATAACGCTGACGGTACAGGCCAGACAATTATTGTCTGGT  
ATAGTGCAACAGCAAAGCAATTTGCTGAGGGCTATAGAGGCGCAGCAGCATATGTTGCAACTCACAGTCTGGG  
GCATT

>HQ699988

ACTTATAATGGAATGGAAGTGTGACCAAGTATAATGACACTATTATACTTCCATGCAGGATAAAGCAAATTA  
TAAACATGTGGCAGGAAACAGGACAAGCAATGTATGCTCCTCCCGTCAGTGGAGTAATAAATTGTAGATCAAA  
TATTACAGGAATACTATTGACAAGAGATGGGGGTAATAATGGGGGTAATACAACTAACGGGGAAGAGACCTTC  
AGACCTGGAGGAGGAGATATGAGGGACAATTGGAGAAAATGAATTATATAAATATAAAGTAGTACAAATTGAAC  
CACTAGGAATAGCACCCACCAAGGCAAAGAGAAGAGTGGTGCAGAGAGAAAAAAGAGCAGTGGGAATAGGAGC  
TATGATCTTTGGGTTCTTAGGAGCAGCAGGAAGCACTATGGGCGCGGCGTCAATAACGCTGACGGTACAGGCC  
AGACAATTATTGTCTGGTATAGTGCAACAGCAAAGCAATTTGCTGAGAGCTATTGAGGCGCAGCAGCATCTGT  
TGCAACTCACAGTCTGGGGCATT

>JX112811

ACTTACTCAGGAAATGAAACCAAGGAAATGAAACCAAGGGAAGAATACAAGTATCATACTTCCATGCAAGA  
TAAAGCAAATTATAAACATGTGGCAGGGAGTAGGACAAGCAATGTATGCTCCTCCCATCAGTGGAAAAGTTAA  
TTGTATATCAAATATTACAGGAATACTATTAACAAGAGATGGTGGTGGTAATAATAGTGCTAATGAGACTTTC  
AGACCGGGAGGAGGAAATATAAAGACAATTGGAGAAAGTGAATTATATAAATATAAAGTAGTACAAATTGAAC  
CACTAGGAATAGCACCCACCAGGGCAAAGAGAAGAGTGGTGGAGAGAGAAAAAAGAGCAGTGGGAATAGGAGC  
TATGATCTTTGGGTTCTTAGGAGCAGCAGGAAGCACTATGGGCGCGGCGTCAATAACGCTGACGGTACAGGCC  
AGACAATTATTGTCTGGTATAGTGCAACAGCAAAGCAATTTGCTGATGGCTATAGAGGCGCAGCAGCATCTGC  
TGCAACTCACAGTCTGGGGCATT

>JX112817

ACTTACATCAGTAAAATTAACACTACAGGGGGGAGTAATGGCACTATCATACTTCCATGCAAGATAAAGCAAA  
TTATAAACATGTGGCAGGGAGTAGGACAAGCAATGTATGCTCCTCCCATCAGTGGAAATAATTAATTGTGTAAC  
AAATATTACAGGAATACTATTAACAAGAGATGGTGGTAATGATAATAGCATTAAATGAGACCTTTAGACCTGGA  
GGAGGAAATATAAAGGACAATTGGAGAAATGAATTATATAAATATAAAGTAGTACAAATTGAACCACTAGGAC  
TAGCACCCACCAGGGCAAAGAGAAGAGTGGTGGAGAGAGAAAAAAGAGCAGTGGGAATAGGAGCTATGATCTT  
TGGGTTCTTAGGAGCAGCAGGAAGCACTATGGGCGCGGCGTCAATAACGCTGACGGTACAGGCCAGACAATTA  
TTGTCTGGTATAGTGCAACAGCAAAGCAATTTGCTGAGGGCTATAGAGGCGCAGCAGCATCTGTTGCAACTCA  
CAGTCTGGGGCATT

>JX112824

ACTTATTTAAATAAAACCACAAGGGAGAGTAATGGCACTATCATACTTCCATGCAGGATAAAGCAAATTATAA  
ACATGTGGCAGGGAGTAGGACAAGCAATGTATGCTCCTCCCATCAGTGGAAAGCATTAAATTGTGTATCAAATAT  
TACAGGAATACTATTAACAAGAGATGGTGGTAATAATGGTACTAGTGATAAAGAGACCTTCAGACCTGGAGGA  
GGAAATATAAAGGACAATTGGAGAAGTGAATTATATAAATATAAAGTAGTAGAAATTGAACCACTAGGAATAG  
CACCCACCAGGGCAAAGAGAAGAGTGGTGGAGAGAGAAAAAAGAGCAGTGGGAATAGGAGCTATGATCTTTGG  
GTTCTTAGGAGCAGCAGGAAGCACTATGGGCGCGGCGTCAATAACGCTGACGGTACAGGCCAGACAATTATTG  
TCTGGTATAGTGCAACAGCAAAGCAATTTGCTGAGGGCTATAGAGGCGCAGCAGCATCTGTTGCAACTCACAG  
TCTGGGGCATT

>JX112825

ACTTACAATGAACTGGAACCAAGGGGAGAATAATGGCACTAATGGCAATATCACACTTCCATGCAGGATAA  
AGCAAATTATAAACATGTGGCAGGAAGTAGGACAAGCAATGTATGCTCCTCCCATCAATGGAATAATTAATTG  
TGTATCAAATATTACAGGAATACTATTAACAAGAGATGGTAGTAATGAACTAGCCCTAACGAGACCTTCAGA  
CCTGGAGGAGGAAATATAAAGGACAATTGGAGAAGTGAATTATATAAATATAAAGTAATAACAAATTGAACCAC  
TAGGAATAGCACCCACCAAGGCAAAGAGAAGAGTGGTGGAGAGAGAAAAAAGAGCAGTGGGAATAGGAGCTTT  
GATCTTTGGGTTCTTAGGAGCAGCAGGAAGCACTATGGGCGCGGCGTCAATAACGCTGACGGTACAGGCCAGA  
CAATTATTGTCTGGTATAGTGCAACAGCAAAGCAATTTGCTGAGGGCTATAGAGGCGCAGCAGCATATGTTGC  
AACTCACAGTCTGGGGCATT

>JX112831

AATTACACAGGAAATAAAACAGGGGGGAATAATAACACTGAACTATCACACTTCCATGCAACATAAAGCAAA  
TTATAAACATGTGGCAGGGAGTAGGACAAGCAATGTATGCTCCTCCCGTCAGTGGAAAGAATTAATTGTGTAAG  
TAATATTACAGGAATACTATTAACAAGAGATGGTGGTAAAACTAGTGCTGACGAGACCTTCAGACCTGGAGGA  
GGAAATATAAAGGACAATTGGAGAAGTGAATTATATAAATATAAAGTAGTACAAATTGAACCACTAGGAATAG  
CACCCACCAGGGCAAAGAGAAGAGTGGTGGAGAGAGAAAAAAGAGCAGTGGGAATAGGAGCTATGATCTTTGG  
GTTCTTAGGAGCAGCCGGAAGCACTATGGGCGCGGCGTCAATAACGCTGACGGCACAGGCTAGACAATTATTG

TCTGGTATAGTGCAACAGCAAAGCAATTTGCTGAGGGCTATAGAGGCGCAACAGCATCTGTTGCAACTCACAG  
TCTGGGGCATT

>JX112836

ACTTACACAGAAAATGGAACCATAGGGGAAAGAAATGACACTATCACACTTCCATGCAAAATAAAGCAAATTA  
TAAACATGTGGCAGGAAATAGGACAAGCAATGTATGCTCCCCCGTCAGTGGAATAATTAATTGTGTATCAAA  
TATTACAGGAATACTATTAACAAGAGATGGTGGTAATAATGGTACTAGTGCTAACGAGACCTTCAGACCTGGA  
GGAGGAAATATAAAGGACAATTGGAGAAGTGAATTATATAAAATATAAAGTAGTACAAATTGAACCACTAGGAA  
TAGCACCCACCAGGGCAAAGAGAAGAGTGGTGGACAGAGAAAAAAGAGCAGTGGGAATAGGAGCTATGATCTT  
TGGGTTCCTTAGGAGCAGCAGGAAGCACTATGGGCGCGGCGTCAATAACGCTGACGGTACAGGCCAGACAATTA  
TTGTCTGGTATAGTGCAACAGCAAAGCAATTTGCTGAGGGCTATAGAGGCGCAGCAGCATCTGTTGCAACTCA  
CAGTCTGGGGCATT

>JX112837

TATTATGAAAATGGAACCATAGGGGGGAGTAATGGCACTATCATACTTCCATGTAGGATAAAGCAAATTATAA  
ACATGTGGCAGGGAGTAGGACAAGCAATGTATGCTCCTCCCATCAGTGGAAGCATTAATTGTGTATCAAATAT  
TACAGGAATACTATTAACAAGAGATGGTGGTGGTAATAATAGAACTAACGAGACCTTCAGACCTGGAGGAGGA  
AATATAAAGGACAATTGGAGAAGTGAATTATATAAAATATAAAGTAGTAGAAATTGAGCCACTAGGAGTAGCAC  
CCACCAAGGCAAAGAGAAGAGTGGTGGAGAGAGAAAAAAGAGCAGTGGGAATAGGAGCTATGATCTTTGGGT  
CTTAGGAGCAGCAGGAAGCACTATGGGCGCGGCGTCAATAACGCTGACGGTACAGGCCAGACAATTATTGTCT  
GGTATAGTGCAACAGCAAAGCAATTTGCTGAGGGCTATAGAGGCGCAGCAGCATCTGTTGCAACTCACAGTCT  
GGGGCATT

>JX112838

ATTTACAATGGAATGAAACCAATATTCCTGACAATAAACTATCATACTTCCATGCAAGATAAAGCAAATTG  
TAAACTTGTGGCAGGAAGTAGGACAAGCAATGTATGCTCCTCCCATCAGGGGAAAAATTAATTGTGTATCAAA  
CATTACAGGAATACTATTAACAAGAGATGGTGGTAATATTAGTAATACTAGTACCGAGACCTTCAGACCTGCA  
GGAGGAGATATGAGGGACAATTGGAGAATGAATTATATAAAATATAAAGTAGTACAAATTGAACCACTAGGAA  
TAGCACCCACCAGGGCAAAGAGAAGAGTGGTGAAGAGAGAAAAAAGAGCAGTGGGAATAGGAGCTATGATCTT  
TGGGTTCCTTAGGAGCAGCAGGAAGCACTATGGGCGCGGCGTCAATAACGCTGACGGTACAGGCCAGACAATTA  
TTGTCTGGTATAGTGCAACAGCAAAGCAATTTGCTGAGGGCTATAGAGGCGCAGCAGCATATGTTGCAACTCA  
CAGTCTGGGGCATT

>JX112839

CATTACGAAAATGGAACCATAAAGGGGGGTAATAACACTAGCGAGATCACACTTCCATGCAGGATAAAGCAAA  
TTATAAACATGTGGCAGGAAGTAGGACAAGCAATGTATGCTCCTCCCGTCAGTGGAAGAATTAATTGTGTATC  
AAATATCACAGGAATACTATTAACAAGAGATGGTGGTAATAATAAGTACTAATGAGACCTTCAGACCTGGA  
GGAGGAGATATAAAGGACAATTGGAGAAGTGAATTATATAAAATATAAAGTAGTACAAATTGAACCACTAGGAA  
TAGCACCCACCAGGGCAAAGAGAAGAGTGGTGGAGAGAGAAAAAAGAGCAGTGGGAATAGGAGTTATGATCTT  
TGGGTTCCTTAGGAGCAGCTGGAAGCACTATGGGCGCGGCGTCAATAACGCTGACGGTACAGGCCAGACAATTA  
TTGTCTGGTATAGTGACAGCAGCAAAGCAATTTGCTGAGAGCTATTGAGGCGCAACAGCATCTGTTGCAACTCA  
CAGTTTGGGGCATT

>GU475031

ACTTACAAAGGAAATGAAACCATAGGGGAGAGGAATGACACTATCATACTTCCATGCAGGATAAAGCAGATTG  
TAAACATGTGGCAGGAAGTAGGACAAGCAATGTATGCTCCTCCCGTCAGTGGAAGAATTAATTGTGTATCAAA  
TATTACAGGAATACTATTAACAAGAGATGGTGGTAATAATAACTAACGAGACCTTCAGACCTGGAGGAGGA  
AATATAAAGGACAATTGGAGAAGTGAATTATATAAAATATAAAGTAGTACAAATTGAACCACTAGGAATAGCAC  
CCACCAGGGCAAAGAGAAGAGTGGTGGAGAGAGAAAAAAGAGCAGTGGGAATAGGAGCTATGATCTTTGGGT  
CTTAGGAGCAGCAGGAAGCACTATGGGCGCGGCGTCAATAACGCTGACGGTACAGGCCAGACAATTATTGTCT  
GGTATAGTGCAACAGCAAAGCAATTTGCTGAGAGCTATAGAGGCGCAGCAGCACATGTTGCAACTCACAGTCT  
GGGGCATT

>GU475030

ACTTACCAAGGAAATGAAACAGGGGGGAATACTAGCAGCACTATCACACTTCCATGCAAGATAAAGCAAATTA  
TAAACATGTGGCAGGGAGTAGGACAAGCAATGTATGCTCCTCCCATCAGTGGAATAATTAATTGTGTATCAAA  
TATTACAGGAATACTATTAACAAGAGATGGTGGTAATAATAATGCTACTAACGAGACCTTCAGACCTGGAGGA  
GGAAATATAAAGGACAATTGGAGAATGAATTATATAAGTATAAAGTAGTACAAATTGAACCACTAGGAATAG  
CACCCACCAGGGCAAAGAGAAGAGTGGTGGAGAGAGAAAAAAGAGCAGTGGGAATAGGAGCTATGATCTTTGG  
GTTCTTAGGAGCAGCTGGAAGCACTATGGGCGCGGCGTCAATAACGCTGACGGTACAGGCCAGACAATTATTG  
TCTGGTATAGTGCAACAGCAAAGCAATTTGCTGAGGGCTATAGAGGCGCAGCAGCATCTGTTGCAACTCACAG  
TCTGGGGCATT

>JX112840

ACTTACACAAGAAATGGAACCATAGGGGGGAGTAATGGCACTATCATACTGCCATGCAAGATAAAGCAAATTA  
TAAACATGTGGCAGGGAGTAGGACAAGCAATGTATGCTCCTCCCATCAGTGGAAGAATTAATTGTGTATCAAA  
TATCACAGGAATACTATTAACAAGAGATGGTGGTAATAGTAGTGCTAACGAGACCTTCAGACCTGGAGGAGGA

AATATAAAGGACAATTGGAGAAAGTGAATTATATAAAATATAAAGTAGTACAAATTGAACCACTAGGAATAGCAC  
CCACCAGGGCAAAGAGAAGAGTGGTGGAGAGAGAAAAAGAGCAGTGGGAATAGGAGCTATGATCTTTGGGTT  
CTTAGGAGCAGCAGGAAGCACTATGGGCGCGGCGTCAATAACGCTGACGGTACAGGCCAGACAATTATTGTCT  
GGTATAGTGCAACAGCAAAGCAATTTGCTGAGGGCTATAGAGGCGCAGCAGCATCTGTTGCAACTCACAGTCT  
GGGGCATT

>JX112845

AATTACACAAGAAATGAAACCATGAGTAAGGACAAGGACACTCTCATACTTCCATGCAGGATAAAGCAAATTA  
TAAACATGTGGCAGGGAGTAGGACAAGCAATGTATGCTCCTCCCATCAGGGGAGTAATTAATTGTTTATCAAA  
TATTACAGGAATACTATTAACAAGAGATGGTGGTAATAATAGGACTAACGAGACCTTCAGACCTGAAGGAGGA  
AATATAAAGGACAACCTGGAGAAATGAATTATATAAAATATAAAGTAGTGCAAATTGAACCACTAGGAATAGCAC  
CTACCAGGGCAAAGAGAAGAGTGGTGGAGAGAGAAAAAGAGCAGTGGGAATAGGAGCTATGATCTTTGGGTT  
CTTAGGAGCAGCAGGAAGCACTATGGGCGCGGCGTCAATAACGCTGACGGTACAGGCCAGACAATTATTGTCT  
GGTATAGTGCAACAGCAAAGCAATTTGCTGAGGGCTATAGAGGCGCAGCAGCATATGTTGCAACTCACAGTCT  
GGGGCATT

>JX112851

ACTTATGGAAATGAAACCATAGGGGAGAGAAATGACAGTATCATACTTCCATGCAAGATAAAGCAAATTATAA  
ACATGTGGCAGGGAGTAGGACAAGCAATGTATGCTCCTCCAATCAGTGGGAAGAATTAATTGTGTATCAAATAT  
TACAGGGATACTCTTAACAAGAGATGGTGGTAATAATAATACTAATGAGATCTTCAGACCTGGAGGAGGA  
AATATAAAGGACAATTGGAGAAAGTGAATTATATAAAATATAAAGTAGTACAAATTGAACCACTAGGAATAGCAC  
CCACCAAGGCAAAGAGAAGAGTGGTGGAGAGAGAAAAAGAGCAGTGGGAATAGGAGCTATGATCTTTGGGTT  
CTTAGGAGCAGCTGGAAGCACTATGGGCGCGGCGTCAATAACGCTGACGGTACAGGCCAGACAATTATTGTCT  
GGTATAGTGCAACAGCAAAGCAATTTGCTGAGGGCTATAGAGGCGCAGCAGCATCTGTTGCAACTCACAGTCT  
GGGGCATT

>GU475023

ACTTACTCAGGAAATGAAAGCACAGGGGGGAATGAGAGCACTATCATACTTCCATGCAGGATAAAGCAAATTA  
TAAACATGTGGCAGGGAGTGGGACAAGCAATGTATGCTCCTCCCATCAGGGGAAGAATTAATTGTGTAAACAAA  
CATTACAGGAATACTATTAACAAGAGATGGTGGTAATAATACTAACGAGACCTTCAGACCTGGAGGAGGAAAT  
ATAAAGGACAATTGGAGAAAGTGAATTATATAAAATATAAAGTAGTACAAATTGAACCACTAGGAGTAGCACCCA  
CCAGGGCAAAGAGAAGAGTGGTGACAGAGAGAAAAAGAGCAGTGGGAATAGGAGCTATGATCTTTGGGTTCTT  
AGGAGCAGCAGGAAGCACTATGGGCGCGGCGTCAATAACGCTGACGGTACAGGCCAGACAATTATTGTCTGGT  
ATAGTGCAACAGCAAAGCAATTTGCTGAGGGCTATAGAGGCGCAGCAGCATATGTTGCAACTCACAGTCTGGG  
GCATT

>GU475027

ACTTACGGAATGGAACCACAGGGGAGAAGAATAGCAGCACTATCATACTTCCATGCAGGATAAAGCAAATTA  
TAAACATGTGGCAGGGAGTAGGACAAGCCATGTATGCTCCTCCCATCAGAGGAAACATTAATTGTGTATCAAA  
TATTACAGGAATACTATTAACAAGAGATGGTGGTGGTGATAATAGTACTAACGAGATCTTCAGACCTGGAGGA  
GGAAATATGAAGGACAATTGGAGAAATGAATTATATAAAATATAAAGTAGTACAAATTGAACCACTAGGAATAG  
CACCCACCAGGGCAAAGAGAAGAGTGGTGGAGAGACAAAAAGAGCAGTGGGAATAGGAGCTATGATCTTTGG  
GTTCTTAGGAGCAGCAGGAAGCACTATGGGCGCGGCGTCAATAACGCTGACGGTACATGCCAGACAATTATTG  
TCTGGTATAGTGCAACAGCAAAGCAATTTGCTGAGGGCTATAGAGGCGCAGCAGCATCTGTTGCAACTCACAG  
TCTGGGGCATT

>MG655196

ACTTATACAGAAGGAAATGAAACCATAGAGGAAAGTAATGGCAATATCACACTTCCATGCAGGATAAAGCAAA  
TTATAAACATGTGGCAGGGAGTAGGACAAGCAATGTATGCTCCTCCCGTCAGTGGAAAAATTAATTGTGTATC  
AAATATTACAGGAATACTATTAACAAGAGATGGTGGTGGTACTGAGGATAACAATACTGAGACCTTCAGA  
CCTGCAGGAGGAAATATGAAGGACAATTGGAGAAAGTGAATTATATAAAATATAAAGTAGTGCAAATTGAACCAC  
TAGGACTAGCACCCACCAGGGCAAAGAGAAGAGTGGTGGAGAGAGAAAAAGAGCAGTGGGAATAGGAGCTAT  
GATCTTTGGGTTCTTAGGAGCAGCCGGAAGCACTATGGGCGCGGCGTCAATAACGCTGACGGTACAGGCCAGA  
CAATTATTGTCTGGTATAGTGCAACAGCAAAGCAATTTGCTGAGGGCTATAGAGGCGCAGCAGCATATGTTGC  
AACTCACAGTCTGGGGCATT

>MG655197

ACTTACAATGAAAGTGAAACCACAGGGGAAAGTAATGGCACTATCATACTTCCATGCAGGATAAAGCAAATTA  
TAAACATGTGGCAGAGAGTAGGACAAGCAATGTATGCTCCTCCCATCAGTGGGAAGAATTAATTGTATATCAAA  
TATTACAGGAATACTATTAACAAGAGATGGTGGTAATAATAATAATGATACTGAGATCTTCAGACCTGGAGGA  
GGAAATATGAAGGACAATTGGAGAAAGTGAATTATATAAAATATAAAGTAGTAGAAATTGAACCACTAGGAATAG  
CACCCACCAGGGCAAAGAGAAGAGTGGTGGAGAGAGAAAAAGAGCAGTGGGAATAGGAGCTCTGATCTTTGG  
GTTCTTAGGAGCAGCAGGAAGCACTATGGGCGCAGCGTCAATAACGCTGACGGTACAGGCCAGACAATTATTG  
TCTGGTATAGTGCAACAGCAAAGCAATTTGCTGAGAGCTATAGAGGCGCAGCAGCATATGTTGCAACTCACAG  
TCTGGGGCATT

>MG655200

ACTTACGGAAATGAAACCATAGGAAATAAAACCGAAGGGGAGAGGAATGGTACTATCACACTTCCATGCAAGA  
TAAAGCAAATTGTAAGAATGTGGCAGGAAGTAGGACAAGCAATGTATGCTCCTCCCATTAGTGGAAGCATTAA  
TTGTGTATCAAATATTACAGGAATACTATTAACAAGAGATGGTGGTAATGGTACTAACGAGACCTTCGAGACC  
TTCAGACCTGCAGGAGGAGATATAAAGGACAATTGGAGAAGTGAATTATATAAAATATAAAGTAGTACAAATTG  
AACCCTAGGAATAGCACCCACCAGGGCAAAGAGAAGAGTGGTGGAGAGAGAAAAAGAGCAGTGGGAATAGG  
AGCTATGATCTTTGGGTTCTTAGGAGCAGCAGGAAGCACTATGGGCGCGGCGTCAATAACGCTGACGGTACAG  
GCCAGACAATTATTGTCTGGTATAGTGCAACAGCAAAGTAATTTGCTGAGGGCTATAGAGGCGCAGCAGCATC  
TGTTGCAACTCACAGTCTGGGGCATT

>JX960603

ACTTACCAAATGGAACCATAAATGGAGAGAAGTATAAGGAAAATATTATACTTCCATGCAGGATCAAGCAAA  
TTATAAACATGTGGCAGAGAGCAGGACAAGCAATGTATGCTCCTCCCATCAAGGGAAGAATTAATTGTGTATC  
AAATATTACAGGAATACTATTAACAAGAGATGGTGGTGATAATAGCACAGCTAACGAGACCTTCAGACCGGGA  
GGAGGAAATATAAAAGACAATTGGAGAAATGAATTATATAAAATATAAGGTAGTACAAATTGAACCACTAGGAA  
TAGCACCCACCAGGGCAAAGAGAAGAGTGGTGCAGAGAGAAAAAGAGCAGTGGGAATAGGAGCTATGATCTT  
TGGGTTCTTAGGAGCAGCAGGAAGCACTATGGGCGCAGCATCAATAACGCTGACGGTACAGGCCAGACAGTTA  
TTGTCTGGTATAGTGCAACAGCAAAGCAATTTGCTGAGGGCTATAGAGGCGCAGCAGCATCTGTTGCAACTCA  
CAGTCTGGGGCATT

>KP109508

GATCATGGTAATGGCACTATCACACTTCCATGCAGGATAAAGCAAATTATAAACATGTGGCAAAGAGCAGGAC  
AAGCAATGTATGCTCCTCCCATCAGTGGAGTAATTAATTGTGTATCAAATATTACAGGAATACTATTGACAAG  
AGATGGTGGTAATACTAGTAGTAGTAACGAGACTTTCAGACCTGGAGGAGGAAATCTAAAGGACAATTGGAAA  
AATGAATTATATAAAATATAAAGTAGTACAAATAGAACCCTAGGAGTAGCACCCACCAAGGCAAAGCGAAGAG  
TGGTGGATAGAGAAAAAGAGCAGTGGGAATAGGAGCTATGATCTTTGGGTTCTTGGGAGCAGCAGGAAGCAC  
TATGGGCGCGGCGTCAATAACGCTGACGGTACAGGCCAGGCAATTATTGTCTGGTATAGTGCAACAGCAAAGC  
AATTTGCTGAGAGCTATAGAGGCGCAGCAGCATATGTTGCAACTCACAGTCTGGGGCATT

>MH327760

AATCACACCGAGGGTAATGGCACTGGCAATATCATACTTCCATGCAAGATAAAGCAAATTATAAACATGTGGC  
AGGGAGTAGGACAAGCAATGTATGCTCCTCCCGTCAGGGGAGTAATTAATTGTGTATCAAACATTACAGGAAT  
AATATTGACAAGGGATGGTGGGACAAATAGCACGAACGATACCGAGATCTTCAGACCTGAAGGAGGAAATATA  
AAAGACAATTGGAGAAGTGAATTATATAAAATATAAAGTAGTACAAATTGAACCCTAGGAGTGGCACCCACCA  
GGGCAAGGAGAAGAGTGGTGGAAAGAGAAAAAGGGCAGTGGGAATAGGAGCTATGATCTTTGGGTTCTTAGG  
AGCAGCAGGAAGCACTATGGGCGCGGCGTCAATAACGCTGACGGTACAGGCCAGACAATTATTGTCTGGTATA  
GTGCAACAGCAAAGCAATTTGCTGAGGGCTATAGAGGCGCAACAGCATATGTTGCAACTCACAGTCTGGGGCA  
TT

>KY213720

ACTTATAATAACACTGAGTTAACTGTAGGTAATAATACTGATAATGATACTATCACGCTTCCATGCAGGATAA  
AGCAAATTATAAACATGTGGCAGGGAGCAGGACAAGCAATGTATGCTCCTCCCATCAGTGGAAAAATTAATTG  
TATATCAAATATTACAGGAATATTATTGACAAGAGATGGTGGTAATAATGCAACAAATGAAGAGATCTTCAGA  
CCTGAAGGAGGAAATATAAAGGACAATTGGAGAAGTGAATTATATAAAATATAAAGTAGTACAAATTGAACCAC  
TAGGAATAGCACCCACCAGGGCAAAGAGAAGAGTGGTGGAGAGAGAAAAAGAGCAGTGGGAATAGGAGCTAT  
GATCTTTGGGTTCTTAGGAGCAGCCGGAAGCACTATGGGCGCAGCGTCAATAACGCTGACGGTACAGGCCAGA  
CAATTATTGTCTGGTATAGTGCAACAGCAAACAATTTGCTGAGGGCTATAGAGGCGCAGCAGCATATGTTGC  
AACTCACAGTCTGGGGCATT

>KY213739

AATTATACAGAAAATGAAGCCACGAAGGGGGATAATACAACCTATCAGACTTCCATGTAAGATAAAGCAAATTA  
TAAACATGTGGCAGGGAGTAGGACAAGCAATGTATGCTCCTCCCATCAGTGGAAAGCATTAGTTGTATATCAA  
TATTACAGGAATACTATTGACAAGAGATGGTGGTGATAATAATGTTAATGAGACCTTCAGACCTGGAGGAGGA  
AATATAAAGGACAATTGGAGAAGTGAATTATATAAAATATAAAGTAGTACAAATTGAACCCTAGGAATAGCAC  
CCACCAAGGCAAAGAGAAGAGTGGTGGAGAGAGAGAAAAAGAGCAGTGGGAATAGGAGCTATGATCTTTGGGTT  
CTTAGGAGCAGCCGGAAGCACTATGGGCGCGGCGTCAATAACGCTGACGGTACAAGCCAGACAATTATTGTCT  
GGGATAGTGCAACAGCAAAGCAATTTGCTGAGGGCTATAGAGGCGCAGCAGCATCTGTTGCAACTCACAGTCT  
GGGGCATC

>KY213717

AATTACACAGCAAATGAAACTGTGTGGAATGACACTATCATACTTCCATGCAGGATAAAACAAATTGTAAACA  
TGTGGCAGGGAGTAGGACAAGCAATGTATGCTCCTCCCGTCAGGGGAATAATTAGTTGTGTATCAAAGATTAC  
AGGATTACTATTGACAAGAGATGGTGGTAATAATAACTAACGAGACCTTCAGACCTGGGGGAGGAAATATG  
AAGGACAATTGGAGAAGTGAATTATATAAAATATAAAGTAGTACAAATTGAACCCTAGGAGTAGCACCCACCA  
GGGCAAGGAGAAGAGTGGTGCAGAGAGAAAAAGAGAGCAGTGGGAATAGGAGCTATGATCTTTGGGTTCTTAGG  
AGCAGCAGGAAGCACTATGGGCGCAGCGTCAATAACGCTGACGGTACAGGCCAGACAATTGTTGTCTGGTATA

GTGCAACAGCAAAGCAATTTGCTGAGAGCTATTGAGGCGCAGCAGCATATGTTGCAACTCACAGTCTGGGGCA  
TT

>AY945721

ACTTACAGAAAAATGAAACCAGGGAGAGGAATGATAGCACTATCATAATTCATGCAAGATAAAACAAATTA  
TAAACATGTGGCAGGGAACAGGACAAGCAATGTATGCTCCTCCCATCAGTGGAACATTAATTGTGTATCAAA  
TATTACAGGAATACTATTGACAAGAGATGGTGGTAATAATAGTGCGGATAACGAGACTTTCAGACCTGGAGGA  
GGAAATATAAAGGACAATTGGAGAAGTGAATTATATAAATATAAAGTAGTAGAAATTGAGCCACTAGGAATAG  
CACCCACCAGGGCAAAGAGAAGAGTGGTGGAGAGAGAAAAAGAGCAGTGGAATAGGAGCTATGATCTTTGG  
GTTCTTAGGAGCAGCAGGAAGCACTATGGGCGTGGCGTCAATAACGCTGACGGTACAGGCCAGACAATTATTG  
TCTGGTATAGTGCAACAGCAAAGCAATTTGCTGAGGGCTATAGAGGCGCAACAGCATATGTTGCAACTCACAG  
TCTGGGGCATT

>AY945722

AATCACAAGGAGTGTAATGGCACTATCACACTTCCATGCAGGATAAAGCAAATTATAAACATGTGGCAGGGAG  
CAGGACAAGCAATGTATGCTCCTCCCATCAGTGGAATAATTAATTGTGTATCAAAATATTACAGGAATACTATT  
GACAAGAGATGGTGGTACTAATAATAATACAAATAGCAGCGAGATATTCAGACCTGGAGGAGGAAATATAAAA  
GATAATTGGAGAAGTAAATTATATAAATATAAAGTAGTACAAATTGAACCACTAGGAATAGCACCCACCAGGG  
CAAAAAGAAGAGTGGTGGAGAGAGAAAAAGAGCAGTGGAATAGGAGCTATGATCTTTGGGTTCTTAGGAGC  
AGCAGGAAGCACTATGGGCGCGGCGTCACTAACGCTGACGGTACAGGCCAGACAATTATTGTCTGGTATAGTG  
CAACAGCAAAGCAATTTGCTGAGGGCTATAGAGGCGCAGCAGCATCTGTTGCAACTCACAGTCTGGGGCATT

>KJ952852

GCTTACAGTGGAATGAAACCATGAATGAAACCATGGATAGGTATAATGACACGATCATACTTCCATGCAGGA  
TAAAGCAAATTATAAACATGTGGCAGGGAGTAGGACAAGCAATGTATGCTCCTCCCATCAGTGGAAGCATTAA  
TTGTGTATCAAAATATTACAGGAATACTATTGACAAGAGATGGTGGTAATAATCTGAATAACAGTAACGAGACC  
TTCAGACCTGGAGGAGGAAATATAAAGGATAATTGGAGAAGTGAATTATATAAATATAAAGTAGTACAAATTG  
AACCCTAGGAATAGCACCCACCAGGGCAAAGAGAAGAGTGGTGGAGAGAGAAAAAGAGCAGTGGAATAGG  
AGCTATGATCTTTGGGTTTTTAGGAGCAGCAGGAAGCACTATGGGCGCGGCGTCAATAACGCTGACGGTACAG  
GCCAGACAATTATTGTCTGGTATAGTGCAACAGCAAAGCAATTTGCTGAGGGCTATAGAGGCGCAGCAGCATC  
TGTTGCAACTCACAGTCTGGGGCATT

>KJ953555

ACTTACAGGGAAATGAAACCATAGGGGGTAATGGCACTATCATACTTCCATGCAAGATAAAGCAAATTATAA  
ACATGTGGCAGGGAGTAGGACAAGCAATGTATGCTCCTACCGTCCGTGGAACAATTAATTGTGTATCAAACAT  
TACAGGAATGTTATTAACAAGAGATGGTGGTGTAAATAAGGATGATAATACTAGCGAGACCTTCAGACCTGGA  
GGAGGAAATATAAAGGACAATTGGAGAAGTGAATTATATAAATATAAAGTAGTACAAATTGAACCACTAGGAA  
TAGCACCCACCAGGGCAAAGAGAAGAGTGGTGGAGAGAGAAAAAGAGCAGTGGAATAGGAGCTATGATCTT  
TGGGTTCTTAGGAGCAGCAGGAAGCACTATGGGCGCGGCGCAATAACGCTGACGGTACAGGCCAGACAATTA  
TTGTCTGGTATAGTGCAACAGCAAAGCAATTTGCTGAGGGCTATAGAGGCGCAGCAGCATATGTTGCAACTCA  
CAGTCTGGGGCATT

>KJ953646

AGTTACACAAAAGAAAAGGGATGTAATGGCACTATCATACTTCCATGCAAGATAAAGCAAATTATAAACATGT  
GGCAGGGAGTAGGACAAGCAATGTATGCTCCTCCCGTCAGAGGAGTAATTAATTGTGTATCAAATATTACAGG  
AATACTATTGACAAGAGATGGTGGTGAGGAGAATAATGGGAGTGAACCTTCAGACCTGGAGGAGGAAATATA  
AAGGACAATTGGAGAAGTGAATTATATAAATATAAAGTAGTACAAATTGAACCACTAGGAGTAGCACCCACCA  
AGGCAAAGAGAAGAGTGGTGGAAAGACAAAAAGAGCAGTGGAATAGGAGCTATGATCTTTGGGTTCTTAGG  
AGCAGCAGGAAGCACTATGGGCGCGGCGTCAATAACGCTGACGGTACAGGCCAGACAATTATTGTCTGGTATA  
GTGCAACAGCAAAGTAATTTGCTGAGGGCTATAGAGGCGCAGCAACATCTGCTGCAACTCACAGTCTGGGGCA  
TT

>AY358052

ACTTACACAGGAATGAAACCATGGAAGGGTGTAAATGGCACTATCATACTTCCATGCAAGATAAAGCAAATTA  
TAAACATGTGGCAGGGAGTAGGACAAGCAATGTATGCTCCTCCCATCAGTGGAATATTAGTTGTGTATCAAA  
TATTACAGGAATACTATTGACAAGAGATGGTGGTATTAATGAGGATAACAAGACCGAGATCTTCAGACCTGGA  
GGAGGAAATATAAAGGACAATTGGAGAAGTGAATTATATAAATATAAAGTAGTACAAATTGAACCACTAGGAA  
TAGCACCCACCAGGGCAAAGAGAAGAGTGGTGGAGAGAGAAAAAGAGCAGTGGAATAGGAGCTATGATCTT  
TGGGTTCTTAGGAGCAGCAGGAAGCACTATGGGCGCGGCGTCAATAACGCTGACGGTACATGCCAGACAATTA  
TTGTCTGGTATAGTGCAACAGCAAAGCAATTTGCTGAGGGCTATAGAGGCGCAGCAGCATCTGTTGCAACTCA  
CAGTCTGGGGCATT

>AY945719

AATCATACTTTCAAAAATAATGAAACCACGGAGGGGTATAATGGCACTATCACAATTCATGCAAGATAAAGC  
AAATTATAAACATGTGGCAAGGAGTGGGACAAGCAATGTATGCTCCTCCCATCAGGGGAAACATTAGTTGTGT  
ATCAAAATATTACAGGCATACTGTTGACAAGAGATGGTGGTAGTAGAGATGCGCCTAATGAGACCTTCAGACCT  
GGAGGAGGAAATATAAAGGACAATTGGAGAAATGAATTATATAAATATAAAGTAGTACAAATTGAACCACTAG

GAATAGCACCCACCAGGGCAAAGAGAAGAGTGGTGGAGAGAGAAAAAGAGCAGTGGGAATAGGAGCTATGAT  
CTTTGGGTTCCTTAGGAGCAGCAGGAAGCACTATGGGCGCAGCGTCAATAACGCTGACGGTACATGCCAGACAA  
TTATTGTCTGGTATAGTGCAACAGCAAAGCAATTTGCTGAGGGCTATAGAGGCGCAGCAGCATCTGTTGCAAC  
TCACAGTCTGGGGCATT

>AY358038

AGTTACCTAAAAAATAAAACCCCTTGACGGGAATGGCACTATCATAATCCCATGCAGAATAAAGCAAATTGTAA  
ACATGTGGCAGGGAGTAGGACAAGCAATGTATGCTCCTCCCATCAATGGAATAATTAATTGTGTATCAAATAT  
TACAGGAATATTATTAACAAGAGATGGTGGTAACAGTACGAATAACGAGACTTTCAGACCTGGAGGAGGAAAT  
ATAAAGGATAATTGGAGAAGTGAATTATATAAAATATAAAGTAGTACAAATTGAACCACTAGGAATAGCACCCA  
CCAGGGCAAAGAGAAGAGTGGTGGAGAGAGAAAAAGAGCAGTGGGAATAGGAGCTATGCTCTTTGGGTTCCTT  
AGGAGCAGCCGGAAGCACTATGGGCGCGGCGTCAATAACGCTGACGGTACAGGCCAGACAATTATTGTCTGGT  
ATAGTGCAACAGCAAAGCAATTTGCTGAGGGCTATAGAGGCGCAGCAGCATCTGTTGCAACTCACAGTCTGGG  
GCATT

>AY358064

ACTTATGGAGAAAATGAAACCATGGAGGGTAATAACAATAGCACTATCATACTTCCATGCAAGATAAAACAAA  
TTGTAAACATGTGGCAGGGAGCAGGACAAGCAATGTATGCTCCTCCCATCAGTGGAAACAATTAATTGTGTATC  
AAATATTACAGGAATACTATTAAACAAGAGATGGTGGTAATAATAAGTACTAATGAGACCTTCAGACCTGGA  
GGAGGAAATATAAAAGACAATTGGAGAAGTGAATTATATAAAATATAAAGTAGTACAAATTGAACCACTAGGAC  
TAGCACCCACCAGGGCAAGGAGAAGAGTGGTGGAGAGAGAAAAAGAGCAGTGGGAATAGGAGCTATGATCTT  
TGGGTTCCTTAGGAGCAGCAGGAAGCACTATGGGCGCGGCGTCAATAACGCTGACGGTACAGGCCAGACAATTA  
TTGTCTGGTATAGTGCAACAGCAAAGCAATTTGCTGAGGGCTATTGAGGCGCAGCAGCATCTGATGCAACTCA  
CAGTCTGGGGCATT

>JN248324

ACTTACCTAAAAAATGAGACAACGTGTAATGGCACATGTAATGGCACTATCATACTTCCATGCAAGATAAAAC  
AAATTATAAACATGTGGCAGGGAGCAGGACAAGCAATGTATGCTCCTCCCATCAGTGGAAAGAATTAATTGTGT  
ATCAAATATTACAGGAATACTATTGACAAGAGATGGCGGTAAATGAAAGTAGTGATACTGAGATCTTCAGACCT  
GAAGGAGGAAATATAAAGGACAATTGGAGAAGTGAATTATATAAAATATAAAGTAGTACAAATTGAACCACTAG  
GAGTAGCACCCACCAGGGCAAAGAGAAGAGTGGTGGAGAAAGAAAAAGAGCAGTGGGAATAGGAGCTGTGAT  
CTTTGGGTTCCTTAGGAGCAGCAGGAAGCACTATGGGCGCGGCATCAATAACGCTGACGGTACAGGCCAGACAA  
TTATTGTCTGGTATAGTGCAACAGCAAAGCAATTTGCTGAGGGCTATAGAGGCGCAACAGCATCTGTTGCAAC  
TCACAGTCTGGGGCATT

>JN248330

ACTTACATGAGAAATGGAACCTGTAATAAATGAAGCTGTGAATGGCACTATCTTTCTTCCATGCAGGATAAAGC  
AAATTATAAACATGTGGCAGGGAGCAGGACAAGCAATGTATGCTCCTCCCATCAGGGGAACAATTAATTGTGT  
CTCAAATATTACAGGAATACTATTGACAAGAGATGGTGGTACTAATAACAATAATGAGACCTTCAGACCTGAG  
GGAGGAGATATGAAGGACAATTGGAGAAGTGAATTATATAAAATATAAAGTAGTAGAAATTGAACCACTAGGAA  
TAGCACCCACCAAGGCAAAGAGAAGAGTGGTGGAAAGAGAAAAAGAGCAGTGGGAATAGGAGCTATGATCTT  
TGGGTTCCTTAGGAGCAGCAGGAAGCACTATGGGCGCAGCGTCAATAACGCTGACGGTACAGGCCAGACAA  
TTGTCTGGTATAGTGCAACAGCAAAGCAATTTGCTGAGAGCTATAGAGGCGCAACAGCATATGTTGCAACTCA  
CAGTCTGGGGCATT

>JN248334

ACTTACTCAGGAAATGGAACCATCATACTTCCATGCCGATAAAGCAAATTATAAACATGTGGCAGGGAGTAG  
GACAGGCAATGTATGCTCCTCCCATCAGTGGAGCAATTAAGTGTGTATCAAATATTACAGGAATACTATTGAC  
AAGAGATGGTGGTACTAATAGGACTAACGAGACTTTCAGACCTGGAGGAGGAAATATAAAGGACAACCTGGAGA  
AGTGAATTATATAAAATATAAGGTAGTAGAAATTGAACCACTAGGAATAGCACCCACCAGGGCAAAGAGAAGAG  
TGGTGGAAAGAGAAAAAGAGCAGTGGGAATAGGAGCTATGATCTTTGGGTTCCTTAGGAGCAGCAGGAAGCAC  
TATGGGCGCGGCGTCGATAACGCTGACGGTACAGGCCAGACAATTATTGTCTGGTATAGTGCAACAGCAAAGC  
AATTGTCTGAGAGCTATAGAGGCGCAGCAGCATCTGTTGCAACTCACAGTCTGGGGCATT

>JX447529

GGTCAGGAGCATAATGGCACTATCACACTTCCATGCAGGATAAAGCAAATTATAAACATGTGGCAGGGAGTAG  
GACAAGCAATGTATGCTCCTCCCATCAGTGGACAAATTAATTGTGTATCGAATATTACAGGAATACTATTGAC  
AAGAGATGGTGGTAAGGATAATGAAACGAATGGCACAGAGACCTTCAGACCTGGAGGAGGAAACATGAAGGAC  
AATTGGAGGAGTGAATTATATAAAATATAAAGTAATACAAATTGAACCACTAGGAGTAGCACCCACCAGGGCAA  
GGAGAAGAGTGGTGGCAGAGAGAAAAAGAGCAGTGGGAATAGGAGCTATGATCTTTGGGTTCCTTAGGAGCAGC  
AGGAAGCACTATGGGCGCGGCGTCAATAACGCTGACGGTACAGGCCAGACAATTATTGACTGGTATAGTGCAA  
CAGCAAAGCAATTTGCTGAGAGCTATAGAGGCGCAACAGCATCTGTTGCAACTCACAGTCTGGGGCATT

>JN248341

ACTTACACAGGAAATGAAACCGGAGAGGGGGGTAATGGTAATGGCACTATCATAATTCATGCAGAATAAAGC  
AAATTATAAACATGTGGCAGGGAGTAGGACAAGCAATGTATGCTCCTCCCATCAGTGGAAAGCATTAATTGTGT  
ATCAAATATTACAGGAATACTATTGACAAGAGATGGTGGTAATAACAACATGACTAACGATAACGAGACCTTC

AGACCTGGAGGAGGAGATATAAGGGACAATTGGAGAAGTGAATTGTATAAATATAAAGTAGTACAAATTGAAC  
CACTAGGAGTAGCACCCACCAAGGCAAAGAGAAGAGTGGTGGAGAGAGAAAAAGAGCAGTGGGAATAGGAGC  
TATGATCTTTGGGTTCTTAGGAGCAGCAGGAAGCACTATGGGCGCAGCGTCAATAACGCTGACGGTACAGGCC  
AGACAATTATTGTCTGGTATAGTGCAACAGCAAAGCAATTTGCTGAGGGCTATAGAGGCGCAGCAGCATATGT  
TGCAACTCACTGTCTGGGGCATT

>JN248342

AATTATAATGGCACAAGAAATGAAACGTGTAATGACACTATCATACTACCATGCAGGATAAAGCAAATTATAA  
ACATGTGGCAGGGAGTAGGACAAGCAATATATGCTCCTCCAATCAGAGGAACACTTAAGTGTGTATCAAATAT  
TACAGGAATACTATTGACAAGAGATGGTGGTAGTAATGAGACTAAAAATGGGACCGAGATATTCAGACCTGGA  
GGGGGAAATATAAAGGACAATTGGAGAAATGAATTATATAAATATAAAGTAGTACAAATTGAACCACTAGGAA  
TAGCACCCACCAGGGCAAAGAGAAGAGTGGTGGAGAGAGAAAAAGAGCAGTGGGAATAGGAGCTATGATCTT  
TGGGTTCTTAGGAGCAGCAGGAAGCACTATGGGCGCGGCGTCAATAACGCTGACGGTACAGGCCAGACAATTA  
TTGTCTGGTATAGTGCAACAGCAAAGCAATTTGCTGAGGGCTATAGAGGCGCAGCAGCATCTGTTGCAACTCA  
CAGTCTGGGGCATT

>JN944654

AATCAAATCATGGGGCAGCATGATGACACTATGGTACTTCCATGCAAGATAAAGCAAATTATAAATATGTGGC  
AGGGAGCAGGACAAGCAATGTATGCTCCTCCCGTCAGTGGAAATAATTAATTGTAGGTCAAATATTACAGGAAT  
ACTATTGACAAGAGATGGTGGTGGTGGTGCTAACAATACAAATGAGACCTTCAGACCTGGGGGAGGAAATATA  
AAGGATAATTGGAGAAGTGAATTATATAAATATAAAGTAGTAAAAATTGAACCACTAGGATTAGCACCCACCA  
GGGCAAAGAGAAGAGTGGTGGAGAAAAGAAAAAGAGCAGCGGAATAGGAGCTATGATCTTTGGGTTCTTAGG  
AGCAGCAGGAAGCACTATGGGCGCGGCGTCAATAACGCTGACGGTACAGGCCAGACAATTATTGTCTGGTATA  
GTGCAACAGCAAAGCAATTTGCTGAGAGCTATAGAGGCGCAACAGCATCTGTTGCAACTCACAGTCTGGGGCA  
TT

>JX447268

ACTTACATAGGAAATGAAACCAGAGAGATATTTAATGGAACTGATGAACTAATGGAACTATCATACTTCCAT  
GCAAAATAAAGCAAATTATAAACATGTGGCAGGGAGTAGGACAAGCAATGTATGCTCCTCCCATCAGTGGAAA  
AATTAATTGTGTATCAAATATTACAGGAATACTATTGACAAGAGATGGTAGTTCTAGAAATAATACGAACGAA  
ACCTTCAGACCTGGAGGGGGAAATATAAAGGATAATTGGAGAAGTGAATTATATAAATATAAAGTAGTACAAA  
TTGAACCACTAGGAATAGCACCCACCAGGGCAAAGAGAAGAGTGGTGGAGAGAGAAAAAGAGCAGTGGGAAT  
AGGAGCTATGATCTTTGGGTTCTTAGGAGCAGCAGGAAGCACTATGGGCGCGGCGTCAATAACGCTGACGGTA  
CAGGCCAGACAATTATTGTCTGGTATAGTGCAACAGCAAAGCAATTTGCTGAGGGCTATAGAGGCGCAGCAGC  
ATCTGTTGCAACTCACAGTCTGGGGCATT

>JX447579

GTTTATAATAATGACACAAAGAATAGAACCAGGGGGAGTAATGACACTATCACAATTCATGCAAAATAAAGC  
AAATTATAAACATGTGGCAGGGGATAGGACAAGCAATGTATGCTCCTCCCATCAGTGGAAACAATTAATTGTGT  
ATCAAATATTACAGGAATACTATTGACAAGAGATGGTGGTGATAGTACTAACGAGACCTTCAGACCTGGAGGA  
GGAAATATAAAGGACAATTGGAGAAGTGAATTATATAAATACAAAGTAGTACAAATTGAACCACTAGGAATAG  
CACCCACCAGGGCAAAGAGAAGAGTGGTGGAAAGAGAAAAAGAGCAGTGGGAATAGGAGCTATGATCTTTGG  
GTTCTTAGGAGCAGCAGGAAGCACTATGGGCGCGGCGTCAATAACGCTGACGGTACAGGCCAGACAATTATTG  
TCTGGTATAGTGCAACAGCAAAGCAATTTGCTGAGGGCTATAGAGGCGCAGCAGCATATGTTGCAACTCACAG  
TCTGGGGCATT

>JX447592

ACTCACATGATAAATGGAACCATGAAGGGGAGTAATGGCACTAATGGCACTAATGGCACTTTTCATACTTCCAT  
GCAGGATAAAGCAAATTATAAACATGTGGCAGGGAGTAGGACAAGCAATGTATGCTCCTCCCATCAAGGGAAAT  
AATTAATTGTGTATCAAACATTACAGGAATATTATTGACAAGGGATGGTGGTAATAACAACACAAATAACGAG  
ACCTTCAGACCTATAGGAGGAAATATAAAGGACAATTGGAGAAGTGAATTATATAAATATAAAGTAGTACAAA  
TTGAACCACTAGGAATAGCACCCACCAAGGCAAAGAGAAGAGTGGTGGAGAGAGAAAAAGAGCAGTGGGAAT  
AGGAGCTATGATCTTTGGGTTCTTGGGAGCAGCAGGAAGCACTATGGGCGCGGCGTCAATAACGCTGACGGTA  
CAGGCCAGACAATTATTGTCTGGTATAGTGCAACAGCAAAGCAATTTGCTGAGGGCTATAGAGGCGCAGCAGC  
ATATGTTGCAACTCACAGTCTGGGGCATT

>JX448256

TCTTACCCGAAAAACGAGACTGAGGGGAATACTACCACTACCACTATCATACTTCCATGCAAGATAAAGCGAA  
TTATAAACATGTGGCAGGGAGTAGGACAAGCAATGTATGCTCCTCCATTAGGGGAAAAATTAAAGTGTGTATC  
AAATATTACAGGAATACTATTGACAAGTGATGGTGGTGGTAAGGGTAATAATAGTAATAGCGAGACCTTCAGA  
CCTGGAGGAGGAAATATAAGGGACAATTGGAGAAGTGAATTATATAAATATAAAGTAGTGCAAATTGAACCAC  
TAGGAATAGCACCCACCAAGCAAAGAGAAGAGTGGTGGAGAGAGAAAAAGAGCAGTGGGAATAGGAGCTAT  
GATCTTTGGGTTCTTAGGAGCAGCAGGAAGCACTATGGGCGCGGCGTCAATAACGCTGACGGTACAGGCCAGG  
CAATTATTGTCTGGTATAGTGCAACAGCAAAGCAATTTGCTGAGGGCTATAGAGGCGCAGCAGCATATGTTGC  
AACTCACAGTCTGGGGCATT

>EU743792

GGCTATATCATACTTCCATGCAGAATAAAGCAAATTATAAACATGTGGCAGGGAGTAGGACAAGCAATATATG  
CCCCCTCCTATCAGTGGAAGAATTAGTTGTGTATCAAATATTACAGGAATCCTATTGACAAGAGATGGTGGTAA  
TAATAATACCGAGACCGAGATCTTCAGACCTGGAGGAGGAAATATAAAGGACAATTGGAGAAGTGAATTATAT  
AAATATAAAGTAGTACAAATTGAACCACTGGGAATAGCACCCACCAAGGCAAGGAGAAGAGTGGTGGACAGAG  
AAAAAAGAGCAGTGGAATAGGAGCTATGATCTTTGGGTTCTTGGGAGCAGCAGGAAGCACTATGGGCGCAGC  
GTCACCTAACGCTGACGGTACAGGCCAGACAATTATTGTCTGGTATAGTGCAACAGCAAAGCAATTTGCTGAGA  
GCTATAGAGGCGCAGCAGCATCTGTTGCAACTCACAGTCTGGGGCATT

>EU743759

CATCAAAACACGACAGGGTGTAATGGAACCTATCACACTCCCATGCAAGATAAAGCAAATTATAAACATGTGGC  
AGGAAGTAGGACAAGCAATGTATGCTCCTCCCATCAGTGGAATAAAGTGTGTATCAAATATTACAGGAAT  
ACTATTGACAAGAGATGGTAATAATGAGACTGGGGCTAATGAGACCTTCAGACCTGAAGGAGGAAATATGAAG  
GACAATTGGAGAATGAATTATATAAATATAAAGTAGTGCAAATTGAACCACTAGGAATAGCACCCCTCCAGGG  
CAAAAAGAAGAGTGGTGGAGAGACAAAAAAGAGCAGTGGAATAGGAGCTATGATCTTTGGGTTCTTAGGAGC  
AGCTGGAAGCACTATGGGCGCGGCGTCAATAACGCTGACGGTACAGGCCAGACAATTATTGTCTGGTATAGTG  
CAACAGCAAAGCAATTTGCTGAGGGCTATAGAGGCGCAGCAGCATCTGTTGCAACTCACAGTCTGGGGCATT

>EU743768

ACTTACATAAATGGAACCATAAATGAAACCATGGAGGGGGCTTAATGACACTATCATACTTCCATGCAAAATAA  
AGCAAAATTATAAACATGTGGCAGAGAGCAGGACAAGCAATGTATGCTCCTCCCATCAGGGGAAGCATTAAATG  
TGTATCAAATATTACAGGAATACTACTAACAAGGGATAGTGGTGATAATGATACTGAGACCTTCAGACCTGAA  
GGAGGAAATATGAAGGACAATTGGAGAAGTGAATTATATAAATATAAAATAGTACAAATTGAACCACTAGGAA  
TAGCACCCACCATGGCAAAGAGAAGAGTGGTGGAGAGAGAAAAAAGAGCAGTGGAATAGGAGCTATGATCTT  
TGGGTTCTTGGGAGCAGCAGGAAGCACTATGGGCGCGGCGTCAATAACGCTGACGGTACAGGCCAGACAATTA  
TTGTCTGGTATAGTGCAACAGCAAAGCAATTTGCTGAGAGCTATAGAGGCGCAGCAGCATCTGTTGCAACTCA  
CAGTCTGGGGCATT

>EU743770

AACTACACGGAAAGGGTTAATGAAACTATCATACTTCCATGCAAGATAAAGCAAATTATAAATATGTGGCAGA  
GAGTAGGACAAGCAATGTATGCTCCTCCCATCAGGGGAAGAATTGGGTGTATATCAAATATTACAGGAATACT  
ACTGACAAGGGATAATGGTGGTACCAATAGGAGTAGTGAGACCTTCAGACCTGGAGGAGGAGATATAAGGGAC  
AATTGGAGAAGTGAATTATATAAATATAAAGTAGTAGAAATTGAACCACTAGGAATAGCACCCACCAGGGCAA  
AGAGAAGAGTGGTGGAGAGAGAAAAAAGAGCAGTGGAATAGGAGCTATGATCTTTGGGTTCTTAGGAGCAGC  
AGGAAGCACTATGGGCGCGGCGTCAATAACGCTGACGGTACAGGTACAGACAATTATTGTCTGGTATAGTGCAA  
CAGCAAAACAATTTGCTGAGGGCTATAGAGGCGCAGCAGCATCTGTTGCAACTCACAGTCTGGGGCATT

>EU743777

AATCAAACCATGCTTAATAAAACTACCATACTTCCATGCAGAATAAAGCAAATTATAAACATGTGGCAGGGAA  
CAGGACAAGCAATGTATGCTCCTCCCATCCAGGGGAAGAATTAATTGTGTATCAAATATTACAGGAATACTATT  
GACAAGAGATGGAGGTAATACTAATGAGAATAATAAACTGAAATCTTCAGACCTGGAGGAGGAAATATGAAG  
GATAATTGGAGAAGTGAATTATATAAATATAAAGTAGTACAAATTGAACCATTAGGAATAGCACCCACCAGGG  
CAAAGAGAAGAGTGGTGGAGAGAGAAAAAAGAGCAGTGGAATAGGAGCTATGATCTTTGGGTTCTTGGGAGC  
AGCAGGAAGCACTATGGGCGCGGCGTCAATAACGCTGACGGTACAGGCCAGACAATTATTGTCTGGTATAGTG  
CAACAGCAAAGCAATTTGCTGAGGGCTATAGAGGCGCAGCAGCATCTGTTGCAACTCACAGTCTGGGGCATT

>EU743780

AATCAAACCCAGTGTAAGGGCAATATCACACTTCCATGCAGGATAAAGCAAATTATAAACATGTGGCAGGAAG  
TAGGAAAAGCAATATATGCTCCTCCCGTCAGTGGAAGTATTAATTGTTTATCAAATATTACAGGGATAATACT  
GACAAGAGATGGTGGTACTCCTGGTAATGTTACTAATAATGGTACTGAAACCGAGATCTTCAGACCTACAGGA  
GGAAATATGGAGGACAATTGGAGAAGTGAATTATATAAATATAAAGTAGTACAAATTGAACCACTAGGAATAG  
CACCCACCAAGGCAAAGAGAAGAGTGGTGGAGAGAGAAAAAAGAGCAGTGGAATAGGAGCTATGATCTTTGG  
GTTCTTAGGAGCAGCTGGAAGCACTATGGGCGCGGCGGTCAGTAACGCTGACGGTACAGGCCAGACAATTATTG  
TCTGGTATAGTGCAACAGCAAAGCAATTTGCTGAGAGCTATAGAGGCGCAACAGCATCTGTTGCAACTCACAG  
TCTGGGGCATT

>JX446961

ACTTACAGAAATGAAACCAGTAATAGCACTATCATACTTCCATGCAGAATAAAGCAAATTATAAACATGTGGC  
AGGAAGTAGGACAAGCAATGTATGCTCCTCCCATCAGGGGAAGAATAAATTGTGTATCAAATATTACAGGAAT  
ACTATTGACAAGAGATGGTGGTAATAGTACAAGTAATAATGAGACCTTCAGACCTGGAGGAGGAAATATGAAG  
GACAATTGGAGAAGTGAATTATATAAATATAAAGTAGTACAAATTGAACCATTAGGAATAGCACCCACCAGGG  
CAAAGAGAAGAGTGGTGGACAGAGAAAAAAGAGCAGTGGAATAGGAGCTATGATCTTTGGGTTCTTAGGAGC  
AGCAGGAAGCACTATGGGCGCGGCGTCAATAACGCTGACGGTACAGGCCAGACAATTATTGTCTGGTATAGTG  
CAACAGCAAAGCAATTTGCTGAGGGCTATAGAGGCGCAACAGCATCTGTTGCAACTCACAGTCTGGGGCATT

>JX447515

ACTTACACAAATACAACCATACAGGGTAATGGTACTATTATACCTCCATGCAAGATAAAGCAAATTATAAATA  
TGTGGCAGGAAGTAGGACGAGCAATGTATGCTCCTCCTGTCAGTGGAAGAATTAATTGTATATCAAATATTAC

AGGAATACTATTAATAAGAGATGGTGGTAATACTAGTGAGTCTAACGAGATCTTCAGACCTGGAGGAGGAAAT  
ATGAAAGACAATTGGAGAAATGAATTATATAAATATAAAGTAGTAGAAATTGAACCACTAGGAATAGCACCCA  
CCAAGGCAAAAAGAAGAGTGGTGGAGAGAGAAAAAGAGCAGTGGGAATAGGAGCTTTGATCTTTGGGTTCTT  
GGGAGCAGCAGGAAGCACTATGGGCGCAGCGTCAATAACGCTGACGGTACAGGCCAGACAATTATTGTCTGGT  
ATAGTGCAACAGCAAAGCAATTTGCTGAGGGCTATAGAGGCGCAGCAGCATATGTTGCAACTCACAGTCTGGG  
GCATT

>JX448039

AATTATACTTGCATAAATAATACGTGCATAAATAATGCAACCATGGATGATAATGGCACTATCATACTTTTCAT  
GCAAAATAAAGCAAATTATAAACATGTGGCAGGGAGTAGGACAAGCAATGTATGCTCCTCCCATCAGTGGAAA  
CATTAGTTTGTGTATCAAATATTACTGGAATACTATTGACAAAGAGATGGTGGTAATAATAGGACTACGACTACC  
GAGACCTTCAGACCTGCAGGAGGAGATATGAAGGACAATTGGAGAAGTGAATTATATAAATATAAAGTAGTAC  
AAATTGAACCACTAGGAATAGCACCCACCAGGGCAAAAGAGAAGAGTGGTGGAGAGAGAAAAAGGGCAGTGGG  
AATAGGAGCTATGATCTTTGGGTTCTTAGGAGCAGCAGGAAGCACTATGGGCGCGGCGTCAATAACGCTGACG  
GTACAGGCCAGACAATTATTGTCTGGTATAGTGCAACAGCAAAGCAATTTGCTGAGGGCTATAGAGGCGCAGC  
AGCATCTGTTGCAACTCACAGTCTGGGGCATT

>JX448198

ACTTACAATGGAACCATGGGGGGATGGAATGGCACTATCAATGGCACTATCAATGCACTATCATAATTCCAT  
GCAGAATAAAGCAAATTATAAATATGTGGCAGGGAGTAGGACAAGCAATATATGCTCCTCCCATCAGAGGAAT  
AATTAATTGTGTATCAAATATCACAGGAATACTATTGACAAAGAGATGGTGGTGATAATAATGCTACTAAAGAT  
ACCGAGATCTTCAGACCTGGAGGTGGAAATATAAAGGACAATTGGAGAAGTGAATTATATAAATATAAAGTAG  
TACAAATTGAACCACTAGGAATAGCACCCACCAGGGCAAAAGAGAAGAGTGGTGGAAAAGAGAAAAAGAGCAGT  
GGGAATAGGAGCTATGATCTTTGGGTTCTTAGGAGCAGCAGGAAGCACTATGGGCGCGGCGTCACTAACGCTG  
ACGGTACAGGCCAGACAATTATTGTCTGGTATAGTGCAACAGCAAAGCAATTTGCTGAGGGCTATAGAGGCGC  
AGCAGCATCTGTTGCAACTCACAGTCTGGGGCATT

>JX446877

ACTTACAAAGATAAAGCCATAGAGGGGAATAATGGCACTATCATACTTCCATGCAGGATAAAACAAATTATAA  
ACATGTGGCAGGGAGTAGGACAAGCAATGTATGCTCCTCCCATCAGGGGAAACATTAGTTGTGTCTCAAATAT  
TACAGGAATACTATTGACAAGAGATGGTGGTTCTGGTAATGATACAAGAAATGATACAGAGACCTTCAGACCT  
GGAGGAGGGAATATAAAGGACAATTGGAGAAGTGAATTATATAAATATAAAGTAGTACAAATTGAACCACTAG  
GACTAGCACCCACCAAGGCAAAAGAGAAGAGTGGTGGAGAGACAAAAAGAGCAGTGGGAATAGGAGCTATGAT  
CTTTGGGTTCTTAGGAGCAGCAGGAAGCACTATGGGCGCGGCGTCAATAACGCTGACGGCACAGGCCAGACAA  
TTATTGTCTGGTATAGTGCAACAGCAAAGCAATTTGCTGAGAGCTATAGAGGCGCAGCAGCATCTGTTGCAAC  
TCACAGTCTGGGGCATT

>JX446918

ACTTACGTAAAGAAATGAAACCAAGGAAAATGATACTATCATACTTCCATGCAAGATAAAGCAAATTATAACA  
TGTGGCAGGGAGTAGGACAAGCAATGTATGCTCCTCCCATCAGTGGAAACATTAGTTGTGTATCAAATATTAC  
AGGAATAATATTGACAAGAGATGGTGGTCTTGGTAATAATAGTGGAGAGACCTTCAGACCTGGAGGAGGAAAT  
ATAAAGGACATTTGGAGAAGTGAATTATATAAATATAAAGTAGTACAAATAGAACCACTAGGAATAGCACCCA  
CCAGGGCAAAAGAGAAGAGTGGTGGAGAGAGAAAAAGAGCAGTGGGAATAGGAGCTATGATCTTTGGGTTCTT  
AGGAGCAGCAGGAAGCACTATGGGCGCGGCGTCAATAACGCTGACGGTACAGGCCAGACAATTATTGTCTGGT  
ATAGTGCAACAGCAAAGCAATTTGCTGAGGGCTATAGAGGCGCAGCAGCATATGTTGCAACTCACAGTCTGGG  
GCATT

>JX447381

ACTTACCTAGGAAATGAAACCAAGGGAGGTATAATGACACTATCATAATTCCATGCAAGATAAAGCAAATTA  
TAAGAATGTGGCAGGGGGTAGGACAAGCAATGTATGCTCCTCCCATCAGGGGAGTCATTAAGTGTAGATCAA  
TATTACAGGAATATTATTGACAAGAGATGGTGTATATAAATTAATGCTACTGAAGAGATTTTCAGACCTGGAGGA  
GGAAATATAAAGGATAATTGGAGAAGTGAATTATATAAATATAAAGTAGTACAAATTGAACCACTAGGAATAG  
CACCCACCAGGGCAAAAGAGAAGAGTGGTGGAGAGAGAAAAAGAGCAGTGGGAATAGGAGCTATGATCTTTGG  
GTTCTTAGGAGCAGCAGGAAGCACTATGGGCGCGGCGTCAATAACGCTGACGGTACAGGCCAGACAATTATTG  
TCTGGTATAGTGCAACAGCAAAGCAATTTGCTGAGGGCTATAGAGGCGCAGCAGCATCTGTTGCAACTCACAG  
TCTGGGGCATT

>JX447773

ACTCACATGCCTAATGGTACTATCATAGGAAAAGACAATATCACACTTCCATGCAGGATAAAGCAAATCATAA  
ACATGTGGCAGGGAGCAGGACAAGCAATGTATGCTCCTCCCATCAGTGGAAATAATTAAATTGTGTATCAAATAT  
TACAGGAATACTATTGACAAGAGATGGTGGTGGTAATAGTAGTAATGAGAACGAGACCTTCAGACCTGGAGGA  
GGAAATATAAAGGACAATTGGAGGAGTGAATTATATAAATATAAAGTAGTACAAATTGAACCACTAGGAATAG  
CACCCACCAAGGCACAGAGAAGAGTGGTGCAGATAGAAAAAGAGCAGTGGGATTAGGAGCTATGATCTTTGG  
GTTCTTAGGAGCAGCAGGAAGCACTATGGGCGCGGCGTCAATAACGCTGACGGTACAGGCCAGACAATTATTG  
TCTGGTATAGTGCAACAGCAAAGCAATTTGCTGAGAGCTATAGAGGCGCAGCAGCATCTGTTGCAACTCACAG  
TCTGGGGCATT

>HQ690985

ACTTACCCAGGAAATGAAACCATGGAGGACCATATCATACTTCCATGCAGGATAAAGCAAATTATAAACATGT  
GGCAGGGAGCAGGACAAGCAATGTATGCTCCTCCCATCAGTGGGAGAATTAATTGTGTATCAAATATTACAGG  
CATACTACTGACAAGAGATGGTGGTAATAATACTAATGAGACTAAAGAAATCTTCAGACCTGGAGGAGGAAAT  
ATGAAGGACAATTGGGAGAAGTGAATTATATAAAATATAAAGTAGTACAAATTGAACCACTAGGAATAGCACCCA  
CCAGGGCAAGGAGAAGAGTGGTGCAGAGAGAAAAAAGAGCAGTGGGAATAGGAGCTATGATCTTTGGGTTCTT  
AGGAGCAGCAGGAAGCACTATGGGCGCAGCGTCAATAACGCTGACGGTACAGGCCAGACAATTATTGTCTGGT  
ATAGTGCAACAGCAAAGCAATTTGCTGAGGGCTATAGAGGCGCAGCAACATCTGTTGCAACTCACAGTCTGGG  
GCATT

>HQ691052

TGCTACACAACAAAACCTGTTTAATGATACTTGCACAGGAAATGAAACCAGCACAGGAAATGAAACCAATAAGG  
AATGTAAACTGTCTAATGGTAATGGCACTATCATACTTCCATGCAAGATAAAGCAAATTATAAACATGTGGCA  
GGGAGTAGGACAAGCAATGTATGCTCCTCCCATCAGTGGAGAATTAATTGTGTATCAAATATTACAGGAATA  
CTATTGACAAGAGATGGAGGTAATAACACGATCAACAATGAGACTTTCAGACCTGGAGGGGGAAATATAAAGG  
ACAATTGGAGAAGTGAATTATATAAAATATAAAGTAGTACAAATTGAACCACTAGGAATAGCACCCCTCCAGGGC  
AAGGAGAAGAGTGGTGGAAAAGAGAAAAAAGAGCAGTGGGAATAGGAGCTATGATCTTTGGGTTCTTGGGAGCA  
GCAGGAAGCACTATGGGCGCGGCGTCAATAACGCTGACGGTACAGGCCAGACAATTATTGTCTGGTATAGTGC  
AACAGCAAAGCAATTTGCTGAAGGCTATAGAGGCGCAGCAGCATATGTTGCAACTCACAGTCTGGGGCATT

>HQ691073

ACCTATAATGACACTAATGACCCTATCATACTTCCATGCAGGATAAAGCAAATTATAAACATGTGGCAGGGAG  
TAGGACAAGCAATGTATGCTCCTCCCATCCGTGGAAGCGTTAATTGTTTCATCAAATATTACAGGAATACTATT  
GACAAGAGATGGGGGTAATAATAGTAATACGCAAGAGACTTTCAGACCTGGAGGAGGAAATATAATGGATAAT  
TGGAGAAATGAATTATATAAAATATAAAGTAGTACAAATTGAACCATTAGGAATAGCACCCACCAGGGCAAAGA  
GAAGAGTGGTGGAGAGAGAAAAAAGAGCAGTGGGAATAGGAGCTATGATCTTTGGGTTCTTAGGAGCAGCAGG  
AAGCACTATGGGCGCGGCGTCAATAACGCTGACGGTACAGGCCAGACAATTATTGTCTGGTATAGTGCAACAG  
CAAAGCAATTTGCTGAGGGCTATAGAGGCGCAGCAGCATCTGTTGCAACTCACGGTCTGGGGCATT

>GQ916574

ACTTACACAGGAAATGAAACCACAGGAGATGAAACCAAGAATATCACACTTCCATGCAGGATAAAGCAAATTA  
TAAACATGTGGCAGGAAGTAGGACAAGCAATGTATGCTCCTCCCATCAGTGGACAAATTAAGTGTGTATCAAA  
TATTACAGGAATACTATTGACAAGAGATGGTGGTGGTAATGCTAATGATACTAATAATACCGAGACCTTCAGA  
CCTGGAGGAGGAAATATAAAGGACAACCTGGAGAAGTGAATTATATAAAATATAAAGTAGTACAAATTGAACCAC  
TAGGAATAGCACCCACCAAGGCAAAGAGAAGAGTGGTGGAGAGACAGAAAAGAGCAGTGGGAATAGGAGCTAT  
GATCTTTGGGTTCTTAGGAGCAGCAGGAAGCACTATGGGCGCGGCGTCAATAACGCTGACGGTACAGGCCAGA  
CAATTATTGTCTGGTATAGTGACGAGCAAAGAAATTTGCTGAGGGCTATAGAGGCGCAGCAGCATCTGTTGC  
AACTCACAGTCTGGGGCATT

>JX446888

GCTTACACAGGAAATGAAACCATGAAAGGGAATAAAACCATCATACTTCCATGCAGGATAAAGCAAATTATAA  
ACATGTGGCAGGGAGTAGGACAAGCAATATATGCTCCTCCCGTCAGGGGAATGATTAATTGTGTATCAAATAT  
TACAGGAATATTATTGACAAGGGATGGTGGTAATGGTACGACCGAGGAGATTTTCAGACCAGGAGGAGGAAAT  
ATAAAAGACAATTGGAGAAGTGAATTATATAAAATATAAAGTAGTACAAATTGAACCACTAGGCATAGCACCCA  
CCAGGGCAAAGAGAAGAGTGGTGGAGAGAAAACAAAAGAGCAGTTGGAATAGGAGCTATGATCTTTGGGTTCTT  
AGGAGCAGCAGGAAGCACTATGGGCGCGGCGTCAATAACGCTGACGGTACAGGCCAGACAATTATTGTCTGGT  
ATAGTGCAACAGCAAAGCAATTTGCTGAGGGCTATAGAGGCGCAGCAGCATCTGTTGCAACTCACAGTCTGGG  
GCATT

>JX448072

ACTTACATGGAAATGGAACCATGCAGAATAGTACGCAGAATAACACGCAAAATGACACTATCATACTCCCAT  
GCAGGATAAAGCAAATTATAAACATGTGGCAGGGAGCAGGACAAGCAATGTATGCTCCTCCAGTTAGGGGAAG  
CATTAAGTGTGTATCAAATATTACAGGAATACTATTGACAAGAGATGGTGGTGCTAATAATACCGAGATCTTC  
AGACCGGCAGGAGGAAATATAAAGGATAAATTGGAGAAGTGAATTATATAAAATATAAAGTAGTACAAATTGAAC  
CACTAGGAATAGCACCCACCAGGGCAAAAAGAAGAGTGGTGGAGAGACAGAAAAGAGCAGTGGGAATAGGAGC  
TATGATCTTTGGGTTCTTAGGAGCAGCAGGAAGCACTATGGGCGCGGCGTCAATAACGCTGACGGTACAGGCC  
AGACAATTATTGTCTGGTATAGTGCAACAGCAAAGCAATTTGCTGAGGGCTATAGAGGCGCAGCAGCATATGT  
TGCAACTCACAGTCTGGGGCATT

>JX448086

AATTACACAAATGGTACTTTAACAACACCACGGAGGGGGGTAGCGACACTACTATCATCCTTCCATGCAAGA  
TAAAGCAAATTATAAACATGTGGCAGGGGAATAGGACAAGCAATGTATGCTCCTCCCATCAGGGGATATATTAA  
TTGTACATCAAATATTACAGGAATACTATTGACAAGAGATGGTGACGGTAATATTAATATTAATGACAGCGAG  
ATCTTCAGACCTGGAGGAGGAAATATGAAGGACAATTGGAGAAGTGAATTATATAAAATATAAAGTAGTACAAA  
TTGAACCACTAGGAATAGCACCTACCAGGGCAAAGAGAAGAGTGGTGGAGAGAGAAAAAAGAGCAGTGGGAAT  
AGGAGCTATGATCTTTGGGTTCTTAGGAACAGCAGGAAGCACTATGGGCGCAGCGTCAATAACGCTGACGGTA

CAGGCCAGACAATTATTGTCTGGTATAGTGCAACAGCAAAGCAATTTGCTGAGGGCTATAGAGGCGCAGCAGC  
ATCTGTTGCAACTCACAGTCTGGGGCATT

>JX448312

AATTATACTTGTCTCGGACAATGGGTGTAATGGCATTATCAATGGCACTATCATACTTCCATGCAGGATAAAGC  
AAATTATAAACATGTGGCAAGGAGCAGGACAAGCAATGTATGCTCCTCCCATCAGGGGAAGCATTAAATTGTGT  
ATCAAATATTACAGGAATATTATTGACAAGAGATGGTGGTAATGGTGATGATACTAATAATACTGAGATCTTC  
AGACCTGGAGGAGGAAATATAAAGGACAATTGGAGAAGTGAATTATATAAATATAAAGTAGTACAAATTGAAC  
CACTAGGAATAGCACCTCCAGGGCAAAGAGAAGAGTGGTGGAGAGAGAAAAAGAGCAGTGGGAATAGGAGC  
TATGATCTTTGGGTTCTTAGGAGCAGCAGGAAGCACTATGGGCGCGGCGTCAATAACGCTGACGGTACAGGCC  
AGACAATTATTGTCTGGTATAGTGCAACAGCAAAGCAATTTGCTGAGGGCTATAGAGGCGCAACAGCATATGT  
TGCAACTCACAGTCTGGGGCATT

>JN388191

ACTCATACTACTTTTAATAAAAACTATCAGACTTCCATGCAAGATAAAGCAAATTATAAACATGTGGCAGAGAA  
CAGGACAAGCAATGTATGCTCCTCCCATCAGTGGAAACATTAAGTGTGTATCAAATATTACAGGAATACTATT  
GACAAGGGATGGTGGTAATAATACTAATGAAACCTTTAGACCTGGAGGAGGAAACATAAAGACAATTGGAGA  
AGTGAATTATATAAATATAAAGTAGTAGAAATTGAACCACTAGGAATAGCGCCCACCAGGGCAAAGAGAAGAG  
TGGTGGAGAGAGAAAAAGAGCAGTGGGAATAGGAGCTATGATCTTTGGGTTCTTAGGAGCAGCAGGAAGCAC  
TATGGGCGCGGCGTCAATAACGCTGACGGTACAGGCCAGACAATTATTGTCTGGTATAGTGCAACAGCAAAGC  
AATTTGCTGAGGGCTATAGAGGCGCAGCAGCATATGTTGCAACTCACAGTCTGGGGCATC

>JN388201

ACTTACAATGGAACCTACATGATGATAATAACAGTACCAATATCACATTTCCATGCAGGATAAAGCAGATTA  
TAAACATGTGGCAGGGAGTAGGACAAGCCATGTATGCTCCTCCCATCAGTGGAAAGAAATTAATTGTGTATCAAA  
TATTACAGGAATACTATTGACAAGAGATGGTGGTGATAGTAATAAGAAAAACGAGACCTTCAGACCTGGAGGA  
GGAAATATAAAGGACAATTGGAGAAATGAATTATATAAATATAAAGTAGTAGAAATTGAACCATTAGGAATAG  
CACCCACCAGGGCAAAGAGAAGAGTGGTGGAGAGAGAAAAAGAGCAGTGGGAATAGGAGCTATGATCTTTGG  
GTTCTTAGGAGCAGCAGGAAGCACTATGGGCGCGGCGTCAATAACGCTGACGGTACAGGCCAGACAATTATTG  
TCTGGTATAGTGCAACAGCAAAGCAATTTGCTGAGGGCTATAGAGGCGCAGCAGCATATGTTGCAACTCACAG  
TCTGGGGCATT

>GQ916585

TGCTATAACAACAAACTGTTTAATAAATACTTGCATGGAAAAATGGAACCAAGTGAATGACACTATCACACTTC  
CATGCAAGATAAAGCAAATTATAAACATGTGGCAGGGAATAGGACAAGCAATGTATGCTCCTCCCATCAGTGG  
AACAAATTAATTGTGCATCAAATATTACAGGAATACTATTGACAAGAGATGGTGGTAAGAATACTTCAGTTAAC  
GGGACCGAGATCTTCAGACCTGGAGGAGGAAATATGAAGGACAATTGGAGAAGTGAATTATATAAATATAAAG  
TAGTACAAATTGAACCACTAGGAATAGCACCCACCAAGGCAAAGAGAAGAGTGGTGAAGAGACAAAAAGAGC  
AGTAGTAGGAATAGGAGCTATGATCTTTGGGTTCTTAGGAGCAGCAGGAAGCACTATGGGCGCAGCGTCAATA  
ACGCTGACGGTACAGGCCAGACAATTATTGTCTGGTATAGTGCAACAGCAAAGCAATTTGCTGAGGGCTATAG  
AGGCGCAGCAGAATATGTTGCAACTCACAGTCTGGGGCATT

>GQ916588

TGCTATAATAAATACTCTCATACTTCCATGTAAGATAAAACAAATTATAAACATGTGGCAGGGAGTAGGACAAG  
CAATGTATGCTCCTCCCATCAATGGAAGAATTAATTGTGTATCAAATATTACAGGAATACTATTGACAAGAGA  
TGGTGGTGTTAATAATGGGACTAACGACACCGAGATCTTCAGACCTGGAGGAGGAAATATAAAGGACAATTGG  
AGAAGTGAATTATATAAATATAAAGTAGTACAAATTGAACCACTAGGAATAGCACCCACCAGGGCAAAGAGAA  
GAGTGGTGGCGAGAGAAAAAGAGCAGTGGGAATAGGAGCTGTGATCTTTGGGTTCTTAGGAGCAGCAGGAAG  
CACTATGGGCGCGGCGTCAATAACGCTGACGGTACAGACCAGACAATTATTGTCTGGTATAGTGCAACAGCAA  
AGCAATTTGCTGAGAGCTATAGAGGCGCAGCAGCATCTGTTGCAACTCACAGTCTGGGGCATT

>GQ916592

AGTTACTTAGAAAATGGAACCATGTGGGAAAATAACAGTATCATACTTCTATGCAGGATAAAGCAAATTATAA  
ATATGTGGCAGGGAGTAGGACAAGCAATGTATGCTCCTCCCATCAGTGGCTTAATTAAGTGTGTATCGAATAT  
TACAGGAATACTATTGACAAGAGATGGTGGTAATAGTAATGAGACTAATAGTACTGATACTGAGATCTTCAGA  
CCTACAGGAGGAAATATAAAGGACAATTGGAGAAGTGAATTATATAAATACAAAGTAGTACAAATTGACCCAC  
TAGGAATAGCACCCACCAAGGCAAAGAGAAGAGTGGTGGAAAGAGAAAAAGAGCAGTGGGACTAGGAGCTAT  
GATCTTTGGGTTCTTAGGAGCAGCAGGGAGCACTATGGGCGCGGCGTCAATAGCGCTGACGGGACAGGCCAGA  
CAATTATTGTCTGGTATAGTGCAACAGCAAAGCAATTTGCTGAGGGCTATAGAGGCGCAGCAGCATATGTTGC  
AACTCACTGTCTGGGGCATT

>GQ916580

ACCTACAGAAATGAAAACACGGGCAGTATCATACTCCCATGCAAAATAAAGCAAATTATAAACATGTGGCAGG  
GAGTAGGACGAGCAATGTATGCTCCTCCCATCAGTGGAAACAATTAATTGTGTATCAAATATTACAGGAATACT  
ATTGACAAGAGATGGGGGTGGTGGTGATGAGGTGAATAACGAGACCGAGATCTTTAGACCTGGAGGAGGAAAC  
ATAAAGGACAATTGGAGAAATGAATTATATAAATATAAAGTAGTACAAATTGAACCACTAGGAATAGCACCCA  
CCAGGGCAAAGAGAAGAGTGGTGGAGAGAGAAAAAGAGCAGTGGGAATAGGAGCTATGATCTTTGGGTTCTT

AGGAGCAGCAGGAAGCACTATGGGCGCGGCGTCAATAACGCTGACGGTACAGGCCAGACAATTATTGTCTGGT  
ATAGTGCAACAGCAAAGCAATTTGCTGAGGGCTATAGAGGCGCAGCAGCATCTGTTGCAACTCACAGTCTGGG  
GCATT

>KT185994

AATTACACAGAGAATAATACCACGGAGGGGTGGAATGGCACTATCATACTTCCATGCAGGATAAAGCAAATTG  
TAAACATGTGGCAGGGAGCAGGACAAGCAATGTATAATCCTCCCATCAGTGGAAAAATTAATTGTGTATCAA  
TATTACAGGAATACTATTGACAAGAGATGGTGGTAATAATAATGAGACTAATGGGACTGAGACTTTCAGACCT  
GGAGGAGGAAATATAAAGGACAATTGGAGAAATGAATTATATAAGTATAAAGTAGTACAAATTGAACCACTAG  
GAATAGCACCCACCAGGGCAAAGAGAAGAGTGGTGGAGAGAGAGAAAAAGAGCAGTGGGAATAGGAGCTATGAT  
CTTTGGGTTCTTGGGAGCAGCAGGAAGCACTATGGGCGCGGCGTCAATAACGCTGACGGTACAGGCCAGACAA  
TTATTGTCTGGTATAGTGCAAGCAATTTGCTGAGGGCTATAGAGGCGCAGCAGCATATGTTGCAAC  
TCACAGTCTGGGGCATT

>KY580553

AATCATACTTGCGAAGGAAATGAAGGGTGTAAATGGCACTAGCAGTAATGGCACTATCATACTTCCATGCAGGA  
TAAAGCAAATTATAAACATGTGGCAGGGAGCAGGACAAGCAATGTATGCTCCTCCCATCAGAGGAACAATTAA  
TTGTGTATCAAATATTACAGGACTACTATTGACAAGAGATGGTGGTAAAGATAATAGTACTAGTGGTAACGAG  
ACCTTCAGACCTGGAGGAGGAAATATAAAGACAATTGGAGAAGTGAATTATATAAATATAAAGTAGTACAGA  
TTGAACCACTAGGAATAGCACCTACCAGGGCAAAGAGAAGAGTGGTGCAGAGAGAAAAAGAGCAGTGGGAAT  
AGGAGCTATGCTCTTTGGGTTCTTAGGAGCAGCAGGAAGCACTATGGGCGCGGCGTCAATAACGCTGACGGTA  
CAGGCCAGACAATTATTGTCTGGTATAGTGCAACAGCAAAGCAATTTGCTGAGGGCTATAGAGGCGCAGCAGC  
ATCTGTTGCAACTCACAGTCTGGGGCATT

>JX447238

ACTTACACAGGAAAAGAAAATGACACCAGGGAAGGGAAGAATGACAATGAAATCATTCCTTCCATGCAGAATAA  
AGCAAATTATAAACATGTGGCAGAGAGTAGGACAAGCAATGTATGCTCCTCCCATTAGAGGAAGAATTAATTG  
TGTATCAAATATTACAGGAATACTATTGACAAGAGATGGTGGTAAATATGACTAATGAGACCTTC  
AGGCCTGGAGGAGGACATATAAAGGACAATTGGAGAAGTGAATTGTACAAATATAAAGTAGTAGAAATTGAAC  
CATTAGGAATAGCACCCACCAAGGCAAAGAGAAGAGTGGTGGAAAGACAAAAAGAGCAGTGGGAATAGGAGC  
TATGATCTTTGGGTTCTTAGGAGCAGCAGGAAGCACTATGGGCGCAGCGTCAATAACGCTGACGGTACAGGCC  
AGACAATTATTGTCTGGTATAGTGCAACAGCAAAGCAATTTGCTGAGGGCTATAGAGGCGCAACAGCACATGT  
TGCAACTCACAGTCTGGGGCATT

>JN388224

TTTCAGACCAATGTCTGCAATGGGACGTGTAATGGCAATATCACACTTCCATGCAGGATAAAGCAAATTATAA  
ACATGTGGCAGGAAGTAGGACAAGCAATGTATAACCTACCAAAGAGGAGAAATTAAGTGTGTATCAAATAT  
TACAGGAATACTATTGACAAGAGATGGTGGTAGTAATAATAGGTCCAACGAGACCTTCAGACCTGGAGGAGGA  
AATATGAAGGACAATTGGAGAAGTGAATTATATAAATATAAAGTAGTAGAAATTGAACCACTAGGAATAGCAC  
CCACCAGGGCAAAGAGAAGAGTGGTGGAGAGAGAAAAAGAGCAATAGCAATAGGAACATAGCTCTTTGGGTT  
CTTAGGAGCAGCCGGAAGCACTATGGGCGCGGCGTCACTAACGCTGACGGTACAGGCCAGACAATTATTGTCT  
GGTATAGTGCAACAGCAAAGCAATTTGCTGAGGGCTATTGAGGCGCAGCAGCATCTGTTGCAACTCACAGTCT  
GGGGCATT

>JX512901

ACTTACACAGGAAATGAACCTATGGGGAATAGGACCGAGGGGAATAATACCAATATCATACTTCCATGTAAGA  
TAAAGCAAATTATAAACATGTGGCAGGGAGTAGGACAAGCAATGTATGCTCCTCCCATCAGAGGAGCTATTAC  
ATGTGTATCAAATATTACAGGAATACTATTGACAAGAGATGGTGGTAAATAGTCCTAATGAGACCTTCAGACCT  
GAAGGAGGAAATATAAAGGACAATTGGAGAAGTGAATTATATAAATATAAAGTAGTACAAATTGAACCACTAG  
GAGTAGCACCTACCAGGGCAAAGAGAAGAGTGGTGGAGAGAGAAAAAGAGCAGTGGGAATAGGAGCTATGAT  
CTTTGGGTTCTTAGGAGCAGCAGGAAGCACTATGGGCGCAGCGTCAATAACGCTGACGGTACAGGCCAGACAA  
TTGTTGTCTGGTATAGTGCAACAGCAAAGCAATTTGCTGAGGGCTATAGAGGCGCAGCAGCATCTGTTGCAAC  
TCACAGTCTGGGGCATT

>KU230434

TCTTACATAAATGAAACCACACCTGGGTATAATGGCACTATCATACTCCCATGCAGGATAAAACAAATTATAA  
ACATGTGGCAGGGAGTAGGACAAGCAATGTATGCTCCTCCCATCAGGGGAATCATTAGTTGTGTATCAAATAT  
TACAGGAATATTATTGACAAGAGATGGTGGTAAATAGCACGAATGAGACTGAGACCTTCAGACCTGGAGGA  
GGAAATATAAAGGACAATTGGAGAAGTGAATTATATAAATATAAGGTAGTACAAATTGAACCACTAGGACTAG  
CACCCACCAAGGCAAAGAGAAGAGTGGTGGAGAGAGAAAAAGAGCAGTGGGAATAGGAGCTATGATCTTTGG  
GTTCTTAGGAGCAGCAGGAAGCACTATGGGCGCGGCGTCAATAACGCTGACGGTACAGGCCAGACAATTATTG  
TCTGGTATAGTGCAACAGCAAAGCAATTTGCTGAGAGCTATAGAGGCGCAACAGCATATGTTGCAACTCACAG  
TCTGGGGCATT

>KU230435

AATCATAATTGCACCGAGGAGAGGTGTAATAGCACTACCAATAGCACTAGCACTGGCAATATCACACTTCCAT  
GTAGAATAAAGCAGATAATAAACATGTGGCAGGGAGTAGGACAAGCAATGTACGCTCCTCCCATTAAGGGAAA

TGTTAGTTGTCTATCAAATATCACAGGAATACTATTGACAAGAGATGGTGATAATGCCAGTGATAGTGAGACC  
TTCAGACCGGGAGGAGGAAATATAAAAGACAATTGGAGAAGTGAATTATATAAAATATAAAGTAGTACAAATTG  
AACCCTAGGAATAGCACCCACCAGGGCAAAGAGAAGAGTGGTGGAGAGAGAAAAAGAGCAGTGGGAATAGG  
AGCTATGATCTTTGGGTTCTTGGGAGCAGCAGGAAGCACTATGGGCGCGGCGTCAATAACGCTGACGGTACAG  
GCCAGACAATTATTGTCTGGTATAGTGCAACAGCAAAGCAATTTGCTGAGAGCTATAGAGGCGCAACAACATA  
TGTTGCAACTCACAGTCTGGGGCATT

>KU230437

ACTTACACAGACGTGAATAATAAAACCAATAAGAATGACACAATCATAATTCATGCAGAATAAAGCAAATTA  
TAAACATGTGGCAGAGAGTAGGACAAGCAATGTATGCTCCTCCCATCAAGGGAAGGATTAGTTGTGTATCAAA  
TATTACAGGAATACTCTTGACAAGAGATGGTGGTAATAATACTGATGCTAATGAGACCTTCAGACCTGAAGGA  
GGAAATATGAAGGACAATTGGAGAAATGAATTATATAAAATATAAAGTAGTACAAATTGAACCACTAGGAATAG  
CACCCACCAGGGCAAGGAGAAGAGTGGTGGACAGAGAAAAAGAGCAGTGGGAATAGGAGCTTTGATCTTTGG  
GTTCTTAGGAGCAGCCGGAAGCACTATGGGCGCGGCGTCAATAACGCTGACGGTACAGGCCAGACAATTATTG  
TCTGGTATAGTGCAACAGCAAAGCAATTTGCTGAGGGCTATAGAGGCACAGCAGCATCTGCTGCAACTCACAG  
TCTGGGGCATT

>MG989575

ACTTACCTAAATGAAACAAATGAATATAATGACACTATCATACTTCCATGCAGGATAAAGCAAATGATAAACA  
TGTGGCAGGGAGCAGGACAAGCAATGTATGCTCCTCCCATCAGTGGAAATAATTAATTGTACATCAAATATTAC  
AGGAATACTATTGACAAGAGATGGTGGTGTAAATGAAAGTAATGGGACCGAGACCTTCAGACCTGGAGGAGGA  
AATATAAAGGACAATTGGAGAAATGAATTATATAAAATATAAAGTAGTACAAATTGAACCACTAGGAATAGCAC  
CCACCAGGGCAAAGAGAAGAGTGGTGGAGAGAGAAAAAGAGCAGTGGGAATAGGAGCTATGCTCTTTGGGTT  
CTTAGGAGCAGCAGGAAGCACTATGGGCGCGGCGTCAATAACGCTGACGGTACAAGCCAGACAATTATTGTCT  
GGTATAGTGCAACAGCAAACAATTTGCTGAGAGCTATAGAGGCGCAGCAGCATCTGCTGCAACTCACAGTCT  
GGGGCATT

>MG989515

AATTACACCAAGGAAGGGTGTAAATGAACTATCACACTTCCATGCAAGATAAAGCAAATAGTACGCATGTGGC  
AGGAAGCAGGACAGGCAATGTATGCTCCTCCCATCAGGGGAATGATTAATTGTGTATCAAATATTACAGGAAT  
ACTACTGACAAGAGATGGTGGTAGAAATAGTAGCAATGAGACCTTCAGACCTGAGGGAGGAAATATAAAGGAC  
AATTGGAGAAATGAATTGTATAAAATATAAGGTAGTACAAATTGAACCACTAGGAATAGCACCCACCAGGGCAA  
AGAGAAGAGTGGTGGAGAGAGAAAAAGAGCAGTGGGAATAGGAGCTATGATCTTTGGGTTCTTAGGAGCAGC  
AGGAAGCACTATGGGCGCGGCGTCAATAACGCTGACGGTACAAGCCAGACAATTATTGTCTGGTATAGTGCAA  
CAGCAAAGCAATTTGCTGAGAGCTATAGAGGCGCAGCAACATCTGCTGCAACTCACAGTCTGGGGCATC

>MG989597

AATTATACAGGAAATGAAACCGAGGGGGAGTATAATGGCACTAATAATGGCACTATCACACTTCCATGCAGGA  
TAAAGCAAATAATAAACATGTGGCAGAAAATAGGACAAGCAATGTATGCTCCTCCCATCAGGGGAAGTATTAA  
TTGTTTATCAAATATCACAGGAATACTATTGACAAGAGATGGTGGTGTATGGTGGTGTCTAATGAAAATGATACA  
GAGACCTTCAGACCTGGAGGAGGAAATATAAAGGACAATTGGAAAAATGAATTATATAAAATATAAAGTAGTAC  
AAATTGAACCACTAGGAATAGCACCCACCAGGGCAAAGAGAAGAGTGGTGGAGAGAGAAAAAGAGCAGTGGG  
AATAGGAGCCATGATCTTTGGGTTCTTAGGAGCAGCAGGAAGCACTATGGGCGCGGCGTCAATAACGCTGACG  
GTACAGGCCAGACAATTATTGTCTGGCATAGTGCAACAGCAAGGTAACCTTGTCTGAGGGCTATAGAGGCGCAGC  
AGCATCTGTTGCAACTCACAGTCTGGGGCATT

>MG989530

ATTTACGTAAAGAAATGAAACGTATAATGACACTATCATACTCCCATGCAAGATAAAGCAAATTATAAACATGT  
GGCAGGGAGTAGGACAAGCAATGTATGCTCCTCCCATTAGAGGAAGCATTAACTGTGCATCAAATATTACAGG  
AATATTATTGACAAGAGATGGTGGTGACGAAAATAGAAGCAAAGAGATCTTCAGGCCTGAAGGAGGAAACATA  
AAGGACAATTGGAGAAATGAATTATATAAAATATAAAGTAGTACAAATTGAACCACTAGGGGTAGCACCCACCA  
GGGCAAAGAGAAGAGTGGTGGAGAGAGAAAAAGAGCAGTGGGAATAGGAGCTATGATCTTTGGGTTCTTAGG  
AGCAGCAGGAAGCACTATGGGCGCAGCGTCACTAACGCTGACGGTACAGGCTAGACAATTATTGTCTGGTATA  
GTGCAACAGCAAAGCAATTTGCTGAGGGCTATAGAGGCGCAGCAGCATCTGTTGCAACTCACAGTCTGGGGCA  
TT

>MG989559

AATCATAAATTGCACCGAGGAGAGGTGTAATAGCACTACCAATAGCACTAGCACTGGCAATATCACACTTCCAT  
GTAGAATAAAGCAGATAATAAACATGTGGCAGGGAGTAGGACAAGCAATGTACGCTCCTCCCATTAAGGGAAA  
TGTTAGTTGTCTATCAAATATCACAGGAATACTATTGACAAGAGATGGTGATAATGCCAGTGATAGTGAGACC  
TTCAGACCGGGAGGAGGAAATATAAAAGACAATTGGAGAAGTGAATTATATAAAATATAAAGTAGTACAAATTG  
AACCCTAGGAATAGCACCCACCAGGGCAAAGAGAAGAGTGGTGGAGAGAGAAAAAGAGCAGTGGGAATAGG  
AGCTATGATCTTTGGGTTCTTGGGAGCAGCAGGAAGCACTATGGGCGCGGCGTCAATAACGCTGACGGTACAG  
GCCAGACAATTATTGTCTGGTATAGTGCAACAGCAAAGCAATTTGCTGAGAGCTATAGAGGCGCAACAACATA  
TGTTGCAACTCACAGTCTGGGGCATT

>MG989562

TCTTACATAAATGAAACACACCTGGGTATAATGGCACTATCATACTCCCATGCAGGATAAAACAAATTATAA  
ACATGTGGCAGGGAGTAGGACAAGCAATGTATGCTCCTCCCATCAGGGGAATCATTAGTTGTGTATCAAATAT  
TACAGGAATATTATTGACAAGAGATGGTGGTAATAATAGCACGAATGAGACTGAGACCTTCAGACCTGGAGGA  
GGAAATATAAAGGACAATTGGAGAAGTGAATTATATAAATATAAGGTAGTACAAATTGAACCACTAGGACTAG  
CACCCACCAAGGCAAAGAGAAGAGTGGTGGAGAGAGAAAAAAGAGCAGTGGGAATAGGAGCTATGATCTTTGG  
GTTCTTAGGAGCAGCAGGAAGCACTATGGGCGCGGCGTCAATAACGCTGACGGTACAGGCCAGACAATTATTG  
TCTGGTATAGTGCAACAGCAAAGCAATTTGCTGAGAGCTATAGAGGCGCAACAGCATATGTTGCAACTCACAG  
TCTGGGGCATT

>KT185904

ACTTACATAAATAACAATGGCACTATCAATGGCACTATCATACTTCCATGCAGGATAAAGCAAATTATAAACA  
TGTGGCAGGAAGTAGGACAAGCAATGTATGCTCCCCCATCAGGGGAAGCATTAAATGTAGCTCAAATATTAC  
AGGAATATTATTAAACAAGAGATGGTGGTAGCAGTAATGGCAGTAATGAGATCTTCAGACCTACAGGAGGAAAT  
ATAAAAAGACAATTGGAGAAATGAACTATATAAATATAAAGTAGTACAAATTGAACCACTAGGAGTAGCACCCA  
CCAAGGCAAAAAGAAGAGTGGTGGAGAGAGAAAAAAGAGCAGTGGGAATAGGAGCTATGATCTTTGGGTTCTT  
AGGAGCAGCAGGAAGCACTATGGGCGCGGCGTCAATAACGCTGACGGTACAAGCCAGACAATTATTGTCTGGT  
ATAGTGCAACAGCAAAGCAATTTGCTGAGGGCTATAGAGGCGCAGCAGCATATGTTGCAACTCACAGTCTGGG  
GCATT

>MG989527

ACTTACACCCAGGAGAATAATGGCACTATCATACTTCCATGCAAGATAAAACAAATTGTAAGAATGTGGCAAG  
GAGCAGGACAAGCAATGTATGCTCCTCCCATCAAGGGAATAATTAAATTGTGTATCAAATATTACAGGAATACT  
ATTGACAAGAGATGGTGGGAGGGGTAACCATACTGCTGATAACGAGACCTTCAGACCTGAAGGAGGAGACATG  
AAGGACAATTGGAGAAGTGAATTATATAAATATAAAGTAGTACAGATTGAACCACTAGGAATAGCACCCACCA  
GGGCAAGGAGAAGAGTGGTGGAGAGAGAAAAAAGAGCAGTGGGAATAGGAGCTATGATCTTTGGGTTCTTAGG  
AGCAGCAGGAAGCACTATGGGCGCGGCGTCAATAACGCTGACGGTACAGGCCAGACAATTATTGTCTGGTATA  
GTGCAACAGCAAAGCAATTTGCTGAGAGCTATAGAGGCGCAGCAGCATCTGTTGCAACTCACAGTCTGGGGCA  
TT

>MG989617

ACTCACAGAGGAAATGAAACCATGGAGGGGAATGGCAATATCACAATTCCATGCAGGATAAAACAAATCATAA  
ACATGTGGCAGGAAACAGGACAAGCAATGTATGCTCCTCCCGTCAGGGGAGTAATTAGGTGTGTATCAAATAT  
TACAGGAATACTATTGACAAGAGATGGTGGTGGTTCTAATAATGCCACTAATGAGACCTTCAGACCTGGGGGA  
GGAAATATAAAGACAACCTGGAGAAGTGAATTATATAAATATAAAGTAGTACAAATTGAACCATTAGGAATAG  
CACCCACCAAGGCAAAGAGGAGAGTGGTGGAGAGAGAAAAAAGAGCAGTGGGAATAGGAGCTATGATCTTTGG  
GTTCTTAGGAGCAGCAGGAAGCACTATGGGCGCGGCGTCAATAACGCTGACGGTACAGGCCAGACAATTATTG  
TCTGGTATAGTGCAACAGCAAAGCAATTTGCTGAGAGCTATAGAGGCGCAACAGCATATGTTGCAACTCACAG  
TCTGGGGCATT

>MF957454

AATCATAGTTGCACAGAGGGACATGGGTGTAACAGTACTACCAAAGATGCTAACGGTACTATCACACTTCCAT  
GCAGGATAAAGCAAATTATAAAAAATGTGGCAGGGAGTAGGACAAGCAATGTATGCTCCTCCCATCAGTGGAAG  
TATTAATTGTAGATCAAATATTACAGGAATATTATTGACAAGAGATGGTGGTAATAGTTCAAATGAGACCTTC  
AGACCTGAAGGAGGAAATATAAAGACAACCTGGAGGAGTGAATTATATAAATATAAAGTAGTGCAAAATTGAAC  
CACTAGGAGTAGCACCCACCAAGGCAAAAAGAAGAGTGGTGGACAGACAAAAAAGAGCAGTGGGACTAGGAGC  
TCTGATCTTTGGATTCTTAGGAGCAGCAGGAAGCACTATGGGCGCGGCGTCAATAACGCTGACGGTACAGGCC  
AGACAATTATTGTCTGGTATAGTGCAACAGCAAAGCAATTTGCTGAGGGCTATAGAGGCGCAGCAGCATATGT  
TGCAACTCACAGTCTGGGGCATT

>MG989509

AATTATAATTGCTCAAAGAATAATACTTGCGAGGGGAAATGAGGGAAATAATCCTAATGGAACCATCATACTTC  
CATGCAAGATAAAGCAAATTATAAACATGTGGCAGAGAACAGGACAAGCAATGTATGCTCCTCCCATCGGGGG  
ATGGATTAATTGTACATCAAATATTACAGGAATATTACTGACAAGAGATGGGGGTGAGAATAACAAGACTAAC  
GAAACCGAGACCCCCGAGACCTTCAGACCTGGAGGAGGGGAATATAAAGGACAATTGGAGAAGTGAATTATATA  
AATATAAAGTAGTACAAATTGAACCACTAGGAATAGCACCCACCAGGGCAAAGCGAAGAGTGGTGGACAGAGA  
AAAAAGAGCAGTGGGAATAGGAGCTTTGATCTTTGGGTTCTTAGGAGCAGCAGGAAGCACTATGGGCGCGGCG  
TCAATAACGCTGACGGTACAGGCCAGACAATTATTGTCTGGTATAGTGCAACAGCAAAGCAATTTGCTGAGAG  
CTATAGAGGCGCAGCAGCATATGTTGCAACTCACAGTCTGGGGCATT

>MG989603

AATTATACAAATGGAACCATACAGGGGGGTAATGATACTATCACACTTCCATGCAGAATAAAACAAATAATAA  
GAATGTGGCAGAGAACAGGACAAGCAATATATGCTCCTCCTGTAGTGGAATAATTAATTGTGTATCAAATAT  
TACAGGAATACTATTGACAAGAGATGGTGGTGGTAACGAGACCGAGACCTTCAGACCAGGAGGAGGAAATATG  
AAGGATAATTGGAGAAATGAATTATATAAATATAAAGTAGTACGAATTGAACCACTAGGGGTAGCACCCACAA  
GGGCAAAGAGAAGAGTGGTGGAGAGAGAAAAAAGAGCAGTGGGACTAGGAGCTATGATCTTTGGGTTCTTAGG  
AGCAGCAGGAAGCACTATGGGCGCAGCGTCAATAACGCTGACGGTACAGGCCAGACAATTATTGTCTGGTATA

GTGCAACAGCAAAGCAATTTGCTGAGGGCTATAGAGGCGCAACAGCGTCTGTTGCAACTCACAGTCTGGGGCA  
TT

>MG989564

ACTTATGGGGTTAATAATACAAATGAAACCAACAAGTATAATGACACTATCACACTCCCATGCAGGATAAAGC  
AAATTATAAACATGTGGCAGAGAACAGGACAGGCAATGTATGCTCCTCCCATCAGGGGAGCAATAAATTGTGT  
ATCAAATATTACAGGAATACTATTGGTAAGAGATGGTGGTCCTAACAGGACTAACGAGACTTTTCAGACCTGGA  
GGAGGAAACATGAAGGACAATTGGAGGAGTGAATTATATAAATATAAAGTAGTACAAATTGAACCACTAGGAA  
TAGCACCCACCAGGGCAAAGAGAAGAGTGGTGGACAGAGAAAAAAGAGCAGTGGGAATAGGAGCTATGATCTT  
TGGGTTCTTAGGAGCAGCAGGAAGCACTATGGGCGCGGCGTCAATAACGCTGACGGTACAGGCCAGACAATTA  
TTGTCTGGTATAGTGCAACAGCAAAGCAATTTGCTGAGAGCTATAGAGGCGCAACAGCATATGTTGCAACTCA  
CAGTCTGGGGCATT

>MG989572

ACTTACCCGTTAAATAGTACTAACATAGAAAATAATACCACGAAGGGGTATAATGACCCTATCATACTTCCAT  
GCAGAATAAAGCAAATCATAAACTTGTGGCAGGGAGTAGGACAAGCAATGTATGCTCCTCCCATCAGGGGAAG  
CATTAATTGTGTATCAAATATTACAGGACTACTATTGATAAGGGATGGTGGTATGCATAATGGGACCGATAAT  
ACCAAGGAGATCTTCAGACCTGGAGGAGGAAATATGAAGGACAATTGGAGAAAATAAATTATATAAATATAAAA  
TAGTACAAATTGAACCGCTAGGAGTAGCACCCACCAGGGCAAAGAGAAGAGTGGTGGGGAGAGAAAAAAGAGC  
AGTGGGAATAGGAGCTTTGATCTTTGGGTTCTTGGGAGCAGCAGGAAGCACTATGGGCGCGGCGTCAATAACG  
CTGACGGTACAGGCCAGACAATTACTGTCTGGTATAGTGCAACAGCAAAGCAATTTGCTGAGAGCTATAGAGG  
CGCAGCAGCATCTGTTGCAACTCACAGTCTGGGGCATT

>MG989538

AATTATACGTGGGCTAATAATACATTTAATGGAACCACGGAAAATGGGACTATCATACTTCCATGCAGGATCA  
AGCAAATTGTAAACATGTGGCAGGGAGCAGGACAAGCAATATATGCTCCTCCCATCAGGGGAAATATTAGTTG  
TGCATCAAATATTACAGGAATACTATTAACAAGAGATGGTGGTAATAATAATGAAACAAACGGGACAGAGATC  
TTCAGACCTGGAGGAGGAAAATATAAAGGACAATTGGAGAAGGGAATTATATAAATATAAAGTAGTACAAATTG  
AACCCTAGGAGTAGCACCCACCAAGGCAAAGAGAAGAGTGGTGGAGAGAGAAAAAAGAGCAGTGGGACTAGG  
AACTATGATCTTTGGGTTCTTAGGAGCAGCAGGAAGCACTATGGGCGCAGCGTCAATAACGCTGACGGTACAA  
GCCAGACAATTATTGTCTGGTATAGTGCAACAGCAAAGCAATTTGCTGAGGGCTATAGAGGCGCAGCAGCATA  
TGTTGCAACTCACAGTCTGGGGCATT

>MG989614

ACTTACAATGGAACCCTGGTGAAAAACAATACTGGAAGTGGAAATATCACACTTCCATGTAGGATAAAGCAAA  
TTATAAACATGTGGCAAGGAGCAGGACAAGCAATGTATGCTCCTCCCGTTAGTGGAATATTAATTGTACATC  
AAATATTACAGGAATACTATTAACAAGAGATGGTGGTAATAATAACAGCTAACGAGACCTTCAGACCTGGA  
GGAGGAAATATAAAGGACAATTGGAGAAGTGAATTATATAAATATAAAGTAGTACAAATTGAACCACTAGGAA  
TAGCACCCACCAGGGCAAAGGAGAAGAGTGGTGGAGAGAGAAAAAAGAGCAGTGGGAATAGGAACTATGATCTT  
TGGGTTCTTGGGAGCAGCAGGAAGCACTATGGGCGCGGCGTCAATAACGCTGACGGTACAAGCCAGACAATTA  
TTGTCTGGTATAGTGCAACAGCAAAGCAATTTGCTGAGAGCTATAGAGGCGCAGCAGCATATGTTGCAACTCA  
CAGTCTGGGGCATT

>MG989496

AGCTACTTAAATAGAACTTAAGTGAATCGCAGTAGAGAACAAAACACTTATACTTCCATGTAGATAAAGC  
AAATTATAAACATGTGGCAGGGAGTAGGACAAGCAATGTATGCTCCTCCCATCAGTGGGCCAATTAATTGTAA  
ATCAAATATTACAGGAATACTGTTAACAAGAGATGGTGGTAATGTTACTGGGAATAATGAGACCTTCAGACCT  
ACAGGAGGAAACATAAAGGACAATTGGAGAAGTGAATTATATAAATACAAAGTAGTACAAATTGAACCACTAG  
GAATAGCACCCACCAGGGCAAAGAGAAGAGTGGTGGAGAGAGAAAAAAGAGCAGTGGGAATAGGAGCTATGAT  
CTTTGGGTTCTTAGGAGCAGCAGGAAGCACTATGGGCGCGGCGTCAATAACGCTGACGGTACAGGCCAGACAA  
TTATTGTCTGGTATAGTGCAACAGCAAAGCAATTTGCTGAGAGCTATAGAGGCGCAACAGCATATGTTGCAAC  
TCACAGTCTGGGGCATT

>MG989539

AATTATAATTGCACAGATGGAAAATGTAATGTCTACTAAGGACAATAATGGCACTATCATACTTCCATGCAGAA  
TAAACAAATTATAAACATGTGGCAAGGAGTAGGACAAGCAATGTATGCTCCTCCCATCAGTGGGAATAATTAA  
TTGTGTATCAGACATTACAGGAATACTATTGACAAGAGATGGTGGTAATAATAATAATAACTAATAGTTTCG  
GAAGAGATCTTCAGACCTGAAGGAGGAAAACATAAAGGACAATTGGAGAAGTGAATTATATAAATATAAAGTAG  
TACAAATTGAACCACTGGGAATAGCACCCACCAAGGCAAAGAGAAGAGTGGTGGAGAGAGAAAAAAGAGCAGT  
GGGAATAGGAGCTATGATCTTTGGGTTCTTAGGAGCAGCAGGAAGCACTATGGGCGCGGCGTCAATAACGCTG  
ACGGTACAGGCCAGACAATTATTGTCTGGTATAGTGCAACAGCAAAGCAATTTGCTGAGAGCTATAGAGGCGC  
AGCAGCATATGTTGCAACTCACGGTCTGGGGCATT

>AY713424

ACTTACAGAGGAAATGAAACCATGGAGAGGAGTAATGGCACTATCATACTTCCATGCAAGATAAAGCAAATTA  
TAAACATGTGGCAGGAAACAGGACAAGCAATGTATGCTCCTCCCATCAATGGAGAAATTAAGTGTATATCAAA  
TATTACAGGAATACTATTGACAAGAGATGGTGGTATTAATAGAACGTATAACGAGACCTTCAGACCGGGAGGA

GGAAATATGAAGGACAATTGGAGAAATGAATTATATAAAATATAAAGTAGTACAAATTGAACCACTAGGAGTAG  
CACCCACCAGGGCAAAGAGAAGAGTGGTGGAGAGAGAAAAAAGAGCAGTGGGAATAGGAATTATGATCTTTGG  
GTTCTTAGGAGCAGCAGGAAGCACTATGGGCGCGGCGTCAATAACGCTGACGGTACAGGCCAGACAATTATTG  
TCTGGTATAGTGCAACAGCAAAGCAATTTGCTGAGGGCTATAGAGGCGCAGCAGCATCTGTTGCAACTCACAG  
TCTGGGGCATT

>JN944664

ACTTACAAAGGAAATGAAACCATAGAGGAGGGTGATAGCACTATTACAATTCCATGCAAGATAAAGCAAATTA  
TAAACATGTGGCAGGGAACAGGACAAGCAATGTATGCTCCTCCCATCAGTGGGAAGTATTAATTGTGTATCAAA  
TATCACAGGAATACTATTGACAAGAGATGGTGGTAATAGTAATGATAACAAGACCGAGACCTTCAGACCTGGA  
GGAGGAAATATAAAAGACAATTGGAGAAGTGAATTATATAAAATATAAAGTAGTACAAATTGAACCACTAGGAG  
TAGCACCCACCAAGGCAAAGAGAAGAGTGGTGGAGAGAGAAAAAAGAGCAGTGGGAATAGGAGCTATGATCTT  
TGGGTTCTTAGGAGCAGCAGGAAGCACTATGGGCGCGGCGTCAATAACGCTGACGGTACAGGCCAGACAATTA  
TTGTCTGGTATAGTGCAACAGCAAAGCAATTTGCTGAGGGCTATAGAGGCGCAGCAGCATCTGTTGCAACTCA  
CAGTCTGGGGCATT

>KJ953503

ACTTACAATGGCACTATCATACTTCCATGCAAGATAAAGCAAATTATAAACATGTGGCAGGGAGTAGGACAAG  
CAATGTATGCTCCTCCCATCAGGGGAAGAATTAATTGTGTATCAAATATTACAGGAATACTATTGACAAGAGA  
TGGTGGTAAGACTAATGAGACTAACGTGACTGAGATTTTCAGACCTGGAGGAGGAAATATGAAGGATAATTGG  
AGAAAATGAATTATATAAAATATAAAGTAGTACAAATTGAACCACTAGGAATAGCACCCACCAGGGCAAAGAGAA  
GAGTGGTGGAGAGAGAAAAAAGAGCAGTGGGAATAGGAGCTATGATCTTTGGGTTCTTAGGAGCAGCAGGAAG  
CACTATGGGCGCGGCGTCAATAACGCTGACGGTACAGGCCAGACAATTATTGTCTGGTATAGTGCAACAGCAA  
AGCAATTTGCTGAGGGCTATAGAGGCGCAACAGCATCTGTTGCAACTCACAGTCTGGGGCATT

>KJ952288

AATCACACCATGGAGGGGTGTAACAATATCACACTTCCATGCAGGATAAAGCAGATTGTAAACATGTGGCAAG  
GAGTAGGACAAGCAATGTATGCTCCTCCCATCAGTGGACTCATTAATTGTTTCATCAAATATTACAGGAATACT  
ATTGACAAGAGATGGTGGTATTAATAACGAGACTGAAGTGACTGAGACCTTTAGACCTGGAGGAGGAGATATA  
AGGGCCAATTGGAGAAGTGAATTATATAAAATATAAAGTAGTACAAATTGAACCACTAGGCATAGCACCCACCA  
GGGCAAAGAGAAGAGTGGTGGAGAGAGAAAAAAGAGCAGTGGGAATAGGAGCTATGATCTTTGGGTTCTTAGG  
AGCAGCAGGAAGCACTATGGGCGCGGCGTCAATAACGCTGACGGTACAGGCCAGACAATTATTGTCTGGTATA  
GTGCAACAGCAAAGCAATTTGCTGAGAGCTATAGAGGCGCAGCAGCATATGTTGCAACTCACAGTCTGGGGCA  
TT

>KJ952992

GATCATACTGGCATAGAAAATGAAACCATAGGGAATGACACTACTATCATACTCCCATGCAAGATAAAGCAAA  
TTATAAACATGTGGCAGGGAGTAGGACAAGCAATGTATGCTCCTCCCATCAGTGGGAATAATTAATTGTGTATC  
AAATATTACAGGAATACTATTGACAAGAGATGGTGGAGATGGTGATACTAATAACGGGACTGAGACCTTCAGA  
CCTGGAGGAGGAAATATGAAGGACAATTGGAGAAGTGAATTATATAAAATATAAAGTAGTAGAAATTGAACCAC  
TAGGAATAGCACCCACCAGGGCAAAGAGAAGAGTGGTGGAGAGACAAAAAAGAGCAGTGGGAATAGGAGCTAT  
GATCTTTGGGTTCTTAGGAGCAGCAGGAAGCACTATGGGCGCGGCGTCAATAACGCTGACGGTACAGGCCAGA  
CAATTATTGTCTGGTATAGTGCAACAGCAGAGCAATCTGCTGAGGGCTATAGAGGCGCAGCAGCATCTGCTGC  
AACTCACAGTCTGGGGCATT

>KJ953319

TCTTATGACCCAGAAAATGAAACCATGAAGGAGTATAATGGCACTAATGGCAATATCACACTTCCATGCAGGA  
TAAAGCAAATTATAAACATGTGGCAGAGAACAGGACAAGCAATGTACGCTCCTCCCATCAGTGGGAAGTATTAA  
TTGTGTATCAAATATTACAGGAATACTATTGACAAGAGATGGTGGGGATAATGATGATAACGAGACCTTCAGA  
CCTGGAGGAGGAAACATAAAGGACAATTGGAGAAGTGAATTATATAAAATATAAAGTAGTACAAATTGAACCAC  
TAGGAATAGCACCCACCAGGGCAAAGAGAAGAGTGGTGGAGAGAGAAAAAAGAGCAGTGGGAATAGGAGCTAT  
GATCTTTGGGTTCTTAGGAGCAGCAGGAAGCACTATGGGCGCGGCGTCAATAACGCTGACGGTACAGGCCAGA  
CAATTATTGTCTGGTATAGTGCAACAGCAAAGCAATTTGCTGAGGGCTATAGAGGCGCAGCAGCATATGTTGC  
AACTCACAGTCTGGGGCATT

>FJ185244

ACTTACCCAATAAATGGAACCATGGAGGGGTATAATGGCACTATTAAATGACACTATCATACTTCCATGCAGGA  
TAAAGCAAATTATAAACATGTGGCAGGAAGTAGGACAAGCAATGTATGCTCCTCCCATCAGGGGAAGAATTAA  
TTGTGTATCAAATATTACAGGAATACTATTGACAAGAGATGGTGGTGCTAATAATACGAACGAGACCTTCAGA  
CCTGGAGGAGGAAATATAAAGGACAATTGGAGAAGTGAATTATATAAAATATAAAGTAGTACAAATTGAGCCAC  
TAGGAATAGCACCCACCAGGGCAAAGAGAAGAGTGGTGGAGAGAGAAAAAAGAGCAGTGGGAATAGGAGCTGT  
GATCTTTGGGTTCTTAGGAGCAGCAGGAAGCACTATGGGCGCGGCGTCAATAACGCTGACGGTACAGGCCAGA  
CAATTATTGTCTGGTATAGTGCAACAGCAAAGCAATTTGCTGAGGGCTATAGAGGCGCAGCAGCATATGTTGC  
AACTCACAGTCTGGGGCATT

>KX389609

AATCAATCACAGGATGGAAATATCACACTCCCATGTAGGATAAAACAAATTGTAAGAATGTGGCAGAGAGTGG  
GACAGGCAATGTATGCCCCCTCCCATTCGAGGAAACATTACATGTACACCAAACATTACAGGATTAATATTAAC  
AAGAGATGGGGGGAACAAGAACAATGAGACTGAGGTCATCAGACCAGGAGGAGAGATATGAGGGACAACCTGG  
AGAAGTGAACCTATATAAGTATAAAGTAGTAAAAATTAACCACCTAGGAATAGCACCCACCAAGGCAAGGAGAC  
GAGTAGTGGGGAGAGAAAAAAGAGCAGTTGGAATGGGAGCTGTTCTCCTTGGGTTCTTGGGAACGGCAGGAAG  
CACTATGGGCGCAGCGTCAATAACGCTGACGGTACAGGTCAGACAATTATTGTCTGGCATAGTGCAACAGCAA  
GGCAACTTGCTGAGAGCTATAGAGGCGCAGCAGAATCTGCTGAAACTCACAGTCTGGGGCATT

>KY346462

ACCTACAATGGTACAAGTAATTCAAACACAACCATCACGATCCCATGTAGAATAAAGCAAATTATAAATATGT  
GGCAGCAGGTAGGACGAGCAATGTATGCCCCCTCCCATTCGAGGAAACATAACATGTAAATCAAATATCACAGG  
ACTACTATTGGTACGTGATGGAGGAAAGGGTGAAAATGGTACAGAGATATTCAGACCTGGAGGAGGAGATATG  
AGGGACAATTGGAGAAGTGAATTATATAAATATAAAGTGGTAGAAATTAAGCCATTGGGAATAGCACCCAGTA  
AAGCAAAAAGGAGAGTGGTGGAGAGAGAAAAAAGAGCAGTGGGAATAGGAGCTGTGTTCTTGGGTTCTTGGG  
AGCAGCAGGAAGCACTATGGGCGCGGCGTCACTGACGCTGACGGTACAGGCCAGACAATTGTTGTCTGGTATA  
GTGCAACAGCAGAGCAATTTGCTGAAGGCTATAGAGGCGCAACAGCATTGTTGCAACTCACAGTCTGGGGCA  
TT

>HQ326137

TTTCATAGTACACAAAATAATTCAACCATCACAATCCCATGCAGAATAAAGCAAATTATAAATATGTGGCAGG  
AGGTAGGAAGAGCAATGTATGCCCCCTCCCATTCGAGGAAATATAACATGTAGATCAAATATCACAGGACTACT  
ATTGGCACGTGATGGAGGAGAAGGCAATGAGACAGAGAATGATACAGAGATATTCAGACCTGGAGGAGGAAAT  
ATGAGGGACAATTGGAGAAGTGAATTATATAAATATAAAGTGGTAGAAATTAACCATTGGGAATAGCACCCA  
CTAAAGCAAAAAGGAGAGTGGTGGAGAGAGAGAAAAAGAGCAGTGGGAATAGGAGCTGTGTTCTTGGGTTCTT  
GGGAGCAGCAGGAAGCACTATGGGCGCGGCGTCAATAACGCTGACGGTACAGGCCAGACAATTGCTGTCTGGT  
ATAGTGCAACAGCAAAGCAATTTGCTGAGGGCTATAGAGGCGCAACAGCATCTGTTGCAACTCACAGTCTGGG  
GCATT

>KP718937

AATTACACAGAGTACAATATAACTCTCCCATGCAAAAATAAAGCAAATTGTAAGGATGTGGCAGAGAGTAGGAC  
AAGCAATGTACGCCCCCTCCTATCCAAGGAGAAATAAGGTGTGACTCAAACATTACAGGACTACTATTAACAAG  
AGATGGTGGGAATAATAGTACAAATGAAACCTTCAGACCTACAGGAGGAGATATGAAGGATAATTGGAGAAGT  
GAGTTATATAAGTATAAAGTGGTGGAAATTAACCACCTAGGAGTAGCACCCACCAAGGCAAAAAGAAGAGTGG  
TGGAGAGAGAAAAAAGAGCAGTGGGAATAGGAGCTGTGCTCTTTGGGTTCTTGGGAGCAGCAGGAAGCACTAT  
GGGCGCAGCGTCAATAACGCTGACGGTACAGGCCAGACAATTATTGTCTGGCATAGTGCAACAGCAAAGCAAT  
TTGCTGAAGGCTATCGAGGCACAACAACATATGTTGAAACTCACTGTCTGGGGCATT

>AJ277823

AATTACCCAGGGTCAAATGACAATGACACTATAACTCTCCCATGCAGAATAAAGCAAATTGTACATATGTGGC  
AGAGAGTAGGACAAGCAATGTATGCCCCCTCCCATCCAAGGAAAAATAGAGTGTAATCAAACATTACAGGACT  
ACTATTAACAAGAGATGGTGGGAATAAAACACAAAATGAAACCTTCAGACCTACAGGAGGAGACATGAGGGAC  
AATTGGAGAAGTGAATTATATAAGTATAAAGTAGTGGAAATTAGACCACTAGGAGTAGCACCCACCAAGGCAA  
AAAGAAGAGTGGTGCAGAGAGAAAAAAGAGCAGTGGGAATAGGAGCTGTGCTCTTTGGGTTCTTGGGAGCAGC  
AGGAAGCACTATGGGCGCGGCGTCAATAACGCTGACGGTACAAGCCAGACAATTATTGTCTGGCATAGTGCAA  
CAGCAAAGCAATTTGCTGAAGGCTATCGAGGCGCAACAGCAACTGTTGAAACTCACTGTCTGGGGCATT

>JF683802

AATTACACTGACATATATAATTCAACAGATAACAGCACAAATGACGCAAATCTCACTCTCCCATGCAGAATAA  
AGCAGATTGTACACATGTGGCAGAGAGTAGGGCAAGCAATATATGCCCCCTCCCATCCAGGGAGTAATAAGGTG  
TGAGTCAAACATTACAGGGCTACTGTTAACAAGAGATGGTGGGAATAATGTCACATAATGAGACCTTTAGACCC  
ACAGGAGGAAATATGAAGGACAATTGGAGAAGTGAATTATATAAGTATAAGGTGGTGGAGATTAAACCACTAG  
GAGTAGCACCCACCAAGGCAAAAAGAAGAGTGGTGGAGAGAGAAAAAAGAGCAGTGGGAATAGGAGCTGTGCT  
CTTTGGGTTCTTGGGAGCAGCAGGAAGCACTATGGGCGCAGCGTCAATAACGCTGACGGTACAGGCCAGACAA  
TTATTGTCTGGTATAGTGCAACAGCAAAGCAATTTGCTGAAAGCTATCGAGGCACAACAGCATCTGTTGAAAC  
TCCCTGTCTGGGGCATT

>KU168270

AATTACACAGAAACAAATAGCACAAATAATGAGACTATAACTCTCTCATGCAGAATAAAGCAAATTGTAAATA  
TGTGGCAGAGAGTAGGACGAGCAATGTATGCCCCCTCCCATCCAGGAGAAATAAGGTGTGACTCAAACATTAC  
AGGACTATTATTAACAAGAGATGGTGGGAACAAGACCAATGACGGTGAGGTCTTCAGACCTATAGGAGGAAAT  
ATAAGGGACAATTGGAGAAGTGAATTGTATAGGTATAAAGTGGTGGCAATTGAACCACTAGGAGTAGCACCCA  
CCAGGGCAAAAAGAAGAGTGGTGGAGAGAGAGAAAAAAGAGCAGTGGGAATAGGAGCTGTGCTCCTTGGGTTCTT  
GGGAGCAGCAGGAAGCACTATGGGCGCGGCGTCAATAACGCTGACGGTACAAGCCAGACAATTATTGTCTGGC  
ATAGTGCAACAGCAAGGCAATTTGCTGAAGGCTATTGAGGCACAACAGCAACTGTTGAGACTCACTGTCTGGG  
GCATT

>AF516184

TTTCAGAATGGTAATAGTACTTGAATGATACTGCAGGAAATGGCACTATCACGCTCCCTTGCAGAATAAGAC  
AAATTGTAAACATGTGGCAGGAAGTAGGAAGAGCAATGTATGCCCCCTCCCATCAAAGGACAAATTAGATGTTT  
ATCAAATATTACAGGGTTGCTATTAACAAGAGATGGTGGTAAAAATGAGAATACCACGAATACCACCGAGATC  
TTCAGACCTGCAGGAGGAGATATGAGGGACAATTGGAGAAGTGAATTATATAAAATATAAAATAGTAAAAATTG  
AACCATTAGGAGTAGCACCCACCAAGGCAAAGAGAAGAGTGGTGCAGAGAGAAAAAAGAGCAGTGGGAACGAT  
AGGAGCTATGTTCTTGGGTTCTTGGGAACAGCAGGAAGCACTATGGGCGCAGCGTCAATAACGCTGACGGTA  
CAGGCCAGGCAATTGTTGTCTGGTATAGTGCAACAGCAGAGAAATCTGCTGAGGGCTATTGAGGCACAACAGC  
ATCTGTTGCAACTCACAGTCTGGGGCATC

>AF457072

AGTCAAACATAATAGTACAGAGTCAGAAAATGATACAATAATCACACTCCCATGCAGAATAAAACAAATTATAA  
ATATGTGGCAAGAAGTAGGAAAAGCAATGTATGCCCCCTCCCATCGCAGGATTCATTAATTGTGCATCAAATAT  
TACAGGGCTACTATTGACAAGAGATGGTGGGATAACTAATAGGTCTAACGAGACCTTCAGACCTGGGAGGAGGA  
GATATGAGGGACAATTGGAGAAGTGAATTATATAAGTATAAGGTAGTAAGAATTGAACCCTGGGAGTAGCAC  
CCACCAAGGCAAGGAGAAGAGTGGTGGAAAGAGAAAAAAGAGCAATAGGACTAGGAGCTATGTTCTTGGGTT  
CTTGGGAGCAGCAGGAAGCACGATGGGCGCAGCGTCAGTGACGCTGGCGGTACAGGCCAGACAGTTATTGTCT  
GGTATAGTGCAACAGCAAAATAATTTGCTGAGGGCTATAGAGGCGCAACAACATCTGTTGCAACTCACGGTCT  
GGGGCATT

>JF804812

ATCTACAATGATACTAAGACTGAGAATGGTACTATCACACTCCCATGCAGAATAAAACAATTTATAAACAGGT  
GGCAGGAAGTAGGAAAAGCAATGTATGCCCCCTCCCATCAGAGGACTAATTAGATGTTTCATCAACATTACAGG  
GCTATTAATAACAAGAGATGGTGGTAATAATGAGAGCCATCCCCTGAACGAGACCTTCAGACCTGGGGGAGGA  
GATATGAGGGACAATTGGAGAAGTGAATTATATAAAATATAAAGTAGTAAAAATTGAGCCATTAGGAGTAGCAC  
CCACCAAGGCAAAGAGAAGAGTGGTGCAGAGAGAAAAAAGAGCAGTGGGAACAATAGGAGCTATGTTCTTGG  
GTTCTTGGGAGCAGCAGGAAGCACTATGGGCGCAGCGTCATTGACGCTGACGGTACAAGCCAGACAATTATTG  
TCTGGTATAGTGCAACAGCAAAAGCAATTTGCTGAGAGCTATTGAGGCGCAACAGCATCTGTTGCAGCTCACAG  
TCTGGGGCATC

>AY727526

AATTATACATATAATAGTACAGAAAACATTAATGAAACAGGAGCAAACATTACAATCCCATGCAGAATAAAAC  
AATTTATAAATATGTGGCAGGAGGTAGGACGAGCAATGTATGCCCCCTCCCATTAAGGAATAATAACATGTAA  
ATCAAATATCACAGGAATATTACTGACACGGGATGGAGGCAGGACTGATACTAACACAGAAACATTCAGGCCT  
GGAGGAGGAGATATGAGGGACAATTGGAGAAGTGAATTATATAAAATATAAAGTGGTAGAAATTAAACCATTAG  
GAATAGCACCCACCAAGGCAAAAGGAGAGTGGTGGAGAGAGAAAAAAGAGCAGTGGGAATAGGAGCTGTGTT  
CCTTGGGTTCTTGGGAGCAGCAGGAAGCACTATGGGCGCAGCGTCAATAACGCTGACGGTACAGGCCAGACAA  
TTATTGTCTGGGATAGTGCAACAGCAAAAGCAATTTGCTGAGGGCTATAGAGGCGCAACAGCATATGTTGCAAC  
TCACAGTCTGGGGCATT

>AY727527

TACTATAGTACATACAATAGTACAGTTAGTAATACAACAGCAGATGTAAACATAACAATCCCATGCAGAATAA  
AACAAATTATAAATATGTGGCAGGAGGTAGGAAGAGCAATGTATGCCCCCTCCCATTAAGGAGCAATAACATG  
TATATCAAACATCACAGGATTATTACTGACACGGGATGGAGACAAGAATGACACAGAGACATTCAGGCCTGGA  
GGAGGAGATATGAGGGACAATTGGAGAAGTGAATTATATAAAATATAAAGTGGTAGAAATTAAACCATTAGGAA  
TAGCACCCACTAAGGCAAAAAGGAGAGTGGTGGAGAGAGAAAAAAGAGCAGTGGGACTAGGAGCTTTGTTCTT  
TGGGTTCTTGGGAGCAGCAGGAAGCACTATGGGCGCAGCATCAATAACGCTGACGGTACAGGCCGACAATTG  
TTGTCTGGGATAGTGCAACAGCAAAAGCAATTTGCTGAGAGCTATAGAGGCGCAACAGCATATGTTGCAACTCA  
CGGTCTGGGGCATT

>DQ366662

ACTCACAGAGAAAATGAAACCGAGGGAAAGGATAATGACACTATCATACTTCCATGCAAAATAAAGCAAATTA  
TAAACATGTGGCAGAGAACAGGACAAGCAATGTATGCTCCTCCCATTTAGGGGAAAAATTAATTGTGTATCAA  
TATTACAGGAATATTATTGACAAGAGATGGTGGTGGTATTAATGATACTAGGGAAAACGAGACCTTCAGACCT  
GGAGGAGGAAATATGGAGGACAATTGGAGAAGTGAATTATATAAAATATAAAGTAGTACAAATTGAACCACTAG  
GAATAGCACCCACCAGGGCAAAGAGAAGAGTGGTGGAGAGGGAAAAAAGAGCAGTGGGAATAGGAGCTTTGAT  
CTTTGGGTTCTTAGGAGCAGCAGGAAGCACTATGGGCGCGCGTCCATAACGCTGACGGTACAGACCAGACAA  
TTATTGTCTGGGATAGTGCAACAGCAAAAGCAATTTGCTGAGGGCTATAGAGGCGCAGCAGCATCTGTTGCAAC  
TCACAGTCTGGGGCATT

>AB845349

ACTTACTGGATAAATGGAAGTAGGGAGGAGAGTAATGGCACTACCAATGGCAATATCACTATCCCATGCAAAA  
TAAAACAAATCATAAACATGTGGCAGGGAGTAGGACAAGCAATGTATGCTCCCCCATCAAAGGAAGACTTAA  
TTGTATATCAAATATTACAGGACTACTATTAACAAGAGATGGTGGTGTATGTTAAAGATAACGAGACCTTCAGA  
CCTGCAGGAGGAGAGATGAAGGACAATTGGAGAAGTGAATTATATAAAATATAAAGTAGTACAAATTGAACCAC  
TAGGAATAGCACCCACCAGGGCAAAGAGAAGAGTGGTGGAGAGAGAAAAAAGAGCAGTGGGAATAGGAGCTAT  
GATCTTTGGGTTCTTGGGAGCAGCAGGAAGCACTATGGGCGCGCGTCAATAACGCTGACGGTACAGGCCAGA

CAATTATTGTCTGGTATAGTGCAACAGCAAAGCAATTTGCTGAGGGCTATAGAGGCGCAGCAGCATCTGTTGC  
AACTCACAGTCTGGGGCATT

>KJ671533

AACTACTCAGAACAAAAATTAAATAATAAAACGTCCTCTCCCAATGACACTATCACTATCCCATGTCTGAATAA  
AACAAATTGTAAATATGTGGCAGGAAGTAGGACGAGCAATGTATACCGCTCCCATTCAGGAAACATTACCTG  
TAACTCAAATATTACAGGTATACTGTTGACAAGAGATGGTGGTAATATAACTAATGGGACTGAGACATTCAGA  
CCTGGGGGAGGAAATATGAAAGACAATTGGAGAAGTGAATTATATAAATATAAAGTAGTAGAAATTAAACCAC  
TAGGAGTAGCACCCACCAGGGCAAAAAGACAAGTGGTGAAGAGAGAAAAAAGAGCAGCAGGAATAGGAGCTTT  
GTTCTTGGGTTCTTGGGGGCAGCAGGAAGCACTATGGGCGCAGCGTCAGTGACGCTGACGGTACAGGCCAGA  
CAATTATTGTCTGGTATAGTGCAACAGCAGAACAACTCTGCTGAGAGCTATTGAGGCGCAACAGCATATGTTGC  
AACTCACAGTCTGGGGCATT

>KU161145

TATTATAATGACACTATCAGACTTCCATGCAGGATAAAAGCAGATTATAAACATGTGGCAAGGAGTAGGACAAG  
CAATGTATGCCCTCCCGTCAGGGGAAGGATTAATTGTGTATCAAACATTACAGGAATACTATTGACAAGAGA  
TGGTGGTAATACTACTGCAGATGCTAGTGAGACCTTCAGACCTGCAGGAGGAAATATGAAGGACAATTGGAGA  
AGTGAATTATATAAATATAAAGTAGTAGAAATTGAACCACTAGGAATAGCACCCACCAAGGCAAAAAGAAGAG  
TGGTGCAGAGAGAAAAAAGAGCAGTGGGAATAGGAGCTATGATCTTTGGGTTCTTAGGAGCAGCCGGAAGCAC  
TATGGGCGCGGCGTCAATAACGCTGACGGTACAAGCCAGACAGTTACTGTCTGGTATAGTGCAACAGCAAAGC  
AATTTGCTGAGGGCTATAGAGGCGCAGCAGCATATGTTGCAACTCACAGTCTGGGGCATT

>KY216147

AATTATACATACAAGACTAATGATAGTAGGACTAATAATACAGCTGAGGATACTAATTCGACCGTCATCACAA  
TCCCATGCAAAATAAAGCAGATTATAAATATGTGGCATGAGGTGGGACGAGCAATGTATGCTCCTCCCATTCG  
AGGAAACATAACATGTAAGTCAAACATCACAGGAATACTATTAGTACGTGATGGAGGAACAAAGTCAAATAGT  
ACAGAGACATTCAGGCCTGGAGGAGGAGATATGAGGAATAATTGGAGAAGTGAATTATATAAATATAAAGTGG  
TAGAAATTAAGCCAGTGGGAGTAGCACCCACTGAAGCAAAAAGGAGAGTGGTGGAGAGAGAAAAAAGAGCAGT  
GGGAATAGGAGCTGTGTTCTTGGGTTCTTGGGAGTAGCAGGAAGCACTATGGGCGCGGCGTCAGTGACGCTG  
ACGGTACAGGTACAGACAATTGCTGTCTGGTATAGTGCAACAGCAAACAATTTGCTGAGGGCTATAGAGGCGC  
AACAGCATATGTTGCAACTCACGGTCTGGGGCATT

>KU820831

TACTATCTTAATAGTACATACAATCCTAATGATACAGCAAACCTCAAACATCACCATCCCATGCAGAATAAAAC  
AGATTGTAAACATGTGGCAGGAGGTAGGACGAGCAATGTATGCTCCTCCCATTCAGGAAAAATAACATGTAA  
ATCAAATATCACAGGACTACTATTGGTACGTGATGGGGGAATTAATCTAAATACAACAAATAATACCGAAACA  
TTCAGGCCTGGAGGAGGAGATATGAGGGACAATTGGAGAAGTGAATTATATAAATATAAAGTGATAGAAATTA  
GGCCATTGGGAATAGCACCCACTAAAGCAAAAAGGAGAGTGGTGGAGAGAGAAAAAAGAGCAGTGGGACTAGG  
AGCTGTGTTCTTGGGGTCTTGGGAGCAGCAGGAAGCACTATGGGCGCGGCGTCAATAACGCTGACGGTACAA  
GCCAGACAATTGTTGTCTGGTATAGTGCAACAGCAAAGTAATTTGCTGAGGGCTATAGAGGCGCAACAGCATA  
TGTTGCAACTCACGGTCTGGGGCATC

>KU992937

TTCTATACTAATGATACAGGAGGCAGTTTAAATCAAACATCACGATTCCATGTAGAATAAAGCAAATTATAA  
ATATGTGGCAGGAGGTAGGGCGAGCAATATATGCCCCCTCCCATTCAGGAAATATAACATGTAAATCAAAGAT  
CACAGGACTACTATTGGTACGTGATGGAGGAAAAGGAAATAATAACAGAGACATTTAGACCTGGAGGAGGA  
GATATGAGGGACAATTGGAGAAGTGAATTATATAAATATAAAGTGGTAGAAGTTAAGCCATTGGGAGTAGCAC  
CTACTAAAGCAAAAAGGAGAGTGGTGGAGAGAGAAAAAAGAGCAGTGGGAATAGGAGCTGTGTTCTTGGGTT  
CTTGGGAGCAGCAGGAAGCACTATGGGCGCGGCGTCAATAACGCTGACGGTACAAGCCAGACAATTGTTGTCT  
GGTATAGTGCAACAGCAAAGCAATTTGCTGAGAGCCATAGAGGCGCAACAGCATATGTTGCAACTCACGGTCT  
GGGGCATT

>KC899012

ACCTATAATGCTACTAGTACAAAAGGTAATTCAAGCTCAGTTATCACACTCCCATGCAGAATAAAGCAAATTA  
TAAACATGTGGCAGGAGGTAGGGCGAGCAATGTATGCCCCCTCCCATTCAGGAAACATAACATGTAAATCCAA  
TATCACAGGAATACTATTGGAATGGGATGGAGGAAATTCAAATAGTTCTAATGCTACATTCAGACCTGGAGGA  
GGAGATATGAAAAACAATTGGAGAAGTGAATTATATAAATATAAAGTGGTAGAAATAAAGCCATTAGGAATAG  
CACCCACTGCAGCAAAAAGGAGAGTGGTGGAGAGAGAAAAAAGAGCAGTGGGAATAGGAGCTGTGTTCTTGG  
GTTCTTAGGCGCGGCAGGAAGCACTATGGGCGCGGCGTCAATAACGCTGACGGTACAGGCCAGACAATTGCTG  
TCTGGTATAGTGCAACAGCAAAGCAATTTGCTGAGGGCCATAGAGGCGCAACAGCATATGTTGCAACTCACGG  
TCTGGGGCATT

>MN044632

ACCTACATGCCTAATGGTACATTCAAGTTTAAATGATACAGACCTGAATGTTACAAGTAATTCAGATTCACCCA  
TCACAATACCATGCAGAATAAAGCAAATTATAAACATGTGGCAGGAGGTAGGACGAGCAATGTATGCTCCTCC  
CATTGAAGGAAACATAACATGTAAATCAAATATCACAGGACTACTATTGGTACGTGATGGAGGAGAGACAGAG  
ACAAACATGACAGAGACATTCAGACCTGGAGGAGGGGATATGAGAGACAATTGGAGAATGAATTATATAAAT

ATAAAGTGGTAGAAATTAAGCCATTAGGAGTAGCACCCACTGAAGCGAAAAGGAGAGTGGTGCAGAGAGAAAA  
AAGAGCAGTGGGAATAGGAGCTGTGTTCCCTTGGGTTCTTGGGAGCAGCAGGAAGCACTATGGGCGTGGCGTCA  
ATAACGCTGACGGTACAGGCCAGGCAACTGCTGTCTGGTATAGTGCAACAGCAAAGCAATTTGCTGAGAGCTA  
TAGAGGCGCAACAACATGTGTTGCAACTCACTGTCTGGGGCATT

>MK397789

ACTTACCAAAGTGAACCATAAATGGGGATAATGGAACCTATTATAATTCCATGTAAAATCAAACAAATTATAA  
ACATGTGGCAGAGAACAGGACAAGCAATATATGCTCCTCCCATCAAGGGAAAAATTAATTGTATATCAAATAT  
TACAGGAATACTATTAAACAAGAGATGGTGGTGTAAATAGCACAGTTAATGAGACCTTCAGACCGGGAGGAGGA  
AATATAAAAGACAACCTGGAGAAGTGAATTATATAAAATATAAAGTAGTACAAATTGAACCACTAGGAGTAGCAC  
CCACCAGGGCAAGAAGAAGAGTGGTGCAGAGAGAAAAAAGAGCAGTGGGAATAGGAGCTATGATCTTTGGGTT  
CTTAGGAGCAGCAGGAAGCACTATGGGCGCGGCGTCAATAACGCTGACGGTACAGGCCAGACAATTATTGTCT  
GGTATAGTGCAACAGCAAAGCAATTTGCTGAGAGCTATAGAGGCGCAGCAGCATCTGTTGCAGCTAACAGTCT  
GGGGCATT

>EU131799

AATCATAATTTGACTGAGAATAATACTTGGCAAGAGAAATGCTAGCGAAAGTACCATCACACTCCCATGCAGAA  
TAAAACAAATTATAAACAGGTGGCAGGAAGTAGGAAGAGCAATGTATGCCCCCTCCCATCAGTGGACAAATTAA  
ATGCTCATCAAATATTACAGGGCTGCTATTAAACAAGAGATGGTGGTAAAACGAATGGGTCCGAAAATGGGTCC  
GAAATCTTCAGACCTGGAGGAGGAGATATGAGAGACAATTGGAGAAGTGAATTATATAAAATATAAAGTAGTAA  
AAATTGAGCCACTAGGAATAGCACCCACCAAGGCAAAAAAGAAGAGTGGTGCAGAGAGAAAAAAGAGCAGTGGG  
AACAAATAGGAGCTATGTTCTCGGGTTCTTGGGAGCAGCAGGAAGCACTATGGGCGCAGCGTCAATGACGCTG  
ACGGTACAGGCCAGACTATTACTGTCTGGTATAGTGCAACAGCAGAACAACTCTGCTGAGAGCTATTGAGGCGC  
AACAGCACATGTTGCAACTCACAGTCTGGGGCATC

>KM111555

ACTTACAGAGAAAATGGAACCATGGAAGGGAGTAATGGCACTATCATACTTCCATGCAAAATAAAGCAAATAA  
TAAACATGTGGCAGGGAGTAGGACAAGCAATGTATGCTCCTCCCGTCAGTGGAAACAATTAATTGTGTATCAAA  
TATTACAGGAATACTATTAAACAAGAGATGGTGGTGGTAGTACCAATGCGACTAACGAGACCGAGATCTTCAGA  
CCTGGAGGAGGAAATATAAAGGACAATTGGAGAAGTGAATTATATAAAATATAAAGTAGTAGAAGTTGAACAC  
TAGGAATAGCACCCACCAGGGCAAAGAGAAGAGTGGTGGCGAGAGAAAAAAGAGCAGTGGGAATAGGAGCTAT  
GATCTTTGGGTTCTTAGGAGCAGCAGGAAGCACTATGGGCGCAGCGTCCATAACGCTGACGGTACAGGCCAGA  
CAATTATTGTCTGGTATAGTGCAACAGCAAAGCAATTTGCTGAGGGCTATAGATGCGCAGCAGCATCTGTTGC  
AACTCACAGTCTGGGGCATT

>KP418805

AATTATACTTTCCAGGCTAATGATACTAGGCAAAGGTCAAACAAAACCTATCACACTCCCATGCAGAATAAAAC  
AAATTATAAACAGGTGGCAGGAAGTAGGAAGAGCAATGTATGCCCCCTCCCATCAGGGGACAAATTAAATGTTC  
ATCAAATATTACAGGAATACTATTAAACAAGAGATGGTGGTGACAAGAGTAGTACTGCAACTAATGAAACCTTC  
AGACCGGGAGGAGGAGATATGAGGGACAATTGGAGAAGTGAATTGTATAAAATATAAAGTAGTAAAGATTGAAC  
CACTAGGAATAGCACCCACCAAGGCAAAGAGAAGAGTGGTGCAGAGAGAAAGAAGAGCAGTGGGAGTAGGAGC  
TATGTTCCCTCGGGTTCTTGGGAGCAGCAGGAAGCACTATGGGCGCAGCATCAATGACGCTGACGGTACAGGCC  
AGACTATTACTGTCTGGTATAGTGCAACAGCAGAACAACTCTGCTGAGAGCTATTGAGGCGCAACAACACATGT  
TGCAACTCACAGTCTGGGGCATC

>AB097867

ACTCATAGTATTTGGAATGGTACTATTTGGAATGGTACTCGGAATGATACTAATATCACGCTCCCTTGCAGAA  
TAAACAAATTGTAAACATGTGGCAGGAAGTAGGAAAAGCAATGTATGCCCCCTCCCATCAGAGGACAAATTAG  
ATGTTTCATCAAATATTACAGGGTTGCTATTAAACAAGAGATGGTGGTAAATGATAAGAACGAGACCACCGAGACC  
TTCAGACCAGGAGGAGGAGATATGAGGGACAATTGGAGAAGCGAATTATATAAAATATAAAATAGTAAAAATTG  
AACCATTAGGAGTAGCACCCACCAAGGCAAAGAGAAGAGTGGTGCAGAGAGAAAAAAGAGCAGTGGGAACGAT  
AGGAGCTATGTTCCCTTGGGTTCTTGGGAGCAGCAGGAAGCACTATGGGCGCAGCGTCAATAACGCTGACGGTA  
CAGGCCAGACAATTGTTGTCTGGTATAGTGCAACAGCAGAGAAATTTGCTGATGGCTATCGAGGCGCAACAGC  
ATCTGTTGCAACTCACAGTCTGGGGCATC

>KT438784

AGTTACAAAGGAGATGAAACCATCATACTTCCATGTAAAATAAAGCAAATTATAAATATGTGGCAGAGAGTAG  
GACAAGCAATGTATGCTCCTACCATCAGGGGAAAAATTAATTGTGTATCAAATATTACAGGAATACTATTGAC  
AAGAGATGGTGGAAATGGTAGTGCGAGACCTTCAGACCTGGAGGAGGAGATATGAAGGACAATTGGAGAAGT  
GAATTATATAAAATATAAAGTAGTACAAATTGAACCACTAGGATTAGCACCCACCAAGGCAAAGAGAAGAGTGG  
TGGAAAGAGAAAAAAGAGCAGTGGGAATAGGAGCTATGATCTTTGGGTTCTTAGGAGCAGCTGGAAGCACTAT  
GGGCGCGGCGTCCATAACGCTGACGGTACAGGCCAGGCAATTATTGTCTGGTATAGTGCAACAGCAAAGCAAT  
TTGCTGAGGGCTATAGAGGCGCAGCAGCATATGTTGCAACTCACAGTCTGGGGCATT

>JN248316

ACTTACCTAGGAAATGAAACCTTGGAGAGGTATACTGGCAATAGCACTAATGGCACTATCATACTTCCATGCA  
GGATAAAGCAAATTGTAAGAATGTGGCAGGGAGTAGGACAAGCAATGTATGCTCCTCCCGTCAAGGGAATAAT

TAATTGTGTATCAAATATTACAGGAATACTATTGACAAGAGATGGTGGTAATAGAACGAAAAATGAGACCTTC  
AGACCTGAAGGAGGAAATATGAAGGACAATTGGAGAAATGAATTATATAAAATATAAAGTAGTACAAATTGAAC  
CACTAGGAATAGCACCCACCAAGGCAAAAAGAAGAGTGGTGGAGAGAGAAAAAGAGCAGTGGGAATAGGAGC  
TATGATCTTTGGGTTCTTAGGAGCAGCAGGAAGCACTATGGGCGCGGCGTCAATAACGCTGACGGTACAGGCC  
AGACAATTATTGTCTGGTATAGTGCAACAGCAAAGCAATTTGCTGAGGGCTATAGAGGCGCAGCAGCATCTGT  
TGCAACTCACAGTCTGGGGCATT

>JN248320

ACTTATGACATAGGAAATGAAACCACAGGGGAGGGTAATGGCACTATTGGCAATATCACACTTCCATGCAAGA  
TAAAGCAAATTATAAACATGTGGCAGGGAGCAGGGCAAGCAATGTATGCTCCTCCCATCAGTGGAGTAATTAA  
TTGTGTATCAAATATTACAGGTATACTATTGACAAGAGATGGTGGTGTAAATAATACGAGTGAGGAGACCTTC  
AGACCTGGAGGAGGAAATATAAAGGACAATTGGAGGAGTGAATTATATAAAATATAAAGTAGTACAAATTGAAC  
CACTAGGAGTAGCACCCACCAGGGCAAAGAGAAGAGTGGTGGAGAGAGAAAAAGAGCAGTGGGAATAGGAGC  
TATGATCTTTGGGTTCTTGGGAGCAGCAGGAAGCACTATGGGCGCAGCGTCAATAACGCTGACGGTACAGGCC  
AGACAATTATTGTCTGGTATAGTGCAACAGCAAAGCAATTTGCTGAGGGCTATAGAGGCGCAACAGCATCTGT  
TGCAACTCACAGTCTGGGGCATT

>JN248349

AATTATAATGGTACTTGGAATAATAATAATCCTTGGAAATGATACTACAGAAAATGGCACTATCATACTCCCTT  
GCAGAATAAGACAAATAGTAAACATGTGGCAGCAAGTAGGAAGAGCAATGTATGCCCTCCCATTCAGGACA  
AATTACATGTGCATCAAATATTACAGGAATACTATTGACAAGAGATGGTGGTGTCTAAGAATGATAGTGGCACC  
GAGACCTTCAGACCTGCAGGAGGAGATATGAGGGACAATTGGAGAAGTGAATTATATAAAATATAAGGTAGTAA  
AAATTGAACCATTAGGAGTAGCACCCACCAAGGCAAAGAGAAGAGTGGTGCAGAGAGAAAAAGAGCAGTGGG  
AATGGGAGCTATGTTCTTGGGTTCTTGGGAGCAGCAGGAAGCACTATGGGCGCAGCGTCAATAACGCTGACG  
GTACAGGCCAGACAATTGTTGTCTGGTATAGTGCAACAGCAGAGAAATTTGCTGAGGGCTATTGAGGCGCAAC  
AGCATCTGTTGCAACTCACAGTCTGGGGCATT

>EU743760

ACTCACATCAATGGCACTAGCAACAGCACTGCGAGGGAGTATAATGGCACTATCACACTTCCATGCAGGATAA  
AGCAAATTATAAAATATGTGGCAGGAAGCAGGACAAGCAATGTATACTCCTCCCATCAGTGGAAATAATTAAGT  
TATATCAAATATTACAGGAATACTATTGACAAGAGATGGTGGTGTCTAATAATGGGACTATCAATGAGACCTTT  
AGACCTGGAGGAGGAGATATGAGGGACAATTGGAGAAGTGAATTATATAAAATATAAAGTAGTAAAAATTGAAC  
CATTAGGAGTAGCACCCACCAAGGCAAGGAGAAGAGTGGTGCAGAGAGAAAAAGAGCAATAGGAATAGGAGC  
TGTGTTCTTGGGTTCTTGGGAGCAGCAGGAAGCACTATGGGCGCGGCGTCAATAACGCTGACGGTACAAGCC  
AGACAATTATTGTCTGGTATAGTGCAACAGCAGAACAACTTGCTGAGAGCTATTGAGGCGCAACAGCATATGT  
TGCAACTCACTGTCTGGGGCATC

>JN860765

ACTTATAACAGTACTGGCAATATCACAATTCATGTAGGATAAAGCAGATTATAAACATGTGGCAGGAAACAG  
GACAAGCAATGTATGCTCCTCCCATTAGTGGAAAAATTAATTGTGTATCAAATATTACAGGAATACTATTGAC  
AAGAGATGGAGGTACTAATAATAATAATAATGGAAGTGAAGTGAAGTGAAGTGAAGTGAAGTGAAGTGAAGT  
AATTGGAGAAGTGAATTATATAAAATATAAAGTAGTACAAATTGAACCACTAGGAGTAGCACCCACCAAGGCAA  
AGAGAAGAGTGGTGGAGAGAGAAAAAGAGCAGTAGGAATAGGAGCTATGATCTTTGGGTTCTTAGGAGCAGC  
CGGAAGCACTATGGGCGCGGCGTCAATAACGCTGACGGCACAGGCCAGACAATTACTGTCTGGTATAGTGCAA  
CAGCAAAGCAATTTGCTGAGGGCTATAGAGGCGCAGCAGCATATGTTGCAACTCACAGTCTGGGGCATT

>MG989494

AATCATACCAAGGGTGAGTGTAACAACACTATCATACTTCCATGTAAGATAAAGCAAATTATAAACATGTGGC  
AGAGAGTAGGACAAGCAATGTATGCTCCTCCCATCAGGGGAAACATTACTTGTGTATCAAATATTACAGGAAT  
ATTATTGACAAGAGATGGTGGTAATGGGACTAACGGGACTGAAACCTTCAGACCTGGAGGAGGAGATATAAAG  
GACAATTGGAGAAATGAATTATATAAAATATAAAGTAGTACAAATTGATCCACTAGGAATAGCACCCACCAAGG  
CAAGAAGAAGAGTGGTGGAGAGGGAAAAAGAGCAGTGGGAATAGGAGCTATGATCTTTGGGTTCTTAGGAGC  
AGCAGGAAGCACTATGGGCGCGGCGTCAATAACGCTGACGGTACAGGCCAGACAATTATTGTCTGGGATAGTG  
CAACAGCAAAGTAATTTGCTGAGGGCTATAGAGGCGCAGCAGCATCTGTTGCAACTCACAGTCTGGGGCATT

>MG989490

AATTATACCAAGGATAAGGAAAAATATCACACTTCCATGCAGGATAAAGCAAATTATAAACATGTGGCAGAGAG  
TAGGACAAGCAATGTATGCTCCTCCCATCAAGGGAAACATTACTTGTGCATCAAATATTACAGGAATAGTATT  
GACAAGAGATGGTGGTGGTAATAATGAGAATAGAAACAACGAGACCTTCAGACCAACAGGAGGAAATATAAAG  
GACAATTGGAGAAATGAATTATATAAAATATAAAGTAGTACAAATTGATCCACTAGGAATAGCACCCACCAAGG  
CAAAAAGAAGAGTGGTGGAGAGAGAAAAAGAGCAGTGGGAATAGGAGCTATGATCTTTGGGTTCTTAGGAGC  
AGCAGGAAGCACTATGGGCGCGGCGTCAATAACGCTGACGGTACAGGCCAGACAATTATTGTCTGGGATAGTG  
CAACAGCAAAGTAATTTGCTGAGGGCTATAGAGGCGCAGCAGCATCTGTTGCAACTCACAGTCTGGGGCATT

>MG989520

TTTCATAATAATGGCACAAATGGCACAAAGTGAATCATCACAATCCCATGCAGGATAAAGCAAATTATAAAACA  
TGTGGCAGAGAGTAGGACAAGCAATGTATGCTCCTCCCATCAGTGGGGCAATCAGTTGTGTCTCAAATATTAC

AGGAATACTATTGACAAGAGATGGTGGTGATGCAAATAACACAAATAACTCTAATACAACCTGATCCTAAAGAA  
ATCTTCAGACCTGCAGGAGGAGATACAAGGGACAATTGGAGAAGTGAATTATATAAAATATAAAGTAGTACAAA  
TTGAACCACTAGGAATAGCACCCACCAAGGCAAAGAGAAGAGTGGTGGACAGAGAAAAAAGAGCAGTGGGAAT  
AGGAGCTATGATCTTTGGGTTCTTAGGAGCAGCAGGAAGCACTATGGGCGCAGCGTCAATAACGCTGACGGTA  
CAGGCCAGACAATTATTGTCTGGTATAGTGCAACAGCAAAGCAATTTGCTGAGGGCTATAGAGGCGCAGCAAC  
ATCTGTTGCAACTCACAGTCTGGGGCATT

>MG989573

AATTATAATGGCACCATCATACTTCCATGCAGGATAAAGCAAATTATAAACATGTGGCAGAGAGTAGGACAAG  
CAATGTATGCTCCTCCCATTAGGGGAAACATTACATGTACATCAAATATTACAGGAATATTATTGACAAGAGA  
TGGCAAAGGTGAAAACGATACAGGGAAAGAGATCTTCAGACCTGGAGGAGGAGATATGAAGGACAATTGGAGA  
AATGAATTATATAAAATATAAAGTAGTACAAATTGAGCCACTAGGAATAGCACCCACCAGGGCAAGGAGAAGAG  
TGGTGCAGAGAGAAAAAAGAGCAGTAGGAATAGGAGCTATGATCTTTGGGTTCTTAGGAGCAGCAGGAAGCAC  
TATGGGCGCGGCGTCAATAACGCTGACGGTACAGGCCAGACAATTATTGTCTGGTATAGTGCAACAGCAAAGC  
AATTTGCTGAGGGCTATAGAGGCGCAACAGCATATGTTGCAACTCACAGTCTGGGGCATT

>MG989599

ACTTATGACAGTAATGACACTATCATAATTCCATGTAGGATAAAGCAAATTATAAACATGTGGCAGGAAACAG  
GACAAGCAATGTATGCTCCTCCTGTCTAGTGGAGCAATTAATTGTGTATCAAATATTACAGGAATACTATTGAC  
AAGAGATGGTGGTAATAATAGAACTAATGAGACCTTCAGACCTGGAGGAGGAAATATAAAGGACAATTGGAGA  
AGTGAATTATATAAAATATAAAGTAGTACAAATTGAACCATTAGGAATAGCACCCACCAGGGCAAGGAGAAGAG  
TGGTGGAGAGACAAAAAAGAGCGGTGGGAATAGGAACTCTGATCTTTGGGTTCTTAGGAGCAGCCGGAAGCAC  
TATGGGCGTGGCGTCAATGACGCTAACGGTACAGGCCAGACAATTATTGTCTGGTATAGTGCAACAGCAAAGC  
AATTTGCTGAGAGCTATAGAGGCACAGCAGCATATGTTGCAACTCACAGTCTGGGGCATT

>MK697709

TTTTACTTTAATGGTACAAAAAGAAATATATTTAATGATACAGAAAGTAATTCGACCATCACAAATCCCATGCA  
GGATAAAGCAAATTATAAACATGTGGCAGGAAGTGGGACGAGCAATGTATGCTCCTCCCATTCAGGAAACAT  
AACATGTAAGTCAAATATCACAGGACTGATATTAGTACGTGATGGAGGAAATAGGGCCACAAATGATACAGAA  
ATATTCAGGCCTGGAGGAGGAAATATGAGGGATAATTGGAGAAGTGAATTATATAAAATATAAAGTGGTAGAAA  
TTAAGCCATTGGGAATAGCACCCACTACATCAAAAAGGAGAGTGGTGGAGAGAGAAAAAAGAGCAGTGGGAAT  
AGGAGCTGTGTTCTTGGGTTCTTGGGAGTAGCAGGAAGCACTATGGGCGCGGCGTCAGTGGCGCTGACGGTA  
CAGGCCAGACAATTATTGTCTGGTATAGTGACGAGCAGCAAAGCAATTTGCTGAGGGCTATAGAGGCGCAGCAGC  
ATATGTTGCAACTCACAGTCTGGGGCATT

>MN336527

TATCATACAGAAGACAATTCGACCATCACACTCCCATGCAAAATAAAGCAAATTATAAATATGTGGCAGGAGG  
TGGGAAGAGCAATGTATGCTCCTCCCATTCAGGAAACATAACATGTAGGTCAAGTATCACAGGACTACTATT  
AGTACGTGATGGAGGAAATGCAATGATACAAATAATACAGAGATATTAGGCCTGGAGGAGGAAATATGAGG  
GATAATTGGAGAAGTGAATTATATAAAATATAAAGTGGTAGAAATTAAGCCATTGGGAGTAGCACCAACTGGGG  
CAAAAAGGAGAGTGGTGGAAAGAGAAAAAAGAGCAGTAGGAATAGGAGCTGTGTTCTTGGGTTCTTGGGAGC  
AGCAGGAAGCACTATGGGCGCGGCGTCAGTGACGCTGACGGTACAGGCCAGACAATTGCTGTCTGGTATAGTG  
CAACAGCAAACAATTTGCTGAGGGCTATAGAGGCGCAACAGCATATGTTGCAACTCACGGTCTGGGGCATC

>JN864056

GACTATATACTTCCATGTAAGATAAAACAAATTGTGAGAATGTGGCAGAAAGTGGGACAAGCAATGTATGCCC  
CTCCCATCGAAGGAAACATTACATGTACGTCAAACATCACAGGACTAATATTAACAAGAGATGGTGGGAATAA  
GAACAGTACAAATGAGACCTTTAGACCTGGGGGAGGAGATATGAGGGACAATTGGAGAAGTGAATTATATAAA  
TATAAAGTAGTAAAAATTGAGCCAGTAGGAATAGCTCCCACTAAGGCAAGACGAAGAGTGGTGCAGAGAGAAA  
AAAGAGCAGTTGGACTAGGAGCTGTCTCCTTGGGTTCTTAGGAGCAGCAGGAAGCACTATGGGCGCGGCGTC  
AATAACGCTGACGGTACAGGTGAGACAATTATTGTCTGGCATAGTGCAACAGCAAAGCAATTTGCTGAGGGCT  
ATAGAGGCGCAGCAGCATCTGTTGCAACTCACAGTCTGGGGCATT

>KT276254

TATCAGAATGATACTGGGAATAGTGTGAATAACACTGAAGACCTAATTACACTCCCATGTAAAATAAGACAAA  
TTGTAAACATGTGGCAGGAAGTAGGAAAAGCAATGTATGCCCTCCCATCAGAGGGCTGATTAATTGTTTCATC  
AAATATTACAGGGTTGCTATTAAACAAGAGATGGTGGTAATGATACATCTGATAAGGAGACCTTCAGACCTGGA  
GGAGGAGATATGAGAGACAATTGGAGAAGTGAATTATACAAATATAAAGTAGTAAAAATTGAACCATTAGGAG  
TAGCACCCACCAAGGCAAAGAGAAGAGTGGTGCAGAGAGAAAAAAGAGCAATAGGAATGGGAGCTCTGTTCTT  
TGGGTTCTTGGGAGCAGCAGGAAGCACTATGGGCGCAGCGTCGGTAACGCTGACGGTACAGGCCAGACAATTA  
TTGTCTGGGTATAGTGCAACAGCAGAACAACTTGCTGAGAGCTATTGAGGCGCAACAGCACCTGTTGCAACTCA  
CAGTCTGGGGCATT

>JN882652

AACTACTCAGGGGAAAATGACACTATAACTCTCCAATGCAAAATAAAGCAAATTATAAAAAATGTGGCAGAAAAG  
TAGGACAAGCAATGTATGCCCTCCCATCCAAGGAGAAAATAAGGTGTAACCTCAAACATTACTGGAATACTATT  
AACAAAGAGATGGTGGCAATAATAATGCCACAAACACGAGCAAGGCCGAGATCTTCAGACCTGGAGGAGGAGAT

ATGAGGGACAATTGGAGAAGTGAATTATATAAAATATAAAGTAGTAAAAATTGAGCCATTAGGAATAGCACCCCA  
CCAAGGCAAAGAGAAGAGTGGTGCAGAGAGAAAAAGAGCAGTGGGAGTAATAGGAGCTATGTTCCCTGGGGTT  
CTTAGGAGCAGCAGGAAGCACTATGGGCGCGGCGTCAATAACGCTGACGGTACAGGCCAGACAATTATTGTCT  
GGTATAGTGCAACAGCAGAACAATTTGCTGAGAGCTATTGAGGCGCAACAGCATCTGTTGCAACTCACAGTCT  
GGGGCATC

>AJ276595

AGCTATAATAGTACAGAAAGTGTTAATGAAACAACCATCATACTCCCATGTAAAATAAAACAAATTATAAACA  
TGTGGCAAGAGGTAGGACGAGCAATGTATGCCAATCCCATTCAGGAAACATAACATGTAACCTCAAATATCAC  
AGGATTACTACTGACACGTGATGGAGGAGTAAATGAGACAAACAGAGACAGAGATATTCAGGCCTGGAGGAGGA  
AATATGAAAGACAATTGGAGAAGTGAATTATATAAAATATAAAGTGGTAGAAATTAAACCATTTGGGAGTAGCAC  
CCACTAAAGCAAAAAGAAGAGTGGTGGAGAGAGAAAAAGAGCAGTGGGAATAGGAGCTGTGTTCCCTGGGGTT  
CTTGGGAGCAGCAGGAAGCACTATGGGCGCAGCGTCAATAACGCTGACGGTACAAGCCAGACAACCTATTGTCTG  
GGTATAGTGCAACAGCAAAAGCAATTTGCTGAGGGCTATAGAGGCGCAACAGCATATGTTGCAACTCACGGTCT  
GGGGCATT

>HQ225812

AATTATACATACATGCCTAATGGTACCATGCATAATGATACAACAGATAATTCAACCTTAATCACAATCCCAT  
GCAGAATAAAACAAATTATAAAATATGTGGCAGGAGGTAGGACGAGCAATGTATGCCCTCCCATTTGAAGGAAA  
CATAACATGTAAATCAAAGATCACAGGACTACTATTGGTACGTGATGGAGGCCCCAATAGGACAGAAGAGATA  
TTCAGACCTGGAGGAGGAGATATGAAAAACAATTGGGGAAAATGAATTATATAAAATATAAAGTGGTAGAAATTA  
AGCCATTGGGAGTAGCACCAACTGAAGCAAAAAGGAGAGTAGTGGAGAGAGAAAAAGAGCAGTGGGAATAGG  
AGCTGTGTTCCCTGGGGTTCTTGGGAGCAGCAGGAAGCACTATGGGCGCGGCGTCAATGACGCTGACGGTACAG  
GCCAGACAGTTGTTGTCTGGTATAGTGCAACAGCAAAAGCAATTTGCTGAGAGCTATAGAGGCGCAACAGCATA  
TGTTGCAACTCACAGTCTGGGGCATT

>KY557336

ACTTACAGTAATTGGAAGTCTAATAGTACTGGGAATGATAATATCACACTCCCATGTAGAATAAGACAAATTG  
TAAACATGTGGCAAGAAGTAGGAAAAGCAATGTATGCCCTCCCTATCAGCGGACAAATTAGATGCTCATCAAA  
TATTACAGGGTTACTATTGACAAGAGATGGTGGTAATAATAAGGAAAGTAATAATGCTGAGACCTTCAGACCT  
GGAGGAGGAAACATGAAGGACAATTGGAGGAGTGAATTGTATAAAATATAAAGTAGTAAAAATTGAACCATTAG  
GAGTAGCACCCACCAAGGCAAAGAGAAGAGTGGTGCAGAGAGAAAAGAGAGCAGTGGGAATAGGAGCTTTGCT  
CGTTGGGTTCTTGGGAGCAGCAGGAAGCACTATGGGCGCAGCGTCAATGACGTTGACGGTACAGGCCAGACAA  
CTACTGTCTGGTATAGTGCAACAGCAGAACAATCTGCTGAGAGCTATTGAGGCGCAACAGCATATGTTGCAAC  
TCACAGTCTGGGGCATA

>KM606633

AACTATAGCTCATCAAGCAATAAGGAGCCTATCACACTCCCATGTAGAATAAGACAAATTGTAAGAATGTGGC  
AAAAGGTAGCACAAAGCAATGTATGCCCTCCCATTCAGGAAACATTACATGTAGAACAAACATTACAGGACT  
ACTATTAACAAGAGATGGGCCTACTACGGAGGATAATAACTGAGGTTTTTCAGACCTGGAGGAGGAAATATG  
AAGGACAATTGGAGAAGTGAATTATATAAGTATAAGGTAGTAAAAATTAAACCACTAGGCATAGCACCCCTCCA  
AGGCAAGGAGAAGAGTAGTGGGCAGAGAGAAAAGAGGAATTGGACTAGGAGCTGTTTTCTTGGTTTTCTTAGG  
AACGGCAGGAAGCACGATGGGCGCAGCGTCAATAACGCTGACGGTACAGGTACAGACAATTATTGTCTGGCATC  
GTGCAACAGCAAAGCAATTTGCTGAGAGCTATAGAGGCGCAACAGCATTGTTGCAACTCACAGTCTGGGGCA  
TT

>KJ541851

AATTATACAAGAAATAGTACAGGAAATGATTCAAACGTAGTCATTACGATCCCATGCAGAATAAAACAAATTA  
TAAACATGTGGCAGGGAGTAGGGCGAGCAATGTATGCCCTCCCATTCAGGAGAAACCGCATCTATCTCTAA  
TATCACAGGATTACTATTGGTACGTGATGGAGGAGAAGACAAAATAATGAGAATGATAATGATACAGAGACA  
TTCAGACCTGGAGGAGGAGACATGAAGGACAATTGGAGAAGTGAATTATATAAAATATAAAGTGGTAGAAATTA  
AGCCATTGGGATTAGCACCCACTACAGCAAAAAGGAGAGTGGTGGAGAGAGAAAAAGAGCAGTAGGAATAGG  
AGCTGTGTTCCCTTGGGTTCTTGTTCAGCAGCCGGAAGCACTATGGGCGCGGCGTCAATAACGCTGACGGTACAG  
GCCAGACAATTGTTGTCTGGTATAGTGCAACAGCAAAGCAATTTGCTGAGGGCTATAGAGGCGCAACAGCATC  
TGTTGCAACTCACGGTCTGGGGCATT

>AF484510

AATTATAGTATGTCAAATAGTACAGGGGTAAATGAGAATGCAACCATCATACTCCCATGCAGAATAAAACAAA  
TTATAAACATGTGGCAGGGAGTAGGAAAAGCAATGTATGCCCTCCCATTTGAAGGACTGATCAATTGTACATC  
AAATATTACAGGACTATTGTTGACAAGAGATGGTGGTATAACTAATGATAGTAGGAATGGGACCTTCAGACCT  
GGAGGGGGAGATATGAGAGATAATTGGAGAAGTGAATTATACAAGTATAAAGTAGTAAGAGTTGAACCACTAG  
GTCTAGCACCCACCAGGGCAAAGAGAAGAGTGGTGGAAAAGAGAAAAAGAGCAATAGGACTGGGAGCTCTGTT  
CCTTGGGTTCTTGGGAGCAGCAGGAAGCACGATGGGCGCAGCGTCACTGACGCTGACGGTACAGGCCAGACAA  
GTATTGTCTGGTATAGTGCAACAGCAAAAACAATTTGCTGAGGGCTATAGAGGCGCAACAGCATCTGTTGCAAC  
TCACAGTCTGGGGCATT

>DQ208433

AATCACACTGACAGCACGTGCGAGGTCAGATAGCAATATGACTGGCAATATAACTCTCCTATGCAAAATAAAAC  
AAATTATAAACATGTGGCAGGAAGCAGGAAAAGCAATGTATGCCCCCTCCCATTCAGAGGACTAATCAATTGTTT  
ATCAAATATTACAGGACTATTACTAACAAGAGATGGTGGGGATAATAGCAGTACAAATGAAACCTTCAGACCT  
GGAGGAGGAGATATGAGAGACAATTGGAGAAGTGAATTATACAAGTATAAAGTAGTAAGAATTGAACCACTAG  
GTCTAGCACCCACCAGGGCAAAGAGAAGAGTGGTGGAAAGAGAAAAAGAGCAATAGGACTGGGAGCTATGTT  
CCTTGGGTTCTTGGGAGCAGCAGGAAGCACGATGGGCGCAGCGTCACTGGCGCTGACGGTACAGGCCAGACAG  
TTATTGTCTGGTATAGTGCAACAGCAAAACAATTTGCTGAGGGCTATAGAGGCGCAACAACATCTGTTGCAAC  
TCACAGTCTGGGGCATT

>GQ365651

TACTACTTTAATGGTAACAGTACATACAAATGATACCAATACTGGACCAAATATCACACTCCCATGCAGAATAA  
AACAAATTATAAACATGTGGCAGGAAGTAGGAAAAGCAATGTATGCCCCCTCCCATCAGAGGACAAATTAGATG  
TTCATCAAATATTACAGGGCTGATATTAACGAGAGATGGTGGTGTGAACAACGCTGAGAACAACACTGAGACC  
TTCAGACCTGGAGGAGGAGATATGAGGGACAATTGGAGAAAGTGAATATATAAAATATAAAGTGGTAGAAATAA  
AACCATTAGGAATAGCACCAACTAAGGCAAAAAGGAGAGTGGTGGAGAGAGAAAAAGAGCAGCACTAGGAGC  
TATGTTCTCTTGGGTTCTTGGGAGCAGCAGGAAGCACTATGGGCGCAGCGTCAATAACGCTGACGGTACAGGCC  
AGACAATTACTGTCTGGGATAGTGCAACAGCAAAAGCAATTTGCTGAGAGCTATAGAGGCGCAACAGCATATGT  
TGCAACTCACAGTCTGGGGCATT

>KF835524

AATTACAATGAGAATTCAAGCCTCATCACAAATTCATGCAAAATTAAGCAAATTATAAACATGTGGCAGGAGG  
TAGGACGAGCAATGTATGCCCCCTCCCATTCAGGAAATATAACATGTAAATCAAATATCACAGGACTACTATT  
GGTGCCTGATGGAGGAGTGACAAATACAAATGAGACAGAGATATTAGACCTGGAGGAGGAGATATGAGGAAT  
AATTGGAGAAGTGAATTATATAAAATATAAAGTAGTAGAAATTAAGCCATTGGGAATAGCACCCACTGAAGCAA  
AAAGGAGAGTGGTGGAGAGAGAAAAAGAGCATTAGGGGGAATAGGAGCTGCGTTCTTGGGTTCTTGAGTTT  
AGCCGGAAGCACTATGGGCGCGGCGTCACTAACGCTGACGGTACAGGCCAGACAATTGCTGTCTGGTATAGTG  
CAACAGCAAAGCAATTTGCTGAGGGCTATAGAGGCGCAACAGCATATGTTGCAACTCACGGTCTGGGGCATT

>KC898982

GATCAAGATGAGTCAAACCCAACCATCATAATCCCATGCAGAATAAAGCAAATTATAAACATGTGGCAGGAGG  
TAGGACGAGCAATGTATGCCCCCCCCCATTCAGGAAACATAACATGTAAATCAAATATCACAGGACTACTATT  
GGTACGTGATGGAGGAGACAGAAATGACACAAATAATACAGAGAAATTCAGACCTGGAGGAGGAGATATGAGG  
GACAATTGGAGAAGTGAATTATATAAAATATAAAGTGGTAGAAATTAAGCCATTGGGAATAGCACCCACTGAAG  
CAAAGAGGAGAGTAGTGGAGAGAGAAAAAGAGCAGTGGGAATAGGAGCTGTGTTCTTGGGTTCTTGGGAGC  
AGCAGGAAGCACTATGGGCGCGGCGTCAATAACGCTGACGGTACAAGCCAGACAATTGTTGTCTGGTATAGTG  
CAACAGCAAAGCAATTTGCTGAGGGCTATAGAGGCGCAACAGCATATGTTGCAACTCACAGTCTGGGGCATT

>HM215402

AGTCATTCAAATTCAATCATCAGGCTCCCATGCAGAATAAAACAAATTATAAACATGTGGCAGAAGGTAGGCC  
GAGCAATGTATGCCCCCTCCCATTGAAGGAAACATAACATGTAAATCAAACATCACAGGACTACTATTGGTACG  
TGATGGAGGAGAACCTAATAATATAGAGATATTAGACCTGGAGGAGGAGATATGAGGGACAATTGGAGAAGT  
GAATTATATAAAATATAAAGTAGTGAAATTAAGCCATTAGGAGTAGCACCCACCAAGGCAAAAAGAAGAGTGA  
TGCAGAAAGAAAAAGAGCAGTGGGAATAGGAGCTGTGTTCTTGGGTTCTTGGGAGCAGCAGGGAGCACTAT  
GGGCGCGGCGTCAGTAACGCTGACGGTACAAGCCAGACAATTGTTGTCTGGTATAGTGCAACAGCAAAGCAAT  
TTGCTGAGGGCTATAGAGGCGCAACAGCATATGTTGCAACTCACAGTCTGGGGCATC

>KC899013

ACCTACAATGGGTACAAGAAGTAATTCAAGCTCAATCATCACTATCCCATGCAGAATAAAGCAAATTATAAACA  
TGTGGCAGGGGGTAGGACGAGCAATGTATGCCCCCTCCCATTGAAGGAAACATAACATGTAAATCAAATATCAC  
AGGACTACTCTTGGTACGTGATGGAGGAATAGGGACACATGGTAAAGAGACATTAGACCTGGAGGAGGAAAT  
ATGAGGGACAATTGGAGAAGTGAATTATATAAAATACAAAGTAGTAGAAATTAAGCCATTGGGAATAGCGCCCA  
CTACAGCAAAAAGGAGAGTAGTGGAGAGAGAAAAAGAGCAGTGGGAATAGGAGCTGTGTTCTTGGGTTCTT  
GGGAGCAGGAGCAAGCACTATGGGCGCAGCGTCAATAACGCTGACGGTACAGGCCAGGCAATTGTTGTCTGGT  
ATAGTGCAACAGCAAAGCAATTTGCTGAAGGCTATAGAGGCGCAACAGCATATGTTGCAACTCACGGTCTGGG  
GCATT

>KC899014

AATCATAAGACTAATAGTACAGAAAGTAATTCAAGCCAGACATCATAATCCCATGCAGAATAAAACAAATTA  
TAAACATGTGGCAGGAGGTAGGACGAGCCATGTATGCCCCCTCCTATTGCAGGAAACATAACATGTAAATCAA  
TATCACAGGACTACTATTAGTACGGGATGGAGGACTATATCCAAATAAGACTGAGACATTAGACCTGGAGGA  
GGAGATATGAGGGACAATTGGAGAAGTGAATTATATAAAATATAAAGTGGTAGAAATTAAGCCATTGGGAGTAG  
CACCCACTAAAGCAAAAAGGAGAGTGGTGGAGAGAGAAAAAGGGGAATAGGAGCTGTGTTCTTGGGTTCTT  
GGGAGTAGCAGGAAGCACTATGGGCGCGGCGTCAATAACGCTGACGGTACAGGCCAGACAATTGTTGTCTGGT  
ATAGTGCAACAGCAAAGCAATTTGCTGAGGGCTATAGAGGCGCAACAGCATATGTTGCAACTCACGGTCTGGG  
GCATT

>KC807958

TACTACCGCCTTAATGGTACATACGAGCCTAATGATATAAGCAATGAGTCAGACATCACACTCCCATGTCAGAA  
TAAAGCAAATTATAAATATGTGGCAGGAGGTAGGACGAGCAATGTATGCCCCCTCCCATTCGAGGAAACATAAC  
ATGTAGATCAAATATCACAGGACTACTATTGGTACGGGATGGAGGAAATGTTACAGGAGATACAGAGATATTC  
AGACCGGGAGGAGGAGATATGAGGGACAATTGGAGAAGTGAATTATATAAATATAAAGTAGTAGAAATTAAGC  
CATTGGGAGTAGCACCCACTGCAGCAAAAAGGAGAGTGGTGGAGAGAGAGAGACAAAAAGAGCAGTGGGACT  
AGGAGCTGTGTTCTTGGGATCTTGGGAGTAGCAGGAAGCACTATGGGCGCGGCGTCAGTGACGCTGACGGTA  
CAGGCCAGAAAATTGCTGTCTGGTATAGTGCAACAGCAAAGCAATTTGCTGAGGGCTATAGAGGCGCAACAGC  
ATCTGTTGCAACTCACGGTCTGGGGCATT

>MK792289

TACTACAATAGTACATACCATACATACATAAATGATACAAAAAGTAATGAGACCATCACGATCCCATGCAAAA  
TAAAGCAAATTATAAATATGTGGCAGGAGGTGGGACGAGCAATGTATGCTCCTCCCATTCGCCGAAACATAAC  
ATGTAGGTTCAGATATCACAGGACTGCTATTAGTACGTGATGGAGGAAATGAGCCAAATAGTACAAATGGTGCA  
GAAGAAATATTCAGGCCTGGAGGAGGAAATATGAAGGATAAATTGGAGAAGTGAACATATATAAATATAAAGTAG  
TAAAAAATTGAACCATTAGGAGTAGCACCCACCAAGGCAAGGAGGAGAGTGGTGCAGAGAGAAAAAGAGCAGT  
GGGAACGATAGGAGCTATGTTCTTGGGTTCTTGGGAGCAGCAGGAAGCACTATGGGCGCAGCATCAATAACG  
CTGACGGTACAGGCCAGACAATTGTTGTCTGGTATAGTGCAACAGCAGAGAAATCTGCTGAGAGCTATTGAGG  
CGCAACAGCATCTGTTGCAACTCACAGTCTGGGGCATC

>FJ388961

AATCATACTAGGCCAATTAACACAGGTGACACTGAAGGAGGAATTATCACCAACCTACATGCAGAATAAAAC  
AAATTATAAACCTGTGGCAGGAAGTAGGAAAAGCAATGTATGCCCCCTCCCATCGAAGGACAAATTAGTTGTTT  
ATCAAATATTACCGGGTTGCTATTAACAACAGATGGGGGTACTAACGGGAGCAACGAGACCGAGGTCTTCAGA  
CCTGCAGGAGGAAATATGAAGGACAATTGGAGAAGTGAATTATACAAATATAAAGTGGTACAAATTGAACCAT  
TAGGAATAGCACCCACCGCAAAGAGAAGAGTGGTGCAGAGAGAAAAAGAGCAGTGGGAATAGGAGCTAT  
GTTCTTGGGTTCTTGGGAGCAGCAGGAAGCACTATGGGCGCAGCATCAGTGATGCTGACGGTACAGGCCAGA  
CAATTATTGTCTGGCATAGTGCAACAGCAAAACAATTTGCTGAGGGCTATTGAGGCGCAACAACATCTGTTGC  
AACTCACAGTCTGGGGCATC

>KU820850

AATTATACAACAGGTAATTCAAGCTCAGTCATCACACTCCCATGCAGAATAAAGCAAATTATAAACATGTGGC  
AGGAGGTAGGACGAGCAATGTATGCCCCCTCCCATTCGAGGAAACATAACATGTAAATCAAATATCACAGGATT  
ACTATTGGTACGTGATGGAGGAGACACAAGTAATACAACTGAAACATTAGACCTGGAGGAGGAAATATGAAG  
GACAATTGGAGAAATGAATTATATAAATACAAAGTAGTAAAAATTGAACCATTAGGAGTAGCACCCACCAAGG  
CAAAGAGAAGCGTGGTGCAGAGAGAAAAAGAGCAGTGGGAATGGGAGCTGTGTTCTTGGGTTCTTAGGAGC  
AGCAGGAAGCACTATGGGCGCGGCGTCAATAACGCTGACGGTACAGGCCAGACAATTGCTGTCTGGTATAGTG  
CAACAGCAAAGTAATTTACTGAGGGCTATAGATGCGCAACAGCATATGTTGCAACTCACAGTCTGGGGCATC

>KF725906

AGTTATAATTCAAATGAGACCATCACACTCCCATGCAGAATAAAACAAATTATAAACAGGTGGCAGGAAGTAG  
GAAAAGCAATGTACGCCCCCTCCCATCCAAGGAGTAATTAGGTGTGCATCAAATATTACAGGGCTGCTATTAAC  
AAGAGATGGGGGCAGTAATATTAAGAACAACGGTACTGAAACCTTCAGACCTGGAGGAGGAAATATGAGGGAC  
AATTGGAGGAGTGAATTATATAAATATAAAGTAGTAAGAATTGAACCATTAGGAGTAGCACCCACCAAGGCAA  
AGAGAAGAGTGGTGCAGAGAGAAAAAGAGCAGCGATAGGAGCTATGATCCTTGGGTTCTTGGGAACAGCAGG  
AAGCACTATGGGCGCAGCGTCAGTGACGCTGACGGTACAGGCCAGACTATTATTGTCTGGTATAGTGCAACAG  
CAAAATAATTTGCTGAGAGCTATTGAGGCGCAACAACATCTGTTGCAACTCACAGTCTGGGGCATC

>KY496623

AGTCATCTGTTTAAATAGTAGTCTGTCTAATAGTAGTAATAGTAGTAAGTATATCACAATTCCATGTAAGATAA  
AACAAATTGTAAGAATGTGGCAGAGAGTGGGACAAGCACTGTATGCCCCCTCCCATCGAAGGAAACATTACATG  
TAGCTCAAACATTACAGGACTACTATTAGTTAGAGATGGAGGAAGCAATATAACAATCAATGAGACTTTTACA  
CCTGCAGGAGGAGACATGAGGGATAATTGGAGAAGTGAATTATATAAATATAAAGTAGTAAAAATTAAACCAC  
TAGGAGTAGCACCCACCGGCAAGGAGAAGAGTGGTGGGAGAGAGAAAAAGAGCAGTTGGACTGGGAGCTGT  
CCTCCTTGGGTTCTTAGGAACAGCAGGAAGCACTATGGGCGCAGCGGCAGTAACGCTGACGGTACAGGTGAGA  
CAACTATTGTCTGGCATAGTGCAACAGCAAAGCAATTTGCTGAGGGCTATAGAGGCGCAGCAGCATATGTTGC  
AACTACCGTCTGGGGCATT

>DQ383755

AACACACGAAAGAAAATGACACAATCAGACTCCCATGTAGAATAAAACAGATTATAAACATGTGGCAGGAAG  
TAGGAAAAGCCATGTATGCCCCCTCCCATCAGAGGACTAATTAGGTGTTTATCAAATATTACAGGGCTGCTATT  
AACAAAGAGATGGTGGTAATGATAACACCACGAACGAGTCTGAAATTTTCAGACCTGGAGGAGGAGATATGAGG  
GACAATTGGAGAAGTGAATTATATAAATACAAGGTAGTAAGAATTGAGCCAGTAGGAGTAGCACCCACCAAGG  
CAAAGAGAAGAGTGGTGCAGAGAGAAAAAGAGCAGTGGGAGTGATAGGAGCTATGTTCTTGGGTTCTTGGG  
AGCAGCAGGAAGCACTATGGGCGCAGCGTCAATGACGCTGACGGTACAGGCCAGACAATTATTGTCTGGTATA  
GTGCAACAGCAAAACAATTTGCTGAGAGCTATTGAGGCGCAACAGCATCTGTTGCAACTCACAGTCTGGGGCA  
TC

>KT427679

GGTCAGTGGGAATAGCACTGGGAATAATACTGAAGGGTCAAATGGAACCATCACAATCCCATGCAGAATAAAAC  
AAATTATAAACAGATGGCAGGAAGTAGGAAGAGCAATGTACGCCCCCTCCCATCGCAGGACAAATTAAGTGTTC  
ATCACAAATTACAGGGTTACTGTTAACAAGAGATGGTGGTACCAATACTACCAGTCTTGAAGAAATCTTCAGA  
CCTGCAGGAGGAGATATGAGGGACAATTGGGAGAAGTAAATTATATAAATATAAAGTAGTAAAAAATTGAGCCAT  
TAGGAATAGCACCCACCAAGGCAAAGAGAAGAGTGGTGCAGAGAGAAAAAAGAGCAATGGGAGTACTAGGAGC  
TGCGGTCTTTGGGTTCTTGGGAGCAGCAGGAAGCACTATGGGCGCAGCGTCACTGACGCTGACGGTACAGGCC  
AGACTATTATTGTCTGGTATAGTGCAACAGCAGAGCAATCTGTTGAGAGCTATTGAGGCGCAGCAGCATATGT  
TGCAACTCACAGTCTGGGGCATC

>KT427801

AATTACAATAGCACTGAGAATATCACTCTCCCATGTGGAATAAAACAAATTGTAAACATGTGGCAGGAAGTGG  
GGCGAGCAATGTATGCCGCTCCCCCTTGAGGAAACATTAAGTGTAGTTCAAGTATTACAGGGCTACTATTAAC  
AAGAGATGGTGGTAACAAGAAAAGACAATGAAACAGAAAAAGAGACCTTCAGACCTGGAGGAGGAAATATGAAA  
GATAATTGGAGAAGTGAATTATATAAATATAAAGTAGTAGAAATTAAGCCATTAGGAATAGCACCCACCAAGG  
CACAGAGAAGAGTGGTGCAGAGGGAAAAAAGAGCAGTGACATTCGGAGCTATGTTCTTTGGGTTCTTGGGAGC  
AGCAGGAAGCACTATGGGCGCAGTGTCAATGACGCTGACGGTACAGGCCAGACAATTATTGTCCGGTATAGTG  
CAACAGCAGAACAACTCTGCTGAGGGCTATTGAGGCGCAACAGCATATGTTGCAACTCACAGTCTGGGGCATC

>MG365765

ACTCATAATGACACTATCACTCTCCCATGTGGAATAAAACAAATTGTAAACCTGTGGCAGGAAGTAGGACGGG  
CTATGTATGCCAATCCCATTTGCAGGACAAATTAAGTGTACATCAAATATTACAGGTCTACTATTGACAAGAGA  
TGGTGGTAATAGTAGTAAGACTGAAATCTTCAGACCTGAGGGAGGAAATATGAAAGACAATTGGAGAAGTGAA  
TTATATAAATACAAAGTAGTAGAAATTAAGCCACTAGGAATAGCACCCACCAGGGCAAAAAGGCGAGTGGTGG  
AGAGAGAAAAAAGAGCAGTGGGACTAGGAGCTTTGTTCTTTGGGTTCTTGGGAACAGCAGGAAGCACTATGGG  
CGCAGCGTCAATAACGCTGACGGTACAAGCCAGACAATTATTGTCTGGAATAGTGCAACAGCAGAGCAATTTG  
CTGAGGGCTATTGAAGCGCAACAGCATCTGTTGCAGCTCACAGTCTGGGGCATT

>DQ085870

GCTCACACTTGGGAATAGAAATGGGAATGGTACTAATAGTACTATCACACTCCCATGCAGAATAAAACAAATTA  
TAAACAGGTGGCAGGAAGTAGGAAAAGCAATGTATGCCCCCTCCCATCCAAGGACAAATTAGATGTTTCATCAAA  
TATTACAGGGTTGTTATTAACAAGAGATGGAGGTAACAACAACGGGACCGAGAACAAATACCGAGATCTTCAGA  
CCTGGAGGAGGGAATATGAGGGATAATTGGAGAAGTGAATTATACAAATATAAAGTAGTAAGAATTGAGCCAT  
TAGGAGTAGCACCCACCAAGGCAAAGAGGAGAGTGGTGCAGAGAGAAAAAGAGAGCAGTGGGAATAGGAGCTGT  
GTTCTTTGGGTTCTTGGGAGCAGCAGGAAGCACTATGGGCGCAGCGTCAATAACGCTGACGGTACAGGCCAGA  
CAATTATTGTCTGGTATAGTGCAACAGCAGAACAACTCTGCTGAGAGCTATTGAGGCGCAACAACATATGTTGC  
AACTCACAGTCTGGGGCATC

>AB253430

AATTATAACAATGGGAATAATACTGGTGGTAATATCACACTCCCATGCAGAATAAAACAAATTGTAAACAGGT  
GGCAGGAAGTAGGAAAAGCAATGTATGCCCCCTCCCATCAGAGGAAACATTACCTGTTTCATCAAATATCACAGG  
GCTGCTATTAACAAGAGATGGTGGTAACAACGTTACCAACGAGTCCGAGATTTTCAGACCTGGAGGAGGAAAT  
ATGAAGGACAATTGGAGAAGTGAATTATATAAATATAAAGTAGTAAAAAATTGAACCATTAGGAGTAGCACCCA  
CCAGGGCAAAGAGAAGAGTGGTGCAGAGAGAAAAAAGAGCAGTGGGAACAATAGGAGCTATGTTCTTTGGGTT  
CTTGGGAGCAGCAGGAAGCACTATGGGCGCAGCGTCTTTGACGCTGACGGTACAAGCCAGACAATTATTGTCT  
GGTATAGTGCAACAGCAAAACAATTTGCTGAGAGCTATTGAGGCGCAACAGCATCTGTTGCAACTCACAGTCT  
GGGGCATC

>KC699033

AATCATACTGAGCAAAATATCACACTACAATGTAGAATAAAACAAATTGTAAACCTGTGGCAGACAGTAGGAA  
GAGCAATATATGCCCCCTCCCATCAAAGGACAAATTAGGTGTTTATCAAACATTACAGGGCTGCTATTAACAAG  
AGATGGTGGTAACGAGAACTCCACCGACAATGACACCGAGACCTTCAGACCTATAGGAGGGAATATAAGGGAC  
AATTGGAGAAGTGAATTATATAAATATAAAGTAGTAAAAAATTGAACCATTAGGAGTGGCACCCACCAGGGCAA  
GGAGAAGAGTGGTGCAGAGAGAAAAAAGAGCAGCAGGACTAGGAGCTGTGTTTATTGGGTTCTTAGGAGCAGC  
AGGAAGCACTATGGGCGCAGCATCAATAACGCTGACGGTACAGGCCAGACAATTATTGTCTGGTATAGTGCAA  
CAGCAGAACAACTCTGCTGAGAGCTATTGAGGCGCAACAGCATCTGTTGCAACTCACAGTCTGGGGCATC

>KX907421

GACTATCCTAATGGTACAATCATCACACTTCCATGCAAAATAAAACAAATTATAAACATGTGGCAGGCGATAG  
GAAAAGCAATATATGCCCCCTCCCATTTGCAGGAAACATAACATGTGTATCAAATATCACAGGACTATTATTGAC  
ACGAGATGGAGGAAGTGGAAATGGTACGGACCCAGAGATATTCAGACCTGCAGGAGGAGACATGAGGGATAAT  
TGGAGAAGTGAATTATATAAATATAAAGTAGTAGAAATTAAGCCATTAGGAGTAGCACCCACTAAGGCACAAA  
GGAGAGTGGTGAAGAGAGAGAGAAGAGCAGTGGGAATAGGAGCTGTGCTCTTTGGGTTCTTGGGAGCAGCAGG  
AAGCACTATGGGCGCAGCGTCAATAACGCTGACGGTACAGGCCAGACAATTATTGTCTGGTATAGTGCAACAG  
CAAAGCAATTTGCTGAGAGCTATAGAGGCGCAACAGCATATGTTGCAACTCACAGTCTGGGGCATT

>KX907359

AATTATACATGGAATAATAGTACAGGGCTAGGTAATATCACAAGTAATATCACACTACCATGTAGAATAAAAC  
AAATTATAAACATGTGGCAGGGAGTAGGAAAAGCAATGTATGCCCCCTCCCATTGAAGGACAAATTAAATGTTT  
ATCAAATATTACAGGGCTAATATTGACAAGAGATGGTGGTAATACAAGTGATGATCCTGAGACCTTCAGACCT  
GGAGGAGGAAATATGAAGGACAATTGGAGAAGTGAATTATATAAATATAAGGTAGTAAGAATTGAACCAATAG  
GCCTAGCACCCACCAAGGCAAAGAGAAGAGTGGTGGAAAAGAGAAAAAGAGCAATAGGACTAGGAGCTATGTT  
CCTTGGGTTCTTGGGAGCAGCAGGAAGCACGATGGGCGCAGCGTCAGTGGCGCTGACGGCACAGGCCAGACAG  
TTATTGTCTGGTATAGTGCAACAGCAAAACAATTTGCTGAGGGCTATAGAGGCGCAACAGCATCTGTTGCAAC  
TCACGGTCTGGGGCATT

>DQ054367

AATCAGACAGGGTTAAATAATAGTACAATCACACTCCAATGCAGAATAAAACAAATTATAAACATGTGGCAAG  
AAGTAGGAAGAGCAATGTATGCCCCCTCCCATTGAAGGAGTAATCAAATGTTTCATCAAACATTACAGGGCTAAT  
ATTGACAAGAGATGGTGCAAAATAATAACGAATGAGACTTTTCAGACCTGGAGGAGGAAATATGAAAGACAAT  
TGGAGAAGTGAATATATAAAATATAAAGTAGTACAAGTTGAACCAATAGGACTAGCACCTACCAAGGCAAAGA  
GAAGAGTGGTGGAAAGGGAAAAAGAGCAATAGGGCTAGGAGCTATGTTTCCTTGGGTTCTTGGGAGCAGCAGG  
AAGCACAATGGGCGCAGCGTCAGTGACGCTGACGGTACAGGCCAGACAGTTATTGTCTGGTATAGTGCAACAG  
CAAAACAATTTGCTGAGGGCTATAGAGGCGCAACAGCATCTGTTGCAACTCACGGTCTGGGGCATT

>AY352654

AGCTATGACATAAGTAACACAACAGATAAGAATATTACACTGCCATGTAGAATAAAACAAATTGTACACATGT  
GGCAGAGAGTAGGACAAGCAATGTATGCCCCCTCCCATTGAAGGAAAGATTACATGTACATCAAATATTACAGG  
ACTAATATTGACAATTGACCATGTTAATCTGACAGGAAAACAATGATAATGTTACCTCAGACCTGGAGGAGGA  
GATATGAGGGACAATTGGAGAAGTGAATATATAAAATATAAAGTAGTAAAAATTGAACCACTAGGAATAGCAC  
CCTCCGAGGCAAGGAGAAGAGTGGTGCAGAGAGAAAAAGAGCAGTGGCACTGGGAGCTATGATCTTTGGGTT  
CTTGGCAGCGGCAGGAAGCACTATGGGCGCGGCGTCATTAACGCTGACGGTACAGGCCAGACAATTATTGTCT  
GGTATAGTGCAACAGCAAAGCAATTTGCTGAGAGCTATACAAGCGCAACAGCATATGTTGCAGCTTACTGTCT  
GGGGCATT

>AY231154

AATTATAGGAGTTTGATTAAGGCTAATATCATACTCTCATGTAGAATAAAACAAATTGTAAGAATGTGGCAGA  
GGGTAGGACAAGCAATATATGCCCCCTCCCATCGCAGGGAACCTTACATGTACATCAAATATTACAGGAATGAT  
ACTAACATGGGATGGTGGTAGTAATAATAGTAGTAAAAATGAATCTGAGACCTTCAGACCTGGAGGAGGAGAC  
ATGAAGGACAATTGGAGAAGTGAATTGTATAAATATAAAGTAGTAAAGATTGAACCACTAGGAATAGCACCCA  
CCAGGGCAAGAAGAAGAGTGGTGCAGAGAGAAAAAGAGCAGTGGGAATAGGAGCTTTGTTCCCTTGGGTTCTT  
GGGAACAGCAGGAAGCACTATGGGCGCGGCGTCAATAACGCTGACGGTACAAGCCAGACAATTATTGTCTGGC  
ATAGTGCAACAGCAAAGCAATTTGCTGAGAGCTATAGAAGCGCAACAACAACCTGTTGCAGCTCACGGTCTGGG  
GCATT

>MN617383

TTTCATAAGAGAACTTGGTTGTCTAATAATACTGGGCAAGATACAGAGAACATCACACTCCAATGTAGAATAA  
AACAGTTATAAACATGTGGCAGGAAGTAGGAAAAGCAATGTATGCCCCCTCCCATCAGTGGACAAATTAGCTG  
TTCATCAAATATTACAGGGCTGCTATTAAACAAGAGATGGTGGTAACAAGAACGAGTCCAATGGAACCTGAAACC  
TTCAGACCTGGAGGAGGAGATATGAGGGACAATTGGAGAAGTGAATTATATAAATATAAAATAGTAAAAATTG  
AGCCATTAGGACTAGCACCCACCAAGGCAAGGAGAAGAGTGGTGCAGAGGGAAAAAGAGCAGTGGGAGCATT  
AGGAGCTATGTTCTTGGGTTCTTGGGAACAGCAGGAAGCACTATGGGCGCAGCGTCACTCACGCTGACGGTA  
CAAGCCAGAATACTACTGTCTGGTATAGTGCAACAACAGAACAAATTTGCTGAAAGCTATTGAGGCGCAACAGC  
GTCTGTTGCAACTCACAGTCTGGGGCATC

>MN617384

AATCAACTGAATAGCAGTGAACTGAAGGCAATGACACAATCACACTCCCATGTAGAATAAAGCAAAATTGTAA  
ACATGTGGCAGGAAGTAGGAAAAGCAATGTATGCCCCCTCCCATCAAAGGACAACTTAAGTCTCATCACAGAT  
TACAGGGCTAATATTAGTAAGAGATGGTGGTAGTAGTGCAATAATACCACTGAGATCTTCAGACCTGGAGGA  
GGAGACATGAGGGACAATTGGAGAAGTGAATTATATAAATATAAAGTAGTAAAAATTGAACCGTTAGGAATAG  
CACCCACCAAGGCAAAAAGAAGAGTGGTGCAGAGAGAAAAAGAGCAGCGGGAATAGGAGCTCTGTTCTTGG  
GTTCTTGGGAGCAGCAGGAAGCACTATGGGCGCAGCATCGATGACGCTGACGGTACAGGCCAGACAATTATTG  
TCTGGTATAGTGCAACAGCAAAACAATTTGCTGAGGGCTATTGAGGCGCAACAACATATGTTGCAACTCACAG  
TCTGGGGCATC

>MN617386

AATCAGACCGTCAATGGAACGTATGTCATCACACTCCCATGCAGAATAAAACAAATTATAAACAGATGGCAGG  
AAGTAGGAAAAGCAATGTATGCTCCTCCCATCAGGGGACAAATTAACTGTACATCAAATATTACAGGGCTGCT  
ATTAACAAGAGATGGTGGTAACGGTAACGAGACCGGCTCCAACAGGTCCGAAATCTTCAGACCTGGAGGAGGA  
GATATGAGGGACAATTGGAGAAGTGAATTATATAAATATAAAGTAGTAAAAATTGAGCCATTAGGAATAGCAC  
CCACCAAGGCTAAGAGAAGAGTGGTGCAGAGAGAAAAAGAGCAGTGGGAACCTATAGGAGCTATGTTCTTGG  
GTTCTTGGGAGCAGCAGGAAGCACTATGGGCGCAGCGTCACTCACGCTGACGGTACAGGCCAGACTATTACTG

TCTGGTATAGTGCAACAGCAGAACAATTTGCTGAAAGCTATTGAGGCGCAACAGCACCTGTTGCAACTCACAG  
TCTGGGGCATT

>MN617388

AATTATAATTTGACTAATGGTACTTGGCAATGGTCAAATAACGAAAGTGTCAATCACACTCCCATGCAGAATAA  
AACAAATTATAAACAGGTGGCAGGAAGTAGGAAAAGCAATGTATGCCCCCTCCCATCAGGGGACAAATTAAGT  
TACATCAAATATTACAGGGCTGCTATTAACAAGAGATGGTGGTGGTAATGAGTCCAGTGAGTTCGAAATCTTC  
AGACCTGGAGGGGGAGATATGAGAGACAATTGGAGAAGTGAATTATATAAATATAAAGTAGTAAAAATTGAGC  
CACTAGGGATAGCCCCACCAAGGCAAAGAGAAGAGTGGTGCAGAGAGAAAGAAGAGCAGTGGGAACAATAGG  
AGCTATGTTTCCTCGGGTTCTTGGGAGCAGCAGGAAGCACTATGGGCGCAGCGTCGATGACGCTGACGGTACAG  
GCCAGACTATTACTGTCTGGTATAGTGCAACAGCAGAACAATCTGCTGAGAGCTATTGAGGCGCAACAGCAAC  
TGTTGCAACTCACAGTCTGGGGCATC

>AJ401043

GATCACTCTGGAAAGTCAAATGAAACAAATTCAAATGACACTATTGTACTCCCATGTAAAATAAAACAAATTG  
TAAGAATGTGGCAGGGAGTAGGACAAGCAATGTATGCCCCCTCCAATTAAAGGAAAAGATTTCTGTAACTCAA  
TATTACAGGACTAATATTGACAAGGGATGGTGGTAATACTACTAATACTATTGAGACCTTTAGACCTGGAGGA  
GGAGATATGAGGGACAATTGGAGAAGTGAACCTATATAAATATAAGGTAGTAAGAATTGAACCACTAGGAATAG  
CACCCTAAGGCAAGGAGACGAGTGGTGGAGAGAGAAAAAATTAGACAAAAAGAGCAGTGGGAATGGGAGC  
CTTGTTCTTTGGGTTCTTGGGAGCAGCAGGAAGCACTATGGGCGCGGCGTCACTGACGCTGACGGTACATGAT  
AGACAAGTATTGTCTGGTATAGTGCAACAGCAAAACAATTTGCTGAGAGCTATAGAGGCGCAACAGCATCTGT  
TGCAACTCACAGTCTGGGGCATT

>HQ595767

TTCTATTGTAACACATCAGCTCTGTTTAATGGCACTTGGGGGGACAATACCACCATGCAGGGAAATAGCACAG  
AGTTAAATGGAACATAACTCTCCCATGCAGAATAAAGCAAATCATAAATATGTGGCAGAAAACAGGAAAAGC  
AATGTATGCCCCCTCCCATCCAAGGAGTAATAAGGTGTGAGTCAAACATTACAGGACTTATATTAACAAGAGAT  
GGTGGGGATACTAACAGAACAAATGAAACCTTTAGACCTGAAGGAGGAAATATGAAGGACAATTGGAGAAGTG  
AATTATATAAGTATAAAGTAGTAAAAATTGAACCACTAGGAGTAGCACCTACCGAGGCAAGGAGGAGAGTGGT  
GCAGAGAGAAAAAAGAGCATTGACTGGGAGCTGTTTTTCATTGGGTTCTTAGGAGCAGCAGGAAGCACTATG  
GGCGCGGCGTCAATGACGCTGACGGTACAGGCTAGACAATTTATTGTCTGGCATA

>MF373125

TTCTACTGTAATACATCAAACTGTTTAACAATACTTGGTTTAATGGTACTTGGGTTAATGATACTTGGGATA  
CTGAGGGTGATAATATCATACTCCCTTGTTAGAAATAAACAATTTATAAACATGTGGCAGGAAGTAGGAAAAGC  
AATGTACGCCCCCTCCCATTAGAGGACAAATTAGTTGTTTCATCAAATATTACAGGGCTACTATTAACAAGAGAT  
GGTGGTAACCACAGCGAGAGTAATAACCTCAGAGATCTTCAGACCTGGAGGAGGAGATATGAGGGACAATT  
GGAGAAGTGAATTATATAAATATAAAGTAGTAAAAATTGAACCATTAGGAATAGCACCCACCAAGGCAAAGAG  
AAGAGTGGTGCAGAGAGAAAAAAGAGCGGTGACACTAGGAGCTATGTTCTTTGGGTTCTTGGGAGCAGCAGGA  
AGCACTATGGGCGCAGCGTCGATGACGCTGACGGTACAGGCCAGACTATTATTGTCTGGTATAGTGCAACAGC  
AAAACAATTTGCTGAGAGCTATTGAGGCGCAGCAACACATG

>JN024344

TTCTACTGTAATGCATCACAACCTGTTTAATAGTAGTTGGAGTGGGAATGACTCTACTTGAATATAGAGGCAA  
ATGAACTATCACACTCCGATGTAATATAAGACAAATTATAAACATGTGGCAGGAAGTAGGGAAAGCAATGTA  
TGCCCCCTCCCATCAGAGGACTAATTAGATGTTTCATCAAACATTACAGGGCTGTTATTAACAAGAGATGGTGGT  
AATGGTAATAACACCAATAATGACACCGAAATCTTTAGACCTGGAGGAGGAGATATGAGGGACAATTGGAGAA  
GTGAATTATATAAATATAAAGTAGTAAGAATTGAACCATTAGGAATAGCACCCACTAAGGCAAAGAGAAGAGT  
GGTGCAGAGAGAAAAAAGAGCAGTGGGACTAGGAGCTATGTTCTTTGGGTTCTTGGGAGCAGCAGGAAGCACT  
ATGGGCGCAGCATCAATAACGCTGACGGTACAGGCCAGACTATTATTGTCTGGTATAGTGCAACAGCAGAACA  
ATCTGCTGAGGGCTACTGAGGCGCAACAGCATCTGTTGCAACTCACAGTCTGGGGCATC

>KC894082

TTCTATTGCAATACATCAGAACTGTTTAATGGTACATACAATGGTACATCAGAAAATAATACTAACGAGGTGA  
TCACACTCCAATGCAAAATAAAACAATTTATAAACATGTGGCAGGAGATAGGAAGAGCAATGTATGCCCCCTCC  
CATTGAAGGAAACATAACATGTAATCAAACATCACAGGGCTACTATTGACACGTGATGGAGGAGGGGACACA  
AACGAGACTGAGACATTGAGACCTGGAGGAGGAGATATGAGGGACAATTGGAGAAGTGAATTATATAAATATA  
AAGTGGTAGAAATTAAGCCATTAGGAGTAGCACCCACTAATGCAAAAAGGAGAGTGGTACAGAGAGAGAAAAAG  
AGCAGTGGGATTAGGAGCTGTGTTCTTTGGGTTCTTGGGAGTGGCAGGAAGCACTATGGGCGCGGCGTCAATA  
ACGCTGACGGTACAGGCCAGACAATTTATTGTCTGGTATAGTGCAACAGCAAAGTAATTTGCTGAGGGCCATA

>FJ444500

TTCTATTGCAATACATCAAGACTGTTTAATGGTAATAGCACATCCATGAATGAGACATACACAAAAAGTGTGG  
ACAAAAGTGAGGACATCACACTCCAATGCAGAATAAACAATTTATCAATATGTGGCAGGGGGTAGGACGAGC  
AATGTATGCCCCCTCCCATGAAAGGAAACATAATATGTAACCTCAAGTATCACAGGACTATTATTGACACGTGAT  
GGAGGAATAGCAGAAAAAGAAATGGCACAGAGACATTTAGACCTGGAGGAGGAGATATGAGGGATAATTGGAGAA  
GTGAATTATATAAATATAAAGTGGTAGAAATTAAGCCATTGGGAATAGCACCCACTAGGGCAAAAAGGAGAGT

GGTGGAGAGAGAGAAAAGAGCAGTGGGAATAGGAGCTGTGTTCCCTTGGGTTCTTGGGAGCAGCAGGAAGCACT  
ATGGGCGCAGCGTCACTAGCGCTGACGGGACAGGCCAGACAACCTGTTGTCTGGTATAGTGCAACAGCAAAGCA  
ACTTGCTGAAGGCCATA

>KC894101

TTCTATTGCAATACAACAAAGCTGTTTAATAGTCCTAATGATACTAGTCCTAATGGTACTAACTCCACCATCA  
CACTCCCATGCAGAATAAAACAAATTATAAACATGTGGCAGGAGGTGGGAAGAGCAATGTATGCCCTCCCAT  
TGCAGGAAACATAACATGCACGTCAAATATTACAGGACTGCTATTGACACGTGATGGAGGTTTACAGGTCACA  
AATGACTCAGAGACATTAGACCTGGAGGAGGAAATATGAAGGACAATTGGAGAAGTGAATTATATAAATATA  
AAGTGGTGGAAATTAAGCCATTGGGGATAGCACCCACTGAGGCAAAAAGGAGAGTGGTGGAGAGAGAAAAAG  
AGCAGTGGGAATAGGAGCTGTGTTCCCTTGGGTTCTTGGGAGCGGCAGGAAGCACTATGGGCGCGGCGTCAATG  
ACGCTGACGGTACAGGCCAGACAACCTGTTGTCTGGCATA

>KP411834

TTCTATTGTTGTACATCATACCTGTTGAATAATACACTAGACAATAATACTATAAAATGATACTACTAATAATG  
GCGGCACAAATGATAGCATCATACTGCAATGCAGAATAAAGCAAATTATCAACGTGGGGCAGGAAGTAGGACG  
AGCAATGTATGCCCTCCAATAAAAGGCAACATAACATGTAGATCAAATATCACAGGAATATTGCTGGCAGAA  
GATGGAGGACCTATCAACGAAACGGAACATTAGACGTGGAGGAGGAGATATGAGAGACAATTGGAGAAGTG  
AATTATATAAATATAAAGTGGTAGAAATTAAGCCATTAGGAATAGCACCCACCAAGGCAAAAAGGAGAGTGGT  
GGGGAGAGAAAAAGAGCGGCACTAGGAGCTATGTTCCCTTGGGTTCTTGGGAGCAGCCGGAAGCACTATGGGC  
GCAGCGTCAATAACGCTGACGGTACAGGCCAGACAATTATTGTCTGGTATAGTGCAACAGCAAAGCAATTTGC  
TGAGGGGCCATA

>HM215317

TTCTACTGCAATACATCAAACCTGTTTACATACAATGGTACATACAATGGTACATACAATGGTACTAAAAATT  
CAACCATCACACTCCAATGCAGAATAAAACAAATTATAAACATGTGGCAGGAGGTAGGGCGAGCAATGTATGC  
CCCTCCCATTCAGGAAACATAACATGTAAATCAAATATCACAGGACTACTATTGCTACGTGATGGAGGAAAC  
ACAACAGGAGGAAACGAAACAGAAAGAAAAGAGATATTAGACCTGGAGGAGGAAATATGAGGGACAATTGGA  
GAAGTGAATTATATAAATATAAAGTGGTGGAGATTAAGCCATTGGGACTAGCACCCACTAAGGCAAAAAGGAG  
AGTGGTGGAGAGAGAGAAAAAGAGCAGTGGGAATAGGAGCTGTGTTCCCTTGGGTTCTTGGGAGCAGCAGGAAGC  
ACTATGGGCGCAGCGTCAATAACGCTGACGGTACAGGCCAGACAACCTGTTGTCTGGTATAGTGCAACAGCAAAA  
GCAATTTGCTGAGAGCCATA

>AY253321

TTCTATTGCAATACATCAAACCTGTTTAAATGGTACATACAATGGTACAGACACGACAGGAAGTACTCCAAATT  
CAAACATCACACTCCAATGCAGAATAAAACAAATTATAAACAGGTGGCAGGGGGTAGGGCAAGCAATGTATGC  
CCCTCCCATTCAGGAAACATAACATGTAAATCAAATATCACAGGACTCCTATTGACGCGTGATAGAGAAAAC  
ACAACCGGCAACGAGACATTAGACCTGGAGGAGGAGATATGAGGGACAATTGGAGAAGTGAATTATATAAAT  
ATAAAGTGGTAGAAATTAAGCCATTGGGACTAGCACCCACAGAGGCAAAAAGGAGAGTGGTGGAGAGAGAGAA  
AAGAGCAGTGGGAATAGGAGCTGTGTTCCCTTGGGTTCTTGGGAGCAGCAGGAAGCACTATGGGCGCAGCGTCA  
ATAACGCTGACGGTACAGGCCAGACAACCTGTTGTCTGGTATAGTGCAACAGCAAAGCAATTTGCTGAGGGCCA  
TA

>HQ615958

TTCTATTGCAATACATCAAGCCTGTTTAAATGGTACATATAATAACACAGGAAGTAATGCAAATTCAAACATCA  
CACTCCAATGCAGAATAAAACAAATTATAAACATGTGGCAGGAGGTGGGACGAGCAATGTATGCTCCGCCCAT  
TGCAGGAGAGATAACATGTAAATCAAATATCACAGGACTACTATTGACACGGGATGGGGGAGAAAAAGACAAT  
GAGACAAATAATGCAGAGGTATTAGACCTGCAGGAGGAGATATGAGGGACAATTGGAGAAGTGAATTATATA  
AATATAAAGTAGTAGAAATTAACCATTAGGATTAGCACCCACTAAAGCAAGAAGGAGAGTGGTGCAGAGGGA  
GAAAAGAGCAGTGGGACTAGGAGCTGTGCTCTTTGGGTTCTTGGGAGCAGCAGGAAGCACTATGGGCGCAGCA  
TCAATAACGCTGACGGTACAGGCCAGACAATTACTGTCTGGTATAGTGCAACAGCAGAGCAATTTGCTGAGGG  
CTATAGAGGCGCAACAGCACATG

>KT183336

TTCTATTGCAATACATCAGGGCTGTTTAAATGGGACATACAATCCTAATGCTACAAACAGTAATTCAGTACTG  
TAAATTCAACCATCACACTCCAGTGCAGAATAAAACAAATTATAAACATGTGGCAGGGAGTAGGACAAGCAAT  
GTATGCCCTCCCGTTGCAGGTAACATAACATGTAAATCAAATATCACAGGAATACTATTGGTAAGGGATGGG  
GGTAATGACAATAACAGTACCACAGAGACATTAGACCTGGAGGAGGAGATATGAGGGACAATTGGAGAAGTG  
AATTGTATAAATATAAAGTGGTAGAGATTAGGCCATTAGGAGTAGCACCCACCAAGGCAAAAAGGAGAGTGGT  
GGAGAGAGAAAAAGAGCAGTGGGAATAGGAGCTGTACTCCTTGGGTTCTTGGGAGCAGCCGGAAGCACTATG  
GGCGCAGCATCAATAACGCTGACGGTACAGGCCAGACAATTGTTGTCTGGTATAGTGCAACAGCAGCAAGCAATT  
TGCTGAGGGCTATAGAGGCGCAGCAACACATG

>JN687734

TTCTATTGCAATACAACAAAACCTGTTTAAATGAAACACTGTTTAAAGTCAGACAATGGTTTCAGACATCATACTCC  
CATGCAGAATAAAACAAATCATAAACATGTGGCAGGGGGTAGGACGAGCAATGTATGCCCTCCCATTCGAGG  
AAACATAACATGCAACTCAAATATCACAGGACTATTATTGACACGTGATGGAGGAGGTGGCAACAGCACAGAA

ACATTGAGACCTGGAGGAGGAAATATGAAAGATAATTGGAGAAGTGAATTATATAAAATATAAAGTGGTAGAAA  
TTAAGCCATTGGGAGTAGCACCCACCAAGGCAAAAAGGAGAGTGGTGGAGAGAGAAAAAGAGCAGTGGGAAT  
AGGAGCTGTACTCCTTGGGTTCTTGGGAGCAGCAGGAAGCACTATGGGCGCGCGTCAATAACGCTGACGGTA  
CAGGCCAGACAACCTGTTGTCTGGTATAGTGCAACAGCAAAGTAATTTGCTGAGAGCTATAGAGGCGCAACAGC  
ACATG

>AY529669

TTCTATTGCAATACATCAAAGCTGTTCAATGATACAAGCCTGCTTAATTATACAGAAGGGAATGCAAACAATA  
ATGAGACCATCATACTCCCATGCAAAATAAAACAAATTATAAACAGGTGGCAAGGGGTAGGACAAGCAATATA  
TGCCCCCTCCCATTCAGGAAACATAACATGTAAATCAAAGATCACAGGACTACTATTGACACGTGATGGAGGT  
AATACCACAAATAACACAGAGACATTGAGACCAGGAGGAGGCGATATGAGGGACAATTGGAGAAGTGAATTAT  
ATAAAATATAAAGTGGTAGAAAATTAAGCCATTGGGAGTAGCACCCACTGAGGCAAAAAGGAGAGTGGTGGAGAG  
AGAAAAAGAGCAGTAGGAATAGGAGCTGTGTTCTTGGGATCTTGGGAGCAGCAGGAAGCACTATGGGCGCA  
GCATCAATAACGCTGACGGTACAGGCCAGACAATTGCTGTCTGGAATAGTGCAACAGCAAAGTAATTTGCTGA  
GGGCCATA

>JX213443

TTCTATTGCAATACATCAAACTGTTTAATGGTACATACGAGCAGCCTAACAGTAGTGATAGGATCAGATTCAA  
CCATCACACTCCCATGCGAATAAAACAAATTATAAACTTGTGGCAGGAGGTAGGACGAGCCATGTATGCCCC  
TCCCATTCAGGAACCATAACATGTAACTCAAGTATCACAGGACTAATATTGACACGTGATGGAGGAAACGAA  
ACTAAGCGCAAGGACACAGAGATATTGAGACCTATAGGAGGAGATATGAGGATTAATTGGAGAAGTGAATTAT  
ATAAAATATAAAGTGGTAGAAAATTAACCATTAGGATTAGCACCCACTACGGCAAAAAGGAGAGTGGTGGAGAG  
AGAAAAAGAGCAGTGGGAATAGGAGCTGTGTTCTTGGGTTCTTAGGAGCAGCAGGAAGCACTATGGGCGCA  
GCATCAATAACGCTGACGGTACAGGCCAGACAACCTGTTGTCTGGTATAGTGCAACAGCAAAGTAATTTGCTGA  
GAGCCATA

>KF716480

TTCTACTGCAATACATCAGAACTGTTTAATAGTATATGGCTTAATAATACTGGTAACTGGACAGGGAATACAA  
CAAAACAGTACAGAGAAAAATAATGGTACAATCACACTTCCATGCAGAATAAAACAAATTATAAACATGTGGCA  
GGGAGTAGGAAAAGCAATGTATGCCCCCTCCCATGGAAGGAGAAATCAAATGTATATCAAATATTACAGGACTA  
TTGTTGACAAGGGATGGTGGTAATAATAATGCTACCAATGAGACCTTCAGACCTGGAGGAGGAGATATGAGAG  
ACAATTGGAGAAGTGAATTATACAAATATAAAGTAGTAACAATTGAACCACTGGGTATAGCACCCACCAAGGC  
AAAGAGAGGAGTGGTGGAAAGAGAAAAAGAGCAATAGGACTAGGAGCTATGTTCTTGGGTTCTTGGGAGCA  
GCAGGAAGCACGATGGGCGCAGTGTCTATTGACGCTGACGGTACAGGTACAGACAGCTATTGTCTGGCATA

>KP411843

TTCTATTGTAATACTTCAGGCCTGTTTAACAGCACTTGGAAATGGCACGAAATCTAAAGCGTCAAATGACAATG  
ACACTATCCTTCGCCCGAGAAAAAAAATAAAATTATGTGGAAGAGACAAAGACTAGGACTACAAGCACCTGC  
CCCTCCTAGCCCAAGAACGAGAAGGTGTAGCACTACCAGTACAGGATTACTATTAGATGGAGATGGTACGAAT  
ACTAATAATGAGACCTTCACGCCGGGACGAGGAGATATAAATATGAATTGCAGAAAGTGAAGTAGATCTATATA  
AATTAGTAGTAATTGAACTTGTACCAGTAGGAGCCACCCCTCCCGATCAAGAGTGGTGTCTGATGCAAAAAA  
AGCAGTTGCAATGGGAGCTTCGCTCGTTTTCTTCTTATCAGCAGCAGCAGGAAGTAATGACGCGGCGTCGACG  
ACACTGACGGTGCAGGTACAGCCATTATTGTCTGGTACAGTGCTACTGCAGCAGCATCTGCTGATGCCATA

>HM215265

TTCTATTGTAATACATCAGGACTGTTTAATGGTACTATATCAAATAGTACTAATATCACACTCCCATGTAAGA  
TAAACAAATTGTAAGAATGTGGCAAAAAGTGGGACAAGCAATGTATGCCCCCTCCCATTCAGGAAACATTAC  
ATGTACATCAAACATTACAGGACTACTATTAACAAGAGATGGGGGGAGTAATGGAACCCATGATGATGAGGTC  
TTCAGACCTGGAGGAGGAGATATGAGGGACAATTGGAGAAGTGAATTATATAAGTATAAAGTAGTAAAAATTA  
AACCCTAGGAATAGCACCCACCAAGGCAAGGAGAAGAGTAGTGGGAAGAGAGAAAAGAGCAGTCGGATTTGG  
AGCTGTTCTCCTTGGGTTCTTAGGAACAGCAGGAAGCACTATGGGCGCGGCGTCAATAACGCTGACGGTACAG  
GTCAGACAATTATTGTCTGGCATA

>KT022403

TTCTATTGTAATACAACAAGCCTGTTTAATAGCACGTGGGGAAATGACACTGTTAACACACCAAGAATGCCA  
CGGGTTCAAATGACACTATAACAATCCTATGCAGAATAAAACAAATTGTAAATATGTGGCAAGAGTAGGAAG  
AGCAATGTATGCCCCCTCCCATGGAAGGAAAAATACAGTGTATATCAAACATTACAGGTATGATATTAACAAGA  
GATGGTGGGAATGAGAATATCAGTGAGATCTTCAGACCTGGAGGAGGAAATATGAGGGACAATTGGAGAAGTG  
AATTATATAAGTATAAAGTAGTAAAAATTGAACCACTAGGAGTAGCACCCACCCAGGCAAGGAGAAGAGTGGT  
GGAGAGAGGAAAAAGGGCAGTTGGACTGGGAGCTGTTTTCTTGGGTTCTTGGGAGCAGCAGGAAGCACTATG  
GGCGCGGCGTCACTGACGCTGACGGTACAGGCCAGAACTTATTGTCTGGCATA

>DQ020274

TTCTATTGTAATACATCAGGACTGTTTAATAGTAGTAGTGAAAATAAGACTAGTAGTGAAAATAAGACTAATA  
TCACACTCCCATGCAGAATCAAACAGATTGTGAGAATGTGGCAGAGAGTAGGACAAGCAATGTATGCCCCCTCC  
CATCGCAGGAAAAATTACATGCATATCAAACATTACAGGACTAATACTAACAAGAGATGGTGGGACTAATAGT  
ACTAATGAGACCTTCAGACCTGCAGGGGGAGACATGAGGGACAATTGGAGAAGTGAATTATATAAGTATAAAG

TAGTAAAGATTAAACCACTAGGAGTAGCACCCACCAAGGCAAGGAGAAGAGTGGTGCAGAGAGAGAAAAGAGC  
AGTTGGAATAGGAGCTGTCTCTTGGGTTCTTAGGAGCAGCAGGAAGCACTATGGGCGCGGCGTCAATAACG  
CTGACGGTACAGGCCAGGCAATTATTGTCTGGCATA

>FM877777

TTCTATTGTAATACAACAAAACCTGTTTAATAGCACTTGGCTTAATAGCACTTGGAAATGACACGACCCAGGCCAA  
ATAATACAAATGAAAACATAACACTCCCATGCAGGATAAAACAAATTGTAAACATGTGGCAGGGAGTAGGACA  
AGCAATGTATGCCCCCTCCTATCGCAGGAATGATACAGTGTGTATCAAATATTACAGGACTGATATTGACAAGA  
GATGGGGGAGACAATAGTAGTAATAATGAGACCTTCAGGCCTGGAGGAGGAAATATGAAGGACAACCTGGAGAA  
GTGAATTATATAAATATAAAGTAGTACAAATTGAACCACTAGGGGTAGCACCCAACAAGGCAAAGAGAAGAGT  
GGTGGAGAGAGAAAAAAGAGCAGTTGGAATAGGAGCTATGTTCTTGGGTTCTTAGGAACAGCAGGAAGCACT  
ATGGGCGCGGCGTCAATAACGCTGACGGTACAGGCCAGGCAATTATTGTCTGGCATA

>KJ849769

TTCTACTGTAACCAACAACTGTTTCATAGTACTTGGGGGAATAATCAGACTAAATCAGATAGCAATGGAA  
CAAGTAATGGAACAATAACACTCCCATGCAGAATAAAACAAATTATAAATATGTGGCAGGGAGTAGGAAAAAGC  
AATGTATGCCCCCTCCCATCAAAGGACAAATTAGCTGTTTCATCAAACATTACAGGACTGTTATTAGTAAGAGAT  
GGTGGTAATAGTACCAGCAATGAAGAGATCTTCAGACCTACAGGAGGAAATATGAAGGACAATTGGAGAAGTG  
AATTATATAAATATAAAGTAGTAAAAATTGAACCTTAGGAGTAGCACCCACCAAGGCAAAGAGAAGAGTGGT  
GCAGAGAGAAAAAAGAGCAGTAGGAATAGGAATATGTTCTTGGGTTCTTGGGAGCAGCAGGAAGCACTATG  
GGCGCAGCGTCAATGACGCTGACGGTACAGGCCAGACAATTATTGTCTGGTATAGTGCAACAGCAAAATAATT  
TGCTGAGGGCCATT

>MG989549

TTCTATTGTAATACAACAAAACCTGTTTAATAGTACTTGGACAGGAAATGAAACCAGTGAAGGGAATAATAGCA  
CTATCATACTTCCCTGTAAGATAAAGCAAATCATAAACATGTGGCAGGAAGTAGGACAAGCAATGTATGCTCC  
TCCCATCAGTGGAAGCATTAATTGTGTATCAAATATTACAGGAATACTATTGACAAGAGATGGTGGTGTAAAC  
AATACGGGAAATGAGACCTTCAGACCTGGAGGAGGAAATACAAAAGACAATTGGAGAAGTGAATTATATAAAT  
ATAAAGTAGTAGAAATTGAACCACTAGGAGTAGCACCCACCAGGGCAAAGAGGAGAGTGGTGGAAAGAGAAAA  
AAGAGCAGTGGAATAGGAGCTATGATCTTTGGGTTCTTAGGAGCAGCAGGAAGCACTATGGGCGCGGCGTCA  
ATAACGCTGACGGTACAGGCCAGACAATTATTGTCTGGTATAGTGCAACAGCAAAAGCAATTTGCTGAGGGCTA  
TAGAGGCGCAGCAGCACATG

>MF373150

TTCTATTGCAATACATCAGCACTGTTTAATAGAACTTGGAAATAGCAATAGCACTTGGAAATAGCACTGGGGAGA  
ATATCACTGATATACATCTCCCATGCAGAATAAAGCAAATTGTAAATATGTGGCAGAGAGTAGGACAAGCCAT  
GTATGCCCCCTCCTATCCCAGGAATAATAAGGTGTGATTCAAACATTACAGGAATACTATTAACAAGAGATGGA  
GGGAAAAACAATAGTAGTAATGAAACCTTCAGACCTGGAGGAGGAGACATGAGGGATAATTGGAGAAGTGAAT  
TATATAAGTATAAAGTAGTAGAAATTGAACCACTAGGTGTAGCACCCGCCAGGGCAAGATCAACAGTGGTGGA  
GAGAGAGACCATAGCAGTCGGACTGGTAGCTGTCTGCTTGGGGTCTTAGGAGCAGCAGGAAGAACTATGGGC  
GCAGCATCACTAACGCTGACGGTACGAGCCATACTATCAGTGTCTGGGATACTGCAGCAGCAGATC

>KU921769

TTCTATTGCAATACAACAGGCCTGTTTAATCACACGTTTAATAGCACGTGGGGAAATGCCACTATTACAGAGA  
ATGCAAAATGAACTATAATTCTTCCATGCAGAATAAAACAAATTATAAATATGTGGCAGGAAGTAGGACAAGC  
AATGTATGCCCCCTCCATTGAAGGAGTAATAAAGTGTATATCAAACATTACAGGAATAATATTGACAAGAGAT  
GGTGGGCACATGAGCAATGGCAGCAATGACAGTATTGAGACCTTCAGACCTGGGGGAGGAAATATGAGGGACA  
ATTGGAGAAGTGAATTATATAAGTATAAAGTAGTAAACTTGAACCACTAGGAGTAGCACCAACCAGGGCAAG  
GAGAAGAGTGGTAGAGAGAGAAAAAAGAGCAGTTGGACTGGGAGCTGTCTTCTTGGGTTCTTGGGAGCAGCA  
GGAAGCACTATGGGCGCAGCGTCAATAACGCTGACGGTACAGGCCAGACAATTATTGTCTGGCATA

>KF725943

TTCTATTGCGATACATCAGACTTGTTTAATAGTACATACGATCTTACTAATAATTCTACTAATATAAGCAAAG  
AGTCAAACGAAACAATCACGCTCAAATGCAGAATAAAACAGATCATAAACATGTGGCAGGAGGTAGGAAGAGC  
AATATATGCCCCCTCCATTGCAGGAAACATAACATGTAAATCAAACATCACAGGACTACTATTAGTACGTGAT  
GGAGGTAATAGCCATGGCACAAATGACACAAATAGCACAAATGAAGAGATATTACAGACCTGAAGGAGGAGATA  
TGAGGGACAATTGGAGAAGTGAATTATATAAATACAAAGTAGTAAACTTGAACCACTAGGATTAGCACCCAC  
CAGGGCAAGGAGAAGAGTGGTGGAGAGAGAAAAACGAGCAGTTGGACTGGGAGCTGTCTTCTTGGGTTCTTG  
GGAACAGCAGGAAGCACTATGGGCGCGGCGTCAGTGGCGCTGACGGTACAGGCCAGACAATTATTGTCTGGCA  
TA

>JX236675

TTCTATTGTAATACATCAGACCTGTTTAATAACATTTGGATAGGAAATGAGACTACAGAAACAAATGAGACTG  
AAACAAATTCAAGTAAGCCTATAACGCTCCAGTGCAGAATAAAGCAAATTATAAACATGTGGCAGAGAGTAGG  
GCAAGCAATATATGCCCCCTCCCATCCAAGGAAAATTAGAATGTAATTCAAACATTACAGGACTGCTATTAAAC  
AGAGATGGTGGAAAAAATAATGACAGTAAAGAAATCTTCAGACCTGGAGGAGGAGATATGAGGGATAATTGGA  
GAAGTGAATTATATAAGTACAAAGTAGTAAAAATTGAACCACTAGGAGTAGCACCCACCAGGGCACAGAGAAG

AGTGGTAAAGAGAGAAAAAAGAGCAGTCATTGGAATGGGAGCGATGTTCTTGGGTTCTTAAGTGCAGCAGGA  
AGCACTATGGGCGCAGCGTCACTAACGCTGACGGTACAGGCCAGACAATTATTGTCTGGCATA

>JN054260

TTCTATTGTAATACATCAGGACTGTTTAATAATAGTGATAATAGTAGTGGTAGTAATAATAGTAGTAGGAATG  
GGAATATCATACTCCCATGCAAGCTCAAACAGATTGTGAGAATGTGGCAGAGAGTAGGACAAGCAATGTATGC  
CCCTCCCATCGCAGGAAAACCTCACATGTATATCAAACATTACAGGACTATTAATAACAAGAGATGGTGGAACT  
AACAGTACTAATGGGACTGAGATCTTCAGACCTGCAGGGGGAGACATGAGGGACAATTGGAGAAGTGAATTAT  
ATAAGTATAAAGTAGTAAAAATTAAACCACTAGGAGTAGCACCCACCAGGGCAAGGAGAAGAGTGGTGGAGAG  
AGAAAAAAGAGCAGTTGGAATAGGAGCTGTTTTCTTTGGGTTCTTAGCAGCAGCAGGAAGCACTATGGGCGCG  
GCGTCAATAACGCTGACGGTACAGGTACAGGCAATTATTGTCTGGCATA

>KT124783

AGTTACTCAAATGAAACGGAAGACGATAATATCACACTCCCATGCAGAATAAAAACAAATTATAAACATGTGGC  
AGGAAGTAGGAAAAGCAATGTATGCTCCTCCCATCAGAGGACAAATTAGATGTTTCATCAAATATTACAGGGAT  
ACTATTAACAAGGGATGGTGGTAAGAACGAGAACAACAACACTGAGATCTTCAGACCTGGAGGAGGAAATATG  
AGGGACAATTGGAGAAGTGAATTATATAAATATAAAGTAGTAAAGATTGAGCCATTAGGAGTAGCACCCACCA  
AGGCAAAACGAAGAGTGGTGCAGAGAGAAAAAAGAGCAGTAGGACTAGGAGCTGTGTTCTTGGGTTCTTGGG  
AGCAGCAGGAAGCACTATGGGCGCAGCGGCAGTGACGCTGACGGCACAGGCCAGACAATTATTGTCTGGGATA  
GTGCAACAGCAGAACAATCTGCTAAGAGCTATTGAGGCGCAACAGCATCTGTTGCAACTCACAGTCTGGGGCA  
TC

>KJ698288

AATTATAATAGTACTGAGAATAATACTGAAACGTCAAATGAGCCTATTATACTCCCATGCAGAATAAAAAAAA  
TTATAAACATGTGGCAGGAAGTAGGAAAAGCAATGTATGCCCTCCCATTAAAGGACAAATTAGATGCTCATC  
AAATATTACAGGGCTGCTATTAAACAAGAGATGGTGGAAAACAACAACACGAACGAGACCTTCAGACCTGGAGGA  
GGAGATATGAGGGACAATTGGAGAAGTGAATTATATAAAATACAAAATAGTAAAAATAGAACCATTAGGTGTAG  
CACCCACCAGGGCAAAGAGAAGAGTGGTGCAGAGAGAAAAAAGAGCAGTGGGAATAGGAGCTGTGCTCTTTGG  
GTTCTTGGGGGCAGCAGGAAGCACTATGGGCGCAGCGTCAATGACGTTGACGGTACAGGCCAGACAATTAATG  
TCTGGTATAGTGCAACAGCAGCAGAATTTGCTGAGGGCTATTGAGGCGCAGCAGCATCTGTTGCAACTCACAG  
TCTGGGGCATC

>KU901765

TACTATAGTAGTAATAGTAGTGGGAGTGGTACAAATAATAACACAATCATACTCCAATGCAGAATAAAAAAAA  
TTATAAACATGTGGCAGACAGTAGGAAAAGCAATGTATGCCCCCTCCCATTAAAGGACAAATTAGATGCTCATC  
AAATATCACAGGGCTATTATTAGTCAGAGATGGAGGTGATAACAGGAGTAACAAAGAGATCTTCAGACCTGCA  
GGAGGAGATATGAGAGACAATTGGAGAAGTGAATTATATAAATATAAAGTAGTAAAAATTGAACCATTAGGAA  
TAGCACCCACTAAGGCAAGGAGAAGAGTGGTGCAAAGAGAAAAAAGAGCAGTGGGAATAGGAGCTTTGTTCTT  
TGGGTTCTTGGGAGCAGCAGGAAGCACTATGGGCGCAGCGTCAATGGCGCTGACGGTACAGGCTAGACAATTA  
TTGTCTGGTATAGTGCAACAGCAGAATAATTTGCTGAGAGCTATTGAGGCGCAACAGCATATGTTGCAACTCA  
CAGTCTGGGGCATC

>EU576268

TATCAGAATAATACTGAAGGGTCAAATAACACTAAAGCAAATAGCACAAATCCTACTCCTATGCAGAATAAAAC  
AAATTATAAACATGTGGCAGGAAGTAGGAAAAGCAATGTATGCCCCCTCCCATTGAAGGAAACATAACATGTAAATCAA  
ATCAAATATTACAGGGCTGCTACTAACAAGAGATGGTGGTGAGCCTAATAACAAAACCAACGATACCTTCAGA  
CCAGGAGGAGGAGATATGAGGGACAATTGGAGAAGTGAATTATATAAATATAAAGTAGTACAAATTGAGCCAA  
TAGGACTAGCACCCACCAAGGCAAAGAGAAGAGTGGTGCAAAGAGAAAAAAGAGCAGTGGGCATAGGAGCTTT  
GTTCTTGGGTTCTTGGGAGCAGCAGGAAGCACTATGGGCGCAGCGTCATTGACGCTGACGGTACAGGCCAGA  
CAATTATTGTCTGGTATAGTGCAACAGCAGAACAACCTTGCTGAGAGCTATTGAGGCGCAACAGCATCTGTTGC  
AACTCACAGTCTGGGGCATC

>HQ699991

GACTACATGCCTAATGGTACAGCAAGTAATTCAAGCTCAAACATCACACTCCCATGCAGAATAAAGCAAATTA  
TAAACATGTGGCAGGAGGTAGGACGAGCAATGTATGCCCCCTCCCATTGAAGGAAACATAACATGTAAATCAA  
TATCACAGGTCTACTATTGGTCCGTGATGGAGGAAGTACAAATAATACAGAAGAGACATTTCAGACCTATAGGA  
GGAAATATGAAGGACAATTGGAGAAATGAATTATATAAGTATAAAGTAGTGGAAATTAAGCCATTGGGACTAG  
CACCCACTGGAGCAAAAAGAAGAGTAGTGGAGAGAGAAAAAAGAGCGGGAATAGGAGCTGTGTTCTTGGGTT  
CTTAGGAGCAGCCGGAAGCACTATGGGCGCGCGTCAATAACGCTGACGGTACAGGCCAGACAATTGTTGTCT  
GGTATAGTGCAACAGCAAAGCAATTTGCTGAAGGCTATAGAGGCGCAACAGCATATGTTGCAACTCACGGTCT  
GGGGCATT

>KU319545

TGTCATAATAATCCAACATCCGAACCGTCTAAAAATCGTGCTGCAAATCCAACATTCATAATCCCATGCAGGG  
TGAAGCAAGTTCTAAGCATGCGCCTCGTATTGCGGGAAGCAATGTATGCCCATCCTATATCAGGAGACGTACT  
ATTGACATCGGATGTGCGGAGGACTGATATCCACACGAGATAACGCTAATAGCGCGAACGAGATATTTAGACCT  
GGAGGAGGAGATATGAGGGACAATTGGAGAAGTGAATTATACAAATATAAAGTGGTAGAAATTAAACCATTAG

GAATAGCACCCACCAAGGCCAAAAAGGAGAGTGGTGGAGAGAGAAAAAGAGCAGTGGGAATAGGAGCTGTATT  
CCTTGGGTTCCTTGGGAACAGCCGGAAGCACTATGGGCGCAGCATCAATAACGCTGACGGTACAGGCCAGGCCAA  
TTGTTGTCTGGTATAGTGCAACAGCAAAGCAATTTGCTGAAGGCTATAGAGGCGCAACAGCATATGTTGCAAC  
TCACGGTCTGGGGCATT

>KJ158423

TGTTACCTGTTTAAATAGATTATACACTGCAGCCAATACAAAGAGTAATTCATGGATTGATATCAACTGCACAG  
TTGCAATCCCATGCAGAATAAAGCAAATTATAAACATGTGGCAGGAGGTAGGGCGAGCAATGTATGCCAATCC  
CATTGAAGGAAATATAACATGTAAATCAGATATCACAGGGATGCTATTAGAACGTGATTGTGGAAAAGAACGT  
GATAAAACGATATCAACTACGAAAGAGATATTCAGACCTATAGGAGGAAATATGAGGGACAATTGGAGAAGTG  
AATTATACAAATATAAAGTGGTAGAAATTAAGCCATTAGGAGTAGCACCCACGGAAGCAAAAAGGAGAGTGGT  
GGAGAGAGAAAAAGAGTAGCGGGACTAGGAGCTGTGTTCTTGGGTTCCTTGGGAGCAGCAGGAAGCACTATG  
GGCGCGGCGTCAATAACGCTGACGGTACAGGCCAGACAATTGTTGTCTGGTATAGTGCAACAGCAAAGCAATT  
TGCTGAGAGCTATAGAGGCGCAACAGCATCTGTTGCAACTCACGGTCTGGGGCATT

>MF373165

GCTCAAGATAAAACGACTGGGGGTAGTGGTAATAATGAAACCATTCCCCTCCCCTGCAGGATAAAACAAATTG  
TCAACATGTGGCAAGTAGTAGGACCAGCAATGTATGCTCCCCTCATTGCAGGAAACATAACAAGTAACTCATC  
TATCACAGGACTACTATTGACACGTGATGGAGGAATCGTAACCAATGCCACCGACACAGAGACATTTAGACCT  
GGAGGAGGAAATATGAAAGACAATTGGAGAAGTGAATTATATAAATATAAAGTGGTAGAAATTAAGCCATTAG  
GAGTAGCACCCACTAAGGCACAGAGGAAAGTGGTGAAGAGAGAAAAAGAGCAGTGGGAATGGGAGC  
TGTTCTCCTTGGGTTCCTTGGGAGCAGCAGGAAGCACTATGGGCGCAGCGTCAATAACGCTGACGGTACAGGCC  
AGACAACGTGTTGTCTGGTATAGTGCAACAGCAAAGCAATTTGCTGAAAGCTATAGAGGCGCAACACATCTGT  
TGCAACTCACAGTCTGGGGCATT

>GU080195

AATCATGATAGTGGGACAGAAGATAATTCAACCATCACACTTCCATGCAGAATAAAACAAATTGTAAACATGT  
GGCAGGAGGTAGGACGAGCAATGTACGCTCCTCCCATTGAAGGAAACATAACATGTATCTCAAATATCACAGG  
ATTACTATTGACACGTGATGGGGGAGAAACAAACAGAACAAATGACACATTCAGACCTGGAGGAGGAAATATG  
AAGGACAATTGGAGAAGTGAATTATATAAATATAAAGTGGTAGAAATTAAGCCATTGGGAATAGCACCCACTG  
GAGCAAAAAGGAGAGTGGTGGAGAGAGAAAAAGAGCAGTGGGACTAGGAGCTGTGATCTTTGGGTTCCTTGGG  
AGCAGCAGGAAGCACTATGGGCGCAGCGTCAATAACGCCGACGGTACAGGCCAGACAACGTGTTGTCTGGTATA  
GTGCAACAGCAAATAATTTGCTGAGGGCTATAGAGGCGCAACAGTATATGTTGCAACTCACGGTCTGGGGCA  
TT

>MF285011

AATTATACAGATAATAGTACAACCTGATGATACCCAGACAAACATCACACTCCAATGTAGAATAAAACAAATTA  
TAAACATGTGGCAGGAGGTAGGACGAGCAATGTATGCTCCTCCCATTGCAGGAAACATAACATGCAACTCAAA  
CATCACAGGATTACTATTGACATATGATGGAGGTGAAACAGGTAATGGTACACCAGAGATATTCAGGCCTGGA  
GGAGGAAATATGAAGGACAATTGGAGAAGTGAATTATATAAATATAAAGTGGTAGAAATTAAGCCATTGGGAA  
TAGCACCCACTGGAGCAAAAAGGAGAGTGGTGGAGAGAGAAAAAGAGCAGTAGGAATAGGAGCTGTGTTCTT  
TGGGTTCCTTGGGAGCAGCAGGAAGCACTATGGGCGCGGCGTCAATAACGCTGACGGTACAGGCCAGACAACGT  
TTGTCTGGTATAGTGCAACAGCAAAGCAATTTGCTGAGAGCTATAGAGGCGCAACAGCATATGTTGCAACTCA  
CGGTCTGGGGCATT

>KF725969

ACCTATCTTAGTAATGAAACCTTTAGACTCCAATGCAAAAATAAAACAAATTATAAACATGTGGCAGACGGTAG  
GACGAGCAATGTATGCCCCCTCCCATTTGCAGGAAACATAACATGTAATTCAAGCATCACAGGATTACTATTGAC  
ACGGGATGGAGGTTCCACAGATAATAATAAAACAGAAACGTTTCAGACCTGGAGGAGGAGATATGAGAGACAA  
TGGAGAAGTGAATTATATAAATATAAAGTGGTGGAAATTAAGCCATTGGGAATAGCACCCACTAAAGCAAAAA  
GGAGAGTGGTGCAGAGAGAGAAAAAGAGCAGCAATAGGAGCTATGATCCTTGGGTTCCTTGGGAGCAGCAGGA  
GCACTATGGGCGCGGCGTCAATGGCGCTGACGGTACAGGTGAGACAATTGTTGTCTGGTATAGTGCAACAGCAA  
AGTAATTTGCTGAGGGCCATAGAGGCGCAACAGCATATGTTGCAACTCACGGTCTGGGGCATT

>AY322187

TATTATACTGGATGCACCACCAACGTACAACAGAAAAAATGCTTCCCATCAGACTACAACCTATAATAAGTA  
ATGTATGCCCTTGTCCATGGCAAGGAGTGTGAGCAGCAACATCTGCTGCTACCATCCTATTATCAACAATAAC  
AGGAGGATCATTGACAACAAGAGGAGTGTTTCACAACTGGTGGAGGTGATACCTTCAGACCTGGAGGAGGAGAT  
ATGAGGGACAATTGGAGAAGTGAATTATACAAATATAAAGTAGTAAGAATTGAACCACTAGGTTTAGCACCCA  
CCAGGGCAAAGAGAAGAGTGGTGGAAAGAGAGAAAAAGAGCAATAGGACTAGGAGCTATGTTCTTGGGTTCCTT  
GGGAGCAGCAGGAAGCACGATGGGCGCAGCGTCACTGACGCTGACGGTACAGGCCAGACAGTTATTGTCTGGT  
ATAGTGCAACAGCAAACAATTTGCTGAGGGCTATAGAGGCGCAACAGCATCTGTTGCAACTCACAGTCTGGG  
GCATT

>KX587434

TTCTAATCAAACCTGAGAGTAACACTACTGAAGGTAATGACACAGTAATTACACTCCCATGCAGAATAAAGCAA  
ATTATAAACATGTGGCAGCAAGTAGGAAAAGCAATGTATGCCCCCTCCCATCGCAGGGCAACTTAATTGCTCAT

CAAACATTACAGGGATATTATTAACAAGAGATGGTGGTAGCGAGAACCATAACCAAGGGTAATGAGACCTTCAG  
ACCAGTAGGAGGAGACATGAGGGACAATTGGAGAAGTGAATTATATAAATATAAAATAGTAAAAATTGAACCC  
TTAGGAATAGCACCCACCAATGCAAAAAGAAGAGTGGTGCAGAGAGAAAAAGAGCAGTGGGACTAGGAGCCT  
TGTTCTTGGGTTCTTGGGAATGGCAGGAAGCACTATGGGCGCAGCGTCAGTGACGCTGACGGTACAGGCCAG  
ACAATTACTGTCTGGTATAGTGCAGCAGCAAAACAACCTTGCTGAGGGCTATTGAGGCGCAACAACACATGTTG  
CAGCTCACAGTCTGGGGCATC
