# Supplementary material for: Extending the Coding Potential of Viral Genomes with Overlapping Antisense ORFs: A Case for the De Novo Creation of the Gene Encoding the Antisense Protein ASP of HIV-1
Source: Viruses. 2022 Jan 14;14(1):146. doi: 10.3390/v14010146 (PMC8781085; doi:10.3390/v14010146)
Supplement: Supplementary file 1 [file viruses-14-00146-s001.zip › Supplementary File S4.pdf]

## Supplementary File S4

Supplementary File S4 contains a control set of 2260 spurious *env/asp* overlaps. The great majority of them (2183 cases) belong to the group M of HIV-1, while the remaining ones belong to the groups N, O, and P of HIV-1 and to SIV infecting chimpanzee or gorilla. A spurious overlap consists of an *env* region which overlaps with an anti-sense ORF interrupted prematurely by one or more stop codons and having a length  $\leq 450$  nt. The nucleotide sequence of overlap is reported both in the alignment format with gaps and in the format without gaps.

>MH705158

TTCTATTGCAATACATCAGGCCTGTTTAAATAGTAGTTGGAACGAAAGTGACACT-----  
-----

GCAAATGACACTATAACGCTCCCGTGCAAAATAAAACAAATTGTAAGGATGTGGCAGAGAGTAGGACAAGCAA  
TGTATGCCCCCTCCCATCCAAGGGGTAATGAGGTGTGAATCTAAC---  
ATTACAGGACTACTATTAACAAGAGATGGTGGGAATGAGGGCAAT-----  
-----

GAAAGTAGTGAGACGTGCAGACCTGGAGGAGGAGATATGAGGGATAATTGGAGAAGTGAACATATAAAATATA  
AAGTAGTAAAAATTGAACCACTA---GGAGTAGCACCCACCAGGGCAAAGAGAAGAGTGGTG-----  
-----GAGAGAGAAAAAAGAGCA---GTTGGA---CTGGGAGCT-----  
---GTCTTCATTGGGTTCTTAGGAGCA---GCAGGAAGCACTATG---GGCGCGGCGTCA---  
GTGACGCTGACGGTACAG---GCCAGACAA---TTATTG---TCTGGCATAGTGCAACAGCAAAAC---  
AATTTG---CTGAGG---GCTATAGAGGCTCAACAGCATCTGTTGAAACTCACGGTCTGGGGCATT

>MH705151

TTCTATTGCAATACATCAGACCTGTTTAAATAGCACTTGGCGGAAACTGGCAAATGGCACTTGGAGCAACATAA  
ATAATGCAACG-----  
-----

TCAAATGACACTATAACTCTCCAATGCAAAATAAAGCAAATTGTAAACATGTGGCAGAGAGTAGGACAAGCAA  
TGTATGCCCCCTCCCATCCAAGGAGTAATACAGTGTGTATCAAAC---  
ATTACAGGACTACTCTTAACAAGAGATGGTGGGAGTAGTAACAGG-----  
-----

GCAAATGAGACCTTCAGACCTGGAGGAGGAGATATGAGGGACAATTGGAGAAGTGAATTATATAAGTATAAAG  
TAGTAAAAATTGAACCACTA---GGAGTAGCACCCACCAGGGCAAGGAGAAGAGTGGTG-----  
-----GAGAGAGAAAAAAGAGCA---ATTGGA---ATGGGAGCT-----  
CTTTTCCTTGGGTTCTTAGGAACA---GCAGGAAGTACTATG---GGCGCGGCGTCA---  
ATAACGCTGACGGTACAG---GCCAGACAA---TTATTG---TCTGGTATAGTACAACAGCAGAGC---  
AATCTG---CTGAGG---GCTATAGAGGCTCAACAGCATCTGTTGAAACTCACAGTCTGGGGCATT

>MH705157

TTCTATTGTAATACATCAAGCCTGTTTAAATAGCACTTGGAAAGAGGAGAATGGCACTGTCTAGCATGCAGAATG  
ACACGGAG-----  
-----

TCAACTGACCCTATAACTCTCCAATGTAGAATAAAGCAAGTTATAAACATGTGGCAGAGAGTAGGACAAGCAA  
TATATGCCCCCTCCCATCCAAGGAGTAATAAGATGTGTATCAAAC---  
ATTACAGGACTACTATTAACAAGAGATGGTGGGAGTAATAATAATACT-----  
-----

TCAAATGAAACCTTCAGACCTGGAGGAGGAGATATGAGGGACAATTGGAGAAGTGAATTATATAAGTATAAAG  
TAGTAAAAATTGAACCACTA---GGAGTAGCACCCACCAAGGCAAAGAGAAGAGTGGTG-----  
-----GAGAGAGAAAAAAGAGCA---GTTGGA---CTGGGAGCT-----  
GTCTTCCTTGGGTTCTTAGGAGCA---GCAGGAAGTACGATG---GGCGCGGCGTCA---  
ATAACGCTGACGGTACAG---GCCAGACAA---TTATTG---TCTGGCATAGTGCAACAGCAGAGC---  
AATCTG---CTGAGG---GCTATAGAGGCTCAACAGCAACTGTTGAGACTCACGGTCTGGGGCATT

>MH705153

TTCTATTGCGATACATCAGGCCTGTTTAAATGGCACTTGGAGCAATACATCAGGCCTGATTAATAGCACTTGA  
GC-----  
-----

GAGAATGACACTATAACTCTCCCATGTAGAATAAAGCAAATTGTAAATATGTGGCAGAGAGTAGGACAAGCAA

TGTATGCCCCCTCCCATCCAAGGAATAATAAATTGTACATCAAAC ---  
 ATTACAGGACTACTGTTAACAAGAGATGGTGGGAATAATAACAGTATA-----  
 -----  
 AATGAGCCTGAGACCTTCAGACCTGGAGGAGGAGATATGAGGGACAATTGGAGAAGTGAACCTATATAAGTATA  
 AAGTAGTAAAAATTCAACCACTA---GGAGTAGCACCCACCAGGGCAAAGAGAAGAGTGGTG-----  
 -----GAGAGAGAAAAAAGAGCA---GTTGGC---ATGGGAGCT-----  
 ---CTTCTCCTTGGGTTCTTAGGAGCA---GCAGGAAGCACGATG---GGCGCGGCGTCA---  
 ATAACGCTGACGGTACAG---GCCAGACAA---TTATTG---TCTGGTATAGTGCAACAGCAGAGC---  
 AATCTG---CTGAGG---GCTATAGAGGCTCAACAGCATCTGTTGAAACTCACGGTCTGGGGCATT  
 >MH705133  
 TTCTATTGCAATACGTACGGCCTGTTTAATAGCACTTGGAGAATGGCACTAAAGAGGGAAATGACACTGCAA  
 AG-----  
 -----  
 TTAAGTGACACTATAACTCTCCCATGCAGAATAAAGCAAATTGTAAGGATGTGGCAGAGAACAGGACAAGCAA  
 TGTATGCCCCCTCCCATCCAGGAGTAATAAATTGTGTCTCTAAC---  
 ATTACAGGGATACTATTAACAAGGGATGGTGGGAATAGTAGTAAT-----  
 -----  
 GCCAATGAAACCTTCAGACCTGGAGGAGGAAATATGAAGGACAATTGGAGAAGTGAACCTATATAAGTATAAAG  
 TAGTAAAAATTGAACCAATA---GGAGTAGCACCCACCAGGGCAAAGAAAAGAGTGGTG-----  
 -----GAGAGAGAAAAAAGAGCA---GTTGGA---CTGGGAGCT-----  
 GTCTTCCTTGGGTTCTTAGGAGCA---GCAGGAAGTACTATG---GGCGCGGCGTCA---  
 ATAACGCTGACGGTACAG---GCCAGACAA---TTATTG---TCTGGCATAGTACAACAGCAAAGC---  
 AATTTG---CTGAGG---GCTATAGAGGCTCAACAGCATATGTTGAGACTCACAGTCTGGGGCATT  
 >JQ403028  
 TTCTACTGCAATACAACAGAACTGTTTAATAGCACGTGGAATGACACGAGCAACACATCGCAGGGGACAAAT-  
 -----  
 -----  
 AACAAAGTACTATTACTCTCCCATGCAGAATAAAGCAATTTGTAAATATGTGGCAGAGAGTAGGACAAGCAA  
 TGTATGCCCCCTCCCATCAAAGGAAAAATACAGTGCATATCAAAT---  
 ATTACAGGTCTACTATTAACAAGAGATGGGGGTAAGGGTAAAAGC-----  
 -----  
 -----  
 AATATTACAGAGATCTTCAGACCTGAAGGAGGAAATATGAAGGACAACCTGGAGAAGTGAATTATATAAATATA  
 AAGTAGTAAAAATTGAACCACTA---GGAGTAGCACCCACCAAGGCAAAGAGAAGAGTGGTG-----  
 -----GAGAGAGAAAAAAGAGCA---GTTGGA---CTGGGAGCT-----  
 ---GTGTTCTTGGGTTCTTAGGAGCA---GCCGGAAGTACTATG---GGCGCGGCGTCA---  
 ATAACGCTGACGGCACAG---GCCAGGCAA---TTATTG---TCTGGTATAGTACAACAGCAGAGC---  
 AATCTG---CTGAGG---GCTATAGAGGCTCAACAGCATCTGTTGAAACTCACGGTCTGGGGCATT  
 >KX389622  
 TTCTATTGCAATACATCAGACTTGTTTAATAGCAATTGGACAAATGGGAATTGGACAAATGGGATAGGCAGCA  
 CGGAG-----  
 -----  
 ACTAATGACACTATAACTCTTCCATGCAGAATAAAGCAGATTATAAGAATGTGGCAGAGAGTAGGACAAGCAA  
 TGTATGCCCCCTCCCATCAAAGGGGTAATAGAGTGTAATCAAAT---  
 ATTACAGGAATAATATTAGTAAGAGATGGTGGTAAGAATAACACA-----  
 -----  
 -----  
 GACAAGGAGACATTTAGACCTGGAGGAGGAGATATGAGGGACAATTGGAGAAGTGAACCTATACAAATATAAAG  
 TAGTAAAAATTGAACCATTA---GGAGTAGCACCCACCAGGGCAAAGAAGAGTGGTG-----  
 -----GAGAGAGAAAAAAGAGCA---GTTGGA---ATAGGAGCT-----  
 GTCTTCCTTGGGTTCTTAGGAGCG---GCAGGAAGCACTATG---GGCGCAGCGTCA---  
 ATAACGCTGACGGTACAG---GCCAGACAA---TTATTG---TCTGGCATAGTGCAACAGCAGAGC---  
 AATCTG---CTGAGG---GCTATAGAGGCTCAACAACATCTGTTGAAACTCACAGTCTGGGGCATT  
 >DQ396400  
 TTCTATTGCAATACATCAGGCCTGTTTAACAGAACTTGGAAATGACACCGCTTGGAAATGAAACAACCTTGGAAATA  
 ACATA-----  
 -----  
 AATTCAAATGGAAGTATAACTCTCCAATGTAGAATAAAGCAAATTTTAAATATGTGGCAGAGAGTAGGACAGG

CGATGTATGCCCCCTCCCATCCCAGGAGAAATAAGGTGTGAATCAAAC ---  
ATTACAGGACTAATCTTAACAAGAGACGGGGGGCTTGAGCTTAACAAT-----  
-----  
ACGAATAATGAGACCTTCAGGCCTGGAGGAGGAGATATGAGGGACAATTGGAGAAGTGAATTGTATAAATACA  
AAGTAATAAAAAATTGAACCACTA---GGAGTAGCACCCACCAGGGCAAAAAGAAGAGTGGTG-----  
-----GAGAGAGAAAAAAGAGCA--GTTGGA--CTGGGAGCT-----  
---GTTTTCCTTGCGTTCTTAGGGGCA--GCAGGAAGCACTATG--GGCGCAGCGTCA---  
ATAACGCTGACGGTACAG---GCTAGGCAA---TTATTG---TCTGGCATAGTGCAACAGCAAAGC---  
AATTTG---CTGAGG---GCTATAGAGGCTCAACAACATTTGTTGAAACTCACAGTCTGGGGCATT  
>FM165645  
TTCTACTGTAACACATCAGGCCTGTTTAATAGCAGTTGGGAAAATGACACTGGCAGCACGCAGGAGTCAAATA  
GAACA-----  
-----  
AAGTCAAATGACACTATAACTCTCCCATGCAGAATAAAGCAAATTATAAATATGTGGCAGAGGGCAGGACAAG  
CAATATATGCCCCCTCCCATCCCAGGGGTAATACAGTGTCAGTCAAAC---  
ATTACAGGACTACTATTAACAAGAGATGGTGGGAATAACAATACA-----  
-----  
ACTAATGAAACCTTCAGACCTGGAGGAGGAAATATGAGGGATAATTGGAGAAGTGAACTATATAAATATAAAG  
TAGTAAAAAATTGAACCACTA---GGAGTAGCACCCACCACGGCAAGGAGAAGAGTGGTG-----  
-----GAGAGAGAAAAAAGAGCA--GTGGGA--CTGGGAGCT-----  
CTGTTTCAATTGGGTTCTTAGGAGCC---GCAGGAAGCACTATG--GGCGCGGCGTCA---  
GTGACGCTGACGGTACAG---GCCAGACAA---TTATTG---TCTGGCATAGTGCAACAGCAAAAC---  
AATTTG---CTGAGG---GCTATTGAGGCTCAACAGCATCTGTTGAAACTCACGGTCTGGGGCATT  
>FM165628  
TTCTACTGCAACACATCAAGACTGTTTAATAGCAGTTGGGAACCATTAGGCCAGTATGATGACAGTCAGAGC-  
-----  
-----  
AATGACACAAATATAACTCTCCCATGCAGAATAAAGCAAATTATAAGGATGTGGCAGAGGACAGGACAAGCAA  
TATATGCCCCCTCCCATCCAAGGGGAAATAACGTGTAGATCAAAT---  
ATTACAGGACTACTATTAACAAGAGATGGTGGAAATAAACTAAT-----  
-----  
GAAACCTCCGAAACCTTCAGACCTGGAGGAGGAGATATGAGAGATAATTGGAGAAGTGAACTATATAAATATA  
AAGTAGTAAAAAATTGAACCACTA---GGAGTAGCACCCACCAAGGCAAAAAGAAGAGTGGTG-----  
-----GAGAGAGAAAAAAGAGCA--GTGGGA--CTGGGAGCT-----  
---GTTCTCATTGGGTTCTTAGGAACA--GCAGGAAGCACTATG--GGCGCGGCGTCA---  
GTGACGCTGACGGTACAG---GCCAGACAA---TTATTG---TCTGGCATAGTGCAACAGCAAAAC---  
AATTTG---CTGAGG---GCTATAGAGGCTCAACAGCATCTGTTGAAACTCACGGTCTGGGGCATT  
>EU191615  
TTCTACTGCAACACATCAACACTGTTTAATAGCAGTTGGCCATTAAACCAGTCTAACAGTTGGAGCAATGGCG  
GA-----  
-----  
AATGACACAAATATAACTCTCCCATGCAGAATAAAGCAAATTATAAGGATGTGGCAGAGGACAGGACAAGCAA  
TATATGCCCCCTCCCATCGAAGGGGTAATAATGTGTAGGTCAAAT---  
ATTACAGGACTCCTATTAACAAGAGATGGTGGAAATGAAGCTAATAAACT-----  
-----  
AATGAAACTGCTGAAATCTTCAGACCTGGAGGAGGGGATATGAGAGATAATTGGAGAAGTGAACTATATAAAT  
ATAAAGTAGTAAAAAATTGAACCACTA---GGAGTAGCACCCACCAGGGCAAAAAGAAGAGTGGTG-----  
-----GAGAGAGAAAAAAGAGCA---GTGGGA--CTGGGAGCT---  
-----GTTCTCATTGGGTTCTTAGGAACA---GCAGGAAGCACTATG---GGCGCGGCGTCA---  
GTGACGCTGACGGTACAG---GCCAGACAA---TTATTG---TCTGGCATAGTGCAACAGCAAAAC---  
AATTTG---CTGAGG---GCTATAGAGGCTCAACAGCATCTGTTGAAACTCACGGTCTGGGGCATT  
>MH746258  
TTCTATTGTAACACATCAGGCCTGTTTAATAGCACATGGTCTAAAAATGGCACACAGCAGGTAGACAAC----  
-----  
-----  
ATAACCAATCCTATAATTCTCCAATGCAGAATAAAGCAGATTATAAATATGTGGCAGAGAGCAGGACAAGCAA

TATATGCCCCCTCCCATCCAAGGACTAATAAGGTGTGAATCAAAC ---  
ATTACAGGACTAATATTAACAAGAGATGGTGGAATGGGAATACA -----  
-----  
-----  
ACAAACAATGAAACCGAAACCTTCAGACCTGGAGGAGGAGATATGAGGGACAATTGGAGAAGTGAATTATATA  
AGTATAAGGTAGTACAAGTTGAACCACTA --- GGAGTAGCACCCACCAAGGCAAAAAGAAGAGTGGTG -----  
----- GAGAGAGAAAAAAGAGCA --- GTTGA ---  
CTAGGAGCT ----- GTATTCATTGGATTCTTAGGAGCA --- GCAGGAAGCACTATG ---  
GGCGCGGCGTCT --- GTGACGCTGACGGTACAG --- GCCAGGCAA --- TTATTG ---  
TCTGGTATAGTGCAACAGCAAAGC --- AATTTG --- CTGAGG ---  
GCTATAGAGGCTCAACAGCATTTGTTGAAACTCACAGTCTGGGGCATT  
>MH746253  
TTCTATTGTAATACATCAGCCTTATTTAATAGCACTTGGAAATGATACCAATAATACGGGATCAAATACTGACA  
ATAACACCAG -----  
-----  
GGGTCAAATGAAGTTATAACTCTCCCTTGCAAGAATAAAACAAATTATACGTATGTGGCAGAGAACAGGACAAG  
CAATGTATGCCCCCTCCCATTTTCAGGAATAATAAATTGTACATCAAAC ---  
ATTACAGGACTAATATTGACAAGAGATGGTAGTAATGGTGATAAT -----  
-----  
-----  
AACAGTGAAACCTTCAGACCTGGAGGAGGAGATATGAGGGACAATTGGAGAAGTGAATTATATAAGTATAAAG  
TAGTAAAAATTGAACCATTA --- GGGGTAGCACCCACCAGGGCAAGGAGAAGAGTGGTG -----  
----- CAGAGAGAAAAAAGAGCA --- GTTGA --- ATAGGAGCT -----  
GTCTTCCTTGCGTTCTTAGGAGCA --- GCAGGAAGCACTATG --- GGCGCAGCGTCA ---  
ATAACGCTGACGGTACAG --- GCCAGACAA --- TTATTG --- TCTGGCATAGTGCAACAGCAAAC ---  
AATTTG --- CTGAGG --- GCTATAGAGGCTCAACAACAGCTGTTGAAACTCACAGTCTGGGGCATT  
>MH746251  
TTCTATTGCAATACATCAGCCCTGTTCAATAGTACTTGGAAATGGCACTGTCAAAATGGCACACAA -----  
-----  
-----  
GCAAAATGGAACATAATTCTACCATGCAGAATAAAGCAAATTATAAGAATGTGGCAGAGAGTAGGACAAGCAA  
TGTATGCCCCCTCCTATCAGAGGAGTGATAAGGTGTGAATCAAAC ---  
ATTACAGGACTAATACTAACAAGAGATGGTGAGGTGGAACATAAT -----  
-----  
-----  
AGCAGCAATGAGACCTTCAGGCCTACAGGAGGAGATATGAGGGACAATTGGAGAAGTGAAGTATATAAGTATA  
AAGTAGTAAAAATTGAACCAATA --- GGATTAGCACCTACCGAGGCAAGGAGGAGAGTGGTG -----  
----- GAGAGAGAAAAAAGAGCA --- ATTGA --- CTGGGAGTT -----  
--- GCCTTCCTTGCGTTCTTAGGAGCA --- GCAGGAAGTACTATG --- GGCGCGGCGTCA ---  
TTGACGCTGACGGCACAA --- GCCAGACAA --- TTATTG --- TCTGGTATAGTGCAACAGCAAAGC ---  
AATTTG --- CTGAGG --- GCTATAGAGGCTCAGCAGCATCTGCTGAAACTCACAGTCTGGGGCATT  
>KU168256  
TTCTATTGCAATACATCAGGCCTGTTTAATAGCACTTGGCATGTCAATAATACATCAAGCCTGGTTAAT ---  
-----  
-----  
AGCACTGGGAACATAACTCTCCCATGCAGAATAAAGCAAATTATAAATATGTGGCAGAGAGTAGGACAAGCAA  
TGTATGCCCCCTCCTATTCCAGGAATAATAAAGTGTGAGTCAAAC ---  
ATTACAGGACTACTATTGATAAGAGATGGTGGAATTAATAATAAC -----  
-----  
-----  
AGTATGAATGAGACCTTCAGACCTGGAGGAGGAGATATGAGAGACAATTGGAGAAGTGAATTATATAAATATA  
AAGTAGTACAAATTGAACCACTA --- GGAGTAGCACCTACCAAGGCAAGAGAAGAGTGGTG -----  
----- GAGAGAGAAAAAAGAGCA --- GTTGA --- TTTGGAGCT -----  
--- GTCTTCCTTGCGTTCTTAGGAGCA --- GCAGGAAGCACTATG --- GGCGCGGCGTCA ---  
ATAACGCTGACGGCACAG --- GCCAGACAA --- TTATTG --- TTTGGCATAGTGCAACAGCAAAGC ---  
AATTTG --- CTGAGG --- GCTATAGAGGCTCAACAGCATCTGTTGAAACTCACAGTCTGGGGCATT  
>KU168305  
TTCTATTGTAATACATCAGGCCTGTTTAATAGCACTTGGAAAGACTAATGGCACTAGCACTTGGAAAGGAGACTA  
ATGGCACT -----  
----- GGGAGCCAGGAA -----

AATAGCAATGACAATATAACTCTCCCATGCAGAATAAAGCAAATTATAAATATGTGGCAGAGAGCAGGACAAG  
CAATGTATGCCCCCTCCCATCGCAGGAGTAATAAAGTGTAACCTCAAAC---  
ATTACAGGACTACTATTAACAAGAGATGGGGGAAGTAATAACAAT-----  
-----  
AGCCAAGAGGAGACTTTCAGACCTGGAGGAGGAAATATGAAGGATAACTGGAGAAGTGAATTATATAGGTACA  
AAGTAGTACAAATTGAACCCCTA---GGAATAGCACCCACCAGGGCAAGGAGAAGAGTGGTG-----  
-----GGGAGAGAAAAAAGAGCA---GTTGGA---CTGGGAGCT-----  
---GTCTTCATTGGGTTCTTAGGAGCA---GCTGGAAGCACTATG---GGCGCAGCGTCA---  
ATAACGCTGACGGCACAG---GCCAGACAA---TTATTG---TCTGGCATAGTGCAACAGCAAAGC---  
AATTTG---CTGAGG---GCTATAGAGGCTCAACAGCATATGTTGAAACTCACGGTCTGGGGCATT  
>KP718918  
TTCTATTGTAATACATCAGGCCTGTTTAATAGCACTTGGTTTAGTAATGGGAGCAGGGGCAATGAGAGCATGG  
AAGATGACACC-----  
-----  
AATATAACTCATATAACTCTCCCATGCAGAATAAGGCAAATTGTGAATATGTGGCAGAGAGCAGGACAAGCAA  
TGTATGCCCCCTCCCATCCAAGGAGTAATAAAGTGTAACATCAAAT---  
ATTACAGGAATACTATTAACAAGAGATGGTGGATATAATATTAGCAAT-----  
-----  
AACGACACCGAGATTTTCAGACCTGGAGGAGGAAATATGAAGGACAATTGGAGAAGTGAATTATATAAATATA  
AAGTAGTAAAAGTTGAACCACTA---GGAATAGCACCCACTAGGGCAAAGAGAAGAGTGGTG-----  
-----GAGAGAGAAAAAAGAGCA---GTTGGA---ATAGGAGCT-----  
---GTGTTTCATTGGGTTCTTAGGAGCA---GCAGGAAGCACTATG---GGCGCAGCGTCA---  
ATAACGCTGACGGCACAG---GCCAGACAG---TTATTG---TCTGGAATAGTGCAACAGCAAAGC---  
AATTTG---CTGAGG---GCTATAGAGGCTCAACAGCATTTGTTGAAACTCACGGTCTGGGGCATT  
>KP718928  
TTCTATTGTAATACATCAGGCCTGTTTAATAGCACTTGGCATAGTAATGGCACTGCAAATGGCACT-----  
-----  
-----  
GAAAAATGCCACTATAACTCTCCCATGCAGGATAAAGCAGATTATAAATCTATGGCAGAGAGTAGGGCAAAGCAA  
TGTATGCCCCCTCCTATCCCAGGAATAATAAATTGTACATCAAAC---  
ATTACAGGACTACTATTAACAAGAGATGGTGGGAATGCTAGTGAG-----  
-----  
-----  
GAAACTGAGACCTTCAGACCTGGAGGAGGAAATATGAAGGACAATTGGAGGAGTGAATTATATAAATATAAAG  
TAGTAAAGATTGAACCACTA---GGAGTAGCACCCACCAGGGCAAAGAGAAGAGTGGTG-----  
-----GAGAGAGAAAAAAGAGCA---GTCGGA---ATAGGAGCT-----  
GTGTTTCATTGGGTTCTTAGGAGCA---GCAGGAAGCACTATG---GGCGCAGCGTCA---  
ATAACGCTGACGGCACAG---GCCAGACAG---TTACTG---TCTGGTATAGTGCAACAGCAAAGC---  
AATTTG---CTGAGG---GCTATAGAGGCTCAACAGCACATGTTGAAACTCACAGTCTGGGGCATT  
>AM279343  
TTCTATTGTAATACATCAGGCCTGTTTAATAGCACTTGGTTTAATAGCACTTGAATGACACTATCAGCAATA  
ATAAC-----  
-----ACA---  
GGGTCAAATGACACCATATATCTCCCATGCAGAATAAAGCAAATTATAAATATGTGGCAAAGGACAGGACAAG  
CAATGTATGCCCCCTCCCATCCGAGGAATAATACAGTGTAATTCAACC---  
ATTACAGGACTACTATTAACAAGAGATGGTGGGATTAACAACAAC-----  
-----  
-----  
AGTACAAATGAAACCTTCAGACCTGGAGGAGGAAATATGAGGGATAATTGGAGAAGTGAACATATAAATATA  
AAGTAGTAAAAATTGAACCACTA---GGAGTAGCACCCACCAAGGCAAGGAGAAGAGTGGTG-----  
-----GAGAGAGAAAAAAGAGCA---GTTGGA---CTGGGAGCT-----  
---GTATTCATTGGGTTCTTAGGAGCA---GCAGGAAGCACTATG---GGCGCGGCGTCA---  
ATAACGCTGACGGTACAG---GCCAGACAA---TTATTG---TCTGGCATAGTGCAACAGCAAAAC---  
AATTTG---CTGAGG---GCTATAGAGGCTCAACAGCATCTGTTGAAACTCACGGTCTGGGGCATT  
>AM279348  
TTCTATTGCAATACATCAGGCCTGTTTGCTCAGGAGTTAAAAAATGACACAAAT-----  
-----  
-----

GACAATAACACAATAATTCTCCTATGCAAAATAAAGCAAATTATAAATATGTGGCAGAGAGTAGGACAAGCAA  
TGTATGCCCCCTCCAGAGCAGGAGTAATAAGGTGTGTATCAAAC---  
ATTACAGGACTACTGTTAACAAGAGATGGTGGAAAAAATGACAATGGA-----  
-----  
-----  
ACTAATGGAAGTGAATGAGATATTCAGGCCTGGAGGAGGAGATATGAGGGACAATTGGAGAAGTGAATTATATAAGT  
ATAAAGTAGTAAGAATTGAACCAAGTA---GGGGTAGCACCCACCAGGGCAAAGAGAAGAGTGGTG-----  
-----GAGAGAGAGAGAAAAGAGCA---GTTGGA---CTGGGAGCT---  
-----GTCTTCCTTGGGTTCTTAGGAGCA---GCAGGAAGCACTATG---GGCGCGGCGTCA---  
CTGACGCTGACGGTACAG---GCCAGGCAA---TTATTG---TCTGGCATAGTGCAACAGCAGAGC---  
AATTTG---CTGAGG---GCTATAGAGGCTCAACAACATATGTTGAGACTCACAGTCTGGGGCATC  
>FJ388894  
TTCTATTGTAACACATCAAGCCTGTTTAATAGCACCTGGAATATTAATACTATTTGGAATAACACTATGTCAA  
ACAGC-----  
-----ACT---  
GAGTCAAACGGCACTATAGTGCTCCCATGCAGAATAAAGCAAATTGTAAATGTGTGGCAGAGAGCAGGACAAG  
CAATATACGCCCCCTCCCATCCAAGGAATAATACAGTGTGTCTCAAAC---  
ATTACAGGACTAATATTAACAAGAGATGGTGGGAATAATAATAACACA-----  
-----  
-----  
AATAATACTGAAATCTTCAGACCTGGAGGAGGAGATATGAGGGACAATTGGAGAAGTGAATTATATAAATATA  
AGGTAGTAAAAATTGAACCATTA---GGAGTAGCACCCACCAAGGCAAGGAGAAGAGTGGTG-----  
-----GGGAGAGAGAAAAAGAGCA---GTTGGA---CTGGGAGCT-----  
---GTCTTCCTTGGGTTCTTAGGAACA---GCAGGAAGCACTATG---GGCGCGGCGTCA---  
ATAACGCTGACGGTACAG---GCCAGGCAA---TTATTG---TCTGGCATAGTGCAACAGCAAAGC---  
AATTTG---CTGAGG---GCTATAGAGGCTCAACAACATCTGTTGAAACTCACTGTCTGGGGCATT  
>FJ388903  
TTCTATTGTAACACATCGGGCCTGTTTAATAGCCAATATAACACATCAGGCCTGGTTAATAACACGCAGGAGT  
CAGGAAGCACA-----  
GAGTCAAATGACACTGAGTCA-----  
ATTGTCACAGACAATATAACTCTCCAAATCAGAATAAAGCAAATTATAAATCAGTGGCAAAGAGTAGCTCAAG  
CAACATATGCCCCCTCCCATCCCAGGAGTAATAAAATGTGTATCAAAC---  
ATTACAGGACTAATATTAAGTAGAGATGGTGGGAGTAGTAGCGGA-----  
-----  
-----  
AATGAAACCTTCAGACCTGGAGGAGGAGATATGAGGGACAATTGGAGAAGTGAATTATATAAGTATAAAGTAG  
TAAAAATTGAACCACTA---GGAGTAGCACCCACCAGGGCAAAGAGAAGAGTGGTG-----  
-----GAGAGAGAGAAAAAGAGCA---GTTGGA---ATAGGAGCT-----  
GTCTTCATTGGGTTCTTAGGAGCA---GCAGGAAGCACTATG---GGCGCGGCGTCA---  
ATGACGCTGACGGTACAG---GCCAGGCAA---TTATTG---TCTGGCATAGTGCAACAGCAAAGT---  
AATTTG---CTGAGG---GCTATAGAGGCTCAACAGCATCTGTTGAAACTCACGGTTTGGGGCATT  
>FJ388909  
TTCTATTGTAATACATCAGGCCTGTTTAATAGCACTTGAATAATGACACCTGGAATGGCAATGACACACAAG  
AGTCAAAT-----  
-----GAAACC-----  
TCGTCAAATGGCACCATTAATCCACCATGCAAAATAAAACAAATTGTAAATATGTGGCAGAGAGTACAACAAG  
CAATGTATCCCCCTCTCGTGAAGGAGTAATAAGGTGTGAATCCATC---  
ATTACAGGACTACTATCAACAAGAGATGGTGGGATTAACAGCAGG-----  
-----  
-----  
ACAAATGAAACCTTCAGACCTGGGGGAGGAGATATGAGGGACAATTGGAGAAGTGAAGTATATAAATATAAGG  
TAGTAAAAATTGAACCACTA---GGAGTAGCACCCACCAGGCAAAGAGAAGAGTGGTG-----  
-----GAGAGAGAGAAAAAGAGCA---GCTGGA---CTGGGAGTT-----  
ATGTTTCCTTGGGTTCTTAGGAGCA---GCCGGAAGCACTATG---GGCGCGGCGTCA---  
ATAACGCTGACGGTACAG---GCCAGACAG---TTATTA---TCTGGTATAGTGCAACAGCAAAGC---  
AATTTG---CTGAAG---GCTATAGAGGCTCAACAGCACCTGTTGAGACTCACGGTCTGGGGCATT  
>FJ388925  
TTCTATTGTAACACATCAGGCCTGTTTAATAGCACTTGAATGCCACTGCCAGCATGCAGGAGTCAAATAGCA  
CAGAG-----  
-----

TCAAACGACACTACTATAACTCTCCCATGCAGAATAAAGCAAATTATAAATATGTGGCAGAGAGCAGGACAAG  
CAATATATATGCCCCCTCCCATCCGAGGAGTAATAAGGTGTGAATCAAAC---  
ATTACAGGACTAATATTAACAAGAGATGGAGGGAATAGTAACAGC-----  
-----  
-----  
ACAAATGAAACCTTCAGACCTGGAGGAGGAGATATGAGGGATAATTGGAGAAGTGAATTATATAAGTATAAAG  
TAGTAAAAATTGAACCACTA---GGAGTAGCACCCACCAGGGCAAGGAGAAGAGTGGTG-----  
-----GAGAGAGAAAAAAGAGCA--GTTGGA--ATAGGAGCT-----  
GTCTTCATTGGGTTCTTAGGAGCA---GCAGGAAGCACTATG---GGCGCGGCGTCA---  
ATAGCGCTGACGGTACAG---GCCAGGCAA---TTATTG---TCTGGCATAGTGCAACAGCAAAGC---  
AATTTG---CTGAGG---GCTATAGAGGCTCAACAGCATATGTTGAAACTCACGGTCTGGGGCATT  
>FJ388932  
CTCTATTGTAACACATCAGGCCTGTTTAATAGCACTTGGCCTGCCAATAACAGTACGCAGGGGTCAAATAGCA  
CA-----  
-----  
GAGTCAAACGACACCGTAATTCTCCAATGCAGAATAAAGCAAATTATAAATATGTGGCAAAGAGTAGGACAAG  
CAATATATATGCCCCCTCCCATACCAGGAGAAATAAAGTGTGTATCAAAC---  
ATTACAGGACTAATATTAACAAGAGATGGTGGGAGTAGCAATAAT-----  
-----  
-----  
ACAGAAAATGAAACCTTCAGACCAGGAGGAGGAGATATGAGGGACAATTGGAGAAGTGAATTATATAAGTATA  
AAGTAGTAAAAATTGAACCACTA---GGAGTAGCACCCACCAGGGCAAAGAGAAGAGTGGTG-----  
-----CAGAGAGAAAAAAGAGCAGTATTAGGTGGACTGGGAGCT-----  
---GTCTTCGTTGGGTTCTTGGGAGCA---GCAGGAAGCACTATG---GGCGCGGCGTCA---  
GTGACGCTGACGGTACAG---GCCAGGAAA---TTATTG---ACTGGCATAGTGCAACAGCAAAGT---  
AATTTG---CTGAGG---GCTATCGAGGCTCAACAGCATCTGTTGAAACTCACGGTCTGGGGCATT  
>FJ388938  
TTCTATTGTAACACATCAGGCCTGTTTAATAGCACTTGGAAATGGCACTACCATGCAGGAGTCAAATAACACAG  
AGTCAAAC-----  
-----GACACT-----  
GAGTCAAACGACATTATAACTCTCCGATGCAGAATAAGGCAAATTATAAGAATGTGGCAGAGAGCAGGACAAG  
CAATGTATGCCCCACCCATCCAAGGAATAATAAAGTGTGAATCAAAC---  
ATTACAGGACTAATATTAGCAAGAGATGGTGGGAATAGAAATGAA-----  
-----  
-----  
ACTGAAACCTTCAGACCTGGAGGAGGAGACATGAGGGACAATTGGAGAAGTGAATTATATAAGTATAAAGTAG  
TAAAAATTGAACCATTA---GGAGTAGCACCCACCAAGGCAAGGAGAAGAGTGGTG-----  
-----CAGAGAGAAAAAAGAGCA--GTTGGA--ATAGGAGCT-----  
GTCTTCATTGGGTTCTTAGGAGCA---GCAGGAAGCACTATG---GGCGCGGCGTCA---  
ATAACGCTGACGGTACAG---GCCAGGCAA---CTATTG---TCTGGCATAGTGCAACAGCAAAGT---  
AATTTG---CTGAAG---GCTATAGAGGCTCAACAACATCTGTTGAAACTCACGGTTTGGGGCATT  
>FJ388942  
TTCTATTGTAACACATCAGGCCTGTTTAATAGCTCTTGGCTGAAGTCAAATAGAACAGGGCCTAGCACAGAGC  
CAAACAAC-----  
-----ACTGAG-----  
CCAAACAACACTATTATAACTCTCCCATGCAAAATAAAGCAAATTATAAATATGTGGCAGAGAACAGGACAAG  
CAATGTATGCCCCCTCCCATCCCAGGAGTAATAAGGTGTGAATCAAAC---  
ATTACAGGACTAATATTAACAAGAGATGGTGGGAATAGTAGCAAT-----  
-----  
-----  
AGCAATGAAACCTTCAGACCTGGAGGAGGAAATATGAGGGACAATTGGAGAAGTGAATTATATAAGTATAAAG  
TAGTAAAAATTGAACCACTA---GGAGTAGCACCCACCAGGGCAAGGAGAAGAGTGGTG-----  
-----GAGAGAGAAAAAAGAGCA--GTTGGA--ATAGGAGCT-----  
GTCTTCATTGGGTTCTTAGGAGCA---GCAGGAAGCACTATG---GGCGCGGCGTCA---  
ATGACGCTGACGGTACAG---GCCAGGCAA---TTATTG---TCTGGCATAGTGCAACAGCAAAGC---  
AATTTG---CTGAGG---GCTATAGAGGCTCAACAGCATATGTTGAAACTCACGGTCTGGGGCATT  
>FJ388946  
TTTTATTGTAATACATCAGGCCTGTTTAATAGAACTTGGTCTACCAATACCAGCATGCAGGTGTCAAATAGCA  
CA-----  
-----

GAGTTAAATGGCCCTATAATTCTCCAATGCAGAATAAAGCAAATTATAAATATGTGGCAAAGAGTAGGACAAG  
CAATATATGCCCCCTCCCATCCCAGGAGTAATAAGGTGTGAATCAAAC---  
ATTACAGGACTAATATTAACAAGAGATGGTGGAAATAATAATACC-----  
-----  
-----  
GGAAATCAAACCTTCAGACCTGTAGGAGGAGATATGAAGGACAATTGGAGAAGTGAATTATATAAGTATAAAG  
TAGTAAAAAATTGAACCACTA---GGAGTAGCACCCCTCCAAGGCAAAGAGAAGAGTGGTG-----  
-----GAGAGAGAAAAAAGAGCA---ATTGGA---ATAGGAGCT-----  
GTCTTCATTGGGTTCTTAGGAGCA---GCAGGAAGCACTATG---GGCGCGGCGTCA---  
GTGACGCTGACGGTACAG---GCCAGGCAA---TTATTG---TCTGGCATAGTGCAACAGCAAAGT---  
AATTTG---CTGAGG---GCTATAGAGGCTCAACAGCATCTGTTGAACCTCACGGTCTGGGGCATT  
>JF683737  
TTCTATTGTAACACATCAGGCCTGTTTAATAGCACGTGGAATGCTAGTGACATCACGCAGGGG-----  
-----  
-----  
TTAAATGACACAATAACTCTCCAATGCAGAATAAAGCAAATTATAAATATGTGGCAGAGAGTAGGGCAGGCAA  
TGTATGCCCCCTCCCATCCAGGGAGAAATAAGGTGTGAATCAAAC---  
ATTACAGGACTAATATTAACAAGAGATGGTGGGAATGGGAATGGA-----  
-----  
-----  
ACAAATGAAACCTTCAGACCTGGAGGAGGAGATATGAGGGACAATTGGAGAAGTGAATTATATAAGTATAAAG  
TAGTAAAAAATTGAACCACTA---GGAGTAGCACCCACCAGGGCAAAGAGAAGAGTGGTG-----  
-----GAGAGAGAAAAAAGAGCA---GTTGGA---CTGGGAGCT-----  
GTATTCATTGGGTTCTTAGGAGCA---GCAGGAAGCACTATG---GGCGCGGCGTCA---  
GTGACGCTGACGGTACAG---GCCAGGCAA---TTATTG---TCTGGCATAGTGCAACAGCAAAGC---  
AATTTG---CTGAGG---GCTATAGAGGCTCAACAGCATTTGTTGAAACTCACAGTCTGGGGCATT  
>JF683759  
TTCTATTGTGACACATCAGGCCTGTTTAATAGCACTTGAATACCACTGACACCATGCACGAGGAGACTAATA  
CA-----  
-----  
GAGGCAAATAGTACTATTACTCTCCCATGCAGAATAAAGCAAATTATAAATATGTGGCAGAGAGCAGGACAAG  
CAATATATGCCCCCTCCCATCCCAGGAGTAATACAGTGTAAATCAAAC---  
ATTACAGGACTAATATTAACAAGAGATGGTGGGAGTAATAGCAGC-----  
-----  
-----  
ACAAATGAAACCTTCAGACCTGGAGGAGGAGATATGAGGGACAATTGGAGAAGTGAATTATATAAGTATAAAG  
TAGTAAAAAATTGAACCACTA---GGAGTAGCACCCACCAAGGCAAGGAGAAGAGTGGTG-----  
-----CAGAGAGAAAAAAGAGCA---GTAGGA---CTGGGAGCG-----  
GTATTCATTGGGTTCTTAGGAGCA---GCTGGAAGCACCATG---GGCGCGGCGTCA---  
ATAACGCTGACGGTACAG---GCCAGGCAA---TTATTG---TCTGGTATAGTGCAACAGCAAAGC---  
AATTTG---CTGAGG---GCTATAGAGGCTCAACAGCATCTGTTGAAACTCACAGTCTGGGGCATT  
>JF683760  
TTCTATTGTAACACCTCAAAGTTGTTTAATAGCACTTGGGATCCTAATAATACCAGCACGCAGGAGTCAAATA  
GC-----  
-----  
ACAAATGATAATATAATTCTCCCATGCAGAATAAAGCAAATTATAAATATGTGGCAGAGAGCAGGACAAGCAA  
TATATGCCCCCTCCCATCCAAGGAATAATAAACTGTGTATCAAAC---  
ATTACAGGATTAATATTAACAAGAGATGGGGGTGTAGGTAACAAC-----  
-----  
-----  
GCAAAGGAAGTCTTCAGACCTGGAGGAGGAGATATGAGGGACAATTGGAGAAGTGAATTATATAAGTATAAAG  
TAGTAAAAAATTGAGCCACTA---GGAGTAGCACCCACTGGGGCAAGGAGAAGAGTGGTG-----  
-----CAGAGAGAAAAAAGAGCA---GTTGGA---CTGGGAGCT-----  
GTTTTTCATTGGGTTCTTGGGAGCA---GCAGGAAGCACTATG---GGCGCGGCGTCA---  
ATGACGCTGACGGTACAG---GCCAGACAA---TTATTG---TCTGGCATAGTGCAACAGCAAAGC---  
AATTTG---CTGAGG---GCTATAGAGGCTCAACAGCATATGTTGAGACTCACGGTCTGGGGCATT  
>JF683761  
TTCTATTGTAACACCTCAAAGCTGTTTAATAGCACTTGAATAATACCAGCACGCAGGAGTCAAATAGCACTA  
AT-----  
-----

CCAAATGATAATATAACTCTCCCATGCAGAATAAAGCAAATTATAAATATGTGGCAAAGAGCAGGACAAGCAA  
 TATATGCCCCCTCCCATCCAAGGAAAAATAAACTGTGTATCAAAC ---  
 ATTACAGGATTAATATTAACAAGAGATGGGGGGGGTAACAGCACA -----  
 -----  
 -----  
 GAGGAAGTCTTCAGACCTGGAGGAGGAGATATGAGGGACAATTGGAGAAGTGAATTATATAAGTATAAAGTAG  
 TAAAAATTGAGCCAATA --- GGAGTAGCACCCACTGAGGCAAGGAGAAGAGTGGTG -----  
 ----- CAGAGAGAAAAAAGAGCG --- GTTGGA --- CTGGGAGCT -----  
 GTTTTCATTGGGTTCTTGGGAGCA --- GCAGGAAGCACTATG --- GGCGGGGCGTCA ---  
 ATGACGCGGACGGTACAG --- GCCAGACAA --- TTATTG --- TCTGGCATAGTGCAACAGCAAAGC ---  
 AATTTG --- CTGAGG --- GCTATAGAGGCTCAACAGCATATGTTGAGACTCACGGTCTGGGGCATT  
 >JF683767  
 TTCTATTGTAATACATCAGGTCTGTTCAATAGCTCTTGGAATATCAATGGCAGCAGGTCAAATAGCACAAGG-  
 -----  
 -----  
 TCAAAATGGCAATATAACTCTCCCATGCAGAATAAAGCAAATTATAAATATGTGGCAAAGAACAGGACAGGCAA  
 TGTATGCCCCCTCCCATCCAAGGAGTAATAAGGTGTGTATCAAAC ---  
 ATTACAGGACTACTGTTAAACAAGAGATGGAGGGGGTAACAATACA -----  
 -----  
 -----  
 AATGAAACTGAAATTTTCAGACCTGGAGGAGGAGATATGAGGGGCAATTGGAGAAGTGAATTATATAAGTATA  
 AAGTAGTAAAAATTGACCCACCA --- GGAGTAGCACCCAACACAGCAAGGAGAAGAGTGGTG -----  
 ----- GGGAGAGAAAAAAGAGCA --- GCTGGAATAATAGGAGCT -----  
 --- GTCTTCCTTGGGTTCTTAGGAGCA --- GCAGGAAGCACTATG --- GGCGCGGCGTCA ---  
 GTGACGCTGACGGTACAG --- GCCAGACAA --- TTATTG --- TCTGGTATAGTGCAACAGCAAAGC ---  
 AATTTG --- CTGAGG --- GCTATAGAGGCTCAACAACACCTGTTGAAACTCACGGTCTGGGGCATT  
 >JF683779  
 TTCTACTGTAACACATCAGGCCTGTTTAATAGCACTTGGTATACCAATAACAGCATGCAGCCAAAT -----  
 -----  
 -----  
 TACACAAAACTATAACTTTGCCATGCAGAATAAAGCAAGTTATAAATATGTGGCAAAGAGTAGGACAAGCAA  
 TGTATGCCCCCTCCCATCCCAGGAATAATACAATGTGTATCAAAC ---  
 ATTACAGGACTAATATTAACAAGAGATGGTGGGCATAATAATAGT -----  
 -----  
 -----  
 GCAAATGAGACCTTCAGACCTGGAGGAGGAGATATGAGGGACAATTGGAGAAGTGAATTATATAAGTATAAAG  
 TAGTGAAAGTTGAACCATTA --- GGAGTAGCACCCACCAGGGCAAGGAGAAGAGTGGTG -----  
 ----- GAGAGAGAAAAAAGAGCA --- GTTGGA --- ATAGGAGCT -----  
 GTCTTCCTTGGGTTCTTAGGAGCA --- GCAGGAAGCACTATG --- GGCGCGGCGTCA ---  
 GTGACGCTGACGGTACAG --- GCCAGGCAA --- TTATTG --- TCTGGCATAGTGCAACAGCAAAGC ---  
 AATTTG --- CTGAGG --- GCTATAGAGGCTCAACAACATATGTTGAAACTCACGGTCTGGGGCATT  
 >JF683782  
 TTCTATTGTAATACATCAAAATTGTTTAATACAACCTTGAATGCCAATGGCAGCGTACAGGAGTCAGTCAACA  
 CT -----  
 -----  
 -----  
 GCAGGCAACACTACTATATTTCTCCCATGCAGAATAAAGCAAATTATAAGGATGTGGCAGAGAGCAGGACAAG  
 CAATATATGCCCCCTCCCATCCAGGGAAGAATAAGGTGTGAATCAAAC ---  
 ATTACAGGACTACTGTTAAACAAGAGATGGTGGAGGTAATGCAAAC -----  
 -----  
 -----  
 AACACAGAAATCTTTAGACCTGGAGGAGGAGATATGAGGGACAATTGGAGAAGTGAATTATATAAGTACAAGG  
 TAGTAAAAATTGAACCACTA --- GGAGTAGCACCCACCAAGGCAAGGAGAAGAGTGGTG -----  
 ----- CAGAGAGAAAAAAGAGCA --- GTTGGA --- CTAGGAGCT -----  
 GTCTTCCTTGGGTTCTTAGGAGCA --- GCAGGAAGCACTATG --- GGCGCGGCGTCA ---  
 ATAACGCTGACGGTACAG --- GCCAGGCAA --- TTATTG --- TCTGGCATAGTGCAACAGCAAAGC ---  
 AATTTG --- CTGAGG --- GCTATTGAGGCTCAACAGCAGATGTTGAGACTCACGGTCTGGGGCATT  
 >JF683783  
 TTCTATTGTAATACATCAAAATTGTTTAATACAACCTTGAATGTCACTGACAGCATAGAAGAGTCA -----  
 -----  
 -----

GGCAACACTATTATAGTCCTCCCATGCAAAATAAAGCAAATTATAAATATGTGGCAGAGAGCAGGACAAGCAA  
TATATCCCCCTCCCATCCGGGAATAATAAGGTGTGAATCCAAC---  
ATTACAGGACTATTATTAACAAGAGATGGTGGAGATACTGAAAAC-----  
-----  
-----  
ACCACAGAAATCTTTAGACCTGGAGGAGGAGATATGAGGGACAATTGGAGAAGTGAATTATATAAGTATAAAG  
TAGTAAAAATTGAACCACTA---GGAGTAGCACCCACCGAGGCAAGGAGAAGAGTGGTG-----  
-----CAGAGAGAAAAAAGAGCA--GTTGGA--ATAGGAGCT-----  
GTCTTCCTTGGGTTCTTAGGAGCA---GCAGGAAGCACTATG---GGCGCGGCGTCA---  
ATAACGCTGACGGTACAG---GCCAGGCAA---TTATTG---TCTGGCATAGTGCAACAGCAAAGC---  
AATTTG---CTGAGG---GCTATAGAGGCTCAACAGCAGATGTTGAGACTCACGGTCTGGGGCATT  
>JF683789  
TTCTATTGTAACACCTCAAAGCTGTTTAATAGCATTGTCATCCTAATGATACCATGCAGGAGGAGACTAATA  
CA-----  
-----  
AATCCAAATGCTAATATAACTCTCCCATGCAGAATAAAGCAAATTATAAATCTGTGGCAAAGAGTAGGGAAAAG  
CAATATATGCCCCCTCCCATCCGAGGAAGAATAGAGTGTGTATCAAAC---  
ATTACAGGATTAATAATAACAAGAGATGGTGGAAATAACACAAAT-----  
-----  
-----  
AACACTGAAATCTTCAGACCTGCAGGAGGAGACATGAGGGACAATTGGAGAAGTGAATTATATAAATATAAAG  
TAGTACAAATTGAGCCACTA---GGAATAGCACCCACTGAGGCAAGGAGAAGAGTGGTG-----  
-----CAGAGAGAAAAAAGAGCA--ATTGGA--CTAGGAGCT-----  
ATGTTCAATTGGGTTCTTAGGAGCA---GCAGGAAGCACTATG---GGCGCGGCGTCA---  
GTGACGCTGACGGTACAG---GCCAGGCAA---TTATTG---TCTGGCATAGTGCAACAGCAAAGC---  
AATTTG---CTGATG---GCTATAGAGGCTCAACAGCATCTGTTGAAACTCACAGTCTGGGGCATT  
>FJ670523  
TTCTATTGTAACACATCAGGCCTGTTTAATAGCACTTGGCCTAATAGCACTTGGAAATGCCAATACCAGCATAC  
AGGAG-----  
-----TCA---  
AATAGCACAGACAATATAACTCTCCAATGCAGAATAAAGCAAATTATAAATCTGTGGCAGAGAGCAGGAAAAG  
CAATATATGCCCCCTCCCATCCAAGGAGCAATACAGTGTATATCAAAC---  
ATTACAGGACTAATATTAACAAGAGATGGAGGTAATAATGGAAC-----  
-----  
-----  
AATAACACTGAGATCTTCAGACCTGGAGGAGGAGATATGAGAGATAATTGGAGAAGTGAATTATATAAGTATA  
AGGTAGTAAAAATTGAACCATTA---GGAGTAGCACCTCCAGGGCAAAGAGAAGAGTAGTG-----  
-----GGGAGAGAAAAAAGAGCA--GTTACA--ATAGGAGCT-----  
---GTCTTCCTTGGGTTCTTAGGAGCA--GCAGGAAGCACTATG---GGCGCGGCGTCA---  
CTGACGCTGACGGTACAG---GCCAGGCAA---TTATTG---TCTGGCATAGTGCAACAGCAAAGC---  
AATTTG---CTGCAG---GCTATAGAGGCTCAACAGCATCTGTTGAAACTCACGGTCTGGGGCATT  
>AF219261  
TTCTATTGTAATACATCAGGCCTGTTTAATAGCACTTGGGTGTCAAACAACACTGGGAAATATTATAGTAATA  
GCACT-----  
-----  
AGGGAAAATCCAAATATAACTCTCCCATGCAGAATAAAACAAATTATAAATATGTGGCAGAGAGCAGGACAAG  
CAATATATGCCCCCTCCCATCGAAGGAGTAATAAGGTGTGAATCAAAC---  
ATTACAGGACTACTATTAACAAGAGATGGTGGGGATAAGAACAAC-----  
-----  
-----  
ACAAGTGAAATCTTCAGACCTGGAGGAGGAAATATGAAGGACAACCTGGAGAAGTGAATTATATAAGTATAAAG  
TAGTAAAAATTGAACCATTA---GGAGTAGCACCCACCCGGAAGGAGAAGAGTGGTG-----  
-----CAGAGAGAAAAAAGAGCA--GTATTTGGGCTGGGAGCT-----  
GTCTTTCTTGGGTTCTTAGGAGCA---GCAGGAAGCACTATG---GGCGCGGCGTCG---  
ATAACGCTGACGGTACAG---GCCAGACAA---TTATTG---TCTGGCATAGTGCAACAGCAAAGT---  
AATTTG---CTGAGG---GCTATAGAGGCTCAACAGCATTTGTTGAAACTCACGGTCTGGGGCATT  
>AF219265  
TTCTATTGTAATACATCAGGCCTGTTTAATAGCACTTGGAGTAATAGCACTTGGAGTTCCAATGCCAGCACGC  
AGGGG-----  
-----

TCAGAAAATGACACTATAACTCTCCCATGCAGAATAAAACAAATTATAAATATGTGGCAGAGAGCAGGACAAG  
CAATGTATGCCCCCTCCCATTCAGGAGTAATAAGGTGTGATTCAAAT---  
ATTACAGGACTAATATTAACAAGAGATGGTGGGGTTACAAATGAA-----  
-----  
-----  
ACCGAAACCTCCAGACCTGGAGGAGGAGATATGGGGGACAATTGGAGAAGTGAATTATATAAATATAAAGTAG  
TGAAAATTGAACCACTA---GGAGTAGCACCCACCAGGGCAAAAAGAGTAGTGTTG-----  
-----GGGAGAGAAAAAAGAGCA---ATTGGA---ATAGGAGCT-----  
GTTTTTCATTGGGTTCTTAGGAGCA---GCAGGAAGCACTATG---GGCGCGGCGTCA---  
ATGACGCTGACGGTACAG---GCCAGACAA---TTATTG---TCTGGCATAGTGCAACAGCAAAGC---  
AATTTG---CTGAGG---GCTATAGAGGCTCAACAACATCTGTTGAAACTCACGGTCTGGGGCATT  
>HM204635  
TTCTATTGTAATACATCACACCTGTTTAATAGCGCTTGTTCTGTCAATGACACCGTGCAGGAGTCAAATAGCA  
CG-----  
-----  
GAGTCAAATGACACTATAACTCTCCAATGCAGAATAAAGCAAATTATAAATATGTGGCAGAGAACAGGACAAG  
CAATGTATGCCCCCTCCCATCCCAGGAGTAATAAGATGTAAC TCAAC---  
ATTACAGGACTAATATTAACAAGAGATGGTGGGAATAATAAGTTCA-----  
-----  
-----  
AATGAAAATGAAACCTTCAGACCTGGAGGAGGAGATATGAGAGACAATTGGAGAAGTGAATTATATAAGTATA  
AAGTAGTAAAAATTGAACCACTA---GGAGTAGCACCCACCAAGGCAAGGAGAAGAGTGTTG-----  
-----CAGAGAGAAAAAAGAGCA---GTTGGA---CTGGGAGCT-----  
---GTCTTCATTGGGTTCTTAGGAGCA---GCAGGAAGCACTATG---GGCGCGGCGTCA---  
GTGACGCTGACGGTACAG---GCCAGACAA---TTATTG---TCTGGCATAGTGCAACAGCAAAGC---  
AATTTG---CTGAGG---GCTATAGAGGCTCAACAACATCTGTTGAAACTCACAGTCTGGGGCATT  
>HM204648  
TTTTATTGTAACACATCAGGCCTGTTTACTGGCACTTGGAATCAGACTAATAGTACTTGGAATAGTGGCACTT  
GGA CT-----  
-----  
AACACTACTGGCAATATAACTCTCCAATGCAGAATAAAGCAGGTCATAAGAATGTGGCAGAGAGTAGGACAAG  
CAATGTATGCCCCCTCCCATCCCAGGAGTAATAAGGTGTGAATCAAAC---  
ATTACAGGACTAATATTAACAAGAGATGGGGAAGGTAACAGTAGC-----  
-----  
-----  
ATAAAAGATGAAACCTTCAGACCTGGAGGAGGGAATATGAAGGACAATTGGAGAAGTGAATTATATAAATATA  
AAGTAGTAAAAATTGAACCAATA---GGAGTAGCACCCACCAGGGCAAAGAGAAGAGTGTTG-----  
-----GAGAGAGAAAAAAGAGCA---GTTGGA---CTAGGAGCT-----  
---GTCTTCATTGGGTTCTTAGGAGCA---GCAGGAAGCACTATG---GGCGCAGCGTCA---  
ATAACGCTGACGGTACAG---GCCAGGCAA---TTGTTG---TCTGGCATAGTGCAACAGCAAAGC---  
AATTTG---CTGAAG---GCTATTGAGGCTCAACAACAGTTGTTGAGACTCACGGTCTGGGGCATT  
>HQ595782  
TTCTATTGCAATACGTCTAAACTGTTTAATAGCACGTGGAAAAATGAAAGCAGGCAGGGG-----  
-----  
-----  
TCAAATGACATTATAACTCTCCCATGCAGAATAAAGCAAATTATAAGGATGTGGCAAAGAGTAGGGCAAGCAA  
TGTATGCCCCCTCCCATCCCAGGAGTAATAGAGTGTAATTCAAAC---  
ATTACAGGGCTACTATTGACAAGAGATGGTGGTAATAGAACCGAA-----  
-----  
-----  
AATGAGACCTTCAGACCTGAGGGAGGAGATATGAGAAACAATTGGAGAAGTGAATTATATAAGTATAAAGTAG  
TAAGAAATTGAACCATTG---GGAGTAGCACCCACCAGGGCAAAAAGAAGAGTGTTG-----  
-----GAGAGAGAAAAAAGAGCA---GCTGGA---TTGGGAGCT-----  
GTCTTCCTTGGGTTCTTAGCAGCA---GCAGGAAGTACTATG---GGCGCAGCGTCA---  
ATAACGCTGACGGCACAG---GCCAGACAA---TTATTG---TCTGGCATAGTACAACAGCAAAGC---  
AATTTG---CTGAGG---GCTATAGAGGCTCAACAGCAACTGTTGAGGCTCACGGTCTGGGGCATT  
>HQ595784  
TTCTATTGCAACACAGCAGGTCTGTTTAATAGCAGCTGGGGGAACAATGACACTGACAGCAACCAGACA-----  
-----  
-----

GCAAAGATAAATATAACTCTCCAATGCAGAATAAAGCAAATTGTAAGGATGTGGCAGAGAGTAGGACAAGCAA  
TGTATGCCCCCTCCCATCGCAGGAACGATAAACTGTTTATCAAAT ---  
ATTACAGGACTACTATTAACAAGAGATGGGGGGACAAATAAGACGTGG-----  
-----  
-----  
TCTCACAATGAGACCTTCAGACCTGAAGGAGGAAATATGAAGGACAATTGGAGAAGTGAATTATATAGGTATA  
AAGTAGTAAAAATTGAACCACTA---GGAGTAGCACCCACCGAGGCAAGGAGAAGAGTGGTG-----  
-----GAGAGAGGAAAAAGAGCA---GTTGGA---ATAGGAGCT-----  
---GTTCTCTTTGGGTTCTTAGGAGCA---GCAGGAAGCACTATG---GGCGCGGCGTCA---  
CTAACGCTGACGGTACAG---GCCAGACAA---TTACTG---TCTGGCATAGTGCAACAGCAGAGC---  
AATCTG---CTGAGG---GCTATAGAGGCTCAACAGCATCTGTTGAAGCTCACAGTCTGGGGCATT  
>Y13718  
TTCTATTGTAACACATCAAGACTGTTTAATAGCACTTGGAAATGACACTACCAGTATGCTAAATGACACGAAG-  
-----  
-----  
CCAAACGACACTATAACTCTCCCATGCAGAATAAAGCAAATTATAAATATGTGGCAAAGAGCAGGACAAGCAA  
TATATGCCCCCTCCCATCCAAGGAGTAATAAGGTGTGAATCAAAC ---  
ATTACAGGACTAATATTAACAAGAGATGGTGGGGGTAATAGCAGT-----  
-----  
-----  
GTAAGTAGTGAACTTTTCAGACCTGGAGGAGGAGATATGAGAGACAATTGGAGAAGTGAATTATATAAGTATA  
AAGTAGTAAAAATTGAACCACTA---GGAGTAGCACCCACCAAGGCAAAGAGAAGAGTGGTG-----  
-----GAGAGAGAAAAAGAGCA---GTTGGA---CTAGGAGCT-----  
---GTTTTCATTTGGGTTCTTAGGAGCA---GCAGGAAGCACTATG---GGCGCGGCGTCA---  
ATAACGCTGACGGTACAG---GCCAGACAA---TTATTG---TCTGGCATAGTGCAACAGCAAAGC---  
AATTTG---CTGAGG---GCTATAGAGGCTCAACAGCATCTGTTGAAACTCACGGTCTGGGGCATT  
>Y13717  
TTCTATTGTAACACATCAGGCCTGTTTAATAGCACTTGGGATAGCAGTGCCAGCATGCAAGAGTCAAAT----  
-----  
-----  
AGCACGGCCAATATAACTCTCCCATGCAGAATAAGGCAAATTATAAATCTGTGGCAGAGAACAGGACAAGCAA  
TATATGCCCCCTCCCATCCAAGGAGTAATAAGGTGTGTATCAGAC ---  
ATCACAGGACTAATATTAACAAGAGATGGTGGGGGTAATGGTACTGAA-----  
-----  
-----  
AGTAAAAAAGAACTTTTCAGACCTGGAGGAGGAGATATGAGGGACAATTGGAGAAGTGAATTATATAAGTATA  
AAGTAGTAAAAATTGAACCACTA---GGAGTAGCACCCACCAAGGCAAAGAGAAGAGTGGTG-----  
-----GAGAGAGAAAAAGAGCA---GTTGGA---ATGGGAGCT-----  
---GTCCTCCTGGGGTTCTTAGGAGCA---GCAGGAAGCACTATG---GGCGCGGCGTCA---  
ATAACGCTGACGGTACAA---GCCAGACAA---TTATTG---TCTGGCATAGTGCAACAGCAAAGC---  
AATTTG---CTGAGG---GCTATAGAGGCTCAACAGCAGGTGTTGAGACTCACGGTCTGGGGCATT  
>HQ385459  
TTCTATTGCGATACATCAGGCCTGTTTAATAGTATTTGGAATAGCACTGCCATCAGCCAGAATGTCTGAGGAG-  
-----  
-----  
TCAAATGATACTATAACTCTCCCATGCAAAATAAGACAAATTGTAAATATGTGGCAGAGAGTAGGACAAGCAA  
TATATGCCCCGTCCCATCAAGGAATAATAAACTGTACATCAAAC ---  
ATTACAGGGCTACTGCTAACAAGAGATGGTGGGGATAATGATAAT-----  
-----  
-----  
AAAACTGAGACTTTTCAGACCTGGAGGAGGAAATATGAAGGACAATTGGAGAAGTGAAGTTATATAGATATAAAG  
TAGTAAAAATTGAACCACTA---GGAGTAGCACCCACCAAGGCAAAGAGAAGAGTGGTG-----  
-----GAGAGAGAAAAAGAGCA---GTTGGA---CTAGGAGCT-----  
GTCATCTTTGGGTTCTTGGGAGCA---GCCGGAAGTACTATG---GGCGCGGCGTCA---  
ATAACGCTGACGGCACAG---GCCACACAA---TTATTG---TCTGGTATAGTACAACAGCAAAGC---  
AATCTG---CTGAGG---GCTATAGAGGCTCAACAGCACCTGTTGAAACTCACGGTCTGGGGCATT  
>HQ385452  
TTCTATTGCAATACATCAGGCCTGTTTTCTGGCTCTTGGTATAATGGCACTTGGGCTAATGACTCTTGGAGTG  
CTGGT-----  
-----CCT---

GGGACCAATGATAATATAACTCTCCCATGCAAAATAAAGCAAATCATAAGAATGTGGCAGAGAGTGGGACAAG  
CAATGTATGCCCCCTCCCATCCAAGGAGAAATAAATTGTGTATCAAAC---  
ATCACAGGACTATTACTAACAAGAGATGGTGGTAATAGTAGTGAA-----  
-----  
-----  
GAGATCTTCAGACCTGGAGGAGGAGATATAAGAGACAATTGGAGGAGTGAATTATATAAATATAAAGTGGTAA  
AAATTGAACCATTA---GGAGTAGCGCCCACCAGGGCAAGGAGAAGAGTGGTG-----  
-----GGAAGAGAAAAAAGAGCA---GTTGGA---CTGGGAGCT-----  
GTCTTCCTTGGGTTCTTAGGAGCA---GCAGGAAGCACTATG---GGCGCGGCGTCA---  
ATCACGCTGACGGTACAG---GCCAGGCAA---TTATTG---TCTGGCATAGTGCAACAGCAGAGC---  
AATCTG---CTGAGG---GCTATAGAGGCTCAACACCATCTGTTGAAACTCACGGTCTGGGGCATT  
>HQ385453  
TTCTACTGCGACACAACAGGCCTGTTTAATAACACAGAGAAA-----  
-----  
-----  
AATGACACTATAATGCTCCCATGCAAAATAAGACAAATTGTACGTATGTGGCAGAGAGTAGGACAAGCAATGT  
ATGCCCCCTCCCATTCAGGAGTAATAAACTGTCTATCAAAC---  
ATTACAGGGCTACTGCTGACAAGAGATGGTGGGGATAGTACTAAT-----  
-----  
-----  
AATACTGAGAAATTCAGACCAGGAGGAGGAGATATAAGGGACAATTGGAGAAGTGAATTATATAAATATAAAG  
TAGTAAAAAATTGAACCACTA---GGAGTAGCACCTACCAAGGCAAAGAGAAGAGTGGTG-----  
-----GAGAGAAGAAAAAGAGCA---GGA-----CTAGCAGCT-----  
GTCTTCCTTGGGTTCTTAGGAGCA---GCAGGAAGCACTATG---GGCGCAGCGTCA---  
ATAACGCTGACGGTACAG---GCCAGACAA---TTATTG---TCTGGTATAGTGCAACAGCAAAAC---  
AATTTG---CTGAAG---GCTATAGAGGCTCAACAACAGATGTTGAGACTCACGGTCTGGGGCATT  
>KT152846  
TTCTATTGTAATACATCAAACCTGTTTAATAGCACTTGGACGAAAAATGACAGCATGCAGGGGTAAATCACA  
CGGAG-----  
-----  
TCAAATGACAATATAACTCTCCCATGCAGACTAAGGCAAATTATAAAAAATGTGGCAGAGAGTAGGACAAGCAA  
TGTATGCCCCCTCCCATCCAAGGAATAATAAAGTGTGAATCAAAC---  
ATTACAGGGCTAATATTAACAAGAGATGGTGGGAATAACAACAGT-----  
-----  
-----  
GCAGAGGAAACCTTCAGACCTGGAGGAGGAGATATGAGGGACAATTGGAGAAGTGAATTATATAAGTATAAAG  
TAGTACAAATTGAACCACTA---GGGGTAGCACCCACCAAGGCAAGGAGAAGAACGGTG-----  
-----GGGAGAGAAAAAAGAGCA---GTTGGA---ATGGGAGCT-----  
GTTTTCCTTGGGTTCTTAGGAGCA---GCAGGAAGCACTATG---GGCGCAGCGTCA---  
ATAACGCTGACGGTACAG---GCCTGGCAA---TTATTG---TCTGGCATAGTGCAACAGCAAAGC---  
AATTTG---CTGAGG---GCTATAGAGGCTCAACAACATCTGTTGAAACTCACGGTCTGGGGCATT  
>KT152841  
TTCTATTGTGATACATCAGCCCTGTTTAATGGCACTTGGGAATAATACCAGCATGAAGGAGTCAAATAGCACGG  
AA-----  
-----  
TCAAATGACACTATAACTCTCCCATGCAGAATAAAGCAAATTATAAATATGTGGCAGAGAGTAGGACAAGCAA  
TGTATGCCCCCTCCCATCCAAGGAATAATAAAGTGTGAATCAAAC---  
ATTACAGGACTACTATTAACAAGAGATGGTGGTGGGGATAACAGTACA-----  
-----  
-----  
AATGAGGAAACCTTCAGACCTGGAGGAGGAGATATGAGGGACAATTGGAGAAGTGAATTATATAGGTATAAAG  
TAGTAAAAAATTGAACCACTA---GGAGTAGCACCCACCAGGGCAAGGAGAAGAACGGTG-----  
-----GGGAGAGAAAAAAGAGCA---GTGGAA---ATAGGAGCT-----  
GTCTTCCTTGGGTTCTTAGGAGCA---GCAGGAAGCACTATG---GGCGCAGCGTCA---  
ATAACGCTGACGGTACAG---GCCAGACAA---TTATTG---TCTGGCATAGTGCAACAGCAAAAC---  
AATTTG---CTGAGG---GAA---GAGGCTCAACAACATTTGTTGAAACTCACGGTCTGGGGCATA  
>KT152842  
TTCTATTGTAATACATCAGCTCTGTTTAATGGCACTTGGGGGCAAAATGCCAGCATGGAGTCAAATGGCACT-

ATAAATGACACTATAATTCTCCCATGCAGACTAAAGCAAATTGTAAGGATGTGGCAGAGAGTAGGACAAGCAA  
 TGTATGCCCCCTCCCATCCAAGGAGAAATAAATTGTGTATCAAAC---  
 ATTACAGGACTAATATTAACAAGAGATGGTGGGAATAATACAGAG-----  
 -----  
 -----  
 GAAATCTTCAGACCTGGAGGAGGAGATATGAGGGACAATTGGAGAAGTGAATTATATAAGTATAAAGTAGTAA  
 AAATTGAACCACTA---GGAGTAGCACCCACCAGTGCAAGGAGAAGAACGGTG-----  
 -----GGGAGAGAAAAAAGAGCA---GTTGGA---ATAGGAGCT-----  
 GTCTTCCTTGGGTTCTTAGGAGCA---GCAGGAAGCACTATG---GGCGCGGCGTCA---  
 ATAACGCTGACGGTACAG---GCCAGACAA---TTATTG---TCTGGCATAGTGCAACAGCAAAGC---  
 AATTTG---CTGAGG---GCTATAGAGGCTCAACAACATCTGTTGAAACTCACAGTCTGGGGCATT  
 >KT152844  
 TTCTACTGTAATACATCAGCCCTGCTTAATGGCACTTGGCAAAATGCCAGCATGCAGGAGTCAAATAGCACAG  
 AG-----  
 -----  
 TCAAAATGACACCATAACTCTCCCATGCAGAATAAAGCAAAGTTATAAATATGTGGCAGAGAGTAGGACAAGCAA  
 TGTATGCCCCCTCCCATCCAAGGAATAATAAAGTGCGTATCAAAC---  
 ATCACAGGACTAATATTAACAAGAGATGGTGGGAATAGTAACAGT-----  
 -----  
 -----  
 AGTACAGTTGAAACCTTCAGGCCTGGAGGAGGAGATATGAGGGACAATTGGAGAAGTGAATTATATAAGTATA  
 AAGTAGTAAAAATTGAACCACTA---GGAGTAGCACCCACCAGGGCAAGGAGAAGAACGGTG-----  
 -----GAGAGAGAAAAAAGAGCA---GTTGGA---ATAGGAGCT-----  
 ---GTCTTCCTTGGGTTCTTAGGAGCA---GCAGGAAGCACTATG---GGCGCAGCGTCA---  
 ATAACGCTGACGGTACAG---GCCAGACAA---TTATTG---TCTGGCATAGTGCAACAGCAAAGT---  
 AATTTG---CTGAGG---GAAATAGAGGCTCAACAACATCTGTTGAAACTCACGGTCTGGGGCATT  
 >AY736809  
 TTCTATTGTAATACATCAGGCCTGTTCAATAGCACTTGGCCTGTCAATGCCAGTGAGCAGGAGTCAAATAGCA  
 CA-----  
 -----  
 GAGTCAGATGGCATTATAACTCTCCGATGCAGAATAAAGCAAATCATAAATATGTGGCAGAGAACAGGACAAG  
 CAATGTATGCCCCCTCCCATCAAGGAATAATAAAGTGTGTATCAAAC---  
 ATTACAGGACTACTGTTAACAAGAGATGGTGGGAATAGTACTGTC-----  
 -----  
 -----  
 AATGAAACTTTTCAGACCTGGAGGAGGAGATATGAGGGACAATTGGAGAAGTGAATTATATAAGTATAAAGTAG  
 TAAAAATTGAACCACTA---GGAGTAGCACCCACCAAGGCAAGGAGAAGAGTGGTG-----  
 -----GGGAGAGAAAAAAGAGCA---GTTGGA---ATAGGAGCT-----  
 GTTTTCCTTGGGTTCTTAGGAGCA---GCTGGAAGCACTATG---GGCGCGGCGTCA---  
 ATAACGCTGACGGTACAG---GCCAGACAA---TTACTG---TCTGGCATAGTGCAACAGCAAAAC---  
 AATTTG---CTGAGG---GCTATAGAGGCTCAACAACAACCTGTTGAAACTCACGGTCTGGGGCATT  
 >AY736810  
 TTTTATTGTAATACATCAGACCTGTTTAATAGTACTTGGAACATTGAAGGCACTGCCAGCATAAATGGCACGG  
 AG-----  
 -----  
 TCAAAATGACAATATAACTCTCCCATGCAGAATAAAGCAAATTATAAATATGTGGCAGAGAGTAGGACAAGCAA  
 TGTATGCCCCCTCCCATCCAAGGAGTAATAAGGTGTCAATCAAAC---  
 ATTACAGGAATACTATTAACAAGAGATGGTGGGAATACTGGGAATAAT-----  
 -----  
 -----  
 AGCAGGACAAATGAAACCTTTAGACCTGGAGGAGGAGATATGAGGGACAATTGGAGAAGTGAATTATATAAGT  
 ATAAAGTAGTAAAAATTGAACCACTG---GGAGTAGCACCCACCAAGGCAAAGAGAAGAGTGGTG-----  
 -----GAGAGAGAAAAAAGAGCA---GTTGGA---CTGGGAGCT---  
 -----GTATTCAATTGGGTTCTTAGGAGCA---GCCGGAAGCACTATG---GGCGCGGCGTCA---  
 ATAACGCTGACGGTACAG---GCCAGACAA---TTATTG---TCTGGCATAGTGCAACAGCAAAGC---  
 AATTTG---CTGAGG---GCTATAGAGGCTCAACAGCATTTGTTGAAACTCACGGTCTGGGGCATT  
 >AY736812  
 TTCTATTGTAATACATCAGGTCTGTTCAATAGCACCTGGAAGGCCAACAATGGCACCTGGAAGGCCAACATAT  
 CAGAG-----  
 -----

TCAAATAACACGGAGATAACTCTCCAATGCAGAATAAAGCAAATTATAAATATGTGGCAGAGAACAGGACAAG  
CAATATATATGCCCCCTCCCATCCAGGGAGTGATAAGGTGTGAATCAAAC---  
ATCACAGGACTACTGTTAACAAGAGATGGTGGGGAGGGGAACAAT-----  
-----  
-----  
GAAAGTGAGATCTTCAGACCTGGAGGAGGAGATATGAGGGACAACCTGGAGAAGTGAATTATATAAGTATAAAG  
TAGTAAAAAATTGAACCACTA---GGAGTAGCACCCACCAGGGCAAGGAGAAGAGTGGTG-----  
-----GGAAGAGAAAAAAGAGCA---GTTGGA---ATAGGAGCT-----  
GTTTTCTTGGGTTCTTAGGAGCA---GCAGGAAGCACTATG---GGCGCGGCGTCA---  
ATAACGCTGACGGTACAG---GCCAGGCAA---TTATTG---TCTGGCATAGTGCAACAGCAAAGC---  
AATTTG---CTGAGG---GCTATAGAGGCTCAACAACATATGTTGAAACTCACGGTCTGGGGCATT  
>AY736815  
TTCTATTGTAATACATCAGGTCTGTTTAATAGCACCTGGGACAACAACACCGACCCAACCAACACAACG----  
-----  
-----  
TCAAATGACACTATCACTCTCCAATGCAGAATAAAGCAAATTTATAAATATGTGGCAGAGAACAGGGCAAGCAA  
TGTATGCCCCCTCCCATCCAAGGGGTAATAAGGTGTGATTCCAAC---  
ATTACAGGACTACTATTAACAAGAGATGGTGGAGTAGGTAACAAT-----  
-----  
-----  
ACAACTGAAACCTTCAGACCTGGAGGAGGAGATATGAGGGACAATTGGAGAAGTGAATTATATAAGTATAAAG  
TAGTAAAAAATTGAACCACTA---GGAGTAGCACCCACCAGGGGCAAGGAGAAGAGTGGTG-----  
-----GAGAGAGAAAAAAGAGCA---GTTGGA---ATAGGAGCT-----  
GTTTTCTTGGGTTCTTAGGAGCA---GCAGGAAGCACTATG---GGCGCGGCGTCA---  
GTAACGCTGACGGTACAG---GCCAGACAA---TTATTG---TCTGGCATAGTGCAACAGCAAAGC---  
AATTTG---CTGAGG---GCTATAGAGGCTCAACAGCATCTGTTGAAACTCACGGTCTGGGGCATT  
>AY736813  
TTCTATTGTGATACATCAGGCCTGTTTAATAGCAGTTGGAATAATAACACTTGAAGGAGTCAAATAGCACGG  
GG-----  
-----  
TCAAATGACACTATAACTCTCCTATGCAGAATAAAACAAATTATAAATATGTGGCAGAGAACAGGACAAGCAA  
TGTATGCCCCCTCCCATCCCAGGGTTAATAAGCTGTAAATCAAAC---  
ATTACAGGTATAATATTGACAAGAGATGGTGGGAATGGTAACAGT-----  
-----  
-----  
ACAAATGAAACCTTCAGACCTGGAGGAGGAGATATGAGGGACAATTGGAGAAGTGAACCTATATAGGTATAAAG  
TAGTACAAATTGAACCACTA---GGAGTAGCACCCACCAGGGCAAGGAGAAGAGTGGTG-----  
-----CAGAGAGAAAAAAGAGCA---GTAGGA---ATAGGAGCT-----  
GTCTTCCTTGGGTTCTTAGGAGCA---GCAGGAAGCACTATG---GGCGCAGCGTCA---  
ATAACGCTGACGGTACAG---GCCAGACAA---TTATTG---TCTGGCATAGTGCAACAGCAAAGC---  
AATTTG---CTGAGG---GCTATAGAGGCTCAACAACATCTGTTGAAACTCACGGTCTGGGGCATT  
>AY736816  
TTCTATTGTGACACATCAGGCCTGTTTACTTGAATAGCACTTGAATGGCACTGAGTCAAACAACACAAAG-  
-----  
-----  
TCAAACGACACTATAACTCTCCAATGCAGAATAAAGCAAATTATAAATATGTGGCAGAGAGTAGGACAAGCAA  
TATATGCCCCCTCCCATCAAAGGAGTAATAAGGTGTGAATCAGAC---  
ATTACAGGACTTATACTAACAAGAGATGGTGGGAATACTAACAGT-----  
-----  
-----  
ACAGAGGAAACCTTCAGACCTGGAGGAGGAGATATGAGGGACAATTGGAGAAGTGAATTATATAAGTATAAAG  
TAGTAAAAAATTGAACCACTA---GGAGTAGCACCCACCAAGGCAAGGAGAAGAGTGGTG-----  
-----GGGAGAGGAAAAAAGAGCA---GTTGGA---ATAGGAGCT-----  
GTCTTCCTTGGGTTCTTAGGAGCA---GCCGGAAGCACTATG---GGCGCGGCGTCA---  
ATAACGCTGACGGTACAG---GCCAGACAA---TTATTG---TCTGGCATAGTGCAACAGCAAAGC---  
AATTTG---CTAAGG---GCTATAGAGGCTCAACAGCATCTGTTGAAACTCACGGTCTGGGGCATT  
>AF457053  
TTCTATTGTAATACATCAGGCCTGTTTAACAGCACCTGGCACTATAACAGCAATGGTACTTGGCACAATAACA  
GCACAAAT-----  
-----AGCATG-----

GACTCAAATGAAACTATAACTCTCACATGCAGAATAAAGCAAATTATAAATATGTGGCAGAGAGTAGGAAAAG  
CAATGTATGCTAATCCCATCCAAGGAATAATAAAGTGTGAATCAAAC---  
ATTACAGGACTACTCTTAACAAGAGATGGTGGGAATACTAGCAGT-----  
-----  
-----  
ACAAATGAAACCTTCAGACCTGGAGGAGGAGATATGAGGGACAATTGGAGAAGTGAATTATACAAATATAAAG  
TAGTAAAGATTGAGCCACTA---GGAGTAGCACCCACCAGGGCACAGAGAAGAGTGGTG-----  
-----GGGAGAGAAAAAAGAGCA---ATTGGA---ATAGGAGCT-----  
GTCTTCCTTGGGTTCTTAGGAGCA---GCAGGAAGCACTATG---GGCGCGGCGTCA---  
ATGACGCTGACGGTACAG---GCCAGACAA---TTATTG---TCTGGCATAGTGCAACAGCAAAGC---  
AATTTG---CTGAGG---GCTATAGAGGCTCAACAACAACCTGTTGAAACTCACGGTCTGGGGCATT  
>AF457055  
TTCTATTGTAATACAACAAACCTGTTTAATAGCACCTGGAGAGGAAATAAACTGTCAGCAATAGCACAGAGT  
TA-----  
-----  
GATGAAAATGGCACTATAACTCTCCCATGCAGAATAAAGCAAATTATAAATATGTGGCAGAGAACAGGACAAG  
CAATGTATGCCCCCTCCCATCCAAGGAGTAATAAAGTGTGTATCAAAC---  
ATTACAGGACTACTATTAACAAGAGATGGTGGAAAGTGATAACAAT-----  
-----  
-----  
ATAAGTAGTGAAACCTTCAGACCAGGAGGAGGAGATATGAGGGACAATTGGAGAAGTGAATTATATAAGTATA  
AAGTAGTGAAACTTGAACCACTA---GGAGTAGCACCCAACAAGGCAAGGAGAAGAGTGGTG-----  
-----GAGAGAGAAAAAAGAGCA---GTTGGA---CTGGGAGCT-----  
---GTATTCATTGGGTTCTTAGGAGCA---GCAGGAAGCACTATG---GGCGCGGCGTCA---  
ATAACGCTGACGGCACAG---GCCAGACAA---TTATTG---TCTGGCATAGTGCAACAGCAAAGC---  
AATTTG---CTGAAG---GCTATAGAGGCTCAACAGCATCTGTTGAAACTCACGGTCTGGGGCATT  
>AF457070  
TTCTATTGTAATACATCAGGCCTGTTTAATAGCACTTGGAAATAGCACTGGGAATGACACTTGGAGTGGCAATG  
CCAGCACG-----  
-----CAG---  
GAGTCAAATGACACTATAACTCTCCCATGCAGAATAAAGCAAATTGTAAATATGTGGCAGAGAATAGGACAAG  
CAATGTATGCCCCCTCCCATCCAAGGAGTAATAAGGTGTGAATCAAAC---  
ATTACAGGACTACTATTAACAAGAGATGGTGGGAACAATGAAAGT-----  
-----  
-----  
GAAACCTTCAGACCTGGAGGAGGAAATATGAGGGACAATTGGAGAAGTGAATTATATAGGTACAAAGTAGTGA  
AAATTGAACCACTA---GGAGTAGCACCCACCAGGGCAAAAAGAAGAGTGGTG-----  
-----GGGAGAGAAAAAAGAGCA---GTTGGA---ATAGGAGCT-----  
GTGTTCTTGGGTTCTTAGGAGCA---GCAGGAAGCACTATG---GGCGCGGCGTCA---  
GTAACGCTGACGGTACAG---GCCAGACAA---TTATTG---TCTGGCATAGTGCAACAGCAAAGC---  
AACTTG---CTGAGG---GCTATAGAGGCTCAACAACATCTGTTGAAACTCACGGTCTGGGGCATT  
>AF457077  
TTCTATTGTAATACATCAGGCCTGTTTAATAGCACTTGGTCTTGGAAATGACACTGCAAATGGCACTGCAATGG  
AG-----  
-----  
CCAAATAGCACTATAACTCTCCCATGCAGAATAAAGCAAATTATAAATATGTGGCAGAGAGTAGGACAAGCAA  
TGATATGCCCCCTCCCATCCCAGGAGTAATAAGTTGTGTATCAAAC---  
ATTACAGGACTAATATTAGTAAGAGATGGAGGGAATAATGTTACA-----  
-----  
-----  
AATGAAACCTTCAGACCTGGAGGAGGAGATATGAGGGACAATTGGAGAAGTGAATTATATAAGTATAAGGTAG  
TAAAAATTGAACCACTA---GGAGTAGCACCCACCAAGGCAAAGAGAAGAGTGGTG-----  
-----GAGAGAGAAAAAAGAGCA---GTTGGA---ATAGGAGCT-----  
GTCTTCCTTGGGTTCTTAGGAGCA---GCAGGAAGCACTATG---GGCGCGGCGTCA---  
ATAACGCTGACGGTACAG---GCCAGACAA---TTATTG---TCTGGTATAGTGCAACAGCAAAGC---  
AATTTG---CTGAGG---GCTATAGAGGCTCAACAACATCTGTTGAAACTCACAGTCTGGGGCATT  
>AF457080  
TTCTATTGTAATACATCGGGCCTGTTTAATAGCACCTACAATGGCACTGACATCGCTGAAAATAGCACGGAG-

TCAAATGACACTATAGTTCTCCCATGCAGAATAAAGCAAATTATAAGGATGTGGCAGCGAGTAGGACAAGCAA  
TGTATGCCCCCTCCCATCCCAGGAATAATAAGATGTGACTCAAAC---  
ATTACAGGATTACTATTAACAAGAGATGGTGGGGATGATAATGAA-----  
-----  
-----  
ACTGAAACCTTTAGACCTGGAGGAGGAGATATGAGGGATAATTGGAGAAGTGAATTATATAAGTATAAAGTAG  
TAAAAATTGAACCACTA---GGAGTAGCACCCACCAGGGCAAAAAGAAGAGTGGTG-----  
-----GAGAGAGAAAAAAGAGCA---GTTGGA---ATAGGGGCT-----  
TTTGTCTTGGGTTCTTAGGAGCA---GCAGGAAGCACTATG---GGCGCAGCATCA---  
ATAACGCTGACGGTACAG---GCCAGACAA---TTATTG---TCTGGCATAGTGCAACAGCAAAGC---  
AATTTG---CTGAGG---GCTATAGAGGCTCAACAACAAATATTGAGACTCACGGTCTGGGGCATT  
>AF457081  
TTCTATTGTAATACATCAGGCCTGTTTAATAGCACTTGGACAAATGACAGTATCAGCACAAATAGCACAAAAG-  
-----  
-----  
TCAAATGACACTATAACTCTCCCATGCAGAATAAAGCAAATTATAAATATATGGCAGAGAGTGGGACAAGCAA  
TGTATGCCCCCTCCCATCCAAGGAGTAATACAGTGTGTATCAAAC---  
ATTACAGGACTACTATTAACAAGAGATGGTGGGGATAACAGTAGT-----  
-----  
-----  
ACGAATGAAACCTTCAGACCTGGAGGAGGAGATATGAGGGACAATTGGAGAAGTGAATTATATAAGTATAAAG  
TAGTAAAAATTGAACCACTA---GGAGTAGCACCCACCAGGGCAAGGAGAAGAGTGGTG-----  
-----GAGAGAGAGAAAAAGAGCA---GTTGGA---CTGGGAGCT-----  
GTTTTTCATTGGGTTCTTGGGAGCA---GCAGGGAGCACTATG---GGCGCAGCGTCA---  
ATAACGCTGACGGTACAG---GCCAGACAA---TTATTG---TCTGGCATAGTGCAACAGCAAAGC---  
AATTTG---CTGAGG---GCTATAGAGGCTCAACAACATCTGTTGAAACTCACGGTCTGGGGCATT  
>AF457083  
TTCTATTGTAATACATCAAGTCTGTTTAATAGTACTTGAATAACAGTACTTGAATACCAGCAGGCAGGAGG  
CAAATAAT-----  
-----AGCCCG-----  
GGGTCAAACGACACTATAACTCTCAAATGCAGAATAAAGCAAATTATAAATATGTGGCAGAGAGCGGGACAAG  
CAATATATGCCCCCTCCCATCCAAGGAGTAATAAGGTGTAACCTCAAAC---  
ATTACAGGACTAATATTAACAAGAGATGGTGGGGGTAATAACAAT-----  
-----  
-----  
ACAAATGAAACCTTCAGACCTGGAGGAGGAGATATGAGGGACAATTGGAGAAGTGAATTATATAAGTACAAAG  
TAGTAAAAATTGAACCACTA---GGAGTAGCACCCACCAGGGCAAAGAGAAGAGTGGTG-----  
-----GAGAGAGGAAAAAGAGCA---GTTGGA---ATAGGAGCT-----  
GTCTTCATTGGGTTCTTAGGAGCA---GCAGGAAGCACTATG---GGCGCGGCGTCA---  
ATAACGCTGACGGCACAG---GCCAGACAA---TTATTG---TCTGGCATAGTGCAACAGCAAAAC---  
AATTTG---CTGAGG---GCTATAGAGGCTCAACAACATCTGTTGAGACTCACGGTCTGGGGCATT  
>AF457084  
TTCTATTGTGACACATCAGGCCTGTTTAATAGCAGTTGGACTGCTAGCAATGATAGCATGCAGGAGGCACATA  
GC-----  
-----  
ACAGAGTCAAATATAACTCTCCAATGCAGAATAAAGCAAATTATAAATATGTGGCAGAGAGCAGGACAAGCAA  
TGTATGCCCCCTCCCATTCAGGAATAATAAGGTGTGAATCAAAC---  
ATTACAGGACTAATATTAACAAGAGATGGTGGTGAGGGTAATAAC-----  
-----  
-----  
AGTACAAATGAAACCTTCAGACCACTAGGAGGAAATATGAGGGACAATTGGAGAAGTGAATTATATAAGTATA  
AAGTAGTAAAAGTTGAACCACTA---GGAGTAGCACCCACCAAGTCAAGGAGGAGAGTGGTG-----  
-----GAGAGAGAAAAAAGAGCA---GTTGGA---CTAGGAGCT-----  
---GTGTTTCATTGGGTTCTTAGGAGCA---GCAGGAAGCACTATG---GGCGCGGCGTCA---  
ATGACGCTGACGGTACAG---GCCAGACAA---TTATTG---TCTGGCATAGTGCAACAGCAAAGC---  
AATTTG---CTGAGG---GCTATAGAGGCTCAACAGCATCTGTTGAAACTCACGGTTTGGGGCATT  
>AF457086  
TTCTATTGTAATACAACAAAACCTGTTTAATAGCACTTGGAGTCATAATGACAGCACGCAAGAGTCAAATAGCA  
CA-----  
-----

AAGTCAAATGACACTATAACTCTCCCATGCAGAATAAAGCAAATTATAAATATGTGGCAGAGAGTAGGACAAG  
CAATATATATGCCCCCTCCCATACAAGGAATAATAAGGTGTGAATCAAAT---  
ATTACAGGACTAATATTAACAAGAGATGGAGGTACCAATAGTACA-----  
-----  
-----  
AATGAAACCTTCAGACCTGGAGGAGGAGATATGAGGGACAATTGGAGAAGTGAATTATATCAGTATAAAGTAG  
TAAAAATTGAACCACTA---GGAGTAGCACCTACCAGGGCAAAGAGAAGAGTGGTG-----  
-----GAGAGAGCAAAAAGAGCA---GTTGGA---ATAGGAGCT-----  
GTCTTCCTTGGGTTCTTAGGAGCA---GCAGGAAGCACTATG---GGCGCGGCGTCA---  
ATAACGCTGACGGTACAG---GCCAGACAA---TTATTG---TCTGGCATAGTGCAACAGCAAAGT---  
AATTTG---CTGAGG---GCTATAGAGGCTCAACAGCATCTGTTGAAACTCACGGTCTGGGGCATT  
>AF457089  
TTTTATTGCAATACATCAGATCTGTTTAATAGTACTTGGCCTGTCAATGCCAGCATGGAGTCAAATAGCACGG  
AG-----  
-----  
TCAAAATGACAATATAACACTCCAATGCAGAATAAAGCAAATTATAAATATGTGGCAGAAAGTAGGACAAGCAA  
TGTATGCCCCCTCCCATACAAGGAGTAATAAGGTGTGAATCAAAC---  
ATTACAGGACTACTATTAACAAGAGATGGTGGATCTAACAGTACA-----  
-----  
-----  
GAAGAAACCTTCAGACCTGGAGGAGGAGATATGAGGGACAATTGGAGAAGTGAATTATATAAGTATAAAGTAG  
TGAAAAATTGAGCCATTA---GGGGTAGCACCCACCAGGGCAAAGAGAAGAGTGGTG-----  
-----GAGAGAGAAAAAGAGCG---GTTACA---CTAGGAGCT-----  
GTATTCATTGGGTTCTTAGGAGCA---GCAGGAAGCACTATG---GGCGCAGCGTCA---  
GTAACGCTGACGGTACAG---GCCAGACAA---TTACTG---TCTGGCATAGTGCAACAGCAAAGC---  
AATTTG---CTGAGG---GCTATAGAGGCTCAACAGCATATGTTGAAACTCACGGTCTGGGGCATT  
>EU110088  
TTCTATTGTAACACATCACGCCTGTTTAATAGCACCTGGTGGGCCAATGGCACCAGGACGGGCTACAACAGC-  
-----  
-----  
ACTGATGGCAATATAACACTCCCATGCAGAATAAAGCAAATTATAAATATGTGGCAGAGAGTAGGACAAGCAA  
TGTATGCCCCCTCCCATCCAGGAAGAATAAGTTGTGAATCAAAC---  
ATTACAGGACTAATATTAACAAGAGATGGTGGGAGTGATAATACA-----  
-----  
-----  
ACTGAAACCTTCAGACCTGGAGGAGGAGATATGAGGGACAATTGGAGAAGTGAATTATATAAGTATAAAGTAG  
TAGAAGTTGAACCACTA---GGAGTAGCACCCACAGAGGCAAGGAGAAGAGTGGTG-----  
-----CAGAGAGAAAAAGAGCA---GTCGGA---CTGGGAGCT-----  
GTCTTCATTGGGTTCTTGGGAGCA---GCAGGAAGCACTATG---GGCGCGGCGTCA---  
GTGACGCTGACGGTACAG---GCCAGACAA---TTATTG---TCTGGTATAGTGCAACAGCAAAGC---  
AATTTG---CTGAGG---GCTATAGAGGCTCAACAACATCTGTTGAAACTCACGGTCTGGGGCATT  
>EU110092  
TTCTATTGTGATACATCAGCTCTGTTCAATAGCACTTGGAAATGCCACTGAGTCAAATGACACAAACTCCACAG  
AATCA-----  
-----  
AACTCAAATGACACTATAACTCTCCCATGCAGAATAAAACAAATTATAAATATGTGGCAGAGAATAGGACAAG  
CAATGTATAACCCTCCCATCCAAGGAAAAATAAAGTGTGAATCAAAC---  
ATTACAGGACTATTGTTAACAAGAGATGGTGGAGAAAATAGAGAAAAT-----  
-----  
-----  
AATGACAGTAGTGAAATCTTCAGACCAGGAGGAGGAGATATGAAGGACAATTGGAGAAGTGAATTGTATAAGT  
ATAAAGTAGTAAAAATTGAACCACTA---GGAGTAGCACCCACCAGGGCAAGGAGAAGAGTGGTG-----  
-----GGGAGAGAAAAAGAGCA---GTTGGA---ATAGGAGCT---  
-----GTCTTCCTTGGGTTCTTAGGAGCA---GCAGGAAGCACTATG---GGCGCGGCGTCA---  
ATAACGCTGACGGTACAG---GCCAGACAA---TTATTG---TCTGGCATAGTGCAACAGCAAAGC---  
AATTTG---CTGAGG---GCTATAGAGGCTCAACAACATCTGTTGAAACTCACAGTCTGGGGCATT  
>EU110094  
TTCTATTGTAATACATCAGGCCTGTTTAGTAGCACTTGGAGTTGGAATGACACTACCAAAACAATGGAATCAA  
ATAGC-----  
-----ACG---

GTGTCAGATGGCACTATAAATCTCCCATGCAGAATAAAGCAAATTATAAATATGTGGCAGAGAGTAGGGCAAG  
 CAATGTATGCCCCCTCCCATCCAAGGAGCAATAAGGTGTACATCAAAC---  
 ATTACAGGACTAATATTAACAAGAGATGGTGGGAAAGATGACAGG-----  
 -----  
 -----  
 AATAATGAAACCTTCAGACCTGGAGGAGGAGATATGAGGGACAATTGGAGAAGTGAATTATATAAATATAAAG  
 TAGTAAAAAATTGAACCACTA---GGAGTAGCACCCACCAGGGCAAAGAGAAGAGTGGTG-----  
 -----GAGAGAGAAAAAAGAGCA---GTTGGA---ATAGGAGCT-----  
 GTCTTCCTTGGGTTCTTAGGAGCA---GCAGGAAGCACTATG---GGCGCGGCGTCA---  
 ATAACGCTGACGGTACAG---GCCAGACAA---TTATTG---GCTGGCATAGTGCAACAGCAAAGC---  
 AATTTG---CTGAGG---GCTATAGAGGCTCAACAACATCTGTTGAAACTCACGGTCTGGGGCATT  
 >KT022360  
 TTCTATTGTAACACATCAGGCTTGTTTAATAACACTTGGGTGTTTAATAGCATTTGGGATAATAGCACTCAGG  
 AGTCCAAT-----  
 -----AGCACA-----  
 GAGTCAAATAAACTATAATTCTCCAATGCAGAATAAAGCAAATTATAAATATGTGGCAGAGAGCAGGACAAG  
 CAATATATGCTCCTCCCATTCAGGAGTAATAAGGTGTGAATCAAAC---  
 ATTACAGGACTAATATTAACAAGAGATGGTGGAAATAATAACAG-----  
 -----  
 -----  
 ATAAATGAAACATTTAGACCTGGAGGAGGAGACATGAGGGACAATTGGAGAAGTGAATTATATAAGTACAAAG  
 TAGTAAAAAATTGAACCACTA---GGAGTAGCACCTACCAAGGCACGGAGAAGAGTGGTG-----  
 -----GAGAGAGAAAAAAGAGCA---GTTACA---ATAGGAGCT-----  
 ATGTTCAATTGGGTTCTTAGGAGCA---GCAGGAAGCACTATG---GGCGCGGCGTCA---  
 ATGACGCTGACGGTACAG---GCCAGACAA---TTATTG---TCTGGCATAGTGCAACAGCAAAGC---  
 AATTTG---CTGAGG---GCTATAGAGGCTCAACAGCATCTGTTGAAACTCACGGTCTGGGGCATC  
 >KT022361  
 TTCTATTGTAATACATCAGGCCTGTTTAATTACAGCTACAGCATGCAGGAGTCAAATGATACGGAG-----  
 -----  
 -----  
 GCAAATGGCACTATAACTCTCCAATGCAAAATAAAACAAATTATAAATATGTGGCAGAGAGTAGGACAAGCAA  
 TGTACGCCCCCTCCCATCCAAGGAGTAATACAGTGTAATCAAAC---  
 ATTACAGGACTAATATTAACAAGAGATGGTGGAAATAGTACTAAT-----  
 -----  
 -----  
 GGTACAGAAATCTTCAGACCTGGAGGAGGAGATATGAGAGACAATTGGAGAAGTGAGTTATATAAGTATAAAG  
 TAGTACAACTTGAACCACTA---GGAGTAGCACCCACCAAGGCAAAGAGAAGAGTGGTG-----  
 -----GAAAGAGAAAAAAGAGCA---GTTGGA---ATAGGAGCT-----  
 GTCTTCCTTGGGTTCTTAGGAACA---GCAGGAAGCACTATG---GGCGCGGCGTCA---  
 CTGACGCTGACGGTACAA---GCCAGACTA---TTATTG---TCTGGCATAGTGCAACAGCAAAGC---  
 AATTTG---CTGAGG---GCTATAGAGGCTCAACAATATCTGTTGAAACTCACGGTCTGGGGCATT  
 >KT022363  
 TTCTATTGTGACACCTCGAAGCTGTTTAATAGCTCTTGGAATGAGAGCACTTGGGATGAAAATAGCACGAAGC  
 CTAAC-----  
 -----  
 AACAATGAAACTATAATTCTCCCATGCAGAATAAAGCAAATCATAAATATGTGGCAGAGAACAGGACAAGCAA  
 TATATGCCCCCTCCCATGAAGGAATAATAAAGTGTGACTCAAAC---  
 ATTACAGGACTAATATTAACAAGAGATGGTGGGAGGATTAACACA-----  
 -----  
 -----  
 ACTAATGAAACTTTTCAGACCTGGAGGAGGAGATATAAGGGACAATTGGAGAAGTGAATTATATAAATATAAAG  
 TAGTAAAAAATTGAGCCACTA---GGAGTAGCACCTCCAGGGCAAAGAGAAGAGTGGTG-----  
 -----GGGAGAGAAAAAAGAGCA---GTTGGA---ATAGGAGCT-----  
 GTCTTCCTTGGGTTCTTAGGAGCA---GCAGGAAGCACTATG---GGCGCGGCGTCA---  
 CTAACGCTGACGGTACAG---GCCAGGCAA---TTATTG---TCTGGCATAGTGCAACAGCAAAGC---  
 AATTTG---CTGAGG---GCTATAGAGGCTCAACAGCATATGTTGAAACTCACGGTCTGGGGCATT  
 >KT022364  
 TTTTATTGTGATACCTCAGGCTTGTTTAATAGTACTTGGGAAATTGAAAACAATACTGCCAGAATAAAGCCAA  
 ATAAC-----  
 -----

ACGGGGTAAATATAACGCTCCCGTGCAGAATAAAGCAAATTATAAATATGTGGCAAAGGGTAGGACAAGCAA  
 TGTATGCCCCCTCCCATCAAAGGAGTAATAAGGTGTGTATCAAAC---  
 ATCACAGGACTACTGCTAACAAGAGATGGTGGGAGTAAAAATAGA-----  
 -----  
 -----  
 AGTAATGAAACCTTCAGACCTGGAGGAGGAGATATGAGGGACAATTGGAGAAGTGAATTATATAAATATAAAG  
 TAGTAAAAATTGAACCACTA---GGAGTAGCACCCCTCCAGGGCAAAGAGGAGAGTGGTG-----  
 -----GAGAGAGAGAAAAGAGCA---GTTGGA---ATAGGAGCT-----  
 GTATTCCTTGGGTTCTTAGGAGCA---GCAGGAAGCACTATG---GGCGCGGCGTCA---  
 CTGACGCTGACGGTACAG---GCCAGACAA---TTATTG---TCTGGCATAGTGCAACAGCAAAGC---  
 AATTTG---CTGAGG---GCTATAGAAGCTCAACAGCATCTGTTGAAGCTTACAGTCTGGGGCATT  
 >KT022365  
 TTCTATTGTGATACGTACGGCTTATTTCAGTAGCACCTGGCAATTCAATGGGAGTACCTGGAACAACACAGATT  
 CAAACAGCACA-----  
 -----  
 GGGTCAGATGACACTATAGAACTCCCATGCAGAATAAAGCAAATTATAAATATGTGGCAGAGAGTAGGACGAG  
 CAATGTATGCCCCCTCCCATCCAAGGAGTAATAAGTTGTGTATCAAAC---  
 ATCACAGGACTAATATTAACAAGAGATAGT---AATAACAGAACT-----  
 -----  
 -----  
 AATGAAACCTTCAGACCTGGAGGAGGAGACATGAGAGACAATTGGAGAAGTGAATTATATAAGTATAAAGTAG  
 TAAAAATTGAACCACTA---GGAGTAGCACCCACCAAGGCAAAAAGAAGAGTGGTG-----  
 -----GAGAGAGAAAAAGAGCA---GTTGGA---ATAGGAGCT-----  
 GTCTTCCTTGGGTTCTTAGGAGCA---GCAGGAAGCACTATG---GGCGCGGCGTCA---  
 ATAACGCTGACGGTACAG---GCCAGACAA---TTATTG---TCTGGCATAGTGCAACAGCAAAGC---  
 AATTTG---CTGAGG---GCTATAGAGGCTCAACAACATCTGTTGAAACTCACAGTCTGGGGCATT  
 >KT022367  
 TTCTATTGTAATACATCAGGTCTATTTAATAGCAGTTGGAATGATACTGAAATCGGGCGGGAGATAAATAGGA  
 CGGAG-----  
 -----  
 TCAAATGACACTATAATTCTCCCATGCAGAATAAAGCAAATTATAAATATGTGGCAGAGAGTAGGACAAGCAA  
 TATATGCCCCCTCCCATCCAAGGAGTAATAAGGTGTGAATCAAAC---  
 ATTACAGGACTAATATTAACAAGGGATGGTGGGGGTAATAACAGA-----  
 -----  
 -----  
 AAAAAATGAAACCTTCAGACCTGGAGGAGGAGATATGAGGGACAATTGGAGAAGTGAATTATATAAGTATAAAG  
 TAGTAAAAATTGAACCAATA---GGAATAGCACCCACCAGGGCAAAGAGAAGAGTGGTG-----  
 -----GAGAGAGAAAAAGAGCA---ATTGGA---ATGGGAGCT-----  
 GTATTCATTGGGTTCTTAGGAGCA---GCAGGAAGCACTATG---GGCGCGGCGTCA---  
 ATAACGCTGACGGTACAG---GCCAGACAA---TTGTTG---TCTGGCATAGTGCAACAGCAAAAC---  
 AATTTG---CTGAGG---GCTATAGAGGCTCAACAACATCTGTTGAAGCTCACGGTCTGGGGCATT  
 >KT022368  
 TTCTATTGTAATACAACAGACCTGTTTGATAGCATTTGGCTTTACAATGCCAGCATGCATAAT-----  
 -----  
 -----  
 GCAAATAGCACGATAACTCTCCAATGCAGAATAAAGCAAATTATCAATATGTGGCAGAGAGTAGGACAAGCAA  
 TGTATGCCCCCTCCCGTCGAAGGAAAAATACAGTGCAAATCAAAC---  
 ATTACAGGACTAATATTAACAAGAGATGGTGGGGTTAACGATACA-----  
 -----  
 -----  
 AATGGAACCGAAATCTTCAGACCTGGAGGAGGGGATATGAGGGACAATTGGAGAAGTGAATTATATAAGTATA  
 AAGTAGTAAAAATTGAACCACTA---GGAGTAGCACCCACCAGGGCAAAGAGAAGAGTGGTG-----  
 -----CAGAGAGAAAAAGAGCA---GTTGGA---ATAGGAGCT-----  
 ---GTATTCCTTGGGTTCTTAGGAGCA---GCAGGAAGCACTATG---GGCGCAGCGTCA---  
 GTGACGCTGACGGTACAG---GCCAGAAGA---TTATTG---TCTGGCATAGTGCAACAGCAAAGC---  
 AATTTG---CTGAAG---GCTATAGAAGCTCAACAGCATCTGTTGAAGCTCACGGTCTGGGGCATT  
 >KT022369  
 TTCTATTGTAATACATCAGGCCTGTTTAATAGCACTTGGAAATTATACTAATAGCATGCAGCAGTCAAATAGCA  
 CAGAG-----  
 -----

TCAAACGAAACTATAACTCTCCAATGCAGAATAAAGCAAATTATAAATATGTGGCAGAGAGTGGGGCAAGCAA  
TATATGCCCCCTCCCATCCCAGGGGTAATAAGGTGTGAATCAAAC---  
ATTACAGGACTAATATTGACAAGAGATGGTGGGAGTAATAACAGT-----  
-----  
-----  
ACAAATGAAACCTTCAGACCTGGAGGAGGGAATGTGAGGGACAATTGGAGAAGTGAATTATATAAGTATAAAG  
TAGTAAAAATTGAACCACTA---GGAGTAGCACCCACCAGGGCAAAGAGAAGAGTGGTG-----  
-----GAGAGAGAAAAAAGAGCA---GTTGGA---CTAGGAGCT-----  
GTCTTCATTGGGTTCTTGGGAACA---GCAGGAAGCACTATG---GGCGCGGCGTCA---  
ATAACGCTGACGGTACAG---GCCAGACAA---TTATTG---TCTGGTATAGTGCAACAGCAAGGC---  
AATTTG---CTGAGA---GCTATAGAAGCTCAACAACAACCTGTTGAGACTCACGGTCTGGGGCATT  
>FJ866117  
TTTTATTGTAATACATCAGGCCTGTTTAATAGTACTTGGTCCCTGACAATAGTACTGGGACTAGTACTGGGA  
ATAATGAC-----  
-----ACT---  
GCCAGCAATGGCACTATAACTCTCCCATGTAGAATAAAGCAGATTATAAATATGTGGCAGAGAGTAGGACAAG  
CAATGTATGCCCCCTCCCATCCAAGGAGTAATAAGGTGTGACTCAAAC---  
ATTACAGGACTACTATTAACAAGAGATGGTGGGAGTGGGAATAAT-----  
-----  
-----  
ACCACAGAGATCTTCAGACCTGGAGGAGGAGATATGAGGGACAATTGGAGAAGTGAATTATATAAGTATAAAG  
TAGTAAGAATCGAACCTCTA---GGAGTAGCACCCACCAGGGCAAAGAGAAGAGTGGTG-----  
-----GAGAGAGAAAAAAGAGCA---GTTGGA---ATAGGAGCT-----  
GTATTCATTGGGTTCTTAGGAGCA---GCAGGAAGCACTATG---GGCGCAGCGTCA---  
ATAACGCTGACGGTACAG---GCCAGACAA---TTATTG---TCTGGCATAGTGCAACAGCAAAGC---  
AATTTG---CTGAGG---GCTATAGAGGCTCAACAGCATTTGTTGAAGCTCACAGTCTGGGGCATT  
>KT022370  
TTCTATTGTAATACATCAGGCCTGTTTAATAGAGCTTACACTAACAGCACTTACAATAACAGCACGCAGGACA  
ATGACAAT-----  
-----AACAGCACG-----  
CAGGACAATGCAACTATAACTCTCCCATGCAGAATAAGGCAAATTATAAATATGTGGCAGAGAGCAGGGAAAAG  
CAATGTATGCCCCCTCCCATCCAAGGAGTAATAAACTGTGTATCAAAC---  
ATTACAGGACTAATTTTAAACAAGAGATGGTGGAAAGAGTAACAGTACG-----  
-----  
-----  
GAGGGGGAAATCTTCAGACCTGGGGGAGGAGATATGAGGGATAATTGGAGAAGTGAATTATATAAGTATAAAG  
TAGTAAAAATTGAACCACTA---GGAGTAGCACCTACCAAGGCAAGGAGAAGAGTGGTG-----  
-----GGGAGAGAGAAAAGAGCA---GTTGGA---CTAGGAGCT-----  
GTCTTCATTGGGTTCTTAGGAGCA---GCCGGAAGCACTATG---GGCGCGGCGTCA---  
GTGACGCTGACGGTACAG---GCCAGGCAA---TTATTG---TCTGGCATAGTGCAACAGCAAAGC---  
AATTTG---CTGAGG---GCTATAGAGGCTCAACAACATCTGTTGAAACTCACGGTCTGGGGCATT  
>KT022372  
TTCTATTGTGATACAGCAGGCCTGTTTAATAGCACTTGGAGTCACAATGACAGCATACAGGGGACAAATAGCG  
CAGAG-----  
-----  
TCAAATGAAACTATAACTCTCCCATGCAGAATAAAGCAAATTATAAATATGTGGCAGAGAGCAGGACAAGCAA  
TGTATGCCCCCTCCCATCCCAGGAGTAATAAAGTGTGTATCAAAC---  
ATTACAGGACTAATATTAACAAGAGATGGTGGGAAGAACATAACA-----  
-----  
-----  
GAGGAAGTCTTCAGACCTGGAGGAGGAGATATGAGGGATAATTGGAGAAGTGAATTATATAAGTATAAAGTAG  
TAAAAATTGAACCACTA---GGAGTAGCACCCACCAAGGCAAGGAGAAGAGTGGTG-----  
-----GGGAGAGAGAAAAGAGCA---GTTGGA---GTAGGAGCT-----  
GTCTTCATTGGGTTCTTAGGAGCA---GCCGGAAGCACTATG---GGCGCGGCGTCA---  
GTGACGCTGACGGTACAG---GCCAGACGA---TTATTG---TCTGGCATAGTGCAACAGCAAAGC---  
AATTTG---CTGAAG---GCTATAGAGGCTCAACAACACCTGTTGAAACTCACGGTCTGGGGCATT  
>KT022373  
TTCTATTGTAACACATCAAGCTTGTTTAGGGGCGCTTGGGAATAGTACAACCTGCAACACTTAATAGCACTGGGA  
AT-----  
-----

AGCAATGACACTATAACTCTTCCATGCAGAATAAAGCAAATTATAAATATGTGGCAGAGAGCAGGACAAGCAA  
 TATATGCCCCCTCCCATAAAAGGAGTAATAAGGTGTAACCTCAAAT ---  
 ATTACAGGACTAATATTAACAAGAGATGGTGGGGGTAGTGATAAT -----  
 -----  
 -----  
 AGAACTGAAACTTTTAGACCTGGAGGAGGAGATATGAGAGACAATTGGAGAAGTGAATTATATAAGTATAAAG  
 TAGTTAAAATTGAACCACTA --- GGAGTAGCACCCACCAGGGCAAAGAGAAGAGTGGTG -----  
 -----GAGAGAGAAAAAAGAGCA --- GTTGGA --- ATAGGAGCT -----  
 GTCTTCATTGGGTTCTTAGGAGCA --- GCAGGAAGCACTATG --- GGCGCGGCGTCA ---  
 ATAACGCTGACGGTACAG --- GCCAGACAA --- TTATTG --- TCTGGCATAGTGCAACAGCAAAGA ---  
 AATTTG --- CTGAGG --- GCTATAGAGGCTCAACAACATCTGTTGAAACTCACGGTCTGGGGCATT  
 >KT022374  
 TTCTATTGTAATACAACAAAGCTGTTCAATAGCTCTTGGTCTGCCAATGCCAGTGAGTCAAATAGTACAGATG  
 GCAATAGT -----  
 -----  
 ACAGATGGCACTATAACTCTCCCATGCAAAATAAAGCAAATTATAAATATGTGGCAGAGAGTAGGACGAGCAA  
 TGTATGCCAATCCCATCCAAGGAAAAATAGAGTGTGCATCAAAC ---  
 ATTACAGGACTAATATTAACAAGAGATGGTGGGAATGTGAGCAGG -----  
 -----  
 -----  
 GAAAAATGAAACCTTCAGACCTGGAGGAGGAGATATGAGGGACAATTGGAGAAGTGAATTATATAAGTATAAAG  
 TAGTAAAGATTGAACCACTA --- GGAGTAGCACCCCATACGGCAAGGAGAAGAGTGGTG -----  
 -----GGGAGAGAAAAAAGAGCA --- GTTGGA --- ATGGGAGCT -----  
 GTCTTCCTTGGGTTCTTAGGAGCA --- GCAGGGAGCACTATG --- GGCGCAGCGTCA ---  
 CTAACGCTGACGGTACAG --- GCCAGACAA --- TTATTG --- TCTGGCATAGTGCAACAGCAAAGC ---  
 AATTTG --- CTGAGG --- GCTATAGAGGCTCAACAACATCTGTTGAAACTCACAGTCTGGGGCATT  
 >KT022375  
 TTCTATTGTAATACATCAAACTGTTTAATAGCACTTGGCCACAGTCAAACCACACGGAA -----  
 -----  
 -----  
 GACAATGGAAATCTAACTCTCCCATGCAGAATAAAACAACCTTATAAACCTGTGGCAAAGAGCAGGACAAGCAA  
 TGTATGCCCCCTCCCATACCAGGAAATATAAGTTGTGTATCAAAC ---  
 ATTACAGGACTACTATTGACAAGAGATGGTGGGAACACTGGGAAC -----  
 -----  
 -----  
 AATACAGAGGGAAAT ---  
 AAAACTGAAATCTTCAGACCTGGAGGAGGAAATATGAGGGACAATTGGAGAAGTGAATTATATAAGTATAAAG  
 TAGTGAAAATTGAACCAATA --- GGAATAGCACCCACCAAGGCAAAGAGAAGAGTGGTG -----  
 -----GAGAGAGAAAAAAGAGCAGCACTTGCT -----GGAGCT -----  
 TTCTTTCTTGGGTTCTTAGGAACA --- GCAGGAAGCACTATG --- GGCGCGGCGTCA ---  
 ATAGCGCTGACGGTACAG --- GCCAGGCAA --- TTATTG --- TCTGGCATAGTGCAACAGCAAAGC ---  
 AATTTG --- CTGAGG --- GCTATAGAGGCTCAACAGCAATTGTTGAGACTCACAGTCTGGGGCATT  
 >KT022376  
 TTCTATTGTAATACATCAGGCCTGTTTGATAGCACTTGGTCGTTTAATAGCACACAGGAGTCAAATAACACGG  
 GG -----  
 -----  
 -----  
 GAAAAATGATACTATAATTCTCCCATGCAGAATAAAGCAAATTATAAACATGTGGCAGAGAGTAGGACAAGCAA  
 TGTATGCCCCCTCCCATCCCAGGAGTAATACAGTGTAACCTCAACC ---  
 ATTACAGGGCTAATATTAACAAGAGATGGTGGGGAGGATAATAAT -----  
 -----  
 -----  
 AACACAGAAACCTTCAGACCTGCAGGAGGAGATATGAGGGACAATTGGAGAAGTGAATTATATAAATATAAAG  
 TAGTAAAACCTGAACCACTA --- GGAGTAGCGCCACCAAGGCAAAGAGAAGAGTGGTG -----  
 -----GAGAGAGAAAAAAGAGCA --- GTTGGA --- CTAGGAGCT -----  
 GTCTTCCTTGGGTTCTTAGGAGCA --- GCAGGAAGCACTATG --- GGCGCGGCGTCA ---  
 ATAACGCTGACGGTACAG --- GCCAGGCAA --- TTATTG --- TCTGGCATAGTGCAACAGCAAAGC ---  
 AATTTG --- CTGAGG --- GCTATAGAGGCTCAACAACATATGTTGAAACTCACAGTCTGGGGCATT  
 >KT022377  
 TTCTATTGTAATACATCAGGGCTGTTCAATAGTACTTGGGAATACCACGAAGGTAAATAGCACAGAG -----  
 -----  
 -----

TCAAATGGCACTATAACTCTCCCATGCAGAATAAAGCAAATTATAAATATGTGGCAAAGAACAGGACAAGCAA  
TGTATGCCCCCTCCCATCAAAGGAATAATAAATTGTGCATCAAAT---  
ATTACAGGACTACTATTAACAAGAGATGGTGGGGATAATAACAGT-----  
-----  
-----  
ACAAATGAAACCTTCAGACCTGGAGGAGGAGATATGAGGGACAATTGGAGAAGTGAATTATATAAGTATAAAG  
TAGTAAAAAATTGAACCACTA---GGGGTAGCACCCACCGAGGCAAGGAGAAGAGTGGTG-----  
-----GAGAGAGAAAAAAGAGCATTGTGTTGGA---ATAGGAGCT-----  
GTCTTCCTTGGGTTCTTAGGAGCA---GCCGGCAGCACTATG---GGCGCGGCGTCA---  
TTAACGCTGACGGTACAG---GCCAGACAA---TTATTG---TCTGGTATAGTGCAACAGCAAAAC---  
AATTTG---CTGAGG---GCTATAGAGGCTCAACAACATCTGTTGAAACTCACGGTCTGGGGCATT  
>FJ866116  
TTCTACTGTGATACATCAGGACTGTTTAATAGCTCTTGGAATAATACATCGGGCCAGTTTAAATAGCACTTGGA  
CTGATGGC-----  
-----TACAAT-----  
AGAAAAGAGCGAGAATATAACTCTCCAATGCAGAATAAAGCAAATTTATAAATATGTGGCAGAGAACAGGGCAAG  
CAATGTATGCCCCCTCCCATCCCAGGAATAATAAAATGTGAATCAAAC---  
ATTACAGGACTAATACTAACAAGAGATGGTGGGCAGGCTAACAAA-----  
-----  
-----  
ACAGAGGAAACCTTCAGACCTGGAGGAGGAGATATGAGGGACAATTGGAGAAGTGAATTATTTAGGTATAAAG  
TAGTAAAAAATTGAACCACTA---GGAGTAGCACCCACCAAGGCAAAGAGAAGAGTGGTG-----  
-----GAGAGAGAGAAAAAGAGCA---GTAATTGGCATGGGAGCT-----  
GTTTTCTTGGGTTCTTAGGAGCA---GCAGGAAGCACTATG---GGCGCGGCGTCA---  
CTGACGCTGACGGTACAG---GCCAGACAA---TTATTG---TCTGGCATAGTGCAACAGCAAGGC---  
AATTTG---CTGAGG---GCTATAGAGGCTCAACAACATCTGTTGAGACTCACGGTCTGGGGCATT  
>FJ866118  
TTCTATTGTAATACAACAGGACTGTTCAATCTCACTTGGAATGGCACTGACAGCACAAATAGAAAT-----  
-----  
-----  
GAGTCAGGCAATATAACTCTCCCATGCAGAATAAAGCAAATTATAAATATGTGGCAAAGAGTAGGACGAGCAA  
TATATGCCCCCTCCCATCCCAGGAGTAGTAAAGTGTAATCAAAT---  
ATTACAGGATTAATATTAACAAGGGATGGTGGAGACGACGAGAAT-----  
-----  
-----  
AACACTGAAACCTTCAGACCTGGAGGAGGAAATATGAGGGACAATTGGAGAAGTGAATTATATAAATATAAAG  
TAGTAAAAAATTGAACCACTA---GGGGTAGCACCCACCAAGGCAAGGAGGAGAACGGTG-----  
-----GAGAGAGAAAAAAGAGCA---GTTGGA---ATAGGAGCT-----  
GTCTTCCTTGGGTTCTTAGGAGCA---GCAGGAAGCACTATG---GGCGCGGCGTCA---  
ATAACGCTGACGGTACAG---GCCAGACAA---TTATTG---GCTGGCATAGTGCAACAGCAAAGC---  
AATTTG---CTGAGG---GCTATAGAGGCTCAACAACAGATGTTGAGACTCACAGTCTGGGGCATT  
>FJ866120  
TTCTATTGTAATACATCACTCCTGTTTGAAAGCATTGTGGTATGGCAATGAAAGCATAAATGCCACAGAAGAGG  
CA-----  
-----  
AATGACACTATAATAACTCTCCGATGCAGAATAAAGCAAATTTATAAAAATGTGGCAGAGAGTAGGACAAGCAA  
TGTATGCCCCCTCCCATCCCAGGAGCAATCAGGTGTAATTCAAAC---  
ATTACAGGACTAATATTAACAAGAGATGGAGGGCTTAATGACAATGGAGCT-----  
-----  
-----  
GATGGAAGAAATGAAACCTTCAGACCTGGAGGAGGAGATATGAGGGACAATTGGAGAAGTGAATTATATAAGT  
ATAAAGTGGTAGAAATTGAACCACTA---GGAGTAGCCCCCACTCAGGCAAGAAGAAGAGTGGTG-----  
-----CAGAGAGAAAAAAGAGCA---GTTGGA---ATAGGAGCT---  
-----GTCTTCATTGGGTTCTTAGGAGCA---GCAGGAAGCACTATG---GGCGCAGCGTCA---  
ATAGCGCTGACGGCACAG---GCCAGACAA---TTATTG---TCTGGCATAGTGCAACAGCAAAGC---  
AATTTG---CTGAGG---GCTATAGAGGTTCAACAACAGTTGTTGAAACTCACGGTCTGGGGCATT  
>FJ866121  
TTCTACTGTAACACATCAAAACTGTTTAATAGTACTTGGCATTACAATAACAGCACTGGGTATAATAATGGCA  
GCCTACAG-----  
-----GAG---

GAAAATAACACAGAGATAGTTCTCCTATGCAGAATAAAGCAAATTATAAATCTGTGGCAGAGGGTAGGAAAGG  
CAATGTATGCCCCCTCCCATCCAAGGAAGCATAAAGTGTAACCTCAAAC---  
ATTACAGGACTACTATTAATCAGGGATGGTGGGGTTAATACTACT-----  
-----  
-----  
AATGAAACCTTCAGACCTGGAGGAGGAGATATGAGGGACAATTGGAGAAGTGAATTATATAAATATAAAGTAA  
TAAAAATTGAACCACTA---GGAATAGCACCCACCAGGGCAAAGAGAAGAGTGGTG-----  
-----GAGAGAGAAAAAAGAGCA---GTTGGA---CTAGGAGCT-----  
GTTTTCTGTTGGGTTCTTAGGAGCA---GCAGGAAGCACTATG---GGCGCAGCGTCA---  
GTGACGCTGACGGTACAG---GCCAGACAG---TTATTG---TCTGGTATAGTGCAACAGCAAAGC---  
AATTTG---CTGAGG---GCTATAGAGGCTCAACAACATATGTTGAAACTCACGGTCTGGGGCATT  
>KT022380  
TTCTATTGTAATACATCAGGCTTGTTTAATAGGACTTGGAAGGGGATAATCAAGGGCACTGCCAATAACA  
CG-----  
-----  
GAGTCAGACCCTATAGTGCTCCAATGCAGAATAAAGCAAATTATAAATATGTGGCAGAGAGTAGGACGAGCAA  
TGTATGCCCCCTCCCATCCAGGAATAATAAATGTGTATCAAAC---  
ATTACAGGACTAATATTAACAAGAGATGGTGGGAATAGTAATGGA-----  
-----  
-----  
GATAATGAAACCTTCAGACCTGGAGGAGGAGATATGAGGGACAATTGGAGAAGTGAATTATATAAGTATAAAG  
TAGTAAAAGTTGAGCCATTA---GGAGTAGCACCCACCAGGGCAAGGAGGAGAGTGGTG-----  
-----GCGAGAGAAAAAAGAGCAGTAGTTGGA---CTGGGAGCT-----  
GTTTTCTGTTGGGTTCTTAGGAGCA---GCAGGAAGCACTATG---GGCGCGGCGTCA---  
ATAACGCTGACGGTACAG---GCCAGACAA---TTATTG---TCTGGCATAGTGCAACAGCAAAGC---  
AATTTG---CTGAGG---GCTATAGAGGCTCAACAACATCTGTTGAAACTCACGGTCTGGGGCATT  
>KT022381  
TTCTATTGTAATACATCAGGCCTGTTTAATTACACCTATCCATCAAATCACAGTGATAAGTCAAATAACACT-  
-----  
-----  
ATAAATGAGACTATAACTCTCCCATGCAGAATAAAACAAATTATAAGAATGTGGCAGAGAACAGGACAAGCAA  
TGTATGCCCCCTCCCATCCAGGAATAATTAAGTGTGAATCAAAC---  
ATTACAGGACTAATATTAACAAGAGATGGT---TTTAATGGCACG-----  
-----  
-----  
AATGAAACCTTCAGGCCTGTAGGAGGAGATATGAGGGACAATTGGAGAAGTGAATTATATAAGTATAAAGTAG  
TAAGAATTGAACCACTA---GGAGTAGCACCCACCAGGGCAAAGAGAAGAGTGGTG-----  
-----GGAAGAGAGAAAAGAGCA---GTTGGA---ATGGGAGCT-----  
GTATTCCTTGGGTTCTTAGGAGCA---GCAGGAAGCACTATG---GGCGCGGCGTCA---  
ATAACGCTGACGGTACAG---GCCAGACAA---TTATTG---TCTGGCATAGTGCAACAGCAAAGC---  
AATTTG---CTGAAG---GCAATAGAGGCTCAACAACATCTGCTGAGACTCACGGTCTGGGGCATT  
>KT022382  
TTCTATTGTAATACATCAGGCCTGTTCAATAGTAGCTGGGGTCCAAATGACACGAAATCAGATAAC-----  
-----  
-----  
TCAACTACAAATTACACTCTCCCATGCAGAATAAAGCAAATTGTAAGGATGTGGCAGAAAATAGGACAAGCAA  
TGTATGCCCCCTCCAATCGAGGGAGAAATAAATTGTGTATCAAAC---  
ATTACAGGACTATTATTAACAAGAGATGGTGGGCATAACAGTATT-----  
-----  
-----  
AACAAATGAAACTGAAACATTCAGACCTGGAGGAGGAGATATGAAGGACAATTGGAGAAGTGAATTATATAAGT  
ATAAAGTAGTAAAAATTGAACCACTA---GGAGTAGCACCCACCAGGGCAAAGAGAAGAGTGGTG-----  
-----GGGAGAGAAAAAAGAGCA---GTTGGA---ATAGGAGCT---  
-----GTTTTCTTGGGTTCTTGGGAGCA---GCAGGAAGCACTATG---GGCGCGGCGTCA---  
ATAACGCTGACGGTACAG---GCCAGACAA---TTATTG---TCTGGCATAGTGCAAGCAGCAAAC---  
AATTTG---CTGAGG---GCTATAGAGGCTCAACAACATCTGTTGAAACTCACGGTCTGGGGCATT  
>KT022383  
TTCTATTGTAATACATCAGGCCTGTTTAATAGCACTTGGAACAGCCCTTGGAATAACACTGGGGAA-----  
-----  
-----

CAAGAAGGCAATATAACTCTCCCATGCAGAATAAAGCAAATTATAAATATGTGGCAGAGAGTAGGACAAGCAA  
TATATGCCCCCTCCCATCCCAGGAGTAATAAAGTGTGAATCGAAC---  
ATTACAGGGCTACTATTAACAAGAGATGGTGGGAACACTAACAGT-----  
-----  
-----  
AGTACTGAAACCTTCAGACCTGGAGGAGGAGATATGAGGGACAATTGGAGAAGTGAATTATATAAATATAAAG  
TAGTAAAAGTTGAACCACTA---GGAGTAGCACCCACCAGGGCAAGGAGAAGAGTGGTG-----  
-----GGGAGAGAAAAAAGAGCA---GTTGGA---ATAGGAGCT-----  
GTCTTCCTTGGGTTCTTAGGAGCA---GCAGGAAGCACTATG---GGCGCGGCGTCA---  
ATAACGCTGACGGTACAG---GCCAGACAA---TTATTG---TCTGGCATAGTGCAACAGCAAAGC---  
AATTTG---CTGAGG---GCTATAGAGGCTCAACAACATATGTTGAAACTCACGGTCTGGGGCATT  
>FJ623487  
TTCTATTGTAATACATCAAGACTGTTTAATAGCACTTGGAAACAATGGCACTTGGAAACAATACCAACATGCAGG  
AGTCAAATAGC-----  
-----ACGAAG-----  
TCAGAAAATGGCACTATAACTCTCCCATGCAGAATAAAGCAAATTATAAATATGTGGCAGAGAACAGGACAAG  
CAATGTATGCCCCCTCCCATCCGAGGAGTAATAAGATGTGAATCAAAC---  
ATTACAGGACTAATATTAACAAGAGATAGTGTGAATAATAGCAA-----  
-----  
-----  
GACAATGAAACCTTCAGACCAGGAGGAGGAGATATGAGGGACAATTGGAGAAGTGAATTATATAAGTATAAAG  
TAGTAAAAGTTGAACCACTA---GGAGTAGCACCCACCACGGCAAGGAGAAGAGTGGTG-----  
-----GGAAGAGAAAAAAGAGCA---GTGGGA---ATAGGAGCT-----  
GTATTCCTTGGGTTCTTGGGAGCA---GCAGGAAGCACGATG---GGCGCGGCGTCA---  
ATGACGCTGACGGTACAG---GCCAGACAA---TTATTG---TCTGGTATAGTGCAACAGCAAAGC---  
AATTTG---CTGAGG---GCTATAGAGGCTCAACAACACCTGTTGAAACTCACGGTCTGGGGCATT  
>FJ623481  
TTTTATTGTAATACATCAGGCCTGTTTAATAGCACTTGGAAATCACACTGACATAAAGGGGTCAAATAGCACGG  
AG-----  
-----  
TCAAGTGAACTATAACTCTCACATGCAGAATAAAGCAAATTATAAATATGTGGCAGAGAGTAGGGCAAGCAA  
TGTATGCCCCCTCCCATACCAGGAGCAATAAGGTGTGAATCAAAC---  
ATTACAGGAATACTCTTAACAAGAGATGGTGGGAATAGCAAGAAC-----  
-----  
-----  
AGCACAAACAGAAATCTTCAGACCTGGAGGAGGAAACATGCGGGACAATTGGAGAAGTGAATTATATAAGTATA  
AAGTAGTACAAATTGAACCACTA---GGAGTAGCACCTACCAGGGCAAAGAGAAGAGTGGTG-----  
-----GAGAGAGAAAAAAGAGCA---ATTGGA---ATAGGAGCT-----  
---GTATTCATTGGGTTCTTAGGAGCA---GCAGGAAGCACTATG---GGCGCGGCGTCA---  
ATAACGCTGACGGTACAG---GCCAGACAA---TTATTG---ACTGGCATAGTGCGACAGCAAAGC---  
AATTTG---CTGAGG---GCTATAGAGGCTCAACAACATCTGTTGAAACTCACGGTCTGGGGCATT  
>FJ623475  
TTTTACTGTGATACATCAGGCCTGTTTAATAGCACTTGGGGAGCCACTGACAGCATGCATGGGGCAAATGACA  
CG-----  
-----  
GAGTCAAATGACACTATAACTCTCCCATGTAGGATAAAACAAATTATAAATAGGTGGCAGAGAGTAGGACAAG  
CAATGTATGCCCCCTCCCATCCAAGGAGTAATAAAGTGCAAATCAGAC---  
ATTACAGGAATAATATTAACAAGAGATGGTGGGAATAATAATGAC-----  
-----  
-----  
AGTAGAAATGAAACCTTCAGACCTGGAGGAGGAGATATGAGGGACAATTGGAGAAGTGAATTGTATAAGTATA  
AGGTGGTAAAGATTGAACCACTA---GGAGTAGCACCCACCAGGGCAAAGAGAAGAGTGGTG-----  
-----GAGAGAGGAAAAAAGAGCA---GTTGGG---ATAGGAGCT-----  
---GTTTTCCTTGGATTCTTAGGAGCA---GCCGGAAGCACTATG---GGCGCGGCGTCA---  
ATAACGCTGACGGTACAG---GCCAGGCAA---TTATTG---TCTGGCATAGTGCAACAGCAAAGC---  
AATTTG---CTGAGG---GCTATAGAGGCTCAACAACATATGTTGAAACTCACGGTCTGGGGCATA  
>FJ623476  
TTCTATTGTAATACATCAGGCCTGTTTAATAGCACTTGGAAATATCACTGACAATCTCAACATAACTCAG----

TCAAATGAGAACATAACTCTCCCATGCAAAATAAAGCAAATTATAAATATGTGGCAGAGAGTAGGACAAGCAA  
TATATGCCCCCTCCCATCCAGGAAGGGTAAGTTGTGTCTCAAAC---  
ATTACAGGACTAATATTAACAAGAGATGGTGGAACAATAACAGT-----  
-----  
-----  
ACAAATGAAACCTTCAGGCCTGGAGGAGGAGATATGAGGGACAATTGGAGAAGTGAATTATATAAGTATAAAG  
TAGTAAGAATTGAACCACTA---GGAGTAGCACCTACCCAGGCAAAGAGAAGAGTGGTG-----  
-----GGAAGAGAAAAAAGAGCA---ATTGGA---ATAGGAGCT-----  
GTCTTCCTTGCGTTCTTAGGAGCA---GCAGGAAGCACTATG---GGCGCGGCGTCA---  
ATAACGCTGACGGTACAG---GCCAGACAG---TTATTG---TCTGGCATAGTGCAACAGCAAAAC---  
AATTTG---CTGAGG---GCTATAGAGGCTCAACAACAACCTGTTGAAACTCACGGTCTGGGGCATT  
>FJ623485  
TTTTATTGTAATACATCAGGCCTGTTTAATAGCACTTGGTATCACAATAGCACTTGGGAATGATCAAACCTGACG  
AG-----  
-----  
AGGTCAAATGACACTATAACTCTCCAATGCAGAATAAAGCAAATTATAAATATGTGGCAGAGAGTAGGACAAG  
CAATATATGCCCCCTCCTATCCAAGGAACAATAAGGTGTGAATCAAAC---  
ATTACAGGACTAATATTAACAAGAGATGGTGGAAGGATAGCAAT-----  
-----  
-----  
ACAACAACCTGAAACCTTCAGACCTAGCGGAGGAGATATGAAGGACAATTGGAGAAGTGAATTATATAAATATA  
AAGTAGTAAAAATTGAACCACTA---GGAGTAGCACCTCCAGGGCAAGGAGAAGAGTGGTG-----  
-----GGAAGAGAAAAAAGAGCA---GTTGGA---ATAGGAGCT-----  
---GTCTTCCTTGCGTTCTTAGGAGCA---GCAGGAAGCACTATG---GGCGCAGCGTCA---  
ATAACGCTGACGGTACAG---GCCAGACAA---TTACTG---TCTGGCATAGTGCAACAGCAAAGC---  
AATTTG---CTGAGG---GCTATAGAGGCTCAACAACATATGTTGAGACTCACGGTCTGGGGCATT  
>FJ623488  
TTCTATTGTAACACATCAGGTCTGTTTAATAGCACTTGGGATAACAATACTGGCAATTGGTCTAGCAATAGCA  
GCAGCATGCAG-----  
-----GGGTCAAAT-----  
AGCACAGATGATACTATAACTCTCCCATGCAGAATAAAGCAAATTATAAATATGTGGCAGAGAACAGGACAAG  
CAATGTATGCCCCCCCCATCCAAGGGATAATAAGGTGTGAATCAAAC---  
ATCACAGGGATAATATTAACAAGAGATGGTGGAAGTACTGAGGAT-----  
-----  
-----  
AATACTACAGAAGTCTTCAGACCTGGAGGAGGAGATATGAGGGACAATTGGAGAAGTGAATTATATAAATATA  
AAGTAGTACAAGTTGAACCAGTA---GGAATAGCACCTCCAAGGCAAGGAGAAGAGTGGTG-----  
-----CAGAGAGAAAAAAGAGCA---ATTGGA---ATGGGAGCT-----  
---GTCTTCCTTGCGTTCTTAGGAGCA---GCAGGAAGCACTATG---GGCGCGGCGTCA---  
ATGACGCTGACGGTACAG---GCCAGAAAT---TTATTG---TCTGGCATAGTGCAACAGCAGAGT---  
AATTTG---CTGAGG---GCTGTAGAGGCTCAACAACAACCTGTTGAGACTCACGGTCTGGGGCATT  
>FJ623478  
TTCTATTGTAATACATCAGGCCTGTTTAATCACACTTACCTGCCTAAGAGCACTTACCTGCCTAATAGCACTT  
GGAATAAC-----  
-----AGTACG-----  
GGATCAAATGACAGTATAACTCTTCCATGTAGAATAAAGCAAATTATAAATATGTGGCAGAGAGTAGGACAAG  
CAATGTATGCCCCCTCCTATCCAAGGAGTAATAAAGTGTAATCAGAT---  
ATTACAGGACTAATATTGACAAGAGATGGTGGAATAGTAACAGT-----  
-----  
-----  
GATAATGAAACCTTCAGACCTGGAGGAGGAGATATGAGGGACAATTGGAGAAGTGAATTATATAAGTATAAAG  
TAGTAAAAATTGAACCACTA---GGAGTAGCACCCACCAGGGCAAAGAGAAGAGTGGTG-----  
-----GAGAGAGAAAAAAGAGCA---GTTGGA---ATAGGAGCT-----  
GTTTTTCATTGGGTTCTTAGGAGCA---GCAGGAAGCACTATG---GGCGCGGCGTCA---  
ATAACGCTGACGGTACAG---GCTAGACAA---TTATTG---TCTGGCATAGTGCAACAGCAAAGC---  
AATTTG---CTGAGG---GCTATAGAGGCTCAACAACATATGTTGAAACTCACGGTCTGGGGCATT  
>FJ623482  
TTCTATTGTAATACATCAGACCTGTTTAATGGCAATAGCACTAGGAATGGCACTGGGAATAGCAACAGCACGC  
CG-----  
-----

GTAAC TGGCAATATAACTCTCCCATGCAGAATAAAGCAAATTATAAATATGTGGCAGAGAGTAGGACAAGCAA  
 TGTATGCCCCGCCCATCCAAGGGGTAATAAGGTGTGTATCAAAC ---  
 ATTACAGGATTAATATTGACAAGAGATGGTGGGAAACAGAATAATAATAGTAAT -----  
 -----  
 -  
 AGTAATAGTAGTGATATTGAAGTCTTCAGACCTGGAGGAGGAGATATGAGGGACAATTGGAGAAGTGAATTAT  
 ATAAGTATAAAGTAGTAAAAATTGAACCACTA --- GGAATAGCACCTACCAAGGCAAAAAGAAGAGTGGTG ---  
 -----GAGAGAGAAAAAAGAGCA --- ATTGGA ---  
 ATAGGAGCT -----GTCCTCCTTGGGTTCTTAGGAACA --- GCAGGAAGCACTATG ---  
 GGCGCGGCGTCA --- ATAGCGCTGACGGTACAG --- GCCAGACAA --- TTAATG ---  
 TCTGGCATAGTGCAACAGCAAAGC --- AATTTG --- CTGAGG ---  
 GCTATAGAGGCTCAACAGCATATGTTGAACTCACAGTCTGGGGCATT  
 >FJ623477  
 TTCTATTGTGATACATCAGGCCTGTTTAAATAGCACCTGGAATAATAGCACCTGGAATAATAATGACACTGCCC  
 AG -----  
 -----  
 TCAAAATGACACAATAACTCTCCCATGCAGAATAAAACAAATTGTAAATATGTGGCAGAGAACAGAACAAGCAA  
 TGTATGCCCCCTCCCATCCAAGGAGTAATAAGGTGTGAATCAAAC ---  
 ATCACAGGACTACTATTAACAAGAGATGGTGGGATTAATAACACA -----  
 -----  
 -----  
 AATGAAACCTTCAGACCTGGAGGAGGAGATATGAGGGACAATTGGAGAAGTGAAGTATATAAGTATAAAGTAG  
 TAAAAATTGAACCACTG --- GGAGTAGCACCTCCAGGGCAAGGAGAAGAGTGGTG -----  
 -----GGGAGAGAAAAAAGAGCA --- GTTGA --- ATAGGAGCT -----  
 TTATTCCTTGGATTCTTGGGCGCA --- GCAGGAAGCACTATG --- GGCGCGGCGTCA ---  
 ATGACGCTGACGGTACAG --- GCCAGACAA --- TTATTG --- TCTGGCATAGTGCAACAGCAAAGC ---  
 AATTTG --- CTGAAG --- GCTATAGAGGCTCAACAACATCTGTTGAGACTCACGGTCTGGGGCATT  
 >FJ623486  
 TTCTATTGTAATACATCAGAACTATTTAATAGCACTTGAATCTTAATAGCACTTGAATCACACTGGCAGCA  
 TACCGGAGTCA -----  
 -----AATAGCACG -----  
 GAGTCAAATGGCACTATAACCTCAAATGCAGAATAAAGCAAATTATAAATATGTGGCAGAGAGTAGGGCAAG  
 CAATGTATGCCCCCTCCCATCAAAGGGACAATAAGGTGTAAATCAAAC ---  
 ATCACAGGACTAATATTAACAAGAGATGGTGGGGATAATAACAGT -----  
 -----  
 -----  
 ACAAAGGAAACCTTCAGGCCTGGAGGAGGAGATATGAGGGACAATTGGAGAAGTGAATTATATCAGTATAAAG  
 TAGTAAACTTGAACCACTA --- GGAGTAGCACCCACCAGGGCAAGGAGAAGAGTGGTG -----  
 -----GGGAGAGAAAAAAGAGCA --- GTTGA --- CTAGGAGCT -----  
 GTTTTCATTGGGTTCTTGGGAGCA --- GCAGGAAGCACTATG --- GGCGCGGCGTCA ---  
 ATGACGCTGACGGTACAA --- GCTAGACAA --- TTATTG --- TCTGGCATAGTGCAACAGCAAAGC ---  
 AATTTG --- CTGAGG --- GCTATAGAGGCTCAACAACATCTGTTGAACTCACGGTCTGGGGCATT  
 >FJ623479  
 TTCTATTGTAATACATCAGACCTGTTTAAATGGTACTTGAATAATAGCACTTTGAATGGCACTGCCAAGCAGG  
 AG -----  
 -----  
 GTAAATGACAGCACTATAACGATCTCATGCAGGATAAAGCAATTTATAAATATGTGGCAGAGAACAGGACGAG  
 CAATGTATGCCCCCTCCCATTCAGGAGTAATAAGTTGTAACTCAAGC ---  
 ATTACAGGATTAATATTAACAAGAGATGGTGGGGATGATAACAAT -----  
 -----  
 -----  
 AATAATGAAACATTTCAGACCTGGAGGAGGAGATATGAGGGACAATTGGAGAAGTGAATTATATAAGTATAAAG  
 TAGTAAAAATTGAACCACTA --- GGAGTAGCACCCACCAAGGCAAGGAGAAGAGTGGTG -----  
 -----GAGAGAGAAAAAAGAGCA --- GTTGA --- ATAGGAGCT -----  
 GTACTCCTTGGGTTCTTAGGAGCA --- GCAGGAAGCACTATG --- GGCGCGGCGTCA ---  
 ATAACGCTGACGGTACAG --- GCCAGACAA --- TTATTG --- TCTGGCATAGTGCAACAGCAAAGC ---  
 AATTTG --- CTGAAG --- GCTATAGAGGCTCAACAACAACCTGTTGAACTCACAGTCTGGGGCATT  
 >HM215275  
 TTCTATTGTAATACATCAGGTCTGTTCAATAGCACTTGGGAGGCCAATAGTACTGCCAATACC -----  
 -----

-----  
AGCACGACAAATATAACTCTCCCATGCAAAATAAAGCAACTTGTGAAGAATGTGGCAGAGGACAGGACAAGCAT  
TGTATGCCCCCTCCCATCGAAGGAGTAATAAAATGTGTATCAAAC---  
ATTACAGGACTAATATTAACAAGAGATGGTGGGGGTAATAACAGT-----  
-----  
-----  
GCAACAAATGAAACCTTCAGACCTGGAGGAGGAGATATGAGGGACAATTGGAGAAGTGAATTATATAAGTATA  
AAGTAGTACAAATTGAACCACTA---GGAGTTGCACCCACCGAGGCAAGGAGAAGAGTGGTG-----  
-----AAGAGAGAAAAAAGAGCA---GTTCTT-----GGACTG-----  
---TTTTTCCTTGGGTTCTTAGCAGCA---GCAGGAAGCACTATG---GGCGCGGCGTCA---  
ATAACGCTGACGGTACAG---GCCAGACAA---TTATTG---TCTGGCATAGTGCAACAGCAAAGC---  
AATTTG---CTGAGG---GCTATAGAGGCTCAACAGCATCTGTTGAAACTCACGGTCTGGGGCATT  
>KT252544  
TTCTATTGTAACACATCAGGCCTGTTTAATAGTACTTGGGATGGGAATAGCACTGAGGCAAACATTACGCAG-  
-----  
-----  
TCAAAATGAGACTATAACTCTCCCATGCAAAATAAAGCAAATTGTAAATATGTGGCAGAGAGTGGGACGAGCAA  
TGTATGCCCCCTCCTATCCCAGGAGTAATAAAGTGTGAATCAAAC---  
ATTACAGGGCTAATACTGACAAGAGATGGTGGGAATGAAACAAAT-----  
-----  
-----  
GGAACAGAAATCTTCAGACCTGTAGGAGGAGACATGAGGGACAATTGGAGAAGTGAATTATATAAGTATAAAG  
TAGTACAAATTAAACCACTA---GGAGTAGCACCCACCAAGGCAAAGAGAAGAGTGGTG-----  
-----CAGAGAGAAAAAAGAGCA---GTTGGA---ATGGGAGCT-----  
GTTTTCTTTGGGTTCTTAGGAGCA---GCTGGAAGCACTATG---GGCGCGGCGTCA---  
ATAACGCTGACGGTACAG---GCCAGACAA---TTATTG---ACTGGCATAGTGCAACAGCAAAGC---  
AATTTG---CTGAGG---GCTATAGAGGCTCAACAGCATCTGTTGAAACTCACTGTCTGGGGCATT  
>HQ540689  
TTCTACTGTAATACAACAAACCTGTTTAATAGTAGCATTCCTTCAACGCCAGCGAGAGGGCAAATAACACCA  
AT-----  
-----  
AGCACAGATGACATTATAACTCTCCAATGCAGAATAAAGCAAATTGTAAAGGATGTGGCAAAGAGTAGGACAAG  
CAATGTATGCCCCCTCCCATCCCAGGAGTAATAAGGTGTGAATCAAAC---  
ATTACAGGACTTATGTTAACATGGGATGGTGGGAGTAAAAATATTACTGAG-----  
-----  
-----  
GGCAATAGAACTGAAACCTTTAGACCTGGAGGAGGAGACATGAGGGACAATTGGAGAAGTGAATTATATAAAT  
ATAAAGTAGTAAAAATTGAACCACTA---GGAGTTGCACCCACCAAGGCAAGGAGAAGAGTGGTG-----  
-----GGAAGAGAAAAAAGAGCA---GTTGGA---ATAGGAGCT---  
-----GTTTTCTTTGGGTTCTTAGGAGCA---GCAGGAAGCACTATG---GGCGCGGCGTCA---  
GTGACGCTGACGGTACAG---GCCAGACAA---TTATTG---TCTGGTATAGTGCAACAGCAAAGC---  
AATTTG---CTGAGA---GCTATAGAGGCTCAACAACAGTTGTTGAAACTCACGGTCTGGGGCATT  
>KU921708  
TTCTATTGTAATACAGTAAATCTGTTCAATAGCTCTTGGGGTGCCAACGCCACTGAGTCAAATAGCACAGGGT  
TA-----  
-----  
AATAATCAAATATAACATCTCCCATGCAGAATAAAGCAAATTATAAATATGTGGCAGAGAACAGGACAAGCAA  
TGTATGCCCCCTCCCGTCGAAGGAATAATAAGTTGTGTATCAGAC---  
ATTACAGGACTACTGTTAACAAGAGACGGAGGAGAAAAATACAACA-----  
-----  
-----  
CATGAAATTTTCAGACCTGGAGGAGGAGATATGAGGGACAATTGGAGAAGTGAATTATATAAGTATAAAGTAG  
TAAAAATTGAACCCCTA---GGAGTAGCACCCACCAAGGCAAGGAGAAGAGTGGTG-----  
-----CAGAGAGAAAAAAGAGCA---GTTGGA---ATGGGAGCT-----  
GTCTTCCTTGGGTTCTTAGGAGCA---GCAGGAAGCACTATG---GGCGCAGCGTCA---  
ATAACGCTGACGGTACAG---GCCAGACAA---TTATTG---TCTGGTATAGTGCAACAGCAAAGC---  
AATTTG---CTGAGG---GCTATAGAGGCTCAACAGCATCTGTTGAAACTCACTGTCTGGGGCATT  
>KU921712  
TTCTATTGTAATACATCAAAGCTGTCTAACAGCACATTTCCACTTAATAAACAACCTCAGAATAACAGCACGCAG-

-----  
ACAAACAGTACTATAACTCTCCCATGCAGAATAAAGCAAATTATAAATATGTGGCAGAGAACAGGAAAAGCAA  
TATATGCCCCCTCCCATCTCAGGACCAATAAAGTGTACATCAAAC---  
ATTACAGGACTAATATTAACAAGAGATGGTGGAATGATAATAATAATGAT-----  
-----  
-----  
ACCAATGGAAATGAAACCTTCAGACCTGGAGGAGGAGATATGAGGGACAATTGGAGAAGTGAATTATATAAGT  
ATAAAGTAGTAAACTTGAACCACTA---GGAGTAGCACCCACCAGGGCAAGAAGAAGAGTGGTG-----  
-----CAGAGAGAGAAAAGAGCA---ATTGGA---CTGGGAGCT---  
-----GTATTCATTGGGTTCTTAGGAGCA---GCAGGGAGCACTATG---GGCGCGGCGTCA---  
GTGACGCTGACGGTACAG---GCCAGAGCC---TTATTG---TCTGGCATAGTGCAACAGCAAAGC---  
AATTTG---CTGAGG---GCTATAGAAGCTCAACAACATCTGTTGAAGCTCACGGTCTGGGGCATT  
>KU921727  
TTCTATTGTGACACATCAAGCCTGTTTAATAGCACTTGGAATGAGAATGACAATGTCAGCAGAACAGAGTCAA  
AT-----  
-----  
AGTACAGAAGATATAACTCTCCAATGCAGAATAAAACAAATTGTAAATATGTGGCAGAGAGTAGGACAAGCGA  
TGTATGCCCCCTCCCATCCAAGGAATAATAAAGTGTGAATCAAAC---  
ATAACAGGACTAATATTAACAAGAGATGGTGGAATCATAATAGT-----  
-----  
ACAAATGAAACCTCC---  
AGAAATGAAACCTTCAGACCTGGAGGAGGAGATATGAGGGACAATTGGAGAAGTGAATTATATAAGTATAAGG  
TAGTAAAAAATTGAACCTCTA---GGAGTAGCACCCACCAAGGCAAAGAGAAGAGTGGTG-----  
-----GAGAGAGAAAAAAGAGCA---GTTGGA---ATAGGAGCT-----  
GTCTTCCTTGGAATTCTTGGGAGCA---GCAGGAAGCACTATG---GGCGCGGCGTCA---  
ATAACGCTGACGGCACAG---GCCAGACAA---TTATTG---TCTGGTATAGTGCAACAGCAAAGC---  
AATTTG---CTGAGG---GCTATAGAGGCTCAACAGCATCTGTTGAGACTCACAGTCTGGGGCATT  
>KU921732  
TTCTATTGTAATACATCAGGCCTTTTTGATGACACTTGGAATGGCACGAAG-----  
-----  
-----  
TCAAATGACACTATAACACTCCCATGCAGAATAAAGCAAGTTATAAATATGTGGCAGAGGACAGGACAAGCAA  
TGTATGCCCCCTCCCATCCAAGGAGTAATAAGGTGCGAATCAAAC---  
ATCACAGGACTAATATTAACAAGAGATGGTGGGCATAACATTACA-----  
-----  
-----  
AATGAAACCTTCAGACCTACAGGAGGAAATATGAGGGACAATTGGAGAAGTGAATTATATAAGTATAAAGTAG  
TAAGAATTGAACCACTA---GGAGTAGCACCCACCTCGGCAAAGAGAAGAGTGGTG-----  
-----GAGAGAGAAAAAAGAGCAGTAGTTGGA---ATGGGAGCT-----  
GTCTTCATTGGGTTCTTGGGAGCA---GCAGGAAGCACTATG---GGCGCGGCGTCA---  
ATGACGCTGACGGTACAG---GCCAGACAA---TTATTG---TCTGGCATAGTGCAACAGCAAAGC---  
AATTTG---CTGAGG---GCTATAGAGGCTCAACAGCATTTGTTGAAGCTCACGGTCTGGGGCATT  
>KU921734  
TTCTATTGTAACACATCAGGTCTGTTTAATAGCACGTGGAATAAGGATAATAACACCTTGAATGGCGCTGTAA  
ATAAC-----  
-----  
ATAACAGACAATATAACCCTCCAATGCAGAATAAAACAAATTATAAATATGTGGCAGAGAGCAGGACAAGCAA  
TATATGCTCCTCCCATCCCAGGAGTAATAAGGTGCACCTCAAAT---  
ATTACAGGATTAATATTAACAAGAGATGGTGGAAGATAGCAATGAA-----  
-----  
-----  
AGTGCTGAAACCTTCAGACCTGGAGGAGGAGATATGGGGGACAACCTGGAGAAGTGAATTATATAAGTATAAGG  
TAGTAAAAAATTGAACCACTA---GGAATAGCACCCAACAGGGCAAAGAGAAGAGTGGTG-----  
-----GAGAGAGAAAAAAGAGCAATCTTGGA---CTGGGAGCT-----  
GTTTTCTGTTGGGTTCTTAGGAGCA---GCAGGAAGCACTATG---GGCGCGGCGTCA---  
CTGACGCTGACGGTACAG---GCCAGAAAC---TTATTG---TCTGGCATAGTGCAACAGCAAAAC---  
AATTTG---CTGAAG---GCTATAGAGGCTCAACAGCATCTGTTGAACTCACGGTCTGGGGCATT  
>KU921738  
TTCTATTGTAACACATCAGAGCTGTTTAATAGCACTTGGAATAGGACTGACCCTGGCACTTGGAATAACACC-

AGCACGCAGGAGTCAAAT-----  
 AGCACAGATCAAAAAATAACTCTCCAATGCAGCATAAAGCAAATTATAAATATGTGGCAAAGGGTAGGACGAG  
 CAATGTATGCCCCCTCCCATCCCAGGACCAATACAGTGTAGATCAAAC---  
 ATTACAGGACTAATATTAGTGAGAGATGGTGGGAATACGAATACT-----  
 -----  
 -----  
 AGCAAGGAAACCTTTAGACCTGCAGGAGGGGATATGAGGGACAATTGGAGAAGTGAATTATATAAATATAAAG  
 TAGTAAAAATTGAACCACTA---GGAGTAGCACCCACCAAGGCAAAGAGAAGAGTGGTG-----  
 -----GAGAGAGGAAAAAGAGCA---GTTGGA---CTAGGAGCT-----  
 GTCTTCATTGGGTTCTTAGGAGCA---GCAGGAAGCACTATG---GGCGCAGCGTCA---  
 ATAACGCTGACGGTACAG---GTCAGACAA---TTATTG---TCTGGCATAGTGCGACAGCAAAGC---  
 AATTTG---CTGAGG---GCTATAGAAGCTCAACAACATCTGTTGAAACTCACGGTCTGGGGCATT  
 >KU921746  
 TTCTATTGTAACACATCAGGTCTGTTCAACAGCACTTGGGATGATACCGCCATACAGGAAAATATCACGGAGA  
 TCACGGAG-----  
 -----  
 TCAAAATGACACAATAACTCTCCAATGCAGAATAAGGCAATTTATAAGGATGTGGCAGAGGACAGGACAGGCAA  
 TGTATGCCCCCTCCCATACAGGAGTAATAAGGTGTGAATCAAAC---  
 ATTACAGGACTAATATTAACAAGAGATGGTGGGCATAGTAATAGT-----  
 -----  
 -----  
 ACTAGTAATGAAACCTTCAGACCTGGAGGAGGAGATATGAGGGACAATTGGAGAAGTGAATTATATAAGTATA  
 AAGTAGTAAAAATTGAACCACTA---GGAGTAGCACCTCCAGGGCAAGGAGAAGAGTGGTG-----  
 -----GGAAGAGAAAAAGAGCA---GTTACA---ATAGGAGCC-----  
 ---GTCTTCCTTGGGTTCTTAGGAGCA---GCCGGAAGCACTATG---GGCGCGGCGTCA---  
 ATAACGCTGACGGTACAG---GCCAGGCAA---TTATTG---TCTGGTATAGTGCAACAGCAAAGC---  
 AATTTG---CTGAAG---GCTATAGAGGCTCAACAACATCTGTTGAGACTCACGGTCTGGGGCATT  
 >KU921752  
 TTCTATTGTAACACATCAGGCCTGTTTAATAGCACTTGGAAATGACACCAGCAATGGGAATGACACCAACATAT  
 CAAATAGC-----  
 -----ACG---  
 GAGAAGAATGAGAATATAACTCTCCAATGCAGAATAAAGCAAATTATAAATATGTGGCAAAGAGTAGGAAAAG  
 CAATGTATGCTCCTCCCATCCCAGGAATAATAAAATGTGAATCAAAC---  
 ATTACAGGACTAATATTAACAAGAGATGGGGGAAAGGAGGAAAAC-----  
 -----  
 -----  
 GAAAGTGAAACCTTCAGACCTGGAGGAGGAGATATGAGGGACAATTGGAGAAGTGAATTATATAAGTATAAAG  
 TAGTAAAAATTGAACCACTA---GGAGTAGCACCCACCAGGGCAAGGAGAAGAGTGGTG-----  
 -----GAGAGAGAAAAAGAGCA---GTTGGA---ATGGGAGCT-----  
 TTGTTCAATTGGGTTCTTAGGAGCA---GCTGGAAGCACTATG---GGCGCGGCGTCA---  
 ATGACGCTGACGGTACAG---GCTAGACAA---CTATTG---TCTGGCATAGTGCAACAGCAAAGC---  
 AATTTG---CTGAGG---GCTATAGAGGCTCAACAGCATCTGTTGAAACTCACAGTCTGGGGCATT  
 >KU921756  
 TTCTATTGTAACACATCAAACCTGTTTAATAGTACTTGGCTTAACAATGGCACATTAGGTAGTGACAATGGCA  
 TATCA-----  
 -----  
 -----  
 GATAGTAAAAACATAACTCTCCCATGCAAAATAAGGCAAATTATCAGAATGTGGCAGAGAGTAGGACAAGCAA  
 TATATGCCCCCTCCCATCCAAGGAGTAATAAGGTGTAAATCAGAC---  
 ATTACAGGACTAATATTAACAAGAGATGGTGGAGTTAATAACAAT-----  
 -----  
 -----  
 ATAACCTGAAACCTTCAGACCTGGAGGAGGAGATATGAGGGACAATTGGAGAAGTGAGTTATATAAATATAAAG  
 TAGTAAAAATTGAACCACTA---GGAGTAGCACCCACCAGGGCAAGGAGAAGAGTGGTG-----  
 -----GGGAGAGAAAAAGAGCA---GTTGGA---GTAGGAGCT-----  
 GTATTCTTGGGTTCTTAGGAGCA---GCAGGAAGCACTATG---GGCGCGGCGTCA---  
 ATAACGCTGACGGTACAG---GCCAGACAA---TTATTG---TCTGGCATAGTGCAACAGCAAAGC---  
 AATTTG---CTAAGG---GCTATAGAGGCTCAACAGCATCTGTTGAAACTCACAGTCTGGGGCATT  
 >KU921759  
 TTCTATTGCAGTACAAAAGGCCTGTTTAATAGCACTTGGAAATGCTAATGGCACCAGGAATGACTTAGGGAGCT  
 CG-----

-----  
GAATCAGATGGCACTATAACTCTCCAGTGCAGAATAAAACAAATTATAAATATGTGGCAGAGAACAGGACAAG  
CAATGTATGCCCCCTCCCATCGCAGGAGTAATAAGTTGTAATTC AAC ---  
ATTACAGGACTACTATTAACAAGAGATGGTGGGAACAATAGTACA-----  
-----  
-----  
AGTGAAACTGAAACCTTTAGACCTGGAGGAGGAGATATGAGGGACAATTGGAGAAGTGAATTATATAAGTATA  
AAGTAGTAAAAATTGAACCATTA---GGAGTAGCACCCACCAGGGCGCGGAGAAGAGCGGTG-----  
-----GGGAGAGAAAAAAGAGCA---GTTGGA---CTGGGAGCT-----  
---GTTTTTCTTGGGTTCTTAGGAGCA---GCAGGAAGCACTATG---GGCGCGGCGGCA---  
GTGACGCTGACGGTACAG---GCCAGACAA---TTATTG---TCTGGCATAGTGCAACAGCAAAGC---  
AATTTG---CTGAGA---GCTATAGAGGCTCAACAACATCTGTTGAAACTCACTGTCTGGGGCATT  
>KU921772  
TTCTATTGTAACACATCAGGCTTGTTTAATAGCAGTTGGAATAGCACCAGCAAGGAGCTAAATAGCACCAACA  
GGGAGCTA-----  
-----  
AATAACATGACTGTAACCTCTCCAATGTAGAATAAAACAAATTATAAATATGTGGCAGAGAGTGGGACAAGCAA  
TGTATGCCCCCTCCCATCCAGGAGTAATAAGTGTGTATCAAAC---  
ATTACAGGATTAATATTAACAAGGATGGTGGGCTTAATCCTACA-----  
-----  
-----  
GAGAACGAAACCGAAACCTTCAGACCTGGAGGAGGAGATATGAGAGACAATTGGAGAAGTGAATTATATATGT  
ATAAAGTAGTGAAAATTGAACCACTA---GGAGTAGCACCCACCAGGGCAAAGAGAAGAGTGGTG-----  
-----GAGAGAGAAAAAAGAGCA---GTTGGA---ATAGGAGCT---  
-----GTTTTCTTGGGTTCTTGGGAGCA---GCAGGAAGCACTATG---GGCGCGGCGTCA---  
ATAACGCTGACGGTACAA---GCCAGACAA---TTATTG---TCTGGCATAGTGCAACAGCAAAGC---  
AATTTG---CTGAGG---GCTATAGAGGCTCAACAGCATCTGTTGAAACTCACAGTCTGGGGCATT  
>KU921780  
TTCTATTGTAATACATCAGGCTTATTTAATGGCACTTGGACCAATGCTAGCATACAAGAAAATAGC-----  
-----  
-----  
ACGGAGTCAAATATAACTCTCCAATGCAGAATAAAACAAATTATAAATATGTGGCAGACAGTAGGACGAGCAA  
TGTATGCTCCTCCCATTTGAAGGAGCAATAAGGTGTGTATCAAAC---  
ATTACAGGACTAATATTAACCAGAGATGGTGGGGATAACACAACCT-----  
-----  
-----  
ACAACTGAAATCTTCAGACCTGGAGGAGGAAATATGAAGGACAATTGGAGAAGTGAATTATATAAGTATAAAG  
TAGTAAAAATTGAACCATTA---GGAGTAGCACCCACCAAGGCAAAGAGAAGAGTGGTG-----  
-----GAGAGAGAAAAAAGAGCA---GTTGGA---CTGGGAGCT-----  
GTCTTCCTTGGGTTCTTAGGAGCA---GCAGGAAGCACTATG---GGCGCGGCGTCA---  
GTAACGCTGACGGTACAG---GCCAGACAA---TTATTG---TCTGGCATAGTGCAACAGCAAAC---  
AATTTG---CTGAGG---GCTATCGAGGCTCAACAACATCTGTTGAAACTCACGGTCTGGGGCATT  
>KU921783  
TTCTATTGTAATACAACAGGCCTGTTTAATAGCACTTGGGGGAATGGCACTTGAATGCCAGCAGCCAGGGGG  
AG-----  
-----  
-----  
TCAAATGACACTATACTCCTCCAATGCAAAATAAAGCAAATTATAAATATGTGGCAGAGAGTAGGACAAGCAA  
TGTATGCTCCTCCCATCCAGGAGTAATAAGGTGTGAATCAAAC---  
ATTACAGGACTAATATTAACAAGAGATGGTGGGGGGGATGACAAT-----  
-----  
-----  
GGAACCGAAACCTTCAGACCTGGAGGAGGAGATATGAGGGATAATTGGAGAAGTGAATTATATAAGTATAAAG  
TAGTAAAAATTGAACCACTA---GGAGTAGCACCCACCAGGGCAAAGAGAAGAGTGGTG-----  
-----GAGAGAGAGAAAAAGAGCA---GTTACA---ATAGGAGCT-----  
GTTTTTCTTGGGTTCTTAGGAACA---GCAGGAAGCACTATG---GGCGCGGCGTCA---  
ATAGCGCTGACGGCACAG---GCTAGACAA---TTATTG---TCTGGCATAGTGCAACAGCAAAGC---  
AATTTG---CTGAGG---GCTATAGAGGCTCAACAACATATGTTGAGACTCACGGTCTGGGGCATT  
>KU921785  
TTCTATTGTAACACATCAGACCTGTTTAATAGCACTTGGTATGGCAATAACACCATGCAGGGATTAAATGGC-----  
-----

-----  
ACAAATGACACTATAATTCTCAAATGCAGAATAAAGCAAATTATAAATATGTGGCAGAGAACAGGACAAGCAA  
TATATGCCCCCTCCCATCCCAGGAGTAATAGAGTGTGTATCAAAC---  
ATAACAGGACTAATATTGACAAGAGATGGTGGGGGTAGTGAGAGC-----  
-----  
-----  
AGGACAGAGGAAACATTTAGACCTGGAGGAGGAGATACGAGGGACAATTGGAGAAGTGAATTATATAAGTATA  
AAGTAGTAAAAATTGAACCACTA---GGAGTAGCACCCACCAGGGCAAAAAGAAGAGTGGTG-----  
-----GAGAGAGAAAAAAGAGCA---ATTGGA---ATAGGAGCT-----  
---GTCTTCATTGGGTTCTTAGGAGCA---GCAGGAAGCACTATG---GGCGCGGCGTCA---  
ATAACGCTGACGGTACAG---GCCAGACAA---TTATTG---TCTGGTATAGTGCAACAGCAAAGC---  
AATTTG---CTGAGG---GCTATAGAGGCTCAACAGCATCTGTTGAAACTCACAGTCTGGGGCATT  
>KU921788  
TTCTATTGTGATACATCAAGCCTGTTTAAACAGCACTTGGGAACCAAACAATGTTAGTAGCAAT-----  
-----  
-----  
TTAAATGGCACTATAACTCTCCAATGCAGAATAAAGCAAAGTCATAAATATGTGGCAGAGAGTAGGACAAGCAA  
TGTATGCCCCCTCCCATCCCAGGAAACATAACATGTAGATCAAAC---  
ATTACAGGAATAATATTAACAAAAGATAAGGATGGTATAAATAAT-----  
-----  
-----  
TCAGATGAAACCTTGAGGCCAGGAGGAGGAGATATGAGGGACAATTGGAGAAGTGAATTATATAAGTATAAAG  
TGGTAAAAAATTGAACCACTA---GGAGTAGCACCCACCAAGGCAAGGAGAAGAGTGGTG-----  
-----GAGAGAGAAAAAAGAGCA---GTTGGA---CTAGGAGCT-----  
GTTTTCTTGGGTTCTTAGGAGCA---GCAGGAAGCACTATG---GGCGCAGCGCCA---  
ATAACGCTGACGGTACAG---GCCAGACAA---TTGTTG---TCTGGCATAGTGCAACAGCAAAGC---  
AATTTG---CTGAGG---GCTATAGAGGCTCAACAACAGCTGTTGAAGCTCACGGTCTGGGGCATT  
>KU921804  
TTCTATTGTGATACATCAAGCCTGTTTACTGGTACTTGAATGGTACTACTTGGATGAATAGCACT-----  
-----  
-----  
GACACTGAAAATATAACTCTTCCATGCAGAATAAAGCAAATTATAAATATGTGGCAGAGGGTAGGGAGAGCAA  
TGTATGCCCCCTCCCATCCAAGGAAAAATAAATTGTACATCAAAC---  
ATTACAGGACTACTATTAACAAGAGATGGTGGGAAAACTAATAAT-----  
-----  
-----  
TCATCTGAAACCTTCAGACCAGGAGGAGGAGATATGAGGGACAATTGGAGAAGTGAATTATATAAGTATAAAG  
TAGTAAAGATTGAACCACTA---GGAGTAGCACCCACCAGGGCAAGAAGGAGAGTGGTG-----  
-----GAAAGAGAAAAAAGAGCA---GTTGGA---CTGGGAGCT-----  
GTATTCATTGGGTTCTTGGGAGCA---GCAGGGAGCACTATG---GGCGCGGCGTCA---  
GTGACGCTGACGGTACAG---GCCAGACGA---TTACTA---TCTGGCATAGTGCAAGCAGCAAAGC---  
AATTTG---CTGAGG---GCTATAGAGGCTCAACAGCATCTGTTGAAACTCACGGTCTGGGGCATC  
>KU921831  
TTCTATTGTAATACATCACGCCTGTTTAGTTACAGGTGCACGTTGAAAATGAGACTAATACTTACACCTGCA  
CTAAC-----  
-ACCATGCATGAGTTC-----  
AATAGCACGGCAATATAACTCTCCAATGCAGACTAAAGCAGATCATAAGGATGTGGCAGAGGACAGGACAAG  
CAATGTATGCCCCCTCCCATCCCAGGGCAAATAATGTGTAGATCAAAC---  
ATTACAGGGTTAATATTAACAAGAGATGGTGGGGTTGATAACAATACA-----  
-----  
-----  
GATGCTACCGAAATCTTCAGACCTGGAGGAGGAGATATGAAGGACAATTGGAGAAGTGAATTATATAAGTATA  
AAGTAGTAAAAATTGAACCACTA---GGAGTAGCACCCACCAGGGCAAGGAGAAGAGTGGTG-----  
-----GGGAGAGAAAAAAGAGCA---GTTGGA---CTGGGAGCT-----  
---GTTTTATTGGGTTCTTAGGAGCA---GCAGGAAGCACTATG---GGCGCGGCGTCA---  
GTGACGCTGACGGTACAG---GCCAGACAA---TTATTG---TCTGGTATAGTGCAACAGCAAAGC---  
AATTTG---CTGAAG---GCTATTGAGGCTCAACAACATCTGTTGAGGCTCACGGTCTGGGGCATT  
>KU921835  
TTCTATTGTAACACATCAGAACTGTTTAAATAGCACTTGGAGTTGGAATAACACTTGAATAACACTCATGAG-

-----  
 CCAAATGGCACTATAACTCTCCAATGCAGAATAAAGCAAATTATAAATATGTGGCAGAGAGTAGGACAAGCAA  
 TGTATGCCCCCTCCCATACAAGGAGAAATAAAGTGTGAATCAAAC---  
 ATCACAGGACTAATATTAACAAGAGATGGT---ATGGGTAACAATGTA-----  
 -----  
 -----  
 TCAAATGAAACCTTCAGACCTGGAGGAGGAGATATGAGGGACAACCTGGAGAAGTGAGTTATATAAATATAAAG  
 TAGTAAAAATTGAACCATTA---GGAGTAGCACCCACTGGGGCAAGGAGAAGGGTGGTG-----  
 -----CAGAGAGAAAAAGAGAGCG---GTTGGA---ATAGGAGCT-----  
 GTCTTCCTTGGGTTCTTAGGAGCA---GCAGGAAGCACTATG---GGCGCAGCGTCA---  
 TTAACGCTGACGGTACAG---GCCAGACAA---TTACTG---TCTGGCATAGTGCAGCAGCAAAGC---  
 AATTTG---CTGAGG---GCTATAGAGGCTCAACAACATATGTTGAAACTCACGGTCTGGGGCATT  
 >KU921841  
 TTCTATTGCAACACATCAGGCCTGTTTAATAGCACTGACATGAGTTCAAATAACACAGAG-----  
 -----  
 -----  
 TTAAATGACACTATAAGACTCCCATGCAGAATAAAACAAATTATACGTATGTGGCAGAAAGTAGGACAAGCAA  
 TGTATGCCCCCTCCCATTAAGGAGTGATAAGATGTAGCTCAAAC---  
 ATTACAGGAATACTATTAACAAGAGATGGTGGGATAGAAAAATGAA-----  
 -----  
 -----  
 ACAGAAATCTTCAGACCTGGAGGAGGAAACATGAAGGACAATTGGAGAAGTGAATTATATAAGTATAAAGTAG  
 TAAAAATTGAACCACTA---GGAGTAGCACCCACCTCGGCAAGGAGAAGAGTGGTG-----  
 -----GAGAGAGAAAAAGAGCA---GTTGGA---CTGGGAGCT-----  
 GTATTCATTGGGTTCTTAGGAGCA---GCAGGAAGCACTATG---GGCGCGGCGTCA---  
 ATGACGCTGACGGTACAA---GCCAGACAA---TTATTG---TCTGGCATAGTGCAACAGCAAAGC---  
 AATTTG---CTGAGG---GCTATAGAGGCTCAACAGCATCTGTTGAAACTCACGGTCTGGGGCATC  
 >KU921852  
 TTCTATTGTAATACATCAGGCCTGTTTAATAGCACTTGAATGACACTGTCATGTTTAATAGCACTGGGAATG  
 ACACTGTC-----  
 -----GGCAGG-----  
 GAGTCAAATGAACTATAACACTCCAATGCAGGATAAAACAAATTATAAATATGTGGCAGAGAACAGGACAAG  
 CAATATATGCCCCCTCCTATCCCAGGAGTAATAAGGTGTGTATCAAAC---  
 ATTACAGGACTAATATTAACAAGAGATGGTGGGAATACGGCAGGGACA-----  
 -----  
 -----  
 GGTTCCTGAAACCTTCAGACCTGGAGGAGGAGATATGAGGGACAATTGGAGAAGTGAATTATATAAGTATAAAG  
 TAGTAAAAGTTGAACCACTA---GGAGTAGCACCCACCAGGGCACAGAGAAGAGTGGTG-----  
 -----CAGAGGGAAAAAGAGCA---GTTGGA---ATAGGAGCT-----  
 GTCTTCATTGGGTTCTTAGGAGCA---GCAGGAAGCACTATG---GGCGCGGCGTCA---  
 ATAACGCTGACGGCACAG---GCCAGACAA---TTATTG---TCTGGTATAGTGCAACAGCAAAGC---  
 AATTTG---CTGAGG---GCTATAGAGGCTCAACAGCATCTGTTGAAACTCACAGTCTGGGGCATC  
 >KF716474  
 TTCTATTGTGACACATCAGGCCTGTTTAATAGCACTTGAATGGTACGGCCAGCAATGTCAGCATACTGACA  
 CGGTG-----  
 -----  
 -----  
 ACAAATGGCACTATAAAGACTCCCATGCAAAATAAAGCAAATTATAAATATGTGGCAGAGAGTAGGACAAGCAA  
 TGTATGCCCCCTCCCATTCAGGAGTAATAAGGTGTGATTCAAAC---  
 ATTACAGGGATGATATTAACAAGAGATGGTGGTGAT-----  
 -----  
 -----  
 AACAGGACAGAAACCTTCAGACCTGGAGGAGGAGATATGAGGGACAATTGGAGAAGTGAATTATATAAATATA  
 AAGTAGTAAAAGTTGAACCACTA---GGAGTAGCACCTACCAGGGCAAGAAGAAGAGTGGTG-----  
 -----GAGAGAGAAAAAGAGCA---GTAGGA---ATAGGAGCT-----  
 ---GTTTTCCTTGGGTTCTTAGGAGCA---GCAGGAAGCACTATG---GGCGCAGCGTCA---  
 ATAACGCTGACGGTACAG---GCCAGACAA---TTATTG---TCTGGTATAGTGCAACAGCAAAGT---  
 AATTTG---CTGAGG---GCTATAGAGGCTCAACAACAGCTGTTGAAACTCACAGTCTGGGGCATT  
 >KF716475  
 TTCTACTGTAATACATCAGGCCTGTTTAATAGCACTTGGTCCCTTAACAACACTTGGTCCCTTAACAGCACGC  
 AGTCAAAT-----

-----GACACA-----  
GGGATAAATGATACCATAACTCTCCCATGCAGAATAAAGCAAATTATAAATATGTGGCAGAGAGTAGGACAAG  
CAATGTATGCCCCCTCCCATCCAAGGAGTAATACAGTGTGTATCAAAC---  
ATTACAGGACTACTGTTAACAAGAGATGGGGGGAATGTGAATAGCAGT-----  
-----  
-----  
AATGGCAATGAAATCTTCAGACCTGGAGGAGGAGATATGAGGGACAATTGGAGAAGTGAATTATATAAGTATA  
AAGTAGTAAAAATTGAACCACTA---GGAGTAGCACCCACCAGGGCAAAGAGAAGAGTGGTG-----  
-----GGGAGAGAAAAAAGAGCA---ATTGGTGGGCTAGGAGCT-----  
---GTTTTCTTGGGTTCTTAGGAATG---GCAGGAAGCACTATG---GGCGCGGCGTCA---  
ATGACGCTGACGGTACAG---GCCAGAAAC---TTATTG---TCTGGCATAGTGCAACAGCAAAGC---  
AATTTG---CTGAGG---GCTATAGAGGCTCAACAACATCTGTTGAAACTCACAGTCTGGGGCATT  
>AY322184  
TTCTATTGTAACACATCAGATCTGTTTAATGAGTCAAATAGTACGGAG-----  
-----  
-----  
TTAAACGACACTATAACTCTCCAATGCAGAATAAAGCAAATTATAAATATGTGGCAGAGAGCAGGACAAGCAA  
TATATGCCCCCTCCCATCCCAGGAGTAATAAGGTGTGTATCAAAC---  
ATTACAGGACTATTGTTAACAAGGATGGTGGGATTAATACCAGT-----  
-----  
-----  
ACAAGTGAAACCTTCAGACCTGGAGGAGGAGATATGAGGGACAATTGGAGAAGTGAATTATATAGGTATAAAG  
TAGTAAAAATTGAACCACTA---GGAGTAGCACCCACCAGGGCAAAGAGAAGAGTGGTG-----  
-----GAGAGAGAAAAAAGAGCA---GTTGGA---ATAGGAGCT-----  
GTTTTCAATTGGGTTCTTAGGAGCA---GCAGGAAGCACTATG---GGCGCGGCGTCA---  
ATAACGCTGACGGTACAG---GCCAGACAA---TTATTG---TCTGGCATAGTGCAACAGCAAAGC---  
AATTTG---CTGAGG---GCTATAGAGGCTCAACAACATCTGTTGAAACTCACGGTCTGGGGCATT  
>AF539405  
TTCTATTGTAACACATCAGGCCTGTTTAATAGCACTTGGAAATGGCAGTGAGGCAAATAGCACG-----  
-----  
-----  
CCACACGAGAATATAACTCTCCAATGCAGAATAAAGCAAATTATAAATATGTGGCAGAGAGCAGGACAAGCAA  
TATATGCCCCCTCCCATCCCAGGAGTAATAAAATGTAATTCAAAC---  
ATTACAGGACTAATATTAACAAGAGATGGTGGGGTTAATAGCAGT-----  
-----  
-----  
GCAAAATGAAACCTTCAGACCTGGAGGAGGAGATATGAGGGACAATTGGAGAAGTGAATTATATAAGTATAAAG  
TAGTAAAAATTGAACCACTA---GGAGTAGCACCCACCAGGGCAAAGAGAAGAGTGGTG-----  
-----GAGAGAGAAAAAAGAGCA---GTTGGA---ATAGGAGCT-----  
GTCTTCATTGGGTTCTTAGGAGCA---GCAGGAAGCACTATG---GGCGCGGCGTCA---  
ATAACGCTGACGGTACAG---GCCAGACAA---TTATTG---TCTGGCATAGTGCAACAGCAAAGC---  
AATTTG---CTGAGG---GCTATAGAGGCTCAACAACATCTGTTGAAACTCACGGTCTGGGGCATT  
>L22943  
TTCTATTGTAATTCATCAGGCCTGTTTAATAGCACTTGGACCAACATGCAGGAGTCAAATAGCACGGAG---  
-----  
-----TCAAATGACACTATAACTCTCCCATGCAGAATA---  
AAAATTATAAACATGTGGCAGAGAGCAGGACAAGCAATGTATGCCCCCTCCCATCCAAGGAATAATAAAGTGTG  
TATCAAAC---ATTACAGGACTAATATTAACAAGAGATGGTGGGGATAATAACAGT-----  
-----  
-----  
GAAAGTGAAACCTTCAGACCTGGAGGAGGAGATATGAGGGACAATTGGAGAAGTGAATTATATAAGTATAAAG  
TAGTAAAAATTGAACCACTA---GGAGTAGCACCCACCAAGGCAAAGAGAAGAGTGGTG-----  
-----GAGAGAGAAAAAAGAGCA---GTTGGA---ATAGGAGCT-----  
GTCTTCCTTGGGTTCTTAGGAGCA---GCAGGAAGCACTATG---GGCGCGGCGTCA---  
ATAACGCTGACGGTACAG---GCCAGACAA---TTATTG---TCTGGCATAGTGCAACAGCAAAGC---  
AATTTG---CTGAGG---GCTATAGAGGCTCAACAACATCTGTTGAAACTCACGGTCTGGGGCATT  
>KX168075  
TTCTATTGTAACACATCAGGCCTGTTTAATAGCACTTGGGAGTTTAATAGCACTTGGGAGTTTAATAGCACTT  
GGGAGTTT-----  
AATAGCACTTGAATAATTCA-----

AATAGCACAGAGAATATAACTCTCCAATGCAGAATAAAGCAAATTGTAAATATGTGGCAAAGAGCAGGACAAG  
CAATATATATGCCCCCTCCCATACCAGGAGTAATAAGGTGTGAATCAAAT---  
ATTACAGGACTAATATTAACAAGAGATGGTGGGGATAATAATAGTACAAAT-----  
-----  
-----  
AATACAAGTGAAACCTTCAGACCTGGAGGAGGAGATATGAGGGACAATTGGAGAAGTGAATTATATAAGTATA  
AAGTAGTAAAAATTGAACCAATA---GGAGTAGCACCCACCAGGGCAAAAAGAAGAGTGGTG-----  
-----GAGAGAGAAAAAAGAGCA---GTTGGA---ATAGGAGCT-----  
---GTCTTCATTGGGTTCTTAGGAGCA---GCAGGAAGCACTATG---GGCGCAGCGTCA---  
GTAACGCTGACGGTACAG---GCCAGACAG---TTATTG---TCTGGTATAGTGCAACAGCAAAGC---  
AATTTG---CTGAGG---GCTATAGAGGCTCAACAGCATCTGTTGAAACTCACGGTCTGGGGCATT  
>AF004885  
TTCTATTGTAATACATCAGGCTTGTTTAATAGCACTTGGTATGTTAATAGCACTTGGAATGACACTGACAGCA  
CTCAG-----  
-----  
GAGTCAAATGACACTATAACTCTCCCATGCAGAATAAAGCAAATTATAAATATGTGGCAGAGAGCAGGACAAG  
CAATGTATGCCCCCTCCCATCCCAGGAGTAATAAAGTGTGAATCAAAC---  
ATTACAGGACTACTATTAACAAGGGATGGTGGAAAGGATAACAAT-----  
-----  
-----  
GTAAATGAAACCTTCAGACCTGGAGGAGGAGATATGAGGGACAATTGGAGAAGTGAATTATATAAGTATAAAG  
TAGTAGAAATTGAACCACTA---GGAGTAGCACCTACCAGGGCAAAGAGAAGAGTGGTG-----  
-----GAGAGAGAAAAAAGAGCA---GTTGGA---ATAGGAGCT-----  
GTCTTCCTTGGGTTCTTAGGAGCA---GCAGGAAGCACTATG---GGCGCAACGTCA---  
ATAACGCTGACGGTACAG---GCCAGACAA---TTATTG---TCTGGCATAGTGCAACAGCAAAAC---  
AATTTG---CTGAGG---GCTATAGAGGCTCAACAACATCTGTTGAAACTCACGGTCTGGGGCATT  
>AF407151  
TTCTATTGTAACACATCAGGCCTGTTTAACAGAGCTTATGGCAATGTCAGCAAGCAAGAGCCAAAT-----  
-----  
-----  
AGCTCCGGCAATATAACACTCCAATGCAGAATAAAGCAAGTTATAAATATGTGGCAGAGAGCAGGACAAGCAA  
TATATGCCCCCTCCCATACAAGGAGTAATAAGATGTGACTCAAAT---  
ATTACAGGACTAATATTAACAAGAGATGGTGGGAAAGATAGTAAT-----  
-----  
-----  
ATAACTGAAACATTTCAGACCTGGAGGAGGAGATATGAGGGACAATTGGAGAAGTGAATTATATAAGTATAAAG  
TAGTAAAAATTGAACCACTA---GGAGTAGCACCCACCAGGGCAAAGAGAAGAGTGGTG-----  
-----GAGAGAGAAAAAAGAGCA---GTTGGA---ATAGGAGCT-----  
GTCTTCATTGGGTTCTTAGGAGCA---GCAGGAAGCACTATG---GGCGCGGCGTCA---  
ATAACGCTGACGGCACAG---GCCAGAAAA---TTATTG---TCTGGCATAGTGCAACAGCAAAGC---  
AATTTG---CTGAGG---GCTATAGAGGCTCAACAACATCTGTTGAAACTCACGGTCTGGGGCATT  
>AF407162  
TTCTATTGCAATACAACAAACCTGTTTAATAGCACTTGAATCACACTGCCAGCATGAATAGCACAGAG---  
-----  
-----  
TCAAATGACACTATAATTCTCCCATGCAGAATAAAACAAATTATAAATATGTGGCAGAGAGTAGGACAAGCAA  
TGTATGCCCCCTCCCATTCGAGGAGTAATAAGGTGTGAATCAAAC---  
ATTACAGGACTAATATTAACAAGAGATGGTGGGAATACTACCGGT-----  
-----  
-----  
ACAAGTGAAATCTTCAGACCTGGAGGTGGAGATATGAGGGACAATTGGAGAAGTGAATTATATAAGTATAAAG  
TAGTAAAAATTGAACCACTA---GGAGTAGCACCCACCAGGGCAAAGAGAAGAGTGGTG-----  
-----GAGAGAGAAAAAAGAGCA---GTTGGA---ATAGGAGCT-----  
GTCTTCATTGGGTTCTTAGGAGCA---GCAGGAAGCACTATG---GGCGCGGCGTCA---  
ATAACGCTGACGGTACAG---GCCAGACAA---TTATTG---TCTGGCATAGTGCAACAGCAAAGC---  
AATTTG---CTGAGG---GCTATAGAGGCTCAACAGCATCTGTTGAAACTCACGGTCTGGGGCATT  
>AF407156  
TTCTATTGCAATACATCAAAACTGTTTAATAGCAGGTGGGAGAACAAATGGCACCGCCAACATGTTGAAGAATG  
ACACA-----  
-----GGG---

TCAAATGAGACTACTCTGATTCTCCGATGCAGAATAAAACAAATTATAAATATGTGGCAGAGAGTAGGACAAG  
CGATGTATGCCCCCTCCCATCCAAGGAGTAATAAATTGTACATCAAAC---  
ATCACAGGACTAATATTAACAAGAGATGGTGGTGGTGAAAACGAT-----  
-----  
-----  
ACAGAGACCTTCAGACCTGGAGGAGGAGATATGAGGGACAATTGGAGAAGTGAATTATATAAGTATAAAGTAG  
TAAAACTTGAACCACTA---GGAGTAGCACCCACCATGGCAAAGAGAAGAGTGGTG-----  
-----GAGAGGGAAAAAAGAGCA---GTTGGA---ATGGCAGCT-----  
GTCTTCCTTGGGTTCTTGGGAACA---GCAGGGAGCACTATG---GGCGCGGCGTCA---  
CTAACGCTGACGGTACAG---GCCAGACAA---TTATTG---TCTGGCATAGTGCAACAGCAAAGC---  
AATTTG---CTGAAG---GCTATAGAGGCTCAACAGCATCTGTTGAGACTCACGGTCTGGGGCATT  
>KT008652  
TTCTATTGTAACACATCAGGCCTGTTTAATAGCACTTGGGGGCACAATGCCAGCAGGCAGGAGAATAGCACGG  
AG-----  
-----  
TCAAGTGACACTATAACTCTCCCATGCAAAATAAAGCAAATTATAAATATGTGGCAGAGAGCAGGGCAAGCAA  
TATATGCCCCCTCCCATCCAGGAGTAATAAGGTGTGAATCAAAC---  
ATTACAGGACTAATATTAACAAGAGATGGTGGGAACAACAACAGT-----  
-----  
-----  
ACAAGTGAAACCTTCAGACCTGGAGGAGGAAATATGAGGGACAATTGGAGAAGCGAATTATATAAGTATAAAG  
TAGTAAAAATTGAACCACTA---GGAGTAGCACCCACCAGGGCAAAGAGAAGAGTGGTG-----  
-----GGGAGAGAAAAAAGAGCA---GTTGGA---ATAGGAGCT-----  
GTTTTCTTGGGTTCTTAGGCGCA---GCAGGAAGCACTATG---GGCGCAGCGTCA---  
GTAACGCTGACGGTACAG---GCCAGACAA---TTATTG---TCTGGCATAGTGCAACAGCAAAGC---  
AATTTG---CTGAGG---GCTATAGAGGCTCAACAACATCTGTTGAAACTCACGGTCTGGGGCATT  
>AF407157  
TTCTATTGTAACACATCAGGCCTGTTTAATGGCATTGGAATGGCACGCAGGAGCCAAATAGAACGGAG----  
-----  
-----  
TCAAACGATACTATAACACTCCAATGCAGAATAAAGCAAATTATAAATATGTGGCAAAGAGTAGGACAAGCAA  
TATATGCCCCCTCCCATCAAGGAGAAATAAGGTGTGAGTCAAAC---  
ATTACAGGACTAATATTAACAAGAGATGGTGGGATAATTAACGGT-----  
-----  
-----  
ACAGAGGAGACCTTCAGACCTGGAGGAGGAGATATGAGGGACAATTGGAGAAGTGAATTATATAAGTATAAAG  
TAGTAAAGATTGAACCATTA---GGAGTAGCACCCACCAAGGCAAAGAGAAGAGTGGTG-----  
-----GAGAGGGAAAAAAGAGCA---GTTGGA---TTCGGAGCT-----  
TTCTTCCTTGGGTTCTTAGGAGCA---GCAGGAAGCACTATG---GGCGCGGCGTCA---  
ATAACGCTGACGGTACAG---GCTAGACAA---TTATTG---TCTGGCATAGTGCAACAGCAAAAC---  
AATTTG---CTGAGG---GCTATAGAGGCTCAACAGCATCTGTTGAAACTCACGGTCTGGGGCATT  
>FJ866112  
TTCTATTGTAATACATCAGAACTATTTAATAGCACTTGGACTTGGAAAGGCAATAATGACAGCATGCAGGGGT  
TAAATAGC-----  
-----ACG---  
GGGTAAACAACACTATAACTCTCCACTGCAGCATAAAGCAAATTATAAATATGTGGCAGAGAGTAGGACAAG  
CAATGTATGCCCCCTCCCATCCAAGGAGTAATAAAGTGTGAATCAAAC---  
ATTACTGGACTACTATTAACAAGAGATGGTGGGAATAATAACATA-----  
-----  
-----  
AACGAGACCCTCAGACCTGGAGGAGGAGATATGAGGGACAATTGGAGAAGTGAATTATATAAGTATAAAGTAG  
TAAAAATTGAACCACTA---GGAGTAGCACCCACCAAGGCAAAGAGAAGAGTGGTG-----  
-----GAGAGAGAAAAAAGAGCA---GTTGGA---ATAGGAGCT-----  
GTCTTCCTTGGGTTCTTAGGAGCA---GCAGGAAGCACTATG---GGCGCAGCGTCA---  
ATAACGCTGACGGCACAG---GCCAGAATA---TTATTG---TCTGGCATAGTGCAAGCAGCAAAGC---  
AATTTG---CTGAAG---GCTATAGAGGCTCAACAGCATCTGTTGAGGCTCACGGTCTGGGGCATT  
>AY322190  
TTCTATTGTAATACATCAGGCCTGTTTAATAGCATTGGAATCACACTAATGGCACTTGGAAATAGCACGGAGT  
TAAAT-----  
-----GGC---

AATATAACTCTCAATATAACTCTCCCATGCAGAATAAACCAAATTATAAATATGTGGCAGAGAGTAGGACAAG  
CAATATTTGCCCTCCCATCCAAGGAGTAATACAGTGTGTATCAAAC---  
ATTACAGGACTAATATTAACAAGAGATGGAGGGAATAATAACACT-----  
-----  
-----  
ACAAATGAAACCTTCAGACCTGGAGGAGGAGATATGAGGGACAATTGGAGAAGTGAATTATATAAGTATAAAG  
TAGTAAAAATTGAACCACTA---GGAGTAGCACCCACCAGGGCACAGAGAAGAGTGGTG-----  
-----CAGAGAGAAAAAAGAGCA---ATTGGA---ATGGGAGCT-----  
GTCTTCATTGGGTTCTTAGGAGCA---GCAGGAAGCACTATG---GGCGCGGCGTCA---  
ATAACGCTGACGGTACAG---GCCAGACAA---TTATTG---TCTGGTATAGTGCAACAGCAAAGC---  
AATTTG---CTGAGG---GCTATAGAGGCTCAACAGCATCTGTTGAAACTCACGGTCTGGGGCATT  
>AY322193  
TTCTATTGTAACACATCAAGCCTATTTAATGGCACTTGGACGGGCAATGACAGCAGGCAGGAGTCAAAT----  
-----  
-----  
AGCAGCGACACTATAACTCTTCCATGCAGAATAAAACAAATTATAAATATGTGGCAGAGGGTAGGACAAGCAA  
TATATGCCCCCTCCCTACAAGGAGTAATCAGATGTGATTCAAAT---  
ATTACAGGACTAATCTTAACAAGAGATGGTGGGAGTCCGGATAAT-----  
-----  
-----  
GAAACCTTCAGACCTGTTGGAGGAGATATGAGGGACAATTGGAGAAGTGAATTATATAAGTATAAAGTAGTAA  
AAATTGAACCATTA---GGAGTAGCACCCACCAGGGCAAAGAGAAGAGTGGTG-----  
-----GAGAGAGAAAAAAGAGCA---GTTGGA---ATAGGAGCT-----  
GTCTTCATTGGGTTCTTAGGAGCA---GCAGGAAGCACTATG---GGCGCGGCGTCA---  
ATAACGCTGACGGTACAG---GCCAGACAA---TTATTG---TCTGGCATAGTGCAACAGCAAAGC---  
AATTTG---CTGAGG---GCTATAGAGGCTCAACAGCATCTGTTGAAACTCACGGTCTGGGGCATT  
>FJ396018  
TTTTATTGTAATACATCAGGCCTGTTTAATAGTACTTGGGATGACAATAATACTAGGAATAATGAGACTGCC-  
-----  
-----  
AGAAATAATACTATAACTCTCCCATGTAGAATAAAGCAAATTATAAATATGTGGCAGAGGGTAGGACAAGCAA  
TGTATGCCCCCTCCCATCAAAGGAGTAATAAGGTGTGAATCAAAC---  
ATTACAGGACTAATATTAACAAGAGATGGTGGACTTAATAACAAT-----  
-----  
-----  
ACAGAGACCTTCAGACCTGGAGGAGGAGATATGAGGGACAATTGGAGAAGTGAATTATATAAGTATAAAGTAG  
TAAAAATTGAACCACTA---GGAGTAGCACCCACCAGGGCAAGGAGAAGAGTGGTG-----  
-----GGAAGAGAAAAAAGAGCA---GTTGGA---ATAGGAGCT-----  
GTCTTCCTTGGGTTCTTAGGAGCA---GCAGGAAGCACTATG---GGCGCGGCGTCA---  
ATAACGCTGACGGTACAG---GCCAGACAA---TTATTG---TCTGGCATAGTGCAACAGCAAAGC---  
AATTTG---CTGAGG---GCTATAGAGGCTCAACGACATCTGTTGAAACTCACGGTCTGGGGCATT  
>AY736811  
TTCTATTGTAATACATCAGGCCTGTTTAATAGCACATATAGCGGGAACGAAACTGTCAGCAATAGC-----  
-----  
-----  
ACAGAGTACAACATAACTCTCCCATGCAAAATAAAGCAAATTATAAATATGTGGCAGAGAACAGGACAAGCAA  
TGTATGCCCCCTCCCATCCAAGGAGTAATAAGCTGTGTGTCAAAC---  
ATTACAGGACTACTATTAACAAGAGATGGTGGTAATGGTGGTAATAAC-----  
-----  
-----  
AATACAACCTGAGACCTTCAGACCTGGAGGAGGAAATATGAAGGACAATTGGAGAAGTGAATTATATAAGTATA  
AAGTAGTAAAAATTGAACCACTA---GGAGTAGCACCCACCAGGGCAAAGAGAAGAGTGGTG-----  
-----GAGAGAGAAAAAAGAGCA---GTTGGA---CTGGGAGCT-----  
---GTATTCTTGGGTTCTTAGGAGCA---GCAGGAAGCACTATG---GGCGCGGCGTCC---  
ATAACGCTGACGGTACAG---GCCAGACAA---TTACTG---TCTGGCATAGTGCAACAGCAAAGC---  
AATTTG---CTGAGG---GCTATAGAGGCTCAACAGCATCTGTTGAAACTCACGGTCTGGGGCATT  
>AY736814  
TTCTATTGCAACACATCAGGCCTGTTTAATAGCACTTGGGATGATAACATTAAGAATGATACTAACAGCACAC  
AGGGG-----  
-----

TCAAATAGCACGGAGATAATTCTCCCATGCAAAATAAAGCAAATTGTAAGGATGTGGCAGAGAACAGGACAAG  
CAATGTATGCTCCTCCAATCCCAGGAGTAATAAGGTGTGTATCAAAC---  
ATTACAGGACTAATACTAACAAGAGATGGTGGGAATACTAGCAGC-----  
-----  
-----  
ATAAATGAAACCTTTAGACCTGGAGGAGGAGATATGAGGGACAACCTGGAGAAGTGAATTATATAAGTATAAAG  
TAGTAAAAATTGAACCACTA---GGAGTGGCACCACCAAGGCAAGGAGAAGAGTGGTG-----  
-----GAGAGAGAAAAAAGAGCA--GTTGGA--ATAGGAGCT-----  
GTCTCTTTGGTTTCTTAGGAGCA---GCCGGAAGCACTATG---GGCGCGGCGTCA---  
ATAACGCTGACGGTACAG---GCCAGACAA---TTATTG---GCTGGCATAGTGCAACAGCAAAGC---  
AATTTG---CTGAGG---GCTATAGAGGCTCAACAGCAAATGTTGAGACTCACGGTCTGGGGCATT  
>AF457075  
TTCTATTGTGATACATCAAGCCTGTTTAATGGCACTTTAGAGGCCAATGCCACCGTGCAAACTTCAAT----  
-----  
-----  
AGCACAGAGCATATAATTCTCCCATGCAAAATAAAGCAAATTATAAATATGTGGCAGAGAGCAGGACAAGCAA  
TGTATGCCCCCTCCCATCCAAGGAGTAATAAATTGTGTGTCAAAC---  
ATTACAGGACTAATATTAACAAGAGATGGTGGGGATAATAATAAT-----  
-----  
-----  
AGTACAAATGAAACATTGAGACCTGGAGGAGGAGATATGAGGGACAATTGGAGAAGTGAATTATATAAGTATA  
AAGTAGTAAAAATTGAACCACTA---GGAGTAGCACCAACCAAGGCAAAAAGAAGAGTGGTG-----  
-----GAGAGAGAAAAAAGAGCA--GTAATTGGACTGGGAGCT-----  
---GTTTTCAATTGGGTTCTTAGGAGCA--GCAGGAAGCACTATG---GGCGCGGCGTCA---  
ATAACGCTGACGGTACAG---GCCAGACAA---TTATTG---TCTGGTATAGTGCAACAGCAAAGC---  
AATTTG---CTGAGG---GCTATAGAGGCTCAACAACATCTGTTGAAACTCACGGTCTGGGGCATT  
>DQ208458  
TTCTATTGTAACACATCAGGCCTGTTCAATAGCACTTGGATTAGCAATACCAGCGTGCGGGGTCAAATAGCA  
CG-----  
-----  
GGGTCAAATGACAGTATAACTCTCCCATGCAGAATAAAGCAAATTATAAATATGTGGCAGAGAATAGGACAAG  
CAATGTATGCCCCCTCCCATCCAAGGAGTAATAAGATGTGTATCAAAC---  
ATTACAGGGCTAATATTAACAAGAGATGGTGGGAGTACTAATAGT-----  
-----  
-----  
ACAACTGAAACCTTCAGACCTGGAGGAGGAGATATGAGGGACAATTGGAGAAGTGAATTATATAAGTATAAAG  
TAGTAAAAATTGAACCACTA---GGAGTAGCACCCACCAGGGCAAGGAGAAGAGTGGTG-----  
-----GGGAGAGAAAAAAGAGCA--GTTGGA--ATAGGAGCT-----  
GTCTTCCTTGGGTTCTTAGGAGCA---GCAGGAAGCACTATG---GGCGCGGCGTCA---  
ATGACGCTGACGGTACAG---GCCAGAAAT---TTATTA---TCTGGCATAGTGCAACAGCAAAGC---  
AATTTG---CTGAGG---GCTATAGAGGCTCAACAACATCTGTTGAAACTCACGGTCTGGGGCATT  
>DQ208467  
TTCTATTGTAATACATCAGGCCTGTTTAATAGCAATTGGAATTACACTAACAGCACGCAGGAGTCAAATAGCA  
CG-----  
-----  
GAGTCAAATGGCACTATAACTCTCCAATGCAGAATAAAGCAAATTATAAATATGTGGCAGAGAGTAGGACAAG  
CAATGTATGCCCCCTCCTATCCCAGGAGTAATAAGGTGTGTATCAAAC---  
ATTACAGGACTAATATTAACAAGAGATGGCGGGGACAACAACAGT-----  
-----  
-----  
ATAACTGAAACCTTCAGACCTGGAGGAGGAGATATGAGGGACAATTGGAGAAGTGAATTATATAAGTATAAAG  
TAGTAAAAATTGAACCACTA---GGAGTAGCACCCACCAGGGCAAGGAGAAGAGTGGTG-----  
-----GGAAGAGAAAAAAGAGCA--GTTGGA--ATAGGAGCT-----  
GTCTTCATTGGGTTCTTAGGAGCA---GCCGGAAGCACGATG---GGCGCGGCGTCA---  
ATAACGCTGACGGTACAG---GCCAGACAA---TTATTG---TCTGGCATAGTGCAACAGCAAAGC---  
AATTTG---CTGAGG---GCTATAGAGGCTCAACAACATCTGTTGAAACTCACGGTCTGGGGCATT  
>DQ208448  
TTCTATTGTAACACATCAGACTTGTTTAATAGCACTTGGTATGGGAATGGGACCAGCATGCGGGAGTCAAATA  
GCACG-----  
-----

GAGTCAAACGACACTATAATTCTCCGATGCAGAATAAAGCAAATTATAAATATGTGGCAGAGAGTAGGACAAG  
CAATATATGCCCCCTCCCATCCCAGGAGTAATAAACTGTGTATCAAAC---  
ATCACAGGACTAATATTAACAAGAGATGGTGGGAATAATAATAAT-----  
-----  
-----  
GAAACTGAAACCTTCAGACCTGGGGGAGGAGATATGAGGGACAATTGGAGAAGTGAATTATATAAGTATAAAG  
TAGTAAAAATTGAACCACTA---GGAGTAGCACCCACCAGGGCAAGGAGAAGAGTGGTG-----  
-----GAGAGAGAAAAAAGAGCA---GTAGTTGGAATAGGAGCT-----  
GTCTTCCTTGGGTTCTTAGGAGCA---GCAGGAAGCACTATG---GGCGCGGCGTCA---  
ATAACGCTGACGGTACAG---GCCAGACAA---TTATTG---TCTGGCATAGTGCAACAGCAAAGC---  
AATTTG---CTGAGG---GCTATAGAGGCTCAACAACATCTGTTGAAACTCACAGTCTGGGGCATT  
>KU749411  
TTCTATTGTAATACAACAGGCCTATTTAATAGTACTTGGGAATACAACAGGCCCATTTAATAATACTTGGCCT-  
-----  
-----  
GATGATGTCAATATAGTACTCCCATGCAAAATAAAGCAAATTATAAATGTATGGCAGAGAGTAGGACAAGCAA  
TATATGCCCCCTCCCATCCAAGGACTAATACAATGTAACTCAAAT---  
ATTACGGGGCTACTATTAACAAGAGATGGTGGGAATAATGGCACA-----  
-----  
-----  
CTTAATGAAACCTTCAGACCTGGAGGAGGAAATATGAAGGACAATTGGAGAAGTGAACTGTATAAATATAAAG  
TAGTAAAAATTGAACCACTA---GGAGTAGCACCCACCAGGGCAAAGAGAAGAGTGGTG-----  
-----GAGAGAGAAAAAAGAGCA---ATTGGA---ATAGGAGCT-----  
GTGCTCATTGGGTTCTTGGGGGCA---GCCGGAAGCACTATG---GGCGCGGCGTCT---  
GTAACGCTGACGGTACAG---GCCAGACAA---TTATTG---TCTGGCATAGTGCAACAGCAAAGC---  
AATTTG---CTGAGG---GCTATAGAGGCTCAGCAACAGATGCTGAAACTCACAGTCTGGGGCATT  
>KX232594  
TTCTATTGTAATACAACAGGACTGTTTAATAGTACTTGGTATAAAAAATGGAACGACTGAGGGAACAAATAGCA  
CGGGG-----  
-----  
-----  
TCAAATGACACTATAACACTCCCATGCAGAATAAAGCAAGTTATAAATGTATGGCAGAGAGTAGGACAAGCAA  
TATATGCCCCCTCCCATCCCAGGGATAATAAGGTGTGAATCAAAT---  
ATTACGGGGCTACTATTAACAAGAGATGGTGGAAATAATACAAGT-----  
-----  
-----  
AATGAAACCTTCAGACCTGGAGGAGGAAATATGAAGGACAATTGGAGAAGTGAACTGTATAAGTATAAAGTAG  
TAAAACTTGAACCACTA---GGAGTAGCACCCACCAAAGCAAAGAGAAGAGTGGTG-----  
-----GAGAGAGAAAAAAGAGCA---ATTGGA---TTTGGAGCT-----  
TTCTTCCTTGGGTTCTTGGGAGCA---GCTGGAAGCACTATG---GGCGCGGCGTCC---  
GTAACGCTGACGGTACAG---GCCAGACAA---TTATTG---TCTGGCATAGTGCAACAGCAAAGC---  
AATTTG---CTGAGG---GCTATAGAGGCTCAGCAGCATATGCTGAAACTCACGGTCTGGGGCATT  
>KX232597  
TTCTATTGTAATACAACAGGTCTGTTTAATAGTACTTGGCCTAGTAATGAGACTAAGGAAGTAAATAACACGG  
AG-----  
-----  
-----  
TCAAATGACATTATCACACTCCCATGCAGAATAAAGCAAATTGTAAATGTATGGCAAAGAGTAGGACAAGCAA  
TATACGCCCCCTCCCATCAAAGGACTAGTACAGTGTAAATTCAAGT---  
ATTACGGGGCTACTATTAAACAGAGATGGTGGGAATAATAACACA-----  
-----  
-----  
GATGAAACCTTCAGACCTGGAGGAGGAAATATGAAGGACAATTGGAGAAGTGAACTATATAAGTATAAAGTAG  
TAAAAATTGAACCACTA---GGAGTAGCACCCACCAGGGCAAGGAGAAGAGTGGTG-----  
-----GAGAGAGAAAAAAGAGCA---GCTGGA---CTAGGAGCT-----  
TTATTTCATTGGGTTCTTGGGAGCA---GCCGGAAGCACTATG---GGCGCAGCGTCT---  
GTAACGCTGACGGTACAG---GCCAGACAA---TTATTG---TCTGGCATAGTGCAACAGCAAAGC---  
AATTTG---CTGAGG---GCTATAGAGGCTCAGCAGCAGATGCTGAGACTCACAGTCTGGGGCATT  
>KX232609  
TTCTATTGTGATACAACAAACCTGTTTAATAGTACTTGGTTTGATAATGGGACTACTGAAGCAAATAGCACGG  
GG-----  
-----

TCAAGTGACATTATAACACTCCCATGCAGAATAAAACAAATTGTAAATGTATGGCAGAGAGTAGGACAAGCAA  
TATATGCCCCCTCCCATCAGAGGACTAATAAAGTGTGAATCAAAT ---  
ATTACGGGGCTACTATTAACCAGAGATGGTGGGCATAATAGCACAAATGCA-----  
-----  
-----  
AGTAGTGAAACCTTCAGACCTGGAGGAGGAAATATGAAGGACAATTGGAGAAGTGAACTATATAAGTATAAAG  
TAGTAAAAATTGAACCACTA---GGAGTAGCACCCACCAGAGCAAGGAGAAGAGTGGTG-----  
-----GAGAGAGAAAAAAGAGCA---ATTGGA---ATAGGAGCT-----  
GTACTCTTTGGGTTCTTGGGAGCA---GCCGGAAGCACTATG---GGCGCGGCGTCC---  
ATAACGCTGACGGTACAG---GCCAGACAA---TTATTG---TCTGGCATAGTGCAACAGCAAAGC---  
AATTTG---CTGAGG---GCTATAGAGGCTCAGCAGCATCTGCTGAAACTCACGGTCTGGGGCATT  
>KX232613  
TTCTATTGTAATACATCAGCCCTGTTTAATAGCACTTGGAGAGACAACCAGACAGATAACCAAACACATACAA  
AT-----  
-----  
GACACTGACATTATAACTCTCCCATGCAGAATAAAGCAAAGTTATAAACATGTGGCAGAGGACAGGACAAGCAA  
TGTATGCCCCCTCCTATCCAAGGAGTAATAAAGTGTACATCAAAT ---  
ATTACAGGACTATTATTAACAAGAGATGGGGGTGCTAACACAACA-----  
-----  
-----  
AATGAAACTTTCAGACCTACAGGAGGAGATATGAAAGACAATTGGAGAAGTGAATTATACAAGTATAAAGTAG  
TAAAAATTGAACCACTA---GGAGTAGCACCCACCAGGGCAAAGAGAAGAGTGGTG-----  
-----GAGAGAGAAAAAAGAGCA---GTTGGA---CTGGGAGCT-----  
GTATTCATTGGGTTCTTGGGAGCA---GCAGGAAGCACTATG---GGCGCGGCGTCA---  
ATCACGCTGACGGTACAG---GCTAGACAA---TTATTG---TCTGGCATAGTGCAACAGCAAAGC---  
AATTTG---CTGAGG---GCTATAGAGGCTCAACAACATATGTTGAAGCTCACAGTCTGGGGCATT  
>KX232614  
TTCTATTGTAATACAACAAACCTGTTTAATAGTACTTGGCCTGAGAATAAAAAATAGCACAGGGTCAAATGACA  
CAGGG-----  
-----  
-----  
TCAAATGGCACTATAACTCTCCAGTGCAAAATAAAGCAAATTATAAATGTATGGCAGAGAGTAGGACAAGCAA  
TATATGCCCCCTCCCATCCCAGGAGCAATAAGATGTAACCTCAAAT ---  
ATTACGGGGCTACTATTAACAAGAGATGGTGGGAATAATAACACA-----  
-----  
-----  
AATGAAACCTTCAGACCTGGAGGGGGAAATATGAAGGACAATTGGAGAAGTGAACTGTATAAATATAAAGTAG  
TAAAACTTGAACCACTA---GGAGTAGCACCCACCAAGGCAAAGAGAAGAGTGGTG-----  
-----GAGAGAGAAAAAAGAGCA---TTCGGA---CTAGGAGCT-----  
GTATTCATTGGGTTCTTGGGAGCA---GCCGGAAGCACTATG---GGCGCGGCGTCT---  
GTAACGCTGACGGTACAG---GCCAGACAA---TTATTG---TTTGGCATAGTGCAACAGCAAAGC---  
AATTTG---CTGAGG---GCTATAGAGGCTCAGCAACACCTGCTGAAACTCACGGTCTGGGGCATT  
>KX232618  
TTCTATTGTAATACATCAGGCCTGTTTAATAGTACTTGGTCTAATAATGAGACTGAGGGAGCGGGG-----  
-----  
-----  
TCAAATGACACTATAACACTCCCATGCAGAATAAAGCAAATTGTAAATGTATGGCAGAGAGTAGGACAAGCAA  
TATATGCCCCCTCCCATCGAAGGACTAATAAAATGTAACCTCAAAT ---  
ATTACGGGGCTACTATTGACAAGAGATGGTGGGGATTATAACACATCTACA-----  
-----  
-----  
AATAATGAAACCTTCAGACCTGGAGGAGGAAATATGAAGGACAATTGGAGAAGTGAACTGTATAAGTATAAAG  
TAGTAAGACTTGAACCACTA---GGAGTAGCACCCACCAGCGAAGAGAAGAGTGGTG-----  
-----GAGAGACAAAAAAGAGCA---ATTGGA---ATAGGAGCT-----  
GTGTTTATTGGGTTCTTGGGAGCA---GCTGGAAGCACTATG---GGCGCGGCGTCC---  
GTAACGCTGACGGTACAG---GCCAGACAA---TTATTG---TCTGGCATAGTGCAACAGCAAAGC---  
AATTTG---CTGCAG---GCTATAGAGGCTCAGCAACATCTGCTGAAACTCACAGTCTGGGGCATT  
>KX232620  
TTCTATTGTAATACAACAAGCCTGTTTAATAGTACTTGGCCTCATAATGAGACGAAAATAAATAGCACGGAAT  
CAAAT-----  
-----

GACAATGGCACTATAACACTCCCATGCAGAATAAAGCAAATTGTAAATATATGGCAGAGAGTAGGACAAGCAA  
TGTATGCCCCCTCCCATCAAAGGACTAATAAGGTGTAATTCAACT---  
ATTACGGGGCTACTATTAACAAGAGATGGGGGTGAGACTAATGGC-----  
-----  
-----  
ACAAATGAAACCTTTAGACCTGGAGGAGGAGATATGAGGGATAATTGGAGAAGTGAACTGTATAAGTATAAAG  
TAGTAAAAATTGAACCACTA---GGAATAGCACCCACCAAAGCAAGGAGAAGAGTGGTG-----  
-----GAGAGAGAAAAAAGAGCA---ATTGGA---CTAGGAGCT-----  
GTATTCATTGGGTTCTTGGGAGCA---GCCGGAAGCACTATG---GGCGCGGCGTCT---  
GTAACGCTGACGGTACAG---GCCAGACAA---TTATTG---TCTGGCATAGTGCAACAGCAAAGC---  
AATTTG---CTGAAG---GCTATAGAGGCTCAGCAGCAACTGCTGAAACTCACGGTCTGGGGCATT  
>KX232624  
TTCTATTGTAATACAACAGGCCTGTTTAATAGTACTTGGTATAATAATGGAAGTGAAGGAAAGCAAATAACACGG  
GG-----  
-----  
TCAAATGACACTATAACACTCCCATGCAGAATAAAACAAATTATAAATGTATGGCAAAGAGTAGGACAAGCAA  
TATATGCCCCCTCCCATCGAAGGACTAATAAGGTGTAATTCAACT---  
ATTACGGGGCTACTATTAACAAGAGATGGGGGTAATAACACAAAT-----  
-----  
-----  
GACACAAGTGAAACCTTCAGACCTGGAGGAGGAGATATGAGGGATAATTGGAGAAGTGAACTGTATAAGTATA  
AAGTAGTAAAAATTGAACCACTA---GGAATAGCACCCACCAAAGCAAGGAGAAGAGTGGTG-----  
-----GAGAGGGAAAAAAGAGCA---GTTGGA---CTAGGAGCT-----  
---GTATTCATTGGGTTCTTGGGAGCA---GCCGGAAGCACTATG---GGCGCGGCGTCC---  
GTGACGCTGACGGTACAG---GCCAGGCAA---TTATTG---TCTGGCATAGTGCAACAGCAAAGC---  
AATTTG---CTGAGG---GCTATAGAGGCTCAGCAACATCTGCTGAAACTCACAGTCTGGGGCATT  
>KX232626  
TTCTATTGTGATACAACAGGCCTGTTTAATAGTACTTGGCCTAACAATGAAACTGGGGAAGTAAATAGCACGG  
GA-----  
-----  
TCAAACGATATTATAACACTCCCATGCAGAATAAAGCAAGTTGTAAATGTATGGCAGAGAGTGGGACAAGCAA  
TATATGCCCCCTCCCATCCAAGGACTAATAAAATGTAACCTCAAAT---  
ATTACGGGGATAATATTAACAAGAGATGGTGGGAATCTTAATTCT-----  
-----  
-----  
ACAAATGAAACTTTTCAGACCTGGAGGAGGAAATATGAAGGACAATTGGAGAAGTGAACTGTATAAGTATAAAG  
TAGTAAAACTTGAACCACTA---GGAGTAGCACCCACCAAGGAGAAGAGTGGTG-----  
-----GAGAGAGAAAAAAGAGCA---ATTACC---ATAGGAGCT-----  
GTGCTCATTGGGTTCTTGGGAGCA---GCCGGAAGCACTATG---GGCGCGGCGTCT---  
GTAACGCTGACGGTACAG---GCCAGACAA---TTATTG---TCTGGCATAGTGCAACAGCAAAGC---  
AATTTG---CTAAGG---GCTATAGAGGCTCAGCAACATCTGCTGAAACTCACAGTCTGGGGCATT  
>KU749423  
TTCTATTGTAATACATCAGGCCTGTTCAATAGCACCTGGTATCCCAATGGCACCAACATAACTAACCCA----  
-----  
-----  
GGACCAGAGAATATAACCCTCCCATGCAGAATAAAGCAAATTGTAAATATGTGGCAGAGAGTAGGGAGAGCAA  
TGTATGCTCCTCCCATCAAAGGAGTAATACAATGTGTATCAAAC---  
ATTACAGGACTACTATTAACAAGAGATGGTGGGAATAATAATAAT-----  
-----  
-----  
ACAACTGAAACCTTCAGACCAGGAGGAGGAGATATGAGGGACAATTGGAGAAGTGAAATTATATAAGTATAAAG  
TAGTACAAGTTGAACCACTA---GGAATAGCACCCACTAGGGCAAGGAGAAGAGTGGTG-----  
-----GAGAGAGAAAAAAGAGCA---GTTGGA---ATGGGAGCT-----  
CTTTTCATTGGGTTCTTAGGAGCA---GCCGGAAGCACTATG---GGCGCGGCATCA---  
ATGATGCTGACGGTACAG---GCCAGACAA---TTATTG---TCTGGCATAGTGCAACAGCAAAGC---  
AATTTG---CTGAGG---GCTATTGAAGCTCAACAGCATATGTTGAAGCTCACGGTCTGGGGCATT  
>KX983643  
TTCTATTGTAATACATCAGAACTGTTTAATAGCACTTGGGGAGAGGAAGGGCGAAAGGACAATATCACGAAG-  
-----  
-----

TCAAATGCCACTATAACTCTCCCATGTAGAATAAAGCAAGTCATCAATATGTGGCAGAGAGCAGGACGAGCAA  
TGTATGCCCCCTCCCATCCAAGGAGTAATAAATTGTGCATCAAAC---  
ATTACAGGACTACTACTAACAAGAGACGGTGGGAATACTAATACTAGC-----  
-----  
-----  
GATCTACCTGAAATCTTCAGACCAGGAGGAGGAGATATGAGGGACAATTGGAGAAGTGAATTATATAAGTATA  
AGGTAGTAAAAATTGAACCACTA---GGAGTAGCACCCACCAAGGCAAGGAGAAGAGTGGTG-----  
-----GAGAGAGAAAAAAGAGCA---GTTGGA---CTGGGAGTT-----  
---GTCTTCCTTGGGTTCTTAGGAGCA---GCAGGAAGCACTATG---GGCGCGGCGTCA---  
ATAACGCTGACGGTACAG---GCCAGACAA---TTATTG---TCTGGCATAGTGCAAGCAGCAAAGC---  
AATTTG---CTGAAG---GCTATAGAGGCTCAACAGCATCTGTTGAAGCTCACAGTCTGGGGCATT  
>KX983542  
TTCTATTGTGATACAACAGGCCTGTTTAATAGCACTTGGAGAATGGCACTCTCAACATGCAGGAATTAAC  
TCACAGTC-----  
ACAACTACACAAATCTC-----  
ACAGACAGTATAAATATAACTCTTCCATGTAGAATAAAGCAAATTATAAATATGTGGCAGAGAGTAGGACAGG  
CAATGTATGCTCCTCCCATCCAAGGAGTAATAAAATGTGTGTCAAAC---  
ATTACGGGACTACTATTAACGAGAGATGGGGGAAT-----  
-----  
-----  
AATGAGACAGAAACCTTCAGACCTGGAGGAGGAAATATGAAGGACAATTGGAGAAGTGAATTATATAAGTATA  
AAGTAGTAAAAGTTGAGCCTATA---GGAGTAGCACCCACCAGGGCAAGGAGAAGAGTGGTG-----  
-----GAGAGAGAAAAAAGAGCA---GTTGGA---ATAGGAGCT-----  
---GTTTTCATTTGGGTTCTTAGGAGCA---GCAGGAAGCACTATG---GGCGCGGCGTCA---  
ATAACGCTGACGGTACAG---GCCAAACAA---TTATTG---TCTGGCATAGTGCAACAGCAAAGC---  
AATTTG---CTGAGG---GCTATAGAGGCTCAACAGCATCTGTTGAAACTCACGGTCTGGGGCATT  
>KX983566  
TTCTATTGTAATACATCAAGCCTGTTTAATAGCATTGTTGGTTAATGGCACTAGGAATGACACTGTCAGC---  
-----  
-----  
AATGGAACCTTATATAACTCTCCCATGCAGAATAAAGCAAATTATAAATATGTGGCAGAGAGTAGGGCAAGCAA  
TGTATGCCCCCTCCCATTAGAGGAGTAATAAAGTGTGAATCAAAC---  
ATTACAGGACTACTGTTAACAAGAGATGGTGGGGAGAATAATAGT-----  
-----  
-----  
ACCAATGAAACCTTCAGACCTGGAGGAGGAGATATGAGGGACAATTGGAGAAGTGAATTATATAAGTACAAAG  
TAGTAAAAATTAAACCACTA---GGAGTAGCACCCACCAAGGCAAGGAGAAGAGTGGTG-----  
-----GAGAGAGAAAAAAGAGCAGTAGTTGGA---CTGGGAGCT-----  
GTCTTCCTTGGGTTCTTAGGAGCA---GCAGGAAGCACTATG---GGCGCAGCGTCA---  
ATAACGCTGACGGTACAG---GCCAGACAA---TTATTG---TCTGGCATAGTGCAACAGCAAAGC---  
AATTTG---CTGAGG---GCTATAGAGGCTCAACAACATCTGTTGAAACTCACGGTCTGGGGCATT  
>JX236677  
TTCTATTGTAATACATCAGCCCTGTTTGATAGCACTTGGCGGTTTAATGGCATTGGCAGTGGAAATGACACTG  
TCAATGCCACT-----  
-----AGA---  
AGCGAGAATGATACTATAAATCTCCCATGCAGGATAAAGCAAATTATAAATATGTGGCAGAGAGCAGGACAGG  
CAATGTATGCCCCCTCCCATCCAAGGAGTAATAAGGTGTGACTCAAAC---  
ATTACAGGTCTATTATTAACAAGAGATGGTGGGAGGGGAATGAT-----  
-----  
-----  
AATAACACTGAGGTCTTCAGACCTGGAGGAGGAAATATGAAGGACAATTGGAGGAGTGAATTATATAAGTACA  
AAGTAGTAAAAATTGAACCATTA---GGAGTAGCACCCACCAGGGCAAGGAGAAGAGTGGTG-----  
-----GAGAGAGAAAAAAGAGCA---GTTGGA---ATAGGAGCT-----  
---GTTTTCATTTGGGTTCTTAGGAGCA---GCAGGAAGCACTATG---GGCGCAGCGTCA---  
ATAACGCTGACGGTACAG---GCCAGGCAA---TTATTG---TCTGGCATAGTGCAACAGCAAAGC---  
AATTTG---CTGAGG---GCTATAGAGGCTCAACAGCATCTGTTGAGACTCACAGTCTGGGGCATT  
>JX236678  
TTCTATTGTAACACATCAACCCTGTTTAGTAGCACTTGGGAGAACGGTACGGAACATAACAGCACGAAG----

TCAAATGACACTATAACTCTCCCATGCAGAATAAAGCAAATTATAAATATGTGGCAGAGAGTAGGACAAGCAA  
TATATGCTCCTCCAATCGAAGGAGAAATAAGGTGTCAATCAAAT ---  
ATTACAGGACTAATATTAACAAGAGATGGTGGTGAGGATATTAAC -----  
-----  
-----  
AGTACAAGTGAAACCTTCAGACCTGGAGGAGGAGATATGAGGGACAATTGGAGAAGTGAATTATATAAGTATA  
AGGTAGTAAAAATTGAACCACTA --- GGAGTAGCACCCACCAGGGCAAGAAGAAGAGTGGTG -----  
----- GAGAGAGAAAAAAGAGCA --- GTTGGA --- ATAGGAGCT -----  
--- GTCTTCATTGGGTTCTTAGGAGCA --- GCAGGAAGCACTATG --- GGCGCGGCGTCA ---  
ATAACGCTGACGGTACAG --- GCCAGACAA --- TTATTG --- TCTGGCATAGTGCAACAGCAAAGC ---  
AATTTG --- CTGAGG --- GCTATAGAGGCTCAACAACATCTGTTGAAGCTCACGGTCTGGGGCATT  
>KU749424  
TTTTATTGTAATACATCAGAACTGTTTAATAGCACTTGGGTATACAATGCATCAGAACTTAATGGCACTTGGG  
TAAACAATGCC -----  
AGCATGCCAGGATCAAAT -----  
AGCACAAGTGAAATATAACTCTCCACTGCAGAATAAAGCAAATTATAAATATGTGGCAGAGAGCAGGAAAAAG  
CAATGTACGCCCTCCCATCTCAGGAAACATAACGTGTGTTTCAAAC ---  
ATTACAGGACTCATATTAACAAGAGATGGTGGGAATACCAATACA -----  
-----  
-----  
ACTGAAATCTTCAGACCTGAAGGAGGAGATATGAGAGACAATTGGAGAAGTGAATTATATAAGTATAAAGTAG  
TAAAAATTGAACCACTA --- GGAGTAGCACCCACCAAGGCAAGGAGGAGAGTGGTG -----  
----- GAGAGAGAAAAAAGAGCA --- ATTGGA --- ATAGGAGCT -----  
GTCTCTTTGGGTTCTTAGGAGCA --- GCAGGAAGCACTATG --- GGCGCGGCGTCA ---  
ATAACGCTGACGGTACAG --- GCCAGACAA --- TTATTG --- TCTGGCATAGTGCAACAGCAAAGC ---  
AATTTG --- CTGAGG --- GCTATAGAGGCTCAACAACATCTGTTGAAACTCACAGTCTGGGGCATT  
>MF565934  
TTCTATTGCAATACATCAAGCCTGTTTAATAGTACTTGGGATGGGAATAGCACTACTAACAGCACGCAGAAG-  
-----  
-----  
CCAAATGGA ACTATAACTCTCCCATGCAGGATAAAGCAAATTATAAATATGTGGCAGAGAACAGGGCAAGCAA  
TGTATGCCCCCTCCCATCCCAGGAAAAATAAGGTGTGACTCAAAC ---  
ATCACAGGACTAATATTAACAAGAGATGGTGGAAATAATAACACT -----  
-----  
-----  
GAAAGTGAAACCTTTAGACCTGAAGGAGGAGACATGAGGAACAATTGGAGAAGTGAGTTATATAAGTATAAAG  
TAGTAAAGATTGACCCACTA --- GGAGTAGCACCCACCGGGCAAAGAGAAGAGTGGTG -----  
----- GAGAGAGAAAAAAGAGCA --- GTTGGA --- ATAGGAGCT -----  
GTCTCTTTGGGTTCTTAGGAGCA --- GCAGGAAGCACTATG --- GGCGCAGCGTCT ---  
CTAACGCTGACGGTACAG --- GCCAGACAA --- TTATTG --- TCTGGCATAGTGCAACAGCAAAGC ---  
AATTTG --- CTGAGG --- GCTATAGAGGCTCAACAACATCTGTTGAGACTCACGGTCTGGGGCATT  
>KX983624  
TTCTACTGTAATACATCAGGCCTGTTTAATAGCCTCTGGATAAATGGCACCATGCTGAATGGTACCCTGAAGA  
ATTCACCC -----  
-----  
AGCACAAATGACACCATAACTCTCCCATGCAGAATAAAGCAAATCATAAACATGTGGCAGAAAGTAGGACAAG  
CAATGTATGCCCCCTCCCATCCCAGGAAGCATAACGTGTGTATCAAAC ---  
ATTACAGGACTAATATTAACAAGAGATGGTGGGAATACTAACAGG -----  
-----  
-----  
ACAGATGAAATCTTCAGACCTGAAGGGGGAATATGAGGGACAATTGGAGAAGTGAATTATATAAGTATAAAG  
TAGTAAAAATTGAACCACTA --- GGAGTAGCACCCACTAGGGCAAAGAGAAGAGTGGTG -----  
----- GAGAGAGAAAAAAGAGCA --- GTTGGA --- CTGGGAGCT -----  
GTCTTCATTGGGTTCTTAGGAGCA --- GCAGGAAGCACTATG --- GGCGCGGCGTCA ---  
ATAACGCTGACGGTACAG --- GCCAGAAAC --- TTATTG --- TCTGGCATAGTGCAACAGCAAAGC ---  
AATTTG --- CTGAGG --- GCTATTGAGGCTCAACAGCATCTGTTGAAACTCACAGTCTGGGGCATT  
>KF716472  
TTCTATTGTAACACAACAGGTCTGTTTAATAGCACTTGGAGTCGGAACACAACAGATAATAACACTTGGTTTA  
GGAACAATGCT -----  
----- AGCAGTAGCACA -----

GGGTAAATGGCACAATAACTCTCCAATGCAAAATAAAGCAAATTATAAATATGTGGCAGAGAACAGGACGAG  
CAATGTATGCCCCCTCCCATACCAGGAACAATAATGTGTAACTCAAGC---  
ATCACAGGACTGCTATTAACAAGAGATGGTGGGAATAGTGGGAAC-----  
-----  
-----  
AACAGTAATGAAACCTTCAGGCCTGGAGGAGGAGATATGAAAGACAATTGGAGAAGTGAATTATATAAGTATA  
AGGTAGTAAAAATTGAACCACTA---GGAGTAGCACCCACCAGGGCAAAGAGAAGAGTGGTG-----  
-----GAGAGAGAAAAAAGAGCA---GTTGGA---ATGGGAGCT-----  
---CTTTTCATTGGGTTCTTGGGAGCA---GCAGGAAGCACTATG---GGCGCGGCGTCA---  
GTGACGCTGACGGTACAG---GCCAGACAA---TTATTG---TCTGGTATAGTGCAACAGCAAAGC---  
AATTTG---CTGAAG---GCTATAGAGGCTCAACAACATCTGTTGAGACTCACAGTCTGGGGCATT  
>AB253421  
TTTTATTGTGATTCATCAGGCCTGTTTAATAGCACTTGGGATAACACTAACATCACGCAGCCAAATAGCACAG  
GG-----  
-----  
TCAAAATGACACCATAACTCTCCAATGCAGAATAAAGCAAATTATAAATATGTGGCAGAGAGCAGGACAGGCCAA  
TGTATGCCCCCTCCCATCCAGGAGTAATAAGTTGTGTATCAAAC---  
ATTACAGGATTACTATTAACAAGAGATGGTGGGATTACCACTGCA-----  
-----  
-----  
AATGAAACCTTCAGACCTGGAGGAGGAGATATGAGGGACAATTGGAGAAGTGAATTATATAAGTATAAGGTAG  
TAAAACTTGAACCACTA---GGAGTAGCACCCACCAGGGCAAGGAGAAGAGTGGTG-----  
-----GAGAGAGAAAAAAGAGCA---GTTGGA---ATAGGAGCT-----  
GTATTCATTGGTTTCTTAGGAGCA---GCAGGAAGCACTATG---GGCGCGGCGTCA---  
ATGACGCTGACGGTACAG---GCCAGACAA---TTATTG---TCTGGCATAGTGCAACAGCAAAGC---  
AATTTG---CTGAGG---GCTATAGAGGCTCAACAACATCTGTTGAAACTCACGGTCTGGGGCATT  
>AB287377  
TTCTATTGTAATACATCAGGCCTGTTTAATAGCACCTGGAATAATAATAATACCAGGGAGAAGATAAATGGTA  
CA-----  
-----  
GAGTCAAATAGCACTATAACTCTCCATTGCAGAATAAAGCAAATTATAAATAGGTGGCAGGAAGTAGGACAAG  
CAATGTATGCCCCCTCCCATCCAGGAGTAATAAATTGTAGATCAAAC---  
ATTACAGGACTAATATTAACAAGAGATGGTGGGGATGGGGATAAC-----  
-----  
-----  
AATACGGAAATCTTCAGACCTGGAGGAGGAAATATGAAGGACAATTGGAGAAGTGAATTATATAAGTATAAAG  
TAGTAAAAATTGAACCACTG---GGAGTAGCACCCACCAGGGCTAAGAGAAGAGTGGTG-----  
-----GAGAGAGCAAAAAGAGCA---GTTGGA---ATAGGAGCT-----  
GTTTTCCTTGGGTTCTTAGGAGCA---GCAGGAAGCACTATG---GGCGCGGCGTCA---  
ATAACGCTGACGGTACAG---GCCAGACAA---TTATTG---TCTGGCATAGTGCAACAGCAAAGC---  
AATTTG---CTGAGG---GCTATAGAGGCTCAACAACATCTGTTGAAACTCACGGTCTGGGGCATT  
>AB287379  
TTCTATTGTAATACATCAGGCCTGTTTAATAGCACTTGGACCAATGAAAGCATGCAAGTAAATAGCACAGAA-  
-----  
-----  
TCAAAATGACACTATAACTCTCCCATGCAGAATAAAGCAAATTATAAATATGTGGCAGAGGGCAGGACAAGCAA  
TATATGCCCCCTCCCATCGAAGGAGTAATAAGGTGTAGCTCAAAC---  
ATTACAGGACTACTATTAACAAGAGATGGTGGGGTTAACAATACA-----  
-----  
-----  
GTCAATGAAACCTTCAGACCTGGAGGAGGAAATATGAGGGATAATTGGAGAAGTGAACCTATATAAATATAAAG  
TAGTAAAAATTGAACCACTA---GGAGTAGCACCCACCAGGGCAAAAAGAAGAGTGGTG-----  
-----GAGAGAGAAAAAAGAGCA---GTTGGA---CTGGGAGCT-----  
GTCTTCATTGGGTTCTTAGGAGCA---GCAGGAAGCACTATG---GGCGCGGCGTCA---  
ATAACGCTGACGGTACAG---GCCAGACAA---TTATTG---TCTGGCATAGTGCAACAGCAAAAC---  
AATTTG---CTGAGG---GCTATAGAGGCTCAACAACATCTGTTGAAACTCACGGTCTGGGGCATT  
>AY713406  
TTCTATTGTAATACATCAAGCCTGTTTAATAGCACTTGGGAATAACACTGCCAGCATGCAGAAGTCAAATAGCA  
CG-----  
-----

GGGTCAAATGACACTATAACTCTCCAATGCAGAATAAAGCAAATTATAAGAATGTGGCAAAGAACAGGACAGG  
CAATGTATGCCCCCTCCCATCAAAGGAGATATAAGGTGTGAATCAAAC---  
ATTACAGGACTAATATTAACAAGAGATGGTGGGAATGATAGCAGT-----  
-----  
-----  
CCAGATGAAATCTTCAGACCTGGAGGAGGAGATATGAGGGACAATTGGAGAAGTGAATTATATAAGTATAAAG  
TAGTACAAATTGAACCTCTA---GGAGTAGCACCCACCAAGGCAAGAAGAAGAGTGGTG-----  
-----CAGAGAGAGAAAAAGAGCA---ATTGGA---ATAGGAGCT-----  
GTCTTCCTTGGGTTCTTAGGAGCA---GCAGGAAGCACTATG---GGCGCGGCGTCA---  
ATAACGCTGACGGTACAG---GCCAGACAA---TTATTG---TCTGGCATAGTGCAACAGCAAAGC---  
AATTTG---CTGAGG---GCTATAGAGGCTCAACAACATCTGTTGAAACTCACGGTCTGGGGCATT  
>L07082  
TTCTATTGTAATACAACAGGCCTGTTTAATAGCACCTGGAAAAATGTAAATGGCACCATGCAGGAGTCAAGCA  
GCACA-----  
-----  
AAGTTAAATGACACTATAACACTCACATGCAGAATAAAGCAAATTATAAATATGTGGCAGAGAGCAGGACAGG  
CAATGTATGCCCCCTCCCATCGAAGGAATAATAAGGTGTGACTCAAAC---  
ATTACAGGACTACTATTAACAAGAGATGGTGGGGTTGGGGGATAACAGT-----  
-----  
-----  
ACAAATGGAACCTGAAACATTTCAGACCTGGAGGAGGAAATATGAGGGACAATTGGAGAAGTGAATTATATAAGT  
ATAAAGTAGTAAAAATTGAACCACTA---GGAGTAGCACCCACCACGGCAAAAAGAAAAGTGGTG-----  
-----GAGAGAGAAAAAAGAGCA---ATTGGA---ATAGGAGCT---  
-----GTCTTCCTTGGGTTCTTAGGAGCA---GCAGGAAGCACTATG---GGCGCGGCGTCA---  
ATAACGCTGACGGTACAG---GCCAGACAA---TTATTG---TCTGGCATAGTGCAACAGCAAAGC---  
AATTTG---CTGAGG---GCTATAGAGGCTCAACAGCATCTGTTGAAACTCACAGTCTGGGGCATT  
>MF373167  
TTCTATTGTAATACATCAGGCCTGTTTAATAGCACTTGGAAATGAAACTACCATGCAGGAGTCAAATGGAACAG  
AG-----  
-----  
TCAAACGACAGCATAACTCTCCCATGCAGAATAAAGCAGATTGTAAATATGTGGCAGAGAACAGGACAAGCAA  
TGTATGCCCCCTCCCATCCAAGGAGTAATACAGTGTGTATCAAAT---  
ATTACAGGACTAATATTAATGAGAGATGGTGGGAATAGTAGTAGG-----  
-----  
-----  
GAAAAATGAAACCTTCAGACCTGGAGGAGGAGATATGAGGGACAATTGGAGAAGTGAATTATATAAGTATAAAG  
TAGTAAAAATTGAACCACTA---GGAGTAGCACCCACCAGGGCAAGGAGAAGAGTGGTG-----  
-----CAGAGAGAAAAAAGAGCG---GTTGGA---CTGGGAGCT-----  
GTTTTCATTGGGTTCTTAGGAGCA---GCAGGAAGCACTATG---GGCGCAGCGTCA---  
GTGACGCTGACGGTACAG---GCCAGGCAA---TTATTG---TCTGGCATAGTGCAACAGCAAAGC---  
AATTTG---CTGAGG---GCTATAGAGGCTCAACAGCATCTGTTGAGACTCACGGTCTGGGGCATT  
>MF373168  
TTCTATTGTGATACATCAGACCTGTTTAATAGCATTGCGCGTTTAATAGCACTCGGGGACACAATGAGACTG  
AAAGATCA-----  
-----AATAGCACAGAG-----  
ACAAATAACACTATTATAAACTTCCATGTAGAATAAAACAAATTATAAATATGTGGCAGAGAGTAGGACAAG  
CAATATTTGCCCCCTCCCATCCAAGGAGTAATACAGTGTGTATCAAAC---  
ATTACAGGACTAATATTAACAAGAGATGGAGGGAATAATAACACT-----  
-----  
-----  
ACAAATGAAACCTTCAGACCTGGAGGAGGAGATATGAGGGACAATTGGAGAAGTGAATTATATAAGTATAAAG  
TAGTAAAAATTGAACCACTA---GGAGTAGCACCCACCAGGGCACAGAGAAGAGTGGTG-----  
-----CAGAGAGAAAAAAGAGCA---ATTGGA---ATGGGAGCT-----  
GTCTTCATTGGGTTCTTAGGAGCA---GCAGGAAGCACTATG---GGCGCGGCGTCA---  
ATAACGCTGACGGTACAG---GCCAGACAA---TTATTG---TCTGGTATAGTGCAACAGCAAAGC---  
AATTTG---CTGAGG---GCTATAGAGGCTCAACAGCATCTGTTGAAACTCACGGTCTGGGGCATT  
>MF373181  
TTCTACTGTAATACATCAGGCCTGTTTAACAGTAGTTGGGGAAATGGCACTAACAACAGCAGCACT-----  
-----  
-----

GGGGGGCAAACCTATAACTCTCCCATGCAAAATAAAGCAAATTGTAAATATGTGGCAGAGGACAGGACAAGCAA  
 TGTATGCCCCCTCCTATCGAAGGAGTAATAAGGTGTGTATCAAAC---  
 ATTACAGGAATACTATTAAGTAGAGATGGTGGGCCTAATAATAGT-----  
 -----  
 -----  
 ACAAATGAAACCTTCAGACCGGGAGGAGGAAATATGAAGGACAATTGGAGAAGTGAATTATATAACTATAAAG  
 TAGTACAAATTAACCCATTA---GGAATAGCACCCACCAAGGCAAAGAGAAGAGTGGTG-----  
 -----GAGAGAGAAAAAAGAGCAGTAGTTGGA---CTGGGAGCT-----  
 TTGTTTCATTGGGTTCTTAGGAGCT---GCAGGAAGCACTATG---GGCGCGGCGTCA---  
 ATGACGCTGACGGTACAG---GCCAGACAA---TTATTG---TCTGGCATAGTGCAACAGCAAAGC---  
 AATTTG---CTGAGA---GCTATAGAGGCTCAACAGCATGTGTTGAGACTCACGGTCTGGGGCATT  
 >MF373182  
 TTCTATTGTAATACATCAGGCCTGTTTAATAGCAGTTGGGGAGTAAACAACACTGATGGCAATATA-----  
 -----  
 -----  
 ACTAATGGCACGATAACTCTCCCCTGCAAAATAAAACAATTTATAAATATGTGGCAGAGAGTAGGACAAGCAA  
 TGTATGCCCCCTCCCATCGAAGGGGCAATAAGTTGTAATTC AACC---  
 ATCACAGGACTACTATTAACAAGAGATGGTGGGTACAACAACAGCACT-----  
 -----  
 -----  
 AACCAAATCGACAAAATCTTCAGACCTGCAGGAGGAGATATGCAGGACAACCTGGAGAAGTGAATTATATAAGT  
 ATAAAGTAGTAAAAATTGAACCATTA---GGAGTAGCACCCACCTGGGCAAGGAGAAGAGTGGTG-----  
 -----CAGAGAGAAAAAAGAGCA---GTTGGA---CTGGGAGCT---  
 -----GTCTTTCTTGGGTTCTTAGGAGCA---GCAGGAAGCACTATG---GGCGCGGCGTCG---  
 ATAACGCTGACGGTACAG---GCCAGACAA---TTATTG---TCTGGCATAGTGCAACAGCAAAGC---  
 AATTTG---CTGATG---GCTATAGAGGCTCAACAGCATTTGTTGAAACTCACAGTCTGGGGCATT  
 >AF069670  
 TTCTATTGTAATACATCAGGCCTGTTTAATAGCACTTGGAGCCAAAATGACACTGGGGTATCAAATAGCACGG  
 AG-----  
 -----  
 TCAAATGACACTATAATTCTTCCATGCAGAATAAAACAATTTATAAATATGTGGCAGAGAGCAGGACAAGCAA  
 TATATGCCCCCTCCCATCCCAGGAATAATAAGGTGTGAATCAAAC---  
 ATTACAGGGCTACTGTTAACAAGAGATGGTGGGGTTGTTAACAGT-----  
 -----  
 -----  
 ACAAATGAAACCTTCAGACCTGGAGGAGGAAATATGAAGGACAATTGGAGAAGTGAATTATATAAGTATAAAG  
 TAGTAAAAATTGAACCACTA---GGAGTAGCACCCACCAGGGCAAGGAGAAGAGTGGTG-----  
 -----CAGAGAGAAAAAAGAGCA---GTTGGA---CTGGGAGCT-----  
 TTATTTCATTGGGTTCTTAGGAGCA---GCAGGAAGCACTATG---GGCGCGGCGTCA---  
 ATAACGCTGACGGTACAG---GCCAGACAA---TTATTA---TCTGGCATAGTGCAACAGCAAAGT---  
 AATTTG---CTGAGG---GCTATAGAGGCTCAACAGCATCTGTTGAAACTCACTGTCTGGGGCATT  
 >AF069671  
 TTCTATTGTAATACATCAGGCCTGTTTAATAGCACTATTTTGAATAGCACTAAGATGAATGACAATGCCAGCA  
 GGGAG-----  
 -----  
 TCGTATGATGACACTATAACCCTCCAGTGCAGAATAAAGCAAATTATAAATATGTGGCAGAGAGTAGGACAAG  
 CAATGTATGCCCCCTCCCATCCGAGGAGCAATAAGATGTAAATCAAAC---  
 ATTACAGGACTATTATTAACAAGAGATGGTGGAAATAGTAACAGT-----  
 -----  
 -----  
 AGTACAAATGAAACCTTCAGACCTGGAGGAGGAGATATGAGAGATAATTGGAGAAGTGAATTATATAAATATA  
 AAGTAGTAAAAATTGAACCACTA---GGAGTAGCACCCACCAAGGCAAAGAGAAGAGTGGTG-----  
 -----GAGAGAGAAAAAAGAGCA---GTTGGA---ATAGGAGCT-----  
 ---GTCTTCCTTGGGTTCTTAGGAGCA---GCAGGAAGCACTATG---GGCGCGGCGTCA---  
 ATAACGCTGACGGTACAG---GCCAGACAA---TTATTG---TCTGGCATAGTGCAACAGCAAAGC---  
 AATTTG---CTGAGG---GCTATAGAGGTTCAACAACATCTGTTGAAACTCACGGTCTGGGGCATT  
 >AF069673  
 TTCTATTGTAATACATCAGGCCTGTTTAATAGTACTTGGAAATGGCACTGACAGCATGCAGAAGTTAAAT----  
 -----  
 -----

AGCACGGGCAATATAACTCTCCCATGCAGAATAAAACAAATTATAAATATGTGGCAGAGAGCAGGACAAGCAA  
 TATATGCCCCCTCCCATCCAAGGAGTAATAAGGTGTGAATCAAAC---  
 ATTACAGGACTAATATTAACAAGAGATGGTGGGAATGATAACAAT-----  
 -----  
 -----  
 GAAAGTGAAATCTTCAGGCCTGGAGGAGGAGACATGAGGGACAATTGGAGAAGTGAATTATATAAGTATAAGG  
 TAGTAAAAATTGAACCACTA---GGAGTAGCACCCACCAAGGCAAAAAGAAGAGTGGTG-----  
 -----GAGAGAGAAAAAAGAGCA---ATTGGA---ATAGGAGCT-----  
 GTCTTCATTGGGTTCTTGGGAGCA---GCAGGAAGCACTATG---GGCGCAGCGTCA---  
 ATAACGCTGACGGTACAG---GCCAGGCAA---TTATTG---TCTGGCATAGTGCAACAGCAAAGC---  
 AATTTG---CTGATG---GCTATAGAGGCTCAACAGCATCTGTTGAAACTCACGGTCTGGGGCATT  
 >AF107771  
 TTCTATTGTAATACATCAGGTCTGTTTAATAGTAGTTGGAATGAAAATGACACCAAAGTAAATTACAACACTG  
 AG-----  
 -----  
 TCAAAATGACACTATAACTCTCCAATGCAGAATAAAGCAAATTATAAATATGTGGCAGAGAACAGGACAAGCAA  
 CGTATGCCCCCTCCCATCCCAGGGGTAAATACAGTGTAGATCAAAC---  
 ATTACAGGACTACTATTAACAAGGGATGGTGGGGTAACTAACAAT-----  
 -----  
 -----  
 ACAAATAATGAAACCTTCAGACCTGGAGGAGGAGATATGAGGGACAATTGGAGAAGTGAATTATACAAGTATA  
 AAGTAGTAAAACTTGAACCACTA---GGAGTAGCACCCACCAAGGCACAGAGAAGAGTGGTG-----  
 -----AAGAGAGAAAAAAGAGCA---GTTGGA---CTGGCAGCT-----  
 ---GTATTCTTTGGGTTCTTAGGAGCA---GCAGGAAGCACTATG---GGCGCGGCGTCA---  
 ATAACGCTGACGGTACAG---GCCAGACAA---TTATTG---TCTGGTATAGTGCAACAGCAAAAC---  
 AATTTG---CTGAGG---GCTATAGAGGCTCAACAGCATATGTTGAGACTCACGGTCTGGGGCATT  
 >HQ659604  
 TTTTATTGTGATACATCAGGCCTGTTTAATAGCACATGGGGGGGAAATAGCACTGACAGCATAACAGGAGTCAA  
 ATAGC-----  
 -----ACA---  
 GAGTCAAATGACACTATAATTCTCCCATGCAGAATAAAGCAAATTATAAATATGTGGCAGAGAGTAGGACAAG  
 CAATGTATGCCCCCTCCCATCCAAGGAGTAATAAAGTGTATATCAAAT---  
 ATTACAGGACTTCTATTAACAAGAGATGGTGGGGATAATAACAGT-----  
 -----  
 -----  
 GCAAAATGAAACCTTCAGACCTACAGGAGGAAATATGAGGGACAATTGGAGAAGTGAATTATATAAGTATAAAG  
 TAGTAAAAATTGAACCACTA---GGAGTAGCACCCACCCCGGCAAGAGAAGAGTGGTG-----  
 -----CAGAGAGAAAAAAGAGCA---GTTGGA---ATAGGAGCT-----  
 GTATTCAATTGGGTTCTTAGGAGCA---GCCGGAAGCACTATG---GGCGCGGCGTCA---  
 ATAACGCTGACGGTACAG---GCTAGACAA---TTATTG---TCTGGCATAGTGCAACAGCAAAGC---  
 AATTTG---CTGAGG---GCTATAGAGGCTCAACAACATCTGTTGAAACTCACGGTCTGGGGCATT  
 >HQ659597  
 TTCTATTGCAACACATCAGAATTGTTTAATAGCACTTGGGATAATAGCACTTGGGATAATAGCACTTGGGATA  
 ATAACATG-----  
 -----CATGAGTCG-----  
 AATAGCACGGAGAATATAACTCTCCAATGTAGGATAAAGCAAATTATAAATATGTGGCAGAGAGCAGGACAAG  
 CAATATATGCCCCCTCCCATCAAAGGAGTAATAGGGTGTAATCAAAC---  
 ATTACAGGACTAATATTAACAAGAGATGGTGGGGAGAAGGGTAATAAC-----  
 -----  
 -----  
 AGTATCAATGAAACCTTCAGACCTGGAGGAGGAGATATGAGGGACAATTGGAGAAGTGAATTATACAAGTATA  
 AAGTAGTAAAAATTGAACCACTA---GGAGTAGCACCCACCAAGGCAAGAGAAGAGTGGTG-----  
 -----GAGAGAGAAAAAAGAGCA---GTTGGA---ATAGGAGCT-----  
 ---GTCTTCCTTGGAATCTTAGGAACA---GCAGGAAGCACTATG---GGCGCGGCGTCA---  
 GTAACGCTGACGGTACAG---GCCAGACAA---TTATTG---TCTGGCATAGTGCAACAGCAAAGC---  
 AATTTG---CTGAGG---GCTATAGAGGCTCAACAGCATCTGTTGAAACTCACAGTCTGGGGCATT  
 >HQ697994  
 TTCTATTGCTACACATCAGGCCTGTTTAATTATACCTTTAATGATACCAGCACAAATAGCACGGAGTCGAAG-  
 -----  
 -----

TCAAATGACACTATAACTCTCCAATGCAGAATAAAGCAAATTATAAATATGTGGCAGAGAGCAGGACAAGCAG  
TATATGCCCCCTCCCATACCAGGGATAATAAGGTGTGAATCAAAC---  
ATTACAGGACTAATATTAACAAGAGATGGTGGGAATAATAATAGT-----  
-----  
-----  
AATACAAATGAAACCTTCAGACCTGGAGGAGGAGATATGAGGGACAATTGGAGAAGTGAATTATATCGGTATA  
AAGTAGTAAAAATTGAACCAATA---GGAGTAGCACCTACCACGGCAAAGAGAAGAGTGGTG-----  
-----GAGAGAGAAAAAAGAGCA---GTTGGA---ATAGGAGCT-----  
---GTCTTCCTTGGGTTCTTAGGAGCA---GCAGGAAGCACTATG---GGCGCGGCGTCA---  
ATAACGCTGACGGTACAG---GCCAGACAA---TTATTG---TCTGGCATAGTGCAACAGCAAAGC---  
AATTTG---CTGAGG---GCTATAGAGGCTCAACAGCATCTGTTGAAACTCACGGTCTGGGGCATT  
>HQ698029  
TTCTATTGCAACACGGCAGGCCTGTTTGATAGCATTGGAATGGTAGCATTGGGAATAACACTGACAATAGTA  
GCATGGAG-----  
-----TTAAAT-----  
GACGATAATGACACTATAACTCTCCCATGCAGAATAAAGCAAATTATAAATATGTGGCAGAGAGTAGGACAAG  
CAATATATGCCCCCTCCCATCCAAGGAGTAATAAGGTGTGACTCAAAT---  
ATTACAGGGTTAATATTAACAAGAGATGGTGGGGATAATAATAGT-----  
-----  
-----  
GCAAAATGAAACCTTCAGACCTGTAGGAGGAGATATGAGGGACAATTGGAGAAGTGAATTATATAAGTATAAAG  
TAGTAAAAATTGAGCCACTA---GGAGTAGCACCCACCAGGGCAAAGAGAAGAGTGGTG-----  
-----GGGAGAGAAAAAAGAGCA---GTTGGA---CTAGGAGCT-----  
GTCTTCATTGGGTTCTTAGGAGCA---GCAGGAAGCACTATG---GGCGCAGCGTCA---  
GTAACGCTGACGGTACAG---GCCAGACAA---TTATTG---TCTGGCATAGTGCAACAGCAAAGC---  
AATTTG---CTGAAG---GCTATAGAGGCTCAACAGCATCTGTTGAGACTCACAGTCTGGGGCATT  
>AY253305  
TTCTATTGTAACACATCAGGCCTGTTTAATGGCCTGTTTAATGGCACCTGGAATGGCAATCACACAAACAGCA  
CG-----  
-----  
GAGTTAAATAGCACTATAATTCTCCAATGCAAAATAAAGCAAATTATAAATATGTGGCAGAGAGCAGGACAAG  
CAATATATGCCCCCTCCCATCCAAGGAGTAATAAAGTGTGTATCAAAT---  
ATTACAGGACTAATATTAACAAGAGATGGTGAGAGGAACAATAGT-----  
-----  
-----  
CTAAATGAAACCTTCAGACCTGGAGGAGGAGATATGAGGGACAATTGGAGAAGTGAATTATATAAGTATAAAG  
TAGTAAAAATTGAACCACTA---GGAGTAGCACCTACCAGGGCAAAGAGAAGAGTGGTG-----  
-----GAGAGAGAAAAAAGAGCA---GTCGGA---CTGGGAGCT-----  
GTCTTCATTGGGTTCTTAGGAGCA---GCAGGAAGCACTATG---GGCGCGGCGTCA---  
GTAACGCTGACGGTACAG---GCCAGACAA---TTATTG---TCTGGCATAGTGCAACAGCAAAGC---  
AATTTG---CTGAGG---GCTATAGAGGCTCAACAGCATCTGTTGAAACTCACGGTCTGGGGCATT  
>AY253314  
TTCTATTGTAATACATCAGGCCTGTTTAATAGCACTTGGACTACCAACAACATGCAGGAGTCAAATGACACT-  
-----  
-----  
AGCAATGGCACTATAACTCTCCCATGCAGAATAAAGCAAATTATAAGGATGTGGCAGAGAGTAGGACAAGCAA  
TGATATGCCCCCTCCCATGAAGGAGTAATAAGATGTGAATCAAAC---  
ATTACAGGACTAATACTAACAAGAGATGGCGGGAATAATAACAGT-----  
-----  
-----  
GCAAAATGAAACCTTTAGACCTGGAGGAGGAGATATAAGGGACAATTGGAGAAGTGAATTATATAAGTATAAAG  
TAGTAAAAATTGAACCACTA---GGAGTAGCACCCACCAGGGCAAAGAGAAGAGTGGTG-----  
-----GAGAGAGAGAAAAAGAGCA---GTTGGA---ATAGGAGCT-----  
GTCTTCCTTGGGTTCTTAGGAGCA---GCAGGAAGCACTATG---GGCGCGGCGTCA---  
ATAACGCTGACGGTACAA---GCCAGACAA---TTATTG---TCTGGCATAGTGCAAGCAGCAAAGC---  
AATTTG---CTGAGG---GCTATAGAGGCTCAACAACAGCTGTTGAAACTCACGGTCTGGGGCATT  
>KX907352  
TTCTATTGTAATACATCAGGCCTGTTTAATAGCACTTGGCTATTTAACAAGTCAAATGAGAATAAGTCAAATG  
AG-----  
-----

TCAGATGTCAATATAACACTCCCATGCAGAATAAAGCAAATTATAAATATGTGGCAGAGAGCAGGACAAGCAA  
TGTATGCCCCCTCCCATCCCAGGAGTAATAAAGTGTGAATCAAAC---  
ATTACAGGACTACTATTAACAAGAGATGGTGGGAATAACAACAAT-----  
-----  
-----  
TCAAATGAGACCTTCAGACCTGGAGGAGGAGATATGAGGGACAATTGGAGAAGTGAATTATATAAGTATAAAG  
TAGTCAAAATTGAACCACTA---GGAGTAGCACCCACCAGGGCAAGGAGAAGAGTGGTG-----  
-----GGAAGAGAAAAAAGAGCA---GTTGGA---ATAGGAGCT-----  
GTTTTCCTTGGGTTCTTAGGAGCA---GCAGGAAGCACTATG---GGCGCGGCGTCA---  
ATAACGCTGACGGTACAG---GCCAGACAA---TTATTG---TCTGGCATAGTGCAACAGCAAAGC---  
AATTTG---CTGAGG---GCTATAGAGGCTCAACAACATCTGTTGAAACTCACAGTCTGGGGCATT  
>KX907348  
TTCTATTGTAACACATCAGGTCTGTTTAATAGCACTTGGTATGGCAATGGCAGCAAGCTGGAGTCAAATAGCA  
CGGGG-----  
-----  
TCAGACGACAATATAACTCTCCACTGTAGAATAAAGCAAATTATAAATATGTGGCAAAGAGCAGGACAAGCAA  
TATATGCCCCCTCCCATCCCAGGAGTAATAAAGTGTCTATCAAAC---  
ATTACAGGACTAATATTAACAAGAGATGGTGGGGACAATAACAGT-----  
-----  
-----  
ACAAATGAAACCTTCAGACCTGGAGGAGGAGATATGAGGGACAATTGGAGAAGTGAATTATATAAGTATAAAG  
TAGTAAAAATTGAACCATTA---GGAGTAGCACCCACCAGGGCAAAGAGAAGAGTGGTG-----  
-----GAAAGAGAAAAAAGAGCA---GTTGGA---CTGGGAAGT-----  
GTTCTCTTTGGGTTCTTAGGAGCA---GCAGGAAGCACTATG---GGCGCGGCGTCA---  
GTAACGCTGACGGTACAG---GCCAGAAAG---TTACTA---TCTGGCATAGTGCAACAGCAAAGC---  
AATTTG---CTGAGG---GCTATAGAGGCTCAACAGCATCTGTTGAAACTCACAGTCTGGGGCATT  
>KX907336  
TTCTATTGTAATACATCAGGCCTGTTTAATAGCACTTGGAACAGCACTGGGTCAAGAAAT-----  
-----  
-----  
GACAGTGGCAATATAACTCTCCCATGCAGAATAAAGCAAATTGTAAATATGTGGCAGAGGACAGGACAAGCAA  
TATACGCCCCCTCCCATCCAAGGAAGAATACAGTGTGTGTCAAAT---  
ATTACAGGACTACTATTGACAAGAGATGGAGGGATTAACAACAGT-----  
-----  
-----  
GAGGAAACCTTCAGACCTGGAGGAGGAAATATGAGAGATAATTGGAGAAGTGAAGTATATAAATATAAAGTAG  
TAAAAATTGAACCACTA---GGAGTAGCACCCACCAGGGCAAAGAGAAGAGTGGTG-----  
-----GAGAGAGAAAAAAGAGCAGTAGTTGGA---CTGGGAGCT-----  
GTCTTCCTTGGGTTCTTAGGAGCA---GCAGGAAGCACTATG---GGCGCGGCGTCA---  
CTGACGCTGACGGTACAG---GCCAGACAT---TTATTG---TCTGGCATAGTGCAACAGCAAAAC---  
AATTTG---CTGAGG---GCTATAGAGGCTCAACAGCATCTGTTGAAACTCACGGTCTGGGGCATT  
>KX907372  
TTCTATTGTAATACATCAGGCCTGTTTAATAGCAGTTGGAACATTAATGGCAGTCGGGAGTCAAATAAAACAC  
AG-----  
-----  
TCAAATGGCACTATAACTCTCCCATGCAGAATAAAGCAAATTATAAATATGTGGCAGAGAGCAGGACAAGCAA  
TATATGCTCCTCCCATCCAAGGAGTAATAAAGTGTGTATCAAAC---  
ATTACAGGACTAATATTAACAAGAGATGGTGGGAATAATAATAAC-----  
-----  
-----  
AGTTCAAATGAAACTTTCAGACCTGGAGGAGGAGATATGAGGGACAATTGGAGAAGTGAATTGTATAAGTATA  
AGGTAGTAAAAATTGAACCACTA---GGGGTAGCACCCACCAGGGCAAAGAGAAGAGTGGTG-----  
-----GAGAGAGAAAAAAGAGCA---GTTGGA---ATAGGAGCT-----  
---GTTTTCCTTGGGTTCTTAGGAGCA---GCAGGAAGCACTATG---GGCGCGGCGTCA---  
ATAACGCTGACGGTACAG---GCCAGACAA---TTACTG---TCTGGCATAGTGCAACAGCAGAGC---  
AATTTG---CTGAGG---GCTATAGAGGCTCAACAACAGTTGTTGAAACTCACGGTCTGGGGCATT  
>KX907383  
TTCTATTGTGACACATCAAGCCTGTTTAATATCACTTGGGATAGAAGTAACGTCACGCAGGAGTTAAATAACA  
CAAAG-----  
-----

TTAAATGACACTATAATTCTCCAATGCAGGATAAAGCAAATTATAAATATGTGGCAGAGAGCAGGACAAGCAA  
TGTATGCCCCCTCCCATCCCAGGAATAATAAAGTGTGAATCAAAC---  
ATTACAGGACTAATATTAACAAGAGATGGGAGT-----  
-----  
-----  
GAGAATGAAACTGAAACCTTCAGACCTGGAGGAGGAGACATGAGGGACAATTGGAGAAGTGAGTTATATAAGT  
ATAAAGTGGTAAAAATTGAACCACTA---GGAGTAGCACCCACCAAGGCAAGGAGAAGAGTGGTG-----  
-----GAGAGAGAGAGAAAAGAGCA---GTCGGA---CTAGGAGCT---  
-----GTCTTCCTTGGGTTCTTAGGAGCA---GCAGGAAGCACTATG---GGCGCAGCGTCA---  
ATAACGCTGACGGTACAG---GTCAGACAA---TTGTTG---TCTGGCATAGTGCAACAGCAAAAC---  
AATTTG---CTGAGG---GCTATAGAAGCTCAACAGCATCTGTTGAAGCTCACGGTCTGGGGCATT  
>KX907389  
TTCTATTGTAACACATCAATCCTGTTTAATAGCACTTGGAATAGCACTAGCACTTGGAATATCTCTGAGAGTG  
TAAATAGC-----  
-----AGCAGTCAG-----  
GAGTCAAATGACACTATAACTCTCCAATGCAGAATAAAGCAAATTATAAATATGTGGCAGAGAACAGGACAAG  
CAATGTATGCCCCCTCCCATCCAAGGAGTAATAAAGTGCATATCAAAT---  
ATTACAGGACTAATATTAACAAGAGATGGTGGGGGTGATGACAAT-----  
-----  
-----  
ACAACTGAAACCTTCAGACCTGGAGGAGGAGATATGAGGGACAATTGGAGAAGTGAATTATATAAGTATAAAG  
TAGTAAAAGTTGAACCACTA---GGAATAGCACCCACCAGGGCAAGGAGAAGAGTGGTG-----  
-----GAGAGAGAGAAAAAGAGCA---GTTGGA---ATAGGAGCT-----  
GTTTTCAATTGGGTTCTTAGGAGCA---GCAGGAAGCACTATG---GGCGCGGCGTCA---  
ATAACGCTGACGGCACAG---GCCAGACAA---CTATTG---GCTGGCATAGTGCAACAGCAAAGC---  
AATTTG---CTGAGG---GCTATAGAGGCTCAACAGCATCTGTTGAAACTCACAGTCTGGGGCATT  
>KX907341  
TTCTATTGTAATACATCAGGCCTGTTTAATAGTACTTGGGATGACACCTCGAATCATAATACAAGTGGCACGG  
AG-----  
-----  
-----  
TCAAATGCCAATATAACTCTCCAGTGTAGAATAAAGCAAATTATAAATATGTGGCAGAGAGCAGGACAAGCAA  
TATATGCCCCCTCCCATCCAAGGAATAATAAAGTGTGAATCAAAC---  
ATTACAGGACTGATATTAACAAGAGATGGTGGAGATAACAATAAC-----  
-----  
-----  
ACTACCACCGAAACCTTCAGACCTGGAGGAGGAGATATGAGGGACAATTGGAGAAGTGAATTATATAAGTATA  
AAGTAGTAAAAATTGAACCACTA---GGAGTAGCACCCACCAAGGCAAGGAGACGAGTGGTG-----  
-----CAGAGAGAGAAAAAGAGCA---GTTGGA---ATGGCAGCT-----  
---TTATTCTTTGGGTTCTTAGGAGCA---GCAGGAAGCACTATG---GGCGCGGCGTCC---  
ATAACGCTGACGGTACAG---GCCAGACAA---TTATTG---TCTGGCATAGTGCAACAGCAAAGC---  
AATTTG---CTGAGG---GCTATAGAGGCTCAACAGCATATGTTGAGACTCACGGTCTGGGGCATT  
>KX907347  
TTCTATTGTAATACATCAGGCCTGTTTAATAGCACTTGGCTGTCTAATAGTACTAACAGCACGGATAACACGG  
GG-----  
-----  
-----  
ACAAATGACACTATAACTCTCCAATGCAGAATAAAGCAAATTATAAATATGTGGCAAAGAGTAGGACAAGCAA  
TGTATGCCCCCTCCCATCCCAGGAGTAATAAGGTGTGAATCAAAC---  
ATTACAGGACTAATGTTAACAAGAGATGGTGGGAATAATGCTACC-----  
-----  
-----  
AATGAAACCTTTAGACCTGGAGGAGGAGATATGAGGGACAATTGGAGAAGTGAATTATATAAGTATAAAGTAG  
TAAAAATTGAACCACTA---GGAGTAGCACCCACCAAGGCAAAGAGAAGAGTGGTG-----  
-----GAGAGAGAGAAAAAGAGCA---GTTGGA---ATAGGAGCT-----  
GTCTTCCTTGGGTTCTTAGGAGCA---GCAGGAAGCACTATG---GGCGCGGCGTCA---  
ATAACGCTGACGGTACAG---GCCAGACAA---TTATTG---TCTGGCATAGTGCAACAGCAAGGC---  
AACTTG---CTGAGG---GCTATAGAGGCTCAACAACATCTGTTGAAACTCACAGTCTGGGGCATT  
>KX907364  
TTCTATTGTAACACATCAGCCCTGTTCAATAGCAGTTGGAGTAGTGTAATGACAGCGGGAACATTAGCCCAG  
AG-----  
-----

CCAAACAAAAATATAACCCCTCCGATGCAGAATAAAGCAAATTATAAATATGTGGCAGAGAGTAGGACAAGCAA  
TATATGCCCCCTCCCATCCAAGGAGTAATAAGGTGTGACTCAAAC---  
ATTACGGGATTAATATTAACAAGCGATTATGGAGGGGACTAACAGT-----  
-----  
-----  
ACACATGAAATCTTCAGACCTGCAGGAGGAAATATGAGGGACAATTGGAGAAGTGAATTATATAAGTATAAAG  
TAGTACAAATTGAACCAATA---GGAGTAGCACCCATCAGGGCAAAGAGAAGAGTGGTG-----  
-----GAGAGAGAAAAAAGAGCA---GTCGGA---CTGGGAGCT-----  
GTCTTCCTTGGTTTCTTAGGAGCA---GCAGGAAGCACTATG---GGCGCGGCGTCA---  
ATGACGCTGACGGTACAG---GCCAGACAA---TTATTG---TCTGGTATAGTGCAACAGCAAAGC---  
AATTTG---CTGAGG---GCTATAGAGGCTCAACAGCATCTGTTGAAACTCACGGTCTGGGGCATT  
>KX907412  
TTCTATTGTAACACATCAGGCCTGTTTCATAGCACTTGGTTTAATAGCACTTGGTTTAATAGCACTTGGGAAG  
ACAATCAGGCA---AAT-----  
-----  
AGCACAAATGACACTATAGTACTCCCATGCAGAATAAAGCAAATTATTAATATGTGGCAGAGAGCAGGACAAG  
CAATATATGCCCCCTCCCATCCCAGGGGAAATAAGGTGTGAATCAAAC---  
ATTACAGGGCTAATGTTAACAAGAGATGGTGGGAATAATAACAATAACAGGACA-----  
-----  
-----  
AATGAAACCAAAAATGAAACCTTCAGACCTGGAGGAGGAGATATGAGGGACAATTGGAGAAGTGAATTATATA  
AGTATAAAGTAGTAAAAATTGAACCACTA---GGACTAGCACCCACCGGGCAAAGAGAAGAGTGGTG-----  
-----GAGAGAGAAAAAAGAGCA---GTTGGA---  
ATAGGAGCT-----GTCTTCCTTGGGTTCTTAGGAGCA---GCAGGAAGCACTATG---  
GGCGCGGCGTCA---ATAACGCTGACGGTACAG---GCCAGACAA---TTATTG---  
TCTGGCATAGTGCAACAGCAAAGC---AATTTG---CTGAAG---  
GCTATAGAGGCTCAACAACATCTGTTGAAACTCACGGTCTGGGGCATT  
>KX907414  
TTCTATTGTAACACATCAGGCCTGTTTAATAGCACTTGGAGTAACACTACCACTTGGGAAAACATTACCGAAA  
GGCAGGAACCA-----  
-----AGCAGCAAC-----  
AAGACAAACGCAACTATAACTCTCCAATGCAGAATAAAGCAAATTATAAATATGTGGCAGAGAACAGGACGAG  
CAATGTATGCCCCCTCCCATCCCAGGAATAATAAGTTGTAACCTCAAAT---  
ATTACAGGACTAATATTAACAAGAGATGGTGGAAATAACAGTACA-----  
-----  
-----  
AATGAAACCTTCAGACCTGGAGGAGGAGACATGAGGGACAATTGGAGAAGTGAATTATATAGGTATAAAGTAG  
TAAAAATTGAACCACTA---GGAGTAGCACCCACTGAGGCAAAGAGAAGAGTGGTG-----  
-----GAGAGAGAAAAAAGAGCA---ATTGGA---ATAGGAGCT-----  
GTTTTCATTGGGTTCTTAGGAGCA---GCAGGAAGCACTATG---GGCGCGGCGTCA---  
ATAACGCTGACGGTACAG---GCCAGACAA---TTATTG---TCTGGCATAGTGCAACAGCAAAC---  
AATTTG---CTGAGG---GCTATAGAGGCTCAACAGCATCTGTTGAAACTCACGGTCTGGGGCATT  
>KX907423  
TTCTATTGTAACACATCAGGCCTGTTTAATAGCATTTGGGTAAAGGGCCAGGAAAGCAATCAGTCAAATAGC-  
-----  
-----  
GCAAATGACACTATAGTACTCCCATGCAGAATAAAGCAAATTATAAATATGTGGCAGAGAGCAGGACAAGCAA  
TATATGCCCCCTCCCATCCCAGGGGAAATAAAGTGTGTATCAAAC---  
ATTACAGGGCTAATATTAACAAGAGATGGTGGGAATAACGGGATA-----  
-----  
-----  
AATGAAACCTTCAGACCTGGAGGAGGAGATATGAGGGACAATTGGAGAAGTGAATTATATAAGTATAAAGTAG  
TAAAAATTGAACCACTA---GGAGTAGCACCCACCAGGGCAAAGAGAAGAGTGGTG-----  
-----GAGAGAGAAAAAAGAGCA---GTTGGA---ATAGGAGCT-----  
GTCTTCCTTGGGTTCTTAGGAGCA---GCAGGAAGCACTATG---GGCGCGGCGTCA---  
ATAACGCTGACGGTACAG---GCCAGACAA---TTATTG---TCTGGCATAGTGCAACAGCAAAGC---  
AATTTG---CTGAAG---GCTATAGAGGCTCAACAACATCTGTTGAGACTCACGGTCTGGGGCATT  
>KX907431  
TTCTATTGTAACACAACAGACCTGTTTAATAGCACCTGGAATGAGACCAGCATACAGGAAAATAGCACAGAGA  
CA-----

-----  
AACACGAGACTATAACTCTCCAATGCAGAATAAAGCAAATTATAAATATGTGGCAGAGAGCAGGACAAGCAA  
TATATGCCCCCTCCCGTACCAGGAGTAATAAGGTGTGACTCAAAT---  
ATTACAGGGCTAATATTAACAAGAGATGGTGGGACTAATAATACA-----  
-----  
-----  
AATGAAACATTCAGGCCTGTAGGAGGAGATATGAAGGACAATTGGAGAAGTGAATTATATAAGTATAAAGTAG  
TAAAAATTGAACCACTA---GGGGTAGCACCCACCAGGGCAAAGAGAAGAGTGGTG-----  
-----GAGAGAGAAAAAAGAGCA---GTTGGA---ATAGGAGCT-----  
GTCTTCCTTGGGTTCTTAGGAGCA---GCAGGAAGCACTATG---GGCGCAGCATCA---  
ATAACGCTGACGGTACAG---GCCAGACAA---TTATTG---TCTGGCATAGTGCAACAGCAAAGC---  
AATTTG---CTGAGG---GCTATAGAGGCTCAACAACAACCTGTTGAAACTCACAGTCTGGGGCATT  
>HQ615968  
TTCTATTGCAACACATCAGACCTATTTAATAGCACTTGGGAAAATAACCCTGTCAGCCAGGAGTCAAATAGCA  
CA-----  
-----  
AGGTCAAACGACACTATAACTCTCCAATGCAAAATAAAGCAAATTATAAGAATGTGGCAGAGAGTAGGACAAG  
CAATGTATGCCCCCTCCCATCCAAGGAGTAATAAACTGTACATCAAAT---  
ATTACAGGACTAATATTAACAAGAGATGGTGGGAATAATAATAAC-----  
-----  
-----  
AGTGGAAATGAAACCTTCAGACCTGCAGGAGGAGATATGAGGGACAATTGGAGAAGTGAATTATATAAGTATA  
AAGTAGTAAAAATTGAACCACTA---GGAGTAGCACCCACCGGGCAAAGAGAAGAGTGGTG-----  
-----GAGAGAGAAAAAAGAGCA---GTTGGA---ATAGGAGCT-----  
---GTCTTCATTGGGTTCTTAGGAGCA---GCAGGAAGCACTATG---GGCGCAGCGTCA---  
ATAACGCTGACGGTACAG---GCCAGACAA---TTATTG---TCTGGCATAGTGCGGCAGCAAAGC---  
AATTTG---CTGCAG---GCTATAGAGGCTCAACAGCATCTGTTGAAACTCACGGTCTGGGGCATT  
>HQ615970  
TTCTATTGTAATACATCAAGCCTGTTTAATAGTACTTGAATTGGAATCACACAAACAGCTTGCAGGATTCAA  
ATAGC-----  
-----ACA---  
GAGACAAATGGCACTATAATTCTCAAATGCAGAATAAAACAAATTATAAGGATGTGGCAGAGAGTAGGACAAG  
CAATGTATGCCCCCTCCTATCCCAGGAGTAATAAGGTGTGTATCAAAC---  
ATTACAGGATTAATATTAACAAGCGATGGCGGGAATAAGACCAGT-----  
-----  
-----  
ACAACAGAGACCTTCAGACCTGGGGGAGGAGATATGAGGGACAATTGGAGAAGTGAATTATATAAGTATAAAG  
TAGTCAAAATTGAACCACTA---GGAGTAGCACCCACCAGGGCAAAGAGAAGAGTGGTG-----  
-----GAGAGAGAAAAAAGAGCA---GTTGGA---ATAGGAGCT-----  
GTCTTCCTTGGGTTCTTAGGAGCA---GCAGGAAGCACTATG---GGCGTGGCGTCA---  
ATGACGCTGACGGTACAG---GCCAGGCAA---TTATTG---TCTGGCATAGTGCAACAGCAAAGC---  
AATTTG---CTGAGG---GCTATAGAGGCTCAACAGCATCTGTTGAAACTCACAGTCTGGGGCATT  
>HQ615971  
TTTTATTGTAATACATCAAACTGTTTAATAGCAGTATATCCTACAATGGCAGTACAAAGTCAGTAGAGTCAA  
TA-----  
-----  
AACAGTAACGAGACAATAAGTCTCCCATGCAGAATAAAGCAAATTATAAATATGTGGCAGAGAGCAGGACAAG  
CAATATATGCCCCCTCCCATCCGAGGAGTAATAAAGTGTAAGTCAGAC---  
ATTACAGGACTACTATTAACAAGAGATGGTGGGGTTACCAACACA-----  
-----  
-----  
AATGAGACCTTTAGACCTGGAGGAGGAAATATGAGGGATAATTGGAAAAGTGAAGTATATAAATATAAAGTAG  
TAAAAATTGAACCATTATTA---GGAGTGGCACCTCTCCTGCAAAGAGAAGAGTGGTG-----  
-----CAGAGAGAAAAAAGAGCA---GTAGGA---CTGGGAGCT-----  
GTTTTTCATTGGGTTCTTAGGAGCA---GCAGGAACCACTATG---GGCGCGGCGTCA---  
ATGACGCTGACGGTACAG---GCCAGACAA---TTATTG---TCTGGCATAGTGCAACAGCAAGGC---  
AATTTG---CTGAGG---GCTATAGAGGCTCAACAGCATCTGTTGAAACTCACGGTCTGGGGCATT  
>HM204620  
TTCTATTGCAACACATCAGGATTGTTTAATAGCAGATGGGAAAATGACACGCAACCAAATAACACGCAG----

-----  
CCAAACGGCACTATAACTCTCCCATGCAGAATAAAGCAAATTATAAATATGTGGCAGAGAACAGGACAAGCAA  
TATATGCCCCCTCCCATCAGAGGAGTAATAAGTTGTCAATCAAAC---  
ATTACAGGACTACTACTAACAAGAGATGGGGGGGGGAAGAATACT-----  
-----  
-----  
AGTGATAATGAAACCTTCAGACCTGGAGGAGGAGATATGAGGGACAATTGGAGAAGTGAATTATATAAGTATA  
AAGTAGTAAAAATTGAACCATTA---GGAGTAGCACCCAACAGGGCAAGGAGAAGAGTGGTG-----  
-----GAGAGAGAAAAAAGAGCA---GTTGGA---ATAGGAGCT-----  
---GTGTTCTTGGGTTCTTGGGAGCA---GCAGGAAGCACTATG---GGCGCAGCGTCA---  
ATGACGCTGACGGTACAG---GCTAGACAA---TTATTG---TCTGGTATAGTGCAACAGCAAAGC---  
AATTTG---CTGAGG---GCTATAGAGGCTCAACAGCATCTGTTGAAACTCACAGTCTGGGGCATT  
>HM204621  
TTCTATTGTAATACATCAAACCTGTTTAAATAGCACTTGGGGTAATGGCAGTTACAGCACCAATGACACAGGGG  
AC-----  
-----  
GCAAAATTCAAATATAACTATCCAATGCAGAATAAAGCAAATTGTAAGGATGTGGCAGAGGACAGGACAAGCAA  
TGTATGCCCCCTCCCATCAAAGGAATAATAAGATGTATGTCAAAT---  
ATTACAGGCCTACTATTAACAAGAGATGGTGGGATTAATAGGACG-----  
-----  
-----  
AATGAAACCTTCAGACCTATAGGAGGAGATATGATGGATAATTGGAGAAGTGAGCTATATAAATATAAAGTAG  
TAAGAATTGAACCAATA---GGAGTAGCACCCAACAGGGCAAAGAGAAGAGTGGTG-----  
-----GAGAGAGAAAAAAGAGCA---GTCTTTGGAATGGGAGCT-----  
GTCTTCCTTGGGTTCTTAGGAGCA---GCCGGAAGCACTATG---GGCGCAGCGTCG---  
ATAACGCTGACGTTACAG---GCCAGACAA---TTGTTG---TCTGGTATAGTGCAACAGCAAAGC---  
AATTTG---CTGAGG---GCTATAGAGGCTCAACAGCATCTGTTGAAACTCACGGTCTGGGGCATT  
>KY658695  
TTCTATTGTAACACATCAAGTTTGTTTAAAGGCACTTGGGAATAATGGCACTTGGAAATGATAGCATGTCAGAGG  
TAAAT-----  
-----AGCACA-----  
GAGTCAAATGACAACATAACTCTCCCATGCAGAATAAAGCAAATTATAAATATGTGGCAGAAAGTAGGGCAAG  
CAATGTATGCCCCACCCATCCAGGGAGTAATAAGGTGTGAATCAAAC---  
ATTACTGGACTAATATTAACAAGAGATGGTGGGAATAGTAGCGGT-----  
-----  
-----  
CAGAAATGAAACCTTTAGACCTGGAGGAGGAGATATGAGGGACAATTGGAGAAGTGAATTATATAAGTATAAAG  
TAGTAAAAATTGAACCACTA---GGAGTAGCACCCAAGGCAAGAAGAAGAGTGGTG-----  
-----CAGAGAGAAAAAAGAGCA---GTTGGA---ATGGGAGCA-----  
CTTTTCATTGGGTTCTTAGGAGCA---GCAGGAAGCACTATG---GGCGCGGCGTCA---  
ATAACGCTGACGGTACAG---GCCAGACAA---TTATTG---TCTGGCATAAGTGCAACAGCAAAGC---  
AATTTG---CTGAAG---GCTATAGAGGCTCAACAGCATCTGTTGAGACTCACTGTCTGGGGCATT  
>KY658696  
TTCTACTGTAATACATCAGGCCTGTTTAAATAGCAATAGCACAGCAAATAGCACAGCAAAGTTTAAATAGCAATA  
GCACAGCA-----  
-----  
AATAGCACAGCAAATATAACTCTCCCATGCAGAATAAAACAAATTGTAATATATGTGGCAGAGGCCAGGACAAG  
CAATGTATGCCCCCTCCAATCCAAGGGCCAATAAGTTGTAGGTCAAAC---  
ATTACAGGATTACTAATAACAAGAGATGGTGGAGAAAACAATGGA-----  
-----  
-----  
ACGAATGAAACCTTCAGACCTGGAGGAGGAGAGATGAGGGATATTTGGAGAAGTGAACCTATATAAATATAAAG  
TAGTGAAAATTGAACCATTA---GGAGTAGCACCCACCAGGGCAAGGAGAAGAGTGGTG-----  
-----GAGAGAGAAAAAAGAGCA---GTTGGA---CTGGGAGCT-----  
GTCTTCATTGGGTTCTTAGGAGCA---GCCGGAAGCACTATG---GGCGTGGCGTCA---  
ATAACGCTGACGGTACAG---GCCAGACAA---TTATTG---TCTGGTATAGTGACGAGCAAAC---  
AATTTG---CTGAGG---GCTATAGAGGCTCAACAGCATATGTTGAAACTCACAGTCTGGGGCATT  
>AF361872  
TTCTATTGTAATACAACAAGCCTGTTTAAATAGCACCTGGTATCACAAGAACAGCACGCAGGGGTCAAATGACA  
CG-----

-----  
GGGTCAGATGACACTATAACTCTCCCATGCAAAATAAAACAAATTGTAAGGATGTGGCAGAGAGCAGGACAAG  
CAATGTATGCCCCCTCCCATTCAGGAGTAATAAGGTGTGAATCAAAC---  
ATTACAGGACTAATATTAACAAGAGATGGGGGGAGTGAGGACAAT-----  
-----  
-----  
ACCACTGAAATCTTCAGACCTGGAGGAGGAAATATGAGGGACAATTGGAGAAGTGAATTATATAAGTATAAAG  
TAGTAAAAATTGAACCACTA---GGAGTAGCACCCACCAAGGCAAAGAGAAGAGTGGTG-----  
-----GGAAGAGAAAAAAGAGCA---GTTGGA---CTGGGAGCT-----  
GTCTTCCTTGCGTTCTTAGGAGCA---GCCGGAAGCACTATG---GGCGCGGCGTCA---  
GTAACGCTGACGGTACAG---GCCAGACAA---TTATTG---TCTGGCATAGTGCAACAGCAGAAC---  
AATTTG---CTGAGG---GCTATAGAGGCTCAACAACATCTGTTGAAACTCACAGTCTGGGGCATC  
>AF361873  
TTCTATTGTAACACATCAGGCCTGTTTAAACAGCACTTGGCATAGCAATGCCAGCATACAAGAGCCAAACAGCA  
CAGAG-----  
-----  
TCAAAATGACACTATTATAACTCTCCAATGTAGAATAAAACAAATTATAAATATGTGGCAGAGAACAGGAAAAAG  
CAATATATGCTCCTCCCATCCAAGGAATAATAAGGTGTGAATCAAAC---  
ATTACAGGACTAATATTAACAAGAGATGGTGGGAGTAATAATAGC-----  
-----  
-----  
ACCAATGAAACCTTCAGACCTGGAGGAGGAGATATGAGGGACAATTGGAGAAGTGAATTATATAAGTATAAAG  
TAGTAAAAATTGAACCACTA---GGAGTAGCACCTCCTGGGCAAGGAGAAGAGTGGTG-----  
-----CAGAGAAAAAAGAGCA---GTTGGA---ATAGGAGCT-----  
GTCTTCCTTGCGTTCTTAGGAGCA---GCTGGAAGCACTATG---GGCGCGGCGTCA---  
ATAACGCTGACGGTACAG---GCCAGACAA---TTATTG---TCTGGCATAGTGCAACAGCAAAGC---  
AATTTG---CTGAGG---GCTATAGAGGCTCAACAGCATCTGTTGAAACTCACGGTCTGGGGCATT  
>HM027846  
TTCTATTGTAACACATCAGGTCTGTTTAAATAGCACGTGGAATACTACCAACATGTGGGAGCAAAATAGCACGG  
AG-----  
-----  
TCAACAATAATACTATATATCTTCAATGCAGAATAAAGCAAATTATCAATATGTGGCAGAGAGTAGGACAAG  
CAATATATGCCCCCTCCCATCCCAGGAATGATAAGGTGTGTCTCAAAT---  
ATTACAGGACTAATATTAACAAGGGATGGTGGGAATATTAGTGAGAA-----  
-----  
-----  
AATGCCAGTGAAATCTTCAGACCAGGAGGAGGAGATATGAGGGACAATTGGAGAAGTGAATTATACAAGTATA  
AAGTAGTAAAAATTGAACCACTA---GGAGTAGCACCAACCCCGGCAAGGAGAAGAGTGGTG-----  
-----GAGAGAGAAAAAAGAGCA---GTCGGA---ATAGGAGCT-----  
---GTCTTCCTTGCGTTCTTAGGAGCA---GCAGGAAGCACTATG---GGCGCGGCGTCA---  
ATAACGCTGACGGCACAG---GCCAGACAA---TTATTG---TCTGGTATAGTGCAACAGCAAAGC---  
AATTTG---CTGAGG---GCTATAGAGGCTCAACAGCATCTGTTGAAACTCACGGTCTGGGGCATT  
>JX877522  
TTCTATTGTGACACATCAGAACTATTTAATAGCACTTGAATGACGCTGCCATTATGAGGGAATTAAATAGAA  
CGGAG-----  
-----  
TCAAACGACACCATAACTCTCCAATGCAAAATAAAGCAAATTATAAATATGTGGCAGAGAGCAGGACGAGCAA  
TGTATGCCCCCTCCCATCCGAGGAGTAATAAGATGTGAGTCAAAT---  
ATTACAGGACTAATATTAACAAGAGATGGTGGGAGGGATGATAAC-----  
-----  
-----  
AATACAACCTGAAACCTTCAGACCTGGAGGAGGAGATATGAGGGACAATTGGAGAAGTGAATTATATAAGTATA  
AAGTAGTAAAACCTTGAGCCACTA---GGAATAGCACCCACCAAGGCAAAGAGAAGAGTGGTG-----  
-----GAGAGAGAAAAAAGAGCA---GTTGGA---CTGGGAGCT-----  
---GTTTTCATTGGGTTCTTAGGAGCA---GCAGGAAGCACTATG---GGCGCGGCGTCA---  
ATAACGCTGACGGTACAG---GCCAGACAA---TTATTG---TTTGGCATAGTGCAACAGCAAAGC---  
AATTTG---CTGAGG---GCTATAGAGGCTCAACAGCATATGTTGAAACTCACAGTCTGGGGCATT  
>HM215272  
TTCTATTGTAATACATCAAGCCTATTTAATAGTACTTGGTGGAGCAACAACAGCAACAACACTGACAGTGAGG  
AGTCAAAT-----

-----AGCATG-----  
GGGTAAATGACACTATAACTCTCCAATGCAGAATAAAGCAAATTATAAATATGTGGCAGAGAGTAGGACAAG  
CAATGTATGCCCCCTCCCATCCAAGGAGTAATAAGGTGTGAGTCAAAC---  
ATCACAGGAATACTATTAACAAGAGATGGTGGGGATAATAACAAT-----  
-----  
-----  
GAAAGTGAAACCTTCAGACCTGTAGGAGGAGATATGAGGGACAATTGGAGAAGTGAATTATATAAATATAAAG  
TAGTAAAAATTGAACCATTA---GGAGTAGCACCCACAGAGGCAAGGAGAAGAGTGGTG-----  
-----GGAAGAGGAAAAAGAGCAGTTGTTGGA---ATGGGAGCT-----  
ATGTTCTTGGGTTTTTGGGAGCA---GCTGGGAGCACTATG---GGCGCGGCGTCA---  
ATAACGCTGACGGTACAG---GCCAGACAA---TTATTG---TCTGGCATAGTGCAACAGCAAAGC---  
AATTTG---CTGAGG---GCTATAGAGGCTCAACAGCATCTGTTGAAACTCACTGTCTGGGGCATT  
>HM027824  
TTCTATTGTAACACATCAGGTCTGTTTAATAGCACGTGGAATGGTACCCAAATGATGGAGCCAAATAGCACAG  
AA-----  
-----  
AACATTAATGATACTATAACTCTTAAATGCAGAATAAAGCAAATTATACATATGTGGCAGAGAGTAGGACAAG  
CAATATATGCCCCCTCCCATCAAAGGAGTGATAAGATGTAAC TCAAAC---  
ATTACAGGACTAATATTAACAAGAGATGGTGGGACTGAAGGGAAT-----  
-----  
-----  
AGCAGTGAAACCTTCAGACCGGGAGGAGGTGATATGAGGGACAATTGGAGAAGTGAATTATATAAGTATAAAG  
TAGTAAAAATTGAACCACTA---GGAGTAGCACCTACCAAGGCAAGGAGAAGAGTGGTG-----  
-----GAGAGAGAAAAAGAGCA---ATCGGA---CTGGGAGCT-----  
GTCTTCCTTGGGTTCTTAGGAGCA---GCAGGAAGCACTATG---GGCGCGGCGTCA---  
ATAACGCTGACGGCACAG---GCCAGACAA---TTATTG---TCTGGCATAGTGCAACAGCAAAGC---  
AATTTG---CTGCAG---GCTATAGAGGCTCAACAGCATCTGTTGAAACTCACAGTCTGGGGCATT  
>JX236669  
TTCTACTGTAATACATCAGGCCTGTTTAATAGCACTTGGAACATTGCTGGGAACAGGACAAATGACACGAAG-  
-----  
-----  
TCAAATGAAACTATAACTCTCCCATGCAGAATAAAGCAAATTGTAAATGTGTGGCAGAGAGTAGGACAAGCAA  
TATATGCCCCCTCCCATCGCAGGAGTAATAAGATGTAAC TCAAAC---  
ATTACAGGATTACTATTAGTAAGAGATGGTGGAGCTACTAACAAT-----  
-----  
-----  
ACTGATGAAACCTTCAGGCCTGGAGGAGGAAATATGAGGGACAATTGGAGAAGTGAATTATATAAGTATAAAG  
TAGTAAAAATTGAACCACTA---GGAGTAGCACCCACCAGGGCAAGGAGAAGAGTGGTG-----  
-----GAGAGAGAAAAAGAGCA---GTTGGA---CTGGGAGCT-----  
GTATTCATTGGGTTCTTAGGAGCA---GCAGGAAGCACTATG---GGCGCGGCGTCA---  
GTGACGCTGACGGTACAG---GCCAGACAA---TTATTG---TCTGGCATAGTGCAACAGCAAAGC---  
AATTTG---CTGAGG---GCTATAGAGGCTCAACAGCATCTGTTGAAGCTCACGGTCTGGGGCATT  
>JX236671  
TTCTATTGTAATACAGCAGGTCTGTTCAATAGAAATTGGACTTGAGTAAGGAGAATGGGACCAGAATGCAGA  
ATAAACCGGAT-----  
-----  
-----  
TCAAATGGCACTATAACTCTCCAATGCAGAATAAAGCAAATTATAAATATGTGGCAGAGAACAGGACAGGCAA  
TGTATGCCCCCTCCCATCCAAGGAGTAATAAAATGTGCATCAAAC---  
ATTACAGGACTACTGTTAACAAGGGATGGTGGAGATAACAAAAACAATAGTACC-----  
AATAGTACCAATCAAAAT-----  
-----  
-----  
AACACTGAAATCTTTAGACCTATAGGAGGAGATATGAGGAATAATTGGAGAAGTGAATTATATAAGTATAAAG  
TAGTAAAAATTGAACCACTA---GGAGTAGCACCTACCACGGCAAGGAGAAGAGTGGTG-----  
-----GGAAGAGAAAAAGAGCAGTACTAGGTGGACTAGGAGCT-----  
GTATTCCTTGGGTTCTTAGGAGCA---GCCGGAAGCACTATG---GGCGCAGCGTCA---  
ATAACGCTGACGGTACAG---GCCAGGCAA---TTATTG---TCTGGCATAGTGCAACAGCAAAGC---  
AATTTG---CTGAGG---GCTATAGAGGCTCAACAACATCTGTTGAAACTCACGGTCTGGGGCATT  
>JX236676  
TTCTATTGTAACACATCAAGCCTATTTAATAGCATTTGGAATGGCAGTAAATCAAATAACACGGAG-----  
-----

-----  
CCAGATAGCACCATAACTCTCCAATGCAGAATAAAGCAAATTATAAATATGTGGCAGAGAGTAGGACAAGCAA  
TGTATGCCCCCTCCCATCCAAGGAGTAATAAGGTGTGAGTCAAAC---  
ATTACAGGGCTAATATTAACAAGAGATGGTGGGAGTAATAGCAGT-----  
-----  
-----  
AGTACAAATGAAACCTTCAGACCTGGAGGAGGAGATATGAGAGACAATTGGAGAAGTGAATTATATAAGTACA  
AAGTAGTAAAAATTGAACCACTA---GGAGTAGCACCCACCAAGGCAAAGAGAAGAGTGGTG-----  
-----GAAAGAGAAAAAAGAGCA---GTTGGA---ATAGGAGCT-----  
---GTTTTCCTTGGGTTCTTAGGAGCA---GCAGGAAGCACTATG---GGCGCAGCGTCA---  
ATAACGCTGACGGTACAG---GCCAGACAA---TTATTG---TTTGGCATAGTGCAACAGCAAAGT---  
AATTTG---CTGAGG---GCTATAGAGGCTCAACAGCATCTGTTGAAACTCACGGTCTGGGGCATT  
>KF716478  
TTCTATTGTAATACATCAAGCCTGTTTAATAGTACTTGGGTATATGGTAATGGAAGCTGGGGGTCAAATAGCA  
CGGGGTAAAT-----  
AGTACAATGATAAATAATACT-----  
ATTTTCAGTGATACCATAATTCTTCAATGCAGAATAAAGCAAATTATAAATATGTGGCAGAGAGCAGGACAAG  
CAATATATGCCCCCTCCCATCAAAGGAGTAATAAGCTGTAGATCAAAC---  
ATCACAGGACTAATATTAACAAGAGATGGTGGGAGTAACAGCAATGCAAGT-----  
-----  
-----  
ACAAATGGAAGTGAAACCTTCAGACCTGGAGGAGGAGATATGAGGGACAATTGGAGAAGTGAATTATATAAGT  
ATAAAGTAGTAAAGTTGAACCACTA---GGAATAGCACCCCTCAAGGCAAGGAGAAGAGTGGTG-----  
-----GCGAGAGAAAAAAGAGCA---GTTGGA---ATAGGAGCT---  
-----GTACTCCTTGGGTTCTTAGGAACA---GCAGGAAGCACTATG---GGCGCAGCGTCA---  
ATAACGCTGACGGTACAG---GCCAGAAAA---TTATTG---TCTGGCATAGTGCAACAGCAAAGC---  
AATTTG---CTGAGG---GCTATAGAGGCTCAACAGCATCTGTTGAAACTCACTGTCTGGGGCATT  
>KP109490  
TTCTACTGTAATACATCAGGCCTGTTCAATAGCACTTGAATAACACCTCGCAGGCAAATAGCTCGGAG---  
-----  
-----  
TTAAAGGGCAATATAACTCTCCCATGCAAAATAAAACAAATTATCAGGATGTGGCAAAGAACAGGACAAGCAA  
TGTATGCCCCCTCCCATCCAAGGAGTAATAAATTGTGTATCAAAC---  
ATTACAGGACTACTATTAACAAGAGATGGTGGGGAGGAGGACAAT-----  
-----  
-----  
AGTACTGAAACCTTCAGACCTGGAGGAGGAGATATGAGGGATAATTGGAGAAGTGAATTATATAAGTATAAAG  
TAGTAAAAATTGAACCACTA---GGAGTAGCACCCACCAAGGCAAGGAGAAGGGTGGTG-----  
-----GAGAGAGAAAAAAGAGCA---GTTGGA---ATAGGAGCT-----  
GTCTCCTTGGATTCTTAGGAGCA---GCAGGAAGCACTATG---GGCGCGGCGTCA---  
ATAACGCTGACGGTACAG---GCCAGACAG---TTATTG---TCTGGTATAGTGCAAGCAGCAAAGC---  
AATTTG---CTGAGG---GCTATAGAGGCTCAACAACAACCTGTTGAAACTCACGGTCTGGGGCATT  
>JF680921  
TTCTATTGTAACACATCAGGCCTGTTTAATAGCACTTGGACTAAGAATAGCAGCACTAACACTTGAATAGTA  
CTGACATCATG-----  
-----TGGGGGGTAAAT-----  
AACAGTGACCATAATATAACTCTCCAATGCAAAATAAAGCAAATTATAACCATGTGGCAGAGGACAGGGCAGG  
CAATGTACGCCCCCTCCCATCCCAGGAATAATAAACTGTGTGTCAAAC---  
ATTACAGGACTACTATTAACAAGAGATGGTGGTGAGGAGAGTAACAGT-----  
-----  
-----  
AGAGATAATGAAACCTTCAGACCTATAGGAGGAAATATGAAGGATAATTGGAGAAGTGAAGTATATAAATATA  
AAGTAGTAAAAATTGAACCACTA---GGAGTAGCACCCACCAAGGCAAAGAGAAGAGTGGTG-----  
-----CAGAGAGAAAAAAGAGCA---GTTGGA---CTGGGAGCT-----  
---GTCTTCATTGGGTTCTTAGGAGCA---GCCGGAAGCACTATG---GGCGCGGCGTCA---  
ATAACGCTGACGGTACAG---GCCAGACAA---TTATTG---TCTGGCATAGTGCAACAGCAAAAC---  
AATTTG---CTGAGG---GCTATAGACGCTCAACAGCATCTGTTGAAGCTCACGGTCTGGGGCATT  
>KF859745  
TTCTATTGTAACACATCAGGCCTGTTTAATAGCACTTGAACAATAGCACTCAAGAGTCTAAT-----  
-----

-----  
 AGCACGGAGACTATAACTCTCCCATGCCGAATAAAGCAAATTGTAAATATGTGGCAGAGAGCAGGACAAGCCA  
 TATATGCCCCCTCCCATCAAAGGAATAATAAATTGTAGATCAAAC ---  
 ATTACAGGACTAATATTAACAAGAGATGGTGGACATAATAATACA -----  
 -----  
 AATGAAACCTTCAGGCCTGGAGGAGGAGATATGAGGGACAATTGGAGAAGTGAATTATATAAGTATAAAGTAG  
 TAAAAGTTGAACCACTA --- GGAGTAGCACCCACCACGGCAAGGAGAAGAGTGGTG -----  
 ----- CAGAGAGAAAAAAGAGCAGTATTTGGA --- CTGGGAGCT -----  
 GTCTTCATTGGGTTCTTAGGAGCA --- GCAGGAAGCACTATG --- GGCGCGGCGTCA ---  
 ATAACGCTGACGGTACAG --- GCCAGACAA --- TTATTG --- TCTGGCATAGTGCAACAGCAAAGC ---  
 AATTTG --- CTGAGG --- GCTATAGAGGCTCAACAGCATCTGTTGAAACTCACGGTCTGGGGCATT  
 >KF716486  
 TTCTATTGTAATACATCAAGTCTGTTTAATAGTACTTGGGACCTTAATGCTACTAGGGAAGAT -----  
 -----  
 -----  
 AGCACGGAGAACATAACTCTCCCATGCAGAATAAAGCAAATCATAAATATGTGGCAAAGAGTAGGACAAGCAA  
 TGTATGCCCCCTCCCATCGAAGGAATAATAAGATGTGACTCAAAC ---  
 ATTACAGGACTACTCTTAACAAGAGATGGTGGGAATAGTAGTACAAATGAA -----  
 -----  
 -----  
 ACTCAGGAAATCTTCAGACCTATAGGAGGGGATATGAAAAGATAATTGGAGAAATGAATTATACAAGTATAAAG  
 TAGTAAAAAATTGAACCTCTG --- GGAGTAGCACCCCTCCTGGGCAAGGAGAAGAGTGGTG -----  
 ----- GAGAGAGGAAAAAAGAGCA --- GTTGGA --- ATAGGAGCT -----  
 GTATTCCTTGGGTTCTTAGGAGCA --- GCAGGGAGCACTATG --- GGCGCAGCGTCA ---  
 ATAACGCTGACGGTACAG --- GCCAGGCAA --- TTATTG --- TCTGGCATAGTGCAACAGCAAAGC ---  
 AATTTG --- CTGAAG --- GCTATAGAAGCTCAACAACAACCTGTTGAGACTCACGGTCTGGGGCATT  
 >M62320  
 TTCTATTGCAACACATCAGGCCTGTTTAATAGCATTGGAATGGCAGCATGTCAAATGACATGGGG -----  
 -----  
 -----  
 CCAAATGGCACTATAACTCTCCAATGTAGAATAAAGCAAATTATAAATATGTGGCAGAGAGTAGGACAAGCAA  
 TGTATGCCCCCTCCCATCCAAGGAGTAATAAGGTGTGAATCAAAC ---  
 ATTACAGGACTACTATTAAACAAGAGATGGGGGTACTAACAATACA -----  
 -----  
 -----  
 AAAAAATGAGACCTTCAGACCTGGAGGAGGAGATATGAGGGACAATTGGAAAAGTGAATTATATAAGTATAAAG  
 TAGTAAAAAATTGAACCACTA --- GGAGTAGCACCCACCAGGGCAAAGAGAAGAGTGGTG -----  
 ----- GAGAGAGAAAAAAGAGCA --- GTTGGA --- CTAGGAGCT -----  
 ATCTTCCTTGGGTTCTTAGGAGCA --- GCTGGAAGCACAATG --- GGCGCGGCGTCA ---  
 ATAACGCTGACGGTACAG --- GCCAGACAA --- TTATTG --- TCTGGTATAGTGCAACAGCAGAGC ---  
 AATCTG --- CTGAGG --- GCTATAGAGGCTCAACAGCATCTGTTGAAACTCACTGTCTGGGGCATT  
 >L22957  
 TTCTATTGTAATACAGCAGGCCTGTTTAATAGTACTTGAATAAAAATGACAGCATAAAGTCAAATGACACAA  
 AG -----  
 -----  
 -----  
 TCAAATGACATTATAACTCTTCAATGCAGAATAAAGCAAATTATAAATATGTGGCAGAGAGTAGGACGAGCAA  
 TGTATGCCCCCTCCCATCAAAGGAGTAATAAGGTGTGAATCAAAC ---  
 ATTACAGGACTACTATTAAACAAGAGATGGTGGAAATGGGAGCAAT -----  
 -----  
 -----  
 ACAAATGAAACCTTCAGACCAGGAGGAGGAGATATGAGGGACAATTGGAGAAATGAATTATATAAGTATAAAG  
 TAGTACAAATTGAACCATTA --- GGAGTAGCACCTACCCAGCAAAGAGAAGAGTGGTG -----  
 ----- CAGAGAGAAAAAAGAGCA --- GTTGGA --- CTAGGAGCT -----  
 GTATTCATTGGGTTCTTAGGAGCA --- GCAGGAAGCACTATG --- GGCGCGGCGTCA ---  
 ATAACGCTGACGGTACAG --- GCCAGACAA --- TTATTG --- TCTGGCATAGTGCAACAGCAAAGC ---  
 AATTTG --- CTGAGA --- GCTATAGAGGCTCAACAGCATCTGTTGAAACTCACAGTCTGGGGCATT  
 >L22951  
 TTCTATTGTGACACATCAGGCCTGTTTAATAGCACTTGAATGGCAATACCAGCAAGCAGGAGTCAAGTAGCA  
 CA -----

-----  
GAGTCAAATGGCAATATAACTCTCCAATGCAGAATAAAGCAAATTATAAATATGTGGCAGAGAGCAGGAAAAG  
CAATATATATGCCCCCTCTATCAAAGGAGTAATAAGGTGTGTATCAAAC---  
ATTACAGGACTAATATTAACAAGAGATGGTGGGGGTAATAACAGT-----  
-----  
-----  
GAAAATGAAACCTTCAGACCTGGAGGAAGAGATATGAGGGACAATTGGAGAAGTGAATTATATAAGTATAAAG  
TAGTAAAAAATTGAACCACTA---GGAGTAGCACCCACCAGGGCAAGGAGGAGAGTGGTG-----  
-----GAGAGAGAAAAAAGAGCA---GTTGGA---GTAGGAGCT-----  
GTCTTCCTTGGGTTCTTAGGAGCA---GCAGGAAGCACTATG---GGCGCGGCGTCA---  
ATAACGCTGACGGTACAG---GCCAGACAA---TTATTG---TCTGGCATAGTGCAACAGCAAAGC---  
AATTTG---CTGAAG---GCTATAGAGGCTCAACAGCATCTGTTGAAACTCACGGTCTGGGGCATT  
>AB253429  
TTCTATTGTAATACATCAGGCCTGTTTAATAGTACTTGGGTAAATGGCACTACCAGCAGCATG-----  
-----  
-----  
TCAAATGGCACTATAACTCTCCCATGCAGAATAAAGCAAATTATAAATATGTGGCAGAGAGTAGGACAAGCAA  
TGTATGCCCCCTCCCATCCAAGGAGTAATAAAGTGTGAATCAAAC---  
ATTACAGGACTAATATTAACAAGAGATGGTGGGGTTAATAGCAGT-----  
-----  
-----  
GACAGTGAAACCTTCAGACCTGGAGGAGGAGATATGAGGGATAATTGGAGAAGTGAATTATATAAGTATAAGG  
TAGTAAAAAATTGAACCACTA---GGAGTAGCACCCACCAAGGCAAGGAGAAGAGTGGTG-----  
-----GAGAGAGAAAAAAGAGCA---GTTACA---CTGGGAGCT-----  
GTATTCATTGGGTTCTTAGGAACA---GCTGGAAGCACAATG---GGCGCGGCGTCA---  
ATAACGCTGACGGTACAG---GCCAGAAAA---TTATTG---TCTGGCATAGTGCAACAGCAAAGC---  
AATTTG---CTGAGG---GCTATAGAGGCTCAACAGCATCTGTTGAAACTCACTGTCTGGGGCATT  
>AY494973  
TTCTATTGTAATACATCAGGCCTGTTTAATAGCACTTGGCCTTGGAATGAGACAAATAGCGAGACAAATAAC-  
-----  
-----  
ACGAACGCTACTATAGTGCTCCCATGCAGAATAAAACAAATTGTAAGAATGTGGCAGAGAGTAGGACAAGCAA  
TGTATGCCCCCTCCCATCCAAGGAGTAATAAAGTGTACATCAAAC---  
ATTACAGGACTACTATTAATAAGAGATGGTGGGGTTGGTAACAATACA-----  
-----  
-----  
AATGGAACCTGAAACCTTCAGACCTGGAGGAGGAAATATGAGGGACAATTGGAGAAGTGAATTATATAAGTATA  
AAGTAGTAAAAAATTGAACCACTA---GGAGTAGCACCCACCGGGGCAAAAAGAAGAGTGGTG-----  
-----GAGAGAGAAAAAAGAGCA---GTTGGA---ATAGGAGCT-----  
---GTGTTTATTGGGTTCTTAGGAGCA---GCTGGAAGCACTATG---GGCGCAGCATCA---  
GTAACGCTGACGGTACAG---GCCAGACAA---TTGTTG---TCTGGCATAGTGCAACAGCAAAGC---  
AATTTG---CTGAGG---GCTATAGAGGCTCAACAGCATATGTTGAAACTCACGGTCTGGGGCATT  
>EU853062  
TTCTATTGTAATACATCAGACCTGTTTAATAGCACTTGGTACTTAAATGGCACTAGCACTTGGTACAATGGCA  
CTGCAAAT-----  
-----AACGCA-----  
CCGTAAATGGTAATATAACTCTCCCATGCAGAATAAAGCAAATCATAAGGATGTGGCAGAGAACAGGACAAG  
CAATGTATGCCCCCTCCCATCAAGGAAAAATAGAATGTGTATCAAAC---  
ATTACAGGACTCCTATTAGTAAGAGATGGTGGGAATGATGAGAATAACAACACA-----AGA-----  
-----  
-  
AATAACACCCTCAAAGATGAAAAATTTCAGACCTGGAGGAGGAGATATGAAGGACAATTGGAGAAATGAATTAT  
ATAGGTATAAAGTAGTAAGAGTTGAACCACTA---GGAGTAGCACCCACCAAGGCAAGGAGAAGAGTGGTG--  
-----GGGAGAGAAAAAAGAGCA---GTTGGA---  
ATAGGAGCT-----GTGTTCTTGGGTTCTTAGGAGCA---GCAGGAAGCACTATG---  
GGCGCGGCGTCA---ATAACGCTGACGGAACAG---GCCAGACAA---TTATTG---  
TCTGGTATAGTGCAACAGCAAAGC---AATTTG---CTGAGG---  
GCTATAGAGGCTCAACAGCAACTGTTGAAACTCACAGTCTGGGGCATT  
>EU852958

TTCTATTGTAATACATCAGGCCTGTTTAAATAGCACCTGGGATAAAAATACCACCGTGCAGGAGTCAAATAGCA  
CG-----  
-----  
GGGTCAAATGACACTATAACTCTCCAATGTAGAATAAAGCAAATTATAAATATGTGGCAGGAAGTAGGACGAG  
CAATGTATGCTCCTCCCATCAAAGGAGTAATAAGGTGTGAATCAAAC---  
ATTACAGGAATGATATTAACAAGAGATGGGGGTAATACTACCGGG-----  
-----  
-----  
AAAAATGAGATCTTTAGGCCTGGAGGAGGAGATATGAGGGATAATTGGAGAAGTGAATTGTATAAGTATAAAG  
TAGTAAAAATTGAACCACTA---GGAGTAGCACCCACCGAGGCAAAGAGAAGAGTGGTG-----  
-----GAGAGAGAAAAAAGAGCA---ATTGGTGGAATAGGAGCT-----  
GTCTTCCTTGGGTTCTTAGGAGCA---GCAGGAAGCACTATG---GGCGCAGCGTCA---  
ATAACGCTGACGGCACAG---GCCAGACAA---TTATTG---TCTGGTATAGTGCAACAGCAAAGC---  
AATTTG---CTGAGG---GCTATAGAGGCTCAACAGCATCTGTTGAAACTCACGGTCTGGGGCATT  
>EU852954  
TTCTATTGTAACACATCAGGCCTGTTTAAATAGCACCTGGTATACAAATAATACCAGCGTGCAGGAGACAAATA  
GCACG-----  
-----  
GGGACAAATGACACTATAATTCTCCAATGTAGAATAAAGCAAATTATAAATATGTGGCAGGAAGTAGGACGAG  
CCATGTATGCTCCTCCCATCAGGGGAGTAATAAGGTGTGAATCAAAC---  
ATTACAGGAATGATATTAACAAGAGATGGGGGTGTGAGTGTTAACAAG-----  
-----  
-----  
ACAACTGAGACTGAGGTCTTCAGACCTGGAGGAGGAGATATGAGGGATAATTGGAGAAGTGAATTGTATAAGT  
ATAAAGTAGTAAAAATTGAACCACTA---GGAGTAGCACCTACCAAGGCAAAGAGAAGAGTGGTG-----  
-----GAGAGAGAAAAAAGAGCA---ATTACTGGAATAGGAGCT---  
-----GTCTTCCTTGGGCTCTTAGGAGCA---GCAGGAAGCACTATG---GGCGCAGCGTCA---  
ATAACGCTGACGGCACAG---GCCAGACAA---TTATTG---TCTGGTATAGTGCAACAGCAAAGC---  
AATTTG---CTGAGG---GCTATAGAGGCTCAACAACATCTGTTGAAACTCACGGTCTGGGGCATT  
>AF484507  
TTCTATTGTAATACATCACAATTGTTTAAATAGCATTGGAATGTCCTAACAGCACAGAGTCAGAGAATAGCA  
CG-----  
-----  
GGGTCAGATGACACTATAACTCTTCCATGCAGAATAAAGCAAATTATAAAGATGTGGCAGAGAACAGGACAAG  
CAATATATGCCCCCCCCATCCAAGGAGTAATAAGGTGTGAATCAAAC---  
ATTACAGGACTATTATTAACAAGAGATGGTGGGAATAACAATACA-----  
-----  
-----  
GGTAATGAAACCTTCAGACCTGCAGGAGGAGATATGAAGGACAATTGGAGAAGTGAATTATATAAGTACAAAG  
TAGTAAAAATTGAACCACTA---GGAGTAGCACCCACCAAGGCAAGAAGGAGAGTGGTG-----  
-----GAGAGAGAAAAAAGAGCA---GTTGGA---ATAGGAGCT-----  
GTATTCCTTGGGTTCTTAGGAACA---GCAGGAAGCACTATG---GGCGCGGCGTCA---  
ATAACGCTGACGGTACAG---GTCAGACAA---TTATTG---TCTGGCATAGTGCAACAGCAAGGC---  
AATTTG---CTGAGG---GCTATAGAGGCTCAACAACAGCTGTTGGAACCTCACGGTCTGGGGCATT  
>AF484508  
TTCTACTGTAACACATCAAGCCTGTTTAAATGGCACTTGGAAATGGCACTGAGAACATAACGGAGTCAAATAGC-  
-----  
-----  
ATGAACGACTCTATAATACTCCAATGCAGAATAAAGCAAATTATAAATATGTGGCAGAGAGCAGGACAAGCAA  
TATATGCCCCCTCCCATCCAGGAGTAATAAGGTGTCAATCAAAC---  
ATTACAGGACTAATATTAACAAGAGATGGTGGAAATAACAGTACA-----  
-----  
-----  
AATGAAACCTCCAGACCTGGAGGGGAGATATGAGGGACAACCTGGAGAAGTGAATTATATAAGTATAAAGTAG  
TAAAACTTGAACCACTA---GGAGTAGCACCCACCAGGGCAAAGAGAAGAGTGGTG-----  
-----GAGAGAGAGAAAAAGAGCA---GTTGGA---CTAGGAGCT-----  
GTTTTCTTTGGGTTCTTAGGAGCA---GCAGGAAGCACTATG---GGCGCGGCGTCA---  
ATAACGCTGACGGTACAG---GCCAGACAA---TTATTG---TCTGGTATAGTGCAACAGCAAAGC---  
AATTTG---CTGAGG---GCTATAGAGGCTCAACAGCATCTGTTGAAACTCACGGTCTGGGGCATT  
>AF484509

TTCTATTGTGACACATCAGGCCTGTTTAATAGCACTTGGTATAATACTTGAATAGCACTGAATCAAAAAGCA  
 CG-----  
 -----  
 GAGTCAAACGACATTACTCTCCAATGCAGAATAAAGCAAATTATAAATATGTGGCAGAGAGCAGGACAAGCAA  
 TATATGCCCCCTCCCATCCAAGGAGTAATAATGTGTAAATCAAAT---  
 ATTACAGGACTAATATTAACAAGAGATGGTGGAGGTAATAGCAGT-----  
 -----  
 -----  
 GAACCTGAAACCTTCAGACCTGGAGGAGGAGACATGAGGGACAATTGGAGAAGTGAATTGTATAAGTATAAAG  
 TAGTAAAAATTGAACCACTA---GGAGTAGCACCCACCAAGGCAAGGAGAAGAGTGGTG-----  
 -----CAGAGAGAAAAAAGAACA---GTTGGA---ATAGGAGCT-----  
 GTGTTCCCTTGGGTTCTTAGGAGCA---GCAGGAAGCACTATG---GGCGCGGCGTCA---  
 ATAACGCTGACGGCACAG---GCCAGAGCA---TTACTG---TCTGGCATAGTGCAACAGCAAAGC---  
 AATTTG---CTGAGG---GCTATAGAGGCTCAACAACATCTGTTGAGACTCACGGTCTGGGGCATT  
 >AF484512  
 TTCTATTGTGATACAACAGGACTGTTTAATAGCAATTGGACTTGAATGACACTGCCAGCATAATGGAGTCAA  
 ATAGC-----  
 -----ATG---  
 GAGTCAACTCAAAATATAACACTCCAATGCAGAATAAAGCAGATTATAAATATGTGGCAGAGAGCAGGTAAAG  
 CAATGTATGCCCCCTCCCATCCAAGGAACAATAAGGTGTGAATCAAAC---  
 ATTACAGGACTACTGTTAACAAGAGATGGTGGGGATAATAGAGAT-----  
 -----  
 -----  
 AATAGAACTGAAACCTTCAGACCTGGAGGAGGAGATATGAGGGATAATTGGAGAAGTGAATTATATAAGTATA  
 AAGTAGTCAAAATTGAACCACTA---GGAGTAGCACGCACCAGGGCAAAGAGAAGAGTGGTG-----  
 -----GAGAGAGAAAAAAGAGCA---GTTGGA---ATAGGAGCT-----  
 ---GTCTTCCTTGGGTTCTTAGGAGCA---GCAGGAAGCACTATG---GGCGCGGCGTCA---  
 ATAACGCTGACGGTACAG---GCCAGACTA---TTATTG---TCTGGTATAGTGCAACAGCAAAGC---  
 AATTTG---CTGAGG---GCTATAGAGGCTCAACAACATTTGTTGAAGCTCACGGTCTGGGGCATT  
 >EU853030  
 CTCTATTGTAATACATCAGGCCTGTTTAATAGCACTTGAATAAAGTGTGACGACGAGTTAAATAGCAAGG  
 AG-----  
 -----  
 -----  
 GCAAATAACAATATAACTCTCCCATGCAAAATAAAGCAAATTATAAACATGTGGCAAAGAACAGGACAAGCAA  
 TGTATGCCCCCTCCCATCCGAGGAGTAATAAATTGTGTGTCAAAC---  
 ATTACAGGACTAATATTAACAAGAGATGGTGGGCCTAACGATACA-----  
 -----  
 -----  
 CATGAAAATGAAACCTTCAGACCTGGAGGAGGAAATATGAGGGACAATTGGAGAAGTGAATTATATAAATATA  
 AAGTAGTAAAAATTGAACCATTA---GGAGTAGCACCCACCAGGGCAAAGAGAAGAGTGGTG-----  
 -----GAAAGAGAAAAAAGGAGCA---GTTGGA---ATAGGAGCT-----  
 ---GTCTTCCTTGGGTTCTTAGGAGCA---GCAGGAAGCACTATG---GGCGCGGCGTCA---  
 ATAACGCTGACGGTACAG---GCCAGACAA---TTGTTG---TCTGGCATAGTGCAACAGCAAAGC---  
 AATTTG---CTGAGG---GCTATAGAGGCTCAACAACATCTGTTGAAACTCACGGTCTGGGGCATT  
 >AF484478  
 TTCTATTGTAACACAACAAACCTGTTTAATAACATTTGGAGTAATGCCAGCATGCAGAAGGCAAATAGC----  
 -----  
 -----  
 ATAAACGACACTATAACTCTCCAATGCAGAATAAAGCAAATTATAAATATGTGGCAGAGAGTAGGACAAGCAA  
 TATATGCCCCCTCCCATCCAAGGAGTGATAAAGTGTGAATCAAAC---  
 ATTACAGGACTAATATTAACAAGAGATGGTGGGGGTAATAACAAT-----  
 -----  
 -----  
 ACAAATGAAACCTTCAGACCTGGAGGAGGAGATATGAGGGACAATTGGAGAAGTGAATTATATAAGTATAAAG  
 TAGTAAAAATTGAACCACTA---GGAGTAGCACCTACCAGGGCAAAGAGAAGAGTGGTG-----  
 -----GAGAGAGAAAAAAGAGCA---GTTGGA---ATGGGAGCT-----  
 GTCCTCATTGGGTTCTTAGGAGCA---GCAGGAAGCACTATG---GGCGCGGCGTCA---  
 ATAACGCTGACGGTACAG---GCCAGACAA---TTATTG---TCTGGCATAGTGCAACAGCAAAGC---  
 AATTTG---CTGAGG---GCTATAGAGGCTCAACAGCATCTGTTGAAACTCACGGTCTGGGGCATT  
 >AF484493

TTCTATTGTAATACATCAGGCCTGTTTAAATAACTTACACTACTGACAGCATAGAGTCAAATGACACGGAG-  
-----  
-----  
CCAGATGCAAATATAACTCTTCCATGCAGAATAAAGCAAATTATAAATATGTGGCAGAGAGTAGGACAAGCAA  
TATATGCCCCCTCCCATCCAAGGAGTAATAAAGTGTGAGTCAAAC---  
ATCACAGGACTACTATTAACAAGAGATGGTGGTACTAACAGTACT-----  
-----  
-----  
AAAAGTACTGAAACCTTCAGACCTGGAGGAGGAGATATGAGGGACAATTGGAGAAGTGAATTATATAAGTATA  
AAGTAGTACAAGTTGAACCAATA---GGAGTAGCACCCACCAGGGCAAAGAGAAGAGTGGTG-----  
-----GAGAGAGAAAAAGAGCA---GTTGGA---ATAGGAGCT-----  
---GTACTCCTTGGGTTCTTAGGAGCA---GCTGGAAGCACAATG---GGCGCGGCGTCA---  
ATAACGCTGACGGTACAG---GCCAGACAG---TTATTG---TCTGGCATAGTGCAGCAGCAAAGC---  
AATTTG---CTGAGG---GCTATAGAGGCTCAACAGCAACTGTTGAGACTCACTGTCTGGGGCATT  
>AB098330  
TTCTATTGTAATACATCAGGCCTGTTCAATGGCACCTGGAAGCCAAACAGCACAGAGTCAAACAACACAACG-  
-----  
-----  
CCAAATGACACTATAACTCTTACATGCAGAATAAAGCAAATTATAAATATGTGGCAGAAAGTAGGACAAGCAA  
TGTATGCCCCCTCCCATCAAGGAGTAATAAGGTGTGAATCAAAC---  
ATTACAGGACTACTATTAACAAGAGATGGAGGGATTAACAGTATA-----  
-----  
-----  
AATGAAACCTTCAGACCTGGAGGAGGAAATATGAGGGACAATTGGAGAAGTGAATTATATAAGTATAAAGTAG  
TAAAAATTGAACCACTA---GGAGTAGCACCCCTCCAGGGCAAAGAGAAGAGTGGTG-----  
-----GAGAGAGAAAAAGAGCA---GTTGGA---ATAGGAGCT-----  
GTCTTCCTTGGGTTCTTAGGAGCA---GCTGGAAGCACTATG---GGCGCGGCGTCA---  
ATAACGCTGACGGCACAG---GCCAGACAA---TTATTG---TCTGGTATAGTGCAACAGCAAAGC---  
AATTTG---CTGAGG---GCTATAAAGGCTCAACAGCATATGTTGAAGCTCACGGTCTGGGGCATT  
>GU367412  
TTCTATTGTGATACATCAGGCCTGTTTAAATAGTACTTGAATGACACTGCCACCAATCAGACTTTTGAT---  
-----  
-----  
GCAAATAGCAATATAACTCTTCAATGTAAAATAAGACAAATTGTACGTATGTGGCAGAGAATAGGACAAGCAT  
TGTATGCCCCCTCCCATCAAGGAGTAATAAGCTGTAAATCAAAC---  
ATTACAGGGCTGCTACTAACAAGAGATGGT---ATGAATGAGAGT-----  
-----  
-----  
AGTGAGACGTTTCAGACCTCAAGGAGGAAATATGAAGGACAATTGGAGAAGTGAATTATATAAATATAAAGTAG  
TAAAAATTGAACCACTA---GGAATAGCACCCACCAGGGCAAAGAGAAGAGTGGTG-----  
-----GAGAGAGAAAAAGAGCA---GTTGGA---CTGGGAGCT-----  
GTCTTCCTTGGGTTCTTGGGAGCA---GCAGGAAGTACTATG---GGCGCGGCGTCA---  
ATAACGCTGACGGCACAG---GCCAGACAA---TTATTG---TCTGGTATAGTACAACAGCAGAGC---  
AATCTG---CTGAGG---GCTATAGAGGCTCAACAGCAACTGTTGAACTCACAGTCTGGGGCATT  
>FJ647148  
TTCTATTGTAATACATCAGGTCTGTTTAGTAGCAGGTGGTTCACCTAATGGCACTAACAGCACGGAGTCAAAT-  
-----  
-----  
-----  
GGCACAGGCAATATAACTCTCCAATGCAGGATAAAGCAAATTATAAATATGTGGCAGAGAGTAGGACAAGCAA  
CGTACCCCCCTCCCATCCAAGGAGAAATAAGGTGTAGATCAAAC---  
ATTACAGGACTACTATTAACAAGAGATGGTGGGATTAACACAACA-----  
-----  
-----  
GAGGAAATCTTCAGACCTGGAGGGGAAATATGAAGGACAATTGGAGAAGTGAATTATATAAGTATAAAGTAG  
TAAAAATTGAACCACTA---GGAGTAGCACCATCCAAGGCAAAGAGAAGAGTGGTG-----  
-----GGAAGAGAAAAAGAGCA---GTTGGA---CTGGGAGCT-----  
GTATTCATTGGGTTCTTGGGAGCA---GCAGGAAGCACTATG---GGCGCGGCGTCA---  
GTGACGCTGACGGTACAG---GCCAGACAA---TTATTG---TCTGGCATAGTGCAGCAGCAAAGC---  
AATTTG---CTGAGG---GCTATAGAGGCTCAACAGCATCTGTTGAACTCACAGTCTGGGGCATT  
>KT183312

TTCTATTGTGACACATCAGGTCTGTTTAAATGGCAGTTGGAGTGAAAATAGCACTTGGAATAGCACTATGGAG-  
 -----  
 -----  
 GCAAAATAGCACAAATTATACTCCCATGTAGAAATAAAGCAAATTATAAATATGTGGCAGAGAACAGGACGAGCAA  
 TGTATGCCCCCTCCCATCCAAGGAACAATACAGTGTACATCAAAC---  
 ATCACAGGATTAATATTAACAAGAGATGGTGGTGAGAAAAACAAT-----  
 -----  
 -----  
 AGCACTGAAGAAATCTTCAGACCTGGAGGAGGAGATATGAGGGACAATTGGAGGAGTGAATTATATAAATATA  
 AAGTAGTAAAAATTGAACCACTA---GGAGTAGCACCCACCAGGGCAAAGAGAAGAGTGGTG-----  
 -----GAGAGAGAAAAAAGAGCA---GTTACA---CTAGGAGCT-----  
 ---GTATTCATTGGGTTCTTAGGAGCA---GCAGGAAGCACTATG---GGCGCGGCGTCA---  
 GTGACGCTGACGGTACAG---GCCAGACAA---TTATTG---TCTGGCATAGTGCAACAGCAAAGC---  
 AATTTG---CTGAGG---GCTATAGAGGCTCAACAGCATATGTTGAAACTCACGGTCTGGGGCATT  
 >KC863311  
 TTCTATTGTAATACAACAGACCTGTTTAAAGGGTACTTGGCATCCTGATAATAAACTTGGAGTGATCCTTGGGA  
 ATGCCAGC-----  
 -ATGAAGTCAAATAAC-----  
 ACATCAAATGTCAATATAACTATCCTATGCAAGATAAAGCAAATTGTAAGGATGTGGCAGAGAGTAGAACAAG  
 CAATGTATGCCCCCTCCCATCCAAGGAGTAATAAGCTGTTTCATCAAAC---  
 ATTACAGGACTACTATTAACAAGCGATGGTGGTAGGGATAATAGCAATAATACTGGTAAGGATAATAGCAATA  
 AAAAT-----  
 -----  
 AATACTGAAACCTTCAGACCTGGAGGAGGAAATATGAGGGACAATTGGAGAAGTGAATTATATAAGTATAAAG  
 TAGTAAAAATTGAACCACTA---GGAGTAGCACCTACCCCGGCAAGGAGAAGAGTGGTG-----  
 -----CAGAGAGAAAAAAGAGCA---GTTGGC---CTAGGAGCT-----  
 GTCTTCATTGGGTTCTTAGGAGCA---GCAGGAAGCACTATG---GGCGCGGCGTCA---  
 GTGACGCTGACGGTACAG---GCCAGACAA---TTATTG---ACTGGTATAGTGCGACAGCAAAGC---  
 AATTTG---CTGAAG---GCTATAGAGGCTCAACAACATCTGTTGAGACTCACAGTCTGGGGCATT  
 >HM623589  
 TTCTACTGCAACACATCAAGCTTGTTTAAATAGGACATTTCCGGCCAACTACACGTATAATAGGACTGCTGACA  
 GCACA-----  
 -----  
 CAGGGGAATACAACATACTATACTATCCCATGCAGAATAAAACAAATTATAAACATGTGGCAGAGAGTAGGACAAG  
 CAATGTATGCCCCCTCCCATGAAGGAGTAATAAGATGTGAATCAAAC---  
 ATTACAGGAATACTATTGACAAGAGATGGTGGGAATGAGACAAAT-----  
 -----  
 -----  
 GTAGAAGTCTTCAGACCAGAGGGAGGAAATATGAGGGACAATTGGAGAAGTGAATTATATAATTACAAGGTAG  
 TAAGAATTGAACCACTA---GGAGTAGCACCCACCAGGGCAAGGAGGAGAGTGGTG-----  
 -----GAGAGAGAAAAAAGAGCA---GTTGGA---CTGGGAGCT-----  
 GTCTTCCTTGGGTTCTTAGGAGCA---GCAGGAAGCACTATG---GGCGCGGCGTCA---  
 ATAACGCTGACGGTACAG---GCCAGGCAA---TTATTG---GCTGGCATAGTGCAACAGCAAAGC---  
 AATTTG---CTGCAA---GCTATAGAGGCTCAACAGCATCTGTTGAAACTCACTGTCTGGGGCATT  
 >MH705163  
 TTCTATTGCAATACAACAGCCCTGTTTAAATAGCACGTGGGAGAATGAGAATGACACGGCCAACATACAGAAGA  
 AT-----  
 -----GGCACG-----  
 GAGTCAAATGACACTATAACACTCCCATGCAGAATAAAACAAATTATAAACATGTGGCAGAGAGTAGGACGAG  
 CAATGTATGCCCCCTCCCATGCAGGAGTAATAAAGTGTACATCAACC---  
 ATTACAGGAATAATATTGACAAGAGATGGTGGGGATAGTGGGAACAAT-----  
 -----  
 -----  
 ACCAGGGAGGAGATCTTCAGACCTGGAGGAGGAGATATGAGGGACAATTGGAGAAGTGAATTATATAAGTATA  
 AAGTAGTAAAACCTTGAACCACTA---GGAGTAGCACCCACCAAGGCAAGGAGAAGAGTGGTG-----  
 -----GAGAGAGAAAAAAGAGCA---GTTGGA---CTGGGAGCT-----  
 ---GTCTTCCTTGGGTTCTTGGGAGCA---GCAGGAAGCACTATG---GGCGCAGCGTCA---  
 ATAACGCTGACGGTACAA---GCCAGACAA---TTATTG---TCTGGCATAGTGCAACAGCAAGGC---  
 AATTTG---CTGAAG---GCTATAGAGGCTCAACAGCATCTGTTGAAACTCACGGTCTGGGGCATT  
 >AF286241

TTCTATTGTAATACAACAAGCCTGTTTAAATAGCACATGGAAGAATGGCGCCACCATACAGGAGAATAGCACGG  
 AG-----  
 -----  
 ACAAATGGAATTATGACTCTCCCATGCAGAATAAAACAAATTGTAGACATGTGGCAGGAAGTAGGACAAGCAA  
 TGTATGCCCCCTCCCATTCGAGGAGTAATATATTGTACATCAAAC---  
 ATTACAGGAATAATATTGACAAGAGATGGTGGGAGCAGTAACACC-----  
 -----  
 -----  
 AATAGTGAGATCTTTAGGCCTGGAGGAGGAGATATGAGGGACAATTGGAGAAGTGAATTATATAAGTATAAAG  
 TAGTAAAAATTGAACCACTA---GGAGTAGCACCCCTCCAGGGCAAAGAGAAGAGTGGTG-----  
 -----GAGAGAGAAAAAAGAGCA---GTGGGA---ATAGGAGCT-----  
 GTTTTCCTTGGGTTCTTGGGAGCT---GCAGGAAGCACTATG---GGCGCGGCGTCA---  
 ATAACGCTGACGGTACAG---GCCAGACAG---TTATTA---TCTGGCATAGTGCAACAGCAAAGC---  
 AATTTG---CTGAAG---GCTATAGAGGCTCAACAGCATCTGTTGAAACTCACAGTCTGGGGCATT  
 >AF286238  
 TTCTATTGCAATACAACAGGCCTGTTTAAATAGCACATGGGAAAATGGCACTAACAAACAGAATTACACGGAG-  
 -----  
 -----  
 TCAAAATGACACTATAACGCTCCAATGCAGAATAAAACAAATTATAAACATGTGGCAGAGAGTAGGCCGAGCAA  
 TGTATGCCCCCTCCCATTCGAGGAGTAATAAAGTGTACATCAAAC---  
 ATTACAGGAATGATATTGACAAGAGACGGTGGGAAGAACAGTATT-----  
 -----  
 -----  
 AATGAGACCTTCAGACCTGGAGGAGGAGATATGAGGGACAATTGGAGAAGTGAATTATATAAGTATAAAGTAG  
 TAAAAATTGAACCACTA---GGAATAGCACCCACAGAGGCAAGGAGAAGAGTGGTG-----  
 -----CAGAGAGAAAAAAGAGCA---GTTGGA---TTGGGAGCT-----  
 GTTTTCCTTGGGTTCTTGGGAGCA---GCAGGAAGCACTATG---GGCGCGGCGTCA---  
 ATAACGCTGACGGTACAG---GCCAGACAA---TTATTG---ACTGGCATAGTGCAACAGCAAAGC---  
 AATTTG---CTGAAG---GCTATAGAGGCTCAACAACAGATGTTGAGGCTCACAGTCTGGGGCATT  
 >AF286237  
 TTCTATTGCAATACAACAGGCCTGTTTAAATGGTACGTGGTGGAAACAATGGTACGTGGAACGGGGCCCTACACAC  
 CTAAT-----  
 -----  
 AACACCAATGGAAGTATAATCCTCCCATGCAGAATAAAACAAATTATAAACATGTGGCAGAGAGTAGGAAGAG  
 CAATGTATGCCCCCTCCCATTCGAGGAATAATAAAGTGTACATCAAAC---  
 ATTACAGGAATAATATTGACAAGAGATGGTGGTAACAATGGGACT-----  
 -----  
 -----  
 AATGAGACCTTCAGACCTGGAGGAGGAGATATGAGGGACAATTGGAGAAGTGAATTATATAAATATAAAGTAG  
 TAAAAATTGAACCACTA---GGAGTAGCACCTACCAGGGCAAAAAGAAGAGTGGTG-----  
 -----GAGAGAGAAAAAAGAGCA---GTTGGA---CTGGGAGCT-----  
 GTCTTCCTTGGGTTCTTGGGAGCA---GCAGGAAGCACTATG---GGCGCGGCGTCA---  
 CTAACGCTGACGGTACAG---GCCAGACAA---TTATTG---TCTGGTATAGTGCAACAGCAAAGC---  
 AATTTG---CTGCAG---GCTATAGAAGCTCAACAGCATCTGTTGAAACTCACAGTCTGGGGCATT  
 >AY521629  
 TTCTATTGCAATACATCAGGTCTGTTTAAATAGTACTTGGAATGACACGGCCATCAATGACACTATCAACGTGC  
 AG-----  
 -----  
 AATTCAACTTACAATATAACTCTCCCATGCAGAATAAGACAAATTGTACATATGTGGCAGAGAGTAGGACAAG  
 CAATGTATGCCCCCTCCCATTCAGGGGTAATAAACTGTACATCAAAC---  
 ATTACAGGGCTACTGTTAACAAGGGATGGTGGGGATAATAGTAGT-----  
 -----  
 -----  
 ACAAATGAGACATTTCAGACCTGGAGGAGGAAATATGAAGGACAATTGGAGAAGTGAATTATATAAATATAAAG  
 TAGTAAAAATTGAACCACTA---GGAGTAGCACCCACCAAGGCAAAGAGGAGAGTGGTG-----  
 -----GAGAGAGAAAAAAGAGCA---GTTGGA---CTAGGAGCT-----  
 GTCTTCCTTGGGTTCTTAGGAGCA---GCAGGAAGTACTATG---GGCGCGGCGTCA---  
 ATGACGCTGACGGTACAG---GCCAGACAA---TTATTG---TCTGGCATAGTACAACAGCAGAGC---  
 AATCTG---CTGAGG---GCTATAGAGGCTCAACAGCACATGTTGAAACTCACAGTCTGGGGCATT  
 >AY521631

TTCTATTGCAATACATCAGGCCTGTTTAAATAGTACTTGGTATAATAGTACTTGAATAACACTGACAGCACAC  
 AGAAA-----  
 -----TCA---  
 AATGGCACGGAGAAAATAACTCTCCCATGCAGAATAAAACAAGTTATAAAAATGTGGCAAAGAGTAGGACAAG  
 CAATGTATGCCCCCTCCCATTC AAGGAGTAATAAAATGTGTATCAAAC---  
 ATTACAGGGATACTGCTAACAAGAGATGGGGGGAACCTTAATAGC-----  
 -----  
 -----  
 TCATTTGAGACGTTTCAGACCTGGAGGAGGAAATATGAAGGACAATTGGAGAAGTGAATTATATAAATATAAAG  
 TAGTAAAAATTGAACCACTA---GGAGTAGCACCCACCAAGGCAAAGAGAAGAGTGGTG-----  
 -----GAGAGAGAAAAAAGAGCG---GTCGGA---CTGGGAGCT-----  
 GTCTTCCTTGGGTTCTTAGGAGCA---GCAGGAAGTACTATG---GGCGCGGCGTCA---  
 ATAACGCTGACGGCACAG---GCCAGACAA---TTATTG---TCTGGTATAGTACAACAGCAGAGC---  
 AATCTG---CTGAGG---GCTATAGAGGCTCAACAGCAAATGTTGAAACTCACGGTCTGGGGCATT  
 >AY521630  
 TTCTATTGCAATACATCAGGTCTGTTTAAATAGTACTTGGAAATAGCACTACCATCAAGCAGAATTTAACTAACA  
 AT-----  
 -----  
 GACACGGGGGTAATAAATCTCCCATGCAGAATAAGACAAATTGTACATATGTGGCAGAGAGTAGGACAAGCAA  
 TGTATGCCCCCTCCCATTAAGGGGTAATAAACTGTACATCAAAC---  
 ATTACAGGGCTACTGCTAACAAGGGATGGTGGGGATAATAATAGT-----  
 -----  
 -----  
 ACAGATGAGAAGTTCAGACCTGGAGGAGGAGATATGAGGGACAATTGGAGAAGTGAATTATATAAATATAAAG  
 TAGTAAAAATTGAACCACTA---GGAGTAGCACCCACCAAGGCAAAGAGAAGAGTGGTG-----  
 -----CAGAGAGAAAAAAGAGCA---GTTGGA---CTAGGAGCT-----  
 GTCTTCCTTGGGTTCTTAGGAGCA---GCAGGAAGTACTATG---GGCGCGGCGTCA---  
 ATAACGCTGACGGCACAG---GCCAGACAA---TTATTG---TCTGGCATAGTACAACAGCAGAGC---  
 AATCTG---CTGAGG---GCTATAGAGGCTCAACAGCACTTGTGAAACTCACAGTCTGGGGCATT  
 >AM000053  
 TTCTATTGCAATACATCAGGCCTATTTAAATAGCAGTTGGGCGCCCAACGGCAGTTGGATCAACAACATTGGCA  
 GT-----  
 -----  
 AGGGAAAATGACACTATGACTCTGCCATGCAGAATAAAACAAATTATAAATATGTGGCAGAGAGTAGAACAAG  
 CAATGTATGCCCCCTCCTATCAAAGGAAACATAAATTGTGTATCAAAC---  
 ATTACAGGACTACTGTTAACAAGAGATGGTGGAACTAATGAACT-----  
 -----  
 -----  
 AGGGAGAATGAGACCTTCAGACCTATAGGAGGAGAGATGAGAGACAATTGGAGAAGTGAATTATATAAGTATA  
 AAGTAGTAAAAATTGAACCACTA---GGAGTAGCACCCACCAAGGCAAAGAGAAGAGTGGTGGAG-----  
 -----GGGAGAGAAAAAAGAGCA---GTTGGA---ATGGGAGCT-----  
 ---TTCTTCCTTGGGTTCTTAGGAGCA---GCAGGAAGCACTATG---GGCGCGGCGTCA---  
 ATAACGCTGACGGTACAG---GCCAGACAA---TTATTG---GCTGGTATAGTGCAACAGCAAAGC---  
 AATTTG---CTGAAG---GCTATAGAGGCTCAACAACATCTGTTGAGACTCACAGTCTGGGGCATT  
 >AM000054  
 TTCTATTGTAATACATCAAGCCTGTTTAAATAGCTCTTGGCCATTAAACAGCACTACCAGCAATAACAGCACTG  
 CC-----  
 -----  
 AGTAATGAGACCATAATTCTGCCATGTAGAATAATACAAATTATAAATATGTGGCAGAGACTAGGACAGGCAA  
 TGTATGCCCCCTCCCATCAAAGGATTAATAAATTGTGTATCAAAC---  
 ATTACAGGACTACTGTTGACAAGGGATGGTGGAGATAGGAACAGT-----  
 -----  
 -----  
 AGTTATGAGACCTTCAGACCTATAGGAGGAAATATGAAGGACAATTGGAGAAGTGAAGTGTATAAGTATAAAG  
 TAGTAAAAATTGAACCACTA---GGAGTAGCACCTACCAAGGCAAAGGAGGAGAGTGGTG-----  
 -----GAGAGAGAAAAAAGAGCA---GTTGGA---ATAGGAGCT-----  
 TTCTTCCTTGGGATCTTAGGAGCA---GCAGGAAGCACTATG---GGCGCGGCGTCA---  
 ATAACGCTGACGGTACAA---GCCAGGCAA---GTATTG---TCTGGTATAGTGCAACAGCAGAGC---  
 AATTTG---CTGAAG---GCTATAGAGGCTCAACAACATTTGTTGAAACTCACAGTCTGGGGCATC  
 >FJ388892

TTCTATTGCAATACAACAGACCTGTTTAAATAGCACTTGGTACACTAATGACACTGGCACAAATAGCACAGGGG  
 CCAATGAA-----  
 -----AAT---  
 GGGGCCAATGAAAATATAACTTTACCATGCAGAATAAAGCAAATTATAAATATGTGGCAGAGAGTAGGGCAAG  
 CAATGTATGCCCCCTCCTATCAAAGGAAGTATAAGGTGTGAATCAAAC---  
 ATTACAGGACTACTACTAACAAGAGATGGTGGAAAGTGAAATGAT-----  
 -----  
 AGCTACAATGAGACCTTCAGACCTATAGGAGGAAATATGAGGGATAATTGGAGAAGTGAACCTATATAAGTATA  
 AAGTAGTAGAAATTGAACCAATA---GGAGTAGCACCTACCAAGGCAAGGAGAAGAGTGGTG-----  
 -----GGGAGAGAAAAAGAGCA---ATTGGA---CTGGGAGCT-----  
 ---GCCTTCCTTGGGTTCTTAGGAGCA---GCAGGAAGCACTATG---GGCGCGGCGTCA---  
 ATAACGCTGACGGTACAG---GCCAGACAA---TTATTG---TCTGGCATAGTGCAACAGCAAAGC---  
 AATTTG---CTGAGG---GCTATAGAGGCTCAGCAGCATCTGCTGAAACTCACAGTCTGGGGCATT  
 >JF683763  
 TTCTATTGCAATACAACAGACCTGTTTCAGTAGCACTTGGGACGAAGATGACACTGACATCACTCTCGCCCAG-  
 -----  
 -----  
 GACAAATGGAACCTATAACTCTGCCATGCAGAATAAAGCAAATTATAAATATGTGGCAGAGAGTAGGACAAGCAA  
 TGTATGCCCCCTCCTATCAAAGGAAGTATAAGGTGTGAATCAAAC---  
 ATTACAGGACTACTACTAACAAGAGATGGTGGAGCTAATAGCAGT-----  
 -----  
 -----  
 AATGAGACCTTCAGACCTATAGGAGGAGATATGAGAGACAATTGGAGAAGTGAACCTATATAAATATAAAGTGG  
 TACAAATTGAACCAATA---GGAATAGCACCTACCAGGGCAAGGAGAAGAGTGGTG-----  
 -----GAGAGAGAAAAAGAGCA---ATTGGA---CTGGGAGCT-----  
 GCCTTCCTTGGGTTCTTAGGAGCA---GCAGGAAGTACTATG---GGCGCGGCGTCA---  
 CTGACGCTGACGGTACAG---GCCAGAAAA---TTATTG---TCTGGCATAGTGCAACAGCAAAAC---  
 AATTTG---CTGAGG---GCTATAGAGGCTCAGCAGCATCTGCTGAAACTCACGGTCTGGGGCATT  
 >JF683798  
 TTCTATTGCGATACAACAAACCTGTTCAATAGCACTTGGGACGGAAATAGCACTGTCACAAATATCACACAG-  
 -----  
 -----  
 ACCAATGAAAATATAACTTTACCATGCAAAATAAGGCAAATTATAAGGATGTGGCAGAGAGTAGGACAAGCAA  
 TGTATGCCCCCTCCTATCAAAGGAATTATAAGGTGTGAATCAAAC---  
 ATTACAGGACTACTGCTAACAAGAGATGGTGGAAATAAAACCAAT-----  
 -----  
 -----  
 AGCAACAATGAGACCTTCAGACCTATAGGAGGAGATATGAGGGACAATTGGAGAAGTGAACCTATATAAGTATA  
 AAGTAGTAAAAGTGAACCAATA---GGAGTAGCACCTACCAGAGCAAGGAGAAGAGTGGTG-----  
 -----GAGAGAGAAAAAGAGCA---ATAATTGGACTGGGAGCT-----  
 ---GCCTTCATTGGGTTCTTAGGAGCA---GCAGGAAGCACTATG---GGCGCGGCGTCA---  
 ATAACGCTGACGGTACAG---GCCAGACAA---TTATTG---TCTGGCATAGTGCAACAGCAAAGC---  
 AATTTG---CTGAGG---GCTATAGAGGCTCAGCAGCATCTGCTGAAACTCACGGTCTGGGGCATT  
 >EF545108  
 TTCTATTGCAATACAACAGGCCTGTTCAATAATGCCAGCAACAATGGTACAAAC-----  
 -----  
 -----  
 CGCACAGACCCTATAATTCTCCCATGCAGAATAAAGCAGATTATAAATATGTGGCAAAGAGTAGGGCAGGCAA  
 TGTATGCTCCTCCTATCAAAGGAATCATAAGGTGTGAATCAAAC---  
 ATTACAGGACTACTATTAAACAAGAGATGGTGGGAATAAAAAATGGAAGC-----  
 -----  
 -----  
 AACGGGACCGAGACCTTCAGACCTATAGGAGGAGATATGAGGGACAATTGGAGAAGTGAATTATATAAGTATA  
 AAGTAGTAAAAATTGAACCAATA---GGAGTAGCACCTACCAGGGCAAAGAGAAGAGTGGTG-----  
 -----GAGAGAGAAAAAGAGAGCA---ATTGGA---CTGGGAGCT-----  
 ---GCCTTCCTTGGGTTCTTAGGAGCA---GCAGGAAGTACTATG---GGCGCGGCGTCA---  
 ATAACGCTGACGGTACAG---GCCAGACAA---TTACTG---TCTGGCATAGTACAACAGCAAAGC---  
 AATTTG---CTGAGG---GCTATAGAGGCTCAGCAGCATCTGCTGAAGCTCACGGTCTGGGGCATT  
 >GU481566

TTCTATTGCAATACAACAGCCCTGTTCAATAGCACTTGGGATGAAAATAGCACTGTCACAAATAGCACAAACG-  
-----  
-----  
GCCAATGAAAATATAACTCTGCCATGCAGAATAAAGCAAATTATAAATATGTGGCAGAGAGTAGGACAAGCAA  
TGTATGCCCCCTCCTATCGCAGGAATTATAAGGTGTGAATCAAAC---  
ATTACAGGACTACTAATAACAAGAGATGGTGGAACATAATAGCAGC-----  
-----  
-----  
AATGAGACTGAGACCTTCAGACCTACAGGAGGAAATATGAGGGACAATTGGAGAAGTGAACATATAAGTATA  
AAGTAGTACAAATTGAACCAATA---GGAGTAGCACCTACCAAGGCAAAGAGAAGAGTGGTG-----  
-----GAGAGAGAAAAAAGAGCA---ATTGGA---CTGGGAGCC-----  
---GCCTTCCTTGGGTTCTTAGGAGCA---GCAGGAAGTACTATG---GGCGCGGCGTCA---  
CTGACGCTGACGGTACAG---GCCAGACAA---TTATTG---TCTGGCATAGTACAACAGCAAAGC---  
AATTTG---CTGAGG---GCTATAGAGGCTCAGCAGCATCTGCTGAAACTCACGGTCTGGGGCATT  
>GU481615  
TTCTATTGCAATACAACAGAACTGTTCAATAGCACTTGGAACACAAGCAGCACTGTCACAAATAGCACACAG-  
-----  
-----  
GCCAATGAAACTATAAGTCTACCATGCAAAATAAAGCAAATTATAAGGATGTGGCAGAGAGTAGGACAAGCAA  
TGTATGCCCCCTCCTATCAACGGAAGTATAAGGTGTGAATCAAAC---  
ATTACAGGACTACTACTAACAAGAGATGGTGAGGTGAAAAATAAT-----  
-----  
-----  
AGCAGCAATGAGACCTTCAGACCTGCAGGAGGAGATATGAAGGACAATTGGAGAAGTGAACATATAAGTATA  
AAGTAGTAGAAATTGAACCAATA---GGATTAGCACCTACCAAGGCAAGGAGAAGAGTGGTG-----  
-----GAGAGAGAAAAAAGAGCA---ATTGGA---CTGGGAGCT-----  
---GCCTTCCTTGGGTTCTTAGGAGCA---GCAGGAAGTACTATG---GGCGCGGCGTCA---  
TTGACGCTGACGGTACAG---GCCAGACAA---TTATTG---TCTGGCATAGTGCAACAGCAAAGC---  
AATTTG---CTGAGG---GCTATAGAGGCTCAGCAGCATCTGCTGAAACTCACAGTCTGGGGCATT  
>HQ896489  
TTCTATTGCAATACAACAGACCTGTTTACAAATAGCACTCTCACAGATAACACAGAG-----  
-----  
-----  
ACCAATGAAACTATAACTCTGCCATGCAGAATAAAGCAAATCATAAATATGTGGCAGAGAGTAGGACAAGCAA  
TGTATGCCCCCTCCTATCAGAGGAAGTATAAGGTGTAATTCAAAC---  
ATTACAGGACTACTGCTAATAAGAGATGGTGAGCTAATAGCAGC-----  
-----  
-----  
AATGAGACCTTCAGACCTATAGGAGGAAATATGAGGGACAATTGGAGAAGTGAACATATAAGTATAAAGTAG  
TAAAAATTGAACCAATA---GGAGTAGCACCTACCAAGGCAAAGAGAAGAGTGGTG-----  
-----GAGAGAGAAAAAAGAGCA---ATTGGA---CTGGGAGCC-----  
GCCTTCCTTGGGTTCTTAGGAACA---GCAGGAAGCACTATG---GGCGCGGCGTCA---  
CTGACGCTGACGGTACAA---GCCAGACAA---TTATTG---TCTGGCATAGTGCAACAGCAAAGC---  
AATTTG---CTGAGG---GCTATAGAGGCTCAGCAACATCTGCTGAAACTCACGGTCTGGGGCATT  
>JQ292897  
TTCTATTGCGATACAACAGCCCTGTTCAATAGCACTTGGGAAAATGGCACTGTTATAAATAGCACACAG----  
-----  
-----  
GCCAATGAGACTATAACTCTACCATGCAGAATAAAGCAAATTATAAATATGTGGCAGAGAGTAGGACGAGCAA  
TGTATGCCCCCTCCTATCAGAGGAATTATAAGGTGTGAATCAAAC---  
ATTACAGGACTACTACTAACAAGAGATGGTGAGGTGAAAAATAAT-----  
-----  
-----  
AGCAGCAATGAGACCTTCAGACCTATAGGAGGAAATATGGAGGACAATTGGAGAAGTGAACATATAAGTATA  
AAGTAGTAGAAATTGAACCAATA---GGAGTAGCACCTACCAAGGCAAAGAGAAGAGTGGTG-----  
-----GAGAGGGAAAAAAGAGCA---ATTGGA---CTGGGAGCT-----  
---GCCTTCCTTGGGTTCTTGGGAGCA---GCAGGAAGCACTATG---GGCGCGGCGTCA---  
CTAACGCTGACGGTACAG---GCCAGACAA---TTATTG---TCTGGCATAGTGCAACAGCAAAGC---  
AATTTG---CTGAGG---GCTATAGAGGCTCAGCAGCATCTGCTGAAACTCACGGTCTGGGGCATT  
>JQ292899

TTCTATTGCAATACAACAGACCTGTTCAATTGGGACGGAAATGGCAATGTTACAAACAGCACACAG-----  
-----  
-----  
GCCGATGGAAATATAACTCTACCATGCAGAATAAAGCAAATTATAAATATGTGGCAGAGAGTAGGACAAGCAA  
TGTATGCCCCCTCCTATCAAAGGAAATATAACGTGTGTATCAAAC---  
ATTACAGGACTACTATTAACAAGAGATGGTGGAGGTGGAATTAAT-----  
-----  
-----  
AGTAGCAATGAGACCTTCAGACCTATAGGAGGAGATATGAGGGACAATTGGAGAAGTGAACATATAAGTATA  
AAGTAGTAAAAATTGAACCAATA---GGAGTAGCACCTACCAAGGCAAGGAGAAGAGTGGTG-----  
-----GAGAGAGAAAAAGAGCA---ATTGGA---CTGGGAGCT-----  
---GCCTTCCTTGGGTTCTTGGGAGCA---GCAGGAAGTACTATG---GGCGCGGCGTCA---  
ATAACGCTGACGGTACAG---GCCAGACAA---TTATTG---TCTGGCATAGTGCAACAGCAAAGC---  
AATTTG---CTGAGG---GCTATAGAGGCTCAGCAGCATATGCTGAAACTCACGGTCTGGGGCATT  
>HQ385841  
TTCTATTGCTATACAACAAAACTGTTCAATAGCACTTGGAACGGAAATGACACTGTTACAAATAGCACACAG-  
-----  
-----  
GCCAATGAAAATATAACTATAACCATGCAGAATAAAGCAAATTATAAATATGTGGCAGAGAGTAGGACAAGCAA  
TGTATGCCCCCTCCTATCAAAGGAAATATAAGCTGTACATCAAAC---  
ATTACAGGACTATTACTAACAAGAGATGGTGGAACTAATAGCAGT-----  
-----  
-----  
AATGAGACCTTCAGACCTATAGGAGGAGATATGAGGGACAATTGGAGAAGTGAACATATAAGTATAAAGTAG  
TACAAATTGAACCAATA---GGAGTAGCACCTACCAAGGCAAAGAGAAGAGTGGTG-----  
-----GAGAGAGAAAAAGAGCA---ATTGGA---CTGGGAGCT-----  
GCCTTCCTTGGGTTCTTGGGAGCA---GCAGGAAGTACTATG---GGCGCGGCGTCA---  
ATAACGCTGACGGTACAG---GCCAGACAA---TTATTG---TCTGGCATAGTACAACAGCAAAGC---  
AATTTG---CTGAGG---GCTATAGAGGCTCAGCAGCATCTGCTGAAACTCACGGTCTGGGGCATT  
>HQ385843  
TTCTATTGCAATACAACAGCCCTGTTCAATAGTACTTGGCACGAAAATAGCACTGATACAATAGCACACAG-  
-----  
-----  
GACAATGAAACTATAACTCTACCATGCAGAATAAAGCAAATTATAAATATGTGGCAGAGAGTAGGACAAGCAA  
TGTATGCCCCCTCCTATCGAAGGAAATATAAGCTGTACATCAAAC---  
ATTACAGGACTACTACTAACAAGGGATGGTGGAGCTAATAGCAGC-----  
-----  
-----  
AATGAGACCTTCAGACCTATAGGAGGAGATATGAGGGACAATTGGAGAAGTGAACATATAAGTATAAAGTAG  
TACAAATTGAACCAATA---GGAGTAGCACCTACCAAGGCAAAGAGAAGAGTGGTG-----  
-----GAGAGAGAAAAAGAGCA---ATTGGA---CTGGGAGCT-----  
GCCTTCCTTGGGTTCTTGGGAGCA---GCAGGAAGCACTATG---GGCGCGGCGTCA---  
ATAACGCTGACGGTACAG---GCCAGACAA---TTATTG---TCTGGCATAGTGCAACAGCAAAGC---  
AATTTG---CTGAGG---GCTATAGAGGCTCAGCAGCATCTGCTGAAACTCACGGTCTGGGGCATT  
>HQ385846  
TTCTATTGCAATACAACAGAACTGTTCAATAGCACTTGGGGCAATGGCACTGTCAAAATAGCACAGGG----  
-----  
-----  
GACAATGAAAATATAATTCTACCATGCAGAATAAAGCAAATCATAAGGATGTGGCAGAGAGTAGGACAAGCAA  
TGTATGCCCCCTCCTATCAAAGGAATTATAAAGTGTAATCAAAC---  
ATTACAGGACTACTACTAACAAGAGATGGTGGAGGTGGAATAGCAGC-----  
-----  
-----  
AATGAGACCAGTGAAACCTTCAGGCCTATAGGAGGAGATATGAGGGACAATTGGAGAAGTGAACATATAAAGT  
ATAAAGTAGTACAAATTGAACCAATA---GGAGTAGCACCTACCAAGGCAAAGAGAAGAGTGGTG-----  
-----GAGAGAGAAAAAGAGCA---ATTGGA---CTGGGAGCT---  
-----GCCTTCCTTGGGTTCTTAGGAGCA---GCAGGAAGCACTATG---GGCGCGGCGTCA---  
ATAACGCTGACGGTACAG---GCCAGACAA---TTATTG---TCTGGCATAGTGCAACAGCAAAGC---  
AATTTG---CTGAGA---GCTATAGAGGCTCAGCAGCATCTGCTGAAACTCACGGTCTGGGGCATT  
>GU481434

TTCTATTGCTATACAACAAACCTGTTCAATAGCACTTGGGGCGAAAATAGCACTGATATAAATAGCACACAG-  
-----  
-----  
GCCAATGAAAATATAACTCTACCATGCAGAATAAAGCAAATTATAAATATGTGGCAGAGAGTAGGACAAGCAA  
TGTATGCCCCCTCCTATCAAAGGAAGTATAATGTGTACATCAAAC---  
ATTACAGGGCTATTACTAACAAGAGATGGTGGAGGTGGAGCTAAT-----  
-----  
-----  
AGCAGCAATGAGACCTTCAGACCTATAGGAGGAAATATGAGGGACAATTGGAGAAGTGAACCTATATAAGTATA  
AAGTAGTAAAAATTGAACCAATA---GGAGTAGCACCTACCACGGCAAGGAGAAGAGTGGTG-----  
-----GAGAGAGAAAAAAGGGCA---ATTGGA---CTGGGAGCT-----  
---GCCTTCCTTGGGTTCTTGGGAGCA---GCAGGAAGCACTATG---GGCGCGGCGTCA---  
CTAACGCTGACGGTACAG---GCCAGACAA---TTATTG---TCTGGCATAGTGCAGCAGCAAAGC---  
AATTTG---CTGAAG---GCTATAGAGGCTCAGCAGCATCTGCTGAAACTCACGGTCTGGGGCATT  
>GU481486  
TTCTATTGCAATACAACAGACCTGTTCAATAGCACTTGGAACGAAACTGACATTGATGCACAGGCCAATGAA-  
-----  
-----  
GTCAATGAAACTATAACTCTACCATGCAGAATAAAGCAAATTATAAATATGTGGCAGAGAGTAGGGCAAGCAA  
TGTATGCCCCCTCCTATCAAAGGAAGTATAAGGTGTGAATCAAAC---  
ATTACAGGACTACTACTAACAAGAGATGGTGGAAAGACTTAATGGC-----  
-----  
-----  
AGCAATGAGACCTTTAGACCTATAGGAGGAGATATGAGGGACAATTGGAGAAGTGAACCTATATAAGTATAAAG  
TAGTACAAATTGAACCAATA---GGAGTAGCACCTACCAAGGCAAAGAGAAGAGTGGTG-----  
-----GAGAGAGAAAAAAGAGCA---ATTGGA---CTGGGAGCT-----  
GCCTTCCTTGGGTTCTTGGGAGCA---GCAGGAAGTACTATG---GGCGCGGCGTCA---  
ATAACGCTGACGGTACAG---GCCAGACAA---TTATTG---TCTGGCATAGTGC AACAGCAAAGC---  
AATTTG---CTGAGG---GCTATAGAGGCTCAGCAGCATCTGCTGAAACTCACGGTCTGGGGCATT  
>GU481644  
TTCTATTGCAATACAACAAACCTGTTCAATAGCACTTGGAAATGAAACAGACATTGTTACAAATATCACACAG-  
-----  
-----  
GGCAATGGA ACTATAACTCTACCATGCAGAATAAAGCAAATTATAAATATGTGGCAGAGAGTAGGACAAGCAA  
TGTATGCCCCCTCCTATCAAAGGAAATATAACGTGTACATCAAAC---  
ATTACAGGACTACTACTAACAAGAGATGGTGGAACTAATAGCAGC-----  
-----  
-----  
AATGAGACCTTCAGACCTATAGGAGGAGATATGAGGGACAATTGGAGAAGTGAACCTATATAAATATAAAGTAG  
TACAAATTGAACCAATA---GGAGTAGCACCTACCAGGGCAAGGAGAAGAGTGGTG-----  
-----GAGAGAGAAAAAAGAGCA---ATTGGA---CTGGGAGCT-----  
GCCTTCCTTGGGTTCTTGGGAGCA---GCAGGAAGCACTATG---GGCGCGGCGTCA---  
CTAACGCTGACGGTACAG---GCCAGACAA---TTACTG---TCTGGCATAGTGC AACAGCAAAGC---  
AATTTG---CTGAGG---GCTATAGAGGCTCAGCAGCATCTGCTGAAACTCACGGTCTGGGGCATT  
>JQ292891  
TTCTATTGCAATACAACAGACCTGTTCAATAGCACTTGGGACAATAGCACTGTCACAAATAGCACAGGG----  
-----  
-----  
ACCAATGAAACTATAACTCTGCCATGTAGAATAAAGCAAATTATAAATATGCGGCAGAGAGTAGGACAAGCAA  
TGTATGCCCCCTCCTATTAGAGGAAGTATAAGGTGTGAATCAAAC---  
ATTACAGGACTACTACTAATAAGAGATGGTGGAGCTAATAGCAGC-----  
-----  
-----  
AATGAGACCTTCAGACCTATAGGAGGAAATATGAGGGACAATTGGAGAAGTGAACCTATATAAGTATAAAGTAG  
TAAAAATTGAACCAATA---GGAGTAGCACCTACCAAGGCAAGGAGAAGAGTGGTG-----  
-----GAAAGAGAAAAAAGAGCA---ATTGGA---CTGGGAGCC-----  
GCCTTCCTTGGGTTCTTAGGAGCA---GCAGGAAGCACTATG---GGCGCGGCGTCA---  
ATGACGCTGACGGTACAG---GCCAGACAA---TTATTG---TCTGGCATAGTGC AACAGCAAAGC---  
AATTTG---CTGAGG---GCTATAGAGGCTCAGCAGCATCTGCTGAAACTCACGGTCTGGGGCATT  
>HQ385820

TTCTATTGCAATACAACAAACCTGTTCAATAGCACTTGGGACACAAATATCACAGAGGCCAATATCACAGAG-  
-----  
-----  
GCCAATGAAACTATAATTCTACCATGCAAAATAAAGCAAATTATAAATATGTGGCAGAGAGTAGGAAAAGCAA  
TGTATGCCCCCTCCTATCAAAGGAAGTATAAGGTGTGAATCAAAC---  
ATTACAGGACTACTACTAACAAGAGATGGTGGAACTAATAGCAGC-----  
-----  
-----  
AATAGCAATGAGACCTTCAGACCTATAGGAGGAAATATGAGGGACAATTGGAGAAGTGAACCTATATAAATATA  
AAGTAGTAAAAATTGAACCAATA---GGAGTAGCACCTACCAAGGCAAAGAGAAGAGTGGTG-----  
-----GAGAGAGAAAAAAGAGCA---ATTGGG---TTGGGAGCT-----  
---GCCTTCCTTGGGTTCTTAGGAGCA---GCAGGAAGCACTATG---GCCGGCGGGTCA---  
ATAACGCTGACGGTACAG---GCCAGACAA---TTATTG---TCTGGCATAGTGCAACAGCAAAGC---  
AATTTG---CTGAGG---GCCATAGAGGCTCAGCAACATATGCTGAAACTCACGGTCTGGGGCATT  
>JF952018  
TTTTATTGCAATACAACAGCCCTGTTCAATAGCACTTGGGACAATAGTAGCATTGCCGAAAATAGCACAGAG-  
-----  
-----  
GACAAATGCAACTATAACTCTACCATGCAGAATAAAGCAAATTATAAATATGTGGCAGAGAGTAGGGCAAGCAA  
TGTATGCCCCCTCCTATCAAAGGAAGTATAAGGTGTGAATCAAAT---  
ATTACAGGACTATTACTAACAAGAGATGGTGGAGATGCCGATGGAAATGGAAC-----  
-----  
-----  
AATAGCAACAATGAAACCTTCAGACCTACAGGAGGAGATATGAGGAACAATTGGAGAAGTGAACCTATATAAAT  
ATAAAGTAGTACAAATTGAACCAATA---GGGGTAGCACCTACCACGGCAAAGAGAAGAGTGGTG-----  
-----GAGAGAGAAAAAAGAGCA---ATTGGA---CTGGGAGCT---  
-----GCCTTCCTTGGGTTCTTAGGAGCA---GCAGGAAGCACTATG---GGCGCGGCGTCA---  
ATAACGCTGACGGTACAG---GCCAGACAA---TTATTG---TCTGGCATAGTGCAACAGCAAAGC---  
AATTTG---CTGAGG---GCTATAGAGGCTCAGCAGCATCTGCTGAAACTCACGGTCTGGGGCATT  
>HQ338112  
TTCTATTGCAATACAACAGAACTGTTCAATAGCACTTGGGACAATAGCACTTGGGACAAAAATGACACTAGCA  
CA-----  
-----  
AATATCACACAGGTCATAACTCTGCCATGCAGAATAAAACAAATTATAAATATGTGGCAGAGAGTAGGACAAG  
CAATGTATGCCCCCTCCTATTAAAGGAGTTATGAGGTGTGAATCAAAC---  
ATTACAGGACTACTACTAACAAGAGATGGTGGAGCTAATAGCAGC-----  
-----  
-----  
AATGAGACCTTCAGACCTATAGGAGGAGATATGAGGGACAATTGGAGAAGTGAACCTATATAAGTATAAAGTAG  
TAGAAATTGAACCAATA---GGAGTAGCACCTACCAGGGCAAAGAGAAGAGTGGTG-----  
-----GAGAGAGAAAAAAGAGCA---ATTACA---CTGGGAGCT-----  
GCCTTCCTTGGGTTCTTAGGAGCA---GCAGGAAGCACTATG---GGCGCGGCGTCA---  
TTGACGCTGACGGTACAG---GCCAGACAA---TTATTG---TCTGGCATAGTGCAACAGCAAAGC---  
AATTTG---CTGAGG---GCTATAGAGGCTCAGCAGCATCTGCTGAAACTCACGGTCTGGGGCATT  
>GU481277  
TTCTATTGCAATACAGCAGACCTGTTCAATAGCACTTGGGACACAAATAGCACACAGACCAATAGAAATATAA  
CT-----  
-----  
GCCAGTGAAAATATAACTCTACCATGCAGAATAAAGCAAATTATAAATATGTGGCAGAGAGTAGGACAAGCAA  
TGTATGCCCCCTCCTATCAAAGGAATTATAATGTGTACATCAAAC---  
ATTACAGGACTACTCCTAACAAGAGATGGTGGAGGTGAACTAAT-----  
-----  
-----  
AGCAGCAATGAGACCTTCAGACCTATAGGAGGAGACATGAGGGACAATTGGAGAAGTGAACCTATATAAATATA  
AAGTAGTAAAAATTGAACCAATA---GGGGTAGCACCTACCAGGGCAAAGAGAAGAGTGGTG-----  
-----GAGAGAGAAAAAAGAGCA---ATTGGA---CTGGGAGCT-----  
---GCCTTCCTTGGGTTCTTGGGAGCG---GCAGGAAGTACTATG---GGCGCGGCGTCA---  
ATAACGCTGACGGTACAG---GCCAGACAA---TTATTG---TCTGGCATAGTACAACAGCAAAGC---  
AATTTG---CTGAGG---GCTATAGAGGCTCAGCAGCATCTGTTGAAGCTCACGGTCTGGGGCATT  
>GU481544

TTCTATTGCAATACAACAAAACCTGTTCAATAGCTCTTGGGGCGAAAATGGCACAAATAGCATCGAG-----  
-----  
-----  
ACCAATGAAACTATAATTCTACCATGCAGAATAAAGCAAATTATAAATATGTGGCAGAGAGTAGGACAAGCAA  
TGTATGCCCCCTCCTATCAAAGGAATTATAAAGTGTGAATCAAAC---  
ATTACAGGACTACTACTAATCAGAGATGGTGGAACCTAACAGCAGT-----  
-----  
-----  
AATGAGACCTTCAGACCTATAGGAGGAGATATGAGGGACAATTGGAGAAGTGAAGTATATAAGTATAAAGTAG  
TAAAAATTGAACCAATA---GGAGTAGCACCTACCAAGGCAAGGAGAAGAGTGGTG-----  
-----GAGAGAGAAAAAAGAGCA---ATTGGA---CTGGGAGCT-----  
GCCTTCCTTGCGTTCTTAGGAGCA---GCAGGAAGCACTATG---GGCGCGGCATCA---  
ATAACGCTGACGGTACAG---GCCAGACAA---TTATTG---TCTGGCATAGTGCAACAGCAAAGC---  
AATTTG---CTGAGG---GCTATAGAGGCTCAGCAACATCTGCTGAAACTCACGGTCTGGGGCATT  
>GU481661  
TTCTATTGCGATACAACAAAACCTGTTCAATAGCACTTGGGAAGAAAAAAGCACTGTTACAAATAGC-----  
-----  
-----  
ACCAATGACACTATAACTCTACCATGCAGAATAAAGCAAATTATAAATATGTGGCAGAGAGTAGGACAAGCAA  
TGTATGCCCCCTCCTATCCAAGGAAATATAAGTTGTGAATCAAAC---  
ATTACAGGACTACTACTAACAAGAGATGGTGGAAGTGAAAAATAAT-----  
-----  
-----  
GAGACCTTCAGACCTATAGGAGGAGATATGAGGGACAATTGGAGAAGTGAATTATACAAGTATAAAGTAGTAA  
AAATTGAACCAATA---GGAGTAGCACCTACCAGGGCAAGGAGAATAGTGGTG-----  
-----AAGAGAGAAAAAAGAGCA---ATTGGA---CTGGGAGTT-----  
GCCTTCCTTGCGTTCTTAGGAGCA---GCAGGAAGCACTATG---GGCGCAGCGTCA---  
CTAACGCTGACGGTACAG---GCCAGACAA---TTATTG---TCTGGCATAGTGCAACAGCAAAGC---  
AATTTG---CTGAGG---GCTATAGAGGCTCAGCAACATCTGCTGAAACTCACGGTCTGGGGCATT  
>KF716491  
TTCTATTGCAATACAACAAAACCTGTTGATAGCACTTGGAAATGACACTGACACAAATAGCACTGACACAAATA  
GCACAGGG-----  
-----  
-----  
GCCAATGAAATTATAACTCTACCATGCAGAATAAAGCAAATTATAAATATGTGGCAGAGAGTAGGACAAGCAA  
TGTATGCCCCCTCCTATCAAAGGAGTTATAAGGTGTGAATCAAAC---  
ATTACAGGACTACTACTAACAAGAGATGGTGGAACCTAATAGCAGC-----  
-----  
-----  
AATGAGAATGAGATCTTCAGACCTATAGGAGGAGATATGAGGGACAATTGGAGAAGTGAAGTATATAAGTATA  
AAGTAGTAGAAGTTGAACCAATA---GGAGTAGCGCCTACCAAGGCAAGGAGAAGAGTGGTG-----  
-----GAGAGAGAAAAAAGAGCA---ATTGGA---CTGGGAGCT-----  
---GCCTTCCTTGCGTTCTTAGGAGCA---GCAGGAAGTACTATG---GGCGCGGCGTCA---  
ATAACGCTGACGGTACAG---GCCAGACAA---TTATTG---TCTGGCATAGTGCAACAGCAAAGC---  
AATTTG---CTGAAA---GCTATAGAGGCTCAGCAGCATCTGCTGAAACTCACGGTCTGGGGCATT  
>KF716492  
TTCTATTGCAATACAACAGAACTGTTCAATAGCACTTGGAAAGAAAATAGCACTATCACAATAACACAACA-  
-----  
-----  
-----  
GCCAATGACACTATAACTCTACCATGCAGAATAAAGCAAATTATAAATATGTGGCAGAGAGTAGGACAAGCAA  
TGTATGCCCCCTCCTATCAAAGGAAGTATAAGGTGTAAATCAAAC---  
ATTACAGGACTACTACTAACAAGAGATGGTGGAAGTGAACCTAAT-----  
-----  
-----  
AGCAGTGAGGAAATCTTCAGACCTATAGGAGGAAATATGAGGGACAATTGGAGAAGTGAAGTATATAAGTATA  
AAGTAGTAAAAATTGAACCAATA---GGAGTAGCACCTACCAAGGCAAGGAGAAGAGTGGTG-----  
-----GAGAGAGAAAAAAGAGCAATAATTGGA---CTGGGAGCT-----  
---GCCTTCCTTGCGTTCTTAGGAGCA---GCAGGAAGCACTATG---GGCGCGGCGTCA---  
CTGACGCTGACGGTACAG---GCCAGACAA---TTATTG---TCTGGCATAGTGCAACAGCAAAGC---  
AATTTG---CTGAGG---GCTATAGAGGCTCAGCAGCATCTGCTGAAACTCACGGTCTGGGGCATT  
>FJ864679

TTCTATTGTAATACAACAGAACTGTTCAATAGCACTTGGTACAAAAATGGCACTAACACAACCTAGCACACAG-  
-----  
-----  
ACCAGTGAAAACATAACTCTGCCATGCAGAATAAAGCAAATTGTAAGGATGTGGCAGAGAGTAGGACAAGCAA  
TGTATGCCCCCTCCTATCAGTGGAATTATAAAGTGTGAATCAAAC---  
ATTACAGGATTAATACTAACAAGAGATGGTGGAGATAATAGTAGC-----  
-----  
-----  
AGCAATGAGACCTTCAGACCTGAAGGAGGAGACATAAGGGACAATTGGAGAAATGAACTATATAAGTATAAAAG  
TAGTAGAAATTGAACCAATA---GGAGTAGCACCTACTGAGGCAAGGAGAAGAGTGGTG-----  
-----CAGAGAGAAAAAAGAGCA---ATTGGA---CTGGGAGCT-----  
GCCTTCATTGGGTTCTTAGGAGCA---GCAGGAAGCACTATG---GGCGCAGCGTCA---  
CTGACGCTGACGGTACAG---GCCAGAAAA---TTATTG---TCTGGCATAGTGCAACAGCAAAGC---  
AATTTG---CTGAGG---GCTATAGAGGCTCAGCAGCATCTGCTGAAACTCACGGTCTGGGGCATT  
>JQ292893  
TTCTATTGCAATACCACAGACCTGTTCAATAGCACTTGGGACAAAAATGACACTATCACAAATACCCAGAGG  
TC-----  
-----  
AATGGAACCTACTATAACTCTGCCATGCAGAATAAAGCAAATTGTAATATGTGGCAGAGAGTAGGACAAACAA  
TGTATGCCCCCTCCTATCAAAGGAAGTATAAGGTGTGAATCAAAC---  
ATTACAGGACTACTGCTAATAAGAGATGGTGGAGAACTAATAGC-----  
-----  
-----  
AGCAGTGAGACCTTCAGACCTGTAGGAGGAGATATGAGGGATAATTGGAGAAGTGAACCTATATAAGTATAAAAG  
TAGTAAAAATTGAACCAATA---GGAGTAGCACCTACCAGGGCAAAGAGAAGAGTGGTG-----  
-----GAGAGAGAAAAAAGAGCA---ATTGGA---CTGGGAGCC-----  
GCCTTCCTTGGGTTCTTAGGAGCA---GCAGGAAGTACTATG---GGCGCGGCGTCA---  
CTGACGCTGACGGTACAG---GCCAGACAA---TTATTG---TCTGGCATAGTGCAACAGCAAAGC---  
AATTTG---CTGAGG---GCTATAGAGGCTCAGCAGCATCTGCTGAAACTCACGGTCTGGGGCATT  
>JF430898  
TTCTATTGCAATACAACAGACCTGTTCAATAGCACTTGGAGGAATGACACTGTGCGAAATATCACG-----  
-----  
-----  
GCCAATGGAACCTATAACTCTGCCATGCAGAATAAAGCAAATTATAAATATGTGGCAGAGAGTAGGACAAGCAA  
TGTATGCCCCCTCCTATCGAAGGAAATATAAGTTGTGAATCAAAC---  
ATTACAGGGCTACTACTAATAAGAGATGGTGGAACTGATGACAGC-----  
-----  
-----  
AATGAGACTGAGTCCTTCAGACCCATAGGAGGAGATATGAGGGACAATTGGAGAAGTGAACCTATATAAATATA  
AAGTGGTACAAATTGAACCAATA---GGAGTAGCACCTACCAAGGCAAGGAGAAGAGTGGTG-----  
-----GAGAGAGAAAAAAGAGCA---ATTGGA---CTGGGAGCT-----  
---GCCTTCCTTGGGTTCTTAGGAGCA---GCAGGAAGCACTATG---GGCGCGGCGTCA---  
TTGACGCTGACGGTACAG---GCCAGACAA---TTATTG---TCTGGCATAGTGCAACAGCAAAC---  
AATTTG---CTGAGG---GCTATAGAGGCTCAGCAGCATCTGCTGAAACTCACGGTCTGGGGCATT  
>HQ834967  
TTTTATTGCAATACAACAGGCCTGTTCAATAGCACTTGGGGCAATAGCACTGACGCAAAT-----  
-----  
-----  
AGCAATGAAAATATAACTCTACCATGCAGAATAAAGCAAATTATAAATATGTGGCAGAGAGTAGGACAAGCAA  
TGTATGCCCCCTCCTATCAGCGGAAATATAAGTTGTGTATCAAAC---  
GTTACAGGACTACTACTAGTAAGAGATGGTGGAGGTGGAATAGT-----  
-----  
-----  
AGCAACAATGAGACCTTCAGACCTATAGGAGGAGATATGAGGGACAATTGGAAAAAGTGAACCTATATAAGTATA  
AAGTAGTAGAAATTGAACCAATA---GGAGTAGCACCTACCAAGGCAAAGAGAAGGGTGGTG-----  
-----CAGAGAGAAAAAAGAGCA---ATTGGAGGACTGGGAGCT-----  
---GCCCTCCTTGGATTCTTAGGAGCA---GCAGGAAGCACTATG---GGCGCGGCGTCA---  
CTGACGCTGACGGTACAG---GCCAGACAA---TTATTG---TCTGGCATAGTGCAACAGCAAAGC---  
AATTTG---CTGAGG---GCTATAGAGGCTCAGCAGCATCTGCTGAAACTCACCGTCTGGGGCATT  
>JX500696

TTCTATTGTAATACAACAAAACCTGTTCAATAGCACTTGGGACAAAATAGTACTTGGAATGAAAATAGCACT-  
 -----  
 -----  
 GCCAATGAAAATATAACTCTGCCATGCAGGATAAAGCAAATTATAAATATGTGGCAGAGAGTAGGACAAGCAA  
 TGTATGCCCCCTCCTATCAAAGGAGTTATAATGTGTAAATCAAAC---  
 ATTACAGGTCTACTCCTAACAGAGATGGTGGAGGTGGAGCTAAT-----  
 -----  
 -----  
 AGCAGCAATGAGACTTTCAGACCTATAGGAGGAAATATGAGGGACAATTGGAGAAGTGAACCTATATAAGTATA  
 AAGTAGTACAAATTGAACCAATA---GGAGTAGCACCTACCAGGGCAAAGAGAAGAGTGGTG-----  
 -----GAGAGAGAAAAAGAGCA---ATTGGA---CTGGGAGCC-----  
 ---GCTTTCCTTGGGTTCTTAGGAGCA---GCAGGAAGCACTATG---GGCGCGGCGTCA---  
 CTGACGCTGACGGTACAG---GCCAGACAA---TTATTG---TCTGGCATAGTGCAACAGCAAAGC---  
 AATTTG---CTGAGG---GCTATAGAGGCTCAGCAGCAGCTGCTGAAACTCACGGTCTGGGGCATT  
 >JX500695  
 TTCTATTGCAATACAACAGGCCTGTTCAATAGCACTTGGGACACAAATGGCACTGTCACAAGTAGCACAAATG  
 GA-----  
 -----  
 ACAAATAAACTATAACTCTGCCATGCAGAATAAAACAAATTATAAATATGTGGCAGAGAGTAGGACAAGCAA  
 TGTACGCCCCCTCCTATCAAAGGAAGTATAAGGTGTGAATCAAAC---  
 ATTACAGGTCTACTACTAATAAGAGATGGTGAAAGGAATAGCAGC-----  
 -----  
 -----  
 AATGAGACCTTTAGACCTATAGGAGGAAATATGAGGGACAATTGGAGGAGTGAACCTATATAAGTATAAAGTAG  
 TACAAATTGAACCAATA---GGACTAGCACCTACCAGGGCAAAGAGAAGAGTGGTG-----  
 -----GAGAGAGAAAAAGAGCA---ATTGGA---CTGGGAGCC-----  
 GCCCTCCTTGGGTTCTTAGGAGCA---GCAGGAAGCACTATG---GGCGCGGCGTCA---  
 ATGACGCTGACGGTACAG---GCCAGACAA---TTATTG---TCTGGCATAGTGCAACAGCAAAGC---  
 AATTTG---CTGAGG---GCTATAGAGGCTCAGCAGCATCTGCTGAAACTCACGGTCTGGGGCATT  
 >JX500694  
 TTCTATTGCAATACAACAGAACTGTTCAATAGCACTTGGGACGGAATGGCACTGCCACAAATAAC-----  
 -----  
 -----  
 ACAGAGGACAATGTAACCTCTGCCATGCAGAATAAAGCAAATTATAAATATGTGGCAGAGAGTAGGACAAGCAA  
 TGTATGCCCCCTCCTATCAGAGGAAGTATAAAGTGTGTATCAAAC---  
 ATTACAGGACTACTACTAATAAGAGATGGTGGAGGTGGAAATAAT-----  
 -----  
 -----  
 AGCAACAATGAGACCTTCAGACCTATAGGAGGAAATATGAGGGACAATTGGAGAAGTGAACCTATATAAGTATA  
 AGGTAGTACAAATTGAACCAATA---GGAATAGCACCTACCACAGCAAAAAGAAGAGTGGTG-----  
 -----GAGAGAGAAAAAGAGCA---ATTGGA---CTGGGAGCT-----  
 ---GCCTTCCTTGGGTTCTTAGGAGCA---GCAGGAAGTACTATG---GGCGCGGCGTCA---  
 ATAACGCTGACGGTACAG---GCCAGACAA---TTATTG---TCTGGTATAGTACAACAGCAAAGC---  
 AATTTG---CTGAGG---GCTATAGAGGCTCAGCAGCATCTGCTGAAACTCACGGTCTGGGGCATT  
 >MH603967  
 TTCTATTGCAATACAACACAACCTGTTTCGATAGCACGTGGGAAGAGAATGCCAATATCACAATACAAATAATA  
 CACAG-----  
 -----  
 -----  
 AATAATGAAAATATAACTCTACCATGCAGAATAAAGCAAATTATAAGGATGTGGCAGGGGGTAGGACAAGCAA  
 TGTATGCCCCCTCCTATAAGAGGAGAAATAAGGTGTGAATCAAAC---  
 ATTACAGGATTACTACTAACAGAGATGGTGGAGGTACAAATAGC-----  
 -----  
 -----  
 AGCAACAATGAGACCTTCAGACCTATAGGAGGAGACATGAGGGACAATTGGAGAAGTGAACCTATATAAGTATA  
 AAGTAGTACAAATTGAACCCATA---GGAGTAGCACCTACCAAGGCAAAGAGAAGAGTGGTG-----  
 -----GAGAGAGAAAAAGAGCA---ATTGGA---CTGGGAGCT-----  
 ---GCCTTCCTTGGGTTCTTAGGAGCA---GCAGGAAGCACTATG---GGCGCGGCGTCA---  
 ATAACGCTGACGGTACAG---GCCAGACAA---TTATTG---TCTGGCATAGTGCAACAGCAAAGC---  
 AATTTG---CTGAGG---GCTATAGAGGCTCAGCAGCATCTGCTGAAACTCACGGTCTGGGGCATT  
 >MH604120

TTTTATTGTAATACAACAGACCTGTTCAATAGCGCTTGGGAAAATGGCAATGCTACAAATATCACACAGGCCA  
 AT-----  
 -----  
 GACAATGAAACTATAATTCTACCATGCAGAATAAGGCAAATTATAAATATGTGGCAAAGAGTAGGACAGGCCA  
 TGTATGCCCCCTCCTATCAGAGGAAATATAACGTGTATATCAAAT---  
 ATTACAGGACTACTACTAACAAGAGATGGTGGAGGTGGAAATAAT-----  
 -----  
 -----  
 AGCAACAATGAGACCTTCAGACCTATAGGAGGAGATATGAGGGACAATTGGAGAAGTGAACCTATATAAATATA  
 AAGTAGTACAAATTGAACCAATA---GGAATAGCACCTAACAGGGCAAAGAGAAGAGTGGTG-----  
 -----GAGAGAGAAAAAAGAGCA---ATTGGA---CTGGGAGCT-----  
 ---GCCTTCCTTGGGTTCTTGGGAGCA---GCAGGAAGTACTATG---GGCGCGGCGTCA---  
 CTAACGCTGACGGTACAG---GCCAGAAAA---TTATTG---TCTGGCATAGTGCAACAGCAAAAC---  
 AATTTG---CTGAAG---GCTATAGAGGCTCAGCAGCATCTGCTGAGACTCACGGTCTGGGGCATT  
 >MH604308  
 TTCTATTGCAATACAACAGACCTGTTCAATAGCACTTGGGACGGAAATAGCACTAGAGATGAAAATGGCAATG  
 ATACAGAT-----  
 -----AGCACA-----  
 CAGAACCAATAGACCTATAACTCTGCCATGCAGAATAAAGCAAATTATAAATATGTGGCAGAGAGTAGGACAAG  
 CAATGTATGCCCCCTCCTATAAAAGGAATTATAAGGTGTACATCAAAC---  
 ATTACGGGACTACTACTAATAAGAGATGGTGGAGGCGGAGCTAAT-----  
 -----  
 -----  
 AGCAGCAATGAGACCTTCAGACCTATAGGAGGAGATATAAGGGACAATTGGAGAAGTGAACCTATTTAAGTATA  
 AAGTAGTACAAATTGAACCAATA---GGAGTAGCACCTACCAGGGCAAAGAGAAGAGTGGTG-----  
 -----GAGAGAGAAAAAAGAGCA---ATTGGA---CTGGGAGCT-----  
 ---GCCTTCCTTGGGTTCTTGGGAGCA---GCAGGAAGTACTATG---GGCGCGGCGTCA---  
 ATAACGCTGACGGTACAG---GCCAGACAA---TTATTG---TCTGGCATAGTACAACAGCAAAGC---  
 AATTTG---CTGAGG---GCTATAGAGGCTCAGCAGCATCTGCTGAAACTCACGGTCTGGGGCATT  
 >MH604056  
 TTCTATTGCAATACAACAGCCCTGTTCAATTGGAACGGCAATGAAACTGTTACAAATAGCACACAG-----  
 -----  
 -----  
 GCCAATGAAACTATAACTTTACCATGCAGAATAAAGCAAATTATAAATATGTGGCAGAGAGTAGGACAAGCAA  
 TGTATGCCCCCTCCTATCAAAGGAAGTATAAGGTGTACATCAAAC---  
 ATTACAGGACTGCTGCTAACAAGAGATGGTGGAACTAACAGCAGC-----  
 -----  
 -----  
 AACAGCACTGAGATCTTCAGACCTATAGGAGGAAATATGAAGGACAATTGGAGAAGTGAACCTATATAAATATA  
 AAGTAGTAAAAATTGAACCAATA---GGAGTAGCACCTACCAAGGCAAGGAGAAGAGTGGTG-----  
 -----GAGAGAGAAAAAAGAGCA---ATTGGA---CTGGGAGCT-----  
 ---GCCTTCCTTGGGTTCTTGGGAGCA---GCAGGAAGCACTATG---GGCGCGGCGTCA---  
 ATAACGCTGACGGTACAG---GCCAGACAA---TTATTG---TCCGGCATAGTGCAACAGCAAAGC---  
 AATTTG---CTGAGG---GCTATAGAGGCTCAGCAGCATCTGCTGAAACTCACGGTCTGGGGCATT  
 >MH604408  
 TTCTATTGCAATACAACAAACCTGTTCAATAGCACGTGGAACGAAACTGACAGTGTTACAAATAGCACACAGG  
 CC-----  
 -----  
 -----  
 AATAATGAAACTATAATTTTACCATGCAGGATAAAGCAAATTATAAGGACGTGGCAGAGAGTAGGACAAGCAA  
 TGTATGCCCCCTCCTATCAAAGGAAGGATAAGGTGTGAATCAAAC---  
 ATTACAGGACTACTACTAACAAGAGATGGTGGAGGTAAAAGTAATAATGAGACA-----  
 -----  
 -----  
 AGTAATAATGAGACCTTCAGACCTATAGGAGGAGATATGAGGGACAATTGGAGAAGTGAACCTATATAAATATA  
 AAGTAGTAGAAATTGAACCAATA---GGAGTAGCACCTACCAAGGCAAAGAGAAGAGTGGTG-----  
 -----GAGAGACAAAAAAGAGCA---ATTGGA---CTGGGAGCT-----  
 ---GCCTTCCTTGGGTTCTTAGGAGCA---GCAGGAAGCACTATG---GGCGCGGCGTCA---  
 CTAACGCTGACGGTACAG---GCCAGACAA---TTATTG---TCTGGCATAGTGCAACAGCAAAGC---  
 AATTTG---CTGAGG---GCTATAGAGGCTCAGCAGCATCTGCTGAAACTCACGGTCTGGGGCATT  
 >MH604109

TTCTACTGCAGTACAGCAGCCCTGTTCAATAGCACTTGGGACGGAAATACCACTATTGCAAATAACACACAG-  
 -----  
 -----  
 AACAAATGAAAATATAACTATAACCATGCAGAATAAAGCAAATTATCAATATGTGGCAGAGAGTAGGACAAGCAA  
 TGTATGCCCCCTCCTATACAAGGAGTTATAACTTGTGAATCAAAC---  
 ATTACAGGACTACTACTAACAAGAGATGGTGGAGTTAATAGCAGC-----  
 -----  
 -----  
 AATGAAACCTTCAGGCCTATAGGAGGAGATATGAGGGACAATTGGAGAAGTGAATTATATAAGTATAAAGTAG  
 TAAAAGTTGAACCAATA---GGAGTAGCACCTACCACGGCAAGGAGAAGAGTGGTG-----  
 -----GGGAGAGAAAAAAGAGCA---ATTGGA---CTGGGAGCT-----  
 GCCCTCCTTGGGTTCTTGGGAGCA---GCAGGAAGCACTATG---GGCGCGGCGTCA---  
 ATAACGCTGACGGTACAG---GCCAGACAA---TTATTG---TCTGGCATAGTGCAACAGCAAAGC---  
 AATTTG---CTAAGG---GCCATAGAGGCTCAGCAGCATCTGCTGAAACTCACGGTCTGGGGCATT  
 >MH604508  
 TTCTATTGCTATACAACAGGGCTGTTCAATAGCACTTGGGACGAAAATAGCACTAGCACAAATATCACACAG-  
 -----  
 -----  
 AAAAAATGAAAATATAACTATAACCATGCAGAATAAAGCAAATTATAAATATGTGGCAGAGAGTAGGACAAGCAA  
 TGTATGCCCCCTCCTATCAGAGGAAATATAAGATGTGTATCAAAC---  
 ATTACAGGACTACTACTAACAAGAGATGGTGGAGATGGAGATAAT-----  
 -----  
 -----  
 AGCAGTGAGACCTTCAGACCTATAGGAGGAGATATGAGGGACAATTGGAGAAGTGAACCTATATAAATATAAAG  
 TAGTACAAATTGAACCCATA---GGAGTAGCACCTACCAAGGCAAGGAGAAGAGTGGTG-----  
 -----GAGAGAGAAAAAAGAGCA---ATTGGA---CTGGGAGCT-----  
 GCCTTCCTTGGGTTCTTAGGAGCG---GCAGGAAGCACTATG---GGCGCGGCGTCA---  
 ATAACGCTGACGGTACAG---GCCAGACAA---TTATTG---TCTGGCATAGTGCAACAGCAAAGC---  
 AATTTG---CTGAGG---GCTATAGAGGCTCAGCAGCATCTGCTGAAACTCACGGTCTGGGGCATT  
 >MH604524  
 TTCTATTGCAATACAACAAACCTGTTCAATAGTGCTTGGAAAAATGGCAGTGCTACAAATAGCACACAAGCC-  
 -----  
 -----  
 AATGGAACAACCTATAACTCTACCATGCAGAATAAAGCAAATTATAAATATGTGGCAGAGAGTAGGACAAGCAA  
 TGTATGCCCCCTCCTATCAAAGGAAGTATAAGGTGTGAATCAAAC---  
 ATTACAGGACTACTACTAACAAGAGATGGTGGAGGTGAAACTAATAGC-----  
 -----  
 -----  
 AGCGATGAAACCGAAACCTTCAGACCTATAGGAGGAGATATGAGGAATAATTGGAGAAGTGAATTATATAAGT  
 ATAAAGTAGTAAAAATTGAACCAATA---GGAGTAGCACCTACCAGGGCAAGGAGAAGAGTGGTG-----  
 -----GAGAGAGAAAAAAGAGCA---GTTGGA---CTGGGAGCT---  
 -----GCCTTCCTTGGGTTCTTGGGAGCA---GCAGGAAGCACTATG---GGCGCGGCGTCA---  
 ATGACGCTGACGGTACAG---GCCAGAAAA---TTATTG---TCTGGCATAGTGCAACAGCAAAGC---  
 AATTTG---CTGAGG---GCTATAGAGGCTCAGCAGCATCTGCTGAAACTCACGGTCTGGGGCATT  
 >MH604541  
 TTCTATTGCAATACAACAAAGCTGTTCAATAGCACTTGGGAAAATAGCACTTGGGAAAATGGCACTGTTGCAA  
 AT-----  
 -----AGCACA-----  
 GGGGACAATGACACTATAACTATAACCATGCAGAATAAAGCAAATTATAAATATGTGGCAAAGAGTAGGACAAG  
 CAATGTATGCCCCCTCCTATCAAAGGAATTATAAGGTGTGAATCAAAC---  
 ATTACAGGACTACTACTAACAAGAGATGGTGGAGGTGGAACCTAAT-----  
 -----  
 -----  
 AGCAGCAATGAGACCTTCAGACCTATAGGAGGAGACATGAGGGACAATTGGAGAAGTGAACCTATATAAGTATA  
 AAGTAGTAAAAATTGAACCAATA---GGAGTAGCACCTACCAGGGCAAAGAGAAGAGTGGTG-----  
 -----GAGAGAGAAAAAAGGGCA---TTTGGA---CTGGGAGCT-----  
 ---GCCTTCCTTACGTTCTTGGGAGCA---GCAGGAAGCACTATG---GGCGCGGCGTCA---  
 ATAACGCTGACGGTACAG---GCCAGACAA---TTATTG---TCTGGCATAGTGCAACAGCAAAGC---  
 AATTTG---CTGAGG---GCTATAGAGGCTCAGCAGCATCTGCTGAAACTCACGGTCTGGGGCATT  
 >MH330347

TTCTATTGCAATACCACATACCTGTTCAATAGCACTTGGGATGGAAATAGCACTGTAAATAGCACAGGG-----  
-----  
-----  
GGCGATAGAAATATAACTTTACCATGCAGAATAAAGCAAATTATAAATATGTGGCAGAGAGTAGGACAAGCAA  
TGTATGCCCCCTCCTATCCGAGGAAACATAAGTTGTGAATCAAAC---  
ATCACAGGACTACTCCTAATAAGAGATGGTGGAGGTGGAAATAAT-----  
-----  
-----  
AAGACTAATGAGACCTTCAGACCTATAGGAGGAGATATGAGGGACAATTGGAGAAGTGAACATATAAGTATA  
AAGTAGTAAAAATTGAACCAATA---GGGGTAGCACCTACCCTGGCCAGGAGAAGAGTGGTG-----  
-----GAGAGAGAAAAAAGAGCAATAATTGGA---CTGGGAGCT-----  
---GCCTTCATTGGGTTCTTAGGAGCA---GCAGGAAGCACTATG---GGCGCGGCGTCA---  
CTGACGCTGACGGTACAG---GCCAGACAA---TTATTG---TCTGGCATAGTGCAACAGCAAAGC---  
AATTTG---CTGAGG---GCTATAGAGGCTCAGCAGCATCTGCTGAAACTCACGGTCTGGGGCATT  
>MH330348  
TTCTATTGCAATACAACAAACCTGTTCAACATAAATAGCACTGACACAAATATCACACAG-----  
-----  
-----  
GACAAATGAACTATAACTCTACCATGCAGAATAAAGCAAATTATAAATATGTGGCAGAGAGTAGGACAAGCAA  
TGTATGCCCCCTCCTATCAAAGGAAGTATAATGTGTGAATCAAAC---  
ATTACAGGACTACTACTAACAAGAGATGGTGGAGGTGACAGAAAT-----  
-----  
-----  
GATACTAATAGTACTGAGACCTTCAGACCTATAGGAGGAGATATGAGGGACAATTGGAGAAGTGAACATATA  
AGTATAAAGTAGTAAAAATTGAACCAATA---GGAGTAGCACCTACCAGGGCAAAGAGAAGAGTGGTG-----  
-----GGGAGAGAAAAAAGAGCA---ATTGGA---  
CTGGGAGCC-----GCCTTCCTTGGGTTCTTAGGAGCA---GCAGGAAGCACTATG---  
GGCGCGGCGTCA---CTGACGCTGACGGTACAG---GCCAGACAA---TTATTG---  
TCTGGCATAGTGCAACAGCAAAGC---AATTTG---CTGAGG---  
GCTATAGAGGCTCAGCAGTATATGCTGAAACTCACGGTCTGGGGCATT  
>MH330349  
TTCTATTGCAATACAACAGCCCTGTTCAATAGCACTTGGAGTGAAAATGGCACTGCCATAAATAGCACAGAG-  
-----  
-----  
GCCAATGGAATATAACTCTGCCATGCAGAATAAGGCAAATTATAAATATGTGGCAGAGAGTAGGACAAGCAA  
TGTATGCCCCCTCCTATCAGAGGAATTATAAGGTGTGAATCAAAC---  
ATTACAGGACTACTGCTAACACGAGATGGTGTAGCTAATAGCAGC-----  
-----  
-----  
AATGAGACCTTCAGACCTATAGGAGGAGATATGAGGAACAATTGGAGAAGTGAACATATAAGTATAAAGTAG  
TAAAAATTGAACCAATA---GGAGTAGCACCTACCAGGGCAAAGAGAAGAGTGGTG-----  
-----GAGAGAGAAAAAAGAGCA---ATTGGA---CTGGGAGCC-----  
GCCTTCCTTGGGTTCTTAGGAGCA---GCAGGAAGCACTATG---GGCGCGGCGTCA---  
CTGACGCTGACGGTACAG---GCCAGACAA---CTCTTG---TCTGGCATAGTGCAACAGCAAAGC---  
AATTTG---CTGAGG---GCTATAGAGGCTCAGCAGCATCTGCTGAAACTCACGGTCTGGGGCATT  
>MH330350  
TTTTATTGTAATACAACAGAACTGTTCAATAGTACTTGGGACGGAAATAACACTGTTACAAATAGCACACAG-  
-----  
-----  
GACAAATGGCACTATAACTCTACCATGCAGAATAAGGCAAATTATAAATATGTGGCAGAGAGTAGGACAAGCAA  
TGTATGCCCCCTCCTATCAGAGGAAATATAAGTTGTGAATCAAAC---  
ATTACAGGACTACTACTAACAAGAGATGGTGGAGTTAATACCAGC-----  
-----  
-----  
AATGAGACCTTCAGACCTACAGGAGGAGATATGAGGAACAATTGGAGAAGTGAACATATAAGTATAAAGTAG  
TACAAATTGAACCAATA---GGAGTAGCACCTACCAAGGCAAAGAGAAGAGTGGTG-----  
-----GAGAGAGGAAAAAGGGCA---ATTGGA---CTGGGAGCT-----  
GCCTTCCTTGGGTTCTTGGGAGCA---GCAGGAAGTACTATG---GGCGCGGCGTCA---  
ATAACGCTGACGGTACAG---GCCAGACAA---TTATTG---TCTGGCATAGTACAACAGCAAAGC---  
AATTTG---CTGATG---GCTATAGAGGCTCAGCAGCATCTGCTGAAACTCACGGTCTGGGGCATT

>MH330351

TTCTATTGCAATACAACAAACCTGTTCAATAGCACTTGGGACAAAAATAGTACTGTCACAAATAGCACAAAC-

-----  
-----

AGCACAGAAACTATAACTCTACCATGCAGAATAAAGCAAATTATAAATATGTGGCAGAGAGTAGGACAAGCAA  
TGTATGCCCCCTCCTATCAAAGGAAGTATAAGGTGTGAATCAAAC---  
ATTACAGGACTAATATTAATAAGAGATGGTGGAAATAATAGCAGC-----

-----  
-----

AATGAGACCTTCAGACCTATAGGAGGAAATATGAGGGACAATTGGAGAAGTGAAGTATATAAATATAAAGTAG  
TAGAGATTGAACCAATA---GGAATAGCACCTACCAAGGCAAGAAGGAGAGTGGTG-----  
-----GAGAGAGAAAAAAGAGCA---ATTGGA---CTGGGAGCT-----  
GCCTTCCTTGGGTTCTTAGGAGCA---GCAGGAAGCACTATG---GGCGCGGCGTCA---  
ATAACGCTGACGGTACAG---GCCAGACAA---TTATTG---TCTGGCATAGTGCAACAGCAAAGC---  
AATTTG---CTGAGG---GCTATAGAAGCTCAGCAGCATCTGCTGAAGCTCACGGTCTGGGGCATT

>MH330352

TTCTATTGCAATACAACACAACCTGTTCAATAGCACTTGGCCTTGGAATGACACTGTCACAAATAGCACAGAG-

-----  
-----

ACCAGTGAAAATATAACTCTACCATGCAGAATAAAGCAAATTATAAATATGTGGCAGAGAGTAGGACAAGCAA  
TGTATGCCCCCTCCTATCAGAGGAAGTATAAGGTGTGAATCAAAC---  
ATTACAGGACTACTACTAATAAGAGATGGTGGAACTAATAGCACC-----

-----  
-----

AATGAGACCTTCAGACCTATAGGAGGAGATATGAGGGACAATTGGAGAAGTGAAGTATATAAGTATAAAGTAG  
TACAAATTGAACCAATA---GGAGTAGCACCTACCAAGGCAAAGAGAAGAGTGGTG-----  
-----GAGAGAGAAAAAAGAGCA---ATTGGA---CTGGGAGCT-----  
GCCTTCCTTGGGTTCTTAGGAGCA---GCAGGAAGCACTATG---GGCGCGGCGTCA---  
ATAACGCTGACGGTACAG---GCCAGACAA---TTATTG---TCTGGCATAGTGCAACAGCAAAGC---  
AATTTG---CTGAGG---GCTATAGAGGCTCAGCAGCATCTGCTGAAACTCACGGTCTGGGGCATT

>MH330353

TTCTATTGCAATACAACAGACCTGTTTCGATAGCACTTGGGATGGAAATAACACAGATAAACTGTACAAATA  
TCACG-----

-----  
-----

GGCAATGGAAGTATGACTCTGCCATGCAGAATAAGGCAAATTGTAAGGATGTGGCAGAGAGTAGGACAAGCAA  
TGTATGCCCCCTCCTATTGAAGGGGAAAATAAGGTGTGAATCAAAC---  
ATTACAGGACTACTACTACTAAGAGATGGTGGAAATTAATAGCAGC-----

-----  
-----

AATGAGACCTTCAGACCTATAGGAGGAGATATGAGGGACAATTGGAGAAGTGAGCTATATAAGTATAAAGTAG  
TAAAAATTGAACCAATA---GGAGTAGCACCTACCCAGGCAAGGAGAAGAGTGGTG-----  
-----GCGAGAGAAAAAAGAGCA---ATTGGA---TTAGGAGCT-----  
GCCTTCCTTGGGTTCTTAGGAGCA---GCAGGAAGCACTATG---GGCGCGGCGTCA---  
ATAACGCTGACGGTACAG---GCCAGACAA---TTATTG---TCTGGCATAGTGCAACAGCAAAGC---  
AATTTG---CTGAAG---GCTATAGAGGCTCAGCAGCATCTGCTGAAACTCACAGTCTGGGGCATT

>MH330354

TTCTATTGCAATACAACAAGCCTGTTCAATAGCACTTGGGATGAAAATAGCACTGTCACAAACACAGAG----

-----  
-----

GCCAATGGAAGTATAAATTCTGCCATGCAGAATAAAGCAAATTATAAATATGTGGCAAAGAGTAGGACAAGCAA  
TGTATGCCCCCTCCTATCAGAGGAAGGATAAGGTGTGAATCAAAC---  
ATTACAGGACTACTAATAACAAGAGATGGTGGAGGTGGAATAAT-----

-----  
-----

AGCACCAATGAAACCTTCAGACCTATAGGAGGAGATATGAGGGACAATTGGAGAAGTGAAGTATATAAGTATA  
AAGTAGTAAAAATTGAACCAATA---GGAGTAGCACCTACCAGGGCAAAGAGAAGAGTGGTG-----  
-----GAGAGAGAAAAAAGAGCA---ATTGGA---CTGGGAGCC-----  
---GCCTTCCTTGGGTTCTTAGGAGCA---GCAGGAAGCACTATG---GGCGCAGCGTCA---  
ATGACGCTGACGGTACAG---GCCAGACAA---TTATTG---TCTGGCATAGTGCAACAGCAAAGC---  
AATTTG---CTGAGG---GCTATAGAGGCTCAGCAGCATCTGCTGAAACTCACGGTCTGGGGCATT

>MH330355

TTCTATTGCAATACAACAAGGCTGTTCAATAGCTCTTGGGGCGAAAATAGCACTGTCACAAATAGCACAGAT-

-----  
-----

GTC AATGGA ACTATAATTCTGCCATGCAGAATAAAACAAATTATAAATATGTGGCAGAGAGTAGGACAAGCAA  
TGTATGCCCCCTCCTATCCCAGGAAATATAACATGTATATCAAAC ---  
ATTACAGGACTACTACTAGTAAGAGATGGTGGACAGAACAGTAGT-----

-----  
-----

AACACCAGTGAAACCTTCAGACCCATAGGAGGAGATATGAAGCACAATTGGAGAAGTGAACATATAAGTATA  
AAGTAGTAGAAATTGAACCAATA --- GGAGTAGCACCTACCAAGGCAAAGAGAAGAGTGGTG-----  
-----GAGAGAGAAAAAAGAGCAATTATTGGA --- CTGGGAGCT-----  
---GCCTTCATTGGGTTCTTAGGAGCA --- GCAGGAAGCACTATG --- GGCGCGGCGTCA ---  
ATAACGCTGACGGTACAG --- GCCAGACAA --- TTACTG --- TCTGGCATAGTGCAACAGCAAAGC ---  
AATTTG --- CTGAGG --- GCTATAGAGGCTCAGCAGCATCTGCTGAAACTCACGGTCTGGGGCATT

>MH330356

TTCTATTGCAATACAACAGACCTGTTTAATAGCACTTGGGAGGAAAATAGCACTGTTACAAATAACACAAAT-

-----  
-----

GCCAATGAAAATATAACTCTGCCATGCAGGATAAAGCAAATTATAAATTTGTGGCAGAGAGTAGGGCGAGCAA  
TGTATGCCCCCTCCTATCAGAGGAATTATAAGGTGTAACCTCAACT ---  
ATTACAGGACTACTACTAACAAGAGATGGTGGAAATGGAAATAGTAGC-----

-----  
-----

AACAATGAGACTGAGACCTTCAGACCTATAGGAGGAAAATATGAGGGACAATTGGAGAAGTGAACATATAAGT  
ATAAAGTAGTAGAAATTGAACCAATA --- GGAGTAGCACCTACCAGGGCAAGGAGAAGAGTGGTG-----  
-----CAGAGAGAAAAAAGAGCA --- GTTGGA --- CTGGGAGCC ---  
-----GCCTTCCTTGGGTTCTTAGGAGCA --- GCAGGAAGCACTATG --- GGCGCGGCGTCA ---  
CTGACGCTGACGGTACAG --- GCCAGACAA --- TTATTG --- TCTGGCATAGTGCAACAGCAAAGT ---  
AATTTG --- CTGAGG --- GCTATAGAGGCTCAGCAGCATCTGCTGAAACTCACGGTCTGGGGCATT

>MG902950

TTCTATTGCAATACAACAAACCTGTTTCAGTAGCACTTGGAACGACACTATCACAAATTTACAGAG-----

-----  
-----

ACCAATGAAACTATAATTCTGCCATGCAGAATAAGGCAATTTATAAAGATGTGGCAGAGAGTAGGACAAGCAA  
TGTATGCCCCCTCCTATCAAAGGGAGCATAAGGTGTGAATCAAAC ---  
ATTACAGGACTACTACTAACAAGAGATGGTGGAAATGGAACTACT-----

-----  
-----

GACAGCAATGAGACCTTCAGACCTATAGGAGGAGATATGAGGGACAATTGGAGAAGTGAACATATAAGTATA  
AAGTAGTACAAATTGAACCAATA --- GGAATAGCACCTACCAAGGCAAAGAGAAGAGTGGTG-----  
-----GAGAGAGAAAAAAGAGCA --- ATTGGA --- CTGGGAGCC-----  
---GCTTTCCTTGGGTTCTTAGGAGCA --- GCAGGAAGTACTATG --- GGCGCGGCGTCA ---  
ATAACGCTGACGGCACAG --- GCCAGACAA --- TTATTG --- TCTGGTATAGTACAACAGCAAAGC ---  
AATTTG --- CTGAGG --- GCTATAGAGGCTCAGCAGCATCTGCTGAAACTCACGGTCTGGGGCATT

>MG902951

TTCTATTGCAATACAACAGACCTGTTCAATAGCACTTGGGGAAATAACACAAATAGCACAGGG-----

-----  
-----

ACCAATGAAACTATAACTCTGCCATGCAGAATAAAGCAAATTATAAATATGTGGCAGAGAGTAGGACAAGCAA  
TGTATGCCCCCTCCTATCCGAGGAATTATAAAGTGTGAATCAAAC ---  
ATTACAGGACTACTACTAACAAGAGATGGTGGAGGTGAAGCTAATAAT-----

-----  
-----

AGCGAGAGCGAGACCTTCAGACCTATAGGAGGAGATATGAGGGACAATTGGAGAAGTGAACATATAAGTATA  
AAGTAGTAGAAATTGAACCAATA --- GGAGTAGCACCTACCAGGGCAAAGAGAAGAGTGGTG-----  
-----CAGAGAGAAAAAAGAGCA --- ATTGGA --- CTGGGAGCC-----  
---GCCCTCCTTGGGTTCTTAGGAGCA --- GCAGGAAGCACTATG --- GGCGCGGCGTCA ---  
ATAACGCTGACGGTACAG --- GCCAGACAA --- TTATTG --- TCTGGTATAGTGCAACAGCAAAGC ---  
AATTTG --- CTGGAT --- GCTATAGAGGCTCAGCAGCATCTGCTGAGACTCACGGTCTGGGGCATT

>MH330337

TTCTATTGCAATACAACAGACCTGTTCAATAGCACTTGGGACGAAAATGACACTGTTACAAATAGCACACAG-

-----  
-----

GCCAATGAAACTATAATTCTACCATGCAGGATAAAGCAAATTATAAATATGTGGCAGAGAGTAGGACAAGCAA  
TGTATGCCCCCTCCTATCAAAGGAAGTATAAGGTGTGAATCAAAC---  
ATTACAGGACTAATACTAACAAGAGATGGTGGAACTAATAGCAGC-----

-----  
-----

AATGAGACCTTCAGACCTATAGGAGGAAATATGAGGGACAATTGGAGAAGTGAACTATATAAGTATAAAGTAG  
TAAAAATTGAACCAATA---GGAGTAGCACCTACCAAGGCAAAGAGAAGAGTGGTG-----  
-----GAAAGAGAAAAAAGAGCA---ATTGGA---CTGGGAGCT-----  
GCCTTCCTTGGGTTCTTGGGAGCA---GCAGGAAGTACTATG---GGCGCGGCGTCA---  
ATAACGCTGACGGTACAG---GTCAGACAA---TTATTG---TCTGGCATAGTGCAACAGCAAAGC---  
AATTTG---CTGAGG---GCTATAGAGGCTCAGCAGCATCTGCTGAAACTCACGGTCTGGGGCATT

>MH330338

TTCTATTGCGATACAACAAAACTGTTCAATAGCACTTGGAACGAAAATGGCACTAGGACAGATACAGATACCA  
CA-----

-----  
-----

CAGGATGAAAATATAACTATAACCATGCAGAATAAAGCAAATTATAAATATGTGGCAGAGAGTAGGACAAGCAA  
TGTATGCCCCCTCCCATCAGAGGAACTATAATGTGTATATCAAAC---  
ATTACAGGGCTACTCCTAACAAGAGATGGTGGAGCTAATAACAGC-----

-----  
-----

AATGAAACCTTCAGACCTATAGGAGGAGATATGAGAGACAATTGGAGAAGTGAACTATATAAGTATAAAGTAG  
TAGAAAATTGAACCAATA---GGGGTAGCACCTACCAAGGCAAAGAGAAGAGTGGTG-----  
-----GAGAGAGAAAAAAGAGCA---GTTGGA---CTGGGAGTT-----  
GCCTTCCTCGGGTTCTTAGGAGCA---GCAGGAAGTACTATG---GGCGCGGCGTCA---  
CTGACGCTGACGGTACAG---GCCAGACAA---TTATTG---TCTGGCATAGTGGAACAGCAAAGC---  
AATTTG---CTGAGG---GCTATAGAGGCTCAGCAGCATCTGCTGAAACTCACGGTCTGGGGCATT

>MH330339

TTCTATTGCAATACAACAGCACTGTTCAATAGCACTTGGGGAGGAAATAACACACAG-----

-----  
-----

GGCAATGAAAGTATAACTCTACCATGCAGAATAAAGCAAATTATAAGGATGTGGCAGAGAGTAGGACAAGCAA  
TGTATGCCCCCTCCTATCCAAGGAAGGATAAGGTGTGAATCAAAT---  
ATTACAGGACTACTATTAACAAGAGATGGTGGAGTAACATAATAGCAGC-----

-----  
-----

AATGGGACTGAGACCTTCAGACCTACAGGAGGAGATATGAGGGACAATTGGAGAAGTGAACTATATAAGTATA  
AAGTGGTAGAAATTGAACCAATA---GGAATAGCACCTACCAGGGCAAGGAGAAGAGTGGTG-----  
-----CAGAGAGAAAAAAGAGCA---ATTACA---CTGGGAGCT-----  
---GCCTTCCTTGGGTTCTTGGGAGCA---GCAGGAAGTACTATG---GGCGCGGCGTCA---  
ATAACGCTGACGGTACAG---GCCAGGCAA---TTATTG---TCTGGTATAGTACAACAGCAAAGC---  
AATTTG---CTAAAG---GCTATAGAGGCTCAGCAGCATCTGCTGAAACTCACGGTCTGGGGCATT

>MH330340

TTCTATTGCAATACAACAGACCTGTTCAATAGCATTTGGGAAAACGGCAATGTCACAAATAGCACAGAG----

-----  
-----

ACCAATGAAACTATAACTCTACAATGCAGAATAAAGCAAATTATAAATATGTGGCAAAGAGTAGGACAAGCAA  
TGTATGCCCCCTCCTATCAGTGGAAAGCATAAGGTGTGAATCAAAC---  
ATTACAGGACTAATACTAATAAGAGATGGTGGATATAATAGCAGC-----

-----  
-----

AATGAGACCTTCAGACCTATAGGAGGAAATATGAAGGACAATTGGAGAAGTGAACTATATAAGTATAAAGTAG  
TAAAAATTGAACCAATA---GGAGTAGCACCTACCAGGGCAAAGAGAAGAGTGGTG-----  
-----GAGAGAGAAAAAAGAGCA---ATCGGA---CTGGGAGCT-----  
GCCTTCCTTGGGTTCTTAGGAGCA---GCAGGAAGTACTATG---GGCGCGGCGTCA---  
CTGACGCTGACGGTACAA---GCCAGACAA---TTATTG---TCTGGCATAGTGCAACAGCAAAGC---  
AATTTG---CTGAGG---GCTATAGAGGCTCAGCAACATCTGCTGAAACTCACGGTCTGGGGCATT

>MH330341

TTCTATTGCAATACAACAGCCCTGTTCAATAGCACTTGGCACGAAAATGACACTGTTACAAATAGCACACAG-

-----  
-----

AACAATGAAACTATAATTCTACCATGCAGAATAAAGCAAATTATAAATATGTGGCAGAGAGTAGGACAAGCAA  
TGTATGCCCCCTCCGATCAGAGGAAGTATAAGGTGTGAATCAAAC---  
ATTACAGGACTACTACTAACAAGAGATGGTGGGGCTAATAGCAGC-----

-----  
-----

AATGAGACCTTCAGACCTATAGGAGGAGATATGAGGGACAATTGGAGAAGTGAACTATATAAGTATAAAGTAG  
TAAAAATTGAACCAATA---GGAGTAGCACCTACCAGGGCAAAGAGAAGAGTGGTG-----  
-----GAAAGAGAAAAAAGAGCA---ATTGGA---CTGGGAGTT-----  
GCCTTCCTTGGGTTCTTGGGAGCA---GCAGGAAGCACTATG---GGCGCGGCGTCA---  
ATAACGCTGACGGTACAG---GCCAGACAA---TTATTG---TCTGGCATAGTGCAACAGCAAAGC---  
AATTTG---CTGAGG---GCTATAGAGGCTCAGCAGCATCTGCTGAAACTCACGGTCTGGGGCATT

>MH330342

TTCTATTGCAATACAACAGCCCTGTTCAATAACACTGACACAAATAGCACAGAG-----

-----  
-----

ACCAGTGGAAATATAACTATAACCATGTAGAATAAAGCAAATTATAAGAATGTGGCAGAGAGTAGGACAAGCAA  
TGTATGCCCCCTCCTATCGAAGGAAATATAACGTGTGTATCAAAC---  
ATTACAGGTCTACTACTAACAAGAGATGGTGGGGTAAATAACACC-----

-----  
-----

AATGAGACCTTCAGACCCATAGGAGGAGATATGAGGGACAATTGGAGAAGTGAACTATATAAGTATAAAGTAG  
TAGAAATTGAACCAATA---GGAGTAGCACCTACCAGGGCAAAGAGAAGAGTGGTG-----  
-----GAGAGAGAAAAAAGAGCA---ATTGGA---CTGGGAGCT-----  
GCCTTCCTTGGGTTCTTAGGAGCA---GCAGGAAGCACTATG---GGCGCGGCGTCA---  
ATGACGCTGACGGTACAG---GCCAGACAA---TTATTG---TCTGGCATAGTGCAACAGCAAAGC---  
AATTTG---CTGCAG---GCTATAGAGGCTCAGCAGCATCTGCTGAGACTCACGGTCTGGGGCATT

>MH330344

TTCTATTGTAATACAACAAAACCTGTTCAATAGCACTTGGGACAAAATAGCACAAAGTACAAATATCACACAG-

-----  
-----

ACAAATGGAAATATAACTCTACCATGCAGAATAAAGCAAATTATAAATATGTGGCAGAGAGTAGGACAAGCAA  
TATATGCCCCCTCCTATCAAAGGAAATATAATGTGTGTATCAAAC---  
ATTACAGGACTACTACTAATAAGAGATGGGGGAGGTGGAAATAAT-----

-----  
-----

AGCATCAATGAAACTTTCAGACCTATAGGAGGAGATATGAGGGACAATTGGAGAAGTGAACTATATAAGTATA  
AAGTAGTACAAATTGAACCAATA---GGGGTAGCACCTACCAGGGCAAGGAGAAGAGTGGTG-----  
-----CAGAGAGAAAAAAGAGCA---ATTGGA---CTGGGAGCC-----  
---GCCTTCCTCGGGTTCTTAGGAGCA---GCAGGAAGCACTATG---GGCGCAGCGTCA---  
CTGACGCTGACGGTACAG---GCCAGACAA---TTATTG---TCTGGCATAGTGCAACAGCAAAGC---  
AATTTG---CTGAGG---GCTATAGAGGCTCAGCAGCATCTGCTGAAACTCACGGTCTGGGGCATT

>MH330345

TTCTATTGCAATACAACAGCCCTGTTCAATAGCATTTGGAACGGAAATGACAATGGCACAAATAGTACAGAG-

-----  
-----

GACACTGACCCTATAATTCTACCATGCAGAATAAAGCAAATTGTAAATATGTGGCAGAGAGTAGGACAAGCAA  
TGTATGCCCCCTCCTATCCCAGGAAATATAAGTTGTACATCAAAC---  
ATTACAGGACTACTACTAACAAGAGATGGA---ATTAATGGCAGC-----

-----  
-----

AATGAGACCTTCCGACCTATAGGAGGAGACATGAGGGACAATTGGAGAAGTGAACTATATAAGTATAAAGTAG  
TAAAAATTGAACCAATA---GGAGTAGCACCTACCAAGGCAAAGAGAAGAGTGGTG-----  
-----GAGAGAGAAAAAAGAGCA---ATTGGA---CTGGGAGCT-----  
GCCTTCCTTGGGTTCTTAGGAGCA---GCAGGAAGCACTATG---GGCGCGGCGTCA---  
ATAACGCTGACGGTACAG---GCCAGACAA---TTATTG---TCTGGCATAGTGCAACAGCAAAGC---  
AATTTG---CTGAGG---GCTATAGAGGCTCAGCAGCATCTGCTGAAACTCACGGTCTGGGGCATT

>MH330346

TTCTATTGCAATACATCAGACCTGTTT-----ACACATAATATCACAGGGGCCAATGAAACAGGG-----

-----  
-----

GCCAATGGAACCTATAACTTATACCATGCAAAATAAAACAAATTATAAATATGTGGCAGAGAGTAGGACAAGCAA  
TGTATGCCCCCTCCTATCAGAGGAATTATAAGGTGTGAATCAAAC---

ATTACAGGACTATTACTAACAAGAGATGGTGGAAAG-----

-----  
-----

AGCGAGAATGAGACCTTCAGACCTATAGGGGGAGATATGAGGGACAATTGGAGAAAGTGAACCTATATAAGTATA  
AAGTAGTAGAAATTGGACCAATA---GGAGTAGCACCTACCAGGGCACAGAGGAAAAGTGGTG-----

-----AAGAGAGAAAAAAGAGCAATTATTGGA---CTGGGAGCT-----

---GCCTTCCTTGGGTTCTTAGGAGCA---GCAGGAAGCACTATG---GGCGCGGCGTCA---

TTGACGCTGACGGTACAG---GCCAGACAA---TTATTG---TCTGGCATAGTGCAACAGCAAAGC---

AATTTG---CTGAGG---GCTATAGAGGCTCAGCAGCATCTGCTGAAACTCACGGTCTGGGGCATT

>HQ616082

TTCTATTGCAATACAACAAACCTGTTCAATGGCACTTGGTCAAAAAGCACAACGGCCAATGCAACT-----

-----  
-----

GCCAATGAAACTATAACTCTACCGTGCAGAATAAAGCAAATTATAAATATGTGGCAGAGAGTAGGACAAGCAA  
TGTATGCCCCCTCCTATCATAGGCAATATAAGCTGTGAATCAAAC---

ATTACAGGACTGCTACTGACAAGAGATGGTGGAAACAACTAATAGC-----

-----  
-----

AGCGATGAGACCTTCAGACCTATAGGAGGAAATATGAGGGACAATTGGAGAAAGTGAACCTATATAAGTATAAAG  
TAGTAATAATTGATCCAATA---GGAGTAGCACCTACCAGGGCAAAGAGAAGAGTGGTG-----

-----GAGAGGGAAAAAAGAGCA---ATTGGA---CTGGGAGTT-----

GCCTTCCTTGGGTTCTTAGGAGCA---GCAGGAAGCACTATG---GGCGCGGCGTCA---

CTGACGCTGACGGTACAG---GCCAGACAA---TTATTG---TCTGGTATAGTGCAACAGCAAAGC---

AATTTG---CTGAGG---GCTATAGAGGCTCAGCAGCATCTGCTGAAACTCACGGTCTGGGGCATT

>DQ823357

TTCTATTGCAATACAACAGAACTGTTCAATAGCACTTGGGGCGAAAATGGCACTATCACAAATAGCACAGAG-

-----  
-----

ACCAGTGAAAATATAACTCTACCATGCAGAATAAAGCAAATTATAAATATGTGGCAGAGAGTAGGACAAGCAA  
TGTATGCCCCCTCCTATCAGAGGAAATATAAGTTGTGTATCAAAC---

ATTACAGGACTACTACTAACAAGAGATGGTGGAACTAATAGCAGC-----

-----  
-----

ACTGAGACCTTCAGACCTACAGGAGGAGATATGAGGGACAATTGGAGAAAGTGAACCTATATAAGTATAAAGTAG  
TAGAAATTGAACCAATA---GGAGTAGCACCTACCAAGGCAAAGAGAAGAGTGGTG-----

-----GAGAGAGAAAAAAGAGCA---ATAATTGGACTGGGAGCT-----

GCCTTCCTTGGGTTCTTAAGTGCA---GCAGGAAGCACTATG---GGCGCAGCGTCA---

CTGACGCTGACGGTACAG---GCCAGACAA---TTATTG---TCTGGCATAGTGCAACAGCAAAGC---

AATTTG---CTGAGG---GCTATAGAGGCTCAGCAGCATTTGCTGAGACTCACGGTCTGGGGCATT

>KU749399

TTCTATTGCAATACAACAGGCCTGTTCAATAGTACTTGGGACAATAGTACTTGGGACAAAAATAGCACTGTCA  
CAAAT-----

-----  
-----

GGCACCGAGGACAATATAACTCTACAATGCAAAATAAAGCAAATTATAAGGATGTGGCAGAGAGTAGGACAAG  
CAATGTATGCCCCCTCCTATCAGAGGAAATATAAAGGTGTACATCAAAC---

ATTACAGGACTACTACTAATAAGAGATGGTGGAAATGGAAATAAT-----

-----  
-----

AGCAACAATGAGACCTTCAGACCGACAGGAGGAGATATGAGAAATAATTGGAGAAAGTGAACCTATATAAGTATA  
AAGTAGTAGAAGTTGAACCAATA---GGAATAGCACCTACCAAGGCAAAGAGAAGAGTGGTG-----

-----GAGAGAGAAAAAAGAGCAATAGTTGGA---CTGGGAGCT-----

---GCCTTCCTTGGGTTCTTAGGAGCA---GCAGGAAGTACTATG---GGCGCGGCGTCA---

ATAACGCTGACGGTACAG---GCCAGACAA---TTACTA---TCTGGCATAGTACAACAGCAGAGC---

AATCTG---CTGAGG---GCTATAGAGGCTCAGCAGCATCTGCTGAAACTCACGGTCTGGGGCATT

>KU749401

TTCTATTGCAATACAACAGACCTGTTCAATAGCACTTGGAACGGCAGCAATAGCACTGCCATGAATAGCTCA-

-----  
-----

GGCAATGAAAATATAACCATACACTGCAGAATAAAGCAAATTATAAATATGTGGCAGAGAGTAGGACAAGCAA  
TGTATGCCCCCTCCTATCAGAGGAAATATAACATGTGTATCAAAC---

ATTACAGGGCTACTACTAATAAGAGATGGGGGAAATGGAAATAAT-----  
-----

-----  
AGCAACAATGAGACCTTCAGACCTATAGGAGGAGATATGAGGGATAATTGGAGAAGTGAACCTATATAAATATA

AAGTAGTAAAAATTGAACCAATA---GGAGTAGCACCTACCAAGGCAAGGAGAAGAGTGGTG-----

-----GGGAGAGAAAAAAGAGCA---ATTGGA---CTGGGAGCT-----

---GCCTTCCTTGGGTTCTTAGGAGCA---GCAGGAAGCACTATG---GGCGCGGCGTCA---

CTGACGCTGACGGTACAG---GCCAGAAAA---TTGCTA---TCTGGCATAGTGCAACAGCAAAGC---

AATTTG---CTGAGG---GCTATAGAGGCTCAGCAGCAACTGCTGAGACTCACAGTCTGGGGCATT

>KY658681

TTCTATTGCAATACAACAGCCCTGTTCAATAGCACTTGGAACACCCTTGGAACGAAAATAGCACTGTTGAAA

GTAGTACA-----  
-----

GGGGACAATGAAAATATAACTATACCATGCAGAATAAAGCAAATTATAAATATGTGGCAGAGAGTAGGACAAG  
CAATGTATGCCCCCTCCTATCAAAGGAATTATAAAGTGTGAATCAAAC---

ATTACAGGACTACTACTGGTAAGAGATGGTGGAAACACTAATAGC-----  
-----

-----  
AGCAATGAGACCTTCAGACCTATAGGAGGAGATATGAGGGACAATTGGAGAAGTGAACCTATATAAGTATAAGG

TAGTAAAAATTGAACCAATA---GGAGTAGCACCAACCAAGGCACAGAGAAGAGTGGTG-----

-----GGGAGAGAAAAAAGAGCA---ATTGGA---CTGGGAGTT-----

GCCTTCCTTGGGTTCTTAGGAGCA---GCAGGAAGCACTATG---GGCGCAGCGTCA---

ATAACGCTGACGGTACAG---GCCAGACAA---TTACTG---TCTGGCATAGTGCAACAGCAAAGC---

AATTTG---CTGAAG---GCTATAGAGGCTCAGCAGCATCTGCTGAAACTCACAGTCTGGGGCATT

>KU749402

TTCTATTGCAATACATCAAACTGTTCAATAGCACTTGGGACGAAAATAGCACTGCCATAAATAGTACAGAG-

-----  
-----

GACAGTGGAATTATAACTATACCATGCAGAATAAGGCAAGTTATAAATATGTGGCAGAGAGTAGGACAAGCAA

TGTATGCCCCCTCCTATCAGAGGAAGTATAAGGTGTGAATCAAAC---

ATTACAGGATTAATACTAACAAGAGATGGTGGAAATATTAGTAGC-----  
-----

-----  
ACCAATGAGACCTTCAGACCTACAGGAGGAGATATGAGGGACAATTGGAGAAGTGAACCTATACAAGTATAAAG

TAGTAAGCATTGAACCAATA---GGAGTAGCACCTACCAAGGCAAGGAGAAGAGTGGTG-----

-----CAGAGAGAAAAAAGAGCA---GTTGGA---CTGGGAGCT-----

GCCTTCCTTGGGTTCTTAGGAGCA---GCAGGAAGCACTATG---GGCGCGGCGTCA---

TTGACGCTGACGGTACAG---GCCAGAAAA---TTATTG---TCTGGCATAGTGCAACAGCAAAAC---

AATTTG---CTGAAG---GCTATAGAGGCTCAGCAGCATCTGCTGAAACTCACAGTCTGGGGCATT

>KU749403

TTCTATTGTAATACAACAGACCTGTTCAATAGCACTTGGGACAGAAATGACACTGATGCAAATAGTACACAGG

TTGATAGTACA---CAG-----  
-----

-----  
GTTGATGTAACTATAACTCTACCATGCAGAATAAAGCAAATTGTAAGGATGTGGCAGAGAGTAGGACAAGCAA

TGTATGCCCCCTCCTATCGGAGGAGTTATAAGGTGTGAATCAAAC---

ATTACAGGACTACTACTAACAAGGGATGGTGGAGCTAATAATAGC-----  
-----

-----  
ACTAATGAGACCTTTAGACCTCTAGGAGGAGATATGAGGGACAATTGGAGAAGTGAACCTATATAAGTATAAAG

TAATACAAGTTGAACCAATA---GGAGTAGCACCTACCCAGCAAAGAGAAGAGTGGTG-----

-----GAGAGACAAAAAAGAGCA---ATTGGA---CTGGGAGCT-----

GCCTTCCTTGGGTTCTTAGGAGCA---GCAGGAAGTACTATG---GGCGCGGCGTCA---

ATAACGCTGACGGTACAG---GCCAGACAA---TTATTG---TCTGGCATAGTACAACAGCAAAGT---

AATTTG---CTGAGA---GCTATAGAGGCTCAGCAGCATCTGCTGAAACTCACAGTCTGGGGCATT

>KU749404

TTCTATTGCAATACAACAGAGCTGTTCAATAGCACTGAGGACAAAAATGGCACTGTCACAAAT-----

-----  
-----

AGCAATGAAAATATAACTCTACCATGCAGGATAAAGCAAATTATAAATATGTGGCAGAGAGTAGGACAAGCAA  
TGTATGCCCCCTCCTATCAGAGGAAATATAACTTGTGAATCAAAC---

ATTACAGGACTACTACTAACAAGAGATGGAGATGATAATAGCAGT-----

-----  
-----

GAGACCTTCAGACCTATAGGAGGAAATATGAGGGACAATTGGAGAAGTGAACCTATATAAATATAAAGTAGTCC  
AAATTGAACCAATA---GGAGTAGCACCTACCAAGGCAAGGAGAAGAGTGGTG-----

-----GGGAGAGAAAAAAGAGCA---ATTGGA---CTGGGAGCT-----

GCCTTCCTTGGGTTCTTAGGAGCA---GCAGGAAGCACTATG---GGCGCGGCGTCA---

CTGACGCTGACGGTACAG---GCCAGACAA---TTATTG---TCTGGTATAGTGCAACAGCAAAGC---

AATTTG---TTGAGG---GCTATAGAGGCTCAGCAGCATCTGCTGAAACTCACAGTCTGGGGCATT

>KU749405

TTCTATTGCAATACAACAGACTTGTTCATTGGGATAGAAATAGCACTGTCCCAAATAAC-----

-----  
-----

ACAAGTAGCAATATAACTCTGCCATGCAGAATAAAGCAAATTATAAATATGTGGCAGAGAGTAGGACAATCAA  
TGTATGCCCCCTCCTATCAGCGGAAAGATAAGGTGTGAATCAAAC---

ATTACAGGACTACTACTAGTAAGAGATGGTGGAGATAATAATAGC-----

-----  
-----

ACCAATGAGACCTTCAGACCTATAGGAGGAGAAATGAGGCACAATTGGAGAAGTGAACCTATATAAGTATAAAG  
TAGTAGAAATTGAACCAATA---GGAGTAGCACCTACCAAGGCAAGGAGAAGAGTGGTG-----

-----GGAAGAGAAAAAAGAGCAGCCTTTGGA---CTGGGAGCT-----

GTCTTCCTTGGGTTCTTAGGAGCA---GCAGGAAGCACTATG---GGCGCGGCGTCA---

CTGACGCTGACGGTACAG---GCCAGGCAA---TTATTG---GCTGGCATAGTGCAACAGCAAAGC---

AATTTG---CTGAGG---GCTATAGAGGCTCAGCAGCATCTGCTGAAACTCACAGTCTGGGGCATT

>KY658682

TTCTATTGCAATACAACAGAACTGTTCAATAGCACTTGGAAATGGCACTGACACAAACAGCACAGAGGAC----

-----  
-----

AATAATGTAAATATAACTATAACCATGCAGAATAAAGCAAATTATAAATATGTGGCAGAGAGTAGGACGAGCAA  
TGTATGCCCCCTCCTATCAGAGGAAATATAACTTGTGAATCAAAC---

ATTACAGGACTACTACTAACAAGAGATGGTGGTAAAGAGAAAAAT-----

-----  
-----

GACAACGAAACCTTTAGACCTATAGGAGGAAATATGAAGGACAATTGGAGAAGTGAACCTATATAAGTATAAAG  
TAGTAGAAATTAAACCAATA---GGAGTAGCACCTACCCCGCAAAGAGAAGAGTGGTG-----

-----GAGAGAGAAAAAAGAGCA---GTTAGC---CTAGGAGTT-----

GCCTTCCTTGGGTTCTTAGGAGCA---GCAGGAAGTACTATG---GGCGCGGCGTCA---

CTGACGCTGACGGTACAG---GCCAGACAA---CTATTG---TCTGGCATAGTACAACAGCAAAGC---

AATTTG---CTGAGG---GCTATAGAGGCTCAGCAGCAATTGCTGAAACTCACGGTCTGGGGCATT

>KU749407

TTCTATTGCAATACAACAGAACTGTTCAATAGCACTTGGGACGACAATAGCACTGTTGCAAATATCACAAAG--

-----  
-----

ACCAATGAAAATATAACTCTACCATGCAGACTAAGGCAAATCATAAAGATGTGGCAGAGAGTAGGACAAGCAA  
TGTATGCCCCCTCCTATCCAAGGAGTTATAAAGTGTGAATCAAAC---

ATTACAGGACTACTACTAACAAGAGATGGTGGAGATGGAACCTAAT-----

-----  
-----

AACAGCAATAATGAGATTTTCAGACCTATAGGAGGAAATATGAGGGACAATTGGAGAAGTGAACCTATATAAGT  
ATAAAGTAGTAGAAATTGAACCAATA---GGAGTAGCACCTACCAAGGCAAAGAGAAGAGTGGTG-----

-----CAGAGAGAAAAAAGAGCAGTTATTGGA---CTGGGAGCT---

-----GCCTTCCTTGGGTTCTTAGGAGCA---GCAGGAAGCACTATG---GGCGCGGCGTCA---

ATAACGCTGACGGTACAG---GCCAGACAA---TTACTG---TCTGGCATAGTGCAACAGCAAAGC---

AATTTG---CTGAGG---GCTATAGAGGCTCAGCAGCATCTGCTGAAACTCACGGTCTGGGGCATT

>AF082486

TTCTATTGCAATACAACAGACCTGTTCAATAGCACTTGGGACGAACATGGCACTGTCACAAATAGCACAATG-

-----  
-----

GCCAATGGAACCTATAACTCTACCATGCAGAATAAAGCAAATTATAAATATGTGGCAGAGAGTAGGACAAGCAA  
TGTATGCCCCCTCCTATTAAAGGAAGTATAAGGTGTGAATCAAAC---  
ATTACAGGACTACTATTAACAAGAGATGGTGGGAAGTGGAACCTAAT-----

-----  
-----

AGCAGCAATGAGACCTTCAGACCTATAGGAGGAAATATGAGGGATAATTGGAGAAGTGAACCTATATAAGTATA  
AAGTAGTAAAAATTGAACCCATA---GGATTAGCACGTACCAGGGCAAAGAGAAGAGTGGTG-----  
-----GAGAGAGAAAAAAGAGCC---ATTGGA---CTGGGAGCT-----  
---GCCTTCCTTGGGTTCTTAGGAGCA---GCAGGAAGTACTATG---GGCGCGGCGTCA---  
ATGACGCTGACGGTACAG---GCCAGACAA---TTATTG---TCTGGCATAGTGCAACAGCAAAGC---  
AATTTG---CTGAGG---GCTATAAAGGCTCAGCAGCATCTGCTGAAACTCACGGTCTGGGGCATT

>KY968402

TTCTACTGTAACACAACAAAACTGTTTAATAGTACTTGGTCTAATAATGATACTGGGGAGGGTACTGCAGATT  
CA-----

-----  
-----

AATAACGAACTATCACAATCCCATGCAGAATAAAACAAATTATAAACATGTGGCAACAAGTAGGAAAAGCAA  
TGTATGCCCCCTCCCATCAGTGGAAACATTAGTTGCTCATCAAAT---  
ATTACAGGGTTACTGTTAACAAGAGATGGTGGAGATAATGATGAC-----

-----  
-----

CTAAACGGGACCGAGACCTTCAGACCTCAAGGAGGAAACATGAAGGACAATTGGAGAAGTGAATTATATAAAT  
ATAAAGTAGTAAAAATTGAACCATTA---GGAGTAGCACCCACCAAGGCAAAGAGAAGAGTGTTG-----  
-----CAGAGAGACAAAAGAGCA---GTGGGA---CTAGGAGCT---  
-----ATGTTTCCTTGGGTTCTTGGGAGCA---GCAGGAAGCACTATG---GGCGCAGCGTCA---  
ATAGCGCTGACGGTACAG---ACCAGACAA---TTATTG---TCTGGTATAGTGCAACAGCAGAAC---  
AATATG---CTGAGG---GCTATTGAGGCGCAACAGCATATGTTGCAACTCACTGTCTGGGGCATC

>KY968404

TTCTACTGTAATACAACACAACCTGTTTTATAGTACTTGGTTGTCTAATGGTAGTAGTTTGACAAATAACACTG  
AA-----

-----  
-----

GGAAATGACACTATCACACTCCCATGCAGAATAAAACAGATTATAAATATGTGGCAGCAAGTAGGAAAAGCAA  
TGTATGCCCCCTCCCATCAAAGGACTAATTAGATGCTCATCGAAT---  
ATTACAGGACTGCTACTAACAAGAGATGGTGGTAGTCATAACGAGAGC-----

-----  
-----

AATGAGACTGAGACATTTCAGACCTGGGGGAGGAGATATGAGGGACAATTGGAGAAGTGAATTATACAAATATA  
AAGTAGTACAAATTGAACCATTA---GGAATAGCACCCACCAAGGCAAAGAGAAGAGTGGTG-----  
-----CAGAGAGAAAAAAGAGCA---GTGGGA---CTGGGAGCT-----  
---TTGTTTCCTTGGGTTCTTGGGAACA---GCAGGAAGCACTATG---GGCGCAGCGTCA---  
TTGACGCTGACGGTACAG---GCCAGACAA---TTATTG---TCTGGTATAGTGCAACAGCAGAAAT---  
AATCTG---CTGAGA---GCTATTGAGGCGCAACAACATCTGTTGCAGCTCACAGTCTGGGGCATC

>KY968408

TTCTACTGTAATACAACAAAACTGTTTAATAAGACTTGGAATGGTACTTGGCTTAATAATGAGAAT-----

-----  
-----

ACTACACAGAATATCACACTCCCATGCAGAATAAAACAAATTATAAACAGGTGGCAGGAAGTAGGAAAAGCAA  
TGTATGCCCCCTCCCATCAAAGGACAAATTAGCTGCTCATCAAAT---  
ATTACAGGGCTGCTATTAACAAGAGATGGTGATAACGAGACTGGG-----

-----  
-----

TCGGAGACCTTCAGACCTGGAGGAGGAGATATGAGGGACAATTGGAGAAGTGAATTATATAAATATAAAGTAG  
TAAAAATTTCAGCCATTA---GGAGTAGCACCCACCAAGGCAAAGAGAAGAGTGGTG-----  
-----CAAAGAGAAAAAAGAGCA---GTGGGA---ATAGGAGCT-----  
GTGTTTCCTTGGGTTCTTGGGAGCA---GCAGGAAGCACTATG---GGCGCAGCGTCA---  
GTAACGCTGACGGTACAG---GCCAGACAA---TTATTG---TCTGGTATAGTGCAAGCAGCAGAAC---  
AATTTG---CTGAGG---GCTATTGAGGCGCAACAGCATCTGTTGCAACTCACAGTCTGGGGCATC

>DQ383749

TTCTACTGTAATACATCACAACCTGTTTAAATAGTACTTGGCCTTGGGAATGGGAATGCGACTACAGATAATACT-

-----  
-----

ACAGGAGTAAATATCACACTCCCATGCAGAATAAAACAAATTATAAACATGTGGCAGGAAGTAGGAAAAGCAA  
TGTATGCCCCCTCCTATTAAAGGACAAATTAGATGTTTCATCAAAT---

ATTACAGGGCTGCTATTAACAAGAGATGGTGGTCATAACGAGACC-----  
-----

-----  
AACGACACTGAGACCTTCAGACCTGGAGGAGGAAATATGAAGGATAATTGGAGAAGTGAATTATATAAAATATA  
AAGTAGTAAAAATTGAACCATTA---GGAATAGCACCCACCACGGCAAAGAGAAGAGTGGTG-----

-----CAGAGAGAGAAAAGAGCA---ATAACA---ATAGGAGCT-----  
---ATGTTACTTGGTTTCTTGGGAACA---GCAGGAAGCACTATG---GGCGCAGCGTCA---

ATCACGCTGACGGTACAG---GCCAGACAA---TTATTG---TCTGGTATAGTGCAACAGCAGAAC---  
AATCTG---CTGAGG---GCTATTGAGGCGCAACAGCATCTGTTGCAACTCACAGTCTGGGGCATC

>MH078532  
TTCTACTGTAACACATCAAAGCTGTTTAAACAGTACTTGGCATAGGAATGGTACTTGGGAATGGTACTAGTACT-

-----  
-----

GAGAAATAACAATCACAATCCCATGCAGAATAAAACAAATTATAAACAGGTGGCAGGAAGTAGGAAAAGCAA  
TGTATGCCCCCTCCCATCAGAGGAAATATTACATGTACATCTAAT---

ATTACAGGACTGTTATTAATAAGAGATGGTGGTAACATTAAACCACG-----  
-----

-----  
AATGAGACCGAGATCTTCAGACCTGGAGGAGGAGACATGAGGGATAATTGGAGAAGTGAATTATATAAAATATA  
AAGTAGTAAGAATTCAGCCATTA---GGAATAGCACCCACCGAGGCAAAGAGAAGAGTGGTG-----

-----CAAAGAGAAAAGAGAGCG---GTGGGAACACTAGGAGCT-----  
---GTGTTCTTGGGTTCTTGGGAGCA---GCAGGAAGCACTATG---GGCGCAGCGGCA---

ACAACGCTGACGGTACAG---GCCAGACAG---TTACTG---TCTGGCATAGTGCAACAGCAAAAC---  
AATTTG---CTGAGA---GCTATTGAGGCGCAACAGCATACGTTGCAACTCACAGTCTGGGGCATT

>AF042102  
TTCTACTGTAATTCAACACAACCTGTTTAAATGGTACTTGGGAATGGTACTTGGATTAATGGTACTTGGGAAGAGTA  
GTTAT-----

-----GGG---  
AATGATACTACAAATATCACACTCCCATGCAGAATAAAGCAAATTATAAACATGTGGCAGGAAGTAGGAAAAG  
CAATGTATGCCCCCTCCCATCAGAGGACAAATTAAATGTACATCAAAT---

ATTACAGGGCTGTTATTAACAAGAGATGGTGGTAACAGTAACACCACG-----  
-----

-----  
GACAACAGCACAGAGACCTTCAGACCTGGAGGAGGAGATATGAGGGACAATTGGAGAAGTGAATTATATAGAT  
ATAAGTAGTACAAGTTGAACCATTA---GGAATAGCACCCACCAGGGCAAAGAGAAGAGTGGTG-----

-----CAAAGAGAAAAAAGAGCA---GTGGGA---ATAGGAGCT---  
-----ATGTTCTTGGGTTCTTAGGAGCA---GCAGGAAGCACTATG---GGCGCAGCGTCA---

GTGACGCTGACGGTACAA---GCCAGACAA---TTATTG---TCTGGTATAGTGACAGCAGCAGAAC---  
AATCTG---CTGAGG---GCTATTGAGGCGCAACAGCATATGTTGCAACTCACAGTCTGGGGCATC

>AF538307  
TTCTACTGTGATTCAACACAACCTGTTTAAATAGTACTTGGCATAATAGTACTTGGGAATAATAATAAAGAGTCAA  
AT-----

-----  
AGCACTGATCCAATCACACTTCCATGCAGAATAAAACAAAATATAAACATGTGGCAGGAAGTAGGAAAAGCAA  
TGTATGCCCCCTCCCATCAGAGGACAAATTAAATGTTTCATCAAAC---

ATTACAGGGCTAATATTAACAAGAGATGGTGGTAATAACACAGACAAT-----  
-----

-----  
AACAAACACCGAAACCTTCAGACCTGGAGGAGGAAATATGAAGGACAATTGGAGAAGTGAATTATATAAAATATA  
AAGTAGTAAAAATTGAACCATTA---GGAGTAGCACCCACCAAGGCAAGGAGAAGAGTGGTG-----

-----CAGAGAGAGAAAAGAGAA---GTAGGA---CTAGGAGTT-----  
---ATGTTCTTGGGTTCTTGGGAGCA---GCAGGAAGCACTATG---GGCGCAGCGTCA---

CTGAGGCTGACGGTACAG---GCCAGACAA---TTATTG---TATGATATAGTGCAACAGCAAAAC---  
AATTTG---CTGAGA---GCTATTGAGGCGCAACATCATCTGTTGCAACTCACAGTCTGGGGCATC

>AF538307  
TTCTACTGTGATTCAACACAACCTGTTTAAATAGTACTTGGCATAATAGTACTTGGGAATAATAATAAAGAGTCAA  
AT-----

-----  
AGCACTGATCCAATCACACTTCCATGCAGAATAAAACAAAATATAAACATGTGGCAGGAAGTAGGAAAAGCAA  
TGTATGCCCCCTCCCATCAGAGGACAAATTAAATGTTTCATCAAAC---

ATTACAGGGCTAATATTAACAAGAGATGGTGGTAATAACACAGACAAT-----  
-----

-----  
AACAAACACCGAAACCTTCAGACCTGGAGGAGGAAATATGAAGGACAATTGGAGAAGTGAATTATATAAAATATA  
AAGTAGTAAAAATTGAACCATTA---GGAGTAGCACCCACCAAGGCAAGGAGAAGAGTGGTG-----

-----CAGAGAGAGAAAAGAGAA---GTAGGA---CTAGGAGTT-----  
---ATGTTCTTGGGTTCTTGGGAGCA---GCAGGAAGCACTATG---GGCGCAGCGTCA---

CTGAGGCTGACGGTACAG---GCCAGACAA---TTATTG---TATGATATAGTGCAACAGCAAAAC---  
AATTTG---CTGAGA---GCTATTGAGGCGCAACATCATCTGTTGCAACTCACAGTCTGGGGCATC

>GU367398

TTCTACTGTAATACAACAACCACTGTTTAAATAGTACTTGGTCCTCTAATGATACTTTGAATGGTACTTGGTCCT  
CTAATTATAAT-----

-TTGAATGATACTGAA-----

GGATCAGGGGACAACATCACACTCCCATGCAGAATAAAACAAATTATAAACATGTGGCAGGGAGTAGGAAGAG  
CAATGTATGCCCCCTCCCATCAGAGGACAAATTAGTTGTTTCATCAAAT---

ATTACAGGGTTATTATTAGTGAGAGACGGGGGTAATATCCAGAAC-----

-----

AATGAGACCTTCAGACCTGCAGGAGGAAATATGAAAGACAATTGGAGAAGTGAATTATATAAGTATAAAGTAG  
TAAGAATTGAACCATTA---GGAATAGCACCCACCAAGGCAAAGAGAAGAGTGGTG-----

-----CAGAGAGAGAAAAGAGCA---ATAGGAACGCTAGGAGCT-----

ATGTTCCCTTGGGTTCTTGGGAGCA---GCAGGAAGCACTATG---GGCGCAGCGTCA---

GTGACGCTGACGGTACAG---GCCAGACAA---TTATTG---TCTGGTATAGTGCAACAGCAGAAC---

AATCTG---CTGAAG---GCTATTGAGGCGCAACAGCATATGTTGCAACTCACAGTCTGGGGCATT

>GU367404

TTCTATTGTAATACAACAACCACTGTTTAAACAGTACTTGGAGAAAGGAGTCAAATAACACTGGAGGAAAT----

-----

-----

ATCACACGAAATATCACGCTCCCATGTAGAATAAGACAGATTGTAAACATGTGGCAGGAAGTAGGAAAAGCAA  
TATATGCCCCCTCCCATGAAAGGACTAATTAGATGTTTATCAAAT---

ATTACAGGGCTGCTATTAACAAGAGACGGTGGTAATCAGAATGGGACT-----

-----

-----

AATGACACTGAAATCTTCAGACCTGGAGGGGGAGATATGAGGGACAATTGGAGAAGTGAATTATATAAATATA  
AAGTAGTAAAAATTGAACCCTTA---GGAATAGCACCCACCAAGGCAAAGAGAAGAGTGGTG-----

-----CAAAGAGAAAAAAGAGCA---GTGGGAGCATTAGGAGCT-----

---ATGTTCCCTTGGGTTCTTGGGAGCA---GCAGGAAGCACTATG---GGCGCAGCGTCA---

GTAACGCTGACGGTACAG---GCCAGACAA---TTATTG---TCTGGTATAGTGCAACAGCAGAAT---

AATCTG---CTGAAG---GCTATTGAGGCGCAACAGCATCTGTTGCAACTCACAGTCTGGGGCATC

>AF146728

TTCTACTGTAATTCAACACAACCTGTTTAAATAGTACTTGGTTTAAATAGTACTGGGAATGATACTGAAAGGGCAA  
CT-----

-----

AACAATACAGAAAATATCACACTCCCATGTAGAATAAAACAAATTATAAACATGTGGCAGAAAGTAGGAAAAG  
CAATGTATGCCCCCTCCCATCAACGGACAGATTAGATGTTTCATCAAAT---

ATTACAGGGCTGATACTAACAAGAGATGGTGGTAATCAAGAGAAC-----

-----

-----

AAGACCGAGATCTTCAGACCTGGAGGAGGAGATATGAGGGACAATTGGAGAAGTGAATTATATAAATATAAAG  
TAGTAAGAATTGAACCATTA---GGAGTAGCACCCACCAAGGCAAAGAGAAGAGTGGTG-----

-----CAGAGAGAAAAAAGAGCA---GTGGGAATGATAGGGGCA-----

ATGATCCTTGGGTTCTTGGGAGCA---GCAGGAAGCACTATG---GGCGCAGCGTCA---

CTGGCGCTGACGGTACAG---ACCAGGCAA---TTGTTG---TCTGGTATAGTGCAACAGCAGAAC---

AATCTG---CTGAGG---GCTATTGAGGCGCAACAGCATCTGTTGCAACTCACAGTCTGGGGCATC

>MN485974

TTCTATTGTAATACAACAAAACCTGTTTAAATGGTACTTGGAAATGGTACTTGGCTATCGGGGAAGTGG-----

-----

-----

CCAAATGAAAATATCACACTCCCATGTAGAATAAAACAAATTGTAAACATGTGGCAAGAAGTAGGAAAAGCAA  
TGTATGCCCCCTCCCATCCAAGGACAGATTAGATGTGACTCAAAT---

ATTACAGGGCTGCTATTAACAAGAGATGGTGGTTCCGGGAATGGAAGTGAAG-----

-----

-----

AATAACACTGAGATCTTCAGACCTGGAGGAGGAAATATGAGAGACAATTGGAGAAGTGAATTATATAAATATA  
AAGTAGTAAAAATTGCACCATTA---GGAATAGCACCCACCAAGGCAAAGAGAAGAGTGGTG-----

-----CAGAGAGAAAAAAGA-----ATAGGAACGCTAGGAGCT-----

---GTGTTCCCTTGGGTTCTTGGGAACA---GCAGGAAGCACTATG---GGCGCAGCGTCA---

CTGACGCTGACGGTACAG---GCCAGACAA---TTATTG---TCTGGTATAGTGCAACAGCAGAAC---

AATTTG---CTGAGG---GCTATTGAGGCGCAACATCATCTGTTGCAACTCACAGTCTGGGGCATC

>MN485990

TTCTACTGTGATTCAACAGAACTATTTAATAGTACTTGGAATTTTAATAATAATACTTGGTATGAGAACTCAA  
ATAACACAAGT-----

-----  
GACAAAGAAAACATCACACTCCCATGTAGAATAAAACAAATTAGAACTTGTGGCAGGAAGTAGGAAAAGCAA  
TGTATGCCCCCTCCCATCCAAGGGCTAATTACATGTCAATCAAAT---  
ATTACTGGGGTGCTACTAACAAGAGATGGTGGTATTAATAACACC-----

-----  
AGGAACGAGACCTTTAGACCTGGAGGAGGAAATATGAAAAGACAATTGGAGAAGTGAACATACAAATATAAAG  
TAATAAAAATTGAACCATTA---GGAGTGGCACCCACCAAGGCAAAGAGAAGAGTGGTG-----  
-----CAGAGAGAAAAAAGAGCA---GTGGGAACAATAGGAGCT-----  
GTGTTTCCTTGTTTCTTGGAACA---GCAGGAAGCACTATG---GGCGCAGCGTCA---  
ATAGCGCTGACGGCACAG---GCCAGACAA---TTATTG---TCTGGTATAGTGCAACAGCAAAAC---  
AATTTG---CTGAGA---GCTATTGAGGCGCAACAACATCTGTTGCAACTCACAGTCTGGGGCATC

>MN485995

TTCTACTGTAATACAACACAACCTGTTTAATAGTACTTGGTGGTCTAATAGTACTGGGAATATTACTGGA----

-----  
CAGCCAGAAAATATCACTCTCCCATGCAGAATAAAACAAATCATAAACTTGTGGCAAGAGGTAGGAAAAGCAA  
TGTATGCCCCCTCCCATCCAAGGACTAATTAGATGTTTCATCAAAT---  
ATTACAGGGTTACTATTAACAAGAGATGGTGATAATCAAACATAA-----

-----  
GAGACTGAGATCTTTAGACCGGGAGGAGGAGATATGAGGGACAATTGGAGAAGTGAATTATATAAATATAAAA  
TAGTAAAAATTGAGCCATTG---GGAATAGCACCCACCAGGGCAAAGAGAAGAGTGGTG-----  
-----CAAAGAGAAAAAAGAGCA---GTGGGA---ATAGGAGCT-----  
CTGTTTCCTTGGGTTCTTGAGAGCT---GCAGGAAGCACTATG---GGCGCAGCGTCG---  
GTGACGCTGACGGTACAG---GCCAGACAA---TTATTG---TCTGGTATAGTGCAACAGCAAAAC---  
AACTTG---CTGAGA---GCTGTTGAGGCGCAACAACATATGTTGCAACTCACAGTCTGGGGCATC

>MN486028

TTCTACTGTAATACAACAGACCTGTTTTGGGGTATTTGGGACCCAAATAATAATACTTGGAAATGGTAGTACAG  
TGGATAAC-----

-----  
ATTCAATGCAGAATAAAACAAATTATAAACAGGTGGCAGGAAGTAGGAAAAGCAATGTATGCCCCCTCCCATTG  
AAGGAAATATTAGCTGTACATCAAAC---  
ATTACAGGACTACTATTGACAAGAGATGGTGGTGGTGGTGAAGGG-----

-----  
CCTAATGATACCGAGATCTTCAGACCTACAGGAGGAGAGATGAGGGACAATTGGAGAAGTGAATTATATAAGT  
ATAAGTAGTACAAATTGAGCCAGTA---GGGATAGCACCTACCAAGGCAAAGAGAAGAGTGGTG-----  
-----CAGAGAGAAAAAAGAGCA---GTGGGA---ATGACAGCT---  
-----GTGTTACTTGGGTCTTGAGCACA---GCAGGAAGCACTATG---GGCGCAGCGTCT---  
CTAACGCTGACGGTACAA---GCCAGACAA---TTATTG---TCTGGTATAGTGCAACAGCAGAAC---  
AATCTG---CTGAAG---GCTATTGAAGCGCAACAGCATCTGTTGCAGCTCACAGTCTGGGGCATC

>MN486034

TTCTACTGTAATACAACAGAGCTATTTAATAGGAATATTACTGAAGAGTCAAACACTAATGGAAATAGCAGT-

-----  
AGCGCAGGAAATATCACACTCCAATGCAGAATAAAACAGATTATAAACATGTGGCAGGAAGTAGGAAAAGCAA  
TGTATGCCCCCTCCCATCAGAGGACAAATTCATGTATATCAAAT---  
ATTACAGGACTAATATTAACAAGAGATGGTGGTAAGACAAATAAT-----

-----  
GAGACAAATGGGACTGAGATTTTCAGACCTGGAGGAGGAAATATGAGAGACAATTGGAGAAGTGAATTATATA  
AATATAAGGTAGTAAAAATTGAACCATTA---GGAGTAGCACCCACCAGGGCAAAGAGAAGAGTGGTG-----  
-----CAGAGAGAAAAAAGAGCA---GTGGGA---  
ATAGGAGCT-----GTGTTTCCTTGAGGTTCTTGAGGAGCA---GCAGGAAGCACTATG---  
GGCGCAGCGTCA---ATAACGCTGACGGTACAG---GCCAGACAA---TTATTG---

TCTGGTATAGTGCAACAGCAAAAC---AATTTG---CTGAGA---  
GCTATTGAGGCGCAACAGCATCTGTTGCAACTCACAGTCTGGGGCATC  
>AY037270  
TTCTACTGTAATACAACAGAACTGTTTAATAGTACTTGGAATTTTACTAGTACCTGGAATATGACTAGTGGGT  
CAAATTAC-----  
-----TCT---  
GCAGAAAGAAATATCATCACACTCTCATGCAGAATAAAACAAATTATAAACATGTGGCAGGAAGTAGGAAAAG  
CAATGTATGCCCCCTCCTATCAGAGGACAAATTAAATGTTTCATCAAAT---  
ATTACAGGGCTGCTATTAACAAGAGATGGTGGGGATAATAACAGA-----  
-----  
AGCACCGAGACCTTTAGACCTGGAGGAGGAAATATGAGAGACAATTGGAGAAGTGAATTATATAAATATAAAG  
TAGTAAAAATTGAACCATTA---GGAGTAGCACCCACCAGGGCAAGGAGAAGAGTGGTG-----  
-----CAAAGAGAAAAAAGAGCA---GTGGGAACGATAGGAGCT-----  
ATGTTTCCTTGGGTTCTTGGGAGCA---GCAGGAAGCACTATG---GGCGCAGCGTCA---  
GTGACGCTGACGGTACAA---GCCAGACAA---TTATTG---TCTGGTATAGTGCAACAGCAGAAC---  
AATCTG---CTGAGG---GCTATTGAGGCGCAACAGCATATGTTGCAACTCACAGTCTGGGGCATC  
>DQ358805  
TTCTACTGTAATACAACGAAGCTGTTTACTGGTACTTTGAATAGCACTGGGACTTGGCATAACAGAAAAC---  
-----  
-----  
CAGACTGATACTATCACACTCCCATGCAAAATAAAACAAATTATAAACAGGTGGCAGGAAGTAGGAAAAGCAA  
TGTATGCCCCCTCCCATTAAGGACAAATTAGCTGTTTCATCAAAT---  
ATTACAGGGATACTATTAACACGAGATGGTGGTGGGAATGGGTCC-----  
-----  
-----  
GACACCACCGCCTCCTTAACACCAGGAGGAGGAGATATGAGGAACAGTTGGAGAAATGAATTATATAATTATG  
AGGTGGTAAAAATTCCACCATTA---GGAGTACCACCCACCGAGGCGAGGAGAAGAGTGGTG-----  
-----CAGAGAGAAAAAAGAGCA---GTGGGGGCACTAGGAGCT-----  
---ATGTTTCCTTGGGTTCTTGGGAACA---GCAGGAAGCACTATG---GGCGCAGCGTCA---  
CTGACGCTGACGGTACAG---GCCAGACAA---TTATTG---TCTGGTATAGTGCAACAGCAGAAT---  
AATTTG---CTGAGA---GCTATTAAGGCGCAACAGCATATGTTGCAACTCACAGTCTGGGGCATC  
>JN692432  
TTCTACTGTAATACATCACAACCTGTTTAATAGAACTTTTAATGGTACTGCAAATAAATTCAATACT-----  
-----  
-----  
ACAAATGGAACCTATCACACTTCAATGTAGAATAAAACAAATCATAAACAGATGGCAGGAAGTAGGAAAAGCAA  
TATACAACCCTCCCATCAGAGGAAACATTAGTTGTTTCATCAAAT---  
ATTACAGGACTACTATTAACAAGAGATGGTGGTAACAATGGGAGC-----  
-----  
-----  
GAGCCCGAGACCTTCAGACCTGGAGGAGGAGAAATGAGGGACAATTGGAGAAGTGAATTATATAAATATAAAG  
TAGTAAAAATTGAGCCATTA---GGAATAGCACCCACCAAGGCAAAAGAAGAGTGGTG-----  
-----CAAAGAGAAAAAAGAGAGCA---GTGGGAGTGGTAGGAGCT-----  
ATGTTTCCTTGGGTTCTTGGGAGCA---GCAGGAAGCACTATG---GGCGCAGCGTCA---  
GTAACGCTGACGGTACAG---GCCAGACTA---TTATTG---TCTGGTATAGTGCAACAGCAGAAC---  
AATTTG---CTGAAG---GCTATTGAGGCGCAACAACATCTGTTGCAACTCACAGTCTGGGGCATC  
>JN692439  
TTCTACTGTGATACCTCACAAATATTTAATAGTAATTGGAATAGTTCTTCAAATTTTAGTCATCATGAAAAT-  
-----  
-----  
TCAAATGAAAATATCACACTCCAATGCAGAATAAAACAAATTATAAACAGGTGGCAGGAAGTAGGAAGAGCAA  
TGTATGCCCCCTCCCATCCGAGGACTAATTAGATGTTTCATCAAAT---  
ATTACAGGGCTGCTATTAACAAGAGATGGTGGTAAGAATGATAACAATGGG-----  
-----  
-----  
ACTGAGAATGGGACTGAGACCTTCAGACCTGGAGGGGGAGATATGAGGGACAATTGGAGAAGTGAATTATATA  
AATATAAAGTAGTTCAAATTGAGCCAGTA---GGAATAGCACCCACCAAGGCAAAAGAGAAGAGTGGTG-----  
-----CAAAGAGAAAAAAGAGCA---GTAGGA---  
GTAGGAGCT-----GTGTTTCCTTGGGTTCTTGGGAACA---GCAGGAAGCACTATG---

GGCGCAGCGTCA---CTCACGCTGACGGTACAG---GCCAGACAA---TTGTTG---  
TCTGGTATAGTGCAACAGCAGAAC---AATCTG---CTGAAG---  
GCTATTGATGCGCAACAGCATCTGTTGCAGCTCACAGTCTGGGGCATC  
>JN692433  
TTCTACTGTAATACAACACAGCTGTTTAAACAGTACTTGGTGGGTAAATGGTACTTGGAAATGATACTACAAAGT  
CAAAT-----  
-----  
GCAACTCAGGAACTCATCACACTCCCATGCAGAATAAAACAAATTATAAACAAAGTGGCAGGAAGTAGGAGTAG  
CAATGTATGCCCCCTCCCATCAGAGGAAACATTAGCTGTGTATCAAAT---  
ATTACAGGGCTGCTATTAACAAGAGATGGTGGTAAAAATGAGAGT-----  
-----  
-----  
AGAACAAACGAAACCTTCAGACCTGGAGGAGGAAATATGAAGGATAATTGGAGAAAGTGAATTATATAAAATATA  
AGGTAAGTAAAAATTGAACCATTA---GGAATAGCACCCACCAAGGCAAGGAGAAAGAGTGGTG-----  
-----CAGAGAGAAAAAAGAGCA---GTGGGA---CTAGGAGCT-----  
---ATGTTCCCTTGGGTTCTTGGGAGCA---GCAGGAAGCACTATG---GGCGCAGCGTCA---  
GTGACGCTGACGGTACAG---GCCAGACAA---TTATTG---TCTGGTATAGTGCAACAGCAGAAC---  
AATTTG---CTGAGG---GCTATTGAGGCGCAACAGCATATGTTGCAACTCACAGTCTGGGGCATC  
>EF637049  
TTCTACTGTAACACAACACAGCTGTTTAAATAGTACTATGTTAAATGATACTAAAAGGCCAGATGAC-----  
-----  
-----  
ACAAATCAAAATATCACACTCCCATGCAGAATAAAACAAATTATAAACAGGTGGCAGGAAGTAGGAAAAGCAA  
TGTATGCCCCCTCCCATCAGTGGAAATAATTAGATGTATATCAAAT---  
ATTACAGGGCTACTACTAACAAGAGATGGTGGTAATGGTAATGGTACTGAG-----  
-----  
----  
TGCGGTAACAATACCGAGTGCTTCAGACCTGGAGGAGGAGATATGAGGGACAATTGGAGAAGTGAAGTATATA  
AATATAAAGTAGTAAGAATTGAGCCATTA---GGAATAGCACCCACCAAGGCAAAGAGAAGAGTGGTG-----  
-----CAAAGAGAAAAAAGAGCA---  
GTGGGAACAATAGGAGCT-----ATGTTCCCTTGGGTTCTTGGGAGCA---GCCGGAAGCACTATG---  
GGCGCAGCGTCA---CTGACGCTGACGGTACAA---GCCAGACAA---TTATTG---  
TCTGGTATAGTGCAACAGCAGAAC---AATTTG---CTGAGG---  
GCTATTGAGGCGCAACAGCATATGTTGCAACTCACAGTCTGGGGCATT  
>JN692462  
TTCTACTGTAATACATCACCCTGTTTAAATAGTACTTGGAAAATTGGAACATAAAGTCTATA-----  
-----  
-----  
GAAAAATGGAATATCACACTCCCATGCAGAATAAAACAAATTATAAACAGGTGGCAGGAAGTAGGAAAAGCAA  
TGTATGCCCCCTCCCATCGAAGGACCAATTAGATGTTTCATCAAAT---  
ATTACAGGGCTGCTATTAACAAGAGATGGTGGTGAAGACAACAATGGGTCC-----  
-----  
-  
GAGACCTCCAATGAGACCTACACCTCTGGACCAGGAGATATGAATATGAATTGCAATTGTGAATTATATTTAT  
ATAAAGATATGGAAATGGAGCCTGTACCATTA---GCACCCACCCCGACCAAGGCAAAGAGAAGAGTGGTG--  
-----CAGAGAGAAAAAAGAGCA---GTGGGA---  
GTAGGAGCT-----GTGTTCCCTTGGGTTCTTGGGAGCA---GCAGGAAGCACTATG---  
GGCGCAGCGTCA---GTGGCGCTGACGGCACAA---GCCAGACAA---TTATTG---  
TCTGGTATAGTGCAACAGCAGGAC---AATCTG---CTGAGG---  
GCTATTGAGGCGCAACAGCATCTGTTGCAACTCACAGTCTGGGGCATC  
>JN692465  
TTCTATTGTAATACAACAGAGCTGTTTAAAGGGTACTTGGAAATGGTACTTGGAAATGGTACTACTTGGGCTAATA  
GTACTTGGGCT-----  
-----AATGGT-----  
ACTGGGAATATGAACATCACACTCCCATGCAGAATAAGACAAATTATAAACATGTGGCAGGAGGTAGGAAAAG  
CAATGTATGCCCCCTCCCATCAGCGGACCCATTAAGTGTACATCAAAT---  
ATTACAGGGATGATATTAACAAGAGATGGTGGTGTATGGTAACGGG-----  
-----  
-----  
AGTCAGGAGATCTTCAGACCTGGAGGAGGAGATATGAGGGACAATTGGAGAAGTGAATTATATAAAATATAAAG

TAATAAAAATTGAACCATTA---GGAGTAGCACCCACCAGGGCAAAGAGAAGAGTGGTG-----  
-----CAGAGAGAAAAAAGAGCA---GCT-----ATAGGAGCT-----  
GTGCTCATTGGGTTCTTGGGAGCA---GCAGGAAGCACTATG---GGCGCAGCGTCA---  
ATAACGCTGACGGTACAA---GCCAGGCAA---TTATTG---TCTGGTATAGTGCAACAGCAGAGC---  
AATCTG---CTGAGA---GCTATTGAGGCGCAACAACACCTGTTGCAACTCACTGTCTGGGGCATC  
>JN692473

TTCTACTGTAATACATCAAAGCTGTTTAATAGGAATTGGACTGATAATAGTAATAATACTGGAAATGATACT-  
-----  
-----  
GGGAATAATACTATCACACTCCCATGCAGAATAAAACAAATTATAAACAGATGGCAGGAAGTAGGAAAGGCAA  
TGTATGCCCCCTCCCATTCGAGGACTAATTAGATGTTTCATCAAAT---  
ATTACAGGGCTGATATTAACAAGAGATGGTGGTAATCATAACAATAGT-----  
-----  
-----

AACGGTAGTGAAATCTTCAGACCTGGGGGAGGAGATATGAGGGACAATTGGAGAAGTGAATTATATAAATATA  
AAGTAATAAAAATTGAGCCATTA---GGAATAGCACCCACCAAGGCAAAGAGAAGAGTGGTG-----  
-----CAGAGAGAAAAAAGAGCA---GTGGGAACGATAGGAGCT-----  
---ATGTTCCCTTGGGTTCTTGGGAGCA---GCAGGAAGCACTATG---GGCGCAGCGGCA---  
GTGACGCTGACGGTACAG---GCCAGACAA---TTATTG---TCTGGTATAGTGCAACAGCAGAAC---  
AATCTG---CTGAGA---GCTATTGAGGCGCAACAGCATATGTTGCAACTCACAGTCTGGGGCATC  
>JN692474

TTTTACTGTAATACAACACAGCTGTTTAATAGCACTTGGCTGTTTAACAGCACTTGGAAATCAAAGTGCTAAT-  
-----  
-----  
GATGCAGACAATATCACACTCCCATGCAGAATAAAACAAATAGTAAACAGATGGCAGGAAGTAGGAAAAGCAA  
TGTATGCCCCCTCCCATCAAAGGACAAATTAGATGTTTCATCAAAT---  
ATTACAGGGCTGCTCTTAACAAGAGATGGTGATAATAACACCAAC-----  
-----  
-----

AACAACGAGACCTTTAGACCTGGAGGAGGAGATATGAGGGACAATTGGAGAAGTGAATTATATAAATATAAAG  
TAGTAAAAATTGAGCCATTA---GGAATAGCACCCACCAAGGCAAAAGAAGAGTGGTG-----  
-----CAGAGAGAAAAAAGAGCA---GTGGGAACAATAGGAGCT-----  
GTGTTCCCTTGGGTTCTTGGGAGCA---GCAGGAAGCACTATG---GGCGCAGCGTCA---  
GTGACGCTGACGGTACAG---GCCAGACTA---TTATTG---TCTGGTATAGTGCAACAGCAGAAC---  
AATCTG---CTGAAG---GCTATTGAAGCGCAACATCATCTGTTGCAGCTCACAGTCTGGGGCATC  
>JN692480

TTCTACTGTAACACAGCACAGCTGTTTAATAATACTTGGCTGTCCAATAATACCTGGCTACAGAATAATACTT  
GG-----  
-----  
ATTAATGGCACTATCACACTCCCATGCAGAATAAGACAAATTGTAAACAGGTGGCAGGAAGTAGGGAGAGCGA  
TGTATGCTCCTCCCATCGCAGGAATAATCAACTGTGTATCAAAC---  
ATTACAGGGCTGATATTAACAAGAGATGGAAACATAACAACAAATAGTACCTAC-----  
-----  
-----

TCTGAAAACAATACTGAAATCTTCAGACCTGGAGGAGGAGATATGAGGGACAATTGGAGAAGTGAATTATATA  
AATATAAAGTGGTAACAATTGAGCCAGTG---GGAATAGCACCCACCGAGGCAAGGAGAAGAGTGGTG-----  
-----CAGAGAGAAAAAAGAGCA---  
GTGGGAACGATAGGAGCT-----ATGTTCCCTTGGGTTCTTGGGAGCA---GCAGGAAGCACTATG---  
GGCGCAGCGTCA---CTAACGCTGACGGTACAG---GCCAGAATA---TTATTG---  
TCTGGTATAGTGCAACAGCAAAAC---AATTTG---CTGAGA---  
GCTATTGAGGCGCAACAACATATGTTGCAACTCACAGTCTGGGGCATC  
>HQ377423

TTCTACTGTGATACAAAACCACTGTTCAATAGTACTTGGAAATGATACTACAGGGTCAATTAC-----  
-----  
-----  
ATTAATGGAACATATCACACTCCGATGCAGAATAAAACAAATTATAAACATGTGGCAGGGAGTAGGAAAAGCAA  
TGTATGCCCCCTCCCATCAGAGGACTAATTAAGTGTACATCAAAT---  
ATTACAGGGCTGCTATTAACAAGAGATGGTGGTAAAGAGAACAGG-----  
-----  
-----

ACCACCGAGACCTTTAGACCTCAAGGAGGAAATATGAAAGACAATTGGAGAAGTGAACCTATATAAATATAAAG  
 TAGTAAAAATTGAACCATTA---GGAATAGCACCCACCAAGGCAAAGCGAAGAGTGGTA-----  
 -----CAAAGAGAAAAAAGAGCA---ATAGGGGTAATAGGAGCT-----  
 ATGTTCTTGGGTTCTTGGGAACA---GCAGGAAGCACTATG---GGCGCAGCGTCA---  
 CTGACGCTGACGGTACAG---GCCAGACAA---TTATTG---TCTGGTATAGTGCAACAGCAGAAC---  
 AATTTG---CTGAGA---GCTATTGAGGCGCAACAACATCTGTTGCAACTCACAGTCTGGGGCATC  
 >HQ377459  
 TTCTACTGCAATACAACACGCCTGTTTGATAGCACTTGGAATGGTACTGCAGGAAATTGGACTGATATTACAG  
 GGTCAAAT-----  
 -----TAC---  
 ACTGATGAAGATAATATTACACTCCCATGCAGAATAAAACAAATTATAAACAGGTGGCAGGAAGTAGGAAAAG  
 CAATGTATGCCCCCCCCATTGCAGGACAAATCAGATGTTTCATCAAAT---  
 ATTACAGGGCTGCTATTAACAAGAGATGGTGGGGCCAATAGATCC-----  
 -----  
 -----  
 GACACCAACGAGACCTTCAGACCTGGAGGAGGAAATATGAAGGACAATTGGAGAAGTGAATTATACAAATATA  
 AAGTAGTAAAAATTGAGCCATTA---GGATTAGCACCCACCAAGGCAAAGAGAAGAGTGGTG-----  
 -----CAGAGAGAAAAAAGAGCA---GTAGGAACACTAGGAGCT-----  
 ---ATGTTCTTGGGTTCTTGGGAGCA---GCAGGAAGCACTATG---GGCGCAGCGTCA---  
 ATGACGCTGACGGTACAG---GCCAGACAA---TTATTG---TCTGGTATAGTGCAACAGCAGAAC---  
 AATTTG---CTGAAG---GCTATTGAGGCGCAACAGCATTTGTTGCAACTCACAGTCTGGGGCATT  
 >KT427681  
 TTCTACTGTAATACATCAACGCTGTTTAATTGGACTGAAAATTCAAATAACAAT-----  
 -----  
 -----  
 GCAAGTGACAATATGACAATCCCATGCAGAATAAGACAAATTGTAAACAGGTGGCAGGAAGTAGGAAAAGCAA  
 TGTATGCCCCCTCCCATCAGCGGACAGATTAGCTGTTTATCAAAT---  
 ATCACAGGGCTGATATTAACAAGAGATGGTGGTATCAACAGCAGCAGCAGC-----  
 -----  
 -----  
 AATGAGACCTATGAGACCTTCAGACCTGCAGGAGGAAATATGAAAGATAATTGGAGAAGTGAATTATATAAAT  
 ATAAAGTAGTAAAGTTGAGCCATTA---GGAGTAGCACCCACCAAGGCAAAGAGAAGAGTGGTG-----  
 -----CAGAGAGAAAAAAGAGCA---ATAACA---CTAGGAGCC---  
 -----ATGTTCTTGGGTTCTTGGGAGCA---GCAGGAAGCACTATG---GGCGCAGCGTCG---  
 ATGACGCTGACGGTACAG---GCCAGACTA---TTATTG---TCTGGTATAGTGCAACAGCAGAAC---  
 AACCTG---CTGAGA---GCTATTGAGGCGCAACAACATCTGTTGCAACTCACAGTCTGGGGCATT  
 >KT427673  
 TTCTACTGTAATACAACAAAGCTGTTTAATAGTACCTGGAATACAACAGAGTTGTTTAATAGTACCAGGTGGA  
 CTAATCAA-----  
 -----ACT---  
 AGGAATGATACTGACATCATACTCCCATGTAGAATAAAACAAATTGTAAACAGGTGGCAGGAAGTAGGAAAAG  
 CAATGTATGCCCCCTCCCATCAGAGGACAAATTAAATGTACATCAAAT---  
 ATTACAGGGCTGCTATTAACAAGAGATGGTAAGATAAGGAACGAGACG-----  
 -----  
 -----  
 AAAAGGAACGAGACCTTCAGACCTGGAGGAGGAGATATGAGGGACAATTGGAGAAGTGAATTATATAAATATA  
 AAGTAGTAAAAATTGAGCCATTA---GGAGTAGCACCCACCACGGCAAAGAGAAGAGTGGTG-----  
 -----CAAAGAGAAAAAAGAGCA---GTAGGAACAATAGGAGCT-----  
 ---ATGTTCTTAGGTTCTTGGGGGCA---GCAGGAAGCACTATG---GGCGCAGCGTCA---  
 ATAACGCTGACGGTACAG---GCCAGACAA---TTATTG---TCTGGTATAGTGACAGCAGAAC---  
 AATCTG---CTGAGG---GCTATTGATGCGCAACAGCATCTGTTGCAACTCACAGTCTGGGGCATC  
 >KT427744  
 TTCTACTGTAATACAACACAGCTATTTAATCATACTTGGGATGGTACTAACTGGACTGATCCTAACTGGTCGT  
 CAAAT-----  
 -----  
 -----  
 ACAACTAACAATATCACACTTCAATGCAGAATAAGACAAATTATAAACAAAGTGGCAGGAAGTAGGAAGAGCAA  
 TATATGCCCCCTCCCATCAAAGGACAAATTAGATGCTCATCAAAA---  
 ATTACAGGGCTGCTACTGACAAGGGATGGTGGCAAAACGAATAGCTCT-----  
 -----  
 -----

AACTCCTCTGAGGTCTTCAGACCTGGAGGAGGAGATATGAGAGATAATTGGAGAAGTGAGCTATATAAATATA  
AGGTAGTAAAAATTGAGCCAGTA---GGAATAGCACCCACCAAGGCAAAGAGAAGAGTGGTG-----  
-----CAGAGAGAAAAAAGAGCA---GTGACA---CTAGGAGCT-----  
---ATGTTCCCTTGGGTTCTTGGGAGCA---GCAGGAAGCACTATG---GGCGCAGCGTCA---  
GTGACGCTGACGGTACAG---GCCAGACTA---TTATTG---TCTGGTATAGTGCAACAGCAAAAC---  
AATTTG---CTGAGA---GCTATTGAGGCGCAACAGCATATGTTGCAACTCACAGTCTGGGGCATC  
>KT427732  
TTCTACTGTAAGACAACACAGCTGTTTAATAGCACTTGGTTAAATACTAGTATTGAGTATAATAATACTGAAG  
GGGCT-----  
-----  
GGAGTACCAAATATCACACTCCAATGCAGAATAAAACAAATTATAAACAGATGGCAGGGAGTAGAAAGAGCAA  
TATATGCCCCCTCCCATCCCGGGACAAATTAGATGTACATCAAAT---  
ATTACAGGGCTGATATTGACACGGGATGGT---AATGGTAATCAAACAGAT-----  
-----  
-----  
AGCACTAACGAAACCTTCAGACCAATAGGAGGAAATATGCAGGACAATTGGAGAAGTGAATTATATAAATATA  
AAGTGGTAAAAATTGAGCCAGTA---GGAATAGCACCCACCAAGGCAAAGAGAAGAGTGGTG-----  
-----CAGAGAGAAAAAAGAGCA---GTGGGAACACTAGGAGCT-----  
---ATGTTCCCTTGGGTTCTTGGGAGCA---GCAGGAAGCACTATG---GGCGCAGCGTCA---  
GTGACGCTGACGGTACAG---GCCAGACTA---TTATTG---TCTGGTATAGTGCAACAGCAGAAC---  
AACCTG---CTGAAG---GCTATTGAGGCGCAACAGCATTTGTTGCAACTCACAGTCTGGGGCATC  
>KT427721  
TTCTACTGTAATACAACACAACCTGTTTAATAGTACTTGGAAATGCAAATGAAAATAGTACTGGGGGAGAGTCAA  
AT-----  
-----  
AGAACTGAAGACTATGTACTCCCATGCAGAATAAAACAGTTTATAAACATGTGGCAGGAGGTAGGAAAAGCAA  
TGTATGCCCCCTCCCATCAGTGGAAATATTACTTGTTTCATCAAAT---  
ATTACAGGGCTGCTATTAACAAGAGATGGTGGTAGT-----  
-----  
-----  
AATGACACCGAGACCTTTAGACCTGGAGGAGGAGATATGAGGGACAATTGGAGAAGTGAATTATACAAATATA  
AAGTAGTAAAAATTGAACCAATA---GGAATAGCACCCACCAAGGCAAAGAGAAGAGTGGTG-----  
-----CAGAGAGAAAAAAGAGCA---GTGGGA---CTAGGAGCT-----  
---CTGTTCCCTTGGGTTCTTGGGAGCA---GCAGGAAGCACTATG---GGCGCAGCGTCA---  
ACAGCGCTGACGGTACAG---GCCAGACAA---GTATTG---TCTGGTATAGTGCAACAGCAAAAC---  
AATTTG---CTGAGG---GCTATTGAGGCGCAACAGCATATGTTGCAACTCACAGTCTGGGGCATC  
>KT427717  
TTCTACTGTAATTCAACACAACCTATTTAATAGTACTTGGAAATAATACTGCTTGGAAATGAGACTATTGAT---  
-----  
-----  
AAAAATGGAATATCATACTTCAATGCAGAATAAAACAAATTATAAACAAAGTGGCAGGAAGTAGGAAAAGCAA  
TATATGCCCCCTCCTATTGCAGGAAATATTACATGTTCTTCAAAC---  
ATTACAGGGATTTTGTTAAACAAGAGATGGTGGGATGAACGTAAGC-----  
-----  
-----  
GATACCACCGAGACCTTTAGACCTGCAGGAGGAGATATGAAAGACAATTGGAGAAGTGAATTATATAAATATA  
AAGTAGTAAGACTTGAGCCATTA---GGGATAGCACCCACCAAGTCAAGGAGAATAGTGGTG-----  
-----CAGAGAGAAAAAAGAGCA---GTGGGGACATTAGGAGCT-----  
---ATGTTCCCTTGGGTTCTTGGGAGCA---GCAGGAAGCACTATG---GGCGCAGCGTCA---  
ATGACGCTGACGGTACAG---GCCAGACGA---CTATTG---TCTGGTATAGTGCAACAGCAGAAC---  
AATATG---CTGAAG---GCTATTGAGGCGCAACAACATATGTTGCAACTCACAGTCTGGGGCATC  
>KT427713  
TTCTATTGTAATACAACAAACCTGTTCAACAGTACTTGGAAATGACACTACTGAAGGAAATAACACAGGA---  
-----  
-----  
AATATAGGAAATATCACACTCCCGTGCAGAATAAAACAAATTATAAACATGTGGCAGCAAGTAGGAAAAGCAA  
TGTATGCCCCCTCCCATCGCAGGACAAATTAGCTGTTTCATCAAAT---  
ATTACAGGGTTGTTACTAACAAGAGATGGTGGTAATAATGATTCT-----  
-----  
-----

AATAATTATGAAATCTTCAGGCCTGGAGGAGGAGATATGAGGGACAATTGGAGAAGTGAATTATACAAATATA  
AAGTAGTAAAAATTGAACCATTA---GGAGTAGCACCCACTAAGGCAAAGAGAAGAGTGGTG-----  
-----CAGAGAGAAAAAAGAGCG---GCA-----CTAGGAGCT-----  
---TTGTTCCCTTGGGTTCTTGGGAGCA---GCAGGGAGCACTATG---GGCGCAGCGGCA---  
GTAACGCTGACGGTACAG---GCCAGAACA---TTATTG---TCTGGTATAGTGCAAGCAGCAAAGG---  
AATTTG---CTGAGA---GCTATTGAGGCGCAACAACATCTGTTGCAACTCACAGTCTGGGGCATC  
>KT427870  
TTCTACTGTAATACATCAGGACTGTTTAATAGTACTTGGGAATAGGGATGGTAATTGGTCTCAGGATGATACTA  
AT-----  
-----  
GGGTCAAATGAAACAATCACACTCCCATGCAGAATAAAACAAGTTATAAACAGGTGGCAGGAAGTAGGAAAAG  
CAATGTATGCCCCCTCCCATCAGCGGAAGGATTTTCTGTTCATCAAAC---  
ATTACAGGGCTACTCTTAGTAAGAGATGGTGGTAACCAGAGCCAC-----  
-----  
-----  
GAGAGTGAGACCTTCCGACCTGGAGGAGGAGATATGAGGGACAATTGGAGAAGTGAATTATATAAATATAAAG  
TAGTAAAAATTGAGCCATTA---GGAATAGCACCCACCAAGGCAAAGAGAAGAGTGGTG-----  
-----CAGAGAGAAAAAAGAGCA---GTGGGAACGCTAGGAGCT-----  
ATGTTCCCTTGGGTTCTTGGGAACA---GCAGGAAGCACTATG---GGCGCAGCGTCA---  
CTGACGCTGACGGTACAG---GCCAGACAA---TTATTG---TCTGGTATAGTGCAACAGCAGAAC---  
AATCTG---CTGAAG---GCTATTGAGGCGCAACATCATCTGTTGCGACTCACAGTCTGGGGCATA  
>KT427707  
TTCTACTGTAATACAACAGGGCTGTTTAATAGTAATAATACTTGGGAATAATACTAATAATAATAGTAGG----  
-----  
-----  
AATAATGAAACATATACCATACCATGCAGAATAAAGCAAATTATAAACAGGTGGCAAGAAGTAGGAAAAGCAA  
TGTACGCCCCCTCCCATCAAAGGAATAATTCAGTGTACATCAAAT---  
ATTACAGGGCTGCTATTAACAAGAGATGGTGGGAATAGTTCAGAA-----  
-----  
-----  
AATGAACTTTTCAGACCTGCAGGAGGAGATATGAGGGACAATTGGAGAAGCGAATTATATAAATATAAAGTAG  
TAAAAATTGAGCCAATA---GGACTAGCACCTACCAAGGCACAGAGAAGAGTGGTG-----  
-----CAGAGAGAAAAAAGAGCA---GTGACA---CTGGGAGCT-----  
ATGTTCCCTTGGGTTCTTAGGAGCA---GCAGGAAGCACTATG---GGCGCAGCGTCA---  
ATAACGCTGACGGTACAG---GCCAGACAA---TTGCTG---TCTGGTATAGTGCAACAGCAGAGT---  
AATCTG---CTGAGG---GCTATTGAGGCGCAACAGCATATGTTGCAACTCACAGTCTGGGGCATC  
>KT427706  
TTCTACTGTAATACATCACTGATATTTAATGATACTTGGCTTAACAGGTCTGAAGAG-----  
-----  
-----  
TCAAATAAACTATCACACTTCAATGCAGAATAAAACAATTATAAACAGGTGGCAGGAAGTAGGAAAAGCAA  
TGTATGCCCCCTCCTATCAAAGGACAAATTAGATGCTCATCAAAT---  
ATTACAGGGCTATTATTAACAAGAGATGGTGGTAACATAAACGAG-----  
-----  
-----  
ACTGGCAATGAGACCTTCAGACCTGGAGGAGGAGATATGAGGGACAATTGGAGAAGTGAAGTATATAAATATA  
AAGTAGTAAAAATTGAGCCATTA---GGAATAGCACCCACCAAGGCAAAGAGAAGAGTGGTG-----  
-----CAGAGAGAAAAAAGAGCA---GTGGGAACAATAGGAGCT-----  
---ATGTTCCCTTGGGTTCTTGGGAGCA---GCAGGAAGCACTATG---GGCGCAGCGTCA---  
ATGACGCTGACGGTACAG---GCCAGACTA---TTATTG---TCTGGTATAGTGCAACAGCAGAAC---  
AATTTG---CTGAGA---GCTATTGAGGCGCAACAGCATATGTTGCAACTCACAGTCTGGGGCATC  
>KT427703  
TTCTACTGTAATACAACAAAGCTATTTAATAGTATTTGGAATAATACACAGCTAGTTAATGGTACTTGGAAAT-  
-----  
-----  
GATACTTACTGGAAGTCTAAA-----  
GTGCCAAATGAACTATCACACTTCCATGCAGAATAAAACAATTATAAACACATGGCAGGAAGTAGGAAAAG  
CAATATATGCCCCCTCCCATCAAAGGGGAAATTAATGCTCATCAGAT---  
ATTACAGGGTTGCTACTGACACGGGATGGTGGTAACATGAGCAACAGCTCTAAC-----  
-----  
-----

GACGGCTTTGAAGTCTTCAGACCTGGAGGAGGAGATATGAGAGACAATTGGAGAAGTGAACCTATATAAAATATA  
AGGTAGTGAGAATTGAGCCATTA---GGAATAGCACCCACCAAGGCAAAGAGAAGGGCGGTG-----  
-----CAGAGAGAAAAAAGAGCA---GTGGGGACAATAGGAGCT-----  
---ATGTTCCCTTGGGTTCTTGGGAGCA---GCAGGAAGCACTATG---GGCGCAGCGTCA---  
GTGACGCTGACGGTACAG---GCCAGACTA---TTATTG---TCTGGTATAGTGCAACAGCAAAGC---  
AATTTG---CTGAGA---GCTATTGAGGCGCAACAGCATATATTGCAACTCACAGTCTGGGGCATC  
>KT427873  
TTCTACTGTAATTCAACACAACCTGTTTAATAGTACCTGGGATACTAATGCAACCTTGAATGCTACAGACAGCC  
AAGATGAA-----  
-----  
CTTAACAAAACCTATCACACTCCCATGTAGAATAAAAACAAATTATAAACATGTGGCAGGAAGTAGGAAAAGCAA  
TGTATGCCCCCTCCCATTAGAGGGGCTAATTAGATGTACAACAAAT---  
ATTACAGGGCTACTATTAACAAGAGATGGTGGCACAGGCAATAAGACT-----  
-----  
-----  
CAAAATAACACTGAGGTCTTCAGACCTGGAGGAGGAGATATGAAGGATAATTGGAGGAGTGAGTTATATAAAAT  
ATAAAGTAGTAAAAATTGAACCATTA---GGAGTAGCACCTACCAAGGCCAAGAGAAGAGTGGTG-----  
-----CAGAGAGAAAAAAGAGCA---GTGGGAACAATAGGAGCT---  
-----ATGTTCCCTTGGGTTCTTGGGAGCA---GCAGGAAGCACTATG---GGCGCAGCGTCA---  
ATAACGCTGACGGCACAG---GCCAGACAA---TTATTG---TCTGGTATAGTGCAAGCAGCAGAAT---  
AATCTG---CTGAGG---GCTATTGAGGCGCAACAACATCTGTTGCAACTCACAGTCTGGGGCATC  
>KT427695  
TTCTACTGCAATACATCGGTGCTGTTTAATGATACTTGGCTGAATAATAATAAGACT-----  
-----  
-----  
GAACACCAAATATCACGCTCCCATGCAAAATAAAACAGATTATAAACATGTGGCAGGAAGTAGGAAAAGCAA  
TGTATGCCCCCTCCCATCAGTGGACCAATTAGGTGTTTCATCAAAT---  
ATCACAGGGCTGCTATTAACAAGAGATGGTGGTAATAGCACAAAT-----  
-----  
-----  
AATAACGAGACCTTCAGACCTGGAGGAGGAGATATGAGGGACAATTGGAGAAGTGAATTATATAAAATATAAAG  
TAGTAAACCTTGAGCCATTA---GGATTAGCACCCACCAAGGCAAAGAGAGTGGTG-----  
-----CAGAGAGAAAAAAGAGCA---GTGGGAACGCTAGGAGCT-----  
ATGTTCCCTTGGGTTCTTGGGAACA---GCAGGAAGCACTATG---GGCGCAGCATCA---  
CTAACGCTGACGGTACAG---GCCAGACTA---TTATTG---TCTGGCATAGTGCAACAGCAGAGC---  
AATTTG---CTGAGG---GCTATTGAGGCGCATCAGCATATGTTGCAACTCACAGTCTGGGGCATC  
>KT427861  
TTTTACTGTAATACAACACCGCTGTTTAATAGTACATGGTCGCTTAATGGTACTACTTGGCAGCTTAATGGTA  
CTCAGAA-----  
-----  
AATGAGTCAGGAAATATCACACTCCAATGTAGAATAAAACAAATCATAACATGTGGCAGGGAGTAGGAAAAG  
CAATGTATGCCCCCTCCCATCAGCGGACTCATAAAATGTTTCATCAAAT---  
ATTACAGGGCTGATATTAACAAGAGATGGTGGTAATAACAATGAAACGAAG-----  
-----  
-----  
AACAACTCCGAAACCTTCAGACCTGGAGGGGGAGATATGAGGGACAATTGGAGGAGTGAATTATATAAAATATA  
AAGTAGTAAAAATTAAGCCATTA---GGAATAGCACCTACCAAGGCAAAGAGAAGAGTGGTG-----  
-----CAGAAAGAAAAAAGAGCA---GTGGGAGCAATAGGAGCT-----  
---ATGTTCCCTTGGGTTCTTGGGAGCA---GCAGGAAGCACTATG---GGCGCAGCGCA---  
ACGACGCTGACGGTACAG---GCCAGACAA---TTATTG---TCTGGTATAGTGCAACAGCAGAAC---  
AATCTG---CTGAGA---GCTATTGAGGCGCAACAACATATGTTGCAACTCACAGTCTGGGGCATC  
>KT427785  
TTTTACTGTAATACAACACAACCTATTTAATAGTACTTGGGTAAATGATACTTTTAGTACTTGGGTAAATAATA  
CTTGGGTT-----AATGGT---  
ACTGTAAAGTCAATTAGTAAT-----  
AAAACAAATATTAATATTACACTTCCATGCAGAATAAAGCAAATTATAAACATGTGGCAGGAAGTAGGAAAAG  
CAATGTATGCCCCCTCCCATCAAGGGACCAATTAGCTGTTTCATCAAAT---  
ATTACAGGACTGCTATTAACAAGAGATGGGGGAAATAGTGATAATAGTAGC-----  
-----  
AAAAATGAGACAAAT---

GAGACCGAGACTTTTAGACCTGGAGGAGGAAATATGAAAGACAATTGGAGAAGTGAATTATATAAATATAAAG  
 TAGTGCAAATTGAACCATTA---GGAATAGCACCCACCAGGGCAAAAAGAAGAGTGGTG-----  
 -----CAAAGAGAGAAAAAGAGCA---GTGGGA---ATAGGAGCA-----  
 TTGTTTCATTGGGTTCTTGGGAGCA---GCAGGAAGCACTATG---GGCGCAGCGTCA---  
 ATGACGCTGACGGTACAG---GCCAGACAA---TTATTG---TCTGGTATAGTGCAACAGCAGAAC---  
 AACCTG---CTGAGG---GCTATTGAGGCGCAACAGCATTTGTTGCAGCTCACAGTCTGGGGCATC  
 >KJ849814  
 TTCTACTGCAATACAACACAGCTATTTAATTGGACAATTGGCAAGTCA-----  
 -----  
 -----AATATAACCCAA-----  
 AATGATAGTGAAATTATTACAATCCAATGCAGAATAAAACAGATTATAAATAAGTGGCAGGAAGTAGGAAAAT  
 CAATATATGCCCCCTCCTATCAGAGGAAATATTAGCTGTTTCATCAAAT---  
 ATTACAGGACTGATATTAACAAGAGATGGTGGTAAT-----  
 -----  
 CACAATGAAACTAAAAACAAGACT-----  
 AAGACTGAGACTTTTCAGACCTGGAGGAGGAGATATGAGGGACAATTGGAGAAGTGAATTATATAAATATAAGG  
 TAGTGAAAATTCAGCCATTA---GGAATAGCACCCACCAGGGCAAGGCGAAGAGTGGTG-----  
 -----CAGAGAGAAAAAAGAGCA---GTGGGAACACTAGGAGCT-----  
 ATGTTCCCTTGGGTTCTTGGGAGCA---GCAGGAAGCACTATG---GGCGCAGCGTCA---  
 ATAACGCTGACGGTACAG---GCCAGACAA---TTGTTG---TCTGGTATAGTGCAAGCAGCAGAAC---  
 AATCTG---CTGAAA---GCTATTGAGGCGCAACAGCATCTGTTGCAACTCACAGTCTGGGGCATC  
 >KT427771  
 TTCTACTGTAATACAACACAACCTGTTTAATAGTACTTGGCAAAGTAATAGTACTGGAAATAGTACTGAGAAT-  
 -----  
 -----  
 AATAGCACATAATCACACTCCCCGTAGGATAAAACAAGTTATAAACATGTGGCAGGAGGTAGGAAAAGCAA  
 TGTATGCCCCCTCCCATCAGTGGACTAATTCAATGTACATCAAAT---  
 ATTACAGGGCTGCTGTTAACAAGAGATGGTGGGTCTGATGGTGAATCTAATAAA-----  
 -----  
 -----  
 ACAGAGAGTGAGATCTTCAGACCTGGAGGAGGAGATATGAGGGACAATTGGAGAAGTGAATTATATAAATATA  
 AAATAGTAAAAATTGAACCATTA---GGAGTAGCGCCACCAAGGCAAAGAGAAGAGTGGTG-----  
 -----CAGAGAGAAAAAGAGAGCACTAGGGGGA---CTAGGAGCT-----  
 ---GTATTCCTTGGGTTCTTGGGAGCA---GCAGGAAGCACTATG---GGCGCAGCGTCA---  
 ATAACGCTGACGGTACAG---GCCAGACAA---TTATTG---TCTGGTATAGTGCAAGCAGCAGAAC---  
 AATCTG---CTGAGG---GCTATTGATGCGCAACGGCACATGTTGCAACTCACAGTCTGGGGCATC  
 >KT427753  
 TTCTACTGTAATACAACAAAACCTGTTCAATAGTACTTGGAAGTGGAATAATGGTACTTGGAAATAGGAATGATA  
 CT-----  
 -----GAAGGACAAGAT-----  
 AACACTGGAGAACTATTACACTTCCATGCAGAATAAAACAAATCATAAACATGTGGCAGGAAGTAGGAAAAG  
 CAATGTATGCCCCCTCCCATCAGAGGACAAATTAATTGCACATCAAAT---  
 ATTACAGGACTGCTATTAACAAGGGATGGTGGTAATAATAATAATAGC-----  
 -----  
 -----  
 AAGAATAACGAGACTTTCAGACCTGGAGGAGGAAATATGAAGGACAATTGGAGAAGTGAATTATATAAATATA  
 AAGTAGTACAAATTGAACCATTA---GGAATAGCACCCACCAAGGCAAAAAGGAGAACGGTG-----  
 -----CAGAGAGAAAAAAGAGCA---GTGGGA---ATAGGAGCT-----  
 ---GTGCTCTTTGGGTTCTTGGGAGCA---GCAGGAAGCACTATG---GGCGCAGCGTCA---  
 GTAACGCTGACGGTACAG---GCCAGACAA---TTGTTG---TCTGGTATAGTGCAACAGCAGAGC---  
 AATCTG---CTGAAG---GCTATTGAGGCGCAACAGCATCTGTTGCAGCTCACAGTCTGGGGCATC  
 >KT427749  
 TTCTACTGTAATACAACAGAACTGTTCTATAGTAATTGGACGTGGAATGGTACTTGGAAATAGGAATGATACTG  
 AAGGATTA-----  
 -----  
 CAAAAATAAACTATTATACTTCCATGCAGAATAAAACAAATCATAAACATGTGGCAGGAAGTAGGAAAAGCAA  
 TGTATGCCCCCTCCCATCAGAGGACAAATTAATTGCACATCAAAT---  
 ATTACAGGACTGCTATTAATAAGAGATGGTGGTAATGATACTGGAAC-----  
 -----  
 -----

AGTGGGACTGAAATTTTCAGACCTCAAGGAGGAAACATGAAAGACAATTGGAGAAGTGAATTATATAAATATA  
 AAGTAGTACAAATTGAACCATTA---GGAATAGCACCCACCAAGGCAAGAGAAGAACGGTG-----  
 -----CAGAGAGAAAAAAGAGCA---GTGGGA---TTTGGAGCT-----  
 ---GTGATCTTTGGGTTCTTGGGAGCA---GCAGGAAGCACTATG---GGCGCAGCGTCA---  
 ATAACGCTGACGGTACAG---GCCAGACAA---TTGTTG---TCTGGTATAGTGCAACAGCAGAGC---  
 AATTTG---CTGAAG---GCTATTCAAGCGCAACAGCATCTGTTGCAGCTCACAGTCTGGGGCATC  
 >KT427826  
 TTTTACTGTAATACAACAAAACCTGTTTAATACTACGTGGAATATTACTGGAGAAGGAAACAACAATCTC----  
 -----  
 -----  
 ACTAATGAAACTATCACACTCCCATGCAGAATAAAACAGTTCATAAACATGTGGCAGGAAGTAGGAAAAGCAA  
 TGTATGCCCCCTCCTATCAGGGGACAAATTCAGTCTCATCAAAT---  
 ATTACAGGGCTACTATTAACAAGAGATGGTGGTAATAGTAATAAT-----  
 -----  
 -----  
 GAGTCGGAGACCTTCAGACCGGGAGGAGGAGATATGAGGGACAATTGGAGGAGTGAATTATATAAATATAAAG  
 TAGTAAAAATTGAACCATTA---GGAATAGCACCCACCAAGGCAAGAAGGAGAGTGGTG-----  
 -----CAAAGAGAAAAAAGAGCA---ATAGGAGGAATAGGAGTT-----  
 GTGATCCTTGGGTTCTTGGGAGCA---GCAGGAAGCACTATG---GGCGCAGCGTCG---  
 CTAACGCTGACGGTACAG---GCCAGACAA---TTATTG---TCTGGTATAGTGCAACAGCAAAGC---  
 AATTTG---CTGAGA---GCTATTGAGGCGCAACAGCGTTTGTGCAACTCACTGTCTGGGGCATC  
 >KJ849821  
 TTCTACTGTGATACAGCAAAGCTGTTTAACAGTACTTGGGAGAGGCGTAATGACACGAAC-----  
 -----  
 -----  
 ACTTGGGAGTCGAACAATACA-----  
 ATACCAAATGAGAATATCACACTCCCATGCAGAATAAAACAAATTATAAACAGGTGGCAGGAAGTAGGAAAAG  
 CAATGTATGCCCCCTCCCATTCAGGACGAATTGAATGTACATCAAAT---  
 ATTACAGGGCTACTATTAACAAGAGATGGTGGT-----  
 -----  
 -  
 TCTAACAATAGTAGTAACGATACCTTCAGACCAGGAGGAGGAGATATGAAGGACAATTGGAGAAGTGAATTAT  
 AATAATATAAAGTAGTACAAATTCAGCCATTA---GGAGTAGCACCCACCAGGTCAAGGAGAAGAGTGGTG--  
 -----CAGAGAGAAAAAAGAGCA---GTAACA---  
 CTGGGAGCT-----ATGTTCCCTTGGGTTCTTGGGAGCA---GCAGGAAGCACTATG---  
 GGCGCAGCGTCA---GTGACGCTGACGGTACAG---GCCAGACAA---TTATTG---  
 TCTGGTATAGTGCAAGCAGCAAAGC---AATTTG---CTGAGG---  
 GCTATTGATGCGCAACAGCACATGTTGCAACTCACAGTCTGGGGCATC  
 >KT427811  
 TTTTACTGTAATACATCAAGACTGTTTAACAGTATTTGGAACAGTACCTGGCAGGATAATACAGCTGAAGAGT  
 CA-----  
 -----  
 -----  
 AATAAATACTGACATCATACTCCATTGCAGAATAAAACAAATTATAAACAGATGGCAGGAAGTAGGAAAAGCAA  
 TGTATGCCCCCTCCCATCAAGGGAAAAATTCAATGTTTCATCAAAT---  
 ATTACAGGGCTGCTATTAGTAAGAGATGGTGGTAACGAGAACT-----  
 -----  
 -----  
 AGTAACACCGAGACCTTCAGACCTGGAGGAGGAGACATGAGGGACAATTGGAGAAGTGAATTATATAAATATA  
 AAGTAGTGCAAATTGAGCCAGTA---GGAATAGCACCCACCAAGGCAAGAAGAAGAGTGGTG-----  
 -----CAGAGAGAAAAAAGAGCA---GTAACA---ATAGGAGCT-----  
 ---ATGTTCCCTTGGGTTCTTGGGAGCA---GCAGGAAGCACTATG---GGCGCAGCGTCA---  
 ATCGCGCTGACGGGACAG---GCCAGACAA---TTATTG---TCTGGTATAGTGCAACAGCAGAAT---  
 AATCTG---CTGAAG---GCTATTGAGGCGCAACAACATATGTTGCAACTCACAGTCTGGGGCATC  
 >KT427796  
 TTCTATTGTAATACATCACAGCTGTTCAATAGTACTTGGAAATTTCACTAGTGCTAGGAATGAGACTGAAGAG-  
 -----  
 -----  
 TCAAATGACACTATCACACTCCCATGTAGGATAAAACAAATTATAAATAAGTGGCAAGAAGTAGGAAAAGCAA  
 TATATGCTCCTCCTATCCAAGGACGAATTTACTGTTTCATCAAAC---  
 ATTACAGGGTTGCTATTAACAAGAGATGGGGGTGAAAAACAACCTG-----  
 -----

-----  
ACCAATGAGACTTTTGTAGACCTGGAGGAGGAGATATGAGGGACAATTGGAGAAGTGAACCTGTATAAATATAAAG  
TAGTAAAAATTGAGCCATTA---GGACTAGCACCCACCAAGGCAAAGAGAAGAGTGGTG-----  
-----CAGAGAGAAAAAAGAGCA---GTGGGAACGCTGGGAGCA-----  
ATGTTTCCTTGGGTTCTTGGGAACA---GCAGGAAGCACTATG---GGCGCAGCGTCG---  
CTGACGCTGACGGTACAG---GCCAGACAA---TTATTG---TCTGGTATAGTGCAACAGCAAAAC---  
AATTTG---CTGAAG---GCTATTGAGGCGCAACAGCATCTGTTGCAACTCACAGTCTGGGGCATT  
>KX181905  
TTCTATTGTAATACAACAAAATTGTTTGATTGGAATGATACAACAAAAGTGTTTAATTGGAATAAATCA----  
-----  
-----TGGACGTTTACA-----  
GAAGGCAATGACACTATTCATATCCCATGCAGAATAAAAACAAATTATAAACAGGTGGCAGGAAGTAGGAAAAG  
CAATGTATGCCCTCCCATTTGGAGGGCTGATTAGATGTTTCATCAAAT---  
ATTACAGGGCTGCTATTAACAAGAGATGGTGGTAATGAGACAAGG-----  
-----  
-----  
GATAACGACACTTTTCAGACCTGGAGGAGGAGATATGAGGGACAATTGGAGAAGTGAATTATATAAATATAAAG  
TAGTAAGAATTGAACCATTA---GGGGTAGCACCCACCAAGGCAAAGAGAAGAGTGGTA-----  
-----CAAAGAGAAAAAAGAGCA---GTGGGAGCAATAGGAGCT-----  
ATGTTTCCTTGGGTTCTTGGGAGCA---GCAGGAAGCACTATG---GGCGCAGCGGCA---  
GTGACGCTGACGGTACAG---GCCAGACAA---TTGTTG---TCTGGTATAGTGCAACAGCAGAAC---  
AATCTG---CTGAGA---GCTATTGAGGCGCAACAGCATTTGTTGCAGCTCACAGTCTGGGGCATC  
>KX181909  
TTCTACTGTAATACAGCAGAGCTGTTTAGTAATACTTGGTTAAATAAGAGTGGCAAT-----  
-----  
-----  
AACGATGGAACTATCACACTTCCATGCAGAATAAAAACAAATTATAAACAGATGGCAGGAAGTAGGAAAAGCAA  
TGTATGCCCCCTCCCATCAGGGGATTAATTGAATGTTTCATCAAAT---  
ATTACAGGGCTGATACTAACAAGAGATGGTGGTAATAATAGTGCA-----  
-----  
-----  
AACAAATGCTAGTGAAACCTTCAGACCCGGAGGGGGAAATATGAAGGACAATTGGGGAAGTGAATTATATAAAT  
ATAAAGTAGTAAAAATTGAGCCCTTA---GGAATAGCACCCACCAGGGCAAAGAGAAGAGTGGTG-----  
-----CAAAGAGAAAAAAGAGCA---GTAACG---CTAGGAGCT---  
-----ATGTTTCCTTGGGTTCTTGGGAACA---GCAGGAAGCACTATG---GGCGCAGCGTCA---  
GTGACGCTGACGGTACAG---GCCAGACAG---TTACTG---TCTGGTATAGTGCAACAGCAGAGC---  
AATCTG---CTGAAG---GCTATTGAGGCGCAACAGCATCTGTTGCAACTCACAGTCTGGGGCATC  
>KX181908  
TTTTACTGTGATACAACAAAGCTGTTTAATAGTACTTGAATAATACTGGAGAGTCAAATTACACGGAG---  
-----  
-----  
GGAAATGCCACTATCATACTTCCATGCAGAATAAAAACAAATTATAAACAGATGGCAGGAAGTAGGAAAAGCAA  
TGTATGCCCCCTCCCATCAGTGGAATATTAGCTGTTTATCAAAT---  
ATTACAGGGGTACTATTAAACAAGAGATGGGGGTAATGAAACAAAT-----  
-----  
-----  
GCCCCTGAGACCTTCAGACCTCAAGGGGGAAATATAAAGGATAATTGGGGAAGTGAATTATATAAATATAAAG  
TAGTAAAAATTGAACCCTTA---GGAGTAGCCCCCCCCCAAGGCAAAGAGAAGAGTGGGG-----  
-----CAAAGAGAAAAAAGAGCA---GTGGGA---ATAGGAGCT-----  
ATGTTTCCTTGGGTTCTTGGGAGCA---GCAGGAAGCAATATG---GGCGCAGCATCA---  
CTAACGCTGACGGTACAG---GCCAGACTA---TTATTG---TCTGGTATAGTGCAACAGCAAAAC---  
AATTTG---CTGAGA---GCTATTGAGGCGCAACAGCATCTGTTGCAGCTCACAGTCTGGGGCATC  
>KX181898  
TTCTACTGTAATACATCACAGCTGTTTAATTGGACTGAAAGAAATAGAAATAGCTCAGATGGGACAGGGTCAA  
AT-----  
-----  
GAGACTGAGACCATTACACTCCCATGCAGAATAAAAACAAATTATAAACAGATGGCAGGAAGTAGGAAAAGCAA  
TGTATGCCCCCTCCCATCAAAGGAAATATTAGCTGTTTCATCAAAT---  
ATTACTGGGCTGCTATTAACAAGAGATGGTGGTACAAACCTGACT-----  
-----

-----  
 GGGTCTAACGGGACCGAGACCTTCAGACCTCAAGGAGGAAAATATGAAGGATAATTGGAGAAGTGAATTATATA  
 AATATAAAGTAGTAAGAATTGAGCCAGTA---GGAATAGCACCCACCGAGGCAAAGAGAAGAGTGGTG-----  
 -----CAAAGAGAAAAAAGAGCA-----  
 GTGGGAACACTAGGAGCT-----ATGTTTCCTTGGGTTCTTGGGAGCA---GCAGGAAGCACTATG---  
 GGCGCAGCGTCA---ATGACGCTGACGGTACAG---GCCAGACAA---TTATTG---  
 TCTGGTATAGTGCAACAGCAAAAC---AATCTG---CTGAAA---  
 GCTATTGAGGCGCAACATCATCTGTTGCAACTCACAGTCTGGGGCATC  
 >KX181899  
 TTCTACTGTAATACATCACAGCTGTTTAATAGTACTTGGAATGGTATTGAGAATATTTTGAATGATACTGAGA  
 ATTAT-----  
 -----  
 ATCACACTCCCATGCAGAATAAAACAAATTATAAATAGGTGGCAGGAAGTAGGAAAAGCAATGTATGCCCCCTC  
 CCATTAAAGGAAATATTAGCTGCACATCAAAC---  
 ATTACAGGGCTGATACTAACAAGAGATGGTGGTAACAATGAGAGC-----  
 -----  
 -----  
 AACGAGACTGAGACTTTCAGACCTGGAGGAGGAGATATGAGGGACAATTGGAGAAGTGAATTATATAAATATA  
 AGGTAGTAAAAATTGAGCCATTA---GGAATAGCACCCACCAAGGCAAAGAGGAGAGTGGTG-----  
 -----CAGAGAGAAAAAAGAGCA---GTGGGAACGCTGGGAGCC-----  
 ---ATGTTTCCTTGGGTTCTTGGGAGCA---GCAGGAAGCACTATG---GGCGCAGCGTCA---  
 ATAACGCTGACGGTACAG---GCCAGACAA---GTATTG---TCTGGTATAGTGCAACAGCAGAAC---  
 AATCTG---CTGAGA---GCTATTGAGATGCAACAGCATCTGTTGCAACTCACAGTCTGGGGCATC  
 >KX181913  
 TTTTACTGCAATACAACACCACTGTTTAATTGGACTGAAGGGTCAAATAACACTCAATGG-----  
 -----  
 -----  
 CCAAAGGACAATATTACACTTCAATGCAGAATAAAACAAATTGTAAACAGGTGGCAGGAAGTAGGAAAAGCAA  
 TGTATGCCCCCTCCTATCAGTGGACTGATTAAGTGTATCAAAAT---  
 ATTACAGGGTTGCTATTAAACAAGAGATGGTGGTAATAAGTCCGGGAAAGAT-----  
 -----  
 -----  
 ACTGGTCCCGAAATTTTTAGACCAGCAGGGGGGAAATATGAAGGGCAATTGGGGAAGTGAATTATATAAATACA  
 AAGTAGTAAAAATTGAACCCCTTA---GGAATAGCCCCCCCCAGGGCAAAGAGAAGAGTGGTG-----  
 -----CAGAGAGAAAAAAGAGCA---GTGGGAGTAATAGGAGCC-----  
 ---ATGTTTCCTTGGATTTTTTGGGAGCA---GCAGGAAGCACTATG---GGCGCAGCGGCA---  
 ATGACGCTGACGGTACAG---ACCAGACAA---TTATTG---TCTGGTATAGTGCAAGCAGCAGAAC---  
 AATTTG---CTGAAA---GCTATTGAGGCGCAACAGCATCTGTTGCAACTCACAGTCTGGGGCATC  
 >MK041573  
 TTCTACTGTAATACAACAAAACATTTTAATAGTACTTGGGATGGGTCAAACATCATAGGAAATGATACA---  
 -----  
 -----  
 AATGACACAGTGATCACACTCCCATGCAGAATAAAACAAATTATAAACATGTGGCAGCGAGTAGGAAAAGCAA  
 TGTATGCCCCCTCCCATCAGAGGACAAATTAGATGTTTCATCAAAT---  
 ATTACAGGGCTGCTGTTAACAAGAGATGGTGGAAATCATACAAGT-----  
 -----  
 -----  
 GGGAAATGAGACCTTCAGACCAGGAGGAGGAGATATGAGGGACAATTGGAGAAGTGAATTATATAAATATAAAG  
 TAGTAAAAATTGAACCATTG---GGAGTAGCACCCACCAGGGCAAAGAGAAGGGTGGTG-----  
 -----CAGAGAGAAAAAAGAGCA---GTAGGA---CTAGGAGCT-----  
 TTGTTTCCTTGGGTTCTTGGGAGCA---GCAGGAAGCACTATG---GGCGCAGCGTCA---  
 CTAACGCTGACGGTACAG---GCCAGACAG---TTATTG---TCTGGTATAGTGCAACAGCAGAAC---  
 AACTTG---CTGAGG---GCTATTGAGGCGCAACAGCACATGTTGCAACTCACAGTCTGGGGCATC  
 >MK041575  
 TTCTACTGTAATACAACACAGCTGTTTAATAATACTTGGAATGATACTGCTTGGAATGATACTAGCTGG---  
 -----  
 -----  
 TCAAAATGGCACTATCACACTCCCATGCAGAATAAAACAAATTATAAACAGGTGGCAGGAAGTAGGAAAAGCAA  
 TGTATGCCCCCTCCCATCAGCGGACAAATTAATTGTTTCATCAAAT---  
 ATTACAGGACTGTTATTAAACAAGAGATGGTGGTAATGACAATGACACGAATACG-----

-----  
-----  
AATGAGACCGAGATCTTCAGACCTGCAGGAGGAGATATGAGGGACAATTGGAGAAGTGAATTATATAAAATATA  
AAGTAGTAAAAATTGAACCATTA---GGAATAGCACCCACCAGGGCAAAGAGAAGAGTGGTG-----  
-----CAGAGAGAAAAAAGAGCA--GTGACA--TTAGGAGCT-----  
---GTGTTCCCTTGGGTTCTTGGGAGCA--GCAGGAAGCACTATG--GGCGCAGCGTCA---  
GTGACGCTGACGGTACAG---GCCAGACTA--TTATTG---TCTGGTATAGTGCAACAGCAGAGC---  
AATTTG---CTGAGA---GCCATTGAGGCGCAACAGCATCTGCTGCAACTCACAGTCTGGGGCATC  
>MG571983  
TTCTACGGTAATACATCAAACCTGTTTAATAATAATATTACAGGGATTATA-----  
-----  
-----  
AAGAAATGGGACTATCATACTCCCATGCAGAATAAAACAAATTATAAACAGGTGGCAGGAAGTAGGAAGAGCAA  
TGTATGCCCCCTCCCATCAGAGGACTAATCAACTGTACATCAAAT---  
ATTACAGGGCTGCTATTAACAAGAGATGGTGGTGGTGGTAATGAG-----  
-----  
-----  
AGTCATAACGAGACCTTCAGACCTGGAGGAGGAGATATGAGGGACAATTGGAGAAGTGAATTATATAAAATATA  
AAGTAGTAAGAATTGAGCCATTA---GGAATAGCACCCACCAAGGCACAGAGAAGAGTGGTG-----  
-----CAAAGAGAAAAAAGAGCA--GTGGGAGCACTAGGAGCT-----  
---ATGTTCCCTTGGGTTCTTGGGAGCA--GCAGGAAGCACTATG--GGCGCAGCGTCA---  
ATAACGCTGACGGCACAG---GCCAGACAA--GTATTG---TCTGGTATAGTGCAACAGCAAAAC---  
AATTTG---CTGAGG---GCTATTGAGGCGCAACAGCATTTGTTGCAACTCACAGTCTGGGGCATC  
>MG571987  
TTCTACTGTAATACAACATCACTGTTTAATAGTACTTGGCTGCTTAATGATACTGGAAATGTTACTGTGCCAA  
ACAAA-----  
-----  
ACGGACGAAATTATCATACTCCCATGCAGAATAAAACAAATTATAAATATGTGGCAAAAAGTAGGAAGAGCAA  
TGTATGCCCCCTCCCATCAGAGGTTATATTAACTGTTTCATCAAAT---  
ATTACAGGGCTGCTATTAGTAAGGGATGGTGGTAATAATAATCAGTCT-----  
-----  
-----  
AATCAGGCTGAAACCTTCAGACCTGGAGGAGGAGATATGAGGGACAATTGGAGAAGTGAATTATATAAAATATA  
AAGTAGTAAAAATTGAGCCATTA---GGAATAGCACCCACCAAGGCAAAGAGAAGAGTGGTG-----  
-----CAGAGAGAAAAAAGAGCA--GTGGGGACACTAGGAGCT-----  
---GTGTTCCCTTGGGTTCTTGGGAGCA--GCAGGGAGCACTATG--GGCGCAGCGTCA---  
CTAACGCTGACGGTACAG---GCTAGACTA--TTATTG---TCTGGTATAGTGCAACAGCAGAAC---  
AATTTG---CTGAGA---GCTATTGAGGCGCAACAGCATATATTGCAACTCACAGTCTGGGGCATC  
>MG571990  
TTCTACTGTAATACAACAAAACCTATTTAATAGTACTTGGGATGGGTCAAACATCATAGGAAATGATACA---  
-----  
-----  
AATGACACAGTGATCACACTCCCATGCAGAATAAAACAAATTATAAACATGTGGCAGCGAGTAGGAAAAGCAA  
TGTATGCCCCCTCCCATCAGAGGACAAATTAGATGTTTCATCAAAT---  
ATTACAGGGCTGCTGTTAACAAGAGATGGTGGAAATCATACAAGT-----  
-----  
-----  
GGGAATGAGACCTTCAGACCAGGAGGAGGAGATATGAGGGACAATTGGAGAAGTGAATTATATAAAATATAAAG  
TAGTAAAAATTGAACCATTG---GGAGTAGCACCCACCAGGGCAAAGAGAAGGGTGGTG-----  
-----CAGAGAGAAAAAAGAGCA--GTAGGA--CTAGGAGCT-----  
TTGTTCCCTTGGGTTCTTGGGAGCA--GCAGGAAGCACTATG--GGCGCAGCGTCA---  
CTAACGCTGACGGTACAG---GCCAGACAG--TTATTG---TCTGGTATAGTGCAACAGCAGAAC---  
AACTTG---CTGAGG---GCTATTGAGGCGCAACAGCACATGTTGCAACTCACAGTCTGGGGCATC  
>MG572002  
TTCTATTGTAATTCATCACAGCTGTTTAATACAACCTTGGATAAATGGCACTACAGGAAATAGAACTAATGAA-  
-----  
-----  
AATGACACACTTATCACACTCCCATGCAGAATAAAACAAATTATAAACAGATGGCAGGAAGTAGGAACAGCAA  
TATATGCCCCCTCCCATGAAAGGCATGATTAAATGTTTCATCAAAT---  
ATTACGGGGGTGCTATTAACAAGAGATGGTGGTTATGATAACAATAGCACG-----

-----  
-----  
CGCCAGAACGAGACCTTCAGACCTGGAGGGGGAAATATGAAGGACAATTGGAGAAGTGAATTATATAAAATATA  
AAGTAGTAAAAGTTGAGCCATTA---GGACTAGCACCCACCAAGGCAAAGAGAAGAGTGGTG-----  
-----CAAAGAGAAAAAAGAGCG--GTAACA---TTAGGAGCT-----  
---ATGTTCCCTTGGGTTCTTGGGAGCA--GCAGGAAGCACTATG--GGCGCAGCGTCA---  
ATGACGCTGACGGTACAG---GCCAGACAA---TTGTTG---TCTGGTATAGTGCAACAGCAGAAC---  
AATCTG---CTGAGA---GCTATTGAGGCGCAACAGCATATGTTGCAACTCACAGTCTGGGGCATA  
>JF320427  
TTCTACTGCAATACAACAGCACTGTTTAATAGTACATGGAACGGTACAGAGGGGATAAGTAAT-----  
-----  
-----  
GCTACAGGAAATATCACACTCCCATGCAGAATAAAACAAGTTATAAACAGATGGCAGGAAGTAGGAAAAGCAA  
TGTATGCCCCCTCCCATTAAGGAGTAATTAGATGTGTATCAAAT---  
ATCACAGGGATACTATTAACGAGAGATGGGGGTAATAATAATAATACT-----  
-----  
-----  
AATCACACCGAGATATTCAGACCTGGAGGAGGAGATATGAGAGACAATTGGAGAGGTGAATTATATAAAATATA  
AGGTAGTAAAATTGAACCATTA---GGAGTAGCACCCACCAAGGCAAAGAGAAGAGTGGTG-----  
-----CAGAGAGAAAAAAGAGCA--GTGGGA---ATAGGAGCT-----  
---TTGTTCCCTTGGGTTCTTGGGAGCA--GCAGGAAGCACGATG--GGCGCAGCGTCA---  
GTGACGCTGACGGTACAG---GCCAGACAA---TTATTG---TCTGGTATAGTGCAACAGCAGAGC---  
AATTTG---CTGAGG---GCTATTGAGGCGCAACAACATATGTTGCAACTCACAGTCTGGGGCATC  
>JF320424  
TTTTACTGTAGTACAACATTATGTTTAATAGTACTTGGGGGTCTAATGAGACTAGGAATGAGACTATA----  
-----  
-----  
GACAATAGCACTATCACAATTCAATGTAAAATAAAACAACCTTATAAACATGTGGCAGGGGGTAGGAAGGGCAA  
TGTATGCCCCCTCCCATCAGGGGAAACATTAGCTGTTTCATCAAAT---  
ATTACAGGACTACTATTAACAAGAGATGGTGAAACAATGGGACA-----  
-----  
-----  
AATGGTACTGAGACCTTCAGACCTGAAGGAGGAAATATGAAGGATAATTGGAGAAATGAATTATATAAAATATA  
AAGTAGTAAAATTGAACCATTA---GGAATAGCACCCACCAAGGCAAAGAGAAGAGTGGTG-----  
-----CAGAGAGAAAGAAGAGCA--GCAGGA---CTGGGAGCT-----  
---TTGTTCAATTGGGTTCTTGTCAGCA--GCAGGAAGCACTATG--GGCGCAGCATCA---  
CTAACGCTGACGGTACAA--GCCAGACAA--TTATTG---TCTGGTATAGTGCAACAGCAGAAC---  
AATTTG---CTGAGA--GCTATTGAGGCGCAACAGCATATGTTGCAACTCACAGTCTGGGGCATC  
>GU562236  
TTCTACTGCAATACAACGCAGCTGTTTAATAGTACTTGGTATAGTAATGGTACTTGGTCTTGGAATGGTACTA  
CTTGGAATGGT-----ACT---  
AGAGAGACAAATAGTACGGAA-----  
GGAAACGACACAATGATCACACTCCCATGCAGAATAAAACAATTTATAAACATGTGGCAGGCAGTAGGAAAAG  
CAATATATGCCCCCTCCCATCAGTGGACTAATCAAATGTACATCAAAT---  
ATTACAGGGCTGTTAATAACAAGAGATGGGGGTGATGAAAGTAATAAAAGTAAC-----TATGGT-----  
-----  
TATGAAAGTAGTAAAAGT---  
GAGAATGAGACCTTCAGACCTGGAGGAGGAAATATGAGGGATAATTGGAGAAGTGAATTGTATAAATATAAAA  
TAGTAAGAATTGAACCATTA---GGACTAGCACCCACCAAGGCAAAGAGAAGAGTGGTG-----  
-----CAGAGAGAAAAGAGAGCC--GCA-----CTAGGAGCC-----  
ATGTTCCCTTGGGTTCTTGGGAGCA--GCAGGAAGCACTATG--GGCGCAGCGTCA---  
CTGACGCTGACGGTACAG---GCCAGACAA---TTATTG---TCTGGTATAGTGCAACAGCAGAGC---  
AATTTG---CTGAGG---GCTATTGAGGCGCAACAGCATATGTTGCAACTCACGGTCTGGGGCATC  
>JQ403024  
TTCTACTGTAATACAACACAACCTGTTTAATAGAGATTGGAATGATACTAGTACTATTAACAGTACT-----  
-----  
-----  
GAAAAATAGAAATATCACACTCCCATGTAGAATAAAACAATTTATAAACATGTGGCAGGAAGTAGGAAAAGCAA  
TGTATGCCCCCTCCCATCCAAGGACAAATTAGATGTTTCATCAAAT---  
ATTACAGGGTTGCTATTAACAAGAGATGGTGGAATGACAATACCACT-----

-----  
-----  
AACACCACTGAGATCTTCAGACCTGTAGGAGGAAATATGAGGGACAATTGGAGAAGTGAATTATACAAATATA  
AAGTAGTACAAATTGAACCATTA---GGATTAGCACCCACCAAGGCAAAGAGAAGAGTGGTG-----  
-----CAGAGAGAAAAAAGAGCA---GTAACG---TTAGGAGCT-----  
---ATGTTCCCTTGGGTTCTTGGGAGCA---GCAGGAAGCACTATG---GGCGCAGCGTCA---  
ATGACGCTGACGGTACAG---GCCAGACAA---TTATTG---TCTGGTATAGTGCAGCAGCAAAAT---  
AATTTG---CTGAAG---GCTATTGAGGCGCAACATCATCTGTTGCAACTCACAGTCTGGGGCATC  
>JQ403041  
TTCTACTGTAATACAACACGACTGTTTAATAGTACTTGGGAATAGTACCGAATCAAATAATACTATA-----  
-----  
-----  
GGAAATGGCACAATCACACTCCCATGCAGAATAAAACAAATTGTAAACATGTGGCAGGAAGTAGGAAAAGCAA  
TGTATGCCCCCTCCCATCAGAGGACAAATTAGATGTTTCATCAAAT---  
ATTACAGGGCTGATATTAACAAGAGATGGTGGTCATGGTGGTCATAATAAGAAT-----  
-----  
-----  
ACCACCAACACCACAGAGATCTTCAGACCTGGAGGAGGAGATATGAGGGACAATTGGAGAAGTGAATTATATA  
AATATAAAGTAGTAAAACTTGAACCATTA---GGAATAGCCCCACCTCGGCAAGGAGAAGAGTGGTG-----  
-----CAGAGAGAAAAAAGAGCA---GTGGGA---  
ATAGGAGCT-----ATGTTCCCTTGGGTTCTTGGGAGCA---GCAGGAAGCACTATG---  
GGCGCAGCGTCA---GTGACGCTGACGGTACAA---GCCAGACTA---TTATTG---  
TCTGGTATAGTGCAACAGCAGAAC---AATTTG---CTGAAG---  
GCTATTGAGGCGCAACAGCATATGTTGCAACTCACAGTCTGGGGCATC  
>KC797225  
TTCTACTGTAATACATCACAATTGTTTAATAGTACTTGGGAATGCTACTGGTACTCAGAATACTACTGGTACTC  
AGAATGAGACT-----  
-----  
-----  
AAAATAGGCAATATCACACTCCCATGTAAATAAAACAAATTATAAACAGGTGGCAAGAAGTAGGAAAAGCAA  
TGTATGCCCCCTCCCATCAAAGGACTAATTAACTGTGTATCAAAT---  
ATTACAGGGATACTATTAACAAGAGATGGTGGTCATTCTAAGAATACAAATAGT-----  
-----  
-----  
ACAGATAATGATACCGAGGTCTTCAGACCTGGAGGAGGAGATATGAGGGACAATTGGAGAAGTGAATTATATA  
AATATAAAGTGGTAAAAATTGAGCCATTA---GGAGTAGCACCCACCAAGGCAAAGAGAAGAGTGGTG-----  
-----CAGAGAGAAAAAAGAGCA---GTGACG---  
CTAGGAGCC-----ATGTTCCCTTGGGTTCTTGGGAGCA---GCAGGAAGCACTATG---  
GGCGCAGCGTCG---CTGACGCTGACGGTACAG---GCCAGACAA---TTATTG---  
TCTGGTATAGTGCAACAGCAGAAC---AACCTG---CTGAGG---  
GCTATTGAGGCGCAACAGCATATGTTGCAACTCACAGTCTGGGGCATC  
>HQ699978  
TTCTACTGTAATACATCACAACCTGTTTAATAGTACTTATAATGGTACTTGGAGTGGTACTACA-----  
-----  
-----  
GGAAATGATACTATCACGCTCCCTTGCAGAATAAAACAAATTGTAAACAGGTGGCAGGAAGTAGGGAAAGCAA  
TGTATGCCCCCTCCCATCAAGGAATAATTAGATGTTTCATCAAAT---  
ATTACAGGGTTGCTATTAACAAGAGATGGTGGTAAGAATGAGAGCGAT-----  
-----  
-----  
AGCAATACCACCGAGACCTTCAGACCTGGAGGAGGAAATATGAGAGACAATTGGAGGAGTGAATTATATAAAT  
ATAAAGTAGTAAAAATTGAACCATTA---GGAGTAGCACCCACCAAGGCAAAAAGAAGAGTGGTG-----  
-----CAGAGAGAAAAAAGAGCA---GTGGGAACGATAGGAGCT---  
-----ATGTTCCCTTGGGTTCTTGGGAGCA---GCAGGAAGCACTATG---GGCGCAGCGTCA---  
ATAACGCTGACGGTACAG---GCCAGACAA---TTGTTG---TCTGGTATAGTGCAACAGCAGAGA---  
AATTTG---CTGAGG---GCTATTGAGGCGCAACAGCATCTGTTGCAACTCACAGTCTGGGGCATC  
>EU131792  
TTCTACTGTAATACATCAGAGCTGTTTAAAAGTACTTGGGAATAATACTAGTACT-----  
-----  
-----  
GGGAATGATCCTATCACGCTCCCTTGCAGAATAAAGCAAATTGTAAACATGTGGCAAGAAGTAGGGAAAGCAA

TGTATGCTCCTCCCATTGAAGGACAAATTAGATGTTTATCAAAT ---  
 ATTACAGGATTGCTATTAACAAGGGATGGTGGTCATAATGGGAGC-----  
 -----  
 -----  
 GAGACCAACGAGACCTTCAGACCTGCAGGAGGAAATATGAGAGACAATTGGAGAAGTGAATTATATAAAATATA  
 AAGTAGTAAAAATTGAACCATTA---GGAGTAGCACCCACCAAGGCAAAGAGAAGAGTGGTG-----  
 -----CAGAGAGAAAAAAGAGCA---GTGGGAACAATAGGAGCT-----  
 ---ATGTTCCCTTGGGTTCTTGGGAGCA---GCAGGAAGCACTATG---GGCGCAGCGTCA---  
 ATGACGCTGACGGTACAG---GCCAGACAA---ATGTTG---TCTGGTACAGTGCAACAGCAAAGA---  
 AATTTG---CTGAGG---GCTATTGAGGCGCAACAGCATCTGTTGCAACTCACAGTCTGGGGCATC  
 >EU131803  
 TTCTACTGTAATACATCAAAAATTATTTAATAGTACTTGGTATAATAATGGTACTTGGGAATAATGCTAGTACT-  
 -----  
 -----  
 GGGAAATGATACTATCACGCTCCCTTGCAGAATAAAACAAATTGTAAACATGTGGCAGGAAGTAGGGAAAGCAA  
 TGTATGCCCCCTCCCATTGCAGGACAAATTAGATGTTTCATCAAAG---  
 ATTACAGGGTTGCTATTAACAAGAGATGGTGGTAATGAGAACAAGACTAAGGAC-----  
 -----  
 ----  
 AACAAACACCGAGACTGAGACCTTTAGACCTGGGGGAGGAGATATGAGAGACTATTGGAGAAGTGAATTATATA  
 AATATAAAGTAGTAAAAATTGAACCATTA---GGAGTAGCACCCACCAAGGCAAAGAGAAGAGTGGTG-----  
 -----CAGAGAGAAAAAAGAGCA---  
 GTGGGAACAATAGGGGCT-----ATGTTCCCTTGGGTTCTTGGGAGCA---GCAGGAAGCACTATG---  
 GGCGCAGCGTCA---ATAACGCTGACGGTACAG---GCCAGACAA---TTGTTG---  
 TCTGGTATAGTGCAACAGCAGAGA---AATTTG---CTGATG---  
 GCTATTGAGGCGCAACAACATTTGTTGCAACTCACAGTCTGGGGCATC  
 >EU363829  
 TTCTACTGTAATACAACAAAACCTGTTTAATAGTATTTGGTATAATAATGGTACTTCGAGTGGTACTACA----  
 -----  
 -----  
 GGAAATGAACTATCATACTCCCTTGCAGAATAAAACAAATTGTAAACATGTGGCAGAAAGTAGGGAGAGCAA  
 TGTATGCCCCCTCCCATTGAAGGAAAAATTAGCTGTGTATCAAAT---  
 ATCACAGGGTTGCTATTAACAAGAGATGGTGGTCAGAATGAGAAC-----  
 -----  
 -----  
 AATACCGAAACCTTCAGACCTGAAGGAGGAAATATGAAAGACAATTGGAGAAGTGAATTATATAAATATAAAG  
 TAGTAAAAATTGAACCATTA---GGAGTAGCACCCACCAAGGCAAAGAGAAGAGTGGTG-----  
 -----CAAAGAGAAAAAAGAGCA---GTGGGAGCAATAGGAGCT-----  
 ATGTTCCCTTGGGTTCTTAGGAGCA---GCAGGAAGCACTATG---GGCGCAGCGTCA---  
 ATAACGCTGACGGTACAG---GCCAGACAA---TTGTTG---TCTGGCATTGTGCAACAGCAGAGA---  
 AATTTG---CTAAGG---GCTATTGAGGCGCAACAGCATCTGTTGCAACTCACAGTCTGGGGCATT  
 >HM215413  
 TTCTACTGTAATACAGCACAACCTGTTTAATAGTACTTGAATACTACTAAGATTTGGGGGAATACTACAGAAG  
 GT-----  
 -----  
 AACAAATAGCACTATCATGCTCCCTTGCAAAATAAAGCAAATTATAAACCTGTGGCAGGAAGTAGGAAAAGCAA  
 TATATGCCCCCTCCCATCGCAGGGCGAATTAGATGTGTATCAAAT---  
 ATTACAGGGTTGCTATTAACAAGAGATGGTGGTCATAATGGGAACGGG-----  
 -----  
 -----  
 TCCAACGAGACCGAGACCTTCAGACCTGCAGGAGGAGATATGAGGGACAATTGGAGAAGTGAATTATATAAAT  
 ATAAAGTAGTAAAAATTGAACCAATA---GGATTAGCACCCACCAAGGCAAAGAGAAGAGTGGTG-----  
 -----CAGAGAGAAAAAAGAGCA---ATGGGA---ATAGGAGCT---  
 -----ATGTTCCCTTGGGTTCTTGGGAGCA---GCAGGAAGCACTATG---GGCGCAGCGTCA---  
 ATAACGCTGACGGTGCAG---GCCAGACGA---TTATTG---TCTGGTATAGTGCAACAGCAAAGA---  
 AATTTG---CTGAGG---GCTATTGAGGCGCAACAACATCTGTTGCAACTCACCGTCTGGGGCATC  
 >EU131802  
 TTCTACTGTAATACATCACAACTGTTTAATAGTACTTGAATGATACTAGTACTTGGAAATGGTAAT-----  
 -----  
 -----

ACAGGAAC TACTGT CACGCT CCCTTG CAGAATA AAAACAAAT TGTAAAC ATGTGGC AGAAAGT AGGGAAAG CCA  
TGTACG CCCCCT CCCATT CAAGGACA AATTAG ATGTTCA TCAAAT ---  
ATTACAG GGTGCT ATTAACA AGAGATGG TGGTAAT ATGAGAGC -----  
-----  
-----  
GAGAATA CCGAGAC CTTCAG ACCTGC AGGAGGA AATATG AGAGATA AATTGG AGAAGTGA ATTATATA AAATATA  
AAGTAGT AAAAATTG AACCATTA --- GGAGTAG CCCCCA CCAAGGCA AAGAGA AGAGTGGT G-----  
----- CAGAGAG AAAAAAG AGCA -- -GTGGG ATTGATAG GAGCT-----  
---ATG TTCCTT GGGTTCT TGGGAG CA-- -GCAGGA AGCACTAT G-- -GGCGC AGCGTCA ---  
ATAACG CTGACGGT ACAG-- -GCCAGG CAA-- -TTATTG -- -TCTGGT ATAGTG CAACAGC AGAGA-- -  
AATTTG -- -CTGATG -- -GCTATT GAGGCG CAACAGA ATATGT TGC GACTCA CAGTCT GGGGCATC  
>EU131804  
TTCTACT GTAACAC ATCACA ACTGTTT AATAGT ACTTGGT ATAGTA ATGGTACT AGGAAGG ATCCTACA ----  
-----  
-----  
GGAAATG GCACTAT CACGCT CCCTTG CAGAATA AAAACAAAT TATAAAC ATGTGGC AGCAAGT AGGGAAAG CAA  
TGTATGC ACCTCCC ATTAAAG GACAAAT TAGATGTTC ATCAAAT ---  
ATTACAG GGTGCT ATTAACA AGAGATGG TGGTTATA ATGAGAGC -----  
-----  
-----  
AACACCAC CGAGAC CTTCAG ACCTGG AGGAGG AGATATG AGAGACA AATTGG AGAAGTGA ATTATATA AAATATA  
AAGTAGT AAAAATTG AACCATTA --- GGAGTAG CACCCAC CCAAGGCA AAGAGA AGAGTGGT G-----  
----- CAGAGAG AAAAAAG AGCA -- -GTAGGA -- -CTAGG AGCT-----  
---ATG TTCCTT GGGTTCT TGGGAG CA-- -GCAGG AGGCACCAT G-- -GGCGC AGCGTCA ---  
ATAACG CTGACGGT ACAG-- -GCCAGAC AA-- -TTGTTG -- -TCTGGT ATAGTG CAACAGC AGAGA-- -  
AATTTG -- -CTGAGT -- -GCTATT GAGGCG CAACAAC GTTTGT TGCAACTC ACAGTCT GGGGCATC  
>JF932472  
TTCTACT GTAATAC AGCACA ACTGTTT AATAGT ACTTGGAC AGGAAATG ATACTAGC ATTTGGA ATGATACTA  
CA-----  
-----  
-----  
GGAAATG ACACTAT CACACT CCCTTG CAGAATA AAAACAAAT TATAAAC ATGTGGC AGGAAGT AGGGAAAG CAA  
TGTATG CCCCCT CCCATT GCAGGACA AATTAG ATGTTCA TCAAAT ---  
ATTACAG GGTGCT ATTAACA AGAGATGG TGGTAAT CATGAGA C-----  
-----  
-----  
AACACTG AGACCTT CAGACCT GGAGGAG GAGATATG AGAGACA AATTGG AGAAGTGA ATTATATAG ATATAAAG  
TAGTAAAA ATTGAAC CATTA-- -GGAGTAG CACCCAC CCAAGGCA AAGAGA AGAGTGGT G-----  
----- CAGAGAG AAAAAAG AGCA -- -GTGGGA ACCTAG GAGCT-----  
ATGTTCC CTTGGGTT CTTGGGAG CA-- -GCAGGA AGCACTAT G-- -GGCGC AGCGTCA ---  
ATAACG CTGACGGT ACAG-- -GCCAGAC AA-- -TTGTTG -- -TCTGGT ATAGTG CAACAGC AGAGA-- -  
AATTTG -- -CTGAGG -- -GCTATT GAGGCG CAACAGC ATCTGT TGCAACTC ACAGTCT GGGGCATC  
>JF932474  
TTCTACT GTAATAC ATCACA ACTGTTT AATAGT ACTTGGC CTTGGA ATAATG ATACTAGT GTTTGGG ATGATA  
CTACA-----  
-----  
-----  
GAAAATG ACATTAT CACGCT CCCTTG CAGAATA AAAACAAAT TATAAAC ATGTGGC AGGAAGT AGGGAAAG CAA  
TGTATG CCCCCT CCCATT CAAGGACA ACTTAA CTGTTCA TCAAAT ---  
ATTACAG GGTGCT ATTAACA AGAGATGG TGGTTAT CATAAT GAGAGC -----  
-----  
-----  
AATAACAC CGAGAC CTTCAG ACCTGG AGGAGG AGATATG AGAGACA AATTGG AGAAGTGA ATTATATA AAATATA  
AAGTAGT AAAAATTG AACCATTA --- GGAGTAG CACCCAC CCAAGGCA AAGAGA AGAGTGGT G-----  
----- CAAAGAG AAAAAAG AGCA -- -GTGGG AGCGATAG GAGCT-----  
---ATG TTCCTT GGGTTCT TGGGAG CA-- -GCAGGA AGCACTAT G-- -GGCGC AGCGTCA ---  
ATAACG CTGACGGT ACAG-- -GCCAGAC AA-- -CTGTTG -- -TCTGGT ATAGTG CAACAGC AGAGA-- -  
AATTTG -- -CTGAGG -- -GCTATT GAGGCG CAACAGC ATCTGT TGCAACTC ACAGTCT GGGGCATT  
>HQ215554  
TTCTACT GTAATACA ACAGGG CTGTTT AATAGT ACTTTG ACTAATG ATACCTG GAATGATA ATCGGT CATATA  
AC-----  
-----

AATGGAACAGGTAACATCACACTCCACTGCAGAATAAAACAAATTATAAACAGGTGGCAGGAAGTAGGAAAAG  
CAATGTATGCCCCCTCCCATCAGTGGACCAATTAGCTGTTTATCAAAT---  
ATTACAGGACTGATATTAACAAGAGATGGAGGTAACAATACCGGGAAT-----  
-----  
CAATCTGATACTGAAACCTTCAGACCTGGGGGAGGGGATATGAAGGACAATTGGAGAAGTGAATTATATAAAT  
ATAAAGTAGTACAAATTGAGCCAATA---GGATTAGCACCCACCAGGGCAAGGAGAAGAGTGGTG-----  
-----CAGAGAGAAAAAAGAGCA---GTGGGAACATTAGGAGCT---  
-----ATGTTTCCTTGGGTTCTTGGGAGCA---GCAGGAAGCACTATG---GGCGCAGCGTCA---  
GTCACGCTGACGGTACAG---GCCAGACAA---TTACTG---TCTGGTATAGTGCAACAGCAGAAC---  
AATTTG---CTGAAA---GCTATTGAGGCGCAACAACATATGTTGCAACTCACAGTCTGGGGCATC  
>JF346917  
TTCTACTGTAATACATCACAACTGTTTAATAGTACTTGGGATATTAATAGTAATGGGACTAATAATACAAAT-  
-----  
-----  
AGCAATATCAATATCACACTCCCTTGCAAAATAAAACAAATTGTAAACATGTGGCAGGAAGTAGGGAAAGCAA  
TGTACGCCCCCTCCCATTAGAGGACAAATTAGATGTTTCATCACAA---  
ATTACAGGGTTGTTATTAACAAGAGATGGTGGTACTAATAATAAT-----  
-----  
CATACCAACGAAACCTTCAGACCTGCAGGGGGAGACATGAGAGACAATTGGAGAAGTGAATTATATAAATATA  
AAGTAGTAAAAATTGAACCATTA---GGAATAGCACCCACCAAGGCAAAGAGAAGAGTGGTG-----  
-----CAGAGAGAAAAAAGAGCA---GTGGGAACAATAGGAGCT-----  
---ATGTTTCCTTGGGTTCTTAGGAGCA---GCAGGAAGCACTATG---GGCGCAGCGTCA---  
GTAACGCTGACGGTACAG---GCCAGACAA---TTATTG---TCTGGTATAGTGCAACAGCAGAGA---  
AATCTG---CTGAGG---GCTATTGAGGCGCAACAGCGTGTGTTGCAACTCACAGTCTGGGGCATC  
>JX960599  
TTCTACTGCAATACAACACAACCTGTTTAATAGTACTTGAATACTTGGGATAATATTACTGGGAATAGTAATG  
AGAATAAT-----  
-----  
ACACAGAACAATATCACACTTCCATGTAGAATAAAACAAATTATAAACATGTGGCAGGGAGTAGGAAAAGCAA  
TGTACGCCCCCTCCCATCGCAGGACGAATTAAATGTTTCATCAGAT---  
ATTACAGGACTATTATTAGTGAGAGATGGT---AATAACAATAACAAT-----  
-----  
-----  
ACAGATAACAAGACAGAACTTTTCAGACCTCAGGGAGGAAACATGAAGGACAATTGGAGAAGTGAATTATATA  
AATATAAAGTAGTAAAAATTGAACCAATA---GGAATAGCACCCACTACGGCAAGGAGAAGAGTGGTG-----  
-----CAGAGAGAAAAAAGAGCA---GTGACA---  
CTAGGAGCT-----ATGTTTCCTTGGGTTCTTAGGAGCA---GCAGGAAGCACAAATG---  
GGCGCAGCGTCA---ATAACGCTGACGGTACAG---GCCAGACAA---TTACTG---  
TCTGGTATAGTGCAACAGCAGAAC---AATTTG---CTGAGG---  
GCCATTGAGGCGCAACAGCATATGTTGCAACTCACAGTCTGGGGCATC  
>JF932497  
TTCTACTGTAATACATCACGACTGTTTAGTAGTACATGGTATACTAATGATACTCAGAATGGTACTACA----  
-----  
-----  
GGAAATGACACTATCACACTCCCTTGCAAGAATAAAACAAATTGTAAACATGTGGCAGGAAGTAGGAAAAGCAA  
TGTATGCCCCCTCCCGTTGAAGGACTAATTAGATGTTTCATCAAAT---  
ATTACAGGGTTGCTATTAACAAGAGATGGTGGTTATAATGTAAGC-----  
-----  
-----  
AACAACACCGAGATCTTCAGACCTGGAGGAGGAGATATGAGGGACAATTGGAGAAGTGAATTATATAAATATA  
AAGTAATAAAAAATTGAACCATTA---GGAGTAGCACCCACCAAGGCAAAGAGAAGAGTGGTG-----  
-----CAAAGAGAAAAAAGAGCA---GTGGGA---ATAGGAGCT-----  
---ATGTTTCCTTGGGTTCTTGGGAGCA---GCAGGAACCACTATG---GGCGCAGCGTCA---  
ATGACGCTGACGGTACAG---GCCAGACAA---TTGTTG---TCTGGTATAGTGCAACAGCAGGGA---  
AATCTG---CTGAGG---GCTATTGAGGCGCAACAGCATATGTTGCAACTCACAGTCTGGGGCATT  
>KX693642  
TTCTACTGTAATACATCACAACTGTTTAATAGTACTTGGGATGTTAATGACACTAGTAATGATACTACA----

-----  
 GGAAATGAAACTATCACGCTCCCTTGCAGAATAAAACAAATTATAAACATGTGGCAGGGAGTAGGGAAAGCAA  
 TGTATGCCCCCTCCCATTAAGGAAAAATTAGATGTTTCATCAAAT ---  
 ATTACAGGGTTGATATTAACAAGAGATGGTGGTGTAATGAGAGC-----  
 -----  
 -----  
 GAGTTC AATGAGACCTTCAGACCTCAAGGAGGAAATATGAAAGACAATTGGAGAAGTGAATTGTATAAATATA  
 AAGTAGTAAAAATTGAACCATTA --- GGAGTAGCACCCACCAAGGCAAAGAGAAGAGTGGTG-----  
 -----CAGAGAGAAAAAAGAGCA-----GGA---ATAGGAGCT-----  
 ---CTGTTCCCTTGGGTTCTTGGGAGCA---GCAGGAAGCACTATG---GGCGCAGCGTCA---  
 ATAACGCTGACGGTACAG---GCCAGACAA---TTGATG---TCTGGTATAGTGCAACAGCAGAGA---  
 AATTTG---CTGAGA---GCTATTGAGGCGCAACAGCATCTGTTGCAACTCACAGTCTGGGGCATC  
 >KX693171  
 TTTTACTGTAATACATCACAACCTGTTTGACAGTATTTGGAATGCTACTACTGGTACTTGGAATGGTACTACA-  
 -----  
 -----  
 GGAGGTGACAATATCACGCTCCCTTGCAGGATAAAACAAATTGTAAACATGTGGCAGGAAGTAGGGAAAGCAA  
 TGTATGCCCCCTCCCATTAAGGACAAATTTATTGTTTCATCAAGT ---  
 ATTACAGGGTTGCTATTAACAAGAGATGGTGGTACGAGTAAGAAT-----  
 -----  
 -----  
 GAGAGCAATACCACCGAGACCTTCAGACCTGGAGGAGGAGATATGAGGGACAATTGGAGAAGTGAATTATATA  
 AATACAAAGTAGTAAAACTTGAACCACTA --- GGAGTAGCACCCACCGAGGCAAAGAGAAGAGTGGTG-----  
 -----CAGAGAGAAAAAAGAGCA---  
 GTGGGAGCGATAGGAGCT-----ATGTTCCCTTGGGTTCTTGGGAGCA---GCAGGAAGCACTATG---  
 GGCGCAGCGTCA---ATAACGCTGACGGTACAG---GCCAGACAA---TTATTG---  
 TCTGGTATAGTGCAACAGCAAAGA---AATTTG---CTGAGG---  
 GCTATTGAGGCGCAACAGCATATGTTGCAACTCACAGTCTGGGGCATC  
 >KX693309  
 TTCTACTGTAATACATCAAACTGTTTAATAGTACTTGGAGTAAGACTAGTACTTGGAATGATACTACA ---  
 -----  
 -----  
 GGAAATGACACTATCACGCTCCCTTGCAGAATAAAACAAATTGTAAACATGTGGCAGGAAGTAGGGAAAGCAA  
 TGTATGCCCCCTCCCATTAAGGACTAATTAAGTGTTCATCAAAT ---  
 ATTACCGGGTTGCTATTAACAAGAGATGGTGGTAATAATACTGAGAGC-----  
 -----  
 -----  
 AACACCACCGAGACCTTCAGACCTACAGGAGGAAATATGAGAGACAATTGGAGAAGTGAATTATATAAATATA  
 AAGTAGTACAAATTGAACCATTA --- GGAGTAGCACCCACCAAGGCAAAGAGAAGAGTGGTG-----  
 -----CAGAGAGAAAAAAGAGCA---GTGGGAACAATAGGAGCT-----  
 ---ATGTTCCCTTGGGTTCTTGGGAGCA---GCAGGAAGCACTATG---GGCGCAGCGTCG---  
 GTAACGCTGACGGTACAG---GCCAGACAA---TTGTTG---TCTGGTATAGTGCAACAGCAGAGA---  
 AATTTG---CTGAGG---GCTATTGAGGCGCAACAGCATCTGTTGCAACTCACAGTCTGGGGCATT  
 >KX693362  
 TTCTACTGTAATACATCAAACTGTTTAATAGTACTTGGAAATGATAATAGTACTTGGAATGATAATGATAAGA  
 CA-----  
 -----  
 -----  
 GGAGATGACAATCTCACGCTCCCTTGTAGAATAAAACAAATTGTAAACATGTGGCAGGAAGTAGGGAAAGCAA  
 TGTATGCCCCCTCCCATTAAGGACAAATTAGATGTTTCATCAAAT ---  
 ATTACAGGGTTGCTATTAACAAGAGATGGTGGTCAGAATGTGAGC-----  
 -----  
 -----  
 AATACCACCGAGACCTTCAGACCTGCAGGAGGAGATATGAGAGACAATTGGAGAAGTGAATTATATAAATATA  
 AAGTAGTAAAAATTGAACCATTA --- GGAGTAGCACCTACCAAGGCAAAGAGAAGAGTGGTG-----  
 -----CAGAGAGAAAAAAGAGCA---GTGGGAACGATAGGAGCT-----  
 ---ATGTTCCCTTGGGTTCTTGGGAGCA---GCAGGAAGCACGATG---GGCGCAGCGTCA---  
 ATAACGCTGACGGTACAG---GCCAGACAA---TTGTTG---TCTGGTATAGTGCAACAGCAGAGA---  
 AATTTG---CTGAGG---GCTATTGAGGCGCAACAGCATCTGTTGCAACTCACAGTCTGGGGCATC  
 >KX693411

TTTTACTGTAATACATCAAACTGTTTAATAGTACTTGGAGTAATAATAATCCTTGGAATACTACTAGTATT-  
 -----  
 -----  
 CAAAATGATACTATCACGCTCCCTTGCAGAATAAAACAAATTGTAAACATGTGGCAGGAAGTAGGGAAAGCAA  
 TGTATGCCCCCTCCCATTCGACGGACCAATTAATTGTTTCATCAAAT---  
 ATTACGGGGTTGCTATTAACAAGAGATGGTGGTAAGGTGGGGAT-----  
 -----  
 -----  
 GTGAGCAACTACACCGAGACCTTCAGACCTGCAGGGGGAAATATGAGAGACAATTGGAGAAGTGAATTATATA  
 GATATAAAGTAGTAAAAATTGAACCATTA--GGAGTAGCACCCACCAAGGCAAAGAGAAGAGTGGTG-----  
 -----CAGAGAGAAAAAAGAGCA---  
 GTGGGAGCAATAGGAGCT-----ATGTTTCCTTGGGTTCTTGGGAGCA---GCAGGAAGCACTATG---  
 GGCGCAGCGTCA---ATAACGCTGACGGTACAG---GCCAGACAA---TTGTTG---  
 TCTGGTATAGTGCAACAGCAGAGA---AATTTG---CTGAGG---  
 GCTATTGAGGCGCAACAGCATCTGTTGCAACTCACAGTCTGGGGCATC  
 >AY561237  
 TTCTACTGTAATTCAACACAACCTGTTTAATAGTACCTGGCCTGCTAATGATACTTGGCATGATACTAACGGGA  
 CAAGTTAT-----  
 -----ACTAAC-----  
 GGGACAAGTGGAACTATCACACTCCCATGCAAAATAAAACAAATTATAAACTTATGGCAGGAAGTAGGAAAAG  
 CAATGTATGCCCCCTCCCATCGCAGGAGCACTTAATTGTTTCATCAAAT---  
 ATTACAGGGCTGTTATTAACAAGAGATGGTGGTAATGACAAGAACAGCAAC-----  
 -----  
 -----  
 AATAGCAACAGCAACGAGACCTTCAGACCGGGAGGAGGAGATATGAGGGACAATTGGAGAAGTGAATTATATA  
 GATATAAAGTAGTAAAAATTGAACCATTA--GGAGTAGCACCCACCGAGGCAAGGAGAAGGTTGGTG-----  
 -----CAAAGAGAAAAAAGAGCA---GTGGGA---  
 TTAGGAGCT-----GTGTTTCCTTGGGTTCTTGGGAGCA---GCAGGAAGCACTATG---  
 GGCGCAGCATCA---GTGATGCTGACGGTACAG---GCCAGGCAA---TTATTG---  
 TCTGGTATAGTGCAACAGCAGAAC---AATCTG---CTGAGG---  
 GCTATTGAGGCGCAACAACATCTGTTGCAGCTCACAGTCTGGGGCATC  
 >KR914676  
 TTCTACTGTAACACAACACCACTGTTTAATAGTAGTTGGTACAAGTCAAATTGGAAAAGTCAAAGGACAAAGG  
 AGATTGGA-----  
 -----  
 GGAAGGGAGACAATCACACTCCAATGTAGAATAAAACAAATTGTAAACATGTGGCAGGAAGTAGGACGAGCAA  
 TGTATGCCCCCTCCCATCAAAGGACAAATTAGATGTTTCATCAAAT---  
 ATTACAGGGGTGCTATTAACAAGAGATGGTGGTAATACCACCAAT-----  
 -----  
 -----  
 CACTCCGAGATCTTCAGACCTGGAGGAGGAAATATGAAGGACAATTGGAGAAGTGAATTATATAAATATAAAG  
 TAGTACAAATTGAACCATTA---GGAATAGCACCCACCAAGGCAAAGAGAAGAGTGGTG-----  
 -----CAGAGAGAAAAAAGAGCA---ATAGGA---TTCGGAGCT-----  
 GTGTTTCCTTGGGTTCTTGGGAGCA---GCAGGAAGCACTATG---GGCGCAGCGTCA---  
 GTAACGCTGACGGTACAA---GCCAGACAA---TTATTG---TCTGGTATAGTGCAACAGCAGAGC---  
 AATTTG---CTGAAT---GCTATTGAGGCGCAACAGCATCTGTTGCAACTCACAGTCTGGGGCATT  
 >FJ388899  
 TTCTACTGCAATACAACAGAACTGTTTAATAGTACTTGGAAATAGTACTACTTGGAAATAGTAATAGTACTACAA  
 ATGCAAAAT-----  
 -----GCA---  
 ACAAATACAGCTAACCTAGTACTCCCATGCAGAATAAAACAGATTGTAAACATGTGGCAGAAAGTAGGAAAAG  
 CAATGTATGCCCCCTCCCATCAAAGGAATAATTAGATGTTTCATCAAAT---  
 ATTACAGGGATAATATTAACAAGAGATGGTGGTAATAGTAATCAGACC-----  
 -----  
 -----  
 AACACCACAGAGATTTTCAGACCTGTAGGAGGAAATATGAAGGACAATTGGAGAAGTGAATTATATAAATATA  
 AAGTAGTACAAATTGAACCATTA--GGAGTAGCACCCACCAAGGCAAAGAGAAGAGTGGTG-----  
 -----CAGAGAGAAAAAAGAGCA---GTGACA---TTAGGAGCT-----  
 ---ATGTTTCCTTGGGTTCTTGGGAGCA---GCAGGAAGCACTATG---GGCGCAGCGTCA---

ATAACGCTGACGGTACAG---GCCAGACAA---TTACTG---TCTGGTATAGTGCAACAGCAGAGC---  
 AATCTG---CTGAGG---GCTATTGAGGCGCAACAGCACCTGTTGCAACTCACAGTCTGGGGCATC  
 >FJ388916  
 TTCTACTGTAATACAACAGGGCTGTATAATAGTACTTGGCAGTTTAAATAGTACTTGGAACTACTACTTGGAAATC  
 ATACTGAC-----CCT---  
 AATCATACTGACCCTATCACACTACCATGCAGAATAAGACAAATTGTAAACAGGTGGCAGGAAGTAGGAAAAG  
 CAATGTATGCCCCCTCCCATCAGCGGACAAATTAGCTGTTTCATCAAAC---  
 ATTACAGGGCTACTATTAACAAGAGATGGTGGTAGTAATGAGAGC-----  
 -----  
 AGAACCAACGAGACCTTTAGACCTGGAGGAGGAGATATGAGGGACAATTGGAGAAAGTGAATTATATAAAATATA  
 AAGTAGTAAGAATTC AACCATTA---GGAATAGCACCCACCAAGGCAAAAAGAAGAGTGGTG-----  
 -----CAAAGAGAAAAAAGAGCA---GTGGGAACGCTGGGAGCT-----  
 ---ATGTTCCCTTGGGTTCTTGGGAGCA---GCAGGAAGCACTATG---GGCGCAGCGTCA---  
 CTGACGCTGACGGTACAG---GCCAGACAA---TTATTG---ACTGGTATAGTGCAACAGCAGAAC---  
 AATCTG---CTGAGA---GCTATTGAGGCGCAACAGCATATGTTGCAACTCACAGTCTGGGGCATC  
 >JF683738  
 TTCTACTGTGATACTACAAAGCTGTTTAAATAGTACTTGGACTGGGAATGAAACTTGGACTGGGAATGAAACTG  
 AAGAG-----  
 -----  
 TCAAAATAATAGTACTATCACACTCCCATGCAGAATAAAAACAAATTATAAACAGATGGCAGGAAGTAGGAAAAG  
 CAATGTATGCCCCCTCCCATCAGAGGAGAAATTAAATGTACATCAAAT---  
 ATTACAGGGCTACTATTAACAAGAGATGGTGGTAATGGTAATGGGACT-----  
 -----  
 CAGAAATCAGACCGAGATCTTCAGACCTGGAGGAGGAGACATGAAGGACAATTGGAGAAAGTGAATTATATAAAAT  
 ATAAAGTAGTAAAAATTGAGCCATTA---GGAATAGCACCTACCAAGGCAAAAAGAAGAGTGGTG-----  
 -----CAGAGAGAAAAAAGAGCA---ATAGGA---CTGGGAGCT---  
 -----GTGTTCAATTGGGTTCTTGGGAGCA---GCAGGAAGCACTATG---GGCGCAGCGTCG---  
 GTGACGCTGACGGTACAG---GCCAGACAG---TTATTG---TCTGGTATAGTGCAACAGCAAAAC---  
 AATTTG---CTAAAA---GCTATTGAGGCGCAACAGCATCTGTTGCAACTCACAGTCTGGGGCATC  
 >JF683756  
 TTCTACTGTAATACATCAAAGCTGTTTAAATAGTACTTGGACTAATAGTAGTAGTACTTGGAAATAATACTGAAG  
 AG-----  
 -----  
 TCAAAATGACACTATCACACTCCCATGTAAATAAAAACAAATTATAAACATGTGGCAGGAAGTAGGAAGAGCAA  
 TGTATGCCCCCTCCCATCAGTGGGCAAATTAGGTGCTCATCAAAT---  
 ATTACAGGGCTACTATTAACAAGAGATGGTGGTCATAACGGAACCAAT-----  
 -----  
 AACGAGACCGAGATCTTCAGACCTGCAGGAGGAAATATGAAGGACAATTGGAGAAAGTGAATTATATAAAATATA  
 AAGTAGTGAAAATTGAGCCATTA---GGAGTAGCACCCACCAGGGCAAAAAGAAGAGTGGTG-----  
 -----CAGAGAGAAAAAAGAGCA---GTGGGA---ATGGGAGCT-----  
 ---TTGCTCCTTGGGTTCTTGGGAGCA---GCAGGAAGCACTATG---GGCGCAGCATCG---  
 GTGATGCTGACGGTACAG---GCCAGACAA---TTATTG---TCTGGTATAGTGCAACAGCAGAAC---  
 AATCTG---CTGAGA---GCTATTGAGGCGCAACAACATATGTTGCAACTCACAGTCTGGGGCATT  
 >JF683764  
 TTCTACTGTGATACAACACAACCTGTTTAAATAGTACTTGGTTTATGAATGGGACTAATACAACCTACC-----  
 -----  
 -----  
 CTTACCGCAAATGCCACAATCCCAAGCCGAATAAAAACAAATTATACACAGGAGGCAGGAAGTAGGAAGAGCAA  
 TGTATGTCCCTGCCCTCAGAGGACCAATTACATGTATATCAAAT---  
 ATGACAGGGACGTTATTAACAAGAGATGGTGGTCATAACAATGGCATT-----  
 -----  
 -----  
 AATGACATTGAGACCTTCAGACCAGGAGGAGGAGATATGAGGGACAATTGGAGAAAGTGAATTATATAAAATATA  
 AAGTAGTAAGAGTTGAACCATTA---GGAATAGCACCCACCAGGGCAAGAGAGAAGAGTGGTG-----  
 -----CAGAGAGAAAAAAGAGCA---GCA-----CTAGGAGCT-----  
 ---ATGTTCCCTTGGGTTCTTGGGAGCA---GCAGGAAGCACTATG---GGCGCAGCGTCA---

ATAACGCTGACGGTACAG---GCCAGACAA---TTGTTG---TCTGGTATAGTGCAACAGCAAAAC---  
 AATTTG---CTGAGA---GCTATTGAGGCGCAACAACACATGTTGCAACTCACAGTCTGGGGCATC  
 >JF683773  
 TTCTACTGTAATACATCACAACGTTTTAATAGTACTTGGACACCTAATGGTACTTGGACATTTAATGCTGCTA  
 GTGGGGCT-----  
 -----TCA---  
 GGATTCAAGGGCACTATCACACTCCCATGTAGAATAAAACAAATTATAAACATGTGGCAGGAAGTAGGAAAAG  
 CAATGTATGCCCCCTCCCATCAGTGGACTAATTAGATGCTCATCAAAT---  
 ATTACAGGACTGCTATTAACAAGAGATGGTGGTATAAAACAATACC-----  
 -----  
 -----  
 AATACCACCGAGATCTTCAGACCTGTAGGAGGAAATATGAAGGACAATTGGAGAAGTGAATTATATAAAATATA  
 AAGTAGTACAAGTTGAACCAATA---GGAATTGCACCCACCAAGGCAAAGAGAAGAGTGGTG-----  
 -----CAGAGAGAAAAAAGAGCA---GTTACA---CTAGGAGCT-----  
 ---GTGTTCCCTTGGGTTCTTGGGAGCA---GCAGGAAGCACTATG---GGCGCAGCGTCA---  
 ATGACGCTGACGGTACAG---GCCAGGCAA---TTATTG---TCTGGTATAGTGCAACAGCAGAAC---  
 AATCTG---CTGAGA---GCTATTCAGGCGCAACAGCATCTGTTGCAACTCACAGTCTGGGGCATC  
 >JQ416158  
 TTCTACTGTAATACATCACAACGTTTTAATAGTATTTGGCCTTGGGAATAGTACTGCAAACAACACTGGA----  
 -----  
 -----  
 GGAAATGACACAATCACACTCCCATGCAGGATAAGACAAATTGTAAATAGGTGGCAGGAAGTAGGAAAAGCAA  
 TGTATGCCCCCTCCCATCAGTGGACAAATTAGATGTTTCATCAAAT---  
 ATTACAGGGCTGCTATTAACAAGAGATGGAGGTCAGACTAACAACCAG-----  
 -----  
 ----  
 ACTGGGAACCAGACCGAGATTTTCAGACCTGGAGGAGGAGATATAAAAGATAATTGGAGAAGTGAATTATACA  
 AATATAAAGTAGTACAAATTGAACCATTA--GGAGTAGCTCCCACTAAGGCAAGGAGAAGAGTGGTG-----  
 -----CAGAGAGAAAAAAGAGCA---CTAACA---  
 CTGGGAGCT-----GTGTTCCCTTGGGTTCTTGGGAACA---GCAGGAAGCACTATG---  
 GGCGCAGCGTCA---CTAACGCTGACGGTACAG---GCCAGACAA---TTATTG---  
 TCTGGTATAGTGCAAGCAGCAGAAC---AATCTG---CTGAGA---  
 GCTATTGAGGCGCAACAACATTTGTTGCAACTCACAGTCTGGGGCATC  
 >JQ403037  
 TTCTACTGTAATACAACACAGCTGTTTAATAGTACTTGGGAATAGTACTTGGACTTTGAATGATACTAGAGGGT  
 CAAATAAC-----  
 -----ACA---  
 AATGGAACCTGGTTATATCATACTCCCATGCAGATTAAACAATTTATAAACATGTGGCAGAGAGTAGGAAAAG  
 CAATGTATGCCCCCTCCCATCAGTGGACAAATTAAGTGTACATCACAC---  
 ATTACAGGGCTGCTATTAACAAGAGATGGTGGTAATAACAATAGC-----  
 -----  
 -----  
 GAACCCACCCAGATCTTCAGACCTGGAGGAGGAGATATGAGAGACAATTGGAGAAGTGAATTATATAAAATATA  
 AAGTAGTAAAAATTGAACCATTA---GGAGTAGCACCCACAAAGGCAAAAGAAGAGTGGTG-----  
 -----CAGAGAGAAAAAAGAGCA---GTAGGA---CTGGGAGCT-----  
 ---ATGTTCCCTTGGGTTCTTGGGAGCA---GCAGGAAGCACTATG---GGCGCAGCATCA---  
 GTGATGCTGACGGTACAG---GCCAGACAG---CTATTG---TCTGGCATAGTGCAACAGCAAAAC---  
 AATTTG---CTGAGA---GCTATTGAGGCGCAACAGCATCTGTTGCAACTCACAGTCTGGGGCATC  
 >KT124803  
 TTCTACTGTAATACAACAAGCCTGTTTAATAGTACTTGGTATGCAAATGGTACAAATAGCACTTGGTCTGAT-  
 -----  
 -----  
 GAGTCAGATGTTATCACACTTCCATGCAGAATAAGACAAATTGTAAACATGTGGCAGGGGGTAGGAAAAGCAA  
 TGTATGCCCCCTCCCATCAGAGGACAGATTAATTGTACATCAAAT---  
 ATTACAGGGCTAATATTAACAAGAGATGGTGGGAACAAGAATGGCACTAATGAG-----  
 -----  
 -----  
 ACCTATGAGACCTTCAGACCTGCAGGAGGAAATATGAAGGACAATTGGAGAAGTGAATTATATAAAATATAAAG  
 TAGTAAAGATTGAACCATTA---GGAATAGCACCCACCAAGGCAAAGAGAAGAGTGGTG-----  
 -----CAAAGAGAAAAAAGAGCA---ATAGGA---ATGGGAGCC-----

TTGTTCCCTTGGGTTCTTGGGAGCA---GCAGGAAGCACTATG---GGCGCAGCGTCA---  
ATGACGCTGACGGTACAG---GCCAGACAG---TTATTG---TCTGGTATAGTGCAACAGCAAAAC---  
AATTTG---CTGAGA---GCTATTGAGGCGCAACAACACCTGTTGCAACTCACAGTCTGGGGCATC  
>KT124751  
TTCTACTGTAATACAACAACCACTGTTTAATAGTACTTGGCCGTTTAATAGTACTTGGGATAGTACTGAAGGGT  
CAAATTACACT-----  
-----  
GTAGAAAATGAAAATATCACACTCCCATGCAGAATAAAACAAATTGTAAACCTGTGGCAGGAAGTAGGAAAAG  
CAATGTATGCCCCCTCCCATCAAAGGACAAATTAGATGTTTCATCAAAT---  
ATTACAGGGCTGCTATTAACAAGAGATGGTGGCAATGCTGGCAATACTAGT-----  
-----  
-----  
AGCAAGAACGAGACCTTCAGACCTGGGGGAGGAAAATATGAAGGACAATTGGAGAAGTGAATTATATAAAATATA  
AAGTAGTAAAAGTTGAACCATTA---GGAATAGCACCCACTAAGGCAAAAAGAAGAGTGGTG-----  
-----CAGAGAGAAAAAAGAGAT---TTGGGA---CTAGGAGCC-----  
---TTGTTCCCTTGGGTTCTTGGGAGCA---GCAGGAAGCACTATG---GGCGCAGCGTCA---  
GTAACGCTGACGGTACAG---GCCAGACAA---TTATTG---TCTGGTATAGTGCAACAGCAGAAC---  
AATTTG---CTGAGG---GCTATTGAGGCGCAACAGCATATGTTGCAACTCACAGTCTGGGGCATC  
>KT124789  
TTCTACTGTAATACAACAGAGCTGTTTAACGGTACTTGGAAATGGTACTTTCTTGAATGTTACTACA-----  
-----  
-----  
GGGCGAGAGAATATCACACTCCCATGCAGAATAAAACAGATTATAAACAGGTGGCAGGAAGTAGGAAAAGCAA  
TGTACGCCCCCTCCCATCAGAGGACCAATTAGATGCTCATCAAAT---  
ATTACAGGGCTGATATTAACAAGAGATGGTGGTCAGAATGCGAGTGCG-----  
-----  
-----  
ACCAACGAAACCTTCAGACCGGGAGGAGGAGATATGAGGGACAATTGGAGAAGTGAATTATATAAAATATAAAG  
TAGTAAAAATTGAGCCATTA---GGAATAGCACCCACCAAGGCAAGGAGGAGAGTGGTG-----  
-----CAGAGAGAAAAAAGAGCA---GTGACA---CTAGGAGCT-----  
ATGTTCCCTTGGGTTCTTGGGAGCA---GCAGGAAGCACTATG---GGCGCAGCTTCA---  
TTGACGCTGACGGTACAG---GCCAGACTA---TTATTG---TCTGGTATAGTGCAACAGCAAAAC---  
AACTTG---CTGAGG---GCTATTGAGGCGCAGCAGCATCTGCTGCAACTCACAGTCTGGGGCATC  
>KT124805  
TTTTACTGTGATACAACAACAACCTGTTCAACAGTACGTGGGATACAAATAATACTGGGGGAGTGAATGAT---  
-----  
-----  
ACTGACGAGCCAATTACACTCCCATGCAGGATAAAACAATTTATAAACATGTGGCAGGAAGTAGGGAAAGCAA  
TGTATGCCCCCTCCCATCCAAGGAATAATTCACCTGTTTCATCAAAT---  
ATTACAGGACTACTATTAACAAGAGATGGTGGTAAGACAGAGAACGGGACAGAG-----  
-----  
-----  
AATGTTACTGAGATCTTTAGACCTGGAGGAGGAGACATGAGGGACAATTGGAGAAGTGAATTATATAAAATATA  
AAGTAGTAAAAATTGAACCATTA---GGAGTAGCACCCACCAGGGCAAAGAGAAGAGTGGTG-----  
-----CAGAGAGAAAAAAGAGCA---GTGACA---CTGGGAGCT-----  
---GTGTTCCCTTGGGTTCTTGGGAGCA---GCCGGAAGCACTATG---GGCGCAGCGTCA---  
CTGACGCTGACGGTACAG---GCCAGACAA---TTATTG---TCTGGTATAGTGCAACAGCAGAAC---  
AATTTG---CTGAGA---GCTATTGAGGCGCAACACCATCTGTTGCAACTCACAGTCTGGGGCATT  
>KT124763  
TTCTACTGTAATTCATCGACACTGTTTAATAGTACTTGGAAATGAAACTATTGCAGGGATTACCAAT-----  
-----  
-----  
GCAAAATGAAACTATCACACTCCCATGCAGAATAAGGCAAAATTATAAACATGTGGCAGGAAGTAGGAAAAGCAA  
TGTATGCCCCCTCCCATTAGTGGAATAATTAGATGTTTCATCAAAT---  
ATTACAGGGCTGCTATTAACAAGAGATGGTGGTAATAATGGTAAT-----  
-----  
-----  
CATAGCGAGAATAAT---  
ACCATTGAGATCTTCAGACCTGGAGGAGGAGATATGAGGGATAATTGGAGAAGTGAATTATATAAAATATAAAG  
TAGTACAAATTGAACCAGTA---GGAGTAGCACCTACCAAGGCAAGAGAAGAGTGGTG-----  
-----CAGAGAGAAAAAAGAGCA---GTGGGA---CTAGGAGCT-----

TTGTTTCCTTGGGTTCTTGGGAGCA---GCAGGAAGCACTATG---GGCGCAGCGTCA---  
 ATAACGCTGACGGTACAG---GCCAGACAA---TTATTG---TTTGGTATAGTGCAACAGCAGAAC---  
 AATCTG---CTGAGA---GCTATTGAGGCGCAACAGCACCTGTTGCAACTCACAGTCTGGGGCATC  
 >KT124779  
 TTCTACTGTGATACAACACAACCTGTTTAATAGTACTTGGAGTAATGCTACTTGAATGAGACTACAGGT----  
 -----  
 -----  
 TCAAATGACACGATTACACTCCAATGTAAATAAAACAAATTATAAACAGGTGGCAGGAAGTAGGAAAAGCAA  
 TGTATGCCCCCTCCCATCCGAGGACAAATAAAGTGTTTCATCAAAT---  
 ATTACAGGGTTGCTATTAACAAGAGATGGTGGTAACGAGACTAAC-----  
 -----  
 -----  
 GGGACCGAGGTCTTCAGACCTATAGGAGGAGATATGAAAAGACAATTGGAGAAGTGAATTATATAAATATAAAG  
 TAGTTCAAATTGAACCATTA---GGAATAGCACCCACCAAGGCAAAGAGAAGAGTGGTG-----  
 -----CAGAGAGAAAAAAGAGCG---GTGACA---CTGGGAGCT-----  
 ATGTTTCCTTGGGTTCTTGGGAGCA---GCGGGAAGCACTATG---GGCGCAGCGTCA---  
 GTGGCGCTGACGGTACAG---GCCAGACAA---TTATTG---TCTGGTATAGTGCAACAGCAGAAC---  
 AATATG---CTGAGG---GCTATTGAGGCACAACAGCATATGTTGCAACTCACAGTCTGGGGCATC  
 >KT124787  
 TTCTACTGTGATACAACACAGCTGTTTAATAGCAATAGCACTTGGCTGTTTAATAACACTTGAATAGTACTG  
 AGAATAATAAT---ACT-----  
 -----  
 GAGAAATAATAATATCACACTCCAGTGCAGAATAAGACAAATTGTAAACATGTGGCAGAAAGTAGGAAAAGCAA  
 TGTATGCCCCCTCCCATCAGAGGACAAATTTACTGTGCATCACAA---  
 ATAACAGGGCTGCTATTAACAAGAGATGGTGGTAGTAGTGATCAG-----  
 -----  
 -----  
 AACAAACACCGAGATCTTCAGACCTGCAGGAGGAAATATGAGGGACAATTGGAGAAGTGAATTATATAAATATA  
 AAGTAGTAAAAATTAAACCATTA---GGAGTAGCACCCACCAAGGCAAAGAGAAGAGTGGTG-----  
 -----CAGAGAGAAAAAAGAGCA---GTAACG---CTAGGAGCT-----  
 ---ATGTTCCCTTGGGTTCTTGGGAGCA---GCGGGAAGCACTATG---GGCGCAGCGGCA---  
 ATGACGCTGACGGTACAG---GCCAGACAA---TTATTG---TCTGGTATAGTGCAACAGCAGAAAT---  
 AATCTG---CTGAGA---GCTATTGAGGCGCAACAGCATCTGTTGCAACTCACAGTCTGGGGCATC  
 >KC596067  
 TTCTACTGTAATACAACACAATTGTTTAACAGTACTTGAATACTACTGAAGATTTAAATAAACTAGAACTG  
 AA-----  
 -----  
 GTAAATGACACAATCACACTCCCATGTAGAATAAGACAAATTATAAACAGATGGCAGGAAGTGGGAAAAGCAA  
 TGTATGCCCCCTCCCATCAGCGGAAACATTAGTTGTTTCATCAAAC---  
 ATCACAGGGCTGCTATTAACAAGAGATGGTGGTCAGAATAATGTGAGC-----  
 -----  
 -----  
 AACACCACAGAGATCTTCAGACCTGGAGGAGGAGATATGAGGGACAATTGGAGAAGTGAATTATATAAATATA  
 AAATAATAAAAATCGAACCATTA---GGAATAGCACCCACCAAGGCAAAGAGAAGAGTGGTG-----  
 -----CAGAGAGAAAAAAGAGCA---GCA-----CTAGGAGCT-----  
 ---ATGTTCCCTTGGGTTCTTAGGAGCA---GCAGGAAGCACTATG---GGCGCAGCGTCA---  
 GTGACGCTGACGGTACAG---GCCAGACAA---TTATTG---TCTGGTATAGTGCAACAGCAAAGT---  
 AACTTG---CTGAAA---GCTATTGAGGCGCAACAGCATCTGTTGCAACTCACAGTCTGGGGCATC  
 >EF514700  
 TTTTACTGTAATACGTCAAACTGTTTGATAGTACCTGGAATGAACTAGTATTTGGAATTATACCACTACTA  
 ATGAT-----  
 -----ACC---  
 ACAAAAAATGACACACTCACACTCCCATGTAAATAAAACAAATTATAAACATGTGGCAGGAAGTAGGAAAAG  
 CAATGTATGCCCCCTCCCATCAGAGGACAAATCAGATGCTCATCAAAT---  
 ATTACAGGGCTGTTATTAACAAGAGATGGTGGTCAGGGTAACGGGACC-----  
 -----  
 -----  
 GATAACACCACCGAGATCTTCAGACCTGCAGGAGGAGATATGAGGGACAATTGGAGAAGTGAATTATATAAAT  
 ATAAAGTAGTAAGAATTGAACCATTA---GGAGTAGCACCCACCAAGGCAAAGAGAAGAGTGGTG-----  
 -----CAGAGAGAAAAAAGAGCA---GTGGGA---CTGGGAGCT---

-----TTGTTTCCTTGGGTTCTTGGGAACA---GCAGGAAGCACTATG---GGCGCAGCATCA---  
 CTAACGCTGACGGTACAG---GCCAGACAA---TTGTTG---TCTGGTATAGTGCAACAGCAGAAC---  
 AATCTG---CTGAGA---GCTATTGAGGCGCAACAACATCTGTTGCAACTCACAGTCTGGGGCATT  
 >EU839598  
 TTCTACTGTAATACAACAAAACCTGTTTAAACAATACTGGACAATTAGATAAAGAAGAAGATGAAGGA-----  
 -----  
 -----  
 GAAGAAGGCAATATCACACTTCCATGCAGAATAAGGCAATTCGTAAACAGGTGGCAAGAAGTAGGAAAAGCAA  
 TGTATGCCCCCTCCCATCAGTGGACAAATTAGATGTTTCATCAAAT---  
 ATTACAGGGCTACTATTAACAAGAGATGGTGGTGGTAGTGGTAAT-----  
 -----  
 -----  
 AGTGAGAATGAGACCTTCAGACCTGGGGGAGGAGATATGAAAGACAATTGGAGAAAGTGAGTTATATAAATATA  
 AAGTAGTAAAAATTTCAGCCATTA---GGAATAGCACCCAGCAAGGCAAAGAGAAGAGTGGTG-----  
 -----CAAAGAGAAAAAAGAGCA---GTGACA---CTAGGAGCT-----  
 ---ATGTTCCCTTGGGTTCTTAGGAGCA---GCAGGAAGCACTATG---GGCGCAGCGTCA---  
 GTAACGCTGACGGTACAG---GCCAGACTA---TTATTG---TCTGGTATAGTGCAACAGCAGAAC---  
 AATCTG---CTGAGG---GCTATTGAGGCGCAACAACATCTGTTGCAACTCACGGTCTGGGGCATC  
 >KC595164  
 TTCTACTGTAATTCAACAAAACCTGTTTAAATAGTACTTGGAAATGGTACTGAAGGGTCAAATAACAGTGGCACAA  
 GGGCAAAT-----  
 -----  
 AACAGTCACATACTCACACTCCCATGCAGAATAAAGCAAATTATAAACATGTGGCAGGAAGTAGGAAAAGCGA  
 TGTATGCCCCCTCCCATCAGAGGACAAATTAGATGCTCATCAAAT---  
 ATTACAGGGTTGCTATTAACAAGAGATGGTGGTAACAACAATAGC-----  
 -----  
 -----  
 GGGACCGAGATCTTCAGACCTGGAGGAGGAGATATGAGGGACAATTGGAGAAGTGAATTATATAAATATAAAG  
 TAGTAAAAATTGAACCATTA---GGAGTAGCACCCACCAAGGCAAAGAGAAGAGTGGTG-----  
 -----CAGAGAGAAAAAAGAGCA---GTGGGA---ATAGGAGCT-----  
 GTGTTCCCTTGGGTTCTTGGGAGCA---GCAGGGAGCACTATG---GGCGCAGCGTCA---  
 ATGACGTTGACGGTACAG---GCCAGACTA---TTATTG---TCTGGTATAGTGCAACAGCAGAAC---  
 AATTTG---CTGAGG---GCTATTGAGGCGCAACAGCATCTGTTGCAACTCACAGTCTGGGGCATC  
 >KC595194  
 TTTTACTGTAATTCAACACAACCTGTTTAAACAGTGTGTTGGAAGGCTAACAGTACTTGAATAGTACTGAAGGGT  
 CAAATAAC-----  
 -----  
 AATGCAGGAAATATCACACTCCCATGCAGAATAAAACAAATTATAAACATGTGGCAGGAAGTAGGAAAAGCAA  
 TGTATGCCCCCTCCCATCAGAGGCCAAATTAGCTGTTTCATCAAAT---  
 ATTACAGGGCTACTATTAACAAGAGATGGTGGTAACATCACTAAC-----  
 -----  
 -----  
 GGGACCGAGATCTTCAGACCTGGAGGAGGAGATATGAGGGACAATTGGAGAAGTGAATTATATAAATATAAAG  
 TAGTAAAAATTGAACCATTA---GGAATAGCACCCACCAAGGCAAAGAGAAGAGTGGTG-----  
 -----CAGAGAGAGAAAAAGAGCA---GTGGGA---ATAGGAGCT-----  
 ATGTTCCCTTGGGTTCTTGGGAGCA---GCAGGAAGCACTATG---GGCGCGGCGTCA---  
 ATGACGTTGACGGTACAG---GCCAGACTA---TTATTG---TCTGGTATAGTGCAACAGCAGAAC---  
 AATTTG---CTAAGG---GCTATTGAGGCGCAACATCATCTGTTGCAACTCACAGTCTGGGGCATC  
 >KC595151  
 TTCTACTGTGATACAACAAAATTGTTTAAATAGTACTTGGGATATTAATGATACTTGAATGGTACTAACGGG-  
 -----  
 -----  
 CCAGATAACACTATCATACTCCCATGCAGAATAAAACAAATTATAAACATGTGGCAGGAAGTAGGAAAAGCAA  
 TGTATGCCCCCTCCCATCAGAGGACGAATTAGGTGTGAATCAAAT---  
 ATTACAGGGCTGCTATTAACAAGAGATGGTGGTGATGATAGCAGT-----  
 -----  
 -----  
 AACCAGACCGAGATCTTCAGACCTGGAGGAGGAGATATGAGGGACAATTGGAGAAGTGAATTATATAAATATA  
 AAGTAGTAAAAATTCAACCATTA---GGAATAGCACCCAACAAGGCAAAGAGAAGAGTGGTG-----  
 -----CAGAGAGAAAAAAGAGCA---GTGGGA---ATAGGAGCT-----

---TTGTTCCCTTGGGTTCTTGGGAGCA---GCAGGAAGCACTATG---GGCGCAGCGTCA---  
 ATGACGTTGACGGTACAG---GCCAGACAA---TTATTG---TCTGGTATAGTGCAACAGCAGAAC---  
 AATCTG---CTGAGG---GCTATTGAGGCGCAACAGCATCTGTTGCAACTCACAGTCTGGGGCATC  
 >KT200350  
 TTCTACTGTAATTTAACAAAACCTGTTTAATAGTACCTGGAATATGAATGCTACCACAGGGAAGTGGACT-----  
 -----  
 TATATTAAAGGGACAGAT-----  
 TACACTGAAGGAAACATCACACTCCCATGCAAAATAAAACAGATTATAAACATGTGGCAGGAAGTAGGAAAAG  
 CAATGTATGCCCCCTCCCATCAGTGGACAAATTAGATGTTTCATCAAAT---  
 ATTACAGGGCTGATAATAACAAGAGATGGTGGTATTAATAATACTACCAACGAG-----  
 -----  
 -----  
 ACCATCGAGACCTTCAGACCTGGAGGAGGAGATATGAGGGACAATTGGAGAAGTGAATTATATAAATATAAAG  
 TAGTAAGAATTGAACCATTA---GGAATAGCACCCACCAAGGCAAAGAGAAGAGTGGTG-----  
 -----CAGAGAGAGAAAAAGAGCA---ATAGGA---TTTGGAGCT-----  
 TTGTTCCCTTGGGTTCTTGGGAGCA---GCAGGAAGCACTATG---GGCGCAGCGTCA---  
 CTGACGCTGACGGTACAG---GCCAGACAA---TTATTG---TCTGGTATAGTGCAACAGCAGAAC---  
 AATTTG---CTGAGG---GCTATTGAGGCGCAGCAGCATATGTTGCAACTCACAGTCTGGGGCATC  
 >EU786679  
 TTCTACTGTAATACAACACAGCTGTTTAATAGTACTTGGGGTATGAATACGACTAAAGGGACAAATACC-----  
 -----  
 -----  
 ACTGAAGGAGATATCATACTCCCATGCAGAATAAAACAAATTATAAACATGTGGCAGGAAGTAGGAAAAGCAA  
 TGTATGCCCCCTCCCATCAGCGGGCCAATTACATGTACATCAAAT---  
 ATTACAGGGCTGCTACTAACAAGAGATGGGGGTGAGAGCAAGAACGAA-----  
 -----  
 -----  
 AGTAACGAGACAGAGATCTTCAGACCAGGAGGAGGAGACATGAAGGACAATTGGAGAAGTGAATTATATAAAT  
 AATAAGTAGTAAAAATTGAACCATTA---GGAATAGCACCCACCAAGGCAAAAAGAAGAGTGGTG-----  
 -----CAAAGAGAAAAAAGAGCA---GTGGGA---CTAGGAGCT---  
 -----GTGTTCCCTTGGGTTCTTGGGAGCA---GCAGGAAGCACTATG---GGCGCAGCGTCA---  
 ATAACGCTGACGGTACAG---GCCAGACAA---TTATTG---TCTGGTATAGTGCAACAGCAGAAC---  
 AACTTG---CTGAGG---GCTATTGATGCGCAACAGCATATGTTGCAGCTCACAGTCTGGGGCATC  
 >KC473841  
 TTCTACTGTAATACATCACAACCTGTTTAGTAGTACTTGGGAATAATACTGTAGGGTTAAATACTACA-----  
 -----  
 -----  
 GGAAATGATACTATCACACTCCACTGCAGAATAAGACAAATTATAAACCTGTGGCAGAGAGTAGGAAAAGCAA  
 TGTATGCCCCCTCCCATTAGAGGACAAATTAGTTGTTTCATCAAAC---  
 ATTACAGGGTTGCTATTAAACAAGAGATGGTGGTAACAACAATCAGAGC-----  
 -----  
 -----  
 AATAACACCGAAATCTTCAGACCTGGAGGAGGAGATATGAGGGACAATTGGAGAAGTGAATTATATAAATATA  
 AAGTAGTAAGAATTGAACCACTA---GGAGTAGCACCCACCAAGGCAAAGAGAAGAGTGGTG-----  
 -----CAGAGAGAAAAAAGAGCA---GTGGGA---CTAGGAGCT-----  
 ---GTGCTCTTTGGGTTCTTGGGAGCA---GCAGGAAGCACTATG---GGCGCAGCGTCA---  
 GTGACGCTGACGGTACAG---GCCAGACAA---TTATTG---TCTGGTATAGTGCAACAGCAAAAT---  
 AATTTG---CTGAAA---GCTATTGAGGCGCAACAGCATCTGTTGCAACTCACAGTCTGGGGCATC  
 >KT200357  
 TTCTACTGTAATACAACACAGCTGTTCAATAGTACTTGGGAGCCAGGGAAGAATACTACTACAGAG-----  
 -----  
 -----  
 GGAAATGACACTATCACGCTCCCATGCAGAATAAAACAGATTATAAACAGGTGGCAGGAAGTAGGAAAAGCAA  
 TGTATGCCCCCTCCCATCAGAGGACGAATTAATTGTACATCAAAT---  
 ATTACAGGGCTGTTATTAACAAGAGATGGTGGTAACAATAATAAC-----  
 -----  
 -----  
 CAGACAAATAGGACAGAGACCTTTAGACCTCAAGGAGGGAATATGAAGGACAATTGGAGAAGTGAATTATATA  
 AATATAAAGTAGTACAAGTTGAGCCATTA---GGAATAGCACCCACCAAGGCAAAGAGAAGAGTGGTG-----  
 -----CAGAGAGAAAAAAGAGCA---GTGGGA---

CTAGGAGCT-----GTGTTCTTGGGTTCTTAGGAGCA---GCAGGAAGCACTATG---  
GGCGCAGCGTCA---ATAACGCTGACGGTACAG---GCCAGACAA---TTGTTG---  
TCTGGTATAGTGCAACAGCAGAAC---AACCTG---CTGAGG---  
GCTATTGAAGCGCAACAACATATGTTGCAGCTCACAGTCTGGGGCATC  
>KP109518  
TTCTACTGTAATACAACAACCACTGTTTAATAGTACCTGGAATGATACTAGTATTAGTGAAAGGTCAAAT-----  
-----  
-----  
ACTACTAAAAACATCACGCTTCCATGCAGAATAAAACAAATTATAAACATGTGGCAAGAAGTAGGGAAAGCAA  
TGTATGCCCCCTCCCATCCCAGGACCAATTCAATGTAGATCAAAT---  
ATTACAGGGATATTATTAACAAGAGATGGTGGTAATACTAGTGAT-----  
-----  
-----  
AGCCAGAATGAAACCTTCAGACCTGGAGGAGGAAATATGAAGGACAATTGGAGAAGTGAATTATATAAATATA  
AAGTAGTAGAAATTGAACCATTA---GGAGTGGCACCCACCAGGGCAAGGAGAAGAGTGGTG-----  
-----CAGAGAGAAAAAAGAGCA---GTGGGAGTAGTAGGAGCT-----  
---ATGTTCTTGGGTTCTTGGGAGCA---GCAGGAAGCACTATG---GGCGCAGCGTCA---  
ATGACGTTGACGGTACAG---GCCAGACTA---TTACTG---TCTGGTATAGTGCAACAGCAGAAC---  
AATCTG---CTGAGA---GCTATTGAAGCGCAACAGCATCTGTTGCAGCTCACAGTCTGGGGCATT  
>KY465969  
TTCTACTGTAATACAACACAGCTGTTTAATAGCACTTGGAAATAAACTGTAGTTGAGAATAATAATTATGGTT  
CT-----  
-----  
GAGAAATGGTACTATCACACTCCAGTGCAGAATAAGACAAATTGTAAACAGGTGGCAGGAAGTAGGAAAAGCAA  
TGTATGCCCCCTCCCATCAGAGGAGTAATTAAGTGTTCATCAAGT---  
ATTACAGGGCTGTTATTAACAAGGGATGGTGGTAATAGTAAGAACACC-----  
-----  
-----  
AACAGGTCATCTGAGATCTTCAGACCTGGAGGAGGAGATATGAGGGACAATTGGAGAAGTGAATTATACAAAT  
ATAAAGTAGTAAAGATTGAACCATTA---GGAGTAGCACCCACCAAGGCAAAGAGGAGAGTGGTG-----  
-----CAGAGAGAAAAAAGAGCA---GTGGGAGCATTAGGAGCT---  
-----ATGTTCTTGGGTTCTTGGGAACA---GCAGGAAGCACTATG---GGCGCAGCGTCA---  
CTGACGCTGACGGTACAA---GCCAGACAA---CTATTG---TCTGGTATAGTGCAACAGCAGAAC---  
AATCTG---CTGCAG---GCTATCGAGGCGCAACATCATCTGTTGCAACTCACCGTCTGGGGCATC  
>KC595204  
TTCTACTGTAACCAACACAGCTGTTTAATAGTACTTGGAAATAGTACTGGGAATCAGAATAATATTGAAGGG-  
-----  
-----  
TTAAATGACACAATCACACTCCCATGCAGAATAAAACAAATTATAAACATGTGGCAGGAAGTAGGAAGAGCAA  
TGTATGCCCCCTCCCATTAGAGGACAAATTAGATGTTTCATCAAAT---  
ATTACAGGGCTGTTATTAACAAGAGATGGTGGTCATAACACGACA-----  
-----  
-----  
GAGACCGAGATCTTCAGACCTGGAGGAGGAGATATGAGGGACAATTGGAGAAGTGAATTATATAAATATAAAG  
TAGTAAAAATTGAACCATTA---GGAGTAGCACCCACCAGAGCAAAGAGAAGAGTGGTG-----  
-----CAGAGAGAAAAAAGAGCA---GTGGGA---ATAGGAGCT-----  
GTGTTCTTGGGTTCTTGGGAGCA---GCAGGAAGCACTATG---GGCGCAGCGTCA---  
GTGACGCTGACGGTACAG---GCCAGACTA---TTATTG---TCTGGTATAGTGCAACAGCAGAAT---  
AATTTG---CTGAAG---GCTATTGAGGCGCAACAGCATCTGTTGCAACTCACAGTCTGGGGCATC  
>DQ141342  
TTCTACTGTAATACAACAACCACTGTTTAATAGTACTTGGCCTAAGAATGGTACCAGCGAGTTAAAT-----  
-----  
-----  
ACCACTGACCCATTCTACTCCCATGTAAATAAAACAAATTATAAACATGTGGCAGAAAGTAGGAAAAGCAA  
TGTATGCCCCCTCCCATCCGTGGACAGATTAGATGCTCATCAAAT---  
ATTACAGGGCTGCTATTACCAAGAGATGGTGGTAACAACAACATGGTAGT-----  
-----  
-----  
AACAAACCGCAGTCCTGAGATCTTCAGACCTGGAGGAGGAGATATGAGGGATAATTGGAGAAGTGAATTATACA  
AATATAAAGTAGTAAAAATTCAACCATTA---GGAGTAGCACCCACCAAGGCAAAGAGAAGAGCGGTG-----

-----CATAGAGACAAAAGAGCA---GTGGGA---  
 CTCGGAGCT-----GTGTTCCCTTGGATTCTTGGGAGCA---GCAGGAAGCACTATG---  
 GGCGCAGCGTCA---CTGACGTTGACGGTACAG---GCCAGACAA---TTATTG---  
 TCTGGTATAGTGCAACAGCAAAAC---AACTTG---CTGAGG---  
 GCTATTGAGGCGCAACAGCATCTGTTGCAACTCACAGTCTGGGGCATC  
 >DQ141343  
 TTCTACTGTGATACATCACAACCTATTTAATAGTACTTGGGAATAGTAGTACTTTGAATAATTTTACTAACGGGT  
 CAAAT-----  
 -----  
 ATAACCTAATGAACTTTTCACTCTCCCATGCAGAATAAAACAATTTATAAACATGTGGCAGGAAGTAGGAAAAG  
 CAATGTATGCCCCCTCCTATCAGAGGAGTAATTAAGTGTATCAAAAT---  
 ATTACAGGGCTGCTATTAACAAGAGATGGTGGTAATAATCATAGTGAC-----  
 -----  
 -----  
 ACCAATCAGGAGATCTTCAGGCCTGCAGGAGGAGATATGAGGGACAATTGGAGAGGTGAATTATATAAGTATA  
 AAGTAGTAAGAGTAGAACCATTA---GGGATAGCACCCACCAAGGCAAAGAGAAGAGTGGTG-----  
 -----CAGAGAGAAAAAGAGCA---GTGGGA---CTAGGAGCT-----  
 ---TTGTTCCCTTGGGTTCTTGGGAGCA---GCAGGAAGCACTATG---GGCGCAGCATCA---  
 ATGACGCTGACGGTACAG---GCCAGACAA---TTATTG---TCTGGTATAGTGCAACAGCAGAAC---  
 AACCTG---CTGAGG---GCTATTGAGGCGCAACAGCATATGTTGCAACTCACAGTCTGGGGCATC  
 >DQ448819  
 TTCTACTGTAATACAACACAACCTGTTTAATAGTACTTGGTATGCTAGTAATAATACTTGAAGGGTACTAAC-  
 -----  
 -----  
 ATTACAGGCAATATCACAACCTCCCATGCAAAATAAAACAATTTATAAACATGTGGCAGGAAGTAGGAAAAGCAA  
 TGTATGCCCCCTCCCATCAGAGGACAAATTAGATGCTCATCAAAAT---  
 ATTACAGGGTTACTATTAACAAGAGATGGGGGTGAGGAAACAACACC-----  
 -----  
 -----  
 GACAACGACACTGAGATCTTCAGACCTGGAGGAGGAAATATGAGGGACAATTGGAGAAGTGAATTATATAAAT  
 ATAAAGTAGTAAGAATTGAACCATTA---GGACTAGCACCCACCAGGGCAAAGAGAAGAGTGGTG-----  
 -----CAGAGAGAGAAAAGAGCA---GTGGGA---CTAGGAGCG---  
 -----TTGTTTCATTGGGTTCTTGGGAGCA---GCAGGAAGCACTATG---GGCGCAGCGTCA---  
 GTGACGTTGACGGTACAG---GCCAGACAA---TTACTG---TCTGGTATAGTGCAACAGCAGAAT---  
 AATTTG---CTGATG---GCTATTGAGGCGCAACAGCATATGTTGAAACTCACGGTCTGGGGCATT  
 >EF531331  
 TTTTACTGTAATACAACACAACCTATTTAATAGTACTTGGGAATATAACAAATCTGTTTAATAGTACTTGGGAATA  
 GTACTGAAGGG-----  
 -----TCAAATAACACT-----  
 AAAAGAAATGGCACAATCATACACCCATGCAGAATAAAACAGATTATAAACATGTGGCAGAAAGTAGGAAAAG  
 CAATGTATGCCCCCTCCCATCGAAGGAATAATTAGATGTGAATCAAAA---  
 ATTACAGGGATGATACTAACAAGAGATGGTGGTCTTGGTCGTAACATT-----  
 -----  
 -----  
 AGCAACGAGACCGAGATCTTCAGACCTGGAGGAGGAGATATGAGGGACAATTGGAGAAGTGAATTGTATAAAT  
 ATAAAGTAGTAAAAATAGAACCCTTA---GGAATAGCACCCCTCCAAGGCAAAGAGAAGAGTGGTG-----  
 -----CAGAGAGAAAAAGAGCA---ATAGGA---TTCGGAGCT---  
 -----ATGTTCCCTTGGGTTCTTGGGAGCA---GCAGGAAGCACTATG---GGCGCAGCGTCA---  
 CTAACGCTGACGGTACAG---GCCAGACAA---TTACTG---TCTGGTATAGTGCAACAGCAGAAC---  
 AATTTG---CTGAGG---GCTATTGAGGCGCAACATCATCTGTTGCAACTCACAGTCTGGGGCATC  
 >MH000288  
 TTCTATTGTAATACAACACAACCTGTTTGATAGTACTTGGGAATGAT-----  
 -----  
 -----  
 ACTACAGACACAATCACAACCTCCCATGCAAAATAAGACAAATTTGTAACTTGTGGCAGGAAGTAGGAAAAGCAA  
 TGTATGCCCCCTCCCATCAGTGGGAATAATTCAGTGTACATCAAAAT---  
 ATTATAGGGTTGCTATTAACAAGAGACGGTGGT-----  
 -----  
 -----  
 ACCGAAATCTTCAGACCAGGAGGAGGAGATATGAGGGACAATTGGAGAAGTGAATTATATAAATATAAAGTAG

TACAAGTTGAACCATTA---GGAATAGCACCCACCAAGGCAAAGAGAAGAGTGGTG-----  
-----CAGAGAGAAAAAAGAGCA---GTGGGAACGCTAGGAGCT-----  
GTATTCCTCGGGTTCTTGGGAGCA---GCAGGAAGCACTATG---GGCGCAGCGTCA---  
ACAGCGCTGACGGTACAG---GCCAGACAA---TTATTG---TCTGGTATAGTGCAACAGCAGAAC---  
AATCTG---CTGAAG---GCTATTGAGGCGCAACAGCATTTGTTGCAGCTCACAGTCTGGGGCATC  
>KC699040  
TTCTATTGTGATACAGCACAACTGTTTAATAGTACTTGGCCTAAGAATAGCACCCAGTAGCACCAATAGCACCG  
GTAAAGGG-----  
-----  
GGGCCAACAACACTATCACACTCCCATGCAGAATAAGACAAATTGTAAACATGTGGCAGGAAGTAGGAAAAGCAA  
TGTATGCTCCTCCCATCAGCGGAAACATCACATGTTTCATCAAAT---  
ATTACAGGGCTGCTATTAACAAGAGATGGGGGTAATAAGAATGAG-----  
-----  
-----  
ACGACCAACAGGACTCAGACCTTCAGACCTATAGGAGGAGATATGAGGGACAATTGGAGAAGTGAATTATATA  
AATATAAAGTAGTAAAAATTGAACCATTA---GGAATAGCACCCACCAAGGCAAAGAGAAGAGTGGTG-----  
-----CAGAGAGAAAAAAGAGCA---GTGGGA---  
GTAGGAGCT-----TTGTTCCTTGGGTTCTTGGGAGCA---GCAGGAAGCACTATG---  
GGCGCAGCGTCA---GTGACGTTGACGGTACAA---GCCAGACAA---TTATTG---  
TCTGGTATAGTGCAACAGCAGAAC---AATCTG---CTGAGA---  
GCTATTGAGGCGCAACAGCATATGTTGCAACTCACAGTCTGGGGCATC  
>KC699032  
TTTTACTGTAATACAACACAGCTGTTTAATAGTACTTGGAA TGCTAATGGTACTAGTCGGGATGGTACTACA-  
-----  
-----  
GGGAATGATACTATCACAATCCAATGCAGAATAAAGCAAATTATAAACAGGTGGCAGGAGGTAGGAAAAGCAA  
TGTATGCCCCCTCCCATCCAAGGACAAATTTACTGTTTCATCAAAT---  
ATTACAGGGCTTCTATTAACAAGAGATGGGGGTAATGACAATAACACT-----  
-----  
-----  
AGCACTAATGAGACCTTCAGACCTGCAGGAGGAAATATGAAGGACAATTGGAGAAGTGAATTATATAAATATA  
AAGTAGTAAAAATTGAGCCATTA---GGAATAGCACCCACCAGGGCAAGGAGAAGAGTGGTG-----  
-----CAGAGAGAAAAAAGAGCA---GTGGGA---CTAGGAGCT-----  
---ATGTTCCTTGGGTTCTTGGGAGCA---GCAGGAAGCACTATG---GGCGCAGCGTCA---  
TTGACGCTGACGGTACAG---GCCAGGCAA---TTATTG---TCTGGTATAGTGCAACAGCAAAC---  
AATTTG---CTAAGA---GCTATTGAGGCGCAACAGCATATGTTGCAACTCACAGTCTGGGGCATC  
>KC699037  
TTTTATTGTAATACATCACAACCTGTTTAATAGTAGTTGGACCAATTACACTAATGGTACTTGGGACAATGACA  
CCATAATA-----  
-----GATAACACT-----  
ACCACTGGAGTAAATATCACACTCCCATGCAGAATAAAACAAATTATAAACATGTGGCAGAAAGTAGGAAAAG  
CCATGTATGCCCCCTCCCATCAGAGGACTAATTCAATGTACATCAAAT---  
ATTACAGGAATACTATTAACAAGAGATGGAGGTAATAGGAATGAGAGCAAT-----  
-----  
-----  
GGCAAAGCAATGAGACCTTCAGACCTGTAGGGGGAGATATGAGGGACAATTGGAGAAGTGAATTATATAAAT  
ATAAAGTAGTAAAAATTAAACCATTA---GGAATAGCACCCACCAGGGCAAAGAGAAGAGTGGTA-----  
-----CAGAGAGAAAAAAGAGCA---GTGGGAACGTTGGGAGCC---  
-----ATGTTCCTTGGGTTCTTGGGAGCA---GCAGGAAGCACTATG---GGCGCAGCGTCA---  
CTAACGCTGACGGTACAA---GCCAGACAA---TTATTG---TCTGGTATAGTGCAACAGCAAAGC---  
AATTTG---CTGAGG---GCTATTGAGGCGCAGCAGCACATGTTGCAACTCACAGTCTGGGGCATT  
>MH000292  
TTCTATTGTAACACAACACAGCTATTTAATAGTACTTGGATGCCT-----  
-----  
-----  
AATGGTGGCACTATCACACTCCCATGCAGAATAAAACAAATTATAAACAGGTGGCAGGAAGTAGGAAAAGCAA  
TGTATGCCCCCTCCCATAGTGGACAAATTAAGTCTCATCAAAC---  
ATTACAGGGTTACTATTAATAAGAGATGGTGGT-----  
-----  
-----

AACGAGACCTTCAGACCTGGAGGAGGAAATATGAAAGACAATTGGAGAAGTGAATTATATAAAATATAAAGTAG  
TACAAATTCAGCCATTA---GGAGTAGCACCCACCAAGGCAAAGAGAAGAGTGGTG-----  
-----CAGAGAGAAAAAAGAGCA---GTGGGAACGCTAGGAGCT-----  
ATGTTTCCTTGGGTTCTTGGGAGCA---GCAGGAAGCACTATG---GGCGCAGCGTCA---  
GTGACGCTGACGGTACAG---GCCAGACAA---TTATTG---TCTGGTATAGTGCAACAGCAAAAC---  
AACTTG---CTGAAA---GCTATTGAGGCGCAACACCATCTGTTGCAACTCACAGTCTGGGGCATT  
>KC699006  
TTCTACTGTAATACAACACAACCTGTTTAATAGTACTTGGGAATAGTACTTGGGATATTAATAGTACTATAGAGT  
CAAATAAC-----  
-----  
ACTGGAGAATATATCACACTCCCATGTAGAATAAAACAAATTATAAACATGTGGCAGGAAGTAGGAAAAGCAA  
TGTATGCCCCCTCCCATCAAAGGACAAATTAGATGTTTCATCAAAC---  
ATTACAGGGCTGCTATTAACAAGAGATGGTGGTAATAACAATAGTAGC-----  
-----  
-----  
AACACCACCGAGACCTTCAGACCTGGAGGAGGAGATATGAGGGACAATTGGAGAAGTGAATTATATAAAATATA  
AAGTAGTAAAAATTGAACCATTA---GGAGTAGCACCCACCAAGGCAAAGAGAAGAGTGGTG-----  
-----CAGAGAGAAAAAAGAGCA---GTGGGA---ATAGGAGCC-----  
---GTGTTTCCTTGGGTTCTTGGGAGCA---GCAGGAAGCACTATG---GGCGCAGCGTCA---  
ATAACGCTGACGGTACAA---GCCAGACTA---TTATTG---TCTGGTATAGTGCAACAGCAGAAC---  
AATCTG---CTGAGG---GCCATTGAGGCGCAACATCATCTGTTGCAACTCACAGTCTGGGGCATC  
>KC699007  
TTCTACTGTAATTCAACACAACCTGTTTAATAGTACTTGGAGTGAAGGGTCAAATAACACTGAAGGAAATAACA  
CTGAA-----  
-----  
GGAAATGACACAATCACACTCCCATGCAGAATAAAACAAATTATAAACATGTGGCAGAACGTAGGAAAAGCAA  
TGTATGCCCCCTCCCATCAGCGGACAAATTAGATGTTTCATCAAAT---  
ATTACAGGGCTGATATTAACAAGAGATGGTGGTAATAACCCAAAC-----  
-----  
-----  
GGGACCGAGATCTTCAGACCTGGAGGAGGAGATATGAGGGACAATTGGAGAAGTGAATTATATAAAATATAAAG  
TAGTAAAAATTGAACCATTA---GGAGTAGCACCTACCAAGGCAAAGAGAAGAGTGGTG-----  
-----CAGAGAGAAAAAAGAGCA---GCGGGA---CTAGGAGCT-----  
GTGTTTCCTTGGGTTCTTGGGAGCA---GCAGGAAGCACTATG---GGCGCAGCGTCA---  
ATAACGCTGACGGTACAG---GCCAGACGA---TTATTG---TCTGGTATAGTGCAACAGCAGAAC---  
AATTTG---CTGAGG---GCTATTGAGGCGCAACATCATCTATTGCAACTCACAGTCTGGGGCATC  
>KC699025  
TTCTACTGTAATACAACAAAACCTGTTTAATAGTACTTGGGAAGGAAAATGGCACCATTGAAGACGATGGTACA-  
-----  
-----  
AAGGATACTAACATCACACTCCCATGCAAAATAAAACAAATTATAAACAGGTGGCAGGCAGTAGGAAAAGCAA  
TGTATGCCCCCTCCCATCAGAGGACAAATTAAATGTACATCAAAT---  
ATTACAGGGTTGCTGTTAGTAAGAGATGGTGGTCATAACACTGAC-----  
-----  
-----  
AACGAGACCTTCAGACCTGGAGGGGGAGACATGAAGGACAATTGGAGAAGTGAAGTATATAAAATATAAAGTAG  
TAAAAGTTGAACCATTA---GGAATAGCACCCACCAAGGCAAAGAGAAGAGTGGTG-----  
-----CAGAGAGACAAAAGAGCA---GTGGGAACACTAGGAGCA-----  
ATGTTTCCTTGGGTTCTTGGGAACA---GCAGGAAGCACTATG---GGCGCAGCGTCA---  
GTGGCGCTGACGGTACAG---GCCAGACAA---TTACTG---TCTGGTATAGTGCAACAGCAAAAC---  
AATTTG---CTGAAG---GCTATTGAGGCGCAACAGCATCTGTTGCAACTCACAGTCTGGGGCATC  
>JF706474  
TTCTACTGTAATTCAGCACCACTGTTTAATAGTACTTGGGAATAGTATTGAGGGTAGTACTGAGGGTAAGAATG  
AA-----  
-----  
AGCAGTGGAGGAAATATCACACTCCTATGTAGAATAAAACAAATTATAAACATGTGGCAGGAAGTAGGAAAAG  
CAATGTATGCCCCCTCCTATCAGAGGAGTAATTCAATGCTCATCAAAT---  
ATTACAGGGCTGCTATTAACAAGAGATGGTGGTAGTGGTAATAGTAGCAAT-----  
-----  
-----

GAGAACGAGACCGAGACCTTCAGACCTGGGGGGGGAAATATGAAGGACAATTGGAGAAGTGAATTATATAAAAT  
ATAAAGTAGTACAAATTGAACCATTA---GGAATAGCACCCACCAAGGCAAAGAGAAGAGTGGTG-----  
-----CAGAGAGAAAAAAGAGCG---GTGGGAACACTAGGAGCT---  
-----GTGTTTCCTTGGGTTCTTGGGAGCA---GCAGGAAGCACTATG---GGCGCAGCGTCG---  
GTAACGCTGACGGTACAG---GCCAGACAA---TTATTG---TCTGGTATAGTGCAACAGCAGAAC---  
AATTTG---CTGAAG---GCTATTGAGGCGCAACAGCATCTGTTGCAACTCACAGTCTGGGGCATC  
>HM204630

TTCTACTGTAATACAACAAAACCTGTTTAATAGTACTTGGGGGAATAATACTGCAGGACAA-----  
-----  
-----  
GGTAATAACACTATCACACTCCCATGCAGAATAAAACAAATTATAAACTTGTGGCAGGAAGTAGGAAAAGCAA  
TGTATGCCCCCTCCCATTAGTGGACACATTTACTGTTTCATCAAAT---  
ATTACAGGGCTACTATTAACAAGAGATGGTGGTACTACCAACATAACC-----  
-----  
-----

AATGAACTGAGATCTTCAGACCTGGAGGGGGAGATATGAGGGACAATTGGAGAAGTGAATTATATAAAATATA  
AAGTAGTAAAAGTTGAACCATTA---GGAATAGCACCCACCAAGGCGAAGAGAAGAGTGGTG-----  
-----CAGAGAGAAAAAAGAGCA---GTGGGA---ATAGGAGCT-----  
---GTGTTTCCTTGGGTTCTTGGGAGCA---GCAGGAAGCACTATG---GGCGCAGCGTCA---  
CTGACGCTGACGGTACAG---GCCAGACAA---TTATTG---TCTGGTATAGTGCAACAGCAGAAC---  
AATTTG---CTGAGA---GCTATTGAGGCGCAACAGCATCTGTTGCAACTCACAGTCTGGGGCATC  
>HM204631

TTTTACTGTAATTCATCACAACTGTTTAATAGTACTTGGAAATGCCACTAGTACTGGGAATAACAGTATAGGG-  
-----  
-----  
TTAAATGGCACTATCACACTCCCATGTAAAATAAAACAGATTATAAACAGGTGGCAGGAAGTAGGAAGAGCAA  
TGTATGCCCCCTCCCATTCAAGGAATAATTAGATGTGAATCAAAT---  
ATTACAGGGCTACTGTTAACAAGAGATGGTGGTAATATAACTAGT-----  
-----  
-----

AATGGGAACGAGACCTTCAGACCCATAGGAGGAAATATGAAGGACAATTGGAGAAGTGAAGTCTATAAAATATA  
AAGTAGTACAAATTGAACCCCTTA---GGAATAGCACCCACCAAGGCAAAGAGAAGAGTGGTG-----  
-----CAGAGAGAAAAAAGAGCA---GTGGGAACAATAGGAGCT-----  
---ATGTTTCCTTGGGTTCTTGGGAGCA---GCAGGAAGCACTATG---GGCGCAGCGTCG---  
GTGGCGCTGACGGTACAG---GCCAGACAA---TTATTG---TCTGGTATAGTGCAAGCAGCAGAAC---  
AACCTG---CTGAGG---GCTATTGAGGCGCAACAGCACATGTTGCAACTCACAGTCTGGGGCATT  
>HM204636

TTCTATTGTAAAACAACAGAGCTGTTTAATAGTACTTGGCCAGGGAATAGTACTGTGAATAATGCTACAGAAT  
CA-----  
-----  
AATGACAATGACACTATCACACTCCCATGCAGAATAAAACAAATTATAAACAGGTGGCAGGAAGTAGGAAAAG  
CAATGTATGCCCCCTCCCATCCAAGGAAACATTAGCTGTTTCATCAAAC---  
ATTACAGGACTGCTATTAAACAAGAGATGGTGGTAAAGATCATAAC-----  
-----  
-----

TCCACCGAGACCTTTAGACCTGGAGGAGGAGATATGAGAGACAATTGGAGAAGTGAATTATACAAATATAAAG  
TAGTAAGAATTGAGCCATTA---GGAGTAGCACCCACCAAGGCAAGGAGAAGAGTGGTG-----  
-----CAGAGAGAAAAAAGAGCA---GCACTG-----GGAGCT-----  
GTGTTTCCTTGGATTCTTGGGAGCA---GCAGGAAGCACTATG---GGCGCAGCGTCA---  
GTGGCGCTGACGGTACAG---GCCAGACAA---TTATTG---TCTGGTATAGTGCAACAGCAAAAC---  
AATTTG---CTGAGG---GCTATTGAGGCGCAACAACATCTGTTGCAACTCACAGTCTGGGGCATC  
>HM204637

TTCTACTGTAATACAACACAGTTGTTTAATAATACACAGTGGGTTAATAGTAATAGTACAAAT-----  
-----  
-----  
AGCAATGACACCATCACACTCCCATGCAGAATAAAACAAATTATAAACAGATGGCAGGAAGTAGGAAAAGCAA  
TGTATGCCCCCTCCCATCGCGGGACAAATTCATGTTTCATCAAAT---  
ATTACAGGGCTAATATTAACAAGAGATGGTGGTAATAAAAAATGACACC-----  
-----  
-----

AACGGGACTGAGACTTTCAGGCCTGGAGGAGGAGATATGAGGGACAATTGGAGAAGTGAATTATATAAAATATA  
AAGTAGTAAAAATTGAACCATTA---GGAATAGCACCCACCAAGGCAAGGAGAAGAGTGGTG-----  
-----CAGAGAGAAAAAAGAGCA---GTAAGT---TTAGGAGCT-----  
---ATGTTCCCTTGGGTTCTTGGGAGCA---GCAGGAAGCACTATG---GGCGCAGCGTCA---  
ATGACGCTGACGGTACAA---GCCAGACAA---TTATTG---TCTGGTATAGTGCAACAGCAAAAC---  
AATTTG---CTGAGA---GCTATTGAGGCGCAACAGCACCTGTTGCAACTCACAGTCTGGGGCATC  
>HM204644  
TTCTACTGCAACACATCAAACTGTTTAATAGTAGTTGGAGTACTAATGGAACATTGTTAAATGGAACGTGGG  
TAAATGAG-----  
-----ACT---  
AGAATAAATGACACAATCATACTCCCATGCAAAATAAAACAAATTATAAACATGTGGCAGAAAGTAGGAAAAG  
CAATGTATGCTCCCCCATCCAAGGAATAATTAAGTCTCATCAAT---  
ATTACAGGACTGCTATTAAACAAGAGATGGTGGTCATAATCAAAATAGC-----  
-----  
-----  
ACCAATGACACAGAGACCTTCAGACCAGGAGGAGGAGATATGAGGGACAATTGGAGAAGTGAATTATATAAAAT  
ATAAAGTAGTAAGAATTGAACCATTA---GGAATAGCACCCACCAAGGCAAAGAGAAGAGTGGTG-----  
-----CAGAGAGAAAAAAGAGCA---GTGGGA---TTCGGAGCT---  
-----ATGTTCCCTTGGGTTCTTGGGAGCA---GCAGGAAGCACTATG---GGCGCAGCGTCA---  
ATAACGCTGACGGTACAG---GCCAGACAA---TTGCTG---TCTGGTATAGTGCAACAGCAAAAC---  
AATTTG---CTGAGG---GCTATTGAGGCGCAACAGCATATGTTGCAACTCACAGTCTGGGGCATC  
>JF680923  
TTCTACTGTAACACAACAAAACCTGTTTAATAGTACCTGGGAGAATAATAGTACTTGGGGGAATAAT-----  
-----  
-----  
ACTACAGGTACTATCACACTCCCATGCAGAATAAAACAAATTGTAAACATGTGGCAAGAAGTAGGAAAAGCAA  
TGTATGCCCCCTCCCATCCAAGGACAAATTAGATGCTCATCAAT---  
ATTACAGGACTGTTATTAAACAAGAGATGGTGGTAATAATAATAGCACA-----  
-----  
-----  
AATCAGAGCGAGACCTTCAGACCTGGAGGAGGAAATATGAAGGACAATTGGAGAAGTGAATTATATAAAATATA  
AAGTAGTAAAAATTGAGCCATTA---GGAATAGCACCCACCAGGGCAAAAAGAAGAGTGGTG-----  
-----CAGAGAGAAAAAAGAGCA---GCC-----ATAGGAGCT-----  
---GTGTTCCCTTGGGTTCTTGGGAGCA---GCAGGAAGCACTATG---GGCGCAGCGTCA---  
GTGACGCTGACGGTACAG---GCCAGACAA---TTATTG---TCTGGTATAGTGCAACAGCAGAAC---  
AATTTG---CTGAAG---GCTATTGATGCGCAACAGCATCTGTTGCAGCTCACAGTCTGGGGCATC  
>JF680924  
TTCTACTGCAATACAACATTACTGTTCAATAGTGATTGGTATCCTAATGATACTAGCACAGGTACTCCAGGGT  
CA-----  
-----  
-----  
GATGGGAATGACTCACTCATACTCCCATGCAGAATAAGACAAATTGTAAACATGTGGCAGGAAGTAGGAAAAG  
CAATGTATGCTCCTCCCATCAAAGGACAAATTAGGTGTCAATCAAT---  
ATTACAGGGATACTACTAACAAGAGATGGTGGGATTGACAACAAC-----  
-----  
-----  
AGGACTAATGAGACCTTTAGACCTGGAGGAGGAGATATGAGGGACAATTGGAGAAGTGAATTATATAAAATATA  
AAGTAGTAAAACCTTGAACCATTA---GGATTAGCACCCACCAAGGCAAAGAGAAGAGTGGTG-----  
-----CAGAGAGAAAAAAGAGCA---GTGGGA---CTAGGAGCT-----  
---ATGTTCCCTTGGGTTCTTGGGAGCA---GCAGGAAGCACTATG---GGCGCAGCGTCA---  
ATGACGCTGACGGTACAG---GCCAGACAA---TTATTG---TCTGGTATAGTGCAACAGCAGAAC---  
AATCTG---CTGAAG---GCTATTGAGGCGCAACAGCATATGTTGCAACTCACAGTCTGGGGCATC  
>JF680933  
TTCTATTGCAATACAACACAACCTGTTTAATACTACTTGGGAATATTACTAATAATATTAATGTTACTAGGAATG  
AT-----  
-----  
-----  
AGTGACAACAGCATTATCACACTCCCATGCAGAATAAAACAAATTATAAACATGTGGCAGGAAGTAGGAAAAG  
CAATGTACGCCCTCCCATCAGAGGACAGATTAGATGTTTCATCAAAA---  
ATTACAGGGCTACTATTAAACAAGAGATGGTGGTAATACAAGCATTGCG-----  
-----  
-----

AACGGGTCTGAGATCTTCAGACCTGGAGGAGGAAATATGAAGGACAATTGGAGAAGTGAATTATACAAATATA  
AAGTAGTAAAAGTTCAACCATTA---GGAATAGCACCCACCAAGGCCAAAAGAAGAGTGGTC-----  
-----CAGAGAGAAAAAAGAGCA---ATAACA---CTAGGAGCT-----  
---GTTTTCCTTGGGTTCTTGGGAGCA---GCAGGAAGCACTATG---GGCGCAGCGTCA---  
ATAACGCTGACGGTACAG---GCCAGACAA---TTATTG---TCTGGTATAGTGCAGCAGCAGAGC---  
AACTTG---CTGAGG---GCTATTGAGGCGCAACAACATATGTTGCAACTCACAGTCTGGGGCATC  
>HQ595797  
TTCTACTGTAATTCAACACAACCTGTTTAGTAGTACTTGGATGGCTAATGGTACTTCAAATGGTACCGTA----  
-----  
-----  
GGGAATGACACTATCATACTCCCATGTAAAATAAAACAATTTGTAAACATGTGGCAGCGAATAGGACAAGCAG  
TGTATGCCCCCTCCCATTAGAGGATACATTAATTGTTTCATCAAAT---  
ATTACAGGACTGCTATTAACAATAGATGGTGACAGGAATGACACC-----  
-----  
-----  
CAGAGTGAGACCTTCAGACCTGGAGGAGGAGATATGAGGGACAATTGGAGAAGTGAATTATATAAATATAAAG  
TAGTAAAAATTGAACCATTA---GGAATAGCACCCACTAAGGCCAAAGAGAAGAGTGGTG-----  
-----CAGAGAGAAAAAAGAGCA---GTAACG---CTGGGAGCT-----  
ATGTTTCCTTGGATTCTTGGGAGCA---GCAGGAAGCACTATG---GGCGCAGCGTCA---  
ATGACGCTGACGGTACAG---GCCAGACTA---TTACTG---TCTGGTATAGTGC AACAGCAGAGC---  
AATCTG---CTGAGG---GCTATTCAGGCGCAACAGCATCTGTTGCAACTTACAGTCTGGGGCATC  
>AJ535611  
TTCTACTGTAATACAACACAGCTGTTTAATAGTACTTGGAAATATTACACAGCTGTTGAATAGTACTGAGTCAA  
AT-----  
-----  
AACACTGGCAATATCACACTCCCATGCAGAATAAGACAAATTGTAAACAGGTGGCAGGAAGTAGGAAAAGCAA  
TGTATGCCCCCTCCCATCAGCGGACAAATTAGTTGTTTCATCAAAT---  
ATTACAGGGTTGCTATTAACAAGAGATGGAGGTAACAGTAGCTAC-----  
-----  
-----  
AATGAGACCGAGACCTTCAGACCAGGAGGAGGAAATATGAGGGACAATTGGAGAAGTGAATTATATAAATATA  
AAGTAGTAAGAATTGAACCAATA---GGAGTAGCACCCACCAGGGCAAAGAGAAGAGTGGTA-----  
-----CAGAGAGAAAAAAGAGCA---ATAACG---CTGGGAGCT-----  
---GTGCTCCTTGGGTTCTTGGGAGCA---GCAGGAAGCACTATG---GGCGCAGCGTCA---  
ATAACGCTGACGGTACAG---GCCAGACAG---TTATTG---TCTGGTATAGTGCAGCAGCAGAAC---  
AATCTG---CTGAGG---GCTATTGAGGCGCAACAGCACCTGTTGCAACTCACAGTCTGGGGCATC  
>AJ286339  
TTCTACTGTAGTACAACAGAACTGTTTAATGACACTTGGGATAAGACTAGGAATAATACTGGAGAGGCA----  
-----  
-----  
GATAACAGCACAATCACACTCCCCTGCAGAATAAAACAAATTATAAACAAGTGGCAAGAAGTAGGAAAAGCAA  
TGTATGCCCCCTCCCATCAGAGGACAAATTAAGTGTACATCAAAT---  
ATTACAGGGCTAGTCTTAACAAGAGATGGTGGAATGAGACTCAT-----  
-----  
-----  
AATGAGACTGAGATCTTCAGACCTGGAGGAGGAGATATGAGGGACAATTGGAGAAGTGAATTATACAAATATA  
AAGTAGTAAAAATTGAGCCATTA---GGAGTAGCACCCACCAAGGCCAAGGAGAAGAGTGGTG-----  
-----CAGAGAGAAAAAAGAGCA---GTGGGAACAATAGGAGCT-----  
---ATGTTTCCTTGGGTTCTTGGGAGCA---GCAGGAAGCACTATG---GGCGCAGCGCCA---  
ATGACGCTGACGGTACAG---GCCAGACAA---TTATTG---TCTGGTATAGTGCAGCAGCAGAAC---  
AATCTG---CTGAAG---GCTATTGAGGCGCAACAGCATCTGTTGCAACTCACAGTCTGGGGCATC  
>DQ207942  
TTCTATTGTAATACAACACAGCTGTTCAATAATACTTGGCTGAATAATGATACTGGGAATAGCACTAAG----  
-----  
-----  
AATAATGCTACAATCACACTCCCGTGCAGAATAAAACAAATTATAAACAGATGGCAGGAAGTAGGAAAAGCAA  
TGTATGCCCCCTCCCATCAGAGGACTAATTAGATGTTTCTTCAAAT---  
ATTACAGGGCTACTATTAGTAAGAGATGGTGGAATAGTAGTGCT-----  
-----  
-----

GATCAGGAGATCTTCAGACCTGGGGGAGGAAATATAAAGGACAATTGGAGAAGTGAACCTATATAAATATAAAG  
 TAGTAAACCTTGAGCCATTA---GGAGTAGCACCCACCAAGGCAAAGAGAAGAGTGGTG-----  
 -----CAGAGAGAAAAAAGAGCA--GTGGGAGTGTCTTGGAGCC-----  
 ATGTTCCCTTGGGTTCTTGGGAGCA---GCAGGAAGCACTATG---GGCGCAGCGTCA---  
 ATAACGCTGACGGTACAG---GCCAGACAA---TTATTG---TCTGGTATAGTGCAACAGCAGAGC---  
 AATTTG---CTGAGA---GCTATTGAGGCGCAACAGCATCTGTTGCAACTCACAGTCTGGGGCATT  
 >MH078546  
 TTCTACTGTGATTCAACACAACCTGTTCAATAGTACTTGGTGGACTAATGGTACTGAGAACGGTACTAGAGGG-  
 -----  
 -----  
 ACAATTGGCACCATCACACTCCAATGCAGAATAAAACAAATTATAAACATGTGGCAGAAAATAGGAAAAGCAA  
 TGTATGCCCCCTCCCATCAAAGGACAAATTTATTGTTTCATCAAAT---  
 ATTACAGGGATAATATTAACAAGAGATGGTGGTAGGGACAATAATACT-----  
 -----  
 -----  
 AATGGCACTGAGACCTTCAGACCTGGAGGAGGAAATATGAAAGACAATTGGAGAAAATGAATTATATAAATATA  
 AAGTAGTAAACCTTAAGCCATTA---GGAATAGCACCCACCAAGGCACGGAGAAGAGTGGTG-----  
 -----CAAAGAGAAAAAAGAGCA--GTGGGA---ATAGGAGCT-----  
 ---CTGTTCCCTTGGGTTCTTGGGAGCA---GCAGGAAGCACTATG---GGCGCAGCGTCA---  
 GTGACGTTGACGGTACAG---GCCAGACAA---TTGTTG---TCTGGTATAGTGCAACAGCAACAC---  
 AACTTG---CTGAAT---GCTATTGAGGCGCAACAACACCTGTTGCAACTCACAGTCTGGGGCATC  
 >EU839600  
 TTCTACTGTAATACATCAAAGCTATTTAACAATACTTGAATACTACTAATACTAAGAAT-----  
 -----  
 -----  
 TGGACTGGTTTTATCATACTCCCATGCAGAATAAAACAAATTATAAATATGTGGCAAAAAGTAGGCAAAGCAA  
 TGTATGCCCCCTCCCATCAGGGGACAAATCAAATGTATATCAGCT---  
 ATTACAGGGATGCTATTAACAAGAGATGGTGGGAACAACAACGAGAATAAGACT-----  
 -----  
 ----  
 GTAGGGAATAGGACCGAGATCTTCAGACCTACAGGAGGAAATATGAAAGATAATTGGAGAAGTGAATTATACA  
 GCTATAAAGTAGTAAAAATTGAACCATTA--GGATTAGCACCCACCAGGGCGAAAAGAAGAGTGGTG-----  
 -----CAGAGAGAAAAAAGAGCA---  
 GTGGGAGCACTGGGAGCT-----ATGTTCCCTTGGGTTCTTGGGAGCA--GCAGGAAGCACTATG---  
 GGCGCAGCGTCA--TTGACGCTGACGGTACAG---GCCAGACAA---TTACTG---  
 TCTGGTATAGTGCAACAGCAAAAT---AATTTG---CTAAGG---  
 GCTATTGAGGCGCAACAGCATCTGTTGCAACTCACAGTCTGGGGCATC  
 >MK303349  
 TTCTACTGTGATACAACAGAACTGTTTAATAGTACTTGAATAATAGTGTGGAGGGTTAAATAACAGT---  
 -----  
 -----  
 AACAGTAATACTATCACACTCCCATGTAGAATAAAACAAATGGTAAACATGTGGCAGAGAGTAGGAAGAGCAA  
 TGTATGCCCCCTCCCATCAAAGGACTAATTAGCTGTTTCATCAGAT---  
 ATTACAGGGCTGCTATTAACAAGAGATGGTGGTAACTATAGTGATAACAGT-----  
 -----  
 -----  
 AATAACACTGAGACCTTCAGACCAGGAGGAGGAGATATGAAAGACAATTGGAGAAGTGAATTATATAAATATA  
 AAGTAGTAGAAATTAAACCACTA---GGAGTAGCGCCACCAAGGCAAAGAAGAGTGGTG-----  
 -----CAAAGAGAAAAAAGAGCA--GTGGGA---ATAGGAGCC-----  
 ---TTGTTCCCTTGGGTTCTTGGGAGCA---GCAGGAAGCACTATG---GGCGCAGCGTCA---  
 ATAACGCTGACGGCACAG---GCCAGACAA---TTATTG---TCTGGTATAGTGCAACAGCAGAAC---  
 AATCTG---CTGAGG---GCTATTGAGGCGCAACAGCAGCTATTGCAACTCACAGTCTGGGGCATC  
 >EF694037  
 TTCTACTGTATTACAACACAACCTGTTTAATAGTACTTGGTGAATGATACTGAAAGGATAAATAACATTGAAG  
 AA-----  
 -----  
 AACACAGAAAATATCACACTCCCATGCAGAATAAGGCAGATTGTAAACCTGTGGCAGACAGTAGGAAAAGCAA  
 TGTATGCCCCCTCCCATCAGAGGACAAATTAGATGTTTCATCAAAT---  
 ATTACGGGGCTGCTATTAACAAGAGATGGTGGTAATCCCAATACC-----  
 -----  
 -----

-----  
 ACGGAAGAGAGCTTCAGACCTGGAGGAGGAGATATGAGGGACTATTGGAGAAGTGAATTATATAAATATAAAG  
 TAGTAAAAATTGAACCATTA---GGAGTAGCACCCACCAAGGCAAAGAGAAGAGTGGTG-----  
 -----CAAAGAGAAAAAAGAGCA---GTAGGA---ATAGGAGCT-----  
 GTGTTCCCTTGGGTTCTTGGGAGTA---GCAGGAAGCACTATG---GGCGCAGCGTCA---  
 ATGACGCTGACGGTACAG---GCCAGACTA---TTATTG---TCTGGTATAGTGCAACAGCAGAAT---  
 AACCTG---CTGAGG---GCTATTGAGGCGCAACAGCATCTGTTGCAACTCACAGCCTGGGGCATC  
 >JF680930  
 TTCTATTGTAATACAACGAACTGTTTAGCAGTAGTTGGAATGAACTACAAATAGCACTGAAAATGGCACT-  
 -----  
 -----  
 GAAAAATGACACAATCACACTTCAATGCAGAATAAAACAAATTATAAACATGTGGCAGGAAGTAGGAAAAGCAA  
 TGTATGCCCCCTCCCATCAAAGGTCCAATTAGATGCTCATCAAAT---  
 ATTACAGGGCTAATATTAACAAGAGATGGTGGTCATAACAATAACACG-----  
 -----  
 -----  
 AACGAGACTGAGATATTCAGACCTGGAGGAGGAGATATGAGGGACAATTGGAGAAGTGAATTATACAAATATA  
 AAGTAGTAAGAATTGAACCCCTTG---GGAGTAGCACCCACCAAGGCAAAGAGAAGAGTGGTG-----  
 -----CAGAGAGATAAAAAGAGCA---GTGGGAGTATTCGGAGCT-----  
 ---ATGTTCCCTTGGGTTCTTGGGAGCA---GCAGGAAGCACTATG---GGCGCAGCGTCA---  
 GTGGCGTTGACGGTACAG---GCCAGACAA---TTATTG---TCTGGTATAGTGCAACAGCAGAAT---  
 AATCTG---CTGAGA---GCTATTGAGGCGCAACAACATCTGTTGCAACTCACAGTCTGGGGCATC  
 >AB287372  
 TTCTACTGTAATTCAACACCACTGTTTAGTAGTAATTGGACTAAGAATACTACTACCGGGTCTTGGATTGGCA  
 GATATGGA-----  
 -----TCAAAT-----  
 GAGACTGATGCAAATATTACACTCATATGCAGAATAAAACAAATTATAAACATGTGGCAGGGGGTAGGAAAAG  
 CAATGTATGCCCCCTCCCATCAGTGGACCAATCAGATGTTTCATCAAAT---  
 ATTACAGGGCTGCTATTAACAAGAGATGGTGGTGAGGATAAGAAC-----  
 -----  
 -----  
 AGCACTAAAGAGACCTTCAGACCCCTAGGAGGAAATATGAAAGACAATTGGAGAAGTGAATTATATCAATATA  
 AAGTAGTAGGAATTGAACCATTA---GGAGTAGCACCCACCAAGGCAAAGAGAAGAGTGGTG-----  
 -----CAGAGAGAAAAAAGAGCA---GTGGGAACGCTGGGAGCT-----  
 ---ATGTTCCCTTGGGTTCTTGGGAGCA---GCAGGAAGCACTATG---GGCGCAGCGTCA---  
 ATGGCGCTGACGGTACAG---GCCAGACAA---TTATTG---TCTGGTATAGTGCAACAGCAGAAC---  
 AATTTG---CTGAGG---GCTATTGAGGCGCAACAACATTTGTTGCAACTCACAGTCTGGGGCATC  
 >AB480693  
 TTCTACTGCAATACATCACAACCTGTTTAATAGTATTTGGATTAATGGTACTGGGAATAATACTTGAATAGTA  
 CTAAGGGT-----  
 -----CATGAA-----  
 AGGTCAGATAACATTACCACACTCCAATGTAGAATAAAACAAATTATAAACATGTGGCAGACAGTAGGAAAAG  
 CAATGTATGCCCCCTCCCATGAAGGACGAATTAGATGTTTCATCAAAA---  
 ATTACAGGGCTCTTATTAGTGAGAGATGGTGGTACGAATAGGACG-----  
 -----  
 -----  
 GCCAACAACGAAACCTTCAGACCTGGAGGAGGAAATATGAGGGACAATTGGAGAAGTGAATTATATAAATATA  
 AAGTAGTAAAAATTGAACCAATA---GGAGTAGCACCCACCGAGGCAAAGAGAAGAGTGGTG-----  
 -----CAGAGAGAGAAAAAGAGCA---GTAGGA---ATAGGAGCT-----  
 ---GTGTTCCCTTGGGTTCTTGGGAGCA---GCAGGAAGCACTATG---GGCGCAGCGTCA---  
 GTGACGCTGACGGTACAG---GCCAGACAA---TTATTG---TCTGGTATAGTGCAACAGCAAAAC---  
 AATTTG---CTGAGA---GCCATTGAGGCGCAACAGCATATGTTGCAACTCACAGTCTGGGGCATC  
 >AB588264  
 TTCTACTGCAATACATCACAACCTGTTTAATAGTACTTGGGAATAGTACTGGGAATAGTAGTACTGAGAATAGTA  
 TG-----  
 -----  
 TCAAATGACACTATCACACTCCCATGTAGGATAAAACAAATTATAAATATGTGGCAGGAAGTAGGAAAAGCAA  
 TGTATGCCCCCTCCCATCGCAGGACTAATTAGATGTTTCATCAAAT---  
 ATTACAGGGCTATTATTAGTGAGAGATGGTGGTGGTAATCAGACT-----  
 -----

-----  
AACGGGACAGAAATCTTCAGACCTGGGGGAGGAAATATGAAGGACAATTGGAGAAGTGAATTATATAAAATATA  
AAGTAGTAAAAATTGAACCAGTA---GGAATAGCACCCGACAGGGCAAAGAGAAGAGTGGTG-----  
-----CAGAGAGAAAAAAGGGCA---GTGGGA---ATAGGAGCT-----  
---GTGTTCCCTTGGGTTCTTGGGAGCA---GCAGGAAGCACTATG---GGCGCAGCGTCA---  
ATAACGCTGACGGCACAG---GCCAGACAA---TTATTG---TCTGGTATAGTGCAACAGCAGAAC---  
AATCTG---CTGAGG---GCCATTGAGGCGCAACAGCATATGTTGCAACTCACAGTCTGGGGCATC  
>AB731669  
TTCTACTGTAATACATCAGCACTGTTTAATTGGAGTATTACTGGGTCAAATATTACAAAAGAC-----  
-----  
-----  
ATTAATAGGTCAAATACTATCCCATGCAGAATAAAACAAATTATCAACATGTGGCAGAAAGTAGGAAAAGCAA  
TATATGCCCCCTCCCATCAGCGGGCAAATTAATTGTTTCATCAAAT---  
ATTACAGGGTTGCTATTAAACAAGAGATGGTGGTAAAAAGTAATCAGACT-----  
-----  
-----  
AATAACACTGAGGTTTTTCAGACCTACAGGAGGAAATATGAGAGATAATTGGAGGAGTGAATTATATAAAATATA  
AAGTAGTAAGGATTGAACCATTA---GGAGTAGCACCCACCAAGGCAAGGAGAAGAGTGGTG-----  
-----CAAAGAGAAAAAAGAGCA---GTGGGAACAATAGGAGCT-----  
---ATGTTCCCTTGGGTTCTTGGGAGCA---GCAGGAAGCACTATG---GGCGCAGCGTCA---  
ATAACGCTGACGGTACAA---GCCAGACTA---TTATTG---TCTGGTATAGTGCAACAGCAAAAC---  
AATTTG---CTGAGA---GCTATTGAGGCGCAACAACATCTGTTGCAACTCACAGTCTGGGGCATC  
>AB565496  
TTCTACTGCAATACAAGACAACTGTTTAATAGTACTTGGGATAATAGTACTTGGAAATGATAGTACTAGGAATA  
GT-----  
-----  
ATTCATGACGAGAATATCACACTCCCATGTAGAATAAAACAAATTATAAACATGTGGCAAACAGTGGGAAAAG  
CAATGTATGCCCCCTCCCATCAAAGGACAAATTAGATGTTTCATCAAAT---  
ATTACAGGGCTATTATTAGAGAGAGATGGTGGTAACAATACGGAC-----  
-----  
-----  
ACCGAAACCTTCAGACCTGGAGGAGGAAATATGAAGGACAATTGGAGAAGTGAATTATATAAAATATAAAGTAG  
TAAAAATTGAACCAGTA---GGAATAGCACCCACCAGGGCAAAGAGAAGAGTGGTG-----  
-----CAGAGAGAAAGAAGAGCA---GTGGGA---ATAGGAGCT-----  
GTGTTCCCTTGGGTTCTTGGGAGCA---GCAGGAAGCACTATG---GGCGCAGCGTCA---  
ATAACGCTGACGGTACAG---GCCAGACAA---TTATTG---TCTGGTATAGTGCAACAGCAGAAC---  
AATTTG---CTGAGA---GCTATTGAGGCGCAACAACATATGTTGCAACTCACAGTCTGGGGCATC  
>AB565478  
TTCTACTGTAATACAACAAAGCTGTTTAATAGTACTTGGTATACTAATGGGAATAAGACTGAAGAATCAAAT-  
-----  
-----  
AACAAATGACACTATTACACTCCCATGCAGAATAAAACAAATTATAAACAGATGGCAGGAAGTAGGAAAAGCAA  
TGTATGCCCCCTCCCATCCAAGGACGAATTTACTGCTCATCAAAT---  
ATTACAGGACTGTTATTAATAAGAGATGGTGGTAACAGTACTGAT-----  
-----  
-----  
AACGAGTCTGAGATCTTCAGACCTGGAGGAGGAGATATGAGGGACAATTGGAGAAGTGAATTATATAAAATATA  
AAGTAGTACAAATTGAGCCATTA---GGAGTAGCACCCACCAAGGCAAAGAGAAGGGTGGTG-----  
-----CAGAGAGAAAAAAGAGCA---GTGGGA---ATAGGAGCT-----  
---ATGTTCCCTTGGGTTCTTGGGAGCA---GCAGGAAGCACTATG---GGCGCAGCGTCA---  
CTAACGCTGACGGTACAG---GCCAGACGA---TTATTG---TCTGGTATAGTGCAACAGCAGAAC---  
AATCTG---CTGAGA---GCTATTGAGGCGCAACAGCATATGTTGCAACTCACAGTCTGGGGCATC  
>JQ316131  
TTCTACTGTAATACATCAAAGCTGTTTAATAGTACTTGGGCTGTGAATATGACTAACGGGTCAAATATAACTA  
AA-----  
-----  
GAAGGAAATACCACAACAATCCCATGCAGAATAAAACATATTATAAACAGGTGGCAAGAAGTGGGAAAAGCAA  
TGTATGCCCCCTCCCATCGAGGGACAAATTAGATGTACATCAAAT---  
ATTACGGGGCTACTATTAAACAAGAGATGGGGGGACTCAGAAAAAT-----  
-----

GGGAGTAACAATGGGACTCACAACAACACTGAGATCTTCAGACCTGGGGGAGGAAATATGAAGGACAATTGGA  
GAAGTGAATTATATAAATATAAAGTAGTAAAAATTGAGCCATTA---  
GGAATAGCACCCACCAAGGCAAGGAGAAGAGTGGTG-----  
--CAGAGAGAAAAAAGAGCA---GTGGGAACAATAGGAGCT-----  
ATGTTTCCTTGGGTTCTTGGGAACA---GCAGGAAGCACTATG---GGCGCAGCGTCA---  
CTGACGCTGACGGTACAG---GCCAGACTA---TTATTG---TCTGGTATAGTGCAACAGCAAAAT---  
AATTTG---CTGAGA---GCTATTGAGGCGCAACAGCATCTGTTGCAACTCACAGTCTGGGGCATC  
>JQ316133  
TTCTACTGTAATACAACAAAACCTGTTTGATAGTACTTGGAATGGTACTAAAGAGTGGAATGATACTAAAGAG-  
-----  
-----  
TCAGATAAAAACATTACACTCCAATGCAGAATAAAAACAAATTATAAACAGGTGGCAGGAAGTAGGACAAGCAA  
TGTATGCCCCCTCCCATCAGCGGACTAATTAGATGTTTCGTCAAAT---  
ATTACAGGGCTAATATTAACAAGAGACGGGGGGCTAACGAGACT-----  
-----  
-----  
CACACCAACACTGAAACCTTCAGACCTGCAGGAGGAGATATGAAGGACAATTGGAGAAGTGAATTATATAAAT  
ATAAAGTAGTAAGAATTGAGCCATTA---GGGATAGCACCCACCAAGGCAAGGAGAAGAGTGGTG-----  
-----CAGAGAGAAAAAAGAGCA---GTGGGAATATTAGGAGCT---  
-----ATGTTTCCTTGGGTTCTTGGGAGCA---GCAGGAAGCACTATG---GGCGCAGCGTCA---  
ATGACGCTGACGGTACAG---GCCAGACAA---TTATTG---TCTGGTATAGTGCAACAGCAGAAT---  
AATTTG---CTGAGA---GCTATTGATGCGCAACAACATCTGTTGCGACTCACAGTCTGGGGCATT  
>DQ295192  
TTCTACTGTGATACAACACAACCTATTTAATAGCACTTGACATGGAATGGTACTTGGATTAACGGGTCAACTA  
AA-----  
-----  
GCTGAGAATGACACAATTGTCTCCCATGCAGAATAAAAACAAATTATAAACAGATGGCAGGAAGTAGGAAAAG  
CAATGTATGCCCCCTCCCATCAGCGGACACATTAATTGCTCATCAAAG---  
ATTACAGGACTGCTATTAACAAGAGATGGGGGGATTAAAAACAGCACGAAC-----  
-----  
-----  
GGGACTCAGACTGAGATCTTCAGACCTGGGGGAGGAGATATGAGGGACAATTGGAGAAGTGAATTATATAAAT  
ATAAAGTAGTAAAAATTGAGCCATTA---GGGATAGCACCCACCAAGGCAAGGAGAAGAGTGGTG-----  
-----CAGAGAGAAAAAAGAGCA---GTGGGAACAATAGGAGCT---  
-----ATGTTTCCTTGGGTTCTTGGGAGCA---GCAGGAAGCACTATG---GGCGCAGCGTCA---  
CTGACGCTGACGGTACAG---GCCAGACTA---CTATTG---TCTGGTATAGTGCAACAGCAGAAT---  
AATTTG---CTGAGA---GCTATTGAGGCGCAACAGCATCTGTTGCAACTCACAGTCTGGGGCATC  
>KT878039  
TTCTACTGTAATACAACAAAACCTGTTTAATAGTACTTGGTATAGTAATGGTACTAGGAAAGATCAAAATGAA-  
-----  
-----  
GGAGATGACACAATTACACTCCAGTGCAGGATAAAAACAAATTATAAACAGGTGGCAAGAAGTAGGAAGGGCAA  
TGTACGCCCCCTCCCATCAGAGGAATAATTAAATGTTTCATCAAAC---  
ATTACAGGGCTGCTATTAACAAGAGATGGGGGGAACGGGACTAAT-----  
-----  
-----  
GGGACTGAGACCTTCAGACCTGGGGGAGGAAATATGAAAGACAATTGGAGAAGCGAATTATATAAATATAAAG  
TAGTAAAAATTGAGCCATTA---GGGATAGCACCCACCAAGGCAAGGAGAAGAGTGGTG-----  
-----CAGAGAGAAAAAAGAGCA---GTGGGGACGCTAGGAGCT-----  
GTGTTTCCTTGGGTTCTTGGGAGCA---GCAGGAAGCACTATG---GGCGCAGCGTCA---  
GTGGCGCTGACGGGACAG---GCCAGACAA---TTATTG---TCTGGTATAGTGCAACAGCAGAAT---  
AATTTG---CTGAGA---GCTATTGAGGCGCAACAGCATCTGTTTCAACTCACAGTCTGGGGCATC  
>KT878021  
TTCTACTGTAATACAACACAGTTGTTCAATAGTACTTGGTTTCATAATGGTACTTGGAGTGGTGCTAAT----  
-----  
-----  
GGGGATGAGACTATGACACTCCCATGCAGAATAAAAACAAATTATAAACAGATGGCAAGAAGTAGGAAAAGCAA  
TGTATGCCCCCTCCCATCGCAGGATCAATTAATTGCTCATCAAAT---  
ATTACAGGACTGTTATTAACAAGAGATGGTGGTATTACCAGCAACAAG-----  
-----

ACTAAGAACAGCACCGAGACTGAGACCTTTAGACCGGGGGGAGGAGATATGAGGGACAATTGGAGAAGTGAAT  
 TATACAAATATAAAGTAGTAAAAATTGAACCACTA---  
 GGAGTAGCACCACCAAGGCAAAGAGAAGAGTGGTG-----  
 --CGGAGAGAAAAAAGAGCA---GTAACA---CTGGGAGCT-----  
 GTGTTTCCTTGGGTTCTTGGGAGCA---GCAGGAAGCACTATG---GGCGCAGCGTCA---  
 GTGACGCTGACGGTACAG---GCCAGACTA---TTATTG---TCTGGTATAGTGACAGCAGCAGAAC---  
 AATCTG---CTGAGG---GCTATTGAGGCGCAACAGCATCTGTTGCAGCTCACAGTCTGGGGCATT  
 >KT878029  
 TTCTACTGTAATACAACAAGACTGTTTAATAGTACTTGGCATACTAATACTACAGGGTTAAATGAAACTGAAG  
 GA-----  
 -----  
 AATAGCACAACTATCACACTCCCATGCAGAATAAAACAAATTATAAACAGATGGCAGGAAGTAGGAACAGCAA  
 TGTATGCCCCCTCCCATCAGCGGACAAATTAGATGTTTCATCAAAT---  
 ATTACAGGGCTGCTATTAACAAGAGATGGGGGGAATAACACTCAT-----  
 -----  
 -----  
 GGGAAATGGGACTGAGATCTTCAGACCTCTGGGAGGAGATATGAAGGACAATTGGAGAAGTGAATTATATAAAT  
 ATAAAGTAGTGAGAATTGAGCCATTA---GGGATAGCACCCACCAGGGCAAGGAGAAGAGTGGTG-----  
 -----CAGAGAGAAAAAAGAGCA---GTGGGAACGATAGGAGCT---  
 -----ATGTTTCCTTGGGTTCTTGGGAGCA---GCAGGAAGCACTATG---GGCGCAGCGTCA---  
 TTGACGCTGACGGTACAG---GCCAGACTA---TTATTG---TCTGGTATAGTGCAACAGCAGAAAT---  
 AATTTG---CTGAGA---GCTATTGAGGCGCAACAGCATCTGTTGCAACTCACAGTCTGGGGCATC  
 >KF561441  
 TTCTACTGTAATACAACACCACTGTTTAATAGTATTTGGTATAGTAATAATACTGAAAAGTCATATAATACTG  
 CA-----  
 -----  
 GAAAATGACACAATTACCCTCCAATGCAGAATAAGACAAATTATAAAAAGGTGGCAGGAGGTAGGAAAAGCAA  
 GGTATGCCCCCTCTCATCACCTGCCTAATTAGATGCTATTCAAAT---  
 ATTACAGGGCTGTTATTGGCAGGTGATGGAGGTGAGGCAGGGAAGGATAAC-----  
 -----  
 -----  
 GGGAAATAAGAATGAGACCTTCAGGCCTGGGGGAGGAGATATGAGGGACAATTGGAGAAGTGAATTGTATAAAT  
 ATAAAGTAGTAGAAATTGAACCATTA---AGGATAGCACCCACCAGGGCAAGGAGAATAGTGGTG-----  
 -----CAGAGAGAAAAAAGAGCA---GTGGGAACATTAGGAGCC---  
 -----ATGTTTCCTTGGGTTCTTGGGAGCA---GCAGGAAGCACTATG---GGCGCAGCGTCA---  
 CTGACGCTGACGGTACAG---GCCAAGCAA---GTATTG---TCTGGTATAGTGCGACAGCAGAAAT---  
 AATTTG---CTGAGA---GCTATTGAGGCGCAACAGCGTCTGTTGCAACTCACAGTCTGGGGCATC  
 >MN043577  
 TTCTACTGTAATACAACACAACCTGTTTAATAGTACTTGGTATAGTCCTTGGAATAGTACTAACGGGTCAAATA  
 TAACT-----  
 -----  
 GAAAGAAATATCACAACTCCCATGCAGAATAAAACAAATTATAAACAGATGGCAGGAAGTAGGAAAAGCAA  
 TGTATGCCCCCTCCCATCAGTGGACAAATTAGATGTTTCATCAAAT---  
 ATTACAGGGCTGCTATTAACAAGAGATGGGGGGACTCAGAACAAT-----  
 -----  
 -----  
 GGGACTGAGATCTTCAGACCTGGGGGAGGAAATATGAAGGACAATTGGAGAAGTGAATTATATAAATATAAAG  
 TAGTAAAAATTGAGCCATTA---GGGATAGCACCCACCGGGGCAAAGAGAAGAGTGGTG-----  
 -----CAGAGAGAAAAA---ACA---GTGGGAACGATAGGAGCT-----  
 ATGTTTCCTTGGGTTCTTGGGAGCA---GCAGGAAGCACTATG---GGCGTAGCGTCA---  
 ATGACGCTGACGGTACAG---GCCAGACTA---TTATTG---TCTGGTATAGTGCAACAGCAGAAAT---  
 AATTTG---CTGAGA---GCTATTGAGGCGCAACAGCATCTGTTGCAACTCACAGTCTGGGGCATC  
 >MN043581  
 TTCTACTGTAATACAACACAACCTGTTTAATAGTACTTGGATGATTACTAATAATTGCAATAGTACTGAAGGAT  
 ACAATAACACT-----  
 -----  
 GCACGAAATAGCACAAATTACCCTCCCATGCAGAATAAAACAAATTATAAACAGGTGGCAGGAAGTAGGAAAAG  
 CAATGTATGCCCCCTCCCATCAGAGGACAAATTAGATGTTTCATCAAAT---  
 ATTACAGGGCTACTATCAACAAGAGATGGGGGGACTGGGAACAAC-----  
 -----

-----  
GAGACTGAGATCTTCAGACCTGGGGGAAGAAATATGAGGGACAATTGGAGAAGTGAATTATATATATATAAAG  
TAGTAACAATTGAGCCATTA---GGGATAGCACCCACCGGGGCAAAGAGAAGAATGGTG-----  
-----CAAAGAGAAAAAAGAGCA---GTGGGAACGATGGGAGCT-----  
ATGTTTCCTTGGGTTCTTGGGAGCA---GCAGGAAGCACTATG---GGCGCGACATCA---  
ATGACGCTGACGGTACAG---GCCAGACTA---TTATTG---TCTGGTATACTGCATCATCAGAAT---  
AATCTG---CTGAAA---GCTATTGAGGCGCAACAGCATCTGTTGCAACTCACAGTCTGGGGCATC  
>HQ386180  
TTCTATTGTAACACAGCACAACTGTTTAATAGTACTTGGAAATGCAACAGAAATGCTTAATAGTACAGAATCAA  
ATGAC-----  
-----ACA---  
AATAGCAACATCAACATCACACTCCAATGCAGAATAAGACAAATTATAAACATGTGGCAGGAAGTAGGAAAAG  
CAATGTATGCCCCCTCCCATCGAAGGACAAATTAGATGTTTCATCAAAT---  
ATTACAGGGATACTATTAACAAGAGATGGTGGTCATAGCACGAACGGGACT-----  
-----  
-----  
GAGAACGGGAACGAGACCTTCAGACCTGGAGGAGGAAAACATGAGGGACAATTGGAGAAGTGAATTATATAAAT  
ATAAAGTAGTAAACTTGAACCATTA---GGAATAGCACCCACCAAGGCAAAGAGAAGAGTGGTG-----  
-----CAGAGAGAAAAAAGAGCG---GTGGGAATGCTAGGAGCT---  
-----ATGTTTCCTTGGGTTCTTGGGAGCA---GCAGGAAGCACTATG---GGCGCAGCGTCA---  
CTAACGCTGACGGTACAG---ACCAGACAT---TTATTG---GCTGATATAGTGCAACAGCAGAAC---  
AATTTG---CTGAGA---GCTATTGAGGCGCAGCAGCATCTGTTGCAACTCACAGTCTGGGGCATC  
>EU744081  
TTCTACTGTAATACAACACAACCTGTTTAATAGTACTTGGATGTTTAATGGTACTTGGGAGTCAAATAGCACTG  
AGGGA-----  
-----  
AATCCACAGAAAATATCACACTCCCATGCAGAATAAAACAAATTATAAACCTGTGGCAGGAAGTAGGAAAGG  
CAATGTATGCCCCCTCCTATCAGGGGACTAATTCAATGTGTATCAAAT---  
ATTACAGGGTTGCTATTAACAAGAGATGGTGGGAACAACACGACTGAG-----  
-----  
-----  
AATGGGACCGAGATTTTCAGACCTGGAGGAGGAGATATGAGGGACAATTGGAGAAGTGAATTATATAAATATA  
AAGTAGTAAAAATTGAACCATTA---GGGGTAGCACCCACCAGGGCAAAGAGAAGAGTGGTG-----  
-----CAGAGAGAAAAAAGAGCA---GTGGGAGTGATAGGAGCT-----  
---ATGTTTCCTTGGGTTCTTGGGAGCA---GCAGGAAGCACTATG---GGCGCAGCGTCA---  
ATGACGCTGACGGTACAG---GCCAGACAA---TTACTG---TCTGGTATAGTGCAACAGCAGAAC---  
AATCTG---CTGAGG---GCTATTGAGGCGCAACAGCATCTGTTGCAACTCACAGTCTGGGGCATC  
>JF320244  
TTCTACTGTAATACATCACAACCTGTTTAATGGAAGTTGGCAACCACCGCTTAATGAACTATATTTCAATACA  
ATGCTACA-----  
-----TGGGCA-----  
AAAAATGACACTAATATCACACTCCCATGCAGAATAAAACAATTTGTAAACATGTGGCAGGAAGTAGGAAAAG  
CAATGTATGCCCCCTCCCATCAGCGGACCAATCAAATGTGTATCAAAT---  
ATTACAGGGTTGCTAATAACAAGAGATGGGGGTTACAACAGTAGTAGC-----  
-----  
-----  
AATGAGACCAATGAGACCTTCAGACCTGCAGGAGGAGAAAATGAGGGACAATTGGAGAAGTGAATTATATAAAT  
ATAAAGTAGTACAAGTTGAACCATTA---GGATTAGCACCCACCAAGGCAAAGAGAAGAGTGGTG-----  
-----CAGAGAGAAAAAAGAGCA---GTGACG---CTGGGAGCT---  
-----ATGTTTCCTTGGGTTCTTGGGAGCA---GCAGGAAGCACTATG---GGCGCAGCGTCA---  
ATAACGCTGACGGTACAG---GCCAGACAG---TTATTG---TCTGGTATAGTGCAACAGCAGAAC---  
AATCTG---CTGAGG---GCTATTGAGGCGCAACATCATCTGTTGCAACTCACAGTCTGGGGCATA  
>JF320226  
TTCTACTGTAATACCACACCACTGTTTAATAGTACCTGGAATGCCACACAACCTGGTTAATATTACTGGGAATA  
TCACAGGG-----  
-----CTTAGT-----  
AATAGAACTGAAAATATTACACTCCCATGTAGAATAAAACAAATTATAAACATGTGGCAGGAAGTAGGAAAAG  
CAATGTATGCTCCTCCCATCGCAGGACGAATTAATGTTTATCAAAT---  
ATTACAGGTTTACTATTAGTAAGAGATGGTGGCAATAGCAATGAC-----  
-----

-----  
ACGGAGACCTTCAGACCTCAAGGAGGAAATATGAAGGACAATTGGAGAAGTGAATTATATAAAATATAAAGTAG  
TAAAAATTGAACCATTA---GGAGTAGCACCCACCAAGGCAAAGAGAAGAGTGGTG-----  
-----CAGAGAGAAAAAAGAGCA---GTGGGAGTACTGGGAGCT-----  
ATGTTCCCTTGGGTTCTTGGGAGCA---GCAGGAAGCACTATG---GGCGCAGCGTCA---  
ATAACGCTGACGGCACAG---GCCAGACAA---TTATTG---TCTGGTATAGTGCAACAGCAGAAC---  
AATCTG---CTGAGG---GCTATTGAGGCGCAACAGCACCTGTTGCAACTCACAGTCTGGGGCATC  
>JF320189  
TTCTACTGTAATTCATCAGAACTGTTTAATAGTACCTGGACCTGGAATGAGACTGAAGGGTCTATTACTGAAG  
GGTCA-----  
-----  
ATTACTAATGGGACAATCACACTCCCATGTAGAATAAGACAAATTATAAACATGTGGCAGAGAGTAGGAAAAG  
CAATGTATGCCCTCCCATCCAAGGACAAATTAGATGTTTCATCAAAT---  
ATTACGGGGCTGCTATTAACAAGAGATGGTGGTGAAGGTAACACCACC-----  
-----  
-----  
AATAACAACGAAACCTTCAGACCTGGAGGAGGTGATATGAGGGACAATTGGAGAAAATGAATTATATAAAATATA  
AAGTAGTACAAATTGAACCATTA---GGAATAGCACCCACCAAGGCAAAGGAGAAGAGTGGTG-----  
-----CAGAGAGAAAAACGAGCA---GTGGGA---CTAGGAGCT-----  
---GTGTTCCCTTGGGTTCTTGGGAGCA---GCAGGAAGCACTATG---GGCGCAGCGTCA---  
GTGACGCTGACGGTACAG---GCCAGACAA---TTATTG---TCTGGTATAGTGCAACAGCAGAAC---  
AATCTG---CTAAG---GCTATTGAGGCGCAACATCATCTGTTGCAACTCACAGTCTGGGGCATC  
>EF210727  
TTCTACTGTAACCTCTACACAGCTGTTTAATAGTACTTGGAACAGCAGCAATTGGAATTGGAATGATACTGAAA  
AG-----  
-----  
ACAAATAAAAGTATCACACTCCCATGCAGAATAAAACAAATTATAAACATGTGGCAGGAAGTAGGAAAAGCAA  
TGTATGCCCCCTCCCATCAGAGGACAAATTAGATGTTTCATCAAAT---  
ATTACAGGGCTGATGCTAACAAGGGATGGTAGTAATGAGAGTCAC-----  
-----  
-----  
AGTGAGATCTTCAGACCAGGAGGAGGAAATATGAGGGATAATTGGAGAAGTGAATTATATAAAATATAAAGTAG  
TAAAAATTGAACCATTA---GGAGTAGCACCCACCAAGGCAAAGAGAAGAGTGGTG-----  
-----CAGAGAGAAAAAAGAGCA---GTAGTGGGGATAGGAGCT-----  
GTGTTCCCTTGGGTTCTTGGGAGCA---GCAGGAAGCACTATG---GGCGCAGCGTCA---  
ATGATGCTGACGGTACAG---GCCAGACAA---TTATTG---TCTGGTATAGTGCAACAGCAGAAC---  
AATTTG---CTGAGG---GCTATTGAGGCGCAACAGCATATGTTGCAACTCACAGTCTGGGGCATC  
>EF210729  
TTTTATTGTAATACAACACGGCTGTTTAATAGTACTTGGAGAATAATACTTGGACTAAGAATCATATTGAGA  
AC-----  
-----  
GAGACTGAAACAATCACACTCCCATGCAAAATAAAACAAATTATAAACAGGTGGCAGGAAGTAGGACAAGCAA  
TGTATGCCCCCTCCCATCCCAGGATGGATTAACTGTTTCATCAAAT---  
ATTACAGGGCTACTATTAACAAGAGATGGTGGTGAAAACGGAACC-----  
-----  
-----  
ACCGAGACCGAGACCTTCAGACCTGGAGGAGGAGATATGAGGGACAATTGGAGAAGTGAATTATATAAAATATA  
AAGTAGTTGAAATTCAACCATTA---GGAGTAGCACCCACCACAGCAAAGAGAAGAGTGGTG-----  
-----CAGAGAGAAAAAAGGGCA---GTAACA---CTAGGAGCT-----  
---ATGTTCCCTTGGGTTCTTGGGAACA---GCAGGAAGCACTATG---GGCGCAGCGTCG---  
CTGACGCTGACGGTACAG---GCCAGACAA---TTATTG---ACTGGTATAGTGCAACAGCAGAAC---  
AATCTG---CTGAGG---GCTATTGAGGCGCAACAGCATATGTTGCAACTCACAGTCTGGGGCATT  
>EF210731  
TTCTACTGTAATCTATCAAAATTGTTTAATAGTACATGGAATGATACTACTTGGAACACGACTGATGAGTCA-  
-----  
-----  
AATGACACTTACATCCTGCTCCCATGTAGGATAAAACAAATTATAAACATGTGGCAGACAGTAGGAAAAGCAA  
TGTACGCCCCCTCCCATCAAAGGAAAAATTAGTTGTTTCATCAAAT---  
ATTACAGGGCTGCTATTAACAAGAGATGGAGGGAATGACAACAGGACT-----  
-----

-----  
CAGGGGGTCGAGATCTTCAGACCTGGAGGAGGAGATATGAGAGATAATTGGAGAAGTGAATTATATAAATATA  
AAGTAGTAAAAATTGAACCATTA---GGAATAGCACCCACCGAGGCCAAAAGAAGAGTGGTG-----  
-----CAGAGAGAAAAAAGAGCA---GTGGGA---ATAGGAGCT-----  
---GTGTTCCCTTGGGTTCTTGGGAGCA---GCAGGAAGCACTATG---GGCGCAGCGGCA---  
GTGACGCTGACGGTACAG---GCCAGACAA---TTATTG---TCTGGTATAGTGCAACAGCAGAAC---  
AATCTG---CTAAAG---GCCATTGAGGCGCAACAGCATCTGTTGCAACTCACAGTCTGGGGCATC  
>EF210735  
TTCTACTGTAACACATCACACCTATTTAATAGTACTTGGAATGATACTAGTAGTTGGGATAATAGC-----  
-----  
-----  
ACTGAAGGAAATATCACACTCCAATGTAGAATAAAAACAAATCATAAACAGGTGGCAGGAAGTAGGAAAAGCAA  
TGTATGCCCCCTCCCATTCAGAGACAAATTAGATGCTCATCAAAT---  
ATTACAGGGCTGCTATTAACAAGAGATGGTGGTCAGGGCAGTAAC-----  
-----  
-----  
GAGACCGAGGTCTTTAGACCTGGAGGAGGAAATATGAAGGACAATTGGAGAAGTGAACCTATATAAATATAAAG  
TAGTAAAAGTTGAACCATTA---GGAATAGCACCCACCAAGGCAAGGAGAAGAGTGGTG-----  
-----CAGAAAGAAAAAAGAGCA---ATAACA---CTAGGAGCT-----  
ATGTTCCCTTGGTTTCTTGGGAGCA---GCAGGAAGCACTATG---GGCGCAGCGTCG---  
ATAACGCTGACGGTACAG---GCCAGACAA---TTATTG---TCTGGTATAGTGCAAGCAGCAGAAAT---  
AATTTG---CTGAGG---GCTATTGAGGCGCAACAGCATATGTTGCAACTCACAGTCTGGGGCATC  
>MH327746  
TTCTACTGCAATACAACAAAACTGTTTAACAGTAGTTGGCCAAATAGTACTAGGAATAATACTGAAGAGTCA-  
-----  
-----  
AATAGCACTGTTATCACACTCCCATGTAGAATAAAAACAAATTATAAACATGTGGCAGGAAGTAGGAAAAGCAA  
TGTATGCCCCCTCCCATCAGGGGACGAATTAATTGTACATCAAAC---  
ATTACAGGGCTACTATTAACAAGAGATGGGGGCAATGGAAATAGC-----  
-----  
-----  
ACGAATGAAACCTTCAGACCTCAAGGAGGAAATATAAGGGACAATTGGAGAAGTGAACCTATATAAATATAAAG  
TAGTAAAAATTGAACCATTA---GGAGTAGCACCTACCAAGGCAAAGAGAAGAGTGGTG-----  
-----CAAAGAGAAAAGAGAGCA---GTGGGA---ATGGGAGCT-----  
TGGTTCCTTGGGTTCTTGGCAGCA---GCAGGAAGCACTATG---GGCGCAGCGTCA---  
GTGACGTTGACGGTACAG---GCCAGACAA---TTATTG---TCTGGTATAGTGCAAGCAGCAAAAT---  
AATTTG---CTGCAA---GCTATTGAGGCGCAACAGCATTTGTTGCAACTCACAGTCTGGGGCATC  
>KY658690  
TTCTACTGCAATACAACAAAACTGTTTAACAGTAGTTGGCCAAATAGTACTAGGAATAATACTGAAGAGTCA-  
-----  
-----  
AATAGCACTGTTATCACACTCCCATGTAGAATAAAAACAAATTATAAACATGTGGCAGGAAGTAGGAAAAGCAA  
TGTATGCCCCCTCCCATCAGGGGACGAATTAATTGTACATCAAAC---  
ATTACAGGGCTACTATTAACAAGAGATGGGGGCAATGGAAATAGC-----  
-----  
-----  
ACGAATGAAACCTTCAGACCTCAAGGAGGAAATATAAGGGACAATTGGAGAAGTGAACCTATATAAATATAAAG  
TAGTAAAAATTGAACCATTA---GGAGTAGCACCTACCAAGGCAAAGAGAAGAGTGGTG-----  
-----CAAAGAGAAAAGAGAGCA---GTGGGA---ATGGGAGCT-----  
TGGTTCCTTGGGTTCTTGGCAGCA---GCAGGAAGCACTATG---GGCGCAGCGTCA---  
GTGACGTTGACGGTACAG---GCCAGACAA---TTATTG---TCTGGTATAGTGCAAGCAGCAAAAT---  
AATTTG---CTGCAA---GCTATTGAGGCGCAACAGCATTTGTTGCAACTCACAGTCTGGGGCATC  
>MF373127  
TTCTACTGTAATACAACAAGACTGTTTAATACTACTTGGAATAACACTGAGAAATCAAATCCCACTGAA----  
-----  
-----  
GGAAATGGCACAATCACACTCCAATGCAGAATAAAAACAAATTATAAACCTGTGGCAGGAAGTAGGAAAAGCAA  
TGTATGCCCCCTCCCATCAGAGGACAAATTAAGTGTTCATCCAAC---  
ATTACAGGACTGCTATTAACAACAGATGGTGGTATGAACACCAGT-----  
-----

-----  
 AATAACAAGACCTTTATACCTGCAGGAGGAGATATGAGAGACTATTGGAGGAGTGGAGTATTGAAATATGATG  
 TAGTAATAGTTGAGCCATTA---GGAATAGCACCAACCACGGATATGAGAAGAGTGGTG-----  
 -----CAGATACAAAAAAGAGCA---GAGCTA---CTACGAGCT-----  
 CTGTTGCTTGTGTTCTTGGGAGCA---GCAGGAAGGACGATG---AGCGCAGCGTCG---  
 ATGACGCTGACGGTACAG---GCCAGACAA---TTATTG---TCTGGTATAGTGCAACAGCAAAAT---  
 AATTTG---CTGCAG---GCTATTGAGGCGCAACAGCATATGTTGAAACTCACAGTCTGGGGCATC  
 >MF373129  
 TTCTACTGTAATACAGCAGAACTGTTTAAACAGTACTTGGAGGAATGACACTGAAAGGTCAAATACCACTACA-  
 -----  
 -----  
 GGAAATGACACAATCACACTTCAATGCACAATAAAACGAATTGTAAACATGTGGCAGGAAGTAGGAAAAGCAA  
 TGTATGCCCCCTCCCATCACAGGACAAATTAATTGTTTCATCAAAA---  
 ATTACAGGGCTACTGTTAAACAAGAGATGGTGGTGGGAACCGAAC-----  
 -----  
 -----  
 ACCAGCGAGACTTTTCAGACCTGGAGGGGGAAATATGAAAAGACAATTGGAGAAGTGAATTATATAAATATAAAG  
 TAATAAAAATTGAACCATTA---GGAGTAGCACCCACCAAGGCAAAGAGAAGAGTGGTG-----  
 -----CAGAGAGAAAAAAGAGCA---GTGGGA---ATAGGAGCT-----  
 GTGTTCCCTTGGGTTCTTGGGAGCA---GCAGGAAGCACTATG---GGCGCAACGTCG---  
 ATGACGCTGACGGTACAG---GCCAGACAA---TTATTG---TCTGGTATAGTGCAACAGCAGAAT---  
 AATTTG---CTGAAG---GCTATTGAGGCGCATCAGCATATGTTGCAACTCACAGTCTGGGGCATC  
 >KP411829  
 TGCTATTGCAAACCATCACTTCTGTTTACTGGCACATACAAGAGTAACATTAATATTTCAAATATCACCCAAT  
 CCTCACAA-----  
 -----TCC---GATGAAAGGTATATTTTAATTCTGGCTTGTATGACG-----  
 ATCAATGTGTGGCAGGTAGTAGGAAAAGCGATCTATTCCCCCTCCCATCAGTGGACAAATTAGATGTTTCATCAA  
 AT---ATTACAGGGCTGCTATTAAACAAGAGATGGTGGTAGCAACAGCAGTAACGAG-----  
 -----  
 -----  
 ACCGAGACTGAAATCTTCAGACCTGTGGGAGGAAATATGAGGGACAATTGGAGAAGTGAATTATATAAATATA  
 AAGTAGTACAAATTGAACCATTA---GGAGTAGCACCCACCAAGGCAAAGAGAAGAGTGGTG-----  
 -----CAAAGAGAAAAAAGAGCA---GTGGGA---TTAGGAGCA-----  
 ---ATGTTCCCTTGGGTTCTTGGGAGCA---GCAGGAAGCACTATG---GGCGCAGCGTCA---  
 ATAACGCTGACGGTACAG---GCCAGACAA---TTATTG---TCTGGTATAGTGCAACAGCAGAAT---  
 AATTTG---CTGAGA---GCTATTGAGGCGCAACAGCATCTGTTGCAACTCACAGTCTGGGGCATC  
 >MF373151  
 CTCTACTGTAATTCCACACAACCTATTTAATAGTACTTGAATGGTACTGAAAGATCAAACCTATTCCACTGAG-  
 -----  
 -----  
 ACTAATGAACTATCACACTCCCATGCAGAATAAAACAAATTATAAACATGTGGCAGAGAGTAGGAAGAGCAA  
 TGTATGCCCCCTCCCATCCAAGGACTAATTAGATGTTTCATCAAAAT---  
 ATTACAGGGCTGCTGCTAAACAAGAGATGGAGGTCAGAATAGTAGT-----  
 -----  
 -----  
 AATAGCACTGAGACCTTCAGACCGGGAGGAGGAAACATGAAGGATAATTGGAGAAGTGAATTATATAAATATA  
 AAGTAATAAAGATTGAACCATTA---GGAGTAGCACCCACCAAGGCAAAGAGAAGAGTGGTG-----  
 -----CAAAGAGAAAAAAGAGCA---ATAACA---GTAGGAGCT-----  
 ---ATGTTCCCTTGGGTTCTTGGGAGCA---GCAGGAAGCACTATG---GGCGCAGCGTCA---  
 ATGGCGCTGACGGTACAG---GCCAGACAA---TTGTTG---TCTGGTATAGTGCAACAGCAGAAC---  
 AATCTG---CTGAGG---GCTATTGAGGCGCAACAGCATCTGTTGCAACTCACAGTCTGGGGCATC  
 >KP411823  
 TTCTACTGTAATACAACACAACCTGTTTAAATAGTACTTGAATATCACTGGAGGGTTAAATAACACTGAA----  
 -----  
 -----  
 GGAAATGGCACAATCACACTCCAATGCAAAATAAAACAAATTTATAAACATGTGGCATGAAGTAGGGAAAGCAA  
 TGTATGCCCCCTCCCATCAGAGGACAGATTACATGTTTCATCAAAAC---  
 ATTACAGGGCTGCTATTAAACAAGAGATGGTGGTGAGAACCCGGGC-----  
 -----  
 -----

AACGACACTGATACTTTACACCTGGAGGGGGAGATATGAAAGACAATTGGAGTAGTGAATTAGATAAATATA  
GAGTAATAGGAATAGCACCCTA---CCAGTAGCACCCACCAAGGCAAAGACAAGATTGTTG-----  
-----CAGAGAGATAAAAAGAGCA---GTTGGA---ATAGGATCT-----  
---GTGTTCTTGTCTTCTTGGTAGCG---GCAGGAAGCACTATG---TCTGCAATGTCA---  
ATGACGATGACGCTACAA---GCTCAAGAA---TTACTG---TATGTGACCGAGCGAATGCAAAAA---  
AATTTG---CTGAAG---GCTATTGAGGCGCAACAGCATCTGTTGCAACTCACAGTCTGGGGCATC  
>MF373162  
TTCTATTGTAATACAACACAGTTATTTAATAGTACTTGGGAGGCTCATCAGCTTAATCAGACTTGGAATGAGC  
CCCTAGGG-----  
-----  
CCAAATGTTACTAATATCACACTCCCATGCAGAATAAAACAAATTATAAACAGGTGGCAGGAAGTGGGAAAAG  
CAATGTTTGCCGCTCCCATCAGCGGACGAATTCAATGCAAAATCAAAT---  
ATTACAGGGTTGTTATTAACAAGAGATGGTGGTACTAACACCAGC-----  
-----  
-----  
GACCCCAACAGAACTGAGACCTTCAGACCTGGAGGAGGAGATATGAGAGACAATTGGAGAAGTGAATTATATA  
AGTATAAAGTAGTACAAATTGAGCCATTA---GGAATAGCACCCACCAAGGCAAAGAGAGTAGTGGA-----  
-----AAGAGAGAAAAAGAGCA---  
GTGGGAGTGCTAGGAGCT-----ATGTTCTTGGGTTCTTGGGAACA---GCAGGAAGCGTTATG---  
GGCGCAGCGTCA---ATGACGCTGACGGTACAG---GCCAGACAA---TTATTG---  
TCTGGTATAGTGCAACAGCAGAAC---AATCTG---CTGAGA---  
GCTATTGAGGCGCAACAACATATGTTGCAACTCACAGTCTGGGGCATC  
>KP411824  
TTCTACTGCAATTCAACACCACTGTTTAATAGCACCTGGGATACTAATGGGACTTGCAAGGGCTCTAATAGT-  
-----  
-----  
GCTGATTGGAATGTTACTGTCCCATGCATTAGCATCCCAATTACTACAATGGGGCAGAACTAGAACAAGCAA  
TGGACGTGCGTCCCATTGCAGGAAAAGCAATATGTTTCATCAAGT---  
TTGTCCAAAGGTATCCTTTTAGCCAATTCCCATAATAGCATTATTGTG-----  
-----  
-----  
CCCCGGCTGGTTATGCCTAAAGGTAAAGATAAGAAGTTCATTGGAACAGGAAAATGTATCAATGTCAAGTAC  
AATGTCAAATTGAACCATTA---GGAGTAGCACCCACCATGGCAAAGAGAAGAGTGGTG-----  
-----CAAAGAGAGAAAAGAGAT---TTGGGA---CTAGGAGCT-----  
CTGTTCTTGGGTTCTTGGGAGCA---GCAGGAAGCACTATG---GGCGCAGCGTCA---  
ATAACGCTGACGGTACAG---GCCAGACAA---TTATTG---TCTGGTATAGTGCAACAGCAGAAC---  
AACTTG---CTGAGG---GCTATTGAGGCGCAACAGCATCTGTTGCAACTCACAGTCTGGGGCATT  
>MF373185  
TTCTACTGTAATTCAACACCACTGTTTAATAGTACTTGGTATGTTAATGGAAGTAGGAATAATGATACTGATA  
TT-----  
-----  
GGAAAGATAAACATCACACTCTCATGTAGAATAAAACAAATTATAAACATGTGGCAGGAAGTAGGAAAAGCAA  
TGTATGCCCTCCCATCCCAGGAAAATTCAATGTATATCAAAT---  
ATTACAGGGCTGCTATTAAACAAGAGATGGAGGTAATACCAGTGAGACCAGG-----  
-----  
-----  
AACGGGACCGAGATTTTCAGACCTGGAGGAGGAAATATGAGGGACAATTGGAGAAGTGAATTATATAAATACA  
AAGTAGTACAAGTTGAACCATTA---GGAATAGCACCCACCAAGGCAAGGAGAAGAGTGGTG-----  
-----CAGAGAGAAAAAGAGCT---CTGGGA---CTAGGAGCT-----  
---TTGTTTCTTGGGTTCTTGGGAGCA---GCAGGAAGCACTATG---GGCGCAGCGTCA---  
GTGACGCTGACGGTACAG---GCCAGACAA---TTATTG---TCTGGTATAGTGCAACAGCAGAAC---  
AATCTG---CTGAGA---GCTATTGAGGCGCAACAACACATGTTGCAACTCACAGTCTGGGGCATC  
>MF373186  
TTCTACTGCAACACAACAACACTGTTTAATAGTACTTGGGAATGATACACAACCTGTCTGATAGCACTTGGAATA  
ATACAAGA-----  
-----  
GGGATAAATGACACTATCACACTCCAATGTAGAATAAGACAAATCATAAACATGTGGCAGAAGGTAGGAAAAG  
CAATGTATGCCCTCCCATCAGTGGACAAATTAGATGTACATCAAAT---  
ATTACAGGGCTGATATTAAACAAGAGATGGTGGTAATAGTGACAACAAC-----  
-----

-----  
 ACCACCCAGCCCCGAGATCTTCAGACCTCAAGGAGGAAATATGAAAGACAATTGGAGAAGTGAATTATATAAAAT  
 ATAAGGTAGTAGCAATTGAACCATTA---GGACTAGCACCCACCAAGGCAAAGAGAAGAGTGGTG-----  
 -----CAGAGAGACAAAAGAGCA---GTAGGA---CTGGGAGCT---  
 -----CTGTTTCCTTGGGTTCTTGGGAGCA---GCAGGAAGCACTATG---GGCGCAGCGTCA---  
 ATGGCGCTGACGGTACAA---GCCAGACAA---TTATTG---TCTGGTATAGTGCAACAGCAGAAC---  
 AATTTG---CTGAGG---GCTATTGAGGCGCAACAGCATCTGTTGCAGCTCACAGTCTGGGGCATT  
 >KY213743  
 TTTTACTGTAATACATCAAAACTGTTTAATAGTACTTGGCTGAATAATAATACAGGGTCAAAT-----  
 -----  
 -----  
 GCCACTGAACCTATCATACTCCCATGCAGGATAAAAACAAATTGTAAACATGTGGCAGGAAGTAGGAAAAGCAA  
 TGTATGCCCCCTCCCATCAGAGGACAAATTAGATGCATATCAAAT---  
 ATTACAGGGCTCCTATTAAACAAGAGATGGTGGTCAAGAGAACAAAACCGAG-----  
 -----  
 -----  
 AACCACACCGAGGTCTTTAGACCCACGGGAGGAAATATGAAGGACAATTGGAGAAGTGAATTATATAAAATATA  
 AAGTAGTAAAAATTGAACCATTA---GGAATAGCACCCACCAAGGCAAAAAGAAGAGTGGTG-----  
 -----CAGAGAGAAAAAAGAGCA---GTGGGA---ATAGGAGCG-----  
 ---ATGTTTCCTTGGGTTCTTGAGCGCA---GCAGGAAGCACTATG---GGCGCAGCGTCA---  
 ATAACGCTGACGGTACAG---GCCAGACAG---TACTG---TCTGGTATAGTGCAACAGCAAAAC---  
 AATTTG---CTGAGA---GCTATTGAGGCGCAACAACATATGTTGCAACTCACAGTCTGGGGCATC  
 >KY213745  
 TTCTACTGCAATACAACACAACCTATTTAATAGTTCTTGAATAATAGTAGTTTGAATAGTACTGAGGGTAATG  
 GAGGG-----  
 -----  
 TCAAATGACACTATCACACTCCCGTGTAGAATAAAAACAAATTATAAACATGTGGCAGGAAGTAGGAAAAGCAA  
 TGTATGCCCCCTCCCATTAAGGACAAATTAGATGCTCCTCAAAT---  
 ATTACAGGACTATTATTAGTAAGAGATGGTGGTAATAACAGGACG-----  
 -----  
 -----  
 GGCGGCAGTGAGACCTTCAGACCTGGAGGAGGAAATATGAAGGACAATTGGAGAAGTGAATTATATAAAATATA  
 AAGTAGTAAAAATTGAACCATTA---GGAATAGCACCCACCAGGGCAAGGAGAAGAGTGGTG-----  
 -----CAGAGAGAAAAAAGAGCA---GTGGGA---CTAGGAGCT-----  
 ---TTGTTTCCTTGGGTTCTTGGGAGCA---GCAGGAAGCACTATG---GGCGCAGCGTCA---  
 ATGACGCTGACGGTACAG---GCCAGACAA---TTATTG---TCTGGTATAGTGCAACAGCAGAAC---  
 AATCTG---CTGAAG---GCCATTGAGGCGCAACAGCATATGTTGCAACTCACAGTCTGGGGCATC  
 >JN248346  
 TTCTACTGTGATTCAACACAACCTGTTTAATAGTAGTTGGAATAGTAATTGGTCTAATAATACTGAA-----  
 -----  
 -----  
 GGGTCAGACAACATTACACTTCAATGCAGAATAAAAACAAATTATAAACATGTGGCAGCAAACAGGAAAGGCAA  
 TGTATGCCCCCTCCCATCAGTGGAATAATTAGCTGTTTCATCAAAT---  
 ATTACAGGGCTGTTATTAAACAAGAGATGGTGGTAACAATCAGACT-----  
 -----  
 -----  
 AATAATAATGAGACCTTCAGACCTGGAGGAGGAAATATGAAGGACAATTGGAGAAGTGAATTATATAGATATA  
 AAGTAGTACAAATTGAACCATTA---GGAGTAGCACCCACCATGGCAAAGAGAAGAGTGGTG-----  
 -----CAGAGAGAAAAAAGAGCA---GTGGGA---ATAGGAGCT-----  
 ---CTATTCCTTGGGTTCTTGGGAGCA---GCAGGAAGCACTATG---GGCGCAGCATCA---  
 ATAACGCTGACGGTACAG---GCCAGACAA---TTATTG---TCTGGTATAGTGCAACAGCAGAAC---  
 AATTTG---CTGAGA---GCTATTGAGGCGCAACAGCATATGTTGCAACTCACAGTCTGGGGCATA  
 >KJ769147  
 TTCTACTGTAACACATCACAACCTGTTTAATAGTACTTGGTATAGTAATGGT-----  
 -----  
 -----  
 -ACTCGAAATGATACT-----  
 GTAGGAAATGGCAATATCACGCTCCCTTGAGAATAAAAACAAATTGTAAACATGTGGCAGGAAGTAGGAAAAG  
 CAATGTATGCCCCCTCCCATTTGGAGGACAAATTAGATGTTTCATCAAAT---  
 ATTACAGGGTTGCTATTAAACAAGAGATGGTGGT-----  
 -----  
 -----

AACAAATCAGAGCAACATC---  
 ACCACCGAGACCTTCAGACCAGGAGGAGAGATATGAGGGACAATTGGAGAAGTGAACCTATATAAATATAAAG  
 TGGTAAAAAATTGAACCATTA---GGAATAGCACCCACCAAGGCAAAGAGAAGAGTGGTG-----  
 -----CAGAGAGAAAAAAGAGCA---GTGGGAATGATAGGAGCT-----  
 ATGTTCCCTTGGGTTCTTGGGAGCA---GCAGGAAGCACTATG---GGCGCAGCGTCA---  
 ATAACGCTGACGGTACAG---GCCAGGCAA---TTGTTG---TCTGGTATAGTGCAACAGCAGAGT---  
 AATCTG---CTGAGA---GCTATTGAGGCGCAACAGCATATGTTGCAACTCACAGTCTGGGGCATC  
 >KP109514  
 TTCTACTGTAATACAACACAGCTATTTAATAATACTTGGCTTACTTGAAGGCCAATGCAAGTGATCCTGAAA  
 AAAAT-----  
 -----  
 AACACAAAAAATATCACACTCCCATGCAGAATAAAACAAATTATAAACATGTGGCAGGAAGTAGGAAAAGCAA  
 TGTATGCCCCCTCCCATCGCAGGACAAATTAAATGTGTATCAAAT---  
 ATTACAGGGTTACTATTAACAAGAGATGGGGGTGAGGACAATAACACT-----  
 -----  
 -----  
 AACGGTAACGAGACCTTCAGACCTGGAGGAGGAGATATGAGGGACAATTGGAGGAGTGAATTATATAAATATA  
 AAGTAGTAAAAATTGAACCATTA---GGAATAGCACCCACTAAGGCAAAGAGAAGAGTGGTG-----  
 -----CAGAGAGAAAAAAGAGCA---GCA-----CTAGGAGCT-----  
 ---ATGTTCCCTTGGGTTCTTGGGAATG---GCAGGAAGCACTATG---GGCGCAGCGTCA---  
 ATAACGCTGACGGCACAG---GCCAGACAA---TTGTTG---TCTGGTATAGTGCAACAGCAGAAC---  
 AATCTG---CTGAGG---GCTATTGAGGCGCAACAACATTTGTTGCAACTCACAGTCTGGGGCATC  
 >EU578539  
 TTCTACTGTAATGCAACACAACCTGTTTAATAGTACTTGGCCCATTAACGGTACTTGGGAAGGATCA-----  
 -----  
 -----  
 AATAATACTAATGTCACACTACCATGCAGAATAAAACAAATTATAAACATGTGGCAGAGAGTAGGCAAAGCAA  
 TGTATGCCCCCTCCCATCAGAGGACAAATTAGATGTTTCATCAAAT---  
 ATCACAGGGCTGCTATTAACAAGAGATGGTGGTGGTAGTAACCAA-----  
 -----  
 -----  
 AGCAACGAGACCTTTAGACCTGGAGGAGGAGACATGAAAGACAATTGGAGAAGTGAATTATATAAGTATAAAG  
 TAGTAAGAATTAAACCATTA---GGAGTAGCCCCCACCAAGGCAAAGAGAAGAGTGGTG-----  
 -----CAGAGAGAAAAAAGAGCA---GTGGGAACAATAGGAGCT-----  
 ATGTTCCCTTGGGTTCTTGGGAGCA---GCAGGAAGCACTATG---GGCGCAGCGTCA---  
 GTGACGCTGACGGTACAG---GCCAGACAA---TTATTG---TCTGGTATAGTGCAACAGCAGAAC---  
 AATTTG---CTGAGG---GCTATTGAGGCGCAACAGCATCTGTTGCAACTTACGGTCTGGGGCATC  
 >HQ217760  
 TTCTATTGTAATACAACAGAGCTGTTTAATAGTACTTGGGATGTTAATAGTACTTTGAATGTTAATAATACTT  
 GGAATAAT-----  
 -----ACTGAA-----  
 GGAGCAAGTGGCAATATCACACTCCCATGCAGAATAAAACAAATTATAAATATGTGGCAGAAAGTAGGCAAGG  
 CAATGTATGCCCCCTCCCATCAGAGGACAAATTAGATGTACATCAAAG---  
 ATCACAGGGCTGCTATTAACAAGAGATGGT---TATAATAATAAT-----  
 -----  
 -----  
 AACAAACACCGAGACTTTCAGACCTGGAGGAGGAAATATGAAGGACAATTGGAGAAGTGAGTTATATAAGTATA  
 AAGTAGTAAAAAATTGAACCATTA---GGAGTAGCACCCACCATGGCAAGGAGGAGAGTGGTG-----  
 -----CAGAGAGAAAAAAGAGCA---GTGGGAACAATAGGAGCT-----  
 ---ATGTTCCCTTGGGTTCTTGGGAGCA---GCAGGAAGCACTATG---GGCGCAGCGTCA---  
 CTGACGCTGACGGTACAG---GCCAGACTA---TTATTG---TCTGGTATAGTGCAACAGCAGAAC---  
 AATCTG---CTGAGG---GCTATTGAGGCGCAACAGCATCTGTTGCAACTCACGGTCTGGGGCATC  
 >AF277071  
 TTCTACTGTAATTCAACACAGCTGTTTAATAGTACTTGAATATTAATGATACTAGGAATGAT-----  
 -----  
 -----  
 ACTACAGGGAATATCACACTCCCATGCAGAATAAGACAAATTGTGAACAGGTGGCAGGAAGTAGGCAAAGCAA  
 TGTATGCCCCCTCCCATCAGAGGACAAATTAGCTGTTTCATCAAAT---  
 ATTACAGGGGTGCTATTAACAAGAGATGGTGGTAATCACACGAGC-----  
 -----

-----  
GAAACTGAGATCTTCAGACCTGGAGGAGGAGATATGAGGGACAATTGGAGAAGTGAATTATATAAATATAAAG  
TAGTAAAAATTGAACCATTA---GGAAAAGCACCCACCAAGGCAAGGAGAAGAGTGGTG-----  
-----CAAAGAGAAAAAAGAGCA---GTGACA---ATGGGAGCT-----  
ATGTTTCCTTGGGTTCTTAGGAGCA---GCAGGAAGCACTATG---GGCGCAGCATCC---  
ATGACGCTGACGGTACAG---GCCAGGCTA---TTATTG---CCTGGTATAGTGCAACAGCAGAGC---  
AATCTG---CTGAGG---GCTATCGAGGCGCAACAACATCTGTTGCAACTCACAGTCTGGGGCATC  
>EF593267  
TTCTACTGTAATACAACAAAGCTGTTTAATAGTACTTGGCATGCTAATGGCACTCGGAATGATACTGGAGGG-  
-----  
-----  
TCAAATGACACTATCATACTACCATGCAGAATAAAACAAATTATAAACATGTGGCAGAAAGTAGGCAAAGCAA  
TCTATGCCCCCTCCCATCAGAGGACAAATTAGATGTGAATCAAAG---  
ATCACAGGGCTGCTATTAACAAGAGATGGTGGTGATGATAACAGA-----  
-----  
-----  
ACCACCGAGATCTTCAGACCTGGAGGAGGAGATATGAGGGACAATTGGAGAAGTGAATTATATAAATATAAAG  
TAGTAAAAATTGAACCATTA---GGAATAGCACCCACCAAGGCAAGGAGAAGAGTGGTG-----  
-----CAGAGAGAAAAAAGAGCA---GTGGGA---ATAGGAGCT-----  
GTGTTTCCTTGGGTTCTTGGGAGCA---GCAGGAAGCACTATG---GGCGCAGCGTCA---  
ATGACGCTGACGGTACAG---GCCAGACTA---TTATTG---TCTGGTATAGTGCAACAGCAGAAC---  
AATTTG---CTGCAG---GCTATTGAGGCGCAACAGCATCTGTTGCAACTCACGGTCTGGGGCATC  
>DQ853436  
TTCTACTGTAATTCAACACGATTGTTTAGTAGTAAGTGGCATGCTAATGATAGTTGGAGTAGTAGTACTTGGGA  
ACGATACT-----  
-----GGA---  
GAGTCAAATGACACTATCACACTCCCATGTAGAATAAAACAAATTATAAACATGTGGCAGGAAGTAGGAAAAG  
CAATGTATGCCCCCTCCCATCAAAGGACAAATTCAATGTTTCATCAAAT---  
ATTACAGGGCTAATATTAACAAGAGATGGTGGTGCAAACACGAAC-----  
-----  
-----  
ACGAGCGAGGAGGTCTTCAGACCTGCAGGAGGAAATATGGGGGACAATTGGAGAAGTGAATTATATAAATATA  
AAGTAGTAAAAATTGAACCAATA---GGAATAGCACCCACCAAGGCAAAAAGAAGAGTGGTG-----  
-----CAGAGAGAAAAAAGAGCA---GTGACA---CTGGGAGCT-----  
---GTGTTTCCTTGGGTTCTTGGGAGCA---GCAGGAAGCACTATG---GGCGCAGCGTCA---  
ATAACGCTGACGGTACAG---GCCAGACAA---TTATTG---TCTGGTATAGTGCAAGCAGCAGAAC---  
AATCTG---CTGAGG---GCTATTGAGGCGCAACAACATCTGTTGCAACTCACAGTCTGGGGCATC  
>KT124806  
TTCTACTGTGATACAACAGAACTGTTTAATAGTACTTGGAGTATTAATGGTACTAGGAATACTACTGAAGGGT  
CA-----  
-----  
AATAGCACAGACATCACACTCCAATGTAGAATAAAACAAATTATAAACATGTGGCAGGAAGTAGGGAAAGCAA  
TGTATGCCCCCTCCCATTAGAGGACAAATTAGATGTTTCATCAAAT---  
ATTACAGGGCTGCTATTAACAAGAGATGGTGGTAGCGGGAGTGAGACT-----  
-----  
-----  
AAAAACGAGACTGAAACCTTCAGACCTGGAGGAGGAAATATGAAGGATAATTGGAGAAGTGAATTATATCAAT  
ATAAAGTAGTAAAAATTGAACCATTA---GGAGTAGCACCCACCAGGGCAAAGAGAAGAGTGGTG-----  
-----CAGAGAGAAAAAAGAGCA---GTCACA---CTAGGAGCT---  
-----GTGTTTCCTTGGTTTCTTGGGAGCA---GCAGGAAGCACTATG---GGCGCAGCGTCA---  
ATAACGCTGACGGTACAG---GCCAGACAA---TTATTG---TCTGGAATAGTGCAACAGCAAAGC---  
AATCTG---CTGAGA---GCTATTGAGGCGCAACAGCATCTGTTGCAACTCACAGTCTGGGGCATC  
>EF593290  
TTTTACTGTGATACAACAGAGCTGTTTAATAGTACTTGGGAATAATACTGATAGTACTCGGAATGATACT----  
-----  
-----  
GAGTCAGACAAAATCACCTCCAATGTAGAATAAAACAAATTATAAACATGTGGCAGGAAGTAGGAAAAGCAA  
TGTATGCCCCCTCCCATCCAAGGACAAATTCAATGTAACCTCAAGT---  
ATTACAGGGCTACTATTAACAAGAGATGGTGGGAACAACTCCACT-----  
-----

-----  
AATTCCACCGAGATATTCAGACCTGGAGGAGGAGACATGAGGGATAATTGGAGAAGTGAATTATATAAAATATA  
AAGTAGTAAAAATTGAACCATTA---GGAGTGGCACCCACCAAGGCAAAGCGAAGAGTGGTA-----  
-----CAGAGAGAAAAAAGAGCA---ATAACG---ATGGGAGCT-----  
---ATGTTCCCTTGGGTTCTTGGGAGCA---GCAGGAAGCACTATG---GGCGCAGCGTCA---  
ATAGCGCTGACGGCACAG---GCCAGACTA---TTATTG---TCTGGTATAGTGCAACAGCAGAAC---  
AATCTG---CTGAGA---GCTATTGAGGCGCAACAGCATATGTTGCAACTCACAGTCTGGGGCATC  
>EU577629  
TTTTACTGTAATACAACACAACCTGTTTAATAGTACCTGGTGGAGGAATGGTACTGAAGTGTTTAATAGTACCT  
GGTGGAGGAAT-----GGT---  
ACTGAAGTGTCAAATAACACT-----  
CAAGGGATTGACACAATCACCCCTCCCATGCAGAATAAAACAATTTGTAAATATGTGGCAGTCAGTAGGAAAAG  
CAATGTATGCCCCCTCCCATCAGGGGACGAATTAATTGTACATCAAAT---  
ATTACAGGGCTGTTATTAACAAGTGATAGAGGTGGGCTTAATAAT-----  
-----  
-----  
GCTACAAATGAGACCTTCAGACCTGGAGGAGGAGATATGAGGGACAATTGGAGAAGTGAATTATATAAAATATA  
AGGTAGTAAGAATTGAACCATTA---GGAATAGCACCCACTAGTGCAAAGAGAAGAGTGGTG-----  
-----CAAAGAGAAAAAAGAGCA---GTGGGAACAATAGGAGCT-----  
---ATGTTCCCTTGGGTTCTTGGGAGCA---GCAGGAAGCACTATG---GGCGCAGCGTCA---  
ATGACGCTGACGGTACAG---GCCAGACTA---TTATTG---TCTGGTATAGTGCAACAGCAAAAC---  
AATTTG---CTGAAG---GCTATTGATGCGCAACAGCATATGTTGCAGCTCACGGTGTGGGGCATC  
>JX863967  
TTCTACTGTAATACAACACCACTGTTTAATAGCACTTGGAAATGAAACTCAACTGTTTAATAGTACTTGGAAATG  
AAACTGAG-----  
-----  
GCAAATGGAACAATTACACTCCCATGCAGAATAAAACAATTTATAAACATGTGGCAGGAAGTAGGAAAAGCAA  
TGTATGCCCCCTCCCATCGAAGGACAAATTTACTGTTCTTCAAAC---  
ATTACAGGGCTACTGTTATTAAGGGATGGTGGTAATACCACAAAC-----  
-----  
-----  
GGGACTGAGATCTTCAGACCTGGAGGAGGAGACATGAGGGACAATTGGAGAAGTGAATTATATAAAATATAAAG  
TAGTAAAAATTGAACCATTA---GGAGTAGCACCCACTAGGGCAAAGAGAAGAGTGGTG-----  
-----CAGAGAGAAAAAAGAGCA---GTGGGA---ATAGGAGCT-----  
ATGTTCCCTTGGGTTCTTGGGAATG---GCAGGAAGCACTATG---GGCGCAGCGTCA---  
CTAACGCTGACGGTACAG---GCCAGACAA---TTGTTG---TCTGGTATAGTGCAACAGCAGAAT---  
AATTTG---CTGAGA---GCTATTGAGGCGCAACAGCACCTGTTGCAACTCACAGTCTGGGGCATC  
>KT124764  
TTCTACTGTAATACCACACAACCTGTTTAATAGTACTTGGTATGCAAACAATACAAATAGTACTGAAGGGGGA-  
-----  
-----  
AACAGTGGGAATATCACACTCCCATGCAGAATAAAACAATTTATAAACATGTGGCAGGAAGTAGGAAAAGCAA  
TGTATGCCCCCTCCCATCAGTGGACAGATTAAATGTACATCAAAT---  
ATTACAGGGCTGCTATTAACAAGAGATGGTGGTCAAGGCAATCAGACC-----  
-----  
-----  
AACACCAGACTGAGATCTTCAGACCTGTAGGAGGAGATATGAAGGACAATTGGAGAAGTGAATTATATAAAT  
ATAAAGTAGTAAGAATTGAACCATTA---GGAATAGCACCCACCAGGGCAAAAAGGAGAGTGGTG-----  
-----CAGAGAGAAAAAAGAGCA---GTGGGA---ATAGGAGCG---  
-----TTGTTCCCTTGGTTTCTTGGGAGCA---GCAGGAAGCACTATG---GGCGCAGCGTCA---  
ATGACGCTGACGGTACAG---GCCAGACTA---TTATTG---TCTGGTATAGTGCAACAGCAGAAC---  
AATCTG---CTGAGA---GCTATTGAGGCGCAACAGCATCTGTTGCAACTCACAGTCTGGGGCATC  
>KT124814  
TTCTACTGTAATACAACACCATTATTTAATAGTACTTGGAAATAACTAGAAATATCAGTGGTCTTGAAGGGT  
CAAAG-----  
-----  
GACAAATGGAATATCACCCCTCCAATGCAGAATAAAACAATTTATAAACATGTGGCAGGAAGTAGGAAAAGCAA  
TGTATGCCCCCTCCCATCAGAGGACAAATTCATGCTCATCAAAT---  
ATTACAGGACTCCTATTAACAAGAGATGGTGGTACTAATGTTACT-----  
-----

-----  
GATAACACCACTGAGATCTTCAGACCTGGAGGAGAAGATATGAGGGACAATTGGAGAAGTGAATTATATAAAT  
ATAAAGTAGTACAAATTGAACCATTA---GGAGTAGCACCCACCAAGGCAAGGAGAAGAGTGGTG-----  
-----CAGAGAGAAAAAAGAGCA---GTGGGA---ATAGGAGCT---  
-----TTGTTCCCTTGGGTTCTTGGGAGCA---GCAGGAAGCACTATG---GGCGCAGCGTCA---  
GTGACGCTGACGGTACAA---GCCAGACAA---TTATTG---TCTGGTATAGTGCAACAGCAGAAC---  
AATCTG---CTGAGG---GCTATTGAGGCGCAACAGCATATGTTGCAACTCACAGTCTGGGGCATC  
>GU331497  
TTCTACTGTAATACATCACAACCTGTTTAATAGTACTTGGGAGTTTAATAGTACTGGAATGCTACTACTAAAG  
AG-----  
-----  
TTAAATAGCACTTATACACTCCCATGCAGAATAAAACAAATTATAAACATGTGGCAGGAAGTAGGAAAAGCAA  
TGTATGCCCCCTCCCATCAGTGGACAAATTAGATGTTTCATCAAAT---  
ATTACAGGGCTGCTCTTAATGAGAGATGGTGGTAATGAGACTGATAAA-----  
-----  
AATAACACTGAGATCTTCAGACCTGGAGGAGGAGATATGAGGGACAATTGGAGAAGTGAATTATACAAATATA  
AAGTAGTAAGAATTGAACCATTA---GGAGTAGCACCCACCAAGGCAAAAAGAAGAGTGGTG-----  
-----CAAAGAGAAAAAAGAGCA---GTGGGAACGTTAGGAGCT-----  
---ATGTTCCCTTGGGTTCTTGGGAGCA---GCAGGAAGCACTATG---GGCGCAGCGTCA---  
ATGGCGCTGACGGTACAG---GCCAGACTA---TTATTG---TCTGGTATAGTGCAACAGCAGAAC---  
AATTTG---CTGAGA---GCTATTGAGGCGCAACAGCATATGTTGCAACTCACAGTCTGGGGCATC  
>DQ869023  
TTCTACTGTAATACATCAAACTGTTTAATAGTACTTGGCATGCTAATGGTACTCGGATTAATGGTACTAATG  
TTTATGCTAAT-----  
-----GGTACTAAT-----  
GCAACCAACACAATTATCACACTCCCATGCAGAATAAGACAAATTATAAACATGTGGCAGGAAGTAGGAAAAG  
CAATGTATGCCCCCTCCCATCAAAGGACAAATTAAATGCTTATCAAAC---  
ATTACAGGGCTACTATTAGTAAGAGATGGTGGAAATAACACAAAT-----  
-----  
GGGAGCGAGATCTTCAGACCTGGAGGAGGGGATATGAGGGACAATTGGAGAAGTGAAGTGTATAAATATAAAG  
TAGTAAAAAATTGAACCATTA---GGAGTAGCACCCACTAAGGCAAAAAGAAGAGTGGTG-----  
-----CAGAGAGAAAAAAGAGCA---GTGGGA---TTCGGAGCT-----  
TTGTTCCCTTGGGTTCTTGGGAGCA---GCAGGAAGCACTATG---GGCGCAGCGTCA---  
GTGACGCTGACGGTACAG---GCCAGACAA---TTGTTG---TCTGGTATAGTGCAACAGCAGAAC---  
AACCTG---CTGAGG---GCTATTGAGGCGCAACAGCGTATGTTGCAACTCACAGTCTGGGGCATC  
>EU578104  
TTCTACTGTAACACAGCACAACCTGTTTAATACTATTTGGAATAATACTTGAATAGTAATGGGAATGATACTG  
AA-----  
-----  
GGGGATAATAAAACAATCATACTCCCGTGCAGAATAAAACAAATTGTAAACAGGTGGCAGGAAGTAGGAAAAG  
CAATGTATGCCCCCTCCCATCAGCGGAATCATTAACTGTTTATCAAAC---  
ATTACGGGGCTGCTATTAAACAAGAGATGGTGGAAATAACAGTAGT-----  
-----  
ACCAACGAGACCTTCAGACCTGGAGGAGGAGATATGAGGGACAATTGGAGAAGTGAAGTCTATAAATATAAAG  
TAGTAAAAAATTGAGCCATTA---GGAGTAGCACCCACCAAGGCAAAAAGAAGAGTGGTG-----  
-----CAGAGAGAAAAAAGAGCA---GTGGGAACGTTAGGAGCG-----  
ATGTTCCCTTGGGTTCTTGGGAGCA---GCAGGAAGCACTATG---GGCGCAGCGTCA---  
GTGACGCTGACGGTACAG---GCCAGACAA---TTATTG---TCTGGTATAGTGCAACAGCAGAAT---  
AATCTG---TTGAAG---GCTATTGAGGCGCAACAGCATCTGTTGCAGCTCACAGTCTGGGGCATC  
>EU578122  
TTCTACTGTAATACAACACAACCTGTTTAATAGTACGTGGAACGGTACTGATAGTAGTCCCGGAATAAT---  
-----  
-----  
ACTGATCACAATATCACACTCCCATGCAGAATAAAACAAATTGTAAACATGTGGCAAGAAGTAGGAAAAGCAA  
TGTATGCCCCCTCCCATCCAAGGAAAAATTGTATGTAGATCAAAT---  
ATTACAGGACTGTTATTAACAAGAGATGGTGGTAATGGGACAGGG-----  
-----

-----  
ACAGAGAAAGAAACCTTCAGACCTGGAGGAGGAAATATGAGGGACAATTGGAGAAGTGAATTATATAAAATATA  
AAGTAGTAAGAGTTGAACCATTA---GGAGTAGCACCCACCGAGGCAAGGAGAAGAGTGGTG-----  
-----CAGAGAGAAAAAAGGGCA---GCAGTGACACTGGGAGCT-----  
---ATGTTCCCTTGGGTTCTTGGGAGCA---GCAGGAAGCACTATG---GGCGCAGCGTCA---  
CTGACGCTGACGGTACAG---GCCAGACTA---TTATTG---TCTGGTATAGTGCAACAGCAGAAC---  
AACTTG---CTGAGA---GCTATTGAGGCGCAACAGCATATGTTGCAACTCACAGTCTGGGGCATC  
>JQ403105  
TTCTACTGTAATACAACAAAACCTGTTTAATAGTACTTGGTATGAAAATGGTACAAATAGTACTTGGTATGCAA  
ATGGTACAAAT-----  
-----AGTACTGGAGAG-----  
GGAAACAGTGATATTATCACAAATCCCATGCAGAATAAAACAATTTATAAACATGTGGCAGGAAGTAGGAAAAG  
CAATGTATGCCCCCTCCCATCAGTGGACAGATTAGATGTTTCATCAAAC---  
ATTACAGGGCTGCTATTAAACAAGAGATGGTGGTGAGGGCAATCAAACC-----  
-----  
-----  
AACAAACCAGGAGATCTTCAGACCTGTAGGAGGAGATATGAAAAACAATTGGAGAAGTGAATTATATAAAATATA  
AAGTAGTAAGAATTGAACCATTA---GGAATAGCACCCACCAAGGCAAAAAGGAGAGTGGTG-----  
-----CAGAGAGAAAAAAGAGCA---GTGGGA---ATAGGAGCG-----  
---TTGTTCCCTTGGGTTCTTGGGAGCA---GCAGGAAGCACTATG---GGCGCAGCGTCA---  
ATGACGCTGACGGTACAG---GCCAGACTA---TTATTG---TCTGGTATAGTGCAACAGCAGAAC---  
AATCTG---CTGAGA---GCTATTGAGGCGCAACAGCATCTGTTGCAACTCACAGTCTGGGGCATC  
>FJ469749  
TTCTACTGTAATACAACAAAGTTGTTTAATAGTACTTGGCATGCGAATGGTACTATTAAAGGGACAGATAATA  
CT-----  
-----  
GGAGGGAATGACACTCACACACTCCCTTGCAGAATAAAACAATTGTAAACATGTGGCAAGAAGTACGAAAAG  
CAATGTATGCCCCCTCCCATCAGAGGACAAATTATGGGCGTATCAAAT---  
ATTACAGGGATACTATTAAACAAGAGATGCTGGTAATAGCGGGAACAAGACC-----  
-----  
-----  
AAGAACGAGACCGAGATTTTCAGACCTGGAGGAGGAGATATGAGGGATAATTGGAGAAGTGAATTATATAAAAT  
ATAAAGTAGTAAAAATTGAACCATTA---GGAGTAGCACCTACCAAGGCAAAGAGAAGAGTGGTG-----  
-----CAGAGAGAAAAAAGAGCA---GTGGGA---ATAGGAGCT---  
-----ATGTTCATTGGGTTCTTGGGAGCA---GCAGGAAGCACTATG---GGCGCAGCGTCA---  
ATAACGCTGACGGTACAG---GCCAGACAA---TTATTG---TCTGGTATAGTGCAACAGCAGAAC---  
AATCTG---CTGAGA---GCTATTGAGGCGCAACAGCATCTGTTGCAACTCACAGTCTGGGGCATC  
>EU578230  
TTCTACTGTAATACATCAGGACTGTTTAATGGTACTTGGAAATGGTACTAGCACTTGGAAATGATACTGCAAATT  
AT-----  
-----  
ACTGCAAATGAGAATATCACACTCCCATGCAGAATAAAACAATTATAAACATGTGGCAGGAAGTAGGAAAAG  
CAATGTATGCCCCCTCCCATCAGAGGACAAATTAAGTGTTCATCAAAA---  
ATTACAGGGCTGCTATTAAACAAGAGATGGTGGCCATCACAACGGCAGC-----  
-----  
-----  
AACAACGACACAGAAATCTTCAGACCTGGAGGAGGAGATATGAGGGACAATTGGAGAAGTGAATTATATAAAAT  
ATAAAGTAGTAAAAATTGAACCATTA---GGAGTAGCACCCACCAGGGCAAAAAGAAGAGTGGTG-----  
-----CAGAGAGAAAAAAGAGCA---GTGGGA---ATGGGAGCT---  
-----TTGTTCCCTTGGGTTCTTGGGAGCA---GCAGGAAGCACTATG---GGCGCAGCGTCA---  
CTAACGCTGACGGTACAG---GCCAGACAA---TTATTG---TCTGGTATAGTGCAACAGCAGAAC---  
AATCTG---CTGAGG---GCTATTGATGCGCAACAACATCTGTTGCAACTCACAGTCTGGGGCATT  
>FJ469754  
TTCTACTGTAATACAACAAGACTGTTTAATAGTAATTGGAATAGCAGTACTTGGAAATAACACTGAAGGGTTAA  
ATACCACT-----  
-----AACCTT-----  
GGAGAAAATGACACAATCATACTCCCATGCAGAATAAAACAGATTATAAACACGTGGCAGAAAGTAGGAAAAG  
CAATATATGCCCCCTCCCATCGAAGGACAAATTAATGTATATCAAAT---  
ATTACAGGGCTGCTATTATTAAAGAGATGGTGGTATAAAATGTGAGT-----  
-----

-----  
GAGACCAACGAAACCTTCAGACCTGGAGGAGGAGATATGAAGGATATTTGGAGAAGTGAATTATATAAAATATA  
AAGTAGTAAAAATTGAACCATTA---GGAATAGCACCCAACAAGGCAAAGAGAAGAGTGGTG-----  
-----CAGAGAGAAAAAAGAGCA---GTGGGA---ATAGGAGCT-----  
---GTGTTCCCTTGGGTTCTTGGGAGCA---GCCGGAAGCACTATG---GGCGCAGCGTCA---  
ATGACGCTGACGGTACAG---GCCAGACAA---TTATTG---TCTGGTATAGTGCAACAGCAAAGC---  
AATTTG---CTGAGG---GCTATTGAGGCTCAACAACATCTGTTGAAACTCACAGTCTGGGGCATC  
>FJ469757  
TTCTACTGTAATTCCTCACAACCTGTTTCAGTAGTACTTGGGAATAGGACTAACGGGACTTGGGAATGATGTTGAAG  
GGTTAAAT-----  
-----TACACT-----  
AATGGAAATGACACAATCACACTCCCATGCAGAATAAAAACAATATATAAACATGTGGCAGGAAGTAGGAAAAAG  
CAATGTATGCCCTCCCATCAGAGGGCAACTTAATTGTTTCATCAAAG---  
ATTACAGGGTTGCTATTAACAAGAGATGGTGTGAACGACACCGAC-----  
-----  
-----  
AAAAATGAGACTTTTCAGACCTCAAGGAGGGGATATGAAGGACAATTGGAGAAGTGAATTATATAAAATATAAAAG  
TAGTAAAAATTGAACCGTTA---GGGATAGCACCCACCAGGGCAAAGAGAAGAGTGGTG-----  
-----CAAAGAGAAAAAAGAGCA---GTGGGA---TTAGGAGCT-----  
ATGTTCCCTTGGGTTCTTGGGAGCA---GCAGGAAGCACTATG---GGCGCAGCATCA---  
ATAACGCTGACGGTACAG---GCCAGACAA---TTACTG---TCTGGTATAGTGCAACAGCAGAAC---  
AATCTG---CTGAGG---GCTATTGAGGCGCAACACCATCTGTTGCAACTCACAGTCTGGGGCATC  
>GU330538  
TTCTACTGTAATACAACAAAACCTGTTTTATAGTAATTGGACTATTAATGGGACTATTGTGAGTAATTGGACAT  
ATGAAAATGAC-----  
-----ACT---  
GGAACAAATGACACTATCATACTCCCATGTAGAATAAAAACAAATTATAAACATGTGGCAGGAAGTAGGAAAAAG  
CAATGTATGCCCTCCCATCAAAGGACCAATTACATGTAACCTCAAGT---  
ATTACAGGGTTGCTATTAACAAGAGATGGTGGTATTAACAGGACCAAT-----  
-----  
-----  
AATGAGACCGAGATCTTCAGACCTGTAGGGGGAGATATGAGGGACAATTGGAGAAGTGAATTATATAAAATATA  
AAGTAGTAGAAATTCACCATTA---GGAATAGCACCCACCAAGGCAAAGAGAAGAGTGGTG-----  
-----CAGAGAGAAAAGAGAGCG---GTAACA---CTAGGAGCT-----  
---ATGTTCCCTTGGGTTCTTGGGAGCA---GCAGGAAGCACTATG---GGCGCAGCGTCA---  
ATGGCGCTGACGGTACAG---GCCAGACAA---TTATTG---TCTGGTATAGTGCAACAGCAGAAC---  
AATCTG---CTGAGG---GCTATTGAGGCGCAACAGCACATGTTGCAACTCACAGTCTGGGGCATT  
>GU330550  
TTCTACTGTAATTTAACACAACCTGTTTAATAGTACTTGGGAATTACTGACAGATTAAATAATAATGAAACTC  
AA-----  
-----  
GGAAATGACACAACAATTCACCTCCCGTGCAGAATAAAAACAAATTATAAACATGTGGCAAGAAGTAGGAAAAAG  
CAATGTATGCCCTCCCATCAGGGGGATAATTAGATGTTTCATCAAAT---  
ATTACAGGGCTGCTATTAACAAGAGATGGTGGTACAAATACCACTGAC-----  
-----  
-----  
AATGACACTGAGGTCTTCAGACCTGGAGGAGGAGACATGAGGGACAATTGGAGAAGTGAATTGTATAAATACA  
AAGTAATACAAATTGAACCATTA---GGAGTAGCACCCACTAAGGCAAAGAGAAGAGTGGTG-----  
-----CAGAGAGAAAAAAGAGCA---GTGGGA---ATAGGAGCT-----  
---GTGTTCCCTTGGGTTCTTGGGAGCA---GCAGGAAGCACTATG---GGCGCAGCGTCA---  
GTGACGCTGACGGTACAG---GCCAGACAA---TTATTG---TCTGGTATAGTGCAAGCAGCAGAGC---  
AATCTG---CTGAGG---GCTATTGAGGCGCATCAACATCTGTTGCAACTCACAGTCTGGGGCATC  
>KT124781  
TTCTACTGTAATTCACACCACTGTTTAATAGTGAATGGTCAGATAATAATACTTGGAAATAGTGCTGAAGAA-  
-----  
-----  
GGAAATGCCACAATCACACTCCAATGCAGAATAAAAACAAATTGTAAACATGTGGCAGGAAGTAGGAAGAGCAA  
TGTATGCACCTCCCATCAAAGGAGTAATTAGCTGTACATCAAAT---  
ATTACAGGACTGATATTAACAAGAGATCATAGTAAGGATAATGTA-----  
-----

-----  
 ACCTTCACCTTCAGACCTGGAGGAGGAAATATGAAGGACAATTGGAGAAGTGAATTATATAAAATATAAAGTAG  
 TAAAAATTGAACCATTA---GGAGTAGCACCCACTACAGCCAAGAGAAGAGTGGTG-----  
 -----CAGAGAGAAAGAAGAGCA---GTGGGA---ATAGGAGCT-----  
 GTGTTCTTGGGTTCTTGGGAGCA---GCAGGAAGCACTATG---GGCGCAGCGTCA---  
 ATAACGCTGACGGTACAG---GCCAGACTA---TTATTG---TCTGGTATAGTGCAACAGCAGAAC---  
 AATCTG---CTGAGA---GCTATTGAGGCGCAACAGCACCTGTTGCAACTCACAGTCTGGGGCATC  
 >MH060766  
 TTCTACTGTAATACAACACAGCTGTTTAATAGTACTTGGCCAGCTAATAATACTGAAAATGAGACTAATGAG-  
 -----  
 -----  
 GCAGATAGCAATATTACACTTCAGTGCAGAATAAAACAAATTATAAACAGGTGGCAGGAAGTAGGAAAAGCAA  
 TGTATGCCCCCTCCCATCAAAGGACAAATTAGCTGTTTCATCAAAT---  
 ATTACAGGGCTACTATTAACAAGAGATGGAGGTAGTAGCAGTAATGGG-----  
 -----  
 ----  
 ACAGAGAATGGGACAGAGATCTTCAGACCTGGAGGAGGAGATATGAGGGACAATTGGAGAAGTGAATTATATA  
 AATATAAAATAGTAAAAATTACACCATTA--GGAGTAGCACCCACCAAGGCAAAGAGAAGAGTGGTG-----  
 -----CAAAGAGAAAAAAGAGCA---GTGACA---  
 CTAGGAGCT-----ATGTTCTTGGGTTCTTGGGAGCA---GCAGGAAGCACTATG---  
 GGCGCAGCGTCG---ATAACGCTGACGGTACAG---GCCAGACAA---TTATTG---  
 TCTGGTATAGTGCAACAGCAGAGC---AATCTG---CTGAGG---  
 GCTATTGAAGCGCAACAGCATATGTTGCAACTCACAGTCTGGGGCATC  
 >MH060965  
 TTCTACTGTAATTCAACACAACCTGTTTAATAGTACTTGGTTTACTGAGGATAATGCGACCGGCACTACC----  
 -----  
 -----  
 GGAAATGAAACAATCATACTCCCATGCAGAATAAAACAAATTATAAACATGTGGCAGGAAGTAGGAAGAGCAA  
 TGTATGCCCCCTCCCATCAGAGGACAAATTAAGTGTACATCAAAT---  
 ATTACAGGACTGATATTAACAAGAGATGGTGGTAATAACAATCACACT-----  
 -----  
 -----  
 AATGAGAACGAAACCTTCAGACCTGGAGGAGGAGATATGAGGGACAATTGGAGAAGTGAATTATATAAAATATA  
 AAGTAGTAAAAGTTGAACCATTA---GGAATAGCACCCCTCTAAGGCAAGGAGAAGAGTGGTG-----  
 -----CAGAGAGAAAAAAGAGCA--GCAGGA---CTAGGAGCT-----  
 ---TTGCTCCTTGGGTTCTTGAGCGCA--GCAGGAAGCACTATG---GGCGCAGCGTCA---  
 CTGACGCTGACGGTACAG---GCCAGGCAA---TTATTG---TCTGGTATAGTGCAACAGCAAAAC---  
 AATTTG---CTGAGG---GCTATTGAGGCGCAACAGCATATGTTGCAACTCACAGTCTGGGGCATT  
 >FJ469686  
 TTCTACTGTAATTCAACAGCACTGTTTAATAGCAGTTGGAATAAGACTGGAGGGGGTTGGACTAAGGAGACAA  
 AT-----  
 -----  
 CACACAAACAGAACTATCACACTCCCATGCAGAATAAAACAAATTATAAACATGTGGCAGCAAGTAGGAAAAG  
 CAATGTATGCCCCCTCCCATCAGAGGACCAATTAAGTGTACATCAAGT---  
 ATTACAGGGCTGCTATTAACAAGAGATGGTGGGAGTAATAGCAGC-----  
 -----  
 -----  
 GCTACAGAGATCTTCAGACCTGGAGGAGGAAATATGAGAGACAATTGGAGAAATGAATTATACAAATATAAAG  
 TAGTAAAAATTGAGCCATTA---GGAGTAGCACCCACCAAGGCAAAGAGGAGAGTGGTG-----  
 -----CAGAGAGAAAAAAGAGCA--ATAGGGGCAATAGGAGCT-----  
 ATGTTCTTGGGTTCTTGGGAGCA---GCAGGAAGCACTATG---GGCGCAGCATCA---  
 GTGACGCTGACGGTACAA---GCCAGGCAA---TTATTG---TCTGGTATAGTGCAACAGCAGAAC---  
 AATCTG---CTGAGG---GCTATTGAGGCGCAACAGCATCTGTTGCAACTCACAGTCTGGGGCATC  
 >FJ469731  
 TTCTACTGCAATTCAACACCACTGTTTAATAAGACTTGGGAATAAGAATGATATTAGGAATAATACTACTGGGA  
 AT-----  
 -----  
 GATAATGACACTATCACACTCCAATGCAGAATAAAACAAATTATAAACATGTGGCAGGAAGTAGGAAAAGCAA  
 TGTATGCCCCCTCCCATTAGAGGACTAATCAGCTGTTTCATCAAAT---  
 ATTACAGGGCTACTATTAACAAGAGATGGAGGTCATAACACAAGT-----

-----  
-----  
AGGGCAAATGAGACCTTCAGGCCTGGAGGAGGAAATATGAAGGACAATTGGAGAAGTGAATTATATAAAATATA  
AAGTAGTAAAAATTGAACCATTA---GGAGTAGCACCCACCAGGGCAAAGAGAAGAGTGGTG-----  
-----CAGAGAGAAAAAAGAGCA---GTGGGA---CTAGGAGCT-----  
---TTATTCCTTGGGTTCTTGGGAGCA---GCAGGAAGCACTATG---GGCGCAGCGTCG---  
ATAACGCTGACGGTACAG---GCCAGACAA---TTATTG---TCTGGTATAGTGCAACAGCAGAAC---  
AATTTG---CTGAGA---GCTATTGAGGCGCAACAGCATCTGTTGCAGCTCACAGTCTGGGGCATC  
>HQ216397  
TTCTACTGTAATTCAACACTGCTGTTTAATAGTAGTTGGAAGAATGAGACCAATGCTGACGGGACAGAG----  
-----  
-----  
GGCAATGATACTATTACACTCCAATGCAGAATAAAACAAATCATAAACAGATGGCAGGAAGTAGGAAAAGCAA  
TGTATGCCCCCTCCCATCGCAGGACAAATTAAGTGTTCATCAAAA---  
ATTACAGGATTGCTATTAACAAGAGATGGTGGTAATCATACCGCC-----  
-----  
-----  
AACACCGAGACCTTCAGACCTGGAGGAGGAGATATGAGAGACAATTGGAGAAGTGAATTATATAAAATACAAAAG  
TAGTAAAAATTGAGCCATTA---GGAATAGCGCCCCACCAAGGCAAGGAGAAGAGTGGTG-----  
-----CAAAGAGAAAGAAGAGCA---GTGGGAACATTTGGAGCT-----  
TTGTTCCCTTGGGTTCTTGGGAGCA---GCAGGAAGCACTATG---GGCGCAGCATCA---  
GTGACGCTGACGGTACAA---GCCAGACAA---TTATTG---TCTGGTATAGTGCAACAGCAGAAC---  
AATCTG---CTGAAG---GCTATTGAGGCGCAACAACAGCTGTTGCAACTCACAGTCTGGGGCATC  
>DQ410636  
TTCTATTGTAATTCAACACAACCTGTTTAATAGTACTTGGGCTAAGAATGGTAGTAGGTTAAATAACAATGGTA  
GTGAGTTTAAT-----  
-----CACACCGAAGAA-----  
AAAGGAAATGACACAATCATACTCCCATGCAGAATAAAACAAATTATAAACATGTGGCAGGGAGTAGGAAAAG  
CAATGTATGCCCCCTCCTATCAAAGGACTAATTAGATGTTTCATCAAAT---  
ATCACAGGGCTGCTAATAACAAGAGATGGGGGTACGGGAAACAAGAGCGAG-----  
-----  
-----  
GAGAACAGGAACGAGACCTTCAGACCTGTAGGAGGAAATATGAGGGACAATTGGAGAAGTGAATTATATAAAAT  
ATAAAGTAGTAAAAATTGAACCATTA---GGAGTAGCACCCACCAAGGCAAAGAGAAGAGTGGTG-----  
-----CAGAGAGAAAAAAGAGCA---GTGGGA---CTCGGAGCT---  
-----ATGTTTCATTGGGTTCTTGGGAGCA---GCAGGAAGCACTATG---GGCGCAGCGTCA---  
GTGACGCTGACGGTACAG---GCCAGACAA---TTATTG---TCTGGTATAGTGCAACAGCAAAAC---  
AATTTG---CTGAGA---GCTATTGAGGCGCAACAGCATCTGTTGCAACTCACAGTCTGGGGCATC  
>KT124758  
TTCTACTGCAACACAACACAACCTGTTTAATAGTACTTGGAAATGATACACAACCTGTCTAATAGCACTTGAATA  
ATACAAGA-----  
-----  
GGGATAAATGACACTATCACACTCCAATGTAAAATAAAACAAATCATAAACATGTGGCAGAAGGTAGGAAAAG  
CAATGTATGCCCCCTCCCATCAGTGGACAAATTAGATGTTTCATCAAAT---  
ATTACAGGGCTGATATTAACAAGAGATGGTGGTAATACTGACAACACC-----  
-----  
-----  
ACCCAGCCCGAGATCTTCAGACCTCAAGGGGGAAATATGAAGGACAATTGGAGAAGTGAATTATATAAAATATA  
AGGTAGTAGCAATTGAACCATTA---GGAATAGCACCCACCAAGGCAAAGAGAAGAGTGGTG-----  
-----CAGAGAGACAAAAGAGCA---GTGGGA---ATGGGAGCT-----  
---CTGTTCCCTTGGGTTCTTGGGAGCA---GCAGGAAGCACTATG---GGCGCAGCGTCA---  
ATAACGCTGACGGCACAG---GCCAGACAA---TTATTG---TCTGGTATAGTGCAACAGCAGAAC---  
AATTTG---CTGAGG---GCTATTGAGGCGCAACAGCATCTGTTGCAGCTCACAGTCTGGGGCATT  
>JX863968  
TTCTATTGTAATTCAACATCACTGTTTAATAGTACTTGGAGGACAAATGAAACTGCAGACTTAAAT-----  
-----  
-----  
ACTACAGAAATTATCACACTCCCATGCAGAATAAAACAAATTATAAACATGTGGCAAGAAGTAGGAAAAGCAA  
TATATGCCCCCTCCCATCGAAGGAAACATTACATGTGTATCAAAT---  
ATTACAGGGCTGCTATTAACAAGAGATGGTGGTAACAATAATCAGAGTAAT-----

-----  
-----  
GAGACGACTGAGATCTTTAGACCTGGAGGAGGAGATATGAGGGACAATTGGAGAAGTGAATTATATAAAATATA  
AAGTAGTAAAAATTGAACCACTA---GGAGTAGCACCCACCAAGGCAAAGAGAAGAGTGGTG-----  
-----CAGAGAGAAAAAAGAGCA---GCGGGA---CTAGGAGCT-----  
---GTGTTTCTTGGGTTCTTGGGAGCA---GCAGGAAGCACTATG---GGCGCAGCGTCA---  
ATAACGCTGACGGCACAG---GCCAGGCAA---TTATTG---TCTGGTATAGTGCAACAGCAAAAT---  
AACTTG---CTGAGA---GCTATTGAGGCGCAACAACATCTGTTGCAACTCACAGTCTGGGGCATC  
>EU577792  
TTCTACTGTGATTCAACACAACCTGTTTAATAGTACTTGGGAATAGTACTAAGTTAAATAGTACTGAGTTAAGTA  
GGACTGAGTCA-----  
AATAACACTGCAGGCACAAAT-----  
GGCACTCAAGACCCTATCATGCTCCCATGCAGAATAAAAACAAATTATAAACATGTGGCAGAAAGTAGGAAAAG  
CAATGTATGCCCCCTCCCATCAGCGGACAAATTAGATGTTTCATCAAGT---  
ATTACAGGTCTGCTATTAACAAGAGATGGTGGTACTAATAATACC-----  
-----  
-----  
AACGAGACCTTCAGACCTGGAGGAGGAGATATGAGGGACAACCTGGAGAAGTGAATTATATAAAATATAAAGTAG  
TAAAAATTAAACCATTA---GGAGTAGCACCCACCAGGGCAAAGAGAAGAGTGGTG-----  
-----CAGAGAGAAAAAAGGGGA-----TTAGGAGCT-----  
GTGTTCCCTTGGGTTCTTGGGAGCA---GCAGGAAGCACTATG---GGCGCAGCGTCA---  
GTGACGCTGACGGTACAG---GCCAGACTA---TTATTG---TCTGGTATAGTGCAACAGCAAAGC---  
AATTTG---CTGAGA---GCTATTGAGGCGCAACAGCATCTGTTGCGACTCACAGTCTGGGGCATC  
>EF593190  
TTCTACTGTAATACAACACGATTGTTTAATAGTACTTGGGAGGCTAATGGTAATTGGACTGGAAGTGAAGGAA  
AT-----  
-----  
GATAATGGCACAGTCACACTTCCATGCAGAATAAAAACAAATTATAAACATGTGGCAACAAGTAGGAAAAGCAA  
TGTATGCCCCCTCCCATTCAGGAAAGATTACATGTAACTCAAGT---  
ATTACAGGAATACTATTAACAAGAGATGGAGGTATCACTAACAACACC-----  
-----  
-----  
GAGACCCACACCGAGACCTTCAGACCTGGAGGAGGAGATATGAGGGACAATTGGAGAAGTGAATTATATAAAAT  
ATAAAGTAGTAAAAATTCAACCATTA---GGAGTAGCACCCACCAAGGCAAAGAAGAAGAGTGGTG-----  
-----CAGAGAGAAAAAAGAGCA---GTGGGA---TTAGGAGCT---  
-----ATGTTCCCTTGGGTTCTTGGGAGCA---GCAGGAAGCACTATG---GGCGCAGCGTCA---  
GTAACGCTGACGGTACAG---GCCAGACAA---TTATTG---TCTGGTATAGTGCAACAGCAGAAC---  
AACTTG---CTGAGG---GCTATTGAGGCGCAACAGCATCTGTTGCAACTCACAGTCTGGGGCATC  
>MH060681  
TTCTACTGTAATTCAACACCACTATTTAATAGTACACACAACAGTACTACTACAAGGTCAAAT-----  
-----  
-----  
GAAACTGAACCAATCATACTCCAATGTAGAATAAAAACAAATTGTAAACATGTGGCAGGAGGTAGGAAAAGCAA  
TGTATGCCCCCTCCCATTCAGGACAAATTAAGTGTACATCAAAT---  
ATTACAGGGCTACTGTTAACAAGAGATGGTGGCAATAATCAGAGTAGAGAA-----  
-----  
-----  
AATAATACCGAGATCTTCAGACCTGGAGGAGGAAATATGAAGGACAATTGGAGAAGTGAATTATATAAAATATA  
AAGTAGTAAAAGTTGAACCATTA---GGAGTAGCACCCACCAAGGCAAAAAGAAGAGTGGTG-----  
-----CAAAGAGAAAAAAGAGCA---GTGGGA---TTCGGAGCT-----  
---TTGTTCCCTTGGGTTCTTAGGAGCA---GCAGGAAGCACTATG---GGCGCAGCGTCA---  
ATGACGCTGACGGTACAG---GCCAGACAA---TTATTG---TCTGGTATAGTGCAACAGCAGAAC---  
AATCTG---CTGAGG---GCTATTGAGGCGCAACAACATCTGTTGCAACTCACAGTCTGGGGCATC  
>MH060990  
TTCTACTGTAATACAACAAAACCTGTTTAATAGTACTTGGGAATAGTACTGAGAATTTTGGGGAGGG-----  
-----  
-----  
TCAGATAACAATATCACACTCCCATGCAGGATAAAGCAAATTATAAACATGTGGCAGGAAGTAGGAAAAGCAA  
TGTATGCCCCCTCCCATCGCAGGACAAATTAGATGTTTCATCAAAC---  
ATTACAGGGCTGATATTAACAAGAGATGGTGGTAGTCATAATGGTAGT-----

-----  
-----  
AATAATAGTGAGACCTTCAGACCTGGAGGAGGAGATATGAGGGACAATTGGAGAAGTGAAC TTTATAAATATA  
AAGTAGTAAAAATTGAACCATTA---GGAGTAGCACCCACTAAGGCCAAAAGAAGAGTGGTG-----  
-----CAGAGAGAAAAAAGAGCA--GCA-----ATAGGAGCT-----  
---TTGTTCCCTTGGGTTCTTGGGAGCA--GCAGGAAGCACTATG--GGCGCAGCGTCA---  
GTAACGCTGACGGTACAG---GCCAGACTA---TTGTTG---TCTGGTATAGTGCAACAGCAGAGC---  
AATCTG---CTGAAA---GCTATTGAGGCGCAACAGCATCTGTTGCAACTCACAGTCTGGGGCATC  
>DQ410526  
TTCTATTGTAATACAACACCACTGTTTAATAATACTTGGTTTAATAGTACTAATAATTTAAATGAAACAAAGG  
AC-----  
-----  
AACAAACAACAACAATCATACTCCAATGCAGAATAAAAACAAATTATAAACATGTGGCAGGAAGTAGGAAAAG  
CAATGTATGCCCCCTCCCATCAGGGGAAACATTAGCTGTTTCATCAAAT---  
ATTACAGGACTATTATTAACAAGAGACGGTGGTCATAATGTGAGC-----  
-----  
-----  
AACACGAACGAGACTTTCAGACCTGGAGGAGGAGATATGAGGGACAATTGGAGAAGTGAATTATATAAATATA  
AAGTAGTAAGAATTGAACCATTA---GGAATAGCACCCACCAAAGCAAAGAGAAGAGTGGTG-----  
-----CAAAGAGAAAAAAGAGCA--GTGGGA---TTAGGAGCT-----  
---GTGTTCAATTGGGTTTCTGGGAGCA--GCAGGAAGCACTATG--GGCGCAGCGTCA---  
ATGACGCTGACGGTACAG---GCCAGACAA---TTATTG---TCTGGTATAGTGCAAGCAGCAGAAC---  
AATCTG---CTGAGA---GCTATTGAGGCGCAACAGCATCTGTTGCAACTCACAGTCTGGGGCATT  
>EF363127  
TTCTACTGTAATACAACAGACTTGTTTACTTGGGAATGGTACTTGGGAATGGTACTGCAGGGGCA-----  
-----  
-----  
GATAACAATACAATCACACTCCAATGCAGAATAAGACAAATTATAAACATGTGGCAGGAAGTAGGAAAAGCAA  
TGTATGCCCCCTCCCATCCAGGATACCTTAACTGTTTCATCAAAT---  
ATTACAGGACTGCTATTAAACAAGGGATGGTGGTCATAACACGAAT-----  
-----  
-----  
ACTACTGAGATCTTCAGACCTGGAGGAGGAGATATGAGGGACAATTGGAGAAGTGAATTATATAAATATAAAG  
TAGTAAAAATTGAACCATTA---GGAATAGCACCCACCAAGGCAAGGAGAAGAGTGGTG-----  
-----CAGAGAGAAAAAAGAGCA--GTGGGA---ATAGGAGCT-----  
GTGTTCCCTTGGGTTCTTGGGAGCA--GCAGGAAGCACTATG--GGCGCAGCGTCA---  
ATAACGCTGACGGTACAG---GCCAGGCTA---TTATTG---TCTGGTATAGTGCAACAGCAAAAC---  
AACTTG---CTGAGA---GCTATTGAGGCGCAACAGCATCTGTTGCAACTCACAGTCTGGGGCATC  
>DQ410205  
TTCTACTGTAATACATCACAACCTGTTTAATAGTAATTGGACTTGGCCTGATACTGAAGGGTCAAATGACACTA  
AC-----  
-----  
-----  
ACTAACGAAAATATCACACTCCCATGCAGAATAAAAACAAATTATAAACATGTGGCAGGAGGTAGGAAAAGCAA  
TGTATGCCCCCTCCCATCAGAGGACAAATTAGCTGTAAATCAAAT---  
ATTACAGGACTGCTATTGACAAGAGATGGTGGTCAGGACGAGAAC-----  
-----  
-----  
GGGACCGAGACCTTCAGACCTGGAGGAGGAGATATGAGGGACAATTGGAGAAGTGAATTATATAAATATAAAG  
TAGTAAAAATTGAACCATTA---GGAGTAGCACCCACCAAGGCAAAGAGAAGAGTGGTG-----  
-----CAGAGAGAAAAAAGAGCA--TTAGGA---ATAGGAGCC-----  
GTGTTCCCTTGGGTTCTTGGGAGCA--GCAGGAAGCACTATG--GGCGCAGCGTCA---  
ATGACGCTGACGGTACAA---GCCAGACTG---CTATTG---TCTGGTATAGTGCAACAGCAGAAC---  
AATTTG---CTGAGG---GCTATTGAGGCGCAACAGCATCTGTTGCAACTCACAGTCTGGGGCATC  
>FJ469733  
TTCTACTGTAATTCAACACAACCTGTTTAATAGTACTTGGTATACTAATAATACTATGGAGGGGTACATGGTA  
AT-----  
-----  
GAGACAAATGGCACTATCACTCTCCCATGCAAAATAAGACAAATTGTAAACAAGTGGCAAGAAGTAGGAAAAG  
CAATGTATGCCCCCTCCCATTAGAGGACTAATTAGATGTTTCATCAAAT---  
ATTACAGGGCTGCTATTAAACAAGAGATGGTGGTCATAATAATAAAT-----

-----  
-----  
AATACTAATGAGACCTTCAGACCTGGAGGAGGAGATATGAGGGACAATTGGAGAAGTGAATTATATAAATACA  
AAGTAGTAAGAATTGAGCCATTA---GGAGTAGCACCCACCAAGGCACAGAGAAGAGTGGTG-----  
-----CAAAGAGAAAAAAGAGCA---GTGGGA---CTAGGAGCT-----  
---GTGTTCCCTTGGGTTCTTGGGAGCA---GCAGGAAGCACTATG---GGCGCAGCGTCA---  
ATAACGCTGACGGCACAG---GCCAGACAA---TTATTG---TCTGGTATAGTGCAACAGCAGAAC---  
AACCTG---CTGAGA---GCTATTGAGGCGCAACAGCATATGTTGCAACTCACAGTCTGGGGCATA  
>JQ403107  
TTCTACTGTGATACAACACAACCTGTTTAATAGCAGCTGGGAGGGGAATGGTACTAAAGATACTATAGAGTCAA  
ATGAC-----  
-----  
ACTGGAGGAAATATCACACTCCCATGTAGAATAAAACAGATTATAAACATGTGGCAGGAAGTAGGAAAAGCAA  
TGTATGCCCCCTCCCATCAGTGGACCAATTAGCTGTTTCATCAAAC---  
ATTACAGGGCTACTATTAAACAAGAGATGGGGGTCATAACAATGACACT-----  
-----  
AACGGGAACGAGACCTTCAGACCTGGAGGAGGAAATATGAAGGACAATTGGAGAAATGAATTATATAAATATA  
AAGTAGTAAAAATTGAACCACTA---GGAGTAGCACCCACCAAGGCAAAGAGAAGAGTGGTG-----  
-----CAGAGAGAAAAAAGAGCA---ATGGGA---CTAGGAGCT-----  
---ATGTTCAATTGGGTTCTTGGGAGCA---GCAGGAAGCACTATG---GGCGCAGCGTCA---  
GTGACGCTGACGGTACAG---GCCAGACAA---TTACTG---TCTGGTATAGTGCGCCAGCAGAAC---  
AATCTG---CTGAGA---GCTATTGAGGCGCAACAGCATATGTTGCAACTCACAGTCTGGGGCATC  
>KM259452  
TTCTACTGTAATACAACAAAACTGTTTAACAGTACGTGGAATAATACTAGT-----  
-----  
-ACTTGGAATTATACA-----  
GATGAACCCGAAAATATCACCTCCCATGCAGAATAAAGCAAATTATAAACATGTGGCAGGAAGTAGGAAAAG  
CAATGTATGCCCCCTCCCATCAGTGGGAATAATTAGATGCACATCAAAG---  
ATTACTGGGCTGCTATTAAACAAGAGATGGTGTT-----  
-----  
AATCGTAATGACAGCAAT---  
ACGACCGAGGTCTTCAGACCTGGAGGAGGAGATATGAGGGACAACCTGGAGAAGTGAATTGTATAAATATAAAG  
TAGTAAAAATTGAACCAGTA---GGACTAGCACCCACCAAGGCAAAGAGAAGAGCGGTG-----  
-----CAGAGAGAAAAAAGAGCA---GTGGGA---ATAGGAGCT-----  
GTGTTCCCTTGGGTTCTTGGGAGCA---GCAGGAAGCACTATG---GGCGCAGCGTCA---  
TTAACGCTGACGGTACAG---GCCAGACTG---TTATTG---TCTGGAATAGTGCAACAGCAGAAC---  
AATCTG---CTGAGA---GCTATTGAGGCGCAACAGCATATGTTGCAACTCACAGTCTGGGGCATC  
>EF593275  
TTCTACTGTAATTCAACACCACTGTTTAATAGTACTTGGTATAGTAATGGTACTGGGAGTGTTTGGAATAACA  
CT-----  
-----  
CAAGCAAATGGCACTATCATACTCCCATGCAGAATAAAGCAAATCATAAACATGTGGCAGCAAGTAGGAAAAG  
CAATGTATGCCCCCTCCCATCCAAGGAATAATTAATTGTTTATCAAAT---  
ATTACAGGGCTGTTACTAACAAGAGATGGAGGTAGTGGAATAATACA-----  
-----  
-----  
GACAATAACACCGAGACCTTCAGACCTGGAGGAGGAGATATGAGGGACAATTGGAGAAGTGAATTATATAAAT  
ATAAAGTAGTAGAACTTAAACCATTA---GGAGTAGCACCCACCAAGGCAAAGAGGAGAGTGGTG-----  
-----CAAAGAGAAAAAAGAGCA---GTGGGA---ATAGGAGCT---  
-----CTTCTCCTTGGGTTCTTGGGAACA---GCAGGAAGCGCTATG---GGCGCAGCGTCA---  
CTGACGCTGACGGTACAG---GCCAGACAT---TTATTG---TCTGGTATAGTGCAACAGCAAAAT---  
AATTTG---CTGAGG---GCTATTGAGGCGCAACAGCATATGTTGCAACTCACAGTCTGGGGCATC  
>JN024100  
TTCTACTGTAATACAACAAAACTGTTTAATAGTACTTGGGAATAGTACTGAGAATGTGGAGGAAGGG-----  
-----  
-----  
CCAGATAACAATATCACACTCCCATGCAGGATAAAGCAAATTATAAACATGTGGCAGGAAGTAGGAAAAGCAA  
TGTATGCCCCCTCCCATCGCAGGACAAATTAGATGTTTCATCAAAT---  
ATTACAGGGCTGATATTAAACAAGAGATGGTGGTGAGAATAACAAC-----

-----  
-----  
GAGACCGAGACCTTCAGACCTGGAGGAGGAGATATGAGGGACAATTGGAGAAGTGAACCTTTATAAATATAAAG  
TAGTAAAAAATTGAACCATTA---GGAGTAGCACCCACTAAGGCAAAAAGAAGAGTGGTG-----  
-----CAGAGAGAAAAAAGAGCA--GCA-----ATAGGAGCT-----  
TTGTTTCCTTGGTTTCTTGGGAGCA--GCAGGAAGCACTATG--GGCGCAGCGTCA---  
ATAACGCTGACGGTACAG---GCCAGACTA---TTGTTG---TCTGGTATAGTGCAACAGCAGAGC---  
AATCTG---CTGAAA---GCTATTGAGGCGCAACAGCATCTGTTGCAACTCACAGTCTGGGGCATC  
>HQ216601  
TTCTACTGTGATACAACACAGCTGTTTAATAGTACTTGGGAATATTGAGAATGATACGAACAGGTCAAAT----  
-----  
-----  
GAAAGTGAAACAATTATACTTCCATGCAAAATAAAGCAAATTATAAACCTGTGGCAGGAAGTAGGAAAAGCAA  
TGTATGCCCCCTCCCATCAGAGATCAAATTAGATGCTCATCAAAT---  
ATTACAGGGCTGCTATTAACAAGAGATGGTGGTAATAATACAACCTGAG-----  
-----  
-----  
AACAAATAACGAGACCTTCAGACCTGGAGGAGGAGATATGAGGGACAATTGGAGAAGTGAACCTTTATAAATATA  
AAGTAGTAAAAAATTGAACCATTA---GGAATAGCACCCACTACTGCAAAAAGAAGAGTGGTG-----  
-----CAGAGAGAAAAAAGAGCG--GCA-----CTAGGAGCC-----  
---TTGTTTCCTTGGGTTCTTGGGAGCA--GCAGGAAGCACTATG--GGCGCAGCGTCA---  
ATAACGCTGACGGTACAG---GCCAGACTA---TTGTTG---TCTGGTATAGTGCAACAGCAGAAC---  
AATCTG---CTGAAG---GCTATTGAGGCGCAACAGCATCTGTTGCAACTCACAGTCTGGGGCATC  
>HQ216795  
TTCTACTGTAACACATCACAGCTGTTTGATAGTACTTGGCTGTTTAATAAGACTGGGGATAATAATACTGAAG  
GG-----  
-----  
TCAAATGACACTATCATACTTCCATGCAGAATAAAACAAATTATAAACAGGTGGCAGGAAGTAGGAAAGGCAA  
TGTATGCCCCCTCCCATCGCAGGACAAATTAGATGTCAATCAAAT---  
ATTACAGGGGTGCTACTAACAAGAGATGGGGGTAAGAGTGGGAACGGT-----  
-----  
-----  
ACTAATGAGACCGAAACATTCAGACCTGTTGGAGGAAATATGAAGGACAATTGGAGAAGTGAATTGTATAAAT  
ATAAGGTAGTAAAGATTGAACCATTA---GGAGTAGCACCCACCAAGGCAAAGAGGCTAGTGGTG-----  
-----CAGAGAGAAAAAAGAGCA--GTGACG---CTGGGAGCT---  
-----ATGTTTCATTGGGTTCTTGGGAGCA--GCAGGAAGCACTATG--GGCGCAGCGTCA---  
CTGACGCTGACGGTACAG---GCCAGACAA---TTACTG---TCTGGTATAGTGCAACAGCAGAAC---  
AATCTG---CTGAGA---GCTATTGAGGCGCAACAGCATCTGTTGCAACTCACAGTTTGGGGCATT  
>JX863965  
TTCTACTGTAATTCAGCACAACTGTTTAATAGTACTTGGGATAATACTGCTGGGAATAATACAGCTGGA----  
-----  
-----  
GAAAATGACACAATCACACTCCCATGCAGAATAAAACAAATTGTAAATAGGTGGCAAGAAGTAGGAAAAGCAA  
TGTACGCCCTCCCATCAGCGGACCAATTAAATGTTTCATCAAAT---  
ATTACAGGACTGCTATTAACAAGAGATGGTGGTCAAAATACAACCT-----  
-----  
-----  
AATAACACCGAAATTTTCAGACCAGGAGGAGGAGATATGAGGGACAATTGGAGAAGTGAATTATATAAATATA  
AAGTAGTAAAAAATTGAACCATTA---GGAGTAGCACCCACTAAGGCAAAGAGAAGAGTGGTG-----  
-----CAGAGAGAAAAAAGAGCA--GTGGGA---ATAGGAGCT-----  
---ATGTTTCCTTGGGTTCTTGGGAGCA--GCAGGAAGCACTATG--GGCGCAGCATCA---  
ATAACGCTGACGGTACAG---GCCAGACAA---TTATTG---TCTGGTATAGTGCAACAGCAGAAC---  
AATCTG---CTGAGA---GCTATTGAGGCGCAACAGCATCTGTTGCAACTCACAGTCTGGGGCATT  
>JF320043  
TTTTACTGTAATACAACAAAACCTATTTAATAGCACTTGGGAGCCTAATAATGTAACGTGCACTGGT-----  
-----  
-----  
GATAATGACACAATCACACTCCCATGCAGAATAAAACAAATTGTAACTTGTGGCAGGAAGTAGGAAGAGCAA  
TGTATGCCGCTCCCATCAGAGGACTGATCAGATGTTTCATCAAAT---  
ATTACAGGGCTACTATTAACAAGAGATGGTGGTGTGATAACAATCAGACCAAT-----

-----  
-----  
GTGACTAATAACACAGAAACCTTCAGACCAGGAGGAGGAGATATGAGGGACAATTGGAGAAGTGAATTATATA  
AATATAAAGTAGTAAAAATTGAACCATTA---GGAGTAGCACCCACCAAGGCAAAGAGAAGAGTGGTG-----  
-----CAGAGAGAAAAAAGAGCA---ATGGGA---  
TTCGGAGCT-----TTTTTCCTTGGGTTCTTGGGAGCA---GCAGGAAGCACTATG---  
GGCGCAGCGTCA---ATAACGCTGACGGCACAG---GCCAGACAA---TTATTG---  
TCTGGTATAGTGCAACAGCAAAAC---AATTTG---CTGAGG---  
GCTATTGAGGCGCAACAACACCTGTTGCAACTCACAGTCTGGGGCATC  
>JF320484  
TTCTACTGTAATTTATCAAACTGTTTAATAGTACTTGGACTAGTAATAGTACTTGGAAATGATACTGGTACTT  
GGAATGAG-----  
-----ACT---  
GGAGAAAATGATACTATAACACTTCAATGTAGAATAAAAACAAATTATAAACATGTGGCAGGAAGTAGGAAGAG  
CAATGTATGCCCCCTCCCATCCAGGGACAAATTAAATGTATATCAAAT---  
ATCACAGGGCTGCTATTAAACAAGAGATGGTGGTAATAGTAATGACACA-----  
-----  
-----  
AAAGATACAGAAATCTTCAGACCTGCAGGAGGAGATATGAGGGACAATTGGAGAAGTGAATTATATAAAATATA  
AAGTAGTAAAAATTGAACCATTA---GGAATAGCACCTCCAAGGCAAAGAGAAGAGTGGTG-----  
-----CAGAGAGAAAGAAGAGCA---GTAACG---CTGGGAGCA-----  
---ATGTTCCCTTGGGTTCTTGGGAACA---GCAGGAAGCACTATG---GGCGCAGCGTCG---  
ATGGCGCTGACGGTACAG---GCCAGACAA---TTATTG---TCTGGTATAGTGCAACAGCAGAGC---  
AATCTG---CTGAGG---GCTATTGAGGCGCAACAGCATCTGTTGCAACTCACAGTCTGGGGCATC  
>EU577873  
TTCTACTGTAATACAACAAAACCTGTTTAATAGTACTTGGAACTACTACTAGTATTTGGAATAATACTGCAGAGA  
ATAATACTACA-----  
-----GGGTCA-----  
AATGAACTGAACCAATCACACTCCCATGCAGAATAAAAACAAATTATAAATATGTGGCAGGAAGTAGGAAAAG  
CAATGTATGCCCCCTCCCATTAAGGAAACATTAGCTGTTCAATCAAAT---  
ATTACAGGATTGATATTAAACAAGAGATGGTGGTAACGTTAACGGGACC-----  
-----  
-----  
AATGGAAGTGAATCTTTAGACCTGCAGGAGGAAATATGAAGGACAATTGGAGGAGTGAATTATATAAAATATA  
AAGTAGTAAAAATTGAGCCATTA---GGAGTAGCACCCACCAAGGCAAAGAGAAGAGTGGTG-----  
-----CAGAGAGAAAAAAGAGCA---GTGGGA---TTCGGAGCT-----  
---GTGTTCCCTTGGGTTCTTGGGAGCA---GCAGGAAGCACTATG---GGCGCAGCGTCG---  
GTGACGCTGACGGTACAG---GCCAGACAA---CTATTG---TCTGGTATAGTGCAACAGCAAAAC---  
AATTTG---CTGAGA---GCTATTGAGGCGCAACATCATCTGTTGCAACTCACCGTTTGGGGCATC  
>KT124778  
TTCTACTGTAATACGTCACAACTGTTTAATAGTACTTGGCTGGGGAATGACACTGAAAGGTTAAACAGAACTG  
AAGGGTCA-----  
-----  
GACAGCACTGAAGTAATCACACTCCAGTGTAGAATAAAAACAAATTATAAACATGTGGCAGGAAGTAGGAAAAG  
CAATGTATGCCCCCTCCCATCGCAGGACAAATTAAGTGTTCATCAAAT---  
ATTACGGGGCTACTATTAAACAAGAGATGGTGGTTACAATGATACT-----  
-----  
-----  
AGCCAGAACGAGACCTTCAGACCTGGGGGAGGAGATATGAGGGACAATTGGAGAAGTGAATTATATAAAATATA  
AAGTAGTAAGAATTGAACCATTA---GGAGTAGCCCCACCAAGGCAAAGAGAAGAGTGGTG-----  
-----CAAAGAGAAAGAAGAGCA---GTGGGA---TTAGGAGCT-----  
---GTGTTCCCTTGGGTTCTTGGGAGCA---GCAGGAAGCACTATG---GGCGCAGCGTCA---  
GTGACGCTGACGGTACAG---GCCAGACAA---TTATTG---TCTGGTATAGTGCAACAGCAAAAC---  
AATTTG---CTGAAG---GCTATTGAGGCGCAACACCATCTGTTGCAACTCACAGTCTGGGGCATC  
>DQ410562  
TTCTACTGTAATACAACACTGCTGTTTGATAGTACTTGGGATGATAATAATAGAAAGTTTGAATTTGAATAAT-  
-----  
-----  
ACTAATAGAAACATCACACTCCCATGCAAGATAAAAACAAATTATAAACAGGTGGCAGGAAGTGGGAAAAGCAA  
TGTATGCCCCCTCCCATTAAGGAGTAATTCAATGTTCAATCAAAT---

ATTACAGGGCTGTTATTAGTAAGAGATGGTGGCAACACTGCTAACAATACT-----  
-----  
-----  
GCTAACAAAACCTGAGACCTTCAGACCTGGAGGAGGAAATATGAAGGACAATTGGAGAAGTGAATTATATAAAT  
ATAAAGTAGTAAAAATTGAACCATTA---GGAGTGGCACCCACCAAGGCAAAGAGGAGAGTGGTG-----  
-----CAGAGGGAAAAAAGAGCA---GTGGGA---ATAGGAGCT---  
-----ATGTTTCCTTGGATTCTTAGGAGCA---GCAGGAAGCACTATG---GGCGCAGCGTCA---  
ATAACGCTGACGGTACAG---GCCAGGCAA---TTATTG---TCTGGTATAGTGCAACAGCAGAAC---  
AATCTG---CTGAGA---GCTATTGAGGCGCAACAGCATCTGTTGCAACTCACAGTCTGGGGCATC  
>FJ469717  
TTCTACTGTAATACAACACAGCTGTTTAATAGTACTTGGTTTACTAATGGCACTTGGATTAATGGTACTGTGT  
TAAATACA-----  
-----AATGAT-----  
ACTGACAAGGGAAACATCACACTCCCATGTAAAATAAAACAAATTATAAACATGTGGCAGGAAGTAGGAAAAG  
CAATATATGCCCCCTCCCATCAAAGGACCAATTAAGTGTACATCAAAT---  
ATTACAGGGATAATAATAACAAGAGATGGTGGTAATAACACGGGCGAAAATAAA-----  
-----  
-----  
AATAAACTTTCACTGAACTTTTCAGACCTGGAGGAGGAAATATGAGGGATAATTGGAAAAGTGAAGTATATA  
AATATAAAGTAGTACAGATTCAACCAATA---GAAATAGCACCCACCAGGGCAAAGAGAAGAGTGGTG-----  
-----CAGAGAGAAAAAAGAGCA---  
GTGGGAGCGCTGGGAGCT-----GTGTTTCCTTGGGTTCTTGGGAGCA---GCAGGAAGCACTATG---  
GGCGCAGCGTCA---ATAACGCTGACGGTACAG---GCCAGACAA---TTATTG---  
TCTGGTATAGTGCAACAGCAGAAC---AATCTG---CTGAAG---  
GCTATTGAGGCGCAACAGCATCTGTTGCAACTCACAGTCTGGGGCATC  
>FJ469724  
TTCTACTGTAATACAACACAACCTGTTTAATAGTACTTGGGAATAATGATACTTGGAAATGATAATAAACTGAA-  
-----  
-----  
GGAAATGGCACAATTACACTCCAATGCAGAATAAAACAATTTATAAACCTGTGGCAGAAAGTAGGAAAAGCAA  
TATATGCCCCCTCCCATCCAAGGAAATATTAGCTGTTTCATCAAAT---  
ATTACAGGGCTGCTATTAAACAAGGGATGGTGGTGTAAACGGGAGC-----  
-----  
-----  
GAGCACAACGAGACACTCAGACCTGGAGGAGGAGATATAAAAGACAATTGGAGAAGTGAATTATATCAATATA  
AAGTAGTAAAAATTGAACCATTA---GGAATAGCACCCACTGCAGCAAAGAGAAGAGTGGTG-----  
-----CAGAGAGAAAAAAGAGCA---GCAGGA---ATAGGAGCT-----  
---CTGCTCCTTGGGTTCTTGTCAGCA---GCAGGAAGCACTATG---GGCGCAGTGTCA---  
GTGACGCTGACGGTACAG---GCCAGACAA---TTATTG---TCTGGTATAGTGCAACAGCAAAAC---  
AATTTG---CTGAGA---GCTATTGAGGCGCAACAGCATCTGTTGCAACTCACGGTCTGGGGCATT  
>FJ469747  
TTCTACTGTAACCAACCACTGTTTAATAGTACTTGGATTGATGAATCATCAGGTATCGCTGAA-----  
-----  
-----  
GGAGATGAGAACATCACACTTCAATGCAGAATAAAACAATTTATAAACATGTGGCAGGAAGTAGGAAAAGCAA  
TGTATGCCCCCTCCCATCAGAGGACAAATTAGATGTTTCATCAAAT---  
ATTACAGGGCTGCTATTAAACAAGAGATGGTGGTCCTAGTAGTAATGAA-----  
-----  
-----  
ACCAACAGGAACGAGACCTTCAGACCGGGAGGAGGAGATATGAGGGACAATTGGAGAAGTGAATTATATAAAT  
ATAAAGTAGTAAAAGTTGAACCATTA---GGAGTAGCACCCACCAGGGCAAAGAGAAGAGTGGTG-----  
-----CAGAGAGAAAAAAGAGCA---GTGGGA---CTAGGAGCT---  
-----GTGTTTCCTTGGGTTCTTGGGAGCA---GCAGGAAGCACTATG---GGCGCAGCGTCA---  
CTGACGCTGACGGTACAG---GCCAGACAA---TTATTG---TCTGGGATAGTGCAACAGCAGAAAT---  
AATCTG---CTGAGA---GCTGTTGAGGCGCAACAGCATCTGTTGCAACTCACAGTCTGGGGCATC  
>FJ653159  
TTCTATTGTAATACAACACAACCTGTTTAATAGTAATTGGAATGAGAGTAGTATTAATAGTACTTGGAAATAGTA  
CTTGGGAAG-----  
-----TCAAAT-----  
GACCCAAATGACACCATCACACTCCCATGCAGAATAAAAACAATTTATAAACATGTGGCAAGAAGTGGGAAAAG

CAATGTATGCCCCCTCCCATCAAAGGTGTAATTCAGTGTTCATCAAAT---  
 ATTACAGGGCTGCTATTAACAAGAGATGGTGGGAGTAATGAGACT-----  
 -----  
 -----  
 AATACCACCGAGACTTTCAGACCTGGGGGAGGAGATATGAGGGACAATTGGAGAAGTGAACCTATACAAATATA  
 AAGTAGTAAAAATTGAACCATTA---GGAGTAGCACCCACCAAGGCAAAAAGAAGAGTGGTG-----  
 -----CAAAGAGAAAAAAGAGCA---GTGGGAACAATAGGAGCT-----  
 ---ATGTTCCCTTGGGTTCTTGGGAGCA---GCAGGAAGCACTATG---GGCGCAGCGTCA---  
 GTGACGCTGACGGTACAA---GCCAGACAA---TTATTG---TCTGGTATAGTGCAACAGCAGAGC---  
 AATTTG---CTGCAG---GCTATTAATGCACAACAACATTTGCTGCAACTAACAGTCTGGGGCATC  
 >FJ653573  
 TTTTACTGTAATACAACAACACTGTTTAATAGTACTTGGAATATGACTGGTACCTGGAATGATACCTGGAATG  
 GTAATAA-----  
 -----AGGTCA-----  
 AATGAACTGACAATATCACACTCCCATGCAGAATAAAACAAATAGTAAACAGGTGGCAGGAAGTAGGCAAAAG  
 CAATGTATGCCCCCTCCCATCAGAGGAAGCATTAGATGTTTCATCAAAT---  
 ATTACAGGGCTGCTATTAACAAGAGATGGGGGATTGATAATAGCACTGAG-----  
 -----  
 -----  
 GCAAAATAACACTGAGATTTTCAGACCTGGAGGAGGAGACATGAGGGACAATTGGAGAAGTGAATTATATAAGT  
 ATAAAGTAGTGAAAATTGAACCATTA---GGAGTAGCACCCACCAAGGCAAGGAGAAGAGTGGTG-----  
 -----CAGAGAGAAAAAAGAGCA---GTGGGAGCACTAGGAGCT---  
 -----ATGTTCCCTTGGGTTCTTGGGAGCA---GCAGGAAGCACTATG---GGCGCAGCGTCA---  
 CTGACGCTGACGGTACAG---GCCAGACAA---TTGTTG---TCTGGTATAGTGCAACAGCAGAAC---  
 AACCTG---CTGAGA---GCTATTGAGGCGCAACAGCATCTGTTGCAACTCACAGTCTGGGGCATC  
 >FJ653360  
 TTCTACTGTAATACAACAGCATTGTTTAATAGTACTTGGAATAATGCTGGAGTATCAAATAGTACTTGGAATA  
 ATGCTGGAGTA-----  
 -----TCAAATCACAGT-----  
 ACAGGAAATGAAACAATCACACTCCAATGCAGAATAAAACAAATTATAAATATGTGGCAGGAAGTAGGAAAAG  
 CAATGTATGCCCCCTCCCATAGTGGACAAATTAAATGTTTCATCAAAT---  
 ATTACAGGGCTGCTATTAACAAGGATGGTGGTATTGATAATACAGG-----  
 -----  
 -----  
 AGCAACGAAACCGAGGTCTTCAGACCTGGAGGAGGAAATATGAAGGACAATTGGAGAAGTGAATTATATAAAT  
 ATAAAGTAATAAAAATTGAACCAGTA---GGAATAGCACCCACCAAGGCAAGGAGAAGAGTGGTG-----  
 -----CAGAGAGAAAAAAGAGCA---GCG-----CTAGGAGCT---  
 -----CTGTTCCCTTGGGTTCTTGGGAATG---GCAGGAAGCACTATG---GGCGCAGCGTCA---  
 GTGACGCTGACGGTACAG---GCCAGGCTA---TTACTG---TCTGGTATAGTGCAACAGCAGAAC---  
 AATCTG---CTGAGG---GCTATTGAGGCGCAACAGCATCTGTTGCAACTCACAGTCTGGGGCATC  
 >FJ653426  
 TTCTACTGTAATACATCACCCTGTTTAATAGTACTTGGAATATTACTGAAGAGACAGATAATATTACTGGAA  
 AGACAGATGAC-----  
 -----AATAAT-----  
 AAAAATGACACAATAATCACACTTCAATGCAGAATAAAACAAATTGTAACATGTGGCAAAAAGTAGGAAGAG  
 CAATGTATGCCCCCTCCCATCAAGGGACAAATTAGGTGTGCATCAAAC---  
 ATTACAGGGCTGCTATTAACAAGAGATGGTGGTAGTAACAAGAACGAT-----  
 -----  
 -----  
 AGTGACACCGAGATCTTCAGACCTGGAGGTGGAGATATGAGGGATAATTGGAGAAGTGAATTATATAAATATA  
 AAGTAGTAGAGATTAAACCATTA---GGAATAGCACCCACCAAGGCAAGAGAAGAGTGGTG-----  
 -----CAAAGAGAAAAAAGAGCA---GTGGGA---CTAGGAGCT-----  
 ---ATGTTCCCTTGGGTTCTTAGGAGCA---GCAGGAAGCACTATG---GGCGCAGCGTCA---  
 GTGACGCTGACGGTACAG---GCCAGAAAT---TTATTG---TCTGGTATAGTGCAACAGCAGAAC---  
 AATTTG---CTGAAG---GCTATTGAGGCGCAACAACACCTGTTGCAACTCACAGTCTGGGGCATC  
 >EU578629  
 TTCTACTGCAATACAACAAAACCTGTTTCAGTAGTACTTGGAATAGTACTACTTGGGATAGTTGGAATAGTACTG  
 AAACA-----  
 -----AAT---  
 AGCACTGACAGAAATATCACACTCCCATGCAGAATAAAACAAATTATAAATATGTGGCAGGAAGTAGGAAGAG

CAATGTATGCCCCCTCCCATCAGAGGACAAATTAGATGCTCATCAAAT---  
ATTACAGGGCTGATATTAACAAGAGATGGTGGTAACAATACAAAT-----  
-----  
-----  
ACAAACGAGACCTTCAGACCTCAAGGAGGAAACATGAAGGACAATTGGAGAAGTGAATTATATAAATATAAAG  
TAGTAAAAAATTGAACCACTA---GGAATAGCACCCACCAAGGCAAAGAGAAGAGTGGTG-----  
-----CAGAGAGAAAAAAGAGCA---GTGGGA---ATGGGAGCT-----  
TTGTTTCCTTGGGTTCTTGGGAGCA---GCAGGAAGCACTATG---GGCGCAGTGTCTG---  
ATGACGCTGACGGTACAG---GCCAGACAA---TTATTG---TCTGGTATAGTGCAACAGCAGAAT---  
AATCTG---CTGAGA---GCTATTGAGGCGCAACAGCATCTGTTGCAACTCACAGTCTGGGGCATC  
>HQ217860  
TTCTACTGTAATACAACAAAACTATTTAATAGTACTTGGGATATAGAAACAATACTTAAGCATACTAAAAATA  
GTAAT-----  
-----  
GACACAAACTCAACTATTACACTCCAATGCAGAATAAAAACAAATTGTAAACATGTGGCAGGAAGTAGGAAAAG  
CAATGTACGCCCCCTCCCATCAGAGGAATAATTAAGTGTACATCAAAT---  
ATTACAGGGCTGCTATTAACAAGAGATGGGGGTATAACAACAGC-----  
-----  
-----  
ACCAACGAGACCTTCAGACCGGGAGGAGGAGATATGAGAGACAATTGGAGAAGTGAATTATACAAATATAAAG  
TAGTAAAAGTTGAACCATTA---GGAATAGCACCCACCAAGGCAAAAAGAAGAGTGGTG-----  
-----CAAAGAGAGAAAAAGAGCA---GTGGGA---ATAGGAGCT-----  
GTGTTTCCTTGGGTTCTTGGGAGCA---GCAGGAAGCACTATG---GGCGCAGCGACA---  
GTGACGCTGACGGTACAG---GCCAGACAA---TTATTG---TCTGGTATAGTGCAACAGCAGAGC---  
AATTTG---CTGAGA---GCTATTGAGGCGCAACAGCATCTGTTGCAGCTCACAGTCTGGGGCATC  
>JF689865  
TTCTACTGTAATACAACAAAACTGTTTAATAGTACTTGGCCTTGGAATGTTACTGGGTCAAATGTTACTGGG-  
-----  
-----  
TTAAATGACACAATCACAATTCATGCAGAATAAAAACAAATTATAAACATGTGGCAGGAAGTAGGAAAAGCAA  
TGTATGCCCCCTCCCATCCAAGGACAAATTAGATGTTTCATCAAAT---  
ATTACAGGGCTACTATTAACCAGAGATGGTGGTAATACAAATGAGAGC-----  
-----  
-----  
AATACCACCGAGACCTTCAGACCTGGAGGAGGAGATATGAGGGACAATTGGAGAAGTGAATTATATAAATATA  
AAGTAGTAAAAAATTGAACCATTA---GGAGTAGCACCCACCAAGGCAAAGAGAAGAGTGGTG-----  
-----CAGAGAGAAAAAAGAGCA---GTGGGA---CTAGGAGCT-----  
---CTGTTTCCTTGGGTTCTTGGGAGCA---GCAGGAAGCACTATG---GGCGCAGCGTCA---  
ATGACGCTGACGGTACAA---GCCAGGCAA---TTATTG---TCTGGTATAGTGCAACAGCAAAAC---  
AATTTG---CTGAGG---GCTATTGAAGCGCAACATCACCTGTTGCAACTCACAGTCTGGGGCATT  
>JF689874  
TTCTACTGTAATACAACAAAGCTGTTTACAAAGCGGTTTGATTGGAATAGGACTGAAGGGTTAAATGACACTG  
CAGGAAAT-----  
-----AAC---  
ACTGGAGGAAATAACATCATAATCCCATGCAGAATAAAAACAAATTATAAACATGTGGCAAGAAGTAGGAAAAG  
CAATATATGCCCCCTCCCATCAGTGGACGAATTAAGTGTACATCAAAC---  
ATTACTGGGCTGCTATTAATAAGAGATGGTGGGATAGGCCCGGGGACA-----  
-----  
-----  
GACAATACTAGTGAAACCTTCAGACCTCAAGGAGGGAATATAAGAGATAATTGGAGAAGTGAATTATATAAAT  
ATAAAGTAGTAAAAAATTGAACCATTA---GGACTAGCGCCACCAAGGCAAGGAGAAGAGTGGTG-----  
-----CAGAGAGAAAAAAGAGCA---ATGGGA---CTAGGAGCT---  
-----TTGTTTCCTTGGGTTCTTGGGAGCA---GCAGGAAGCACTATG---GGCGCAGCGTCA---  
CTGACGCTGACGGTACAG---GCCAGACAA---TTATTG---TCTGGTATAGTGCAACAGCAGAAC---  
AATTTG---CTGAGA---GCTATTGAGGCGCAACAGCATATGTTGCAACTCACAGTCTGGGGCATC  
>JF689875  
TTCTACTGTAATACAACACAACTGTTTAATAGTACTTGGAAATGAGAATAGTACTAAAGAAGGAAATGGA----  
-----  
-----  
AATGACACAATAACCACACTCCCATGCAGAATAAAAACAAATTATAAACATGTGGCAAGAAGTAGGAAAAGCAA

TGTATGCCCCCTCCCATCAGAGGAAACATTAGCTGTACATCAAAT ---  
ATTACAGGGCTGCTATTAACAAGAGATGGTGGGAATAAT-----  
-----  
-----  
GAGACCGAGACCTTCAGACCTGGAGGAGGAAATATGAAGGATAATTGGAGAAGTGAATTATATAAATATAAAG  
TAGTAAAAATTCAACCATTA---GGAGTAGCACCCACCAAGGCAAAGAGAAGAGTGGTG-----  
-----CAGAGAGAAAAAAGAGCA--GTGGGA---CTAGGAGCT-----  
GTGTTTCCTTGGGTTCTTGGGAGCA--GCAGGAAGCACTATG--GGCGCAGCGTCA---  
ATAACGCTGACGGTACAG---GCCAGACAA---TTATTG---TCTGGTATAGTGCAACAGCAGAAC---  
AATTTG---CTGAGG---GCTATTGAGGCGCAACAGCATCTGTTGCAACTCACAGTCTGGGGCATT  
>JX863990  
TTCTACTGTAATACAACAACCACTGTTTAATAGTACTTGGAAATTCTACTACTTTGAATTCTACTAGTACT----  
-----  
-----  
GGGAATGGGACCATCACACTCTCATGTAGAATAAAACAAATTATAAACAGGTGGCAGGAAGTAGGAAAAGCAA  
TGTATGCTCCTCCCATCAGAGGACAAATTAAGTGTTCATCAAAT---  
ATTACAGGGCTACTGTTAACAAGAGATGGTGGTCACACAAACAACACC-----  
-----  
-----  
AACAAAACCTGAGACCTTTAGACCTGGAGGAGGAGACATGAGGGACAATTGGAGAAGTGAATTATACAAATATA  
AAGTAGTAAAAATTGAACCATTA---GGAATAGCACCCACCAAGGCAAGGAGAAGAGTGGTG-----  
-----CAGAGAGAAAAAAGAGCA--ATAGGA---ATAGGAGCT-----  
---GTGTTTCCTTGGGTTCTTGGGAACA--GCAGGAAGCACTATG--GGCGCAGCGGCA---  
GTGACGCTGACGGTACAA---GCCAGACAA---TTACTG---TCTGGTATAGTGCAACAGCAAAAC---  
AATTTG---CTGAGG---GCTATTGAGGCGCAGCAGCATCTGTTGCAACTCACAGTCTGGGGCATC  
>JF320363  
TTCTACTGTAACACAGCAAAACCTGTTTGATACATCACAACTACAACCTGTCTAATAGCAGCACTGAA-----  
-----  
-----  
GAAAATGACACACTCACAATTCATGCAGAATAAAACAAGTTATAAACAGGTGGCAGGAAGTAGGAAAAGCAA  
TGTATGCCCCCTCCCATCAGAGGACAAATTAATGTGTATCAAAC---  
ATTACAGGGCTGCTATTAACAAGAGATGGTGGAAAGACTGAGGATAATACT-----  
-----  
-----  
ACTAATACTACTGAGGTCTTCAGACCTCAAGGAGGAAATATGAAAGATAATTGGAGAAGTGAATTATATAAAT  
ATAAGGTAGTAAGAACTGAACCATTA---GGAGTAGCACCCACCAAGGCAAAGAGAAGAGTGGTG-----  
-----CAGAGAGAAAAAAGAGCA--ATAGGGGATTAGGAGCG---  
-----TTGTTTCCTTGGGTTCTTGGGAGCA--GCAGGAAGCACTATG--GGCGCAGCGTCA---  
ATAACGCTGACGGCACAG---GCCAGACAA---ATATTG---TCTGGTATAGTGCAACAGCAGAAT---  
AATTTG---CTGAGA---GCTATTGAGGCGCAACAACATCTGTTGCAACTCACAGTCTGGGGCATC  
>JF320036  
TTCTACTGTAATACAACACAGCTGTTTAATATTAGTAGTACACAACCTGTTTAATAGTACTTGGAAATAGTACCG  
AA-----  
-----GGG---  
CTAAACACAAAAAATATCACACTCCAATGCAGAATAAAACAAATTATAAACATGTGGCAGCAAGTAGGAAAAG  
CAATGTATGCCCCCTCCCATCAGAGGACCAATTAATGTATATCAAAT---  
ATTACAGGGCTGCTGTTAACAAGAGATGGTGGGAAGATAAATGAGAGTAGG-----  
-----  
-----  
GCAATGAGACTGAGACCTTCAGACCTGGAGGAGGAGATATGAGGGACAATTGGAGAAGTGAACCTCTATAAAT  
ATAAAGTAGTAAAAATTAAACCATTA---GGAGTAGCACCCACTAAGGCAAAAAGAAGAGTGGTG-----  
-----CAGAGAGAAAAAAGAGCA---GTGGGA---CTAGGAGCA---  
-----TTGTTTCCTTGGGTTCTTGGGAGCA---GCAGGAAGCACTATG---GGCGCAGCGTCA---  
ATAACGCTGACGGTACAG---GCCAGACAA---TTATTG---TCTGGTATAGTGCAACAGCAGAAC---  
AATCTG---CTGAGG---GCTATTGAGGCGCAACAGCACCTGTTGCAACTCACAGTCTGGGGCATC  
>JF320502  
TTCTACTGTAATACAACAAAACCTGTTTAATAGCATTTGGAATGAAACACAACCTGTTTAATAGTACTTGGAAATG  
AGACT-----  
-----  
GAAAGAGGAGTCAATATCACACTCCCATGTAGAATAAAACAAATTATAAATATGTGGCAGGAAGTAGGAAAAG

CAATGTATGCCCCCTCCCATCAGAGGAATAATTCAATGTACATCAAAC ---  
ATTACAGGACTGATATTAACAAGAGATGGTGGTAAAAAAATAATGGGAGTGAA -----  
-----  
-----  
ACCTCCAATGGGAATGAAACCTTCAGACCTGGAGGAGGAGATATGAGAGACAATTGGAGAAGTGAATTATATA  
AATATAAAGTAGTAAAAGTTGAACCATTA --- GGAATAGCACCCACTAGGGCAAGGAGAAGAGTGGTG -----  
----- CAGAGAGAGAAAAGAGCA --- GTGGGA ---  
ATAGGAGCT ----- GTGTTCCCTTGGGTTCTTGGGAGCA --- GCAGGAAGCACTATG ---  
GGCGCAGCGTCA --- ATAACGCTGACGGTACAG --- GCCAGACAA --- TTATTG ---  
TCTGGTATAGTGCAACAGCAGAAC --- AATCTG --- CTGAAA ---  
GCTATTGATGCGCAACAGCATCTGTTGCAACTCACAGTCTGGGGCATC  
>JF320151  
TTCTACTGTAATACAACAGAGCTGTTTAATGATACTTGGCTGAGTAATAATACTTGGCTGTCAAATTATACTG  
AGAGTAAT -----  
----- AAT ---  
AATACTGCTAAAAATATCGTACTCCCATGCAGAATAAAAACAAATTATAAACAGATGGCAGGAAGTAGGAAAAG  
CAATGTATGCCCCCTCCCATCAGTGGACTAATTAGATGCTCATCAAAT ---  
ATTACAGGGCTGCTCTTAACAAGAGATGGTGGTAATCATAACACTAGT -----  
-----  
AATGACACCGAGACTTTCAGACCAGGAGGAGGAGATATGAGGGATAATTGGAGAAGTGAATTATATAAAATATA  
AAGTAGTAAAAATTGAGCCATTA --- GGAGTAGCACCCACCAAGGCAAGGAGAAGAGTGGTG -----  
----- CAGAGAGAAAAAAGAGCA --- GTGGGA --- CTAGGAGCT -----  
--- TTGTTCCCTTGGGTTCTTGGGAGCA --- GCAGGAAGCACTATG --- GGCGCAGCATCA ---  
GTGACGCTGACGGTACAA --- GCCAGACAA --- TTATTG --- TCTGGTATAGTGCAACAGCAAAAC ---  
AATTTG --- CTGAGG --- GCTATTGAGGCGCAACAGCATATGTTGCAACTCACAGTCTGGGGCATT  
>JF320145  
TTCTACTGTAATTCAACAAAACTGTTTAGCAGTGCTTGGTATACTAATAATACTAATAGTAGTAATACTGAAG  
GG -----  
-----  
TCAAATGACACTGTTATCATACTTCCATGCAAAATAAAAACAAATTATAAACATGTGGCAGGAAGTAGGAAGAG  
CAATGTATGCCCCCTCCCATCGCAGGAAACATTAGCTGTTTCATCAAAT ---  
ATTACAGGACTGCTGTTAACAAGAGATGGTGGTCACACGGAACTGCC -----  
-----  
AACACCACAGAAATCTTCAGACCTGGAGGAGGAGATATGAGGGACAATTGGAGAAGTGAATTATATAAAATATA  
AAGTAGTAAAAATTGAACCATTA --- GGAGTAGCACCCACCAAGGCAAGGAGAAGAGTGGTG -----  
----- CAGAGAGAAAAAAGAGCA --- GTAACA --- GTGGGAGCT -----  
--- GTGTTCCCTTGGGTTCTTGAGTGCA --- GCAGGAAGCACTATG --- GGCGCAGCGTCA ---  
CTGACGCTGACGGTACAG --- GCCAGACTA --- CTGTTG --- TCTGGTATAGTGCAAGCAGCAGAGC ---  
AATCTG --- CTGAGG --- GCTATTGAGGCGCAACAACAACCTGTTGCAACTCACAGTCTGGGGCATC  
>HQ908232  
TTCTACTGTAATACAACAAGGCTGTTTAATAGTACTTGGCAGTCCAATAGTACGGGGAATGATACTGGAGGGT  
CA -----  
-----  
AATAACACTGAACCTATCACACTCCTATGCAGAATAAAAACAAATTGTAACAGGTGGCAAGAAGTAGGAAAAG  
CAATGTATGCCCCCTCCCATCAGAGGACAAATTTACTGTAGATCAAAT ---  
ATTACAGGGCTGCTATTACAAGGGATGGTGGTAATGTCCAGAAC -----  
-----  
AACATGACTGAGACCTTCAGACCAGGAGGAGGAGATATGAGGGACAATTGGAGAAGTGAATTATATAAAATATA  
AAGTAGTAAAAATTGAGCCATTA --- GGAATAGCACCCACCGGGCAAGGAGAAGAGTGGTG -----  
----- CAGAGAGAAAAAAGAGCG --- GTGACA --- CTGGGAGCT -----  
--- ATGTTCCCTTGGGTTCTTGGGAGCA --- GCAGGAAGCACTATG --- GGCGCAGCGTCA ---  
ATAACGCTGACGGTACAG --- GCCAGACAA --- TTACTG --- TCTGGTATAGTGCAACAGCAGAAC ---  
AATCTG --- CTGAAG --- GCTATTGATGCGCAGCAGCATATGTTGCAACTCACCGTCTGGGGCATC  
>KM353665  
TTCTACTGTAATACAACAAAATTGTTTAATAGTACTTGGTATAATAATAGT -----  
-----  
-ACTTGAATAATACT -----

GGAGGAAATGACACATTACACTCCCATGTAGAATAAAACAAATTATAAACATGTGGCAGACAGTAGGAAGAG  
CAATGTATACCCCTCCCATCAGAGGATTAATTAAGTGTACATCAAAT---  
ATTACAGGGCTGATATTAACAAGAGATGGTGGG-----  
-----  
GGTGGTAACGAGAGTAATCAT-----  
ACCACAGAGGTCTTCAGACCTGCAGGAGGAGATATGAGGGACAATTGGAGGAGTGAATTATATAAATACAAAG  
TAGTAAAAATTGAACCATTA---GGAATAGCACCCACCAGGGCAAAAAGAAGAGTGGTG-----  
-----CAGAGAGAAAAAAGAGCA--GTGGGG--ATGGGAGCT-----  
CTGTTCCCTTGGGTTCTTAGGAGCA---GCAGGAAGCACTATG---GGCGCAGCGTCA---  
ATAACGCTGACGGTACAG---GCCAGACAA---TTATTG---TCTGGTATAGTGCAACAGCAGAGC---  
AATTTG---CTGAAG---GCTATTGAGGCGCAACAGCATCTGTTGCAACTCACAGTCTGGGGCATC  
>JN687750  
TTCTACTGTGATACAAAAAGCTGTTTAATAGTACTTGGTGGGTAAATAATACTTGGAAAGGCACTAAAGGGG  
ATGAG-----  
-----  
ACTAGGAATGGCACAATCGAACTCCCATGCAGAATAAAACAAATTATAAACATGTGGCAGGAAGTAGGAAAAG  
CAATGTATGCCCTCCCATCAGAGGACAAATTCAGTGTTCATCAAAT---  
ATTACAGGGCTGCTATTAACAAGAGATGGGGGTAATAATGAAACG-----  
-----  
-----  
AACGGAACAGAAACCTTCAGACCTGGAGGAGGAGATATGAGGGACAATTGGAGAAGTGAATTATATAAATATA  
AAGTAGTAAAAATTGAGCCATTA---GGAATAGCACCCGGCAGGGCAAAGAGAAGAGTGGTG-----  
-----CAGAGAGAAAAAAGAGCA--GTGGGA---CTAGGAGCT-----  
---ATGTTCCCTTGGGTTCTTGGGAGCA--GCAGGAAGCACTATG---GGCGCAGCGTCA---  
ATAACGCTGACGGTACAG---GCCAGACAA---TTACTG---TCTGGTATAGTGCAACAGCAGAAC---  
AACTTG---CTGAGA---GCTATTGAGGCGCAGCAGCATATGTTGCAACTCACAGTCTGGGGCATC  
>HM204582  
TTTTATTGTAATACATCAGAACTGTTTAAAGTACCTGGAATAGTACTGATACCTTCAACAGTACTGGAGAGA  
GA-----  
-----  
GGGAATGACACAATCATTCTCCCATGCAAAATAAGGCAAGTTGTAAACATGTGGCAGGAAGTAGGAAAAGCAA  
TGTATGCCCCCTCCTATCAGAGGTCAAATTAAGTGTTCATCAAAT---  
ATTACAGGGCTGCTATTAACAAGAGATGGTGGTGATAAAAAATAGT-----  
-----  
-----  
ACAAACGAGACCTTCAGACCTGGAGGAGGAGATATGAGGGACAATTGGAGAAGTGAATTATATAAATATAAGG  
TAGTAAAAATTGAACCATTA---GGAATAGCACCCACCAAGGCAAAGAGAAGAGTGGTG-----  
-----CAAAGAGAAAAAAGAGCA--GTGGGA--ATAGGAGCT-----  
TTGTTCCCTTGGGTTCTTGGGAGCA---GCAGGAAGCACTATG---GGCGCAGCGTCA---  
CTGACGCTGACGGTACAA---GCCAGACTA---TTATTG---TCTGGTATAGTGCAACAGCAGAAC---  
AATTTG---CTGAGG---GCTATTGAGGCGCAACAGCATCTGTTGCAACTCACGGTCTGGGGCATC  
>HM204589  
TTCTACTGTAATTCAACACAATTGTTTAATAGTACTTGGGATAAGAATGGTAGTAGAATAAATGGAAGTGAAG  
GA-----  
-----  
GAAAGTGGTACCATCACACTCCCATGCAGAATAAAACAAATTATAAACATGTGGCAGGAAGTAGGAAAAGCAA  
TGTATGCCCCCTCCCATCAGAGGACAAATTTATTGTTTCATCAAAT---  
ATTACAGGGATGCTATTAACAAGAGATGGTGGTACTAATGATACTGAC-----  
-----  
-----  
AAAAACGACACCGAGACCTTCAGACCTGGAGGAGGAGATATGAGGGATAATTGGAGAAGTGAATTATATAAAT  
ATAAAGTAGTAAAAATTGAGCCATTA---GGAGTAGCACCCACCAAGGCAAAGAGAAGAGTGGTG-----  
-----CAGAGAGAAAAAAGAGCA---GTGGGA---TTGGGAGCT---  
-----CTGTTCCCTTGGGTTCTTGGGAGCA---GCAGGAAGCACTATG---GGCGCAGCGTCA---  
GTGACGCTGACGGTACAG---GCCAGACAA---TTATTG---TCTGGTATAGTGCAACAGCAGAAC---  
AATCTG---CTGAGG---GCTATTGAGGCGCAACAGCATCTGTTGCAACTCACAGTCTGGGGCATC  
>KY112061  
TTCTACTGTAATTCAACACAGCTGTTTAATAGTGCTTGGCCTTGAATGATACTGAAGGGTCAAATGACGCT-  
-----  
-----

AAAAAAGATAATATCACACTCCCATGCAAAATAAAACAAATTATAAACATGTGGCAGGGAGTAGGAAAAGCAA  
TGTATGCCCCCTCCCATCGAAGGAAAAATTAAATGCTCATCAAAT ---  
ATTACAGGACTGCTATTAACAAGAGATGGTGGTTATGAGAACAAAT-----  
-----  
-----  
GAGACCAAGCCCCGAGATCTTCAGACCTGGAGGAGGAGATATGAGGGACAATTGGAGGAGTGAATTATATAAAT  
ATAAAGTAGTAAAAATTGAACCATTG --- GGAGTAGCACCTACCAAGGCAAAGAGAAGAGTGGTG-----  
-----CAGAGAGAAAAAAGAGCA---TTTGGA---CTAGGAGCT---  
-----GTGTTTCCTTGGGTTCTTGGGAGCA---GCAGGAAGCACTATG---GGCGCAGCATCA---  
ATAACGCTGACGGTACAG---GCCAGACAA---TTATTG---TCTGGTATAGTGCAACAGCAGAAC---  
AATTTG---CTGAGG---GCTATTGAGGCGCAACAGCATCTGTTGCAACTCACAGTCTGGGGCATC  
>EU576345  
TTCTACTGTGATACAACAAAACTGTTTAATAGTACTTGGGGGAATAGTACTTGGGGGTATAAAATGACAAATG  
AC-----  
-----  
ACTGCAAAAGACAACATCACACTCCCATGTAGAATAAAACAAATTATAAACATGTGGCAGGAAGTAGGAAAAG  
CAATGTATGCCCCCTCCCATCAAAGGACAAATTAGATGTACATCAAAT ---  
ATTACAGGGTTGGTGTAAACAAGAGATGGTGGTGGTGGTAGTGGTACA-----  
-----  
-----  
AATAACACCACAGAGATCTTCAGACCTGGAGGAGGAGATATGAGGGACAATTGGAGAAGTGAATTATATAAAT  
ATAAAGTAGTAAGAATTGAACCATTA---GGAATAGCACCCACCAAGGCAAAGAGAAGAGTGGTG-----  
-----CAGAGAGAAAAAAGAGCA---GCA-----ATAGGAGCT---  
-----ATGTTTCCTTGGGTTCTTGGGAGCA---GCAGGAAGCACTATG---GGCGCAGCGTCA---  
ATAACGCTGACGGTACAG---GCCAGACTA---TTATTG---TCTGGTATAGTGCAACAGCAGAAC---  
AATCTG---CTGAGG---GCTATTGAGGCGCAACATCAACTGTTGCAACTCACAGTTTGGGGCATC  
>EU576383  
TTCTACTGTAATTCAACACAACCTGTTTAACAGTACTTGGCATAGTAACAGTACTTGAATGATACTGGAAAGT  
CAGAA-----  
-----  
AATAATACAAAAATCATCACACTCCCATGCAGAATAAAACAAATTATAAACATGTGGCAGGAAGTAGGAAAAG  
CAATGTATGCCCCCTCCTATCAGAGGACAAATTAGATGTTTCATCAAAT ---  
ATTACAGGGCTGATACTAACAAGGGATGGAGGTCATGGAGGTAATGACAAT-----  
-----  
-----  
AACCAGACCACCGAGACCTTCAGACCTGGAGGAGGAAATATGAAGGACAATTGGAGAAGTGAATTATATAAAT  
ATAAAGTAGTAAAAATTGAACCATTA---GGAGTAGCACCCACCCGGCAAAAAGAAGAGTGGTG-----  
-----CAGAGAGAAAAAAGAGCA---TTAGTGGGATTCGGAGCT---  
-----CTGTTTCCTTGGGTTCTTGGGAGCA---GCAGGAAGCACTATG---GGCGCAGCGTCA---  
ATAACGCTGACGGTACAG---GCCAGACAA---TTACTG---TCTGGTATAGTGCAACAGCAAAAC---  
AATTTG---CTGAAG---GCTATTGAGGCGCAACAGCATCTGCTGCAACTCACAGTCTGGGGCATC  
>KX129209  
TTCTACTGTAATTCAACACAACCTGTTTAATAGTACGTGGATTGGGAATAGCACTGAAGAGTCAAAT-----  
-----  
-----  
GGCACTGAAAACATCACACTCCCATGTAGAATAAAACAAATTGTAAATCTGTGGCAGGAAGTAGGAAGAGCAA  
TGTATGCCCCCTCCCATCAGAGGACTAATTAAATGTTTCATCAAAT ---  
ATTACTGGGCTGTTGTTAACGAGAGATGGTGGTCAGTCTGACAATACT-----  
-----  
-----  
ACCAACGGGACCGAGACCTTTAGACCTGGAGGAGGAAATATGAAGGACAATTGGAGAAGTGAATTATATAAAT  
ATAAAGTAGTACAAATTGAACCATTA---GGAATAGCACCCACCAAGGCAAAGAGAAGAGTGGTG-----  
-----CAGAGAGAAAAAAGAGCA---GTGGGA---CTAGGAGCT---  
-----TTGTTTCCTTGGGTTCTTGGGAGCA---GCAGGAAGCACTATG---GGCGCAGCGTCA---  
GTGACGCTGACGGTACAG---GCCAGACAA---TTATTG---TCTGGTATAGTGCAAGCAGCAGAAC---  
AACTTG---CTGAGA---GCTATTGAGGCGCAACAACATATGTTGCAACTCACAGTCTGGGGCATC  
>KM259534  
TTCTACTGTAATACAACAAAACTGTTTAATAGTACTTGAATGGGACTAATATT-----  
-----  
-----  
-GATATTGGAAACAGT-----

ACGAAAGATGACAATATCACACTCCCATGCAGAATAAAACAAATTATAAATAGGTGGCAAGAGGTAGGAAAAG  
 CAATGTATGCCCCTCCCATCAGAGGACAAATTAGATGTTTCATCAAAC---  
 ATTACAGGGCTGCTATTAACAAGAGATGGTGGT-----  
 -----  
 AATAGCAATAACACCAACGAG-----  
 ACCACCGAGACCTTCAGACCTACAGGAGGAAATATGGAGGACAATTGGAGAAGTGAATTATATAAATATAAAG  
 TAGTGCAAATTCAACCATTA---GGAGTAGCACCCACCGAGGCAAAGAGAAGAGTGGTG-----  
 -----CAGAGAGAAAAAAGAGCA---GTGGGA---TTAGGAGCT-----  
 ATGTTCCCTTGGGTTCTTGGGAGCA---GCAGGTAGCACTATG---GGCGCAGCGTCA---  
 ATAACGCTGACGGTACAG---GCCAGACAA---TTACTG---TCTGGTATAGTGCAACAGCAGAAC---  
 AATTTG---CTGAGG---GCTATTGAGGCGCAACAGCATATGTTGCAACTCACAGTCTGGGGCATC  
 >HQ217957  
 TTCTACTGTAATACATCAGAACTGTTTAATAGTACCTGGAATATAACACACTTTAATAGTACCTGGAATGATA  
 CT-----  
 -----  
 GAAGGATCAAATAACATCACACTCCCATGCAGAATAAAACAAATTATAAATATGTGGCAACAAGTAGGAAAAG  
 CAATGTATGCCCCTCCCATCCAAGGATTAATTCAATGTTTCATCAAAT---  
 ATTACAGGGCTGCTATTAACAAGAGATGGAGGTAATAATAGTACT-----  
 -----  
 -----  
 AACGAGATCTTCAGACCTGGAGGAGGGGATATGAGGGACAATTGGAGAAGTGAATTATATAGATATAAAGTAG  
 TAAGAATTGAACCATTA---GGAGTAGCACCCACCAAGGCAAGGAGAAGAGTGGTG-----  
 -----CAAAGAGAAAAAAGAGCA---GTGGGAACAATAGGAGCT-----  
 ATGTTCCCTTGGGTTCTTGGGAGCA---GCAGGAAGCACTATG---GGCGCAGCGTCA---  
 GTGACGCTGACGGTACAG---GCCAGACAA---TTATTG---TCTGGAATAGTGCAACAGCAAAAC---  
 AATTTG---CTGAAG---GCTATTGAGGCGCAACAACACCTGTTGCAACTCACAGTCTGGGGCATC  
 >HQ217984  
 TTCTACTGTAATTCAACACAACCTGTTTAATAGTACTTGGACTAGGGAAAATGGTAGTTGGACTAGGAATGATA  
 CCGCT-----  
 -----GCA---  
 AATGAGACTGAGATTATCACACTCCCATGCAGAATAAAACAAATTATAAACATGTGGCAGGAAGTAGGAAAAG  
 CAATGTATGCCCCTCCCATCAAAGGACTTATTCAATGTTTCATCAAAT---  
 ATTACAGGATTGTTATTAACAAGAGATGGTGGTAATAATAGCAAC-----  
 -----  
 -----  
 ATCAATGAGATCTTTAGACCTGGAGGAGGAGATATGAGGGACAATTGGAGAAGTGAATTGTACAAATATAAGG  
 TAGTAAAAATTGAACCATTA---GGAGTAGCACCCACCAAGGCAAGGAGGAGAGTGGTG-----  
 -----CAAAGAGAGAAAAAGAGCA---GTGGGA---CTAGGAGCT-----  
 CTGTTCCCTTGGGTTCTTGGGAGCA---GCAGGAAGCACTATG---GGCGCAGCGTCA---  
 TTGACGCTGACGGTACAG---GCCAGACAA---TTATTG---TCTGGTATAGTGCAACAGCAGAAC---  
 AATATG---CTGAGG---GCTATTGAGGCGCAGCAGCACCTGTTGCAACTCACAGTCTGGGGCATC  
 >JF689886  
 TTCTACTGTAATTCAACACAACCTGTTTAATAGTACTTGGACTAAATATGATAATGGAACCTTGGGTTAAGAAGA  
 ATGGCACT-----  
 -----GAA---  
 TGGGTGAATGATAACAATCACACTCCCATGCAGAATAAAACAAATTATAAACATGTGGCAGGAAGTAGGAAAAG  
 CAATGTATGCCCCTCCCATCAGGGGACTAATTAATTGTATATCAAAT---  
 ATTACAGGGATACTGCTAACAAGAGATGGTGGTCAGGTTAATGGT-----  
 -----  
 -----  
 ACCAATGAGACCTTCAGACCAGGAGGAGGAGATATAAAGGATAATTGGAGAAGTGAATTATATAAATATAAAG  
 TAGTAAAAATTGAACCATTA---GGAGTAGCACCCACCAAGGCAAGGAGAAGAGTGGTG-----  
 -----CAGAGGGAAAAAAGAGCA---ATTGGA---ATAGGAGCT-----  
 TTGTTCCCTTGGGTTCTTGGGAGCA---GCAGGAAGCACTATG---GGCGCAGCGTCA---  
 GTGACGCTGACGGTACAA---GCCAGACAA---TTATTG---TCTGGTATAGTGCAACAGCAGAAC---  
 AATTTG---CTGAGG---GCTATTGAGGCGCAACAACATCTGTTGCAACTCACAGTCTGGGGCATC  
 >JF320385  
 TTCTACTGTAATACAACACAACCTGTTTAATAGTACTTGGATTTCGGAATGATACTAAATGGTCAAGTAACTCTA  
 CA-----  
 -----

GGAAATGGCACCATTATACTCCCATGCAGAATAAAACAAATTATAAACATGTGGCAGGAAGTAGGAAAAGCAA  
TGTATGCCCCCTCCTATCAGAGGAAACATTAGCTGTTTCATCAAAT---  
ATTACAGGGCTGCTATTAACAAGAGATGGGGGCAATAGTAATCAAACGACC-----  
-----  
-----  
CAGACCAAAGAAACAGAAACCTTCAGACCTGGAGGAGGAGATATGAGGGACAATTGGAGAAGTGAATTATATA  
AATATAAAGTAGTAAAAATTGAACCATTA---GGAGTAGCACCCACCAAGGCAAAGAGAAGAGTGGTG-----  
-----CAGAGAGAAAAAAGAGCA---GTGGGA---  
ATAGGAGCA-----ATGTTCCCTTGGATTCTTGGGAGCA---GCAGGAAGCACTATG---  
GGCGCAGCGTCA---CTAACGCTGACGGTACAG---GCCAGACAA---TTATTG---  
TCTGGTATAGTGCAGCAGCAGAAC---AATCTG---CTGAGA---  
GCTATTGAGGCGCAACAGCATCTGTTGCAACTCACAGTCTGGGGCATC  
>JF320150  
TTCTACTGTAATACAACACAACCTGTTTAATAGTACTTGGAACTACTACTGGGAGTGTGACTAATGGGTCAAATA  
ACAGT-----  
-----CAG---  
GGAGAAAATGGTACTATCACACTCCCGTGCAGAATAAAACAAATTATAAACATGTGGCAGGAAGTAGGAAAAG  
CAATGTATGCCCCCTCCAATCAGTGGAGAAATTAAATGTACATCAAAT---  
ATTACAGGACTGCTATTAACAAGAGATGGTGGTAATAGTAGCGAC-----  
-----  
-----  
AACGAGACCTTCAGACCTGGAGGAGGAGATATGAGGGACAATTGGAGAAGTGAATTATATAGATATAAAGTAG  
TAAAAATTGAACCATTA---GGAATAGCACCCACCAAGGCACAAAGAAGAGTGGTG-----  
-----CAGAGAGAAAAAAGAGCA---GCGGGA---CTAGGAGCG-----  
TTGTTCCCTTGGGTTCTTGGGAGCA---GCAGGAAGCACTATG---GGCGCAGCATCA---  
ATAATGCTGACGGTACAG---GCCAGACAA---TTGTTG---TCTGGTATAGTGCAACAGCAGAAC---  
AATCTG---CTGAGG---GCTATTGAGGCGCAACAGCATCTGTTGCAACTCACAGTCTGGGGCATC  
>JF320539  
TTCTACTGTAATACAACACAATTGTTCAATAATACTTGGAAAGGTACTGAAGAAGAGAATAGTACTAGGAAT-  
-----  
-----  
AGTAATGACACCATCACACTCCCATGCAGAATAAAACAAATTGTAAACATGTGGCAGGAAGTAGGAAAAGCAA  
TGTATGCCCCCTCCCATCAGAGGACTAATTCAATGTACATCAAAC---  
ATTACAGGGATAATATTAACAAGAGATGGTGGTAATAACACGAAT-----  
-----  
-----  
ACCACTGAGATCTTCAGACCAGGAGGAGGAGACATGAGGGACAATTGGAGAAGTGAATTATATAAATATAAAG  
TAGTAAAAATTGAACCATTA---GGAATAGCACCCACTAGGGCAAAGAGAAGAGTGGTG-----  
-----CAGAGAGAAAAAAGAGCA---GTGGGA---ATAGGAGCT-----  
TTGTTCCCTTGGGTTCTTGGGAGCA---GCAGGAAGCACTATG---GGCGCAGCGTCA---  
ATGACGCTGACGGTACAG---GCCAGACTA---TTATTG---TCTGGTATAGTGCAACAGCAGAAC---  
AATCTG---CTGCAG---GCTATTGAGGCGCAACAGCGTCTGTTGCAACTCACAGTCTGGGGCATC  
>JF320131  
TTCTATTGTAATACAACACAACCTGTTCAATAGTACTTGGGAGAGCAATATTACTACTGGGAATTGGAGCAAAA  
CTGAA-----  
-----GGA---  
TCAAATAACACTAACATCACACTCCCATGTAGAATAAGACAAATTGTAAACATGTGGCAGAAAGTAGGAAAAG  
CAATGTATGCCCCCTCCCATCAGGGGACCAATTCAATGTATATCAGAT---  
ATCACAGGGCTGCTATTAACAAGAGATGGAGGTAATAACGGGGACAAT-----  
-----  
-----  
AACAACACAGAGACCTTCAGACCTGGAGGAGGAGATATGAGGGACAATTGGAGAAGTGAATTATATAAATATA  
AAGTAGTACAAATTGAACCAATA---GGAATAGCACCCACCAAGGCGCAGAGAAGAGTGGTG-----  
-----CAGAGAGAAAAAAGAGCA---GTGGGA---GTAGGAGCT-----  
---TTTCTCTTTGGGTTCTTGGCAACA---GCAGGAAGCACTATG---GGCGCAGCGTCA---  
ATAACGCTGACGGTACAA---GCCAGACAA---TTATTG---TCTGGTATAGTGCAACAGCAGAGC---  
AATTTG---CTGAGG---GCTATTGAGGCGCAACAGCATATGTTGCAACTCACAGTCTGGGGCATC  
>HM638503  
TTCTACTGTAATACAACAGGGCTGTTTAGTAGTACTTGGAAATGAGAGTACTACTTGGGAAAGGTCAAAT----

-----  
GACACTGAAATAATCACTCTCCCATGCAGAATAAAACAAATTATAAACATGTGGCAGGCAGTAGGAAAAGCAA  
TATATGCCCCCTCCCATCAGTGGACAAATTAATTGTTTCATCAAAT---  
ATTACAGGGCTGCTATTAACAAGAGATGGTGGTTACAATGGTACGAAT-----  
-----  
-----  
GACACCCAGACCGAGACCTTCAGACCTCAGGGAGGAAATATGAAAGACAATTGGAGAAGTGAATTATATAAAT  
ATAAAGTAGTAAAAATTGAACCATTA---GGACTAGCACCCACCAAGGCAAAGAGAAGAGTGGTG-----  
-----CAGAGAGAAAAAAGAGCA---GTGGGA---ATAGGAGCT---  
-----ATGTTCTTTGGGCTCTTGGGAGCA---GCAGGAAGCACCATG---GGCGCAGCGTCA---  
GTGACGCTGACGGTACAG---GCCAGAAAG---TTGTTG---TCTGGTATAGTGCAACAGCAGAAC---  
AATCTG---CTGAGG---GCTATTGAGGCGCAACAGCATATGTTGCAACTCACAGTCTGGGGCATC  
>KT124801  
TTCTACTGTAATACAACCGAACTGTTTAATAGTACTTGGACTAGGAATAATGGTACCGGGTATGATGGGTCTA  
ATGGCACT-----  
-----  
GAAGGAAATGACACAATCACACTCCCATGCAGAATAAAACAAATTATAAACATGTGGCAGGAAGTAGGAAAAG  
CAATGTATGCCCCCTCCTATTAGAGGACAAATTAGATGCTCATCAAAT---  
ATTACAGGACTGATATTAACAAGAGATGGGGGTCAAAGAAACGGG-----  
-----  
-----  
AGTACTAATGAGACCTTCAGACCAGGAGGAGGAAATATGAGGGACAATTGGAGAAGTGAATTATATAAGTATA  
AAGTAATAAAAAATTGAACCACTA---GGAGTAGCACCCACCAGGGCAAAGAGAAGAGTGGTG-----  
-----CAGAGAGAAAAAAGAGCA---GTGGGA---ATAGGAGCT-----  
---GTGTTCTTTGGGTTCTTGGGAGCA---GCAGGAAGCACTATG---GGCGCAGCGTCA---  
CTAACGCTGACGGTACAG---GCCAGACAA---TTATTG---TCTGGTATAGTGCAACAGCAAAAC---  
AATTTG---CTGAGA---GCTATTGAGGCGCAACAACATATGTTGCAACTCACAGTCTGGGGCATC  
>KM354092  
TTCTACTGTGATACAACACAACCTATTTAATAGTACTTGGAAAAATGGTAGCACT-----  
-----  
-GGGAATGATCATGAA-----  
GAGTCAAATGGAAATATCACACTCCCATGCAGAATAAAACAAATTATAAACATGTGGCAGGAAGTAGGAAAGG  
CAATGTATGCCCCCTCCCATTAGAGGATACATTAATTGTTTCATCAAAT---  
ATTACAGGGCTGCTATTAACAAGAGATGGTGGT-----  
-----  
GATAATAGCACAAAT---  
GGGACCGAGATATTTCAGACCTCTAGGAGGAGATATGAAGGACAATTGGAGAAGTGAATTATATAAATATAAAG  
TTGTGAGAATTGAACCATTA---GGAATAGCACCCACCAAGGCAAAGAGAAGAGTGGTG-----  
-----CAAAGAGAAAAAAGAGCA---GTGGGA---TTTGGAGCT-----  
CTGTTCTTTGGGTTCTTGGGAGCA---GCAGGAAGCACTATG---GGCGCAGCGTCA---  
ATAACGCTGACGGTACAG---GCCAGACAA---TTATTG---ACTGGTATAGTGCAACAGCAGAAC---  
AATCTG---CTGAGA---GCTATTGAGGCGCAACAACATCTGTTGCAACTCACAGTCTGGGGCATC  
>JN687763  
TTCTACTGCAATACAACACAACCTGTTTAATAGTACTTGAATACTAATGGTACTTGGACAGGAAGTAATACT-  
-----  
-----  
AATAGCAGTAACATTACACTCCCATGCAGAATAAAACAAATTGTAAACATGTGGCAGGAAGTAGGAAAAGCAA  
TGTATGCCCCCTCCCATCAGCGACTAATTCAGTGTTCATCAAAT---  
ATTACAGGGCTGATATTAACAAGGGATGGTGGTAGTGGTAATGACACC-----  
-----  
-----  
AACACAACACTGAGACCTTCAGACCTGCAGGAGGAGATATGAGGGACAATTGGAGAAGTGAATTATACAAAT  
ATAAAGTAGTAAAAATTGAACCATTA---GGAGTAGCACCCACCAGGGCAAAGAGAAGAGTGGTG-----  
-----CAAAGAGAGAAAAGAGCA---GTGGGA---ATGGGAGCT---  
-----CTGTTCTTTGGGTTCTTGGGAGCA---GCAGGAAGCACTATG---GGCGCAGCGTCA---  
ATGACGCTGACGGTACAG---GCCAGACAA---TTATTG---TCTGGTATAGTGCAACAGCAGAGC---  
AATTTG---CTGAGG---GCTATTGAGGCGCAACAGCATCTGTTGCAACTCACAGTCTGGGGCATC  
>KM258901  
TTCTACTGTAATACAACACAGTTATTTAATGGTACTTGGAAATGGTACTTGGAAATGGTACTTGGACTGAT----  
-----ACTTGGAAATGAT---

ACTTGGAATGAGACTCACCCA-----  
 ACTAGCAACGACACTATCACACTCCCATGTAGGATAAAGCAAATTATAAACAGATGGCAGGAAGTAGGAAAAG  
 CAATGTATGCCCCCTCCCATCAGAGGAAACATTACCTGTTCTCTCAAAT---  
 ATTACAGGGCTGCTATTAACAAGAGATGGTGGT-----  
 -----  
 AACCGGAATGAGACCAAT---  
 AGCACAGAGACCTTCAGACCTGGAGGAGGAGATATGAGGGACAATTGGAGAAGTGAATTATATAAATATAAAG  
 TAGTAAAAATTGAGCCACTA---GGAGTAGCACCCACCAAGGCAAAAAGAAGAGTGGTG-----  
 -----CAGAGAGAAAAAAGAGCG---GTGGGAATGCTAGGAGCT-----  
 ATGTTCTTGGGTTCTTAGGAGCA---GCAGGAAGCACTATG---GGCGCAGCGTCA---  
 ATAACGCTGACGGTACAG---GCCAGACAA---TTATTG---TCTGGTATAGTGCAACAGCAAAAC---  
 AATTTG---CTGAGA---GCTATTGAGGCGCAACAGCATATGTTGCAACTCACAGTCTGGGGCATC  
 >JQ403073  
 TTCTACTGTAATACAACAACAACTGTTTGATGATAATTGGCCTAATGGAACCTGGATGTATAATAGCACT----  
 -----  
 -----  
 AGAAATGACACTATCATACTCCCATGCAGGATAAAACAAATTGTAAACATGTGGCAGGAAGTAGGAAAAGCAA  
 TGTATGCCCCCTCCCATCAAAGGACTAATTCAGTGTAAATTCAGT---  
 ATTACAGGGCTGCTATTAACAAGAGATGGTGGCACTAATAACACC-----  
 -----  
 -----  
 AACGAGACCTTCAGACCGGGAGGAGGAGACATGAGGGACAATTGGAGAAGTGAATTATATAAATATAAAGTAG  
 TAAAAATTGAACCATTA---GGAGTAGCACCCACCAAGGCAAAGAGAAGAGTGGTG-----  
 -----CAGAGAGAGAAAAGAGCA---GTGGGA---CTAGGAGCT-----  
 CTGTTCTTGGGTTCTTGGGAGCA---GCAGGAAGCACTATG---GGCGCAGCGTCA---  
 ATGGCGCTGACGGTACAG---ACCAGACAA---TTATTG---TCTGGTATAGTGCAACAGCAGAAC---  
 AATTTG---CTGAGG---GCTATTGAGGCGCAACAGCATCTGTTGCAACTCACAGTCTGGGGCATC  
 >JQ403078  
 TTCTATTGTAATACAACACAGCTGTTTAATAGTACTTGAATGGTACTGAGACTGAGAATAATACTACAGGGT  
 CAAAT-----  
 -----  
 -----  
 AACACTGATAATATCAGACTCCCATGCAGAATAAAACAAATTGTAAACAGGTGGCAGGAAGTAGGAAAAGCAA  
 TGTATGCCCCCTCCCATCGAGGGCATAATTAGTTGTTTCATCAAAT---  
 ATTACAGGGCTTTTATTAAACCAGAGATGGTGGTAACGGGAGCAGT-----  
 -----  
 -----  
 AACGCCGAGATCTTCAGACCTCAAGGAGGAGATATAAGGGACAATTGGAGAAGTGAATTATATAAATATAAAG  
 TAGTAAAAATTGAGCCACTA---GGAGTAGCACCCACCAAGGCAAAGAGAAGAGTGGTG-----  
 -----CAGAGAGAAAAAAGAGCA---GTGGGA---ATAGGAGCT-----  
 GTGTTCTTGGGTTCTTGGGAGCA---GCAGGAAGCACTATG---GGCGCAGCGTCA---  
 ATAACGCTGACGGTACAG---GCCAGACAA---TTATTG---TCTGGTATAGTGCAACAGCAGAAC---  
 AATCTG---CTGAGG---GCTATTGAGGCGCAACAACATCTGTTGCAACTCACAGTCTGGGGCATC  
 >JQ610064  
 TTCTATTGCAATACAACAGAACTGTTTACTTGAATTTAACACAACCTGTCTGAGAATTCAACTGGG-----  
 -----  
 -----  
 AATGATGCTAATATCACACTCCCATGTAGAATAAAACAAATTATAAACATGTGGCAGGAAGTAGGAAAAGCAA  
 TGTATGCCCCCTCCCATCAGCGGACCAATTAATTGCACATCAAAT---  
 ATTACAGGACTACTATTAACAAGAGATGGTGGTAATAACAATGACAGGACTAAC-----  
 AATGGCAGTGATAGTAAT---AACAGTACT-----  
 -----  
 -----  
 CAGACTGAGATCTTCAGACCTGGAGGAGGAGATATGAAGGACAATTGGAGAAGTGAATTATATAAATATAAAG  
 TAGTAAGAATTGAACCATTA---GGAGTAGCACCCACCAAGGCAAAGAGAAGAGTGGTG-----  
 -----CAAAGAGAAAAAAGAGCG---GTGGGAACGCTAGGAGCT-----  
 TTGTTCTTGGGTTCTTGGGAGCA---GCAGGAAGCACTATG---GGCGCAGCGTCA---  
 ATAACGCTGACGGTACAA---GCCAGACAA---TTATTG---TCTGGTATAGTGCAACAGCAAAGC---  
 AATTTG---CTGAGA---GCTATTGAGGCGCAACAGCATCTGTTGCAACTCACAGTCTGGGGCATC  
 >KM259406  
 TTCTACTGTAATACAACAAAACCTGTTTAAATAGTACTTGGGATAAAAATGGCACTTTG-----  
 -----

AGTGAAAATGGCACTCAG-----  
 AATGAACTGAACCAATCACACTCCCATGCAGAATAAAACAAATTATAAACATGTGGCAGGAAGTAGGGAGAG  
 CAATGTATGCCCCCTCCCATCAGAGGAAACATTAGCTGTTTCATCAAAT---  
 ATTACAGGACTGTTGTTAACAAGAGATGGTGT-----  
 -----  
 -  
 AACAAAGACCTGGGGCAACGACACCTTCAGGCCTATAGGAGGAAATATGAAAGACAATTGGAGGAGTGAATTAT  
 ATAAATATAAAGTAGTAAAAATTGAACCATTA---GGAATAGCACCCAACACGGCAAAGAGAAGAGTGGTG--  
 -----CAGAGAGAAAAAAGAGCA---GTGGGC---  
 ATAGGAGCT-----CTGTTTCCTTGGGTTTCTTGGGAGCA---GCAGGAAGCACTATG---  
 GGCGCAGCGTCA---ATGACGCTGACGGTACAG---GCCAGACAA---TTATTG---  
 TCTGGTATAGTGCAACAGCAGAAC---AATTTG---CTGAGG---  
 GCTATTGAGGCGCAACAGCATCTGTTGCAACTCACAGTCTGGGGCATT  
 >HQ217713  
 TTCTACTGTGATTCAACACCACTGTTTAATAGGACCTGGATGGCTAATGAGACTTTGAATAGTACTACTTTGA  
 ATAGTACT-----  
 -----GGA---  
 GAGTCAAATAAAATATCACACTCGCATGCAGAATAAAACAAATTATAAACATGTGGCAGCGAGTAGGGAAAAG  
 CAATGTATGCCCCCTCCTATCAGAGGACAAATTAGATGTTTCATCAAAT---  
 ATTACAGGGCTGCTGTTAACAAGAGATGGGGGTCAACAACAGGAGACTGGA-----  
 -----  
 -----  
 GATAACAGGACTGAGATCTTCAGACCGGGAGGAGGAGATATGAGGGACAATTGGAGAAGTAAATTATATAAAT  
 ATAAAGTAGTAAAAATTGAACCATTA---GGAGTAGCACCCACCAAGGCAAAGAGAAGAGTGGTG-----  
 -----CAGAGAGAAAAAAGAGTA---GCGGGA---TTCGGAGCT---  
 -----TTGTTTCCTTGGGTTCTTGGGAGCA---GCAGGAAGCACTATG---GGCGCAGCGTCA---  
 GTGACGCTGACGGTACAG---GCCAGACAA---TTACTG---TCTGGTATAGTGCAACAGCAGAAC---  
 AATTTG---CTGAGG---GCTATTGAGGCGCAACAGCATCTGTTGCAACTCACAGTCTGGGGCATC  
 >MK383397  
 TTCTACTGTAATTCAACACCACTGTTTAATAGTACTTGAATGGTACTGACGAGTCAAATCACCATGGAGAA-  
 -----  
 -----  
 AATGACACAATCATCACACTCCGCTGCAGAATAAAACAAATTATAAACATGTGGCAGGAAGTAGGAAGAGCGA  
 TGTATGCCCCCTCCCATTAAGGAAACATTAGCTGTTTCATCAAAT---  
 ATTACAGGGCTGCTATTAAACAAGAGATGGTGGTAATGGTAACCGG-----  
 -----  
 ----  
 ACTGACAACAACACCGAGATCTTCAGACCTCAGGGAGGAAATATGAAAGATAATTGGAGAAGTGAATTATATA  
 AATATAAAGTAGTAAGAATTGAACCATTA---GGAATAGCACCCACCAAGGCAAAGAGAAGAGTGGTG-----  
 -----CAGAGAGAAAAAAGAGTA---GTGGGA---  
 ATGGGAGCT-----TTGTTTCCTTGGGTTTCTTGGGAGCA---GCAGGAAGCACTATG---  
 GGCGCAGCGTCA---GTGACGCTGACGGTACAA---GCCAGACTA---TTACTG---  
 TCTGGTATAGTGCAACAGCAGAAC---AATTTG---CTGAGG---  
 GCTATTGAGGCGCAACAGCGTCTGTTGCAACTCACAGTCTGGGGCATC  
 >KT124761  
 TTCTACTGTAATACAACAAAGCTATTTAATAGTACTTGGGATCGGAATGGAACACAGATAAATGACACTATC-  
 -----  
 -----  
 ACAAATGACACTATCATACTCCCATGTAGAATAAAACAAATTATAAACAGGTGGCAAGAAGTAGGAAAAGCAA  
 TGTATGCCCCCTCCCATTAGAGGAGACATTAAGTGTTCATCACAG---  
 ATTACAGGGCTGCTATTAAACAAGAGATGGTGGTCAGAGCAATGACAGC-----  
 -----  
 -----  
 AGTATGAATGAGATCTTCAGACCTGGAGGAGGAGATATGAGGGACAATTGGAGAAGTGAATTATATAAATATA  
 AAGTAGTAAGAATTGAGCCATTA---GGAGTAGCACCCACCAAGGCAAAAAGAAGGGTGGTG-----  
 -----CAGAGAGAAAAAAGAGCA---GTAACA---CTAGGAGCT-----  
 ---GTGTTTCCTTGGGTTTCTTGGGAGCA---GCAGGAAGCACTATG---GGCGCAGCGTCA---  
 ATAACGCTGACGGCACAG---GCCAGACAA---TTATTG---TCTGGTATAGTGCAACAGCAGAGC---  
 AATCTG---CTGAAA---GCTATTGAGGCGCAACAGCGTCTGTTGCAACTCACAGTCTGGGGCATT  
 >KM353846

TTCTACTGTAATACATCAAAGTTGTTTAAACAGTACTTGGAATGGCACT-----  
 -----  
 -----AAGGAATACCAG-----  
 GGAGTGAATGGCACACTCACACTCCCATGCAGAATAAAACAAATCATAAACATGTGGCAGAAAGTAGGAAAAG  
 CAATGTATGCCCCCTCCCATCCAGGAAATATTAATTGCTCATCAAAT---  
 ATTACAGGGCTGCTATTAATGAGAGATGGTGGTAAC-----  
 -----  
 AAGGGGAACGAAACCGATAAT-----  
 ACTACCGAGATCTTTAGACCTGGAGGAGGAAATATGAGGGACAATTGGAGAAGTGAATTATATAAATATAAAG  
 TAGTGAGAATTGAACCATTA---GGAGTAGCACCCACCAAGGCAAAAAGAAGAGTGGTG-----  
 -----CAGAGAGAAAAAAGAGCG---GTAACA---GTGGGAGCT-----  
 ATGTTCCCTTGGGTTCTTGGGAGCA---GCAGGAACCACTATG---GGCGCAGCATCA---  
 TTGACGCTGACGGTACAG---GCCAGACAA---TTATTG---TCTGGTATAGTGCAACAGCAAAGC---  
 AATTTG---CTGAGG---GCTATTGAGGCGCAACAGCATCTGTTGCAGCTCACAGTCTGGGGCATC  
 >KY112135  
 TTCTACTGTAATACAACAGAACTGTTTAAATAGTACTTGGGATAAGGATGGGACAAGGCTTAATGACACTGGA-  
 -----  
 -----  
 GGAGATGGCAACATCACACTCCCATGTAGAATAAAACAAATTATAAACATGTGGCAGGAAGTAGGAAAAGCAA  
 TGTATGCCCCCTCCCATCAGAGGACAAATTAGCTGTGTATCAAAT---  
 ATCACAGGGCTACTATTAACAAGAGATGGGGGTGTAGACGATACT-----  
 -----  
 -----  
 CAAAACGAAACCTTCAGACCTGGAGGAGGAGATATGAGGGACAATTGGAGAAGTGAATTATATAAATATAAGG  
 TAGTAAAAATTGAACCATTA---GGAGTAGCACCTAGCAAGGCAAGAGAAGAGTGGTG-----  
 -----CAAAGAGAAAAAAGAGCA---GTGGGAACGTTAGGAGCC-----  
 ATGTTCCCTTGGGTTCTTGGGAGCA---GCAGGAAGCACTATG---GGCGCAGCGTCA---  
 CTGACGCTGACGGTACAG---GCCAGACAA---TTATTG---TCTGGTATAGTGCAACAGCAGAAC---  
 AATCTG---CTGAGA---GCTATTGAGGCGCAACAGCATCTGTTGCAACTCACAGTCTGGGGCATC  
 >JQ403070  
 TTCTACTGTAATACAACACAACCTGTTTAAATAGTACTTGGCTGTTTAAATGATACTTTGAATGATACTCAAGAGG  
 AGTATGGT-----  
 -----  
 GAGAATAACGGGACTATCACACTCCCATGCAGAATAAAACAAATTATAAACAGATGGCAGGAAGTAGGAAAAG  
 CAACATATGCCCCCTCCCATCAGAGGACAAATTAAATGTTTCATCAAAT---  
 ATTACAGGGATACTATTAACAAGAGATGGTAGTCAAGGCAACGGG-----  
 -----  
 -----  
 AGTGAGACCTTCAGACCAGGAGGAGGAGATATGAGGGACAATTGGAGAAGTGAATTATATAAATATAAAGTAG  
 TAAAAATTGAGCCATTA---GGAGTAGCACCCACCAAGGCAAGGAGAAGAGTGGTG-----  
 -----CAAAGGGAAGGAGCA---GTGGGAACGCTAGGAGCC-----  
 ATGTTCCCTTGGGTTCTTGGGAGCA---GCAGGAAGCACTATG---GGCGCAGCGTCA---  
 GTGACGCTGACGGTACAG---GCCAGACAA---CTATTG---TCTGGTATAGTGCAACAGCAGAAC---  
 AACCTG---CTGAGA---GCTATTGAGGCGCAACAGCATCTGTTGCAACTCACAGTCTGGGGCATC  
 >JQ403031  
 TTCTACTGCAATACAACAAAACCTATTTAAATAGTACTTGGAATAGTAGTAGTAGTGGGTTATTGAGGGTC  
 AGGAAGAG-----  
 -----  
 TCAAATGACAATATCACACTCCCATGTAGAATAAAACAAATTATAAACATGTGGCAGGGAGTAGGAAAAGCAA  
 TGTATGCCCCCTCCCATCCAAGGAAAAATTAGATGTTTCATCAAAC---  
 ATTACAGGGCTATTATTAGTGAGAGATGGTGGTATTAACAAGACG-----  
 -----  
 -----  
 AATGACACTGAAACCTTCAGACCTCAAGGAGGAAATATGATGGACAATTGGAGAAGTGAATTATATAAATATA  
 AAGTAGTAAAAATTGAACCATTA---GGAATAGCACCCACCAAGGCAAGAGAAGAGTGGTG-----  
 -----CAGAGAGAAAAAAGAGCA---GTGGGA---ATGGGAGCT-----  
 ---TTGTTCCCTTGGGTTCTTGGGAGCA---GCAGGAAGCACTATG---GGCGCAGCGTCA---  
 ATGGCGCTGACGGTACAG---GCCAGACAA---TTATTG---TCTGGTATAGTGCAACAGCAGAAC---  
 AATCTG---CTGAGA---GCCATTGAGGCGCAACAGCATATGTTGCAACTCACAGTCTGGGGCATC  
 >JQ403085

TTCTACTGTAATACATCACAACCTGTTTAAAGGGTACCTGGTTGACTAATGATACCTGGGCTAATGGTACCTGGA  
CAAAT-----  
-----GACACT-----  
AGCAAAAATGACAACATCACACTCCCATGCCGAATAAAACAAATTGTAACTTGTGGCAGGAAGTAGGAAGAG  
CAATGTATGCCCCCTCCCATCAGAGGAGAAATTCATTGTATATCAAAT---  
ATTACAGGGCTGTTATTAACAAGAGATGGTGGCCAGAATGCAACC-----  
-----  
AACGAGACCTTCAGACCTGTAGGAGGAGATATGAGGGACAATTGGAGAAGTGAATTATATAAATATAAAGTAG  
TAAAAATTGAACCATTA---GGAGTAGCACCCACCAAGGCAAAGAGAAGAGTGGTG-----  
-----CAGAGAGAAAAAAGAGCA---GTGGGA---CTAGGAGCT-----  
GTGTTTCCTTGGGTTCTTGGGAGCA---GCAGGAAGCACTATG---GGCGCAGCGTCA---  
CTGACGCTGACGGTACAG---GCCAGGCAA---TTATTG---TCTGGTATAGTGCAACAGCAAAAC---  
AACTTG---CTGAGA---GCTATTGAGGCGCAACAGCACCTGTTGCAACTCACAGTCTGGGGCATC  
>JQ403094  
TTCTACTGTAATACATCACGACTATTTAATAGTACTTGGAACTAGTAGTATTTGGAATACTACTGGAAGGC  
CAAATATT-----  
-----ACA---  
GGGAGCACTGACATTATCATACTCCCATGCAGAATAAGACAAATTATAAACATGTGGCAGGAAGTAGGAAAAG  
CAATGTATGCCCCCTCCCATCAGAGGACGAATTCAGTGTAGCTCAAAT---  
ATTACAGGGCTGCTATTAACAAGAGATGGTGGTAATACTAATAACTCA-----  
-----  
GACGCACATGAGATCTTCAGACCTGGAGGAGGAGATATGAGGGACAATTGGAGAAGTGAATTATATAAATATA  
AAGTAGTAAAAATTGAACCATTA---GGAATAGCGCCCAAGGCAAAGAGAAGAGTGGTG-----  
-----CAGAGAGAAAAAAGAGCA---GTGGGA---ATGGGAGCT-----  
---CTGTTTCCTTGGGTTCTTGGGAACA---GCAGGAAGCACTATG---GGCGCAGCGTCA---  
GTGACGCTGACGGTACAG---GCCAGACAA---TTATTG---TCTGGTATAGTGCAACAGCAGAGC---  
AATCTG---CTGAGG---GCTATTGATGCGCAACAGCATCTGTTGCAGCTCACAGTCTGGGGCATC  
>MH666195  
TTCTACTGTAATACAACAAAACCTGTTTAAATAGTACTTGGTTTGGGAATAGTACTGATAATACTCACAATATTA  
CTCAGAA-----  
-----  
GGTAATGGTACTATCACACTTCCATGCAGAATAAAGCAAATTATAAACATGTGGCAGGAAGTAGGAAAAGCAA  
TGTATGCCCCCTCCCATCAGTGGAAATAATTAGATGTAACCTCAAAT---  
ATTACAGGGCTGTTATTAACAAGAGATGGTGGTAATAACAATGGCAGC-----  
-----  
AACACTACTGAGGAGATTTTGTAGACCTACAGGAGGAAATATGAAAGACAATTGGAGAAGCGAATTATATAAAT  
ATAAGTAGTAGAAATTGAACCAATA---GGATTAGCCCCCACCAGGCAAAGAGAAGAGTGGTG-----  
-----CAGAGAGAAAAAAGAGCA---GTGGGA---ATAGGAGCT---  
-----ATGTTTCCTTGGGTTCTTGGGAGCA---GCAGGAAGCACTATG---GGCGCAGCGTCA---  
ATAACGCTGACGGTACAA---GCCAGACAA---TTATTG---ACTGGTATAGTGCAACAGCAAAGC---  
AATTTG---CTGAAG---GCTATTGAGGCGCAACAACATCTGTTGCAACTCACAGTCTGGGGCATC  
>KR423482  
TTCTACTGTAATACAACGAAACCTGTTTAAATAGTAGTTGGAATCAGAATGCTACTAATCAGAATGCTACT---  
-----  
-----AACAA-----  
GGAGGAAATGACACAATTACACTCCCATGTAGAATAAAACAGATTATAAACATGTGGCAGGAAGTAGGAAAGG  
CAATGTATGCCCCCTCCCATAAAAGGATTAATTAGATGTTTCATCAAAT---  
ATTACAGGGCTGATATTAACAAGAGATGGTGGTAATGACAAATAGCACA-----  
-----  
AACACAACACTGAAATCTTCAGACCGGGAGGAGGAGATATGAGGGACAATTGGAGAAGTGAATTATATAAAT  
ACAAAGTAGTAAGAGTTGAACCATTA---GGGATAGCACCCAACAAGGCAAAGAGGAGAGTGGTG-----  
-----CAGAGAGAAAAAAGAGCA---GTGGGG---ATAGGAGCT---  
-----TTGTTTCCTTGGGTTCTTGGGAGCA---GCAGGAAGCACTATG---GGCGCAGCGTCA---  
GTGACGCTGACGGTACAA---GCCAGACAA---TTATTG---TCTGGTATAGTGCAAGCAGCAGAAC---  
AATCTG---CTGAGG---GCTATTCAGGCGCAACAGCAACTGTTGCAGCTCACAGTCTGGGGCATC  
>HM638568

TTCTACTGTAATACATCACAACCTATTTTAATAGTACTTGGTATGGTAATGAGACTAAAAATGGGACTGAAAATG  
 GA-----  
 -----  
 ACTGACACAATAATTCAACTCCCATGCAGAATAAAACAAATTATAAACATGTGGCAGCAAGTAGGAAAAGCAA  
 TGTATGCCCCCTCCCATCGAAGGACTAATTAGCTGCTCGTCAAAC---  
 ATTACAGGACTGCTGTTAACAAGAGATGGTGGTGATAATAATAGC-----  
 -----  
 -----  
 ATGAACGAGATTTTCAGACCTGAAGGAGGAAATATGAAGGACAATTGGAGAAGTGAATTATATAAATATAAAG  
 TAGTAAAAGTTGAACCATTA---GGAATAGCACCCACCAAGGCAAGGAGAAGAGTGGTG-----  
 -----CAGAGAGAAAAAAGAGCA---GTAGGA---ATAGGAGCT-----  
 TTGTTCCCTTGGGTTCTTGGGAGCA---GCAGGAAGCACTATG---GGCGCAGCGTCA---  
 CTGACGCTGACGGTACAG---GCCAGACAA---TTATTG---TCTGGTATAGTGCAACAGCAGAAC---  
 AATTTG---CTGAGG---GCTATTGAGGCGCAACAGCATTGTGTTGCAACTCACAGTCTGGGGCATC  
 >GU733713  
 TTCTACTGTAATACAACCTAGACTGTTCAATAGTACTTGGAAATGTTAGTACTTGGAAATATTAGTCAGACTGAAG  
 GGTCA-----  
 -----TAC---  
 AACACTGAAGAAAATATCACACTCCCATGCAGAATAAAACAGATTGTAAACATGTGGCAGGAAGTAGGAAAAG  
 CAATGTATGCCCCCTCCCATCAGAGGAATAATTAGATGTTTCATCAAAT---  
 ATTACAGGGATAATGTTAACAAGAGATGGTGGTAAGAATAGGACAGAG-----  
 -----  
 -----  
 AACACCACTGAGACTTTCAGACCGGGAGGAGGAAATATGATGGACAATTGGAGAAGTGAACCTATATAACTATA  
 AAGTAGTAAAAATTGAACCATTA---GGGGTAGCACCCACCAAGGCAAAGAGAAGAGTGGTG-----  
 -----CAGAGAGAAAAAAGAGCA---GCGGGA---CTAGGAGCT-----  
 ---TTGTTCCCTTGGGTTCTTGGGAGCA---GCAGGAAGCACTATG---GGCGCAGCGTCA---  
 CTGACGCTGACGGTACAG---GCCAGACAA---TTATTG---TCTGGTATAGTGCAACAGCAGAAC---  
 AATTTG---CTGAGA---GCTATTGAGGCGCAACAGCACCTGTTGCAACTCACAGTCTGGGGCATC  
 >JX140657  
 TTCTACTGTAATACAACACCACTGTTTAAATAGTACTTGGGGGAATGACACTTTGACTAATGGAGGATCAAAT-  
 -----  
 -----  
 AGCACTGAAAATATCACACTTCAATGCAGAATAAAACAAATTATAAACATGTGGCAGGAAGTAGGAAAAGCAA  
 TGTATGCCCCCTCCCATCGCAGGAAACATTAGCTGTTTCATCAAAT---  
 ATTACAGGGCTGCTATTAAACAAGAGATGGTGGTAATGGCACAAAC-----  
 -----  
 -----  
 GAGACAGAGATCTTCAGACCCGAAGGAGGGAATATGAAGGACAATTGGAGAAGTGAATTATATAAATATAAAG  
 TAGTACAAATTGAACCATTA---GGAATAGCACCCACAAAGGCAAAGAGAAGAGTGGTG-----  
 -----CAGAGAGAAAAAAGAGCA---GTGGGA---CTAGGAGCT-----  
 GTGCTCTTTGGGTTCTTGGGAGCA---GCAGGAAGCACTATG---GGCGCAGCGTCA---  
 CTGACGCTGACGGTACAA---GCCAGGCAA---TTATTG---TCTGGTATAGTGCAACAGCAAAGC---  
 AATTTG---CTGAGG---GCTATTGAGGCGCAACAGCACCTGTTGCAACTCACAGTCTGGGGCATC  
 >MK164668  
 TTCTACTGTAATACAACAGAACTGTTTAAATAGTACTTGGGGTAATAGTAATAATACTAACAATAATACTGGA-  
 -----  
 -----  
 GGGGAAGAACTATCACTCTCCCATGCAGAATCAAACAAATTATAAACATGTGGCAGGAAGTAGGAAAAGCAA  
 TGTATGCCCCCTCCCATCAGAGGACAAATTAGGTGTTTCATCAAAG---  
 ATTACAGGGCTAATATTAACAAGAGATGGTGGCAACGAGAACAACGACAGTGAG-----  
 -----  
 -----  
 ATCTTCGAGATCTTCAGACCTACAGGAGGAAATATGAGGGACAATTGGAGAAGTGAATTATACAAATATAAAG  
 TAGTAAAAATTGAACCATTA---GGAATAGCACCCACCAAGGCAAAAAGAAGAGTGGTG-----  
 -----CAGAGAGAAAAAAGAGCA---GTGGGAATACTAGGAGCT-----  
 ATGTTCCCTTGGGTTCTTGGGCGCA---GCAGGAAGCACTATG---GGCGCAGCGTCA---  
 CTGACGCTGACGGTACAG---GCCAGACAA---CTCTTG---TCTGGTATAGTGCAACAGCAGAAC---  
 AACCTG---CTGAGG---GCTATTGAGGCGCAACATCATCTGTTGCAACTCACAGTCTGGGGCATC  
 >KC935959

TTCTACTGTAATACAACAAAACCTGTTTGTAGTAGTACTTGGAAGTGGGATAATGGTACTTGGAATATTAGTGGGT  
 TAGATAACAGT-----  
 -----  
 ACAGAACAAAATATCACACTCCCATGCAGAATAAAACAAATCATAAATATGTGGCAGACAGTAGGAAAAGCAA  
 TGTATGCCCCCTCCCATTAAGGGACAAATTCATGTATATCAAAT---  
 ATTACAGGGCTGCTATTAACAAGAGATGGTGGTAATGAAAGTGATACA-----  
 -----  
 -----  
 ACCAGGAACAACGAGACCTTCAGACCGGGAGGAGAGATATGAGGGACAATTGGAGAAGTGAATTATATAAAT  
 ATAAAGTAGTAGAAGTTGAACCATTA---GGAATAGCACCCACCAAGGCAAAGAGAAGAGTGGTG-----  
 -----CAGAGAGAAAAAAGAGCA---GTGACA---CTAGGAGCT---  
 -----CTGTTTCCTTGGGTTCTTGGGAGCA---GCAGGAAGCACTATG---GGCGCAGCATCA---  
 ATGACGCTGACGGTACAG---GCCAGACAA---TTATTG---TCTGGTATAGTGCAACAGCAGAAT---  
 AATCTG---CTGAGG---GCTATTGAGGCGCAACAGCATCTGTTGCAGCTCACAGTCTGGGGCATC  
 >KM082006  
 TTCTACTATAACACAACCCAGCTGTTTGATAGTACGTGGTTAACTAATGGTACTAGGATAAGACCAAATACTA  
 CTGATGGA-----  
 -----  
 ACTAATGGAAATATCACACTTCATGCAGAATAAAACAAATTATAAACAGGTGGCAAGAAGTAGGAAAAGCAA  
 TGTATGCCCCCTCCCATCAGAGGACAAATTAGATGTACATCAAAT---  
 ATTACAGGGTTAATATTAACAAGAGATGGTGGTCATGACGGGAAC-----  
 -----  
 -----  
 GAGACAAATGAGAAGGAGACCTTCAGACCTGGAGGAGGAGATATGAGGGACAATTGGAGAAGTGAATTATATA  
 AATATAAAGTAGTAAAAATTGAGCCAATA---GGAATAGCACCCACCATGGCAAAGAGAAGGGTGGTG-----  
 -----CAGAGAGAAAAAAGAGCA---GTAACG---  
 CTGGGAGCT-----ATGTTTCCTTGGGTTCTTGGGAGCA---GCAGGAAGCACTATG---  
 GGCGCAGCGTCG---ATGACGCTGACGGTACAG---GCCAGACTA---TTATTG---  
 TCTGGTATAGTGCAACAGCAGAGC---AATCTG---CTGAGA---  
 GCTATTGAGGCGCAACAGCAACTGTTGCAACTCACAGTCTGGGGCATC  
 >MG196775  
 TTCTATTGTAATACATCAGAACTGTTTAATAGTGAGTGGCATACTAATTATACATGGAATAGTACTTACAGTA  
 CAATAAAT-----GGTACTTGGAATAGTACT---  
 GACATTGAGGGTGTA-----  
 AACGCTACTGAAAAGATCACACTCCCATGTAGAATAAAACAAATTATAAACAGGTGGCAGGAAGTAGGAAAAG  
 CAATGTATGCCCCCTCCCATCGCAGGAACAATTAAATGTGTATCAAAT---  
 ATTACGGGGCTGCTGTTAACCAGAGACGGTGGCAACAATGAAACC-----  
 -----  
 -----  
 AAAGCCACTGAGGTCTTCAGACCTCAAGGAGGAAATATGAAGGACAATTGGAGAAGCGAATTATATAAATATA  
 AAGTAGTACAAATTGAACCATTA---GGAGTAGCACCCAACAAGGCAAAGAGAAGAGTGGTG-----  
 -----CAGAGAGAAAAAAGAGCA---ATAACA---ATAGGAGCT-----  
 ---ATGTTTCCTTGGGTTCTTGGGAGCA---GCAGGAAGCACTATG---GGCGCAGCGTCA---  
 ATGACGCTGACGGTACAG---GCCAGACAA---TTACTG---TCTGGTATAGTGCAACAGCAGAGC---  
 AATTTG---CTGAGA---GCTATTGAGGCGCAACAGCATCTGTTGCAACTCACAGTCTGGGGCATC  
 >JQ182826  
 TTCTACTGCAATACATCAGCACTGTTTAATAGTACTTGAGTACTAAGAATGGTACTCAGGTGTTGAATATAA  
 CTAATGAC-----  
 -----  
 ACCAGCACCAACATCACACTCCCATGCAGAATAAAACAAATTATAAACATGTGGCAGGAAGTAGGAAAAGCAA  
 TGTATGCCCCCTCCCATCAGAGGACTAATTAGGTGTACATCAAAC---  
 ATTACAGGACTACTATTAACAAGAGATGGTGGTAATGGTAATGGCAATACCACG-----  
 -----  
 -----  
 AATGGGACAGAGACCTTCAGACCTGTAGGAGGAGATATGAAGAATAATTGGAGAAGTGAATTATATAAATATA  
 AAGTAGTACAAATTCAACCATTA---GGAGTAGCACCCACCAAGGCAAAGAGAAGAGTGGTG-----  
 -----CAGAGAGAGAAAAAGGAT---TTGGGA---CTAGGAGCT-----  
 ---TTGTTCAATTGGGTTCTTGGGAGCA---GCAGGAAGCACTATG---GGCGCAGCGTCA---  
 ATAACGCTGACGGCACAG---GCCAGACAA---TTGCTG---TCTGGTATAGTGCAACAGCAGAGC---  
 GATCTG---ATGAAG---GCTATTGAGGCGCAGCAGCATCTGTTGCAACTCACAGTCTGGGGCATC

>MK385523

TTCTACTGTAATTCAACACCACTGTTTAAATAGTACTTGGTATGGTAATAGTACTTGAATGGTACTGAAGGGT  
CAAATTAC-----

-----  
ACTGAAAAAATATCATACTCTCATGCAGAATAAAACAGATTATAAACATGTGGCAGGAAATAGGAAAAGCAA  
TGTATGCCCCCTCCATTAGAGGAAACATTAGCTGTTTCATCAAAT---  
ATTACAGGGCTGCTATTAACAAGAGATGGTAGTAGTAATAACGAG-----

-----  
AGCCAGCCCCGAGATCTTCAGACCTGGAGGAGGAAATATGAAGGATAATTGGAGAAGTGAATTATATAAAATATA  
AAGTAGTAAGAATTGAACCATTA---GGAGTAGCACCCACCAAGGCAAGGAGAAGAGTGGTG-----  
-----CAGAGAGAAAAAGAGAGCA---GTGGGA---ATAGGAGCT-----  
---GTGTTTCCTTGGGTTCTTGGGAGCA---GCAGGAAGCACTATG---GGCGCAGCGTCA---  
ATGACGCTGACGGTACAG---GCCAGACTA---TTACTG---TCTGGTATAGTGCAACAGCAGAAC---  
AATTTG---CTGAGG---GCTATTGAGGCGCAACAGCGTCTGTTGCAACTCACAGTCTGGGGCATC

>KM353922

TTCTATTGCGATACAACACAACCTGTTTAAATAGTAGTTGGCCTTGAATGGTACA-----  
-----  
GAAGAGTCAAATAACACT-----  
GAAGGAAATGACACAATCACCCCTCCCATGCAAAATAAAAACAATTATAAACCTGTGGCAGGAAGTAGGAAAAG  
CAATGTATGCCCCCTCCCATCAGAGGACAAATTAATTGCACATCAAAT---  
ATTACAGGGTTACTATTAACAAGAGATGGTGGT-----

-----  
AGTACCAGCAATGAGACCGAGATCTTTAGACCTGCAGGAGGAGACATGAGAGATAATTGGAGAAGTGAATTAT  
ATAAATACAAAGTAGTAAAAATGAACCAATA---GGAGTAGCACCCACCAGGGCAAAGAGAAGAGTGGTG--  
-----CAGAGAGAAAAAGAGCA---GTGGGA---  
TTAGGAGCT-----ATGTTTCCTTGGGTTCTTGGGAGCA---GCAGGAAGCACTATG---  
GGCGCAGCGTCA---GTGACGCTGACGGTACAG---GCCAGACAA---TTACTG---  
TCTGGTATAGTGCAACAGCAGAAC---AATTTG---CTGAGG---  
GCTATTGAGGCGCAACATCATCTGTTGCAACTCACAGTCTGGGGCATC

>KM354862

TTCTACTGTAATACAACACAACCTATTTAAATAGTAATTGGACTGCTACTGGA-----  
-----  
-AATACAAATAACACT-----  
GGAGGAAATGCCACAATCACACTCCCTTGCAGAATAAAACAACCTATAAACATGTGGCAGGGAGTAGGAAAAG  
CAATGTATGCCCCCTCCAATAAGAGGACTAATTAGATGTTTCATCAAAC---  
ATTACAGGGCTACTGTTAAACAAGAGATGGTGGT-----

GGTAGCAATGGAACATAAT---  
GGAAGTGAAGTCTTCAGACCTCATGGAGGGGATATAAGGGACAATTGGAGAAGTGAATTATATAAATACAAAG  
TAGTAAAAATTGAACCATTA---GGAGTAGCACCCAACAAGGCAGAGAGAAGAGTGGTG-----  
-----CAGAGAGAAAAAGAGCA---GTGACA---ATAGGAGCT-----  
GTGTTTCCTTGGGTTCTTGGGAGCA---GCAGGAAGCACTATG---GGCGCAGCGTCA---  
ATGACGCTGACGGTACAG---GCCAGACAA---CTATTG---TCTGGTATAGTGCAACAGCAAAGC---  
AATTTG---CTGAGG---GCTATTGAGGCGCAACAGCACCTGTTGCAACTCACAGTCTGGGGCATC

>KX587037

TTCTACTGTAATACAACACCACTGTTTAAATAATAGTCTGCTTGGCAATGGTATCAATGGGACAAAT-----  
-----  
AACACAGAACCAATCGTACTTCATTGCAGAATAAAACAATTATAAACATGTGGCAGAAAGTAGGAAAAGCAA  
TGTATGCCCCCTCCTATCAAAGGACCGATTACATGCTCATCAAAT---  
ATAACAGGACTGATATTAACAAGAGATGGTGGTACAAATAGGACC-----

-----  
AATGAGACCTTCAGACCTGGAGGAGGAGATATGAGGGACAATTGGAGAAGTGAATTATATAAATATAAAGTAG  
TAAAAATTGAACCATTA---GGAGTAGCACCCACTAAGGCAAAGAGAAGAGTGGTG-----  
-----CAGAGAGAAAAAGAGCA---GTGGGA---CTTGGAGCT-----  
TTGTTTCCTTGGGTTCTTAGGAGCA---GCAGGAAGCACTATG---GGCGCAGCGTCA---

ATGACGCTGACGGTACAA---GCCAGACAA---TTATTG---TCTGGTATAGTGCAACAGCAGAAC---  
 AATCTG---CTGAGG---GCTATTGAGGCGCAACAACATTTGTTGCAACTCACAGTCTGGGGCATC  
 >KX587241  
 TTCTACTGTAATACGACACAACCTGTTTAATAATACTTGGAAATGGTACTTGGGGTGAGAATATT-----  
 -----  
 -----  
 ACCGGAATATTATCACACTCCCATGCAGAATAAAACAAATTATAAACATGTGGCAGGAAGTAGGAAAAGCAA  
 TGTATGCCCCCTCCCATCAGAGGAAATATTAGCTGTTTCATCAGAT---  
 ATTACAGGGCTAATATTAACAAGAGATGGTGGTCATGACAATGAGACC-----  
 -----  
 -----  
 AACAAACACAGCGATCTTCAGACCAGGAGGAGGAAATATGAAGGACAATTGGAGAAGTGAATTATATAAATATA  
 AAGTAGTAAAAATTGAACCAATA---GGAGTAGCACCCACCAAGGCAAAGAGAAGAGTGGTG-----  
 -----CAGAGAGAAAAAAGAGCA---GTGGGA---GTAGGAGCT-----  
 ---GTGCTCCTTGGGTTCTTGTTCAGCA---GCAGGAAGCACTATG---GGCGCAGCGTCA---  
 ATAACGCTGACGGCACAG---GCCAGACAA---TTACTG---TCTGGTATAGTGCAACAGCAAAAC---  
 AATTTG---CTGAGA---GCTATTGAGGCGCAACAACATATGTTGCAACTCACAGTCTGGGGCATC  
 >KX587299  
 TTCTACTGTAATACAACAAAGCTGTTTAATAGTACTTGGGATAATACAACCTGCAGGGTTAAATACC-----  
 -----  
 -----  
 ACTGAAAAAATTATCACACTCCCATGCAGAATAAGACAAATTATAAATATGTGGCAGCAGGTAGGAAAAGCAA  
 TGTATGCCCCCTCCTATCAGAGGAAAAATCCAATGCACATCAAAC---  
 ATTACAGGGTTATTATTAACAAGAGATGGTGGTAACGAGAACGAGACC-----  
 -----  
 -----  
 TATAACAATGAGACTTTTCAGACCTGGAGGAGGAGATATGAAGGACAATTGGAGAAGTGAATTATATAAATATA  
 AAGTAGTAAGAATTGAACCATTA---GGAATAGCACCCACCAAGGCAAAAAGAAGAGTGGTG-----  
 -----CAGAGAGAAAAAAGAGCA---ATAGGA---ATGGGAGCC-----  
 ---TTCTTCCTTGGGTTCTTGGGAGCG---GCCGGAAGCACTATG---GGCGCAGCGTCA---  
 ATGGCGCTGACGGTACAG---GCCAGACAA---TTATTG---TCTGGTATAGTGCAAGCAGCAAAAC---  
 AACTTG---CTGAGG---GCTATTGAGGCGCAACAGCATCTGTTGCAACTCACAGTCTGGGGCATC  
 >MG900412  
 TTCTACTGTAATTCAACAAAGCTGTTTAATAGTACTTGGCCTTGGAAATGATACTCAAGGGTCACATGAC---  
 -----  
 -----  
 ACTAATGGCACACTCACACTCCCATGCAGAATAAAACAAATTATAAACATGTGGCAGGAAGTAGGAAAAGCAA  
 TGTATGCCCCCTCCCATCGAAGGAATAATTAAATGCTCATCAAAC---  
 ATTACAGGACTGTTATTAAACAAGAGATGGTGGTTACGAGAGCAAT-----  
 -----  
 -----  
 AAGACTGATGAGATCTTCAGACCTGGAGGAGGAGATATGAGGGACAATTGGAGGAGTGAATTATATAAATATA  
 AAGTAGTAAAAATTGAACCATTG---GGAGTAGCACCTACCAAGGCAAAGAGGAGAGTGGTG-----  
 -----CAGAGGGAAAAAAGAGCA---TTTGGA---CTAGGAGCT-----  
 ---GTGTTCTTGGGTTCTTGGGAGCA---GCAGGAAGCACTATG---GGCGCAGCATCA---  
 ATAACGCTGACGGTACAG---GCCAGACAA---TTATTG---TCTGGTATAGTGCAACAGCAGAAC---  
 AATTTG---CTGAGG---GCTATTGAGGCGCAACAGCATCTGTTGCAACTCACAGTCTGGGGCATT  
 >KC473826  
 TTCTACTGTAATTCAACACAGCTGTTTAGTAGTAATTGGACTAGGGATAATACGTCTAGTAATTGGACTAGGA  
 AGGATAAC-----  
 -----GATACAGAG-----  
 CCTAATAAGACTGTGATCACACTCCCATGCAGAATAAAACAAATTATAAACATGTGGCAGGAAGTAGGAAAAG  
 CAATGTATGCCCCCTCCTATCAAAGGACTTATTCAATGTTTCATCAAAT---  
 ATTACAGGATTGTTATTAACAAGAGATGGTGGCGACAACAATAGC-----  
 -----  
 -----  
 AACACTGAAATCTTTAGACCTGGAGGAGGAGATATGAGGGACAATTGGAGAAGTGAATTATACAAATATAAAG  
 TAGTAAAAAATTGAACCATTA---GGAGTAGCACCCACCAAGGCAAGGAGGAGAGTGGTG-----  
 -----CAAAGAGAGAAAAAGAGCA---TTGGGA---ATGGGAGCT-----  
 CTGTTCTTGGGTTCTTGGGAGCA---GCAGGAAGCACTATG---GGCGCAGCGTCA---

TTGATGCTGACGGTACAG---GCCAGACAA---TTATTG---TCTGGTATAGTGCAACAGCAGAAC---  
 AATATG---CTGAGG---GCTATTGAGGCGCAGCAGCATCTGCTGCAACTCACAGTCTGGGGCATC  
 >KC473828  
 TTCTACTGTAATACAACAAAGCTGTTTAATAGCACTCTTAATGACACTTGAATTTTGGAAAT-----  
 -----  
 -----  
 GAAACTGGGGATATCATACTCCCGTGCAGAATAAAACAAATTATAAATCTGTGGCAGAAAGTAGGAAAAGCAA  
 TGTATGCCCCCTCCCATTAAGGACAGATTAACTGCACATCAAAT---  
 ATTACAGGGCTACTCTTAATAAGAGATGGCGGTGATAACGGGACT-----  
 -----  
 -----  
 GCCAGTGAGACCTTCAGACCTCAAGGAGGAAATATGAAGGACAATTGGAGAAGTGAATTATATAAATATAAAG  
 TAGCACAAGTTGAGCCAATA---GGAATAGCACCCACCAAGGCAAAGAGAAGAGTGGTG-----  
 -----  
 -----CAGAGAGAAAAAAGAGCA---GTGACT---ATGGGAGCT-----  
 TTGTTTCCTTGGGTTCTTGGGAACA---GCAGGAAGCACTATG---GGCGCAGCGTCG---  
 ATAACGCTGACGGTACAG---GCCAGACAA---TTACTG---TCTGGTATAGTGCAACAGCAGAGC---  
 AATCTG---CTGAGA---GCTATTGAGGCGCAACAGCATCTGTTGCAACTCACAGTCTGGGGCATC  
 >KC473829  
 TTCTACTGTAATACGACAGAACTGTTTAATAGTTCTTGGTATTGGAATGATACGAATGATACTTTAAAGAGC-  
 -----  
 -----  
 AATGAAGAAAATATCACACTTCTGTGCAGAATAAAACAAATTGTAAACATGTGGCAGGAAGTAGGAAAAGCAA  
 TGTATGCCCCCTCCCATTAGAGGACCAATTAGCTGTACATCAAAT---  
 ATTACAGGGATACTCTTAACAAGAGATGGAGGTCAGGGTAATAATACT-----  
 -----  
 -----  
 AATGATACTGAAATCTTCAGACCAGGAGGAGGAGATATGAGGGACAATTGGAGAAGTGAATTATATAAATATA  
 AAGTAGTAAAAATTGAACCATTA---GGAGTAGCACCCACCAGGGCAAAAAGAAGAGTGGTA-----  
 -----  
 -----CAGAGAGAAAAAAGAGCA--ATAGGGGGATTAGGAGCG-----  
 ---TTGTTTCCTTGGGTTCTTGGGAGCA--GCAGGAAGCACTATG---GGCGCAGCGTCA---  
 ATGACGCTGACGGTACAA---GCCAGGCTA--TTATTG---ACTGGTATAGTGCAACAGCAAAAT---  
 AATTTG---CTGAAG---GCTATTGAGGCGCAACAACATCTGTTGCAACTCACAGTCTGGGGCATT  
 >KC473830  
 TTCTACTGTGATTCAACACAACCTGTTTAGTAGTAATTGGACTAGGAATGATAGTAGTAGTAATTGGACTAGGA  
 GTGATAATGAT-----  
 -----ACAGAG-----  
 TCTAACAATACTGTGATCACACTCCCATGCAGAATAAGACAAATTATAAACATGTGGCAGGAAGTAGGAAAAG  
 CAATGTATGCCCCCTCCTATCAAAGGACTTATTCAATGTACATCAAAT---  
 ATTACAGGATTATTATTAACAAGAGATGGTGGTAATGGTAATAAA-----  
 -----  
 -----  
 ACGAACGACACTCTGGAGATCTTTAGACCTGGAGGAGGAGATATGAGGGACAATTGGAGAAGTGAATTGTACA  
 AATATAAAGTAGTAAAAATTGAACCATTA---GGAGTAGCACCCACCAAGGCAAGGAGGAGAGTGGTG-----  
 -----  
 -----CAAAGAGAGAAAAGAGCA---GTGGGA---  
 CTAGGAGCT-----CTGTTTCCTTGGGTTCTTGTGTCAGCA---GCAGGAAGCACTATG---  
 GGCGCAGCATCA---TTGACGCTGACGGTACAG---GCCAGACAA---TTACTG---  
 TCTGGTATAGTGCAACAGCAGAAC---AATATG---CTGAGG---  
 GCTATTGAGGCGCAACAGCATCTGTTGCAACTCACAGTCTGGGGCATC  
 >KU677990  
 TTCTACTGTAATACATCAAGACTGTTTAATAGTACTTTGTATAGTAATAATACTTGGAGTAGTAATATTACAG  
 AA-----  
 -----  
 -----  
 TTAATGGCATTATCACACTCCCATGCAGAATAAAACAAATTGTAAACATGTGGCAGGAAGTAGGAAAAGCAA  
 TGTATGCCCCCTCCCATCAGTGGACAAATTAAGTGTTCATCAAAC---  
 ATTACAGGACTATTATTAACAAGAGATGGTGGTGATGAGGAGAAC-----  
 -----  
 -----  
 AAGACTGATGAGATTTTCAGACCTGGAGGAGGAGATATGAGGGACAATTGGAGAAGTGAAGTATATAAATATA  
 AAGTAGTAAAAATTGAACCATTA---GGAGTAGCACCCCTCCAGGGCAAAGAGAAGAGTGGTG-----  
 -----  
 -----CAGAGAGAAAAAAGAGCA---GTGGGA---CTAGGAGCT-----

---TTGTTTCATTGGGTTCTTGGGAGCA---GCAGGAAGCACTATG---GGCGCAGCGTCA---  
 GTGACGCTGACGGTACAG---GCCAGACAA---TTATTG---TCTGGTATAGTGCAACAGCAGAAC---  
 AATTTG---CTGAGG---GCTATTGAGGCGCAACATCATCTGTTGCAACTCACAGTCTGGGGCATC  
 >MG196672  
 TTCTACTGTAATTCATCATCACTGTTTAACAGTACTTGAATAATACTAGTTTAAATGGAAGTATAAGT-----  
 -----  
 -----  
 TGGAAATGGAAGTATCACACTTCAATGCAGAATAAAACAAATTATAAACATGTGGCAGGAAGTAGGAAAAGCAA  
 TGTATGCCCCCTCCTATCAGAGGACAAATTAGGTGTAGATCAAAT---  
 ATTACAGGGCTGCTACTACTAAGAGATGGGGGTGAGGGTAATACTACT-----  
 -----  
 -----  
 GACAAACACCTCCGAGACCTTCAGACCTGGAGGAGGAGATATGAGGGACAATTGGAGAAGTGAATTATATAAAAT  
 ACAAAGTAGTACAAATTGAACCATTA---GGAGTAGCACCCACCAAGGCAAAGAGAAGAGTGGTG-----  
 -----  
 -----CAGAGAGAAAAAAGAGCA---ATAACG---CTAGGAGCT---  
 -----ATGTTTCCTTGGGTTCTTGGGAACA---GCAGGAAGCACTATG---GGCGCAGCGTCA---  
 ATAACGCTGACGGCACAG---GCCAGGCAA---TTATTG---TCTGGTATAGTGCAACAGCAGAAC---  
 AACTTG---CTGAGA---GCTATTGAGGCGCAACAACATCTGTTGCAACTCACAGTCTGGGGCATT  
 >MG196679  
 TTCTACTGTAATACAACACAACCTGTTTAATAGTACTTGAAGGATAATAATACTGGGTAAATACCAATGATA  
 CTAATACT-----  
 GGG---ATAAATACCTAT-----  
 GGCCTAATGGAACATTCATACTCCCATGTAGAATAAAACAAATTATAAACATGTGGCAGGAAGTAGGAAGAG  
 CAATGTATGCCCCCTCCCATCAGAGGACTAATTAGATGTAAATCAAAT---  
 ATAACAGGGCTGATACTAACAAGAGATGGTGGTAATAATAATAGT-----  
 -----  
 -----  
 ACAAATGAGACCTTCAGACCTGGAGGGGGAGATATGAAGGACAATTGGAGAAGTGAATTATATAAAATATAAAG  
 TAGTAAAAAATTGAACCATTA---GGAGTAGCACCTTCCAAGGCAAAGAGAAGAGTGGTG-----  
 -----  
 -----CAGAGAGAGAAAAAGAGCA---ATAGGGGGATTAGGAGCT-----  
 CTGTTCCCTTGGGTTCTTGGGAGCA---GCAGGAAGCACTATG---GGCGCAGCGTCA---  
 CTGACGCTGACGGTACAG---GCCAGACTA---TTATTG---TCTGGTATAGTGCAACAGCAGAAC---  
 AACTTG---CTGAGA---GCTATTGAGGCGCAACAGCATCTGTTGCAGCTCACAGTCTGGGGCATC  
 >KF384800  
 TTCTACTGTAATACAACAGGACTGTTTAATAGTACTTGAATAGTACTAGTACTGAGCTAAATGAC-----  
 -----  
 -----  
 ACTACAGGAAATATCAAACCTCCCATGCAGAATAAAACAAATTATAAACATGTGGCAGAAAGTAGGAAAAGCAA  
 TGTATGCCCCCTCCCATAGAAGGAGTAATTCATGTTTCATCAAAT---  
 ATTACAGGGCTAATATTAACAAGAGATGGTGGTGGTGGTAACGATACGATG-----  
 -----  
 -----  
 GGGAACGAGACCTTCAGACCGGGAGGGGGAGATATGAGGGACAATTGGAGGAGTGAATATATAGATATAAAG  
 TAGTAAAAAATTGAACCATTA---GGAATAGCACCCACCAAGGCAAAGAGAAGAGTGGTG-----  
 -----  
 -----CAGAGAGAAAAAAGAGCA---GTG-----ATAGGAGCG-----  
 ATGTTCCCTTGGGTTCTTGGGAGCA---GCAGGAAGCACTATG---GGCGCAGCGGCA---  
 GTGACGCTGACGGTACAG---GCCAGACTA---TTATTG---TCTGGTATAGTGCAACAGCAAAAC---  
 AACTTG---CTGAGA---GCTATTGAGGCGCAACAGCATATGTTGCAACTCACAGTCTGGGGCATT  
 >KF384801  
 TTTTACTGTAATACATCACAACCTGTTTAAGAGTACTTGGTGGACAAATAATACTCGGAATATACCA-----  
 -----  
 -----  
 CTACAAGGAAATGTCACACTCCCATGCAAAATAAAGCAAATTATAAACATGTGGCAAGAAGTAGGAAAAGCAA  
 TGTATGCCCCCTCCCATCGGAGGACTAATTAATTGTACATCAAAT---  
 ATTACAGGGCTGCTATTAACAAGAGATGGTGGTATAACGAATGGG-----  
 -----  
 -----  
 ACTGAGACCTTCAGACCTGGAGGGGGAGATATGAGGGACAATTGGAGAAGTGAATTATATAAAATATAAAGTAA  
 TAAAAAATTCAACCATTA---GGGATAGCACCCACCAAGGCAAAGAGAAGAGTGGTG-----  
 -----  
 -----CAGAGAGAAAAAAGAGCA---GTGGGA---GTGGGAGCT-----

TTGTTTCCTTGGGTTCTTGGGAGCA---GCAGGAAGCACTATG---GGCGCAGCGTCC---  
 GTAACGCTGACGGTACAG---GCCAGACAA---TTATTG---TCTGGTATAGTGCAACAGCAGAGC---  
 AATCTG---CTGAGG---GCTATTGAGGCGCAACAACATCTGTTGCAACTCACAGTCTGGGGCATT  
 >KF384803  
 TTCTACTGTAATTCAACACCACTGTTTAATAGTACCTGGGAAAATGGTACTTGGACGAATGAGAGTGGTATTG  
 GA-----  
 -----  
 GGATCAGATAATATCACACTTCCATGCAGAATAAAACAAATTATAAACCTGTGGCAGGAAGTAGGAAAAGCAA  
 TGTATGCTCCTCCCATCGAAGGACAAATTAGATGTTTCATCAAAT---  
 ATTACAGGGCTGTTATTAACAAGAGATGGTGGTTCTAATCAGACT-----  
 -----  
 -----  
 AACGAGACCTTCAGACCTGGAGGAGGAGATATGAGGGACAATTGGAGAAGTGAATTATATAAATATAAAGTAG  
 TAAAAATTGAACCATTA---GGATTAGCACCCACCAAGGCAAAGAGAAGAGTGGTG-----  
 -----CAGAGAGAAAAAAGAGCA---GCAGGA---CTGGGAGCT-----  
 CTGTTTCCTTGGGTTCTTGGGAGCA---GCAGGAAGCACTATG---GGCGCAGCGTCA---  
 ATGACGCTGACGGTACAG---GCCAGACTA---TTATTG---TCTGGTATAGTGCAACAGCAGAAC---  
 AATTTG---CTGAGA---GCTATTGAGGCGCAACAGCATCTGTTGCAACTCACAGTCTGGGGCATT  
 >KF384804  
 TTCTATTGTAATACAACAACACTGTTTAATAGTACTTGGAAATGTTACTGATCCTTGGAAATCTCCTGGAGGGT  
 CAAAT-----  
 -----  
 AACACTGGAGATATCACACTCCCATGCAGAATAAAACAAATTGTGAACAGGTGGCAGGAAGTAGGAAAAGCAA  
 TGTATGCCCCCTCCAATCTCAGGATATATTAAGTGTTCATCAAAA---  
 ATTACAGGGCTGATATTAACAAGAGATGGTGGTTATAACACCACC-----  
 -----  
 -----  
 AATGAGACTGAGATCTTCAGACCTGGAGGAGGAGATATGAGGGACAATTGGAGAAGTGAATTATATAAATATA  
 AAGTAGTAAGAATTGAACCATTA---GGAATAGCACCTACCACGGCAAAGAGAAGGGTGGTG-----  
 -----CAGAGAGAAAAAAGAGCA---GTGGGA---ATGGGAGCG-----  
 ---TTGTTCCCTTGGGTTCTTGGGAGCA---GCAGGAAGCACTATG---GGCGCAGCGTCA---  
 ATGATGCTGACGGTACAG---GCCAGACAA---TTATTG---TCTGGTATAGTGCAACAGCAGAAC---  
 AATCTG---CTGAGG---GCTATTGAGGCGCAACAACATCTGTTGCAACTCACAGTCTGGGGCATC  
 >KF384807  
 TTCTACTGTAACACAACAACACTGTTCAATAGTACTTGGGATGGGAATGATACTACTGAAAGGTCAAAGAGTA  
 CTGAAGAA-----  
 -----  
 AATGCAACAATCATCACAATCCCATGCAGAATAAAACAAATTATAAACATGTGGCAGAAAGTAGGAAAAGCAA  
 TATATGCCCCCTCCCATCAAAGGAAACATTAGTTGTTTCATCAAAT---  
 ATTACAGGGCTGCTATTAACAAGAGATGGTGGGAATAACGAGGAC-----  
 -----  
 -----  
 AGCACCAATGAGACCTTCAGACCTCAAGGAGGAGATATGAGGGACAATTGGAGAAGTGAGCTATATAAATACA  
 AAGTAGTAAGAATTGAACCATTA---GGAATAGCACCCACCAAGGCAAGGAGAAGAGTGGTG-----  
 -----CAGAGAGAAAAAAGAGCA---GTGGGA---ATAGGAGCT-----  
 ---TTGTTCCCTTGGGTTCTTGGGAGCA---GCAGGAAGCACTATG---GGCGCAGCGTCG---  
 CTGACGCTGACGGTACAG---GCCAGACAA---TTATTG---TCTGGTATAGTGCAACAGCAGAAC---  
 AATCTG---CTGAGA---GCTATTGAGGCGCAACAGCATATGTTGCAACTCACAGTCTGGGGCATC  
 >KC473835  
 TTCTACTGTAATACAACACCACTATTTAATAGTACTTGGCATGGGAATGAGAGTGATAGTATAGAATCAAATA  
 ACAGT-----  
 -----  
 ACAGAAGAAACCATCACAATTCAATGCAGAATAAAACAAATTATAAACATGTGGCAAGAGGTGGGAAAAGCAA  
 TGTATGCCCCCTCCATTAGAGGACAGATTAGATGTTTCATCAAAC---  
 ATCACAGGACTGCTATTAACAAGAGATGGTGGTAATAATAACAAG-----  
 -----  
 -----  
 AGTGAGACCTTCAGACCGGGAGGAGGAAATATGAAGGACAATTGGAGAAGTGAAGTATATAAATATAAAGTAG  
 TAAAAATTGAACCATTA---GGATTAGCACCCACCAGGGCAAAGAGAAGAGTGGTG-----  
 -----CAGAGAGAAAAAAGAGCA---GTGGGA---TTCGGAGCT-----

TTGTTTCCTTGGGTTCTTGGGAGCA---GCAGGAAGCACTATG---GGCGCAGCGTCA---  
GTGACGCTGACGGTACAG---GCCAGACAA---TTATTG---TCTGGTATAGTGCAACAGCAGAGC---  
AATCTG---CTGAGG---GCTATTGAGGCGCAACAGCATCTGTTGCAACTCACAGTCTGGGGCATC  
>KF384808  
TTCTACTGTAATACATCAAACTGTTTAATAGTACTTGAATAATAATAGTACTTGAATAATAACAGTATTT  
GGAATGCTACT-----  
-----  
CAAAATGAACTATCACACTTCCATGCAGAATAAAACAAATTATAAACATGTGGCAGGAAGTAGGAAAAGCAA  
TGTATGCCCCCTCCCATCAGAGGAGAAATTAGATGTGCATCAAAC---  
ATTACTGGACTGCTATTAACAAGAGATGGTGGTAACAATGGGAGT-----  
-----  
-----  
GAGAGTGAGACCTTCAGACCTGGAGGAGGAGATATGAGGGACAATTGGAGAAGTGAATTATATAAATACAAAAG  
TAGTAAAAATTAAACCATTA---GGAGTAGCACCCACCAAGGCAAAGAGAAGAGTGGTG-----  
-----CAGAGAGAAAAAAGAGCA---GTGGGA---ATAGGAGCT-----  
GTGTTTCCTTGGGTTCTTGGGAGCA---GCAGGAAGCACTATG---GGCGCAGCGTCA---  
ATAACGCTGACGGTACAG---GCCAGAAAG---TTACTG---TCTGGTATAGTGCAACAGCAGAAC---  
AATCTG---CTGAGG---GCTATTGATGCGCAACAGCATCTGTTGCAACTCACAGTCTGGGGCATC  
>KF384811  
TTCTACTGTAATTCATCAAACTGTTTAATAATACTTGAATGGTACTAACTGGACAGATACATGGTATAATA  
GC-----  
-----  
ACAAATGAACTATCATACTCCCGTGCAGAATAAAACAAGTTATAAACATGTGGCAGGAAGTAGGAAAAGCAA  
TGTATGCCCCCTCCCATCAGAGGAAAAATTAAATGTAAATCAAAC---  
ATTACAGGGCTGTTGTTAACAAGAGATGGCGGTGGTGGGAGCAATGAA-----  
-----  
-----  
ACCACCGAGACCTTCAGACCTGGAGGAGGAAATATGAGGGACAATTGGAGAAGTGAATTATATAAATATAAAG  
TAGTAAAAATTCAACCAGTA---GGCTTGGCACCCACCAGGGCAAAGAAGAGTGGTG-----  
-----CAGAGAGAAAAAAGAGCA---GTAACA---CTGGGAGCT-----  
GTGTTTCCTTGGGTTCTTGGGAGCA---GCAGGAAGCACTATG---GGCGCAGCGTCA---  
ATGACGCTGACGGTACAG---GCCAGACAA---TTATTG---TCTGGTATAGTGCAACAGCAGAGC---  
AATTTG---CTGAAA---GCTATTGAGGCGCAACAGCATCTGTTGCAACTCACAGTCTGGGGCATT  
>KX156409  
TTTTACTGTAATACAACAAAACCTGTTCAATAGTACTTGAATAGTAATAGTACTAGCAACAACACTAAAGGA-  
-----  
-----  
AATGAGACTATTATCGAAATACCATGCAGGATAAGACAAATTATAAACATGTGGCAGCAAGTAGGAAGAGCAA  
TGTATGCCCCCTCCCATCAGAGGACTAATTAGATGTTTCATCAAAC---  
ATTACAGGACTAATATTAACAAGAGATGGTGGTCATAATCAGGCC-----  
-----  
-----  
AATGACAGTGAGATCTTCAGACCTGGAGGAGGAGATATGAGGGACAATTGGAGAAGTGAATTATATAAATATA  
AAGTAGTAAGAATTGAACCATTA---GGAATAGCACCCACCAAGGCAAAGAAGAGTGGTG-----  
-----CAGAGAGAAAAAAGAGCA---GTGGGA---CTAGGAGCT-----  
---ATGTTCCCTGGGGTTCTTAGGAGCA---GCAGGAAGCACTATG---GGCGCAGCGTCA---  
GTGACGCTGACGGTACAA---GCCAGACAA---TTATTG---TCTGGTATAGTGCAACAGCAGAAC---  
AATTTG---CTGAGA---GCTATTGAGGCGCAACAGCATATGTTGCAACTCACAGTCTGGGGCATT  
>KY778615  
TTCTACTGTAATACATCAAAGTTGTTTAACAGTACTTGAATGGCACTGAGGAAAACCAGGGA-----  
-----  
-----  
GTGAATGGCACACTCACACTCCCATGCAGAATAAAACAAATCATAAACATGTGGCAGAAAGTAGGAAAAGCAA  
TGTATGCCCCCTCCCATCCAGGGAAATATTAATTGCTCATCAAAT---  
ATTACAGGGCTGCTATTAATGAGAGATGGTGGTAACAAGGGGAACGGAACC-----  
-----  
-----  
GATAATACTACCGAGATCTTTAGACCTGGAGGAGGAAATATGAGGGACAATTGGAGAAGTGAATTATATAAAT  
ATAAAGTAGTGAGAATTGAACCATTA---GGAGTAGCACCCACCAAGGCAAAGAAGAGTGGTG-----  
-----CAGAGAGAAAAAAGAGCG---GTAACA---GTGGGAGCT---

-----ATGTTTCCTTGGGTTCTTGGGAGCA---GCAGGAAGCACTATG---GGCGCAGCATCA---  
 TTGACGCTGACGGTACAG---GCCAGACAA---TTATTG---TCTGGTATAGTGCAACAGCAAAGC---  
 AATTTG---CTGAAG---GCTATTGAGGCGCAACAGCATCTGTTGCAGCTCACAGTCTGGGGCATC  
 >KT124768  
 TTCTACTGTAATACATCAGAACTGTTTAATAGTACTTGGTATAACAGTACATACAATGAGACTGCACCA-----  
 -----  
 -----  
 GGCAATGAAACAATCACACTCCCATGCAAAATAAGGCAGTTTGTAAACAGGTGGCAGGAAGTAGGAAAAGCAA  
 TGTATGCCCCCTCCCATCAGAGGAATAATTAGATGTTTATCAAAT---  
 ATTACAGGATTGATATTAACAAGAGATGGGGGTATCTATAATAAC-----  
 -----  
 ACGAATGGGACCATT---  
 GGGAAATGAGACTTTTCAGACCTGGAGGGGGAGATATGAGGGACAATTGGAGAAGTGAATTATATAAATATAAAG  
 TAGTAAAAATTGAACCATTA---GGAGTAGCACCCACCAAGCAAGGAGAAGAGTGGTG-----  
 -----CAGAGAGAAAAAAGAGCA---GTGGGA---TTCGGAGCT-----  
 ATGTTTCCTTGGGTTCTTGGGAGCA---GCAGGAAGCACTATG---GGCGCAGCGTCA---  
 GTGACGCTGACGGTACAG---GCCAGGCAA---TTATTG---TCTGGTATAGTGCAAGCAGCAAAAC---  
 AACTTG---CTGAGG---GCTATTGAGGCGCAACAGCATATGTTGCAACTCACAGTCTGGGGCATT  
 >MG196879  
 TTCTACTGTAATACAACGCAACTGTTTAGGGGTAATGGTACTGGTAATGGTACTGGAGAG-----  
 -----  
 -----  
 TCAAGTGACATTGTCACACTCCCATGCAGAATAAAACAAATTGTAAACATGTGGCAGAAAGTAGGAAAAGCTA  
 TGTATGCCCCCTCCCATCAAAGGACTAATTAGATGTTTCATCAAAT---  
 ATTACAGGGCTAATATTAACAAGAGATGGTAGTAATAAAAGTAAA-----  
 -----  
 -----  
 AGTGATCCAGAGATCTTCAGACCTGCAGGAGGAGATATGAGGGACAATTGGAGAAGTGAATTATATAAATATA  
 AAGTAGTAAAAATTCAACCATTA---GGAGTAGCACCCACCAAGGCAAAGAGAAGAGTGGTG-----  
 -----CAGAGAGAAAAAAGAGCA---GTGGGA---ATAGGAGCT-----  
 ---GTGTTCCCTTGGGTTCTTAGGAGCA---GCAGGAAGCACTATG---GGCGCAGCGTCA---  
 ATAACGCTGACGGTACAG---GCCAGACAA---TTATTG---TCTGGTATAGTGCAACAGCAGAAC---  
 AATCTG---CTGAGA---GCTATTGAGGCGCAACAGCATCTGTTGCAACTCACAGTCTGGGGCATC  
 >MG197013  
 TTCTACTGTAATACAACACAGCTGTTTAATAGCACTTGGAAATAGCACGACTAATAATGACACTGAAGGATCA-  
 -----  
 -----  
 AGTAATGCTACGATCACACTCCCATGTAGAATAAGACAAATTATAAACATGTGGCAGACAGTAGGAAAAGCAA  
 TGTATGCCCCCTCCCATCAGAGGAGAGATTAGCTGTTTCATCAAAT---  
 ATTACAGGGCTGCTGTTAAACAAGAGATGGT---AATACCAATCACACT-----  
 -----  
 -----  
 GATGCCACTGAGACCTTTAGACCTGGAGGAGGAGATATGAGGGACAATTGGAGAAGTGAATTATATAAATATA  
 AAGTGATACAACTTGAACCAATA---GGAGTAGCACCCACCAAGGCAAAGAGAAGAGTGGTG-----  
 -----CAAAGAGAAAAAAGAGCA---GTGGGGGCAATAGGAGCT-----  
 ---ATGTTCCCTTGGGTTCTTGGGAGCA---GCAGGAAGCACTATG---GGCGCAGCGTCA---  
 ATAACGCTGACGGTACAG---GCCAGACTA---TTATTG---TCTGGTATTGTGCAACAGCAAAAC---  
 AATTTG---CTGAGG---GCTATTGAGGCGCAACAGCATCTGTTGCAACTCACAGTCTGGGGCATC  
 >MG197046  
 TTCTACTGTAATACCTCAAACTGTTTAACAGTACATGGCCAAATAATACTAAAAATGCTAATATC-----  
 -----  
 -----  
 ACTGAAGGAAGTATCACACTCCCGTGCAGAATAAAACAAATTATAAACATGTGGCAGGAAGTAGGAAAGGCAA  
 TGTATGCCCCCTCCCATCAGAGGACAACCTTAAGTGTTCATCAAAT---  
 ATTACAGGGCTGCTATTAACAAGAGATGGGGGTATAATCAGGCG-----  
 -----  
 -----  
 AACAAATAGCGAGACCTTCAGACCGGGAGGAGGAGATATGAGGAACAATTGGAGAAGTGAATTATATAAATATA  
 AAGTAGTAAGAGTTGAACCATTA---GGAGTAGCACCCACCAAGGCAAAGAGAAGAGTGGTG-----  
 -----CAAAGAGAAAAAAGAGAGCA---GTGGGA---ATGGGAGCT-----

---TTGTTCCCTTGGGTTCTTGGGAGCA---GCAGGAAGCACTATG---GGCGCAGCGTCA---  
CTAACGCTGACGGTACAA---GCCAGACAA---TTATTG---TCTGGTATAGTGCAACAGCAAAAC---  
AATTTG---CTGAGA---GCTATTGAGGCGCAGCAGCATATGTTGCAACTCACAGTCTGGGGCATC  
>MG197064  
TTCTACTGTAATACATCAAACTGTTTAAACAATACCTGGACTAAGGGTACTTGAATAGTACATGGTCATGGG  
CA-----  
-----  
AATGAACTAACATCACACTCCCATGCAGAATAAAACAGATTATAAACATGTGGCAGGAAGTAGGAAAAGCAA  
TGTATGCCCCCTCCCATCGAAGGAATAATTAGATGTGCCTCAAAC---  
ATTACAGGGCTGCTATTAACAAGAGATGGTGGTAAACATGATAATATTACC-----  
-----  
ATTAATGGTAATGTCATTGACTATAAC-----  
ACCACCGAGGTCTTCAGACCTGGAGGGGGAGATATGAGGGACAATTGGAGAAGTGAATTATATAAATACAAAG  
TAGTACAAATTGAACCATTA---GGAGTAGCACCCACTAAGGCAAAAAGAAGAGTGGTG-----  
-----CAGAGAGAAAAAAGAGCA---GTGGTA---CTAGGAGCT-----  
TTGTTCCCTTGGGTTCTTGGGAGCA---GCAGGAAGCACTATG---GGCGCAGCGTCA---  
ATGACGCTGACGGTACAG---GCCAGACTA---TTATTG---TCTGGTATAGTGCAACAGCAGAAC---  
AATTTG---CTGAGG---GCTATTGAGGCGCAACAACATCTGTTGCAACTCACAGTCTGGGGCATT  
>MG197113  
TTCTACTGTAACACATCAAAGTTGTTTAAATAGCACTTGGAACTATAATAATGCTACAGGAAACACTGAAGGAA  
ATAGCACACAA-----  
-----  
GGAAATATCACACTCATCACACTCCCATGCAGAATAAAACAGATTATAAACAGGTGGCAGGAAGTAGGAAAAG  
CAATGTATGCCCCCTCCCATCAGCGGACAAATTAAGTGTTCATCAAAT---  
ATTACAGGACTACTATTAACAAGAGATGGTGGTCATAATAACAAT-----  
-----  
-----  
AGCACAATTGAGACCTTTAGACCTACAGGAGGAGATATGAGGAACAATTGGAGAAGTGAATTATATAAATATA  
AAGTAGTAAAAATTGAGCCATTA---GGAATAGCACCCACCAAGGCAAAAAGAAGAGTGGTG-----  
-----CAGAGAGAAAAAAGAGCA---GTAGGAACGCTGGGAGCT-----  
---ATGTTCCCTTGGGTTCTTAGGAGCA---GCAGGAAGCACTATG---GGCGCAGCGTCA---  
GTGACGTTGACGGTACAG---GCCAGACTA---TTATTG---TCTGGTATAGTGACAGCAGCAGAGC---  
AAGCTG---CTGAGG---GCTATTGAGGCGCAACAGCATATGTTGCAACTCACAGTCTGGGGCATC  
>KM355159  
TTCTATTGTAATTTAACAAAACCTGTTTAAATAGTACTTGAATAAGACTGAAGGGCCTTGG-----  
-----  
AATGTTACTGAAGAGTATGGG-----  
AATATTACTGACCCTATCATACTCCCATGCAGAATAAAACAAATTATAAACATGTGGCAGAGAGTAGGAAGGG  
CAATGTATGCCCCCTCCCATCAAAGGCAAACCTTCAATGTACATCAAAT---  
ATTACAGGGCTCCTATTAACAAGAGATGGTGGT-----  
-----  
-  
AAGGTGAATAATGAGACTGAGATCTTTAGGCCTGCAGGAGGAGATATGAGGGACAATTGGAGAAGCGAATTAT  
ATAAATATAAAGTAGTAAAAATTGAACCATTA---GGAATAGCACCCACCAGGGCGAAGAGAAGAGTGGTG--  
-----CAGAGAGAAAAAAGAGCA---GTGGGA---  
TTAGGAGCT-----ATGTTCCCTTGGGTTCTTGGGAGCA---GCAGGAAGCACTATG---  
GGCGCAGCGGCA---GTGACGCTGACGGTACAG---GCCAGACAA---TTATTG---  
TCTGGTATAGTGACAGCAGCAGAAC---AATCTG---CTGAAG---  
GCTATTGAGGCGCAGCAGCATCTGTTGCAACTCACAGTCTGGGGCATC  
>MG196745  
TTCTACTGTAATTCACACCACTGTTTAAATGGGACTTGGCAGAATATGACGAATATTACT-----  
-----  
-----  
GAAAACTTAAATATCACACTCCCATGCAGAATAAAGCAGATTATAAACATGTGGCAGAAAGTAGGAAAAGCAA  
TGTATGCCCCCTCCCATCAGTGGAAGTATTCAATGTTTCATCAAAC---  
ATTACAGGGCTACTGTTAACAAGAGATGGTGGCATCACTAATAACACTAATAGC-----  
-----  
-----  
AGTAATGATGAGACCTTCAGACCTGGAGGGGGAGATATGAGGGACAATTGGAGAAGTGAATTATATAAATATA  
AAGTAGTAAAAATTGAACCTTTA---GGATTAGCACCCACCAGGGCAAGGAGACTAGTGGTG-----

-----CAAAGAGACAAAAGAGCA---GTGGGA---ATGGGAGCT-----  
 ---ATGTTCCCTTGGGTTCTTGGGAGCA---GCAGGAAGCACTATG---GGCGCGCGTCA---  
 ATGACGCTGACGGTACAG---GCCAGACAA---TTATTG---TCTGGTATAGTGCAACAGCAAAAC---  
 AACTTG---CTGAAG---GCTATTGAGGCGCAACAGCACCTGTTGCGACTCACAGTCTGGGGCATC  
 >MG196964  
 TTCTACTGTAATACAACAAAATTGTTTAATAGTACTTGGACTGAGAATAGTACTGAAGGGTCAAAC-----  
 -----  
 -----  
 AGCACTGAAATAATCACACTCCCATGCAGGATAAAAACAAATTATAAACATGTGGCAGAGAGTAGGGAGAGCAA  
 TGTATGCCCCCTCCCATCAAAGGACCAATTAGATGTTTCATCAAAT---  
 ATTACAGGGCTGCTATTAACAAGAGATGGTGGTCATAATATGACT-----  
 -----  
 -----  
 AATGATAGTGAGACCTTCAGACCTGTGGGAGGAGATATGAAGAACAATTGGAGAAGTGAATTATATAAAATATA  
 AAGTAGTAAAAGTCGAACCATTA---GGAGTAGCACCCACCAAGGCAAGGAGAAGAGTGGTG-----  
 -----CAGAGAGAGAAAAGAGCA---GTGGGA---ATAGGAGCT-----  
 ---GTGTTCCCTTGGGTTCTTGGGAGCA---GCAGGAAGCACTATG---GGCGCAGCGTCA---  
 ATGACGCTGACGGTACAG---GCCAGACAA---CTATTG---TCTGGTATAGTGCAACAGCAGAAC---  
 AACTTG---CTAAGA---GCTATTGAAGCGCAACAGCATCTGTTGCAGCTCACAGTCTGGGGCATT  
 >MG197035  
 TTCTACTGTGATACAACACAACCTGTTCAATATTACTTGGGATACTAACAACACTAGTAATAGCAATGGTACT-  
 -----  
 -----  
 GACGGTGATAAAATCACACTCCCATGCAGAATAAAAACAAATTATAAATCTGTGGCAGGGAGTAGGAAGAGCAA  
 TGTATGCCCCCTCCCATCAGCGGACTAATTAGCTGTTTCATCAAAT---  
 ATTACAGGTCTGCTGTTAGTAAGTGATAGTGGTAATCAAACCTAAC-----  
 -----  
 -----  
 GAGACTGAGACCTTCAGACCTATAGGAGGAGAGATGAGGGACATTTGGAGAAGTGAATTATACAAGTATAAAG  
 TAGTACAAATTGAACCATTA---GGAGTAGCACCCACCAAGGCAAAGAGAAGAGTGGTG-----  
 -----CAGAGAGAAAAAAGAGAG---CTGACA---TTAGGAGCT-----  
 TTGTTCAATTGGGTTCTTGGGGGCA---GCAGGAAGCACTATG---GGCGCAGCGTCG---  
 ATGACGCTGACGGTACAG---GCCAGACTA---TTATTG---TCTGGTATAGTGCAACAGCAGAAC---  
 AATCTG---CTGAGA---GCTATTGAGGCGCAACAGCATCTGTTGCAACTCACAGTCTGGGGCATC  
 >MK214316  
 TTCTACTGTAATACCGCACAACTGTTTAATAGTAGTTGGACTACTACTGAAAAGACAAATAACACTGAAGGAG  
 GA-----  
 -----  
 AATGACACAATAATCATGCTCCCTTGCAGAATAAAAACAAATTATAAACAGGTGGCAGGAAGTAGGAAAAGCAA  
 TGTATGCCCCCTCCAATCAGCGGACTAATTAGATGTTTCATCAAAC---  
 ATTACAGGGCTACTGTTAAACAAGAGATGGTGGTAGCAGCAATAAACT-----  
 -----  
 -----  
 AATGAACTGAGATCTTCAGACCTCATGGAGGGGATATGAGGGACAATTGGAGAAGTGAATTATATAAAATATA  
 AAGTAGTAAAAATTGAACCATTA---GGAATAGCACCTAGCAAGGCAAAGAGAAGAGTGGTG-----  
 -----CAGAGAGAAAAAAGAGCG---GTGACA---ATAGGAGCT-----  
 ---GTGTTCCCTTGGGTTCTTGGGAGCA---GCAGGAAGCACTATG---GGCGCAGCGTCA---  
 CTGACGCTGACGGTACAG---GCCAGACAA---CTATTG---TCTGGTATAGTGCAACAACAAAGC---  
 AATTTG---TTGAGG---GCTATTGAGGCGCAACAGCACCTGTTGCAACTCACAGTCTGGGGCATC  
 >KX505616  
 TTCTACTGTAATACAACACAACCTGTTTAATAGTACTTGGGAAGGAAAATAGTACTGGGAATAATACTGAAGAG-  
 -----  
 -----  
 TTAATGACACTATCACACTCCCATGTAGAATAAAAACAAATTATAAACATGTGGCAGGAAGTAGGAAAAGCAA  
 TGTATGCCCCCTCCCATCCAAGGACAAATTAGATGTTTCATCAAAT---  
 ATTACAGGGCTAGTATTAACAAGAGATGGTGGTCATACCAATAAGACTGAG-----  
 -----  
 -----  
 AACAAAGACTGAGGTCTTCAGACCTGTAGGAGGGAATATGAAGGACAATTGGAGAAGTGAATTATATAAAATATA  
 AAGTAGTAAAAATTGAACCATTA---GGAGTAGCACCCACTAAGGCAAAGAGAAGAGTGGTG-----

-----CAGAGAGAAAAAGAGCA---GCA-----ATAGGAGCT-----  
 ---GTGTTCCCTTGGGTTCTTGGGAGCA---GCAGGAAGCACTATG---GGCGCAGCGTCG---  
 ATAACGCTGACGGTACAG---GCCAGACTA---TTATTG---TCTGGTATAGTGCAACAGCAGAGC---  
 AATCTG---CTGAGG---GCTATTGAGGCGCAACAGCAGCTGTTGCAGCTTACAGTCTGGGGCATC  
 >KR182192  
 TTCTACTGCGATACAACACAGCTGTTTAACAGTACTTGGTGGACTAATGAACTTGGGAAGGATATCGAAGGGT  
 CA-----  
 -----  
 AATAACACTAACATCACACTTCCATGCAGGATAAAACAAATTATAAACAGGTGGCAGGGAGTAGGAAAAGCAA  
 TGTATGCCCCCTCCCATCAAAGGACAAATTAGCTGTTTCATCAAAT---  
 ATTACAGGGCTAATATTAACAAGAGATGGTGGTACTCACGAGGAC-----  
 -----  
 -----  
 GAGACCCCTGAGATCTTCAGACCTGGAGGAGGAGATATGAGGGACAATTGGAGAAGTGAATTATATAAATATA  
 AAGTAGTAAAAATTGAGCCATTA---GGAGTAGCACCCACCAAGGCAAAGAGGAGAGTGGTG-----  
 -----CAGAGAGAAAAGAGCA---GTGGGAACGCTGGGAGCT-----  
 ---ATGTTCCCTTGGGTTCTTGGGAGCA---GCAGGAAGCACTATG---GGCGCAGCATCG---  
 ATAACGCTGACGGTACAA---GCCAGACAA---TTATTG---TCTGGTATAGTGCAACAGCAGAAC---  
 AACTTG---CTGAAG---GCTATTGAGGCGCAACAGCACCTGTTGCAACTCACAGTCTGGGGCATC  
 >KR182242  
 TTCTATTGTAATACAACACCACTGTTTAACAGTACTTGGGTGCTTAACAGTACTTTGAATAGTACTGAAGGGT  
 CCAATAGT-----  
 -----  
 ACTGGACAAAATATCACACTCCAATGTAGAATAAAGCAAATTATAAATATGTGGCAGGAGGTAGGAAAAGCAA  
 TGTTTGCCCCCTCCCATCAGAGGATCAATTCAATGTTTCATCCAAC---  
 ATTACAGGGCTGCTACTAACAAGAGATGGTGGTAATGACAATAAC-----  
 -----  
 -----  
 AAGACTGAGATCTTTAGGCCTTGGGGAGGAGATATGAAGGACAATTGGAGAAGTGAATTATATAAATATAAAG  
 TAATAAAAATTGAACCATTA---GGAGTAGCACCCACCAAGGCAAAGAGAAGAGTGGTG-----  
 -----CAGAGAGAAAAAGAGCG---GCAGGA---CTGGGAGCT-----  
 CTGCTCATTGGGTTCTTGGGAGCA---GCAGGAAGCACAATG---GGCGCAGCGTCA---  
 GTGACGCTGACGGTACAG---GCCAGACTA---TTATTG---TCTGGTATTGTGCAACAGCAGAGC---  
 AATCTG---CTGAGA---GCTATTGAGGCGCAACAGCATATGTTGAAGCTCACAGTCTGGGGCATC  
 >KR182343  
 TTCTACTGTGATACAACAAAACCTGTTTAATAGTACTTGGCCTTGGCCTGCTAATAAAACAGATGATGGCACAA  
 ATGCA-----  
 -----ACA---  
 GCATCAGACAAAATATCACACTCCCATGCAGAATAAAACAAATTATAAACATGTGGCAGAAAGTGGGAAGAG  
 CAATATATGCCCCCTCCCATCAAAGGACCAATTGAATGTGTATCAAAT---  
 ATTACAGGGATAATATTAACAAGGGATGGTGATAAGAATAATACC-----  
 -----  
 -----  
 TACAATGAGACCTTCAGACCTACAGGAGGAGAAATGAAGGACAATTGGAGAAGTGAATTATATAAATATAAAG  
 TAATAAAAATTGAACCATTA---GGAATAGCACCTACCAGGGCAAAGAGAAGAGTGGTG-----  
 -----CAGAGAGAAAAAGAGCA---GTGGGA---ATAGGAGCT-----  
 CTGCTTCTTGGGTTCTTGGGAGCA---GCAGGAAGCACTATG---GGCGCAGCGTCA---  
 ATGACGCTGACGGTACAA---GCCAGGCAA---TTACTG---TCTGGCATAGTGCAACAGCAGAAC---  
 AATCTG---CTGAAA---GCTATTGAGGCGCAACAGCAGCTGTTGCAACTCACAGTCTGGGGCATC  
 >KT986555  
 TTCTACTGTAATACTACACAACCTGTTTAATAGTACTTGAATAAGAATAAACTAATAACTTGGGAAGGA  
 ATGACACA-----  
 -----AAT---  
 AGTAATGAAACAACAATCACAATCCCATGCAGAATAAAACAAATTATAAACATGTGGCAGGGAGTAGGCAAGG  
 CAATGTATGCCCCCTCCCATCAGAGGATTAATCAGATGTTTCATCAAAC---  
 ATTACAGGACTGATATTAACAAGAGATGGTGGTCAGAGTAATGAAACAGGG-----  
 -----  
 -----  
 AACCAACCCGAGATATTACAGACCTGGAGGAGGAGACATGAGGGACAATTGGAGAAGTGAATTATATAGATATA  
 AAGTAGTAGAAATTGAACCATTA---GGAATAGCACCCACCAAGGCGAAGAGAAGAGTGGTG-----

-----CAGAGAGAAAAAGAGCG---GTCACA---CTAGGAGCT-----  
 ---GTGTTCCCTTGGGTTCTTGGGAGCA---GCAGGAAGCACTATG---GGCGCAGCGTCA---  
 ATGACGTTGACGGTACAA---GCCAGACAG---TTATTG---TCTGGTATAGTGCAACAGCAGAAC---  
 AATCTG---CTAAGA---GCTATTGAGGCGCAACAGCACCTGTTGCAACTCACGGTCTGGGGCATC  
 >KX505508  
 TTCTATTGTAATTTAACAAAACCTGTTTAATAGTACTTGGAAATAAGACTGAAGGGCCTTGGAAATGTTACTGAAG  
 AGTATGGG-----  
 -----  
 AATATTACTGACCCTATCATACTCCCATGCAGAATAAAACAAATTATAAACATGTGGCAGAGAGTAGGAAGGG  
 CAATGTATGCCCCCTCCCATCAAAGGCAAACCTTCAATGTACATCAAAT---  
 ATTACAGGGCTCCTATTAACAAGAGATGGTGGTAAGGTGAATAAT-----  
 -----  
 -----  
 GAGACTGAGATCTTTAGGCCTGCAGGAGGAGATATGAGGGACAATTGGAGAAGTGAATTATATAAATATAAAG  
 TAGTAAAAATTGAACCATTA---GGAATAGCACCCACCAGGCGAAGAGAAGAGTGGTG-----  
 -----CAGAGAGAAAAAGAGCA---GTGGGA---TTAGGAGCT-----  
 ATGTTCCCTTGGGTTCTTGGGAGCA---GCAGGAAGCACTATG---GGCGCAGCGGCA---  
 GTGACGCTGACGGTACAG---GCCAGACAA---TTATTG---TCTGGTATAGTGCAACAGCAGAAC---  
 AATCTG---CTGAAG---GCTATTGAGGCGCAGCAGCATCTGTTGCAACTCACAGTCTGGGGCATC  
 >KX027971  
 TTCTACTGTAATACAACACGACTGTTTCGAAAGTACTTGGCATGGAAATGAGACTTGGTATGGGAATGAG----  
 -----  
 -ACTATAGAGCCAGAG-----  
 GCAAAATGACACAATAATCGAACTCCCATGCAGAATAAAACAAATTATAAACATGTGGCAGGAAGTAGGAAAAG  
 CAATGTACGCCCCCTCCCATCAGAGGACCAATTAAATGTTTCATCAAAT---  
 ATTACAGGGCTACTATTAACAAGAGATGGTGGTGATGATCAGTACAGTAAGAAT-----  
 GAGACCTCCTGCAATAAT-----  
 -----  
 ACTACTGAGACCTTCAGACCTGGAGGAGGGAATATGAAGGACAATTGGAGAAGTGAATTATATAAATATAAAG  
 TAGTAAAAATAGAACCATTA---GGAGTAGCACCCACCAAGGCAAAAAGAAGAGTGGTG-----  
 -----CAGAGAGAAAAAGAGCA---GTAGGA---ATAGGAGCT-----  
 ATGTTCCCTTGGGTTCTTGGGAGCA---GCAGGAAGCACTATG---GGCGCAGCATCA---  
 ATAACGCTGACGGTACAG---GCCAGACAA---TTATTG---TCTGGTATAGTGCAACAGCAGAAC---  
 AATCTG---CTAAGG---GCTATTGAGGCGCAACAACATCTGTTGCAACTCACAGTCTGGGGCATC  
 >KX505446  
 TTCTACTGCAATACAACACAACCTATTTAATAGTACTTGGTCAAAAATAATACTTGGGAGAAGAATGAAGACA  
 ATTCA-----  
 -----  
 ATTAATAGTACTATCACACTCCCATGCAGAATAAAACAAATTATAAACATGTGGCAGGAAGTAGGAAAAGCAA  
 TGTATACCTCCCCAATCAAAGGACAGATTAGCTGTAACTCAAGT---  
 ATTACAGGGATACTATTAACAAGAGATGGTGGAAAGAAATAATAGT-----  
 -----  
 -----  
 GACAAATGAGACCTTCAGACCTGGAGGAGGAGATATGAGGGACAATTGGAGAAGTGAATTATATAAATATAAAG  
 TAGTAAAAATTGTACCATTA---GGAATAGCACCCACTGCGGCAAAAAGAAGAGTGGTG-----  
 -----CAGAGAGAAAAAGAGCA---GCA-----CTAGGAGCT-----  
 ATGTTCCCTTGGGTTCTTGGGAGCA---GCAGGAAGCACTATG---GGCGCAGCATCA---  
 GTGACGCTGACGGTACAG---GCCAGACTA---TTATTG---TCTGGTATAGTGCAACAGCAGAAC---  
 AATCTG---CTGAGG---GCTATTGAGGCGCAACATCATCTGTTGCAACTCACAGTCTGGGGCATC  
 >KT986947  
 TTCTACTGTGATACAACAAAACCTATTTAATAGTACTTGGAAATAGTACTTGGGACAATAATAGTACTCGGAATA  
 AT-----  
 AACAGATCAGAGGACAGATCA-----  
 GAGAGCGATGACACAATCACACTACCATGCAGAATAAGACAAATTATAAACAGATGGCAAGAAGTAGGAAAAG  
 CAATGTATGCCCCCTCCCATCAAAGGACTAATTGAATGTAACCTCAACA---  
 ATTACAGGGCTGCTCTTAGCAAGAGATGGTGGTATCAACAGCACA-----  
 -----  
 -----  
 GGGAAATGAGACCTTCAGACCTCAAGGAGGAAATATGAGGGACAATTGGAGAAGTGAATTATATAAGTATAAAA  
 TAGTAAAAATTGAACCATTA---GGAATAGCACCCACTAAGGCAAAAAGAAGAGTGGTG-----

-----CAGAGAGAAAAAAGAGGA---GCGGGA---CTAGGAGCT-----  
 TTGTTCTTGGATTCTTGGGAGCA---GCAGGAAGCACTATG---GGCGCAGCGTCA---  
 GTGACGCTGACGGTACAA---GCCAGACAA---TTATTG---TCTGGTATAGTGCAACAGCAGAAC---  
 AATCTG---CTGAGG---GCTATTGAGGCGCAGCAGCATATGTTGCAACTCACAGTCTGGGGCATC  
 >MH264238  
 TTCTACTGTAATTCACACAGCTGTTTAATAGTACTTGGTATCTTAATGGTACTTGGAAATGCAACTGAAGGGT  
 TAAATAAC-----  
 -----  
 ACTGAAGGAAATATCACACTCCCATGCAGAATAAAACAAATTATAAACATGTGGCAGCAGGTAGGAAAAGCAA  
 TGTATGCCCCCTCCTATCAGAGGACTAATTAGATGCACATCAAAC---  
 ATTACAGGGATAATATTAACAAGAGATGGTGGTTACGAGAACAAGACCGATAAC-----  
 -----  
 -----  
 AATACTAATACTGAGATCTTCAGACCTGGAGGAGGAGATATGAGGGACAATTGGAGAAGTGAATTATATAAAAT  
 ATAAAGTAGTAAGAATTGAACCATTA---GGAGTAGCACCCACCAAGGCAAAGAGAAGAGTGGTG-----  
 -----CAGAGAGAAAAAAGAGCA---GTGGGA---ATAGGAGCC---  
 -----TTGTTCTTGGGTTCTTGGGAGCG---GCAGGAAGCACTATG---GGCGCAGCGTCA---  
 ATGACGCTGACGGTACAG---GCCAGACAA---TTATTG---TCTGGTATAGTGCAACAGCAAAAC---  
 AACTTG---CTGAGG---GCTATTGAGGCGCAACAGCATCTGTTGCAACTCACAGTCTGGGGCATC  
 >KX587339  
 TTCTATTGTAATACAACAAACCTGTTTAATAGTACATGGCATACTAACGGAACAAATAGCACTGACAAT---  
 -----  
 -----  
 GGTACTGACACAATCACAATCCAATGCAGAATAAAACAAATAATAAACACGTGGCAGGAAGTAGGAAAAGCAA  
 TGTATGCCCCCTCCCATCCAAGGACAACCTTAAGTGTTCATCAAAT---  
 ATTACAGGGCTGCTATTAACAAGAGATGGTGGTAATGATAGTAATACT-----  
 -----  
 -----  
 ACCAATAACACTGAGATCTTCAGACCTCAAGGAGGAAATATGAGAGACAATTGGAGAAGTGAATTATATAAAAT  
 ATAAAGTAGTAAAAATTGAACCATTA---GGAGTAGCACCCACCGAGGCAAAGAGAAGAGTGGTG-----  
 -----CAGAGAGAAAGAAGAGCA---GTGGGA---CTAGGAGCT---  
 -----ATGTTCTTGGGTTCTTAGGAGCA---GCAGGAAGCACTATG---GGCGCAGCGTCA---  
 TTGACGCTGACGGTACAG---GCCAGACAA---TTATTG---TCTGGTATAGTGCAACAGCAGAAC---  
 AATTTG---CTGAGA---GCTATTGAGGCGCAACAGCATCTGTTGCAACTCACAGTCTGGGGCATT  
 >KX505536  
 TTCTACTGTAATACAACACAGCTGTTCAATAGTACATGGGATTGTACTGGAAGTGCATGTACATTGAATGGA-  
 -----  
 -ACTGTTCTTAATGGG-----  
 ATAAATAACACCAATATTACTCTCCCATGCAGGATAAAACAAATTATAAACATGTGGCAAAAAGTAGGAAAAG  
 CAATGTACAACCCTCCCATCAAAGGAGTAATTCAATGTACATCAAAT---  
 ATTACAGGGATAATATTAACAAGCGATAATGGTGGGATTGGAAAT-----  
 -----  
 -----  
 AATGAAAATGAAACCTTCAGACCTGCAGGAGGAGATATGAGGGACAATTGGAGAAGTGAATTATATAAAATATA  
 AAGTAGTAAGAATTGAGCCATTA---GGAATAGCACCCACCAAGGCAAAAAGGAGAGTGGTG-----  
 -----CAGAGAGAAAAAAGAGCA---GTAACA---TTAGGAGCT-----  
 ---ATGTTCAATTGGGTTCTTGGGAGCA---GCAGGAAGCACTATG---GGCGCAGCGTCA---  
 GTGACGCTGACGGTACAG---GCCAGACAA---TTGCTG---TCTGGTATAGTGCAACAGCAGAGC---  
 AATCTG---CTGAAG---GCTATTGAGGCGCAACAGCATCTGTTGCAACTCACAGTCTGGGGCATC  
 >MG196412  
 TTCTACTGTAATTCATCAAACTGTTTAATAGTACTTGGGGAAGTACTGACGGGTCAAATAGCACTGAA---  
 -----  
 -----  
 ACAAATGGCACAATCATACTCCCATGCAGAATAAGACAAATTATAAACAAAGTGGCAGCAAGTAGGAAAAGCAA  
 TATACGCCCCCTCCCATCCAAGGACGAATTAAATGTTTATCAAAT---  
 ATTACAGGGCTGCTATTAACAAGAGATGGTGGTCATAACAACAGTAGCAAT-----  
 -----  
 -----  
 GAGAGTAGGAGTGAGATCTTCAGACCTGGAGGAGGAGACATGAGGGACAATTGGAGAAGTGAATTATATAAAAT  
 ATAAAGTAGTAAGAATTGAACCAGTA---GGAATAGCACCCACCAAGGCAAAGAGAAGAGTGGTG-----

-----CAGAGAGAAAAAGAGCA---GTGGGAACAATAGGAGCT---  
 -----ATGTTTCCTTGGGTTCTTGGGAGCA---GCAGGAAGCACTATG---GGCGCAGCGTCA---  
 TTGACGCTGACGGTACAG---GCCAGACAA---TTATTG---TCTGGTATAGTGCAACAGCAGAAC---  
 AATCTG---CTGAAG---GCTATTGAGGCGCAACAGCACCTGTTGCAACTCACAGTCTGGGGCATC  
 >MK115401  
 TTCTATTGTAATTCATCATCACTGTTTAATAGTACCTGGACTAAAAATGGTACTGGTAGTTGGCAGTCTAATG  
 ATACT-----  
 -----  
 CAGAAATGGTAATATCACACTCCAATGCAGAATAAAACAAATTATAAACCTGTGGCAGGGAGTAGGAAAAGCAA  
 TGTATGCCCCCTCCCATCAGTGGACAAATTAAGTGTACATCAAAT---  
 ATTACAGGGCTGGTTTTTAACAAGAGATGGGGGAAGGTGATTAAAT-----  
 -----  
 -----  
 GAAACTGAGACCTTTAGACCTGGAGGAGGAAATATGAAGGATAATTGGAGAAGTGAATTATATAAATATAAAG  
 TAGTAAGAATTGAACCATTA---GGAATAGCACCCACCAAGGCAAAAAGAAGAGTGGTG-----  
 -----CAAAGAGAGAAAAAGAGCA---GTAGGA---CTGGGAGCT-----  
 ATGTTTCCTTGGGTTCTTGGGAGCA---GCCGGAAGCACTATG---GGCGCAGCGTCA---  
 ATAGCGCTGACGGAACAG---GCCAGACGA---GTATTG---TCTGGTATAGTGCAACAGCAGAAC---  
 AATTTG---CTGAGG---GCTATTGAGGCGCAACAGCATTTGTTGCAACTCACAGTCTGGGGCATT  
 >MK169417  
 TTCTACTGTAATACAACAATGTTTAATAGTAGTTGGATTTCGGAATGGTACTGATTGGACTTGAATAGTA  
 CCACA-----  
 -----  
 CAAAATGATACTATCATACTCCCATGCAAAATAAAACAAATTATAAACATGTGGCAGGAAGTAGGAAAAGCGA  
 TGTATGCCCCCTCCTATCGAAGGAATAATTAGGTGTGTATCAAAT---  
 ATTACTGGGTTGCTATTAACAAGAGATGGTGGTCACAACAGCAGC-----  
 -----  
 -----  
 AACGGTACTGAGACCTTCAGACCTGCAGGAGGAAATATGAAGGACAATTGGAGAAGTGAATTATACAAATATA  
 AAGTAGTAAAAGTTGAACCATTA---GGAGTAGCACCCACCAAGGCAAAGAGAAGAGTGGTG-----  
 -----CAGAGAGAAAAAGAGCA---ATAGGAGGACTAGGAGCT-----  
 ---GTGTTTCCTTGGGTTCTTGGGAGCA---GCAGGAAGCACTATG---GGCGCAGCATCA---  
 ATGACGCTGACGGTACAG---GCCAGACAA---TTATTG---TCTGGTATAGTGCAACAGCAGAAC---  
 AATCTG---CTGAAG---GCTATTGAGGCGCAACAGCATATGTTGCAACTCACAGTCTGGGGCATC  
 >MK169834  
 TTCTACTGTAATACAACACCACTGTTTAATCCAAATGGAATAAGAAAT-----  
 -----  
 -----  
 GACACTGGAAATATCACACTCCAATGCAGAATAAAACAAATTATAAACATGTGGCAGGAAGTGGGAAAAGCAA  
 TGTATGCCCCCTCCCATCCAGGTCAAATTAGGTGTGTATCAAAT---  
 ATTACAGGGCTGATATTAACAAGAGATGGTGGTGATAATAACGAG-----  
 -----  
 -----  
 ACCGAGGTCTTCAGACCTGGAGGAGGAGATATGAGGGACAATTGGAGAAGTGAATTATATAAATATAAAGTAG  
 TACAAATTGAACCATTA---GGAGTAGCACCCACCACGCAAGAAGAAGAGTGGTG-----  
 -----CAGAGAGAAAAAGAGCA---GTAAGT---TTTGGAGCT-----  
 CTGTTTCCTTGGGTTCTTGGGAGCA---GCAGGAAGCACTATG---GGCGCAGCGTCA---  
 ATGACGCTGACGGTACAG---GCCAGGCAA---TTATTG---TCTGGTATAGTGCAACAGCAGAAC---  
 AATCTG---CTGAGA---GCTATTGAGGCGCAACAACATATGTTGCAACTCACAGTCTGGGGCATT  
 >AY736819  
 TTCTACTGTAATACATCACCCTGTTTAATAGTACTTGAATGGTAATAATACTTGAATAATACTACAGGG-  
 -----  
 -----  
 TCAAATAACAATATCACACTTCAATGCAAAATAAAACAAATTATAAACATGTGGCAGAAAGTAGGAAAAGCAA  
 TGTATGCCCCCTCCCATGGAAGGACAAATTAGATGTTTCATCAAAT---  
 ATTACAGGGCTACTATTAACAAGAGATGGTGGTAAGGACACGGACACG-----  
 -----  
 -----  
 AACGACACCGAGATCTTCAGACCTGGAGGAGGAGATATGAGGGACAATTGGAGAAGTGAATTATATAAATATA  
 AAGTAGTAACAATTGAACCATTA---GGAGTAGCACCCACCAAGGCAAAGAGAAGAGTGGTG-----

-----CAGAGAGAAAAAGAGCA---GCG-----ATAGGAGCT-----  
 ---CTGTTCCCTTGGGTTCTTAGGAGCA---GCAGGAAGCACTATG---GGCGCAGCGTCA---  
 GTGACGCTGACGGTACAG---GCCAGACTA---TTATTG---TCTGGTATAGTGCAACAGCAGAAC---  
 AATTTG---CTGAGG---GCCATTGAGTCGCAACAGCATATGTTGCAACTCACAGTCTGGGGCATC  
 >AF025753  
 TTCTACTGTAATACAACAAAACCTGTTTAATAGTACTTGGGAATAGTACTTGGGAATGATACTGAAGGGTCAATTG  
 CCACTGAA-----  
 -----GGAAAT-----  
 ACCACTGAAGAAAATATCACACTCCCATGCAGAATAAAACAAATTATAAACATGTGGCAGGAAGTAGGAAAAG  
 CAATGTATGCCCCCTCCCATCGCAGGACAAATTAGATGTTTCATCAAAT---  
 ATTACAGGGCTGCTATTAACAAGAGATGGTGGTAATGGTAATAGCAGC-----  
 -----  
 -----  
 AACTACACTTCCGAGATCTTCAGACCGGGAGGAGGAGATATGAGGGACAATTGGAGAAGTGAATTATATAAAAT  
 ATAAAGTAGTAAAAATTGAACCATTA---GGAGTAGCACCCACCAAGGCAAAGAGAAGAGTGGTG-----  
 -----CAGAGAGAAAAGAGAGCA---GTGGGA---ATAGGAGCG---  
 -----TTGTTCCCTCGGGTTCTTGGGAGCA---GCAGGAAGCACTATG---GGCGCAGCGTCA---  
 CTGACGCTGACGGCACAG---GCCAGACTA---TTATTG---TCTGGTATAGTGCAACAGCAGAAC---  
 AATCTG---CTGAGG---GCTATTGAGGCGCAACAGCATCTGTTGCAACTCACAGTCTGGGGCATT  
 >MH012806  
 TTCTACTGTAATTCAACACAACCTGTTTAATAGTACTTGGAGTAGTAATAGTACTGGGAGTAATAGCACTGAA-  
 -----  
 -----  
 GAAGAAAGAAATATCACACTCCCATGCAGAATAAAGCAAATTATAAACATGTGGCAGGAAGTAGGAAAAGCAA  
 TGTATACCCCTCCCATCGGAGGACAAATTCATGTTTCATCAAAT---  
 ATTACAGGGCTACTATTAACAAGAGATGGTGGTCATAGTGGGAACGAGTCC-----  
 -----  
 -----  
 GAGAACAGGCCCCGAGATCTTCAGACCAGGAGGAGGAGATATGAGGGATAATTGGAGAAGTGAATTATATAAAAT  
 ATAAAGTAGTAAAGTTGAACCATTA---GGAATAGCACCCACCAAGGCAAAGAGAAGAGTGGTG-----  
 -----CAGAGAGAAAAGAGAGCA---GTGGGA---ATAGGAGCT---  
 -----ATGTTCCCTTGGGTTCTTGGGAGCA---GCAGGAAGCACTATG---GGCGCAGCGTCG---  
 GTGACGCTGACGGTACAG---GCCAGACAA---TTATTG---TCTGGTATAGTGCAACAGCAGAAC---  
 AATCTG---CTGAAG---GCTATTGAGGCGCAACAGCATCTGTTGCAACTCACAGTCTGGGGCATC  
 >MH012971  
 TTCTACTGTAATTCAACACAACCTGTTTAAGAGTATTTGGCATGGGAATGAAACCACGTGGAATACAAAT---  
 -----  
 -----  
 AACACTGAAAATATCACACTCCCGTGCAGAATAAAACAATTTATAAACATGTGGCAGGAAGTAGGGAAAGCAA  
 TGTATGCCCCCTCCCATCAGTGGACAAATTAGATGTTTCATCAAAT---  
 ATTACAGGGCTGCTATTAACAAGAGATGGTGGTGCTAAGGAGAAC-----  
 -----  
 -----  
 GAGACCACCTACAATGAGACCTTCAGACCTGGAGGAGGAGATATGAGGGACAATTGGAGAAGTGAATTATATA  
 AATATAAAGTAGTAAGAATTGAACCATTA---GGAGTAGCACCCACCAAGGCAAAGAGAAGAGTGGTG-----  
 -----CAGAGAGAAAAAGAGCA---GTGGGA---  
 ATAGGAGCT-----CTGTTCCCTTGGGTTCTTGGGAACA---GCAGGAAGCACTATG---  
 GGCGCAGCGTCA---CTGACGCTGACGGTACAG---GCCAGACAA---TTATTG---  
 ACTGGTATAGTGCAACAGCAGAAC---AACCTG---CTGAGA---  
 GCTATTGAGGCGCAACAGCATCTGTTGCAACTCACAGTCTGGGGCATC  
 >MH012542  
 TTCTACTGTAATACAACACAACCTGTTTAATAGTACTTGGACTTGGGAATGATACTAAAGGGTCAAATGACACTG  
 GA-----  
 -----  
 GGAAATGGCACAATCACACTCCCATGCAGAATAAAACAAATTATAAACATGTGGCAGGAAGTAGGAAAAGCAA  
 TGTATGCCCCCTCCCATCCAGGACAAATTAGATGTTTCATCAAAT---  
 ATTACAGGGCTGCTATTAACAAGAGATGGTGGTAACAATAATCAGAGCAGCGAG-----  
 -----  
 -----  
 ACCACCGAGGTCTTCAGACCTGGAGGAGGAGATATGAGGGACAATTGGAGAAGTGAATTATATAAAATATAAAG

TAGTAAAAATTGAACCATTA---GGAGTAGCACCCACCAAGGCAAAGAGAAGAGTGGTG-----  
-----CAGAGAGAAAAAAGAGCA---GTGGGA---ATAGGAGCT-----  
GTGTTTCCTTGGGTTCTTGGGAGCA---GCAGGAAGCACTATG---GGCGCAGCGTCA---  
ATGACGCTGACGGTACAG---GCCAGACTA---TTATTG---TCTGGTATAGTGCAACAGCAGAAC---  
AATTTG---CTGAGG---GCTATTGAGGCGCAACAGCATCTGTTGCAACTCACAGTCTGGGGCATC  
>AY835773  
TTCTACTGTAATACAACACAACACTGTTTAATAGTACTTGGGAAGACAGTTAATATTTGGAATGTTACTGAAAGGT  
CAAATTAC-----  
-----ACT---  
GAAGGAAATGACACACTCATACTCCCATGCAGAATAAAACAAATTATAAACATGTGGCAGGAAGTAGGAAAAG  
CAATGTATGCCCCCTCCCATCAGTGGACAAATTAGATGTTTATCAAAT---  
ATTACAGGGCTACTGTTAACAATAGATGGTGGTGATAATAGCACG-----  
-----  
-----  
ACCGAGACCTTCAGACCTGGAGGAGGAGATATGAGGGACAATTGGAGAAGTGAATTATATAAATATAAAGTAG  
TAAAAATTGAACCATTA---GGAGTAGCGCCACCAAGGCGAAGAGAAGAGTGGTG-----  
-----CAAAGAGAGAAAAAGAGCA---GTGGGA---CTAGGAGCT-----  
ATGTTTCCTTGGGTTCTTGGGAGCA---GCAGGAAGCACTATG---GGCGCAGCGTCA---  
CTGACGCTGACGGTACAG---GCCAGACAA---TTATTG---TCTGGTATAGTGCAACAGCAGAGC---  
AATTTG---CTGAGA---GCTATTGAGGCGCAACAGCATCTGTTGCAACTCACAGTCTGGGGCATC  
>AY835435  
TTCTACTGTAATACAACACAACACTGTTTAATAGTACTTGGTTTAATAATGCTACTTTGAATGTTAATAGTAATG  
TTACT-----  
-----  
GAAGGGTCAGAAAATATCACACTCCCATGCAGAATAAGACAAATTGTGAACATGTGGCAAGAAGTAGGAAAAG  
CAATGTATGCCCCCTCCCATCCAAGGGCAAATTAGATGTTTCATCAAAT---  
ATTACAGGGCTGCTATTAACAAGAGATGGTGGTGGTAGTAACAGTAGT-----  
-----  
-----  
AACACGAGCGAGGAGGTCTTCAGACCTGGAGGAGGAAATATGAGGGACAATTGGAGAAGTGAATTATATAAAT  
ATAAAGTAGTAAAAATTGAACCATTA---GGAATAGCACCCACCAAGGCAAAGAGAAGAGTGGTG-----  
-----CAGAGAGAAAAAAGGACA---GTGGGA---ATAGGAGCT---  
-----TTGTTTCCTTGGGTTCTTGGGAGCA---GCAGGAAGCACTATG---GGCGCAGCGTCA---  
ATGACGCTGACGGTACAG---GCCAGACAA---TTACTG---TCTGGTATAGTGCAACAGCAGAAC---  
AATCTG---CTGAGG---GCTATTCAGGCGCAACAGCATCTGTTGCAGCTCACAGTCTGGGGCATT  
>AY331292  
TTCTACTGTGATACAACAAAACACTGTTTAATAGTACTTGGCATGGTAATGAAACATCTTGAATAATACTGAAA  
AG-----  
-----  
TTAAATGACACTATCATACTCCCATGCAGAATAAAACAAATTATAAACATGTGGCAGGAAGTAGGAAAAGCAA  
TGTATGCCCCCTCCAATCGAAGGACTAATTAACTGTTTCATCAAGT---  
ATTACGGGGCTGCTATTAACAAGAGATGGTGGTAAGAGCAATAAT-----  
-----  
-----  
CAGACTGAGATCTTCAGACCTGGAGGAGGAGATATGAGGGACAATTGGAGAAGTGAACATATAAATATAAAG  
TAGTAAAAATTGAACAGTA---GGAGTAGCACCCACCAAGGCAAAGAGAAGAGTGGTG-----  
-----CAGAGAGACAAAAGAGCA---GTGGGA---CTAGGAGCG-----  
TTGTTTCATTGGGTTCTTGGGAGCA---GCAGGAAGCACTATG---GGCGCAGCGTCA---  
ATGACACTGACGGTACAG---GCCAGACAA---TTATTG---TCTGGTATAGTGCAACAGCAGAAC---  
AACTTG---CTGAGG---GCTATTGAGGCGCAACACATCTGTTGCAACTCACAGTCTGGGGCATC  
>EU289191  
TTCTACTGTAATACATCACAACACTGTTTAATAGTACTTGGGAATGGTACTGAAGGGTTTAATAGTACT-----  
-----  
-----  
GGGAGTGAAAATATCACACTCCCATGCAGAATAAGACAAAGTTGTAAACCTGTGGCAGGAAGTAGGAAAAGCAA  
TGTATGCCCCCTCCCATCAGGGGAGTAATTAAATGTTTCATCAAAC---  
ATTACAGGGGTACTATTAACAAGAGATGGTGGTTATGATGATAATAATACC-----  
-----  
-----  
GCAAAACACCAACGAGACCTTCAGACCAGGAGGAGGAGATATGAGGGACAATTGGAGAAGTGAATTATATAAAT

ATAAAGTAGTAAGAATTGAACCATTA---GGAGTAGCACCCACCAGGGCAAAGAGAAGAGTGGTG-----  
-----CAGAGAGAAAAAAGAGCA---GTGACA---CTAGGAGCT---  
-----TTGTTTCCTTGGGTTCTTGGGAGCA---GCAGGAAGCACTATG---GGCGCAGCGTCA---  
CTGACGCTGACGGTACAG---GCCAGACTC---TTGTTG---TCTGGTATAGTGCAGCAGCAGAAC---  
AATCTG---CTGAGG---GCTATTGAGGCGCAACAACATCTGTTGCAACTCACCGTCTGGGGCATC  
>KT124744  
TTCTACTGTAATACAACACCATTATTTAATAGTACTTGGGGAGCTAATAGTAATTGGACTTGAATAATACTC  
AAGAGTTA-----  
-----AAT---  
GGCACTCAAGGAAATATCACACTCCAATGCAGAATAAAACAAATTATAAACATGTGGCAGGAGGTAGGAAAAG  
CCATGTATGCCCCCTCCCATCAGAGGACTAATTAGTTGTTTCATCAAAT---  
ATTACAGGGTTGCTATTAACAAGAGATGGTGGTAATAACAACGCCACC-----  
-----  
-----  
AACAAATGGCACAGAGATCTTCAGACCTGGAGGGGGAGATATGAGGGACAATTGGAGAAGTGAATTATATAAAT  
ATAAAGTAGTAAAAATTGAACCAGTA---GGATTAGCACCAACCAAGGCAAAGAGAAGAGTGGTG-----  
-----CAGAGAGAAAAAAGAGCA---GTGGGA---CTAGGAGCG---  
-----CTTTTCCTTGGGTTCTTGGGAGCA---GCAGGAAGCACTATG---GGCGCAGCGTCA---  
ATGACGCTGACGGTACAG---GCCAGACAA---TTATTG---TCTGGTATAGTGCAACAGCAGAAC---  
AATTTG---CTGAGA---GCTATTGAGGCGCAACAGCATATGTTGCAACTCACAGTCTGGGGCATC  
>KT124770  
TTCTACTGTAATACATCAAACTGTTTAATAGTACCTGGGAGTGAATAAATAGTACCAGAGATTGGAATAATA  
CT-----  
GAAATGTCAAATAACACT-----  
GAAGGAAATGGAATCTACTCTCCAATGCAGAATAAAACAAATTGTAAATATGTGGCAGGAAGTAGGAAAAG  
CAATGTATGCCCCCTCCCATCAGAGGACAAATTAGATGTTTCATCAAAT---  
ATTACCGGGTTGCTATTAACAAGAGATGGTGGTTACAACATCAGC-----  
-----  
-----  
AATAACAACGAGACCTTCAGACCTGGAGGAGGAGATATGAGGGACAATTGGAGAAGTGAATTATACAGATATA  
AAGTAGTAAAAATTGAACCATTA---GGAATAGCACCCACCAAGGCAAAGAGAAGAGTGGTG-----  
-----CAAAGAGAAAAAAGAGCA---GTGGGA---TTAGGAGCT-----  
---ATGTTCCCTTGGGTTCTTGGGAGCA---GCAGGAAGCACTATG---GGCGCAGCATCA---  
ATGATGCTGACGGTACAG---GCCAGACAA---TTATTG---TCTGGTATAGTGCAACAGCAGAGC---  
AATCTG---CTGCAG---GCTATTGAGGCACAACAGCATCTGTTGAAACTCACAGTCTGGGGCATT  
>EU575670  
TTCTACTGTAATACAACAAAACTGTTTAATAGTACTTGGGTAAATGGTACTAGGAATGATACTGAAGAGTCA-  
-----  
-----  
AATAGCACTGAAATCACACTCCCATGCAGAATAAAACAAATCATAAACATGTGGCAGGAAGTAGGAAAAGCAA  
TGTATGCCCCCTCCTATCAGAGGACAAATTAGATGTTTCATCAAAT---  
ATCACAGGGCTGCTATTAACAAGAGATGGGGGTGAGGGAGTTGAGAAA-----  
-----  
-----  
AACGATACCGAGATCTTTAGACCTGAAGGAGGAGATATGAAGAACAATTGGAGAAGTGAATTATATAAATATA  
AAGTAGTACAAATTGAACCATTA---GGAGTAGCACCCACCAGGGCAAAGAGAAGAGTGGTG-----  
-----CAGAGAGAAAAAAGAGCA---GTGGGA---ATAGGAGCT-----  
---ATGTTCCCTTGGGTTCTTGGGAGCA---GCAGGAAGCACTATG---GGCGCAGCGTCA---  
ATGGCGCTGACGGTACAA---TCCAGACAA---TTATTG---TCTGGTATAGTGCAACAGCAAAAC---  
AACTTG---CTGAGA---GCTATTGAGGCGCAACATCATCTGTTGCAACTCACAGTCTGGGGCATT  
>EU575927  
TTCTACTGTAATACCTCACAACCTGTTTAATAGCTCTTGGTATTCAAATGGTACTCGGAATGGTACTGAAGAA-  
-----  
-----  
TCAAATGACCTTATCACACTCCCATGCAGAATTAAACAAATTGTAAACATGTGGCAGGAAGTAGGAAAAGCAA  
TGTATGCCCCCTCCCATTAGAGGACACATTAAGTGTACATCAAAT---  
ATTACAGGGCTGTTATTAACAAGAGATGGGGGTGAGAGTAATGAAACC-----  
-----  
-----  
AAGGACGAGGAGATCTTCAGACCTGGAGGAGGAGATATGAGGGACAATTGGAGAAGTGAATTATATAAATATA

AAGTAGTAAGAATTGAACCATTA---GGAATAGCACCCACCAGGGCAAAGAGAAGAGTGGTG-----  
-----CAGAGAGAAAAAAGAGCA---GTGGGA---ATAGGAGCT-----  
---CTGTTCCCTTGGGTTCTTGGGAGCA---GCAGGAAGCACTATG---GGCGCAGCGTCA---  
ATAACGCTGACGGTACAG---GCCAGGCTA---TTAATG---TCTGGTATAGTGCAACAGCAAAAC---  
AATCTG---CTGAGA---GCTATTGAGGCGCAACAGCATCTGTTGCAACTCACAGTCTGGGGCATC  
>U84854  
TTCTACTGTAACACAACACAACCTGTTCAATATTACTAATACTCAAAAC-----  
-----  
-----  
ACTACAGGAAATCACACACTCCCCTGCAGAATAAAACAAATTATAAACATGTGGCAGGAAGTAGGAAAAGCAA  
TGTATGCCCCCTCCCATCAGAGGACAAATTAGATGTAAATCAAAT---  
ATTACAGGGCTGTTATTAACAAGAGATGGTGGTGAAAAACACAAACCACACA-----  
-----  
-----  
GACAATAATACTGAGATCTTCAGACCTGGAGGAGGAGATATGAGGGACAATTGGAGAAGTGAATTATATAAAT  
ATAAAGTAGTAAAAATTGAACCATTA---GGAGTAGCACCCACCAAGGCAAAGAGAAGAGTGGTG-----  
-----CAGAGAGAAAAAAGAGCA---GTGGGA---ATAGGAGCT---  
-----ATGTTCCCTTGGGTTCTTGGGAGCG---GCAGGAAGCACTATG---GGCGCAGCGTCA---  
GTGACGCTGACGGTACAG---GCCAGACTA---TTATTG---TCTGGAATAGTGCAACAGCAGAGC---  
AATTTG---CTGAGG---GCTATTGAGGCGCAACAGCATCTGTTGCAACTCACAGTCTGGGGCATC  
>AY835442  
TTCTACTGTAATACAACACAACCTGTTTAATAATACTTGGAAATGGTACTGGATGGTCAGATAACTCAGAGAACA  
CT-----  
-----  
ACAGGAAACGGAACCTATCACACTCCCATGCAGAATAAAACAAATTGTAACTGTGGCAGGAAGTAGGAAAAG  
CAATGTATGCCCCCTCCCATCAGAGGACTAATTAGATGTTTCATCAAAT---  
ATTACAGGGCTGCTATTAACAAGAGATGGAGGTAATAATACCACCACGAAC-----  
-----  
-----  
GGGACTCAGACTGAGATATTTCAGACCTGGAGGAGGAGATATGAGGGACAATTGGAGAAGTGAATTATATAAAT  
ATAAAGTAGTAAAAATTGAACCATTA---GGAGTAGCACCCACTAGGGCAAAGAGAAGAGTGGTG-----  
-----CGGAGAGAAAGAAGAGCA---GCA-----CTAGGAGCT---  
-----TTGTTCCCTTGGGTTCTTGGGAGCA---GCAGGAAGCACTATG---GGCGCAGCGTCA---  
ATGACGCTGACGGTACAG---GCCAGACTA---TTATTG---TCTGGTATAGTGCAACAGCAGAAT---  
AATTTG---CTGAGG---GCTATTGAGGCGCAACAGCATCTGTTGCAACTCACAGTCTGGGGCATC  
>EU289186  
TTCTACTGTAATACAGCACAACCTGTTTAATAGTACTTGGGAAGCTAATAGTACTTGGGAAAATGATAATGAAA  
GGGTA-----  
-----GGT---  
CACAGTAACAAGACTATCATACTACAATGCAGAATAAAACAAATTATAAACATGTGGCAGGAAGTAGGAAAAG  
CAATGTATGCCCCCTCCCATCAGCGGACAGATTAGATGTTTCATCAAAT---  
ATTACGGGGCTGCTATTAACAAGAGATGGTGGTAACGGTAACGAGACC-----  
-----  
-----  
AACCGGACCGAGGTCTTCAGACCTGGAGGAGGAAATATGAAAGATAACTGGAGAAGTGAATTATATAAATATA  
AAGTAGTAAAAATTGAACCATTA---GGAGTAGCACCCACCAGGGCAAAGAGAAGAGTGGTG-----  
-----CAAAGAGAAAAAAGAGCA---GTGGGA---ATGGGAGCT-----  
---TTGTTCAATTGGGTTCTTGTTCAGCA---GCAGGAAGCACTATG---GGCGCAGCGTCA---  
ATGACGCTGACGGTACAG---GCCAGACAA---TTATTG---TCTGGTATAGTGCAACAGCAGAGC---  
AATTTG---CTGAGA---GCTATTGAGGCGCAACACATCTGTTGCAACTCACAGTCTGGGGCATC  
>DQ853463  
TTCTACTGTAATACAACACAATTGTTTAATGGTATGTGGCATGCTAATGGTACTTGAATAGTACTTGAATG  
ATACT-----  
-----GGA---  
GGGTCAAATGACACTATCAGACTCCCATGTAGAATAAAACAAATTGTAAACATGTGGCAGGAAGTAGGAAAAG  
CAATGTATGCCCCCTCCCATCAAAGGACAAATTCAATGTTTCATCAAAT---  
ATTACAGGGCTGATATTAACAAGAGATGGTGGTAACAGCACGAAC-----  
-----  
-----  
GAGACCGGGGAGGTCTTCAGACCTGGAGGAGGAAATATGAAGGACAATTGGAGAAGTGAATTATATAAATATA

AAGTAGTAGAAATTGAACCATTA---GGAGTAGCACCCACCAAGGCAAAGAGAAGAGTGGTG-----  
-----CAGAGGGAAAAAAGAGCA---GTGGGATTAATAGGAGCT-----  
---GTGTTCCCTTGGGTTCTTGGGAGCA---GCAGGAAGCACTATG---GGCGCAGCGTCA---  
ATAGCGCTGACGGTACAG---ACCAGACAC---TTATTG---TCTGGTATAGTGCAACAGCAGAAC---  
AATCTG---CTGAGG---GCTATTGAGGCGCAACAACATCTGTTGCAACTCACAGTCTGGGGCATC  
>KT124769  
TTCTACTGTAATACAGCAGAACTGTTTAATAGTACTTGGTATGCAAATGGTACTTGGTATGCAAATGGTACA-  
-----  
-AATAGTACTGGAGGG-----  
GGAAACAAGACTAATATCACACTCCCATGCAGAATAAAACAATTTATAAACATGTGGCAGGAAGTAGGAAAAG  
CAATGTATGCCCTCCCATCAGTGGACAGATTAGATGTGCATCAAAT---  
ATTACAGGACTGCTATTAACAAGAGATGGTGGTCAGGGCAATCAGACC-----  
-----  
-----  
GACAACCAGACTGAGATCTTCAGACCTGTAGGAGGAGATATGAAGAACAATTGGAGAAGTGAATTATATAAAT  
ATAAAGTAGTAAGAATTGAACCATTA---GGAATAGCACCCACCAGGGCAAAAAGGAGAGTGGTG-----  
-----CAGAGAGAAAAAAGAGCA---GTGGGA---ATAGGAGCT---  
-----TTGTTCCCTTGGGTTCTTGGGAGCA---GCAGGAAGCACTATG---GGCGCAGCGTCA---  
ATGACGCTGACGGTACAG---GCCAGACTA---TTATTG---TCTGGTATAGTGCAACAGCAGAAC---  
AATCTG---CTGAGG---GCTATTGAGGCGCAACAACATCTGTTGCAACTCACAGTCTGGGGCATC  
>EU289196  
TTCTACTGTAATACATCAAACTGTTTAATAGTACTTGAATAGTACTGGAGGGTCCATTTCTGAA-----  
-----  
-----  
GACTCAGAAAATATCACACTCCCATGCAGAATAAAACAAATTGTAAACATGTGGCAGGAGGTAGGAAAAGCAA  
TGTATGCCCCCTCCCATCAGAGGACAGATCAGATGTTTCATCAAAT---  
ATTACAGGGCTGCTATTAACAAGAGATGGTGGTATAAATCAGAGC-----  
-----  
-----  
ATCAGCGAGACCTTCAGACCGGGAGGAGGAGATATGAGGGACAATTGGAGAAGTGAATTATACAAATATAAAG  
TAGTAAAAAATTGAACCATTA---GGAATAGCACCCACCAAGGCAAGGAGAAGAGTGGTG-----  
-----CAAAGAGAAAAAAGAGCA---GTGGGA---ATAGGAGCT-----  
GTGTTCCCTTGGGTTCTTGGGAGCA---GCAGGAAGCACTATG---GGCGCAGCGTCA---  
CTGACGCTGACGGTACAG---GCCAGACTA---TTATTG---TCTGGTATAGTGCAACAGCAGAAC---  
AATCTG---CTGAGG---GCTATTGAGGCGCAACAGCATATGTTGCAACTCACAGTCTGGGGCATC  
>EU576141  
TTCTACTGTAATACAACACCACTGTTTAATAGTACTTGAATAATACTCGGACTGATGATTATCCTACTGGG-  
-----  
-----  
GGGGAACAAAATATCACACTCCAATGCAGAATAAAACAAATTATAAACATGTGGCAGGGAGTAGGAAAAGCAA  
TGTATGCTCCTCCCATCAGAGGACAAATTAGATGTTTCATCAAAT---  
ATTACAGGGCTGCTATTAACAAGAGATGGTGGTAGAGATCAGAAT-----  
-----  
-----  
GGTACTGAGACCTTCAGACCTGGAGGAGGAAATATGAGGGACAATTGGAGAAGTGAATTATATAAATATAAAG  
TAGTAAAAAATTGAACCATTA---GGAATAGCACCCACCGCGGCAAAGAGAAGAGTGGTG-----  
-----CAGAGAGAAAAAAGAGCA---GTGGGA---CTAGGAGCT-----  
TTTATCCTTGGGTTCTTGGGAGCA---GCAGGAAGCACTATG---GGCGCAGCGTCA---  
ATGGCGCTGACGGTACAG---GCCAGACTA---TTATTG---TCTGGTATAGTGCAACAGCAAAAC---  
AATTTG---CTGAGA---GCTATTGAGGCGCAACAGCATATGTTGCAACTCACAGTCTGGGGCATC  
>AY835446  
TTCTACTGTAATACAGCAGAACTGTTTAATAGTACTTGGTATGCAAATGGCACAATTAGTATTGGAGGGGGA-  
-----  
-----  
AACAAAGACTAATATCATACTCCCATGCAGAATAAAACAATTTATAAACATGTGGCAGGAAGTAGGAAAAGCAA  
TGTATGCCCCCTCCCATCAGTGGACAGATTAGATGTTTCATCAAAT---  
ATTACAGGACTGCTATTAACAAGAGATGGTGGTAGGGGCAATCAGACC-----  
-----  
-----  
GACAACCAGACTGAGATCTTCAGACCTGTAGGAGGAGATATGAAAAACAATTGGAGAAGTGAATTATATAAAT

ATAAAGTAGTAAGAATTGAACCATTA---GGAATAGCACCCACCAGGGCAAAAAGGAGAGTGGTG-----  
 -----CAGAGAGAAAAAAGAGCA---GTGGGA---ATAGGAGCT---  
 -----TTGTTTCCTTGGGTTCTTGGGAGCA---GCAGGAAGCACTATG---GGCGCAGCGTCA---  
 ATGACGCTGACGGTACAG---GCCAGACTA---TTATTG---TCTGGTATAGTGCAACAGCAGAAC---  
 AATCTG---CTGAGG---GCTATTGAGGCGCAACAGCATCTGTTGCAACTCACAGTCTGGGGCATC  
 >EF593282  
 TTCTACTGTAATTCAACACCACTGTTTAGTAGTACTTGGTATACTGGGAATAGTACCAATAGTACTAAAGGGT  
 TAAAT-----  
 -----  
 AACGCTACAGAAATTATCACACTCCTATGTAGAATAAAACAAATTATAAACATGTGGCAGGAAGTAGGAAAAG  
 CAATGTATGCCCCCTCCCATCAGAGGACAAATTAGATGCTCATCAAAT---  
 ATTACAGGGCTGCTATTAACAAGAGATGGTGGTAATAGCAGCAGC-----  
 -----  
 -----  
 AATGAAGAGATTTTCAGACCTGCAGGAGGAGATATGAGGGACAATTGGAGAAGTGAATTATATAAATATAAAG  
 TAGTAAAAATTGAACCATTA---GGAGTAGCACCCACCAAGGCAAAGAGAAGAGTGGTG-----  
 -----CAGAGAGAAAAAAGAGCA---GTGGGA---ATAGGAGCT-----  
 GTGTTTCCTTGGGTTCTTGGGAGCA---GCAGGAAGCACTATG---GGCGCAGCGTCA---  
 GTGACGCTGACGGTACAG---GCCAGACAA---TTATTG---TCTGGAATAGTGACGAGCAGAAC---  
 AATCTG---CTGAGG---GCTATTCAGGCGCAACAGCATCTGTTGCAACTCACAGTCTGGGGCATC  
 >JQ610043  
 TTCTATTGTAATACAACACCGCTGTTTAGCAGCAGGTGGGGGCCTGACGGCACTTGGGAATAGCACTTGGAAAC  
 GTACAAGT-----  
 -----ACA---  
 ACTAACAACGACACTATCACACTCCAATGCAGAATAAAACAAATTATAAACAGGTGGCAGGAAGTAGGAAGAG  
 CAATGTATGCCCCCTCCCATCCAAGGACAAATTAGATGCTCATCAAAT---  
 ATTACAGGGCTGCTATTAACAAGAGATGGTGGTCATGGTAATGAC-----  
 -----  
 -----  
 ACGGATAATACCACCGAGACCTTCAGACCTGGAGGAGGAAATATGAGGGACAATTGGAGAAGTGAAGTGTATA  
 AATATAAAGTAGTAAAAATTGAGCCATTA---GGATTAGCACCCACCAAGGCAAAGAGAAGAGTGGTG-----  
 -----CAAAGAGAAAAAAGAGCA---  
 GTGGGAACGCTAGGAGCT-----ATGTTTCCTTGGGTTCTTGGGAGCA---GCAGGAAGCACTATG---  
 GGCGCAGCGGCA---GTGACGCTGACGGTACAG---GCCAGACAA---TTATTG---  
 TCTGGTATAGTGCAACAGCAGAAC---AATTTG---CTGAAG---  
 GCTATTGAGGCGCAACAGCATATGTTGCAACTCACAGTCTGGGGCATC  
 >JN786752  
 TTCTACTGTAATACAACAAAACCTGTTTAATAGTACTTGGGATGCTAATAGTACTTGGGATGGTAATAGTACTA  
 TGGATAAAGGG-----  
 -----TCAAAT-----  
 CACACTAACAATACTATCACACTCCCATGCAGAATAAAACAAATTATAAACATGTGGCAGGGAGTAGGAAAAG  
 CAATGTATGCCCCCTCCCATCAGTGGACTTATTAGCTGTACATCAAAT---  
 ATTACAGGGCTGATATTAACAAGAGATGGTGGTAATAATAACAAGACAGAG-----  
 -----  
 -----  
 AACGAAAACAAGACTGAGATCTTCAGACCTGGAGAAGGAGATATGAGGGATAATTGGAGAAGTGAATTATACA  
 AATATAGAGTAGTAAAAATTGAACCATTA---GGAGTAGCACCTACCGAGGCAAAGAGAAGAGTGGTG-----  
 -----CAAAGAGAAAAAAGAGCA---GTGGGA---  
 TTTGGAGCT-----TTGTTTCCTTGGGTTCTTGAGTGCA---GCAGGAAGCACTATG---  
 GGCGCAGCGTCA---GTGACGCTGACGGTACAG---GCCAGACAA---TTATTG---  
 TCTGGTATAGTGCAACAGCAGAAC---AATCTG---CTGAGG---  
 GCTATTGAGGCGCAACAACATCTGTTGCAACTCACAGTCTGGGGCATC  
 >EF593212  
 TTCTACTGTAATACAACACCACTGTTTAATAGTACTTGGGAATAATACTAATGAAGGGTCAGGTAAC-----  
 -----  
 -----  
 TATGAAGGAAATATCACACTCCAATGCAGAATAAAACAAATTATAAATATGTGGCAGCAAGTAGGAAAAGCAA  
 TGTATGCCCCCTCCCATCCAAGGACAAATTTACTGTTTCATCAAAT---  
 ATTACAGGGCTGCTATTAACAAGAGATGGTGGTGGTAATAACGAG-----  
 -----

-----  
AGCAGCGAGACCTTCAGACCTGGAGGAGGAGATATGAGGGACAATTGGAGAAGTGAATTATATAAATATAAAG  
TAGTAAACTTGAACCATTA---GGAATAGCACCCACCAGGGCAAAGAGAAGAGTGGTG-----  
-----CAGAGAGAAAAAGAGCA---GCGGGA---CTAGGAGTT-----  
ATGTTTCCTTGGGTTCTTGGGAGCA---GCAGGAAGCACTATG---GGCGCAGCGTCA---  
ATGGCGCTGACGGTACAA---GCCAGACAA---TTATTG---TCTGGTATAGTGCAACAGCAGAGC---  
AATCTG---CTGAGG---GCTATTGAGGCGCAACAACATATGTTGCAACTCACAGTCTGGGGCATC  
>EF593300  
TTCTACTGTAATACAACACAGTTGTTTAATAGTACTTGGGAATAGTACTGGGAATAATAAACAGG-----  
-----  
-----  
TCAGGAGAAAATATCACACTCCCATGCAGAATAAAACAATTTCATAAACCTGTGGCAAGAAGTAGGAAAAGCAA  
TGTATGCTCCTCCCATCAAAGGAGAAATTCAATGCCGATCAAAT---  
ATTACAGGGCTAATAATAACAAGAGATGGTGGTAACACTACTGAA-----  
-----  
-----  
GAGATCTTCAGACCTGGAGGAGGAGATATGAGGGACAATTGGAGAAGTGAATTATATAAATATAAAGTAGTAA  
GAATTGAACCATTA---GGAATAGCACCCACCAAGGCAAAGAGAAGAGTGGTG-----  
-----CAAAGAGAAAAAGAGCA---GTGGGA---TTCGGAGCT-----  
ATGTTTCCTTGGGTTCTTGGGAGCA---GCAGGAAGCACTATG---GGCGCAGCGTCA---  
ATAGCGCTGACGGCACAG---GCCAGACAA---TTATTG---TCTGGTATAGTGCAACAGCAAAAC---  
AATTTG---CTGAGG---GCTATTGAGGCGCAACAGCATATGTTGCAACTCACAGTCTGGGGCATT  
>GQ153937  
TTCTACTGTGATACAACAACCACTGTTTAATAGTACTTGGGATAATACTAGTACTTGGGAATAATAGTAACACTC  
AGAAT-----  
-----  
AAAAATGATAGGAATATCACACTCCAATGCAGGATAAAACAATTATAAACATGTGGCAGGAAGTAGGAAAAG  
CAATGTATGCCCTCCCATTTATGGGACAAATTAGATGTGTATCAAAT---  
ATTACAGGGCTGCTATTAAACACGGGATGGTGGTAACGGTAGCGAGGCC-----  
-----  
-----  
AAAAACGACACGGAGATCTTCAGACCTGGAGGAGGAGATATGAGGGACAATTGGAGAAGCGAATTATATAAAT  
ATAAAGTAGTAAAAATTGAACCATTA---GGAGTAGCACCCACCAAGGCAAAGAGAAGAGTGGTG-----  
-----CAGAGAGAAAAAGAGCA---GTGGGAACGATAGGAGCT---  
-----ATGTTTCCTTGGGTTCTTGGGAGCA---GCAGGAAGCACTATG---GGCGCAGCGTCA---  
TTGACGCTGACGGTACAG---GCCAGACAA---TTGTTG---TCTGGTATAGTGCAACAGCAGAAC---  
AATCTG---CTGAGA---GCCATTGAGGCGCAACAGCACCTGTTGCAGCTCACAGTCTGGGGCATT  
>MH263121  
TTCTACTGTAACACAACAACCACTGTTTAATAGTACTTGGGAATAATAATAGTACTTGGGAATAATACTGAAGGG-----  
-----  
-----  
ACAGATCACAATATCACACTCCCATGCAGAATAAAACAATTTATAAATCTGTGGCAGGAAGTAGGAAAAGCAA  
TGTATGCTCCTCCCATCAGGGGACAAATTAGATGCTCATCAAAT---  
ATTACAGGGCTGCTATTAAACAAGAGATGGTGGTAATAATAAACACG-----  
-----  
-----  
GACCACTCTGAAACCTTCAGACCTGGAGGAGGAGACATGAGGGACAATTGGAGAAGTGAAGTATATAAATATA  
AAGTAGTAAAAATTGAACCATTA---GGAATAGCACCCACCAGGGCAAAGAGAAGAGTGGTG-----  
-----CAGAGAGAAAAAGAGCA---GTGGGA---ATAGGAGCT-----  
---TTGTTCCCTTGGGTTCTTGGGAGCA---GCAGGAAGCACTATG---GGCGCAGCGTCA---  
GTGACGCTGACGGTACAG---GCCAGACAA---TTATTG---TCTGGTATAGTGCAACAGCAAAGC---  
AATTTG---CTGAAG---GCTATTGAGGCGCAACAGCATCTGTTGCAACTCACAGTCTGGGGCATC  
>MH263194  
TTCTATTGCAACACAACCCAGCTGTTTAATAGTACTTGGTATAATAATGAGACTACTTGGTTTAATAATGGGA  
CTCAT-----  
-----  
CCTAATGAGACCATCATTCTCCCATGCAAAATAAAACAATTGTAAACCTGTGGCAGCAAGTAGGAAAAGCAA  
TGTATGCCCCCTCCCATCAGTGGAAGAATTATGTGTAATTCAACT---  
ATTACAGGGCTGCTATTAAACAAGAGATGGTGGTAATAATAGTCCC-----  
-----

-----  
AACGAGACCTTCAGACCTGGAGGAGGAGATATGAGAGACAATTGGAGAAGTGAATTATATAAAATATAAAGTAG  
TTAGGATTGAACCATTA---GGAATAGCACCCACCAGGGCACAGAGAAGAGTGGTG-----  
-----CAAAGAGAAAAAAGAGCA---GTGGGAGTGCTTGGAGCT-----  
ATGTTCCCTTGGGTTCTTGGGAACA---GCAGGAAGCACTATG---GGCGCAGCGTCA---  
ATAACGCTGACGGTACAG---GCCAGACAA---TTATTG---GCTGGTATAGTGCAACAACAGAAC---  
AATCTG---TTGAGA---GCTATTGAGGCGCAACAGCATATGTTGCAACTCACAGTCTGGGGCATC  
>MH263520  
TTCTACTGTAATACAGCAAAGCTATTTAATAGTACATGGTATAGTGCAGGGAATAGCACTGATGGGGATAAAG  
GA-----  
-----  
AATAATAACATAATCACACTCCCATGCAGAATAAAACAAATTGTAAACATGTGGCAGGAAGTAGGAAAAGCAA  
TGTATGCCCCCTCCCATCAGTGGACAAATTAGATGCTCATCAAAT---  
ATTACAGGGCTGCTATTAACAAGAGATGGTGGTCATGACAAATGACACA-----  
-----  
AACGGGACAGAGATCTTCAGACCTGGAGGAGGGAATATGAAGGACAATTGGAGAAGTGAATTATATAAAATATA  
AAGTAGTAAGAATTGAACCATTA---GGAGTAGCACCCACCAGGGCAAAGAGAAGAGTGGTG-----  
-----CAGAGAGACAAAAGAGCA---GTGGGA---ATAGGAGCT-----  
---CTGTTCCCTTGGGATCTTGGGAGCA---GCAGGAAGCACTATG---GGCGCAGCGTCA---  
ATAACGCTGACGGTACAG---ACCAGACAA---TTATTG---TCTGGTATAGTGCAACAGCAGAAC---  
AATTTG---CTGAGG---GCTATTGAGGCGCAACAGCACATGTTGCAACTCACAGTCTGGGGCATT  
>KX984437  
TTCTACTGTAATACATCAAAATTGTTTAGTAGTACTTGGAAATGGTACTACCACACTGCCTAGTAGTACTTGGGA  
ATACTACT-----  
-----  
CAGAAATGATACTATCACACTCCCATGCAGAATAAAACAAATTATAAACCTGTGGCAGGAAGTAGGAAAAGCAA  
TGTATGCCCCCTCCCATCAAAGGACAGATTAAATGTTTCATCAAAT---  
ATTACAGGGCTGTTATTAACAAGAGATGGTGGTATTACCAACAAC-----  
-----  
AGCATGAATCAGACCTTCAGACCTGGAGGAGGAGATATGAAGGACAATTGGAGAAGTGAATTATATAAAATATA  
AAGTAGTAAAAATTGAACCATTA---GGAATAGCGCCTACCAAGGCAAAGAGAAGAGTGGTG-----  
-----CAGAGAGAAAAAAGAGCA---GTGGGA---ATAGGAGCT-----  
---TTGTTCCCTTGGGTTCTTGGGAGCA---GCAGGAAGCACTATG---GGCGCAGCGTCA---  
ATAACGCTGACGGTACAG---GCCAGACTA---TTATTG---TCTGGTATAGTGCAACAGCAGAAC---  
AATTTG---CTGAGG---GCTATTGAGGCGCAACAGCATATGTTGCAACTCACAGTCTGGGGCATC  
>KX984699  
TTCTACTGTAATACAACAAAACCTGTTTAGCAGTACTTGGTATGATAATGGAACGTCAAAAAGCACTGAAAGA-  
-----  
-----  
TTAAATGACACTATCATACTCCCATGCAGGATAAAACAGATTATAAACATGTGGCAGGAAGTAGGAAAAGCAA  
TGTATGCCCCCTCCCATCAGAGGACAAATTAAGTGTTCATCAAAT---  
ATTTACAGGGCTGCTATTAACAAGAGATGGTGGTAATGATAATAACACG-----  
-----  
AACGACATCGAGACATTTCAGACCGGGAGGAGGAGATATGAGGGACAATTGGAGAAGTGAATTATATAATTATA  
AAGTGGTAAAAATTGAACCATTA---GGAATAGCACCCACTAAGGCAAAGAGAAGAGTGGTG-----  
-----CAAAGAGAAAAAAGAGCG-----GGA---ATAGGAGCT-----  
---TTGTTCCCTTGGGTTCTTGGGATTA---GCAGGAAGCACTATG---GGCGCAGCGTCA---  
GTGACGCTGACGGTACAA---GCCAGACTA---TTATTG---TCTGGTATAGTGCAACAGCAGAAC---  
AATCTG---CTGAGG---GCTATTGAGGCGCAACAGCATCTGTTGCAACTCACGGTCTGGGGCATC  
>MH632763  
TTCTACTGTGATACAACAAAATTGTTTAATAGTACTTGGAAATGTTAGTAGTATTTGGAATGTTACT-----  
-----  
-----  
GAGGATAAAAATATCACACTCACATGTAGAATAAGACAAATTATAAACAGGTGGCAAGAAGTAGGAAAAGCAA  
TGTATGCCCCCTCCCATCAGAGGACAAATTAGATGTTTCATCAAAT---  
ATTACAGGACTGTTATTAACAAGAGATGGTGGTCAGAACACAACA-----  
-----

-----  
AGCGAGACCTTTAGACCTGGAGGAGGAGATATGAGGGACAATTGGAGAAGTGAATTATATAAAATATAAAGTAG  
TACAAATTAAACCATTA---GGAATAGCACCCACCAGGGCACGGAGAAGAGTGGTG-----  
-----CAGAGAGAGAAAAGAGCA---GTAGGA---CTGGGAGCA-----  
ATGTTTCCTTGGGTTCTTGGGAGCA---GCAGGAAGCACTATG---GGCGCAGCGTCA---  
GTGACGCTGACGGTACAG---GCCAGACAA---TTACTG---TCTGGTATAGTGCAACAGCAGAAC---  
AATCTG---CTGAGG---GCTATTGATGCGCAACAGCACCTGTTGCAACTCACAGTCTGGGGCATC  
>MH576107  
TTCTACTGTAATACAACACAACCTGTTT-----ACTTGGGGGAGTAATAGTACTAACATTACAGGA-----  
-----  
-----  
AGTAATAGCACACTCACACTCCCATGCAGAATAAAACAAATTATAAATATGTGGCAGAGAGTAGGAAGAGCAA  
TGTATACCCCTCCTATCAGAGGACTAATTCATGCTCATCAAAT---  
ATTACAGGACTACTATTAACAAGAGATGGTGGGTATGGCAATAACAAT-----  
-----  
-----  
ACCAATGATACTGAGATCTTCAGACCTGGAGGAGGAGACATGAGGGATAATTGGAGAAGTGAATTATATAAAAT  
ATAAAGTGGTAAAAATTGAACCATTA---GGAGTAGCACCCACCAAGGCAAGGAGAAGAGTGGTG-----  
-----CAAAGAGAAAAAAGAGCA---GTAGGA---ATAGGAGCT---  
-----GTGTTTCCTTGGGTTCTTGGGAGCA---GCAGGAAGCACTATG---GGCGCAGCGTCA---  
ATAACGCTGACGGTACAG---GCCAGACAA---TTACTG---TCTGGTATAGTGCAACAGCAGAAC---  
AATTTG---CTGAGG---GCTATTGAGGCGCAACAGCACCTGTTGCAACTCACAGTCTGGGGCATC  
>MH576084  
TTCTATTGTAATTCATCATCACTGTTTAATAGTACCTGGACTAAAAATGATACTGGTAGTTGGCAGTCTAATG  
ATACT-----  
-----  
CAGAAATGGTAATATCACACTCCAATGCAGAATAAAACAAATTATAAACCTGTGGCAGGGAGTAGGAAAAGCAA  
TGTATGCCCCCTCCCATCAGTGGACAAATTAACTGTACATCAAAT---  
ATTACAGGGCTGATTTTAAACAAGAGATGGGGGGGAGATGATTAAT-----  
-----  
-----  
GAAACTGAGACCTTTAGACCTGGAGGAGGAAATATGAAGGATAATTGGAGAAGTGAATTATATAAAATATAAAG  
TAGTAAGAATTGAACCATTA---GGAATAGCACCCACCAAGGCAAAAGAAGAGTGGTG-----  
-----CAAAGAGAGAAAAGAGCA---GTAGGA---CTGGGAGCT-----  
ATGTTTCCTTGGGTTCTTGGGAGCA---GCCGGAAGCACTATG---GGCGCAGCGTCA---  
ATAGCGCTGACGGAACAG---GCCAGACGA---GTATTG---TCTGGTATAGTGCAACAGCAGAAC---  
AATTTG---CTGAGG---GCTATTGAGGCGCAACAGCATTTGTTGCAACTCACAGTCTGGGGCATT  
>MH633199  
TTCTACTGTAACACAACACAATTGTTTAATAGTACTTGGAATATTACTAGTAACTCTTGGAATAGTACTAGTA  
ATTAT-----  
-----  
ACTAATGAAAATATCACACTCCCGTGCAGAATAAAACAAATTATAAACAGGTGGCAGGAAGTAGGAAAAGCAA  
TGTATGCCCCCTCCCATCAGTGGACCAATAAGATGTTTCATCAAAT---  
ATTACAGGGCTACTACTAACAAGAGATGGTGGTAACAATAATGATACC-----  
-----  
-----  
AGCACCGAAGTCTTCAGACCTGGGGGAGGAGACATGAAAGACAATTGGAGAAGTGAATTATATAAAATATAAAG  
TAGTACAAATTGAGCCATTA---GGAGTAGCACCCACCAAGGCAAGAGAAGAGTGGTG-----  
-----CAGAGAGAAAAAAGAGCA---GTGGGA---ATAGGAGCG-----  
ATATTCCTTGGGTTCTTGTTCAGCA---GCAGGAAGCACTATG---GGCGCAGCGTCG---  
ATGACGCTGACGGTACAG---GCCAGACAA---TTATTG---TCTGGTATAGTGACAGCAGCAGAAC---  
AATCTG---CTGAGG---GCTATTGAGGCGCAACAACATCTGTTGCAACTCACAGTCTGGGGCATC  
>EU616649  
TTCTACTGCAATACATCAGGACTGTTTAATAGTTCTTGGGATATTAATGGTTCTTGGTATGGTAATAGAGGG-  
-----  
-----  
TCAAATGACACAATTACACTCCCATGCAGAATAAAACAAATTTATAAACATGTGGCAGGAAGTAGGAAAAGCAA  
TGTATGCCCCCTCCTATCCAAGGACTAATTAAGTGTATCAAAT---  
ATTACAGGGCTGCTATTAACAAGAGATGGTGGCAATAGCAGTCATAGT-----  
-----

-----  
 AATGGGACAGAGACCTTTAGACCTGGAGGAGGAGATATGAGAGATAATTGGAGAAGTGAATTATATAAAATATA  
 AAGTAGTAAAAATTGAACCATTA---GGAGTAGCACCCACCAAGGCAAAGAGAAGAGTGGTG-----  
 -----CAGAGAGAAAAAAGAGCA---GTGGGA---ATAGGAGCT-----  
 ---TTATTCCTTGGGTTCTTGTTCAGCA---GCAGGAAGCACTATG---GGCGCAGCGTCA---  
 ATGACGCTGACGGTACAG---GCCAGACAA---TTATTG---TCTGGTATAGTGCAACAGCAGAAC---  
 AATTTG---CTGAGA---GCTATTGAGGCGCAACAGCATATGTTGCAACTCACAGTCTGGGGCATC  
 >FJ469704  
 TTCTACTGTAACCTTAACAAAACCTGTTTAATAGTACTTGGGCTTGAATAGTACTTGAATAGTACTGAAGGAA  
 AT-----  
 -----  
 GAAAAATAACTATCACACTCCCATGTAGAATAAAACAAATTATAAACATGTGGCAGACAGTAGGAAAAGCAA  
 TGTATGCCCCCTCCTATCAGAGGACAAATTACATGCTCATCACAT---  
 ATTACAGGGATACTATTAACAAGAGATGGTGGTAACAGTGATGACACA-----  
 -----  
 -----  
 AACTATACTGAGATCTTCAGACCTGCAGGAGGAGATATGAGGGACAATTGGAGAAGTGAATTATATAAAATATA  
 AAGTAGTAAAAATTGAACCATTA---GGAGTAGCACCTACCAAGGCAAAGAGAAGAGTGGTG-----  
 -----CAGAGAGAAAAAAGAGCA---GTGGGA---TTAGGAGCT-----  
 ---ATGTTCTTGGGTTCTTGGGAGCA---GCAGGAAGCACTATG---GGCGCAGCGTCG---  
 CTGACGCTGACGGTACAG---GCCAGGCAG---TTATTG---TCTGGTATAGTGCAACAGCAGAAC---  
 AATCTG---TTGAGG---GCTATTGAGGCGCAACAGCATCTGTTGCAACTCACAGTCTGGGGCATC  
 >FJ469725  
 TTCTACTGTAATTCATCAAAAACCTGTTTAAGGGTACCTGGAATGGTACTACATTGTCAAATACCACTAAAGGAA  
 TAAATAAT-----  
 -----ACT---  
 CAAGGAGAGAAAATAATCACAATCCAGTGCAAAATAAAACAATTTATAAACAGGTGGCAGGAAGTAGGAAAAG  
 CAATGTATGCCCCCTCCCATCAGCGGACCAATTATATGTCCATCAAAT---  
 ATTACAGGGCTGCTATTAACAAGAGATGGTGGTAATGGCACCAAT-----  
 -----  
 -----  
 AGGACGACCGAGACCTTCAGGCCTGAAGGAGGAGATATGAGGGACAATTGGAGAAGTGAATTATATAAAATATA  
 AAGTAGTAAAAATTGAACCATTA---GGATTAGCACCCACCAAGGCAAAGAGAAGAGTGGTG-----  
 -----CAGAGAGAAAAAGAACA---GTGGGA---ATAGGAGCT-----  
 ---TTGTTCTTGGGTTCTTGGGAGCA---GCAGGAAGCACTATG---GGCGCAGCGTCA---  
 ATGACGCTGACGGTACAG---GCCAGGCTA---TTATTG---TCTGGTATAGTGCAACAGCAAAAC---  
 AACTTG---CTGAGG---GCTATTGAGGCGCAACAGCATCTGTTGCAACTCACAGTCTGGGGCATC  
 >MN515543  
 TTCTACTGTAATTCACATCACTGTTTAATAGTACTTGGATGTTTAATAGTACTTGAATGGCACTGATGGGA  
 ATGATGCT-----  
 -----  
 GACTCTAGAGAAAATATCACACTCCAATGCAGAATAAAACAAATTATAAACATGTGGCAGGAAGTAGGAAAAG  
 CAATGTATGCCCCCTCCCATCCAAGGGCTAATTAGATGTTTCATCAAAT---  
 ATTACTGGGCTGCTATTAACAAGAGATGGTGGTAATCACAATAACAGT-----  
 -----  
 -----  
 AATGGGACAGAGACCTTTAGACCTGGAGGAGGAGATATGAGGGACAATTGGAGAAGTGAATTATATAAAATATA  
 AAGTAGTAAAAATTGAACCATTG---GGAGTAGCACCCACCAAGGCAAAGAGAAGAGTGGTG-----  
 -----CAGAGAGAAAAAAGAGCA---CTAGGGGGACTAGGAGCT-----  
 ---TTGTTCTTGGGTTCTTGGGAGCA---GCAGGAAGCACTATG---GGCGCAGCGTCC---  
 CTGACGCTGACGGTACAG---GCCAGACTA---TTATTG---TCTGGTATAGTGCAACAGCAGAAC---  
 AATCTG---CTGAGA---GCTATTGAGGTGCAACAGCATCTGTTGCAACTCACAGTCTGGGGCATC  
 >MN515731  
 TTCTATTGTAATACCGCAAAAACCTGTTTAGTAGTACTTGGCATGCTAATGGTACGTGGAATGGTACTTGAATA  
 AACT-----  
 -----  
 ACAGAGCAAAATATTACAATTCTATGCAGAATAAAACAAATTATAAACATGTGGCAGGAAGTAGGAAAAGCAA  
 TGTATGCCCCCTCCCATCGGAGGAAAAATTAGATGCTCATCAAAT---  
 ATCACAGGGCTACTATTAGTGAGAGATGGTGGCAACACCACCATC-----  
 -----

-----  
GGGAACACCACTGAGATTTTCAGACCTCAAGGAGGAAATATGAAGGACAATTGGAGAAGTGAATTATATAAAT  
ATAAAGTAGTACAAATTGAACCAATA---GGAGTAGCACCCACCAAGGCAAAAAGAAGAGTGGTG-----  
-----CAGAGAGAAAAAAGAGCA---GTGGGA---ATAGGAGCT---  
-----CTGCTCCTTGGGTTCTTGGGAGCA---GCAGGAAGCACTATG---GGCGCAGCGTCA---  
ATAACGCTGACGGTACAG---GCCAGACAA---TTATTG---TCTGGTATAGTGCAACAGCAAAAC---  
AATTTG---CTGAGA---GCTATTGAGGCGCAACAGCATCTGTTGCAACTCACAGTCTGGGGCATC  
>GU728412  
TTCTACTGTAATACAACACAACCTGTTTAATAGTACTTGGGATATAAAGAGTAATATGACAAGGTCAAAT-----  
-----  
-----  
AACACTGAACCAATCACCCCTCCAATGCAGAATAAAGCAAATTATAAACATGTGGCAGGAAGTAGGAAAAGCAA  
TGTATGCCCCCTCCCATCAGAGGACAAATTAAATGTTTCATCAAAT---  
ATTACAGGGCTGCTATTAAACAAGAGATGGTGGTAATGAGACAGGGAAAGAG-----  
-----  
-----  
AATGATACAGAGAAAGAGACCTTCAGACCTGGAGGAGGAGATATGAGGGACAATTGGAGAAGTGAACTTTATA  
AATATAAAGTAGTAAAAATTAAACCATTA---GGAGTAGCACCCACTGCAGCAAAAAGAAGAGTGGTG-----  
-----CAGAGAGAAAAAAGAGCG---GCACTA-----  
GGAGCC-----TTGTTCCCTTGGGTTCTTGGGAGCA---GCAGGAAGCACTATG---GGCGCAGCGTCA-  
---GTAACGCTGACGGTACAG---GCCAGACTA---TTATTG---TCTGGTATAGTGCAACAGCAGAAC---  
AATCTG---CTGAGA---GCTATTGAGGCGCAACAGCATCTGTTGCAACTCACAGTCTGGGGCATC  
>GU727880  
TTCTACTGTAATACAACACAACCTGTTTAATAGTACTTGGAAATGGTACACAACCTGCCTAATCTTACT-----  
-----  
-----  
GGGAATGAAAATATCACACTCCAATGCAGAATAAAGCAAATTATAAATATGTGGCAGGAAGTAGGAAAAGCAA  
TATATAACCCTCCCATCCAAGGACTAATTAGATGTTTCATCAAAT---  
ATTACAGGGCTGTTATTAAACAAGAGATGGTGGTCATGGGAATAAT-----  
-----  
-----  
GACACCGAGATCTTCAGACCAGGAGGAGGAGATATGAGGGACAATTGGAGAAGTGAATTATATAAATATAAAG  
TAGTAAAAATTGAACCATTA---GGACTAGCACCCACCACGGCGAAGAGAAGAGTGGTG-----  
-----CAGAGAGAAAAAAGAGCA---GTGGGA---ATAGGAGCA-----  
TTGTTCCCTTGGGTTCTTGGGAGCA---GCAGGAAGCACTATG---GGCGCAGCGTCA---  
ATGACGCTGACGGTACAA---GCCAGACAA---TTATTG---TCTGGTATAGTGCAACAGCAGAAC---  
AATCTG---CTGAGG---GCTATTGAGGCGCAACAACATGTATTGCAGCTCACAGTCTGGGGCATC  
>DQ886031  
TTCTACTGTAATACATCACGGCTGTTTAATAGTACTTGGAAATATTACTGAAGGGTCAAATAGCACTGCAGGC-----  
-----  
-----  
TCTAACAAGAATATCACACTCCCATGCAGGATAAAACAAATTATAAACATGTGGCAGGAAGTAGGAAAAGCAA  
TGTATGCCCCCTCCCATCAGCGGACTAATTAGATGTACATCAAAT---  
ATTACAGGGCTGTTACTAACAAGAGATGGTGGTCATGATAATAAAACA-----  
-----  
-----  
AATGACACCGAGATCTTCAGACCTGGAGGAGGAAACATGAGGGACAATTGGAGAAGTGAATTATATAAATATA  
AAGTAGTAAAAATTGAACCATTA---GGAATAGCACCCACCAAGGCAAGGAGAAGAGTGGTG-----  
-----CAAAGAGACAAAAGAGCA---GTGGGA---ATAGGAGCT-----  
---ATGTTCCCTTGGGATCTTAGGAGCA---GCAGGAAGCACTATG---GGCGCAGCGTCA---  
ATAACGCTGACGGTACAG---GCCAGACAA---CTATTG---TCTGGTATAGTGCAACAGCAGAAC---  
AATTTG---CTGAGG---GCCATTGAGGCGCAACAGCATCTGTTGCAACTCACAGTCTGGGGCATA  
>DQ886032  
TTCTACTGTAACACAACAAAACCTTTTTAATAATAATACTGAAGGGTCAAAAAACACTGAA-----  
-----  
-----  
GACAATACCACACTCACACTCCCATGCAGAATAAAACAGATTATAAACATGTGGCAGGAAGTAGGAAGAGCAA  
TGTATGCCCCCTCCTATCAAAGGAATAATTAGATGTACATCAAAT---  
ATTACAGGGCTGATATTAAACAAGAGATGGTGGTCATAACATGAATAACACG-----  
-----

-----  
 AATGAGACCACCGAGACCTTCAGACCTGGAGGAGGAGATATGAGGGACAATTGGAGAAGTGAATTATATAAAAT  
 ATAAAGTAGTAAGAATTGAACCATTA---GGAATAGCACCTTCCAGGGCAAAGAGAAGAGTGGTG-----  
 -----CAGAGAGAAAAAAGAGCA---GTGGGA---ATAGGAGCT---  
 -----GTGTTTCCTTGGGTTCTTGGGAGCA---GCAGGAAGCACTATG---GGCGCAGCGTCA---  
 CTGACGCTGACGGTACAG---GCCAGACAA---TTATTG---TCTGGTATAGTGCAACAGCAGAAC---  
 AATTTG---CTGAGA---GCTATTGAGGCGCAACAGCATCTGTTGCAGCTCACAGTCTGGGGCATC  
 >GU367399  
 TTCTACTGCAATACAACAGGACTGTTTAATAGTTCTTGGGAATAATGATACTATCTGGAATGATACTAGCACTG  
 AAGGA-----  
 -----  
 AGGAGAAATGACACAATCATACTCCCATGCAGAATAAGACAAATTGTAAACATGTGGCAGGAAGTAGGAAAAG  
 CAATGTATGCCCTCCTATCCAAGGACTAATTAAGTGTTCATCAAAT---  
 ATTACAGGGCTGCTATTAACAAGAGATGGTGGTAATAGCAACAAT-----  
 -----  
 -----  
 AGCTATGAGACCTTTAGACCTGGAGGAGGAGATATGAGGGACAATTGGAGAAGTGAACCTATATAAAATATAAAG  
 TAGTAAAAATTGAACCAATA---GGAGTAGCACCCACCAAGGCAAAGAGACGAGTGGTG-----  
 -----CAGAGAGAAAAAAGAGGG---GTCGGG---ATCGGAGCT-----  
 TTGTTTCCTTGGGTTCTTGGGAGCA---GCAGGAAGCACTATG---GGCGCAGCGTCA---  
 ATAACGCTGACGGTACAG---GCCAGACAA---CTATTG---TCTGGTATAGTGCAACAGCAAAAC---  
 AACTTG---CTGAGG---GCTATTGAGGCGCAACAACATCTGTTGCAACTCACAGTCTGGGGCATC  
 >GU367403  
 TTCTACTGTAATACATCAAACTGTTTAATAGTACTTGGGGGTGGAATGTCACTGAAAATGGCACTGAAGTGT  
 CAAAT-----  
 -----  
 AACACTGAAGGAAATATCACACTTCCATGCAGAATAAAACAAATTATAAACATGTGGCAAAAAGTAGGAAAAG  
 CTATATATGCCCTCCTATCAGAGGACAAATTAGCTGTTTATCAAAT---  
 ATTACAGGGCTGCTATTAACAAGAGATGGTGGTCATAACGAGGGTAAC-----  
 -----  
 -----  
 GAGACTAAGACTGAGGTCTTCAGACCTGGAGGAGGAGATATGAGGGACAACCTGGAGGAGTGAATTATATAAAAT  
 ATAAAGTAGTAAAAATTGAACCATTA---GGAGTAGCACCCACCAAGGCAAAAAGAAGAGTGGTG-----  
 -----CAAAGAGAAAAAAGAGCA---GTAGGA---ATAGGAGCT---  
 -----GTGTTTCCTTGGGTTCTTGTTCAGCA---GCAGGAAGCACTATG---GGCGCAGCGTCA---  
 CTGACGCTGACGGTACAG---GCCAGACAA---TTATTG---TCTGGTATAGTGCAACAGCAGAAC---  
 AATCTG---CTGAGG---GCTATTGAGGCGCAACAGCATCTGTTGCAACTCACAGTCTGGGGCATC  
 >KP754467  
 TTCTATTGTAATACAACACCGCTGTTTAATAGTAGTTGGAATGAACTACTCTTCAGAAGGGGAAATAATAGTA  
 CTCAG-----  
 -----  
 GATAATGAACTATCACAATCCAATGCAGAATAAAACAAATTATAAACAGGTGGCAGGAAGTAGGAAAAGCAA  
 TGTATGCCCTCCCATCCAAGGACTAATTATGTGTGCATCAAAT---  
 ATTACAGGGATACTATTAACAAGAGATGGTGGTGATGGTAATGGTACA-----  
 -----  
 -----  
 AACAAATACCACCGAGATCTTCAGACCTGGAGGAGGAGACATGAGGGACAATTGGAGAAATGAATTATATAAAAT  
 ATAAAGTAGTACAAATTGAGCCATTA---GGAGTAGCACCCAGCAAGGCAAAGAGAAGAGTGGTG-----  
 -----CAAAGAGAAAAAAGAGCA---GTAGGA---CTAGGAGCT---  
 -----TTGTTTCCTTGGGTTCTTGGGAGCA---GCAGGAAGCACTATG---GGCGCAGCGTCG---  
 ATGACGCTGACGGTACAG---GCCAGACAA---TTATTG---TCTGGTATAGTGCAACAGCAGAAC---  
 AATCTG---CTGAGG---GCTATTGAGGCGCAACAACAGCTGTTGCAACTCACAGTCTGGGGCATT  
 >KP754469  
 TTCTACTGTGATACATCAAACTGTTTAATAGTACTTGGGATAAGGGTAATTGGAGTACAGGGACAATTGCCA  
 CTAAC-----  
 -----  
 GGAAATGACACTATCATACTCCAATGCAGAATAAGACAAATTATAAACATGTGGCAGGAAGTAGGAAAAGCAA  
 TCTATGCCCTCCTATCAGTGGATACGTTAACTGTACATCAAAT---  
 ATTACAGGGTTGATATTAACAAGAGATGGTGGTAATGATAATGGTACA-----  
 -----

AAAAATGGTACAAAC---  
TCCACCGAGACTTTTACAGCTGGAGGAGGAGATATGAGGGACAATTGGAGAAGTGAATTATATAAATATAAAG  
TAGTAAAAAATTGAACCATTA---GGAATAGCACCCACCAAGGCAAAGAGAAGAGTGGTG-----  
-----CAGAGAGAAAAAAGAGCA---GTGGGG---ATGGGAGCT-----  
TTGTTTCCTTGGGTTCTTGGGAGCA---GCAGGAAGCACTATG---GGCGCAGCGTCA---  
ATAACGCTGACGGTACAA---GCCAGACAA---TTGTTG---TCTGGTATAGTGCAACAGCAGAAC---  
AATCTG---CTGAAG---GCTATTGAGGCGCAACAGCATCTGTTGCAACTCACAGTCTGGGGCATC  
>KP754471  
TTCTACTGTAACACATCACAACTGTTTAATAGTACGTGGAATGATACTGAAAGGCCAAATAGCAATGGAGAA-  
-----  
-----  
AATGACCAAAATATTACACTCCCTTGCAGAATAAGACAAATTGTAAACATGTGGCAGGAGGTAGGAAAAGCAA  
TGTATGCCCCCTCCCATCAGAGGACCAATTCAATGCTCATCAAAC---  
ATTACAGGGATGATATTAACAAGAGATGGTGGCAATAACAGTGCC-----  
-----  
-----  
CAGAACGAGACCTTCAGACCTGGAGGAGGAGACATGAGGGACAATTGGAGAAGTGAATTATATAAATATAAAG  
TAGTAAAAAATTGAACCATTA---GGAGTAGCACCCACCAAGGCAAAAAGAAGAGTGGTG-----  
-----CAGAGAGAAAAAAGAGCA---GTGGGA---ATAGGAGCT-----  
TTGTTTCATCGGGTTCTTGGGAGCA---GCAGGAAGCACTATG---GGCGCAGCGTCA---  
ATGACGCTGACGGTACAG---GCCAGACAG---TACTG---TCAGGTATAGTGCAACAGCAAAAC---  
AATTTG---CTGAGA---GCTATTGAGGCGCAACAGCATATGTTGCAACTCACAGTCTGGGGCATC  
>FJ469744  
TTCTACTGTAATTCAACACAACCTGTTTGATAGTACTTGGGATAATGGAACAAAAACAAATACCACTGAGGGAA  
GAAATAGCGAT-----  
-----GGAGGA-----  
AATAGCAGCGAACCCATCATACTCCCATGCAGAATAAAACAAATTATAAACATGTGGCAGGAAGTAGGAAAAG  
CAATGTATGCCCCCTCCCATCAGTGGAACATTACATGTTTCATCCAAT---  
ATTACAGGGTTGCTATTAACAAGAGATGGTGGCAAGGGCAATGAGACTCAGGGC-----  
-----  
-  
TATGGGACTCAGGGCACTGAGATCTTCAGACCTGGAGGAGGAGATATGAGAGACAACCTGGAGAAGTGAATTAT  
ATAAATATAAAGTAGTAAGAATTGAACCATTA---GGAGTAGCACCCACCAAGCCAAAGAGAAGAGTGGTG--  
-----CAGAGAGAAAAAAGAGCA---GTGGGA---  
TTAGGAGCT-----CTGTTTCCTTGGGTTCTTGGGAGCA---GCAGGAAGCACTATG---  
GGCGCAGCGTCA---ATGACGCTGACGGTACAG---GCCAGACTA---TTATTG---  
TCTGGTATAGTGACAGCAGCAGAAC---AATCTG---CTGAGG---  
GCTATTGAGGCGCAACAGCATCTGTTGCAACTCACAGTCTGGGGCATC  
>GU728345  
TTCTACTGTAAAACATCAAGACTATTTAATAGTACTTGGAAATGGTACTTGGAAATGGTACTGAAGGACCAATCT  
GGAATGGTACT-----GAAAGGTCAGAA---  
GGACCAATCTATGATGACCCT-----  
AAAAGAAAAGACACAATCACACTCCAATGCAGAATAAAACAAATTATAAACATGTGGCAGAGAGTAGGAAAAG  
CAATGTATGCCCCCTCCCATCAGTGGAATAATTAGATGTTTCATCAAAT---  
ATTACAGGGCTGATATTAACAAGAGATGGTGGAAACAATAACGAGACTAAT-----  
-----  
-----  
ACCCCTGAGGTCTTCGAGACTAGACCTGGAGGAGGAAATATGAGGGATAATTGGAGAAATGAATTATATAAAT  
ATAAAGTAGTAAAAAATTGAACCATTA---GGAGTAGCACCCACCAAGGCAAAGAGAAGAGTGGTG-----  
-----CAGAGGGAAAAAAGAGCA---GTGACA---CTAGGAGCT---  
-----GTGTTTCCTTGGGTTCTTGGGAGCA---GCAGGAAGCACTATG---GGCGCAGCATCA---  
ATAACGCTGACGGTACAG---GCCAGACAA---TTATTG---TCTGGTATAGTGCAACAGCAGAGC---  
AATCTG---CTGAGG---GCTATTGAGGCGCAACAGCATATGTTGCAACTCACAGTCTGGGGCATC  
>FJ687543  
TTCTACTGTGACTCAACAAAACCTGTTTAATTTTACTTGGAAATGGTACTGAAACAAATAACACTGGA-----  
-----  
-----  
GGAAGTGATAAAATCATACTCCCATGCAGAATAAAACAAATTATAAAAATGTGGCAGAAAGTAGGACAAGCAA  
TGTATGCCCCCTCCCATCCAAGGAAAAATTTACTGCTCATCAAAT---  
ATTACAGGGCTACTATTAACAAGAGATGGTGGCATCAACAATGAACCT-----

-----  
-----  
AACAACTACTGAGACCTTCAGACCTGGAGGAGGAAATATGAAGGATAATTGGAGAAGTGAATTATATAAAATATA  
AAGTAGTACAAATTGAACCATTA---GGAGTAGCACCCACCAAGGCCAAAAGAAGAGTGGTG-----  
-----CAGAGAGAAAAAAGAGCA--GTGGGC--ATAGGAGCT-----  
---TTGTTCCCTTGGGTTCTTGGGAGCA--GCAGGAAGCACTATG--GGCGCAGCGTCA---  
ATAACGCTGACGGTACAG---GCCAGACAA--TTATTG---TCTGGTATAGTGCAACAGCAGAAC---  
AATCTG---CTGAGG---GCTATTGAGGCGCAACAGCATATGTTGCAACTCACAGTCTGGGGCATC  
>GU727919  
TTCTACTGTAATACAACACAACCTGTTTAATAGTATTTGGAGGTTTAATAGTATTTGGAGGTTTAATGATACTA  
AGGAGAACAAT-----  
-----CAAAGTAA-----  
GGAAATGACACAGTTATCACACTCCCATGTAAAATAAAAACAAATTATAAACTTGTGGCAAGAAGTAGGAAAGG  
CAATGTATGCCCCCTCCCATCAGAGGACAAATTAAGTGTACATCAAAT---  
ATTACAGGGATACTATTAATAAGAGATGGTGGTAAGAGTAATGAGACT-----  
-----  
-----  
AACAAACACCGAGACCTTCAGACCTGGGGGAGGAAATATGAAGGACAATTGGAGAAGTGAATTATATAAAATACA  
AAGTAGTAAGAATTGAACCATTG---GGAATAGCACCCACCACGGCAAAGAGAAGAGTGGTG-----  
-----CAAAGAGAAAAAAGAGCA--GTGGGAATGCTAGGAGCT-----  
---ATGTTCCCTTGGGTTCTTGGGAGCA--GCAGGAAGCACTATG--GGCGCAGCGTCA---  
ATAACGCTGACGGTACAA---GCCAGACAA--TTATTG---TCTGGTATAGTGCAACAGCAGAGC---  
AATCTG---CTGAGG---GCTATTGAGGCGCAACAGCATATGTTGCAACTCACAGTCTGGGGCATC  
>KF725982  
TTCTACTGTAACACAACACCACTGTTTAACAAAAACACACCTGGATAGCCTGAATAGCACT-----  
-----  
-----  
ACAGACGGTAATATTACACTTCAATGCAGAATAAAACAAATTATAAACATGTGGCAGGAAGTAGGAAAAGCAA  
TGTATGCCCCCTCCCATCAGAGGACAAATTAGATGTTTCATCAAAT---  
ATTACAGGGCTGTTATTAACAAGAGATGGTGGTAATGGTAATGAGAGC-----  
-----  
-----  
AGCAACCATGAGACCTTCAGACCTGGGGGAGGAGATATGAGGGACAATTGGAGAAGTGAATTATATAAAATATA  
AAGTAGTACAAATTGAACCATTA---GGAATAGCACCCACCAAGGCCAAAAGAAGAGTGGTG-----  
-----CAGAGAGAAAAAAGAGCA--GTGGGA--ATAGGAGCT-----  
---TTGTTCCCTTGGGTTCTTGGGAGCA--GCAGGAAGCACTATG--GGCGCAGCGTCA---  
GTGACGCTGACGGTACAA---GCCAGACAA--TTACTG---TCTGGTATAGTGCAACAGCAGAAC---  
AATTTG---CTGAGG---GCTATTGAGGCGCAACAACATTTGTTGCAACTTACAGTCTGGGGCATC  
>KF725986  
TTCTACTGTAATACAGCACCACTGTTTAATAGTACTTGAATGATACCAGTGCCTGGAATATAACT-----  
-----  
-----  
GATACTAGCCCACTCACAATCCAGTGCAGAATAAGACAAATTATAAATAGGTGGCAGGAAGTAGGAAAATCGA  
TGTATGCCCCCTCCCATCAGTGGACAAATTAAGTGTTCATCAAAT---  
ATTACAGGGCTGCTATTAACAAGAGATGGTGGTGGAAACAGGTCC-----  
-----  
-----  
CAGGAAAACAGGTCCGAGACCTTCAGACCTGGAGGAGGAGACATGAGGGACAATTGGAGGAGTGAATTATATA  
AATATAAAGTAGTAAAAATTGAGCCATTA---GGGATAGCACCCACCAAGGCCAAGGAGGAGTGGTG-----  
-----CAAAGAGAAAAAAGAGCA---  
GTGGGAGCGATAGGAGCT-----ATGTTCCCTTGGATTCTTGGGGACA--GCAGGAAGCACTATG---  
GGCGCAGCGGCA---TTGACGCTGACGGTACAG---GCCAGACAA--TTATTG---  
TCTGGTATAGTGCAACAGCAAAAC---AATTTG---CTGAGG---  
GCTATTGAGGCGCAACATCATCTGTTGCAACTCACAGTCTGGGGCATC  
>KF725988  
TTCTACTGTGATACAAAAAACTGTTTAATAGTACATGGAATTTTAATAATACTTGAATTTCTACTCAAACA-  
-----  
-----  
GGCAATGACACAATCACACTCCCATGCAGAATAAAACAAATTATAAACATGTGGCAAGGAGTAGGAAAAGCAA  
TGTATGCCCCCTCCCATTAGTGGACAAATCAACTGTTTATCAAAT---

ATTACAGGGCTGATATTAACAAGAGATGGTGGTCAGAACGATAGC-----  
-----  
-----  
AGTAAGGAGACCTTCAGACCTGCAGGAGGAAATATGAAGGACAATTGGAGAAGTGAATTATATAAATATAAAG  
TAGTACAAATTGAACCATTA---GGAGTAGCACCCACCAAGGCAAAGAGAAGAGTGGTG-----  
-----CAAAGAGACAAAAGAGCA--GTGGGA--ATAGGAGCA-----  
TTGTTTCCTTGGGTTCTTGGGAGCA--GCAGGAAGCACTATG--GGCGCAGCGTCA---  
ATGACGCTGACGGTACAG---GCCAGGCAA--TTATTG---TCTGGTATAGTGCAGCAGCAGAAC---  
AATCTG---CTGAGG---GCTATTGAGGCGCAGCAGCACCTGCTGCAACTCACAGTCTGGGGCATC  
>KF726003  
TTCTACTGTGATACAACACAGCTGTTTAATAGTACTTGGGTAAATGGTACTATAAAGAATAGTACTGAAGAA-  
-----  
-----  
AATAACACATTAATTCAGCTCCCATGTAGAATAAAAACAAATTATAAACAGATGGCAGGAAGTAGGAAAAGCAA  
TGTATGCCCCCTCCTATCAAAGGAGTAATTAGCTGTTTCATCAAAT---  
ATTACAGGGCTGATCTTAACAAGAGATGGTGGAAATAATAATAGTGCA-----  
-----  
-----  
GCTAATGAGACCTTTAGACCTGCAGGAGGAGATATGAAGGACAATTGGAGAAGTGAACCTATATAAATATAAAG  
TAGTACAGATTGAACCATTA---GGAGTAGCACCCACCCAGGCAAAGAGAAGAGTGGTG-----  
-----CAGAGAGAAAAAAGAGCA--GTGGGAACAATAGGAGCT-----  
ATGTTTCCTTGGGTTCTTGGGAGCA--GCAGGAAGCACTATG--GGCGCAGCGTCA---  
ATAACGCTGACGGTACAG---GCCAGACAA--TTATTG---TCTGGTATAGTGCAGCAGCAGCAC---  
AATTTG---CTGAGA---GCTATTGAGGCGCAACAGCATCTGTTGCAACTCACAGTCTGGGGCATC  
>KU168260  
TTCTACTGTAATACAACACAACCTGTTTAATAGTATTTGGGAAGGTAATAAGACTCAGACAGGTCATAGTACTC  
ATAAT-----  
-----  
GCTAGGAATGACACTATCACGCTCCCATGTAGAATAAAAACAAATTATAAACATGTGGCAGGAAGTAGGAAAAG  
CAATGTATGCCCCCTCCCATCCATGGACAAATTAGATGTATATCAAAT---  
ATCACAGGTCTGCTATTAAACAAGAGACGGTGGTATACACAACAAAACC-----  
-----  
-----  
CACATGACTGAGGTCTTCAGACCTGGAGGAGGAAATATGAAGGACAATTGGAGAAGTGAATTATACAAATATA  
AAGTAGTACAAATTGAACCATTA---GGGCTGGCACCCACCAAGGCAAAGAGAAGAGTGGTG-----  
-----CAGAGAGAAAAAAGAGCA--GTGGGAGCAATAGGAGCT-----  
---TTGTTTCCTTGGGTTCTTGGGAGCA--GCAGGAAGCACTATG--GGCGCAGCGTCA---  
CTGGCGCTGACGGTACAG--ACCAGACAA--TTACTG---TCTGGTATAGTGCAACATCAGAAC---  
AATCTG---CTGAGG---GCTATTCAAGCGCAACAGCATCTGTTGCAGCTTACAGTCTGGGGCATC  
>KT452481  
TTCTACTGTAATACAACAAAACCTGTTTAACAGTACTTGGATTTGGAATAGTACTGAAGGGTCAAACCTCC---  
-----  
-----  
AGTGAAGGAAACACAACACTCCAATGCAGAATAAAAACAAATTGTAAACATGTGGCAGGAAGTAGGAAAAGCAA  
TGTATGCTCCTCCCATCAAAGGAGTAATCAGATGTTTCATCAAAT---  
ATTACAGGGCTGTTATTAACAAGAGATGGTGGTAGCAAGAACAGTAGCGAGAAC-----  
-----  
-----  
ACCACCCTAAGGAGACCTTCAGACCTGGAGGAGGAGATATGAGGGATAATTGGAGAAGTGAATTATATAAAT  
ATAAAGTAGTAAAAATTGAACCATTA---GGAATAGCACCCACCAAGGCAAGGAGAAGAGTGGTG-----  
-----CAGAGAGAAAAAAGAGCC---GTGGGA---ATAGGAGCA---  
-----TTGTTTCCTTGGGTTCTTGGGAGCA--GCAGGAAGCACTATG--GGCGCAGCGTCA---  
CTAACGCTGACGGTACAG---GCCAGACAA--TTATTG---TCTGGTATAGTGCAGCAGCAAAAC---  
GATTTG---CTGAGA---GCTATTGAGGCGCAACATCATCTGTTGCAACTCACAGTCTGGGGCATC  
>KT452508  
TTCTACTGTGATACAACAAAACCTGTTTGATAGCTCTTGGAAATAAACTGGAAGAATAGATAAAAGGAATAATA  
CAGAAGGG-----  
-----  
TCAAATGACACAATCACACTCCCATGCAGAATAAAAACAAATTATAAACATGTGGCAGGAAGTAGGAAAAGCAA  
TGTATGCTCCTCCCATCAGTGGACGGATTAACTGTACATCAAAT---

ATTACAGGGCTGATATTAACAAGAGATGGTGGTCATAATGTTACA-----  
-----  
-----  
ACTAAAGGGGACACCTTCAGACCTGGAGGAGGAAATATGAAGGACAATTGGAGAAGTGAATTATATAAAATATA  
AAGTAGTAAAAATTGAACCATTA---GGAATAGCACCCACCAAGCAAGGAGAAGAGTGGTG-----  
-----CAGAGAGAAAAAAGAGCC---GTGGGA---TTAGGAGCT-----  
---TTGTTCCCTTGGGTTCTTGGGAGCA---GCAGGAAGCACTATG---GGCGCAGCGTCA---  
ATGGCGCTGACGGTACAG---GCCAGACAA---TTATTG---TCTGGTATAGTGCAACAGCAGAAC---  
AATCTG---CTGAGG---GCCATTGAGGCGCAACAGCATCTGTTGCAACTCACAGTCTGGGGCATC  
>KT452155  
TTCTACTGCAATACATCACGACTATTTAATAGTACTTGGTTTAAGAATGATAGTACTTGGTTTAGGAATGATA  
CTGGGAAT-----  
-----GATACA-----  
GAAAAGTCAGAAAAGATCATACTTCCATGCAGAATAAAACAAATTATAAATATGTGGCAGGAAGTAGGAAAAG  
CAATGTATGCCCCCTCCCATCCGAGGACTAATTAGTTGTCCATCAAAT---  
ATTACAGGACTGTTATTAACAAGAGATGGTGGTGGAGATAATAACAGA-----  
-----  
-----  
ACTAATGAGACTTTTCAGACCTCAAGGAGGAGATATGAGGGACAATTGGAGAAGTGAATTATATAAAATATAAAG  
TAGTAAGAATTGAACCATTA---GGAATAGCACCCACCAAGGCAAGGAGGAGAGTGGTG-----  
-----CAAAGAGAAAAAAGAGCA---GTGGGAACATTAGGAGCT-----  
ATGTTCCCTTGGGTTCTTGGGAACA---GCCGGAAGCACTATG---GGCGCAGCGTCA---  
ATAACGCTGACGGTACAG---GCCAGACAA---TTATTG---TCTGGTATAGTGCAACAGCAAAAT---  
AACTTG---CTGAGA---GCTATTGAGGCGCAACAGCATCTGTTGCAACTCACAGTCTGGGGCATC  
>U39243  
TTCTATTGCAATACAACAAAACCTGTTTAGTAGTACATATATAGTTAATAATACACATGACAGTAAT-----  
-----  
-----  
ACAACAAAATTTTAAACATCATGCAGAATAAAACAAATTATAAACATGTGGCAAGGGGTAGGACGAGCAA  
TGTATGCCCCCTCCCATTCAGGAAACATAACATGTAAATCAAAT---  
ATCACGGGACTACTACTGACACGTGATGGAGGAAATAAGACAGAAAGC-----  
-----  
-----  
AATGACACAGAGACATTCAGGCCTCAGGGAGGAGATATGAGGGACAATTGGAGAAATGAATTATATAAAATATA  
AAGTGGTAGAAGTTAACCCATTA---GGAATAGCACCCACTAAGGCAAAAAGGAGAGTGGTG-----  
-----GACAGAGAAAAAAGAGCA---GTAGTGGGACTAGGAGCT-----  
---GTGTTCCCTTGGGGTCTTGACACCC---GCAGGAAGCACTATG---GGCGCAGCATCA---  
ATAACGCTGACGGTACAG---GCCAGACAA---TTATTG---TCGGGCATAGTGCAACAGCAAAAC---  
AATTTG---CTGAGG---GCTATAGAGGCGCAACAGCATATGTTGCAACTCACGGTCTGGGGCATT  
>U39240  
TTCTATTGCAATACATCAATACTGTTTAATACAACATACCTGGTTAATAATAATTTGACTGAG-----  
-----  
-----  
AAAAATTCAACCATTATGCTCCCATGCAGAATAAAACAAATTATAAACATGTGGCAGGAGGTAGGACGAGCAA  
TGTATGCCCCCTCCCATTCAGGACTCATACAATGTAACCTCAAGT---  
ATCACAGGACTGCTACTGACACGTGATGGAGGAGTGAGAAATGACACAAAT-----  
-----  
-----  
GAGACAGAGACAGAGACATTCAGACCTGCAGGAGGAGATATGAGGGACAATTGGAGAAGTGAATTATATAAAT  
ATAAAGTGGTAGAAATTCAGCCATTA---GGAATAGCACCCACTAAGGCAAAAAGGAGAGTGGTG-----  
-----GAGAGAGAAAAAAGAGCA---GCGGGA---ATAGGAGCT---  
-----TTGTTCCCTTGGGTTCTTGGGAGCA---GCAGGAAGCACTATG---GGCGCAGCGTCG---  
ATAACGCTGACGGTACAG---GCCAGACAA---TTATTG---TCGGGTATAGTGCAACAGCAAAAC---  
AATTTG---CTGAGA---GCTATAGAGGCGCAACAGCATATGTTACAACCTCACAGTCTGGGGCATT  
>AF443090  
TTCTATTGCAATACATCACGCCTGTTTAATAGTACATACAATCCTAATAGTACATACAATAATAGTATAGAAG  
GT-----  
-----  
AGGTCAAATGCAACCATTACACTCCAATGCAGAATAAAGCAAATTATAAACCTCTGGCAGGAGGTAGGACGAG  
CAATATATGCCCCCTCCCATTCAGGAAACATAACATGTAAATCAAAT---

ATCACAGGATTACTCTTGACACGTGATGGAGGTAATAATTCAACG-----  
 -----  
 -----  
 ACAGAGATATTCAGACCTCAAGGAGGGAATATGAAGGACAATTGGAGAAGTGAATTATATAAATATAAAGTGG  
 TAGAAGTTAAGCCATTG---GGGGTAGCACCCACTAAGGCAAAAAGGAGAGTGGTG-----  
 -----GAGAGAGAAAAAAGAGCA---GTAGGA---ATAGGAGCT-----  
 GTGTTTCCTTGCGTTCTTGGGAGCA---GCAGGAAGCACTATG---GGCGCAGCGTCA---  
 ATGACGCTGACGGTACAA---GCCAGACAA---CTGTTG---TCTGGTATAGTGCAACAGCAAAGC---  
 AATTTG---CTGAGG---GCTATAGAGGCGCAACAGCATATGTTGCAACTCACAGTCTGGGGCATT  
 >AF443097  
 TTCTATTGCAATACATCAGAGCTGTTTAATGGTACATACAACAGTACAGGAAATGATTCA-----  
 -----  
 -----  
 AATTCAAACCTCATCACACTCCAATGCAGAATAAAACAAATTATAAACATGTGGCAGAAGGTAGGACGAGCCA  
 TGTATGCCCCCCCCATTGAAGGAAACATAACATGTATATCAAAT---  
 ATCACAGGACTATTATTAACACGTGATGGAGGATATGAGGCAAAT-----  
 -----  
 -----  
 CATACTGAGATATTCAGACCTATAGGAGGAGATATGAGGGACAATTGGAGAAGTGAATTATATAAATATAAAG  
 TGGTAGAAATTAAGCCATTA---GGACTAGCACCCACTGAGTCAAAAAGGAGAGTGGTG-----  
 -----GAGAGAGAAAAAAGAGCA---GTGGGA---ATAGGAGCT-----  
 GTGTTTCCTTGCGTTCTTGGGAGCA---GCAGGAAGCACTATG---GGCGCGGCGTCA---  
 ATAACGCTGACGGTACAG---GCCAGACAA---CTGTTG---TCTGGTATAGTGCAACAGCAAAGC---  
 AATTTG---CTGAGA---GCTATAGAGGCGCAACAACATATGCTGCAACTCACGGTCTGGGGCATT  
 >AF443109  
 TTCTATTGCAATACATCACTACTGTTTAATAGCAGTTATAATGGTAATAGTAGTTATAATGATACAGGA----  
 -----  
 -----  
 AGCAATTCAACCATCACACTCCAATGCAGAATAAAACAAGTTATAAACATGTGGCAGAGGGTAGGACAAGCAA  
 TATATGCCCCCTCCCATTTGAAGGAATAATAACATGTAACTCAAGT---  
 ATCACAGGATTACTCTTAGTGAGGGATGGAGACAATCAAACAAGT-----  
 -----  
 -----  
 GATACAGAGACATTTCAGACCACAAGGAGGAGAAATGAGGGACAATTGGAGAAGTGAGTTATATAAATATAAAG  
 TGGTAGAAATTAAGCCATTG---GGAGTAGCACCCACTACGGCAAAAAGGAGAGTGGTG-----  
 -----GAGAGAGAAAAAAGAGCT---GTGGGA---ATGGGAGCT-----  
 ATGATCCTTGCGTTCTTGAGTGCA---GCAGGAAGCACTATG---GGCGCAGCGTCA---  
 ATAACGCTGACGGTACAG---GCCAGACAA---TTGTTG---TCTGGAATAGTGCAACAGCAAAGC---  
 AATTTG---CTGAGG---GCTATAGAGGCGCAACAGCATATGTTGCAACTCACAGTCTGGGGCATT  
 >AF443114  
 TTCTATTGCAACACATCAAGCCTGTTTAATAATACATACCGGCCTACATACTGGCCTAATGGTACAGAA----  
 -----  
 -----  
 AGTAATTCAACCATCACACTTCAATGCAGAATAAAACAAATTATAAACATGTGGCAAAAAGTAGGACGAGCAA  
 TATATGCCCCCTCCCATTTGCAGGAAAAATAACATGTAAATCAAAC---  
 ATCACAGGACTACTATTAGTACGTGATGGAGGTAATGGAGGCAACAAT-----  
 -----  
 -----  
 ACCGCAACAGAAATATTCAGACCTGGAGGAGGAAATATGAAGGACAATTGGAGAAGTGAATTATATAAATATA  
 AAGTGGTAGAAATTAAGCCATTG---GGAATAGCACCCACTGGAGCAAAAAGGAGAGTGGTG-----  
 -----GGGAGAGAAAAAAGAGCA---GTGGGA---ATAGGAGCT-----  
 ---GTGTTCCCTCGGTTCTTGGGAGCA---GCAGGAAGCACTATG---GGCGCGGCGTCA---  
 ATAACGCTGACGGTACAG---GCCAGACAA---CTGTTG---TCTGGTATAGTGCAACAGCAAAGC---  
 AATTTG---CTGAAG---GCTATAGAGGCGCAACATCATCTGTTGCAACTCACGGTCTGGGGCATT  
 >KR861331  
 TTCTATTGCAATACATCAGGCCTGTTTAATGAAACATACTTGTTTAATGGTACAAATTTGGATAATGATAAT-  
 -----  
 -----  
 AGTACAAGCAACATCACACTTCAATGCAAAATAAAACAAATTATAAACATGTGGCAGGGGGTAGGACGAGCAA  
 TATATGCCCCCTCCCATTTGCAGGAAACATAACATGTAAATCAAAT---

ATCACAGGACTACTATTGACACGTGATGGAGGTATCAATACTACA-----  
 -----  
 -----  
 AGTAACCAGATATTCAGGCCTGGAGGAGGAGATATGAGGGACAATTGGAGAAGTGAATTATATAAATATAAAG  
 TAGTAGAAGTTAAGCCATTG---GGAATAGCACCCACTAAAGCAAGAAGGAGAGTGGTG-----  
 -----CAGAGAGAAAGAAGAGCA--GTGGGA--ATAGGAGCT-----  
 GTGTTCCCTTGGGTTCTTGGGAGCA--GCAGGAAGCACTATG--GGCGCAGCGTCA---  
 ATAACGCTGACGGTACAG---GCCAGACAA--CTGTTG---TCTGGAATAGTGCAACAGCAGAGC---  
 AATTTG---CTGAGA---GCTATAGAGGCGCAACAGCATATGTTGCAACTCACAGTCTGGGGCATT  
 >KR861314  
 TTCTATTGTAATACATCAAGACTGTTTGATAGTAATGGCACTTATAATAATACAGAA-----  
 -----  
 -----  
 TCAAAACAGCACAATCACACTCCCATGCAGAATAAAACAAATTATAAACATGTGGCAGAAAGTGGGACGAGCAA  
 TGTATGCCCCCTCCCATTGAAGGAATGCTAACATGTAAATCAAAT---  
 ATCACTGGACTACTATTGACACGAGATGGAGGAGAAGGAAATCAA-----  
 -----  
 -----  
 GGGTCAGAGATATTCAGACCTGGAGGAGGAAATATGAGGGACAATTGGAGAAGTGAATTATATAAATATAAAG  
 TGGTAGAGATTAAACCATTG---GGAGTAGCACCCACTGGGGCAAAAAGGAGAGTGGTG-----  
 -----GAGAGAGAAAAAAGAGCA--GTGGGA--ATAGGAGCT-----  
 GTGCTCCTTGGGTTCTTGGGAGCA--GCAGGAAGCACTATG--GGCGCGGCGTCA---  
 CTCACGCTGACGGTACAG---GCCAGACAA--TTATTG---TCCGGTATAGTGCAACAGCAAAGC---  
 AATTTG---CTGAGG---GCCATAGAGGCGCAACAGCATATGTTGCAACTCACAGTCTGGGGCATT  
 >KR861341  
 TTCTATTGCAATACATCAGGACTGTTTAATGGTACATACCATCCTCAATATAAT-----  
 -----  
 -----  
 -GATACACAGAATAAT-----  
 TACACAGACTCAAACATCACACTCCCATGCAGAATAAAACAAATTGTAAATATGTGGCAGGGGGTAGGAAGGG  
 CAATATATGCCGCTCCCATTGAAGGAAAAATAGTATGTACATCAAAT---  
 ATCACAGGACTAATATTGACAAGGGATGGAGGAGAAAAATAATAGA-----  
 -----  
 -----  
 ACAGAAACATTTAGACCTGAAGGAGGAAATATGAGGGACAATTGGAGAAGTGAATTATATAAATATAAAGTGG  
 TAGAAATTCAGCCATTG---GGAGTGGCACCCACTGAGGCAAAAAGGAGAGTGGTG-----  
 -----GAGAGAGAAAAAAGAGCA--GTGGGA--ATAGGAGCT-----  
 GTGTTCCCTTGGGTTCTTGGGAGCA--GCAGGAAGCACTATG--GGCGCGGCGTCA---  
 ATAACGCTGACGGTACAG---GCCAGACAA--CTGTTG---TCTGGTATAGTGCAACAGCAAAGC---  
 AATTTG---CTGAGG---GCTATAGAGGCGCAACAGCATATGTTGCAACTCACAGTCTGGGGCATT  
 >KR861270  
 TTCTATTGCAATACATCAAGACTGTTTACAAACATAGATAATAATAATACAGAACTGAT-----  
 -----  
 -----  
 AATGATACCACCATCACCATCCCATGCAAAATAAAACAAATTATAAACATGTGGCAGAAGGTAGGACGAGCAA  
 TGTATGCCCCCCCCATTGAAGGAAACATAACATGTAAATCAAAT---  
 ATCACAGGACTACTATTGACACGTGATGGAGGTAATGAAACAAAC-----  
 -----  
 -----  
 TACAACACTGAGATATTCAGACCTGGAGGAGGAGATATGAGGGACAATTGGAGAAGTGAATTATATAAATATA  
 AAGTGGTGGAGGTTAGGCCATTA---GGAATAGCACCCACTAAAGCAAAAAGGAGAGTGGTG-----  
 -----GAGAGAGAGAAAAAGAGCA--GTGGGA--ATAGGAGCT-----  
 ---GTGTTCCCTTGGGTTCTTGGGAGCA--GCAGGAAGCACTATG--GGCGCGGCATCA---  
 CTAACGCTGACGGTACAG---GCCAGACAA--TTATTG---TCTGGTATAGTGCAACAGCAAAGC---  
 AATTTG---CTGAGG---GCGATAGAGGCGCAACAACATATGTTGCAACTCACAGTCTGGGGCATT  
 >KR861273  
 TTCTATTGCAATACATCTGAGCTGTTTAATAAGCAGTTTAACAATACAAACAGTACAGAAAGTGAGTCAAAT-  
 -----  
 -----  
 TCAAAATTCAATCATCACACTCCCATGTAGAATAAAACAAATTATAAACATGTGGCAGGAGGTAGGACGAGCGA  
 TGTATGCCCCCTCCCATTGCAGGAAACATAACATGTAAATCAAAT---

ATCACAGGACTACTATTGACACGCGATGGAGGACCTGGAAATAGA-----  
-----  
-----  
AGTAACGAGACATTCAGACCCTTAGGAGGAGATATGAAGGACAATTGGAGAAGTGAATTATATAAGTATAAAG  
TGGTAGAGATTTCAGCCATTA---GGACTAGCACCCACTAGGGCAAAAAGGAGAGTGGTG-----  
-----GAGAGAGAGAAAAGAGCA--GTGGGA--ATAGGAGCT-----  
GTGTTCCCTTGGGTTCTTGGGAGCA--GCAGGAAGCACTATG--GGCGCAGCATCA---  
ATAACGCTGACGGTACAG---GCCAGACAA---CTGTTG---TCTGGTATAGTGCAACAGCAAAAC---  
AATTTG---CTGAGG---GCTATAGAGGCGCAACAACATTTGTTGCAACTCACGGTTTGGGGCATT  
>KR861280  
TTCTATTGCAATACATCAAAATTGTTCAATGGTATATATAACAGTACAGGAAATAACAGTACAGGCAATAGTT  
CAAGT-----  
-----  
CAAAATAAGACCATCACCATACCATGCAGAATAAAACAAATTATAAATATGTGGCAGAAAGTAGGACGAGCAA  
TGTATGCCCCCTCCCATTCGAGGAAACATAACATGTAACTCAAGT---  
ATCACAGGACTACTATTAGTACGTGATGGAGGACAAGATAACAATACC-----  
-----  
-----  
AATGGAACAGAAACATTCAGACCTGGAGGAGGAAATATGAAGGACAATTGGAGAAGTGAATTATATAAATATA  
AAGTGGTAGAAATTAAGCCATTA---GGAATAGCACCAACTGGAGCAAAAAGGAGAGTGGTG-----  
-----GGTAGAGAAAAAAGAGCA--GTAGGA--ATAGGAGCT-----  
---GTGGTCCTTGGGATCTTGGGAGTA--GCCGGAAGCACTATG--GGCGCGGCGTCA---  
TTGGCGCTGACGGGACAG---ACCAGACAA---CTGTTG---TCTGGTATAGTGCAACAGCAAAGT---  
AATTTG---CTGAGG---GCTATAGAGGCGCAACAGCATGTGTTGCAACTCACGGTCTGGGGCATT  
>KR861308  
TTCTATTGCAATACATCAAACTCTGTTCAATAGTACATACCTGTCTAATGGTACACACTTGTTTAATAATACAA  
ACATTACAGAC-----  
-----TAT---  
ACAGACAATTCAACCATCACACTCCAATGCAGAATAAAGCAAATTATAAACATGTGGCAGGAGGTAGGACAAG  
CAATATATGCCCCCTCCCATTCGAGGAACAATAACATGTAAATCAAAG---  
ATCACAGGACTACTATTGACACGTGATGGAGGATCAGATCCAGATAAT-----  
-----  
-----  
AAGACTGAGGAGACATTCAGACCTGGAGGAGGAGATATGAGAGACAATTGGAGAAGTAAATTATATAAATATA  
AAGTAGTAGAAATTAAGCCATTG---GAAGTAGCACCCACTGGGGCAAAAAGGAGAGTGGTG-----  
-----GAGAGAGAAAAAAGAGCA--GTGGGA--ATAGGAGCT-----  
---GTGTTCCCTTGGGTTCTTGGGAGCA--GCAGGAAGCACTATG--GGCGCAGCGTCA---  
ATAACGCTGACGGTACAG---GCCAGACAA---CTGTTG---TCTGGAATAGTGCAACAGCAAAGC---  
AATTTG---CTGAGA---GCTATAGAGGCGCAACAGCATATGTTGCAACTCACGGTCTGGGGCATT  
>KY658708  
TTCTATTGCAACACATCACAACGTGTTTAATAGTACATACAGTCCCAGTTTTAATGGTACAGAAGGTAAA---  
-----  
-----  
TTAAATGGGACCATCACAATCCCATGTAGAATAAAACAAATTATAAACATGTGGCAGAAAGTAGGACAAGCAA  
TGTATGCCCCCTCCCATTCGAGGAAACCTAACATGTGAATCAAAT---  
ATCACAGGATTACTATTGACACGTGATGGAGGAAAAACAGGTTCA-----  
-----  
-----  
AATCACCAGAGATATTTCAGACCTGGAGGAGGGGATATGAGGGATAACTGGAGAAGTGAATTATATAAATATA  
AAGTGGTAGAAATTAAGCCATTG---GGAGTAGCACCCACTGAGGCAAAAAGGAGAGTGGTG-----  
-----GAGAGAGAAAAAAGAGCA--GTGGGA--ATAGGAGCT-----  
---GTGTTCCCTTGGGTTCTTGGGAGCA--GCTGGAAGCACTATG--GGCGCAGCGTCA---  
ATAACGCTGACGGTACAG---GCCAGACAA---TTGTTG---TCTGGTATAGTGCAAGCAGCAAAGC---  
AATTTG---CTGAGG---GCTATAGAGGCGCAACAGCATCTGTTGCAACTCACAGTCTGGGGCATT  
>AF443084  
TTTTATTGCAATACATCAAACTGTTTACATACCAGTCTAATAGCACATACGTG-----  
-----  
-----  
GCTAATAGTACCATCACGCTCCCATGCAAAATAAAACAAATTATAAACATGTGGCAGGAGGTGGGACGAGCAA  
TGTATGCACCTCCCATTCGAGGAAACATAACATGTCAATCAAAT---

ATCACAGGACTACTGTTGACACGTGACGGAGGCACAGAGACAGAC-----  
 -----  
 -----  
 AATAAGACAGAGACATTTCAGACCTGGAGGAGGAGATATGAGGGACAGTTGGAGAAGTGAATTATATAAAATATA  
 AAGTGGTAGAAATTAAGCCATTA---GGAGTAGCACCCACTAAGGCCAAAAGAAGAGTGGTG-----  
 -----GAAAGAGAAAAAAGAGCA---GTGGGA---ATAGGAGCT-----  
 ---GTACTCCTTGGGTTCTTGGGAGCA---GCTGGAAGCACTATG---GGCGCAGCGTCA---  
 ATAGCGCTGACGGCACAG---GCCAGACAA---GTGTTG---TCTGGTATAGTGCAACAGCAAAGC---  
 AATTTG---CTGAGG---GCTATAGAGGCGCAACAGCATATGTTGCAACTCACAGTCTGGGGCATT  
 >KC899004  
 TTCTATTGTAATACATCAGGCCTGTTTAATGGTACATACAGGCCTAATGGTAATAATAATGGTACTAATGATA  
 CAATG-----  
 -----  
 AGTAATGCAACCATCACAATCCCATGCAGAATAAAGCAAATTATAAACATGTGGCAGGAGGTAGGACGAGCAA  
 TGTATGCCCCCTCCTATTGCAGGGAACATAACATGTAAATCAAAT---  
 ATCACAGGGATACTATTGGTACGTGATGGAGGAGATAATCAGACA-----  
 -----  
 -----  
 GAAGAGATATTTCAGACCTGGAGGAGGAGATATGAGGAACAATTGGAGAAGTGAATTATATAAAATATAAAGTGG  
 TAGAAATTAAGCCATTG---GGAATAGCACCCACTGGAGCAAAAAGGAGAGTGGTG-----  
 -----GAGAGAGAAAAAAGAGCAGTAGTGGGA---ATAGGAGCT-----  
 GCGCTCCTTGGGTTCTTGAGTACA---GCCGGAAGCACTATG---GGCGCGGCGTCA---  
 ATAGCGCTGACGGTACAG---GCCAGACAA---TTGCTG---TCTGGTATAGTGCAACAGCAAAGT---  
 AATTTG---CTGAGG---GCTATAGAGGCGCAGCAGCATATGTTGCAACTCACGGTCTGGGGCATT  
 >KF835522  
 TTCTATTGTAATACATCAAGACTGTTTAATAGTACATACAATCCTAAGAGTACAGGAAGTAAT-----  
 -----  
 -----  
 TCAAGCTCAATCATCACAATCCCATGCAGAATAAAGCAAATTATAAACATGTGGCAGGAGGTAGGAAGAGCAA  
 TGTATGCCCCCTCCCATTTGAAGGAAACATAACATGTAGATCAAAG---  
 ATCACAGGACTACTATTGGTACGTGATGGAGGAAGCCAGTGCCAAACAGT-----  
 -----  
 ----  
 ACAGAGACAGAGACAGAGATATTTCAGACCTGGAGGAGGAGATATGAGGGACAATTGGAGAAGTGAATTATATA  
 AATATAAAGTGGTAGAAATTCAGCCATTG---GGAATAGCACCCACTAAAGCAAAAAGGAGAGTGGTG-----  
 -----GAGAGAGAAAAAAGAGCA---GCA-----  
 CTAGGAGCT-----TTGTTTCCTTGGGTTCTTGGGAGCA---GCAGGAAGCACTATG---  
 GGCGCGGCGGCA---GTAACGCTGACGGTACAG---GCCAGACAA---TTATTG---  
 TCTGGTATAGTGCAACAGCAAAGC---AATTTG---CTGAGG---  
 GCTATAGAGGCGCAACAGCATATGTTGCAACTCACGGTCTGGGGCATT  
 >HM215403  
 TTCTATTGTAATACATCAAGCCTGTTTAATGGCACATACAATGGCACATACATGACTAATATGGCTAAT---  
 -----  
 -----  
 GATTCATCAGAAATCACAATCCCATGCAGAATAAAGCAAATTGTAAACATGTGGCAGGAGGTAGGACGAGCAA  
 TGTATGCCCCCTCCCATTTGCAGGAAACATAACATGTAGATCAAAT---  
 ATCACAGGACTATTATTGGTACGTGATGGAGGACGATCAGAGGTGTCA-----  
 -----  
 -----  
 AATACTACAGAGACATTTCAGACCTCAAGGGGGAGATATGAGGGACAATTGGAGAAGTGAATTATATAAAATATA  
 AAGTGGTAGAAATTAAGCCATTA---GGAATAGCACCCACTGGAGCGAAAAGGAGAGTAGTG-----  
 -----GAGAGAGAAAAAAGAGCA---GCGGGA---ATAGGAGCT-----  
 ---GTGTTTCCTTGGGTTCTTGAGTGCA---GCCGGAAGCACTATG---GGCGCGGCGTCA---  
 TTAACGCTGACGGTACAG---GCCAGACAA---TTGCTG---TCTGGTATAGTGCAACAGCAAAGC---  
 AATTTG---CTGAGG---GCTATAGAGGCGCAACAGCATATGTTGCAACTCACAGTCTGGGGCATT  
 >HM215408  
 TTCTATTGTAATACATCAAGACTGTTTAATAGTACATACAGCAATGGTACACTCAGGTTTAATGGTACAGACT  
 TTAATGGTACA-----  
 -----ATGGAT-----  
 AATTCAAGCTCAACCATCACAATCCCATGCAGAATAAAGCAAATTTATAAACATGTGGCAGGAAGTAGGAAGAG

CAATGTATGCCCCCTCCCATTTGAAGGAAACATAACATGTAGATCAAAT ---  
ATCACAGGACTACTATTGGTACGTGATGGAGGAACAAATTTAACAGCAGAA-----  
-----  
TTAAATCAGACAGAGATATTTAGACCTGAAGGAGGAAATATGAGGGACAATTGGAAAAATGAATTATATAAAT  
ATAAAGTGGTAGAAATTAAGCCATTG---GGACTAGCACCCACTGGAGCAAAAAGGAGAGTGGTG-----  
-----GAGAGACAAAAAAGAGCA---GTGGGA---ATAGGAGCT---  
-----GTAATCTTTGGGTTCTTGGGAGCA---GCCGGAAGCACTATG---GGCGCGGCGTCA---  
ATGGCGCTGACGGTACAG---GCCAGACAA---TTGTTG---TCTGGTATAGTGCAACAGCAAAGC---  
AATTTG---CTGAGG---GCTATAGAGGCGCAACAGCATCTGTTGCAACTCACGGTCTGGGGCATT  
>HQ699950  
TTCTATTGTAATACATCAGGCCTGTTTAATAGTACATACATGCCTAATGGTACCTACATGTCTAATGGTACCA  
AT-----  
-----  
AGTAATGCAACCATCACAATCCCATGCAGAATAAAGCAAATTATAAACATGTGGCAGGAGGTAGGACGAGCAA  
TATATGCCCCCTCCCATTTGCAGGAAACATAACATGTAAATCAAAT---  
ATCACAGGGCTACTATTGGTACGTGATGGAGGACCAGATAATCAG-----  
-----  
ACAGAGATATTCAGACCTGAAGGAGGAGATATGAGGAACAATTGGAGAAGTGAATTATATAAATATAAAGTGG  
TAGAAATTAAGCCATTG---GGACTAGCACCCACTGGAGCAAAAAGGAGAGTGGTG-----  
-----GAGAGAGAAAAAAGAGCA---GTGGGA---ATAGGAGCT-----  
GTGTTCCCTTGGGTTCTTGAGTGCA---GCCGGAAGCACTATG---GGCGCGGCGTCA---  
ATAACGCTGACGGTACAG---GCCAGACAA---TTGCTG---TCTGGTATAGTGCAACAGCAAAGT---  
AATTTG---CTGAGG---GCTATAGAGGCGCAGCAGCATATGTTGCAACTCACGGTCTGGGGCATT  
>HQ699981  
TTCTATTGTAACACATCAGGCCTGTTTAATAGTACATACATGCCTAGTGGTACATACATAACTAATGATACAA  
AT-----  
-----  
AGTAGTTCAGATACAATCACAATCCCATGCAAAATAAAGCAAATTATAAACATGTGGCAGGAGGTAGGACGAG  
CAATGTATGCCTCTCCCATTTGCAGGAAACATAACATGTACATCAAAT---  
ATCACGGGACTACTATTGGTACGTGATGGAGACAAAACAAGTAAT-----  
-----  
-----  
ACTACAGAGACATTCAGACCTCAAGGAGGAGACATGAGGGACAATTGGAGGAGTGAATTATATAAATATAAAG  
TGGTAGAAATTAAGCCATTG---GGAATAGCACCCACTAAAGCAAAAAGGAGAGTGGTG-----  
-----GAGAGAGAAGAAAGAGCAGCGGGAATAGGAATAGGAGCT-----  
TTGTTCCCTTGGGTTCTTGAGTGCA---GCCGGAAGCACTATG---GGCGCGGCGTCA---  
ATAACGCTGACGGTACAG---GCCAGACAA---TTGTTG---TCCGGTATAGTGCAACAGCAAAGC---  
AATTTG---CTGAGG---GCTATAGAGGCGCAACAGCATATGTTGCAACTCACGGTCTGGGGCATT  
>KC807928  
TTCTATTGTAATACAACAAACCTGTTTAATAGTACATACAATAGTACAACAGGCCTGTTTACTTATACATACA  
ATGGTACT-----ACA---  
TACAATGGTAGTGTACAGAC-----  
AATGATAGCATCCCAATCCAAATCCAATGCAGAATAAAGCAAATTATAAACATGTGGCAGGAGGTAGGACGAG  
CAATGTATGCCCCCTCCCATTTGCAGGGAACATAACATGTAGCTCAAAT---  
ATCACAGGACTACTATTGACACGTGATGGAGGAAATACAACCTGTGACA-----  
-----  
-----  
CAAAAAGAGATATTCAGACCTCAAGGAGGAAATATGAGAGACAATTGGAGAAATGAATTATATAAATATAAAG  
TGGTAGAAGTTAAGCCATTG---GGACTAGCACCCACTAAAGCAAAAAGGAGAGTGGTG-----  
-----GAAAGAGAAAAAAGAGCA---GTGGGA---CTAGGAGCT-----  
GTGTTCCCTTGGGTTCTTGGGAGCA---GCAGGAAGCACTATG---GGCGCGGCGTCA---  
ATGACGCTGACGGTACAG---GCCAGACAA---TTGTTG---TCTGGTATAGTGCAACAGCAAAGC---  
AATTTG---CTGAGA---GCTATAGAGGCGCAACAGCATATGTTGCAACTCACGGTCTGGGGCATT  
>JF683757  
TTCTATTGCAACACATCAGTACTGTCTAATAGTACCCATAATAGTGGTACTGGATGGCACCTACAATCAAGTG  
ATATT-----  
-----  
AATTCTTATGCAACCATCGCGGTTTCATATAGAATAGGACAAATTATAAACATGTGGCGGCAGGTAGGACGAG

CAATCTATGGCCCTCCGGTGGCACGAAAAATGTCAGCCCATCCAAGT---  
ACCACAGGCCTATTATTGGTATGTGATGGGGGTGAGAAGAGCTTAAATAGCACA-----  
AATGGCACAGGTATCACA---AAT-----  
-----  
GCCACAGAGATATTTAGACCTCAAGGAGGAGATATGAAGGACAATTGGAGAAGTGAATTATATAAGTATAAAG  
TGGTAGAAATTAAGCCATTG---GGAATAGCACCCACTGAAGCAAGAAGGAGAGTGGTG-----  
-----GAGAGAGAAAAAAGAGCA--GTGGGA---ATAGGAGCT-----  
GTGATCCTTGGGTTCTTGGGAGCA--GCAGGAAGCACTATG--GGCGCGGCGTCA---  
ATAGCGCTGACGGCACAG---GCCAGAACA---GTAATG---GCTGGTATAGTGCAACAGCAAAGC---  
AATTTG---CTGAGG---GCTATAGATGCGCAACAGCATATGTTGCAGCTCACAGTCTGGGGCATT  
>JF683770  
TTCTATTGCAATACAACAAAACTGTTTAATAATACATACTGGTCTAATATTACACTGAATGGTCCA-----  
-----  
-----  
CCGAACAAAACAATCATAATCCCATGCAGGATAAAAACAAATTATAAACATGTGGCAGAGGGTAGGACAAGCAA  
TGTATTACCCTCCCATTGCAGGAAGCATAACATGCAAAATCAAAT---  
ATCACAGGACTACTATTAACAAGAGATGGAGGAATACATAAAACAAATAGCAGC-----  
ATAAAATGACACAAGCACAAATAACACA-----  
-----  
ACTGACCCAAACATAGAGATATTCAGACCTGGAGGAGGAGATATGAGAGATAATTGGAGAAGTGAATTATATA  
AATATAAAGTGGTAGAAATTAAGCCTTTA--GGAGTAGCACCCACTGAGGCAAAAAGGAGAGTGGTG-----  
-----GAGAGAGAAAAAAGAGCA--GTGGGA---  
ATAGGAGCT-----GTGTTCCCTTGGGTTCTTGGGAGTA--GCAGGAAGCACTATG---  
GGCGCGGCGTCA--ATAACGCTGACGGTACAG--GCCAGACAA--TTGTTG---  
TCTGGTATAGTGCAACAGCAAAGC---AATTTG---CTGAAG---  
GCTATAGAGGCGCAACAACAGCTGTTGCGACTCACAGTCTGGGGCATT  
>L22940  
TTCTACTGCAATACATCAGACCTGTTTAATAATCAGAGTATC-----  
-----  
-----  
ACAAATGAAAACATCACACTTCAATGCAGAATAAAAACAAATTATAAACATGTGGCAGGAGGTAGGACGAGCAA  
TGTATGCCCCCTCCCATTAAGGAATAATAACATGTAAATCAAAT---  
GTCACAGGACTGCTACTGACACGTGATGGAGGGACAAATACCACA-----  
-----  
-----  
ACAGAAGGAGAGATATTCAGACCTGGAGGAGGAGATATGAGGGACAATTGGAGAAGTGAATTATATAAATACA  
AAGTGGTAGAAATTAAGCCAGTA---GGAATAGCACCCACTAAGGCAAAAAGGAGAGTGGTG-----  
-----GGGAGAGAAAAAAGAGCA--GCA-----CTAGGAGCT-----  
---ATGTTCCCTTGGGTTCTTGGGAGCA--GCCGGAAGCACTATG--GGCGCAGCATCA---  
ATAACGCTGACGGTACAG--GCCAGACAA--TTATTG---TCTGGTATAGTGCAACAGCAAAGC---  
AATTTG---CTGAGG---GCTATAGAGGCGCAGCAGCATATGTTGCAACTCACGGTCTGGGGCATT  
>L23065  
TTCTATTGTAATACATCAGCCTTGTTTAATGATTCAATTACAAATGCACCCATTAATAATTCGAGT-----  
-----  
-----  
ACAGATGCAAACATCACACTTCAATGCAGAATAAAAACAAATTATAAACATGTGGCAGGAGGTAGGACGAGCAA  
TGTATGCCCCCTCCCATTAAGGAATAATAGCATGTAAATCAAAT---  
ATCACAGGACTGCTACTGACACGTGATGGAGGGACAAATAGCACA-----  
-----  
-----  
GACGAGACATTCAGACCTGGAGGAGGAGATATGAGGGACAATTGGAGAAGTGAATTATATAAATACAAAGTGG  
TAGAAATTAAGCCATTA---GGACTAGCACCCACTAAGGCAAAAAGGAGAGTGGTG-----  
-----GAGAGAGAAAAAAGAGCA--GCA-----CTAGCAGCT-----  
GTGTTCCCTTGGGTTCTTGGGAGCA--GCCGGAAGCACTATG--GGCGCAGCATCA---  
ATAACGCTGACGGTACAG---GCCAGACAA--TTATTG---TCTGGTATAGTGCAACAGCAAAGC---  
AATTTG---CTGAAG---GCTATAGAGGTGCATCAGCATATGTTGCAACTCACAGTCTGGGGCATT  
>EU786681  
TTCTACTGCAATACAACAAAACTGTTTAATGGCACATACAGTAATGGCACATACAGTCCGGGATATAATTCAA  
GCTCA-----  
-----

CACTCAAACAACCTCCATCATAATTCAATGCAGAATAAAACAAATTATAAACATGTGGCAGAAGGTAGGACAAG  
CAATGTATGCCCCCTCCTATTGCAGGAAACATAACATGTAACCTCAAAT---  
ATCACAGGACTACTATTGACACGTGATGGAGGAAGCAGTAATGAC-----  
-----  
-----  
ACTAAAGAGATATTCAGACCTACAGGAGGAAACATGAAAGACAATTGGAGAAGTGAATTATATAAATATAAGG  
TGGTAGAAATTAAGCCATTA---GGAATAGCACCCACTAAGGC AAAAAGGAGAGTGGTGCAG-----  
-----AGAGAAAGAGAAAAAAGAGCAGTAGTGGGA---CTAGGAGCT-----  
GTGTTTCCTTGGGTTCTTGGGAGCA---GCAGGAAGCACTATG---GGCGCAGCATCA---  
ATAACGCTGACGGTACAG---GCCAGACAA---TTATTG---TCTGGTATAGTGCAACAGCAAAAC---  
AATTTG---CTGAGG---GCTATAGAGGCGCAACAGCATCTGTTGCAACTCACGGTCTGGGGCATT  
>EF531335  
TTCTATTGCAACACATCAGATCTGTTTAATAGTACATATTTTAATAATACATATTTTAATGGTGTATATAATG  
GTACA-----  
-----  
AGAGATAATGGTACCATCACACTCCCTTGCAGAATAAAACAATTTATAAACATGTGGCAGAGGGTAGGAAGAG  
CAATGTACGCCCTCCCATTC AAGGACTTATAACATGTAGGTCAAAT---  
ATCACAGGACTACTATTGACACGTGATGGAGGAAACACTATTAACAATACA-----  
-----  
-----  
AATAACAATACAGAGATATTCAGACCTGGAGGAGGAGATATGAGGGACAATTGGAGAAGTGAATTATATAAAT  
ATAAAGTGGTAGAAATTAGGCCATTA---GGAGTAGCACCTACTGATGCAAGAAGGAGAGTGGTG-----  
-----GGGAGAGAAAAAAGAGCA---GTA-----ATGGGAGCT---  
-----TTGTTTCCTTGGGTTCTTGGGAGCA---GCAGGAAGCACTATG---GGCGCAGCGTCA---  
ATGGCGCTGACGGTACAG---ACCAGACAA---TTATTG---TCTGGTATAGTGCAACAGCAAAGC---  
AATTTG---CTGAGG---GCCATAGAGGCGCAACAGCATATGTTGCAACTCACGGTCTGGGGCATC  
>KU319529  
TTCTATTGCGATACATCAAATCTGTTTAATATGACATACTTGTTTAATGATTGGAGTTACGAACATAGTACTG  
AC-----  
-----  
TCAGATTTTCATCATCATGATCCGCTGCAGAATAACACATATAATAAACATGTGGCAGGTAGTGAGAGCAGTAC  
TGTATGCCCCCTGCCCTTCGCAGGCAACAGTTAAGCAAGCAATCCATC---  
TACGCAGTACTACTATGGA CTGATGCAGCAAGTAGTTACTGG-----  
-----  
-----  
CGCGAGAAAGAGATATTCAGACCTGCAGGAGGAGATATGAGGGACAATTGGAGAAGTGAATTATATAAATATA  
AAGTGGTAGAGATTAAACCATTA---GGAATAGCACCCACTGAGGC AAAAAGGAGAGTGGTG-----  
-----GAGAGAGAAAAAAGAGCA--GTGGGA--ATAGGAGCT-----  
---GTGTTTCCTTGGGTTCTTGGGAGCA--GCAGGAAGCACTATG--GGCGCAGCGTCA---  
CTGACGCTGACGGTACAG--GCCAGGCAA--TTGCTG--TCTGGTATAGTGCAACAGCAAAAC---  
AATTTG--CTGAGA--GCTATAGAGGCGCAACAGCATATGTTGCAACTCACAGTCTGGGGCATA  
>KU319530  
TTCTATTGCAATACATCAAGACTGTTTAATGGTGCATACATGTATAACAGTACTAATAGTACT-----  
-----  
-----  
TCAAATGCAACCATCACACTCCAATGCAGAATAAAGCAAATTATAAACATGTGGCAGGGGGTAGGACGAGCAA  
TGTATGCCCCCTCCCATTTGAAGGAAACATTACATGTAAATCAATA---  
TCACAGGATTCTATTGACCCTGATGGAGGATTGGGC-----  
-----  
-----CAAAAACCCAAGGTTTCCAAGTGGGAGAGGAACCTTAGGGACA-----  
-----TTGGAAATGGATCCTTTG---GGTTACCCCTG-----GCCAAAAGGAAGGGGAG-  
-----AAAAGAAAAAAAAGGACA---GGGGTT---  
TTACGAAAA-----AACTGG-----GCGCAGAAGCCTATG---  
GGCGCAGCATCA---ATAACGCTGACGGTACAG---GCCAGACAA---TTGTTG---  
TCTGGTATAGTGCAACAGCAAAGT---AATTTG---CTGAGG---  
GCTATAGAGGCGCAACAGCATATGTTGCAACTCACGGTCTGGGGCATT  
>KU319538  
TTCTATTGCAATACAACCAGATTGTTTAACAGTACAATAAAATACAACATTGGT-----  
-----  
-----

AATTACTTAATCATTATACTCCCATGTAGAATAAGCCAAATGTTAGGAATGGGGCAGAGGGTAGGCCAAGCAA  
TGTATGCCCTTCCCATTGCAGGAAACATAACATGTATTTCAAAT---  
ATCACAGGACTACTATTGACACGTGATGGAGCCGAGGTATCACAT-----  
-----  
-----  
AGCACAAATGAGACATTTCAGACCAGGAGGAGAGATATGAGGGACAATTGGAGAAGTGAATTATATAAATATA  
AAGTGGTAGAAGTTAAACCATTA---GGAGTAGCACCCACTGAGGCAAAAAGGAGAGTGGTG-----  
-----GAGAGAGAAAAAAGAGCA---GTGACA---ATAGGAGCT-----  
---ATGTTCTTGGGTTCTTGGGAGTA---GCAGGAAGCACTATG---GGCGCAGCGTCA---  
ATGGCGCTGACGGTACAG---GCCAGGCAA---TTGTTG---TCTGGTATAGTGCAACAGCAAAGC---  
AATTTG---CTGAGA---GCTATAGAGGCGCAACAGCATATGTTGCAACTCACAGTCTGGGGCATT  
>KU319539  
TTCTATTGTAATACATCAAACTGTTTAAATGGTACATACAATAAGAACAATACTAATAGGACTAATACTAAT-  
-----  
-----  
AGTACTTCAACCATCACACTTCAATGCAGAATAAAACAAATTATAAACATGTGGCAGGGGGTAGGACAAGCAA  
TGTCTGCCCCCTCCCATTCAAGGAAACATAACATGTGAATCAAAT---  
ATCACAGGACTACTATTGACACGTGATGGAGGAACAATAATAACGAAACAAATAAACACAGAAGCAA  
ATAAT-----  
-----  
AACACAGAAACATTTCAGACCTGGAGGAGGAGATATGAGGGACAATTGGAGAAATGGAGGTGAGTTATATAAAT  
ATAAAGTGGTAGAAGTTAATCCATTA---GGAATAGCACGCCTGAGGCAAAAAGGAGAGTGGTG-----  
-----CAGAGAGAAAAAAGAGCA---GTGGGA---ATAGGAGCT---  
-----GTGCTCCTTGGGTTCTTGGGAGCA---GCTGGAAGCACTATG---GGCGCAGCGTCA---  
GTAACGCTGACGGTACAG---GCCAGACAA---TTGCTG---TTTGGTATAGTGCAACAGCAAAGC---  
AATTTG---CTGAAG---GCTATAGAGGCGCAACAGCATATGTTGCAACTCACGGTCTGGGGCATT  
>KU319540  
TTCTATTGCAATACATCAGGCCTGTTTACTAGCACAAAATA-----  
-----GAACTG---  
TTTAATAGCAGTACAAATTTA-----  
AACATCACACTCCAATGCAGGATAAGAGATCAACTTGTACAACATGTGAGGCTAAAGAAGTCAGTAATGATGC  
CAATGTACGCCCTCCTATCAATGGAGATATAGCATGTAGATCAAAC---  
ATCACAGGTCTACTATTGACACGTGATGGAGGCAACACCAACACA-----  
-----  
-----  
TCTGAGATATTTCAGACCTGGGGGAGGAGATATGAGGGACAATTGGAGAAGTGAATTATATAAATATAAAGTAG  
TAGAAATTAAGCCATTA---GGAATAGCACCCACTGAGGCGAAAAGGAGAGTGGTG-----  
-----GAGAGAGAAAAAAGAGCA---GCA-----CTAGGAGCT-----  
TTGTTCTTGGGTTCTTGGGAGCA---GCAGGAAGCACTATG---GGCGCAGCATCA---  
ATAACGCTGACGGTACAG---GCCAGACAA---TTATTG---TCTGGTATAGTGCAACAGCAAAGT---  
AATTTG---CTGAGA---GCTATAGAAGCGCAACAGCATATGTTGCAACTCACGGTCTGGGGCATT  
>KU319542  
TTCTATTGCAATACAACAAAACCTGTTTAAATAGTACATACAATGCTAATAGTACAAACAGTACT-----  
-----  
-----  
TCAAATTCAACCATCACAAATCCAATGCAGAATAAAACAAATTATAAACATGTGGCAGGAGGTAGGACGAGCAA  
TGTATGCCCCCTCCCATTGCAGGAAACATAACATGTAACCTCAACT---  
ATTACAGGAATACTATTAACACGTGATGGAGGGTATAATATTACC-----  
-----  
-----  
AACGACACAAAAACATTCTTACCTGGAGGAGGAGATATGATGAACAATTGGAGAAATGAATTATATAATTATA  
AAGTGGTAGAAAATAAACCATTA---GGAATAGCTCCTACTAGTGCAAAGAGGAGAGTGGTG-----  
-----GAGAAAAAAGAGCA---ATATGGGGAATAGGAGCT-----  
---GCGCTCCTTGGTTTCTTACGAGCA---GCAGGAAGCACTATG---GGCGCAGCGTCA---  
TTGACGCTGACGGTACAG---GCCAGGCAA---TTGTTG---TCTGGTATAGTGCAACAGCAAAGC---  
AATTTG---CTGAGG---GCTATAGAGGCGCAACAACATATGTTGCAACTCACGGTCTGGGGCATT  
>KU319543  
TTCTACTGCAATACATCAAATTTGTTTAAATAGAACTTACCTGATTAATGGTACCTATAATAATAAACT-  
-----  
-----

TCCATAAGCACCATCACACTCCACTGCAAAATAAAACAAATTATAAATATGTGTCTAGGGGGTAGGACAAGCAA  
TGTATGCCCCCTGCCACTGCAGGAATCATATCATGTATATCAACT---  
ATCGCAGTACTACTACTTGTCTGGTGATGGAGGCAATGATACAAGT-----  
-----  
-----  
GATACAGAGACATTTCAGACCTGGAGGAGGAGATATGAGGGACAATTGGAGAAGTGAATTATATAAATATAAAG  
TGGTAGAAGTTCACCCATTA---GGAGTAGCACCCACTAGAGCAAAAAGGAGAGTGGTG-----  
-----GAGAGAGAAAAAAGAGCA---GCA-----CTAGGAGCT-----  
ATGATCATTGGGTTCTTGGGAGCA---GCAGGAAGCACTATG---GGCGCAGCATCA---  
ATAACGCTGACGGTACAG---GCCAGGCAA---TTGTTG---TCTGGTATAGTGCAACAGCAAAGC---  
AATTTG---CTGAGG---GCTATAGAGGCGCAACAGCATATGTTGCAACTCACAGTCTGGGGCATA  
>KU319547  
TTCTACTGTGTTTCAATTCAAATATGTAATGGGGTTTACTTTACTTGACACATGGACTACCTACAACCTCTAATG  
ATGCT-----  
-----  
GATTACACAGACATCCTCACTCTGACATGCAGAATAAAACTAATTGTAACTTGAGTCAGGAGCTGGGGCGAG  
CAAGGTCTGCCCCCTCCCATTCGACGGATCCGTAATAATGTACATCTAAT---  
TTTACAGGACTAGTATTGACACGTGCTGGAGGAAATGCCACAGGG-----  
-----  
GATGTTACCGCGGAGAAT---  
AACACAGAGATATTTCAGACCTGGAGGAGGAGAGATGAGGGACAATTGGAGAAGTGAATTATATAAATATAAAG  
TGGTAGAAATTAAACCATTA---GGAGTAGCACCCACTGAGGCAAAAAGGAGAGTGGTG-----  
-----GAGAGAGAAAAAAGAGCA---GTGGGA---ATAGGAGCT-----  
GTGTTCTTGGGTTCTTGGGAGCA---GCAGGAAGCACTATG---GGCGCAGCATCA---  
ATAACGCTGACGGTACAG---GCCAGACAA---TTGTTG---TCTGGTATAGTGCAACAGCAAAGC---  
AATTTG---CTGAGG---GCTATAGAGGCGCAGCAGCATATGTTGCAACTCACAGTCTGGGGCATT  
>KU319548  
TTCTATTGCAATACATCACAACCTGTTTAATAGGACATACATGGAACTACTATTAGCGCTGTGTCA-----  
-----  
-----  
ACAAATACAAAAATCACCTCCTATGCAAAATAAAACAAATTATTCAAATGCTTCAGGGAGTAGGACGAGCAA  
TGTATGCCCCCTCGCAATGAAAGAAACATAACATGTCTTTCAAAT---  
ATCACAGGATTACTATTGACACGTGATGGAGGAATTAACAGTAGC-----  
-----  
-----  
ACAACTGAGATATTTCAGACCTGGGGGAGGAGATATGAGGGACAATTGGAGAAGTGAATTATATAAATATAAAG  
TGGTAGAAATCAAACCATTA---GGAGTAGCACCCACTAAGGCAAAAAGGAGAGTGGTG-----  
-----GAGAGAGAAAAAAGAGCA---GTGGGA---ATAGGAGCT-----  
GTGCTCCTTGGGTTCTTGGGAGCA---GCAGGAAGCACTATG---GGCGCAGCATCA---  
ATAACGCTGACGGTACAG---GCCAGGCAA---TTGTTG---TCTGGTATAGTGCAACAGCAAAGC---  
AATTTG---CTGAGG---GCTATAGAGGCGCAACAGCATATGTTGCAACTCACAGTCTGGGGCATT  
>KU319549  
TTCTATTGCAAAACATCAAACTGTTTATTAAGACTTGGAAGTTGGAACCATCGGAAT-----  
-----  
-----  
GATGGAACCATCATCACGATCCCATGCAGAATAAAACAAATTATACATATGTGGCAGGGAGTAGGACGAGCAA  
TGTATGCCCCCTCCCATCAGTGGACCAATAACATGTAGATCAAAT---  
ATCACAGGACTACTACTGACACGGGATGGAGGCATCAGTGACAATAACAGT-----  
-----  
-----  
ACCAATACCACAGAGATATTTCAGACGTCAAGGAGGAGATATGAAAGACAATTGGAGAAGTGAATTATATAAAT  
ATAAAGTGGTAGAAATTAAGCCATTA---GGAATAGCACCCACTAAGGCAAAAAGGAGAATGGTG-----  
-----CAGAGAGAGAGAGGAGAA---AAGAGG---CACGGAGCT---  
-----ATGTTCTTGGGTTCTTGGGAGCA---GCCGGAAGCACTATG---GGCGCAGCATCA---  
ATAACGCTGACGGTACAG---GCCAGACAA---TTATTG---TCAGGTATAGTGCAACAGCAAAGC---  
AATTTG---CTGAGG---GCTATAGAGGCGCAACAGCATATGTTGCAACTCACGGTCTGGGGCATT  
>AF219266  
TTCTATTGCTATACTTCAAGACTGTTTAACAGTACATACCTGTTTAATGGTACTTACCTGGTTAATGATATAA  
ATAGT-----  
-----

ACAGGAAATGCAACCATCATACTCCCATGCAAAATAGAACAAATTATAAACATGTGGCAGGAGGTAGGGCGAG  
CAATGTATGCCCCCTCCCATTTGAAGGAAACATAACATGTAGCTCAAAC---  
ATCACAGGACTATTATTGGTACGTGATGGAGGAAAAGATTCAAAT-----  
-----  
GGCACAGAGATATTCAGACCTGGAGGAGGAGATATGAGGGACAATTGGAGAAGTGAATTATATAAATATAAAG  
TGGTAGAAATTAAGCCATTG---GGAATAGCACCCACTAAGGCAAAAAGGAGAGTGGTG-----  
-----GAGAGAGAAAAAAGAGCA--GTAGGA--ATAGGAGCT-----  
GTGTTCTTGGGTTCTTGGGAGCA---GCAGGAAGCACTATG---GGCGCGGCGTCA---  
ATAACGCTGACGGTACAG---GCCAGACAA---GTGTTG---TCTGGTATAGTGCAACAGCAAAGC---  
AATTTG---CTGAGG---GCTATAGAGGCTCAACAGCATATGTTGCAACTCACGGTCTGGGGCATT  
>FJ977095  
TTCTATTGCAATACATCAGAACTGTTTAAGAATGGTACAAATAATGGTACCAATAGTACAGACTCAACA----  
-----  
-----  
AATTC AACATCCATCACAATCCAATGCAGAATAAAACAAATTATAAATATGTGGCAGGGGGTAGGTGAGCAA  
TATATGCCCCCTCCCATTTAAAGGAAACATAACATGTAACTCAAAT---  
ATCACAGGACTACTGCTGACACGTGATGGAGGAAAAGGAGAAGAAAGT-----  
-----  
-----  
GATAATAAGACAGAGATATTCAGACCTGCAGGAGGAGATATGAGGGACAATTGGAGAAGTGAATTATATAAAT  
ACAAAAGTGGTAGAAATTCAGCCATTA---GGAGTAGCACCCACTGAGGCGAAAAGGAGAGTGGTG-----  
-----GAGAGAGAAAAAAGAGCA--GTGGGA--ATAGGAGCT---  
-----GTGTTCTTGGGTTCTTGGGAGCA---GCAGGAAGCACTATG---GGCGCAGCGTCA---  
ATAACGCTGACGGTACAG---GCCAGACAA---TTATTG---TCAGGCATAGTGCAACAGCAAAGT---  
AATTTG---CTGAGA---GCTATAGAGGCGCAACAGCATATGTTGCAACTCACGGTCTGGGGCATT  
>HQ595787  
TTCTATTGCAATACATCAAATTTGTTTAATAGGACATACAATATAACAAATTTGCTTAATGGGACATACAATA  
TATCAAATTCG-----  
-----TCTGATGGG-----  
ACAAACAATACAATCATCAAACCTCAATGCAGAATAAAACAAATTATAAACATGTGGCAGGGGGTCGGGCAAG  
CAATGTATGCCCCCTCCCATTTGCGGGAACATAACATGTAAATCAAAT---  
ATCACAGGACTACTGATAACACGAGATGGAGGGACTGAAGGTAACT-----  
-----  
-----  
ACAGAGATAGAGATATTCAGACCTGGAGGAGGAGACATGAAGGACAATTGGAGAAGTGAATTATACAAATATA  
AAGTGGTAGAAATTAAGCCATTA---GGAGTAGCACCCACTGGGGCAAAAAGGAGAGTGGTG-----  
-----GAGAGAGAAAAAAGAGCA--GTGGGA--ATGGGAGCT-----  
---GTGTTCTTGGGTTCTTGGGAGCA---GCAGGAAGCACTATG---GGCGCGGCGTCA---  
ATAACGCTGACGGTACAG---GCCAGACAA---TTATTG---TCTGGTATAGTGCAACAGCAAAGC---  
AATTTG---CTGAGA---GCTATAGAGGCGCAACAGCATATGTTGCAACTCACGGTCTGGGGCATT  
>HQ595800  
TTCTATTGCAATACATCAGGATTGTTTAATGGCGTCTACATTGAGGGCAACTACACGCATAATATTAAGAAC-  
-----  
-----  
TCAAATGAAAACATCACACTTCAATGCAGAATAAAACAAATTATAAACATGTGGCAGGAGGTAGGACGAGCAA  
TATATGCCCCGCCCATTGCAGGAAATATAACATGTGTATCAAAT---  
ATCACAGGACTACTGTTGACACGTGATGGAGGAGCCAATGTTTCA-----  
-----  
-----  
GAAGAGACATTCAGACCTGGAGGAGGAGATATGAGGGACAATTGGAGAAGTGAATTATATAAATATAAAGTGG  
TAGAAATTAACCATTA---GGAATAGCACCCACCGAGGCAAAAAGGAGAGTGGTG-----  
-----AGGAGAGAAAAAAGAGCA--GTG-----ATAGGAGCT-----  
GTGTTCTTGGGTTCTTGGGAGCA---GCAGGAAGCACTATG---GGCGCGGCGTCA---  
ATAGCGCTGACGGCACAG---GCCAGGCAA---TTACTG---TCTGGTATAGTGCAACAGCAAAGC---  
AATTTG---CTGAGG---GCTATAGAGGCGCAACAGCATATGTTGCAACTCACAGTCTGGGGCATT  
>AY255823  
TTCTATTGCAATACATCAGCCCTGTTTACAAATTCAACCATC-----  
-----  
-----

CCAAATACAACCATCACACTCCCATGCAAAATAAAACAAATTATAAATATGTGGCAGGAGGTAGGACGAGCAA  
 TGTATGCCCCCTCCCATTAAGGAGAGATAACATGTAATTCAACT---  
 ATCACAGGAATACTACTGACACGTGATGGAGGCAACACCACAAAC-----  
 -----  
 -----  
 GAAATCGAAACATTTCAGACCTGGAGGAGGAGATATGAGGGACAATTGGAGAAGTGAATTATATAAATACAAAG  
 TGGTAGAAATTAAGCCATTA---GGAATAGCACCCACGGAGGCAAAAAGGAGAGTGGTG-----  
 -----GAGAGAGAAAAAAGAGCA---GCA-----CTAGGAGCT-----  
 GTGTTTCCTTGGGTTCTTGGGAGCA---GCCGGAAGCACTATG---GGCGCAGCATCA---  
 ATGACGCTGACGTTACAG---GCCAGACAA---TTACTG---TCGGGTATAGTGCAACAGCAAAGC---  
 AATTTG---CTGAGG---GCTATAGAGGCGCATCAGCATATGCTGCAACTCACAGTCTGGGGCATT  
 >KP109480  
 TTCTATTGCAACACATCAAGCCTGTTTAAGGGTACATATAGGCCTAATGGTACAAGTAATTCCACT-----  
 -----  
 -----  
 TCAGGCTCTATCATCACACTCCCATGCTACATAAAACAAGTTATAAACTTGTGGCAGGAGGTAGGACGAGCAA  
 TATATGCCCCCTCCCATTAAGGAAACATAACATGTATATCAAAT---  
 ATCACAGGACTACTATTGGTAAGAGATGGAGGAAATCATGAAGAG-----  
 -----  
 -----  
 GCAAAATACGACAGAGACATTTCAGACCTGGAGGAGGAAATATGAGAGACAATTGGAGAAGTGAATTATATAAAT  
 AATAAGTAGTAGAAATTAAGCCATTG---GGAGTAGCACCCACTAAAGCAAGAAGGAGAGTGGTG-----  
 -----GAGAGAGAAAAAAGAGCA---GTGGGAGTAGGAGCTGTT---  
 -----ATGTTTCCTTGGGTTCTTGGGAGCA---GCAGGAAGCACTATG---GGCGCGGCGTCA---  
 ATAACGCTGACGGTACAG---GCCAGACAA---TTGCTG---TCTGGTATAGTGCAACAGCAAAGC---  
 AATTTG---CTGAAG---GCTATAGAGGCGCAACAGCATCTGTTGCAACTCACGGTCTGGGGCATT  
 >KP109483  
 TTCTATTGTAATACATCAAGCCTGTTTAATAGTACATTTAATAGTACATACATGACTAATGATACAGACATGA  
 AT-----  
 -----  
 TCAAACTCAACCATCTCAATCCCATGCCGCATAAAACAAATTATAAACATGTGGCAGGAGGTAGGACGAGCAA  
 TGTATGCCCCCTCCCATTCAGGAAACATAACATGTAAATCAAAT---  
 ATCACAGGACTACTATTGGTACGAGATGGAGGAAACTCAAATGATACA-----  
 -----  
 -----  
 AATGAGCCAGAGATATTCCGACCTCAAGGAGGAGATATGAGGGACAATTGGAGAAGTGAATTATATAAATATA  
 AAGTGGTAGAAATTAAGCCATTG---GGAGTAGCACCCACTGCAGCAAAAAGGAGAGTGGTG-----  
 -----GGAAGAGAAAAAAGAGCA---GTGGGA---CTAGGAGCT-----  
 ---ATGATCCTTGGGTTCTTGGGAGCA---GCCGGAAGCACTATG---GGCGCGGCGTCA---  
 ATAACGCTGACGGTACAG---GCCAGACAA---TTGTTG---TCTGGTATAGTGCAACAGCAAAGC---  
 AATTTG---CTGAGG---GCTATAGAGGCGCAACAGCATATGTTGCAACTCACGGTCTGGGGCATT  
 >KY929363  
 TTCTATTGCAATACATCAAACTGTTCAACAGTACATACTGGCAGAATGGTACATACTCATACTGGAATAATG  
 GG-----  
 TCATTTCCTAGAATGGAATGATACACAAAGCACT-----  
 CCAAATCGAAGCATCACAATTCCATGCAGAATAAAACAAATTATAAACATGTGGCAGGAGGTAGGACGAGCAA  
 TGTATGCCCCCTCCCATTCAGGAAAAATAATGTGTAAATCCAAT---  
 ATCACAGGAATACTATTGGAACGTGATGGAGGAAATACAAATGAGACA-----  
 -----  
 -----  
 AATAAGACAGAGACATTTCAGACCAATAGGAGGAGATATGAGGAATAATTGGAGAAGTGAATTATATAAATATA  
 AAGTGGTAGAAATTAAGCCATTG---GGGGTAGCGCCCACTAAGGCAAGAAGGAGAGTGGTG-----  
 -----GAGAGAGAAAAAAGAGCA---ATAGGGGGAATAGGAGCT-----  
 ---GTATTTCCTTGGGTTCTTAGGAGCA---GCAGGAAGCACTATG---GGCGCGGCGTCA---  
 ATAACGCTGACGGTACAG---GCCAGACAA---TTGTTG---TCTGGTATAGTGCAACAGCAAAGC---  
 AATTTG---CTGAAG---GCTATAGAGGCGCAACATCATCTGTTGCAACTCACGGTCTGGGGCATT  
 >KY929365  
 TTCTATTGCAATACATCAGGCCTGTTTAATGCTACATACAATAGTACATCAGGCCTGTTTAATGCTACTAATC  
 AC-----  
 -----

ACAAATAACACCATCACCATCCCCTGCAGAATAAAACAATTTATAAACATGTGGCAGGGGGTAGGAAAAGCAA  
 TGTATGCCCCCTCCCATTCAGGGAACATAACATGTACATCAAAT---  
 ATCACAGGAATACTATTGACATGGGATGGAGGAGAAAAATAGAACA-----  
 -----  
 -----  
 GATAATGATACAGAGACATTCAGACCTGCAGGAGGAGATATGAGGGACAATTGGAGAAGTGAATTATACAAAT  
 ATAAAGTGGTAGAAATTCAGCCATTG---GGGGTAGCACCCACTAAAGCAAAAAGGAGAGTGGTG-----  
 -----GAGAGAGAAAAAAGAGCA---GTGGGA---CTAGGAGCT---  
 -----GTGTTCTTGGGTTCTTGGGAGCA---GCAGGAAGCACTATG---GGCGCAGCGTCA---  
 ATGGCGCTGACGGTACAG---GCCAGACAA---TTGTTG---TCTGGTATAGTGCAACAGCAAAGC---  
 AATTTG---CTGAGG---GCTATAGAGGCGCAACAACACATGTTGCAACTCACGGTCTGGGGCATT  
 >KY929369  
 TTCTATTGTAATACATCAGGCCTGTTTAATAGTAATAATGAGACAAACAATAATTCAAGCTTA-----  
 -----  
 -----  
 ATCACAATTCATGCAGAATAAAACAAGTTGTAAACTTGTGGCAGGGGGTAGGACGAGCAATGTATGCTCCTC  
 CCATAGCAGGAAACATAACATGTAATTCAAAT---  
 ATCACAGGACTACTATTGGTACGTGATGGAGGAACAGGAAATAAC-----  
 -----  
 -----  
 ACAATAGAGAAATTCAGACCTCAAGGAGGAGATATGAGAGACAATTGGAGGAACGAACTATATAAATATAAAG  
 TGGTAGAAATTAAACCATTG---GGAGTAGCACCCACTAAAGCAAAAAGGAGAGTGGTG-----  
 -----GAGAGAGAAAAAAGAGCAATAGCGGGA---CTAGGAGCT-----  
 GTGTTCTTGGGTTCTTGGGAGCA---GCAGGAAGCACTATG---GGCGCGGCGTCA---  
 ATAACGCTGACGGTACAG---GCCAGACAA---TTGTTG---TCTGGTATAGTGCAACAGCAAAGT---  
 AATTTG---CTGAGG---GCTATAGAGGCGCAACAGCATCTGTTGCAACTCACGGTCTGGGGCATT  
 >KY929370  
 TTCTATTGTAATACATCAGGCCTGTTTAATGGTACATACATGTCTAATGGTACTTATAATGAGACAAACAATA  
 AT-----  
 -----  
 TCAAGCTCAAACATCACAATTCATGCAGAATAAAACAAGTTATAAACTTGTGGCAGGGGGTAGGACGAGCAA  
 TGTATGCTCCTCCCATTCAGGAAAAATAACATGTAACTCAAAT---  
 ATCACAGGACTACTATTGGTACGTGATGGAGGAACAGGTAATCAGACA-----  
 -----  
 -----  
 AATGATATAGAGACATTCAGACCTCAAGGAGGAGATATGAGAGACAATTGGAGGAGCGAATTATATAAATATA  
 AGGTGGTAGAAATTAAACCATTG---GGAATAGCACCCACTGAAGCAAAAAGGAGAGTGGTG-----  
 -----GGAAGAGAAAAAAGAGCA---GTGGGA---CTAGGAGCT-----  
 ---GTGCTCTTGGGTTCTTGGGAGCA---GCAGGAAGCACTATG---GGCGCGGCGTCA---  
 ATAACGCTGACGGTACAG---GCCAGACAA---TTGTTG---TCTGGTATAGTGCAACAGCAAAGC---  
 AATTTG---CTGATG---GCTATAGATGCGCAACAGCATCTGTTGCAACTCACAGTCTGGGGCATT  
 >KX756609  
 TTCTATTGCAATACCTCAAACTGTTTAATATATCAAACCTGTCTTCTAATGATACA-----  
 -----  
 -----  
 ACAGATAATGGCACAATCATGATCCCATGCAGAATAAAACAATTTATAAACATGTGGCAGGAGGTAGGACGAG  
 CAATGTATGCTCCTCCCATTCAGGAAACATAACGTGTAGTTCAAAC---  
 ATCACCGGACTACTGTTGGAACGTGATGGAGGAAATTCAACTAATTCAACTAAT-----TCA-----  
 -----  
 -----  
 AATAGGACAGAGACATTCAGGCCTCAAGGAGGAAATATGAGGAACAATTGGAGAAGTGAATTATATAAATATA  
 AGGTGGTAGAAATACAACCAGTG---GGAATAGCGCCCACTACAGCAAAAAGGAGAGTGGTG-----  
 -----GAGAGAGAAAAAAGAGCA---GTGGGA---ATAGGAGCT-----  
 ---ATGTTCTTGGGTTCTTGGGAGCA---GCAGGAAGCACTATG---GGCGCAGCGTCG---  
 ATAACGCTGACGGTACAG---GCCAGACAA---CTGTTG---TCTGGTATAGTGCAACAGCAAAGC---  
 AATTTG---CTGAGA---GCTATAGAGGCGCAACAACATCTGTTGCAACTCACAGTCTGGGGCATT  
 >MK076687  
 TTCTATGGTAATACAGCAGGCCTGTTTAATAATACATACAATATTACAACAGGCACGCTTACATACAATGGTA  
 AATCCCTTAAT-----  
 -----

GATTTAAACTCAACCATCACACTCCCATGCAGAATAAAGCAGTTTAAAAATATGTGGCAGGGGGTAGGAAGAG  
 CAATGTATGCCCCCTCCCATTTGCAGGAAACATAACATGTACATCAAAT- - -  
 ATCACAGGCATAATATTGACACGTGATGGAGGGAATGAGAGTAGTACTGAA- - - - -  
 - - - - -  
 GTTCACAATAATACAGAGACATTTCAGACCTCAAGGGGGAAATATGAGAGATAATTGGAGAAGTGAATTATACA  
 AATATAAAGTGGTAGAAATTAAGCCATTG- - -GGAGTAGCACCCACTGCAGCAAAAAGGAGAGTGGTG- - - - -  
 - - - - -GAAAAAGAAAAAAGG- - - - -GGC- - -  
 CTAGGAGCT- - - - -ATACTCATTGGGTTCTTGGGAACA- - -GCAGGAAGCACTATG- - -  
 GGCGTGCGTCA- - -ATAACGCTGACGGTACAG- - -GCCAGACAA- - -TTGTTG- - -  
 TCTGGTATAGTGCAACAGCAAAAGC- - -AATTTG- - -CTGAGA- - -  
 GCTGTAGAGGCGCAACAACATCTGTTGCAACTCACGGTCTGGGGCATT  
 >KX069225  
 TTCTATTGCAATACATCAGGACTGTTTAAATGGTACATATAATGGTACAGACAGTGGTACATACAATAGT- - - - -  
 - - - - -  
 - - - - -  
 ACAGGCAAAAACATCACACTTCAATGCAGAATAAAACAAATTATAAACATGTGGCAGGAGGTAGGGCGAGCAA  
 TGTATGCTCCTCCCATTAAGGAAATATAACATGTATATCAAAT- - -  
 ATCACAGGGATACTACTGGTACGTGATGGAGGACTAAACACTAAT- - - - -  
 - - - - -  
 - - - - -  
 GATAGTGATGAGACATTTCAGACCTGGAGGAGGAAACATGAGGGACAATTGGAGAAGTGAATTATATAAAATACA  
 AAGTGGTAGAAATTAAGCCATTG- - -GGAGTAGCACCCACTGAAGCAAGAAGGAGAGTGGTG- - - - -  
 - - - - -GAGAGAGAAAAAGAGCA- - -GTGGGA- - -CTAGGAGCT- - - - -  
 - - -GTGCTCCTTGGGTTCTTGGGAGCA- - -GCAGGAAGCACTATG- - -GGCGCGGCGTCA- - -  
 ATAACGCTGACGGTACAG- - -GCCAGACAA- - -TTGTTG- - -TCTGGTATAGTGCAACAGCAAAAC- - -  
 AATTTG- - -CTGAGA- - -GCCATAGAGGCGCAACAGCATATGTTGCAACTCACGGTCTGGGGCATT  
 >KY713231  
 TTCTATTGCAATACCTCAAGCTTGTTTAGCAGTATAAGCCCTAATAGTACA- - - - -  
 - - - - -  
 - - - - -  
 AATAAATACTGTAATAACAATCCCATGCAGAATAAAACAAATTATAAACATGTGGCAAGGGGTAGGACGAGCAA  
 TATACGCCCCCTCCTATTGAAGGAAACATAACATGTAAATCAAAT- - -  
 ATCACAGGAATACTATTGGTACGTGATGGAGGCACAAATACTACA- - - - -  
 - - - - -  
 -  
 GAAGAAGGAAAAGAAATAGAAATATTTAGACCTCAAGGAGGAAATATGAAGGACAATTGGAGAAGTGAATTAT  
 ATAAATATAAAGTGGTAGAAATTAAGCCATTA- - -GGAGTAGCACCCACTAAAGCAAAAAGGAGAGTGGTG- - -  
 - - - - -GAGAGAGAAAAAGAGCAGTAGTGGGG- - -  
 CTAGGAGCT- - - - -GCGTTCCTTGGGTTCTTGTACAGT- - -GCAGGAAGCACTATG- - -  
 GGCGCGGCGTCA- - -ATAACGCTGACGGTACAA- - -GCCAGACAA- - -TTGTTG- - -  
 TCTGGTATAGTGCAACAGCAAAAGC- - -AATTTG- - -CTGAGA- - -  
 GCTATAGAGGCGCAACAGCATATGTTGCAACTCACAGTCTGGGGCATT  
 >KY713235  
 TTCTATAGGAGACAGTCAAAATTGTTTAAATCACACATACATGCAGAATGGTACACACAATGGTACAATAAAT- - -  
 - - - - -  
 - - - - -  
 GGTTCAGACCCAATCATAATTCCATGCAGAATAAAGCAAATTATAAACATGTGGCAGGAGGTAGGAAGAGCAA  
 TGTATGCCTCTCCCATTTGCAGGAAACATAACCTGTAAATCAAAT- - -  
 ATCACAGGACTACTATTGACACGAGATGGAGGACTCAAAATGATAGTAGTAAT- - - - -  
 - - - - -  
 - - - - -  
 GAGACAAAGATAGAGATATTCAGACCTGGAGGAGGAAACATGAAAGACAATTGGAGAAGTGAATTATACAAAT  
 ATAAAGTGGTAGAAATTAAGCCATTG- - -GGAATAGCACCCACTGAAGCAAGAAGAAGAGTAGTG- - - - -  
 - - - - -CAGAGAGAAAAAGAGCA- - -GTGACA- - -CTAGGAGCT- - -  
 - - - - -ATGTTTCCTTGGGTTCTTGGGAGCA- - -GCAGGAAGCACTATG- - -GGCGCGGCGTCA- - -  
 ATAACGCTGACGGTACAG- - -GCCAGACAA- - -TTGTTG- - -TCTGGTATAGTGCAACAGCAAAAGC- - -  
 AATTTG- - -CTGAGG- - -GCTATAGAGGCGCAACATCATCTGTTGCAACTCACAGTTTGGGGCATT  
 >MN703343

TTCTATTGTAATACATCAAGACTGTTTAAATGGTACATATAATAACAACAGAGGAG-----  
-----  
-----  
TCAAACCTCAACCATCACAATCCAATGCAGAATAAAACAAATTATAAACATGTGGCAGGAGGTAGGACGAGCAA  
TGTATGCCCCCTCCCATTCAGGAAACATAACATGTGAATCAAAC---  
ATCACAGGACTAATATTGGTACGTGATGGAGGAACTCATGAAAATAGT-----  
-----  
-----  
AATACTACAGAGATATTCAGACCTGGAGGAGGAGATATGAGGGACAATTGGAGAAGTGAACATATAAAATATA  
AAGTGGTAGAAGTTAGGCCTTTG---GGAATAGCACCCACTAAAGCAAAAAGGAGAGTGCTG-----  
-----GAGAGACAAAAAAGAGCA---GTAGGA---ATGGGAGCT-----  
---GTGTTCCCTTGGGATCTTGGGAGCA---GCAGGAAGCACTATG---GGCGCGGCGTCA---  
ATAACGCTGACGGTACAG---GCTAGACAA---TTGTTG---TCTGGTATAGTGCAACAGCAAAAC---  
AATTTG---CTGAGG---GCTATAGAGGCGCAACAGCACATGTTGCAACTCGCAGTCTGGGGCATT  
>MN703361  
TTCTATTGTAATACATCAGGCCTGTTTAAATGAAAGCCGGCTTAACGAAACAGAAGGTGAT-----  
-----  
-----  
TCAAGTAAAAACATCACACTTCCATGTAGAATAAAGCAAATTATAAACATGTGGCAGGCGGTAGGAAAAGCAA  
TATATGCCCCCTCCCATTCAGGAAACATAACATGTAAATCAAAT---  
ATCACAGGATTACTATTGGAACGTGATGGAGGCAAAGGCAATGCA-----  
-----  
-----  
ACAGAGGAAATATTCAGACCTGGAGGAGGAAATATGGGGGACAATTGGAGAAGTGAATTATATAAAATATAAAG  
TGGTAGAAATTCAACCATTG---GGAATAGCACCTACTGGAGCAAAAAGGAGAGTAGTG-----  
-----GAGAGAGAAAAAAGAGCAGTAGTGGA---ATAGGAGCT-----  
GTGTTCCCTTGGGATCTTGAGTGCA---GCAGGAAGCACTATG---GGCGCGGCGGCA---  
ATAACGCTGACGGTACAA---GCCAGACAA---TTATTG---TCTGGTATAGTGCAACAGCAAAGC---  
AATTTG---CTGAAG---GCTATAGAGGCGCAACAGCATATGTTGCAGCTCACGGTCTGGGGCATT  
>AF067159  
TTCTATTGTAATACATCAGGCCTGTTTAAATAGTACATACATGAGTGGTACATACATGAATTCAAGTGCAGACA  
TG-----  
-----  
-----  
AATTCAAGCTACATCACAATCCCATGCAGAATAAAGCAAATTATAAACATGTGGCAGGAGGTAGGACGAGCAA  
TGTATGCCCCCTCCCATTCAGGAAACATAACATGTAAATCAAAT---  
ATCACAGGAATACTATTGGAACGTGATGGAGGGTCAAGGTCAAAT-----  
-----  
-----  
GGCACAGAGACATTCAGACCTGGAGGAGGAGATATGAGGAACAATTGGAGAAGTGAATTATATAAAATATAAAG  
TGGTAGAAATTCAAGCCATTG---GGAGTAGCACCCACGGAAGCAAAAAGGAGAGTGCTG-----  
-----GAGAGAGGAAAAAAGAGCA---GTGGA---ATAGGAGCT-----  
GTGTTCCCTTGGGTTCTTGGGAGCA---GCAGGAAGCACTATG---GGCGCGGCGTCA---  
ATAACGCTGACGGTACAG---GCCAGACAA---TTGTTG---TCTGGTATAGTGCAACAGCAAAGC---  
AATTTG---CTGAGG---GCTATAGAGGCGCAACAGCATCTGTTGCAACTCACGGTCTGGGGCATT  
>FJ866133  
TTCTATTGCAATACATCAGGACTGTTTAAATAATAATATTACA-----  
-----  
-----  
AATGCAACCACCACCTCCCATGCAGAATAAAACAAATTGTAAACATGTGGCAGGGGGTAGGACGAGCAATGT  
ATGCCCCCTCCCATGAAGGAAAAATAACATGTAACTCAAAT---  
ATCACAGGACTGCTCCTGACACGTGATGGAGGGGTGAATAATGAA-----  
-----  
-----  
ACGACAGAGACATTCAGACCTGGAGGAGGAGATATGAAGGACAATTGGAGAAATGAATTATATAAAATATAAAG  
TGGTAGAAATTCAAGCATTA---GGAATAGCACCCACTGGAGCAAAAAGGAGAGTGCTG-----  
-----GAGAGAGAAAAAAGAGCG---GTGGA---CTAGGAGCT-----  
GTGTTCCCTTGGGTTCTTGGGAGCC---GCAGGAAGCACTATG---GGCGCAGCATCA---  
ATAACGCTGACGGTACAA---GCCAGACAA---TTATTG---TCGGGTATAGTGCAACAGCAAAAC---  
AACTTG---CTGAGA---GCTATAGAGGCGCAACAACATATGTTGCAACTCACAGTCTGGGGCATT  
>AB097871

TTCTATTGTAATACATCAGGCCTGTTTAAATGGGACATACAATGATACATACAGGTCTAATGATACAGAT-----  
-----  
-----  
AGTAATTCAACCATCACACTCCCATGCAGAATAAAGCAAATTATAAACATGTGGCAGGAGGTAGGACGAGCAA  
TGTATGCCCCCTCCTATTGCAGGAAACATAACATGTAAATCAAAC---  
ATCACAGGACTACTATTGGTACGTGATGGAGGAAATGGTACACAG-----  
-----  
-----  
ACATTCAGACCTGGAGGAGGAAATATGAAGGATAATTGGAGAAGTGAATTATATAAAATATAAAAGTGGTAGAAA  
TTCAGCCATTA---GGAATAGCACCCACTGGAGCAAAAAGGAGAGTGGTG-----  
-----GAGAGAGAAAAAGAGCA---GCA-----ATAGGAGCT-----  
ATGTTCCCTTGGGTTCTTGGGAGCA---GCAGGAAGCACTATG---GGCGCGGCGTCG---  
ATGGCGCTGACGGTACAG---GCCAGACAA---TTGTTG---TCTGGTATAGTGCAACAGCAAAGC---  
AATTTG---CTGAGG---GCTATAGAGGCGCAACAGCATATGTTGCAACTCACAGTCTGGGGCATT  
>KC894076  
TTCTATTGCAATACATCAGGACTGTTTAAACAGTACATACAATAGTACATCAGGAATGTTTAAACAGTACATACA  
ATAGTTACAAT-----  
-----AGTGCAGGAAAT-----  
AATTCAAATTCAATCATCACACTCCAATGCAGAATAAAACAAATTATAAACATGTGGCAGGGGGTAGGACAAG  
CAATGTATGCTCCTCCCATTAAGGAAACATAACATGTAAATCAAAT---  
ATCACAGGACTACTATTGACACGTGATGGAGGAAGGGGAAATGATACT-----  
-----  
-----  
AATGGAACAGAGACATTCAGACCTGGAGGAGGAGATATGAGGGACAATTGGAGAAGTGAATTGTATAAAATATA  
AAGTGGTAGAAATTAAGCCATTG---GGAATAGCACCCACTGAGGCAAAAAGGAGGATGGTG-----  
-----GAGAGAGAAAAAGAGCA---GTTGGA---ATAGGAGCT-----  
---GTGTTCCCTTGGGTTCTTGGGAGCC---GCAGGAAGCACTATG---GGCGCAGCATCA---  
CTAACGCTGACGGTACAG---GCCAGGCAA---CTGTTG---TCTGGTATAGTGCAACAGCAAAGC---  
AATTTG---CTGAGG---GCCATCGAGGCGCAACAGCATATGTTGCAACTCACGGTCTGGGGCATC  
>KC894073  
TTCTATTGCAATACATCAAACTGTTTAAATGGTACATACAATGGTACATACACAAATAATGAT-----  
-----  
-----  
ACAAACAGCACAATCATACTCCCATGCAGAATAAAACAAATTATAAACATGTGGCAGGAGGTAGGACAAGCAA  
TGTATGCCCCCTCCCATTGAAGGAATCATAGCATGTAATTCAACT---  
ATCACAGGATTATTATTGACACGTGATGGAGGAGACAAGAATGGG-----  
-----  
-----  
AGTAAGCCAGAAATATTTCAGACCTGGAGGAGGAGATATGAGGGACAATTGGAGGAGTGAATTATATAAAATATA  
AAGTGGTAGAAATTAAGCCATTG---GGAATAGCACCCACTAAGGCAAAAAGGAGAGTGGTGGAG---AAA---  
-----GAAAAACAATTCAAAAAGAGCA---GTAGGA---ATAGGAGCT-----  
---GTGTTCCCTTGGGTTCTTGGGAGCA---GCAGGAAGCACTATG---GGCGCGGCGTCA---  
ATAACGCTGACGGTACAG---GCCAGACAA---TTGTTG---TCTGGTATAGTGCAACAGCAAAGC---  
AATTTG---CTGAGG---GCTATAGAGGCGCAACAGCATATGTTGCAACTCACAGTCTGGGGCATT  
>FJ444207  
TTCTATTGCAATACATCAAACTGTTTACAGAAAGTAATTCAACCTCAAACAGCACC-----  
-----  
-----  
TCAAACACCGTACTCACACTCCCATGCAGAATAAAACAAATTATAAACATGTGGCAGGGGGTAGGACGAGCAA  
TGTATGCCCCCTCCCATTGAGGGAAATATAACATGTGAATCAAAC---  
ATCACAGGATTACTATTGACGCGTGATAGA---ACAGACAATAAA-----  
-----  
-----  
ACAGAGACATTTAGACCTGGAGGAGGAGACATGAGGGACAATTGGAGAAGTGAATTATACAAATATAAAAGTGG  
TAGAAATTCAGCCATTA---GGAGTAGCACCCACTAAGGCAAAAAGGAGAGTGGTG-----  
-----GAGAGAGAAAAAGAGCA---GTGGGA---ATAGGAGCT-----  
GTGTTCCCTTGGGTTCTTGGGAGCA---GCAGGAAGCACTATG---GGCGCAGCATCA---  
ATAACGCTGACGGTACAG---GCCAGACAA---TTGTTG---TCTGGTATAGTGCAAGCAGCAGAGC---  
AATTTG---CTGAGG---GCTATAGAGGCGCAACAGCATATGTTGCAACTCACGGTCTGGGGCATT  
>KC894078

TTCTATTGTAATACATCAAACCTGTTTAAATATTAATATTACAGGAAATATTACAGGAAATATGACA-----  
 -----  
 -----  
 GGAAATGAAAACATCACACTCCCATGCAGAATAAAACAAATTATAAACATGTGGCAAAGGGTAGGGCAAGCTA  
 TATATGCCCCCTCCCATTGCAGGAAACATAACATGTAACTCAAGT---  
 ATCACAGGACTACTGTTGACACGTAATGGAGGCAATGATAACAGAACAGGG-----  
 -----  
 -----  
 AATAATAATACAGAGACATTCAGACCTGGAGGAGGAGATATGAGGGATAATTGGAGAAGTGAATTATATAAAAT  
 ATAAAGTGGTAGAAGTTTCAGCCATTG---GGAGTAGCACCCACTGGAGCAAAAAGGAGAGTGGTG-----  
 -----GAGAGAGAAAAAAGAGCA---GTA-----ATGGGAGCT---  
 -----ATGTTTCCTTGGGTTCTTGGGAGCA---GCAGGAAGCACTATG---GGCGCGGCGTCA---  
 GTGGCGCTGACGGTACAG---GCCAGACAA---CTATTG---TCTGGTATAGTGCAACAGCAAAGC---  
 AATTTG---CTGAGG---GCTATAGAGGCGCAACAGCATCTGTTGCAACTCACGGTCTGGGGCATT  
 >KC894079  
 TTCTATTGCAATACATCAGACCTGTTTAAATGGTACATACAGAAATGGTACATACAATCATACAGGAAGAAGT-  
 -----  
 -----  
 TCAAAATGGAACCATCACCTCCAATGCAAAATAAAACAAATTATAAACATGTGGCAGGAGGTAGGAAGAGCAA  
 TATATGCCCCCTCCCATTGAAGGAGAAATAACATGTAACTCAAAT---  
 ATCACAGGACTACTATTGCTACGTGATGGAGGTCAATCAAAATGAAACA-----  
 -----  
 -----  
 AATGACACAGAGACATTCAGACCTGGAGGAGGAGATATGAGGGACAATTGGAGAAGTGAATTATATAAAATATA  
 AAGTAGTAGAAATTAAACCATTG---GGAGTAGCACCCACTGAGGCAAAAAGGAGAGTGGTG-----  
 -----GAGAGAGAAAAAAGAGCA--GTGGGA---ATAGGAGCT-----  
 ---GTGTTCCCTTGGGTTCTTGGGAGCA--GCCGGAAGCACTATG---GGCGCAGCATCA---  
 ATGACGCTGACGGTACAG---GCCAGGCAA---TTATTG---TCTGGTATAGTGCAACAGCAAAGC---  
 AATTTG---CTGAGG---GCTATAGAGGCGCAACAGCATATGTTGCAACTCACGGTCTGGGGCATT  
 >KC894081  
 TTCTATTGTAATACATCAGGACTGTTTAAATGGTACATACCACCCTAATGGTACATACAATGAGACAGCAGTTA  
 AT-----  
 -----  
 TCAAGCGACACAATCACACTCCAATGCAGAATAAAACAAATTATAAACATGTGGCAAGAGGTAGGAAGAGCAA  
 TGTATGCTCCTCCCATTGCAGGAAATATAACATGTAATTCAACT---  
 ATCACAGGACTATTATTGACACGTGATGGAGGAATAAATCAGACA-----  
 -----  
 -----  
 GGAGAAGAGATATTTCAGACCTGGAGGAGGAGATATGAGGGATAATTGGAGAAATGAATTATATAAAATATAAAG  
 TGGTGGAGATTAAGCCATTA---GGAATAGCACCCACTAAGGCAAAAAGGAGAGTGGTG-----  
 -----GAGAGAGAAAAAAGAGCA--GTGGGA---ATAGGAGCT-----  
 GTGTTCCCTTGGGTTCTTGGGAGCA---GCAGGAAGCACTATG---GGCGCGGCGTCA---  
 ATAACGCTGACGGTACAG---GCCAGACAA---CTGTTG---TCTGGTATAGTGCAACAGCAAAGC---  
 AATTTG---CTGAGG---GCCATAGAGGCGCAACAGCATATGTTGCAACTCACGGTCTGGGGCATT  
 >FJ444522  
 TTCTATTGCAATACATCAGGCCTGTTTAAATAGTACATATAATCCAAATAGTACATATAATAATTCAAGC----  
 -----  
 -----  
 TCAGACACACCACTTAGACTCTCATGTAGAATAAAACAAATTATAAATATGTGGCAGGGGGTAGGAAGAGCAA  
 TATATGCCCCCTCCCATTGAAGGAAGCATAACATGTAACTCAAGT---  
 ATCACAGGACTACTATTGCTACGTGATGGAGGTCATGACGGTGACTCA-----  
 -----  
 -----  
 AATAACACAGAGACATTTAGACCGGGAGGAGGAGATATGAGGGACAACCTGGAGAAGTGAATTATATAAAATATA  
 AAGTGGTAGAAATTAAGCCATTG---GGAGTAGCACCCACTGACGCAAAAAGAAGAGTGGTG-----  
 -----GAAAGAGAAAAAAGAGCA--GTAGTGGGAATAGGAGCT-----  
 ---GTGCTCCTTGGGTTCTTGGGAGCA---GCCGGAAGCACTATG---GGCGCGGCGTCA---  
 CTAACGCTGACGGTACAG---GCCAGACAA---CTGCTG---TCTGGTATAGTGCAACAGCAAAAC---  
 AATTTG---CTGAGG---GCTATAGAGGCGCAACAGCATATGTTGCAACTCACGGTCTGGGGCATT  
 >KC894089

TTTTATTGCAATACATCAGCACTGTTTAAATGGTACATACAATTCTACATACAATTCTACTAGTAAC-----  
-----  
-----  
CCAAACATCACAATCACAATCCAATGCAGAATAAAACAAATTATAAACATGTGGCAGGAGGTGGGACGAGCAA  
TGTATGCCGCTCCCATTGCAGGAGACATAACATGTGAATCAAAC---  
ATCACAGGACTACTATTGACACGTGATGGAGGAAATACTGCAAAC-----  
-----  
-----  
GGGACAGAGATATTCAGACCTGGAGGAGGAGATATGAGGGATAATTGGAGAAGTGAATTATATAAATATAAAG  
TGGTAGAAGTTCAGCCATTG---GGAGTAGCACCTACCAAGGCAAAAAGAAGAGTGGTG-----  
-----GGTAGAGAAAAAAGAGCA---GTA-----CTGGGAGCT-----  
GTGTTTCCTTGGGTTCTTGGGAGCA---GCAGGAAGCACTATG---GGCGCGGCGTCA---  
ATGGCGCTGACGGTACAG---GCCAGACAA---TTGTTG---TCTGGTATAGTGCAACAGCAAAGT---  
AATTTG---CTGAGG---GCTATAGAGGCGCAACAGCATATGTTGCAACTCACAGTCTGGGGCATT  
>KC894097  
TTCTATTGCAACACATCACAACCTGTTTAAATGGTACATACTTTAATAGTACATACTTTAATGGTACATACAATG  
GTACATACCCA-----  
-----  
AATAATACAAACATCACACTTCAATGCAGAATAAAACAAATTATAAACATGTGGCAGGGGGTAGGAAGAGCAA  
TGTATGCCCCCTCCCATTGCAGGAAACATAACATGTGAATCAAAT---  
ATCACAGGACTATTATTGACATGGGATGGAGGAAATAATGGAGAAAATAACACA-----  
AGAAATGGTACAGGAAAT-----  
-----  
GGTACAGAGACATTCAGACCTGGAGGAGGAGATATGAGGGACAATTGGAGGAGTGAATTATATAAATATAAAG  
TGGTAGAAATTAAGCCATTG---GGAATAGCACCCACTGAGGCAAAAAGGAGAGTGGTG-----  
-----GAGAGAGAAAAAAGAGCA---GTGGGA---CTAGGAGCT-----  
GTGTTTCCTTGGATTCTTGGGAGCC---GCAGGAAGCACTATG---GGCGCAGCGTCA---  
ATGACGCTGACGGTACAA---GCCAGACAA---TTGCTG---TCTGGTATAGTGCAACAGCAAAGC---  
AATTTG---CTGAGA---GCTATAGAGGCGCAACAGCATATGTTGCAACTCACAGTCTGGGGCATT  
>KC894084  
TTCTATTGCAATACATCAGAACTGTTTAAATAATACATACTGGCCTAATAGTACTGTTACAAATGGAAC-----  
-----  
-----  
TTAAATGGAACCTTCACACTCCCATGCAAAATAAAACAAATTATAAACATGTGGCAGGAGATAGGAAGAGCAA  
TATATGCCCCCTCCCATTGCAGGAAACATAACATGTAAATCAAAT---  
ATCACAGGACTACTATTAACACGTGATGGAGGTACATAACCCAGAG-----  
-----  
-----  
AAGAATGACACAGAGACATTCAGACCTGGAGGAGGAGATATGAGGGATAATTGGAGAAGTGAATTATACAAAT  
ATAAGTAGTAGAAGTCAAGCCATTA---GGAATAGCACCCACGGGGGCAAAAAGGAGAGTGGTG-----  
-----GAGAGAGAAAAAAGAGCA---GTGGGA---ATAGGAGCT---  
-----GTGTTTCCTTGGGTTCTTGGGAGCA---GCAGGAAGCACTATG---GGCGCGGCGTCA---  
ATAACGCTGACGGTACAG---GCCAGACAA---TTATTG---TCTGGTATAGTGCAACAGCAAAGC---  
AATTTG---CTGAGG---GCTATAGAGGCGCAGCAGCATATGCTGCAACTCACGGTCTGGGGCATT  
>KC156114  
TTCTATTGCAACACATCAAGATTGTTTAAATCATACATTTAATGAGACA-----  
-----  
-----  
TCAGACGAAGACATCACACTCCAATGTAGGATAAAACAAATTATAAACATGTGGCAGGGGGTAGGACGAGCAA  
TATATGCCCCCTCCCATTGCAGGAAACATAACATGTAACTCAAAT---  
ATCACAGGACTACTATTGACACGTGATGGAGGGAAGAGTAATAGTAGT-----  
-----  
-----  
AATCAGACAGAGATATTCAGACCTGCAGGAGGAAATATGAGGGACAATTGGAGAAGTGAATTATATAAATATA  
AAGTGGTAGAAATTAAACCATTA---GGAATAGCACCCACTAAGGCGAAAAGGAGAGTGGTG-----  
-----GAGAGAGAAAAAAGAGCG---GCA-----ATAGGAGCT-----  
---ATGTTTCCTTGGGTTCTTGGGAGCA---GCAGGAAGCACTATG---GGCGCGGCGTCA---  
ATAACGCTGACGGTACAG---GCCAGACAA---TTATTG---TCTGGTATAGTGCAACAGCAAAGC---  
AATTTG---CTGAGA---GCTATAGAGGCGCAACAGCATATGTTGCAACTCACGGTCTGGGGCATT  
>KC156120

TTTTATTGCAATACATCAATACTGTGGGATAGTGATAAGAGT-----  
-----  
-----  
AATGACACAAACATCACACTCCCATGCAGAATAAAACAAATTATAAATATGTGGCAGGAGGTAGGACGAGCAA  
TGTATGCCCCCTCCCATTCGAGGAAGCATAACATGTAAATCAAAA---  
ATCACAGGACTACTATTGGTACGTGATGGAGGAATAAATAGCAGC-----  
-----  
-----  
ACAGAGACATTTCAGACCTGGAGGAGGAAATATGAAGGACAATTGGAGAAGTGAATTATATAAATATAAAGTGG  
TAGAAATTTCAGCCATTA---GGAGTTGCACCCACTGGAGCAAAAAGGAGAGTGGTG-----  
-----GAGAGGGAGAAAAGAGCA---GTGGGA---ATAGGAGCT-----  
GTGTTTCCTTGGGTTCTTGGGAGCA---GCTGGAAGCACTATG---GGCGCAGCGTCA---  
ATAACGCTGACGGTACAG---GCCAAACAA---CTGTTG---TCTGGTATAGTGCAACAGCAGAGT---  
AATTTG---CTGAGA---GCTATAGAGGCGCAACAGCATATGCTGCAACTCACAGTCTGGGGCATA  
>HM204588  
TTCTATTGCAACACATCAAACTGTTTAAATAGTACGTGGAATAGTACAGAAAATACTAATATA-----  
-----  
-----  
CCAAATGCAACCATCTACATCCAATGCAGAATAAAACAAATTATAAACATGTGGCAGGGGGTAGGACGAGCAA  
TATATGCCCCCTCCCATTCGAAGGAAACATAACATGCAACTCAATT---  
ATCACAGGAATACTATTGACACGTGATGGAGGAAGGGACGATAACAATAACCAA-----  
-----  
-  
ACAAACCAAACAGAGATAGAGATATTCAGACCTGCAGGAGGAGATATGAGGGACAATTGGAGAAGTGAATTAT  
ATAAATATAAAGTGATAGAAATTAAGCCATTA---GGAATAGCACCCACTAAGGC AAAAAGGAGAGTGGTG--  
-----GAGAGAGAAAAAGAGCA---GTGGGA---  
ATAGGAGCT-----GTGTTTCCTTGGGTTCTTGGGAGCA---GCAGGAAGCACTATG---  
GGCGCAGCATCA---ATAACGCTGACGGTACAG---GCCAGACAA---TTGTTG---  
TCTGGTATAGTGCAACAGCAAAAC---AATTTG---CTGAGG---  
GCTATAGAGGCGCAACAACATATGTTGCAACTCACAGTCTGGGGCATT  
>HQ615984  
TTCTATTGCAATACATCAGGCCTGTTTAAATGGTACATTTAATGGTACATACATGCCAAATAGTACAGAAAGTA  
CT-----  
-----  
TCAAATACAAACATCACACTCCAATGCAGAATAAAACAAATCATAAACATGTGGCAGCAGGTAGGACGAGCAA  
TGTATGCCCCGCCCATTGAAGGAAACATAACATGTAGATCAAAT---  
ATCACAGGACTACTATTGACACGTGACGGAGGCGGAAGAGCAAAT-----  
-----  
-----  
GATACTGAAGAGATATTCAGGCCTGGAGGAGGAGATATGAGGGACAATTGGAGAAGTGAATTATACAAATATA  
AAGTGGTAGAGGTTTCAGCCATTG---GGAATAGCACCCACTAAGGC AAAAAGGAGAGTGGTG-----  
-----GAGAGAGAAAAAGAGCA---GTGGGA---ATGGGAGCT-----  
---GTGTTTCCTTGGGTTCTTGGGAGCA---GCAGGAAGCACTATG---GGCGCGGCGTCA---  
ATAACGCTGACGGTACAG---GCCAGACAA---TTGTTG---TCTGGTATAGTGCAACAGCAAAGC---  
AATTTG---CTGAGG---GCCATAGAGGCGCAACAGCATATGTTGCAACTCACGGTCTGGGGCATT  
>KC156216  
TTCTATTGCAATACATCAAACTGTTTAAATAGTATACACAATAGTACAGATATGTATAATAGTACAGTT----  
-----  
-----  
AGTAATTCAACCATCACACTCCAATGCAAAATAAAACAAATTATAAATATGTGGCAGGGGGTAGGACGAGCAA  
TGTATGCCCCCTCCCATAGCAGGAAACATAACATGTAAATCAAAT---  
ATCACAGGACTACTATTAACACGGGATGGAGGAAACGTGAGTGG-----  
-----  
-----  
ACAACAGAGACATTTCAGACCTGGAGGAGGAAATATGAAGGACAATTGGAGAAGTGAATTATATAAATATAAAG  
TGGTGGAATTCAGCCATTA---GGAATAGCACCCACTAAGGC AAAAAGGAGAGTGGTG-----  
-----GAAAGAGAAAAAGAGCA---GTGGGA---ATAGGAGCT-----  
GTGTTTCCTTGGGTTCTTGGGAGTA---GCCGGAAGCACTATG---GGCGCAGCATCA---  
ATGACGCTGACGGTACAG---GCCAGACAA---TTGTTG---TCTGGTATAGTGCAACAGCAAAGC---  
AATTTG---CTGAGG---GCTATAGAGGCGCAACAGCATATGTTGCAGCTCACGGTCTGGGGCATT

>KC156219

TTCTATTGCTATACATCAGAACTGTTTAAATGAGACAGACAAACTGCTTAATAAGACAAAAGAGAAA-----

-----  
-----

GACAATTCAACCATCATACTCCCATGCAGAATAAAACAAATTATAAACATGTGGCAGGGGGTAGGACGAGCAA  
TATATGCCCCCTCCCATTTGAAGGAAATATAACATGTAAGTCAAAT---

ATCACAGGATTACTATTGACACGTGATGGAGGAGAGGACATTAATGGAAGT-----

-----  
-----

AATAGAGAAGAGATATTGAGACCTGGAGGAGGAGATATGAAGGATAATTGGAGAAGTGAATTATATAAAATATA  
AAGTAGTAGAAATTCAGCCATTA---GGAATAGCACCCACTAAGGCAAAAAGGAAAGTGGTG-----

-----GAGAGAGAAAAAGAGCA---GCA-----ATAGGAGCT-----

---GTGTTCCCTTGGGTTCTTGGGGGCA---GCAGGAAGCACTATG---GGCGCGGCGTCA---

ATAACGCTGACGGTACAA---GCCAGACAA---TTATTG---TCTGGTATAGTGCAACAGCAAAGC---

AATTTG---CTGAGA---GCTATAGAGGCGCAACAGCATATGTTGCAACTCACGGTCTGGGGCATT

>HQ615963

TTCTATTGCAATACATCAAGCCTGTTTAAATAGGACATATAATAGTACAGATATGGCCAATAGTACAGAA----

-----  
-----

GCTAACAGTACCATCACAATCCACTGCAGAATAAAACAAATTATAAACATGTGGCAGGAGGTGGGACGAGCAA  
TGTATGCCCCCTCCCATTAAGGAAACATAACATGTATATCAAAT---

ATCACAGGACTACTATTAACAAGGGATGGAGGAGATAATAATGAA-----

-----  
-----

ACGGAGACATTCAGACCTGGAGGAGGAAATCTGAGGGACAATTGGAGAAGTGAATTATATAAAATATAAAGTGG  
TAGAAGTTTCAGCCATTG---GGAGTAGCACCCACTAATTCAAGAAGGAGAGTGGTG-----

-----GAGAGAGAAAAAGAGCA---GTGGGA---CTAGGAGCT-----

GTGTTCCCTTGGGTTCTTGGGGGCA---GCAGGAAGCACTATG---GGCGCAGCATCA---

ATAACGCTGACGGTACAG---GCCAGACAA---TTATTG---TCTGGTATAGTGCAACAGCAAAGC---

AATTTG---CTGAAA---GCTATAGAGGCTCAACAGCATATGTTGAAACTCACGGTCTGGGGCATT

>HQ615964

TTCTACTGCAATACATCAAACCTGTTTAAACAGTACATATAACAGTAACAGTACATATAACAGTACAGATACTC  
CT-----

-----  
GAGGATAAAAACATCACACTCCAATGCAGAATAAAACAAATTATAAACATGTGGCAGGGGGTAGGACAAGCAA  
TGTATGCCCCCTCCCATTTGAGGAAACATAACATGTAAATCAAAT---

ATCACAGGATTATTATTAAACACGTGATGGAGGAACCAACACAAAC-----

-----  
-----

AACACAACAGAAATATTGAGACCTGGAGGAGGAGATATGAGGGACAATTGGAGAAGTGAATTATATAAAATATA  
AAGTGGTAGAAATTCACCATTA---GGAGTAGCACCTACTCAGGCAAAAAGGAGAGTGGTG-----

-----GAGAGAGAAAAGAGG-----GGA---ATAGGAGCT-----

---GTGTTCCCTTGGGTTCTTGGGAGCA---GCAGGAAGCACTATG---GGCGCAGCATCA---

ATGACGCTGACGGTACAG---GCCAGACAA---TTGTTG---TCTGGTATAGTGCAACAGCAAAGC---

AATTTG---CTGAGG---GCTATAGAGGCGCAACAGCATATGTTGCAACTCACGGTCTGGGGCATT

>HM204613

TTCTATTGCGATACATCAAAACTGTTTAAATAGTACATACCTGGCTAATGGCACACGCTGGATTAATGATAGTA  
CAGAA-----

-----CAG---

AATACAAGCAAAGTCATCTCACTCCCATGTAGAATAAAACAAATTATAAACATGTGGCAGGAGGTAGGACGAG  
CAATGTATGCTCCTCCCATTTGAAGGAAACATAAGATGTGAATCAAAT---

ATCACAGGATTGTTATTGACGCGTGATGGAGGAATAGATAACAAC-----

-----  
-----

AAGAGCGAGATATTGAGACCTGGAGGAGGAGATATGAGGGACAATTGGAGAAGCGAATTATATAAAATATAAAG  
TGGTAGAAATTAAACCATTG---GGAATAGCACCCACTAAGGCAAAAAGGAGAGTGGTG-----

-----GAGAGAGAGAAAAAGAGCA---GTGGGA---ATAGGAGCT-----

CTGTTCCCTTGGGTTCTTGGGAGCA---GCAGGAAGCACTATG---GGCGCGGCGTCA---

ATGACGCTGACGGTTTACAG---GCCAGACAA---TTGTTG---TCTGGTATAGTGCAACAGCAAAGC---

AATTTG---CTGAGG---GCTATAGAGGCGCAACAACATATGTTGCAACTCACGGTCTGGGGCATT

>KC186690

TTCTATTGCAACACAACAGGATTATTTTAATTATATGTACAATGCTATTAATAATAGTATACAGTTTATTAATA  
GTACAAACCTT-----

-----ACAGAA-----

CCAAGTGACAACAACATCACACTTCAATGTAGAATAAAACAAATTATAAACATGTGGCAGGGAGTAGGAAGAG  
CAATGTATGCTCCTCCCATTTGCAGGAAACATAACATGTAGATCTAAT---

ATCACAGGAATACTATTGACACGTGATGGGGGCAATAGTGATGAGAAGAATAAC-----TCAACTAAT----

-----  
GACACTGAGACATTTAGACCTGGAGGAGGAGACATGAGGGACAATTGGAGAAGTGAATTATATAAATATAAAG  
TGGTAGAAATTAGACCATTG---

GGAATAGCACCCACTAAGGCAAAAAGGAGAGTGGTGGAGATGGAGATGCCAGGGATCAAACCCACCTCACGCT  
CAGCAAGGAGAAGAAGAGCA---GTGGGA---ATAGGAGCT-----

TTGTTCCCTTGGGTTCTTGGGAGCA---GCAGGAAGCACTATG---GGCGCGGCGTCA---  
ATAACGCTGACGGTACAG---GCCAGACAA---CTGCTG---TCTGGTATAGTGCAACAGCAAAAT---

AATTTG---CTGATG---GCTATAGAGGCGCAACAGCATATGTTGCAACTCACAGTCTGGGGCATT  
>KC187578

TTCTATTGCAATACATCAGGACTGTTTAATAGTACATACAATAATGGTACATACACTAGTGCATACAATATT-  
-----

-----ACA---

GAAAAATAATTCAAGTATTACACTCCCATGCAGAATAAAGCAGATTATTAACATGTGGCAGGGGGTAGGACGAG  
CAATGTATGCCCTCCCATTTGCAGGAAACATAACATGCAGATCAAAT---

ATCACAGGACTACTATTGACACGGGATGGTGGCAATGGAATCAATGTG-----  
-----

-----  
ACCACAGAGATATTCAGACCTGAAGGGGGAAATATGAAGGACAATTGGAGAAGTGAATTATACAAATACAAAG  
TGGTAGAAATTCAGCCATTG---GGAATAGCACCCACCAAGGCAAAAAGGAGAGTGGTG-----

-----GAGAGAGAAAAAAGAGCA---GTGGGA---ATAGGAGCT-----  
GTGTTCCCTTGGGTTCTTGGGAGCA---GCAGGAAGCACTATG---GGCGCGGCGTCA---

ATAACGCTGACGGTACAG---GCCAGACAA---TTATTG---TCTGGTATAGTGCAACAGCAAAGC---  
AATTTG---CTGAGA---GCTATAGAGGCGCAACAGCATATGTTGCAACTCACGGTCTGGGGCATT

>KC187323  
TTCTATTGTAATACATCAAACTGTTTAATAATACATTTGATGGTACAAACATGATGAATAACAAT-----  
-----

-----  
ACAGATGAAACCATCACACTCCAATGCAGAATAAAACAAATTATAAACATGTGGCAGGGGGTAGGACGAGCAA  
TGTATGCCCCCCCCATTAAGGGAATCATAACATGTAAATCAAAT---

ATCACAGGACTACTATTGACACGTGATGGAGGAAATCACAATGAGACT-----  
-----

-----  
AATAACACAGAGACATTGACACCTGCAGGAGGAAATATGAAGGACAATTGGAGAAGTGAATTATATAAATATA  
AAGTGGTAGAAATTAAGCCATTA---GGAATAGCACCCACTACGGCAAAAAGGAGAGTGGTG-----

-----GAGAGAGAAAAAAGAGCA---GTGGGA---ATAGGAGCT-----  
---GTGTTCCCTTGGGTTCTTGGGAGCA---GCAGGAAGCACTATG---GGCGCAGCATCA---

ATAACGCTGACGGTACAG---GCCAGACAA---TTGTTG---TCTGGTATAGTGCAACAGCAAAGC---  
AATTTG---TTGAGA---GCTATAGAGGCGCAACAGCATATGTTGCAACTCACAGTCTGGGGCATT

>KC186955  
TTCTATTGCAATACATCGCAACTGTTTAATAGTACATACCCTAATGAGACATATAATATTAATGTTAATGATA  
CA-----

-----  
AATTC AACAGAGATTG TACTCCCATGCAGGATAAAACAAATTATAAACATGTGGCAGGAGGTAGGACGAGCAA  
TGTATGCTCCTCCCATTTGCAGGAAACATAACATGTAGATCAAAT---

ATCACAGGATTACTATTGACGCGAGATGGAGGACCTAATCAGACC-----  
-----

-----  
ACAGAAACATTGACACCTGCAGGAGGAGATATGAGGGACAATTGGAGAAGTGAATTATACAAATATAAAGTGG  
TAGAAATTAAGCCATTG---GGAATAGCACCCACTGGGGCAAAAAGGAGAGTGGTG-----

-----GAGAGAGAAAAAAGAGCA---GTGGGA---ATAGGAGCT-----  
GTGTTCCCTTGGGTTCTTGGGAGCA---GCAGGAAGCACTATG---GGCGCGGCGTCA---

ATCACAGGATTACTATTGACGCGAGATGGAGGACCTAATCAGACC-----  
-----

-----  
ACAGAAACATTGACACCTGCAGGAGGAGATATGAGGGACAATTGGAGAAGTGAATTATACAAATATAAAGTGG  
TAGAAATTAAGCCATTG---GGAATAGCACCCACTGGGGCAAAAAGGAGAGTGGTG-----

-----GAGAGAGAAAAAAGAGCA---GTGGGA---ATAGGAGCT-----  
GTGTTCCCTTGGGTTCTTGGGAGCA---GCAGGAAGCACTATG---GGCGCGGCGTCA---

ATCACAGGATTACTATTGACGCGAGATGGAGGACCTAATCAGACC-----  
-----

-----  
ACAGAAACATTGACACCTGCAGGAGGAGATATGAGGGACAATTGGAGAAGTGAATTATACAAATATAAAGTGG  
TAGAAATTAAGCCATTG---GGAATAGCACCCACTGGGGCAAAAAGGAGAGTGGTG-----

-----GAGAGAGAAAAAAGAGCA---GTGGGA---ATAGGAGCT-----  
GTGTTCCCTTGGGTTCTTGGGAGCA---GCAGGAAGCACTATG---GGCGCGGCGTCA---

CTAACGCTGACGGTACAG---GCCAGACAA---TTGTTG---TCTGGTATAGTGCAACAGCAAAGC---  
AATTTG---CTGAGG---GCCATAGAGGCGCAACAGCATCTGTTGCAACTCACAGTCTGGGGCATT  
>KC187164  
TTCTATTGCAATACATCAGGACTGTTTAAAAATAGGATATACAGTAGTACATACAATGATACAGTAAATAATT  
CAAGC-----  
-----  
TCAGAGAACATCACAATCACACTCCCATGCAGAATAAAACAAATTATAAACATGTGGCAGAGGGTAGGACGAG  
CAATGTATGCTCCTCCCATTAAGGAAGCTTAACATGTAACTCAAGT---  
ATCACAGGGTTACTATTGACGAGGGATGGAGGCAGTGGAGACAACACA-----  
-----  
-----  
AGTACAGAGATCTTCAGACCTGGAGGAGGAGATATGAGGGACAATTGGAGAAGTGAATTATACAAATATAAAG  
TGGTAGAAGTTCAACCATTA---GGAATAGCACCCACTAAGGCAAAAAGGAGAGTGGTG-----  
-----GAGAGAGAAAAAAGAGCA---GTGGGA---ATAGGAGCT-----  
GTGTTCCCTTGGGTTCTTGGGAGCA---GCCGGAAGCACTATG---GGCGCGGTGTCA---  
ATAACGCTGACGGTACAG---GCCAGACAA---TTGCTG---TCTGGTATAGTGCAACAGCAAAGC---  
AATTTG---CTGAAG---GCTATAGAGGCGCAACAGCATATGTTGCGACTCACGGTCTGGGGCATT  
>KC186730  
TTCTACTGCAATACATCAAGACTGTTTAATGGTACATACTATAATGGTATATACAACCATACAGAGGGTAATT  
CAACCATA-----CACTAT---  
AATGGTACATACAACCATACA-----  
GAAGGTAAATTCAAACATCACACTCCCATGCAGAATAAAACAAATTTATAAACCTGTGGCAGAAGGTGGGAAGAG  
CAATGTATGCCCTCCCATTCAGGAAGAGTAACATGTAAATCAAAT---  
ATCACAGGACTACTATTGTTACGTGATGGAGGTAAACAAATAACACA-----  
-----  
-----  
AATACAGAGATATTCAGGCCTGGAGGAGGAGATATGAGGGACAATTGGAGAAGTGAATTATACAAATATAAGG  
TGGTAGAAATTAAACCATTG---GGAGTAGCTCCCACCAAGGCAAAAAGGAGAGTGGTG-----  
-----GAGAGAGAAAAAAGAGCA---GTGGGA---ATAGGAGCT-----  
GTGTTCCCTTGGGTTCTTAGGAGCA---GCAGGAAGCACTATG---GGCGCAGCGTCA---  
ATAACGCTGACGGTACAG---GCCAGACAA---CTGTTG---TCTGGGATAGTGCAACAGCAAAC---  
AATTTG---CTGAGA---GCTATAGAGGCGCAACAGCATCTGTTGCAACTCACAGTCTGGGGCATT  
>KC187620  
TTCTATTGCAATACATCAGGACTATTTAATGGTACATATACAAACATGAGCAGCACAGGAAAT-----  
-----  
-----  
GCAAAATGCAACATCACACTTCAATGCAAAATAAAACAAATTATAAACATGTGGCAACAGGTGGGAAAAGCAA  
TGTATGCTGCTCCCATTCAGGAAACATAACATGTAAATCAAAT---  
ATCACAGGACTTCTATTGACACGTGATGGAGGAGTAGGAAACAATGAC-----  
-----  
-----  
ACAAATGGCACAGAGACATTCAGACCTGGAGGAGGAGATATGAGGGACAATTGGAGAAGTGAATTATACAAAT  
ATAAGTGGTAGAAATTCAGCCATTA---GGAATAGCACCCACTAAGGCAAAAAGGAGAGTGGTG-----  
-----GAGAGAGAAAAAAGAGCA---GTAGGA---ATAGGAGCT---  
-----TTGTTCCCTTGGGTTCTTAGGAGCA---GCCGGAAGCACTATG---GGCGCAGCGTCA---  
ATAACGCTGACGGTACAG---GCCAGACAA---TTGTTG---TCTGGTATAGTGCAACAGCAAAGC---  
AATTTG---CTGAGA---GCTATAGAGGCGCAACAGCATATGTTGCAACTCACAGTCTGGGGCATT  
>KY111994  
TTCTATTGCAATACATCAAATCTGTTTAATGGTACATACAATGGTACATACATAAGTACAAAC-----  
-----  
-----  
AGTACTTCAAACATCACGCTTCAATGCAGAATAAAACAAATTATAAACATGTGGCAGGGGGTAGGAAGAGCAA  
TGTATGCTCCTCCCATTCAGGAAACATAACATGTAAATCAAAT---  
ATCACAGGGCTACTATTGACACGTGATGGAGGGACCAAAAATAATAGCAACGAA-----  
-----  
-----  
ACAGAGGAGACATTCAGGCCTGCAGGAGGAGATATGAGGGATAATTGGAGAAGTGAATTATATAAATATAAAG  
TAGTAGAAATTCAGCCATTA---GGAATAGCACCAACTGGTGCAAAAAGGAGAGTGGTG-----  
-----GAGAGAGAAAAAAGAGCA---GCAGGA---CTAGGAGCT-----  
TTGTTCCCTTGGGTTCTTGGGAGCA---GCAGGAAGCACTATG---GGCGCAGCATCA---

ATAACGCTGACGGTACAG---GCCAGACAA---TTGTTG---TCTGGTATAGTGCAACAGCAAAGC---  
 AATTTG---CTGAGG---GCTATAGAGGCGCAACAGCATATGTTGCAACTCACGGTCTGGGGCATC  
 >KC187280  
 TTCTATTGTAATACATCACAATTGTTTAAATAGTACACACAAGAGTACAGCCGATCCTACAAGGAGTGAGTCAA  
 AT-----  
 -----  
 GAAAATGAAACCATTATACTCCCATGCAAAATAAAACAAATTATAAACATGTGGCAGGAGGTAGGACGAGCAA  
 TGTATGCCCCCTCCCATTCAGAGAAACATAACATGTAAATCAAAT---  
 ATCACAGGGCTATTATTGACACGTGATGGAGAGTATAATGGGACA-----  
 -----  
 -----  
 AACAAAAATGAAACATTTCAGACCTGCAGGAGGAGACATGAGGGACAACCTGGAGAAAGTGAATTATATAAAATATA  
 AAGTGGTAGAAATTC AACCATTCG---GGAGTGGCACCCACTAAGGCAAAAAGGAGAGTGGTG-----  
 -----GAGAGAGAAAAAAGAGCA---ATAACA---ATGGGAGCT-----  
 ---GTGTTCCCTTGGGTTCTTAGGAGCA---GCAGGAAGCACTATG---GGCGCAGCGGCA---  
 GTAACGCTGACGGCACAG---GCCAGACAA---CTGTTG---TCTGGTATAGTGCAACAGCAAAGC---  
 AATTTG---CTGAGG---GCTATAGAGGCACAACAGCATATGTTGCAACTCACAGTCTGGGGCATT  
 >KC187249  
 TTCTATTGCAATACATCACAACCTGTTTAAATGGAACATACTATGCAAATGGGACATCCACGTCTAATGATACAG  
 CAGGTAAT-----  
 -----  
 TCAAGCGACATCATCATACTCCCATGCAGAATAAAACAAATTATAAATATGTGGCAGAAGGTAGGACGGGGCAA  
 TGTATGCTCCTCCCATTCAGAGAAACATAACATGTCACTCAAAC---  
 ATCACAGGATTACTATTGACAAGGGATGGTGGAAACAGGAATGGC-----  
 -----  
 -----  
 ACAAATGAGACATTTCAGACCTGCAGGAGGAGATATGAGGGACAATTGGAGAAGTGAATTATACAAATACAAAG  
 TGGTAGAAGTTAATCCATTG---GGAGTAGCACCCACTAGGGCAAAAAGGAGAGTGGTG-----  
 -----GAGAGAGAAAAAAGAGCA---GTGGGA---ATAGGAGCT-----  
 ATGTTCCCTTGGGTTCTTGGGAGCA---GCAGGAAGCACTATG---GGCGCGGCGTCA---  
 ATAACGCTGACGGTACAG---GCCAGACAG---TTGTTG---TCTGGTATAGTGCAACAGCAAAGC---  
 AACCTG---CTGAGG---GCCATAGAGGCGCAACAGCATATGTTGCAACTCACGGTCTGGGGCATT  
 >MF502153  
 TTCTATTGCAATACATCACAACCTGTTCAATAGTAGCAGTAATTCAAGCTCAACCAGCAAT-----  
 -----  
 -----  
 TCAAACCTCAACCATCACCTCCCATGCAGAATAAAACAAATTATAAACATGTGGCAGGGGGTAGGACGGGGCAA  
 TGTATGCCCCCTCCCATTCAGGAAAAATAACATGTAAATCAAGT---  
 ATCACAGGATTACTATTGACACGTGATGGGGGACCTCGGAATGGC-----  
 -----  
 -----  
 ACAGAGACATTTCAGACCTGGAGGAGGAGATATGAGGGACAATTGGAGAAGTGAATTATATAAAATATAAAGTGG  
 TAGAAGTTAAACCATTG---GGAATAGCACCCACTGGAGCAAAAAGGAGAGTGGTG-----  
 -----GAGAGAGAAAAAAGAGCA---GTGGGA---ATGGGAGCT-----  
 ATGTTCCCTTGGGTTCTTGGCAGCA---GCAGGAAGCACTATG---GGCGTGGCGTCA---  
 ATAACGCTGACGGTACAG---GCCAGACAA---TTGCTG---TCTGGTATAGTGCAACAGCAAAGT---  
 AATTTG---CTGAGA---GCCATAGAGGCGCAACAGCATATGTTGCAACTCACAGTCTGGGGCATT  
 >MF353063  
 TTCTATTGCAATACATCAAGCCTGTTTAAATAGGACATATATGGCTAATAGTACAGATATGGCTAATAGTACAG  
 AAACCTAAC-----  
 -----  
 AGTAACGGAACCATCACAATCCACTGCAGAATAAAACAAATTATAAACATGTGGCAAGGGGTGGGACGAGCAA  
 TGTATGCCCCCTCCCATTCAGAGAAACATAACATGTATATCAAAT---  
 ATCACAGGACTACTATTGACAAGGGATGGAGGAAACACCAGTATCAGTGAG-----  
 -----  
 -----  
 AAGACAGAGACATTTCAGACCTGAAGGAGGAAATATGAAGGACAATTGGAAAAGTGAATTATATAAAATATAAAG  
 TGGTAGAAGTTAAGCCATTA---GGAGTAGCACCCACTAATGCAAGAAGGAGAGTGGTG-----  
 -----GAGAGAGAAAAAAGAGCAGTAGTGGGA---ATGGGAGCT-----  
 GTGTTCCCTTGGGTTCTTGGGAGCG---GCAGGAAGCACTATG---GGCGCAGCATCA---

ATAACGCTGACGGTACAG---GCCAGACAA---TTATTG---TCTGGTATAGTGCAACAGCAAAGC---  
 AATTTG---CTGAAG---GCTATAGAGGCTCAACAGCATATGTTGAGACTCACGGTCTGGGGCATT  
 >HM638803  
 TTCTATTGCAATACTGCAAGCCTGTTTAATAGTACATACAATCCTAATCCTAATGGTACAGAAGACAATTCAA  
 ATTCA-----  
 -----  
 ACTTCAAATTCAAGCATCACAATCAAATGCAGAATAAAGCAAATTATAAACATGTGGCAGGAGGTAGGAAAAG  
 CAATGTATGCCCCCTCCCGTTGCAGGAAATATAACATGTATATATCCAAT---  
 ATCACAGGACTACTATTGACACGTGATGGAGGAAAGGGAGGTGGCACA-----  
 -----  
 -----  
 AGTAATGACACAGAGATATTCAGACCTCAAGGAGGAAAATATGAAGGACAATTGGAGAAGTGAATTATATAAAAT  
 ATAAAGTGGTAGAAATTAACCATTAA---GGAGTAGCACCACTAAGGCCAAAAAGGAGAGTGGTG-----  
 -----GAGAGAGAAAAAAGAGCA---GTGGGA---CTAGGAGCT---  
 -----GTGCTCTTTGGGTTCTTGGGAGCA---GCAGGAAGCACTATG---GGCGCAGCATCA---  
 ATAACGCTGACGGTACAG---GCCAGACAA---TTGTTG---TCTGGTATAGTGCAACAGCAAAGC---  
 AATTTG---CTGAGA---GCTATAGAGGCGCAACAGCATATGTTGCAACTCACGGTCTGGGGCATT  
 >KC894127  
 TTCTATTGCAATACATCAAGATTGTTTGATCCTAAAGGTACTAATGGTACA-----  
 -----  
 -----  
 GATAATTCAACCATCCAACCTCCCATGCAGAATAAAACAAATTGTAAACATGTGGCAGGGGGTAGGAAGAGCAA  
 TGTATGCCCCCTCCCATTCAGGAAACATAACATGTAGATCAAAT---  
 ATCACAGGACTACTATTGGTACGTGATGGAGGCAGAGACGCAAATACC-----  
 -----  
 -----  
 ACAGAGCCAGAGATCTTCAGACCTGGAGGAGGAGATATGAGGGACAATTGGAGAAGTGAATTATATAAAATATA  
 AAGTGGTAGAAATTCAGCCATTG---GGAGTAGCACCCACTAGGGCAAAAAGGAGAGTGGTG-----  
 -----GAGAGAGAAAAAAGAGCA--GTGGGA---ATAGGAGCT-----  
 ---GTGTTCCCTTGGGTTCTTGGGAGCA--GCAGGAAGCACTATG---GGCGCGGCGTCA---  
 ATGACGCTGACGGTACAG---GCCAGACAA---CTGCTG---TCTGGTATAGTGCAACAGCAAAGC---  
 AATTTG---CTGAGA---GCTATAGAGGCGCAACAGCATATGTTGCAACTCACAGTCTGGGGCATT  
 >HM639260  
 TTCTATTGCAATACATCAGGACTGTTTAATGAGACATACAATCCTAATGGTACAGAAAGTAAT-----  
 -----  
 -----  
 TCAAGCGCAGTCATCACACTCCCATGCAGAATAAAACAAATTATAAACATGTGGCAGGAAGTAGGAAAAGCAA  
 TATATGCCCCCTCCCATTCAGGAAACATAACATGTAAATCAAAT---  
 ATCACAGGACTACTATTGGTACGTGATGGAGGAAACTCAAATGGCACA-----  
 -----  
 -----  
 AATAACACAGAGATATTCAGACCTGGAGGAGGAGATATGAGGGACAATTGGAGAAGTGAATTATATAAAATATA  
 AAGTGGTAGAAATTAACCATTG---GGAATAGCACCCACTAGTGCAAAAAGGAGAGTGGTG-----  
 -----GAGAGAGAAAAAAGAGCA--GTTGGA---ATAGGAGCT-----  
 ---GTGTTCCCTTGGGTTCTTGGGAGCA--GCAGGAAGCACTATG---GGCGCGGCGTCA---  
 ATAACGCTGACGGTACAG---GCCAGACAA---CTGTTG---TCTGGTATAGTGCAACAGCAAAGC---  
 AATTTG---CTGAGA---GCTATAGAGGCGCAACAGCATATGTTGCAACTCACGGTTTGGGGCATT  
 >KJ541837  
 TTCTATTGTAATACATCAGGCCTGTTTAATGGTTCATACAATTATAATGCTACAGCA-----  
 -----  
 -----  
 AGTAATTCCAGCTCAGAC-----  
 AATTCAGCTCAGTCATCAGAATCCCATGCAGAATAAAGCAAATTATAAACATGTGGCAGGAGGTAGGACGAG  
 CAATGTATGCCCCCTCCCATTCAGGAAACATAACATGTAAATCAAAT---  
 ATCACAGGAATACTATTGTATCACAGGACTACTGTTGGAGGA-----  
 -----  
 -----  
 AAGGAAAATGATAAATAC---  
 TGGAAAGAGACATTTCAGACCTACAGGAGGAGATATGAGGGACAATTGGAGAAGTGAATTATATAAAATATAAAG  
 TGGTAGAAATTAACCATTG---GGGATAGCACCCACTGAAGCAAGAAGGAGAGTGGTG-----  
 -----GAAAGAGAAAAAAGAGCA--GTGGGA---GTAGGAGCT-----  
 ATGTTCCCTTGGGTTCTTGGGAGCA---GCAGGAAGCACTATG---GGCGCGGCGTCA---

ATAACGCTGACGGTACAG---GCCAGACAA---TTGTTG---TCTGGTATAGTGCAACAGCAAAGC---  
 AATTTG---CTGAGG---GCTATAGAGGCGCAACAGCATCTGTTGCAACTCACAGTCTGGGGCATT  
 >KJ158428  
 TTCTATTGTAATACATCAGGTCTGTTTAATGTTACATACATGCCTAATGGTACA-----  
 -----  
 GAGAGTAATTCAAATAGT-----  
 CAGTTAAACAATATCACAAATATCCCATCCATCACAATCCAAAAAAGATGTGGCAGAAGGTAGGACAAG  
 CAATGTATGCTCCTCCCATTTGCAGGAAACATAACATGTAAATCCAAT---  
 ATCACAGGAATTATATTGGTACGTGATGGAAGAGAA-----  
 -----  
 GACAAGGTTAATATAGAGACAAAT-----  
 AAGACTGAGACATTCAGACCTGGAGGAGGAGATATGAGAGACAACCTGGAGAAGTGAATTATATAAATATAAAG  
 TGGTAGAAATTAAGCCATTG---GGGATAGCACCCACCGAAGCAAAAAGGAGAGTGGTG-----  
 -----GAGAGAGAAAAAAGAGCA---GTGGGA---ATAGGAGCT-----  
 GTGTTCCCTTGGGTTCTTGGGAGCA---GCAGGAAGCACTATG---GGCGCAGCGTCA---  
 CTAACGCTGACGGTACAG---GCCAGACAA---TTGTTG---TCTGGTATAGTGCAACAGCAAAGC---  
 AATTTG---CTGAGA---GCTATAGAGGCGCAACAGCATATGTTGCAACTCACGGTCTGGGGCATT  
 >KJ541839  
 TTCTATTGTAATACATCAAACTGTTTAATGGTACATACATTCCTAATGGTACA-----  
 -----  
 GGAAGTTACTTAAGCAGT-----  
 AATTCAAGCTCAAACATCACAATTCATGCAGAATAAAGCAAATTATAAACATGTGGCAGGAGGTAGGACGAG  
 CAATATATGCCCCCTCCCATTTGAAGGAAACATAACATGTAGATCAAAT---  
 ATCACAGGAATAATATTGACACGTGATGGAGGAAAAATCCAAAATCAA-----  
 -----  
 AATGAGACAGACAAT--ACAACAGAAGACTATTCTAGCGTGGAAGGA---  
 ATGAAGGACAATTGGAGAAGTGAATTATATAAATATAAAGTGGTAGAAATTCAGCCATTG---  
 GGAATAGCACCCACTGGAGCAAAAAGGAGAGTGGTG-----  
 --GAGAGAGAAAAAAGGGAT---GTGACA---CTAGGAGCT-----  
 TTGTTCCCTTGGGTTCTTGGGAGCG---GCAGGAAGCACTATG---GGCGCGGCGTCA---  
 ATAACGCTGACGGTACAG---GCCAGACAA---TTGTTG---TCTGGTATAGTGCGACAGCAAAGC---  
 AATTTG---CTGAGA---GCTATAGAGGCGCAACAGCATCTGTTGCAACTCACAGTCTGGGGCATT  
 >KJ541841  
 TTCTATTGTAATACATCAAACTGTTTAATGGTACATACATGCTTAATGGTACA-----  
 -----  
 GGAAGTTATTTAATCAGT-----  
 AATTCAAGCTCAAACATCACAATTCATGCAGAATAAAGCAAATTATAAACATGTGGCAGGAGGTAGGACGAG  
 CAATATATGCCCCCTCCCATTTGAAGGAAACATAACATGTAGATCAAAT---  
 ATCACAGGACTACTATTGACACGTGATGGAGGACAA-----  
 -----  
 TCCAAAATCAAATTAGACAGTCAA-----  
 TCCACAGAGATATTTAGACCTGGAGGAGGAGATATGAAGGACAATTGGAGAAGTGAATTATATAAATATAAAG  
 TGGTAGAAATTCAGCCATTG---GGAATAGCACCCACTGGAGCAAAAAGGAGAGTGGTG-----  
 -----GAGAGAGAAAAAAGGGAT---GTGACA---CTAGGAGCT-----  
 TTGTTCCCTTGGGTTCTTGGGAGCG---GCAGGAAGCACTATG---GGCGCGGCGTCA---  
 ATAACGCTGACGGTACAG---GCCAGACAA---TTGTTG---TCTGGTATAGTGCAACAGCAAAGC---  
 AATTTG---CTGAGA---GCTATAGAGGCGCAACAGCATCTGTTGCAACTCACAGTCTGGGGCATT  
 >KJ541844  
 TTCTATTGTAATACATCAGACCTGTTTAAGGCGGCAGGTCCGTGGCCGTCTAAC-----  
 -----  
 ACACCGGATCAGGATACA-----  
 AGTACAAATGAAAACATCACACTCCAATGCAGAATAAAGCAAATTATAAACATGTGGCAGGAGGTAGGACGAG  
 CAATGTATGCTCCTCCCATTTGCAGGGAACATAATATGTAGATCAAAT---  
 ATCACAGGACTTCTATTAGTACGTGATGGAGGAGAA-----  
 -----  
 GACAAACATAATACAGGGACAAAT-----  
 GGGACAGAGACATTCAGACCTGAAGGAGGAGATATGAGGGACAATTGGAGAAGCGAATTATATAAATATAAAG  
 TGGTAGAACTTAAACCATTA---GGAGTAGCACCCACTGGATCCAAAAGGAGAGTGGTG-----  
 -----GAGAGAGAAAAAAGAGCA---GTGGGA---CTAGGAGCT-----  
 GTGTTCCCTTGGGTTCTTGGGAGCA---GCAGGAAGCACTATG---GGCGCGGCGTCA---

ATGACGCTGACGGTACAG---GCCAGACAA---TTGTTG---TCTGGTATAGTGCAACAGCAAAGC---  
 AATTTG---CTGAGG---GCTATAGAGGCGCAACAGCATCTGTTGCAGCTCACGGTCTGGGGCATT  
 >KJ541848  
 TTCTATTGCAACACATCAAACTGTTTAATAGTACATACATGCCTAAACATGCA-----  
 -----  
 AAGTGCCATACAATCACA-----  
 AAGGCACACGCAATCATCACAATTCCATGCAGAATAAAACAAATTATAAATATGTGGCAGGAGGTAGGACGAG  
 CAATGTATGCTCCTCCCATTAAGGAAAAATAACATGTAATTCAAGT---  
 ATCACAGGACTGCTATTGACACGTGACGGAAGGGAA-----  
 -----  
 AACAAAAAGAATTCAAAGGGGGGT-----  
 GATACAGAACTTTTCAGACCTGAAGGAGGAAATATGAAAAGACAATTGGAGAAGTGAATTATATAAATATAAGG  
 TGGTAGAAATTAAGCCATTG---GGAATAGCACCCACTGGAGCAAAAAGGAGAGTGGTG-----  
 -----GAGAGAGAAAAAAGAGCA---GTGGGA---CTGGGAGCT-----  
 CTGTTCCCTTGGGTTCTTGGGAGCA---GCAGGAAGCACTATG---GGCGCAGCGTCA---  
 ATGACGCTGACGGTACAG---GCCAGACAA---TTGTTG---TCTGGTATAGTGCAACAGCAAAC---  
 AATTTG---CTGAGA---GCTATAGAGGCGCAACATCAGTTGTTGCAACTCACGGTCTGGGGCATT  
 >MF373132  
 TTCTATTGCAATACATCAAACCTGTTTAATAGTAGTAAACCTAATATAACAGCAAAT-----  
 -----  
 -----  
 GAAAAATGGAACCATCACACTCCCATGCAGAATAAAACCAATTGAAACCTTGGGGCAGGGGGTAGGAAAAGCAA  
 TTATTGCCCCCTCCATTAAAGGAAAATTACCTGGTACTTCCAAA---  
 TTCCCAGGCTTACCACTGGCCCCGAGTAGGGGTGAAAAAATAGGAACCTAT-----  
 GGAAATTTGGCA--AAAAGAGAA-----  
 -----  
 TTTTCCCCGGGGGGGGGAGATATGAGTGACAATTGGAGAAGTGAATTATATAAATATAAAGTGGTAGAAATTA  
 ATCCATTA---GGAGTAGCACCCACTAAGGCAAAAAGGAGAGTGGTG-----  
 -----GAGAGAGAAAAAAGAGCA---GTGGGA---ATAGGAGCT-----  
 GTGTTCCCTTGGGTTCTTGGAGTGCA---GCAGGAAGCACTATG---GGCGCAGCGTCA---  
 ATAACGCTGACGGTACAA---GCCAGACAA---TTGTTG---TCTGGTATAGTGCAACAGCAAAC---  
 AATTTG---CTGAGA---GCTATAGAGGCGCAACAACATATGTTGAACTCACAGTCTGGGGCATT  
 >MF373137  
 TTCTATTGTAATACATCAGGCTTGTTTAATACATCAGGCCCATTTAATAATAGTGAAACAAATAACACA---  
 -----  
 -----  
 GCAAAATGTAAACATCACACTCCCATGCAGAATAAAACAAATTATAAACATGTGGCAGGGGGTAGGACAAGCAA  
 TGTATGCCCCCTCCTGTTGCAGGAAACATAACATGTAGATCAAAT---  
 ATCACAGGAATACTACTGACACGTGATGGAGGAATAAATACCACAACCTAAT-----  
 -----  
 -----  
 AACACATACGAACTATTAGGCCTACAAGAAGAGACAATAGGGACAATTGGAGAAGTGAATTATATAAATATA  
 AAGTAGTAGAAATTCAGCCATTA---GGAGTAGCACCCACTGAGGCAAGAAGGAGAGTGGTG-----  
 -----GAGAGAGAAAAAAGAGCA---GTGGGA---ATAGGAGCT-----  
 ---GTGTTCCCTTGGGTTCTTGGGAGCA---GCAGGAAGCACTATG---GGCGCAGCATCC---  
 ATAACGCTGACGGTACAG---GCCAGACAA---TTATTG---TCTGGTATAGTGCAACAGCAGAAC---  
 AATCTG---CTGCGG---GCTATAGAGGCGCAACAGCATATGTTGCAACTCACAGTCTGGGGCATT  
 >MF373138  
 TTCTATTGCAGTACATCATCCCTGCTTAATTTTACTTGGCGAAGTTTATTTTGCCATGCCCAAGCCCCGTTCC  
 AGGAACTCAT---AAT-----  
 -----  
 AATAGTACAAATAACATCCCCTTCCCATGCAGAATAAAACAAATTTATAAACATGTGGCAAACGGTAGGGCGAG  
 CAATGTATGCTCCTCCCATTCAGGAGTAATAACATGTAATTCAAAC---  
 ATCACAGGACTACTACTGACACGAGATGGAGGAAATCCAACAAATAGCACTGAA-----  
 -----  
 -----  
 GGAAATAATGAACTGAGATATTAGACCTGGAGGAGGAGATATGAGAGACAATTGGAGAAGTGAATTATATA  
 AATACAAAGTGGTAGAAATTAAGCCATTA---GGAGTAGTACCCACTAAGGCAAAAAGGAGAGTGGTG-----  
 -----GAGAGAGAAAAAAGAGCA---GCA-----  
 CTAGGAGCT-----ATGTTCCCTTGGGTTCTTGGGAGCA---GCCGGAAGCACTATG---

GGCGCAGCGTCA---ATAGCGCTGACGGTACAA---GCCAGACAA---TTGTTG---  
TCTGGTATAGTGCAGCAGCAAAAC---AATTTG---CTGAGG---  
GCTATAGAGGCGCAACAGCATATGTTGCAACTCACGGTCTGGGGCATT  
>MF373139  
TTCTATTGCAATACATCGGGCCTGTTTAGTATAAATTATACAGAAAATAATACAGATAATATTCAGAGTATGG  
AC-----  
-----  
ATCACACTCCCCTGCCCGATCAGACAAATCATAATCATGTGGCAGGGGCTAGAGGTAGCAATATCTACCCCTC  
CCCCTAACGGTACAGTATCATGTACTTCTAAT---  
TTCCTGCGTAGTCCTGCTACGTGCTGGAGGGCGTCATCGGGGAAATGAA-----  
-----  
-----  
AGTGGGACAGAGACATTGAGACCTGCAGGAGGAGATATGAAGGACAATTGGAGAAAGTGAATTATATAAAATATA  
AGGTAGTAGAAATTAAGCCATTA---GGAGTAGCACCCACTAAGGCAAAAAGGAGAGTGGTG-----  
-----GAGAGAGAAAAAAGAGCA---GTGGGA---CTAGGAGCT-----  
---GTGTTCCCTTGGGTTCTTGGGAGCG---GCAGGAAGCACTATG---GGCGCAGCATCA---  
ATAACGCTGACGGTACAG---GCCAGACAA---TTATTG---TCTGGTATAGTGC AACAGCAAAAC---  
AATTTG---CTGAGG---GCTATAGAGGCGCAACAGCATATGTTGCAACTCACAGTCTGGGGCATT  
>KP411839  
TTCTACTGCAATACATCAAAGCTGTTTAATAGTACATACCCGCTAACAGTACTGATACGTACATGAACAGTG  
CT-----  
-----  
AATACTTCAAACATCATACTTCAATGCAGAATAAAACAAATCATAAACATGTGGCAGGGGGTAGGACAAGCAA  
TGTATGCCCCCTCCTATTGCAGGGAACATAACATGTGAATCAAAT---  
ATCACAGGACTGCTGTTAACACGTGATGGAGGAAACAATCAAACA-----  
-----  
-----  
GAGGAGGAGACATTTACACCTGGAGGAGGAGATATGAGAGACAATTGGAGAAAGTGAATTATATAAAATACAAAG  
TGGTAGAAATTAAGCCATTA---GGAATAGCACCCACCAAGGCAAAAAGGAGAGTGGTG-----  
-----GAGAGAGAAAAAAGAGCA---GTGGGA---ATAGGAGCT-----  
GTGTTCCCTTGGGGTCTTGGGAGCA---GCAGGAAGCACTATG---GGCGCAGCATCA---  
ATAACGCTGACGGTACAG---GCCAGACAA---TTGTTG---TCTGGTATAGTGCAGCAGCAAAGC---  
AATCTG---CTGAGG---GCTATAGAGGCGCAACAGCATATGTTGCAACTCACAGTCTGGGGCATT  
>MF373148  
TTCTATTGCAATACATCAGAACTGTTTAACGGTACATACAGCAACGGTACATACACGCCTAATAATAATGGGA  
GTGAC-----  
-----  
TCAAATTTGACCATCACCATCCCGTGCAGAATAAAACAAGTTGTAAATCTGTGGCAGGGAGTAGGACAAGCAA  
TGGATGCCCCCTCCCATTCAGGAGCATATCGTGGGGATCAATAT---CCGAGGACTACTATTGCCCCGT---  
GGAGGAGGACCGAACCCAGT-----  
-----  
ACCGCGGAGATATTGAGACCTGGAGGAGGAGATATGAGGGACAATTGGAGAAAGTGAATTATATAAAATATAAAG  
TGGTGGAAGTTAACCATT---GGAATAGCACCCACTAGAGCAAAAAGGAGAGTGGTG-----  
-----GAGAGAGAAAAAAGAGCA---GTGGGA---ATAGGAGCT-----  
GTGTTCCCTTGGGTTCTTAGGAGCA---GCAGGAAGCACTATG---GGCGCAGCATCA---  
GTAACGCTGACGGTACAA---GCCAGGCAA---TTGTTG---TCTGGTATAGTGC AACAGCAAAGC---  
AATTTG---CTGAGG---GCTATAGAGGCGCAACAGCATATGTTGCAACTCACAGTCTGGGGCATT  
>KP411836  
TTCTATTGCAATACATCAAACCTGTTTAATAGTACATACAATAGTACT-----  
-----  
-----  
AATGATACCATCACACTCCAATGTAAGATAAAACAAATCATAAACATGTGGCAGGGGGTAGGACGAGCAGCAG  
TATTCTCCTCCCATCGCAGGCAAGACATCACATCTTATACTAC---  
TATTACAGCAGTACTGCTGACGACCTGATGGAGGACGATGAACTAATAAT-----  
-----  
-----  
ACTGTAGAGACATTGAGACCTGGAGGAGGGGATATGAGAGACAATTGGAGAAAGTGAATTGTATAAAATATAAAG  
TGGTAGAAGTTAAACATTA---GGAATAGCTCCATCTCATTCAAAAAGGAGAGTGGTG-----  
-----CAGAGAGAAAAAAGAGCA---GTGGGC---CTGGGAGCT-----  
ATGTTCCCTTGGGTTCTTGGGAGCC---GCAGGAAGCACTATG---GGCGTGGCGTCA---

TTGACGCTGACGGTACAG---GCCAGACAA---TTATTG---TCTGGTATAGTGCAGCAGCAAGGC---  
 AACTTG---CTGAGG---GCTATAGAGGCGCAACAGCATCTGTTGCAACTCACAGTCTGGGGCATT  
 >MF373152  
 TTCTATTGCACTACATCACAACCTGTTTACTAGTACATACATGGCTACATACATGTCTATAGCACTAATAGTAC  
 TTCAATTGAACCATGCACACTCGATGCAGGAAAAGACACAA-----  
 -----  
 ATTAACATGTGGCAGGGGGTAGGCCAAGCAATGTATGCCCTCCCATTAAGGAAGTATAACATGTAGATCAA  
 AT---ATCACGGGAATACTACTGACACGAGATGGAGGAACCAACTCCACA-----  
 -----  
 -----  
 AATGAAACATTTCAGACCTGGAGGAGGAGATATGAGGGACAATTGGAGAAGTGAATTATATAAATATAAAGTGG  
 TAGAAATTAAGCCATTG---GGAATAGCACCCACTAAGGCAGGAGAGTGGTG-----  
 -----GAGAGAGAAAAAGAGCG---GCA-----TTAGGAGCT-----  
 ATGTTTCCTTGGGTTCTTGGGAGCA---GCTGGAAGCACTATG---GGCGCAGCATCA---  
 ATTACGCTGACGGTACAG---GCCAGACAA---TTGTTG---TCTGGTATAGTGCACAGCAAAGC---  
 AATTTG---CTGAGG---GCTATAGAGGCGCAACAGCATATGTTGCAACTCACGGTCTGGGGCATT  
 >MF373159  
 TTCTATTGCAATACATCAGGGCTGTTTCGAATTAATATTTCTGATGCACATAATGATGCACATAAT-----  
 -----  
 -----  
 GACACAAATGTAAACATCACAATTCATGCAGAATAAAGCAAATTATAAATATGTGGCAGGGGGTAGGACGAG  
 CAATGTATGCTCCTCCCATTAAGGAATAATACAATGTAGATCAAAT---  
 ATCACAGGACTGCTACTGACACGTGATGGTGGTAATGGTGGTAAT-----  
 -----  
 -----  
 GAAACAAATTCAGAGACGTTTAGACCTTTAGGAGGAGATATGAAGGACAATTGGAGAAGTGAATTATATAAAT  
 ACAAAGTAGTAGAAATTCAACCAGTA---GGAATAGCACCCACTAGAGCAAGAAGGAGAGTGGTG-----  
 -----GAGAGAGAAAAAGAGCA---GCA-----CTAGGAGCT---  
 -----ATGTTTCCTTGGGTTCTTAGGAGCA---GCCGGAAGCACTATG---GGCGCAGCATCA---  
 ATAACGCTGACGGTACAG---GCCAGACAA---TTATTG---TCTGGTATAGTGCACAGCAAAC---  
 AACTTG---CTGAGA---GCTATAGAGGCGCAACAGCATATGTTGCAACTCACGGTCTGGGGCATT  
 >MF373166  
 TTCTATTGCAATACATCAAACTGTTTAATAGTACATTTAATAATAATACATTTATATTTAATGGTACAGGGA  
 GGAAC-----TAT---  
 ACAGGAAATGGGACTATAACC-----  
 ACAGGAAATGAGACTATAACCATCCCATGCAGAATAAAACCAATTATAAACATGTGGCAGGGGGTAGGACAAG  
 CAATGTATGCCGCCCCCATTAAGGAGTTATACAGTGTACTTCAAAT---  
 ATCACAGGAATATTACTGACACGTGATGGAGGAGGAAATGGAACA-----  
 -----  
 -----  
 GAGGAGACATTTCAGGCCTGGAGGAGGAAATATGAAGGACAATTGGAGAAGTGAATTATATAAATATAAAGTGG  
 TAGAAATTAAACCATTA---GGAGTAGCACCCACTAAGGCAGGAGAGTGGTG-----  
 -----GAGAGAGAAAAAGAGCA---GTGGGA---ATAGGAGCT-----  
 ATGTTTCCTTGGTTTCTTGGGAGCA---GCTGGAAGCACTATG---GGCGCAGCTTCA---  
 ATAACGCTGACGGTACAA---GCCAGACAA---TTATTG---TCTGGTATAGTGCACAGCAAAGC---  
 AATTTG---CTAAGG---GCTATAGAGGCGCAACAGCATATGTTGCAACTCACAGTCTGGGGCATT  
 >MF373169  
 TTCTACTGCAATACATCAGGCCTGTTTAATAGTACATACAATAATGCATACAATAGTACTAATAGTACT----  
 -----  
 -----  
 ACAAATGACACCATCACACTTCAATGCAGAATAAAACAAATTATAAATATGTGGCAGGGGGTAGGAAAAGCAA  
 TATATGCTCCTCCCATTCAGGAAACATAACATGTGAATCAAAT---  
 ATCACAGGACTACTATTGACACGTGATGGAGGAAATGATAAAACAGGG-----  
 -----  
 -----  
 AACACCACAGAGACATTTCAGACCTGGAGGAGGAAATATGAGGGACAATTGGAGAAGTGAATTATATAAATATA  
 AAGTGGTAGAAATTAAACCATTA---GGAATAGCACCCACCAAGGCAGGAGAGTGGTG-----  
 -----GAGAGAGAAAAAGAGCA---GTGGGA---ATAGGAGCT-----  
 ---GTACTCCTTGGGTTCTTGGGAGCA---GCAGGAAGCACGATG---GGCGCAGCGTCA---

ATAACGCTGACGGTACAG---GCCAGGCAA---TTGTTG---TCTGGTATAGTGCAACAGCAAAGC---  
 AATTTG---CTGAGG---GCTATAGAGGCGCAACAGCATATGTTGCAACTCACGGTCTGGGGCATT  
 >MF373175  
 TTTTATTGCAATACATCCAACCTGTTTAATAATAGTATGATA-----  
 -----  
 -----  
 AATCCAAATGTTACCATCACACTCCCATGCAGAATAAAACAGATTATAAACATGTGGCAGCAGGTAGGAAAGG  
 CAATGTATGCCCCCTCCCATTCAGGAAGAATAACATGTAACCTCAAAT---  
 ATCACAGGACTGCTACTGACACGTGATGGGGGAACAAATCAGACA-----  
 -----  
 -----  
 AACAGCACAGAGATATTCAGACCTGGAGGAGGAGACATGAGAGACAATTGGAGAAGTGAATTATATAAAATATA  
 AGGTGGTAGAAATTCAGCCATTA---GGAGTAGCACCCACTAGGGCAAAAAGGAGAGTAGTG-----  
 -----GGCAGAGAGAAAAAGAGCA---GTGGGA---CTAGGAGCT-----  
 ---ATGTTCCCTTGGGTTCTTGAGTGCA---GCAGGAAGCACTATG---GGCGCAGCATCA---  
 CTAACGCTGACGGTACAG---GCCAGACAA---TTGTTG---TCTGGTATAGTGCAACAGCAAAGA---  
 AATTTG---CTGAGG---GCTATAGAGGTGCATCAGCATATGTTGCAACTCACGGTCTGGGGCATT  
 >MF373179  
 GTCTATTGCGATACATCAGACCTGCTCACTACATCAGTTAGTGTTCAAAAAGTACTAGTTATCACT-----  
 -----  
 -----  
 AGTACAGATGCCATCATACTCCGCATGCCAAATACAACACATTATAAGCATGTGGCAGTGAGTACGACGAGCA  
 TTGTATGCCCCCTCCTATGAAAGGCATGCGTAGCAGTACATGCACT---  
 ATCACAGGTACTACTGACCTCAGGGATGGAAGGACTGACTATCAC-----  
 -----  
 -----  
 AGCATGTACATAGTCAGACCTGGAGGAGGAGATATGAGGGACAATTGGAGAAGTGAATTATATAAAATATAAAG  
 TGGTAGAAGTTAAGCCAATA---GGAATAGCACCCACTGGGGCAAAAAGGAGAGTGGTG-----  
 -----GAGAGAGAAAAAAGAGCG---GCA-----CTAGGAGCT-----  
 GTGTTCCCTTGGGTTCTTGGGAGCA---GCCGGAAGCACTATG---GGCGCAGCATCA---  
 GTAACGCTGACGGTACAG---GCCAGACAA---TTATTG---TCGGGTATAGTGCAACAGCAGAAC---  
 AATTTG---CTGAGG---GCTATAGAGGCGCAACAGCATATGTTGCAACTCACGGTCTGGGGCATT  
 >MF373192  
 TTCTATTGCAATACAACAGCCTTGTTTCATAATAATATT-----  
 -----  
 -----  
 ACAAATTCAACCATCATGCTCCCATGCAGAATAAAACAATTTATAAACCTGTGGCAGGGGGTAGGACGAGCAA  
 TGTATGCTCCTCCCATTAAGGACTAATAACATGTAATTCAAGT---  
 ATCACAGGAATACTACTGACACGAGATGGAGGAGATGTCAATCAAACA-----  
 -----  
 -----  
 GCAAATGAAACAGAGACATTCAGACCTGGAGGAGGAGACATGAGGGACAATTGGAGAAGTGAATTATATAAAT  
 ACAAAGTGGTAGAAATTAACCATTA---GGAATAGCACCTACCCCGGCAAAAAGGAGAGTGGTG-----  
 -----GAGAGAGAAAAAAGAGCA---GCA-----CTAGGAGTT---  
 -----ATGTTCCCTTGGGTTCTTGGGAGCA---GCTGGAAGCACTATG---GGCGCAGCATCA---  
 TTAACGCTGACGGTACAG---GCCAGACAA---TTATTG---TCAGGTATAGTGCAACAGCAAAAC---  
 AATTTG---CTGAGA---GCTATAGAGGCGCAACAGCATATGTTGCAACTCACAGTCTGGGGCATT  
 >KP411835  
 TTCTATTGCGATACATCAAACCTGTTTAATGAGACAAAATTTAATAGTAGT-----  
 -----  
 -----  
 ACAAATGAAAACATCACACTCCGATGCAGAATAAAACAAATTATAAACATGTGGCAGAAGGTAGGACGGGCAA  
 TGTATGCCCCCTCCCATTCAGGAACAATAAAATGTGACTCAAAT---  
 ATCACAGGATTACTACTAACACGAGATGGAGGCAAAAATGAAAATGAA-----  
 -----  
 -----  
 ACACAAGAGATATTCAGACCTGCAGGAGGAGATATGAGGGACAATTGGAGAAGTGAATTATATAAAATATAAAG  
 TGGTAGAAATTAAGCCATTA---GGAATAGCACCCACTGCTGCAAAAAGGAGAGTGGTG-----  
 -----GGGAGAGAGAAAAAGAGCA---GCA-----CTAGGAGCT-----  
 ATGTTCCCTTGGGTTCTTGGGAGCA---GCAGGAAGCACTATG---GGCGCAGCATCA---

ATAACGCTGACGGTACAG---GCCAGACAA---TTATTG---TCTGGTATAGTGCAACAGCAAAGC---  
 AATTTG---CTGAGA---GCTATAGAGGCGCAACAACATATGTTGCAACTCACAGTCTGGGGCATT  
 >MF373198  
 TTCTATTGCAATACATCAGGCCTGTTTAAATGAGACAAATGGTACATATGCTACA-----  
 -----  
 -----  
 AATGGTACAACCATCACACTTCCATGCAGAATAAAGCAAATTATAAGGATGTGGCAGGGGGTAGGACAAGCAA  
 TGTATGCCCCCTCCCATTCAGAGGAGTAATATCATGTAATTCAAAT---  
 ATCACAGGACTGCTACTAACCCGTGATGGAGGTAGTGGTCACAAT-----  
 -----  
 -----  
 AATAACACAGAGATATTCAGACCTGAAGGAGGAGATATGAGGGATAATTGGAGAAGTGAATTATATAAAATACA  
 AAGTGGTAGAAATTAAGCCATTA---GGGATAGCACCCACTAAGGCAAGAAGGATGGTGGTG-----  
 -----CAGAGAGAAAAAAGAGCA---GCA-----CTGGGAGCT-----  
 ---GTATTCCTTGGGTTCTTGGGAGCA---GCTGGAAGCACTATG---GGCGCAGCATCA---  
 ATAACGCTGACGGTACAG---GCCAGACAA---TTATTG---TCTGGCATAGTGCAACAGCAAAGC---  
 AATTTG---CTGAAG---GCTATAGAGGCGCATCAGCATATGCTGCAACTCACAGTTTGGGGCATT  
 >HM215318  
 TTTTATTGCAATACATCCAACCTGTTTAAATAGTACATACATAAACAGCACA-----  
 -----  
 -----  
 AACATCACATACATCACAATCCCATGCAGAATAAAACAAATAATAAACATGTGGCAGAGGGTAGGACAAGCAA  
 TGTATGCCCCCTCCCATTCAGGAAACATAACATGTAACTCAAGT---  
 ATCACAGGACTAATATTGACACGGGATGGAGGAAAAAACAACACA-----  
 -----  
 -----  
 AATGAAACATTTCAGACCTGGAGGAGGAGATATGAGGGACAATTGGAGAAGTGAATTATATAAAATATAAGGTGG  
 TAGAAATTCACCATTG---GGAATAGCACCCACCAAGGCAAAAAGGAGAGTGGTG-----  
 -----GAGAGAGAAAAAAGAGCA---GTTGGA---CTAGGAGCT-----  
 TTGTTCTTGGGTTCTTGGGAGCA---GCAGGAAGCACTATG---GGCGCGGCGGCA---  
 ATAACGCTGACGGCACAG---GCCAGACAA---GTGTTG---TCTGGCATAGTGCAACAGCAGAGC---  
 AATTTG---CTGAGA---GCTATAGAGGCGCAACAGCATATGTTGCAACTCACGGTCTGGGGCATT  
 >KX907415  
 TTCTATTGCAATACATCAGGCTTGTTTAAATGAAACAGGCTTGTTTAAATGAAACACACAATAGTACC-----  
 -----  
 -----  
 ATGAATGATAACATCACACTCCCATGCAGAATAAAACAAATTATAAACATGTGGCAGGAGGTAGGACGAGCAA  
 TCTATGCCCCCTCCCATTCAGGAAACATAGCCTGTAACTCAAAT---  
 ATCACAGGACTACTATTGACACGTGATGGAGGCAGCATTAATGGAAGCGAG-----  
 -----  
 ----  
 GATGAGAATAACACAGAAATATTCAGACCTGGAGGAGGAAACATGAAGGACAATTGGAGAAGTGAATTATATA  
 AATATAAAGTGGTAGAAATTAAGCCATTG---GGAATAGCACCCACTGCGGCAAAAAGGAGAGTGGTG-----  
 -----GAGAGAGAAAAGAGAGCA---GTGGGA---  
 CTAGGAGCT-----GTGTTCTTGGGTTCTTGGGAGCA---GCTGGAAGCACTATG---  
 GGCGCGGCGTCA---ATAACGCTGACGGCACAA---GCCAGACAA---GTGTTG---  
 TCTGGTATAGTGCAACAGCAAAGC---AATTTG---CTGAGG---  
 GCTATAGAGGCGCAACAGCATATGTTGCAACTCACGGTTTGGGGCATC  
 >KX907398  
 TTCTATTGCAATACATCAAAGCTGTTTGATAGTAGTCTGTTTAAATAGTACTGAAAGTAATAGTACTGGTAAT-  
 -----  
 -----  
 AATTATACTGACATCAAACCTCCCATGCAGAATAAAACAAATTATAAACATGTGGCAGGGGGTAGGACGAGCAA  
 TATATGCCCCCTCCCATTCAGGAAACATAACATGTAAATCAAAT---  
 ATCACAGGAATATTATTAACACGTGATGGAGGCTATGACAACGCTACA-----  
 -----  
 -----  
 AATGGCACGGAGACCTTCAGACCTGGAGGAGGAGATATGAGGGACAATTGGAGAAGTGAATTATATAAAATATA  
 AAGTGGTAGAAATTAAGCCATTG---GGAATAGCACCCACTAAGGCAAAAAGGAGAGTGGTG-----  
 -----GAGAGAGAAAAAAGAGCA---GCGGGA---ATAGGAGCT-----

---GTGTTCCCTTGGGTTCTTGGGAGCT---GCAGGAAGCACTATG---GGCGCGGCGTCA---  
 ATAACGCTGACGGTACAA---GCCAGACAA---TTGTTG---TCTGGTATAGTGCAACAGCAAAGT---  
 AATTTG---CTGAAG---GCTATAGAGGCGCAACAACATCTGTTGCAACTCACGGTTTGGGGCATT  
 >KX907425  
 TTCTATTGCAATACAGTAGGCCTGTTTAATAAAACATACAATAGTACC-----  
 -----  
 -----  
 ATGAATGGTACCATCACACTCCCATGCAGAATAAAACAAATTATAAACATGTGGCAGGAGGTAGGACGAGCAA  
 TCTATGCCCCCTCCATTGAAGGAAACATAACATGTAACCTCAAGT---  
 ATCACAGGACTACTATTGACACGTGATGGAGGCAACACTAATGAA-----  
 -----  
 -----  
 AGTGAAGAGATATTCAGACCTGGAGGAGGAAACATGAGGGACAATTGGAGAAGTGAATTATATAAATATAAAAG  
 TGGTAGAAATTAAGCCATTG---GGAGTAGCACCCACTGAGGCAAAAAGGAGAGTGGTG-----  
 -----GAGAGAGAAAAAGAGAGCA---GTAGGA---CTAGGAGCT-----  
 GTGTTCCCTTGGGTTCTTGGGAGCA---GCTGGAAGCACTATG---GGCGCGGCGTCA---  
 ATAACGCTGACGGCACAA---GCCAGACAA---TTGTTG---TCTGGTATAGTGCAACAGCAAAGC---  
 AATTTG---CTGAGG---GCTATAGAGGCGCAACAACATATGTTGCAACTCACGGTTTGGGGCATT  
 >KX907428  
 TTCTATTGCAACACATCAGGCCTGTTTAATAAAACATACAATGATACC-----  
 -----  
 -----  
 ATGAATAGTACCATCACACTCCCATGTAGGATAAAACAAATTGTAAACATGTGGCAGGAGGTAGGACGAGCAA  
 TCTATGCCCCCTCCTATTGCAGGAAACATAACATGTAACCTCAAAT---  
 ATCACAGGACTACTACTGACACGTGATGGAGGCACGAATGTGACA-----  
 -----  
 -----  
 AATGGCACACAGATTTTCAGACCTGGGGGAGGAGACATGAGGGACAATTGGAGAAGTGAATTATATAAATATA  
 AAGTGGTAGAAATTAACCATTG---GGAATAGCACCCACTACGGCACAAAGGAGAGTGGTG-----  
 -----GCGAGAGAAAAAGAGCA---GTGGGA---CTAGGAGCT-----  
 ---GTGTTCCCTTGGGTTCTTGGGAGCA---GCTGGAAGCACTATG---GGCGCGGCGTCA---  
 ATAACGCTGACGGCACAA---GCCAGACAA---TTGCTG---TCTGGTATAGTGCAACAGCAAAGC---  
 AATTTG---CTGAGA---GCTATAGAGGCGCAACAACATATGTTGCAACTCACGGTTTGGGGCATC  
 >HQ615976  
 TTCTATTGCAATACATCAAAAAATATTTAATAGTATATACCAGGAGAATTACACTAACAGTGCTAATAGTACAG  
 AA-----  
 -----  
 -----  
 AACACGGGCACACTCACACTCCCATGCAGAATAAAACAAATTGTAAACATGTGGCAGGGGGTAGGACGGGCAG  
 TGTATGCCCCCTCCATTCAAGGGAACATAACATGTAAATCAAAT---  
 ATCACAGGACTGCTACTGACACGTGATGGAGGAATAAATGAGACA-----  
 -----  
 -----  
 GATGAAACATTTCAGGCCTATAGGGGGAAATATGAGGGACAATTGGAGAAGTGAATTATATAAATATAAGGTGG  
 TAGAAATTAACCATTA---GGAATAGCACCCACTAAGGCAAAAAGGAGAGTGGTG-----  
 -----GAGAGAGAAAAAGAGCG---GTAGGA---ATAGGAGCT-----  
 GTGCTCTTTGGGTTCTTGGGAGCA---GCAGGAAGCACTATG---GGCGCAGCGTCA---  
 ATAACGCTGACGGTACAA---GCCAGACAA---TTATTG---TCTGGTATAGTGCAACAGCAAAC---  
 AATTTG---CTGAGG---GCTATAGAGGCGCAACAGCATATGTTGCAACTCACGGTCTGGGGCATT  
 >KF526226  
 TTCTATTGCCATACATCAACCCTGTTTAATAATAATATTACAAATTCA-----  
 -----  
 -----  
 ACCAATTCAACCATCACACTCCCATGCAGGATAAAACAAATTATAAACATGTGGCAGGAGGTAGGACGAGCAA  
 TGTATGCCCCGCCCATTCAAGGAATAATAAGATGTAGATCAAAT---  
 ATCACAGGACTACTACTAACACGTGATGGAGGCACAGGGACAAATGAC-----  
 -----  
 -----  
 ACAAACACAACCGAGACATTTAGACCTGGAGGAGGAGATATGAGGGACAATTGGAGAAGTGAATTATATAAAT  
 ATAAAGTGGTAGAAATTAACCATTA---GGAATAGCACCCACTAAGGCAAAAAGGAGAGTGGTG-----  
 -----GAGAGAGAAAAAGAGCA---GCA-----CTAGGAGCT---

-----TTGTTTCCTTGGGTTCTTGGGAGCA---GCAGGAAGCACTATG---GGCGCAGCATCA---  
 ATAACGCTGACGGTACAG---GCCAGACAA---TTATTG---TCGGGTATAGTGCAACAGCAAAGC---  
 AATTTG---CTGAGA---GCTATAGAAGCGCAACAGCATATGTTGCAACTCACGGTCTGGGGCATT  
 >AY838567  
 TTTTATTGCAATACATCAAGCCTGTTTAAATAGTACACACAATACATCAAGCCTGTTTAAATGGTGCATACAATA  
 ATGAA-----  
 -----  
 GGAACAAATCAAACCATCACACTCCAATGCAGAATAAAACAAATTATAAACATGTGGCAGGAGGTGGGACGAG  
 CAATGTATGCCCCCTCCATTGAAGGAAACATACCATGTAAATCAAAT---  
 ATCACAGGACTACTATTGACACGTGATGGAGGAACAGAAGAAGAA-----  
 -----  
 -----  
 AATGATAAAGAGACATTGAGACCTGGAGGAGGAGATATGAGGGACAATTGGAGAAAGTGAATTATATAAAATATA  
 AAGTGGTAGAAATTAAGCCATTA---GGAATAGCACCCACTACTGCAAAAAGGAGAGTGGTG-----  
 -----CAGAGAGAGAAAAAGAGCA---GTGGGC---ATAGGAGCT-----  
 ---GTGTTCCCTTGGGTTCTTGGGAGCA---GCAGGAAGCACTATG---GGCGCGGCGTCA---  
 ATAACGCTGACGGTACAG---GCCAGACAA---TTATTG---TCTGGTATAGTGCAACAGCAAAGC---  
 AATTTG---CTGAGG---GCTATAGAGGCGCAACAGCATATGTTGCAACTCACGGTCTGGGGCATT  
 >AY463229  
 TTCTATTGCTATACATCAGAATTGTTTAAATAACACATACATACCTACATACATGAATAATAAAACAGAT---  
 -----  
 -----  
 GATAATTCTACCATCACACTTCCATGCAGAATAAAACAAATTATAAACATGTGGCAGGAGGTAGGACGAGCAA  
 TGTATGCCCCCTCCATTGACAGGAAACATAACATGTAACTCAAGT---  
 ATCACAGGACTACTATTGACACGTGATGGAGGCAATAATAATAAT-----  
 -----  
 -----  
 GATACTGAAATATTCAGACCTGGAGGAGGAAATATGAAGGATAATTGGAGAAAGTGAATTATATAAAATATAAAG  
 TGGTAGAAATTCAGCCACTG---GGAGTAGCACCCACTGGGGCAAAAAGGAGAGTGGTG-----  
 -----GAGAGAGAAAAAAGAGCA---GTGGGA---ATAGGAGCT-----  
 GTGTTCCCTTGGGTTCTTGGGAGCA---GCAGGAAGCACTATG---GGCGCGGCGTCA---  
 ATAACGCTGACGGTACAG---GCCAGACAA---CTGCTG---TCTGGTATAGTGCAACAGCAAAGC---  
 AATTTG---CTGAGA---GCTATAGAGGCGCAACAACACGTGTTGCAACTCACAGTCTGGGGCATT  
 >JX845587  
 TTCTATTGCAATACAACACAACCTGTTTTCAAACAAAAGTGTT-----  
 -----  
 -----  
 CCAACCAACAAAACAATCATACTCCTATGCAGGATAAAACAAATTATAAACATGTGGCAGGGGGTAGGACGAG  
 CAATGTATGCCCCCTCCATTGACAGGAAACATAACATGTAACTCAAAT---  
 ATCACAGGACTACTATTGACACGTGATGGAGGAAAAAACAACGCAACAGGG-----  
 -----  
 -----  
 GGCAACGAAACAGAGATATTCAGACCTGGAGGAGGAAATATGAAGGACAATTGGAGAAAGTGAATTATACAAAT  
 ATAAAGTGGTAGAAATTAAGCCATTA---GGAGTAGCACCCACTAAGGCACAAAAGGAGAGTGGTG-----  
 -----CAGAGAGAAAAAAGAGCA---GTGGGA---ATAGGAGCT---  
 -----GTGCTCCTTGGGTTCTTGGGAGCA---GCAGGAAGCACTATG---GGCGCGGCGTCA---  
 ATAACGCTGACGGTACAG---GCCAGACAG---CTGTTG---TCTGGTATAGTGACAGCAAAGC---  
 AATTTG---CTGAGA---GCTATAGAGGCGCAACATCATATGTTGCAACTCACGGTCTGGGGCATT  
 >AY463235  
 TTCTATTGCAATACAACGCAACTGTTTAAATAGTACATACTATAATAGTACTAATAGTACAGAGGAGACA---  
 -----  
 -----  
 GGAAATTCAAACATCACACTTCAATGCAGAATAAAACAAATTATAAACATGTGGCAAGGGGTAGGACAAGCAA  
 TGTATGCCCCCTCCATTCAAGGAATAATAACATGTAGATCAAAC---  
 ATCACAGGAATACTACTGGCACGTGATGGAGGAGCCTCAAATAGCACAGAA-----  
 -----  
 -----  
 AACTCAACTAACACAGAGATATTCAGGCCTGGAGGAGGAGATATGAGGGACAATTGGAGAAATGAATTATATA  
 AATATAAAGTGGTAGAAGTTAAACCATTA---GGAGTAGCACCTACTAGAGCAAAAAGGAGAGTGGTG-----  
 -----GAGAGAGAAAAAAGAGCA---GTGGGA---

ATAGGAGCT-----GTGTTCTTGGGTTCTTGGGAGCC---GCAGGGAGCACTATG---  
 GGCGCAGCATCA---ATAACGCTGACGGTACAG---GCCAGACAA---TTATTG---  
 TCGGGTATAGTGCAACAGCAAAGC---AATTTG---CTGAGG---  
 GCTATAGAGGCGCAACAGCATATGTTGCAACTCACGGTCTGGGGCATT  
 >DQ275648  
 TTCTATTGCAATACATCAGCACTGTTTAATAGTAATATTACAAAAGATAATGATACAAAAGATAAT-----  
 -----  
 -----  
 GATACAGGAGATATTACACTTCAATGCAAAATAAAACAAATTATAAACATGTGGCAGGAGGTAGGACGAGCAA  
 TGTATGCCCCCTCCCATTTGAAGGAAGCATAACATGTGAATCAATT---  
 ATCACAGGACTACTACTAGTCCGTGATGGAGGCACAAATACTACA-----  
 -----  
 -----  
 AAAGAAATATTTCAGACCTGGAGGAGGAGATATGAAGGACAATTGGAGAAGTGAATTATATAAATATAAAGTGA  
 TAGAAATTAAACCATTG---GGAATAGCACCCACTGGAGCAAAAAGGAGAGTGGTG-----  
 -----GAGAGAGAAAAGAGAGCA---GTAGGA---ATAGGAGCT-----  
 GTGATCCTTGGGTTCTTGGGAGCA---GCAGGAAGCACTATG---GGCGCGGCGTCA---  
 ATAACGCTGACGGTACAG---GCCAGACAA---CTGTTG---TCCGGTATAGTGCAACAGCAAAGT---  
 AATTTG---CTGAGG---GCTATAGAGGCGCAACAGCATATGTTGCAACTCACGGTCTGGGGCATT  
 >DQ351220  
 TTCTATTGTAATACATCAGGACTGTTTAATAATACAGAAAAC-----  
 -----  
 -----  
 AACACCATCACACTTCAATGCAGAATAAAACAAATTATAATCATGTGGCAGGGGGTAGGGCGAGCAATATATG  
 CCCCTCCCATTTGAAGGAAACATAAACTGTAATTCAAAT---  
 ATCACAGGATTACTATTGCTACGTGACGGAGGAATAACGAATACA-----  
 -----  
 -----  
 ACAGAGGAGATATTTCAGACCTGGAGGAGGAGATATGAGAGATAACTGGAGAAGTGAATTATATAAATATAAAG  
 TGGTAAAAATTGAGCCATTA---GGAATAGCACCCACTGGGGCAAAAAGGAGAGTGGTG-----  
 -----GAGAGAGAAAAAAGAGCA---GTGGGA---ATAGGAGCT-----  
 GTGTTCTTGGGTTCTTGGGAGCA---GCAGGAAGCACTATG---GGCGCGGCGTCA---  
 ATGACGCTGACGGTACAG---GCCAGACAA---CTGTTG---TCTGGTATAGTGCAAGCAGCAAAGC---  
 AATTTG---CTGAGG---GCTATAGAGGCGCAACAGCATATGTTGCAACTCACAGTCTGGGGCATT  
 >DQ369995  
 TTCTATTGCGACACATCACAACTATTTAATAAGACATACAATGTTACAGATGATTCAAACACC-----  
 -----  
 -----  
 ACAGACACAAACAACACAATTCAATGCAGAATAAAGCAGATTATAAACATGTGGCAGGAAGTAGGACGAGCAA  
 TGTATGCCCCCTCCCATCGCAGGAAGCATAACATGTACCTCAAAAT---  
 ATTACAGGACTACTATTGACACGTGATGGAGGGGGAGGCACAAATAGCACA-----  
 -----  
 -----  
 AGTAATACGGAAGAGATATTTCAGACCCGGAGGAGGAAATATGAAGGATAATTGGAGAAGTGAATTATATAAAT  
 ATAAAGTGGTAGAAGTTCAGCCATTA---GGAATAGCTCCCACTAAAGCAAAAAGGAGAGTGGTG-----  
 -----GAGAGAGAAAAAAGAGCA---ATAGGA---ATAGGAGCT---  
 -----GTGTTCTTGGGTTCTTGGGAGCA---GCAGGAAGCACTATG---GGCGCAGCGTCA---  
 ATAACGCTGACGGTACAG---GCCAGACAA---CTATTG---TCTGGTATAGTGCAACAGCAAAGC---  
 AACTTG---CTGAGG---GCTATAGAGGCGCAACAGCATATGTTGCAACTCACGGTCTGGGGCATC  
 >DQ351223  
 TTCTATTGCAATACAACAGGACTGTTTGCTAGTAAAAATGATTCAAACACAACCATCAGT-----  
 -----  
 -----  
 ACAAACGCAACCATCACACTCCCATGTAGAATAAAACAAATTATAAACATGTGGCAGGGGGTAGGACGAGCGA  
 TGTATGCCCCCTCCCATTCAGAGGAACATAACATGTAGATCAAAAT---  
 ATCACAGGATTGTTATTGCTACGTGATGGGGGAGACAATCAGACC-----  
 -----  
 -----  
 ACAGAGACATTTCAGGCCTGGAGGAGGAAATATGAAGGACAACCTGGAGAAGTGAATTATATAAATATAAAGTAG  
 TAGAAATTAAAGCCATTG---GGAATAGCACCCACGAAGGCAAAAAGGAGAGTGGTG-----

-----GAGAGAGAAAAAGAGCA---GCGGGA---ATAGGAGCG-----  
ATGATCTTTGGGTTCTTGGGAGCA---GCAGGAAGCACTATG---GGCGCGGCGTCA---  
ATAACGCTGACGGTACAG---GCCAGACAG---CTGTTG---TCTGGTATAGTGCAGCAGCAAAGC---  
AATTTG---CTGAGA---GCTATAGAGGCGCAACAGCATATGTTGCAACTCACGGTCTGGGGCATT  
>DQ351227  
TTCTATTGCAATACATCAGGACTGTTTAATGGTATATACAATCCTAATGGTACAGAGAGTAAT-----  
-----  
-----  
TCAAGCTCAAGCATCACACTTCAATGCAGAATAAAACAAATTATAAACATGTGGCAGGAGATAGGACGAGCAA  
TGTATGCCCCCTCCCATTTGAAGGAAACATAACATGTAAATCAAAT---  
ATCACAGGAATATTATTGACACGTGATGGAGGAAACGATAGTAGT-----  
-----  
-----  
ACAGAAGAAACATTTCAGACCTGGGGGAGGAGATATGAGGGACAATTGGAGAAGTGAATTATACAAATATAAAG  
TGGTAGAAATTAACCATTG---GGAATAGCACCCACTGGGGCAAAAAGGAGAGTGGTG-----  
-----GAGAGAGAAAAAAGAGCA---GTGGGA---ATAGGAGCT-----  
GTGTTCTTGGGTTCTTGGGAGCA---GCAGGAAGCACTATG---GGCGCGGCGTCA---  
ATAACGCTGACGGTACAG---GCCAGACAA---CTGTTG---TCTGGTATAGTGCAACAGCAAAAC---  
AATTTG---CTGAGG---GCTATAGAGGCGCAACAGCATATGTTGCAACTCACAGTCTGGGGCATT  
>DQ396388  
TTCTATTGCAATACATCAGGACTGTTTAATAGTACATACATGCCTAATGGTACAGAAAGCAATTCAACCATC-  
-----  
-----  
ACAAAGTCAACCATCACACTCCTATGCAGAATAAAACAAATTATAAACATGTGGCAGCAAGTAGGAAGAGCAA  
TGTATGCCCCCTCCCATTTGCAGGAAACATAACATGTACATCAAAC---  
ATCACAGGAATATTATTAGTACGTGATGGAGGCTACAGTAACAAT-----  
-----  
-----  
ACTACAGAGATATTTCAGACCTGGAGGAGGAAATATGAAGGACAATTGGAGAAGTGAATTATATAAATACAAAG  
TGGTAGAAGTTAAGCCATTG---GGAATAGCACCCACTAAGGCAAAAAGGAGAGTGGTG-----  
-----GAGAGAGAAAAAAGAGCA---GCA-----CTAGGAGCT-----  
ATGTTCTTGGGTTCTTGGGAGCA---GCAGGAAGCACTATG---GGCGCGGCGTCA---  
ATAACGCTGACGGTACAG---GCCAGACAA---TTGTTG---TCTGGTATAGTGCAACAGCAAAGC---  
AATTTG---CTGAGG---GCTATAGAGGCGCAACAGCATATGTTGCAACTCACGGTCTGGGGCATT  
>DQ351228  
TTTTATTGCAACACATCAAACTATTTAATGGTACATACGAGAATAGTACAGACAAGGAGTCAAACAGC---  
-----  
-----  
ACAAATTCAATCATCACAATTCATGCAGAATAAAACAAATTATAAACATGTGGCAGGAGGTGGGACGAGCAA  
TGTATAACCCTCCCATTTGCAGGAAACATAACATGTAAATCAAAT---  
ATCACAGGACTACTATTAGTACGTGATGGA---GACAACAATAGT-----  
-----  
-----  
ACAGAAACATTTCAGACCTCAAGGAGGAAATATGAAGGACAATTGGAGGAGTGAATTATATAAATATAAAGTGG  
TGGAAATTAAGCCATTG---GGAATAGCACCCACTGAAGCAAAAAGGAGAGTGGTG-----  
-----GAGAGAGAAAAAAGAGCA---GTAGGA---ATAGGAGCG-----  
GTACTCCTTGGGTTCTTGGGAGCA---GCAGGAAGCACTATG---GGCGCGGCGTCA---  
ATAACGCTGACGGTACAG---GCCAGACAA---CTGTTG---TCTGGTATAGTGCAACAGCAAAGC---  
AATTTG---CTGAGA---GCTATAGAGGCGCAACAGCATATGTTGCAACTCACAGTCTGGGGCATT  
>DQ093592  
TTCTATTGCAATACAACAAACCTGTTTATTAATACTACTGCTAAT-----  
-----  
-----  
AACAGTGATCACATCACACTCCCATGCAAAATAAAACAAATTATAAACATGTGGCAGGAGGTAGGACGAGCAA  
TGTATGCCCCCTCCCATTTGCAGGAAACATAATATGTAACCTCAAGT---  
ATCACAGGACTACTATTGCTACGTGATGGAGGATACAATGTTAGC-----  
-----  
-----  
AATACCACAGAGACATTTCAGACCTGGAGGAGGAAATATGAAAGACAATTGGAGAAGTGAATTATATAAGTATA  
AAGTGGTAGAAATTAAGCCATTG---GGAATAGCTCCCACTGGAGCAAAAAGGAGAGTGGTG-----

-----GAGAGAGAAAAAGAGCA---GTGGGA---ATAGGAGCT-----  
---GTGTTCTTGGGTTCTTGGGAGCA---GCAGGAAGCACTATG---GGCGTGGCGTCA---  
ATAACGCTGACGGTACAG---GCCAGACAA---CTGTTG---TCTGGTATAGTGCAACAGCAAAGC---  
AATTTG---CTAAGA---GCTATAGAGGCGCAACAGCATATGTTGCAACTCACAGTCTGGGGCATT  
>DQ275652  
TTCTACTGCAATACATCTAAACTGTTTAATAATATATACAATCCTACATATGTGAATAATGGGTCAAAA-----  
-----  
-----  
ATTAATGAAACCATCAGACTTCAATGCAGAATAAAACAAATTATAAACATGTGGCAGGGGGTAGGACAAGCAA  
TGTACGCTCCTCCCATTGAAGGAAACATAACATGTAAATCAAAT---  
ATCACAGGACTACTATTGACACGTGATGGAGGAAACACAAACAGC-----  
-----  
-----  
AATGACACAGAGATATTCAGACCTGGAGGAGGAAATATGAAGGACAATTGGAGAAATGAATTATATAAATATA  
AAGTGGTAGAAATTAAGCCATTG---GGAATAGCACCCACTGAGGCACGAAGGAGAGTGGTG-----  
-----GAGAGAGAAAAAGAGCA---GTGGGA---ATAGGAGCT-----  
---GTACTCCTTGGGTTCTTGGGAGCA---GCAGGAAGCACTATG---GGCGCGGCGTCA---  
CTAACGCTGACGGTACAG---GCCAGACAA---CTGTTG---TCTGGTATAGTGCAACAGCAAAT---  
AATTTG---CTGAGG---GCTATAGAGGCGCAACAGCATATGTTGCAACTCACGGTCTGGGGCATT  
>DQ275655  
TTCTATTGCAATACAACACAACCTGTTTCAGTTTAATGAAAGTTATTCAAACACAACCT-----  
-----  
-----  
GATTATGAAAACATCACACTCCCCTGCAGAATAAGACAAATTATAAACATGTGGCAGGAGGTAGGACGAGCAA  
TGTATAACCCTCCCATTGCAGGAAATATAACATGTAACTCAAGT---  
ATCACAGGACTACTATTGACACGTGATGGAGGCAAAACAAATGGCACCAACAGC-----  
-----  
-----  
ACAGAAGAGACATCAGAGACATTCAGACCTGGAGGAGGAAATATGAAGGACAATTGGAGAAGTGAATTATATA  
AATATAAAGTGGTAGAAATTAAGCCATTG---GGAATAGCACCCACTAAGGCAAAAAGGAGAGTGGTG-----  
-----GAGAGAGAAAAAGAGCA---GTAGGA---  
ATAGGAGCT-----GTGCTCTTTGGGTTCTTGGGAGCG---GCAGGAAGCACTATG---  
GGCGCAGCGTCA---ATAACGCTGACGGTACAG---GCCAGACAA---CTGTTG---  
TCTGGTATAGTGCAACAGCAAAGC---AATTTG---CTGAGA---  
GCTATAGAGGCGCAACAGCATATGTTGCAACTCACAGTCTGGGGCATT  
>DQ011175  
TTCTATTGCAATACATCAAACTATTTAATAGTACATACAATCCTGACCATAATAGTACAGGAAAT-----  
-----  
-----  
ATCACAGGGGTCATCACAATTCCATGCAGAATAAAACAAATTATAAACATGTGGCAGGAGGTGGGACGAGCTA  
TGTATGCTCCTCCCATTAAGGAAACATAACATGTAACTCAAGT---  
ATCACAGGACTACTATTAAACACGTGATGGAGGCAAGTCAAATGACACAATA-----  
-----  
-----  
GAAAACAAAATGAAACATTTAGACCTCAAGGAGGAAATATGAAGGACAATTGGAGAAGTGAATTATATAAAT  
ATAAGGTGGTACAAATTGAGCCATTG---GGAATAGCACCCACTAAAGCAAAAAGGAGAGTGGTG-----  
-----GAGAGAGAAAAAGAGCA---GTGGGA---ATAGGAGCT---  
-----GTGTTCTTGGGTTCTTGGGAGCA---GCAGGAAGCACTATG---GGCGCGGCGTCA---  
ATGGCGCTGACGGTACAG---GCCAGACAA---GTGCTG---TCTGGTATAGTGCAACAGCAAAGC---  
AATTTG---CTGAGA---GCTATAGAGGCGCAACAGCATATGTTGCAGCTCACGGTCTGGGGCATT  
>AY901971  
TTCTATTGCAATACATCAAGACTATTTAATAATACATTTAATTATACAGACACAACAGAACTTAACAGCACAG  
ACAGC-----  
-----ACA---  
GACTCAAACGAGACCATCACAATTCCATGCAGAATAAAACAAATTATAAACATGTGGCAGCAGGTAGGACGAG  
CAATGTATGCTCCTCCCATTCAGGGAACATAACATGTACATCAAAT---  
ATCACAGGATTACTATTGGTACGTGATGGAGGCAAGGATAATACA-----  
-----  
-----  
GGTACAAATGAGACATTCAGACCTCAAGGAGGAAATATGAAGGACAATTGGAGAAGTGAATTATACAAATATA

AAGTGGTAGAAATTAAACCATTG---GGAATAGCACCTACTGGGGCAAAAAGGAGAGTGGTG-----  
-----GAAAGGGAAAAAAGAGCA---GCG-----CTAGGAGCT-----  
---ATGTTCCCTTGGGTTCTTGGGAGCA---GCAGGAAGCACTATG---GGCGCAGCGTCA---  
ATAACGCTGACGGTACAG---GCCAGACAA---CTGTTG---TCTGGTATAGTGCAACAGCAAAAC---  
AATTTG---CTGAGA---GCCATAGAGGCGCAACAGCATATGTTGCAACTCACAGTCTGGGGCATA  
>DQ164106  
TTCTATTGCAATACATCAGGACTATTTAACAGTACATTTAATGATACATACGCACCAAACAACACAGAC----  
-----  
-----  
ACAAACGAGACCATCACAATTCAATGCAGAATAAAACAAATTATAAACATGTGGCAGCAGGTAGGACGAGCAA  
TGTATGCTCCTCCCATTGCAGGGAACATAACATGTAACCTCAAGT---  
ATCACAGGATTACTATTGGTGCGTGATGGAGGCACAAAGACAGATGAT-----  
-----  
-----  
AACACAACAGAGACATTGAGACCTGAAGGAGGAAATATGAGGGACAATTGGAGAAAGTGAATTATACAAATATA  
AAGTAGTAGAAATTAAACCATTG---GGAATAGCACCTACTGAGGCAAAAAGGAGAGTGGTG-----  
-----CAGAGAGAAAAAAGAGCA---GTGGGA---ATAGGAGCT-----  
---GTGTTCCCTTGGGTTCTTGGGAGCA---GCAGGAAGCACTATG---GGCGCGGCGTCA---  
ATAACGCTGACGGTACAG---GCCAGACAA---CTGTTG---TCTGGTATAGTGCAACAGCAAAAC---  
AATTTG---CTGAGA---GCCATAGAGGCGCAACAACATATGTTGCAACTCACGGTCTGGGGCATA  
>DQ093597  
TTCTATTGCAATACATCAAGACTATTTAATAGTACATACTGGGAAGGATCTAATAGTACAGGA-----  
-----  
-----  
GGTGACTCAACCATCACAATTCCATGCAGAATAAAACAAATTATAAACATGTGGCAGGAGGTAGGACGAGCAA  
TGTATGCCCCCTCCCATAGCAGGAAACATAACATGTAACCTCAAGT---  
ATCACAGGATTACTATTAGTACGTGATGGAGGCCTATCCAAAAATAAC-----  
-----  
-----  
ACAAATCAAAATGAAACATTGAGACCTGGAGGAGGAGATATGAAAGACAATTGGAGGAGTGAATTATATAAAT  
ACAAAGTGGTAGAAATTAAGCCATTG---GGAATAGCACCCACTAAAGCAAAAAGGAGAGTGGTG-----  
-----GAGAGAGAAAAAAGAGCA---GTGGGA---ATAGGAGCT---  
-----GTGCTCCTTGGGTTCTTGGGAGCA---GCAGGAAGCACTATG---GGCGCAGCGTCA---  
ATAGCGCTGACGGCACA---GCCAGACAA---GTGTTG---TCTGGTATAGTGCAACAGCAAAGT---  
AATTTG---CTGAGG---GCTATAGAGGCGCAACAGCATATGTTGCAACTCACGGTCTGGGGCATT  
>AY901972  
TTCTATTGCAATACATCACAATTATTTAATAGTACATACTATGATGCATACAATGTTACAGGCAATGTTACAA  
AC-----  
-----  
AATGATAATTCAACCATCACAATTCAATGCAGAATAAGACAATTTATAAACATGTGGCAGAAGGTAGGAAAAG  
CAATGTATGCCCCCTCCCATGACAGGAAACATAACATGTGAATCAAAT---  
ATCACAGGACTACTATTAGTACGGGATGGAGGCCCAAATAACGCA-----  
-----  
-----  
GCAGAAATATTGAGACCTGGAGGAGGCAATATGAAGGACAATTGGAGAAAGTGAATTATATAAATATAAAGTGG  
TGGAATTAAGCCATTG---GGAATAGCACCCACTGAGGCAAAAAGGCGAGTGGTG-----  
-----GAGAGAGAAAAAAGAGCA---GTGGGA---ATAGGAGCT-----  
TTGTTCCCTTGGGTTCTTGGGAGCA---GCAGGAAGCACTATG---GGCGCAGCGTCA---  
CTGACGCTGACGGTACAG---GCCAGACAA---CTGTTG---TCTGGTATAGTGCAACAGCAAAGC---  
AATTTG---CTGCAA---GCTATAGAGGCGCAACAGCATTTGTTGCAACTCACGGTCTGGGGCATT  
>AY772692  
TTCTATTGCAATACAACAAAACCTGTTTAATGAAAATGAAACAAGTAAG-----  
-----  
-----  
GCAAAATGACACAATCATACTCCCATGCAGAATTAAAACAAATCATAAACATGTGGCAGACGGTAGGACGAGCAA  
TGTATGCTCCTCCCATTGAAGGATACATAAATTGTACATCAAAT---  
ATCACAGGAATACTATTGACACGTGATGGAGGAAATAATAAAACAAAT-----  
-----  
-----  
AACACAAAAGAGATATTGAGACCTGCAGGAGGAGATATGAGGAACAATTGGAGAAAGTGAATTATACAAATATA

AAGTAGTAGAAATTCAGCCATTG---GGAATAGCACCCACTACTGCAAAAAGGAGAGTGGTG-----  
-----GAGAGAGAAAAAAGAGCA---GCA-----CTAGGAGCT-----  
---ATATTCCTTGGGTTCTTGGGAGCA---GCAGGAAGCACTATG---GGCGCGGCGGCA---  
ATAACGCTGACGGTACAG---GCCAGACAA---CTGTTG---TCTGGTATAGTGCAACAGCAAAGC---  
AATTTG---CTGAGA---GCTATAGAGGCGCAACAGCATCTGTTGCAACTCACGGTCTGGGGCATT  
>DQ351232  
TTCTATTGCAATACATCAGAGTTGTTTACATACAATTTTACAGGGAGTAGT-----  
-----  
-----  
TCAAGCAAAAACATCACACTTCAATGCAGAATAAAACAATTTATAAACATGTGGCAGGAGGTAGGACGGGCAG  
TGTATGCCCCCTCCCATTTGAAGGGAGCATAACATGTAACCTCAAAT---  
ATCACAGGACTACTATTAACACGTGATGGAGGCGACAATAACACA-----  
-----  
-----  
AGTATAGAGATATTCAGACCTGGAGGAGGAAATATGAAGGACAATTGGAGAAGTGAATTATATAAATACAAAAG  
TAGTAGAAATTAACCATTG---GGAATAGCACCCAACACAGCAAAAAGGAGAGTAGTG-----  
-----GGGAGAGAAAAAGAGAGCA---GTGGGA---ATGGGAGCT-----  
GTGATCTTTGGGTTCTTGGGAGCA---GCAGGAAGCACTATG---GGCGCAGCGTCA---  
GTAACGCTGACGGTACAG---GCCAGACTA---TTGTTG---TCTGGTATAGTGCAACAGCAAAAC---  
AATTTG---CTGAGA---GCTATAGAGGCGCAACAGCATCTGTTGCAACTCACGGTCTGGGGCATT  
>DQ164107  
TTCTATTGCAATACATCGGCACTATTTTCATAGTCCTACATACAATGAGACAAAAGGT-----  
-----  
-----  
AATTCAACAACCATCACACTTCCATGTAGAATAAAACAAATTATAAACATGTGGCAGGGGGTAGGACGAGCTA  
TGTATGCTCCTCCTATTGCAGGAGAAATAACATGTAACCTCAAGC---  
ATCACAGGACTACTATTGACACGTGATGGAGGAGAAGGAGAGAAT-----  
-----  
-----  
CACACAGAGATATTCAGGCCTGGAGGAGGAAATATGAAGGACAATTGGAGAAGTGAATTATATAAATATAAAG  
TGGTAGAAATTAAGCCATTG---GGAGTAGCACCCACTAAGGCGGAAAGGAGAGTGGTG-----  
-----AAAAAAGAAAAAAGAGCA---GTGGGA---ATAGGAGCG-----  
TTGTTCTTGGGATCTTGGGAGCA---GCAGGAAGCACTATG---GGCGCGGCGTCA---  
ATAACGCTGACGGTACAG---GCCAGACAA---CTGTTG---TCGGGTATAGTGCAACAGCAAAAT---  
AATTTG---CTGAGG---GCTATAGATGCGCAACAGCATATGTTGCAACTCACGGTCTGGGGCATT  
>DQ369997  
TTCTATTGTAACACTTCAGAACTGTTTAATAGTACATACAATCCTACATACAATGGGACAAAT-----  
-----  
-----  
AGTACAAACATCACCACAATTCAATGCAGAATAAAACAAATTATAAACATGTGGCAAGGGGTAGGACGAGCAA  
TGTATGCCCCCTCCCATTTGCAGGAAACATAACATGCAAATCAAAA---  
ATCACAGGACTACTATTGACACGTGATGGAGGAAGAAATAATAGT-----  
-----  
-----  
ACAGGGACATTTCAGACCCGGAGGAGGAGATATGAGGGACAATTGGAGAAGTGAATTATATAAATATAAAGTGG  
TAGAAATTAACCATTA---GGAATAGCACCCACTGAGGCAAAACGGAGAGTGGTG-----  
-----GAGAGAGAAAAAAGAGCA---GTGGGA---ATAGGAGCT-----  
GTGTTCTTGGGTTCTTGGGAGCA---GCAGGAAGCACTATG---GGCGCAGCGTCA---  
ATGACGCTGACGGTACAG---GCCAGACAA---TTACTG---TCTGGTATAGTGCAACAGCAGAGC---  
AATTTG---CTGAGA---GCTATAGAGGCGCAACAGCATATGTTGCAACTCACGGTCTGGGGCATT  
>DQ093600  
TTCTATTGCAATACAACAAAACCTGTTTAATGAAAGTGAAACACAGTTTGCGGCAAAACAACAGT-----  
-----  
-----  
GCCAATAGTAACATCACACTCCCATGCAAGATAAAACAAATTATAAACATGTGGCAGCAGGTGGGACGAGCAA  
TGTATGCCCCCTCCTGTTCAAGGAAACATAATATGTAACCTCTAGT---  
ATCACAGGACTACTATTGACACGTGATGGAGGAGTTAACAATACT-----  
-----  
-----  
AATGAGACATTTCAGACCTGGAGGAGGAAATATGAAAGACAATTGGAGAAATGAATTATATAAATATAAAGTGG

TAGAAATTAAGCCATTA---GGAATAGCACCCACTAGGGCAAAAAGGAGAGTGTTG-----  
 -----GAGAGAGAAAAAGAGCA---GTGGGA---CTAGGAGCT-----  
 GTGATCTTTGGGTTCTTGGGAGCA---GCAGGAAGCACTATG---GGCGCGGCGTCA---  
 ATAACGCTGACGGTACAG---GCCAAACAA---CTGTTG---TCTGGTATAGTGCAACAGCAAAGC---  
 AATTTG---CTGAGA---GCTATAGAGGCGCAACAGCATATGTTGCAACTCACGGTCTGGGGCATT  
 >DQ011166  
 TTCTATTGTAATACAACAGATCTGTTTAATAGTACATTTAATAGTGAATACAATAGTACAGACAGGCATAAT-  
 -----  
 -----  
 AATAATACCAATATCACACTCCAATGCAGGATAAAAACAAGTGATAAACATGTGGCAGCAGGTAGGACGAGCAA  
 TGTATGCTCCTCCCATTGCAGGAAACATAACATGTATCTCAAAT---  
 ATCACAGGATTACTATTGGTGCGTGATGGAGGAGGAAAAAATAACACA-----  
 -----  
 -----  
 AATCAAACAGAGGAGATATTCAGACCTGGAGGAGGAGATATGAGGGACAATTGGAGAAGTGAATTATACAAAT  
 ATAAGGTGGTAGAACTCAAACCATTG---GGAATAGCACCTACTGAGGCAAAGAGGAGAGTGTTG-----  
 -----GAGAGAGAAAAAGAGCA---GTGGGA---ATAGGAGCT---  
 -----GTGTTCTTGGGTTCTTGAGTGCA---GCAGGAAGCACTATG---GGCGCGGCGTCA---  
 ATGACGCTGACGGTACAG---GCCAGACAA---TTGTTG---TCTGGTATAGTGCAACAGCAAAAC---  
 AATTTG---CTGAAG---GCCATAGAGGCGCAACAACATCTGTTGCAACTCACGGTCTGGGGCATT  
 >DQ011167  
 TTCTATTGCAATACATCAGGACTGTTTAATAAGAGTAATACAGACATGACTAATAAAACAGAA-----  
 -----  
 -----  
 GATAATTCAACCATCACACTCCCATGTAGAATAAAACAGATTATAAACATGTGGCAGAACGTAGGACGAGCAA  
 TATATGCCCCCTCCCGTTCAAGGAAACATAACATGTAACCTCAAGT---  
 ATCACAGGACTACTATTGACACGTGATGGAGGTAACGGAAATGACACT-----  
 -----  
 -----  
 AATGGCACAGAGATATTCAGACCTGGAGGAGGAGATATGAGGGACAATTGGAGAAGTGAATTATACAAATATA  
 AAGTGGTAGAAATTAAGCCATTG---GGAATAGCACCCACTAAGGCAAAAAGGAGAGTGTTG-----  
 -----GAGAGAGAAAAAGAGCA---GTGGGA---ATAGGAGCT-----  
 ---GTGTTCTTGGGTTCTTGGGAGCA---GCAGGAAGCACTATG---GGCGCAGCATCA---  
 ATAACGCTGACGGTACAG---GCCAGACAA---TTGTTG---TCTGGAATAGTGCAACAGCAAAGC---  
 AATTTG---CTGAGG---GCTATAGAGGCGCAACAGCATATGTTGCAACTCACGGTCTGGGGCATT  
 >DQ093590  
 TTCTATTGTAATACATCAAACTGTTTAATAGTACATACAATCCTAATAATACAGAAAGTAAT-----  
 -----  
 -----  
 TCAAGCGCAGTAATCACACTCCCATGCAAGATAAAGCAAATTATAAACATGTGGCAGCAGGTAGGGCGAGCAA  
 TGTATGCTCCTCCCATTGCAGGAAACATAACATGTAACCTCAAAT---  
 ATCACAGGATTACTACTGGTGCGTGATGGGGGAACAATTGGCAATGGC-----  
 -----  
 -----  
 ACAAATAACGAGACATTTCAGACCTGGAGGAGGAGATATGAGGGACAATTGGAGAAGTGAATTATACAAATATA  
 AAGTGGTAGAAGTTAAACCATTG---GGAATAGCACCTACTCAGGCAAAAAGGAGAGTGTTG-----  
 -----GAGAGAGAAAAAGAGCA---GTGGGA---CTAGGAGCT-----  
 ---GTGTTCTTGGGTTCTTGGGAGCA---GCAGGAAGTACTATG---GGCGCGGCGTCA---  
 ATAACGCTGACGGTACAG---GCCAGACAA---CTGTTG---TCTGGCATAGTGCAACAGCAAAGC---  
 AATTTG---CTGAGG---GCCATAGAGGCGCAACAGCATATGTTGCAACTCACGGTCTGGGGCATT  
 >DQ011178  
 TTCTATTGCAACACATCAGGCCTGTTTAATACTACAGACCTGTTTAATAATACAGACCTGTCTAATAGTACAG  
 GA-----  
 -----  
 -----  
 AGTAATGAAAACATCACGCTTCCATGCAGAATAAAACAATTTGTGAATATGTGGCAGGAGGTAGGGCGAGCAA  
 TGTATGCCCCCTCCCATTCAAGGAATCATAAATTGTATATCAAAT---  
 ATCACAGGAATACTATTGCTACGTGATGGAGGAAACACGAGTGCTAAT-----  
 -----  
 -----  
 GGAACATTAAACAGAGACATTTCAGACCTGGAGGAGGAAATATGAAGGACAATTGGAGAAGTGAATTATATAAAT

ATAAGGTGGTAGAAATTAGGCCATTA---GGAGTAGCACCCACCAAGGCAAAAAGGAGAGTGGTG-----  
 -----GAGAGAGAAAAAAGAGCA---GTGGGA---ATAGGAGCT---  
 -----GTGCTCTTTGGGTTCTTGGGAGCA---GCAGGAAGCACTATG---GGCGCGCGTCA---  
 ATAACGCTGACGGTACAG---GCCAGACAA---CTGCTG---TCTGGTATAGTGCAACAGCAAAGC---  
 AATTTG---CTGAGG---GCTATAGAGGCGCAACAGCATATGTTGCAACTCACGGTCTGGGGCATT  
 >DQ056405  
 TTCTATTGCAATACATCACAGTTGTTTAATACATCATATGTGTTTAATAATACTGCTAATAATACAGAG----  
 -----  
 -----  
 GCAAAATCAAAACATCACACTGCCATGCAGAATAAAACAAATTATAAACATGTGGCAGGAGGTGGGACGAGCAA  
 TATATGCCCCCTCCCATTCGAGGAAAAATAACATGTAAATCAAAT---  
 ATCACAGGGTTACTATTGACACGTGATGGAGGAAATTCAAACGATACT-----  
 -----  
 -----  
 AATAACACAGAGATATTCAGACCTGCAGGAGGAGATATGAGGGACAATTGGAGAAAGTGAACCTATATAAATATA  
 AAGTGGTAGAAATTAAGCCGCTA---GGAGTAGCACCCACAGAGGCAAAAAGGGGAGTGGTG-----  
 -----GAGAGAGAAAAAAGAGCA---GTAGGA---ATAGGAGCT-----  
 ---GTGTTCCCTGGGTTCTTGGGAGCA---GCAGGAAGCACTATG---GGCGCAGCATCA---  
 ATAACGCTGACGGTACAG---GCCAGACAA---TTGTTG---TCTGGAATAGTGCAACAGCAAAGC---  
 AATTTG---CTGAGG---GCTATAGAGGCGCAACAGCATCTGCTGCAACTCACAGTCTGGGGCATT  
 >AY901980  
 TTTTATTGTAATACATCACAACCTGTTTAATAGTACATACAATCCTGCATACAGTCATAATGAGACAGAA----  
 -----  
 -----  
 AGTAATTCAACCATCATGCTTCCATGCAGAATAAAACAAATTATAAACATGTGGCAGGAGGTAGGAAAAGCAA  
 TGTATGCCCCCTCCCATTCGAGGAAACATAATATGTAACCTCAAGT---  
 ATCACAGGACTACTATTGACACGTGATGGAGGAAACAATAACACG-----  
 -----  
 -----  
 AATACAGAAGAAATATTCAGACCTGGAGGAGGAAATATGAAGGACAATTGGAGAAATGAATTATATAAATATA  
 AAGTGGTAGAAATTCAGCCATTG---GGAGTAGCACCCACCGAGGCAAAAAGGAGAGTGGTG-----  
 -----GAGAGAGAAAAAAGAGCA---GTGGGA---CTGGGAGCT-----  
 ---GTGTTCCCTGGGGTCTTGAGTTTG---GCAGGAAGCACTATG---GGCGCAGCGTCA---  
 ATAACGCTGACGGTACAG---GCCAGGCAA---CTGTTT---GCTGGTATAGTGCAACAGCAAAT---  
 AATTTG---CTGAGG---GCTATAGAGGCGCAACAGCATATGTTGCAACTCACAGTCTGGGGCATT  
 >AY878059  
 TTCTATTGCAATACAACAAAACCTGTTTAACATAACCTATAATAACAGTAATTCA-----  
 -----  
 -----  
 GACAACAATACCATCACGCTCCCCTGCAGAATCAAACAATTTATAAACCTGTGGCAGGAGGTAGGGCGAGCAA  
 TGTATGCCCCCTCCCATTCGAAGGAAAAATAACATGTCACTCAAGT---  
 ATTACAGGACTACTATTGACACGTGATGGAGGAACGAGTGCAAACAATGATACA-----CAA----  
 -----  
 -----  
 GCAAGTACAAACAAT---  
 AATACAGAGACATTTCAGACCTGGAGGGGGAGATATGAAAAACAATTGGAGAAATGAATTATATAAATATAAAG  
 TGGTAGAAATTAAGCCCTTA---GGAGTAGCACCCACTGGAGCAAAAAGGAGAGTGGTG-----  
 -----GAGAGAGAAAAAAGAGCA---GTAGGA---ATAGGAGCT-----  
 GTAATCTTTGGGTTCTTGGGAGCA---GCAGGAAGCACTATG---GGCGCGGCGTCA---  
 ATAACGCTGACGGTACAG---GCCAGACAA---TTGTTG---TCTGGTATAGTGCAACAGCAAAGC---  
 AATTTG---CTGAGA---GCTATAGAGGTGCAACAGCATATGTTGCAACTCACGGTTTGGGGCATT  
 >DQ011174  
 TTCTATTGCAATACGACAGAACTGTTTAATGATAGTAGCTCA-----  
 -----  
 -----  
 GAAAAACATCACACTCCCATGCAGAATAAAACAAATTGTAAACATGTGGCAGGGGGTAGGACGAGCAATGTATG  
 CCCCTCCCATTCGAAGGAAGCATAACATGTAATTCAAGT---  
 ATCACAGGACTACTATTAGAACGTGATGGAGGGGAAAGCTATAAT-----  
 -----  
 -----  
 AAAACAGAGATATTCAGGCCTGGAGGAGGAAATATGAAGGACAATTGGAGAAAGTGAATTATATAAATATAAAG

TGGTAGAAATTAAGCCATTA---GGAGTAGCACCCACAAGGGCAAAAAGGAGAGTGGTG-----  
-----GAGAGAGAAAAAAGAGCA---GTGGGA---ATAGGAGCT-----  
GTGTTCTTGGGTTCTTGGGGGCA---GCAGGAAGCACTATG---GGCGGGCGTCA---  
ATAACGCTGACGGTACAG---GCCAGACAA---CTGCTG---TCTGGTATAGTGCAACAGCAAAGC---  
AATTTG---CTGAGA---GCTATAGAGGCGCAACAGCATATGTTGCAACTCACGGTCTGGGGCATT  
>DQ382373  
TTCTATTGCAATACATCAAACCTGTTTAATGGAACTGGTATAGTAATGGTTCATTCCTGTTCAATGGAAGTT  
GGGATAATAAT-----  
-----AATACAGAC-----  
ACAGAGAATTC AACCATCACACTTCAATGCAGAATAAAACAAATTATAAATATGTGGCAGGAGGTGGGAAGGG  
CAATGTATGCCCCCTCCCATCGAAGGAAACATAACATGTAAATCAAAT---  
ATCACAGGACTACTATTGGTACGTGATGGAGGAACAGGCAATGACACA-----  
-----  
-----  
GAAAAATGACACAGAAATATTCAGACCTGGAGGAGGAAATATGAGGGACAATTGGAGAAATGAATTATATAAAT  
ATAAAGTGGTAGAAATTAGGCCATTG---GGAATAGCACCCACTGAGGCAAAAAGGAGAGTGGTG-----  
-----GAGAGAGAAAAAAGAGCA---GTGGGA---ATAGGAGCT---  
-----GTGTTCTTGGGTTCTTAGGAGCA---GCAGGAAGCACTATG---GGCGCAGCATCA---  
ATAACGCTGACGGTACAG---GCCAGACAA---GTATTG---TCTGGAATAGTGCAACAGCAAAGC---  
AATTTG---CTGAGA---GCTATAGAGGCGCAACAGCATATGTTGCAACTCACAGTCTGGGGCATT  
>DQ369991  
TTCTATTGCAATACTACAAACCTGTTTAATGAAAATATAACAAGTGTAATATAACAAGTAAAAATGAT---  
-----  
-----  
TCAACAGACAGCATCACACTTCAATGCAGGATAAAACAAATTATAAACATGTGGCAGGAGGTAGGACGAGCAA  
TGTATGCCCCCTCCCATTCAGGAAACATAACATGTAAATTCAACT---  
ATCACAGGACTACTATTAACACGTGATGGAGGAAACATCACGAAT-----  
-----  
-----  
AACACAGAGGAGATATTTAGACCTGGAGGAGGAAATATGAAGGATAATTGGAGAAGTGAATTATATAAATACA  
AGGTGGTAGAAATTAAACCATTA---GGAGTAGCACCCACCAAGGCAAAAAGGAGAGTGGTG-----  
-----GAGAGAGAAAAAAGAGCA---GTAGGA---CTAGGAGCT-----  
---CTGTTCTTGGGTTCTTGGGAGCA---GCAGGAAGCACTATG---GGCGCAGCATCA---  
ATAACGCTGACGGTACAG---GCCAGACAA---GTGTTG---TCTGGTATAGTGCAACAGCAAAGC---  
AATTTG---CTGAGG---GCTATAGAGGCGCAACAGCATATGTTGCAACTCACGGTCTGGGGCATT  
>GQ999986  
TTCTATTGCAATACATCAAACTTTTTTAATAATACATACTATAATGGTACAGGAAATGCTAACAGT-----  
-----  
-----  
ACGCATGAAAACATCACACTCCCATGCAGAATAAAACAAATTATAAGGATGTGGCAGAAGGTAGGACAAGCAA  
TGTACGCCCCCTCCCATTCAGGAAACATAACATGTACATCAAAT---  
ATCACAGGACTACTACTGGTACGTGATGGAGGAGAGGCAATGGCACA-----  
-----  
-----  
AACACATAGAGACATT CAGACCTGGAGGAGGAGATATGAGGGACAATTGGAGAAGTGAATTATATAAATATA  
AAGTGGTAGAAATTCAGCCATTG---GGAATAGCACCCACCAAGGCAAAAAGGAGAGTGGTG-----  
-----GAGAGAGAAAAAAGAGCA---GTGGGA---ATAGGAGCT-----  
---ATGTTCTTGGGTTCTTGGGAGCA---GCAGGAAGCACTATG---GGCGGGCGTCA---  
ATGGCGCTGACGGTACAG---TCCAGACAA---CTGTTG---TCTGGTATAGTGCAACAGCAAAGC---  
AATTTG---CTGAGG---GCTATAGAGGCGCAACAGCATATGTTGCAACTCACGGTCTGGGGCATT  
>GQ999987  
TTCTACTGCAATACAACAGGACTGTTTAATCATAGTGGGGTAAACACCAAGAAGTGTCTTAATAATAACTG  
AG-----  
-----  
-----  
TCAAAACACAACCATCACACTCCCATGCAAAATAAAACAAATTATAAACATGTGGCAGGAGGTAGGACGGGCAA  
TGTATGCCCCCTCCCATTCAGGAAACATAACATGTAACTCAAGT---  
ATCACAGGACTACTATTAACACGTGATGGAGGTAATAATAAAAATAAAACAGAA-----  
-----  
-----  
AATGACACAAAGATAGAGATATTCAGACCTGGAGGAGGAAATATGAAGGACAATTGGAGAAGTGAATTATATA

AATATAAAGTGGTAGAAATTCAACCACTG--GGAGTAGCACCCACGGAGGCAAAAAGGAGAGTGGTG-----  
 -----GAGAGAGAAAAAAGAGCA---GTAGGA---  
 ATAGGAGCT-----GTACTCTTTGGGTTCTTGGGAGCA---GCAGGAAGCACTATG---  
 GGCGCGCGTCA---ATAACGCTGACGGTACAG---GCCAGACAA---CTATTG---  
 TCTGGTATAGTGCAACAGCAAAGC---AATTTG---CTGAGA---  
 GCTATAGAGGCGCAACAGCATATGTTGCAACTCACAGTCTGGGGCATT  
 >GQ999977  
 TTCTATTGCAATACATCAGGACTGTTTAATGGTACATACAATGGTACGGGAAATAAT-----  
 -----  
 -----  
 TCAACAGAAACCATCACACTTCAATGCAGAATAAAACAAATTATAAATATGTGGCAGGAGGTAGGACGAGCAA  
 TGTATGCCCCCTCCCATTCAGGAAACATAACATGTAACTCAAAG---  
 ATCACAGGACTACTACTAGTACGTGATGGAGGCACATATGGAGAT-----  
 -----  
 -----  
 AACAAAACAGAGACATTTCAGACCTGGAGGAGGAAATATGAAGAACAATTGGAGAAAGTGAATTATATAACTATA  
 AAGTGGTAGAAATTAAACCATTAA---GGAATAGCACCCACTGAGGCAAAAAGGAGAGTGGTG-----  
 -----GAGAGAGAAAAAAGAGCA---GTAGGA---ATAGGAGCT-----  
 ---GTGTTCCCTTGGGTTCTTGGGAGTA---GCAGGAAGCACTATG---GGCGCAGCGTCA---  
 ATAACGCTGACGGCACAG---GCCAGACAA---CTATTG---TCTGGTATAGTGCAACAGCAAAGC---  
 AATTTG---CTGAGA---GCTATAGAGGCGCAACAGCATATGTTGCAACTCACGGTCTGGGGCATT  
 >FJ443986  
 TTCTATTGCAATACATCAAAGCTGTTTACAGACATGCTTAATGACACA-----  
 -----  
 -----  
 AAAGATAATCAAACCACACTCCCCTGCAAAATAAAACAAATTATAAATATGTGGCAGGGGGTAGGACGAGCAA  
 TGTATGCCCCCTCCCATTCAGGGAAGCATAACATGTAACTCAAGT---  
 ATCACAGGACTACTATTAACACGTGATGGAGGAAAACCTAATGCCACGGCTAAT-----  
 -----  
 ----  
 GCCACGGTAGAGGTAGAGGTATTCAGACCTGGAGGAGGAAATATGAAGGACAATTGGAGAAGTGAATTGTATA  
 AATATAAAGTGGTAGAAATTAAGCCATTA--GGAATAGCACCCACTAAAGCAAAAAGGAGAGTGGTG-----  
 -----GAGAGAGGGAAAAGAGCA---GTGGGA---  
 ATAGGAGCT-----GTGCTCCTTGGGTTCTTGGGAGCA---GCAGGAAGCACTATG---  
 GGCGCAGCGTCA---ATAACGCTGACGGTACAG---GCCAGACAA---TTGTTA---  
 TCTGGTATAGTGCAACAGCAAAAC---AATTTG---CTGAGA---  
 GCTATAGAGGCGCAACAGCATATGTTGCAACTCACGGTCTGGGGCATT  
 >HQ615951  
 TTCTATTGCAATACATCAAACTGTTTAATGGTACATACCCAGCAAATAGTACAAACAGT-----  
 -----  
 -----  
 ACTTCAAACATACATCACACTCAAATGCAGAATAAAACAAATTATAAACATGTGGCAGGGAGTAGGACGAGCAA  
 TGTATGCCCCCCCCATTGAGGAAACATAACATGTGAATCAAAT---  
 ATCACAGGACTACTGTTGACAAGGGATGGAGGAAACAGTAGTACT-----  
 -----  
 -----  
 AATGAGACATTTCAGACCTGCAGGAGGAGATATGAGGGACAATTGGAGAAGTGAATTATATAAATATAAAGTAG  
 TAGAAATTAGGCCATTA---GGAATAGCACCCACTGGGGCAAAAAGGAGAGTGGTG-----  
 -----GAGAGAGAAAAAAGAGCA---GTGGGA---TTCGGAGCT-----  
 GTGTTCCCTTGGGTTCTTGGGAGCA---GCAGGAAGCACTATG---GGCGCAGCATCA---  
 ATAACGCTGACGGTACAG---GCCAGACAA---TTGTTG---TCTGGTATAGTGCAACAGCAAAGC---  
 AATTTG---CTGAGG---GCTATAGAGGCGCAACAGCATATGTTGCAACTCACGGTCTGGGGCATC  
 >JN687821  
 TTCTATTGCAATACATCACACCTGTTTAGTAATAATGGTACA-----  
 -----  
 -----  
 AATTCTATCATCACACTCCCATGCAGGATAAAACAAATAATAAACATGTGGCAGGGGGTGGGACGAGCAATGT  
 ATGCCCCCTCCTATTCAAGGAGACATAACATGTAAATCAAAC---  
 ATAACAGGAATACTATTGACACGTGATGGAGGAAGAAATGGCAAC-----  
 -----

-----  
ACAACAGAGATATTCAGACCTGGAGGAGGAGATATGAGGGACAATTGGAGAAGTGAATTATATAAATATAAAG  
TGGTAGAAATTAAGCCATTG---GGAATAGCACCCACTGAAGCTAAAAGGAGAGTGGTG-----  
-----GAGAGAGAAAAAGAGAGCA---GTGGGA---ATAGGAGCT-----  
GTGTTTCCTTGGGTTCTTGGGAGCA---GCAGGAAGCACTATG---GGCGCGGCGTCG---  
ATAACGCTGACGGTACAG---GCCAGACAA---CTGTTG---TCTGGTATAGTGCAACAGCAAAGC---  
AATTTG---CTGAGA---GCCATAGAAGCGCAACAGCATATGTTGCAACTCACAGTCTGGGGCATT  
>KC863367  
TTCTATTGCAATACATCAGGCCTGTTTAATGGTACACTTAATGATACATACACGGCTAATAGTACAAGT----  
-----  
-----  
GATAACTCAACCATCACACTCCAATGCAGAATAAAACAAATTATAAACATGTGGCAAGGGGTAGGACAAGCAA  
TGTATGCCCCCTCCCATTGAGGGAAACATAACATGTAAATCAAAT---  
ATCACAGGGCTACTATTGACCCGTGATGGAGGAACAAATACTAGT-----  
-----  
-----  
GAGGAGGAGACATTCAGACCTGGAGGAGGAGATATGAGGGACAATTGGAGAAGTGAATTATACAAATATAAAG  
TGGTAGAGATTAAGCCATTG---GGAATAGCACCCACTCAGGCAAAAAGGAGAGTGGTG-----  
-----GAGAGAGAAAAAAGAGCA---GTGGGA---ATAGGAGCT-----  
GTGTTTCCTTGGGTTCTTGGGAGCA---GCCGGAAGCACTATG---GGCGCGGCGTCA---  
ATAACGCTGACGGTACAG---GCCAGACAA---TTATTG---GCTGGTATAGTGCAACAGCAAAGC---  
AATTTG---CTGAGG---GCTATAGAGGCGCAACAGCATATGTTGCAACTCACAGTCTGGGGCATT  
>KC894137  
TTCTATTGCAATACATCAAACCTGTTTAATGATACACATACAGCAAACATCACA-----  
-----  
-----  
GCAAAACATCACACTCACACTCCCATGCAGAATAAAACAAATTATAAACATGTGGCAGGAGGTAGGAAAAGCAA  
TGTATGCCCCCTCCCATTGCAGGAAACATAACATGTACATCAAAT---  
ATCACAGGATTGCTATTGGTACGTGATGGAGGTACAAATAGAACT-----  
-----  
-----  
AATGAAACATTCAGACCTGGAGGAGGAGATATGAGGGACAATTGGAGAAGTGAATTATATAAATATAAAGTGG  
TAGAAATTCAGCCATTG---GGAATAGCACCCACTAAGGCAAAAAGGAGAGTGGTG-----  
-----GAGAGAGAAAAAAGAGCA---GTGGGA---ATTGGAGCT-----  
GTGCTCCTTGGATTCTTGGGAGCA---GCAGGAAGCACTATG---GGCGCGGCGTCA---  
ATAACGCTGACGGTACAG---GCCAGACAA---TTGTTG---TCTGGTATAGTGCAACAGCAAAGC---  
AATTTG---CTGAAG---GCTATAGAGGCGCAACAGCATCTGTTGCAACTCACAGTCTGGGGCATT  
>JN681229  
TTCTATTGCGATACAACAAAACCTGTTTAATACAACAAGAGGGGAGGAT-----  
-----  
-----  
CTTCATGAAAATACCACAATTCCATGCAAGATAAAGCAAATTATAAACATGTGGCAAGAGGTAGGACGAGCAA  
TGTATGCCCCCTCCCATTGCAGGAAACATAAATTGTACATCAAAC---  
ATCACAGGACTACTATTGACACATGATGGAGGAAACAACCCGAAT-----  
-----  
-----  
AGCAGCACGATATTCAGACCTGGAGGGGGGAATATGAAGGACAACCTGGAGAAGTGAATTATATAAATATAAAG  
TGGTAGAAATTAACCATTG---GGAATAGCACCCACTGCATCAAAAAGGAGAGTGGTG-----  
-----GAGAGAGAAAAAAGAGCA---GTAGGA---ATAGGAGCT-----  
GTGATCCTTGGGTTCTTGGGAACA---GCAGGAAGCACTATG---GGCGCGGCGTCA---  
ATAACGCTGACGGTACAG---GCCAGACAA---CTGTTG---TCCGGTATAGTGCAACAGCAAAGC---  
AATTTG---CTGAGA---GCCATAGAGGCGCAACAGCATATGTTGCAACTCACGGTCTGGGGCATT  
>FJ443911  
TTCTATTGCAATACAACACAACCTGTTTAACAGTACATACAATACCAATGAT-----  
-----  
-----  
ACAAGGGTAACATCACACTTCCATGCAGAATAAAACAGATTATCAACATGTGGCAAAGGGTAGGACGAGCAA  
TGTATGCTCCTCCCATTGCAGGAAACATAACATGTATATCAAAC---  
ATCACAGGACTACTGTTAGTACGTGATGGAGGCAATAGCAGTGAC-----  
-----

-----  
 ACAACAGAAACATTTCAGACCTGGAGGAGGAAATATGAAGGACAATTGGAGAAGTGAACCTATATAAATATAAAG  
 TGGTAGAAATTTCAGCCATTA---GGAGTAGCACCCACTAAAGCAAAAAGGAGAGTGGTG-----  
 -----GAGAGAGAAAAAAGAGCA---GTGGGA---ATAGGAGCT-----  
 GTGTTTCCTTGGGTTCTTGGCAACA---GCAGGAGGCACTATG---GGCGCGGCGTCA---  
 ATAACGCTGACGGTACAG---ACCAGACAA---TTGTTG---TCTGGTATAGTGCAACAGCAAAGC---  
 AATTTG---CTGAAG---GCTATAGACGCGCAACAGCATCTGTTGCAACTCACAGTCTGGGGCATT  
 >KT183265  
 TTCTATTGTAATACATCAGGACTGTTTAATGGTACATACAATAATATATACAATACAGACAATGATACAACA-  
 -----  
 -----  
 GACAAATGGAACCATCACACTCCCATGCAAAATAAAACAAATTATAAACATGTGGCAGGAGGTAGGAAGAGCAA  
 TATACGCCCCCTCCCATTCAGGAAATCTAACATGTATGTCAAAC---  
 ATCACAGGACTTCTCTTGGTACGGGATGGAGGTAATCAAAATAAT-----  
 -----  
 -----  
 AGCACAGAGGTATTTCAGACCTGGAGGAGGAGATATGAGGGACAATTGGAGAAGTGAATTATATAAATATAAAG  
 TGGTAGAAATTGAGCCATTG---GGAATAGCACCCACTAAGGCAAAAAGGAGAGTGGTG-----  
 -----GAGAGAGAAAAAAGAGCA---GTGGGA---ATAGGAGCT-----  
 GTACTCCTTGGGTTCTTGGGAGCA---GCAGGAAGCACTATG---GGCGCGGCGTCA---  
 ATAACGCTGACGGTACAG---GCCAGGCAA---CTGTTG---TCTGGTATAGTGCAACAGCAAAAT---  
 AATTTG---CTGAGA---GCTATAGAGGCGCAACAGCATATGTTGCAGCTCACGGTCTGGGGCATT  
 >KC894114  
 TTCTATTGTGATACATCAAGACTATTTAATGGTACATACAATGGTACAGATAGTAATCCAAACAATGGTACAG  
 ATAGT-----  
 -----GATTCA-----  
 AACTCAAATTCAAACATCACACTTCCATGCAGAATAAAACAGATTATAAACATGTGGCAGGAGGTAGGAAGAG  
 CAATGTATGCTCCTCCCATTCAGGAAGCATAACATGTAAATCAAAC---  
 ATCACAGGATTATTATTGACGCGTGATGGAGGCAAAGAGGAAAATAGC-----  
 -----  
 ----  
 ACAACTAACAGAATAGAGATATTTCAGACCTGGAGGAGGAAATATGAAGGACAATTGGAGAAGTGAATTATATA  
 AATATAAAGTAGTAGAAATCAAACCATTG---GGAATAGCACCCACTGGAGCAAAAAGGAGAGTGGTG-----  
 -----GAGAGAGAAAAAAGAGCA---GTGGGA---  
 ATAGGAGCT-----GTGTTTCCTTGGGTTCTTGGGAGCG---GCAGGAAGCACTATG---  
 GGCGCGGCGTCA---ATAACGCTGACGGTACAG---GCCAGACAA---TTGTTG---  
 TCTGGTATAGTGCAACAGCAAAGC---AATTTG---CTGAAG---  
 GCTATAGAGGCACAACATCATCTGTTGCAACTCACAGTCTGGGGCATT  
 >KC894117  
 TTCTATTGCAATACAACAAGGTTGTTTAATGGCACCTACAATAGCACCTCAAGTGATAAGTCAAACCTCAAGT-  
 -----  
 -----  
 GATCAGTTAAACATCACACTCCCATGCAGAATAAAACAAATTATAAACATGTGGCAGGAGGTAGGACGAGCAA  
 TATATGCCCCCTCCCATTCAGGATACATAAAATGTAGTTCAAAT---  
 ATCACAGGACTACTGTTGACACGTGATGGAGGTAATGGAGGTAATAATACT-----  
 -----  
 -----  
 GAAAATAATACAGAGACATTTCAGGCCTGGAGGAGGAGATATGAGAGACAATTGGAGAAGTGAATTATATAAAT  
 ATAAATAGTAGAAATTAAACCATTA---GGAATAGCACCCACTACGGCAAAAAGGAGAGTGGTG-----  
 -----GAGAGAGAAAAAAGAGCA---GTGGGA---ATAGGAGCT---  
 -----GTGTTTCCTTGGGTTCTTGGGAGCA---GCAGGAAGCACTATG---GGCGCGGCGTCA---  
 ATAACGCTGACGGTACAG---GCCAGACAA---TTGTTG---TCTGGTATAGTGCAACAGCAAAGT---  
 AATTTG---CTGAGA---GCTATAGAGGCGCAACAACATCTGTTGCAACTCACGGTCTGGGGCATA  
 >KC894118  
 TTCTATTGTAACACATCAGACCTGTTTAATAGAGTATACAATACTACAGGCACGTATAATAGTACAGAAAGA-  
 -----  
 -----  
 AGAAATTCACCATCACAATTCAATGCAGAATAAAACAAATTATAAACATGTGGCAGAGGGTAGGACAAGCAA  
 TGTATGCCCCCTCCCATTCAGGAAACATAACATGTAAATCAAAC---  
 ATCACAGGATTACTATTGACACGAGATGGAGGACAAAATATAAAAAAT-----

-----  
-----  
GAAACAAATAAAGAGACATTCAGACCTGGAGGAGGAGATATGAGGGATAACTGGAGAAGTGAATTATATAAAT  
ACAAAGTGGTAGAAATTAACCATTG---GGAGTAGCTCCAAC TGGGGCAAAAAGGAGAGTGGTG-----  
-----GGGAGAGAAAAAAGAGCA---TTGGGA---ATGGGAGCT---  
-----ATGATCTTTGGGTTCTTGGGAGCA---GCAGGAAGCACTATG---GGCGCGGCGTCA---  
ATAACGCTGACGGTACAG---GCCAGAAAT---TTGTTA---TCTGGTATAGTGCAACAGCAAAGC---  
AATTTG---CTGAAG---GCTATAGAGGCGCAACAGCATCTGTTGCAACTCACAGTTTGGGGCATA  
>KC894120  
TTCTATTGCAATACATCAAACCTGTTTAATAATATTAGTACAGGCAAT-----  
-----  
-----

TCTGGTAACATCACACTCCCATGCCAAATAAAACAAATTGTAAGAATGTGGCAGGGAGTGGGACAAGCAATGT  
ATGCCCCCTCCCATTCAGGAAGCATAACATGTAGATCAAAT---  
ATCACAGGACTATTATTGACACGTGATGGAGGCAAAAACAAATTACACA-----  
-----  
-----

GACCTAGAGATATTCAGACCAGGAGGAGGTGATATGAGGGACAATTGGAGAAGTGAATTATATAAATATAAAG  
TAGTAGAAATTAAGCCATTA---GGAATAGCACCAACTGGGGCAAAAAGGAGAGTGGTG-----  
-----GAGAGAGAAAAAAGAGCA---GTGGGA---ATAGGAGCT-----  
GTACTCCTTGGGTTCTTGGGAGCA---GCAGGAAGCACTATG---GGCGCGGCGTCA---  
ATAACGCTGACGGTACAG---GCCAGACAA---TTGTTG---TCTGGTATAGTGCAACAGCAAAGC---  
AATTTG---CTGAGA---GCCATAGAGGCGCAACAGCATATGTTGCAACTCACAGTCTGGGGCATT  
>KC156115  
TTCTATTGCAATACATCAAACTGTTTAATGGTACCATAGTTGATGGTACTACCCTGGTTAATAGTACCATAT  
TTAAT-----  
-----GATACC-----  
ATGTCTAATGGAACCATCACACTCCCATGTAGAATAAAACAAATTATAAATATGTGGCAGGAGGTAGGACGAG  
CAATCTATGCCCCCTCCCATTCAGGAACATCACATGTATCTCTAAT---  
ATCACAGGACTACTATTGACACGTGATGGTGGAGGTGCCGGGGATGGG-----  
-----  
----

TCAAATGACACAGAAGAAATATTCAGACCTGGAGGAGGAGATATGAGGGACAATTGGAGAAGTGAATTATATA  
AATATAAAGTGGTAGAAATTAAGCCGTTG---GGAATAGCACCCACTAAGGCAAAAAGGAGAGTGGTG-----  
-----GAGAGAGAAAAAAGAGCA---GTGGGA---  
ATGGGAGCT-----GTGTTTCCTTGGGTTCTTGGGAGCA---GCAGGAAGCACTATG---  
GGCGCAGCGGCA---GTAACGCTGACGGTACAG---GCCAGACAA---TTGTTG---  
TCTGGAATAGTGCAACAGCAAAGC---AATTTG---CTGAGA---  
GCTATAGAGGCGCAACAGCATATGTTGAACTCACGGTCTGGGGCATT  
>KC894124  
TTTTACTGTAATACAACAAAACCTGTTTAATACAACAGAATTTAATGAAAATGAT-----  
-----  
-----

TCAAATGATACCATCACACTCCCATGTAGAATAAAACAAATTTATAAACATGTGGCAGGGAGTAGGAAGAGCAA  
TGTATGCCCCCTCCCATTCAGGAACATAACCTGTAACTCAAGT---  
ATCACAGGAATATTATTGATACATGAAGAAAGGGGTGATAATCAGACAAGG-----  
-----  
-----

ATATTCAAACCTATAGGAGGAGATATGAAGAATAATTGGAGAAGTGAAGTATACAAATATAAAGTGGTAGAAA  
TTAAGCCATTG---GGAATAGCACCCACTGATGCAAAAAGGAGAGTGGTG-----  
-----GAGAGAGAAAAAAGAGCA---GTGGGA---ATAGGAGCT-----  
TTGTTTCCTTGGGTTCTTGGGAGCA---GCAGGAAGCACTATG---GGCGCGGCGTCA---  
GTGACGCTGACGGTACAG---GCCAGACAG---TTGTTG---TCTGGTATAGTGCAACAGCAAAGC---  
AATTTG---CTGAGG---GCTATAGAGGCGCAACAGCATATGTTGCAACTCACAGTCTGGGGCATT  
>HM204615  
TTCTATTGCAATACATCAGGCCTGTTTAATGGTACATACAATAGTACAAACAATAGTACAGGA-----  
-----  
-----

GACAATAAGACCATCACACTCCCATGCAGAATAAAACAAATTATAAACATGTGGCAGGGGGTAGGACGAGCAA  
TGTATGCCCCCTCCCATTCAGGAACATAACATGTAAATCAAAT---

ATCACAGGATTACTATTGACACGTGATGGAGGAAATACTCATAAT-----  
 -----  
 -----  
 AATACAGAGATATTCAGACCTGGAGGAGGCAATATGAAAGACAATTGGAGAAATGAATTGTATAAATATAAAG  
 TGGTAGAAATTAAGCCATTA---GGAATAGCACCCACTAGTGCAAAAAGGAGAGTGGTG-----  
 -----GCAAGAGAAAAAAGAGCA--GTGGGA--ATAGGAGCT-----  
 GTGTTCCCTTGGGTTCTTGGGAGCA--GCAGGAAGCACTATG--GGCGCGGCGTCA---  
 ATAACGCTGACGGTACAG---GCCAGACAA--TTATTA--ACTGGTATAGTGCAACAGCAAAGT---  
 AATTTG---CTGAGG---GCTATAGAGGCGCAACAGCATATGTTGCAACTCACGGTCTGGGGCATT  
 >FJ443547  
 TTCTATTGCAATACAACAGAACTGTTCAATAATACTAATAAA-----  
 -----  
 -----  
 ACTGGCATACTCCCATGCAAAAATAAACAAATTATAAACATGTGGCAGGGGGTAGGACGAGCAATGTATGCCC  
 CTCCCATTGAAGGAAACATAACATGTAGGTCAATT---  
 ATCACAGGACTACTATTGGTACGTGATGGAGGAGAAGATAATAGC-----  
 -----  
 -----  
 ACAGAGGAGGTATTCAGACCTGGAGGAGGAAATATAAAGGACAATTGGAGAAGTGAATTATATCAATATAAAG  
 TGGTAGCAATTAAGCCGTTG---GGAATAGCACCCACGCCGGCAAAAAGGAGAGTGGTGGAC---AGG-----  
 -----GAAGTGGTGAAGAGAGGAAAAAGAGCA--GTGGGA--ATAGGAGCT-----  
 GTGTTCCCTTGGGTTCTTGGGAGCA--GCAGGAAGCACTATG--GGCGCGGCGTCA---  
 ATAACGCTGACGGTACAG---GCCAGACAA--CTGTTG---TCTGGTATAGTGCAACAGCAAAGC---  
 AATTTG---CTGAGA---GCTATAGAGGCGCAACAGCATATGTTGCAACTCACGGTCTGGGGCATT  
 >FJ443838  
 TTCTATTGCAATACATCAAACTGTTTAATGGTATATACAATAATACATACCATAAT-----  
 -----  
 -----  
 ACATCTAGTAATATCATACTCAATGCAGAATAAAACAAATTATAAACATGTGGCAAAAGGTAGGACGAGCAA  
 TGTATGCCCCCTCCCATTCAGGAAACATAACATGTACATCAAT---  
 ATCACAGGACTACTATTGACACGTGATGGAGATAATAGGACTGAG-----  
 -----  
 -----  
 TCAGAGACATTCAGACCTGGAGGAGGAGACATGAGGGACAATTGGAGAAGTGAATTATATAAATACAAGGTGG  
 TAGAAATTCACCATTA---GGAGTAGCACCCACTGAGGCAAGAAGGAGAGTGGTG-----  
 -----GGGAAAGAAAAAGAGCAGTAGTAGGA--ATAGGAGCT-----  
 GTGCTCCTTGGGTTCTTGAGTGCA--GCAGGAAGCACTATG--GGCGCAGCGTCA---  
 ATAACGCTGACGGTACAG---GCCAGACAA--TTGTTG---TCTGGTATAGTGCAACAGCAAAGC---  
 AATTTG---CTGAGA---GCTATAGAGGCGCAACAGCATATGTTGCAACTCACGGTCTGGGGCATT  
 >FJ443865  
 TTCTATTGCAATACATCAAACCTGTTTAATGATAGTACAAAA-----  
 -----  
 -----  
 AGTAATTCAAGCATCACACTCCCATGCAGAATAAAACAAATTATAAACATGTGGCAGAAGGTAGGACGAGCAA  
 TGTATGCCCCCTCCCATTCAGGAAACATAACATGTAGATCAGAG---  
 ATCACAGGACTACTATTGGTACATGATGGAGGAACAAATAGCAGT-----  
 -----  
 -----  
 AATGAGACATTCAGGCCTGGAGGAGGAGATATGAGGGATAATTGGAGAAGTGAATTATATAAATATAAAGTGG  
 TAGAAATTAAGCCATTA---GGAGTAGCACCCACTCAGGCAAAAAGGAGAGTGGTG-----  
 -----GAGAGAGAAAAAAGAGCA--GTGGGA--ATAGGAGCT-----  
 GTGTTCCCTTGGGTTCTTGGGAGCA--GCAGGAAGCACTATG--GGCGCGGCGTCA---  
 ATAACGCTGACGGTACAG---GCCAGACAA--TTGTTG---TCTGGTATAGTGCAAGCAGCAAAGC---  
 AATTTG---CTGAGG---GCTATAGAGGCGCAACAGCATATGTTGCAACTCACGGTCTGGGGCATT  
 >MN202472  
 TTCTATTGTAACACATCAGACCTGTTTAATAGAGTATACAATACTACAGGCACGTATAATAGTACAGAAAGA-  
 -----  
 -----  
 AGAAATTCAACCATCACAATTCAATGCAGAATAAAACAAATTATAAACATGTGGCAGAGGGTAGGACAAGCAA  
 TGTATGCCCCCTCCCATTCAGGAAACATAACATGTAAATCAAAC---

ATCACAGGATTACTATTGACACGAGATGGAGGACAAAATATAAAAAATGAAACA-----  
 -----  
 -----  
 AATAAAGAGACATTTCAGACCTGGAGGAGGAGATATGAGGGATAACTGGAGAAGTGAATTATATAAATACAAAG  
 TGGTAGAAATTAAACCATTG---GGAGTAGCTCCAAC TGGGGCAAAAAGGAGAGTGGTG-----  
 -----GGGAGAGAAAAAAGAGCA--TTGGGA--ATGGGAGCT-----  
 ATGATCTTTGGGTTCTTGGGAGCA--GCAGGAAGCACTATG--GGCGCGGCGTCA---  
 ATAACGCTGACGGTACAG---GCCAGAAAT--TTGTTA--TCTGGTATAGTGCAACAGCAAAGC---  
 AATTTG---CTGAAG---GCTATAGAGGCGCAACAGCATCTGTTGCAACTCACAGTTTGGGGCATA  
 >KT183218  
 TTCTATTGCAATACAACAAAGCTATTTCACAAACACAACC-----  
 -----  
 -----  
 ACAAATACAACCATCCTAATCCCATGCAGAATAAAACAATTTGTAAACATGTGGCAGGAGGTAGGGCGAGCAA  
 TGTATGCCCCCTCCCATTGCAGGAAACATAACATGTAACTCAAGT---  
 ATCACAGGACTACTATTGGTACGTGATGGAGGAATTTCAAATGACACAAAT-----  
 -----  
 -----  
 AACACAACCTGAAACATTTCAGGCCTGGAGGAGGAAACATGAAGGACAATTGGAGAAGTGAATTATATAGCTATA  
 AAGTGGTAGAACTTAAGCCACTA---GGAGTAGCACCCACTGGAGCGAAAAGGAGAGTGGTGGAG-----  
 -----ATGGAAAGATCAAAAAGAGCA--GTGGGA--ATAGGAGCT-----  
 ---GCACTCCTTGGGTTCTTGGGAGCA--GCAGGAAGCACTATG--GGCGCGGCGTCA---  
 ATGGCGCTGACGGTACAG---GCCAGACAA--CTGCTG---TCTGGTATAGTGCAACAGCAAAGC---  
 AATTTG---CTGAGA---GCCATAGAGGCGCAACAGCATATGTTGCAACTCACGGTCTGGGGCATT  
 >HM623548  
 TTCTATTGCAATACAACAAAACCTGTTTAAGGAAGGTGAGTCAAATGCAACAGAT-----  
 -----  
 -----  
 TTAAATGCAACAATCATACTCCCATGCAGGATAAAACAATTTATAAACATGTGGCAGGGGGTAGGACAAGCAA  
 TGTATGCCCCCTCCCATTGCAGGAAACATAACATGTATCTCAAAT---  
 ATCACAGGACTACTATTGACACGTGATGGAGGAAGAGACTCCAATAAC-----  
 -----  
 -----  
 ACAAATGACACAGAGACATTTCAGACCTGGAGGAGGAAATATGAAGGACAATTGGAGAAGTGAATTATATAAAT  
 ATAAAGTGGTAGAAATTTCAGCCATTG---GGAGTAGCTCCCCTGGATCAAAAAGGAGAGTGGTG-----  
 -----GAGAGAGAAAAAAGAGCA--GTGGGA--CTGGGAGCT---  
 -----GTACTCCTTGGGTTCTTGGGAGCA--GCAGGAAGCACTATG--GGCGCGGCGTCA---  
 ATAGCGCTGACGGTACAG---GCCAGACAA--CTGTTG---TCTGGTATAGTGCAACAGCAAAAC---  
 AATTTG---CTGAGA---GCTATAGAGGCGCAACAGCATATGTTGCAACTCACAGTCTGGGGCATT  
 >HM623549  
 TTCTATTGCAATACATCAGGACTATTTAAGGGTACATTTAATGGTACAGAAGTTGGTACATTTAATGGTACAA  
 AAGTTAAT-----  
 -----AGT---  
 ACAGACACAAAAACATCACACTTCAATGCAGAATAAAACAATTTATAAACATGTGGCAGGAGGTAGGACGAG  
 CAATATATGCCCCCTCCCATTGCAGGAAACATAATATGTATATCAAAT---  
 ATCACAGGACTACTACTAGTACGTGATGGAGGCAATTTAAATAGC-----  
 -----  
 -----  
 ACAAATGACACATTTCAGACCTGGAGGAGGAAATATGAAGGACAATTGGAGAAGTGAATTATATAAATATAAAG  
 TGGTAGAACTTAAGCCATTG---GGAATAGCACCAACTGAAGCAAAAAGGAGAGTGGTG-----  
 -----GAGAGAGAAAAAAGAGCA--GTGGGA--ATAGGAGCT-----  
 TTGTTCTTGGGTTCTTGGGAGTA---GCAGGAAGCACTATG--GGCGCAGTGTC---  
 ATGACGCTGACGGTACAG---GCCAGACAA--CTGTTG---TCTGGTATAGTGCAACAGCAAAAC---  
 AACTTG---CTGAAA---GCTATAGAGGCGCAACAGCGTATGTTGCAACTCACAGTCTGGGGCATT  
 >HM623552  
 TTCTATTGCAATACCTCACAACTGTTTAAGGGTACATACAATGGTACAGACAATACATACAATGGGACA----  
 -----  
 -----  
 AAAGAAGCAAACATCACACTTCAATGCAGAATAAAACAATTTGTAAACATGTGGCAGGAGGTAGGAAAAGCAA  
 TGTATGCTCCTCCCATTGCAGGCCAAATAACATGTAAATCAAAT---

ATCACAGGACTACTATTAGTACGTGATGGAGGTAAGGTAACAAAAACAAATAGT-----  
 -----  
 -  
 ACCACAGATGATAAAATAGAGATATTCAGACCTTCAGGAGGAGATATGAGGGACAATTGGAGAAGTGAATTAT  
 ATAAATATAAAGTGGTAGAAATTAAGCCATTA---GGAATAGCACCCACTGGAGCAAAAAGGAGAGTGGTG--  
 -----CAGAGAGAAAAAAGAGCA---GTGGGA---  
 CTAGGAGCT-----ATGTTCTTGGGTTCTTGGGAGCA---GCAGGAAGCACTATG---  
 GGCGCAGCGTCA---ATAACGCTGACGGTACAG---GCCAAACAA---CTGTTG---  
 TCTGGTATAGTGCAACAGCAAAAT---AATTTG---CTGAGA---  
 GCTATAGAGGCGCAACAGCATATGTTGCAACTCACAGTCTGGGGCATT  
 >HM623555  
 TTCTATTGCAATACAACAAACCTGTTTTATTATAATGGAAGTGAGAAG-----  
 -----  
 -----  
 AATGACACAACCATCACCATCCAATGCAAAATAAAACAAATTATAAACATGTGGCAAGAGGTAGGACGAGCAA  
 TGTATGCCCCCTCCCATTCAGGAAACATAACATGTAGATCAAAT---  
 ATCACAGGATTACTATTGACACGTGATGGAGGAAACACGAATAGT-----  
 -----  
 -----  
 ACAGAGGAGATATTCAGACCTGGAGGAGGAAATATGAAGGACAATTGGAGAAGTGAATTATATAAATATAAGG  
 TGGTAGAAATTCAGCCATTG---GGAATAGCACCCAATAAGGCAAAAAGGAGAGTGGTG-----  
 -----GAGAGAGAAAAAAGAGCA---GTAGCA---ATAGGAGCT-----  
 GTGCTCCTTGGGTTCTTGGGAGTA---GCCGGAAGCACTATG---GGCGCGGCGGCA---  
 CTAACGCTGACGGTACAG---GCCAGACAA---CTGTTG---TCTGGTATAGTGCAACAGCAAAGC---  
 AATTTG---CTGAGA---GCTATAGAGGCGCAACAGCATATGTTGCAACTCACAGTCTGGGGCATT  
 >HM623562  
 TTCTATTGCAATACAACAAAACCTGTTTAATGCAAGTGAGACGGCTAGAAATATTAGTAAC-----  
 -----  
 -----  
 CCAAATGAAAATATCACACTCCCATGCAGGATAAAACAAATTATAAACATGTGGCAGGAGGTAGGACGAGCAA  
 TGTATGCCCCCTCCCATTCAGGAAACATAACATGTAACCTCAAAT---  
 ATCACAGGACTACTACTGACAAGGGATGGAGGAAACTATAGTATCACA-----  
 -----  
 -----  
 AATAACACAGAGACATTTCAGACCTGGAGGAGGAAATATGAAGGACAATTGGAGAAGTGAATTATATAAATATA  
 AAGTAGTAGAAGTTAAGCCATTG---GGAGTAGCACCCACTAAAGCAAAAAGGAGAGTGGTG-----  
 -----GAGAGAGAAAAAAGAGCA---ATAGGA---ATGGGAGCT-----  
 ---GTACTCCTTGGGTTCTTGGGAGCG---GCAGGAAGCACTATG---GGCGCAGCGTCA---  
 ATAACGCTGACGGTACAG---GCCAGACAA---TTGTTG---TCTGGTATAGTGCAACAGCAAAGC---  
 AATTTG---CTGAGA---GCCATAGAGGCGCAACAGCGCATGTTGCAACTCACGGTCTGGGGCATT  
 >HM623568  
 TTCTACTGCAATACATCAAACCTGTTTAATTCAACAAGACTAAAACCTGTTTAATTCAAGTGATCCA-----  
 -----  
 -----  
 GGCGACAAAACCATCACACTCCAATGCAGAATAAAACAAATTATAAACATGTGGCAGCAGGTAGGACGAGCCA  
 TGTATGCCCCCTCCCATTTGAAGGAAAAATATCATGTAACCTCAAGT---  
 ATCACAGGATTACTATTGACACGTGATGGAGGACATAGAAACACAACA-----  
 -----  
 -----  
 AACACACAGAGGTATTTCAGACCTGGAGGAGGAGATATGAGGGACAATTGGAGAAGTGAATTATATAAATATA  
 AAGTGGTAGAAATTCAACCATTG---GGAGTAGCTCCACCAAGGCAAAAAGGAGAGTGGTG-----  
 -----GAGAGAGAAAAAAGAGCA---TTGGGA---TTCGGAGCT-----  
 ---GTGCTCATTGGGTTCTTGGGAGCA---GCAGGAAGCACTATG---GGCGCGGCGTCA---  
 ATAACGCTGACGGTACAG---GCCAGACAA---CTGCTG---TCTGGTATAGTGCAACAGCAAAGC---  
 AATTTG---CTGAGA---GCTATAGAGGCGCAACAGCATATGTTGCAACTCACAGTCTGGGGCATT  
 >HM623571  
 TTCTATTGCAACACATCAAGACTGTTTAATGGTACATTTAATGAGACAAAGTTTAATAATACTTCAAACAACA  
 CC-----  
 -----  
 -----  
 ACTCCTCAAAACATCACTCTCCAATGCAGAATAAAACAAATCATAAACACGTGGCAGGGGGTAGGACAAGCAA

TATATGCCCCCTCCCATTCAGAGAAACATAACATGTAATTCAAGT ---  
ATCACAGGAATACTATTAACACGTGATGGAGGCCAAGACACAAATGGCACAGAT-----  
-----  
-  
GAGACCAAAAACGACACAGAGACATTCAGACCTATAGGAGGAGATATGAGGGACAATTGGAGAAGTGAATTAT  
ATAAGTATAAAGTGGTAGAAATTCAGCCATTA---GGAATAGCACCCACTAAGGCAAGAAGGAGAGTGGTG--  
-----GAAAGAGTAAGAAGAGCA---GCA-----  
CTGGGAGCT-----GTGTTCTTGGGTTCTTGGGAGCG---GCAGGAAGCACTATG---  
GGCGCAGCGTCA---ATAACGCTGACGGTACAG---GCCAGACAA---TTATTG---  
TCTGGTATAGTGCAACAGCAGAGT---AATCTG---CTGAGA---  
GCTATAGAGGCGCAACAGCATATGTTGCAACTCACGGTCTGGGGCATT  
>HM623577  
TTCTATTGCAACACATCAGGACTGTTTAAGGATACAAACGATACAAACATGTCTAATGATACAGGA-----  
-----  
-----  
AAGTCTAATGAGACAACACTTCACTGCAGAATAAAACAAATAATAAACATGTGGCAGGAGGTAGGACGAGCAA  
TATATGCCCCCTCCCATTCAGAGAGAAATAAGATGTGTATCAAAC---  
ATCACAGGACTACTATTGACACGTGATGGAGGACAGTTAGAAAAC-----  
-----  
-----  
AGCACAGAAGAGATATTCAGACCTGGAGGAGGAAATATGAGGGACAATTGGAGAAGTGAATTATATAAATATA  
AAGTGGTAGAAATCAAACCGCTA---GGAATAGCACCCACTGGTGCAAAAAGGAGAGTGGTG-----  
-----GAGAGAGAAAAAGAGCA---GTGGGA---ATAGGGGCT-----  
---GTGTTCAATTGGGTTCTTAGGAGCA---GCCGGAAGCACTATG---GGCGCAGCGTCA---  
ATAACGCTGACGGTACAG---GCCAGACAA---TTGTTG---TCTGGAATAGTGCAACAGCAAAGC---  
AATTTG---CTGAGG---GCTATAGAGGCGCAACAGCATCTGTTGCAACTCACAGTCTGGGGCATT  
>JN687726  
TTCTATTGCAATACATCAAATCTGTTTAATACTACAGGACCTACA-----  
-----  
-----  
ACAAATGCAACTATCACACTCCCATGCAGAATAAAACAGATTATAAACATGTGGCAGGGGGTAGGACAAGCAA  
TGTATGCCTCTCCCATTCAGAGAAATATAACATGTAACCTCAAAT---  
ATCACAGGATTACTATTGACACGTGATGGAGGTCATAATGGTACA-----  
-----  
-----  
TATGGTAATGAGACATTCAGACCTGGAGGAGGAGATATGAGGGACAATTGGAGAAGTGAATTATATAAATATA  
AGGTGGTGGAAATTAAACCATTA---GGAATAGCACCCACTGAGGCAAAAAGAAGAGTGGTG-----  
-----CAGAGAGAGAAAAAGAGCA---GTGGGA---CTAGGAGCT-----  
---GTGTTCTTGGGTTCTTGGGAGCA---GCAGGAAGCACTATG---GGCGCGGCGTCA---  
GTGGCGCTGACGGTACAG---GCCAGACAA---CTGTTG---TCTGGTATAGTGCAACAGCAAAGC---  
AATTTG---CTGAAA---GCTATAGAGGCGCAACAACATATGTTGCAACTCACGGTCTGGGGCATT  
>KC154023  
TTCTATTGCAATACAACAGGACTGTTTAATGCAACAAACCTCAATGCAACAAAT-----  
-----  
-----  
CCCAATGAAAACATCACACTCCCATGCAGAATAAAGCAATTTGTAAACATGTGGCAGGGGGTAGGACGAGCAA  
TGTATGCCCCCTCCTGTTGAAGGAATAATAACATGTAACCTCAAGT---  
ATCACAGGACTACTGTTGACACGTGATGGGGGAAACACAGACAAT-----  
-----  
-----  
AACACAACAGAGACATTCAGACCTGGAGGAGGAAATATGAAGGACAATTGGAGAAGTGAATTATATAAATATA  
AAGTAGTAGAAATTCAACCATTG---GGAATAGCACCCACAAACGCAAAAAGGAGAGTGGTG-----  
-----GAGAGAGAAAAAGAGCA---GTGGGA---ATAGGAGCT-----  
---GTATTCCTTGGGTTCTTGGGAGCA---GCAGGAAGCACTATG---GGCGCGGCGTCA---  
ATAACGCTGACGGTACAG---GCCAGACTA---CTGTTG---TCTGGTATAGTGCAACAGCAAAGC---  
AATTTG---CTGAGA---GCTATAGAGGCGCAACAACATATGTTGCAACTCACGGTCTGGGGCATT  
>HM204619  
TTCTATTGCAATACAACACAATTGTTTAATAGTACATATAATGTTACAGATCCGTTTAATAGTACAGAACTG-----  
-----  
-----

GGTAATGATACCATCACACTCCCATGCAGAATAAAGCAAATTATAAACATGTGGCAGAGGGTAGGACGAGCAA  
TGTATGCTCCTCCCATTGCAGGAAACATAACATGTAGATCAAAT ---  
ATCACAGGATTGCTATTGGTGCGTGATGGAGGAAATAATAATCAG-----  
-----  
-----  
ACAGGGAGAGAGATATTCAGACCTGCAGGAGGGAATATGAAAGATAATTGGAGAAGTGAATTACATAAATATA  
AAGTGGTAGAAATTAAGCCATTG---GGAATAGCACCCACTAAGGCAAAAAGGAGAGTGGTG-----  
-----GAGAGAGAAAAAAGAGCA---GTGGGA---CTGGGAGCT-----  
---GTGTTCTTTGGGTTCTTAGGCGCA---GCAGGAAGCACTATG---GGCGCGGCGTCA---  
ATAGCGCTGACGGCACAG---GCCAGACAA---GTGTTG---TCTGGTATAGTGCAACAGCAAAGC---  
AATTTG---CTGAGG---GCTATAGAGGCGCAACAACATATGTTGCAACTCACGGTCTGGGGCATT  
>JX140666  
TTTTATTGCAATACAACAAATCTGTCTAATACAAGTCTGTTTAATGACAGTAGT-----  
-----  
-----  
TCAAAACAAAACCATCACGCTCCCATGTAGGATAAAACAAATTATAAACATGTGGCAGGGGGTAGGACGAGCAA  
TGTATGCCCCCTCCCATTGCAGGGAACATAACATGCAACTCAAGC---  
ATCACAGGACTATTATTAACACGTGATGGAGGAAACATGAGTGGCACTGATGAAGGAAAAACAACACGACTA  
AC-----  
GGGAATAACACGACTAACGGGATTGAAATATTTAGACCTGGAGGAGGAAATATGAAGGACAATTGGAGAAGTG  
AATTATATAAATATAAAGTGGTAGAAATTCAGCCATTG---  
GGAGTAGCACCCACGAAGGCAAAAAGGAGAGTGGTG-----  
--GAGAGAGAAAAAAGAGCA---GTGGGA---ATAGGAGCT-----  
GTACTCCTTGGGTTCTTGGGAACA---GCAGGAAGCACTATG---GGCGCGGCGTCA---  
ATAACGCTGACGGTACAG---GCCAGACAA---CTGTTG---TCTGGTATAGTGCAACAGCAAAGC---  
AATTTG---CTGAGA---GCTATAGAGGCGCAACAGCATATGTTGCAACTCACAGTCTGGGGCATT  
>KF114893  
TTCTATTGCAATACAACAGCACTGTTTAATAGGACTACATACAATACTACATACAATGGAACAGATACAACA-  
-----  
-----GACAAT-----  
GGGACAGATACAACATCACACTTCAGTGCAGAATAAAACAAATTATAAACATGTGGCAGGGGGTAGGACAAG  
CAATGTACGCCCTCCAGTTGAAGGAATCATAACATGTAAC TCAAAT ---  
ATCACAGGAATACTATTGACACGTGATGGAGGTACAGGCGAAGAC-----  
-----  
-----  
AATAAACACAGAGATATTTAGACCTGGAGGAGGAAATATGAAGGACAATTGGAGAAGTGAATTATATAAATATA  
AAGTGGTAGAAATTAAGCCATTG---GGAATAGCACCCACTGAGGCAAGAAGGAGAGTGGTG-----  
-----GAGAGAGAAAAAAGAGCA---GTGGGA---ATAGGAGCT-----  
---GTGATCATTGGGTTCTTGGGAGCA---GCAGGAAGCACAATG---GGCGCGGCGTCG---  
ATGACGCTGACGGTACAG---GCCAGACAA---CTGTTG---TCTGGTATAGTGCAACAGCAAAT---  
AATTTG---CTGAGG---GCTATAGAGGCGCAACAACATATGTTGCAACTCACGGTCTGGGGCATC  
>JN681253  
TTCTATTGCAATACAACAAATCTGTTTAATGGAACAAAGCTGTTTAATGAAAGTGGTTCAAGTGGTTCAAAC-  
-----  
-----  
ATAAGTA ACTATATCATACTCCCATGCAGAATGAAACAAATTATAAACATGTGGCAAGGGGTAGGACGAGCAA  
TGTACGCCCTCCTATTGCAGGAAACATAACATGTAGATCAAAC---  
ATCACAGGACTACTATTGACACGTGATGGA---AACAACAGCAAC-----  
-----  
-----  
ACTGAGCAAACATTTCAGACCTGGAGGGGGAATATGAAGGACAATTGGAGAAGTGAATTATATAAATATAAAG  
TGGTAGAAATTAAGCCATTG---GGAATAGCTCCCACTGGAGCAAAAAGGCGAGTGGTG-----  
-----GAGAGAGAAAAAAGAGCA---ATAGGA---ATAGGAGCT-----  
GTGTTCTTGGGTTCTTGGGAGTA---GCAGGAAGCACTATG---GGCGCGGCGTCA---  
ATGACGCTGACGGTACAG---GCCAGACAA---CTGTTG---TCTGGTATAGTGCAACAGCAAAGT---  
AATTTG---CTGAGA---GCAATAGAGGCGCAACAGCATATGTTGCAACTCACGGTCTGGGGCATT  
>JN681255  
TTCTATTGCAATACATCACAAC TGT T TACTGGAAATGGTACAGCTAATAGTACAGGC-----  
-----  
-----

AATACAACCATCACCACACTCCCATGCAGAATAAAACAAATTATAAACATGTGGCAGGGGGTAGGACGAGCAA  
TGTATGCCCCCTCCCATTGAAGGAAACATAACATGTAAATCAAAC---  
ATCACAGGACTACTATTGACACGTGATGGAGGCAACGACAACAATCAA-----  
-----  
-----  
AGTAGAACAGAGACATTTAGACCTGGAGGAGGAAATATGAAGGACAATTGGAGAAGTGAATTATATAAATATA  
AAGTGGTAGAAATTAAGCCATTA---GGAATAGCACCCACTGAAGCAAAAAGGAGAGTGGTG-----  
-----GAGAGAGAAAAAAGAGCA---GTGGGA---CTAGGAGCT-----  
---GTAATCCTTTGGGTTCTTGGGAGCA---GCAGGAAGCACTATG---GGCGCGGCGTCA---  
ATAACGCTGACGGTACAG---GCCAGACAA---TTGTTG---TCTGGTATAGTGCAACAGCAAAGC---  
AATTTG---CTGAAA---GCTATAGAGGCGCAGCAGCATATGTTGCAACTCACAGTCTGGGGCATT  
>HQ595752  
TTCTATTGTAATACATCACAGCTGTTTAATAGGACTGATACAGACATGCAGCAAGACAACACA-----  
-----  
-----  
GGAAATGATACAATCACACTCCAATGCAGAATAAAACAAATTATAAACATGTGGCAGGAGGTAGGACGAGCAA  
TGTATGCCTCTCCCATTGCAGGAGACATAACATGCAAAATCAAAT---  
ATCACAGGATTAATATTGACACGTGATGGAGGTAATAGCAGCACAGGGAATGAT-----  
-----  
-----  
AGTAATAGCCGCACAGAGATATTCAGACCTGCAGGAGGAGATATGAGGGACAATTGGAGAAGTGAATTATATA  
AATATAAAGTGGTGGAGATTAAGCCATTA---GGAGTAGCACCCACTCATTCAAAAAGGAGAGTGGTG-----  
-----GAAAGAGAAAAAAGAGGA-----  
ATAGGAGCT-----GTGCTCCTTGGGTTCTTGGGAGCA---GCAGGAAGCACTATG---  
GGCGCAGCGTCA---ATAGCGCTGACGGTACAG---GCCAGACAA---CTGTTG---  
TCTGGTATAGTGCAACAGCAAAGC---AATTTG---CTGAGA---  
GCTATAGAGGCGCAACAGCATATGTTGCAACTCACGGTCTGGGGCATT  
>HQ615957  
TTCTATTGCAATACATCAGCACTGTTTAATGGCAATGGCACATCTGTTAATGAT-----  
-----  
-----  
ACAACTTCAACCATCACACTTCCATGCAGAATAAAACAAATTATAAACATGTGGCAGGAGGTAGGACGAGCAA  
TGTATGCCCCCTCCCATTGCAGGAAACATAGCATGTGAATCAAAT---  
ATCACAGGACTACTATTAGAACGTGATGGAGGTGGAGGCAATGAC-----  
-----  
-----  
ACAGAAGAGATATTTCAGACCTGGAGGAGGAAATATGAGGGACAATTGGAGAAGTGAAGTGTATAAATATAAAG  
TGGTAGAAATTCAACCATTA---GGAGTAGCACCCACTAAGACAAAAGGAGAGTGGTG-----  
-----GAGAGAGAGAAAAAGAGCA---GTGGGA---ATAGGAGCT-----  
GTGTTCTTGGGTTCTTGGGAGCA---GCAGGAAGCACTATG---GGCGCAGCATCA---  
ATAACGCTGACGGTACAC---GCCAGACAA---TTATTG---TCTGGTATAGTGCAACAGCAAAGC---  
AATTTG---CTGAGG---GCTATAGAGGCGCAACAGCATCTGTTGCAACTCACGGTCTGGGGCATT  
>HQ595760  
TTCTATTGTAATACAACAAGACTGTTTAATAATACAGAAAGTAACTCAACCATCACCGGGAAT-----  
-----  
-----  
CATTCAGACACTATCACACTCCCATGTAGAATAAAACAAATTATAAACATGTGGCAGGAGGTAGGACGAGCAA  
TGTATGCCCCCTCCCATTGCAGGAACCATAACATGTATCTCAAAT---  
ATCACAGGACTACTATTGGTACGGGATGGAGGCATACCAAATGAG-----  
-----  
-----  
AACACAGAAATATTTCAGACCTCAAGGAGGAAATATGAAGGACAATTGGAGAAGTGAATTATATAAATATAAAG  
TGGTAGAAATTAAGCCATTA---GGAATAGCACCCACTACGGCAAGAGAAGAGTGGTG-----  
-----CAGAGAGAAAAAAGAGCA---GTGGGA---ATAGGAGCT-----  
GTGCTCCTTGGGTTCTTGGGAGCA---GCAGGAAGCACTATG---GGCGCGGCGTCA---  
ATAACGCTGACGGTACAG---GCCAGACAT---CTGTTG---TCTGGTATAGTGCAACAGCAAAGC---  
AATTTG---CTGAGA---GCTATAGAGGCGCAACAGCATATGTTGCAACTCACAGTTTGGGGCATT  
>KT183289  
TTCTATTGTAATACAACAAAATTGTTTAATAGTACATACAATAGTACATACTATAAGAATAATAACTAATA  
GTACAGAA-----

-----  
GAAAACTCTACCATCACGCTCACATGCAGAATAAAGCAATTTATAAACATGTGGCAGGAGGTAGGACGGGCAA  
TGTATGCCCCCTCCCATTTGAAGGAAACATAACATGTAGATCAAAC---  
ATCACAGGACTACTACTGACGCGTGATGGAGGAAATTC AACAGAT-----  
-----  
-----  
ACTCAAACGGAGACATTTCAGGCCTGAGGGAGGAAATATGAAGAACAATTGGAGAAGTGAATTATATAAATACA  
AAGTGGTAGAAATTAAACCATTG---GGAATAGCACCCACTAGAGCAAAAAGGAGAGTGGTG-----  
-----CAGAGGGAAAAAAGAGCA---GTGGGA---ATAGGAGCT-----  
---GTGTTCTTGGGTTCTTGGGAGCA---GCAGGAAGCACTATG---GGCGCAGCATCA---  
ATAACGCTGACGGTACAA---GCCAGACAA---CTATTG---TCGGGTATAGTGCAACAGCAAAGC---  
AATTTG---CTGAGA---GCTATAGAGGCGCAACAGCATATGTTGCAACTCACGGTCTGGGGCATT  
>GU080183  
TTCTATTGCGATACATCAGCACTGTTTAAATAGTACATACAATTCTGCATACAATAAGGAGACTAATAGTACAT  
ACAATAAT-----  
-----GGGACA-----  
GTAAGTAATTC AACTATCACACTTCCATGCAGAATAAAGCAAATTATAAACATGTGGCAAGAGGTAGGACGAG  
CAATGTATGCCCCCCCCATTG CAGGAAATATAACATGTAAATCAAAT---  
ATCACAGGATTACTATTAGTACGTGATGGAGGAGGCACAAATACA-----  
-----  
-----  
ACAAATGAGACATTTCAGACCTCAAGGAGGAAATATGAAGGACAATTGGAGAAGTGA ACTATATAAATATAAAG  
TGGTAGAAATTGAGCCATTG---GGAATAGCACCCGATAAGGCAAGAAGGAGAGTGGTG-----  
-----AAGAGAGAAAAAAGAGCA---GTGGGA---ATAGGAGCT-----  
TTGTTCTTGGGTTCTTGGGAGCA---GCAGGAAGCACTATG---GGCGCAGCATCA---  
TTAATGCTGACGGTACAG---GCCAGACAA---CTGTTG---TCTGGTATAGTGCAACAGCAAAGC---  
AATTTG---CTGAGA---GCTATAGAGGCGCAACAGCATATGTTGCAACTCACGGTCTGGGGCATT  
>GU080187  
TTCTACTGCAATACATCAAGCCTATTCAATATTACATACCATAACAATGGAACAAACACTAGTACATACACAG  
AC-----  
-----  
AGCAACAGCATAATTACAATTCCATGCAGAATAAAACAAATTATAAACATGTGGCAGGGGGTAGGACGAGCAA  
TGTATGCCCTCCCCCATTG CAGGAAACATAACATGTAAATCAAAT---  
ATCACAGGAATACTATTAAACACGTGATGGAGGCTATCTAGAGAACAATACA-----  
-----  
-----  
AATAATGACAAAGAAATATTTCAGACCTGGAGGAGGAAATATGAAAGACAATTGGAGAAGTGA ACTATATAAAT  
ATAAAGTGGTAGAAATTAGACCATTG---GGAATAGCACCCACTAAAGCAAAAAGGCTAGTGGTG-----  
-----AAGAGAGAAAAAAGAGCA---GTAACA---CTAGGAGCT---  
-----CTGTTCTTGGGTTCTTGGGAACA---GCTGGAAGCGCTATG---GGCGCGGCGTCA---  
CTGACGCTGACGGTACAG---GCCAGACAA---TTGTTG---TCTGGTATAGTGCAACAGCAAAT---  
AATTTG---CTGAGG---GCTATAGAGGCGCAACAGCATATGTTGCAACTCACAGTCTGGGGCATT  
>HM623590  
TTCTATTGTAATACATCAAACTGTTTAAATAGGACAGAAAATAATTCAATAGAAAGTAATTCCACC-----  
-----  
-----  
AGTAATGCCAACATCACACTTCAATGCAGGATAAAACAAATTATAAACATGTGGCAGGGGGTAGGACGAGCAA  
TGTATGCCCCCTCCCATTTGCAGGAAACATAACCTGTAACTCAAAT---  
ATCACAGGAATACTATTGACACGTGATGGAGGAAGTAAAAATAAC-----  
-----  
-----  
AGTACAGAGACATTTCAGACCTGGAGGAGGAAATATGAAGGACAATTGGAGAAGTGAATTATATAAATATAAAG  
TGGTAGAAATTAAGCCATTG---GGAATAGCACCCACTAAGGCAAAAAGGAGAGTGGTG-----  
-----GAGAGAGAAAAAAGAGCA---GTGGGA---ATAGGAGCT-----  
GTGTTCTTGGGTTCTTGGGAGCA---GCAGGAAGCACTATG---GGCGCGGCGTCA---  
ATAACGCTGACGGTACAG---GCCAGACAA---CTGTTG---TCTGGTATAGTGCAACAGCAGAAT---  
AATTTG---CTGAGG---GCTATAGAGGCGCAACAGCATATGTTGCAACTCACGGTCTGGGGCATT  
>HM623598  
TTCTATTGCAATACCACAAAAATTGTTTAAATAAGACTATTGCA-----  
-----

-----  
AACGGAACCATCACACTCCCATGCAGAATAAAACAAATTATAAACATGTGGCAGGAGGTAGGACGAGCAATGT  
ATGCCCCCTCCCATTCAGGAAACATAACATGTGAATCAAAT---  
ATCACAGGACTATTATTGCTACGTGATGGAGGAAGGATTAATGACACT-----  
-----  
-----  
AATAACACAGAAGAGATATTCAGACCTGGAGGAGGAAATATGAAGGACAATTGGAGAAGTGAATTATATAAAT  
ATAAAGTGGTAGAAGTTCAGCCATTG---GGAATAGCTCCTACTGAATCAAAAAGGAGAGTGGTG-----  
-----GAGAGAGAAAAAAGAGCA---GTGGGA---ATGGGAGCT---  
-----GTACTCCTTGGGTTCTTGGGAGCT---GCAGGAAGCACTATG---GGCGCGGCGTCA---  
ATAACGCTGACGGCACAG---GCCAGACAA---CTGTTG---TCTGGTATAGTGCAACAGCAAAGC---  
AATTTG---CTGAGA---GCTATAGAGGCGCAACAGCATATGTTGCAACTCACGGTCTGGGGCATT  
>HM623604  
TTCTATTGCAATACATCAGGACTGTTTAATAATAGCAAAAAGT-----  
-----  
-----  
GATTCAAACATAACCACACTCCCATGCAAAATAAAACAAATTATAAACATGTGGCAGAAGGTAGGACGAGCAA  
TGTATGCCCCCTCCCATTCAGGAAACATAACATGTAACCTCAAAT---  
ATCACAGGACTACTATTGGTACGCGATGGGGGATACAATGTAGACAATCAG-----  
-----  
-----  
ACAGACAATAAGACAGAGATTTTTAGACCTGGAGGAGGAAATATGAAGGATAATTGGAGAAGTGAATTATATA  
AATATAAAGTGGTTGAAATTAAGCCATTA---GGAATAGCACCCACTAAGGCAAAAAGGAGAGTGGTG-----  
-----GAGAGAGAAAAAAGAGCA---GTGGGA---  
CTAGGAGCT-----GTGTTCTTGGGTTCTTGGGAGCA---GCAGGAAGCACTATG---  
GGCGCGGCATCA---ATAACGCTGACGGTACAG---GCCAGACAA---CTGTTG---  
TCTGGTATAGTGCAACAGCAAAGC---AATTTG---CTGAGA---  
GCTATAGAGGCGCAACAGCATATGTTGCAACTCACGGTCTGGGGCATT  
>HM623606  
TTCTATTGCAATACAACAAGGCTGTTTACAAATCTGAGTGCAAGT-----  
-----  
-----  
AGTGATTATACAATCACACTCCCATGCAGAATAAAACAAATTATAAACATGTGGCAGGAGGTAGGACGAGCAA  
TGTATGCCCCCTCCCATTCAGGAGAAATAAAATGTAGCTCTAAT---  
ATCACAGGACTACTATTGACGCGTGATGGAGGAATAGGAGACAAC-----  
-----  
-----  
ACAACAGAGATATTCAGACCTGGAGGAGGAAATATGAAAGATAATTGGAGAAGTGAATTATATAAATATAAAG  
TGGTAGAAATTAAGCCATTA---GGAATAGCACCCACTGGGGCAAAAAGGAGAGTGGTG-----  
-----GAGAGAGAAAAAAGAGCA---GCA-----CTAGGAGCT-----  
ATGTTCTTGGGTTCTTGGGAGCA---GCAGGAAGCACTATG---GGCGCGGCGTCA---  
ATAACGCTGACGGTACAA---GCCAGACAA---CTGTTG---TCTGGGATAGTGCAACAGCAAAGC---  
AATTTG---CTGAGA---GCTATAGAGGCGCAACAGCACATGTTGCAACTCACAGTCTGGGGCATT  
>HM623584  
TTCTATTGCAATACATCAGGCCTGTTTAATGGTACATACAATAGTACAAGAAGTAATGCAAGT-----  
-----  
-----  
TCAAGTCAAATCATCACACTCCAATGCAGAATAAAACAGATTATAAACAGGTGGCAAGAGGTGGGACGAGCAA  
TGTATGCCCCCTCCCATTCAGGAAAAATAACATGTAACCTCAAGT---  
ATCACAGGACTACTATTGACACGGGATGGAGGAACAAGTGATAAT-----  
-----  
-----  
GGAACAGAGACATTTCAGACCTGGAGGAGGAAATATAAGGGACAATTGGAGAAGTGAATTATATAAATATAAAG  
TGGTAGAAATTAATCCATTG---GGAGTAGCACCCACCAAGGCAAAAAGGAGAGTGGTG-----  
-----GAGAGAGAAAAAAGAGCA---GTGGGA---ATAGGAGCT-----  
GTGCTCCTTGGGTTCTTGGGAGCG---GCAGGAAGCACTATG---GGCGCAGCGTCA---  
ATAACGCTGACGGTACAG---GCCAGACAA---CTGTTG---TCTGGTATAGTGCAACAGCAAAGC---  
AATTTG---CTGAGA---GCTATAGAGGCGCAACAGCATATGTTGCAACTCACAGTCTGGGGCATT  
>HM623587

TTCTATTGCAATACAACAAACCTGTTCAATTTTAATGAAACACAACCTTAATGAAATACAACCTTAATAATGCAA  
CAGAA-----AAC---  
AACACAAGCACCAATATCACACTCACATGCAGAATAAAACAATTTGTAAACATGTGGCAAAGGGTAGGACGAG  
CAATGTATGCCCCCTCCCATTCAGGAAATATAACATGTCATTCAAAC---  
ATCACAGGACTGCTATTGACACATGATGAAGAAGAAATGAATAACGCAACT-----  
-----  
GGGGCAAATAAAACAGAGGTATTCAGACCTATAGGAGGCAATATGAAGGACAATTGGAGAAGTGAATTATACA  
AATATAAAGTAGTAGAAATTAAACCATTG---GGAGTAGCACCCACAGAGGCAAAACGGAGAGTGGTG-----  
-----GAGAGAGAAAAAAGAGCA---GCA-----  
ATAGGAGCT-----ATGTTCCCTTGGGTTTCTGGGAGCG---GCAGGAAGCACTATG---  
GGCGCGGTGTCA---TTGACGCTGACGGTACAG---GCCAGACAA---CTGCTG---  
TCTGGTATAGTGCAACAGCAAAGC---AATTTG---CTGAGA---  
GCTATAGAGGCGCAACAACATCTGTTGCAACTCACGGTCTGGGGCATT  
>KF114886  
TTCTATTGCAATACATCAAACCTGTTTAATGGCACATACAATGGCACATATCAG-----  
-----  
GGTAATGATACAATAACACTTCAATGCAGAATAAAACAAATTATAAACAGGTGGCAGGAGGTAGGAAGTGCAA  
TGTATGCCCCCTCCCATTAAGGAAACATAACATGTAAATCAAAT---  
ATCACAGGACTACTATTGGTACGTGATGGAGGCTCAGAAAAACAAC-----  
-----  
ACAACCGAGACATTTCAGACCTGAAGGAGGAAATATGAAAGACAATTGGAGAAGTGAATTATATAAATATAAGG  
TGGTAGAAGTTAAGCCATTA---GGAATAGCACCCACTGACGCAAGAAGGAGAGTGGTG-----  
-----GAGAGAGAAAAAAGAGCA---GTGGGA---ATAGGAGCT-----  
GTGTTCCCTTGGATTCTTAGGAGCA---GCAGGAAGCACTATG---GGCGCAGCAGCA---  
GTGACGCTGACGGTACAG---GCCAGACAA---TTATTG---TCTGGTATAGTGCAACAGCAAAGC---  
AATTTG---CTGAGA---GCTATAGAGGCGCAACAGCATATGTTGCAACTCACAGTCTGGGGCATT  
>KF114887  
TTCTACTGCAATACAACATACCTGTTTAATAACAGTGCA-----  
-----  
TCAGAGGGAAACATCACAATCCCATGCAGAATAAAACAGATTATAAATATGTGGCAGGAGGTAGGACGAGCAA  
TGTATGCCCCGCCCCGTTGCAGGAAACATAACATGTAAATCAAAT---  
ATCACAGGATTACTATTAGTACGTGATGGTGAAATGAGGACAACAGCACAGAT-----  
-----  
GGGAATAAGACAGAGATATTTCAGACCTCAAGGAGGAAATATGAAGGACAATTGGAGAAGTGAATTATATAAAT  
ATAAGTGGTAGAAGTTAAGCCATTA---GGAATAGCACCCACTACAGCAAAAAGGAGAGTGGTG-----  
-----GAAAGAGAAAAAAGAGCA---GTCGGA---ATAGGAGCT---  
-----GTGTTCCCTTGGGTTCTTGGGAGCA---GCAGGAAGCACTATG---GGCGCAGCGTCA---  
GTGGCGCTGACGGTACAA---GCCAGACAA---TTGTTG---TCTGGTATAGTGCAACAGCAAAT---  
AATTTG---CTGAGA---GCTATAGAGGCGCAACAGCATATGTTGCAACTCACAGTCTGGGGCATT  
>MF284967  
TTTTATTGCAATACATCAAGCCTGTTTAATAGTACATACTATCCTAATGATACAGAGAGTAACTCAAGCAAC-  
-----  
TCAAGCAACACCATCACACTTCAATGCAGAATAAAGCAAATTTGTAAACATGTGGCAGGAGGTAGGACAAGCAA  
TGTATGCCCCCTCCAGTTGCAGGAAAAATAACATGTAACTCAAAT---  
ATCACAGGACTACTACTGACACGTGATGGAGGAAAGGGTGGTGGTACAGAA-----  
-----  
AATAACACAGAGATATTTCAGACCTGGAGGAGGAGATATGAGGGACAATTGGAGAAGTGAATTATATAAATATA  
AAGTTGTAGAGATTAAACCATTG---GGAATAGCACCCACTGATGCAAAAAGGAGAGTGGTG-----  
-----GAAAGAGAAAAAAGAGCA---GCA-----ATAGGAGCT-----  
---GTACTCCTTGGGTTCTTGGGAGCA---GCCGGAAGCACTATG---GGCGCGGCGTCA---  
ATAACGCTGACGGTACAG---GCCAGACAA---TTGTTG---TCTGGTATAGTGCAACAGCAAAGC---  
AATTTG---CTGAGA---GCTATAGAGGCGCAACAGCATATGTTGCAACTCACAGTCTGGGGCATT

>KF725897

TTCTATTGCAACACATCAGGCCTGTTTAAATGGAACATACAATCCTAATGGAACACACAGTTTTAAATAATGGT-

-----  
-----

ACCAATGGTACCATCACACTTCAATGCAGAATAAAACAAATTATAAACATGTGGCAGAAAGTAGGAAGAGCAA  
TGTATGCCCCCTCCCATTCAGGAAGAATAACATGTAAATCAAAT---  
ATCACAGGACTACTATTGACACGTGATGGAGGAAGCAACAATACT-----  
-----

ACAGAGATATTCAGACCTGCAGGAGGAGATATGAGGGACAATTGGAGAAGTGAATTATATAAATATAAAGTGG  
TAGAAATTAAGCCATTA---GGAGTAGCACCCACTGGGGCAAAAAGGAGAGTGGTG-----  
-----GAGAGAGAAAAAAGAGCA---GTAGGA---ATAGGAGCT-----  
GTGTTTCCTTGCGTTCTTGGGAGCA---GCAGGAAGCACTATG---GGCGCAGCATCA---  
ATAACGCTGACGGTACAG---GCCAGACAA---CTGTTG---TCTGGTATAGTGCAACAGCAAAGC---  
AATTTG---CTGAGA---GCTATAGAGGCGCAACAGCATATGTTGCAACTCACGGTCTGGGGCATT

>KF725917

TTCTATTGCAACACATCACAATTGTTTAAATAGTACAGTCAATGGTACAATATCTAATAATACAGGCAAT----

-----  
-----

AGTACAGACATCATCACACTCCCATGCAGGATAAAACAAATTATAAACATGTGGCAGGGGGTAGGACGAGCAA  
TGTATGCCCCCTCCCATTCAGGAACATAACATGTAAGTCAAAC---  
ATCACAGGATTACTATTGACACGTGATGGAGGATATAACACAAGTGGG-----  
-----

GATAACGAGACATTCAGACCTGCAGGAGGAGATATGAGAGACAATTGGAGAAGTGAATTGTATAAATATAAAG  
TAGTAGAAATTCAGCCATTA---GGAATAGCACCCACAGGAGCAAGAAGGAGAGTGGTG-----  
-----GAGAGGCAAAAAGAGCA---GTAGGA---ATAGGAGCT-----  
GTGTTTCCTTGCGTTCTTGGGAGTA---GCCGGAAGCACTATG---GGCGCGGCGTCA---  
ATGGCGCTGACGGTACAG---GCCAGACAA---TTGTTG---TCTGGTATAGTGCAACAGCAAGGC---  
AATTTG---CTGAGA---GCTATAGAGGCGCAACAACACATGTTGCAACTCACAGTCTGGGGCATT

>JN681257

TTCTATTGTAATACATCAAAACTGTTTAAATGAGACAGAAACGAAGTCA-----

-----  
-----

AACATCTCAAACATCACACTTCCATGCAGAATAAAACAAATTATAAACATGTGGCAGGGGGTAGGACGAGCAA  
TGTATGCCCCCTCCTATTGCAGGAAGCATAACATGTAAGTCAAAT---  
ATCACAGGACTACTATTGACACGTGATGGAGGAGGAGGAAATGAACT-----  
-----

AATCACACAGAAACATTCAGACCTACAGGAGGAAATATGAAGGACAATTGGAGAAGTGAATTATATAAATATA  
AAGTGGTAGAAATTAAGCCATTG---GGAATAGCACCCACTAGAGCAAAAAGGAGAGTGGTG-----  
-----GAGAAAGAAAAAAGAGCA---GTGGGA---ATAGGAGCT-----  
---GTGTTTCCTTGCGTTCTTGGGGGCA---GCAGGAAGCACTATG---GGCGCGGCGTCA---  
ATAACGCTGACGGTACAG---GCCAGACAA---CTGTTG---TCTGGTATAGTGCAACAGCAAAT---  
AATTTG---CTGAGG---GCTATAGAGGCGCAACAGCATATGTTGCAACTCACGGTCTGGGGCATT

>JN681259

TTCTATTGCAATACAACAAAACCTGTTTAAATGAAAGTGAAGTAAAG-----

-----  
-----

TCAAACGAAACAATCACACTCCCATGCAGAATAAAACAAATTATAAACATGTGGCAGGAGGTAGGACGAGCAA  
TGTATAACCCTCCCATGGAAGGAAACATAACATGTAAGTCAAGT---  
ATCACAGGACTATTATTGACATGGGATGGAGGAAATAACACAAAT-----  
-----

AAAAATCAAACATTCAGACCTGGAGGAGGAGATATGAGGGACAATTGGAGAAGTGAATTATATAAATATAAAG  
TGGTAGAAATTAAGCCATTG---GGAGTAGCACCCACTGAGGCAAAAAGGAGAGTGGTG-----  
-----GAGAGAGAAAAAAGAGCA---GTGGGA---ATAGGAGCT-----  
GTGCTCTTTGGGTTCTTGGGAGCA---GCAGGAAGCACTATG---GGCGCGGCGTCA---  
ATAACGCTGACGGTACAT---GCCAGACAA---CTGTTG---AATGGTATAGTGCAACAGCAAAC---  
AATTTG---CTGAGA---GCTATAGAGGCGCAACAGCATATGTTGCAACTCACGGTCTGGGGCATT

>KC154028

TTCTATTGTAACACAACAGAACTGTTTTATAATGATTTTAATAATACAGGA-----

-----  
-----

AAGAATGTAAACATCACACTCCAGTGCAAAATAAAACAAATTATAAACATGTGGCAGCAGGTAGGACGAGCAA  
TGTATGCCCCCTCCCATTTGAAGGAAACATAACATGTACATCAAAT---

ATTACAGGACTACTATTGACATGGGATGGAAACATAACAAATGAAGATAATACA-----TCT----

-----  
-----

AGTACAAATCATACATTTCAGACCTGCAGGAGGAGATATGAGGGACAATTGGAGAAAGTGAACATATATAAATATA  
AAGTGGTAGAAGTTAAGCCATTG---GGAGTAGCACCCACTAAGGCACAAAGGAGAGTGGTG-----

-----GAGAGGAAAAAAAAGAGCA---TTGGGA---ATAGGGGCT-----

---ATGTTCTTGGGATCTTGGGAACA---GCAGGAAGCACTATG---GGCGCGGCGTCA---

ATAACGCTGACGGTACAG---GCCAGACAA---TTATTG---TCTGGTATAGTGCAACAGCAAAGC---

AATTTG---CTGAGA---GCTATAGAGGCGCAACAGCATCTGTTGCAACTCACGGTCTGGGGCATT

>KF725924

TTCTATTGCGATACATCAAATCTGTTCAATGAAAGTAAAAGTTGGTATTCAAACAACAGTACA-----

-----  
-----

GACGACATAAACATCACACTCCCCCTGTAGGATAAAACAAATTGTAAACATGTGGCAGAGAGTAGGACAAGCAA  
TATATGCCCCCTCCCATTTGCAGGAAGCATAACATGTAAATCAAAT---ATCACAGGACTACTATTGGCA----

---CGCATAACAGATAACACA-----

-----  
AATGGGACAGAGAAATTTAAACCTGAAGGAGGAAATATGAAGAATAATTGGAGAAAGTGAATTATATAAATATA  
AAGTGGTAGAAATTC AACCATTA---GGAATAGCCCCCACTGCATCAAAAAGGAGAGTGGTA-----

-----GAGAGAGAAAAAAGAGCA---GTGGGA---ATAGGAGCT-----

---GTGCTCCTTGGGTTCTTGGGAGCA---GCAGGAAGCACTATG---GGCGCGGCGTCA---

ATAACGCTGACGGTACAG---GCCAGACAA---CTGTTG---TCTGGTATAGTGCAACAGCAAAGC---

AATTTG---CTGAGA---GCTATAGAGGCGCAACAGCATATGTTGCAGCTCACAGTCTGGGGCATT

>KF725926

TTCTATTGCTATACATCACAACCTGTTTAATAGTACATACAAGACATACAATCATAGTTGGACAACA-----

-----  
-----

GGTAATGCAACCATCACACTTCCATGCAGAATAAAACAAATTATAAACATGTGGCAGGGAGTAGGACAAGCAA  
TGTATGCCCCCTCCCATTTCAAGGAAATATAACATGTAAATCAAAT---

ATCACAGGAATACTATTAGTACGTGATGGAGACAAAAATGATACA-----

-----  
-----

GAGACATTTCAGACCTCAAGGAGGAAATATGAAAGACAATTGGAGAAGTGAATTATATAAATATAAAGTGGTAG  
AAATTAAGCCATTA---GGAATTGCACCTACTGGAGCAAAAAGGAGAGTGGTG-----

-----GAGAGAGAAAAAAGAGCA---GTGGGA---ATAGGAGCT-----

GTACTCCTTGGGTTCTTGGGAGCA---GCAGGAAGCACTATG---GGCGCAGCGTCA---

ATAACGCTGACGGTACAG---GCCAGACAA---TTATTG---TCTGGTATAGTGCAACAGCAGGAC---

AATCTG---CTGAGG---GCTATAGAGGCGCAACAGCATATGTTGCAACTCACGGTCTGGGGCATT

>KF725934

TTCTATTGCAATACATCAACCTTGTTTAATAGTACATATGGGTTTAATGGTACATACAATGGGACAACA----

-----  
-----

AACAATGATACATACACTCCAATGCAGAATAAAACAAATTATAAACATGTGGCAAAAGGTAGGACAAGCAA  
TGTATGCCCCCTCCTATTCAAGGAGTAATACAATGTAAATCAAAT---

ATCACAGGACTACTATTGACACGGGATGGAGGTGAAGGAAATAATACAAAT-----

-----  
-----

AATGGTACAGAGACATTTCAGACCTGGAGGAGGAGATATGAGGGATAACTGGAGAAAGTGAATTATATAAATACA  
AGGTGGTAGAAGTTCAGCCATTA---GGAGTAGCACCCACTGCTGCAAGAAGGAGAGTGGTG-----

-----CAGAGAGAAAAAAGAGCA---GTAACA---CTAGGAGCT-----

---ATGATCCTTGGATTCTTGGGAACA---GCAGGAAGCACTATG---GGCGCGGCGTCA---

ATGGCGCTGACGGTACAG---GCCAAACAA---TTGTTG---TCTGGTATAGTGCAACAGCAAAGC---

AATTTG---CTGAAG---GCTATAGAGGCGCAACAGCATATGTTGCAACTCACAGTCTGGGGCATA

>KF725961

TTCTATTGTAATACAACAAAGCTGTTTAAATAGTACATACTTTCCTAATGGTACATACATGCCTAATGTTACAG  
 AA-----  
 -----  
 GATAATGGCACAATCATACTCCCATGCAGGATAAAGCAAATTATAAACATGTGGCAGGCGGTAGGACAAGCAA  
 TATATGCTCCTCCCATCGCAGGGAACATAACATGTATCTCAAAT---  
 ATCACAGGATTACTATTGGAGCGTGATGGAGGAAATGAAAGTAACACAGAG-----  
 -----  
 -----  
 GAGATATTCAGACCTCAAGGAGGAAACATGAGGGACAATTGGAGAAGTGAATTATACAAATATAAAGTGGTAG  
 AAGTTAAACCATTA---GGAATAGCACCTACTAAGGCAAAAAGGAGAGTGGTG-----  
 -----GAGAGAGAAAAAAGAGCA---GTGGGA---CTAGGAGCT-----  
 GTGTTTCCTTGGGTTCTTGGGAGCA---GCAGGAAGCACTATG---GGCGCGGCGTCA---  
 ATAACGCTGACGGTACAG---GCCAGACAA---TTGCTG---TCTGGTATAGTGCAACAGCAAAAC---  
 AATTTG---CTGAGA---GCCATAGAGGCGCAACAGCATATGTTGCAACTCACGGTCTGGGGCATT  
 >KF725984  
 TTCTATTGCAATACAACAAAACTGTTTAAATAGGATATATTATCCTAATGGTACATACAATGGTACA-----  
 -----  
 -----  
 GAAAAATGATACCATCATACTCCCATGTAGAATAAAACAAATTATAAACATGTGGCAAGGGGTAGGACGAGCAA  
 TGTATGCCCCCTCCCATTCGAGGAGAAATAACATGTAACCTCAAGT---  
 ATCACAGGACTACTATTGACACGTGATGGAGGACGTGATGGAGGCAACAATAGC-----  
 -----  
 -----  
 GCAGAGACAGAGACATTCAGACCTAGCGGAGGAAATATGAGGGACAACCTGGAGAAGTGAGTTATATAAATATA  
 AAGTGGTAGAAATTCAGCCATTA---GGAGTAGCACCCACTAAGGCAAAAAGAAGAGTGGTG-----  
 -----GAGAGAGAAAAAAGAGCA---GTGGGG---CTAGGAGCT-----  
 ---GTATTCCTTGGGTTCTTGGGAGCA---GCAGGAAGCACTATG---GGCGCGGCGTCA---  
 ACAGCGCTGACGGTACAG---GCCAGACAA---CTGTTG---TCTGGTATAGTGCAACAGCAGAGC---  
 AATCTG---CTGAGA---GCCATAGAGGCGCAACAGCATATGTTGCAACTCACGGTCTGGGGCATT  
 >KF725994  
 TTCTATTGCAATACATCAAAACTGTTTAAATAGTAATTTTACAGAGAATTTTACAGAGACTTCTAATAGT---  
 -----  
 -----  
 ACAGAGGGTGACATCACACTCCAATGCAGAATAAAACAAATTATTAACATGTGGCAGGGGGTAGGACGAGCAA  
 TGTATGCCCCCTCCCATTCGAGGAACCATAACATGTAACCTCAAGC---  
 ATCACAGGAATACTATTGACACATGATGGT--AACCATTGAGAAGAA-----  
 -----  
 -----  
 GAGGTGGTGGTATTTCAGACCTGGAGGAGGAGATATGAGGGACAACCTGGAGAAGTGAATTATATAAATATAAAG  
 TGGTAGAAGTTAAACCACTA---GGAATAGCACCCACTCAGGCAAAAAGAAGAGTGGTG-----  
 -----GAGAGAGAAAAAAGAGCA---GTGGGA---CTAGGAGCT-----  
 GTGTTTCCTTGGGTTCTTGGGAGCG---GCAGGAAGCACTATG---GGCGCAGCGTCA---  
 ATAACGCTGACGGTACAG---GCCAGACAA---CTGCTG---TCTGGTATAGTGCAACAGCAAAGC---  
 AATTTG---CTGAAG---GCTATAGAGGCGCAACAGCATATGTTGCAACTCACGGTCTGGGGCATT  
 >KF725998  
 TTCTATTGTAATACATCAAACCTGTTTAAATGATACAGGGAGTAATTCA-----  
 -----  
 -----  
 ACTAATTCAACCATCATACTCCCATGCAGAATAAGACAAATTATAAACATGTGGCAGGGGGTAGGACGAGCAA  
 TGTATGCCCCCTCCCATTAAGGAAACATAACATGCAACTCAAGC---  
 ATCACAGGAATACTATTGACACGTGATGGAGGAAAGGACAACAGTACA-----  
 -----  
 -----  
 AATGAAACAGAGACATTCAGACCTATAGGAGGAAATATGAGGGACAACCTGGAGAAGTGAATTATATAAATATA  
 AAGTGGTAGAAATCAAGCCATTG---GGAATAGCACCCACTCAGGCAAAAAGAAGAGTGGTG-----  
 -----GAGAGAGAAAAAAGAGCA---GCGGGA---GTAGGAGCT-----  
 ---GTGCTCTTTGGGTTCTTGGGAGCA---GCCGGAAGCACTATG---GGCGCAGCGTCA---  
 ATGGCGCTGACGGTACAG---GCCAGACAA---CTGTTG---TCTGGTATAGTGCAACAGCAAAGC---  
 AATTTG---CTGAAG---GCTATAGAGGCGCAACAACATATGTTGCAACTCACGGTCTGGGGCATT  
 >KP109517

TTCTATTGCAATACATCAAACTGTTTAAATAGTAATGATACAGAGAGTGATTCA-----  
-----  
-----  
ACCACAAACATCACCACACTTCAATGCAGAATAAAACAAATTATAAACATGTGGCAAAAGGTAGGACGAGCAA  
TGTATGCCCCCTCCCATTCGAGGAAACATAACATGTAATTCAAAC---  
ATCACGGGACTGCTATTGACACGTGATGGAGGAAATAACAGCACT-----  
-----  
-----  
AACACGAGGAGATATTCAGACCTGCAGGAGGAGATATGAGGGACAACCTGGAGAAAGTGAATTATATAAAATATA  
AAGTGGTAGAAGTTAAGCCATTG---GGAATAGCACCCACCAAGGCAAAAAGAAGAGTGGTG-----  
-----GAACGAGAAAAAAGAGCA---GTGGGA---ATAGGAGCT-----  
---TTGTTCCCTTGGGTTCTTGGGAGCA---GCAGGAAGCACTATG---GGCGCAGCGTCA---  
CTAACGCTGACGGTACAG---GCTAGACAA---CTGTTG---TCTGGTATAGTGCAACAGCAAAGT---  
AATTTG---CTGCAA---GCTATAGAGGCGCAACAGCATATGTTGCAACTCACAGTCTGGGGCATT  
>MH933706  
TTCTATTGCAACACATCAAGCTTGTTTAAATGGAACATACAGTAATTACACTGATATAAACAGTTCTAGTATT-  
-----  
-----  
ATCACACTCCCATGCAGGATAAAACAAATTATAAACATGTGGCAGGCGGTAGGACGAGCAATATATGCCCCCTC  
CCATCGAAGGGAACATAACATGTAAATCAAAT---  
ATCACAGGACTACTATTGACACGTGATGGAGGAAAAGACAATAAT-----  
-----  
-----  
AACACAGAGGTATTTCAGACCTGGAGGAGGAGAGATGAGGGACAACCTGGAGAAATGAATTATATAAAATATAAAG  
TGGTAGAAATTAAGCCATTA---GGAATAGCACCCACTCATGCAAAAAGGAGAGTGGTG-----  
-----GAGAGAGAAAAAAGAGCA---GTGGGA---ATAGGAGCT-----  
TTGTTCCCTTGGGTTCTTGGGAGCA---GCAGGAAGCACTATG---GGCGCGGCGTCA---  
ATAACGCTGACGGTACAG---GCCAGACAA---CTGTTG---TCTGGTATAGTGCAACAGCAAAGC---  
AACTTG---CTGAGG---GCTATAGAGGCGCAACAGCATATGTTGCAACTCACAGTCTGGGGCATT  
>MK643550  
TTCTATTGCAATACATCACAACCTGTTTAAATGGTACATATACAGGCAATAACACAGAGAACAAT-----  
-----  
-----  
TCAAGCGAAACAATCACACTCCCATGCAGGATAAAACAAATTATAAACATGTGGCAGGAGGTAGGACGAGCAA  
TGTATGCTCCTCCCATTCGAAGGAAAAATAACATGTAACCTCAAGC---  
ATCACAGGACTACTATTGACAAGTGACAAAGGGGTATAGGAAAT-----  
-----  
-----  
AATCAGACAGAGACATTTCAGACCTGGGGGAGGCAATATGAAAGACAATTGGAGCAATGAATTATATAAAATATA  
AAGTAGTGGAATTAGACCATTA---GGAGTAGCACCAACTGCTGCAAAAGAGGAGAGTGGTG-----  
-----GAGAGAGAAAAAAGAGCA---GTAGGA---ATAGGAGCT-----  
---GTACTCTTTGGGTTCTTGGGAGCC---GCAGGAAGCACTATG---GGCGCGGCGTCG---  
ATAACGCTGACGGTACAA---GCCAGACAA---CTGTTG---TCTGGTATAGTGCAACAGCAAAGC---  
AATTTG---CTGAGA---GCTATAGAGGCGCAACAGCATATGTTGCAACTCACAGTTTGGGGCATT  
>MN611462  
TTCTATTGTGATACAACACAACCTGTTTAAATCAAACACTGTTTAAATGGAAGTGATTCAAACAAAACAAACATT-  
-----  
-----  
-----  
GTCCTCCCCTACATTGTCCTCCCATGCAGAATAAAACAGATTATAAACATGTGGCAGAAGGTAGGACGAGCAA  
TATATAATCCTCCCATTCGAGGAAACCTAACATGTAACCTCAAGT---  
ATCACAGGGCTACTATTGACACGTGATGGAGGAGAGAACATGACA-----  
-----  
-----  
CAGGGAGCGGAAACATTTCAGACCTACAGGAGGAAATATGAAGGACAATTGGAGAAAGTGAATTATATAAAATATA  
AAGTGGTAGAAATTCAGCCATTG---GGAGTAGCACCCACTGAGGCAAAAAGGAGAGTGATG-----  
-----CAGAGAGAAAGAAGAGCAGTAGTGGGA---ATGGGAGCT-----  
---GTGCTCCTTGGGTTCTTGGGAGCA---GCAGGAAGCACTATG---GGCGCGGCGTCA---  
ATAACGCTGACGGTACAG---GCCAGACAA---CTGTTG---TCTGGTATAGTGCAACAGCAAAGC---  
AATTTG---CTGAGA---GCTATAGAGGCGCAACAGCATCTGTTGCAACTCACGGTCTGGGGCATT  
>MN097669

TTCTATTGTAATACAACACAGTTGTTTAAATGATAGCATCTCAAACGCCACTAACCTCAACATCTCAAACGCC-  
-----  
-----  
ACTAACATCACACTCACACTCCCATGCAGAATCAAACAAATTATAAACATGTGGCAGGAGGTAGGACGAGCAA  
TGTATGCCCCCTCCCATCGAAGGAAACATAACATGTGTATCAAAT---  
ATCACAGGACTACTACTGCTACGTGATGGCGGAAACACCAATAACACC-----  
-----  
-----  
ACTCAGCCAGAGATATTCAGACCTGGAGGAGGAAATATGAAGGATAATTGGAGAAGTGAATTATATAAAATATA  
AAGTGGTAGAAATTAAGCCATTA---GGAATAGCTCCACGAGGCAAAAAGGAGAGTGGTG-----  
-----GAAAGAGAAAAAAGAGCA---GTA-----CTAGGAGCT-----  
---TTGCTCCTTGGGTTCTTGGGAGCA---GCAGGAAGCACTATG---GGCGCGGCGTCA---  
ATAGCGCTGACGGTACAG---GCCAGAAAT---CTGTTG---TCTGGTATAGTGCAACAGCAAAGC---  
AATTTG---CTGAGA---GCTATAGAGGCGCAACAGCATATGTTGCAGCTCACGGTCTGGGGCATT  
>MN097680  
TTCTATTGCAATACATCAAACCTTGTTTAATAGTACATACAACGGTACAGACATGGCTAATGGTACAGGAAAT-  
-----  
-----  
ACTTCAGAGTACATCACACTCCAATGCAGAATAAAACAAATTATAAACATGTGGCAGGAGGTGGGGCGAGCAA  
TGTATGCCCCCTCCCATTCAGGAAACATAACCTGTGAATCAAAT---  
ATCACAGGACTACTATTGACACGAGATGGAGGAAAAGAAAAATAAT-----  
-----  
-----  
ACAGAGACATTCAGACCTGAAGGAGGAGATATGAGGAATAATTGGAGAAGTGAATTATATAAAATATAAAGTAG  
TAGAAATTCACCATTAA---GGAATAGCACCCACTAAGGCAAGAAGGAGAGTGGTG-----  
-----CAGAAAGAGAAAAGAGCA---GTGGGA---ATGGGAGCG-----  
TTGTTCTTGGGTTCTTGGGGGCA---GCAGGAAGCACTATG---GGCGCAGCATCA---  
ATAACGCTGACGGTACAG---GCCAGACAA---TTATTG---TCTGGTATAGTGCAACAGCAAAGC---  
AATTTG---CTGAGG---GCTATAGAGGCGCAACAGCATATGTTGCAACTCACGGTCTGGGGCATT  
>MN097584  
TTCTATTGCAATACATCAAAGCTGTTT-----  
-----  
-----CTTAATAGC-----  
ACAAATGACAATCACACCATAATCCCCTGCAGAATAAAACAAATTATAAATATGTGGCAGGAGGTAGGACGAG  
CAATGTATGCCCCCTCCCATTCGCGGAAACATAACATGTAACCTCAAGT---  
ATCACAGGACTACTATTAAACACGTGATGGAGGAAAAAATAATGACACGGAA-----  
-----  
-----  
GAGGAAGAGGTATTTCAGACCTGGAGGAGGAAATATGAAGGACAATTGGAGAAGTGAATTATATAAAATATAAAG  
TGGTAGAAATTAAGCCATTA---GGAATAGCACCCACTAAAGCAAAAAGGAGAGTGGTG-----  
-----GAGAGAGAGAAAAGAGCA---TTGGGA---ATAGGAGCT-----  
GTACTCCTTGGGTTCTTGGGAGCA---GCAGGAAGCACTATG---GGCGCAGCGTCA---  
ATAACGCTGACGGTACAG---GCCAGACAA---TTGTTA---TCTGGTATAGTGCAACAGCAAAC---  
AATTTG---CTGAGA---GCTATAGAGGCGCAACAGCATATGTTGCAACTCACGGTCTGGGGCATT  
>AY162225  
TTCTATTGCAATACATCTGTACTGTTTAAATGGCACATACAGTAATGGCACAAACAGTACA-----  
-----  
-----  
AATACAACAGTCATCACACTCCCATGCAGAATAAAACAAATTATAAACATGTGGCAGGGGGTAGGACGAGCAA  
TGTATGCCCCCTCCCATTCAGGAAACATAACATGTAGATCAAAC---  
ATCACAGGACTAATATTGACACGTGATGGAGGGCAGGGAGAGAAT-----  
-----  
-----  
GACACAAATGAGATATTTAGACCTGCAGGAGGAGATATGAGGGACAATTGGAGAAGTGAATTATACAAATATA  
AAGTGGTAGAAATTCAGCCATTA---GGAGTAGCACCCACTAAGGCAAAAAGGAGAGTGGTG-----  
-----GAGAGAGAAAAAAGAGCA---GCT-----TTGGGAGCT-----  
---GTGTTCTTGGGTTCTTGGGAGCA---GCAGGAAGCACTATG---GGCGCGGCATCA---  
ATAATGCTGACGGTACAG---GCCAGACAA---CTGTTG---TCTGGTATAGTGCAACAGCAAAGC---  
AATTTG---CTGAGA---GCTGTAGAGGCGCAACAGCATATGTTGCAACTCACGGTCTGGGGCATT  
>AF391249

TTCTATTGCAATACATCAGAACTGTTTAATAGTACATACATGCCTAATGGTACAGAAAGTAAT-----  
 -----  
 -----  
 ACAAGCAAAACCATCATACTCCCATGCAGAATAAAACAAATTATAAATATGTGGCAGGGGGTAGGACGAGCAA  
 TGTATGCCCCCTCCCATTCAGAGAAACATAACATGTCAATCAAAT---  
 ATCACAGGAATACTATTGACCCGTGATGGAGGAGAAGAGTCAAAGTCA-----  
 -----  
 -----  
 AATGGAACAGAGATATTCAGGCCTGCAGGAGGGGATATGAAGGACAATTGGAGAAGTGAATTATATAGATATA  
 AAGTGGTAGAAATTAAACCATTA---GGAGTAGCACCCACTGAGGCAAAAAGGAGAGTGGTG-----  
 -----GAGAGAGAAAAAAGAGCA---GTGGGA---ATAGGAGCT-----  
 ---GTGTTCCCTTGGGTTCTTGGGAGCA---GCAGGAAGCACTATG---GGCGCGGCGTCA---  
 ATAACGCTGACGGTACAG---GCCAGACAA---CCGTTT---TCTGGTATAGTGCAACAGCAAAGC---  
 AATTTG---CTGAGG---GCTATAGAGGCGCAACAGCATATGTTGCAACTCACAGTCTGGGGCATT  
 >EU293444  
 TTCTATTGCAATACATCAAAATTATTTAATGGTACATACAATGGTACAGAAAGTAATGGTACAAAAAGTAAT-  
 -----  
 -----  
 GATACAGAAATCATCACACTTCAATGCAAAATAAAACAAATTGTAAATATGTGGCAAGGGGTAGGACGAGCAA  
 TGTATGCCCCCTCCCATTCAGGAAATATAACATGTAAATCAAAT---  
 ATCACAGGATTACTATTGACACGTGATGGAGGAAATAATAACAAT-----  
 -----  
 -----  
 AATAAGACAGAGACATTTCAGACCTGGAGGAGGAGATATGAGAGACAATTGGAGAAGTGAATTATATAAATATA  
 AAGTGGTAGAAATTAAACCATTA---GGAATAGCACCCACTAATGCAAAAAGGAGAGTGGTG-----  
 -----GAGAGAGAAAAAAGAGCA---GTGGGA---ATAGGAGCT-----  
 ---GTGTTCCCTTGGGTTCTTGGGAGCA---GCAGGAAGCACTATG---GGCGCAGCGTCA---  
 ATAACGCTGACGGTACAG---GCCAGACAA---CTGTTG---TCTGGTATAGTGCAACAGCAAAGC---  
 AATCTG---CTGAGA---GCTATAGAGGCGCAACAGCATATGTTGCAACTCACGGTCTGGGGCATT  
 >AY522721  
 TTCTATTGCAACACATCAAGGCTGTTTAATGAGACAGTAAAA-----  
 -----  
 -----  
 AATAATGCAACCATCACAATCCCATGCAAAATAAAACAATTTATAAACATGTGGCAAAAGGTAGGACAAGCAA  
 TGTATGCCCCCTCCCATTAAGGAAACATAACATGTACATCAAAT---  
 ATCACAGGACTACTATTGACACGTGATGGAGGGAATCACAACAATAGC-----  
 -----  
 -----  
 CATAGCACAGAGATATTCAGACCTGGAGGAGGAGACATGAAAGATAACTGGAGAAGTGAATTATATAAATATA  
 AAGTGGTAGAAATTAAGCCATTG---GGCATAGCACCCACTGGGGCAAAAAGGAGAGTGGTG-----  
 -----GAGAGAGAAAAAAGAGCA---GTGGGA---ATAGGAGCT-----  
 ---GTGTTCCCTTGGGTTCTTGGGAGCA---GCAGGAAGCACTATG---GGCGCAGCGTCA---  
 GTGACGCTGACGGTACAG---GCCAGACAA---TTGTTG---TCTGGTATAGTGCAACAGCAAAAC---  
 AATTTG---CTGAGA---GCTATAGAGGCGCAACAACATCTGTTGCAACTCACGGTCTGGGGCATA  
 >AY522732  
 TTCTATTGCAATACATCAATCCTGTTCAATAAGATGTACCATCCTGATGGTATAGGAAATACCTCAAATTGGA  
 GT-----  
 -----  
 -----  
 AATTCAGTTCAAACATCACCCCTTCAATGCAGAATAAAACAAATTATAATCATGTGGCAGGGGGTAGGACAAG  
 CAATGTATGCCCCCTCCCATTCAGGAAACATAACATGTAAATCAAAT---  
 ATCACAGGACTACTATTGGTGCGTGATGGAGGCAGTAATGACACA-----  
 -----  
 -----  
 GACCCAGAGACATTTCAGACCTGGAGGAGGAGATATGAGGGACAATTGGAGAAGTGAATTGTATAAATATAAAG  
 TAGTAGAAATTAAACCATTA---GGAGTAGCACCCACCAAGGCAAAAAGGAGAGTGGTG-----  
 -----GAGAGAGAAAAAAGAGCA---GTGGGA---ATAGGAGCT-----  
 GTGTTCCCTTGGGTTCTTGGGAGCA---GCAGGAAGCACTATG---GGCGCAGCATCA---  
 ATAACGCTGACGGTACAG---GCCAGACAA---TTGCTG---TCTGGTATAGTGCAACAGCAAAGC---  
 AATTTG---CTGAGG---GCTATAGAGGCGCAACAGCATATGTTGCAACTCACAGTCTGGGGCATT  
 >AY522734

TTCTACTGTAATACATCAAATCTGTTTAAATGGCACATACCCAGATAATGGTACAACAGGA-----  
 -----  
 -----  
 AGTCATTCAACCATCATACTCCAATGCAGAATAAAACAATTTATAAACATGTGGCAGGAGGTAGGAAGAGCAA  
 TGTATGCCCCCTCCCATTTGAAGGAAACATAACATGTAACCTCAAGT---  
 ATCACAGGACTACTGCTGACGCGGGATGGAGGAAACAGAAACGAA-----  
 -----  
 -----  
 ACCAATGGCGAGATATTCAGACCTGGAGGAGGAGATATGAGGGACAATTGGAGAAGTGAATTATATAAAATATA  
 AGGTGGTAGAAATTAAGCCATTG---GGAGTAGCACCCACGGCGGCAAAAAGGAGAGTGGTG-----  
 -----GAGAGAGAAAAAAGAGCA---GCG-----ATAGGAGCT-----  
 ---TTGTTCCCTTGGGTTCTTAGGAGCA---GCCGGAAGCACTATG---GGCGCGGCGTCA---  
 ATAACGCTGACGGCACAG---GCCAGACGA---TTGCTG---TCTGGTATAGTGCAACAGCAAAGC---  
 AATTTG---CTGAGG---GCTATAGAGGCGCAACAGCATATGTTGCAACTCACGGTCTGGGGCATC  
 >DQ447267  
 TTCTACTGCAATACATCAGGACTGTTTAAATAGAAGGTATAATGGTACAGAAAATAATACTTATGATGATACA-  
 -----  
 -----  
 GATAATTCAACCATCACAATTCCATGCAGAATAAAACAATTTATAAACATGTGGCAGCAGGTAGGACGGGCAA  
 TATATGCCCCCTCCCATTTGCAGGAAACATAACATGTAATTCAGT---  
 ATCACAGGATTACTATTGACACGCGATGGAGGAAATCAGACTGAGGAGGAC-----  
 -----  
 ----  
 AATATCACAAAGACAGAGATATTCAGACCAGGAGGAGGAGATATGAGGGATAATTGGAGAAGTGAACCTATATA  
 AATATAAAGCGGTAGAAATTAAGCCATTA---GGAGTAGCGCCCACTGGAGCAAAAAGGAGAGTGGTG-----  
 -----GAGAGAGAAAAAAGAGCA---GTGGGA---  
 ATAGGAGCT-----GTACTCCTTGGGTTCTTGGGAGCA---GCAGGAAGCACTATG---  
 GGCGCAGCGTCA---ATAGCGCTGACGGCACAG---GCCAGACAA---GTGTTG---  
 TCTGGAATAGTGCAACAGCAAAAC---AATTTG---CTGAGA---  
 GCTATAGAGGCGCAACAGCATATGTTGCAACTCACAGTCTGGGGCATT  
 >JX905394  
 TTCTACTGCAATACATCAAACTGTTTAAATGGTACATATAATGGTACATATAATGGTACA-----  
 -----  
 -----  
 GAAAAATAGCACCATTACCCTCCCATGCAAAATAAAACAATTTATAAACATGTGGCAAGGGGTAGGAAGAGCAA  
 TGTATGCCCCGCCCATTCAAGGAAATATAACATGTGAATCAAAC---  
 ATCACAGGACTACTATTGACACGTGATGGAGGCACAAATAACT-----  
 -----  
 -----  
 AATAGTACAGAGACATTCAGACCTGGAGGAGGAAATATGAAGGACAATTGGAGAAGCGAATTATATAAAATATA  
 AAGTGGTAGAAATTAAGCCATTA---GGACTAGCACCCACTAATGCAAAAAGGAGAGTGGTG-----  
 -----GAGAGAGAAAAAAGAGCA---GTGGGA---ATAGGAGCT-----  
 ---GTGTTCCCTTGGGTTCTTGGGAGCA---GCAGGAAGCACTATG---GGCGCAGCATCA---  
 ATAACGCTGACGGTACAG---GCCAGACAA---TTATTG---TCTGGTATAGTGCAACAGCAAAGC---  
 AATTTG---CTGAGA---GCTATAGAGGCGCAACAGCATATGTTGCAACTCACGGTCTGGGGCATT  
 >HQ625577  
 TTCTATTGCAATACATCAGGGCTGTTTAAATAGAACATACCTGTCTAATGAAACATACCTGTCTAATGATACAC  
 TGACTAATGGT-----  
 -----  
 -----  
 ACAAATAGGAATATAACACTCCCATGCAAAATAAAACAATTTATAAACATGTGGCAGGGGGTAGGAAAAGCAA  
 TGTATGCCCCCTCCCATTTGAAGGAAACATAACATGTAGATCAAAT---  
 ATCACAGGAATACTATTAACACGTGATGGAGGGAAAAGTGAGGGA-----  
 -----  
 -----  
 ACGAAAAATGGTACAGAGATATTCAGACCTGGAGGAGGAGATATGAAGGACAATTGGAGAAATGAATTATATA  
 AATATAAAGTGGTAGAAATTCAGCCATTA---GGAGTAGCACCCACTAAGGCAAAAAGGAGAGTGGTG-----  
 -----GAGAGAGAAAAAAGAGCA---GTGGGA---  
 CTGGGAGCT-----GTGCTCTTTGGGTTCTTGGGAGCA---GCAGGAAGCACTATG---  
 GGCGCAGCGTCA---ATAACGCTGACGGTACAG---GCCAGACAA---TTGCTG---

TCTGGTATAGTGCAACAGCAAAGC---AATTTG---CTGAGA---  
GCTATAGAGGCGCAACAGCATATGTTGCAACTCACGGTCTGGGGCATT  
>HQ625581  
TTCTATTGCAATACATCAAACTGTTTTCAAATCGCATGTTTAACTTTACAAACAGTTCAGACACAAACACAA  
ACAGT-----  
-----  
TCAGGCGGCTACATCACACTCCCATGTAGGATAAAACAAATTATAAACATGTGGCAGAGGGTAGGACGAGCAA  
TGTATAACCTCCCATTGATGGAGACATAACATGTAACCTCAACT---  
ATCACAGGACTACTATTGTCACGTGATGGTGGTAGTGTAACAACCTCAGGG-----  
-----  
-----  
ACAAACGAGACATTTCAGACCTGGAGGAGGAGACATGAAGGACAATTGGAGAAATGAATTATATAAATACAAAG  
TGATAGAAATTAAGCCATTA---GGAGTAGCTCCCCTGGTTCCAGAAGGAGAGTGGTG-----  
-----GAGAGAGAAAAAAGAGCA---GTGGGC---ATAGGAGCT-----  
GTGCTCCTTGGGTTCTTGGGAGCA---GCAGGAAGCACTATG---GGCGCGGCGTCA---  
ATAACGCTGACGGTACAG---GCCAGACAA---CTGTTG---TCTGGTATAGTGCAACAGCAAAGC---  
AATTTG---CTAAGA---GCTATAGAGGCGCAACAGCATATGTTGCAACTCACAGTCTGGGGCATT  
>HQ625568  
TTCTATTGCAATACAACAAATCTGTTTAATACAACAGACCTGTTGAGTAACAATAGTACGTTAGAAAAC---  
-----  
-----  
AAAACAAAACCATCACACTCCCATGCAAAATAAAACAAATTATAAACATGTGGCAGGAAGTAGGACGAGCAA  
TGTATGCCCCGCCCATTCAGAGAAACATAACATGTAGATCAAAT---  
ATCACAGGACTACTATTGACCCGTGATGGAGGGAGCTATAGTGATAGA-----  
-----  
GGGAATAGTAGTGCAAATGAAACA-----  
GAAAAAGAAATATTTCAGACCAGGAGGAGGAAATATGAAGGACAATTGGAGAAGTGAATTATATAAATATAAGG  
TGGTAGAAGTTAAGCCATTG---GGAGTAGCACCCCTGAGGCAAAAAGGAGAGTGGTG-----  
-----GAGAGACAAAAAAGAGCA---GTGGGA---CTAGGAGCT-----  
ATGTTCCCTTGGGATCTTGGGAATA---GCAGGAAGCACTATG---GGCGCGGCGTCA---  
ATCACGCTGACGGTACAG---ACCAGACAA---CTGTTG---TCTGGTATAGTGCAACAGCAAAGC---  
AATTTG---CTGAGA---GCTATAGAGGCGCAACAGCATATGTTGCAACTCACGGTCTGGGGCATT  
>HQ625588  
TTCTATTGTAATACATCACAACCTGTTTAATGGTGTGTATAAATTCAACCAGCAGTAATTCAACCGAT---  
-----  
-----  
AGTAAGAAAAACATCACACTCCCATGCAGAATAAAACAAATTATAAACATGTGGCAAGAGGTAGGACGAGCAA  
TGTATGCCCCCTCCCATTGACAGGAAACATAACATGTATCTCAAAC---  
ATCACAGGATTACTATTGACACGGGATGGAGGAACAAACAATGAGACT-----  
-----  
-----  
AATGGTACAGAGACATTTCAGGCCTGGAGGAGGAAATATGAAGGACAATTGGAGAAGTGAATTATATAAGTATA  
AGGTAGTGGAATTCACCATTA---GGAATAGCACCCCTGATGCAAAAAGGAGAGTGGTG-----  
-----GAGAGACAGAAAAGAGCAGTAATAGGA---CTAGGAGCT-----  
---ATGTTCCCTTGGGATCTTAGGAGTA---GCAGGAAGCACTATG---GGCGCAGCATCA---  
ATAACGCTGACGGTACAG---GCCAGACAA---TTGTTG---TCTGGTATAGTGCAACAGCAAAGT---  
AATTTG---CTGAAG---GCTATAGAGGCGCAACAGCATATGTTGCAACTCACAGTCTGGGGCATT  
>KY229671  
TTCTATTGCAATACATCAAACCTGTTTAATAGTACATACAGGCCTAATAGTACATACGGGTCTAATAGTACTT  
CC-----  
-----  
ATCACACTTCAATGCAGAATAAAACAAATTATAAACATGTGGCAGGAGGTAGGGCGAGCAATGTATGCCCTC  
CCATTGACAGGAAACATAACATGTAAATCAAAT---  
ATCACAGGACTACTATTAACACGTGATGGAGGGCACAATACAACA-----  
-----  
-----  
AACAAAACAGAGATATTTCAGACCTGGAGGAGGAGATATGAGAAACAATTGGAGAAGTGAATTATATAAATATA  
AAGTGGTAGAAATTAAGCCATTA---GGAGTAGCTCCCCTAGGGCAAAAAGGAGAGTGGTG-----  
-----GAGAGAGAAAAAAGAGCA---GTAGGA---ATAGGAGCT-----  
---GTGTTCCCTTGGGTTCTTGGGAGCA---GCAGGAAGCACTATG---GGCGCAGCATCA---

ATAACGCTGACGGTACAG---GCCAGACAA---TTGTTG---TCTGGTATAGTGCAGCAGCAAAGC---  
AATTTG---CTGAGA---GCTATAGAGGCGCAACAGCATATGTTGCAACTCACGGTCTGGGGCATT  
>AB254148  
TTCTATTGCAATACATCAAACTGTTTAATGGTACATACATGTCTAATAGTACAAAT-----  
-----  
-----  
AGTACTTCAAACATCACACTTCAATGCAGAATAAAACAAATTATAAACATGTGGCAGGGGGTAGGACAAGCAA  
TGTATGCCCCCTCCTATTGCAGGAAACATAACATGTAAATCAAAT---  
ATCACAGGACTACTATTGACACGTGATGGAGGAGGTAATGACACAACAGGG-----  
-----  
-----  
CAGAATAAGACAGAGACATTCAGACCTGGAGGAGGAGATATGAGGGACAATTGGAGAAGTGAGTTATATAAAT  
ATAAAGTAGTAGAAATTAAGCCATTA---GGAATAGCTCCCACTCCGGCAAAAAGGAGAGTGGTG-----  
-----GAGAGAGAAAAAGAGCA---GTGGGA---ATAGGAGCT---  
-----GTGTTCCCTTGGGTTCTTGGGAGCA---GCAGGAAGCACTATG---GGCGCAGCGTCA---  
GTGACGCTGACGGTACAA---GCCAGACAA---TTGTTG---TCTGGTATAGTGC AACAGCAAAGC---  
AATTTG---CTGAGG---GCTATAGAGGCGCAACAACATATGTTGCAACTCACGGTCTGGGGCATT  
>AB254156  
TTCTATTGCGACACATCAAACCTGTTTAACAGCACATTTAATGTTAACAGCACATTTAATGGTACAGATAATG  
CA-----  
-----  
AATAGCACACAGAACATCACACTCCAATGCAGAATAAAACAAATTATAAACATGTGGCAGGAGGTAGGACGAG  
CAATGTATGCCCCCTCCCATTCAGGAAACATAACATGTATTTCAAAT---  
ATCACAGGAATACTATTAACACGTGATGGA---AATGATAATTAC-----  
-----  
-----  
ACAGAGACATTCAGACCTATAGGAGGAAATATGAAGGACAATTGGAGAAGTGAATTATACAAATATAAAGTGG  
TAGAAATTAAGCCATTA---GGAGTAGCACCCACCAAGGCAAAAAGGAGAGTGGTG-----  
-----GAGAGACAAAAAGAGCA---GTGGGA---CTAGGAGCT-----  
GTGTTCCCTTGGGTTCTTAGGAGCA---GCAGGAAGCACTATG---GGCGCAGCGTCA---  
ATAACGCTGACGGTACAG---GCCAGACAA---TTGTTG---TCTGGTATAGTGC AACAGCAAAGC---  
AATTTG---CTGAGA---GCTATAGAGGCGCAACAGCACATGTTGCAACTCACAGTCTGGGGCATA  
>KY229510  
TTCTATTGCAAGACATCACGACTATTTAATGGCACATACAGAGGTCCTAATGATACAAAAAGCAAT-----  
-----  
-----  
TTAAGTGAGACTATCACACTCCAATGCAAAATAAAACAGATTATAAACACGTGGCAGGGGGTAGGACGAGCAA  
TATATGCCCCCTCCCATTCGCGGAAACATAACATGTAAATCAAAT---  
ATCACAGGACTACTCTTGGTAAGGGATGGAGGGAATAATACAAAT-----  
-----  
-----  
GAAGAAATATTTAGACCTGGAGGAGGAGATATGAGGGACAATTGGAGAAGTGAATTATATAAATATAAAGTAG  
TAGAAATTAAGCCATTG---GGAATAGCACCCACCAAGGCAAAAAGGAGAGTGGTG-----  
-----GAGAGAGAAAAAGAGCA---GTGGGA---ATAGGAGCT-----  
GTA CTCTTGGGTTCTTGGGAACA---GCAGGAAGCACTATG---GGCGCAGCGTCA---  
ATAACGCTGACGGTACAG---GCCAGACAA---GTGTTG---TCTGGTATAGTGC AACAGCAAAGC---  
AATTTG---CTGAGG---GCTATAGAGGCGCAGCATCATATGTTGCAACTCACGGTCTGGGGCATT  
>GU939143  
TTCTATTGTAATACATCAAACTGTTTAATAGTACATACAATCCTAATTACAATGGTACAGAAAATAAT----  
-----  
-----  
TTAAACTACACCATAACACTCAATTGCAGAATAAAACAAATTATAAACATGTGGCAGGAGGTAGGACGAGCAA  
TATATGCCCCCTCCCATTTGAAGGAAACATAATGTGTAATTCAAGT---  
ATCACAGGACTACTGTTGCTGCGTGATGGAGGAATAAGTGAGAGTGAG-----  
-----  
-----  
CCAAATGACACAGAGACATTCAGACCTGGAGGAGGAGATATGAAGGACAATTGGAGAAGTGAATTATATAAAT  
ATAAAGTGGTAGAAATTAAGCCACTG---GGATTAGCACCCACCACAGCAAAAAGGAGAGTGGTG-----  
-----GAGAGAGAAAAAGAGCA---GTGGGA---ATAGGAGCT---  
-----GTGTTCCCTTGGGTTCTTGGGAGCA---GCAGGAAGCACTATG---GGCGCGGCGTCG---

ATAACGCTGACGGTACAG---GCCAGACAA---CTGCTG---TCTGGTATAGTGCAACAGCAAAGC---  
 AATTTG---CTGAGG---GCTATAGAGGCGCAACAGCATATGTTGCAACTCACAGTCTGGGGCATT  
 >HM036864  
 TTCTATTGTAATACATCAGGCCTGTTTAAATGGTACATTTAATGGAACATACCCTAATAGTACAGACCCTAAT-  
 -----  
 -----  
 GGAAATGATACCATCACACTCCCATGCAGAATAAAACAGTTTATAAACATGTGGCAGAAGGTAGGACGAGCAA  
 TGTATGCCCCCTCCCATTAAGGAAACATAACATGTAACCTCAAAT---  
 ATCACAGGATTACTGTTGACGAGTGATTATGGAAGAAATGCAAGT-----  
 -----  
 -----  
 AAAAAAGAGACATTTCAGACCTGGAGGAGGAGATATGAGGGACAATTGGAGAAGTGAATTATATAAATATAAAG  
 TGGTAGAAATTAAACCATTG---GGAGTAGCACCCACTGGAGCAAAAAGGAGAGTGGTG-----  
 -----GAGAGAGAAAAAAGAGCA---GTGGGA---ATAGGAGCT-----  
 GTTCTCCTTGGGTTCTTGGGAGCA---GCAGGAAGCACTATG---GGCGCAGCGTCA---  
 ATAACGCTGACGGTACAG---GCCAGACAA---TTGTTG---TCTGGTATAGTGCAACAGCAAAGC---  
 AATTTG---CTGAGG---GCTATAGAGGCGCAACAGCATATGTTGCAACTCACGGTCTGGGGCATT  
 >DQ422948  
 TTCTATTGCAATACAACAAAACCTGTTTCATGAGGGAAGCAGGAAAAAT-----  
 -----  
 -----  
 GATAATGATACAATCACACTTCCATGCAGAATAAAACAATTTATAAACATGTGGCAGGAGGTAGGACGAGCAA  
 TGTATGCACCTCCCATTCAGGAAACATAACATGTAATTCGAAGC---  
 ATCACAGGAATACTATTGGTACGTGATGGAGGTACCAATAACACA-----  
 -----  
 -----  
 AATGAGACATTTCAGACCTGGAGGAGGAGATATGAGGGACAATTGGAGAAGTGAATTATATAAATATAAAGTGG  
 TAGAAATTCGAACCATTG---GGAATAGCACCCACTAAGGCAAAAAGGAGAGTGGTG-----  
 -----GAGAGAGAAAAAAGAGCA---GTGGGA---CTAGGAGCT-----  
 GTGTTCTTGGGTTCTTGGGAGCA---GCGGGAAGCACTATG---GGCGCGGCGTCA---  
 ATAACGCTGACGGCACAG---GCCAGACAA---TTGCTG---TCTGGTATAGTGCAACAGCAAAGC---  
 AATTTG---CTGAGA---GCTATAGAGGCGCAACAGCATATGTTGCAACTCACAGTCTGGGGCATT  
 >EU166653  
 TTCTATTGCAATACATCAAGACTGTTTAAATAGTACACACTGGGCTAATGGTACTACAGACATGTCTAAT---  
 -----  
 -----  
 GATACTAAGAATATCACCTCCCATGCAAAATAAAACAAATTATAAACATGTGGCAGGGGGTAGGACGAGCAA  
 TATATGCCCCCTCCCATTCGAAGGAAGCATAACATGTAATTCGAAGT---  
 ATCACAGGACTACTATTGACACGTGATGGAGGAAACAGTCATAAT-----  
 -----  
 -----  
 ACTACAGAGACATTCAGACCTGGAGGAGGAGATATGAGAGACAATTGGAGAAGTGAATTATATAAATATAAGG  
 TGGTAGAAATTAAGCCATTA---GGACTAGCACCCACTGAGGCAAAAAGGAGAGTGGTG-----  
 -----CAGAGAGAAAAAAGAGCA---GTGGGG---ATAGGAGCT-----  
 GCATTCTTGGGTTCTTGGGATTA---GCAGGAAGCACTATG---GGCGCGGCATCA---  
 ATAACGCTGACGGTACAG---GCCAGACAA---TTATTG---TCTGGTATAGTGCAACAGCAAAGC---  
 AATTTG---CTGAGA---GCTATAGAGGCGCAACAGCATATGTTGCAACTCACAGTCTGGGGCATT  
 >HM036843  
 TTCTATTGCAATACATCGAACCTGTTTAAATAGGCTATACCTGTTTAAATAGTACATACAACCTAATAGCACAG  
 AAAATTAT-----  
 -----AATAGC-----  
 ACAGGAAATGAGACCATCACACTCCAATGCAGAATAAAACAAATTATAAACATGTGGCAGGGGGTAGGAAAAG  
 CAATGTATGCCCCCTCCCATTCAGGAAACATAACATGTAATTCAAAT---  
 ATCACAGGACTAATATTAACGCGTGATGGAGGAACGCATGAGAACAAAAGT-----  
 -----  
 -----  
 TCCTCAGAGACAGAGACATTCAGACCTGGAGGAGGAGATATGAGGGACAATTGGAGAAGTGAATTATATAAAT  
 ATAAAGTGGTAGAAATCAAACCATTA---GGAATAGCACCCACTAAGGCAAAAAGGAGAGTGGTG-----  
 -----GAGAGAGAAAAAAGAGCAGTAGTGGGA---CTAGGAGCT---  
 -----TTGTTCTTGGGTTCTTGGGAGCA---GCAGGAAGCACTATG---GGCGCAGCATCA---

ATAACGCTGACGGTACAG---GCCAGACAA---TTGTTG---TCTGGTATAGTGCAACAGCAAAGT---  
 AATTTG---CTGAGG---GCTATAGAGGCGCAACAGCATATGTTGCAACTCACAGTCTGGGACATT  
 >KY229617  
 TTCTATTGCGAAACATCAGACCTGTTTAATAGTACATTTAGATTTAATGGTACAGACATACAGACCACATTTA  
 ATGATACA-----  
 -----  
 TTGAATGATACACAGATCATCATCAAATGCAGAATAAAGCAAATTATAAACATGTGGCAAGGGGTAGGGCGAG  
 CAATATATGCCCCCTCCCATTTGAAGGAAATATAACATGTGAATCAAAT---  
 ATCACAGGATTAATATTGACACGGGATGGAGGGAATACCACAGAT-----  
 -----  
 -----  
 CCAGAGACATTCAGACCTGCAGGAGGAGATATGAGGGACAATTGGAGAAGTGAATTATATAAATATAAAGTGG  
 TAGAAATTCAGCCATTA---GGAGTAGCACCCACAAAGGCAAAAAGGAGAGTGGTGGAG-----  
 -----AGAAGAGAAAAAAGAGCA---GTGGGA---ATAGGAGCT-----  
 GTGTTCCCTTGGGTTCTTGGGAGCA---GCAGGAAGTACTATG---GGCGCAGCATCA---  
 ATAACGCTGACGGTACAG---GCCAGACAA---CTGTTG---TCTGGTATAGTGCAACAGCAGAGC---  
 AATCTG---CTGAGG---GCTATAGAGGCGCAACAGCATATGTTGCAACTCACGGTCTGGGGCATT  
 >HM036739  
 TTCTATTGCAATACATCAGGCCTGTTTAATTATACATTTACAGCTAATGATACAAAGATACAGATCACATCTA  
 ATGAC-----  
 -----  
 ACACCTTAATGATACACTGACCATCAAATGCAGAATAAAGCAAATTATAAACATGTGGCAGGGGGTAGGACGAG  
 CAATGTATGCCCCCTCCCATTTGAAGGAATAATAGCATGTAATTCAACT---  
 ATCACAGGATTAATATTGACACGGGATGGAGGGAAGAATACCAGTAAC-----  
 -----  
 -----  
 AATGACACAGAGACATTCAGACCTGCAGGAGGAGATATGAGGGACAATTGGAGAAGTGAATTATATAAATATA  
 AAGTGGTAGAAATTCAGCCATTA---GGAGTAGCACCCACAAAGGCAAAAAGGAGAGTGGTGGAG-----  
 -----AGAAGAGAAAAAAGAGCA---GTGGGA---ATAGGAGCT-----  
 ---GTGTTCCCTTGGGTTCTTGGGAGCA---GCAGGAAGCACTATG---GGCGCAGCATCA---  
 ATAACGCTGACGGTACAG---GCCAGACAA---CTGTTG---TCTGGTATAGTGCAACAGCAGAGC---  
 AATCTG---CTGAGG---GCTATAGAGGCGCAACAGCATATGTTGCAACTCACGGTCTGGGGCATT  
 >GU329051  
 TTCTATTGCGATACATCAGGCCTGTTTGATTCAAGCCTGTTGAATAAGACAGAAAATAGTACAAAGACAGAA-  
 -----  
 -----  
 AATAATACAAACATCATACTCCAATGCAGAATAAAACAAATTATAAACATGTGGCAAGAGGTAGGAAAAGCAA  
 TATATGCCCCCTCCCATTTGAAGGAAACATAACATGTATATCAAAC---  
 ATCACAGGAATACTATTGACGAGGGATGGAGGAAACAATAACAAT-----  
 -----  
 -----  
 GACACAGAGATATTCAGACCTGGAGGAGGGAATATGAAAGACAATTGGAGAAGTGAATTATATAAATATAAAG  
 TAGTAGAAATTCAGCCATTG---GGAATAGCACCTACCGAGGCAAAGAGAAGAGTGGTG-----  
 -----GAGAGAGAAAAAAGAGCA---GTGGGA---ATAGGAGCT-----  
 GTGTTCCCTTGGGTTCTTGGGAGCA---GCAGGAAGCACTATG---GGCGCAGCGTCA---  
 ATGACGCTGACGGTACAG---GCCAGACAA---TTGTTG---TCTGGTATAGTGCAACAGCAAAGC---  
 AATTTG---CTGAGA---GCCATAGAGGCGCAACAGCATATGTTGCAACTCACAGTCTGGGGCATT  
 >GU329105  
 TTCTACTGCAATACATCAGACCTGTTTAAGGGTGAATTTAATGGTACGCGTAATCTAGGAAATGAT-----  
 -----  
 -----  
 ACTTCAGGAAACATCACACTCAACTGCAGAATAAAACAAATTATAAACATGTGGCAGGAGGTAGGGCGAGCAA  
 TGTATGCCCCCTCCCATTTGCAGGAAATATAACATGTAACCTCAAGT---  
 ATCACAGGACTACTATTGACACGTGATGGAGGAGAACTAATGAA-----  
 -----  
 -----  
 ACTGAGAGTGAGACATTTAGACCTGGAGGAGGAGATATGAGGGACAATTGGAGAAGTGAATTATATAAATATA  
 AAGTGGTAGAAGTTAATCCATTA---GGAATAGCACCCACTAATGCAAGAAGGAGAGTGGTGACA-----  
 -----AAAGAAGAAGTGAGAAAGAAAAGAGCA---GTGGGA---CTAGGAGCT-----  
 ---GTGTTCCCTTGGGTTCTTGGGAGCA---GCAGGAAGCACTATG---GGCGCGGCGTCA---

ATAACGCTGACGGTACAG---GCCAGACAA---TTACTG---TCTGGTATAGTGCAACAGCAAAAC---  
AATTTG---CTGAGA---GCTATAGAGGCGCAACATCATATGTTGCAACTCACAGTCTGGGGCATC  
>GU329116  
TTCTATTGCAATACATCAGGCCTGTTTAAATAAGACATACAATGATACA-----  
-----  
-----  
AGTGATAAAAACATCACACTCCCATGCAGGATAAAAACAAATTATAAACATGTGGCAGAAGGTAGGACAGGCAA  
TGTATGCCCCCTCCCATTAGAGGAAACATAACATGTCACTCAAAT---  
ATCACAGGGCTATTATTGGTACGTGATGGGGGAAACACAAACAATACTGACACA-----AAT-----  
-----  
AATACTGATTCAAAT---  
AGAACTGAGATATTTAGACCTGGAGGAGGAGATATGAGAGACAATTGGAGAAGTGAATTGTACAAATATAAAG  
TGGTAGAAATTAAGCCATTG---GGAATAGCACCCACTGGAGCAAAAAGGAGAGTGGTG-----  
-----GGGAGAGAGAAAAAGAGCA---GCGGGA---ATAGGAGCT-----  
TTACTCCTTGGGTTCTTGGGAGCT---GCAGGAAGCACTATG---GGCGCGGCGTCA---  
ATAACGCTGACGGTACAG---GCCAGACAA---TTATTG---TCTGGTATAGTGCAACAGCAAAGC---  
AATTTG---CTGAGA---GCCATAGATGCGCAACAGCATATGTTGCAACTCACGGTCTGGGGCATT  
>GU329220  
TTCTATTGCAATACATCAAACTTATTCAATAGATCACTGTCTAATGATACAGAAGAAGATACAGAC-----  
-----  
-----  
AGTAATAGAACCATCACACTCCCATGTAGAATAAAAACAGATTATAAACATGTGGCAGGAAGTAGGAAGAGCAA  
TGTATGCCCCCTCCCATTCAGGAAACATAACATGTGTATCAAAT---  
ATCACAGGACTACTCCTGGTGCGGGATGGAGGCCATCAAAATAGCACAGAG-----  
-----  
-----  
AATAATAACACAGAGATATTCAGACCTGGAGGAGGAGATATGAGGGACAATTGGAGAAGTGAATTATATAAAT  
ACAAAGTAGTAGAAATTAACCATTG---GGAATAGCACCTACCAAGGCACGGAGGAGAGTGGTG-----  
-----CAGAGAGAAAAAAGAGCA---GTGGGA---ATAGGAGCT---  
-----GTACTCCTTGGGTTCTTGGGAACA---GCAGGAAGCACTATG---GGCGCAGCGTCA---  
ATAACGCTGACGGTACAG---GCCAGACAA---TTGCTG---TCTGGTATAGTGCAACAGCAAAGC---  
AATTTG---CTGAGA---GCTATTGAGGCGCAACAGCATATGTTGCAACTCACAGTCTGGGGCATT  
>GU329240  
TTCTATTGCAATACATCAGATCTGTTTAAATTCATCAAACTGTTTAAATACAAACAATACTGAG-----  
-----  
-----  
AACTTAACAATAATCACCATTCCATGCAGAATAAAAACAAATCATAAACATGTGGCAGGAGGTAGGACGAGCAA  
TGTATGCTCCTCCCATTCAGGAAACATAACATGTACATCAGAC---  
ATCACAGGATTACTATTGGTACGTGATGGAGGCACAGAAAGTAGC-----  
-----  
-----  
ACAAAAGAGATATTCAGACCTGGAGGAGGAGATATGAGGGATAATTGGAGAAGTGAATTATACAAATATAAAG  
TGGTAGAAATTAAGCCATTG---GGAATAGCACCCACCGAGGCAAAAAGGAGAGTGGTG-----  
-----GAGAGAGAAAAAAGAGCA---GTGGGA---CTAGGAGCT-----  
TTGTTCTTGGGTTCTTGGGAGTA---GCAGGAAGCACTATG---GGCGCGGCGTCA---  
ATAACGCTGACGGTACAG---GCCAGACAA---CTGTTG---TCTGGTATAGTGACAGCAGCAAAGC---  
AATTTG---CTGCAG---GCTATAGAGGCTCAACAGCATATGTTGAAACTCACGGTCTGGGGCATT  
>GU329324  
TTCTATTGCAATACATCAGGGTTGTTTAAATGGTACATACAATAGTACAGACAGTAAT-----  
-----  
-----  
TCAAACTCAACCATCACAATTCCATGCAGAATAAAAACAAATTATAAACATGTGGCAGGAAGTAGGACGAGCAA  
TATATGCCCCCTCCCATTCAGGAAACATAACATGTAACCTCAAGT---  
ATCACAGGACTACTATTGGTACGTGATGGGGGCAGCAACGCCACT-----  
-----  
-----  
AATGAAACATTTCAGACCTCAAGGAGGAAATATGAAAGACAATTGGAGAAGTGAATTATATAAATATAAAGTGG  
TAGAAGTTAAGCCATTG---GGAATAGCACCAACTGAAGCAAAAAGGAGAGTGGTG-----  
-----GAGAGAGAAAAAAGAGCA---GTAGGA---ATAGGAGCT-----  
GTGTTCTTGGGTTCTTGGGAGCA---GCAGGAAGCACTATG---GGCGCAGCGTCA---

ATAACGCTGACGGTACAG---GCCAGACAA---CTGCTG---TCTGGTATAGTGCAACAGCAAAGC---  
 AATTTG---CTGAGG---GCTATAGAGGCGCAACAGTATATGTTGCAACTCACAGTCTGGGGCATC  
 >GU329333  
 TTCTATTGCAATACATCAAATCTGTTTAATAGACACCTGCTCAATAGTAAAGGTATGTCTAATAATACAGAA-  
 -----  
 -----  
 AGTAATTCAACAATCATACTCCCATGCAAAATAAAACAAATTGTAAACATGTGGCAGGAGGTAGGACGAGCAA  
 TGTATGCCTCTCCCATTCAGGAAACATAACATGTAAATCAAAT---  
 ATCACAGGACTATTATTGGTACGTGATGGGGGAAGTAGCATAAAT-----  
 -----  
 -----  
 CAAACAGAGATATTTAGGCCTCAAGGAGGAGACATGAGGGACAACCTGGAGAAGTGAGTTATATAAATATAAAG  
 TGGTAGAAATTAAACCATTG---GGAGTAGCACCCACTGAGGCAAAAAGGAGAGTGATG-----  
 -----CAGAGAGAAAAAAGAGCA---GTGGGA---ATGGCAGCT-----  
 GTGTTTCCTTGGGTTCTTGGGAGCA---GCAGGAAGCACTATG---GGCGCGGCGTCA---  
 ATAACGCTGACGGTACAG---GCCAGACAA---TTATTG---TCTGGTATAGTGCAACAGCAAAGC---  
 AATTTG---CTGAGG---GCTATAGAGGCGCAACAGCATCTGTTGCAACTCACGGTCTGGGGCATT  
 >GU329368  
 TTCTATTGCAATACAACACCACTGTTTAATTACAGTGCAACAGAGCTGTTTAGTAATAGTAGTAAAAACATTA  
 GT-----  
 -----  
 GAAAAGGACACCATCACACTCCAGTGCAGAATAAAACAAATTATAAACATGTGGCAGAAAGTAGGACGAGCAA  
 TGTATGCCCCCTCCCATTCAGGAAACATAACATGTACATCAAAC---  
 ATCACAGGACTACTATTGGTCCGGGATGGAGGCGTCAACAGAACA-----  
 -----  
 -----  
 AATCACAATGAGACATTTAGACCTGGAGGGGGAGACATGAGAGACAATTGGAGAAGTGAATTATATAAATATA  
 AAGTGGTAGAGATAAAGCCATTG---GGAATAGCACCAACTGAGGCAAAAAGGAGAGTGGTG-----  
 -----GAGAGACAAAAAAGAGCA---GTGGGA---CTGGGAGCT-----  
 ---ATGTTCCCTTGGGTTCTTGGGAGCA---GCAGGAAGCACTATG---GGCGCGGCGTCA---  
 ATAGCGCTGACGGCACAG---GCCAGACAA---TTGTTG---TCTGGTATAGTGCAAGCAGCAAAAC---  
 AATTTG---CTGCAG---GCCATAGAGGCGCAACAGCATCTGTTGCAACTCACTGTCTGGGGCATT  
 >GU329512  
 TTCTATTGCAATACAACGAACCTGTTTAAGGGTGTGTATAATGGTACTTATAATGATACTTCAACTAATACTA  
 AT-----  
 -----  
 GGAACAAGCAAAACATCACACTTCAATGCAGAATAAAACAAATTATAAACATGTGGCAGGAGGTAGGACGAG  
 CAATGTATGCCCCCTCCCATTCAGGAAACATCCAATGTATATCAAAT---  
 ATCACAGGACTACTATTGACACGGGATGGAGGCAGCACAAATAGC-----  
 -----  
 -----  
 TCAAATGAGACATTCAGACCTGGAGGAGGAAATATGAAGGACAATTGGAGAAGTGAATTATATAAATATAAAG  
 TGGTAGAAATTAAGCCATTA---GGAATAGCACCCGATAAGGCAAAAAGGAGAGTGGTG-----  
 -----GAGAGAGAAAAAAGAGCA---GTAGGA---ATAGGAGCT-----  
 GTGTTTCCTTGGGTTCTTGGGAGCA---GCCGGAAGCACTATG---GGCGCAGCGTCA---  
 ATAACGCTGACGGTACAG---GCCAGACAA---TTGTTG---TCTGGTATAGTGCAACAGCAAAGC---  
 AATTTG---CTGAGG---GCTATAGAGGCGCAACAGCATATGTTGCAACTCACAGTCTGGGGCATT  
 >MK749242  
 TTCTATTGCAACACATCAGGGCTGTTTAAGGGAATGTACCTGGATAATAGCACCAACCACAGAGAATTCA----  
 -----  
 -----  
 ACTTCGCCAAACATCACACTCCACTGCAAAATAAAACAAATTTATAAACATGTGGCAGGGGGTAGGTCAAGCAA  
 TGTATGCCCCCTCCCATTCAGGAAACATAAGATGTGAATCAAAT---  
 ATCACAGGAATACTGTTAACACGTGATGGAGGAGGGGAAAATAAT-----  
 -----  
 -----  
 AACACAAAAGAAACCTTCAGACCTGGAGGAGGAGATATGAGGGACATATGGAGAAGTGAGTTATATAAATATA  
 AAGTGGTAGAAATTAAGCCATTA---GGAGTAGCACCCACTGAGGCAAAAAGGAGAGTTGTG-----  
 -----GAGAGAGAAAAAAGAGCA---GTGGGA---GTAGGAGCT-----  
 ---GTGATCTTTGGGTTCTTGGGAGCA---GCAGGAAGCACTATG---GGCGCAGCGTCA---

TTAACGCTGACGGTACAG---GCCAGACAA---TTGCTG---TCTGGTATAGTGCAACAGCAAAGC---  
AATTTG---CTGAGA---GCCATAGAGGCGCAACAGCATATGTTGCAACTCACGGTCTGGGGCATT  
>KU749426  
TTCTATTGCAACACATCAGGACTGTTTAATGGTATATACAATACTACAAGTAATTCAAGTGAT-----  
-----  
-----  
ACAAATAAAAACATCACACTCCAATGCAGGATAAGACAATTTATAAACTTGTGGCAGGAGGTAGGAAAGGCAA  
TGTATGCACCTCCCATTGCAGGAAACATCACTTGTAATCAAAT---  
ATCACAGGAATACTATTAACACGTGATGGAGGAGAAGGAAAGAAT-----  
-----  
-  
CAAAACAAACAGTAGTCAAGAGATATTCAGACCTGGAGGAGGAAATATAAAGGATAAATTGGAGAAGTGAAGTAT  
ACAAATATAAAGTGGTAGAAATTAAACCATTA---GGACTAGCACCCACTCCGGCAAAAAGGAGAGTGGTG--  
-----GAGAGAGAAAAAAGAGCA---GTGGGA---  
ATAGGAGCT-----GTGTTCCCTTGGGTTCTTGGGAGCA---GCCGGAAGCACTATG---  
GGCGCGGCGTCA---ATAACGCTGACGGTACAG---GCCAGACAA---CTATTG---  
TCTGGTATAGTGCAACAGCAAAGC---AATTTG---CTGAGG---  
GCTATAGAGGCGCAACAGCATATGTTGCAACTCACGGTCTGGGGCATT  
>KR820394  
TTCTATTGCAATACATCAAGACTATTCAATGATGATGATAATGATACAGCACTGGCTAGTGATACAGCTTTAA  
AT-----  
-----  
AAAAATAAAACCATCACACTCCCATGCAAAATAAAACAGATTATAAACATGTGGCAGGAAGTAGGACGAGCAA  
TGTATGCCCCCTCCCATTGCAGGGAACATAACATGTAACTCAAAC---  
ATCACAGGAATACTATTAACACGTGATGGAGGAAATGGAAATCGC-----  
-----  
ACAGGAAATCAGACAGAGGCCAATCGCAAT-----  
CGCACAGAGATATTTAGACCTGCAGGAGGAAATATGAAGGACAATTGGAGAAGTGAATTATATAAATATAAAG  
TGGTAGAAATTAAGCCATTA---GGAATAGCACCAACTGAAGCAAAAAGGAGAGTGGTG-----  
-----GAGAGAGAAAAAAGAGCA---GTGGGA---ATAGGAGCT-----  
GTGTTCCCTTGGGTTCTTGGGAGCA---GCAGGAAGCACTATG---GGCGCGGCGTCA---  
ATAACGCTGACGGTACAG---GCCAGACAA---CTGCTG---TCTGGTATAGTGCAACAGCAAAGT---  
AATTTG---CTGAGG---GCTATAGAGGCGCAACAGCATCTGTTGCAACTCACGGTCTGGGGCATT  
>AF286225  
TTCTATTGCAATACATCAAACTGTTTAATGGTACGTTTAATGGTACAAACACTTCTAATGATAGA-----  
-----  
-----  
AGTAATTCGACCATTACGCTTCAATGCAGAATAAAACAAATTACAAACATGTGGCAGGGGGTAGGACAAGCAA  
TGTATGCTCCTCCAATTAAAGGAAACATAACATGTAAATCAAAT---  
ATCACAGGACTACTATTAACACGTGATGGAGGGACAAATGACACA-----  
-----  
-----  
GAGACACCAGAGACATTTCAGACCTGGAGGAGGAGACATGAAGGACAATTGGAGAAGTGAATTATATAAATATA  
AAGTGGTAGAAATTAAGCCATTA---GGAGTAGCACCCACTAAGGCACGAAGGAGAGTGGTG-----  
-----GAGAGAGAAAAAAGAGCA---GTAGGA---ATAGGAGCT-----  
---GTGTTCCCTTGGGTTCTTGGGAGCA---GCAGGAAGCACTATG---GGCGCAGCATCA---  
ATAACGCTGACGGTACAG---GTCAGACAA---TTATTG---TCTGGTATAGTGCAACAGCAAAGC---  
AATTTG---CTGAGG---GCTATAGAGGCGCAACAGCACATGTTGCAACTCACAGTCTGGGGCATT  
>KJ787684  
TTCTACTGTAATACATCAGGACTGTTTAATAATACATGGAATGTTACTGCAAAGGAA-----  
-----  
TGGGAGAATAACAGTACATGG-----  
AATCAGACAAATGTAGTCAAAATCCCATGCAGAATAAAACAGATTGTAAACCTGTGGCAAACAGTAGGAACAG  
CAATGTATGCCCTCCAGAGAAGGACTAATTAGATGTTTCATCAAAC---  
ATTACAGGGCTAATATTGACAAGAGATGGTGGT-----  
-----  
-----  
AAGAATAGCTCTACTGAGATCTTCAGACCTGGAGGAGGAGATATGAGAGACAATTGGAGAAGTGAAGTATATA  
AATACAAAGTAGTGCAAATTGAACCAATA---GGAATAGCACCCACCGGGGCAAAAGAGAAGAGTGGTA-----  
-----CAAAGGGAAAGAAGAGCA---ATAGGA---

CTGGGAGTT-----ATGTTCTTGGGTTCTTGGGAGCA---GCAGGAAGCACGATG---  
GGCGCAGCGTCA---GTGACGCTGACGGTACAG---GCCAGACAG---CTACTG---  
TCTGGTATAGTGCAACAGCAAAAC---AATTTG---CTGAGG---  
GCTATAGAGGCGCAACAGCATATGTTGCAACTCACAGTCTGGGGCATT  
>U88822  
TTCTACTGCAATACATCAGGACTGTTTAATAGTGCATGGAATATATCAGGACATAGTACAGGGTTA-----  
-----  
-----  
AATGATACAATCATAACCATCCCATGCAGAATAAAACAAATTATAAACATGTGGCAGGAAGTAGGAAAAGCAA  
TGTATGCCCCCTCCCATTTGAAGGGCAAATTAATTGTTTCATCAAAT---  
ATTACAGGGCTACTATTGACAAGAGATGGTGGTGCTAATAATACT-----  
-----  
-----  
CAGAATGACACCTTTAGACCTGGAGGAGGAGATATGAGAGACAACCTGGAGAAGTGAATTATATAAATATAAAG  
TAGTAAAAATTGAACCACTA---GGAGTAGCACCCACCAAGGCAAAGAGAAGAGTGGTG-----  
-----GAAAGAGAAAAAAGAGCA--ATAGGA---CTAGGAGCT-----  
ATGTTCTTGGGTTCTTGGGAGCA---GCAGGAAGCACGATG---GGCGCAGCGTCA---  
ATGACGCTGACGGTACAG---GCCAGACAA---GTATTG---TCTGGTATAGTGCAACAGCAAAAC---  
AATTTG---CTGAGG---GCTATAGAGGCGCAACAGCATCTGTTGCAACTCACGGTCTGGGGCATT  
>AJ277820  
TTCTACTGCAATACATCAAACTATTTAATAGTACATGGAGTATAGAGAGTAATATTACAGAGTCA-----  
-----  
-----  
AATGATAGTACAATCATACTTCCATGCAGAATAAAACAGATTGTAAACATGTGGCAGAGAGTAGGAAAAGCAA  
TGTATGCCCCCTCCCATTTGAAGGAATAATCAGATGTTTCATCAAAT---  
ATTACAGGGCTACTATTGCTAAGAGATGGTGGGGTAAATAATCAT-----  
-----  
-----  
AGTAATGAGACCTTCAGACCTGGAGGAGGAGATATAAGGGACAATTGGAGAAGTGAATTATATAAATATAAAG  
TAGTAAGACTTGAACCACTA---GGAGTAGCACCCACCAGGGCAAAGAGAAGAGTGGTG-----  
-----GAAAGAGAAAAAAGAGCA--ATAGGA---TTAGGAGCT-----  
ATGTTCTTGGGTTCTTGGGAGCA---GCAGGAAGCACGATG---GGCGCAGTGTCA---  
ATGACGCTGACGGTACAG---GCCAGACTG---TTACTG---TCTGGTATAGTGCAACAGCAAAAC---  
AATTTG---CTGAGG---GCTATAGAGGCGCAACAGCATCTGTTGCAACTCACGGTCTGGGGCATT  
>AY371156  
TTCTACTGCAATACATCAGGACTGTTTAATAGAAATATTAGTACAGAGAGTACTGAAAATAGTACAGGA----  
-----  
-----  
GTAAATGATACAATAACCATCCCATGTAAAATAAGACAAATTATAAACATGTGGCAGGGAGTAGGAAAAGCAA  
TATATGCCCCCTCCCATTTGAAGGACAAATTAAATGTTTCATCAAAT---  
ATTACAGGGCTACTATTGACAAGAGATGGTGGTAATACTTCTTAT-----  
-----  
-----  
GAGGAGACCTTCAGGCCTGGAGGAGGAAATATGAAGGACAATTGGAGAAGTGAATTATATAAATATAAAGTAG  
TAAGAATTGAACCACTA---GGAGTAGCACCCACCAGGGCAAAGAGAAGAGTGGTG-----  
-----GAAAGAGAAAAAAGAGCA--ATAGGA---TTAGGAGCT-----  
ATGTTCTTGGGTTCTTGGGAGCA---GCAGGAAGCACGATG---GGCGCAGCGTCA---  
GTGACGCTGACGGTACAG---GCCAGACAA---TTATTG---TCTGGTATAGTGCAACAGCAAAAT---  
AATTTG---CTGAGG---GCTATAGAGGCGCAACAGCATCTGTTGCAACTCACGGTCTGGGGCATT  
>FJ388945  
TTCTACTGTAATACATCAAACTGTTTAATACAACATGGTCTAGTGAAACATGGGAGAATAGTACGGGAAATA  
ATACC-----  
-----  
-----  
GAATTAAATGGTACGATAACCATCCCATGTACAATAAAACAAATTATAATCATGTGCCAGGGAGTGGGAGTAG  
CAATGTATACCCCTCCCCCTGCAGGAATAATTCAGTGTAATCAAAT---  
ATTACAATTACAGGGCTGACAAGAGATGGTGGTAATAATAGTAAT-----  
-----  
-----  
TGTAATGAGACCTTCAGGCCTGGAGGAGGAGATATGAGGGACAATTGGAGAAGTGAATTGTATAAATATAAAG  
TAGTAAGAATTGAACCATTA---GGAATAGCACCCACCAGAGCAAAGAGAAGAGTGGTG-----

-----GAAAGAGAAAAAAGAGCA---ATAGGA---TTAGGAGCT-----  
 ATGTTTCCTTGGGTTCTTGGGAGCA---GCAGGAAGCACGATG---GGCGCAGCGTCA---  
 ATAGCGCTGACGGCACAG---GCCAGACAA---GTGTTG---TCCGGTATAGTGCAACAGCAAAAT---  
 AATTTG---CTGAGG---GCGATAGAGGCGCAACAACATCTGTTGCAACTCACGGTCTGGGGCATT  
 >AF219271  
 TTCTACTGTAATACATCAAACTGTTTAATAGTAATATTAGTACATCAGAAGGGGCTAATAGTACAAAGTCA-  
 -----  
 -----  
 AATAATAGAACAATCACACTCCAATGCAGAATAAAACAAATTATAAATATGTGGCAAGGAGTAGGAAAAGCAA  
 TGTATGCCCCCTCCCATTTGAAGGACTAATTAGATGTTTCATCAAAT---  
 ATTACAGGGCTACTATTGACAAGAGATGGTGGTTCAAATACTAGT-----  
 -----  
 -----  
 TCTCATGAGACCTTCAGACCTGGAGGAGGAAATATGAAGGACAATTGGAGAAGTGAATTATATAAATATAAGG  
 TAGTAAAAATTGAACCACTA---GAAGTAGCACCCACCAGGGCAAAGAGAAGAGTGGTG-----  
 -----GAAAGAGAAAAAAGAGCA---ATAGGA---CTAGGAGCT-----  
 ATGTTTCCTTGGGTTCTTGGGAGCA---GCAGGAAGCACGATG---GGCGCAGCGTCA---  
 GTGACGCTGACGGTACAG---GCCAGACAG---TTATTG---TCTGGTATAGTGCAACAGCAAAAT---  
 AATTTG---CTGAGG---GCTATAGAGGCGCAACAACATCTGTTGCAACTCACAGTCTGGGGCATT  
 >AF219272  
 TTCTACTGCAATACATCAGGACTGTTTAATAGTACATGGGGTTCAGGACTGTCTAAT-----  
 -----  
 -----  
 GGTACTGAGAATATCACCATCCCATGCAGAATAAAACAAATTATAAACATGTGGCAGGGAGTAGGAAAAGCAA  
 TGTATGCCCCCTCCCATTTGAGGAATAATCAGCTGTTTCATCAAAT---  
 ATTACAGGGCTACTATTGACAAGAGATGGAGGTACAAATAGTAGT-----  
 -----  
 -----CATAACGAGACCTTC---AGACCT---  
 GGAGATATGAGAGACAATTGGAGAAGTGAATTATATAAATATAAAGTAGTAAGAATTGAACCCCTA---  
 GGAGTAGCACCCACCAGGGCAAAAAGAAGAGTGGTG-----  
 ---GAAAGAGAAAAAAGAGCA---ATTGGA---TTAGGAGCT-----  
 TTGTTCCCTTGGGTTCTTGGGAGCA---GCAGGAAGCACAATG---GGCGCAGCGTCA---  
 TTGACGCTGACGGTACAG---GCCAGACAA---TTATTG---GCTGGTATAGTGCAACAGCAAAAC---  
 AATTTG---CTGAGG---GCTATAGAGGCGCAACAGCATCTGTTGCAACTCACGGTCTGGGGCATT  
 >HQ595791  
 TTCTACTGCGATACATCAAGACTATTTAATAGTACCTGGACGAATAGTACCTGGGGGAACGATACTAGCTCAA  
 AT-----  
 -----  
 AGGAATGATACAATCACACTCCCATGCAGGATAAAACAAATTATAAACATGTGGCAGGAAGTAGGAAAAGCAA  
 TGTATGCCCCCTCCCATTCGAGGACTAATCAGATGCTCATCACGC---  
 ATTACAGGACTATTGTTGACAAGAGATGGTGGTATCTATAATAGTAGT-----  
 -----  
 -----  
 CAGGAAGAAGAGACCTTCAGACCGGGAGGAGGAGATATGAGGGACAATTGGAGAAGTGAATTATACAAATATA  
 AGGTAGTAAGAATTGAACCACTA---GGTCTAGCACCCACCAGGGCAAAGAGAAGAGTGGTG-----  
 -----GAAAGAGAAAAAAGAGCA---ATAGGA---CTGGGAGCT-----  
 ---GTGTTCCCTTGGGTTCTTAGGAGCA---GCAGGAAGCACAATG---GGCGCAGCGTCA---  
 CTGACGCTGACGGTACAG---GCCAGACAG---TTACTG---TCTGGTATAGTGCAACAGCAAAAC---  
 AATTTG---CTGAGG---GCTATAGAGGCGCAACAGCATCTGTTGCAACTCACAGTCTGGGGCATT  
 >KF716476  
 TTCTACTGCAATACATCAAAATTGTTTACAACAAATATAACAAGTAACACT-----  
 -----  
 -----  
 AGTGAAGGGAACATCACACTCCCATGCAGAATAAAACAAATTATAAACATGTGGCAGGGAGTAGGAGGAGCAA  
 TGTATGCCCCCTCCTAGGGAAGGATTGATCACATGTTTCATCAAAT---  
 ATCACAGGACTACTGTTGACAAGAGATCAAGAGGGCTCAAATAAC-----  
 -----  
 -----  
 ATTAATGAGACCTTCAGACCTGGAGGAGGAAATATGAAAGACAATTGGAGAAGTGAATTATACAAATATAAAG  
 TAGTAAGAATTGAACCACTA---GGTCTAGCACCCACCAGGGCAAAAAGAAGAGTGGTG-----

-----GAAAGAGAAAAAAGAGCA---ATAGGC---CTGGGAGCT-----  
 ATGTTCTTGGGTTCTTGGGAGCA---GCAGGAAGCACAATG---GGCGCAGCGTCA---  
 CTGACGCTGACGGTACAG---GCCAGACAG---TTACTG---TCTGGTATAGTGCAACAGCAAAAC---  
 AATTTG---CTGAGA---GCTATAGAGGCGCAACAGCATCTGTTGCAACTCACAGTCTGGGGCATT  
 >FJ866137  
 TTCTACTGCAATACATCAGAACTGTTTAATAATACATGGTTAAATAATACAGGGAAGTGGTCATCAGAT----  
 -----  
 -----  
 AGTACAGGGATAATCATGCTCCCATGCAGAATAAAACAAATTATAAACATGTGGCAGGGAGTAGGAAAAGCAA  
 TGTATGCCCCCTCCCATTCAGGACTAATCAATTGTTTCATCAAAT---  
 ATTACAGGACTATTGTTGACAAGAGATGGTGGTGCAAATAGTAGT-----  
 -----  
 -----  
 CAGAATGAGACCTTCAGACCGGGAGGAGGAGATATGAGAGACAATTGGAGAAGTGAATTATACAAATATAAAG  
 TAGTAAAAATTGAACCACTA---GGATTAGCACCCACCAAGGCAAGGAGAAGAGTGGTG-----  
 -----GAAAGAGAAAAAAGAGCA--ATAGGA---CTAGGAGCT-----  
 ATGTTCTTGGGTTCTTGGGAGCA---GCAGGAAGCACGATG---GGCGCAGCGTCA---  
 CTGACGCTGACGGTACAG---GCCAGACAG---TTATTG---TCTGGTATAGTGCAACAGCAAAAC---  
 AATTTG---CTGAGG---GCTATAGAGGCGCAACAGCATCTGTTGCAACTCACAGTCTGGGGCATT  
 >FJ866135  
 TTCTACTGCAACACATCAAGACTGTTTAATAATAGTGAATGGAAATCAAATAGTAGTACAGGGGGA-----  
 -----  
 -----  
 AATGAAAGTATAATCATACTCCCATGCAGAATAAAACAAATTATAAACATGTGGCAGGGAGTAGGAAGAGCAA  
 TGTATGCCCCCTCCCATTCAGGACACATCAATTGTTTCATCAAAT---  
 ATTACAGGACTATTGTTGACAAGAGATGGTGGTGTAACATAATCAG-----  
 -----  
 -----  
 AGTTCGAATGAGACCTTCAGACCTGGGGGAGGAGACATGAGAGACAATTGGAGAAGTGAATTATACAAATATA  
 AAGTAGTAAGAATTGAACCACTA---GGTCTAGCACCCACCAGGGCAAAGAGAAGAGTGGTG-----  
 -----GAAAGAGAAAAAAGAGCA--ATAGGA---CTGGGAGCT-----  
 ---ATGTTCTTGGGTTCTTGGGAGCA---GCAGGAAGCACGATG---GGCGCAGCGTCG---  
 CTGACGCTGACGGTACAG---GCCAGACAG---TTATTG---TCTGGTATAGTGCAACAGCAAAAC---  
 AATTTG---CTGAGG---GCTATAGAGGCGCAACAGCATCTGTTGCAACTCACAGTCTGGGGCATT  
 >AY322189  
 TTCTACTGCAACACATCAAACCTGTTTAATAGCATTTGGAATGTTACTAATGGTACTAGCCAGCTGGAGTCAA  
 ATAGC-----  
 -----ACA---  
 GAGTTAGCCGGAATATAACTCTCCCATGCAGAATAAAGCAAATTATAAACATGTGGCAGGGAGTAGGAATAG  
 CAATGTATGCCCCCTCCCATTCAGGAATAATCAAATGTTTCATCAAAT---  
 ATTACAGGACTATTGTTAAACAAGAGATGGTGGTGCAAGATAATAGT-----  
 -----  
 -----  
 AGTCAGAATGAGACCTTCAGACCAAGGAGGAGGAGATATGAGAGACAATTGGAGAAGTGAATTATACAAATATA  
 AAGTAGTAAGAGTTGAACCACTA---GGTATAGCACCCACCAAGGCAAAGAGAAGAGTGGTG-----  
 -----GAAAGAGAAAAAAGAGCA---ATAGGA---CTGGGAGCT-----  
 ---ATGTTCTTGGGTTCTTGGGAGCA---GCAGGAAGCACGATG---GGCGCAGCGTCA---  
 GTGACGCTGACGGTACAG---GCCAGACAG---TTACTG---TCTGGTATAGTGCAACAGCAAAAC---  
 AATTTG---CTGAGA---GCTATAGAGGCGCAACAGCATCTGTTGCAACTCACAGTCTGGGGCATT  
 >FJ866138  
 TTCTACTGCAGTACATCAGAACTGTTTAATAGTACATGGAATACATCAATTAGTAGTACAAGGAATACATCAA  
 AT-----  
 -----  
 -----  
 AGTACAAGGGATATCAGACTCCCATGCAGAATAAAACAAATTATAAACATGTGGCAGGGAGTAGGAAAAGCAA  
 TGTATGCCCCCTCCCATAGAAAGGACTAATCAAATGTTTCATCAAAT---  
 ATTACAGGACTATTGTTGGCAAGAGATGGTGATGTAAACAATAAT-----  
 -----  
 -----  
 AGTCAGGAGACCCTTAGACCTGGAGGAGGAGATATGAGAGACAATTGGAGAAGTGAATTATACAAATATAAAG  
 TAGTAAGACTTGAACCACTA---GGTCTAGCACCCACCAGGGCAAAGAGAAGAGTGGTG-----

-----GAAAGAGAAAAAAGAGCA---ATAGGA---CTAGGAGCT-----  
ATGTTCTTGGGTTCTTGGGAGCA---GCAGGAAGCACGATG---GGCGCAGCGTCA---  
CTGACGCTGACGGTACAG---GCCAGACAG---TTATTG---TCTGGTATAGTGCAACAGCAAAAC---  
AATTTG---CTGAGG---GCTATAGAGGCGCAACAGCATCTGTTGCAACTCACAGTCTGGGGCATT  
>FJ866141  
TTCTACTGCAATACATCAAGACTGTTTAATAGTACATGGGGGGATAATAATACATCAAGTGATACA-----  
-----  
GAGGAAGGTAACATCACCATCCCATGTAGAATAAAACAAATTATAAACATGTGGCAAGGAGTAGGAAAAGCAA  
TGTATGCCCCCTCCCATTTGAAGGACTAATCAGATGTTTCATCAAAT---  
ATTACAGGATTACTGTTAACATATGATGGGGGTGTAAATAATAAT-----  
-----  
AGTCAGAGTGAGATCTTCAGACCTGGAGGAGGAGATATGAGAGACAATTGGAGAAAGTGAATTATACAAATATA  
AAGTAGTAAGACTTGAACCACTA---GGTCTAGCACCCACCAAGGCAAAAAGAAGAGTGGTG-----  
-----GAAAGAGAAAAAAGAGCA---ATAGGC---CTAGGAGCT-----  
---ATGTTCTTGGGTTCTTGGGAGCA---GCAGGAAGCACGATG---GGCGCAGCGTCA---  
TTGACGCTGACGGTACAG---GCCAGACAA---TTATTG---TCTGGTATAGTGCAAGCAGCAAAAC---  
AATCTG---CTGATG---GCTATAGAGGCGCAACAGCATCTGTTGCAACTCACAGTCTGGGGCATT  
>GU204938  
TTCTACTGCAATACAACCTGGACTGTTTAATAATAGTGTATGGAAGAATGATAGTGATACAGCAAAT-----  
-----  
AGTACAGAGGTAATCAAACCTCCCATGCAGAATAAAACAAATTATAAACATGTGGCAGGGAGTAGGCAAAGCAA  
TGTATGCCCCCTCCCATTTGAAGGACAAATCGAATGTACATCAAAT---  
ATCACAGGACTATTGCTGACAAGAGATGGTGGTGTAAAGTAATAAT-----  
-----  
AGTCAGAATGAAACCTTTAGGCCTGGAGGAGGAGATATGAGAGACAACCTGGAGGAGTGAACATACAAATATA  
AGGTAGTAAGAATTGAACCACTA---GGTCTAGCACCCACCAGGGCAAGGAGAAGAGTGGTG-----  
-----GAAAGAGAAAAAAGAGCA---ATAGGA---CTAGGAGCT-----  
---ATGTTCTTGGGTTCTTGGGAGCA---GCAGGAAGCACGATG---GGCGCAGCGTCA---  
TTGACGCTGACGGTACAG---GCCAGACAG---TTAATG---TCTGGTATAGTGCAACAGCAAAAC---  
AATTTG---CTGAGA---GCTATAGAGGCGCAGCAGCATCTGTTGCAACTCACAGTCTGGGGCATT  
>HQ659623  
TTCTACTGCAATACATCAGGACTGTTTAATAATAGTGAGTGGACAGATACGACACCAAATACGACA-----  
-----  
TCAAATGGTACCATCATACTCCCATGCAGAATAAAACAAATTATAAACCTGTGGCAGGGAGTAGGAAGAGCAA  
TGTATGCCCCCTCCCATTTCAAGGACTAATCAGATGTTTCATCAAAT---  
ATTACAGGACTATTGTTGACAAGAGATGGTGGAAATAATAATAGT-----  
-----  
AGTCTGAATGAGACCTTCAGACCTGGAGGAGGAGATATGAGAGACAATTGGAGAAAGTGAATTATACAAATATA  
AAGTAGTAAGAATTGAACCACTA---GGTCTAGCACCCACCAGTGCAAGAGAAGAGTGGTG-----  
-----GAAAGAGAAAAAAGAGCA---ATAGGA---CTGGGAGCT-----  
---GTGTTCTTGGGTTCTTGGGAGCA---GCAGGAAGCACGATG---GGCGCAGCATCA---  
CTGATGCTGACGGTACAG---GCCAAACAG---CTATTG---TCTGGTATAGTGCAACAGCAAAAC---  
AATTTG---CTGAGA---GCTATAGAGGCGCAGCAACATCTGTTGCAACTCACAGTCTGGGGCATT  
>KX907406  
TTCTACTGTAATACATCAGGACTGTTCAATAGTACATGGGATATTACGAATACTAGTAGCCCAAACAAC-----  
-----  
ACAGACCCAATTATCACACTACAATGCAGAATAAAACAAATTATAAACATGTGGCAGGGAGTAGGAAGAGCAA  
TATATGCCCCCTCCCATTTGCAGGGCAAATTCTATGTTTCATCAAAT---  
ATTACAGGGCTACTATTGACAAGAGATGGTGGTGCAGATAATAGC-----  
-----  
AGTCATAATGAGACCTTCAGACCTGGAGGAGGAAATATGAAGGACAATTGGAGAAAGTGAATTGTATAAATATA  
AAGTAGTAAAAATTGAACCACTA---GGAATAGCACCCACCAAGGCAAGGAGAAGAGTGGTG-----

-----GAAAGGGAAAAAAGAGCA---ATAGGA---CTAGGAGCT-----  
---ATGTTCCCTTGGGTTCTTGGGAGCA---GCAGGAAGCACGATG---GGCGCAGCGTCA---  
GTGACGCTGACGGTACAG---GCCAGACAG---TTACTG---TCTGGTATAGTGCAGCAGCAAAGC---  
AATTTG---CTGAGG---GCTATACAGGCGCAACAGCATCTGTTGCAGCTCACTGTCTGGGGCATT  
>HQ615975  
TTCTACTGTAATACAACAAAACCTGTTTAATACAAGTGAATCAAATAGGACAGAG-----  
-----  
-----  
GTAAATGGAACAATCACACTCCCATGCAGAATAAAACAAATTATAAACATGTGGCAGGGAGTAGGGAAAGCAA  
TCTATGCCCCCTCCCATTTGAAGGACACATCAACTGTTTATCAAAT---  
ATTACAGGACTATTGTTGACAAGAGATGGTGGTGCAAACAATAAG-----  
-----  
-----  
AGTCAGAATGAGACCTTCAGACCTGGAGGAGGAGATATGAGAGACAATTGGAGAAGTGAATTATACAAATATA  
AAGTAGTAAGAATTGAACCACTA---GGTCTAGCACCCACCAAGGCAAAGAGAAGAGTGGTG-----  
-----GAAAGAGAAAAAAGAGCA---ATAGGA---CTAGGAGCT-----  
---TTGTTCCCTTGGGTTCTTGGGAGTA---GCAGGAAGCACAATG---GGCGCAGCGTCG---  
ATGACGCTGACGGTACAG---GCCAGGCAA---TTATTG---TCTGGTATAGTGCAACAGCAAAAC---  
AATTTG---CTGAGG---GCTATAGAGGCGCAACAGCATCTGTTGCAACTCACAGTCTGGGGCATT  
>JX512899  
TTCTACTGCAATACAACAAGACTGTTCAATAGTACATGGAATACAACACTACATCAAATAGTACAGAACAA----  
-----  
-----  
AATGATACAAGAATACTATTCCCATGCAGAATAAAACAAATTATAAACATGTGGCAGGGAGTAGGAAAAGCAA  
TGTATGCTCCTCCCATTTGAAGGACTAATCAGATGTACATCAAAT---  
ATTACAGGACTATTGTTGGCAAGAGATGGTGGTGCAAGCAATAAT-----  
-----  
-----  
AGTCAGACTGAGACCTTCAGACCTGGAGGAGGAGATATGAGAGACAATTGGAGAAGTGAATTGTACAAATATA  
AAGTAGTAAGAATTGAGCCACTA---GGTCTAGCACCCACCAGGGCAAAGAGAAGAGTGGTG-----  
-----GAAAGAGAAAAAAGAGCA---ATAGGA---CTGGGAGCT-----  
---ATGTTCCCTTGGGTTCTTGGGAGCA---GCAGGAAGCACGATG---GGCGCAGCGTCA---  
CTGACGCTGACGGTACAG---GCCAGACAG---TTATTG---TCTGGTATAGTGCAACAGCAAAAC---  
AATTTG---CTGAGG---GCTATAGAGGCGCAACAGCATCTGTTGCAACTCACAGTCTGGGGCATT  
>KF986106  
TTCTACTGCAATACAACAAAACCTGTTTAACAGTACATGGCATAACAGTACATGGAAG-----  
-----  
AATGATACTGCATTAAATACA-----  
ACAGGGGATAAGATAATCACACTCCCATGTAGAATAAAACAAATTATAAACATGTGGCAGGGAGTAGGCAAAG  
CAATGTATGCCCCCTCCCATTTGCAGGACTAATCAGATGTTTATCAAAT---  
ATTACAGGACTATTGTTAAACAAGAGATGGTGGTAAACTAAT-----  
-----  
AATCATAGTGAGACC---  
CTTAATGAGACCTTCAGACCTGGAGGAGGAGATATGAGAGACAATTGGAGAAGTGAATTATACAAATATAAAG  
TAGTAAGACTTGAACCACTA---GGTCTAGCGCCACCAAGGCAAAGAGAAGAGTGGTG-----  
-----CAGAGAGAAAAAAGAGCA---ATAGGA---CTAGGAGCT-----  
ATGTTCCCTTGGATTCTTGGGAGCA---GCAGGAAGCACAATG---GGCGCAACGTCA---  
CTGACGTTGACGGTACAG---GCCAGACAG---TTATTG---TCTGGTATAGTGCAACAGCAAAAC---  
AATCTG---CTGAGG---GCTATAGAGGCGCAACAGCATCTGTTGCAACTCACAGTCTGGGGCATT  
>KF986033  
TTCTACTGTAATACAACAAAACCTGTTTAATAACAATAAT-----  
-----  
-----AGT---  
ACTAATGAGACAGTAATCACACTCCCATGCAGAATAAAACAAATTATAAACATGTGGCAGGGAGTAGGAAAAG  
CAATGTATGCCCCCTCCCATTTGCAGGAAGCATTCGCTGTTTATCCAAT---  
ATTACAGGACTATTGTTGACAAGAGATGGTGGG-----  
-----  
-  
AATAAGACTGCTCAGAATGAAACCTTCAGACCTGGAGGAGGAGATATGAGAGACAATTGGAGAAGTGAATTGT  
ACAAATATAAAGTAGTAAAAATTGAACCACTA---GGTCTAGCACCCACCAAGGCAAAAAGAAGAGTGGTG--

-----GAAAGAGAAAAAGAGCA---GTAGGA---  
CTAGGAGCT-----ATGTTCTTGGGTTCTTGGGAGCA---GCAGGAAGCACAATG---  
GGCGCAGTGTC---ATGACGCTGACGGTACAG---GCCAGACAG---GTGTTG---  
TCTGGTATAGTGCAACAGCAAAAC---AATTTG---CTGAGG---  
GCTATAGAGGCGCAACAGCATCTGTTGCAACTCACAGTCTGGGGCATT  
>KF716479  
TTCTACTGCAATACATCAGGACTGTTTAATAGTACATGGCAGGAAAATAGTACTCTATTAAATAAAACAAATT  
AT-----  
-----ACA---  
GAAGAAAATAAAACAATCACACTCCCATGCAGAATAAAACAAATTATAAATATGTGGCAGAGAATAGGAAAAG  
CAATGTATGCCCCCTCCCATTTGAAGGACTAATCAAATGTTCTCAAAT---  
ATTACAGGACTATTGTTGGAAAAGAGATGGTAGTGTTGAAAATAAT-----  
-----  
AGTCAGGAGACTGTCAGACCTGTAGGAGGAGAGATGAGAAACAATTGGAGAAGTGAATTATACAAATATAAAG  
TAGTAAGAATTAAACCAATA---GGTCTAGCACCCACCAGGGCAAAGAGAAGAGTGGTG-----  
-----GAAAAACAAAAAAGAGCA--ATAGGA---CTAGGAGCT-----  
ATGTTCTTGGGTTCTTGGGAGCA---GCGGGAAGCACGATG---GGCGCAGCGTCA---  
ATGGCGCTGACGGTACAG---GCCAGACAA---GTACTG---TCTGGTATAGTGCAACAGCAAAAC---  
AATTTG---CTGAGG---GCTATAGAGGCGCAACAGCATCTGTTGCAACTCACAGTCTGGGGCATT  
>AB485651  
TTCTACTGTAATACATCAAGATTGTTTAATAGTGAATGGAGATACAATACAACAAGTAAGGAATGGAGTTCTA  
ATACAACA-----  
-----ATAAT-----  
ACAGGGGTAAATGAAATCAAACCTCCCATGCAGAATAAAACAGCTTATAAACATGTGGCAGAGAGTAGGAAAAG  
CAATGTATGCCCCCTCCCATTTGAAGCACTAATTAACGTTCATCAAAC---  
ATTACAGGACTATTGTTGTCAAGAGATGGTGGTGCAAATAATAAT-----  
-----  
AGTCAGAATGAGACCTTCAGACCTGGAGGAGGAGATATGAGAGACAATTGGAGAAGTGAATTGTACAAATATA  
AAGTAATAAGAATTGAACCAATA---GGTCTAGCACCCACCAAGGCAAAAAGAAGAGTGGTG-----  
-----GAAAGGGAAAAAAGAGCA--ATAGGA---CTAGGAGCT-----  
---ATGTTCTTGGGTTCTTGGGAGCA--GCAGGAAGCACGATG---GGCGCAGCGTCA---  
TTGACGCTGACGGTACAG---GCCAGACAG---TTAATG---TCTGGTATAGTGCAACAGCAAAAT---  
AATTTG---CTGAGG---GCTATAGAGGCGCAACAACATCTGTTGCAACTCACAGTCTGGGGCATT  
>AJ320484  
TTCTACTGCAATACATCAAACTGTTTAACAGTGCATGGAATGACAGTACATGGAATATAGGGAATAATAATA  
CAGGG-----  
-----  
TCAGATAATGAGACAATCATTATCCCATGCAGAATAAAACAAATTATAAACATGTGGCAGGGAGTAGGAAAAG  
CAATGTATGCCCCCTCCCATCGAAGGATGGATCAATTGTGCATCAAAT---  
ATTACAGGGCTCTTACTGGTAAGGGATGGTGGTGGTGCAAATGAT-----  
-----  
AGTCAGAACGAGACCTTCAGACCTCAAGGAGGAGATATGAGAGACAATTGGAGAAGTGAATTATACAAGTATA  
AAGTAGTAAAAATTGAACCACTA---GGAATAGCACCCACCAAGGCAAAGAGAAGAGTGGTG-----  
-----GAAAGAGAAAAAAGAGCA--ATAGGA---CTAGGAGCT-----  
---ATGTTCTTGGGTTCTTGGGAGCA---GCAGGAAGCACGATG---GGCGCAGCGTCA---  
TTGACGCTGACGGTACAG---GCCAGACAA---TTATTG---TCTGGTATAGTGCAACATCAAAAC---  
AATTTG---CTGATG---GCTATAGAGGCGCAACAGCATCTGTTGCAACTCACAGTCTGGGGCATT  
>U08805  
TTCTACTGCAATACATCAAAATTGTTTAATCATAGTGTAGGGGAGAATAATACTCTATCAATTAGCAACGGG-  
-----  
-----  
GTAAATACTAACATCACACTCCCATGCAAAATAAAACAAATTGTAAACATGTGCCAGGGAGTAGGAAAAGCAA  
TGTATGCCCCCTCCCATTTCAAGGACTAATCAGATGTTTCATCAAAT---  
ATTACAGGACTATTGTTGACAAGAGATGGTGGTAATACTAGTCAG-----  
-----  
AATGAGACCTTCAGACCTGGAGGAGGAGATATGAGAGACAATTGGAGAAGTGAATTATACAATATAAAGTAA

TAAAAATTGAACCACTA---GGTCTAGCACCCACCAGGGCAAAGAGAAGAGTGGTG-----  
-----GCAAGAGAAAAAAGAGCA---ATAGGA---CTAGGAGCT-----  
GTGTTCCCTTGGGTTCTTGGGAGCA---GCAGGAAGCACAAATG---GGCGCAGCGTCA---  
CTGACGCTGACGGTACAG---GCCAGACAG---TTAATG---TCTGGTATAGTGCAACAGCAAAAC---  
AATTTG---CTGAGG---GCTATAGAGGCGCAACAGCATCTGTTGCAACTCACAGTCTGGGGCATT  
>EU852998  
TTCTACTGCAATACATCAGGACTGTTTAACTAATGTGACATCAAATAGTACAGCAAAT-----  
-----  
-----  
CCAAATGGGAACATCACACTCCCATGCAGAATAAAACAAATTGTAAACATGTGGCAGGGAGTAGGAAAAGCAA  
TATATGCCCCCTCCCATTTGAAGGACTAATCAACTGCTCATCAAAT---  
ATTACAGGACTATTGTTGGCAAGAGATGGTGGTGCAAAATAATAAT-----  
-----  
-----  
AGTCAGAATGAGACCTTCAGACCTGCAGGAGGAGATATGAGAGACAATTGGAGAAAGTGAATTATACAAATATA  
AAGTAGTAAGAATTGAGCCAATA---GGTCTAGCACCTGCCAGGGCAAAGAGAAGAGTGGTG-----  
-----GAAAGAGAAAAAAGAGCA---ATAGGA---CTGGGAGCT-----  
---ATGTTCCCTTGGGTTCTTGGGAGCA---GCAGGAAGCACGATG---GGCGCAGCGTCA---  
ATAACGCTGACGGTACAG---GCCAGACAA---GTACTG---TCTGGTATAGTGCAACAGCAAAAC---  
AATTTG---CTGAGG---GCTATAGAGGCGCAACAGCATCTGTTGCAACTCACAGTCTGGGGCATT  
>JX658585  
TTCTACTGCAATACATCAGGACTGTTTAAATAGTAGTGGTATAACAAATAGTACAGGAATGTTGAATAATAGT-  
-----  
-----  
GATATATCAAATATCACAATCCACTGCAGAATAAGACAAATTATAAACATGTGGCAGGGAGTAGGAAAAGCAA  
TGTATGCCCCCTCCCATTAAGGACTAATCTACTGTTTCATCAAAT---  
ATTACAGGACTATTGTTAAACAAGAGATGGTGCAGATAATAATAGT-----  
-----  
-----  
CCGAATGAAGCCTTCAGACCTGAAGGAGGAAATATGAAAGACAATTGGAGGAGTGAATTATACAAATATAAAG  
TAGTAAGAATTGAGCCATTA---GGTCTAGCACCCACCAGGGCAAAGAGAAGAGTGGTG-----  
-----GAAAGAGAAAAAAGAGCA---ATAGGA---CTAGGAGCT-----  
ATGTTCCCTTGGGTTCTTGGGAACA---GCAGGAAGCACGATG---GGCGCAGCGTCA---  
CTGACGCTGACGGTACAG---GCCAGACAA---TTATTG---TCTGGTATAGTGCAACAGCAAAAC---  
AATTTG---CTGAGG---GCTATAGAGGCGCAACAGCATCTGTTGCAACTCACAGTCTGGGGCATT  
>EU852934  
TTCTACTGCAATACATCACAGCTGTTTAAATAGTACATGGGAAGCCAATACGACAGATAAG-----  
-----  
-----  
CTAAATGAGACAATCACACTCCCATGCAGAATAAAACAAATTATAAACATGTGGCAGGGAGTAGGAAAAGCAA  
TGTATGCCCCCTCCCATTTGAAGGACAAATCACATGTTTCATCAAAT---  
ATTACAGGGCTTTTATTGACAAGAGATGGTGGTACAAATAATAGT-----  
-----  
-----  
AGTCAGAATGAGACCTTCAGACCTGGAGGAGGAGATATGAGAGATAATTGGAGAAAGTGAATTATACAAATATA  
AAGTAGTAAGAATTGAACCACTA---GGTCTAGCACCCACCAGGGCAAAGAGAAGAGTGGTG-----  
-----GAAAGAGAAAAAAGAGCA---ATAGGA---CTGGGAGCT-----  
---ATGTTCCCTTGGGTTCTTGGGAGCA---GCAGGAAGCACGATG---GGCGCAGCGTCA---  
CTGACGCTGACGGTACAG---GCCAGACAA---TTATTG---TCTGGTATAGTGCAACAGCAAAAC---  
AATTTG---CTGAGA---GCTATAGAGGCGCAACAGCATCTGTTGCAACTCACAGTCTGGGGCATT  
>EU852982  
TTCTACTGCAATACATCAGGACTGTTTAAACAATACGTTTAAATGGGAGAATGGCACTTTATTAAATACTACAG  
TAAATATT-----ACAGAG-----  
AATAGTACAGAGAATATCACACTCCCATGCAGAATAAAACAAATTATAAACATGTGGCAGGGAGTAGGAAAAG  
CAATGTATGCCCCCTCCCATCGCAGGACTAATTAAATGTTTCATCAAAT---  
ATTACAGGACTATTATTGACAAGGGATGGTGGTACAAATAATAGT-----  
-----  
-----  
CAGGATGATGAGACCTTTAGACCTGGAGGAGGAGATATGAGGGACAATTGGAGAAAGTGAATTATATAAATATA

AAGTAGTAAAAATTGAACCACTA---GGTCTAGCACCCACCAAGGCAAAGAGAAGAGTGGTG-----  
-----GAAAGAGAAAAAAGAGCA---ATAGGA---CTGGGAGCT-----  
---TTGTTCCCTTGGGTTCTTGGGAGCA---GCAGGAAGCACGATG---GGCGCAGCGTCA---  
ATAACGCTGACGGTACAG---GCCAGACAG---TTATTG---TCTGGTATAGTGCAGCAGCAAAAT---  
AATTTG---CTGAGA---GCTATAGAGGCGCAACAGCATCTGTTGCAACTCACAGTCTGGGGCATT  
>EU853014  
TTCTACTGCAATACATCAGGACTGTTCAATCATAGTGTATGGAGCAATAATGGTACATGGAATACTACATCAA  
TT-----  
-----  
AATAAACAGAGAATATCATACTCCCATGCAGAATAAAACAAATTATAAACATGTGGCAAAGAGTAGGAAAAG  
CAATGTATGCCCCCTCCCATTCAGGAGTAATCAATTGTGTATCAAAT---  
ATTACAGGACTATTGTTGATAAGAGATGGTGGTAATACTAATACTAGTCAT-----  
-----  
-----  
AATAATGGGACTGAGACCTTCAGACCTGGAGGAGGAGATATGAGAGACAATTGGAGAAGTGAATTATACAAAT  
ATAAAGTAGTAAGACTTGAGCCACTA---GGTCTAGCACCCACCAGGGCAAAGAGAAGAGTGGTG-----  
-----GAAAGAGAAAAAAGAGCA---GTAGGA---CTAGGAGCT---  
-----ATGTTCCCTTGGGTTCTTGGGAGCA---GCAGGAAGCACGATG---GGCGCAGCGTCA---  
CTGACGCTGACGGTACAG---GCCAGACTG---TTATTG---TCTGGTATAGTGCAACAGCAAAAT---  
AATTTG---CTGAGG---GCTATAGAGGCGCAACAGCATCTGTTGCAACTCACAGTCTGGGGCATT  
>AF484502  
TTCTACTGCAATACAGCAGGACTGTTTAATAGTACATGGAACAGGACAAATAGTGAATGGATAAATAGTAAAT  
GGACAAAT-----  
-----AAG---  
ACAGAAGATGTAAATATCACACTTCAATGCAGAATAAAACAAATTATAAACACGTGGCAGGGAGTAGGAAAAG  
CAATGTATGCCCCCTCCCGTTAGTGGAATAATCCGATGTTTCATCAAAT---  
ATTACAGGACTGTTGCTGACAAGAGATGGTGGTGGTGCGATAATAAT-----  
-----  
-----  
AGGCAGAATGAGACCTTCAGACCTGGGGGAGGAGATATGAGAGACAATTGGAGAAGTGAATTATACAAATATA  
AAGTAGTAAGAATTGAACCACTA---GGTATAGCGCCACCAAGGCAAAGAGAAGAGTGGTG-----  
-----GAAAGAGAAAAAAGAGCA---ATAGGA---CTGGGAGCC-----  
---TTGTTCCCTTGGGTTCTTGGGAACA---GCAGGAAGCCCGATG---GGCGCAGTGTCA---  
ATGACGCTGACGGTACAG---GCCAGACAA---GTATTG---TCTGGTATAGTGCAACAGCAAAAC---  
AATCTG---CTGAGG---GCTATAGAGGCGCAACAGCATCTGTTGCAACTCACAGTCTGGGGCATT  
>AF484506  
TTCTACTGCAATACATCAGGACTGTTTAATAGTACATGGGAAAATGGTACATTAAATAGTGCGGAG-----  
-----  
-----  
GGAAATGATACAATCACACTCCCATGCAGAATAAAACAAATTATAAACATGTGGCAGGAAGTAGGAAAAGCAA  
TGTATGCCCCCTCCCATTCAGGACTAATCCAATGTTTCATCAAAT---  
ATTACAGGACTATTGTTGACAAGAGATGGTGGTGTAAATAATAGT-----  
-----  
-----  
CAGAATGAGACCTTCAGGCCTGGAGGGGGAGATATGAGAGACAATTGGAGAAGTGAATTATACAAATATAAAG  
TAGTAAAAATTGAACCACTA---GGTATAGCACCCACCAAGGCAAAGAGAAGAGTGGTG-----  
-----GAAAAAGAAAAAAGAGCA---ATAGGC---CTGGGAGCT-----  
ATGTTCCCTTGGGTTCTTGGGAGCA---GCAGGAAGCACGATG---GGCGCAGCGTCA---  
CTGACGCTGACGGTACAG---GCCAGACAG---TTATTG---TCTGGTATAGTGCAACAGCAAAAC---  
AATTTG---CTGAGG---GCTATAGAGGCGCAACAGCATCTGTTGCAACTCACAGTCTGGGGCATT  
>AF484513  
TTCTACTGCAATACATCAGAACTGTTTAATAGTACATGGGGGAATTCTAGTACATCAACTAGTACAGGGGTA-  
-----  
-----  
-----  
AATAAGAGTACAATCACTATCCCATGCAGAATAAAACAAATTATAAACATGTGGCAGGAAGTAGGAAAAGCAA  
TGTATGCCCCCTCCCATTCAGGACTAATCAAATGTTCCCTCAAAT---  
ATTACAGGACTATTGTTGGTAAGAGATGGTGGTGCAACTAATAAT-----  
-----  
-----  
AGTCAGAATGAGACCTTCAGACCTGGAGGAGGAGATATGAGAGACAATTGGAGAAGTGAATTATACAAATATA

AAGTAGTAAGACTTGAACCACTA---GGTCTAGCACCCACCAAGGCAAAGAGAAGAGTGGTG-----  
-----GAAAGAGAAAAAAGAGCA---ATAGGA---CTGGGAGCT-----  
---ATGTTCCCTTGGGTTCTTGGAACA---GCAGGAAGCACGATG---GGCGCAGCGTCA---  
CTGACGCTGACGGTACAG---GCCAGACAG---TTATTG---TCTGGTATAGTGCAACAGCAAAAC---  
AATTTG---CTGAGG---GCTATAGAGGCGCAACAGCATCTGTTGCAACTCACAGTCTGGGGCATT  
>AF484518  
TTCTACTGCAATACAACAGTACTGTTTAATAGCACATGGGAAAATAATAGTACATGGGGTAATGAGAGT----  
-----  
-----  
GCAATGGGTAATGTCACACTCCCATGCAGAATAAAACAAATTATAAACATGTGGCAGGGAGTAGGAAAAGCAA  
TGTATGCCCCCTCCCATTTGAAGGACTAATCAGCTGCTCATCAAAT---  
ATTACAGGATTACTGTTTGACAAGAGATGGTGGTGGAAATGAAAGT-----  
-----  
-----  
AGTCAGAATGAGACCTTCAGACCTGGAGGGGGAGATATGAGAGACAATTGGAGAAGTGAATTATATAAATATA  
AAGTAGTAAGAATTGAACCATTA---GGTCTAGCACCCCTCCAAGGCAAAAAGAAGAGTAGTA-----  
-----GAAAGAGAGAAAAAGAGCA---ATTGGA---CTAGGAGCT-----  
---ATGTTCCCTTGGGTTCTTGGAACA---GCAGGAAGCACGATG---GGCGCAGCGTCA---  
CTGACGCTGACGGTACAG---GCCAGACAG---CTACTG---TCTGGTATAGTGCAACAGCAAAAC---  
AATTTG---CTGAGG---GCTATAGAGGCGCAACAGCACCTGTTGCAACTCACAGTCTGGGGCATT  
>AY304496  
TTCTACTGCAATACATCAGGACTGTTTAATGGTGTATGGAAGAATAATACATCAGATAATGAAACGGTAAAT-  
-----  
-----  
GGAAGTGAGACAATAACAATCCCATGCAGAATAAAACAAATTATAAACACGTGGCAAGGAGTAGGAAGAGCAA  
TGTATGCCCCCTCCCATTTAGAGGACTAATCCGATGTTTCATCAAAC---  
ATTACAGGACTATTGTTAACAAGAGATGGTGGTACAAATGGTGCT-----  
-----  
-----  
AGTCAGAAGGAGACCTTCAGACCCGGAGGAGGAGATATGAGAGACAATTGGAGAAGTGAATTATACAAATATA  
AAGTAGTAAAAATTGAACCATTA---GGTCTAGCACCCACCAGGGCTAAAAGAAGAGTGGTG-----  
-----GAAAGAGAGAAAAAGAGCA---ATAGGA---CTAGGAGCT-----  
---ATGTTCCCTTGGGTTCTTGGAACA---GCAGGAAGCACGATG---GGCGCAGTGTCA---  
CTGACGCTGACGGTACAG---GCCAGACAG---GTACTG---TCTGGTATAGTGCAAGCAGCAAAAC---  
AATTTG---CTGAGG---GCCATAGAGGCGCAACAGCATCTGTTGCAACTCACAGTCTGGGGCATT  
>AF484480  
TTCTACTGCAATACATCAAACTGTTTAATAATACATTTAATACTAGTGATTGGAGGACTTATAATACATCAA  
ATAGT-----  
-----  
ACAGGGAATGAGACAATCACACTCCCATGCAGAATAAAACAAATTATAAACATGTGGCAGGGAGTAGGAAGAG  
CAATGTATGCCCCCTCCCATTTAGAGGACTAATCAGATGTTTCATCAAAT---  
ATTACAGGACTATTGTTGACAAGAGATGGGGGTAATGCAATAATACT-----  
-----  
-----  
AATCAAAGTGAGACCTTCAGACCTGGAGGAGGAGATATGAGAGACAATTGGAGAAGTGAATTATACAAATATA  
AAGTAGTAAGAATTGAGCCAATA---GGTCTAGCACCCACCAAGGCAAGGAGAAGAGTGGTG-----  
-----GAAAGAGAGAAAAAGAGCA---ATAGGA---CTAGGAGCT-----  
---ATGTTCCCTTGGGTTCTTGGAACA---GCAGGAAGCACGATG---GGCGCAGCGTCA---  
CTGACGCTGACGGTACAG---GCCAGACAG---GTGTTG---TCTGGTATAGTGCAACAGCAAAAC---  
AACTTG---CTGAAG---GCTATAGAGGCGCAACAGCATCTGTTGCAACTCACAGTCTGGGGCATT  
>AF484485  
TTCTACTGCAATACATCAGAATTGTTTAATAATAGTGTATGGACATCAAATAATACAGGGATGTCAAATAGT-  
-----  
-----  
-----  
ACAAAGGCAAATATCACACTCCCGTGCAGAATAAAACAAATTATAAACATGTGGCAGGGAGTAGGAAAAGCAA  
TGTATGCCCCCTCCCATTTGCAAGGACAAATCAGATGCTCGTCAAAT---  
ATTACAGGATTATTGTTGACAAGAGATGGTGGTGCAATAATAAT-----  
-----  
-----  
AGTCAGAATGAGACCTTCAGACCTGGAGGAGGAGATATGAAAGACAATTGGAGAAGTGAATTATACAAATATA

AAGTAGTAAGACTTGAACCACTA---GGTCTAGCACCCACCAAGGCAAAGAGAAGAGTGGTG-----  
-----GAAAGAGAAAAAAGAGCA---ATAGGA---CTGGGAGCT-----  
---ATGTTCCCTTGGGTTCTTGGGAGCA---GCAGGAAGCACGATG---GGCGCAGCGTCG---  
CTGACGCTGACGGTACAG---GCCAGACTA---TTATTG---TCTGGTATAGTGCAACAGCAAAAC---  
AATTTG---CTGAGG---GCTATAGAGGCGCAACAGCATCTGTTGCAACTCACAGTCTGGGGCATT  
>AF484486  
TTCTATTGCAATACATCAGGACTGTTTAATAGTACATGGAGGAATGATACATCAAGTAGTACATGGAGGAATG  
ATACATCAAGT-----  
-----AGTACA-----  
AAGCCAGATGAGACACTCACACTCCCATGCAGGATAAAACAAATTATAAACCTGTGGCAGGAAGTAGGAAGAG  
CAATGTATGCCCCCTCCCATTCAGGAAACATCACATGTTTCATCAAAT---  
GTTACAGGACTATTGTTGACAAGAGATGGTGGTACACATAATAATAAT-----  
-----  
-----  
AGTCAGACTGAGACCATCAGGCCTGGAGGAGGAGATATGAGAAACAATTGGAGAAGTGAATTATACAAATATA  
AAGTAGTAAGAATTGAGCCAATA---GGCCTAGCACCCACCAAGGCAAAGAGAAGAGTGGTG-----  
-----GAAAGAGAAAAAAGAGCA---ATAGGC---CTGGGAGCT-----  
---ATGTTCCCTTGGGTTCTTGGGAGCA---GCAGGAAGCACGATG---GGCGCAGCGTCA---  
CTGACGCTGACGGTACAG---GCCAGACAA---GTATTG---TCTGGTATAGTGCAACAGCAAAAT---  
AATTTG---CTGAGG---GCTATAGAGGCGCAACAGCACCTGTTGCAACTCACAGTCTGGGGCATT  
>AF484487  
TTCTACTGTGATACAACAGGACTGTTTAATGGTACAAATAGTACAGGGGGA-----  
-----  
-----  
GATAATGAGACAATCACACTCCAATGCAGAATAAAACAAATTATAAACATGTGGCAGGGAGTAGGAAGAGCAA  
TGTATGCCCCCTCCCATTCAGGGCAAATCTATTGCTCATCAAAT---  
ATTACAGGACTATTGCTGACAAGAGATGGTGGTAACAATGATACG-----  
-----  
-----  
GGGGAGGAGATTTTCAGACCTGTAGGAGGAGATATGAGAGACAATTGGAGAAGTGAATTATACAAATATAAAG  
TAGTAAGAATTGAACCACTA---GGTCTAGCACCCCTCCAAGGCAAGGAGAAGAGTGGTG-----  
-----GAAAGAGAAAAAAGAGCA---ATAGGA---CTAGGAGCT-----  
GTGTTCCCTTGGGTTCTTGGGAGCA---GCAGGAAGCACGATG---GGCGCAGCGTCG---  
CTGACGCTGACGGTACAG---GCCAGACAG---TTATTG---TCTGGTATAGTGCAACAGCAAAAC---  
AATTTG---CTGCAG---GCTATAGAGGCGCAACAGCATCTGTTGCAACTCACAGTCTGGGGCATT  
>AF484519  
TTCTATTGCAACACATCAGGACTGTTTAATAGTACATGGACATCAAATAGTACATCAAATAGTACAAAGGTAA  
AT-----  
-----  
AGTACTGAGCCAATCACACTCCAATGCAGAATAAAACAAATTATAAATATGTGGCAGGGAGTAGGAAGAGCAA  
TGTATGCCCCGCCCATTGAAGGACTAATTCATTGTTTCATCAAAT---  
ATTACAGGACTACTGTTGACAAGAGATGGTGGTACAAATAATACT-----  
-----  
-----  
AGTCAGAATGAGACTTTCAGACCTGGAGGAGGAAATATGAGAGACAATTGGAGAAGTGAATTATACAAATATA  
AAGTAGTAAGAATTGAACCAATA---GGTCTAGCACCCACCAAGGCAAAGAGGAGAGTGGTG-----  
-----GAAAGAGAAAAAAGAGCA---ATAGGA---CTAGGAGCT-----  
---ATGTTCCCTTGGGTTCTTGGGAACA---GCAGGAAGCACGATG---GGCGCAGCGTCA---  
ATAACGCTGACGGTACAG---GCCAGACAG---TTACTG---TCTGGTATAGTGACAGCAGCAAAAC---  
AATTTG---CTGAGG---GCTATAGAGGCGCAACAGCATCTGTTGCAACTCACAGTCTGGGGCATT  
>AF484494  
TTCTACTGCAATACATCAGGACTGTTTAATAATAGTGTATGGAATACTAGTGTATGGAGAAATGATAGTACAT  
TA-----  
-----  
-----  
GATAATGAGACTATCACACTCCCATGCAGAATAAAACAAATTATAAACATGTGGCAAGGAGTAGGAAAAGCAA  
TGTATGCCCCCTCCCATTCAGGACGAATCAGTTGTTTCATCAAAT---  
ATTACAGGACTATTGTTGACAAGAGATGGTGGTGCAAAATAATAAT-----  
-----  
-----  
AGTCAGAATGAGACCTTCAGACCTGGAGGAGGAGATATGAGAGATAATTGGAGAAGTGAATTATACAAATACA

AAGTAATAAGAATTGAACCACTA---GGTCTAGCACCCACCAAGGCCAAAAGAAGAGTGGTG-----  
-----GAAAGAGAAAAAAGAGCA---ATAGGA---CTAGGAGCT-----  
---ATGTTCCCTTGGGTTCTTGGGAGCA---GCAGGAAGCACGATG---GGCGCAGCGTCA---  
CTGACGCTGACGGTACAG---GCCAGACAG---TTATTG---TCTGGTATAGTGCAGCAGCAAAAC---  
AATTTG---CTGAGG---GCTATAGAGGCGCAACAACATCTGTTGCAACTCACAGTCTGGGGCATT  
>AF484495  
TTCTACTGCAACACAACAGGATTGTTTAATCATAGTAAATGGAATAATAATAATACATCAGAATGGAATAAT-  
-----  
-----  
ACAGATAAGATAATCACACTCCCATGCAGACTAAAAACAAATTATAAACATGTGGCAGGGAGTAGGAAGAGCTA  
TGTATGCCCCCTCCCATTTGAAGGAGAAATTAAATGTTTCATCAAAT---  
ATTACAGGACTATTGTTAACAAGAGATGGAGGTACAAATAGTACT-----  
-----  
-----  
CAGAAATGAGACCTTCAGACCTGGAGGGGGAGATATGAGAGACAATTGGAGAAGTGAATTATACAAATATAAAG  
TAGTAAGAATTGAACCACTA---GGTCTAGCACCCACCAGAGCAAAGAGAAGAGTGGTG-----  
-----CAAAGAGAAAAAAGAGCA---ATAGGA---CTGGGAGCT-----  
ATGTTCCCTTGGGTTCTTGGGAGCA---GCAGGAAGCACGATG---GGCGCAACGTCG---  
ATGGCGTTGACGGTACAG---GCCAGACAA---TTGTTG---TCTGGTATAGTGCAACAGCAAAAC---  
AATTTG---CTGAGG---GCTATAGAGGCGCAACAGCATCTGTTGCAACTCACAGTCTGGGGCATT  
>AF484497  
TTCTACTGCAATACATCAGGACTGTTTAATAGTGAATGGACATCGTCTAAAGGTGAATGGACAGGGGTAGAAA  
AGAAT-----  
-----  
AGTACAAGCAGCAACAACAACCTCCCATGCAGAATAAAAAACAAATTATAAACATGTGGCAGGGAGTAGGAAAAG  
CTATGTATGCCCCCTCCCATTAAGGACAAATCAGATGTTTCATCAAAT---  
ATTACAGGACTATTGTTGACAAGAGATGGTGGTGTAATAATAAT-----  
-----  
-----  
AGTCAGGAGACCTTCAGACCTGGAGGAGGAGATATGAGAGACAATTGGAGAAGTGAATTATACAAATATAAAG  
TAGTAAGAATTGAACCACTA---GGCCTAGCACCCACCAAGGCCAAAAGAAGAGTGGTG-----  
-----GAAAGAGAAAAAAGAGCA---ATAGGA---CTAGGAGCT-----  
TTGTTCCCTTGGGTTCTTGGGAGCA---GCAGGAAGCACAATG---GGCGCAGCGTCA---  
CTGACGCTGACGGTACAG---GCCAGACAG---GTATTG---GCTGGTATAGTGCAACAGCAAAAC---  
AATTTG---CTGAGG---GCTATAGAGGCGCAACAGCATCTGTTGCAACTCACAGTCTGGGGCATT  
>AF484498  
TTCTACTGCAATACAGCAAGATTGTTTAATTATGAATGGAGTAATAATACATTAGCTAGTACAGGGAATGACA  
GT-----  
-----  
-----  
AAAGGGAATGACAGTATCACACTCCAATGCAGAATAAAAAACAAATTATAAACATGTGGCAGGGAGTAGGAAAAG  
CAATGTATGCCCCCTCCCATTTAGGGACTAATCACCTGTTTCATCAAAT---  
ATTACAGGACTATTGTTGACAAGAGATGGTGGTGCAAATAATAAT-----  
-----  
-----  
AGTCAGAATGAGACCTTCAGACCTGGAGGAGGAGATATAAGGGACAATTGGAGAAGTGAATTATACAAATATA  
AAGTAGTAAACTTTGAACCACTA---GGTCTAGCACCCACCAGGGCAAAGAGAAGAGTGGTG-----  
-----GAAAGAGAAAAAAGAGCA---ATAGGA---CTAGGAGCT-----  
---ATGTTCCCTTGGGTTCTTGGGAGCA---GCAGGAAGCACGATG---GGCGCAGCGTCC---  
CTGACGCTGACGGTACAG---GCCAGACAG---TTATTG---TCTGGTATAGTGCAACAGCAAAAT---  
AATTTG---CTAATG---GCTATAGAGGCGCAACAGCATCTGTTGCAACTCACAGTCTGGGGCATT  
>AF484499  
TTCTACTGCAATACATCAAAGCTGTTTAATAGTACATGGACAGGGGGTGGAAATATCACAAATATCACA----  
-----  
-----  
AGTATCACAAATATCACACTCCCATGCAGAATAAAAAACAAATTATAAACATGTGGCAGGGAGTAGGCAAAGCAA  
TGTATGCCCCCTCCCATTTGAAGGACTAATCCAATGTTTCATCAAAT---  
ATTACAGGACTATTATTGACAAGAGATGGTGGTGCAACTAATGAT-----  
-----  
-----  
AGTCAGAGTGAGACCTTTAGACCTGCAGGAGGAGATATGAGAGATAATTGGAGAAGTGAATTATACAAATATA

AAGTAGTAAGAATTGAACCACTA---GGTCTAGCACCCACCAAGGCAAAGAGAAGAACAGTG-----  
-----GAAAGAGAAAAAAGAGCA---ATAGGA---CTAGGAGCT-----  
---ATGTTCCCTTGGGTTCTTGGGAGCA---GCAGGAAGCACGATG---GGCGCAGCGTCA---  
CTGACGCTGACGGTACAG---GCCAGACTG---TTATTG---TCTGGTATAGTGCAACAGCAAAAC---  
AATTTG---CTGAGG---GCTATAGAGGCGCAACAGCATCTGTTGCAACTCACAGTCTGGGGCATT  
>U36871  
TCCTACTGCAATACATCAAACTGTTTAATAGTACATGGAGGAATAATAATACATCAAATAGTACAGGGGTAA  
ATAGT-----  
-----ACA---  
GGGGAAAATGAGATAATCAAACTCCCATGCAGAATAAAACAAATTGTAAATATGTGGCAGGGAGTAGGAAAAG  
CAATGTATGCCCCCTCCCATTTGAAGGGCTAATCAATTGTTTCATCAAAT---  
ATTACAGGACTATTGTTGACAAGAGATGGTGGTGCCAATAATAGT-----  
-----  
-----  
CAGAATGAGACCTTCAGACCTGGAGGAGGAGATATGAGGGACAATTGGAGAAGTGAATTATACAAATATAAAG  
TAGTAAAACCTGAACCACTA---GGTCTAGCACCCACCAGGGCAAAGAGAAGAGTGGTG-----  
-----GAAAGAGAAAAAAGAGCA---ATAGGA---CTAGGAGCT-----  
ATGTTCCCTTGGGTTCTTGGGAGCA---GCAGGAAGCACGATG---GGCGCAGCGTCA---  
CTGACGCTGACGGTACAG---GCCAGACAG---TTAATG---TCTGGTATAGTGCAACAGCAAGAC---  
AATTTG---CTGAGG---GCTATAGAGGCGCAACAGCATCTGTTGCAACTCACAGTCTGGGGCATT  
>EF575364  
TTCTACTGCAACACATCAGGACTATTTAATGGTACATGGAGAAATGCTACATCAAATAGTACACAG-----  
-----  
-----  
CTGAATGGTACAATCACGCTCCCATGCAGAATAAAACAAATTATAAACATGTGGCAAGAAGTAGGAAAAGCAA  
TGTATGCCCCCTCCCATTTGAAGGATTCATCAATTGTTTCATCAAAT---  
ATTACAGGACTATTGTTGGTAAGAGATGGTGGTAGTAATGATGAT-----  
-----  
-----  
AGTCAGAATGAGACCTTCAGACCTGGAGGAGGAGATATGAGAGACAATTGGAGAAGTGAATTATACAAATATA  
AGGTAGTAAGAATTGAACCACTA---GGTCTAGCACCCACCAAGGCAAAAAGAAGAGTGGTG-----  
-----GAAAGAGAAAAAAGAGCA---ATAGGA---CTGGGAGCT-----  
---ATGTTCCCTTGGGTTCTTGGGAGCA---GCAGGAAGCACGATG---GGCGCAGCGTCA---  
ATAACGCTGACGGTACAG---GCCAGACAG---TTACTG---TCTGGTATAGTGCAACAGCAAAAC---  
AATTTG---CTGAGG---GCTATAGAGGCGCAACAGCATCTGTTGCAACTCACAGTCTGGGGCATT  
>EF575370  
TTCTACTGCAATACATCAAACTGTTTAATAGTACATGGGAGAATGTGAATGTTACTACATCAAATAATACAG  
GG-----  
-----  
-----  
CCAGATAGTACAATCACACTCCCATGCAGAATAAAACAAATTATAAACATGTGGCAGGGAGTAGGAAAAGCAA  
TGTATGCCCCCTCCCATTTGAAGGGCTAATCAAATGTTTCATCAAAT---  
ATTACAGGACTATTGTTACTAAGAGATGGTGGTCTAAATACTAGT-----  
-----  
-----  
CAGAGTGAAACCTTCAGACCTGGAGGAGGAGATATGAGGGACAATTGGAGAAGTGAATTATACAAATATAAAG  
TAGTAAAAATTGAACCAATA---GGTCTAGCACCTACCAAGGCAAGGAGAAGAGTGATG-----  
-----GAAAGAGAAAAGAGAGCA---ATAGGA---CTGGGAGCT-----  
GTGTTCCCTTGGGTTCTTGGGAGCA---GCGGGAAGCACAATG---GGCGCAGCGTCA---  
CTAACGCTGACGGTACAA---GCCAGACAA---GTATTG---TTTGGTATAGTGCAACAGCAAAAC---  
AATTTG---CTGAGG---GCTATAGAGGCGCAGCAGCATCTGCTGCAACTCACAGTCTGGGGCATT  
>EF575429  
TTCTACTGCAATACATCAGGACTGTTTAATAATACATTTAATACTAAGAATAGTACAGAGGTAAATAGTAAT-  
-----  
-----  
-----  
GGGACAGAGGTAATCATACTCCCATGCAGAATAAAACAAATTACAAACATGTGGCAGAAAGTAGGAAAAGCAA  
TGTATGCCCCCTCCTATTGAAGGACTAATCAGCTGTTTCATCAAAT---  
ATCACAGGACTATTGTTGACAAGAGATGGTGGTAATATAACTAGT-----  
-----  
-----  
CAGAATGAGACCTTCAGGCCTGCAGGAGGAGATATGAGAGATAATTGGAGAAGTGAATTATACAAATATAAAG

TAGTAAGAATCGAACCACTA---GGTCTAGCACCCACCAAGGCAAGGAGAAGAGTGGTG-----  
-----GAAAGGGAAAAAAGAGCA---ATAGGA---CTGGGAGCT-----  
TTGTTTCCTTGGGTTCTTGGGAACA---GCAGGAAGCACGATG---GGCGCAGCGTCA---  
CTGACGCTGACGGTACAG---GCCAGACAG---TTATTG---TCTGGTATAGTGCAACAGCAAAAC---  
AATTTG---CTGAGG---GCTATAGAGGCGCAACAGCATCTGTTGCAACTCACAGTCTGGGGCATT  
>EF575482  
TTCTACTGCAATACATCACGCCTGTTTAATAGTACATGGAATAATAATACAGGGGATATAGGGAGTAGTGAT-  
-----  
-----  
ACAAATAAGAATATCACAATCCCATGCAGAATAAAACAAATTATAAACATGTGGCAGGGAGTAGGAAAAGCAA  
TGTATGCCCCCTCCCATCGAAGGAAAAATCCAGTGTTAGATCAAAT---  
ATTACAGGGCTCTTACTGACAAGAGATGGTGGTGCAGATGCTAAT-----  
-----  
-----  
CAGAATGAGACCATCAGACCTGGAGGAGGAGATATGAGAGACAATTGGAGAAGTGAATTATACAAATATAAGG  
TAGTAAGAATTGAACCACTA---GGAATAGCACCCACCAAGGCAAAGAGAAGAGTGGTG-----  
-----GAAAGAGAAAAAGAGAGCA--ATAGGA---CTAGGAGCT-----  
GTGTTTCCTTGGGTTCTTGGGAGCA---GCAGGAAGCACGATG---GGCGCAGTGTC---  
TTAACGCTGACGGTACAA---GCCAGACAG---TTATTG---TCTGGTATAGTGCAACAGCAAAGC---  
AATTTG---CTGAAG---GCTATAGAGGCGCAACAGCGTCTGTTGCAACTCACAGTCTGGGGCATT  
>JQ403079  
TTCTACTGCAATACATCAGGACTGTTTAATAATATATGGAATGGCACTTGGAATGGCACTTTAAATAGTACA-  
-----  
-----  
GGGAGAGAGAATATCACACTCCGATGCAGAATAAAACAAATTATAAACATGTGGCAGGGAGTAGGAAAAGCAA  
TGTATGCCCCCTCCCATGGAAGGAGTAATTAATTGTACATCAAAT---  
ATTACAGGACTAATATTAACAAGAGATGGTGGTGCTAATGAGAGT-----  
-----  
-----  
CAGAATAATAATGAGACCTTCAGACCTGGAGGAGGAGATATGAGGGACAATTGGAGAAGTGAGTTATACAAAT  
ATAAAGTAGTAAAAATTGAACCATTA---GGTCTAGCACCCACCAGGGCAAAAAGGAGAGTGGTG-----  
-----GAAAGAGAAAAAAGAGCA--ATAGGA---CTGGGAGCT---  
-----TTGTTTCCTTGGGTTCTTGGGAGCA---GCAGGAAGCACGATG---GGCGCAGCGTCA---  
ATGGCGCTGACGGTACAG---GCCAGACAA---GTATTG---TCTGGTATAGTGCAACAGCAAAAC---  
AATTTG---CTGAGG---GCTATAGAGGCGCAACAGCATTTGTTGCAACTCACAGTCTGGGGCATT  
>AY773338  
TTCTACTGTAATACATCAAGGCTGTTTAATAATACATGGAATGGTACAACATGGTCAAATAAGACAGAC---  
-----  
-----  
ACCAATGGGACAGTCACACTCCCATGCAGAATAAAACAAATTATAAACATGTGGCAGGAAGTAGGAAAAGCAA  
TGTATGCCCCCCCCATAGAAGGACTACTTAGATGTTTCATCAAAT---  
ATTACAGGGTATATATTGACAAGAGATGGTGGTTATACCACTTCT-----  
-----  
-----  
GGCAATGCGACCTTCAGACCTGGCGGAGGAGATATGAGGGACAATTGGAGAAGAGAATTATATACATACAAAG  
TAGTACAAATTGGACCAATA---GGAGTAGTGCCCAACAGGGCAAAGAGAAGAGTGGTG-----  
-----GAAAGGGAAAAAAGAGGG---GTT-----  
-----TTCTTGGGAGCA---GCAGGAAGCACGATG---GGCGCAGCGTCA---  
TTGTCGCTGCCGGTACAG---GCCAGACAG---GTATTG---TCTGGTACAGTGCAACAGCAAAGC---  
AATTTG---CTCAGG---GCTATATCGGCGCAACAGCATCTGTTGCAACTCACGGTCTGGGGCATT  
>AY773340  
TTCTACTGTAATACATCAAGGCTGTTTAGTAATACATGGATGGTACATGGGATAATAATACATGGT-----  
-----  
-----  
TCAAATCAGACAGTCAGACTCCCATGCAGAATAAAACAAATTATAAACATGTGGCAGGAAGTAGGAAAAGCAA  
TGTATGCCCCCTCCCATAGAAGGAACAATTAGGTGTTTCATCAAAT---  
ATTACAGGGCTAATATTGACAAGAGATGGTGGTAATAATAGTTCT-----  
-----  
-----  
AACACGAGACCTTCAGACCTGGCGGAGGAGATATGAGGGACAATTGGAGAAGTGAATTATATAAATACAAAG

TAATACAAATTGAACCAATA---GGAGTAGCGCCACCAAGGCAAAGAGAAGAGTGGTG-----  
 -----GAAAGGGAAAAAAGAGCA---ATAGGA---CTAGGAGCT-----  
 ATGTTCTTGGGTTCTTGGGAGCA---GCAGGAAGCACAATG---GGCGCAGCGTCA---  
 GTGACGCTGACGGTACAG---GCCAGACAG---GTATTG---TCTGGTAGAGTGCAACAGCAAAAC---  
 AATTTG---GCCAGG---GCTATAGAGGCGCAACAGCATCTGTTGCAACTCACGGTCTGGGGCATT  
 >AY773341  
 TTCTACTGTAATACATCAGGGCTGTTTAATAATACATGGGATAATAGTAATAGGACATGGTCAAATAAGGGAG  
 CA-----  
 -----  
 TGGTCAAATCAGACAGTCACACTCCCATGCAGAATACGACAAATTATATACATGTGGCAGAAAGTTGGAAAAG  
 CAATGTATGCCCCCTCCCATACAAGGAACACTTAGATGCTCATCAAAT---  
 ATTACAGGACTACTATTACAAAGAGATGGTGGTAATAATAGTTCT-----  
 -----  
 -----  
 AACAAACGAGACCTTCAGACCTGGCGGAGGAGATACGAGGGACAATTGGAGAAGTGAATTATATAAATACAAAG  
 TACTACAAATTGAACCAAGA---GGAGCAGCGCCACCAAGGCAAAGAGAAGAGTGGTG-----  
 -----GAAAGGGAAAAAAGAGCA--ATACGA---CTCGGAGCT-----  
 ATGTTCTTGGGTTCTTGGGAGCA---GCAGGAAGCACAATG---GGCGCAGCGTCA---  
 GAGACGCGGACGGTACAG---GCCAGACAG---GTATTG---TCTGGTATACTGCAACAGCAAAAC---  
 AATTTG---CTCAGG---GCTATCGAGGCGCAACAGCATCTGTTGCAACTCACGGTCTGGGGCATT  
 >EF633445  
 TTCTACTGTAATACATCAGGGCTGTTTAATAGTACATGGAATAGGACAGGGAATAATAGTAGTAGTACAGGG-  
 -----  
 -----  
 TCAAATGAGACAATCACACTTCCATGCAGAATAAGACAAATTATAAACATGTGGCAGGGAGTAGGAAAAGCAA  
 TGTATGCCCCCTCCCATAGAAGGACTAATTAGATGTTTCATCAAAT---  
 ATTACAGGGCTAATATTGACAAGGGATGGTGGTGATAATAGTAGT-----  
 -----  
 -----  
 TCTCACAATGAGACCTTCAGACCTGGAGGAGGAGATATGAGGGACAATTGGAGAAGTGAATTATATAAATACA  
 AAGTAGTAAGAATTGAACCAATA---GGATTAGCACCCACCAGGGCAAAGAGAAGAGTGGTG-----  
 -----GCAAGGGAAAAAAGAGCA--ATAGGA---CTAGCGAGC-----  
 ---TGGTTCCTTGGGTTCTTGGGAGCA--GCAGGAAGCACAATG---GGCGCAGCGTCT---  
 GTGACGCTGACGGTACAG---GCCAGACAG---TTATTG---TCTGGTATAGTGCAACAGCAAAAC---  
 AATTTG---CTGAGA---GCTATAGAGGCGCAACAGCATCTGTTGCAACTCACAGTCTGGGGCATT  
 >FJ900266  
 TTCTACTGCAATACATCAGGATTGTTTAATAACAGTGATACC-----  
 -----  
 -----  
 TCAAACAGAACTATTACTCTCCCATGTAGAATAAAACAAATTGTAAACATGTGGCAGGGAGTAGGACAAGCAA  
 TGTATGCCGCTCCTGTTGCAGGAAAAATTACCTGTAACCTCAAAC---  
 ATTACAGGCCTACTATTGACAAGAGATGGTGGTAATAATAGTCAT-----  
 -----  
 -----  
 ACCGAGACCTTCAGACCTGGGGGAGGAAATATGAAAGACAATTGGAGAAGTGAAGTATATAAATATAAAGTAG  
 TAGAACTTGAACCATTA---GGAGTAGCACCCACCAAGGCAAGAAGAAGAGTGGTGGCG-----  
 -----AGAGGGAGAGAAAAAAGAGCA---GTGGGA---ATAGGAGCT-----  
 TTGTTCTTTGGGTTCTTGGGAGCA---GCAGGAAGCACTATG---GGCGCAGCGTCA---  
 ATAACGCTGACGGTACAG---GCCAGACAA---TTATTG---TCTGGAATAGTGCAACAGCAGAAC---  
 AATCTG---CTGAGA---GCTATTGAAGCGCAGCAGCATATGTTGCAGCTCACAGTCTGGGGCATT  
 >FJ900267  
 TTCTACTGCAATACATCAAAATTGTTTAATAATAACACAGAA-----  
 -----  
 -----  
 CCCAATGGCACTATCACTCTTCCATGTAAATAAAACAAATTGTAAACATGTGGCAGGGAGTAGGACAAGCAA  
 TGTATGCCGCTCCTATTGCAGGAAACATTACCTGTAACCTCAAAT---  
 ATTACAGGCTTACTATTGACAAGAGATGGTGGTACGAATCAGAGT-----  
 -----  
 -----  
 GCTACTGAGACATTTCAGACCTGGGGGAGGAAATATGAAAGACAATTGGAGAAGTGAGCTATATAAATATAAAG

TAGTACAAATTGAACCACTA---GGAGTAGCACCCACCAAGGCAAAAAGACGAGTGGTGGAG-----  
 -----AAAGAGAGACCAAAGAGAGCA---GTGGGA---ATAGGAGCT-----  
 CTGTTCCCTTGGGTTCTTGGGAGCA---GCAGGAAGCACTATG---GGCGCAGCATCA---  
 ATAACGCTGACGGCACAG---GCCAGACAA---TTATTG---TCTGGAATAGTGCAACAGCAGAAC---  
 AATCTG---CTGAGG---GCTATTGAAGCGCAGCAGCATCTGTTGCAGCTCACAGTCTGGGGCATT  
 >DQ189088  
 TTCTACTGCAATACATCAGGACTGTTTAATGACACAGATGAC-----  
 -----  
 -----  
 AATGGCACTATCACTCTCCCATGTGCAATAAAACAAATTGTAAACATGTGGCAGGAAGTAGGACGAGCAAAACA  
 ATCACCCTCCCATGACAGGAAACATTACCTGTGGTTCAAAT---  
 ATTACAGGTCTACTATTGACAAGAGATGGTGGTACTGGGAATTGCACTGATGGT-----  
 -----  
 -  
 GGTACTGGGAATTGCACTGAGACCTTCAGACCTGGGGGAGGAAATATGAAAGATAATTGGAGAAGTGAATTAT  
 ATAAATACAAAGTAGTAGAAATTGAACCACTA---GGAGTAGCACCCACCAAAGCAAGAAGACAAGTGGTA--  
 -----AAGAGAGAAAAAAGAGCA---GTGGGA---  
 ATGGGAGCT-----TTGTTCATTGGGTTCTTGGCAGCA---GCAGGAGGCACTATG---  
 GGCGCGGCGTCA---ATAACGCTGACGGTACAG---GCCAGACAG---TTACTG---  
 TCTGGAATAGTGCAACAGCAAAAC---AATTTG---CTGAGA---  
 GCTATTGAAGCGCAACAGCATATGTTGCAGCTCACAGTCTGGGGCATT  
 >MH746263  
 TTCTACTGCGATACATCACAACCTGTTTAATGAGTCA-----  
 -----  
 -----GCAGGT-----  
 CAATTCAATGGAAGTATCATTCTCCCATGTAAAATAAAACAAATTATAAACATGTGGCAGGAAGTAGGACGAG  
 CAATGTATGCTGCTCCTGTTGCAGGAAACATTACCTGTAACTCAAAT---  
 ATCACAGGCCTATTGTTAACAAGAGATAGACATGGTGAGGCTAAT-----  
 -----  
 -----  
 ACTACTGAGACCTTCAGACCTGGAGGAGGAAATATGAGAGACAATTGGAGAAGTGAAGTATATAAATATAAAG  
 TAGTAAGAATTGAGCCACTA---GGGGTAGCACCTACCAGGGCAAAAAGACGAACGGTG-----  
 -----CAGAGAGAAAAAAGAGCA---GTAGGA---ATGGGAGCC-----  
 TTGTTCCCTTGGGTTCTTGGGAGCA---GCAGGAAGCACTATG---GGCGCAGCATCA---  
 ATAACGCTGACGGTACAG---GCCAGACAA---TTGCTG---TCTGGAATAGTGCAACAGCAAAAC---  
 AATTTG---CTGATG---ACTATTGAAGCGCAACAACACCTGTTGCAGCTCACAGTCTGGGGCATT  
 >MH746246  
 TTCTACTGCGATACATCAAAATTGTTTAAT-----  
 -----  
 -AATAATACAAAAGCATCA-----  
 GCATCCAATGGCACTATCACTATCCCATGTAAAATAAAACAAATTATAAACATGTGGCAGGGAGTAGGACAAG  
 CAATGTATGCCCTCCCATTCAGGAAACATTACCTGTGTTCAAAC---  
 ATTACAGGCCTACTATTGATAAGAGATGGTGGTAGTAATCAGAAT-----  
 -----  
 -----  
 AATTCTGAGGAGATCTTTAGACCTGGGGGAGGAAATATGAAAGACAATTGGAGAAGTGAAGTATATAAATATA  
 AAGTAGTAGAAATTGAGCCGCTA---GGAGTAGCACCCACCAAGGCAAGAAGACCAGTGGTG-----  
 -----AGCAGAGAAAAAAGAGCA---GCAGGA---ATAGCAGCG-----  
 ---TTGTTCCCTTGGGTTCTTGGGAGCA---GCAGGAAGCACTATG---GGCGCAGCGTCA---  
 ATAACGCTGACGGTACAG---GCCAGACAA---TTATTG---TCTGGAATAGTGCAACAGCAAAAC---  
 AATTTG---CTGAGG---GCTATTGAAGCGCAACAGCATATGTTGCAGCTCACAGTCTGGGGCATT  
 >FJ771006  
 TTCTACTGCAATACATCAGGACTGTTTAATGACACAGTATCC-----  
 -----  
 -----  
 AATGACACTATCACTCTCCCATGTCAAATAAAACAAATTGTAAATATGTGGCAGGAAGTGGGACGAGCAATGT  
 ATGCCGCTCCCATGGAAGGGAACATTACCTGTAACTCCAAT---  
 ATTACAGGTCTACTATTGACAAGAGATGGTGGTAAGAATAATGATACTGAG-----  
 -----  
 -----

AATAAAGATACTGAGATCTTCAGACCTGGGGGAGGAGATATGAGAGACAATTGGAGAAGTGAATTATATAAAAT  
ATAAAGTAGTAGAAATTGAACCACTA---GGAGTAGCACCCACCAGGGCAAAAAGACAAGTGGTG-----  
-----AAGAGAGAAAAAAGAGCA---GTAGGA---ATGGGAGCT---  
-----GTTTTCTTGGGTTCTTGGGAGCA---GCAGGAAGCACTATG---GGCGCAGCGTCA---  
ATAACGCTGACGGTACAG---GCCAGACAA---TTATTG---TCTGGCATAGTGCAACAGCAAAAC---  
AATTTG---CTGAGG---GCTATTAAAGCGCAACAGCATCTGTTGCAGCTCACAGTCTGGGGCATT  
>FJ771008  
TTCTACTGTAATACATCAGGACTGTTTAAATTCAATGCCTCATCCGGTGAG-----  
-----  
-----  
AATAGTACAAATATCACTCTCCCATGTAGAATAAAACAAGTTATAAACATGTGGCAGGAAGTAGGACGAGCAA  
TGTATGCCGCTCCTATTGAAGGAAAAATTTATTGTAGCTCAAAT---  
ATTACAGGTCTACTATTGACTAGAGATGGTGGTACTAATGATACT-----  
-----  
-----  
AATGGTACTGAGACCTTCAGACCTGGGGGAGGAGATATGAGAGACAATTGGAGAAGTGAATTATATAAAATATA  
AGGTAGTAAGAATTGAACCACTA---GGAGTAGCACCCACCAAGGCAAAAAGACAAGTGGTG-----  
-----CAGAGAGAAAAAAGAGCA---GTGGGA---CTAGGAGCT-----  
---GTGTTCTTGGGTTCTTGGGAGCA---GCAGGAAGCACTATG---GGCGCAGCGTCA---  
ATAACGCTGACGGTACAG---GCCAGACAA---TTATTG---TTTGAATAGTGCAACAGCAGAAC---  
AATCTG---CTGAGG---GCTATTGAAGCACAAACAGCATATGTTGCAGCTCACAGTCTGGGGCATT  
>KJ849782  
TTCTACTGCAATACATCAGAACTGTTTAATGACACAGGCAAT-----  
-----  
-----GAC---  
ACTAGTGCCGCTACTATCACTCTCCCATGTAAAATAAAACAAGTTATAAACATGTGGCAGGAAGTAGGAAAAG  
CAGTGTAATGCTCCCATTCAGGAAACCTTGCTGTAACTCAACT---  
ATTACAGGTCTACTATTGACAAGAGATGGTGGT-----  
-----  
CAGGACAATAATAGT---  
ACTACTGAGATCTTCAGACCTGGGGGAGGAAATATGAAAGACAATTGGAGAAGTGAGTTATATAAAATATAAAG  
TAGTAGAAATTGAACCACTA---GGAGTAGCACCCACCAGGGCAAAAAGACAAGTGGTG-----  
-----CAGAAGCAAAAAGAGCA---GTGGGG---CTGGGAGCT-----  
ATGTTCTTGGGTTCTTGGGAGCA---GCAGGAAGCACTATG---GGCGCAGCGTCA---  
ATAACGCTGACGGCACAG---GCCAGACAA---GTATTG---TTTGAATAGTGCAACAGCAGAGC---  
AATTTG---CTGAGG---GCTATTGAAGCGCAACAGCACATGTTGCAGCTCACAGTCTGGGGCATT  
>KT427774  
TTCTACTGCAATACATCAAACTGTTTAATGACAATAGCACTCAAAAATCC-----  
-----  
-----  
AATAATGACACTATCACTCTCCCATGTGCAATAAAACAATGGTAAACATGTGGCAGGAAGTGGGGCGAGCAA  
TGTATGCCGCTCCCATTCAGGGAACATTACCTGTAATTCAAAT---  
ATTACAGGTCTACTATTGGTAAGAGATGGTGGAAATGGTGGAAATAAT-----  
-----  
-----  
ACTAATAAGACTGAGATCTTCAGACCTGGGGGAGGAAATATGAAAGACAAGTGGAGAAGTGAATTATATAAAAT  
ATAAAGTAGTAGAAATTCAGCCACTA---GGAGTAGCACCCACCAGGGCAAAAAGACAAGTGGTG-----  
-----AAGAGAGAAAAAAGAGCA---GTGGGA---CTGGGAGCT---  
-----TTGTTCTTGGGTTCTTGGGAGCA---GCAGGAAGCACTATG---GGCGCAGCGTCA---  
ATAACGCTGACGGTACAG---GCCAGACAA---TTATTG---TCTGGTATAGTGCAACAGCAGAAT---  
AATCTG---CTGAGG---GCTATTGAAGCGCAACAGCATCTGTTGCAGCTTACAGTCTGGGGCATT  
>MG365768  
TTCTACTGCAATACAGCAGGACTGTTTAAACAACACTGAT-----  
-----  
-----  
AAGAATATCACTATCACTCTCCCATGTCAAATAAAACAGATCATAAACATGTGGCAGGAAGTGGGACGAGCAA  
TGTATGCCGCTCCCATTCAGGGAAGCATTACCTGTAACCTCAAAT---  
ATTACAGGTCTGATATTGACAAGAGATGGTGGCAATAGAAATGATACT-----  
-----  
-----

AATTGCACTGAGACCTTCAGACCTGGGGGAGGAAATATGAAAGACAATTGGAGAAGTGAATTGTATAAATATA  
AAGTAGTAGAAATTGAACCATTA---GGAATAGCACCCACCACGGCAAAAAGACAAGTGGTG-----  
-----AAGAGAGACAAAAGAGCA---GTCGGA---ATAGGAGCT-----  
---GTGCTCATTGGATTCTTGGGAGCA---GCAGGAAGCACTAGG---GGCTTAGCCTCA---  
GTGGCGCTGACGGTACAG---GCCAGACAA---TTATTG---TCTGGAATAGTGCAACAGCAGAAC---  
AATTTG---CTGAGG---GCCATTGAAGCGCAACAGCATATGTTGCAGCTCACAGTCTGGGGCATT  
>KU749396

TTCTACTGCAATACAACAAAACCTGTTTAATAATACAAGATAC-----  
-----  
-----  
AATGATACTATCACTCTCCCTCTCCCATGTCAAATAAAAACAAATAGTGAACATGTGGCAGGAAGTAGGAAGAG  
CAATGTATACCTCTCCCATTCAGGAAACATTACTTGTAACTCAAAT---  
ATTACAGGTCTACTATTGACAAGAGATGGTGGTAATAATACTGATAAT-----  
-----  
-----

AATAAATACTGAGATCTTCAGACCTGGGGGAGGAGATATGAAAGACAATTGGAGAAGTGAATTATATAAATATA  
AAGTAGTAGAAATTGAACCACTA---GGAATAGCACCCACCAGGGCAAAAAGACGAGTGGTG-----  
-----GAGAGACAAAAAGAGCA---GTAGGA---ATGGGAGCT-----  
---ATGTTCCCTTGGGTTCTTGGCAGCA---GCAGGAAGCACTATG---GGCGCAGCGTCA---  
ATAACGCTGACGGCACAG---GCCAGACAA---TTATTG---TTTGAATAGTGCAACAGCAAAGC---  
AATTTG---CTGAGG---GCTATTGAAGCGCAACAGCATATGTTGCAGCTCACAGTCTGGGGCATT  
>MG365764

TTCTACTGTAATACATCAGGACTGTTTAATAATAAC-----  
-----  
-----ACA---  
GAATCCAATGACACTATCACTCTCCCATGTCTGAATAAGACAAATTGTAAACATGTGGCAGGAAGTAGGAAAAG  
CAATGTATGCCGCTCCCATTCAGGAAACCTTGCCTGCAGCTCAAAC---  
ATTACAGGTCTACTATTGACAAGAGATGGTGGTCAGAGTAATGGGACTAGTAAT-----  
-----  
-----

GGGACTACTGAGACCTTCAGACCTGGGGGAGGAAATATGAAAGACAATTGGAGAAGTGAATTATATAAATATA  
AAGTGGTAGAAATTGAACCACTA---GGAGTAGCACCCACCAAGGCAAGAAGACCAGTGGTG-----  
-----AAGAGAGAAAAAGAGCA---GTGGGAATAATAGGAGCT-----  
---TTGTTCCCTTGGGTTCTTGGGAGCA---GCAGGAAGCACTATG---GGCGCAGCGTCA---  
ATAACGCTGACGGTACAG---GCCAGACAA---TTATTG---TCTGGAATAGTGCAACAGCAGAGC---  
AATTTG---CTGAGG---GCTATTGAAGCGCAACAGCATATGTTGCAGCTCACAGTCTGGGGCATT  
>KX181923

TTCTACTGCAATACATCAAGACTGTTTAATGACACAAAA-----  
-----  
-----  
TTCAATGACACTATCGTTCTCCCATGTCTGAATAAGACAACCTGGTAAGACTGTGGCAGGAAGTAGGACGAGCAA  
TGTATGCCGTTCCCATTCAGGAAGCATTACCTGTAACTCAACT---  
ATTACAGGTCTACTATTGACAAGAGATGGTGGTCAGCATAATGAACT-----  
-----  
-----

AATAAACTGAGATCTTCAGACCTGGGGGAGGAAATATGAAAGACAATTGGAGAAGTGAATTATATAAATATA  
AAGTAGTAGAAATTGAACCACTA---GGAGTAGCACCCACTGGGGCAAGGAGACAAGTGGTG-----  
-----AAGAGAGAAAAAGAGCAGTAGTGGGA---ATAGGAGCT-----  
---GTGCTCATTGGGTTCTTGGGAGCA---GCAGGAAGCACTATG---GGCGCGGCGTCA---  
GTGACGCTGACGGTACAG---GCCAGACAA---TTATTG---TCTGGAATAGTGCAACAGCAGAAC---  
AATTTG---CTGAAG---GCTATTGACGCGCAACAACATATGTTGCAGCTCACAGTCTGGGGCATT  
>KX181926

TTTTACTGCAATACATCAGGCCTGTTTAATGACTCAATAATA-----  
-----  
-----  
AATGGCACTGAGAGTATCACTCTCCCATGTCTGAATAAAAACAAATTGTAAACATGTGGCAGGAAGTAGGACGAG  
CAATGTATGCCGTTCTTATTGACGGAACATTACCTGTATTTCAAAT---  
ATTACAGGTCTGCTATTAACAAGAGATGGTGGTCTGAACAATGATACT-----  
-----  
-----

AATCAGACTGAGACCTTCAGACCTGGGGGGGAAATATGAAGGACAATTGGAGAAGTGAATTATATAAATATA  
AAGTAGTAGAAATTGAACCCCTA---GGGGTAGCCCCCCCAGGGCAAAAAGACAAGTGGTA-----  
-----AAGAGAGAAAAAAGAGCA---GTGGGA---ATAGGAGCT-----  
---TTGTTCCCTTGGGTTTTTGGGAGCA---GCAGGAAGCAATATG---GGCGCGGGGTCA---  
ATGACGCTGACGGTACAG---GCCAGACAA---TTGTTG---TCTGGGATAGTGCAACAGCAAAAC---  
AATTTG---CTGAGG---GCTATTGAAGCGCAACAGCATTTGTTGCAGCTCACAGTCTGGGGCATT  
>KX181925  
TTCTACTGCAATACATCAGCTCTGTTTAATAATGAAACAGGATCCAATGACACTACAGGA-----  
-----  
-----  
TCCAATAGCACTATCACTCTCCCATGTAGAATAAAACAAGTTGTAAACATGTGGCAGGAAGTAGGGCGAGCAA  
TGTATACCGCTCCCATTGCAGGAAGCATTACCTGTAACTCAAAT---  
ATTACAGGTCTACTATTGACAAGAGATGGTGGTTATGAAAAATAAT-----  
-----  
-----  
CAGACTGAGACCTTCAGACCTGGGGGAGGAAATATGAAAAGACAATTGGAGAAGTGAATTATATAAATATAAAG  
TAGTAGAAATTCAGCCACTA---GGAGTAGCACCCACCAGGGCAAAAAGACCAGTGGTG-----  
-----AGGAGAGAGAAAAAGAGCAGCAGTGGGA---ATAGGAGCT-----  
ATGTTCCCTTGGGTTCTTGGGAGCA---GCAGGAAGCACTATG---GGCGCGGCGTCA---  
ATAGCGCTGACGGTACAG---GCCAGACAA---TTATTG---TCTGGCATAGTGCAACAGCAGAAC---  
AATCTG---CTGAGG---GCTATTGAAGCGCAACAGCATCTGTTGCAGCTCACAGTCTGGGGCATT  
>MK041565  
TTCTACTGCAATACAACAAATCTATTTGGTGACACAATGGTAAATAAC-----  
-----  
-----  
ACAGATGACACAATCACACTCCCATGTAGAATAAAACAATTTGTAAACATGTGGCAGGAAGTGGGACGAGCAA  
TGTATGCCAATCCTGTTGCAGGAAACATTACCTGTAACTCAAAT---  
ATTACAGGTCTACTATTGACAAGAGATGGTGGTACTAATAAAACA-----  
-----  
-----  
GATGAAACTGAGACCTTTAGACCAGGGGGAGGAAATATGAAAGACAATTGGAGAAGTGAATTATATAAATATA  
AAGTAGTAAAAATTGAACCACTA---GGAATAGCACCCACCAGGGCAAAAAGACTAGTGGTG-----  
-----CAGAGAGAAAAAAGAGCA---GTAGGA---CTGGGAACT-----  
---CTGTTCCCTTGGGTTCTTGGGAGCA---GCCGGAAGCACTATG---GGCGCAGCGTCA---  
ATGACGCTGACGGTACAG---GCCAGACAA---TTATTG---TCTGGAATAGTGCAACAGCAGAGC---  
AATCTG---CTGAGG---GCTATTGAAGCGCAACATCACATGTTGCAGCTCACAGTCTGGGGCATT  
>AY173958  
TTCTACTGCAATACATCAGGACTGTTTAATGACACAGGATCC-----  
-----  
-----  
AATGGCACTATCACTCTCCTATGTCTGAATAAAACAATGGTAAACATGTGGCAGGAAGTGGGACGAGCAATGT  
ATGCCGCTCCCATCTCAGGAAACATTACCTGTAACTCGAAT---  
ATTACAGGTCTACTATTGACAAGAGATGGTGGTCAGAATAATAAT-----  
-----  
-----  
CAGACTGAGACCTTCAGACCTGGGGGAGGAAATATGAAAAGACAATTGGAGAAGTGAATTATATAAGTATAAAG  
TAGTAGAAATTGAACCACTA---GGAGTAGCACCCACCAGGGCAAAAAGACAAGTGGTG-----  
-----AGGAGAGAGAAAAAAGAGCA---GTGGGA---ATGGGAGCT-----  
TTGTTCCCTTGGGTTCTTGGGAGCGG---GCAGGAAGCACTATG---GGCGCGGCGTCA---  
ATAACGCTGACGGTACAG---GCCAGACAA---TTATTG---TCTGGAATAGTGCAACAGCAGAGT---  
AATCTG---CTGAGG---GCTATTGAAGCGCAACAGCATCTGTTGCAGCTCACAGTCTGGGGCATT  
>JF683771  
TTCTATTGTAATACATCAGAATTGTTTAATAATAGTAACTCA-----  
-----  
-----  
AACAAATGGCACTATCACTCTCCCATGTAAATAAAACAATTTATAAACATGTGGCAGGGAGTAGGGCAAGCAA  
TGTATGCCCCCTCCCATTGCAGGAAAAATTACCTGTAACTCAAGT---  
ATTACAGGCCTACTATTGACAAGAGATGGTGGTCAAAAGTAATAAGAGTAAA-----  
-----  
-----

GATAATGGGAGTGAGATCTTCAGACCTGGGAGAGGAAATATAAAAGACAATTGGAGAAGTGAAGTATATAAAAT  
ACAAAGTAGTAGAAATTGAACCACTA---GGAATAGCACCCACCAAGGCAAAAAGACAAGTGGTA-----  
-----AAGAGAGAAAAAAGAGCA---GTGGAA---ATAGGAGCT---  
-----GTGTTCCCTTACGTTCTTGGGAGCA---GCAGGAAGCACTATG---GGCGCAGCGTCA---  
CTAACGCTGACGGTACAG---GCCAGACAA---TTATTG---TCTGGGATAGTGCAGCAGCAAAAC---  
AATTTG---CTGAAG---GCTATTGAAGCGCAACAGCATCTGTTGCAGCTCACAGTCTGGGGCATT  
>HM068554

TTCTACTGCAATACATCAAAACTGTTTAAACAACACAGAATTCAAT-----  
-----  
-----  
GTCAGTGACACTATCATTCTCCCATGTGCGAATAAAGCAAATTGTAAACATGTGGCAGGAAGTAGGACAAGCAA  
TGTATGCTAATCCTATTGCAGGAAACATCACCTGTAACTCAAGT---  
ATTACAGGTATACTATTGACAAGAGATGGTGGTAACGGGAATGAAACTGAG-----  
-----  
-----

AATAATGATACTGAAATCTTCAGACCTGGGGGAGGAAATATGAAAGACAATTGGAGAAGTGAATTATATAAAAT  
ATAAAGTAGTAGAAATTGAACCACTA---GGAGTAGCACCCACCAGGGCAAAAAGACAAGTGGTG-----  
-----AAGAGAGAAAAGAGAGCA---GCGGGA---ATGGCAGCT---  
-----TTGCTCCTTGGGTTCTTGGGCGCA---GCAGGAAGCACTATG---GGCGCAGCGTCA---  
ATAACGCTGACGGTACAG---GCCAGACAA---TTATTG---TCTGGAATAGTGCAGCAGCAGAAC---  
AATCTG---CTGAGG---GCTATTGAAGCTCAACAGCATATGTTGAAGCTCACAGTCTGGGGCATT  
>JX140671

TTCTACTGTAATACATCAAAACTGTTTAAATGAAACAGAATCCGGTAACACA-----  
-----  
-----  
CAGAATGACACTATCATACTCCCATGTAGAATAAAACAAATTATAAACCTGTGGCAGCAAGTAGGGCGAGCAA  
TGTATGCCGCTCCCATTGCAGGACACATTACATGTAATTCAAGT---  
ATTACAGGGCTACTACTAATAAGAGATGGTGGTCAGCATAATAGTAGT-----  
-----  
-----

AATGATGCTGAGATCTTCAGACCTGGGGGAGGAGATATGAGAGACAATTGGAGAAGTGAATTATACAAATATA  
AAGTAGTAGAAATTGAACCACTA---GGAGTAGCACCCACCAAGGCAAAAAGACAAGTGGTG-----  
-----AGGAGAGAAAAAAGAGCA---GTGGGA---CTAGGAGCT-----  
---CTGTTCCCTTGGGTTCTTGAGTACA---GCAGGAAGCACTATG---GGCGCAGCGTCA---  
ATAACGCTGACGGTACAG---GCCAGACAA---TTATTG---TCTGGAATAGTGCAACAGCAAAAC---  
AATTTG---CTGAGG---GCTATTGAAGCGCAACAGCATATGTTGCAGCTCACAGTCTGGGGCATT  
>KJ883138

TTCTACTGTAATACATCAAAACTGTTTAAATGAAAAAGAACTCAATAACACA-----  
-----  
-----  
CAGAATGACACTATCATACTCCCATGTAGAATAAAACAAGTTATAAACCTGTGGCAGGAAGTAGGGCGAGCAA  
TGTATGCCGCTCCCATTGCAGGAAACATTACATGTCAATTCAAAT---  
ATTACAGGGCTACTATTGACAAGAGATGGTGGTCAAAGGAATGAGACT-----  
-----  
-----

AATACTACTGAGATCTTCAGGCCTGGGGGAGGAGATATGAGAGACAATTGGAGAAGTGAATTATATAAATATA  
AAGTAGTAGAAATTGAACCACTA---GGAGTAGCACCCACCAAGGCAAAAAGACAAGTGGTG-----  
-----AGGAGAGAAAAAAGAGCA---GTGGGA---CTAGGAGCT-----  
---CTGTTCCCTTGGGTTCTTGAGCGCA---GCAGGAAGCACTATG---GGCGCGGCGTCA---  
ATGACGCTGACGGTACAG---GCCAGACAA---TTATTG---TCTGGAATAGTGCAACAGCAAAAC---  
AATTTG---CTGAGG---GCTATTGAAGCGCAACAGCATATGTTGCAGCTCACAGTCTGGGGCATT  
>DQ979023

TTCTACTGCAATACATCAAAATTGTTTACAAATAACATAAGC-----  
-----  
-----  
TCCAATGGGACTATCACTCTCCCATGTAGAATAAAACAGATTATAAACATGTGGCAGGGAGTAGGACAAGCAA  
TGTATACCGCCCCCATTGCAGGAAACATTACATGTAACTCAAAT---  
ATTACAGGCTTACTCATAACAAGAGATGGTGGTCAGGAGGGGCGTAAT-----  
-----  
-----

GATACTGAAGAAATATTTCAGACCTGGGGGAGGAAATATGAAAGACAATTGGAGAAGTGAACCTATATAAAATATA  
AAGTAGTAGAAATTAAACCACTA---GGAATAGCACCCACCGAGGCAAGGAGACAAGTGGTG-----  
-----AAGAGAGAAAAAAGAGCA---GCAGGA---CTAGGACTT-----  
---TTGTTCCCTTGGGTTCTTGGGAGCA---GCAGGAAGCACTATG---GGCGCAGCGTCA---  
ATAACGCTGACGGTACAG---GCCAGACAT---TTATTG---TCTGGAATAGTGCAACAGCAAAAC---  
AATTTG---CTGAAG---GCTATTGAAGCACAACAGCATATGTTGCAGCTCACAGTCTGGGGCATT  
>DQ979024  
TTCTATTGCAATACAACAAAATTGTTTAATGGTAGTGGAACAATGACATTATC-----  
-----  
-----  
ACTAATGGCACTATCACTATCCCATGTAGAATAAAAACAAATTGTAAACATGTGGCAGGGAGTAGGACAAGCAA  
TGTATGCCGCTCCCATTGCAGGACAAATTACCTGTAACTCAAAT---  
ATTACAGGCATAATATTGACAAGAGATGGTGGTAACAAAAATGAGACTAAT-----  
-----  
-----  
AAAAATGGGACTGAGATCTTCAGACCTGCAGGAGGAAATATGAAAGACAATTGGAGAAGTGAACCTCTATAAAAT  
ATAAAGTAGTAGAAATTGAACCACTA---GGAGTAGCACCTACCAAGGCAAAAAGACGAGTGGTG-----  
-----ACGAGAGAAAAAAGAGCA---TTGGGA---ATGGGAGCC---  
-----TTGTTCCCTTGGGTTCTTGGGAGCA---GCAGGAAGCACTATG---GGCGCAGCGTCA---  
ATAACGCTGACGGTACAG---GCCAGACAA---TTATTG---TCTGGAATAGTGCAACAGCAAAAC---  
AATCTG---CTGAAG---GCCATTGAAGCGCAACAGCATCTGTTGCAGCTCACAGTCTGGGGCATT  
>AF075703  
TTCTACTGCAATACATCACTACTGTTTAATAATACAGTACCT-----  
-----  
-----  
AATAATGGCACTATCACTCTCCCATGTCTGAATAAAAACAAATTTGTAAACATGTGGCAGGAAGTAGGACGAGCAA  
TGTATGCCGCTCCCATTGCAGGAAACATTACCTGTAACTCAAAT---  
ATTACAGGTCTGCTATTGACAAGAGATGGTGGTCAGAGTAATAAT-----  
-----  
-----  
AGTGATTCTGAGACCTTCAGACCTGGGGGAGGAGATATGAAAGACAATTGGAGAAGTGAACCTATATAAAATATA  
AAGTAGTAGAAATTGAACCACTA---GGAGTAGCACCCACCAGGCCCAAAAGACCAGTGGTG-----  
-----AGGAGAGAAAGAAGAGCA---GTGGCA---ATAGGAGCT-----  
---GTATTCCTTGGGTTCTTGAGCGCA---GCAGGAAGCACTATG---GGCGCGGCGTCA---  
CTAACGCTGACGGTACAG---GCCAGACAA---TTATTG---TCTGGAATAGTGCAACAGCAGAAC---  
AATCTG---CTGCAG---GCTATTGAAGCGCAACAGCATATGTTGCAGCTCACAGTCTGGGGCATT  
>KU168276  
TTCTACTGCAATACATCAGGGCTGTTTAATAATACAGGAACT-----  
-----  
-----  
AATGAACTATCACTCTCCCATGTCAAATAAAAACAAATTGTAAACATGTGGCAGGGAGTAGGACGAGCAATGT  
ATGCTGCTCCCATTGCAGGAAACATTACCTGTAGATCAAAC---  
ATTACAGGTCTACTATTGACAAGAGATGGTGGTCAGAGTACTAAT-----  
-----  
-----  
GGTAGTATTGAGACCTTCAGACCTGGGGGAGGAGATATGAAAGACAATTGGAGAAGTGAACCTATATAAAATACA  
AAGTAGTAGAAATTCAACCACTA---GGAATAGCACCCACCGAGGCAAAAAGACAAGTGGTG-----  
-----AAGAGAGAAAAAAGAGCA---GTGGGA---ATAGGAGCT-----  
---TTGTTCCCTTGGGTTCTTGGGAGCA---GCAGGAAGCACTATG---GGCGCGGCGCA---  
ACAACGCTGACGGTACAG---GCCAGACAA---TTATTG---TCTGGAATAGTGCAACAGCAAAAC---  
AATTTG---CTGAGG---GCTATTGAAGCGCAACAGCATATGTTGCAGCTCACAGTCTGGGGCATT  
>AJ249238  
TTCTACTGCGATACATCAGGATTGTTTAATGAAAGTGAAAAG-----  
-----  
-----  
TACAATGGCACTATCATTCTCCCATGTAAAATAAAAACAAATTATAAACATGTGGCAGGGAGTAGGACAAGCAA  
TGTATTCCGCTCCCATTGCAGGACGCATTAACCTGTAACTCAAAT---  
ATTACAGGCCTACTATTAACAAGAGATGGTGGTCAGAGTAATGATACT-----  
-----  
-----

AATAGGACTGAGACTTTTCAGACCTGAGGGAGGAAACATGAAAGACAATTGGAGAAATGAACTATATAAATATA  
AAGTAGTAGAAATTGAACCACTA---GGAGTAGCACCCACCAAGGCAAGAAGACGAGTGGTG-----  
-----CAGAGAGAAAAGAAGAGCA---GTGGGA---ATAGGAGCT-----  
---CTGTTCCCTTAGATTCTTGGGAGCA---GCAGGAAGCAACATA---GGCGCAGCGTCA---  
ATAACGCTGACGGTACAG---GCCAGACAA---TTACTG---TCTGGAATAGTGCAGCAGCAAAAC---  
AATTTG---CTGAGG---GCTATTGAAGCGCAACAGCATCTGTTGCAGCTCACAGTCTGGGGCATT  
>AY231157  
TTCTACTGCGATACATCACAGCTGTTTGATAGTACAGTACTT-----  
-----  
-----  
AATGGCACCATCACTCTCCCATGTGCAATAAAACAAATTGTAAACATGTGGCAGGGAGTAGGAAAAGCAATGT  
ATGCTGCGCCCATTCAGGAAGCATTACCCGTCATTCAAAT---  
ATTACAGGTCTACTATTGACAAGAGATGGTGGTCAGAAATAGTAGG-----  
-----  
-----  
AATGAGACCTTCAGACCTGGGGGAGGAGATATGAAAGACAATTGGAGAAGTGAAGTATATAAATATAAAGTAG  
TAGAAATTGAACCACTA---GGAATAGCACCCACCAGGGCAAAAAGACCAGTGGTG-----  
-----AAGAGAGAAAAAGAGCG---TTGGGA---ATGGGAGCT-----  
TTGTTTCTTGGGTTCTTGAGCGCA---GCAGGAAGCACTATG---GGCGCAGCGTCA---  
ATAACGCTGACGGCACAG---GCCAGACAA---TTATTG---TCTGGAATAGTGCAACAGCAGAAC---  
AATCTG---CTGAGG---GCTATTGAAGCGCAACAGCATCTGTTGCAGCTCACAGTCTGGGGCATT  
>KU168274  
TTCTATTGCAATACATCAGAGTTGTTTAAACTAATATA-----  
-----  
-----  
ACCAATAACACTATCACTCTCCCATGTAGAATAAAACAGATTGTAAAAATGTGGCAGGGAGTAGGACAAGCAA  
TGTATGCCGCTCCCATTGCAGGAAGCATTACCTGTAACTCAAAT---  
ATTACAGGATTACTATTGACAAGAGATGGTGGTCAGGATAATAAAAAATGGG-----  
-----  
-----  
ACTAATAGGACTGAGACCTTCAGACCTGGGGGAGGAAATATGAAAGACAATTGGAGAAGTGAAGTATATAAAT  
ATAAAGTAGTAGAAATTGAACCACTA---GGAATAGCACCCACCAGGGCAAAAAGACAAGTGGTG-----  
-----CAGAGAGAAAAAGAGCA---GCGGGA---ATAGGACTT---  
-----TTGTTCCCTTGGGTTCTTGGGAGCA---GCAGGAAGCACTATG---GGCGCAGCGTCG---  
ATAACGCTGACGGTACAG---ACCAGACAA---TTATTG---TCTGGAATAGTGCAACAGCAAAAC---  
AATTTG---CTGAAG---GCTATTGAAGCGCAACAGCATATGTTGCAGCTCACAGTCTGGGGCATT  
>AB485659  
TTCTACTGCAATACATCAGGACTGTTTAATAGTAGCACGAGCCCCGAAGGAGTGTTTAACACGAGC-----  
-----  
-----  
CACAAAGGAAATATCACTCTCCTATGTAGAATAAAACAGATTATAAACATGTGGCAGGGAGTAGGCCAAGCAA  
TGTATGCCGCTCCCATTGCAGGAAGCATTACCTGTAACTCAAAT---  
ATTACAGGCTTACTATTGACAAGAGATGGTGGTCAGAATAATGAG-----  
-----  
-----  
ACTGAGACCTTCAGACCTGGGGGAGGAAATATGAAAGACAATTGGAGAAGTGAAGTATATAAATATAAAGTAG  
TAGAAATTGAACCACTA---GGAATAGCACCCACCAGGGCACAAAGACAAGTGGTG-----  
-----AAGAGAGAAAAACGAGCA---GCGGGA---TTAGGACTT-----  
TTGCTCCTTGGGTTCTTGGGAGCA---GCAGGAAGCACTATG---GGCGCGGCGTCA---  
ATAACGCTGACGGTACAG---GCCAGACAA---TTATTG---TCTGGAATAGTGCAACAGCAAAAC---  
AATTTG---CTGAAG---GCTATTGAAGCGCAACAGCATCTGTTGCAGCTCACAGTCTGGGGCATT  
>HQ236605  
TTCTACTGCAATACAACACAACCTGTTTAACTACACAAGATATTCCAATGGCACTATCATTTTCGGT-----  
-----  
-----  
TCCAATGGCACTATCACTCTCCCATGCAGAATAAAACAAATTGTAAACATGTGGCAGGAAGTAGGACGAGCAA  
TATATGCCGCTCCAATTGCAGGGAACATCACCTGTCACTCAAAT---  
ATTACAGGCCTACTATTGACAAGAGATGGTGGTAGTGGCAATGGTACT-----  
-----  
-----

GACAATAGAAGTGAGATCTTCAGACCTGGAGGGGGAAACATGAAAGACAATTGGAGAAATGAATTATATAAAT  
ATAAAGTAGTAAGAATTGAACCACTA---GGAATAGCACCCACCAGGGCACACAGACGAGTGGTG-----  
-----AAGAGACAAAAAAGAGCA---CTCGGA---ATGGGAGCC---  
-----ATGTTTCATTGGGTTCTTGGGAGCA---GCAGGAAGCACTATG---GGCGCAGCGTCA---  
GTGACGCTGACGGTACAG---GCCAGACAA---TTGATG---TCTGGAATAGTGCAACAGCAAAAT---  
AATTTG---CTGATG---GCCATTAAAGCGCAACAGCATCTGTTGCAGCTCACAGTCTGGGGCATT  
>KU168275  
TTCTACTGCAATACATCAGGGCTGTTTAATAATACAGTACTC-----  
-----  
-----  
AATAACACTACTATCACTCTCCCATGTGCGAATAAAACAAATTGTAAACATGTGGCAGGGAGTAGGACAAGCAA  
TGTATGCCGCTCCCATTGCAGGAAACATTACCTGTAGATCAAAT---  
ATTACAGGTCTATTATTGACAAGAGATGGTGGTGAGAAATAATGAT-----  
-----  
-----  
ACTGAGACCTTCAGACCTGGGGGAGGAGATATGAAAGACAATTGGAGAAGTGAACCTATATAAATACAAAGTAG  
TAGAAATTCAACCACTA---GGAATAGCACCCACCAAGGCAAAAAGACAAGTGGTG-----  
-----AAGAGGGAAAAAAGAGCA---GTTGGA---ATGGGAGCC-----  
TTGTTCCCTTGGGTTCTTGGGAGCA---GCAGGAAGCACTATG---GGCGCGGCGTCA---  
GTAACGCTGACGGTACAG---GCCAGACAA---TTATTG---TCTGGAATAGTGCAACAGCAAAGC---  
AATTTG---CTGAGG---GCTATTGAAGCGCAACAGCATCTGTTGCAGCTCACAGTCTGGGGCATT  
>MH705144  
TTCTACTGCAACACAAGTAAGCTGTTTAACACAACCTTGGCTAAATAATAAAACGGAAACACAATGGCATTATCA  
ACAGC-----  
-----  
AGCACTGAAATTATGGTGCTTCCGTGTAGAATAAGACAATTTGTAAACATGTGGCAAAGAGTAGGAAGAGCAA  
TGTATGCCCCCTCCCATTGCAGGGGTAAATTCAGTGTAATTCAGAT---  
ATCACAGGTCTACTATTGACAAGAGATGGTGGTAATACTGGTAATAAT-----  
-----  
ACAGGAGGTGATGGTAAT-----  
AATACCGACATCCTCAGACCTACAGGGGGAGATATGAGAGACAATTGGAGAAGTGAACCTATATAAATATAAGG  
TAGTAAAACTTGAACCACTA---GGAGTAGCACCCACCAGGGCAAAAAGACAAGTGGTGAAA-----  
-----GGAAAAGAAAGAGAAAAAAGAGCA---GTGGGA---CTGGGAGCT-----  
ATGTTCCCTTGGGTTCTTGGGAGCA---GCAGGAAGCACTATG---GGCGCAGCGTCA---  
ATAACGCTGACGGTACAG---GCTAGACTA---TTATTG---TCTGGTATAGTGCAACAGCAAAGC---  
AATTTG---CTGAGG---GCTATAGAAGCGCAACAGCATATGTTGCAGCTCACAGTCTGGGGCATT  
>AY371158  
TTCTACTGCGACACAACAGCACTGTTTAACACAACATTACTTAACACAACAATGGAT-----  
-----  
-----  
AATAATGGTACTATCATTATTCCATGTAGAATAAAACAAATTGTAAACGTGTGGCAAAGAGTAGGGCGAGCAA  
TGTATGCCCCCTCCCATTGCAGGAAAAATTTCAGTGCAACTCAAAT---  
ATCACAGGTCTACTATTGACAAGAGATGGTGGAAAGTAAGGCAAAT-----  
-----  
-----  
AACACAGACATCCTCAGACCTATAGGGGGAGAGATGAGAGACAATTGGAGAAGTGAATTATATAAATATAAGG  
TAGTACAAATTCAACCACTA---GGAATAGCACCCCTCCAGGGCAAAAAGACAAGTGGTG-----  
-----AAGAGAGAAAGAAGAGCA---GTAGGA---ATAGGAGCT-----  
GTGTTCCCTTGGGTTCTTGGGAGCA---GCAGGAAGCACTATG---GGCGCAGCGTCA---  
ATAACGCTGACGGTACAG---GCCAGACAA---TTATTG---TCTGGTATAGTGCAACAGCAAAAC---  
AATTTG---CTGAAG---GCTATAGAAGCGCAACAGCATCTGTTGCAGCTCACAGTCTGGGGCATT  
>JX140672  
TTCTACTGCAATACATCAGCTCTGTTTAATACAGAAGCTCTGAAAAATAACACAGGT-----  
-----  
-----  
CAAAATGGCACTACCACCATTTATTGTAGAATAAAACAAATTATAAATATGTGGCAAAGAGTAGGAAAAGCAA  
TGTATGCCCCCTCCCATTGCAGGAAAAATTTCAGTGTAACCTCAAGT---  
ATCACAGGTCTAATATTAACAATAGATGGT---AATAGAACAAAT-----  
-----  
-----

AATAAGAGTGAGACCTCAGACCTGGAGGGGGAGATATGAAAGACAATTGGAGAAGTGAACGTGTATAAATATA  
AGGTAGTGAAAATTGAACCATTA---GGAGTAGCACCCACCAGGGCAAAAAGACGAGTGGTG-----  
-----AGCAGAGAGAAAAAGAGCA---GTGGGA---CTAGGAGCT-----  
---ATGTTCCCTTGGGTTCTTGGGAGCA---GCAGGAAGCACTATG---GGCGCGGCGTCA---  
ATAACGCTGACGGTACAG---GCCAGACAA---TTGTTG---TCTGGTATAGTGCAACAGCAAAGC---  
AATTTG---CTGAAG---GCTATTGAAGCGCAGCAGCACTTGTTCAGCTCACAGTCTGGGGCATT  
>KU749420  
TTCTACTGTAACACAAGCAGACTGTTTAATAACACACTGTTTAATAACACACAGCTTAATAACACA-----  
-----  
-----  
GAAGGAGGGAACATTACTCTTCCATGTAGAATAAAACAATTTGTAAACATGTGGCAAAGAGTAGGAAAAGCAA  
TGTATGCCCCCTCCCATTTGCTGGAAGAATTCAGTGTATCTCAAAT---  
ATCACAGGTCTACTATTGACAAGAGATGGTGGTACTAATGATACGTCT-----  
-----  
-----  
ACAAATGAGACCTTCAGACCTGGAGGGGGAGACATGAGAGATAATTGGAGAAGTGAACGTGTATAAATATAAGG  
TAGTAAAAATTGAGCCACTA---GGAGTAGCCCCCACTAGGGCAAAAAGGCGAGTGGTG-----  
-----CAGAGAGAAAAAAGAGCT---GTGGGA---CTAGGAGCT-----  
CTGTTCCCTTGGGTTCTTGGGAGCA---GCAGGAAGCACTATG---GGCGCGGCGTCA---  
ATAACGCTGACGGTACAG---GCCAGAAAC---TTATTG---TCTGGTATAGTGCAACAGCAGAAT---  
AATCTG---CTGAAG---GCTATAGAAGCGCAACAGCATCTGTTGCAGCTCACAGTCTGGGGCATT  
>AJ277824  
TTCTACTGCAACACAGATGAGCTGTTTAATAACAGCTTGTGAATAACACA-----  
-----  
-----  
AAAAAAGAAAATATCACTCTTCCATGTAGAATAAAACAATTTGTAAACATGTGGCAAAGGGTAGGACAAGCAA  
TGTATGCCCCCTCCTATAGCCGGACAAATTCAGTGCAACTCAAGT---  
ATCACAGGTCTACTATTGACAAGAGATGGT---AACAAAAATGGG-----  
-----  
-----  
TCCGAGACCCTCAGACCTGGAAGGGGAGATATGAGAGACAATTGGAGAAGTGAACGTATATAAATATAAGGTAG  
TAAAAATTGAACCCCTA---GGAGTAGCACCCACCAGGGCAAAAAGACAAGTGGTG-----  
-----AAGAGAGAAAGAAGAGCA---GTGGGA---ATAGGAGCT-----  
GTGTTCCCTTGGGTTCTTGGGAGCA---GCAGGAAGCACTATG---GGCGCGGCGTCA---  
ATAACGCTGACGGTACAG---GCCAGACAA---TTATTG---TCTGGTATAGTGCAACAGCAAAGC---  
AATTTG---CTGAAG---GCTATAGAAGCGCAACAGCATCTGTTGCAGCTCACAGTCTGGGGCATT  
>AJ249237  
TTCTACTGCAACACAACACTATTCTGTTTAATCACACAAGAGTAAATGACATTCTGTCTAATAATCACACGAGA-  
-----  
-----  
GAAAAATGACACTATCACTCTTCCATGTAGAATAAAACAATTTGTAAACATGTGGCAAAGAGTAGGACAGGCAA  
TGTATGCCCCCTCCCATTTGCCGGAATAATTCAGTGTAACCTCAAAT---  
ATCACAGGTCTACTATTAAACAATAGATGGTGGGGAGGGAAATGAG-----  
-----  
-----  
TCCGAGACCCTCAGACCTGGAGGGGGAGATATGAGAGACAATTGGAGAAGTGAACGTATATAAATATAAGGTAG  
TAAAAATTGAACCACTA---GGAGTAGCACCCACCAAGGCAAAAAGACAAGTGGTG-----  
-----CAGAGAGAAAAAAGAGCA---GTGGGA---ATGGGAGCT-----  
ATGTTCCCTTGGGTTCTTGGGAGCA---GCCGGAAGCACTATG---GGCGCGGCGTCA---  
ATAACGCTGACGGTACAG---GCCAGAAAC---TTATTG---TCTGGTATAGTGCAAGCAGCAAAGC---  
AATTTG---CTGAAA---GCTATTGAAGCGCAACAGCATCTGTTGCAGCTCACAGTCTGGGGCATT  
>AF377956  
TTCTACTGCAACACAGTAGCTCTGTTTAATGCAACTAACATGACTAATGCAATGAACAGG-----  
-----  
-----  
TCCAATGGCATTATCACTCTTCCATGTAGAATAAGACAAATTTGTAAACATGTGGCAAAGAGTAGGACGAGCAA  
TGTATGCCGCTCCCATTTGCTGGACAAATTCAGTGTAACCTCAAGC---  
ATCACAGGTCTAATATTGACAAGAGATGGTGGGAAAAATAATACC-----  
-----  
-----

AATAATGACACCCTCAGACCTGGAGGGGGAGATATGAGAGACAATTGGAGAAGTGAACCTGTATAAATATAAGG  
TAGTAAAAATTGAACCACTA---GGAGTAGCACCCACCAAGGCAAAAAGACAAGTGGTGAAG-----  
-----AGAGAAAGAGAAAAAAGAGCA---GTGGGA---ATAGGAGCT-----  
GTGCTCCTTGGGTTCTTGGGAGCA---GCAGGAAGCACTATG---GGCGCGGCGTCA---  
ATGACGCTGACGGTACAG---GCCAGACAA---TTATTG---TCTGGTATAGTGCAACAGCAAAAC---  
AATTTG---CTGAAG---GCTATAGAAGCGCAACAGCATCTGTTGCAGCTCACAGTCTGGGGCATT  
>JN054264  
TTCTACTGTAACACAACAAAGCTGTTTAATTCAAGTCTGCTTAACAGTACAAGTACAAATGAAAGTATACCTG  
AG-----  
-----  
ATTATTCTTCCATGTAGAATAAAACAAATTATAAACATGTGGCAAAGAGTAGGAAAAGCAGTGTATTCTCTCCC  
CCATTGACAGGGAAAATTCAAGTGTATCTCAAAT---  
ATCACAGGTCTATTATTGGTGAGGGATGGTGGTAATACATCCCAC-----  
-----  
-----  
AATGACAATGACACCCTCAGACCTATGGGGGGAGATATGAAAGCCAATTGGAGAAGTGAACCTGTATAAATATA  
AGGTAGTAAAAATTGAGCCACTA---GGAATAGCACCCCTCCAGGGCAAAAAGACGAGTGGTG-----  
-----CAGAGAGAGAAAAGAGCT---GTGGGA---ATAGGAGCT-----  
---TTGCTCTTTGGGTTCTTGGGAGCA---GCAGGAAGCACTATG---GGCGCAGCGTCA---  
CTAACGCTGACGGTACAG---GCCAGACAA---TTATTG---TCTGGTATAGTGCAACAGCAAAGC---  
AATTTG---CTGAAG---GCTATAGAAGCGCAACAGCATCTGTTGCAGCTCACAGTCTGGGGCATT  
>KF725967  
TTCTACTGTAATACAACAGATCTGTTTAATATAACAGCTCTGGTTAATAAC-----  
-----  
-----  
ACAGGGAACAATATCACTATCCCATGTAGAATAAAACAAATTATAAACATGTGGCAAAGAGTAGGACGAGCAA  
TGTATGCCCCCTCCCATAGCCGGAAGAATTCAAGTGTAACTCAACT---  
ATCACAGGTCTACTATTAACAAGAGATGGTAGAAATGATACAAAT-----  
-----  
-----  
GAGACCCTCAGACCTGGAGGGGGAGATATGAGAGACAATTGGAGAAGTGAAGTATATAAATATAAGGTAGTGA  
AAATTGAACCACTA---GGAGTAGCACCCACTGAGGCAAGAAGACAAGTGGTA-----  
-----AAGAGAGAAAAAAGAGCA---GTGGGA---ATGGGAGCT-----  
GTGCTCTTTGGGTTCTTGGGAACA---GCAGGAAGCACTATG---GGCGCGGCGTCA---  
ATAACGCTGACGGTACAG---GCCAGACAA---TTATTG---TCTGGTATAGTGCAAGCAGCAAAGC---  
AATTTG---CTGAAG---GCTATAGACGCGCAACAGCATCTGTTGCAGCTTACAGTCTGGGGCATT  
>AY371121  
TTCTATTGTAATACATCAGAACTGTTTAATATTAATATATCAAATAGTAGTACAAATAGTACT-----  
-----  
-----  
GAGAATGAACTATCACACTCCCATGTAAAATAAAACAAATTGTAAGAATGTGGCAGAGAGTGGGACAAGCAA  
TGTATGCCCCCTCCTATCGCCGGAACATTACATGTAAATCAAAC---  
ATTACAGGACTAATATTAACAAGAGATGGTGGAAATACTAGGGAT-----  
-----  
-----  
AATACCTCAGAGATCTTCAGACCTGGAGGAGGAGAAATGAGAGACAATTGGAGAAATGAATTATATAATTATA  
AAACAGTAAAAATCAAATCATTA---GGAGTAGCACCCACCAGGGCAAGGAGAAGAGTGGTG-----  
-----GAGAGAGAAAAAAGAGCA---GTTGGA---ATAGGAGCT-----  
---GTCTTCCTTGGGTTCTTAGGAGCA---GCAGGAAGCACTATG---GGCGCGGCGTCA---  
ATAACGCTGACGGTACAG---GTCAGACAA---TTATTG---TCTGGCATAGTGCAACAGCAAAAC---  
AATTTG---CTGAGG---GCTATAGAGGCGCAGCAGCATCTGTTGCAACTCACAGTCTGGGGCATT  
>FJ389367  
TTCTATTGTAATACATCAGGCCTGTTTAATATATCATATAATAGTACAGAGAATAGTACTTATAATGAA----  
-----  
-----  
GGGAATGAGACTTATACACTCCCATGTAAAATAAAACAAATTGTGAGAATGTGGCAAAGAGTGGGACAAGCAA  
TGTATGCCCCCTCCCATCAAAGGAAACATTACATGTAGATCAAAC---  
ATTACAGGACTACTATTAACAAGAGATGGTGGGGAGAAATGATAATAAT-----  
-----  
-----

AACAGTAGTGAGGTCTTCAGACCTGCAGGAGGAGACATGAGGGACAATTGGAGAAGTGAATTATATAAGTATA  
AAATAGTAAAAATAAAACCATTA---GGAGTAGCACCCACCAAGGCAAGGAGAAGAGTGGTG-----  
-----GGGAGAGAAAAAAGAGCA---GTAGTTGGACTAGGAGCT-----  
---GTTTTCCTTGGGTTCTTAGGAGCA---GCAGGAAGCACTATG---GGCGCGGCGTCA---  
ATAACGCTGACGGTACAG---GTCAGACAA---TTATTG---TCTGGCATAGTGCAACAGCAAAGC---  
AATTTG---CTGAGA---GCTATAGAGGCACAGCATCATCTGTTGCAACTCACAGTCTGGGGCATT  
>FJ389365  
TTCTATTGTAATACATCAGACTTGTTTAATATCAGTACAACAAATAGT-----  
-----  
-----  
ACTAATGATACTATCACACTCCCATGTAAGATAAAAACAAATTGTGAGAATGTGGCAGAGAGTGGGACAAGCAA  
TGTATGCCCCCTCCCATTGCAGGAGAAATTACATGCAGGTCAAAT---  
ATTACAGGACTACTATTAACAAGAGATGGTGGGGGTGGAGGTAAT-----  
-----  
-----  
CAAACAAATGAAACCTTCAGACTTGCAGGAGGAAATATGAGGGACAATTGGAGAAGTGAATTATATAAGTATA  
AAGTAGTAAAGATTAAACCACTA---GGAATAGCACCCACCAAGTCAAGGAGAAGAGTGGTG-----  
-----GAGAGAGAAAAAAGAGCA---GTTGGA---ATAGGAGCT-----  
---GCCTTCCTTGGGTTCTTAGGAGCA---GCAGGAAGCACTATG---GGCGCGGCGTCA---  
ATAACGCTGACGGTACAG---GTCAGACAA---TTATTG---TCTGGCATAGTGCAACAGCAAAGC---  
AATTTG---CTGAGA---GCTATAGAGGCGCAGCAACATCTGCTGCAACTCACAGTCTGGGGCATT  
>AM279346  
TTCTATTGTAATACATCAAACTGTTTAATCCTAATGGTACAGAG-----  
-----  
-----  
AATGAGACTCATATCACAATCCCATGTAAATAAAAACAAATTGTGAGAATGTGGCAGAGAGTGGGACAAGCAA  
TGTATGCCCCCTCCCATCGCAGGAAACATTACATGTAGATCAAAC---  
ATTACAGGACTATTATTAACAAGAGATGGTGACAGTAGGAGTAAT-----  
-----  
-----  
GACAGTGAGATCGTCAGACCTGCAGGAGGAGACATGAGGGACAATTGGAGAAGTGAATTATATAAGTATAAAG  
TAGTAAAAATAAAACCATTA---GGAATAGCACCCACCAGGGCAAGGAGAAGAGTGGTG-----  
-----GAGAGAGAAAAAAGAGCAGTAGTTGGA---ATGGGAGCT-----  
TTTCTCCTTGGGTTCTTAGGAGCA---GCAGGAAGCACTATG---GGCGCGGCGTCA---  
ATAACGCTGACGGTACAG---GTCAGACAA---TTACTG---TCTGGCATAGTGCAACAGCAAAGC---  
AATTTG---CTGAGG---GCTATAGAGGCGCAGCAGCACCTGCTGCAACTCACAGTCTGGGGCATT  
>JF327806  
TTCTATTGTAATACATCAAAATTATTTACATCAAACCTGACA-----  
-----  
-----  
TCAAATAATGACACTATCATGCTCCCATGTGAGATAAAAACAAATTGTGAGAATGTGGCAGGGAGTGGGACAAG  
CAATGTATGCCCCCTCCCATCGCAGGAGAAATTACATGTAGATCAAGT---  
ATTACAGGAATACTATTAACAAGAGATGGTGGGAATGATAATAGCACA-----  
-----  
-----  
ATTGGAAATGAAACCTTCAGACCTGGAGGAGGAGATATGAGGGACAATTGGAGAAGTGAATTATATAAGTATA  
AAATAGTAAAAATTAAACCACTA---GGAATAGCATCCACTAGGGCAAGGAGAAGAGTAGTG-----  
-----GAGAGAGAAAAAAGAGCA---GCA-----TTTGGAGCT-----  
---ATCTTCCTTGGGTTCTTAGGAACA---GCCGGAAGCACTATG---GGCGCAGCGTCA---  
ATAACGCTGACGGTACAG---GTCAGACAA---TTATTG---TCTGGCATAGTGCAACAACAAAGC---  
AATTTG---CTGAGG---GCTATAGAGGCGCAGCAACATCTGTTGCAACTCACAGTCTGGGGCATT  
>AY231155  
TTCTATTGTAATACATCAAGTCTGTTTACTAATTGGGAGAATATGACA-----  
-----  
-----  
AATCAGACTAATCACACAATCCCATGTAAGATAAAAACAAATTGTAAGAATGTGGCAGAGAGTGGGACAAGCAA  
TGTATGCCCCCTCCCATCGCAGGAAACATTGAATGTAGCTCAAAC---  
ATTACAGGACTACTGTGACAAAGAGATGGTGGGAAGAATGATAATGGA-----  
-----  
-----

AGTGAGAATTTTGGAGATTTTCAGACCTGGAGGAGGAGATATGAGGGACAATTGGAGAAGTGAATTGTATATGT  
ATAAACAGTAAAAATCAAATCACTA---GGAGTAGCACCCACCAGGGCACGAAGAAGAGTGGTG-----  
-----GAGAGAGAAAAAAGAGCA---GTTGGA---CTTGAGCT---  
-----GTCTTCCTTGGGTTCTTAGGAGCA---GCAGGAAGCACTATG---GGCGCAGCGTCA---  
ATAACGCTGACGGTACAG---GTCAGACAA---TTATTG---TCTGGCATAGTGCAACAGCAAAGC---  
AATTTG---CTGAAG---GCTATAGAGGCGCAGCAGCATCTGTTGCAACTCACAGTCTGGGGCATT  
>AY231156  
TTCTATTGTAATACATCAGGACTGTTTAATAGTAGTAATCTGTCTAATAGTAGTAACAAT-----  
-----  
-----  
GAGACCGATATTATAACGCTCCCATGTAGAATAAAACAAATTGTAAGAATGTGGCAGAGAGTGGGACAAGCAA  
TGTATGCCCCCTCCCATAGAAGGAAACATTACATGTATATCAAAT---  
ATTACAGGACTATTATTAACAAGGATGGTGGGAAGACTAACAGT-----  
-----  
-----  
AGTAATGAGACCTTCAGACCTGCAGGAGGAGACATGAGGGACAATTGGAGAAGTGAATTATATAAGTATAAAG  
TAGTAAAAATTAAACCACTA---GGAATAGCACCCACCAAGGCAAGGAGAAGAGTGGTG-----  
-----GGGAGAGAAAAAAGAGCA---GTTGGA---ATAGGAGCT-----  
GTCTTCCTTGGGTTCTTAGGAACA---GCAGGAAGCACTATG---GGCGCAGCGGCA---  
ATAACGCTGACGGTACAG---GTCAGACAA---TTATTG---TCTGGCATAGTGCAACAGCAAAGC---  
AATTTG---CTGAGG---GCTATAGAGGCTCAGCAACATATGTTGCAGCTCACAGTCTGGGGCATT  
>EF033660  
TTCTATTGTAATACATCAGGATTGTTTAATAGTAGTAACCTTAAAAGTAGTAACCTGACT-----  
-----  
-----  
GGTAATGAGACCATCACACTCCCATGTAGGATAAAACAAATTGTGAGAATGTGGCAGAGAGTGGGACAAGCAG  
TGTATGCCCCCTCCCATTCAGGAAACATTACATGTATATCAAAC---  
ATTACAGGACTACTAATAACAAGAGATGGTGGGAATAATAGCAGC-----  
-----  
-----  
CAAAATGAGACCTTTAGACCTGCAGGAGGAGACATGAGGGACAATTGGAGAAGTGAATTATATAAGTATAAAG  
TAGTAAAAATTAAACCACTA---GGAGTAGCACCCACCAGGGCAAGGAGAAGAGTGGTG-----  
-----GGGAGAGAAAAAAGAGCA---GTTGGA---CTGGGAGCT-----  
GTCTTCCTTGGGTTCTTAGGAACA---GCAGGAAGCACTATG---GGCGCAGCGGCA---  
GTAACGCTGACGGTACAG---GTCAGACAA---CTATTG---TCTGGCATAGTGCAACAGCAAAGC---  
AATTTG---CTGAGG---GCTATAGAGGCTCAGCTACATCTGTTGCAACTCACAGTCTGGGGCATT  
>KT022379  
TTCTATTGTAATACATCTAGATTGTTTAATGATAATATTACACATAATAATAGTGCATCTAATAATAAT---  
-----  
-----  
ACTAAGGGAAACATCACACTCCCATGTAAATAAAACAAATTGTGAGAATGTGGCAAAGAGTGGGACAAGCAA  
TGTATGCCCCCTCCTATCGCAGGAGAACTTACATGTAAATCAAAC---  
ATTACAGGACTATTATTAACAAGAGATGGTGGGACTCATAAAAAT-----  
-----  
-----  
AATAAAAGTGAGATCTTCAGACCTGCAGGAGGAGATATGAAGGACAATTGGAGAAGTAAATTATATAAGTATA  
AAGTAGTAAAAATTAAACCACTA---GGAGTAGCACCCACCAAGCAAGGAGAAGAGTGGTG-----  
-----GGAAGAAAAAAAAGAGCA---GTTGGA---CTGGGAGCT-----  
---GTCTTCCTTGGGTTCTTGGGAGCA---GCAGGAAGCACTATG---GGCGCAGCGTCG---  
ATAACGCTGACGGTACAG---GCCAGACAA---TTATTG---TCTGGCATAGTGCAACAGCAAAC---  
AATTTG---CTGAGA---GCTATAGAAGCGCAGCAGCATTTGTTGCAGCTCACAGTCTGGGGCATT  
>JN248582  
TTCTATTGTAACACAACAGGACTGTTTAATAATAGTACATTGGAGCTTAATAACACT-----  
-----  
-----  
AGTAATGGCACTATCACACTCCCATGTAAATAAAACAAATTGTGAGAATGTGGCAGAGAACTGGACAAGCAA  
TGTATGCCCCCTCCCATCGCAGGAAATATTACATGTAGATCAAAC---  
ATTACAGGACTATTATTAACAAGAGATGGTGGGAATAATGATACT-----  
-----  
-----

CATGAGACCTTCAGACCTGGAGGAGGAGATATGAGGGACAATTGGAGAAGCGAACTATATAAATATAAAATAG  
 TAAAAATTAAACCACTA---GGAATAGCACCCACCAAGGCAAGGAGAAGAGTGGTG-----  
 -----CAGAGGGAAAAAGAGCAGTAGTTGGA---CTAGGAGCT-----  
 GTCTTCCTTGGGTTCTTGGGAGCA---GCAGGAAGCACTATG---GGCGCAGCGTCA---  
 ATAACGCTGACGGTACAG---GTCAGACAA---TTATTG---TCTGGCATAGTGCAACAGCAAAGC---  
 AATTTG---CTGAGG---GCTATAGAGGCACAGCAACATCTGTTGCAACTCACAGTCTGGGGCATT  
 >AF069947  
 TTCTATTGTAATACATCAGGATTGTTTAATGATAGTGCATCA-----  
 -----  
 -----  
 AATGACACTATCACACTCCCATGTAAGATAAAACAAATAGTGAGAATGTGGCAAAGAGTGGGACAAGCAATGT  
 ATGCCCCCTCCCATCGCAGGAAAACATTACATGTAGATCAAAT---  
 ATTACAGGGCTACTATTAACAAGAGATGGTGGAATGATGGGGCTAATAGC-----  
 -----  
 -----  
 ACAAATCAAATGAAACCTTCAGACCTGGAGGAGGAGATATGAGGGACAATTGGAGAAGTGAATTATATAAGT  
 AAAAAATAGTAAGAATTAAACCACTA---GGAATAGCACCCACCAGGGCAAGAAGAAGAGTGGTG-----  
 -----GAGAGAGAAAAAGGGCA---GTTGGA---CTGGGAGCT---  
 -----GTCCTCCTTGGGTTCTTAGGAACA---GCAGGAAGCACTATG---GGCGCGGCGTCA---  
 ATAACGCTGACGGTACAG---GTCAGACAA---TTATTG---TCTGGCATAGTGCAACAGCAAAGC---  
 AATTTG---CTGAGG---GCTATAGAGGCGCAGCAACATCTGTTGCAACTCACAGTCTGGGGCATA  
 >KY229519  
 TTCTATTGTAATACATCAGAACTGTTTAATCCTAATACCCTGAATAGTAATAGTAGT-----  
 -----  
 -----  
 GATCAGTCTAACATCACCTCCCATGTAAATAAAAACAAATTGTGAGAATGTGGCAGAAAGTGGGACAAGCGA  
 TGTATGCCCCCTCCCATTCAGGAGAGATTACATGTAGATCAAAC---  
 ATTACAGGAATACTATTAACAAGAGATGGTGGAATCACCAGAACATT-----  
 -----  
 -----  
 AGTGGAATGAAACCTTCAGACCTGCAGGAGGAGACATGAGGGACAATTGGAGAAGTGAATTATATAAGTATA  
 AAGTAGTAAAAATTAAACCACTA---GGAATAGCACCCACCAAGGCAAAAAGAAGAGCGGTG-----  
 -----GAGAGAGAAAGAAGAGCA---GTTGGA---ATGGGAGCT-----  
 ---TTACTCCTTGGGTTCTTAGGAACA---GCAGGAAGCACTATG---GGCGCAGCGTCA---  
 ATAACGCTGACGGTACAG---ATCAGACAG---TTGTTG---TCTGGTATAGTGCAACAGCAAAGC---  
 AATTTG---CTGAGA---GCTATAGAGGCGCAGCAGCATCTGTTGCAGCTTACAGTCTGGGGCATT  
 >KY229535  
 TTCTATTGTAATACATCAGGACTGTTTATGAATAACCTGACTAGTGGTAGT-----  
 -----  
 -----  
 GATCAGGATAACATCACCTCCCATGTAAATAAAAACAAATTGTGAGAATGTGGCAGAGAGTGGGACAAGCGA  
 TGTATGCCCCCTCCCATTCAGGAGAGATTACATGTAGATCAAAC---  
 ATTACAGGAATACTATTAACAAGAGATGGTGGAAGTAACAATAACAAT-----  
 -----  
 -----  
 GATTCCAATAACAAT---  
 GGAAATGAAACCTTCAGACCTGCAGGAGGAGACATGAGGGACAATTGGAGAAGTGAATTATATAAGTATAAAG  
 TAGTAAAAATTAAATCCACTA---GGAATAGCACCCACCAGGGCAAGAAGAAGAGTGGTGGGG-----  
 -----AAAGAAAGAGAAAGAAGAGCA---GTTGGA---ATGGGAGCT-----  
 TTCTCCTTGGGTTCTTAGGAGCA---GCAGGAAGCACTATG---GGCGCAGCGTCA---  
 ATAACGCTGACGGTACAG---GTCAGACAA---TTGTTG---TCTGGCATAGTGCAACAGCAAAGC---  
 AATTTG---CTGAGA---GCTATAGAGGCGCAGCAGCATCTGCTGCAGCTTACAGTCTGGGGCATT  
 >KU168273  
 TTCTATTGCAATACATCAAACTGTTTAATAGTATCTGGTATGTTAACGGGACAAATGGGACCGTACTAAATG  
 GAACAATTACT-----  
 -----GGGACC-----  
 GGAATAATGGAACAATTACACTGCCATGCAGAATAAAAAACAAATTGTAAACATGTGGCAGAGAGTAGGACAAG  
 CAATGTATGCCCCCTCCCATTAGGGGAGATATTACATGCGAATCAAAT---  
 ATTACAGGACTAATATTAACAAGTGACTATGTTAATACAACAGATACA-----  
 -----  
 -----

AATGGAAGTGTACCTCAGACCTACAGGAGGAGACATGAGGGACAATTGGAGAAGTGAATTATATAAATATA  
 AAGTAGTAAAAATTGAGCCACTA---GGAATAGCACCTCCAGGGCAAGGAGAAGAGTGGTG-----  
 -----GAAAGAGAAAAAAGAGCT---GTGGGA---ATGGGAGCT-----  
 ---TTTTTCCTTGGGTTCTTGGGAGCA---GCAGGAAGCACTATG---GGCGCGGCGTCC---  
 ATGGCGCTGACGGTACAG---GCCAGACAA---TTATTG---TCTGGTATAGTGCAACAGCAAAGT---  
 AATCTG---CTGAGA---GCTATAGAGGCGCAACAGCATATGTTGCAGCTCACAGTCTGGGGCATT  
 >AF005496  
 TTCTATTGCAATACATCAGGGCTGTTTAATAGTAGTTGGGAAATGCATACTAATTACACATCAAATGACACAA  
 AG-----  
 -----  
 GGAAACGAAAACATTACACTGCCATGCAGAATAAAACAAATTGTAAACATGTGGCAGAGAGTAGGACGAGCAA  
 TGTATGCCCCCTCCCATCCAAGGAAACATTATGTGTGTATCAAAT---  
 ATTACAGGACTAATATTGACAAATTGACGAGGGTAACGCGTCTGCA-----  
 -----  
 -----  
 GAAAAATTATACCTTCAGACCTGGAGGAGGAGATATGAGGGACAATTGGAGAAGTGAATTGTATAAATATAAAG  
 TAGTAAAAATTGAACCACTG---GGAATAGCACCCACCAAGACAAGGAGAAGAGTGGTG-----  
 -----GAGAGAGAAAAAAGAGCA---GTGGGA---ATGGGAGCT-----  
 TCTTTCCTTGGGTTCTTGGGAGCA---GCAGGAAGCACTATG---GGCGCGGCGTCA---  
 ATAACGCTGACGGTACAG---GCCAGGCAA---TTATTG---TCTGGTATAGTGCAAGCAGCAAAGC---  
 AATTTG---CTGAGA---GCTATACAGGCGCGACAGCATATGTTGCAGCTCACGGTCTGGGGCATT  
 >KY392776  
 TTCTATTGTAATACATCAAACTGTTCAATAGTAGTGAAAAAT-----  
 -----  
 -----  
 TCCAATGCAAACATCACACTCCCATGTAGAATAAGGCAAATTGTAAGGATGTGGCAGAGAGTAGGACAAGCAA  
 TATATGCCCCCTCCCATCGCAGGAAACATTACATGCATGTCAAAT---  
 ATTACAGGATTAATATTGACACGTGATGGGGGAGTTAACAATAACAATGACAGT-----  
 -----  
 -----  
 ACTAATAATACAGAAATCTTCAGACCTACAGGAGGAAATATGAAGGACAATTGGAGAAGTGAGCTATATAAAT  
 ATAAAGTGGTAAAAATTGAGCCACTA---GGAGTAGCACCTACCAGGGCAAAAAGAAGAGTGGTG-----  
 -----GAGAGAGAAAAAAGAGCA---GTGGGA---ATGGGAGCT---  
 -----GTGTTTCCTTGGGTTCTTGGGAACA---GCAGGAAGCACTATG---GGCGCAGCGTCA---  
 ATAACGCTGACGGTACAG---GTCAGACAA---TTGTTG---TCTGGCATAGTGCAACAGCAAAGC---  
 AATTTG---CTAAG---GCTATAGAGGCTCAACAGCATCTGTTGAGACTCACTGTCTGGGGCATT  
 >KU168280  
 TTCTATTGCAATACATCACAACCTGTTCAATAATAGTTGGAATGGAAGTAGTTGGAATAACAATGCT-----  
 -----  
 -----  
 ACAAATGACACTATCACAATTCATGTAAAATAAGACAAATTGTGAGAATGTGGCAGAGAGTAGGACAAGCCA  
 TATACGCCCCCTCCCATCGCAGGAAACATTACATGTGTATCAAAT---  
 ATTACAGGATTAATATTAAACACGTGATGGGGGACAGGGAGGAAAT-----  
 -----  
 -----  
 GAGACAAACAAGACT---  
 GAGGCTGAGACCTTCAGACCTACAGGAGGAGATATGAGGGACAATTGGAGAAGTGAATTATATAAATATAAAG  
 TAGTGGAGGTTGAGCCACTA---GGAGTAGCACCCACCAGGGCAAAAAGAAGAGTGGTG-----  
 -----GGGAGAGAAAAAAGAGCG-----GGA---ATAGGAGCT-----  
 CTGTTTCCTTGGGTTCTTGGGAGCA---GCAGGAAGCACTATG---GGCGCAGCGTCA---  
 ATAACGCTGACGGTACAG---GCCAGACAA---TTGCTG---TCTGGCATAGTGCAACAGCAAAGC---  
 AATTTG---CTGAAT---GCTATAGAGGCTCAACAGCATCTGTTGAAGCTCACTGTCTGGGGCATT  
 >GU237072  
 TTCTATTGTAATACATCAAGCCTGTTCAATAGTAGCTGGAGTAGTAAGAATGATACAAATAGC-----  
 -----  
 -----  
 ACAGCAAATTACACAATCATCCCATGTAAAATAAGACAAATAGTGAGAATGTGGCAGAAAGTAGGACAAGCAA  
 TATATGCCCCCTCCCATGAAAGGAAACATTACATGCTCATCAAAT---  
 ATTACAGGATTAATATTGACACGTGATGGAGGAGACAAGAACAGCACTAGC-----  
 -----  
 -----

AACAAACAGTACTGAGATCTTTAGACCCACAGGAGGAGATATGAAAGACAATTGGAGAAGTGAATTATATAAAAT  
 ATAAAGTAGTAGAGATTGAGCCACTA---GGAGTAGCACCCACCAGGGCAAAAAGAAGAGTGGTG-----  
 -----GAGAGAGAAAAAAGAGCA---CTGGGA---ATAGGAGCT---  
 -----GTGTTCTTGGGTTCTTGGGAACA---GCAGGAAGCACTATG---GGCGCAGCGTCA---  
 ATAACGCTGACGGTACAG---GTCAGACAA---TTGTTG---TCTGGCATAGTGCAACAGCAAAGC---  
 AATTTG---CTGAAG---GCTATAGAGGCTCAACAGCATCTGTTGAAGCTCACTGTCTGGGGCATT  
 >AJ249239  
 TTCTACTGCAATACAACAAAACCTGTTTAATGAGACAGGGGAG-----  
 -----  
 -----  
 AATGGTACTATCACACTCCCATGTAGAATAAAGCAGATTATAAACATGTGGCAGAAAAGTGGGAAAAGCAATAT  
 ATGCCCCCTCCCATTCAGGAAAGTATTAAGTGTAGCTCAAAT---  
 ATTACAGGAATGATATTGACAAGAGATGGTGGTAATAATACTCAT-----  
 -----  
 -----  
 AATGAGACCTTCAGACCTGGAGGAGGAGACATGAGGGACAATTGGAGAAGTGAAGTGTATAAATATAAAGTAG  
 TACAGATTGAACCACTA---GGAATAGCACCCACCAGGGCCAGGAGAAGAGTGGTG-----  
 -----CAGAGAGAAAAAAGAGCA---GTAGGA---TTAGGAGCT-----  
 GTGTTCTTTGGATTCTTGGGAGCA---GCAGGAAGCACTATG---GGCGCGGCGTCA---  
 ATAACGCTGACGGTACAG---GCCAGACAA---TTATTG---TCTGGTATAGTGCAACAGCAAAGC---  
 AATTTG---CTGAGA---GCTATAGAAGCGCAACAACATCTGTTACAGCTCACGGTCTGGGGCATT  
 >MH746262  
 TTCTATTGCAATACAACACAACCTGTTTAATGGC-----  
 -----  
 -----  
 ACGATTGGCAATATCACACTGCCATGTAGGATAAAACAAATTATAAACATGTGGCAAGGAGTAGGACAAGCAA  
 TGTATGCTCCTCCCATCAATGGAATACTTAATTGTGTATCAAAT---  
 ATTACAGGAATACTATTGACAAGAGATGGTGGTAATCATACGAAT-----  
 -----  
 -----  
 GAAACTGAGACCTTCAGACCGGGAGGAGGAAATATAAAGGACAATTGGAGAAGTGAATTATATAAATATAAAG  
 TAGTAGAAATTGAACCACTA---GGAATAGCACCCACCAAGGCAAAGAGAAGAGTGGTG-----  
 -----GAGAGAGAAAAAAGAGCA---GTGGGA---ATAGGAGCT-----  
 ATGATCTTTGGGTTCTTAGGAGCA---GCCGGAAGCACGATG---GGCGCGGCGTCA---  
 ATAACGCTGACGGTACAG---GCCAGACAA---TTATTG---TCTGGTATAGTGCAAGCAGCAAAGC---  
 AATTTG---CTGAGG---GCTATAGAGGCGCAGCAGCATATGTTGCAACTCACAGTCTGGGGCATT  
 >U51188  
 TTCTATTGCAATACAACAGCACTGTTTAATAGTACTTGGATAAATGGAACCATGCAGGAGGTTAATGGCACA-  
 -----  
 -----  
 -----  
 AACTCAGGCAATATCACACTTCATGCAGGATAAAGCAAATTGTAAACATGTGGCAGGAAGTAGGACGAGCAA  
 TGTATGCTCCTCCCATCAGTGAAGTAATTAATTGTGTATCAAAT---  
 ATTACAGGAATACTATTGACAAGAGATGGGGGTATTAATCAAAATCAG-----  
 -----  
 -----  
 ACTAACAAAAATGAGACCTTCAGACCTGGAGGAGGAAATATAAAGGACAATTGGAGAAGTGAATTATACAAAT  
 ATAAAGTAGTACAAATTGAACCACTA---GGAATAGCACCCACCAAGGCAAGGAGAAGAGTGGTG-----  
 -----GAGAGAGAAAAAAGAGCA---GTGGGA---ATAGGAGCT---  
 -----ATGATCTTTGGGTTCTTAGGAGCA---GCAGGAAGCACTATG---GGCGCGGCGTCA---  
 ATAACGCTGACGGTACAG---GCCAGACAA---TTATTG---TCTGGTATAGTGCAACAGCAAAGC---  
 AATTTG---CTGAGG---GCTATAGAGGCGCAGCAGCATCTGTTGCAACTCACAGTCTGGGGCATT  
 >JX112863  
 TTCTATTGCAATACAACAAAACCTGTTTAATAATACTTGCATAAATGGAACCACGAAGGG-----  
 -----  
 -----  
 TGTAATGGTACTATCATAATTCTATGCAAGATAAAGCAAATTGTAAACATGTGGCAGGGAGTAGGACAAGCAA  
 TGTATGCTCCTCCCGTCAGAGGAACAATTAATTGTGTATCAAAT---  
 ATTACAGGAATAATATTGACAAGAGATGGTGGAGTTAATAGGACA-----  
 -----  
 -----

CATAACGAGACCTTCAGACCTGGAGGAGGAAATATGAAAGATAATTGGAGAAATGAATTATATAAATATAAAA  
CAGTACTAATTGAACCACTA---GGAATAGCACCCACCAGGGCAAAGAGAAGAGTGGTG-----  
-----GAGAGAGAAAAAAGAGCA--GTGGGA--ATAGGAGCT-----  
ATGATCTTTGGGTTCTTGGGAGCA---GCAGGAAGCACTATG---GGCGCAGCGTCA---  
ATAACGCTGACGGTACAG---GCCAGACAA---TTATTG---TCTGGTATAGTGCAACAGCAAAGC---  
AATTTG---CTGAGG---GCTATAGAGGCGCAACATCATCTGTTGCAACTCACAGTCTGGGGCATT  
>EF036528  
TTCTATTGCAATACAACAAGATTGTTTAATAATACTTGCATAAACAATGAAACCATAGAG-----  
-----  
-----  
GGGTGTCAGAACATCACAATTCCATGTAAGATAAAAGCAAATTATAAACATGTGGCAGGAAACAGGACAAGCAA  
TGTATGCTCCTCCCATCAGGGGAAAAATTAGTTGTATATCAAAT---  
ATTACAGGAATACTATTGACAAGAGATGGTGGTGCTAATAAGACG-----  
-----  
-----  
AATGAGGAGATCTTCAGACCTGGAGGAGGAAATATAAGGGACAATTGGAGAAGTGAGTTATACAAATATAAAG  
TAGTACAAATTGAACCACTA---GGAGTAGCACCCACCAGGGCAAAGAGAAGAGTGGTG-----  
-----GAAAGAGAAAAAAGAGCA--GTGGGA--ATAGGAGCT-----  
ATGATCTTTGGGTTCTTAGGAGCA---GCAGGAAGCACTATG---GGCGCGGCGTCA---  
ATAACGCTGACGGTACAG---GCCAGACAA---TTATTG---TCTGGTATAGTGCAACAGCAAAGC---  
AATTTG---CTGAGG---GCTATAGAGGCGCAACAGCATATGTTGCAACTCACCGTCTGGGGCATT  
>HM215415  
TTCTATTGCAATACAACAAAATTGTTTAATAATACTTGCATAGAGGAGTGCAATGAAACCATTTGC-----  
-----  
-----  
TACAATGAAACCACTTATCTTCCATGTAGGATAAAAGCAAATTATAAACATGTGGCAGGGAGTAGGGCAAGCAA  
TGTATGCTCCTCCTATTGAGGGAAAAATTAGTTGTGTATCAAAT---  
ATTACAGGAATACTATTAACAAGAGATGGTGGTAATAATAATAGT-----  
-----  
-----  
ACAGGTAATGAGACCTTCAGACCTGGAGGAGGAAATATAAAGGACAATTGGAGAAATGAATTATATAAATATA  
AAGTAGTACAAATTGAACCACTA---GGAATAGCACCCACCAGGGCAAAGAGAAGAGTGGTG-----  
-----GAGAGAGAAAAAAGAGCA--GTGGGA--ATAGGAGCT-----  
---ATGATCTTTGGGTTCTTAGGAGCA---GCAGGAAGCACTATG---GGCGCGGCGTCA---  
ATAACGCTGACGGTACAG---GCCAGACAA---TTATTG---TCTGGTATAGTGCAACAGCAAAGC---  
AATTTG---CTGAGG---GCTATAGAGGCGCAGCAGCATTTGTTGCAACTCACAGTCTGGGGCATT  
>KF835503  
TTCTATTGTAATACATCACAACCTGTTTAATACAACACAACCTTAAACGGTTTAATAATGGTGGG-----  
-----  
-----  
GGTAGTGACACTATCATACTTCCATGTAAGATAAAACAAATTATAAACATGTGGCAGGGAGCAGGACAAGCAA  
TGTATGCTCCTCCCATCAGTGGAGCAATTAATTGTTTCATCAAAT---  
ATTACAGGAATACTATTAACAAGAGATGGTGGTGTTCATAATGGGAGT-----  
-----  
-----  
AACGAGACCGAGATCTTCAGACCTGGAGGAGGAAATATAAAGGACAATTGGAGAAGTGAACATATATAAATATA  
AAGTAGTAGAAATTGAACCATTA---GGAATAGCACCCACCAAGGCAAGGAGAAGAGTGGTG-----  
-----GAGAGAGAAAAAAGAGCA--GTGGGA--ATAGGAGCT-----  
---ATGATCTTTGGGTTCTTAGGAGCA---GCAGGAAGCACTATG---GGCGCGGCGTCA---  
ATAACGCTGACGGTACAG---GCCAGACAA---TTATTG---TCTGGTATAGTGCAACAGCAAAGC---  
AATTTG---CTGAGG---GCTATTGAGGCGCAACAGCATATGTTGCAACTCACAGTCTGGGGCATT  
>KF835505  
TTCTATTGCAATACATCACAACCTGTTTACTTGGAAAGAAAATGAAACCATAAATGGG-----  
-----  
-----  
GGTAATGGTAGTATCACACTTCAATGCAAGATAAAAGCAAATTATAAACATGTGGCAGGGAGTGGGACAAGCAA  
TGTATGCTCCTCCCGTCAATGGAACCTATTAATTGTGTATCAAAT---  
ATTACAGGAATACTATTGACAAGAGATGGTGGTAATAATAATGAGAGT-----  
-----  
-----

AATACAAATGAGACCTTCAGACCTGGAGGAGGAGATATGAGGGACAATTGGAGAAATGAATTATATAAAATATA  
AAGTAGTAGAAATTGAACCACTA---GGAATAGCACCCACCAGGGCAAAGAGAAGAGTGGTG-----  
-----GAGAGAGAAAAAAGAGCA---GTGGGA---ATAGGAGCT-----  
---ATGATCTTTGGGTTCTTGGGAGCA---GCTGGAAGCACTATG---GGCGCAGCGTCA---  
ATAACGCTGACGGTACAG---GCCAGACAA---TTATTG---TCTGGTATAGTGCAACAGCAAAGC---  
AATTTG---CTGAGG---GCTATTGAGGCGCAGCAGCATATGTTGCAACTCACAGTCTGGGGCATT  
>KF835527  
TTCTATTGCAACACATCAAACCTGTTTAATACAACATACCTTAATAGTAGCACA-----  
-----  
-----  
GAAAAATAACAATATCACACTTCCATGCAGAATAAAGCAAATTATAAACATGTGGCAGGGAACAGGACAAGCAA  
TGTATGCTCCTCCCATCAGTGGAACATTAGCTGTGTATCAAAT---  
ATTACAGGAATACTATTGACAAGAGATGGTGGTGGGAATGGTACAGAGGGG-----  
-----  
-----  
ACGAATGAGACCTTCAGACCTGGAGGAGGAAATATGAAGGACAATTGGAGAAATGAATTATATAAAATATAAAG  
TAGTACAAATTGAACCACTA---GGAATAGCACCCACCAGGGCAAAGAGAAGAGTGGTG-----  
-----GAGAGAGAAAAAAGAGCA---GTGGGA---ATAGGAGCT-----  
ATGATCTTTGGATTCTTGGGAGCA---GCAGGAAGCACTATG---GGCGCGGCGTCA---  
ATAACGCTGACGGTACAG---GCCAGACAA---TTATTG---TCTGGTATAGTGCAACAGCAAAGC---  
AATTTG---CTGAGG---GCTATAGAGGCGCAGCATCATTTGCTGCAACTCACAGTCTGGGGCATT  
>JX112809  
TTCTATTGCAATACAAGCCAACTGTTTAATGCTACTTACGGAACAAATGAAACCACGCGTACG-----  
-----  
-----  
CGTAATGACACTATCATACTTCCATGCAGGATAAAGCAAATTATAAACATGTGGCAGGGAGTAGGACAAGCAA  
TGTATGCTCCTCCCATCAGTGGAAGAATTAATTGTGTATCAAAT---  
ATTACAGGAATACTATTAACAAGAGATGGTGGTGATAATAATAGT-----  
-----  
-----  
ACTAACGAGACCTTCAGACCTGGAGGGGGAGATATAAAGGACAATTGGAGAAGTGAATTATATAAAATATAAAG  
TAGTACAAATTGAACCACTA---GGAGTAGCACCCACCAGGGCAAAGAAGAGTGGTG-----  
-----GAGAGAGAAAAAAGAGCA---GTGGGA---ATAGGAGCT-----  
ATGATCTTTGGGTTCTTAGGAGCA---GCAGGAAGCACTATG---GGCGCGGCGTCA---  
ATAACGCTGACGGTACAG---GCCAGACAA---TTATTG---TCTGGTATAGTGCAACAGCAAAGC---  
AATTTG---CTGAGG---GCTATAGAGGCGCAGCATCATCTGTTGCAACTCACAGTCTGGGGCATT  
>JX112813  
TTCTATTGCAATACAACAAAACCTGTTTAACAGTACTTGGACAGGAAATGAAACCATAAATGAGAAT-----  
-----  
-----  
GGGACTACTAAAATCATAATTCCATGCAGGATAAAGCAAATTATAAACATGTGGCAAGGAGCAGGACAAGCAA  
TATATGCTCCTCCCATCAGTGAGCAATTAATTGTGTATCAAAT---  
ATTACAGGAATACTATTGACAAGAGATGGTGGTGATGGTAATCAT-----  
-----  
-----  
ATAAACGAGACCTTCAGACCTGCAGGAGGAAATATGAGGGACAATTGGAGAAGTGAATTATATAAAATATAAAG  
TAGTACAAATTGAACCATTA---GGAATAGCACCCACCAGGGCAAAGAGAAGAGTGGTG-----  
-----GAGAGACAAAAAAGAGCA---GTGGGA---ATAGGAGCT-----  
ATGATCTTTGGGTTCTTAGGAGCA---GCAGGAAGCACTATG---GGCGCGGCGTCA---  
ATAACGCTGACGGTACAG---GCCAGACAA---TTATTG---TCTGGTATAGTGCAACAGCAAAGC---  
AATTTG---CTGAGG---GCTATAGAGGTGCAGCAGCATATGTTGCAACTCACAGTCTGGGGCATT  
>JX112814  
TTCTATTGCAATACAAGCCAACTGTTTAATAAACTTACTATGGAAATGAAACTACTTCCATAGGGAATACC-----  
-----  
-----  
ACGAATAACACTATCGTACTTCCATGCAAGATAAAGCAAATTATAAACATGTGGCAGGGAGTAGGACAAGCAA  
TGTATGCTCCTCCCATCAGTGGAACATTAGTTGTGTATCAAAT---  
ATTACAGGAATACTATTAACAAGAGATGGTGGTAATAATAAGTCT-----  
-----  
-----

CAGGTGAACGAGACCTTCAGACCTGGAGGAGGAAATATGAAGGACAACCTGGAGAAGTGAATTATATAAAATATA  
AAGTAGTACAAATTGAACCATTA---GGAATAGCACCCACCAGGGCAAAGAGAAGAGTGGTG-----  
-----GAGAGAGAAAAAAGAGCA---GTGGGA---ATAGGAGCT-----  
---ATGATCTTTGGGTTCTTAGGAGCA---GCAGGAAGCACTATG---GGCGCGGCGTCA---  
ATAACGCTGACGGTACAG---GCCAGACAA---TTATTG---TCTGGTATAGTGCAACAGCAAAGC---  
AATTTG---CTGAGG---GCTATAGAGGCGCAGCAGCATCTGCTGCAACTCACAGTCTGGGGCATT  
>JX112820  
TTCTATTGCAATACATCAGGACTGTTTAATAGTACTTGGGAAAGAAATGGAACCATGAGGGGGCATAATAGC-  
-----  
-----  
ACTAATGGCACTATCATACTTCCATGCAGGATAAAAGCAAATTATAAACATGTGGCAGGGAGTAGGACAAGCAA  
TGTATGCTCCTCCCATCGCAGGAAGTATTAATTGTACATCAAAT---  
ATTACAGGGATACTATTGACAAGAGATGGTGGTTATGATGCGGAGAAT-----  
-----  
-----  
AATGAGACTGAGACTTTCAGACCTGGAGGAGGAAATATAAAAGACAATTGGAGAAGTGAATTATATAAAATATA  
AAGTAGTACAAATTGAACCACTA---GGAATAGCACCCACCATGGCAAAGAGAAGAGTGGTG-----  
-----GAAAGAGAAAAAAGAGCA---GTGGGA---ATAGGAGTT-----  
---ATGATCTTTGGGTTCTTAGGAGCA---GCCGGAAGCACTATG---GGCGCAGCGTCA---  
CTAACGCTGACGGTACAG---GCCAGACAA---TTATTG---TCTGGTATAGTGCAACAGCAAAGC---  
AATTTG---CTGAGG---GCTATAGAGGCGCAGCAGCATATGTTGCAACTCACAGTCTGGGGCATT  
>JX112823  
TTCTATTGCAATACAAGCCAACTGTTTAATGATACAGGAAATGAAACCATAGGGGAAT-----  
-----  
-----  
AATAGTAACACTATCATACTTCCATGCAGGATAAAAGCAAATTATAAACATGTGGCAGGGAGTAGGACAAGCAA  
TGTATGCTCCTCCCATCAGTGGAACAATTAATTGTGTATCAAAT---  
ATTACAGGAATACTATTAACAAGAGATGGCGGTACTAATGGTAATAATACTAAT-----AAT-----  
-----  
-----  
ACCACTAATAATACCGAGACCTTCAGACCTGGGGGAGGAAATATAAAGGACAATTGGAGAAGTGAATTATATA  
AATATAAAGTAGTACAAATTGAACCACTA---GGAATAGCACCCACCAGGGCAAAGAGAAGAGTGGTG-----  
-----GACAGAGAAAAAAGAGCA---GTGGGA---  
ATAGGAGCT-----ATGATCTTTGGGTTCTTAGGAGCA---GCTGGAAGCACTATG---  
GGCGCGGCGTCA---ATAACGCTGACGGTACAG---GCTAGACAA---TTATTG---  
TCTGGTATAGTGCAACAGCAAAGC---AATTTG---CTGAGG---  
GCTATAGAGGCGCAGCATCATTTGTTGCAACTCACAGTCTGGGGCATT  
>JX112826  
TTCTATTGCAATACAAGCAAACCTGTTTAATTTTACTTTCCCAAGAAATGAAACAGGGGAG-----  
-----  
-----  
AATGATACAACACTATCATACTTCCATGCAGGATAAAAGCAAATTATAAACATGTGGCAGGGAGTAGGACAAGCAA  
TGTATGCTCCTCCCATCAGTGGGATAATTAATTGTGTATCAAAT---  
ATTACAGGAATACTATTAACAAGAGATGGTGGTCATAATAATACTACT-----  
-----  
-----  
ATTACTAATGAGACCTTCAGACCTGGAGGAGGAAATATAAAGGACAATTGGAGAAGTGAATTATACAAATATA  
AAGTAGTACAAATTGAACCACTA---GGAATAGCACCCACCAGGGCAAAGAGAAGAGTGGTG-----  
-----GAGAGAGAAAAAAGAGCA---GTGGGA---ATAGGAGCT-----  
---ATGATCTTTGGGTTCTTAGGAGCA---GCAGGAAGCACTATG---GGCGCGGCGTCA---  
ATAACGCTGACGGTACAG---GCCAGACAA---TTATTG---TCTGGTATAGTGCAACAGCAAAGC---  
AATTTG---CTGAGG---GCTATAGAGGCGCAGCAGCATATGTTGCAACTCACAGTCTGGGGCATT  
>JX112835  
TTCTATTGCAATACAAACAAACCTGTTTAATGTAACTTACAATGAAAAGAATACCACAGGGGGG-----  
-----  
-----  
AGTAATGGCACTATCATACTCCTATGCAAGATAAAAGCAAATTATAAACATGTGGCAGGAAGTAGGACAAGCAA  
TGTATGCTCCTCCCATCAGTGGAGAATTAATTGTGTATCAAAT---  
ATTACAGGAATACTACTAACAAGAGATGGTGGTGGTACTAATAGG-----  
-----  
-----

-----  
ACTAATGAGACCTTCAGACCTGGAGGAGGAAATATAAAGGACAATTGGAGAAGTGAATTATATAAATATAAAG  
TAGTACAACCTGAACCACTA---GGAATAGCACCCACCAGGGCAAAGAGAAGAGTGGTG-----  
-----GAGAGAGAAAAAAGAGCA---GTGGGA---ATAGGAGCT-----  
ATGATCTTTGGGTTCTTGGGAGCA---GCAGGAAGCACTATG---GGCGCGGCGTCA---  
ATAACGCTGACGGTACAG---GCCAGACAA---TTATTG---TCTGGTATAGTGCAACAGCAAAGC---  
AATTTG---CTGAGG---GCTATAGAGGCGCAGCATCATCTGTTGCAACTCACAGTCTGGGGCATT  
>JX112844  
TTCTATTGCAATACAACAAACCTGTTTAAACAGTACTTGGGAAAATGGAACCACGGAGGGTAAT-----  
-----  
-----  
GGCACCGAGAAGATCATACTTCCATGCAGGATAAAGCAAATTATAAACATGTGGCAGGGAGCAGGACAAGCAA  
TGTATGCTCCTCCCATCAGTGGAACAATTAATTGTGTATCAAAT---  
ATTACAGGAATACTATTAACAAGAGATGGTGGTTATAATAATGCG-----  
-----  
-----  
GATAACGAGACCTTCAGACCTGGAGGAGGAAATATAAAGGACAATTGGAGAAGTGAATTATATAAATATAAAG  
TAGTAGAAATTGAACCACTA---GGAATAGCACCCACCAGGGCAAAGAGAAGAGTGGTG-----  
-----GAGAGAGAAAAAAGAGCA---GTGGGA---ATAGGAGCT-----  
ATGATCTTTGGGTTCTTGGGAGCA---GCAGGAAGCACTATG---GGCGCGGCGTCA---  
ATAACGCTGACGGTACAG---GCCAGACAA---TTATTG---TCTGGTATAGTGCAACAGCAAAGC---  
AATTTG---CTGAGG---GCTATAGAGGCGCAGCAGCATATGCTGCAACTCACAGTCTGGGGCATT  
>GU475036  
TTCTATTGCAATACAACAAAACCTGTTTAAATAGGAATAATAAC-----  
-----  
-----  
TATAGCACTATCATACTTCCATGCAAGATAAAGCAAATTGTAAGAATGTGGCAGGGAGTAGGACAAGCAATGT  
ATGCTCCTCCCATCAGTGGAAGCATAAATTGTGTATCAAAT---  
ATTACAGGAATACTATTGACAAGAGATGGTGGTATTCATAATAGT-----  
-----  
-----  
AGTGATGAGACCTTCAGACCTGGAGGAGGAAATATAAAGGACAATTGGAGAAGTGAATTATATAAATATAAGG  
TAGTAGAAATTGAACCACTA---GGAATAGCACCCACCAAGGCAAAGAGAAGAGTGGTG-----  
-----GAGAGAGAAAAAAGAGCA---GTGGGA---ATAGGAGCT-----  
ATGATCTTTGGGTTCTTAGGAGCA---GCAGGAAGCACTATG---GGCGCGGCGTCA---  
ATAACGCTGACGGTACAG---GCCAGACAA---TTATTG---TCTGGTATAGTGCAACAGCAAAGC---  
AATTTG---CTGAGG---GCTATAGAGGCGCAACAGCATATGTTGCAACTCACAGTCTGGGGCATT  
>GU475019  
TTCTATTGCAATACAACAAATCTGTTTAAATAACTTGCATAAACAATGCAAGCACAAAAGGG-----  
-----  
-----  
TGTAATGAAAATATCATACTTCCATGCAGGATAAAACAAATTATAAACATGTGGCAAGGAGTAGGACAAGCAA  
TGTATGCTCCTCCCATCAGTGGAATAATTACTTGTAGATCAAAT---  
ATTACAGGAATACTATTGACAAGAGATGGTGGTAATCATAGCACA-----  
-----  
-----  
GGTAATGAGACCTTCAGACCTGAAGGAGGAAATATAAAGGACAATTGGAGAAATGAATTATATAAATATAAAG  
TAGTAGAAATTGAACCACTA---GGAATAGCACCCACCAGGGCAAAGAGAAGAGTGGTG-----  
-----GAGAGAGAAAAAAGAGCA---GTGGGA---ATAGGAGCT-----  
ATGATCTTTGGGTTCTTAGGAGCA---GCAGGAAGCACTATG---GGCGCAGCGTCA---  
ATAACGCTGACGGTACAG---GCCAGACAA---TTATTG---TCTGGTATAGTGCAACAGCAAAGC---  
AATTTG---CTGAGG---GCTATAGAGGCGCAGCAGCATCTGTTGCAACTCACAGTCTGGGGCATT  
>JX960627  
TTCTATTGCAATACAACAAACCTGTTCAATAGTACTTGGAAAAATGAGACCATGGAGGGAGGTAATGAT----  
-----  
-----  
AATTACACTAAAATCATACTTCCATGCAGGATAAAGCAAAGTTATAAACATGTGGCAAGGAGCAGGACAAGCAA  
TGTATGCTCCTCCCATCAGTGGAATAATTAAGTGTGTATCAAAT---  
ATTACAGGAATACTATTGACAAGAGATGGTGGTAATAATAACT-----  
-----  
-----

-----  
GAAGAGACTTTTCAGACCTGGAGGAGGAGATATAAAGAACAATTGGAGAAGTGAATTATATAAAATATAAAGTAG  
TACAAATAGAACCACTA---GGAGTAGCACCCACCAGGGCAAAGAGAAGAGTGGTG-----  
-----GATAGAGAAAAAAGAGCA---GTGGGA---ATAGGAGCT-----  
ATGATCTTTGGGTTCTTGGGAGCA---GCAGGAAGCACTATG---GGCGCGGCGTCA---  
ATAACGCTGACGGTACAG---GCCAGACAA---TTATTG---TCTGGTATAGTGCAACAGCAAAGC---  
AATTTG---CTGAGG---GCTATAGAGGCGCAGCAGCATATGTTGCAACTCACAGTCTGGGGCATT  
>JX960615  
TTCTATTGCAATACAACAAAGCTGTTCAATAGTACTTGGATAGGAAATGAAACCACGGAGGGAGGTAAT----  
-----  
-----  
GATAATGACACTATCATACTTCCATGCAGGATAAAAGCAAATTATAAACATGTGGCAAGGAGCGGGACAAGCAA  
TGTATGCTCCTCCCATCAGTGGAATAATTAAATGTGTATCAAAT---  
ATTACAGGAATACTATTGACAAGAGATGGTGGTGATTATAATAAT-----  
-----  
-----  
ACAAATGAGACCTTCAGACCTGGAGGAGGAAATATAAAGGACAATTGGAGAAGTGAATTATATAAAATATAAGG  
TAGTACAAATAGAACCACTA---GGAGTAGCACCTACCAGGGCAAAGAGAAGAGTGGTG-----  
-----GAGAGAGAAAAAAGAGCA---GTGGGA---ATAGGAGCT-----  
ATGATCTTTGGGTTCTTAGGAGCA---GCAGGAAGCACTATG---GGCGCGGCGTCA---  
ATAACGCTGACGGTACAG---GCCAGACAA---TTATTG---TCTGGTATAGTGCAACAGCAAAGC---  
AATTTG---CTGAGG---GCTATAGAGGCGCAACAGCATATGTTGCAACTCACAGTCTGGGGCATT  
>JX960639  
TTCTATTGCAATACAACAAAATTGTTTAATAGTACAGAAAATGGAACCATGGAGGGG-----  
-----  
-----  
CTTAATGGCACTATTATACTCCCATGCAGGATAAAACAAATTGTAAACCTGTGGCAGGGAGCAGGACAAGCAA  
TGTATGCTCCTCCCGTCAGTGGAATAATTATGTGCATCAAAT---  
ATTACAGGAATACTATTAACAAGAGATGGTGGTAATAATGCAACA-----  
-----  
-----  
ACTAACGAGACCTTCAGACCGGGAGGAGGAAATATAAAGGACAATTGGAGAAGTGAATTATATAAAATATAAAG  
TAGTACAAATTGAACCACTA---GGAGTAGCACCCACCAGGGCAAAGAGAAGAGTGGTG-----  
-----GATAAAGAAAAAAGAGCA---GTGGGA---ATAGGAGCT-----  
ATGATCTTTGGGTTCTTAGGAGCA---GCAGGAAGCACTATG---GGCGCGGCGTCA---  
ATAACGCTGACGGTACAG---GCCAGACAA---TTATTG---TCTGGTATAGTGCAACAGCAAAGC---  
AATTTG---CTGAGA---GCTATAGAGGCGCAGCATCATCTGTTGCAACTCACAGTCTGGGGCATT  
>JX960632  
TTCTATTGCAATACAACAAGGCTGTTCAATAGTACTTGGATAGGAAATGAGACCATAGGAAATGAGACCATGG  
GGGAAGGTAAT-----  
-----  
AATAATAACACTATCATACTTCCATGCAGGATAAAAGCAAATTATAAACATGTGGCAAGGAGCAGGACAAGCAA  
TATATGCTCCTCCCATCAGTGGAATAGTTAATTGTGTATCAAAT---  
ATTACAGGGATACTATTGACAAGAGATGGTGGTCAAGAAGATAAT-----  
-----  
-----  
GGAACAAATAGCGAGATTTTCAGACCTGGAGGAGGAAATATAAAGGACAATTGGAGAAGTGAATTATATAAAAT  
ATAAAGTAGTAGAAATAGAACCACTA---GGAGTAGCACCCACCAGGGCAAAGAGAAGAGTGGTA-----  
-----AATAGAGAAAAAAGAGCA---GTGGGA---ATAGGAGCT---  
-----ATGATCTTTGGGTTCTTGGGAGCA---GCAGGAAGCACTATG---GGCGCGGCGTCA---  
ATAACGCTGACGGTACAG---GCCAGACAA---TTATTG---TCTGGTATAGTGCAACAGCAAAGC---  
AATTTG---CTGAGG---GCTATAGAGGCGCAGCAGCATATGTTGCAACTCACAGTCTGGGGCATT  
>MH672757  
TTCTATTGCAATACAACAAAGCTGTTCAATGGTAATGGCACTAAAAATGGTAGTGAGACA-----  
-----  
-----  
AACAGTAGCACTATCATACTTCCATGCAGGATAAAAGCAAATTATAAACATGTGGCAAGGAGCAGGACAAGCAA  
TGTATGCTCCTCCCATCAGTGGAATAATTAAATGTGTATCAAAT---  
ATTACAGGAATACTATTAACAAGAGATGGTGGTAATCATAATAAT-----  
-----

-----  
ACTACCGAGATTTTCAGACCTGGAGGAGGAAATATGGAGGACAATTGGAGAAGTGAATTATATAAATATAAAG  
TAGTACAAATAGAACCACTA---GGAGTAGCACCCACCAAGGCAAAGAGAAGAGTGGTG-----  
-----GATAGAGAAAAAAGAGCA---GTGGGA---ATAGGAGCT-----  
ATGATCTTTGGGTTCTTGGGAGCA---GCAGGAAGCACTATG---GGCGCGGCGTCA---  
ATAACGCTGACGGTACAG---GCCAGACAG---TTATTG---TCTGGTATAGTGCAGCAGCAAAGC---  
AATTTG---CTGAGG---GCTATAGAGGCGCAACAGCATATGTTGCAACTCACAGTCTGGGGCATT  
>JX112798  
TTCTATTGCAATACAACAAAACCTGTTCAATAATGAAACCATG-----  
-----  
-----  
AAAGAGGACACTATCATACTTCCATGCAGGATAAAAGCAAATTATAAACTTGTGGCAAGGAGTGGGACAAGCAA  
TGTATGCTCCTCCCATCAGTGGAAATAATTCAATGTGTATCAAAT---  
ATTACAGGAATAATATTAACAAGGGATGGTGGTAATCAAAGTAATAGTAATGTA-----  
-----  
-----  
ACTAGAGAGATCTTCAGACCTGGAGGAGGAAATATGAAGGACAATTGGAGAAGTGAATTATATAAATATAAAG  
TAGTACAAATTGAACCACTA---GGAGTAGCACCCACCAAGGCAAAGAGAAGAGTGGTG-----  
-----GATAGACAAAAAAGAGCA---GTGGGA---ATAGGAGCT-----  
ATGATCTTTGGGTTCTTAGGAGCA---GCAGGAAGCACTATG---GGCGCGGCGTCA---  
ATAACGCTGACGGTACAG---GCCAGACAA---TTATTG---TCTGGTATAGTGCAACAGCAAAGC---  
AATTTG---CTGAGA---GCTATAGAGGCGCAGCAGCATATGTTGCAACTCACAGTCTGGGGCATT  
>JX112799  
TTCTATTGTAATACAACAAAATGTTTAATAAGACAGAGAATGGAACCATGGAGGGG-----  
-----  
-----  
TTTAATACCACTATCATACTTCCATGCAGGATAAAAGCAAATTGTAAGGATGTGGCAGGGAGTAGAACAAGCAA  
TGTATGCTCCTCCCATCAGTGGAAACATTACTTGTAGATCAAAT---  
ATTACAGGAATACTATTAACAAGAGATGGTGGTGGTTATGATACA-----  
-----  
-----  
TCTCCCGAAACCTTCAGACCAGGAGGAGGAAATATGAAGGACAATTGGAGAAGTGAATTATATAAATATAAAG  
TAGTACAAATTGAACCACTA---GGAATAGCACCTCCAGGGCAAAGAGAAGAGTGGTG-----  
-----GATAGACAAAAAAGAGCA---GTGGGA---ATAGGAGCT-----  
ATGATCTTTGGGTTCTTAGGAGCA---GCAGGAAGCACTATG---GGCGCAGCGTCA---  
ATAACGCTGACGGTACAA---GCCAGACAA---TTATTG---TCTGGTATAGTGCAACAGCAAAGC---  
AATTTG---CTGAGG---GCTATAGAGGCGCAGCAGCATCTGTTGCAACTCACAGTCTGGGGCATT  
>KC870041  
TTCTATTGCAATACAACAAAACCTGTTTAATAAGACTTTCGATAAGAACATAGAA-----  
-----  
-----  
-AATGACACCATGGAT-----  
GGCAGTAATAACACTATCATACTTCCATGCAGGATAAAAGCAAATTATAAACATGTGGCAGGGAGTAGGACAAG  
CAATGTATGCCCTCCCATTAGGGGAAAAATTCAATTGTGTATCAAAT---  
ATTACAGGAATACTATTGACAAGAGATGGTGGT-----  
-----  
-----  
ACTGATAATAACGAGACCTTCAGACCTGGAGGGGGAAACATAAAAGACAATTGGAGAAGTGAATTATATAAAT  
ATAAAGTAGTACAAATTGAACCACTA---GGGGTAGCACCTACCAGGGCAAAGAGAAGAGTGGTG-----  
-----GAAAGAGAAAAAAGAGCA---GTGGGA---ATAGGAGCT---  
-----ATGATCCTTGGGTTCTTAGGAGCA---GCAGGAAGCACTATG---GGCGCGGCGTCA---  
ATAACGCTGACGGTACAG---GCCAGACAA---TTATTG---TCTGGTATAGTGCAACAGCAAAGC---  
AATTTG---CTGCGG---GCTATAGAGGCGCAACAGCATATGTTGCAACTCACAGTCTGGGGCATT  
>MH672923  
TTCTATTGCAATACAACAAAATGTTTAATAGTACAGAAAATGGAACCATGGAGGGG-----  
-----  
-----  
TTTAATACCACTATCATAATTCCATGCAAGATAAAAGCAAATTGTAAATATGTGGCAGGGAGTAGGACAAGCAA  
TATATGCTCCTCCCATTAGTGGAGTAATTAAGTGTCAATTCAAAT---  
ATTACAGGAATACTATTAACAAGAGATGGTGGTAATAATAATGCA-----  
-----

-----  
AATAACGAAACCTTCAGACCGGGAGGAGGAAATATAAAGGACAATTGGAGAAATGAATTATATAAATATAAAG  
TAGTACAAATTGAACCACTA---GGAATAGCACCCACCAAGGCAAAAAGAAGAGTGGTG-----  
-----GAGAGAGAAAAAAGAGCA---GTGGGA---ATAGGAGCT-----  
ATGATCTTTGGGTTCTTAGGAGCA---GCAGGAAGCACTATG---GGCGCAGCGTCA---  
GTAACGCTGACGGTACAG---GCCAGACAA---TTATTG---TCTGGTATAGTGCAACAGCAAAGC---  
AATTTG---CTGAGA---GCTATAGAGGCGCAACAGCACCTGTTGCAACTCACAGTCTGGGGCATT  
>MG655206  
TTCTATTGCAATACTAGCAGACTGTTTAATGCTACTTATTATAAAAATGGAACCACAGAGAATGGAACCACAG  
AGGGG-----  
-----  
AGTAATCACACTATCATACTTCCATGCAGAATAAAGCAAATTATAAACATGTGGCAGGGAGTAGGACAAGCAA  
TGTATGCTCCTCCCATCAGTGGAAGAATTAATTGTGTATCAAAT---  
ATTACAGGAATACTATTAACAAGAGATGGTGGTAGTAATGCTACA-----  
-----  
-----  
AATGAGACCTTCAGACCTGAAGGAGGGAATATAAAGAACAATTGGAGAAGTGAATTATATAAATATAAAGTAG  
TACAAATTGAACCACTA---GGAGTAGCACCCACCAGGGCAAAGAGAAGAGTGGTG-----  
-----GAGAGAGAAAAAAGAGCA---GTGGGA---ATAGGAGCT-----  
ATGATCTTTGGGTTCTTGGGAGCA---GCTGGAAGCACTATG---GGCGCGGCGTCA---  
ATAACGCTGACGGCACAG---GCCAGACAA---TTATTG---TCTGGTATAGTGCAACAGCAAAGC---  
AATTTG---CTGAGG---GCTATAGAGGCGCAGCAACATCTGCTGCAACTCACAGTCTGGGGCATT  
>MG655209  
TTCTATTGCGATACAACAAAACTGTTTAATAGTACAGGAAATGGAACCATGGAGGGG-----  
-----  
-----  
CTTAATGGCACCATTATACTTCCATGCAAGATAAAGCAAATTATAAACATGTGGCAGGGAGCAGGACAAGCAA  
TATATGCTCCTCCCATCAGTGGAAGAATTGAGTGTAGATCAAAT---  
ATTACAGGAATACTATTAACAAGAGATGGTGGTCATAATATAACT-----  
-----  
-----  
AACGAGACCTTCAGACCAGGAGGAGGAAATTTAAAGGACAATTGGAGAAATGAATTATATAAATATAAAGTAG  
TACAAATTGAACCACTA---GGAATAGCACCCACCAAGGCAAAGAGAAGAGTGGTG-----  
-----AATAGAGAAAAAAGAGCA---GTGGGA---ATAGGAGCT-----  
ATGATCTTTGGGTTCTTAGGAGCA---GCAGGAAGCACTATG---GGCGCGGCGTCA---  
ATAACGCTGACGGTACAG---GCCAGACAA---TTATTG---TCTGGTATAGTGCAACAGCAAAGC---  
AATTTG---CTGAGA---GCTATAGAGGCGCAGCAGCATCTGTTGCAACTCACAGTCTGGGGCATT  
>MG655214  
TTCTATTGCAATACAACAAAGTTATTTAATAGTACAGAAAATGGAACCAGGGAAGAGGGT-----  
-----  
-----  
CATAATGGCACTATTATACTCCCATGCAGGATAAAGCAAATTGTAAACATGTGGCAGGGAGCAGGCCAAGCAA  
TGTATGCTCCTCCCGTCAGAGGAAACATTAATTGTGTATCAAAT---  
ATTACAGGACTACTATTAACAAGAGATGGTGGTATTAAGGGAAT-----  
-----  
-----  
CACAACGAGACCTTCAGACCGGGAGGAGGAAATATAAAGGACAATTGGAGAAGTGAATTATATAAATATAAAG  
TAGTACAAATTGAACCACTA---GGAGTAGCACCCACCAAGGCAAAAAGAAGAGTGGTG-----  
-----GATAGAGAAAAAAGAGCA---GTAGGA---ATAGGAGCT-----  
ATGATCTTTGGGTTCTTAGGAGCA---GCAGGAAGCACTATG---GGCGCGGCGTCA---  
ATAACGCTGACGGTACAG---GCCAGACAA---TTATTG---TCTGGTATAGTGCAACAGCAAAGC---  
AATTTG---CTGAGA---GCTATAGAGGCGCAGCAGCATATGCTGCAACTCACAGTCTGGGGCATT  
>MG655215  
TTCTATTGCAATACAACACAATTGTTTAATAATAATTCCACG-----  
-----  
-----  
TTTAATACCACTGTCATACTTCCATGCAGGATAAAGCAAATTGTAAATATGTGGCAGGGGGTAGGACGAGCAA  
TGTATGCTCCTCCCATCAGTGGAATGATTAATTGTGTATCAAAT---  
ATTACAGGAATAATATTAACAAGAGATGGTGGTTATAGTAATACA-----  
-----

-----  
ACTAACGAAACCTTCAGACCGGGAGGAGGAAATATAAAGGACAATTGGAGAAGTGAACTATATAAATATAAAG  
TAGTACAAATTGAACCACTA---GGAATAGCACCCACCAGGGCAAAGAGAAGAGTGGTG-----  
-----ACTAGAGAAAAAAGAGCAGTAGTGGA---ATAGGAGCT-----  
ATGATCTTTGGGTTCTTAGGAGCA---GCAGGAAGCACTATG---GGCGCAGCGTCA---  
ATAACGCTGACGGTACAG---GCCAGACAA---TTATTG---TCTGGTATAGTGCAACAGCAAAGC---  
AATTTG---CTGAGA---GCTATAGAGGCGCAGCAGCATCTGCTGCAACTCACAGTCTGGGGCATT  
>DQ234790  
TTCTATTGCAATACAACACAACCTGTTTGATAGTAGTTGGAATACAACAACAACCAATAGGGAG-----  
-----  
-----  
AACCGTAGTAATTTTCACTTCCATGCAGGATAAAACAAATTATAAACATGTGGCAGGAAACAGGAAAAGCAA  
TGTATGCTCCTCCCATCAGGGGAAGCATTTCAGTGTGTATCAAAT---  
ATTACAGGAATACTATTGACAAGAGATGGTGGTAATAATAATGGGTCT-----  
-----  
-----  
AACGAGACCGAGACCTTTAGACCTGGAGGAGGAGATATAAGAGACAATTGGAGAAGTGAATTATATAAATATA  
AAGTAGTACAAATTGAACCACTA---GGAGTAGCACCCACCAGGGCAAAGAGAAGAGTGGTG-----  
-----GAGAGAGAAAAAAGAGCAGTAGTGGA---ATAGGAGCT-----  
---ATGATCTTTGGGTTCTTAGGAGCA---GCAGGAAGCACTATG---GGCGCGGCGTCA---  
TTAACGCTGACGGTACAG---GCCAGACAA---TTACTG---TCTGGTATAGTGCAACAGCAAAGC---  
AATTTG---CTGAGG---GCTATAGAGGCGCAACAGCATATGTTGCAACTCACAGTCTGGGGCATT  
>KF859741  
TTCTATTGCAATACAACAAAAATTATTTAATCACACAAACAATGACACCATGCAG-----  
-----  
-----  
TATAATGACACTATCACACTTCCATGCAGGATAAAGCAAATTATAAACATGTGGCAGAGAGTAGGACAAGCAA  
TGTATGCTCCTCCCGTCAGGGGAAGAATTAATTGTGTATCAAAC---  
ATTACAGGAATACTATTGACAAGGGATGGTGGTGGGACAAACAGT-----  
-----  
-----  
ACGAACGAGATCTTCAGACCTCAAGGAGGAAATATAAAGGACAATTGGAGAAGTAAATTATATAAATATAAAG  
TAGTACAAATTGAACCACTA---GGAGTGGCACCCACCAGGGCAAAGAGAAGAGTGGTG-----  
-----GAGAGAGAAAAAAGAGCA---GTGGA---ATAGGAGCT-----  
CTGATCTTTGGGTTCTTAGGAGCA---GCAGGAAGCACTATG---GGCGCGGCGTCA---  
ATAACGCTGACGGTACAG---GCCAGACAA---TTATTG---TCTGGTATAGTGCAACAGCAAAGC---  
AATTTG---CTGAGG---GCTATAGAGGCGCAGCAGCATCTGTTGCAACTCACAGTCTGGGGCATT  
>MH327759  
TTCTATTGCAATACAACACAATTATTTAATAAC-----  
-----  
-----  
ACCAATGGTACTATCATACTTCCATGCAAGATAAAACAAATTATAAACATGTGGCAGGGAGTAGGACAAGCAA  
TGTATGCTCCTCCCGTCAGGGGAAAAATTAATTGTGTATCAAAC---  
ATTACAGGAATACTATTGACAAGGGATGGTGGGGCAAATAGCAG-----  
-----  
-----  
AATGAGACCTTCAGACTTCAAGGAGGAAATATAAAGGACAATTGGAGAAATGAATTATATAAATATAAAGTAG  
TACAAATTGAACCACTA---GGAATAGCACCCACCAGGGCACGGCGAAGAGTGGTG-----  
-----GAGAGAGAAAAAAGAGCA---GTGGA---ATAGGAGCT-----  
ATGATCTTTGGGTTCTTAGGAGCA---GCAGGAAGCACTATG---GGCGCGGCGTCA---  
ATAACGCTGACGGTACAG---GCCAGACAA---TTATTG---TCTGGTATAGTGCAACAGCAAAGC---  
AATTTG---CTGAGG---GCTATAGAGGCGCAGCAGCATCTGTTGCAACTCACAGTCTGGGGCATT  
>MH078562  
TTCTATTGCAATACAACACGATTATTTAATTGCACAAACAATAATAACAG-----  
-----  
-----  
TGTAATGAACTATCATACTTCCATGCAAGATAAAGCAAATTATAAACATGTGGCAGGGAGTAGGACAAGCAA  
TGTATGCTCCTCCCATCAGGGGAAGAATTAATTGTGTATCAAAC---  
ATTACAGGAATACTATTAACAAGGGATGGTGGTCAGACAAACGATACG-----  
-----  
-----

-----  
 AACTACGAAACCTTCAGACCTGCAGGAGGAAATATAAAGGACAATTGGAGAAATGAATTATATAAATATAAAG  
 TAATACAAATTGAACCACTA---GGATTGGCACCCACCAGGGCAAGGCGAAGAGTGGTG-----  
 -----GAGAGAGAAAAAAGAGCA---GTGGGA---ATAGGAGCT-----  
 ATGATCTTTGGGTTCTTAGGAGCA---GCAGGAAGCACTATG---GGCGCGGCGTCA---  
 ATAACGCTGACGGTACAG---GCCAGACAA---TTATTG---TCTGGTATAGTGCAACAGCAAAGC---  
 AATTTG---CTGAGG---GCTATAGAGGCGCAGCAGCATATGTTGCAACTCACAGTCTGGGGCATT  
 >MF373160  
 TTCTATTGCAATATAACAAAACCTGTTTAATAGTACTTGGGGGAGTAATGGCACTTGGAATGGCACTGAA----  
 -----  
 -----  
 TACAATAACGATACCATACTCCCATGCAGGATAAAGCAAATTATAAACATGTGGCAACAACCAGGACAAGCAA  
 TGTATGCTCCTCCCCTTCAGGGAGTAATTAATTGTATATCAAAT---  
 ATTACAGGACTAATATTGACAAGAGATGGTGGTATTAATACTACA-----  
 -----  
 -----  
 ATTAATGAAACCTTCAGACCTGGAGGAGGAAATATAAAGGACAATTGGAGAAGTGAATTATATAAATATAAAG  
 TAGTACAAATTGAACCACTA---GGAATAGCACCCACCAAGGCAAAGAGAAGAGTGGTG-----  
 -----GAGAGAGAGAAAAAGAGCA---GTGGGA---ATAGGAGCT-----  
 ATGATCTTTGGGTTCTTAGGAGCA---GCCGGAAGCACTATG---GGCGCGGCGTCA---  
 ATAACGCTGACGGTACAG---GCCAGACAA---TTATTG---ACTGGTATAGTGCAAGCAGCAAAGC---  
 AATTTG---CTGAGA---GCTATAGAGGCGCAACAGCATCTGTTGCAACTCACAGTCTGGGGCATT  
 >KP411840  
 TTCTATTGCAATACATCAAGGCTGTTTAATAGTACTTACAATGGAAGTGAACCGGGGAAAGAG-----  
 -----  
 -----  
 GGTAATGGCACTATTATACTTCCATGCAGGATAAAGCAAATTATAAACATGTGGCAGGGAGTGGGACGAGCAA  
 TGTATGCTCCTCCCCTCAGTGGAAGCATTAATTGTACATCAAAT---  
 ATTACAGGAATACTATTGACAAGCGATTATGGTGGTAATAATACA-----  
 -----  
 -----  
 CAGAATGAGACCTTCAGACCTGCAGGAGGAAATATAAAGGACAATTGGAGAAGTGAATTATATAAATATAAAG  
 TAGTACAAATTGAACCACTA---GGAGTAGCACCCACCAAGGCAAAGAGAAGAGTGGTG-----  
 -----GAGAGACAAAAAAGAGCA---GTGGGA---ATAGGAGCT-----  
 ATGATCTTTGGGTTCTTGGGAGCA---GCAGGAAGCACTATG---GGCGCGGCGTCA---  
 ATAACGCTGACGGTACAG---GCCAGACAA---TTATTG---ACTGGTATAGTGCAACAGCAAAGC---  
 AATTTG---CTGAGG---GCTATAGAGGCGCAGCAGCATCTGTTGCAACTCACAGTCTGGGGCATT  
 >KP411841  
 TGCTACTGCAACCCCTGCAACTGTTTAATAATAAGACTCATACTAATGGT-----  
 -----  
 -----  
 ACTAATGGCGCTATTGTACTTCTACGGATAATTAAGATAATGAAAATGATGAACCTGGGAGGAGGAGCAGCA-  
 --CAGGCTCCGCCTGCTCCTCGAAGTAGTATATGTGTTATTTCA---  
 GTTTCAAGAATAACACTGATACTAGTGGGTGGTGGTATGATAATAATAAT-----  
 -----  
 -----  
 AATAACCGCCAGAGCTTCGGACGAGCGGGAGGATGGATGAGGTACGATTATGGATATGAAGTATTACAATATG  
 AACTAGTACGAATAGTACCA-----CCACCAACAACAACAACCATGGTGGAGATG-----  
 -----AGAAAAAGAGAAAAAGGAAAAAGAGCA---GTGGTA---ATAAGAGTT-----  
 ---TTGATCATCGGAGGAATAGGAACA---GCA-----GCGGCACCA---  
 TTATCGCTGACGGCGATG---GCCAGCAG---ATATTG---TCATGGATATTGAGACAGCGGAGG---  
 CTGCTG---CTGATG---AGTATTAAGTTGATGGAGCATCAGCAGCAGCTCACCTGCTGGGCCATC  
 >KP411842  
 TTCTATTGCAATACATCAAGGCTGTTTAATAGTACTTACAATGGAAGTGAAGTACCGAAGGGTCAAATGAG-  
 -----  
 -----  
 GGTAATGGCACTATTATACTTCCATGCAGGATAAAGCAAATTATAAACATGTGGCAGGGAGCAGGACGAGCAA  
 TGTATGCTCCTCCCCTCAGTGGAAGCATTAATTGTACATCAAAT---  
 ATTACAGGAATACTATTGACAAGCGATTATGGTGGTAGTAATACA-----  
 -----  
 -----

-----  
CAGAAATGAGACCTTCAGACCTGCAGGAGGAAATATAAAGGACAATTGGAGAAGTGAATTATATAAATATAAAG  
TAGTACAAATTGAACCACTA---GGAGTAGCACCCACCAAGGCAAAGAGAAGAGTGGTG-----  
-----GAGAGACAAAAAAGAGCA---GTGGGA---ATAGGAGCT-----  
ATGATCTTTGGGTTCTTGGGAGCA---GCAGGAAGCACTATG---GGCGCGGCGTCA---  
ATAACGCTGACGGTACAG---GCCAGACAA---TTATTG---ACTGGTATAGTGCAACAGCAAAGC---  
AATTTG---CTGAGG---GCTATAGAGGCGCAGCAGCATCTGTTGCAACTCACAGTCTGGGGCATT  
>KY213735  
TTCTATTGCAATACAACAAAACCTGTTTAATAGTCCTTGCCTGAAAAATGAAGAAAATGGAACA-----  
-----  
-----  
TGTAATAGCACTATCATACTTCCATGTAAGATAAAGCGAATTGTAAGATTGTGGCAGGAAGTAGGTCAAGCAA  
TGTATGCTCCTCCCATCAGCGGAATCATTAGGTGTAACCTCAACT---  
ATTACAGGAATACTATTGACAAGAGATGGTGGTAACCTTAATAAC-----  
-----  
-----  
AGTACTAATGAAACCCTCAGACCTGGAGGAGGAAATATAAAGGACAATTGGAGAAGTGAATTATATAAATATA  
AAGTAGTACAAATTGAACCACTA---GGAATAGCACCCACCAAGGCAAAAAGAAGAGTGGTG-----  
-----GAGAGAGAAAAAAGAGCA---GTGGGA---ATAGGAGCT-----  
---ATGATCTTTGGGTTCTTAGGAGCA---GCAGGAAGCACTATG---GGCGCGGCGTCA---  
ATAACGCTGACGGTACAG---GCCAGACAA---TTATTG---TCTGGTATAGTGCAACAGCAAAAC---  
AATTTG---CTGAGG---GCTATAGAGGCGCAGCAGCATCTGTTGCAACTCACAGTCTGGGGCATT  
>KY213733  
TTCTATTGCAATACAACAAAACCTGTTTAATAACACTTGCATAAATGGAACAATGGAAAATGAG-----  
-----  
-----  
AGTAATAGCACTATCATACTTCCATGCAAGATTAAACAAATTATAAACATGTGGCAGGGAGCAGGACAAGCAA  
TGTATGCTCCTCCCATCAGTGGAAGAATTAATTGTATATCAAAT---  
ATTACAGGAATACTATTAACAAGAGATGGTCAG-----  
-----  
-----  
CCGAATGATACGGAGATCTTCAGACCTGGAGGAGGAGATATGAAGGACAATTGGAGAAATGAATTATATAAAT  
ATAAAGTAGTACAAATTGAACCACTA---GGAATAGCACCCACCAGGGCAAAGAGAAGAGTGGTG-----  
-----GAGAGAGAAAAAAGAGCA---GTGGGA---ATAGGAGCG---  
-----ATGATCTTTGGGTTCTTAGGAGCA---GCAGGAAGCACTATG---GGCGCGGCGTCA---  
ATAACGCTGACGGTACAG---GCCAGACAG---TTATTG---TCTGGTATAGTGCAACAGCAAAGC---  
AATTTG---CTGAGG---GCTATAGAGGCGCAGCAGCATCTGCTGCAACTCACAGTCTGGGGCATT  
>KY213722  
TTCTATTGCAATACAACAAAACCTGTTTAATAGTACTTGGGGAGAAAATGAAAACATAACCACGGGGGGGTCTA  
AT-----  
-----  
AACACTCACACTGTCATTCCATGCAGGATAAAGCAAATTATAAACATGTGGCAGGGAACAGGACAAGCAATGT  
ATGCTCCTCCCATCAGGGGAAACATTACTTGTGTATCAAAC---  
ATTACAGGAATACTATTGACAAGAGATGGTGGTGATAATAATAGT-----  
-----  
-----  
ATTAACGAGACCTTCAGACCTGGAGGAGGAAATATAAAGGACAATTGGAGAAGTGAATTATATAAATATAAAG  
TAGTACAAATTGAACCACTA---GGAGTAGCACCTCCAAGGCAAGGAGAAGAGTGGTG-----  
-----GAGAGAGAAAAAAGAGCA---GTTGGA---ATAGGAGCT-----  
ATGATCTTTGGGTTCTTAGGAGCA---GCAGGAAGCACTATG---GGCGCGGCGTCG---  
CTAACGCTGACGGTACAG---GCCAGACAA---TTATTG---TCTGGTATAGTGCAACAGCAAAGC---  
AATTTG---CTGAGG---GCTATAGAGGCGCAGCAGCATATGTTGCAACTCACAGTCTGGGGCATT  
>KJ952667  
TTCTATTGCAATACAACAAAACCTGTTTAATAATACGTGCATAGGAAATGAAACCATAGAGGGG-----  
-----  
-----  
TGTAATGACACTATCATACTTCCATGCAAGATAAAGCAAATTGTGAACATGTGGCAGGGAGCAGGACAAGCAA  
TGTATGCTCCTCCCATCAGTGGAATAATTAATTGTGTATCAAAT---  
ATTACAGGAATACTATTGACAAGAGATGGTGGTTATAATAATAATACT-----  
-----

-----  
AAGGCTAACGAGACCTTCAGACCTGAAGGAGGAAATATAAAGGACAATTGGAGAAATGAATTATATAAATATA  
AAGTAGTAGAAATTGAACCACTA---GGAATAGCACCCACCAGGGCAAAGAGAAGAGTGGTG-----  
-----GAGAGACAAAAAAGAGCA---GTGGGA---ATAGGAGCT-----  
---ATGATCTTTGGGTTTTTGGGAGCA---GCAGGAAGCACTATG---GGCGCGGCGTCA---  
ATAACGCTGACGGTACAG---GCCAGACAA---TTATTG---TCTGGTATAGTGCAACAGCAAAGC---  
AATTTG---CTGAGG---GCTATAGAGGCGCAGCAGCATATGTTGCAACTCACAGTCTGGGGCATT  
>KJ953089  
TTCTATTGCAATACATCACAACCTGTTTAATAGTACTTGGATAGGAAATGAAACCAAGGAAGAGTGT-----  
-----  
-AATAAATTCAAGAAA-----  
GAGTGTAATAGCACTATCATACTTCCATGCAAGATAAAGCAAATTATAAACATGTGGCAGGGAGTAGGACAAG  
CAATGTATGCTCCTCCCATTAGAGGAAGAATTAATTGTGTATCAAAT---  
ATCACAGGAATACTATTGACAAGAGATGGTGGTAGTATTAATAGGAAT-----  
-----  
-----  
TATGAGAATGAGACCTTCAGACCTGGAGGAGGAAATATAAAGGACAATTGGAGAAAGTGAATTATATAAATATA  
AAGTAGTAGAAATTGAACCACTA---GGAGTAGCACCCACCAAGGCAAAGAGGAGAGTGGTG-----  
-----GAGAGAGAAAAAAGAGCA---GTGGGA---ATAGGAGCT-----  
---ATGATCTTTGGGTTCTTAGGAGCA---GCAGGAAGCACTATG---GGCGCGGCGTCA---  
ATAACGCTGACGGTACAG---GCCAGACAA---TTATTG---TCTGGTATAGTGCAACAGCAAAGC---  
AATTTG---CTGAAG---GCTATAGAGGCGCAACAGCATCTGTTGCAGCTCACAGTCTGGGGCATT  
>KJ953475  
TTCTATTGTAATACAACAAAATTGTTTAATAGTACTTGGACAGAAAATGAAACCGAGGAGGGG-----  
-----  
-----  
AATAATAACACTATCATACTTCCATGCAAGATAAAGCAAATTATAAACATGTGGCAGGGAGTAGGACAAGCAA  
TGTATGCTCCTCCCATCAGTGGAAAAATTAATTGTGTATCAAAT---  
ATTACAGGAATACTATTGACAAGAGATGGTGGTAATAATGCGATGAATGAG-----  
-----  
-----  
ACCTATGAGACCTTTAGACCTGGAGGAGGAAATATGAAGGACAATTGGAGAAGTGAATTATATAAATATAAAG  
TGGTACAAATTGAACCACTA---GGAATAGCACCCACCAGGGCAAAGGAGAAGAGTGGTG-----  
-----GAGAGAGAAAAAAGAGCA---GTGGGA---ATAGGAGCT-----  
ATGATCTTTGGGTTCTTAGGAGCA---GCAGGAAGCACTATG---GGCGCGGCGTCA---  
ATAACGCTGACGGTACAG---GCCAGACAA---TTATTG---TCTGGTATAGTGCAACAGCAAAGC---  
AATTTG---CTGAGG---GCTATAGAGGCGCAGCAGCATCTGTTGCAACTCACAGTCTGGGGCATT  
>KU168264  
TTCTATTGCAATACAACAGACCTGTTTAATAAACTTACAGAGGAAATGAAACTGGGGAAGAGAGT-----  
-----  
-----  
AATGGCACTAATATCATACTTCATTGCAGGATAAAGCAAATTATAAACATGTGGCAGGGAGTAGGACAAGCAA  
TGTATGCTCCTCCCATCAGTGGAAAGCATTAAATTGTGCATCAAAT---  
ATTACAGGAATACTATTGACAAGAGATGGTGGGTTGGGTAATACA-----  
-----  
-----  
AGTAACAATGAGACCTTCAGACCTGGAGGAGGAAATATAAAGACAATTGGAGAAGTGAATTATATAAATATA  
AAGTAGTACAAATTGAACCACTA---GGAATAGCACCCACCAAGGCAAAGAGAAGAGTGGTG-----  
-----GACAGAGAAAAAAGAGCA---GTGGGA---ATAGGAGCT-----  
---ATGATCTTTGGGTTCTTAGGAGCA---GCAGGAAGCACTATG---GGCGCGGCGTCA---  
ATAACGCTGACGGTACAG---GCCAGACAA---TTATTG---TCTGGTATAGTGCAACAGCAAAGC---  
AATTTG---CTGAGA---GCTATAGAGGCGCAGCAGCATCTGCTGCAACTCACAGTCTGGGGCATT  
>AY358059  
TTCTATTGCGATACAACAAAACCTGTTTAATAATACTATAAAA-----  
-----  
-----  
AATGGAACCATAACGCTTCCATGCAAGATAAAGCAAAGTTGTAACATGTGGCAGGGAGCAGGACAGGCAATGT  
ATGCTCCTCCCATCAAGGGAAGCATTAAATTGTGTATCAAAT---  
ATTACAGGAATACTATTGACAAGAGATGGTGGTAATCAAAACGCG-----  
-----

-----  
 ACTGAGATTTTTCAGACCTGGAGGAGGAAATATAAGGGACAATTGGAGAAGTGAATTATATAAAATATAAAGTGG  
 TACAAATTGAACCACTA---GGAATAGCACCCACCAGGGCAAAGAGAAGAGTGTTG-----  
 -----GAGAGAGAAAAAAGAGCA---GTGGGA---ATAGGAGCT-----  
 ATGATCTTTGGGTTCTTAGGAGCA---GCAGGAAGCACTATG---GGCGCGGCGTCA---  
 ATAACGCTGACGGTACAG---GCCAGACAA---TTATTG---TCTGGTATAGTGCAACAGCAAAGC---  
 AATTTG---CTGAGG---GCTATAGAGGCGCAGCAGCATCTGTTGCAACTCACAGTCTGGGGCATT  
 >AY358068  
 TTCTATTGCAATACAACAAAATTGTTTAATAGTACTTGGACAGAAAATGGAAACATAGGGGAGTATAATTACA  
 CGGGGTAT-----  
 -----AAT---  
 TACACGGGTAATAATACCATACTTCCATGCAGGATAAAAGCAAATTATAAACATGTGGCAGGGAGCAGGACAAG  
 CAATGTATGCTCCTCCCATCAGTGGAACATTAGTTGTGTATCAAAT---  
 ATTACAGGAATACTATTGACAAGAGATGGTGGTAATACTACGGAT-----  
 -----  
 -----  
 AACGAGACCTTCAGACCTGGAGGAGGAAATATAAAGGACAATTGGAGAAATGAATTATATAAAATATAAAGTAG  
 TACAAATTGAACCACTA---GGAGTAGCACCCACCAGGGCAAAGAGAAGAGTGTTG-----  
 -----GAGAGAGAAAAAAGAGCA---GTGGGA---ATAGGAGCT-----  
 GTGATCTTTGGGTTCTTAGGAGCA---GCAGGAAGCACTATG---GGCGCGGCGTCA---  
 ATAACGCTGACGGTACAG---GCCAGACAA---TTATTG---TCTGGTATAGTGCAACAGCAAAGC---  
 AATTTG---CTGAGG---GCTATAGAGGCGCAGCAGCATCTGTTGCAACTCACAGTCTGGGGCATT  
 >DQ314732  
 TTCTATTGCAATACAACACAACCTGTTTAATAGTACTTGGGTAGGAAATGAAACCAAAAAGGGGGATAATGGCA  
 CTATAAGAAAT-----  
 -----GAAACCAAAAAG-----  
 GGGGATAATGGCACTATCATACTTCCATGCAGGATAAAAGCAAATTATAAACATGTGGCAGGAAACAGGACAAG  
 CAATGTATGCTCCTCCCATCAGTGGAACAATTAATTGTGTATCAAAT---  
 ATTACAGGACTACTATTGACAAGAGATGGTGGAGGTAATAATGACTCG-----  
 -----  
 -----  
 AGTCAGAACGAGACCTTCAGGCCTGGAGGGGGAAATATAAAGGACAATTGGAGAAGTGAATTATATAAAATATA  
 AAGTAGTAGAAATTGAACCACTA---GGAATAGCACCCACCAGGGCAAAGAGAAGAGTGTTG-----  
 -----GAGAGAGAAAAAAGAGCA---GTGGGA---ATAGGAGCT-----  
 ---ATGATCTTTGGGTTCTTAGGAGCG---GCAGGAAGCACTATG---GGCGCGGCGTCA---  
 ATAACGCTGACGGTACAG---GCCAGACAA---TTATTG---TCTGGTATAGTGCAACAGCAAAGC---  
 AATTTG---CTGAGG---GCTATAGAGGCGCAGCAGCATCTGTTGCAACTCACAGTCTGGGGCATT  
 >JX447561  
 TTCTATTGCAATACATCAAACCTGTTTGATAGAAATGAAACCACGAGTAAT-----  
 -----  
 -----  
 GGCCTGGCACTATCATACTTCCTTGCAAGATAAAGCAAATTGTACGCATGTGGCAGAGAACAGGACAAGCAA  
 TGTATGCTCCTCCCATCAGTGGAAGCATCAATTGTGTATCAAAT---  
 ATTACAGGAATTCTGTTGACAAGAGATGGTGGTAATGGTAATAATACT-----  
 -----  
 -----  
 AATCAGACAGAGATCTTCAGACCTGAGGGAGGAAATATAAAGGACAATTGGAGAAGTGAATTATATAAAATATA  
 AAGTGGTACAAATTGAACCACTA---GGAATAGCACCCACCAGGGCAAGAAGAAGAGTGTTG-----  
 -----CAGAGAGAAAAAAGAGCA---GTGGGA---ATAGGAGCT-----  
 ---ATGATCTTTGGGTTCTTAGGAGTA---GCAGGAAGCACTATG---GGCGCGGCGTCA---  
 ATAACGCTGACGGTACAG---GCCAGACAA---TTATTG---TCTGGTATAGTGCAACAGCAAAGC---  
 AATTTG---CTGAGG---GCTATAGAGGCGCAGCAGCATCTGTTGCAACTCACAGTCTGGGGCATC  
 >JX447855  
 TTCTATTGCAATACAACACAACCTGTTTAATAGTACTTACGGAGAAAATGGAGAAAATGAAACCATGGGGGGG-  
 -----  
 -----  
 AATAATGGCACTATCATACTTCCATGTAAGATAAAGCAGATTATAAACATGTGGCAGGGAGTAGGACAAGCAA  
 TGTACGCTCCTCCCATCAGTGGAAGAATTAATTGTAGATCACAA---  
 ATTACAGGAATACTATTGATAAGAGATGGTGGTTATGATCGTGTT-----  
 -----

-----  
AACGAGACCTTCAGACCTGAAGGAGGAAATATGAAGGACAATTGGAGAAGTGAATTATATAAAATATAAAGTAG  
TACAAATTGAACCACTA---GGAGTAGCACCCACCAGGGCAAAGAGAAGAGTGGTG-----  
-----GAGAGAGAAAAAAGAGCA---GTGGGA---ATAGGAGCC-----  
ATGATCTTTGGGTTCTTAGGAGCA---GCAGGAAGCACTATG---GGCGCGGCGTCA---  
ATAACGCTGACGGTACAG---GCCAGACAA---TTATTG---TCTGGTATAGTGCAACAGCAAAGC---  
AATTTG---CTGAGG---GCTATAGAGGCGCAGCAGCATCTGTTGCAACTTACAGTCTGGGGCATT  
>JX448022  
TTCTATTGCAATACAACATCACTGTTTAAATGATACTTGCATAGGAAATGAAACCAAGGAAGGG-----  
-----  
-----  
TGTAATACAACATCATACTTCCATGCAGGATAAAACAAATTGTAAACATGTGGCAGGGAGTAGGACAGGCAA  
TGTATGCTCCTCCCATCAGTGGAAGAATTAATTGTGTATCAAAT---  
ATTACAGGAATACTATTGACAAGAGATGGTGGTGTAAATAATGAT-----  
-----  
-----  
TCTAGTGAGATCTTCAGACCTGGAGGAGGGGATATAAGAGACAAATGGAGAAGTGAATTATATAAAATATAAAG  
TAGTACAAATTGAACCATTA---GGAGTAGCACCCACCAGGGCAAAGAGAAGAGTGGTG-----  
-----GAGAGACCAAAAAGAGCA---GTGGGA---ATAGGAGCT-----  
ATGATCTTTGGGTTCTTAGGAGCA---GCAGGAAGCACTATG---GGCGCGGCGTCA---  
ATAACGCTGACGGTACAG---GCCAGACAA---TTATTG---TCTGGTATAGTGCAACAGCAAAGC---  
AATTTG---CTGAGG---GCTATAGAGGCGCAACATCATCTGTTGCAACTCACAGTCTGGGGCATT  
>EU743764  
TTCTATTGCAATACAACACAACCTGTTTAAATCTTAATAATGCTACTGACAGA-----  
-----  
-----  
GAAAATAAAAATATCACACTTCCATGCAGGATAAAGCAAATTATAAAAATGTGGCAGAGAGTAGGACAAGCAA  
TGTATGCTCCTCCCATCAGGGGAAAAATTAATTGTGTCTCCAAT---  
ATTACAGGAATACTATTAACAAGAGATGGTGGTAGTCACAATGATACT-----  
-----  
-----  
AATAATAACTGAGACCTTTAGACCCGCAGGAGGAAATATAAAAGACAATTGGAGAAGTGAATTATATAAAT  
ATAAAGTAGTAAGAATTGAACCACTG---GGAATAGCACCCACCAGGGCAAGGAGAAGAGTGGTG-----  
-----GACAGACCGAAAAGAGCA---GTGGGA---ATAGGAGCT---  
-----ATGATCTTTGGGTTCTTAGGAGCA---GCAGGAAGCACTATG---GGCGCGGCGTCA---  
CTAACGCTGACGGTACAG---GCCAGACAA---TTACTG---TCTGGTATAGTGCAACAGCAAAGC---  
AATTTG---CTGAGG---GCTATAGAGGCGCAGCAGCATCTGTTGCAACTCACAGTCTGGGGCATT  
>EU743781  
TTCTATTGCGATACAACAAAACCTGTTTAAATAATAATTGCACACAAAATGCAACCGATCAGGATGAAAAAAG-  
-----  
-----  
TGTAATGGCACTCTCATACTTCCATGCAGGATAAAGCAAATTATAAACATGTGGCAGGGAGTAGGACAAGCAA  
TATATGCTCCTCCCGTCCGTGGAAGTATTACTTGTGTATCAAAT---  
ATTACAGGAATAACTGACAAGAGATGGTGGTACTCATAAGAATGGTACT-----  
-----  
-----  
GCTGATAATACAACCGAGATCTTCAGACCTACAGGAGGAAAATATGAAGGACAATTGGAGAAGTGAATTATATA  
AATATAAAGTAGTACAAATTGAACCACTA---GGAATAGCACCCACCAGGGCAAAGAGAAGAGTGGTG-----  
-----GAGAGAGAAAAAAGAGCA---GTGGGA---  
CTAGGAGCT-----ATGATCTTTGGGTTCTTAGGAGCA---GCTGGAAGCACTATG---  
GGCGCGGCGGCA---GTAACGCTGACGGTACAG---GCCAGACAA---TTATTG---  
TCTGGTATAGTGCAACAGCAAAGC---AATTTG---CTGAGA---  
GCTATAGAGGCGCAACAACATCTGTTGCAACTCACAGTCTGGGGCATT  
>JX446699  
TTCTATTGCAATACATCAAGACTGTTTAAATAGCACTTGCTTCAAAAATCATAACCACTGAGGCCACTCAGG  
AGTGTAAT-----  
-----GACACTATC-----  
ACAACAGATGGCAAGATCATACTTCACTGCAGGATAAAGCAAATTATAAACATGTGGCAGGGAGCAGGACAAG  
CAATGTATGCTCCTCCCATCAGTGGAAGAATTAATTGTGTATCAAAC---  
ATTACAGGAATACTATTGACAAGAGATGGTGGTGATACTGGTAAAAATTATACA-----AAT----

-----  
-----  
GGTACCAGGAAAGAGATCTTCAGACCTGGAGGAGGAAATATGAAGGACAATTGGAGAAGTGAATTATATAAAT  
ATAAAGTAGTACAAATTGAACCACTA---GGAATAGCACCCACCAGGGCAAAGAGAAGAGTGGTG-----  
-----GAGAGAGAAAAAAGAGCA---GTGGGA---ATAGGAGCT---  
-----ATGATCTTTGGGTTCTTAGGAGCA---GCCGGAAGCACTATG---GGCGCAGCGTCA---  
ATAACGCTGACGGTACAA---GCCAGACAA---TTATTG---TCTGGTATAGTGCAACAGCAAAGC---  
AATTTG---CTGAGG---GCTATAGAGGCGCAGCAGCATATGTTGCAACTCACAGTCTGGGGCATT  
>JX446736  
TTCTATTGCAATACAACAAAACTGTTTAATAATGCTTGCATAAAAAATGAAACCAATGGGAAC-----  
-----  
-----  
TGTAATGGTACTATCTATCTTCCTTGCAAGATAAAGCAAATTATAAACATGTGGCAGGGAGCAGGACAAGCAA  
TGTATGCTCCTCCCATCAGTGGAAGAATTAATTGTGAATCAAAT---  
ATTACAGGAATACTATTGACAAGTGATGGGGGTAACATGACCGGA-----  
-----  
-----  
AACACAAGACCTTCAGACCTGCAGGGGGAAATATGAAAGACAATTGGAGAAGTGAATTATATAAATATAAAG  
TAGTGCAAATTGAACCACTA---GGAATAGCACCCACCAGGGCAAAGAGAAGAGTGGTG-----  
-----GAGAGAGAAAAAAGAGCA---GTGGGA---ATAGGGGCT-----  
ATGATCTTTGGGTTCTTAGGAGCA---GCAGGAAGCACTATG---GGCGCAGCGTCA---  
ATAACGCTGACGGTACAG---GCCAGACAA---TTATTG---TCTGGTATAGTGCAACAGCAAAGC---  
AATTTG---CTGAGA---GCTATAGAGGCGCAGCAGCATCTGTTGCAACTCACAGTCTGGGGCATT  
>JX447312  
TTCTATTGCAACACAACAAAACTGTTTAATTGGACAGAAGGTGAAACCATAGAGAAT-----  
-----  
-----  
AGCACGGAGAATATCATGCTGCCATGCAAGATAAAGCAAATTATAAACATGTGGCAGGAAACAGGACAAGCAA  
TGTATGCTCCTCCCATCAGTGGAATGATTAATTGTGTATCAAAT---  
ATTACAGGAATACTATTGACAAGAGATGGTGGTCATGATGGTAATAATACAAAT-----AAT---  
-----  
-----  
ACAAATAATAATACCGAGACCTTCAGACCTGGAGGAGGAAATATAAAGGACAATTGGAGAAGTGAATTATATA  
AATATAAAGTAGTACAAATTGAACCACTA---GGAATAGCACCCACCAGGGCAAAGAGAAGAGTGGTG-----  
-----GAGAGAGAAAAAAGAGCA---GTGGGA---  
ATAGGAGCT-----ATGATCTTTGGGTTCTTGGGAGCA---GCAGGAAGCACTATG---  
GGCGCAGCGTCA---ATAACGCTGACGGTACAG---GCCAGACAA---TTATTG---  
TCTGGTATAGTGCAACAGCAAAGC---AATTTG---CTGAGA---  
GCTATAGAGGCGCAGCAGCATCTGTTGCAACTCACAGTCTGGGGCATT  
>JX447646  
TTCTATTGCAATACAACAAACCTGTTTAATAATACTTGCTTAAATGAAACCAAG-----  
-----  
-----  
TGTAATGGCACTGTACACTTCCATGCAGGATAAAGCAAATTATAAACATGTGGCAGGGAGTAGGACAAGCAA  
TGTATGCTCCTCCCATCAGGGGAAATATTACTTGTGTATCAAAT---  
ATTACAGGAATACTATTGACAAGAGATGGTGGTAATGGGGGGAAC-----  
-----  
-----  
GAGACCTTCAGACCTGAAGGAGGAAATATGAAGGACAATTGGAGAAATGAATTATATAAATATAAAGTAGTAC  
AAATTGAACCACTA---GGATTAGCACCCACCAAGGCAAAAAGAAGAGTGGTG-----  
-----GAGAGAAAAAAAAGAGCA---GTGGGA---ATAGGAGCT-----  
ATGATCTTTGGGTTCTTAGGAGCA---GCAGGAAGCACTATG---GGCGCGCGTCA---  
ATAACGCTGACGGTACAG---GCCAGACAA---TTATTG---TCTGGTATAGTGCAACAGCAAAGC---  
AATTTG---CTGAGG---GCTATAGAAGCGCAGCATCATCTGTTGCAACTCACAGTCTGGGGCATT  
>JN944659  
TTCTATTGTAATACAACAAAACTGTTTAATAGTACTTGGAGAGAAAATGAAACCATAGAGGAGCATAATGGC-  
-----  
-----  
ACTAATGGCACTATCATACTTCCATGTAGGATAAAGCAAATTATAAACATGTGGCAGGGAGTAGGACAAGCAA  
TGTATGCTCCTCCCATCAGTGGAATAATTAAATTGTATATCAAAT---

ATTACAGGAATACTATTGACAAGAGATGGAGGTCATAATACGAGT-----  
-----  
-----  
AACGAGACCTTCAGACCTGGAGGAGGAAATATAAAGGACAATTGGAGAAGTGAATTATATAAATATAAAGTAG  
TACAAATTGAACCACTA---GGAATAGCACCCACCAGGGCAAAGAGAAGAGTGGTG-----  
-----GAGAGAGAAAAAAGAGCA--GTGGGA--ATAGGAGCT-----  
ATGATCTTTGGGTTCTTAGGAGCA--GCAGGAAGCACTATG--GGCGCGGCGTCA---  
ATAACGCTGACGGTACAG---GCCAGACAA--TTACTG---TCTGGTATAGTGCAACAGCAAAGC---  
AATTTG---CTGAGG---GCTATAGAGGCGCAACAGCATCTGTTGCAACTCACAGTCTGGGGCATT  
>HQ691090  
TTCTATTGCAATACAACAAAACCTGTTTAATAATACCTGCATAAATGAAACCATGAGGGGAAGCAATGAAACCA  
GG-----  
-----  
GAGTGTAATAACACTATTACACTTCCATGCAGGATAAAGCAAATTATAAACATGTGGCAGGGAGTAGGACAAG  
CAATGTATGCTCCTCCCATCAGTGGAATAATTAGTTGTGTATCAAAT---  
ATTACAGGAATACTATTGACAAGAGATGGTGGTAATAATACTGGG-----  
-----  
-----  
AATGACGAGATTTTCAGACCTGCAGGAGGAAATATAAGGGACAATTGGAGAAATGAATTATATAAGTATAAAG  
TAGTACAAATTGAACCACTA---GGAGTAGCACCCACCAAGGCAAAGAGAAGAGTGGTG-----  
-----GAGAGACAAAAAAGAGCA--GTGGGA--ATAGGAGCT-----  
ATGATCTTTGGGTTCTTAGGAGCA--GCAGGAAGCACTATG--GGCGCGGCGTCA---  
ATAACGCTGACGGTACAG---GCCAGACAA--CTATTG---TCTGGTATAGTGCAACAGCAGAGC---  
AATCTG---CTGAGG---GCTATAGAGGCGCAACATCATCTGTTGCAACTCACAGTCTGGGGCATT  
>JX446728  
TTCTATTGCAATACAACAAAATGTTTCATAGTAATTGGACAACAACAAATGGCACTATAGAAAGGTACAAT-  
-----  
-----  
GACAATGAACTATCATACTTCCATGCAAGATAAAGCAAATTATAAATATGTGGCAGGGAGTAGGACAAGCAA  
TGTATGCTCCTCCCATCAGAGGAATAATTAATTGTACATCAAAT---  
ATTACAGGAATATTATTGACAAGAGATGGTGGTCTTCATAATGGGACT-----  
-----  
-----  
AACGATACAGAGACATTTCAGGCCTGAAGGAGGAAATATAAAGGACAATTGGAGAAGTGAATTATATAAATATA  
AAGTAGTACAGATTGAACCATTA---GGAGTAGCACCTACCAGGGCAAAGAGAAGAGTGGTG-----  
-----GAGAGAGAAAAAAGAGCA--GTGGGA--ATAGGAGCT-----  
--ATGATCTTTGGGTTCTTAGGAGCA--GCAGGAAGCACTATG--GGCGCGGCGTCA---  
ATAACGCTGACGGTACAG---GCCAGACAA--TTATTG---TCTGGTATAGTGCAACAGCAAAGC---  
AATTTG---CTGAGA--GCTATAGAGGCGCAGCAGCATCTGTTGCAACTCACAGTCTGGGGCATT  
>JX447013  
TTCTATTGCAATACAACAAAACCTATTTAATGGTAATGGGACA-----  
-----  
-----  
AATGAAACCATCTATCTTCCATGCAGGATAAAGCAAATTATAAATATGTGGCAGGAAGTAGGACAAGCAATGT  
ATGCTCCTCCCATCAGAGGATGCATTAATTGTGTATCAAAT---  
ATTACAGGGATACTATTGACAAGAGATGGTGGTGGTGGTAATAAT-----  
-----  
-----  
AGTAACAATGAGACCTTCAGACCTGGAGGAGGAAATATAAAGGACAATTGGAGAAGTGAATTATATAAATATA  
AAGTAGTACAAATTGAGCCACTA---GGACTAGCTCCACCAGGGCAAAGAGAAGAGTGGTG-----  
-----GATAGAGAAAAAAGAGCA--GTGGGA--ATAGGAGCT-----  
---ATGATCTTTGGGTTCTTAGGAGCA--GCAGGAAGCACTATG--GGCGCGGCGTCA---  
ATAACGCTGACGGTACAG---GCCAGACAA--TTATTG---TCCGGTATAGTGCAACAGCAAAGC---  
AATTTG---CTGAGG---GCTATAGAGGCGCAACAGCATATGTTGCAACTCACAGTCTGGGGCATT  
>JX447057  
TTCTATTGCAATACAACACGACTGTTTAATCATTCTCACAATGAAACCTGGAAGGAGAAG-----  
-----  
-----  
TATAATGGCACTATCATACTTCCATGCAAGATAAAGCAAATTATAAACATGTGGCAGGGAGTAGGACAAGCAA  
TGTATGCTCCTCCCATCAGTGGAAGATTGAGTGTGTATCAAAT---

ATTACAGGAATACTATTGACAAGAGATGGTGGTGTTAATCAAAC-----  
-----  
-----  
AATGGGACCGAGATCTTCAAACCTGGAGGAGGAAATATAAAGGACAATTGGAGAAGTGAATTATATAAATACA  
AAGTAGTACAAATTGAACCACTA---GGATTGGCACCTACCAAGGCAAAGAGAAGAGTGGTG-----  
-----GAGAGAGAAAAAAGAGCA---GTGGGA---ATAGGAGCT-----  
---ATGATCTTTGGGTTCTTAGGAGCA---GCAGGAAGCACTATG---GGCGCGCGTCA---  
ATAACGCTGACGGTACAG---GCCAGACAA---TTATTG---TCTGGTATAGTGCAACAGCAAAGA---  
AATTTG---CTGAGG---GCTATAGAGGCGCAGCAGCATCTGTTGCAACTCACAGTCTGGGGCATT  
>JX447480  
TTCTATTGCAACACAACAAAACCTGTTTAATAGTACTTGGAGAGGAAATGAAACCATAGCGGGCTATGAT----  
-----  
-----  
AATAACAGCAATATCATACTTCCATGCAGGATAAAGCAAATTATAAACATGTGGCAGGAAGTAGGACAAGCAA  
TGTATACTTCTCCCGTCAGTGGAGAATTAATTGTATCTCAAAT---  
ATCACAGGAATACTATTAACAAGAGATGGTGGTGGTAATCATAGC-----  
-----  
-----  
AATGAGACCTTTAGACCTGGAGGAGGAAATATGAAGGACAATTGGAGAAGTGAAGTATATAAATATAAAGTAG  
TACAACTTGAACCACTA---GGAATAGCACCCACCAAGGCAAAGAGAAGAGTGGTG-----  
-----GAGAGAGAAAAAAGAGCA---GTGGGA---ATAGGAGCT-----  
ATGATCTTTGGGTTCTTAGGAGCA---GCCGGAAGCACTATG---GGCGCAGCGTCA---  
ATAACGCTGACGGTACAG---GCCAGACAA---TTATTG---TCTGGTATAGTGCAACAGCAAAGC---  
AATTTG---CTGAGG---GCTATAGAGGCGCAGCATCGTCTGTTGCAACTCACAGTCTGGGGCATT  
>HQ691006  
TTCTATTGCAATACAACACAACCTGTTTAATAATAATTGTACAAATGAAACCATGAATGGG-----  
-----  
-----  
TGTGATGGCAATATCACACTTCCATGCAAGATAAAGCAAATTGTAAACATGTGGCAGGGAGTGGGACAAGCAA  
TGTATGCTCCTCCCATCAGAGGACAAATTAGTTGTGTGTCAAAT---  
ATTACAGGGATACTACTGACAAGAGATGGTGGTCATAATGGTAGT-----  
-----  
-----  
ACAAATAATGAGACCTTCAGACCTGGAGGAGGAAATATAAAGGACAATTGGAGAAGTGAATTATATAAATATA  
AAGTAGTAGAAATTGAACCACTA---GGGATAGCACCTTCTGGGCAAGGAGAAGAGTGGTG-----  
-----GAGAGACAAAAAAGAGCA---GTGGGA---ATAGGAGCT-----  
---ATGATCTTTGGGTTCTTAGGAGCA---GCAGGAAGCACTATG---GGCGCGCGTCA---  
GTAACGCTGACGGTACAG---GCCAGACAA---TTATTG---TCTGGTATAGTGCAACAGCAAAGC---  
AATTTG---CTGAGG---GCTATAGAGGCGCAGCAGCATCTGTTGCAACTCACAGTCTGGGGCATT  
>GQ916573  
TTCTATTGCAATACAACAACACTGTTTAATAATACTTGCATAAAAAATGAAACCGCGGAGGGG-----  
-----  
-----  
TGTAATAAACTATCACACTTCAATGCAGGATAAAGCAAATTATAAATATGTGGCAGGGAGTAGGACAAGCAA  
TGTATGCTCCTCCCATCAGTGGGAAGCATCAGTTGTGAATCTAAT---  
ATTACAGGATTACTACTGACAAGAGATGGTGGGAAGCAATATTAATACT-----  
-----  
-----  
ATTAATAAGAATGAGATCTTCAGACCTGGAGGAGGAAATATGAAGGATAATTGGAGAAATGAATTATATAAAT  
ATAAAGTAGTAAAAATTGAACCACTA---GGAATAGCACCCACCAGGGCAAAGAGAAGAGTGGTG-----  
-----GAGAGAGAAAAAAGAGCA---GTGGGA---ATAGGAGCT---  
-----TTGATCTTTGGGTTCTTAGGAGCA---GCAGGAAGCACTATG---GGCGCGCGTCA---  
ATAACGCTGACGGTACAG---GCCAGACAA---TTATTG---TCTGGTATAGTGCAACAGCAAAGC---  
AATTTG---CTGAGG---GCTATAGAGGCGCAGCAGCATATGTTGCAACTCACAGTCTGGGGCATT  
>JX447074  
TTCTATTGCAACATAACAACACTGTTCAATACTACCTACTTA-----  
-----  
-----AAT---  
CAAACCACAGGAAAGTATACACTTCCATGTAAGATAAAGCAAATTATAAACATGTGGCAGGGAGTAGGGCAAG  
CAATGTATGCTCCTCCCATCAGGGGAACAATTAATTGTATATCAAAT---

ATTACAGGAATATTATTGACAAGAGATGGTGGTATGAATATAAAT-----  
-----  
-----  
AGCACTAACGAGACCTTCAGACCTGGAGGAGGAAATATAAAGGACAATTGGAGAAATGAATTATATAAATATA  
AAGTAGTACAAATTGAACCACTA---GGAGTAGCACCCACCAAGGCAAAGAGAAGAGTGGTG-----  
-----GAGAGAGAAAAAAGAGCA---GTGGGA---ATAGGAGCT-----  
---CTGATCTTTGGGTTCTTAGGAGCA---GCAGGAAGCACTATG---GGCGCGGCGTCA---  
ATAACGCTGACGGTACAG---GCCAGACAA---TTATTG---TCTGGTATAGTGCAACAGCAAAGC---  
AATTTG---CTGAGG---GCTATAGAGGCGCAACAGCATATGTTGCAACTCACAGTCTGGGGCATT  
>JX447303  
TTCTATTGCAATACATCACAACCTGTTTAATTACACAACAGATGCAGACATGAGGAACAAGACAGCCATA----  
-----  
-----  
AAAAATAGCACTATCATACTTCCATGCAGGATAAAAGCAAATTATAAACATGTGGCAGGGAGTAGGACAAGCAA  
TGTATGCTCCTCCCATCAGTGGAAATAATTAATTGTGTATCAAAT---  
ATTACAGGAATATTATTGACAAGAGATGGTGGTGAGCAGAAGAATGAGAGT-----  
-----  
-----  
AGGCGAAATGAGACCTTCAGACCTGAAGGAGGAAATATGAAGGACAATTGGAGAAAGTGAATTATATAAATATA  
AAGTAGTACAAATTGAACCACTA---GGAGTAGCACCCACTAAGGCAAAGGAGAAGAGTGGTG-----  
-----GAGAAACAAAAAAGAGCA---GTGGGA---ATAGGAGCT-----  
---ATGATCTTTGGGTTCTTAGGAGCA---GCAGGAAGCACTATG---GGCGCGGCGTCA---  
ATAACGCTGACGGTACAG---GCCAGACAA---TTATTG---TCTGGTATAGTGCAACAGCAAAGC---  
AATTTG---CTGAGA---GCTATAGAGGCGCAACATCATATGTTGCAACTCACAGTCTGGGGCATT  
>JX447335  
TTCTATTGCAATACATCACAACCTGTTTAATAGTACTGTTAATGGCACTATCACACTTCCTAAT-----  
-----  
-----  
GGCACACTTCCATGCAAGATAAAGCAAATTATAAAAAATGTGGCAAGGGGTAGGACAAGCAATGTATGCTCCTC  
CCATCAATGGAAGCATTAATTGTGTATCAAAC---  
ATTACGGGACTACTATTAACAAGGGATGGTGGTAATCAGGGTAATCAT-----  
-----  
-----  
ACTAATGATACTGAGACCTTCAGACCTGGAGGAGGAAACATAAAGGACAATTGGAGAAAGTGAATTATATAAAT  
ATAAGGTGGTACAAATTGAACCACTA---GGAATAGCACCCACCAGGGCAAAGAGAAGAGTGGTG-----  
-----GAAAGAGAAAAAAGAGCA---GTGGGA---ATAGGAGCT---  
-----ATGATCTTTGGGTTCTTAGGAGCA---GCAGGAAGCACTATG---GGCGCGGCGTCA---  
ATAACGCTGACGGTACAG---GCCAGACAA---TTATTG---TCTGGTATAGTGCAACAGCAAAGC---  
AATTTG---CTGAGG---GCTATAGAGGCGCAGCAGCATCTGTTGCAACTCACAGTCTGGGGCATT  
>JN388161  
TTCTATTGCAATACAACACAACCTGTTTAATAGTACTTGCATGGGAGATATGCCCAAGGATGGGTGTAATGGCA  
CTTTC-----  
-----  
AATGGCACCGGCACTATCATACTTCCATGCAGAATAAAGCAATTTATAAACATGTGGCAGGGAGTAGGACAAG  
CAATGTATGCTCCTCCCATCAAGGGAAACATTAGTTGTGTATCAAAT---  
ATTACAGGAATACTATTAACAAGAGATGGTGGTAATAGGACTCATAAC-----  
-----  
-----  
GGGACTAAGGAAGAGATCTTCAGACCTGCAGGAGGAAATATGAAGGACAATTGGAGAAAGTGAATTATATAAAT  
ATAAAGTAGTACAAATTGAACCACTA---GGAGTAGCACCTACCAAGGCAAAGAGAAGAGTGGTG-----  
-----GATAGACAAAAAAGAGCA---GTGGGA---ATAGGAGCT---  
-----ATGATCTTTGGGTTCTTGGGAGCA---GCAGGAAGCACTATG---GGCGCAGCGTCA---  
ATAACGCTGACGGTACAG---GCCAGACAA---TTATTG---TCTGGTATAGTGCAACAGCAAAGC---  
AATTTG---CTGAGA---GCTATAGAGGCGCAACAACATCTGTTGCAACTCACAGTCTGGGGCATT  
>GQ916591  
TTCTATTGCAATACAACAAAACTGTTTAATGAGACTTACCTGAATGGGTCTACTTACCTGAATGAG-----  
-----  
-----  
TCTACTGGCTATATCATACTTCCATGCAAGATAAAGCAAATTATAAACATGTGGCAGGGAGCAGGACAAGCAA  
TGTATGCCCCCTCCCATCAGTGGAAAAATTAATTGTGTATCAAAT---

ATTACAGGAATACTATTGACAAGAGATGGTGGGACTAATAATACA-----  
-----  
-----  
AACGAGACCTTCAGACCTGGAGGAGGAAATATGAAGGACAATTGGAGGAGTGAATTATATAAAATATAAAGTAG  
TACAAATTGAACCACTA---GGAGTAGCACCCACCAAGGCAAGGAGAAGAGTGGTG-----  
-----GAGAGAGAAAAAAGAGCA--GTGGGA--ATAGGAGCT-----  
ATGATCTTTGGTTTCTTAGGAGCA--GCAGGAAGCACTATG--GGCGCGGCGTCA---  
ATAACGCTGACGGTACAG---GCCAGACAA--TTATTA--TCTGGTATAGTGCAACAGCAAAGC---  
AATTTG---CTGAGG---GCTATAGAGGCGCAGCAGCATCTGTTGCAACTCACAGTCTGGGGCATT  
>GQ916581  
TTCTATTGCAATACAACAAAACCTGTTTAATAGTACCTGGGCCAAGGAGGGGTGGAATGGCACTAATTATAATG  
ACACTTATTAT-----  
-----AATGGCACT-----  
AATTATACTGGCAATATCACACTTCCATGCAGGATAAAAGCAAATTGTAAACATGTGGCAGGGAATAGGACAAG  
CAATGTATGCTCCTCCCATCAGTGGAACGATTCACTGTGTATCAGAA---  
ATTACAGGAATACTATTGACAAGAGATGGTGATATTACTAATGCG-----  
-----  
-----  
GCTAACGAGACTTTTCAGACCTGGAGGAGGAAATATAAAGGACAATTGGAGAAGTGAATTATATAAAATATAAAG  
TAGTGCAAATTGAACCACTA---GGAATAGCACCCACCAGGGCAAAGAGAAGAGTGGTG-----  
-----GAGAGAGAAAAAAGAGCA--GTGGGA--ATAGGAGCG-----  
ATGATCTTTGGGTTCTTAGGAGCA--GCAGGAAGCACTATG--GGCGCGGCGTCA---  
ATAACGCTGACGGTACAG---GCCAGGCAA--TTATTG---TCTGGTATAGTGCAACAGCAAAGC---  
AATTTG---CTGAGG---GCTATAGAGGCGCAGCAGCATCTGTTGCAACTCACAGTCTGGGGCATT  
>JF680932  
TTCTATTGCAATACAACAAAGATGTTTAATGCGACAGAAAATGGAACCAGGGAAGGG-----  
-----  
-----  
AATAACAATACGATCATAATTCCATGCAGGATAAAAGCAAATTGTAAACATGTGGCAGAAAACAGGACAAGCAA  
TGTATGCTCCTCCCATCAGGGGAATAATTAATTGTGTATCAAAT---  
ATTACAGGAATATTATTAACAAGAGATGGTGGAAATGAGGATAATCAT-----  
-----  
-----  
AGTAAGGACAACGAGACCTTCAGACCTGCAGGAGGAAATATAAAGGACAATTGGAGAAGTGAATTATATAAAAT  
ATAAAGTAGTACAAATTGAACCACTA---GGAATAGCACCCACCAAGGCAAAGAGAAGAGTGGTG-----  
-----GAGAGAGAAAAAAGAGCA--GTGGGA--ATAGGAGCT---  
-----ATGATCTTTGGGTTCTTAGGAGCA--GCAGGAAGCACTATG--GGCGCGGCGTCA---  
ATAACGCTGACGGTACAG---GCCAGACAA--TTATTG---TCTGGTATAGTGCAACAGCAAAGC---  
AATTTG---CTGAGG---GCTATAGAGGCGCAACAGCATATGTTGCAACTCACAGTCTGGGGCATT  
>KT185951  
TTCTATTGCAATACAACAAAACCTGTTTAATGGTACTTACCCGAAAAATGGAACAGATGGAACA-----  
-----  
-----  
AATAATGACACTATCATACTCCCATGTAGGATAAAGCAAATTGTAAAGATTGTGGCAGGAAGTAGGTCAAGCAA  
TGTATGCTCCTCCCATCAGTGGAAGCATTGAGTGCTACTCAAAT---  
ATTACAGGAATACTATTGACAAGAGATGGTGGTAATACTAGCAATAGT-----  
-----  
-----  
GATGGTGGTAATATTAGC---  
AATAGTGAAACCTTCAGACCTGGAGGAGGAAATATAAAGGACAATTGGAGAAGTGAATTATATAAAATATAAAG  
TAGTACAAATTGAACCACTA---GGAATAGCACCCACCAAGGCAAAAAGAAGAGTGGTG-----  
-----GAGAGAGAAAAAAGAGCA--GTAGGA--ATAGGAGCT-----  
ATGATCTTTGGGTTCTTAGGAGCA--GCAGGAAGCACTATG--GGCGCGGCATCA---  
ATAACGCTGACGGTACAG---GCCAGACAA--TTATTG---TCTGGTATAGTGCAACAGCAAAGC---  
AATTTG---CTGAGG---GCTATAGAGGCGCAGCAGCATCTGTTGCAACTCACAGTCTGGGGCATT  
>KT185973  
TTCTATTGCAATACATCAAAAACCTGTTCAACAATACTTGCAGAGAAGATAGCACGAAGGAGGGGTGTAATGAT-  
-----  
-----  
ACCATACTGCCATGCAAAAATAAAGCAAATTATAAGGATGTGGCAGGGAGTAGGACAAGCAATGTATGCTCCTC  
CCATCAGTGGGAGTATCAACTGTATATCAAAT---

ATTACAGGAATACTATTGACAAGAGATGGTGGTTACAACAATAAGAGTAATGGG-----  
-----  
-----  
AACGAGACTGAGACTTTCAGACCTGGAGGAGGAAATATGAAGGACAATTGGAGAAATGAATTATATAAAATATA  
AAGTAGTACAAATTGAACCACTA---GGAATAGCACCCACCAAGGCAAAGAGAAGAGTGGTG-----  
-----GAGAGAGAAAAAAGAGCA---GTGGGA---ATAGGAGCT-----  
---ATGATCTTTGGGTTCTTAGGAGCA---GCAGGAAGCACTATG---GGCGCGGCGTCA---  
ATAACGCTGACGGTACAG---GCCAGACAA---TTATTG---TCTGGTATAGTGCAACAGCAAAGC---  
AATTTG---CTGAGG---GCTATAGAGGCGCAACAGCATCTGTTGCAACTCACAGTCTGGGGCATT  
>KT185837  
TTCTATTGCAATACAACAAAACCTGTTTAATAGTACAGGGAAC-----  
-----  
-----  
TATAATGACACTATCATACTTCCATGCAGGATAAAAGCAAATTATAAACATGTGGCAGAGAGTAGGACAAGCAA  
TGTATGCTCCTCCCATCAGGGGCAACATTACTTGTGTATCAAAT---  
ATTACAGGAATATTATTGACAAGAGATGGTGGTGCGAATCAGACTAATGAG-----  
-----  
-----  
ACCGATGAGACCTTCAGACCGGGAGGAGGAGATATAAAGGACAATTGGAGAAATGAATTATATAAAATATAAAG  
TAGTACAAATTGATCCATTA---GGAATAGCACCCACCAAGGCAAAGAGAAGAGTGGTG-----  
-----GAGAGAGAAAAAAGAGCA---GTGGGA---ATAGGAGCT-----  
ATGATCTTTGGGTTCTTAGGAGCA---GCAGGAAGCACTATG---GGCGCGGCGTCG---  
ATAACGCTGACGGTACAG---GCCAGACAA---TTATTG---TCTGGGATAGTGCAACAGCAAAGT---  
AATTTG---CTGAGG---GCTATAGAGGTGCAGCAGCATATGTTGCAACTCACAGTCTGGGGCATT  
>MG989500  
TTCTATTGCAATACAACAAAACCTGTTTAATAGGACTTACCCAGGAAATGATACCACTGAGGGG-----  
-----  
-----  
CAGAAATGGCACTATCATACTCCCATGCAGAATAAAGCAAATTATAAACATGTGGCAGGAAGTAGGACAAGCAA  
TGTATGCTCCTCCCATCAGAGGACCGATTAACTGCTCATCAATT---  
ATTACAGGAATACTATTGACAAGGGATGGTGGTAGTAGTACTCAAAACGAG-----  
-----  
-----  
ACTCAAAACGGGACCGAGATCTTCAGACCTGGAGGAGGAAATATAAAGGACAATTGGAGAAGTGAATTATATA  
AATATAAAGTAGTACAAATTGAACCACTA---GGAATAGCACCCACCAGGGCAAAGAGAAGAGTGGTG-----  
-----GAGAGGGAAAAAAGAGCA---GTGGGA---  
ATAGGAGCT-----ATGATCTTTGGGTTCTTGGGAGCA---GCAGGAAGCACTATG---  
GGCGCGGCGTCA---ATAACGCTGACGGTACAG---GCCAGACAG---TTACTG---  
TCTGGTATAGTGCAACAGCAAAGC---AATTTG---CTGAGA---  
GCTATAGAGGCGCAGCAGCATATGCTGCAACTCACAGTCTGGGGCATA  
>MG989502  
TTCTATTGCAATACAACAAAACCTGTTTAATGGTACTTACCCGAAAAATGGAACAGATGGAACA-----  
-----  
-----  
AATAATGACACTATCATACTCCCATGTAGGATAAAGCAAATTGTAAGATTGTGGCAGGAAGTAGGTCAAGCAA  
TGTATGCTCCTCCCATCAGTGGAAGCATTGAGTGCTACTCAAAT---  
ATTACAGGAATACTATTGACAAGAGATGGTGGTAATACTAGCAATAGTGATGGT-----  
-----  
-  
GGTAATATTAGCAATAGTGAAACCTTCAGACCTGGAGGAGGAAATATAAAGGACAATTGGAGAAGTGAATTAT  
ATAAATATAAAGTAGTACAAATTGAACCACTA---GGAATAGCACCCACCAAGGCAAAAAGAAGAGTGGTG--  
-----GAGAGAGAAAAAAGAGCA---GTAGGA---  
ATAGGAGCT-----ATGATCTTTGGGTTCTTAGGAGCA---GCAGGAAGCACTATG---  
GGCGCGGCATCA---ATAACGCTGACGGTACAG---GCCAGACAA---TTATTG---  
TCTGGTATAGTGCAACAGCAAAGC---AATTTG---CTGAGG---  
GCTATAGAGGCGCAGCAGCATCTGTTGCAACTCACAGTCTGGGGCATT  
>MG989521  
TTCTATTGCAATACATCAAAACCTGTTCAACAATACTTGCAGAGAAGATAGCACGAAGGAGGGGTGTAATGAT-  
-----  
-----

ACCATACTGCCATGCAAAATAAAGCAAATTATAAGGATGTGGCAGGGAGTAGGACAAGCAATGTATGCTCCTC  
CCATCAGTGGGAGTATCAACTGTATATCAAAT---  
ATTACAGGAATACTATTGACAAGAGATGGTGGTTACAACAATAAGAGTAATGGG-----  
-----  
-----  
AACGAGACTGAGACTTTTCTAGACCTGGAGGAGGAAATATGAAGGACAATTGGAGAAATGAATTATATAAAATATA  
AAGTAGTACAAATTGAACCACTA---GGAATAGCACCCACCAAGGCAAAGAGAAGAGTGGTG-----  
-----GAGAGAGAAAAAAGAGCA---GTGGGA---ATAGGAGCT-----  
---ATGATCTTTGGGTTCTTAGGAGCA---GCAGGAAGCACTATG---GGCGCGGCGTCA---  
ATAACGCTGACGGTACAG---GCCAGACAA---TTATTG---TCTGGTATAGTGCAACAGCAAAGC---  
AATTTG---CTGAGG---GCTATAGAGGCGCAACAGCATCTGTTGCAACTCACAGTCTGGGGCATT  
>KU230418  
TTCTATTGCAATACAACAAGCTTGTTTAATAAACTTACATAGGAAATGAAACCAGAAATGAAACCCATGATG  
GG-----  
-----  
GGGAGTAATAAACTATTACACTTCCATGCAAGATAAAGCAAATTGTAAGGATGTGGCAGGGAGTAGGACAAG  
CAATGTATGCTCCTCCCATCAGTGGAGTAATTAAGTGTATCAAAT---  
ATTACAGGAATACTATTAACAAGAGATGGTGGTCAGGGTGGTCATAATAAT-----  
-----  
-----  
ACAACTGAGACCGAGACCTTCTAGACCTGGAGGAGGAAATATAAAGGATAATTGGAGAAAGTGAATTATATAAAAT  
ATAAAGTAGTACAAATTGAACCACTA---GGAATAGCACCCACCAGGGCAAAGAGAAGAGTGGTG-----  
-----GAGAGAGAAAAAAGAGCA---GTGGGA---ATAGGAGCT---  
-----ATGATCTTTGGGTTCTTAGGAGCA---GCAGGAAGCACTATG---GGCGCAGCGTCA---  
ATAACGCTGACGGTACAG---GCCAGACAA---TTATTG---TCTGGTATAGTGCAAGCAGCAAAGC---  
AATTTG---CTGAGG---GCTATAGAGGCGCAACAGCATCTGTTGCAACTCACAGTCTGGGGCATT  
>MG989579  
TTCTATTGCAATACAACAAAATTGTTTAATGGAAACCATAGCAAGAGT-----  
-----  
-----  
GGTAATGACAGCATCGTACTTCCATGTAAGATAAAGCAGATTATAAACCTGTGGCAGGGAGTAGGACAAGCAA  
TGTATGCTCCTCCCATCAGGGGGATAATTAAGTGTGTATCAAAT---  
ATTACAGGAATACTATTGACAAGAGATGGTGGAGCTCACAATGGGAGT-----  
-----  
-----  
AACGAGACTGAAATCTTTAGACCTGGAGGAGGAAATATGAAGGACAATTGGAGAAAGTGAAGTATATAAAATATA  
AAGTAGTACAAATTGAACCTCTA---GGAATAGCACCCACCAGGGCAAAGAGAAGAGTGGTG-----  
-----GAGAAAGAAAAAAGAGCA---GTGGGA---ATAGGAGCT-----  
---ATGATCTTTGGGTTCTTAGGAGCA---GCAGGAAGCACTATG---GGCGCGGCGTCA---  
CTAACGCTGACGGTACAG---GCCAGACAA---TTATTA---TCTGGTATAGTGCAACAGCAAAGC---  
AATTTG---CTGAGG---GCTATAGAGGCGCAGCAGCATCTGTTGCAACTCACAGTCTGGGGCATT  
>MG989561  
TTCTATTGCAATACAACAAAATTTTAATAATACTTGCATAAATGAAACCACGGAGGGG-----  
-----  
-----  
TGTAATAAACTATCTATCTTCCATGCAGAATAAAACAAATTATAAACATGTGGCAGGGAGCAGGACAAGCAA  
TGTATGCTCCTCCCATCAGGGGAAGGATTACTTGTGTATCAAAT---  
ATTACAGGAATACTATTGACAAGAGATGGTGGTGGTTGATAATGCTACG-----  
-----  
-----  
AACGGGACCGAGATCTTCTAGACCCGAGGAGGAAATATAAAGGACAATTGGAGAAAGTGAATTGTTTAAATATA  
AAGTAGTACAAATTGAACCACTA---GGACTAGCACCCACCAAGGCAAAGAGAAGAGTGGTG-----  
-----GAGAGAGAAAAAAGAGCA---GTGGGA---ATAGGAGCT-----  
---ATGATCTTTGGGTTCTTAGGAGCA---GCAGGAAGCACTATG---GGCGCGGCGTCA---  
ATAACGCTGACGGTACAG---GCCAGACAA---TTACTG---TCTGGTATAGTGCAACAGCAAAGC---  
AATTTG---CTGAGG---GCTATAGAGGCGCAGCAGCATCTGTTGCAACTCACGGTCTGGGGCATT  
>MF957493  
TTCTATTGCAATACAACAAAATTTTAAATGGTACAGAAAATGGAACCATGGAGGGGAATACTGAC-----  
-----  
-----

ACTAATGGCACTATCATCCTTCCATGCAGGATAAAGCAAATTGTAAGAATGTGGCAGGGAGTAGGACAAGCAA  
 TATATGCTCCTCCCATCAGTGGAACATTAGTTGTGAATCAAAC ---  
 ATTACAGGAATACTATTGACAAGAGATGGTGGTAGTGGTAGTTATACTAATGAT-----  
 -----  
 -  
 AGTGATGCTAATAATACAGAAATCTTCAGACCTGAGGGAGGAAATATAAAGGACAATTGGAGAAGTGAATTAT  
 ACAAATATAAAGTAGTACAAATTGAACCACTA---GGAGTAGCACCCACCAAGGCAAGGAGAAGAGTGGTG--  
 -----GAGAGAGAAAAAAGAGCA---GTGGGA---  
 ATAGGAGCT-----ATGATCTTTGGGTTCTTAGGAGCA---GCAGGAAGCACTATG---  
 GGCGCGGCGTCA---ATAACGCTGACGGTACAG---GCCAGACAA---TTATTG---  
 TCTGGTATAGTGCAACAGCAAAGC---AATTTG---CTGAGG---  
 GCTATAGAGGCGCAGCAGCATCTGTTGCAACTCACAGTCTGGGGCATT  
 >MG989524  
 TTCTATTGCAATACAACACAACCTTTTTTAATAGTACTAGTACTAACAAC-----  
 -----  
 -----  
 TCAGAAGGGAATATCATAATTCCATGCAGGATAAAGCAAATTATAAACATGTGGCAGGGAGTAGGGCAAGTAA  
 TGTATGCTCCTCCTGTCCAAGGGCGAATTAATTGTGCATCAAAT ---  
 ATTACAGGAATACTATTAACAAGAGATGGTGGTCATAACGGGACATCC-----  
 -----  
 -----  
 CAGAACGAGACATTTTCGACCTGGAGGAGGAAATATAAAGGACAATTGGAGGAGTGAATTATATAAATATAAAG  
 TAGTACAAATTGAACCACTA---GGAATAGCACCCACCAGGGCAAAGAGAAGAGTGGTA-----  
 -----AAGAGAGAAAAAAGAGCA---GTGGGC---ATAGGAGCT-----  
 ATGATCTTTGGGTTCTTAGGAGCA---GCAGGAAGCACTATG---GGCGCGGCGTCA---  
 ATAACGCTGACGGTACAG---GCCAGACAA---TTATTG---TCTGGTATAGTGCAACAGCAAAGC---  
 AATTTG---CTGAGG---GCTATAGAGGCGCAGCAGCATATGTTGCAACTCACAGTCTGGGGCATT  
 >MG989535  
 TTCTATTGCAATACAACAAAACTGCTTAATAATACTTGTATAAAAAATCACACCCAGAAGGGG-----  
 -----  
 -----  
 TGTAATGACAGTATCATACTTCCATGCAGAATAAAGCAGTTCATCAACATGTGGCAGGGAGTAGGACAAGCAA  
 TGTATGCTCCTCCCATCAGGGGAATCATTAATTGTGTATCAAAT ---  
 ATTACAGGAATACTATTGACAAGAGATGGTGGTAATGTAAC TAAT-----  
 -----  
 -----  
 ACTAGTGAAATCTTCAGACCAGGGGGAGGAAATATAAAGGACAATTGGAGAAGTGAATTATATAAATATAAAG  
 TAGTACAAATTGAACCACTA---GGAATAGCACCCACCAGGGCAAAGAGAAGAGTGGTG-----  
 -----GAGAGAGAAAAAAGAGCA---GTGGGA---ATAGGAGCT-----  
 ATGATCTTTGGGTTCTTAGGAGCA---GCAGGAAGCACTATG---GGCGCAGCGTCA---  
 ATAACGCTGACGGCACAG---GCCAGACAA---TTATTG---TCTGGTATAGTGCAACAGCAAAGC---  
 AATTTG---CTGAGA---GCTATAGAGGCGCAGCATCATCTGTTGCAACTCACAGTCTGGGGCATT  
 >MG989548  
 TTCTACTGCAATACAACACAACCTATTTAATGGTACTGGT-----  
 -----  
 -----  
 ACTAATAGCACTATCACACTTCCATGCAGGATAAAGCAAATTATAAACATGTGGCAGGGAGTAGGACAAGCAA  
 TGTATGCTCCTCCCATCAGTGGAACAATCAATTGTATATCAAAT ---  
 ATTACAGGAATATTATTGACAAGAGATGGTGGTCATAATAATGGT-----  
 -----  
 -----  
 ACTAATGAGACCTTCAGACCTGGAGGAGGAAATATAAAGGACAATTGGAGAAGTGAATTATATAAATATAAAG  
 TAGTAGAAATTGAACCACTA---GGAATAGCACCCACCAAGGCAAGGAGAAGAGTGGTG-----  
 -----GAGAGAGAAAAAAGAGCA---GTAGGA---ATAGGGGCT-----  
 ATGATCTTTGGGTTCTTAGGAGCA---GCAGGAAGCACTATG---GGCGCGGCGTCA---  
 ATAACGCTGACGGTACAG---GCCAGACAA---TTATTG---TCTGGTATAGTGCAACAGCAAAGC---  
 AATTTG---CTGAGG---GCTATAGAGGCGCAGCAGCATCTGTTGCAACTCACAGTCTGGGGCATT  
 >MG989534  
 TTCTATTGCAATACATCAAACTGTTTAATAGAACATATGAGTTTAATAGAACACATGAGGGAAATGATACCA  
 TG-----

-----  
AATGATACCACTATCATAATTCCATGCAAAATAAAGCAAATAATAAGAATGTGGCAGGGAGCAGGACAAGCAA  
TGTATGCTCCTCCCGTCAGGGGAAAAATTTCAGTGTGTATCAAAT---  
ATTACAGGAATATTATTGACAAGAGATGGTGGTGGTGGGAATACT-----  
-----  
-----  
AGTAATAATGAGACCTTCAGACCTGGAGGAGGAAACATAAAGGACAATTGGAGAAGTGAATTATACAAATATA  
AAGTAGTACAAATTGAACCATTA---GGGATAGCACCCACCAGGGCAAAAAGAAGAGTGGTG-----  
-----GAGAAACACAAAAGAGCA---GTGGGA---ATAGGAGCT-----  
---GTGATCTTTGGGTTCTTAGGAGCA---GCCGGAAGCACTATG---GGCGCGGCGTCA---  
ATATCGCTGACGGTACAG---GCCAGACAA---TTATTG---TCTGGTATAGTGCAACAGCAAAGC---  
AATTTG---CTGAGA---GCTATAGAGGCGCAACAGCATCTGTTGCAACTCACAGTCTGGGGCATC  
>MG989537  
TTCTATTGCAATACAACAAAACCTGTTT-----  
-----  
-GATAATGAAACCACAGGG-----  
CCGTGTAATGACACCATTATACTTCCATGCAGAATAAAGCAAATTATAAGAATGTGGCAGGGAGTAGGACAAG  
CAATGTATGCTCCTCCCATCAGTGGAAGTATTAATTGTGTATCAAAT---  
ATTACAGGAATACTATTGACAAGAGATGGTGGTAATCATAATGGG-----  
-----  
-----  
AACAAAGTACTGAGACCTTCAGACCTGGAGGAGGAAATATAAAAGACAATTGGAGAAGTGAATTGTTTAAAT  
ATAAAGTAGTAGAAATTGAACCACTA---GGAATAGCACCCACCAGGGCAAAGAGAAGAGTGGTG-----  
-----GAAAGAGAAAAAAGAGCA---GTGGGA---CTAGGAGCT---  
-----ATGATCTTTGGGTTCTTAGGAGCA---GCAGGAAGCACTATG---GGCGCAGCGTCA---  
ATAACGCTGACGGTACAT---GCCAGACAA---TTGTTG---TCTGGTATAGTGCAACAGCAAAGC---  
AATTTG---CTGAGG---GCTATAGAGGCGCAGCAGCATATGCTGCAACTCACAGTCTGGGGCATT  
>MG989554  
TTCTATTGCAATACAACACAACCTGTTTAATAGTAATGAAACT-----  
-----  
-----  
ACCTATAATAAACTATCATACTTCCATGCAGGATAAAGCAGATTATAAGATTGTGGCAGGGAATAGGACAAG  
CAATGTATGCTCCTCCCATAGTGGAACAATTAATTGTGTATCAAAT---  
ATCACAGGAATACTATTGACAAGAGATGGTGGAGATGGTGATAATACTAGT-----  
-----  
-----  
AGTAAAAATGAGACCTTCAGACCTGGAGGAGGAAATATAAAAGACAATTGGAGAAATGAATTATATAAATATA  
AAGTAGTAGAAATTGAACCACTA---GGAATAGCACCTTCCAAGGCACGGAGAAGAGTGGTG-----  
-----GACAGACAAAAAAGAGCA---GTGGGA---ATAGGAGCT-----  
---ATGATCTTTGGGTTCTTAGGAGCA---GCAGGAAGCACTATG---GGCGCGGCGTCA---  
ATAACGCTGACGGTACAG---GCCAGACAA---TTATTG---TCTGGTATAGTGCAACAGCAAAGC---  
AATTTG---CTGAGA---GCCATAGAGGCGCAGCAGCATATGTTGCAACTCACAGTCTGGGGCATT  
>JX848346  
TTCTATTGCAATACAACACAACCTGTTTAATAAGACTGACATAGAAAATGAAACCAAGGAGGCTAAT-----  
-----  
-----  
GCTAATGGCACTATCATACTTCCATGCAAGATAAAGCAAATTATAAACATGTGGCAGGGAGTAGGACAAGCAA  
TGTATGCTCCTCCCATCAGTGACAAATTAGTTGTGTATCAAAT---  
ATTACAGGAATACTATTGACAAGAGATGGTGGTAGTCAGAACGGAACGGG-----  
-----  
-----  
ACCACCGAGACCTTCAGACCTGGAGGAGGAAATATAAAGGACAATTGGAGAAGTGAATTATATAAATATAAAG  
TAGTACAAATTGAACCACTA---GGAGTAGCACCCACCAGGGCAAAGAGAAGAGTGGTG-----  
-----GAGAGAGAAAAAAGAGCA---GTGGGA---ATAGGAGCT-----  
ATGATCTTTGGGTTCTTAGGAGTA---GCAGGAAGCACTATG---GGCGCAGCGTCA---  
ATAACGCTGACGGTACAG---GCCAGACAA---TTATTG---TCTGGTATAGTGCAACAGCAAAGC---  
AATTTG---CTGAGA---GCTATAGAGGCGCAACAACATCTGTTGCAACTCACAGTCTGGGGCATT  
>KJ952820  
TTCTATTGCAATACAACAGGACTGTTTAATAATTGCACAGGAAATGAAACC-----  
-----

-----  
TGTAATGACACTATCATACTTCCATGCAGGATAAAGCAAATTATAAACATGTGGCAGGGAGCAGGACAAGCAA  
TGTATGCTCCTCCCATCAGGGGAACAATTAATTGTCTATCAAAT---  
ATTACAGGAATAATATTGACAAGAGATGGTGGTAATAATATTAAGAAT-----  
-----  
-----  
AACGAGACGGAGATCTTCAGACCTGGAGGAGGAGATATGAAGGACAATTGGAGAAATGAATTATATAAATATA  
AAGTAGTACAGATTGAACCACTA---GGAGTAGCACCCACCAGGGCAAAGAGAAGAGTGGTG-----  
-----GAGAGAGAAAAAAGAGCA---GTGGGA---ATAGGAGCT-----  
---ATGATCTTTGGGTTCTTAGGAGCA---GCAGGAAGCACTATG---GGCGCAGCGTCA---  
ATAACGCTGACGGTACAG---GCCAGACAA---TTATTG---TCTGGTATAGTGCAACAGCAAAGC---  
AATTTG---CTGAGG---GCTATAGAGGCGCAGCATCATCTGTTGCAACTCACAGTCTGGGGCATT  
>HM215432  
TTCTATTGCAATACATCAAACTATTTTAATAGTACAAAAAATAGTACTTGTGAGGGG-----  
-----  
-----  
TGTAATGGTACTATCATACTTCCATGTAAGATAAAGCAAATTTATAAACATGTGGCAGAACCCAGGACAAGCAA  
TGTATGCTCCTCCCATCGAGGGAAAAATTAATTGTGTATCAAAT---  
ATTACAGGAATACTATTGACAAGAGATGGTGGTGTAAATAGTACA-----  
-----  
-----  
AATAACGAGACCTTCAGACCTCAAGGAGGAAATATGAAGGACAATTGGAGAAGTGAATTATATAAATATAAAG  
TAGTACAAATTGAACCACTG---GGAATAGCTCCCACCAGGGCAAGGAGAAGAGTGGTG-----  
-----GAGAGAGAAAAAAGAGCA---GTGGGA---ATAGGAGCT-----  
ATGATCTTTGGGTTCTTAGGAGCA---GCAGGAAGCACTATG---GGCGCGGCGTCA---  
ATAACGCTGACGGTACAG---GCCAGACAA---TTATTG---TCTGGTATAGTGCAACAGCAAAGC---  
AATTTG---CTGAGG---GCTATAGAGGCGCAGCAGCATCTGTTGCAACTCACAGTCTGGGGCATT  
>AY444805  
TTTTATTGCAATACAACACAGTTGTTTAATAGTACTTGGAGAATAAATGAAACTATGGGGGAGTCTAATGAC-  
-----  
-----  
ATAAACTCAAATATCACACTTCCATGCAGGATAAGGCAAATTGTAAAAATGTGGCAGGGAGTAGGACAAGCAA  
TGTATGCTCCTCCCATCGATGAAGCAATTCAGTGTGTATCAAAT---  
ATTACAGGAATACTATTGACAAGAGATGGTGGTCATAATGTGAGT-----  
-----  
-----  
AATGATACTGAGACCTTCAGACCTGGAGGAGGAGATATAAGGGACAATTGGAGAAGTGAATTATATAAATATA  
AAGTAGTAGAAATTGAACCACTA---GGAATAGCACCCACCAGGGCAAGGAGAAGAGTGGTG-----  
-----GAGAGAGAAAAAAGAGCA---GTGGGA---ATAGGAGCT-----  
---ATGATCTTTGGGTTCTTAGGAGCA---GCAGGAAGCACTATG---GGCGCGGCGTCA---  
ATAACGCTGACGGTGCAG---GCCAGACAA---TTATTG---TCTGGTATAGTGCAACAGCAAAGC---  
AATTTG---CTGAGA---GCTATAGAGGCACAACAGCATCTGTTGCAACTCACAGTCTGGGGCATT  
>FJ185251  
TTCTATTGCAATACAACAAGACTGTTTAATAATACTTGCATAAAAAATGAAACCACGGAGGGG-----  
-----  
-----  
TGTGATGGCACTATCACACTGCCATGCAGGATAAAGCAAATTATAAACATGTGGCAGGGAGTAGGACAAGCAA  
TATATGCTCCTCCCATCAGAGGAAAAATTAATTGTGTATCAAAT---  
ATTACAGGAATACTATTGACAAGAGATGGTGGTGCTCATAATACG-----  
-----  
-----  
ACGACTAATGAGACCTTCAGACCTGGGGGAGGAAATATGAGGGACAATTGGGAAAAGTGAATTATATAAATATA  
AAGTAGTAGAAATTGAACCACTA---GGAATAGCACCCACCAGGGCAAAGAGAAGAGTGGTG-----  
-----GAGATAGAAAAAAGAGCA---GTGGGA---ATAGGAGCT-----  
---ATGATCTTTGGGTTCTTAGGAGCA---GCAGGAAGCACTATG---GGCGCGGCGTCA---  
ATAACGCTGACGGTACAG---GCCAGACAA---TTATTG---TCTGGTATAGTGCAACAGCAAAGC---  
AATTTG---CTGAGG---GCTATAGAGGCGCAGCAGCATCTGTTGCAACTCACAGTCTGGGGCATT  
>FN432728  
TTCTATTGCAATACATCAAACTGTTTAATAGCACTTGGGACAGCAATAGCACTGTTAGCTCAGATGACAGTG  
ATACT-----

-----  
AATGACAATGTCAATATAACTCTCCCATGCAGAATAAAGCAAATTATAAATATGTGGCAGAGAGTAGGACAAG  
CAATATATATGCCCCCTCCCATCGAAGGAGTAATACAGTGTGAATCAAAC---  
ATCACAGGACTACTATTAACAAGAGATGGAGGGAATGAGAATAATACAAAC-----  
-----  
-----  
ACAACTAAAGGAGAAGTTTTTCAGGCCTGGAGGAGGAAATATGAGGGACAATTGGAGAAGTGAAGTATAACAAGT  
ATAAAGTAGTAAAAATTGAACCACTA---GGTGTAGCACCCCTCACCTGCAAGAAGAAGAGTGGTG-----  
-----CAGAGAGAAAAAAGAGCA---GTCGGC---CTAGGAGCT---  
-----TTCTTCCTTGGGTTCTTAGGAGCA---GCAGGAAGCACTATG---GGCGCAGCGTCA---  
ATAACGCTGACGGTACAG---GCCAGACAG---TTACTG---TCTGGGATAGTGCAACAGCAAAGC---  
AATTTG---CTGAGG---GCTATAGAGGCTCAACAACATATGTTGAAACTCACGGTCTGGGGCATT  
>HQ912710  
TTCTATTGCAATACATCAGAACTGTTTAATAGCACTTGGAAATAACAATAGCATTGCCAACTCAACAGAT----  
-----  
-----  
AGCAAGAGCACCATAACTCTCCAATGCAAAATAAAGCAAATTGTAAATATGTGGCAGAAAGTAGGACAAGCAA  
TGTATGCCCCCTCCCATCCAAGGAGTAATAAGCTGTAATTC AAGC---  
ATTACAGGATTACTATTAACAAGAGATGGAGGGAATAATAATAGT-----  
-----  
-----  
ACAAATGAGACCTTCAGGCCTGGAGGAGGAGATATGAGGGACAATTGGAGGAGTGAATTATATAAGTATAAAG  
TAGTAAAAATTGAACCAATA---GGTGTAGCACCCACCCATGCAAAAAGAAGGGTGGTG-----  
-----CAGAGAGAAAAAAGAGCA---GTTGGA---CTAGGAGCT-----  
GTCCTCTTTGGGTTCTTAGGAGCA---GCAGGAAGCACTATG---GGCGCGGCGTCA---  
ATAACGCTGACGGTACAG---GCCAGACAA---TTATTG---TCCGGTATAGTGCAACAGCAGGGC---  
AATCTG---CTGAGA---GCTATAGAGGCTCAACAACATCTGTTGAAACTCACGGTCTGGGGCATT  
>DQ313242  
TTCTATTGCAATACACCGATACTGTTTAATAGCACCTGGGAGTACAATAGCACTTGGGGTAACTATAGCTCAA  
ATTAC-----  
-----ACA---  
GGGTCAAATGACATTATAACTCTCCAATGCAAAATAAAGCAAATTGTAAATATGTGGCAGAAAGTAGGACAAG  
CAATGTATGCCCCCTCCCATCCCAGGAGAGTTAAGGTGTGAATCAAAC---  
ATTACAGGATTATTATTAACAAGGGATGGAGGGACTAATAGTACAAAT-----  
-----  
-----  
GAGACTTTCGAGACTTTTAGGCCTGGAGGAGGAGACATGAGGGACAATTGGAGAAGTGAATTATATAAGTATA  
AGGTAGTAAAAATTGAACCACTA---GGTGTGGCACCCACCCATGCAAAAAGAAGAGTGGTG-----  
-----CAGAGAGAAAAAAGAGCA---GTTGGA---CTGGGAGCT-----  
---GTCTTCCTTGGGTTCTTAGGAGCA---GCAGGAAGCACTATG---GGCGCGGCGTCA---  
ATAACGCTGACGGTACAG---GCCAGACAA---TTATTG---TCCGGTATAGTGCAACAGCAGAAC---  
AATTTG---CTGAGG---GCTATAGAGGCTCAACAACATCTGTTGAAACTCACGGTCTGGGGCATT  
>MH746242  
TTCTATTGCAATACATCAGCACTATTTAATAGTAGTTGGAATAGCACTACTTGAATAGCACTCGAAATACCA  
ATGCTAGCTCA-----  
-----  
AATGACACAGAACCTATAACTCTCCAATGCAGAATAAAACAAATTGTAAATATGTGGCAGAGGATAGGACAAG  
CAATGTATGCCCCCTCCCATCAAAGGAGAAATAAGGTGTGAATCAAAC---  
ATTACAGGACTACTATTAACAAGAGATGGAGGGACAAATAATAGT-----  
-----  
-----  
ACAAATGAAACATTTCAGACCTGGAGGAGGAGATATGAGGGACAATTGGAGAAGTGAATTATATAAGTATAAGG  
TAGTACAAATTGAACCAATA---GGTGTGGCACCCACCCATGCAAAAAGAAGAGTGGTG-----  
-----GAGAGAGAAAAAAGAGCA---GTTGGA---CTGGGAGCT-----  
GTCTTCCTTGGGTTCTTAGGAGCA---GCAGGAAGCACTATG---GGCGCGGCGTCA---  
ATAACGCTGACGGTACAG---GCCAGACAA---TTATTG---TCTGGTATAGTGCAACAGCAGAGC---  
AATTTG---CTGAGG---GCTATAGAGGCTCAACAACATATGTTGAGACTCACGGTCTGGGGCATT  
>MH746250  
TTCTATTGCAATACATCAGGACTATTTAATAGCACTTGGAAATGGAATACTACCACTAGGAATTGGATTGACA  
TCTCA-----

-AATAACACAGACACTGTC-----  
 TCAATAACACAAATATAACTCTCCAGTGCAGAATAAAACAATTTGTAAATATGTGGCAGAGGGTAGGACAAG  
 CAATGTATGCCCCCTCCCATCCCAGGAGAGATAAGATGTAACCTCAAAC---  
 ATTACAGGACTACTATTAACAAGAGATGGAGGGAATAACAGTGGT-----  
 -----  
 -----  
 GATGCAAATGAGACATTTCAGACCTGGAGGAGGAGATATGAGGGACAATTGGAGAAGTGAATTATATAAGTATA  
 AGGTAGTACAAATTGAACCAATA---GGTCTGGCACCCACCCCTGCAAAACGAAGAGTGGTG-----  
 -----GAGAGAGAAAAAAGAGCA---ATTGGA---ATGGGAGCT-----  
 ---TTCTTCCTTGGGTTCTTGGCAACA---GCAGGAAGCACTATG---GGCGCAGCGTCA---  
 ATAACGCTGACGGTACAA---GCCAGACAA---TTATTG---TCTGGTATAGTGCAACAGCAAAGC---  
 AATTTG---CTGAGG---GCTATAGAGGCTCAACAACATATGTTGAAACTCACGGTCTGGGGCATT  
 >MH078536  
 CTCTATTGCAATACATCAGGCTTGTTTAATAGCACTTGGGAAAACAATACTAACATA-----  
 -----  
 -----  
 ACCAACTCCAATATAACGCTCAAAATGCCAAATAAAGCAAATTATAAGGATGTGGCAGAGAGTAGGACAAGCAA  
 TGTATGCCCCCTCCCATTAAGGAAATATAACATGTGTATCAAAC---  
 ATTACTGGACTACTATTAACAAGAGATGGAGGGGGGAATAACT-----  
 -----  
 -----  
 AATGAGACCTTCAGACCTGGAGGAGGAGATATGAGGGACAATTGGAGAAGTGAATTATATAAGTATAAAGTAG  
 TAAAAATTGAACCACTA---GGTGTAGCACCCACCCATGCGAAGAGAAGAGTGGTG-----  
 -----GAGAGAGAAAAAAGAGCA---GTTGGA---CTGGGAGCT-----  
 GTCTTTCTTGGGTTCTTAGGGGCA---GCAGGAAGCACTATG---GGCGCAGCGTCA---  
 ATAACGCTGACGGTACAG---GCCAGACAA---TTATTG---TCTGGTATAGTGCAACAGCAGAGC---  
 AATCTG---CTGAAG---GCTATAGAGGCTCAACAACAGCTGTTGAGACTCACAGTCTGGGGCATT  
 >MH078539  
 TTCTATTGCGATACATCAGAGCTGTTCAATAGGACTTGGGTGTGGAATGACACTGTTGACAATAACACAGTTA  
 ACAAT-----  
 -----AGCACA-----  
 GATGACAATAGCACATAACTCTCCCATGCAAAATAAAGCAAATTGTAAGGATGTGGCAGAAAGTAGGACAAG  
 CAATGTATGCCCCCTCCCATCCCAGGAGTAATAAGGTGTGACTCAAAC---  
 ATTACAGGACTAATATTAACAAGAGATGGAGGGAATAGTAATAGTAGTAATAAT-----  
 -----  
 -----  
 GGCACAAGGGAAGAACTTTTCAGGCCTGGAGGGGGAGACATGAGGGACAATTGGAGAAGTGAATTATATAAGT  
 ATAAGGTAATACAAATTGAACCATTA---GGAGTAGCACCCACCAAGGCAAGGAGAAGAGTGGTG-----  
 -----GAGAGAGAAAAAAGAGCA---GTTGGA---ATGGGAGCT---  
 -----CTTTTCCTTGGGTTCTTAGGAGCA---GCAGGAAGCACTATG---GGCGCGGCGTCA---  
 ATAACGCTGACGGTACAG---GCCAGACAA---TTATTG---TCTGGTATAGTGCAACAGCAGAGC---  
 AATCTG---CTGAAA---GCTATAGAGGCTCAACAACAGCTGTTGAGACTCACAGTCTGGGGCATT  
 >HQ912707  
 TTCTATTGCAATACATCAACACTGTTTAATAGCACTTGGGAATGGCAATGACACTGCCAGCTCAAATTACACAG  
 GA-----  
 -----  
 TCAAATGATACTATAACTCTCCAATGCAGAATAAAGCAAATTGTAAACATGTGGCAGAGAGTAGGACAAGCCA  
 TGTATGCCCCCTCCCATCAAAGGAAAAATAAAGTGTGAATCAAAC---  
 ATTACAGGACTACTATTAACAAGAGATGGAGGAAAGAATAGTAGT-----  
 -----  
 -----  
 AATACAAGTGAGACCTTCAGACCTGGAGGAGGAGATATGAGGGACAATTGGAGAAGTGAATTATATAAGTATA  
 AAGTAGTCAAAATTGAACCACTA---GGTGTAGCACCTAACCGTGCAAAAAGAAGAGTGGTG-----  
 -----GAGAGAGAAAAAAGAGCAGTTGGAGTTGGACTGGGAGCA-----  
 ---GTCTTCCTTGGGTTCTTAGGAGCA---GCAGGAAGCACTATG---GGCGCGGCGTCA---  
 CTAACGCTGACGGTACAG---GCCAGACAA---TTATTG---TCCGGTATAGTGCAACAGCAGAGC---  
 AATTTG---CTGAGG---GCTATAAAGGCTCAACAACATCTGTTGAAACTCACGGTCTGGGGCATT  
 >EU513199  
 TTCTATTGCAATACAACAAAGCTGTTTAATAGCACTTGGGAATAATGATAACTACAATGTCAGCGCAAACCTCA  
 CAGAG-----

-----GAA-----  
AACAGAAAGGAAAACATAACTCTCCACTGCAGAATAAAGCAAATTGTAAATATGTGGCAGAGAGTAGGACAAG  
CAATATATATGCCCCCTCCCATCCCAGGAAACATAACTTGTGGATCAAAC---  
ATTACTGGGCTACTATTAACAAGAGATGGAGGGAATAATGGTACA-----  
-----  
-----  
AATGATACTGAGACCTTCAGGCCTGGAGGAGGAGATATGAGGGACAATTGGAGAAGTGAATTATATAAATATA  
AAGTAGTAAAAATTGAACCACTA---GGTGTAGCACCAACCCCTGCAAAAAGAAGAGTGGTG-----  
-----GAAAGAGAAAAAAGAGCA---GTTGGA---ATGGGAGCT-----  
---TTGATCTTTGGGTTCTTAGGAGCA---GCAGGAAGCACTATG---GGCGCGGCGTCA---  
ATGGCGCTGACGGTACAG---GCCAGACAA---TTATTG---TCTGGTATAGTGCAACAGCAGAGC---  
AATCTG---CTGAAG---GCTATAGAGGCTCAACAACATCTGTTGAGACTCACGGTCTGGGGCATT  
>KU168265  
TTCTATTGTTATACATCAAAATTATTTAATAGCATTGTGGAGGAGCAATGACACTTGGAGGAGCGATGGCAATG  
ACCAT-----  
-----  
ACAAAGGAAACCATAACTCTCCAATGCAGAATAAAGCAAATTGTAAATATGTGGCAGAGAGTAGGACAAGCAA  
TGTATGCCCCCTCCCATCCCAGGAGTAATAAGGTGTGAATCAAAC---  
ATTACAGGACTACTATTAACAAGAGATGGAGTAGGGAATAATATG-----  
-----  
-----  
ACAAATGAAACCTTCAGGCCTGGGGGAGGAAATATGAAGGACAATTGGAGAAGTGAAGTATATAAGTATAAAG  
TAGTAAAAATTGAACCACTA---GGTGTAGCACCTCCTATGCAAGGAGAAGAGTGGTG-----  
-----GAAAGAGAAAAAAGAGCA---GTTGGA---ATAGGAGCT-----  
GTCTTCCTTGGGTTCTTAGGAGCA---GCAGGAAGCACTATG---GGCGCGGCGTCA---  
CTAACGCTGACGGTACAG---GCCAGAAAA---TTATTG---TCTGGTATAGTGCAACAGCAGAGC---  
AATCTG---CTGCAG---GCTATAGAGGCTCAACAACAGCTGTTGAGGCTCACGGTCTGGGGCATT  
>MK086123  
TTCTATTGCAATACAACAGACCTATTT-----TCTTGGAATAGTAGTAACCCATGGAAGAACATAACG-----  
-----  
-----  
TCAAATGACAGTATAACTCTCCAATGCAGAATAAAGCAAATTGTAAAGGATGTGGCAGCAAGTAGGACAAGCAA  
TGTATGCCCCCTCCTATACCAGGAATAATAAGGTGTGAATCAAAC---  
ATTACAGGAATACTGTTAACAAGAGATGGAGGAAATAATAATACA-----  
-----  
-----  
AATAACACAGAGGTATTTCAGGCCTGGAGGAGGAGATATGAGGGACAATTGGAGAAGTGAATTATATAAATATA  
AAGTAGTAAAAATTGAACCATTA---GGTGTAGCACCTCCCGTGCAAGAAGAAGAGTGGTG-----  
-----GAGAGAGAAAAAAGAGCA---GTTGGC---CTGGGAGCT-----  
---TTCTTCCTTGGGTTCTTAGGAGCA---GCAGGAAGCACTATG---GGCGCGGCGTCA---  
ATAACGCTGACGGTACAG---GCCAGACAA---TTATTG---TCTGGTATAGTGCAACAGCAGAGC---  
AATCTG---CTGCGG---GCCATAGAGGCTCAACAACATCTGTTGAAACTCACGGTCTGGGGCATT  
>AY371122  
TTCTATTGCAATACAACAAGCCTGTTTAATAGCACTTGGCATGACAATGACACTGCCAGCTCAAACCAC-----  
-----  
-----  
ACAAATGGCACTATAACTCTCCAATGCAGAATAAAGCAAATTATAAATATGTGGCAGAGAGTAGGACAAGCAA  
TATATGCCCCCTCCTATCCCAGGAGAAATAAGGTGTGACTCAAAC---  
ATTACAGGACTACTATTAACAAGAGATGGAGGGAATAATAATGTGACG-----  
-----  
-----  
AATGGGACTGAGACTTTTCAGGCCTGAAGGAGGAGATATGAGAAACAATTGGAGAAGTGAATTATATAAGTATA  
AAGTAGTAAAAATTGAACCAATA---GGTGTAGCACCTACCCCTGCAAAAAGAAGAGTGGTG-----  
-----GGGAGAGAAAAAAGAGCA---CTG-----GGAGCTGCT-----  
---GTCTTCCTTGGGTTCTTAGGAGCA---GCAGGAAGCACTATG---GGCGCGGCGTCA---  
ATAACGCTGACGGTACAG---GCCAGACAA---CTATTG---TCCGGTATAGTGCAACAGCAGAGC---  
AATTTG---CTGAGG---GCTATAGAGGCTCAACAACACCTGTTGAGACTCACGGTCTGGGGCATT  
>AY371123  
TTCTATTGCAATACAACAGACCTATTTAATAGCACTTGGAAACGAAACCACAGAGTCAAAT-----  
-----

-----  
GGCAATATGAATCTAACAATCCCATGCAGAATAAAACAATTTGTGAATTTGTGGCAGAAAGTAGGACAAGCAA  
TGTATGCCCCCTCCCATCCAAGGAGAAATAAGGTGTGAATCAAAC---  
ATTACAGGATTACTATTAACAAGAGATGGAGGGGTAAATAATAAT-----  
-----  
-----  
AATAGTACGGAGATATTCAGGCCTGGAGGAGGAGATATGAGGGACAATTGGAGAAGTGAATTATATAAGTATA  
AGGTAGTTCAAATTAAACCACTA---GGTGTGGCACCTACCCATGCAAAACGAAGAGTGGTG-----  
-----GAGAGAGAAAAAGAGCA---GTTGGA---ATAGGAGCT-----  
---GTTTTCTTGGGTTCTTAGGAGCA---GCAGGAAGCACTATG---GGCGCGGCGTCA---  
ATAACGCTGACGGCACAG---GCCAGACAA---TTATTG---TCTGGTATAGTGCAACAGCAGAGC---  
AATCTG---CTGAGG---GCTATAGAGGCTCAACAACATCTGTTGAAACTCACGGTCTGGGGCATT  
>AY371124  
TTCTATTGCAATACATCACAACCTGTTTAATAGAACTTGGGGTAATAATAGCACCTGGGGAAACGAGACAGGGG  
AG-----  
-----  
GGCAATATAACTATCACTCTCCCATGCAGAATAAAGCAAATTTGTAAATATGTGGCAAAGAGTAGGACGAGCAA  
TGTATGCCCCCTCCCATCCAAGGAGAAATAAGGTGTAACTCAAAC---  
ATTACAGGACTACTATTAACAAGAGATGGAGGGAATAATACTAAT-----  
-----  
-----  
AGTACAGATGAGATCTTCAGGCCTGGAGGAGGAGATATGAGGGACAATTGGAGAAGTGAATTATATAAGTATA  
AGGTAGTAAAAATTGAACCACTA---GGTGTAGCACCCACCCATGCAAAAAGAAGAGTGGTG-----  
-----GAGAGAGAAAAAGAGCA---GTTGGA---CTGGGAGCT-----  
---GTTTTCTTGGGTTCTTAGGAGCA---GCAGGAAGCACTATG---GGCGCGGCGTCA---  
ATAACGCTGACGGTACAG---GCCAGACAA---TTATTG---TCTGGTATAGTGCAACAGCAGAGC---  
AATTTG---CTGAAG---GCTATAGAGGCTCAACAACATCTGTTGAGACTCACAGTCTGGGGCATT  
>AY371131  
TTCTATTGCGATACATCAGGACTGTTTAATAGCACTTGGGACAGCACTTGGGGCAATAACAATGACAGCTCAG  
AG-----  
-----  
GCAAAATGGCACTATAACTCTCCAATGCAGAATAAAGCAAATTTGTAAATATGTGGCAGAAAGTAGGACAAGCAA  
TGTATGCCCCCTCCCATCCAAGGAGTAATAAGGTGTGAATCAAAC---  
ATTACAGGACTAATATTAACAAGGGATGGAGGGCCTGATAGTCCA-----  
-----  
-----  
AATGAGATATTCAGGCCTGGAGGAGGAGATATGAGGGACAATTGGAGAAGTGAATTATATAAGTATAAGGTAG  
TACAAATAGAACCAATA---GGTGTGGCACCCACTTATGCAAAGAGAAGAGTGGTG-----  
-----GAGAGAGAAAAAGAGCA---TTTGGA---GTGGGAGCT-----  
GTCTTCCTTGGGTTCTTAGGAGCA---GCAGGAAGCACTATG---GGCGCGGCGTCA---  
ATAACGCTGACGGTACAG---GCCAGACAA---TTATTG---TCCGGTATAGTGCAACAGCAAAGC---  
AATTTG---CTGAGG---GCTATAGAGGCTCAACAACATCTGTTGAAACTCACGGTCTGGGGCATT  
>GU201498  
TTCTATTGCAATACATCACAACCTATTTAATAGCACTTGGGATGGTCCATTTAATAGCACTTGAATGACAATA  
GCACAGAC-----  
-----ACA-----  
GAGTTAAATGACACTATAACTCTCCAATGCAGAATAAAGCAAATTTGTAAATATGTGGCAGAGAGTAGGACAAG  
CAATGTATGCCCCCTCCCATCCAAGGAGTAATAAGGTGTGAATCAAAC---  
ATTACAGGACTGCTATTAACAAGGGATGGAGGGAATAATAGCACA-----  
-----  
-----  
AATGAGACATTCAGGCCTGGAGGAGGAGATATGAGGGACAATTGGAGAAGTGAAGTATATAAGTATAAGGTAG  
TACAAATTGAACCACTA---GGTGTGGCACCCACCCGGGCAAAAAGAAGAGTGGTG-----  
-----GAGAGAGAAAAAGAGCA---GTAGGA---CTGGGAGCT-----  
GTCTTCTTTGGGTTCTTAGGAGCA---GCAGGAAGCACTATG---GGCGCGGCGTCA---  
ATAACGCTGACGGTACAG---GCCAGACAA---TTATTG---TCCGGTATAGTGCAACAGCAGAGC---  
AATCTG---CTGAGG---GCTATAGAGGCTCAACAACATCTGTTGAAACTCACGGTCTGGGGCATC  
>GU201499  
TTCTATTGCAATACATCAAACTGTTTAATAGCACTTGGATTAAATGGCACTAGCAATTGGATTAAATGACACTT  
GGACTAAT-----

-----GGCAAT-----  
GAGGATGATAATAAAATAACTCTCCAATGCAGAATAAAGCAAATTATAAATATGTGGCAGAGAGTAGGACAAG  
CAATGTATGCCCCCTCCCATCCGAGGAGAAATAAGGTGTCAATTCAAAT---  
ATTACAGGTCTACTATTAACAAGAGATGGAGGGAATAATAATAGT-----  
-----  
-----  
GCTGCAAATGAAACCTTCAGGCCTACAGGAGGAGACATGAGGGACAATTGGAGAAGTGAATTATATAAATATA  
AAGTAGTAAAAATTGAACCACTA---GGTGTAGCACCAAACAAGGCAAAAAGAAGAGTGGTG-----  
-----GAGAGAGAAAAAAGAGCA---GTTGGA---ATGGGAGCT-----  
---TTCTTCCTTGGGTTCTTAGGAGCA---GCAGGAAGCACTATG---GGCGCGGCGTCA---  
ATAACGCTGACGGTACAG---GCCAGACAA---TTATTG---TCTGGTATAGTGCAACAGCAGAGA---  
AATCTG---CTGCAG---GCTATAGAGGCTCAACAACATCTGTTGAGACTCACGGTCTGGGGCATT  
>AY371137  
TTCTATTGCAATACATCACAACCTGTTTAATAGTACTTGGAAATAGTACTTATAGCAATAATGCCAACTTA----  
-----  
-----  
ACAAATGGCACTATAACTCTCCAATGCAGAATAAAGCAAATTGTACAGATGTGGCAGAGAGTAGGACAAGCAA  
TGTATGCCCCCTCCCATCCAAGGAGTAATAAGGTGTGAGTCAAAC---  
ATAACAGGATTACTATTAACAAGAGATGGAGGGACAAATAATACA-----  
-----  
-----  
AATAATACCGAGACATTCAGGCCTGGAGGAGGAGATATGAGGGACAATTGGAGAAGTGAATTATATAAGTATA  
AGGTAGTACAAATTGAACCAGTG---GGTGTGGCACCCACCCATGCAAAAAGAAGAGTGGTG-----  
-----GAGAGAGAAAAAAGAGCA---GTTGGA---CTGGGAGTT-----  
---GCGTTCCTTGGGTTCTTAGGAGCA---GCAGGAAGCACTATG---GGCGCGGCGTCA---  
ATAACGCTGACGGTACAG---GCCAGACAA---TTATTG---TCTGGTATAGTGCAACAGCAGAGC---  
AATTTG---CTGAAG---GCTATAGAGGCTCAACAACATATGTTGAAACTCACGGTCTGGGGCATT  
>AY371132  
TTCTATTGCAGTACATCAAGACTATTTAATAGCACGTGGGATAATAGCACGTGGAATAACAATACCACT----  
-----  
-----  
GACACAGATGACATAACTCTCCCATGCAGAATAAAGCAATTTGTAAATATGTGGCAGAGAGTAGGACAAGCAA  
TGTATGCCCCCTCCTATCCGAGGAGAAATAAGGTGTGAGTCAAAC---  
ATTACAGGACTACTATTAACAAGGGATGGAGGAAATAATAGCACA-----  
-----  
-----  
AATGAGACATTCAGGCCTGGAGGAGGAGATATGAGGGACAACCTGGAGAAGTGAATTATATAAGTATAAGGTAG  
TACAAATTGAACCACTA---GGTGTGGCACCCACCCGTGCAAGGAGAAGAGTGGTG-----  
-----GAGAGAGAAAAAAGAACA---GTAGGA---CTGGGAGCT-----  
GTCTTCCTTGGGTTCTTAGGAGCA---GCAGGAAGCACTATG---GGCGCGGCGTCA---  
ATAACGCTGACGGTACAG---GCCAGACAA---TTATTG---TCCGGTATAGTGCAACAGCAGAGC---  
AATCTG---CTGAGG---GCTATAGAGGCTCAACAACATCTGTTGAAACTCACGGTCTGGGGCATT  
>GU201500  
TTCTATTGCAATACATCAAACTGTTTAATAGCATTTGGTCTAACAATACATCAAAATCGTTTAATAGCACTT  
GGCTTAACAGT-----  
-----AGCATT-----  
GGGAATGACAGTAGCATAACTCTCCAATGCAGAATAAAGCAATTTGTAAGTATGTGGCAGAGAGTAGGACAAG  
CAATGTATGCTCCTCCCATCCCAGGAGAACTAAGGTGCGAATCAAAC---  
ATTACAGGACTACTATTAACAAGAGATGGAGGAGGTAATAATAGG-----  
-----  
-----  
GAAAATGAGACCTTCAGGCCTGGAGGAGGAGATATGAGGGACAATTGGAGAAGTGAATTATATAAGTATAAAG  
TAGTAAAAATTGAACCACTA---GGTGTAGCACCTCCCAGGCAAAAAGAAGAGTGGTG-----  
-----AATAGAGAAAAAAGAGCA---GTTGGA---ATAGGAGCT-----  
CTCTTCCTTGGGTTCTTAGGAGCA---GCAGGAAGCACTATG---GGCGCGGCGTCA---  
ATGACGCTGACGGTACAG---GCCAGACAA---TTATTG---TCTGGTATAGTGCAACAGCAGAGC---  
AATCTG---CTGAAG---GCTATAGAGGCTCAACAACATCTGTTGAGACTCACGGTCTGGGGCATT  
>AY371134  
TTCTATTGCAATACATCACAACCTGTTTAATAGCACTTGGAAATCTAATAGCACTTGGAAACAGCACTAGGAACA  
AT-----

-----  
 AACACTGACATTATAACTCTCCAATGCAGAATAAAGCAAATTGTAAATATGTGGCAGAAAATAGGACAAGCAA  
 TGTATGCCCCCTCCCATCCAAGGAGTAATAGAGTGTAAATCAAAC ---  
 ATTACAGGACTACTATTAACAAGGGATGGAGGGCGAGGGCCTGAT -----  
 -----  
 -----  
 AATACAAGTGAATATTCAGGCCTGGAGGAGGAGATATGAGGGACAATTGGAGAAGTGAATTATATAAGTATA  
 AGGTAGTACAAATAGAGCCAATA --- GGTGTGGCACCCACCCATGCAAAAAGAAGAGTTGTG -----  
 -----GAGAGAGAAAAAAGAGCA --- GTTGGA --- CTGGGAGCT -----  
 --- GTCTTCCTTGGTTTCTTAGGAGCA --- GCAGGAAGCACTATG --- GGCGCGGCGTCA ---  
 ATAACGCTGACGGTACAG --- GCCAGACAA --- TTAGTG --- TCTGGTATAGTGCAACAGCAGAGC ---  
 AATCTG --- CTGAGG --- GCTATAGAGGCTCAACAGCATCTGTTGAAACTCACAGTCTGGGGCATT  
 >AY371136  
 TTCTATTGCAATACATCAAAGCTATTTAATAGCACTTGGACTTGGACCAATGACACTGCCAGCTCAAATGACA  
 CAAAG -----  
 -----  
 GGGTTAAATGACACTATAACGCTCCAATGCAGAGTAAGGCAAATTGTAAGAATGTGGCAGAAAGTAGGACAAG  
 CAATGTATGCCCCCTCCCATCCGAGGAGTAATAAGATGTGAGTCAAAC ---  
 ATTACAGGACTACTATTAACAAGGGATGGAGGGACAAATAATAAA -----  
 -----  
 -----  
 AATAATGAGACATTTAGGCCTGGAGGAGGAAATATGAGGGACAATTGGAGAAGTGAATTATATAAGTATAAGG  
 TAGTACAAATTGAACCACTA --- GGTGTGGCACCCACCCATGCAAGAAGAAGAGTGGTG -----  
 -----CAGAGAGAAAAAAGAGCA --- GTTGGA --- CTGGGAGCT -----  
 GTCTTCCTTGGGTTCTTAGGAGCA --- GCAGGAAGCACTATG --- GGCGCGGCGTCA ---  
 ATAACGCTGACGGTACAG --- GCCAGACAA --- TTATTG --- TCCGGTATAGTGCAACAGCAGAGC ---  
 AATCTG --- CTGAGG --- GCTATAGAGGCTCAACAGCATCTGTTGAAACTCACGGTCTGGGGCATT  
 >AY371138  
 TTCTATTGCAATACATCAGAACTATTTAATAGCACTTGGGCACATGACACAAATAACACAGGGTTG -----  
 -----  
 -----  
 GATAATGGCAATCTAACTCTCCAATGCAGAATAAAGCAAATTGTAAGAATGTGGCAGAGGACAGGACAAGCAA  
 TGTTTGCCCCCTCCCATCCAAGGAGAAATAAAGTGTGAATCAAAC ---  
 ATTACAGGATTACTATTAACAAGAGATGGAGGGAACAATGGTAGT -----  
 -----  
 -----  
 GCAAAATGAGACATTCAGGCCTGGAGGAGGAGATATGAGGGACAATTGGAGAAGTGAATTATATAAGTATAAGG  
 TAGTACAAATTGAACCAATA --- GGTGTGGCACCCACCCATGCAAAAAGAAGAGTGGTG -----  
 -----GAGAGAGGAAAAAGAGCAGTAGTTGGA --- CTGGGAGCT -----  
 GTCTTCCTTGGGTTCTTAGGAGCA --- GCAGGAAGCACTATG --- GGCGCAGCGTCA ---  
 ATAACGCTGACGGTACAA --- GCCAGACAA --- TTATTG --- TCTGGTATAGTGCAACAGCAGAGC ---  
 AATTTG --- CTGAGG --- GCCATAGAGGCTCAACAACAACCTGTTGAAACTCACGGTCTGGGGCATT  
 >AY371142  
 TTCTATTGCAATACATCAAACTGTTTAATAGCACTTGGGAAAATGGAACTTTAACCAGCTCAAACCACACAA  
 GG -----  
 -----  
 TCAAAATGGCACCATAACCCTCCAATGCAAAATAAGGCAAATTGTAAGAATGTGGCAGAGAGTAGGACAAGCAA  
 TGTATGCCCCCTCCCATCGACGGGACATAAGGTGCGAATCAAAC ---  
 ATTACAGGACTACTATTAACAAGAGATGGAGGGAGTAAAAATAGC -----  
 -----  
 -----  
 ACAAATAATGAGACTTTTCAGGCCTGGAGGAGGAGATATGAGGGACAATTGGAGAAGTGAATTATATAAGTATA  
 AAGTAGTAGAAGTTGAACCAATA --- GGTGTAGCACCCACCTATGCAAAAAGAAGAGTGGTG -----  
 -----GAGAGAGAAAAAAGAGCA --- GTTGGA --- CTGGGAGCT -----  
 --- GTCTTCCTTGGGTTCTTAGGAGCA --- GCAGGAAGCACTATG --- GGCGCGGCGTCA ---  
 ATAACGCTGACGGTACAG --- GCCAGACAA --- TTGTTG --- TCTGGTATAGTGCAACAGCAGAGC ---  
 AATTTG --- CTGAAG --- GCTATAGAGGCTCAACAACATCTGTTGAGACTCACGGTCTGGGGCATT  
 >AY371125  
 TTCTATTGCAATACATCAGGACTATTTAATAGCACTTGGACTTGGAAATAGTGATAATAACACTGGATATAGCA  
 AC -----

-----  
 AACACTAGTGAACCTTATAACTCTCCAATGTAGAATAAAGCAGATTATAAATATGTGGCAGAGAGTAGGACAAG  
 CAATGTATGCCCCCTCCCATTAGAGGAATAATAAAATGTGAATCAAAC---  
 ATTACAGGGCTATTATTAACAAGAGATGGAGGAAATAATAGTACA-----  
 -----  
 -----  
 AATGAGACATTCAGGCCTGGAGGAGGAGATATGAGGGACAATTGGAGAAGTGAATTATATAAATATAAGGTAA  
 TACAAATTGAACCATTA---GGTGTGGCACCCAACAAGGCAAAAAGAAGAGTGGTG-----  
 -----GAGAGAGAAAAAGAGCA---GTGGGA---ATTGGAGCT-----  
 GTCTCTTTGGGTTCTTAGGAGCA---GCAGGAAGCACTATG---GGCGCAGCGTCA---  
 ATAACGCTGACGGTACAG---GCCAGACAA---TTATTG---TCTGGTATAGTGCAACAGCAGAGC---  
 AATCTG---CTGAGG---GCTATAGAGGCTCAACAACATCTGTTGCAACTCACGGTCTGGGGCATT  
 >AY371126  
 TTCTATTGCAATACATCAAACCTGTTTAATAGCACTTGGATTAGCAATAGCACTTGGAAATAGCAGTAGCAGTA  
 CA-----  
 -----  
 GGGTCAGACATTATAACTCTCCAATGCAGAATAAAGCAAATTGTAAATATGTGGCAGAAAAGTAGGACAAGCAA  
 TGTATGCCCCCTCCCATCCGAGGAGAAATAAGATGTAACCTCGAAC---  
 ATTACAGGACTACTATTAACAAGGGATGGAGGGGATAGAGGGAATAGTGGT-----  
 -----  
 ----  
 GGTGCAAATGGGACCGAACTTTCAGGCCTGGAAGAGAAAAATATGAAGGACAATTGGAGAAGTGAATTATATA  
 AGTATAAGGTAGTAAAAATTGAACCACTA---GGTGTAGCACCCCTCCCATGCAAAAAGAAGAGTAGTG-----  
 -----GAGAGAGAAAAAGAGCA---GTTGGA---  
 ATGGGAGCT-----GTCTTCCTTGGGTTCTTAGGAGCA---GCAGGAAGCACTATG---  
 GGCGCAGCGTCA---ATAACGCTGACGGTACAG---GCCAGACAA---TTATTG---  
 TCCGGTATAGTGCAACAGCAGAAC---AATCTG---CTGAGA---  
 GCTATAGAGGCTCAACAACATCTGTTGAAACTCACGGTCTGGGGCATT  
 >AY371127  
 TTCTATTGCAACACAACAGACTTATTTAATAGCACTTGGGATAACAGTAGCATTGAGACTAACTATAGCACTG  
 GG-----  
 -----  
 AATAACAATGAACTATAACTCTCCAATGCAGAATAAAACAAATTGTAAATATGTGGCAGAAAAGTAGGACAAG  
 CAATGTATGCCCCCTCCCATCCGAGGAGTAATAAGGTGTGAATCAAAC---  
 ATTACAGGGTTACTATTAACAAGAGATGGAGGGAACAATACTGAGGCA-----  
 -----  
 -----  
 AATGAGAATGAGACATTCAGGCCTGGAGGAGGAGATATGAGGGACAATTGGAGAAGTGAATTATATAAGTATA  
 AGGTAGTACAAATTGAGCCACTA---GGTGTGGCACCCACCCAGGCAAAGAGAAGAGTGGTG-----  
 -----CAGAGAGAAAAGAGAGCA---GTTGGA---ATGGGAGCT-----  
 ---TTCTTCCTTGGGTTCTTAGGAGCA---GCAGGAAGCACTATG---GGCGCGGCGTCA---  
 ATAACGCTGACGGTACAG---GCCAGACAA---TTATTG---TCTGGTATAGTGCAACAGCAGAGC---  
 AATCTG---CTGAGG---GCTATAGAGGCTCAACAACATCTGTTGAAACTCACGGTCTGGGGCATT  
 >AY371139  
 TTCTATTGCAATACATCAAGCCTGTTTAATAGCATTTGGAGTACCAATAGTACTGGGAATAACAATAGCACT-  
 -----  
 -----  
 GGGGATGGCAATATAACTCTCCAATGCAGAATAAAGCAAATTATAAAGATGTGGCAGAGAGTAGGACAAGCAA  
 TGTATGCCCCCTCCCATCCGAGGAGAAATAAGGTGCAACTCAAAC---  
 ATTACAGGACTACTATTAACAAGAGATGGAGGGGTTAATAATAGT-----  
 -----  
 -----  
 ATAAATGAGACCTTCAGGCCTGGAGGAGGAGATATGAGGGACAACCTGGAGAAGTGAATTATATAAGTATAAAG  
 TAGTAAAGATTGAACCACTA---GGTGTAGCACCCACCCGTGCAAAAAGAAGAGTGGTG-----  
 -----GGGAGAGAAAAAGAGCAGTTGTTGGA---CTGGGAGCT-----  
 GTCTTCCTTGGGTTCTTAGGAGCG---GCAGGAAGCACTATG---GGCGCGGCGTCA---  
 ATAACGCTGACGGTACAG---GCCAGACAA---TTATTG---TCTGGTATAGTGCAACAGCAGAGC---  
 AATTTG---CTGAGG---GCTATAGAGGCTCAACAACATCTGTTGAGACTCACGGTCTGGGGCATT  
 >AY371140

TTCTATTGCAATACATCAAACTGTTTAAATAGCACTTGGAGTAACAATGACACTGCCAGCTCAAACCACACAG  
GG-----  
-----  
TTAAATAACACTATAACTCTCCAATGCAGAATAAAGCAAATTATAAATATGTGGCAGAAAGTAGGACAAGCAA  
TGTATGCCCCCTCCCATCCGAGGAGAAATAAGGTGTGAATCAAAC---  
ATTACAGGACTACTACTAACAAGAGATGGAGGGAGTAATAATAGT-----  
-----  
ACAAATGAGACTTTTCAGGCCTGGAGGAGGAGATATGAGGGACAATTGGAGAAGTGAATTGTATAAGTATAAAG  
TAGTAAAAATTGAACCACTA---GGTGTAGCCCCCACCAGGCAAAAAGAAGAGTGGTG-----  
-----GGGAGAGAAAAAAGAGCA---GTTGTTGGACTGGGAGCT-----  
GTCTTCCTTGGGTTCTTAGGAGCA---GCAGGAAGCACTATG---GGCGCGGCGTCA---  
ATGACGCTGACGGTACAG---GCCAGACAA---TTGTTG---TCCGGTATAGTGCAACAGCAGAGC---  
AATTTG---CTGAGG---GCTATAGAGGCTCAACAACATCTGTTGAAACTCACGGTCTGGGGCATT  
>AY371146  
TTCTATTGCAATACAACAGCACTATTTAATAGCACTTGGTTTGGCAATGAGACTGACAGCTCAAACCATACAA  
GG-----  
-----  
TCAAAATGACACTATAACTCTCCAATGCAGAATAAAGCAAATTGTAAGGATGTGGCAGAAAGTAGGACAAGCAA  
TGTATGCCCCCTCCCATCAAAGGAAACATAACGTGTAAATCAAAT---  
ATTACAGGAATACTATTAACAAGAGATGGAGGAACTAATAGAACA-----  
-----  
AATGAGACATTCAGGCCTGGAGGAGGAGATATGAGAGACAATTGGAGAAGTGAATTATATAAGTATAAGGTAG  
TACAAATTGAACCACTA---GGTGTGGCACCTACCCCTGCAAAAAGAAGAGTGGTG-----  
-----CAGAGAGAAAAAAGAGCA---GTTGGA---ATGGGAGCT-----  
TTCTTCCTTGGGTTCTTAGGAGCA---GCAGGAAGCACTATG---GGCGCGGCGTCC---  
CTGACGCTGACGGTACAG---GCCAGACAA---TTGTTG---TCTGGTATAGTGCAACAGCAGAGC---  
AATTTG---CTGAGG---GCTATAGAGGCTCAACAACATCTGTTGAAACTCACAGTCTGGGGCATT  
>AY371128  
TTCTATTGCAATACATCAAACTGTTCAATAGCATTTGGACTTTGGAGAATGGCAATTGGACTAACAATAGCA  
CAGAA-----  
-----  
AATGGAAATGACACTATAACTCTCCAATGCAGAATAAAGCAAATTATAAATATGTGGCAGAGAGTAGGACAAG  
CAATGTATGCCCCCTCCCATCCCAGGAGTAATAATGTGTAAATCAAAT---  
ATCACAGGACTACTATTAACAAGAGATGGAGGGAACAGTGGTGGT-----  
-----  
GCAAAATGAGACCTTCAGGCCTGGAGGAGGAGATATGAGAGACAATTGGAGAAGTGAATTATATAAGTATAAAG  
TGGTGAAGATTAAACCACTA---GGAGTAGCACCCACCAATGCAAAAAGAAGAGTGGTG-----  
-----GGGAGAGAGAAAAAGAGCA---GTTGGA---CTGGGAGCT-----  
GTCTTCCTTGGGTTCTTAGGAGCA---GCAGGAAGCACTATG---GGCGCGGCGTCA---  
ATAACGCTGACGGTACAG---GCCAGACTA---TTATTG---TCTGGTATAGTGCAACAGCAAAGC---  
AATTTG---CTGAAG---GCTATAGAGGCTCAACAACATCTGTTGAGACTCACGGTCTGGGGCATT  
>AY371129  
TTCTATTGCAATACATCAGAACTATTTAATAGCACTTGGGGTAATAGCACTTGGGATAATAGCACTTGGGATA  
ACAGC-----  
-----  
TCAAATTATGACAATATAACTCTCCAATGCAGAATAAAGCAAATTATAAATATGTGGCAGAAAGTAGGACAAG  
CAATGTATGCCCCCTCCCATCCCAGGAGTAATAAGGTGTGAATCAAAC---  
ATTACAGGACTACTATTAACAAGGGATGGAGGGAGCAGTAATGGTACA-----  
-----  
AATGAGACAAGTGAGACATTCAGGCCTGGAGGAGGAGATATGAGAGACAATTGGAGAAGTGAATTATATAAGT  
ACAAGGTAGTACAAATTGAACCATTA---GGTGTGGCACCCCTCCCATGCAAAAAGAAGAGTGGTG-----  
-----GAGAGAGGAAAAAGAGCA---GTTGGA---ATGGGAGCT---  
-----TTCTTCCTTGGGTTCTTAGGAGCA---GCAGGAAGCACTATG---GGCGCAGCGTCA---  
CTGACGCTGACGGTACAA---GCCAGACAA---TTATTG---TCTGGTATAGTGCAAGCAGCAGAGC---  
AATTTG---CTGAAG---GCTATAGAGGCTCAACAACATCTGTTGAAACTCACGGTCTGGGGCATT  
>AY371130

TTCTATTGTAATACAACAAAACCTATTTTAACACTGCCAGCTTAAATGACACAGAG-----  
-----  
-----  
ACAAATGGCACTATAACTCTCCCATGCAGAATAAAACAAATTGTAAATATGTGGCAGAAAGTAGGACAGGCAA  
TGTATGCCCCCTCCCATCCAAGGAGTAATAAGGTGTGAATCAAAC---  
ATTACAGGACTACTATTAAACAAGAGATGGAGGGAACAATAGGAGT-----  
-----  
-----  
ACAGAAACCTTTAGGCCTGGAGGAGGAGATATGAGGGACAATTGGAGAAGTGAATTATATAAGTATAAAGTAG  
TAAAAATTGAACCACTA---GGTGTGGCACCCACCCGTGCAAAAAGAAGAGTGGTG-----  
-----GAGAGAGAAAAAGAGCA---GTTGGA---ATGGCAGCT-----  
GTCTTCTTTGGGTTCTTAGGAGCA---GCAGGAAGCACTATG---GGCGCGGCGTCA---  
ATAACGCTGACGGTACAG---GCCAGACAA---TTATTG---TCCGGTATAGTGCAACAGCAGAGC---  
AATTTG---CTGAAA---GCTATAGAGGCTCAACAACATATGTTGAGACTCACGGTCTGGGGCATT  
>GU201513  
TTCTATTGCAATACATCAAGACTATTTAATAGTACTTGGACTAGCAACTCTACAACAAATTCAACT-----  
-----  
-----  
GCTAATGAAATTATAACTCTCCAATGTAGAATAAAGCAAATTGTAAATATGTGGCAGACGGTAGGACAAGCAA  
TGTATGCCCCCTCCCATCCCAGGAATAATAAGGTGTGACTCAAAC---  
ATTACAGGACTACTATTAAACAAGAGATGGAGGGGATACAAATAGA-----  
-----  
-----  
ACAAATGAAATATTCAGACCTGGAGGAGGAGATATGAGGGACAATTGGAGAAGTGAGTTATATAAGTATAAGG  
TAGTAAAAATTGAACCAATA---GGTGTGGCACCCACCCCTGCAAAAAGAAGAGTGGTG-----  
-----GAAAGAGGAAAAAGAGCA---GTTGGA---CTGGGAGCT-----  
GTCTTCCTTGGGTTCTTAGGAGCA---GCAGGAAGCACTATG---GGCGCGGCGTCA---  
ATAACGCTGACGGTACAG---GCCAGACAA---TTATTG---TCCGGTATAGTGCAACAGCAGAGC---  
AATTTG---CTGAGG---GCTATAGAGGCTCAACAACATCTGTTGAAACTCACGGTCTGGGGCATT  
>GU201514  
TTCTATTGCAATACATCAGAGTTGTTTAATAGCATTGGAATAACAATGGCAGCATTGTTGTTATAACAATGACA  
CTGCTATCAAT-----  
-----AACACAGAG-----  
CCAAAGAATAAGACTCTAACTCTCCAATGCAGAATAAAGCAGGTTATAAAGATGTGGCAGAGAGTAGGACAAG  
CAATGTATGCCCCCTCCCATCCGAGGAGAAATAAGGTGTGATTCAAAC---  
ATTACAGGACTATTATTAAACAAGAGATGGAGGGAATAATAGGACA-----  
-----  
-----  
GATGAGACCTTCAGGCCTGGAGGAGGAGATATGAGGGACAATTGGAGAAGTGAATTATATAAGTATAAAGTAG  
TAAAAATTGAACCACTA---GGTGTAGCACCCACCTATGCAAAAAGAAGAGTGGTG-----  
-----GAGAGAGAAAAAGAGCA---GTTGGA---ATAGGAGCT-----  
GTCTTCCTTGGGTTCTTAGGAGCA---GCAGGAAGCACTATG---GGCGCGGCGTCA---  
ATAACGCTGACGGTACAG---GCCAGACAA---TTATTG---TCTGGTATAGTGCAACAGCAGAGC---  
AATTTG---CTGAAG---GCTATAGAGGCTCAACAACATCTGTTGAGACTCACGGTCTGGGGCATT  
>AY371141  
TTCTATTGCAATACATCAGGACTGTTTAATAGCAGTTGGGATAGCAATAGCACTGAGGAAACCAATAATTCAG  
AA-----  
-----  
AATAATGAACTATAACTCTCCAATGCAGAATAAAGCAAATTGTAAACATGTGGCAGAGAGTAGGACAAGGAA  
TGTATGCCCCCTCCCATCCAGGAATAATAAGGTGTGAATCAAAC---  
ATTACAGGACTACTATTAAACAAGAGATGGAGGGGAAAATAATAGT-----  
-----  
-----  
ACAAATCAGACCTTCAGGCCTGGAGGAGGAGATATGAGGGACAATTGGAGAAGTGAATTATATAAGTATAAAG  
TAGTAAAAATTGAACCAATA---GGTGTAGCACCCACCCATGCAAAAAGAAGAGTGGTG-----  
-----GAGAGAGGAAAAAGAGCA---GTTGGA---CTGGGAGCT-----  
GTCTTCCTTGGGTTCTTAGGAGCA---GCAGGAAGCACTATG---GGCGCGGCGTCA---  
ATAACGCTGACGGTACAG---GCCAGACAA---TTATTG---TCTGGTATAGTGCAACAGCAGAGC---  
AATCTG---CTGAAA---GCTATAGAGGCTCAACAACATCTGTTGAAACTCACGGTCTGGGGCATT  
>DQ313247

TTCTATTGTAATACAACAGATCTGTTTAAATAGCACTTGGGCTAATAATAGCAATAAGTGGGACTCAACAGCCC  
 CA-----  
 -----  
 GAGAATGGCACTATAACTCTCAAATGCAGAATAAAGCAAATTGTAAATATGTGGCAGAGAGTAGGACAAGCAA  
 TATATGCCCCCTCCCATCGAAGGAGACATAAGGTGTGAATCAAAT---  
 ATTACAGGACTACTATTAAACAAGAGATGGAGGGGAAAATAGTAGT-----  
 -----  
 -----  
 GAGCCCAGTGAGACCTTCAGGCCTGGAGGGGGAGATATGAGGGATAATTGGAGAAGTGAATTATATAAGTATA  
 AAGTAGTAAAAATTGAACCACTA---GGTGTAGCACCTACCCATGCAAAAAGAAGAGTGGTG-----  
 -----GAGAGAGGAAAAAGAGCA---GTTGGA---CTGGGAGCT-----  
 ---TTCTTCTTTGGGTTCTTAGGAGCA---GCAGGAAGCACTATG---GGCGCGGCGTCA---  
 ATAACGCTGACGGTACAG---GCTAGACAA---TTATTG---TCTGGTATAGTGCAACAGCAGAGC---  
 AATTTG---CTGAGA---GCTATAGAGGCTCAACAACATATGTTGAAACTCACGGTCTGGGGCATT  
 >MK086121  
 TTCTATTGCAATACATCAAATTTATTCAATAGCACTTGGGAATAGCACTTGGGGTAATAACACTTGGGAATAGCA  
 GTAGC-----  
 -----  
 ACTAATATTAATATAACGCTTCAATGCAGAATAAAGCAAATTGTAAATATGTGGCAGACAGTAGGACAAGCAA  
 TGTATGCCCCCTCCCATCCAAGGAGAAATAAGGTGTGAATCAAAC---  
 ATTACAGGATTACTATTGACAAGAGATGGAGGGGGGACAGAGACC-----  
 -----  
 -----  
 AATAATACAGAGATCTTCAGGCCTGGAGGAGGAGATATGAGGGACAATTGGAGAAGTGAATTATATAAGTATA  
 AAGTAGTAAAAATTGAACCACTA---GGTGTAGCACCCACCCATGCAAAAAGAAGAGTGGTG-----  
 -----GAGAGAGAAAAAGAGCA---GTTGGA---CTGGGAGCT-----  
 ---GTCTTCCTTGGGTTCTTAGGAGCA---GCAGGAAGCACTATG---GGCGCGGCGTCA---  
 ATAACGCTGACGGTACAG---GCCAGACAA---TTATTG---TCTGGTATAGTGCAACAGCAGAGC---  
 AATTTG---CTGAAG---GCTATAGAGGCTCAACAACAGATGTTGAGACTCACGGTCTGGGGCATT  
 >EU513187  
 TTCTATTGCAATACAACAGCACTATTTAATAGCACTTGGGATAACAATAGTACTAGGGAAGACAATAACTCAA  
 CA-----  
 -----  
 GGAATGACACTATAACTCTCCAATGCAGAATAAAGCAAATTGTGAGGATGTGGCAAAGATCAGGACAAGCAA  
 TGTATGCCCCCTCCCATCCAAGGAGTAATAAAGTGTAAATCAAAT---  
 ATCACAGGACTACTATTAAACAAGGGATGGGGGGAATAATGAAAGT-----  
 -----  
 -----  
 ACAAATGAGACCTTCAGACCTGGAGGAGGAGATATGAGGGACAATTGGAGAAGTGAATTATATAAGTATAAAG  
 TAGTAAAAATTGAACCACTA---GGTGTAGCACCCACCCATGCAAAAAGAAGAGTGGTG-----  
 -----CAGAGAGAAAAAGAGCA---GTAGGA---CTGGGAGCT-----  
 GTCTTCTTTGGGTTCTTAGGAGCA---GCAGGAAGCACTATG---GGCGCGGCGTCA---  
 ATAACGCTGACGGTACAG---GCCAGACAA---TTATTG---TCTGGTATAGTGCAACAGCAGAGC---  
 AATTTG---CTGAAG---GCTATAGAGGCTCAACAGCATCTGTTGAAACTCACGGTCTGGGGCATT  
 >EU513195  
 TTCTATTGCAATACATCAAGACTGTTTAAATAGCACTTGGGGTAGCAATAACACTTGGGATAACAGC-----  
 -----  
 -----  
 ACGGAGCAAAATATAACTCTCAGATGCAAAATAAAGCAGATTATAAATATGTGGCAGAGAGTAGGACAAGCAA  
 TGTATGCCCCCTCCCATCCGAGGAGAAATAAGATGTGAATCAAAC---  
 ATTACAGGACTACTATTAAACAAGGGATGGAGGGGGTAATAGTAGT-----  
 -----  
 -----  
 AGTGCAAATGAGACCTTCAGACCTACAGGAGGAAATATGAAGGACAATTGGAGAAGTGAATTATATAAGTATA  
 AAGTAGTAAAAATTGAACCACTA---GGTGTAGCACCCACCCGTGCAAAAAGAAGAGTGGTG-----  
 -----GGGAGAGAAAAAGAGCA---GCA-----CTGGGAGCT-----  
 ---GTCTTCCTTGGGTTCTTAGGAGCA---GCAGGAAGCACTATG---GGCGCGGCGTCA---  
 ATAACGCTGACGGTACAG---GCCAGACAA---TTATTG---TCCGGTATAGTGCAACAGCAGAGC---  
 AATTTG---CTGAAG---GCTATAGAGGCTCAACAACATCTGTTGAAACTCACGGTCTGGGGCATT  
 >EU513189

TTCTATTGCAATACATCAGGACTATTTAATAGCACTTGGCACAATAGCACTTGGACCAATAGCACCCTGGCT  
 CAAATGGC-----  
 -----ACA---  
 GAGTCAAATGACACTATAACTCTCCAATGCGAAATAAAGCAATTTATAAATATGTGGCAGAGAGTAGGACGAG  
 CAATGTATGCCCCCTCCCATCCCAGGAGTGATAAGGTGTGAATCAGAC---  
 ATTACAGGACTACTATTAACAAGAGATGGACCGAATAGTACACAA-----  
 -----  
 -----  
 AATGAGACATTCAGGCCTGGAGGAGGAGATATGAGAGACAATTGGAGAAGTGAATTATATAAGTATAAAGTAG  
 TACAAATTGAACCACTA---GGTGTGGCACCCACCCATGCAAAAAGAAGAGTGGTG-----  
 -----GAGAGAGAAAAAGAGCA---GTTGGA---CTGGGAGCT-----  
 GTCTTCTTTGGGTTCTTGGGAGCG---GCAGGAAGCACTATG---GGCGCGGCGTCA---  
 ATAACGCTGACGGTACAG---GCCAGACAA---TTATTG---TCTGGTATAGTGCAACAGCAGAGC---  
 AATTGG---CTGAAA---GCTATAGAGGCTCAACAACATCTGTTGAGACTCACGGTCTGGGGCATT  
 >EU513196  
 TTCTATTGCAATACATCAGGCCTATTTAATAGCACTTGGTATAGCAATAGCACTAACAGCTCAAATCACACAA  
 AT-----  
 -----  
 GGCACAGATGATATAACTCTCCAATGCAGAATAAAGCAAATTGTAAATATGTGGCAGAGAGTAGGACAAGCAA  
 TGTATGCCCCCTCCCATCCGAGGAGAAATAAGGTGTGAATCAAAC---  
 ATTACAGGAATACTATTAACAAGAGATGGAGGGAATAATGGTAGT-----  
 -----  
 -----  
 AAAGCAAATGAGACCTTCAGACCTGGAGGAGGAGACATGAGGGACAATTGGAGAAGTGAATTATATAAATACA  
 AAGTAGTAAAAATTGAACCAATA---GGTATAGCACCCACCCATGCAAAAAGGAGAGTGGTG-----  
 -----GAGAGAGAAAAAGAGCA---GTCGGA---CTGGGAGCT-----  
 ---TTCTTCCTTGGGTTCTTAGGAGTA---GCAGGAAGCACTATG---GGCGCGGCGTCA---  
 ATGACGCTGACGGTACAG---GCCAGACAT---TTATTG---TCTGGTATAGTGCAACAGCAGAGC---  
 AATCTG---CTGAAG---GCTATAGAGGCTCAACAACAGCTGTTGAGACTCACAGTCTGGGGCATT  
 >EU513191  
 TTCTATTGCAATACATCAAACTGTTTAGTAGCACTTGGGATAATAGCACTTGGGGTAATAACACTTGGGGTA  
 ACAGCACT-----  
 -----GGG---  
 GACAACAATGAGACCATAACCTCCAATGCAAAATAAAACAAATTATAAATATGTGGCAGCAAGTAGGACGAG  
 CAATGTATGCCCCCTCCCATCCAAGGAGAGATAAGGTGTGAGTCAAAC---  
 ATTACAGGACTACTATTAACAAGAGATGGAGGGGCTAATAGCAGT-----  
 -----  
 -----  
 ACAAATGAGACCTTCAGGCCTGGAGGAGGAGATATGAGGGATAATTGGAGGAGTGAATTATATAAGTATAAAG  
 TTGTAAAAATTGAACCACTA---GGTGTAGCACCCACCCGTGCAAAAAGAAGAGTGGTG-----  
 -----CAGAGAGAAAAAGAGCG---GTTGGA---CTGGGAGCT-----  
 GTCTTCATTGGGTTCTTAGGAGCA---GCAGGAAGCACTATG---GGCGCAGCGTCA---  
 ATAACGCTGACGGTACAG---GCCAGACAA---TTATTG---TCCGGTATAGTGCAACAGCAGAGC---  
 AATTG---CTGAAG---GCTATAGAGGCTCAACAACATCTGTTGAGACTCACGGTCTGGGGCATT  
 >EU513184  
 TTCTATTGCAATACATCAAACTATTTGATAGCATTTGGAATAGAATAATGGGTCAAATTACACAAGGTTAG  
 GTGATGAC-----  
 -----ACA---  
 GAGACAAATGACCCTATAACTCTCCAATGCAGAATAAAGCAAATTGTAAGAATGTGGCAGACAGTAGGACAAG  
 CAATGTATGCCCCCTCCCATCCGGGGAGAAATAAAATGTGAATCAAAC---  
 ATTACAGGACTGCTATTAACACGAGATGGAGGAAATAATAATAGT-----  
 -----  
 -----  
 ATGAATGAGACATTCAGGCCTGGAGGAGGAGATATGAGGGACAATTGGAGAAGTGAATTATATAAGTATAAGG  
 TAGTACAAATTGAACCACTA---GGTGTGGCACCCACCTTTGCAAAAAGAAGAGTGGTG-----  
 -----GAGAGAGGAAAAAGAGCA---GTTGGA---CTGGGAGCT-----  
 GTTTTCCTTGGGTTCTTAGGAGCT---GCAGGAAGCACTATG---GGCGCGGCGTCA---  
 ATAACGCTGACGGTACAG---GCCAGACAA---TTACTG---TCTGGTATAGTGCAACAGCAAAGC---  
 AATTTG---CTGAGG---GCTATAGAGGCTCAACAACATCTGTTGAACTCACGGTCTGGGGCATA  
 >EU513193

TTCTATTGCAATACATCAGGACTGTTTAAATAGCACCTGGTGGGATAGCAACAATAGCACTGAGAATATAACTC  
 AC-----  
 -----  
 AGAAAAGAAAATATAACTCTCCAATGCAGAATAAAGCAATTTATAAATATGTGGCAGAGAGTGGGACGAGCAA  
 TGTATGCCCCCTCCCATCCAAGGAGTAATAAGGTGTGAATCAAAC---  
 ATTACAGGAATACTATTAAACAAGAGATGGTGGGGTTAATAATAATAAC-----  
 -----  
 -----  
 ACAAACAAAACCTGAGACCTTCAGGCCTGGAGGAGGAGATATGAGGGACAATTGGAGAAGTGAATTATATAAGT  
 ATAAAGTAGTGAAAATTGAACCACTA---GGTGTAGCACCCACCCATGCAAAAAGAAGAGTGGTG-----  
 -----GAGAGAGAAAAAAGAGCA---GTTGGA---CTGGGAGCT---  
 -----GTCTTCCTTGGGTTCTTAGGAGCA---GCAGGAAGCACTATG---GGCGCGGCGTCA---  
 ATAACGCTGACGGTACAG---GCCAGACAG---TTATTG---TCTGGTATAGTGCAACAGCAGAGC---  
 AATTTG---CTGAAG---GCTATAGAGGCTCAACAACAGCTGTTGAGACTCACAGTCTGGGGCATT  
 >EU513186  
 TTCTATTGTAATACATCAAGCCTATTTAATTATACATTTAGCAATAGCACTGAGGATAACAACCCA-----  
 -----  
 -----  
 AGTAATGCCACAATAACTCTCCAATGCAGAATAAGGCAAGTTGTAAATATGTGGCAGAGAGTAGGACTAGCAA  
 TGTATGCCCCCTCCCATCAAAGGAAACTAAGATGTGAATCAAAC---  
 ATTACAGGACTACTATTAAACAAGAGATGGAGGGAATAATAATAAT-----  
 -----  
 -----  
 GCAACTGAGACATTTCAGGCCTGGAGGAGGAGATATGAGGGACAACCTGGAGAAGTGAATTATATAAATATAAGG  
 TAGTACAAATTGAACCCCTA---GGTGTGGCACCCACCTATGCAAAAAGAAGAGTGGTG-----  
 -----GAAAGAGGAAAAAGAGCAGTAGTTGGA---CTAGGAGCT-----  
 GTCTTCCTTGGGTTCTTAGGAGCA---GCAGGAAGCACTATG---GGCGCGGCGTCA---  
 ATAACGCTGACGGTACAG---GCCAGACAA---TTATTG---TCTGGTATAGTGCAACAGCAGAGC---  
 AATCTG---CTGAGG---GCTATAGAGGCTCAACAACAGCTGTTGAAACTCACGGTCTGGGGCATT  
 >MH705136  
 TTCTATTGCAATACCTCAAATCTATTTGATAGCGCTTGGGAAGCAAACCTCAAATCACACAGAGTCAAATGAC-  
 -----  
 -----  
 ACAAGGGCAAATATAACTCTCCAATGCAGAATAAGGCAAATTGTAAAGGATGTGGCAGAGAGTAGGACAAGCAA  
 TGTATGCCCCCTCCCATCCGAGGAGAAATAAGGTGTGAGTCAAAC---  
 ATTACAGGACTACTATTAAACAAGAGATGGAGGGGATGGGAACAATGCA-----  
 -----  
 -----  
 ACTAATGAGACATTTCAGGCCTGGAGGAGGAGATATGAGAGACAATTGGAGAAGTGAACCTATATAAATATAAGG  
 TAGTACAAATTGAACCACTA---GGTGTAGCACCCACCCATGCAAAAAGAAGAGTGGTG-----  
 -----GAGAGAGAAAAAAGAGCA---GTGGA---ATAGGAGCT-----  
 GTCTTCCTTGGGTTCTTAGGGGCA---GCAGGAAGCACTATG---GGCGCGGCGTCA---  
 ATAACGCTGACGGTACAG---GCCAGACAA---TTATTG---TCCGGTATAGTGCAACAGCAGAGC---  
 AATTTG---CTGAGG---GCTATAGAGGCTCAACAACAACCTGTTGAAACTCACAGTCTGGGGCATT  
 >MH460467  
 TTCTATTGTAATACATCAGGACTATTTAATTATAGTTGGAATACATCAGAACCAACCAATAATTGGAATAGTA  
 GTGCTCAG-----  
 -----  
 GATAACGATACCATAACTCTCCAATGCAGAATAAAGCAAATAGTAAATATGTGGCAGGAAGTAGGACAAGCAA  
 TGTATGCCCCCTCCCATCCAAGGAATAATAAGGTGTGAATCAAAC---  
 ATTACAGGACTACTATTAAACAAGAGATGGAGGGACAAATAATAGT-----  
 -----  
 -----  
 ACAAATGAGACATTTCAGACCTGGGGGAGGAGATATGAGGGACAATTGGAGAAGTGAATTATATAAGTATAAGG  
 TAGTACAAATTGAACCAATA---GGTTTGGCACCCACCCATGCAAAAAGAAGAGTGGTG-----  
 -----CAGAGAGAAAAAAGAGCAGTAATTGGA---ATGGGAGCT-----  
 GTCTTCCTTGGGTTCTTAGGAGCA---GCAGGAAGCACTATG---GGCGCGGCGTCA---  
 ATAACGCTGACGGTACAG---GCCAGACAA---TTATTG---TCCGGTATAGTGCAACAGCAGAGC---  
 AATTTG---CTGAGG---GCTATAGAAGCTCAACAACATCTGTTGAAACTCACGGTCTGGGGCATT  
 >EU513198

TTCTATTGCAATACCTCAAACCTGTTTAAATGGCACTTTGTATAACAACACCTGGATGTTTAAATGGCACTTTGT  
 ATAATAATACT-----  
 -----AACGAGAGC-----  
 TCAACATCAGGTACTATAACTATCAAGTGCAGAATAAAGCAAATCATAAATATGTGGCAGACAGTAGGACAAG  
 CAATGTATGCCCCCTCCCATCCCAGGAGAAATAAGGTGTGAATCAAAC---  
 ATTACAGGATTGCTATTAACAAGAGATGGAGAGGCTGGAAAAAGC-----  
 -----  
 -----  
 ACAAATGAGACCTTCAGGCCTATAGGAGGAAATATGAGAGACAATTGGAGAAGTGAATTATACAAATATAAAG  
 TAGTAAAAATTGAACCACTA---GGTGTAGCACCCACACCTGCAAAAAGAAGAGTGGTG-----  
 -----GAGAGAGAAAAAAGAGCA---GTGGGA---CTGGGAGCT-----  
 GTCTTCCTTGGGTTCTTAGGAGCA---GCAGGAAGCACTATG---GGCGCAGCGTCA---  
 ATAACGCTGACGGTACAG---GCTAGACAA---TTATTG---TCTGGTATAGTGCAACAGCAAAGC---  
 AATTTG---CTGAAG---GCTATAGAGGCTCAACAACATCTGTTGAAACTCACGGTCTGGGGCATT  
 >JF706407  
 TTCTATTGTGATACATCAAGACTGTTTAAATAGCACTTGGCCTAATAGCACATGGGACAATAATACTCAAAAAG  
 ATGAG-----  
 -----  
 AATGACACAGGGTACTATACTCTCCAATGCAGAATAAAGCAAATTATAAATATGTGGCAGAGAGTAGGACAAG  
 CAATGTATGCCCCCTCCTATCCCAGGAGAAATAAGTTGTGAATCAAAC---  
 ATTACAGGACTACTATTAACAAGAGATGGAGGGAATAATAATAAT-----  
 -----  
 -----  
 AGTATAAATGAGACCTTCAGGCCTGGTGGAGGAGATATGAGGGACAATTGGAGAAGTGAATTATATAAGTACA  
 AAGTGGTACAAATTGAGCCAATA---GGAATAGCACCCACCCCTGCAAAAAGAAGAGTGGTG-----  
 -----GAGAGAGAGAAAAAGAGCAGTAGTTGGA---CTAGGAGCT-----  
 ---GTCTTCCTTGGGTTCTTAGGAGCA---GCAGGAAGCACTATG---GGCGCAGCGTCA---  
 ATAACGCTGACGGTACAG---GCCAGACAA---TTATTG---TCTGGTATAGTGCAACAGCAGAGC---  
 AATCTG---CTGCAG---GCTATAGAGGCTCAACAACATCTGTTGAGACTCACGGTCTGGGGCATT  
 >JF706428  
 TTCTATTGCAATACATCAGGACTATTTAAATGGCACTTTGAATGGCACTGAAACTTGAATAACACTTGGGGTG  
 ACAGTAGC-----  
 -----AATGAG-----  
 AATGAAAATGAGAATATAACTATCCAATGCAGAATAAAACAAATTGTAAATATGTGGCAGAGAGTAGGACGAG  
 CAATGTATGCCCCCTCCCATCAAAGGAGTAATAAAGTGTGAATCAAAC---  
 ATTACAGGACTACTATTAACAAGAGATGGAGAGGGTAATAATAGG-----  
 -----  
 -----  
 ACAAATGAGACCTTCAGGCCTGGAGGAGGAGATATGAGGGATAATTGGAGAAGTGAATTATATAAATATAAAG  
 TAGTAAAAATTGAACCACTA---GGTATAGCACCCACCCATGCAAAAAGAAGAGTGGTG-----  
 -----CAGAGAGAAAAAAGAGCA---GTTGGA---CTGGGAGCT-----  
 GTCTTCCTTGGGTTCTTAGGAGCA---GCAGGAAGCACTATG---GGCGCGGCGTCA---  
 ATAACGCTGACGGTACAG---GCCAGACAA---TTATTG---TCTGGTATAGTGCAACAGCAGAGT---  
 AATCTG---CTGAAG---GCTATAGAGGCTCAACAACATCTGTTGAGACTCACAGTCTGGGGCATT  
 >KU168310  
 TTCTATTGCAATACATCACAACATTTTAAATAGCACTTGGAAACAACACCAATATCAGCTTAAATGAC-----  
 -----  
 -----  
 ACAAATGAAAATATAACTCTCCCATGCAGAATAAAGCAAAGTTATAAATATGTGGCAGAGAGTAGGACAAGCAA  
 TGTATGCCCCCTCCCATCGCAGGAACACTAAAGTGTAAATCAAAC---  
 ATTACAGGATTACTATTAACAAGAGATGGAGGGGAGAGCAATAATACA-----  
 -----  
 -----  
 AATACAAATGAGACCTTCAGGCCTGGAGGAGGAGATATGAGGGACAATTGGAGAAGTGAATTATATAAGTATA  
 AAGTAGTAAAAATTGAACCACTA---GGTGTAGCACCTACCCATGCAAAAAGAAGAGTGGTG-----  
 -----GAGAGAGAAAAAAGAGCAGTGTTTGA---CTGGGAGCT-----  
 ---GTCTTCCTTGGGTTCTTAGGAGCA---GCAGGAAGCACTATG---GGCGCGGCGTCA---  
 ATAACGCTGACGGTACAG---GCCAGACAA---CTATTG---TCTGGTATAGTGCAAGCAGCAGAGC---  
 AATTTG---CTGAGG---GCTATAGAGGCTCAACAACATCTGTTGAAACTCACGGTCTGGGGCATT  
 >JN687776

TTCTATTGTAATACAACAAAACCTATTTTAATAGCACTTGGACTAATGAGACAAATCACACAGCTAGC-----  
-----  
-----  
ATAGATAGAAATATAACTCTCCAATGCAGAATTAAGCAAATTGTAAATATGTGGCAAAGAGTAGGACAAGCAA  
TATATGCCCCCTCCCATCCCAGGAGTAATAAGGTGTGAATCAAAC---  
ATTACAGGACTACTACTAACAAGAGATGGAGGGACAAATAGTTCA-----  
-----  
-----  
AATAATGAGACATTCAGGCCTGGAGGAGGAGATATGAGGGACAATTGGAGAAGTGAATTATATAAGTATAAGG  
TAGTACAAATTGAACCAATA---GGTGTGGCACCACCCCTGCAAAAAGAAGAGTGGTG-----  
-----GAGAGAGAAAAAAGAGCA---GTTGGA---GTAGGAGCT-----  
TTTATCCTTGGGTTCTTAGGAGCA---GCAGGAAGCACTATG---GGCGCGGCGTCA---  
ATAACGCTGACGGTACAA---GCCAGACAA---TTATTG---TCTGGTATAGTGCAACAGCAGAGC---  
AATTTG---CTGAAG---GCTATAGAGGCTCAACAACATCTGTTGAAACTCACGGTCTGGGGCATT  
>JX140646  
TTCTATTGCAATACAACAGAATTATTTAATAAGACTTTTAATGATACTGATCTAAAAGTTAAATAGCAGTAGCA  
TTAAGGAG-----  
-----  
TCAAAATGATACTATAACTCTCCAATGTAGAATAAAGCAATTTGTAAGGATGTGGCAGAGAGTAGGACAAGCAA  
TGTATGCCTCTCCCATCCCAGGAGTAATAAGGTGTGAATCAAAC---  
ATTACAGGTCTACTATTAACAAGAGATGGAGGGGGTAATGAAAGCACA-----  
-----  
-----  
AGAGATAATGAGACATTCAGGCCTGGAGGAGGAGATATGAGAGACAATTGGAGAAGTGAATTATATAAGTATA  
AGGTAGTACAAATTGAACCAATA---GGAGTGGCACCACCTATGCAAAAAGAAGAGTGGTG-----  
-----GAGAGAGAAAAAAGAGCA---GTTGGA---CTGGGAGCT-----  
---GTCTTCCTTGGGTTCTTAGGGGCA---GCAGGAAGCACTATG---GGCGCGGCGTCA---  
ATAACGCTGACGGTACAG---GCCAGGCAA---TTATTG---TCTGGTATAGTGCAACAGCAGGGC---  
AATCTG---CTGAGG---GCTATAGAGGCTCAACAACACCTGTTGAAACTCACAGTCTGGGGCATT  
>JX140647  
TTCTATTGTAATACATCAGGACTATTTAATAGTAGTTGGACCGCGAACGACATTTTGAATAACAGTACTGCTA  
GCTCAAAT-----  
-----  
AACACAGAAGTTATAACTCTCCAATGCAGAATAAAGCAAATTATAAATATGTGGCAGACAGTAGGACAAGCAA  
TGTATGCCCCCTCCCATCCGAGGAGAAATAAGGTGTGAGTCAAAT---  
ATTACTGGACTACTATTAACAAGAGATGGAGGGAATAATATGACA-----  
-----  
-----  
AATGAAACCTTCAGGCCTGGAGGAGGGGATATGAGGGACAATTGGAGAAGTGAATTATATAAGTATAAAGTAG  
TACAAATTGAACCACTA---GGTGTAGCACCCACCCATGCAAAAAGAAGAGTGGTG-----  
-----GAGAGAGAAAAAAGAGCA---GTTGGA---ATAGGAGCT-----  
GTCTTCCTTGGGTTCTTAGGAGCA---GCAGGAAGCACTATG---GGCGCGGCGTCA---  
ATAACGCTGACGGTACAA---GCCAGACAA---TTATTG---TCTGGTATAGTGCAACAGCAGAGC---  
AATTTG---CTGATG---GCTATAGAGGCTCAACAACATATGTTGAAACTCACTGTCTGGGGCATT  
>KF859739  
TTCTATTGCAGTACATCAGCACTGTTTAATAGCACTTGGCTGTTTAATGAAACTTATAGCACTTGGCATAGCT  
CTTGGAACAGT-----  
-----  
AGCGCTGAGAATATAACTCTCCAATGCAGAATAAAGCAAATTTGTGAATATGTGGCAGAGAGTAGGGCAAGCAA  
TGTATGCCCCCTCCCATTCGAGGAATGATAAGGTGTGAATCAAAC---  
ATTACAGGACTACTATTAACAAGAGATGGAGGGAATAAAATACT-----  
-----  
-----  
AGTGCAAATGAGACCTTCAGGCCTGGAGGAGGAGATATGAAGGACAATTGGAGAAGTGAATTATATAAGTATA  
AAGTAATAAAAAATAGAACCACTA---GGTGTGGCACCACCCCTGCAAAAAGAAGAGTGGTG-----  
-----GGAAGAGAAAAAAGAGCA---GTTGGA---CTAGGAGCT-----  
---GTCTTCCTTGGGTTCTTAGGAGCA---GCAGGAAGCACTATG---GGCGCAGCGTCA---  
ATAACGCTGACGGTACAG---GCCAGACAA---TTATTG---TCTGGTATAGTGCAACAGCAGAGC---  
AATTTG---CTGAAG---GCTATAGAGGCTCAACAACATCTGTTGAGACTCACGGTCTGGGGCATT  
>KU749419

TTCTATTGCAGTACATCAAGCCTGTTTAAATAGCACTTGGAATAATAGCATTGGGGATAATAGCACTAGGGAT-  
-----  
-----  
GACAATAGCACTATTACTCTCCCATGCAGAATAAAGCAAATTGTAAATATGTGGCAGGGAGTAGGACAAGCAA  
TGTATGCCCCCTCCCATCCCAGGAGAAATAAAGTGTGAATCAAAT---  
ATTACAGGACTATTATTGACAAGAGATGGTGGGAGAAATAGCACA-----  
-----  
-----  
AATGAGACCTTCAGGCCTGGAGGAGGAGATATGAGGGACAATTGGAGAAATGAATTATATAAGTATAAAGTAG  
TAAAAATTGAACCACTA---GGTGTGGCACCCACCCATGCAAAAAGAAGGGTGGTG-----  
-----GAGAGAGAAAAAAGAGCA---GTTGGA---CTAGGAGCT-----  
GTCTTCCTTGGGTTCTTAGGAGCA---GCAGGAAGCACTATG---GGCGCGGCGTCA---  
ATAACGCTGACGGTACAG---GCCAGACAA---TTATTG---TCCGGTATAGTGCAACAGCAGAGC---  
AATTTG---CTGAGG---GCTATAGAGGCTCAACAACAGGTGTTGAGACTCACGGTCTGGGGCATT  
>MK086109  
TTCTATTGCAATACATCTAACCTATTTAAATAGCACTTGGGGGAGCAATACCACTACCAGCTGGAATACCAGCT  
CAATTGGC-----  
-----  
ACAAATGAAACTATAACTATCCAGTGCAGAATAAAGCAGATTGTAAAGATGTGGCAGAGAGTAGGACAAGCAA  
TGTATGCCCCCTCCCATCCCAGGAAAAATAAGGTGTAACCTCAAGC---  
ATTACAGGACTGCTATTAACAAGAGATGGAGGGAATAATAGTAGT-----  
-----  
-----  
GACAATGAGACCTTCAGGCCTGGAGGAGGAGATATGAGGGACAATTGGAGAAGTGAATTATATAAGTATAAAG  
TAGTAAAAATTGAACCACTG---GGTGTAGCACCCACCCATGCAAGGAGAAGAGTGGTG-----  
-----GAGAGAGAAAAAAGAGCA---GTTGGA---CTGGGAGCT-----  
GTCTTCCTTGGGGTCTTAGGAGCA---GCAGGAAGCACTATG---GGCGCGGCGTCA---  
ATAACGCTGACGGTACAG---GCCAGACAA---TTATTG---TCTGGTATAGTGCAACAGCAAAGT---  
AATTTG---CTGAGG---GCTATAGAGGCTCAACAGCATATGTTGAGACTCACGGTCTGGGGCATT  
>MK086113  
TTCTATTGCAATACAACAAAACTATTTAAATAGCATTTGGAGTAAGAATAGTGGGAATTGGAGTAGTACAAATG  
GG-----  
-----  
ACAAATGACACTATAACTCTCCAATGCAGAATAAAACAAATTGTAAAGATGTGGCAGAGAGTAGGACAAGCAA  
TGTACGCCCCCTCCCATCCGAGGAAACATAACGTGTGGATCAAAC---  
ATTACAGGATTACTATTAACAAGAGATGGAGATGGAGGTGCACAT-----  
-----  
-----  
AGTCCCAATGAAACATTTCAGGCCTGGAGGAGGAAATATGAAGGACAATTGGAGAAGTGAATTATACAAGTATA  
AGGTAGTACAAATTAAACCATTA---GGTGTAGCACCCACCCAGGCAAAAAGAAGAGTGGTG-----  
-----GAGAGAGAAAAAAGAGCA---GTTGGA---CTGGGAGCT-----  
---GTCTTCCTTGGGTTCTTAGGAGCA---GCAGGAAGCACTATG---GGCGCGGCGTCA---  
CTGACGCTGACGGTACAG---GCCAGACAA---TTATTG---TCTGGTATAGTGCAACAGCAGAGC---  
AATCTG---CTGCGG---GCCATAGAGGCTCAACAACATCTGTTGAAACTCACGGTCTGGGGCATT  
>MK086125  
TTCTATTGCAATACATCAGGCCTATTCAATAGCACTTGGCACAATAGCACTTGGGATAGTAATGAAACTGCCA  
GTGCA-----  
-----  
ACAAATGACACTATAACTCTCCGATGCAGAATAAAGCAAATTGTAAATATGTGGCAGAAAGTAGGACGAGCAA  
TGTATGCCCCCTCCCATTCAGGAGTAATAAGATGTGAGTCAAAC---  
ATTACAGGATTACTATTAACAAGAGATGGAGGAAATAATAAAT-----  
-----  
-----  
AGTGTAATGAGACATTTCAGGCCGGGAGGAGGAGATATGAGGGACAATTGGAGAAGTGAATTATATAAGTATA  
AAGTAGTACAAATTGAGCCACTA---GGTGTAGCACCCACCCATGCAAGAAGAAGAGTGGTA-----  
-----CAGAGGGAAAAAAGAGCA---GTTGGA---CTGGGAGCT-----  
---GTCTTCCTTGGGTTCTTAGGAGCA---GCAGGAAGCACTATG---GGCGCGGCGTCA---  
ATAACGCTGACGGTACAG---GCCAGACAA---TTATTG---TCTGGTATAGTGCAACAGCAGAGT---  
AATTTG---CTGCGG---GCTATAGAGGCTCAACAACATCTGTTGAAACTCACGGTCTGGGGCATT  
>HQ912706

TTCTATTGCAATACAACAGAACTATTTTAATAGCACTTGGAACGTAAGTCCAGCTCAAACCTACACAGAGTCAA  
AC-----  
-----  
TCAAAATGACAGTATAACTCTCCCATGCAGAATAAAACAAATTGTGAATTTATGGCAGAAAGTAGGACAAGCAA  
TGTATGCCCCCTCCCATCCAAGGAGAAATAAGGTGTGAATCAAAC---  
ATTACAGGATTACTATTAACAAGAGATGGAGGGAATAATAGTACA-----  
-----  
-----  
AATGAGACATTTCAGGCCTGGAGGAGGAGATATGAGGGACAATTGGAGAAGTGAATTATATAAGTATAAGGTAG  
TACAAATTGAACCACTA---GGTGTGGCACCCACCCAGGCAAAAAGAAGAGTGGTG-----  
-----GAGAGAGAAAAAGAGCA---GTTGGA---ATAGGAGCT-----  
GTCTTCCTTGGGTTCTTAGGAGCA---GCAGGAAGCACTATG---GGCGCGGCGTCA---  
CTAACGCTGACGGTACAG---GCCAGACAA---TTATTG---TCTGGTATAGTGCAACAGCAGAGC---  
AATCTG---CTGAGG---GCTATAGAGGCTCAACAACATCTGTTGAAACTCACGGTCTGGGGCATT  
>AM279349  
TTCTATTGCAATACATCAGGCCTGTTTAAATAACACTTTGAATAATAACACTTGGACTTGGGATAATAGCACA-  
-----  
-----  
AAGGATGACAATATAACTCTCCGATGCAGGATAAAGCAAATTGTAAATATGTGGCAGAGAGTAGGACAAGCAA  
TGTATGCCCCCTCCCATCCAAGGAGTGATAAGGTGTGAATCAAAC---  
ATTACAGGATTACTATTAACAAGAGATGGAGGGAATAATAATAGC-----  
-----  
-----  
ACAACAAATGAGACCTTCAGGCCTGGAGGAGGAGATATGAGGGACAATTGGAGAAGTGAATTATATAAAATATA  
AGGTAGTAAAAATTGAACCACTA---GGTGTAGCGCCTACCCATGCAAAAAGAAGAGTGGTG-----  
-----GAGAGAGAAAAAGAGCA---GTTGGA---CTGGGAGCT-----  
---GTCTTCCTTGGGTTCTTAGGAGCA---GCAGGAAGCACTATG---GGCGCGGCGTCA---  
ATAACGCTGACGGTACAG---GCCAGACAA---TTATTG---TCCGGTATAGTGCAACAGCAGAGC---  
AATCTG---CTGAAG---GCTATAGAGGCTCAACAACATCTGTTGAGACTCACGGTCTGGGGCATT  
>AM279361  
TTCTATTGCAATACATCAGCACTGTTCAATAGCACTTATGACAATAGCACTTGGAAATGACAGTACAAATACCA  
GCTCA-----  
-----  
GAGACAAATGACACTATAACTCTCCAATGCAAAATAAAGCAAATTGTAAGAATGTGGCAGAGAGTAGGACAAG  
CAATGTATGCCCCCTCCCATCCCAGGAATAATAAGGTGTGAATCAAAC---  
ATTACAGGACTAATATTAACAAGAGATGGAGGGAATAATAATAGT-----  
-----  
-----  
GAAAAATCAGACTTTTCAGGCCTGGAGGAGGAGATATGAGGGACAATTGGAGAAGTGAATTATATAAGTATAAAG  
TAGTAAAAATTGAACCACTA---GGTATAGCACCCACCCATGCAAAAAGAAGAGTGGTG-----  
-----CAGAGAGAAAAAGAGCA---GTTGGA---ATAGGAGCT-----  
GTCTTCCTTGGGTTCTTAGGAGCA---GCGGGAAGCACTATG---GGCGCGGCGTCA---  
ATAACGCTGACGGTACAG---GCCAGACAA---TTATTG---TCCGGTATAGTGCAACAGCAGAAC---  
AATTTG---CTGAAG---GCTATAGAGGCTCAACAACAGTTGTTGAAACTCACAGTCTGGGGCATT  
>AM279360  
TTCTATTGCAATACAACAAAACCTGTTTAAATAGCACGTGGAATAGCAGTACTGGGAATAACAATGTCAGC----  
-----  
-----  
TCAAAATGACACTATAACCCTCCAATGCAAAATAAAGCAAATTGTAAATATGTGGCAAAAAGTAGGACAAGTAA  
TGTATGCCCCCTCCCATCCCAGGAATAATAAGGTGTGAATCAAAT---  
ATTACAGGACTATTATTAACAAGAGATGGAGGAAATAATAATGAAACA-----  
-----  
-----  
GAGAAATGGGACTGAGACCTTCAGGCCTGGAGGAGGAGATATGAGGGACAATTGGAGAAGTGAATTGTATAAGT  
ATAAAGTAGTAAAAATTGAACCACTA---GGTGTAGCACCCACCCATGCAAAAAGAAGAGTGGTG---GAG---  
-----AGGAGAGAAAAAGAGCA---GTTGGA---CTGGGAGCT---  
-----GTCTTCTTTGGGTTCTTAGGAGCA---GCAGGAAGCACTATG---GGCGCGGCGTCA---  
CTAACGCTGACGGTACAG---GCCAGACAA---TTATTG---TCTGGTATAGTGCAACAGCAGAGC---  
AATTTG---CTGAAG---GCTATAGAGGCTCAACAACATCTGTTGAAACTCACGGTCTGGGGCATT  
>AM279358

TTCTACTGCAATACATCAGCACTGTTTAAATAGCACTTGGAAATAACACTTTGGATACTAACAATAGCACTCAG-  
 -----  
 -----  
 GATAATGACACTATAACTCTCCAATGCAGAATAAAGCAAATTATAAGGATGTGGCAGACAGTAGGACAAGCAA  
 TGTATGCCCCCTCCCATCCAAGGAAAAATAAGGTGTGAATCAAAC---  
 ATTACAGGACTACTGTTAACAAGAGATGGAGGGAACAGTGATGGT-----  
 -----  
 -----  
 GCAAAATGAGACCTTCAGGCCTGGAGGAGGAGATATGAGGGACAATTGGAGAAGTGAATTATATAAGTATAAAG  
 TAGTAAAAAATTGAACCACTA---GGTGTAGCACCCACCCGAGCAAAAAGAAGAGTGGTG-----  
 -----GAGAGAGAAAAAAGAGCAGTAGTTGGA---CTGGGAGCT-----  
 GTCTTCCTTGCGTTCTTAGGAGCA---GCAGGAAGCACTATG---GGCGCGGCGTCA---  
 CTAACGCTGACGGTACAG---GCCAGACAA---TTATTG---TCCGGTATAGTGCAACAGCAGAGC---  
 AATCTG---CTGAGG---GCTATAGAGGCTCAACAACATATGTTGAAACTCACAGTCTGGGGCATT  
 >AJ286133  
 TTCTATTGTAATACATCAGAACTATTTAAATAGCATTGTGGAATATTAATAGCACTTGGAAATAACAGTGACACTG  
 CCAGC-----  
 -----TCG---  
 AAGCCAAATGACACTATAACTCTACAATGCAGAATAAGGCAAATTGTAAGAATGTGGCAGAAAGTAGGACAAG  
 CAATATATGCCCCCTCCTATCCCAGGAGTAATAAGGTGTGAATCAAAC---  
 ATTACAGGACTACTATTAACAAGAGATGGAGGGGAAGATAATAAT-----  
 -----  
 -----  
 GCAAGTGAGACATTTCAGGCCTGGAGGAGGAGATATGAGGGACAATTGGAGAAGTGAATTATATAAGTATAAGG  
 TAGTACAAATTGAACCACTA---GGCGTGGCACCCACCTGGGCAAAAAGAAGAGTGGTG-----  
 -----GAGAGAGGAAAAAGAGCA---GTTGGA---CTGGGAGCT-----  
 GTCTTCCTTGCGTTTCTTAGGAGCA---GCAGGAAGCACTATG---GGC---CGGTCA---  
 ATAACGCTGACGGTACAG---GCCAGACAA---TTATTG---TCCGGTATAGTGCAACAGCAGAGC---  
 AATTTG---CTGAGG---GCTATAGAGGCTCAACAACATCTGTTGAAACTCACGGTCTGGGGCATT  
 >AF377955  
 TTCTATTGTAATACATCAGCACTGTTTAAATAGTACTTGGTTTAGCAATAGTACTGGGGATAACAATAGTTCAA  
 CA-----  
 -----  
 -----  
 GGAATGAACTATAACTCTCCAATGCAGAATAAAGCAAATTGTAAATATGTGGCAGAGAGTAGGACAAGCAA  
 TGTATGCCCCCTCCCATCCAAGGAGTAATAAGGTGTGAATCAAAC---  
 ATTACAGGATTACTATTGACAAGAGATGGAGGGAATAATAATAGC-----  
 -----  
 -----  
 ACAAATGAGACCTTCAGACCTGGAGGAGGAGATATGAGGGACAATTGGAGAAGTGAATTATATAAGTATAAAG  
 TAGTAAACTTGAGCCACTG---GGTGTAGCACCCACCCGTGCAAAAAGAAGAGTGGTG-----  
 -----GAGAGAGAAAAAAGAGCA---GTTGGA---CTGGGAGCT-----  
 GTCTTCCTTGCGTTCTTAGGAGCA---GCAGGAAGCACTATG---GGCGCGGCGTCA---  
 ATAACGCTGACGGTACAG---GCCAGACTA---TTATTG---TCTGGTATAGTGCAACAGCAGAGC---  
 AATTTG---CTGAAA---GCTATAGAGGCTCAACAGCATCTGTTGAAACTCACGGTCTGGGGCATT  
 >AM279352  
 TTCTATTGCAATACATCAGGACTCTTTAAATAGCACTTGGAAATAGCAATGACACTGACAGATCAAACCACACAG  
 GA-----  
 -----  
 -----  
 CCACATAACAATATAACTCTCCAATGCAGAATAAAGCAAATTGTAAATATGTGGCAGAGAGTAGGACAAGCAA  
 TGTATGCCCCCTCCCATCCAAGGCGAAATAAGGTGTGTATCAAAC---  
 ATTACAGGATTACTACTAACAAGAGATGGAGGGATCAGTAATAAG-----  
 -----  
 -----  
 ACAGAGGAGATATTTCAGGCCTGGAGGAGGAGATATGAGGGACAATTGGAGAAGTGAATTATATAAGTATAAGG  
 TAGTACAAATTAAACCACTA---GGTGTGGCACCAGACCGGGCAAAAAGAAGAGTGGTG-----  
 -----GGAAGAGAAAAAAGAGCA---GTTGGA---ATGGGAGCT-----  
 CTTTTCTTGCGTTCTTAGGAGCA---GCAGGAAGCACTATG---GGCGCGGCGGCA---  
 ATGACGCTGACGGTACAG---GCCAGACAA---TTATTG---TCTGGTATAGTGCAACAGCAGAGC---  
 AATTTG---CTGAGG---GCTATAGAGGCTCAACAACATCTGTTGAAACTCACGGTCTGGGGCATT  
 >AY271690

TTCTATTGCAATACATCAGGACTATTTTAATAGCACTTGGAGTAGGAATAGCACTGATAACAGCACTTGAATA  
 TCAATGACACT-----  
 -----GTCAGCTCA-----  
 AATCACACAGGAAATATAACTCTCCAATGCAGAATAAGGCAAGTTGTAAGAATGTGGCAGAGGGTAGGACAAG  
 CAATGTATGCCCCCTCCCATCCCAGGAGAAATTAAGTGTAATCAAAC---  
 ATTACAGGAATACTATTGACAAGAGATGGAGGGACAAAAATCAGAATGCAAGT-----  
 -----  
 -  
 GAGGAATTTAATACAACCTGAGGTATTCAGACCTGGAGGAGGAGACATGAGGGACAATTGGAGAAGTGAATTAT  
 ATAAATATAAGGTAGTACAAATTGAACCAATA---GGTGTGGCACCCACCCGTGCAAAAAGAAGAGTGGTG--  
 -----CAGAAAGAAAAAGAGCA---GTTGGA---  
 CTGGGAGCT-----TTCTTCCTTGGGTTCTTAGGAGTT---GCAGGAAGCACTATG---  
 GGCGCAGCGTCA---ATAACGCTGACGGTACAG---GCCAGACAA---TTATTG---  
 TCTGGTATAGTGCAACAGCAGAGC---AATCTG---CTGAAG---  
 GCTATAGAGGCTCAACAACATATATTGAGACTCACGGTCTGGGGCATT  
 >HQ700002  
 TTTTATTGCAATACATCAAAGCTGTTTAATAGCACCTGGCCTGGGAATATCACTGGGAATAACTATAACCAGCT  
 CA-----  
 -----  
 AACTCAAGTGACAATATAGCTCTCCAATGCAGAATAAGACAAATTGTAAATATGTGGCAGAAAGTAGGAAAAG  
 CAATATATGCTCCTCCCATCCCAGGAGAAATAAAGTGTTGAATCAAAC---  
 ATTACTGGACTACTACTAACAAGAGATGGAGGAAACAATAATGCA-----  
 -----  
 -----  
 AGTAATGAGACCTTCAGGCCTGGAGGAGGAGATATGAGGGACAATTGGAGAAGTGAATTATATAAGTATAAAG  
 TAGTGAGAAATTAACCCACTA---GGTATAGCACCCACCCACGCAAAAAGAAGAGTGGTG-----  
 -----GAGAGAGAAAAAGAGCA---GTTGGA---CTGGGAGCT-----  
 GTCTTCCTTGGGTTCTTAGGAGCA---GCAGGAAGCACTATG---GGCGCGGCGTCA---  
 ATAACGCTGACGGTACAA---GCCAGACAA---TTATTG---TCTGGTATAGTGCAACAGCAGAGC---  
 AATCTG---CTGAAG---GCTATAGAGGCTCAACAGCATCTGTTGAAGTTCACAGTCTGGGGCATT  
 >JF683758  
 TTCTATTGCAATACATCAGGACTGTTTAATAGCATTTGGGATAATAACAGCACTTGAATGGGAGC-----  
 -----  
 -----  
 AACTCAGGCAATATAACTCTCCCATGCAGAATAAGGCAAATTGTAAATATGTGGCAGAGAGTAGGAAAAGCAA  
 TGTATGCCCCCTCCCATCCAAGGAGAAATAAGGTGTGACTCAAAC---  
 ATTACTGGACTACTATTAGCAAGAGATGGAGGGGATGGTACTGAG-----  
 -----  
 -----  
 ACAAATGAGACTTTTCAGGCCTATAGGAGGAGATATGAGAGACAATTGGAGAAGTGAATTATATAAGTATAAAG  
 TAGTAAAAATTGAACCATTA---GGCATAGCACCCACCCGGGCAAAAAGAAGAGTGGTG-----  
 -----AGCAGAGAGAAAAGAGCA---GTTGGA---ATGGCAGCT-----  
 ATCTTCCTTGGGTTCTTAGGAGCA---GCAGGAAGCACTATG---GGCGCGGCGTCA---  
 ATAACGCTGACGGTACAG---GCCAGACAG---TTATTG---TCTGGTATAGTGCAACAGCAGAGC---  
 AATCTG---CTGCAG---GCTATAGAGGCTCAACAGCACATGTTGAGACTCACGGTCTGGGGCATT  
 >JF683786  
 TTCTATTGCAATACATCAAAGTTGTTTAATAGCAGTTGGGGAAACAACACTGCCAGTAACCATAACAGAGGCAA  
 GT-----  
 -----  
 GGAGAAAATGACACTATAACTATAACAATGCAGAATAAAGCAAATTATAAATCTATGGCAGAGAGTAGGACAAG  
 CAATGTATGCCCCCTCCTATCCAAGGAATAATAAGGTGTGAATCAAAC---  
 ATTACAGGATTACTATTAACAAGAGATGGAGGGAATAATAGTAGT-----  
 -----  
 -----  
 GGTGCAGATGAGACTTTTCAGGCCTGGAGGAGGAGATATGAGAGACAATTGGAGAAGTGAATTATATAAGTATA  
 AAGTAGTAAAAATTGAACCACTA---GGTGTTCACCCACCCGTGCAAAAAGAAGAGTGGTG-----  
 -----GAAAGACAAAAAGAGCA---ATTGGA---ATGGGAGCT-----  
 ---GTCTTCCTTGGGTTCTTAGGAGCA---GCAGGAAGCACTATG---GGCGCAGCGTCA---  
 CTATCGCTGACGGTACAG---GCCAGACAA---TTATTG---TCCGGTATAGTGCAACAGCAGAGC---  
 AATTTG---CTGAAG---GCTATAGAGGCTCAACAACATATGTTGAGACTCACGGTCTGGGGCATT

>JF683792

TTCTACTGCAATACAACAAACCTGTTTAAATAGCACTTGGAATAGCACTTGGTATAATAATGGGAGTAGCGCCA  
AC-----

-----  
AATATAACTCACACTATAACTCTCCCATGCAGAATAAGGCAAATTGTAAATATGTGGCAGAGAGTAGGACAAG  
CAATGTATGCCAATCCCATCCCAGGAGTAATAAGGTGTGAATCAAAC---  
ATTACAGGACTACTACTAACAAGAGATGGAGGGAATAATAACTCA-----

-----  
AATGAAGAGACCTTCAGGCCTGGAGGAGGAGATATGAGGGACAATTGGAGAAGTGAATTATATAAGTATAAAG  
TAGTAAAAATTGAACCACTA---GGTCTAGCACCCACCCATGCAAAAAGAAGAGTGGTG-----  
-----GAAAGAGAAAAAAGAGCAGTTGTTGGA---CTGGGAGCT-----  
GTCTTCCTTGGGTTCTTAGGAGCA---GCAGGAAGCACTATG---GGCGCAGCGTCA---  
ATAACGCTGACGGTACAG---GCCAGACAA---TTATTG---TCTGGTATAGTGCAACAGCAGAGC---  
AATTTG---CTGAAA---GCTATAGAGGCTCAACAACAGCTGTTGAGACTCACAGTCTGGGGCATT

>JF683795

TTCTATTGCAATACATCAGGACTATTTAAATAGCACTTGGGATAATAGCACTTGGAAATACCACTGCAAATTACA  
CA-----

-----  
GAGTCAAGTGACAATATAACTCTCCAATGCAGAATAAAGCAAATTGTAAATATGTGGCAGAGAGCAGGACAAG  
CAATATATGCCCCCTCCCATCCCAGGAGTAATAAGGTGTGAATCAAAC---  
ATTACAGGACTACTATTAACAAGAGATGGAGGAAATGACAGTAGT-----

-----  
ACAGAGGAGACCTTCAGGCCTGGAGGAGGAGATATGAGGGACAATTGGAGAAGTGAACATATAAGTATAAAG  
TGGTAAAAATTGAACCACTA---GGTGTAGCACCCACCCGTGCAAAAAGAAGAGTGGTG-----  
-----GAGAGAGGAAAAAGAGCAGTAGTTGGA---CTGGGAGCT-----  
GTCTTCCTTGGGTTCTTAGGAGCA---GCAGGAAGCACTATG---GGCGCGGCGTCA---  
ATAACGCTGACGGTACAG---GCCAGACAA---TTATTG---TCCGGTATAGTGCAACAGCAGAGC---  
AATTTG---CTGAAG---GCTATAGAGGCTCAACAACATATGTTGAAACTCACAGTCTGGGGCATT

>JF683799

TTTTATTGCGATACATCAAGACTGTTTAAATAGCACTTGGGATACTAGCACTGGGTATGACAATAGCAGCAGA-  
-----

-----  
GACAATGACACTATAACTCTCAAATGCAAAATAAGGCAAGTTGTAAGGATGTGGCAAAGAGTAGCACAAAGCAA  
TGTATGCCCCCTCCCATCCAAGGAGAAATAAGGTGTAACTCAACA---  
ATTACAGGACTACTATTAACAAGAGATGGAGGGAATAGTAGTGGT-----

-----  
GCAAAATGAGACCTTCAGGCCTGGAGGAGGAGATATGAGGGACAATTGGAGAAGTGAATTATATAAGTATAAAG  
TAGTAAAGATTGAACCACTA---GGTGTAGCACCCACCCATGCAAAAAGAAGAGTGGTG-----  
-----GAGAGAGAAAAAAGAGCA---GTTGGA---ATAGGAGCT-----  
GTCCTCCTTGGGTTCTTAGGAGCA---GCAGGAAGCACTATG---GGCGCGGCGTCA---  
ATAACGCTGACGGTACAG---ACCAGACAA---TTATTG---TCTGGTATAGTGCAACAGCAGAGC---  
AATTTG---CTGAAG---GCTATAGAGGCTCAACAACAGCTGTTGAGACTCACGGTCTGGGGCATT

>KT124792

TTCTATTGCAATACATCAGGACTGTTTAAATAGCACTTGGATCAATGGGAGCTGGGTCAATAATGATACCTGGG  
CCAAT-----

-----AAT---

GATACCTCAAAAAATATAACTCTCCAATGCAGAATAAAGCAAATTATAAATATGTGGCAGAGAGTAGGGCAAG  
CAATGTATGCCCCCTCCCATCAAAGGAGAAATAAGGTGTAGATCAAAC---  
ATTACTGGACTACTATTAACAAGAGATGGAGGGAATAATAGTAGT-----

-----  
GGAAATGAGACATTTCAGGCCGGCAGGAGGAGATATGAGAGACAATTGGAGAAGTGAATTATATAAGTATAAAG  
TAGTAAAAATTGAACCACTA---GGTGTAGCACCCACACATGCAAGGAGACAAGTAGTG-----  
-----GGGAGAGAAAAAAGAGCA---GTTGGA---CTGGGAGCT-----  
GTCTTCCTTGGGTTCTTAGGAGCA---GCAGGAAGCACTATG---GGCGCGGCGTCA---  
ATAACGCTGACGGTACAG---GCCAGACAA---TTATTG---TCTGGTATAGTGCAACAGCAGAGC---  
AATCTG---CTGAAG---GCTATAGAGGCTCAACAACATATGTTGAGACTCACAGTCTGGGGCATT

>L22939

TTCTATTGCAATACATCAAGTCTGTTTAAATAGCACTTGGAATAGCAGCTCAATTCACACAAATTACAGCTCAA  
AT-----

-----  
GACACAGACAATATAACTCTCCAATGCAGAATAAAGCAAATTGTAAATATGTGGCAGAAAGTAGGAAAAGCAA  
TATATGCCCCCTCCCATCTCAGGAGAAATAAGGTGTGAATCAAAC---  
ATTACAGGACTAATATTAACAAGAGATGGAGGGAGTAATAATAGT-----

-----  
ACAAATGAGATCTTCAGGCCTGGAGGAGGAGATATGAGGGATAATTGGAGAAGTGAATTATATAAGTATAAAG  
TAGTAAAAATTGAACCACTA---GGTGTAGCACCCACCCGTGCAAAAAGAAGAGTGGTG-----  
-----GAGAGAGAAAAAAGAGCA---GTTGGA---CTGGGAGCT-----  
TTCTTCCTTGCGTTCTTAGGAGCT---GCAGGAAGCACTATG---GGCGCGGCGTCA---  
ATAACGCTGACGGTACAG---GCCAGACAA---TTATTG---TCCGGTATAGTGCAACAGCAGAGC---  
AATTTG---CTGAGG---GCTATAGAGGCTCAACAACATCTGTTGAAACTCACGGTCTGGGGCATT

>AY151002

TTCTATTGCAATACAGCAGGCCTGTTTAAATAGCACTTGGGATGATAACAATAGCACAGGGTCAAACACAAAG-

-----  
TCAAAATGACATTATAACTCTCCAATGTAGAATAAAGCAACTTATAAATATGTGGCAGAGAGTAGGACAGGCCAA  
TGTATGCCCCCTCCCATCCGAGGAATAATAAGGTGTAACCTCAAAC---  
ATTACTGGATTACTATTAACAAGAGATGGAGGGAATAATAGTACA-----

-----  
AATGAGACCTTCAGGCCTGGAGGAGGAGATATGAGGGACAATTGGAGGAGTGAATTATATAAATATAAAGTAG  
TAAAAATTGAACCACTA---GGTGTAGCACCCACCCCTGCAAAAAGAAGAGTGGTG-----  
-----GAGAGAGAAAAAAGAGCA---GCTGGA---CTGGGAGCT-----  
GTCTTCCTTGCGTTCTTAGGAGCA---GCAGGAAGCACTATG---GGCGCGGCGTCA---  
ATAACGCTGACGGTACAG---GCCAGACAG---TTATTG---TCCGGTATAGTGCAACAGCAAAGC---  
AATTTG---CTGAAG---GCTATAGAGGCTCAACAACATATGTTGAGACTCACGGTCTGGGGCATT

>MK177825

TTCTATTGCAATACATCACAACCTGTTTAAATAGCACCTGGAATGAACATAACATTACCAACTCAACCTTTACAG  
AG-----

-----  
GACAATACAACCTCTCACTCTCACATGTAGAATAAAGCAATTTATAAATATGTGGCAGAGAGTAGGACAAGCAA  
TGTATGCCCCCTCCCATCCAAGGAGAAATAAAATGTAATTCAAAC---  
ATTACTGGATTACTGTTAACACGGGATGGAGGGAAGAACTGAG-----

-----  
AGCAATGAGACCTTCAGGCCTGGAGGAGGGGATATGAGGAACAATTGGAGAAGTGAATTATATAAGTATAAGG  
TAGTAGAAATTAAACCACTA---GGTGTAGCACCCCTCACCTGCAAAAAGAAGAGTGGTG-----  
-----GAGAGAGAAAAAAGAGCA---GCA-----CTGGGAGCT-----  
GTCTTCCTTGCGTTCTTAGGAGCA---GCAGGAAGCACTATG---GGCGCGGCGTCA---  
ATAACGCTGACGGTACAG---GCCAGAAAG---TTATTG---TCTGGTATAGTGCAACAGCAAAGC---  
AATTTG---CTGAAG---GCTATAGAGGCTCAACAACATATGTTGAGACTCACGGTCTGGGGCATT

>MK177826

TTCTATTGCAATACATCAAACTGTTTAAATAGCACCTGGGAGAATGAAAATAACACTACCAACTCAAACCTCTG  
CA-----

-----  
GAGAATATAACTCTCACTCTCCCATGTAGAATAAAGCAAGTCATAAATATGTGGCAGAGAGTAGGACAAGCAA  
TGTATGCCCCCTCCCATCCAAGGAATAATAAAATGTAATTCAAAC---  
ATTACTGGATTACTGCTAACACGGGATGGAGGGAATAACAATACA-----

-----  
ACGAATGAGACCTTCAGGCCTGGAGGAGGGGATATGAGGGACAATTGGAGAAGTGAATTATACAAGTATAAAG  
TAGTAAAAATTGAACCACTA---GGTGTAGCACCCCTCCTATGCAAAAAGAAGAGTGGTG-----  
-----GAGAGAGAAAAAAGAGCA---GTTGGA---CTAGGAGCT-----  
GTCTTCCTTGCGTTCTTAGGAGCA---GCAGGAAGCACTATG---GGCGCGGCGTCA---  
ATAACGCTGACGGTACAG---GCCAGACAA---TTATTG---TCTGGTATAGTGCAACAGCAGAGC---  
AATCTG---CTGAAG---GCTATAGAGGCTCAACAACAAATGTTGAGACTCACGGTCTGGGGCATT

>KY989950

TTCTATTGTAATACATCAAAATTGTTTAAATAGCACTTGGAATACCAGCCACACAGAG-----

-----  
-----

TCAGGTGACAATATAACTCTCCCATGCCGAATAAAACAAATTGTAAGGATGTGGCAGAATGTAGGACAAGCAA  
TGTATGCCCCCTCCCATCCCAGGAGAAATAAGGTGTGACTCAAAC---

ATTACTGGACTACTATTAACAAGAGATGGAGGGGAGGAAAATAGGAATGGGACA-----

AACGGGAATGGG---ACA-----  
-----

AAGGAGGAGACCTTCAGGCCTGGAGGAGGAGATATGAGGGACAACCTGGAGAAGTGAATTATACAAGTATAAAG  
TAGTAAAAATTGAACCAGTA---GGTGTAGCACCTACTCATGCAAAAAGAAGAGTGGTG-----

-----GAGAGAGAAAAAAGAGCA---GTA-----CTTGAGCT-----

GTCTTCCTTGGGTTCTTGGGAGCA---GCAGGAAGCACTATG---GGCGCGGCGTCA---

ATAACGCTGACGGTACAG---GCCAGACAA---TTGTTG---TCTGGTATAGTGCAACAGCAAAGC---

AATTTG---CTGAAG---GCTATAGAGGCTCAGCAACAACCTGTTGAGGCTCACGGTCTGGGGCATT

>MF157740

TTCTATTGCAGTACATCAGAACTGTTTAAATAGCACTTGGAACGGGTAAATAACACTACTACTTGGAATAGCA  
CTGCCAAC-----

-----  
TCAACAAATGACCCTATAACTCTCCGGTGTAGAATAAAGCAAATTGTAAGGATGTGGCAGAGAGTAGAACAAG  
CAATGTATGCCCCCTCCCATCCGAGGAGAAATAAGGTGTGAGTCAAAC---

ATTACAGGATTACTATTAACAAGAGATGGAGGGCATGATGATGGGACAGAT-----  
-----

-----  
GAGACAGAGGAGACCTTCAGGCCTGGAGGAGGAGATATGAGGGACAATTGGAGAAGTGAATTATATAAGTATA  
AAGTAGTAAAAATTGAACCACTA---GGTGTAGCACCCACCCATGCAAAAAGAAGAGTGGTG-----

-----GAGAGAGAAAAAAGAGCA---GTTGGA---CTGGGAGCT-----

---GTCTTCCTTGGGTTCTTAGGAGCA---GCAGGAAGCACTATG---GGCGCGGCGTCA---

ATAACGCTGACGGTACAG---GCCAGACAA---TTATTG---TCTGGTATAGTGCAACAGCAGAGC---

AATTTG---CTGAGA---GCTATAGAGGCTCAACAACATCTGTTGAGACTCACGGTCTGGGGCATT

>MH742763

TTCTATTGCAATACATCAGAATTATTTAAACAATAACACAGAATTAAACAATGGCACTGCCGGC-----  
-----

-----  
GTAAATGACACTATAAAACTCCCATGCAGGGTAAAGCAAATTGTAAGAATGTGGCAGAAAGTAGGGCAAGCAA  
TGTATGCCCCCTCCCATCAAAGGAGTAATAAGGTGTAACTCAAAC---

ATTACAGGACTACTGTTAACAAGGGATGGAGGGAATACTAGCACA-----  
-----

-----  
GAGGAGGAGATATTTAGGCCTGGAGGAGGAGATATGAGGGACAACCTGGAGAAGTGAATTATATAAGTATAAGG  
TAGTACAAATTGAACCATTA---GGTGTGGCACCCACCCATGCAAAAAGAAGAGTGGTG-----

-----GAGAGAGAAAAAAGAGCA---CTTGGA---ATAGGAGCT-----

GTCTTCATTGGGTTCTTAGGAGCA---GCAGGAAGCACTATG---GGCGCGGCGTCA---

ATAACGCTGACGGTACAG---GCCAGACAA---TTATTG---TCCGGTATAGTGCAACAGCAGAGC---

AATCTG---CTGAGG---GCTATAGAGGCTCAACAACATCTGTTGAAACTCACGGTCTGGGGCATT

>MH742765

TTCTATTGCAATACATCAGCACTGTTTAAATAGCACTTGGAATAACAGTACTGGCACTTGGA CTGACACTAACA  
ATAGCAGTTCA-----

-----  
GAGTCAAATGGCACTATCACTCTCAAATGCAAAATAAAGCAAATTGTAAATATGTGGCAGAGAGTAGGGCAAG  
CAATGTATGCCCCCTCCCATCGAAGGAATAATAAGGTGTGAATCAAAC---

ATTACAGGACTACTATTAACAAGAGATGGAGGGAATAATAATGCA-----  
-----

-----  
AATGAGACTTTTCAGGCCTGGAGGAGGAGATATGAGGGATAATTGGAGAAGTGAATTATATAAATATAAAGTAG  
TAAAAATTGAACCACTA---GGTGTAGCACCCACCTATGCAAAAAGAAGAGTGGTG-----

-----GAGAGAGAAAAAAGAGCA---GTTGGA---CTGGGAGCT-----

GTTCTCTTTGGGTTTCTAGGAGCA---GCAGGAAGCACTATG---GGCGCGGCGTCA---

ATAACGCTGACGGTACAG---GCCAGACAA---TTATTG---TCCGGTATAGTGCAACAGCAGAGC---

AATTTG---CTGAGA---GCTATAGAGGCTCAACAACATCTGTTGAAACTCACGGTCTGGGGCATT

>MH742766

TTCTACTGCAATACGACAGACCTGTTTAAACAGCCAGTGGCCCACTAACAACCTCAGAG-----

-----  
-----

TCAAATGACACTATAACTCTCCAATGCAGAATAAAGCAATTTATAAATATGTGGCAGAGAGTAGGACAAGCAA  
TGTATGCCCCCTCCCATCCAAGGAAATATAAGTTGTAGATCAAAC---

ATTACAGGACTACTATTAACAAGAGATGGAGGGAATAATAATAGT-----

-----  
-----

AAGACAAATGAGACTTTTAGGCCTGGAGGAGGAGATATGAGGGACAATTGGAGAAGTGAATTATATAAGTATA  
AAGTAGTAAAAATTGAACCAATA---GGTGTAGCACCCACCCATGCAAAAAGAAGAGTGGTG-----

-----GAGAGAGAAAAAAGAGCA---GCTGGA---CTGGGAGCT-----

---GTCTTCCTTGGGTTCTTAGGAGCA---GCAGGAAGCACTATG---GGCGCGGCGTCA---

ATAACGCTGACGGTACAG---GCCAGACAA---TTATTG---TCTGGTATAGTGCAACAGCAGAGC---

AATCTG---CTGAGG---GCTATAGAGGCTCAACAGCATCTGTTGAAACTCACGGTCTGGGGCATT

>MH742768

TTCTATTGCAATACAACAAAACTGTTTAAATAGCACTTGGTTTAACAATGGCACAAACGCCACAAACAACGAAG  
CA-----

-----  
-----

ATGAATGACACTCTAACTCTCCAATGCAGAATAAAGCAAATTTGTGAGAATGTGGCAGACAGTAGGACAAGCAA  
TGTATGCCCCCTCCCATCTCAGGAGAGATAAGGTGTAATTCAAAC---

ATTACTGGGTTGCTATTAACAAGGGATGGAGGGGAGGATAATAGTACAAAAAAT-----

-----  
-----

GAGACAAAGGAGACTTTCAGGCCTGGAGGAGGAGATATGAGGGACAATTGGAGAAGTGAATTATATAAATATA  
AAGTAGTAAAAATTGAACCTCTA---GGTGTAGCACCCACCCGTGCAAAGAGAAGAGTGGTG-----

-----GAGAGAGAAAAAAGAGCA---GTTGGA---CTGGGAGCT-----

---GTCTTCCTTGGGTTCTTAGGAGCA---GCAGGAAGCACTATG---GGCGCGGCGTCA---

ATAACGCTGACGGTACAG---GCCAGACAA---TTATTG---TCTGGTATAGTGCAACAGCAGAGC---

AATCTG---CTGAAG---GCTATAGAGGCTCAACAACAGCTGTTGAGACTAACAGTCTGGGGCATT

>MH742770

TTCTATTGTGATACATCAGGTCTGTTTAAATAGCGTTTGGGATAGGAATGGCACTACTTGAATAGCAACACCA  
CAAGT-----

-----  
-----

GACACTGATGATATAATTCTCTCATGCAGAATAAGACAAATTATAAATATGTGGCAGAGAGTAGGACAAGCAA  
TGTATGCCCCCTCCCATTAAGGAGTGATAAACTGTGAATCAAAC---

ATTACAGGGCTACTGCTAACAAGAGATGGAGGGACTAATAGGGGT-----

-----  
-----

AGTACAAATGAGACTTTCAGGCCTGTAGGAGGAGATATGAGAGACAATTGGAGAAGTGAATTATATAAGTATA  
AAGTAGTAAAAATTGAGCCACTA---GGAGTAGCACCCACCAGGGCAAAAAGAAGAGTGGTG-----

-----GAGAGAGAAAAAAGAGCA---GTTGGA---CTGGGAGCT-----

---GTCTTCCTTGGGTTCTTAGGAGCA---GCAGGAAGCACTATG---GGCGCGGCGTCA---

ATAACGCTGACGGTACAA---GCCAGACAA---TTATTG---TCTGGTATAGTGCAACAGCAAAGC---

AATTTG---CTGAAG---GCTATAGAGGCTCAACAACATCTGTTGAGACTCACGGTCTGGGGCATT

>MH742762

TTCTATTGCAATACATCAGACCTGTTTAAATGCATCAAGCACT-----

-----  
-----

TGGGGTAACAATATAACTCTCCCATGCAGAATAAAGCAAATTTGTAAATATGTGGCAGAAAGTAGGACGAGCAA  
TGTATGCCCCCTCCCATTCAGGAGAAATAAGGTGTGAATCAAAC---

ATAACAGGACTACTATTAACAAGAGATGGAGGGAATAATAATAAT-----

-----  
-----

ACAAATGAGACCTTCAGACCTGGAGGAGGAGATATGAGGGACAATTGGAGAAGTGAATTATATAAGTATAAAG  
TAGTAAAAATTGAACCACTA---GGTGTAGCACCCACCCATGCAAAAAGAAGAGTGGTG-----

-----CAGAGAGAAAAAAGAGCA---GTTGGA---CTGGGAGCT-----

GTCTTCCTTGGGTTCTTAGGAGCA---GCAGGAAGCACTATG---GGCGCGGCGTCA---

ATAACGCTGACGGTACAG---GCCAGACAA---TTGCTA---TCTGGTATAGTGCAACAGCAGAGC---

AATTTG---CTGAAG---GCTATAGAGGCTCAACAACATCTGTTGAGACTCACGGTCTGGGGCATT

>MH000309

TTCTATTGCAATACGACAGACCTGTTTAAACAGCAAGTGGTTTCAGT-----

-----  
-----

AACAACGGCATTATAACTCTCCAATGCAGAATAAAGCAATTCTATAAATATGTGGCAGAGAGTAGGACAAGCAA  
TGTATGCCCCCTCCCATCTCAGGAATTATAAATTGTACATCAAAC---

ATTACAGGACTATTATTAACCAGAGATGGAGGA-----

-----  
-----

ACTGAGACTTTTtaggcctggaggaggagatatgagggacaattggagaagtgaatttatataagtataaaagtag  
TAAAAATTGAACCAATA---GGAATAGCACCCACCCATGCAAAAAGAAGAGTGGTG-----

-----GAGAGAGAAAAAAGAGCA---GTTGGA---CTGGGAGCT-----

GTCTTCCTTGGGTTCTTAGGAGCA---GCAGGAAGCACTATG---GGCGCGGCGTCA---

ATAACGCTGACGGTACAG---GCCAGACAA---TTATTG---TCTGGTATAGTGCAACAGCAGAGC---

AATCTG---CTGAGG---GCTATAGAGGCTCAACAACAGCTGTTGAAACTCACAGTCTGGGGCATT

>MH742757

TTCTACTGCAATACAACAAACTTGTTTAACATCAGCCTGGGGAACAGTACCACTAACAGCTCAGAG-----

-----  
-----

TCAAAATGACAATATAACTCTCCAATGCAGAATAAAGCAAATTATAAGGATGTGGCAGAGAGTAGGACAAGCAA  
TGTATGCCCCCTCCCATCCAAGGAGATATAAGTTGTAGATCAAAC---

ATTACAGGACTACTATTAACAAGAGATGGAGGGACAAGAGATGGAGGGAAT-----

-----  
----

GTGACTAATAATACTGAGATTTTtaggcctgaaggaggaaatatgaaggacaattggagaagtgaatttatata  
AGTATAAAGTAGTAAGAATTGAACCAATA--GGTGTAGCACCCACCCGTGCAAAAAGAAGAACGGTG-----

-----GGGAGAGAGAAAAAGAGCA---GTTGGA---

CTGGGAGCT-----GTCTTCCTTGGGTTCTTAGGAGCA---GCAGGAAGCACTATG---

GGCGCGGCGTCA---ATAACGCTGACGGTACAG---GCCAGACAA---TTATTG---

TCTGGTATAGTGCAACAGCAGAGC---AATCTG---CTGAGG---

GCTATTGAGGCTCAACAGCATCTGTTGAAACTCACAGTCTGGGGCATT

>AY231152

TTCTATTGCAATACATCAATACTGTTTAAATAGCACTTGGAATACCAATGACACTTGGAATATCAATAACACTG  
ACACA-----

-----  
-----

GAGTCAAATGACACTATAACTATCCAATGCAGAATAAGGCAAGTTGTAAAGATGTGGCAGAAAGTAGGACAAG  
CAATGTATGCCCCCTCCCATCGAAGGAGTAATAAGTTGTAAATCAAAC---

ATTACAGGACTACTATTAACAAGAGATGGAGGGAATCATAATAAT-----

-----  
-----

ACAAATGAGACTTTcaggcctggaggaggagatatgagggacaattggagaagtgaatttatataagtataaaag  
TAGTAAAAATTGAGCCACTA---GGTGTAGCACCCACCCGTGCAAAAAGAAGAGTGGTG-----

-----GAGAGAGAAAAAAGAGCAGTATTTGGA---CTGGGAGCT-----

GTTTTTCCTTGGGTTCTTAGGAGCA---GCAGGAAGCACTATG---GGCGCGGCGTCA---

ATAACGCTGACGGTACAG---GCCAGACAA---TTATTG---TCCGGTATAGTGCAACAGCGGAGC---

AATTTG---CTGAGG---GCTATAGAGGCTCAACAACATCTGTTGAAACTCACAGTCTGGGGCATT

>AY231153

TTCTATTGCAATACATCAAAACTGTTTGATAGCACTTGGTATAGCAATGATAGCACTTGGTATAGCAATGACA  
CCAGCTTAAAC-----

-----CACACA-----

GAGTCAAATGGCACTATAACTCTCCAATGCAGAATAAAGCAAATTATAAATATGTGGCAAAAGGTAGGGCGAG  
CAATGTATGCCCCCTCCCATCCAAGGAGTAATAAGGTGTGATTCAAAC---

ATTACAGGACTACTATTAACAAGAGATGGAGGGGATAATAATACT-----

-----  
-----

AAAAATGAGACCTTcaggcctggaggaggagatatgagggacaattggagaagtgaatttatataagtataaaag  
TAGTAAAAATTGAACCACTA---GGTGTAGCACCCACCCATGCAAAAAGAAGAGTGGTG-----

-----GAGAGAGAAAAAAGAGCA---GTTGGA---CTGGGAGCT-----

GCCTTCCTTGGGTTCTTAGGAGCA---GCAGGAAGCACTATG---GGCGCGGCGTCA---

ATAACGCTGACGGTACAA---GCCAGACAA---TTATTG---TCCGGTATAGTGCAACAGCAGAGC---  
 AATCTG---CTGAAA---GCTATAGAGGCTCAACAACAGATGTTGAGACTCACGGTCTGGGGCATT  
 >MH742764  
 TTCTATTGCAATACATCAATACTGTTTAATAGCACTTGGAATAATAGCACTTGGGATAATAACACTAGAGATA  
 ACAAT-----  
 -----AACAA-----  
 GCCACAAATGATACTATGACTCTCCAATGCAGAATAAAGCAAATTGTAAGAATGTGGCAGACAGTAGGACAAG  
 CAATGTATGCCCCCTCCCATCCAAGGAACAATAAAGTGTGAGTCAAAC---  
 ATTACAGGACTACTATTAACAAGAGATGGAGGAAATAATAATAAT-----  
 -----  
 -----  
 ACAAATGAGACTTTTCAGGCCTGGAGGAGGAGATATGAGGGACAATTGGAGAAGTGAATTATATAAGTATAAAG  
 TAGTAAACCTTAAACCACTA---GGTGTAGCACCCACCCCTGCAAAAAGAAGAGTGGTG-----  
 -----ATGAGAGAAAAAAGAGCA---GCA-----CTGGGAGCT-----  
 ATTTTCCTTGGGTTCTTAGGAGCA---GCAGGAAGCACTATG---GGCGCGGCGTCA---  
 ATAACGCTGACGGTACAG---GCCAGACAA---TTATTG---TCCGGTATAGTGCAACAGCAGAGC---  
 AATTTG---CTGAGA---GCTATAGAGGCTCAACAACATATGTTGAAACTCACGGTCTGGGGCATT  
 >AF321079  
 TTCTATTGCAATACAGCATCACTGTTTAATAGCACTTGGTATAGCAATGGCAGCTCAAACCTACGCAGGG----  
 -----  
 -----  
 TCAAATGGGAATATAACTCTCCAATGCAGAATAAAGCAAATTGTAAATATGTGGCAGAGAGTAGGACAAGCAA  
 TGTATGCCCCCTCCCATCCAAGGAGTAATAAGGTGTGTATCAAAC---  
 ATTACTGGACTACTATTAACAAGAGATGGAGGGAATAATAATAGT-----  
 -----  
 -----  
 AGTACAAATGAGACCTTTAGGCCTGGAGGAGGAGACATGAGAGACAATTGGAGAAGTGAATTATATAAGTATA  
 AAGTAGTAAAAATTGAACCACTA---GGTGTAGCACCCCTCCCGTGCAAAAAGAAGAGTGGTG-----  
 -----GAGAGAGAAAAAAGAGCA---ATCGGA---CTGGGAGCT-----  
 ---GTTTTCCTTGGGTTCTTAGGAGCA---GCAGGAAGCACTATG---GGCGCGGCGTCA---  
 ATAACGCTGACGGTACAG---GCCAGACAA---TTATTG---TCCGGTATAGTGCAACAGCAGAGC---  
 AATCTG---CTGAAG---GCTATAGAGGCTCAACAACATATGTTGAAACTCACGGTCTGGGGCATT  
 >AB286856  
 TTCTATTGCTATACATCAGACCTGTTTAATAGCACTTGGCCCAATAAACTGCAGAGTCAAATAGCACAGGGT  
 CAATA-----  
 -----  
 AGGTCAAATGAGACTATAACTCTCAAATGCAGAATAAAGCAAATTATAAATATGTGGCAGAGAGTAGGACAAG  
 CAATATATGCCCCCTCCCATCAGAGGAGAAATAAGGTGTGATTCAAAC---  
 ATTACAGGACTAATATTAACAAGAGATGGAGGGAATAATAGTGAGAGT-----  
 -----  
 -----  
 GCAAATGGAAGTGAATTTTCAGGCCTGGAGGAGGAGATATGAGGGACAATTGGAGAAGTGAATTATATAAGT  
 ATAAAGTAGTAAAAATTGAACCACTA---GGATTAGCACCCACTAGAGCAAAAAGAAGAGTGGTG-----  
 -----CAGAGAGAAAGAAGAGCA---GTTGGC---CTGGGAGCT---  
 -----TTATTCAATTGGGTTCTTAGGAGCA---GCAGGAAGCACTATG---GGCGCGGCGTCA---  
 TTAACGCTGACGGTACAG---GCCAGACAA---TTACTG---TCTGGTATAGTGCAACAGCAAAGC---  
 AATTTG---CTGAGG---GCTATAGAGGCTCAACAACATCTGTTGAAACTCACAGTCTGGGGCATT  
 >AB286857  
 TTCTATTGCAATACATCAGGACTGTTTAATAGCACTTGGGAGAATAATACTAGCACAGCCAGCTCAACAAATG  
 TTAGCTCA-----  
 -----ATA---  
 AATGACACTGACATTATAGAAGTCAAATGCAGAATAAAGCAAATTGTAAATATGTGGCAGAAAGTAGGACAAG  
 CAATGTATGCTCCTCCATTCCAGGAGTAATAAGGTGTGATTCTGAAC---  
 ATTACAGGACTACTATTAACAAGAGATGGAGGGAAGAATAGTAGT-----  
 -----  
 -----  
 GCTACAAATGAGACCTTCAGGCCTGGAGGGGAGATATGAGAGACAATTGGAGAAGTGAATTATATAAATATA  
 AAGTAGTAAAAATTGAACCACTG---GGTGTAGCACCCACCCATGCAAAAAGAAGAGTGGTG-----  
 -----GAGAGAGAAAAAAGAGCA---GTTGGA---CTAGGAGCT-----  
 ---GTACTCCTTGGGTTCTTAGGAGCA---GCAGGAAGCACTATG---GGCGCGGCGTCA---

ATAACGCTGACGGTACAG---GCCAGACAA---TTATTG---TCTGGTATAGTGCAACAGCAGAGC---  
 AATCTG---CTGAGA---GCTATAGAGGCTCAACAACAGCTGTTGAGACTCACGGTCTGGGGCATT  
 >AB286859  
 TTCTATTGTAATACAACAACACTGTTTAATAGCACTTGGGATGACAATAACACTGCCAGCTCAAACCTACACAG  
 GG-----  
 -----  
 TCAAAATGGCACTATAACTCTCCAATGCAGAATAAAGCAAATTATAAATATGTGGCAGAAAGTAGGACAAGCAA  
 TGTATGCCCCCTCCCATCCAAGGAGTAATAAGGTGTAACCTCAAGC---  
 ATTACTGGACTACTATTAACAAGAGATGGAGGAAGTAATAGTAGT-----  
 -----  
 -----  
 ACAAATGAAACTTTTCAGGCCTGGAGGAGGAGACATGAGGGACAATTGGAGAAGTGAATTATATAAGTATAAAG  
 TAGTAAAAATTGAACCACTG---GGTGTAGCACCCACCCATGCAAAAAGAAGAGTGGTG-----  
 -----GAGAGAGAAAAAAGAGCA---GTTGGA---CTGGGAGCT-----  
 GTCTTCCTTGGGTTCTTAGGAGCA---GCAGGAAGCACTATG---GGCGCAGCGTCA---  
 CTAACGCTGACGGTACAG---GCCAGACAA---TTATTG---TCTGGTATAGTGCAACAGCAAAGC---  
 AATTTG---CTGAAG---GCTATAGAGGCTCAACAACATCTGTTGAAACTCACAGTCTGGGGCATT  
 >AB286862  
 TTCTATTGCAATACAACAAATTTGTTTAATAGCACTTGGGAAAAGAAAAAGGGCACTTGAATGATACCACTG  
 CCAAC-----  
 -----  
 CCACCAAATGGCACTATAACTCTCCAATGCAGAATAAAGCAAATTGTAAATATGTGGCAGAGAGTAGGACAAG  
 CAATATATGCCCCCTCCCATCCCAGGAATAATAAGTTGTAATTCAGC---  
 ATCACAGGATTACTATTAACAAGAGATGGGGGTGAGGGGAATGAAACT-----  
 -----  
 -----  
 AGGAAAAATGAGACCTTCAGACCTGGAGGAGGAGATATGAGGGACAATTGGAGAAGTGAATTATATAAGTATA  
 AAGTGGTAAAAATTGAACCACTA---GGTGTGGCACCTACCTATGCAAAAAGAAGAGTGGTG-----  
 -----GAGAGAGAAAAAAGAGCA---GTTGGA---ATGGGAGCT-----  
 ---GTCTTACTTGGGTTCTTAGGAGCA---GCAGGAAGCACTATG---GGCGCAGCGTCA---  
 ATAACGCTGACGGTACAG---GCCAGACAA---TTATTG---TCCGGTATAGTGCAACAGCAGAGC---  
 AATCTG---CTGAAA---GCTATAGAGGCTCAACAACAACCTGTTGAGACTCACGGTCTGGGGCATT  
 >AB286863  
 TTCTATTGCTATACATCAGAACTGTTTAATAGCACTTGAATAATAATACTGGCAGCCCAAACAGC-----  
 -----  
 -----  
 ACAAATGACACTATAACTCTTCAATGCAAAATAAAGCAAATTGTAAATATGTGGCAGAGGGTAGGGCAAGCGA  
 TGTATGCCCCCTCCCATCCCAGGAGAGCTAAGGTGTGACTCAAAC---  
 ATTACTGGACTACTATTAACAAGAGATGGAGGGAATACTAATAATACA-----  
 -----  
 -----  
 AATACAACCTGAAACCTTCAGGCCGGGAGGGGGAGATATGAGGGACAATTGGAGAAGCGAACTATACAAGTATA  
 AAGTAGTACAAATTGAACCAATA---GGAGTAGCACCCACCCCGGCAAAAAGAAGAGTGGTG-----  
 -----GAGAGAGAAAAAAGAGCA---GTTGGA---CTGGGAGCT-----  
 ---GTCTTCCTTGGGTTCTTAGGAGCA---GCAGGAAGCACTATG---GGCGCAGCGTCA---  
 ATAACGCTGACGGTACAG---GCCAGACAA---TTATTG---TCCGGTATAGTGCAACAGCAGAGC---  
 AATTTG---CTGAGA---GCTATAGAGGCTCAACAACATCTGTTGAAACTCACGGTCTGGGGCATT  
 >AB231895  
 TTCTATTGCAATACATCAGGACTGTTTAATAGTACTTGGTATAGCGATACCACTGCAAACCAAACAGAG----  
 -----  
 -----  
 TCAAAATGACACCATAACTCTACAATGCAGAATAAAGCAAATTATAAATATGTGGCAGACAGTAGGACAGGCAA  
 TGTATGCCCCCTCCCATCCAAGGAGTAATAAGGTGTGAATCAAAC---  
 ATCACTGGATTACTATTAACAAGAGATGGAGGGAATAAGAATCAT-----  
 -----  
 -----  
 ACAAATGAGACCTTCAGGCCTGGAGGAGGAGATATGAGAGACAATTGGAGAAGTGAATTATATAAGTATAAAG  
 TAGTAAAGATTGAACCAATA---GGTGTAGCACCTCTCCTGCAAAAAGAAGAGTGGTG-----  
 -----GGAAGAGAAAAAAGAGCA---GTCGGA---CTGGGAGCT-----  
 GTCTTCCTTGGGTTCTTAGGAGCA---GCAGGAAGCACTATG---GGCGCGGCGTCA---

ATGACGCTGACGGTACAA---GCCAGACAA---TTATTG---TCTGGTATAGTGCAACAGCAGAGC---  
 AATTTG---CTGAAG---GCTATAGAGGCTCAACAACATCTGTTGAAACTCACGGTTTGGGGCATT  
 >AB231896  
 TTCTATTGCGATACATCAGGGCTGTTTAATAGCACTTGGGATAACATTACCAGTACAAATGGCACAAGGTAA  
 AT-----  
 -----  
 GAAACTGAAACTATAACTCTCCCATGCAGAATAAAACAAATTGTAAGAATGTGGCAGAGAGTAGGACAAGCAA  
 TGTATGCCCCCTCCTATCCAAGGAGAACTACGGTGTGAATCAAAT---  
 ATTACAGGACTACTATTAACAAGAGATGGAGGGAATAATAATCGT-----  
 -----  
 -----  
 ACAAATGAGACCTTCAGGCCTATAGGAGGAGATATGAAGGACAATTGGAGAAGTGAATTATATAAATATAAAG  
 TGGTAAAAAATTGAACCACTA---GGTATAGCACCCCTCCAGGGCAAAAAGGAGAGTGGTG-----  
 -----GAGAGAGAAAAAAGAGCA---GTTGGA---CTGGGAGCT-----  
 GTCTTCCTTGGGTTCTTAGGAGCA---GCAGGAAGCACTATG---GGCGCGGCGTCA---  
 TTAACGCTGACGGTACAG---GCCAGACAA---TTATTG---TCCGGTATAGTGCAACAGCAAAGC---  
 AATTTG---CTGAGG---GCTATAGAGGCTCAACAACATCTGTTGAAACTCACAGTCTGGGGCATT  
 >AB231898  
 TTCTATTGCAATACATCAAGACTGTTTAATAGCAATTGGAAAAACGGTACTGCCAGCTCAAATGGCACT----  
 -----  
 -----  
 GCAAATGACATTATAACTCTCCAATGCAGAATAAGGCAAATTATAAATATGTGGCAGAAAGTAGGAAAAGCAA  
 TGTATGCCCCCTCCCATCCCAGGAGTAATAAGGTGTGAGTCAAAC---  
 ATTACAGGACTACTATTAACAAGAGATGGAGGGAATACTAGT-----  
 -----  
 -----  
 GGTGTAAATGAGACTTTCAGACCTGAAGGAGGAAATATGAAAGACAATTGGAGAAGTGAATTATATAAGTATA  
 AAGTAATAAAAAATTGAACCACTA---GGTGTAGCACCCACCCGTGCAAGAAGAAGAGTGGTG-----  
 -----GGAAGAGAAAAAAGAGCA--ATAGGTGGACTGGGAGCT-----  
 ---GCCCTCCTTGGGTTCTTAGGAGCA--GCAGGAAGCACTATG---GGCGCGGCGTCA---  
 ATAACGCTGACGGTACAG---GCCAGACAA---TTATTG---TCTGGTATAGTGCAACAGCAGAGC---  
 AATCTG---CTGAGG---GCTATAAAGGCTCAACAAGAACTGTTGAGACTCACGGTCTGGGGCATT  
 >AB049811  
 TTCTATTGCAATACATCAGAACTGTTTAATAGGAATTACAATAGGTCTAGCAATAGCACTTGGAAATTACAATA  
 GTTCTAGCAAG-----  
 -----GGCACA-----  
 GAGTCAAATGGCACTATAATTCTCCAATGCAGAATAAAGCAAATTGTAAATATGTGGCAGAGAGTAGGACAAG  
 CAATATATGCCCCCTCCCATCCCAGGAGTAGTAAGGTGTGTCTCAAAC---  
 ATTACAGGACTACTATTAACAAGAGATGGAGGGAATGGTAATAGT-----  
 -----  
 -----  
 ACAAATGAGACTTTCAGACCGGGAGGAGAGATATGAGGGACAATTGGAGAAGTGAATTATATAAGTATAAAG  
 TAGTAAAAAATTGAACCACTA---GGTGTAGCACCCACCCATGCAAAAAGAAGAGTGGTG-----  
 -----GGGAGAGAAAAAAGAGCA---GTTGGA---CTGGGAGCT-----  
 GTCTTCCTTGGGTTCTTAGGAGCT---GCAGGAAGCACTATG---GGCGCAGCGTCA---  
 ATAACGCTGACGGTACAG---GCCAGACAA---TTATTG---TCTGGTATAGTGCAACAGCAGAGC---  
 AATCTG---CTGAGG---GCTATAGAAGCTCAACAACATATGTTGAAGCTCACGGTCTGGGGCATT  
 >AB485633  
 TTCTATTGTAAGACATCGAGACTGTTTAATAGCACTTGGCAGTTTAATAGCACTTGGAAAGAGCATTTCGGGATG  
 GC-----  
 -----  
 AATGACAATGACACTATAACTCTCCCATGCAGAATAAGACAAATTGTACATATGTGGCAGAGAGTAGGACAAG  
 CAATGTATGCCCCCTCCATTGAGGAGTAATAAACTGTCTATCAAGC---  
 ATTACAGGACTACTGCTAACAAGAGATGGTGGTGGGAATGGGAAT-----  
 -----  
 -----  
 AGTACAAAGGAGATCTTCAGGCCTGGAGGAGGAGATATGAGGGACAATTGGAGAAGTGAATTATATAAGTATA  
 AGGTAGTGAAAATTGAACCACTA---GGTGTAGCACCCACCCATGCAAAAAAAGAGTGGTG-----  
 -----GAGAGAGAAAAAGAGAGCA---GTTGGA---CTGGGAGCT-----  
 ---GTCTTCCTTGGGTTCTTAGGAGCA---GCAGGAAGCACTATG---GGCGCGGCGTCA---

ATAACGCTGACGGTACAG---GCCAGACAA---TTATTG---TCCGGTATAGTGCAACAGCAGAGC---  
 AATCTG---CTGAAG---GCTATAGAGGCTCAACAACATCTGTTGAGACTCACGGTCTGGGGCATT  
 >HQ385450  
 TTCTATTGCAATACATCAGAACTGTTTACTAGCACTTGGCCCAATGAGAATAATAGCACCGAGACCAATAATA  
 CTGCCAAC-----  
 -----TTA---  
 AATAATACAGACACTATAACTCTCCAATGCAGAATAAAGCAAATTGTAAGAATGTGGCAGACAGTGGGACAAG  
 CAATGTATGCCCCCTCCCATCAAAGGGGTAATAAATTGTAAATCAAAC---  
 ATTACAGGACTATTATTAATAAGAGATGGAGGGAAAAATAATAGT-----  
 -----  
 -----  
 GAAAAATGAGACTTTTCAGGCCTGGAGGAGGAGATATGAGGGACAATTGGAGAAGTGAATTATATAAGTATAAAG  
 TAGTAAAGATTGAACCAATA---GGTGTAGCACCCACCCATGCAAAAAGAAGAGTGGTG-----  
 -----GAGAGAGAAAAAAGAGCA---GTTGGA---ATGGGAGTG-----  
 TTTATCCTTGGGTTCTTAGGAGCA---GCAGGAAGCACTATG---GGCGCGGCGTCA---  
 ATAACGCTGACGGTACAG---GCCAGACAA---TTATTG---TCTGGTATAGTGCAACAGCAGAGC---  
 AATTTG---CTGAGG---GCTATAGAGGCTCAACAACATCTGTTGAAACTCACAGTCTGGGGCATC  
 >HQ385451  
 TTCTATTGCAATACATCAGGACTGTTTAATAGCACCTGGGTGAATAACAGTAGCACTGAGGGTGCCAGTAACA  
 ATGCCAGC-----  
 -----TCA---  
 GATGCAAATGACACTATAACTCTCCAATGCAGGATAAAGCAAATTATAAATCTGTGGCAGAGAGTAGGAAAAG  
 CAATGTATGCCCCCTCCCATCCCAGGAATAATAAGGTGTGACTCAAAC---  
 ATTACAGGACTATTATTAACAAGAGATGGAGGGTATAATAAAT-----  
 -----  
 -----  
 AGTAGAAATGAGACTTTTCAGACCTGGAGGAGGAGATATGAGGGACAATTGGAGAAGTGAATTATATAAGTATA  
 AAGTAGTAAAAATTGAACCACTA---GGTATAGCACCCACCAAGGCAAGGAGAAGAGTGGTG-----  
 -----GAGAGAGAAAAAAGAGCA---GTTGGC---ATGGGAGCT-----  
 ---CTCTTCCTTGGGTTCTTAGGAGCA---GCAGGAAGCACTATG---GGCGCGGCGTCA---  
 ATAACGCTGACGGTACAG---GCCAGACAA---TTATTG---TCTGGTATAGTGCAACAGCAGAGC---  
 AATTTG---CTGAGA---GCTATAGAGGCTCAACAACATCTGTTGAAACTCACGGTCTGGGGCATT  
 >HQ385460  
 TTCTACTGCAATTCATCAGCACTGTTTGATACAACATGGAACGCCACTACATGGAATAATACCATAGAGTCAA  
 ATAATACC-----  
 -----ACA---  
 GGGCCAAACGATACAATCACACTCCACTGCAGGATAAAACAGATTATAAACATGTGGCAGACAGTAGGACAAG  
 CAATGTACGCCCCCTCCCATCCGAGGAGAAATAAGGTGTGAATCAAAC---  
 ATTACAGGACTACTATTAACAAGAGATGGAGGGAATGGTAATAGTAGT-----  
 -----  
 -----  
 GGTGGTGCAAATGAGACTTTTAGGCCTGGAGGAGGAGATATGAGGGACAATTGGAGGAGTGAATTATATAAGT  
 ATAAAGTAGTAAAAATTGAACCACTA---GGTGTAGCACCCACCCATGCAAAGAGAAGAGTGGTG-----  
 -----GAGAGAGAAAAAAGAGCA---ATTGGA---CTGGGAGCT---  
 -----TTCTTCCTTGGGTTCTTAGGAACA---GCAGGAAGCACTATG---GGCGCAGCGTCA---  
 ATAACGCTGACGGTACAG---GCCAGACAA---TTATTG---TCTGGTATAGTGCAACAGCAAAGC---  
 AATTTG---CTGATG---GCTATAGAGGCTCAACAACATATGTTGAAACTCACTGTCTGGGGCATT  
 >HQ385446  
 TTCTATTGCAATACATCAGGACTGTTTAACATTTGGGAGAAC-----  
 -----  
 -----  
 AATGACAATATAACTCTCCCATGCAGAATAAAGCAAATTATAAATATGTGGCAGAAAGTAGGACAAGCAATGT  
 ATGCCCCCTCCATTGCAGGAAAAATAGAGTGTGAGTCAAAC---  
 ATTACAGGACTACTGCTAACAAGAGATGGAGGAAATAATAATAGTACA-----  
 -----  
 -----  
 AATAAAAGTGAGACTTTTCAGGCCTGGAGGAGGAGACATGAGGGACAATTGGAGAAGTGAATTATATAAGTATA  
 AGATAGTAAAAATTGAACCACTA---GGTGTGGCACCCACTCATGCAAAAAGAAGAGTGGTG-----  
 -----GGGAGAGAAAAAAGAGCA---GTTGGA---CTGGGAGCT-----  
 ---GTTCTCTTTGGGTTCTTAGGAGCA---GCAGGAAGCACTATG---GGCGCGGCGTCA---

ATAACGCTGACGGTACAG---GCCAGACAA---CTATTG---TCTGGTATAGTGCAACAGCAGAGC---  
 AATCTG---CTGAAA---GCTATAGAGGCTCAACAACATCTGTTGAAACTCACAGTCTGGGGCATT  
 >HQ385447  
 TTCTATTGCAATACAACAGCACTGTTTTATGGTACATTGTATAACAATGACACTTGGGATAGAAATAGCACTT  
 GGGAT-----  
 -----AAC---  
 AACAACTCAACAAATATAACTCTCCAATGCAAAATAAAGCAAATTATAAGAATGTGGCAGAGAGTAGGGCAAG  
 CAATGTATGCCCCCTCCCATCCGAGGAAAAATATGGTGTGAATCAAAC---  
 ATTACAGGAATACTATTAACAAGAGATGGGGGGAATGATAATGCA-----  
 -----  
 -----  
 AATGAGACCTTCAGGCCTGGAGGAGGAGATATGAGGGACAATTGGAGAAGTGAATTATATAAATATAAAGTAG  
 TAAAAATTGAGCCACTA---GGTGTAGCACCCACCCATGCAAAAAGAAGAGCGGTG-----  
 -----GATAGAGAAAAAAGAGCA---GTTGGA---CTGGGAGCT-----  
 TTTTTCCTTGGGTTCTTAGGAGCA---GCAGGAAGCACTATG---GGCGCGGCGTCA---  
 ATAACGCTGACGGTACAG---GCCAGACAA---TTATTG---TCTGGTATAGTGCAACAGCAGAGC---  
 AATCTG---CTGAAG---GCTATAGAGGCTCAACAACATCTGTTGAGACTCACGGTCTGGGGCATT  
 >HQ385462  
 TTCTATTGCAATACATCAGGACTGTTTAATAGCACTTGGCCAGAGGCAAATGCCACACAGTCAAATACCACAC  
 AG-----  
 -----  
 TCAAAATAGCACTATAACTCTCCCATGCAGAATAAAGCAAATTGTAAATATGTGGCAGAAAGTAGGACAAGCAA  
 TGTATGCCCCCTCCCATCCAAGGAATAATAAAGTGTGAATCAAAC---  
 ATTACAGGGTTATTGTTAACAAGAGATGGGGGAAATAATAGTGGAAT-----  
 -----  
 -----  
 AATGGTGAACCTGATATTTTCAGGCCCCGAAGGAGGAGATATGAGAGATAATTGGAGAAGTGAATTATATAAGT  
 ATAAAGTAGTAAAAATTGAACCACTG---GGTATAGCACCCAGCCATGCAAAAAGAAGAGTGGTG-----  
 -----GAGAGAGAAAAAAGAGCA---GTTGGA---CTGGGAGCT---  
 -----GTCTTCCTTGGGTTCTTAGGAGCA---GCAGGAAGCACTATG---GGCGCGGCGTCA---  
 ATAACGCTGACGGCACAC---GCCAAACAA---TTACTG---TCTGGTATAGTGCAACAGCAGAGT---  
 AATCTG---CTGAGG---GCTATAGAGGCTCAACAACATCTGTTGAAACTCACGGTCTGGGGCATT  
 >HQ385455  
 TTCTATTGCAATACAACAGCCCTGTTTAACACAACCTTGGATCAATGGCACTGACAGCTCAAACAAC-----  
 -----  
 -----  
 AGCACAGAGTCTATAACGATCCAATGCAGAATAAAGCAAATTATAAACATGTGGCAGAAAGTAGGACAAGCAA  
 TATATGCCCCCTCCTATCCAGGAACAATAAGGTGTGAATCAAAC---  
 ATTACAGGACTATTATTAACAAGAGATGGAGGAAAGAATAGAACA-----  
 -----  
 -----  
 AATAATGAGACTTTTCAGGCCTGAAGGAGGAGATATGAGGGACAATTGGAGAAGTGAATTATATAAGTATAAAG  
 TAGTAAAAATTGAACCACTA---GGTATAGCACCTACCTATGCAAAAAGAAGAGTGGTG-----  
 -----GAGAGAGAAAAAAGAGCA---GTTGGA---CTGGGAGCT-----  
 GTCTTCCTTGGGTTCTTAGGAGCA---GCAGGAAGCACTATG---GGCGCGGCGTCA---  
 GTGACGCTGACGGTACAG---GCCAGACAA---TTATTG---TCTGGTATAGTGACAGCAGCAAAGC---  
 AATTTG---CTGAAG---GCTATAGAGGCTCAACAACATCTGTTGAGACTCACAGTCTGGGGCATT  
 >HQ385457  
 TTCTATTGCAATACATCAGAACTGTTTAATAGTACTTGAATAACAATAGCACTGGGGATAACAAT-----  
 -----  
 -----  
 AGCTCAACACCAATAATTCTCCAATGCAAAATAAAGCAAATTATAAGAATGTGGCAGAAAGTAGGACAAGCAA  
 TGTATGCCCCCTCCCATCCAGGAGAAATAAGGTGTGAATCAAAC---  
 ATTACTGGACTACTATTAACAAGAGATGGAGGGAATAATAATAAT-----  
 -----  
 -----  
 ACAAATGAAACATTTCAGGCCTGGGGGAGGAGATATGAGAGACAATTGGAGAAGTGAATTATATAAGTATAAAG  
 TAGTAAAAATTGAACCACTA---GGTGTAGCACCTACCCGTGCAAAAAGAAGAGTGGTG-----  
 -----GAGAGAGAAAAAAGAGCA---GTTGGA---ATGGGAGCT-----  
 TTATTCCTTGGGTTCTTAGGAGCA---GCAGGAAGCACTATG---GGCGCGGCGTCA---

ATAACGCTGACGGTACAG---GCCAGACAA---TTATTG---TCCGGTATAGTGCAACAGCAGAGC---  
 AATTTG---CTGAAG---GCTATAGAGGCTCAACAGCATCTGTTGAGACTCACGGTCTGGGGCATT  
 >HQ385449  
 TTCTACTGCAATACATCAAGACTGTTTAATAGCACTTGGAATAACATTAATAGCACTGGGTATAACCTCACAG  
 GG-----  
 -----  
 TCACAGGAAAATATAACTCTCCAATGCAGAATAAAGCAAATTGTAAGAATGTGGCAGAGAGTAGGACAAGCAA  
 TGTATGCCCCCTCCCATCCGAGGAGAAATAAGGTGTAACCTCAAAC---  
 ATTACTGGACTACTATTAACAAGAGATGGAGGGAATGAAAATAAT-----  
 -----  
 -----  
 AATACAAACGAGACCTTCAGGCCTGGAGGAGGAGATATGAGGGACAATTGGAGAAGTGAATTATATAAGTATA  
 AAGTAGTAAAAATTGAACCACTA---GGTGTAGCACCCACCCGTGCAAGAAGAAGAGTGGTG-----  
 -----GAGAGAGAAAAAAGAGCA---GTTGGA---CTGGGAGCT-----  
 ---GTCTTCCTTGGGTTCTTAGGAGCA---GCAGGAAGCACTATG---GGCGCGGCGTCA---  
 ATAACGCTGACGGTACAG---GCCAGACAA---TTATTG---TCCGGTATAGTGCAACAGCAAAGC---  
 AATTTG---CTGAAG---GCTATAGAGGCTCAACAACATCTGTTGAGACTCACGGTCTGGGGCATT  
 >HQ385454  
 TTCTATTGCTACACATCAAACCTGTTTAACAGTACTTGGGATGACAACAGTACTTGGGATAACAATACTACTT  
 GGGATAAC-----  
 -----AGCACG-----  
 ACAGAGGACACCAACATAACTCTCCAATGCAGGATAAAGCAAATTGTAAATATGTGGCAGAGAGTAGGACAAG  
 CAATATATGCCCCCTCCCATCCAAGGAGACATAAAGTGTGAATCAAAC---  
 ATTACTGGATTATTGTTAACAAGAGATGGAGAGAATAATACTATG-----  
 -----  
 -----  
 AATGAGACTTTCAGGCCTGGAGGAGGAGACATGAGGGACAATTGGAGAAGTGAATTATATAAATATAAAGTAG  
 TAAAAATTGAACCACTA---GGTGTAGCACCCACCCATGCAAAAAGAAGAGTGGTG-----  
 -----GAGAGAGAAAAAAGAGCA---GTTGGA---CTAGGAGCT-----  
 GTCCTCTTTGGGTTCTTAGGAGCA---GCAGGAAGCACTATG---GGCGCGGCGTCA---  
 ATAACGCTGACGGTACAG---GCCAGACAA---TTATTG---TCTGGTATAGTGCAACAGCAGAGC---  
 AATTTG---CTGAAG---GCTATAGAGGCTCAACAACATCTGTTGAAACTCACGGTCTGGGGCATT  
 >MH078541  
 TTCTACTGTAATACATCAGCACTGTTTAATAGCACTTGGAATTGGAATAATAACACTTGGGGGACCAATGAGA  
 GCAGCTCACAG-----  
 -----GCAAAT-----  
 GCACTGGTGAACCTATAACTCTCCAATGCAGAATAAAGCAAATTATAAATATGTGGCAGAAAGTAGGACGAG  
 CAATGTATGCCCCCTCCCATCCCAGGAGTCATAAGGTGTGAGTCAAAC---  
 ATTACAGGCCTACTGCTAACAAGAGATGGAGGAAGTACTAATAGT-----  
 -----  
 -----  
 ACAAATGAGACTTTCAGGCCTGGAGGAGGAGACATGAGGGATAATTGGAGGAGTGAATTATATAAGTATAAAG  
 TAGTAAAAATTGAACCACTA---GGTGTAGCACCTACTCGTGCAAGAAGAAGAGTGGTG-----  
 -----GGAAGAGAAAAAAGAGCA---GTTGGA---CTGGGAGCT-----  
 GTTTTCCTTGGGTTCTTAGGAGCA---GCAGGAAGCACTATG---GGCGCAGCGTCA---  
 CTAACGCTGACGGTACAG---GCCAGACAA---TTATTG---TCTGGTATAGTGCAACAGCAGAGT---  
 AATCTG---CTGAGG---GCTATAGAGGCTCAACAACAGATGTTGAGGCTCACGGTCTGGGGCATT  
 >MH078542  
 TTCTATTGCAATACATCAAAATTGTTTAATAGTACTTGGAATGAGAATAGTACTTGGAATAGTAGTCAG----  
 -----  
 -----  
 AGTAATGAGAATATAACCATCCCATGCAGAATAAGACAAATTGTACATCTGTGGCAGAGAGTAGGACAAGCAA  
 TGTATGCCCCCTCCCATCCGGGAGTAATAACCTGTACATCAAAT---  
 ATTACAGGGCTACTGCTAACAAGAGATGGTGGAATAATAATAGT-----  
 -----  
 -----  
 ACAAATGAGACCATCAGGCCTCAAGGAGGAAATATGAAGGACAATTGGAGGAGTGAATTATACAAATATAAAG  
 TAGTAAAAATTGAACCAATA---GGAGTAGCACCCACCAAGGCAAAGAGAAGAGTGGTG-----  
 -----GAGAGAGAAAAAAGAGCA---GTTGGA---CTGGGAGCT-----  
 GTCTTCCTTGGGTTCTTAGGAGCA---GCAGGAAGCACTATG---GGCGCAGCGTCA---

ATAACGCTGACGGTACAG---GCCAGACAA---TTATTG---TCTGGTATAGTGCAACAGCAAAGC---  
 AATTTG---CTGAAG---GCTATAGAGGCTCAACAGCAGCTGTTGAGACTCACAGTCTGGGGCATT  
 >MH078544  
 TTCTATTGTAATACAACAAAATTGTTTAGTAGCACTTGGGCTAATAATAGCACTTTGGGTAATAGCACTGAGG  
 ATAAC-----  
 -----  
 AACAACTACTATAACTCTCCAATGTAGAATAAAGCAAATTGTGAATATGTGGCAGAGAGTAGGACAAGCAA  
 TGTATGCCCCCTCCCATTCAGGAGAAATAAGTTGTGTATCGAAC---  
 ATTACTGGACTTTTATTAACAAGAGATGGAGAGGGTAGTAATAGG-----  
 -----  
 -----  
 ACAAATGAGACCTTCAGGCCTGGAGGAGGGGATATGAGGGACAATTGGAGAAGTGAATTATATAAGTATAAAA  
 TAGTAAAAATTGAACCACTA---GGTATAGCACCTACTCATGCAAGAAGGAGAGTGGTG-----  
 -----GAGAGAGAAAAAAGAGCA---GTTGGA---CTGGGAGCT-----  
 TTCTTCCTTGGGTTCTTAGGAGCA---GCAGGAAGCACTATG---GGCGCGGCGTCA---  
 ATAACGCTGACGGTACAA---GCCAGACAA---TTATTG---TCTGGTATAGTGCAACAGCAGAGC---  
 AATCTG---CTGAAG---GCTATAGAGGCTCAACAACATCTGTTGAAACTCACGGTCTGGGGCATT  
 >MK397970  
 TTCTATTGCAATACATCACAGTTGTTTAATAGCACTTGGGAGAACCGGGAATTAAATGGCAGTATA-----  
 -----  
 -----  
 TCAGATGGCAATATAACGATCCCCCTGCAGAATAAAGCAAATTATAAATATGTGGCAGAGAGTAGGACAAGCAA  
 TGTATGCCCCCTCCCATCCAAGGAGAGATAAGGTGTCAATCAAAC---  
 ATTACTGGACTAATATTAACAAGAGATGGAGGTAATAATGAGACA-----  
 -----  
 -----  
 CATACTGAGACCTTCAGGCCTGGAGGAGGAGATATAAGGGACAATTGGAGAAGTGAATTATATAAATATAAAG  
 TAGTAAAAATTGAACCACTA---GGAGTAGCACCCACCAGGGCAAAGAGAAGAGTGGTG-----  
 -----GAAAGAGAAAAAAGAGCA---GTTGGA---CTGGGAGCT-----  
 GTCTTCCTTGGGTTCTTAGGAGCA---GCAGGAAGCACTATG---GGCGCAGCGTCA---  
 ATAACGCTGACGGTACAA---GCCAGACAA---CTATTG---TCCGGTATAGTGCAACAGCAGAAC---  
 AATTTG---CTGAAG---GCCATAGAGGCTCAACAACAGATGTTGAGACTCACGGTATGGGGCATT  
 >KF561435  
 TTCTATTGCAATACATCAAAATTGTTTAATAGCACTTGGGACAACAATAGCACTTGGGACAACAATAGCACTT  
 GGGAAAACAAT-----  
 -----AGCAATACC-----  
 AACTCAAGTGGCACTATAACTTTCCAATGCAAAATAAAGCAAATTGTAAATATGTGGCAGAGAGTAGGACAAG  
 CAATGTATGCCCTTCCCATCCAAGGAGTAATAAGGTGTGAGTCAAAT---  
 ATTACAGGATTATTGTTAAACAAGAGATGGAGGGAATAAGAATAAT-----  
 -----  
 -----  
 AGTAATAATGAGACTTTCAGACCTGGAGGAGGAGATATGAGGGATAATTGGAGAAGTGTATTATATAAGTATA  
 AAGTAGTAAAAATTGAACCACTG---GGTGTAGCACCCACCCATGCAAGAAGAAGAGTGGTG-----  
 -----GGGAGAGAAAAAAGAGCA---GTCGGA---CTGGGAGCT-----  
 ---GTCCTCTTGGGATTCTTAGGAGCA---GCAGGAAGCACTATG---GGCGCGGCGTCA---  
 CTAACGCTGACGGTACAG---GCCAGACAA---TTATTG---TCCGGTATAGTGCAACAGCAGAGC---  
 AATTTG---CTAAGG---GCTATAGAGGCTCAACAACATCTGTTGAAACTCACGGTCTGGGGCATT  
 >DQ168577  
 TTCTATTGCAATACATCAAACTGTTTAATAGCACTGGGGATACCAATACCACTGCCAAC-----  
 -----  
 -----  
 TCAACAGGAACTATAGAGCTCCAATGCAGAATAAAGCAAATTGTAAATATGTGGCAGAAAGTAGGACAAGCAA  
 TATATGCCCCCTCCCATCCAAGGAATAATAAGGTGTGATTCAAAC---  
 ATTACAGGACTACTATTAACAAGAGATGGAGGGATTGAGAATGCA-----  
 -----  
 -----  
 GATAATGAGACCTTCAGGCCGGGAGGAGGAGATATGAGGGACAATTGGAGAAGCGAATTATATAAGTATAAAG  
 TAGTAAAAATTGAACCACTA---GGTGTAGCACCCACAAAAGCAAAAAGAAGAGTGGTG-----  
 -----GAGAGAGAAAAAAGAGCA---GTC-----GTTGGAGCT-----  
 CTCTTCCTTGGGTTCTTAGGAGCA---GCAGGAAGCACTATG---GGCGCGGCGTCA---

ATAACGCTGACGGTACAG---GCCAGACAA---TTATTG---TCCGGTATAGTGCAACAGCAGAGC---  
 AATTTG---CTGAGA---GCTATAGAGGCTCAACAACATCTGTTGAAACTCACGGTCTGGGGCATT  
 >DQ168578  
 TTCTATTGTAATACATCAAACCTGTTTAAATAGCACTTGGAATACCAGCTCAATCCACACAGAGCAAAATGCA-  
 -----  
 -----  
 ACTAATGAAACTATAACTCTCCAATGCAAAATAAAGCAAATTGTAAATATGTGGCAGAGAGCAGGACAAGCAA  
 TATATGCCCCCTCCCATCCAAGGAGAAATAAGGTGTGACTCAAAC---  
 ATTACAGGAATATTATTAACAAGAGATGGAGGAAATAATAATAGT-----  
 -----  
 -----  
 ACAAATGAGACCTTCAGGCCTGGAGGAGGAGATATGAGAGACAATTGGAGAAGTGAATTATATAAGTACAAAAG  
 TAGTAAAACCTGAACCACTA---GGTATAGCACCCACCCATGCAAAAAGAAGAGTGGTG-----  
 -----GAGAGAGAAAAAAGAGCA---GTA-----CTGGGAGCT-----  
 GTCTTCATTGGGTTCTTAGGAGCA---GCAGGAAGCACTATG---GGCGCGGCGTCA---  
 ATAACGCTGACGGTACAG---GCCAGACAA---TTATTG---TCCGGTATAGTGCAACAGCAAAGC---  
 AATTTG---CTGCAG---GCTATAGAGGCTCAACAACATCTGTTGAGACTCACGGTCTGGGGCATT  
 >JN248580  
 TTCTACTGCAATACATCAGCACTGTTTAAACAACAGCTTAAACA-----  
 -----  
 -----  
 AATGGAAGTATAACTCTCCCATGCAGAATAAAGCAAATTGTAAATATGTGGCAGAGAGTAGGACTAGCAATGT  
 ATGCCCCCTCCCATCCAAGGAAACATAACATGTAATTCAAAC---  
 ATTACAGGACTACTATTAACAAGAGATGGAGGGAATAATAGGAATAATGAG-----  
 -----  
 ----  
 AATAGTAGTGAACCTGAGACCTTCAGGCCGGGAGGAGGAGATATGAGGGATAATTGGAGAAGTGAATTATATA  
 AGTATAAAGTAGTAAAAATCGAACCACTA--GGTGTAGCACCTACTAAAGCAAAAAGAAGAGTGGTG-----  
 -----GAGAGAGAAAAAAGAGCA---GCCGGA---  
 CTGGGAGCT-----TTTTTCCTTGGGTTCTTAGGAGCA---GCAGGAAGCACTATG---  
 GGCGCGGCGTCA--ATAACGCTGACGGTACAG---GCCAGACAA---TTATTG---  
 TCTGGTATAGTGCAACAGCAGAGC---AATCTG---CTGAGA---  
 GCTATAGAGGCTCAACAACATCTGTTGAAACTCACGGTCTGGGGCATT  
 >KX389630  
 TTCTATTGCAATACATCATCACTGTTTAAACGGCACCTGGAGGGCCAATGGCACTGACAATAACACTTTCAAC-  
 -----  
 -----  
 TTAATGACACTATAATTATCCCATGCAGAATAAAACAAATTGTAAACATGTGGCAGAAAGTAGGACAAGCAA  
 TGTATGCCCCCTCCCATCAAAGGAGTAATAAGTTGTATTTCAAAC---  
 ATTACGGGATTACTATTAACAAGAGATGGAGGGGAGCGTAACGAT-----  
 -----  
 -----  
 AGTACAAATGAGACCTTCAGGCCTGGCGGAGGAGATATGAGGGACAATTGGAGAAGTGAATTATATAAGTATA  
 AAGTAGTAAAAATTGAACCATTA---GGTGTAGCACCCACCTCTGCAAAAAGAAGAGTGGTG-----  
 -----GAGAGAGAAAAAAGAGCA---GCTGGA---CTAGGAGCT-----  
 ---TTCTTCCTTGGGTTCTTAGGAGCA---GCAGGAAGCACTATG---GGCGCGGCGTCG---  
 ATGACGCTGACGGTACAA---GCCAGACAA---TTATTG---TCTGGTATAGTGCAACAGCAAAGT---  
 AATTTG---CTGAAA---GCTATAGAGGCTCAACAACAGATGTTGAGACTCACAGTCTGGGGCATT  
 >KX389629  
 TTCTATTGCAACACATCAGGACTATTTAATAGCAGTTGGCCTAACAATAGCACTTGGAATAATATA-----  
 -----  
 -----  
 ACAAATGACAATATAACTCTCCAATGCAGAATAAAGCAAATTGTCAATATGTGGCAGAGAGTAGGACAAGCAA  
 TGTATGCCCCCTCCCATCCAAGGAGTAATAAGGTGTGAATCAAAC---  
 ATTACAGGACTACTATTAACAAGAGATGGAGGGTATGATAATAGTACC-----  
 -----  
 -----  
 AATAACACAGAAACATTTCAGGCCTGCAGGAGGAGATATGAGAGATAATTGGAGAAGTGAATTGTATAAGTATA  
 AAGTAGTAAAAATTGAACCGCTG---GGTGTAGCACCCACCCATGCAAAAAGAAGAGTGGTG-----  
 -----GAGAGAGAAAAAAGAGCA---GTAGGA---CTGGGAGCT-----

---GTCTTCCTTGGGTTCTTAGGAGCA---GCAGGAAGCACTATG---GGCGCGGCGTCA---  
ATAACGCTGACGGTACAG---GCCAGACAA---TTATTG---TCTGGTATAGTGCAACAGCAAGGC---  
AATTTG---CTGAAG---GCCATAGAGGCTCAACAACAGCTGTTGAGACTCACGGTCTGGGGCATT  
>JN248585  
TTCTATTGCAATACATCAGGACTGTTTAATAGTAATTGGCATAGAAATACTACTAATGATACTTGGTATACTA  
ACGAC-----  
-----ACA---  
GCAACAGCAGCACTATAACTATCCAATGCAGAATAAAACAAATTGTAAACATGTGGCAGAGAGTAGGACAAG  
CAATATATGCTCCTCCCATTCAGGAAAAATAGAGTGTAATCAAAC---  
ATTACTGGACTATTATTAATAAGAGATGGGGGAATACGAATACTAGC-----  
-----  
-----  
AGTACAAATGAGACTTTCAGACCTGTAGGAGGAGAGATGAGAGACAATTGGAGAAAGTGAATTATATAAGTATA  
AAGTAGTAAAAATTGAACCACTA---GGTGTAGCACCCACCTATGCAAAAAGAAGAGTGGTG-----  
-----GAGAGAGAAAAAAGAGCA---GTTGGA---ATGGGAGCT-----  
---TTCTTCCTTGGGTTCTTAGCAGCA---GCAGGAAGCACCATG---GGCGCGGCGTCA---  
ATAACGCTGACGGTACAG---GCCAGACAA---TTATTG---ACTGGTATAGTGCAACAGCAGAGC---  
AATCTG---CTGAAG---GCTATAGAGGCTCAACAACAGCTGTTGAGACTCACAGTCTGGGGCATT  
>JN248589  
TTCTATTGCAATACATCAGACCTGTTTAATAGCAGTTGGGATAATAACAATAACACTGATAGCTCAAACCACA  
CAGGG-----  
-----  
TCAGGTAACGATACCATAACTCTCCAATGCAGAATAAAGCAAATTATAAATATGTGGCAGAGAGTAGGACAAG  
CAATATATGCCCCCTCCCATCCAAGGAGTAATAAACTGTGAATCAAAC---  
ATTACAGGGCTAATATTAACAAGAGATGGAGAGAATAATACTAAG-----  
-----  
-----  
GCAAAATGAAACCTTCAGGCCTGGAGGAGGAGATATGAGGGACAATTGGAGAAGTGAATTGTATAAGTACAAGG  
TAGTAAAAATTGAACCACTA---GGTGTAGCACCCACCCGTGCAAGAAGAAGAGTGGTG-----  
-----GAGAGAGAAAAAAGAGCG---GTTGGA---CTGGGAGCT-----  
GTCTTCCTTGGGTTCTTAGGAGCA---GCAGGAAGCACTATG---GGCGCGGCGTCA---  
CTGACGCTGACGGTACAG---ACCAGACAA---TTATTG---TCTGGTATAGTGCAACAGCAGAGC---  
AATTTG---CTGAGA---GCTATAGAGGCTCAACAGCATCTGTTGAAACTCACGGTCTGGGGCATT  
>JN248590  
TTCTATTGCAACACATCAAACTGTTTAATAGCACTTGGTTGTCTAATAGCACTTGGAACTACTTGGCAAC-  
-----  
-----  
CAAAATGAAAATATAAACACTCCAATGTAGGATAAAGCAAATTATAAATATGTGGCAGAGAGTAGGACAAGCAA  
TATATGCCCCCTCCTATCCAAGGAGAAATAAAATGTGACTCAAAC---  
ATTACTGGACTACTATTAAACAAGAGACGGAGGGGAGAGTAACAGT-----  
-----  
-----  
ACAGAGGAGACCTTCAGGCCTGGAGGAGGAGATATGAGGGACAATTGGAGAAGTGAATTATATAAGTATAAAG  
TAGTAAAAATTGAACCACTA---GGTATAGCACCCACCCATGCAAAAAGAAGAGTGGTG-----  
-----GAGAGAGAAAAAAGAGCA---GTTGGA---CTGGGAGCT-----  
GTCTTCCTTGGGTTCTTAGGAGCA---GCAGGAAGCACTATG---GGCGCGGCGTCA---  
ATAACGCTGACGGTACAA---GCCAGACAA---TTATTG---TCCGGCATAGTGCAACAGCAAAGC---  
AATTTG---CTGAAG---GCTATAGAGGCTCAACAACATCTGTTGAAACTCACGGTCTGGGGCATT  
>JN248592  
TTCTATTGCAATACAACACCACTGTTTAAGAGCGTTTGGGAATAAAAATGGGAGCACTTGGAAACAGCAATACCA  
CTAACAGT-----  
-----ACA---  
GAGTCAAATAACACTATAACCCCTCCAGTGCAAAATAAAGCAAATTATAAATCTGTGGCAGAGAGTAGGACAAG  
CAATATATGCCCCCCCCATCCCAGGAGTAATAAGGTGTGAATCAAAT---  
ATTACAGGACTACTATTAAACAAGAGATGGGGGAAATATTGATGAT-----  
-----  
-----  
GATGCAAATGAGACTTTCAGGCCGGGAGGAGGAGATATGAGGGACAATTGGAGAAGTGAATTATATAAGTATA  
AAGTAGTAAAAATTGAACCACTA---GGTGTAGCACCCACCCGTGCAAGAAGAAGAGTGGTG-----  
-----GGGAGAGAAAAAAGAGCA---GTTGGA---CTAGGAGCT-----

---GTCTTCCTTGGGTTCTTAGGAGCA---GCAGGAAGCACTATG---GGCGCAGCGTCA---  
 GTAACGCTGACGGTACAA---GCCAGACAA---TTATTG---TCTGGTATAGTGCAACAGCAAAGC---  
 AATTTG---CTGAGG---GCGATAGAGGCTCAACAACAGTTGTTGAAACTCACGGTCTGGGGCATT  
 >KX389617  
 TTCTATTGCAATACAACAGGACTGTTTAATAGCACGTGGACTAGCAGTGGCCATGGCACTTATAACATCACTG  
 ACAGCTCA-----  
 -----AAA---  
 AACCTCACAGAGGACATTACACTCCAATGCAGAATAAAGCAAATTATAAATCTGTGGCAGAAAGTAGGGCAAG  
 CAATATATGCCCCCTCCCATCCCAGGAGTAATAAGTTGCAACTCAAAC---  
 ATTACTGGACTACTATTGACAAGAGATGGAGGGAATAATAATGAT-----  
 -----  
 -----  
 TCAACAGAGACCTTCAGACCTGGAGGAGGAGACATGAGGGACAATTGGAGAAGTGAATTATATAAGTATAAAG  
 TAGTAAAAATTGAACCACTA---GGTATAGCACCTACCCATGCAAAAAGAAGAGTGGTG-----  
 -----GAAAGAGAAAAAAGAGGA---TTTGGA---ATGGGAGCT-----  
 GTCTTCCTTGGGTTCTTAGGAGCA---GCAGGAAGCACTATG---GGCGCAGCGTCA---  
 ATAACGCTGACGGTACAG---GCCAGACAA---TTATTG---TCCGGTATAGTGCAACAGCAGAGC---  
 AATCTG---CTGAAG---GCTATTGAGGCTCAACAGCATCTGTTGAAACTCACAGTCTGGGGCATT  
 >KX389614  
 TTCTATTGCAATACATCAAACTGTTTGATAGCACTTGGCCTACAAATAGCACT-----  
 -----  
 -----  
 TCAAAATGGCACTATAACTCTTCAATGCAGAATAAAGCAAATAATCAATATGTGGCAGAGAGTAGGACAGGCAA  
 TGTATGCCCCCTCCCATCAAAGGAGCACTAAATTGTTCTTCAAAC---  
 ATTACAGGACTACTATTAACAAGAGATGGAGGGATAAGGAATGATACA-----  
 -----  
 -----  
 GATAAGAATGAGACTTTCAGGCCGGGAGGAGGAGATATGAGGGACAATTGGAGAAGTGAATTATATAAATATA  
 AAGTAGTAAAAATTGAACCACTA---GGTGTAGCACCCACCCCTGCAAGAAGAAGAGTGGTG-----  
 -----GAGAGAGGAAAAAGAGCA---GTGGA---ATGGGAGCT-----  
 ---GTCTTCCTTGGGTTCTTGGGAGCA---GCAGGAAGCACTATG---GGCGCAGCGTCA---  
 ATAACGCTGACGGTACAG---GCCAGACAA---TTATTG---TCTGGTATAGTGCAACAGCAGAGC---  
 AATCTG---CTGAGA---GCTATAGAGGCTCAACAACATCTGTTGAAACTCACGGTCTGGGGCATT  
 >KX389610  
 TTCTATTGCAATACATCAAACTGTTTAATAGCAGTTGGAGTAACGACAGTAACACTGACAACAATGACAATA  
 ACACTGAC-----  
 -----  
 AACTCTAGCATTATAACTCTCCAATGCAGAATAAGGCAAATTGTAAATATGTGGCAGAGAGTAGGACAAGCAA  
 TGTATGCCCCCTCCCATCCCAGGAGTAATTAGTTGTAATTCAAGC---  
 ATTACAGGACTATTATTAACAAGAGATGGGGGAAATAAGAGTGAA-----  
 -----  
 -----  
 AACGAGACCTTCAGGCCTGGAGGAGGAAATATGAGGGACAATTGGAGAAGTGAATTATATAAGTATAAGGTAG  
 TAAGAATTGAACCATTA---GGTGTAGCACCCACCCATGCAAAAAGAAGAGTGGTG-----  
 -----GAGAGACAAAAAGAGCA---GTTGGA---CTGGGAGCT-----  
 GTCCTCTTTGGGTTCTTAGGAGCG---GCAGGAAGCACTATG---GGCGCGGCGTCA---  
 ATAACGCTGACGGTACAG---GCCAGACAA---TTATTG---TCCGGTATAGTGCAACAGCAGAGT---  
 AATCTG---CTGAAA---GCTATAGAGGCTCAACAACATCTGTTGAGACTCACGGTCTGGGGCATT  
 >KX389643  
 TTCTATTGCAACACATCGAACCTGTTTAATAGCAGTTGGGAGAACGGTACCAGATTAAACAACACAAAG----  
 -----  
 -----  
 TCAAAATGGCACTATAATTCTCCAATGTAGAATAAAGCAAATTGTAAATATGTGGCAGAAAGTGGGACAAGCAA  
 TGTATGCCCCCTCCTATCCCAGGAATAATAAGGTGTGAGTCAAAC---  
 ATCACTGGACTATTATTAACAAGAGATGGAGGGGAAAATAGTTCA-----  
 -----  
 -----  
 ACTGAGACTTTCAGACCTGAAGGAGGAAATATGAAGGACAATTGGAGAAGTGAATTATATAAGTATAAAGTTG  
 TAAAAATTGAACCACTA---GGTGTAGCACCCCTCCCGTGCAAAAAGAAGAGTGGTG-----  
 -----GAGAGAGAAAAAGAGCA---GTTGGA---ATAGGAGCT-----

GTCTTCCTTGGGTTCTTAGGAGCA---GCAGGAAGCACTATG---GGCGCGGCGTCA---  
 ATAACGCTGACGGTACAG---GCCAGACAA---TTATTG---TCTGGTATAGTGCAACAGCAGAAT---  
 AATTTG---CTGAAA---GCTATAGAGGCTCAACAACAGATGTTGAGACTCACGGTCTGGGGCATT  
 >KX389644  
 TTCTATTGCAATACATCAGGACTGTTTAATAACACGTTTAATCATGAAACGTTTGTATAGCAATATGACGACTG  
 ATAAC-----  
 -----  
 AGCACAGGAAATATAACTCTCCCATGTAGAATAAGACAAATTGTAAATATGTGGCAGAGAGTAGGACAAGCAA  
 TGTATGCCCCCTCCCATCAGCGGAGTAATAAGGTGTAATTCAAAT---  
 ATTACTGGACTAATATTAACAAGAGATGGAGGGAATAACAGTACA-----  
 -----  
 -----  
 AATGAGACCTTTAGGCCTGGAGGAGGGGATATGAGGGACAATTGGAGAAGTGAATTATATAAATATAAGGTAG  
 TAAAAATTGAACCAATA---GGTGTGGCACCCACCTATGCAAGAAGAAGAGTGGTG-----  
 -----CAGAGAGAAAAAAGAACAA---GTTGGA---CTGGGAGCT-----  
 GTCTTCTTTGGGTTCTTAGGAGCA---GCAGGAAGCACTATG---GGCGCGGCGTCA---  
 ATAACGCTGACGGTACAG---GCCAGACAA---TTATTG---TCTGGTATAGTGCAACAGCAGAGC---  
 AATCTG---CTGAGG---GCTATAGAGGCTCAACAACATATGTTGAAACTCACAGTCTGGGGCATT  
 >KY953197  
 TTCTATTGCAACACAACAACACTGTTTAATAGTACTTGGGGACTGATTAATAATACTATTTGGGGAAGCTACA  
 ATAGTAGCTAC--AAT-----  
 -----AGTAGCCAGATA-----  
 AAGGAAAATGATACCATAATTCTCCCATGCAGACTAAAGCAAATTGTAAGAATGTGGCAGAGAGTAGGACAAG  
 CAATGTATGCCCCCTCCTATCCAGGGAGTAATAAAGTGTATTCAAAC---  
 ATTACAGGATTACTGTTAACGAGCGATGGAGGGTTTAGGAATACA-----  
 -----  
 -----  
 AGTGAGATCGTCAGGCCTGGAGGAGGAGACATGAGGGACAATTGGAGAAGTGAATTATATAAATACAAAGTAG  
 TAAAAATTATGCCACTA---GGTGTAGCACCCCTCCTATGCAAAAAGAAGAGTGGTG-----  
 -----CAGAGAGAAAAAAGAGCA---GTTGGA---ATGGGAGCT-----  
 ATGTTCTGTTGGGTTCTTAGGAGCT---GCAGGAAGCACTATG---GGCGCGGCGTCA---  
 ATAACGCTGACGGTACAG---GTCAGGCAA---TTATTG---TCTGGCATAGTGCAACAGCAGAGA---  
 AATTTG---CTGAAT---GCTATAGAGGCTCAACAACAGCTGTTGAGACTCACGGTCTGGGGCATT  
 >KY953198  
 TTCTATTGTGATACATCAAACCTGTTTAATAGCACTTGGGATAATATCACTAGGAACAATAGCACTTGGGACA  
 AGAGC-----  
 -----AATACA-----  
 GAGTCAAATGACACTATAACACTCCAATGCAAAATAAAACAGATTGTAAATATGTGGCAGAGAGTAGGACAAG  
 CAATATATGCCCCCTCCCATCGCAGGAGAAATAAGGTGTGAATCAAAT---  
 ATTACTGGATTATTATTAAACAAGAGATGGAGGGGATATAAATGAG-----  
 -----  
 -----  
 ACTGAGATCTTCAGGCCTGGAGGGGGAGATATGAGGGACAATTGGAGAAGTGAATTATATAAGTATAAAGTAG  
 TAAAAATTGAACCCCTA---GGTATAGCACCTACTCATGCAAAAAGAAGAGTGGTG-----  
 -----GGGAGAGAAAAAAGAGCA---GTTGGA---CTGGGAGCT-----  
 GTCTTCTTTGGGTTCTTAGGAGCA---GCAGGAAGCACTATG---GGCGCGGCGTCA---  
 ATAACGCTGACGGTACAG---GCCAGACAA---TTATTG---TCTGGTATAGTGCAACAGCAGAGC---  
 AATCTG---CTGAAG---GCTATAGAGGCTCAACAGCATCTGTTGAAACTCACGGTCTGGGGCATT  
 >KX389647  
 TTCTATTGCAATACATCAGGACTGTTTAATAGCGCTTGGAGGATTAATGGCACTGTTAACCATACAGAATCAA  
 ATACCAACCAT-----  
 -----  
 ACAAATAACACCATAATTCTCCCATGCAGAATAAAGCAAATTGTAAATATGTGGCAAAGGGTAGGACAAGCAA  
 TATATGCCCCCTCCCATCCGAGGAATCATAAGGTGTGTATCAAAC---  
 ATTACAGGACTATTATTAACAAGAGATGGAGGGAATGAGGCAAAT-----  
 -----  
 -----  
 AATAGTGAGACCTTCAGACCTGGAGGAGGGGATATGAGGGACAATTGGAGAAGTGAATTATATAAGTATAAAG  
 TAGTAAAAATTGAACCACTG---GGTGTAGCACCCACCCATGCAAAAAGAAGAGTGGTG-----  
 -----GAGAGAGAAAAAAGAGCA---GTTGGA---ATGGGAGCT-----

CTTCTCTTTGGGTTCTTAGGAGCA---GCAGGAAGCACTATG---GGCGCGGCGTCA---  
 ATAACGCTGACGGTACAA---GCCAGACAA---TTATTG---TCCGGTATAGTGCAACAGCAGAGC---  
 AATTTG---CTGAGA---GCTATAGAGGCTCAACAACATCTGTTGAAACTCACAGTCTGGGGCATT  
 >KX389649  
 TTCTATTGCAATACATCAGGACTGTTTAGTAGCGTTTGGGAAGAACGAT-----  
 -----  
 -----  
 ACCAATGCAACGATAACTCTCCAATGCAGAATAAAGCAAATTATCAATATGTGGCAGAGAGTAGGACAAGCAA  
 TGTATGCCCCCTCCCATCCCAGGAGCAATAAGGTGTGACTCAAAC---  
 ATTACAGGACTACTATTACTAAGAGATGGAGGAGATAATAATAGT-----  
 -----  
 -----  
 ACAAATGAGACTTTTCAGGCCTGGAGGAGGAAATATGAAGGACAATTGGAGAAGTGAGTTATATAAGTATAAAG  
 TAGTAAAAGTTGAACCACTA---GGTATAGCACCTACCCGTGCAAAAAGAAGAGTGGTG-----  
 -----ATGAGAGAAAAAAGAGCA---GTTGGA---CTGGGAGCT-----  
 GCCTTCCTTGGGTTCTTAGGAGCA---GCAGGAAGCACTATG---GGCGCGGCGTCA---  
 ATAACGCTGACGGCACAG---GCCAGACAA---TTACTG---TCCGGTATAGTGCAACAGCAGAGC---  
 AATCTG---CTGCAA---GCTATAGAGGCTCAACAGCATCTGTTGAAACTCACTGTCTGGGGCATT  
 >AF069933  
 TTCTATTGCAGTACATCAAACTTTTTAATAGCACTTGGAAATAACAGTAACATTAGCAGCTCAAATAACACAG  
 AT-----  
 -----  
 TCAAAATGACACTATAACTATCCAATGCAGAATAAAGCAAATTATAAATATGTGGCAGAGAGTAGGACAGGCAA  
 TGTATGCCCCCTCCCATCCGAGGAGAAATAAGGTGTGAATCAAAC---  
 ATTACAGGACTACTATTAACAGGAGATGGAGGGGAAAAATAATGGGACA-----  
 -----  
 -----  
 AACGGGACAGAGACATTTCAGGCCTGGAGGAGGAGATATGAGGGACAATTGGAGAAGTGAATTATATAAATATA  
 AGGTAGCACAAATTGAACCAATA---GGTGTGGCACCCACCCATGCAAAAAGAAGAGTGGTG-----  
 -----GAGAGAGAAAAAAGAGCA---GTTGGA---CTGGGAGTT-----  
 ---GCCTTCCTTGGGTTCTTAGGAGCA---GCAGGAAGCACTATG---GGCGCAGCGTCA---  
 ATAACGCTGACGGTACAG---GCCAGACAA---TTATTG---TCTGGTATAGTGCAACAGCAGAGC---  
 AATTTG---CTGAAG---GCTATAGAGGCTCAACAACATCTGTTGAAACTCACGGTCTGGGGCATT  
 >AF069941  
 TTCTATTGCAATACATCAGGACTGTTTAATAGCACTTGGAAATAAACAATTGGAATACCACTAGCAATAACA  
 GCTCA-----  
 -----  
 -----  
 AAGTCAAATGAAATTATAAACTCCAATGCAGAATAAGGCAAATTGTAAATATGTGGCAGAGAGTAGGACAAG  
 CAATGTATGCCCCCTCCACCCCTAGGAGTAATAAGGTGTGAATCAAAC---  
 ATTACAGGACTACTATTAACAAGAGATGGAGGGAAGCATAATAGT-----  
 -----  
 -----  
 ACAAATGAGACTTTTCAGGCCTGGAGGAGGAGATATGAGGGACAATTGGAGAAGTGAATTATATAAGTATAAAG  
 TAGTAAAAATTGAAGCACTA---GGTGTAGCACCTACCTATGCAAAAAGAAGAGTGGTG-----  
 -----GAGAGAGAAAAAAGAGCA---GTTGGA---CTGGGAGCT-----  
 GTCTTCCTTGGGTTCTTAGGAGCA---GCAGGAAGCACTATG---GGCGCGGCGTCA---  
 ATAACGCTGACGGTACAG---GCCAGACAA---TTATTG---TCCGGTATAGTGCAACAGCAGAGC---  
 AATCTG---CTGAGG---GCTATAGAGGCTCAACAACATCTGTTGAAACTCACAGTCTGGGGCATT  
 >L39106  
 TTCTATTGCAATACATCAAACTGTTTAATAGCACTTGGGATAATAGCAATAGCACTGCCAACCACACAGGG-  
 -----  
 -----  
 -----  
 TCAAAATGACACTATAACTCTCCAATGCAGAATAAAGCAAATTGTAAATATGTGGCAGAAAGTAGGACAAGCAA  
 TGTATGCCCCCTCCCATCCAAGGAATAATAAGATGTGATTCAAAC---  
 ATTACAGGACTACTATTAACAAGAGATGGAGGGAATAATAGTACA-----  
 -----  
 -----  
 AATGAAACCTTCAGGCCTGGAGGAGGAGATATGAGGGACAATTGGAGAAGTGAATTATATAAGTATAAAGTAG  
 TAAAAATTGAACCACTA---GGTGTAGCACCCACCCGTGCAAAAAGAAGAGTGGTG-----  
 -----GAGAGAGAAAAAAGAGCG---GTTGGA---CTGGGAGCT-----

GTCTTCCTTGGGTTCTTAGGAGCA---GCAGGAAGCACTATG---GGCGCGCGGTCA---  
 ATAACGCTGACGGTACAG---GCCAGACAA---TTATTG---TCCGGCATAGTGCAACAGCAGAGC---  
 AATTTG---CTGAAA---GCTATAGAGGCTCAACAACATCTGTTGAAACTCACGGTCTGGGGCATT  
 >KX232598  
 TTCTATTGTAATACAACAGGACTATTTAATAGCGCTTGGCAATTTAATAGCGCTTGGCAGGAGAATGACACTG  
 AA-----  
 -----  
 ACAGAGGGAAATATAACTCTTCCATGCAAAATAAAGCAAATTATAAATATGTGGCAGAGGGTAGGACAAGCAA  
 TTTATGCCCCCTCCCATCCAAGGAGTAGTAAAGTGTGAGTCAAAC---  
 ATTACTGGACTACTATTGACAAGAGATGGGGGAATTAAGAATAGT-----  
 -----  
 -----  
 ACGAATGAAACTTTTCAGGCCTGGAGGAGGAGATATGAGGGACAATTGGAGAAGTGAATTATATAAGTATAAAG  
 TAGTAAAAAATTGAACCATTA---GGTGTAGCACCCACCCGTGCAAAAAGAAGAGTGGTG-----  
 -----GAGAGAGAAAAAAGAGCA---ATTGGTGGACTGGGAGCT-----  
 GCATTCCTTGGGTTCTTAGGAGCA---GCAGGAAGCACTATG---GGCGCGGCGTCA---  
 ATAACGCTGACGGTACAG---GCCAGACAA---TTATTG---TCTGGTATAGTGCAACAGCAGAGG---  
 AATTTG---CTGAAG---GCTATTGAGGCTCAACAACAGATGTTGAGACTCACGGTCTGGGGCATT  
 >KY658712  
 TTCTATTGTAATACAACAAAACTATTTAATAGCACTTGAATGCAACAAATCCATCTAATAGCAGCTAT----  
 -----  
 -----  
 GGCAACGAAACTATAACTCTTCCATGCAGAATAAAGCAAATTATAAATATGTGGCAGAGGGTAGGACAAGCAA  
 TTTATGCCCCCTCCCATCCAAGGAATAATAAAGTGTGAGTCAAAC---  
 ATTACTGGACTACTATTGACAAGAGATGGGGGAACAATAAGCTCG-----  
 -----  
 -----  
 AAGAATGAAACTTTTCAGGCCTGGAGGAGGAGACATGAGGGATAATTGGAGAAGTGAATTATATAAGTATAAAG  
 TAGTAAAAAATTGAACCATTA---GGTATAGCACCCACCCCTGCAAGAAGGAGAGTGGTG-----  
 -----GAGAGAGAAAAAAGAGCA---ATTGGT---GTGGGAGCT-----  
 GTATTCCTTGGGTTCTTATCAGCA---GCAGGAAGCACTATG---GGCGCGGCGTCA---  
 ATAACGCTGACGGTACAG---GCCAGACAA---TTATTG---TCTGGTATAGTGCAACAGCAAAGT---  
 AATTTG---CTGAAG---GCTATTGAGGCTCAACAACAGATGTTGAGACTCACGGTCTGGGGCATT  
 >KX232616  
 TTCTATTGTGATACAACACAACCTATTTAATAGCACTTGAATACAACACAACCTCAACAATGACAACGAGACAG  
 AG-----  
 -----  
 GACAATACAACCTCTTACTCTTCCATGCAGAATAAAGCAAATTGTAAATATGTGGCAGAGGGTAGGACAAGCAA  
 TTTATGCCCCCTCCCATCCAGGAATAATAGAGTGTGAATCAAAC---  
 ATTACTGGACTACTGTTGACAAGAGATGGGGGAAATAGTGATAGC-----  
 -----  
 -----  
 TCGAATGAAACTTTTAGGCCTGGAGGAGGAGACATGAGAGACAATTGGAGAAGTGAATTATATAAATATAAAG  
 TAGTAAAAAATTGAACCACTA---GGAGTAGCACCCACCAGGGCAAAGAGAAGAGTGGTG-----  
 -----GAGAGAGAAAAAAGAGCA---GTTGGA---CTAGGAGCT-----  
 TTGTTTCATTGGGTTCTTAGGAGCA---GCAGGAAGCACTATG---GGCGCGGCGTCA---  
 GTGACGCTGACGGTACAG---GCCAGACAA---TTATTG---TCTGGTATAGTGCAACAGCAAAGC---  
 AATTTG---CTGAGG---GCTATTGAGGCTCAACAACAGATGTTGAGACTCACGGTCTGGGGCATT  
 >KX232622  
 TTCTATTGTAATACAACAAAACTATTTAATAGCACTTGAATAGCAATGGCACTTGAATAGCACTGGGAAGG  
 ACAATAGCACT-----  
 -----GGA---  
 ACAGGGAACGATACAATAACTCTTCCATGCAAAATAAAGCAAATTATAAATATGTGGCAGAGGGTAGGACAAG  
 CAATTTATGCCCCCTCTATCCCAGGAGTAATACAGTGTGAGTCAAAC---  
 ATTACTGGACTACTATTGACAAGAGATGGGGGAGTTAATAGTACT-----  
 -----  
 -----  
 ACAAATGAAACTTTTCAGGCCTGGAGGAGGAGACATGAGGGACAATTGGAGAAGTGAATTATATAAGTATAAAG  
 TAGTAAAAAATTGAACCAGTA---GGTGTAGCACCCAACCGTGCAAGAAGGAGAGTGGTG-----  
 -----GAGAGAGAAAAAAGAGCA---ATTGGA---ATGGGAGCT-----

TTTTTCCTTGGGTTCTTAGGAGCA---GCAGGAAGCACTATG---GGCGCGGCGTCA---  
 ATAACGCTGACGGTACAC---GCCAGACAA---TTATTG---TCTGGTATAGTGCAACAGCAAAGT---  
 AATTTG---CTGAAG---GCTATTGAGGCTCAACAACAGATGTTGAGACTCACGGTCTGGGGCATT  
 >KP411845  
 TTCTATTGTAATACTTCAGGCCTGTTTAAACAGCACTTGGGATGGCACAGCACAAAGCAACACAGAT-----  
 -----  
 -----  
 GATGATGACACTATCCTTCTCCCGCGAAAAATAAATATAATTATAAATATGAGGAGAAGAGTAGGACTATCAA  
 TATCTGCTCCTCCTAGACGAGGAACAAGGAGGTGTACTTCTATT---  
 ATTACAGTACTACTATTAACAGGAGGTGGGAGTACTACTAATACT-----  
 -----  
 -----AATGATGACATCTTG---  
 CCTGCAGGAGGAGAAAAAGATGAACTACTGTAGAAGAGAAACAATATATATATAAAAGTAGTAATAATAGCAGCAT  
 TA---GTAGCAGCACCCCCCCCCCTCCTCAAGAAGAGTAGTG-----  
 -----CTGAGAAAAAAAAGAGCA---GCAGTA---GTAGTAGCA-----  
 GTCGTCTTTGTCGTCTTAAGAGCA---GCAGGAAGCAGTATG---  
 ATCGCGTCGTCGATAATGATGATGACAGTAGAC---GCATACCAG---TGTTTG---  
 TCTGGTATAGTGCAACAGCAGTAC---AATTTG---CTGTAT---  
 GCTAATGAGGTTCAACAACATCTGTTGAACTCTCATTTTGGGGCATT  
 >MF373200  
 TTCTATTGCAATACATCAGCATTGTTTAAATAGCACTTGGGTAAATAACACTTGAATAACGAGATCAACGAG-  
 -----  
 -----  
 ACCAACAAGACCATAACTCTCCAATGCAGGATAAAGCAAATTATAAATATGTGGCAGAGAGTAGGACAAGCAA  
 TGTATGCCCCCTCCCATCCCAGGAGCAATAAAATGTGAATCAAAC---  
 ATTACAGGACTACTACTGACAAGAGATGGAGGAAATAATAATACA-----  
 -----  
 -----  
 ACTGAGACTTTTAGGCCTGGAGGAGGAGACATGAGGGACAATTGGAGAAGTGAATTATATAAGTATAAAGTAG  
 TAAAAATTGAACCACTA---GGTGTAGCACCCAGTCGTGCAAAAAGAAGAGTGGTG-----  
 -----GAGAGAGAAAAAAGAGCAGTTGTTGGA---ATGGCAGCT-----  
 GTTTCCTTGGTTTCTTAGGAGCA---GCAGGAAGCACTATG---GGCGCGGCGTCA---  
 ATAACGCTGACGGTACAG---GCCAGACAA---TTATTG---TCTGGTATAGTGCAACAGCAGAGC---  
 AATCTG---CTGAAG---GCTATAGAGGCTCAACAACATATGTTGAGACTCACGGTCTGGGGCATT  
 >AF107770  
 TTCTATTGCAATACATCAAATCTGTTTAAATAGAACTTGAATCATAATGGCACTTGAATGCACCAGGACCGT  
 TTAATGACACT-----  
 GAGGATAAAACAATAAATGGC-----  
 ACTGAGGATAAAACAATAACTCTCCAATGCAGAATAAAGCAAATTGTGCGTATGTGGCAGAAAGTAGGACAAG  
 CAATGTATGCCCCCTCCCATCCCAGGAGAAATAAGGTGTGAATCAAAC---  
 ATTACAGGACTACTATTAACAAGAGATGGAGGGAATGATAATAAT-----  
 -----  
 -----  
 AATACAGAGACCTTCAGGCCTGGAGGAGGAGATATGAGGGACAATTGGAGAAGTGAATTATATAAATATAAAG  
 TAGTAAAAATTGAACCACTA---GGTGTAGCACCCCTCCCATGCAAAAAGAAGAGTGGTG-----  
 -----GAGAGAGAAAAAAGAGCACTTGTGGA---CTGGGAGCT-----  
 TTCTTCTTTGGGTTCTTAGGAGCA---GCAGGAAGCACTATG---GGCGCGGCGTCA---  
 ATAACGCTGACGGTACAG---GCCAGACAA---TTATTG---TCTGGTATAGTGCAACAGCAGAGC---  
 AATCTG---CTGAAG---GCTATAGAGGCTCAACAACATCTGTTGAGACTCACGGTCTGGGGCATT  
 >HM215281  
 TTCTATTGCAATACAACACCACTGTTTAAATAGCACTTGGTACAGCAATAACACTGCCAATAGCTCAAACAGCA  
 CA-----  
 -----  
 -----  
 GAGTTAAATGGAATAAATACTCTCCAATGCAGAATAAAGCAAATTGTAATATATGTGGCAAAGGGTAGGACAGG  
 CAATGTATGCCCCCTCCCATCCCAGGAGAAATAAGGTGTGAATCAAAC---  
 ATTACTGGACTACTATTAACAAGAGATGGAGGGGGGAATAATACA-----  
 -----  
 -----  
 AATACAAATGAGACCTTTAGGCCTGGAGGAGGAGATATGAGGGACAATTGGAGAAGTGAATTATATAAGTATA  
 AAGTAGTAAAAATTGAACCACTA---GGTGTAGCACCCACCCCTGCAAAAAGAAGAGTGGTG-----

-----GAGAGAGAAAAAGAGCA---GTTGGA---CTGGGAGCT-----  
---GTCTTCTTTGGGTTCTTAGGAGCA---GCAGGAAGCACTATG---GGCGCGGCGTCA---  
TTAACGCTGACGGTACAG---GCCAGACAA---TTATTG---TCCGGTATAGTGCAACAGCAAAGT---  
AATTTG---CTGAAG---GCTATAGAGGCTCAACAACATCTGTTGAAACTCACAGTCTGGGGCATT  
>HM215292  
TTCTATTGCGATACATCAAACTGTTTAATAGCACTTGGACC AAAAATAGCACTTGGAACTACTACAGAA-----  
-----  
TTAGGTGGCAATATAACGCTCCAGTGCAAAATAAAGCAAATTATAAATACGTGGCAAAAAGTAGGACTAGCAA  
TGTATGCCCCCTCCCATCCAAGGAATAATAAGGTGTGATTCAAAC---  
ATTACAGGACTACTATTAAACAAGAGATGGAGGGAATAATAATGCA-----  
-----  
AGTGAGACTGAGACCTTCAGGCCTGGAGGAGGAGATATGAGGGACAATTGGAGAAGTGAATTATATAAATACA  
AAGTAGTAAAAATTAAACCACTA---GGTGTGCGACCCACCCATGCAAAAAGAAGAGTGGTG-----  
-----GAGAGAGAAAAAGAGCA---GTTGGA---CTGGGAGCT-----  
---GTTTTCCTTGGGTTCTTAGGAGCA---GCAGGAAGCACTATG---GGCGCGGCGTCA---  
ATAACGCTGACGGTACAG---GCCAGACAA---TTATTG---TCCGGTATAGTGCAACAGCAGAGC---  
AATTTG---CTGCAA---GCTATAGAGGCTCAACAACATCTGTTGAAACTCACGGTCTGGGGCATT  
>KT223759  
TTCTATTGCAATACATCAAAGCTGTTTAATAGCACTTGGAA TGCCACTGACATCAATAGCAATGTCAGCACAG  
ACTCAGGG-----  
-----  
AAAAATGACACTATAACTCTCCCATGCAGAATAAAGCAAATTATAAGGATGTGGCAGAGCGTAGGGCAAGCAA  
TGTATGCCCCCTCCTATCCAAGGAATAATAAAGTGTGAATCAAAC---  
ATTACAGGACTACTATTAAACAAGAGATGGAGGGAAGGAAAACAAT-----  
-----  
AGTACAAATGAGACTTACAGGCCAGGAGGAGGAGACATGAGGGACAATTGGAGAAGTGAATTATATAAGTATA  
AAGTAGTGAAAATTGAACCATTT---GGTATAGCACCCACCCCTTGCAAGGAGAAGAGTGGTG-----  
-----GAGAGAGAAAAAGAGCA---GTTGGA---CTGGGAGCT-----  
---GTCTTCCTTGGGTTCTTAGGAGCA---GCAGGAAGCACTATG---GGCGCGGCGTCA---  
GTGACGCTGACGGTACAA---GCCAGACAA---TTGTTG---TCTGGTATAGTGCAACAGCAGAGC---  
AATCTG---CTGAAG---GCTATAGAGGCTCAACAACACTTGTGAGACTCACAGTCTGGGGCATT  
>KT223760  
TTCTATTGCAACACATTAGGACTGTTTAATAGCACTTGGAACTGGGAATGGCACTTGGATAACAATAGCTCAA  
TT-----  
-----  
AGCTATGCTCGTGTAACCTCTCCAATGCAAAATAAAGCAAATTGTAAATATGTGGCAGAGAGTAGGACAAGCAA  
TGTATGCCCCCTCCCATCCAGGGGA ACTAAGGTGTGATTCAAAT---  
ATTACAGGACTATTATTAAACAAGAGATGGGGGA-----  
-----  
-  
AAAATAATACTAATGAATGAGACCTTCAGGCCTGGAGGAGGAGATATGAGGGACAATTGGAGAAGTGAATTAT  
ATAAGTATAAAGTAGTAAATTTGAACCACTA---GGTGTAGCACCTACCCATGCAAAAAGAAGAGTGGTG--  
-----CAGAGAGAAAAAGAGCA---GTTGGA---  
ATGGGAGCT-----CTCTTCCTTGGGTTCTTAGGAGCA---GCAGGAAGCACTATG---  
GGCGCGGCGTCA---ATAACGCTGACGGTACAG---GCCAGACAA---TTATTG---  
TCTGGTATAGTGCAACAGCAGAGT---AATCTG---CTGAAG---  
GCTATAGAGGCTCAACAACAGCTGTTGAGACTCACAGTCTGGGGCATT  
>AJ251056  
TTCTATTGCAATACAGCAGAACTGTTTAATAGCACTTGGGCTAGCAATACTAATGGCATT TGGGCTAGCAATA  
TAAATGCTAGC-----  
-----AATAACAAG-----  
GACGCAAATGACACTATAACTCTCAAATGCAAAATAAAACAAATTATAAATATGTGGCAGAAAGTAGGACAAG  
CAATATATGCCCCCTCCCATCGAAGGAGTAATAAGGTGTGATTCAAAC---  
ATTACAGGAATACTATTAAACAAGAGATGGAGGGGATAATACTAAT-----  
-----  
GGTGATGAGACTTTCAGGCCTGGAGGAGGAGATATGAGGGACA ACTGGAGAAGTGA ACTATATAAGTATAAAG

TAGTAAAAATTGAACCACTA---GGTGTAGCACCTCCCATGCAAAAAGAAGAGTGGTG-----  
-----GAGAGAGAAAAAAGAGCA---GTTGGA---CTGGGAGCT-----  
GTCTTCCTTGGGTTCTTAGGAGCA---GCAGGAAGCACTATG---GGCGCAGCGTCA---  
ATAACGCTGACGGTACAG---GCCAGACAA---TTATTG---TCTGGTATAGTGCAACAGCAGAAC---  
AATCTG---CTGAAG---GCTATAGAGGCTCAACAACATTTGTTGAAACTCACGGTCTGGGGCATT  
>AJ251057  
TTCTATTGCAATACATCAGGACTGTTTAATGGCACTTGGAAATGGCACTAGCAGCTCAAACCACACATGG----  
-----  
-----  
GTAAATGACACTATAACTCTCCAATGCAGAATAAGGCAAATTGTAAATATGTGGCAGAGAGTAGGACGAGCAA  
TGTATGCCCCCTCCCATCCAGGGAGAAATAAAGTGTGTATCAAAC---  
ATTACTGGACTACTATTAACAAGAGATGGAGGGGATAATAATAGT-----  
-----  
-----  
ACAAATGAGACTTTTCAGGCCTGGAGGAGGAGATATGAGGGACAATTGGAGAAGTGAATTATATAAATATAAAG  
TAGTAAAAATTGAACCACTG---GGTGTAGCACCTACCGTGCAAAAAGGAGAGTGGTG-----  
-----GAGAGAGAAAAAAGAGCA---GTTGGA---ATAGGAGCT-----  
GTCTTCCTTGGGTTCTTAGGAGCA---GCAGGAAGCACTATG---GGCGCGGCGTCA---  
ATGACGCTGACGGTACAG---GCCAGACAA---TTATTG---TCTGGTATAGTGCAACAGCAGAGC---  
AATCTG---CTGAGG---GCTATAGAGGCTCAACAACATCTGTTGAAACTCACAGTCTGGGGCATT  
>HM215264  
TTCTATTGCAATACATCAGAACTGTTTAATAGCACTTGGACTAGCAATAACACTTGGGGTAGCAGTAGCTTA-  
-----  
-----  
AATCACACAAATATAACTCTCCAATGCAGAATAAAGCAAATTATAAGAATGTGGCAGAGAGTAGGACAAGCAA  
TGTATGCCCCCTCCTATCAAAGGGGAAATAAGGTGTGAATCAAAC---  
ATTACTGGACTACTATTAATAAGAGATGGA---ATTGTTAATAGT-----  
-----  
-----  
ACAAATGAGACCTTCAGGCCTGGAGGAGGAGATATGAGGGACAATTGGAGAAGTGAATTATATAAATATAAAG  
TAGTAAAAATTGAACCACTA---GGGGTAGCACCTAACCGTGCAAAAAGAAGAGTGGTG-----  
-----GAGAGAGAAAAAAGAGCA---GTTGGA---CTGGGAGCT-----  
TTCTTTCTTGGGTTCTTAGGAGCA---GCAGGAAGCACTATG---GGCGCGGCGTCA---  
ATGACGCTGACGGTACAG---GCCAGACAA---TTATTG---TCCGGTATAGTGCAACAGCAGAGC---  
AATTTG---CTGAAG---GCTATAGAGGCTCAACAACATCTGTTGAGACTCACGGTCTGGGGCATT  
>HM215290  
TTCTATTGTAATACATCAGCACTGTTTAATAGCACTTGGAAATGGCACTGACAGTGCAAACAAGACAAAG----  
-----  
-----  
TCAAATGAAACTATAACTCTCCAATGCAAAATAAAGCAAATTATAAATATGTGGCAGAGAGTAGGACAAGCAA  
TGTATGCCCCCTCCCATCCAAGGAGAAATAAAGTGTACATCAAAC---  
ATTACAGGACTACTACTAACAAGAGATGGAGGGAATACTAGTGGT-----  
-----  
-----  
GCAAATGAGACTTTTCAGGCCTGGAGGAGGAGACATGAGGGACAATTGGAGAAGTGAAGTTATATAAATATAAAG  
TAGTAAAAATTGAGCCACTA---GGTGTAGCACCCACCCCTGCAAAAAGAAGAGTGGTG-----  
-----GGGAGAGAAAAAAGAGCA---GTTGGA---CTGGGAGCT-----  
GTCTTCCTTGGGTTCTTAGGAGCA---GCAGGAAGCACTATG---GGCGCGGCGTCA---  
ATAACGCTGACGGTACAG---GCCAGACAA---TTATTG---TCTGGCATAGTGCGACAGCAGAGC---  
AATCTG---CTGAGG---GCTATAGAGGCTCAACAACATCTGTTGAAACTCACGGTCTGGGGCATT  
>HM215291  
TTCTATTGCAATACATCAAACTATTTAATAGCACTTGGAAATAGCACTGAAAATAACAATACCAGTGAC----  
-----  
-----  
ACAAATGGTATTATAACTCTCCAATGCAGAATAAAGCAAATTGTAAATATATGGCAGAGAGTAGGACAAGCAA  
TGTATGCCCCCTCCTATCCAAGGAGTAATAAGGTGTGAATCAAAC---  
ATTACAGGACTACTATTAACAAGAGATGGAGGGGATAATGATAGT-----  
-----  
-----  
ACAAATGAGACCTTCAGGCCTGGAGGAGGAGATATGAGGGACAATTGGAGAAGTGAATTATATAAGTATAAGG

TAGTACAAGTTGAACCACTA---GGTGTGGCACCCACCCATGCAAGAAGAAGAGTGGTG-----  
 -----GAGAGAGGAAAAAGAGCA---GTTGGA---GTGGGAGCT-----  
 GTTTTCCTTGGGTTCTTAGGAGCA---GCAGGAAGCACTATG---GGCGCGGCGTCA---  
 ATAACGCTGACGGTACAG---GCCAGACAA---TTATTG---TCTGGTATAGTGCAACAGCAGAGC---  
 AATTTG---CTGAAG---GCTATAGAGGCTCAACAACATCTGTTGAAACTCACGGTCTGGGGCATT  
 >HM215293  
 TTCTATTGCAATACATCAAAGCTGTTTAATAGCACTTGGGGTAACAATACCACTAACAGCTCATCAGAATCAA  
 AT-----  
 -----  
 AACAAATGACACTCTAATTCTCCAATGCAGAATAAGACAAATTGTAAGGATGTGGCAGAGAGTAGGACAAGCAA  
 TGTATGCCCCCTCCCATCAGAGGAGAAATAAGGTGTGAGTCAAAC---  
 ATTACAGGGCTACTATTAACAAGAGATGGAGGGATTAATAATACA-----  
 -----  
 -----  
 AATAATGAGACCTTCAGGCCTGGAGGAGGAGATATGAGGGACAATTGGAGAAGTGAATTATATAAGTATAAAG  
 TAGTAAAAATTGAACCACTA---GGTGTAGCACCTACCCATGCAAAAAGAAGAGTGGTG-----  
 -----GAGAGAGAAAAAAGAGCA---GTTGGA---CTGGGAGCT-----  
 TTCTTCCTTGGGTTCTTAGGAGCA---GCAGGAAGCACTATG---GGCGCGGCGTCA---  
 ATAACGCTGACGGTACAA---GCCAGACAA---TTACTG---TCTGGTATAGTGCAACAGCAGAGC---  
 AATCTG---CTGAGA---GCAATTGAGGCTCAACAACATCTGTTGAGACTCACGGTCTGGGGCATT  
 >JX447154  
 TTCTATTGCAATACATCAGGACTGTTTAATAGCACTTGGGAATCACAGGAGCACTTGGGAATAGCACTGATCACA  
 ATATCTCT-----  
 -----GAC---  
 AGCTCAAACCCCAATATAACTCTCCAATGCAGAATAAAGCAAGTTATAAATATGTGGCAGAGAGTAGGACAAG  
 CAATGTATGCCCCCTCCCATCCCAGGAGTAATAAGGTGTGAATCAAAC---  
 ATTACTGGACTGTTATTAACAAGAGATGGAGGAAATGAGAGTAGT-----  
 -----  
 -----  
 ACAAATGAGACTTTTCAGACCTGGAGGAGGAGACATGAGGGACAATTGGAGAAGTGAATTATATAAGTATAAAG  
 TAGTAAAAATTGAACCACTG---GGTGTAGCACCTCCCGTGCAAAAAGAAGAGTGGTG-----  
 -----GAGAGAGAAAAAAGAGCA---GTTGGA---CTGGGAGCT-----  
 GTCTTCCTTGGGTTCTTAGGAGCA---GCAGGAAGCACTATG---GGCGCGGCGTCG---  
 GTGACGCTGACGGTACAG---GCCAGACAG---TTATTG---TCTGGTATAGTGCAACAGCAGAGC---  
 AATTTG---CTGAGG---GCTATAGAGGCTCAACAACATTTGTTGAAACTCACGGTCTGGGGCATT  
 >KF716488  
 TTCTATTGCAACACCTCAGGACTGTTTAATAGCAGCTTCAATAGTAGCAGCATCAATGACACAGACACAGAG-  
 -----  
 -----  
 TTAACCTGGCAATATAACTCTTCCATGCAGAATAAAACAGATTGTAAATATGTGGCAGAAGGTAGGAAAAGCAA  
 TGTATGCCCCCTTATTGAAGGAATAATAAGGTGTGAGTCAAAC---  
 ATTACAGGACTGATATTAACAAGAGATGGAGGGGGCAATACAACA-----  
 -----  
 -----  
 GAGGAGACGGAGACCTTCAGGCCTGGAGGAGGAGATATGAGGGACAATTGGAGAAATGAATTATATAAATATA  
 AGGTAGTGAGAATTGACCCAATA---GGTGTAGCACCCACTAAGGC AAAAAGAAGAGTGGTG-----  
 -----GAGAGAGGAAAAAAGAGCA---GTTGGA---CTGGGAGTT-----  
 ---GCCTTCCTTGGGTTCTTAGGAGCA---GCAGGAAGCACTATG---GGCGCGGCGTCA---  
 ATAACGCTGACGGTACAG---GCCAGACAA---TTATTG---TCTGGTATAGTGCAACAGCAGAGC---  
 AATCTG---TTGAGA---GCTATAGAGGCTCAACAACATCTGTTGAAACTCACAGTCTGGGGCATT  
 >AY444811  
 TTCTATTGCAATACATCGGGACTGTTTAATAGTACTTTTAATAACACTCAGGCCAACTCAAGTTACACCTCAG  
 GG-----  
 -----  
 ACAAATGATACTATACTTCTCCAATGCAGAATAAGGCAAAATTATAAGAATGTGGCAGAGAGTAGGACAAGCAA  
 TGTATGCCCCCTCCCATCCAAGGAGAAATAAGGTGTGAATCAAAC---  
 ATTACTGGACTACTATTAACAAGAGATGGAGGGGATACTAGTGAT-----  
 -----  
 -----  
 AATAGTACCGAGACCTTCAGGCCTGGAGGAGGAGATATGAGGGACAATTGGAGAAGTGAATTATATAAGTATA

AAGTAGTAAAAATTGAACCAATA---GGTATAGCACCCACCAAGGCAAAAAGAAGAGTGGTG-----  
-----CAGAGAGAAAAAAGAGCA---GTTGGA---ATAGGAGCT-----  
---GTCCTCTTTGGGTTCTTGGGAGCA---GCAGGAAGCACTATG---GGCGCAGCGTCA---  
ATAACGCTGACGGTACAG---GCCAGACAA---TTATTG---TCCGGTATAGTGCAACAGCAAAGC---  
AATTTG---CTGAAG---GCCATAGAGGCTCAACAACATCTGTTGAGACTCACAGTCTGGGGCATT  
>DQ869018  
TTCTACTGCAATACAACAGCACTGTTTAATAGCACTTGGGATAGCAATACCACTGCCAGCGAAGAGTCAAATA  
GC-----  
-----  
ACCATAGATGACATTATAACTCTCCAATGCAGAATAAAGCAAGTTGTAAACATGTGGCAGAAAGTAGGACAAG  
CAATGTATGCCCCCTCCCATTCAGGAGAAATAAGGTGTGAATCAAAC---  
ATTACAGGACTACTATTAACAAGAGATGGAGGGGATAATAATAAC-----  
-----  
-----  
AGTGAGACCTTCAGACCTGGAGGAGGAGATATGAGGGACAATTGGAGAAGTGAATTATATAAATATAAAGTAG  
TAAAAATTGAACCGCTA---GGAGTAGCACCTCCAGGGCAAAAAGAAGAGTGGTG-----  
-----GAGAGAGAAAAAAGAGCA---GTTGGA---CTGGGAGCT-----  
GTCTTCCTTGGGTTCTTAGGAACA---GCAGGAAGCACTATG---GGCGCGGCGTCA---  
ATAACGCTGACGGTACAG---GCCAGACAA---TTATTG---TCCGGTATAGTGCAACAGCAGAGC---  
AATCTG---CTGAAG---GCCATAGAGGCTCAACAGCAACTGTTGAGACTCACGGTCTGGGGCATT  
>JF320297  
TTCTATTGCAATACATCAGAACTATTTAATAGCAGTTGGAATAATGACACTGCCAGCTCAAATAACACAGGG-  
-----  
-----  
TCAAATGACACTATAACTCTCCAATGCAGAATAAAGCAAATTGTAAATATGTGGCAGAAGGTAGGACAAGCAA  
TGTATGCCCCCCCCATCAAAGGAGTAATAAGGTGTGAATCAAAC---  
ATTACAGGACTAATATTAACAAGAGATGGAGGGGATAATAATAATAAT-----  
-----  
-----  
AGTGTAATGAGACCTTCAGGCCTGGAGGAGGAGATATGAGGGACAATTGGAGAAGTGAATTATATAAGTATA  
AAGTAGTAAAAATTGAACCACTA---GGTATAGCGCCACCCATGCAAGAAGAAGAGTGGTG-----  
-----CAGAGAGAAAAAAGAGCA---GTTGGA---CTAGGAGCT-----  
---CTCTTCCTTGGGTTCTTAGGAGCA---GCAGGAAGCACTATG---GGCGCGGCGTCA---  
ATAACGCTGACGGTACAG---GCCAGACAA---TTATTG---TCCGGTATAGTGCAACAGCAGAGC---  
AATCTG---CTGAAA---GCTATAGAGGCTCAACAACATCTGTTGAAACTCACGGTCTGGGGCATT  
>AY736840  
TTCTATTGCAATACATCAATACTGTTTAATAGCACTTGGGACAATAGCACTGTCAACACAAATAATATCACAG  
AG-----  
-----  
CCAAATGATACTATAACCCTCCAATGCAGAATAAAGCAAATTATAAATATGTGGCAGAAAGTAGGGCAAGCAA  
TGTATGCCCCCTCCCATCAAAGGAATCATAAGGTGTGATTCAAAC---  
ATTACTGGATTACTATTAACAAGAGATGGAGGGAATAATAATAGT-----  
-----  
-----  
ACAAATGAGACCTTCAGACCTGGAGGAGGAGATATGAGGGACAATTGGAGAAGTGAATTATATAAGTATAAAG  
TAGTAAAAATTGATCCAATA---GGGGTGGCTCCCACCCATGCAAAAAGAAGAGTGGTG-----  
-----GAGAAAGAAAAAAGAGCA---GTTGGA---CTGGGAGCT-----  
GTCTTCATTGGGTTCTTAGGAGCT---GCAGGAAGCACTATG---GGCGCGGCGTCA---  
ATAACGCTGACGGTACAA---GCCAGACAA---TTATTG---TCTGGTATAGTGCAACAGCAAAGC---  
AATTTG---CTGAAG---GCTATAGAGGCTCAACAACATCTGTTGAGACTCACAGTCTGGGGCATT  
>KU168266  
TTCTATTGCAATACATCAGGCCTGTTTAATAGTACTTGGGAATGTGACCACCAGCCTCAACCAGAGTGAA----  
-----  
-----  
GCGGACGTAAATATAACTCTCCCATGCAAAATAAAACAAATTGTACGTATGTGGCAGGGAGTAGGACAAGCAA  
TGTATGCCCCCTCCCATTCAGGAGTAATTAAGTGTACATCAAAC---  
ATCACAGGGCTACTGCTAACAAGAGACGGGGGGAGGGATAATGGT-----  
-----  
-----  
GCAAAATGAGACGTTGAGACCCGGAGGAGGAAATATAAAGGACAATTGGAGAAGTGAATTATATAAATATAAGG

TAGTAAAAATTGAACCACTA---GGTGTAGCACCCACCCGTGCAAAAAGAAGAGTGGTG-----  
 -----GAGAGAGAAAAAAGAGCA---GTTGGA---CTGGGAGCT-----  
 GTCCTCTTTGGGTTCTTAGGAGCA---GCAGGAAGCACTATG---GGCGCGGCGTCA---  
 ATAACGCTGACGGTACAG---GCCAGACAA---TTATTG---TCTGGTATAGTGCAACAGCAGAAC---  
 AATCTG---CTGAGG---GCTATAGAGGCTCAACAGCAAATGTTGAAACTTACGGTCTGGGGCATT  
 >KU168267  
 TTCTATTGCAATACATCAGATCTGTTTCGATAGCACTTGGACTTCAAACCACACCTCAAACCACACAGGGTCAG  
 ATGAGACC-----  
 -----ATA---  
 ACGTCAAATGACACTATAATTCTCCAATGTAGAATAAAGCAAATTGTAAGGATGTGGCAGACAGTAGGACAAG  
 CAATGTATGCCCCCTCCCATCCCAGGAGAAATAAGGTGTGAATCAAAC---  
 ATTACTGGACTACTATTAACAAGAGATGGAGGGCAAACAGAAAAT-----  
 -----  
 -----  
 AATAATGAGACCTTCAGGCCTGGAGGAGGAAATATGAAGGACAATTGGAGAAGTGAATTATATAAGTATAAAG  
 TAGTAAAAATTGAACCACTA---GGTGTAGCACCCACCCCTGCAAGAAGAAGAGTGGTG-----  
 -----CAGAGAGAAAAAAGAGCA---GTTGGACTACTGGGAGCT-----  
 GTCTTCCTTGGGTTCTTAGGAGCA---GCAGGAAGCACTATG---GGCGCGGCGTCA---  
 ATAACGCTGACGGTACAG---GCCAGACAA---TTACTG---TCTGGTATAGTGCAACAGCAAAGC---  
 AATTTG---CTGAAA---GCTATAGAGGCTCAACAACATCTGTTGAGACTCACGGTCTGGGGCATT  
 >MF510462  
 TTCTATTGCAATACATCAGACCTGTTTAAATAGCACTTGGGATAACAATACCAACAGTTCAAACCTTCACA----  
 -----  
 -----  
 GGTAATGACACTATAACTCTCCAATGCAGAATAAAGCAATTTGTAAATATGTGGCAGAGGGTAGGACAAGCAA  
 TGTATGCCCCCTCCCATCGAAGGAAGAATAAGATGTGAATCAAAT---  
 ATTACTGGACTACTATTAACAAGAGATGGAGGAGAAGGTAATAAT-----  
 -----  
 -----  
 AGGACAAATGAAACCTTCAGGCCTGGAGGAGGAGATATGAGGGACAATTGGAGAAGTGAATTATATAAGTATA  
 AAGTAGTAAAAATTGAACCACTA---GGTGTAGCACCCACCCATGCAAAAAGAAGAGTGGTG-----  
 -----CAGAGAGAAAAAAGAGCA---GTGGGA---CTGGGAGCT-----  
 ---GTCTTCCTTGGGTTCTTAGGAGCG---GCAGGAAGCACTATG---GGCGCGGCGTCA---  
 ATAACGCTGACGGTACAG---GCCAGACAA---TTATTG---TCTGGTATAGTGCAACAGCAGAGC---  
 AATTTG---CTGAAG---GCTATAGAGGCTCAACAACATCTGTTGAAACTCACAGTCTGGGGCATT  
 >AF082485  
 TTCTACTGTAATACAACAAAACCTGTTTGATAGCACTTGGAAATGGTACTGAAGAGTTAGATAAACT-----  
 -----  
 -----  
 GAAGGAGATATAGTCACACTCCCATGCAGAATAAAACAAATTATAAACATGTGGCAGGAAGTAGGAAAAGCAA  
 TGTATGCCCCCTCCCATCGCGGGACAAATTAGATGTTCTCAAAT---  
 ATTACAGGACTGCTATTAAACAAGAGATGGTGGTTACCAGAGCAAT-----  
 -----  
 -----  
 GTCACCGAGATCTTCAGACCTGGAGGAGGAGATATGAGGGACAATTGGAGAAGTGAATTATATAAATATAAAG  
 TAGTAAAAATTGAACCATTA---GGAGTAGCGCCCACCAGGGCAAAGAGAAGAGTGGTG-----  
 -----CAGAGAGAGAAAAAGAGCA---GTGGGA---ATAGGAGCT-----  
 GTGTTCTTGGGTTCTTGGGAGCA---GCAGGAAGCACTATG---GGCGCGGCGTCA---  
 ATAACGCTGACGGTACAG---GCCAGACAA---TTATTG---TCTGGTATAGTGCAACAGCAGAAAT---  
 AATCTG---CTGAGG---GCTATTGAGGCGCAACAACATCTGTTGCAACTCACAGTCTGGGGCATC  
 >FJ388917  
 TTCTATTGCAATACAACAAAACCTGTTTAAATAGTACACTGAAAAATGGTACATTCATTCCGGGTACAAAT----  
 -----  
 -----  
 TCTAATTCAAACATCACACTCCAATGCAGACTAAAAACAATTTGTAAGGATGTGGCAGGAAGTGGGACAAGCAA  
 TGTACTCCTCCCAATGGAAGGGAAAAATTTACTGCAGCTCAAAT---  
 ATTACAGGACTAATATTAACAAGAGATGGTGGTAATAATGGTGATGAC-----  
 -----  
 -----  
 AATGGTACTGAGACCTTCAGACCTGGAGGAGGAGACATGAGGGACAATTGGAGAAGTGAACCTATATAAATATA

AAGTAGTAAGGATTGAACCAATA---GGAGTAGCACCCACTGAAGCAAGGAGACGGGTGGTG-----  
-----CAGAGAGAAAAACGAGCA---GTGGGA---ATAGGAGCC-----  
---GTGTTCCCTTGGGTTCTCGGGAGCA---GCAGGAAGCACTATG---GGCGCAGCGTCA---  
TTGACGCTGACGGTACAG---GCCAGACAA---TTATTG---TCTGGTATAGTGCAGCAGCAGAGC---  
AATCTG---CTGAGG---GCTATAGAGGCTCAACAACATCTGTTGAGACTCACAGTCTGGGGCATT  
>JN687742  
TTCTATTGTAGCACAAACAGCACTGTTTAATAGTACCTGGACGTATAATGGTACCTGGACTACCAATGGCAGCA  
CTGAG-----  
-----  
ACAGATGACACAATCATTACACTGCAATGCAGAATAAGACAAATTGTAAACCTGTGGCAGGCAGTGGGACAAG  
CAATGTACGCCCCCCCATTGTCAGGAAACATTACCTGCAGCTCAAAT---  
ATTACAGGAATGATATTGACAAGAGATGGTACTAATAGTACTAAT-----  
-----  
-----  
AATGATACCTTCAGACCTGGAGGAGGAGACATGAGGGACAATTGGAGAAGTGAAGTATATAAATATAAAGTAG  
TAAAGATTGAACCAATA---GGAGTAGCACCCACTAGGGCAAGGAGACGAGTGGTG-----  
-----CAGAGAGAAAAACGAGCA---GTAGGA---CTGGGAGCT-----  
GTGTTCCCTTGGGTTCTTGGGAGCA---GCAGGAAGCACTATG---GGCGCAGCGTCA---  
ATAACGCTGACGGTACAG---GCCAGACAA---TTATTG---TCTGGCATAGTGC AACAGCAGAGC---  
AATCTG---CTAAGG---GCTATAGAGGCTCAACAACATCTGTTGAAACTCACAGTCTGGGGCATT  
>JX140648  
TTCTATTGCAACACAACAGAACTGTTTAATAGTACCTGGACACTGAATAATAGTACCAATAGCAGCATTGAGA  
CA-----  
-----  
AATGGCACAACTATTATACTGCCATGCAGAATAAGACAATTTATAAACATGTGGCAGGAAGTGGGACAAGCAA  
TGTACGCCCCCCCCATTGAAGGAAGCATTAATGCAGCTCAAAT---  
ATTACAGGAATGATACTGACAAGAGATGGTGGTAATAGTACTACT-----  
-----  
-----  
AATGAGACCTTCAGACCTGGAGGAGGAAACATGAGGGACAATTGGAGAAGTGAAGTATATAAATATAAAGTAG  
TAAAGATTGAACCAGTA---GGAGTAGCACCCACTAAGGCAAGGAGACGAGTGGTG-----  
-----CAGAGAGAAAAACGAGCA---GTAGGA---CTGGGAGTG-----  
ATGTTCCCTTGGGTTCTTGGGAGCA---GCAGGAAGCACTATG---GGCGCAGCGTCA---  
ATGACGCTGACGGTACAG---GCCAGACAA---TTATTG---TCTGGCATAGTGC AACAGCAGAGC---  
AATTTG---CTAAGG---GCTATAGAGGCTCAACAACATCTGTTGAAACTCACAGTCTGGGGCATT  
>JN687748  
TTCTATTGCAACACATCACAGCTGTTTTTAGGTAATGGTACAAATAGTACAAACACAAATAAT-----  
-----  
-----  
ACAAATTCAACTATTGAACTCAAATGCAGAATAAGACAAATTGTAAACATGTGGCAGGGAGTGGGACAAGCAA  
TGTACGCCCCACCCATTGCAGGGAGCATTAGCTGCAGCTCAAAT---  
ATTACAGGATTAATATTGACAAGAGATGGTGGTAATGATACTGGG-----  
-----  
-----  
ACGAATGAGACCTTCAGACCTGGAGGAGGAGACATGAGGGACAATTGGAGAAGTGAAGTATATAAATATAAAA  
TAGTAAAGATTGAACCAGTA---GGAGTAGCACCCACTAGGGCCAGGAGACGAGTGGTG-----  
-----CAGAGAGAAAAACGAGCA---GTGGGA---ATAGGAGCT-----  
GTGCTCCTTGGGTTCTTGGGAGCA---GCAGGAAGCACTATG---GGCGCAGCGTCA---  
ATAACGCTGACGGTACAG---GCCAGACAA---TTATTG---TCTGGCATAGTGC AACAGCAAGGC---  
AATTTG---CTGAGG---GCTATAGAAGCTCAACAACATCTGTTGAGGCTTACGGTCTGGGGCATT  
>AF119820  
TTCTACTGCAATACATCAGGACTGTTTAATAGTACATACATGTTTAATAGTACAAATAGGACAAACACAACCA  
AT-----  
-----  
GGAACAAACTCAACCATCACGCTCCCATGCAGAATAAAAACAAATTGTAAGAATGTGGCAGGGAGTAGGACAAG  
CAATGTACGCCCTCCCATTCAGGGAGCATTAAGTGCAGCTCAGAT---  
ATTACAGGAATAATATTGACAAGAGATGGTGGTATAAGTAATAATAATGAG-----  
-----  
-----  
ACTAATGATAATGAGACCCTCAGACCTGGAGGAGGAGACATGAGGGACAATTGGAGAAGTGTACTATATAAAT

ATAAAGTAGTAAAGATTGAACCAAGTG---GGAATAGCACCCACGGGGGCAAGGAGACGAGTGGTG-----  
 -----CAGAAAGAAAAACGAGCA---GTGGGA---CTAGGAGCT---  
 -----TTGTTTCCTTGGGTTCTTGGGAGCA---GCAGGAAGCACTATG---GGCGCAGCGTCA---  
 CTAACGCTGACGGTACAG---GCCAGACAA---TTATTG---TCTGGTATAGTGCAACAGCAGAGC---  
 AATCTG---CTGAGG---GCTATAGAGGCTCAGCAACATCTGCTGAAACTCACGGTCTGGGGCATT  
 >KU168269  
 TTCTATTGTAATACATCCAATCTGTTTAATAGTAATATAACAGAGAATGATACAACAAAT-----  
 -----  
 -----  
 AGTAATGACAATATCACACTCCCATGTAGGATAAAAACAAATTGTAAGAATGTGGCAGAGAGTGGGACAAGCAA  
 TGTATGCCCCCTCCCATTCGAGGAAACATTACATGTAGATCAAAC---  
 ATTACAGGAATACTATTAACAAGAGATGGTAATGGTGGGAATGATACC-----  
 -----  
 -----  
 AATAGCAATGAGACTTTTCAGACCTGGAGGAGGAGATATGAGGGACAATTGGAGAAGTGAATTATACAACCTATA  
 AAGTAGTAAAAATTAAACCACTA---GGAGTAGCACCCACCCATGCAAGAAGAAGAGTGGTG-----  
 -----GGGAGAGAGAAAAGAGCA---GTTGGA---CTAGGAGCT-----  
 ---CTTCTCCTTGGGTTCTTGGGAACA---GCAGGAAGCACTATG---GGCGCAGCGTCA---  
 ATAACGCTGACGGTACAG---GCCAGACAA---TTATTG---TCTGGTATAGTGCAACAGCAAAGT---  
 AATTTG---CTGCAA---GCTATAGAGGCGCAACAGCATCTGTTGCAGCTCACAGTCTGGGGCATT  
 >AB286852  
 TTCTATTGTAATACATCAAACTATTTAATAGTACTTTTTCTAATGATAATTCCACAGATAATGATACCTCTT  
 TA-----  
 -----  
 GAAAAAATGGTACCATCACACTCCCATGTAAGATAAAAACAAATTGTAAGAATGTGGCAGAGAGTGGGACAGG  
 CAATGTATGCCCCCTCCCATTCGAGGAAACATTACATGTATATCAAAC---  
 ATTACAGGACTAATATTAACAAGAGATGGGCACAATGGGCACAATCAG-----  
 -----  
 -----  
 AGTAATAATGAGACCTTCAGACCTACAGGAGGAGATATGAGGGACAATTGGAGAAGTGAATTATATAAGTATA  
 AAGTAGTAAGAATTAAACCACTA---GGAATAGCACCCACCAAGGCAAGAAGAAGAGTAGTG-----  
 -----GGCAGAGAGAAAAGAGCA---GTTGGA---CTGGGAGCT-----  
 ---GTTTTCTTGGGTTCTTAGGAGCG---GCAGGAAGCACTATG---GGCGCAGCGTCA---  
 ATAACGCTGACGGTACAG---GTCAGACAA---TTATTG---TCTGGCATAGTGACAGCAGCAAAGC---  
 AATTTG---CTGAGA---GCTATAGAAGCGCAGCAGCATCTGTTGCAGCTCACAGTCTGGGGCATT  
 >AF069934  
 TTTTATTGTAATACATCAGAGCTGTTTACTAATACATCAACTAAGAATGGG-----  
 -----  
 -----  
 ACCAATGAAACACCCACACTCCCATGTAAGATAAAAACAAATTGTAAGAATGTGGCAGAGAGTGAGACAAGCAA  
 TGTATGCCCCTCCCATTCGAGGAAACATTACGTGTACATCAAAC---  
 ATTACAGGACTACTATTAACAAGAGATGGG---AATAATGACAGT-----  
 -----  
 -----  
 CACACTGAGACCTTCAGACCTGGAGGGGGAGATATGAGGGACAATTGGAGAAGTGAATTATATAAGTATAAAG  
 TAGTAAAAATTAAACCACTA---GGAATAGCACCCACCTGGGCGAGGAGAAGAGTAGTG-----  
 -----GGGAGAGAGAAAAGAGCA---GTTGGA---CTGGGAGCT-----  
 GTTTTCTTGGGTTCTTAGGGACA---GCAGGAAGCACTATG---GGCGCAGCGTCA---  
 ATAACGCTGACGGTACAG---GTCAGACAA---TTATTG---TCTGGCATAGTGACCCAGCAAAGC---  
 AATTTG---CTGAGA---GCTATAGAGGCGCAGCAGCATCTGTTGCAACTCACAGTCTGGGGCATT  
 >AJ288981  
 TTTTATTGTAATACATCACAACCTGTTTAACAGTAGTAACCTTAATAATAATAGCTCAGAT-----  
 -----  
 -----  
 AATAATGGGACCATCACACTCCCATGTAGGATAAATCAAATTATAAGAATGTGGCAAAGAGTGGGACAAGCAA  
 TGTATGCCCCCTCCCATTCGAGGAAACATTACATGTACATCAAAC---  
 ATTACAGGACTACTATTAACAAGAGATGGGCATAATGACACTGAA-----  
 -----  
 -----  
 ATCTTCAGACCTGGAGGAGGAAATATGAAGGACAATTGGAGAAGTGAATTATATAAGTATAAAGTAGTAAAAA

TTAAACCACTA---GGGATAGCACCCACCAAGGCAAGGAGAAGAGTAGTG-----  
-----GGGAGAGAGAAAAGAGCAGTTGTTGGA---CTGGGAGCT-----  
GTTTTTCCTTGGGTTCTTAGGAACG---GCAGGAAGCACTATG---GGCGCAGCGTCA---  
ATAACGCTGACGGTACAG---GTCAGACAA---TTATTG---TCTGGCATAGTGCACCAGCAAAGC---  
AATTTG---CTGAGA---GCTATAGAGGCGCAGCAGCATCTGTTGCAACTCACAGTCTGGGGCATT  
>EU363837  
TTCTATTGTAATACATCAGGCCTGTTTAATGGTACATACATGTCTAATGGTACACAAAGTAAT-----  
-----  
-----  
TCAAGCTCAATCATCACGATTCCATGCAGAATAAAGCAAATTATAAACATGTGGCAGGAGGTAGGACGGGCAA  
TGTATGCCCCCTCCCATTTGAAGGAAACATAACATGTAAATCAAAT---  
ATCACAGGACTACTATTGGTACGTGATGGAGGAACGACAAATACTATA-----  
-----  
-----  
AATGATACAGAGATATTCAGACCTGGAGGAGGAGACATGAGGGACAATTGGAGAAGTGAATTATATAAATATA  
AAGTGGTAGAAATTAAGCCATTA---GGAGTAGCACCCACTGCAGCAAAAAGGAGAGTGGTG-----  
-----GAGAGAGAAAAAAGAGCA---GTGGGA---CTAGGAGCT-----  
---GTGTTCCCTTGGGTTCTTGGGTGCA---GCAGGAAGCACTATG---GGCGCGGCGTCA---  
ATAACGCTGACGGTACAA---GCCAGACAA---TTATTG---TCTGGTATAGTGCAACAGCAAAGC---  
AATTTG---CTGAGA---GCTATAGAGGCGCAACATCATCTGTTGCAACTCACAGTCTGGGGCATT  
>KC492737  
TTCTATTGTAATACATCAAGACTGTTTAATGGTACATACATGTTTAATGGTACAAGGGGTAAATTCAGC---  
-----  
-----  
TCAAACTCAACCATCACAATCCCATGCAGAATAAAGCAAATTATAAATATGTGGCAGCAGGTAGGACGAGCAA  
TGTATGCCCCCTCCCATTTGAAGGAAACCTAACATGTAGATCAAAT---  
ATCACAGGATTACTATTGGTACGTGATGGAGGAGACAACACAAAT-----  
-----  
-----  
AAAACAGAGATATTCAGACCTCAAGGGGGAGATATGAGGGACAATTGGAGAAGTGAATTATATAAATATAAAG  
TAGTAGAAATTAAGCCATTG---GGAGTAGCACCCACTGCAGCAAAAAGGAGAGTGGTG-----  
-----GAGAGAGAAAAAAGAGCA---GTGGGA---ATAGGAGCT-----  
GTGTTCCCTTGGGTTCTTGGGAGCA---GCAGGAAGCACTATG---GGCGCGGCGTCA---  
ATAACGCTGACGGTACAG---GCCAGACAA---TTGCTG---TCTGGTATAGTGCAACAGCAAAGC---  
AATTTG---CTGAGG---GCTATAGAGGCGCAACAACATCTGTTGCAACTCACGGTCTGGGGCATT  
>JX392379  
TTCTATTGTAATACATCAGGCCTGTTTAATGGTACATACAGGAATGGTACATACATGCCCAATGGTACCACAA  
AT-----  
-----  
AATTCAAGCTACATCACAATCCCATGCAGAATAAAGCAAATTATAAATATGTGGCAGGAGGTAGGACGAGCAA  
TGTATGCCCCCTCCCATTTGCAGGAAACATAACATGTAGATCAAAT---  
ATCACAGGACTACTATTGGTACGTGATGGAGGAAAAACAAATGATACA-----  
-----  
-----  
AATAATACAGAGATATTCAGACCTGGAGGAGGAGATATGAGGGACAATTGGAGAAGTGAATTATATAAATATA  
AAGTGGTAGAAATTAAGCCATTG---GGAGTAGCACCCACTGCAGCAAAAAGGAGAGTGGTG-----  
-----GAGAGAGAAAAAAGAGCA---GTGGGA---CTAGGAGCT-----  
---GTGTTCCCTTGGGTTCTTGGGAGCA---GCAGGAAGCACTATG---GGCGCGGCGTCA---  
ATAACGCTGACGGTACAG---GCCAGACAA---TTGCTG---TCTGGTATAGTGCAACAGCAAAGC---  
AATTTG---CTGAAG---GCTATAGAGGCGCAACAGCATCTGTTGCAACTCACGGTCTGGGGCATT  
>KF835494  
TTCTATTGTAATACATCAGGCCTGTTTAATAGTACATACATGTTCAATAATACAGACATATTTAATGGTACAG  
GAAAT-----  
-----  
-----  
AGTTCAAAAGTCATCACGATTCCATGCAGAATAAAGCAAATTATAAATATGTGGCAGGAGGTAGGACGAGCAA  
TGTATGCCCCCTCCCATTTGAAGGAAACATAACATGTAACTCAACT---  
ATCACAGGACTACTATTGGTACGTGATGGAGGAAAGCATAATAATAGT-----  
-----  
-----  
AATACTACAGAAACATTTCAGACCTGGAGGAGGAGATATGAAGGACAATTGGAGAAGTGAATTATACAAATATA

AAGTGGTAGAAATTCAGCCATTG---GGAGTAGCACCCACTGGAGCAAAAAGGAGAGTGGTG-----  
 -----GAGAGAGAGAAAAAGAGCA---GCAGGA---CTAGGAGCT-----  
 ---GTGTTCCCTTGGGTTCTTGGGAGCA---GCAGGAAGCACTATG---GGCGCGGCGTCA---  
 TTAACGCTGACGGTACAG---GCCAGACAA---TTGCTG---TCTGGTATAGTGCAACAGCAAAGC---  
 AATTTG---CTGAAG---GCTATAGAGGCGCAACAGCATCTGTTGCAACTCACAGTCTGGGGCATT  
 >KF835511  
 TTCTATTGTAATACATCAGACCTGTTTAATGGTACATATAATGGTACATACATACATAATGATACACAAGGT-  
 -----  
 -----  
 AATTCAACTGTCTTTACAATCCAATGCAGAATAAAGCAAATTATAAATATGTGGCAGGAGGTAGGACGAGCAA  
 TGTATGCTCCTCCCATTGCAGGAAATATAACATGTAAATCAAAT---  
 ATCACAGGACTACTATTGGTACGTGATGGAGGAAATACTAGTACA-----  
 -----  
 -----  
 GAAGAGATATTCAGACCTGGAGGAGGAGATATGAAAAACAATTGGAGAAGTGAATTATATAAATATAAAGTGG  
 TAGAAATTAAGCCATTG---GGAATAGCACCCACTGCAGCAAAAAGGAGAGTGGTG-----  
 -----GAGAGAGAAAAAGAGCAGTAATGGGA---ATAGGAGCT-----  
 GTGTTCCCTTGGGTTCTTGGGAGCA---GCAGGAAGCACTATG---GGCGCGGCGTCA---  
 ATAACGCTGACGGTACAG---GCCAGACAA---TTGCTG---TCTGGTATAGTGCAACAGCAAAGC---  
 AATTTG---CTGAAG---GCTATAGAGGCGCAACATCATCTGTTGCAACTCACGGTCTGGGGCATT  
 >JF346907  
 TTCTATTGTAATACATCAGGCCTGTTCAATAGTACATACCTGTTCAATAGTACATACATGTCTAATGGTAGTT  
 CAAACTCA-----  
 -----AAC---  
 AACACAACTCAACCATCACAAATCCCATGCAGAATAAAGCAAATTATAAATATGTGGCAGGAGGTAGGACGAG  
 CAATGTATGCCCCCTCCATTGCAGGAAACATAACATGTAAATCAAAT---  
 ATCACAGGACTACTATTGGTCCGTGATGGAGGAGATCAAAAATCAAATGAGACA-----GAG---  
 -----  
 -  
 AATGGGACAGAGACTGAGGAGACATTTAGACCTGGAGGAGGAGATATGAGGGACAATTGGAGAAGTGAATTAT  
 AATAATATAAAGTGGTAGAAATTAAGCCATTG---GGAATAGCACCCACTAAAGCAAAAAGGAGAGTGGTG--  
 -----GAGAGAGAAAAAGGGGA-----  
 CTAGGAGCT-----GTGTTCCCTTGGGTTCTTAGGAGCA---GCAGGAAGCACTATG---  
 GGCGCGGCGTCA---ATAACGCTGACGGTACAG---GCCAGACAA---TTGCTG---  
 TCTGGTATAGTGCAACAGCAAAGC---AATTTG---CTGAAG---  
 GCTATAGAGGCGCAACAGCATCTGTTGCAACTCACGGTCTGGGGCATC  
 >JF346913  
 TTCTATTGTAATACAACAGGCCTGTTTAAGGGTACATACAACCCTAATTACACAAACCCTAATGGTACAGGGA  
 GT-----  
 -----  
 AATTCAAGCTCAACCATCACAAATACCATGCAAAATAAAGCAAATTATAAATATGTGGCAGGAGGTAGGACGAG  
 CAATGTATGCCCCCTCCATTGCAGGAAACATAACATGTAAATCAAAT---  
 ATCACAGGACTGCTATTGGTACGTGATGGAGGATACACAAATAAGACA-----  
 -----  
 -----  
 AATCATACAGAGATATTCAGGCCGGGAGGAGGAGATATGAAGGATAATTGGAGAAGTGAATTATATAAATATA  
 AAGTGGTAGAAATCAAGCCATTG---GGAGTAGCACCCACTAAAGCAAAAAGGAGAGTGGTG-----  
 -----GAGAGAGAAAAAGAGCA---GCA-----TTAGGAGCT-----  
 ---GTGTTCCCTTGGGTTCTTGGGAGCA---GCAGGAAGCACTATG---GGCGCGGCGTCA---  
 ATGGCGCTGACGGTACAG---GCCAGACAA---TTGCTG---TCTGGTATAGTGCAACAGCAAAGC---  
 AATTTG---CTGAGG---GCTATAGAGGCGCAACAACATCTGTTGCAACTCACGGTATGGGGCATT  
 >EU363847  
 TTCTATTGTAATACCTCAAACTGTTTAATGGTACATACAACAATGGTACATACAATGGTACATACGGT----  
 -----  
 -----  
 ACGGAAAGTAATATACAATCCCATGCAGAATAAAGCAAATTATAAACATGTGGCAGGAGGTAGGACGAGCAA  
 TGTATGCTCCTCCCATTGCAGGAAACATAACATGTAACTCAACT---ATCACAGGCTACTAT---  
 GTACGTGATGGAGGAACAGGAAATGGGACA-----  
 -----  
 -----  
 GATAATGGTACAGAGATATTCAGACCTGGAGGAGGAGATATGAGAAACAATTGGAGAAGTGAATTATATAAAT

ATAAAGTGGTAGAAATTAAGCCATTG---GGAGTAGCACCCACTGAAGCAAAAAGGAGAGTGGTG-----  
 -----GAGAGAGAAAAAAGAGCA---GTGGGA---CTAGGAGCT---  
 -----GTGTTTCCTTGGGTTCTTGGGAGCA---GCAGGAAGCACTATG---GGCGCGCGCTCA---  
 ATAACGCTGACGGTACAA---GCCAGACAA---TTGTTG---TCTGGTATAGTGCAACAGCAAAGC---  
 AATTTG---CTGAGA---GCTATAGAGGCGCAACAGCATCTGTTGCAACTCACAGTCTGGGGCATT  
 >KF835500  
 TTCTATTGTAATACATCAGGCATATTTAATAGTACATACAATGAGACATACCAAGGTAACTCA-----  
 -----  
 -----  
 ACTAACTTAAACATCACAATTCATGCAAAATAAAGCAAATTATAAACATGTGGCAGGGGGTAGGACGAGCAA  
 TGTATGCCCCCTCCCATTAAGGAAACATAACATGTAGATCAAAT---  
 ATCACAGGACTACTACTGACACGTGATGGAGGAATAAATGTAACAAAT-----  
 -----  
 -----  
 AGAACAGATCAAGAGATATTCAGACCTGCAGGAGGAGATATGAGGGACAATTGGAGAAGTGAATTATATAAAT  
 ATAAAGTGGTAGAAATTAAGCCATTG---GGGGTAGCACCCACTACAGCAAAAAGGAGAGTGGTG-----  
 -----GAGAGAGAAAAAAGAGCA---GTGGGA---CTGGGAGCC---  
 -----GTGTTTCCTTGGGTTCTTGGGAGCA---GCAGGAAGCACTATG---GGCGCAGCGTCA---  
 ATAACGCTGACGGTACAA---GCCAGACAA---TTGTTG---TCTGGTATAGTGCAACAGCAAAGC---  
 AATTTG---CTGAAA---GCTATAGAGGCGCAACAACATCTGTTGCAACTCACGGTCTGGGGCATT  
 >KF835507  
 TTCTATTGTAATACATCAGGCCTGTTTAATGGTACATACAGACAGCCTAATGGTACATACGTGTTTAAAGGAG  
 ATTCA-----  
 -----AAC---  
 TCAAAACATTACAACCATTACACTCCCATGCAGAATAAAGCAAATTATAAACATGTGGCAGGAGGTAGGACGAG  
 CAATGTATGCCCCCTCCCATTCAGGAAAAATAACATGTAAATCAAAT---  
 ATCACAGGACTACTGTTGGTACGTGATGGAGGGTCAAATGATACA-----  
 -----  
 -----  
 GAGACAAATAAAACAGAGACATTTAGACCTCAAGGAGGAGATATGAGGGACAATTGGAGAAGTGAATTATATA  
 AATATAAAGTGGTAGAAATTAAGCCATTG---GGAATAGCACCCACTGGGGCAAAAAGGAGAGTGGTG-----  
 -----GAGAGAGAAAAAAGAGCA---GTGGGA---  
 CTAGGAGCT-----GTGTTTCCTTGGGTTCTTGGGAGCA---GCAGGAAGCACTATG---  
 GGCGCGGCATCA---ATAACGCTGACGGTACAG---GCCAGACAA---CTGTTG---  
 TCTGGTATAGTGCAACAGCAAAGC---AATTTG---CTGAAA---  
 GCTATAGATGCGCAACAGCATCTGTTGCAACTCACGGTCTGGGGCATT  
 >KF835509  
 TTCTATTGTAATACATCAGGCCTGTTTAACAGTACATACAATCCTAATGGTACAAATTATAAT-----  
 -----  
 -----  
 TCAAACTCAACCATCACAATCCCATGCAGAATAAAGCAAATTATAAACATGTGGCAGGGGGTAGGACGAGCAA  
 TGTATGCCCCCTCCCATTCAGGAAACATAACATGTAGATCAAAT---  
 ATCACAGGACTACTATTGTTACGTGATGGAGGAACTTCAGATTCAAGT-----  
 -----  
 -----  
 AATACAACAGAGATATTCAGACCTGGAGGAGGGGATATGAGGGACAATTGGAGAAATGAATTATATAAATATA  
 AAGTGGTAGAAATTCAGCCATTG---GGAATAGCACCCACTGGAGCAAAAAGGAGAGTGGTG-----  
 -----GAGAGAGAAAAAAGAGCA---GTGGGA---CTAGGAGCT-----  
 ---ATGTTCAATTGGGTTCTTGGGAGCA---GCAGGAAGCACTATG---GGCGCGGCGTCA---  
 ATAACGCTGACGGTACAA---GCCAGACAA---TTGTTG---TCTGGTATAGTGCAACAGCAAAGC---  
 AATTTG---CTGAGA---GCTATAGAGGCGCAACAGCATCTGTTGCAACTCACTGTCTGGGGCATT  
 >KF835534  
 TTCTATTGTAATACATCAGGCCTGTTTAATAGTACATACATGTCTAATGGTACATACATGCCTAATGGT----  
 -----  
 -----  
 ACAGGAACAAACATCACAATTCATGCAAGAATAAAACAAATTATAAACATGTGGCAGGAGGTAGGACGAGCAA  
 TGTATGCCCCCTCCCATTCAGGAAACATAACATGTAGGTCAAAT---  
 ATCACAGGATTACTCTTGGTACGTGATGGAGGAAAGAGAAATGGTACA-----  
 -----  
 -----

AATAATACAGAGATATTCAGACCTGGAGGAGGAGATATGAGAGACAATTGGAGAAATGAATTATATAAAATATA  
AAGTGGTAGAAATTCAGCCATTG---GGAGTAGCACCCACTAGAGCAAAAAGGAGAGTGGTG-----  
-----GAGAGAGAAAAAAGAGCAGTAGTAGGA---CTAGGAGCT-----  
---GTGTTCCCTTGGGTTCTTGGGAGCA---GCAGGAAGCACTATG---GGCGCGGCGTCA---  
ATAACGCTGACGGTACAG---GCCAGACAA---CTGTTG---TCTGGTATAGTGCAACAGCAAAGC---  
AATTTG---CTGAAA---GCTATAGAGGCGCAACAGCATCTGTTGCAACTCACGGTCTGGGGCATT  
>KF835545  
TTCTATTGTGATACGTCAGACCTGTTTAATGATACATACAATGACAAGTTTAATGGTACAACAGGTGAT----  
-----  
-----  
TCAAAACAAAACCATCACAATCCAATGCAGAATAAAGCAAATTATAAACATGTGGCAGGAGGTAGGACGAGCAA  
TGTATGCCCCCTCCCATTGCAGGAAACATAACATGTAGATCAAAT---  
ATCACAGGACTACTATTGGTACGTGATGGAGGTAATGGGACAGAGACA-----  
-----  
-----  
AATGGCACAGAAACATTTCAGACCTGGAGGAGGAGATATGAGGGACAATTGGAGAAATGAACTATATAAAATATA  
AAGTGGTAGAAATTCAGCCATTG---GGAGTAGCACCCACTGCAGCAAAAAGGAGAGTTGTG-----  
-----GAGAGAGAAAAAAGAGCA---ATAGGA---TTTGGAGCT-----  
---ATGTTCCCTTGGGTTCTTGGGAGCA---GCAGGAAGCACTATG---GGCGCGGCGTCA---  
ATAACGCTGACGGTACAA---GCCAGACAA---TTGCTG---TCTGGTATAGTGCAACAGCAAAGT---  
AATTTG---CTAAGA---GCTATAGAGGCGCAACAGCATCTGTTGCAACTCACTGTCTGGGGCATT  
>HQ699961  
TTCTATTGCAATACATCAGGCCTGTTTAATGGTAATATTACAAAAGATAACTCAAGCTCAGATAAT-----  
-----  
-----  
TCAAGCTCAGTCATCATACTCCCATGCAAAATAAAGCAAATTATAAATATGTGGCAGGAGGTAGGACGAGCAA  
TGTATGCCCCCTCCCATTGAAGGAAACATAACATGTAAATCAAAT---  
ATCACAGGACTACTCTTAGTACGTGATGGGGGATACACAAATGGCACA-----  
-----  
-----  
GAGAGTAATAACGAGACATTTCAGACCAGGAGGAGGAGATATGAGAGACAATTGGAGAAGTGAATTATATAAAT  
ATAAGGTGGTAGAAATTAAGCCATTG---GGAATAGCACCCACTAAATCAAAAAGGAGAGTGGTG-----  
-----GAGAAAGAAAAAAGAGCA---GTGGGA---CTGGGAGCT---  
-----GTGTTCCCTTGGGTTCTTGGGAGCT---GCAGGAAGCACTATG---GGCGCGGCGTCA---  
ATAACGCTGACGGTACAA---GCCAGACAA---TTGCTG---TCTGGTATAGTGCAACAGCAAAGC---  
AATTTG---CTGAGA---GCTATGGAGGCGCAGCATCATCTGTTGCAACTCACAGTCTGGGGCATT  
>HM215416  
TTCTATTGTAATACATCAGGCCTGTTTAATAGTACGTACAATGGTACATACAGGGGTACAGGAGATAAT----  
-----  
-----  
TCAAGCTCAATCATCACAATCCCATGCAGAATAAGGCAAATTATAAACATGTGGCAGAAGGTAGGACGAGCAA  
TGTATGCCCCCTCCCATTGAAGGAAACATAGCATGTAACCTCAAGT---  
ATCACAGGACTACTGTTGGTACGTGATGGAGGAAGCCCAAATAATCCAGAG-----  
-----  
-----  
ATTCCAAATAATACAGAGATATTCAGACCTGGAGGAGGAGACATGAAGGACAATTGGAGAAATGAATTATATA  
AATATAAAGTGGTAGAAATTCAACCATTG---GGAGTAGCACCCACTGAAGCAAAAAGGAGAGTGGTG-----  
-----CAGAGAGAAAAAAGAGCA---GTGGGA---  
ATAGGAGCT-----GTGTTCCCTTGGGTTCTTGGGAGCA---GCAGGAAGCATTATG---  
GGCGCGGCGTCA---ATAACGCTGACGGTACAA---GCCAGACAA---CTGTTG---  
TCTGGTATAGTGCAACAGCAAAGC---AATTTG---CTGAGA---  
GCTATAGAGGCGCAACAGCACATGTTGCAACTCACGGTCTGGGGCATT  
>HQ700001  
TTCTATTGTAATACATCAGGCCTGTTTAATAGTACATACATGGTTAATGGTACATACATGTTTAATGGTACAG  
AGATGTTTAAT-----  
AGTACAACAGGTAATTATTCA-----  
GGCTCAAACCTCAAACATCACAATCCCATGCAGAATAAAAACAAATTGTAAACATGTGGCAGGAGGTAGGACGAG  
CAATGTATGCCCCCTCCCATTGCAGGAAACATAACATGTAAATCAGAT---  
ATCACAGGATTACTATTGGTACGTGATGGAGGAAGAGAGCCAAAT-----  
-----

-----  
 AATGATACAGAGACATTTCAGACCTGGAGGAGGAGATATGAAGGACAATTGGAGAAGTGAATTATATAAAATATA  
 AAGTGGTACAAATTAAGCCATTG---GGAGTAGCACCCACTGAAGCAAAAAGGAGAGTGGTG-----  
 -----GAGAGAGAAAAAAGAGCAGTACTGGGAGGACTAGGAGCT-----  
 ---GTGTTCCCTTGGGTTCTTGGGAGCA--GCAGGAAGCACTATG--GGCGCGGCGTCA--  
 ATAACGCTGACGGTACAA--GCCAGAAAA--TTGTTG---TCTGGTATAGTGCAACAGCAAAGC---  
 AATTTG---CTGAAA---GCTATAGAGGCGCAACAGCATCTGTTGCAACTCACGGTCTGGGGCATT  
 >KF250369  
 TTCTATTGTAATACATCAAGACTGTTTAATAGTACATACAATAGTACATTAGACCTGTCTAGT-----  
 -----AGT---  
 ACATACAATAGTACAAAAGAT-----  
 AATTCAAGCTCCCCCATCACAACTCATGCAGAATAAAGCAAATTATAAACATGTGGCAGGAGGTAGGACGAG  
 CAATGTATGCCCTCCCATTCAGGAAGCATAACATGTAAATCAAAT---  
 ATCACAGGACTACTATTGGTGCGTGATGGAGGA-----  
 -----  
 -  
 ATAGGACCAAAAGATACAGAGACATTTCAGACCTGGAGGAGGAGATATGAGAGACAATTGGAGAAATGAATTAT  
 ATAAATATAAAGTGGTAGAAATTCAGCCATTG---GGAGTAGCACCCACTGAAGCAAAAAGGAGAGTGGTG--  
 -----GAGAGAGAAAAAAGAGCA---GTGGGA---  
 CTAGGAGCT-----GTGTTCCCTTGGGTTCTTGGGAGCA--GCAGGAAGCACTATG---  
 GGCGCGGCGTCA--ATAACGCTGACGGTACAG--GCCAGACAA--TTGTTG---  
 TCTGGTATAGTGCAACAGCAAAGC---AATTTG---CTGAGA---  
 GCTATAGAGGCGCAACAACATATGTTGCAACTCACGGTCTGGGGCATT  
 >KU820846  
 TTCTATTGTAATACATCAGGCCTGTTTAATGGTACATACAATGATACATACGAGCTAAATGGTACAGAAAGT-  
 -----  
 -----  
 AATTCAAGCTTAATCACAAATCCCATGCAGAATAAAGCAAATTATAAACATGTGGCAAAAGGTGGGACGAGCAA  
 TGTATGCCCCCTCCCATTCAGGAAACATTACATGTAAATCAAAT---  
 ATCACAGGACTACTATTAGTACGTGATGGAGGAGCAAATCAGACA-----  
 -----  
 -----  
 AATGATACAGAGATATTTCAGGCCTGGAGGAGGAAATATGAAGGACAATTGGAGAAGTGAATTATATAAAATATA  
 AAGTGGTAGAAGTTAAGCCAGTA---GGAATAGCCCCCACTAAAGCAAAAAGGAGAGTGGTG-----  
 -----GAGAGAGAAAAAAGAGCA--GCG-----CTAGGAGCT-----  
 ---GTGTTCCCTTGGGTTCTTGGGAGCA--GCAGGAAGCACTATG--GGCGCGGCGTCA--  
 ATAACGCTGACGGTACAA--GCCAGACAA--TTGTTG---TCTGGTATAGTGCAACAGCAAAGC---  
 AATTTG---CTGAGA--GCTATAGAGGCGCAACAGCATATGTTGCAACTCACGGTCTGGGGCATT  
 >AJ866553  
 TTCTATTGCAATACATCAGACCTGTTTAATAGCATTTGGAATAGCACTAGGGAAAATACAAATAACACAAATG  
 CA-----  
 -----  
 AATTACACAGATTACATTATCCCATGCAGAATAAAGCAAATTGTGAGAATGTGGCAGAGAGTAGGACAAGCAA  
 TGTATGCTCCTCCCATCCAGGAGTAATAAGCTGTACATCCAAT---  
 ATTACAGGACTAATAATAACAAGAGATGGTGGGAGTAATAACACT-----  
 -----  
 -----  
 GGGAGTGAAACCTTCAGACCTACAGGAGGAAATATGAAAAATAATTGGAGAAGTGAATTATATAAGTATAAAG  
 TAGTAGAAATTGAACCACTA---GGAGTAGCACCCACCAGGGCAAGGAGAAGAGTGGTG-----  
 -----CAGAGAGAAAAAAGAGCA--GTTGGA--ATGGGAGCT-----  
 TTGTTCCCTTGGGTTCTTAGGAGCA--GCAGGAAGCACTATG--GGCGCAGCGTCA--  
 ATAACGCTGACGGTACAG---GCCAGACAA--TTACTG---TCTGGTATAGTGCAAGCAGCAGAGC---  
 AATCTG---CTGAAG---GCTATAGAGGCTCAACAGCATATGTTGAGACTCACAGTCTGGGGCATA  
 >AY093603  
 TTCTATTGCAATACAACAAACCTATTTAATTGGAATAACACTAAGGATATCATGCCAAAT-----  
 -----  
 -----  
 GGCACAAAGAATTACTTTATCCAATGCAAAATAAAGCAAATTGTGAGAATGTGGCAGAGAGTAGGACAAGCAA  
 TGTATGCCCCCTCCTATCCAGGAATAATAGAGTGTGTATCAAAC---  
 ATTACAGGACTAGTATTAACAAGAGATGGTGGGACTGGCAATACA-----  
 -----

-----  
-----  
AGTGAGACCTTCAGACCTACAGGAGGAAATATGAAGGACAATTGGAGAAGTGAATTATATAAGTATAAAGTAG  
TAAAAATTGAACCACTA---GGAGTGGCACCCACCAGGGCAAAGAGAAGAGTGTTG-----  
-----GAGAGAGAAAAAAGAGCA---GTTGGA---ATGGGAGCT-----  
CTTTTCCTTGCGTTCTTAGGAGCA---GCAGGAAGCACTATG---GGCGCGGCGTCA---  
ATGACGCTGACGGTACAG---GCCAGACAA---TTATTG---TCTGGTATAGTGCAACAGCAGAGC---  
AATCTG---CTGAAG---GCTATAGAGGCTCAACAGCATCTGTTAAAACTCACAGTCTGGGGCATT  
>AY093604  
TTCTATTGCGATACATCAGGCCTGTTTAATAGCACGTGGAAAAATGGCACTAATATACAGGGGTCAAATGGCA  
CT-----  
-----  
GGATCAAATTACACACAGATCCAGTGCAAAATAAAGCAAATTGTGAGAATGTGGCAGAGAGTAGGACAAGCAA  
TGTATGCCCCCTCCCATCCAGGAGTAATAGGGTGTATATCAAAC---  
ATTACAGGACTAATATTAACAAGAGATGGTGGGGACAATACAGGT-----  
-----  
-----  
GATAATGAAACCTTCAGACCTATAGGAGGAAATATGAAGGACAATTGGAGAAGTGAATTATATAAGTATAAAG  
TAGTAAAACTTGAACCACTA---GGAGTAGCACCCACCCGGCAAAGAGAAGAGTGTTG-----  
-----GAGAGAGAAAAAAGAGCA---GTTGGA---ATGGGAGCT-----  
CTTTTCCTTGCGTTCTTAGGAGCA---GCAGGAAGCACTATG---GGCGCAGCGTCA---  
ATAACGCTGACGGTACAG---GCCAGACAA---TTATTG---TCTGGCATAGTGCAACAGCAGAGC---  
AATCTG---CTGAAG---GCTATAGAGGCTCAACAGCATTTGTTGAAACTCACGGTCTGGGGCATT  
>AY093607  
TTCTATTGCAATACATCAAGCCTATTTAATAGCACTTGGGATGAAAATAACACTAAAAGTGCACAGGGGCCAA  
AT-----  
-----  
GGCACGGCCAATATCACAATCCCATGTAAAATAAGACAAATTGTGAGAATGTGGCAGAGAGTAGGACAAGCAA  
TGTATGCCCCCTCCCATCCAGGAGTAATAAATTGTATATCAAAC---  
ATTACAGGACTAATATTAATAAGAGATGGGGGAATGAGAGCGCT-----  
-----  
-----  
ACAAATGAGACCTTCAGACCTATAGGAGGAGATATGAAGAATAATTGGAGAAGTGAATTATATAAGTATAAAG  
TAGTAAAAATTGAACCACTA---GGAGTGGCACCCACCAGGGCAAAGAAGAAGAGTGTTG-----  
-----CAGAGAGAAAAAAGAGCA---GTTGGA---ATGGGAGCT-----  
CTGTTCCCTTGCGTTCTTAGGAGCA---GCAGGAAGCACTATG---GGCGCAGCGTCA---  
ATAACGCTGACGGTACAG---GCTAGACAA---TTATTG---TCTGGTATAGTGCAACAGCAGAGC---  
AATCTG---TTGAAG---GCTATAGAGGCTCAACAGCATCTGTTGAAACTCACGGTCTGGGGCATT  
>MN178644  
TTCTATTGCAATACAACAAAGCTGTTCAATAGTAGTTGGATAGGAAATGAGACTAGGAATGAGACCATAGAGG  
AAGGT-----  
-----  
CATGATAACACTATCATACTTCCATGCAAAATAAAGCAAATTATAAATATGTGGCAAAGAACAGGACAAGCAA  
TGTATGCTCCTCCAGTCAGAGGAATAATTATTGTGCATCAAAT---  
ATTACAGGAATACTATTGACAAGAGATGGTGGGAATGATAGGACT-----  
-----  
-----  
ACAAACGAGACTTTTCAGACCTGGGGGAGGAAATATGAAGGACAATTGGAGAAGTGAATTATATAAATATAAAG  
TAGTACAAATAGAACCACTA---GGAGTAGCACCCACCAGGGCAAAGAGAAGAGTGTTG-----  
-----AGTAGAGAAAAAAGAGCA---GTGGGA---ATAGGAGCT-----  
ATGATCTTTGGGTTCTTGGGAGCA---GCAGGAAGCACTATG---GGCGCAGCGTCA---  
ATAACGCTGACGGTACAG---GCCAGACAA---TTATTG---TCTGGTATAGTGCAACAGCAAAGC---  
AATTTG---CTGAGG---GCTATAGATGCGCAACAGCATATGTTGCAACTCACAGTCTGGGGCATT  
>AF289548  
TTCTACTGCAATACATCAGAACTGTTTAATAGTACATGGACATCAAATAATACAAGTACAGGGGTA-----  
-----  
-----  
AATGGGAGTACAATCACACTCCCATGCAGAATAAGACAAATTATAAATATGTGGCAGGGAGTAGGAAAAGCAA  
TATATGCCCCCTCCCATTCAGGACTGATCAATTGTTTCATCAAAT---  
ATTACAGGACTAGTGTTGACAAGAGATGGTGGTGCGAATAATAAT-----

-----  
 -----  
 AGTCAGAATGAGACCTTCAGACCTGGAGGAGGAGATATGAGGGACAATTGGAGAAGTGAATTATACAAATATA  
 AAGTAGTAAAAATTGAACCAATA---GGTCTAGCACCCACCACGGCAAAGAGAAGAGTGGTG-----  
 -----GAAAGAGAAAAAAGAGCA---ATAGGA---CTGGGAGCT-----  
 ---GTGTTCCCTTGGGTTCTTGGGAGCA---GCAGGAAGCACAATG---GGCGCGGCGTCG---  
 CTGACGCTGACGGTACAG---GCCAGACAA---GTATTG---TCTGGTATAGTGCAGCAACAAAAC---  
 AATTTG---CTGAGG---GCTATAGAGGCGCAACAGCATCTGTTGCAACTCACAGTCTGGGGCATT  
 >AF289549  
 TTCTACTGCAATACAACAATACTGTTTAATAATAGTGAATGGACATCAAATAATACAGGTAATACAAGTTCAG  
 GG-----  
 -----  
 GTAAATGATAGTACAATCATAATCCCATGCAGAATAAAACAAATTGTAAACATGTGGCAGAAAGTAGGAAAAG  
 CAATATATGCCCCCTCCCATTCAGGACTAATCAGCTGTTTCATCAAAC---  
 ATAACAGGACTATTGTTGACAAGAGATAGAGATGGTGGTGCAAATAAT-----  
 -----  
 -----  
 ACTAGTCAGAATGAGACCTTCAGACCTGGAGGAGGAGATATGAGAGACAATTGGAGAAGTGAATTATACAAAT  
 ACAAAGTAGTAAAAATTGAACCACTA---GGTCTAGCACCCACCAAGGCAAAGAGAAGAGTGGTG-----  
 -----GAAAGAGAAAAAAGAGCA---ATAGGA---CTGGGAGCT---  
 -----ATGTTCCCTTGGGTTCTTGGGAGCA---GCAGGAAGCAGCATG---GGCGCAGCGTCG---  
 CTGACGCTGACGGTACAG---GCCAGACAG---TTATTG---TCTGGTATAGTGCAACAGCAAAAC---  
 AATTTG---CTGAAG---GCTATAGAGGCGCAACAGCATCTGTTGCAACTCACAGTCTGGGGCATT  
 >AF289550  
 TTCTACTGCAATACATCAAAACTGTTTAATAGCAGTATAGAGATATCAAATACAAGTATAGGT-----  
 -----  
 -----  
 AATACAAGTATAATCAAACCTCCCATGCAAAATAAAACAAATTATAAACATGTGGCAGGGAGTAGGAAAAGCAA  
 TATATGCCCCCTCCCATTCAGGATTAATCAACTGTTTCATCAAAT---  
 ATTACAGGACTATTGTTAACAAGAGATGGTGGTGCAAATAATAGTAAT-----  
 -----  
 -----  
 CAGAGTGGGGAGATCTTCAGACCTGGAGGAGGAGATATGAGAGACAATTGGAGAAGTGAATTATATAAATATA  
 AAGTAGTAAGGATTGAACCACTA---GGTCTAGCACCCACCAAGGCAAAGAGAAGAGTGGTG-----  
 -----GAAAGAGAAAAAAGAGCA---ATAGGA---CTGGGAGCT-----  
 ---GTGTTCCCTTGGGTTCTTGGGAGCA---GCAGGAAGCACAATG---GGCGCAGCGTCG---  
 TTGACGCTGACGGTACAG---GCCAGGCAG---TTATTG---TCTGGTATAGTGCAACAGCAAAAC---  
 AATTTG---CTGAGG---GCTATAGAGGCGCAACAGCATATGTTGCAACTCACAGTCTGGGGCATT  
 >AY371149  
 TTCTATTGTAATACATCAGGCCTGTTTAATAGCAGTTGGAGTAGGGAGAATGGCAATGGCACAGACAATTGGA  
 ATATCACAACA-----  
 -----AACCACACG-----  
 AGCTCCAATGACACTATAACTCTCCCATGCAAAATAAAGCAAATTGTACATATGTGGCAGAGAGTAGGACAAG  
 CAATGTATGCCCCCTCCCATCCGAGGAGAAATAAGGTGTGTGTCAAAC---  
 ATTACAGGAATACTATTAAACAAGAGATGGTGGGAGAGATACAAAT-----  
 -----  
 -----  
 CATACTACCGATACCTTCAGACCTACAGGAGGAGATATGAGGGACAATTGGAGAAGTGAATTATATAGGTATA  
 AAGTAGTGGCAATTGAACCACTA---GGAGTAGCACCCACCAGGGCAAGAAGAAGAGTGGTG-----  
 -----GAGAGAGAAAAAAGAGCA---GTAGGG---ATAGGAGCT-----  
 ---GTGCTCCTTGGGTTCTTGGGAACA---GCAGGAAGCACTATG---GGCGCAGCGTCA---  
 ATAACGCTGACGGTACAA---GCCAGACAA---TTATTG---TCTGGCATAGTGCAACAGCAAGGC---  
 AATTTG---CTGAAG---GCTATCGAGGCTCAACAGCAACTGTTGAGACTCACTGTCTGGGGCATT  
 >KP718935  
 TTCTATTGCAATACATCAAACCTGTTTAATAGCAGTTGGAAAATTGGAAATAGCACTGCAAATAAACAAGTGGC-  
 -----  
 -----  
 ACAAATGACACTATAACTCTCCAATGTAGAATAAAGCAAATTGTACATATGTGGCAGAGAGTAGGACAAGCAA  
 TGTATGCCCCCTCCCATTCAGGAAAAATAAGGTGTGAATCAAAC---  
 ATTACAGGACTACTATTAAACAAGAGATGGTGGGAATAATAGTGCA-----

-----  
-----  
AATGAAACCTTCAGACCTACAGGAGGAGATATGAAGGACATTTGGAGAAGTGAATTATATAAGTATAAAGTAG  
TGGAAATTAAACCACTA---GGAGTAGCACCCACCAGGGCAAAAAGAAGAGTGGTG-----  
-----GAGAGAGAAAAAAGAGCA---GTTGGA---CTAGGAGCT-----  
GTACTCCTTGGGTTCTTGGGAACA---GCAGGAAGCACTATG---GGCGCGGCGTCA---  
ATAACGCTGACGGTACAG---GCCAGACAA---TTATTG---TCTGGTATAGTGCAACAGCAAAGC---  
AATTTG---CTGAAA---GCTATTGAGGCTCAACAGCAACTGTTGAAACTCACTGTCTGGGGCATT  
>KP718938  
TTCTATTGCAATACATCACAACCTGTTTAATAGCACTTGGGATAACAATACAACCTTGGGATAACAATACAACAC  
AGAATAAT-----  
-----  
AGCAGTAAGAATATAACTCTTCCATGCAAAATAAAGCAAATTGTAAGGATGTGGCAGAGAGTAGGACAAGCAA  
TGTATGCCCCCTCCCATCCAAGGAGAAATAAAGTGTTGAATCAAAC---  
ATTACAGGACTAATATTAACAACAGATGGT---ACGGGAAATAGC-----  
-----  
-----  
ACAAATGAGACCGTCAGACCTGCAGGAGGAGATATGAGGGACAATTGGAGAAGTGAGCTATATAAGTATAAAG  
TAGTGGAGATTAAACCACTA---GGAGTAGCACCCACCAGGGCAAAAAGAAGAGTGGTG-----  
-----GAGAGAGAAAAAAGAGCA---GTGGGA---CTAGGAACT-----  
TTGCTCCTTGGGTTCTTGGGAACA---GCAGGAAGCACTATG---GGCGCAGCGTCA---  
ATAACGCTGACGGTACAG---GCCAGACAA---TTATTG---TCTGGCATAGTGCAACAGCAAAGC---  
AATTTG---CTGAAG---GCTATTGAAGCTCAACAGCAACTGTTGAAGCTCACTGTCTGGGGCATT  
>KY658700  
TTCTATTGCAACACAACAAAGCTGTTTAATAGCACTTGGCAGTTTAATGATACTAATGGTACTTGGCGGGAAA  
ATGGCACT-----  
-----GAA---  
GACAAAAATGACACTATATATCTTCCATGCAGAATAAAGCAGATTGTAAGACTATGGCAGACAGTAGGACAAG  
CAATGTATGCCCCCTCCCATCCGAGGAGAAATAAGGTGTAATTCAAAT---  
ATTACAGGGTTGCTATTAACAAGAGATGGTGGACAGTCAAATGAGTCA-----  
-----  
-----  
AAGGTTAATGAGACCTTCAGACCTACAGGAGGAAATATGAAAGACAATTGGAGAAGTGAATTATATAGGTATA  
AGGTGGTGGAAATTAAACCACTA---GGAGTAGCACCCACCAAGGCAAGAAGAAGAGTGGTG-----  
-----CAGAGAGAAAAAAGAGCA---GTGGGA---ATGGGAGCT-----  
---GTACTCCTTGGGTTCTTGGGAGCA---GCAGGAAGCACTATG---GGCGTAGCGTCA---  
ATAACGCTGACGGTACAA---GCCAGACAA---TTATTG---TCTGGTATAGTGCAACAGCAAAGC---  
AATTTG---CTGAGG---GCTATTGAGGCTCAACAGCAATTGTTGAGACTCACTGTCTGGGGCATT  
>AF069945  
TTCTATTGTAATACATCAAGTCTGTTTAATAGCACTTGGGAAAATGAAAATACAACCTAGCAATGGGACTGAG-  
-----  
-----  
GAAAATGGCACTATAACTCTCCCATGCAGAATAAAGCAAATTGTAAATCTGTGGCAGAGAGTAGGACAAGCAA  
TGTATGCCCCCTCCCATCCAAGGAACTTAACATGTAACTCAAAC---  
ATTACAGGGCTACTATTAACAAGAGATGGTGGGAAAAATAACACT-----  
-----  
-----  
CATAATGAGACCTTCAGACCTACAGGAGGAGATATGAAGGACAATTGGAGAAGTGAATTATATAAATATAAAG  
TGGTAGAAATTAAACCACTA---GGAGTAGCACCCACCAGGGCAAAAAGAAGAGTGGTG-----  
-----GAGAGAGAAAAAAGAGCA---CTGGGA---ATAGGAGCT-----  
GTGCTCCTTGGGTTCTTGGGGACA---GCAGGAAGCACTATG---GGCGCGGCGTCA---  
ATAACGCTGACGGTACAG---GCCAGACAA---TTATTG---TCTGGCATAGTGCAACAGCAAAGC---  
GATTTG---CTGAAG---GCTATAGATGCACAACAGCAACTGCTAAAACCTCACTGTCTGGGGCATA  
>AF408631  
TTCTACTGCAATACATCAAACTGTTTAATGACACAACAACC-----  
-----  
-----  
AATGACACTATTATTCTCCCATGCAAAATAAAACAAATTGTAAATATGTGGCAGGAAGTGGGACGAGCAATGT  
ATGCCGCTCCCATCGCAGGAAGCATTACCTGTAGATCAAAT---  
ATTACAGGTCTACTATTGACAAGAGATGGTGGTCAGACTAATATTACTAATCAG-----ACT----

-----  
-  
GAGACTAATCAGACTACTGAGATCTTCAGACCTGGGGGAGGAGATATGAGAGACAATTGGAGAAGTGAATTAT  
ATAAATATAAAGTAGTAGAAATTGAGCCACTA---GGAGTAGCACCCACCAGGGCAAGAAGACAAGTGGTG--  
-----AGAAGAGAAAAAGAGCA---GTGGGA---  
ATGACAGCT-----GTGTTCTTTGGGTTCTTGCCAGCA---GCAGGAAGCACTATG---  
GGCGCAGCGTCA---ATAACGCTGACGGCACAG---GCCAGACAA---TTATTG---  
TCTGGAATAGTGCAACAGCAGAAC---AATCTG---CTGAGG---  
GCTATTGAAGCGCAACAGCATCTGTTGCAGCTCACAGTCTGGGGCATT  
>AF408629  
TTCTACTGCAATACATCAAACTGTTTGATGAAGGACTGTTTAATACAACAGAT-----  
-----  
-----  
GACAAATGACACTATTATTCTCCCATGTGCAATAAAACAAATTGTAAACATGTGGCAGGAAGTGGGACGAGCAA  
TGTATGCCGCTCCCATTGCAGGAAACATTAACTGTAACTCAACT---  
ATTACAGGTCTAATATTGACAAGAGATGGTGGGAAAAATACTACT-----  
-----  
-----  
GGGAATGAGACCTTCAGACCTGGGGGAGGAAATATGAAAAGACAATTGGAGAAGTGAATTATATAAATATAAGG  
TGGTAGAAATTCAACCACTA---GGAGTAGCACCCACCACGGCAAAGAGACAAGTGGTG-----  
-----CAGAGAGAAAGAAGAGCA---GTGGGA---ATGGGAGCT-----  
TTGTTCCCTTGGGTTCTTGGGAGCA---GCAGGAAGCACTATG---GGCGCGGCGTCA---  
ATAACGCTGACGGTACAG---GCCAGACAA---TTATTG---TCTGGAATAGTGCAACAGCAAAAC---  
AATTTG---CTGAGG---GCTATTGAAGCGCAACAGCATCTGTTGCAGCTCACAGTCTGGGGCATT  
>AY037266  
TTCTACTGTGATACATCAAACTGTTTCATGACACGCTGATTAATACCAATACATCCGATGACACT-----  
-----  
-----  
GCTAATGGCACTATAACTCTCCCATGTAGAATAAACTAATTGTAAACCTGTGGCAGGAAGTGGCACGAGCAA  
TGTATGCCGCTCCCATTGCAGGAAGCGTTACCTGTAACTCAAGT---  
ATTACAGGTCTACTATTGACAAGAGATGGTGGTCAGAAGAATAGT-----  
-----  
-----  
ACTAATGACACCTTCAGACCTGGGGGAGGAAATATGAGGGACAATTGGAGAAGTGAATTATATAAATATAAAG  
TAGTAGAAATTAAACCATTA---GGAATAGCTCCCACCAAGGCAAAAAGACAAGTGGTG-----  
-----AAGAGAGAAAGAAGAGCA---GTGGGA---ATAGGAGCG-----  
TTGTTCCCTTGGGTTCTTGGGAACA---GCAGGAAGCACTATG---GGCGCGGCGTCA---  
ATAACGCTGACGGTACAG---GCCAGACAA---TTATTG---TCTGGAATAGTGCAACAGCAGAAC---  
AATTTG---CTGAGG---GCTATTGAAGCGCAACAGCATCTGTTGCAGCTCACAGTCTGGGGCATT  
>AF385936  
TTCTACTGCAATACATCAGGACTGTTTAATGATACAATATCC-----  
-----  
-----  
AATGATACTATTATTCTCCCATGTAAAATAAAACAAATTGTAAACCTGTGGCAGGAAGTGGGACGAGCAATGT  
ATGCCGCTCCCATTGAAGGAAACATTACCTGTAACTCAAAT---  
ATTACAGGTCTACTATTGACAAGAGATGGTGGTCTTAATGAGACT-----  
-----  
-----  
AATCAGACTGAAACCTTCAGACCTGGGGGAGGAAATATGAAAGACAATTGGAGAAGTGAATTATATAAATATA  
AAGTGGTAGAAATTGAACCACTA---GGAGTAGCACCCACCAGGGCAAAAAGACAAGTGGTG-----  
-----ACGAGAGAAAAAGAGCA---GTGGGA---ATAGGAGCT-----  
---TTGTTCCCTTGGGTTCTTGGGAGCA---GCAGGAAGCACTATG---GGCGCGGCGTCA---  
GTGACGCTGACGGTACAG---GCCAGACAA---TTATTG---TCTGGAATAGTGCAACAGCAAAAC---  
AACTTG---CTGCAG---GCTATTGAAGCGCAACAGCATCTGTTGCAGCTCACAGTCTGGGGCATT  
>JN054280  
TTCTACTGCAATACATCAAACTGTTTAATAACACAAAAAAT-----  
-----  
-----  
AATGGCACTATTACTCTCCCATGTGCAATAAAACAAATTGTAAACCTGTGGCAGGAAGTGGGACGAGCAATGT  
ATGCCGCTCCCATTGCAGGAAACATTACCTGTAACTCAAAT---

ATTACAGGTCTGCTATTAACAAGAGATGGGGGACAAAGTTATAATAGTACTAAT-----AAC-----  
-----  
-  
AGTACTATTAATAGGACTGAGATCTTCAGACCTGGGGGAGGAAATATGAAAGACAATTGGAGAAATGAATTAT  
ATAAATATAAAGTGGTAGAAATTGAACCACTA---GGAATAGCACCCACCAAGGCAAAAAGACAAGTGGTG--  
-----AAGAGAGAAAAAAGAGCA---  
GTAGGAGTAATAGGAGCT-----ATGTTCCCTGGGTTCTTGGGAGCA---GCAGGAAGCACTATG---  
GGCGCAGCGTCA---ATAACGCTGACGGTACAG---GCCAGACAA---TTATTG---  
TCTGGAATAGTGCAACAGCAAAAC---AATTTG---CTGAGG---  
GCTATTGAAGCGCAACAGCATCTGTTGCAGCTCACAGTCTGGGGCATT  
>JN235963  
TTCTACTGCAATACATCAGGACTGTTTAATAATGACACAGTA-----  
-----  
-----  
TCCAATGGCACTATTACTCTCCCATGTCTGAATAAAACAAATTATAAACATGTGGCAGGAAGTGGGACGAGCAA  
TGTATGCCAATCCCATTGCAGGAAACATTACCTGTAACTCAAAT---  
ATTACAGGTCTACTATTGACAAGAGATGGTGGTGGTCATAGTAATGAA-----  
-----  
-----  
ACTAATCAGACTGAGATCTTCAGACCTGGGGGAGGAAATATGAAAGACAATTGGAGAAGTGAATTATATAAAT  
ATAAAGTAGTAGAAATTGAACCACTA---GGAGTAGCACCCACCAGGGCAAAAAGACAAGTGGTG-----  
-----AAGAGAGAAAAAAGAGCA---GTGGGA---CTAGGAGCT---  
-----GTGTTTCATTGGGTTCTTGGGAGCA---GCAGGAAGCACTATG---GGCGCAGCGTCA---  
GTAACGCTGACGGTACAG---GCCAGACAA---TTATTG---TCTGGAATAGTGCAACAGCAGAGC---  
AATTTG---CTGAAG---GCTATTGAAGCGCAACAGCATCTGTTGCGGCTCACAGTCTGGGGCATT  
>AY037272  
TTCTACTGCAATACATCAGGACTGTTTAATGAAAGCCTGATTAATGTCACA-----  
-----  
-----  
CAACCCAATGACATTACTCTCCCATGTCTGAATAAAACAAATTGTAAACCTGTGGCAGAAAGTGGGACGAGCAA  
TGTATGCCGCTCCCATTGCAGGAAGCATTATCTGTATCTCAAAT---  
ATTACAGGTCTACTATTGACAAGAGATGGTGGTCAGAATAATAGT-----  
-----  
-----  
ACTCCTGAGATCTTCAGACCTGGGGGAGGAAATATGAAAGACAATTGGAGAAGTGAATTATATAAATATAAAG  
TAGTAGAAATTGAACCACTA---GGAATAGCACCCACCGGGGCAAAAAGACAAGTGGTA-----  
-----AAGAGAGAAAAAAGAGCA---ATAGGA---ATGGGAGCT-----  
TTGTTCCCTTGGGTTCTTGGGAGCA---GCAGGAAGCACTATG---GGCGCGGCGTCA---  
ACAGCGCTGACGGTACAG---GCCAGACAG---TTATTG---TCTGGAATAGTGCAACAGCAGAAC---  
AATTTG---CTGAGA---GCTATTGAAGCGCAACAGCATCTGTTGCAGCTCACAGTCTGGGGCATT  
>AY371154  
TTCTATTGCAATACATCAGCCCTGTTTAATAGCGCTTGGAGAAATGATACTAACAGCACGCAGGTTTCGGGG-  
-----  
-----  
TCAAATGACAATATAACTCTCCCATGCAGAATAAAGCAATTTGTAAAGCTATGGCAGAGGGTGGGACAAGCAA  
TGTATGCCCCCTCCCATCCAAGGAGTAATAAGGTGCGAATCAAAC---  
ATTACAGGGCTACTATTAACAAGAGATGCTGAGGGTAATAATAGA-----  
-----  
-----  
ACAAATGAGACCTTCAGACCTGGAGGAGGAGATATGAGGGATAATTGGAGAAGTGAATTATATAAATATAAAG  
TAGTAAAAATTGAACCACTA---GGAGTAGCACCCAGCAGAGCAAGGAGAAGAGTGGTA-----  
-----GCAAGAGAAAAAAGAACA---GTTGGA---CTAGGAGCT-----  
GTCTTCCTTGGGTTCTTAGGAGCA---GCAGGAAGCACTATG---GGCGCAGCGTCA---  
CTGACGCTGACGGTACAG---GCCAGACAA---TTATTG---TCTGGCATAGTGCAACAACAGAAC---  
AATCTG---CTGATG---GCTATAGAGGCTCAACAGCACCTGTTGAAACTCACGGTCTGGGGCATT  
>DQ845388  
TTCTATTGCAATACATCAGCCCTGTTTAATAGCACTTGGGAAGGGAACAATACCAGCACGCAAGGGTCAAATG  
ACACA-----  
-----  
GGGTCAAATGACACTATAACTCTCCCATGCAGAATAAAACAAATTTGTAAATATATGGCAGAGAGTAGGACAAG

CAATATATGCCCCCCCCATCCAAGGAGTAATAAGGTGTGACTCAAAC ---  
ATTACAGGACTACTATTAACAAGAGATGGTGGGGATAATGATACTACT-----  
-----  
AGGGCAAATGAGACCTTCAGACCTGGAGGAGGAGATATGAAGGACAATTGGAGAAGTGAATTATATAAATACA  
AAGTAGTAAAAATTGAACCACTA---GGAGTAGCACCCACCAAGGCAAAGAGAAGAGTGGTG-----  
-----GCAAGAGAAAAAAGAGCA---GCA-----CTGGGAGCT-----  
---GTCTTCCTTGGGTTCTTAGGAGCA---GCAGGAAGCACTATG---GGCGCGGCGTCA---  
ATAACGCTGACGGTACAG---GCCAGACAA---TTATTG---TCTGGCATAGTGCAACAGCAGAGC---  
AATCTG---CTGATG---GCTATACAGGCTCAACAGCATATGTTGAAACTTACGGTCTGGGGCATT  
>DQ845386  
TTCTATTGCAATACATCAGAACTGTTTAATAGTGCATGGAGAAATGGGACCAGAGTGCGGGGGTCAACTAAC-  
-----  
-----  
ACAAGTGAAAATATAACTCTCCCATGCAGAATAAAGCAAATTGTAAAATTATGGCAGAGAGTAGGGCAGGCAA  
TATATGCCCCCTCCCATCCAAGGAGTAATAAGGTGTGAATCAAAC---  
ATTACAGGGCTACTATTAACAAGAGATGGTGGGAATAATAATGAGACA-----  
-----  
-----  
AATAAGACTGAGACCTTCAGACCTGGAGGAGGAGATATGAAGGACAATTGGAGAAGTGAATTATATAAATATA  
AAGTAGTAAAAATTGAACCACTA---GGAGTAGCACCCAGCAGAGCAAGGAGAAGAGTGGTG-----  
-----GCAAGAGAAAAAAGAGCA---GTTGGA---CTAGGAGCT-----  
---GTCTTCCTTGGGTTCTTAGGAGCA---GCAGGAAGCACTATG---GGCGCGGCGTCA---  
TTAACGCTGACGGTACAG---GCCAGACAA---TTGTTG---TCTGGTATAGTGCAACAGCAGAAT---  
AACCTG---CTGATG---GCTATAGAGGCTCAACAGCATATGTTGAAACTCACAGTCTGGGGCATT  
>DQ845387  
TTCTATTGTAATACATCAGAACTGTTTAATAGCACTTGGACAAATGACACTAACAGCACGCAGGGGTCAAAT-  
-----  
-----  
GACACAACGCCCATTATTCTCCCATGCAGAATAAAGCAAATTATAAATATGTGGCAGAGAGTAGGACAAGCAA  
TATATGCCCCCTCCCATTTGAAGGAGTAATAAGGTGTGAATCAAAC---  
ATTACAGGACTACTATTAACAAGAGATGGGGGTAATAACAGAACA-----  
-----  
-----  
AGTGAGATCTTCAGACCTGGAGGAGGGGATATGAGGGACAACCTGGAGGAGTGAATTATATAAATATAAAGTAG  
TAAAAATTGAGCCACTA---GGAGTAGCACCCAGCAAGGCAAGGAGAAGAGTGGTG-----  
-----ACGAGAGAAAAAAGAGCA---GTTGGA---ATAGGAGCT-----  
GTCTTCCTTGGGTTCTTAGGAGCA---GCAGGAAGCACTATG---GGCGCGGCGTCA---  
TTAACGCTGACGGTACAG---GCCAGAAAC---TTATTG---TCTGGTATAGTGCAACAGCAGAAC---  
AACCTG---CTGAGG---GCTATAGAGGCTCAACAGCAACTGTTGAAACTCACGGTCTGGGGCATT  
>MH705141  
TTCTACTGCAATACATCAGGCCTGTTTAATAGCAGTTGGGAAAATGACAATGCCAGCACAGGGTCAAATAACA  
CAGAG-----  
-----  
TCAAATGCCAATATAACTCTCCCATGCAAAATAAAGCAATTTGTAAATGTATGGCAGAGAGTAGGACAAGCAA  
TGTATGCCCCCTCCCATTTGCAGGATTAATAAGATGTGAATCAAAT---  
ATTACAGGACTATTATTAACAAGAGATAATGAGGGTAATAACAGG-----  
-----  
-----  
ACAAATGAGACCTTCAGACCCGGAGGAGGAGACATGAAGGACAATTGGAGAAGTGAATTATATAAGTATAAAG  
TAGTAAAAATTGAACCACTA---GGAGTAGCACCCAGCAAGGCAAGGAGAAGAGTGGTG-----  
-----GCAAGAGAAAAAAGAGCAGTTGTTGGA---CTAGGAGCT-----  
GTCTTCATTGGGTTCTTAGGAGCA---GCAGGAAGCACTATG---GGCGCGGCGTCA---  
TTAACGCTGACGGTACAG---GCCAGACAA---TTATTG---TCTGGCATAGTGCAACAACAGAAC---  
AATCTG---TTGATG---GCTATAGAGGCTCAACAGCATTTGTTGAAGCTCACGGTCTGGGGCATT  
>KP718924  
TTCTATTGCAATACATCAGGCCTGTTTAATAGTACTTGGGAATCTAACAATACCAGCACGTGCGGGTCAAATG  
ACACAGGG-----  
-----  
TCAAATGACACTATAACTCTCCCATGCAGAATAAAGCAATTTGTAAAGATGTGGCAGAGAGTAGGACAAGCAA

TATATGCCCCCTCCCATCCCAGGAGTAATACAGTGTAATTCAAAC ---  
ATTACAGGACTACTATTAGCAAGAGATGGTGGGGATGATAATACA -----  
-----  
-----  
ACAAATGAGACCTTCAGACCTATAGGAGGAGATATGAAGGACAATTGGAGAAGTGAATTATATAAATATAAAG  
TAGTAAAAATTGAACCATTA --- GGAGTAGCACCCAGCAAGGCAAGGAGAAGAGTGGTG -----  
-----GCAAGAGAAAAAAGAGCA --- ATCGGAGGACTAGGGGCT -----  
GTCTTCCTTGCGTTCTTAGGAGCA --- GCAGGAAGCACTATG --- GGCGCGGCGTCA ---  
CTGACGCTGACGGTACAG --- GCCAGACTA --- TTATTG --- TCTGGCATAGTGCAACAGCAGAAC ---  
AATCTG --- CTGAGG --- GCTATAGAGGCTCAACAACATCTGTTGAAACTCACGGTCTGGGGCATT  
>KP718926  
TTCTATTGCAATACAACAAAACCTGTTTAAATAGCACTTGGGACAACCTACACGCAAGGGTCAAATGAC -----  
-----  
-----  
ACAGAGGACCCTATAGTTCTCCCATGCAGAATAAAGCAATTTGTAAATATATGGCAGAGAGTAGGACAAGCAA  
TATATGCCCCCTCCCATCCAAGGAGTAATAAATTGTAGCTCAAAC ---  
ATTACAGGACTACTATTAACAAGAGATAATGATGAGGGTAGTAAT -----  
-----  
-----  
AGGGCAAATGAGACCTTCAGACCTGGAGGAGGAGATATGAGGGACAATTGGAGAAGTGAGTTATATAAATATA  
AAGTAGTAAAAATTGAACCACTA --- GGAGTAGCACCCAGCAGGGCAAGGAGAAGAGTGGTG -----  
-----GCAAGAGAAAAAAGAGCAATAGTTGGA --- ATAGGAGCT -----  
--- CTCTTCCTTGCGTTCTTAGGAGCA --- GCAGGAAGCACTATG --- GGCGCGGCGTCA ---  
CTAACGCTGACGGTACAG --- GCCAGACAA --- TTATTG --- TCTGGCATAGTGCAACAGCAGAGC ---  
AATCTG --- CTGAGG --- GCTATAGAGGCTCAACAGCATCTGTTGAAACTCACGGTCTGGGGCATT  
>AF460972  
TTCTATTGCAATACATCAGCCCTGTTTAAATAGCACTTGGGAAAATGACACTGTCAGCACGCAAGGGTCAAATG  
ACACA -----  
-----  
GGGTCAAATGACACTATAACTCTCCCATGCAGAATAAAGCAATTTGTAAACATGTGGCAGAGAGTAGGACAAG  
CAATGTATGCCCCCTCCCATCCAAGGAATAATAAGGTGTGAATCAAAC ---  
ATTACAGGACTACTATTATCAAGAGATGGTGGTGTGGGTAATAAT -----  
-----  
-----  
AGGACAAATGAGACATTCAGACCTGGAGGAGGAAATATGAAAGACAATTGGAGAAGTGAATTATATAAGTATA  
AAGTAGTAAAAATTGAACCATTA --- GGAGTAGCACCCAGCAGAGCGAGGAGAAGAGTGGTG -----  
-----GCAAGAGAAAAAAGAGCA --- GTAGTTGGACTAGGGGCT -----  
--- GTCTTCCTTGCGTTCTTAGGAGCA --- GCAGGAAGCACTATG --- GGCGTGCGTCA ---  
CTAACGCTGACGGTACAG --- GCCAGACAA --- TTATTG --- TCTGGCATAGTGCAACAACAGAAC ---  
AATCTG --- CTGATG --- GCTATAGAGGCTCAACAGCATCTGTTGAAACTCACGGTCTGGGGCATT  
>AF460974  
TTCTATTGCAATACATCAACCCTGTTTAAATAGCACTTGGGCAAATGACACAAAGGCAAATGACACAGGG ---  
-----  
-----  
TCAAATGACACTATAACTCTCCCATGCAGAATAAAGCAATTTGTAAATAAGTGGCAAAGAGTAGGACAATCAA  
TGTATGCCCCCTCCCATCCAAGGAACAATAAGGTGTGACTCAAAC ---  
ATTACAGGACTACTATTAACAAGAGATGGGGGTGATAATAGCCTA -----  
-----  
-----  
AATGAGACCTTCAGACCTGGAGGAGGAGATATGAGGGACAATTGGAGAAGTGAATTATATAAATATAAAGTAG  
TAAAAATTGAACCACTA --- GGAGTAGCACCCAGCAAGGCAAGGAGAAGAGTGGTG -----  
-----ACAAGAGAAAAAAGAGCA --- GTGGGA --- CTAGGGGCT -----  
GTCTTCCTTGCGTTCTTAGGAGCA --- GCAGGAAGCACTATG --- GGCGCGGCGTCA ---  
CTAACGCTGACGGTACAG --- GCCAGACAA --- TTATTG --- TCTGGCATAGTGCAACAACAGAAC ---  
AATCTG --- CTGAGG --- GCTATAGAGGCTCAACAGCATCTGTTGAAACTCACGGTCTGGGGCATT  
>AF450097  
TTCTATTGTAATACAACAAAATTGTTTAAACAGTACTTGGACTGTGAATGGAACCTACAAATACTACAAAT ---  
-----  
-----  
AACAAATGACACAATCACACTCCCATGCAAAATAAAACAAATTATAAACATGTGGCAGGAAGTAGGAAAAGCAA

TGTATGCCCCCTCCCATCAGCGGTCAAATTAGATGCTCATCAAAT ---  
 ATTACAGGGCTGCTATTAGTAAGAGATGGTGGTAATAGTAACGAG-----  
 -----  
 -----  
 ACCGAGATCTTCAGACCTGGAGGAGGAAATATGAAGGACAATTGGAGAAGTGAATTATATAAATATAAAGTAG  
 TAAAAATTGAACCATTA---GGAGTAGCACCCACCAGGGCAAGGAGAAGAGTGGTG-----  
 -----CAAAGAGAAAAAAGAGCA---GTGGGA---ATAGGAGCT-----  
 TTGCTCATTGGGTTCTTGGGAGCA---GCAGGAAGCACTATG---GGCGCAGCGTCA---  
 ATGACGTTGACGGTACAG---GCCAGACAA---TTACTG---TCTGGTATAGTGCAACAGCAGAAC---  
 AATCTG---CTGAGG---GCTATTGAGGCGCAACAGCATATGTTGCAACTCACAGTCTGGGGCATA  
 >JN248351  
 TTCTACTGTAATACATCACAACTGTTTAATAGTACATGGAATAATACTGCAGGAAAATTCTAATAATGAT----  
 -----  
 -----  
 ACCAATACCACTATCACGCTCCCTTGCAGAATAAGACAAATTGTAAATATGTGGCAGGAAGTAGGAAGAGCAA  
 TGTATGCCCCCTCCCATTGAAGGACAAATTAGCTGTTTCATCAAAT ---  
 ATTACAGGGTTGCTATTAACAAGAGATGGTGGTCATAACAATGTTAGC-----  
 -----  
 -----  
 AATACCACCGAGACCTTCAGACCTGGAGGAGGAGATATGAGGGACAATTGGAGAAGTGAATTATATAAATATA  
 AAGTAGTAAAAATTGAACCATTA---GGAGTAGCACCCACCAAGGCAAAGAGGAGAGTGGTG-----  
 -----CAAAGAGAAAAAAGAGCA---GTGGGAACGATAGGAGCT-----  
 ---GTGTTCCCTTGGGTTCTTGGGAGCA---GCAGGAAGCACTATG---GGCACAGCGTCA---  
 ATAACGCTGACGGTACAG---GCCAGACAA---TTGTTG---TCTGGTATAGTGCAACAGCAGAGA---  
 AATTTG---CTGAGG---GCCATTGAGGCGCAACAGCATCTGCTGCAACTCACAGTCTGGGGCATC  
 >KT022406  
 TTCTATTGCAATACATCAAGCCTGTTTAATGGCACATGGAACAGGGCTAACTACACAATGGAG-----  
 -----  
 -----  
 AATGACACTATTATGAATATCACATGCAGAATAAAACAAATTATAAACATGTGGCAGAGAGTAGGACAAGCAA  
 TGTATGCCCCCTCCCATTGCAGGAGTAATAAAGTGTACATCAAAC ---  
 ATTACAGGAATAATATTGACAAGAGATGGTGGGAACGGGAACAACAGT-----  
 -----  
 -----  
 ACCAACAGTACAGAGACCTTCAGGCCTGGAGGAGGAGATATGAGAGACAATTGGAGAAGTGAATTATATAAGT  
 ATAAAGTAGTAAAAATTGAACCATTA---GGAGTAGCACCCACCAAGGCAAAGAGAAGAGTGGTG-----  
 -----GAGAGAGAAAAAAGAGCA---GTTGGA---CTGGGAGCT---  
 -----GTCTTCCTTGGGTTCTTGGGAGCA---GCAGGAAGCACTATG---GGCGCAGCGTCA---  
 ATAACGCTGACGGTACAG---GCCAGACAA---TTATTG---TCTGGCATAGTGCAACAGCAAAGC---  
 AATTTG---CTGAAG---GCTATAGAGGCTCAACAACATCTGTTGAGACTCACGGTCTGGGGCATT  
 >AY945736  
 TTCTATTGCAATACATCAGACCTGTTTAATAGCACGTGGACCAACGACACGTGGGGGGAAAATGGCACTGCCA  
 ACGAC-----  
 -----TCA---  
 AAGTCAAATGACACTATAATGCTCCCATGCAGGATAAAACAAATTATAAACATGTGGCAGAGAGTAGGACAAG  
 CAATGTATGCCCCCTCCCATTCAGGAATAATAAAGTGTACATCAAAC ---  
 ATTACAGGAATAATATTGACAAGAGATGGTGGAGAGAACGATAGT-----  
 -----  
 -----  
 ACAGAGACCTTCAGACCTGGAGGAGGAGATATGAGAGACAATTGGAGAAGTGAATTATATAAGTATAAAGTAG  
 TAAACTTGAACCACTA---GGAGTAGCACCCACCAAGGCCAGGAGAAGAGTGGTG-----  
 -----GAGAGAGACAAAAGAGCA---GTTGGA---CTGGGAGCT-----  
 TTCTTCCTTGGGTTCTTGGGAGCA---GCAGGAAGCACTATG---GGCGCAGCGTCA---  
 CTAACGCTGACGGTACAG---GCCAGACAA---TTATTG---TCTGGCATAGTGCAACAGCAAAGC---  
 AATTTG---CTGAAG---GCTATAGAGGCTCAACAACATCTGTTGAGACTCACAGTCTGGGGCATT  
 >AF286239  
 TTCTATTGCGATACATCAGGCCTGTTTAATAGCACGTGGCCTGCCAATGCATCAAGGGAGAATGAGGAG----  
 -----  
 -----  
 AAAGATCGCAATGTGACTCTCCCATGCAGAATAAAACAAATTGTAAACATGTGGCAGAGAGTAGGACGAGCAA

TGTATGCCCCCTCCCATTAACGGAACAATAAAGTGTACATCCAAC ---  
 ATTACAGGAATGATATTAACAAGAGATGGG --- AACAGTGGGGGCAAT -----  
 -----  
 -----  
 GCAACCAATGAGACCTTCAGACCTGGAGGAGGAGATATGAGGGACAATTGGAGAAGTGAATTATATAAGTATA  
 AAGTAGTAAAACTAGAACCACTA --- GGAGTAGCACCTACCAGGGCAAGAAGAAGAGTGGTG -----  
 ----- GAGAGGGAAAAAAGAGCA --- GCA ----- GTTGGACTG -----  
 --- TTCTTCCTTGGGTTCTTGGGAGCA --- GCAGGAAGCACTATG --- GGCGCGGCGTCA ---  
 GTGACGCTGACGGTACAG --- GCCAGACAA --- TTATTG --- TCTGGCATAGTGCAACAGCAAAGC ---  
 AATTTG --- CTGAAG --- GCTATAGAGGCTCAACAGCATATGTTGAGACTCACGGTCTGGGGCATT  
 >EU581825  
 TTCTACTGCAATACATCAGGATTGTTTAATAACTCAGTATTC -----  
 -----  
 -----  
 AATAATAACACTATCACTCTCCCATGTGCGAATAAAACAAATTGTAAACATGTGGCAGGAAGTGGGACGAGCAA  
 TGTATGCCGCTCCCATTTGCAGGAAACATTGCCTGTAGCTCAAAT ---  
 ATTACAGGTCTACTATTGACAAGAGACGGTGGTTGTCAGAACCAGAGCAAT -----  
 -----  
 -----  
 ACTAACTGTACAGAGACCTTCAGACCTTGGGGAGGAAATATGAAAGACAATTGGAGAAGTGAATTATATAAAAT  
 ATAAAGTAGTAGAAATTGAACCATTA --- GGAATAGCACCCACCAAGGCAAAGAGAAGAGTGGTG -----  
 ----- CAGAGAGACAAAAGAGCA --- GTGGGA --- TTGGGAGCT ---  
 ----- ATGTTTCCTTGGGTTCTTGGGAGCA --- GCAGGAAGCACTATG --- GGCGCAGCGTCA ---  
 ATAACGCTGACGGTACAA --- GCTAGACAA --- TTATTG --- TCTGGAATAGTGCAACAGCAAAAC ---  
 AATTTG --- CTGAGG --- GCTATTGAAGCGCAACAGCATATGTTGCAGCTCACAGTCTGGGGCATT  
 >AY037281  
 TTCTACTGCAATACATCAAACTGTTTAATGACTCCCGGGATAATGACACAGAA -----  
 -----  
 -----  
 TCCAATGACACTATCATTCTCCCATGTGCGAATAAAACAAATTGTAAACAGGTGGCAGGAAGTAGGACAAGCAA  
 TGTATGCCGCTCCCATTTGCAGGAAACATTGTTTGTAACTCAAAT ---  
 ATTACAGGTCTACTATTGACAAGAGATGGTGGTCAGGGAAATGGT -----  
 -----  
 -----  
 AGTGGACCAGAAATCTTCAGACCTGAGGGAGGAAATATGAAAGACAATTGGAGAAGTGAATTATATAAAATACA  
 AAGTAGTAGAAATTGAACCATTA --- GGAGTAGCACCCACCAAGGCAAAGAGAAGAGTGGTG -----  
 ----- CAGAGAGAAAAAAGAGCA --- GTGGGA --- ATGGCAGCT -----  
 --- GTGTTCAATTGGGTTCTTGGGAGCA --- GCAGGAAGCACTATG --- GGCGCAGCGTCA ---  
 ATAACGCTGACGGTACAG --- GCCAGACAA --- TTATTG --- TCTGGAATAGTGCAACAGCAGAGC ---  
 AATCTG --- CTGAGG --- GCTATTGAAGCGCAACAGCATATGTTGCAGCTCACAGTCTGGGGCATT  
 >EU581827  
 TTCTACTGCAATACATCAGGATTGTTTAATGACACAGTATCT -----  
 -----  
 -----  
 AATGGCACTATCACTCTCCCATGTAAAATAAAACAAATTGTAAACATGTGGCAGGAAGTGGGAAGAGCAATGT  
 ATGCCGCTCCCATTTGCAGGAAAAATTACCTGTAACTCAAGT ---  
 ATTACAGGTCTTCTATTGACAAGAGATGGTGGTAGTAATACAACA -----  
 -----  
 -----  
 GGCAACACAGAGACCTTCAGACCTGGGGGAGGAGATATGAGAGACAATTGGAGAAGTGAATTATATAAAATATA  
 AAGTAGTAGAAATTCAACCAATA --- GGAGTAGCACCCACCCGCGCAAAAAGAAGAGTGGTG -----  
 ----- CAAAGAGAAAAAAGAGCA --- GCA ----- TTAACAACT -----  
 --- ATGTTCCCTTGGGTTCTTGGGAGCA --- GCAGGAAGCACTATG --- GGCGCAGCGTCA ---  
 ATAGCGCTGACGGTACAG --- GCCAGACAA --- TTATTG --- TCTGGAATAGTGCAACAGCAAAGC ---  
 AATTTG --- CTGAGA --- GCTATTGAAGCGCAACAACATATGTTGCAGCTCACAGTCTGGGGCATT  
 >KP718931  
 TTCTATTGTGATACAACACAACTGTTTAATAGTACCTGGGATAAGAGTACCTGGAATAACACCAATAGCAGCT  
 ATGAGGGA -----  
 -----  
 AATGGAGATGATACTATTACATTGCAGTGCAAAATAAAACAAATTGTAAACATGTGGCAGAGAGTAGGACAAG

CAATGTATGCCCCCTCCCATCGCGGGAAATATTACATGTGTATCAAAT---  
ATTACAGGACTAATATTGACAAGTGACTTTGTTAATGCAACTACA-----  
-----  
-----  
GATGTGACCTTCAGACCTGGAGGAGGAGATATGAGGGACAATTGGAGAAGTGAATTATATAAATATAAAGTGG  
TGAAAATTGAACCACTA---GGAGTAGCACCCCTCTAAGGCAAAGAGAAGAGTGGTG-----  
-----GAGAGAGAAAAAAGAGCA---ATTGGA---ATAGGAGCT-----  
GTCTTCCTTGGGTTCTTAGGAGCA---GCAGGAAGCACTATG---GGCGCGGCGTCA---  
ATAACGCTGACGGTACAG---GCTAGACAA---TTATTG---TCTGGTATAGTGCAACAGCAAAGC---  
AATTTG---CTGAGG---GCTATAGAGGCTCAACAGCATCTGTTGAAACTCACGGTCTGGGGCATT  
>AF377959  
TTTTATTGTAATACAACAAACCTGTTTACATGGGATAGCACCACCAATGGCACCAATGGCAACTACACAGTAA  
GT-----  
-----  
AATAATGATACTATTACACTGCAATGCAGAATAAAACAAATTATAAACATGTGGCAGAGAGTAGGACAAGCAA  
TGTACGCTCCTCCCATCGAAGGAAGCATTACATGTGTATCAAAT---  
GTTACAGGACTAATATTGACAAGTGACTTTGTTAATAAGTCAACA-----  
-----  
-----  
GAGGAGGTGACCTTCAGACCTGGAGGGGGAGATATGAGAGACAATTGGAGAAGTGAATTATATAAATATAAAG  
TAGTGAAAATTGAACCACTA---GGAGTAGCACCCACTAAGGCAAAGAGAAGAGTGGTG-----  
-----GGGAGAGAAAAAAGAGCA---GTTGGA---CTAGGAGCT-----  
GTCTTCCTTGGGTTCTTAGGAGCA---GCAGGAAGCACTATG---GGCGCGGCGTCA---  
ATAACGCTGACGGTACAG---GCTAGACAA---TTATTG---TCTGGTATAGTGCAACAGCAAAGC---  
AATTTG---CTGAGG---GCTATAGAGGCTCAACAGCATCTGTTGAAACTCACGGTCTGGGGCATT  
>EU743963  
TTCTATTGCAATACATCAGGACTGTTCAATAGCACTTGGACTGACAACACGACAGAATTAAATAGCACGGATG  
GC-----  
-----  
AATATAACTCATATAATTCTTCCGTGCAGAATAAAGCAAATTATAAATATGTGGCAGAGAGTAGGACAAGCAA  
TGTATGCCCCCTCCCATCCCAGGAATAATAAGGTGTGAGTCAAAC---  
ATTACAGGATTACTATTGACAAGAGATGGTGGGGTTACTGATAACAGT-----  
-----  
-----  
ACAGAAGATGAGACTTTCAGACCTGGAGGAGGAGATATGAGAGACAATTGGAGAAGTGAATTATATAAATATA  
AAGTAGTACAAATTGAACCACTA---GGAGTAGCACCCACCAAGGCAAGGAGAAGGGTGGTG-----  
-----GAGAGAGAAAAAAGAGCA---GTTGCTGGACTTGGAGCT-----  
---GTCCTCTTTGGGTTCTTAGGAGCA---GCAGGAAGCACTATG---GGCGCGGCGTCA---  
ATAACGCTGACGGTACAG---GCCAGACAA---TTATTG---TCTGGCATAGTGCAACAGCAAAGC---  
AATTTG---CTGAAT---GCTATAGAGGCTCAACAGAATCTGTTGAGACTCACGGTCTGGGGCATT  
>AY371165  
TTCTATTGTAATACAGCAAGCCTGTTTAAACAGTACTTGGGGACCAGGGTCAAATAACACGAATGACCCTAGTA  
AC-----  
-----  
ACGAGTGACACTATAATTCTCCCGTGCAGAATAAAGCAAATTATAAATATGTGGCAGAGAGCAGGACAAGCAA  
TGTATGCCCCCTCCCATCCCAGGAATAATAAAGTGTGAATCAAAC---  
ATTACAGGACTACTATTGACAAGAGATGGTGGGGATAATAATAGT-----  
-----  
-----  
ACAAATGAGACTTTCAGACCTGGAGGAGGAGATATGAGAGACAATTGGAGAAGTGAATTATTTAAATATAAAG  
TAGTAAAAATTGAACCACTA---GGAGTAGCACCCACCAAGGCAAAGAGAAGAGTGGTG-----  
-----GAAAGAGAAAAAAGAGCA---GTTGGA---TTTGGAGCT-----  
GTCTTCCTTGGGTTCTTAGGAGCA---GCAGGAAGCACTATG---GGCGCGGCGTCA---  
ATAACGCTGACGGTACAG---GCCAGACAA---TTATTG---TCTGGCATAGTGCAACAGCAAAGC---  
AATTTG---CTGAGG---GCTATAGAGGCTCAACAGCATATGTTGAGACTCACAGTCTGGGGCATT  
>JN864049  
TTCTATTGCAATACATCAGGCCTGTTTAAATAGCACTTGGCATAATAATGACACTGGCAGTGGGGCAGAGTACC  
AGAGC-----  
-----  
ACGAATGATAGTATAACTCTCCCGTGCAAAATAAAGCAAATTATAAATATGTGGCAGAGAGTAGGACAAGCAA

TGTATGCTCCTCCCATCCCAGGAATAATAGAGTGTAAGTCAAAC ---  
 ATTACAGGACTACTGTTGACACGAGATGGTGGAATGGTAGTGAC -----  
 -----  
 AGTGCAAATGAGACTTTCAGACCTGGAGGAGGAGATATGAGAGACAATTGGAGAAGTGAATTATATAAATATA  
 AAGTAGTAAAAATTGAACCACTA --- GGAGTAGCACCCACTAAGGCAAAGAGAAGGGTGGTGGA --- AGA ---  
 -----  
 --- AAGGTGGTGGAGAGAAAAGAAAAGAGCA --- ATTGGA --- TTTGGAGCT -----  
 --- GTCTTCCTTGGGTTCTTAGGAGCA --- GCCGGAAGCACTATG --- GGCGCGGCGTCA ---  
 ATAACGCTGACGGTACAG --- GCCAGACAA --- TTATTT --- TCTGGCATAGTGACAGCAGCAAAGC ---  
 AATTTG --- CTGAGG --- GCTATAGAGGCTCAACAACAAATGTTGAAACTCACGGTCTGGGGCATT  
 >JN864050  
 TTCTATTGCAATACATCAGGCCTGTTTAATAGCACTTGGTATCCAAATGGCAGCATGACAGGGTATACAAATG  
 ACACAAAT -----  
 -----  
 GACAAATGGCACCATAATTCTCCCTTGCAGAATAAAGCAGGTTATAAATATGTGGCAGAGAGCAGGAAAAGCAA  
 TGTATGCCCCCTCCCATCCCAGGAGTAATAAGGTGTGAGTCAAAC ---  
 ATTACAGGACTACTATTAACAAGAGATGGTGGGATAAACAGTACA -----  
 -----  
 -----  
 GAGGAGACTTTTAGACCTGGAGGAGGAGATATGAGAGACAATTGGAGAAGTGAATTATATAAATATAAGGTAG  
 TAAAAATTGAACCACTA --- GGAGTAGCACCCACCCACTCAATGAGAAGAGTGGTG -----  
 -----  
 --- CAGAGAGAAAAAGAGCA --- GTTGA --- TTGGGAGCT -----  
 GTCTTCCTTGGGTTCTTAGGAGCA --- GCAGGAAGCACTATG --- GGCGCGGCGTCA ---  
 ATAACGCTGACGGCACAG --- GCCAGACAA --- TTATTG --- TCTGGCATAGTGCAACAGCAAAGC ---  
 AATTTG --- CTGAGG --- GCTATAGAGGCTCAACAGAATATGTTGAGACTCACGGTCTGGGGCATT  
 >JN864051  
 TTCTATTGCAATACATCAGGCCTGTTTAATAGCACTTGGAAATTGGAATGACACTGTCAACACGACAGAGAACA  
 ATGAT -----  
 -----  
 -----  
 ACAAACGGCACTATAACTCTCCAGTGCAGAATAAAGCAAATTATAAATATGTGGCAGAGAGTAGGACAAGCAA  
 TGTATGCCCCCTCCCATCCCAGGAGTAATACGATGTGAGTCAAAC ---  
 ATTACAGGAATACTATTGACAAGGGATGGTGGGACTAATGACAGT -----  
 -----  
 -----  
 AGTCTAAATGAGACTTTCAGACCTGGGGGAGGAGATATGAAAGACAATTGGAGAAGTGAATTATATAAATATA  
 AAGTAGTAAAAATTGAACCACTA --- GGAGTAGCGCCCAAGGCAAGGAGAAGGGTGGTG -----  
 -----  
 --- CAGAGAGAAAAAGAGCA --- ATTGGA --- TTTGGAGCT -----  
 --- TTCTTCCTTGGGTTCTTAGGAGCA --- GCAGGTAGCACTATG --- GGCGCGGCGTCA ---  
 CTGACGCTGACGGTACAG --- GCCAGACAA --- TTATTA --- TCTGGCATAGTGCAACAGCAAAAC ---  
 AATTTG --- CTGAGG --- GCTATAGAGGCTCAACAACAGATGTTGAGACTCACAGTCTGGGGCATT  
 >JN864058  
 TTCTATTGCAATACATCAGGCCTGTTCAATAGCACTTGGAAATAATAGCACTTGGAAACAACAGACATGTTTA  
 ATAGCACT -----  
 -----  
 --- GGG ---  
 AATGAGAATGAGAACATAACTCTCCCATGCAGAATAAAGCAAATTATAAATATGTGGCAGAGAACAGGACAAG  
 CAATGTATGCCCCCTCCCATCCCAGGAATAATAAAGTGTGAGTCAAAC ---  
 ATTACAGGACTACTATTGACAAGAGATGGTGGGATTAATAACAAT -----  
 -----  
 -----  
 TCAAATGAGACTTTTAGACCTGGAGGAGGAGATATGAAAGACAATTGGAGAAGTGAATTATACAAATATAAAG  
 TAGTAAAAATTGAACCACTA --- GGAGTAGCACCCACCAGGCAAGGAGAAGGGTGGTG -----  
 -----  
 --- CAGAGAGAAAAAGAGCA --- GTTGA --- TTGGGAGCT -----  
 GTCTTCCTTGGGTTCTTAGGAGCA --- GCAGGAAGCACTATG --- GGCGCGGCGTCA ---  
 CTAACGCTGACGGTACAG --- GCCAGACAA --- TTGTTG --- TCTGGCATAGTGCAACAGCAAAAC ---  
 AATTTG --- CTGCAG --- GCTATAGAGGCTCAACAGCAGATGTTGAGACTCACGGTCTGGGGCATT  
 >FM877780  
 TTCTATTGTAATACATCAGGCCTGTTTAATAGCACTTGGAAAAATGGAGTTTGGGAAAGGGCAGGATGAACC  
 AGACA -----  
 -----  
 --- AAT ---  
 GACACGAATGAAAACATAACACTCCCATGCAGGATAAAAACAAATTGTAAACATATGGCAGGAAGTAGGACAAG

CAATGTATGCCCCCTCCAGTTGCAGGAGAGATACAGTGTGTAACAAAC---  
ATTACAGGAATAATATTGACAAGAGATGGGGGAATTAATAATGAG-----  
-----  
-----  
ACTACTGAGACCTTCAGACCTGGAGGAGGAAATATGAAGGACAATTGGAGAAGTGAGTTATACAAATATAAAG  
TAGTAAACTTGAACCACTA---GGAGTAGCACCCGACAAGGCAAAGAGAAGAGTGGTG-----  
-----GAGAGAGAAAAAAGAGCA---GTTGGA---CTGGGAGCT-----  
CTTTTCCTTGGGTTCTTAGGAACA---GCAGGAAGCACTATG---GGCGCGGCGTCA---  
ATAACGCTGACGGTACAG---GCCAGACAA---TTATTG---TCTGGCATAGTGCAACAGCAAAGC---  
AATTTG---CTGAGG---GCTATAGAGGCTCAACAGCATGTGTTGAAGCTCACCGTCTGGGGCATT  
>FM877781  
TTCTATTGTGATACATCAGGACTGTTTAATAGCAGTTGGCCAATTAATAGCAGCTGGCCAATAATAACAGTG  
AG-----  
-----  
ACAAATGAAACAATAACACTCCCATGCAGGATAAAACAAATTGTAAACATGTGGCAAGGAGTAGGACAAGCAA  
TGTATGCCCCCTCCTATCGAAGGAGAGATACAGTGTATATCAAAT---  
ATTACAGGAATAATATTGACAAGAGATGGGGGAAATAACAGTAAC-----  
-----  
-----  
ACTGAAATCTTCAGACCTGGAGGAGGAAATATGAAGGACAATTGGAGAAGTGAATTATATAAGTATAAGGTAG  
TTCAAATTGAACCGCTG---GGAGTAGCACCCAGCGAGGCAAGGAGAAGAGTGGTG-----  
-----CAGAGAGAAAAAAGAGCA---GTAGGA---ATGGCAACT-----  
CTTTTCCTTGGGTTCTTGGGAACA---GCAGGAAGCACTATG---GGCGCAGCGTCA---  
ATAACGCTGACGGTACAG---GCCAGAAAA---TTATTG---TCTGGCATAGTGCAACAGCAAAGC---  
AATTTG---CTGAAG---GCTATAGAAGCTCAACAGCATATGTTGAAGCTCACAGTCTGGGGCATT  
>FM877782  
TTCTATTGTAACACATCAGGCCTGTTTAATAGAACTTGGAAAGATGGCAATTGGACCACCCAGGAAAATGGG-  
-----  
-----  
ACAAATGAAAACATAACACTCCCATGCAGGATAAAACAAATTGTACGCATGTGGCAAGAAGTAGGACAAGCAA  
TGTATGCCCCCTCCTGTGCGAGGAATGATACAGTGTATATCAAAT---  
ATTACAGGATTAATATTGACAAGAGATGGGGGGAAAGATAAGAAT-----  
-----  
-----  
GATACTGAGATCTTCAGACCTGGAGGAGGAAATATGAAAGACAATTGGAGAAGTGAATTATATAAGTATAAAG  
TAGTACAAATTGAGCCACTA---GGATTAGCACCTACCAAGGCAAGGAGAAGAGTGGTG-----  
-----GAGAGAGAAAAAAGAGCA---GTTGGA---ATGGGAGCT-----  
CTTTTCCTTGGGTTCTTGGGAGCA---GCCGGAAGCACTATG---GGCGCGGCGTCA---  
ATAACGCTGACGGTACAG---GCCAGACAA---TTGCTG---TCTGGCATAGTGCAACAGCAAAGC---  
AATTTG---CTGAGG---GCTATAGAAGCTCAACAGCATATGTTGAAGCTCACAGTCTGGGGCATT  
>AM851091  
TTCTATTGCGATACAAAAGAACTGTTTAATAGTACCTGGAATAAGAGCACCAATGGCACCTGGACTAAGAACA  
GCACCACTGGC-----  
-----GAGACA-----  
GGGAACACAGCAAATATTACACTGCAATGCAGAATAAAACAAATTGTAAACATGTGGCAGAGAACAGGACAAG  
CAATATATGCCCCCTCCTATTAGAGGAATAATTCAGTGTGAATCAAAT---  
ATTACAGGGATACTATTGACAAGAGATAGG---CATAATCATACT-----  
-----  
-----  
AATGAGACCTTCAGACCTGGAGGAGGAAATATGAAGGACAATTGGAGAAATGAATTATATAAATATAAAGTAG  
TAGAAATTGAACCACTA---GGAATAGCACCCACCAGGGCAAAAAGGAGAGTGGTG-----  
-----GAGAGAGAAAAAAGAGCA---GTGGGA---ATAGGAGCT-----  
TTGATCTTTGGGTTCTTAGGAGCA---GCAGGAAGCACTATG---GGCGCGGCGTCA---  
ATAACGCTGACGGTACAT---GCCAGACAA---TTATTG---TCTGGTATAGTGCAACAGCAAAGC---  
AATTTG---CTGAGG---GCTATAGAGGCGCAACAGCATATGTTGCAACTCACAGTCTGGGGCATT  
>JF804811  
TTCTACTGTAATACATCACTGCTGTTTAATACTACTTGGGAGAAGCATAATACCACTCAACCTTGGATAATGA  
AAAATGAACCT-----  
-----GGGTAT-----  
GATGTGAATAGGAATATCACACTCCACTGCAGAATAAAACAAATTATAAACAGGTGGCAGGAAGTAGGAAAAAG

CAATGTATGCCCCCTCCCATCAGTGGAATAATTAAGTGTATTATCAAAT---  
ATTACAGGGCTGTTACTAACAAGAGATGGAGGTCCAAACGGGACC-----  
-----  
-----  
CAAAATGAGACCTTCAGACCTCAAGGAGGAGATATGAGAGACAATTGGAGAAGTGTATTATATAAAATATAAAG  
TAGTAAAAAATTGAGCCATTA---GGGGTAGCACCCACCAGGGCAAAGAGAAGAGTGGTG-----  
-----CAGAGAGAAAAAAGAGCA--GTGGGA---CTGGGAGTC-----  
TTGTTTCCTTGGGTTCTTGGGAGCA--GCAGGAAGCACTATG--GGCGCAGCATCA---  
ATAACGCTGACGGTACAG---GCCAGACAG---TTATTG---TCTGGTATAGTGCAACAGCAAAAC---  
AATTTG---CTGAGG---GCTATTGAGGCGCAACAGCATCTGTTGCAGCTCACAGTCTGGGGCATC  
>AY455778  
TTCTACTGCAATACAACACAGCTGTTTATTAGTACTTGGCTGTATAATACTACTTGGACACGGCCGAGTCAAA  
AG-----  
-----  
TGCTATGATACTATCACAATCCCATGCAGAATAAAACAAATTATAAACAGGTGGCAGGAAGTAGGAAAAGCAA  
TGTATGCCCCCTCCCATCAAAGGAAATATTAGCTGTTTCATCAAAT---  
ATTACAGGGTTGCTATTAACAAGAGATGGTGGAAATAACAACGACACG-----  
-----  
-----  
AACGGGACCGAGACCTTCAGACCTGGAGGAGGAGATATGAGGGACAATTGGAGAAGTGAATTATATAAAATATA  
AAGTAGTAAAAATTGAGCCATTA---GGAATAGCACCCAACAAGGCAAAGAGAAGAGTGGTG-----  
-----CAGAGAGAAAAAAGAGCA--GTGGGA---ATAGGAGCT-----  
---CTGTTTCCTTGGGTTCTTGGGAGCA--GCAGGAAGCACTATG--GGCGCAGCGTCA---  
ATGACGCTGACGGTACAA---GCCAGACAA---TTATTG---TCTGGTATAGTGCAACAGCAAAGC---  
AATTTG---CTGAGA---GCTATTGAGGCGCAACAGCATCTGTTGCAGCTCACAGTCTGGGGCATC  
>EF158043  
TTCTATTGTAATACATCAGGCCTGTTTAATAGCACTTGGAAATATCAATGGCAGCGGAGGGTTTAATAGC---  
-----  
-----  
ACAAATGACAACATAACTCTCCCATGTAGAATAAAGCAAATTATAAATATGTGGCAGAGAACAGGACAAGCAA  
TGTATGCCCCCTCCCATCAAAGGAGAAATCAGGTGTGTATCAAAC---  
ATTACAGGACTATTGTTGACAAGAGATGGTGGTGGTAATGCCAGT-----  
-----  
-----  
CAGAAATGAGACCTTCAGACCTGGAGGAGGAGATATGAGAGACAATTGGAGAAGTGAATTATACAAATATAAAG  
TAGTAAAAAATTGAACCACTA---GGAGTAGCACCCACCGGGCAAAGAGAAGAGTGGTG-----  
-----GAGAGAGAAAAAAGAGCA--GTTGGA---CTAGGAGCT-----  
GTGTTTCATTGGGTTTTTAGGAGCA---GCCGGAAGCACTATG---GGCGCGGCGTCA---  
GTGACGCTGACGGTACAG---GCCAGGCAA---TTATTG---TCTGGCATAGTGCAACAGCAAAGC---  
AATTTG---CTGAGG---GCTATAGAGGCTCAACAGCATGTGTTGAGGCTCACGGTCTGGGGCATT  
>EF158040  
TTCTATTGTGATACATCAGGTCTGTTTAATAGCGCTTGGAAATGGCACCAATGGCAACGAAATGTCAAATATC-  
-----  
-----  
ACAAATGGCACTATAACTCTCCAATGCAGAATAAAGCAAATTGTAAATATGTGGCAGAGAGTAGGACAGGCAA  
TGTATGCCCCCTCCCATCCCAGGAGTAATCAGGTGTGTATCAAAC---  
ATTACCGGACTATTGTTAACAAGAGATGGTGGTCAGGATAATGGG-----  
-----  
-----  
AGTAGTGAGATCTTCAGACCTGGAGGAGGAGATATGAGAGACAATTGGAGAAGTGAATTATATAAAATATAAAG  
TAGTACAACCTGAACCACTA---GGAGTAGCACCCACTAAGGCAAGGAGAAGAGTGGTG-----  
-----GAGAGAGAAAAAAGAGCA--GTTGGA---ATAGGAGCT-----  
GTGTTTCATTGGGTTCTTAGGAGCA---GCAGGAAGCACTATG---GGCGCAGCGTCA---  
ATGACGCTGACGGTACAG---GCCAGACAA---TTATTG---TCTGGCATAGTGCAACAGCAAAGT---  
AATTTG---CTGAGG---GCTATAGAGGCTCAACAGCATATGTTGAAACTCACGGTCTGGGGCATT  
>EF158041  
TTCTATTGTGATACATCAGGCCTGTTTAACAGTACCTGGAATATCACTGACATAGGAGAGCCAAATAGCACAA  
AT-----  
-----  
AGCACAAATGACACTATAACTCTCCCATGCAGAATAAAGCAAATTATAAATATGTGGCAGAGAACAGGACAAG

CAATATATGCCCCCTCCCATCCGAGGAGAAATCAGGTGTGTATCAAAC ---  
ATTACAGGACTATTGTTGACAAGAGATGGTGGTACTAATAACAGT-----  
-----  
-----  
AGTCTGAATGAGACCTTCAGACCTGGAGGAGGAGATATGAGAGACAACCTGGAGAAGCGAATTATACAAATATA  
AAGTAGTAAAACTTGAACCACTA---GGAGTAGCACCCACCAGGGCAAAGAGAAGAGTGGTG-----  
-----GAGAGAGAAAAAAGAGCA---GTCGGA---CTGGGAGCT-----  
---ATGTTTCATTGGGTTCTTAGGAGCA---GCAGGAAGCACTATG---GGCGCGGCGTCA---  
ATGACGCTGACGGTACAG---GCCAGACAA---TTATTG---TCTGGCATAGTGCAACAGCAAAGC---  
AATTTG---CTGAGG---GCTATAGAGGCTCAACAGCATATGTTGAAACTCACGGTCTGGGGCATT  
>EF158042  
TTCTATTGTAATACATCAGGACTGTTTAAACAGCACTTGGAAAATCAATGCCAGCGAAGAGTTAAATAGCACAA  
AT-----  
-----  
GACAAATGTAACCTATAACTCTCCCATGCAGAATAAAGCAAATTATAAATATGTGGCAGAGAACAGGACAGGCCAA  
TGTATGCCCCCTCCCATCCGAGGAGAAATTAGGTGTGTATCAAAC---  
ATTACAGGAATATTGTTGACCAGAGATGGTGGTAGAGTTAATGAA-----  
-----  
-----  
AGTCTAAATGAGACCTTCAGACCTGGAGGAGGAGATATGAGAGACAATTGGAGAAGTGAATTATACAAATATA  
AAGTAGTAAAAATTGAACCACTA---GGAGTAGCACCCACCAGGGCAAAGAGAAGAGTGGTG-----  
-----GAGAGAGAAAAAAGAGCA---GTTGGA---CTGGGAGCT-----  
---GTGTTTCATTGGGTTCTTAGGAGCA---GCAGGAAGCACTATG---GGCGCGGCGTCA---  
GTGACGCTGACGGTACAG---GCCAGACAA---TTATTG---TCGGGCATAGTGCAACAGCAAAGC---  
AATTTG---CTGAGG---GCTATAGAGGCTCAACAGCATATGTTGAAACTCACGGTCTGGGGCATT  
>GQ477443  
TTCTATTGTGATACATCAGGCCTGTTTAAATAGCACTTGGAAATATCAGTGGCAGCGAAGAGTTAAATAGC----  
-----  
-----  
ACAAATGACATAATAACTCTCCCATGCAGAATAAAGCAAATTATAAATCTATGGCAGAGAATAGGGCAAGCAA  
TGTATGCCCCCTCCCATCCGAGGAGAAATTAGGTGTGAATCAAGC---  
ATTACAGGACTATTGTTGACAAGAGATGGTGGTGTAAATGGGAGT-----  
-----  
-----  
CAGAAATGAAACCTTCAGACCTGGAGGAGGAGATATGAGAGACAATTGGCGAAGTGAATTATACAAATATAAAG  
TAGTAGAACTTGAACCACTA---GGAGTAGCTCCCACCAGGGCAAAGAGAAGAGTGGTG-----  
-----GAGAGAGAAAAAAGAGCA---GTCGGA---CTAGGAGCT-----  
ATGTTTCATTGGGTTCTTAGGAGCA---GCAGGAAGCACTATG---GGCGCGGCGTCA---  
ATGACGCTGACGGTACAG---GCCAGACAA---TTATTG---TCTGGCATAGTGCAACAGCAAAGT---  
AATTTG---CTGAGG---GCTATAGAGGCTCAACAGCATATGTTGAAACTCACGGTCTGGGGCATT  
>GQ477442  
TTCTATTGTAATACATCAGGCCTGTTTAAATAGCACTTGGAAATATCAATGGCAGTGAAGGGGTAAATAGC----  
-----  
-----  
ACAAATGTCAATATAACTCTCCCATGCAGAATAAAGCAATTATAAATATGTGGCAGAGAACAGGACAAGCAA  
TGTATGCCCCCTCCCATCAAGGAGAAATCAGGTGTGTATCAAAC---  
ATTACAGGACTATTGTTGACAAGAGATGGTGGTAATGGTAATGACAGT-----  
-----  
-----  
CAGGCTAATGAGACCTTCAGACCTGGAGGAGGAGATATGAGAGACAATTGGAGAAGTGAATTATACAAATATA  
AAGTAGTAAAACTTGAACCACTA---GGAGTAGCACCCACCAGGGCAAAGAGAAGAGTGGTG-----  
-----GAGAGAGAAAAAAGAGCA---GTTGGA---ATAGGAGCT-----  
---GTGTTTCATTGGGTTCTTAGGAGCA---GCAGGAAGCACTATG---GGCGCGGCGTCA---  
ATGACGCTGACGGTACAG---GCCAGACAA---TTATTG---TCTGGCATAGTGCAACAGCAAAGC---  
AATTTG---CTGAAG---GCTATAGAGGCTCAACAGCATATGTTGAGACTCACGGTCTGGGGCATT  
>GQ477446  
TTCTATTGTAATACATCAGGCCTGTTTAAACAATAGCCTGTTTAAACAGCAGCGGAGAGTCA-----  
-----  
-----  
GATAGCACAAATATAACTCTCCCATGCAGAATAAAGCAAATTATAAATATGTGGCAGAGAACAGGACAAGCAA

TGTATGCCCCCTCCCATCCGAGGAGAAATCAGGTGTGTATCAAAC ---  
 ATTACAGGACTATTGTTGACAAGAGATGGTGGTGCTAATGAGAAT -----  
 -----  
 -----  
 GAGAGTGAGACCTTCAGACCTGGAGGAGGAGATATGAGAGATAATTGGAGAAGTGAATTATACAAATATAAAG  
 TAGTAAAAATTGAACCACTA --- GGAGTAGCACCCACCAAGGCAAAGAGAAGAGTGGTG -----  
 -----GAGAGAGAAAAAAGAGCA --- GTTGGA --- CTGGGAGCT -----  
 TTGTTTCATTGGGTTCTTAGGAGCA --- GCAGGAAGCACTATG --- GGCGCGGCGTCA ---  
 GTGACGCTGACGGTACAG --- GCCAGACAA --- TTATTG --- TCTGGCATAGTGCAACAGCAAAGC ---  
 AATTTG --- CTGAAG --- GCTATAGAGGCTCAACAGCATATGTTGAGACTCACGGTCTGGGGCATT  
 >GQ477448  
 TTCTATTGTAATACATCAGGCCTGTTTAAACAGCACTTGGGATAATAGCACTTGGTATAACAATGGCAGCCAAA  
 GGTCA -----  
 -----AAT ---  
 AGCACAAGTGGCATTATAACTCTCCCATGCAGAATAAAGCAAATTATAAATATGTGGCAGAGAACAGGACAAG  
 CAATGTATGCCCCCTCCCATTCAGGAGAAATCAAGTGTATATCAAAC ---  
 ATTACAGGACTATTGTTGACAAGAGATGGTGGTAATCATGATGGTAAT -----  
 -----  
 -----  
 GAGAGTCAGGAGACCTTCAGACCTGGAGGAGGAGATATGAGAGACAATTGGAGAAGTGAATTATACAAATATA  
 AAGTAGTAAAAATTGAACCACTA --- GGAGTAGCACCTACCAGGGCAAGGAGAAGAGTGGTG -----  
 -----GAGAGAGAAAAAAGAGCA --- GTTGGA --- CTAGGAGCT -----  
 --- GTGTTTCATTGGGTTCTTAGGAGCA --- GCAGGAAGCACTATG --- GGCGCGGCGTCA ---  
 GTGACGCTGACGGTACAG --- GCCAGACAA --- TTGCTG --- TCTGGCATAGTGCAACAGCAAAGC ---  
 AATTTG --- CTAAAG --- GCTATAGAGGCTCAACAGCAGATGTTGAGACTCACAGTCTGGGGCATT  
 >AB703608  
 TTCTATTGTAATACATCAGGCCTGTTTAAACAGCACTTGGGAATACCAATGGCAGCGAAGGGTCAACAGAC ---  
 -----  
 -----  
 ACAAGTGGCAATATAACTCTCCAATGCAGAATAAAGCAAATTATAAATATGTGGCAGAGAACAGGACAAGCAA  
 TATATGCCCCCTCCCATCCGAGGAGAAATCATGTGTAAATCAAAC ---  
 ATTACAGGACTATTGTTAAACAAGAGATGGTGGTGGTGGTAATCAG -----  
 -----  
 -----  
 AGTCAGAATGAGACCTTCAGACCTGGAGGAGGAGATATGAGAGACAATTGGAGAAGTGAATTATACAAATATA  
 AAGTAGTAAAAATTGAACCACTA --- GGAGTAGCACCCACCAAGGCAAAGAGAAGAGTGGTG -----  
 -----CAGAGAGAAAAAAGAGCA --- GTTGGA --- CTGGGAGCT -----  
 --- TTGTTTCATTGGGTTCTTAGGAGCA --- GCAGGAAGCACTATG --- GGCGCGGCGTCA ---  
 GTGACGCTGACGGTACAG --- GCCAGACAA --- TTATTG --- TCTGGCATAGTGCAACAGCAAAAC ---  
 AACTTG --- CTGAGG --- GCTATAGAGGCTCAACAGCATATGTTGAAACTCACGGTCTGGGGCATT  
 >AB703615  
 TTCTATTGTAATACATCAAACCTGTTTAGTAGCACTTGGTTTATCAATGGCAGCGGAGAGTCACATAATAAAA  
 ATGGC -----  
 -----  
 ACTAATGACACTATAACTCTCCAATGCAGAATAAAGCAAATTATAAATCTGTGGCAGAGAACAGGACAAGCAA  
 TGTATGCCCCCTCCCATCCAAGGAGAAATTAGGTGTGTATCAAAC ---  
 ATTACAGGACTGTTGTTGACAAGAGATGGTGGTGGTAAATGTGAGC -----  
 -----  
 -----  
 AATGAGACTGAAACCTTCAGACCTGGAGGAGGAGATATGAGAGACAATTGGAGAAATGAATTATACAAATATA  
 AAGTAGTAAAAATTGAACCACTA --- GGAGTAGCACCCACCAGGGCAAAGAGAAGAGTGGTG -----  
 -----GAGAGAGAAAAAAGAGCA --- GTTGGA --- CTAGGAGCT -----  
 --- GTGTTTCATTGGGTTCTTAGGAGCA --- GCAGGAAGCACTATG --- GGCGCGGCGTCA ---  
 GTGACGCTGACGGTACAG --- GCCAGACAA --- TTATTG --- TCTGGCATAGTGCAACAGCAAAGC ---  
 AATTTG --- CTGAGG --- GCTATAGAGGCTCAACAGCATATGTTGAAACTCACGGTCTGGGGCATT  
 >AB703609  
 TTCTATTGTAATACATCAGGCCTGTTTAAACAGTACTTGGGAATATCAATGGCAGCGGAGGGTTAGATAAC ---  
 -----  
 -----  
 ACAAATGATAATATAACTCTCCAATGCAGAATAAAGCAAATTATAAATATGTGGCAGAGAACAGGGCAAGCAA

TGTATGCCCCCTCCCATCCGAGGAGAAATCAGGTGTGTATCAAAC ---  
 ATTACCGGACTATTGTTGACAAGAGATGGTGGTAATAATAGTGAG-----  
 -----  
 AGTCAGGAGACCTTCAGACCTGGAGGAGGAGATATGAGAGACAATTGGAGAAGTGAATTATACAAATATAAAG  
 TAGTAAAAATTGAACCAATA --- GGAGTAGCACCCACCAAGGCAAAAAGAAGAGTAGTG-----  
 -----GAGAGAGAAAAAAGAGCA --- GTTGGA --- CTGGGAGCT-----  
 ATGTTTCATTGGGTTCTTAGGAGCA --- GCAGGAAGCACTATG --- GGCGCGGCGTCA ---  
 GTGACGCTGACGGTACAG --- GCCAGACAA --- TTATTG --- TCTGGCATAGTGCAACAGCAAGGC ---  
 AACTTG --- CTGAGG --- GCCATCGAGGCTCAACAGCATATGTTGAGACTCACAGTCTGGGGCATT  
 >AB703611  
 TTCTATTGTAATACGTCAGGTCTGTTTAACAGTACTTGGAATGTCACTGGCAGCAAAGAGTCACATAGC-----  
 -----  
 -----  
 CCAAAATGATACTATAACTCTCCCATGCAGAATAAAGCAAATTATAAATATGTGGCAGAGAACAGGACAAGCAA  
 TGTATGCCCCCTCCCATCAAAGGAGAGAAATCAGGTGTGTATCAAAC ---  
 ATTACAGGACTATTGTTGACAAGAGATGGTGGGGTTAATAACAGC-----  
 -----  
 -----  
 CAGAAATGAGACCTTCAGACCTGGAGGAGGGAATATGAGAGACAATTGGAGAAGTGAATTATACAAATATAAAG  
 TAGTGAAAATTGAACCACTA --- GGAGTAGCACCCACCAAGGCAAGAGAAGAGTGGTG-----  
 -----GAGAGAGAAAAAAGAGCA --- GTAGGA --- CTGGGAGCT-----  
 GTGTTTCATTGGGTTCTTAGGAGCA --- GCAGGAAGCACTATG --- GGCGCAGCGTCA ---  
 ATGACGCTGACGGTACAG --- GCCAGACAA --- TTATTG --- TCTGGCATAGTGCAACAGCAAAGT ---  
 AATTTG --- CTGAAG --- GCTATAGAGGCTCAACAGCATATGTTGAAACTCACGGTCTGGGGCATT  
 >AB703612  
 TTCTATTGTAATACATCAGGCCTGTTTAATAGCACTTGGCCTATCAATGGTAGCAGCGAAGGGAAAAATAGC-----  
 -----  
 -----  
 ACAGATGACACTATAACTCTCCACGCGAGAATAAAGCAGATTATAAATATGTGGCAGAGAACAGGACAAGCAA  
 TGTATGCCCCCTCCCATTAAGGAGAGAAATCAGATGTGTATCAAAC ---  
 ATTACAGGAATATTGTTGACAAGAGATGGTGGTGAGGGGAATCAGACTGAGGGG-----  
 AATCAAAC TGAGGGGAAC-----  
 -----  
 CGGACCGAGACCTTCAGACCTGGAGGAGGAGATATGAGAGACAATTGGAGAAGTGAATTATACAAATATAAAG  
 TAGTAGAACTTGAACCACTA --- GGAGTAGCACCCACCAAGGCAAGAGAAGAGTGGTG-----  
 -----GAGAGAGAAAAAAGAGCA --- GTTGGA --- CTAGGAGCT-----  
 GTGTTTCATTGGGTTCTTGGGAGCA --- GCAGGAAGCACTATG --- GGCGCGGCGTCA ---  
 ATGACGCTGACGGTACAG --- GCCAGACAA --- TTATTG --- TCTGGCATAGTGCAACAGCAAAGC ---  
 AATTTG --- CTGAGG --- GCTATAGAGGCTCAACAGCAGACGTTGAGACTCACGGTCTGGGGCATT  
 >AB703613  
 TTCTATTGTAATACATCGAGCCTGTTTAACAGCACTTGGTATAACAATGGCAGCAAAGAGTTAAATAGC-----  
 -----  
 -----  
 GCAAAATGGCATTATAAACTCCCATGTAGAATAAAGCAAATTATAAATACGTGGCAGAGAACAGGACAAGCAA  
 TGTATGCCCCCTCCCATCCGAGGAGAAATTAGGTGTGAATCAAAC ---  
 ATTACAGGACTATTGTTGACAAGAGATGGTGGAAATGATACTAAT-----  
 -----  
 -----  
 CAGACTGAGACCTTCAGACCTGGAGGAGGAGATATGAGAGACAATTGGAGAAGTGAATTATACAAATATAAAG  
 TAGTAAAAATTGAACCACTA --- GGAGTAGCACCCACCAAGGCAAGAGAAGAGTGGTG-----  
 -----GAGAGAGAAAAAAGAGCA --- TTTGGA --- CTGGGAGCT-----  
 TTGTTCTGTTGGGTTCTTAGGAGCA --- GCAGGAAGCACTATG --- GGCGCGGCGTCA ---  
 GTGACGCTGACGGTACAG --- GCCAGACAA --- TTATTG --- TCTGGCATAGTGCAACAGCAAAGC ---  
 AATTTG --- CTGAGG --- GCTATAGAGGCTCAACAGCATATGTTGAAACTCACGGTCTGGGGCATT  
 >AB703614  
 TTCTATTGTAATACATCAGGCCTGTTTAACAGCGCTTGGGAATATCACTGGCAGCAGCGAAGGGTTAAATAGT-----  
 -----  
 -----  
 ACAAATGACACTATAACTCTCCCATGCAGAATAAAGCAAATTATAAATATGTGGCAGAGAATAGGACAAGCAA

TGTATGCCCCCTCCCATCCAAGGAGTAATCAGGTGTGAATCAAAC ---  
 ATTACAGGACTATTGTTGACACGAGATGGTGGTAATAATAGGAATGAGAGT-----  
 -----  
 -----  
 GAAAAATGAGACTGAGACCTTCAGACCTGGAGGGGGAGATATGAAAGATAATTGGAGAAGTGAATTATACAAAT  
 ATAAAGTAGTAAACTTGAACCACTA --- GGAGTAGCACCCACCAGGGCAAAGAGAAGAGTGGTG-----  
 -----GAGAGAGAAAAAAGAGCA --- GCTGGA --- CTGGGAGCT---  
 -----GTGTTTCATTGGGTTCTTAGGAGCA --- GCAGGAAGCACTATG --- GGCGCGGCGTCA ---  
 ATGACGCTGACGGTACAG --- GCCAGACAA --- TTATTG --- TCTGGCATAGTGCAACAGCAAAGC ---  
 AATTTG --- CTGAGG --- GCTATAGAGGCTCAACAGCATATGTTGAAACTCACGGTCTGGGGCATT  
 >EF087995  
 TTCTATAGCGATACATCAGGCATGTTTAATAGCACTTGGGATAACAATAGCACTTGGGAATAACAATAGCAGCA  
 TGACAGGG-----  
 -----TCAAAT-----  
 AACACAAATGACAATATAAACTCCCGTGTAGAATAAAGCAAGTTATAAATATGTGGCAGAGAGTAGGACAAG  
 CAATGTATGCCCCCTCCCATCGCAGGAATAATAAGGTGTGAGTCAAAT ---  
 ATTACAGGACTACTATTGACAAGAGATGGTGGGAATACTAGCAGT-----  
 -----  
 -----  
 ACAAATGAGACTTTTCAGACCAGGAGGAGGAGATATGAGGGACAATTGGAGAAGTGAATTATATAAGTATAAGG  
 TAGTACAAATTGAACCACTA --- GGTGTGGCACCCACCCGTGCAAAAAGAAGGGTGGTG-----  
 -----GAGAGAGAAAAAAGAGCAGTTGTTGGA --- CTGGGAGCT-----  
 GTCTTCCTTGGGTTCTTAGGAGCA --- GCAGGAAGCACTATG --- GGCGCGGCGTCA ---  
 ATAACGCTGACGGTACAG --- GCCAGACAA --- TTAGTG --- TCCGGTATAGTGCAACAGCAAAGC ---  
 AATTTG --- CTGAGG --- GCTATAGAGGCTCAACAACATCTGTTGAAACTCACGGTCTGGGGCATT  
 >EF087994  
 TTCTATTGCAATACATCAGGCCTGTTTAATAGCACTTGGGGGTATAACAATAGCAACGTGACAAGGTTAAATA  
 AC-----  
 -----  
 ACGAATGACACTATAATTCTCCCGTGTAAAATAAAGCAAATTATAAAGATGTGGCAGAGAGTAGGACAAGCAA  
 TGTATGCCCCCTCCCATCGCAGGAAGGATAAGGTGTGAGTCAAAT ---  
 ATTACAGGACTACTATTGACAAGAGATGGTGGGAAAAATAACAGT-----  
 -----  
 -----  
 ACAAATGAGACTTTTCAGACCAGGAGGAGGAGATATGAGGGACAATTGGAGGAGTGAATTATATAAGTATAAGG  
 TAGTACAAATTGAACCACTA --- GGTGTGGCACCCACCCGAGCAAAGAGAAGGGTGGTG-----  
 -----GAGAGAGAAAAAAGAGCA --- GTTGGA --- CTGGGAGCT-----  
 GTCTTCCTTGGGTTCTTAGGAGCA --- GCAGGAAGCACTATG --- GGCGCGGCGTCA ---  
 ATAACGCTGACGGTACAA --- GCCAGACAA --- TTAGTG --- TCCGGTATAGTGCAACAGCAAAGC ---  
 AATTTG --- CTGAGG --- GCTATAGAGGCTCAACAACATCTGTTGAAACTCACGGTCTGGGGCATT  
 >EF116594  
 TTCTACTGCAATACATCAGGCCTGTTCAATAGTACATGGAACACTACTACCAGCACGCAGATTCCAAATAGGA  
 CT-----  
 -----  
 ACAGATGGGAATATAACTCTCCCTTGCAGAATAAAGCAAATTGTCAATATGTGGCAGAGAGTAGGACAAGCAA  
 TGTATGCCCCCTCCCATCCCAGGAGTAATAAGGTGTGAGTCCAAC ---  
 ATTACAGGACTAATGTTAACAAGAGATGGTGGGATTAACAAAACA-----  
 -----  
 -----  
 GATAATGAGACCTTCAGACCTGGGGGAGGAGATATGAGGGATAATTGGAGAAGTGAATTATATAAGTATAAAG  
 TAGTAAAAATTGAACCAATA --- GGAATAGCACCCACCAAGGCAAGGAGAAGAGTGGTG-----  
 -----GAGAGAGAAAAAAGAGCA --- GTTGGA --- CTGGGAGCT-----  
 GTCTTCCTTGGGTTCTTAGGAGCA --- GCAGGAAGCACTATG --- GGCGCGGCGTCT ---  
 ATAACGCTGACGGTACAG --- GCTAGACAA --- TTATTG --- TCTGGCATAGTGCAACAGCAGAGC ---  
 AACCTG --- CTAAGG --- GCTATAGAGGCTCAACAACATCTGTTGAAACTCACGGTCTGGGGCATT  
 >KP718917  
 TTCTATTGCAATACAACAAAACCTGTTCAATCACCTGTTCAATAATAGTGAGTGGGACAATGCAGCTAACAGC-  
 -----  
 -----  
 ACGAATGAGAGTATAACTCTCCCTTGCAGAATAAAGCAAATTATAAATATGTGGCAGAGAGTAGGACAAGCAA

TGTATGCCCCCTCCCATCCCAGGAGAAATAAGGTGTAGATCTAAT ---  
 ATTACAGGACTATTGTTAACAAGAGATGGTGGAAGCAACAATGCA-----  
 -----  
 -----  
 ACTAATGAAACCTTCAGACCTGGAGGAGGAGACATGAGGGACAATTGGAGAAGTGAATTATATAAGTATAAGG  
 TAGTGAAAATTGAACCAATA---GGAGTAGCACCCACCGGGGCAAGGAGAAGAGTGGTG-----  
 -----CAGAGAGAAAAAAGAGCA--GTTGGC---CTAGGAATT-----  
 GCCTTCCTTGGGTTCTTAGGAGCA---GCAGGAAGCACTATG---GGCGCGGCGGCC---  
 ATAACGCTGACGGTACAG---GCCAGACAA---TTGTTG---TCTGGCATAGTGCAACAGCAGAGC---  
 AATCTG---CTAAGG---GCTATAGAGGCTCAACAACACATGTTGAGACTCACGGTCTGGGGCATT  
 >AF377957  
 TTCTATTGCGATACAACAGGCCTGTTCAATAGTAGTTGGAGCTACAATGGCACGAGTTGGAATAAGACCACTA  
 CAAAT-----  
 -----GGC---  
 ACTACAAATGGCAATATAACTCTCCATTGCAGAATAAAAACAAATTATAAATATGTGGCAGAGAGTAGGACAAG  
 CAATGTATGCCCCCTCCCATCCGAGGAGTAATAAGGTGTGAATCTAAC---  
 ATTACAGGATTGCTATTAACAAGAGATGGTGGGACAAACAATAGT-----  
 -----  
 -----  
 AACACTACTGAAACCTTCAGACCTGGAGGAGGAGATATGAGGGACAATTGGAGAAGTGAATTATATAAGTATA  
 AAGTAGTAAAAATTGAACCAATA---GGAGTAGCACCTACCGGGGCAAGGAGAAGAACGGTG-----  
 -----GAGAGAGAGAAAAAGAGCA--GTTGGA---CTAGGAGCT-----  
 ---GTTTTTCTTGGATTCTTAGGAGCA---GCAGGAAGCACTATG---GGCGCGGCGTCT---  
 GTGACGCTGACGGTACAG---GCCAGACAA---TTATTG---TCTGGCATAGTGCAACAGCAGAGC---  
 AATCTG---CTGAGG---GCTATAGAGGCTCAACAACATCTGTTGAAACTCACGGTCTGGGGCATT  
 >JF683745  
 TTCTATTGCAATACAACAAACCTGTTCAATAGTGTTTGGACAGACGGGAAATGGAATAATACCATGAACAGCA  
 GTCAA-----  
 -----  
 TCAGATAGTAATAATATAACTCTCCATTGCAAAATAAAAACAAATTGTAAGGATGTGGCAAAGAGTAGGACAAG  
 CAATGTATGCCCCCTCCCATCCGAGGAGTAATAAACTGTATATCCAAC---  
 ATTACAGGACTGCTATTAACAAGAGATGGTGGGCTAAGTAATAGG-----  
 -----  
 -----  
 ACAAATGAGACCTTCAGACCTGGAGGAGGAGATATGAGGGACAATTGGAGAAGTGAATTATATAAGTATAAAG  
 TAGTAAAAATTGATCCACTA---GGAGTAGCACCTCCAGGGCAAGGAGAAGAGTGGTG-----  
 -----GAGAGAGAAAAAAGAGCA--GTTGGA---CTGGGAGCT-----  
 ATGTTCTTTGGATTCTTAGGAGCA---GCAGGAAGCACTATG---GGCGCGGCGTCC---  
 TTAACGCTGACGGTACAG---GCCAGACAA---TTATTG---TCTGGCATAGTGCAACAGCAGAGC---  
 AATCTG---CTGAGG---GCTATAGAGGCTCAACAGCATCTGTTGAAACTCACGGTCTGGGGCATT  
 >FJ213783  
 TTCTACTGCAATACATCAAACTGTTTAAATGACACAGCTTCC-----  
 -----  
 -----  
 AATAATGGTACCATCACTCTCCCATGTCTGAATAAAACAAATTGTAAACATGTGGCAGGAAGTGGGACGAGCAA  
 TGTATACCGCTCCCATTCAGGAGACATTACCTGTAGATCAAAT---  
 ATTACAGGTCTACTATTGACAAGAGATGGTGGTCAGAAAAATAATGGAAGTTGT-----  
 -----  
 -  
 ACAGAGGCAACTTGTACACAGATCTTCAGACCTCAGGGAGGAAATATGAAAGACAATTGGAGAAGTGAATTAT  
 AATAATATAAAGTAGTAGAAATTGAACCATTAA---GGAATAGCACCCACCAGGGCAAAGAGAAGAGTGGTG--  
 -----CAGAGAGAAAAAAGAGCA---GTGGGA---  
 ATGGCAGCT-----GTGTTCAATTGGGTTCTTGGGAGCA---GCAGGAAGCACTATG---  
 GGCGCGGCGTCA---ATAACGCTGACGGTACAG---GCCAGACAA---TTATTG---  
 TCTGGAATAGTGCAACAGCAGAAC---AATCTG---CTGAGG---  
 GCTATTGAAGCGCAACAGCATATGTTGCAGCTCACAGTCTGGGGCATT  
 >FJ213780  
 TTCTACTGCAATACATCAAACTGTTTGATAACATAGAAAAAC-----  
 -----  
 -----

AATGGAAC TATCATTCTCCCATGTAAAATAAAACAAATAGTAAACATGTGGCAAGAAGTGGGACGAGCAATGT  
ATGCCGCTCCCATTCAGGAAACATTGTCTGTAACTCAACT---  
ATTACAGGTCTACTCTTAACAAGAGATGGTGGTCATGGTAATGGCACA-----  
-----  
-----  
ATCAATAAGACAGAGATCTTCAGACCTGGGGGAGGAAATATGAAAGACAATTGGAGAAGTGAATTATATAAAT  
ATAAAGTAGTAGAAATTGAACCATTA---GGAATAGCACCCACCAGGGCAAGGAGAAGAGTGGTG-----  
-----CAGAGAGATAAAAGAGCA---GTGGGA---ATGGCAGCT---  
-----ATGTTTCCTTGGGTTCTTGGGAGCA---GCAGGAAGCACTATG---GGCGCAGCGTCA---  
ATAACGCTGACGGTACAG---GCCAGACAA---TTATTG---TCTGGAATAGTGCAACAGCAAAGC---  
AATTTG---CTGAGG---GCTATTGAAGCGCAACAGCATATGTTGCAGCTCACAGTCTGGGGCATT  
>EU735535  
TTCTACTGCAATACATCAAATCTGTTTAATGACACGATAGGC-----  
-----  
-----  
AATGGCACTATAATTCTCCCATGTAAAATAAGACAAATTGTAAACATGTGGCAGGAAGTGGGACGAGCAATGT  
ATGCTGCTCCCATTCAGGAAACATTGCCTGTAACTCAACT---  
ATTACAGGTCTACTATTGACAAGAGATGGTGGTAGTGGGAAGTAATGGT-----  
-----  
-----  
ACTAATCAAAATGAGACCTTCAGACCTGGGGGAGGAAATATGAAAGACAATTGGAGAAGTGAATTATACAAAT  
ATAAAGTAGTAGAAATTGAACCACTA---GGAATAGCACCCACCAGGGCACAAGACAAAGTGGTG-----  
-----AAGAGAGAAAAAAGAGCA---GCA-----CTAGGAGTT---  
-----GTGTTTCCTTGGGTTCTTGGCAGCA---GCAGGAAGCACTATG---GGCGCGGCGTCA---  
ATAACGCTGACGGTACAG---GCCAGACAA---TTACTG---TCTGGAATAGTGCAACAGCAGAAT---  
AATCTG---CTGAAG---GCTATTGATGCGCAACAGCATCTGTTGCAGCTCACAGTCTGGGGCATT  
>EU735538  
TTCTACTGCAATACATCAGGACTGTTTAATGACACAGAAATTGAAGCTAATCACACAAATGCTAAT-----  
-----  
-----  
GATAATGACACTATCATTCTCCCATGTAAAATAAAACAGATGATAAACATGTGGCAGGAAGTAGGACGAGCAA  
TGTATGCTGCCCCCGTGGCAGGAAACATTATCTGTAACTCAAAT---  
ATTACAGGACTACTATTAACAAGAGATGGTGGTAATAAGACTCATAAT-----  
-----  
-----  
GATACTAGGAATGAGATCTTTAGACCTGGAGGAGGAAATATGAAGGACAATTGGAGAAGTGAATTATATAAAT  
ATAAAGTAGTAAGAATTGAGCCATTA---GGAGTAGCACCCACCAGGGCAAGGAGAAGAGTGGTG-----  
-----CAGAGAGAAAAAAGAGCA---GTAACA---ATGGGAGCT---  
-----ATGTTTCCTTGGGTTCTTGGGAGCA---GCAGGAAGCACTATG---GGCGCAGCGTCA---  
CTAACGCTGACGGTACAG---GCCAGACAA---TTATTG---TCTGGTATAGTGCAACAGCAGAAC---  
AATCTG---CTGAAG---GCTATTGAAGCGCAACAACATCTGTTGCAGCTCACAGTCTGGGGCATT  
>EU735537  
TTCTACTGCAATACATCAGGATTGTTTGATAATAACACAGGGACTGAC-----  
-----  
-----  
ACTAATGACACTATCACTCTCCCATGTAAAATAAAACAAATAGTAAATATGTGGCAAGAAGTAGGACGAGCAA  
TGTATGCCGCCCCCATTGCAGGAAACATTACCTGTAACTCAAGT---  
ATTACAGGACTACTATTGACAAGAGATGGTGGTCAGAATAATGAGACT-----  
-----  
-----  
AATAAATACTGAGACCTTCAGACCTGGGGGAGGAAATATGAAGGACAATTGGAGAAGTGAATTATATAAATATA  
AAGTAGTAAAAATTGAGCCATTA---GGAGTAGCACCCACCAGGGCAAGGAGAAGAGTGGTG-----  
-----CAGAGAGAGAAAAAGAGCA---GTGACG---CTGGGAGCT-----  
---ATGTTTCCTTGGGTTCTTGGGAGCA---GCAGGAAGCACTATG---GGCGCAGCGGCA---  
ACAACGCTGACGGTACAG---GCCAGACAA---TTATTG---TCTGGTATAGTGCAAGCAGCAAAGC---  
AATTTG---CTGAGG---GCTATTGAAGCGCAACAGCATATGTTGCAGCTCACAGTCTGGGGCATT  
>EU170155  
TTCTACTGCAATACAACAGAACTGTTTAATGACACAGAAATCC-----  
-----  
-----

AATAACACTATCATTACTCTCCCATGTCTGAATAAAACAAATTATAAACATGTGGCAGGAAGTGGGACGAGCAA  
TGTATGCTGCTCCCATTGCAGGAAACATTACCTGTTTCATCAAAT ---  
ATTACAGGTCTACTATTGACAAGAGATGGTGGTCTGGCTAATCAGACT-----  
-----  
-----  
GGAAATCAGAATGACACCTTCAGACCTGGGGGAGGAGATATGAGAGACAATTGGAGAAGTGAATTATATAAAT  
ATAAAGTAGTAGAAATTGAGCCATTA --- GGAATAGCACCCACCACAGCAAAGAGAAGAGTGGTG-----  
-----CAGAGAGAAAAAAGAGCA---GTG-----  
-----GGAAGCACTATG---GGCGCAGCGTCA---  
GTAACGCTGACGGTACAG---GCCAGACAA---TTATTG---TCTGGTATAGTGCAACAGCAGAAC---  
AATTTG---CTGAAG---GCTATTGAGGCGCAACAGCACCTGTTGCAACTCACAGTCTGGGGCATC  
>EU170139  
TTCTACTGTAATACAACAATACTGTTTAATGAAACAGGATTTAATGACACAAGA-----  
-----  
-----  
TCCAATGACACCATTACTCTCCCATGTCTGAATAAAACAGATTATAAACATGTGGCAGGAAGTGGGACGAGCAA  
TGTATACTGCTCCCATCGCAGGAAACATTGCTTGTTTCATCAAAT ---  
ATTACAGGTCTACTATTGACAAGAGATGGTGGTAAGACTACTGAC-----  
-----  
-----  
AATCAGACTGACACCTTCAGACCTGGGGGAGGAGATATGAGAGACAATTGGAGAAGTGAATTATATAAATATA  
AAGTAGTAGAAATTGAGCCATTA --- GGAATAGCACCCAATAAAGCAAGGAGAAGAGTGGTG-----  
-----CAGAGAGAAAAAAGAGCA---GTGGGG-----  
-----GGCGCAGCGTCA---  
GTAACGCTGACGGTACAG---GCCAGACAA---TTATTG---TCTGGTATAGTGCAACAGCAGAAT---  
AATTTG---CTGAGG---GCTATTGAGGCGCAACAGCACATGTTGCAACTCACAGTCTGGGGCATC  
>FN392874  
TTCTATTGCAATACATCAGGCCTATTTAATAGCACTTGGTCTGACAAAAATAATACAGACAGCAATAGCACGG  
AG-----  
-----  
TCAAATAGCACTATAACTCTTCCATGCAGAATAAAGCAAATTATAAATATGTGGCAGAGAGTAGGACGAGCAA  
TGTATGCTCCTCCCATCCGAGGAATAATAAAGTGTAAGTTCAAAC ---  
ATTACAGGACTACTATTAACAAGAGATGGTGGTGTAAATAATAGTACA-----  
-----  
-----  
AATGAGACCTTCAGACCAGGAGGAGGAGATATGAGGGACAATTGGAGAAGTGAATTATATAAGTATAAAGTAG  
TAAAAATTGAACCACTA --- GGAGTAGCACCCACAAAGGCAAGGAGAAGAGTGGTG-----  
-----GAGAGAGAAAAAAGAGCA---GTTGGA---CTGGGAGCT-----  
TTCTTCCTTGCGTTCTTAGGAGCA---GCAGGAAGCACTATG---GGCGCAGCGGCA---  
GTAACGCTGACGGTACAG---GCTAGACAA---TTATTG---TCTGGCATAGTGCAACAGCAGAGC---  
AATCTG---CTGAGG---GCTATAGAGGCTCAGCAGCATCTGTTGAAACTCACGGTCTGGGGCATT  
>FN392876  
TTCTATTGCAATACATCAGGCCTGTTTAATACCACTTGGTACAACAATGGTTTCAAGACCTTGGTACAATGGTA  
CAAAT-----  
-----  
AGCACGGAGCCAATAACTCTTCAATGCAGAATAAAGCAAATTATAAATATGTGGCAGAGAGTAGGACAAGCAA  
TGTATGCCCCCTCCCATCCCAGGAATAATACAATGTAAGTCAAGC ---  
ATTACAGGAATACTATTAACAAGAGATGGTGGTAACAATAGTACA-----  
-----  
-----  
AATGAGACCTTCAGACCTGGAGGAGGAGATATGAGGGACAATTGGAGAAGTGAATTATATAGGTATAAAGTAG  
TACAAGTTGAACCACTA --- GGAGTAGCACCCACCAGGGCAAAGAGAAGAGTGGTG-----  
-----GAGAGAGAAAAAAGAGCA---GTTGGA---ATAGGGGCT-----  
GTCTTCCTTGCGTTCTTAGGAGCA---GCAGGAAGCACTATG---GGCGCAGCGTCA---  
ATAACGCTGACGGTACAG---GCCAGACAA---TTATTG---TCTGGCATAGTGCGACAGCAGAAC---  
AATCTG---CTGAAG---GCTATAGAGGCTCAACAGCATCTGTTGAAACTCACGGTCTGGGGCATT  
>EU448295  
TTCTATTGTAATACATCACAATTGTTTAATAGCACTTGGAGCCACAATGATACAGGCAGCACGAAGGAG----  
-----  
-----

TACAATGGCACTATACAACCTCCATGCAGAATAAAGCAAATTATAAATATGTGGCAGAGAGCAGGACGAGCAA  
TGTTTGCCCTCCCATCCAAGGAGCAATAAGGTGTGAATCAAAC---  
ATTACAGGACTATTATTAACAAGAGATGGTGGTAATGCAAATGAGGCT-----  
-----  
-----  
AGAAATGAGACTGAGATCTTCAGACCTGGAGGAGGAGATATGAGGGACAATTGGAGAAGTGAATTATATAAGT  
ATAAAGTAGTACAAATTGAGCCACTA---GGAGTAGCACCCACCAGGGCAAGGAGAAGAGTGGTG-----  
-----GAGAGAGAAAAAAGAGCAGTTGTTGGA---CTGGGAGCT---  
-----GTCTTCATTGGGTTCTTAGGAGCA---GCAGGAAGCACTATG---GGCGCAGCGGCA---  
GTGACGCTGACGGTACAG---GCCAGGCAA---TTATTG---TCTGGCATAGTGCAACAGCAGAGC---  
AATCTG---TTGAGG---GCTATAGAGGCTCAACAGCATCTGTTGAAGCTCACGGTCTGGGGCATT  
>DQ358801  
TTCTACTGCAATACATCAGGACTGTTTCAGTTTAATGACACAGAT-----  
-----  
-----  
TCCAATGACACTATCATTCTCCCATGTGCAATAAAACAAATTGTAAACATGTGGCAGGAAGTGGGGCGAGCAA  
TGTATGCCGCTCCCATTGCAGGAAACATTACCTGTAACTCAAAT---  
ATTACAGGTCTACTATTGACAAGAGATGGTGGTCAGGATAATGGGACT-----  
-----  
-----  
AATGATATTGAGACCTTCAGACCTGGGGGAGGAAATATGAAAGACAACCTGGAGAAGTGAATTATATAAATATA  
AAGTAGTAGAAATTAATCCATTA---GGAATAGCACCTCCAGGGCAAAAAGACAAGTGGTG-----  
-----CAGAGAGAAAAAAGAGCA---GCGGGA---ATAGCAGTT-----  
---ATGCTCTTTGGGTTCTTGGGAGCA---GCAGGAAGCACTATG---GGCGCGGCGTCA---  
ATGGCGCTGACGGTACAG---GCCAGACAA---TTATTG---TCTGGCATAGTGCAACAGCAGAAC---  
AATCTG---CTGAGA---GCTATTGAAGCGCAACAGCATCTGTTGCAGCTCACAGTCTGGGGCATT  
>DQ358802  
TTCTACTGCGATACATCAACACTGTTTAATGACAATGACACAGTA-----  
-----  
-----  
TCCAATGACACTATCACTCTCCCATGTAAAATAAAACAAATTGTAAACATGTGGCAGGAAGTGGGGCGAGCAA  
TGTATGCCGCTCCCATTGCAGGAGAAATTACCTGTAGATCAAAT---  
ATTACAGGTCTACTATTGACAAGAGATGGTGGCCGAAATATTAGTACT-----  
-----  
-----  
GATCAGCCTGAGATCTTCAGACCTGGGGGAGGAAATATGAAAGACAACCTGGAGAAGTGAATTATATAAATATA  
AAGTAGTAGAAATTGAGCCACTA---GGAGTAGCACCCACCGAGGCAAAAAGACAAGTGGTG-----  
-----AAGAGAAAAAAAAGAGCA---GCGGGA---ATAACAGCT-----  
---TTGTTCCCTTGGGTTCTTGGGAGCA---  
GCAGGAAGCACTATGGGCGCAGCCTCAATGACGCTGACGGTACAGGACCAG---ACGAATTAT---  
TGGACTTGCCCATATTGCAGTCCGCGGGAACAA---TCTGCT---GAGAGG---  
ACTATTGAAGCGCAACAGCATCTGTTGCAGCTCACAGTCTGGGGCATT  
>MG365771  
TTCTACTGCAATACATCAAACTGTTTAATAATGACACAGGATCCAATGACACTACAGGA-----  
-----  
-----  
TCCAATGACACTATCACTCTCCCATGTAGAATAAAACAAGTTGTAAACATGTGGCAGGAAGTGGGGCGAGCAA  
TGTATGCCGCTCCCATTGCAGGAAGAATTACCTGTAACTCAAAT---  
ATTACAGGTCTACTATTGACAAGAGATGGTGGTCACACTAGTACTAATGAGACT-----  
-----  
-----  
AATCAGACTGAGACCTTCAGACCTGAGGGAGGAAATATGAAAGACAATTGGAGAAGTGAATTATATAAATATA  
AAGTAGTAGAAATTCAGCCACTA---GGAGTAGCACCTCCAGGGCAAAAAGACCAGTGGTG-----  
-----CAGAGAGAAAAAAGAGCA---GTGGGA---CTAGGAGCT-----  
---ATGTTCCCTTGGGTTCTTGGGAGCA---GCAGGAAGCACTATG---GGCGCGGCGTCA---  
ATAACGCTGACGGTACAG---GCCAGACAA---TTATTG---TCTGGCATAGTGCAACAGCAGAAC---  
AATCTG---CTGAGG---GCTATTGAAGCGCAACAGCATCTGTTGCAGCTCACAGTCTGGGGCATT  
>HM026456  
TTCTACTGCAATACATCAGGACTGTTTAATGACACAGGATCC-----  
-----

-----  
AACAAATGAGACTATCATTCTCCCATGTAGAAATAAAACAAATGATAAACATGTGGCAGGAAGTGGGGCGAGCAA  
TGTATGCCGCCCGCGTTGCAGGAAACATTACCTGTAACCTCGAAT ---  
ATTACAGGTCTACTATTGACAAGAGATGGTGGTCCTGGTAATAAG-----  
-----  
-----  
ACTCAAATCTTCAGACCTGGGGGAGGAGATATGAAAGACAACCTGGAGAAGTGAATTATACAAATATAAAGTAG  
TAGAAATTGAGCCACTA---GGAATAGCACCCACCAAGGCAAAAAGACAAGTGGTG-----  
-----ACGAGAGAAAAAAGAGCA---GTGGGA---CTGGGAGCG-----  
TTGTTCTTGGGTTCTTGGGAGCA---GCAGGAAGCACTATG---GGCGCGGCGTCA---  
ATAACGCTGACGGTACAG---GCCAGACAA---TTATTG---GCTGGCATAGTGCAACAGCAAAAC---  
AATTTG---CTGAGG---GCTATTGAAGCGCAACAGCATCTGTTGCAGCTCACAGTCTGGGGCATT  
>HM026458  
TTCTACTGCAATACATCAGGACTGTTTGATGAATCAATATTCAATAACACAGAC-----  
-----  
-----  
AACAGTGACAACATCACTCTCCCATGTCAAATAAAACAAATTGTAAACATGTGGCAGGAAGTGGGACGAGCAA  
TGTATGCCGCCCGCGTTGCAGGAAGCATTACCTGCAACTCAAAT ---  
ATTACAGGTCTACTATTGACAAGAGATGGTGGACAGAATAATGATACT-----  
-----  
-----  
AATGAACTGAGACCTTCAGACCTGGGGGAGGAAATATGAAAGACAATTGGAGAAGTGAATTATATAAAATATA  
AAGTAGTAGAAATTGAGCCACTA---GGAGTAGCACCCACCAGGGCAAAAAGACAAGTGGTG-----  
-----CAGAGAGAAAAAAGAGCA---ATAGGA---ATGGGAGCT-----  
---TTGTTCTTGGGTTCTTGGGAGCA---GCAGGAAGCACTATG---GGCGCAGCGTCG---  
GTAGCGCTGACGGTACAG---GCCAGACAA---TTATTG---TCTGGCATAGTGCAACAGCAAAAC---  
AATTTG---CTGAGG---GCTATTGAAGCGCAACAGCATCTGTTGCAGCTCACAGTCTGGGGCATT  
>HM026459  
TTTTACTGCAATACATCAGGACTGTTTAATAATAATATCACACAA-----  
-----  
-----  
TCTAAGGACATTATCACCTCCCATGTCTGAATAAAACAAAGTGGTAAACCTGTGGCAGGAAGTGGGGCGAGCAA  
TGTATGCCGCCCGCGATTGAAGGAATAATTACCTGTAACCTCAAGT ---  
ATTACAGGTCTACTATTGACAAGAGATGGTGGTCAGGGTAATAGTACT-----  
-----  
-----  
GATAATAACACTGAGATCTTTAGACCTGGGGGGGAAATATGAAAGACAACCTGGAGAAGTGAATTATATAAAAT  
ATAAGTAGTAGAAATTGAGCCACTA---GGAGTAGCACCCACCAGGGGCAAAAAGACAAGTGGTG-----  
-----AAGAGAGAGAAAAGAGCA---GTAGGGCTACTGGGAGCT---  
-----TTGTTCTTGGGTTCTTGGGAACA---GCAGGAAGCACTATG---GGCGCAGCGTCA---  
ATGGCGCTGACGGTACAG---GCCAGACAA---TTATTG---TCTGGCATAGTGCAACAGCAAAAC---  
AATTTG---CTGAGG---GCTATTGAAGCGCAACAACATCTGTTGCAGCTCACAGTCTGGGGCATT  
>HM026460  
TTCTACTGCAACACATCAAGACTGTTTAATGACACAGGATCCAGA-----  
-----  
-----  
TCCAATGACACTATCATTCTCCCATGTCTGAATAAAACAAATTGTAAACATGTGGCAGGAAGTGGGGCGAGCAA  
TGTATGCCGCTCCCATTCAGGAAATATTACCTGTAATTCAAAT ---  
ATTACAGGTCTACTATTGACAAGAGATGGTGGTAATCAGACTGAGAGT-----  
-----  
-----  
AATAATAATGAGATCTTCAGACCTGGGGGAGGAAATATGAAAGACAACCTGGAGAAGTGAATTATATAAAATATA  
AGGTAGTAGAAATTGAGCCACTA---GGAATAGCACCCACCAAGGCAAGAAGACGAGTGGTGGCGAGAGAA---  
-----AAAAGAGCAGTGGTGGCGAGAGAAAAAAGAGCA---GTAGGA---CTAGGAGCT-----  
---ATGTTCAATTGGTATCTTGGGAGCA---GCAGGAAGCACTATG---GGCGCGGCGTCA---  
ATAACGCTGACGGTACAG---GCCAGACAA---TTATTG---TCTGGCATAGTGCAACAGCAGAGT---  
AATCTG---CTGAGG---GCTATTGAAGCGCAACAGCATCTGTTGCAGCTCACAGTCTGGGGCATT  
>KJ849798  
TTCTACTGTAATACAACAGTACTGTTTAATAGTACATGGAATGAGACAAATATT-----  
-----

-AATCAAGAGTCAAAT-----  
 AACTCAACTGACATAATCACACTCCGATGCAAAATAAAACAAATTATAAACATGTGGCAGGAAGTAGGAAAAG  
 CAATGTATGCCCCCTCCCATTAGTGGATACCTTAATTGTTTCATCAAAT---  
 ATCACAGGGCTGATATTAATAAGAGATGGTGGT-----  
 -----  
 AATAACAGCACAAAT---  
 GAGACTGAGATCTTCAGACCTGGAGGAGGAAATATGAAGGACAATTGGAGAAGTGAATTATATAAATATAAAG  
 TAGTAAAAAATTGAACCATTA---GGAATAGCACCCACCAGGGCAAAGAGAAGAGTGGTG-----  
 -----CAGAGAGAAAAAAGAGCA---GTGGGA---TTTGGAGCT-----  
 TTGTTCTTGGGTTCTTGGGAGCA---GCAGGAAGCACTATG---GGCGCAGCGTCA---  
 GTGGCGCTGACGGTACAG---GCCAGACAA---TTATTG---TCTGGTATAGTGCAACAGCAAAAC---  
 AATTTG---CTGAGG---GCTATTGAGGCGCAACAGCATATGTTGCAACTCACAGTCTGGGGCATC  
 >GQ175883  
 TTCTATTGCAATACAACAAAACTATTTAATGATACTTGCATAGAAAATAATACCAG-----  
 -----  
 -----  
 TGTAATCACGCTATCATACTTCCATGCAGGATAAAGCAGATCATAAACATGTGGCAAGGAGTAGGACAAGCAA  
 TGTATGCTCCTCCCATCAATGGAAAAATTAATTGTGTATCAAAT---  
 ATTACAGGAATACTATTAACAAGAGATGGTGGTAGAAATAGTAGT-----  
 -----  
 -----  
 GATGGTAATGAAACCTTCAGACCTGGAGGAGGAAATATAAAGGACAATTGGAGAAGTGAATTATATAAATATA  
 AAGTAGTACAAATTGAACCACTG---GGAATAGCACCCACCAGGGCAAAGAGAAGAGTGGTG-----  
 -----GAGAGAGAAAAAAGAGCA---GTGGGC---ATAGGAGCT-----  
 ---CTGATCTTTGGGTTCTTAGGAGCA---GCAGGAAGCACTATG---GGCGCGGCGTCA---  
 ATAACGCTGACGGTACAG---GCCAGACAA---TTATTG---TCTGGTATAGTGCAACAGCAAAGC---  
 AATTTG---CTGAGG---GCTATAGAGGCGCAGCAGCATATGTTGCAACTCACAGTTTGGGGCATC  
 >AF192135  
 TTCTATTGTAATACATCAGGATTGTTTAATAAATCATTATTGAATGAGACTAGTAATGAGACTACAGATGGT-----  
 -----  
 -----  
 GCAAATAATACTATCACACTCATGTAGATAAAGCAAATTGTAAGAATGTGGCAGAGAGTAGGACAAGCAA  
 TATATGCCCCCTCCCATTCAGGAAACATTACATGCACATCAAAT---  
 ATTACAGGATTGCTATTGACACGTGATGGGGGATATACAAATAATACT-----  
 -----  
 -----  
 AATGGAACAGAGATTTTCACACCTACAGGAAGAAATATGAGGGACAATTGGAGAAGTGAGTTATATAAATATA  
 AAGTGGTGAAGATTGAGCCAATA---GGAGTAGCACCCACCAGGGCAAAAAGAAGAGTGGTG-----  
 -----GGGAGAGAAAAAAGAGCA---GTAGGAATAATGGGAGCT-----  
 ---ATGTTCTTGGGTTCTTGGGAACA---GCAGGAAGCACTATG---GGCGCAGCGTCA---  
 ATAACGCTGACGGTACAG---GCCAGACAA---TTGTTG---TCTGGTATAGTGCAACAGCAAAGC---  
 AATTTG---CTGAAG---GCTATAGAGGCTCAACAGCACCTGTTGAGACTCACTGTCTGGGGCATT  
 >JN417239  
 TTCTATTGCAATACATCACACCTGTTTAATAGCACTTGAATAACAGCACACAGGTGTCAAATAACACACAG-----  
 -----  
 -----  
 TTAAATGACACTATAACTCTCCAATGCAGAATAAAACAAATTATAAACATGTGGCAGGGAGTAGGAAAAGCAA  
 TGTATGCCCCCTCCCATTTGAAGGAAAGATTACATGTTTATCAAAT---  
 ATTACAGGACTAATATTAACAAGAGATGGTGGTGCAAATAATAAT-----  
 -----  
 -----  
 AGTCAGAATGAGACTTTCAGACCTGCAGGAGGAGATATGAGAGACAATTGGAGAAGTGAATTATACAAATATA  
 AAGTAGTAAGACTTGAACCACTA---GGTCTAGCACCCACCAGGGCAAGGAGAAGAGTGGTG-----  
 -----GCAAGAGAAAAAAGAGCA---ATAGGA---CTAGGAGCT-----  
 ---ATGTTCTTGGGTTCTTGGGAGCA---GCAGGAAGCACAAATG---GGCGCAGCGTCA---  
 CTGACGCTGACGGTACAG---GCCAGAAAA---TTATTG---TCTGGTATAGTGCAAGCAGCAAAAC---  
 AATTTG---CTGAGG---GCTATAGAGGCGCAACAACATTTGTTGCAACTCACAGTCTGGGGCATT  
 >JN882655  
 TTCTATTGCAATACATCAGGACTGTTTAATAGTACTTGAATGACACTAGTACTTGAATGAC-----  
 -----

-----  
ACTGATAGGAATGTAACCTCTCCCATGCAGAATAAAGCAATTTATAAATATGTGGCAGAGAGTAGAGCGAGCAA  
TGTATGCCCCCTCCCATCCGAGGAGACATAAAATGTGCATCAAAC---  
ATCACTGGACTACTACTAACAAGAGATGGAGGGAATAATAATAGT-----  
-----  
-----  
ACAAATGAGACCTTCAGGCCTGCAGGAGGAGATATGAGAGACAATTGGAGAAGTGAATTATATAAGTATAAGG  
TAGTAAAAATTGAACCATTA---GGAATAGCACCCACCAGGGCAAAAAGGAGAGTAGTG-----  
-----GGGAGAGAGAAAAAGAGCA---GTTGGA---ATGGGAGCT-----  
GTCTTCCTTGGGTTCTTGGGAGCA---GCAGGAAGCACTATG---GGCGCGGCGTCA---  
ATAACGCTGACGGTACAG---GCCAGACAA---TTATTG---TCTGGTATAGTGCAACAGCAAAAC---  
AATTTG---CTGAAG---GCTATAGAGGCTCAACAACATATGTTGAGACTCACAGTTTGGGGCATT  
>KC898985  
TTCTATTGTAACACATCAGGCCTGTTTAAATAGTACATACATACTTAATGGTACATACATGTACAGGGCTAATG  
GTACAGACAAG-----AAT---  
ACGACTGATGGTACAATTAGT-----  
AATCCAAACTCAACCATCACAAATCCCATGTAGAATAAAGCAAATTGTAAACATGTGGCAGGAGGTGGGACAAG  
CAATGTATGCCTCTCCCATTCAGGAAACATAACATGTAAATCAAAT---  
ATCACAGGACTACTATTGGTACGTGATGGAGGTGGAGAGAAAAAT-----  
-----  
-----  
GATACAGAAATCTTCAGACCTGGAGGAGGAGATATGAGGGACAATTGGAGAAGTGAATTATATAAATATAAAG  
TGGTAGAAATTCAGCCATTG---GGGGTAGCACCCACTAAAGCAAAAAGGAGAGTAGTG-----  
-----GAGAGAGAAAAAGAGAGCA---GTGGGA---ATAGGAGCT-----  
GTGTTCCCTTGGGATCTTGAGTGTA---GCTGGAAGCACTATG---GGCGCGGCGTCA---  
ATGGCGCTGACGGTACAG---GCCAGACAA---TTGCTG---TCTGGTATAGTGCAACAGCAGAAC---  
AATTTG---CTGAGG---GCTATAGAGGCGCAACAGCATATGTTGCAACTCACGGTCTGGGGCATT  
>KC899008  
TTCTATTGTGATACATCAGGCCTGTTTAAATGGTACATATGGTACATACGATCCTAATGGCACAGAAGGTAATT  
CAAGC-----  
-----TCAGAA-----  
GGTAATTCAAATTCATCATACTTCCATGCAGAATAAAGCAAATTATAAACATGTGGCAGGAGGTAGGACGAG  
CAATGTATGCCCCCTCCCATTCAGGGAACATAACATGTAAATCAAAT---  
ATCACAGGACTACTATTGGTACGTGATGGAGGAACTCAAATGAAACA-----  
-----  
-----  
AAAAATGAAGAGATATTCAGACCTGAAGGAGGAGATATGAGGGACAATTGGAGAAGTGAATTATATAAATATA  
AAGTGGTAGAAATTAAGCCATTG---GGAGTAGCACCCACTGAAGCAAAAAGGAGAGTAGTG-----  
-----GAGAGAGAAAAAGAGCA---GTGGGA---CTAGGAGCT-----  
---GTGTTCCCTTGGGTTCTTGGGTGCA---GCCGGAAGCACTATG---GGCGCAGCGTCA---  
GTAGCGCTGACGGTACAG---GCCAGACAA---TTGCTG---TCTGGTATAGTGCAACAGCAAAAC---  
AATTTG---CTGAGG---GCTATAGAGGCGCAACAGCATATGTTGCAACTCACGGTCTGGGGCATT  
>JX679207  
TTCTATTGTAATACATCAAGACTATTTAAATAGTACATACATGTCTAATGGTACATACATACACAATTAATA  
GT-----  
-----  
AACATCTCAAACATCACAAATTCATGCAGAATAAAGCAAATTGTAAACATGTGGCAGGAGGTAGGACGAGCAA  
TGTATGCCCCCTCCCATTCAGGAAATATAACATGTAAATCAAAT---  
ATCACAGGACTACTATTGGTACGTGATGGAGGATCAAATGAGACT-----  
-----  
-----  
CAGCCAGAGATATTCAGACCTGGAGGAGGAGATATGAGGGACAATTGGAGAAGTGAATTATATAAATATAAAG  
TGGTAGAAATTAAGCCATTG---GGACTAGCACCCACTACTGCAAAAAGGAGAGTAGTG-----  
-----GAGAGAGAAAAAGAGCA---GTGGGA---ATAGGAGCT-----  
GTGTTCCCTTGGGTTCTTGGGTGCA---GCCGGAAGCACTATG---GGCGCGGCGTCA---  
ATAACGCTGACGGTACAG---GCCAGACAA---TTGTTG---TCTGGGATAGTGCAACAGCAAAGC---  
AATTTG---CTGAAG---GCTATAGAGGCGCAACAGCATCTGTTGCAACTCACGGTCTGGGGCATT  
>KC870044  
TTCTATTGTAATACATCAGGTCTGTTTAAATAGTACATACCTGCCTAATGGCACA-----  
-----

TTCATGACTAATGATACA-----  
 ACTTATAGCCCAAACATCACAATCCCATGCAGAATAAAACAAATTATAAACATGTGGCAGGAGGTAGGACGAG  
 CAATGTACGCCCTCCCATTTGCAGGAGAAATAACATGTAAATCAAAG---  
 ATCACAGGACTACTATTGGTAAGGGATGGAGGA-----  
 -----  
 -  
 CTACCAAATAAGACAAATGAGACATTCAGACCTGGAGGAGGAGATATGAGAGACAATTGGAGAAGTGAATTAT  
 ATAAATATAAAGTGGTAGAAATTAAGCCATTG---GGCATAGCACCCACTACTGCAAAAAGGAGAGTGGTG--  
 -----GAGAGAGAAAAAGAGCA---GTGGGA---  
 CTAGGAGCT-----TTGTTTCCTTGGGTTCTTGGGTGCA---GCCGGAAGCACTATG---  
 GGCGCGGCGTCA---ATAACGCTGACGGTACAG---GCCAGACAA---TTGTTG---  
 TCTGGTATAGTGCAACAGCAAAAC---AATTTG---CTGAGG---  
 GCTATAGAGGCGCAACAGCATATGTTGCAACTCACGGTCTGGGGCATT  
 >JN230353  
 TTCTATTGCAATACATCAGCACTATTTAATAGCAGTTGGAATAGCACTGGGAATAGCACTGGGGTGAAT----  
 -----  
 -----  
 ATCACTGACCCTATAAGACTCCCATGCAAAATAAAGCAAATTATAAATATGTGGCAGAGAGTAGGACAAGCAA  
 TATATGCCCTCCTATCCAGGAGTAATAAGGTGTAATTCAAAC---  
 ATTACAGGAATACTATTAACAAGAGATGGAGGGACTGGGACTAACAGT-----  
 -----  
 -----  
 ACAAATGAGACCGAGACCTTCAGACCTGGAGGAGGAGACATGAGGGATAATTGGAGAAGTGAATTATATAAGT  
 ATAAAGTAGTAAAAATTGAACCACTA---GGTGTAGCACCCACCGGGGCAAAACGAAGAGTGGTG-----  
 -----GAGAGAGGAAAAAGAGCAGTCGTCGGA---CTGGGAGCT---  
 -----GTCTTCCTTGGGTTCTTAGGAACA---GCAGGAAGCACTATG---GGCGCAGCAGCA---  
 TTAACGCTGACGGTACAG---GCCAGACAA---TTATTG---TCTGGTATAGTGCAACAGCAGAAC---  
 AATCTG---CTGAGG---GCTATAGAGGCTCAACAGCACATGTTGAAACTCACGGTCTGGGGCATT  
 >KC899009  
 TTCTATTGTAATACATCAGGTCTGTTTAATGGAACATACATGCCTAATGGTACAATGGATAGTCCA-----  
 -----  
 -----  
 AGCACAATCCCATGCAGAATAAAGCAAATTATAAACATGTGGCAGGAGGTAGGGCGAGCAATGTATGCCCCCTC  
 CTATTGAAGGAAACATAACATGTCAATCAAAT---  
 ATCACAGGAATACTATTGGTACGGGATGGAGAGTTAAATAGGACA-----  
 -----  
 -----  
 GAAGAGATATTCAGACCTGGAGGAGGAGATATGAGGAACAATTGGAGAAGTGAATTATATAAATATAAAGTGG  
 TAGAAATTAAGCCATTG---GGAATAGCACCCACTGAAGCAAAAAGGAGAGTGGTG-----  
 -----GAGAGAGAAAAAGAGCA---GTGGGA---ATAGGAGCT-----  
 GTGTTTCCTTGGGTTCTTGGGAGCA---GCAGGAAGCACTATG---GGCGCGGCGTCA---  
 ATAACGCTGACGGTACAG---GCCAGACAA---TTGTTG---TCTGGGATAGTGCAACAGCAAAGC---  
 AATTTG---CTGAGG---GCTATAGAGGCGCAACAGCATATGTTGCAACTCACGGTCTGGGGCATT  
 >KC870043  
 TTCTATTGTAATACATCAGGCCTGTTTAAGGGTACATACACTAATGGT-----  
 -----  
 -----ACATTAAGT-----  
 AATTCAGCTCAGACATCACAATCCCATGCAGAATAAAGCAAATTATAAACATGTGGCAGGAGGTAGGAAGAG  
 CAATGTATGCCCTCCCATTTGAAGGAAACATAACATGTAAATCAAAT---  
 ATCACAGGACTACTATTGGTACGTGATGGAGGT-----  
 -----  
 -  
 ACTTCTAATAATAATACAGAGGTATTTAGACCTGGAGGAGGAGATATGAGGGACAATTGGAGAAGTGAATTAT  
 ATAAATATAAAGTGGTAGAAATTAAGCCATTG---GGAGTAGCACCCACTGGAGCAAAAAGGAGAGTGGTG--  
 -----GAGAGAGAAAAAGAGCA---GTGGGA---  
 ATAGGAGCT-----GTGTTTCCTTGGGTTCTTGGGAGCA---GCAGGAAGCACTATG---  
 GGCGCGGCGTCA---ATAACGCTGACGGTACAG---GCCAGACAA---TTGTTG---  
 TCTGGCATAGTGCAACAGCAAAAC---AATTTG---CTGAAG---  
 GCTATAGAGGCGCAACATCATCTGTTGCAACTCACAGTCTGGGGCATT  
 >JN251903

TTCTACTGCAATACATCAGGACTGTTTAAATAACACACTGTAAATGTAAATGAAACAGGA-----  
-----  
-----  
TCTAATAACACTATCACTCTCCCATGTGCGAATAAAACAAATTGTAAACATGTGGCAGGAAGTAGGGCGAGCAA  
TGTATGCCGCTCCCATTGCAGGAAACATTACCTGTAACCTCAAAT---  
ATTACAGGTCTACTATTGACAAGAGATGGTGGTCAGACTAATGAGACT-----  
-----  
AATGGGAATGAGACTGTCAGGCCTGGGGGAGGAAATATGAAAGACAATTGGAGAAATGAATTATATAAAATATA  
AAGTAGTAGAAATTGAACCTCTA---GGAGTAGCACCCACCAAGGCAAAAAGACAAGTGGTG-----  
-----CAGAGAGAAAAAAGAGCA---ATAGGA---ATAGGAGCT-----  
---ATGTTTCCTTGGGTTCTTGGGAGCA---GCAGGAAGCACTATG---GGCGCGGCGTCA---  
ATAACGCTGACGGTACAG---GCCAGACAA---TTATTG---TCTGGAATAGTGCAACAGCAGAAC---  
AATTTG---CTGCAG---GCTATTGAAGCGCAACAGCATCTGTTGCAGCTTACAGTCTGGGGCATC  
>AB845347  
TTCTATTGCAATACAACAAAACTGTTTAAATAACTTGCATAAGAAATAAAACCATGGAGGGG-----  
-----  
-----  
TG TAGTGGCAATATCACTATCCCATGCAAGATAAAACAAATTATAAACATGTGGCAGGGCATAGGACAAGCAA  
TGTATGCTCCTCCCATCAGTGGAAAAATTAAATTGTGTATCAAAT---  
ATTACAGGAATACTATTGACAAGAGATGGTGGTGCTAATAATACA-----  
-----  
-----  
AATAATGAGACCTTCAGACCTGGAGGAGGAGATATGAAGGACAATTGGAGAAGTGAATTATATAAAATATAAAG  
TAGTAGAAATTGAACCACTA---GGAATAGCACCCACCAGGGCAAAGAGAAGAGTGGTG-----  
-----GAGAGAGAAAAAAGAGCA---GTGGGA---ATAGGAGCT-----  
ATGATCTTTGGGTTCTTAGGAGCA---GCAGGAAGCACTATG---GGCGCGGCGTCA---  
ATAACGCTGACGGTACAG---GCCAGACAA---TTATTG---TCTGGTATAGTGCAACAGCAAAGC---  
AATTTG---CTGAGG---GCTATAGAGGCGCAGCATCATCTGTTGCAACTCACAGTCTGGGGCATC  
>KU749388  
TTCTACTGTGACTCCACTCCACTGTTTAAATAGTACTTGGAAATGGTACTGAAGAAATAAATGGCACTGAA---  
-----  
-----  
GGAAATGACACGATCACACTCAAATGCAGAATAAAACAAATTATAAACATGTGGCAGAGAGTAGGAAGAGCAA  
TGTATGCCCCCTCCCATTCAAGGACAAATTAGCTGTTTCATCAAAT---  
ATTACAGGGATTCTATTAACAAGAGATGGTGGTAGTGGCAACGAG-----  
-----  
-----  
ACGAACAACAAGACAGAGACCTTCAGACCTGGAGGAGGAGATATGAGGGACAATTGGAGAAGTGAATTATATA  
AATATAAAGTAGTAAAAATTGAACCATTA---GGAGTGGCACCAACCCATGCAAAGAGAAGAGTGGTG-----  
-----CAGAGAGAAAAAAGAGCA---ATAGGA---  
CTAGGAGCT-----ATGTTTCCTTGGGTTCTTGGGAGCA---GCAGGAAGCACTATG---  
GGCGCAGCGTCA---ATAACGCTGACGGTACAG---GCCAGACAA---TTATTG---  
TCTGGTATAGTGCAGCAGCAGAAT---AATCTG---CTGAGG---  
GCTATTGAAGCGCAACAGCATATGTTGCAACTCACAGTCTGGGGCATC  
>DQ358811  
TTCTACTGTAACTCAACACAACCTGTTTAAATAGTACTTGGTATGGTAATGAAACTTGGAAATGGTACTGAAAAAT  
TCAAT-----  
-----  
GAGGAAATGACACAATCAGCCTCCCATGCAGAATAAAACAAATTATAAACATGTGGCAAGGAGTAGGAAAAG  
CAATGTATGCCCCCTCCCATCCAAGGACAAATTAGATGTACATCAAAT---  
ATTACAGGGCTGATGTTAACAAGAGATGGTGGTCATAACAATGACACG-----  
-----  
-----  
CACCAGATGACAGAGACCTTCAGACCTGGAGGAGGAGACATGAGGGACAATTGGAGAAGTGAATTATATAAAT  
ATAAAGTAGTAAGAATTGAACCATTA---GGAATAGCACCCACCAAGGCAAAGAGAAGAGTGGTG-----  
-----CAGAGAGAAAAAAGAGCA---ATAGGA---ATAGGAGCT---  
-----ATGCTCCTTGGGTTCTTGGGAGCA---GCAGGAAGCACTATG---GGCGCAGCATCA---  
ATAACGCTGACGGTACAG---GCCAGACTA---TTATTG---TCTGGTATAGTGCAACAGCAAAAC---  
AATTTG---CTGAGG---GCTATTGAGGCGCAACAGCATCTGTTGCAACTCACAGTCTGGGGCATC

>KJ671535

TTTTATTGCAATACATCAAGATTGTTTACTGGCACAGTGGTCAATGGCACT-----

-----  
-CTCACTAATGCCACT-----

ATCACTAATGGCACTATCACTCTCCCCTGTCTGAATAAAACAAATTGTAAACATGTGGCAAGAAGTAGGACGAG  
CAATGTATGCCGCTCCTGTTGCAGGAAGCATTAACTGTACATCAAAT---

ATTACAGGGCTACTATTGACAAGAGATGGGGGT-----

-----  
AAGGATAATCAGACTAAT---

AAGAATGAGATCTTTAGACCTGGAGGAGGAAATATGAAAAGATAATTGGAGAAGTGAATTATATAAATATAAAG  
TGGTAGAAATTGAACCACTA---GGAGTAGCACCCACCAGGGCAAAGAGGCAAGTGGTG-----

-----AAGAGAGAAAGAAGAGCA---GTGGGA---ATAGGAGCT-----

TTGTTTCCTTGGGTTCTTGGGAGCA---GCAGGAAGCACTATG---GGCGCAGCGTCA---

ATGACGCTGACGGTACAA---GCTAGACTA---TTATTG---TCTGGTATAGTGCAACAGCAGAAC---

AATCTG---CTGAGA---GCTATTGAGGCACAACAGCATCTGTTGCAACTCACAGTCTGGGGCATT

>KJ671537

TTCTATTGCAATACATCAGGACTGTTTAATGACTCAAAATTCATGACTCAAAATTC-----

-----  
AATGGCAATTTCTCTTCC-----

AATGACACTAGCACTATCACTATCCCATGTAGAATAAAACAAGTCATAAACATGTGGCAGGAAGTAGGACGAG  
CAATGTATGCTGCTCCTATTGCAGGAAACATTATCTGTAACCTCAAAT---

ATTACAGGTCTACTATTGACAAGAGATGGTGGT-----

-----  
-

CAAACAAATAATACAAACGAGACCTTCAGACCTGGGGGAGGAAATATGAAAGACAATTGGAGAAGTAAGTTAT  
ATAAAATATAAAGTAGTAGAAGTTGAACCACTA---GGAGTAGCACCCACCAAGGCACAAAGACGAGTGGTA--

-----AAGAGAGACAAAAGAGCA---GTGGGA---

ATGGGAGCT-----TTGTTTCATTGGGTTCTTGAGCGCA---GCAGGAAGCACTATG---

GGCGCAGCGTCA---GTGACGCTGACGGTACAG---GCCAGACAA---TTATTA---

TCTGGTATAGTGCAACAGCAGAAC---AACTTG---CTGAGA---

GCTATTGAGGCGCAACAGCATCTGTTGCAACTCACAGTCTGGGGCATT

>MK341078

TTTTATTGTAATACTTCACAACTGTTTAATAGTACTTGGATCAATAGTATTTGG-----

-----  
AGCAATGACACAATCATACTTCCATGCAGAATAAGACAAATTATAAACTTGTGGCAGGAAGTAGGAAGAGCAA

TGTATGCCCCCTCCCATTAGTGGACCTATTAAATGTTTCATCAAAT---

ATTACAGGTCTACTACTAACAAGGGATGGGGGTGAGAGTAATAAC-----

-----  
GAGACTGAGACCTTCAGACCTGGGGGAGGGAATATGAAAGACAATTGGAGAAGTGAATTATATAAATATAAAG

TAGTAGAACTTAAACCACTA---GGAGTAGCACCCACCAAGGCAAAAAGACAAGTGATA-----

-----GGGAGACAAAAAAGAGGG-----CTAGGCGCT-----

GTGTTTCCTTGGGTTCTTGGGAGCA---GCAGGAAGCACTATG---GGCGCAGCGTCG---

CTGACGCTGACGGTACAA---GCCAGACTA---TTATTG---TCTGGTATAGTGCAACAGCAGAAC---

AATCTG---CTGAGG---GCCATTGAGATGCAACAACATCTGTTGAAACTCACAGTCTGGGGCATT

>GU595149

TTCTATTGTAATACAGCACAACCTGTTTAATAGTACTTGGACGAATGGTACTGAACAGACAAATAGCACTATA-

-----  
GGAATGACACAATCACACTCCCATGCAAAATAAAACAAATTATAAACTTGTGGCAGGAAGTAGGAAAAGCAA

TGTATGCCCCCTCCCATCAGTGGACTAATTAGATGTTTCATCAAAT---

ATTACAGGTCTACTACTGACAAGGGATGGGGGTGAGAATAATGAT-----

-----  
ACTAAGAATGAGACCTTCAGACCTGGGGGAGGGGATATGAAAGACAATTGGAGAAGTGAATTATATAAATATA

AAGTAGTAGAAATTAAACCACTA---GGAGTAGCACCCACCAAGGCAAAAAGACAAGTGGTG-----

-----GGGAGACAAAAAAGAGGA-----CTAGGAGCT-----

---GTGTTTCCTTGGGTTCTTGGGAGCA---GCAGGAAGCACTATG---GGCGCAGCGTCA---

ATAACGCTGACGGTACAG---GCCAGACTA---TTATTG---TCTGGTATAGTGCAACAGCAGAAC---  
 AATCTG---CTGAGG---GCTATTGAGGCGCAACAGCATCTGTTGCAACTCACAGTCTGGGGCATC  
 >KU992930  
 TTCTATTGTAATACTTCAAACCTGTTTAATAGTACATACTACTCTAATGGTACATACTCTAATGGTACAGTAG  
 ACAAT-----  
 -----  
 TCAAGCTCATCCATCACGATTCAATGCAGAATAAAGCAAATTATAAATATGTGGCAGGAGGTAGGACGAGCAA  
 TATATGCCCCCTCCCATTTGAAGGAAATATAACATGTAGATCAAAT---  
 ATCACAGGACTACTATTAGTACGTGATGGAGGAGTTGGAAATGATACAGAG-----  
 -----  
 -----  
 AATAATACAGAGATATTTAGACCTGGAGGAGGAGATATGAAGGACAATTGGAGAAGTGAATTATATAAATATA  
 AAGTGGTAGAAATTAAGCCATTG---GGAGCAGCACCCACTAAAGCAAAAAGGAGAGTGGTG-----  
 -----GAGAGAGAAAAAAGAGCA---GTGGGA---ATAGGAGCT-----  
 ---GTGTTCCCTTGGGTTCTTGGGAGCA---GCAGGAAGCACTATG---GGCGCGGCGTCA---  
 ATAACGCTGACGGTACAA---GCCAGACAA---TTGTTG---TCTGGTATAGTGCAACAGCAAAGC---  
 AATTTG---CTGAGA---GCTATAGAGGCGCAACAGCATATGTTGCAACTCACGGTCTGGGGCATT  
 >AY037271  
 TTCTACTGCAATACATCAAACTGTTTAATAACAACACAGAA-----  
 -----  
 -----  
 TTCAATAACACTATTATTCTCCCATGTGCGAATAAAACAGATGGTAAACATGTGGCAGGAAGTGGGACGAGCAA  
 TGTATGCCGCTCCCATTTGCAGGAAACATTAAGTGTAGCTCAAAT---  
 ATTACAGGTTTACTATTGACAAGAGATGGTGGTATAAATATAACA-----  
 -----  
 -----  
 AGTGGTCAGGAGACCTTCAGACCTGGGGGAGGAAATATGAAAGACAATTGGAGAAGTGAATTATATAAATATA  
 AAGTAGTAGAAATTGAACCATTA---GGAGTAGCACCCACCAAGGCAAAGAGAAGAGTGGTG-----  
 -----CAGAGAGAAAAAAGAGCA---GTGGGA---ATGGGAGCT-----  
 ---TTGTTCCCTTGGGTTCTTGGGAGCA---GCAGGAAGCACTATG---GGCGCGGCGTCA---  
 ATAACGCTGACGGTACAG---GCCAGACAA---TTATTG---TCTGGAATAGTGCAACAGCAGAAC---  
 AATTTG---CTAAGG---GCTATTGAAGCGCAACAGCATCTGTTGCAGCTCACAGTCTGGGGCATT  
 >MF372649  
 TTCTATTGCAATACATCAGCACTGTTTAATAGCACTTGGAAATCCACTTCAATTGCAAATTTACAGAG---  
 -----  
 -----  
 GAAAAATGGCACTATTACTATCCAATGCAGAATAAAGCAATTTATAAATATGTGGCAGAGAGTAGGAAGAGCAA  
 TGTATGCCCCCTCCCATCAAAGGAAAGATACAATGTAAGTCAACC---  
 ATAACAGGACTCATATTAACAAGAGATGGAGGTAATGGTAATAGC-----  
 -----  
 -----  
 AGTGCAAATGAGACATTTCAGACCTGGAGGAGGAGACATGAGGGACAATTGGAGAAGTGAATTATACAAGTACA  
 AAGTAGTAAAAATTGAACCATTA---GGTGTAGCACCCACCAAGGCAAAAAGAAGAGTGGTG-----  
 -----GAGAGAGAAAAAAGAGCG---GTTGGA---CTGGGAGCT-----  
 ---GTTTTCCTTGGGTTCTTAGGAGCA---GCAGGAAGCACTATG---GGCGCGGCGTCA---  
 ATAACGCTGACGGTACAA---GCCAGACAA---TTATTG---TCTGGTATAGTGCAACAGCAGAGC---  
 AATCTG---CTGAAG---GCTATAGAGGCTCAACAACAGCTGTTGAGACTCACAGTCTGGGGCATT  
 >MH666154  
 TTCTATTGCAATACATCAGGACTGTTTGATAGTACTTGAATACATCAAGACTGTCTAATGGTACTTGAATG  
 AT-----  
 -ACATCAAGAGAATCTAAT-----  
 AACTCAGTCAATAACATAACTCTTCAATGCAGAATAAGGCAAATTGTAAGAATGTGGCAGAGAGTAGGGCAAG  
 CAATGCATGCCCCCTCCCATCCGAGGAGAAATAAGATGTGTATCAAAC---  
 ATTACTGGACTACTATTAACAAGGGATGGAGGGACGACTAATGAGACAGAG-----  
 -----  
 -----  
 ACAGAGGAGATCTTCAGGCCTGCAGGAGGAGATATGAGAGACAATTGGAGAAGTGAATTATATAAGTATAAAG  
 TAGTAAAAATTGAACCACTA---GGTGTAGCACCCAACTATGGAAGAAGAAGAGTGGTG-----  
 -----GAGAGAGAAAAAAGAGCA---GTTGGA---CTGGGAGCT-----  
 GTCTTCCTTGGGTTCTTAGGAGCA---GCAGGAAGCACTATG---GGCGCGGCGTCA---

ATAACGCTGACGGTACAG---GCCAGGCAG---TTATTG---TCTGGTATAGTGCAACAGCAAAGC---  
 AATTTG---CTGAAG---GCTATAGAGGCTCAACAACAGCTGTTGAGACTCACAGTCTGGGGCATT  
 >MH666157  
 TTCTACTGCAATACATCAGAACTGTTTAATAGTACTTGGAATGCCAATGGTAGCAATGATAGCCTAAAC-----  
 -----  
 -----  
 CACACTGGCAACATAACTCTCAATTGCAGAATAAAGCAAATTATAAATATGTGGCAGAGAGTAGGGCAAGCAA  
 TTTATGCCCCCTCCCATCCGAGGAGTAATAAGGTGTGAATCAAAC---  
 ATTACTGGAATATTATTAACAAGAGATGGAGGGAAAAGTAATGCT-----  
 -----  
 -----  
 ACAAATGAGACCTTCAGGCCTGCAGGAGGAGATATGAGAGACAATTGGAGAAGTGAATTATATAAGTATAAAG  
 TAGTAAAAATTGAACCACTA---GGTGTAGCACCCACCCCTGCAAAAAGAAGAGTAGTG-----  
 -----GGGAGAGAAAAAAGAGCA---GTTGGA---CTGGGAGCT-----  
 GTCTTCCTTGGGTTCTAGGAGCA---GCAGGAAGCACTATG---GGCGCGGCGTCA---  
 ATAACGCTGACGGTACAG---GCCAGACAA---TTATTG---TCTGGTATAGTGCAACAGCAGAGC---  
 AATTTG---CTGAAG---GCTATAGAGGCTCAACAGCATATGTTGAGACTCACAGTTTGGGGCATT  
 >MH666161  
 TTCTATTGCAATACATCAGGACTGTTTAATAGTACTTGGAACAATACTTGAAAAGATACATCAGAATAT---  
 -----  
 -----  
 AATGGATCTACCATAACTCTCCAATGCAGAATAAGGCAAATTGTAAGGATGTGGCAGAGAGTAGGGCAAGCAA  
 TGTATGCCCCCTCCCATCCAAGGAGAAATAAGATGTGCATCAAAC---  
 ATTACTGGACTACTATTAACAAGAGATGGAGGGGATAATAGTGGG-----  
 -----  
 -----  
 ACAAATGAGACCTTCAGGCCTGAGGGAGGAGATATGAAAGACAATTGGAGAAGTAAATTATATAAATATAAAG  
 TAGTGAAAATTGAACCACTA---GGTGTAGCACCCACCTATGGAAGAAGGAGAGTGGTG-----  
 -----GGGAGAGAAAAAAGAGCA---GTTGGA---CTGGGAGCT-----  
 GTCTTCTTTGGGTTCTAGGAGCA---GCAGGAAGCACTATG---GGCGCGGCGTCA---  
 ATAACGCTGACGGTACAG---GCCAGACAA---TTATTG---TCTGGTATAGTGCAACAGCAAAGC---  
 AATTTG---CTGAAG---GCTATAGAGGCTCAACAACAACCTGTTGAGACTCACAGTCTGGGGCATT  
 >MH666156  
 TTCTATTGTAATACATCAGGACTGTTTAATAGTACTTGAGCAATACGAGCAATACATCAGGACCTAATACC-  
 -----  
 -----  
 TCAGACGCTGACATAACTCTCCAATGCAGAATAAGGCAAATTATAAGGATGTGGCAGAGAGTAGGGCAGGCAA  
 TATATGCCCCCTCCCATCCAAGGAGAAATAAGGTGTGTATCAAAC---  
 ATTACTGGACTACTATTAACAAGGGATGGAGGGACTGATAATAAT-----  
 -----  
 -----  
 ACAGATGAGACCTTCAGGCCTGCAGGAGGAGATATGAGAGATAATTGGAGAAGTGAATTATATAAATATAAAG  
 TAGTAAAAATTGAACCACTA---GGTGTAGCACCCACCCCTGCAAGAAGAAGAGTGGTG-----  
 -----GGGAGAGAAAAAAGAGCA---GTT-----CTGGGAGCT-----  
 GTCTTCCTTGGGTTCTAGGAGCA---GCAGGAAGCACTATG---GGCGCGGCGTCA---  
 ATAACGCTGACGGTACAG---GCCAGACAA---TTATTG---TCTGGTATAGTGCAACAGCAAAGT---  
 AATTTG---CTGAAG---GCTATAGAGGCTCAACAACAGCTGTTGAGACTCACAGTCTGGGGCATT  
 >MH666155  
 TTCTATTGCAATACATCAGGACTGTTTAATAGTACTTGGAATAGTACTTGGAACCAATACATCAGGCATTAAT-  
 -----  
 -----  
 AGCTCAGAACCTATAATTCTCCAATGCAGGATAAGGCAAATTATAAGAATGTGGCAGAGAGTAGGGCAAGCAA  
 TGTATGCCCCCTCCCATCCGAGGAGAAATAAGGTGTGAATCAAAC---  
 ATTACTGGACTACTATTAACAAGGGATGGAGGGAATGATAATACA-----  
 -----  
 -----  
 AATGAGACCTTCAGGCCTGCAGGAGGAGATATGAGAGACAATTGGAGAAGTGAATTGTATAAGTATAAAGTAG  
 TAAAAATTGAACCACTA---GGTGTAGCACCCGCGCCAGGCAAGGAGAAGAGTAGTG-----  
 -----GGGAGAGAAAAAAGAGCA---GTTGGA---ATAGGAGCT-----  
 GTCTTCCTTGGGTTCTAGGAGCA---GCAGGAAGCACTATG---GGCGCGGCGTCA---

ATAACGCTGACGGTACAG---GCCAGGCAG---TTATTG---TCTGGGATAGTGCAACAGCAAAGC---  
 AATTTG---CTGAAG---GCTATAGAGGCTCAACAACATATGTTGAGACTCACAGTCTGGGGCATT  
 >KF850149  
 TTCTATTGTAATACAACAAAATTGTTTAATAGTACTTGGAAGGGAAATGAA-----  
 -----  
 -ACCATGGAGAGGGAT-----  
 AATAAGACTGAGATCATCATACTTCCATGCAGGATAAAGCAAATTATAAACATGTGGCAGGGAGCAGGACAAG  
 CAATGTATGCTCCTCCCATCAAGGGATTAATTAATTGTACATCAAAT---  
 ATTACAGGAATACTATTAACAAGAGATGGTGGT-----  
 -----  
 ----  
 CATAATGGTACAAATGAGACCTTCAGACCTGGAGGAGGAAATATAAAGGACAATTGGAGAAGTGAATTATATA  
 AATATAAAGTAGTAGAACTTGAACCACTA---GGGGTAGCACCCACCAGGGCAAAGAGAAGAGTGGTG-----  
 -----GAAAGAGAAAAAAGAGCA---GTGGGA---  
 ATAGGAGCT-----ATGATCTTTGGGTTCTTAGGAGCA---GCAGGAAGCACTATG---  
 GGCGCGGCGTCA---ATAACGCTGACGGTACAG---GCCAGACAA---TTATTG---  
 TCTGGTATAGTGCAACAGCAAAGC---AATTTG---CTGAGG---  
 GCTATAGAGGCGCAACAGCGTATGTTGCAACTCACAGTCTGGGGCATT  
 >MG518476  
 TTCTATTGTAATACAACAAAATTGTTTAATAGTACTTGGAAGGGAAATGAAACCATGGAGAGGAATAAT----  
 -----  
 -----  
 AACACTGACACTATCATACTTCCATGCAGGATAAAGCAAATTATAAACCTGTGGCAGGGAGTAGGACAAGCAA  
 TGTATGCTCCTCCCATCAGGGGAGCAATTAATTGTGTATCAAAT---  
 ATTACAGGAATACTATTAACAAGAGATGGTGGTCATAATAGTACA-----  
 -----  
 -----  
 AATGAGACCTTCAGACCTGGAGGAGGAAATATAAAGGACAATTGGAGAAGTGAATTATATAAATATAAAGTAG  
 TAGAGATTGAACCACTA---GGAATAGCACCCACCAGGGCAAAGAGAAGAGTGGTG-----  
 -----GAGAGAGAAAAAAGAGCA---GTGGGA---ATAGGAGCT-----  
 ATGATCTTTGGGTTCTTAGGAGCA---GCCGGAAGCACTATG---GGCGCGGCGTCA---  
 CTAACGCTGACGGTACAG---GCCAGACAA---TTATTG---TCTGGTATAGTGCAACAGCAAAGC---  
 AATTTG---CTGAGG---GCTATAGAGGCGCAACAGCATATGTTGCAACTCACAGTCTGGGGCATT  
 >AY371145  
 TTCTATTGCAATACATCAGGACTATTTAATAGCACTTGGGAAATGAACACAACCAGCTTAGGG-----  
 -----  
 -----  
 TTAAATGATACTATAATTCTCCAGTGCAGAATAAAGCAAATTGTAAATATGTGGCAGAGAGTAGGACAAGCAA  
 TGTACGCCCCCTCCCATCCAGGAAAAATAAGGTGTCTAGTCAAAC---  
 ATTACAGGACTACTATTGACAAGAGATGGTGGGACTAGTAACAATACAGAG-----  
 -----  
 ----  
 ACTAGTAACAGTACAGAGACTTTCAGACCTGGAGGAGGAGATATGAGAGATAATTGGAGAAGTGAATTATATA  
 AATATAAAGTAGTAAAAATTGAACCACTA---GGAGTAGCACCTACCAGGGCAAAGAGGAGGGTGGTG-----  
 -----GAGAGAGAAAAAAGAGCA---GTTGGA---  
 CTGGGAGCT-----GTCTTCCTTGGGTTCTTAGGAGCA---GCAGGAAGCACTATG---  
 GGCGCGGCGTCA---ATAACGCTGACGGTACAG---GCCAGACAA---TTATTG---  
 TCTGGCATAGTGCAACAGCAAAGC---AATTTG---CTGAGG---  
 GCTATAGAGGCTCAACAACATATGTTGAGACTCACGGTCTGGGGCATT  
 >KP718921  
 TTCTATTGTAATACAACAGAACTATTTAATAGCACTTGGGAGAGTAGCAATAGCACTAACAGCTCAAGTGCA-  
 -----  
 -----  
 ACAAATGGAACTATAACTCTCAAATGCAGGATAAAGCAAATTATAAATATGTGGCAGAGAGTAGGACAAGCAA  
 TGTATGCCCCCTCCCATCCAAGGAATAATAAGGTGTGAATCAAAC---  
 ATTACAGGACTACTATTAACAAGAGATGGAGGAGATACTAATAGT-----  
 -----  
 -----  
 AATAATAGTGAGATCTTCAGGCCTGGAGGAGGAGATATGAGGGACAATTGGAGAAGTGAATTATATAAGTATA  
 AAGTAGTAAAAATTGAACCAATA---GGTATAGCACCCACCCATGCAAAAAGAAGAGTGGTG-----

-----GAGAGAGAAAAAGAGCA---GTTGGACTACTGGGAGCT-----  
 ---GCCTTCCTTGGGTTCTTAGGAGCA---GCAGGAAGCACTATG---GGCGCAGCGTCA---  
 ATAACGCTGACGGTACAG---GCCAGACAA---TTATTG---TCTGGCATAGTGCAACAGCAAAGC---  
 AATTTG---CTGAGG---GCTATAGAGGCTCAACAACAGCTGTTGAACTCACAGTCTGGGGCATT  
 >KP718922  
 TTCTATTGCCATACATCAAACCTATTTAATAGCACTTGGAAAGAGAACACAACAGAGTCAAGTGGCAATATA-  
 -----  
 -----  
 ACAAGTGGCAATATAACTCTCCAGTGCAGAATAAAGCAAATTGTAAATATGTGGCAGAGAGCAGGAAAAGCAA  
 TGTATGCCCCCTCCCATTCAGGAGTGATAGAGTGTAGGTCAAAC---  
 ATTACAGGGCTCCTATTACAAAGAGATGGAGGGAAAAATAATACAAATAAT-----  
 -----  
 -----  
 ACCTTATGGCCTGGAGGAGGAGATATGAGGGATAATTGGAGAAGTGAGTTATACAAATATAAAGTAGTGAAAA  
 TTGAACCACTA---GGAGTAGCACCCACCAGGGCAAGGAGAAGGGTGGTG-----  
 -----CAGAGAGAAAAAGAGCA---GTTGGA---ATAGGAGCT-----  
 GTCTTCCTTGGGTTCTTAGGAACA---GCAGGAAGCACTATG---GGCGCAGCGGCA---  
 GTAACGCTGACGGTACAG---GCCAGACAA---TTATTG---TCTGGTATAGTGCAACAGCAAAGC---  
 AATTTG---CTGAAG---GCTATAGAGGCTCAACAACAACCTGTTGAGACTCACGGTCTGGGGCATT  
 >JF683748  
 TTCTATTGTAACACATCAGGCCTGTTTAATAGCACTTGGACTGCCAATGGTGGCAGGCTGCGGGAAGATAGTG  
 CA-----  
 -----  
 AAGTCAAACAGCACTATAACTCTCCAATGTAGAATAAAGCAAATTATAAATATGTGGCAGAGAGCAGGACAAG  
 CAATATATGCCCCCTCCCATCCAAGGAGTAATAAGGTGTGAATCAAAC---  
 ATTACAGGGCTAATATTAACAAGAGATGGTGGGGGGAGTAATGAT-----  
 -----  
 -----  
 ACAGCGGAAACCTTCAGACCTGGAGGAGGAGATATGAGGGACAATTGGAGAAGTGAATTATATAAGTATAAAG  
 TAGTAAAAATTGAACCATTA---GGAGTAGCACCCACCAAGGCAAGGAGAAGAGTGGTG-----  
 -----GAGAGAGAAAAAGAGCA---GTTGGA---CTGGGAGCT-----  
 GTCTTCATTGGGTTCTTGGGAGCA---GCAGGAAGCACTATG---GGCGCGGCGTCA---  
 GTGACGCTGACGGTACAG---GCCAGGCAA---TTATTG---TCTGGCATAGTGCAACAGCAAAGC---  
 AATTTG---CTGAAG---GCTATAGAGGCTCAACAGCAGCTGTTGAGACTCACAGTTTGGGGCATT  
 >MK086114  
 TTCTATTGCAATACAACAAACCTGTTTAACAGCATTTGGAATTACAATAGCACTGGGAATCACAGTGACAGCA  
 TGACAAATAAC-----  
 -----  
 ACGGATGGCAATATAATTCTCCAGTGCAGAATAAAGCAAATTATAAATATGAGGCAGAGAGCAGGAAAAGCAA  
 TATATGCCCCCTCCCATTCGAGGAAGAATACAGTGTGAGTCAAAC---  
 ATTACAGGAATACTATTGACAAGAGATGGTGGGAATAATGCTAGT-----  
 -----  
 -----  
 AATTCAAATGAGACTTTTAGACCTGGAGGAGGAGATATGAGAGACAATTGGAGAAGTGAATTATATAAATATA  
 AAGTAGTAAAAATTGAACCACTA---GGAGTAGCACCCACCAAGGCAAGAAGGAGAGTGGTG-----  
 -----GAGAGAGAAAAAGAGCA---TTTGGA---TTGGGAGCT-----  
 ---ATGTTCCCTTGGGTTCTTGGGAACA---GCAGGAAGCACTATG---GGCGCAGCGTCG---  
 CTAACGCTGACGGTACAG---GCCAGACAA---TTATTG---TCTGGCATAGTGCAACAGCAAAGC---  
 AATTTG---CTGAGA---GCTATAGAGGCTCAACAGAATATGTTGAGACTCACAGTCTGGGGCATT  
 >MF373389  
 TTCTATTGCAATACATCAGGCCTGTTTAATAGTACATACACTAATGGTACATTTAATTATAATGGTACATCTA  
 ATTAT-----  
 -----ACA---  
 GAAAGTAATGTGACCATCACACTCCCATGCAGAATAAAACAAATTATAAATATGTGGCAGAAGGTGGGAAGAG  
 CAATGTATGCTCCTCCCATTCAGGAAACATAACATGTAAGTCAAAT---  
 ATCACAGGACTACTGTTAGTACGTGATGGAGGATATGCAAAGGATGCA-----  
 -----  
 -----  
 AATGATACAGAGATATTAGGCCTGGAGGAGGAAATATGAAGGACAATTGGAGAAGTGAATTATATAAATATA  
 AAGTGGTAGAAATTAAGCCATTG---GGACTAGCACCCACTGAAGCGAAAAGGAGAGTGGTG-----

-----GAGAGAGAAAGAAGAGCA---GTAGGA---ATAGGAGCT-----  
 ---GTGTTCCCTTGGGTTCTTGGGAGTA---GCAGGAAGCACTATG---GGCGCGGCGTCA---  
 ATGGCGCTGACGGTACAG---GCCAGACAA---TTGCTG---TCTGGTATAGTGCAACAGCAAAAC---  
 AATTTG---CTGAGG---GCTATAGAGGCGCAACAGCATATGTTGCAACTCACGGTCTGGGGCATT  
 >KX159285  
 TTCTACTGCGATACAACAAAATTGTTTAATGAGAGACAGAAAATGGATCACGGAAGA-----  
 -----  
 -----  
 GCTATAATGGCTACTATCTTACATCCATGTAGGATAAAACAAATTGTAAACATCTGGCAGCGAGTGGGACAAG  
 CAACGTGCTCCTCCCATGCTGCAGCAAACATATCATGTCAGTCAAAT---  
 ATCACAGGACTACTATTAGTACGTGATGGAGGAAATGATACAGAG-----  
 -----  
 -----  
 GAGACAGAGACATTTCAGGCCTGGAGGAGGAGATATAAAGGACAATTGGAGAAGTGAATTATATAAATATAAAG  
 TAGTACAAATTGAACCATTA---GGAATAGCACCCACCAAAGCAAAGAGAAGAGTGGTA-----  
 -----GACAGAGAAAAAAGAGCA---GTGGGA---ATAGGAGCT-----  
 ATGATCTTTGGGTTCTTAGGAGCA---GCAGGAAGCACTATG---GGCGCGGCGTCA---  
 ATAACGCTGACGGTACAG---GCCAGACAA---TTATTG---TCTGGTATAGTGCAACAGCAAAAC---  
 AATTTG---CTGAGA---GCTATAGAGGCGCAACAACATCTGTTGCAACTCACAGTCTGGGGCATT  
 >MN452901  
 TTCTATTGTAATACATCAAGCCTGTTTAATGGTACATACAATAGCAGTAGGCCAAACAGTACT-----  
 -----  
 -----  
 TCAAACCTCAATCATCATAATCCCATGCAGAATAAAGCAAATTATAAATATGTGGCAAGGAGTAGGACAAGCAA  
 TGTACGCTCCTCCCATCAGTGGAAACAATTAATTGTGTATCAAAT---  
 ATTACAGGAATCTTATTGACAAGGGATGGTGGTAATGATACCGTGAGTAGG-----  
 -----  
 -----  
 GAAAAATGAGACCTTCAGACCTGGAGGAGGCAATATAAAGGACAATTGGAGAAATGAATTATATAAATATAAAG  
 TAGTAGAAATTGAACCACTA---GGAATAGCACCCACCAAGGCAAAGAGAAGAGTGGTG-----  
 -----GAGAGAGAAAAAAGAGCA---GTGGGA---ATAGGAGCT-----  
 ATGATCTTTGGGTTCTTAGGAGCA---GCAGGAAGCACTATG---GGCGCAGCGTCA---  
 ATAACGCTGACGGTACAG---GCCAGACAA---TTATTG---ACTGGTATAGTGCAACAGCAAAGC---  
 AATTTG---CTGAGG---GCTATAGAGGCGCAACATCATCTGTTGCAACTCACAGTCTGGGGCATT  
 >MH682099  
 TTCTATTGCAATACATCAGGCCTGTTTAATAAGACATACTCGTCTAATAGTACATTTAATAATACAGAA---  
 -----  
 -----  
 GATAATTCAACCATCACAATCCCATGCTACATAAAGCAAATTATAAATATGTGGCAGGAGGTGGGACGAGCAA  
 TGTATGCTCCTCCCATTCAGGAAACATAACATGTAGGTCAAAT---  
 ATCACAGGACTACTATTAGTACGTGATGGAGGACCAGAGTCAAATTGTACAAAG-----  
 -----ACA---  
 GGATCAGAGTCAAATTGTACAGAGACATTTCAGGCCTGGAGGAGGAGATATGAGGGACAATTGGAGAAGTGAAT  
 TATATAAATATAAAGTGGTAGAAGTTAAGCCATTG---  
 GGAGTAGCACCCACTGAAGCAAAAAGGAGAGTGGTG-----  
 ---GAGAGAGAAAAAAGAGCA---GTGGGA---ATAGGAGCT-----  
 GTGTTCCCTTGGGTTCTTGGGAGTA---GCAGGAAGCACTATG---GGCGCGGCGTCA---  
 ATGACGCTGACGGTACAG---GCCAGACAA---TTGCTG---TCTGGTATAGTGCAACAGCAAAGC---  
 AATTTG---CTGAGG---GCTATAGAGGCGCAACAGCATATGTTGCAACTCACAGTCTGGGGCATT  
 >AY371167  
 TTCTATTGCAATACATCAGGCCTGTTTAATAGCACTTGGAATGACACTGGCAGCATGCCAGAGTCAAATAAC-  
 -----  
 -----  
 ACGAATGGCAATATAACTCTCCAGTGCAGAATAAAGCAGATTATAAATATGTGGCAGAGAACAGGACAAGCAA  
 TGTATGCCCCCTCCCATCCAGGAACAATAAGGTGTGAGTCAAAC---  
 ATTACAGGACTACTACTGACAAGAGATGGTGGGACTCCTAACAGT-----  
 -----  
 -----  
 ACAAATGAAACTTTTCAGACCTGGAGGAGGAGATATGAGAGACAATTGGAGAAGTGAATTATATAAATATAAAG  
 TAGTAAACCTTGAACCACTA---GGAGTAGCACCCACCAAGGCAAAGAGAAGAGTGGTG-----

-----CAGAGAGAAAAAAGAGCG---GTTGGA---TTGGGAGCT-----  
GTCTTCCTTGGGTTCTTAGGAGCA---GCAGGAAGCACTATG---GGCGCGGCGTCA---  
ATAACGCTGACGGTACAG---GCCAGACAA---TTATTG---TCTGGCATAGTGCAACAGCAAAGC---  
AATTTG---CTGAAG---GCTATAGAGGCTCAACAGCATCTGTTGAGACTCACAGTCTGGGGCATT  
>FJ388953  
TTCTATTGTAACACATCAGGCCTGTTTAATAGCACTTGGCATGCCAATGACAGTTTGCAAGAGTCAAATGACA  
CA-----  
-----  
ACAATAAAGAAGAATATAACTCTCCAATGCAGAATAAAGCAGATTATAAATCTGTGGCAGAGAGCAGGACAAG  
CAATGTATGCCCCCTCCCATCCCAGGAGTAATAAAGTGTGTATCAAAC---  
ATAACAGGACTAATATTAACAAGAGATGGTGGAGGTAATAACACAGCT-----  
-----  
-----  
CGTGATAATGAAACCTTCAGACCTGGAGGAGGAGATATGAGGGACAATTGGAGAAGTGAATTATATAAGTATA  
AAGTAGTAAAAATTGAGCCACTA---GGAGTAGCACCCACCAGGGCAAGGAGGAGAGTGGTG-----  
-----GAGAGAGAAAAAAGAGCA---GTTGGA---ATAGGAGCT-----  
---GTCTTCATTGGGTTCTTGGGAGCA---GCAGGAAGCACTATG---GGCGCGGCGTCA---  
GTGACGCTGACGGTACAG---GCCAGGCAA---TTATTG---TCTGGCATAGTGCAACAGCAAAGC---  
AATTTG---CTGAGG---GCTATAGAGGCTCAACAACATCTGTTGAAACTCACAGTCTGGGGCATT  
>KR017779  
TTCTATTGCAATACATCAGGACTGTTTAATAGCACTTGGAAAGATTAATAGCACTTGGAAATAGC-----  
-----  
-----  
ACTAATGGCACTATAACTCTCCTGTGCAGAATAAAGCAAATTGTAAACATGTGGCAGAGAGCAGGACAAGCAA  
TGTATGCCCCCTCCCATCCCAGGAGTAATAAGATGTGAATCAAAC---  
ATTACAGGGATACTATTGACAAGAGATGGCGGGGAGGATTCCTAAT-----  
-----  
-----  
AAGACTAATGAAACAGAAATTTTCAGACCTGGAGGAGGAGATATGAGAGACAATTGGAGAAGTGAATTATATA  
AATATAAAGTAGTAAAAATTGAACCACTA---GGAGTAGCACCCACCGAGGCAAAGAGAAGGGTGGTG-----  
-----GAGAGAGAAAAAAGAGCA---GTTGGA---  
CTGGGAGCT-----GTTTTTCCTTGGGTTCTTAGGAGCA---GCAGGAAGCACTATG---  
GGCGCGGCGTCA---ATAACGCTGACGGTACAG---GCCAGACAA---TTATTG---  
TCTGGTATAGTGCAACAGCAAAGC---AATTTG---CTGAGG---  
GCCATAGAAGCTCAACAGCATGTGTTGAGACTCACAGTCTGGGGCATT  
>U76035  
TTCTATTGCAATACATCAGGCCTGTTTAATAGCACTTGGAAAAATAGCACCAGCATAAATGACACGGTG---  
-----  
-----  
TCAAATGGCACTATAACTCTCCCATGCAGAATAAAGCAAATTGTAAATATGTGGCAAAGAGTAGGACAAGCAA  
TGTATGCCCCCTCCCATCAAAGGAGTAATAAAGTGTGAATCAAAC---  
ATTACAGGAATACTATTAAACAAGAGATGGTGTGGGTAATAACACA-----  
-----  
-----  
GCAAATGAGACCTTCAGACCTGGAGGAGGAGATATGAGGGACAATTGGAGAAGTGAATTATATAAGTATAAAG  
TAGTAAAGATTGAACCACTA---GGAGTAGCACCCACCAAGGCAAAGAGAAGAGTGGTG-----  
-----GCGAGAGAAAAAAGAGCA---ATTGGA---ATGGGAGCT-----  
TTCTTCCTTGGGTTCTTAGGAGCA---GCAGGAAGCACTATG---GGCGCGGCGTCA---  
ATAACGCTGACGGTACAT---GTCAGACAA---TTATTG---TCTGGTATAGTGACAGCAGAGC---  
AATCTG---CTGAGG---GCTATAGAGGCTCAACAGCATCTGTTGAAACTCACAGTCTGGGGCATT  
>MH327751  
TTCTATTGCAATACAACAAAATTGTTTAATTGCACAGACAATAATAACACATACACA-----  
-----  
-----  
TGTAATGACACTATCGTACTTCCATGCAAGATAAAGCAAATTATAAACATGTGGCAAGGAGTAGGACAAGCAA  
TGTATGCTCCTCCCGTCAGGGGAATAATTAATTGTGTATCAAAC---  
ATTACAGGAATACTATTGACAAGGGATGGTGGGACAAATAGCACT-----  
-----  
-----  
AATAGAAATGAGACCTTCAGACCTCAAGGAGGAAATATAAAGGACAATTGGAGAAGTGAATTATATAAATATA

AAGTAGTACAAATTGAACCACTA---GGAGTGGCACCCACTAGGGCAAGGCGAAGAGTGGTG-----  
-----GAGAGAGAAAAAAGAGCA---GTGGGA---ATAGGAGCT-----  
---ATGATCTTTGGGTTCTTAGGAGCA---GCAGGAAGCACTATG---GGCGCGCGTCA---  
ATAACGCTGACGGTACAG---GCCAGACAA---TTATTG---TCTGGTATAGTGCAACAGCAAAGC---  
AATTTG---CTGAGG---GCTATAGAGGCGCAGCAGCATCTGTTGCAACTCACAGTCTGGGGCATT  
>KP411826  
TTCTACTGTAACACAACAGAACTGTTTAAACAGTACTTGGAATAGCACTGAAGAGTCAAGTACCCCTAAA----  
-----  
-----  
GGAAATGACACAATTACACTCCAATGTAGAATAAAACAAATTATAAACATGTGGCAGGAAGTAGGAAAAGCAA  
TGTATGCCCCCTCCCATCAGAGGACAAATTAATTGTTTCATCAAAC---  
ATCACAGGGCTACTGTTAAACAAGAGATGGCGATCAGAACGACAGT-----  
-----  
-----  
GAGACTTTCAGACCTGGAGGAGGAAATATGAAAGACAATTGGAGAAGTGAATTATATAAATATAAAGTAATAA  
AAATTGAACCACTA---GGAATAGCACCCACCAGGGCAAAGAGAAGAGTGGTG-----  
-----GAGAGAGAAAAAAGAGCA---GTGGGA---ATAGGAGCT-----  
ATGATCTTTGGGTTCTTGGGAGCA---GCAAGAAGCACTATG---GGCGCAGCGTCA---  
CTGACGCTGACGGTACAG---GCCAGACAA---TTATTG---TCTGGTATAGTGCAACAGCAGAAT---  
AATTTG---CTGAAG---GCTATTGAGGCGCAACAGCATCTGTTGCAACTCACAGTCTGGGGCATT  
>AY358069  
TTCTATTGCAACACAACAGATCTGTTCAACACAACAAAACCTAAATGAAACCACGTTAAATAATAGC-----  
-----  
-----  
ACTAATAGCACTATCATACTTCCATGCAGAATAAAGCAAATTATAAACATGTGGCAGGGAGTAGGACAAGCAA  
TGTATGCTCCTCCCATCAGAGGAAAGATTAATTGTGTATCAAAT---  
ATTACAGGAATACTATTGACAAGAGATGGTGGTAATAATAATCAGACTAATAAT-----  
-----  
-----  
CAGACTAACAAGACCGAGACCTTCAGACCTGGAGGAGGAAATATGAAGGACAATTGGAGAAATGAATTATATA  
AATATAAAGTAGTACAAATTGAACCACTA---GGAATAGCACCCACCAAGGCAAAAAGAAGAGTGGTG-----  
-----GAGAGAGAAAAAAGAGCA---GTGGGA---  
ATAGGAGCT-----ATGATCTTTGGGTTCTTAGGAGCA---GCAGGAAGCACTATG---  
GGCGCGGCGTCA---ATAACGCTGACGGTACAG---GCCAGACAA---TTATTG---  
TCTGGTATAGTGCAACAGCAAAGC---AATTTG---CTGAGG---  
GCTATAGAGGCGCAGCAGCATCTGTTGCAACTCACAGTCTGGGGCATT  
>MG989522  
TTCTATTGCAATACATCACGACTGTTTAATAATACTTGTGCAAAAATGTAACCCAGGAAGGG-----  
-----  
-----  
TGTAATGAACTATCATACTCCCATGCAGGATAAAGCAAATAGTAAACATGTGGCAGAGAGCAGGACAAGCAA  
TGTATGCTCCTCCCATCAGTGGACAAATTAATTGCATATCAAAT---  
ATTACAGGAATACTGTTGACAAGAGACGGTGGTAAGGACGGTGATAATGGT-----  
-----  
-----  
ACTCATAATGGGAGCGAGATCTTCAGACCTACAGGAGGAAATCTAAGGGACAATTGGAGAAATGAATTATATA  
AATATAAGGTAGTGCAAAATTGAACCACTA---GGAATAGCACCCACCAAGGCAAGAGAAGAGTAGTG-----  
-----GAGAGAGAAAAAAGAGCAGTAGTGGGA---  
ATAGGAGCT-----ATGATCTTTGGGTTCTTAGGAGCA---GCAGGAAGCACTATG---  
GGCGCGGCGTCA---ATAACGCTGACGGTACAG---GCCAGACAA---TTATTG---  
TCTGGTATAGTGCAACAGCAAAGC---AATTTG---CTGAGA---  
GCTATAGAGGCGCAACAGCATATGTTGCAACTCACAGTCTGGGGCATC  
>MG989595  
TTCTACTGTAATACAACACAACCTGTTTAAATAGTACTTGGTATGGGAATGATTCTGACAAGAATAATAACAATA  
ATAAT-----  
-----  
GACAAATGACACAATCATACTCCCATGTAAATAAGACAAATTGTAAACATGTGGCAGGAAGTAGGAAAAGCAA  
TATATGCTCCTCCTATCAGTGGACAAATTAAGTGTTCATCAAAG---  
ATTACAGGGCTGTTATTAACAAGAGATGGTGGTAATGGTAACGGTACC-----  
-----

-----  
AGGAATGAAACCTTCAGACCTGGAGGAGGAAATATGAGGGACAATTGGAGAAGTGAATTATATAAATATAAAG  
TAGTAAAAATTGAACCATTA---GGAGTAGCACCCACTAAGGCAAAGAGAAGAGTGGTG-----  
-----CAGAGAGAAAAAAGAGCT---GTAACA---CTGGGAGCT-----  
GTGTTCCCTTGGGTTCTTGGGAGCA---GCAGGAAGCACTATG---GGCGCAGCGTCA---  
TTGACACTGACGGTACAG---GCCAGACAA---TTATTG---TCTGGTATAGTGCAACAGCAGAAC---  
AATCTG---CTGAGG---GCTATTGAGGCGCAACATCATCTGTTGCAACTCACAGTCTGGGGCATT  
>MG989556  
TTCTATTGCAATACATCAAACTGTTTAATAGTACTTGGAATGGAACAAACAATACAGGAGGG-----  
-----  
-----  
GATACTGGCACTATCATACTTCCATGTAGGATAAAAGCAAATTATAAACATGTGGCAGCAAACAGGACAAGCAA  
TGTATGCTCCTCCCATCAGTGGACCAATTAATTGTATGTCAAAT---  
ATTACAGGAATACTATTGACAAGAGATGGTGGAGTTAATAATAGT-----  
-----  
-----  
CATACTAATGAAACCTTCAGACCTGGAGGAGGAGATATGAAAAATAATTGGAGAAATGAATTATATAAATATA  
AAGTAGTACAAATTGACCCACTA---GGAATAGCACCCACCAAGGCAAAGAGGAGAGTGGTG-----  
-----GAGAGAGAAAAAAGAGCA---GTGGGA---ATAGGAGCT-----  
---ATGATCTTTGGGTTCTTAGGAGCA---GCAGGAAGCACTATG---GGCGCGGCGTCA---  
ATAACGCTGACGGTACAG---GCCAGACAA---TTATTG---TCTGGTATAGTGCAACAGCAAAGC---  
AATTTG---CTGAGG---GCTATAGAGGCGCAGCAGCATCTGTTGCAACTCACAGTCTGGGGCATT  
>MG989612  
TTCTACTGTAATACAACAAAACTGTTTAATAGTACTTGGAATAATACTGGAGAGTCAAATGAGATCTCTACA-  
-----  
-----  
GGAAATGACACCATCACACTCCCATGCAGAATAAAACAAATTATAAACATGTGGCAGCAAGTAGGGAAAGCAA  
TGTATGCTCCTCCCATCAGTGGTCAAATTAATGCTCATCAAAT---  
ATTACAGGGCTACTATTATTAAGAGACGGTGGTAACCAGAACAAATAGCGCC-----  
-----  
-----  
AACACAGAGACATTTCAGACCGGGAGGAGGAGACATGAGGGACAATTGGAGAAGTGAATTATATAAATATAAAG  
TAGTAAAAATTGAACCATTA---GGAGTAGCACCAACCAAGGCAAAGAAGAAGAGTGGTG-----  
-----CAGAGAGACAAAAGAGCA---GCA-----CTAGGAGCG-----  
GTGTTCCCTTGCCTTCTTGGGAGCA---GCAGGAAGCACTATG---GGCGCAGCGTCA---  
ATAACGCTGACGGTACAG---GCCAGACAA---TTACTG---TCTGGTATAGTGCAACAGCAGAAC---  
AATTTG---CTGAGA---GCTATTGAGGCGCAACAGCATATGTTGCAACTCACAGTCTGGGGCATA  
>KF250395  
TTCTATTGTAATACATCACAACCTGTTTAATAGTACATGGAAGAATCACACTGGTACATATGAGACGAATGATA  
CAAGTAACAAT-----  
-----  
CCAAACATCACAATCACAATTCCATGCAGAATAAAGCAAAGTTATAAACATGTGGCAGGAGGTCGGGCGAGCAA  
TGTATGCCCCCTCCCATTAAGGAACCATAACATGTAAATCAAAT---  
ATCACAGGGCTACTATTGACACGTGATGGAGGAAATGGAAATATGACA-----  
-----  
-----  
AATGAGACAGAGACATTTCAGACCTGGAGGAGGAGATATGAGGGACAATTGGAGAAGTGAATTATATAAATATA  
AAGTAGTAGAAATTAAGCCATTG---GGAGTAGCACCCACTGGAGCAAAAAGGAGAGTGGTG-----  
-----GAGAGAGAAAAAAGAGCA---GTGGGA---ATAGGAGCT-----  
---GTGTTCCCTTGGGTTCTTGGGAGCA---GCAGGAAGCACTATG---GGCGCGGCGTCA---  
ATAACGCTGACGGTACAG---GCCAGACAA---TTGTTG---TCTGGTATAGTGCAACAGCAAAGT---  
AATTTG---CTGAGG---GCTATAGAGGCGCAACAACATATGTTGCAACTCACGGTCTGGGGCATT  
>KF250398  
TTCTATTGTAATACATCAGGCCTGTTTAATGAGACAGACATGCTGCGTATTACA-----  
-----  
-----  
GAAGGTAATATCACCACAATCCCATGCAGAATAAAGCAAATTATAAACATGTGGCAGAGGGTAGGAAAAGCAA  
TGTATGCCTCTCCCATCAAAGGAAACATAACATGTAAATCAAAT---  
ATCACAGGACTACTATTGGTACATGATCAAGTA-----AATTCA-----  
-----

-----  
 ACCAATATGACATTTCAGACCTGAAGGAGGAGATATGAAGAACAATTGGAGAAGTGAATTATATAAATATAAAG  
 TAGTAGAAATTAATCCATTG---GGAATAGCACCCACTGCAGCAAAAAGGAGAGTGGTGGAG---AGA-----  
 -----GAAAATAAGAGAGAAAAAAGAGCG---GTGGGA---CTAGGAGCT-----  
 TTGTTCTTGGGTTCTTGGGAGCA---GCAGGAAGCACTATG---GGCGCGGCGTCA---  
 ATAACGCTGACGGTACAA---GCCAGACAA---TTGCTG---TCTGGTATAGTGCAACAGCAAAAC---  
 AATTTG---CTGATG---GCTATAGAGGCGCAACAGCATATGTTGCAACTCACAGTCTGGGGCATT  
 >KY200514  
 TTCTATTGCAATACATCAAGCCTGTTTAATGGGACATACATGTCTGATGGTACACCTACTGGTATACTTAATG  
 GTACAAAC-----  
 -----  
 GATAATGAGACCATCACAATTCAATGCAAAATAAAGCAAATTATAAATATGTGGCAGAAGGTGGGACGGGCAA  
 TGTATGCTCCTCCCATTGCAGGAAACATAACATGTAGGTCAAAT---  
 ATCACAGGACTACTATTAGTACGTGATGGAGGAACAGTGTCAAATAATACA-----  
 -----  
 ----  
 GAGTCAAATAACACAGAGATATTCAGGCCTGGAGGAGGAGATATGAGGGACAATTGGAGAAGTGAATTATACA  
 AATATAAAGTGGTAGAAATTGAACCACTA---GGAATAGCACCTACCATGGCAAAAAGAAGAGTGGTG-----  
 -----GACAGACAAAAAAGAGCA---GTGGGA---  
 ATAGGAGCT-----ATGATCTTTGGGTTCTTAGGAGCA---GCAGGAAGCACTATG---  
 GGCGCAGCGTCA---ATAACGCTGACGGTACAG---GCCAGACAA---TTATTG---  
 TCTGGTATAGTGCAACAGCAAAGC---AATTTG---CTGAGA---  
 GCTATAGAGGCGCAACAGCATCTGTTGCAACTCACAGTCTGGGGCATT  
 >MG519330  
 TTCTATTGCAATACAACAAACCTGTTTAATAATGATTGCATAAACAATACCACAGCGGGGGG-----  
 -----  
 -----  
 TGTAATAAGACTATCATACTTCCATGCAAGATAAAACAAATTATAAACATGTGGCAAGGAGTAGGACAAGCAA  
 TGTATGCTCCTCCCATCCAGGAATAATTAATTGTGTATCAAAT---  
 ATTACAGGAATACTATTGACAAGAGATGGTGGTATTCTATAACACAAGCGCA-----  
 -----  
 -----  
 GGTAACGAGACCTTTAGACCAGGAGGAGGAAATATGAAGGACAATTGGAGAAATGAATTATATAAATATAAAG  
 TAGTAGAAATTGAACCACTA---GGAATAGCACCCACCAGGGCAAAGAGAAGAGTGGTG-----  
 -----GAAAGACAAAAAAGGGCA---GTGGGA---ATAGGAGCT-----  
 ATGATCTTTGGGTTCTTAGGAGCA---GCAGGAAGCACTATG---GGCGCGGCGTCA---  
 ATAACGCTGACGGTACAG---GCCAGACAA---TTATTG---TCTGGTATAGTGCAACAGCAAAGC---  
 AATCTG---CTAAGG---GCTATAGAGGCGCAGCAGCATCTGTTGCAACTCACAGTCTGGGGCATT  
 >MN336531  
 TTCTATTGCAATACATCAAAATTGTTT---AGCACCAGGGAAGGG-----  
 -----  
 -----  
 CTTAATAGCACTATCATACTTCCATGCAGGATAAAACAAATTGTAAACATGTGGCAGGGAGCAGGACAAGCAA  
 TGTATGCTCCTCCCATCAAAGGAAGCATTAAATTGTTATTCAAAT---  
 ATTACAGGAATACTATTAACAAGAGATGGTGGTAATAATAGTACG-----  
 -----  
 -----  
 GAGACCTTCAGACCAGGAGGAGGAAATATGAAGGACAATTGGAGAAATGAATTATATAAATATAAAGTAGTAG  
 AAATTGAACCACTA---GGAGTAGCACCCACCAGGGCAAAGAGGAGAGTGGTG-----  
 -----GATAGAGAAAAACGAGCA---GTGGGA---ATAGGAGCT-----  
 ATGATCTTTGGGTTCTTAGGAGCA---GCAGGAAGCACTATG---GGCGCAGCGTCA---  
 ATAACGCTGACGGTACAG---GCCAGACAA---TTATTG---TCTGGTATAGTGCAAGCAGCAAAGC---  
 AATTTG---CTGAGA---GCTATAGAGGCGCAGCAGCATCTGTTGCAACTCACAGTCTGGGGCATT  
 >KU820848  
 TTCTATTGTAATACATCGAACTGTTTAATGGTACATACAATAACAAGTAATTCAGTAATGGTACATACA  
 ATACAACA-----  
 -----AGT---  
 AATTCAAGTTTCAGTCATCACAATCCCATGCAAAATAAAACAAATTATAAACATGTGGCAGGAGGTAGGACGAG  
 CAATGTATGCTCCACCCATTGAAGGAAATATAACATGTAGATCAAAT---  
 ATTACAGGGTTGCTATTAAACAAGAGATGGTGGTAGT-----

-----  
-----  
AATACCACCGAGACATTTCAGACCTCAAGGAGGAGATATGAGAGACAATTGGAGAAGTGAATTATATAAAATATA  
AAGTAGTAAAAATTGAACCATTA---GGAGTAGCACCCACCAGGGCAAAGAGAAGAGTAGTG-----  
-----CAGAGAGAAAAAAGAGCA---GTGGGA---ATAGGAGCT-----  
---GTGTTCCCTTGGGTTCTTGGGAGCA---GCAGGAAGCACTATG---GGCGCAGCGTCA---  
ATAACGCTGACGGTACAG---GCCAGACAA---TTGTTG---TCTGGTATAGTGCAACAGCAAAAC---  
AATTTG---CTGAGA---GCTATAGAGGCGCAACAACATATGTTGCAACTCACGGTCTGGGGCATT  
>MH327758

TTTTATTGCAATACATCAGGCCTGTTTAATAAGACATACCCGTCTAATAGTACAGTTAATAATACAGAA----  
-----  
-----  
ACTGATTTCGATCATCACGATCCCATGCAAAATAAAGCAAATTATAAATATGTGGCAGGAGGTGGGACGAGCAA  
TGTATGCTCCTCCCATTGTCAGGAAACATAACATGTAGGTCAAAT---  
ATCACAGGACTACTATTAGTACGTGATGGAGGATTAAATAATACA-----  
-----  
-----

ACTGAGGTATTCAGGCCTCAAGGAGGAGATATGAGGGACAATTGGAGAAGTGAATTATATAAAATATAAAAGTGG  
TAGAGATTAAAGCCATTG---GGAATAGCACCCACTGGAGCAAAAAGGAGAGTGGTG-----  
-----GAGAGAGAAAAAAGAGCA---GTGGGA---ATAGGAGCT-----  
GCGTTCCTTGGGTTCTTGGGAGTA---GCAGGAAGCACTATG---GGCGCGGCGTCA---  
GTGACGCTGACGGTACAG---GCCAGACAA---TTGCTG---TCTGGTATAGTGCAACAGCAAAGC---  
AATTTG---CTGAGG---GCTATAGAGGCGCAACAGCATATGTTGCAACTCACGGTCTGGGGCATT  
>KF250401

TTCTATTGTAATACATCAGGCCTGTTTAATAGTACATACTCGTCTAATAGTACATACAATGATACAGGA----  
-----  
-----  
AGTAATGAAACCATCACAAATCCCATGCAAACTAAAGCAAATTATAAACATGTGGCAGAAGGTAGGACGAGCAA  
TGTATGCCCCCTCCCATTGTCAGGAAACATAACATGTAACCTCAAAT---  
ATCACAGGACTACTGTTGGTACGTGATGGAGGAGGAACAAATAAT-----  
-----  
-----

TCAGAGGAGATATTCAGACCTCAAGGAGGAAATATGAAGGACAATTGGAGAAGTGAATTATATAAAATATAAAG  
TAGTAAAAATTGAACCATTA---GGATTGGCACCCACCCCTGCAAAGAGAAGCGTGGTG-----  
-----CAGAGAGAAAAAAGAGCA---GTGACA---CTAGGAGCT-----  
TTGTTCCCTTGGGTTCTTGGGAACA---GCAGGAAGCACTATG---GGCGCGGCGTCA---  
ATAACGCTGACGGTACAG---GCCAGACAA---TTGTTG---TCTGGTATAGTGCAACAGCAAAGC---  
AATTTG---CTGATG---GCTATAGAGGCGCAACATCATATGTTGCAACTCACGGTCTGGGGCATT  
>AJ508597

TTCTATTGTAATACATCAGGACTGTTTAATGGTACAGAACTGCTTAATAGTACATCT-----  
-----  
-----  
AATAATACTGCAATCACACTCCGATGTAGAATAATACGAATTATAAGGATGTGGCAGAGAGTGGGACAAGCCA  
TTTACGCCCCCTCCCATTGAAGGATACATTACATGTACATCAAAT---  
ATAACAGGATTACTATTTACAAGAGATGGA---AATAACAATGAC-----  
-----  
-----

AGTGAGACCTTCAGACCTGGAGGAGGAGATATGAGGGACAATTGGAGAAGTGAATTATATAAGTATAAAGTAG  
TAAAAGTTAAACCACTA---GGAATAGCACCCAACAAGGCAAGGAGAAGAGTAGTG-----  
-----GGGAGAGAGAAAAGAGCA---GTTGGA---CTGGGAGCT-----  
GTTTTCCCTTGGGTTCTTAGGAACA---GCCGGAAGCACTATG---GGCGCGGCGTCA---  
ATAACGCTGACGGTACAG---GTCAGACAA---TTATTG---TCTGGCATAGTGCAACAGCAAAGC---  
AATTTG---CTGAGA---GCTATAGAGGCGCAGCAGCATCTGTTGCAACTCACAGTCTGGGGCATT  
>AJ508595

TTCTATTGTAATACATCAGGCCTGTTTAATATGTCAGGGAGTAGTAATATATCAGGGAAT-----  
-----  
-----  
AGTAATGAGACCATCACACTCCCATGTAGGATAAAAACAAATTGTAAGGATGTGGCAGAGAGTGGGACAAGCCA  
TTTATGCCCCCTCCCATCGCAGGATACATTACATGCACATCAGAC---  
ATTACAGGACTACTATTTACAAGAGACGGGGTCATCACAGCAGT-----  
-----

-----  
-----  
AATGAGACCTTCAGACCGGAAGGAGGAGATATGAGGAACAATTGGAGAAGTGAATTATATAAGTATAAAGTAG  
TAAAAATTAAACCACTA---GGAATAGCACCCACCAGAGCAAGGAGAAGAGTAGTG-----  
-----GGGAGAGAGAAAAGAGCA---GTTGGA---CTGGGAGCT-----  
GTGTTTCCTTGGGTTCTTAGGAACA---GCAGGAAGCACTATG---GGCGCAGCGTCA---  
ATAACGCTGACGGTACAG---GCCAGACAA---TTATTG---TCTGGCATAGTGCAACAGCAAAGC---  
AATTTG---CTGAGA---GCTATAGAGGCGCAGCAGCATCTGTTGCAACTCACAGTCTGGGGCATT  
>KU168299  
TTCTATTGCAATACAACAGCATTGTTTAATAGCTCTTGGGATGCCAACACACTAAGTAATAGCACT-----  
-----  
-----  
GTAAATGACACTATAACTCTCCAATGCAGAATAAAGCAAATTGTAAATATGTGGCAGAAAGTAGGACAAGCAA  
TGTATGCCCCCTCCCATCCCGAGGAATAATAAAGTGTGAATCAAAC---  
ATTACAGGGTTACTATTAAACAAGAGATGGAGGGAACACAGATAAT-----  
-----  
-----  
ATAACTGAGACTTTTCAGGCCTGGAGGAGGAAATATGAGGGACAATTGGAGGAGTGAATTGTATAAATATAAAG  
TAGTAAAAATTGAACCATTA---GGTGTAGCACCCACCCATGCAAAAAGAAGAGTGGTG-----  
-----GGAAGAGAAAAAAGAGCA---GTTGGA---CTGGGAGCT-----  
GTCTTCCTTGGGTTCTTAGGAGCA---GCAGGAAGCACTATG---GGCGCGGCGTCA---  
ATAACGCTGACGGTACAA---GCCAGACAA---TTATTG---TCCGGTATAGTGCAACAGCAGAGC---  
AATCTG---CTAAGG---GCTATAGAGGCTCAACAACATATGTTGAAGCTCACGGTCTGGGGCATT  
>AJ866554  
TTCTATTGCAATACAACAAAACCTGTTTAATAGCACTTGGAAATAGTTGGGATAATAGCACTTGGAAATAGTACCA  
GCTCAAACGAC-----  
-----ACATGG-----  
CCAAAGGGGTCAAATATAACTCTCCAATGCAGAATAAAGCAAATTATAAATATGTGGCAGAGAGTAGGACAAG  
CAATGTATGCCCCCTCCCATCCCGAGGAGAAATAAAGTGTGTATCAAAC---  
ATTACTGGACTAATATTAAACAAGAGATGGAGGGAATAATAATAGT-----  
-----  
-----  
GCAAGTGAGACCTTCAGGCCTGGAGGAGGAGATATGAGGGACAATTGGAGAAGTGAATTATATAAATATAAAG  
TAGTAAAAATTGAACCACTA---GGAGTAGCACCCACTAGAGCGAAGAGAAGAGTGGTG-----  
-----GAGAGAGAAAAAAGAGCA---GTTGGA---CTGGGAGCT-----  
TTCTTCTTTGGGTTCTTAGGAGCA---GCAGGAAGCACTATG---GGCGCGGCGTCA---  
ATAACGCTGACGGCACAG---GCCAGACAA---TTATTG---TCTGGCATAGTGCAACAGCAGAGC---  
AATCTG---CTGAAG---GCTATAGAGGCTCAACAGCATCTATTGAAACTCACGGTCTGGGGCATT  
>AJ866556  
TTCTATTGCAATACATCAGCACTGTTTAATAGCACTTGGGTAGGGGTTAATGGCAATTGGAGCAATACCAGCT  
CAAACAAC-----  
-----ACA-----  
GGGTAAATGACATTATAACTCTTCGATGCAGAATAAAACAAATTATAAATATGTGGCAGAGAGTAGGACAAG  
CAATGTATGCCCCCTCCCATCCAAGGAGAACTAAGGTGTGACTCAAAC---  
ATTACTGGATTACTATTAAACAAGAGATGGAGAGGGTGATACTAAG-----  
-----  
-----  
GAAAATGAGACCTTCAGGCCTGGAGGAGGAGATATGAGGGACAATTGGAGAAGTGAATTATATAAGTATAAAG  
TAGTAAAAATTAAACCACTA---GGTGTAGCACCCACCCGTGCAAAAAGGAGAGTGGTG-----  
-----GAGAGAGAAAAAAGAGCA---GTTGGA---CTGGGAGCT-----  
GTCTTCCTTGGGTTCTTAGGAGCA---GCAGGAAGCACTATG---GGCGCGGCGTCA---  
ATAACGCTGACGGTACAG---GCCAGACAA---TTATTG---TCCGGTATAGTGCAACAGCAGAAC---  
AATTTG---CTGAAG---GCTATAGAGGCTCAACAACATTTGTTGAGACTCACGGTCTGGGGCATT  
>AJ866558  
TTCTATTGCAGTACATCAGCATTGTTTAATAGCACCTGGATGATGGTTAATGGCACCTGGAGCGCACTGCAA  
ATGACACAGAG-----  
-----GCAAAT-----  
AACAAATATAACTCATATAACTCTCCAATGCAAAATAAAGCAAATTGTAAATATGTGGCAGAGAGTAGGACAAG  
CAATATATGCCCCCTCCTATCCAAGGAAAAATAAGTTGTAAATTCAGC---  
ATTACAGGACTGCTATTAAACAAGAGATGGAGGAGGGAATAATACT-----

-----  
-----  
GCAAAATGAAACTTTTCAGGCCTGGAGGAGGAGATATGAGGGACAATTGGAGAAGTGAATTATATAAGTATAAAG  
TAGTAAAAAATTGAACCACTA---GGTGTGGCACCCACCCATGCAAAAAGAAGAGTGGTG-----  
-----GGAAGAGAGAAAAAGAGCG--GTTGGA---CTGGGAGCT-----  
GTCTTCCTTGGGTTCTTAGGAGCA---GCAGGAAGCACTATG---GGCGCGGCGTCA---  
ATAACGCTGACGGTACAG---GCCAGACAA---TTATTG---TCCGGTATAGTGCAACAGCAGAGT---  
AATTTG---CTGAGG---GCTATAGAGGCTCAACAACAACCTGTTGAAACTCACGGTCTGGGGCATT  
>AJ866555  
TTCTACTGCAATACAACAACAACCTGTTTAATAGCGCTTGGTTTAATGGCACTTGGGTATACAACAATAACACCA  
ATGTC-----  
-----  
AGCTCAGGGTCAAATATAACTCTCCCATGCAGCATAAAGCAAATTGTGAGAATGTGGCAGAAAGTAGGACAAG  
CAATGTATGCCCCCTCCCATCCCAGGAATAATAAGGTGTGAGTCAAAT---  
ATTACAGGACTAATCTTAACAAGAGATGGGGGGAACGATAGCAGT-----  
-----  
-----  
GTAAATGAGACCTTCAGGCCTGGAGGAGGAGATATGAGGGACAATTGGAGAAGTGAATTATATAAGTATAAAG  
TAGTAAAAAATTGAACCACTA---GGTGTAGCACCCACCCCTGCAAAAAGAAGAGTGGTG-----  
-----CAGAGAGAAAAAAGAGCAGTAGTTGGA---ATGGGAGCT-----  
CTTTTCCTTGGGTTCTTAGGAGCA---GCAGGAAGCACTATG---GGCGCAGCGTCA---  
GTAACGCTGACGGTACAG---GCCAGACAA---TTATTG---TCCGGTATAGTGCAACAGCAGAGC---  
AATTTG---CTGAGG---GCTATAGAGGTTCAACAACATCTGTTGAAACTCACGGTCTGGGGCATT  
>AF184155  
TTCTATTGCAATACATCAGGACTGTTTAATAGCACTTGGTATAAAAATAGCACTTGGTATAGCAATAGCACTG  
CCAGCTCAAAC-----  
-----CACACA-----  
GAGTTAAATAGCACTATAACTCTCCAATGCAAAATAAAGCAAATTATAAATATGTGGCAGAAAGTAGGACAAG  
CAATGTATGCCCCCTCCCATCCAAGGAGTAATAAGATGTGATTCAAAC---  
ATTACAGGACTACTATTAACAAGAGATGGAGGGAGTAATAATAAT-----  
-----  
-----  
ACACCTGAGATCTTCAGGCCTGGAGGAGGAAATATGAGGGACAATTGGAGAAGTGAATTATATAAGTATAAAG  
TAGTAAAAAATTGAACCACTA---GGTGTAGCACCCACCCGTGCAAAAAGAAGAGTGGTG-----  
-----GAGAGAGAAAAAAGAGCA--GTTGGA---CTGGGAGCT-----  
GTCTTCCTTGGGTTCTTAGGAGCA---GCAGGAAGCACTATG---GGCGCAGCGTCA---  
ATAACGCTGACGGTACAG---GCCAGACAA---TTATTG---TCCGGTATAGTGCAACAGCAGAGC---  
AATTTG---CTGAGA---GCTATAGAGGCTCAACAACATCTGTTGAAACTCACGGTCTGGGGCATT  
>HQ385445  
TTCTATTGCAATACATCAAGCCTATTTAATAGCACTTGAATACATCAAGCATTAGCATTGAGAATAGTACCG  
AT-----  
-----  
TACTCAAATGAACTATAACTCTCCAATGCAGAATAAAGCAAATTATAAATATGTGGCAGACAGTAGGACAAG  
CAATATATGCCCCCTCCCATCCCAGGAATAATAAGCTGTAATTCAAAC---  
ATTACTGGACTACTATTAACAAGAGATGGAGGAAATACTAATAGT-----  
-----  
-----  
ACGAATGAAACCTTCAGGCCTGGGGGAGGAGATATGAGGGACAATTGGAGAAGTGAATTATATAAGTATAAAG  
TAGTGAAAATTGAACCACTA---GGTGTAGCACCCACTCATGCAAAAAGAAGAGTGGTG-----  
-----GAGAGAGAAAAAAGAGCA--GTTGGA---CTGGGAGCT-----  
GTCTTCCTTGGGTTCTTAGGAGCA---GCAGGAAGCACTATG---GGCGCGGCGTCA---  
ATGGCGCTGACGGTACAG---GCCAGACAA---TTATTG---TCCGGTATAGTGCAACAGCAGAGC---  
AATTTG---CTGAAG---GCTATAGAGGCTCAACAGCATCTGTTGAGACTCACGGTCTGGGGCATT  
>GU201497  
TTCTATTGCAATACATCAAGACTGTTTAATAGCACTTGGTATAATGACACTAGAAGGCCCAACTACACAGAG-  
-----  
-----  
TTAAATGGCACTATAACCCTCCAATGCAGAATAAAGCAAATTATAAATATGTGGCAGAGAACAGGACAAGCAA  
TATATGCCCCCTCCCATCCCAGGAGAAATAAGGTGTAATTCAAAC---  
ATTACAGGAATACTATTAGTAAGAGATGGAGGGGTTAATACTAGT-----

-----  
-----  
ACAAATGAGACCTTCAGGCCTGCAGGAGGAGATATGAGGGATAATTGGAGAAGTGAATTATATAAGTATAAAG  
TAGTAAAAATTGAACCACTA---GGTGTAGCACCCACCCATGCAAGAAGAAGAGTGGTG-----  
-----CAGAGAGAAAAAAGAGCA--GTTGGA---CTGGGAGCT-----  
GTCTTCCTTGGGTTCTTAGGAGCA--GCAGGAAGCACTATG--GGCGCGGCGTCA---  
ATAACGCTGACGGTACAA---GCCAGACAA---TTATTG---TCCGGTATAGTGCAACAGCAGAGC---  
AATCTG---CTGAGA---GCTATAGAGGCTCAACAACATATGTTGAGACTCACGGTCTGGGGCATT  
>JN864047  
TTCTATTGCAATACATCAGGCCTGTTTAATGGCACTTGGGATAAATCTTACAACATGACAGAG-----  
-----  
-----  
TTGACTGGCACTATAATTCTCCCGTGCAGAATAAAGCAAATTATAAATATGTGGCAGAGAGTGGGACAAGCAA  
TGTATGCCCCCTCCCATCCCGAGGAAGAATAAAGTGTGAGTCAAAT---  
ATTACAGGGCTACTATTGACAAGAGATGGTGGAAGTAATAATGAT-----  
-----  
-----  
ACTAGTGAGATTTTTAGACCTGGAGGAGGAGACATGAGAGATAATTGGAGAAGTGAACATATAAATATAAAG  
TAGTAAAAATTGAACCAATA---GGAGTAGCACCCACCAAGGCAAGAAGAAGGGTGGTG-----  
-----GAGAGAGAAAAAAGAGCA--ATTGGA---TTTGGAGCT-----  
GCCTTCATTGGGTTCTTAGGAGCA---GCCGGAAGCACTATG--GGCGCGGCGTCA---  
ATAACGCTGACGGTACAG---GCCAGACAA---TTATTG---TCTGGCATAGTGCAACAGCAAAGC---  
AATTTG---CTGAAG---GCTATAGAGGCTCAACAGCATATGTTGAGACTCACGGTCTGGGGCATT  
>JN864052  
TTCTATTGCAATACATCACAACATTTTAATGGCACTTGGTCTAATAACACTGGGAATGGGAATGCTACCAGCT  
CA-----  
-----  
AATGAACTATAATAACTCTTCCATGTAGAATAAAGCAAATTATCAATATGTGGCAGAGAGTAGGACAAGCAA  
TGTATGCCCCCTCCCATCCGAGGAGGAATAAGGTGCGACTCAAAC---  
ATTACAGGATTACTATTAACAAGAGATGGAGGAACGAATAGTACA-----  
-----  
-----  
CATCAGACATTTCAGGCCTGGAGGAGGAGATATGAGAAACAATTGGAGAAGTGAATTATATAAGTATAAGGTAG  
TACAAATTGAACCAATA---GGTGTGGCACCCACCCCTGCAAAAAGAAGAGTGGTG-----  
-----GAAAGAGAAAAAAGAGCA--GTAGGA---CTGGGAGCT-----  
GTCTTCCTTGGGTTCTTAGGAGCA--GCAGGAAGCACTATG--GGCGCAGCGTCA---  
ATAACGCTGACGGTACAG---ACCAGACAA---TTATTG---TCCGGTATAGTGCAAGCAGCAGAGC---  
AATCTG---CTGAGG---GCTATAGAGGCTCAACAGCATCTGTTGAAACTCACAGTCTGGGGCATT  
>JN864053  
TTCTATTGCAATACAACAAACCTGTTTAATAGCACTTGGTATAACAATGACACTAGTGCTTGGTATAACAATG  
GCACAGGACCA-----  
TACAATGGCACAGGACTA-----  
TGGATAAATGGCACTATAATTCTCTCGTGTAGAATAAAGCAAATTGTAAACATGTGGCAAAGAGTAGGACAAG  
CAATGTATGCTCCCCCATCCGAGGAAGAATAGAGTGTCAATCAAAC---  
ATTACAGGACTACTGTTGACAAGAGATGGTGGGGAGCATAATAATACTAATAAT-----  
AATAATACTAATAAT-----  
-----  
AATACTGAGATTTTTTAGGCCTGGAGGAGGAGATATGAGAGACAATTGGAGAAGTGAATTATATAAATATAAAG  
TAGTAAAAATTGAACCACTA---GGAATAGCACCCACCAAGGCAAGGAGAAGAGTGGTG-----  
-----CAGAGAGAAAAAAGAGCA--GTTGGA---TTTGGAGCT-----  
GTCTTCCTTGGGTTCTTAGGAGTA---GCCGGAAGCACTATG--GGCGCGGCGTCA---  
ATGGCGCTGACGGTACAG---GCCAAACAA---TTATTG---TCTGGCATAGTGCAACAGCAAAGC---  
AATTTG---CTGAGG---GCTATAGAGGCTCAACAGCAGATGTTGAGACTCACGGTCTGGGGCATT  
>DQ826727  
TTCTATTGCAATACATCAGGCTTATTTAATAGTAGTTGGACAGGAAATAACACAGAAAATAACACTGCA-----  
-----  
-----  
CTGAATGGCACTATAACTCTCCCGTGCAGAATAAAACAAATTGTAAACATGTGGCAGAGAGTAGGACGAGCAA  
TGTATGCCCCCTCCCATCCCGAGGTAATAAGGTGCACATCAAAC---  
ATTACAGGATTAATACTGACAAGGGATGGTGAAACCATGGAAATAGT-----

-----  
-----  
AGTTATAAAAATGAAACCTTCAGACCTGGAGGAGGAGACATGAGGGACAATTGGAGAAGTGAATTATATAAGT  
ATAAGGTAGTACAAATTGAACCAGTA---GGTGTGGCACCCACCCATGCAAGAAGAAGAGTGGTG-----  
-----GAGAGAGGAAAAAGAGCA---GTTGGA---CTGGGAGCT---  
-----GTCTTCCTTGGGTTCTTAGGAGCA---GCAGGAAGCACTATG---GGCGCGGCGTCA---  
ATAACGCTGACGGTACAG---GCCAGACAA---TTACTG---TCCGGTATAGTGCAACAGCAGAGC---  
AATTTG---CTGAAG---GCTATAGAGGCTCAACAACAGCTGTTGAAACTCACGGTCTGGGGCATT  
>MH078538

TTCTATTGCAATACATCAGGACTGTTCAATAAGAATTGGACATATGATAACAGCAATATCACCTCAAATAAC-

-----  
-----  
ACAGAATCAACTATAACTCTCCCATGCAACATAAGGCCAAATTGTAAAGATGTGGCAGAGAGTAGGACGAGCAA  
TGTATGCCCCCTCCTATCGCAGGAAACATAAGTTGCAACTCAAAC---  
ATTACTGGATTACTCTTAACAAGAGATGGAGGGAATAATACACAT-----  
-----

-----  
AAGAATAAGACCGAGACCTTCAGGCCTGCAGGAGGAGATATGAGGGACAATTGGAGAAGTGAATTATATAAAT  
ATAAAGTAGTAAAAATTGAACCATTA---GGTATAGCACCCCTCCAAGGCAAAAAGAAGAGTGGTG-----  
-----GAGAGAGAAAAAGAGCA---GTTGGA---ATGGGAGCT---  
-----GTCTTCTTTGGGTTCTTAGGAGCA---GCAGGAAGTACTATG---GGCGCGGCGTCA---  
ATAACGCTGACGGCACAG---GCCAGGCAA---CTATTG---TCTGGTATAGTACAACAGCAGAGT---  
AATCTG---CTAAGG---GCTATAGAGGCTCAACAAAAACATGTTGAGACTCACGGTCTGGGGCATT  
>AY371143

TTCTATTGCAGTACATCACCACTGTTTAATAGCACTTGGGACAGTAATAACACTGCCAGTTCAAACCACACAG  
AG-----  
-----

TCAAATGACATTATAACTCTCCAATGCAGAATAAAGCAAATTATAAATATGTGGCAGAGGGTGGGACAAGCAA  
TGTATGCCCCCTCCCATCAGTGGAAACATAACTTGTGAATCAAAC---  
ATAACAGGACTACTATTAACAAGAGATGGAGGGGCTACTAATAGT-----  
-----

-----  
ACAACAAATGAGACCTTCAGGCCTGGAGGAGGAGATATGAGGGACAATTGGAGAAGTGAATTATATAAGTATA  
AAGTAGTAAAAATTGAACCACTA---GGTGTAGCACCCACCCCTGCAAGAAGAAGAGTGGTG-----  
-----CAGAGAGAAAAAGAGCA---GTTGGA---CTGGGAGCT-----  
---GTTTTCTTTGGGTTCTTAGGAGCA---GCAGGAAGCACTATG---GGCGCGGCGTCA---  
GTGACGCTGACGGTACAG---GCCAGACAA---TTATTG---TCTGGTATAGTGCAAGCAGCAGCGC---  
AATCTG---CTGCAG---GCTATAGAGGCTCAACAACATCTGTTGAAACTCACGGTCTGGGGCATT  
>KF716465

TTCTATTGCAATACATCACAACCTGTTTAATGGCACTTGGTTTAATGACACTTGAACAACAATACCAATGACA  
AC-----  
-----

AGCTCAGAATTTATAACTCTCCAATGCAGAATAAAGCAAATTGTAAATATGTGGCAGAGAGTAGGACAAGCAA  
TGTATGCCCCCTCCCATCCAGGAGTAATAAGTTGTAATTCAAAC---  
ATTACTGGACTACTATTAATAAGAGATGGAGGGAATAATAATATT-----  
-----

-----  
ATGAAGGAGACCTTCAGGCCTGGAGGAGGAGATATGAGGGACAATTGGAGAAGTGAATTATATAAATATAAAG  
TAGTAAAAATTGAACCACTA---GGTGTAGCACCCACCCATGCAAAAAGAAGAGTGGTG-----  
-----GAGAGAGAAAAAGAGCA---GTTGGA---CTGGGAGCT-----  
GTCTTCTTTGGGTTATTAGGAGCA---GCAGGAAGCACTATG---GGCGCGGCGTCA---  
ATCACGCTGACGGTACAG---GCCAGACAA---TTATTG---TCCGGTATAGTGCAACAGCAGAGC---  
AATTTG---CTGAAG---GCTATAGAGGCTCAACAACATATGTTGAGACTCACGGTCTGGGGCATT  
>FJ670515

TTTTATTGCAATACATCAAGCCTGTTTAATAGTACTTGGTACGGTAATGGCACTAACAATACAACCTGACACGG  
GG-----  
-----

TCCAATGATACTATAAGTCTCCCATGCAGGATAAAAACAAATTGTACATATGTGGCAGAGAGTAGGACAAGCAA  
TGTATGCCCCCTCCAATTCAAGGAATAATAAACTGTAAATCAAAC---  
ATTACAGGGCTACTGCTAGTAAGAGATGGTGGGAATGGGAATGGTACA-----  
-----

-----  
-----  
AATGAGACCGAGACGTTCTAGACCTGGAGGAGGAAACATGAAGGACAATTGGAGAAGTGAATTATATAAAATATA  
AAGTAGTAAAAATTGAACCACTA---GGAGTAGCACCCACCAGGGCAAAGAGAAGAGTGGTG-----  
-----GGGAGAGAAAAAAGAGCA--GTTGGA---CTGGGAGCT-----  
---GTCTTCCTTGGGTTCTTAGGAGCA--GCCGGAAGTACTATG--GGCGCGGCGTCA---  
ATAACGCTGACGGCACAG---GCCAGACAA---TTATTG---TCTGGCATAGTACAACAGCAGAGC---  
AATCTG---CTGAGG---GCTATAGAGGCTCAACAGCACATGTTGAGACTCACGGTCTGGGGCATT  
>KU685587

TTCTATTGCAGTACATCAGGATTGTTTAATATGACTTGGTATAAGAACAGCTCAGAGTCAAATAGCACTGAC-

-----  
-----  
AGGCCTGGAATATAACTCTCCAATGCAGAATAAAGCAATTTATAAATATGTGGCAGAGAGTAGGGCAAGCAA  
TGTATGCCCCCTCCCATCAGAGGAGAAATAAGTTGTGTGTCAAAC---  
ATTACTGGAATACTATTAACAAGAGATGGAGGGAAAAATAGTACT-----  
-----

-----  
-----  
GAAAAGGAGATCTTCAGGCCTGGAGGAGGAGACATGAGGGACAATTGGAGAAGTGAATTATACAAGTATAAAG  
TAGTAGAAATTGAACCACTA---GGTGTAGCACCCACCCGTGCAAAAAGAAGAGTGGTG-----  
-----GAGAGAGAAAAAAGAGCA--GCA-----CTAGGAGCT-----  
GTCTTCATTGGGTTCTTGGGAGCA---GCAGGAAGCACTATG--GGCGCGGCGTCA---  
GTGGCGCTGACGGTACAG---GCCAGACAA---TTATTG---TCTGGTATAGTGCAACAGCAAAGC---  
AATTTG---CTGAAA---GCTATAGAGGCTCAACAGCAACTGTTGAAACTCACAGTCTGGGGCATT  
>KR067669

TTCTATTGTAATACATCAAACTGTTCAATAGCACTTGGCCGGTTAATAGCACTTGGCATAATAGAACTAACA  
TTGACAGT-----  
-----

-----  
-----  
TCAAATGGCACAATAACTCTCCAATGCAGAATAAAGCAAGTTATAAATATGTGGCAGAAAGTAGGGCAAGCCA  
TGTATGCCCCCTCCCATCCAAGGAGAAATAAGGTGTGACTCAAAC---  
ATTACTGGACTACTATTAACAAGAGATGGAGGGAGTAGTAATGAT-----  
-----

-----  
-----  
ATGAGTGAGACCTTCAGGCCTGGAGGAGGAGATATGAAGGACAATTGGAGAAGTGAATTATATAAGTATAAAG  
TAGTAAAAATTGAACCAATA---GGGGTGGCACCCACCCCTGCAAAAAGAAGAGTGGTG-----  
-----GAGAGAGAAAAAAGAGCA--GTAGGA---CTGGGAGCT-----  
GTCTTCTTTGGGTTCTTAGGAGCA---GCAGGAAGCACTATG--GGCGCGGCGTCA---  
ATAACGCTGACGGTACAG---GCCAGACAG--TTATTG---TCTGGTATAGTGCAACAGCAAAGC---  
AATTTG---CTGAGG---GCTATAGAGGCTCAACAACAGCTGTTGAGACTCACGGTCTGGGGCATT  
>KR067670

TTCTATTGCAATACATCAAACTGTTTAGTGGCTCTTGAATGATAGCTCTTTGAATGATAGTAATACAAATG  
GAAAC-----  
-----

-----  
-----  
TCAAGTGAACTACTATAATTCTCCCATGCAAAATAAGACAAATTGTACGTATGTGGCAGACAGTAGGACAAG  
CAATGTATGCCCCCTCCCATCAAGGAGCAATAAATTGTACATCAAAC---  
ATTACAGGGCTACTGCTAACGAGAGATGGTGGGGATGAACCAGAG-----  
-----

-----  
-----  
AATGAGACGTTCTAGACCTGGAGGAGGAGATATGAGGGATAATTGGAGAAGTGAATTATATAAATATAAAGTAG  
TAAAAATTGAACCACTA---GGAGTGGCACCCACCAGGGCAAAGAGAAGAGTGGTG-----  
-----GGGAGAGAGAAAAGAGCA--ATTGGA---ATAGGAGCT-----  
GTCTTCCTTGGGTTCTTAGGAGCA---GCAGGAAGCACTATG--GGCGCGGCGTCA---  
GTAACGCTGACGGTACAG---GCCAGACAA---TTATTG---TCCGGTATAGTGCAACAGCAAAAC---  
AATTTG---CTGAGG---GCTATAGAGGCTCAACAGCAGTTGTTGAAACTCACGGTCTGGGGCATT  
>KR067667

TTCTATTGCAATACATCAAACTTGTTTAACAGTACTTGGTATAGTAACGGTACCAACAGTACTGAGAAAAAT-

-----  
-----  
AATGACACCAACATAACTCTCCAATGTAGAATAAAGACAAATTGTAAATATGTGGCAGAGGGTAGGACAAGCAA  
TGTATGCCCCCTCCCATCAGAGGAAACATAACTTGTATATCAAAC---  
ATTACAGGACTGTTGTAAACAAGAGATGGAGGGGATAATAGTACA-----  
-----

-----  
-----  
AATGCAACTGAGACTTTCAGGCCTGGAGGAGGAGATATGAGGGACAATTGGAGAAGTGAATTATATAAATATA  
AAGTAGTACAAGTTGAACCGCTA---GGAGTAGCACCCAAACAGGGCAAAAAGAAGAGTGGTG-----  
-----CAGAGAGAAAAAAGAGCA--GTTGGA---CCGGGAGCT-----  
---GTCTTCATTGGGTTCTTAGGAGCT--GCAGGAAGCACTATG--GGCGCGGCGTCA---  
ATGACGCTGACGGTACAG---GCCAGACAA---TTATTG---TCTGGTATAGTGCAGCAGCAAAGT---  
AATTTG---CTGAGG---GCTATAGAGGCTCAACAGCAGGTGTTGAGACTCACGGTCTGGGGCATT  
>KR067671  
TTCTATTGTAATACAGCAGAGTTGTTTAATAGCACTTGGAATAATGATACTATGAGCTCAAATGACACTAGC-  
-----  
-----  
TCAAATGACACTATAACTCTCCAATGCAGAATAAGGCAAATTATAAAGATGTGGCAGAAAGTAGGACAAGCAA  
TGTATGCCCCCTCCCATCCAGGAGAAATAAGGTGTGAATCAAAC---  
ATTACTGGACTACTATTAACAAGGATGGAGGGAATGGGAATAAT-----  
-----  
-----  
GATCCAAATGAGACCTTCAGGCCTGGAGGAGGAGATATGAGGGACAATTGGAGAAGTGAATTATATAAGTATA  
AAGTAGTAAAAATTGAACCACTA---GGTGTAGCGCCACCCATGCAAGAAGAAGAGTGGTG-----  
-----GAAAGAGAAAAAAGAGCA--GTTGGA---CTGGGAGCT-----  
---GTCCTCTTTGGATTCTTAGGAGCA--GCAGGAAGCACTATG--GGCGCGGCGTCA---  
ATAACGCTGACGGTACAA---GCCAGACAA---TTATTG---TCCGGTATAGTGCAGCAGCAGAGC---  
AATCTG---CTGAAG---GCTATAGAGGCTCAACAACATTTGTTGAGACTCACGGTCTGGGGCATT  
>MH078547  
TTCTATTGCAATACATCAGCATTATTTAATAGCACTTGGAATAAGCCTTGGAATAATTCAATGAATAACACTG  
AGGGAGGG-----  
-----  
TCAAATGACATTCTTACTCTCAAATGCAAGATAAGGCAAGTTGTAAGAATGTGGCAAAGAGTGGGACAAGCAA  
TGTATGCCAATCCCATCCAGGAGTAATAAGGTGTGAATCAAAC---  
ATAACAGGACTACTATTAACAAGAGATGGAGGGAATAACAATAGT-----  
-----  
-----  
ACAAATGAACTTTTAGGCCTGGAGGAGGAGATATGAGGGACAATTGGAGAAGTGAATTATATAAGTATAAAG  
TAGTAAAAATTGAACCATTA---GGTGTAGCACCTACCCGTGCAAGAAGAAGAGTGGTG-----  
-----CAGAGAGAAAAAAGAGCA--GTTGGA--ATGGCAGCT-----  
GTCTTCTTTGGGTTCTTGGGAGCA---GCAGGAAGCACTATG--GGCGCGGCGTCA---  
ATAACGCTGACGGTACAA---GCCAGACAA---TTATTG---TCTGGTATAGTGCAACAGCAGAGC---  
AATCTG---CTGCGG---GCTATAGAGGCTCAACAACATCTGTTGAACTCACGGTCTGGGGCATT  
>MH078549  
TTTTATTGCAATACATCAAGCCTGTTTAATAGCAGATGGTATAATGGAACAACTGCAAACAACACAGATG  
AC-----  
-----  
AATGCTGATAATATAACACTCCCATGCAGACTAAAACAAGTGATAAGAATGTGGCAGAAAGTAGGGCAAGCAA  
TGTATGCCCCCTCCTATCAAAGGAGAAATAAGGTGTGTCTCAAAT---  
ATTACTGGACTACTATTAACAAGAGATGGAGGGTATGGAGGGAAT-----  
-----  
-----  
AGTACAGATGAGACCTTCAGGCCTGGAGGAGGAGATATGAGGGACAATTGGAGGAGTGAATTATATAAGTATA  
AAGTAGTAAAAATCGAACCCTA---GGGGTGGCACCCACCCGAGCAAAAAGAAGAGTGGTG-----  
-----GAGAGAGAAAAAAGAGCA--GTTGGA---ATGGCAGCT-----  
---GTCTTCCTTGGGTTCTTAGGAGCA--GCAGGAAGCACTATG--GGCGCGGCGTCA---  
CTGACGTTGACGGTACAA---GCCAGACAA---TTATTG---TCCGGTATAGTGCAACAGCAAAGC---  
AATTTG---CTGAAG---GCTATAGAGGCTCAACAACAGATGTTGAGACTCACGGTCTGGGGCATT  
>MH078550  
TTCTATTGCAACACAGCAGGCCTGTTTAATGGTACTTGGGCTAATGATACTTGGGATCAAGGAAATGGCACGA  
AA-----  
-----  
GAAAAATGACACTATAACTCTCCAATGCAAAATAAAAACAAGTTGTACATATGTGGCAGAGAGTAGGACAAGCAA  
TGTATGCCCCCTCCCATCCAGGAGAAATAAGATGTGGATCAAAC---  
ATTACAGGGCTACTGCTAACAAGAGATGGTGGGAATACTAATAAT-----

-----  
-----  
ACAGAGGAGACGTTTCAGACCTGGAGGAGGAAATATGAAAAGACAATTGGAGAAGTGAATTATATAAATATAAAG  
TAGTACAAATTGAACCAATA---GGAATAGCACCCACCAAGGCAAAGAGAAGAGTGGTG-----  
-----GAGAGAGAAAAAAGAGCA--ATTGGA---CTGGGAGCT-----  
GTCTTCCTTGGGTTCTTAGGAGCA---GCAGGAAGTACTATG---GGCGCGGCGTCA---  
ATAACGCTGACGGTACAG---GCCAGACAA---TTATTG---ACTGGTATAGTACAACAGCAGAGC---  
AATCTG---CTGAGG---GCTATAGAGGCTCAACAGCACATGTTGAAGCTCACAGTCTGGGGCATT  
>KX389616  
TTCTATTGCAACACATCAAACTGTTTAATAGTATTTGGGATAACAATGCCACAAAAAATAATATTACTGACA  
AAAATGGT-----  
-----  
ATTAATGATACTATAACTCTCCCATGCAGAATAAGACAAATTGTACATATGTGGCAGAGAGTAGGACAAGCAA  
TGTATGCTCCTCCCATTCCAGGAGTAATAAACTGTACATCAAAC---  
ATTACAGGGATATTGCTAACAAGAGATGGTGGCAATAATAGTGAT-----  
-----  
-----  
ACAAATGAGACATTTCAGACCTGGAGGAGGAGATATGAGAGATAATTGGAGAAGTGAATTGTATAAATATAAAG  
TAGTAAAAAATTGAACCACTA---GGAGTAGCACCCACCAATGCAAAGAGAAGAGTGGTG-----  
-----GAGAGAGAAAAAAGAGCA--GTTGGA---CTGGGAGCT-----  
GTCTTCCTTGGGTTCTTAGGAGCA---GCAGGAAGTACTATG---GGCGCGGCGTCA---  
ATGGCGCTGACGGCACAG---GCCAGACAA---CTATTG---ACTGGTATAGTACAACAGCAGAAC---  
AATCTG---CTGAGG---GCTATAGAGGCTCAGCAGCAAATGTTGAGACTCACAGTCTGGGGCATT  
>KU168304  
TTCTATTGCAATACATCAGGACTATTTAATAGCACTTGGAGTAATCTAAATGACACAAATGGCACAAATCCAG  
AGCCAAAT-----  
-----  
GACACTCACACTCTAACTATCCAATGCAGAATAAAGCAAATTGTAAGAATGTGGCAGAGGGTAGGACAAGCAA  
TGTATGCCCCCTCCCATCGAAGGAGAAATAAGGTGTGAATCAAAC---  
ATTACAGGATTACTATTAAACAAGAGATGGAGGAGCAAATAATAAT-----  
-----  
-----  
AATACAAAGGAGACATTTCAGGCCTGGAGGAGGAGATATGAGGGACAATTGGAGAAGTGAATTATATAAGTATA  
AGGTAGTACAAATTGAACCAATA---GGTGTGGCACCCACCCATGCAAAAAGAAGAGTGGTG-----  
-----GAGAGAGGAAAAAGAGCA--GTTGGA---ATAGGAGCT-----  
---GTCTTCCTTGGGTTCTTAGGAGCA---GCAGGAAGCACTATG---GGCGCAGCATCA---  
ATGACGCTGACGGTACAG---GCCAGACAA---TTATTG---TCCGGTATAGTGACAGCAGCAAAGC---  
AATTTG---CTGAGG---GCTATAGAGGCTCAACAACAGCTGTTGAAGCTCACAGTCTGGGGCATT  
>EU513188  
TTCTATTGCAATACATCAGAACTGTTTAATAGCAATTGGACTAATACTAATAACAATACCAATAATGCCAGCT  
CA-----  
-----  
GAGGCAAATGGCAATATAACTCTCACATGCAAAATAAAGCAAATTATAAATATGTGGCAAAGAGTGGGACAAG  
CAATGTATGCCCCCTCCCATCCAGGGAATAATAAGGTGTGAATCAAAC---  
ATTACAGGATTATTATTAACAAGAGATGGAGGGTTTAGGAATGATACA-----  
-----  
-----  
AATGAGACCTATGAGGCCTTCAGGCCTGGAGGAGGAGATATGAGGGACAATTGGAGAAGTGAAGTATATAAGT  
ATAAAGTAGTAAAAATTGAACCACTA---GGTGTAGCACCCACTCATGCAAAAAGAAGAGCGGTG-----  
-----CAGAGAGAAAAAAGAGCA---GTTGGG---CTGGGAGCT---  
-----GTCTTCCTTGGGTTCTTAGGAGCA---GCAGGAAGCACTATG---GGCGCGGCGTCA---  
ATGACGCTGACGGTACAG---GCCAGACAA---TTATTG---TCCGGTATAGTGCAACAGCAGAGT---  
AATCTG---CTGAGG---GCTATAGAGGCTCAACAACATCTGTTGAGACTCACGGTCTGGGGCATT  
>EU513185  
TTCTATTGCAGTACATCAAATCTATTTAATAGTACCTGTACAAATAATAACGGCACTGCAAATTGTACAAATA  
CAAATGGG-----  
-----ACA---  
GCATTAAATGAACTATAACTCTCCAATGCAGAATAAAAACAAATTGTAAGGATGTGGCAGAGAGTAGGACAAG  
CAATGTATGCCCCCTCCCATCCAAGGAGTAATAAGGTGTGAATCAAAC---  
ATTACAGGAATAATATTAACAAGGGATGGAGGGGATAGTAATGATACA-----

-----  
-----  
AATGGAAATGAGACATT CAGGCCTGGAGGAGGAGATATGAGGGACAATTGGAGAAGTGAATTATATAAGTATA  
AAGTAGTGCAACTTGAACCATTA---GGTGTGGCACCTACCCAGTCAAGAAGAAGAGTGGTG-----  
-----GAGAGAGAAAAAAGAGCA--GTTGGA--ATGGGAGCT-----  
---TTGTTCCCTTGGGTTCTTAGGAGCA--GCAGGAAGCACTATG--GGCGCGGCGTCA---  
GTGACGCTGACGGTACAG---GCCAGACAA---TTATTG---TCTGGTATAGTGCAACAGCAAAGC---  
AATTTG---CTGAGG---GCTATAGAGGCTCAACAGCATCTGTTGAAACTCACAGTCTGGGGCATT  
>EU513194  
TTCTATTGCAATACATCAGGACTGTTTAAACAGCACTTGGTGAATAACAATAACAGT-----  
-----  
-----  
TCAAAATAACATTACCACTCTCCAATGCAGAATAAAGCAGATTGTGAATCTGTGGCAGAGAGTAGGAAAAGCAA  
TGTATAACCCTCCCATCCAAGGAGTAATAAGGTGCGAATCAAAC---  
ATTACAGGGCTACTATTAACAAGAGATGGAGGGCTTAATGATAGT-----  
-----  
-----  
AGTACAAATGAAACCTTCAGGCCTGGAGGAGGAGATATGAGGGACAATTGGAGAAGTGAATTGTATAGGTACA  
AAGTAGTAAAAATTGAACCATTA---GGAGTAGCACCTCCAGGGCAAGGAGAAGAGTGGTG-----  
-----CAGAGAGAAAAAAGAGCA--ATTGGA--ATGGGAGCT-----  
---GTCTTCCTTGGGTTCTTAGGAGCA--GCAGGAAGCACTATG--GGCGCGGCGTCA---  
ATAACGCTGACGGTACAG---GCCAGACAA---TTATTG---TCTGGTATAGTGCGACAGCAAAGC---  
AATTTG---CTGAAG---GCTATAGAGGCTCAACAACATCTGTTGAAACTCACGGTCTGGGGCATT  
>EU513183  
TTCTATTGCAATACATCAAGCCTGTTTAAATAGCACTTGAATTGGAATGGCACTAGCATAACAGGGGCCAAATG  
ACACG-----  
-----  
CAGTCAAATGGCACTATAACACTCCCATGCAGAATAAAACAAATTGTAAATATGTGGCAGAGAGCAGGACAAG  
CAATGTATGCCCCCTCCCATCCCAGGAATAATAAAGTGTGAGTCAAAC---  
ATTACAGGACTACTATTGGTAAGAGATGGTGGGAATAATAGTGGT-----  
-----  
-----  
TCAAATGAAACCTTCAGACCTACAGGAGGAGATATGAGAGACAATTGGAGAAGTGAACCTATATAAATATAAAG  
TAGTAGAAATTGAACCACTA---GGAGTAGCACCCACCAGGGCAAAAAGAAGAGTGGTG-----  
-----GAGAGAGAAAAAAGAGCA--GTTGGA--TTGGGAGCT-----  
GTCTTCCTTGGGTTCTTAGGAGCA--GCAGGAAGCACTATG--GGCGCGGCGTCA---  
ATAACGCTGACGGTACAG---GCCAGACAA---TTATTG---TCTGGCATAGTGCAACAGCAAAGC---  
AATTTG---CTGAGG---GCTATAGAGGCTCAACAACATCTGTTGAAACTCACGGTCTGGGGCATT  
>KU168307  
TTCTATTGCAATACATCAGACCTGTTTGATAGCACATGGCCTAACAATAGTAGTAACAATAGCACTAAC---  
-----  
-----  
AATAGCACTACCATAACTCTCAAATGCAGAATAAAGCAAATTGTAAATATGTGGCAGAGAACAGGGCAAGCAA  
TGTATGCCCCCTCCCATCCCAGGACTAATAAGGTGTGAGTCAAAC---  
ATTACAGGACTGCTATTGACAAGAGATGGAGGGGATAATAACAGT-----  
-----  
-----  
ACAAATGAGACTTTTCAGACCTGGAGGAGGAGATATGAGAGATAATTGGAGAAGTGAATTATATAACTATAAAG  
TAGTAAAAATTGAACCAGTA---GGCATAGCACCCACCAAGGCAAAAAGAAGGGTGGTG-----  
-----GAGAGAGAAAAAAGAGCA--GTTGGA--ATAGGAGCT-----  
GTCTTCCTTGGGTTCTTAGGAGCA--GCAGGAAGCACTATG--GGCGCGGCGTCA---  
ATAACGCTGACGGTACAG---GCCAGACAA---TTATTG---TCTGGCATAGTGCAACAGCAAAGT---  
AATTTG---CTGAGA---GCTATAGAGGCTCAACAACAGTTGTTGAGACTCACAGTCTGGGGCATT  
>AM279362  
TTCTATTGCAATACATCAGGCCTATTTAATAGCATTTGGTCTTGGAATACTAGCACTTGAATTATACCAACT  
CAAATTCC-----  
-----ACAGGG-----  
TTAGATAATGACACTATAACTCTCCAATGCAGAATAAAGCAAATTGTAAATATGTGGCAGAGAGTAGGACAAG  
CAATGTATGCCCCCTCCCATCAAAGGAATGATAAGGTGTGAATCAAAC---  
ATTACAGGATTACTATTAACAAGAGATGGAGGGAAGACTAATGATACT-----

-----  
-----  
AATACAACCTGAGACATTTCAGGCCTGGAGGAGGAGATATGAGGGATAATTGGAGAAGTGAATTATATAAGTATA  
AGGTAGTACAAATTAAACCATTTG---GGTGTGGCACCCACCCATGCAAAAAGAAGAGTGGTG-----  
-----GAGAGAGAAAAAAGAGCA---GTTGGA---CTGGGAGTT-----  
---GCCTTCCTTGGGTTCTTAGGAGCA---GCAGGAAGCACTATG---AGCGCAGCGTCC---  
ATAACGCTGACGGTACAG---GCCAGACAA---TTATTG---TCTGGTATAGTGACAGCAGCAAAGC---  
AATTTG---CTGAGG---GCTATAGAGGCTCAACAACATCTGTTGAAACTCACGGTCTGGGGCATT  
>AM279356  
TTCTATTGCAATACATCAAACTATTTTAATAGCACTTGGTATAGCAATGGTAGTGCCAGCTTAGATCACACAA  
AT-----  
-----  
AAAGATGAAAATATAACTCTCCTATGTAGAATAAGGCAAATTGTAAATATGTGGCAGAGAGTAGGACAAGCAA  
TGTATGCCCCCTCCCATCGAAGGAGTAATAAGGTGTGAATCAAAC---  
ATTACAGGATTGCTATTAAACAAGAGATGGAGGGAAAGATAATAGTACA-----  
-----  
-----  
AATAGTACACAGGAGATATTCAGGCCTGGAGGAGGAGATATGAGGGACAATTGGAGAAGTGAATTATATAAGT  
ATAAGGTAGTACAAATTGAACCAATA---GGTGTAGCACCCACACATGCAAAAAGAAGAGTGGTG-----  
-----GAGAGAGAAAAAAGAGCA---GTTGGA---CTGGGAGTT---  
-----TTCTTCCTTGGGTTCTTAGGAGCT---GCAGGAAGCACTATG---GGCGCGGCGTCA---  
ATAACGCTGACGGCACAG---GCCAGACAA---TTATTG---TCCGGTATAGTGCAACAGCAAAGC---  
AATTTG---CTGAGG---GCTATAGAGGCTCAACAACATATGTTGAAACTCACGGTCTGGGGCATT  
>AM279363  
TTCTATTGCAATACATCAGGATTATTTAATAGTACTTGGAAATCTAATAGCACTTGGGACAATAACACTGACA  
CAGGG-----  
-----  
TCAACAATATAACTCTCACCCCTCCAATGCAGAATAAAGCAAATTGTAAATATGTGGCAGAGGGTAGGACAAG  
CAATGTATGCCCCCTCCCATCCCAGGAGTAATAAGGTGTGACTCAAAC---  
ATTACAGGACTCCTATTAAACAAGGATGGAGGGAATACTAGCACA-----  
-----  
-----  
GATGAAACATTTCAGGCCTGGAGGAGGAGATATGAGGGACAACCTGGAGAAGTGAATTATATAAGTATAAGGTAG  
TACAAATTGAACCAATA---GGTGTGGCACCCACCCATGCAAAAAGAAGAGTGGTG-----  
-----GAGAGAGAAAAAAGAGCA---GTAGGA---CTGGGAGCT-----  
GTCCTCATTTGGGTTCTTAGGAGCA---GCAGGAAGCACTATG---GGCGCGGCGTCA---  
ATAACGCTGACGGTACAG---GCCAGACAA---TTATTG---TCTGGTATAGTGCAACAGCAGAGT---  
AATCTG---CTGAAG---GCTATAGAGGCTCAACAACATCTGTTGAAACTCACAGTCTGGGGCATT  
>KM606636  
TTCTATTGTAATACATCAAATCTGTTTAATAAAACCTTTAACCACAACCTCAACAGGGTCAAATTCAACAGAG-  
-----  
-----  
TCAGATAGGACTATAACTCTCCCATGCAGAATAAAGCAAATTATAAATATGTGGCAGAAAGTAGGACAAGCAA  
TGTATGCCCCCTCCCATCCGAGGAGTAATAAAGTGTGAATCAAAC---  
ATTACAGGACTACTATTAAACAAGAGATGGAGGGGTGAATAATGGT-----  
-----  
-----  
AGTACAAACGAGACTTTTCAGGCCTGGAGGAGGAGACATGAGGGACAATTGGAGAAGTGAATTATATAAGTATA  
AAGTAGTAAAAATTGAACCACTA---GGTGTGGCACCCACCCCTGCAAAAAGAAGAGTGGTG-----  
-----GAGAGAGAAAAAAGAGCA---ATTGGA---ATAGGAGCT-----  
---GTCTTCCTTGGGTTCTTAGGAGCA---GCAGGAAGCACTATG---GGCGCAGCGTCA---  
ATAACGCTGACGGTACAG---GCCAGACAA---TTACTG---TCTGGTATAGTGCAACAGCAGAGC---  
AATCTG---CTGAGA---GCTATAGAGGCTCAACAACATATGTTGAAACTCACGGTCTGGGGCATT  
>AB052867  
TTCTATTGCAATACATCAAGACTGTTTAATAGTACTTGGAAATGACAATAGCACTTGGAAATGACAGTAGCTCAA  
ATTAC-----  
-----ACA---  
GAGTCAAATGACACTATAACTCTCCAATGCAGAATAAAGCAAATTATAAATATGTGGCAGGGAGTAGGACAAG  
CAATGTATGCCCCCTCCCATTAGAGGAGTGATAAGGTGTGAATCAAAT---  
ATTACAGGACTACTATTAAACAAGAGATGGAGGGATTAATAATAGT-----

-----  
-----  
ACAAATGAGACCTTCAGACCTGGAGGAGGAGATATGAGAGACAATTGGAGAAGTGAATTATACAAGTATAAAG  
TAGTAAAACTTGAACCACTA---GGAGTGGCACCCACCAGGGCAAGGAGAAGAGTGGTA-----  
-----ACAAGAGAAAAAAGAGCA--GTTGGA---ATGGGAGCT-----  
TTGTTTCCTTGGGTTCTTAGGAGCA--GCAGGAAGCACTATG--GGCGCGGTGTCA---  
ATGACGCTGACGGTACAG---GCCAGACAA--TTATTG---TCCGGTATAGTGCAACAGCAGAGC---  
AATCTG---CTAAAA---GCTATAGAGGCTCAGCAGCATCTGTTGAAACTCACGGTCTGGGGCATT  
>HQ385444  
TTCTATTGCAATACATCAGACCTGTTTAATAGTACTTGGCTAAACTCAACTGTGGAA-----  
-----  
-----

TCAAATGAGACTATAATTCTCCCATGCAAAATAAAACAAATTATAAATATGTGGCAGAGAGTAGGACAAGCAA  
TGTATGCACCTCCCATTCAAGGAGTAATAAACTGTGTATCAAAC---  
ATTACAGGGATACTGCTAGTAAGAGATGGTGGGAATAATAATAGT-----  
-----  
-----

ACAGCTGAGACATTTCAGACCTGGAGGAGGAGATATGAAGGACAATTGGAGAAGTGAATTGTATAAATATAAAG  
TAGTAAAAATTGAACCACTA---GGAGTAGCACCTACCAGGGCAAAGAGACGAGTGGTG-----  
-----GAGAGAGAAAAAAGAGCA--GTTGGA---CTGGGAGCT-----  
GTCTTCTTTGGGTTCTTAGGAGCA--GCAGGAAGTACTATG--GGCGCAGCGTCA---  
ATAACGCTGACGGTACAG---GCCAGACAA--TTATTG---TCTGGTATAGTACAACAGCAGAGT---  
AATTTA---CTGAAG---GCTATAGAGGCTCAACAACATCTGTTGAAACTCACGGTCTGGGGCATT  
>KR067668  
TTCTATTGCAATACATCAGGACTGTTTAATAGCGCTTGGAACAGTAGCACTTGGAAACAATACCCTGACCAAC-  
-----  
-----

AATACTGGCAATATAACGCTCCACTGCAGAATAAAGCAAATTATAAATAAGTGGCAGAGAGTAGGACAAGCAA  
TGTATGCCCCCCCCATCCCAGGAGTAATAAGGTGTGAGTCAAAC---  
ATCACAGGATTACTACTAACAAGAGATGGAGGAAACAATAATAGG-----  
-----  
-----

ACAAATGAGACTTTTCAGGCCTGAAGGAGGAGATATAAGGGACAATTGGAGGAGTGAATTATATAAGTATAAAG  
TAGTAAAAATTGAACCAGTA---GGAGTAGCACCCACCAGGGCAAGGAGAAGAGTGGTG-----  
-----GAAAGAGAGAAAAAGAGCA--GTCGGA---CTGGGAGCT-----  
GTCTTCCTTAGGTTCTTAGGAGCA--GCAGGAAGCACCATG--GGCGCGGCGTCA---  
ATAACGCTGACGGTACAG---GCCAGACAA--TTATTG---TCTGGTATAGTGCAACAGCAAAGT---  
AATTTG---CTGAAG---GCTATAGAGGCTCAACAACACCTGTTGAGACTCACGGTCTGGGGCATT  
>KU749413  
TTCTATTGTAATACAACAAGCCTGTTTAATAGTACTTGGTATAATAATGAGACTGAGAACACAAATAGCACGG  
GA-----  
-----

TCAAATGAAACCATAACACTCCCATGCAGAATAAAGCAAATTGTAAATGTATGGCAGAGAGTAGGACAAGCAA  
TATATGCCCTCCCATCCAAGGACTAATACAATGTAACTCAAAT---  
ATTACGGGGATACTATTAACAAGAGATGGTGGGAATAACGGATCA-----  
-----  
-----

TCTAATGAAACTTTTCAGGCCTGGAGGAGGAGATATGAGGGACAATTGGAGAAGTGAATTATATAAGTATAAAG  
TAGTGAAAATTGAACCATTA---GGTGTAGCACCCACCCATGCAAAAAGAAGAGTGGTG-----  
-----CAGAGAGAAAAAAGAGCA--ATTGGA---ATAGGAGCT-----  
GTGCTCATTGGGTTCTTGGGAGCA--GCCGGAAGCACTATG--GGCGCGGCGTCC---  
ATAACGCTGACGGTACAG---GCCAGACAA--TTATTG---TCTGGTATAGTGCAACAGCAAAGC---  
AATTTG---CTGAGG---GCTATAGAGGCTCAGCAACATATGCTGAAACTCACAGTCTGGGGCATT  
>KX232596  
TTCTATTGTAATACAACACAGCTATTTAATAGCACTTGGGAATATAACAGGACTATCTAATAGCAATTGGACAG  
GTAAT-----  
-----

GACACTAGCAATATAACTCTTCCCATGCAGAATAAAGCAAAGTTGTAAATATGTGGCAGAGGGTAGGACAAGCAA  
TTTATGCCCCCTCCCATCCCAGGAATAATACAGTGTCTAGTCAAAC---  
ATTACTGGACTACTATTGACAAGAGATGGGGGAAATAATAATAAT-----  
-----

-----  
-----  
AGTTCGAATGAACTTTTCAGGCCTGGAGGAGGAGACATGAGGGACAATTGGAGAAGTGAGTTATATAAGTATA  
AAGTAGTAAAAATTGAGCCATTA---GGTGTAGCACCCACTCCTGCAAAAAGGAGAGTGGTG-----  
-----GAGAGAGAAAAAAGAGCA---ATTGGTGGACTGGGAGCT-----  
---GTATTCCTTGGGTTCTTAGGAGCA---GCAGGAAGCACTATG---GGCGCGGCGTCA---  
ATAACGCTGACGGTACAG---GCCAGACAA---TTATTG---TCTGGTATAGTGCAACAGCAGAGT---  
AATTTG---CTAAAG---GCTATTGAGGCTCAACAACAGATGTTGAGACTCACGGTCTGGGGCATT  
>KY658718  
TTCTATTGTAATACAACAGGACTATTTAATAGCACTTGGATGGAAAATAGCAGCATTGTTGGGAAAGCAATGGCA  
ATAAA-----  
-----  
ACAAATGAAACTATAACTCTTCCATGCAGAATAAAGCAAATTGTAAATATGTGGCAGAGAGTGGGACAAGCAA  
TTTATGCCCCCTCCCATCCCAGGAATAATACAGTGTGAGTCAAAC---  
ATTACTGGACTACTATTGACAAGAGATGGGGAAATTAATAGTTCA-----  
-----  
-----  
AATGAACTTTTCAGGCCTGGAGGAGGAGACATGAGGGACAATTGGAGAAGTGAATTATATAAGTATAAAGTAG  
TAAAAATTGAACCAGTA---GGTGTAGCACCCACCCGTGCAAGAAGGAGAGTGGTG-----  
-----GAGAGAGAAAAAAGAGCA---ATTGGTGTACTGGGAGCT-----  
GCATTCCTTGGGTTCTTAGGAGCA---GCAGGAAGCACTATG---GGCGCGGCGTCA---  
ATAACGCTGACGGTACGG---GCCAGACAA---TTATTG---TCTGGTATAGTGCAACAGCAGAGT---  
AATTTG---CTGAAG---GCTATTGAGGCTCAACAACAGATGTTGAGACTCACGGTCTGGGGCATT  
>KX232617  
TTCTATTGTAATACAACAAAACTATTTAATAGCACTTGGAAAGGAAATATCACTTGGGAGAGCAATGGCAATA  
AA-----  
-----  
ACAAATGACAGTATAACTCTTCCATGCAGAATAAAGCAAATTGTAAATATGTGGCAGAGGGTAGGACAAGCAA  
TTTATGCCCCCTCCCATCCCAGGAGTAATAACGTGTGAGTCAAAC---  
ATTACTGGACTACTATTGACAAGAGATGGGGGAAATAATAATAATAGA-----  
-----  
-----  
AATAATGAACTTTTCAGGCCTGGAGGAGGAGACATGAGGGACAATTGGAGAAGTGAATTATATAAGTATAAAG  
TAGTAAAAATTGAACCATTA---GGTGTAGCACCCACCCCTGCAAGAAGGAGAGTGGTG-----  
-----GAGAGAGAAAAAAGAGCA---ATTGGTGGACTGGGAGCT-----  
GTATTCCTTGGGTTCTTAGGAGCA---GCAGGAAGCACTATG---GGCGCGGCGTCA---  
ATAACGCTGACGGTACAG---GCCAGACAA---TTATTG---TCTGGTATAGTGCAACAGCAGAGT---  
AATTTG---CTGAAG---GCTATAGAGGCTCAACATCAAATGTTGAGACTCACGGTCTGGGGCATT  
>KX232623  
TTCTATTGTAATACAACAGGCCTGTTTAATAGTACTTGGCCTAGGAATGAGAATGAGACTAGGGAAGCAAATA  
GCACAGGG-----  
-----  
TCAGATGACATCATAAACACTCCCATGCAGAATAAAGCAAATTATAAATGTATGGCAGAGAGTAGGGCAAGCAA  
TATATGCCCCCTCCTATCCCAGGACTAATAAGATGTAACCTCAAGT---  
ATTACGGGGCTACTATTAGTAAGAGATGGTGGAATAATAACACA-----  
-----  
-----  
GATAATGAAACCTTCAGACCTGGAGGAGGAAATATGAAGGACAATTGGAGAAGTGAATTGTATAAGTATAAAG  
TAGTAAACCTGAACCACTA---GGAGTAGCACCCACCAGGGCAAAGAGAAGAGTGGTG-----  
-----GAGAGAGAAAAAAGAGCA---TTTGGA---TTAGGAGCT-----  
GTATTCATTGGGTTCTTGGGAGCA---GCCGGAAGCACTATG---GGCGCGGCGTCT---  
GTAACGCTGACGGTACAG---GCCAGGCAA---TTATTG---TCTGGCATAGTGCAACAGCAAAGC---  
AATTTG---CTGAGG---GCTATAGAGGCTCAGCAGCAGATGCTGAAACTCACGGTCTGGGGCATT  
>KX232627  
TTCTATTGTAATACAACAAAACTATTTAATAGTACTTGGGGCAATGGCAGTGAACCAGAG-----  
-----  
-----  
GTAAACAATACCATAACCCTGCCATGCAGAATAAAGCAAATTGTAAATATGTGGCAGAGGGTAGGACAAGCAA  
TTTATGCCCCCTCCCATCCCAGGAAGAATAAAGTGTGAATCAAAC---  
ATTACTGGACTACTATTGACAAGGGATGGGGACAGAATAATAGG-----

-----  
-----  
TCAATGAACTTTTCAGGCCTGGAGGAGGAGATATGAGGGACAATTGGAGAAGTGAATTATATAAGTATAAAA  
TAGTAAAAATTGAACCATTA---GGTGTAGCACCCACCCATGCAAGAAGGAGAGTGGTG-----  
-----GGGAGAGAAAAAAGAGCA--ATTGGTGGACTGGGAGCT-----  
GTATTCCTTGGGTTCTTAGGAGCA--GCAGGAAGCACTATG--GGCGCAGCGTCA---  
ATAACGCTGACGGTACAG---GCCAGACAA--TTATTG---TCTGGTATAGTGCAACAGCAAAGT---  
AATTTG---CTGAAG---GCTATTGAGGCTCAACAACAGATGTTGAGACTCACAGTCTGGGGCATT  
>HM215282  
TTCTATTGTAATACATCAAGCCTGTTTAATAGCACTTGGTATAACAATAGCAATAACAACAATGCCAGCTCAA  
ACCCC-----  
-----ACA---  
GAGTTAAATGGCACTATAACTCTCCCATGCAGAATAAAGCAAATTGTAAATATGTGGCAGAAAGTAGGACAAG  
CAATGTATGCCCTCCCATCCCAGGAATAATAGAGTGTAATCAAAC---  
ATTACAGGATTGTTATTAACAAGAGATGGAGGGAATAGTAATGGT-----  
-----  
-----  
GCAATGAACTTTTCAGGCCTGGAGGAGGAGATATAAGGGACAATTGGAGAAGTGAATTATATAAGTATAAAG  
TAGTAAAAATTGAACCACTA---GGTGTAGCACCCACCCATGCAAGAAGAAGAGTGGTG-----  
-----GGGAGAGAAAAAAGAGCA--GTAGGA---CTGGGAGCT-----  
GTCATCTTTGGGTTCTTAGGAGCA--GCAGGAAGCACTATG--GGCGCGGCGTCA---  
ATAACGCTGACGGTACAG---GCCAGACAA--TTATTG---TCTGGTATAGTGCAACAGCAAAGC---  
AATTTG---CTGCAG---GCTATAAAGGCTCAACAACATCTGTTGAGGCTCACGGTCTGGGGCATT  
>KR017777  
TTCTATTGCAATACATCAAAGCTGTTTGAAGGTTGGATTGGAATCATAGCAATGGGAGTTGGGAAAGGAATA  
ATAAA-----  
ACAAATGATGAAAATAAA-----  
ACAGAGGATGGAAATATAATTCTCCCATGCAAAATAAAGCAAATAGTAAGAATGTGGCAGAGAGCAGGACAGG  
CAATGTATGCCCTCCCATCAAAGGATTAATAAATTGTAAATCAAAC---  
ATTACAGGACTACTATTAACAAGGGATGGA--ACACATAATGGG-----  
-----  
-----  
ACCAACGAGACCTTCAGGCCTATAGGAGGAGAGATGAGGGACAATTGGAGAAGTGAATTATATAAATATAAAG  
TAGTGGAATTAACCACTA---GGAGTAGCACCCACCGAGGCAAGGAGAAGAGTGGTG-----  
-----CAGAGAGAAAAAAGAGCA--GTGGGA--ATAGGAGCT-----  
GTGCTCCTTGGGTTCTTAGGAGCA--GCAGGAAGCACTATG--GGCGCGGCGTCA---  
ATAACGCTGACGGTACAG---GCCAGACAA--TTATTG---TCTGGTATAGTGCAACAGCAGAGC---  
AATTTG---CTGAAG---GCTATAGAGGCTCAACAACATCTGTTGAGACTCACGGTCTGGGGCATT  
>KU749421  
TTCTATTGTAATACATCAAAGCTATTTAATAGCACCTGGAATAGCACTGGGGAGAATCAGAAAATT-----  
-----  
-----  
AGGAATGGGACTCTCATCCTCCCATGCAGAATAAAGCAAATTGTACGGATGTGGCAGAGAGTAGAACAAGCAA  
TGTATGCCCTCCCATCCAAGGAGAAATAAGATGTCATTCAAAT---  
ATTACAGGAATACTGTTAACGAGAGATGGCGGGGGTAACGAGACA-----  
-----  
-----  
AAGGAGACCTTCAGACCTGTAGGAGGAAATATGAAAGACAATTGGAGAAGTGAATTATATAAGTATAAAGTAG  
TAAAAATTGAGCCAATA---GGAATAGCACCTCCAGGGCACGAAGAATAGTGGTG-----  
-----GGGAGAGAAAAAAGAGCA--GTTGGA---CTGGGAGCT-----  
GTCTTCCTTGGGTTCTTAGGAGCA--GCAGGAAGCACTATG--GGCGCGGCGTCA---  
GTGACGCTGACGGTACAG---GCCAGACAA--TTATTG---TCGGGCATAGTGCAACAGCAAAGC---  
AATTTG---CTGATG---GCTATAGAGGCTCAACAACATATGTTGAAACTCACGGTCTGGGGCATT  
>GU201504  
TTCTATTGTGATACAGCAGAACTATTTAATAGTACTTGGGAAAGGGAAAATGGCACTCGGAGAAAT-----  
-----  
-----  
AGCACTGGGAATATAAATCTCCAGTGCAGAATAAAGCAAATTGTAAATATGTGGCAGAGAACAGGACAAGCAA  
TGTATGCCCTCCCATTCAGGAATAATAGAATGTAAAGTCAAAC---  
ATTACAGGACTACTATTGACAAGAGATGGTGGAGCTAATAACAGT-----

-----  
-----  
GCAGAGGAGACTTTTCAGACCTGGAGGAGGAGATATGAGAGACAATTGGAGAAGTGAATTATATAAGTATAAAG  
TAGTAAAAAATTGAACCACTA---GGGGTAGCACCCACCCATGCAAAAAGAAGAGTGGTG-----  
-----GAGAGAGAAAAAAGAGCA--GTTGGA---CTGGGAGCT-----  
GTCTTCCTTGGGTTCTTAGGAGCA--GCAGGAAGCACTATG--GGCGCGGCGTCA---  
ATAACGCTGACGGTACAG---GCTAGACAA--TTATTG---TCTGGCATAGTGCAACAGCAAAGC---  
AATTTG---CTGAGG---GCTATAGAGGCTCAACAGCATATGTTGAGACTCACGGTCTGGGGCATT  
>KR017773  
TTCTATTGCAATACATCAGGCCTATTTAATAGCACTTGGAATAGCACTGGGAATAATAATAATATC-----  
-----  
-----

AGCTCAGACAATATCACTCTCCCATGCAGAATAAAGCAAATTGTGAGGCTATGGCAGAGAGTAGGACAAGCAA  
TGTATGCCCCCTCCCGTCTCAGGAGTAATAAGATGTGAATCAAAC---  
ATTACAGGACTACTATTAACAAGAGATGGAGGGAAGAAAAATAAGAGT-----  
-----  
-----

AGTGACCCTGAAACCTTCAGACCTGGAGGAGGAGATATGAAGGACAATTGGAGAAGTGAATTATATAAGTATA  
AAGTAGTAAAAAATTGAACCATTA---GGAGTAGCACCCACCAAGGCAAAAAGAAGAGTGGTG-----  
-----GAGAGAGAAAAAAGAGCA--GCTGGA---CTGGGAGCT-----  
---GTCCTCCTTGGGTTCTTAGGAGCA--GCAGGAAGCACTATG--GGCGCGGCGTCA---  
ATAACGCTGACGGTACAG---GCCAGACAA--TTATTG---TCTGGCATAGTGCAACAGCAAAGC---  
AATTTG---CTGAGA---GCTATAGAGGCTCAACAGCAGATGTTGAGACTCACGGTCTGGGGCATT  
>KR017772  
TTCTATTGCGATACATCAGATCTGTTTAATAGCACTTGGGACAATAATACTGTCTAGCCCAAACGACACAGAG-  
-----  
-----

GCAAAAGACAATATAACCCCTCCAGTGCAGAATAAAGCAGATTGTAAATATGTGGCAGAGAGTAGGACAAGCAA  
TATATGCCCCCTCCCATCCGAGGAGTAATAAGGTGTGAATCAAAC---  
ATTACTGGACTACTATTAGTAAGAGATGGAGGAATTGATAATAGG-----  
-----  
-----

ACAAATGAGACCTTCAGGCCTGGAGGAGGAGATATGAGGGACAATTGGAGAAGTGAATTATATAAGTATAAAG  
TAGTAAAAAATTGAACCACTA---GGTGTAGCACCCACTAGGGCAAAAAGAAGAGTGGTG-----  
-----GAGAGAGAAAAAAGAGCA--GTTGGA--ATAGGAGCT-----  
GTCTCCTCGGGTTCTTAGGAGCA--GCAGGAAGCACTATG--GGCGCGGCGTCA---  
CTAACGCTGACGGTACAG---GCCAGACAA--TTATTG---TCTGGTATAGTGCAACAGCAAAGC---  
AATTTG---CTGAAG---GCTATAGAGGCTCAACAACATCTGTTGAAACTCACGGTCTGGGGCATT  
>GQ372986  
TTCTATTGCAATACAACAGATCTGTTTAATAGCGCCTGGAATGCCAGCTCAACCTGGCCCAAC-----  
-----  
-----

TCAACAGGTAATATAACTCTCCAATGCAGAATAAAGCAAATTATAAATATGTGGCAGAGGGTAGGACAAGCAA  
TGTATGCCCCCTCCCATCCGAGGAGAAATAAGGTGTGAATCAAAC---  
ATTACAGGACTACTCTTAACAAGAGATGGAGGGACTAACACTAACAGT-----  
-----  
-----

AGTGGTGCAAACGAGACTTTTCAGGCCTGGAGGAGGAGATATGAGAGACAATTGGAGAAGTGAATTATATAAAT  
ATAAAGTAGTAAAAAATTGAACCACTA---GGAGTAGCACCCCTCCAAGGCAAAGAGAAGAGTGGTG-----  
-----GAGAGAGAAAAAAGAGCA--GTTGGA---TTTGAGCT---  
-----GTCTTCCTTGGGTTCTTGGGAGCA--GCAGGAAGTACTATG--GGCGCGGCGTCA---  
ATAACGCTGACGGTACAG---GCCAGACAA--TTATTG---TCTGGGATAGTACAACAGCAGAGC---  
AATCTG---CTGAGG---GCTATAGAGGCTCAACAGCAACTGTTGAAACTCACGGTCTGGGGCATT  
>AB231894  
TTCTACTGCAATACAGATGAACTGTTTAATAGCACTTGGAATAGTAGCACTTGGAATAGTAGCAGTACTACC-  
-----  
-----

GATAGCTCAAATATAACTCTCCACTGCAGAATAAAACAAATTATAAATATGTGGCAGACAGTAGGACGAGCAA  
TGTATGCCCCCTCCCATCCGAGGAATAATACAGTGTAACCTCAAAC---  
ATTACAGGATTGCTATTAACAAGAGATGGAGGAAAGGATAATAGTACTGAG-----  
-----

-----  
 -----  
 ACTAATAACTGAGACTTTTCAGGCCTGGAGGAGGAGACATGAGGGACAATTGGAGAAGTGAATTATATAAAT  
 ATAAAGTAGTAAAAGTTGAACCAATA---GGTGTAGCACCCACCAAGGCAAAAAGAAGAGTGGTG-----  
 -----GAGAGAGAAAAAAGAGCA---GTTGGA---ATAGGAGCT---  
 -----GTCTTCCTTGGGTTCTTAGGAGCA---GCAGGAAGCACTATG---GGCGCGGCGTCA---  
 ATAACGCTGACGGTACAA---GCCAGACAA---TTATTG---TCTGGTATAGTGCAACAGCAGAGC---  
 AATTTG---CTGAGA---GCTATAGAGGCTCAACAACAGATGTTGAGACTCACGGTCTGGGGCATT  
 >AY521632  
 TTCTATTGCAATACATCAGGCCTGTTTAATAGTAGTTGGAGTTGGAATGACACTACAAATTTAACGGAA----  
 -----  
 -----  
 TCAAAATGGTACTATAAATCTCCCATGTAAAATAAAACAAATTATACGTATGTGGCAGAGAGTAGGGCAAGCAG  
 TGTATGCCCCCTCCCATCCAAGGAGTAATACGCTGTAAATCAAAC---  
 ATTACAGGGCTACTGCTAACAAGAGATGGTGGGAATGATAATGAT-----  
 -----  
 -----  
 AATACAACCTGAGAAGTTTAGACCTGGAGGAGGAAATATGAAGGACAATTGGAGAAGTGAATTATATAAATATA  
 AAGTAGTAAAAATTGAACCACTA---GGAGTAGCACCCACCAAGGCAAAAAGAAGAGTGGTG-----  
 -----GAGAGAGAAAAAAGAGCA---GTTGGA---CTGGGAGCT-----  
 ---GTCTTCCTTGGGTTCTTAGGCGCA---GCTGGAAGTACTATG---GGCGCGGCGTCA---  
 ATAACGCTGACGGCACAG---GCCAGACAA---TTACTG---TCTGGCATAGTACAACAGCAGAGT---  
 AATCTG---CTGAGA---GCTATAGAGGCTCAACAGCACCTGTTGAAACTCACGGTCTGGGGCATT  
 >AY521633  
 TTCTATTGCAATACATCAGGCCTGTTTAATAGTACTTGGATTTCGGTATGCCAATGGCACCGTGCAGAACAAATG  
 GCACG-----  
 -----  
 GAGCCAAATGGTATTATTCTCTCCAATGCAGAATAAGACAAGTTGTACGTATGTGGCAGAAAGTACGACAAG  
 CAATATATGCCCCCTCCCATAGAGGAGTAATATGCTGTGTATCCATC---  
 ATTGCAGGGCTACTACTAACAAGAGATGGTGGGGATAATAACT-----  
 -----  
 -----  
 ACCGAGAAGTTCAGACCTGGAGGAGGAGATATGAGGGACAATTGGAGAAGTGAATTATATAAATATAAAGTAG  
 TAAAAATTGAACCACTA---GGAGTAGCACCCACCAAGGCAAAAAGAAGAGTGGTG-----  
 -----GGGAGAGAAAAGAGAGCA---GTTGGA---CTGGGAGCT-----  
 GTCTCTTTTGGGTTCTTAGGAGCA---GCAGGAAGTACTATG---GGCGCGGCGTCA---  
 ATAACGCTGACGGCACAG---GCCAGACAA---TTATTG---TCTGGCATAGTACAACAGCAGAGC---  
 AATCTG---CTGAGG---GCTATAGAGGCTCAACAGCACCTGCTGAAACTCACAGTCTGGGGCATT  
 >JN864055  
 TTCTATTGCGATACAACAGAATTATTTAATAGTACTTGGGAGACTAATAACACTGCCAGCTCCAATACC---  
 -----  
 -----  
 ACAAATGGAACCTATAACTCTCCAATGCAGAATAAAGCAAATTATAAATATGTGGCAGAGAGTAGGACAAGCAA  
 TGTATGCCCCCTCCCATCCGAGGAGTAATAAGGTGTGAATCAAAC---  
 ATTACAGGACTACTATTAACAAGAGATGGAGGGACAACCTGAGACA-----  
 -----  
 -----  
 AATAATAAAGAGACATTTCAGGCCTGCAGGAGGAGATATGAGGGACAATTGGAGAAGTGAATTATATAAGTATA  
 AGGTAGTACAAATTGAACCACTA---GGTGTGGCACCCACCCATGCAAAAAGAAGAGTGGTG-----  
 -----GAGAGAGGAAAAAAGAGCA---GTTGGA---ATAGGAGCT-----  
 ---GCTTTCCTTGGGTTCTTATCAGCA---GCAGGAAGCACTATG---GGCGCGGCGTCA---  
 ATAACGCTGACGGTACAG---GCCAGACAA---TTATTG---TCTGGTATAGTGCAACAGCAAAGC---  
 AATTTG---CTGAAG---GCTATAGAGGCTCAACAACATCTGTTGAAACTCACAGTCTGGGGCATT  
 >FJ388896  
 TTCTATTGCAATACATCAGGCCTGTTTAATAGCTCTTGGTATAACAATGGCACTGCCATCTCAAACCACACAG  
 GGTCAAAT-----  
 -----GGCACT-----  
 GGGTCAAATGGCACTATCACTCTCCAATGCAGAATAAAGCAAAGTTATAAATATGTGGCAGAAAGTAGGACAGG  
 CAATGTATGCCCCCTCCCATCCCAGGAATAATAAGATGTGACTCAAAC---  
 ATTACTGGACTACTATTAACAAGAGATGGAGGGAGTAATAATAACAAAT-----

-----  
 -----  
 GAGACTAAGACTAAGATCTTCAGGCCTGGAGGAGGAGATATGAGGGACAATTGGAGAAGTGAATTATACAAGT  
 ATAAAGTAGTAGAAATTGAACCACTA---GGTGTAGCACCCACCCCTGCAAGAAGAAGAGTGGTG-----  
 -----CAGAGAGAAAAAAGAGCA---GTTGGA---ATGGGAGCT---  
 -----TTGCTCTTTGGGTTCTTAGGAGCA---GCAGGAAGCACTATG---GGCGCGGCGTCA---  
 ATAACGCTGACGGTACAG---GCCAGACAA---TTACTG---TCTGGTATAGTGCAACAGCAGAGC---  
 AATCTG---CTGAAG---GCTATAGAGGCTCAACAACAGATGTTGAGACTCACGGTCTGGGGCATT  
 >DQ926899  
 TTCTATTGCAATACATCAGAACTGTTTAATAGCACTTGGGGCAATAACACCTGGGACAATAACACTGCC-----  
 -----  
 -----  
 AGCTCAGAAAATATAACTCTCCAATGCAGAATAAAACAATTTATAAATATGTGGCAGAGAGTAGGAAGAGCAA  
 TGTATGCCCCCTCCCATCCGAGGAATAATAAGTTGTAAATCAAAC---  
 ATTACTGGACTACTATTAACAAGAGATGGAGGGAAATATAATGATAGC-----  
 -----  
 -----  
 AATGCAACTCAGATCTTCAGGCCTGGAGGAGGAGATATGAGGGACAATTGGAGAAGTGAATTATATAAGTATA  
 AAGTAGTAAAAATTGAACCACTA---GGTGTAGCACCCACACATGCAAGAAGAAGAGTGGTG-----  
 -----GGGAGAGACAAAAGAGCA---GTTGGA---CTGGGAGCT-----  
 ---TTCTTCCTTGGGTTCTTAGGAGCA---GCAGGAAGCACTATG---GGCGCAGCGTCA---  
 ATAACGCTGACGGTACAA---GCCAGACAA---TTATTG---TCTGGTATAGTGCAACAGCAAAGC---  
 AATTTG---CTGAAA---GCTATAGAGGCTCAACAACAGCTGTTGAGACTCACGGTCTGGGGCATT  
 >JN882651  
 TTCTATTGCAATACGACAAGCCTGTTTAACAACAGCCAGTGGCCATTTAATGGGAGTAGTAACCCTGTC-----  
 -----  
 -----  
 CCTAATGGCACCATAACTCTCCAATGCAGAATAAAGCAATTCATAAATATGTGGCAGAGAGTAGGACAAGCAA  
 TGTATGCCCCCTCCCATCCGAGGAAATATAAGTTGTATGTCAAAC---  
 ATTACAGGACTACTATTAATAAGAGATGGAGGGAATGGTAATAGT-----  
 -----  
 -----  
 ACAAATGAGACTTTTAGGCCTGGAGGAGGAGATATGAGGGACAATTGGAGAAGTGAATTATATAAGTATAAAG  
 TAGTAAAAATTGAACCAATA---GGTATAGCACCCACCCATGCAAGAAGAAGGGTGGTG-----  
 -----GGGAGAGACAAAAGAGCA---GCTGGA---CTGGGAGCT-----  
 GTCTTCCTTGGGTTCTTAGGAGCA---GCAGGAAGCACTATG---GGCGCGGCGTCA---  
 ATAACGCTGACGGTACAG---GCCAGACAA---TTATTG---TCTGGTATAGTGCAACAGCAGAGC---  
 AATCTG---CTGAAG---GCTATTGAGGCTCAACAGCATCTGTTGAAACTCACGGTCTGGGGCATT  
 >MH666158  
 TTCTATTGCGATACATCAGGACTGTTTAATAGTTCTTGAATGGCACTAGTCCTAGGAATGATACT-----  
 -----  
 -----  
 ACCAATAGCACTATAACTCTCCAATGCAGAATAAAGCAAATTATCAATATGTGGCAGAGAGTAGGGCAAGCAA  
 TGTATGCCCCCTCCCATCCGAGGGGTAATAAGGTGTGAATCAAAC---  
 ATTACTGGACTATTATTAACAAGAGATGGAGGGAATAAAAAATAAT-----  
 -----  
 -----  
 AGTGATCCTGAGATCTTCAGGCCTGCAGGAGGAGATATGAGAGACAATTGGAGAAGTGAATTATATAAGTATA  
 AAGTAGTGAAAATTGAACCACTA---GGTATAGCACCCAACCGTGCAAAAAGAAGAGTAGTG-----  
 -----GGGAGAGAAAAAAGAGCA---GTTGGA---CTGGGAGCT-----  
 ---GTCTTCCTTGGGTTCTTAGGAGCA---GCAGGAAGCACTATG---GGCGCGGCGTCA---  
 ATAACGCTGACGGTACAG---GCCAGACAA---TTACTG---TCCGGTATAGTGCAACAGCAGAGC---  
 AATCTG---CTGAAG---GCTATAGAGGCTCAACAACAGCTGTTGAGACTCACAGTTTGGGGCATC  
 >JN882653  
 TTCTATTGCAATACATCAATACTGTTTAATGGTACATTTAATGGTACAGAATTTAATGATACAGAAATTAAC-  
 -----  
 -----  
 AATACAACCACACTCCGACTCCCATGCAGAATAAAACAGATTGTAAACATGTGGCAGGGAGTAGGAAAAGCAA  
 TGTATGCCCCCTCCCATTTGAAGGAAAAATCAACTGTTTCTCAAAT---  
 ATTACAGGGCTACTATTAGTAAGAGATGGAGGGACTAATAATAGT-----

-----  
-----  
ACAAATGAGACCTTTAGACCTGGAGGAGGAGATATGAGGGACAATTGGAGAAGTGAATTATATAAGTATAAAG  
TAGTAAAAAATTGAACCATTA---GGAGTAGCACCCACCAGGGCAAGGAGAAGAGTGGTG-----  
-----GAGAGAGAAAAAAGAGCA--ATTGGA--ATGGGAGCT-----  
CTTTTCCTTGGGTTCTTAGGAGCA--GCAGGAAGCACTATG--GGCGCAGCGTCA---  
ATAACGCTGACGGTACAG---GCCAGACAA--TTATTG---TCTGGCATAGTGCAACAGCAGAGC---  
AATCTG---CTGAGA---GCTATAGAGGCTCAGCAGCAAATGTTGAGGCTCACGGTCTGGGGCATT  
>JF683752  
TTCTATTGCAATACATCAGGACTGTTTAATAGTACTTGGGAATACCACTGATACTTGGGAATAACACTTATAGC-  
-----  
-----  
CACAATGACACTATAACTCTCCAATGCAGAATAAAGCAATTTGTAAATATGTGGCAGAGAGTAGGGCGGGCAA  
TGTATAACCCTCCCATCCCAGGAGAAATAAAGTGTGCATCAAAC---  
ATTACTGGACTACTATTAACAAGAGATGGAGGGAGTAATAATATT-----  
-----  
-----  
ACAAATGAGATCTTCAGGCCTGCAGGAGGAGATATGAGAGACAATTGGAGAAGTGAACCTATATAAGTATAAAG  
TAGTAAAAAATTGAACCACTG---GGTGTAGCACCCACCCCTGCAAAAAAAGAGTAGTG-----  
-----GGGAGAGAGAAAAAGAGCA--GTTGGA--CTGGGAGCT-----  
GTCTTCCTTGGGTTCTTAGGACCA---GCAGGAAGCACTATG--GGCGCGGCGTCA---  
ATAACGCTGACGGTACAG---GCCAGACAA--TTATTG---TCTGGTATAGTGCAACAGCAGAGC---  
AATTTG---CTGAAG---GCTATAGAGGCTCAACAACATATGTTGAGACTCACAGTCTGGGGCATT  
>MH666162  
TTCTACTGCAATACATCAGGACTGTTTAATAGTACTTGGGAATAGTACTTGGATCAACTTAGATAAC-----  
-----  
-----  
TTAAATGGCAGCATAACTCTCCAATGCAAAATAAAGCAATTTATAAATATGTGGCAGAGAGTAGGGCAAGCAA  
TGTATGCCCCCTCCCATCAAAGGAATGATACAGTGTAGATCAAAC---  
ATTACTGGACTAATATTAACAAGAGATGGAGGGAATACTGAGAATGCT-----  
-----  
-----  
ACTGATAATGATACAGAGATCTTCAGGCCTACAGGAGGAGATATGAGAGACAATTGGAGAAGTGAATTATATA  
AGTATAAAGTAGTAAAAAATTGAACCACTA--GGTGTAGCACCCACCCATGCAAGAAGAAGAGTGGTG-----  
-----GAGAGACAAAAAAGAGCA--GTTGGA--  
CTGGGAGCT-----GTCTTCCTTGGGTTTCTAGGAGCA--GCAGGAAGCACTATG---  
GGCGCAGCGTCA--ATAACGCTGACGGTACAG---GCCAGACAA--TTATTG---  
TCTGGTATAGTGCAACAGCAGAGA--AATTTG--CTGCAA---  
GCTATAGAGGCTCAACAACATATGTTGAGACTCACAGTCTGGGGCATT  
>JF683766  
TTCTACTGCAATACATCAACACTATTTAATAGAACATGGAATGGTACCACATGGAAT-----  
-----  
-----  
AACACAGCAAATAGTACAATCCCATGTAGAATAAAACAAATTATAAACATGTGGCAGGGAGTAGGAAAAGCAA  
TGTATGCCCCCTCCCATGAAGGACAAATAAATTGTACATCAAAT---  
ATTACAGGGCTACTACTGACAGTAGATGGTGGTAATAATACTAAT-----  
-----  
-----  
AATTCAGAGACATTCAGACCTGGAGGAGGAGATATGAAAGACAATTGGAGAAGTGAATTATATAAGTATAAGG  
TAGTACAAATTGAACCAATA---GGTGTGGCACCCACCCATGCAAAAAGAAGAGTGGTG-----  
-----GAGAGAGAAAAAAGAGCA--GTTGGA--CTGGGAGCT-----  
GTCTTCCTTGGGTTCTTAGGAGCA--GCAGGAAGCACTATG--GGCGCGGCGTCA---  
ATAACGCTGACGGTACAG---GCCAGACAA--TTATTG---TCTGGTATAGTGCAACAGCAGAGC---  
AATCTG---CTGAGG---GCTATAGAGGCTCAACAACATCTGTTGAAACTCACAGTCTGGGGCATT  
>AB231897  
TTCTATTGCAATACATCAACACTGTTTAATAGCACTTGGATTAGGAATAGCTCAAATAGCACTTGGGAATAGCT  
CTGCCCTCGAAC-----  
-----AGCACA-----  
GAGTTAAATAGCAATATAACTCTTCAGTGCAGAATCAAGCAAATTGTAAGAATGTGGCAGAGAGTAGGACAAG  
CAATGTATGCCCCCTCCAATCGCAGGAGACATAAGGTGTGAATCAAAC---

ATTACTGGACTACTATTAACAAGAGATGGAGGGCATGAGACTGAG-----  
-----  
-----  
AATAAGACTGAGATCTTCAGGCCTGGAGGAGGAGATATGAGGGACAATTGGAGAAGTGAATTATATAAGTATA  
AAGTAGTAAAAATTAAACCATTA---GGTATAGCACCCACCCATGCAAAAAGAAGAGTGGTG-----  
-----ACGAGAGAAAAAAGAGCA---GTTGGA---CTGGGAGCT-----  
---GTCTTCCTTGGGTTCTTAGGAACA---GCAGGAAGCACTATG---GGCGCAGCGTCA---  
CTAACGCTGACGGTACAG---GCCAGACAA---TTATTG---TCCGGTATAGTGCGACAGCAAAAC---  
AATTTG---CTGAAG---GCTATAGAGGCTCAACAACAGCTGTTGAGACTCACGGTCTGGGGCATT  
>AB480046  
TTCTATTGCAATACATCAGGCCTGTTTAATAGTACCTGGTATGGAAATGGCAATGACACCACAAATGGCACGA  
TTCTA-----  
-----CAT---  
GGTAATAGAACTCATATAACTCTCCCATGCAGAATAAGACAAATTGTACATATGTGGCAGAGAGTAGGACAAG  
CAATGTATGCCCCCTCCCATTAAGGAATAATAAAATGTACATCAAAC---  
ATTACAGGGCTACTGCTAAACAAGAGATGGTGGGAATAATAATAGT-----  
-----  
-----  
ACAAATGAGACATTCTAGACCTGGGGGAGGAAATATGAAGGACAATTGGAGAAGTGAATTATATAGATATAAAG  
TAGTAAAAATTGAACCACTA---GGAGTAGCACCCACCAGGGCAAAAAGAAGAGTGGTG-----  
-----GAGAGAGAAAAAAGAGCAATTGTTGGA---CTGGGAGCT-----  
GTCTTCTTTGGGTTCTTAGGAGCA---GCAGGAAGTACTATG---GGCGCGGCGTCA---  
ATAACGCTGACGGTACAG---GCCAGACAA---TTATTG---TCTGGTATAGTACAACAGCAGAAC---  
AATCTG---CTAAGG---GCCATAGAGGCTCAACAGCAACTGTTGAAACTCACGGTCTGGGGCATT  
>MK086119  
TTCTATTGCAATACAACAGACCTATTT-----TCTTGGAATAGTAGTAGCCCATGGAAGAACATAACG-----  
-----  
-----  
TCAAATGACAGTATAACTCTCCAATGCAGAATAAAGCAAATTGTAAGGATGTGGCAGCAAGTAGGACAAGCAA  
TGTATGCCCCCTCCTATACCAGGAATAATAAGGTGTGAATCAAAC---  
ATTACAGGAATACTGTTAACAAGAGATGGAGGAAATAATAATACA-----  
-----  
-----  
AATAACACAGAGGTATTCTAGGCCTGGAGGAGGAGATATGAGGGACAATTGGAGAAGTGAATTATATAAATATA  
AAGTAGTAAAAATTGAACCATTA---GGTGTAGCACCTTCCCGTGCAAGAAGAAGAGTGGTG-----  
-----GAGAGAGAAAAAAGAGCA---GTTGGC---CTGGGAGCT-----  
---TTCTTCCTTGGGTTCTTAGGAGCA---GCAGGAAGCACTATG---GGCGCGGCGTCA---  
ATAACGCTGACGATACAG---GCCAGACAA---TTATTG---TCTGGTATAGTGACAGCAGCAGAGC---  
AATTCTGCTGACGGGCTC---ATAGAGGCTCAACAACATCTGTTGAAACTCACGGTCTGGGGCATT  
>MK086120  
TTCTATTGCAATACAACAGACCTATTT-----TCTTGGAATAGTAGTAGCCCATGGAAGAACATAACG-----  
-----  
-----  
TCAAATGACAGTATAACTCTCCAATGCAGAATAAAGCAAATTGTAAGGATGTGGCAGCAAGTAGGACAAGCAA  
TGTATGCCCCCTCCTATACCAGGAATAATAAGGTGTGAATCAAAC---  
ATTACAGGAATACTGTTAACAAGAGATGGAGGAAATAATAATACA-----  
-----  
-----  
AATAACACAGAGGTATTCTAGGCCTGGAGGAGGAGATATGAGGGACAATTGGAGAAGTGAATTATATAAATATA  
AAGTAGTAAAAATTGAACCATTA---GGTGTAGCACCTTCCCGTGCAAGAAGAAGAGTGGTG-----  
-----GAGAGAGAAAAAAGAGCA---GTTGGC---CTGGGAGCT-----  
---TTCTTCCTTGGGTTCTTAGGAGCA---GCAGGAAGCACTATG---GGCGCGGCGTCA---  
ATAACGCTGACGGTACAG---GCCAGACAA---TTATTG---TCTGGTATAGTGACAGCAGCAGAGC---  
AATCTG---CTGCGG---GCCATAGAGGCTCAGCAACATCTGTTGAAACTCGCGGTCTGGGGCATT  
>KR017771  
TTCTACTGTAATACAACAAATCTGTTTAATAATCTGTTTAATAATACAGAA-----  
-----  
-----  
GACAAATGGTACAATCACTATTCCATGTAGAATAAAGCAAATTATAAACATGTGGCAAAGAGTAGGACGAGCAA  
TGTATGCCCCCTCCCATAGCCGAAAAATTCAAGTGTAACTCAACT---

ATCACAGGTCTACTATTAACAAGAGATGGTGGTAATACTAATGTG-----  
 -----  
 -----  
 ACTGTGACTGAGATCCTCAGACCTGGAGGGGGAGATATGAGAGACAATTGGAGAAGTGAAGTGTATAAATATA  
 AGGTAGTGAAAATTGAACCACTA---GGAGTAGCACCCACCAGGGCAAAAAGACAAGTGGTA-----  
 -----ACCAGAGCAAAAAGAGAC---ATGGGA---ATAGGAGCT-----  
 ---ATGCTCCTTGGGTTCTTGGGAGCA---GCAGGAAGCACTATG---GGCGCGGCGTCA---  
 ATAACGCTGACGGTACAG---GCCAGACAA---CTATTG---TCTGGTATAGTGCAACAGCAAAAT---  
 AATTTG---CTGAAG---GCTATAGAAGCGCAACAGCATCTGTTGCAGCTTACAGTCTGGGGCATT  
 >MK086117  
 TTCTATTGCAATACAACAGACCTATTT-----TCTTGAATAGTAGTAGCCCATGGAAGAACATAACG----  
 -----  
 -----  
 TCAAAATGACAGTATAACTCTCCAATGCAGAATAAAGCAAATTGTAAGGATGTGGCAGCAAGTAGGACAAGCAA  
 TGTATGCCCCCTCCTATACCAGGAATAATAAGGTGTGAATCAAAC---  
 ATTACAGGAATACTGTTAAACAAGAGATGGAGGAAATAATAATACA-----  
 -----  
 -----  
 AATAACACAGAGGTATTTCAGGCCTGGAGGAGGAGATATGAGGGACAATTGGAGAAGTGAATTATATAAATATA  
 AAGTAGTAAAAATTGAACCATTA---GGTGTAGCACCCCTCCCGTGCAAGAAGAAGAGTGGTG-----  
 -----GAGAGAGAAAAAAGAGCA---GTTGGC---CTGGGAGCT-----  
 ---TTCTTCCTTGGGTTCTTAGGAGCA---GCAGGAAGCACTATG---GGCGCGGCGTCA---  
 ATAACGCTGACGATACAG---GCCAGACAA---TTATTG---TCTGGTATAGTGACGAGCAGAGC---  
 AATCTG---CTGCGG---GCCATAGAGGCTCAACAACATCTGTTGAAACTCACGGTCTGGGGCATT  
 >MK086118  
 TTCTATTGTAATACATCAGAACTATTTAATAGCACATGGAATAGTAGCACTCCTAGCACT-----  
 -----  
 -----  
 GGAAATAGAACTATAACTCTCCAATGCAAAATAAAGCAAATTGTAAGAATGTGGCAAAAGGTAGGACAAGCAA  
 TGTATGCTCCTCCCATTAGTGGAATATAAGTTGTAACCTCAAAC---  
 ATTACAGGATTGCTATTAAACAAGAGATGGAGTGGACAATAATAGT-----  
 -----  
 -----  
 ACAAATGAGACATTCAGGCCTGGAGGAGGAGATATGAGGGACAATTGGAGAAGTGAATTATATAAGTATAAGG  
 TAGTACAAATTAAACCATTA---GGTGTGGCACCCACCCAGGCAAAAAGAAGAGTGGTG-----  
 -----CAGAGAGAAAAAAGAGCA---ATTGGA---CTGGGAGCT-----  
 GTGTTCAATTGGGTTCTTAGGAGCA---GCAGGAAGCACTATG---GGCGCGGCGTCA---  
 ATAACGCTGACGGTACAG---GCCAGAGAA---TTATTG---TCTGGTATAGTGCGACAGCAGAGC---  
 AATCTG---CTGCAG---GCTATAGAGGCTCAACAGCATCTGTTGAAACTCACAGTCTGGGGCATT  
 >MK086115  
 TTCTATTGCAATACAACAAGACTATTTAATAGCATTTGGAGTAGGAATGAGACTAAGAATGACAATGACACTT  
 GGAGTAAT-----  
 -ATCACTAATAGCACTGCC-----  
 TGGACAAATGACACTATAACTCTCCAATGCAGAATAAAGCAAATTGTAAGAATGTGGCAGAGAGTAGGACAAG  
 CAATGTACGCCCCCTCCCATCCAAGGAGAAATAAAGTGTGAGTCAAAC---  
 ATTACAGGATTACTATTAAACAAGAGATGGAGGTGCACATGGTGAC-----  
 -----  
 -----  
 AATGAGACATTCAGGCCTGGAGGAGGAAATATGAAGGACAATTGGAGAAGTGAATTATATAAGTATAAGGTAG  
 TACAAATTAAACCATTA---GGTGTAGCACCTACACATGCAAAAAGAAGAGTGGTG-----  
 -----GAGAGAGAAAAAAGAGCA---GTTGGA---CTGGGAGCT-----  
 GTCTTCCTTGGGTTCTTAGGAGCA---GCAGGAAGCACTATG---GGCGCGGCGTCA---  
 ATAACGCTGACGGTACAG---GCCAGACAA---TTATTG---TCTGGTATAGTGCAACAGCAGAGC---  
 AATTTG---CTGAGG---GCTATAGAGGCTCAACAACATCTGTTGAAACTCACAGTCTGGGGCATT  
 >MK086126  
 TTCTATTGTAATACAACACCACTATTTAATAGCACTTGGGAAGAGCAATGACACTGCCAGTTCAAAC-----  
 -----  
 -----  
 CCAAATGACACTATAACTCTCCAATGCAGAATAAAACAAATTGTAAATATGTGGCAGAAAGTAGGACAAGCAA  
 TGTATGCCCCCTCCCATCTCAGGAAACATAATGTGTAACTCAACC---

ATTACAGGAATACTATTAACAAGAGATGGAGGGATTAATAATACA-----  
-----  
-----  
GAGGAGGAGGAGACGTTTCAGGCCTGGAGGAGGAGATATGAGGGACAATTGGAGAAGTGAATTATATAAGTATA  
AGGTAGTAAAAATTGAGCCACTA---GGTGTGGCACCCACCTATGCAAAAAGAAGAGTGGTG-----  
-----GAGAGAGAAAAAAGAGCA---GTTGGA---CTGGGAGCT-----  
---GTCTTCCTTGGGTTCTTAGGAGCA---GCAGGAAGCACTATG---GGCGCGGCGTCG---  
ATAACGCTGACGGTACAG---GCCAGACAA---TTATTG---TCTGGTATAGTGCAACAGCAGAGC---  
AATCTG---CTGAAG---GCTATAGAGGCTCAACAACATCTGTTGAAACTCACGGTCTGGGGCATT  
>JN864057  
TTCTATTGCAATACAACAAGACTGTTTAAATAGCATGTGGATCAAAAATGTCAGCAGTGACACTTGGAATAACA  
ACATCACTAGT-----  
-----  
GATAACAATGGCACTATAACTCTCCAATGCAGAATAAAGCAAATTGTAAATATGTGGCAAAGAGTAGGACAAG  
CAATGTATGCCCCCTCCCATCCAAGGAGAATTAAGGTGTGAATCAAAC---  
ATTACAGGACTACTGTTAAACAAGAGATGGAGGGGATACTAATAAT-----  
-----  
-----  
ACAGAGACCTTCAGGCCTGGAGGAGGAGATATGAAGGACAATTGGAGAAGTGAATTATACAAGTATAAAGTAG  
TGAAAAATTGAACCACTA---GGTATAGCACCCACCCCTGCAAAAAGAAGAGTGGTG-----  
-----GAGAGAGAAAAAAGAGCA---GTTGGA---CTAGGAGCT-----  
GTTTTCTTGGGTTCTTAGGAGCA---GCAGGAAGCACTATG---GGCGCGGCGTCA---  
ATAACGCTGACGGTACAG---GCCAGACTA---TTAATG---TCTGGTATAGTGCAACAGCAGAGC---  
AATTTG---CTGAAG---GCTATAGAGGCTCAACAACAGCTGTTGAGACTCACGGTCTGGGGCATT  
>MK086116  
TTCTACTGTAATACAACAGTTCTGTTTAAATACCACAGGG-----  
-----  
-----  
TTAAAAGACAGTATCACTATTCCATGTAAAATAAAACAAATCATAAACATGTGGCAAAGAGTAGGACGAGCAA  
TGTATGCCCCCTCCCATTCAGGAAAAATTCAATGTAACTCAAGT---  
ATTACAGGTCTACTCTTAAACAAGAGATGGTGTAAATGATACAAAA-----  
-----  
-----  
AATGAAACCCTCAGACCTGGAGGGGGAGATATGAGAGACAATTGGAGAAGTGAAGTGTATAAATATAAGGTAG  
TGCAAATTGAACCACTA---GGAGTAGCACCCACCAGGGCACAAAGACGAGTGGTA-----  
-----CAGAGAGAAAAAAGAGCAGTAGTGGGA---CTAGGAGCT-----  
ATGTTCAATTGGGTTCTTGGGAGCA---GCAGGAAGCACTATG---GGCGCGGCGTCA---  
ATAACGCTGACGGTACAG---GCCAGACAA---TTATTG---TATGGTATAGTGCAACAGCAGAGC---  
AATCTG---CTGAGG---GCTATAGAAGCGCAACAGCATCTGTTGCAGCTCACAGTCTGGGGCATT  
>AY371147  
TTCTATTGCAATACAACAACACTATTTAAATAGCACTTGGGATACAAATAGCACTTGGAATACCAGCATAAGCA  
GCACA-----  
-----  
GGGTCAAATGACACCATAACTATCCCATGCAGAATAAAGCAAATTGTAAATATGTGGCAGAGAGTAGGACAAG  
CAATGTATGCCCCCTCCCATCCGAGGAAAGATACAGTGTAAGTCAAAC---  
ATTACAGGATTACTATTGACAAGAGATGGTGGGGGTGATAACAGG-----  
-----  
-----  
ACAAATGAGACTTTTAGACCTGAAGGAGGAAATATGAAAGACAATTGGAGAAGTGAATTATATAAATATAAAG  
TGGTAAAACCTGAACCACTA---GGTGTAGCACCCACACAGGCAAGAAGAAGAGTGGTG-----  
-----CAGAGAGAAAAAAGAGCA---GTTGGA---ATGGGAGCT-----  
TTATTCCTTGGGTTCTTAGGAGCA---GCCGGAAGCACTATG---GGCGCGGCGTCG---  
CTAACGCTGACGGTACAG---GCCAGACAA---TTATTG---TCTGGTATAGTGCAACAGCAAAGC---  
AATTTG---CTGAGG---GCTATAGAGGCTCAACAGCATATGTTGAGACTCACAGTCTGGGGCATT  
>AB480048  
TTCTATTGTAATACAACAGGACTGTTTAAATATATCAAGTAATGAACTAAATAATACATTAGATAATAAT----  
-----  
-----  
AACAAATGAGAGTATCACACTCCCATGTAGAATAAAACAAATTGTAAGAATGTGGCAGAGAGTGGGACAAGCAA  
TGTATGCACCTCCCATTCAGGAAAGAATTCAATGTAAATCAAAC---

ATTACAGGAATACTATTAACAAGAGATGGTGGAGAAGGAGAGAAT-----  
-----  
-----  
AGCACTAAGGAGATCTTCAGACCTGGAGGAGGAGATATGAGGGACAATTGGAGAAGTGAATTATATAAATATA  
AAACAGTAAAAATCAAATCACTA---GGAATAGCACCCACCAGGGCAAGGAGACGAGTGGTG-----  
-----GGGAGAGAAAAAAGAGCA---GTTGGA---CTGGGAGCT-----  
---GTCTTCCTTGGGTTCTTAGGAGCA---GCTGGGAGCACTATG---GGCGCGGCGTCA---  
ATAACGCTGACGGTACAG---GTCAGACAA---TTGTTG---TCTGGCATAGTGCAACAGCAAAGC---  
AATTTG---CTGAGG---GCTATAGAGGCGCAGCAGCATCTGTTGCAACTCACAGTCTGGGGCATT  
>AJ866557  
TTCTATTGCAATACATCACAACCTGTTTAAACAGTACTTGGAGTAACAATGGCACTGCCATCCACACAGGG----  
-----  
-----  
TCAAAATGATACTATAACTCTCCAATGCAGAATAAAGCAAATTGTAAGGATGTGGCAGAGAGTAGGACAAGCAA  
TGTATGCCCCCTCCTATCCCAGGAATAATAAGGTGTGAATCAAAC---  
ATTACAGGCCTACTATTAACAAGAGATGGAGGGAATAGTAATAATAGT-----  
-----  
-----  
AATACAAATGAGACTTTCAGGCCTGGAGGAGGAGATATGAGGGACAATTGGAGAAGTGAATTATATAAGTATA  
AAGTAGTAAGAATTGAACCACTA---GGTGTAGCACCCCTCCCGTGCAAGAAGAAGAGTGGTG-----  
-----GAGAGAGAAAAAAGAGCA---GTTGGA---ATAGGAGCT-----  
---GTTTTCTTGGGTTCTTAGGAGCA---GCAGGAAGCACTATA---GGCGCAGCATCA---  
GTAACGCTGACGGTACAG---GCCAGACAA---CTATTG---TCTGGTATAGTGCAACAGCAGAGC---  
AATCTG---CTGAAG---GCTATAGAGGCTCAACAACAGCTGTTGAGACTCACAGTCTGGGGCATT  
>MH667256  
TTCTATTGTAATACATCAAACCTGTTTAAATAGCACTTGGAAACAATAGCACTTGGGATAACAATAAACA-----  
-----  
-----  
GGGAATGAGAATATAACTCTCCAATGCAAAATAAAGCAATTTGTAAATATGTGGCAGAGGGTAGGAAGAGCAA  
TGTATGCCCCCTCCCATCCGAGGAGTAATAAAGTGTGTATCACAC---  
ATTACAGGACTAATATTAACAAGAGATGGAGGAAATAATAATACA-----  
-----  
-----  
CAGGAGGAGATTTTTAGGCCTGGAGGAGGAGATATGAGGGACAATTGGAGAAGTGAATTATATAAATATAAAG  
TAGTAAAAATTAAACCACTA---GGAGTAGCACCCACTATGGCTAAAAGAAGAGTGGTG-----  
-----GAGAGAGAAAAAAGAGCA---GTTGGA---ATAGGAGCT-----  
GTCTTCCTTGGGTTCTTAGGAGCA---GCAGGAAGCACTATG---GGCGCGGCGTCA---  
GTGACGCTGACGGTACAG---GCCAGACAA---TTATTG---TCTGGCATAGTGCAACAGCAAAGC---  
AATTTG---CTGAAG---GCTATAGAGGCTCAACAACAGCTGTTGAGACTCACGGTCTGGGGCATT  
>FJ388944  
TTCTATTGCAATACAACATTACTATTTGATAGCACTTGGTATGGAAATGGCTCTGACATCGACAAAATAAATA  
AAACA-----  
-----  
ATGTCAAATGAACTATAATTCTCCCATGCAGAATAAAGCAAATTGTACGCATGTGGCAGAGAGTAGGACAAG  
CAATGTACGCCCCCTCCCATCCCAGGAGAAATAAGGTGTGAGTCAAAC---  
ATTACAGGACTACTATTGACAAGAGATGGTGGGGGTAACGGTAGC-----  
-----  
-----  
AGTACAAATGAGACCTTCAGGCCTGGAGGAGGAGATATGAGAGACAATTGGAGAAGTGAATTATATAAGTATA  
AGGTAGTAAAAATTGAACCACTA---GGTGTAGCACCCAACAAGGCAAGAAGGAGAGTGGTG-----  
-----GAGAGAGAAAAAAGAGCA---GTTGGA---ATAGGAGCT-----  
---GTCTTCCTTGGGTTCTTAGGAGCG---GCAGGAAGCACTATG---GGCGCGGCGTCA---  
ATAACGCTGACGGTACAG---GCCAGGCAA---TTATTG---TCTGGTATAGTGCAACAGCAGAGT---  
AATTTG---CTGAAG---GCTATAGAGGCTCAACAACACTTGTGAGACTCACGGTCTGGGGCATT  
>DQ313254  
TTCTATTGCAATACATCAGGTCTGTTTAAATAGTACTTGGTATCGGAATGGCACTGCCATCAGGCAGAACGGCA  
CG-----  
-----  
GGGTAAATGATACTATAACTCTCCCATGCAGAATAAAGCAAATTGTACGTACATGGCAGAGAGTAGGACAAG  
CAATGTATGCCCCCTCCCATTCAGGAGTAATAAAATGTGAATCAAAC---

ATTACGGGGCTACTGTTAACAAGAGATGGTGGGAATAATAGTAGTAAT-----  
-----  
-----  
AATGACACTGAGACCTTCAGACCTGGAGGAGGAGATATGGAAGACAATTGGAGAAGTGAATTATACAACCTATA  
AGGTAGTAAAAATTAAACCATTA---GGAATAGCACCCACCAAGGCAAGGAGAAGAGTAGTG-----  
-----GGGAGAGAGAAAAAGAGCA---GTTGGA---CTGGGAGCT-----  
---GTTTTCCTTGGGTTCTTAGGGACA---GCAGGAAGCACTATG---GGCGCAGCGTCA---  
ATAACGCTGACGGTACAG---GTCAGACAA---TTATTG---TCTGGCATAGTGCACCAGCAAAGC---  
AATTTG---CTGAGA---GCTATAGAGGCGCAGCAGCATCTGTTGCAGCTCACAGTCTGGGGCATT  
>AM279364  
TTCTATTGCAATACATCAGGCCTGTTTAATAGTACTTGGGAATGACACTAGCATCAATGAGAACTACACGGAT-  
-----  
-----  
CCAAATGCAACTCTTATTCTCCTATGCAGAATAAAACAAATTGTGCGTATGTGGCAGAGAGTAGGGCAAGCAA  
TGTATGCCCCCTCCCATTCAGGAGTAATACAGTGTGTATCAAAC---  
ATTACAGGGCTACTGCTAAACAAGAGATGGTGGGAATAATACTAAT-----  
-----  
-----  
AGGACAGATGAGACGTTTCAGACCTGGAGGAGGAGATATGAAGGACAATTGGAGAAATGAGTTATATAAGTATA  
AAGTAGTAAAAATTGAACCACTA---GGAGTAGCACCCACCAAGGCAAGGAGAAGAGTGGTG-----  
-----CAGAGAGAAAAAAGAGCA---ATTGGA---ATGGGAGCT-----  
---CTTTTCCTTGGGTTCTTAGGAACA---GCAGGAAGCACTATG---GGCGCGGCGTCA---  
ATAACGCTGACGGTACAG---GCCAGGCAA---TTATTG---TCTGGCATAGTGC AACAGCAGAGC---  
AATCTG---CTGATG---GCCATAGAGGCTCACCAGCATTTGTTGAAACTCACGGTCTGGGGCATT  
>KR017778  
TTCTATTGCAATACATCACGATTGTTTAATAGCACTTGGACTGGGAATAACACTACTTGGAGTATCAGCAGCG  
AGAACGATACT-----  
-----  
GGGAAAGATGATCCCATAATTCTCCCATGTAGAATAAAGCAAATTATAAATATGTGGCAGAGAGTAGGACAAG  
CAATATACACTCCTCCTATTCAAGGAGAACTAAGGTGTGACTCAAAC---  
ATTACAGGACTATTGTTAAACAAGAGATGGTGGGAATAACAATGAC-----  
-----  
-----  
ACAGAGATCTTCAGACCTATAGGAGGAAATATGAAGGACAATTGGAGAAGTGAATTATATAAGTATAAAGTGG  
TGGAGATTAAAGCCACTA---GGAATAGCACCCACCAAGGCAAAAAGAAGAGTGGTG-----  
-----GAGAGAGAAAAAAGAGCA---GTAGGA---ATAGGAGCT-----  
GTACTCCTTGGGTTCTTGGGAGCA---GCAGGAAGCACTATG---GGCGCGGCGTCA---  
ATAACGCTGACAGTGCAG---GCCAGACAA---TTATTG---TCTGGCATAGTGC AACAGCAAAAC---  
AACTTG---CTGAAG---GCTATAGAAGCACAAACAGCAGCTGTTAAAACTCACTGTCTGGGGCATA  
>EU513192  
TTCTATTGTAATACATCAGACCTGTTTAATTGGGAGAATGACACCTTGCAGGGGCCAAATAAGGCTGTG---  
-----  
-----  
TCAAATGATAATATAACTCTCCCATGCAGAATAAAGCAAATTATAAATATGTGGCAGAGAGTAGGACAAGCAA  
TATATGCCCCCTCCTATCCAAGGAGTAATAAGGTGTAACTCAAAC---  
ATTACAGGACTACTATTAACAAGAGATGGTGGGAACAATAGTAAT-----  
-----  
-----  
CCGACTGAGACCTTCAGACCTGAAGGAGGGGATATGAGGGACAATTGGAGGAGTGAATTATATAAGTATAAAG  
TAGTAAAAATTGAACCACTA---GGAGTAGCACCCACCAAGGCAAGGAGAAGAGTGGTG-----  
-----ACGAGAGAAAAAAGAGCA---ATTGGA---ATGGGAGCT-----  
GTCTCTTTTGGGTTCTTAGGAGCA---GCAGGAAGCACTATG---GGCGCGGCGTCA---  
ATAACGCTGACGGTACAG---GCCAGACAA---TTATTG---TCTGGCATAGTGC AACACAACAGAAC---  
AACCTG---CTGAGG---GCTATAGAGGCTCAACAGCAACTGTTGAAACTCACAGTCTGGGGCATT  
>AY894995  
TTCTATTGTAATACAACAAAATTATTTAATGGTATCTGGAATAAAACAGGTAGTACCACATATAACTATACAA  
ATAGC-----  
-----  
ACAGAGAATGATACTATTACACTGCCATGCAGAATAAAACAAAGTTGTAAGAATGTGGCAGAGGACAGGACAAG  
CAATGTATGCCCCCTCCTATCCAGGGAATAATAAGGTGTGCATCTAAC---

ATTACAGGAATAATATTAACAAGAGATGGTGGAATAACAATAAT-----  
-----  
-----  
GCAACTGAGACCTTCAGACCTGGAGGAGGAAATATGAAAGACAATTGGAGAAGTGAATTATATAAATATAAGG  
TAGTGAAAATTGAACCACTA---GGAGTAGCACCCACTAGGGCAAGGAGGAGAGTAGTG-----  
-----GGGAGAGAAAAAAGAGCA---GTTGGA---CTAGGAGCT-----  
GTCTTCCTTGGGTTCTTGGGA-----GGCGCAAAATCA---  
ATGACGCTGACGGTACAG---GCCAGACAA---TTATTG---TCTGGTATAGTGCAACAGCAAAGC---  
AATTTG---CTGAGG---GCTATAGAGGCTCAACAACAGATGTTGAGACTCACGGTCTGGGGCATT  
>AY371163  
TTCTATTGCAATACATCAGGCCTGTTTAATAGCACTTGGAGAAACATTAATGGCACTTGAATAGCACTGGCA  
ACACA-----  
-----  
GAGTTAAATAGCACTATAATTCTCCTGTGTAGGATAAAAACAAATTGTAAATATGTGGCAGAGAACAGGACAAG  
CAATGTATGCCCTCCCATCCCAGGAGTGATAAGGTGTGAGTCAAAC---  
ATTACAGGACTACTATTGACAAGAGATGGTGGAATGAGAATAATATTAAT-----  
-----  
-----  
ACAAATACAACCTGAAACCTTCAGACCTGGAGGAGGAGATATGAGAGACAATTGGAGAAGTGAATTATATAAAT  
ATAAAGTAGTAAAAATCGAACCACTA---GGAGTAGCACCCACCAAGGCAAAGAGAAGAGTGGTG-----  
-----GAGAGAGAAAAAAGAGCA---GTTGGA---TTGGGAGCT---  
-----GTTTTCTTGGGTTCTTAGGAGCA---GCAGGAAGCACTATG---GGCGCGGCGTCA---  
ATAACGCTGACGGTACAG---GCCAGACAA---TTATTG---TCTGGCATAGTGCAACAGCAAAGC---  
AATTTG---CTGAGG---GCTATAGAGGCTCAACAGCATCTGTTGAGACTCACGGTCTGGGGCATT  
>FM877779  
TTCTATTGTAATACATCAAGCCTGTTTAATAGCACGTACTTGAATATAACA-----  
-----  
-----  
AAGGGAAACATAACAATGCTCCCATGCAGGATAAAAACAAATTGTAAACATGTGGCAGGGAGTAGGACGAGCAA  
TATATGCCCCCTCCTATTGCAGGAAAGATACAGTGTGTATCTAAT---  
ATAACAGGACTAATATTGACAAGAGATGGGGGAAATGAAGATAAT-----  
-----  
-----  
AATACTGAAACCTTCAGACCTGGAGGAGGAAATATGAAAGACAATTGGAGAAGTGAATTATATAAGTATAAAG  
TAGTAAAAATTGAACCACTA---GGAATAGCACCCACCAAGGCAAAGAGAAGAGTGGTG-----  
-----GAGAGAGAAAAAAGAGCA---GTTGGA---CTGGGAGCT-----  
CTTTTCTTTGGGTTCTTAGGAGCA---GCAGGAAGCACTATG---GGCGCAGCGTCA---  
ATAACGCTGACGGTACAG---GCCAGACAA---TTATTG---TCTGGCATAGTGCAACAGCAAAGC---  
AATTTG---CTGAGG---GCTATAGAGGCTCAACAGCACATGTTGAAGCTCACAGTCTGGGGCATT  
>FM877778  
TTCTATTGTAATACATCAGGACTGTTTAATAGCACTTGGCTGGTTAATAGCACTAGGGAGAATGGCACGAGC-  
-----  
-----  
ACCATGGGAAACATAAACACTCCCATGCAGGATAAAAACAAATTGTAAACATGTGGCAGGGAGTAGGACAAGCAA  
TGTATGCCCCCTCCTGTGCGAGGAATGATACAGTGTGTATCAAAT---  
ATTACAGGACTAATATTAACAAGAGATGGGGGAAGTAATGATAATAGTACT-----  
-----  
-----  
GATAATAATACTGAGACCTTCAGACCTACAGGAGGAAATATGAAAGACAATTGGAGAAGTGAATTATACAAAT  
ATAAAGTAGTACAACCTGAACCACTA---GGATTAGCACCCACCGAGGCAAAAAGAAGAGTGGTG-----  
-----GAGAGAGAAAAAAGAGCA---GTTGGA---ATGGGAGCT---  
-----CTTTTCTTGGGTTTTTAGGAACA---GCAGGAAGCACTATG---GGCGCGGTGTCA---  
ATGACGCTAACGGTACAG---GCCAGACAA---TTATTG---TCTGGCATAGTGCAACAGCAAAGC---  
AATTTG---CTGAGG---GCTATAGAGGCTCAACAGCATATGTTGAAACTCACAGTCTGGGGCATT  
>FM877783  
TTCTATTGTAATACATCAGGCCTGTTTAATAACGAGTGAATAGCACTTGAAGAATAGCACTTGG-----  
-----  
-----  
GAAAAATGGCACCATAAACACTCCCATGCAGGATAAAAACAAATAGTAAATATGTGGCAGGGAGTAGGACAAGCAA  
TGTATGCCCCCTCCTGTGCGAGGAATGATACAGTGTGCATCAAAT---

ATTACAGGACTAATATTGACAAGAGATGGGGGAGAGAATAATAGT-----  
-----  
-----  
AGTAAGGAGACCTTCAGACCTGGAGGAGGAGATATGAAGGACAATTGGAGAAGTGAATTATATAAGTACAAAG  
TAGTACAACCTGAACCATTA---GGAGTAGCACCCACCAAGGCAAAAAGAAGAGTGGTG-----  
-----GAGAGAGAAAAAAGAGCA--ATGGGA--ATGGCAGCT-----  
ATGTTTCCTTGGGTTCTTAGGAGCA--GCAGGAAGCACTATG--GGCGCGGCGTCA---  
ATAACGCTGACTGTACAG---GTCAGACAA--TTATTG---TCTGGAATAGTGCAACAGCAAAGC---  
AATTTG---CTGAGA---GCTATAGAGGCTCAACAGCATATGTTGCAGCTCACAGTCTGGGGCATT  
>FM877784  
TTCTATTGCAATACCTCAGGTCTGTTTAATAGCACTTGGAAATGGAACAAGTGGGTCAAATGTCAAT----  
-----  
-----  
ACAACTGGCAATATAACACTACCATGCAAAATAAAACAAATTATAAACATGTGGCAGAGAGTAGGACAAGCAA  
TGTATGCTCCTCCCATCCCAGGAATAATACAGTGTATATCAAAT---  
ATTACAGGGTTATTAATAACAAGAGATGGTGGAAATAATGCAACT-----  
-----  
-----  
AATGAAACGGAGATCTTCAGACCTGGAGGAGGAGATATGAGGGACAATTGGAGAAGTGAATTATATAAATATA  
AAGTAGTAGAAATTGAACCACTA---GGAGTAGCACCCACCAAGCAAAGAGAAGGGTGGTG-----  
-----CAGAGAGAAAAAAGAGCA--GTAGGA--ATAGGAGCT-----  
---GTGTTTCCTTGGGTTCTTAGGAGCA--GCAGGAAGCACTATG--GGCGCGGCGTCA---  
ATGACGCTGACGGTACAG---GCCAGACAA--CTATTG---TCGGGCATAGTGCAACAGAAAAAC---  
AACTTT---CTGAAG---GCTATAGAGGCTCAACAGCACCTGTTGAAACTCACGGTCGGGGGCATT  
>KT022402  
TTCTATTGTAACACATCAGGCCTTTTTTAATAGCAAGTGGCATAGGGATAACAATAGCAGCATTGGGTATAGCA  
ATAATAGCACA-----  
-----  
GAGTCAAATGACACTATAACTCTCCAATGCAGAATAAAGCAATTTATAAACTGTGGCAGAGAGTAGGACAAG  
CAATGTATGCCCCCTCCCATCCCAGGAATAATAAGGTGTGACTCAAAT---  
ATTACAGGTCTCATATTAACAAGAGATGGGGGAAATAACAATGCA-----  
-----  
-----  
AGCAATGAAACCTTCAGACCTGGGGGAGGAGATATGAGGGACAATTGGAGAAGTGAACATATATAAGTATAAAG  
TAGTAAAAATTGAACCACTA---GGGTTAGCACCCCTCCAGGGCAAGGAGAAGAGTGGTG-----  
-----GAGAGAGAAAAAAGAGCA--GTTGGA--CTGGGAGCT-----  
GTATTCCTTGGGTTCTTGGGAGCA--GCTGGAAGCACTATG--GGCGCAGCGGCA---  
ATAACGCTGACGGCACAG---GCCAGACAA--TTATTG---TCTGGTATAGTGCAACAGCAAAGC---  
AATTTG---CTGCAA--GCTATAGAGGCTCAACAGCAACTGTTGAGACTCACGGTCTGGGGCATT  
>KT022407  
TTCTATTGCAATACATCAAGCTTGTTTAATAGCACATGGAACGGCACTGCACGGGATAACAAAAAC-----  
-----  
-----  
TCAAATGATACTATGACTCTCCCATGCAAAATAAAACAAATTATAAACATGTGGCAGAGAGTAGGACAAGCAA  
TATATGCCCCCTCCCATTGCAGGAATGATACAGTGTACATCAAAC---  
ATTACAGGAATAATATTGATAAGAGATGGGGGTAATCTCAGTGCG-----  
-----  
-----  
AGCAATGAGACCTTCAGACCTGGAGGAGGAGATATGAGGGACAATTGGAGAAGCGAATTATATAAGTATAAAG  
TAGTAAAAATTGAACCACTA---GGAGTGGCACCCACCAGGGCAAGGAGAAGAGTGGTG-----  
-----GAGAGAGAAAAAAGAGCA--GTTGGA--ATAGGAGCT-----  
GTCTTCCTTGGGTTCTTAGGAGCA--GCAGGTAGCACTATG--AGCGCGGCGTCA---  
ATAACGCTGACGGTACAG---GCCAGACAA--TTATTG---TCTGGCATAGTGCAACAGCAAAGC---  
AATTTG---CTGAGG---GCTATAGAGGCTCAACAGCATCTGTTGAAACTCACGGTCTGGGGCATT  
>KT022386  
TTTTATTGTAACACATCAGGTCTGTTCAATAGCTCTTTCAAGAGCTCTTGGAAGGTTAATGTGTCAAAT----  
-----  
-----  
GACAAATAGCACTATAACTCTCCCATGCAAGAATAAAACAAATTGTAAACATGTGGCAGAGAGTAGGACGTGCAA  
TGTATGCCCCCTCCCATTGCAGGAGTAATAAAATGTGAGTCAAAC---

ATTACAGGACTAATATTAACAAGAGATGGAGGGAAAGTGGACAAT-----  
-----  
-----  
GACAAATGACACTGAGACCTTCAGACCTGGAGGAGGAGATATGAGGGACAATTGGAGAAGTGAATTATATAAGT  
ATAAAGTAGTAAAACTTGAACCACTA---GGAGTAGCACCCACCGAGGCAAGGAGAAGAGCGGTG-----  
-----CAGAGAGAAAAAAGAGCA---ATTGGA---CTGGGAGCT---  
-----TTCTTCCTTGGGTTCTTGGGAACA---GCAGGAAGCACTATG---GGCGCGGCGTCA---  
CTAACGCTGACGGTACAG---GCCAGGCAA---TTATTA---TCTGGCATAGTGCAACAGCAAAGC---  
AACTTG---CTGAAG---GCTATAGAGGCTCAACAACATATGTTGAGACTCACGGTCTGGGGCATT  
>KU749429  
TTCTATTGTGATACATCAATCCTGTTTAAATAGCACTTGGTATCACAATGGCAGTATCTTGCAGAAGTCAAAT-  
-----  
-----  
AGCACGGATAATATAATTCTCCCATGCAGAATAAAGCAAATTATAAATATGTGGCAGAGAGCAGGACAAGCAA  
TATATGCCCCCTCCCATCAAAGGACCAATAGTGTGTGAATCAAAT---  
ATTACAGGACTAATATTAACAAGAGACGGTGGCACGGATGACAAT-----  
-----  
-----  
ACAACTGAAACTTTTCAGACCTGGAGGAGGAGATATGAGGGACAATTGGAGAAGTGAATTATATAAGTATAAAG  
TAGTAAAAAATTGAACCATTA---GGATTAGCACCTCCAGGGCAAGGAGAAGAGTGGTG-----  
-----GAGAGAGAAAAAAGAGCA---GCGGGG---CTAGGAGCT-----  
GTCTTCATTGGGTTCTTAGGAATG---GCAGGAAGCACTATG---GGCGCGGCGTCG---  
ATGACGCTGACGGTACAG---GCCAGACAA---TTATTG---TCTGGTATAGTGCAACAGCAAAGC---  
AATTTG---CTGAGG---GCTATAGAGGCTCAACAGCAGATGTTGAGACTCACGGTCTGGGGCATT  
>KU749427  
TTTTATTGCAATACAACAGAGTTGTTTAAATGGCACATGGAGTAATGGCACTGAATGGAGCAAGGGCAATGTCA  
GC-----  
-----  
ACAAATGGCAATATAACTATCCCATGCAGAATAAAACAAATTATAAACATGTGGCAGAGAGTAGGAAAAGCAA  
TGTATGCTCCTCCCATCCAGGAGTAATAAGGTGTGTATCAAAC---  
ATTACAGGACTAATATTAACAAGAGATGGTGATACTAGCAGTGCA-----  
-----  
-----  
GATGAAACCTTCAGACCTGGAGGAGGAGATATGAGAGACAATTGGAGAAGTGAATTGTATAAGTATAAAGTAG  
TAAAGATTGAACCACTA---GGAGTAGCACCTACCAGGGCAAAGAGAAGAGTGGTG-----  
-----CAGAGAGACAAAAGAGCA---GTGGGA---ATGGGAGCT-----  
TTATTCCTTGGGTTCTTGGGAGCA---GCAGGAAGCACTATG---GGCGCAGCGTCA---  
ATAACGCTGACGATACAG---GCCAGACAA---TTATTG---TCTGGCATAGTGCAACAGCAAAGC---  
AATTTG---CTGAAA---GCTATAGAGGCTCAGCAGCAACTGTTGAGGCTCACGGTCTGGGGCATT  
>AF457088  
TTCTATTGTAACACATCAGGCCTGTTTAAATAATAGTGTGTTGGAATAGCACTACCGTCACGCAGGAGTCAAATA  
GCACG-----  
-----  
GAGTCAAATGGCAATATAACTCTCAATTGCAGAATAAAGCAAATTATAAATATGTGGCAGAGAGTAGGACAAG  
CAATGTATGCCCCCTCCTATTCCAGGAGTAATACAGTGTGTATCAAAC---  
ATTACAGGACTAATATTAACAAGAGATGGTGGGAAGAATAACAGT-----  
-----  
-----  
ACAAATGAAACCTTCAGACCTGGAGGAGGAGATATGAGGGACAATTGGAGAAGTGAACCTATATAAATATAAAG  
TAGTAAAAAATTGAACCACTA---GGAGTAGCACCCACCAGGGCAAAGAGAAGAGTGGTG-----  
-----GAGAGAGAAAAAAGAGCC---GTTGGA---ATAGGAGCT-----  
GTATTCCTTGGGTTCTTGGGAGCA---GCAGGAAGCACTATG---GGCGCGGCGTCA---  
ATAACGCTGACGGTACAG---GCCAGACAA---TTATTG---TCTGGCATAGTGCAACAGCAAAGC---  
AATTTG---CTGAGA---GCTATAGAGGCTCAACAACATCTGTTGAAACTCACGGTCTGGGGCATT  
>FJ623492  
TTCTATTGCAATACATCAGGCCTGTTTAAATAGCACATGGAATAGCACATGGGAGAATAACATTAATGAC----  
-----  
-----  
ACGAAGCCAAATATAACTCTCCCATGCAGAATAAAGCAAATTATAAATATGTGGCAGAGAACAGGACAAGCAG  
TATATGCTCCTCCCATCCAAGGAGTAATAAGGTGTATATCAAAC---

ATTACAGGACTAATATTAACAAGAGATGGTGGGAATAATAGTAGG-----  
-----  
-----  
ACAAATGAAATCTTCAGACCTGGAGGAGGAGATATGAGAGACAATTGGAGAAGTGAATTATATAAGTATAAAG  
TAGTAAAGATTGAACCACTA---GGAGTAGCACCCACCAAGGCAAGGAGAAGAGTGGTG-----  
-----CAGAGAGAAAAAAGAGCA--GTTGGA--ATAGGAACT-----  
GTCCTCCTTGGGTTCTTAGGAGCA---GCCGGAAGCACTATG--GGCGCGGCGTCA---  
ATAACGCTGACGGTACAG---GCCAGACAA--TTATTG---TCTGGCATAGTGCAACAGCAAAGC---  
AATTTG---CTGAAG---GCTATAGAGGCTCAACAGCAGATGTTGAGACTCACTGTCTGGGGCATT  
>AY945739  
TTCTATTGTAATACATCAGGTCTGTTCAATAGCACTTGGTATGCCAATAGCAGCATGCAAGGGTCAAATGACA  
CG-----  
-----  
GAGTTAAATGGCACTATAACTCTCCCATGCAGAATAAAACAAATTATAAATATGTGGCAAAGAGTAGGACAAG  
CAATGTATGCCCTCCCATCCAAGGAGTAATAAGATGTAAATCAAAT---  
ATCACAGGACTACTGTTAAACAAGAGATGGAGGGAAGGGAAATGAC-----  
-----  
-----  
ACTGAAACTTTCAGACCCGGAGGAGGAGATATGAGGGACAATTGGAGAAGTGAATTATATAAGTACAAAGTAG  
TAAAAATTGAACCATTA---GGAGTAGCACCCAACAAGGCAAAGAGAAGAGTGGTG-----  
-----GAGAGAGAAAAAAGAGCA--GTTGGA--ATAGGAGCT-----  
GTCTTCCTTGGGTTCTTAGGAGCA---GCAGGAAGCACTATG--GGCGCAGCGTCA---  
CTAACGCTGACGGTACAG---GCCAGACAA--TTATTG---TCTGGCATAGTGCAACAGCAAAGC---  
AATTTG---CTGAGG---GCTATAGAGGCTCAACAACATATGTTGAAACTCACGGTCTGGGGCATT  
>KC473836  
TTCTACTGTAACACATCAGACCTGTTTAATAGCACTTGGAAATAGCACTGAGTCAAATAGCACAGAGGCAGAGT  
CA-----  
-----  
AACAAATGACACTATAACTCTTCCATGCAGAATAAAGCAAATTATAAATATGTGGCAGAGAGTAGGACAAGCAA  
TATACGCCCCCTCCCATCCCAGGAGTAATAAAGTGTAATCAAAC---  
ATTACAGGACTAATATTAACAAGAGATGGGGGTATTAACAATAGT-----  
-----  
-----  
AGCAGCTCCGAGACCTTCAGACCTGGAGGGGGAGATATGAGGGACAATTGGAGAAGTGAATTATATAAGTATA  
AAGTAGTACAAATTGAACCATTA---GGAGTAGCACCTCCAGGGCAAGGAGAAGAGTGGTG-----  
-----CAGAGAGAAAAAAGGGCA--GTAACC---CTAGGAGCT-----  
---CTATTCCTTGGGTTCTTGGAACA--GCAGGAAGCACTATG--GGCGCAGCGTCA---  
GTAACGCTGACGGTACAG---GCCAGGCAA--TTATTG---TCTGGTATAGTGCAACAGCAGAGC---  
AATCTG---CTGAGG---GCTATTGAGGCGCAACATCATCTGTTGCAACTCACAGTCTGGGGCATT  
>EU220698  
TTCTATTGTAATACATCACAACCTGTTTAATAGCACTTGGGACAAAATGGCACTTGGATCAATGGCAGCGCAG  
AC-----  
-----  
-----  
ACAACAAATGGAACCTACTCTCCCGTGCAGAATAAAGCAAATTATAAATATGTGGCAGCGAGTAGGAAAAG  
CAATGTATGCCCTCCCATCCAAGGAGTAATAGAATGTAGATCAGAG---  
ATTACAGGACTACTATTAACAAGAGATGGTGGGAATGAGAGCAGT-----  
-----  
-----  
TCAGCAGAGACCTTCAGACCTGGAGGAGGAAATATGAAGGACAATTGGAGAAGTGAATTATATAAGTATAAAG  
TAGTAAACTAGAACCACTA---GGAGTAGCACCCACCAAGGCAAGGAGAAGAGTGGTG-----  
-----GAGAGAGAAAAAAGAGCA--GCT-----CTAGGAGCA-----  
GTCCTTTTTGGGTTCTTAGGAGCA---GCAGGAAGCACTATG--GGCGCAGCGTCA---  
ATAACGCTGACGGTACAG---GCCAGAAAA--TTATTG---TCTGGCATAGTGCAACAGCAAAGC---  
AATTTG---CTGATG---GCTATAGAGGCTCAACAGCATATGTTGAAACTCACGGTCTGGGGCATT  
>DQ083238  
TTCTATTGTAATACATCAGAACTGTTTAATAGCACTTGGAAATCCAGTACGCAGGGGACAAATAACACAGAG-  
-----  
-----  
CTAAATGACACGATAACTCTCCCATGCAGAATAAAGCAAAGTTATAAATATGTGGCAGAGAGTGGGACAAGCAA  
TGTATGCCCCCTCCCATCAAAGGAATAATAAAGTGTTGTATCAAAC---

ATTACAGGACTAATATTAACAAGAGATGGTGGGATTAATAGTACA-----  
-----  
-----  
AATGGAACCTGAAACCTTCAGACCTGGAGGAGGAGATATGAGGGACAATTGGAGAAGTGAATTATATAAATATA  
AGGTAGTACAAATTGAACCACTA---GGAGTAGCACCCACCAAGGCAAGGAGAAGAACGGTG-----  
-----GGGAGAGAAAAAAGAGCA---ATTGGA---CTAGGAGCT-----  
---GTGTTCCCTTGGGTTCTTAGGAGCA---GCAGGAAGCACTATG---GGCGCAGCATCA---  
ATAACGCTGACGGTACAG---GCCAGACAA---TTATTG---TCTGGTATAGTGCAACAGCAAAGC---  
AATTTG---CTGAGG---GCTATAGAGGCTCAACAACAAATGTTGAGACTCACGGTCTGGGGCATT  
>AF067156  
TTCTATTGTAATACATCAGGCCTGTTTAATGGCACTTGGGAATGCCAGCATGCAGGAGTCAAATAGCACGGAG-  
-----  
-----  
TCAAAATGAAACTATAATTCTCCCATGCAGAATAAAACAAATTATAAATATGTGGCAGAGAGTAGGACAAGCAA  
TGTATGCCCCCTCCCATTCAGGAATAATAAAGTGTGTATCAAAC---  
ATTACAGGACTAATATTAACAAGAGATGGT---AAAAGTAGTAAC-----  
-----  
-----  
AGTACAGATGAAATCTTCAGACCTGGAGGAGGAGATATGAGGGACAATTGGAGAAGTGAATTATATAAGTATA  
AAGTAGTAAAAATTGAACCACTA---GGAGTAGCACCCACCAGGGCAAGGAGAAGAGCGGTG-----  
-----GGGAGAGAAAAAAGAGCA---GTTGGA---ATAGGAGCT-----  
---GTCTTCCTTGGGTTCTTAGGAGCA---GCAGGAAGCACTATG---GGCGCAGCGTCA---  
ATAACGCTGACGGTACAG---GCCAGACAA---TTATTG---TCTGGCATAGTGCAACAGCAAAGC---  
AATTTG---CTGAGG---GCTATAGAGGCTCAACAACATCTGTTGAAACTCACGGTCTGGGGCATT  
>AF457061  
TTCTATTGTAATACATCAGGCCTGTTTAATAGCACTTGGGGCTGGTATAATAACACTTGGGAATAATAGCACTT  
GGAATAAC-----  
-----AGTGGC-----  
AACACACAGGAGAATATAACTCTTCAATGCAGAATAAAACAAATTGTAAACATGTGGCAGGAGGTAGGAAAAG  
CAATGTATGCCCCCTCCCATTCAGGAGAAATAACATGTAAATCAAAT---  
ATCACAGGACTACTACTGACACGTGATGGAGGAGTAGGGACAGACAATAAG-----  
-----  
-----  
ACAAATGACACAGAAATATTCCGGCCTGGAGGAGGAGATATGAGGGACAATTGGAGAAGTGAATTATATAAAT  
ATAAAGTAGTAGAAATTAAACCATTA---GGAATAGCACCCACTAAGGCAAAAAGGAGAGTGGTG-----  
-----GAGAGAGAGAAAAGAGCA---GTGGGA---ATAGGAGCT---  
-----GTGTTCCCTTGGGTTCTTGGGAGCA---GCAGGAAGCACTATG---GGCGCAGCATCA---  
ATAACGCTGACGGTACAG---GCCAGACAA---TTACTG---TCTGGTATAGTGCAACAGCAAAGC---  
AATTTG---CTGAGG---GCTATAGAGGCGCAACAGCATATGTTGCAACTCACGGTCTGGGGCATT  
>AF457087  
TTCTATTGTAACACATCAGGCCTGTTTAATAGCACTTGGGAATGACACTGCCATCGAGGCTAAGTCAAATAACA  
CG-----  
-----  
GAGACAGACGGTATTATAACTCTCCAATGCAGAATAAAGCAACTTATAAATATGTGGCAGAGGGTAGGACAAG  
CAATATATGCCCCCTCCCATCCCAGGATTAATAAGGTGTGAATCAAAC---  
ATTACAGGGCTAATATTAACAAGAGATGGTGGGAATAATGGTGGGAATAAT-----  
-----  
-----  
AGCAGTGAAAAAATGAAACCTTCAGACCTGGAGGAGGAGATATTAGGGACAATTGGAGAAGTGAATTATATA  
AGTATAAAGTAGTAAAAATTGAACCACTA---GGAGTAGCACCCACCAAGGCAAGGAGAAGAGTGGTG-----  
-----CAGAGAGAAAAAAGAGCA---ATTGGA---  
CTGGGAGCT-----GTCTTCATTGGGTTCTTAGGAGCA---GCAGGAAGCACTATG---  
GGCGCGGCGTCA---ATAACGCTGACGGTACAG---GCCAGACAA---TTATTG---  
TCTGGCATAGTGCAACAGCAAAGC---AATTTG---CTGAGG---  
GCTATAGAGGCTCAACAGCATCTGTTGAAACTCACAGTCTGGGGCATT  
>KT022391  
TTCTATTGTGATACATCAGGCCTGTTTAATAGCGCTTGGGCAGCCAATAGCACTTGGACAGCCAATGACACTG  
AC-----  
-AGAAATCAGGTAGAT-----  
AACAAATATGACACCATAACTCTCCCATGTAAAATAAAGCAAATTATAAATATGTGGCACAGAGTAGAACAAG

CAATATATGCCCCCTCCCATTCAGGAGTAATAAGGTGTGAATCAAAC---  
ATTACAGGACTACTATTAACAAGAGATGGTGGGGTTAGGGTTGAC-----  
-----  
-  
AATACAAGTAATACAAGTGAAACCTTCAGACCTGGAGGAGGAGATATGAAGGATAATTGGAGAAGTGAATTAT  
ATAAGTATAAAGTAGTAGAAATTGAACCACTA---GGAGTAGCACCCACCAGGGCAAAGAGAAGAGTGGTG--  
-----GAGAGAGAAAAAAGAGCA---GTTGGA---  
ATAGGAGCT-----GTTTTCATTGGGTTCTTAGGAGCA---GCAGGAAGCACTATG---  
GGCGCGGCGTCA---GTGACGCTGACGGTACAG---GCCAGACAA---GTATTG---  
TCTGGCATAGTGCAACAGCAAAGC---AATTTG---CTAAGG---  
GCTATAGAGGCTCAACAACATCTGTTGAAACTCACGGTCTGGGGCATT  
>KT022393  
TTTTATTGTAACACATCAGGCCTGTTTAATAGCAGTTGGGCAAATAACACAGAGTCAAACAACACAGAG----  
-----  
-----  
TTAAACAGAACTATAACGCTCCCATGCAGAATAAAGCAAATTATAAATATGTGGCAGAGAACAGGACAAGCAA  
TGTATGCCCCCTCCCATCCAAGGAGTAATAAGGTGTGAATCAAAC---  
ATTACAGGATTAATATTGACAAGAGATGGTGGGGATAATAGTATA-----  
-----  
-----  
AATGAAACCTTCAGACCGGGAGGAGGAGATATGAGGGATAATTGGAGAAGTGAATTATATAAGTATAAAGTAG  
TAAAAATTGAACCACTA---GGAGTAGCACCCACCAGGGCAAAGAGAAGAGTGGTG-----  
-----GAGAGAGAAAAAAGAGCA---GTTGGA---ATAGGAGCT-----  
GTCTTCCTTGGGTTCTTAGGAGCA---GCAGGAAGTACTATG---GGCGCGGCGTCA---  
ATGACGCTGACGGTACAG---GCCAGGCAA---TTATTG---TCTGGAATAGTACAACAGCAAAGT---  
AATTTG---CTGAGG---GCTATAGAGGCTCAACAGCATCTGTTGAAGCTCACGGTCTGGGGCATT  
>KT022395  
TTTTATTGTAATACATCAGGACTGTTTAATGAGAGTTGGGTAAATGGCACTGAACCAAGTAGCAATGATACT-  
-----  
-----  
GATATGACTCCCATAACTCTCCAATGCAGAATAAAGCAAATTATAAATATGTGGCAGAGAATAGGACAGGCAC  
TGTATGCCCCCTCCCATCCCAGGAGAAATAAGGTGTAACTCAAAC---  
ATTACCGGACTACTATTAGTAAGAGATGGAGGGTCTCTTAACAGT-----  
-----  
-----  
ACAAATGAAACCTTCAGACCTGGAGGAGGAGACATGAGGGACAATTGGAGAAGTGAATTATATAAGTATAAAG  
TAGTAAAAATTGAACCACTA---GGAGTAGCACCCAACAAGGCAAAGAGAAGAGTGGTG-----  
-----GAAAGAGAAAAAAGAGCA---GCTGGA---ATAGGAGCT-----  
TTGCTCATTGGGTTCTTAGGAGCA---GCAGGAAGCACTATG---GGCGCGGCGTCA---  
ATAACGCTGACGGTACAG---GCCAGACAA---TTGTTG---TCTGGCATAGTGCAACAGCAAAGC---  
AATTTG---CTGAGG---GCTATAGAGGCTCAACAGCATCTGTTGAAACTCACGGTCTGGGGCATT  
>KT022408  
TTCTATTGTAATACATCAGGCCTGTTTAATAGTACTTGGAATAGCACAGAGCGGTCTAGAAATAGCACTAACA  
GCACAGGG-----  
-----  
GAAGGTAGAAATATAACTCTCCAATGCAGAATAAAGCAAATTATAAATATGTGGCAGAGAGTAGGACAAGCAA  
TGTATGCCCCCTCCCATCCAAGGAGAAATAAAGTGTGTATCAAAC---  
ATTACAGGAATACTATTAACAAGAGATGGTGGGAACAATACAAGT-----  
-----  
-----  
CAAAATGAAACCTTTAGACCTGGAGGAGGAGATATGAGGGACAATTGGAGAAGTGAATTATATAAGTATAAAG  
TAGTACAAATTGAACCACTA---GGAGTAGCACCCACCAGGGCAAAGAGAAGAGTGGTG-----  
-----CAGAGAGAAAAAAGAGCA---GTTGGA---CTGGGAGCT-----  
GTCTTCATTGGGTTCTTAGGAGCA---GCAGGAAGCACTATG---GGCGCAGCGTCA---  
ATAACGCTGACGGTACAA---GCCAGACAA---TTATTG---TCTGGCATAGTGCAACAGCAAAGC---  
AATTTG---CTGAGG---GCTATAGAGGCTCAACAGCATCTGTTGAAACTCACAGTCTGGGGCATT  
>KT022413  
TTCTATTGTAATACATCAAGCCTGTTTAATAGCGCTTGGAATCACACTCACAATGACAGCATACAGGGG----

TCAAATGACACTCTAACTCTCCCATGTAGAATAAAGCAAATTATAAATATGTGGCAGAGAGTAGGACAAGCAA  
TGTATGCCCCCTCCCATCCAAGGAATAATAAAGTGTGAATCAAAC---  
ATTACAGGACTAATATTAACAAGAGATGGTGGTGGGAGTAATAAC-----  
-----  
-----  
AGTACAGATGAAATCTTCAGACCGGGAGGAGGAAATATGAGGGACAATTGGAGAAGTGAATTATATAAGTATA  
AAGTAGTAAAAATTGAACCAATA---GGAGTAGCACCCACCAAGGCAAGGAGAAGGGTGGTG-----  
-----GAGAGAGAAAAAAGAGCA---GTTGGA---ATAGGAGCT-----  
---GTTTTCCTTGGGTTCTTGGGAGCA---GCAGGAAGCACTATG---GGCGCGGCGTCA---  
ATAACGCTGACGGTACAG---GCCAGACAA---TTATTG---TCTGGCATAGTGCAACAGCAAAGC---  
AATTTG---CTGAGG---GCTATAGAGGCTCAACAACAGATGTTGAGACTCACGGTCTGGGGCATT  
>FJ623489  
TTCTATTGTGACACATCAGGCCTATTTAATAGCACTTGGTATGGGAATGGGACCAACACAACGGAACCAGATA  
GC-----  
-----  
ACAAATGACAATATAACTCTCCCATGCAGAATAAAGCAAATTATAAATATGTGGCAGAGAGTAGGACAAGCAA  
TGTACGCCCCCTCCCATCCCAGGAGCAATAAGCTGTACCTCAAAC---  
ATTACAGGATTATTATTAACAAGAGATGGTGGGTATAATAGCACT-----  
-----  
-----  
AATGAAACCTTCAGACCTGGTGGAGGAGATATGAGGGACAATTGGAGAAGTGAATTATTTAAGTACAAGGTAG  
TACAAATTAAACCACTA---GGAGTAGCACCCACCGAGGCAAGGAGAAGAGTGGTG-----  
-----CAGAGAGAAAAAAGAGCA---GTTGGA---CTAGGAGCT-----  
TTCTTCATTGGGTTCTTAGGAGCA---GCTGGAAGCACTATG---GGCGCGGCGTCA---  
ATAACGCTGACGGTACAG---GCCAGACAA---CTGTTG---TCTGGCATAGTGCAACAGCAAAGC---  
AATTTG---CTGAGG---GCTATAGAGGCTCAACAGCATCTGTTGAAACTCACAGTCTGGGGCATT  
>HM215276  
TTCTATTGTGATACATCAATCCTGTTTAATAGCACTTGGTATCACAATGGCAGTATCTTGCAGAAGTCAAAT-  
-----  
-----  
AGCACGGATAATATAATTCTCCCATGCAGAATAAAGCAAATTATAAATATGTGGCAGAGAGCAGGACAAGCAA  
TATATGCCCCCTCCCATCAAAGGACCAATAGTGTGTGAATCAAAT---  
ATTACAGGACTAATATTAACAAGAGACGGTGGCACGGATGACAAT-----  
-----  
-----  
ACAACTGAACTTTTCAGACCTGGAGGAGGAGATATGAGGGACAATTGGAGAAGTGAATTATATAAGTATAAAG  
TAGTAAAAATTGAACCATTA---GGATTAGCACCTCCAGGGCAAGGAGAAGAGTGGTG-----  
-----GAGAGAGAAAAAAGAGCA---GCGGGG---CTAGGAGCT-----  
GTCTTCATTGGGTTCTTAGGAATG---GCAGGAAGCACTATG---GGCGCGGCGTCG---  
ATGACGCTGACGGTACAG---GCCAGACAA---TTATTG---TCTGGTATAGTGCAACAGCAAAGC---  
AATTTG---CTGAGG---GCTATAGAGGCTCAACAGCAGATGTTGAGACTCACGGTCTGGGGCATT  
>KF716469  
TTCTATTGTAATACATCAGGCCTGTTTAATCATAACATCACAATCACACGCAGGAGGCAAATGGCACGGGG---  
-----  
-----  
TCAAATGGCAATATAACTCTCCCATGCAGAATAAAGCAAATTATAAATATGTGGCAGAGAACAGGACAAGCAA  
TGTATGCCCCCTCCCATCCAAGGAGTAATAAAATGTGTATCAAAT---  
ATTACAGGACTACTATTAACAAGAGATGGTGGGGGAAATAACAGGACAGAG-----  
-----  
-----  
GAAATCTTTAGACCTGGAGGAGGAGATATGAGGGACAATTGGAGAAGTGAATTATATAAGTATAAAGTAGTAA  
AAATTGAACCACTG---GGAGTAGCACCTACCACGGCAAGGAGAAGAGTGGTG-----  
-----GGAAGAGAAAAAAGAGCA---GTTGGA---CTAGGAGCT-----  
GTCTTCTTTGGGTTCTTAGGAGCA---GCCGGAAGCACTATG---GGCGCGGCGTCA---  
ATAACGCTGACGGCACAG---GCCAGACAA---TTATTG---TCTGGCATAGTGCAACAGCAGAGC---  
AATCTG---CTGAGG---GCTATAGAGGCTCAACAACATCTGTTGAAACTCACGGTCTGGGGCATT  
>KF716471  
TTCTATTGTAATACATCAGGCCTGTTTAATCATAACATGACACGCAGGAGGCAAACAGCACGGGG---  
-----  
-----

TTAAATGGCAATATAACTCTCCCATGCAGAATAAAGCAAATTGTAAATATGTGGCAGAGAGCAGGACAAGCAA  
TGTATGCCCCCTCCCATCCAAGGAGTAATAAAATGTGTATCAAAT---  
ATTACAGGACTACTATTAACAAGAGATGGTGGGGGAAATAGCAGT-----  
-----  
-----  
ACAAAGGAAATCTTTAGACCTGGAGGAGGAGATATGAGGGACAACCTGGAGAAGTGAATTATATAAGTATAAAG  
TAGTAAAAATTGAGCCACTG---GGGGTAGCACCTACCGAGGCACGGAGAAGAGTGGTG-----  
-----GGAAGAGAAAAAAGAGCA--GTTGGA---ATAGGAGCT-----  
GTCTTCCTTGGGTTCTTAGGAGCA---GCAGGAAGCACTATG---GGCGCGGCGTCA---  
ATAACGCTGACGGTACAG---GCCAGACAA---TTATTG---TCTGGCATAGTGCAACAGCAGAGC---  
AATCTG---CTGAGG---GCTATAGAGGCTCAACAACATCTGTTGAAACTCACGGTCTGGGGCATT  
>KU921793  
TTCTATTGTAACACATCAAGCCTGTTTAAATAGCACTTGGGGTAATACCAGTGTGCCAGAGTTAAATAGCACGG  
AGGCAAATAGC---ACG-----GAG-----  
-----  
CAAAACAATATAACAATAACACTCCAATGCAGAATAAAGCAAATTATAAACATGTGGCAGAGAGCAGGACAAG  
CAATGTATGCCCCCTCCCATCCAAGGAGAGATAAGGTGTATATCAAAC---  
ATTACAGGATTAATATTAACAAGAGATGGTGGGAATAATAAATAC-----  
-----  
-----  
AGCACAAATGAAACCTTCAGACCTGGAGGAGGAGATATGAGGGACAATTGGAGGAGTGAATTATATAAGTATA  
AAGTGGTAAAAATTGAACCAATA---GGAATAGCACCCACCAGGGCAAAAAGAAGAGTGGTG-----  
-----CAGAGAGAGAAAAAGAACA--GTAGGA---CTAGGAGCT-----  
---GTCTTCATTGGGTTCTTAGGAGCA--GCAGGAAGCACTATG---GGCGCGGCGTCA---  
GTGACGCTGACGGTACAG---GCTAGACAA---CTATTG---TCTGGCATAGTGCAACAGCAAAGC---  
AATTTG---CTGAGG---GCTATAGAGGCTCAACAGCATCTGTTGAAACTCACGGTCTGGGGCATT  
>KU921796  
TTCTATTGTGACACATCAGGCCTGTTTAAATAGCACTTGGGATAGCAATAACAGCGAGCAAGAGTCAAATAGCA  
CTGAGTTA-----  
-----  
AACAAATATAACTCTAACTCTCCACTGCAGAATAAAGCAAATTATAAATATGTGGCAGAGAGCAGGACAAGCAA  
TGTATGCCCCCTCCCATCCAAGGAGTGATAAGATGTGTATCAAAC---  
ATTACAGGATTAATATTAACAAGAGATGGTGGGGATCATAAATAC-----  
-----  
-----  
AGCGCAAATGAAACCTTCAGACCTGGAGGAGGAGATATGAGGGACAATTGGAGGAGTGAATTATATAAGTATA  
AAGTAGTAAAAATTGAACCAATA---GGAATAGCACCCACCAAGGCAAGAAGAAGAGTGGTG-----  
-----CAGAGAGAGAAAAAGAGCA--ATAGGA--ATGGGAGCC-----  
---GTCTTCCTTGGGTTCTTAGGAGCA--GCAGGAAGCACTATG---GGCGCAGCGTCA---  
GTAGCGCTGACGGTACAG---GCCAAACAA---CTATTG---TCTGGCATAGTGCAACAGCAAAAC---  
AATTTG---CTGAGG---GCTATAGAGGCTCAACAGCATATGTTGAAACTCACGGTCTGGGGCATT  
>KU921839  
TTCTATTGTAATACATCAGGACTGTTTAAATAGCACTTGGAAATCCACTAACATGCAGGAGCTAGATAGCACAG  
AG-----  
-----  
GCAAATGGTACTATAATACTCCCATGCAAAATAAAGCAAATCATAAATATGTGGCAGAGAGTAGGACAAGCAA  
TGTATACCCCTCCCATACCGGGAGTAATAAATTGTGAATCAAAC---  
ATCACAGGATTAATATTAACAAGGGATGGTGGCCCTAATAACGAT-----  
-----  
-----  
ACAGAAATCTTCAGACCAGGAGGAGGAGATATGAGGGACAATTGGAGAAGTGAATTATACAAGTATAAAGTAG  
TAAAAATTGAACCATTA---GGAGTAGCACCCACCAAAGCAAGGAGAAGAGTGGTG-----  
-----GAGAGAGAAAAAAGAGCA--GTTGGA---ATAGGAGCT-----  
GTTCTCGTTGGGTTCTTGGGAGCA---GCAGGAAGCACTATG---GGCGCGGCGTCA---  
ATAACGCTGACGGCACAG---GCCAGGCAA---TTATTG---TCTGGCATAGTGCAACAGCAAAGC---  
AATTTG---CTGAGG---GCTATCGAGGCTCAACAACAGCTGTTGAAACTCACGGTCTGGGGCATT  
>KU749431  
TTCTATTGTGATACAACAAGCCTGTTTAAATAGTACTCACTCCCCTAACGACACGCAGGGTGACCAGGAGTCAA  
AT-----  
-----

TCAAATGACACTATAACTCTCCCATGCAGAATAAAGCAAATTATAAATATGTGGCAGAGAACAGGACAAGCAA  
TATATGCCCCCTCCCATCGAAGGAGATATAAGGTGTAGCTCAAAC---  
ATTACAGGATTATTATTAACAAGAGATGGTGGGATTAATGTGAGC-----  
-----  
-----  
ACTACTAATGAAACCTTCAGACCTAGTGGAGGAGATATGAGGGACAATTGGAGAAGTGAATTATATAAGTACA  
AGGTAGTAAGAATTAAACCACTA---GGAGTAGCACCCACCAAGGCAAGGAGAAGAGTGGTG-----  
-----GAGAGAGAAAAAAGAGCA---GTTGGA---ATGGGAGCT-----  
---TTCTTCCTTGGGTTCTTAGGAGCA---GCAGGAAGCACTATG---GGCGCAGCGTCA---  
ATAACGCTGACGGTACAG---GCCAGAAAC---TTATTG---TCTGGCATAGTGCAACAGCAAAAC---  
AATTTG---CTGAGG---GCTATAGAGGCTCAACAACATCTGTTGAAACTCACAGTCTGGGGCATT  
>FJ396022  
TTCTATTGTAACACATCAGGCCTGTTTAATAGCACTTGGTATAATGGCAGCATGTCAAATAGCACGGAG----  
-----  
-----  
TCAAATGACAATATAACACTCCAATGCAGAATAAAGCAAATTATAAATATGTGGCAGAGAGTAGGACAAGCAA  
TGTATGCCCCCTCCCATCCAAGGAGAAATAAAGTGTGTATCAAAC---  
ATTACAGGGCTAATATTAACAAGAGATGGTGGTGACAGCACAAAT-----  
-----  
-----  
GAAACCTTCAGACCTGGAGGAGGAGATATGAGGGACAATTGGAGAAGTGAATTATATAAATATAAAGTGGTAG  
AAATTAAACCATTA---GGAGTAGCACCCACTGAGGCAAAAAGGAGAGTGGTG-----  
-----GAGAGAGAAAAAAGAGCA---GTGGGA---ATAGGAGCT-----  
GTGTTCCCTTGGGTTCTTGGGAGCA---GCAGGAAGCACTATG---GGCGCAGCGTCA---  
ATAACGCTGACGGTACAG---GCCAGACAA---TTATTG---TCTGGCATAGTGCAACAGCAAAGC---  
AATTTG---CTGAGG---GCTATAGATGCTCAACAGCATATGTTGAAACTCACGGTCTGGGGCATT  
>AF457064  
TTCTATTGTAACACATCAGGCCTGTTTAATAGCACTTGAATGACAGTGACAGCATGCAGGGGCCAAATAGCA  
CG-----  
-----  
AAGTCAAATGGCACTATAACTCTCCCATGCAGAATAAAGCAAATTATAAATATGTGGCAGAGAGCAGGACAAG  
CAATATATGCCCCCTCCCATCCCAGGAATAATAAGGTGTGAATCAAAC---  
ATTACAGGCCTAATATTAACAAGAGATGGTGGGGATAATAGCAGT-----  
-----  
-----  
ACAAATGAAACCTTCAGACCTGGAGGAGGAGATATGAGGGACAATTGGAGAAGTGAATTATATAAGTATAAAG  
TAGTAAAAATTGAACCACTA---GGAGTAGCACCCACCGAGGCAAAGAGAAGAGTGGTG-----  
-----GAGAGAGAAAAAAGAGCA---GTTGGA---ATAGGAGCT-----  
GTCTTCATTGGGTTCTTAGGAGCA---GCAGGAAGCACTATG---GGCGCGGCGTCA---  
ATGACGCTGACGGTACAG---GCCAGACAA---TTATTG---TCTGGCATAGTGCAACAGCAAAGC---  
AATTTG---CTGAGG---GCTATAGAGGCTCAACAGCAACTGTTGAAACTCACGGTCTGGGGCATT  
>KU749428  
TTCTATTGCAACACATCACAGCTGTTTAATTCTACTGCTCAATAGTACAGAAAGTATTAATGAAACAAGT-  
-----  
-----  
GGTAATGAAACAATCACACTCCCATGCAGAATAAAACAGATTATAAACATGTGGCAGGAGGTAGGGCGGGCAA  
TGTATGCCCCCTCCCATTAGAGGAATAATAACATGTAAATCAAAT---  
ATCACAGGACTACTACTGACACGTGATGGAGGAAATGAGAAAAAT-----  
-----  
AACTCAGAGGCAAAT---  
AACACAGAGATATTAGGCCTGGAGGAGGAAATATGAAGGACAATTGGAGAAGTGAATTATATAAGTATAAAG  
TAGTAAAAGTTGAACCACTA---GGAGTAGCACCCACCAAGGCAAAGAGAAGAGTGGTG-----  
-----GAGAGAGAAAAAAGAGCA---GTAGGA---ATAGGAGCT-----  
GTCTTCATTGGGTTCTTAGGAGCA---GCCGGAAGCACTATG---GGCGCAGCGTCG---  
GTGACGCTGACGGTACAG---GCCAGACAA---TTATTG---TCTGGCATAGTGCAACAGCAAAGT---  
AATTTG---CTGAGG---GCTATAGAGGCTCAACAACATTTGTTGAAACTCACGGTCTGGGGCATT  
>KX983685  
TTCTATTGTAATACATCAGGCCTGTTTAATAACACATGGGCTAATAACAATTGGACTGACAGCACAAATTAC-  
-----  
-----

ACAAATGACAATATAACTCTCCAATGCAGAATAAAGCAAATTATAAATATGTGGCAGAGGACAGGACAAGCAA  
 TGTATGCCCCCTCCCATCCAAGGAATAATAATGTGTAGGTCAAAC ---  
 ATTACAGGCCTACTATTAACAAGAGATGGAGGGAATACAAATGATACA-----  
 -----  
 -----  
 AATGCAACTGAAACCTTCAGACCTGGGGGAGGAAATATGAGGGATAATTGGAGAAGTGAGCTATATAAATATA  
 AAGTAGTAAAAGTTGAACCACTA---GGAGTAGCACCCACCGAGGCAAGAAGAAGAGTGGTG-----  
 -----CAGAGAGAAAAAAGAGCA---GTTGGA---CTGGGAGCT-----  
 ---GCCCTCCTTGGGTTCTTAGGAGCA---GCAGGAAGCACTATG---GGCGCGGCGTCA---  
 ATAACGCTGACGGTACAG---GCCAGACTA---TTATTG---TCTGGTATAGTGCAACAGCAAAGC---  
 AATTTG---CTGAGG---GCTATAGAGGCTCAACAGCATATGTTGAAGCTCACAGTCTGGGGCATT  
 >U88823  
 TTCTATTGTAATACATCAGGCTTGTTTAATAGCACCTGGAGTAAAAGAAATGGCACCTGGCAGTCAAATGGC-  
 -----  
 -----  
 ACAGAATTAAATATAACACTCCCATGCAGAATAAAGCAAATTATAAATATGTGGCAGAGGACAGGACAAGCAA  
 TGTATGCCCCCTCCCATCCAAGGAGTAATAAGCTGTGTATCAAAC ---  
 ATTACAGGACTACTATTAACAAGAGATGGTGGAAATAATAACT-----  
 -----  
 -----  
 ACAACTGAAACCTTCAGACCTGGAGGAGGAGATATGAGGGATAATTGGAGAAGTGAACTATATAAATATAAAG  
 TAGTAAAAAATTGAACCACTA---GGAGTAGCACCCACCAGGGCAAAGAGGAGAGTGGTG-----  
 -----GAGAGAGAAAAAAGAGCA---GTTGGA---CTGGGAGCT-----  
 GTCTTCATTGGGTTCTTAGGAGCA---GCAGGAAGCACTATG---GGCGCGGCGTCA---  
 ATAACGCTGACGGTACAG---GCCAGACAA---TTATTG---TCTGGCATAGTGCAACAGCAAAGC---  
 AATTTG---CTGAGG---GCTATAGAGGCTCAACAGCATCTATTAAACTCACAGTCTGGGGCATT  
 >MF373141  
 TTTTATTGTAATACATCAGTACTTTTTTAACAGAAGTATAACAGGCAATATCACAAACCTAACAGAAGTA----  
 -----  
 -----  
 AACAGTACAAACATCACACTCCCATGCAGAATAAAACAAATTATAAACATGTGGCAGGGGGTAGGACGAGCAA  
 TGTATGCCCCCTCCCATTCAGGATTCATAAAATGTGAATCAAAT ---  
 TTCACAGGACTACTCCTGACACGTGATGGAGGGAATATTAGTACA-----  
 -----  
 -----  
 GAGAACGAGACATTTCAGGCCGGAAGGAGGAAATATGAAGGACAATTGGAGAAGTGAATTATATAAATATAAAG  
 TGGTAGAAATTAAACCATTA---GGAATAGCACCCCATAAAGGCAAAAAGAAGAGTGGTG-----  
 -----GAGAGAGAAAAAAGAGCA---GTGGGA---ATAGGAGCT-----  
 GTGTTCTTGGGTTCTTGGGAGCA---GCAGGAAGCACTATG---GGCGCAGCATCA---  
 CTAACGCTGACGGTACAG---GCCAGACAA---TTATTG---TCGGGTATAGTGCAACAGCAGAGC---  
 AATCTG---CTGAGG---GCTATTGAGGCGCAACAGCATATGTTGCAACTCACAGTCTGGGGCATT  
 >MF373155  
 TTCTATTGTAATACAACAGGCCTGTTTAATAGCACTTGGAATGATACCACTTTGAACAGCACCACTGAGTTAA  
 ACAAC-----  
 -----  
 ACATATGAAAATATAACTCTTCCATGTAGAATAAAGCAAATTATAAACATGTGGCAGAGAGCAGGAAAAGCAA  
 TGTATGCCCCCTCCCATCCCAGGAATAATAAGGTGTGAGTCAAAC ---  
 ATTACAGGACTACTGTTAACAAGCGATGGTGGGAATAAAAGTACT-----  
 -----  
 -----  
 ACAAATGAAACCTTCAGACCTGGAGGAGGAGATATGAGGGACAATTGGAGAAGTGAATTATATAAGTATAAAG  
 TAGTAAAACCTGAACCACTA---GGAGTAGCACCTGAAAGGGCAAAAAGAAGAGTGGTG-----  
 -----GCGAGAGAAAAAAGAGCA---GTTGGA---CTGGGAGCT-----  
 GTCTTCATTGGGTTCTTAGGAGCA---GCAGGAAGCACTATG---GGCGCGGCGTCA---  
 CTGACGCTGACGGTACAG---GCCAGACAA---TTATTG---TCTGGTATAGTGCAACAGCAAAGC---  
 AATTTG---CTGAAG---GCTATAGAGGCTCAACAGCACCTGTTGAGACTCACGGTCTGGGGCATT  
 >AF071474  
 TTCTATTGTGATACATCAGGGCTGTTTAATAGCACCTGGCCGTTTAATAGCACAAACAGCACAGGG-----  
 -----  
 -----

CCAAATGGCACTATAACTCTCCAATGCAGAATCAAGCAAATTATAAGGATGTGGCAGAGAACAGGACAAGCAA  
TATATGCCCCCTCCCATCCCAGGAGAAATAAACTGTGTATCAAAC---  
ATTACAGGACTACTATTAACAAGAGATGGTGGGAATAATATTACA-----  
-----  
-----  
AATGAAACCTTCAGACCTGGAGGAGGAGATATGCAGGACAATTGGAGAAGTGAATTATATAAGTATAAGGTAG  
TACAAATTGAACCACTA---GGAGTAGCACCCACCAAGGCAAGGAGAAGAGTGGTG-----  
-----GAGAGAGAAAAAAGAGCA---GTTGGC---ATGGGAGCT-----  
GTCTTCATTGGGTTCTTAGGAGCA---GCAGGAAGCACTATG---GGCGCAGCGTCA---  
GTAACGCTGACGGTACAG---GCCAGACAA---TTATTG---TCTGGCATAGTGCGACAGCAAAGC---  
AATTTG---CTGAGA---GCTATAGAGGCTCAACAACATTTGTTGAAACTCACAGTCTGGGGCATT  
>AY253318  
TTCTATTGTAACACATCAGGCCTGTTTAATAGCACTTGGAAATAGCAATGCCAGCATGCAGACGTCAAATGGTA  
CG-----  
-----  
GGGTTAAATGACACTATAATTCTTCTATGTTGTATAATACTTATTATTATGTGGCGGAGAGCAGGACGAG  
CAGTATTTGCCCCCTCCTATCCTACGAGGAGTAATGTGGGGATCATAAC---  
ATCACAGGGCTACTATTATCAACAGATGGTGGGGATGGTACACAT-----  
-----  
-----  
GAAGAACTCTTCGTACCTGGACGAGGAGATATGAAGGTCAAGGGCAGAAGCAAATTCTATTTGTATAAAGTTG  
TAAAAATTGAACCTGTA---CGTGTAGCACCCACCCCTGCCAACACAAAAGTGGTG-----  
-----GAGAGAGAAAAAAGAGCA---GTTGCA---ATAGGAACT-----  
GGATTTGTTGGGTTTTTAGGATCA---GGAGCAAGCACTATG---GGTGCGGCGTCA---  
ATAACGCTGACGGTACAG---GCCAGACAA---TTATTG---TCTGGCATAGTGCAACAGCAAAGC---  
AATTTG---CTGAGG---GCTATAGAGGCTCAACAACATCTGTTGAAGCTTACGGTCTGGGGCATT  
>AY253315  
TTCTATTGCAACACAACAGACCTGTTTAATTGGAATAATGACACCAGGCAGAAGCGAAATAGAACAGAG----  
-----  
-----  
TCAGATAACACTATAACTCTCCAATGCAGAATAAAGCAAATTATAAATATGTGGCAGAGAACAGGACAAGCAA  
TATATGCCCCCTCCCATCCAAGGAGCAATAAGGTGTGACTCAAAC---  
ATTACAGGACTAATATTAGCAAGAGATGGGGGTAACACAAATGAA-----  
-----  
-----  
AGTGAAGAGGAAATCTTCAGACCTATAGGAGGAGATATGAGGGACAATTGGAGAAGTGAATTATATAAGTACA  
AAGTAGTGAATTTGAGCCACTA---GGAGTAGCACCCACCACGGCAAAGAGAAGAGTGGTG-----  
-----GAGAGAGAAAAAAGAGCA---GTTGGA---CTGGGAGCT-----  
---GTCTTCCTTGGGTTCTTAGGAGCA---GCAGGAAGCACTATG---GGCGCAGCATCA---  
CTGACGCTGACGGTACAG---GCCAGACAA---TTATTG---TCTGGCATAGTGCAACAGCAAAGC---  
AATTTG---CTGAGG---GCTATAGAGGCTCAACAACATCTGTTGAGACTCACAGTCTGGGGCATT  
>AY253319  
TTCTATTGCAACACATCAGGCCTGTTTGATAGCATTTGGAATGACACTGACAGCATGCAGGGGTTAGATAGCA  
TG-----  
-----  
GAGTCAGATGGCACTATAACTCTCCAATGCAGAATAAAGCAAATTATAAATATGTGGCAGAGAGCAGGACAAG  
CAATATATGCCCCCTCCCATCCCAGGAGTAATAGAGTGTACATCAAAC---  
ATTACAGGACTAATATTAACAAGAGATGGTGGGAATAGTAGCAGT-----  
-----  
-----  
ACAAATGAAACCTTCAGACCTGGAGGAGGAGATATGAGGGACAATTGGAGAAATGAATTATATAAGTATAAGG  
TAGTAAAAATTGAGCCACTA---GGAGTAGCACCCACCAAGGCAAAAAGAAAAGTGGTG-----  
-----GAGAGAGAAAAAAGAGCA---GTTGGA---ATAGGAGCT-----  
GTTTTCTTGGGTTCTTGGGAGCA---GCAGGAAGCACTATG---GGCGCGGCGTCA---  
ATAACGCTGACGGTACAG---GCCAGACAA---TTATTG---TCTGGCATAGTGCAACAGCAAAGC---  
AATTTG---CTGAGG---GCTATAGAGGCTCAACAGCATCTGTTGAAACTCACGGTCTGGGGCATT  
>AY734552  
TTCTATTGTAATACATCAGGCCTGTTTAATGGCATTGGAACAATACCAGCACGCAGGAGTCAAATAGCACGG  
AA-----  
-----

TCAAATGACACTATAACTATTCCATGCAGAATAAAGCAAATTATAAATATGTGGCAGAGAGTAGGACAAGCAA  
TGTATGCCCCCTCCCATCCAAGGAATGATAAGGTGTGAATCAAAC---  
ATTACAGGACTACTGTTAACAAGAGATGGTGGGAATGAGAGCAGT-----  
-----  
-----  
ACAAATGAAACCTTCAGACCTGGAGGAGGAGATATGAGGGACAATTGGAGAAGTGAATTATATAAGTATAAAG  
TAGTAAAAAATTGAACCGTTA---GGAGTAGCACCCACCAGGGCAAAGAGAAGAGTGGTG-----  
-----GGAAGAGAAAAAAGAGCA---GTTGGA---ATAGGAGCT-----  
GTCTTCCTTGGGTTCTTAGGAGCA---GCCGGAAGCACTATG---GGCGCGGCGTCA---  
ATAACGCTGACGGTACAG---GCCAGACAA---TTATTG---TCTGGTATAGTGCAACAGCAAAGC---  
AATTTG---CTGAAG---GCTATAGAGGCTCAACAACATATGTTGAGACTCACAGTCTGGGGCATA  
>AY734553  
TTCTATTGCAACACATCAAGCCTGTTTAATAGCACTTGGAAATGGCACTACTGATAATGGCACTGGCAGCACAA  
AC-----  
-----  
AGCGCAAATAGCAATATAACTCTCCAATGCAAAATAAAGCAAATTATAAATATGTGGCAGAGAGCAGGACAAG  
CAATATATGCCCCCTCCCATCCCAGGAGTGATAAAGTGTGTATCAAAC---  
ATTACAGGACTAATATTAACAAGAGATGGTGGGAATAATAACAGT-----  
-----  
-----  
ACAAATGAAACCTTCAGACCAGGAGGAGGAGATATGAGGGACAATTGGAGAAGTGAATTATATAAGTATAAGG  
TAGTAAAAAATTGAACCACTA---GGAGTAGCACCCACCAGGGCAAAGAGAAGAGTGGTG-----  
-----GAGAGAGAAAAAAGAGCA---GTCGGA---ATAGGAGCT-----  
GTTCTCCTTGGGTTCTTAGGAACA---GCAGGAAGCACTATG---GGCGCGGCGTCA---  
ATAACGCTGACGGTACAG---GCCAGACAA---TTATTG---TCTGGCATAGTGCAACAGCAAAGC---  
AATTTG---CTGAGG---GCTATAGAGGCTCAACAACACATGTTGAAACTCACAGTCTGGGGCATT  
>AY734562  
TTCTATTGTGATACATTTGAACTGTTTAATAGCACTTGGAAATCTCACTGCCAGCATGCAGGGGTCAAATAGA-  
-----  
-----  
ACGGAGGGCAATATAACACTCCCGTGCAGAATAAAACAAATTGTAAACATGTGGCAGGGGGTAGGACGAGCAA  
TGTATGCCCCCTCCCATTCAGGAAATATAACATGTAGATCAAAC---  
ATCACAGGACTATTATTGACAAGTGATCATGGTAATGGTAGTCCA-----  
-----  
-----  
ACAAATGAGACATTTCAGACCTGGAGGAGGAAATATGAGGGACAATTGGAGAAATGAATTATATAAATACAAAG  
TGGTAGAAATTAAGCCATTA---GGAATAGCACCCACTAAGGCAAAAGGAGAGTGGTG-----  
-----GAGAGAGAAAAAAGAGCA---GTGGGA---ATAGGAGCT-----  
GTGCTCCTTGGGTTCTTGGGAGCA---GCAGGAAGCACTATG---GGCGCGGCGTCA---  
ATAACGCTGACGGTACAG---GCCAGACAA---TTATTG---TCTGGTATAGTGCAACAGCAAAGC---  
AATTTG---CTGAAG---GCTATAGAGGCGCAACAACATATGTTGCAACTCACAGTCTGGGGCATT  
>AY734554  
TTCTATTGTAACACATCAGGACTGTTTAATAGCACTTGGAAATAGCAATGACAACGTGCAGGAGTCAAATAGCA  
CA-----  
-----  
-----  
AAGTCAAACGACACTATAACTCTCCAATGCAGAATAAAACAAATTATAAATATGTGGCAGAGGGTAGGACGAG  
CAATGTATGCCCCCTCCCATCCCAGGAGTAATAAGGTGTAATTCAAAC---  
ATTACAGGACTAATATTAACAAGAGATGGTGGGAATGAGAGCAGT-----  
-----  
-----  
ATAAATGAAACCTTCAGACCTGGAGGAGGAGATATGAGAGACAATTGGAGAAGTGAATTATATAAGTATAAAG  
TAGTAAAAAATTGAACCACTA---GGAGTAGCACCCACCAGGGCAAAGAGAAGAGTGGTG-----  
-----GAGAGAGAAAAAAGAGCA---GTTGGA---ATAGGAGCT-----  
GTCTTCATTGGGTTCTTAGGAGCA---GCAGGAAGCACTATG---GGCGCGGCGTCA---  
ATAACGCTGACGGTACAG---GCCAGACAA---TTACTG---TCTGGCATAGTGCAACAGCAAAGC---  
AATTTG---CTGAGG---GCTATAGAGGCTCAACAGCATCTGTTGAAACTCACGGTCTGGGGCATT  
>AY734555  
TTCTATTGTAACACATCAGGCCTGTTTAATAGCACTTGGAAATACTAACACTTTGAATAGCAGTAACAGCATGG  
AG-----  
-----

GAGTCAAATGACAATATAACTCTCCAATGTAGAATAAAGCAAATTATAAATATGTGGCAGAGAGCAGGACAAG  
CAATGTATGCCCCCTCCCATCCCAGGAATAATAAGGTGTGAATCAAAC---  
ATTACAGGACTAATATTAATGAGAGATGGTGGGAATAATAATACA-----  
-----  
-----  
AATGAGACATTCAGACCTGGAGGGGGAGATATGAGGGACAATTGGAGAAGTGAATTATACAAATATAAAGTAG  
TAGAAATTAAGCCATTA---GGAATAGCACCCAACAGGGCAAAAAGGAGAGTGGTG-----  
-----GAGAGAGAAAAAAGAGCA---GTTGGA---CTGGGAGCT-----  
TTGTTTCCTTGGGTTCTTAGGAGCA---GCAGGAAGCACTATG---GGCGCGGCGTCA---  
ATAACGCTGACGGTACAG---GCCAGAAAT---TTACTG---TCTGGCATAGTGCAGCAGCAAAGC---  
AATTTG---CTGAGG---GCTATAGAGGCTCAACAGCAGATGTTGAGACTCACGGTCTGGGGCATT  
>KX907342  
TTCTACTGCAATACATCAGGTCTGTTTAATTATACAGAAGGTACTTTAAATAGTACAATCAAT-----  
-----  
-----  
AGTACAGAACCAATCACACTCCCATGCAGGATAAAACAAATTATAAACATGTGGCAGGGGGTAGGACGAGCAA  
TGTATGCCCCGCCCATTGCAGGAACCATAACATGTAGATCAAAC---  
ATTACAGGACTACTATTGACACGTGATGGAGGATGTCATAATAAT-----  
-----  
-----  
TGTACAGAGAAATTCAGACCTGGAGGAGGAGATATGAGGGACAATTGGAGAAGTGAATTATATAAATATAAAG  
TGGTAGAAATCAAACCATTA---GGAATAGCACCCACTAGGGCAAAAAGGAGAGTGGTG-----  
-----GAGAGAGAAAAAAGAGCA---GTGGGA---ATAGGAGCT-----  
GTGTTTCCTTGGGTTCTTGGGAGCA---GCAGGAAGCACTATG---GGCGCAGCATCA---  
ATAACGCTGACGGTACAG---GCCAGACAA---TTACTG---TCTGGTATAGTGCAACAGCAAAGC---  
AATTTG---CTGAGG---GCTATAGAGGCGCAACAGCATATGTTGCAACTCACAGTCTGGGGCATT  
>KX907377  
TTCTATTGCAACACCACAGAACTGTTTAATAGAACATACTGGTCAAATGAGACAGGAAGCAATTCAAACAATT  
CAAGCAGT-----  
-----  
-----  
TCAAATGACACCATCACACTCCCATGCAGAATAAAACAAATTATAAACATGTGGCAGAGAGTAGGACAAGCAA  
TGTACGCCCCCTCCCATTCAGGAAACATAACATGTGAATCAAAC---  
ATTACAGGGCTACTGTTAACAAGAGATGGTGAGAAT-----  
-----  
-----  
AACGGTACAGAACTTTTAGACCTGGAGGAGGAGATATGAGGGACAATTGGAGAAGTGAATTATATAAGTATA  
AAGTAGTAAAAATTGAACCACTA---GGAGTGGCACCCACCAGGGCAAAAAGGAGAGTGGTG-----  
-----GAGAGAGAAAAAAGAGCA---GTTGGA---ATAGGAGCT-----  
---GTCCTCTTTGGGTTCTTAGGAACA---GCAGGAAGCACTATG---GGCGCGGCGTCA---  
ATGACGCTGACGGTACAG---GCCAGACAA---TTATTG---TCTGGCATAGTGCAACAGCAAAGC---  
AATTTG---CTGAGG---GCTATAGAGGCTCAACAACATATGTTGAAACTCACGGTCTGGGGCATT  
>KX907379  
TTCTATTGTAATACATCAAGCCTGTTTAATAGCACTTGGGACAACAGTAGCATCACACAGAATTACACGGAG-  
-----  
-----  
-----  
TCAAATGAGACTATAACTCTCCAGTGCAGAATAAAACAAATTGTAAACGCGTGGCAGAGAGTAGAACAAGCAA  
TATATGCCCCCTCCCATCCAAGGAGTAATAAGGTGTGACTCAAAC---  
ATTACAGGACTACTATTAACAAGAGATGGTGGTGGTAATAACAGT-----  
-----  
-----  
AGTGAACCGAAACCTTTAGACCTGGAGGAGGAGATATGAGGGACAATTGGAGAAGTGAATTATATAAGTATA  
AAGTAGTAAACTTGAACCACTA---GGAGTAGCACCTACCAAGGCAAAAAGAAGAGTGGTG-----  
-----GAAAGAGAAAAAAGAGCA---GTCGGA---ATAGGAGCT-----  
---GTTTTCCTTGGGTTCTTAGGAGCA---GCAGGAAGCACTATG---GGCGCGGCGTCA---  
ATGACGCTGACGGTACAG---GCCAGACAA---TTATTG---ACTGGCATAGTGCAACAGCAAAGC---  
AATTTG---CTGAGG---GCTATAGAGGCTCAACAACACCTGTTGAAACTCACGGTCTGGGGCATT  
>KX907409  
TTCTATTGTAACACATCATCCCTGTTTAATAGTACTTGGCAGGTCAGCGGGCAGGGGTAAATAGCACGGAG-  
-----  
-----

TTAGGTGACACTATAACTCTCCAATGCAGAATAAAGCAAATTATAAATATGTGGCAGAGAGCAGGACAAGCAA  
 TATATGCCCCCTCCCATCCCAGGAGTAATAAGGTGCGAATCAAAC ---  
 ATAACAGGACTAATATTAACAAGTGATTATGGGAATAGTAGCAGT-----  
 -----  
 -----  
 GACAATGAAACCTTCAGACCTACAGGAGGAGATATGAGGGACAATTGGAGAAGTGAATTATATAAGTATAAAG  
 TAGTGAAAATTGAACCAATA---GGAGTAGCACCCACCAAAGCAAGAAGAAGAGTGGTG-----  
 -----CAGAGAGAAAAAAGAGCA---GTTGGA---CTGGGAGCT-----  
 GTCTTCATTGGGTTCTTAGGAGCA---GCAGGAAGCACTATG---GGCGCGGCGTCA---  
 GTGACGCTGACGGTACAG---GCCAGACAA---TTATTA---TCTGGCATAGTGCAACAGCAAAGC---  
 AATTTG---CTGAGG---GCTATAGAGGCTCAACAGCATATGTTGAAACTCACAGTCTGGGGCATT  
 >KX907362  
 TTCTATTGTGACACATCAGACCTGTTTAATAGCACTTGGCCTAGCAATACCAATAACAGCATACAGGAGTCAA  
 ATAGCACA-----  
 -----  
 GAGCCAAACGCCACTATAACACTCCCATGCAGAATAAAACAAATTATAAATATGTGGCAGAGAGCAGGACAAG  
 CAATGTATGCCCCCTCCCATCCCAGGAATGATAAAGTGTAACCTCAAAC---  
 ATTACAGGACTCATATTAACAAGAGATGGTGAAATGATAGCAGT-----  
 -----  
 -----  
 ACAGATGAAATCTTCAGACCTGGAGGAGGAGACATGAGGGACAATTGGAGAAGTGAATTATATAAGTATAAAG  
 TAGTACAAATTGAACCACTA---GGAGTAGCACCTACCAGGGCAAGGAGAAGAGTGGTG-----  
 -----CAGAGAGAAAAAAGAGCA---GTTGGA---ATGGGAGCT-----  
 GTGCTCATTGGGTTCTTAGGAGCA---GCAGGAAGCACTATG---GGCGCAGCGTCA---  
 GTAACGCTGACGGTACAG---GCCAGACAA---TTATTG---TCTGGCATAGTGCAACAGCAAAGC---  
 AATTTG---CTGAGG---GCTATAGAGGCTCAACAGCATCTGTTGAAACTCACAGTCTGGGGCATT  
 >KX907381  
 TTCTATTGTAATACATCAGGTCTGTTTAATAGCACTTGGTCTAACAGCACGCAGGCGTCAAATGACACAGAG-  
 -----  
 -----  
 TCAAATGACACTATAACTCTCCCATGCAGAATAAAGCAAATTATAAATATGTGGCAGAGAGTAGGACAAGCAA  
 TGTATGCCCCCTCCCATCCAAGGAATAATAAACTGTATATCAAAT---  
 ATTACAGGACTAATATTAACAAGAGATGGTGGAATAACAATGGA-----  
 -----  
 -----  
 ACTGAAACCTTCAGACCTGGAGGAGGAGACATGAGGGACAATTGGAGAAGTGAATTATATAAGTATAAAGTAG  
 TAAAAATTGAACCACTA---GGAGTAGCACCCACCAGGGCAAAGAGAAGAGTGGTG-----  
 -----GAGAGAGAAAAAAGAGCA---GTAGGA---ATAGGAGCT-----  
 GTCTCTTTGGGTTCTTAGGAGCA---GCAGGAAGCACTATG---GGCGCGGCGTCA---  
 ATAACGCTGACGGTACAG---GCCAGACAA---TTATTG---TCTGGTATAGTGCAACAGCAAAGC---  
 AATTTG---CTGAGG---GCCATAGAGGCTCAACAACAACCTGTTGAAACTCACAGTCTGGGGCATC  
 >KX907386  
 TTCTATTGTAATACATCAAACCTGTTTAATGACACTTGGCCTATGTCAAATAACACGGAG-----  
 -----  
 -----  
 TCAGATGACAACATAACCCTCCAATGCAGGATAAAGCAAATTATAAATATGTGGCAGAGAGCAGGACAAGCAA  
 TGTATGCCCCCTCCCATTCAGGAAACATAACATGTATATCAAAT---  
 ATTACAGGACTACTGTTAACAAGAGATGGTGGGGGGAATAGCAGT-----  
 -----  
 -----  
 ACTGGTAATGAAACCTTCAGACCTGGAGGAGGAAATATGAAGGACAATTGGAGAAGTGAATTATATAAGTATA  
 AAGTAGTACAACCTGAACCCCTA---GGAGTAGCACCTACCAGGGCAAGAAGAAGAGTGGTG-----  
 -----CAGAGAGAAAAAAGAGCAGTAGTTGGA---CTGGGAGCT-----  
 ---GTTTTATTGGGTTCTTAGGAGCA---GCAGGAAGCACTATG---GGCGCGGCGTCA---  
 ATAACGCTGACGGTACAG---GCCAGACAA---TTATTG---TCTGGTATAGTGCAACAGCAAAGC---  
 AATTTG---CTGAGG---GCTATAGAGGCTCAACAGCATATGTTGAAACTCACAGTCTGGGGCATT  
 >KX907429  
 TTCTATTGCAACACATCAGGTTTGTTTAATAGCACTTGGGATATCAATGACACTGCCAGCGTGCAGGTGTCAA  
 ATGGCACG-----  
 -----

AAGTCAAACAGCACTATAACTCTCCAATGCAGAATAAAGCAAATTATAAATATGTGGCAAAGAGTAGGGCAAG  
 CAATATATATGCCCCCTCCCATCCAAGGAATGATAAGGTGTGTATCAAAT---  
 ATTACAGGACTAATATTAACAAGAGATGGTGGGAATGATAGCAGG-----  
 -----  
 -----  
 ACAAATGAAACCTTCAGACCTGGAGGAGGAGATATGAGGGACAATTGGAGAAGTGAATTATATAAGTATAAGG  
 TAGTAAACCTTGAGCCATTA---GGAATAGCACCCAACAGGGCAAAGAGAAGAGTGGTG-----  
 -----GAGAGAGAAAAAAGAGCA---GTTGGA---ATAGGAGCT-----  
 GTCCTCTTTGGGTTCTTGGGAGCA---GCAGGAAGCACTATG---GGCGTGGCGTCA---  
 ATGACGCTGACGGTACAG---GCCAGACAA---TTATTG---TCTGGCATAGTGCAACAGCAAGGC---  
 AATTTG---CTGAGG---GCTATAGAGGCTCAACAGCATCTGTTGAAACTCACAGTCTGGGGCATT  
 >HQ615972  
 TTTTATTGTAACACATCAGGCCTGTTTAATAGCACTTGGAGTTTTAATAGCACTGGAAATAATTACAGCATGA  
 ATAGCACCAAT-----  
 -----GACACT-----  
 ATAACCTAACGACACTATAATTCTCCAATGTAGAATAAAGCAAATTATAAATATGTGGCAGAGAGTAGGACAGG  
 CAATGTATGCCCCCTCCCATTCGAGGAGTAATAAGGTGTGAATCAAAC---  
 ATTACAGGACTAATATTAACAAGAGATGGAGGTAATAATGGGTCA-----  
 -----  
 -----  
 AATGAAATCTTCAGACCTGGAGGAGGAGATATGAGGGACAATTGGAGAAGTGAATTATATAAATATAAAGTAG  
 TAAAAATTGAGCCACTA---GGAGTAGCACCCACCAAGGCAAAAAGAAGAGTGGTG-----  
 -----GAGAGAGCAAAAAGAACA---GTAGGA---CTGGGAGCT-----  
 GTCTTCCTTGGGTTCTTAGGAGCA---GCAGGAAGCACTATG---GGCGCAGCGTCA---  
 ATAACGCTGACGGCACAG---GCCAGACAA---TTATTG---TCTGGCATAGTGCAACAGCAAAGC---  
 AATTTG---CTGAGG---GCTATAGAGGCTCAACAGTATCTGTTGAAGCTCACAGTCTGGGGCATT  
 >HM204625  
 TTCTATTGTGACACATCAGGCCTGTTTGATAGCCAGGCAAATAGA-----  
 -----  
 -----  
 ACAAATGACACTATAACTCTCCAATGCAGAATAAAGCAAATTATAAATATGTGGCAGAGAGTAGGACAAGCAA  
 TGTATGCCCCCTCCCATTAAGGAGTAATAAATTGTACATCACAT---  
 ATTACAGGATTAATATTAACAAGAGATGGTGGTAATGATACAACT-----  
 -----  
 -----  
 GAAACCTTCAGACCTGGAGGAGGAGATATGAGGGACAATTGGAGAAGTGAACCTATATAAGTATAAAGTAGTAA  
 AAATTGAGCCACTA---GGAGTAGCACCCACCAGGGCAAGGAGAAGAGTGGTG-----  
 -----GGGAGAGAAAAAAGAACA---GTTGGA---CTAGGAGCT-----  
 GTCCTCTTTGGGTTCTTAGGAGCA---GCAGGAAGCACTATG---GGCGCGGCGTCA---  
 ATAACGCTGACGGTACAG---GCCAGACAA---TTATTG---TCTGGCATAGTGCAACAGCAAAGC---  
 AATTTG---CTGAAG---GCTATAGAGGCTCAACAGCATATGTTGAGACTCACGGTCTGGGGCATT  
 >KY658699  
 TTCTATTGTAACACATCAGGCCTGTTTGATAACAACACGCTGACAAATACA-----  
 -----  
 -----  
 ACGCAGGAAAATATAACTCTCCCATGCAGAATAAAGCAAATTATAAATATGTGGCAGAGAGCAGGACAAGCAA  
 TATATGCCCCCTCCCATTAAGGAGTAATAAAGTGTGAATCAAAT---  
 ATTACAGGATTAATATTAACAAGAGATGGTGGTAATACTAATGATAGCGAT-----  
 -----  
 -----  
 GAAATTGAAACCTTCAGACCTGGAGGAGGAGATATGAGGGACAATTGGAGAAGTGAACCTATATAAGTATAAAG  
 TAGTAAAAATTGAGCCACTA---GGAGTAGCACCCACCAAGGCAAGGAGAAGAGTGGTG-----  
 -----GGGAGAGAAAAAAGAGCA---GTTGGA---ATAGGAGCT-----  
 GTCCTCTTTGGGTTCTTAGGAGCA---GCAGGAAGCACTATG---GGCGCGGCGTCA---  
 ATAACGCTGACGGTACAG---GCCAGACAA---TTATTG---TCTGGCATAGTGCAAGCAGCAAAGC---  
 AATTTG---CTGCAG---GCTATAGAGGCTCAACAGCATATGTTGAGACTCACGGTCTGGGGCATT  
 >AF361876  
 TTCTATTGTAATACAACAGACCTGTTTAATAGCACCAGGTACCGGGTTAATAGCACTTGGAAATATGCAGGGGT  
 CAAATAGT-----  
 -----ACG---

GAGTCCAATGACACTATAACTCTCCAATGCAGAATAAAGCAAATCATAAATATGTGGCAGAGAGCAGGACAAG  
CAATGTATGCCCCCTCCCATTTGAAGGAAACATAACATGTATGTCAAAC---  
ATTACAGGACTACTGTTAACAAGAGATGGTGGGAATAATAACAGT-----  
-----  
-----  
ACAAATGAAACCTTCAGACCTGAAGGAGGAGATATGAGGGACAATTGGAGAAGTGAATTATATAAGTATAAAG  
TAGTAAACTTGAACCACTA---GGAGTAGCACCTACCAGGGCAAAAAGAAGAGTGGTG-----  
-----GAAAGAGAAAAAAGAGCA---GTTGGA---CTGGGAGCT-----  
GTCTTCCTTGGGTTCTTAGGAGCA---GCAGGAAGCACTATG---GGCGCGGCGTCA---  
ATAACGCTGACGGTACAG---GCCAGAAAT---TTATTG---TCTGGTATAGTGCAACAGCAAAAC---  
AATTTG---CTGAGG---GCTATAGAGGCTCAACAGCATATGTTGAAACTCACGGTCTGGGGCATT  
>AF361879  
TTCTATTGTAATACTTCAGGCCTGTTTAATAGCACTTGGAACATTACCAGCACACAGAAGTCAAATAGCACGG  
AG-----  
-----  
TCAATAATGACACTATAACTCTCCAATGCAGAATAAAGCAAATTATAAATATGTGGCAGAGAGTAGGACAAG  
CAATGTATGCCCCCTCCCATCCCAGGAGCAATAGGGTGTAATCAAAC---  
ATTACAGGACTATTGTTAACAAGAGATGGTGGGGAGAATAACAGT-----  
-----  
-----  
GAAAAATGAAACCTTCAGACCTGGAGGAGGAAATATGAGGGACAATTGGAGAAGTGAATTATATAAGTATAAAG  
TAGTAAACTTGAACCACTA---GGAGTAGCACCTACCAAGGCAAAAAGAAGAGTGGTG-----  
-----GAGAGAGAAAAAAGAGCA---GTTGGA---CTAGGAGCT-----  
GTCTTCATTGGGTTCTTAGGAGCA---GCAGGAAGCACTATG---GGCGCGGCGTCA---  
ATAACGCTGACGGTACAG---GCCAGACAA---TTATTG---TCTGGCATAGTGCAACAGCAAAGC---  
AATTTG---CTGAAG---GCTATAGAGGCTCAACAACAATTGTTGAGACTCACGGTCTGGGGCATT  
>HM215279  
TTCTATTGCAATACATCAGACCTATTTAATGGCACGTTTAATGAGACATCAGGCCAGTTTAAAT-----  
-----  
-----  
AGCACATTTAATAGTACACTCCAGTGCAGAATAAAACAAATTATAAACATGTGGCAGGAAGTCGGACAAGCAA  
TGTATGCCCCCTCCCATTCAGGAAGCATAACATGTATATCGAAT---  
ATCACAGGACTAATATTAACAAGAGATGGTGGGAATACTAACAGT-----  
-----  
-----  
ACAAAGGAAACCTTCAGACCTGGAGGAGGAAATATGAGGGACAATTGGAGAAGTGAATTATATAAGTATAAAG  
TAGTAAAAATTGAACCACTA---GGAGTAGCACCCACCAAGGCAAGGAGAAGAGTGGTG-----  
-----GAGAGAGAAAAAAGAGCA---GTAGGA---ATAGGAGCT-----  
GTCTTCATTGGGTTCTTAGGCGCA---GCAGGAAGCACTATG---GGCGCGGCGTCA---  
ATAACGCTGACGGTACAG---GCCAGACAA---TTATTG---TCTGGTATAGTGCAACAGCAAAGC---  
AATTTG---CTGAGG---GCTATAGAGGCTCAACAGCATCTGTTGAAACTCACGGTCTGGGGCATT  
>HM215315  
TTCTATTGTGATACATCAGCCCTGTTTAATAGCACTTGGAAATAACAGCACGAGGAACAGCATGGAGTGG---  
-----  
-----  
TTAAATGACACTATAACTCTCCAATGCAAAATAAAGCAAATTATAAATATGTGGCAGAGAGCAGGACAAGCTA  
TGTACGCCCCCTCCCATCCAAGGAACAATAAGTTGTAACCTCAAAC---  
ATTACAGGACTACTGTTAACAAGAGATGGGGGGAAGGACACCACA-----  
-----  
-----  
AATGAAACCTTTAGACCTGGAGGAGGAGACATGAGGAACAATTGGAGAAGTGAATTATATAAGTATAAAGTAG  
TAAACTTGAACCACTA---GGAGTAGCACCTACCAAGGCAAAAAGAAGAGTGGTG-----  
-----GAGAGAGAAAAAAGAGCA---GTTGGA---ATAGGAGCT-----  
GTCTTCATTGGGTTCTTAGGAGCA---GCAGGAAGCACTATG---GGCGCGGCGTCA---  
ATAACGCTGACGGTACAG---GCCAGACAA---TTATTG---TCTGGTATAGTGCAACAGCAAAGC---  
AATTTG---CTGAGG---GCTATAGAGGCTCAACAGCAACTGTTGAAACTCACGGTCTGGGGCATT  
>HM215322  
TTCTATTGTGATACATCAGACCTGTTTAATAGCACTTGGAAATTATACTAGTATCACGTCAAATAGCACGGAG-  
-----  
-----

TCAAATGACACTATAACTCTCCAATGCAGAATAAAGCAAATTATAAATATGTGGCAGAGAGAAGGACAAGCAA  
TGTATGCCCCCTCCCATTGAAGGAAACATAACATGTATGTCAAAC ---  
ATTACAGGACTACTGTTAGTAAGAGATGGTGGGATTAATAACAGG-----  
-----  
-----  
ACAGATGAAATCTTCAGACCTGGAGGAGGAAATATGAAAGACAATTGGAGAAGTGAATTATATAAGTATAAAG  
TAGTAAAACTTGAACCACTA---GGAGTAGCACCTACCAGGGCAAAAAGAAGAGTGGTG-----  
-----GAGAGAGAAAAAAGAGCA---GTTGGA---CTGGGAGCT-----  
GTCTTCATTGGGTTCTTAGGAGCA---GCAGGAAGCACTATG---GGCGCGGCGTCA---  
ATAACGCTGACGGTACAG---GCCAGAAAT---TTATTG---TCTGGTATAGTGCAACAGCAAAAC---  
AATTTG---CTGAGG---GCTATAGAGGCTCAACAGCATATGTTGAAACTCACAGTCTGGGGCATT  
>AF484491  
TTCTATTGTAATACATCAGGTTTGTTTAATAGCTCCTGGGCAAATAACACTGACAATAGCAATAACACTGTCA  
AT-----  
-----  
AGCACGGACATTATAACTCTCCCATGCAGAATAAAGCAAATTGTAAATATGTGGCAAAGAACAGGACAAGCAA  
TGTATGCCCCCTCCCATCAAAGGAGTGATAAGGTGTGAATCAAAT ---  
ATTACAGGACTACTATTAACAAGAGATGGTGGGGCTACTAGCATT-----  
-----  
-----  
ATAAATGAAACCTTCAGACCTGGAGGAGGAAATATGAGGGACAATTGGAGAAGTGAATTATATAAGTATAAAG  
TAGTACAAATTGAACCACTA---GGAGTAGCACCCACCAGGGCAAGGAGAAGAGTGGTG-----  
-----GAGAGGGGAAAAAAGAGCA---ATTGGA---ATAGGAGCT-----  
GTATTCCTTGGGTTCTTAGGAACA---GCAGGAAGCACTATG---GGCGCGGCGTCA---  
ATAACGCTGACGGTACAG---GCCAGACAA---TTACTG---TCTGGTATAGTGCAACAGCAAAGC---  
AATTTG---CTGAGG---GCTATAGAGGCTCAACAGCATATGTTGAAACTCACGGTCTGGGGCATT  
>AF484501  
TTTTATTGTAACACATCAGGCCTGTTTAATCACACTTACACTTGGTATAATGGCAGCTTGCAGGAGTCAAATA  
GC-----  
-----  
ACGGGGTCAGACAACATAACTCTCCAATGCAGAATAAAGCAAATTATAAATATGTGGCAGAGAGTGGGACAAG  
CTATGTATGCCCCCTCCCATTGAGGAGTAATACAGTGTGAATCAAAC ---  
ATTACAGGACTAATATTAACAAGAGATGGTGGAAATAATAATGAT-----  
-----  
-----  
AATACAACCTGAAATCTTCAGACCTGGAGGAGGAGATATGAGGGACAATTGGAGAAGTGAATTATATAAGTATA  
AAGTAGTAACAATTGAACCACTA---GGAGTAGCACCCACCAGGCAAGGAGAAGAGTGGTG-----  
-----GAGAGAGAAAAAAGAGCA---GTGGGA---ATAGGAGCT-----  
---GTCCTCCTTGGGTTCTTAGGAACA---GCAGGAAGCACTATG---GGCGCGGCGTCC---  
ATGACGCTGACGGTACAG---GCCAGACAA---TTATTG---TCTGGCATAGTGCAACAGCAAAGC---  
AATTTG---CTGAAG---GCTATAGAGGCTCAACAGCAACTGTTGAGACTCACGGTCTGGGGCATT  
>FJ647147  
TTCTATTGCAATACATCAGGCCTGTTTAACAGCACTTGGGAGTTTAACAACCCTTTTAATGAAACTGAGTGGC  
CA-----  
-----  
CAAAATAAACTATAATTCTCCAATGCAGAATAAAGCAAATTGTAAATATGTGGCAGAGAGTAGGACAGGCGA  
TGTATGCCCCCTCCCATCAAAGGAGTAATAAGGTGTAAATCAACC ---  
ATTACAGGACTATTCTTAACAAGAGATGGTGGAAATACTAGCAGT-----  
-----  
-----  
ACAAATGAGACCTTCAGGCCTGGAGGAGGAGATATGAGGGACAATTGGAGAAGTGAATTGTATAAATATAAAG  
TAATAAAAATTGAACCAATA---GGAGTAGCACCCACCAGGGCAAAAAGAAGAGTGGTG-----  
-----GAAAGAGAAAAAAGAGCA---GTTGGA---CTGGGAGCT-----  
GTTTTCTTGGGTTCTTAGGAGCA---GCAGGAAGCACTATG---GGCGCAGCGTCA---  
ATAACGCTGACGGTACAG---GCCAGACAA---TTATTG---TCTGGCATAGTGCAACAGCAAAGC---  
AATTTG---CTGAGG---GCTATAGAGGCTCAACAGCATCTGTTGAAACTCACAGTCTGGGGCATT  
>KT183118  
TTCTACTGCAATACATCAGGCCTGTTTAATGACACATTTATGCCCAATAATACGGCTAATAGTACTAAGAATG  
AAACA-----  
-----

CAGGAAAAGAATATAACTATCTCATGCAAAATAAAACAAATTATAAGAATGTGGCAAAGAGTAGGACAAGCAA  
TGTATGCCCCCTCCCATTTGAAGGATTAATAAAATGTGAATCAAAC---  
ATTACAGGAATACTATTGACAAGAGATGGTGGGAACAATACTAAC-----  
-----  
-----  
AGTACAGAGGTCTTCAGACCTGGAGGGGGAAATATGAAGGACAAGTGGAGAAGTGAATTATATAATTATAAGG  
TAGTAAAAATTGAACCACTA---GGAGTAGCACCCACCGGGGCAAGGAGAAGAGTGGTG-----  
-----GAGAGAGAGAAAAAGAGCAGTAGTTGGA---CTGGGAGCT-----  
GTCTTCCTTGGGTTCTTAGGAGCA---GCAGGAAGCACTATG---GGCGCGGCGTCA---  
TTAACGCTGACGGTACAG---GCCAGGCAA---TTATTG---GCTGGCATAGTGCAACAGCAAAGC---  
AATTTG---CTGCAG---GCTATAGAGGCTCAACAACATATGTTGAAACTCACTGTCTGGGGCATT  
>GU201611  
TTCTATTGTAACACAACAGACTTGTTTAATAGCAGTTGGGCTAACAATGGCAGCAGGCTGGGGCCAAATGGTA  
CA-----  
-----  
GAGTCAGACATTATAACTATCCAATGCAGAATAAAGCAAATTATAAATATGTGGCAAAGAGTAGGACAAGCAA  
TATATGCCCCCTCCAGAAAAAGGAGTAATAAGGTGTGACTCAAAC---  
ATTACAGGACTGATATTAACAAGAGATGGTGGTAGCAATAACACA-----  
-----  
-----  
AATAATGAAACCTTCAGACCTGGAGGAGGAGACATGAGGGACAATTGGAGAAGTGAATTATATAAGTATAAAG  
TAGTAAAACTTGAACCACTA---GGGGTAGCACCTACCCCGGCAAAAAGAAGAGTGGTG-----  
-----GAGAGAGAGAAAAAGAGCA---GTTGGA---CTAGGAGCT-----  
GTTTTTCATTGGGTTCTTAGGAGCA---GCAGGAAGCACTATG---GGCGCGGCGTCA---  
GTAACGCTGACGGTACAG---GCTAGACAA---TTATTG---TCTGGCATAGTGCAAGCAGCAAAGT---  
AATTTG---CTGAGG---GCTATAGAGGCTCAACAACATATGTTGAAACTCACGGTCTGGGGCATT  
>KF114883  
TTCTATTGCAATACATCAAATCTATTCAATAGTACATACAAT-----  
-----  
-----  
GAAACAACCATCACAATTCAGTGCAGAATAAAACAATTTATAAACATGTGGCAGGGGGTAGGACGAGCAATGT  
ATGCCCCCTCCCATTTGAAGGAAAAATAACATGTAACCTCAAAT---  
ATCACAGGGCTACTACTGACCCGTGATGGAGGCATAAACACAACAGAAAACGGC-----ATAAACACA---  
ACA-----  
-----  
GGAAAAGAGATATTTCAGACCTGAGGGAGGAAATATGAAAGACAATTGGAGAAATGAATTATATAAATATAAAG  
TGGTGGAATTAAGCCATTG---GGAATAGCACCCACTGAGGCGAAAAGAAGAGTGGTG-----  
-----GAAAGAGAAAAAAGGGCA---GTGGGA---CTAGGAGCT-----  
GTGTTCTTGGGTTCTTGGGAGCA---GCAGGAAGCACTATG---GGCGCGGCGTCA---  
ATAACGCTGACGGTACAG---GCCAGACAA---CTGTTG---TCTGGTATAGTGCAACAGCAAAAC---  
AATTTG---CTGAGA---GCTATAGAGGCGCAACAGCATATGTTGCAACTCACGGTCTGGGGCATT  
>GU329121  
TTCTATTGCAACACATCAGGCCTGTTTAATAGCAGTTGGAAAATTGAGAATGGCAATGCCACGCTAAATAGCA  
CG-----  
-----  
TGGCCAAATGGCACCATAACTCTTCAATGCAGAATAAAGCAAATTATAAATATGTGGCAAAGGACAGGACAAG  
CAATATATGCCCCCTCCCATCCAAGGAGTAATAAGGTGTGACTCAAAC---  
ATTACAGGACTACTATTAACAAGAGATGGTGGGGATAATAATGGT-----  
-----  
-----  
ACAGAAACCTTCAGACCTGGAGGAGGAGATATGAGGGACAATTGGAGAAGTGAGTTATATAAATATAAAGTAG  
TAAAAATTGAGCCACTA---GGAGTAGCACCCACCAGGGCAAAGAGAAGAGTGGTG-----  
-----GAGAGAGAAAAAAGAGCA---GTAGGA---ATAGGAGCT-----  
GTGTTCTTGGGTTCTTAGGAGCA---GCAGGAAGCACTATG---GGCGCGGCGTCA---  
ATAACGCTGACGGTACAG---GCCAGACAA---TTATTG---TCTGGCATAGTGCAACAGCAAAGC---  
AATTTG---CTGAGG---GCTATAGAGGCTCAACAGCATATGTTGAAACTCACGGTCTGGGGCATT  
>JF680922  
TTCTATTGCAACACATCAGGACTGTTTAATAGCACTTGGTTTCAGAATGGCACTAACATTACACAGGGG----  
-----  
-----

TCAGATGGCAATATAACTCTTCATTGCAGAATAAAGCAAATCATAAATATGTGGCAGAGAGCAGGACAAGCAA  
TATATGCCCCCTCCCATCAAGGGAGTAATAAAGTGTGTATCAAAC ---  
ATTACAGGACTAATATTAACAAGAGATGGTGGTACCAATGTGACG-----  
-----  
AATGGAACCTGAAATCTTCAGGCCTGGAGGGGGAGATATGAAGGATAATTGGAGAAGTGAATTATATAAATATA  
AAGTGGTAGAAATTAAACCATTA---GGAGTAGCACCCACCAAGGCAAAAAGGAGAGTGGTG-----  
-----GGAAGAGAAAAAAGAGCA---GTAGGA---ATAGGAGCT-----  
---GTGTTCTTGGGTTCTTGGGAGCA---GCAGGAAGCACTATG---GGCGCAGCGTCA---  
ATAACGCTGACGGTACAG---GTCAGACAA---TTATTG---TCTGGCATAGTGCAACAGCAAAAC---  
AATTTG---CTGAGG---GCTATAGAGGCTCAACAGCATCTGTTGAGACTCACAGTCTGGGGCATT  
>AF457056  
TTCTATTGTGATACATCAGGCCTGTTTAATTACACGTTTTATCCCAATGGCAGCTTGCAGGGGGAATCAAATG  
AC-----  
-----  
ACGCAGGAGAAGATAACTCTCCCATGCAGAATAAAGCAAATTATAAATATGTGGCAGAGAACAGGGCAAGCAA  
TATATGCCCCCTCCCATCCAAGGAGTAATAAGATGTGTATCAAAC ---  
ATTACAGGAATACTATTAACAAGAGATGGTGGAGATACTGGGGAC-----  
-----  
AACAACTACTGAAACCTTCAGACCTGGAGGAGGAGATATGAGGGACAATTGGAGAAGTGAATTATATAAGTATA  
AAGTAGTACAAATTGAACCACTA---GGAGTAGCACCCACCAGGGCAAGGAGAAGAGTGGTG-----  
-----GGAAGAGAAAAAAGAGCA---GTTGGA---ATAGGAGCT-----  
---GTTTTCTTGGGTTCTTAGGAGCA---GCAGGAAGCACTATG---GGCGCGGCGTCA---  
ATAACGCTGACGGTACAG---GCCAGACAA---TTGTTG---TCTGGTATAGTGCAACAGCAAAGC---  
AATTTG---CTGAGG---GCTATAGAGGCTCAACAACATCTGTTGAAACTCACGGTCTGGGGCATT  
>KT022400  
TTCTATTGTAACACAGCAGGCCTGTTTAATAGCACTTGGAAATAGTAGCACTTATAGTAACAATGCCAGCGGGC  
AGGAG-----  
-----  
TCAAATGACACTATAACTCTCCAATGCAGAATAAAGCAAATTATAAATATGTGGCAGAGAGCAGGACAAGCAA  
TATATGCCCCCTCCCATCGAAGGAGTAATAAAGTGTGTATCAAAC ---  
ATTACAGGACTAATATTAACAAGAGATGGTGGGAATGCTAACAGT-----  
-----  
ACAAATGAAACCTTCAGACCTGGAGGAGGAGATATGAGGGACAATTGGAGAAGTGAATTATATAAGTATAAAG  
TAGTAGAACTTGAACCACTA---GGAGTAGCACCCACCAAGGCAAGAGAAGAGTGGTG-----  
-----GAGAGAGAAAAAAGAGCA---GTTGGA---CTGGGAGCT-----  
GTTCTCATTGGGTTCTTAGGAGCA---GCAGGAAGCACTATG---GGCGCAGCGTCA---  
GTGACGCTGACGGTACAG---GCCAGACAA---CTATTG---TCTGGCATAGTGCAACAGCAAAGC---  
AATTTG---CTGATG---GCTATAGAGGCTCAACAGCAACTGTTGAAACTCACAGTCTGGGGCATT  
>KT022401  
TTCTATTGCAACACAAATGAATTGTTTAATAGCACTTGGTTTTTGAACACTACTAATACCAGCACGTGGGAGT  
CAAATGGG-----  
-----  
ACGAGGTCAGAAAATATAACTCTCAAATGCAGAATAAAGCAAATTATAAATATGTGGCAGAGAGCAGGACAAG  
CAATGTATGCCCCCTCCCATCCGAGGAGTAATAAACTGTACATCAAAC ---  
ATTACAGGACTAATATTAACGAGAGATGGTGGGGTTAATAACAAT-----  
-----  
ACAAATGAAATCTTCAGACCTGGAGGAGGAGATATGAGGGACAATTGGAAAAGTGAATTATATAAATATAAGG  
TAGTAAAAATTGAACCACTA---GGAGTAGCACCCACCAAGGCAAGAGAAGAGTGGTG-----  
-----GAGAGAGAAAAAAGAGCA---GTTGGA---ATAGGAGCT-----  
GTATTCATTGGGTTCTTAGGAGCA---GCAGGAAGCACTATG---GGCGCGGCGTCA---  
ATAACGCTGACGGTACAG---GCCAGACAA---TTATTG---TCTGGCATAGTGCAACAGCAAAGC---  
AATTTG---CTGAAG---GCTATAGAGGCTCAACAGCATCTGTTGAGACTCACGGTCTGGGGCATT  
>KT022414  
TTCTATTGCAATACATCAAGACTGTTTAATAGCATTTGGGAGCATAATAGCACTTGGACCAATACACGGGGA-

TCAAATAGCACAATAACTCTCCCATGCAGAATAAAGCAAATTATAAATATGTGGCAGAGAGTAGGACAAGCAA  
TGTATGCTCCTCCCATCGCAGGAGCAATACAGTGTGCATCAAAT ---  
ATTACAGGACTAATATTAACAAGAGATGGTGGAAATCATAACAGG-----  
-----  
-----  
ACAAATGAAACCTTCAGACCTGGAGGAGGAGATATGAGGGACAATTGGAGAAGTGAATTATATAAGTATAAAG  
TAGTAAAAAATTGAACCACTA---GGAGTAGCACCCACCAGGGCAAAGAGAAGAGTGGTG-----  
-----GAGAGAGAAAAAAGAGCA---GTTGGA---CTAGGAGCT-----  
GTTTTTCATTGGGTTCTTAGGAGCA---GCAGGAAGCACTATG---GGCGCAGCGTCA---  
GTGACGCTGACGGTACAA---GCCAGGCAA---TTACTG---TCTGGCATAGTGCAACAGCAAAGC---  
AATTTG---CTGAGG---GCTATAGAGGCTCAACAGCACCTGTTGAGACTCACGGTCTGGGGCATT  
>KU749430  
TTCTATTGCGATACAGCAAACTGTTTAATAGCACGTGGGAGTACAATGGCACTGAATACAACATGACCAAAG  
GG-----  
-----  
TCAAATGGAAATCTGACTCTCCCATGCAGAATAAAACAAATTGTACACATGTGGCAGAGAGTAGGACAAGCAA  
TGTATGCCCCCTCCCATCCCGAGGAATAATAAAGTGTGAATCAAAC---  
ATCACAGGACTAATATTAACAAGAGATGGTGGGAAGAATACCAGT-----  
-----  
-----  
AATGAGACCTTCAGACCTGGAGGAGGAGATATGAGGGATAATTGGAGAAGTGAATTATATAAGTATAAAGTAG  
TAAAACTTGAACCACTA---GGAGTAGCACCCACCGCAGCAAGGAGAAGAGTGGTG-----  
-----CAGAGAGAAAAAAGAGCA---GTTGGA---ATGACAGCT-----  
GTCTTCCTTGGGTTCTTAGGAGCA---GCAGGAAGCACTATG---GGCGCGGCGTCA---  
ATAACGCTGACGGTACAG---GCCAGACAA---CTGTTG---TCTGGCATAGTGCAACAGCAAAGC---  
AATTTG---CTGAAG---GCTATAGAGGCTCAACAGCATATGTTGAGACTCACGGTCTGGGGCATT  
>KF716470  
TTCTATTGTAATACATCAGGCCTATTTAATAGTACTTGGCATTGGAATAATACTGATACTAATGGCACCAATG  
GT-----  
-----  
ACTAATGATACTATAACTCTCCCATGCAGAATAAAGCAAATTATAAATATGTGGCAGAGGGTAGGACAAGCAA  
TATATGCCCCCTCCCATCCCGAGGGTAATAAAATGTGTATCAGAC---  
ATTACAGGACTCCTATTAACAAGAGATGGTGGGGTCAATAATAGC-----  
-----  
-----  
AGCAATAATGAAACCTTCAGACCTGGAGGAGGGGATATGAGGGACAATTGGAGAAGTGAATTATATAAGTATA  
AGGTAGTAAAAAATTGAACCACTA---GGAGTAGCACCCACCAAGGCAAAGAGAAGAGTGGTG-----  
-----GAGAGAGAAAAAAGAGCA---GTTGGA---CTGGGAGCT-----  
---GTCTTCATTGGGTTCTTGGGAGCA---GCAGGAAGCACTATG---GGCGCGGCGTCA---  
ATAACGCTGACGGTACAG---GCCAGGCAA---TTATTG---TCTGGCATAGTGCAACAGCAAAGC---  
AATTTG---CTGAGG---GCTATAGAGGCTCAACAACATCTGTTGAAACTCACAGTCTGGGGCATT  
>KU921717  
TTCTATTGTAACACATCAAGCCTGTTTAATAGCACTTGGAAATAGCACTTGGAAATGGCAATGACAGCAGCACA-  
-----  
-----  
GAAAAATGGCACTATAACTTTACAATGCAAAATAAAGCAAATCATAAATATGTGGCAGAGAGTAGGACAAGCAA  
TGTATGCCCCCCCCATTCAAGGAGTCATAAATTGTAAATCAAAC---  
ATTACAGGATTGATATTAACAAGGGATGGTGGAAACACTACCAGC-----  
-----  
-----  
AGTGAGGAAATTTTCAGACCTGGAGGGGGAGATATAAGGGATAATTGGAGAAGTGAATTATATAAGTATAAAG  
TAGTAAAAAATTGAGCCACTA---GGAGTAGCACCCACCAGGGCAAAGGAGAAGAGTGGTG-----  
-----AAGAGAGAAAAAAGAGCA---GTTGGA---CTGGGAGCT-----  
TTTTTCCTTGGGTTCTTAGGAGCA---GCGGGAAGCACTATG---GGCGCGGCGTCA---  
ATAACGCTGACGGTACAG---GCCAGGCAA---TTATTG---TCTGGCATAGTGCAACAGCAAAGC---  
AATTTG---CTGAGG---GCTATAGAGGCTCAACAACATCTGTTGAGACTCACGGTCTGGGGCATT  
>KU921730  
TTCTATTGTAATACATCAAACTGTTTAATAGCACTTGGTATAATTCCACTAATACCCTTGGGAGGATGAC-  
-----  
-----

GGCACACAGAATATAACTCTCCCATGCAGAATAAAGCAAATTATAAATCTGTGGCAGAGAACAGGACGAGCAA  
TGTATGCCCCCTCCCATCCGAGGAGTAATACAGTGTAGGTCAAAT---  
ATTACAGGGCTAATATTAACAAGAGATGGTGGGAATGATAATGATACC-----  
-----  
-----  
AGTAACAATGAAACCTTCAGACCTGGAGGTGGAAATATGAGGGACAATTGGAGAAGTGAATTATATAAGTATA  
AAGTAGTACAAATTGAACCAATA---GGAATAGCACCCACCAAGGCAAGGAGGATAGTGGTA-----  
-----GGGAGAGAAAAAAGAGCA---GTTGGA---CTAGGAGCT-----  
---GTCTTCCTTGGGTTCTTAGGAGCA---GCCGGAAGCACTATG---GGCGCAGCGTCA---  
ATGACGCTGACGGTACAG---GCCAGACAG---TTATTG---TCTGGCATAGTGCAACAGCAAAGC---  
AATTTG---CTGAGG---GCTATAGAGGCTCAACAGCATCTGTTGAAACTCACAGTCTGGGGCATT  
>KU921766  
TTCTACTGCAATACATCAAATCTGTTTAATGGTACATGGATAGTAAATAATACAAATAGTACAAATAATGCAG  
ATACA-----  
-----  
TCAAAATAGTAATATTACACTCCAATGCAGAATAAAACAAATTATAAACAGGTGGCAGGAAGTAGGAAAAGCAA  
TCTATGCCCCCTCCTATTGCAGGACTAATAAAATGTTTCATCAAAT---  
ATTACAGGAATATTGTTAAACAAGAGATGGTGGTGCAAGTCATAAT-----  
-----  
-----  
AATCAGAGTGAGACCCTCAGACCTGGAGGAGGAAATATGAAAGATAATTGGAGAAGTGAATTATACAAATATA  
AAGTAGTAAGGCTTGAACCAATA---GGTCTAGCACCCACCAGGGCAAAAAGAAGAGTGGTG-----  
-----GAAAGAGAAAAAAGAGCA---ATAGGA---CTGGGAGCT-----  
---ATGTTCCCTTGGGTTCTTGGGAGCA---GCAGGAAGCACAAATG---GGCGCAGCGTCG---  
GTGACGCTGACGGTACAG---GCCAGACAG---TTATTG---TCTGGCATAGTGCAACAGCAAAT---  
AATTTG---CTGAGG---GCTATAGAGGCGCAACAGCATATGTTGCAACTCACAGTCTGGGGCATT  
>AF075702  
TTCTATTGTAATACATCAGGCCTGTTTAATAGCACTTGGGTAAATGGCAGCAGGGAATCAAATAGCACA----  
-----  
-----  
GATAATGATACTATAACTCTCCCGTGTAGAATAAAGCAAATTATAAATATGTGGCAGAGAGTAGGACAAGCAA  
TGTATGCCCCCTCCCATCCGAGGAGTAATAAGGTGTGAATCAAAC---  
ATTACAGGATTAATATTAACAAGAGATGGTGGGAATAATACCAGT-----  
-----  
-----  
ACAAATGAAACCATCAGACCTGCAGGAGGAGATATGAGGGACAATTGGAGAAGTGAATTATATAAATATAAAG  
TAGTAAAAATTGAACCACTA---GGAGTAGCACCCACCAAGGCAAGGAGAAGAGTGGTG-----  
-----GAGAGAGAAAAGAGAGCA---GTTGGA---ATAGGAGCT-----  
GTGTTCCCTTGGGTTCTTAGGAGCA---GCAGGAAGCGCTATG---GGCGCAGCGGCA---  
GCAACGCTGACGGTACAG---GCCAGGCAA---TTATTG---TCTGGCATAGTGCAACAGCAAAGC---  
AATTTG---CTGAAG---GCTATAGAGGCTCAACAGCATCTGTTGAAACTCACGGTCTGGGGCATT  
>HQ659612  
TTTTATTGTAATACATCAGACATGTTTAATAGCACTTGGAAATTGGAATAGCAGTGCCAACATGATGGAGTCAA  
ATAGCACCAGC-----  
-GTGCAGGGGCCAAAT-----  
ATAACTGAGCAAAATATAACTCTCCAATGCAGAATAAAGCAAATTATAAATATGTGGCAGAGAGCAGGACAAG  
CAATATATGCCCCCTCCTATCAAAGGAGTAATAAGGTGTGAATCAAAC---  
ATTACAGGGCTAATATTAACAAGAGATGGGGGAAAAAGTAACAACACA-----  
-----  
-----  
AATAAATACTGAAACCTTCAGACCTACAGGAGGAGATATGAGGGACAATTGGAGAAGTGAATTATACAAATATA  
AAGTGGTGGAAATTAAACCATTA---GGAGTAGCACCCACTGAGGCAAAAAGGAGAGTGGTG-----  
-----AAGAGAGGAAAAAGAGCA---GTAGGA---ATAGGAGCT-----  
---GTATTCCCTTGGGTTCTTGGGAGCA---GCAGGAAGCACTATG---GGCGCAGCGTCA---  
ATAACGCTGACGGTACAG---GCCAGACAA---TTATTG---TCTGGCATAGTGCAACAGCAAAGC---  
AATTTG---CTGAGG---GCTATAGAGGCTCAACAGCATCTGTTGAAGCTCACAGTCTGGGGCATT  
>KX907397  
TTCTATTGTAATACATCAGGCCTGTTTAATAGCACGTGGAACAATAGCATGTGGAACAACATGCTGACTTGGGA  
ATGCC-----  
-----

ACGGGGAAGTACATTATGACTCTCCCATGTAAAATAAAACAAATTATAAATATGTGGCAGGGAGTAGGAAAAG  
CAATGTATGCCCCCTCCCATTTGAAGGACTAATTCAATGCTCATCAAAT---  
ATTACTGGACTATTATTAACAAGAGATGGGGGTGTAAATAATGAT-----  
-----  
-----  
AGTCAGAGTGAGACCTTCAGACCTGGAGGGGGAGATATGAGAGACAATTGGAGAAGTGAATTATACAAATATA  
AAGTAGTAAGAATTGAACCAATA---GGTCTGGCACCTACCAGGGCAAAAAGAAGAGTGGTG-----  
-----GAAAGAGAAAAAAGAGCA---ATAGGA---CTGGGAGCT-----  
---ATGTTCCCTTGGGTTCTTGGGAGCA---GCAGGAAGCACGATG---GGCGCAGCGTCA---  
CTGACGCTGACGGTACAA---GCCAGAGAG---TTATTG---TCTGGTATAGTGCAACAGCAAAAT---  
AATTTG---CTGAGA---GCTATAGAGGCGCAACAGCATCTGTTGCAACTCACTGTCTGGGGCATT  
>KX907350  
TTCTATTGCAATACATCAAACCTGTTTAAACGGCACTTGGAAATGGTAGCACTTGGGATAGCCCTTGAATAGGA  
ATAAC-----  
-----  
AGCAATGAAAATATAACACTCCAATGCAGAATAAAACAAATTATAAATATGTGGCAGAGAGCAGGACAAGCAA  
TGTATGCCCCCTCCCATCCAAGGAGTAATAAGGTGTGAATCAAAC---  
ATCACAGGACTACTATTAAACACGTGATGGAGGAGAAAAATAATAAT-----  
-----  
-----  
ACTACAGAGACATTTCAGGCCGGTAGGAGGAAATATGAAAAGACAACCTGGAGAAGTGAATTATATAAGTATAAAG  
TAGTAAAAAATTGAACCACTA---GGAGTAGCACCCACTAGGGCAAGGAGAAGAGTGGTG-----  
-----GAGAGAGAGAAAAAGAGCA---GTTGGA---ATAGGAGCT-----  
GTGTTCCCTTGGGTTCTTGGGAGCA---GCAGGAAGCACTATG---GGCGCAGCGTCA---  
ATAACGCTGACGGTACAG---GCCAGACAA---TTATTG---ACTGGCATAGTGCAACAGCAAAGC---  
AATTTG---CTGAGG---GCTATAGAGGCTCAACAGCAAAATGTTGAGACTCACAGTCTGGGGCATT  
>KX907351  
TTTTATTGTAACACATCAGGCTTGTTTAAATAGCTCTTGGTCTTGAATGGTACCAATAACACGGAGTCAGGTA  
AC-----  
-----  
ATAAATGTCAATATAACTCTCCCATGCAGAATAAAGCAAATTATAAATATGTGGCAGAGAGTAGGACAAGCAA  
TGTATGCCCCCTCCCATTCAGGAGTGATACAGTGTGTATCAAAC---  
ATTACAGGACTAATATTAAACAAGAGATGGTGGGAATAATAGCAGT-----  
-----  
-----  
ACAAATGAAATCTTCAGACCTGGAGGAGGAGATATGAGGGACAATTGGAGAAGTGAATTATATAAGTATAAAG  
TAGTAAGAATTGAACCATTA---GGAGTAGCACCCACTAAGGCAAAAAGGAGAGTGGTG-----  
-----GAGAGAGAAAAAAGAGCA---GTGGGA---ATAGGAGCT-----  
GTGTTCCCTTGGGTTCTTGGGAGCA---GCAGGAAGCACTATG---GGCGCAGCGTCA---  
ATAACGCTGACGGTACAG---GCCAGACAA---TTATTG---TCTGGTATAGTGCAACAGCAAAGC---  
AATTTG---CTGAGG---GCTATAGAAGCGCAACAGTACCTGTTGAAGCTCACGGTCTGGGGCATT  
>KX907353  
TTCTATTGTAACACATCAAAGTTGTTTGACAGCAGTTGGCCAAAAACAAATAGCACGGTGCAGGAGTCAAAT-  
-----  
-----  
AGCACAGACAATATAACGCTCCAATGTAGAATAAAGCAAATTATAAATATGTGGCAGAGAGTAGGACAAGCAA  
TGTATGCCCCCTCCCATTCAGGAGTAATAAGGTGTGAATCAAAC---  
ATTACAGGACTAATACTAACAAGAGATGGTGGAAAGTAATACCAAT-----  
-----  
-----  
GCAAGTGAAACCTTCAGACCTGGAGGAGGAGATATGAGGGACAATTGGAGAAGTGAATTATATAAGTACAAAG  
TAGTAAAAAATTGAACCACTA---GGAGTAGCACCCACCAGGGCAAGAGAAGAGTGGTG-----  
-----GAGAGAGAAAAAAGAGCA---GTTGGA---ATAGGAGCT-----  
GTATTTCATTGGGTTCTTAGGAGCA---GCAGGAAGCACTATG---GGCGCAGCGTCA---  
ATAACGCTGACGGTACAG---GCCAGACAA---TTATTG---GCTGGCATAGTGCAACAGCAAAGT---  
AATTTG---CTGAGG---GCTATAGAGGCTCAACAGCATCTGTTGAAACTCACGGTCTGGGGCATT  
>KX907419  
TTTTATTGTGACACATCAAACCTGTTTAAATAGCAATTGGACTGTGACTGACAGCGAACCGAAGCTAAATAGCA  
CGGAG-----  
-----

CCAAACGACAATATAACTCTCCAATGCAGAATAAAGCAAATTATAAGGATGTGGCAGAGAGTAGGACAAGCAA  
TGTATGCCCCCTCCCATCCCAGGAATAATAGAGTGTAATCAAAC---  
ATTACAGGACTAATACTAACAAGAGATGGTGGGCCTCCTAATACA-----  
-----  
-----  
ACTGAGACCTTCAGACCTGGAGGAGGAGATATGAGGGACAATTGGAGAAGTGAATTATATAAATATAAGGTAG  
TAAAAATTGAACCAATA---GGAGTAGCACCCACCGGGGCACGGAGAAGAGTGGTG-----  
-----GGGAGAGAAAAAAGAGCA---GTAGGA---ATAGGAGCT-----  
GTGTTCCCTTGGGTTCTTGGGAGCA---GCAGGAAGCACGATG---GGCGCAGCGTCA---  
GTGACGCTGACGGTACAG---GCCAGACAG---TTACTG---TCTGGTATAGTGCAACAGCAAAGC---  
AATTTG---CTGAGG---GCTATAGAGGCTCAACAGCATCTGTTGAGACTCACAGTCTGGGGCATT  
>KX907370  
TTCTACTGCAATACAACAAATTTGTTTAATGCAACAAATGGTTTAATAGGAGTATAGAGGAAAGTGCAAATG  
CAAATGAC-----  
-----ACA---  
AGTGAGAATTCCACACTCACACTCCCATGCAGAATAAAACAAATTATAAACATGTGGCAGGGAGTAGGAAAAG  
CAATGTATGCCCCCTCCCATTCAGGGCAAATCAAATGTTTCATCAAAT---  
ATTACAGGACTATTGTTGACAAGAGATGGT---AATAATAGTCAT-----  
-----  
-----  
GAGACCTTCAGACCTGGGGGAGGAGATATGAGAGACAATTGGAGAAGTGAATTATACAAATATAAAGTAGTAA  
AAATTGAACCAATA---GGTCTAGCACCCACCAGGGCAAAGAGAAGAGTGGTG-----  
-----GAAAGAGAAAAAAGAGCA---ATAGGA---CTGGGAGCT-----  
GTGTTCCCTTGGGTTCTTGGGGGCA---GCAGGAAGCACAATG---GGCGCAGCGTCG---  
CTAACGCTGACGGTACAG---GCCAGGCAA---GTATTG---TCTGGTATAGTGCAACAGCAAAAC---  
AATTTG---CTGAGG---GCTATAGAGGCGCAACAGCATCTGTTGCAACTCACAGTCTGGGGCATT  
>HM215280  
TTCTACTGCAATACATCACAACCTGTTTAATACTACATGGAGTAAAAATGGTACATCAAATAGTACAGGGTCA-  
-----  
-----  
AATAATAGTACAATCATACTCCCATGCAGAATAAAACAAATTATAAATATGTGGCAGAGAACAGGACAAGCAA  
TGTATGCCCCCTCCCATCCCAGGAGTAATAAGGTGTGTATCAAAC---  
ATTACAGGACTAATTTTAAACAAGAGATGGTGGAAATAATAACAAA-----  
-----  
-----  
ACAGATGAAACTCTCAGACCTGGAGGTGGAGATATGAGGGACAATTGGAGAAGTGAATTATATAAGTATAAAG  
TAGTAAAACCTGAACCACTA---GGAGTAGCACCCACCAGGGCAAAGAGAAGAGTGGTG-----  
-----GGGAGAGAAAAAAGAGCA---GTTGGA---ATAGGAGCT-----  
GTTTTCATTGGGTTCTTAGGAGCA---GCAGGAAGCACTATG---GGCGCAGCGTCA---  
GTAACGCTGACGGTACAG---GCCAGACAA---TTATTG---TCTGGCATAGTGCAACAGCAAAGC---  
AATTTG---CTGAGG---GCTATAGAGGCTCAACAGCATATGTTGAAACTCACGGTCTGGGGCATT  
>KF716489  
TTCTATTGTAATACATCAGGCCTGTTTAATAGTACTTGGTATCCTAATAGTACTTTGAATGATAGTACTGGAA  
AG-----  
-----  
TATAATAAGACAATAACACTCCCATGTAGAATAAAGCAAATTGTAAACATGTGGCAAAGAGTAGGACAAGCAA  
TATATACCCCTCCCATTCAGGAATAATAAAGTGTGTATCAAAC---  
ATTACAGGACTATTATTAACAAGAGATGGTGGTATGAGTAACACAAAT-----  
-----  
-----  
AACACAACCTGAAATCTTCAGACCTGGAGGAGGAGATATGAGGGACAATTGGAGAAGTGAATTGTATAAGTATA  
AAGTAGTAGAAATTAAACCACTA---GGAATAGCCCCCTAGCAAGGCAAAGAGAAGAGTGGTG-----  
-----GAGAGAGAAAAAAGAGCA---GTTGGA---ATAGGAGCT-----  
---GTACTCTTTGGGTTCTTAGGAGCA---GCAGGAAGCACTATG---GGCGCAGCGTCA---  
ATAACGCTGACGGTACAG---GCCAGACAA---TTATTG---TCTGGCATAGTGCAACAGCAAAGC---  
AATTTG---CTGAGA---GCTATAGAGGCTCAACAGCATATGTTGAAACTCACAGTCTGGGGCATT  
>EU110096  
TTCTATTGTAACACATCAGGCCTGTTTAATAGCACTTGGGAATAGCAATAGCACTTGGGAATAGCACTGCCACGC  
AGGAGTCAAAT-----  
-----AACACG-----

GAGTTAAATGGCAATATAACTCTCCCATGCAGAATAAAGCAAATTGTAAGAATGTGGCAGAGAGTAGGACAAG  
CAATGTATGCCCCCTCCCATTTGCAGGAGTAATACAGTGTAATCAAAC---  
ATTACAGGAATGATATTGACAAGAGATGGTGGAATAGTACAGAGACT-----  
-----  
-----  
TCCAATAATAATGAGACTTTTCAGACCTGGAGGAGGAGATATGAGAGATAATTGGAGAAGTGAATTATATAAGT  
ATAAAGTAGTAAACTTGAACCACTA---GGAGTAGCACCCACAAAAGCAAGGAGAAGAGTGGTG-----  
-----GAGAGAGAGAAAAGAGCA---GTGGGA---CTGGGAGCT---  
-----CTCTTCCTTGGGTTCTTAGGAGCA---GCCGGAAGCACTATG---GGCGCGGCGTCA---  
CTAACGCTGACGGGACAG---GCCAGACAA---TTATTG---TCTGGCATAGTGCAACAGCAAAGC---  
AATTTG---CTGCAG---GCTATAGAGGCTCAACAGCATCTGTTGAAACTCACAGTCTGGGGCATT  
>DQ912822  
TTCTATTGTAACACATCAGGTCTGTTTAATAGCACTTGGAACAAAACCTGACAGTGGCAGCATGCAGGGATCAA  
ATAGC-----  
-----  
ACAACAAGTGACGTTATAACTCTCCCATGCAGAATAAAAACAAATTGTAAATATGTGGCAGAGAGCAGGACAAG  
CAATGTATGCCCCCTCCCATTTCCAGGAGTAATAAGGTGTGTATCAAAC---  
ATTACAGGACTACTATTAACAAGAGATGGTGGAATGATAACT-----  
-----  
-----  
ACCGAAATTTTCAGACCTGGAGGAGGAAATATGAGGGACAATTGGAGAAGTGAATTATATAAGTATAAAGTAG  
TAAAAATTGAACCACTA---GGAGTAGCACCCACCAGGGCAAAGAGAAGAGTGGTG-----  
-----GAGAGAGAAAAAGAGCA---GTTGGA---ATAGGAGCT-----  
GTCCTCATTGGGTTCTTAGGAGCA---GCAGGAAGCACTATG---GGCGCGGCGTCA---  
ATAACGCTGACGGTACAG---GCCAGACAA---TTATTG---TCTGGTATAGTGCAACAGCAAAGC---  
AATTTG---CTGAGA---GCTATAGAGGCTCAACAGCATATGTTGAGACTCACGGTCTGGGGCATT  
>AF457058  
TTCTATTGTAATACATCAGGACTGTTCAATAGTACTGTGAATACTTTGAATATTAGCACTTGGAAATTACAATG  
AG-----  
-----  
TCAGATAACACTACTATACAACCTCCCATGCAGAATAAAAACAAATTATAAACATGTGGCAGGGAGTGGGACAAG  
CAATGTATGCCCCCTCCCATTTGCAGGAGTCATCAAATGTTTCATCAAAT---  
ATTACAGGACTATTGTTGACAAGAGATGGTGGTGCAAATAGTACC-----  
-----  
-----  
AGTCAGAAAGAAACCTTCAGACCTGGAGGGGAGACATGAGAGACAATTGGAGAAGTGAATTATATAAATATA  
AAGTAGTAAGAATTGAACCACTA---GGTCTAGCACCCACCAGGGCAAGAAGAAGAGTGGTG-----  
-----GAAAGAGAAAAAGAGCA---ATAGGA---CTGGGAGCT-----  
---ATGTTCCCTTGGGTTCTTGGGAGCA---GCAGGAAGCACGATG---GGCGCAGCGTCA---  
CTGACGCTGACGGTACAT---GCCAGACAG---TTATTA---TCTGGTATAGTGCAACAGCAAAC---  
AATTTG---CTGAGG---GCTATAGAGGCGCAACAACATCTGTTGCAACTCACAGTCTGGGGCATT  
>AF457082  
TTCTATTGCAACACATCAGACCTGTTTAATAGCAATTGGACTTGGGATAGTAATAATGGCACTATGAAGGAGG  
TAAATAGC-----  
-----ACG---  
GGGTCAAATGGCACTATAACTCTCCAATGCAGAATAAAGCAAATTATAAATATGTGGCAGAGAGCAGGACAAG  
CAATATATGCCCCCTCCCATCAAAGGAGTAATAAACTGTGTATCAAAT---  
ATTACAGGACTAATATTAACAAGAGATGGTGGGGATAATAGTAGT-----  
-----  
-----  
ACAGAAACCTTCAGACCTGGAGGAGGAGATATGAGGGACAATTGGAGAAGTGAATTATATAAGTATAAAGTAG  
TAAAAATTGAACCACTA---GGAGTAGCACCCACCAGGGCAAAGAGAAGAGTGGTG-----  
-----GAGAGAGAAAAAGAGCA---GTTGGA---ATAGGAGCT-----  
GTCTTCCTTGGGTTCTTGGGAGCA---GCAGGAAGCACTATG---GGCGCGGCGTCA---  
ATAACGCTGACGGTACAG---GCCAGACAA---TTATTA---TCTGGCATAGTGCAACAGCAAAGC---  
AATTTG---CTGAGG---GCTATAGATGCTCAACAACATCTGTTGAAGCTCACGGTCTGGGGCATT  
>KT022385  
TTCTATTGTAATACAACAGCCCTGTTTAATAGCATTTGGAATGATACTGGCCTTAATAATAAACTTGGGATA  
CAAAT-----  
-----

ACAAATGATACTATAATCCCATGCAGAATAAAGCAAATTATACGAATGTGGCAGAGAGTAGGACAAGCAATGT  
ACGCCCCCTCCCATCCCGGGAGTGATAAAGTGTATATCTAAC ---  
ATTACAGGGCTACTATTAACAAGAGATGGTGGACAGGGCAATAAT-----  
-----  
-----  
GAAACTGAAACCTTCAGACCTGGAGGAGGAAATATGAAGGACAATTGGAGAAGTGAATTATATAAGTATAAAG  
TAGTAAAAATTGAACCACTA---GGAGTAGCACCCACCAGGGCAAGGAGAAGAGTGGTG-----  
-----GAGAGAGAAAAGAGAGCA---GTTGGA---CTGGGAGCT-----  
GTATTCATTGGGTTCTTAGGAGCA---GCAGGAAGCACTATG---GGCGCAGCGTCA---  
ATAACGCTGACGGCACAG---GCCAGACAA---TTGTTG---TCTGGTATAGTGCAACAGCAAAGC---  
AATTTG---CTGAGG---GCTATAGAGGCTCAACAGCATCTGTTGAAACTCACAGTCTGGGGCATT  
>KT022387  
TTCTATTGTAATACAACAGAACTGTTTAATAGCACCTGGTTTAATAGCACTTGGGACAGCACGCAGGCGCCAA  
ATAGCACG-----  
-----  
GATTCAAATGACACTATAACCTCCAATGCAGAATAAAACAAATTATAAATATGTGGCAGAGAGTAGGACAAG  
CAATGTATGCCCCCTCCCATCCCAGGAGTAATACAGTGTGTATCAAAC---  
ATTACAGGATTACTATTAACAAGAGATGGTGGGGATAATAACAGT-----  
-----  
-----  
ACAAATGAAACCTTCAGACCTGGAGGAGGAGATATGAGGGACAATTGGAGAAGTGAATTATATAAGTATAAAG  
TAGTAAAAATTGAACCACTA---GGAGTAGCACCCACCAGGGGCACAGAGAAGAGTGGTG-----  
-----GAAAGACAAAAAAGGGCA---GTTGGA---ATAGGAGCT-----  
GTGTTCCCTTGGGTTCTTAGGAGCA---GCAGGAAGCACTATG---GGCGCGGCGTCA---  
ATAACGCTGACGGTACAG---GCCAGACTA---TTATTG---TCTGGCATAGTGCAACAGCAAAGC---  
AATTTG---CTGAGG---GCTATAGAGGCTCAGCAACATCTGTTGAAACTCACAGTCTGGGGCATT  
>KT022388  
TTCTATTGTGACACATCCAGCCTGTTTAATAGCACTTGGGATACCGATGACACCAGGCGAGAGTTAAATAGCA  
CAGAG-----  
-----  
-----  
TCAAATGACACTATAACACTCCAATGCAGAATAAAGCAAATTATAAATATGTGGCAGAGAGTAGGACAAGCAA  
TGTATGCCCCCTCCCATCCAAGGAATAATAAGGTGTAAATCAAAA---  
ATTACAGGACTAATATTAACAAGAGATGGTGGTAAGAATAGCAGT-----  
-----  
-----  
ACCAATGAAATCTTCAGACCTGGAGGAGGAGATATGAGGGACAATTGGAGAAGTGAATTATATAAGTATAAAG  
TAGTAAAACTTGAACCATTA---GGAGTAGCACCCACAAGGGCAAAAGAAGAGTGGTG-----  
-----GAGAGAGAAAAAAGAGCA---GTTGGA---ATAGGAGCT-----  
GTCTTCCTTGGGTTCTTAGGAGCA---GCAGGAAGCACTATG---GGCGCAGCGTCA---  
ATAACGCTGACGGCACAG---GCCAAACAA---TTATTG---TCTGGCATAGTGCAACAGCAAAGC---  
AATTTG---CTGAGG---GCTATAGAGGCTCAACAACATCTGTTGAAACTCACAGTCTGGGGCATT  
>KT022389  
TTCTACTGCAATACATCAGCACTGTTTAATAGGACTTATAATATATCAGAACTGGGTAATACTAATAATATAT  
CAGATACTAGT-----  
-----  
-----  
AATACATCAAAGTTTATCCCACTCCCATGCAGAATAAAGCAAATTATAAACATGTGGCAGGAAGTAGGCAAAG  
CAATATATGCCCCCTCCCATTCAGGAATAATCAGATGTTTCATCAAAT---  
ATTACAGGACTATTGATGACAAGGGATGGTGGTGAATATAATAAT-----  
-----  
-----  
AGTCAGAATGAAACCTTCAGACCTGGAGGGGGAGATATGAGAGACAACCTGGAGAAGTGAATTATATAAATATA  
AAGTAGTAAAACTCGAACCATTA---GGTCTAGCACCCACCAGGGCAAAGAGAAGAGTGGTG-----  
-----GACAGAGAAAAAAGAGCA---ATAGGA---CTAGGAGCT-----  
---ATGTTCCCTTGGGTTCTTGGGAGCA---GCAGGAAGCACGATG---GGCGCAGCGTCA---  
CTGACGCTGACGGTACAG---GCCAGACAG---TTATTG---TCTGGTATAGTGCAACAGCAAAAT---  
AATTTG---CTGAGA---GCTATAGAGGCGCAACAGCATATGTTGCAACTCACAGTCTGGGGCATT  
>KT022390  
TTCTATTGCAATACATCAGGACTGTTTAATACATTAAATAGTACAGGGATA-----  
-----  
-----

AATGAGACTACAATCACACTCCCATGCAGGATAAAACAAATTATAAACATGTGGCAGGGAGTAGGAAAAGCAA  
TGTATGCCCCCTCCCATTTGAAGGACTAATCCACTGTTTCATCAAAC---  
ATTACAGGACTATTATTGACAAGAGATGGTGGTAATGATGGTGCA-----  
-----  
-  
AATATTACTAATCAGAATGAGACTTTTAAACCTGAAGGAGGAGATATGAGAGACAATTGGAGAAGTGAATTAT  
ACAAATATAAAGTAGTAAAAATTGAACCACTA---GGTCTAGCACCCACCAAGGCAAAAAGAAGAGTGGTG--  
-----GAAAGACAAAAAAGAGCA---ATAGGA---  
CTAGGAGCT-----GTGTTCTTGGGTTCTTGGGAGCA---GCAGGAAGCACAATG---  
GGCGCAGCGTCA---CTGACGCTGACGGTACAG---GCCAGACAG---TTATTG---  
TCTGGTATAGTGCAACAGCAAAAC---AATTTG---CTGAGG---  
GCTATAGAGGCGCAACAGCATCTGTTGCAACTCACAGTCTGGGGCATT  
>KT022392  
TTCTATTGTAACACATCAGGCCTGTTTAATGGCACTGTCAAACAGGAGTCAAATGGCACAGAG-----  
-----  
-----  
TCAAAATGATACTATAATTCTCCAATGCAAAATAAAGCAAATTATAAATATGTGGCAGAGAGTAGGACAAGCAA  
TATATGCCCCCTCCCATCCCAGGAGTAATAAGGTGTGTCTCAAAC---  
ATTACAGGACTAATATTAACAAGAGATGGTGTTAATAGCAGTGCA-----  
-----  
-----  
AATGAAACCTTCAGACCTGGAGGAGGGGATATGAGGGACAACCTGGAGAAGTGAATTATATAAGTATAAAGTAG  
TAAAAATTGAACCACTA---GGAGTAGCACCCACCAGGGCAAAAAGAAGAGTGGTG-----  
-----GAGAGAGAAAAAAGAGCA---GTTGGA---ATAGGAGCT-----  
GTTTTTCATTGGGTTCTTGGGAGCA---GCAGGAAGCACTATG---GGCGCGGCGTCA---  
ATGACGCTGACGGTACAG---GCCAGACAA---TTATTG---TCTGGCATAGTGCAACAGCAAAGC---  
AATTTG---CTGAGG---GCTATAGAGGCTCAACAACATCTGTTGAAACTCACGGTCTGGGGCATT  
>KT022394  
TTCTACTGCAATACATCAAGACTGTTCAATAGTACATGGGTATTAAATAGTACATCAAATAGTACATGGACAT  
TAAATAGTACA-----  
-----ACGGGAGAT-----  
AGCAGTACATCAAATATCACAATCCCATGCAGAATAAAACAAATTATAAACAGGTGGCAGGAAACAGGAACAG  
CAATATACGCCCTCCCATTTGAAGGACTAATTCAGTGTTCATCAAAT---  
ATTACAGGACTACTATTAACAAGAGATGGTGGGAACCTAATGAGACAAG-----  
-----  
-----  
GAGAATGAAACCTTTAGACCAGAAGGAGGAAATATGAAAGACAATTGGAGAAGTGAATTATACAAATATAAAG  
TAGTAAGACTTGAACCACTA---GGTCTAGCACCCACCAAGGCAAGAGAAGAGTGGTG-----  
-----GAAAGAGAAAAAAGAGCA---ATAGGA---CTAGGAGCT-----  
ATGTTCTTGGGTTCTTGGGAGCA---GCAGGAAGCACGATG---GGCGCAGCGTCA---  
CTGACGCTGACGGTACAG---GCCAGACAG---TTATTG---TCTGGTATAGTGCAACAGCAAAAC---  
AATTTG---CTGAGG---GCTATAGAGGCGCAACAGCATATGTTGCAGCTCACAGTCTGGGGCATT  
>KT022396  
TTCTATTGCAGCACATCAGGCCTGTTTAATGGCACTTGGACTTGGACTAATGACACTGGGAGTAATAACAATG  
TCAGCCAGCAA-----  
-----  
GAGTTAAATGACACTATAACTCTCCCATGCAAAATAAAGCAAGTTATAAATATGTGGCAAAGGGTGGGACAAG  
CAATATATGCCCCCTCCCATCCCAGGAGTAATAAGGTGTGAATCAAAC---  
ATTACAGGACTAATATTATCAAGAGATGGTGGAGATAATAACAGT-----  
-----  
-----  
ACAAATGAAACCTTCAGACCTGGAGGAGGAGATATGAGGGACAATTGGAGAAGTGAATTATATAAGTATAAAG  
TAGTAAAAATTGAACCACTA---GGAGTAGCACCCACCAGGGCAAGAGAAGAGTGGTG-----  
-----GAGAGAGAAAAAAGAGCA---GTTGGA---CTGGGAGCT-----  
GTTTTTCATTGGGTTCTTAGGAGCA---GCAGGAAGCACTATG---GGCGCGGCGTCA---  
GTGACGCTGACGGTACAG---GCCAGACAA---TTATTG---TCTGGCATAGTGCAACAGCAAAGC---  
AATTTG---CTGAGG---GCTATAGAGGCTCAACAACATCTGTTGAAACTCACGGTCTGGGGCATT  
>KT022399  
TTCTACTGCAATACATCAAATCTGTTTAAGGGGACATTTAATGGGACATCAAATAGTACAGGGAATAAT----  
-----

-----  
GAGAATCAAACATCACACTCCCATGCAGAATAAAACAAATTATAAACATGTGGCAGGAAGTGGGAAAAGCAA  
TGTATGCCCCCTCCCATTCAGGAATAATTAAATGCTCATCAAAT---  
ATTACAGGACTATTGTTGACAAGAGATGGTGGTACAGAAAATAAT-----  
-----  
-----  
GATAGTGAGACCATCAGGCCTGGAGGAGGAGATATGAGAGACAATTGGAGAAGTGAATTATACAAATATAAAG  
TAGTAAGACTTGAACCACTA---GGTCTAGCACCCACCAGGGCAAAGAGAAGAGTGGTG-----  
-----GAAAGAGAAAAAAGAGCA---GTAGGA---CTAGGAGCT-----  
ATGTTCTTGGGTTCTTGGGAGCA---GCAGGAAGCACAAATG---GGCGCAGCGTCA---  
CTGACGCTGACGGTACAG---GCCAGACTG---TTATTG---TCTGGTATAGTGCAGCAGCAAAAC---  
AATTTG---CTGAGG---GCTATAGAGGCGCAACAACATCTGTTGCAACTCACAGTCTGGGGCATT  
>KT022409  
TTCTACTGTAATACAACAGGCCTGTTTAATAGCACTTGGAAAGTTTAATAGCACTTGGGAGCAAGGGTCAAATA  
CCACGGAG-----  
-----  
ACAAATGAAACTATAACTCTCCAATGCAGAATAAAGCAAATCATAAACATGTGGCAGACAGTAGGACAAGCAA  
TGTATGCTCCCCCATCCAGGAGTAATAAAGTGTAGATCAAAC---  
ATTACAGGATTAATATTAACAAGAGATGGTGGGAATAATAACAAT-----  
-----  
GGAAGTGGAATAATAACAAT-----  
GGAAGTGAAATCTTCAGACCTGGAGGAGGAGATATGAGAGACAATTGGAGAAGTGAATTATATAAGTATAAAG  
TAGTAAAAATTGAACCCCTA---GGAGTAGCACCCACCAGGGCAAAGAGAAGAGTGGTG-----  
-----GAGAGAGAAAAAAGAGCA---GTTGGA---ATAGGAGCT-----  
GTCTTCCTTGGGTTCTTAGGAGCA---GCAGGAAGCACTATG---GGCGCGGCGTCA---  
ATAACGCTGACGGTACAG---GCCAGACAA---TTATTG---TCTGGCATAGTGCAACAGCAAAGC---  
AATTTG---CTGAAG---GCTATAGAGGCTCAACAACATCTGTTGAAACTCACGGTCTGGGGCATT  
>KT022410  
TTCTATTGTAACACATCAAGCCTGTTTAATAGCACTTGGAAATTTAACTGCCAACAGGCAGGGACCAAATAGCA  
CGGAG-----  
-----  
TCAACTGACACCATAACTCTACAGTGCAGAATAAAGCAAATTATAAATATGTGGCAGAGAACAGGACAAGCAA  
TATATGCCCCCTCCAATCCAGGGAGTAATAAGGTGTGCATCAAAC---  
ATTACAGGACTACTATTAACAAGAGATGGTGTCT-----  
-----  
-----  
GGCAGTGACAGTGAAACCTTCAGACCTACAGGAGGAGATATGAGAGACAATTGGAGAAGTGAATTATATAAAT  
ATAAGTAGTAAAAATTGAACCATTA---GGAGTAGCACCCACCAGGGCAAGGAGAAGAGTGGTG-----  
-----GGGAGAGAAAAAAGAGCA---GTTGGA---ATAGGAGCT---  
-----GTATTCTTGGGTTCTTAGGAGCA---GCAGGAAGCACTATG---GGCGCGGCGTCA---  
ATAACGCTGACGGTACAG---GCCAGACAA---TTGTTG---TCTGGCATAGTGCAACAGCAAAGC---  
AATTTG---CTGAAG---GCTATAGAGGCTCAACAACAGCTGTTGAGACTCACTGTCTGGGGCATT  
>KT022411  
TTCTACTGTAACACATCAAATCTGTTTAATAGCACATGGACTAATAGTACATGGAATATAACAGAAGAGGCTA  
AT-----  
-----  
AGTACAGAGCCAATTATACTCCAATGCAGAATAAAGCAAATTATAAATCTGTGGCAGAGAGTAGGACAAGCAA  
TGTATGCTCCTCCCATCCAAGGAGTAATAAGGTGTGAATCAAAC---  
ATTACAGGACTAATATTAACAAGAGATGGTGGGCATAATAAGACA-----  
-----  
-----  
AATGAAACCTTCAGACCTGGAGGAGGAGACATGAGGGATAATTGGAGAAGTGAATTATACAAATATAAGGTGG  
TAAAAATCGAGCCACTA---GGAGTAGCACCCACAAGGGCAAGGAGAAGAGTGGTG-----  
-----CAGAGAGAAAAAAGAGCA---GTTGGA---ATAGGAGCT-----  
GTCTTCCTTGGGTTCTTGGGAGCA---GCAGGAAGCACTATG---GGCGCAGCGTCA---  
ATAACGCTGACGGTACAG---GCTAGACAA---TTATTG---TCTGGCATAGTGCAACAGCAAAGC---  
AATTTG---CTGAAG---GCTATAGAGGCTCAACAACATCTGTTGAAACTCACGGTCTGGGGCATT  
>FJ623491  
TTCTATTGTAACACCTCAGGCCTGTTTAATAGCGCTTGGTCGGGCAATACCAGTAATACCAGAACCAATAGT-  
-----

-----  
GCAGAAGCCAATATAACTCTCCAATGCAGGATAAAGCAAGTTATAAATATGTGGCAGAGAGTAGGACAAGCAA  
TATATGCCCCCTCCCATCTCAGGAGTAGTAAGGTGTAAATCAAAT---  
ATTACAGGACTACTATTAACAAGAGATGGTGGGGGTAATGGTACA-----  
-----  
-----  
AATGAAACCTTTAGACCTGGAGGAGGAGATATGAGGGACAATTGGAGAAGTGAATTATATAAGTATAAGGTAG  
TAAAAATTGAACCACTA---GGAGTAGCACCCACCAGGGCAAAGAGAAGAGTGGTG-----  
-----GAGAGAGAAAAAAGAGCA---GTTGGA---ATAGGAGCT-----  
GTTTTTCATTGGGTTCTTGGGAGCA---GCAGGAAGCACTATG---GGCGCGGCGTCA---  
ATAACGCTGACGGTACAG---GCTAGACAA---TTATTG---TCTGGCATAGTGCAACAGCAAAGC---  
AATTTG---CTGAGG---GCTATAGAGGCTCAACAACATCTGTTGAAACTCACGGTCTGGGGCATT  
>KP174771  
TTCTATTGTAACACATCAGGCCTATTTAATAGCACGTGGGATGCGAATGCCACCATGAATGCCAACAGTACGG  
AGTCA-----  
-----  
AATGACACAACCTATCACTCTCCAATGCAGAATAAAGCAAATTATAAATATGTGGCAGAGAACAGGACAAGCAA  
TGTATGCCCCCTCCCATCCAGGAGAAATAAGGTGTGAATCAAAC---  
ATTACAGGACTAATACTAACAAGAGATGGGGGAAGTAATAATACA-----  
-----  
-----  
AATGAGACCTTCAGACCTGGAGGAGGAGATATGAGGGACAATTGGAGAAGTGAATTATATAAGTATAAAGTAG  
TAAAAATTGAACCACTA---GGAGTAGCACCCACCAGGGCAAAAAGGAGAGTGGTG-----  
-----GAGAGACAAAAAAGAGCA---GTTGGC---ATAGGAGCT-----  
GTCTTCCTTGGGTTCTTAGGAGCA---GCAGGAAGCACTATG---GGCGCGGCGTCA---  
ATAACGCTGACGGTACAG---GCCAGACAA---TTATTG---TCTGGTATAGTGCAAGCAGCAAAGC---  
AATTTG---CTGAGG---GCTATAGAGGCTCAACAACATCTGTTGAAACTCACAGTCTGGGGCATT  
>KU921707  
TTCTACTGTAATACATCGAACCTGTTTAATAGCACTTGGTACAGTAACGGTTCGATGCCAAATATC-----  
-----  
-----  
ACTACTGGCAATATAACTCTCCCGTGCAGAATAAAACAAATTATAAAGATGTGGCAGAGAGCAGGACAAGCAA  
TATATGCCCCCTCCCATCAAAGGAGTAATAAGGTGTGACTCAAAC---  
ATTACAGGATTACTACTAACAAGAGATGGTGGGAGTACTAACAGT-----  
-----  
-----  
ACAAATGAAACCTTCAGACCTGCAGGAGGAGACATGAGGGACAATTGGAGAAGTGAATTATATAAATATAAAG  
TAGTAAAAATTGAACCACTA---GGAGTAGCACCCACCAAGGCAAAGAGAAGAGTGGTG-----  
-----GAAAGAGAAAAAAGAGCAATTATTGGA---CTGGGAGCT-----  
GTATTCGTTGGGTTCTTAGGAGCA---GCAGGAAGCACTATG---GGCGCGGCGTCA---  
GTGACGCTGACGGTACAG---GCCAGACAA---TTATTG---TCTGGCATAGTGCAACAGCAAAGC---  
AATTTG---CTGATG---GCTATAGAGGCTCAACAACATTTGTTGAAACTCACAGTCTGGGGCATT  
>KU921719  
TTCTACTGTAATACATCAGGCTTGTTTAATAGCACTTGGTTTAGCAATGTCAGCTTGCAAGAAAATAGCACAG  
AG-----  
-----  
-----  
TCAAGTGGCAATATAACTCTCCACTGCAGAATAAAGCAAGTTATAAATATGTGGCAGAGAGTAGGACAAGCAA  
TGTATGCCCCCTCCCATCTCGGGAAAAATAAGGTGTGAATCAAAC---  
ATTACAGGACTAATATTAACAAGGGATGGTGGGAATAGTGACAATACA-----  
-----  
-----  
AGTACAGATGAGACCTTCAGACCTGCAGGAGGAGATATGAGGGACAATTGGAGAAGTGAATTATACAAGTATA  
AAGTAGTACAAATTGAACCACTA---GGAGTAGCACCCACCAGGGCAAAAAGAAGAGTGGTG-----  
-----GAGAGAGGAAAAAAGAGCA---GTTGGG---CTGGGAGCT-----  
---GTGTTTCATTGGGTTCTTGGGAGCA---GCAGGAAGCACGATG---GGCGCAGCGTCC---  
CTGACGCTGACGGTACAG---GCCAGACAA---TTATTG---TCTGGTATAGTGCAACAGCAAAGC---  
AATTTG---CTGAGG---GCTATAGAGGCTCAACAAAGTCTGTTGAAACTCACAGTCTGGGGCATT  
>KU921749  
TTCTACTGCAATACATCAAGCCTGTTTAGGAGTACATGGGAAAATAGTACTACATTAAATAGTACAGGG-----  
-----

-----  
 GGAAATGAGACAATTACACTCCAATGCAGAATAAAACAGATTATAAACATGTGGCAGGGAGTAGGGAAGGCAA  
 TGTATGCCCCCTCCTATTGAAGGACTAATCTCCTGTTTCATCCAAT ---  
 ATTACAGGGCTATTATTAACGAGAGATGGT --- AATAAAAAATAGT-----  
 -----  
 -----  
 CAGAAGAATGAGACCTTCAGACCTGGAGGAGGAGATATGAGGGACAATTGGAGAAGTGAATTATATAAATATA  
 AAGTAGTAAAAATTGAACCACTA --- GGAGTAGCACCCACCGGGGCACGGAGAAGAGTGGTG-----  
 -----GGAAGAGAAAAAAGAGCA --- GTTGGA --- ATAGGAGCG-----  
 ---GTCCTCCTTGGGTTCTTAGGAGCA --- GCAGGAAGCACTATG --- GGCGCGGCGTCA ---  
 ATAACGCTGACGGTACAG --- GCCAGAGAA --- TTAGTG --- TCTGGCATAGTGCAACAGCAAAGT ---  
 AATTTG --- CTGAGG --- GCTATAGAGGCTCAACAACAACCTGTTGAAACTCACGGTCTGGGGCATT  
 >KU921798  
 TTCTATTGTAACACATCAGGCCTGTTTCATGGCAAATGGTCTAATGGCACTTGGACTAGGAATGACACT----  
 -----  
 -----  
 GCAAAACGACACTATAAGGCTCCCATGCAGAATAAAGCAAATTATAAATATGTGGCAGAGAGCAGGACAAGCAA  
 TATATGCCCCCTCCCATAAAAAGGAGTAATAACATGTAGATCAAAT ---  
 ATTACAGGACTACTATTAACAAGAGATGGTGGAACGAATAGTACA-----  
 -----  
 -----  
 AATGAAACCTTCAGACCTGGAGGAGGAGATATGAGGGACAATTGGAGAAGTGAATTATATAATTATAAAGTAG  
 TAAAAATTGAACCACTA --- GGAGTAGCACCCCTCCAAGGCAAAGAGAAGAGTGGTG-----  
 -----GAGAGAGAAAAAAGAGCA --- GTC-----GGAATG-----  
 GTCCTCATTGGGTTCTTAGGAGCA --- GCAGGAAGCACTATG --- GGCGCAGCGGCA ---  
 GTAACGCTGACGGAACAG --- GCCAGACAA --- TTATTG --- TCTGGCATAGTGCAACAGCAAAGC ---  
 AATTTG --- CTGAAG --- GCTATAGAGGCTCAACAGCATCTGTTGAAACTCACGGTCTGGGGCATT  
 >KU921799  
 TTCTATTGTGACACATTAGGCCTGTTTAAAGGCACTTGGTCTAATGGCACTTGGTCTAATGGCAATTGGACTA  
 GGAATGACACT-----  
 -----  
 -----  
 GGCAGCAACAACACTATAATTCTCCCATGCAGAATAAAGCAAATTATAAAGATGTGGCAGAGAACAGGACAAG  
 CAATATATGCCCCCTCCCATAGAAGGAGTAATAAGATGTGAATCAAAT ---  
 ATTACAGGACTAATATTAACAAGAGATGGTGGAAGAATGAGCTA-----  
 -----  
 -----  
 AATGAAACCTTCAGACCTGGAGGAGGAAATATGAAGGACAATTGGAGAAGTGAATTATATAAATATAAAGTAG  
 TAAAAATTGAACCACTA --- GGAGTAGCACCCACCGGGCAAAGAGAAGAGTGGTG-----  
 -----GAGAGAGAAAAAAGGGGA --- GTTGGA --- ATAGGAGTT-----  
 GTCTTCTTTGGGTTCTTAGGAGCA --- GCAGGAAGCACGATG --- GGCGCAGCGGCA ---  
 CTAACGCTGACGGTACAG --- GCCAGACAA --- TTATTG --- TCTGGCATAGTGCAACAGCAAAGC ---  
 AATTTG --- CTGAAG --- GCTATAGAGGCTCAACACCATCTGTTGAAACTCACAGTCTGGGGCATT  
 >KU921805  
 TTCTATTGTGACACATCAAGACTGTTTAATGGCGCTTGGTCTGGGAATGACACTAGCATTGAACAGGAGCAAA  
 AT-----  
 -----  
 -----  
 GGAACCGACCTTATAACTCTCCCATGCAGAATAAAGCAAATTATAAATATGTGGCAGAGAACAGGACAAGCAA  
 TATATGCCCCCTCCCATGAGGAGTAATAAGATGTGAATCAAAT ---  
 ATTACAGGATTAATATTAACAAGAGATGGGGGACTTAATAATACAAAT-----  
 -----  
 -----  
 AAAGATAATGAAACCTTCAGACCTACAGGAGGAAATATGAGGGACAATTGGAGAAGTGAATTATATAAATATA  
 AGGTAGTAAAAATTGAACCACTA --- GGAGTCGCACCCACCGAGCAAGGAGAAGAGTGGTG-----  
 -----GAGAGAGAAAAAAGAGCA --- GTTGGA --- ATAGGAGCT-----  
 ---GTCCTCCTTGGGTTCTTAGGAGCA --- GCAGGAAGCACTATG --- GGCGCAGCGGCA ---  
 GTGACGCTGACGGTACAG --- GCCAGACAA --- TTATTG --- TCTGGTATAGTGCAACAGCAAAGC ---  
 AATTTG --- CTGCAG --- GCTATAGAGGCTCAACAGCATCTGTTGAAACTCACAGTCTGGGGCATT  
 >KU921813  
 TTCTATTGTAATACATCAAGCTTGTGGTAGCACTTGGGTCCCTAATAGCACTGTGGACACCAACAGTACCA  
 ACAGC-----

-----  
ACGCAGGGGACAACCTATAACTCTCCAATGCAGAATAAAACAAATTATAAACATGTGGCAGAGAGTAGGAAGAG  
CCATGTATGCCCCCTCCCATTCAGGAACAATCAGCTGTTTCATCAAAT---  
ATTACAGGACTATTGTTGACAAGAGATGGTGGTGCAAACAGTAGT-----  
-----  
-----  
CATAATGAGACTTTTCAGACCTGGAGGGGGAGATATAAGAGACAATTGGAGAAGTGAATTATACAAATACAAAG  
TAGTAAGAATTGAACCATTA---GGACTAGCACCCACCAGGGCAAAGAGAAGAGTGGTG-----  
-----GAAAGAGAAAAAAGAGCA---ATAGGA---CTAGGAGCT-----  
GTGTTTCCTTGGGTTCTTGGGAGCA---GCAGGAAGCACGATG---GGCGCAGCGTCA---  
TTGACGCTGACGGTACAG---GCCAGACAA---TTATTG---ACTGGTATAGTGCAACAGCAAAAC---  
AATTTG---CTGAGG---GCTATAGAGGCGCAACAGCATTTGTTGCAACTCACAGTCTGGGGCATT  
>AF407149  
TTCTATTGTAATACATCAGGCCTGTTTGATAGCACTTGGAATGACACTGACAGCAGACAG-----  
-----  
-----  
GAAAAATGGCACTATAACTCTCCCATGCAGAATAAAGCAAATTATAAATATGTGGCAGAGAACAGGACAAGCAA  
TATATGCCCCCTCCCATCCAAGGAGCAATAAGGTGTGTATCAAAC---  
ATTACAGGACTAATATTAACAAGAGATGGTGGGAACAATAACAGT-----  
-----  
-----  
ACAAATGAAACCTTCAGACCTGGAGGAGGAGATATGAGGGACAATTGGAGAAGTGAATTATATAAGTATAAAG  
TAGTAAAAAATTGAACCACTA---GGAGTAGCACCCACCAAGGCAAGGAGAAGAGTGGTG-----  
-----GGGAGAGAAAAAAGAGCA---GTTGGA---ATAGGAGCT-----  
GTCTTCCTTGGGTTCTTAGGAGCA---GCAGGAAGCACTATG---GGCGCGGCGTCA---  
ATAACGCTGACGGTACAG---GCCAGACAA---TTACTG---TCTGGCATAGTGCAACAGCAAAGC---  
AATTTG---CTGAAA---GCTATAGAGGCTCAACAGCATCTGTTGAGACTCACGGTCTGGGGCATT  
>AF457059  
TTCTACTGTAACACATCAAGCCTGTTTAATAGCACTTGGAATAGTACTAGCACTGGGCACAATGCCAGCGGGC  
AG-----  
-----  
-----  
GAGATAAATGACACTATAATTCTCCAATGCAGAATAAAGCAAATTATAAATATGTGGCAGAGAATAGGACAAG  
CAATGTATGCCCCCTCCCATCAAAGGAGCAATATGGTGTAGATCAAAC---  
ATTACAGGACTAATATTAACAAGAGATGGTGGGGAGGACAATAGC-----  
-----  
-----  
AGTACTGAAACCTTCAGACCTGGAGGAGGAAACATGAAGGATAATTGGAGAAGTGAATTATATAAGTATAAAG  
TAGTAAACCTTGAACCATTA---GGAGTGGCACCCACCAGGGCAAAGAGAAGAGTGGTG-----  
-----GAGAGAGAAAAAAGAGCA---GCTGGA---CTGGGAGCT-----  
GTTTTTCATTGGGTTCTTAGGAGCA---GCCGGAAGCACTATG---GGCGCAGCGTCA---  
GTAACGCTGACGGTACAG---GCCAGACAG---TTATTG---TCTGGCATAGTGCAACAGCAAAAC---  
AATTTG---CTGAAG---GCTATAGAGGCTCAACAACATCTGTTGAAACTCACGGTCTGGGGCATT  
>AF457073  
TTCTATTGTAACACATCAGACCTGTTTAATAGCACCTGGAACAGCACCACACTGGAGTCAAACACCACAGGG-  
-----  
-----  
-----  
TCAAATGGCACTTTAATTCTCCAATGCAGAATAAAGCAAATTATAAATATGTGGCAGAGAGTAGGACAAGCAA  
TGTATGCCCCCTCCCATCAAAGGAGTAATAAGGTGTAATTCAACA---  
ATTACAGGGCTACTATTAACAAGGGATGGTGGAAAGGATAACAGTAGT-----  
-----  
-----  
GAGAGTAGTGAAGAAATCTTCAGACCTGAAGGAGGAAATATGAGGGACAATTGGAGAAATGAATTATATAAGT  
ATAAAGTAGTAAAAATTGAACCACTA---GGAGTAGCACCCACCAGGGCAAAGAGAAGAGTGGTG-----  
-----GGGAGAGAGAAAAGAGCA---GTTGGA---CTGGGAGCT---  
-----GTTTTTCCTTGGGTTCTTAGGAGCA---GCAGGAAGCACTATG---GGCGCGGCGTCA---  
ATAACGCTGACGGTACAG---GCCAGACAA---TTATTG---TCTGGCATAGTGCAACAGCAAAGC---  
AATTTG---CTGAGA---GCTATAGAGGCTCAACAGCATCTGTTGAAACTCACGGTCTGGGGCATT  
>DQ208501  
TTCTATTGTAATACATCAGGCCTGTTTAATAGCACTTGAGGTTGGAATCACACTGTCAGCAGCATGCAGGAAG  
CAAATGGC-----

-----ACG---

GAGTCAAATGGCACTATAACCTCCAATGCAGAATAAAGCAAATTATAAATATGTGGCAGAGAGTAGGACGAG  
CAATGTATGCCCCCTCCCATCGAAGGAATAATAAGGTGTGAATCAAAC---

ATTACAGGACTAATATTAACAAGAGATGGTGGGGTTAATAACAGT-----

-----

ACAAATGAAACCTTCAGACCTGGAGGAGGAGATATGAGGGACAATTGGAGAAGTGAATTATATAAGTATAAGG  
TAGTAAAAATTGAACCACTA---GGAGTAGCACCCACCCGCGCAAGAGAAGAGTGGTG-----

-----GAGAGAGAAAAAAGAGCA---GTCGGA---ATAGGAGCT-----

GTCTTCCTTGGTTTCTTAGGAGCA---GCAGGAAGCACTATG---GGCGCGGCGTCA---  
ATAACGCTGACGGTACAG---GCCAGACAA---TTATTG---TCTGGCATAGTGCAACAACAAAGC---  
AATTTG---CTGAGG---GCTATAGAGGCTCAACAGCAGATGTTGAGACTCACGGTCTGGGGCATT  
>DQ187009

TTCTATTGTAATACATCAGGCCTGTTTTCCAGCACGCAGGAG-----

-----

TCAAGTGATCCTATAACTCTCCCATGCAGAATAAAGCAAATTATAAATATGTGGCAGAGAGTAGGACAAGCAA  
TGTATGCTCCTCCCATCCAAGGAGAAATAAGGTGTAAATCAAAC---

ATTACAGGAATAATATTAACAAGAGATGGTGGGCTTGGTACTACA-----

-----

AATGAAACCTTCAGACCTGGAGGAGGAGACATGAGGGACAATTGGAGAAGTGAGTTATATAAGTATAAAGTAG  
TAAAAATTGAACCACTA---GGAGTAGCACCCACCAGGGCAAGGAGAAGAGTGGTG-----

-----GAGAGAGAGAAAAAGAGCA---GTTACA---ATAGGAGCT-----

GTTCTCCTTGGGTTCTTGGGAACA---GCAGGAAGCACTATG---GGCGCAGCGTCA---  
CTAACGCTGACGGTACAG---GCCAGACTA---TTATTG---TCTGGCATAGTGCAACAGCAAAGC---  
AATTTG---CTGAGG---GCTATAGAGGCTCAACAACATCTGTTGAAACTCACAGTCTGGGGCATT  
>AF075701

TTCTATTGTAACACAACAGGCCTGTTTAATAGCACGTGGAATGACACTGCCACAGAGCAGAAG-----

-----

CCAAACGACACTATAAGACTCCAATGCAGAATAAAGCAAATTATAAATATGTGGCAAAGAGCAGGACGAGCAA  
TATATGCCCCCTCCCATCCAAGGAGTAATAAATTGTGTATCAGAC---

ATTACAGGACTAATATTAACAAGAGATGGTGGGGTTAATAATACA-----

-----

AATGAAACCTTCAGACCTGGAGGGGGAGATATGAGGGACAATTGGAGAAGTGAATTATATAAGTATAAAGTAG  
TAAAAATTGAACCACTA---GGAGTAGCACCCACCAGGGCAAAGAGAAGAGTGGTG-----

-----GAGAGAGAAAAAAGAGTA---GCTGGA---CTAGGAGCT-----

GTCTTCATTGGGTTCTTAGGAGCA---GCAGGAAGCACTATG---GGCGCGGCGTCA---  
ATAACGCTGACGGTACAG---GCCAGACAA---TTGTTG---TCTGGCATAGTGCAACAGCAAAAC---  
AATTTG---CTGAAG---GCTATAGAGGCTCAACAACATCTGTTGAAACTCACGGTCTGGGGCATT  
>AF071473

TTCTATTGTAATACATCAGGCCTGTTTAATAGCACTTGAATAAAGTACAGCATGCAGGAGTCACATAGCA  
CG-----

-----

GAGACAAATGACACTATAACTCTCCCATGCAGAATAAAGCAAATTATAAATATGTGGCAGAGAGTAGGACAAG  
CAATGTATGCCCCCTCCCATCCAAGGAGTAATAAAGGTGTACATCAAAC---

ATTACAGGACTGATATTAACAAGAGATGGTGGGGTTAATAACAGC-----

-----

ATAAATGCAACCTTCCGACCTGGAGGAGGAGATATGAGGGACAATTGGAGAAGTGAATTATATAAGTATAAAG  
TAGTAAAAATTGAACCAGTA---GGAATAGCACCCAACAGGGCAAAGAGAAGAGTGGTG-----

-----GAGAGAGAAAAAAGAGCA---GTTGGA---ATAGGAGTT-----

GTCTTCTTTGGGTTCTTGGGAGCA---GCAGGAAGCACTATG---GGCGCAGCGTCA---  
ATAACGCTGACGGTACAG---GCCAGACAA---TTATTG---TCTGGCATAGTGCAACAGCAAAGC---  
AATTTG---CTGAGG---GCTATAGAGGCTCAACAACATCTGTTGAAACTCACGGTCTGGGGCATT  
>AY253316

TTCTACTGCAATACATCAGAACTGTTTAATAGTACATGGAGCATGAACAATAATACATCAAATAGTACAGGG-

-----

-----  
GTAAATGAGAATATCACACTCCAATGCAGGATAAAAACAAATTATAAACATGTGGCAGGGAGTAGGAAAAGCAA  
TATATGCTCCTCCCATTGAAGGAATAATCAGCTGTTTCATCAAAT---  
ATTACAGGACTAATATTAACAAGAGATGGTGGGAATAATAACAGTACA-----  
-----  
-----  
AATGAAAATGAAACCTTTAGACCTGGAGGAGGAGATATGAGGGACAATTGGAGAAGTGAATTATATAAGTATA  
AAGTAGTAAAAATTGAACCACTA---GGAGTAGCACCCACCAGGGCAAAGAGAAGAGTGGTG-----  
-----GAGAGAGAAAAAAGAGCA---GTTGGA---ATAGGAGCT-----  
---GTCCTCTTTGGGTTCTTAGGAGCA---GCAGGAAGCACTATG---GGCGCAGCGTCA---  
ATAACGCTGACGGCACAG---GCCAGACAA---TTATTG---TCTGGTATAGTGCAACAGCAAAGC---  
AATTTG---CTGAGG---GCTATAGAGGCTCAACAGCATGTGTTGAGACTCACGGTCTGGGGCATT  
>KX907376  
TTCTATTGTAATACATCAGGCCTGTTTAGTAGCACTTGGAATGTCACCTTACAATAATAACACTTGGAATGCCA  
CTCAGGTG-----  
-----TCAAATAGCACA-----  
GAGCCAAATGGCACTATAGTGATCCCATGCAGAATAAAGCAAATTATAAATATGTGGCAGAGAACAGGACAAG  
CAATGTATGCCCTCCCATTCAGGAAAAATACAGTGCAATCAAAC---  
ATTACAGGACTACTATTAACAAGAGATGGTGGGGACACTAGCAGT-----  
-----  
-----  
ATGAATGAAACCTTCAGACCTGGAGGAGGAGATATGAGGGACAATTGGAGAAGTGAATTATATAAATATAAAG  
TAGTAAAAATTGAACCATTA---GGAGTAGCACCCACCAGGGCGCAGAGACGAGTGGTG-----  
-----GGAAGAGAAAAAAGAGCA---GTTGGA---CTGGGAGCT-----  
GTCTTCCTTGGGTTCTTAGGAGCA---GCAGGAAGCACTATG---GGCGCAGCGTCA---  
CTGACGCTGACGGTACAG---GCCAGACAA---TTATTG---TCTGGCATAGTGCAAGCAGCAAAT---  
AATTTG---CTGAGG---GCTATAGAGGCTCAACAACAACCTGTTGAAACTCACAGTCTGGGGCATT  
>KX907355  
TTCTATTGTAACACATCAGGCCTGTTTAGCAGCATTAGCCGATTTAATAACAATAGCGAAATAAATAGCACAG  
GG-----  
-----  
TTAAACGGCACTATAACTCTCCAATGCAAAATAAAGCAAATTATAAGAATGTGGCAGAGAACAGGACAAGCAA  
TGTATGCCCCCTCCCATCCAGGAGTAATAAGGTGTCAATCAAAC---  
ATTACAGGAATAATATTAACAAGAGATGGTGGGATTAATAACACA-----  
-----  
-----  
AATGAAACCTTCAGACCTGGAGGAGGAGATATGAGGGACAATTGGAGAAGTGAATTATACAAATATAAAGTAG  
TAAAAATTGAACCAATA---GGAGTAGCACCCACCAGGGCAAAGAGAAGAGTGGTG-----  
-----GAGAGAGAAAAAAGAGCA---GTTGGA---ATAGGAGCT-----  
GTCTTCATTGGGTTCTTAGGAGCA---GCAGGAAGCACTATG---GGCGCGGCGTCA---  
ATAACGCTGACGGTACAA---GCCAGACAA---TTATTG---TCTGGTATAGTGCAACAGCAAAGT---  
AATTTG---CTGAGG---GCTATAGAAGCTCAACAGCATCTGTTGAAACTCACAGTCTGGGGCATT  
>KX907361  
TTCTATTGTAACACATCAAAGTTATTTAATAATGGCACTGCCAAC-----  
-----  
-----  
ATAGATGACTCTATAACTCTCCCATGCAAAATAAAGCAAATTATAAGGATGTGGCAGAGAACAGGACAAGCAA  
TGTATGCCCCCTCCTATCCAAGGAACAATAGAGTGTATATCAAAC---  
ATTACAGGACTGCTATTAACAAGAGATGGTGGGAGTGATAGCAAT-----  
-----  
-----  
ACAAATGAAACCTTCAGACCTGGAGGAGGAGATATGAGGGACAATTGGAGAAGTGAATTATATAAGTATAAGG  
TAGTAAAAATTGAACCACTA---GGAGTAGCACCCACCAAGGCAAAGAGAAGAGTGGTG-----  
-----GAGAGAGAAAAAAGAGCA---GTTGGA---ATAGGAGCT-----  
GTCCTCTTTGGGTTCTTAGGAGCA---GCAGGAAGCACTATG---GGCGCGGCGTCA---  
TTAGCGCTGACGGAACAG---GCCAGGCAA---TTATTG---TCTGGCATAGTGCAACAGCAAAGT---  
AATTTG---CTGAGG---GCTATAGAGGCTCAACAGAATATGTTGAGGCTCACAGTCTGGGGCATT  
>HQ615969  
TTCTACTGCAATACATCAGGACTATTTAATAGTACATGGTTAGCAAATGGGACACCAAATAGTACAGGGATA-----  
-----

-----  
AATGAGAGTACAATTACACTCCCATGCAGAATAAAACAAATTATAAATATGTGGCAGAGAACAGGACAAGCAA  
TATATGCCCCCTCCCATCCAAGGAGTAATAAGGTGTGAATCAAAT---  
ATTACAGGACTAATATTAACAAGAGATGGTGGGGATACTAATGGA-----  
-----  
-----  
ACAGATGAAACCTTCAGGCCTGGAGGAGGAGATATGAGAGACAATTGGAGAAGTGAATTATACAAATATAAGG  
TAGTAAAAATTGAACCACTA---GGAGTAGCACCCACCAGGGCAAGGAGAAGAGTGGTG-----  
-----GACAGAGAAAAAAGAGCA---GTTGGA---TTAGGAGCT-----  
GTCTTCCTTGGGTTCTTAGGAGCA---GCAGGAAGCACTATG---GGCGCAGCGTCA---  
ATAACGCTGACGGTACAG---GCTAGACAA---TTATTG---TCTGGCATAGTGCGGCAGCAAAGC---  
AATTTG---CTGCAG---GCTATAGAGGCTCAACAGCAGCTGTTGAACTTACGGTCTGGGGCATT  
>KY658698  
TTCTATTGTAATACATCAGGCCTGTTTAAACAGTGCTTGGGAATAACACTAACCTCTTGACAAATAGCACAGGG-  
-----  
-----  
ACAAATGGCACTATAACTCTCCCATGCAGGATAAAGCAAATTATAAACATGTGGCAGAGAGTAGGGCAAGCAA  
TGTATGCCCCCTCCCATCCAAGGAGTAATAAAGTGTGTATCAAAC---  
ATTACAGGACTAATATTAACAAGAGATGGAGGGGATAATAACAGT-----  
-----  
-----  
ACAAGGGAAATCTTCAGACCTGGAGGAGGAGATATGAGGGACAATTGGAGAAGTGAATTATATAAGTATAAAG  
TAGTACAACTTGAACCATTA---GGAGTAGCACCCACCAGGGCAAAGAGAAGAGTGGTG-----  
-----GAGAGAGAAAAAAGAGCA---GTCGGA---ATGGCAGCT-----  
GTTTTTCATTGGGTTCTTAGGAGCA---GCAGGAAGCACTATG---GGCGCGGCGTCA---  
ATAACGCTGACGGTACAG---GCCAGACAA---TTATTG---TCTGGCATAGTGCAACAGCAAAGC---  
AATTTG---CTGAGG---GCTATAGAGGCTCAACAACATCTGTTGAACTCACAGTCTGGGGCATT  
>AF442565  
TTCTATTGTAACACATCAGGCCTGTTTAAATAGCACTTGGGAGGGCAACAATACCAGCATATTAAATGGCACGG  
GG-----  
-----  
TCAAACGACAATACAACCTCTCCCATGCAGAATAAAGCAAATTATAAATATGTGGCAGAGAGTAGGACAAGCAA  
TATATGCCCCCTCCCATCCCAGGAGTAATAAAGTGTGTGTCAAAT---  
ATTACAGGACTAATATTAACAAGAGATGGTGGTAATGATGGTAGT-----  
-----  
-----  
AATGAGACCTTCAGACCTGGAGGAGGAGATATGAGGGACAATTGGAGAAGTGAATTATATAAGTATAAAGTAG  
TAAAAATTGAACCAATA---GGAGTAGCACCCACCAGGGCAAAGAGAAGAGTGGTG-----  
-----GAGAGAGAAAAAAGAGCA---GTTGGA---CTGGGAGCT-----  
GTCTTCATTGGGTTCTTAGGAGCA---GCAGGAAGCACTATG---GGCGCGGCGTCA---  
ATAACGCTGACGGTACAG---GCCAGGCAA---TTATTG---TCTGGCATAGTGCAACAGCAAAGC---  
AATTTG---CTGAGG---GCTATAGAGGCTCAACAGCATCTGTTGAACTCACTGTCTGGGGCATT  
>AF442570  
TTCTACTGTAACACATCAAACCTGTTTAAATAGCACTTGGGAATAATGACAATGCCACACAGTTAAATAGCACGG  
AG-----  
-----  
-----  
TCAAACGAAACTATAACTCTTCAATGCAAAATAAAGCAAATTATAAATATGTGGCAGAGAGTAGGACAAGCAG  
TATATGCCCCCTCCCATCAAGGAGTAATAAAATGTGAATCAAAC---  
ATTACAGGAATAATATTAACAAGAGATGGTGGAAATAATAGCAGT-----  
-----  
-----  
GCAGAGGAGACCTTCAGACCTGGAGGAGGAGATATGAGGGACAATTGGAGAAGTGAATTATATAAATATAAAG  
TAGTAAAAATTGAACCACTA---GGAGTAGCACCCACCAAGGCAAGGAGAAGAGTGGTG-----  
-----GAGAGAGAAAAAAGAGCA---GTTGGA---ATAGGAGCT-----  
GTTTTTCATTGGGTTCTTAGGAGCA---GCTGGAAGCACTATG---GGCGCGGCGTCA---  
GTGACGCTGACGGTACAG---GCCAGACAA---TTATTG---TCTGGCATAGTGCAACAGCAAAGC---  
AATTTG---CTGAGG---GCTATAGAGGCTCAACAGCAAATGTTGAACTCACAGTCTGGGGCATT  
>AF442566  
TTCTATTGTAACACATCAGGCCTGTTTAAATAGCACTTGGAGTAATGGCACTAGGAAGGACAATGACAGCAGGC  
AGAAA-----

-----  
ACAAATGACACTATAATAACTCTCCAATGCAGAATAAAGCAAATTATAAATTTGTGGCAGAGAGCAGGACAAG  
CAATATATATGCCCCCTCCCATCGAAGGAATAATAAGATGTAACCTCAAAC---  
ATTACAGGACTAATATTAACAAGAGATGGGGGCGAATCTAATAACAAA-----  
-----  
-----  
ACTGAAGAACTGAAACCTTCAGACCTGGAGGAGGAGATATGAGGGACAATTGGAGAAGTGAATTATATAAGT  
ATAAAGTAGTAAAAATTGAACCACTA---GGAGTAGCACCCACCAGGGCAAGGAGAAGAGTGGTG-----  
-----CAGAGAGAAAAAAGAGTA---GCT-----TTTGGAGCT---  
-----GTCTTCATTGGGTTCTTAGGAGCA---GCAGGAAGCACTATG---GGCGCAGCGTCA---  
ATAGCGCTGACGGCACAG---GCCAGACAG---TTATTG---TCTGGTATAGTGCAACAGCAAAGC---  
AATTTG---CTGAGG---GCTATAGAGGCTCAACAGCATATGTTGAAACTCACGGTCTGGGGCATT  
>HM027851  
TTCTATTGTAACACAACAAACCTGTTCAATAGCACCTGGGAGAACGGCAAGCAGACATCAAATAGCACA----  
-----  
-----  
AACAAATGACACTATAACTCTCCCATGTAGAATAAAACAAATTGTAAATATGTGGCAGAGAACAGGACAGGCAA  
TATATGCCCCCTCCCATCCAAGGAATAATAAGGTGTAACCTCAACC---  
ATTACAGGACTACTATTAACAAGAGATGGTGGGAATAATAACAAT-----  
-----  
-----  
ACAAATGACACCTTCAGACCTGGAGGAGGAGATATGAGGGACAATTGGAGAAGTGAATTATATAAATATAAAG  
TAGTACGAATTGAACCATTA---GGAGTAGCACCCACCGAGGCAAGGAGAAGAGTGGTG-----  
-----GGGAGAGAAAGAAGAGCA---GTTGGA---CTGGGAGTT-----  
TTCTTCCTTGGGTTCTTAGGAGCA---GCAGGAAGCACTATG---GGCGCAGCGTCA---  
ATAACGCTGACGGTACAG---GCCAGACAG---TTACTG---TCTGGCATAGTGCAACAGCAAAT---  
AATTTG---CTGAGA---GCTATAGAGGCTCAACAGCATCTGTTGAGACTCACAGTCTGGGGCATT  
>HM027850  
TTCTATTGTAACACATCAGATCTGTTTAATGGCAGTTGGAATAACACAATGCAGGGGTCAAATAACACGGGG-  
-----  
-----TCAAATGACACTATAACTCTCAAATGTAGAATA-----  
-----  
--ATAACAGTACAA-----AATGAAACTAAA-----  
-----  
-----  
ACCTTTAGACCTACAGGAGGAGATATGAGGGACAATTGGAGAAGTGAATTATATAAATATAAGGTAGTAAAAA  
TTGAGCCACTA---GGAGTAGCACCCACCAAGGCAAAGAGAAGAGTGGTG-----  
-----GAGAGAGAAAAAAGAGCA---GTTGGA---CTAGGAGCT-----  
GTCTTCCTTGGGTTCTTAGGAGCA---GCAGGAAGCACTATG---GGCGCGGCGTCA---  
ATGACGCTGACGGTACAG---GCCAGACAA---TTATTG---TCTGGTATAGTGCAACAGCAAAC---  
AATTTG---CTGAAG---GCTATAGAGGCTCAACAACATCTGTTGAAACTCACAGTCTGGGGCATT  
>HM027864  
TTCTACTGTAATACATCAGGCCTATTTAATGGCAGTTGGAGTAGAAATGATACTACAAATGACACAGAG----  
-----  
-----  
TCAAATGACACTATAACTCTACAATGTAGAATAAAACAAATTTATAAATATGTGGCAAAGAGTAGGACAAGCAA  
TGTATGCCCCCTCCCATTAAGGACCAATCACGTGTAACCTCAAAT---  
ATAACAGGACTATTGTTGACAAGGGATGGTAGTGGAATCAAAT-----  
-----  
-----  
AATGATACCGAGACCTTTAGACCTGGAGGAGGAAATATGAGGGACAATTGGAGAAGTGAATTATACAAATATA  
AAGTAGTAAAAATTGAACCACTA---GGAGTAGCACCCACCAGGGCAAAGAGAAGAGTGGTG-----  
-----GAGAGAGAAAAAAGAGCA---GTTGGA---ATAGGAGCT-----  
---GTCCTCTTTGGGTTCTTAGGAGCA---GCAGGAAGCACTATG---GGCGCAGCGTCA---  
ATAACGCTGACGGTACAG---GCCAGACAA---TTATTG---TCTGGCATAGTGCAACAGCAAAGC---  
AATTTG---CTGAGG---GCTATAGAGGCTCAACAACATATGTTGAAACTCACAGTCTGGGGCATT  
>HM027870  
TTCTATTGTAATACATCAGGCCTGTTTAATAGCACTTGGGATAGCAATGAGCTTAATAGCACTTTGAATGGCA  
CT-----  
-----

GAGTCAAATGACACTATAACTCTCCCATGCAGAATAAAACAAATTATAAATATGTGGCAGAGAGTAGGACAGG  
CAATGTATGCCCCCTCCCATCCCAGGAATAATAAGGTGTGAATCAAAC---  
ATTACAGGACTAATATTAACAAGAGATGGTGGAACATTACCAAC-----  
-----  
-----  
AATACAGAAATCTTCAGACCGGGGGGAGGAGATATGAGGGACAATTGGAGAAGTGAATTATATAAGTATAAAG  
TAGTAAAAAATTGAACCACTA---GGAGTAGCACCTACCAAAGCAAAGAGAAGAGTGGTG-----  
-----GAGAGAGAAAAAAGAGCA---GTTGGA---CTAGGAGCT-----  
GTCTTCATTGGATTCTTAGGAGCA---GCAGGAAGCACTATG---GGCGCGGCGTCA---  
ATAACGCTGACGGTACAG---GCCAGACAA---TTATTG---TCTGGCATAGTGCAACAGCAAAGC---  
AATTTG---CTGAGA---GCTATAGAGGCTCAACAACATCTGTTGAAGCTCACGGTCTGGGGCATT  
>JX658625  
TTCTACTGTAATACATCAAACTGTTTAATAATAGTATAGGGAGGAATGCTACTACATCAAAT-----  
-----  
-----  
AGTACAGAATCTATAACACTCCCATGCAAAATAAAACAAATTATAAACATGTGGCAGGGAGTAGGCAAAGCAA  
TGTATGCCCCCTCCCATTTGAAGGACTAATCAAATGTGAATCAAAT---  
ATTACAGGGCTATTGTTGACAAGAGATGGTGGAATACTAATAAT-----  
-----  
-----  
CAGAATGAGACCTTCAGACCTGGAGGAGGAGATATGAGAGACAATTGGAGAAGTGAATTATACAAATATAAAG  
TAGTAAGAATTGAACCACTA---GGTCTAGCACCCACCAGGGCAAAGAGAAGAGTGGTG-----  
-----GAAAGAGAAAAAAGAGCA---ATAGGA---CTGGGAGCT-----  
TTGTTCTTGGGTTCTTGGGAGCA---GCAGGAAGCACAATG---GGCGCAGCGTCG---  
CTGACGCTGACGGTACAG---GCCAGACAA---GTACTG---TCTGGTATAGTGCAACAAAAAT---  
AATTTG---CTGAGA---GCTATTGAGGCGCAACAGCATCTGTTGCAACTCACAGTCTGGGGCATT  
>HM027827  
TTCTACTGTAATACATCAGGCCTGTTTAATGGCACCTGGAATAGTAATGATACTATAAATGAAACAGAG----  
-----  
-----  
ACAAATGACATTATAATTCTCCAATGTAGAATAAAACAAATTATAAATATGTGGCAAAGAGTAGGACAAGCAA  
TGTATGCCCCCTCCCATTAAGGACCAATCACGTGTAACCTCAAAT---  
ATAACAGGACTATTGTTGACAAGAGATGGTGGAAGAGAAAAGAGAAA-----  
-----  
-----  
CAGAATAATGAGACCTTTAGACCTGAAGGAGGAAATATGAAGGACAATTGGAGAAGTGAATTATACAAATATA  
AAGTAGTAAAAATTGAACCACTA---GGAGTAGCACCCACCAGGGCAAAGAGAAGAGTGGTG-----  
-----GAGAGAGAAAAAAGAGCA---GTTGGA---ATAGGAGCT-----  
---GTCCTCTTTGGGTTCTTAGGAGCA---GCAGGAAGCACTATG---GGCGCAGCGTCA---  
ATAACGCTGACGGTACAG---GCCAGGCAA---TTATTG---TCTGGCATAGTGCAACAGCAAAGC---  
AATTTG---CTGAGG---GCTATAGAGGCTCAACAACATATGTTGAAACTCACAGTCTGGGGCATT  
>HM215273  
TTCTATTGTAATACATCAGGATTGTTTAATAGCACTCATCCTATCAACAGGACGACAAATAGCACAGAG----  
-----  
-----  
AACAAATGGAACCTATAACTCTCCCATGCAGAATAAAACAAATTATAAATATGTGGCAGAGGGCAGGACAAGCAA  
TATATGCCCCCTCCCATCCCAGGAATAATAAGGTGTACATCAAAC---  
ATTACAGGACTATTATTAACAAGAGATGGTGGAATCATAATGATACT-----  
-----  
-----  
AACAACTACTGAAACCTTCAGACCTGGAGGAGGAGATATGAAAGATAATTGGAGAAGTGAACCTGTATAAATATA  
AAGTAGTAAAAATTGAACCACTA---GGTCTAGCACCCACCAAGGCAAAAAGAAGGTGGTG-----  
-----AAAAGAGAAAAAAGAGCA---ATAGGA---CTAGGAGCT-----  
---TTGTTCTTGGGTTCTTGGGAGCA---GCAGGAAGCACGATG---GGCGCAGCGTCA---  
CTGACGCTGACGGTACAG---GCCAGACAA---GTACTG---TCTGGTATAGTGCAACAGCAAAC---  
AATTTG---CTGATG---GCTATAGAGGCGCAACAGCATCTGTTGCAACTCACAGTCTGGGGCATT  
>HM215274  
TTCTATTGTAATACATCAAGCTTGTTTAATAGCACCTGGAACAAGAACAGTGACACCTGGAACACCACCAGGA  
ACGTG-----  
-----

CCTAAGTTAGAACCTATAACACTCCCATGCAGAATAAAGCAAATTATAAATATGTGGCAGCGAACAGGACAAG  
CAATGTATGCCCCCTCCCATCCAGGGAGTAATAAGGTGTAACCTCAACC---  
ATTACAGGACTCCTATTAACAAGAGATGGTGGGCTTAATAATGAA-----  
-----  
-----  
ACCTATGAAACCTTCAGACCTGGAGGAGGAGATATGAGGGACAATTGGAGAAGTGAGTTATACAAATATAAAG  
TAGTAAGAATTGAACCAATA---GGAATAGCACCCACCAAGGCAAAGAGAAGAGTGGTG-----  
-----GAGAGAGAAAAAAGAGCA--GTTGGA--ATGGCAGCT-----  
GTATTCATTGGGTTCTTGGGAGCA---GCAGGAAGCACTATG---GGCGCGGCGTCA---  
ATAACGCTGACGGTACAG---GCCAGACAA---TTATTG---TCTGGCATAGTGCGACAGCAAAAC---  
AAGTTG---CTGAGA---GCTATAGAGGCTCAGCAGCATCTGCTGAGACTCACGGTCTGGGGCATT  
>JX236674  
TTCTATTGCAACACATCAGACCTGTTTAATAGCAGTTGGAAGAACAGTACCAGCATACATAACAGTACC----  
-----  
-----  
AGCAATGACACTATAACTATCCCATGCAGGATAAAGCAAATTATAAATATGTGGCAGAGAGCGGGAAAAGCAA  
TATATGCCCCCTCCCATCCAAGGAGTAATAAAGTGTGAATCCAAC---  
ATTACAGGACTAATATTAACAAGAGATGGTGGGAATTAGTAACAGTACA-----  
-----  
-----  
AATAAAAAATGAAACCTTCAGACCTGGAGGGGGAGATATGAGGGACAATTGGAGAAGTGAATTATATAAGTATA  
AAGTAGTAAAAATCGAGCCAATA---GGAATAGCACCCACCAGGGCAAGGAGAAGAGTGGTG-----  
-----GAGAGAGAGAAAAAGAGCA--GTTGGA--CTAGGAGCT-----  
---GTTTTCATTGGGTTCTTAGGAGCA--GCAGGAAGCACTATG---GGCGCGGCGTCA---  
ATAACGCTGACGGTACAG---GCCAGACAA---TTATTG---TCTGGCATAGTGCAACAGCAGAGT---  
AATCTG---CTGAAG---GCTATAGAGGCTCAACAGCAGCTGTTGAGACTCACGGTCTGGGGCATT  
>KF859746  
TTCTATTGTAATACATCAAGCCTGTTCAATAGCACGTGGCCTGCTAATGACAGCATGCAGGCAAATAGCACGG  
AAAAAT-----  
-----  
AGCACGGAGATGATAAACTCTCATGCAACATAAAGCAAATTATAAATATGTGGCAGAGAGTAGGACAAGCAA  
CATATGCCCCCTCCCATCAAAGGAATAATAAAGTGTGAATCAAAC---  
ATTACAGGATTAATATTAACAAGAGATGGTGGGAATAATAACAATGGA-----  
-----  
-----  
AACAAATAAAGTGAAACCTTCAGACCTGGAGGAGGAGATATGAGGGATAATTGGAGAAGTGAATTATATAAGT  
ATAAGGTAGTAAGGATTGAACCATTA---GGAGTAGCACCCACCAGGGCAAAAAGACGAATGGTG-----  
-----GAGAGAGAGAAAAAGAGCA--GTTGGC---CTGGGAGCT---  
-----GTCTTCTTTGGGTTCTTAGGAGCA--GCAGGAAGCACTATG---GGCGCGGCGTCA---  
ATAACGCTGACGGTACAG---GCCAGACAA---TTATTG---TCTGGCATAGTGCAACAGCAAAGC---  
AATTTG---CTGAGA---GCTATAGAGGCTCAACAGCAGCTGTTGAGACTCACAGTCTGGGGCATT  
>KF859747  
TTCTACTGTGATACATCAGGCCTGTTTAATAGTACTTGGAATACCACTGACACTGGCAGCATAACTCAAAT-  
-----  
-----  
AGTACAGATAATATAACTCTCCCATGCAGAATAAAGCAAATTGTAAATATGTGGCAGAGAGTAGGACGAGCAA  
TGTACGCCCCCTCCCATCCAGGGAATAATAAGGTGTGAATCAAAC---  
ATTACAGGATTACTATTAACAAGAGATGGTGGTAACAGTACAAAT-----  
-----  
-----  
GAAACCTTCAGACCTGGGGGAGGAGATATGAAAGACAATTGGAGAAGTGAATTATACAAATATAAAGTAGTAA  
GAATTGAACCACTA---GGAATAGCACCCAACAGGGCCAGGAAAAGAGTGGTG-----  
-----GGAAGAGAAAAAAGAGCA---GTTGGA---ATTGGAGCT-----  
GTATTCCTTGGGTTCTTAGGAGCA---GCAGGAAGCACTATG---GGCGCGGCGTCA---  
ATAACGCTGACGGTACAG---GCCAGACAA---TTATTG---TCTGGCATAGTGCAACAGCAAAGC---  
AATTTG---CTGAGG---GCTATAGAGGCTCAACAGCAGATGTTGAAACTCACAGTCTGGGGCATT  
>KP109491  
TTCTATTGTAATACATCAGACCTGTTTAATAGCACCTGGCCCAGGGATGCCTGGAATAGCAGCAACCAGACTG  
GGACAAGG-----  
-----

GACAATATAAATATAACTCTCCAATGTAGAATAAAGCAAATTATAAATATGTGGCAGAGAACAGGACAAGCAA  
TATATGCCCCCTCCCATCCCAGGAAACATAACTTGTGTATCAAAC---  
ATTACAGGACTAATATTAACAAGAGATGGTGGGGCTAATAATGAA-----  
-----  
GGCAATGAAACCTTCAGACCTGGAGGAGGAGATATGAGGGACAATTGGAGAAGTGAATTATATAAGTATAAAG  
TAGTAAAAATTGAACCACTA---GGAGTGGCACCCACCAAGGCAAGGAGAAGAGTGGTG-----  
-----CAGAGAGAAAAAAGAGCA---GTTGGA---ATGGGAGCT-----  
TTGTTTCATTGGGTTCTTAGGAGCA---GCAGGGAGCACTATG---GGCGCGGCGTCA---  
ATAACGCTGACGGTACAG---GCCAGACAA---TTATTG---TCTGGTATAGTGCAACAGCAAAGC---  
AATTTG---CTGAGG---GCTATAGAGGCTCAACAACATCTGTTGAAGCTCACAGTCTGGGGCATT  
>KF716487  
TTCTATTGTAATACAACAAAATTGTTTGATAGCACTTGGAAACAAACCACTTGGAAACACAACGAGCACAGGGG  
AGACAAAT-----  
-----AACACAGGG-----  
GAGACAAATGACACTATAACTATCCCATGTAGAATAAAGCAAATTATAAATATGTGGCAGAGGACAGGACAAG  
CAATATATGCCCCCTCCCATTCAGGAATAATAAGGTGTGACTCAAAC---  
ATTACAGGACTACTATTAACAAGAGATGGTGGGCCTGGTAATACA-----  
-----  
ACTGAAATCTTCAGACCTGGAGGAGGAGATATGAGGGATAATTGGAGAAGTGAAGTATATAAATATAAAGTAG  
TAAAAGTTGAACCATTA---GGAGTAGCACCCACCAGGGCAAAGAGAAGAGTGGTG-----  
-----GAGAGAGAAAAAAGAAC---GTTGGA---CTGGGAGCT-----  
GTTTTCTTTGGGTTCTTAGGAGCA---GCAGGAAGCACTATG---GGCGCGGCGTCA---  
ATAACGCTGACGGTACAG---GCCAGACAG---TTATTG---TCTGGCATAGTGCAACAGCAAAGT---  
AATTTG---CTGAGG---GCTATAGAGGCTCAACAGCATCTGTTGAAACTCACGGTCTGGGGCATT  
>KF716490  
TTCTATTGTAATACAACAAACCTGTTTAATACTACTTGGAGTAATGGCAGCCTGGTTAATATTACGGAGTCAA  
ATAAT-----  
-----GCT---  
ACAAATAATGCTACGATTCTTCTCCCATGCAGAATAAAGCAAATTATAAATATGTGGCAGAGAGTAGGACAAG  
CAATGTATGCCCCCTCCCATCCCAGGAGTAATACAGTGACATCAAAC---  
ATTACAGGACTATTATTAACAAGAGATGGTGGGAATATTACTAAC-----  
-----  
AATACAGAGATCTTTAGACCTGGAGGGGGGAGATATGAGGGACAATTGGAGAAGTGAAGTATATAAATATAAAG  
TAGTAAGAATTGAACCATTA---GGAGTAGCACCCACCGGGCAAAGAGAAGAGTGGTG-----  
-----GAGAGAGAAAAAAGAGCAATTGCTGGA---ATAGGAGCT-----  
GTCTCTTTGGGTTCTTAGGAGCA---GCAGGAAGCACTATG---GGCGCGGCGTCA---  
CTAACGCTGACGGTACAG---GCCAGACAA---TTATTG---TCTGGCATAGTGCAACAGCAAAGC---  
AATTTG---CTGCAG---GCTATAGAGGCTCAACAGCATCTGTTGAAACTCACGGTCTGGGGCATT  
>KF716482  
TTCTATTGTGACACATCAGGCCTGTTTAATAGCAGCTGGGATGGCAACAGCGAGGATAACAATACTCAG---  
-----  
-----  
GGAAGTACACTATAACTCTCCAATGCAAAATAAAGCAAATTATAAGGATGTGGCAAAGAACAGGACAAGCAA  
TGTATGCCCCCTCCCATCCAAGGAACAATAAAGTGTCAATCAAAC---  
ATTACAGGGCTATTATTGACAAGAGATGGGGGGAGTGAAAGTACA-----  
-----  
AATGAAAGTGAAACCTTCAGACCTGGAGGAGGAAATATGAGGGACAATTGGAGAAGTGAATTATATAAATATA  
AAGTAGTAAAGATTGAACCACTA---GGAGTAGCACCCACCAGGGCAAAGAGAAGAGTGGTG-----  
-----GAGAGAGAAAAAAGAGCA---GTTGGA---CTGGGAGCT-----  
---GTCTTCATTGGGTTCTTAGGAGCA---GCAGGAAGCACTATG---GGCGCAGCGTCA---  
GTGACGCTGACGGTACAG---GCCAGACAA---TTATTG---TCTGGTATAGTGCAACAGCAAAAC---  
AATTTG---CTGAGG---GCTATAGAGGCTCAACAGCATCTGTTGAAACTCACGGTCTGGGGCATT  
>KP109493  
TTCTATTGCAACACAACAAGGCTGTTTAATAGCACTTGGAGTAATGACACTTGGGATAATAGCACTTGGGATA  
AA-----  
-----

TCAAACAACATTATAAATCTCCAATGCAGAATAAAGCAAATCATAAATATGTGGCAGAGAACAGGACGAGCAA  
TGTATGCCCCCTCCCATTCAAGGAGTAATAAGGTGTGAATCAAAC---  
ATTACAGGACTAATATTAACAAGAGATGGTGGGAATAGTAACGAG-----  
-----  
-----  
ACAGAAATCTTCAGACCTGGGGGAGGAGATATGAGGGACAATTGGAGAAGTGAATTATATAAGTATAAAGTAG  
TAAAAATTGAACCACTA---GGAGTAGCACCCACCGAGGCAAAGAGAAGAGTGGTG-----  
-----GAGAGAGAAAAAAGAGCAGCTGTTGGA---CTGGGAGCG-----  
TTCTTCATTGGGTTCTTAGGAGCA---GCAGGAAGCACTATG---GGCGCGGCGTCA---  
ATAACGCTGACGGTACAG---GCCAGACAA---TTATTG---TCTGGCATAGTGCAACAGCAAAGC---  
AATTTG---CTGAGG---GCTATAGAGGCTCAACAGCATATGTTGAAACTCACGGTCTGGGGCATT  
>KY580490  
TTCTATTGTGATACAGCAGAACTGTTTGATAGCGCTTGGAATAGTAGTAGCAATTGGACTATAACTGACAAGT  
CA-----  
-----  
AATAATACCAATATAACCTCCAGTGCAGAATAAAGCAAATTATAAATATGTGGCAGAGAGTAGGACAAGCAA  
TGTATGCCCCCTCCCATCCCAGGAGTAATAAGGTGTACATCAAAC---  
ATTACAGGACTAATATTAACAAGAGATGGTGGGGAGACTAACAATGCA-----  
-----  
-----  
ACTGAAGAAACCTTCAGACCGGGAGGAGGAGACATGAGGGACAATTGGAGAAGTGAATTATATAAATATAAAG  
TAGTAAAAATTGAACCACTA---GGAGTAGCACCCACCGGGGCAAAAAGAAGAGTGGTG-----  
-----GAGAGAGAAAAAAGAGCA---ATTGGA---ATAGGAGCT-----  
GTCTTCATTGGGTTCTTAGGAGCA---GCAGGAAGCACTATG---GGCGCAGCGTCA---  
ATAACGCTGACGGTACAG---GCCAGACAA---TTATTG---TCTGGCATAGTGCAACAGCAAAGC---  
AATTTG---CTGAAG---GCTATAGAGGCTCAACAACATCTGTTGAGACTCACAGTCTGGGGCATT  
>KP109497  
TTCTACTGTAATACATCAGGGTTGTTTAATAGTACATGGAGAAGGAACAGTACAAATGGTACATGGGAAAGTG  
ATATATCAGGG-----  
-----  
GTAAATGAGAGTACAATCACACTCCCATGCAGAATAAAACAAATTATAAACATGTGGCAGGGGGTAGGAAGAG  
CAATGTATGCCCCCTCCCATTCAGGATCAATTAATTGTTTCATCAAAT---  
ATTACAGGATTATTGTTGACAAGAGATGGTGGTACAAACAGTAGT-----  
-----  
-----  
CAGAATGACACCTTCAGACCTGGAGGAGGAGATATGAGGGACAATTGGAGAAGTGAATTATACAAATATAAAG  
TAGTAAGAATTGAACCAATA---GGTCTGGCACCCACCAAGGCACAAAGAAGAGTGGTG-----  
-----GCAAGAGAAAAAAGAGCA---ATAGGA---CTGGGAGCT-----  
ATGTTCTTGGGTTCTTGGGAGCA---GCAGGAAGCACGATG---GGCGCAGCGTCA---  
GTGACGCTGACGGTACAG---GCCAGACAG---TTATTG---TCTGGTATAGTGCAACAGCAAAAC---  
AATTTG---CTGAGG---GCTATAGAGGCGCAACAGCATCTGTTGCAACTCACAGTCTGGGGCATT  
>KF716484  
TTCTATTGTAACACATCAGGTCTGTTTAATAGCACATGGGAAAGGAATATGACATCAAATAGCACAGAG---  
-----  
-----  
TCAAATGACACCATAACTCTCCAATGCAGAATAAAGCAGATTGTAAACATGTGGCAGAGAGTAGGACAAGCAA  
TATATGCCCCCTCCCATTCCAGGAGAAATAAGGTGTAGATCAAAC---  
ATTACAGGACTAATATTAACAAGAGATGGTGGGGGGCAGAACGATACAGGA-----  
-----  
-----  
GGAGGAGGAAACGAAACCTTCAGACCTGGAGGAGGAGATATGAGGGACAATTGGAGAAGTGAATTATACAAGT  
ATAAAGTAGTAAAGATTGAACCACTA---GGAGTAGCACCCACCAAGGCAAAGAGAAGAGTGGTG-----  
-----GCGAGAGAAAAAAGAGCA---ATTGGA---CTGGGAGCT---  
-----GCGTTCCTTGGGTTCTTAGGAGCA---GCAGGAAGCACTATG---GGCGCAGCGTCA---  
ATAACGCTGACGGTACAG---GCCAGAGCA---TTATTG---TCTGGCATAGTGCAACAGCAAAGC---  
AATTTA---CTGAAG---GCTATAGAGGCTCAACAGCAACTGTTGAAACTCACGGTCTGGGGCATT  
>AY352657  
TTCTACTGCAATACATCAGGACTGTTTAATAATAGTGTATGGAGGAATGATTATCCATCAAATAGTACAGGAG  
TA-----  
-----

AAGGAGAGCGTAATCACACTCCCATCCAAATAAAACAAATTATAAACCTGTGGCAGGGAGTAGGAACAGCAA  
TGTATCCCCCTCCCATTGAAGGACTAATCAAATGTTTCATCAAAT---  
ATTACAGGACTATTATTGACAAGAGATGGTGGTGTCAATAATAGT-----  
-----  
-----  
CAGAATGAGACCTTCAGACCTGGAGGAGGAGATATGAGGGACAATTGGAGAAGTGAATTATACAAATATAAAG  
TAGTAAGACTTGAACCACTA---GGTCTGGCACCTACCAGGGCAAAGAGAAGAGTGGTG-----  
-----GAAAGAGAAAAAAGAGCA---ATAGGA---CTAGGAGCT-----  
ATGTTCCCTTGGGTTCTTGGGAGCA---GCAGGAAGCACGATG---GGCGCAGCGTCA---  
CTGACGCTGACGGTACAG---GCCAGACTG---TTATTG---TCTGGTATAGTGCAACAGCAAAAC---  
AATTTG---CTGATG---GCTATAGAGGCGCAACAGCATCTATTGCAACTCACAGTCTGGGGCATT  
>U36883  
TTCTACTGCAATACATCAGGACTGTTTAATGGTACATGGAGTAATGGTACATGGAGTAATGATACATCAAATA  
GTGCA-----  
-----  
AATGGAAATGGTACAATCACTCTCCCATGTAGAATAAAACAAATTATAAACATGTGGCAGGGAGTAGGAAAAG  
CAATGTATGCCCCCTCCCATTAAGGACGAATCCAATGTGAATCAAAT---  
ATTACAGGACTATTGTTGACAAGAGATGGCGGTGAGACCAATGAT-----  
-----  
-----  
AGTACTGAGACCTTCAGACCTGGAGGAGGAGATATGAGGGACAATTGGAGAAGTGAATTATACAAATATAAAG  
TAGTAAGAGTTGAACCACTA---GGTCTAGCACCCACCAGGGCAAAGAGAAGAGTGGTG-----  
-----GAAAGAGAAAAAAGAGCA---ATAGGA---CTAGGAGCT-----  
GTGTTCCCTTGGGTTCTTGGGAGCA---GCAGGAAGCACGATG---GGCGCAGCGTCA---  
CTAACGCTGACGGTACAG---GCCAGACAG---TTAATG---GCTGGTATAGTGCAACAGCAGAAC---  
AATTTG---CTGAGG---GCTATAGAGGCGCAACAGCACCTGTTGCAACTCACAGTCTGGGGCATT  
>KJ579955  
TTCTATTGCAACACATCAGGCCTATTTAATAGCATTTGGGAGAATGGCACT-----  
-----  
-TTGAAAAGCAATGAC-----  
AGCATGTCAAACAACATAACTCTCCAATGCAGAATAAAGCAAATTATAAATATGTGGCAGAGAACAGGACAAG  
CAATGTATGCCCCCTCCCATCCCAGGAGTAATAAGGTGTGAGTCAAAC---  
ATTACAGGATTAATATTAACAAGAGATGGTGGG-----  
-----  
-  
AATAATAACAATGAAAGTGAAACCTTCAGACCTGGAGGAGGAGATATGAGGGACAATTGGAGAAGTGAATTAT  
ATAAGTATAAAGTAGTAAAAATTGAACCACTA---GGAGTAGCACCCACCAAAGCAAGGAGAAGAGTGGTG--  
-----GAGAGAGAAAAAAGAGCAGTTGTTGGA---  
ATAGGAGCT-----GTCTTCTTTGGGTTCTTAGGAGCA---GCAGGAAGCACTATG---  
GGCGCGGCGTCA---CTAACGCTGACGGTACAG---GCCAAGCAA---TTATTG---  
TTTGGCATAGTGCAACAGCAAAGC---AATTTG---CTGAGG---  
GCTATAGAGGCTCAACAGCATCTGTTGAAACTCACGGTCTGGGGCATT  
>AF484503  
TTCTATTGTAACACATCAGGCCTGTTTAATAACAGTTGGAATGGCACGCAGATGTCAAATAGCATGAAG---  
-----  
-----  
CCAAATGACACCATAACTCTCCAATGCAGGATAAAGCAAATTGTAAATATGTGGCAGAGAGCAGGACAAGCAA  
TATATGCCCCCTCCTATCCGAGGAGTAATAAGGTGTGTATCAAAC---  
ATTACAGGACTGATATTAACAAGAGATGGTGTCTGAGGATAAGGAC-----  
-----  
-----  
AGTACAAAGGAAACCTTCAGACCTGCAGGAGGAGATATGAGGGACAATTGGAGAAGCGAATTATATAAATATA  
AAGTAGTAAAAATTGAACCACTA---GGAGTAGCACCCACCAAGGCAAAGAGAAGAGTGGTG-----  
-----GAGAGAGAAAAAAGAGCA---GTTGGA---ATAGGAGCT-----  
---GTCTTCCTTGGGTTCTTAGGAGCA---GCCGGAAGCACTATG---GGCGCAGCGTCA---  
ATAACGCTGACGGTACAG---GCCAGACAA---TTGTTG---TCTGGCATAGTGCAACAGCAAAGC---  
AATTTG---CTGAAG---GCTATAGAGGCTCAACAGCATCTGTTGAAACTCACGGTCTGGGGCATT  
>AF484521  
TTCTACTGCAATACATCACAACTATTTAATAGAACATGGAATGATAGTATATCAAATAATGCATGGAAGAATA  
ATAGT-----

-----ACA-----  
GGGGAAAATGACACAATCACTCTCCCATGCAGAATAAAACAAATTATAAACATGTGGCAGGAAGTAGGAAAAG  
CAATGTATGCCCCCTCCCATTAAGGTCTAATCAGATGTTCTCTCAAAT---  
ATTACAGGACTATTGTTAGTAAGAGATGGTGGAATAATAGTAGT-----  
-----  
-----  
CAGAATGAAACCTTCAGACCTGGAGGAGGAGATATGAGAGACAATTGGAGAAGTGAATTATACAAATATAAAG  
TAGTAAGAATTGAACCACTA---GGTCTAGCACCCACCAAGGCAAAGAGGAGAGTGGTA-----  
-----GAAAGAGAAAAAAGAGCA---ATAGGA---CTGGGAGCT-----  
GTATTCCTTGGGTTCTTGGGAGCA---GCGGGAAGCACGATG---GGCGCAGCGTCA---  
CTGACGCTGACGGTACAG---GCCAGAAAT---CTATTG---TCTGGTATAGTGCAACAGCAAAAT---  
AATTTG---CTGAGG---GCTATAGAGGCGCAACAGCATCTGTTGCAACTCACAGTCTGGGGCATT  
>AF484522  
TTCTACTGCAATACATCAGGACTGTTTAAACAATAGTGTATGGACATCAAATAGTACGATAGGG-----  
-----  
-----  
GCAAAATGGGACAATCACACTCCCATGCAGAATAAAACAAATTATAAATATGTGGCAGGGAGTAGGAAAAGCAA  
TGTATGCCCCCTCCCATTAAGGACAAATCAACTGTTTCATCAACT---  
ATTACAGGACTATTGTTGACAAGAGATGGTGGTGTAATAATAAT-----  
-----  
-----  
AGTCAGAACGAGACCTTCAGACCTGGAGGGGGAGATATGAGAGACAACCTGGAGAAATGAATTATACAAATATA  
AAGTAGTAAGAATTGAACCACTA---GGTCTAGCACCCACCAAGGCAAGGAGAAGAGTGGTG-----  
-----GAAAGAGAAAAAAGAGCA---ATAGGA---CTGGGAGCT-----  
---GTGTTCTTGGGTTCTTGGGAGCA---GCAGGAAGCACGATG---GGCGCAGCGTCG---  
CTGACGCTGACGGTACAG---GCCAGACAG---TTACTG---TCTGGTATAGTGCAACAGCAAAAC---  
AATTTG---CTGAGG---GCTATAGAGGCGCAACAGCATTTGTTGCAACTCACAGTTTGGGGCATT  
>AF484482  
TTCTACTGCAATACATCAGAACTGTTTAAATAGTGAATGGAAAAATGGGACTACATCAAACAGTACA-----  
-----  
-----  
AGAAATAGGACAATCACACTCCCATGCAGAATAAAACAAATCATCAACATGTGGCAGGGAGTAGGAAGAGCAA  
TGTATGCCCCCTCCCATTAAGGACTAATCAATTGTTTCATCAAAT---  
ATTACAGGACTATTGTTAACAAGAGATGGTGGTACAAATCAAAGT-----  
-----  
-----  
GAGGAGACTTTCAGACCTGGGGGAGGAGATATGAGAGACAATTGGAGAAATGAATTATACAAATATAAAGTAG  
TAAGAATTGAACCACTA---GGTCTAGCACCCACCAGGGCAAAAAGAAGAGTGGTG-----  
-----GAAAGAGAAAAAAGAGCA---ATAGGA---CTAGGAGCT-----  
TTGTTCTTGGGTTCTTGGGAACA---GCAGGAAGCACGATG---GGCGCAGCGTCA---  
CTGACGCTGACGGTACAG---ACCAGACAA---GTATTG---TCTGGTATAGTGCAACAGCAAAAC---  
AATTTG---CTGAGG---GCTATAGAGGCGCAACAGCATCTGTTGCAACTCACAGTCTGGGGCATT  
>AF484479  
TTCTATTGTAACACATCAGGGTTGTTTAAATAGCACTTGGACGGGTAACAACGCTGCCAACAGC-----  
-----  
-----  
ACGGAGGGCAATATAACTCTCCCGTGCAGAATAAAGCAAATTATAAATATGTGGCAGAGAGTAGGACAAGCAA  
TGTATGCCCCCTCCCATCCAAGGAGTAATAAAATGTGTATCAAAT---  
ATTACAGGAATATTATTAACAAGAGATGGTGGATCAAATGGAAC-----  
-----  
-----  
GGAATGAAACCTTCAGACCTGGAGGAGGAGATATGAGGAGACAATTGGAGAAGTGAACATATAAGTATAAAG  
TAGTAAAAGTTGAGCCACTA---GGGGTAGCACCCACCAGGGCAAGGAGAAGAGTGGTG-----  
-----GAGAGAGAAAAAAGAGCA---GTTGGA---ATAGGAGCT-----  
GTATTCCTTGGGTTCTTAGGAGCA---GCAGGAAGCACTATG---GGCGCGGCGTCA---  
ATAACGCTGACGGTACAG---GCCAGACAA---TTATTG---TCTGGCATAGTGCAAGCAGCAAAGC---  
AATTTG---CTGAGG---GCTATAGAGGCTCAACAGCATTTGTTGAGACTCACAGTCTGGGGCATT  
>AF484517  
TTCTATTGTAACACATCAGGCCCTGTTTAAACAGCACTTGGACAAATGGCACTATGCAGGGGTTAAAT-----  
-----

-----  
GGCACAGGAAACATAACACTCTCATGCAGAATAAAACAAATTATAAACATGTGGCAGGGAGTAGGAAAAGCAA  
TGTATGCCCCCTCCCATTTGAAGGACTAATCCAATGTTTCATCAAAT---  
ATTACAGGACTATTGTTGACAAGAGATGGTGGTAATAATAATAGT-----  
-----  
-----  
CAAAATGAGACCTTCAGACCTGGAGGAGGAGATATGAGAGACAATTGGAGAAGTGAATTATATAAATATAAAG  
TAGTAAGAGTTGAACCAATA---GGTCTAGCACCCACCAAGGCAAAGAGAAGAGTGGTG-----  
-----GAAAGAGAAAAAAGAGCA---ATTGGA---CTGGGAGCT-----  
GTGTTTCCTTGGGTTCTTGGGAGCA---GCAGGAAGCACGATG---GGCGCAGCGTCA---  
ATGACGCTGACGGTACAG---GCCAGACAG---GTATTG---TCTGGTATAGTGCAACAGCAAAAT---  
AATTTG---CTGAGG---GCTATAGAGGCGCAACAGCATCTGTTGCAACTCACAGTCTGGGGCATT  
>AF484488  
TTCTATTGTAATACATCAGGTCTGTTTAATAGTACTTGGGAATAGTACTAAGGAAAAATGATACTGACAGC----  
-----  
-----  
GGGAGTGGCACCATAACTCTCCCATGCAAAATAAAGCAAATTATAAATATGTGGCAGAGAGTAGGACAAGCAA  
TATATGCCCCCTCCCATCAGAGGAGTAATAAGGTGTGATTCAAAC---  
ATTACAGGACTACTGTTAACAAGAGATGGAGGGGATAGTAACAAT-----  
-----  
-----  
AATGAAACCTTCAGACCTGGAGGGGGAGATATGAGGGACAATTGGAGAAGTGAATTATATAAGTATAAAGTAG  
TAAAAATTGAGCCAATA---GGAGTAGCACCCACCAGGGCAAAGAGAAGAGTGGTG-----  
-----CAGAGAGAAAAAAGAGCA---GTTGGA---ATAGGAGCT-----  
GTATTCCTTGGGTTCTTGGGAGCA---GCAGGAAGCACTATG---GGCGCAGCGTCA---  
ATAACGCTGACGGTACAG---GCCAGACAA---TTATTG---TCTGGCATAAGTGCAACAGCAAAGC---  
AATTTG---CTGATG---GCTATAGAGGCTCAACAGCATCTGTTGAAACTCACGGTCTGGGGCATT  
>AF484492  
TTCTATTGTAACACATCAAAGTTGTTTAATAGCACTTGGGGGGAAAATAGCACTTGGGGGGAAAATAGCACTA  
GCATA-----  
-----  
-----  
GAGTTAAATGACACTATAACTCTCCCGTGCAAAATAAAGCAAATTATAAATATGTGGCAGAGAACAGGACAAG  
CAATATATGCCCCCTCCCATCCAAGGAGTGATAAGGTGCGAGTCAAAT---  
ATTACAGGACTATTGTTAACAAGAGATGGTGGTAAAAATAATAGT-----  
-----  
-----  
AATCAGAATGAAACCTTCAGACCTGGAGGAGGAGATATGAGGGACAACCTGGAGAAGTGAGTTATATAAGTATA  
AAGTAGTAAAAATTGAACCTTTG---GGAGTAGCACCCACCAAGGCAAAGAGAAGAGTGGTG-----  
-----GGAAGAGAAAAAAGAGCA---GTAGGA---CTAGGAGCT-----  
---TTGTTTCCTTGGGTTCTTGGGAGCA---GCAGGAAGCACTATG---GGCGCAGCGTCA---  
ATAACGCTGACGGTACAA---GCCAGACAA---TTATTG---TCTGGCATAAGTGCAACAGCAAAAC---  
AATTTG---CTGAGG---GCTATAGAGGCTCAACAGCATCTGTTGAAACTCACGGTCTGGGGCATT  
>AF484496  
TTCTATTGTAATACATCAGGCCTGTTTAATAGCACCTGGGACAGCAAGACAAATTACACGGAGTCAAAT----  
-----  
-----  
AGCACTACTAATATAACTCTTCCATGCAGAATAAAGCAAATTATAAATATGTGGCAGAGAGTAGGACAAGCAA  
TGTATGCCCCCTCCCATCCAAGGAGTAATAAATTGTGTGTCAGAC---  
ATTACAGGACTACTATTAGTAAGAGATGGTGGTCCTGGAAATACA-----  
-----  
-----  
TCTGAAACCTTCAGACCTGGAGGAGGAAATATGAGGGACAATTGGAGAGGTGAATTATATAAGTATAAAGTAG  
TACAAATTGAACCACTA---GGAGTAGCACCCACCAGGGCAAAGAGAAGAGTGGTG-----  
-----GAGAGAGAAAAAAGAGCA---GTTGGA---ATAGGAGCT-----  
GTATTCCTTGGGTTCTTGGGAGCA---GCAGGAAGCACTATG---GGCGCGGCGTCA---  
ATAACGCTGACGGTACAG---GCCAGACTA---TTATTG---TCTGGTATAGTGCAACAGCAAAAT---  
AATTTG---CTGAGG---GCTATAGAGGCTCAACAGCATCTGTTGAAACTCACAGTCTGGGGCATC  
>KJ948659  
TTCTATTGTAACACATCAGAACTGTTTAATAGCACTTGGGAATGACACTAAC-----  
-----

-----TGGCAGGGATCA-----  
AATGACACGGAGAACATAACGCTCCCATGCAGAATAAAGCAAATTATAAATATGTGGCAGAGAACAGGACAAG  
CGATATATGCCCCCTCCCATCCAAGGAGTAATACAGTGTAATCAAAC---  
ATTACAGGACTAATATTAACAAGAGATGGGGGG-----  
-----  
-  
AAGAATAACAGTAATAATGAAACCTTTAGACCTATAGGAGGAGATATGAGGGACAATTGGAGAAGTGAATTGT  
ATAAGTATAAAGTAGTAAAAATTGAACCCTTA---GGAGTAGCACCCACTAAGGCAAAGAGAAGAGTGGTG--  
-----GAGAGAGAAAAAGAGCA---GTGGGA---  
CTAGGAGCT-----GTTTTCTTCGGGTTCTTAGGAGCA---GCAGGAAGCACTATG---  
GGCGCGGCGTCA---ATAACGCTGACGGCACAG---GCCAGACAA---CTATTG---  
TCTGGCATAGTGCAACAGCAAAGC---AATTTG---CTGAGG---  
GCTATAGAGGCTCAACAGCATCTGTTGAAGCTCACGGTCTGGGGCATT  
>JF683744  
TTCTACTGCAATACATCACGGCTATTTAATAATAGCGCAGCATCCAAT-----  
-----  
-----  
GGTACTATCCCTATCACAATCCCATGTATCATAAACATGTGGCAGGGAGTGGGGCAGGCAATGTATCAGGCAA  
TCTATGCTGGAACATTGCAGGAAAAATAAATAGTACATCCATT---ATT-----  
TCAGCAAGAGATGGGGCCAGAGATGGAGGCAATGAT-----  
-----  
AGTAACTATACTGAAACCTTCAGGCCTGGGGGAGGAAATATGAAAGACAATTGGAGAAGTGAGCTATATAAAT  
ACAAAGTAGTAGAAATTAAACCACTA---GGAGTAGCGCCCACCAGGGCAAAAAGACAAGTGGTG-----  
-----AGAAGAGAAAAAGAGCG---GCA-----CTAGGAGCT---  
-----TTGTTCTTCGGGTTCTTGGGAGCA---GCAGGAAGCACTATG---GGCGCGGCGTCA---  
ATAACGCTGACGGTACAG---GCCAGACAA---TTATTG---TCTGGAATAGTGCAACAGCAAAT---  
AATTTG---CTGAGA---GCTATTGAAGCGCAACAACATCTGTTGCAGCTCACAGTCTGGGGCATT  
>AY371164  
TTCTATTGTAATACATCAGGCCTGTTTAATAGCACTTGGCCCAATGGCACTGGGCCTAATAATGGCACTTGA  
GC-----  
-----  
AGTGAAAGTGACATTATACAACCTCCCATGCAAAATAAAGCAAATTATAAATGTGTGGCAGAGAACAGGACAAG  
CAATATATGCCCCCTCCCATCCCAGGAGTAATAAGGTGTGAATCAAAC---  
ATTACAGGACTACTTTTAAACAAGAGATGGTGGGAATGGTGGGAATGAT-----  
-----  
-----  
ACCAATCACACTGAGATCTTCAGACCTGGAGGAGGAAATATGAAGGACAATTGGAGAAGTGAATTATATAAAT  
ATAAAGTAGTAAAAATTGAACCATTA---GGAATAGCACCCACCAGGGCAAAGAGAAGAGTGGTG-----  
-----GAGAGAGAAAAGAGAGCA---GTCGGA---ATAGGAGCT---  
-----GTGTTCTTCGGGTTCTTGGGAGCA---GCAGGAAGCACTATG---GGCGCAGCGTCA---  
ATAACGCTGACGGCACAG---GCCAGACAG---TTATTG---TCTGGTATAGTGCAACAGCAAAGC---  
AATTTG---CTAAGG---GCTATAGAGGCTCAACAGCAACTGTTGAACTCACGGTCTGGGGCATT  
>KP718932  
TTCTATTGCAATACATCAGGCCTGTTTAATAGCACGTGGAATAAAGTGGCAGCATGCAAGACAATAATAGTG  
AC-----  
-----  
ACTACTGGCACTATAATTCTCCCGTGCAACATAAAGCAAATTGTAAACATGTGGCAGAGAGTAGGACAAGCAA  
TGTATGCCCCCTCCCATCCCAGGAATAATAAATGTGACTCAAAC---  
ATTACAGGGATGTTATTGACAAGGGATGGCGGTCTTAATGATAGT-----  
-----  
-----  
GCAGAGACTTTCAGACCTGGAGGAGGAGATATGAGAGACAATTGGAGAAGTGAATTATATAAATATAAAGTAG  
TAAAAATTGAACCACTA---GGAGTAGCACCCACCAGGGCAAAGAGAAGGGTGGTG-----  
-----GAGAGAGAAAAAGAGCA---GTTGGA---CTGGGAGCT-----  
GTTTTCTTCGGGTTCTTAGGAGCA---GCAGGAAGCACTATG---GGCGCGGCGTCA---  
ATAACGCTGACGGTACAG---GCCAGACAA---TTATTG---TCTGGTATAGTGCAACAGCAAAGC---  
AATTTG---CTGAGG---GCCATAGAAGCTCAACAGCATATGTTGAGACTCACAGTCTGGGGCATT  
>GU332510  
TTCTACTGTAACACAACCCAGCTGTTTAATAACATAAGAGGA-----  
-----

-----  
AATGACACTATCACCTACCATGTAGAATAAAACAAATTGTAAATATGTGGCAGGGGGTAGGACAAGCAATGT  
ATGCTTCTCCCATTTGCCGAAAAATTTCAGTGTAACCACT---  
ATCACAGGTCTCATATTGACAAGAGATGGTGGTAATACCACCAAT-----  
-----  
-----  
GGTACCGACACCCTCAGACCTGGAGGGGGAAATATGAAAGACAATTGGAGAAGTGAATTGTATAAATATAAGG  
TAGTGAAAATTGAGCCAATA---GGAGTAGCACCCACCAAGGCAAAAAGACAAGTGGTG-----  
-----AGGAGAGAAAAAAGGGCA---GTGGGA---ATGGGAGCT-----  
GTGTTCTTGGGTTCTTAGGAGCA---GCAGGAAGCACTATG---GGCGCAGCGTCA---  
ATAACGCTGACGGTACAG---GCCAGACAA---TTATTG---TCCGGTATAGTGCAACAGCAGAGC---  
AATCTG---CTGAGG---GCTATAGAGGCTCAACAACATCTGTTGAAGCTCACGGTCTGGGGCATT  
>KY392772  
TTCTATTGTAATACCTCAGGCCTGTTTAATAGCACTTGGGTCAAGAATGGTACAGACATGAGGGCAATTGACA  
CA-----  
-GGATTAAATGACACA-----  
GAATCAAATGGCACTATAACTCTTCAATGCAGAATAAAGCAAATTATAAGAATGTGGCAGAAAGTAGGACAAG  
CAATGTATGCCCTCCCATCCCAGGAGAAATAAGGTGTAACCTCAAC---  
ATTACAGGATTACTACTAACAAGGGATGGTGATAAAAAACACTAGT-----  
-----  
-----  
GAAACCTTCAGACCTGGAGGAGGGGATATGAGGGACAATTGGAGAAGTGAATTATATAAATATAAAGTAGTCA  
AAATTGAACCACTA---GGAGTAGCACCTACCAGGGCAAGGAGAAGAGTGGTG-----  
-----GAGAGAGAAAAAAGAGCA---GTTGGA---CTGGGAGCT-----  
GTCTTCCTTGGGTTCTTAGGAGCA---GCAGGAAGCACTATG---GGCGCAGCGTCA---  
ATAACGCTGACGGTACAG---GTCAGACAA---TTATTG---TCTGGCATAGTGCAACAGCAAAGC---  
AATTTG---CTGAGG---GCTATAGAGGCGCAGCAGCATCTGCTGCAACTCACAGTCTGGGGCATT  
>EU191618  
TTCTATTGCAGTACATCAGGCCTGTTTAATAGCACTTGGGAAAATGGCACTCAGGTGGCAAATGACACGGGG-  
-----  
-----  
TCAAATGACACTATAACTCTCCCATGCAGAATAAAGCAAATTGTAAGAATGTGGCAGAGAGTAGGACAAGCAA  
TGTATGCCCCCTCCCATCCAAGGAATGATAAGATGTGAATCAAAC---  
ATTACAGGATTAATATTAACAAGAGATGGTGTGGGAATAACAGT-----  
-----  
-----  
ACAAATGAAACCTTCAGACCTGGAGGAGGAGATATGAGGGACAATTGGAGAAGTGAATTATATAAGTATAAAG  
TAGTAAAAATTGAACCATTA---GGAGTAGCACCCAGCAGGGCAAAGAGAAGAGTGGTG-----  
-----GCGAGAGAAAAAAGAGCA---GTTGGA---CTGGGAGCT-----  
GTTTCTCCTTGGGTTCTTAGGAGCA---GCAGGAAGCACTATG---GGCGCAGCGTCA---  
CTAACGCTGACGGTACAG---GCCAGACAA---TTATTG---TCTGGCATAGTGCAACAGCAGAGC---  
AATCTG---CTAAGG---GCTATAGAGGCTCAACATCATCTGTTGCAGCTCACTGTCTGGGGCATT  
>EF025170  
TTCTATTGTAATACATCAGGCCTGTTTAATAGTACTTGGCCTAATGGCACTCGGAGCGAAGAGGACAAT---  
-----  
-----  
GAAACTGACATTATAACTCTCCCATGCAGAATAAAGCAAATTATAAATATGTGGCAGAGAACAGGACAAGCAA  
TATATGCCCCCTCCCATCCAAGGAGTAATAAGGTGTGAATCAAAC---  
ATTACAGGACTACTTTTAACAAGAGATGGTGGGAATGATAGCAAT-----  
-----  
-----  
CACACTGAGATCTTCAGACCTGGAGGGGGAAATATGAAGGACAACCTGGAGAAGTGAATTATATAAGTATAAAG  
TAGTAAAAATTAAACCATTA---GGGGTAGCACCCACCAGGGCAAGAAGAAGAGTGGTG-----  
-----GGAAGAGAAAAAAGAGCA---GTTGGA---CTGGGCGTC-----  
GTCCTCCTTGGGTTCTTAGGAACA---GCAGGAAGCACTATG---GGCGCGGCGTCA---  
ATAACGCTGACGGTACAG---GTCAGACAA---TTATTG---TCTGGCATAGTGCAACAGCAAAGC---  
AATTTG---CTGAGG---GCTATAGAGGCGCAGCAACATCTGCTGCAACTCACAGTCTGGGGCATT  
>GU332511  
TTCTATTGTGATACATCAGAGCTGTTTAATAGTAGTCTCATTTGGTGATAATCTAACTAGTAGTAATACATCT-  
-----

-----  
GATAATAAAACAATCACACTTCAATGTAAGATAAAACAAATTGTAAGAATGTGGCAGAGAGTGGGACAAGCAA  
TGTATGCCCCCTCCCATCGCAGGAAATATTACATGTAAATCAAAT---  
ATTACAGGGCTACTATTAACAAGAGATGGTGGGAATAGCAGTAAA-----  
-----  
-----  
AATAATGACACCTTCAGACCTGCAGGAGGAGATATGAGGGACAATTGGAGAAGTGAATTATATAAGTATAAAG  
TAGTAAAAATTAAACCACTA---GGAGTAGCACCCACCAAGGCAAGGAGAAGAGTGGTG-----  
-----GGGAGAGAAAAAAGAGCA---GTTGGA---GTAGGAGCT-----  
GTTCTCCTTGGGTTCTTATCAGCA---GCCGGAAGCACTATG---GGCGCGGCGTCA---  
ATAACGCTGACGGTACAG---GCCAGACAA---ATATTG---TCTGGCATAGTGCAACAGCAAAGC---  
AATTTG---CTGAGA---GCTGTAGAGGCGCAGCAGCATCTGTTGCAACTCACAGTCTGGGGCATT  
>JX422197  
TTCTATTGCAATACATCAGGACTGTTTAATAGCACTTGGAGAACAATGGCAATGGCACTTGGAGGGAAAAATA  
GCACTGGGGAT-----  
-----  
GATAATACAGGCAACATAACTCTCCAATGTAGAATAAAGCAAATTGTAAATATGTGGCAGAAAGTAGGACAAG  
CAATGTATGCCCCCTCCCATCCAAGGAGTAATAAGGTGTGAATCAAAC---  
ATTACTGGGCTATTATTAACAAGAGATGGAGGAAATACTAATAATACA-----  
-----  
-----  
ATTAATGAAACCTTCAGACCTGGAGGGGGAGATATGAGGGACAATTGGAGAAGTGAATTATATAAGTATAAAG  
TAGTAAAAATTGAACCACTA---GGTGTAGCACCCACCCGTGCAAAAAGAAGAGTGGTG-----  
-----GAGAGAGAAAAAAGAGCA---GTAGGA---CTGGGAGCT-----  
GTCTTCCTTGGGTTTCTAGGAGCA---GCAGGAAGCACTATG---GGCGCGGCGTCA---  
ATAACGCTGACGGTACAG---GCTAGACAA---TTATTG---TCTGGTATAGTGCAACAGCAGAGC---  
AATTTG---CTGAAG---GCTATAGAGGCTCAACAACAGCTGTTGAGACTCACAGTCTGGGGCATT  
>AF457062  
TTCTATTGTAATACATCAAGCCTGTTTAATAGCACCTGGCCCTGGGAGAAGTTAAACAGCACAGATAATAGTA  
GC-----  
-----  
ACAGATGACAATATAACTCTCACATGCAGAATAAAGCAAATTATAAATATGTGGCAGAGAGTAGGACAAGCAA  
TATATGCCCCCTCCTATCCCAGGAGAAATAAGATGTGTATCAAAC---  
ATTACAGGACTAATATTAACAAGAGATGGTGGGGATAATAGCAGT-----  
-----  
-----  
ACAAATGAAACCTTCAGACCTGGAGGAGGAAATATGAGGGACAATTGGAGAAGTGAATTATATAAGTATAAAG  
TAGTAAAAATTGAACCACTA---GGAGTAGCACCCACCGCAAGGAGAAGAGTGGTG-----  
-----CAGAGAGAAAAAAGAGCA---GTTGGA---ATAGGAGCT-----  
GTTTTCATTGGGTTCTTAGGAGCA---GCAGGAAGCACTATG---GGCGCAGCGTCA---  
ATAACGCTGACGGTACAG---GCCAGACAA---TTATTG---TCGGGCATAGTGCAACAGCAAAGC---  
AATTTG---CTGAGG---GCTATAGAGGCTCAACAGCATCTGTTGAAACTCACAGTCTGGGGCATT  
>KY392771  
TTCTATTGTAATACAACAAAGTTGTTTAATAGCACCTGGTATAATATCAATAGTACATGGAATACCAATAGCA  
GTACT-----  
-----GGGAAT-----  
CACACCAATGATACCATTTACTGCCATGTAGAATAAAACAAATTGTAAATATGTGGCAGAGAGTAGGACAAG  
CAATGTATGCCCCCTCCCATTAGAGGAGATTAATTGCAGCTCAAAT---  
ATTACAGGAATGATATTGACATTTGACCGTCTGAATAAGAGTGAG-----  
-----  
-----  
GTGAATGTGACCTTCAGACCTGGAGGAGGAAATATGAAAGACAATTGGAGAAGTGAATTATATAAATATAAAG  
TAGTAAAAATTAGACCACTA---GGAGTAGCACCCACCAAGGCAAGGAGAAGAGTGGTG-----  
-----CAGAGAGAAAAAAGAGCA---ATAGGTGGACTGGGAGCT-----  
GCCTTCCTTGGGTTCTTAGGAGCA---GCAGGAAGCACTATG---GGCGCGGCGTCA---  
ATAACGCTGACGGTACAG---GTCAGACAA---TTATTG---TCTGGCATAGTGCAACAGCAAAGC---  
AATTTG---CTGAGA---GCTATAGAGGCGCAACAACATCTGTTGCAACTCACAGTCTGGGGCATT  
>KC186563  
TTCTATTGCAACACATCAGGCCTGTTTAATAGCACTTGGAGTAATACTACTGTGGCAAATAATACGGGG-----  
-----

-----  
GTAAATGGAAC TATAACTCCCATGCAGAATAAAACAAATTATAAATATGTGGCAGAGAGCAGGACAAGCAA  
TATATGCCCCCTCCCATCCAAGGATTAATAAATTGTGTATCAAAC ---  
ATTACAGGACTACTATTAACAAGAGATGGTCAGAAGAATGGTAGT-----  
-----  
-----  
GACAATGATACCTTTAGACCTATAGGAGGAAATATGAAGGACAATTGGAGAAGTGAATTATATAAATATAAAG  
TGGTGGAGATTAGACCATTA---GGAGTAGCACCCACCAGGGCAAAAAGAAGAGTGGTG-----  
-----GAGAGAGAAAAAAGAGCA---GTGGGA---ATAGGAGCT-----  
GTGCTCTTTGGGTTCTTGGGAGCA---GCAGGAAGCACTATG---GGCGCGGCGTCA---  
ATAACGCTGACGGTACAG---GCCAGACAA---TTGTTG---ACTGGCATAGTGCAACAGCAAAGC---  
AATTTG---CTGCAG---GCTATAGAGGCACAACAGCATCTATTAAAGCTCACTGTCTGGGGCATT  
>GU201508  
TTCTATTGCAATACATCACTCCTGTTTAAACAGCACCTGGATGGTGAATGGCACTGGGGTCACCAATGGCAATA  
AT-----  
-----  
GTCACCAATGACATTATAACACTCCCATGCAGAATAAAGCAAATTATAAATATGTGGCAGAGGGTAGGACAAG  
CAATGTACGCCCCCTCCCATCCGAGGAATCATAAATTGTGTATCAAAC ---  
ATTACAGGACTACTCTTAAACAAGAGATGGTGGTAGCAGCCAAAAC-----  
-----  
-----  
GGATCTGAGACCTTCAGACCTGGAGGAGGAGATATGAGAGACAATTGGAGAAGTGAATTATATAAGTATAAAG  
TAGTAAAAATTGACCCAATA---GGAGTAGCACCCACCAGGGCAAAAAGAAGAGTGGTG-----  
-----GAGAGAGAAAAAAGAGCA---CTTGTTGGACTGGGAGCT-----  
GTCTTCCTTGGGTTCTTAGGAACA---GCAGGAAGCACTATG---GGCGCGGCATCA---  
CTAACGCTGACGGTACAG---GCCAGACAA---TTATTG---TCTGGCATAGTGCAACAGCAGAGC---  
AATCTG---CTGAGG---GCTATAGAGGCTCAACAGCATTTGTTGAGACTCACGGTCTGGGGCATT  
>KP718927  
TTCTATTGCAATACAACACAACCTGTTTAAATAGTACCTGGCAAGAGGGCACCAACAACAGCAATGCAGGT----  
-----  
-----  
AATGATACTACTATTACACTGCCATGCAGAATAAAACAAATTGTAAACATGTGGCAGAGAGTAGGACAAGCAA  
TGTATGCCCCCTCCCATCCAAGGAGCGATAAAGTGTGTATCTAAC ---  
ATTACAGGACTAATATTGACAAGAGATGGTGGGAATAATAGGACA-----  
-----  
-----  
AATGAGACCATCAGACCTGGAGGAGGGGATATGAGGGACAATTGGAGAAGTGAATTATATAAATATAAAACAG  
TGAGAATTGAACCACTA---GGAATAGCACCCACTCATGCAAGGAGAAGAATGGTG-----  
-----AACAGAGAAAAAAGAGTA---GCTGGA---ATGGGAGCT-----  
GTCTTCCTTTGGGTTCTTAGCAGCA---GCAGGAAGCACTATG---GGCGCAGCGTCA---  
ATAACGCTGACGGTACAG---GCCAGACAA---CTATTG---TCTGGTATAGTGCAACAGCAAAGC---  
AATTTG---CTGAAT---GCTATAGAGGCTCAACAGCAGCTGTTGAAACTCACGGTCTGGGGCATT  
>KP718919  
TTCTATTGCAATACATCGGGCCTGTTTAAATAGCACTTGGGGAAGTGGGGACTACACTGCAGGAAATGACACTG  
TA-----  
-----  
-----  
GGAAATGACACTATAACTCTCCGGTGCAGAATAAAGCAAATTATAAATATGTGGCAGAAAGTAGGACAAGCAA  
TGTATGCCCCCTCCCATCCCAGGAGTAATAAGGTGTGAGTCAAAT ---  
ATTACAGGACTACTCTTGACAAGAGATGGTGGGAATAATAATAGT-----  
-----  
-----  
ATAAATGAGACTTTTCAGACCTGGAGGAGGAGATATGAGAGACAATTGGAGAAGTGAATTATATAAATATAAAG  
TAGTAAAAATTGAACCACTA---GGAATAGCACCTACCCAGGCAAGAGAAGGGTGGTG-----  
-----GAGAGAGAAAAAAGAGCA---GTTGGA---TTAGGAGCT-----  
TTCTTCCTTGGGTTCTTAGGAGCA---GCTGGAAGCACTATG---GGCGCAGCATCA---  
CTAACGCTGACGGTACAG---GCCAGACAA---TTATTG---TCTGGCATAGTGCAACAGCAAAGC---  
AATTTG---CTAAGG---GCTATAGAGGCTCAACAACAGATGTTGAGACTCACGGTCTGGGGCATT  
>KY359380  
TTTTATTGCAATACATCAGGCCTGTTTACTAATGGCACAAATATAACT-----  
-----

-----  
ACAAATATAAATATAACTCTCCCGTGCAGAATAAAACAAATTATAAATATGTGGCAGAGAGTAGGACAAGCAA  
TGTATGCCCCCTCCCATCGCCGAGTAATAAGATGTGACTCAAAC---  
ATTACAGGACTACTGTTAACAAGAGATGGTGGAATTAACAATGAC-----  
-----  
-----  
AGTAATACTGAGGTCTTCAGGCCTACAGGAGGAGATATGAGGGACAATGGGAGAAGTGAATTATACAAATATA  
AAGTAGTAAAACCTTGAACCCCTA---GGAGTAGCACCCACCAGGGCAAGGAGAAGAGTGGTG-----  
-----GGAAGAGAAAAAAGAGCA---GTTGGA---CTGGGAGCT-----  
---GCCTTCCTTGGGTTCTTAGGAGCA---GCAGGAAGCACTATG---GGCGCAGCGTCA---  
CTAACGCTGACGGTACAG---GCCAGACAA---TTATTG---TCTGGCATAGTGCAACAGCAAAGC---  
AATTTG---CTGAGG---GCTATAGAGGCTCAACAACATATGTTGAAACTCACAGTCTGGGGCATT  
>KJ849789  
TTCTATTGCAATACATCAGGCCTGTTTAAATAGCACTTGGGAATAACACACAGCCA-----  
-----  
-GATAACACAACAGAT-----  
AACACAACAGAGTTTCATAACTCTGCCATGCAGAATAAAGCAAATCATAAATATGTGGCAGAGAGTAGGACAAG  
CAATGTATGCCCCCTCCCATTCAGGAATAATAAATTGTACATCAAAT---  
ATTACAGGGCTAATATTAACAAGAGACGGT-----  
-----  
-  
AATCCTAATGCGAGTAGTGAAACCTTCAGACCTGGAGGAGGGGATATGAGGGACAATTGGAGAAGTGAAGTAT  
ATAAGTATAAAGTAGTACAAATTGAACCACTA---GGAGTAGCACCCACCTGGGCAAGGAGAAGAGTGGTG--  
-----CAGAGAGAAAAAAGAGCA---GTTGGA---  
CTGGGAGCT-----GTCTTCCTTGGGTTCTTGGGAGCA---GCAGGAAGCACTATG---  
GGCGCAGCGTCA---ATGACGCTGACGGTACAG---GCCAGACAA---TTATTG---  
TCTGGTATAGTGCAACAGCAGAGC---AATCTG---CTGAAG---  
GCTATAGAGGCTCAACAACATCTGTTGAAACTCACAGTCTGGGGCATT  
>FJ388929  
TTCTATTGCAATACATCAGGCCTGTTTAAATAGTACTTACAATGGGACAGAGGAGGCAAATGAAAATGACACTA  
AG-----  
-----  
GCAAATGACACTATAATACTTCCATGCAGAATAAAGCAATTTATAAATATGTGGCAGAGAGTAGGAAAAGCAA  
TGTATGCCCCCTCCCATTCAGGAGTAGTACAGTGTAATTCAAGC---  
ATTACAGGATTATTATTAACAAGAGATGGTGGTAGTAAAAATGAG-----  
-----  
-----  
ACTGGGGAAACATTTCAGACCTGGAGGAGGAAATATGAGAGACAATTGGAGAAGTGAATTATATAAGTATAAAG  
TAGTAAGGATTGAACCACTA---GGAGTAGCACCCACCAAGGCAAAGAGAAGAGTGGTG-----  
-----GAGAGAGAAAAAAGAGCA---GTCGGA---CTGGGAGCG-----  
GTTTTCTTGGGTTCTTAGGAACA---GCAGGAAGCACTATG---GGCGCAGCGTCA---  
ATAACGCTGACGGTACAG---GCCAGACAG---CTATTA---TCTGGCATAGTGCAACAGCAGAGA---  
AATCTG---CTGCAG---GCTATAGAGGCTCAACAGCATCTGTTGAAACTCACAGTTTGGGGCATT  
>EU191612  
TTCTATTGCGATACAACAAAATTGTTTACAACTTGTCTACAAATAGCACGGGGTTGGATGATAATAGCACGG  
GG-----  
-----  
TCGAATGATACCATAATTCTCCCGTGCAGAATAAAACAAGTTATAAATATGTGGCAGAGAGTAGGACAAGCAA  
TGTATGCCCCCTCCTATCCGAGGAGTAATAAGGTGTAACCTAAC---  
ATTACAGGACTACTATTAACAAGAGATGGTGGAATGGGAATAAC-----  
-----  
-----  
AGTACAGAGGAGATTTTCAGACCTGGAGGAGGAGATATGAGGGATAATTGGAGAAGTGAATTATATAAGTATA  
AAGTAGTAAAAATTGAACCACTG---GGAGTAGCACCCACCAGGGCAAGGAGAAGAGTGGTG-----  
-----CAGAGAGAAAAAAGAGCA---GTTGGA---CTGGGAGCT-----  
---GTCTTCCTTGGATTCTTAGGAGCA---GCAGGAAGCACTATG---GGCGCGGCGTCC---  
ATAACGCTGACGGTACAG---GCCAGACAA---TTATTG---TCTGGCATAGTGCAACAGCAGAGC---  
AATTTG---CTGAGG---GCTATAAAGGCTCAACAACATCTGTTGAAACTCACGGTCTGGGGCATT  
>AF069672

TTCTATTGTAATACATCAAGCCTGTTTAAACAGCACGTGGAGTAACGATAACAACACTCAGGGGTCAAATAGCA  
 CA-----  
 -----  
 GAGACAAAAGGCACTATAACTCTCCCATGCAGAATAAAGCAAATTATAAATATGTGGCAGAGAGCAGGAAAAG  
 CAATGTATGCCCCTCCCATCCAAGGAGTAATAAGGTGTGAATCAAAC---  
 ATCACAGGACTAATATTAACAAGAGATGGTGGAGATGCCGGGGAA-----  
 -----  
 -----  
 AATGAAACCTTCAGACCTGGAGGAGGAGATATGAGGGACAATTGGAGAAGTGAGTTATATAAGTATAAAGTAG  
 TAAAAATTGAACCACTA---GGAGTAGCACCCACCCAGGCAAGGAGAAGAGTGGTG-----  
 -----AAGAGAGAAAAAAGAGCA---GTTGGA---CTAGGAGCT-----  
 GTCTTCATTGGGTTCTTAGGAGCA---GCAGGAAGCACTATG---GGCGCGGCGTCA---  
 ATAACGCTGACGGTACAG---GCCAGACAA---TTATTG---TCTGGCATAGTGCGACAGCAAAGT---  
 AATTTG---CTGAAG---GCTATAGAGGCTCAACAACATCTGTTGAAACTCACGGTCTGGGGCATT  
 >AF411965  
 TTCTACTGCAATACATCAAGACTGTTTAAATAGCACATTTGATAACACATCTCTGGTTAATGGCACGGGTAATA  
 GTACCAAC-----  
 -----ACACAG-----  
 GGGGCAAATGACACTATATATATTCCATGCAGAATAAAACAGATTATAAACATGTGGCAAAGAGTGGGACAAG  
 CAATGTATGCCCCTCCCATTCAGGAGTAATAAAATGTGAATCAAAC---  
 ATTACAGGAATGCTATTAACAAGAGACGGTGGGTCTGAAAGTAAC-----  
 -----  
 -----  
 GGTACAGAGGTCTTCAGACCTGGAGGAGGAGATATGAAGGACAATTGGAGAAGTGAATTATATAATTATAAAG  
 TAGTAAAAATTGAACCACTA---GGAGTAGCACCCACCAGGGCAAAGAGAAGAGTGGTG-----  
 -----GAGAGAGAAAAAAGAGCA---GCTGGA---ATAGGAGCT-----  
 GTCCTCCTTGCGTTCTTAGGAGCA---GCAGGAAGCACTATG---GGCGCGGCGTCA---  
 ATAACGCTGACGGTACAG---GCCAGGAAA---TTATTG---ACTGGCATAGTGCGGCAGCAAAGC---  
 AATTTG---CTGCAG---GCTATAGAGGCTCAACAACATCTGTTGAAACTCACGGTCTGGGGCATT  
 >U86778  
 TTCTATTGCAATACATCAGGCCTGTTTAAATAGTACATACAATAGGGCATAACGACTAATGGTACAGGA---  
 -----  
 -----  
 AATGACTCAACCATCACACTCCCATGCAGAATAAAACAAATTATAAACATGTGGCAGGAGGTAGGGCGAGCAA  
 TATATGCCCCTCCCATTCAGGAAACATAACATGTATATCAAAT---  
 ATCACAGGACTATTATTGCTACGTGATGGAGGAAAAGAAGACAAT-----  
 -----  
 -----  
 AAAACAGAGATGTTTCAGACCTGGAGGAGGAGATATGAGGGACAATTGGAGAAGTGAATTATATAAATATAAAG  
 TGGTAGAAATTAAACCATTG---GGAATAGCACCCACTAAGCCACCCAGGAGAGTGGTG-----  
 -----GAGAGAGGTGGAAGAACA---GTGGGA---ATAGGAGCT-----  
 GTGTTCTTGCGTTCTCGGGAGCA---GCAGGAAGCACTATG---GGCGCGGCGTCA---  
 ATAACGCTGACGGTACAG---GCCAGACAA---CTGTTG---TCTGGTATAGTGCAACAGCAAAGC---  
 AATTTG---CTGAAG---GCTATAGAGGCTCAACAGCATCTGTTGAAACTCACGGTCTGGGGCATT  
 >L22955  
 TTCTATTGCAATACATCAAACCTGTTTAAATAGTACATACAATCCTAATAGTACAGAAAGTAAT-----  
 -----  
 -----  
 TCAGACTTAAACATCACACTCCCATGCAGAATAAAACAAATTATAAACATGTGGCAGAGAGTAGGACGAGCAA  
 TGTATGCCCCTCCCATTCAGGAGTAATAAAGTGTACATCAAAC---  
 ATTACAGGAATAATATTGTCAAGAGATGGTGGGAACAGTGGGAACAGT-----  
 -----  
 -----  
 ACCAATGGGACTGAGACCTTCAGACCTGGAGGAGGAGATATGAGGGACAATTGGAGAAGTGAATTATATAAGT  
 ATAAAGTAGTAAACTAGAACCACTA---GGAGTAGCACCCACCAAGCCAAGGAGAAGAGTGGTG-----  
 -----GAGAGAGAAAAAAGAGCA---GTTGGA---CTGGGAGCT---  
 -----GTCTTCCTTGCGTTCTTGGGAGCA---GCAGGAAGCACTATG---GGCGCGGCATCA---  
 ATAACGCTGACGGTACAG---GCCAGACAA---CTGTTG---TCTGGTATAGTGCAACAGCAAAGC---  
 AATTTG---CTGAAG---GCTATAGAGGCTCAACAGCATCTGTTGAAACTCACGGTCTGGGGCATT  
 >MK086111

TTCTATTGTAATACATCAAGCCTGTTTCGATAGTGCTTGGCTTAATAATGAAACTGGCATCGGGCAAACATCA  
 CAGAG-----  
 -----  
 TCAAATAATACTATAACTCTCCAATGCAGAATAAAACAATTTATAAATATGTGGCAGAGAGTAGGGCAAGCAC  
 TGTATGCCCCCTCCTATTCCAGGAAACATAACCTGTAGATCAAAC---  
 ATTACAGGGCTGCTACTAACAAGAGATGGTGGGAATAATACGAGTGATAATGGT-----  
 -----  
 -----  
 ACAGTTATTGAAACATTTCAGACCTGGAGGAGGAGATATGAGGGACAATTGGAGAAGTGAATTATATAAATATA  
 AAGTAGTAAAACTTGAACCACTA---GGAATAGCACCCACCGAGGCAAGGAGAAGAGTGGTG-----  
 -----GAGAGAGAAAAAAGAGCA---ATTGGA---CTAGGAGCT-----  
 ---TTTTTCCTTGGGTTCTTGGGAGCA---GCAGGAAGCACTATG---GGCGCAGCGTCA---  
 CTAACGCTGACGGTACAG---GCCAGACAA---TTATTG---TCTGGTATAGTGCAACAGCAAAAC---  
 AATTTG---CTGAAG---GCTATAGAGGCTCAGCAGCTCATGTTGAAACTCACGGTCTGGGGCATT  
 >HQ385818  
 TTCTACTGTAATACATCACAATTGTTTAATAGTACTTGGAGAATGGTACTTTTGCCAATGGCACTGAA----  
 -----  
 -----  
 GGAAATGGCACAATCACACTCCCATGCAGAATAAAGCAATTTATAAACATGTGGCAACAAGTAGGAAAAGCAA  
 TGTATGCCCCCTCCCATCAGTGGACAAATTAAGTCTCATCAAAT---  
 ATTACAGGGCTACTATTAACAAGAGATGGTGGTAGTGGTAACAGCACA-----  
 -----  
 -----  
 GAGAACGAGACTGAGATCTTCAGACCTGCAGGGGGAGATATGAGGGACAATTGGAGAAGTGAATTATATAAAT  
 ATAAAGTAGTACAAGTTGAGCCATTA---GGATTAGCACCCACCAGGGCAAAGAGAAGAGTGGTG-----  
 -----CAGAGAGAAAAAAGAGCA---ATAGGC---CGGGGAGCT---  
 -----GCCTTCCTTGGGTTCTTAGGAGCA---GCAGGAAGCACTATG---GGCGCGGCGTCA---  
 ATGACGCTGACGGTACAG---GCCAGACAA---TTATTG---TCTGGCATAGTGCAACAGCAAAGC---  
 AATTTG---CTGAGG---GCCATAGAGGCTCAGCAACATATGCTGAAACTCACGGTCTGGGGCATT  
 >MN485971  
 TTCTATTGCAATACATCAGGCCTGTTTAATAGTATTTGGAATAGTAGCACTTGGAAATAATAATAGCACTGGGA  
 ATAACAGCACA---CAG-----GAG-----  
 -----  
 -----  
 TCAAATGACACTATAACTCTCCAATGCAGTATAAAACAAATTTATAAACATGTGGCAGGGAGTAGGAAAAGCAA  
 TGTATGCCCCCTCCCATGAAGGAAAGATTGCATGTTTATCACA---  
 ATTACAGGACTAATATTAACAAAAGATGGTGGTGCAAAAAATAAT-----  
 -----  
 -----  
 AGTCAGAATGAGACTTTTCAGACCTGCAGGAGGAGATATGAGAGACAATTGGAGAAGTGAATTATACAAATATA  
 AAGTAGTAAGACTTGAACCACTA---GGTCTAGCACCCACCAGGGCAAGGAGAAGAGTGGTG-----  
 -----GTAAGAGAAAAAAGAGCA---ATAGGA---CTAGGAGCT-----  
 ---ATGTTCCCTTGGGTTCTTGGGAGCA---GCAGGAAGCACAAATG---GGCGCAGCGTCA---  
 CTGACGCTGACGGTACAG---GCCAGACAA---TTACTG---TCTGGTATAGTGCAACAGCAGAAC---  
 AATTTG---CTGAGG---GCTATTGAGGCGCAACAGCATATGTTGCAACTCACAGTCTGGGGCATC  
 >AJ277825  
 TTCTATTGTAATACATCAGGCCTGTTTAATAGCACTTGGAGCCTTAACAGCAGCGCGCCAGATGACACAGAA-  
 -----  
 -----  
 -----  
 TCAAATGACACTATAACTCTCCCATGCAGAATAAAGCAAATTTATAAACATGTGGCAAAGGGCAGGACGAGCAA  
 TATATGCCCCCTCCCATCCAAGGAATAATAAGGTGTAATTCAAGC---  
 ATTACAGGACTACTATTAACAAGAGATGGTGGGGATAACAATACG-----  
 -----  
 -----  
 CATAATGAAACCTTCAGACCTGGAGGTGGAATATGAGGGATAATTGGAGAAGTGAAGTATATAAATATAAAG  
 TAGTAAAAATTGAACCACTA---GGAGTAGCACCCACCAAGGCAAAAAGAAGAGTGGTG-----  
 -----GAGAGAGAAAAAAGAGCA---GTTGGA---CTGGGAGCT-----  
 GTCTTCATTGGGTTCTTAGGAGCA---GCAGGAAGCACTATG---GGCGCGGCGTCA---  
 ATAACGCTGACGGTACAG---GCCAGACAA---TTATTG---TCTGGCATAGTGCGACAGCAAAGC---  
 AATTTG---CTGAGG---GCTATAGAGGCTCAACAGCATCTGTTGAAACTCACGGTCTGGGGCATT  
 >HQ595799

TTCTATTGTAACACATCAAGACTGTTTAAATAGCACTTGGCATGATAACAGCACGCTAGAGTCAAATCAAACAG  
 AG-----  
 -----  
 TCAAACGATACTATAATACTCCCATGCAGAATAAAACAAATTATAAACATGTGGCAGAGAGCAGGACAAGCAA  
 TGTATGCCCCCCCCATTCAAGGAGTGATAAGGTGTGTATCAAAT---  
 ATTACAGGACTAATATTAACAAGAGATGGTGGGGATAATAACAGC-----  
 -----  
 -----  
 GCAAAACGAAACCTTCAGACCTGGAGGAGGAGATATGAGGGACAATTGGAGGAGTGAATTATATAAATATAAAAG  
 TAGTAAAAATTGAACCAATA---GGAATAGCACCCACCGAGGCAAGGAGAAGAGTGGTG-----  
 -----CAGAGAGAGAAAAAGAGCA---GTAGGA---CTAGGAGCT-----  
 GTTTTCATTGGGTTCTTAGGAGCA---GCAGGAAGCACTATG---GGCGCGGCGTCA---  
 ATGACGCTGACGGTACAG---GCCAGACAA---TTATTG---TCTGGCATAGTGCAACAGCAAAGC---  
 AATTTG---CTGAAG---GCTATAGAAGCTCAACAGCATCTGTTGAAACTCACGGTCTGGGGCATT  
 >AY322191  
 TTCTATTGTACTACCTCAGGCCTGTTTAAATGGCACTTGGGACAGCAAGCAGAAGTCAAATAGCACGGAG----  
 -----  
 -----  
 TCAGATGACACTATAACTCTCCCATGCAAAATAAAGCAAATTATAAATATGTGGCAGAGGGTGGGACAAGCAA  
 TGTATGCCCCCTCCTATCCAAGGAATAATAAGTTGTGTATCAAAC---  
 ATTACAGGACTAATATTAACAAGAGATGGTGGGGGTAATAACAGT-----  
 -----  
 -----  
 AGCAATGAAACCTTCAGACCTGGAGGAGGAGATATGAGAGACAATTGGAGAAGTGAATTATATAAGTATAAAAG  
 TAGTAAAAATTGAACCACTA---GGAGTAGCACCCACCAGGGCAAGGAGAAGAGTGGTG-----  
 -----GGGAGAGAAAAAAGAGCA---GTTGGA---ATGGGAGCT-----  
 GTCTTCCTTGGGTTCTTAGGAGCA---GCAGGAAGCACTATG---GGCGCGGCGTCA---  
 ATAACGCTGACGGTACAG---GCCAGACAA---TTATTG---TCTGGCATAGTGCAACAGCAAAGC---  
 AATTTG---CTGAGA---GCTATAGAGGCTCAACAACATCTGTTGAAACTCACGGTCTGGGGCATT  
 >JN977603  
 TTCTATTGCAACACATCACAGCTGTTTAAATTCATCACTGCTCAATAGTACAGAAAGTATTAATGAAACAAGT-  
 -----  
 -----  
 GGTAATGAAACAATCACACTCCCATGCAGAATAAAACAGATTATAAACATGTGGCAGGAGGTAGGGCGGGCAA  
 TGTATGCCCCCTCCCATTAGAGGAATAATAACATGTAAATCAAAT---  
 ATCACAGGACTACTACTGACACGTGATGGAGGAAATGAGAAAAATAACTCA-----  
 -----  
 -----  
 GAGGCAAATAACACAGAGATATTCAGGCCTGGAGGAGGAAATATGAAGGACAATTGGAGAAGTGAATTATATA  
 AGTATAAAGTAGTAAAAGTTGAACCACTA---GGAGTAGCACCCACCAAGGCAAAGAGAAGAGTGGTG-----  
 -----GAGAGAGAAAAAAGAGCA---GTAGGA---  
 ATAGGAGCT-----GTCTTCATTGGGTTCTTAGGAGCA---GCCGGAAGCACTATG---  
 GGCGCAGCGTCG---GTGACGCTGACGGTACAG---GCCAGACAA---TTATTG---  
 TCTGGCATAGTGCAACAGCAAAGT---AATTTG---CTGAGG---  
 GCTATAGAGGCTCAACAACATTTGTTGAAACTCACGGTCTGGGGCATT  
 >AY887516  
 TTCTATTGTGATACAAAAACCTGTTTAAATAGCACTTGGAACGACAGTAACATCAACATCACACAGGAGTCAA  
 ATGAC-----  
 -----ACA---  
 GATTCAAAGGCAATATAACTCTCCAGTGCAGAATAAAGCAAATTATAAATATGTGGCAGAGAGCAGGACAAG  
 CAATATATGCCCCCTCCCATCCCGGAGTAATAAGATGTGAGTCGAAC---  
 ATTACAGGAATAATATTAACAAGAGATGGTGGGAATGTTAGCAGT-----  
 -----  
 -----  
 CAAAATGAAACCTTCAGACCTGGAGGAGGAGATATGAGGGACAATTGGAGAAGTGAATTATATAAGTATAAAAG  
 TAGTAAAAATTGAACCACTA---GGAGTAGCACCTCCAAGGCAAAGAGAAGAGTGGTG-----  
 -----GAGAGAGAAAAAAGAGCA---GTCGGA---ATAGGAGCT-----  
 GTTTTCCTTGGGTTCTTAGGAGCA---GCAGGAAGCACTATG---GGCGCGGCGTCA---  
 CTGACGCTGACGGTACAG---GCCAGACAA---TTATTG---ACTGGCATAGTGCAACAGCAAAGC---  
 AATTTG---CTGAGG---GCTATAGAGGCTCAACAACATCTGTTGAAACTCACAGTCTGGGGCATT

>HQ540690

TTCTATTGTAATACATCAGGCCTGTTTAAATAGCACTTGGAACCTCTACTAATGGAAATTGGACTCAAAACGAAA  
CTGAC-----

-----  
AATAAGACTGAAACTATAAGTCTCCCATGCAGAATAAAGCAAATTATAAACATGTGGCAGAGAGTAGGACAAG  
CAATGTATGCCCCCTCCCATACAAGGAGTAATAAGCTGTAACCTCAAGC---  
ATTACAGGACTGCTACTAACAAGAGATGGTGGTTACAATAATAGC-----

-----  
AATAATGAAACCTTCAGACCTGTAGGAGGAAACATGAAGGACAATTGGAGAAGTGAATTATATAAGTATAAAG  
TAGTAAAAATTGAGCCACTA---GGAATAGCACCCACCAGGGCAAAAGGAGAGTGGTG-----  
-----GAGAGAGAAAAAAGAGCA---GTGGGA---TTCGGAGCT-----  
TTGTTCCCTTGGGTTCTTGGGAGCA---GCAGGAAGCACTATG---GGCGCAGCATCA---  
ATAACGCTGACGGTACAG---GCCAGACAA---TTATTG---TCGGGTATAGTGCAACAGCAAAAC---  
AATTTG---CTGAGG---GCTATAGAGGCGCAACAGCATATGTTGCAACTCACAGTCTGGGGCATT

>DQ093606

TTCTACTGCAATACATCAAGATTGTTTAAATAGCACATTTAAGGTCAAGGACACAGATAATAATGCTGGGGACA  
AC-----

-----  
ACAGAAGAGGATATAACTATCCCATGCAGAATAAAACAAATTATAAACATGTGGCAGAGAGTAGGACAAGCAA  
TGTATGCCCCCTCCCATTCAGAGGAGTAATAAAATGTGAATCAAGC---  
ATCACAGGAATACTATTGACAAGAGATGGGGGGGAGTCTGATAAC-----

-----  
AAAACAGAAGAGGTCTTCAGACCTGAAGGAGGAAATATGAAGGACAATTGGAGAAGTGAATTATATAATTATA  
AGGTAGTAAAAATTGAACCACTA---GGAGTAGCACCCACCAAGGCAAAGAGAAGAGTGGTG-----  
-----GAGAGAGAAAAAAGAGCAGTAGTTGGA---CTGGGAGCT-----  
---GTTTTCCCTTGGGTTCTTAGGAGCA---GCAGGAAGCACTATG---GGCGCAGCATCG---  
ATAACGCTGACGGTACAG---GCCAGGCAA---TTATTG---ACTGGCATAGTGCGGCAGCAAGGC---  
AATTTG---CTGCAG---GCTATAGAGGCTCAACAACATCTGTTGAAGCTCACTGTCTGGGGCATT

>HQ540691

TTCTACTGCAATACATCAGGCCTGTTTAAAGGGCACATTTAGGTTAATGACACGGGTAATAGTAACAGCACAC  
AG-----

-----  
GGGGCAAATGACACCATAACTATCCCATGCAGAATAAAACAGATTATAAATATGTGGCAAAGAGTGGGACAAG  
CAATGTATGCCCCCTCCCATTTGAAGGAGTAATAAAATGTAAGTCAAAC---  
ATTACAGGAATGCTATTGACAAGAGACGGCGGGGCTGAAAGCAAT-----

-----  
ACAGAGGTCTTCAGACCTGGGGGAGGAGATATGAAGGACAATTGGAGAAGTGAATTATATAATTATAAAGTAG  
TAAAAATTGAACCAGTA---GGAGTAGCACCCGCCAAGGCAAAGAGAAGAGTGGTG-----  
-----GAGAGAGAAAAAAGAGCA---GTTGGA---ATAGGAGCT-----  
GTCCTCCTTGGGTTCTTAGGAGCA---GCAGGAAGCACTATG---GGCGCAGCGTCA---  
ATAACGCTGACGGTACAG---GCCAGACAA---TTATTG---ACTGGCATAGTGCGGCAGCAAAAGC---  
AATTTG---CTGCAG---GCTATAGAGGCTCAACAACATCTGTTGAAACTCACGGTCTGGGGCATT

>HQ595773

TTCTATTGCAATACATCAAACTGTTTAAATAGCACTTGGAAGAATGACACTTGGGAGTCAAATAGCACAGAG-  
-----

-----  
TCAAATGGCACTATATATCTTAATTGCAGAATAAAACAAATTATAAACATGTGGCAGGGAGTAGGAAAAGCAA  
TGTATGCCCCCTCCCATTTGAAGGAATGATTACATGTATATCAAAT---  
ATTACAGGGATATTATTAACAAGAGATGGTGGTGCAAATAATAAT-----

-----  
AGTCAGAATGAGACTTTTCAGACCTGGAGGAGGAGATATGAGAGACAATTGGAGAAGTGAATTATATAAATATA  
AAGTAGTAAGGCTTGAACCACTA---GGTCTAGCACCCACCAAGGCAAGGAGAAGAGTGGTG-----  
-----ACAAGAGAAAAAAGAGCA---ATAGGA---CTAGGAGCT-----  
---ATGTTCCCTTGGGTTCTTGGGAGCA---GCAGGAAGCACAAATG---GGCGCAGCGTCA---  
CTGACGCTGACGGTACAG---GCCAGGCAG---TTATTG---TCTGGTATAGTGCAAGCAGCAAAAC---  
AATTTG---CTGATG---GCTATAGAGGCGCAACAACATTTGTTGCAACTCACAGTCTGGGGCATT

>HQ595793

TTCTATTGCAATACATCAGGCCTGTTTAAATAGCACTTGGAATAACAGCACACAGGTGTCAAATGACACACAG-

-----  
-----

TTAAATGACACTATAACTCTCCAATGCAGGATAAAAACAAATTATAAACTTGTGGCAGGGAGTAGGAAAAGCAA  
TGTATGCTCCTCCCATTGAAGGAAATATTACATGTTTATCAAAT---

ATTACAGGACTAATATTAACAAGAGATGGTGGTGCAAATACTACT-----  
-----

-----  
-----

AGTCAGAATGAGACTCTCAGGCCTGCAGGAGGAGATATGAGAGACAATTGGAGAAGTGAATTATACAAATATA  
AAGTAGTAAGACTTGAACCACTG---GGTCTAGCACCCACCAGGGCAAGGAGAAGAGTGGTG-----

-----GCAAGAGAAAAAAGAGCA---ATAGGA---CTAGGAGCT-----

---GTGTTCCCTTGGGTTCTTGGGAGCA---GCAGGAAGCACAAATG---GGCGCAGCGTCA---

CTGACGCTGACGGTACAG---GCCAGACAA---TTATTG---TCTGGTATAGTGCAAGCAGCAAAAC---

AATTTG---CTGAGG---GCTATAGAGGCGCAACAACACTTGTGCAACTCACAGTCTGGGGCATT

>L22942

TTCTACTGCAATACATCAAACTGTTTAAATAGTGTATGGGGAAATTCAAGTAATGTGACAAAGGTAAATGGGA  
CA-----  
-----

AAGGTAAAAGAGACAATCACACTCCCATGTAAAATAAAAACAAATTATAAACATGTGGCAGGAAGTAGGACGAG  
CAATGTATGCCCCCTCCCATTTGAAGGACTCATCAACTGTTTCATCAAAT---

ATTACAGGACTATTGTTGACAAGAGATGGTGGTGAAAAATAATAGT-----  
-----

-----  
-----

AGTCAGAATGAGACCTTCAGACCTGGAGGAGGAGATATGAGAGACAATTGGAGAAGTGAATTATACAAATATA  
AAGTAGTAAAAATTGAACCACTA---GGTCTAGCACCCACCAGCGCAAAGAGAAGAGTGGTG-----

-----GAAAGAGAAAAAAGAGCA---ATAGGA---CTGGGAGCT-----

---ATGTTCCCTTGGGTTCTTGGGAGCA---GCAGGAAGCACGATG---GGCGCAGCGTCA---

ATGACGCTGACGGTACAG---GCCAGACAG---TTAATG---TCTGGTATAGTGCAACAGCAAAAC---

AATTTG---CTGAGG---GCTATAGATGCGCAACAGCATCTGTTGCAACTCACAGTCTGGGGCATT

>DQ208482

TTCTACTGTAACACATCAGAACTGTTTAAATAGTGTATGGGCAAATGATAGTACAGAAAATAATAGTACATGGA  
AC-----  
-----

AATGAGAGTATAATCACACTCCCATGCAGAATAAAAACAAATTATAAACATGTGGCAGGGAGTAGGACGAGCAA  
TGTATGCCCCCTCCCATTTGAAGGATACATCAACTGTTTCATCAAAT---

ATTACAGGACTATTGCTGACAAGAGATGGTGGTATAAATAATAATAGT-----  
-----

-----  
-----

CATGATAATGAGACCTTCAGACCTGGAGGAGGAGATATGAGAGACAATTGGAGAAGTGAATTATACAAATATA  
AAGTAGTAAAAATTGAACCACTA---GGTCTAGCACCCACCAAGGCAAGGAGAAGAGTGGTG-----

-----GAAAAAGAAAAAAGAGCA---ATAGGA---CTAGGAGCT-----

---ATGTTCCCTTGGGTTCTTGGGAGCA---GCAGGAAGCACGATG---GGCGCAGCGTCA---

CTGGCGCTGACGGGACAG---GCCAGACAG---TTAATG---TCTGGTATAGTGCAACAGCAAAAC---

AATTTG---CTGAGG---GCTATAGATGCGCAACAGCATCTGTTGCAACTCACAGTCTGGGGCATT

>U36866

TTCTACTGCAATACATCAGACCTGTTTAAATAGTACATGGGAGAGTAATAATACATCAAATAGTACAGGGTCA-  
-----  
-----

AATAATGGTACAATCATACTTCCATGCAGAATAAAAACAAATTATAAACCTGTGGCAGCAAGTAGGAAAAGCAA  
TGTATGCCCCCTCCCATCGAAGGAATAATCACGTGTAGATCAAAT---

ATTACAGGGCTATTACTGACAAGAGATGGGGGTAGTAATAATAGT-----  
-----

-----  
-----

CATAACGAGACCTTCAGACCTGGAGGAGGAGATATGAGAGACAATTGGAGAAGTGAATTATACAAATATAAAG  
TAGTAAAAATTGAACCACTA---GAAGTAGCACCCACCAGGGCAAGGAGAAGAGTGGTG-----

-----GAGAGAGAAAAAAGAGCA---GTTGGA---ATAGGAGCT-----

GTCTTCATTGGGTTCTTAGGAGCA---GCAGGAAGCACTATG---GGCGCGGCGTCA---

ATAACGCTGACGGTACAG---GCCAGACAA---TTATTG---TCTGGCATAGTGCAACAGCAAAGT---

AATTTG---CTGAGG---GCTGTAGAGGCTCAACAGCATATGTTGAAACTCGCGGTCTGGGGCATT

>AY444799

TTCTATTGTGACACATCAGGCCTGTTTAAATAGCACGTGGAATGTCAATACCAGCGTGCAGCAGTCAAATATCA  
CGGGC-----

-----  
AATATCACGGACAATATAACTCTCCCATGCAGAATAAAGCAAATTATAAATATGTGGCAGAGAGCAGGACAAG  
CAATGTATGCCCCCTCCCATCCAAGGAAAAATAAAGTGTGTATCAAAC---  
ATTACAGGACTAATATTAACAAGAGATGGTGGAGGTAATAGCAGT-----

-----  
GCAAAATGAAACCTTTAGACCTGGAGGAGGAGATATGAGGGACAATTGGAGAAGTGAATTATATAAGTATAAAG  
TAGTAAGAATTGAACCACTA---GGAGTAGCACCCACCAAGGCAAAAAGAAGAGTGGTG-----  
-----CAGAGAGAAAAAAGAGCA---ATTGGA---ATAGGAGCT-----  
GTCCCTCATTGGGTTCTTAGGAGCA---GCCGGAAGCACTATG---GGCGCAGCGTCA---  
ATAACGCTGACGGTACAG---GCCAAACAA---TTATTG---TCTGGTATAGTGCAACAGCAAAGC---  
AATTTG---CTGAGG---GCTATAGAGGCTCAACAGCAGCTGTTGAAACTCACAGTCTGGGGCATT

>AY371160

TTCTATTGTAATACATCAGGCTTGTTTAAACAGCACTTGGTATAAGGAGACTGCCCCCTGTCAGCAGAACAGGGT  
CAAAT-----

-----  
GACACAAGTGACAATATAACTCTCCCGTGTAGAATAAAGCAAATTATAAATATGTGGCAGAGAACAGGACAAG  
CAATGTATGCCCCCTCCCATCCCAGGAATAATAAGGTGTGAGTCAAAC---  
ATTACAGGACTATTATTGACAAGAGATGGTGGGATTAGCAATAAC-----

-----  
AGTAATGAGACTTTTCAGACCTACAGGAGGAGAGATGAAAGATAATTGGAGAAGTGAATTATATAAATATAAAG  
TAGTAAAAAATTGAACCACTG---GGAGTAGCACCCACCAAGGCAAGGAGAAGGGTGGTG-----  
-----GAGAGAGAAAAAAGAGCA---GTTGGA---CTTGGAGCT-----  
GTCTTCCTTGGGTTCTTAGGAGCA---GCCGGAAGCACTATG---GGCGCGGCGTCA---  
ATAACGCTGACGGTACAG---GCCAGACAA---TTATTG---TCTGGCATAGTGCAACAGCAAAGT---  
AATTTG---CTGAAG---GCTATAGAGGCTCAACAGAATCTGTTGAGACTCACAGTCTGGGGCATT

>MK086110

TTCTATTGCAACACATCAAACCTTGTTT-----AATTGGAATGGTACTTGAATGGTAACACAACA-----  
-----

-----  
GGCAATGACACGATAACTCTCCAGTGCAGAATAAAGCAAATTATAAATATGTGGCAGAGGGTAGGACAAGCAA  
TGTATGCCCCCTCCCATCCAGGAGAAATAAAGTGTGAGTCAAAC---  
ATTACAGGACTACTATTGACAAGAGATGGTGGGAACAGTACAGAT-----

-----  
AATGAGACTTTTCAGACCTGGAGGAGGAGATATGAGAGACAATTGGAGAAGTGAATTATATAAATATAAAGTAG  
TAAAAAATTGAACCACTA---GGAGTAGCACCCAACAAGGCACGGAGGAGAGTGGTG-----  
-----GGGAGAGAAAAAAGAGCA---GTTGGA---CTAGGAGCT-----  
GTCTTCCTTGGGTTCTTGAGTGCA---GCAGGAAGCACTATG---GGCGCGGCGTCA---  
CTGACGCTGACGGTACAG---GCCAGGCAA---TTATTG---TCTGGCATAGTGCAACAGCAAAAC---  
AATTTG---CTGAGG---GCAATAGAGGCTCAACAGCATATGTTGAGACTCACGGTCTGGGGCATT

>AF377958

TTCTATTGCGATACATCAAACTGTTTAAATAGTACTTGGGACAAGAATGGCACGTGGGTTAATGGCCACACAG  
GG-----

-----  
TCAGATAATGACAATATAACTCTCCAATGCAGAATAAAACAAATTATAAATATGTGGCAGAGAGTAGGACAAG  
CAATGTATGCCCCCTCCCATCCCAGGAGTAATAAGGTGTGAATCTAAC---  
ATTACAGGACTACTATTAACAAGAGATGGAGGGAATAATAATAAT-----

-----  
AGTGCAAATGAGACCTTCAGGCCTGGAGGAGGAGATATGAGGGACAATTGGAGAAGTGAATTATATAAGTATA  
AGGTAGTAGAAATTGAACCACTA---GGTGTAGCACCCAACCATGCAAGAAGAAGAGTGGTG-----  
-----GAGAGAGAAAAAAGAGCA---GTTGGA---CTGGGAGCT-----  
---GTCTTCCTTGGGTTCTTAGGAGCA---GCAGGAAGCACTATG---GGCGCAGCGTCA---  
ATAACGCTGACGGTACAG---GCCAGACAA---TTATTG---TCTGGTATAGTGCAACAGCAGAGC---  
AATTTG---CTGAAA---GCTATAGAGGCTCAACAACATATGTTGAGACTCACGGTCTGGGGCATT

>MH705142

TTCTATTGCAATACATCAGCCCTGTTTAAATAGCAAGTGGGAAAGTGAATACAATGCCAGCGAGAATGAACAAA  
AG-----

-----  
AGTGACACTAATATAACTATTCCATGTAGAATAAAGCAATTTGTAAATGTATGGCAGAGAGTAGGACAAGCAA  
TGTATGCCCCCTCCAGTCCAAGGAGAAATAAGATGTGACTCAAAC---  
ATTACAGGACTACTATTAGAAAGAGAATATGGGGATCATCATAATGGG-----

-----  
ACAAATGAGACTTTTCAGACCTACAGGAGGAGACATGATGAACAATTGGAGAAGTGAATTATATAAGTATAAAG  
TAGTAAAAGTTGAACCACTA---GGAGTAGCACCCAGCGGAGCAAGGAGAAGAGTGGTG-----  
-----GCAAGAGAAAAAAGAGCA---CTTGAGGAGCTAGGGGCT-----  
GTCTTCCTTGCGTTCTTAGGAGCA---GCAGGAAGCACTATG---GGCGCGGCGTCA---  
CTGACGCTGACGGTACAG---GCCAGACAA---TTACTG---TCTGGTATAGTGCAACAGCAGAGC---  
AATCTG---CTAAGG---GCTATAGAGGCTCAACAACATATGTTGAAACTCACAGTCTGGGGCATT

>AY371162

TTCTATTGCAATACAACACAACCTGTTTAAATAGTACCTGGGAAAATGACACCCTGAAGGGAGCGGCA-----

-----  
GGTAATGATACTATTACACTGCCATGCAGAATAAAACAAATTGTAAACATGTGGCAGAGAGTAGGACAAGCAA  
TGTATGCCCCCTCCCATCCAAGGAGTAATACAGTGTGTATCAAAC---  
ATTACAGGACTAATATTGACAAGAGATGGTGGGAGTAATAACAAT-----

-----  
ACAAATGAGACCATCAGACCTGGAGGAGGGGAGATGAGGGACAATTGGAGAAGTGAATTATATAAATATAAAG  
TAGTACAAATTGAACCACTA---GGAGTAGCACCCACCAGGGCAAGGAGAAGAGTGGTG-----  
-----CAGAGAGAAAAAAGAGCA---GTTGGA---TTGGGAGCT-----  
CTTTTCCTTGCGTTCTTAGGAGCA---GCAGGAAGCACTATG---GGCGCAGCGTCA---  
ATAACGCTGACGGTACAG---GCCAGACAA---TTATTG---TCTGGCATAGTGCAACAGCAGGGC---  
AATCTG---CTGAGG---GCTATAGAGGCTCAACAACATCTGTTGAAGCTCACGGTCTGGGGCATT

>MH705135

TTCTATTGTGATACATCAAGCCTGTTTAAATAGCACTTGGTCCTGGGAAAATGGCAATTGGTCTTGGAATAATA  
ATGACACGACC-----

-----ACCATGAAC-----

GAGATAAATACAAATGTGACTATCCCATGCAGAATAAAGCAAATAGTAAATATGTGGCAGAGAGTAGGACAAG  
CAATGTATGCCCCCTCCCATCCCAGGAATAATAAATTGTGTATCAAAC---  
ATTACAGGACTATTATTGACAAGAGATGGTGGGAGTAATAACAGT-----

-----  
ACAAATGAGACTTTTAGACCTGGAGGAGGAGATATGAGGGACAATTGGAGAAGTGAATTATATAAGTATAAAG  
TAGTAAAAATTGAACCACTA---GGAGTAGCACCCACTAGGGCCAGGAGACGAGTGGTG-----  
-----CAGAGAGAAAAACGAGCA---ATGGGA---ATAGGAGCT-----  
GTGCTCCTTGCGTTCTTGGGAGCA---GCAGGAAGCACTATG---GGCGCGGCGTCA---  
ATAACGCTGACGGTACAG---GCCAGACAA---TTATTG---TCTGGTATAGTGCAACAGCAAAGC---  
AATTTG---CTGAGG---GCTATAGAGGCTCAACAGCATCTGTTGAAACTCACGGTCTGGGGCATT

>AF069932

TTCTATTGCAATACATCAGGCTTGTTTAAATAGCACTTGGACAAATGGGACAAACAGCACGGGG-----

-----  
ACTAATGACAATATAACTCTTCCATGCAGAATAAAGCAAATTATAAATATGTGGCAGAGAGTAGGACAAGCAA  
TGTATGCCCCCTCCCATCAAAGGAGTAATAGAGTGTAAATCAAAT---  
ATTACAGGAATACTATTAATGAGAGATGGTGGTGCTAATGATACA-----

-----  
GCTAACAGTGAGACATTTCAGACCTGGAGGAGGAGATATGAAGGACAATTGGAGAAGTGAATTATATAAGTATA  
AAGTAGTAAAAATTGAACCACTA---GGAGTAGCACCCACCAGGGCAAAGAGAAGAGTGGTG-----  
-----GAGAGAGAAAAAAGAGCA---GTTGGA---CTGGGGGCT-----  
---GTCTTCCTTGCGTTCTTAGGAGCA---GCAGGAAGCACTATG---GGCGCGGCGTCA---  
TTAACGCTGACGGTACAG---GCCAGACAA---TTATTG---TCTGGCATAGTGCAACAGCAGAGC---  
AATCTG---CTGAAG---GCTATAGAGGCTCAACAGCATCTGTTGAAACTCACAGTCTGGGGCATT

>AF069939

TTCTATTGCAACACATCAGGACTGTTTAAATAGCACTTGGGATAACAACAACATTGCCAGCTCAAACCACACAG  
GG-----

-----  
TCAAAATGATACTATAACTCTCCAATGCAGAATAAAGCAAATTATAAATCTGTGGCAGAAAGTAGGACAAGCAA  
TGTATGCCCCCTCCCATCCCAGGAATAATAAGGTGTGAATCAAAT---  
ATTACTGGACTCCTATTAACAAGAGATGGAGGGAATAATAATAGT-----

-----  
ACAAATGAGACCTTCAGACCTGGAGGAGGAGATATGAGGGACAACCTGGAGAAGTGAATTATATAAGTATAAAG  
TAGTAAAAAATTGAACCACTA---GGTGTAGCACCCACCAAGGCAAAAAGAAGAGTGGTG-----  
-----GCGAGAAAAAAAAGAGCA---GTTGGA---CTGGGAGCT-----  
GTCTTCCTTGTTTCTTAGGAGCT---GCAGGAAGCACTATG---GGCGCAGCGTCA---  
ATAGCGCTGACGGTACAG---GCCAGACAA---TTATTG---TCCGGCATAGTGCAACAGCAGAGC---  
AATCTG---CTGAGG---GCTATAGAGGCTCAACAGCATATGTTGAAACTCACGGTCTGGGGCATT

>KT427849

TTCTACTGCAACACAATACAGCTGTTTAAATAGTACTTGGTTCAATGAGAATAGTACTTGGTTCAATGAGAGTG  
GTACAGGG-----

-----  
TCAAACTGAAAATATCACACTCCCATGCAGAATAAAGCAAATTATAAATAGGTGGCAGGAAGTAGGAAAAG  
CAATGTATGCCCCCTCCCATCAGTGGACGAATTAAGTGTTCATCAAAT---  
ATTACAGGGCTGCTATTGGTAAGAGATGGTGGTGTATGGGAACGCG-----

-----  
ACAGCAGAAATCTTCAGACCTGGAGGAGGAGATATGAGGGACAATTGGAGAAGTGAATTATATAAATATAAAG  
TAGTACAAATAGAACCATTA---GGAATAGCACCCACCAAGGCGAGGAGAAGAGTGGTG-----  
-----CAGAGAGAAAAAAGAGCA---GTGGGAACGATAGGAGCT-----  
ATGTTCTTGTTTCTTGGAACA---GCAGGAAGCACTATG---GGCGCAGCGTCA---  
GTAGCGCTGACGGTACAG---GCCAGACAA---TTATTG---TCTGGTATAGTGCAACAGCAAAAT---  
AATTTG---CTGAAG---GCTATTGAGGCGCAACATCATCTGTTGCAACTCACAGTCTGGGGCATT

>KT427790

TTCTATTGCAATACATCAGGACTGTTTAAATGGTACATACAGACCTAATATTACAGGAAACCATAGTGAAATA-  
-----

-----  
GAAAAATTCGACCATTACAATCCCATGCAGAATAAAACAAATTATAAATATGTGGCAGGAGGTAGGAAAAGCAA  
TGTATGCCCCCTCCCATCAAGGAATAATAACATGTAGATCAAAT---  
ATCACAGGACTACTACTAACACGGGATGGAGGAGGCAATGTCAAT-----

-----  
GACAGCACAGAGACATTTCAGGCCTGGAGGAGGAGATATGAGGGACAATTGGAGAAGTGAATTATATAAATATA  
AAGTGGTAGAAATTAAACCATTA---GGAATAGCACCCACTGCGGCAAAAAGGAGAGTGGTG-----  
-----GAGAGAGAAAAAAGAGCA---GTGGGA---ATAGGAGCT-----  
---ATGATCTTTGGTTCTTGAGCA---GCAGGAAGCACTATG---GGCGCAGCATCA---  
ATAACGCTGACGGTACAA---GCCAGACAA---TTATTG---TCTGGGATAGTGCAACAGCAAAGC---  
AATTTG---CTGAGA---GCTATAGAGGCGCAACAGCATATGTTGCAACTCACGGTCTGGGGCATT

>KC898981

TTCTATTGTAATACATCAGGCCTGTTTAAATAGTACATACAATAATGGTACATACATGTTTAAATGGTACAAACC  
TGTCTAAT-----  
GAGACACAAGAGTATTAT-----

AATTCAGCTCAGTCATTACAATCCAATGCAAAATAAAGCAAATTATAAATATGTGGCAGGCGGTAGGACGAG  
CAATGTATGCCCCCTCCCATTCAGGAAACATAACATGTAGATCAAAT---  
ATCACAGGACTACTATTGGCACGTGATGGAGGAACAAAAATGAGACA-----

-----  
AATAATACAGAGATATTTCAGACCTGGAGGAGGAGATATGAAGGACAACCTGGAGAAGTGAATTATATAAATATA  
AAGTGGTAGAAATTAAACCATTA---GGAATAGCACCCACTGCAGCAAAAAGGAGAGTGGTG-----  
-----GAGAGAGAAAAAAGAGCA---GTGGGA---ATAGGAGCT-----  
---GTGTTCTTTGGTTCTTGAGCA---GCAGGAAGCACTATG---GGCGCGGCGTCA---  
ATGACGCTGACGGTACAG---GCCAGACAA---TTGCTG---TCTGGTATAGTGCAAGCAGCAAAGC---  
AATTTG---CTGAGG---GCTATAGAGGCGCAACAACATATGTTGCAACTCACGGTCTGGGGCATT

>KF835539

TTCTATTGTAATACTTCAGGCCTGTTTAAATGGTACATACCTGCCTAATGGTACATACATGCCTAATGATATAC  
AAGAT-----

-----  
ACAAACTCAACCATCACGATTCCATGCAGAATAAAGCAAATTATAAATATGTGGCAGGAGGTAGGACGAGCAA  
TGTATGCCCCCTCCCATTTGAAGGAAACATAACATGTAAATCAAAT---  
ATCACAGGACTACTATTGGTACGTGATGGAGGAAACCAAGAAAAAACAGGAAAT-----AAT----

-----  
-  
ACAACAAATGATACAACAGAGACATTTCAGACCTCAAGGAGGAGATATGAGGGATAATTGGAGAAGTGAATTAT  
ATAAATATAAAGTGGTAGAAATTAAGCCATTG---GGAATAGCACCCACTAAAGCAAAAAGGAGAGTAGTG--  
-----GAGAGAGAAAAAAGAGCA---GTGGGA---  
CTAGGAGCT-----GTGTTCTTGGGTTCTTGGGAGCA---GCAGGAAGCACTATG---  
GGCGCGGCGTCA---ATAACGCTGACGGTACAG---GCCAGACAA---TTGCTG---  
TCTGGTATAGTGCAACAGCAAAGC---AATTTG---CTGCAA---  
GCTATAGAGGCGCAACAGCATCTGTTGCAACTCACGGTCTGGGGCATT

>KC898983

TTCTATTGTAATACATCAAAGCTGTTTAAATGGCACATACAATGGCACAGACATGACTAATATGATTAAT----

-----  
AGTTCAGCAGTAATCATAATCACATGCAGAATAAAGCAAATTGTAAACATGTGGCAGGAGGTAGGACGAGCAA  
TGTATGCCCCCTCCCATTTGCAGGAAACATAACATGTAGATCAAAT---  
ATCACAGGACTATTATTGGTACGTGATGGAGGAAAATCAAATACT-----

-----  
ACAGAGACATTTCAGACCTCAAGGGGGAGATATGAGGGACAATTGGAGAAGTGAATTATATAAATATAAAGTGG  
TAGAAATTAAGCCATTA---GGAATAGCACCCACTGAAGCAAAAAGGAGAGTAGTG-----  
-----GAGAGAGAAAAAAGAGCA---GCGGGA---ATAGGAGCT-----  
GTGTTCTTGGGTTCTTGAGTGCA---GCCGGAAGCACTATG---GGCGCGGCGTCA---  
GTAACGCTGACGGTACAG---GCCAGACAA---TTGCTG---TCTGGTATAGTGCAACAGCAAAGC---  
AATTTG---CTGAGG---GCTATAGAGGCGCAACAGCATATGTTGCAACTCACGGTCTGGGGCATT

>HM776938

TTCTATTGTAATACATCAGGCCTGTTTAAATAGTACATACTGGCCTAATGGTACATACATGTATTATAAAACAA  
AC-----

-----  
AATGATTCAATCATCACAATCCCATGCAGAATAAAGCAAATTATAAACATGTGGCAGCAGGTAGGAAGAGCAA  
TGTATGCCCCCTCCCATTTGCAGGAAGAATAACATGTAACTCAAAT---  
ATCACAGGACTACTATTGGTACGTGATGGAGGCCTAGGTAATACTACA-----

-----  
GATAATACTACAGAGACGTTTCAGACCCCAAGGAGGAAATATGAGGGACAATTGGAGAAGTGAAGTATATAAAT  
ATAAAGTGGTAGAAATTAGCCGTTG---GGAATAGCACCCACTAAAGCAAAGAGGAGAGTGGTG-----  
-----GAGAGAGAAAAAAGAGCA---GTGGGA---ATAGGAGCT---  
-----GTGTTCTTGGGTTCTTGGGAGCA---GCAGGAAGCACTATG---GGCGCGGCGTCA---  
ATAACGCTGACGGTACAG---GCCAGACAA---TTGCTG---TCTGGTATAGTGCAACAGCAAAGC---  
AATTTG---CTGAAG---GCTATAGAGGCGCAACAGCATATGTTGCAACTCACGGTCTGGGGCATT

>KF250381

TTCTATTGTAATACATCAGGTCTGTTTAAATGGTACATACAATAGTACAAGA-----

-----  
-----TACAATAATACA-----  
AGGGAGAATGGAACCATCACAATCCCATGTAGAATAAAGCAAATTATAAACATGTGGCAAGAGGTAGGACGAG  
CAATGTATGCCCCCTCCCATTAAGGAAACATAACATGTAAATCAAAT---

ATCACAGGACTACTATTGGTACGTGATGGAGGA-----

-----  
ACAAATCAAAGTAAT---  
ACAACAGAGATATTTCAGACCTGGAGGAGGGGATATGAGGGACAATTGGAGAAGTGAATTATATAAATATAAAG  
TGGTAGAAATTAAGCCATTG---GGAGTAGCACCCACTAAAGCAAAAAGGAGAGTGGTG-----  
-----GAGAGAGAAAAAAGAGCA---GTGGGA---TTGGGAGCT-----  
ATGTTCTTGGGTTCTTGGGAGCA---GCAGGAAGCACTATG---GGCGCAGCGTCA---

ATAACGCTGACGGTACAA---GCCAGACAA---TTGTTG---TCTGGTATAGTGCAACAGCAAAGC---  
 AATTTG---CTGAGA---GCTATAGAGGCGCAACAGCATCTGTTGCAACTCACTGTCTGGGGCATT  
 >KF250382  
 TTCTATTGTAATACATCAGGCTTGTTTAATGGTACATACCATAATGGTACATAC-----  
 -----  
 ACATTTAATGGTACAGAA-----  
 GGTAATGCAAGCTCAATCATCATTCATGCAGAATAAAGCAAATTATAAATATGTGGCAAGAGGTAGGACGAG  
 CAATGTATGCCCCCTCCCATTTGAAGGAAAATTAGAATGTAAATCAAAT---  
 ATCACAGGACTACTATTGGTACGTGATGGAGGG-----  
 -----  
 ----  
 ATAAATACTACAGAGGAGACATTCAGACCTGGAGGAGGAGATATGAGGGACAATTGGAGAAATGAATTATATA  
 AATATAAAGTGGTAGAAGTTCAGCCATTG---GGAATAGCACCCACTAAAGCAAAAAGGAGAGTGGTG-----  
 -----GAGAGAGAAAAAAGAGCA---GCGGGA---  
 CTGGGAGCT-----GTGTTCCCTTGGGTTCTTGGGAGCA---GCAGGAAGCACTATG---  
 GGCGCGGCGTCA---ATAACGCTGACGGTACAG---GCCAGACAA---TTGTTG---  
 TCTGGTATAGTGCAACAGCAAAGC---AATCTG---CTGAGA---  
 GCTATAGAGGCGCAACAACATCTGTTGCAACTCACTGTCTGGGGCATT  
 >KC898988  
 TTCTATTGTAATACATCAAGCCTGTTTAATAGTACATACACGAATGGTACATACATGTTTAATGGTACGATAG  
 GTAAT-----  
 -----  
 TCAAGTTCAGACATCACAATTCAATGCAAAATAAAGCAAATTATAAACATGTGGCAGGAGGTAGGACGAGCAA  
 TGTATGCCCCCTCCCATTTAAAGGAAACATAACATGTAAATCAAAT---  
 ATCACAGGACTACTATTGGTACGTGATGGAGGAAATGGGACAAAT-----  
 -----  
 -----  
 CAGACAGAGACATTCAGACCTGGAGGAGGAGATATGAGAGACAACCTGGAGAAGTGAATTATATAAATATAAAG  
 TGGTAGAAATTAAGCCATTG---GGAGTAGCACCCACTAAGGCAAAAAGGAGAGTGGTG-----  
 -----GAGAGAGAAAAAAGAGCA---GTGGGA---ATAGGAGCT-----  
 GTGTTCCCTTGGGTTCTTAGGTGCA---GCCGGGAGCACTATG---GGCGCGGCGTCA---  
 ATAACGCTGACGGTACAG---GCCAGACAA---TTGTTG---TCTGGTATAGTGCAACAGCAAAGC---  
 AATTTG---CTGAGG---GCTATAGAGGCGCAACAGCATATGTTGCAACTCACGGTCTGGGGCATT  
 >KC899010  
 TTCTACTGTAATACAACAAAACCTGTTTAATAATACTTGAATAGTACTAAACGAGACTTTGAGAAACCTTGA  
 GTGATGATAAC-----  
 -----  
 AGAACAGGCATTATCACAATCCCATGCAGAATAAAACAAATTATAAACATGTGGCAGGGAGTAGGAAAAGCAA  
 TGTATGCCCCCTCCCATTTGCAGGAAACATAACATGTAACTCCACT---  
 ATCACAGGACTACTGTTGGTACGTGATGGAGGAAATACTACAGGGAAAAATGAT-----  
 -----  
 -----  
 ACAAATAATATAGAGATATTCAGGCCTCAAGGAGGAAATATGAAGGACAATTGGAGAAGTGAATTATATAAAT  
 ATAAAGTAGTAAAAATTGAACCATTG---GGAGTAGCACCCACCAAGGCAAAGAGAAGAGTGGTG-----  
 -----CAGAGGGAAAAAAGAGCA---GTGGGGCGTTTGGAGCT---  
 -----ATGTTCCCTTGGGTTCTTGGGAGCA---GCAGGAAGCACTATG---GGCGCAGCGTCA---  
 ATAACGCTGACGGTACAG---GCCAGACAA---TTGTTG---TCTGGTATAGTGCAACAGCAGAGA---  
 AATTTG---CTGAGG---GCTATTGAGGCGCAACAACATCTGTTGCAACTCACAGTCTGGGGCATC  
 >KC807955  
 TTCTATTGTAATACATCAAGCCTGTTTAATAGTACATACAATGGTACATACATGTTTAATGGTACAATGGTTG  
 ATAATATA-----  
 -----AATAGG-----  
 ACTTCAGACTTAAACTTCACAATCCCATGCAGGATAAAGCAAATTATAAATCTGTGGCAGGAGGTAGGACGAG  
 CAATGTATGCCCCCTCCCATTTGAAGGAAGAATAACATGTAAATCAAAT---  
 ATCACAGGACTACTATTGACACGTGATGGAGGGAATGGGACAGAGACA-----  
 -----  
 -----  
 AATCAGACAGAGATATTCAGACCTGGAGGAGGAGATATGAGGGACAATTGGAGAAGTGAATTATATAAATATA  
 AAGTAGTAGAAATTAAGCCATTG---GGAGTAGCACCCACTACAGCAAAAAGGAGAGTGGTG-----  
 -----GAGAGAGAAAAAAGAGCA---GTGGGA---ATAGGAGCT-----

---GTGTTCCCTTGGGGTCTTGGGAGTA---GCCGGAAGCACTATG---GGCGCGGCGTCA---  
 ATAACGCTGACGGTACAG---GCCAGACAA---TTGCTG---TCTGGTATAGTGCAACAGCAAAT---  
 AATTTG---CTGAGA---GCTATAGAGGCGCAACAGCATCTGTTGCAACTCACGGTCTGGGGCATT  
 >KC807982  
 TTCTATTGTAATACATCAAACTGTTTAATAGTACATACATGCCTACATACAATGATACAGAGAATAGT-----  
 -----  
 -----  
 TCAAAATGAAAGCATCACAATCCCATGCAGAATAAAGCAAATTATAAATATGTGGCAGAAGGTAGGACGAGCAA  
 TGTATGCCCCCTCCCATTCAGGAATCATAACATGTAAATCAAAT---  
 ATCACAGGACTACTATTGGCACGTGATGGAGGAAAAGGTAATGAGACAGAT-----  
 -----  
 -----  
 AATAAGACAGAAATATTTAGACCTCAAGGAGGAAATATGAGGGACAATTGGAGAAATGAATTATATAAATATA  
 AAGTGGTAGAAATCAAGCCATTG---GGAATAGCACCAACTGGAGCAAAAAGGAGAGTGGTG-----  
 -----GACAGACAAAAAAGAGCA---GTGGGA---ATAGGAGCT-----  
 ---GTGTTCCCTTGGGTTCTTGGGAGCA---GCAGGAAGCACTATG---GGCGCGGCGTCA---  
 ATAACGCTGACGGTACAG---GCCAGAAAA---TTGCTG---TCTGGTATAGTGCAACAGCAAAGC---  
 AATTTG---CTGAGA---GCTATAGAGGCGCAACAGCACATGTTGCAACTCACGGTCTGGGGCATT  
 >KF250399  
 TTCTATTGTAATACATCAAACTGTTTAATGGTACATACAATGATACAGACATGTCTAATGGTACAGAA-----  
 -----  
 -----  
 AGTAATTCAACCATCACAATTCATGCAGAATAAAGCAAATTATAAACATGTGGCAGGGGGTAGGACGAGCAA  
 TGTATGCCCCCTCCCATTTGAAGGAAACATAACATGTAAATCAAAT---  
 ATCACAGGACTACTATTGGTACGTGATGGAGGAGAAGAGACAAAT-----  
 -----  
 ----  
 GTTACAAATAACACAGAGACATTCAGACCTCAAGGAGGAGATATGAAGGACAATTGGAGAAGTGAATTATATA  
 AATATAAAGTGGTAGAAATTAAGCCATTG---GGAATAGCACCCACTGGAGCAAAAAGGAGAGTGGTG-----  
 -----GAGAGAGAAAAAAGAGCA---GTAGGA---  
 ATAGGAGCT-----GTGTTCCCTTGGGTTCTTGGGAGCA---GCAGGAAGCACTATG---  
 GGCGCGGCGTCA---ATAACGCTGACGGTACAG---GCCAGACAA---TTGTTG---  
 TCTGGTATAGTGCAACAGCAAAGC---AATTTG---CTGAGA---  
 GCTATAGAGGCGCAACAACATCTGTTGCAACTCACGGTCTGGGGCATT  
 >KF250405  
 TTCTATTGTAATACATCAGGCCTGTTTAATGGTACATACAACAATACAGCCAATAATTCAAGC-----  
 -----  
 -----  
 TCAACAGCACAATCATAATCCCATGTAGAATAAAGCAAATTATAAATATGTGGCAGGAGGTAGGACGAGCAA  
 TGTATGCCCCCTCCCATTAAGGAAACATAACATGTAAATCAAAT---  
 ATCACAGGAATATTATTGATCCGTGATGGAGGAAATGGAAATGAGACA-----  
 -----  
 -----  
 AATGAAACAGAGACATTCAGACCTCAAGGAGGAGATATGAGGGACAATTGGAGAAGTGAATTATATAAATATA  
 AAGTAGTAAAAATAGAACCATTA---GGAGTAGCACCCACCAAGGCAAAAAGAAGAGTGGTG-----  
 -----CAGAGAGAAAAAAGAGCA---GTAGGA---ATAGGAGCT-----  
 ---GTGTTCCCTTGGGTTCTTGGGAGCA---GCAGGAAGCACTATG---GGCGCGGCGTCA---  
 ATAACGCTGACGGTACAG---GCCAGACAA---TTGTTG---TCTGGTATAGTGCAACAGCAAAGC---  
 AATTTG---CTGAGG---GCTATAGATGCGCAACAACATATGTTGCAACTCACAGTCTGGGGCATC  
 >MK792287  
 TTCTATTGCAATACATCAGGCCTGTTTAATAGTACATACTGGTCTAATGGTACATACAAGATCAATGATACAT  
 ACAAGTT-----  
 -AATGATACAGAAAGT-----  
 AAGTCAATCATCTTCCAAATCCCATGCAGAATAAAGCAAATTGTAAACATGTGGCAGGAGGTAGGAAGAGCAT  
 TTTATGCCCCCTCCCATTTGAAGGAAACATAACATGTAAATCAAAT---  
 ATCACAGGACTACTATTGGTACGTGATGGAGGGCAGCCAAAAAATGGT-----  
 -----  
 ----  
 ACAAATAGTACAGAAGAGATATTCAGACCTATAGGAGGAAATATGAAGGACAATTGGAGAAGTGAATTATACA  
 AGTATAAAGTGGTAGAAATTCAACCATTG---GGAGTAGCACCCACTACAGCAAAAAGGAGAGTGGTG-----

-----GGAAGAGAAAAAAGAGCAGTATTTGGA---  
 ATAGGAGCT-----GTGTTCTTGGGTTCTTGGGAGCA---GCAGGAAGCACTATG---  
 GGCGCGGCGTCA---ATAGCGCTGACGGTACAG---GCCAGACAA---TTGCTG---  
 TCTGGTATAGTGCAACAGCAAAAC---AATTTG---CTGAGA---  
 GCTATAGAGGCGCAACAGCATATGTTGCAACTCACGGTCTGGGGCATT  
 >EU839599  
 TTCTATTGCAATACATCAAGACTATTTAATGGTACATACCCACGTATGAACAGTACAGGAGAT-----  
 -----  
 -----  
 AATTCAAGTGTAATCACACTTCAATGCAGAATAAAACAAATTATAAACATGTGGCAGAGGGTAGGACGAGCAA  
 TGTATGCCCCCTCCCATTCAGAGGAAACATAACATGTAACCTCAAGT---  
 ATCACAGGACTAATACTGACAAGGGATGGTGGTAACATAACAAAT-----  
 -----  
 -----  
 AACACAGAAGAAAAATTGAGACCTATAGGAGGAGATATGAGGGACAATTGGAGAAAGTGAATTATATAAATATA  
 AAGTGGTAGAAGTTGAGCCATTA---GGAATAGCACCTACTAATGCAAAAAGGAGAGTGGTG-----  
 -----GAGAGAGAAAAAAGAGCA---GTGGGA---GTAGGAGCT-----  
 ---ATGCTCCTTGGGTTCTTGGGAGCA---GCAGGAAGCACTATG---GGCGCGGCATCA---  
 GTGATGCTGACGGTACAG---GCCAGACAA---CTGTTG---TCTGGTATAGTGCAACAGCAAAGC---  
 AATTTG---CTGAGG---GCTATAGAGGCGCAACAGCATTTGTTGCAACTCACGGTCTGGGGCATT  
 >EU000514  
 TTCTACTGTAATACATCAAACTGTTTAATAGTACTTGGAACAGTAGTAGTACTTGGACTION-----  
 -----  
 -----  
 ACAGGAAATATCACCACAATCCCATGCAGAATAAAGCAAATTGTAAATATGTGGCAGGAAGTAGGACGAGCAA  
 TGTATGCCCCCTCCCATTTGAAGGACTAATTAGATGTACATCAAT---  
 ATTACAGGGTTACTATTAACAAGAGATGGTGGTTATGAGAACAAGACA-----  
 -----  
 -----  
 GGAACAGGACAGAGACCTTCAGACCTGCAGGAGGAAATATGAGGGACAATTGGAGAAAGTGAATTATATAAAT  
 ATAAAGTAGTAAAAATTGAACCATTA---GGAGTAGCACCCACCAAGGCAAAGAGAAGAGTGGTG-----  
 -----CAAAGAGAAAAAAGAGCA---GTGGGAGCGATAGGAGCT---  
 -----GTGTTCTTGGGTTCTTGGGAGCA---GCAGGAAGCACTATG---GGCGCAGCGGCA---  
 ATAACGCTGACGGTACAG---GCCAGACAA---TTGATG---TCTGGTATAGTGCAACAGCAGAGA---  
 AATTTG---CTGAGA---GCTATTGAGGCGCAACAGCATCTGTTGCAACTCACAGTCTGGGGCATT  
 >AB097873  
 TTCTATTGTAATACAACACAACCTGTTTAATAGTAGTTGGAATGAGACTGATATTGGGAATAATACTAGTACTG  
 GG-----  
 -----  
 AATGATACTACTATCATGCTCCCTTGCAGAATAAAACAAGTTGTAAACATGTGGCAGGAAGTAGGAAAAGCAA  
 TGTATGCCCCCTCCCATCAGAGGACTAATTAAATGTTTCATCAAT---  
 ATTACAGGGTTACTATTGACAAGAGATGGTGGTCATAATGAGACT-----  
 -----  
 -----  
 GAGACTGAGACCTTCAGACCTGGAGGAGGAGATATGAGGGACAATTGGAGAAAGTGAATTATATAAATATAAAG  
 TAGTAAAAATTGAACCATTA---GGAGTAGCACCCACCAGGGCAAAGAGAAGAGTGGTG-----  
 -----CAGAGAGAAAAAAGAGCA---GTGGGAATGATGGGAGCT-----  
 ATGTTCTTGGGTTCTTGGGAACA---GCAGGAAGCACTATG---GGCGCAGCGTCA---  
 ATAACGCTGACGGTACAG---GCCAGACAA---TTGTTG---TCTGGTATAGTGCAACAGCAGAGA---  
 AATTTG---CTGAGG---GCTATTGAGGCGCAACAGCATATATTGCAACTCACAGTCTGGGGCATC  
 >MF373189  
 TTCTACTGTAATACATCAAACCTGTTTAATACATCAAACCTGTTTAATACTGATGATAATGCAACTGGA----  
 -----  
 -----  
 AAAAGTGACACTATCACTCTCACATGCCCAAGAAAACTAATTATAAACATGTGGCAGGAATTAGGGAAAGGGA  
 AGGATGCGCCTCCCATTCGAAGCCAAAGACAATGTACATCTTCC---  
 ATTACCGGACTGCTATTGCTAATAGATGGAGGTTTAGACAACACC-----  
 -----  
 -----  
 AACACGAGACCTTCAGACCTGGAGGAGGAGATATAAGAGATAATTGGAAAAGTGGGAATATATAAATATTATG

CATTAAAAATAGAACCATTA---GGAATATCACCCAACTGCAACGAAAACAGTGATG-----  
-----CTAAGGGAACAAAGAGTA---ATGAGA---ACAGGAGCT-----  
GTGTTCCCTTGGGTTCTTGGGAGCA---GCAGGAAGCACTATG---GGCGCAGCGTCA---  
ATAACGCTGACGGTACAG---GCCAGGCTA---TTATTG---TCTGGTATAGTGCAGCAGCAGAGC---  
AATTTG---CTGAGG---GCTATTGAGGCGCAACAACATCTGTTGCAACTCACAGTCTGGGGCATC  
>KT183077  
TTCTACTGTAATACATCAAACTGTTTAATACTACACTGTTTAATAAGAATAGTACTACACTGACTTGGAATG  
ATACTGAC-----  
-----  
ACTGCAGAAAATATTACAATCCCATGCAGAATAAAACAAATTATAAATATGTGGCAGGAAGTAGGAAAAGCAA  
TATATGCTCCTCCCATCAGTGGACTAATTAGATGCTCATCAAAT---  
ATTACAGGACTGCTATTAATAAGAGATGGGGGTAATGATAATCAG-----  
-----  
-----  
ACTGAGATCTTTAGACCTGGAGGAGGAGATATGAGGGATAACTGGAGAAGTGAATTATACAAATATAAAGTAG  
TAGAAATTAAGCCATTA---GGAGTAGCACCCACCAAGGCAAAGAGAAGAGTGGTG-----  
-----CAGAGAGAAAAAGAGCA---ATAATAGGGATGGGAGCT-----  
GTGCTCTTTGGGTTCTTGGGAGCA---GCAGGAAGCACTATG---GGCGCAGCGTCA---  
ATAACGCTGACGGTACAG---GCCAGACAA---TTACTA---TCTGGTATAGTGCAACAGCAAAAC---  
AATTTG---CTGAGA---GCTATTGAGGCGCAACAACATCTGTTGCAACTCACAGTCTGGGGCATT  
>KJ849787  
TTCTACTGCAATACATCAGGACTGTTTAATTACTTCAATAATAACACCAAT-----  
-----  
-AATAACAAATCCTCT-----  
TCTGATGACACTCATATCACTCTCCCATGTCTGAATAAAACAAATTATAAACATGTGGCAGGAAGTAGGAAGAG  
CAATGTATGCTAATCCCATTCAGGAAACATTACCTGTAGATCAAAT---  
ATTACAGGCCTACTATTGACTAGAGATGGTGGT-----  
-----  
CATAATGATAATACTACTAAT-----  
CGGACTGAGATCTTTAGACCTGGGGGAGGAAATATGAAAGACAATTGGAGAAGTGAATTATATAAATACAAAG  
TAGTAGAAATTGAACCACTA---GGAGTAGCACCCACAAAGGCAAAAGACAAGTGGTG-----  
-----AGCAGACACAGAAGAGCA---GTGGGA---TTTGGAGCT-----  
GTGTTCCCTTGGGTTCTTGTCTGGCA---GCAGGAAGCACTATG---GGCGCAGCGTCA---  
GTGACGCTGACGGTACAG---GCCAGGCAA---TTATTG---TCTGGTATAGTGCAACAGCAGAAC---  
AATTTG---CTGAAA---GCTATTGAGGCGCAACAGCATTTGTTGCAACTCACAGTCTGGGGCATT  
>KJ849800  
TTCTACTGCAATACATCACAACCTGTTTAATGAGACA-----  
-----  
-----  
ATAAGCAATGACACTATCAAACCTCCCATGTCTGAATAAAACAAATTGTAAACATGTGGCAAGAAGTAGGAAAAG  
CAATGTATGCCACTCCCATTCAGGAAACATTACCTGTAACTCAAAC---  
ATTACAGGTCTACTATTGACAAGGGATGGTGGT-----  
-----  
CAGAATAATGATACCAAT---  
AAGACTGAGACCTTCAGACCTGGGGGAGGAAATATGAAGGACAATTGGAGAAGTGAATTATATAAATATAAAG  
TAGTAGAAATTCAACCACTA---GGAATAGCACCCACCAAGGCAAAAGACAAGTGGTG-----  
-----AAAAAAGAAAAAAGAGCA---ATAGGA---CTAGGAGCT-----  
ATGTTCCCTTGGGTTCTTGGGAGCA---GCAGGAAGCACTATG---GGCGCAGCGTCA---  
ATAACGCTGACGGTACAG---ACCAGACAA---TTAATG---TCTGGTATAGTGCAACAGCAAAGC---  
AATTTG---CTGAGG---GCTATTGAGGCGCAACAGCATCTGTTGCAACTCACGGTTTGGGGCATC  
>KY968400  
TTCTACTGTAATACAACACAACCTATTTAATACTACTTGGAAAAATAATAACTGAAGAGACAAATAGCACTA  
AA-----  
-----  
GGAATGACACTATCACACTCCCATGCAGAATAAAACAGATCATAAATATGTGGCAGGAAGTAGGAAAAGCAA  
TGTATGCCCCCTCCTATCAGCGGAAAAATTAGATGCTCATCAAAT---  
ATTACAGGACTGCTACTAACAAGAGATGGTGGTATTCATAACAATAGC-----  
-----  
-----  
AATGGGACTGAGACCTTCAGACCTGGGGGAGGAAATATGAAGGATAATTGGAGAAGTGAATTATATAAATATA

AAGTAGTACAAATTGAACCATTA---GGAGTAGCACCCACCAGGGCAAAGCGAAGAGTGGTG-----  
 -----CAGAGAGAAAAAAGAGCA---GCAGGA---ATGGGAGCT-----  
 ---TTGTTCCCTTGGGTTCTTGGGAGCA---GCAGGAAGCACTATG---GGCGCAGCGGCA---  
 GTGACGCTGACGGTACAG---GCCAGACAA---TTATTG---TCTGGTATAGTGCAACAGCAAAAC---  
 AATTTG---CTGATG---GCTATTGAGGCGCAACAGCATCTGTTGCAACTCACAGTCTGGGGCATC  
 >AY037267  
 TTCTACTGTAATACAACACCGCTATTTAATAGTACTTGGCCGTCTAATAATACTCAGAATAATACTGAC----  
 -----  
 -----  
 CCTGGAAGAAACATCACACTTCAATGCAGAATAAAACAAATTATAAACATGTGGCAGGAAGTAGGAAGAGCAA  
 TGTATGCCCCCTCCCATTAAGGACTAATTAGTTGTTTCATCAAAT---  
 ATTACAGGGCTACTATTAAACATTTCGATGGTGGTAAACCGAATAGC-----  
 -----  
 -----  
 ACCAACGAGACTTTTCAGACCAGCAGGAGGAAATATGAGGGACAATTGGAGAAGTGAATTATATAAATATAAAG  
 TAGTAAAAATTGAGCCATTA---GGAGTAGCACCCAACAAGGCAAAAGAAGAGTGGTG-----  
 -----CAAAGAGAAAAAAGAGCA---GTGGGAACAATAGGAGCC-----  
 ATGTTCCCTTGGGTTCTTGGGAGCA---GCAGGAAGCACTATG---GGCGTAGCGTCA---  
 ATGACGCTGACGGTACAG---GCCAGACAA---TTATTG---TCTGGTATAGTGCAACAGCAGAAC---  
 AATCTG---CTGAGG---GCTATTGAGGCGCAACAGCATATGTTGCAACTCACAGTCTGGGGCATC  
 >KY968405  
 TTCTACTGTAATACAACACCACTGTTTAATAGCACTTGGAAATAGGACTAATAGCACTTGGAAATAGGAATGGGA  
 ATAGT-----  
 -----  
 -----  
 ACTAATGGTACAATCACACTCCAATGCAGAATAAAACAAATTATAAACATGTGGCAGGAAGTAGGAAAAGCAA  
 TGTATGCCCCCTCCCATCCAAGGACTAGTTAACTGTTTCATCAAAT---  
 ATTACAGGTCTACTATTGACAAGAGATGGTAGTCAG-----  
 -----  
 -----  
 AATGATACTGAGACCTTCAGACCTGGGGGAGGAGATATGAAAGACAATTGGAGAAGTGAATTATATAAATATA  
 AAGTAGTAAGAATTGAACCATTA---GGAGTAGCACCAACAAGGCAAAAGAGAAGAGTGGTG-----  
 -----CAGAGAGAAAAAAGAGCA---GTGGGA---CTAGGAGCT-----  
 ---ATGTTCCCTTGGGTTCTTGGGAGCA---GCAGGAAGCACTATG---GGCGCAGCGTCA---  
 GTGACGCTGACGGTACAG---GCCAGACAA---TTATTG---TCTGGTATAGTGCAACAGCAGAAC---  
 AATCTG---CTGAGA---GCTATTGAGGCGCAACAACATCTGTTGCAACTCACAGTCTGGGGCATC  
 >MH078535  
 TTTTACTGCAATACAGCAGGATTGTTTAATAACATAAAA-----  
 -----  
 -----  
 AATAATGGAACAATCATACTCCCTTGCAGAATAAAACAAATAATAAACATGTGGCAGGAAGTAGGAAAAGCAA  
 TGTATGCTCCTCCCATCAGCGGACGAATCAACTGTTTCATCAAAT---  
 ATTACAGGTCTAATATTGACAAGAGATGGTGGCTATCAAATGATAGT-----  
 -----  
 -----  
 AATGCTAGTGAAATCTTCAGACCTGGAGGAGGAGATATGAGGGACAATTGGAGAAGTGAATTATATAAATATA  
 AAGTAGTAAAAGTTGAACCATTA---GGGATAGCACCCACCAAGGCAAAAGAGAAGAGTGGTG-----  
 -----CAGAGAGAAAGAAGAGCA---GTGGGA---CTAGGAGCT-----  
 ---GTGTTCCCTTGGGTTCTTGGGAGCA---GCAGGAAGCACTATG---GGCGCAGCGTCA---  
 ATAACGCTGACGGTACAG---GCCAGACAA---TTATTG---TCTGGTATAGTGACAGCAGAGAAC---  
 AATCTG---CTGAGG---GCTATTGAGGCGCAACAGCACCTGTTGCAACTCACAGTCTGGGGCATC  
 >AF408628  
 TTCTACTGTAACCAACACCGCTGTTTAATAGTACTTGGCATACAAATGGTACTAGTACTTTAGAGTCAAATG  
 CCACT-----  
 -----  
 -----  
 GAAGGAAACGACACAATCATACTCCCATGCAGAATAAAACAAATTATAAACAGGTGGCAGGAAGTAGGAAAAG  
 CAATGTATGCCCCCTCCCATCAGAGGAATAATTAAGTGTATTATCAAAT---  
 ATTACAGGGCTGCTGTTAATAAGAGATGGTGGTAATCAGAATCAGACA-----  
 -----  
 -----  
 GGGGATCAGACAGAGACCTTCAGACCTGGAGGAGGAAATATAAAAGACAATTGGAGAAGTGAATTATATAAAT

ATAAAGTAGTAGAAATTGAACCATTA---GGAGTAGCACCCACCAAGGCAAAGAGAAGAGTGGTG-----  
 -----CAGAGAGAAAAAAGAGCA---GCG-----ATAGGAGCT---  
 -----ATATTCCTTGGGTTCTTGGGAGCA---GCAGGAAGCACTATG---GGCGCAGCGTCA---  
 ATAACGCTGACGGTACAG---GCCAGACTA---TTATTG---TCTGGTATAGTGCAACAGCAGAAC---  
 AATTTG---CTGAGG---GCTATTGAGGCACAACAACATCTGTTGCAACTCACAGTCTGGGGCATC  
 >AY037278  
 TTCTACTGCAATACATCAGGACTGTTTAATAACACAAAAGAA-----  
 -----  
 -----  
 AATGGCACTATTATTCTCCCATGTAGAATAAAACAAATTGTAAACATGTGGCAGGAAGTGGGACAAGCAATGT  
 ATGCCGCTCCCATTCAGGAAACATTTCTGTAACTCAAAT---  
 ATTACAGGTCTACTATTGACAAGAGATGGTGGTCAGAATAATGATACT-----  
 -----  
 -----  
 AATGGAAGTGAAGTCTTCAGACCTGGGGGAGGAAATATGAAAGACAATTGGAGAAATGAATTATATAAAATATA  
 AGGTAGTAGAAATTGAACCACTA---GGAATAGCACCCACCAGGGCAAAGAGACGAGTGGTG-----  
 -----GAGAGAGAAAAAAGAGCA---GTGGGA---ATAGGAGCT-----  
 ---TTGTTCCCTTGGGTTCTTGGGAGCA---GCAGGAAGCACTATG---GGCGCAGCGTCA---  
 ATAACGCTGACGGTACAG---GCCAGGCAA---TTATTG---TCTGGAATAGTGCAACAGCAGAAC---  
 AATCTG---CTGAGA---GCTATTGAAGCGCAACAACATATGTTGCAGCTCACAGTCTGGGGCATT  
 >AY037283  
 TTCTACTGCAATACATCAAGACTGTTTAATGACACACTGTTTAATGATACAGAA-----  
 -----  
 -----  
 TCCAATGAAACTATTATTCTCCCATGTAAAATAAAACAAGTTGTAAACCTGTGGCAGGAAGTGGGACGAGCAA  
 TGTATGCCGCTCCCATTCAGGAGCCATTACCTGTAACTCAACT---  
 ATTACAGGTCTATTATTGACAAGAGATGGTGGTCAGAGTAATGATACTAAT-----  
 -----  
 -----  
 GGTACTAAGATTGAGACCTTCAGACCTGGGGGAGGAAATATGAAAGACAATTGGAGAAGTGAATTATATAAAAT  
 ATAAAGTAGTAGAAATTGAACCAATA---GGAGTAGCACCCACCAAGGCAAAAAGACAAGTGGTG-----  
 -----AGGAGAGAAAAAAGAGCA---GCA-----TTGGGAGCG---  
 -----TTGCTCCTTGGGTTCTTGGGAGCA---GCAGGAAGCACTATG---GGCGCGGCGTCA---  
 ATAACGCTGACGGTACAG---GCCAGACAA---TTATTG---TCTGGAATAGTGCAACAGCAAAAC---  
 AATTTG---CTGAGG---GCTATTGAAGCGCAACAGCATCTGTTGCAGCTCACAGTCTGGGGCATT  
 >DQ358803  
 TTCTACTGTAATACAACACAACACTGTTTAATAGTACTTGGGATAGTACTGCAGGGAGCAACACTGAT-----  
 -----  
 -----GGAAGTGACGCCATCATACTCCTATGCCGAATA---  
 AACAAATTATACATGTGGCAGAAGTAGGAAAAGC---  
 ATGTTTGCCCCTCCCATCAGCGGACAAATCAGATGCTCATCAAAT---  
 ATTACAGGTATACTATTGACAAGAGATGGTGGTCAGAATAATGATACT-----  
 -----  
 -----  
 AATGAGACTGAGATCTTCAGACCTGGAGGAGGAGATATGAGAGACAATTGGAGGAGTGAATTATATAGATATA  
 AAGTGGTAAAAATTGAGCCATTA---GGAGTAGCACCCACCTTGGCAAAGAGAAGAGTGGTG-----  
 -----CAGAGAGAAAAAAGAGCA---GTGGGG---ATAGGAGCT-----  
 ---TTGTTCCCTTGGGTTCTTGGGAGCA---GCAGGAAGCACTATG---GGCGCAGCGTCA---  
 ATAACGCTGACGGTACAG---GCCAGACAA---TTATTG---TCTGGTATAGTGCAACAGCAGAAC---  
 AATTTG---CTGAGG---GCTATTGAGGCGCAACAACATCTGTTGCAACTCACAGTCTGGGGCATC  
 >DQ358804  
 TTCTACTGCAATACATCAGGACTGTTTGATGAAACAAAATTTAATGACACAGAATCC-----  
 -----  
 -----  
 AATAACGCCACTATCACTCTCCTATGTGCAATAAAACAAATTGTAAACATGTGGCAGGAAGTAGGACGAGCAA  
 TGTATGCCAATCCCATTCAGGAAGCATTACCTGTAACTCAACT---  
 ATCACAGGTCTATTATTGACAAGAGATGGTGGTCAGAATACTACG-----  
 -----  
 -----  
 AATAGTACTGAGATCTTCAGACCTGGGGGAGGAAATATGAAAGACAATTGGAGAAGTGAATTATATAAAATATA

AAGTAGTAGAAATTGAACCACTA---GGAATAGCACCCCTCCAGGGCAAAAAGACAAGTGGTG-----  
-----AAGAGAGAAAAAAGAGCA---GTTGGA---CTAGGAGCT-----  
---ATGTTTCATTGGGTTCTTGGGAGCA---GCAGGAAGCACTATG---GGCGCGGCGTCA---  
ATAACGCTGACGGTACAG---GCCAGACAA---TTACTG---TCTGGAATAGTGCAGCAGCAAAAT---  
AATTTG---CTGAGG---GCTATTGAAGCGCAACAGCATCTGTTGCAGCTCACAGTCTGGGGCATT  
>DQ358806

TTCTACTGCAATACATCAGGACTGTTTAATGACACAGTACCC-----  
-----  
-----  
AATGGCACTATCACTCTCCCATGTGCAATAAAACAAATTGTAAATATGTGGCAAGGAGTGGGGCAAGCAATGT  
ATGCCGCTCCCATTCAGGAAAATATTACCTGCAGATCAAAT---  
ATTACAGGTATACTATTGACAAGAGATGGTGGTGATGCTAATCAGAATGAT-----  
-----  
-----

CCCAATGGAAATGAGACCTTTAGACCTGGGGGAGGAAATATGAAAGACACCCGGAGAGTGAATTATATAAAAT  
ATAAAGTAGTAAAAATTGAGCCATTA---GGAATAGCACCCACCAAGGCAAAGAGAAGAGTGGTG-----  
-----CAGAGAGAAAAAAGAGCA---GTGGGCACGTTAGGAGCT---  
-----ATGTTCTTGGGTTCTTGGGAGCA---GCAGGAAGCACTATG---GGCGCAGCGTCA---  
ATAACGCTGACGGTACAG---GCCAGGCAA---TTATTG---TCTGGTATAGTGCAACAGCAAAAC---  
AATTTG---CTGAGG---GCTGTTGAAGCGCAACAACATCTGTTGCAACTCACAGTCTGGGGCATC  
>DQ358812

TTTTACTGCAATACATCAGAACTGTTTAATAACACAAAAAAC-----  
-----  
-----  
AATGGCACCATCATTCTCCCATGTAAAATAAAACAAATTGTAAACATGTGGCAGAGAGTAGGACGAGCAATGT  
ATGCCAATCCCATTCAGGAAAAATTAAGTAACTGAACTCAAAT---  
ATTACAGGTCTATTATTGACAAGAGATGGTGGTAATCAGGCTAATGAGACTAGT-----GGT-----  
-----  
-

ATTCAGACTAATGGGACTGAGATCTTCAGACCTGGAGGAGGAAATATGAGAGACAATTGGAGAAGTGAATTAT  
ATAAATATAAAGTAGTACAAATTAAACCACTA---GGAATAGCACCCACCAGGGCAAAAAGACGAGTGGTG--  
-----CAGAGAGCAAGAAGAGCA---GTGGGA---  
ATAGGAGCT-----CTTTTCATTGGATTCTTAGGAGCA---GCAGGAAGCACTATG---  
GGCGCGGCGTCA---ATAACGCTGACGGTACAG---GCCAGACAA---TTATTG---  
TCTGGAATAGTGCAACAGCAAAAC---AATTTA---CTGCAG---  
GCTATTGAAGCGCAACAGCATCTGTTGCAGCTCACAGTCTGGGGCATT  
>MG365770

TTCTACTGCAATACATCAGGGCTGTTTAATGAAACAAAC-----  
-----  
-----  
TTTAATGACACTATCACTCTCCCATGTGCAATAAAACAAATTGTAAACATGTGGCAGGAAGTAGGACGAGCAA  
TGTATGCCAATCCCATTAAGGAAACATTACCTGCAGCTCAAAT---  
ATTACAGGTCTAATATTGACAAGAGATGGTGGTCAGAAGAATGATACT-----  
-----  
-----

AATCAGACTGAGACCTTCAGACCTGGGGGAGGAAATATGAAAGACAATTGGAGAAGTGAATTATACAAATATA  
AAGTAGTAGAAATTGAACCACTA---GGAGTAGCACCCACCAAGGCAAAAAGACAAGTGGTG-----  
-----ACGAGACAAAAAAGAGCA---GCA-----ATAGGAGCT-----  
---TTGTTCCCTTGGGTTCTTGAGTGCA---GCAGGAAGCACTATG---GGCGCGGCGTCA---  
ATAACGCTGACGGTACAG---GCCCAGACAA---TTATTG---TCTGGGATAGTGCAACAGCAGAGC---  
AATTTG---CTGAGG---GCTATTGAAGCGCAACAACATCTGTTGCAGCTCACAGTCTGGGGCATA  
>JN692449

TTCTACTGTAATACAACACAACCTGTTTAATAGTACTTGGCATTGTAATGCCACTGGAAAGTCTAATTACACAG  
AA-----  
-----  
GGAAATGACACAATCACACTCCCATGCAGAATAAAACAAATTGTAAACATGTGGCAAGAAGTAGGAAAAGCAA  
TGTATGCCCCCTCCCATCAGAGGACAAATTAGCTGTTTCATCAAAT---  
ATTACAGGACTGCTATTAACAAGAGATGGTAGTAACAACACCAAC-----  
-----  
-----

GAAAGCGAGATCTTCAGACCTGGAAGAGGAAATATAAAGAACAATGGAAGGAGTGAAC TATACAAATATAAAG  
TAGTAAAAATTTCAGCCATTA --- AGAGTAGCACCTACCAAGGCAAAGAGAAGAGTGGTG -----  
-----CAGAGAGAAAAAAGAGCA --- GTGACC --- CTAGGAGCT -----  
GTGTTTCCTTGGGTTCTTGGGAGCA --- GCAGGAAGCACTATG --- GGCGCAGCGTCG ---  
CTGACGCTGACGGTACAG --- GCCAGACAA --- TTATTG --- TCTGGTATAGTGCAGCAGCAAAAC ---  
AATTTG --- CTGAGA --- GCTATTGAAGCGCAACAACATATGTTGCAGCTCACAGTCTGGGGCATC  
>EF637052  
TTCTACTGCAATACATCAGGACTATTTAATAACGCACTGTTTAATGACACAGGAGTCAATAATGGC -----  
-----  
-----  
AGTGATGACAATATCATTCTCCCATGTGCGAATAAAACAAATTGTAAACATGTGGCAGGAAGTAGGACGAGCAA  
TGTATACTGCTCCTATTGCAGGAAACATTACCTGTAGATCAAAT ---  
ATTACAGGTCTTCTATTGACAAGGGATGGTGGTAATAATGGTGAT -----  
-----  
-----  
AATCAGACTCAGATTTTCAGACCTGGGGGAGGAAACATGAAAGACAATTGGAGAAAGTGAATTATATAAAATATA  
AAGTAGTAGAGATTGAACCACTA --- GGAGTAGCACCCACCAGGGCAAAAAGACAAGTGGTG -----  
-----ACAAGAGAAAAGAGCA --- GCA --- GTGGGACTG -----  
---TTTTTCCTTGGGTTCTTGGGAGCA --- GCAGGAAGCACTATG --- GGCGCAGCGTCA ---  
CTGACGCTGACGGTACAG --- GCCAGACTA --- TTAGTG --- TCTGGTATAGTGCAGCAGCAGAGC ---  
AATCTG --- CTGAGA --- GCTATTGAGGCGCAACAGCATCTGTTGCAACTCACAGTCTGGGGCATT  
>MH938678  
TTCTACTGTAATACAACAAAGCTGTTTAATAGTACTTGGAAATGGCACTAATAGTATTAAT -----  
-----  
-----  
AAGACTGGTACTATCACAATCCCATGCAGAATAAAACAAATTATAAACAGGTGGCAGGAAGTAGGAAAAGCAA  
TATATGCCCCCTCCCATTGGAGGACAAATTAGATGTTTCATCAAAT ---  
ATTACAGGGCTGCTAATAACAAGAGATGGTGGTCATAATCAGACT -----  
-----  
-----  
GCTGAAACCTTCAGACCTGGAGGAGGAGATATGAAAGACAACCTGGAGAAATGAATTATATAAAATATAAAGTAG  
TAGAAATTGAGCCACTA --- GGAATAGCACCCCTCCAAGGCAAAGAGAAGAGTAGTG -----  
-----CAGAGAGAAAAGAGAGCA --- GTGACA --- TTAGGAGCT -----  
ATGTTTCCTTGGGTTCTTGGGAGCA --- GCAGGAAGCACTATG --- GGCGCAGCGTCA ---  
ATGACGCTGACGGTACAG --- GCCAGACAA --- TTATTG --- TCTGGTATAGTGCAGCAGCAGAAC ---  
AATTTG --- CTGAAG --- GCTATTGAAGCGCAACAGCATATGTTGCAGCTCACAGTCTGGGGCATT  
>JN692456  
TTCTACTGTAATACATCAGCACTGTTTAATAGTACTTGGCCGTCTAATAGTACTTGGAAATGATACTGACAATA  
AA -----  
-----  
-----  
GGAAATGATACTATCATCATACTCCCATGCAGAATAAAACAAATTATAAACAGGTGGCAGGAAGTAGGAAAAG  
CAATGTATGCCCCCTCCCATCGCAGGACAAATTAGATGTTTCATCAAAC ---  
ATTACAGGGCTGCTATTAAACAAGAGATGGTGGTAACAACAGCACC -----  
-----  
-----  
AATGAAACCTTCAGACCAGGAGGAGGAGATATGAGGGACAATTGGAGAAAGTGAATTATTTAAATATAAAGTAA  
TAAGAATTGAACCATTA --- GGAATAGCCCCCACTCAGGCAAAGAGAAGAGTGGTG -----  
-----CAGAGAGAAAAAAGAGCA --- GCA --- CTAGGAGCT -----  
ATGTTTCCTTGGGTTCTTGGGAGCA --- GCAGGAAGCACTATG --- GGCGCAGCATCA ---  
ATAACGCTGACGGTACAG --- GCCAGACAA --- TTATTG --- TCTGGTATAGTGCAACAGCAGAAC ---  
AATCTG --- CTGAGA --- GCTATTGAGGCGCAACAACATCTGTTGCAACTCACAGTCTGGGGCATC  
>JF804808  
TTCTACTGTAATACAACAACAACTGTTTAATAGTACTTGGACTTGGAAATAATAGCAATAGTACTTGGAAATAGGA  
ATGATAGCACT -----  
-----AATACTTGGGAT -----  
AGTGCTAATGAAAATATCACACTCCCATGCAGAATAAAACAAATTATAAACAGGTGGCAGGAAGTAGGAAAAG  
CAATGTATGCCCCCTCCCATCAAAGGACAAATTAGATGTTTCATCAAAT ---  
ATTACGGGGCTGATATTAACAAGAGATGGTGGGTCCAATCACAGC -----  
-----  
-----

TCCACCGAGACCTTCAGACCTGGAGGGGGAGATATGAGGGATAATTGGAGAAGTGAGTTATATAAATATAAAG  
TAGTAAAAATTGAGCCATTA---GGAATAGCCCCCAACAAGGCAAAAAGAAGAGTGGTG-----  
-----CAGAGAGAAAAAAGAGCA---GTGGGAGTGATAGGAGCT-----  
ATGTTTCCTTGGGTTCTTGGGAGCA---GCAGGAAGCACTATG---GGCGCAGCGTCA---  
ATGACGCTGACGGTACAG---GCCAGACAA---CTGTTG---TCTGGTATAGTGCAACAGCAAAAT---  
AATTTG---CTGAGA---GCTATTGAGGCGCAACAGCATCTGTTGCAGCTCACAGTCTGGGGCATC  
>HM026455  
TTCTACTGCAATACATCAGAATTGTTTACTGACAAAAAATTCAATGCC-----  
-----  
-----  
ACCCATGGCACTATCACTCTCCCATGTGCGAATAAAACAAATTGTAAACCTATGGCAGGAAGTAGGAAGAGCAA  
TATATGCCGCTCCCATTGAAGGAAACATTACCTGTAATTCAAAT---  
ATTACAGGTCTACTACTAACAAGAGATGGTGGTCAGAACAGTAGT-----  
-----  
-----  
GCTAATGAGACCTTCAGACCTGGGGGAGGAGATATGAGAGACAATTGGAGAAGTGAATTATATAAATATAAAG  
TAGTAGAAATTGAACCACTA---GGAATAGCACCCACCAAGGCAAAAAGAAGAGTGGTG-----  
-----CAGAGAGAAAAAAGAGCA---GTGGGA---ATAGGAGCG-----  
TTGTTTCATTGGGTTCTTGGGAGCA---GCAGGAAGCACTATG---GGCGCAGCGTCA---  
ATAACGCTGACGGTACAG---GCCAGACAA---TTATTG---TCTGGAATAGTGCAAGCAGCAGAAC---  
AACCTG---CTGAGG---GCTATTGAAGCGCAACAGCATCTGTTGCAGCTCACAGTCTGGGGCATT  
>JN687738  
TTCTACTGTGACACAACACAGCTGTTTAATAGTACTTGGAAATATTACTAAAAACAGATAATAGCTCTTGGAGTG  
GT-----  
-----  
ACAACCTCAGAATATCACACTCCCATGTAGAAATAAAACAATTCATAAACAGGTGGCAGGAAGTAGGAAAAGCAA  
TGTATGCCCCCTCCCATCCAAGGACTAATTAAATGTACATCAAAT---  
ATTACAGGGCTGCTATTAAACAAGAGATGGTAGTAACGAATCCCTA-----  
-----  
-----  
AAAGACATCGAGATCTTCAGACCTGTAGGGGGAAATATGAGGGACAATTGGAGAAGTGAATTATATAAATATA  
AAGTAGTAAAAGTTGAGCCAATA---GGAATAGCACCCACCAAGGCAAAAGAGAAGGGTGGTG-----  
-----CAGAGAGAAAAAAGAGCG---GTAACG---CTGGGAGCT-----  
---GTGTTCCCTTGGGTTCTTGGGAGCA---GCAGGAAGCACTATG---GGCGCAGCGGCA---  
GTGACGCTGACGGTACAG---GCCAGACAA---TTATTG---TCTGGTATAGTGCAACAGCAGAGC---  
AATCTG---CTGAGG---GCTATTGAGGCGCAACAACATATGTTGCAACTCACAGTCTGGGGCATC  
>HQ236610  
TTCTACTGTAATACATCAGGACTGTTTAATACATCAAGACTGATTATTAATGACACTTCCCCT-----  
-----  
-----  
CTCAATGACACTATCATTCTCCCATGTAGAAATAAAACAAATTGTAAACATGTGGCAGGGAGTAGGAAGAGCAA  
TGTATGCTAATCCAATTGCAGGAAACATTACCTGTAACCTCAAAT---  
ATTACAGGGCTACTATTGACAAGAGATGGTGGAAAGAAAGATAAT-----  
-----  
-----  
CAGACTGACGAGATCTTCAGACCTGGGGGAGGAAATATGAAAGACAATTGGAGAAGTGAATTATATAAATATA  
AAGTAGTAGAAATTGAACCACTA---GGAATAGCTCCCACAAAGGCAAAAAGACAAGTGGTG-----  
-----CGGAGAGACAAAAGAGCA---GTGGGA---TTTGGAGCT-----  
---TTGTTCCCTTGGGTTCTTGTGTCAGCA---GCAGGAAGCACTATG---GGCGCAGCGTCA---  
GTGACGCTGACGGTACAG---GCCAGGCAA---TTGTTG---TCTGGTATAGTGCAACAGCAGAAAT---  
AATTTG---CTGAAA---GCTATTGAGGCGCAACAGCATCTGTTGCAACTCACAGTCTGGGGCATT  
>MG365769  
TTCTACTGCAATACATCAGAACTGTTTAATGAAACACTAACAAAAACCAAT-----  
-----  
-----  
GACAATAACACAATCACTCTCCTATGTCAAATAAAACAAATTGTAAACATGTGGCAGGGAGTAGGACGAGCAA  
TGTATGCCGCTCCCATTGCAGGAAACATTACCTGTAACCTCAAAT---  
ATTACAGGTTTACTATTGACAAGAGATGGTGGTAGAACTACCAAG-----  
-----  
-----

AATGATACTGAGATCTTCAGACCTGGGGGAGGAGATATGAAAAACAATTGGAGAAGTGAACATATATAAATATA  
 AAGTAGTAGAAATTGAACCACTG---GGAATAGCACCCACCAAGGCAAAAAGACAAGTGGTG-----  
 -----AAGAGAGAAAAAAGAGCAGTAGTGGGA---ATGGGAGCT-----  
 ---TTGTTCCCTTGGGTTCTTGAGCGCA---GCAGGAAGCACTATG---GGCGCGCGTCA---  
 ATAACGCTGACGGTACAG---GCCAGACAA---CTACTG---TCTGGAATAGTGCAACAGCAAAAC---  
 AATTTG---CTGAGG---GCTATTGAAGCGCAACAGCATCTGTTGCAGCTCACAGTCTGGGGCATT  
 >KT427871  
 TTCTACTGTAACACATCAAACTGTTTAGTAGTACTTTGGAATAGTAGTACTTTGAATAGTACTGGAGAGTCAA  
 ATAAC-----  
 -----  
 ACTGAGGACACAATTATACTCCCATGCAGAATAAAACAAATTATAAACATGTGGCAGAGAGTAGGAAAAGCAA  
 TGTATGCCCCCTCCCATCCAAGGACAAATTAAGTGTTCATCAAAT---  
 ATTACAGGGATGATATTAACAAGAGATGGGGGTCATAACACGAGC-----  
 -----  
 -----  
 GAGACGACCGAAATCTTCAGACCTGGAGGAGGAAATATGAAGGACAATTGGAGAAGTGAATTATATAAATATA  
 AAGTAGTACAAATTGAACCATT---GGAATAGCACCCACCAGGGCTAAGAGAAGAGTGGTG-----  
 -----CAGAGAGAAAAAAGAGCA---GTAGGA---CTAGGAGCT-----  
 ---TTGTTCCCTTGGGTTCTTAGGAGCA---GCGGGAAGCACTATG---GGCGCAGCGTCA---  
 ATAACGCTGACGGTACAG---GCCAGACAA---TTATTG---TCTGGTATAGTGCAACAGCAAAAT---  
 AATTTG---CTGAGG---GCTATTGAGGCGCAACAGCATATGTTGCAACTCACAGTCTGGGGCATT  
 >KT427779  
 TTCTACTGCAATACATCACAGCTGTTTAATGACACAGAATCC-----  
 -----  
 -----  
 AATAATAGCATTATTACTCTCCCATGTAGAATAAAACAAATAGTAAACATGTGGCAGGAAGTAGGAAAGGCAA  
 TGTATGCCGCTCCCATTCAGGAAACATTACCTGTAACCTCAAAT---  
 ATTACAGGTCTGCTACTAACAAGAGATGGTGGCCAGGATAATAATACT-----  
 -----  
 -----  
 AATCAGAATGAGACCTTCAGACCTGGGGGAGGAGATATGAGAGATAATTGGAGAAGTGAGTTATATAAATATA  
 AAGTAGTAGAAATTGAACCATT---GGAATAGCACCCACCAGGGCAAGAAGACGAGTGGTG-----  
 -----CAGAGAGAGAAACGAGCA---GTGGGA---CTAGGAGCT-----  
 ---GTGTTCCCTTGGATTCTTAGGAGCA---GCAGGAAGCACTATG---GGCGCAGCATCA---  
 ATAACGCTGACGGTACAG---GCCAGACAA---TTATTG---TCTGGAATAGTGCAACAGCAGAAC---  
 AATTTG---CTGAGG---GCTATTGAAGCGCAACAGCATCTGTTGCAGCTCACAGTCTGGGGCATT  
 >KJ849813  
 TTCTACTGCAACACATCAAACTGTTTAATGACACAGAA-----  
 -----  
 -----  
 TTCAATAATGACACTATCACTCTCCATTGTCAAATAAAACAAATTGTAAACATGTGGCAGGAAGTAGGACGAG  
 CAATGTATGCCGCTCCCGTTGCAGGAAACATTACCTGTAACCTCAACT---  
 ATCACAGGTTTAATACTGACAAGAGATGGGGGT-----  
 -----  
 -----  
 GGTAATGGTAATGAACTAAT-----  
 TCGACTGAGACTTTTCAGACCTGGGGGAGGAGATATGAGAGACAATTGGAGAAGTGAATTATATAAATATAAAG  
 TAGTAGAAATTGAACCACTA---GGAATAGCACCCACCAGGGCACAAAGACGAGCGGTG-----  
 -----CAGAGAGAAAAAAGAGCA---GTGGGA---CTAGGAGCT-----  
 TTGTTCCCTTGGGTTCTTGGGAACA---GCAGGAAGCGCTATG---GGCGCAGCGTCA---  
 TTGACGCTGACGGTACAG---GCCAGACAA---TTATTG---TCTGGTATAGTGCAACAGCAGAGC---  
 AATTTG---CTGAGG---GCTATTGAGGCGCAACAGCATATGTTGCAACTCACAGTCTGGGGCATC  
 >KT427651  
 TTCTACTGTAACACATCCCGACTATTTGATGATAGTTGGAATGGTACTTGGTCAAAGAACACT-----  
 -----  
 -----  
 ACTATAGAAAATATCACACTCCCATGCAGAATAAAACAAAGTTGTAAACCTGTGGCAGCAAGTAGGAAAAGCAA  
 TGTATGCCGCTCCCATCAAAGGACTACTTAAGTGTACATCAAAT---  
 ATTACAGGGCTGATATTAGCAAGAGATGGTGGTTATAATGTTGAT-----  
 -----  
 -----

AACAAACAGAGATCTTCAGACCTGCAGGAGGAGATATGAGGGACAATTGGAGAAGTGAATTATATAAATATA  
 AAGTAGTAAAAATTGAGCCATTA---GGAGTAGCACCCACCAAGGCAAAGAGAAGAGTGGTG-----  
 -----CAGAGAGAAAAAAGAGCA---GTAACA---TTAGGAGCT-----  
 ---ATGTTCCCTTGGGTTCTTGGGAGCA---GCAGGAAGCACTATG---GGCGCAGCGTCA---  
 ATGACGCTGACGGTACAG---GCCAGACTA---TTATTG---TCTGGTATAGTGCAACAGCAGAAC---  
 AATTTG---CTGAGA---GCTATTGAGGCGCAACAGCATCTGTTGCAACTCACAGTCTGGGGCATT  
 >KJ849794  
 TTCTACTGCAATACAACACTATTGTTTAACGAAGAATTAAATAACACTGGC-----  
 -----  
 -----ACTGATGACACT-----  
 GGCACCTAACGACACTATCATTCTCCCATGTAAAATAAAACAAATAATAAACATGTGGCAGGAAGTGGGACGAG  
 CTATGTACGCTGCTCCCATTCAGGAAACATTACCTGTTACTCAAAT---  
 ATTACAGGTCTACTATTGGTAAGAGATGGTGGTAATACT-----  
 -----  
 AATGATGGTAATACTACTAGTGGTAAT-----  
 AAGACCGAGATCTTCAGACCTGAGGGAGGAAATATGAAAAGACAATTGGAGAAGTGAACCTATATAAATATAAAG  
 TAATAGAAATAGAACCACTA---GGGGTAGCACCCACCAAGGCAAAAAGACAAGTGGTG-----  
 -----AAGAGAGAAAAAAGAGCA---ATAGGA---ATGGGAGCT-----  
 TTGTTCCCTTGGGTTCTTGGGAGCA---GCAGGAAGCACTATG---GGCGCAGCGTCA---  
 GTAACGCTGACGGTACAG---GCCAGACAA---TTATTG---TCTGGTATAGTGCAACAGCAGAAC---  
 AATCTG---CTGAGG---GCTATTGAAGCGCAACAGCATCTGTTGCAGCTCACAGTCTGGGGCATC  
 >KT427660  
 TTCTACTGTAATACAACACAGCTGTTTAATAGTACAATAGTTAATAATACAATGCAGAATAAGACT-----  
 -----  
 -----  
 GGGAAATGGTAATATCACACTCCCATGCACAATAAAACAAATTATAAATATGTGGCAGAAAGTAGGGAAAGCAA  
 TGTATGCCCCCTCCCATCAGAGGACAAATTAGCTGTACATCAAAT---  
 ATTACAGGTCTACTATTGACTAGAGATGGGGATCAGAATGACAGT-----  
 -----  
 -----  
 GAGACCTTCAGACCTCAGGGAGGAAATATGAAAGATAATTGGAGAAGTGAATTATATAAATACAAAGTAGTAA  
 GAATTGAGCCATTA---GGAGTAGCACCCACCAAGGCAAAGAGAAGAGTGGTG-----  
 -----CAGAGAGAAAAAAGAGCA---GTGGGAACATTAGGAGCT-----  
 ATGTTCCCTTGGGTTCTTGGGAGCA---GCAGGAAGCACTATG---GGCGCAGCGGCA---  
 CTGACGCTGACGGTACAG---GCCAGACTA---TTATTG---TCTGGTATAGTGCAACAGCAAAAC---  
 AATTTG---CTGAGA---GCTATTGAGGCGCAACAGCATCTGTTGCAACTCACAGTCTGGGGCATC  
 >KX181927  
 TTCTATTGCAATACATCAGGCCTGTTCAATATGTCCCATACAATGGCAATGAC-----  
 -----  
 -----  
 ACAACCACTGTCACTATCACCTCCCGTGTCTGAATAAAACAAATTGTAAACATGTGGCAGGAGGTAGGACGAG  
 CAATGTATGCCGCTCCCATTCAGGAAGCATTACCTGCAAAATCAAAT---  
 ATTACAGGTCTGCTATTGACAAGAGATGGTAGTAGCAATAATAGTACT-----  
 -----  
 -----  
 CATAATAACACTGAGACCTTCAGACCTGGGGGAAAGAATATAAAAGACAATTGGAGAAGTGAACCTGTATAAAT  
 ATAAAGTAATAGAAATTGAACCACTA---GGAATAGCACCCACCAAGGCAAAAAGACGAGTGGTG-----  
 -----ACGAGAGAAAAAAGAGCA---GTAGGA---ATAGGAGCT---  
 -----TTGTTCCCTTAAGTTCTTAGGAGCA---GCAGGAAGCACTATA---GGCGCAGCGTCA---  
 GTGACGCTGACGGTACAG---GCCAGACAA---TTATTG---TCTGGTATAGTGCAACAGCAGAAC---  
 AATTTG---CTGAGA---GCTATTGAGGCGCAACAGCATATGTTGCAACTCACAGTCTGGGGCATT  
 >MK041580  
 TTCTACTGCAATACATCAGGACTGTTTAATGAGACA-----  
 -----  
 -----  
 GAATTCAATGGTACTATCACTCTCCCATGTCTGAATAAAACAAATTGTAAACATGTGGCAGGAAGTAGGAAAAG  
 CAATGTATGCCGCTCCCATTCGAGGAACATTACCTGCAACTCAAAT---  
 ATTACAGGTCTACTATTGACAAGAGATGGTGGTCAGAATAATAAT-----  
 -----  
 -----

GCTACTGAGATCTTCAGACCTGGGGGAGGAAATATGAAAGACAATTGGAGAAGTGAATTATATAAATATAAAG  
TAGTAGAAATTGAACCACTA---GGAGTAGCACCCACCAGGGCAAAAAGACAAGTGGTG-----  
-----AGGAGAGAAAAAAGGGCA---GTGGGA---ATAGGAGCT-----  
TTGTTCCCTTGGGTTCTTGGGAGCA---GCAGGAAGCACTATG---GGCGCAGCGTCA---  
CTAACGCTGACGGTACAG---GCCAGACAA---TTATTG---TCTGGAATAGTGCAACAGCAGAGC---  
AATTTG---CTGAGG---GCTATTGAAGCGCAACAGCATATGTTGCAGCTCACAGTCTGGGGCATT  
>AF005495  
TTCTACTGCAATACATCAGGACTGTTTAATGACACAGTAGAC-----  
-----  
-----  
AATGGCACTATCACTCTCCCATGTCTGAATAAAGCAAATTGTAAATATGTGGCAGGAAGTGGGGCGAGCAATGT  
ATGCCGCTCCCATTTGCAGGAAACATTACCTGTAGCTCAAAT---  
ATTACAGGTCTACTATTGACAAGAGATGGTGGTCAGAAATAATCAG-----  
-----  
-----  
ACGGAGGAGACCTTCAGACCTGGGGGAGGAAATATGAAAGACAACCTGGAGAAGTGAATTATATAAATATAAAG  
TAGTAGAAATTGAGCCATTA---GGAGTAGCACCCACCAAGGCAAAAAGACAAGTGGTG-----  
-----AAGAGAGAAAAAAGAGCA---GTGGGA---ATGGGAGCT-----  
TTGTTCCCTTGGGTTCTTGGGAGCA---GCAGGAAGCACTATG---GGCGCAGCGTCA---  
ATAACGCTGACGGCACAG---GCCAGACAA---TTATTG---TCTGGCATAGTGCAACAGCAGAAT---  
AATTTG---CTGAGG---GCTATTGAAGCGCAACAGCATCTGTTGCAGCTCACAGTCTGGGGCATT  
>AY455784  
TTCTACTGCAATACATCAGGACTGTTTAATAACACAAGATCC-----  
-----  
-----  
AATGGCACTATCACTCTCCCATGTCTGAATAAAACAAATTATAAATATGTGGCAGGAAGTAGGACGAGCAATGT  
ATGCCCCCTCCCGTTGCAGGAAACATTACCTGTAACTCAAAT---  
ATTACAGGTCTACTATTGACAAGAGATGGTGGTAAACAGAATGGTACT-----  
-----  
-----  
AATCAGACTGAGATCTTCAGACCTGGGGGAGGAGATATGAGAGACAATTGGAGAAGTGAATTATATAAATATA  
AAGTAGTAGAAATTGAACCACTA---GGAGTAGCACCCACCAAGGCAAAAAGACAAGTGGTG-----  
-----AAGAGAGAAAAAAGAGCA---ATAGGA---ATAGGAGCT-----  
---GTACTCCTTGGGTTCTTGGGAAGA---GCAGGAAGCACTATG---GGCGCGGCGTCA---  
ATAACGCTGACGGCACAG---GCCAGACAA---GTATTG---TCTGGAATAGTGCAACAGCAGAAC---  
AATCTG---CTGAGG---GCTATTGAAGCGCAACAGCATCTGTTGCAGCTCACAGTCTGGGGCATT  
>AY455785  
TTCTACTGCAATACATCAAACTGTTTAATAACATAGGAGAC-----  
-----  
-----  
AATGGCACTATCATTCTCCCATGTCTGAATAAAACAAATTATAAACATGTGGCAGGAAGTAGGACGAGCAATGT  
ATGCCGCTCCCATTTGCAGGAAACATTACCTGTAACTCAAAT---  
ATTACAGGTTTACTATTGACAAGAGATGGTGGTCAGACTAATGAA-----  
-----  
-----  
ACTAATACTGAGACCTTCAGACCTGGGGGAGGAAATATGAAAGACAATTGGAGAAGTGAATTATATAAATATA  
AAGTAGTAGAAATTGAACCAATA---GGAATAGCACCCACCAGGGCAAAAAGACGAGTGGTG-----  
-----CAGAAAGAAAAAAGAGCA---GTGGGA---ATGGGAGCT-----  
---TTGTTCCCTTGGGTTCTTGGGAGCA---CAAGGAAGCACTATG---GGCGCGGCGTCA---  
ATAGCGCTGACGGTACAG---GCCAGACAA---TTATTG---TCTGGAATAGTGCAACAGCAGAAC---  
AATTTG---CTGAGG---GCTATTGAAGCGCAACAGCACCTGTTGCAGCTCACAGTCTGGGGCATT  
>AY455780  
TTCTATTGCGACACATCACAACCTGTTTAATAACACAAAAGTC-----  
-----  
-----  
AATGACACTATCACCTCCCGTGTAGAATAAAACAAATTGTAAACATGTGGCAGGAAGTAGGACGAGCAATGT  
ATGCCGCTCCTATTGCAGGAAACATTACCTGTAAATCAAGT---  
ATTACAGGTCTACTATTGACAAGAGATGGTGGTCAGGCTAATAGG-----  
-----  
-----

ACTGAGACCTTCAGACCTGGGGGAGGAAATATGAAAGACAATTGGAGAAGTGAATTATATAAAATATAAAGTAG  
 TAGAAATTGAACCACTA---GGAGTAGCACCCACCGGGGCAAGAAGACAAGTGGTG-----  
 -----AGGAGAGAAAGAAGAGCA---GTGGGAATGCTAGGAGCT-----  
 ATGTTCCCTTGGGTTCTTGGGAGCA---GCAGGAAGCACTATG---GGCGCAGCGTCA---  
 ATATCGCTGACGGTACAG---GCCAGACAA---TTATTG---TCTGGTATAGTGCAACAGCAGAAC---  
 AATCTG---CTGAGA---GCTATTGAGGCGCAACAGCATATGTTGCAACTCACAGTCTGGGGCATT  
 >AY771592  
 TTCTACTGTGATACAACACAACCTGTTTAATAGTACTTGGGAATGATACTTGGTATAATAATGTGAATGAT----  
 -----  
 -----  
 ACTAGTGAAAATATCACACTCCCATGCAGAATAAAACAAATTATAAACAAAGTGGCAGGAAGTAGGAAAAGCAT  
 TTTATGCCCCCTCCTATCAGCGGACAAATTAGATGTTTCATCAAAT---  
 ATTACAGGTATACTATTGACAAGAGATGGTGGTCAGAATAGTCAG-----  
 -----  
 -----  
 AATGAGACCTTCAGACCAGGAGGAGGAAATATGAAGGACAATTGGAGAAGTGAATTATATAAAATATAAAGTAG  
 TAAGAGTTGAGCCATTA---GGAATAGCACCCACCAGGGCAAAGAGAAGAGTGGTG-----  
 -----CAGAGAGAAAGAAGAGCA---GTGGGAACACTAGGAGCT-----  
 ATGTTCCCTTGGGTTCTTGGGAGCA---GCAGGAAGCACTATG---GGCGCAGCGTCA---  
 ATGACGCTGACGGTACAG---GCCAGACTA---CTATTG---TCTGGTATAGTGCAACAGCAGAAC---  
 AATCTG---CTGAGA---GCTATTGAGGCGCAACAGCATATGTTGCAGCTCACAGTCTGGGGCATT  
 >AY771593  
 TTCTACTGTAATTCAACTCAACTGTTCAATAGTACTTGGCTCAATAATACTTGGTATAATACTACTTGGGAAG  
 GAAAT-----  
 -----  
 AGCACTGAAGACAATATCACACTCCCATGCAGAATAAAACAAATTATAAACCTGTGGCAGAAAGTAGGAAAAG  
 CAATGTATGCCCCCTCCTATCAGAGGACAAATTAGATGCTCATCAAAT---  
 ATTACAGGTCTAATATTGACAAGAGATGGTGGTCGTCAGAATGATACT-----  
 -----  
 -----  
 AATGCTACTGACACCTTAACAGCTGGAGGAGGAAATATGAACGACTGTTGGAGAGGTGAATTTTATTATTATA  
 AAGTAGTAATAGTTGCGCCAATA---GGAGCACCCCCCCCCCAGGCAAAGAGAATAGTGGTG-----  
 -----CAAAAAGAAAAAGAGCG--GTGGGAGTAATAGGAGCT-----  
 --ATGTTCCCTTGGGTTCTTGGGAGCA--GCAGGAAGCACTATG--GGCGCAGCGTCA--  
 ATGACGCTGACGGTACAG--GCCAGGTCA--TTATTG--TCTGGTATAGTGCAACAGCAGAAC--  
 AATCTG--CTGAGG--GCTATTGAGGCGCAACAGCATCTGTTGCAACTCACAGTCTGGGGCATT  
 >AY536233  
 TTCTACTGCAATACATCAGGACTGTTTAATGAAACAAGGTTTAATAACACAACA-----  
 -----  
 -----  
 TCCAATGACACCATTATTCTCCAATGTAAATAAGACAAATAGTAAACCTGTGGCAGGAAGTGGGACGAGCAA  
 TGTATGCCGCTCCCATTGAAGGAAATATTACCTGTAACCTCAAAT---  
 ATTACAGGTCTACTATTGACAAGAGATGGTGGTAATACTAGTCAGGCT-----  
 -----  
 -----  
 AATAAGACTGAGACCTTCAGACCTGGGGGAGGAAATATGAGAGACAATTGGAGAAGTGAATTATATAAAATATA  
 AAGTAGTAGAAATTGAACCACTA---GGAATAGCACCCACCAAGGCAAAAAGACAAGTGGTG-----  
 -----CAGAGAGAAAAAAGAGCAGTAGTGGGA---ATAGGAGCT-----  
 ---GTTCTCCTTGGGTTCTTGGGAGCA---GCAGGAAGCACTATG---GGCGCAGCGTCA---  
 ATAACGCTGACGGTACAG---GCCAGACAA---TTATTG---TCTGGAATAGTGCAACAGCAGAGC---  
 AATTTG---CTGAGG---GCTATTGATGCGCAACAGCATATGTTGCAGCTCACAGTCTGGGGCATT  
 >AY536238  
 TTCTACTGCAATACATCAGAACTGTTTAATAACACAGAAACCAATAGCACAAACACCAATGGCACAGAA----  
 -----  
 -----  
 ACCAATGGCACTATTATTCTCCCATGTAGAATAAAACAAATTGTGAACATGTGGCAGGAAGTGGGACGAGCAA  
 TGTATGCCAATCCCATTGCAGGAAACATTACCTGCAACTCAAAT---  
 ATTACAGGTCTACTATTGACAAGAGATGGTGGTAATACTAGTAAT-----  
 -----  
 -----

AATACTGAGACCTTCAGACCTGGGGGAGGAGATATGAGAGACAATTGGAGAAGTGAATTATATAAATATAAGG  
TAGTAGAAATTCAACCATTA---GGAATAGCACCCACCAAGGCAAGGAGACCAGTGGTG-----  
-----AAGAGAGAAAAAAGAGCA---GTGGGA---CTAGGAGCT-----  
TTGATCATTGGGTTCTTGGGAGCA---GCAGGAAGCACTATG---GGCGCAGCGTCA---  
ATGGCGCTGACGGTACAG---GCCAGACAA---TTATTG---TCTGGAATAGTGCAACAGCAAAAC---  
AATTTG---CTGAGA---GCTATTGAAGCGCAACAACATATATTGCAGCTCACAGTCTGGGGCATT  
>KU749408  
TTCTACTGCAATACATCAGGACTGTTTAATAACTCACTGCTCAATGACACAAAATCCAATAATGACACAGGA-  
-----  
-----  
TCCAATAATACTATTACTCTCCCATGTAGAATAAGACAAAATTGTAAACCTGTGGCAGGAAGTAGGACGAGCAA  
TGTATGCCGCTCCCATTGCAGGAAACATTACCTGTAACTCAAAT---  
ATTACAGGTATACTATTGACAAGAGATGGTGGTCAGAAATAATAAGAATGAGACC-----TTC-----  
-----  
-----  
AAGAATGAGACCTTCAGACCTGGGGGAGGAAATATGAGAGACAATTGGAGAAGTGAATTATATAAATATAAAG  
TAGTAGAAATTGAACCACTA---GGAGTAGCACCCACCAAGGCAAAAAGACAAGTGGTG-----  
-----AAGAGAGAAAAAAGAGCA---GTAGGA---ATGGGAGCT-----  
TTGTTCCCTTGGGTTCTTGGGAGCA---GCAGGAAGCACTATG---GGCGCAGCGTCA---  
GTAGCGCTGACGGTACAG---GCCAGACAA---TTATTG---TCTGGAATAGTGCAACAGCAGAAC---  
AATTTG---CTGAGG---GCTATTGAAGCGCAACAGCATATGTTGCAGCTCACAGTCTGGGGCATT  
>FJ853621  
TTCTACTGTAATACATCAGAACTGTTTAATAACACAATATCC-----  
-----  
-----  
AAAAATGGCACTATCATTCTCCCATGTCTGAATAAAACAAAATTATAAACATGTGGCAGGAAGTGGGGCGAGCAA  
TGTATGCCGCTCCCATTGCAGGAAACATTACCTGTAACTCAAAT---  
ATTACAGGTCTACTATTGGTAAGAGATGGTGGTAATCGTAATCAGACA-----  
-----  
-----  
AATAAGACTGAGACCTTCAGACCTGGGGGAGGAAATATGAAGGACAATTGGAGAAGTGAATTATATAAATATA  
AAGTAGTAGAAATTGAACCACTA---GGAATAGCACCCACCAAGGCAAAAAGACAAGTGGTA-----  
-----ACGAGAGAAAAAAGAGCA---GTGGGA---CTGGGAGCT-----  
---CTGTTCCCTTGGGTTCTTGGGAGCA---GCAGGAAGCACTATG---GGCGCGGCGTCA---  
ATAACGCTGACGGTACAG---GCCAGACAA---TTATTG---TCTGGAATAGTGCAACAGCAGAGC---  
AATCTG---CTGAGA---GCTATTGAAGCGCAACAGCATATGTTGCAGCTCACAGTCTGGGGCATT  
>JX140661  
TTCTATTGCAATACATCAGGACTGTTTAATAACATAAAAAATT-----  
-----  
-----  
AATGGTACTATTACTCTCCCATGTCTGAATAAAACAAAATTGTAAACATGTGGCAGGAAGTGGGACGAGCAATGT  
ATGCCAATCCCATTGCAGGAAACATTACCTGTAGCTCAATT---  
ATTACCGGTCTGTTATTGACAAGAGATGGTGGTAATCAGACTGGTAATAAT-----  
-----  
-----  
AGTTATATTGAGACCTTCAGACCTGGGGGAGGAAATATGAAAGACAATTGGAGAAGTGAATTATATAAATATA  
AAGTAGTAGAAATTGAACCACTA---GGAGTAGCACCCACCAGGGCAAAAAGACAAGTGGTG-----  
-----AAGAGAGAAAAGAGAGCA---CTAGGA---CTAGGAGCT-----  
---TTGTTCCCTTGGGTTCTTGGGAGCA---GCAGGAAGCACTATG---GGCGCAGCGTCA---  
GTGACGCTGACGGTACAG---GCCAGACAA---TTATTG---TCTGGAATAGTGACAGCAGAGAAC---  
AATTTG---CTGAAG---GCCATTGAAGCGCAGCAGCATCTGTTGCAGCTCACAGTCTGGGGCATT  
>FJ904244  
TTCTATTGCGATACATCTAAATTGTTTAAAGTGTTTAATGACACCAATGGCACAAAAGCCAATAAT-----  
-----  
-----  
GACACAGACCCTATCATTCTCCCATGTCTGAATAAAACAAAATTGTAAACATGTGGCAAGAAGTAGGACGAGCAA  
TGTATGCTAATCCCATTGAGGGAAACATCACCTGTAGATCAAAT---  
ATTACAGGTCTAATATTGACAAGAGATGGTGGTAATCATAATAATGATAGT-----  
-----  
-----

CAGGATAATCAGACTGAAATCTTTAGACCTGGAGGAGGAAATATGAAAGACAATTGGAGAAGTGAATTATATA  
AATATAAAGTAGTAGAAATTGAACCACTA---GGAGTAGCACCCACCAGGGCAAAAAGGCAAGTGGTG-----  
-----AAGAGAGAAAAAAGAGCA---ATGGGA---  
CTAGGAGCT-----TTGTTCCCTTGGGTTCTTGGGAGCA---GCAGGAAGCACTATG---  
GGCGCAGCGTCA---GTGACGCTGACGGTACAA---GCCAGACAA---TTACTG---  
TCTGGTATAGTGCAACAGCAGAAC---AATCTG---CTGAGA---  
GCTATTGAGGCACAACAGCATCTGTTGCAACTCACAGTCTGGGGCATT  
>AB480301  
TTCTACTGCAATACATCAGGATTGTTTAATGACACAGAAACC-----  
-----  
-----  
AATGATACTATCATTCTCCCATGTAAAATAAAACAAATTATAAACATGTGGCAGGAAGTGGGACGAGCAATGT  
ATGCCGCTCCCATTCAGGAAAACATTACCTGTAACTCAAAGT---  
ATTACAGGTCTACTATTGACAAGAGATGGTGGTCAGAAAAATAAT-----  
-----  
-----  
ACTAATGAGACCTTCAGACCTGGGGGAGGAAATATGAAAGACAATTGGAGAAGTGAATTATATAAATATAAAG  
TAGTAGAAATTCAACCACTA---GGAGTAGCACCCACCAGGGCAAGAAGATTGGTGGTG-----  
-----AAGAGAGAAAAAAGAGCA---GTGGGA---ATGGGAGCT-----  
ATGTTCCCTTGGGTTCTTGGGAGCA---GCAGGAAGCACTATG---GGCGCAGCATCA---  
ATAACGCTGACGGTACAG---GCCAGACAA---TTATTG---TCTGGAATAGTGCAACAGCAAAAC---  
AATTTG---CTGAAG---GCTATTGAAGCGCAACAGCATCTGTTGCAGCTCACAGTCTGGGGCATT  
>JN251899  
TTCTACTGCAATACATCAGGACTGTTTAATGACACAAGACTGTTAAATGACACA-----  
-----  
-----  
TCCAATAACACTATTGTTCTACCATGTCAAATAAAACAAATTGTAACTTATGGCAGGAAGTAGGACGAGCAA  
TGTATGCCGCTCCCATTCAGGAAATATTACCTGTAGCTCAAAT---  
ATTACAGGTCTACTATTGACAAGAGATGGTGGTCACAGTAATAAT-----  
-----  
-----  
ACTAATGAGACCTTCAGACCTGGGGGAGGAAACATGAAAGACAATTGGAGAAGTGAATTATATAAATATAAAG  
TAGTAGAAATTGAACCACTA---GGAGTAGCACCCACCAAGGCAAAAAGACAAGTGGTG-----  
-----AAGAGAGAAAAAAGAGCA---GTGGGA---ATAGGAGCT-----  
GTTCTCCTTGGGTTCTTGGGAGCA---GCAGGAAGCACTATG---GGCGCAGCGTCA---  
GTAGCGCTGACGGTACAG---GCCAGACAA---TTATTG---TCTGGAATAGTGCAACAGCAGAAC---  
AATCTG---CTGAGG---GCTATTGAAGCGCAACAGCATATGTTGCAGCTCACAGTCTGGGGCATT  
>JN251905  
TTCTACTGTGATACATCAAACTGTTTAATGAGACAAAATTCAATGACACTAGTGAA-----  
-----  
-----  
GGTAGTCCTAATATTACTCTCCCATGTGCAATAAAACAAATTGTAAACATGTGGCAGGAAGTGGGGCGAGCAA  
TGTATGCCGCTCCCATTCAGGAGCCATTACCTGTAACTCAAAT---  
ATTACAGGTCTCCTATTGACAAGAGATGGTGGTAATACTACTAAT-----  
-----  
-----  
CAGACTATTGAGATCTTCAGACCTGGGGGAGGAGATATGAAAGACAATTGGAGAAGTGAATTATATAAATATA  
AAGTAGTAGAAATTGAACCATTA---GGAATAGCACCCACCAAGGCAAGAGACGAGTGGTG-----  
-----CAGAGAGAAAGAAGAGCA---GTGGGA---ATGGCAGCT-----  
---GTACTCCTTGGGTTCTTGGGAGCA---GCAGGAAGCACTATG---GGCGCAGCGTCA---  
ATAACGCTGACGGTACAG---GCCAGACAA---TTATTG---TCTGGGATAGTGCAACAGCAGAGC---  
AATTTG---CTGAGG---GCTATTGAAGCGCAACAGCATCTGTTGCAGCTCACAGTCTGGGGCATT  
>AY781128  
TTCTACTGCAATACAACACAACCTGTTTAATGACGCAGTATCT-----  
-----  
-----  
AGTGACACTATTATTCTCCCATGTAAAATAAAGCAAATTATAAACATGTGGCAGGAAGTGGGACGAGCAATGT  
ATGCCGCTCCCATTCAGGAAAATATTACCTGTAACTCAAAC---  
ATTACAGGTCTATTATTGGTAAGAGATGGTGGTAATAATAATCAGACT-----  
-----

-----  
AATAA TACTGAGACCTTTAGACCTGGGGGAGGAAATATGAAAGACAATTGGAGAAATGAATTATATAAATATA  
AAGTAGTAGAAATTGAACCACTA---GGAGTAGCACCCACCAGGGCAAAAAGACAAGTGGTG-----  
-----AAGAGAGAAAAAAGAGCA---GCAGGA---ATAGGAGCT-----  
---GTGCTCATTGGGTTCTTGGGAGCA---GCTGGAAGCACTATG---GGCGCGGCGTCA---  
ATGACGCTGACGGTACAG---GCCAGACAA---TTATTG---TCTGGAATAGTGCAACAGCAGAGC---  
AATCTG---CTGAGG---GCTATTGAAGCGCAACAGCATCTGTTGCAGCTCACAGTCTGGGGCATT  
>JN235953  
TTCTACTGCAATACATCAGGACTGTTTAATGACACAATATCC-----  
-----  
-----  
AATGACACTATCATCCTCCCGTGTGCAATAAAACAAATTGTAAACATGTGGCAGGAAGTGGGACGAGCAATGT  
ATGCCGCTCCCATTTGCAGGAAACATTACCTGTAGCTCAAAT---  
ATTACAGGTCTACTATTGACAAGAGATGGTGGTCAGAAATAATGGA-----  
-----  
-----  
ACAGAGACCTTCAGACCTGGAGGAGGAGATATGAGGGACAATTGGAGAAGTGAATTATATAAATATAAAGTAG  
TAGAAATTGAACCATTA---GGAATAGCACCCACCAAGGCAAAGAGAAGAGTGGTG-----  
-----CAGAGAGAAAAAAGAGCAGTAATGGGA---TTAGGAGCT-----  
GTGTTCCCTTGGGTTCTTGGGAGCA---GTAGGAAGCACTATG---GGCGCAGCATCA---  
CTAACGCTGACGGTACAG---GCCAGACAA---TTATTG---TCTGGTATAGTGCAACAGCAAAAC---  
AATTTG---CTGAGG---GCTATTGAGGCGCAACAGCATATGTTGCAACTCACAGTCTGGGGCATC  
>KF726017  
TTCTACTGTAATACAACAAAACCTGTTTAATAGTACTTGGGAGACTGCTTAATAGTACTTGAATAGTACTGAAG  
GGTTAAAT-----  
-----GACACT-----  
GTAGGAAATGACACAATCACACTCCCATGCAGAATAAAACAAATTGTAAATTTGTGGCAGGAAGTAGGAAGAG  
CAATGTATGCCCCCCCCCATCAGTGGAACATTAGATGTTTCATCAAAT---  
ATTACAGGTCTATTACTGACAAGGATGGGGGTGAGGGTAATTCAAGTAAT-----  
-----  
-----  
AGTACTACGGAGACCTTCAGACCTGGGGGAGGAAATATGAAAGACAATTGGAGAAGTGAAGTATATAAATATA  
AAGTAGTAGAAATCAAACCACTA---GGAGTAGCACCCACCAAGGCAAGAAGACAAGTGGTG-----  
-----AGGAGAGAAAAAAGAGGC-----CTAGGAGCT-----  
---GTGTTCCCTTGGGTTCTTAGGAGCA---GCAGGAAGCACTATG---GGCGCAGCGTCA---  
ATAACGCTGACGGTACAG---GCCAGACTA---TTATTG---TCTGGTATAGTGCAACAGCAGAAC---  
AATCTG---CTGAGG---GCTATTGAGGCGCAACAGCATCTGTTGCAACTCACAGTCTGGGGCATC  
>MK086130  
TTCTACTGTAACACAACAAGGCTGTTT-----GAGGAGAATAATAATGCAACACAGAAAAAT-----  
-----  
-----  
AATGAACTATTATCACTCTTCCCTGTAGAATAAGACAACATGTAAACATGTGGCAAAGAGTGGGACGAGCAA  
TGTATGCCCCCCCCCATTTGCTGGAATAATTCAGTGTAACCTCAAAT---  
ATCACAGGTCTACTATTAAACAAGAGATGGT---AATAACACTGGA-----  
-----  
-----  
AATAATGACACCCTCAGACCTGGAGGGGGAGATATGAGAGACAATTGGAGAAGTGAAGTGTATAAATATAAGG  
TAGTAAAAATTGAACCACTA---GGAATAGCACCCCTCCAAGGCAAAAAGACGAGTGGTG-----  
-----CAGAGAGAAAAAAGAGCA---GTGGGA---ATGGGAGCT-----  
ATGTTCCCTTGGGTTCTTGGGAACA---GCAGGAAGCACTATG---GGCGCGGCGTCA---  
ATGGCGCTGACGGTACAG---GTCAGACAA---TTATTG---TCTGGTATAGTGCAAGCAGCAAAGC---  
AATTTG---CTGAAG---GCTATAGAAGCGCAACAGCATCTGTTGCAGCTCACAGTCTGGGGCATT  
>U39253  
TTCTACTGCAATACATCAAAACCTGTTTAGTACATCAAATAGTACATGGGTA-----  
-----  
-----  
AACAAAGACTACAATCACACTCCCATGCAGAATAAGACAAATTATAAACATGTGGCAGAAAGTAGGAAAAGCAA  
TGTACGCCCCCTCCCATTTGAAGCACTAATCAACTGTTTCATCAAAT---  
ATTACAGGACTATTGTTGACAAGAGATGGTGGTGTAAATAATAGT-----  
-----

-----  
 CAGGAGGAGATCTTCAGGCCTGGAGGTGGAGATATGAGAGACAATTGGAGGAGTGAATTATACAAATATAAAG  
 TAATAAGAATTGAACCAATA---GGTCTAGCACCCACCAGGGCAAAGAGAAGAGTGGTG-----  
 -----GAAAGAGAAAAAAGAGCA---ATAGGA---CTGGGAGCT-----  
 GTGTTCCCTTGGGTTCTTGGGAGCA---GCAGGAAGCACTATG---GGCGCAGCATCA---  
 ATAACGCTGACGGTACAA---GCCAGACAA---TTATTG---TCAGGTATAGTGCAACAGCAAGAT---  
 AATTTG---CTGAGG---GCTATAGAGGCGCAACAGCATATGTTGCAACTCACAGTCTGGGGCATT  
 >AY074891  
 TTCTACTGTAACACATCAGGACTGTTTAATAGTATAAGTATAAGTGAATCAAATAGTACAGG-----  
 -----  
 -----  
 GTAAATGGTACAATCACACTCCGATGCAGAATAAAACAAATTATAAACATGTGGCAGGGAGTAGGAAAAGCAA  
 TATATGCCCCCTCCCATTTGAGGGACTAATCCAATGTTTCATCAAAT---  
 ATTACAGGACTATTGTTGACAAGAGATGGTGGTAATAATAGTCAG-----  
 -----  
 -----  
 ACTGAGACTGAGACCTTCAGACCTGGAGGAGGAGATATGAGAGATAATTGGAGAAGTGAATTATACAGATATA  
 AAGTAGTAAGAATTGAACCAATA---GGTCTAGCACCCACCAGGGCAAAAAGAAGAGTGGTG-----  
 -----ACAAGAGAAAAAAGAGCA---ATAGGA---CTGGGAGCT-----  
 ---ATGTTCCCTTGGGTTCTTGGGAGCA---GCAGGAAGCACGATG---GGCGCAGCGTCG---  
 CTGACGCTGACGGTACAG---GCCAGACAG---TTATTG---TCTGGTATAGTGCAACAGCAAAAC---  
 AATTTG---CTGAGA---GCTATAGAGGCGCAACAGCATCTGTTGCAACTCACAGTCTGGGGCATT  
 >KU921741  
 TTCTACTGCAAGACATCAGAACTGTTTAATAGTACATGGACATTAAATAGTACAAGTGAAGGGACATCAAATA  
 GTACAAAG-----  
 -----ATA---  
 ACAAAATAGTACAAATATAACACTCCCGTGCAGAATAAAACAAATTATTAACATGTGGCAGGGAGTAGGAAAAG  
 CAATGTATGCCCCCTCCCATTTGAAGGACTTATCAAATGCTCATCAAAT---  
 ATTACAGGAATATTGTTGACAAGAGATGGTGGTACAGATAATCAGACAAATGAG-----  
 -----  
 -----  
 ACCTTCAGTGAGACCTTCAGACCTGGAGGAGGAGATATGAGGGACAATTGGAGAAGTGAATTATACAAATATA  
 AAGTAGTAAAAATTGAACCAATA---GGTCTAGCACCCACCAGGGCAAAAAGGAGAGTGGTG-----  
 -----GAAAGAGAAAAAAGAGCA---ATAGGA---CTGGGAGCT-----  
 ---ATGTTCCCTTGGGTTCTTGGGAGCT---GCAGGAAGCACGATG---GGCGCAGCGTCG---  
 GTGACGCTGACGGTACAG---GCCAGACAG---CTAATG---TCTGGTATAGTGCAACAGCAAAGC---  
 AATTTG---CTGAGG---GCTATAGAGGCGCAACAACATATGTTGCAACTCACAGTCTGGGGCATT  
 >MF373183  
 TTCTATTGCAATACATCAAGCCTGTTTCATGAGAACATCACTGCAAACAGCACAAACAGCACAGAT-----  
 -----  
 -----  
 GTAAATAAAAACATCACACTTCAATGCAAAATCAGACAAATTGTAAGAATGTGGCAAGGGATAGGACAAGCAA  
 TGTATGCCCCCTCCCATTTGAAGGACTAATAAATTGTAAATCAAAT---  
 ATCACAGGGCTGTTGCTGACACGTGATGGAGGCCCCAACACCAG-----  
 -----  
 -----  
 ACTAATGAAACATTTAGACCTCAAGGGGGAAATATGAGGGACAATTGGAGAAGTGAATTATATAAATACAAAG  
 TGGTAGAAATTAAGCCATTA---GGACTAGCACCCACTGGGGCACAGAGGAGAGTGGTG-----  
 -----GGAAGAGAAAAAAGAGCA---GCAACA---CTAGGAGCT-----  
 TTGTTCCCTTGGGTTCTTGGGAGCA---GCCGGAAGCACTATG---GGCGCAGCGTCA---  
 ATAACGCTGACGGTACAG---GCCAGACAA---TTATTG---TCTGGTATAGTGCAACAGCAAAGC---  
 AATTTG---CTGAGA---GCCATAGAGGCGCAACAGCATATGTTGCAACTCACAGTCTGGGGCATT  
 >AY253309  
 TTCTACTGCAATACATCAGGGCTATTTAATAATAGTGAGTGGACATCAAATAGTACAAATAGTACATCAAATA  
 GTACA-----  
 -----  
 GGGGGAGATGATGTAATCACACTCCAATGCAAAATAAAACAGATCATAAACATGTGGCAGGGAGTAGGAAAAG  
 CAATGTATGCCCCCTCCCATTTGAAGGCCAAATCAGATGTTTCATCAAAT---  
 ATTACAGGACTATTGTTAACAAGAGATGGTGGTCAGAATAAGAGT-----  
 -----

-----  
CAGGAGGAGACCTTCAGACCTGGAGGAGGAAATATGAGAGACAATTGGAGAAGTGAATTATACAAATATAAAG  
TAGTAAGGATTGAACCACTA---GGTCTAGCACCCACCAGGGCACAAAGAAGAGTGGTG-----  
-----CAAAGAGAAAAAAGAGCA---ATAGGC---CTGGGAGCT-----  
ATGTTTCCTTGGGTTCTTGGGAGCA---GCAGGAAGCACGATG---GGCGCGGCGTCG---  
CTGACGCTGACGGTACAG---GCCAGACAG---TTATTG---TCTGGTATAGTGCAACAGCAAAAC---  
AATTTG---CTGAGG---GCTATAGAGGCGCAACAACATTTGTTGCAACTCACAGTCTGGGGCATT  
>HQ615974  
TTCTACTGCAATACAACACCACTGTTTAATAATAGTGTATGGTCAAGTAATACAAGTATAGATACAAGTACAA  
ATAATACA-----  
-----GAG---  
GGAAATAATGGGACAATCATACTCCAATGTAGAATAAAACAAATTGTAAACATGTGGCAAAAAGTAGGAAAAG  
CAATATATGCCCCCTCCCATTCAGGACTAATCAATTGTCACTCAAAT---  
ATTACAGGAATATTGTTGACAAGAGATGGTGGTAACAATATTAATCAGACTAAG-----  
AACAAATAGTAGTCAGACTGAGAGC-----  
-----  
AATAGGAGTCAGACTGAGACCTTCAGACCTGGAGGAGGAGATATGAGAGACAATTGGAGAAGTGAATTATATA  
AATATAAAGTAGTAAGAATTGAACCAATA---GGTATAGCACCCACCAAGGCAAAAGAGAAGAGTGGTG-----  
-----GAAAGAGAAAAAAGAGCA---ATAGGA---  
CTGGGAGCT-----ATGTTTCCTTGGGTTCTTGGGAGCA---GCAGGAAGCACAAATG---  
GGCGCAGCGTCG---GTGACGCTGACGGTACAG---GCCAGACAG---TTATTG---  
TCTGGTATAGTGCAACAGCAGAGC---AATTTG---CTGAGG---  
GCTATAGAGGCGCAACAGCATCTGTTGCAACTCACAGTCTGGGGCATT  
>AF484500  
TTCTACTGCAATACATCAGGGATATTTAATAGTACATGGGAGGCTAATAATACAGCAAATAGTACAGGG-----  
-----  
-----  
GTAGATAAGAATATCACACTCTCATGCAGAATAAAACAAATTATAAACATGTGGCAGGGAGTAGGAACAGCAA  
TGTATGCCCCCTCCCATTCAGGACTAATTAAATGTACATCAAAT---  
ATTACAGGACTATTGTTAACAAGAGATGGTGGTGCAAATAATAAT-----  
-----  
-----  
AGTCAGAATGAGACCTTCAGACCTGGAGGGGGAGATATGAGAGACAATTGGAGAAGTGAATTATACAAATATA  
AAGTAGTAAGAATTGAACCACTA---GGTCTAGCACCCACCAGGGCAAAGAGAAGAGTGGTG-----  
-----GAAAGAGAGAAAAAGAGCA---ATAGGA---CTGGGAGCT-----  
---ATGTTTCCTTGGGTTCTTGGGAGCA---GCAGGAAGCACGATG---GGCGCAGCGTCA---  
CTGACGCTGACGGTACAT---GCCAGACAG---TTATTG---TCTGGTATAGTGCAACAGCAAAAT---  
AATTTG---CTGAGG---GCTATAGAGGCGCAGCAGCATCTGTTGCAACTCACAGTCTGGGGCATT  
>MF373188  
TTCTACTGCAATACATCAGAGCTGTTTAATGAAACAGAAAAAC-----  
-----  
-----  
TCCAATGGCACTATTATTCTCCCATGTAGAATAAAACAAATGATAAACATGTGGCAGGAAGTGGGACGAGCAA  
TGTATGCCGCTCCTATTGCAGGAAACATTGTCTGTAACTCATCT---  
ATTACAGGTCTACTATTGACAAGAGATGGGGGTAATAATGATAAT-----  
-----  
-----  
AATAACACTGAGATCTTCAGGCCTGGAGGAGGAGATATGAGGGACAATTGGAGAAGTGAATTATACAAATATA  
AAGTGGTAGAAATTCAACCATTA---GGAATAGCACCCACCAAGGCAAAAAGGAGAGTGGTG-----  
-----GAGAGAGAAAAAAGAGCA---GCA-----TTGGGAGCT-----  
---TTGTTCCCTTGGGTTCTTGGGAGCA---GCCGGAAGCACTATG---GGCGCAGCATCA---  
ATAACGCTGACGGTACAG---GCCAGACAA---TTATTG---TCTGGGATAGTGCAACAGCAGAGC---  
AATCTG---CTGAGG---GCTATTGAAGCGCAACAGCATCTGTTGCAGCTCACAGTCTGGGGCATT  
>EU166607  
TTCTATTGCAACACATCAGAACTGTTTAATGATACATACAATAATACTACT-----  
-----  
-----  
CCAAATGGGACCATCACACTCCAATGCAGAATAAAACAAATTATAAACATGTGGCAGGGAGTAGGACAAGCAA  
TGTATGCCGCCCCCATTCAGGAAACATTATCTGTAACTCAAGT---  
ATTACGGGGCTACTATTGACAAGAGATGGTGGTAAAAATAAACT-----

-----  
-----  
GGAGAAGAGATATTCAGACCTGGAGGAGGAGATATGAGGGACAATTGGAGAAGTGAACCTCTATAAATATAAAG  
TAGTAGAAATTCAACCACTA---GGAGTAGCACCCACCAGGGCAAGAAGACAAGTGGTG-----  
-----AGAAGAGAAAAAAGAGCA--GTGGGA---ATAGGAGCC-----  
TTGTTTCCTTGGGTTCTTGGGAGCA--GCAGGAAGCACTATG--GGCGCAGCATCA---  
ATAACGCTGACGGTACAG---GCCAGACAA--GTGCTG---TCTGGTATAGTGCAACAGCAAAAC---  
AATTTG---CTGAGA---GCTATAGAGGCGCAACAGCATATGTTGCAACTCACAGTCTGGGGCATT  
>KY392768  
TTCTACTGCGACACATCAGGATTATTTAATGTTACATATGAGGTCAATAGTTCAAACCAAATTAATAATGCT-  
-----  
-----  
ACTAATAATAACATCACACTTCCATGTAAAATAAAACAATTTATAAACATGTGGCAGAAGGTAGGACGAGCAA  
TGTATGCCCCCTCCTATTGAAGGAATAATAACATGTGTATCAAAT---  
ATTACAGGTCTACTATTGACTCGTGATGGAGGTCAAAAATAACTCA-----  
-----  
-----  
GACACAGAGACCTTCAGACCAACAGGGGGAAATATGAAGGACAATTGGAGAAGTGAATTATATAAATATAAAG  
TAGTAGAAATTAAACCACTA---GGAGTAGCACCCACCAAGGCAAGAAGGAGAGTGGTG-----  
-----GAGAGAGAAAAAAGAGCA--GCGGGA---CTGGGAGCT-----  
GTGATCATTGGGTTCTTGGGAGCA--GCAGGAAGCACTATG--GGCGCAGCGTCA---  
CTAACGCTGACGGTACAG---GCCAGACAA--TTATTG---TCTGGTATAGTGCAACAGCAAAAT---  
AATTTG---CTGAAA---GCTATAGAGGCGCAACAGCATCTGTTGCAGCTCACAGTCTGGGGCATT  
>AB286849  
TTCTATTGCAATACATCAGGCCTGTTTAATAGTACATATTACAGCCTGTTTAATAGTACATATTACAATGGTA  
CATAC-----  
-----  
AATAATAATACCAACATCACCCCTCCAATGCAGGATAAGACAAATTGTAAACATGTGGCAAGAGGTAGGAAAAG  
CAATGTATGCTGCTCCCATTC AAGGAAGCATAACATGTGCATCAAAC---  
ATCACAGGGTTACTCTTGACACGCGACGGAGGCAATGGAGAGACA-----  
-----  
-----  
AATGGGACAGAGATTTTCAGACCTCAAGGAGGAAATATAAAGGACAATTGGAGAAGTGAATTATATAAATATA  
AAGTAGTAGAAGTTGAACCACTA---GGAGTAGCACCCACTAAGGCAAAAAGGAGAGTGGTG-----  
-----GAGAGAGAAAAAAGAGCA--GTGGGA---CTGGGAGCT-----  
---GCGTTCTTGGGGTTCTTAGGAGCA--GCAGGAAGCACTATG--GGCGCAGCGTCA---  
CTAGCGCTGACGGTACAG---GCCAGACAA--TTACTG---TCTGGTATAGTGCAACAGCAAAAT---  
AATTTG---CTGAGA---GCTATAGAGGCGCAACAACATATGTTGCAACTCACAGTCTGGGGCATT  
>AJ277819  
TTCTACTACAACACAACAGATCTGTTTAATAACATGGAAAAAACT-----  
-----  
-----  
AACAATAACACTATCATTCTCCCATGTAAAATAAGACAATTTGTAAACATGTGGCAAAGAGTGGGACGAGCCA  
TGTATGCCCCCTCCCATTTGCCGACAAATTCAGTGTAATTC AAAG---  
ATCACAGGTCTACTATTGACAAGAGATGGTGGAGAGAATACAAAT-----  
-----  
-----  
GGGTCCGAGACCCTCAGGCCTGGAGGAGGAGATATGAGAGACAATTGGAGAAGTGAACCTATATAAATATAAGG  
TAGTAAGAATAGAACCACTA---GGAGTAGCACCTACCAAGGCAAAAAGACAAGTGGTG-----  
-----CAGAGAGGAAAAAAGAGCA--GTGGGA---ATAGGAGCT-----  
GTACTCTTTGGGTTCTTAGGAGCA--GCAGGAAGCACTATG--GGCGCGGCGTCA---  
ATAACGCTGACGGTACAG---GCCAGACAA--TTATTG---TCTGGTATAGTGCAACAGCAGAAT---  
AATTTG---CTGAAG---GCTATAGAAGCGCAACAGCATCTGTTGCAGCTCACAGTCTGGGGCATT  
>MN485986  
TTCTACTGCAACACCTCACAACCTGTTT-----ACATGGTCAGATAATAGCACAGGGATA-----  
-----  
-----  
AATGATAGCACAAATCGTACTCTCTTGTAGAATAAAACAATTTATAAATATGTGGCAGGAAGTAGGAAAAGCTA  
TGTATGCCCCCTCCCATTTGCAGGAAAAATCAGTTGTTTCATCAAAA---  
ATTACAGGGCTGTTATTGACAAGGGATGGTGGTAAAGAGACTAACGAGACCTCC-----

-----  
-----  
GCTCACGAGATAGAGATCTTCAGACCTGCAGGAGGAGATATGAGGGACAATTGGAGAAGTGAATTATATAAAAT  
ATAAAGTAGTAAGAATTGAACCCCTT---GGAATAGCACCCACTAGGGCAAAAAGAAGAGTGGTG-----  
-----GAAAGAGAAAAAAGAGCA---ATAGGA---CTAGGAGCT---  
-----ATGTTTCCTTGGGTTCTTGGGAGCA---GCAGGAAGCACTATG---GGCGCGCGCTCA---  
ATAACGCTGACGGTACAG---GCCAGACAA---TTATTG---TCTGGTATAGTGCAACAGCAAAAT---  
AATTTG---CTGAGA---GCTATAGAGGCGCAACAGCATCTGTTGCAACTCACGGTCTGGGGCATT  
>FJ670527  
TTCTACTGCAACACATCATCCCTGTTTAATGGGACATGGACTAATAATACATGGCACAATATTACA-----  
-----  
-----  
TGGAACACAAATATGACAATCCCATGCAAAATAAGGCAAATTGTAAACATGTGGCAAGGAGTAGGAAAAGCAA  
TGTATGCCCCCTCCCATCGAAGGACACATCAACTGTTTCATCAAAT---  
ATTACAGGACTACTATTGATAAGAGATGGGGGTAAAGGACAGAATCAG-----  
-----  
-----  
AGTAATCAGAGTGAGACTTTCAGACCTGGAGGAGGAGATATGAGGGACAATTGGAGAAGTGAATTATATAAAAT  
ATAAAGTAGTAAAAATTGAACCTCTA---GGAATAGCACCCACCAAGGCAAGGAGAAGAGTGGTG-----  
-----CAAAGAGAAAAAAGAGCA---ATAGGA---CTAGGAGCT---  
-----ATGTTTCCTTGGGTTCTTGGGAGCA---GCAGGAAGCACGATG---GGCGCAGCGTCA---  
GTGACGCTGACGGTACAG---GCCAGACAA---TTGATG---TCTGGTATAGTGCAACAGCAAAAC---  
AATTTG---CTGAGA---GCTATAGAGGCGCAACAGCATCTGTTGCAACTCACAGTCTGGGGCATT  
>FJ388908  
TTCTACTGCAATACATCAAACTGTTTAATAGGACATGGGATACAGGGAATACTACAGAACAGGGTATTAGTA  
TA-----  
-----  
GGGTCAAATGATATAATCATACTCCCATGCAAACTAAAACAAATTATAAACATGTGGCAGGAAGTAGGAAAAG  
CAATGTATGCCCCCTCCCATGAAGGAGAAATCAAATGCTCATCAAAT---  
ATTACAGGGCTACTATTAACAAGAGATGGGGGAAATATTAATGGAAGT-----  
-----  
-----  
AGTAATCAGACAGAGATCTTCAGACCTGGAGGAGGAGATATGAGAGACAATTGGAGAAGTGAATTATATAAAAT  
ATAAAGTAGTAACAATTGAACCAATA---GGACTAGCACCCACCAAGGCAAAAAGAAGAGTGGTG-----  
-----GAAAGAGAAAAAAGAGCA---ATAGGG---TTAGGAGCT---  
-----ATGTTTCCTTGGGTTCTTGGGAGCA---GCCGGAAGCACGATG---GGCGCAGCGTCA---  
GTGACGCTGACGGTACAG---GCCAGACAA---TTGTTG---TCTGGTATAGTGCAAGCAGCAAAAC---  
AATTTG---CTGAGG---GCTATAGAGGCGCAACAGCACTTGTGCAACTCACGGTCTGGGGCATT  
>KX579838  
TTCTACTGCAATACATCAGAACTGTTTAATTGGGATAATAGTACAAAGAGTACTGTAAATGGA-----  
-----  
-----  
ACAAAATTAAATATAACTATCCACTGTAAATAAAAACAAATTATAAACATGTGGCAGGGAGTAGGAAGAGCAA  
TGTATGCCCCCTCCCATCGAAGGACAAATTCATGTATATCAAAT---  
ATTACAGGGCTACTATTGACAAGAGATGGTGGTAGTGATTCTAAT-----  
-----  
-----  
GAGACCTTCAGGCCTGGAGGAGGAGATATGAGAGACAATTGGAGAAGTGAATTATATAAAATATAAAGTAGTAA  
GAGTTGAGCCATTA---GGAGTAGCACCCACCAGGGCAAGAGAAGAGTGGTG-----  
-----GACAGAGAAAAAAGAGCA---ATAGGA---TTAGGAGCT-----  
ATGTTTCCTTGGGTTCTTGGGAGCA---GCAGGAAGCACTATG---GGCGCAGCGTCA---  
GTGACGCTGACGGTACAG---GCCAGACAA---TTATTG---TCTGGTATAGTGCAACAGCAAAAT---  
AATTTG---CTGAGG---GCTATAGAGGCGCAACAGCATCTGTTGCAACTCACGGTCTGGGGCATT  
>MN337382  
TTCTACTGCAATACATCAGGACTGTTTAATAGAGCATTTAATAATACAACATGGGATACTAGTACAGGGAGTG  
CTAGA-----  
-----  
TTAAATAATACAATAACCATCCTATGTAGAATAAAAACAAATTATAAACATGTGGCAGGGAGTAGGAAGAGCAA  
TGTATGCCCCCTCCCATGAAGGACAAATTAAATGTTTCATCAAAT---  
ATTACAGGGTTACATTTGACAGCAGATTGGGTTGGAAATGAGTCTGTG-----

-----  
-----  
TCTAGAGTAATTTACAGGCCTGGAGGAGGAAATATGAAGGACAATTGGAGAAGTGAATTATATAAATATAAAG  
TAGTAAAAATTGAACCACTA---GGAGTAGCACCCACCAGGGCAAGGAGAAGAGTGGTG-----  
-----GAAAGAGAAAAAAGAGCA--ATAGGA---CTAGGAGCT-----  
ATGTTTCCTTGGGTTCTTGGGAGCA--GCAGGAAGCACGATG--GGCGCAGCGTCA---  
GTGACGCTGACGGTACAA---GCCAGACAA---CTGTTG---TCTGGTATAGTGCAACAGCAAAAT---  
AACTTG---CTGAGG---GCTATAGAGGCGCAACAGCATCTGTTGCAACTCACGGTCTGGGGCATT  
>AY352655

TTCTATTGCAACACAACAAAACCTGTTTAAATAGTAGCTGGAAACATGACAATAACACCAATAACACCTGGAATA  
GAACTAATGGT-----  
AAAAATCGATGGCCGCTAT-----  
ACAGAAAATGATACTATTACACTGCCATGTAGAATAAAAACAAATTATAAACATGTGGCAGAGAGTGGGACAAG  
CAATGTATGCCCCCTCCCATCCAAGGAAATATTACATGTGTATCAAAT---  
ATTACAGGACTAATATTGACAAGGACCATCCGAGTAATAAT-----  
-----  
-----

ACCTTCAGACCTGGAGGAGGAGATATGAGAGACAATTGGAGAAGTGAAGTATATAAATATAAAGTAGTAAAAA  
TTGAACCACTA---GGAGTGGCACCCCTCCGAGGCAAGGAGAAGAGTGGTG-----  
-----CAGAGAGAAAAAAGAGCA--GTGGGA---CTAGGAGCC-----  
ATGATCTTTGGGTTCTTGGGAGCA--GCTGGGAGCACTATG--GGCGCGGCGTCA---  
TTAACGCTGACGGTACAG---GCCAGACAA---TTGCTG---TCTGGTATAGTGCAACAGCAAAGC---  
AATTTG---CTGAGA---GCTATACAAGCGCAACAGCATATGTTGCAGCTTACTGTCTGGGGCATT  
>KU310619

TTCTATTGTAATACATCAGAACTGTTCAATCTATCAAGATTGTTCAATGGCAGTGGGGAAGAGACTAGC----  
-----  
-----  
AATAAGACTCATATCACACTCCCATGTAGGATAAAACAAATTGTGAGAATGTGGCAGAGAGTAGGACAAGCAA  
TATATGCCCCCTCCCATCGCAGGAAACATCACATGCACATCAAAT---  
ATTACAGGATTATTATTGACACGTGATGGGGGACCCAGTAATGGA-----  
-----  
-----

ACTAATGAAACCTTCAGACCTACAGGAGGAGATATGAGGGACAATTGGAGGAGTGAGTTATATAAATATAAAG  
TAGTAGAGATTGAGCCAGTA---GGAATAGCACCCACCAAGGCAAAAAGAAGAGTGGTG-----  
-----GAGAGAGAAAAAAGAGCA--GTGGGA---ATGGGAGCT-----  
GTGTTTCCTTGGGTTCTTGGGAGCA--GCAGGAAGCACTATG--GGCGCAGCGTCA---  
ATAACGCTGACGGTACAG---GTCAGACAA---TTGTTG---TCTGGCATAGTGCAACAGCAAAGC---  
AATTTG---CTGAAG---GCTATAGAGGCGCAACAGCATCTGTTGAAACTCACTGTCTGGGGCATT  
>AF286236

TTCTATTGCAACACATCAGAGCTGTTTACTGGTATTTGGAATGGTACTTGGGATAAGAATTGCACTAGCACTG  
AGAGT-----  
-----

AATTGCACTGGAAATATTACACTCCCATGCAGGATAAAACAAGTGGTAAGAACATGGCAGGGAGTAGGACAAG  
CAATGTATGCCCCCTCCTATCGAAGGGACAATTAGGTGCTCATCAAAT---  
ATTACAGGTCTACTATTGACAAGAGATGGTGGTAATGGCAATGCA-----  
-----  
-----

ACTCAAAATGAGACCTTTAGACCTGGAGGAGGAGACATGAAAGATAATTGGAGAAGTGAATTGTATAAGTATA  
AAGTAGTAAAAATTGAACCACTA---GGAGTAGCACCCACCAGGGCAAAAAGAAGAGTGGTG-----  
-----GAGAGAGAAAAAAGAGCA--GTGGGG---ATGGGAGCT-----  
---TTGTTTCTCGGGTTCTTGGGAGCA--GCCGGAAGCACTATG---GGCGCGGCGTCA---  
ATGGCGCTGACGGCACAG---GCCAGACAA---TTATTG---TCTGGTATAGTGCAGCAGCAAAAC---  
AATTTG---CTGAGG---GCTATAGAGGCGCAACAGCATCTGTTGCAACTCACAGTCTGGGGCATT  
>MN617377

TTCTACTGTAATACATCACAACCTGTTTAGTAGTACTTGGGATAATAATGGTACTGAGATTAATACTACAGGAA  
CTACA-----  
-----

GGAAAATGACACTATCATTCTCCCTTGCAGAATAAAAACAACTTGTAACATGTGGCAGGAAGTAGGGAAAGCAA  
TGTATGCCCCCTCCCATTAGTGGAATAATTAGATGTTTCATCGAAT---  
ATTACAGGATTGCTATTAACAAGAGATGGTGGTAACAATCAGAGCACT-----  
-----

-----  
-----  
ATCAATGAGACTTTTCAGACCTGGAGGAGGAGACATGAGAGACAATTGGAGAAGTGAATTATATAAATATAAAG  
TAGTAAAAATTGAACCATTA---GGAGTAGCACCCACCAAGGCAAAGAGAAGAGTGGTG-----  
-----CAAAGAGAAAAAAGAGCA--GTGGGAAGTATAGGAGCT-----  
ATGTTTCCTTGGGTTCTTGGGAGCA--GCAGGAAGCACAAATG--GGCGCAGCGTCA---  
ATAACGCTGACGGTACAG---GCCAGACAA--TTGTTG---TCTGGTATAGTGCAACAGCAGAGA---  
AATCTG---CTGAGG---GCTATTGAGGCGCAACAGCATCTGTTGCAACTCACAGTCTGGGGCATC  
>HM215251  
TTTTATTGTAATACATCAAACTATTTAATAGTAGTTGGTGGTTTAACTACAAATAGCATAGGAATAAATA  
CAAATAGC-----  
-----ACG---  
GAAATAAATGATACTATCATACTTCCATGTAGAATAAAAACAAATTGTGAGAATGTGGCAGAGAGTAGGACAAG  
CAATGTATGCCCCCTCCCATTCAGGAAATATTACATGTGTATCAAAC---  
ATTACAGGCTTATTACTGACACGTGATGGGAAATATAGGCCAAAT-----  
-----  
-----  
AGTACTAATGAGACCTTCAGACCTACAGGAGGAGAAATGAGGGACATTTGGAGAAATGAATTATATAATTATA  
AGGTAGTGGAGATTGAACCACTA---GGAGTAGCACCCACCAAGGCAAGGAGAAGAGTGGTG-----  
-----CAGAGAGAGAAGAGAGCA--GTGGGA---ATAGGAGCT-----  
---TTGTTCCCTTGGGTTCTTAGGAGCA--GCAGGAAGCACTATG--GGCGCAGCGTCA---  
ATAACGCTGACGGTACAG---GCCAGACAA--TTATTG---TCTGGTATAGTGCAACAGCAAAGT---  
AATTTG---CTGAGG---GCTATAGAGGCTCAACAACATCTGTTGAAACTCACTGTCTGGGGCATT  
>HM215249  
TTCTATTGTAATACATCAGGATTATTCAATAAGAGTTGGGGGAGTTGGGAGCCTAATACTACAGAGGTTAATA  
ATGTA-----  
-----ACT---  
AAAGAAAATGGTACTATCACACTTCAATGTAAAATAAAAACAAATTGTGAGAATGTGGCAGAGAGTAGGACAAG  
CAGTGTATGCCCCCTCCCATTCAGGAAATATTACATGTACATCAAAC---  
ATTACAGGCTTATTACTGACACGTGATGGGGGTAACAATAATAGT-----  
-----  
-----  
GATAATGAGACCTTCAGACCTACAGGAGGAGATATGAGGGACATTTGGAGAAGTGAATTATATAATTATAAGA  
TAGTGGAGATTGAACCACTA---GGAGTAGCACCCACCAAGGCAAGGAGAAGAGTGGTG-----  
-----CAGAGAGAAAAGAGAGCA--GTGGGA---ATAGGAGCT-----  
TTGTTCCCTTGGGTTCTTAGGAACA--GCAGGAAGCACTATG--GGCGCAGCGTCA---  
ATAACGCTGACGGTACAG---GCCAGACAA--TTATTG---TCTGGCATAGTGCAACAGCAAAGT---  
AATTTG---CTGAGG---GCTATAGAGGCTCAACAACATCTGTTGAAACTCACTGTCTGGGGCATT  
>KY392780  
TTTTATTGTAATACATCAGGATTGTTCAATGGCACTAGGTTCAATGGCACTAGGACAAATGGC-----  
-----  
-----  
ACAAATGAACTATCACACTCCCATGTAAAATAAAAAAAGTTGTGAGAATGTGGCAGAGAGTAGGACAAGCAA  
TTTATGCCCCCTCCCATCGCAGGAAACATTACATGCTCATCAAAT---ATTACAGGATTAATATTAACA-----  
-----CATGAAAGTTCT-----  
-----  
-----  
AATGATACAGAAATCTTCAGACCTATAGGAGGAAATATGAAGGACAATTGGAGAAGTGAATTATATAAGTATA  
AGGTAGTGAAGATTGAGCCACTA---GGAGTGGCACCCACCAGGGCAAAGAGAAGAGTGGTG-----  
-----GAGAGAGAAAAAAGAGCAATAGCTGGA---ATAGGGGCT-----  
---GTCTTCCTTGGGTTCTTGGGAACA--GCAGGAAGCACTATG--GGCGCAGCGTCA---  
ATAACGCTGACGGTACAG---GCCAGACAA--TTATTG---TCTGGCATAGTGCAACAGCAGAAC---  
AATCTG---CTGAAG---GCTATAGAGGCTCAACAACATCTGTTGAAGCTCACAGTCTGGGGCATT  
>FN392873  
TTCTATTGCAATACATCAGGACTGTTTAAATGACAGTTGGTCTAATGGCAGTTGGTCCAAAAACAGTACAGAC-  
-----  
-----  
AGCACACAGAACATAAATCTTCCATGCAGAATAAAGCAAATTATAAATATGTGGCAGAGAGTAGGACAAGCAA  
TATATGCCCCCTCCCATTCGAGGAATAATAAACTGTAAATCAAAC---  
ATTACAGGACTACTACTAACAAGAGATGGGGGAGATAATAACAGT-----  
-----

-----  
 ACAAATGAGACCTTCAGACCGGGAGGAGGAGACATGAGAGATAATTGGAGAAGTGAATTATATAAGTATAAAG  
 TAATAAAAATTGAACCACTA---GGGGTAGCACCCACCAAGGCAAGGAGAAGAGTGGTG-----  
 -----CAGAGAGAAAAAAGAGCA---GTTGGA---CTGGGGGCT-----  
 TTTTTCCTTGGGTTCTTGGGAGCA---GCAGGAAGCACTATG---GGCGCAGCGTCG---  
 CTAACGCTGACGGTACAG---GCCAGACAA---TTACTG---TCTGGCATAGTGCAACAGCAGAGC---  
 AATCTG---CTAAGG---GCTATAGAGGCTCAACAGCACCTGTTGAAACTCACAGTCTGGGGCATT  
 >KY392773  
 TTCTATTGCAATACAACACAGCTATTTAATAGCACCTGGGAGAAAAACACAACCAGTGAAGGCTATAGACAGA  
 TAAATAAC-----  
 -----ACAACA-----  
 AATGATACTACTACTATTGTGTGCTGCCATGCAGAATAAAACAAATTGTAAACATGTGGCAGAGGGTAGGACAAG  
 CAATGTATGCCCTCCCATCAGTGGAAAAATTACATGTGAGTCAAAT---  
 ATTACAGGACTAATATTGACAAGCGACTTTGTTAATCAGTCTAAG-----  
 -----  
 -----  
 GATAGTGATAGTGTTACCTTCAGACCTGGAGGAGGAGATATGAGGGACAATTGGAGAAGTGAATTATATAAAT  
 ATAAAGTAGTAAAAATTGTACCACTA---GGTGTAGCACCCACCGAGGCAAGGAGAAGAGTGGTG-----  
 -----CAGAGAGAAAGAGCAGAA---GACAGTGGCAACGAGGCT---  
 -----GTCCTCTTTGGGTTCTTGGGAGCA---GCAGGGAGCACTATG---GGCGCAGCGTCA---  
 ATGACGTTGACGGTACAG---GCCAGACAA---TTATTG---TCTGGTATAGTGCAACAGCAGAGC---  
 AATCTG---CTGAAG---GCTATAGAGGCTCAACAACATATGTTGAGACTCACAGTCTGGGGCATA  
 >JF706452  
 TTCTATTGCAATACATCAGCGCTATTTAACAGCTCTTGGGAACCCAACAAAATAACACAATAACACATCAA  
 TG-----  
 -----  
 TTAAATGGCAATATCACTCTCCCATGCAGAATAAAACAAATTGTAAACATGTGGCAAAGAGCAGGGCGAGCAA  
 TGTACGCCCCCTCCCATTCGCCGAAAAATTCAATGTAACTCAAAT---  
 ATCACAGGTCTCATATTAACAAGAGATGGTGGTAATAATAGTAAGACAAGT-----  
 -----  
 ----  
 AATGAGACTGAGACTGAGACCTTCAGACCTGGAGGGGGGAGACATGAGAGACAACTGGAGAAGTGAAGTGTATA  
 AATATAAGGTAGTGAATAATTGAACCACTA---GGAGTAGCACCCACCAAGGCAAGAAGACATGTGGTG-----  
 -----CAGAGAGCAAAAAGAGCA---GTGGGA---  
 TTAGGAGCT-----GTATTCCTTGGGTTCTTGGGAGCA---GCAGGAAGCACTATG---  
 GGCGCAGCGTCA---ATAACGCTGACGGTACAG---GCCAGACAA---TTATTG---  
 TCTGGTATAGTGCAACAGCAAAGC---AATTTG---CTGAAG---  
 GCTATAGAAGCTCAACAGCATCTGTTGCAGCTCACAGTCTGGGGCATT  
 >KP718920  
 TTCTATTGCAATACATCAGAACTGTTTAATAGCACATGGACATATAATGATACTAAAAATAAACTGACAGCC  
 AGACAGGG-----  
 -----  
 TCAAATGACAACATAACTCTCCCATGTAGGATAAAGCAAATTATAAATATGTGGCAGAGAACAGGAAAAGCAA  
 TGTATGCCCCCTCCCATCCAGGAATAATAAGGTGTGAGTCAAAC---  
 ATTACAGGACTAATATTGACAAGAGATGGTGGGGTTAATAGTACA-----  
 -----  
 -----  
 AATGAGACTTTCAGACCTGGAGGAGGAGATATGAGAGACAAATTGGAGAAGTGAATTATATAAATATAAAGTAG  
 TAAAAATTGAACCACTA---GGAGTAGCACCCAGCAGGGCAAGGAGAAGGGTGGTG-----  
 -----CAGAGAGAAAAAAGAGCA---GTTGGA---ATTGGAGCT-----  
 GTCTTCCTTGGGTTCTTAGGAGCA---GCAGGAAGCACTATG---GGCGCGGCGTCA---  
 ATGACGCTGACGGTACAG---GCCAGACAA---TTATTG---TCTGGTATAGTGCAACAGCAAAGC---  
 AATTTG---CTGAAG---GCTATAGAGGCTCAACAGCATCTGTTGAAACTCACGGTCTGGGGCATT  
 >JF683772  
 TTCTATTGCAATACATCCAACTGTTTAATGGTACATGGTTTAATGGCACATGGGTTAATGGCACATGGTACA  
 ATAATACACTA-----  
 -----GACAGCAATGAC-----  
 ACAGAGAATGGGACTATAACTCTCCCATGCAAAATAAGACAAATAGTAAGAATGTGGCAAAGAGTAGGACAAG  
 CAATGTATGCCCTCCCATCCAAGGGGTAATACATTGTCAATCAAAC---  
 ATTACAGGACTACTATTAACGAGAGATGGAGACAAGAAT-----

-----  
-----  
GAAACTGAAACCTTCAGACCTACAGGAGGAGATATGAGGGACAATTGGAGAAGTGAATTATATAAGTATAAAG  
TAGTAAAAAATTGAACCACTA---GGAGTAGCACCCACCAGGGCAAGGAGAAGAGTGGTG-----  
-----GAGAGAGAAAAAAGAGCA--GTTGGA--ATGGGAGCT-----  
ATCTTCCTTGGTTTCTTAGGAGCA--GCAGGAAGCACTATG--GGCGCGGCGTCA---  
ATAACGCTGACGGTACAG---GCCAGACAG---TTATTG---GCTGGCATAGTGCAACAGCAGAGT---  
AATCTG---CTGAAA---GCTATAGAGGCCCAACAGCAACTGTTGAGGCTCACAGTCTGGGGCATT  
>JX140679  
TTCTATTGCAATACAACAACCACTGTTTGATAGCAGTTGGGGTATCAATGACACTGTCAGCAATAGCAATGACG  
CTGAC-----  
-----  
AGCGATGACAACATAACTCTTCAATGCCGAATAAAGCAAATTATAAAAATGTGGCAGAGAGTAGGACAAGCAA  
TATATGCCCCCTCCCATCCGAGGAAACATAAGTTGTCACTCAAAC---  
ATTACAGGGCTACTATTAAACAAGAGACGGAGGGAACAATAGTACA-----  
-----  
-----  
AATGAGACTTTCAGGCCTGGAGGAGGAGACATGAGAGATAATTGGAGAAGTGAATTATATAAGTATAAAATAG  
TAAAAAATTGAACCACTT---GGTGTAGCACCCACCCATGCAAAAAGAAGAGTGGTG-----  
-----GGGAGAGAAAAAAGAGCA--ATTGGA--ATGGGAGCT-----  
TTCTTCCTTGGGTTCTTAGGAGCA--GCAGGAAGCACTATG--GGCGCAGCGTCA---  
ATAACGCTGACGGCACAG---GCCAGACAA---TTATTG---TCCGGTATAGTGCAACAGCAGAGC---  
AATTTG---CTGAAG---GCTATAGAGGCTCAACAAAATCTGTTGAGACTCACGGTCTGGGGCATT  
>JF680905  
TTCTATTGCAATACATCAGGACTGTTTAATAGCTCTTGGAAATAGCACTGACAACTCAAACCACACAGGGTTA-  
-----  
-----  
AATAATGACACTATAATTCTCCCATGCAGAATAAAGCAAATTGTAAATATGTGGCAGAGAGTAGGACAAGCAA  
TATATGCCCCCTCCCATCCAAGGAGCAATAAGATGTAATTCAAAT---  
ATTACAGGACTACTATTAAACAAGAGATGGAGGGAATAATGGGACA-----  
-----  
-----  
AATAACACCGAAATCTTCAGACCTGAGGGAGGAAATATGAAGGACAATTGGAGAAGTGAATTATATAAATATA  
AAGTAGTAAAAAATTGAGCCACTA---GGTGTAGCACCCCTCACGTGCAAAAAGAAGAGTGGTG-----  
-----GAGAGAGAAAAAAGAGCA--GTTGGA--CTGGGAGCT-----  
---GTCCTCTTTGGATTCTTAGGAGCA--GCAGGAAGCACTATG--GGCGCGGCGTCA---  
ATAACGCTGACGGTACAG---GCCAGACAA---TTATTG---TCCGGCATAGTGCAACAGCAGAGC---  
AATCTG---CTGAGA---GCTATAGAGGCTCAACAACATATATTGAAACTCACGGTCTGGGGCATT  
>MH078558  
TTCTATTGCAATACATCAAATCTGTTTAATAGGACTTACAGCAGGGGGATGAACGGCACTTGGGAGACAAATG  
ACACAGGG-----  
-----  
ATAAATGACACTAAAAGCCTTCAATGTAAATAAAGCAAATTATAAATATGTGGCAGAGAGTAGGACGAGCAA  
TGATATGCCCCCTCCCATCCAGGAGTAATAGAGTGTAAGTCAAAC---  
ATTACAGGACTACTATTGACAAGAGATGGGGGTGCTAATAACAAT-----  
-----  
-----  
AGGACTGAGGAAACATTTAGACCTGGAGGAGGAGATATGAGAGATAATTGGAGAAGTGAATTATATAAGTACA  
AAGTAGTAAAAAATTGAACCACTA---GGAGTAGCACCCACCAAGGCAAGAGAAGAGTGGTG-----  
-----GAGAGAGGGAAAAAGAGCA--GTCGGA--ATGGGGGCT-----  
---TTCTTCCTTGGGTTCTTAGGAGCA--GCAGGAAGCACTATG--GGCGCAGCGTCA---  
ATGACGCTGACGGTACAG---GCCAGACAA---TTATTA---TCTGGCATAGTGCAACAGCAGAGT---  
AATCTG---CTGAGA---GCTATAGAGGCTCAACAGCATCTGTTGAAACTCACAGTCTGGGGCATT  
>MH078559  
TTCTATTGCAACACATCAGATCTGTTTAATAGTACTTGGGATAAGAACTACTTGGAAATAACAACATATCAGA  
AT-----  
-----  
GAGAAATGACAATATAACTCTCCCATGCAGAATAAAACAATTTGTACATATGTGGCAGAGAGTAGGACAAGCAA  
TATATGCCCCCTCCCATCAAGGAGTAATAAAAATGTAAATCAAAC---  
ATTACTGGAATACTATTAAACAAGTGATGAAGGTTTTAAAAACACA-----

-----  
-----  
ACTGAGATCTTCAGACCTGGAGGAGGAGATATGAGGGACAATTGGAGAAGTGAATTATATAAATATAAAGTAG  
TAAAAATTGAACCACTA---GGAGTAGCACCCCTCCTGGGCAAGGAGGAGAGTGTTG-----  
-----CAGAGAGAAAAAAGAGCA---GTTGGA---CTGGGAGCT-----  
GTCTTCCTTGGGTTCTTGGGAGCA---GCAGGAAGTACTATG---GGCGCAGCGTCA---  
CTAACGCTGACGGTACAG---GCCAGACAA---TTATTG---TCTGGCATAGTACAACAGCAGAAC---  
AATCTG---CTGAAG---GCTATAGAGGCTCAACAGCAACTGTTGAAACTCACGGTCTGGGGCATT  
>JF680912  
TTCTATTGCAATACATCAACCCTATTTAATAGCACATGGAATTGGAATGGCACTCAGAACATAACT-----  
-----  
-----  
GGCACTGCAAATCACATTATCCCATGCAAAATAAAGCAAATTGTGAGAATGTGGCAGGGAGTAGGACAAGCAA  
TGTATGCCCCCTCCCATCAGCGGAATGATACAATGCAATTC AAGC---  
ATTACAGGACTATTGTTAAACAAGAGATGGAGGGAACAGAAACAAT-----  
-----  
-----  
TCAGACAATGAGACATT CAGGCCTGGAGGAGGAGATATGAGGGACAATTGGAGAAGTGAATTATATAAGTATA  
AAGTAGTAAAAATTGAACCACTA---GGAGTAGCACCCACCAGGGCAAAGAGAAGAGTGTTG-----  
-----GAGAGAGAAAAAAGAGCA---GTTGGA---ATGGGAGCT-----  
---TTGTTCTTGGGTTCTTAGGAGCA---GCAGGAAGCACTATG---GGCGCAGCGTCA---  
ATAACGCTGACGGTACAA---GCCAGACAA---TTATTG---TCTGGTATAGTGCAACAGCAAAGT---  
AATTTG---CTGAAG---GCTATAGAGGCTCAACAACAAC TGTGAAACTCACGGTCTGGGGCATT  
>KU168285  
TTTTATTGTAACACAAC TACGCTATTTAATCATACTTTTTCTTGTAACAATTCCACCTGTCAGAACATGTCTG  
GCAGTGAC-----  
-----  
ACTTCTAGCAATGACACTATACCTTGCAGGTTGAAACAGATAGTAAGGTCATGGATAGGGGGAGAGTCGGGAT  
TCTATGCACCTCCCATCAAGGGTGCCCTAAATTGCACCTCACAA---  
ATAACTGGAATGATTTTACAAC TGGACTATCCATGGAACAACACAGAGGGAAAG-----  
-----  
GCCACAAATAACACAAAAACAAT-----  
ACCAACGTCATATTTAGACCAACAGGGGGAGATATGAAAGATATATGGAGGACTAAATTATTTAACTATAAGG  
TAGTAAAGGTAAACCTTTT---AGTATAGCACCTACAAAAGTTGCAAGACCAGTCATAGGAACT-----  
-----GGCACTCATAGGGAGAAAAGGGCA---GCAGGT---ATGGCAATG-----  
CTATTCTTGGGGGTTCTAAGTGCA---GCAGGAAGCACTATG---GGCGCAGCGGCA---  
ACAGCGCTGACGGTACAG---ACCCGAAGT---TTAATA---AAGGGTATAGTGCAACAGCAGGAT---  
AAACTG---CTGAGA---GCAATACAGGCCCAGCAACACTTGCTGAGGTTATCTGTATGGGGCATT  
>KU168294  
TTTTATTGCAACACATTTGAGTTGTTTAATTATACTTTTAGATGTAGAGGGTCCAAC TGTACTTCTGAAAATA  
GC-----  
-----  
ACCCAAATAAATGGAACAATACCTTGCAAGATAAAACAAGTAGTAAGGACATGGATGGGGGGAAGGTCAGGAC  
TCTATGCACCTCCCATTAAGGTGAACTAACATGTGAATCAAAC---  
ATAACTGGAATGCTACTACAAAGGGATCAACCATGGAACCAAACATGTAACAGC-----  
-----  
-----  
ACATTTAGACCAATAGGGGGAGATATGAGAGATATATGGAGAAGTAGCTTATACAAC TACAAAGTAGTAAAAA  
TAAACCTTTT---AGTGTGGCACCTACAAGAATTGCAAGGCCAGTCATAAGTCTT-----  
-----AGATCTCCTAGAGAAAAAAGGGCA---GCAGGA---TTGGGAATG-----  
CTATTCTTGGGGGTGCTAAGTGCA---GCAGGTAGCACTATG---GGCGCAGTGTC A---  
ACGACACTGACGGTACAG---ACCCAAAAA---GTGTTA---AAGGGTATAGTGCAACAGCAGGAC---  
AACCTG---CTGAGA---GCGATACAGGCCCAGCAACATTTGCTGAGGCTATCTGTATGGGGCATT  
>KU168284  
TTTTATTGCAACACATCTGGGTTGTTTAATCATACTTTTGAGTGTATAGAGCACAAC TGTACTTCTAAAATTA  
ATAGCACCCAT-----  
-----GAAAAAT-----  
AGCTCCCAAAGAAATGGAACAATACCGTGCAGGATAAGACAGGTAGTAAGAGCATGGATGGGGGGAAGGTCAG  
GACTCTATGCACCTCCCATCAAAGGTATCCTAACATGTCAATCAAAT---  
ATAACTGGAATGCTACTAGAAAGGGATGAACCATGGAACCAAACA-----

-----  
-----  
GGCACAAATAACAGCACATTTAGACCAACAGGGGGAGATATGAGAGATATATGGAGAACTAGCTTATACAATT  
ACAAAGTAGTAAGAATAAAACCTTTT---AGTGTGGCACCTACAAAAATTGCAAGACCAGTCATAAAAGCT---  
-----CCTAGAGAAAAGAAGGGCA---GCAGGA---TTGGGAATG---  
-----CTATTCTTGGGGGTGCTAAGTGCA---GCAGGTAGCACTATG---GGCGCAGTGTCA---  
ATGACACTGACGGTACAG---ACCCAAAAC---GTGTTA---AAGGGTATAGTGCAACAGCAGGAC---  
AACCTG---CTGAGA---GCGATACAGGCCAGCACCCTTGCTGAGGCTATCTGTATGGGGCATT  
>AY532635  
ATCTATTGTAATACTTCCAGATTATTCAATGAGAGCATGAATACAAATGGGACT-----  
-----  
-----  
AATGGGACTATTACTCTGCCCTGTAGAATAAGACAAATTGTAAATTTGTGGACAAGAGTAGGAAAAGGAATTT  
ATGCACCGCCAATTCGGGGAAATCTTACCTGTAACTCCACT---  
ATTACTGGACTGATTCTAGAACATAGTGGTGGCAGTAAT-----GGC-----  
-----  
-----  
ACAGTATATCCACAGGAGGAAACATGGTCAATCTCTGGAGACAAGAGTTGTATAAGTACAAAACAGTCAGTA  
TAGAACCCATA---GGAGTAGCACCAGGTAAAGCTAAAAGACGCACAGTG-----  
-----AGTAGAGAAAAAGAGCAGCCTTTGGA---CTAGGTGCG-----  
CTGTTTCTGGGGTTTCTTGGAGCA---GCAGGGAGCACTATG---GGCGCAGCGTCA---  
ATAACGCTGACGGTACAG---GCCCGGACA---TTGTTA---TCTGGGATAGTGCAACAGCAGAAT---  
AATCTG---GTGAGA---GCAATAGAGGCGCAACAACATTTGTTGCAACTCTCAATCTGGGGCATT  
>GQ324959  
TTCTATTGTAACACTTCCAAATTATTTGATAAAAAATTTACTTAAACAAGACA-----  
-----  
-----  
AACGAGACTATTGTTCTGCCCTGTAGAATAAAACAGATTGTAACTTGTGGACAAGGGTAGGAAAAGGGATTT  
ATGCACCACCAGTTAGGGGAAATCTTACCTGTAACTCCAAT---  
ATTACTGGACTGATTCTAGAGTATAGTGGTAACAGTGGTAACGAA-----  
-----  
-----  
ATGGTGTATCCCTCAGGAGGACACATGGTTAATCTTTGGAGACAAGAGTTGCATAACTACAAAGTAGTTAGTA  
TAGAACCCATA---GGAGTAGCACCAGTAAAGCTAAAAGGCACACAGTG-----  
-----AGTAGAGAAAAGAGAGCAGCCTTTGGA---CTAGGTGCG-----  
CTGTTTCTTGGGGTTTCTTAGAGCA---GCAGGGAGCACTATG---GGCGCAGCGTCA---  
ATAACGCTGACGGTACAG---GCCCGGACA---TTATTA---TCTGGGTAGTGCAACAACAGAAT---  
AATCTG---TTGAGA---GCTTTAGAGGCGCAACACCATTTGTTGCAACTCTCAGTCTGGGGCATT  
>AJ006022  
TTCTATTGTAACACTTCCAAATTATTTAATGAGGAATTACTTAAACGAGACA-----  
-----  
-----  
GGTGAGCCTATTACTCTGCCCTGTAGAATAAGACAGATTGTAAATTTGTGGACAAGGGTAGGAAAAGGAATTT  
ATGCACCACCAATTCGGGGAGTTCTTAACTGTACCTCCAAT---  
ATTACTGGACTGGTTCTAGAATATAGTGGTGGGCCTGACACCAAGGAA-----  
-----  
-----  
ACAATAGTATATCCCTCAGGAGGAAACATGGTTAATCTCTGGAGACAAGAGTTGTATAAGTACAAAGTAGTTA  
GCATAGAACCCATA---GGAGTAGCACCAGGTAAAGCTAAAAGACGCACAGTG-----  
-----AGTAGAGAAAAAGAGCAGCCTTTGGA---CTAGGTGCG-----  
CTGTTTCTTGGGGTTTCTTGGAGCA---GCAGGGAGCACTATG---GGCGCAGCGTCA---  
ATAACGCTGACGGTACAG---GCCCGGACA---TTATTA---TCTGGGATAGTGCAACAGCAGAAT---  
ATTCTG---TTGAGA---GCAATAGAGGCGCAACAACATTTGTTGCAACTCTCAATCTGGGGCATT  
>HQ179987  
TTTTATTGTAACACCAGCAGCCTGTTTAACTTTAGTTATACTTGAATGACACCACCTGGCGGGCTGCAGGCA  
ATCATAAT-----  
-----  
ACAAGTGAAAATATAACACTGTCTTGTAGACTGAAGCAAGTAGTTAATTCATGGATGAGAGTGGGATCAGGCT  
TGTTTTCGACACCTATTGAGGGGGAATTAAGTGTCAATCCAAC---  
ATTACAGGTTTAAATGTTAGAAAAGAGAACTACCTTACAAT---GACAGC-----

-----  
-----  
AGCAAGAACACCACTTTAAGTCCTATAGGGGGGAGACATGACAAATATCTGGAGAAGTGAGTTATATCCCTACA  
AAGTAGTTCAAGTAAAAGCTCTG---GCCGTGGCACCTACAAAAATTTCCAGACCTACAATTATGGCT-----  
-----CATGATGGACATAGGAAGAAAAGGGCA---GCAGGC---CTAGGAATG-----  
---CTATTCCTTGGGTTTCTGAGCGCA---GCAGGAAGCACTATG---GGCGCAGCGGGA---  
ATCACGCTGACGGTACAG---GCCAAGCAA---TTATTG---CATGGTATAGTGACGACGAGCAAC---  
AATATG---CTAAGA---GCTATAGAGGCACAGCAAGAATTGCTGAGACTCTCTGTGTGGGGCATA  
>KY953207  
TTTTATTGTAACACCAGTAGCCTGTTTAATTATAGCTATACTTGTAATACCTCGGGTGCATGTATCATTAAATC  
CTACAGGTAAT-----  
-----CACACA---  
GGTGAGAACATGATAATAACACTACCTTGTAGACTAAAGCAAGTAGTTAATTCATGGATGAAAGTGGGATCAG  
GCTTGTTTGCGCCACCTATCGAGGGACAATTGCAGTGCCACTCCAAC---  
ATTACAGGTTTAATATTAGACAGAGCATCACCTTATAATGTCAAC-----  
-----  
-----  
AGCAGTAACACCACTTTAAGTCCTACCGGGGGAGAAATGAGAAATATCTGGAGAAGTGAGTTATATCCCTACA  
AGGTAGTTCAAGTAAAAGCTCTG---GCTGTGGCACCTACAAGGGTCTCCAGACCTACAATCATGGCT-----  
-----CATGATGCTCATAGGAAAAAAGGGGA---GCAGGC---CTAGGAATG-----  
---CTATTCCTTGGGTTTCATGAGTGCA---GCAGGAAGCACTATG---GGCGCAGCGGCA---  
GTTACGCTGACGGTACAG---GCCAGGCAA---TTATTG---CATGGTATAGTGACGACGAGCAAC---  
AATATG---CTACGA---GCTATAGAGGCACAGCAAGAATTGCTGAGACTCTCTGTGTGGGGCATA  
>JQ866001  
TTCTATTGTGACCTCAAAAATTGGACAAACAATGGCATCGAG-----  
-----  
-----  
ATCGATGGAATGCTGATAGCACCATGTCTGACTTAGACAGATAGTAAATCATTGGGGAATAGTATCCAGGGGAA  
TTTATCTCCCTCCCAGGGAGGGACAGGTCAAATGTGTATCTAGT---  
ATTACAGGATTATAATGACAGCTGAGACGAATGACACTGAT-----  
-----  
-----  
GGCACTATCACACCCACCTTCTCTGCAAAGGTGGAAGACTACTGGAAAGTAGAAATGAGTAGATACAAAGTAG  
TGGAGATACAGCCATTA---TCAGTGGCACCCACTAAAGGAAAAAGACCAGTAGTTGGTGAC-----  
-----CCAGAAGCAAAAAGTAGAAGTAAAAGAGAA---ATAGGA---ATGGGAATG-----  
ATCTTTATGGGATTTCTCAGTGCA---GCAGGAAGTACTATG---GGCGCAGCGTCA---  
ATAGCGCTGACGGTACAA---GCCAGAGGA---TTGCTC---TCTGGTATAGTACAGCAGCAAGCA---  
AATTTG---CTGCAG---GCAATAGAGGCTCAACAACATTTGTTGCAGCTCTCGGTGTGGGGCATA  
>JX178450  
TTTTATTGTGAGACATCTTCATTGTTTAATGCTACAATAGATATTACACCAAATACTACACTGAATGAGACGA  
CCTGGGATTAT---CCA-----GCT-----  
-----GAGAAC-----  
AATATTAACCAAGAAATGATAATCCATTGTAGAATAAAACAAATTGTATCAATGTGGCAGAGAGTGGGAAAAG  
GAATATTTTCTCCTCCTATTAGAGGAACCATTCAATGTAACCTCCACT---  
ATTACAGGACTACTGCTAACTCGCGATGGTAATAACAAAGCAGATAGTGAGAACAAAACAAGGATTGAAACAG  
GACAG-----  
AACAAAGCAGAAGAGATTAATAGGACTGACATTTTTAGACCTGCAGGAGGAGAAATGAGAGACAATTGGAGAA  
GTGAATTATATAGATACAAGGTGGTGAAAATTGAACCACTA---  
GGACTAGCACCCACCAAGGCAAAAAGAAGGACTGTA-----  
---AATAGAGAAAAAAGAGCA---CCAGGA---CTAGGACTG-----  
ATGTTCTTGGGTTCTTGGGAGCA---GCAGGGAGCACTATG---GGCGCAGCATCA---  
TTAACGCTGACGGTACAG---GCCAGGCAA---TTATTG---ACTGGCATAGTGCAACAGCAAAGC---  
AATTTG---CTGAGA---GCTATAGAGGCGCAACAGCACTTGTGCAACTCTCAGTCTGGGGCATT  
>EF535993  
TTTTATTGTAACACCACCCCATTTGTTCAATAACAGTTGGACAAATACAACCTAGCTCAGATATA-----  
-----  
-----  
AATAGCTCAAATATAATAATAAACTGTAGAATAAGGCAAATTGTAACTCCTGGATGAGAGTGGGCAAGGGAA  
TTTACGCCCCACCAATTAGAGGAACTATAAGTTGCACATCAAAT---  
ATTACTGGGCTCCTGCTCGAGTTAGACAGAGGACTCCCGAGAAATGGGACTAAT-----ACCAATAAC---

AAG-----  
-----  
TTAACACTATACCCTACAGGAGGAGAGATGAGAGATTTGTGGAGGCTGGAATTACATAAATACAAAGTAGTCA  
GCATAGAACCCATA---GGAGTGGCACCAAGTAAAGCTAAAAGGCACACAGTG-----  
-----ACAAGAGAAAAAAGAGCAGCCTTTGGA---CTAGGTGCG-----  
CTGTTTCTTGGGTTTCTAGGAGCA---GCAGGAAGCACTATG---GGCGCAGCATCA---  
CTAACGCTGACGGTACAG---GCCCGGCAA---TTATTG---TCAGGGATAGTGCAACAGCAGAAC---  
AACCTG---CTGAGA---GCAATAGAGGCGCAACAGCATTTGTTGCAACTCTCAGTATGGGGCATT  
>DQ373065  
TTTTACTGTAATACCAGTCAATTGTTTACAAATCAAAATGGCAACACAACCTGGCAAT-----  
-----  
-----  
ATCACCTTACAATGCAGAATAAGACAAATTGTAAATTTATGGACAAGAGTAGGAAAAGGAATTTATGCTCCGC  
CAATTAAAGGACCTATTAACGTCTCTCTAAC---  
ATCACTGGGATAATACTTGACTATACAAAGTCTGGAACCTGAGAAGTAC-----  
-----  
-----  
ACCATATATCCACAGGGGGAGACATGACTAACCTCTGGAGGCAGGAGTTGTATAAGTATAAGGTGGTCAGCA  
TAGAACCCATA---GGAGTAGCACCAGGAAAAGCTAAAAGACACACAGTG-----  
-----ACTAGACAAAAAAGAGCAGCC---TTTGGA---CTAGGTGCG-----  
CTGTTTCTTGGGTTTCTTGGAGCA---GCAGGGAGCACTATG---GGCGCAGCGTCA---  
ATAACGCTGACGGTACAG---GCCCGGAAA---TTATTA---TCTGGGATAGTGCAAGCAGCAGAAT---  
AATCTG---CTGAGA---GCAATAGAGGCGCAACAACACTTGCTGCAACTCTCAGTTTGGGGCATT  
>DQ373064  
TTTTTATTGTAACACCTCGGCCTTGTTCAATGACACCTTGTTACGCAATAAAACCTTGCTCAATGAAACC---  
-----  
-----  
TTGCACAATAACTTGACACTACCTTGTAGGATTAGACAAATTGTAAACCTATGGCTAAGAGTAGGAAAGGGAA  
TATTTGCTCCACCTATTAGAGGTAACATCCGCTGTAATTCCACT---  
ATTACTGGGTTGATCCTAGAAAAACACACAAACACAGACAAT-----  
-----  
-----  
ATCACCTTCCGTCCAATAGGAGGGGATATGACAGACATCTGGAGAAGTGAATTATATAACTATAAAATAGTAA  
AAATTGAACCATTA---GGAGTAGCGCCTACCAGGGCGAGAAGGAGGACTGTG-----  
-----GATAGAGAAAAAAGAGCA---GCAGGG---CTGGGAGTG-----  
TTTTTCCTTGGGTTCTTGGGAGCA---GCAGGGAGCACTATG---GGCGCAGCATCA---  
TTAACGCTGACGGTACAG---GCCAGACAA---TTATTG---ACTGGCATAGTGCAACAGCAGAGT---  
AATTTG---CTGAGA---GCTATAGAGGCGCAGCAACACTTGCTGCAACTCTCAGTCTGGGGCATC  
>EF535994  
TTTTACTGTAATACATCAAACCTTATTCAATCAATCCACTATT-----  
-----  
-----  
AACAAATATTACACACATTCCGTGCAGAATAAGACAAATTGTAAATCAGTGGCAAGGAGTAGGAAAAGGAATCT  
TTGCACCTCCTATTAGAGGAACAATTCAATGTAATTCCACA---  
ATCACAGGCCTACTCTTAACAAGAGATGGTAAAAATGAGACT-----  
-----  
-----  
GAAACTTTTtagacctacaggaggagacatgagaaataattggagaagtgaattatatacaaatacaaggtagtaa  
AAATTGAACCCCTA---GGATTAGCACCAACCAAGGCAAAAAGGAGAACAGTG-----  
-----CAAAGAGAAAAGAGGGCA---GTAGGA---CTGGGAGTG-----  
ATGTTTCCTTGGATTTCATGGGAGCA---GCAGGAAGCACTATG---GGCGCAGCGGCA---  
CTGACGCTGACGGTACAG---GCCAGAAAT---CTACTC---TCTGGTATAGTGCAACAGCAAAGC---  
AATTTG---CTGAAA---GCTATAGAGGCGCAACAGCATCTGTTGCAACTCTCAGTCTGGGGCATT  
>AF115393  
TTTTATTGCAATACTACTACATTGTTTAATTATACGTGGAAAAACAACAATATAACTAAGGGA-----  
-----  
-----  
GATAACACCACCTTCTTCCCATGTAGAATAAGGCAAAATTGTAAACTCCTGGATGAGAGTGGGGAAGGGAATTT  
ATGCCCCACCAATTAGAGGAGTTATAAGTTGCACATCAAAC---  
GTTACTGGGATTATACTTGAGACAGGGCATGGCATCAACAACAGCATCACCAAC-----

-----  
-----  
ATCACGCTATACCCTACAGGAGGAAACATGGTAGACTTGTGGAGGCTTGAATTGCATAAATACAAGGTAGTTA  
GCATAGAACCCATA---GGAGTAGCACCAAGTAAAGCTAAAAGGCACACAGTA-----  
-----TCAAGAGAAAAAAGAGCAGCCTTTGGA---CTGGGTGCG-----  
CTGTTTCTTGGGTTCTTAGGAGCA---GCAGGAAGCACTATG---GGCGCAGCATCA---  
GTGGTGCTGACGGTACAG---GCCCGGCAA---TTATTG---TCAGGGATAGTGCAACAGCAGAAC---  
AACCTG---CTGCGA---GCAATAGAGGCGCAACAGCATTTGTTGCAACTCTCAGTTTGGGGCATT  
>AJ271369  
TTTTATTGTAATACCACTCCACTCTTCAATAAGTTTAATTATACTTGTGATAACCAAAACAACCTGCACCAGAA  
ATAACACAAAT-----  
-----GACACAAAC-----  
TCAGACAATAGTACACTAACAATATCATGTAGAATAAGGCAAATTGTAAACTCCTGGATGAGAGTGGGGAAAAG  
GAATCTATGCCCCACCAATAAGAGGGAACATAACATGCATATCAAAT---  
ATAACTGGACTCCTCCTCGAAGCAGGAGGAAAATGGGAAAACAATACT-----  
-----  
-----  
ATAACAGTGTACCCTTCAGGGGGAGAAATGAGAGACTTGTGGAGGCTTGAATTAAACAGGTATAAAGTAGTTA  
GCATAGAACCCATA---GGAGTAGCACCAACTAAGGCTAAAAGGCACACGGTG-----  
-----GCAAGAGAGAAAAGAGCAGCCTTTGGA---CTAGGAGCA-----  
CTGTTCCCTCGGGTTTCTAGGAGCA---GCAGGAAGCACTATG---GGCGCAGCATCA---  
GTGGTGCTGACGGTACAG---GCCCGGCAC---TTGTTG---TCAGGGATAGTGCAACAGCAGAAC---  
AACCTG---CTGCGA---GCAATAGAGGCGCAACAACATTTGTTGCAACTCTCAGTTTGGGGCATC  
>AF382828  
TTTTATTGTAATACATCAAGATTAATTACCTGTAACAGTAGTGACACAAGTGAG-----  
-----  
-----  
TACATTCTCCCATGCAAAATTAGGCAAGTAGTAAATTCTTGGATGAGAGTGGGGAAAGGTATCTTTGCCCCGC  
CTAGAAGAGGAACTATAACCTGTAATTCCACC---  
ATTACAGGACTCCTCTTAGAAGTACAGAATGGCACGGGGAAC-----  
-----  
-----  
AACACAGAAGTTTACCTGTCAGGGGGAGATATGAGAGATATTTGGAGGAGTGAATTATATAAATATAAAATAG  
TAAAAATTGAGCCACTG---GGGGTGGCACCAACAAAAGCAAAGAGGTACACAGTGGCA---AAA-----  
-----GCACTTGATAGATCCAAAAGAGCAGCCTTTGGA---CTGGGGGCG-----  
CTGTTTCTTGGATTCTTGGAGCA---GCAGGAAGCACTATG---GGCGCAGCATCT---  
GTGATGCTGACGGTACAA---GCTCGAAAC---CTGCTT---TCGGGAATAGTGACAGCAGCAAAAT---  
AACTTG---CTGCGA---GCCATAGAAGCTCAGCAACACCTGCTGCAGCTATCAGTCTGGGGCATA  
>AF447763  
TTTTACTGTAATCTCACAAATTGGACTAATACCTGGACAGCTAATAGAACCAATAAT-----  
-----  
-----  
ACTCATGGTACTCTTGTTCACCATGCAGACTGAGGCAGATAGTAAATCATTGGGGTATAGTGTCAAAAGGGG  
TTTACCTTCCCCAAGGAGGGGAACAGTAAAATGTCACTCAAAC---  
ATCACAGGACTTATCATGACAGCAGAAAAAGACAAC-----  
-----  
-----  
AATAATAGTTATACCCCCCAATTTTCTGCTGTAGTAGAAGACTATTGGAAAGTAGAATTAGCAAGATATAAAG  
TGGTGGAATTCAGCCCTTG---TCAGTGGCTCCA---AGGCCAGGAAAAAGGCCTGAAATT---AAG-----  
-----GCCAATCATACTAGGTCAAGAAGAGAT---GTGGGC---ATAGGACTG-----  
TTGTTTCTTGGATTCTTAGTGCA---GCAGGAAGTACAATG---GGCGCAGCGTCA---  
ATAGCGCTGACGGCACAG---GCCAGAGGA---TTACTC---TCTGGTATTGTACAGCAGCAACAA---  
AACCTG---CTTCAG---GCCATAGAAGCGCAACAACACTTGTTCAGCTCTCTGTATGGGGCATT  
>DQ374657  
TTTTATTGTAATCTTACTGGTTGGACAAATCCCTGGAACAACACAAACCAC-----  
-----  
-----  
AGAAATGGAACCTCTAGTAGCACCATGTAGACTTAGACAAATAGTTAATCATTGGGGGATAGTATCTAAAGGAA  
TTTATCTTCTCCAAGGAGGGGAACATTAAAGTGCAATTCAAAT---  
ATTACAGGACTTATTATGACAGCAGAAAAAGGA-----

-----  
-----  
GGTAATAACACAGTTCCTACATTCTCCGGTAAAGTAGAAGACTATTGGAAAGTAGAGTTAGCAAGGTATAAAG  
TAGTAGAGATTTCAGCCCTTG---TCAGTGGCTCCT---AGGCCAGGAAAGAGGCCTGAAATT---AAG-----  
-----GCTAACCACACTAGATCAAGAAGGGAT---GTTGGC---ATAGGACTG-----  
TTGTTTCTTGGATTTCTCAGTGCA---GCAGGAAGTACAATG---GGCGCAGCGTCA---  
ATAGCGCTGACGGCACAG---GCCAGAGGG---TTACTC---TCTGATATTGTACAGCAGCAACAA---  
AACCTG---CTGCAG---GCCATAGAGGCGCAACAACATCTGTTGCAGCTCTCTGTGTGGGGCATC  
>DQ374658  
TTTTATTGTAATCTTACAACCTTGGACAGGTAACTGGACACGTAACAGGACACATCAGACAAGTGCCCTG----

-----  
AACAAAACACATCTATTAGCACAAATGTAGGCTTAGACAGATAGTTAATCATTGGGGTATAGTATCTAAAGGAA  
TTTACCTCCCTCCAAGGAAGGGACATATAAAGTGCGTTTCAAAC---  
ATCACAGGACTGATTATGACAGCAGAAGGAGGAAACAGCAACAGA-----

-----  
ACCCCCACATTCTCCAGTAAGGTAGAAGACTATTGGAAAAGTAGAATTAGCAAGGTATAAAGTGGTGGAGATTC  
AGCCCTTG---TCAGTGGCTCCT---AGGCCAGGAAAAAGGCCTGAAATT---AAG-----  
---GCTAATCACACTAGATCAAGAAGGGAT---GTTGGC---ATAGGACTG-----  
TTGTTTCTTGGATTTCTCAGTGCA---GCAGGAAGTACAATG---GGCGCAGCGTCA---  
CTAGCGCTGACGGCACAG---GCCAGAGGG---TTACTC---TCTGGTATTGTACAGCAGCAACAA---  
AACCTG---CTGCAG---GCCATAGAGGCGCAACAACATCTGTTGCAGCTCTCTGTGTGGGGCATC  
>JN091691  
TTTTACTGCAATCTGACAAATTTGGACTAGCCCAGATTACATTGGCAAGAATGGCAGC-----

-----  
ATTGTAGCACAAATGTAGACTTAGACAGATAGTTAATCATTGGGGTATAGTATCTAAAGGAATTTATCTTCCTC  
CAAGAAGAGGAACAATAAAATGTACATCAAAC---ATTACGGGGTTAATCCTTACAGCAGAAGGCGGA-----

-----  
AATGAAACTATAACACCTACATTCTCCAGTAAAGTAGAAGATTATTGGAAAGTAGAATTGGCAAGATATAAAG  
TAGTGAAATTTCAGCCCTTG---TCGGTGGCTCCA---AGGCCAGGGAAAAGGCCTGAGATT---AAG-----  
-----GCTAATCATACTAGGTCAAAAAGAGAT---GTTGGC---ATAGGGCTG-----  
TTATTTCTTGGATTTCTCAGTGCA---GCAGGAAGTACAATG---GGCGCAGCGTCA---  
ATAGCGCTGACGGCACAG---GCCAGAGGG---TTACTC---TCTGGTATTGTACAACAGCAACAA---  
AACTTG---CTGCAG---GCCATAGCAGCGCAACAACATCTGTTGCAGCTCTCTGTGTGGGGCATT  
>JN091690  
TTCTATTGCAACCTCACTAACTGGACAAATATAACGTGGCTAGAGACGTGGCTAAAGACTAACAAT-----

-----  
AGTTCCCGTCCCCTTGTAGCACCATGTAAACTTAGGCAGATAGTAAACCATTGGGGTATAGTATCTAAAGGTA  
TCTACCTACCTCCTAGAAGGGGAAATTTAACATGCAGATCTAAC---  
ATTACAGGGTTCATTACGACATGGGATAATGAC-----

-----  
ACGGAGAACGTGCTTGTTACCTTTTCAGCCAAAGTAGAAGACTATTGGAAGGTAGAAAATGTCACGATACAAAG  
TAGTGAAATTTCAGCCCTTG---GCCATAGCTCCT---ACTACAGGAAAAGGCCGGAGATT---AGA-----  
-----GCCAATCACACAAGGTCAAAAAGAGAT---GTTGGC---ATAGGACTG-----  
TTGTTCTTGGGATTTCTCAGTGCA---GCAGGAAGTACAATG---GGCGCAGCGTCA---  
ATAGCGCTGACGGCACAG---GCCAGAGGA---TTGCTC---TCTGGTATTGTACAGCAGCAGCAC---  
AACCTG---CTGCAG---GCCATAGAAGCTCAACAGCACTTGTACAGCTTTCTGTGTGGGGCATT  
>AF103818  
TTTTATTGTAATACAATTCCCCTATTTAACATGACCTACAACAATACC-----

-----  
GACAACACCACTATCACACTTAAGTGTAGAATAAGACAAATTGTAAATCAGTGGATGAGAGTAGGAAAAGGAA  
TCTTTGCCCCACCAATCAAAGGTGTGCTAAGTTGTAACTCAAAT---  
ATAACGGGAATGATTCTTGACATAAGCATAAGCGCAGTCAATAACGATAGTAGG-----AAT----

-----  
 ATAACAGTGATGCCTACAGGAGGAGATATGACGGCTTTATGGAAAAATGAATTACATAAGTATAAGGTGGTCA  
 GCATAGAACCTATA---GGAGTGGCACCAGGTAAGGCCAAAAGGCATACAGTG-----  
 -----AAAAGAGAAAAAAGAGCAGCCTTTCGGA---CTAGGTGCA-----  
 CTGTTCTCCTGGGGTTTCTTGAGCA---GCAGGAAGCACTATG---GGCGCAGCATCA---  
 GTAGTGCTGACGGTACAG---GCCCCACAA---TTATTG---TCAGGGATAGTGCAACAGCAGAAT---  
 AATCTG---CTAAGA---GCAATAGAGGCCCAACAGCATTTATTGCAACTATCAGTTTGGGGCATT  
 >FJ424866  
 TTCTACTGTAATACCACTAAAAATGTTTAGCTACAATTGCACAACAGAGGGTTGCAATACCACTGAAACAAGCA  
 AT-----  
 -----  
 ACCACTGAAACAATAATATATTCCCTGCCATCTAAAAACAGGTAGTCAGGTCCTGGATGAGAGTAGGCTCAG  
 GCCTATTTGCTCCGCCTATTAGGGGAACCTCTAAGATGTATATCTAAC---  
 ATTACAGGAATAATATTACAAAGGGATGCACCCCTAAAAACTGAT-----  
 -----  
 -----  
 GAGAACAGCACCTTAAGACCAATAGGAGGTGACATGACAAACATTTGGAGGAGTGAACTGTACCCCTACAAGG  
 TGGTGAGGGTCAAGGCATTG---ACTGTGGCACCAACAAAAGCAAAGAGGCCTGTTATTGGC-----  
 -----CATAACAGGGAAAAACGTGCA---GCAGGC---CTGGGAATG-----  
 CTGTTTCTTGGGTTCATGAGTGCA---GCAGGAAGCACGATG---GGCGCAGCGGCA---  
 GTAACGCTGACGGTACAG---GCCAGGCAA---GTCTTG---CATGGTATCGTGACAGCAGCAAAAC---  
 AACATG---CTGAGA---GCTATAGCAGCTCAGCAAGAATTGCTGAGACTCTCTGTTTGGGGCATA  
 >KP004990  
 TTTTATTGTAATACCTCTAAACTCTTCAACTATACCTATGTCTGTAATCAGACAGATCAAGGTAATGCTAATT  
 ATTCTGTGCAT-----  
 -----AGTACTAGTACA-----  
 TTAGAAAATGGAACCTTAGTAATACCCTGCAAATTAAGGCAGGTAGTTAATTCATGGATGAGAGTGGGATCAG  
 GACTTTTTGCACCACCTGTCCCGGAAGCCTAACGTGCCACTCCAAT---  
 ATCACAGGTCTAATCCTTCAAAGGGACTGGCCACTAAACAATAAT-----  
 -----  
 -----  
 ACGACTACTATTTTGAGGCCTGAAGGAGGAGACATGAAAGACATCTGGAGAAGTGAGCTATATCCATATAAGG  
 TAGTCCAAGTAAAAGCTTTG---GCTGTGGCACCTACAAAATCTCCAGACCAACAATTATGGCA-----  
 -----CAGACTCATCAGAGGGAAAAAAGAGGA---GCAGGC---CTCGGAATG-----  
 CTATTCCTTGGGTTCATGAGTGCA---GCAGGAAGCACGATG---GGCGCAGCGGCA---  
 GTAACGCTGACGGTACAA---GCCAAGCAA---TTATTG---CATGGTATAGTGCAACAGCAGAAT---  
 AATCTG---CTCAGA---GCGATAGAGGCACAGCAAGAATTGCTGAGGCTCTCTGTGTGGGGCATA  
 >HQ615979  
 TTCTATTGTAACACAACAGCCCTGTTTAATCATAGTATCACTGCAAATAGCACAGAGTCAGATAATGGCACTA  
 TA-----  
 -----  
 ACTCATAATGGCACTATAACTCTCCCATGTAGAATAAAGCAAATTATAAAAATGTGGCAAAGAACAGGACAAG  
 CAATATATGCCCCCTCCCATCCAAGGAATAATAAGGTGTGAATCAAAC---  
 ATTACAGGACTAATATTAAACAAGAGATGGTGGAATAACAGTACAGAT-----  
 -----  
 -----  
 AACAGCACAGAAATCTTCAGACCTGGAGGAGGAGATATGAGGGACAATTGGAGAAGTGAACCTATATAAGTATA  
 AAGTAGTAAAACCTGAACCACTA---GGAGTAGCACCCACCAGGGCAAGGAGAAGAGTGGTG-----  
 -----CAGAGAGAAAAAAGAGCA---GTCGGA---ATAGGAGCT-----  
 ---GTCTTCCTTGGGTTCCTTAGGAACA---GCAGGAAGCACTATG---GGCGCGGCGTCA---  
 CTGACGCTGACGGTACAG---GCTAGACAA---CTATTG---TCTGGTATAGTGCAACAGCAAAAGC---  
 AATTTG---CTAAGG---GCTATAGAGGCTCAACAGCATATGTTGAAACTCACAGTCTGGGGTATT  
 >HQ834965  
 TTCTATTGCAATACAACAGACCTGTTCAATAGCACTTGGGACAAAAATGGCACTGGCACAAGTACGGGG----  
 -----  
 -----  
 GCCAGTGACAATATAACTCTGCCATGCAAAATAAGGCAAATTATAAGAATGTGGCAGAGAGTAGGACAAGCAA  
 TGTATGCCCCCTCCTATCAAAGGAATTATAAAGTGTGAATCAAAC---  
 ATTACAGGACTACTGCTAACAAGAGATGGTGGAATAATAGCAGC-----  
 -----

-----  
TATGAGACCTTCAGACCTATAGGAGGAAATATGAGGGACAATTGGAGAAGTGAAGTATATAAGTATAAAGTAG  
TAAAAATTGAACCAATA---GGAGTAGCACCTACCGGGGCAAAGAGAAGAGTGGTG-----  
-----GAGAGAGAAAAAAGAGCA---ATTGGA---CTGGGAGCT-----  
GCCTTCCTTGCGTTCTTAGGAGCA---GCAGGAAGCACTATG---GGCGCGCGTCA---  
ATAACGCTGACGGTACAG---GCCAGACAA---TTATTG---TCTGGCATAGTGCAACAGCAAAGC---  
AATTTG---CTGCAG---GCTATAGAGGCCAGCAGCATCTGCTGAAACTCACGGTCTGGGGTATT  
>KY658684  
TTCTACTGTAATACCTCAGAACTGTTTAGTAGTACTTGGAATGAACTAATGGATCAAGTACTTGGAATGGTA  
CT-----  
-----  
CAGAAATGAACTATCACACTTCCATGCAGAATAAGACAAATTGTAAACATGTGGCAGCAAGTAGGAAGAGCAA  
TATATGCCCCCTCCCATCAAAGGACCAATTGTATGTGTATCAAAT---  
ATTACAGGGCTGATATTGACAAGAGATGGTAGTCAGAGCAACCAGACT-----  
-----  
-----  
GACCAGCCTGAGGTCTTCAGACCTACAGGAGGAAATATGAAGGACAATTGGAGAAGTGAATTATATAAATATA  
AAGTAGTACAAATTGAACCAGTA---GGAATAGCACCCACTAAGGCAAGAAGAAGAGTGGTG-----  
-----CAGAGAGAAAAAAGAGCA---GTGGGA---ATAGGAGCT-----  
---GTGTTCCCTTGCGTTCTTGCGGAGCA---GCAGGAAGCACTATG---GGCGCAGCGGCG---  
GTGACGCTGACGGTACAG---GCCAGACAA---TTATTG---TCTGGTATAGTGCAACAGCAGAAC---  
AATCTG---CTGAGG---GCTATTGAGGCGCAACAGCATATGTTGCAACTCACAGTCTGGGGTATC  
>DQ358808  
TTCTACTGTAATACATCAAAGCTGTTTAATAGTACTTGGTCGCGTAATAGTACTAATGGTACTTGACGCTTA  
ACAGTACT-----  
-----TAT---  
ACTACAGAGAATATCACAATACTCCCATGCAGAATAAAACAATTATAC---  
AGGTGGCAGGAAGTAGGAAAAGCAATGTATGCCCCCTCCCATCAGTGGACTAGTTAGATGTTTCATCAAAT---  
ATTACAGGGCTGCTATTAACAAGAGATGGTGGCAGGAACAAGTCC-----  
-----  
-----  
GACGAGACCTTCAGACCTGGAGGAGGAGACATGAGGGACAATTGGAGAAGTGAATTATATAAATATAAAGTAG  
TAAAAATTGAGCCATTA---GGAGTAGCACCCACCAGGGCAAAGAGAAGAGTGGTG-----  
-----CAGAGAGAAAAAAGAGCA---GTGGGAACGATGGGAGCT-----  
TTGTTCCCTTGCGTTCTTGCGGAGCA---GCAGGAAGCACTATG---GGCGCAGCGTCA---  
TTGACGCTGACGGTACAG---GCCAGACAA---TTATTG---TCTGGTATAGTGCAACAGCAAAAC---  
AATTTG---CTGAGG---GCAATTCAGGCACAACAGAGCCTGTTGCAACTCACAGTCTGGGGCGTC  
>JN692461  
TTCTACTGTAATACAACAAAACCTGTTTAATAGTACTTGGATTAAAGAGTAATAATACTTGAGCAGTAATTGGA  
CT-----  
-----  
GATACAGAAAATATCACACTCCCATGCAGAATAAAACAAATTATAAACAAATGGCAGGAAGTAGGAAAAGCAA  
TGTATGCCCCCTCCCATCAAGGGACCAATTAGCTGTTTATCAAAC---  
ATTACAGGGCTGTTATTAACAAGAGATGGCGGTAACGAGACCACTAAT-----  
-----  
-----  
AAAATAATGAACTTTTCAGACCTGCAGGAGGAGATATGAGGGACAATTGGAGAAGTGAATTATATAAATATA  
AAATAGTAAAAATTGAACCATTA---GGAGTAGCACCCACCAAGGCAAAGAGAAGAGTGGTG-----  
-----CAGAGAGAAAAAAGAGCA---GCAGGA---CTAGGAGCT-----  
---GTGTTCCCTTGCGTTCTTGCGGAGCA---GCAGGAAGCACTATG---GGCGCAGCGGCA---  
GTGACGCTGACGGTACAG---GCCAGACAA---TTATTG---TCTGGTATAGTGCAACAGCAAAGC---  
AATTTG---CTGAGA---GCTATTGAGGCGCAACAACATATGTTGCAACTCACAGTCTGGGGCGTC  
>JN692471  
TTCTACTGTAATACAACAAAACCTGTTTAATAATACTTGGAACAATAGTGCTTGATGCATAATGAAGGGTCA-  
-----  
-----  
AATGAACTGAAATCACAATCCTATGCAGAATAAAACAAATTATAAACAGGTGGCAGGACATAGGAAAAGCAA  
TGTATGCCCCCTCCCATCCAAGGACAAATTAGATGTTTCATCAAAT---  
ATTACAGGGCTGCTATTAACAAGAGATGGTGGTAATAACAGGAAC-----  
-----

-----  
GAGAGCAGTGAGACCTTCAGACCTGGAGGAGGAGATATGAGGGACAATTGGAGAAGTAAATTATATAAAATATA  
AAGTAGTAAAAATTGAGCCATTA---GGAGTAGCACCTTCCAAGGCAAGGAGAAGAGTGGTG-----  
-----CAAAGAGAAAAAAGAGCA---GTGGGA---TTTGGAGCT-----  
---ATGTTCCCTTGGGTTCTTGGGAGCA---GCAGGAAGCACTATG---GGCGCAGCGTCA---  
GTGACGCTGACGGTACAG---GCCAGACAA---TTATTG---TCTGGTATAGTGCAACAGCAGAGC---  
AATCTG---CTGAGG---GCTATTGAGGCGCAACAGCACCTGTTGCAACTCACAGTCTGGGGTATC  
>KT427743  
TTCTATTGTAATACAACAAAGCTGTTTAATTGGACTGAAGGATCAAATAACACTGGAGAAGAC-----  
-----  
-----  
AATACAACAACACTATTACACTCCCATGCAGAATAAAACAAATTATAAACAGGTGGCAGGAAGTAGGAAGAGCAA  
TGTATGCCCCCTCCCATTAGAGGACAAATTAGATGCTCATCAAAT---  
ATTACAGGGTTGTTATTAACAAGAGATGGAGGTAACAATAACAAT-----  
-----  
-----  
AACTCAAAGGAGATCTTCAGACCTGGAGGAGGAAATATGAAGGACAATTGGAGAAGTGAATTATATAAAATATA  
AAGTAGTAAGAATTGAGCCATTA---GGAGTAGCACCCAGCAAGGCAAAGAGAAGAGTGGTG-----  
-----CAGAGAGAAAAAAGAGCA---GTGGGAACAATAGGAGCT-----  
---ATGTTCCCTTGGATTCTTGGGAGCA---GCAGGAAGCACTATG---GGCGCAGCGTCA---  
TTAACGCTGACGGTACAG---GCCAGGCTA---TTATTG---TCTGGTATAGTGCAACAGCAAAAC---  
AACTTG---CTGAGA---GCTATTGAGGCGCAACATCATCTGTTGCAACTCACAGTCTGGGGCGTC  
>KJ849820  
TTCTATTGTAACACATCACAGCTGTTTGATAGTACTTGGTTGAAAAATGGG-----  
-----  
-ACTGGTACTATAAAT-----  
AATGCTAGCAAACTATCACACTCCCTTGCAGAATAAAACAAATTATAACAAGTGGCAGGAAGTGGGAAAAG  
CAATGTATGCTCCTCCCATCAAAGGACAAGTTAGATGTTTCATCAAAT---  
ATTACAGGGCTGCTATTAACAAGAGATGGAGGCAGCAGTAGC-----  
-----  
ACAAACAATACCAAC---  
GACACAGAGATCTTTAGACCTGCAGGAGGAGATATGAGGGACAATTGGAGAAGTGAATTATACAAATATAAAG  
TAGTAAGAATTGAGCCATTA---GGAGTAGCACCTTCCAGGGCAAAGAGAAGAGTGGTG-----  
-----CAGAGAGAAAAAAGAGCA---GTGGGAACGATAGGAGCT-----  
ATGTTCCCTTGGGTTCTTGGGAGCA---GCAGGAAGCACTATG---GGCGCAGCGTCA---  
CTGACGCTGACGGTACAG---GCCAGACAA---TTATTG---TCTGGTATAGTGCAACAGCAAAAC---  
AATTTG---CTGAGA---GCTATTGATGCGCAACAACATATGTTGCAGCTCACAGTCTGGGGTATA  
>KJ849785  
TTCTACTGTAATACATCAAAATTGTTTAATAGTACCTGGCCTAATAGTACTTTGGAA-----  
-----  
AATAGTACTGGGTCAAATAGT-----  
ACTCAGAATGAGACTATTACACTCCCATGCAGAATAAAACAAATTATAAACAGGTGGCAGGAAGTAGGAAGAG  
CAATATATGCCCCCTCCCATCAGAGGACAAATTAAATGTACATCCAAT---  
ATTACAGGGTTGATATTAACAAGAGATGGGGGT-----  
-----  
AATAGTAATGAGAGC---  
ACAACAGAAACCTTCAGACCTGGAGGAGGAGATATGAGGGACAATTGGAGAAGTGAATTATATAAAATATAAAG  
TAGTAAAAATTGAACCATTA---GGACTAGCACCCACCAAGGCAAAGAGAAGAGTGGTG-----  
-----CAGAGAGAAAAAAGAGCA---ATAACA---CTGGGAGCT-----  
ATGTTCCCTTGGGTTCTTGGGAGCA---GCAGGAAGCACTATG---GGCGCAGCGTCA---  
CTGACGCTGACGGTACAG---GCCAGACTA---TTATTG---TCTGGTATAGTGCAAGCAGCAGAAC---  
AATCTG---CTGAGA---GCTATTGAGGCGCAACAGCATATATTGCAACTCACAGTCTGGGGCGTT  
>EU023921  
TTCTACTGTAATTCAACAGAGCTGTTTAATAGTACTTGAATCAGAATGATACTAGAAATAACACTGGA----  
-----  
-----  
CAAAATGACACGATCACGCTCCCATGCAGAATAAAACAAATTATAAACATGTGGCAGGAAGTAGGAAAAGCAA  
TGTATGCCCCCTCCCATCAGAGGACAAATTAGATGTTTCATCAAAT---  
ATTACAGGGCTACTATTAACAAGAGATGGGGGTAATGATGGTGGTAATTAC-----  
-----

-----  
ACAAACAAGACAGAGACCTTCAGACCTGGAGGTGGAAATATGAGGGATAATTGGAGAAGTGAATTATATAAAAT  
ATAAAGTAGTAAAAATTGATCCAATA---GGAGTAGCACCCACCAAGGCAAAGAGAAGGGTGGTG-----  
-----CAGAGAGAAAAAAGAGCA---ATGGGA---CTAGGAGCT---  
-----ATGTTTCCTTGGGTTCTTGGGAGCA---GCAGGAAGCACTATG---GGCGCAGCGTCA---  
ATAACGCTGACGGCACAG---GCCAGACAA---TTATTG---TCTGGTATAGTGCAACAGCAGAAT---  
AATTTG---CTGAGG---GCTATTGAGGCGCAACAGCATCTGTTGCAACTCACAGTCTGGGGTATC  
>EU131798  
TTCTACTGTAATACATCACAACCTGTTTAATAGTACTTGGGAATAAACTAGTATTGGGTATAATATTACA----  
-----  
-----  
GGAAATAGCATTATCACGCTCCCTTGCAGAATAAAACAAATTGTAAACAGGTGGCAGGAAGTAGGGAAAGCAA  
TGTATGCCCCCTCCCATTCAGAGACAAATTAGATGTTTCATCAAAT---  
ATTACAGGGTTGATATTAACAAGAGATGGTGGTAAGAATGAGAACAACACC-----  
-----  
-----  
ACCGAGACCTCCGAGACCTTCAGACCTGGAGGAGGAAATATGAAAGACAATTGGAGAAGTGAATTATATAAAAT  
ATAAAGTAGTACAAATTGAACCATTA---GGAGTAGCACCCACCAGGGCAAAGAGAAGAGTGGTG-----  
-----CAGAGAGAAAAAAGAGCA---CTGGGA---ATAGGAGCT---  
-----ATGTTTCCTTGGGTTCTTGGGAGCA---GCAGGAAGCACTATG---GGCGCAGCATCA---  
ATAACGCTGACGGTACAG---GCCAGACAA---TTGTTG---TCTGGTATAGTGCAACAGCAGAGA---  
AATTTG---CTGAGA---GCAACTGAGGCGCAACAGCATCTGTTGCAACTCACAGTCTGGGGCGTC  
>EU131810  
TTCTACCGTAATACATCACAACCTGTTTAATAGTACTTGGAAATGTTAGTAGTACTTGGAAATGATACTACA----  
-----  
-----  
GGAAATGACAATATCACACTCTCTTGCAGAATAAAGCAAATTGTAAACATGTGGCAGGAAGTAGGGAAAGCAA  
TGTATGCCCCCTCCCATTCAGAGGACAAATTAGCTGTTTCATCAAAA---  
ATTACAGGGTTACTATTAACAAGAGATGGTGGTAATAATGAGAGC-----  
-----  
-----  
GAGAACACCGAGACCTTCAGACCTGGAGGAGGAGATATGAGAGACAATTGGAGAAGTGAATTATATAAAATATA  
AAGTAGTAAAAATTGAACCATTA---GGAGTAGCACCCACCAAGGCAAAGAGAAGAGTGGTG-----  
-----CAGAGAGAAAAAAGAGCA---GTGGGAACGATAGGAGCT-----  
---ATGTTTCCTTGGGTTCTTGGGAGCA---GCAGGAAGCACTATG---GGCGCAGCGTCA---  
ATAACGCTGACGGTACAG---GCCAGACAA---CTGTTG---TCTGGTATAGTGCAACAGCAGAGA---  
AATTTG---CTGAGG---GCTATTGAGGCGCAACAGCATATGTTGCAACTCACAGTCTGGGGTATC  
>JF932488  
TTCTACTGTGATACATCACGACTGTTTAATAGTACTTGGTCTAATAATGGTACTACGAATGGTACTACA----  
-----  
-----  
GGAAATGACACTATCACGCTCCCTTGCAGAATAAGACAAATTGTAAACATGTGGCAGGAAGTAGGGAGAGCAA  
TGTATGCCCCCTCCCATTCAGAGACAAATTAAGTCTGTTTCATCAAAT---  
ATTACAGGGTTGCTATTAACAAGAGATGGTGGTAATACTAATGATACT-----  
-----  
-----  
AACAAATAGCACCGAGACCTTCAGACCTGGAGGAGGAGATATGAGAGACAATTGGAGAAGTGAATTATATAAAAT  
ATAAAATAGTAAAAATTGAACCATTA---GGAATAGCACCCACCAAGGCAAAGAGAAGAGTGGTG-----  
-----CAGAGAGAAAAAAGAGCA---GTGGGAACGATAGGAGCT---  
-----ATGTTTCCTTGGGTTCTTGGGAGCA---GCAGGAAGCACTATG---GGCGCAGCGTCA---  
ATAACGCTGACGGTACAG---GCCAGACAA---TTGTTG---TCTGGTATAGTGCAACAGCAGAGA---  
AATCTG---CTGAGG---GCTATTGAGGCGCAGCAGCATCTGTTGCAACTCACAGTCTGGGGTATC  
>KR914678  
TTCTACTGTAATACATCAAACTGTTTAATAGCACTTGGGAATAAGGATAGTTGGAATAATGAAGCTTGGAAATG  
AAACTGAA-----  
-----  
GCAAGTGATACTATCACACTTCCATGCAGAATAAAACAAATTATAAACATGTGGCAGGAAGTAGGGAAAGCAA  
TGTATGCCCCGCCCATTCAGTGGACAGATTAGATGTGTATCAAAT---  
ATTACAGGGTTGCTGTTAACAAGAGATGGTGGTAATAGTAACAAT-----  
-----

-----  
GAGTCCGAGACCTTCAGACCTGCAGGAGGAAATATGAAGGACAATTGGAGAAGTGAATTATATAAATATAAAG  
TAGTAAAAATTGAACCATTA---GGAGTAGCACCCACCAAGGCAAAGAGAAGAGTGGTG-----  
-----CAAAGAGAAAAAAGAGCA---ATAACA---CTAGGAGCT-----  
ATGTTTCCTTGGGTTCTTGGGAGCA---GCAGGAAGCACTATG---GGCGCAACGTCA---  
ATAACGTTGACGGTACAG---GCCAGACGA---TTGTTG---TCTGGTATAGTGCAACAGCAGAGC---  
AATCTG---CTGAGA---GCTATTGAGGCGCAACAGCATATGTTGCAACTCACAGTCTGGGGCACA  
>JF683781  
TTTTATTGTAATACAACACAATTGTTTAATAGTACTTGGCCAAATGATACAACCT-----  
-----  
-----  
ATTGAACAAAATATCACACTCCCATGCAGAATAAAACAAATTATAAACATGTGGCAGGGAGTAGGAAAAGCGA  
TGTATGCCCCCTCCCATCAGTGGACAAATTAGATGTTTATCAAAT---  
ATTACAGGACTGCTATTAACAAGAGATGGTGGTAAGCATGAGAGC-----  
-----  
-----  
AGGGACGAGACCTTCAGACCTGGAGGAGGAGATATGAGGGACAATTGGAGAAGTGAATTATATAAATATAAAG  
TAGTAAAAATTGAACCATTA---GGAGTAGCACCCACCAAGGCAAAGAGAAGAGTGGTG-----  
-----CAAAGAGAAAAAAGAGCG---GTGACG---CTGGGAGCC-----  
TTGTTTCCTTGGGTTCTTGGGAGCA---GCAGGAAGCACTATG---GGCGCAGCGTCA---  
ATGACGCTGACGGTACAG---GCCAGACGA---TTATTG---TCTGGTATAGTGCAAGCAGCAGAAC---  
AATCTG---CTGAGG---GCTATTGAGGCGCAACAGCATCTGTTGCAACTCACAGTCTGGGGCGTT  
>JF683807  
TTCTACTGTAATTCAACACCACTGTTTAATAGTATTTGGAACAAGACTGATGATACTTGAATTCAACACAAC  
AATCG-----  
-----  
GGTGGGAATAAACTATCACACTCTCATGCAGAATAAAACAAATTATAAACAGGTGGCAGGAGGTAGGAAAGG  
CAATATATGCCCCCTCCCATCAAAGGAATCATTAAATGCACATCAAAT---  
ATTACAGGGTTACTATTAACAAGAGATGGTGGTAATAATAATGAAAGT-----  
-----  
-----  
GACACCACCGAAACCTTCAGACCTGGAGGGGGAGATATGAGAGACAATTGGAGAAGTGAATTATATAAATATA  
AAGTAGTAAGAATTGAACCATTA---GGAATAGCACCCACCAAGGCAAAGAGAAGAGTGGTG-----  
-----CAGAGAGAAAAAAGAGCA---GTGGGA---CTAGGAGCT-----  
---TTGTTTCCTTGGGTTCTTGGGAGCA---GCAGGAAGCACTATG---GGCGCAGCGTCA---  
CTAACGCTGACGGTACAG---GCCAGACAA---TTATTG---TCTGGTATAGTGCAACAGCAGAAC---  
AATTTG---CTGAGA---GCTATTGAGGCGCAACAGCATATGTTGCAACTCACAGTCTGGGGTATA  
>KY324591  
TTCTACTGTAATACAACACAGCTGTTTAATAGTACTTGAATTCTACTGATACTTGAATGAAACAGAAGAG-  
-----  
-----  
TCAAATGACAATATCACCATCCCATGCAGAATAAAACAAATTATAAACAAGTGGCAAAGGGTAGGACAGGCAA  
TGTATGCCCCCTCCCATCAGTGGACTAATTAGGTGTTTATCAAAC---  
ATCACAGGGATACTATTAACAAGAGATGGTGGTAGTGGTAATAAAACAACAGT-----  
-----  
-----  
ACTGAGGAAAAGAAAAGCAACAGTACTGAG-----  
GAAAAGGAAATCTTCAGGCCTCAAGGAGGAGACATGAGGGATAACTGGAGAAATGAATTATATAAATATAAAG  
TAGTAAAAATTGAACCATTA---GGATTAGCACCCACCAAGGCAAAGAGAAGAGTGGTG-----  
-----CAGAGAGAAAAAAGAGCA---GTGGGG---TTCGGAGCC-----  
TTGTTTCCTTGGGTTCTTGGGAGCA---GCAGGAAGCACTATG---GGCGCAGCGTCA---  
GTGACGCTGACGGTACAG---GCCAGACAA---TTATTG---TCTGGTATAGTGCAACAGCAGAAC---  
AACTTG---CTGAGA---GCTATTGAGGCGCAACAGCATATGTTGCAACTCACAGTCTGGGGTATT  
>AF041127  
TTCTATTGTAATACAACAGGACTGTTTAATAGTACTTGAATGCTAATAGTACTGGGAATGAT-----  
-----  
-----  
ATTAAAGAACATATCATACTCCCATGTAGAATAAAACAAATTATAAACATGTGGCAGGAAGTAGGAAAAGCAA  
TGTATGCCCCCTCCTAGCAGAGGAAAAATTAAATGTTTATCAAAT---  
ATTACAGGGCTACTATTAACAAGAGATGGTGGTAATAATAACACA-----  
-----

-----  
AATGAGACCTTCAGACCTGGAGGAGGAGATATAAGGGACAATTGGAGAAGTGAATTATATAAAATATAAAATAG  
TAAAAATCGAACCATTA---GGAGTAGCACCCACCAGGGCAAAGAGAAGAGTGGTG-----  
-----CAGAGAGAAAAAAGAGCA---GTAACG---ATGGGAGCT-----  
CTGTTCCCTTGGGTTCTTGGGAACA---GCAGGAAGCACTATG---GGCGCAGCGTCA---  
ATGATGCTGACGGTACAG---GCCAGACAA---TTATTG---TCTGGTATAGTGCAACAGCAAAGC---  
AATTTG---CTGAGG---GCTATTGAGGCGCAACAGCATCTGTTGCAACTCACAGTCTGGGGTATC  
>KC699023  
TTCTACTGTGATACAACACAGTTGTTTAATAGTACTTGGCAATCTAATAGTACTTGGAAATAATGCTACA----  
-----  
-----  
GGCAATGAAAATATCACACTCCCATGCAGGATAAAAACAAATTATAAATAGATGGCAGGAAGTAGGAAAAGCAA  
TGTATGCCCCCTCCCATCGCAGGACAAATTAGATGTTTCATCAAAT---  
ATTACAGGGATAATATTAACAAGAGATGGTGGGGGTAATGATACT-----  
-----  
-----  
AATAAGGAGACCTTCAGACCTGGAGGAGGAAATATGAAAAGACAATTGGAGAAGTGAGTTATATAAAATATAAAG  
TAGTAAAAGTTGAGCCACTA---GGAGTAGCACCCACCAAGGCAAAGAGAAGAGTGGTG-----  
-----CAGAGGGAAAAAAGAGCA---GTGGGAACGCTAGGAGCT-----  
ATGTTCCCTTGGGTTCTTGGGAGCA---GCAGGAAGCACTATG---GGCGCAGCGTCA---  
ATGGCGCTGACGGTACAG---GCCAGACAA---TTATTG---TCTGGTATAGTGCAACAGCAAAAC---  
AATTTG---CTGAGG---GCTATTGAGGCGCAACAACATATGTTGCAACTCACAGTCTGGGGCGTC  
>HQ595775  
TTCTACTGTAACACAGCACAGCTGTTTAATAGTAGCTGGCCTCATAATAGGACAGATAATAGTACAGAGTCAA  
GT-----  
-----  
AATAGTAATAAAACAATCATCCTCCAATGCAGAATAAAAACAAATTATAAACATGTGGCAGGGAGTAGGAAAAG  
CAATGTATGCCCCCTCCAATCAGTGGACCAATTAGATGTACATCAAAT---  
ATTACAGGGCTGATATTGACAAGAGATGGTGGTAATAGTAGTGATATT-----  
-----  
-----  
AAGAATGATACCGAGACCTTCAGGCCTCAAGGAGGAAATATGAGGGACAATTGGAGAAGTGAATTATATAAAAT  
ATAAAGTAGTAAGAATTGAACCATTA---GGAGTAGCACCCACCAGGGCAAGGAGAAGAGTGGTG-----  
-----CAGAGAGAAAAAAGAGCA---GTAAC---CTAGGAGCT---  
-----GTGTTCCCTTGGGTTCTTGGGAGCA---GCAGGAAGCACTATG---GGCGCAGCGTCA---  
ATAGCGCTGACGGCACAA---GCTAGACAA---TTATTG---TCTGGTATAGTGCAACAGCAGAAC---  
AATCTG---CTGAGG---GCTATTGAGGCGCAACAGCATCTGTTGCAACTCACAGTCTGGGGGAATC  
>HQ595795  
TTCTACTGTAATACATCACAACGTGTTTAATAGTAGTTGGCCTGCTAATAGTAGTTGGTCTGTTCAGAATAAC-  
-----  
-----  
ACAAATGAACTATCACACTCCCGTGTAGAATAAAAACAAATTATAAACATGTGGCAGGAAGTAGGAAAAGCAA  
TGTATGCCCCCTCCCATCAAAGGACAAATTAAGTGTGTTTATCAAAT---  
ATTACAGGGTTGATATTAAACAAGAGATGGTGGTACAACTCAACT-----  
-----  
-----  
AGCACCACCGAGACCTTCAGACCTGCAGGGGGAATATGAGGGACAATTGGAGAAGTGAAGTATATAAAATATA  
AAGTAGTAAAACCTTGAACCATTA---GGAATAGCACCCACCAAGGCACAGAGAAGAGTGGTG-----  
-----CAGAGAGAAAAAAGAGCA---GTGGGA---CTAGGAGCT-----  
---CTGTTCCCTTGGGTTCTTGGGTGCA---GCAGGAAGCACTATG---GGCGCAGCGTCA---  
GTAACGCTGACGGTACAG---ACCAGACAA---TTATTG---TCTGGTATAGTGCAACAGCAAAAC---  
AATCTG---CTGATG---GCTATTGAGGCGCAACAGCATATGTTGCAACTCACAGTCTGGGGTATT  
>MK303347  
TTCTACTGTAACACAACACGACTGTTTAATAGCACTGATTGGAATAGTACTAATAATAATAAT-----  
-----  
-----  
GAGTCAAATATTATCACAATCCAATGCAAAATAAAAACAAATTTATAAACATGTGGCAGAGAGTAGGAAAAGCAA  
TGTATGCCCCCTCCCATCAAAGGACAAATTAAGTGTACATCAAAT---  
ATTACAGGGCTGCTATTAAACAAGAGATGGCGGAAACGAGACCAAC-----  
-----

-----  
 AACACTGAGACCTTCAGACCTGGGGGAGGAGATATGAGGGATAATTGGAGAAATGAATTATATAAATATAAAG  
 TAGTAAAAATTGAACCATTA---GGAATAGCACCCACCAAGGCAAAGAGAAGAGTGGTG-----  
 -----CAGAGAGAAAAAAGAGCA---GTGGGA---ATAGGAGCT-----  
 TTGTTCCCTTGGGTTCTTAGGAACA---GCAGGAAGCGCTATG---GGCGCAGCGTCA---  
 GTGACGCTGACGGTACAG---GCCAGACAA---TTATTG---TCTGGTATAGTGCAACAGCAGAAC---  
 AATCTG---CTGAGG---GCTATTGAGGCGCAACATCATCTGTTGCAACTCACAGTCTGGGGCGTC  
 >AB588331  
 TTCTACTGTAATACAACAAAGCTGTTCAATAGTGCTTGGTTTAATGGTACTAGGGATAATACTGATAACTTAA  
 AT-----  
 -----  
 AACGCTGATACAGAAATCACACTCCCATGCAGAATAAAACAAATTATAAACAGGTGGCAAGAAGTAGGAAAAG  
 CAATGTATGCCCCCTCCCATCCAAGGACAAATTAGCTGTTTCATCAAAT---  
 ATTACAGGGATAATATTAACAAGAGATGGTGGTGATAACAACAAG-----  
 -----  
 -----  
 TCCGAAACCTTTAGACCTGGAGGAGGAAATATGAAGGACAATTGGAGAAGTGAATTATATAAATATAAAGTAG  
 TAAGAATTGAGCCATTA---GGATTAGCACCCACCAAGGCAAAGAGAATAGTGGTG-----  
 -----CAAAGAGAAAAAAGAGCA---GTAACA---TTCGGAGCT-----  
 CTGTTCCCTTGGGTTCTTAGGAGCA---GCAGGAAGCACTATG---GGCGCAGCGTCA---  
 ATAGCGCTGACGGGACAG---GCCAGACAA---TTATTG---TCTGGTATAGTGCAAGCAGCAGAAC---  
 AATCTG---CTGAGA---GCTATTGAGGCGCAACAGCATATGTTGCAACTCACAGTCTGGGGCGTC  
 >HQ386159  
 TTCTACTGTGACACAACAACACTGTTTAATAGTACTTGGCCTGTTAATAGTACTGGGAATGGTACTGTGTCAA  
 AT-----  
 -----  
 AACACTGAAGAAATAACACTCCCATGCAGAATAAAACAAATTATAAACATGTGGCAGGAAATAGGAAGAGCAA  
 TGTATGCCCCCTCCCATCCAAGGATACATTAACTGTTTCATCAAAT---  
 ATTACAGGGCTGCTATTAACAAGAGATGGTGGTAATGATAATGAG-----  
 -----  
 -----  
 AGCAAACCCGAGACATTTCAGACCAGGAGGAGGAAATATGAAGGACAATTGGAGAAGTGAATTATATAAATATA  
 AAGTAGTAAAAATTGAACCATTA---GGACTAGCACCCACCAAGGCAAAGAGAAGAGTGGTG-----  
 -----CGGAGAGAAAAAAGAGCA---GTGGGA---ATAGGAGCT-----  
 ---TTGTTCCCTTGGGTTCTTGGGAGCA---GCAGGAAGCACTATG---GGCGCAGCGTCA---  
 CTGACGCTGACGGTACAG---GCCAGACAA---TTACTG---TCTGGTATAGTGCAACAGCAGAGC---  
 AATTTG---CTGAGG---GCTATTGAGGCGCAACAGCATATGTTGCAACTCACAGTCTGGGGCGTC  
 >EU744114  
 TTCTACTGTGATTCAACACAATTGTTTAATAGTACTTGGATAGCTAATAGGACTTGGGAGAATGATAATAGC-  
 -----  
 -----  
 ACTGGAGGAAATATCATGCTCCCATGCAGAATAAAACAAATTATAAACATGTGGCAGGAAGTAGGAAAAGCAA  
 TGTATGCCCCCTCCCATCAGAGGACAAATTAGATGTTCAACAAAT---  
 ATCACAGGGCTGCTATTAACAAGAGATGGTGGAGATGCTGGGGAC-----  
 -----  
 -----  
 AACGAGACCGAGATCTTCAGACCTGGAGGAGGAAATATGAGGGACAATTGGAGAAGTGAATTATATAAATATA  
 AAGTAGTAAAAATTGAACCATTA---GGAGTAGCACCCACTAAGGCAAGGAGAAGAGTGGTG-----  
 -----CAGAGAGAAAAAAGAGCA---GTGGGA---CTAGGAGCT-----  
 ---ATGTTCCCTTGGGTTCTTGGGAGCA---GCAGGAAGCACTATG---GGCGCAGCGTCA---  
 ATGACGCTGACGGTACAG---GCCAGACAA---TTATTG---TCTGGTATAGTGCAAGCAGCAAAAC---  
 AACTTG---CTGAGG---GCTATTGAGGCGCAACAGCATCTGTTGCAACTCACAGTCTGGGGTATC  
 >KP411822  
 TTCTACTGTAATACAACAGGACTGTTTAATAGTACTTGGAAATAGCACTGAAGGGTTAAATGACACTGAA----  
 -----  
 -----  
 GAAAAATGACACACTCACACTCCAATGCAGAATAAAACAAATTATAAACATGTGGCAGGAAGTAGGAAAAGCAA  
 TGTATGCCCCCTCCCATCACAGGACGAATTAGATGTACATCAAAC---  
 ATTACAGGGCTGCTCTTAACAAGAGATGGTGGTACCGACCAGAGT-----  
 -----

-----  
GATGCTAAGGTCTTCATACCTGGAGGAGGAGATATGAGAGACAATTGGAGAAGTGAATTATATAAATATAAAG  
TAGTAAAAGTTGAGCCATTA---GGATTAGCACCCACCAAGGCAAAGAGAAGAGTGGTG-----  
-----CAGAGAGAAAAAAGAGCA---GTGGGA---CTAGGAGCT-----  
TTGTTCCCTTGGGTTCTTGGGAGCA---GCAGGAAGCACTATG---GGCGCAGCGTCG---  
ATGACGCTGACGGTACAG---GCCAGACAA---TTATTG---TCTGGTATAGTGCAACAGCAAAAT---  
AATTTG---CTGCAG---GCTATTGAGGCGCAACAGCATCTGTTGAAACTCACAGTCTGGGGTATC  
>KP411825  
TTCTACTGGAACACAACATCCCTATTTGATAGTACTTGAATACGAATGCTACTTGGGATAGGAATTGGAATG  
ATACC-----  
-----AGT---  
GGAGAAAATGACATCATCACCTCCCATGTAGAATAAAGCAAATTATATACATGGGGCAGGAAGTAGGAAAAG  
CTATGTATGCCCTCCCATCTGACTAATTAGCTGCTCATCCAAC---  
ATTACCGGGTTGTTATTAATAGGATGTGGTGGTGAAAAGCTACAAT-----  
-----  
-----  
GATGAGATCTTCACACCTGGAGGAGGAAATATGAAAGATTACTGGAGAAGTGAATTATATAAATATGATGTAC  
AAGAAATTGAACCATTA---T TAGTAGCACCCACCAAGGCAAAGAGGATAGTGGTG-----  
-----CATAGAGAAAAAAGAGCA---T'TAGA---TTCGGATCT-----  
ATGTTCCCTTGGGTTCTTGGAAAGCG---CCAGGAAGCACTATG---GGCGCAGCGTCA---  
ATAACACTGACGGTACAG---GCCATACTA---TTATTG---TCTGGTATACTGCACCAGCATAGC---  
AATCTG---CTGAAA---GCTATTGAGGCTCATCAGCTTCTGTTGCTTGTCACAGTCAGTCTTATT  
>MF373201  
TTCTACTGTAATACATCACAATTGTTTAATAGTACTTGAAGGATGGAAATATTACTGAAGGGAAC-----  
-----  
-----  
ATTACAGCAAATATCACACTCCCATGCAGAAGAAGACAAATAGTAAACATGTGGCAGGAAGTAGGAAAAGCAA  
TGTATGCCCCCTCCCATCAGAGGACAAATTAATTGTGCATCAGAT---  
ATTACTGGGTTGCTATTAACAAGAGATGGTGGTTCTGAGTCCAAC-----  
-----  
-----  
CACACAGAGATATTTCAGACCTGGAGGAGGAGATATGAGAGACAATTGGAGAAGTGAATTATACAAATATAAAG  
TAGTGAAAATTGAACCATTA---GGAATAGCACCCACCAAGGCAAAGAGAAGAGTGGTG-----  
-----CAGAGAGAGAAAAAGAGCA---GTAGGA---ATAGGAGCT-----  
GTGTTCCCTTGGGTTCTTGGGAGCA---GCAGGAAGCACTATG---GGCGCAGCATCA---  
ATGACGCTGACGGTACAG---GCCAGACAA---TTATTG---TCTGGTATAGTGCAACAGCAGAAC---  
AATCTG---CTGAGA---GCTATTGAGGCGCAACAACATCTGTTGCAACTCACAGTCTGGGGTATC  
>JX448103  
TTTTACTGTAATACAACACCACTGTTTAATAGTACTTGGGACAATAATACATGGGACAATAATACATGGGACA  
CAACACAG-----  
-----TCCAATGCG-----  
ACTGTCACTGACTCAATTATACTTCAATGCAGAATAAAACAGGTTATAAACCTGTGGCAGGAAGTAGGAAAAG  
CAATGTATGCCCCCTCCCATCAAAGGAAACATTAGCTGTTCAATCAAAT---  
ATTACAGGGTTGCTATTAACAAGAGATGGGGGCAATGACAATAGCACA-----  
-----  
-----  
AATGGGAACGAGACCTTCAGACCGGGAGGAGGAAACATGAAGGACAATTGGAGAAGTGAATTATATAAATATA  
AAGTAGTACAAGTTGAACCATTA---GGAGTAGCACCCACCAAGGCAAGGAGGAGAGTGGTG-----  
-----CAAAGAGAAAAAAGAGCA---GTGGGA---ATAGGAGCT-----  
---GTGTTCCCTTGGGTTCTTGGGAGCA---GCAGGAAGCACTATG---GGCGCAGCGTCA---  
ATAACGCTGACGGTACAG---GCCAGGCAA---TTATTG---TCTGGTATAGTGCAACAGCAGAAC---  
AACTTG---CTGAGA---GCTATTGAGGCGCAACAACATATGTTGCAACTCACAGTCTGGGGTATC  
>AF277059  
TCCTACTGTAATACAACAAAGCTGTTTAATGGTACTTGAATGATAATAGTACTTGAATGATACTGGGGAG-  
-----  
-----  
TCAAATAACACTATCACACTCCCATGCAGAATAAAACAAATTATAAACATGTGGCAGAAAGTAGGCAAAGCAA  
TGTATGCCCCCTCCCATCAGAGGACAAATTAGATGTGCATCAAAT---  
ATCACAGGGCTGCTGTTAACAAGAGGTGGTGGCAGTAATAATAGC-----  
-----

-----  
AACACGAGACTTTTCAGACCTGGAGGAGGAGATATGAGGGACAATTGGAGAAGTGAATTATATAAATATAAAG  
TAGTAAAAAATTGAACCATTA---GGAATAGCACCCACCAAGGCAAAGAGAAGAGTGGTG-----  
-----CAGAGAGAAAAAAGAGCA---GTGGGAACAATAGGAGCT-----  
ATGTTTCCTTGGGTTCTTGGGAGCA---GCAGGAAGCACTATG---GGCGCAGCGTCA---  
GTGACGCTGACGGTACAG---GCCAGACTA---TTATTG---TCTGGTATAGTGCAACAGCAGAAC---  
AATCTG---CTGAAG---GCTATTGAGGCGCAACGGCATCTGTTGCAACTCACGGTCTGGGGCGTC  
>FJ496078  
TTCTACTGTAATACAACAAAACCTATTCAATAGTACTTGGGAATAGTACTAGGAATGATACTGAAAGGAATAGTA  
AT-----  
-----  
GAAACTGACACAATCACACTCCCATGCAGAATAAAACAAATTATAAACATGTGGCAGGGAGTAGGAAAAGCAA  
TGTATGCCCCCTCCTATCAGAGGACTAATTAGATGTTTCATCAAAT---  
ATTACAGGGCTGTTATTAACAAGGGATGGTGGTAATACTAACAGGAGCGGG-----  
-----  
-----  
AGCAACGGGTCTGAGACCTTCAGACCTGGAGGAGGAAAATATGAAGGACAATTGGAGAAGTGAATTATATAAAT  
ATAAAGTAGTAAACTTGAACCATTA---GGAATAGCACCCACCAAGGCAAAGAGAAGAGTGGTG-----  
-----CAGAGAGAAAAAAGAGCA---GTAGGA---CTAGGAGCG---  
-----TTGTTTCATTGGGTTCTTGGGAGCA---GCAGGAAGCACTATG---GGCGCAGCGTCA---  
GTAACGCTGACGGTACAG---GCCAGACAA---TTATTG---TCTGGTATAGTGCAACAGCAGAAC---  
AATCTG---CTGATG---GCTATTGATGCACAACAGCATCTGTTGCAACTCACAGTCTGGGGCGTC  
>FJ469758  
TTCTACTGTAATACAACACAACCTATTTAAGAGTACTTGGCAGGTTAATGATACTTGGCAGGGAGAGTCAAATG  
ACTCT-----  
-----  
AAAGGGAATGACACAATCATACTCCCATGCAAAATAAAACAAATATAAACATGTG---  
GTTGGAAGTAGGAAAAGCATGTATGCCCCCTCCC---ACATTAAACAATTAAATGTTTCATCAAAT---  
ATTACAGGGCTGATATTAACAAGAGATGGTGGACATGGTGGTAATAGTAGTGAT-----  
-----  
-  
GATGATGTGAACAAAACCGAGATATTCAGACCTGGAGGAGGAGATATGAGGGACAATTGGAGAAGTGAATTAT  
ATAAATATAAAGTAGTAAGAATTGAACCATTA---GGAGTAGCACCCACCAAGGCAAAGAGAAGAGTGGTG--  
-----CAGAGAGAGAAAAAGAGCA---GTGGGC---  
CTAGGAGCT-----ATGTTTCCTTGGGTTCTTGGGAGCA---GCAGGAAGCACTATG---  
GGCGCAGCGTCA---ATAACGCTGACGGTACAG---GCCAAACAA---TTATTG---  
TCTGGTATAGTGCAACAGCAGAAC---AATCTG---CTGAGG---  
GCTATTGAGGCGCAACAGCATCTGTTGCAACTCACAGTCTGGGGTATC  
>KX156454  
TTCTACTGTAATACAACAAAGCTGTTTAATAGTACTTGGAGTTTAATACTACTTCTAATGGTACTTGGAAAT  
TTAATGGTACT-----  
-TGGAATGGTACAGGA-----  
CCAGGAAACGACACCATCAGGCTCCCATGCAGAATAAAACAAATTATAAACATGTGGCAGCAAGTAGGAAAAG  
CAATGTATGCCCCCTCCCATCGAAGGACACATTAAATGTTTCATCAAAT---  
ATTACAGGGCTGCTATTGATAAGAGATGGTGGTAATAATGGGAAT-----  
-----  
-----  
AACGAGACCGAGACCTTCAGACCTGGAGGAGGAGATATGAGGGACAATTGGAGAAGTGAATTATATAAATATA  
AAGTAGTAAAAATTGAACCCTTA---GGAGTAGCACCCACTAAGGCAAAGAGAAGAGTGGTG-----  
-----CAGAGAGAAAAAAGAGCTGCATTTGGA---CTAGGAGCT-----  
---TTGTTTCCTTGGGTTCTTGGGAGCA---GCAGGAAGCACTATG---GGCGCAGCGTCA---  
ATAACGCTGACGGTACAA---GCCAGACAA---TTACTG---TCTGGTATAGTGCAGCAGCAAAAC---  
AATTTG---CTGAGA---GCTATTGAGGCGCAACAGCACCTGTTGCAACTCACAGTCTGGGGTATT  
>HQ217850  
TTCTACTGTAACCAACACCACTGTTTAATAGCACTTGGGAATAGGACTTGGGAATGAAGAATCAAATAAC----  
-----  
-----  
ACTGATAAAAATATCACACTCCAATGCAGAATAAAACAAATTGTAAACATGTGGCAGCGAGTAGGAAAAGCAA  
TGTATGCCCCCTCCCATCAATGGACTAATTAGATGCTCATCAAAT---  
ATTACGGGGCTGCTATTAACAAGAGATGGGGGTAATAAACTAAACGAG-----

-----  
-----  
TCCGAGATCGAGATCTTCAGACCTGGAGGAGGAAATATGAGGGAAAATTGGAGAAGTGAATTATATAAAATATA  
AAGTAGTGCAAATTGAACCAATA---GGACTAGCACCCACAAAGGCAAAGAGAAGAGTGGTG-----  
-----CAGAGAGAAAAAAGAGCA---GTGGGAATGTTAGGAGCT-----  
---ATGTTCCCTTGGGTTCTTGGGAACA---GCAGGAAGCGCTATG---GGCGCAGCGGCA---  
ATAACGCTGACGGTACAG---GCCAGACAG---TTACTG---TCTGGTATAGTGCAACAGCAAAAC---  
AATTTG---CTGAGG---GCTATTGAGGCGCAACAGCATCTGTTGCAACTCACAGTCTGGGGCGTC  
>JF689889  
TTCTACTGTAATTCAACACCACTGTTTAATAGTACTTGGGATAATAGTACTTGGGATGATAATGGAAGGTCAA  
AT-----  
-----AAC---  
ACTGGAAACGACTCAATCGTACTCCTATGCAGAATAAAACAAATTATAAACATGTGGCAGGAAGTAGGAAAAG  
CAATGTATGCCCCCTCCCATCAGAGGACCAATTAATGTTTCATCAAAT---  
ATTACAGGGCTGATATTAACAAGAGATGGTGGTCATAACACCACC-----  
-----  
-----  
AACGAGACCTTCAGACCTGGAGGAGGAGATATGAGGGACAATTGGAGAAGTGAATTATATAAAATATAAAGTAG  
TAAAAATTGAACCATTA---GGAATAGCACCCACCAAGGCAAAGAGAAGGGTGGTG-----  
-----CAAAGAGAAAAAAGAGCA---GTGGGA---ATAGGAGCT-----  
ATGTTCCCTTGGGTTCTTGGGAGCA---GCAGGAAGCACTATG---GGCGCAGCGTCA---  
CTAACGCTGACGGTACAG---GCCAGACTA---CTATTG---TCTGGTATAGTGCAACAGCAGAAC---  
AATTTA---CTGAGA---GCTATTGAGGCGCAACAGCATCTGTTGCAACTCACAGTCTGGGGAGTC  
>JX864021  
TTCTACTGTAATACAACAAAACCTATTTAATAGTACTTGGAGTCAAAATGGCACTAGGAGTGGTCCTGAAAGGA  
TAAAT-----  
-----  
GACACTGACATCATCACACTCCAATGCAGAATAAAACAAGTTGTAAACATGTGGCAGGAAGTAGGAAAAGCAA  
TGTATGCCCCCTCCCATCAGTGGACAAATTAAATGCTCATCAAAT---  
ATTACAGGGCTGCTATTAACAAGAGATGGTGGTAACACAAATGTGAGC-----  
-----  
-----  
AATGAGACCGAGACCTTCAGACCAGGAGGAGGAAATATGAGAGATAATTGGAGAAGTGAATTATATAAAATATA  
AAGTAGTAAAAATTGAGCCATTA---GGAATAGCACCCACCAAGGCAAAGAGAAGAGTGGTG-----  
-----CAGAGAGAAAAAAGAGCA---GTGGGA---GTAGGAGCT-----  
---GTGCTCCTTGGGTTCTTGGCAGCA---GCAGGAAGCACTATG---GGCGCAGCGTCA---  
ATAACGCTGACGGTACAG---GCCAGACAA---TTACTG---TCTGGTATAGTGCAACAGCAGAAC---  
AATCTG---CTGAGG---GCTATTGAGGCGCAACAACATCTGTTGCAACTCACAGTCTGGGGGAATC  
>JF320467  
TTCTACTGTGACTCAACAAAACCTGTTTACTTGGAAATAGTACTTGGAAATAGTACTGAAAGATCAAATAAC---  
-----  
-----  
ACTGCAGGAAATATCACACTCCCATGCAGAATAAAACAAATTATAAACATGTGGCAGGGAGTAGGAAGAGCAA  
TGTATGCCCCCTCCCATCAAAGGACAAATTAGCTGTTTCATCAAAT---  
ATTACAGGGCTACTACTAACAAGAGATGGTGGTAATGATGGTAACCAACGAGA-----  
-----  
-  
GGGAATGAGACAAAGACAGAAATCTTCAGACCTATAGGAGGAAATATGAAAGACAATTGGAGAAGTGAAGTAT  
ATAAATATAAAGTAGTAAAAATTGAACCATTA---GGAATAGCACCCACCAAGGCAAAGAGAAGAGTGGTG--  
-----CAGAGAGAAAAAAGAGCA---GTGGGG---  
CTAGGAGCT-----TTGTTCCCTTGGGTTCTTGGGAGCA---GCAGGAAGCACTATG---  
GGCGCAGCATCA---CTAACGCTGACGGTACAA---GCCAGATCA---TTATTG---  
TCTGGTATAGTGCAACAGCAGAAC---AATCTG---CTGAAG---  
GCTATTGAGGCGCAACAGCGTCTGTTGCAACTCACAGTCTGGGGCACC  
>GU330994  
TTCTACTGTAATACATCACAACCTGTTTAGGGATACTTGGAAATAATACTTGGAAATGGTATTTGGAATAATGATA  
CT-----  
-----  
GAAGTAAATGAACTATTACACTCCCATGCAGAATAAAACAAATTATAAACATGTGGCAGGAAGTAGGAAAAG  
CAATGTATGCCCCCTCCCATCAGAGGACAAATTAATTGTTTCATCAAAT---

ATTACAGGGCTGCTATTAACAAGAGATGGTGGTGAGAGTAACAAG-----  
-----  
-----  
ACCATCGAGGTCTTCAGACCTGGAGGAGGAGATATGAGGGACAATTGGAGAAGTGAATTATATAAATATAAAG  
TAGTAAAAATTGAACCATTA---GGAGTAGCACCCACCAAGGCAAAGAGAAGAGTGGTG-----  
-----CAGAGAGAAAAAAGAGCA--GTGGGA---CTAGGAGCT-----  
CTGTTTCGTTGGGTTCTTGGGAGCA--GCAGGAAGCACTATG--GGCGCAGCGTCA---  
ATAACGCTGACGGTACAA---GCCAGACAA---TTATTG---TCTGGTATAGTGCAACAGCAGAAC---  
AATCTG---CTGAGA---GCTATTGAGGCGCAACAGCATCTGTTGCAGCTCACAGTCTGGGGCGTC  
>KC312386  
TTCTACTGTAACCAACAACACTGTTTAATAGCACTTGGGAATGCTACTAAAGAGCTTAATGACACTGGGAGTA  
GTACT-----  
-----  
GAAGGGTCAAATATCACACTCCCATGCAGAATAAAACAAATTATAAACATGTGGCAGGAAGTAGGAAAAGCAA  
TGTATGCCCCCTCCCATCAGAGGACAAATTACATGTGTATCAAAT---  
ATTACAGGACTGCTATTAACAAGAGATGGTGGTAATGATACCAATACT-----  
-----  
-----  
AACAAATGACACCGAGATCTTCAGACCTGCAGGAGGAGACATGAGGGACAATTGGAGAAGTGAATTATATAAAT  
ATAAAGTAGTAAAAATTGAACCATTA---GGAATAGCACCCACCAAGGCAAAGAGAAGAGTGGTG-----  
-----CAGAGAGAAAAAAGAGCA--GTGGGA---ATAGGAGCT---  
-----GTGTTTCCTTGGGTTCTTGGGAGCA--GCAGGAAGCACTATG--GGCGCAGCGTCA---  
ATGACGCTGACGGTACAA---GCCAGACTA---TTATTG---TCTGGTATAGTGCAACAGCAGAAC---  
AACTTG---CTGAGA---GCTATTGAGGCGCAACAACATCTGTTGCAACTCACAGTCTGGGGTATC  
>JQ403062  
TTCTACTGTGATTTAGCACAACTGTTCAAGAGTAGTTGGAATGGTACTGAACAGATAAATGGC-----  
-----  
-----  
ACTGACAAAAATATCACTCTCCCATGCAGAATAAAACAAATTATAAATATGTGGCAGGAAGTAGGCAGAGCAA  
TGTATGCCCCCTCCCATCAGTGGACAAATTAAATGTGCATCAAAT---  
ATTACAGGGCTGCTATTAACAAGAGATGGTGGTAATAATAATAGTAGT-----  
-----  
-----  
AATGAGACTGAGACCTTCAGACCTGCAGGAGGAGATATGAGGGACAATTGGAGAAGTGAACATATATAAATATA  
AAGTAGTAAAGATTGAACCATTA---GGAATAGCACCCACCAAGGCAAAGAGAAGAGTGGTG-----  
-----CAGAGAGAAAAAAGAGCA--GTGGGAACATTAGGAGCT-----  
---ATGTTCCCTTGGGTTCTTGGGAGCA--GCAGGAAGCACTATG--GGCGCAGCGTCG---  
CTGACGCTGACGGTACAA---GCCAGACTA---TTATTG---TCTGGTATAGTGCAACAGCAGAAC---  
AATCTG---CTGAGA---GCTATTGAGGCGCAACAGCACCTGTTGCAACTCACAGTCTGGGGAGTT  
>JQ403063  
TTCTACTGTAATACAACAACAAATTGTTTAACAGTACTTGGGAATGAAAGTATCCCACTCAATTCTTCCGATGATA  
ATATCCCA-----  
-----AAT---  
TCTTCCAATGATAATATCATACTCCCATGTAGGATAAAACAAATTATAAACATGTGGCAGGGAGTAGGAAAAG  
CAATGTATGCCCCCTCCCATCAGAGGACAAATTAGATGTTTCATCAAAT---  
ATTACAGGGCTATTATTAACAAGAGATGGTGGTGATAGTAATAAAAGTGAG-----  
-----  
-----  
GAGGTGTTTATAGACCTGGGGGAGGAGATATGAAGGACAATTGGAGAAGTGAATTATATAAATATAAAGTAGTAA  
AAATTGAACCATTA---GGAATAGCACCTACCAAGGCAAAGAGAAGAGTGGTG-----  
-----CAGAGAGAAAAAAGAGCA--GTGGGAACAATAGGAGCT-----  
ATGTTTCCTTGGGTTTTTGGGAGCA--GCAGGAAGCACTATG--GGCGCAGCGTCA---  
ATGACGCTGACGGTACAG---GCCAGGCAA---TTATTG---TCTGGTATAGTGCAACAGCAGAAC---  
AATCTG---CTGAGA---GCTATTGAGGCGCAACAGCATATGTTGCAACTCACAGTCTGGGGTATT  
>JF680915  
TTCTACTGTAATTCAACACAACACTGTTTAATAGTACTTGGGAAAATAATGGTACAAATGGTAATGAAGGATCA-  
-----  
-----  
AATAGTGACAATATTACACTCCCATGCAGAATAAAACAAATTATAAACATGTGGCAGGAAGTAGGAAAAGCAA  
TGTATGCCCCCTCCCATCAGTGGACCAATTAGCTGTTTCATCAAAT---

ATTACAGGGCTGCTATTAACAAGAGATGGTGGTAACATTACCAAT-----  
-----  
-----  
AACACTGAAACCTTCAGACCAGGAGGAGGAAATATGAGGGACAATTGGAGAAGTGAATTATATAAATATAAAA  
TAGTAAGAATTGAGCCCTTA---GGTATAGCACCCACCAGGGCAAGGAGAAGAGTGGTG-----  
-----CAGAGAGAAAAAAGAGCA--GTGGGA--ATAGGAGCT-----  
GTGTTCCCTTGGGTTCTTGGGTGCA---GCAGGAAGCACTATG---GGCGCAGCGTCG---  
CTAACGCTGACGGTACAG---GCCAGACGA---TTATTG---TCTGGTATAGTGCAACAGCAGAAC---  
AACTTG---CTGAGG---GCTATTGAGGCGCAACAGCATATGTTGCAGCTCACAGTCTGGGGCGTC  
>MK145772  
TTCTACTGTAATTCAACACGACTGTTTAATAGTACTTGGTCTAATAGTACTTGGCCTAATAATGGTACTTGGGA  
ATGATACA-----  
-----  
GGAGCAGAGATTATCACACTCCCATGTAAAATAAGACAAATTGTAAACAAGTGGCAAGAAATAGGAAAAGCAA  
TATATGCCCCCTCCCATCAGCGGACTGATTAGATGTTTCATCAAAT---  
ATTACAGGGATACTCTTAACAAGAGATGGTGGTATTAATGGGAAT-----  
-----  
-----  
AATACTACTGAGATCTTCAGACCTCAAGGAGGAGATATGAAGGACAATTGGAGAAGTGAATTATATAAATATA  
AAGTGGTAGAACTTGAACCATTA---GGAATAGCACCCACCAGGGCACAGAGAAGAGTGGTG-----  
-----CAGAGAGAAAAAAGAGCA--GTGGGA--CTAGGAGCT-----  
---TTGTTCCCTTGGGTTCTTGGGAGCA---GCAGGAAGCACTATG---GGCGCAGCGTCA---  
GTGGCGCTGACGGTACAA---GCCAGACAA---TTATTG---TCTGGTATAGTGCAACAGCAGAAC---  
AATTTG---CTGAGA---GCTCTTGAGGCGCAACAGCATCTGTTGCAACTCACAGTCTGGGGTGTC  
>KM354962  
TTCTACTGTAATACAACAACCACTGTTTAATAGTACTTGGAAATTCAACACACCTATTTAATAGT-----  
-----AGTTGG---  
AATATGACTAAAGAATTAAAT-----  
ATCACTAATGAGCCACTCACACTCCCATGCAGAATAAGGCAAATCATCAACATGTGGCAGGAAGTAGGAAAAG  
CAATGTATGCCCCCTCCCATCAGTGGAAAAATTAAATGCTCATCAAAT---  
ATTACAGGGCTGCTATTAACAAGAGATGGTGGT-----  
-----  
AGTGGTAATAGCACAGAGAAC-----  
ACAACGGAGATCTTCAGACCTGGAGGAGGAGACATGAGGGACAATTGGAGAAGTGAATTATATAAATATAAAG  
TGGTAAAAAATTGAACCCTTA---GGAGTAGCACCCACTAAGGCAAAGAGAAGAGTGGTG-----  
-----CAGAGAGAAAAAAGAGCA--GTGGGA--ATAGGAGCT-----  
GTGTTCCCTTGGGTTCTTGGGAGCA---GCAGGAAGCACTATG---GGCGCAGCGTCA---  
ATGATGCTGACGGTACAG---GCCAGACAA---CTATTG---TCTGGTATAGTGCAACAGCAGAAC---  
AACTTG---CTGAGG---GCTATTGAGGCGCAACAGCATCTGTTGCAACTCACAGTCTGGGGTATC  
>KT124809  
TTCTACTGTAATACAACAAAATTGTTTAATAGTACTTGGACTAATGGTACTCGAAATGATACTGAAGAGATCC  
AT-----  
-----GCTAAAGAGAGC-----  
AATCAAACCTGTTAATATTACCCTTCCATGCAGAATAAAACAAATTATAAACATGTGGCAAAAAGTAGGAAGAG  
CAATGTATGCCCCCTCCCATCAGTGGACAAATTAAATGCGTATCAAAT---  
ATTACAGGGTTGCTATTAACAAGAGATGGTGGTACTGAGAACGAG-----  
-----  
-----  
ACCGAAACCTTTAGACCTGCAGGAGGAAATATGAAGGACAATTGGAGAAGTGAATTATATAAATATAAAGTAG  
TAAAGATTGAACCATTA---GGAGTAGCACCCACCAGGGCAAAGAGAAGAGTGGTG-----  
-----CAGAGAGAAAAAAGAGCA--GTGGGA--ATAGGAGCT-----  
GTGTTCCCTTGGGTTCTTAGGAGCA---GCAGGAAGCACTATG---GGCGCAGCGGCA---  
GTGACGCTGACGGTACAG---GCCAGACAA---TTATTG---TCTGGTATAGTGCAACAGCAGAAC---  
AATTTG---CTGAGG---GCTATTGAGGCGCAACAGCATCTGTTGCAGCTCACAGTCTGGGGTGTC  
>KU641402  
TTCTACTGTAATACAACAAAACCTGTTTAATAGTACTTGGAAATGCAACACACATGATTAATGGTACTTGGAAATG  
AT-----  
-----  
ACTGAGGGAAATATCACCCCTCCCATGCAGAATAAAACAAATTATAAACATGTGGCAGGAAGTAGGAAAAGCAA  
TGTATGCCCCCTCCCATCAGAGGACAAATTAGATGTTTCATCCAAT---

ATTACAGGGTTGCTATTAACAAGAGATGGTGGTAAGACTAACGAGAGC-----  
-----  
-----  
AACACCACCGAGATCTTTAGACCTGGAGGAGGAGATATGAGAGACAATTGGAGAAGTGAATTATATAAATATA  
AAGTAGTAAGAATTGAACCATTA---GGGGTAGCACCCACCAAGGCAAAGAGAAGAGTGGTG-----  
-----CAGAGAGAAAAAAGAGCA--GTGGGA--ATAGGAGCT-----  
---CTGTTCCCTTGGGTTCTTGGGAGCA--GCAGGAAGCACTATG--GGCGCAACGTCG---  
ATGGCGTTGACGGTACAG---GCCAGACAA--TTATTG---TCTGGTATAGTGCAACAGCAGAAC---  
AATTTG---CTGAGA---GCTATTGAGGCGCAACAACATTTGTTGCAACTCACAGTCTGGGGCGTC  
>KC473832  
TTCTACTGTAATACAACAACCACTGTTTAATAGTACTTGGCACACAAATGGTACTTGGCAGGGTATTGAAGGGT  
CAAATAAC-----  
-----  
ACTGAAGACCTTATCACACTCCCATGCAGAATAAAACAAATTATAAATATGTGGCAGGAAGTAGGAAAAGCAA  
TGTATGCCCCCTCCCATAGAGGAAATATTATTTGTTTCATCAAAA---  
ATTACAGGGCTGTTATTAACAAGAGATGGGGGTGAGAAAAATCAG-----  
-----  
-----  
AGCAGCAACGAGACCTTCAGACCTGCAGGAGGAGATATGAGGAACAATTGGAGAAGTGAATTATATAAATATA  
AAGTAGTAAAAATTGAACCATTA---GGAGTAGCACCCACCAAGGCAAGGAGAAGAGTGGTG-----  
-----CAGAGAGAAAAAAGAGCA--GTGGGA--ATGGGAGCT-----  
---TTGTTCCCTTGGGTTCTTGAGTGCA--GCAGGAAGCACTATG--GGCGCAGCATCA---  
ATAACGCTGACGGTACAG---GCCAGACAA--TTACTG---TCTGGTATAGTGCAACAGCAGAAC---  
AATCTG---CTGAGG---GCTATTGAGGCGCAACAGCATCTGTTGCAACTCACAGTCTGGGGCGTC  
>MG197055  
TTCTACTGTAATACAACAATGTTTAATAGTACTTGGAAAAAGGGCAAGAATGATACTTGGAGTAGGAATA  
AAACTGAT-----  
-----GAGACA-----AATAGCACTGAG---  
ATCATACTCCAATGTAGAATAAAACAAATTATAAACATGTGGCAGAAGGTAGGAAAAGCAATGTATGCCCCTC  
CCATTAGAGGAAACATTAGATGTACATCAAAT---  
ATTACAGGACTAATGCTAGTAAGAGATGGTGGTAGTGATACACAG-----  
-----  
-----  
GGCAATGAGACCTTCAGACCTGGAGGAGGAGACATGAGGGACAATTGGAGAAGTGAATTATATAAATATAAAG  
TAGTAAAAATTGAACCATTA---GGAGTAGCACCCACCAAGGCAAGGAGAAGAGCGGTG-----  
-----CAGAGAGAAAAAAGAGCA--ATAACA--CTAGGAGCT-----  
ATGTTCCCTTGGGTTCTTGGGAACA--GCAGGAAGCACTATG--GGCGCAGCGTCA---  
GTAACGCTGACGGTACAG---GCCAGGCGA--TTATTG---TCTGGTATAGTGCAAGCAGCAGAAC---  
AATCTG---CTGAGG---GCTATTGAGGCGCAGCAGTATATGCTGCAACTCACAGTCTGGGGTATT  
>KY778345  
TTCTACTGTAATACAACAACCACTATTTAATAGTAGTTGGAATGGTACTGAGAATAGTATTAACGGATCAAGT-  
-----  
-----  
AGCAATGGAACTATCATACTCCCATGCAGAATAAAACAAATTATAAACATGTGGCAGAAAGTAGGAAAAGCAA  
TGTATGCCCCCTCCCATCAGAGGACAAATTAGATGTTTCATCGAAT---  
ATTACAGGACTGATATTAACAAGAGATGGTGGAGCCGGGGGCAAGGGC-----  
-----  
-----  
AATGACAGTGAGATCTTCAGACCTGGAGGAGGAGATATGAGGGACAATTGGAGAAGTGAATTATATAAATATA  
AAGTAGTAAAAATTGAACCATTA---GGAGTAGCACCCACCAGGGCAAAGAGAAGAGTGGTG-----  
-----CAAAGAGAAAAAAGAGCA--GTGGGA--ATAGGAGCT-----  
---ATGGTCCCTTGGGTTCTTGGGAGCA--GCAGGAAGCACTATG--GGCGCAGCGTCA---  
GTGACGCTGACGGTACAG---GCCAGACTA--TTATTG---TCTGGTATAGTGCAACAGCAAAAC---  
AATTTG---CTGAGG---GCTATTGAGGCGCAACAGCACCTGTTGCAACTCACAGTCTGGGGTATC  
>KR182306  
TTCTACTGTAATACAACAGAACTGTTTAATAGTACGTGGACTAGGAATGGTACTGACAAATGGTCAAGTAACA  
ATACA-----  
-----  
GGAAATGAAACAATTATACTCCCATGCAGAATAAGACAAATTATAAACATGTGGCAGCAAGTAGGAAAAGCAA  
TGTATGCCCCCTCCCATCAGCGGATACATTAATTGTACATCAAAT---

ATTACAGGGATGCTATTAACAAGAGATGGTGGTAATAACAATGAAACC-----  
-----  
-----  
AATGGGACTGAGATCTTCAGACCTGCAGGAGGAGATATGAGGGACAATTGGAGAAGTGAATTATATAAATATA  
AAGTAGTACAAATTGAACCATTA---GGAATAGCACCCACCAAGGCAAGAAGAAGAGTGGTG-----  
-----CAAAGAGAGAAAAGAGCA---GTGGGAGTAATAGGAGCT-----  
---ATGTTCCCTTGGGTTCTTGGGAGCA---GCAGGAAGCACTATG---GGCGCAGCGTCA---  
ATAACGCTGACGGTACAA---GCCAGACAA---TTATTG---TCTGGTATAGTGCAACAGCAGAAT---  
AATTTG---CTGAGA---GCTATTGAGGCGCAACAACATCTGTTGCAACTCACAGTCTGGGGTATC  
>KR182345  
TTCTACTGTGATACAGCATCACTGTTTAATAGTACTTGGGAATAGTACTTGGGAATATTGGAAATGATACTGAAG  
GGTCAGATGGC-----  
-----  
ACTGAAAGAAATATCAAACCTCAAATGCAGAATAAAACAAATTATAAACATGTGGCAGGAAGTAGGAAGAGCAA  
TGTATGCCCCCTCCTATCAAAGGACTAATTAGATGTACATCAAAT---  
ATTACAGGGTTAATATTAACAAGAGATGGTGGTAAAAACAACAT-----  
-----  
-----  
GACACCGAAATCTTTAGACCTGGAGGGGGAGATATGAGAGACAATTGGAGAAGTGAATTATATAAATATAAAG  
TAGTACAAATTGAACCATTA---GGAGTAGCACCCCTCCAAGGCAAAGAGAAGAGTGGTG-----  
-----CAGAGAGAAAAAAGAGCA---GTGGGA---ATAGGAGCT-----  
GTGTTCCCTTGGGCTCTTGTGAGCA---GCCGGAAGCACTATG---GGCGCAGCGTCA---  
GTGACGCTGACGGTACAA---ACCAGACAA---TTATTG---GCTGGTATAGTGCAACAGCAGAAC---  
AATTTG---CTGAGA---GCTATTGAGGCGCAACAGCATATGTTGCAACTCACAGTCTGGGGTATC  
>AY247224  
TTCTACTGTGATTCAACACAACCTGTTTAATAGTACTTGGCTGTTTAATAGTACTTGGGAAAATGATACTAGAG  
GG-----  
-----  
TCAGATAGCGAAAATATCACACTCCCATGCAGAATAAAACAAATTATAAACATGTGGCAGGAAGTAGGAAAAG  
CAATGTATGCCCCCTCCCATCAGAGGACAAATTAGATGTTTCATCAAAT---  
ATTACAGGGCTGCTATTAACAAGAGATGGTGGGAATAATAGGAAC-----  
-----  
-----  
GAGACCACCGAGATCTTCAGACCTGGAGGAGGAGATATGAGGGACAATTGGAGAAGTGAATTATATAAATATA  
AAGTAGTAAAAATTGAACCATTA---GGAGTAGCACCCACCAAGGCAAAGAGAAGAGTGGTG-----  
-----CAGAGAGAAAAAAGAGCA---GTGGGAACGATAGGAGCT-----  
---ATGTTCCCTTGGGTTCTTGGGAGCA---GCAGGAAGCACTATG---GGCGCAGCGTCA---  
ATGGCGCTGACGGTACAG---GCCAGACAA---TTATTG---TCTGGTATAGTGCAACAGCAGAAC---  
AACTTG---CTGAGA---GCTATTGAGGCGCAACAGCATCTGTTGCAACTCACAGTCTGGGGAATC  
>AY835774  
TTCTACTGTGATTTCATCACGATTGTTTAACAGTACTTGGGAATGGTACTTGGGAGACAGGGTGGGAATGATACTG  
AAAAG-----  
-----  
GCAGATGAGACAAATATCATACTCCCATGTAGAATAAAACAAATTATAAACATGTGGCAGGAAGTAGGAAAAG  
CAATGTATGCCCCCTCCCATCAGAGGACTAATTAGATGTTTCATCAAAT---  
ATTACAGGGCTACTATTAACAAGAGATGGTGGTAATTATAATAAAACCGGGAAT-----ATA---  
-----  
ACCGGGAATAAGACC---  
GAGATCGAAGTCTTCAGACCTGGAGGAGGAGATATGAGGGACAATTGGAGAAGTGAATTATATAAATATAAAG  
TAGTAAAAATTGAACCATTA---GGAGTAGCACCCACCAAGGCAAAGAGAAGAGTGGTG-----  
-----CAGAGAGAAAAAAGAGCA---GTGGGAACGTTAGGAGCT-----  
ATGTTCCCTTGGGTTCTTGGGAGCA---GCAGGAAGCACTATG---GGCGCAGCGTCA---  
ATGACGCTGACGGTACAG---GCCAGACTA---TTATTG---TCTGGTATAGTGCAACAGCAAAAC---  
AATTTG---CTGAGG---GCTATTGAGGCGCAACAGCATCTGTTGCAACTCACAGTCTGGGGTATC  
>EU289185  
TTCTATTGCAACTCAACACCACTGTTTAATAGTACTTGGGAATGATACAAAAGGGTCAAATAACACAGTA----  
-----  
-----  
GGAAATGACACAATCATACTTCAATGCAGGATAAAACAAATTATAAACATGTGGCAGGAAGTAGGCAAAGCAA  
TGTATGCCCCCTCCCATCAAAGGAAACATTAGCTGTTTCATCAAAT---

ATTACAGGGCTGCTATTAACAAGAGATGGTGGTATTGTGGACAAT-----  
-----  
-----  
AACGATACCGAGACCTTCAGACCTGGAGGAGGAGATATGAGGGACAATTGGAGAAGTGAATTATATAAAATATA  
AAGTAGTAAAAATTGAACCATTA---GGAATAGCACCCACCAAGGCAAAGAGAAGAGTGGTG-----  
-----CAGAGAGAAAAAAGAGCA---ATAGGA---ATAGGAGCT-----  
---ATGTTCTTGGGTTCTTAGGAGCA---GCAGGAAGCACTATG---GGCGCAGCGTCA---  
ATGACGCTGACGGTACAG---GCCAGACAA---TTATTG---TCTGGTATAGTGCAACAGCAGAAC---  
AATTTG---CTGAGG---GCTATTGAGGCGCAACAGCATCTGTTGCAACTCACAGTCTGGGGCGTC  
>EF593311  
TTCTACTGTGATTCAACACCACTATTTAATAGTACTTGGGAGAATAGTACTTGGGATAATAGTACTTGAATA  
CT-----  
-----  
GAAGGAAATGACACAATCACCTCACATGTAGAATAAAACAAATTATAAACATGTGGCAAAAAGTAGGAAAAG  
CAATGTATGCCCCCTCCCATTAGAGGACAAATTAGATGCTCATCAAAT---  
ATTACAGGGCTGCTATTAACAAGAGATGGTGGTGTAAAGAATAATGAA-----  
-----  
-----  
ACCAACACCACCGAGACCTTCAGACCTGGAGGAGGAGATATGAGGGACAATTGGAGAAGCGAATTATATAAAAT  
ATAAGGTAGTAAAAATTGAACCACTA---GGGTTAGCCCCCACCAGGCAAGGAGAAGAGTGGTG-----  
-----CAGAGAGAAAAAAGAGCA---GTGGGA---TTAGGAGCT---  
-----TTGTTCTCGGGTTCTTGGGAGCA---GCAGGAAGCACTATG---GGCGCAGCGTCA---  
ATAACGCTGACGGTACAG---GCCAGACTA---TTATTG---TCTGGTATAGTGCAACAGCAGAAC---  
AATCTG---CTGAAG---GCTATTGAGGCGCAACAGCGTATGTTGCAACTCACAGTCTGGGGTATC  
>KT808396  
TTTTACTGTAATACAACATCACTATTTAGTAGTACTTGGGATAATAATACAATATCACTATTTAATAGTACTG  
GGAATAGT-----  
-----AATGAA-----  
GGATTAAATGACACAATCACCTCACATGCAGAATAAAACAAATTATAAACATGTGGCAGGAAGTAGGAAAAG  
CAATGTATGCCCCCTCCCATCAGAGGACAAATTAGATGTTCACTCAAAT---  
ATTACAGGGCTGCTATTAACAAGAGATGGTGGTAATAATAGCTCTGATAAT-----  
-----  
-----  
AGCTCTGGGGAGACCTTCAGACCTGGAGGAGGAGATATGAGGGACAATTGGAGAAGTGAATTATATAAAATATA  
AAGTAATAAAAATTGAACCATTA---GGAGTAGCACCCACCAAGGCAAGAAGAAGAGTGGTG-----  
-----CAGAGAGAAAAAAGAGCA---GTGGGA---CTAGGAGCT-----  
---TTGCTCTTTGGGTTCTTGGGAGCA---GCAGGAAGCACTATG---GGCGCAGTGTC---  
ATGACGCTGACGGTACAG---GCCAGACAA---TTATTG---TCTGGTATAGTGCAACAGCAGAAC---  
AACCTG---CTGAGG---GCTATTGAGGCGCAACAACACCTGTTGCAACTCACAGTCTGGGGCGTC  
>KP754464  
TTCTACTGTGATACAACAAAACCTGTTTAACAGTACTTGGCCCAATAACAGTACTTGGCCCAATAACACTGAAG  
TCACA-----  
-----AATACC-----  
ACTGAAAATGGCACTATCACTCCAATGCAAAATAAAACAAATTATAAACCTGTGGCAAGAAGTAGGAAAAG  
CAATGTATGCCCCCTCCCATCAATGGACCGATTAAATGTAGATCAAAT---  
ATTACAGGGTTAATATTAACAAGAGATGGTGGTATAAACAACACCACC-----  
-----  
-----  
GAGACTAACACCACCGAGACTTTTAGACCTGGAGGAGGAGATATGAGGGACAATTGGAGAAGTGAATTATATA  
AATACAAAGTAGTAAGAATTGAACCATTA---GGAATAGCACCCACCAAGGCAAAGAGAAGAGTGGTG-----  
-----CAGAGAGAAAAAAGAGCA---GTGGGG---  
CTGGGAGCT-----TTGTTCTTGGGTTCTTGGGAGCA---GCAGGAAGCACTATG---  
GGCGCAGCGTCA---ATGGCGCTGACGGTACAA---GCCAGACAA---TTATTG---  
TCTGGTATAGTGACAGCAGCAGAAC---AATCTG---CTGAGG---  
GCTATTGAGGCGCAACAGCATCTGTTGCAACTCACTGTCTGGGGTATC  
>GU728348  
TTCTATTGTGATACAACACAACCTGTTTAATAGTACTTGGGAGAATGATAATGCTACTGCGGGGGCAACA-----  
-----  
-----  
GGAAATGACACAATCATACTCCCATGCAGAATAAAACAAATTATAAACATGTGGCAGAAAGTAGGAAAAGCAA

TGTATGCCCCCTCCCATCCAGGGACAAATTAGATGCTTATCAAAT ---  
ATTACAGGGCTGCTATTAACAAGAGATGGTGGTCATAACAGGACC -----  
-----  
GGTAATGAGACCTTCAGACCTGGAGGAGGAGATATGAGGGACAATTGGAGAAGTGAGCTATATAAATACAAAG  
TAGTAAAAAATTGAACCATTG --- GGAATAGCACCCACCAGGGCAAAGAGAAGAGTGGTG -----  
-----CAGAGAGAAAAAAGAGCG --- TTGGGCATAGGAGCTGCT -----  
TTGTTTCCTTGGGTTCTTGGGAGCA --- GCAGGAAGCACTATG --- GGCGCAGCGTCA ---  
GTGACGCTGACGGTACAG --- GCCAGACAA --- TTATTG --- TCTGGTATAGTGCAACAGCAGAAC ---  
AATTTG --- CTGATG --- GCTATTGAGGCGCAACAGCATCTGTTGCAACTCACAGTCTGGGGCGTC  
>GU728283  
TTCTACTGTAATTCATCACAACCTGTTTAGTAGTTCTTGGAAATGGTAATAGTACTAGAAATAGTACTGGGTCA-  
-----  
-----  
AAAGACAAAGACATTATACTCCCATGCAGAATAAAACAATTTATAAACATGTGGCAGAGAGTAGGAAAAGCAA  
TATATGCCCCCTCCCATAAAAAGGACCAATTAGCTGTTTATCAAAT ---  
ATTACAGGGCTGTTATTAACAAGAGATGGGGGCTTAGGAAACAACAGTTCA -----  
-----  
GAAAAAAGACTGAGACCTTCAGACCTGGAGGGGGAAATATGAAGGACAATTGGAGAAGTGAGTTATATAAAT  
ATAAAGTAGTAAAAAATTGAACCATTA --- GGAGTAGCACCCACCAAGGCAAGGAGAAGAGTGGTG -----  
-----CAGAGAGAAAAAAGAGCA --- GTGGGA --- CTAGGAGCT ---  
-----CTGTTTCCTTGGGTTCTTGGGAGCA --- GCAGGAAGCACTATG --- GGCGCAGCGTCA ---  
ATGACGCTGACGGTACAG --- GCCAGACAA --- TTATTG --- TCTGGTATAGTGCAACAGCAAAAC ---  
AATTTG --- CTGAGA --- GCTATTGAGGCGCAACAACATCTGTTGCAACTCACAGTCTGGGGCGTC  
>KY658703  
TTCTACTGTAATTCACACCACTGTTTAATGGTACTTGGAAATAATACTAACAATGGA -----  
-----  
-----  
GAAAAAATGATACAATCACACTCCACTGCAGAATAAAACAATTTATAAACATGTGGCAAAGAACAGGCAAAG  
CAATGTATGCCCCCTCCCATAGAGGACCAATTAACTGTTTCATCAAAT ---  
ATTACAGGACTGCTATTAACAAGAGATGGTGGTAATACCAGTGAG -----  
-----  
-----  
AGCAACACTGAGATCTTCAGACCTCTAGGAGGAGATATCAGGGACAATTGGAGAAGTGAATTATACAAATATA  
AAGTAATAAAAAATTGAACCAGTA --- GGAATAGCACCCACCAAGGCAAAGAGAAGAGTGGTG -----  
-----CAGAGAGAAAAAAGAGCA --- GTGGGAACAATAGGAGCT -----  
---ATGTTTCCTTGGGTTCTTGGGAGCA --- GCAGGAAGCACTATG --- GGCGCAGCGTCA ---  
ATGACGCTGACGGTACAG --- GCCAGACAA --- TTGTTG --- TCTGGTATAGTGCAACAGCAAAAC ---  
AATTTG --- CTGAGG --- GCTATTGAGGCGCAACAGCATCTGTTGCAGCTCACGGTCTGGGGGAGTC  
>KT452596  
TTCTATTGTAATACAACACCATGTTTAATGATACTTGGACTAGGAATGGTACTGATGGTACTTGGATTTCAA  
ATAGTAAT -----  
-----  
AGGACTGGAAATATCACACTCCTATGCAGAATAAAACAATTTATAAACATGTGGCAGGAAGTAGGAAAAGCAA  
CATATGCCCCCTCCCATCAGAGGGCCAATTACGTGTGTATCAAAC ---  
ATTACAGGTCTGATGTTAACAAGAGATGGTGGTAATAATCAGACA -----  
-----  
-----  
AATAATACCGAGATCTTCAGACCTGGAGGGGGAAATATGAAGGACAATTGGAGAAGTGAATTATATAAATATA  
AAGTAGTCCAAATTGAACCATTG --- GGAGTAGCACCCACCAAGGCAAAGAGAAGAGTGGTG -----  
-----CAGAGAGAAAAAAGAGCA --- GTCACG --- CTAGGAGCT -----  
---ATGTTTCCTTGGGTTCTTGGGAGCA --- GCAGGGAGCACTATG --- GGCGCAGCGTCA ---  
ATGGCGCTGACGGTACAG --- GCCAGACAA --- TTATTG --- TCTGGTATAGTGCAATCAGCAGAAAT ---  
AACCTG --- CTGAGA --- GCTATTGAGGCGCAACAACATATGTTGCAACTCACAGTCTGGGGCGTC  
>KR861317  
TTCTATTGCAATACATCAGACCTGTTTAATACATCAAAACTGGTTAATGAGACTCATAAA -----  
-----  
-----  
CGTAATGATACCATCACAATCCCATGCAGAATAAAACAATTTATAAACATGTGGCAGGAGGTAGGACGAGCAA

TGTATGCTCCTCCCATTGCAGGAAACATAACATGTACATCAAAT ---  
 ATCACCGGACTACTATTAGAATACGATGGAAGAAAGGATAAAAAC -----  
 -----  
 -----  
 AAAACAGAGACATTTCAGACCTGGGGGAGGAGATATGAGGGATAACTGGAGAAGTGAGTTATATAAATATAAAG  
 TGGTAGAAATTAAGCCATTG --- GGAATAGCACCCACTGGAGCAAAAAGGAGAGTGGTG -----  
 -----GAAAGAGGAAAAAGAGCA -- -GTAGGA -- -ATAGGAGCT -----  
 GTGCTCCTTGGGTTCTTGGGAGCA -- -GCAGGAAGCACTATG -- -GGCGCGGCGTCA -- -  
 ATAACGCTGACGGTACAG -- -GCCAGACAA -- -TTGTTG -- -TCTGGTATAGTGCAACAGCAAAGC -- -  
 AATTTG -- -CTGAGG -- -GCTATAGAGGCGCAGCAGCATCTGTTGCAACTCACAGTCTGGGGTATT  
 >KR861333  
 TTCTATTGCAATACATCAGGCCTGTTTAATGATACAAATGAT -----  
 -----  
 -----  
 GGTACAACAAACATCACACTCCCATGCAGAATAAAACAAATTATAAACATGTGGCAGGGGGTAGGGCGAGCAA  
 TGTATGCCCCCCCCATTGCAGGAAACATAAAATGTGAATCAAAC ---  
 ATCACAGGATTACTATTGACACGTGATGGAGGAAACAATAGTAGT -----  
 -----  
 -----  
 GAGAAAAATTGAGAGATTTCAGACCTGGAGGAGGAGATATGAGGGACAATTGGAGAAGTGAATTATATAAATATA  
 AAGTGGTAGAGATTAAGCCATTA --- GGAATAGCACCCACTGAGGCAAGAAGGAGAGTGGTG -----  
 -----GAGAGAGAGAAAAAGAGCA -- -GTGGGA -- -ATAGGAGCT -----  
 -- -GTGTTCCCTTGGGTTCTTGGGAGCA -- -GCAGGAAGCACTATG -- -GGCGCGGCATCA -- -  
 ATAACGCTGACGGTACAG -- -GCCAGACAA -- -TTATTG -- -TCTGGTATAGTGCAACAGCAGAGC -- -  
 AATTTG -- -CTGAGG -- -GCTATAGAGGCGCAACAACATTTGTTGCAACTCACGGTCTGGGGTATT  
 >KR861283  
 TTCTATTGCAATACATCAGGATTGTTTAATGGAACATACAATGGAACATAATATTACAGGAGACAGCAACATCA  
 CA -----  
 -----  
 -----  
 CTAGACAGCAACATCACACTCCCATGCAGAATAAAACAATTTGTAAACATGTGGCAGGGGGTAGGACGAGCAA  
 TGTATGCCCCCTCCCATTGAAGGAATCATACAATGTAACTCAAAT ---  
 ATCACAGGACTATTGTTAACACGTGATGGAGGAGGAGGCGATAAT -----  
 -----  
 -----  
 TCAACTGAAATATTCAGGCCTACAGGAGGAAATATGAGAGACAATTGGAGAAGTGAATTATACAAATATAAAG  
 TGGTAGAAATTCACCATTG --- GGAATAGCACCCACTACAGCAAGGAGGAGAGTGGTG -----  
 -----GAGAGAGAAAAAAGAGCA -- -GTAGGA -- -GTGGGAGCC -----  
 TTGTTCCCTTGGGTTCTTAGGAGCA -- -GCAGGAAGCACTATG -- -GGCGCAGCATCA -- -  
 ATAACGCTGACGGTACAG -- -GCCAGACAA -- -TTGTTG -- -TCTGGAATAGTGCAACAGCAAAAC -- -  
 AATTTG -- -CTGAGA -- -GCTATAGAGGTGCAACAACATATGTTGCAACTCACAGTCTGGGGTATT  
 >KC898980  
 TTCTATTGTAATACATCAGGCCTGTTTAATGGTACATACATGCCTAATGGTACATACATGCCTAATGGTACAG  
 AAAGTAAT -----  
 -----  
 -----  
 TCAAACTCAACCATCACAAATACCATGCAAAATAAAGCAAATTATAAACATGTGGCAGGAAGTAGGACGAGCAA  
 TGTATGCCCCCTCCCATTGCAGGAAATATAACATGTAAATCAAAT ---  
 ATCACAGGACTACTATTGGTACGTGATGGAGGAAGCGAGCCAAATATT -----  
 -----  
 -----  
 ACAAATAATGATACAGAGACATTTCAGACCTGGAGGAGGAGATATGAGGGACAATTGGAGAAGTGAATTATATA  
 AATATAAAGTGGTAGAAATTAAACCATTG --- GGAATAGCACCCACTGCAGCAAAAAGGAGAGTGGTG -----  
 -----GAGAGAGAAAAAAGAGCA -- -GTGGGA -- -  
 ATAGGAGCT -----GTGTTCCCTTGGGTTCTTGGGAGCA -- -GCAGGAAGCACTATG -- -  
 GGCGCGGCGTCA -- -ATAACGCTGACGGCACAG -- -GCCAGACAA -- -TTATTG -- -  
 TCTGGTATAGTGCAACAGCAAAGC -- -AATTTG -- -CTGAGG -- -  
 GCTATAGAGGCGCAACAGCATATGTTGCAACTCACAGTCTGGGGCGTT  
 >KU319550  
 TTTTCATTGCAGTACTACAGGACTGTTTACTGATACATATGGTACAAGTACATGCGGCCTAACAGTACAGGAA  
 ATACT -----  
 -----

TCAGGAATTACACCATCACACTCCACTGCAAAATAAAACAATTTATAAACATGTGGCAGGGGGTAGGGCTAG  
CAATGTATGCCCCCTTCCCTTGCAGGAAACATAATATGTAAATCAAAT---  
TTCACAGGACTAGTCTTGACATGTGATGGAGGAGAGGGGAATAAC-----  
-----  
-----  
GTGACTAACTTGACAGAGACATTTAGACCTGGAGGAGGAGATATGAGGGACAATTGGAGAAGTGAATTATATA  
AATATAAAGTGGTAGAAATTAAACCATTA--GGAGTAGCACCTACTAAGGCAAAAAGGAGAGTGGTG-----  
-----GAGAGAGAAAAAAGAGCA---GTGGGA---  
ATAGGAGCT-----GTGTTCCCTTGGGTTCTTGGGAGCA---GCAGGAAGCACTATG---  
GGCGCAGCATCA---ATAACGCTGACGGTACAG---GCCAGGCAA---TTGTTG---  
TCTGGTATAGTGCAACAGCAGAAC---AATTTG---CTGAGG---  
GCTATAGAGGCGCAACAGCATATGTTGCAACTCACGGTCTGGGGCGTT  
>FJ977093  
TTCTATTGCAATACATCACAATTGTTTAAATACATCACATTGGTTTAAATAATACAACAAAT-----  
-----  
-----  
CAGACTGAACCCATCACACTCCAATGCAGAATAAAACAGATTGTAAACATGTGGCAGGGGGTAGGACGAGCAA  
TGTATGCCCCCTCCCATTAAGGAAACATAACATGCAGATCAAAT---  
ATCACAGGATTACTATTGACACGTGATGGAGGAAACAATGCAAGT-----  
-----  
-----  
GCAAGTGAGGAGACATTTAGACCTGGAGGAGGAAATATGAAAGACAATTGGAGAAGTGAATTATATAAATATA  
AGGTAGTAGAAATTAACCCATTA---GGAATAGCACCCACTAAGGCAAAAAGGAGAGTGGTG-----  
-----GAGAGAGAAAAAAGAGCA---GCA-----ATAGGGGCT-----  
---GTGTTCCCTTGGGTTCTTGGGAGCC---GCAGGAAGCACTATG---GGCGCGGCGTCG---  
CTAACGCTGACGGTACAG---GCCAGACAA---TTATTG---TCTGGTATAGTGCAACAGCAAAGC---  
AATTTG---CTGAGG---GCTATAGAGGCGCAACAGCATATGTTGCAACTCACAGTCTGGGGTATT  
>KU921827  
TTCTATTGTAATACATCAGGCCTGTTTAAATAGTAGTTGGAAACAGGAACATAATAAACAGTTGGAATAGAA  
TTGACAAC-----  
-----AGGACA-----  
GAATCAAATGACACTATAATTCTCCCATGCAAGATAAAACAAATTATAAACATGTGGCAGGAGGTAGGACGAG  
CAATGTATGCTCCTCCCATTCAGGAAACATAACATGCAATCAAAT---  
ATCACAGGATTATTACTAACACGTGATGGGGGACCAGACTCAAAT-----  
-----  
-----  
GGCACAGAAATATTAGGCCTGTAGGAGGAAACATGAAGGACAATTGGAGAAGTGAATTATATAAATACAAAG  
TGGTAGAAATTAACCATTA---GGACTAGCACCCACTAGGGCAAAAAGGCGAGTGGTGGACAGA-----  
-----GAAAAATGGTGGACAGAAGAAAAAGAGCA---GTGGGA---CTAGGAGCT-----  
ATGTTCCCTTGGGATCTTGGGAGTA---GCAGGAAGCACTATG---GGCGCAGCATCA---  
ATGACGCTGACGGTACAG---GCCAGACTA---TTATTG---GCTGGTATAGTGCAACAGCAAAAC---  
AATTTG---CTGAGA---GCTATAGAGGCGCAACAGCATATGTTGCAACTCACTGTCTGGGGCGTT  
>KC894080  
TTCTATTGCAATACATCAAACCTGTTTAAATACTACTAATAGTACAGAAAGTACTTCAAATTCAACCTTT---  
-----  
-----  
ATCACGCTCCAGTGCAGAATAAAACAGATTATAAACATGTGGCAGGGGGTAGGACAAGCAATGTATGCCCCCTC  
CCATTGCAGGAAACATAACATGTAAATCAAAT---ATCACAGGACTACTCTTGACCCGTGATGGA---  
ATACCAAATGCA-----  
-----  
-----  
ACAAATGAGACATTGACACCTGGAGGAGGAGATATGAGGGACAATTGGAGAAGTGAATTATATAAATATAAAG  
TGGTAGAAATTAAGCCATTG---GGACTAGCACCCACTACAGCAAAAAGGAGAGTGGTG-----  
-----GAGAAACAAAAAAGAGCA---GTGGGA---TTAGGAGCT-----  
GTGTTCCCTTGGGTTCTTGGGAGTA---GCAGGAAGCACTATG---GGCGCGGCGTCA---  
ATCACGCTGACGGCACAG---GCCAGACAA---CTGTTG---TCTGGTATAGTGCAACAGCAAAAC---  
AATTTG---CTGAGA---GCTATAGAGGCGCAACAGCATATGTTGCAACTCACGGTCTGGGGTATT  
>HM070584  
CTCTATTGCAATACATCAAACTGTTTAAATGGTATATACAATAATTATACAGAAGACAATTCA-----  
-----  
-----

ACAGGCCCAGACATCACACTCCCATGCAGAATAAAACAAATTATAAACATGTGGCAGGAGGTAGGAAGAGCGA  
TGTATGCCCCCTCCCATTCAGAGGAGAAATAACATGTAACCTCAAGT---  
ATCACAGGACTACTATTGACACGTGATGGAGGAAATACTAGAGGAAATACT-----  
-----  
-----  
ACGGGAGGAAATGAGACATTCAGACCTGGAGGAGGAGATATGAGGGACAATTGGAGAAGTGAATTATATAAAT  
ATAAAGTGGTAGAAATTAGGCCATTA---GGAATAGCACCCACTGAGGCAGGAGAGAGTGGTG-----  
-----GAGAGAGAAAAAGAGCA---GTGGGA---ATAGGAGCC---  
-----TTGTTTCCTTGGGTTCTTGGGAGCA---GCAGGAAGCACTATG---GGCGCGGCGTCA---  
ATAACGCTGACGGTACAG---GCCAAACAA---TTGTTG---TCTGGCATAGTGCAACAGCAAAGC---  
AATTTG---CTGAGG---GCTATAGAGGCGCAACAGCATCTGTTGCAACTCACAGTCTGGGGTATT  
>HM204597  
TTCTATTGCAATACATCAGGCCTGTTTAATAAGACATACTATAGTAATGGTACATACAATAATATTAGTACAG  
ACAAT-----  
-----  
AGTACTGATTCTAACATCACACTCCCATGCAGAATAAAACAGATTATAAACATGTGGCAGCAGGTAGGAAGAG  
CAATGTATGCCCCCTCCTATTGCAGGAAACATAACATGTATATCAAAT---  
ATCACAGGACTACTATTAACACGTGATGGAGGACCTGAAAAATAATGAC-----  
-----  
-----  
ACAAATAGAAACGAGACATTCAGACCTGGAGGAGGAGATATGAGGGACAATTGGAGAAGTGAATTATATAAAT  
ATAAAGTGGTAGAAATTAAGCCATTA---GGAATTGCTCCCACTGAGGCGAAAAGGAGAGTGGTG-----  
-----GAGAGAGAAAAAGAGCA---GTGGGA---ATAGGAGCT---  
-----GTGTTTCCTTGGGTTCTTGGGAGCA---GCTGGAAGCACTATG---GGCGCAGCGTCA---  
ATAACGCTGACGGCACAG---GCCAGACAA---CTGTTG---TCTGGTATAGTGCAACAGCAAAGC---  
AATTTG---CTGAGA---GCTATAGAGGCGCAACAGCATATGTTGCAACTCACAGTCTGGGGTATT  
>KC187073  
TTCTATTGCGATTTCATCAGCACTGTTTAATGGCCAGTATAATGGTACAAATGTCCAGTATAAT-----  
-----  
-----  
AGTACAGAAAATATAACACTTCAATGCAGAATAAAACAAATTATCAACATGTGGCAGGGGGTAGGACGAGCAA  
TATATGCCCCCTCCCATTCAGGAAACATAACATGTAAATCAAAT---  
ATCACAGGACTAATATTAACACGGGATGGAGGAGAAAGTAATGATTCA-----  
-----  
-----  
AAAATTGCAGAGATATTCAGACCTGCAGGAGGAGATATGAGGGACAATTGGAGAAGTGAACATATATAAATATA  
AAGTGGTAGAAATTAAGCCATTA---GGAATAGCACCCACTGAGGCAAAAAGGAGAGTGGTG-----  
-----GAGAGAGAAAAAGAGCA---GTGGGA---ATGGGAGCT-----  
---GTGTTTCCTTGGGTTCTTGGGAGCA---GCAGGAAGCACTATG---GGCGCGGCGTCA---  
ATAACGCTGACGGTACAA---GCCAGACAA---CTGTTG---TCTGGTATAGTGCAACAGCAAAGC---  
AATTTG---CTGAGG---GCTATAGAGGCGCAACAGCATATGTTGCAACTCACGGTCTGGGGTATT  
>KP109526  
TTCTATTGCAATACATCAGGACTGTTCAATGGCACATACAATAATACAAATAGTACAGAGGGT-----  
-----  
-----  
ATAAATAAAACCATCACACTCCCATGCAGAATAAAACAAATTATAAACATGTGGCAGAAGGTAGGACGAGCAA  
TGTATGCCCCGCCCATTGCAGGAAACATAATATGTAACCTCAAGT---  
ATCACAGGACTACTATTGACACGTGATGGAGGAGTACATGACAAT-----  
-----  
-----  
GAGAAATGAGACGGAGACATTCAGACCTGGAGGAGGAGACATGAGGGACAATTGGAGAAGTGAATTATATAAAT  
ATAAAGTGGTAGAAGTGGAGCCATTG---GGAGTGGCACCCACTAAGGCAAAAAGAAGAGTGGTG-----  
-----GAGAGAGAGAAAAGAGCA---GTGGGA---ATAGGAGCT---  
-----TTGTTTCCTTGGGTTCTTGGGAGCA---GCAGGAAGCACTATG---GGCGCGGCGTCA---  
ATAACGCTGACGGTACAG---GCCAGACAA---TTATTG---TCTGGTATAGTGCAACAGCAGGAC---  
AATCTG---CTGAGA---GCTATAGAGGCGCAACAGCATATGTTGCAACTCACAGTCTGGGGTATT  
>HM639114  
TTCTATTGCAACACATCAAGCCTGTTTAATGGTACATACAATAGTACAGGAATGCCTAATAATACA-----  
-----  
-----

GGAGGTGCAAATATCACACTCCAATGCAAAATAAAACAAATTATAAACATGTGGCAGGAGGTGGGACGAGCAA  
TGTATGCCCCCTCCCATTCAGGAAACATAACATGTAGATCAAAT ---  
ATCACAGGACTACTATTGACACGCGATGGAGGAAATAGTACAGAGACA-----  
-----  
-----  
AAAAATGGTACAGAGATATTCAGACCTGGAGGAGGAGATATGAGGGACAATTGGAGAAGTGAATTATATAAAT  
ATAAAGTGGTAGAAATTAAGCCATTA---GGAATAGCACCCACTGAGGCAAAAAGGAGAGTGGTG-----  
-----GAGAGAGAGAAAAAGAGCA---GTGGGA---ATAGGAGCT---  
-----ATGTTTCCTTGGGTTCTTGGGAGCA---GCAGGAAGCACTATG---GGCGCGGCATCA---  
ATAACGCTGACGGTACAG---GCCAGACAA---TTATTG---TCTGGTATAGTGCAACAGCAAAGC---  
AATTTG---CTGAAG---GCTATAGAGGCGCAACAGCATATGTTGCAACTCACGGTCTGGGGTATT  
>KC894130  
TTCTATTGCAATACATCAAGCCTGTTTAATGGTAGATACAATAGTACAAGAAGTACT-----  
-----  
-----  
TCAAAATTCAACCATCACACTCCAATGCAAAATAAAACAAATTATAAACATGTGGCAGGAGGTGGGACGAGCAA  
TGTATGCCCCCTCCCATTCAGGAAACATAGCATGTAGATCAAAT ---  
ATAACAGGACTATTATTGACACGTGATGGAGGTAATGGAGGAGAC-----  
-----  
-----  
AATACTACAGAGATATTCAGACCTGGAGGAGGAAATATGAGGGACAATTGGAGAAGTGAATTATATAAATATA  
AAGTGGTGGAAATTAAGCCATTA---GGAGTAGCACCCACTGAGGCAAAAAGGAGAGTGGTG-----  
-----GAGAGAGAGAAAAAGAGCA---GTGGGA---ATAGGAGCT-----  
---GTGTTTCCTTGGGTTCTTGGGAGCA---GCAGGAAGCACTATG---GGCGCGGCATCA---  
ATAACGCTGACGGTACAG---GCCAGACAA---TTATTG---TCTGGTATAGTGCAACAGCAAAGT---  
AATTTG---CTGAGG---GCTATAGAGGCGCAACAGCATATGTTGCAACTCACGGTCTGGGGTATT  
>KU341728  
TTCTATTGTAATACCTCAGGCCTGTTTAATAGGACATACATGCCTACATACATGCCTAATGGTACAGAAAGTA  
AT-----  
-----  
-----  
TCAAACTCAACTATCACAATTCATGCAGAATAAAACAAATTATAAACATGTGGCAGCAGGTAGGACGAGCAA  
TATATGCCCCCTCCCATTCAGGAAACATAATATGTAAATCAAAC ---  
ATCACAGGACTACTATTGGTACGTGATGGAGGAATAAAGGAAAAT-----  
-----  
-  
GATACAGAGAATAAGACAGAGACATTCAGACCTGGAGGAGGAGATATGAGGGACAATTGGAGAAGTGAATTAT  
ATAAATATAAAGTAGTAGAAATTAAGCCATTG---GGAGTAGCACCCACTAAAGCAAAAAGGAGAGTGGTG--  
-----GAGAGAGAAAAAGAGCA---TTGGGA---  
ATAGGAGCT-----GTGTTTCCTTGGGTTCTTGGGAGCA---GCCGGGAGCACTATG---  
GGCGCAGCGTCA---ATAACGCTGACGGTACAG---GCCAGACAA---TTGCTG---  
TCTGGTATAGTGCAACAGCAAAGC---AATTTG---CTGATG---  
GCTATAGAGGCGCAACAGCATCTGTTGCAACTCACAGTCTGGGGCGTT  
>MF373134  
TTCTACTGTAATACAACAGGCCTGTTTAATAATAATAGGATA-----  
-----  
-----  
AATTC AACCATCACACTCCCATGCAGAATAAAGCAAATTATAAACATGTGGCAGGAAGTAGGAAGAGCAATAT  
ATGCCCCCTCCCGTTGAAGGACTCATAACATGTAGATCAAAT ---  
ATCACAGGAATACTACTAACACGTGATGGAGGCAATACTACTGCA-----  
-----  
-----  
ACAAACGAGACATTCGGGCCGGGAGGAGGAGATATGAGGGACAATTGGAGAAGTGAATTGTATAAATATAAAG  
TGGTAGAGATCAAGCCATTA---GGAATAGCACCCACTGGGGCAAGGAGGAGAGTGGTG-----  
-----AAGAGAGAAAAAGAGCA---GCAACA---CTAGGAGTT-----  
ATGTTTCCTTGGGTTCTTGGGAGCA---GCTGGAAGCACTATG---GGCGCAGCATCA---  
ATAACGCTGACGGTACAG---GCCAGACAA---TTATTG---TTGGGTATAGTGCAACAGCAAAT---  
AATTTG---GTGAGG---GCTATAGAGGCGCAACAGCATTTATTGCAACTCACAGTTTGGGGAATT  
>MF373135  
TTCTATTGCGATACATCAGAACTGTTTAATAGTACATACATGTCTAACAGTACTAACAGTACAAAT-----  
-----

-----  
TCAAGTTCAACCATCACACTCCCATGCGAGGATAAAACAAATTATAAACATGTGGCAGGGGGTAGGACGAGCAA  
TATATGCCCCCTCCCATTTGAAGGAAACATAACATGTATATCAAAC---  
ATCACAGGAATACTATTGACGCGTGATGGAGGAAACAATAACACA-----  
-----  
-----  
GAGACAGAGAAATTCAGACCTGGAGGAGGAGATATGAGGGACAATTGGAGAAGTGAATTATATAAATATAAAG  
TGGTGGAAATTAAACCATTA---GGAATAGCACCCACTAAGGC AAAAGGAGAGTGGTG-----  
-----GAGAGAGAAAAAAGAGCA---GTGGGA---ATAGGAGCT-----  
GTGTTCCCTTGGGTTCTTGGGGGCA---GCAGGAAGCACTATG---GGCGCAGCGTCA---  
ATAACGCTGACGGTACAG---GCCAGACAA---TTGTTG---TCTGGTATAGTGCAACAGCAAAAC---  
AATTTG---CTGAGG---GCTATAGAGGCGCAACAGCATATGTTGCAACTCACGGTCTGGGGTATT  
>KP411830  
TTCTATTGCAATACATCAAGACTGTTTAAATACGACATCATTTGTTATGTACTATGTGTACTGCAGGGTCTAATA  
GTACT-----  
-----AATAGT-----  
ACTTCAGATGAACCCATCATCTCCCATGCAGAATAAAACAAATAGTAAACATGTGGCAGAGGGTAGGACGAG  
CAATGTATGCCAATCCCATTTGCAGGAAACATAACATGTAGATCAAAT---  
ATCACAGGACTACTACTGACACGTGATGGAGGCAATACTAATAAC-----  
-----  
-----  
ACAACTGAAATATTCAGACCAGGAGGAGGAGATATGAGGGACAATTGGAGAAGTGAATTATATAAATACAAAG  
TGATAGAGATTAAGCCATTA---GGAATAGCACCCCTCAAAGGC AAAAGGAGAGTGGTG-----  
-----GAGAGAGAAAAAAGAGCA---GCA-----CTAGGAGTT-----  
ATGTTCCCTTGGGTTCTTGGGAGCA---GCTGGAAGCACTATG---GGCGCAGCGTCT---  
TTAACGCTGACGGTACAG---GCCAGACAA---TTGTTG---TCTGGTATAGTGCAACAGCAAAGC---  
AATTTG---CTGAGG---GCTATAGAGGCGCAACAGCATCTGTTGCAACTCACGGTCTGGGGGATT  
>MF373176  
TTCTATTGTAATACATCAGGCCTGTTTAAATGGTACATACATGCCTAATGGTACAAACAGTAAC-----  
-----  
-----  
TCAAGCTCAAACATCACACTCCCATGCAGAATAAAGCAATTTATAAACATGTGGCAGGGGGTAGGACGAGCAA  
TGTATGCCCCCTCCCATTTGAAGGAAACATAACATGTAATTC AATT---  
ATCACAGGACTACTATTGGAACGTGATGGAGGGGAAACAAACAGT-----  
-----  
-----  
AGTACAGAGACATTTAGACCTGGAGGAGGAGATATGAGGAACAACCTGGAGAAGTGAATTATATAGATATAAAG  
TGGTAGAAATTAAGCCCTTG---GGAGTAGCACCCACTACAGCAAAAAGGAGAGTGGTG-----  
-----GAGAGAGAAAAAAGAGTA---GTGGGA---ATAGGAGCT-----  
GTGTTCCCTTGGGTTCTTAGGAGCA---GCTGGAAGCACTATG---GGCGCGGCGTCA---  
ATAACGCTGACGGCACAG---GCCAGACAA---TTGTTG---TCTGGTATAGTGCAACAGCAAAGC---  
AATTTG---CTGAGA---GCTATAGAGGTGCAGCAGCATATGTTGCAACTCACGGTCTGGGGTATT  
>AY253307  
TTCTATTGCAATACATCAGAATTGTTTAAAGTTTAAATGGGACATACATAGGTAATACTACA-----  
-----  
-----  
GACAATGAGACAATCACACTCCCATGTAGAATAAAACAAATTATAAACATGTGGCAGAGGGTAGGACAAGCGA  
TGTATGCCCCCTCCAATTAAAGGAAATATAACATGTAAATCAAAG---  
ATCACAGGAATACTAATGACACGTGATGGTGGTATGAATGGGACA-----  
-----  
-----  
AAGGAGGAGATCTTCAGACCTGGAGGAGGAGATATGAGAGATAATTGGAGAAATGAATTATATAAATATAAAG  
TGGTAGAAATCAAACCATTA---GGAGTAGCACCCACTAGGGCAAAAAGGAGAGTGGTG-----  
-----GAGAGAGAAAAAAGAGCA---GTGGGA---ATAGGAGCT-----  
GTGTTCCCTTGGGTTCTTGGGGGCA---GCAGGAAGCACTATG---GGCGCGGCGTCA---  
ATAACGCTGACGGTACAG---GCCAGACAA---TTATTG---TCTGGTATAGTGCAACAGCAAAGC---  
AATTTG---CTGAAG---GCTATAGAGGCGCAGCAGCATATGTTGCAACTCACGGTCTGGGGTGT  
>AY253317  
TTCTATTGCAATACATCAAACTGTTTAAATGGCACATACATGCTTAATCACACTGACACAGAAAGTAAT----

-----  
TCAACATCAGACATCACACTCCAATGCAGAATAAAACAAATTATAAACATGTGGCAGGAGGTAGGACGAGCAA  
TGTATGCCCCCTCCCATTCAGAGACACATAATATGTAACCTCAAGT---  
ATCACAGGACTACTATTGCTACGTGATGGAGGCAGTGGCAAGGGCATA-----  
-----  
-----  
AATAATGAAACAGAGATATTCAGACCTGGAGGAGGAGATATGAGGGATAATTGGAGAAGTGAATTATATAAAT  
ATAAAGTGGTAGAAATTAACCATTTG---GGAGTAGCACCCACCGAGGCAAAAAGAATAGTGGTG-----  
-----GAGAGAGAAAAAGAGCA---GTGGGA---ATAGGAGCT---  
-----GTGCTCCTTGGGTTCTTGGGAGCA---GCAGGAAGCACTATG---GGCGCAGCGTCA---  
ATAACGCTGACGGCACAG---GCCAGACAA---TTGTTG---ACTGGTATAGTGCGACAGCAAAGC---  
AATTTG---CTAAGG---GCTATAGAGGCGCAACAGCATCTGTTGCAACTCACTGTCTGGGGTATT  
>AY253320  
TTCTATTGTAATACAACAGACCTATTTAATAGAACTATTACTGATGGAACTACAAATACTTACTGATGAAA-  
-----  
-----  
ATTCAAATATCACACTCCAATGTAGAAATAAAACAAATTATAAATATGTGGCAGGGGGTAGGACGAGCAATAT  
ATGCCCCCTCCAATTGAAGGAGAAATAATATGTACATCAAAAC---  
ATCACAGGACTGCTATTGACACGTGATGGAGGAACTGGAGAAAATAGCAGT-----  
-----  
-----  
ACAAACAATACAGAGATATTCAGACCTGGAGGAGGAGATATGAGAGACAATTGGAGAAGTGAATTATATAAAT  
ATAAAGTGGTAGAAATTAAGCCATTA---GGAATAGCACCCACTAGGGCAAAAGGAGAGTGGTG-----  
-----GAGAGAGAGAAAAGAGCA---GTGGGA---ATGGGAGCT---  
-----GTGCTCCTTGGGTTCTTGGGAGCA---GCAGGAAGCACTATG---GGCGCAGCGTCA---  
ATAACGCTGACGGTACAG---GCCAGACAA---CTATTG---TCTGGTATAGTGCAACAGCAAAC---  
AATTTG---CTGAGA---GCTATAGAGGCGCAACAGCATATGTTGCAACTCACGGTCTGGGGTATT  
>KX907357  
TTCTATTGCAACACATCAGGCCTGTTTAATAGTACATACAACGATACATACATGCCTAATGATACAACAAGTA  
CA-----  
-----  
-----  
AACAAATACAAAAATCACACTCCCATGCAGGATAAAACAGATTATAAACATGTGGCAGGGGGTAGGACGAGCAA  
TGTATGCCCCCTCCCATTCAGGAAACATAACATGTAGATCAAGT---  
ATCACAGGACTAATATTAGTACGTGATGGAGGTTCTGAAACAAAT-----  
-----  
-----  
GAAACATTCAGACCTGAAGGAGGAAACATGAGGGACAATTGGAGAAGTGAATTATATAAATATAAAGTGGTAG  
AAATTAAGCCATTA--GGAATAGCACCCACTGACGCAAAAGGAGAGTGGTG-----  
-----GAGAGACAAAAAGAGCA---GTGGGA---ATAGGAGCT-----  
ATGTTCTTGGGTTCTTGGGAGCA---GCAGGAAGCACTATG---GGCGCGGCGTCA---  
ATAACGCTGACGGCACAG---GCCAGAAAA---GTGTTG---TCTGGTATAGTGCAACAGCAAAGC---  
AATTTG---CTGAGG---GCTATAGAGGCGCAACAGCATCTGTTGCAACTCACAGTCTGGGGGATT  
>AY838566  
TTCTATTGCAACACATCAAACCTGTTTTATAATGATACATACCAGTCT-----  
-----  
-----  
AATAACGGCAGCATCACACTCCCCTGCAAAATAAAACAAATTATAAATATGTGGCAGAAGGTAGGACGAGCAA  
TGTATGCCCCCTCCCATTAAGGAAACATAACATGTAAATCAAGT---  
ATCACAGGAATACTATTGACACGGGATGGAGGGGCAGAAAACAACACA-----  
-----  
-----  
GAGAAGCCAGAGATATTCAGGCCTGGAGGAGGGGATATGAGGGACAATTGGAGAAGTGAATTATATAAATATA  
AAGTAGTAGAAATTAAGCCATTG---GGAGTAGCACCCACCGAGGCAAAAAGGAGAGTGGTG-----  
-----GAGAGAGAAAAAGAGCA---GTGGGA---ATAGGAGCT-----  
---GTGTTCTTGGGTTCTTGGGAGCA---GCAGGAAGCACTATG---GGCGCGGCGTCA---  
ATAACGCTGACGGTACAG---GCCAGACAA---TTGTTG---TCTGGTATAGTGCAACAGCAAAC---  
AATTTG---CTGAGA---GCTATAGAGGCGCAACAGCATATGTTGCAACTCACGGTCTGGGGAATT  
>JX845611  
TTCTATTGCAATACAACAAAACTGTTTAATAAAACACTGTTCAATGAGACA-----  
-----

-----  
AGTGAGAACAACATCACACTCTCATGCAGAATAAAACAGATTATAAACATGTGGCAGCAGGTAGGACGAGCAA  
TGTATAACCCCTCCCATTGAAGGAAGCATAACATGTAACCTCAACT---  
ATAACAGGACTACTCTTGTTCCGTGATGGAGGAGGCAAGAATAAC-----  
-----  
-----  
ACTGAGATATTCAGACCTGGAGGAGGGAATATGAAGGACAATTGGAGAAGTGAATTATATAAGTATAAAGTGG  
TAGAAATTAAGCCATTG---GGAATAGCACCCACTGGGGCAAAAAGGAGAGTGGTG-----  
-----GAGAGAGAAAAAAGAGCA---GTAGGA---ATAGGAGCT-----  
GTGTTTCCTTGGGTTCTTGGGTGCA---GCCGGAAGCACTATG---GGCGCGGCGTCG---  
ATAACGCTGACGGCACAG---GCCAGACAA---CTGTTG---TCTGGTATAGTGCAACAGCAAAGC---  
AATTTG---CTGAGA---GCTATAGAGGCGCAACAGCATCTGTTGCAACTCACAGTCTGGGGTATT  
>AY529666  
TTCTATTGCAATACATCAGGCCTATTTAATGGTACATTTAATGGTACATACATGTCTAATGGTACAGAG----  
-----  
-----  
AATAATTCAAACATCACACTCCAATGTAGAATAAAACAAATTATAAAAATGTGGCAGGGGGTAGGACAAGCAA  
TGTATGCCCCCTCCCATTCAAGGAAACATAACATGTAAATCAAAT---  
ATCACAGGACTGCTATTGACACGTGATGGAGGAACAGAAAACGGAACA-----  
-----  
-----  
GAGAGAAATAATGAGACATTTAGACCTGGAGGAGGAGATATGAAGGACAATTGGAGAAGTGAATTATACAAAT  
ATAAAGTGGTAGAAATTAAGCCATTA---GGAATAGCACCCACTAGTGCAAAAAGGAGAGTGGTG-----  
-----GAAAGAGAGAAAAGAGCA---GTGGGA---ATAGGAGCT---  
-----GTGTTTCCTTGGGTTCTTGGGAGCA---GCAGGAAGCACTATG---GGCGCGGCGTCA---  
ATAGCGCTGACGGTACAG---GCCAGACAA---TTATTG---TCTGGTATAGTGCAACAACAAAGC---  
AATTTG---CTGAGG---GCTATAGAGGCGCAACAGCATTTGTTGCAACTCACGGTCTGGGGCGTT  
>DQ447270  
TTTTATTGCAATACAACAAAACCTGTTTAATAATAGTAATTAT-----  
-----  
-----  
AATAATAGTATGGTTATACTCCCATGTAGAATAAAACAAATTATAAACATGTGGCAGGAGGTAGGACGAGCAA  
TGTATGCCCCCTCCCATTGCAGGAAACCTAACATGTAAATCAAAT---  
ATCACAGGACTGCTGTTGACACGTGATGGAGGAAAGGAAAAAAT-----  
-----  
-----  
GGGACAGAGATATTCAGACCTGGAGGGGGGAGATATGAGGGACAATTGGAGAAGTGAATTATATAAATATAAAG  
TGGTAGAAATTAAACCATTA---GGAATAGCACCCACTGAGGCAAAAAGGAGAGTGGTG-----  
-----GAGAGAGAAAAAAGAGCA---GTGGGA---ATAGGAGCT-----  
GTGTTTCCTTGGGTTCTTGGGAGCA---GCAGGAAGCACTATG---GGCGCGGCGTCA---  
ATAACGCTGACGGTACAG---GCCAGACAA---CTGTTG---TCTGGTATAGTGCAACAGCAAAGC---  
AATTTG---CTGAGA---GCTATAGAGGCGCAACAGCATATGTTGCAACTCACGGTCTGGGGTATT  
>DQ275653  
TTCTATTGCAATACATCAAGTCTGTTTAATGAAAGTAAACAAACAGAAGTGAGTCAAAT-----  
-----  
-----  
CCAAATGACACAATCACACTCCCATGCAGGATAAAACAAATTATAAACATGTGGCAGGAGCCAGGGCGAGCGA  
TGTATGCCCCCTCCCATTGCAGGAAAAATAACATGTAACCTCAAAT---  
ATCACAGGACTGTTATTGACACGTGATGGAGGGAATGACACACAG-----  
-----  
-----  
GGAAGCGAAACATTTCAGACCTGGAGGAGGAAATATGAAGGACAATTGGAGAAGTGAATTATATAAATATAAAG  
TGGTAGAGATTAAGCCATTG---GGAATAGCACCCACTACATCAAAAAGGAGAGTGGTG-----  
-----GAGAGAGAAAAAAGAGCA---GTGGGA---ATAGGAGCT-----  
GTAATCCTTGGGTTCTTGGGAGCA---GCAGGAAGCACTATG---GGCGCGGCGTCA---  
ATAACGCTGACGGCACAG---GCCAGACAA---CTGTTG---TCTGGTATAGTGCAACAGCAAAC---  
AATTTG---CTGAGA---GCTATAGAGGCGCAACAGCATATGTTGCAACTCACAGTCTGGGGTATT  
>DQ396384  
TTCTATTGCAATACCACAAAGTTGTTTAATAGTACATACAATGGAACAGAAAGC-----  
-----

-----  
AACAAATGAAACTATCACACTCCCATGCGAGAAATAAAACAAATTATAAACATGTGGCAGGAGGTAGGACGAGCAA  
TGTATGCCCCCTCCCATTGCCGGTAACATAACATGTAGCTCAAAT---  
ATCACAGGACTACTCCTGACACGTGATGGAGGAAATGGAACCTGACACT-----  
-----  
-----  
AATGGGACAGAGACATTTCAGACCTGGAGGAGGAAATATGAGGGACAATTGGAGAAGTGAATTATACAAATATA  
AAGTGGTAGAAATTAAGCCATTG---GGGATAGCACCCACTGACGCAAAAAGGAGAGTGGTG-----  
-----GAAAGAGAAAAAAGAGCA---GTGGGA---ATAGGAGCT-----  
---GTACTCCTTGGGTTCTTGGGAGCA---GCAGGAAGCACTATG---GGCGCGGCGTCA---  
ATAACGCTGACGGCACAG---GCCAGACAA---GTGCTG---TCTGGTATAGTGCAACAGCAAAGC---  
AATTTG---CTGAAG---GCTATAGAGGCGCAACAGCATCTGTTGCAACTCACGGTCTGGGGTATT  
>DQ275661  
TTCTATTGCACTACAACAGACCTGTTTAATACAACAAAAATATTTAATGATACA-----  
-----  
-----  
GGTAATCAAACAATCACACTCCCATGCGAGAAATAAAACAGATTATAAATATGTGGCAAGAGGTAGGACGAGCAA  
TGTATAACCCTCCCATTGAAGGAATCATAGCATGTAATTCAACT---  
ATAACAGGATTACTCTTGCTACGTGATGGAGGAATCACTGATAATACTAAT-----  
-----  
-----  
GGCACAAAGGACAAAGAGATATTCAGACCTGGAGGAGGAAATATGAAGGACAATTGGAGAAGTGAATTATATA  
AGTATAAAGTAGTAGAAATTAAGCCATTG---GGAATAGCACCCACTAAGGCAAAAAGGAGAGTGGTG-----  
-----GAGAGGGAAAAAAGAGCA---GTGGGC---  
ATAGGAGCT-----GTGTTCCCTTGGGTTCTTGGGTGCA---GCAGGAAGCACTATG---  
GGCGCGGCGTCG---GTAACGCTGACGGTACAG---GCCAGACAA---CTGTTG---  
TCTGGTATAGTGCAACAGCAAAGT---AATTTG---CTGAGA---  
GCTATAGAGGCGCAACAGCATATGTTGCAACTCACAGTCTGGGGTATT  
>AY901976  
TTCTATTGCAATACAACAAATCTGTTTACAAATAATACAACAGATAAT-----  
-----  
-----  
AACAGTAGTATCATCACACTCCCATGCGAGAAATAAAACAAATTATAAACATGTGGCAGGAGGTAGGACGAGCAA  
TGTATGCCCCCTCCCATTGCAGGAACTTAACATGTAACTCAAGT---  
ATCACAGGACTACTACTGACACGTGATGGAGGAAACAAAAACGGAACA-----  
-----  
-----  
AATAACACAGAGATATTCAGGCCTGGGGGAGGAAATATGAAAGACAATTGGAGAAGTGAATTATATAAATATA  
AAGTGGTAGAAATTAAGCCATTG---GGAATAGCTCCCACTAAGGCAAAAAGGAGAGTGGTG-----  
-----GAGAGAGAAAAAAGAGCA---GTGGGA---ATAGGAGCT-----  
---GTGCTCCTTGGTTTCTTGGGAGCA---GCAGGAAGCACTATG---GGCGCGGCGTCA---  
ATAACGCTGACGGTACAG---GCTAGACAA---CTGTTG---TCTGGTATAGTGCAACAGCAAAGC---  
AATTTG---CTGAGA---GCTATAGAGGCGCAACAGCATTTGTTGCAACTCACGGTCTGGGGTATT  
>AY878071  
TTCTATTGTAATACAACAAAACCTGTTTACAAATCTGACTAGTAACAATGAAACAAATCTGACTAGTAAA-----  
-----  
-----  
AATGAATCAGACATCGAACTTCCATGCGAGGATAAAACAAATTATAAATATGTGGCAGAAGGTAGGACGAGCAA  
TGTATGCCCCCTCCCATTGCAGGAAACATAACATGTAAATCAAAT---  
ATCACAGGACTACTGTTGACACGGGATGGAGGAAATACCAACAAAAGT-----  
-----  
-----  
AATAATACAGAACTTTTGTAGACCTGGAGGAGGAAACATGAAAGACAATTGGAGAAGTGAATTATATAAATATA  
AAGTGGTAGAAACTAAGCCATTG---GGAATAGCACCCACTGGATCAAAAAGGAGAGTGGTG-----  
-----GAGAGAGAAAAAAGAGCA---GTGGGA---ATAGGAGCT-----  
---GTGCTCTTTGGGTTCTTGGGAGCA---GCAGGAAGCACTATG---GGCGCGGCGTCA---  
ATAACGCTGACGGTACAG---GCCAGACAA---CTGTTG---TCTGGTATAGTGCAACAGCAAAGC---  
AATTTG---CTGAGA---GCTATAGAGGCGCAACAGCATATGTTGCAACTCACAGTCTGGGGTATT  
>DQ093587

TTCTATTGCAATACAACAAAACCTGTTCAATGACAGTGCTTTAAGTGCTTTCAACAAAACC-----  
-----  
-----  
TCTAATGAAACCATCACACTCCCATGCAGAATAAAACAGATTATAAACATGTGGCAGGAGGTAGGACGAGCAA  
TGTATGCCCCCTCCCATTGAAGGGAACATAACATGTAACCTCAAGT---  
ATCACAGGACTATTATTGCTACGTGATGGAGGAAAAGAAAATAATGAG-----  
-----  
-----  
ACCAATAACACAGAGATATTCAGACCTGGAGGAGGAAACATGAAAGACAATTGGAGAAGTGAAGTATATAAAAT  
ATAAAGTGGTAGAAATTAAGCCATTG---GGAATAGCACCCACGATGGCAAAAAGGAGAGTGGTG-----  
-----GAGAGAGAAAAAAGAGCA---GTGGGA---ATAGGAGCT---  
-----GTGCTCCTTGGGTTCTTGGGAGCA---GCAGGAAGCACTATG---GGCGCGGCGTCA---  
ATAACGCTGACGGTACAG---GCCAGACAA---CTGTTG---TCTGGTATAGTGCAACAGCAAAGC---  
AATTTG---CTGAGA---GCTATGGAGGCGCAACAGCATATGTTGCAACTCACAGTCTGGGGCACT  
>DQ382380  
TTCTATTGCAATACATCAAAACCTGTTTCATGGAACATACAATGGTACATACAATTCTAGTGGAGAG-----  
-----  
-----  
GATAATTCAACCATCACACTCCAATGCAGAATAAAACAATTTATAAACATGTGGCAGGAGGTAGGAAGAGCAA  
TGTATGCCCCCTCCCATTGCAGGAAACATAACATGTAAATCAAAC---  
ATCACAGGACTAATATTGACACGTGATGGAGGAAATGACAAATGGCACAAATGAC-----  
-----  
-  
ACTACCACAAATAAAACAGAGATATTCAGACCTGGAGGAGGAGATATGAGGGACAACCTGGAGAAGTGAATTAT  
ATAAATATAAAGTGGTAGAAGTCAAGCCATTG---  
GGAGTAGCACCCACCAAGGCAAAAAGGAAAGTGGTGGAG-----  
AGAGAAAGAGTAAAAAGAGCA---GTGGGA---CTAGGAGCT-----  
GTGTTTCATTGGGTTCTTGGGAGCA---GCAGGAAGCACTATG---GGCGCAGCGTCA---  
ATAACGCTGACGGCACAG---GCCAGACAA---CTGTTG---TCTGGTATAGTGCAACAGCAAAGC---  
AATTTG---CTGAGA---GCTATAGAGGCGCAACAACATATGTTGCAACTCACGGTCTGGGGCGTT  
>GQ999972  
TTCTATTGCAATACATCAAAACCTGTTTAATGAGAGCATGTTAAATAGTACAGACAATAGTACAAAA-----  
-----  
-----  
GAGGATGTAAACATCATACTCCCATGCAGGATAAAACAAATTATAAACATGTGGCAGGAGGTAGGACGAGCAA  
TGTATGCCCCCTCCCATTGCAGGAAACATAATATGTACCTCAAAT---  
ATCACAGGGCTACTACTGACACGTGATGGAGGGCCAGAGAATGGC-----  
-----  
-----  
ACAGATACAGTCAGACCTGTAGGAGGAGATATGAGGAACAATTGGAGAAGTGAATTATATAAATATAAGGTGG  
TAGAAATTAAGCCATTG---GGAATAGCACCCACTAAGGCAAAAAGGAGAGTGGTGGAG-----  
-----AGGAGGGAAAAAAGAGCA---GTGGGA---ATAGGAGCT-----  
GTGTTCCCTTGGGTTCTTGGGAGCA---GCAGGAAGCACTATG---GGCGCAGCGTCA---  
ATGACGCTGACGGTACAG---GCCAGACAA---TTGTTG---TCTGGAATAGTGCAACAGCAAAGC---  
AATTTG---CTGAGG---GCTATAGAGGCGCAACAGCATATGTTGCAACTCACGGTCTGGGGAGTT  
>HQ615945  
TTCTATTGCAATACATCACTACTATTTAATAGCAATGATACAGAAAGTAACAATGATACAGTAAGTAGTAATT  
CA-----  
-----  
-----  
ACCAGTAATTCAACCATCACACTTCGATGCAGAATAAAACAAATTATAAACATGTGGCAGGAGGTAGGACGAG  
CAATGTATGCCCCCTCCCATTGAAGGAAACATAACATGTAAATCAAAT---  
ATCACAGGACTAATATTAGCACGTGATGGTGGAAACTCAAATGAC-----  
-----  
-----  
TCAAATAAAGAGATATTCAGACCTGAAGGAGGAAATATGAAGGACAATTGGAGAAGTGAATTATATAAATATA  
AAGTAGTAGAAATTAACCATTTG---GGAATAGCACCCACTAAAGCACAAAGGAGAGTGGTG-----  
-----AAGAGAGAAAAAAGAGCA---GTAGGA---ATAGGAGCT-----  
---GTGTTCCCTTGGATTCTTGGGAGTA---GCCGGAAGCACTATG---GGCGCAGCGTCA---  
ATAACGCTGACGGCACAG---GCCAGACAA---GTGTTG---TCTGGTATAGTGCAACAGCAAAGC---  
AATTTG---CTGAGG---GCTATAGAGGCGCAACAGCATATGTTGCAACTCACGGTCTGGGGTATT

>KC156116

TTCTATTGCAATACAACAAAACCTGTTTAAATGATACAGAAAAATATAAC-----

-----  
-----

AGTACAAACATCATACTCCCATGTAGAATAAGACAAATTGTAAACATGTGGCAGGGGGTAGGACGAGCAATAT  
ATGCCCCCTCCCATTAAGGAAACATAACATGTGAATCAAAT---  
ATTACAGGACTACTGTTGACACGTGATGGAGGGAATAAAAGCAAC-----

-----  
----

CAAACCTAACCAAAATGAGACATTCAGACCTGGAGGAGGAGATATGAGGGATAATTGGAGAAGTGAATTATATA  
AATATAAAGTGGTAGAAATTAAGCCATTG---GGAATAGCACCCACTGAAGCAAAAAGGAGAGTGGTG-----

-----GAGAGAGAAAAAAGAGCA---GCAGGA---

ATAGGAGCT-----GTGTTCCCTTGGGTTCTTGGGAGCA---GCAGGAAGCACTATG---

GGCGCGGCGTCA---ATAACGCTGACGGTACAG---ACCAGACAA---TTGTTG---

TCTGGTATAGTGCAACAGCAAAGC---AATTTG---CTGAAG---

GCTATAGAGGCGCAACAGCACCTGTTGCAACTCACAGTCTGGGGTATT

>HM204618

TTCTATTGCAATACATCACAACCTGTTTAAATAGCGCTGAAAATGAAACAGATATT-----

-----  
-----

ATAAATTCAAACATCACACTGCCATGCAGAATAAAACAAATTATAAACATGTGGCAGGAGGTAGGACGAGCAA  
TGTATGCCCCCTCCCATTCAGGAAACATAATATGTAAATCAAAT---

ATCACAGGACTACTATTAGTACGTGATGGAGGCAACATCAGCGACAGC-----

-----  
-----

AACCAAACAGAGATATTCAGACCTGGAGGAGGAGATATGAGGGACAATTGGAGAAGTGAATTATATAAAATATA  
AAGTGGTAGAAATTAAGCCATTG---GGAATAGCCCCCACTGAAGCAAAAAGGAGAGTGGTG-----

-----GAGAGAGAAAGAAGAGCA---GTGGGA---ATAGGAGCT-----

---GTGTTCCCTTGGGTTCTTGGGAGCA---GCAGGAAGCACTATG---GGCGCAGCGTCA---

ATAACGCTGACGGTACAG---GCCAGACAA---CTGTTG---TCTGGTATAGTGCAACAGCAAAGC---

AATTTG---CTGAGG---GCTATAGAGGCGCAACAGCATATGTTGCAACTCACGGTCTGGGGTATA

>HQ615961

TTCTATTGCAATACAACATTTCTGTTTAAATAACAGTGCTTCA-----

-----  
-----

AACACAACCTATCACTCTCCCATGCAAAATAAAACAGATAATAAACATGTGGCAGGGGGTAGGACGAGCAATGT  
ATGCCCCCTCCCATTCAGGAAACATAACATGTGAATCAAAT---

ATCACAGGACTACTATTGACACGTGATGGAGAAGATAACAACAAA-----

-----  
-----

ACAGAGACATTCAGACCTGGAGGAGGAGATATGAAGGACAATTGGAGAAGTGAATTATATAAAATATAAAGTAG  
TAGAAATTAGGCCATTG---GGAGTAGCACCCACAAAGGCAAAAAGGAGAGTGGTGGAG-----

-----AAAAAAGAAGAAAAAAGAGCA---GTGGGA---TTAGGAGCT-----

GTGATCCTTGGGTTCTTGGGAGCA---GCAGGAAGCACTATG---GGCGCGGCGTCA---

ATAACGCTGACGGTACAG---GCCAGACAA---CTGTTG---TCTGGTATAGTGCAACAGCAAAGT---

AATTTG---CTGAGA---GCTATAGAGGCGCAACAGCATATGTTGCAACTCACGGTCTGGGGAGTT

>HM623611

TTCTATTGCAATACATCAAACTATTTTAAATAATGAGACAGAGAGGAAT-----

-----  
-----

TCAACCACCATCACCTCCCATGCAGAATAAAACAAATTATAAACATGTGGCAGGAGGTAGGACGAGCGATGT  
ATGCCCCCTCCTGTTGCAGGAAACATAACATGTAAATCAAAT---

ATCACAGGACTACTATTGGTACGTGATGGAGGAACAACAAATGAG-----

-----  
-----

AGCACACAAGAAATATTCAGACCTGGAGGAGGAGACATGAGGGACAATTGGAGAAGTGAATTATATAAAATATA  
AAGTGGTAGAAATTAAGCCATTG---GGAGTAGCACCCACTAAGGCAAAAAGGAGAGTGGTG-----

-----GAGAGAGAAAAAAGAGCA---GCG-----CTAGGAGCT-----

---GTGTTCCCTTGGGTTCTTGGGAGCA---GCAGGAAGCACTATG---GGCGCAGCGTCA---

ATAACGCTGACGGTACAG---GCCAGACAA---CTATTG---TCGGGTATAGTGCAACAGCAAAGC---  
 AATTTG---CTGAAG---GCTATAGAAGCGCAACAGCATCTGTTGCAGCTTACGGTCTGGGGTATT  
 >KF725900  
 TTCTATTGCGATACATCACAACGTTTTAATGGAACATACGTGAATAACACAAGCAATAATTCT-----  
 -----  
 -----  
 GACATCACCACACTCACACTCCCATGCAGAATAAAACAGATTATAAACATGTGGCAGGAGGTAGGACGAGCAA  
 TATATGCCCCCTCCCATTCAGAGAAACATAACATGTAGCTCAAAT---  
 ATCACAGGAATTTTATTAGTACGGGATGGAGGCGAAGATGAAGATAGT-----  
 -----  
 -----  
 AATGACACAGAGATATTTAGACCTGGAGGAGGAGATATGAGGAACAATTGGAGAAGTGAACATACAAATATA  
 AAGTGGTAGAAGTTAAACCATTAA---GGAATAGCACCAACTGAAGCAAAAAGGAGAGTGGTG-----  
 -----GAGAGAGAAAAAGAGCA---GTGGGA---CTAGGAGCT-----  
 ---GTGCTCTTTGGGTTCTTGGGAGCA---GCAGGAAGCACTATG---GGCGCAGCATCA---  
 ATGACGCTGACGGTACAG---GCTAGACAA---TTATTG---TCTGGTATAGTGCAACAGCAAAGC---  
 AATTTG---CTGAAG---GCTATAGAGGCGCAACAGCATATGTTGCAACTCACGGTCTGGGGAATT  
 >JX213387  
 TTCTATTGTGATACATCAAACTATTTAACATGTATAATGGTACATATAATGATACAGAAAGAGGG-----  
 -----  
 -----  
 TCAAACTTAACCATCATACTCCAATGCAGAATAAAACAATTTATAAACATGTGGCAGGAGGTAAGACAAGCAA  
 TGTATGCCCCCTCCCATTTGAAGGAAACATAACATGTAGATCAAAT---  
 ATCACAGGACTACTCTTGACAAGGGATGGAGGTAAGGAAGATCCAAAC-----  
 -----  
 -----  
 AATACAGATGAGACATTCAGACCTGGAGGAGGAAATATGAAAGACAATTGGAGAAGTGAATTATATAAATATA  
 AAGTGGTAGAAATTAAGCCATTG---GGAGTAGCACCCACTGAGGCAAAAAGGAGAGTGGTG-----  
 -----GAGAGAGGAAAAAGAGCA---GTGGGA---CTGGGAGCT-----  
 ---ATGTTCTTGGGATCTTGGGAGCA---GCAGGAAGCACTATG---GGCGCAGCGTCA---  
 ATCACGCTGACGGTACAA---GCCAGACAA---TTGCTG---TCTGGTATAGTGCAACAGCAAAGC---  
 AATTTG---CTGAGG---GCTATAGAGGCACAACAACATCTGTTGCAACTCACAGTCTGGGGTATT  
 >KF986058  
 TTCTACTGCAATACATCAAGACTGTTTAATAGTACATGGAATGATAAT-----  
 -----  
 -----AGAATTACAGGG-----  
 GGTAATGACAGTACAATCACACTCCCATGCAGAATAAAACAACCTTATAAACATGTGGCAGAGAGTGGGAAAAG  
 CAATGTATGCCCCCTCCCATTCAGGAGTAATCAGTTGTACATCAAAT---  
 ATTACAGGACTATTGTTGACAAGGGATGGTGGT-----  
 -----  
 GTAGATAATCAGAGG---  
 AATAGTGAGACCTTCAGACCTGGAGGAGGAGATATGAGAGACAATTGGAGAAGTGAATTATACAAATATAAAG  
 TAGTAAGAATTGAACCACTA---GGTCTAGCACCCACCAAGGCAAAAAGAAGAGTGGTG-----  
 -----GAAAGAGAGAAAAAGAGCA---ATAGGA---CTAGGAGCT-----  
 CTGTTCTTGGGTTCTTGGGAGCA---GCAGGAAGCACAATG---GGCGCAGCGTCA---  
 CTGACGCTGACGGTACAG---GCCAGACAA---TTATTG---TCTGGTATAGTGCAACAGCAAAC---  
 AATTTG---CTGAGG---GCTATAGAGGCGCAACAGCACCTGTTGCAACTCACAGTCTGGGGCGTT  
 >KF986041  
 TTCTACTGCAATACATCAGGATTGTTCAATATATCA-----  
 -----  
 -----  
 GGAGGAAATGAGACTATAACCCCTTCCATGCAGAATAAAACAATCATAAACATGTGGCAGGGAGTAGGAAAAG  
 CAATGTATGCCCCCTCCCATTTGAAGGGCTAATCAAATGTTTCATCAAAT---  
 ATTACAGGCTTATTGTTGACAAGAGATGGTGGC-----  
 -----  
 -----  
 GCAAAACAATACTAGT---  
 CAAAGTGAGACCTTCAGACCTGGAGGAGGAGATATGAGAGACAATTGGAGAAGTGAATTATACAAATATAAAG  
 TAGTAAGAATTGAACCACTA---GGTCTAGCACCCACCAAGGCAAGGAGAAGAGTGGTA-----  
 -----GAAAGAGAGAAAAAGAGCA---ATAGGA---CTGGGAGCT-----  
 GTGTTCTTGGGTTCTTGGGAGCA---GCAGGAAGCACGATG---GGCGCAGCGTCA---

TTGACGCTGACGGTACAG---GCCAGACAA---GTGTTG---TCAGGTATAGTGCAACAGCAAAAC---  
 AATTTG---CTGAGG---GCTATAGAGGCGCAACAGCATCTGTTGCAACTCACAGTCTGGGGTATT  
 >JX236670  
 TTCTACTGTAATACATCAAAATTGTTTAATAGTGAATGGGGGAATAATAATACATTAGATAGAACAGGGGAA-  
 -----  
 -----  
 AATGGGAGTACAATCACACTCCCATGCAGAATAAAACAAATTATAAACATGTGGCAGGGAGTAGGAAAAGCAA  
 TGTATGCCCCCTCCCATTCAGGAATAATCCAATGTTTCATCAAAT---  
 ATTACAGGACTATTGTTGACAAGAGATGGGGGTGTAAATAATAAT-----  
 -----  
 -----  
 AGTCAGAATGAGACCTTTAGACCGGGAGGAGGAGATATGAGAGATAATTGGAGGAGTGAATTATACAAATATA  
 AAGTAGTAAGACTTGAACCAATA---GGTCTAGCACCCACCAGGGCAAAGAGAAGAGTGGTG-----  
 -----GAAAGAGAAAAAAGAGCA---ATAGGA---ATGGGAGCT-----  
 ---ATGTTCCCTTGGGTTCTTAGGAGCA---GCAGGAAGCACGATG---GGCGCAGCGTCA---  
 CTGACGCTGACGGTACAG---GCCAGACAA---TTATTG---TCTGGTATAGTGCAACAGCAAAAC---  
 AATTTG---CTGAAG---GCTATAGAGGCGCAACAGCATCTGTTGCAACTCACAGTCTGGGGTATT  
 >EU852966  
 TTCTACTGCAATACATCAGGACTGTTTACATCAAATATTACAGGG-----  
 -----  
 -----  
 GTAAATGAGACAATCAAACCTCCCATGTGCAATAAAACAAATTATAAACATGTGGCAGGGAGTAGGAAAAGCAA  
 TGTATGCTCCTCCCATTCGCGGAGTAATCAAGTGTACATCAAAT---  
 ATTACAGGACTATTGTTGACAAGAGATGGTGGTGCAGATACTCAA-----  
 -----  
 -----  
 AATGAGACCTTCAGACCTGGAGGAGGAGATATGAGAGACAATTGGAGAAGTGAATTATATAAATATAAAGTAG  
 TAAGAATTGAACCACTA---GGTCTAGCACCCACCAAGGCAAAGAGAAGAGTGGTG-----  
 -----GAAAGAGAAAAAAGAGCA---ATAGGA---CTGGGAGCT-----  
 ATGTTCCCTTGGGTTCTTAGGAGCA---GCAGGAAGCACAAATG---GGCGCAGCGTCA---  
 TTGACGCTGACGGTACAA---GCCAGACAG---TTATTG---TCTGGTATAGTGCAACAGCAAAAC---  
 AATTTG---CTGAGG---GCTATAGAGGCGCAACAGCATCTGTTGCAACTCACAGTCTGGGGCGTT  
 >AF484505  
 TTCTACTGCAATACATCAGGACTGTTTAATAATAGTGTATGGATAGATGGTAAATTAAATAGTACAGGGGTA-  
 -----  
 -----  
 AATGACAGTACAATCACACTCCAATGCAGAATAAAACAAATTATAAATATGTGGCAGAGCGTAGGAAGAGCAA  
 TGTATGCTCCTCCCATTCAGGACCGATCAACTGTTTCATCAAAT---  
 ATTACAGGACTATTGTTGACAAGAGATGGTGGTAATGATACTAGA-----  
 -----  
 -----  
 CTGAGTGAGACCTTCAGACCTGGAGGAGGAGATATGAGAGACAATTGGAGAAGTGAACATACAAATATAAAG  
 TAGTAAGAATTGAACCAATA---GGTCTAGCACCCACCAAAGCAAAGAGAAGAGTGGTA-----  
 -----GAAAGAGAAAAAAGAGCA---ATAGGA---CTGGGAGCT-----  
 GTGTTCCCTTGGGTTCTTGGGAGCA---GCAGGAAGCACGATG---GGCGCAGCGTCA---  
 GTGACGCTGTGAGTACAG---GCCAAACAG---TTAATG---TCTGGTATAGTGCAACAGCAATAC---  
 AATTTG---CTGAGG---GCTATAGAGGCGCAACAGCATCTGTTGCAACTCACAGTCTGGGGCAAT  
 >AF484516  
 TTCTACTGCAATACATCAGGACTGTTTAATAGTACATGGACTAATAGTACAGGGGTAAAT-----  
 -----  
 -----  
 AACCAACAGTACAATCACCATCCCATGCAGAATAAAACAAATTATAAACATGTGGCAGGGAGTAGGAAAAGCAA  
 TATATGCCCCCTCCCATTCAGGACAAATCAACTGTTTCATCAAAT---  
 ATTACAGGACTATTGTTGACAAGAGATGGCGGTGCAAATAATAAT-----  
 -----  
 -----  
 GGTACAAATGAGACCGTCAGACCTGGAGGAGGAGATATGAGGGACAATTGGAGAAGTGAACATATAAATATA  
 AAGTAGTAAGAATTGAACCACTA---GGTATAGCACCCACCAAGGCAAAGAGAAGAGTGGTG-----  
 -----GAAAGAGAAAAAAGAGCA---ATAGGA---CTAGGAGCT-----  
 ---ATGTTCCCTTGGGTTCTTGGGAGCA---GCAGGAAGCACGATG---GGCGCAGCGTCA---

ATGGCGCTGACGGTACAG---GCCAGACAG---TTATTG---TCTGGTATAGTGCAACAGCAAAAC---  
 AATTTG---CTGAGG---GCTATAGAGGCGCAACAGCATCTGTTGCAACTCACAGTCTGGGGCGTT  
 >AF484481  
 TTCTACTGCAACACATCAGGACTGTTTAATAGTACATGGGGAAAAGATACAAATAGTACAAGGGTAGAG-----  
 -----  
 -----  
 AATAATAGTACAATCACACTCCGATGCAACATAAAACAAATTATAAACATGTGGCAGGGAGTAGGAAAAGCAA  
 TGTATGCCCCCTCCCATTAAGGAGTAATCAGCTGTTTCATCGAAT---  
 ATTACAGGACTATTGTTGACAAGAGATGGTGGAGTAAAGAATAAT-----  
 -----  
 -----  
 AGTGAGGAGACCGTCAGACCTGGAGGAGGAGATATGAGAGACAATTGGAGAAGTGAATTATACAAATATAAAG  
 TAGTAAAAATCGAGCCACTA---GGTCTAGCTCCCACCAGGGCAAAGAGAAGAGTGGTG-----  
 -----GAAAGAGAAAAAAGAGCA---GTAGGA---CTAGGAGCT-----  
 TTGTTCCCTTGGGTTCTTGGGAGCA---GCAGGAAGCACGATG---GGCGCAGCGTCA---  
 CTGACGCTGACGGTACAG---GCCAGACAG---TTATTG---TCTGGTATAGTGCAACAGCAAAAC---  
 AATTTG---CTGAGG---GCTATAGAGGCGCAACAGCATCTGTTGCAACTCACAGTCTGGGGCGTT  
 >AY795903  
 TTCTATTGCAATACATCAGAACTGTTTAATCAAAGTGCATGGGGA-----  
 -----  
 -----  
 AATACAAGTGAGATCACACTCCAATGTAGAATAAAACAAATCATAAACATGTGGCAGGGAGTAGGAAAAGCAA  
 TGTATGCCCCCTCCCATTAAGGACTAATCAGGTGTTTCATCAAAC---  
 ATTACAGGGCTATTATTGACAAGAGATGGGGGCAATGAAAAATAAT-----  
 -----  
 -----  
 GAGACCTTCAGGCCTGGAGGAGGAGACATGAGGGACAATTGGAGAAGTGAATTATACAAATATAAAGTAGTAA  
 GAATTGAACCACTA---GGTCTAGCACCCACCAGGGCAAAGAGAAGAGTGGTG-----  
 -----GAAAGAGAAAAAAGAGCA---ATAGGA---CTAGGAGCT-----  
 TTGTTCCCTTGGGTTCTTGGGAGCA---GCAGGAAGCACGATG---GGCGCAGCGTCA---  
 CTGACGCTGACGGTACAG---GCCAGACAG---TTATTG---TCTGGTATAGTGACAGCAGCAAAAT---  
 AATTTG---CTGAGG---GCTATAGAGGCGCAACAGCACCTGTTGCAACTCACAGTCTGGGGCGTT  
 >MG365767  
 TTCTACTGCAATACATCAGGACTGTTTAATGACACAGAA-----  
 -----  
 -----  
 ACCAATGACACTATCATTCTCCCATGTGCGAATAAAACAAATTGTAAACATGTGGCAGGAGGTAGGAAGAGCAA  
 TGTATGCCGTTCCCATTAAGGAAACATTACCTGTAGATCAAAT---  
 ATTACAGGTCTACTCTTAACAAGAGATGGTGGTCAACAATGATACT-----  
 -----  
 -----  
 AAAGGAAATGAGACCTTCAGACCTGGGGGAGGAGATATGAGAGACAATTGGAGAAGTAAATTATATAAATATA  
 AAGTAGTAGAAATTGAACCACTA---GGGGTAGCACCCACCAGGGCAAAAAGACAAGTGGTG-----  
 -----AGAAGAGAAAAAAGAGCA---GTGGGA---ATAGGAGCT-----  
 ---TTGTTCCCTTGGGTTCTTGGGAGCA---GCAGGAAGCACTATG---GGCGCGGCGTCA---  
 ATGACGCTGACGGTACAG---GCCAGACAA---TTATTG---TCTGGGATAGTGCAACAGCAGAAC---  
 AACTTG---CTGAGG---GCTATTGAAGCGCAACAGCACATGTTGCAGCTCACAGTCTGGGGTATT  
 >KU749395  
 TTCTACTGCAACACATCAGGACTGTTTAATGACACAGTGTCTAATGACACAGTATTC-----  
 -----  
 -----  
 AATGATGAAACTATCACTCTCCCATGTAGAATAAAACAAATTGTAAACCTGTGGCAAGAAGTGGGGCGAGCAA  
 TGTATGCCGCTCCCATTAAGGAAACATTACTTGTAACTCAAAT---  
 ATTACAGGTCTACTATTAACAAGAGATGGTGGTAGTGATACTAGT-----  
 -----  
 -----  
 AACAAATGAGACAGAGATCTTCAGACCTGGGGGAGGAAATATGAAAGACAATTGGAGAAGTGAATTATATAAAT  
 ATAAAGTAGTAGAGATTAGCCACTA---GGAATAGCACCCACCAAGGCAAAAAGACAAGTGGTG-----  
 -----CAGAGAGAAAAAAGAGCA---GTGGGA---ATGGGAGCT---  
 -----GTGCTCCTTGGGTTCTTGGGAGCA---GCAGGAAGCACTATG---GGCGCGGCGTCA---

ATAGCGCTGACGGTACAG---GCCAGACAA---TTATTG---TCTGGCATAGTGCAACAGCAGAAC---  
 AATCTG---CTGAAG---GCTATTGAAGCGCAACAACATCTGTTGCAGCTCACAGTCTGGGGTATT  
 >HQ236559  
 TTCTACTGTAATACAACAACACTGTTTGATGAAACAAAATGG-----  
 -----  
 -----  
 AATGACGACACCATCGTTCTCCCATGTAGAATAAAGCAAATTGTAAACATGTGGCAAGCAGTAGGAAGAGCAA  
 TGTATGCCGCTCCTATTACAGGCAACATTACCTGTAACCTCAAAT---  
 ATTACAGGCCTATTATTGACAAGAAATGGG---AAAAAT-----  
 -----  
 -----  
 GACACTGAAACCTTTAGCCCTGAAGGAGGAAATATGAAAAGACAATTGGAGAAGTGAACTATATAAATATAAAG  
 TAGTAGAAATTCAGCCACTA---GGAGTAGCACCTTCCAGGGCAAGGAGACGAGTGGTG-----  
 -----CAGAGAGAAAAAAGAGCA---GTAGGG---TTGGGAGCC-----  
 ATGTTCCCTTGGGTTCTTGGGAGCA---GCAGGAAGCACTATG---GGCGCAGCGTCA---  
 ATAACGCTGACGGTACAG---ACCAGACAA---TTATTG---TCTGGGATAGTGCAAGCAGCAGAGC---  
 AATCTG---CTGAGG---GCCATTGAAGCACAACAGCATATGTTGCAGCTCACAGTCTGGGGCGTT  
 >AF190127  
 TTCTATTGCAATACAACAAAATTGTTTAATAGCACCTGGACCAATAGCAGCTATACCAATGACACCTATAACA  
 GCAACAGC-----  
 -----ACAGAA-----  
 GATATCACAGGAAATATCACACTACAATGCAAAATAAAACAAATTGTGAACATGTGGCAGAGAGTAGGACAAG  
 CAATGTATGCCCCCTCCCATCAGAGGAAACATCACATGTATATCAAAT---  
 ATTACAGGACTAATATTGACATTTGACCGG---AATAATACAAAT-----  
 -----  
 -----  
 AATGTTACCTTCAGACCTGGAGGAGGAGATATGAGGGACAATTGGAGAAGTGAATTATATAAATATAAAGTAG  
 TAAAAATTGAACCACTG---GGAGTAGCACCAACCGAGGCAAGGAGAAGAGTGGTG-----  
 -----GAGAGAGAAAAAAGAGCA---GTAGGA---ATGGGAGCT-----  
 TTTTTCCTTGGGTTCTTGGGAGCA---GCAGGAAGCACTATG---GGCGCAGCGTCT---  
 ATAACGTTGACGGTACAG---GCCAGACAA---TTATTG---TCTGGTATAGTGCAACAGCAAAGC---  
 AATTTG---CTGAGA---GCTATACAGGCGCAACAGCATATGTTGCAGCTCACGGTCTGGGGTATT  
 >AF190128  
 TTCTATTGCAATACATCAGGGCTGTTTAATAGTAGTTGGACTGGGGACAATATTAATATGCCAAATGAC---  
 -----  
 -----  
 ACAGGAAAAAATATTACACTGCCATGCAGAATAAAACAAATTGTAAATATGTGGCAGAGAGTAGGACAAGCAA  
 TGTATGCTCCTCCCATTAAGGAAGCATTACATGTGTATCAAAT---  
 ATTACAGGATTAATCCTGACTTATGACGAAGATAAGGGAAATAAT-----  
 -----  
 -----  
 GATAATGTTACCTTCAGACCTGGAGGAGGAGATATGAGGGACAATTGGAGAAGTGAATTATATAAATATAAAG  
 TAGTAAAAATTGAACCACTG---GGAGTAGCACCCACCGAGGCAAGGAGAAGAGTGGTG-----  
 -----GAGAGAGAAAAAAGAGCT---GTGGGA---ATGGGAGCT-----  
 TTTTTCCTTGGGTTCTTGGGAGCA---GCTGGAAGCACTATG---GGCGCAGCGTCA---  
 ATAACGCTGACGGTACAG---GCCAGGCAA---TTATTG---TCTGGTATAGTGCAAGCAGCAAAGC---  
 AATTTG---CTAAGA---GCTATACAGGCGCAACAGCACATGTTGCAGCTCACGGTCTGGGGTATT  
 >KY392777  
 TTCTATTGCGATACAACAGACTTGTTTAATAGCACCTGGATCAATAGCAGCTATAGCACTAACTACAATAAT-  
 -----  
 -----  
 AGCAACTACAATATCACACTGACATGCAAGATAAAACAAATTGTGAGAATGTGGCAGAGAGTAGGACAAGCAA  
 TGTATGCCCCCTCCCATCAAAGGACAGATTACATGTGTATCAAAT---  
 ATTACAGGACTAATTTTGACAAGAGACGGTGGTAATGGGTCCAAT-----  
 -----  
 -----  
 GTTAGTGATACCTTCAGACCAGGAGGGGAGATATGAGGGATAATTGGAGAAGTGAATTATATAAATATAAAG  
 TAGTAAAAGTTGAACCACTA---GGAGTAGCACCAACTAAGGCAAGGAGAAGAGTGGTG-----  
 -----GAGAGAGAAAAAAGAGCT---GTGGGA---ATAGGAGCT-----  
 TTGTTCCCTTGGTTTCTTGGGAGCA---GCAGGAAGCACTATG---GGCGCAGCGTCT---

GTAACGCTGACGGTACAG---GCCAGACAA---CTATTG---TCTGGTATAGTGCAACAGCAAAGT---  
 AATTTG---CTGAGA---GCTATACAAGCGCAACAGCATATGTTGCAGCTCACGGTCTGGGGTGT  
 >KY392778  
 TTCTATTGTAATACATCAAGGCTATTTAATAGTACTTGGCTATCCAATAGTACTTGGAACTCGACTGACATGC  
 CAAGT-----  
 -----  
 AACACATCAAATATAACACTGCCATGCAGAATAAAACAAATTGTAAACATGTGGCAAAGAGTAGGACAAGCAA  
 TGTATGCCCCCTCCCATCCAAGGAAAACCTTCAATGTGTATCAAAT---  
 ATTACAGGCTTAATATTGACAGTAGATAATGCTAACATGTCTGCA-----  
 -----  
 -----  
 GCTAACTTTACCTTCAGACCTGGAGGAGGAGATATGAAGGACAATTGGAGGAGTGAACTATATAAGTATAAAG  
 TAGTAAAAATTGAACCATTG---GGAATTGCACCAACCAGGGCAAGGAGAAGAGTGGTG-----  
 -----GAGAGAGAAAAAAGAGCT---GTGGGA---ATGGGAGCT-----  
 TTTTTCCTTGGGTTCTTGGGAGCA---GCAGGAAGCACTATG---GGCGCGGCGTCA---  
 ATAACGCTGACGGTACAG---GCCAGGCAA---TTATTG---TCTGGTATAGTGCAAGCAGCAAAGC---  
 AATTTG---CTGAGA---GCTATACAGGCGCAACAGCATATGTTGCAGCTCACGGTCTGGGGTGT  
 >KU168279  
 TTCTATTGCAATACATCAAAATTATTTAATAGTACCTGGGACGCCAACAAAACCTCTAGCACA-----  
 -----  
 -----  
 AACAAATACAATGATCACACTGCCATGCAGAATAAAACAAATTATAAAGATGTGGCAGAGAGTAGGACAGGCAA  
 TGTATGCCCCCTCCCATCAGCGGAGATATTACATGTATATCAAAT---  
 ATTACAGGATTAATATTGACAAATGATGAGGGTAATATGTCTGCA-----  
 -----  
 -----  
 GAGAATTTTACTTTTCAGACCTGTAGGAGGAGAGATGAGGGACAATTGGAGAAGTGAATTATATAAATATAAAG  
 TAGTAAAGATTGAACCACTG---GGAGTAGCACCCACCAAGGCAAGGAGAAGAGTGGTG-----  
 -----GAGAGAGAAAAAAGAGCT---GTGGGA---ATGGGAGCC-----  
 TTTTTCCTTGGGTTCTTGGGAGCA---GCAGGAAGCACTATG---GGCGCGGCGTCA---  
 CTAACGCTGACGGTACAG---GCCAGACAA---TTATTG---TCTGGTATAGTGCAACAGCAAAGC---  
 AATTTG---CTGAAA---GCTATACAGGCGCAACAGCATATGTTGCAGCTCACGGTCTGGGGTGT  
 >MH327752  
 TTCTATTGCAATACAACACAATTATTTAATTGCACAAACAATAATACAAACAATAATGACACCGAAGTG---  
 -----  
 -----  
 TGTAATGACCCTATCATACTTCCATGCAAGATAAAGCAAATTATAAACATGTGGCAGGGAGTAGGACAAGCAA  
 TGTATGCTCCTCCCGTCAGGGGAATAATTAATTGTGTATCAAAC---  
 ATTACAGGAATACTGTTGACAAGGAATGGTGGGAATAATAGCAGC-----  
 -----  
 -----  
 AACGAGAGCGAGACCTTCAAACCTGAAGGAGGAAATATAAAGACAATTGGAGAAATGAATTATATAAATATA  
 AAGTAGTACAAATTGAACCACTA---GGAGTGGCACCCACCAGGGCAAGGCGAAGAGTGGTG-----  
 -----GAAAGAGAAAAAAGAGCA---GTGGGG---ATAGGAGCT-----  
 ---ATGATCTTTGGGTTCTTAGGAGCA---GCAGGAAGCACTATG---GGCGCGGCGTCA---  
 ATAACGCTGACGGTACAG---GCCAGACAA---TTATTG---TCTGGTATAGTGCAACAGCAAAGC---  
 AATTTG---CTGAGG---GCTATAGAGGCGCAACAGCATATGTTGCAACTCACAGTCTGGGGTATT  
 >MF373147  
 TTCTATTGCAATACAACAAAACCTGTTTAATAATACTTGCATTAATGAAACCATAAGTGGA-----  
 -----  
 -----AGT---  
 GAAGGTACCGTCACCATCCCATGTCCGAGAAGGCTAAATAAAAAATATGAGGATGGGGCAAGGACTAGGACTGG  
 AAGCGCATGCCCCCTCCCGTAACTATAAATTTTGTCTGTGAATTTAAC---  
 GTTACACGAATACCAATGACTAGAGATAGTGGTATTAATAATACTAATACT-----  
 -----  
 -----  
 ACCTACACACCCGCACGAGGAAGAAGAAAGGACAATGACAGATGTAAAATGGATATATATAAATATAAACTAG  
 TTGAACCTGTACGACTA---GGAATAACATCCGCAAAAGACAAAA---ATGATA-----  
 -----GAGATAGAGAGAAAAAAGAAATAGCACTGGGAGTTATAACT-----  
 ATTATCTTCGTGTTCTTGGCAGCA---ACCAGTATGACTACG---GCCTCGGCGTGC---

CTGACGCTGACGGCACAG---ACTTACCAG---TCAGTG---ACAGGAGTATACTTGCAAATCAAT---  
ATGCTG---ATGCCT---ATAGATGAGCAGCAGCATCTAGCTCTGCTGCTACTCATAGTCTGGTGT  
>EU743757  
TTTTATTGCAATACATCAAACTGTTTAATACTACTGTCTTAAAAAATGGAAT-----  
-----  
-----  
ATGAGTGGTAATATCACAATTCCATGCAAGATAAAGCAAATTATAAACATGTGGCAGGGAGTAGGACAAGCAA  
TGTATGCTCCTCCCATCAGTGGAACAATTAATTGTGTATCAAAT---  
ATTACAGGAATACTATTGACAAGAGATGGTGGTGAAGGGACTAAGAAT-----  
-----  
-----  
AATGAGACTGAGACCTTCAGACCTGGAGGAGGAAATATAAAGGACAATTGGAGAAGTGAATTATATAAATATA  
AAGTAGTACAAATTGAACCACTA---GGAATAGCACCCACCAGGGCAAAGAGGAGAGTGGTG-----  
-----GAGAGAGAAAAAAGAGCA---GTGGGA---ATAGGAGCT-----  
---ATGATCTTTGGGTTCTTAGGAGCA---GCAGGAAGCACTATG---GGCGCGGCGTCA---  
ATAACGCTGACGGTACAG---GCCAGACAG---TTATTG---TCTGGTATAGTGCAACAGCAAAGC---  
AATTTG---CTGAGG---GCTATAGAGGCGCAGCAGCATATGTTGCAACTCACAGTCTGGGGTATT  
>KU230430  
TTCTATTGCAATACATCAAGATTGTTTAATGGTACAGGAAATGGAACCATGGAGGGGCCTAATGGC-----  
-----  
-----  
ACTAATGGCACTGTCATACTCCCATGCAGGATAAAGCAAATTGTAAACATGTGGCAGGGAGCAGGACAGGCAA  
TGTATGCTCCTCCCATCAGGGGAATAATTAATTGTGTATCAAAT---  
ATTACAGGGATATTATTAACAAGAGATGGTGGTAAGAATACTACG-----  
-----  
-----  
AATAACGAGACCTTCAGACCTGGAGGAGGAAATATAAAGGACAATTGGAGAAGTGAATTATATAAATATAAAG  
TAGTAGAACTTGAACCACTA---GGAATAGCACCCACCAGGGCAAGGAGGAGAGTGGTG-----  
-----GACAGAGAAAAAAGAGCA---GTGGGA---ATAGGAGCT-----  
ATGATCTTTGGGTTCTTAGGAGCA---GCAGGAAGCACTATG---GGCGCAGCATCA---  
ATAACGCTGACGGTACAA---GCCAGACAA---TTATTG---TCTGGTATAGTGCAACAGCAAAGC---  
AATTTG---CTGAGG---GCTATAGAGGCGCAGCAGCATCTGTTGCAACTCACAGTCTGGGGTATT  
>AF015916  
TTCTATTGCAACACAACACGACTGTTTAATAATACTTGCGTAGAGAATGGAACCAGGGAGGGG-----  
-----  
-----  
TGTAATGGCAATATCACACTTCCATGCAAGATAAAGCAAATTATAAACATGTGGCAGGGAGCAGGACAAGCAA  
AATATGCTCCTCCCATCAGTGGAACAATTAATTGTGTATCAAAT---  
ATTACAGGAATACTATTGACAAGAGATGGTGGTGCAAATAATGCAGCGAGT-----  
-----  
-----  
AACACGGGACCGAGACCTTCAGACCTGGAGGAGGGAATATAAAGACAATTGGAGAAGTGAATTATATAAAT  
ATAAGTAGTACAAATTGAACCACTA---GGAATAGCACCCACCAGGGCAAAGAGAAGAGTGGTG-----  
-----GAGAGAGAAAAAAGAGCC---GTGGGA---ATAGGAGCT---  
-----ATGATCTTTGGGTTCTTAGGAGCA---GCAGGAAGCACTATG---GGGGCAGCATCA---  
ATAACGCTGACGGTACAG---GCCAGACAA---TTATTG---TCTGGTATAGTGCAACAGCAAAGC---  
AATTTG---CTGAGG---GCTATAGAGGCACAGCAGCATCTGTTGCAACTAACAGTCTGGGGGATT  
>EU513182  
TTCTATTGCAATACATCAAGACTGTTTAATAGCACTTGAATAATAGTAGCATTTGGGATAATAGCACTGGGG  
ACTATAAC-----  
-----AGCACT-----  
AAGGACAACGAGACAATAACTCTCCCATGCAGAATAAAGCAAATTATAAATATGTGGCAGAAAGTAGGACAAG  
CAATGTATGCCCCCTCCCATCAAAGGAATAATAAGGTGTGATTCAAAC---  
ATTACAGGACTACTATTAACAAGGATGGAGGGATTAATAATAGT-----  
-----  
-----  
ACGAGTGAGACATTTCAGGCCTGGAGGAGGAGATATGAGGGACAATTGGAGAAGTGAATTATATAAGTATAAGG  
TAGTACAAATTGAACCAATA---GGTTTGGCACCCACCCATGCAAAAAGGAGAGTGGTG-----  
-----GAGAGAGAAAAAAGAGCA---GTTGGA---CTGGGAGCT-----  
CTTTTCCTTGGGTTCTTAGGAGCA---GCAGGAAGCACTATG---GGCGCGGCGTCA---

ATGACGCTGACGGTACAG---GCCAGACAA---TTATTG---TCTGGTATAGTGCAACAGCAGAGC---  
 AATTTG---CTGAGG---GCTATAGAGGCTCAACAACATCTGTTGAAACTCACGGTCTGGGGCGTT  
 >AF119819  
 TTCTACTGCAATACATCAGACCTGTTTAAATAGGACATACATGGTTAATAAAAACGAAACAAATAGTACAAACA  
 CG-----  
 -----  
 ACAGATGAAAAAATTATCAGGCTTCCATGCAGAATAAAACAAATTGTAAACAGGTGGCAGGAAGTGGGACAAG  
 CAATATACGCCCCCATTGCAGGGATCATTAACTGCAACTCAAGTT---  
 ATTACAGGAATAATATTGACAAGAGATGGTGGTAATAGAAGTGAT-----  
 -----  
 -----  
 ACTGGCAATGAGACCTTCAGACCTGGAGGAGGAGACATGAGGGACAATTGGAGAAAGTGAACATATATAAATATA  
 AAGTAGTACAAATTGAACCAGTA---GGAGTAGCACCCACTAGGGCAAGGAGACGGGTGGTG-----  
 -----CAGAGAGAAAAACGAGCA---GTGGGAATAGGAGCTGTG-----  
 ---TTCCCTGGCTTGTTCTTGGGAGCA---GCAGGAAGCACTATG---GGCGCAGCGTCA---  
 ATAACGCTGACGGTACAG---GCCAGGCAA---TTGTTG---TTTGGCATAGTGCAACAGCAGAGC---  
 AATCTG---CTGAGG---GCTATAGAGGCTCAACAACAGCTGTTGAGACTCACGGTCTGGGGCGTT  
 >AF193253  
 TTCTACTGCGATACATCAAAATTGTTTAAATGCCACAGTGTTTAAATGATACAGTGTTTAAATGCCACAATGTTTA  
 ATAAT-----  
 -----  
 GACAGTGACAAGAATATCATTCTCCCATGTAAAATAAAACAAATAGTAAGAATGTGGCAGGGAGTAGGACAAG  
 CAATGTATGCCGCTCCCATTCAGGAAACATTGCCTGTAACTCAACT---  
 ATTACAGGGATACTATTGGCAAGAGATGGTGGAAATGGTAATGATAGC-----  
 -----  
 -----  
 TCCAACGACACAGAGATATTCAGACCTGGAGGAGGAGATATGAGAGACAATTGGAGAAAGTGAACATATATAAAT  
 AATAAGTAGTAGAGATTCAACCACTA---GGAATAGCACCCACCAGGGCAAAAAGACAAGTGGTG-----  
 -----AAGAGAGAAAAAAGAGCA---ATGGGA---ATAGGAGCT---  
 -----ATGTTTCCTTGGGTTCTTGGCAGCA---GCAGGAAGCACTATG---GGCGCGGCGTCA---  
 ATAGCGCTGACGGTACAG---GCCAGACAA---TTATTG---TCTGGAATAGTGCAACAGCAAAAC---  
 AATTTG---CTGCAG---GCTATTGAAGCGCAACAGCATCTGTTGCAGCTCACAGTCTGGGGTATT  
 >JF346906  
 TTCTATTGTAATACATCACGCCTGTTTAAATAGTACATACATGACTAATGGCACATACATGTTTAAATGGTACAC  
 AA-----  
 -----  
 AATAATTCAGACATCACAATCCCATGCAGAATAAAGCAAATTATAAATATGTGGCAGGAGGTAGGACGAGCAA  
 TGTATGCCCCCTCCCATTCAGGAAACATAACATGTAACTCAAGT---  
 ATCACAGGACTACTATTGATACGTGATGGAGGAAATACAACTGAGTCA-----  
 -----  
 -----  
 AATACTACAGAGATATTCAGACCTGGAGGAGGAGATATGAGGGACAATTGGAGAAATGAATTATATAAATATA  
 AAGTGGTAGAAATTAAGCCATTG---GGAGTAGCACCCACTGACGCAAGAAGGAGAGTGGTG-----  
 -----GAGAGAGAAAAAAGAGCA---GTGGGA---ATAGGAGCT-----  
 ---GTGTTCCCTTGGGTTCTTGGGAGCA---GCAGGAAGCACTATG---GGCGCGGCGTCA---  
 ATAACGCTGACGGTACAG---GCCAGACAA---TTGCTG---TCTGGTATAGTGCAACAGCAAAGC---  
 AATTTG---CTGAGG---GCTATAGAGGCGCAACAGCATATGTTGCAACTCACAGTCTGGGGTATT  
 >JF346914  
 TTCTATTGTAATACATCAGGCCTGTTTAAATGGTACAAGAAAGTTTAAATAGTACAGGAAGTAAT-----  
 -----  
 -----  
 TCAAGCTCAATCATCACAATCCCATGCAGAATAAAGCAAATTTATAAATATGTGGCAGGAGGTAGGACGAGCAA  
 TGTATGCCCCCTCCCATTCAGGAAACATAACATGTAGATCAAAT---  
 ATCACAGGACTACTATTGGTACGTGATGGAGGAAATTCAAGTGGA-----  
 -----  
 -----  
 ACAGAAGAGACATTTCAGACCTCAAGGAGGAGATATGAGGGACAATTGGAGAAAGTGAATTATATAAATATAAAG  
 TGGTAGAAATTAAGCCATTG---GGAGTAGCACCCACTGCAGCAAAAAGGAGAATAGTG-----  
 -----GAGAGAGAAAAAAGAGCA---GCG-----ATAGGAGCT-----  
 GTGTTCCCTTGGGTTCTTGGGAGCA---GCAGGAAGCACTATG---GGCGCGGCGTCA---

ATAACGCTGACGGTACAG---GCCAGAAAA---TTGTTG---TCTGGTATAGTGCAACAGCAAAGC---  
 AATTTG---CTGAGA---GCTATAGAGGCGCAACAGCATCTGTTGCAACTCACGGTCTGGGGTATT  
 >HQ326146  
 TTCTATTGTAATACTTCAGGACTGTTTAATGGTACATACAGGTCTAATGATACAAAAGGTAAT-----  
 -----  
 -----  
 TCAAGCTCAATCATCACGATTCCATGCAGAATAAAACAAATTATAAATATGTGGCAGGAGGTAGGACGAGCAA  
 TGTATGCCCCCTCCCATTTGAAGGAAACATAACATGTAAATCAAAT---  
 ATCACAGGACTACTATTGGTACGTGATGGAGGAGCGACAAGTGCG-----  
 -----  
 -----  
 GGAACAGAGACATTTCAGACCTGAAGGAGGAGATATGAAGGACAATTGGAGAAGTGAATTATATAAATATAAAG  
 TGGTAGAAATTAACCATTG---GGAGTAGCACCCACTGGAGCAAAAAGGAGAGTGGTG-----  
 -----GAGAGAGAAAAAAGAGCA---GTGGGA---CTGGGAGCT-----  
 GTGTTCTTTGGGTTCTTGGGAGCA---GCAGGAAGCACTATG---GGCGCGGCGTCC---  
 ATGACGCTGACGGTACAG---GCCAGACAA---TTGCTG---TCTGGTATAGTGCAACAGCAAAGC---  
 AATTTG---CTGAAG---GCTATAGAGGCGCAACAACATCTGTTGCAACTCACGGTCTGGGGCACT  
 >AF408627  
 TTCTACTGCAATACATCAAGACTGTTTAATGACACAATACCC-----  
 -----  
 -----  
 AATGGCACTATTATTCTCCCATGTCTGAATAAAACAAATTGTAAACCTGTGGCAAGAAGTGGGACGAGCAATGT  
 ATGCCGCTCCCATTTGCAGGAAACATTACCTGTAGCTCAAAAC---  
 ATTACAGGTCTACTATTGACAAGAGATGGTGGTCATACTCCTAATCAGACT-----  
 -----  
 -----  
 GAGAATAGTACTGAGACCTTCAGACCTGGGGGAGGAAATATGAAAGACAATTGGAGAAGTGAATTATATAAAT  
 ATAAAGTAGTAGAAATTGAACCACTA---GGAGTAGCACCCACCAGGGCAAAAAGACAAGTGGTG-----  
 -----CAGAGAGAAAAAAGAGAAACAGTGGTGGGAATAGGAGCG---  
 -----TTGTTCTTGGGTTCTTGGGAGCA---GCAGGAAGCACTATG---GGCGCGGCGTCA---  
 ATGGCGCTGACGGTACAA---ACCAGACAA---TTATTG---TCTGGGATAGTGCAACAGCAGAAC---  
 AATTTG---CTGAGG---GCTATTGAAGCGCAACAGCATCTGTTGCAGCTCACAGTCTGGGGCGTT  
 >DQ354120  
 TTCTACTGTAATACATCACAACCTGTTTAATAGTACTTGAATGGTACTAGTGCTTGAATTATACTACA---  
 -----  
 -----  
 GAAAAATGACACTATCAGGCTCCCTTGCAGAATAAAACAAATTATAAACATGTGGCAGGAAGTAGGAAAAGCAA  
 TGTATGCCCCCTCCCATTCAGGACTAATTAGATGTTTCATCAAAT---  
 ATTACAGGGTTGCTATTAAACAAGAGATGGTGGTAATAATACGAAC-----  
 -----  
 -----  
 ACCGAGACCTTCAGACCTGCAGGAGGAGATATGAGGGACAATTGGAGAAGTGAATTATATAAATATAAAGTAG  
 TAAAAATTGAACCATTA---GGAGTAGCACCCACCAGGGCAAAAGAGAAGAGTGGTG-----  
 -----CAAAGAGAAAAAAGAGCA---GTGGGAACGATAGGAGCT-----  
 ATGTTCTTGGGTTCTTGGGAGCA---GCAGGAAGCACTATG---GGCGCAGCGTCA---  
 ATAACGCTGACGGTACAG---GCCAGACAA---TTGTTG---TCTGGTATAGTGCAACAGCAGAGA---  
 AATTTG---CTGAAG---GCTATTGAGGCGCAACAGCATCTGTTGCAACTCACAGTCTGGGGTATT  
 >JF804807  
 TTCTACTGTAATACATCAAAGCTGTTTAATAGTACTTGGACAGGGAATGACACTGGGACTAAT-----  
 -----  
 -----  
 ACTACTGGTAATATCACACTCCCATGCAGAATAAAGCAAATTGTAAACATGTGGCAGGAAGTAGGAAAAGCAA  
 TGTATGCCCCCTCCCATCACAGGACAAATTAGTTGTTTCATCAAAT---  
 ATTACAGGGCTGCTATTAAACAAGAGACGGTGGTAACCTATACCAAG-----  
 -----  
 -----  
 GACAATGAGACCTTTAGACCTGCAGGAGGAGATATGAGGGACAATTGGAGAAGTGAATTATATAAATATAAAG  
 TAGTAAAGATTGAGCCATTA---GGAGTAGCACCCACCAAGGCAAAAGAGAAGAGTGGTG-----  
 -----CAGAGAGAAAAAAGAGCA---GTGGGAACATTAGGAGTT-----  
 CTGTTCTTGGGTTCTTGGGAGCA---GCAGGAAGCACTATG---GGCGCAGCGTCA---

GTGGCGCTGACGGTACAG---GCCAGACAA---TTATTG---TCTGGCATAGTGCAACAGCAAAAC---  
 AATTTG---CTGAGA---GCTATTGAGGCGCAACAACATCTGTTGCAACTCACAGTCTGGAGCGTC  
 >KX907411  
 TTCTACTGTAATACATCAAACCTGTTTAATAATACATGGAATAGTAGCAGTTGGACAGGGGAA-----  
 -----  
 -----  
 AATAACTCAACAATCACAATACCATGCAGAATAAAACAAATTATAAACATGTGGCAGAGAGTAGGAAAAGCAA  
 TGTATGCTCCTCCCATCGAAGGAGAAATTAAATGTTTCATCAAAT---  
 ATTACAGGGCTACTATTGACAAGAGATGGAGATGGTGGTAACAATAAT-----  
 -----  
 -----  
 AGTTCTCAGGAGACCTTCAGACCTGGAGGAGGAAATATGCAAGACAATTGGAGAAAGTGAATTATATAAAATATA  
 AGGTAGTAAAAATTGAGCCACTA---GGAATAGCACCCACCAAGGCAAAAAGAAGAGTGGTG-----  
 -----GAAAGAGAAAAAAGAGCA---ATAGGA---TTAGGAGCT-----  
 ---ATGTTCCCTTGGGTTCTTGGGAGCA---GCAGGAAGCACGATG---GGCGCAGCGTCA---  
 ATGGCGCTGACGGTACAG---GCCAGACAG---TTATTG---TCTGGTATAGTGCAACAGCAAAAT---  
 AATTTG---CTGAGG---GCTATAGAGGCGCAACAGCATCTGTTGCAACTCACGGTCTGGGGCGTT  
 >JN417240  
 TTCTATTGCAATACATCAGGCCTGTTTAATAGCATTGGAATAGCAGCACATGGGAGTCAAATAGCACAGAGT  
 TAAAT-----  
 -----AGCACA-----  
 GAGTTAAATGACAATATAACTCTCCAATGCAGAATAAAACAAATTATAAACATGTGGCAGGGAGTAGGAAAAG  
 CAATGTATGCCCCCTCCATTGAAGGAAAGATTATATGTAGATCAAAT---  
 ATTACAGGACTATTATTAACAAGAGATGGTGGTGCAAATAACT-----  
 -----  
 -----  
 AATCAGAATGAGACTCTCAGACCTGGGGGAGGAGATATGAGAGACAATTGGAGAAATGAATTATACAAATATA  
 AAGTAGTAAGACTTGAGCCACTA---GGTATAGCACCCACCAGGGCAAGAAGAAGAGTGGTG-----  
 -----GCAAGAGAAAAAAGAGCA---ATAGGA---CTAGGAGCT-----  
 ---ATGTTCCCTTGGGTTCTTGGGAGCA---GCAGGAAGCACATG---GGCGCAGCGTCA---  
 CTGACGCTGACGGTACAG---GCCAGACAG---CTATTG---TCTGGTATAGTGCAAGCAGCAAAAT---  
 AATTTG---CTGAGG---GCTATAGAGGCGCAACAACATCTGTTGCAACTCACAGTCTGGGGCGTT  
 >KC898991  
 TTCTATTGTAATACATCAAGGCTGTTTAATGGTACATTTAATGGTACATTCATACCTAATGGTAACATG---  
 -----  
 -----  
 ACTAATGAAACAATCACAATTCATGCAGAATAAAGCAGATTATAAACATGTGGCAGAAGGTAGGACAAGCAA  
 TGTATGCCCCCTCCATTGCAGGAAACATAACATGTATATCAAAT---  
 ATCACAGGATTACTATTGGTACGTGATGGAGGAATAAATCAGAGT-----  
 -----  
 -----  
 TCAGAGACATTCAGACCTGGAGGAGGAGATATGAGGGACAATTGGAGAAGTGAATTATATAAAATATAAAGTGG  
 TAGAAATTAAGCCATTG---GGAGTAGCACCCACTGAAGCAAAAAGGAGAGTGGTG-----  
 -----GAGAGAGAAAAAAGAGCAGTATTTGGAGGAATAGGAGCT-----  
 GTGTTCCCTTGGGTTCTTGAGTGCA---GCCGGAAGCACTATG---GGCGCGGCGTCA---  
 ATAACGCTGACGGTACAG---GCCAGACAA---TTGCTA---TCTGGTATAGTGCAACAGCAAAGC---  
 AATTTG---CTGAGG---GCTATAGAGGCGCAACAGCATATGTTGCAACTCACAGTCTGGGGTATT  
 >KC898994  
 TTCTATTGTAATACATCAGGCCTGTTTAATGGTACCTACAATGATACAGAAAATAATTCAACTAATAAT---  
 -----  
 -----  
 TCAAACCTCAACCATCACAATCCCATGCAGAATAAAGCAAATTATAAACATGTGGCAGGAGGTAGGACGAGCAA  
 TGTATGCCCCCTCCATTGAAGGAAATATAACATGTAAATCAAAT---  
 ATCACAGGACTACTATTGGTATATGATGGAGGAAGAACAGAGCGA-----  
 -----  
 -----  
 AATACTACAGAGATATTTCAGACCTGGAGGAGGAGATATGAGAGACAATTGGAGAAAGTGAATTATATAAAATATA  
 AAGTGGTAGAAATTAAGCCATTG---GGAGTAGCACCCACTGGAGCAAAAAGGAGAGTGGTG-----  
 -----GAGAGAGAAAAAAGAGCA---GTGGGA---ATAGGAGCT-----  
 ---GTGTTCCCTTGGGTTCTTGGGAGCA---GCAGGAAGCACTATG---GGCGCGGCGTCA---

ATAACGCTGACGGTACAG---GCCAGACAA---TTGTTG---TCTGGTATAGTGCAACAGCAAAGC---  
 AATTTG---CTGAGG---GCTATAGAGGCACAACAGCATCTGTTGCAACTCACGGTCTGGGGTATT  
 >MH986013  
 TTCTATTGTAATACATCAAACTGTTTGATAGTACTTGGGCTCGGAATACCAGTACTGGGAATAATGCCACTT  
 GG-----  
 -AATAAGACTGGGGATAGC-----  
 ACTAATGATACTCATATCATACTCCCATGCAGAATAAAACAAATTATAAATATGTGGCAGGAAGTAGGAAAAG  
 CAATGTATGCCCCCTCCCATCAGTGGAAAAATTAGCTGTTTATCAAAT---  
 ATTACAGGGCTTCTATTAATAAGGGATGGTGGTGAAAACAGGACCAAT-----  
 -----  
 -----  
 AATGAGACAGAGACCTTCAGACCTGGAGGAGGAAAATATGAAGGACAATTGGAGAAGTGAATTATATAAATATA  
 AAGTAGTAAGAATTGAGCCATTA---GGAGTAGCACCCACCAAGGCAAAGAGAAGAGTGGTG-----  
 -----CAGAGAGAAAAAAGGGCA---GTGGGAACACTAGGAGCT-----  
 ---ATGTTCCCTTGGGTTCTTGGGAGCA---GCAGGAAGCACTATG---GGCGCAGCGTCC---  
 TTGACGCTGACGGTACAG---GCCAGGCAA---TTATTG---TCTGGTATAGTGCAACAGCAGAAC---  
 AATTTG---CTGAGA---GCTATTGAGGCGCAACAACATCTGTTGCAACTCACAGTCTGGGGTATC  
 >MN055644  
 TTCTATTGTAATACATCAGGCATGTTTAAACGGCACAGACAAGTTTAATGATTCAAGC-----  
 -----  
 -----  
 ATTACAATCCCATGCAGAATAAAACAAATTATAAATATGTGGCAGGAGGTAGGACGAGCAATGTATGCCCCCTC  
 CCATTGCAGGAACATAACATGTAAATCAAAT---  
 ATCACAGGACTACTATTGGTACGTGATGGAGGACGGACAAATGAT-----  
 -----  
 -----  
 ACTGAAGAGACATTTCAGACCTGGAGGAGGAGATATGAGGGACAATTGGAGAAGTGAATTATACAAATATAAAG  
 TGGTAGAAATTAAGCCATTG---GGAATAGCACCCACTGAAGCAAAAAGAAGAGTGGTG-----  
 -----CTGAGAGAAAAAAGAGCA---GTGGGA---ATAGGAGCT-----  
 GTGTTCCCTTGGGTTCTTGGGAGTA---GCAGGAAGCACTATG---GGCGCGGCGTCA---  
 CTGACGCTGACGGTACAG---GCCAGACAA---TTGCTG---TCTGGTATAGTGCAACAGCAAAAT---  
 AATTTG---CTGAGG---GCTATTGAGGCGCAACAGCATATGTTGCAACTCACAGTCTGGGGTATT  
 >KF716464  
 TTCTATTGCAATACATCAGAACTATTTAATAGTATTTGGAATAGCACTTGGAATAACACTCAGGACAACAGC-  
 -----  
 -----  
 ACAAGTCCAAATATAACTCTCCAATGCAGAATAAAGCAAATTGTAAGAATGTGGCAGCAAGTAGGAAAAGCAA  
 TGTATGCCCCCTCCCATTCAGGAATAATAAGGTGTGTATCAAAC---  
 ATTACAGGACTACTATTAAACAAGAGACGGTGGGACTAATATGACA-----  
 -----  
 -----  
 AATGAGACTTTTCAGACCTGGAGGAGGAGATATGAGAGACAATTGGAGAAGTGAATTATATAAATATAAAGTAG  
 TAAAAATTGAACCACTA---GGAGTAGCACCCACCAGGGCAAAGAGAAGGGTGGTG-----  
 -----CAGAGAGAAAAAAGGGCA---GTTGGA---CTGGGAGCT-----  
 GTTTTCCTTGGGTTCTTAGGAGCA---GCAGGAAGCACTATG---GGCGCAGCGTCA---  
 ATAACGCTGACGGTACAG---GCCAGACAA---TTATTG---TCTGGCATAGTGCAACAGCAAAGC---  
 AATTTG---CTGAGG---GCTATAGAGGTTCAACAGCATATGTTGAAACTCACAGTCTGGGGCGTT  
 >JX447830  
 TTCTATTGTAATACAACAACCACTGTTTAAATAGTACTTGGCCTTCAAATGATACTAGTGCT-----  
 -----  
 -----  
 AGGACTGGTACTATCACGCTCCCTTGCAAAATAAAACAAATTATAAACATGTGGCAGGGAGCAGGACAAGCAA  
 TGTATGCTCCTCCCATCAGGGGAAAAATTAATTGTCTATCAAAT---  
 ATTACAGGAATACTGTTGACAAGAGATGGTGGTAATAGTACAAGT-----  
 -----  
 -----  
 AATGAGACCTTTAGACCTGGAGGAGGAGATATGAGGGACAATTGGAGAAGTGAATTATATAAATATAAAGTAG  
 TAAAAATTGAACCATTA---GGAGTAGCACCCACCAGGGCAAAGAGAAGAGTGGTG-----  
 -----CAGAGAGAAAAAAGAGCG---GTGGGAACACTAGGAGCT-----  
 ATGTTCCCTTGGGTTCTTGGGAACA---GCAGGAAGCACTATG---GGCGCAGCGTCA---

ATAACGCTGACGGTACAG---GCCAGACAA---TTGTTG---TCTGGTATAGTGCAACAGCAGAGA---  
 AATTTG---CTGAGG---GCTATCGAGGCGCAACAGCATCTGTTGCAACTCACAGTCTGGGGTATC  
 >AY082968  
 TTCTATTGCAATACAACACAAATGTTTAATAATACTTGCATAGGAAATGAAACCAAGGAGGGG-----  
 -----  
 -----  
 TGTAATGGCACTATCATACTTCCATGCAAGATAAAGCAAATTATAAACATGTGGCAGGGAGCAGGACAAGCAA  
 TGTATGCTCCTCCCATCAGGGGAAGAATTAGTTGTGTATCAAAT---  
 ATTACAGGAATACTATTGACAAGAGATGGTGGTGTCTGATACAACA-----  
 -----  
 -----  
 AATAATGAGACCTTCAGACCTGGAGGAGGAAATATAAAGGATAATTGGAGAAGTGAATTATATAAATATAAAG  
 TAGTACAAATTGAACCACTA---GGAATAGCACCCACCAGGGCAAAGAGAAGAGTGGTG-----  
 -----GAGAGAGAAAAAAGAGCA---GTGGGA---ATAGGAGCT-----  
 ATGATCTTTGGGTTCTTAGGAGCA---GCAGGAAGCACTATG---GGCGCGGCGTCA---  
 ATAACGCTGACGGTACAG---GCCAGACAA---TTATTG---TCTGGTATAGTGCAACAGCAAAGC---  
 AATTTG---CTGAGG---GCTATAGAGGCGCAGCAGCATCTGTTGCAACTCACAGTCTGGGGCAGT  
 >KU310618  
 TTCTATTGCAATACATCACAGCTATTTAATAGTACTTGAATAGCAATAACACGTCAGATGGCACA-----  
 -----  
 -----  
 TCAAAATATTACACTTACACTGAAATGCAGAATAAAACAAATTATAAACATGTGGCAGAGAGTAGGACAAGCAA  
 TGTATGCCCCCTCCCATCCCGGGAAGTCTTACATGTGTATCAAAT---ATTACAGGTTTAATATTGACA-----  
 -----ATTGACAAGGTTAACAGGTCT-----  
 -----  
 GAGGCTAACGGAAGTCTTACCTTCAGGCCAGGAGGAGGAGATATGAGGGACAATTGGAGAAGTGAGCTATATA  
 AATATAAAGTAGTAAAAATTGAACCACTG---GGAATAGCACCCACCAAGGCAAGGAGAAGAGTGGTG-----  
 -----CAGAGAGAAAAAAGAGCT---GTGGGA---  
 ATGGGAGCT-----TTGTTTCCTTGGGTTCTTGGGAGCA---GCAGGAAGCACTATG---  
 GGCGCGGCGTCA---ATAACGCTGACGGTACAG---GCCAGGCAA---TTATTG---  
 TCTGGTATAGTGCAACAGCAAAGC---AATTTG---CTGAAA---  
 GCTATACAGGCGCAACAGCATATGTTGCAGCTTACAGTCTGGGGTATT  
 >KX398187  
 TTTTATTGTGACACATCTGGGATGTTTAATTATACCTTTAATTGTACAGGAACCAGCTGCGATAACAAAACTA  
 GT-----  
 -----  
 ACTGAGAATAGTACCACAATATTTTGCAAGATAAAACAGGTGGTAAGATCATGGATGAGGGGAGCGTCAGGAC  
 TCTATGCCCCCTCCCATTCGAGGTCAACTAAAATGTATGTCAAAT---  
 ATAACCTGGGATGATTCTACAAATGGATAAGCCATGGAACAATACT-----  
 -----  
 -----  
 GACGAGAATGCTACATTTAGACCAGGAGGGGGAAATATGGAAGATATATGGAGAACACAATTGTTCAATTATA  
 AAGTAGTAAGGGTAAAACCTTTT---AGTGTAGCACCTACAAAAATTGCAAGGCCAGTCATAGGC---ACT---  
 -----GGTACTCATAGAGGAAAGAGAGCA---GTAGGG---TTGGGAATG-----  
 ---CTATTCTTAGGGGTTCTAAGTGCA---GCAGGTAGCACTATG---GGCGCAGCGGCA---  
 ACAGCGCTGACGGTACAG---ACCCACACT---TTGATG---AAGGGTATAGTGCAACAGCAGGAC---  
 AACCTG---CTAAGA---GCAATACAGGCTCAGCAGCAACTGCTGAAGCTATCTGTATGGGGTATC  
 >AJ239083  
 TTCTATTGTAACACATCTGGGATGTTTAATTATACCTTTTCATGTAAAGGAACCTAAGTGTACCCAAGTTGGTT  
 CCCAAAT-----  
 -----GAA---  
 TATAATAATCATACAACCAAGATACCTTGCAGGATAAAACAGGTGGTAAGGTCATGGATAAGGGGAGGGTCGG  
 GACTCTATGCACCTCCAGGCAAGGTCCCCTAAAATGTAGCTCAAAC---  
 ATAACCTGGAATGATTCTACAATTGGATAAGCCATGGAACAGAAAGTGGG-----  
 -----  
 -----  
 CACAACAATGACACCACATTTAGACCAATAGGAGGAGAAATGAAAGATATATGGAGAAGTGAATTGTTCAAAT  
 ACAAAGTAGTAAAGGTAAAACCTTTT---AGTGTGGCACCTACAAAAATTGCAAGGCCAGTCATAGGC---  
 ACG-----GGCACTCAAAGAGAAAAGAGAGCA---GTAGGA---TTGGGAATG-  
 -----CTATTCTTAGGGGTTCTAAGTGCA---GCAGGTAGCACTATG---GGCGCAGCGGCA---

ACAACGCTGGCGGTACAG---ACCCACACT---TTGATG---AAGGGTATAGTGCAACAGCAGGAC---  
 AACCTG---CTAAGA---GCAATACAGGCCAGCAGCAATTGCTGAGGCTATCTGTATGGGGTATC  
 >KX907367  
 TTCTATTGTAATACATCAGGCCTGTTCAACAGCACTTGAATAATAATGACTCTGCCAGCACAAGTCGCACGG  
 AG-----  
 -----  
 TCAAATGACACTATAACCCCTCCCATGCAGAATAAAACAAATTATAAATATGTGGCAGGGGGTAGGAAGAGCAA  
 TGTATGCCCCCTCCATTGCAGGAAACATAACATGTAAATCAAAT---  
 ATTACAGGAATACTATTGACACGCGATGGGGGGTCAGATAACAAC-----  
 -----  
 -----  
 AGTAACACAGAAATATTGACACCTGGAGGAGGAAATATAAAGGATAATTGGAGAAGTGAATTGTACAAATATA  
 AAGTAGTAGAAATTAAACCATTG---GGAATAGCACCCACTACGGCAAAAAGGAGAGTGGTG-----  
 -----GAGAGAGAAAAAGAGCA---GTTGGA---ATAGAAGCT-----  
 ---GTGTTCCCTTGGGCTCTTGGGAGCA---GCAGGAAGCACTATG---GGCGCAGCGTCA---  
 ATGACGCTGACGGTACAG---GCCAGACAA---TTGCTG---TCTGGTATAGTGCAACAGCAAAGT---  
 AATTTG---CTGAGA---GCTATAGAGGCGCAACAGCATATGTTGCAACTCACAGTCTGGGGAATT  
 >KX907387  
 TTCTACTGCAACACAACAGGACTGTTTAAATGACAGTAAGTGGCAACACAATAATAGTGAATGGGAAGAAACAA  
 GTAAAAGG-----  
 -----ATGAAT-----  
 AGTCCAGAGGCAATATCACACTCCAATGCAGAATAAAACAAATTGTAAACATGTGGCAGGGGGTAGGACGAG  
 CAATGTATGCTCCTCCCATAGGGGAGTAATCAAATGTACATCAAAT---  
 ATTACAGGGCTATTGTTGACAAGGGATGGTGGTTTAAATACTAGC-----  
 -----  
 -----  
 AATAATGAGACCTTCAGACCTGGAGGAGGAGATATGAGAGACAATTGGAGAAGTGAATTATACAAATATAAAG  
 TAGTAAGAATTGAACCACTA---GGTCTAGCACCTACCAAGGCAAAAAGAAGAGTGGTG-----  
 -----GAAAGAGAAAAAGAGCA---ATAGGA---ATGGGAGCT-----  
 TTGTTCCCTTGGGTTCTTGGGAACA---GCAGGAAGCACGATG---GGCGCGGCGTCA---  
 CTGACGCTGACGGTACAG---GCCAGACAG---TTACTG---TCTGGTATAGTGCAACAGCAAAT---  
 AATTTG---CTGAGA---GCTATAGAGGCGCAACAACATCTGTTGCAACTCACAGTCTGGGGCGTT  
 >KP109492  
 TTCTATTGTAATACATCAGACCTGTTTAAATAGCAAGTGGGAAAATGGCAGCATGTGGGAAAATGACACC---  
 -----  
 -----  
 GAAATACGGGAAATAGT-----  
 ACAGAGGTGGTAAATATAACTCTTCAATGTAAAATAAAGCAAATTATAAATATGTGGCAAAGAGTAGGACAAG  
 CAGTATATGCCCCCTCCCATCCAGGAAAAATAAAGTGTGATTCAAAC---  
 ATTACAGGGCTAATATTAAACAAGAGATGGTGGGAAAGTTAACAGT-----  
 -----  
 -----  
 ACAAATGAAACCTTCAGACCTGGAGGAGGAGATATGAGGGACAATTGGAGAAGTGAATTATATAAGTATAAGG  
 TAGTAAAAATTGAACCAATA---GGAATAGCACCCACCAAGGCAAAGAGAAGAGTGGTG-----  
 -----GAGAGAGAAAAAGAGCA---GTTGGA---ATAGGAGCT-----  
 GTTCTCCTTGGGTTCTTAGGAGCA---GCAGGAAGCACTATG---GGCGCGGCGTCA---  
 CTAACGCTGACGGTACAG---GCCAGACAA---TTATTG---TCTGGCATAGTGACAGCAGCAAAGT---  
 AATTTG---CTGAAG---GCTATTGAGGCTCAACAACACCTGTTGAAACTCACAGTCTGGGGTATT  
 >KF716485  
 TTCTATTGTAACACATCAAACCTGTTTAAAGGGTATTTGGAATGGCAAGTGAATGGCACAATAGC-----  
 -----  
 -----  
 ACTGAGTCATACATAAATATCACATGTAGAATAAAGCAAATTATAAATATGTGGCAGAGAGCAGGAAAAGCAA  
 TGTATGCCCCACCCATTAAAGGAATAGTCAATTGTATATCAAAT---  
 ATTACAGGGTTATTGTTGACACGCGATGGTGGTGTAAATAGTACT-----  
 -----  
 -----  
 AATGAGACCTTCAGACCTGGAGGAGGAAATATGAGAGACAATTGGAGAAGTGAATTATATAAATATAAAGTAG  
 TAAGACTTGAACCACTA---GGTCTAGCACCCACCAGGGCGAAGAGAAGAGTGGTG-----  
 -----GAAAGAGAAAAAGAGCA---ATAGGA---CTGGGAGCT-----  
 ATGTTCCCTTGGATTCTTGGGAGCA---GCAGGAAGCACGATG---GGCGCAGCGTCA---

CTGACGCTGACGGTACAG---GCCAGACTA---CTATTG---TCTGGTATAGTGCAACAGCAAAAC---  
 AATTTG---CTGAGG---GCTATAGAGGCGCAACAGCATCTGTTGCAACTCACAGTCTGGGGCGTT  
 >GQ365649  
 TTCTATTGCAATACATCAAACTGTTTAATGGTACATATAATGGTACATATAATAGTGCTGCAACA-----  
 -----  
 -----  
 GAAACTTCAAACATTACAATCCCATGCAGAATAAAACAAATTATAAATATGTGGCAGAGGGTAGGAGGAGCAA  
 TGTATGCCCCCTCCCATTCAGGACTAATAACATGTAGATCAAAT---  
 ATCACAGGAATATTACTGACACGGGATGGAGGCGTGGATGACACAGAG-----  
 -----  
 -----  
 AATGGCACAGAGACATTCAAGCCTGGAGGAGGAGATATGAAAGACAATTGGAGAAGTGAATTATATAAATATA  
 AAGTGGTAGAAATCAAACCATTA---GGAGTAGCACCTACTAAGGCAAAAAGGAGAGTGGTG-----  
 -----GAGAGAGAAAAAGAGCA---GTGGGA---ATAGGAGCT-----  
 ---GTGTTCTTGGGTTCTTGGGAGCA---GCAGGAAGCACTATG---GGCGCAGCATCA---  
 ATAACGCTGACGGTACAG---GCCAGACAA---TTATTG---TCTGGGATAGTGCAACAGCAAAAC---  
 AATTTG---CTGAGG---GCTATAGAGGCGCAACAGCATATGTTGCAACTCACGGTCTGGGGTATT  
 >MN659380  
 TTCTATTGCAATACATCAGTCCTGTTTAATAGTACATACATGTCTAATGGTACCTGGAAAAATGGTACATGGG  
 AA-----  
 -----  
 GGTTCGAACATCACAATCATCCCATGCAGAATAAAGCAGATTATAAACATGTGGCAGGAGGTAGGACGAGCAA  
 TGTATGCTCCTCCCATTCAGGAAACATAACATGTAAGTCAAAT---  
 ATCACGGGACTATTAATAGTACGTGATGGAGGATCAGAGTCAAATAGCACA-----  
 -----  
 -----  
 AATGATACAGAGATATTCAAGCCTGGAGGAGGAGATATGAGGGACAATTGGAGAAGTGAATTATATAAATATA  
 AAGTGGTAGAAATTAAGCCATTG---GGAGTAGCACCCACTGAAGCAAAGAGGAGAGTGGTG-----  
 -----GAGAGAGAAAAAGAGCA---GTGGGA---ATAGGAGCT-----  
 ---GTGTTCTTGGGTTCTTGGGAGTA---GCAGGAAGCACTATG---GGCGCAGCGTCA---  
 ATGACGCTGACGGTACAG---GCCAGACAA---TTGCTG---TCTGGTATAGTGCAACAGCAAAGC---  
 AATTTG---CTGAGG---GCTATAGAGGCGCAACAGCATATGTTGCAACTCACGGTCTGGGGTATT  
 >AB485665  
 TTCTATTGCAACACAACAGAATTGTTTGATAGTACTTGGAATGGCACCAGTGGCAACTATACGACAAATGCCA  
 CAACA-----  
 -----  
 -----  
 AATGAACTGATACTATTATACTACCATGCAAAATAAAACAAATTGTAAACATGTGGCAGAGAGTAGGGCAAG  
 CAATATATGCCCCCTCCCATCAGAGGAAATATTACATGTGTATCAAAT--GTTACAGGACTAATATTGACA--  
 ---GTTGACCATGCTGCAGAG-----  
 -----  
 -----  
 AATGATAGTGTTACCTTCAGACCTGGAGGAGGAGATATGAGGGACAATTGGAGAAGTGAAGTATATAAATATA  
 AAGTAGTAAAAATTGAACCATTA---GGAGTAGCACCTTCCCGGCAAGAAGAAGAGTGGTG-----  
 -----CAGAGAGAAAAAGAGCA---GTGGGA---ATAGGAGCT-----  
 ---ATGATCTTTGGGTTCTTGGGAGCA---GCAGGAAGCACTATG---GGCGCGGCGTCA---  
 TTAACGCTGACGGTACAG---GCCAGACAA---TTATTG---TCTGGTATAGTGCAACAGCAAAGC---  
 AATTTG---CTGAGA---GCTATACAAGCGCAACAGCATCTGTTGCAGCTCACTGTCTGGGGCGTC  
 >MH705148  
 TTTTATTGTGACACATCTGGGATGTTTAATTATACCTTTTCATGTAACGGGAGCAATTGTATTAATACCCAAA  
 ATAACAGC-----  
 -----  
 -----  
 AGCAGAAATGACACTACTATGTTTGTAAATTGAGACAGGTAGTAAGGTCATGGATGGGGGGAGAGTCAGGAC  
 TCTATGCACCTCCCATCCGAGGTCACCTACAATGCAGCTCAAAC---  
 ATAACCTGGAATGATTCTAGAACTGGATAATCCATGGAACAGCAGC-----  
 -----  
 -----  
 CACAGCAACAACACATTTAGACCAACAGGGGGAAATATGAAAGATATATGGAGAAGTGAATTGTTCAAATACA  
 AAGTAGTAAGGGTAAAACCTTTT---GGTGTGGCACCTACACATATTGCAAGACCAGTCATAGGCACG-----  
 -----GGCACTCGTAGAGAGAAAAAGAGCA---GTAGGA---TTGGGAATG-----  
 ---CTATTCTTGGGGTTTCTAAGTGCA---GCAGGTAGCACTATG---GGCGCAGCGGCA---

GTAACGCTGACGGTACAG---ACCCACACT---GTGATA---AAGGGTATAGTGCAACAGCAGAAC---  
 AACCTG---CTAAGA---GCAATACAGGCCCAGCAGGAATTGCTGAGGCTATCTGTATGGGGTATC  
 >MH705150  
 TTCTATTGTGACACAACCTAAGATGTTTAATTATACCTTCCGATGTAACGGAAACACCTGTGATGATGGCAATG  
 ATAACCAA-----  
 -----  
 AGTAACAATAAACTCAGATACCTTGCAGGCTGAAACAGGTGGTAAGGTCATGGATACAGGGAGGATCGGGAA  
 TCTATGCACCTCCCATCAAAGGTAATCTAACATGTGCATCACGC---  
 ATAACCTGGAATGATTCTACAATTAGATGTGCCATGGGGAAACAAGAGCAGCAATGGACAC-----AAT-----  
 -----  
 -----  
 AGCAGCACTGCAATATTTAGACCAGTAGGGGGAGATATGAAAGACATATGGAGAACTGAATTGTTCAACTACA  
 AAGTAGTAAGGATAAAGCCTTTT---AGTGTGGCACCCACATATATTACAAGGCCAGTCGTAGGCACT-----  
 -----AGCACTCATAGAGGAAAAAGAGCA---GTAGGA---TTAGGAATG-----  
 ---CTATTCTTGGGGGTTCTAAGTGCA---GCAGGAAGCACTATG---GGCGCAGCGGCA---  
 ACAGCGCTGACGGTACAG---ACCCAAGCT---TTGATG---AAGGGTATAGTGCAACAGCAGGAC---  
 AACCTG---CTAAGA---GCAATACAGGCCCAGCAGCACTTGCTGAGGCTATCTGTATGGGGTATC  
 >L20571  
 TTTTATTGTAACACATCTGGGATGTTTAACCTATACTTTTATCAACTGTACAAAGTCCGGATGCCAGGAGATCA  
 AAGGGAGCAAT-----  
 -----  
 GAGACCAATAAAAATGGTACTATACCTTGCAAGTTAAGACAGCTAGTAAGATCATGGATGAAGGGAGAGTCGA  
 GAATCTATGCACCTCCCATCCCCGGCAACTTAACATGTCATTCCAAC---  
 ATAACCTGGAATGATTCTACAGTTAGATCAACCATGGAATTCACACAGGT-----  
 -----  
 -----  
 GAAAATACACTTAGACCAGTAGGGGGAGATATGAAAGATATATGGAGAACTAAATTGTACAACCTACAAAGTAG  
 TACAGATAAAACCTTTT---AGTGTAGCACCTACAAAAATGTCAAGACCAATAATAAACATT-----  
 -----CACACCCCTCACAGGGAAAAAGAGCA---GTAGGA---TTGGGAATG-----  
 CTATTCTTGGGGGTGCTAAGTGCA---GCAGGTAGCACTATG---GGCGCAGCGGCA---  
 ACAGCGCTGACGGTACGG---ACCCACAGT---GTACTG---AAGGGTATAGTGCAACAGCAGGAC---  
 AACCTG---CTGAGA---GCGATACAGGCCCAGCAACACTTGCTGAGGTTATCTGTATGGGGTATT  
 >AB485666  
 TTTTATTGTGACACATCTCGGCTGTTTAACCTATACTTTTAAGTGTAAATGGTTCCCAATGTAATGAGACCAATA  
 AAACCTCAGACA---AAT-----  
 -----  
 -----  
 AAAACTCAGGATACTATAATACCTTGCAAGATAAGACAGGTAGTAAGATCATGGATAAAGGGAGAGTTAGGAC  
 TCTATGCACCTCCCATCCAGGTGATCTAACATGTAAATCCAAC---  
 ATAACCTGGGATGATTTTACAACCTAGATACACCCTACAACCTCCTCATGTGACAAT-----  
 -----  
 -----  
 GTCACATTTAGACCAACAGGGGGAGATATGAGAGATATATGGAGAACTGAATTGTACAACCTACAAAGTAATAC  
 AGGTAAAACCTTTT---AGTGTAGCACCTACAAAAATTTCAAGACCAATAATAGGCCTT-----  
 -----AACACCACCCACAGAGGAAAAAGAGCA---GTAGGA---TTGGGAATG-----  
 CTATTCTTAGGGGTTCTAAGCGCA---GCAGGTAGCACTATG---GGCGCAGCGGCA---  
 ACAACGCTGGCGGTACGG---ACCCAAGGT---GTACTA---AAGGGTATAGTGCAACAGCAGGAC---  
 AACCTG---CTGAGA---GCGATACAGGCCCAGCAACATTTGCTGAGGTTATCTGTATGGGGTATT  
 >KU168293  
 TTTTATTGTAACACAAGTCACATGTTTAATTATACATTCAATTGTACTAACTCCAACCTGTAGTAATACTACT-  
 -----  
 -----  
 TATGATAACAGTACAAGAATATATTGCCAGTTGAGACAGGTAGTAAGGTCATGGATGAGGGGAGGGTCAGGGC  
 TCTATGCACCTCCTATCAAAGGTAATCTAACCTGCAGTTCAAAC---  
 ATAACCTGGATTGATTCTACAAATGGATACACCATGGAATAAAACC-----  
 -----  
 -----  
 AACCACACAGTCACATTTAGACCAACAGGAGGAGATATGAAGGATATATGGAAAAACCAATTGTACAATTACA  
 AAGTAGTAAGGGTAAAATCTTTT---AGTGTAGCACCTACTAAGATTAGTAGACCAGTTGTAGGCACT-----  
 -----AACCATCAAAGAGAAAAAAGGGCA---GTAGGA---TTGGGAATG-----  
 ---CTATTCTTGGGGGTTCTAAGTGCA---GCAGGTAGCACTATG---GGCGCAGCGGGA---

ATAACGCTGTCGGTACGA---ACCCACTCA---TTAATA---AGGGGGATAGTGCAACAGCAGGAC---  
 AACCTG---CTGAGA---GCGATACAGGCCCAGCAACATCTGCTGAGGTTATCTGTATGGGGTATT  
 >KU168281  
 TTCTATTGTAACACATCTGGGATGTTTAATTATACCTTTGCATGTACAGGAATCAACTGTAATATTACTCAAG  
 ATAACAGT-----  
 -----  
 AGAAATAATGACACTTGGAGACTGCCTTGCAGGATAAAACAGGTGGTAAGGTCATGGATAAGGGGAGGGTCGG  
 GACTCTATGCACCTCCCAGGCCAGGTAACCTAACATGCAGTTCACAC---  
 ATAACCTGGAATGATTCTGCAAGTGGATGAGCCATGGAACAAGACCAA-----  
 -----  
 -----  
 AACAAACAGCAAAGCCATCTTTAGACCAATAGGGGGAAAATATGGAAGATATATGGAGAACTGAACTGTTCAAAT  
 ACAAAGTAGTAAAGGTGAAACCTTTT---AGTGTGGCACCTACAAAAATTGCAAGGCCAATCATAGGCACT--  
 -----GGCAATCAAAGAGAGAGAAAAGAGCA---GTAGGA---TTGGGAATG---  
 -----CTATTCTTGGGGGTTCTAAGTGCA---GCAGGTAGCACTATG---GGCGCAGCGGCA---  
 ACAACGCTGGCGGTACAG---ACCCACACT---TTGATG---AAGGGTATAGTGCAACAGCAGGAC---  
 AACCTG---CTAAGA---GCAATACAGGCCCAGCAGCAATTGCTGAGGCTATCTGTATGGGGTATC  
 >KU168295  
 TTTTATTGTAACACAGCGGAAAATGTTTAATTATACCTTTAAGTGTAAAGGCGCCACCTGTAACCTCCACCAGTT  
 TA-----  
 -----  
 GAAAACAATGGGACTAGCAATCTAACTTGTAAAGATTAGACAGGTGGTAAGGTCCTGGATGAAGCAAGGGTCGG  
 GACTCTATGCACCCCCCATCAGAGGTAACCTAGCATGCATGTCAAAC---  
 ATAACCTGGAATAATTCTACAATTAGATACACCATGGAACAACAGTAAAGAA-----  
 -----  
 -----  
 AATACAACAGCCACATTTAGACCAACGGGGGGAGATATGACAGATATATGGAGAACTCAATTGTTCAACTACA  
 AAGTAGTAAGGGTAAAACCTTTT---AGTGTGGCACCTACAAAAATTGCAAGGCCAGTCATAGGCACT-----  
 -----GGCAATCTTAGACAGAAGAGAGCA---GTAGGA---TTGGGAATG-----  
 ---CTATTCTTGGGGGTTCTAAGTGCA---GCAGGAAGCACTATG---GGCGCAGCGGCA---  
 ACGGCGCTAGCGGTACAG---ACCCACACT---TTGATG---AAGGGTATAGTGCAACAGCAGGAC---  
 AACCTG---CTAAGA---GCAATACAGGCCCAGCAGCACCTGCTGAGGCTATCTGTATGGGGTATT  
 >AY169813  
 TTTTATTGTGACACAAGTAAGATGTTTAATTATACCTTTAATTGTAACAAGACCAAATGTAATAATAGTAAAA  
 ATAGTACCCAT-----  
 -----  
 -----  
 AATAACACTATGACAACAATACCTTGCAGAATAAAACAGGTAGTAAGGTCATGGATAAGGGGAGAGTCGGGAC  
 TCTATGCACCCCCCATTAAGGTAATTTAACCTGCATATCAAAC---  
 ATAACCTGGAATGATTCTATTAAGGGACGAGCCAGGG---AATAACAGCAGA-----  
 -----  
 -----  
 CACACCCTTAGGCCAGTAGGGGGAGATATGAAAGATATATGGAGAACTGAATTAGTCAATTACAAAGTAGTAA  
 AAATAAAACCTTTT---AGTGTAGCACCTACAAAAATTACAAGGCCAGTCATAAGC-----  
 -----ACCCATAGAGAAAAAAGAGCA---GTAGGA---TTGGGAATG-----  
 CTATTCTTAGGGGTTCTAAGTGCA---GCAGGTAGCACTATG---GGCGCAGCGGCA---  
 GTGACGCTGACGGTACAG---ACCCAACT---TTGTTG---AAGGGTATAGTGCAACAGCAGGAC---  
 AACCTG---CTAAGA---GCAATACAGGCCCAGCAACAGTTGCTGAGGTTATCTGTATGGGGTATC  
 >AY169809  
 TTTTATTGTAACACAACGGGGTTGTTTAATTATACCTTTCTGTGTGAAAACCTCCATCTGTAACCTTCACCCATA  
 ACAAT-----  
 -----  
 -----  
 ACTTCAGAGGAGCGCAATCTAACTTGTAGAATTAGACAGGTGGTAAGGTCATGGATGAAGACAGGGTCGGGAC  
 TCTATGCACCTCCCATCGAAGGTAACCTAACATGTAGGTCAAAC---  
 ATAACCTGGAATGATTCTAGAAATGGATAAACCATGG---AACAAAAGTACAAAC-----  
 -----  
 -----  
 AATGAAACAGCCATATTTAGACCAATAGGGGGAGATATGAAAGAAATATGGAGAACTGAATTGTTCAACTACA  
 AAGTAGTAAGGGTAAAACCTTTT---AGTGTGGCACCTACAAAAATTGCAAGGCCAGTCATAGGCACT-----  
 -----GGCACTCCTAGACAGAAGAGAGCA---GTAGGA---TTGGGAATG-----  
 ---CTATTCTTGGGGGTTCTAAGTGCA---GCAGGAAGCACTATG---GGCGCAACGGCA---

ACAACGCTGGCGGTACAG---ACCCACACT---TTAATG---AAGGGTATAGTGCAACAGCAGGAC---  
 AACCTG---CTAAGA---GCAATACAGGCCAGCAGCATTTGCTGAGGCTATCTGTATGGGGTATT  
 >AY169802  
 TTTTATTGTAACACATCGGGGATGTTTAATTATACCTTTACATGTAACAAAACCAACTGCACCTAACAATAGGA  
 CTGAT-----  
 -----  
 AATAGCACTAATGACACAATACCTTGCAAGTTGAGACAGGTAGTGAGGTCATGGATACAGGGGGGGTTCAGGAC  
 TCTATGCCCCCTCCCATCAAAGGTACCCTAACATGTATGTCAAAC---  
 ATAACCTGGGATGATTCTAGAAATGGAACGGTCATGGAACGGGAGTGCTACAAAG-----  
 GACATTAATGCTACATGGAAC-----  
 -----  
 ATTAATGCTACATTCAGACCAATAGGGGGGAGATATGAAAAGATATATGGAGAACTCAATTATTCAACTATAAGG  
 TGGTAAGGGTGAAACCTTTT---AGTGTAGCACCTACAAAAATTGCAAGGCCAGTCATAGGCATG-----  
 -----GGCACTGGTACTCATAGGGAAAAGAGAGCA---GTAGGA---TTGGGAATG-----  
 CTATTCTTAGGGGTTCTAAGTGCA---GCAGGTAGCACTATG---GGCGCAGCAGCA---  
 ACAGCGCTGACGGTACAG---ACCCACACT---TTGATA---AAGGGTATAGTGCAACAGCAGGAC---  
 AACCTG---CTGAGA---GCAATACAGGCTCAGCATCAACTGCTGAAGCTATCTGTATGGGGTATC  
 >AY169816  
 TTTTATTGTAACACATCTAATTTATTTAATTATACCTTTTCATGTAATGGAACCACCTGTAATGATAGCCAAA  
 GT-----  
 -----  
 ACCACCAATGACACACAGATACCTTGCAAACCTGAGACAGGTAGTAAGGTCATGGATAAAAGGACAGTCAGGAT  
 TCTATGCACCTCCCATCAAGGGTAACCTGACATGTACATCAAAC---  
 ATAACAGGAATGATTCTACAAATGGATGCACCATGGAACAGCACCAGA---AAC-----AACAGCGAA---  
 AAC-----  
 -----  
 CAAACTGCAACATTTAGACCAACAGGGGGGAGAAATGAAAAGATATATGGAGAACTGAGTTGTTCAACTACAAAG  
 TAGTAAGAGTAAACCTTTT---AGTGTGGCACCCACATCAATTGCAAGGCCAGTTGTAGGCACT-----  
 -----AGCACTCATAGAGAAAAAAGAGCA---ATAGGA---TTAGGAATG-----  
 CTATTCTTGGGGGTTCTAAGTGCA---GCAGGTAGCACTATG---GGCGCAGCGGCA---  
 ACAGCGCTGACGGTACAG---ACCCACACT---TTGATA---AAGGGTATAGCGCAACAGCAGGAC---  
 AACCTG---CTAAGA---GCAATACAGGCCAGCAGCAATTGCTGAGGCTATCTGTATGGGGTATC  
 >AY169807  
 TTTTACTGTAACACATCTCAGATGTTTAATTATACCTTTACATGTGATGGAACCACCTGTAAGAACTTAGGAT  
 TCAAT-----  
 -----  
 AGCACTAATAACACTCAGATACCTTGCAAGTTGAAGCAGGTAGTAAGGTCATGGATAAAAGGAGAATCAGGAC  
 TCTATGCACCTCCCATCCAAGGTCAATTAAACATGTAGATCAAAC---  
 ATAACCTGGAATGATTCTACAAATGGATCAGCCATGGAACGGGAGCCAGAGC-----  
 -----  
 -----  
 AATAGCAATAGCACATTTAGACCGATAGGGGGGAAATATGAAAAGATATATGGAGAACTGAATTGTTTAGATACA  
 AAGTAATAAGGATAAAACCTTTT---AGTGTGGCACCTACAAGAATTACAAGGCCAGTCATAGGCTTT-----  
 -----GGCCACCACAAGGAAAAAAGAGCA---GTGGGC---TTGGGAATG-----  
 ---CTATTCTTGGGGGTTCTAAGTGCA---GCAGGTAGCACTATG---GGCGCAGCGGCA---  
 ACAGCGCTGACGGTACAG---ACCCACACT---TTGATA---AAGGGTATAGTGCAACAGCAGGAC---  
 AACCTG---CTAAGA---GCAATACAGGCCAGCAGCACTTGCTGAGGCTATCTGTATGGGGTATC  
 >AY169804  
 TTTTATTGTAACACATCTCAAATGTTTAACCTATACTTGTAAGCTGTACAAGCTCAGAATGCAACTGTACAAGAC  
 CCGGATACAAC-----  
 -----  
 GGAACCAATGGAATGAGACTATACCTTGCAAGTTAAGACAGGTAGTAAGATCATGGATAAAGGGAGAGTCGG  
 GACTCTATGCACCTCCCATCCCTGGCAACCTAACATGTCAATCCAAC---  
 ATAACCTGGAATGATTCTGCAATTAGATGCACCATGGAATTCACATGT-----  
 -----  
 -----  
 ACTAAAACATTTAGACCAGTAGGGGGGAGATATGAAAAGATATATGGAGAACTGAATTGTACAACCTACAAGGTAG  
 TGCAGATAAAACCTTTT---AGTGTAGCACCTACAAAAAGTTTCAAGACCAATAATAAGCATT-----  
 -----AACACCAATCACAGAAGAAAAAGAGCA---GTAGGA---CTGGGAATG-----  
 CTGTTCTTTGGGGTACTAAGTGCA---GCAGGTAGCACTATG---GGCGCAGCGGCA---

ACAACGCTGGCGGTACGA---ACCCACAGT---GTACTG---AGGGGTATAGTGCAACAGCAGGAT---  
 AACCTG---CTGAGA---GCGATACAGGCCAGCAACATTTGCTGAGGTTATCTGTATGGGGTATT  
 >AY169812  
 TTCTATTGTAACACATCTGGGATGTTTAATTATACCTTTTATGTAATGGGACCAACTGTAAAAACCAAAGTA  
 CCCAT-----  
 -----  
 AGCAATAATGGCACGATACCTTGCAAGTTGAAACAGGTGGTAAGATCATGGATGAGGGGAGGGTCGGGACTCT  
 ATGCACCTCCCATCCCAGGTAACCTAACATGCATGTCACAC---  
 ATAACCTGGAATGATTCTACAAATAGATGGGCCATGGAACAAC---AAC-----  
 -----  
 -----  
 ACCACAAACAATACATTTAGACCAATAGGGGGAGATATGAAAGATATATGGAGAAAATGAATTGTTCAACTACA  
 AAGTAGTGAGGGTAAAACCTTTT---AGTGTGGCACCTACATCAATTGCAAGGCCAGTCATAGGCACT-----  
 -----GGCACTCATAGAGAGAAAAGAGCA---GTAGGA---TTGGGAATG-----  
 ---CTATTCTTGGGGGTTCTAAGTGCA---GCAGGTAGCACTATG---GGCGCAGCGGCA---  
 ACAGCGCTGACGGTACAG---ACCCACTCT---CTGATA---AAGGGTATAGTGCAACAGCAGGAC---  
 AACCTG---CTAAGA---GCAATACAGGCCAGCAGGAATTGCTGAGGCTATCTGTATGGGGTATC  
 >MH705147  
 TTCTATTGTAACACATCTGGGATGTTTAATTATACCTTTTCACGCAATAGGACCAACTGTAATATCCAAAGTA  
 AC-----  
 -----  
 AGTAGCAATAATGGCACGATACCTTGCAAGTTGAAACAGGTGGTAAGAGCATGGATGAGGGGAGGGTCGGGAC  
 TCTATGCACCTCCCATCAAAGGTAACCTAATATGCAGATCAAAC---  
 ATAACCTGGAATGCTTCTAGAAATAGATGGGCCATGGAACAAAACAACCACA-----  
 -----  
 -----  
 AACAAAGAGCACATTTAGACCAACAGGGGGAGAGATGAAAGATATATGGAGAACTGAATTGTTCAAATATAAAG  
 CAGTGAGGGTAAAACCTTTT---AGTGTGGCACCTACATCAATTGCAAGGCCAGTCATAGGCACT-----  
 -----GGCACTCATAGAGAGAAAAGAGCA---GTAGGA---TTGGGAATG-----  
 CTATTCTTAGGGGTTCTAAGTGCA---GCAGGTAGCACTATG---GGCGCAGCGGCA---  
 ACAGCGCTGACGGTACAG---ACCCACACT---GTGATA---AAGGGTATAGTGCAACAGCAGGAC---  
 AACCTG---CTGAGA---GCGATACAGGCCAGCAAGAATTGCTGAGGCTATCTGTATGGGGTATC  
 >AY618998  
 TTCTATTGTAACACATCTGGGATGTTTAATTATACTTTCTCATGTAAAGGAACCAACTGCACTACTAACCAAA  
 GT-----  
 -----  
 AGTAATGAACTAGTATACCTTGCAAGTAAACAGATAGTAAGGTCATGGATGAGGGGAGAGTCGGGACTCT  
 ATGCACCTCCCATCAAAGGTAATCTAACATGTAGATCACGA---  
 ATTACTGGAATGATTCTACAAATAGATATGCCATGGAATAAAAGC-----  
 -----  
 -----  
 GAAGCAAACGTTACATTTAGACCAGTAGGGGGAGATATGAAAGACATATGGAGAACTGAATTGTTCAAATACA  
 AAGTAGTGGAATAAAAACCTTTT---AGTGTGGCACCTACAAAAATTGCAAGGCCAGTCATAGGCACT-----  
 -----GACACTCATAGAGAAAAAGAGCA---GTAGGA---TTGGGAATG-----  
 ---CTATTCTTGGGGGTTCTAAGTGCA---GCAGGTAGCACTATG---GGCGCAACGGCA---  
 ACAGCGTTGACGGTACAG---ACCCACACT---TTGATA---AAGGGTATAGTGCAACAGCAGGAC---  
 AACCTG---CTAAGA---GCAATACAGGCCAGCAGCAATTGCTGAGACTATCTGTATGGGGTATC  
 >KF859742  
 TTTTATTGTATCACAGATCAAATGTTTAACTATACCTTCCACTGTAACAAAACCAAATGTACTGATAACAGTA  
 GCTAT-----  
 -----  
 ATCGACCCAAATAATTATATACCTTGCAAACAGGTGGTAAGGTCATGGATGCGGGGAGGGTCGGGAA  
 TCTATGCACCTCCCATCAAAGGTAATCTAACATGTATATCAAAC---  
 ATAACCTGGAATGATTCTACAATTAGATAGCCATGGAACAGAAGT-----  
 -----  
 -----  
 GAAAAATGCAAACGCAACATTTAGACCAGAAGGAGGAAATATGAAAGAGATATGGAGAGCTGAATTGTTCAACT  
 ACAAAGTAGTAAGGGTAAAACCTTTT---AGTGTAGCACCCACACCTATTGCAAGACCAGTCATAGGCACT--  
 -----AGCACTCATAGAGAAAAAGAGCA---GTAGGA---TTAGGAATG---  
 -----CTGTTCTTGGGGGTTCTAAGTGCA---GCAGGAAGCACTATG---GGCGCAGTGTCA---

ACAACGCTGACGGTACGG---ACCCACACT---TTGATA---AAGGGTATAGTGCAACAGCAGGAC---  
 AACCTG---CTAAGA---GCAATACAGGCCCAGCAGCATTTGCTGAGGCTAACTGTATGGGGTATC  
 >KX228804  
 TTTTATTGTAACACAAGTAATATGTTTAATTATAGCTTTGAATGTGACGGAACACCTGTACC-----  
 -----  
 -----  
 ATACCTTGCAGGTTAAACAGGTGGTAAGGTCATGGATACAGGGAGGGTCGGGACTCTATGCACCTCCCATCA  
 GAGGTAATCTAACATGTACATCAAAC---  
 ATAACCTGGAATGATTCTACAAATGGATATGCCATGGAACAACAGCGGTACAGGA-----  
 -----  
 -----  
 AACAGGACTGCAACATTGAGACCAGGAGGGGGAGAGATGAAAGACATATGGAGAACTGAATTGATCAACTACA  
 AAGTAGTAAGGATAAAACCTTTT---AGTGTGGCACCCACACCTATTGCAAGGCCAGTCATAGGCACT-----  
 -----AGCACTCATAGAGAAAAAGAGCA---GTAGGA---TTGGGAATG-----  
 ---CTATTCTTGGGGGTTCTAAGTGCA---GCAGGTAGCACTATG---GGCGCAGCGGCT---  
 ACAGCGCTGACGGTACGG---ACCCACACA---TTGATG---AAGGGTATAGTGCAACAGCAGGAC---  
 AACCTG---CTAAGA---GCAATACAGGCCCAGCAGCAATTGCTGAGGCTATCTGTATGGGGTATC  
 >KU168289  
 TTTTATTGTAACACATCTCAATTGTTTAATTATACCTTGTTCATGTAACAAAACACCTGTAAATTTAACCAAA  
 GT-----  
 -----  
 AGCACTAATAACACTCGGATACCTTGCAGGCTGAAACAGGTGGTAAGATCATGGATGAGGGGAGGGTCAGGAA  
 TCTATGCACCTCCCATCCAGGTAATCTAACATGTACATCAAAC---  
 ATAACCTGGAATGATTCTACAAAATGATGAACCATGGAACAGCAGCGTA-----  
 -----  
 -----  
 GGACGCGCAATATTTAAACCTACAGGGGGAGATATGATGGATATATGGAGAACTGAATTGTACAACCTACAAGG  
 TAGTAAGGGTAAACCTTTT---AGTGTAGCACCCACACCTATTGCAAGGCCAGTCATAGGCACT-----  
 -----GGCACTCATAGAGAAAAAGAGCA---GTAGGA---TTGGGAATG-----  
 CTATTCTTGGGGGTTCTAAGTGCA---GCAGGTAGCACTATG---GGCGCAGCGGCA---  
 ACAGCGCTGACGGTACAG---ACCCGCACT---TTGATG---AAGGGTATAGTGCAACAGCAGGAC---  
 AACCTG---CTGAGA---GCAATACAGGCCCAGCAGCACTTGTCTGAGGCTATCTGTATGGGGTATC  
 >KU168286  
 TTCTATTGTAACACATCTAATCTATTTAATTATACCTTTTCATGTGAAGGAACCAACTGTACATGTAACGGAA  
 CCAACTGT-----  
 -----GGGACT-----  
 AACAAATAGCACAAATAGCACGATACCCTGTAGGTTGAGACAGGTGGTAAGGTCATGGATAAGGGGACAGTCGG  
 GACTCTATGCAGCTCCCATCCGAGGTAACCTAACATGCATATCAAAC---  
 ATCACTGGAATAATTTTACAAATGGATTGCCATGGAACACAAC-----  
 -----  
 -----  
 AACACCAATGCCACATTTAGGCCAACAGGGGGAGATATGGAAGATATATGGAGAACTGAATTGATCAAATACA  
 AAGTAGTAAAGGTAAACCTTTT---AGTGTGGCACCTACAAAAATTGCAAGGCCAGTCATAGGCACT-----  
 -----GGCACTCACAGAGGAAAAAGGGCA---GTAGGA---TTGGGAATG-----  
 ---CTATTCTTGGGGGTTCTAAGTGCA---GCAGGAAGCACTATG---GGCGCAGCGGCA---  
 ACAGCGCTGACGGTACAG---ACCCACACT---TTGATA---AAGGGTATAGTGCAACAGCAGGAC---  
 AACCTG---CTAAGA---GCAATACAGGCCCAGCAGCAATTGCTGAGGCTCTCTGTATGGGGTATC  
 >KU168292  
 TTTTATTGTAACACAACGGAGTTGTTTATTTATAACTTTAATTGTAGCAACTCCACATGCAACATCTCAGATG  
 CCTAT-----  
 -AGGAAAATTAATAGT-----  
 GGTAGTGATGGATTGCATAATATAACTTGTAGAATTAACAGGTGGTAAGGTCATGGATGAAGACAGGGTCGG  
 GACTCTATGCACCTCCCATCAGAGGTCACTTAAATGTGAGTCAAAC---  
 ATAACCTGGAATGATTCTACAATTGGATTACCCATGGAACAGTACA-----  
 -----  
 -----  
 ATTAGAAATGCCACATTTAGCCCAATAGGGGGAGATATGAAAGACATATGGAGAACTCAATTGTACAACCTACA  
 AAGTAGTAAGGGTAAACCTTTT---AGTGTGGCACCTACAAAAATTGCAAGGCCAGTCATAGGTACT-----  
 -----GGCACC GG TAGACAGAAAGAGAGCA---GTAGGA---TTGGGAATG-----  
 ---CTATTCTTGGGGGTTCTAAGTGCA---GCAGGAAGCACTATG---GGCGCAGCGGCA---

ACAGCGCTGACGGTACGG---ACCCAACT---TTAATA---AAGGGTATAGTGCAACAGCAGGAC---  
 AACCTG---CTAAGA---GCAATACAGGCCCAGCAGCACTTGCTGAGGCTATCTGTATGGGGTATT  
 >KY112585  
 TTTTATTGTAACACAAGTAGCATGTTTAACTATACCTTTTACTGTAACAACCTCCACCTGTAACAATGGAAGCA  
 ATCAG-----  
 -----  
 AATGGAAACAACATGACAATACCTTGCAGGATAAAACAGGTAGTGAGATCATGGATGAAGGGAGGGTCAGGAC  
 TATATGCACCTCCCATCAGAGGTCACCTTACAGTGTATATCAAAT---  
 ATAACCTGGAATGATCCTACAATTGGATCGAGAATGGAATTATACTAATAATGAC-----  
 -----  
 ----  
 ACAAGAGATGCCAATGCCACATTTAGACCAACAGGGGGAGAGATGAGAGATATATGGAGAACAGAATTGTACA  
 ACTATAAAGTAGTAAGGGTAAAGCCTTTT---  
 AGTGTGGCACCTACAACAATTACAAGGCCAGTCATAAGCAAC-----  
 --CATAGAAATAAAAGAGCA---GCAGGA---TTGGGAATG-----  
 CTATTCTTGGGGGTACTAAGTGCA---GCAGGAAGCACTATG---GGCGCAGCGGCA---  
 ACAGCGCTGACGGTACGG---ACCCAAAC---TTAATA---AAGGGTATAGTGCAACAGCAGGAC---  
 AACCTG---CTGAGA---GCGATACAGGCCCAGCAACACTTGCTGAGGTTATCTGTGTGGGGTATC  
 >AF407418  
 TTTTATTGTAACACAAATCAGCTGTTTAAATCATACTTTTCTGCAAGAAGAATATGACCTATAACAAGATCA  
 ATTGTACTAAT-----  
 -----ATTAGCAAT-----  
 AATAGCAATGGCACTCAGGCAATACCTTGCAGGTTGAGACAAGTAGTAAGGGACTGGATGAGGGGAGGATCGG  
 GACTTTATGCACCTCCCATCCCAGGAAACCTAGTATGCAGGTCAAAC---  
 ATAACCTGGAATGATTCTACAATTGGACACGCCATGG---AATAAAACACAT-----  
 -----  
 -----  
 CCTAACAGCACCACCCTTAGACCAGGAGGGGGAGATATGAAAGATATATGGAGAACTCAATTGTTCAAATATA  
 AAGTAGTAAGAGTAAAACCTTTT---AGTGTAGCACCAACAAAAATTGCAAGGCCAACTATAGGAACT-----  
 -----AGCACTCATAGAGAGAAAAAGAGCA---GCAGGT---TTGGCAATG-----  
 ---CTATTCTTGGGGATTCTAAGTGCA---GCAGGAAGCACTATG---GGCGCAGCGGCA---  
 ACAGCGCTGACGGTACGG---ACCCAGCAT---CTGATA---AAGGGTATAGTGCAACAGCAGGAT---  
 AACCTG---CTAAGA---GCAATACAGGCCCAGCAACACTTGCTGAGGCTATCTGTATGGGGTATT  
 >KU168288  
 TTTTACTGTAACACATCTTGGTTGTTTAAATTATACCTTTTATGTGTAATGGAACCTACCTGTGAGAGCCCAAATA  
 TCAACAGC-----  
 -----  
 ACTAATAACACTCTGATACCTTGCAGGTTGAGGCAGGTAGTAAGGTCATGGATGAGGGGAGGATCGGGACTCT  
 ATGCACCTCCCATCCGAGGTAACCTTAACATGTAGATCAAAC---  
 ATAACCTGGGATGATTCTACAGATGGATCAACCATGGAACATGAGC-----  
 -----  
 -----  
 CGCCAGAACAGCACATTTAGACCAACAGGGGGAGATATGAAAGACATATGGAGAACTGAATTGCTCAGATACA  
 AAGTAGTAAGGATAAAACCTTTT---AGTGTGGCACCTACAAAAATTACAAGGCCAGTCATAGGCTTT-----  
 -----GGCACCCGCAGAGAAAAAGAGCA---GTGGGC---TTGGGAATG-----  
 ---CTATTCTTGGGGTTCTAAGTGCA---GCAGGTAGCACTATG---GGCGCAGCGGCA---  
 ACAGCGCTGACGGTACGG---ACCCACACT---TTGATA---AAGGGTATAGTGCAACAGCAGGAC---  
 AACCTG---CTAAGA---GCAATACAGGCCCAGCAGCAATTGCTGAGGCTATCTGTATGGGGTATC  
 >KU168290  
 TTCTATTGTAATACATCTAAGATGTTTAAATTATACCTTTTATGTAAAGGAACCAACTGTACTAATACCCAAA  
 GTAATAGT-----  
 -----  
 ACCAGAAATGACACTGTAATATATTGCAAGATAAGACAGGTAGTAAGATCATGGATGAGGGGAGGGTCAGGAC  
 TCTTTGCACCGCCCATTCAGGTAACCTAACATGCAGATCACAA---  
 ATAACCTGGAATGATGCTACAAATGGATAAGCCATGGAATGGAAGC-----  
 -----  
 -----  
 AACAGCAACAGCACATTTAGACCAACAGGGGGAGATATGAAAGATATATGGAGAACTGAATTGTTCAAATACA  
 AAGTAGTAAGGGTAAAACCTTTT---AGTGTGGCACCTACAAAAATTGCAAGGCCAGTCATAGGCATA-----  
 -----GGCACTGGCACTCATAGAGAGAAAAAGAGAC---ATAGGA---TTGGGAATG-----

---CTATTCTTGGGGGTTCTAAGTGCA---GCAGGTAGCACTATG---GGCGCAGCGGCA---  
 ACAACGCTGGCGGTACAG---ACCCAAAA---GTGATG---AAGGGTATAGTGCAACAGCAGGAC---  
 AACCTG---TTGAGA---GCAATACAGGCCCAGCAGCAATTGCTGAGGCTATCTGTATGGGGTATC  
 >KU168291  
 TTTTACTGTAACACATCTGCAATGTTTAATTATACCTTTTCATGTAATAGAACCACCTGTAATTTCCCAATA  
 TCAAT-----  
 -----  
 AGAGATAATAACACTCTGATACCTTGCAGGTTGAGACAGGTAGTAAGGTCATGGATGAGGGGAGGATCGGGAC  
 TTTATGCACCTCCCATCCGAGGTAACCTAACATGTAAATCAAAC---  
 ATAACCTGGAATGATTCTACAAATGGATCAGCCATGGAACATGAGC-----  
 -----  
 -----  
 CGGGGGAACAGCACATTTAGACCAACAGGGGGAGATATGAAAGATATATGGAGAACTGAATTGCTCAGATACA  
 AAGTAGTAAGGATAAAACCTTTT---AGTGTGGCACCTACAAAAATTACAAGGCCAGTCATAGGCTAC-----  
 -----GGCACCCGCAGAGAAAAAGAGCA---GTGGGC---TTGGGAATG-----  
 ---CTATTCTTGGGGGTTCTAAGTGCA---GCAGGTAGCACTATG---GGCGCAGCGGCA---  
 ACAGCGCTGACGGTACAG---ACCCACACT---TTGATA---AAGGGTATAGTGCAACAGCAGGAC---  
 AACCTG---CTAAGA---GCAATACAGGCCCAGCAGCACTTGCTGAGGCTATCTGTATGGGGTATC  
 >KU168282  
 TTTTATTGTAACACATCTAAGATGTTTAACTATACTTTTGAAGTGTACAAGTGGCAACTGTACTGAGATCAATT  
 CCATGAAT-----  
 -----  
 AAAACTGATGAGCATAATGGACTACCTTGCAGGTTAAGACAGGTAGTAAGATCATGGATAAAGGGAGAGTCAG  
 GACTTTATGCACCTCCCATCAGAGGCAACCTCACATGCCAGTCCAAC---  
 ATAACCTGGAATGATTCTACAACTAGATGAACCATATAACCGCACATCA-----  
 -----  
 -----  
 GATGCAAATGTCACACTTAGACCAAGTGGGGGAGACATGCAAGATATATGGAGAGCTCAATTGTACAACTACA  
 AAGTAGTACAGATAAAACCTTTT---AGTGTAGCACCTACAAGAATCTCAAGGCCAACATAAAACCTT-----  
 -----AACACCCCTCGCAGAGAAAAAGAGCA---GTAGGA---TTGGGAATG-----  
 ---CTGTTCTTGGGGGCGCTAAGCCTT---GCAGGTAGCACTATG---GGCGCAGTGGCA---  
 ACAACACTGACGGTACAG---ACCCACAGT---GTACTG---AAGGGTATAGTGCAACAGCAGGAC---  
 AACCTG---CTGAGA---GCGATACAGGCCCAGCAACACCTGCTGAGGCTATCTGTATGGGGTATC  
 >KU168296  
 TTTTACTGTAACACATCTCAGATGTTCAATTATACCTTTATATGTAATGAAACCACCTGTGAGAACACCTGTA  
 AGAGCCCA-----  
 -----AAT---  
 TGCAGTAGCAATATCACTCAGATACCTTGCAGGTTGAAGCAGGTAGTAAGGTCCTGGATGAAGGGAGGATCAG  
 GACTCTATGCACCTCCCATCCGAGGTCAATTAAAGATGTGAATCAAAC---  
 ATAACCTGGAATGATTCTAGAAATGGATCAGCCATGGAACGGGAAC-----  
 -----  
 -----  
 CAAAGCAACAGCACAAGGACATTTAGACCAACAGGGGGAAATATGAAAGATATATGGAGAACTGAATTGCTCA  
 GATACAAAGTAGTAAGAATAAAACCTTTT---  
 AGTGTGGCACCTACAAAAATTACAAGGCCAGTCATAGGCTTT-----  
 GGCCCCCGCAGAGAAAAAGAGCT---GTGGGC---TTGGGAATG-----  
 CTATTCTTGGGGGTTCTAAGTGCA---GCAGGTAGCACTATG---GGCGCAGCGGCA---  
 ACAGCGCTGACGGTACAG---ACCCACACT---TTGATA---AAGGGTATAGTGCAACAGCAGGAC---  
 AACCTG---CTAAGA---GCAATACAGGCCCAGCAGCACTTGCTGAGGCTATCTGTATGGGGTATC  
 >KU168297  
 TTTTACTGTTACACAGCTGATATGTTTAAGTATACCTTTAGATGTAATGAAACCACCTGTATCCCAGGATTCA  
 ATAGCTCA-----  
 -----  
 GAATCCAAGAATAACACCCGGATACCTTGCAGGATAAAGCAGGTAGTAAGGTCATGGATGAGGGGAGGATCAG  
 GACTCTATGCACCTCCAATCCGAGGAACTTAACATGTGAATCAAAC---  
 ATAACCTGGAATGATTCTACAAATGGATGAGCCATGGAACACGAGCAGA-----  
 -----  
 -----  
 AAGAACAACACATTTAGACCAGTAGGGGGAGATATGAAAGATATATGGAGAACTGAATTGCTCAGATACAAAG  
 TAGTAAGGATAAAACCTTTT---AGTGTGGCACCTACAAAAGTTACAAGACCAGTCATAGGCTTT-----

-----GGCCCCCGCAGAGAAAAAAGAGCA---GTGGGC---TTGGGAATG-----  
CTATTCTTGGGGGTTCTAAGTGCA---GCAGGTAGCACTATG---GGCGCAGCGGCA---  
ACAGCGCTGACGGTACGG---ACCCACACT---TTGATA---AAGGGTATAGTGCAACAGCAGGAC---  
AACCTG---CTGAGA---GCAATACAGGCCCAGCAGCACTTGCTGAGGCTATCTGTATGGGGTATC  
>JX245014  
TTTTATTGTAACACCACTAAGTTGTTTAATTATAACTTTACATGTAATGGAGCCACCTGTAATGAAACCATCC  
ATAACCAAAGT-----  
-----TACCAT-----  
AGCTATAAGAATCAAAGTATAATACCTTGCAAATTGAAGCAGGTGGTAAGGTCATGGATACAGGGAGGGTCGG  
GACTCTATGCACCTCCCATCAAAGGTAATCTAACATGTACATCAAAC---  
ATAACTGGAATGCTTCTGGAAATGGATAGCCCATGGAACAAAAGT-----  
-----  
-----  
AGCACGAATGCAACTTTTAGACCAATAGGGGGAAATATGAAAGATATATGGAGAACTGAGTTGTACAACTACA  
AAGTAGTAAGGGTAAAACCTTTT---AGTGTGGCACCCACATATATTACAAGGCCAGTCATTAAATCT-----  
-----CATAGGGAAAAAAGAGCA---GTAGGA---CTGGGAATG-----  
---CTATTCTTGGGGGTTCTAAGTGCA---GCAGGTAGCACTATG---GGCGCAGCGGCA---  
ACAGCGCTGACGGTACAG---ACCCACACA---TTGATA---AAGGGTATAGTGCAACAGCAGGAC---  
AACCTG---CTAAGA---GCAATACAGGCCCAGCAGCACTTGCTGAGGCTATCTGTATGGGGTATC  
>JX245015  
TTTTATTGTAACACCTCTAAGATGTTTTGTTATACTTTCAACTGTAGTAGATCCAACAACCTGCACCCTTATTA  
AGAACAACCTGT-----  
---ACCATTAATAGT-----  
ACTAGTAATAGTACGAGTGAGATACCTTGCAGGTTGAGACAGGTGGTAAGATCATGGATGGGGGGACAGTCAG  
GACTCTATGCTCCTCCCATCAAAGGTAATCTAACATGTATATCAAAC---  
ATAACTGGAATGATTCTACAACCTGGATAAGCCATGGAACATCAGT-----  
-----  
-----  
AATAGGAACATCACACTTAGACCCACAGGGGGAGATATGAAAGATATATGGAGAACTGAATTGTTCCAATACA  
AGGTAGTAAAGGTAAAACCTTTT---AGTGTGGCACCTACAAAAATTGCAAGGCCAGTCATAGGCACT-----  
-----GGCACTCATAGAGAAAAAAGAGCA---GTAGGA---TTGGGAATG-----  
---CTATTCTTGGGGGTTCTAAGTGCA---GCAGGTAGCACTATG---GGCGCAGCGGCA---  
ACAGCGCTGACGGTACAG---ACCCACACT---TTGATA---AAGGGTATAGTGCAACAGCAGGAC---  
AACCTG---CTAAGA---GCGATACAGGCCCAGCAGCATTTGCTGAGGCTATCTGTATGGGGTATC  
>AJ302646  
TTCTATTGTAACACATCTAAGATGTTTAATTATACCTTTTCATGTATAGGAACCAACTGTACTAGTAACCAAA  
ATAGCAGC-----  
-----  
AACAGTAATGACACTCGGATATATTGCAGGATAAAACAGGTGGTAAGGTCATGGATACAGGGAGGGTCAGGAC  
TCTATGCACCTCCAGGAAAGGTAACCTAACATGCAGCTCACTC---  
ATAACTGGAATGATTCTACAATTGGATATGCCATGGAACAGCACCAAC-----  
-----  
-----  
AACAGCAACGCCACATTTAGACCAACAGGGGGAGATATGAAAGATATATGGAGAACTGAATTGTTCAAATACA  
AAGTAGTAAAGGTAAAACCTTTT---AGTGTGGCACCTACAAAAATTGCAAGGCCAGTCATAGGCACT-----  
-----GGCACTCAAAGAGAAAAAAGAGCA---GTAGGA---TTGGGAATG-----  
---CTATTCTTAGGGGTTCTAAGTGCA---GCAGGAAGCACTATG---GGCGCAGCGGCA---  
ACAGCGCTGGCGGTACAG---ACCCAATCT---TTGATG---AAGGGTATAGTGCAACAGCAGGAC---  
AACCTG---CTAAGA---GCAATACAGGCCCAGCAGCAATTGCTGAGGCTATCTGTATGGGGTATC  
>AJ302647  
TTCTATTGTAACACATCTCAGATGTTTAATTATACCTTTTCATGTACAAGAACCAACTGTATTAGACAAAGTA  
ACAGT-----  
-----  
AGCATTAATGGCACAATATCTTGCAGGATAAAACAGGTGGTAAGGTCATGGATACAGGGAGGGTCGGGACTTT  
ATGCACCTCCAGGCCAGGTTACCTAACATGCAACTCATCC---  
ATAACTGGAATGATTCTACAATTGGATAAGACATGGAACCGCACCAAC-----  
-----  
-----  
AACAGCGAATCCACATTTAGACCAATAGGGGGAGATATGAAAGATATATGGAGAACTGAATTGTTCAAATACA  
AAGTAGTAAAGATAAAAACCTTTT---AGTGTGGCACCTACAAAAATTGCAAGACCAGTCATAGGCACT-----

-----GGCACTCGAAGAGAAAAAGAGCA---GTAGGA---TTGGGAATG-----  
 ---CTGTTCTTGGGGGTTCTAAGTGCA---GCAGGAAGCACTATG---GGCGCAGCGGCA---  
 ACAACGCTGGCGGTACAG---ACCCACACT---TTGATG---AAGGGTATAGTGCAACAGCAGGAC---  
 AACCTG---CTAAGA---GCAATACAGGCCAGCAGCAATTGCTGAGGCTATCTGTATGGGGTATC  
 >JN571034  
 TTTTATTGTGACACAGGGAAAAATGTTTAATTATACCTTGAATGTAACGGAACCATCTGTGAGAATATCAGTA  
 GTGAGAGTAAT-----  
 -----AGCAGTAGT-----  
 GAGAGTAAGAATAAAACGCGGATACCTTGCAGGCTGAAACAGATGGTAAGGTCATGGGCAACAGGAGGGTCAG  
 GAATCTATGCACCTCCCATCCAAGGCAATCTCACATGTACATCAAAC---  
 ATAACCTGGGATGATTCTACAAACAGATGGGGTATGGGACTACCCC-----  
 -----  
 -----  
 CACCCCAACAATGTAACATTTAGACCAACAGGGGGAAATATGGAAGATATATGGAGAACTGAATTGTACAAC  
 ACAAAGTAGTAAAGGTAAACCTTTT---AGTGTGGCACCCACAAGAATTGCAAGGCCAGTCATAGGCACT--  
 -----GGCACTCATAGAGAAAAAGAGCA---GCAGGA---TTGGGAATG---  
 -----CTGTTCTTGGGGGTTCTAAGTGCA---GCAGGAAGCACTATG---GGCGCAGCGGCA---  
 ACAGCGCTGACGGTACAG---GCCACACT---TTGATG---AAGGGCATAGTGCAACAGCAGGAC---  
 AACCTG---CTAAGA---GCAATACAGGCCAGCAACACTTGTCTGAGGCTGTCTGTATGGGGTATC  
 >AY169805  
 TTTTACTGCAACACATCTCAGATGTTTAATTATATCTTTAACTGTACCGGAACACCTGTAATTATACAAAA  
 ACATC-----  
 -----  
 CAAAAATTATACCTTTAGCCAAAATACCACTAGCACTAAGATACCTTGCAGATTGAGGCAGGTAGTAAGGTCAT  
 GGATGAGGGGAGGATCGGGACCTTATGCACCTCCCATCCGAGGTAACCTAACATGTGGATCAAAC---  
 ATAACCTGGAATGATTCTAGAAATGGATGAGCCATGGAACGAGAGC-----  
 -----  
 -----  
 CACAGGGAAAGCATATTTAGACCAACAGGGGGAAATATGAAAGATATATGGAGAACTGAATTGCTCAGATACA  
 AAGTAGTAAGGATAAAACCTTTT---AGTGTGGCACCTACAAAAATTACAAGGCCAGTCATAGGCTTT-----  
 -----GGCACCCGCAGAGAAAAAGAGCA---GTGGGC---TTGGGAATG-----  
 ---CTATTCTTGGGGGTTCTAAGTGCA---GCAGGTAGCACTATG---GGCGCAGCGGCA---  
 ACAGCGCTGACGGTACAG---ACCCACACT---TTGATA---AAGGGTATAGTGCAACAGCAGGAC---  
 AACCTG---CTAAGA---GCAATACAGGCCAGCAGCACTTGTCTGAGGCTATCTGTATGGGGTATC  
 >KF859744  
 TTTTACTGTGACACAACCTCAGATGTTTAATTATACCTTTAACTGTACTGACACCAGGTGTGATAATCAAAGT-  
 -----  
 -----  
 ACCACCAGCAGTAATAATATACCTTGCAGGTTGAGGCAGGTAGTAAGGTCATGGATGAGAGGAGGATCGGGAC  
 TCTATGCACCTCCCATCCGAGGTAACCTAACATGTGGATCAAAC---  
 ATAACCTGGAATGATTCTACAAATGGATCAGCCATGGAACGGGAGCCAGAGCAAC-----  
 -----  
 -----  
 ACAAACAGGAGCAGCACCTTTAGACCAATAGGGGGAGATATGAAAGATATATGGAGAACTGAATTGCTCAGAT  
 ACAAAGTAGTAAGGATAAAACCTTTT---AGTGTGGCACCTACAAAAATTACAAGGCCAGTCATAGGCTTT--  
 -----GGCACCCGCAGAGAGAAAAAGAGCA---GTGGGC---TTGGGAATG---  
 -----CTATTCTTGGGGGTTCTAAGTGCA---GCAGGTAGCACTATG---GGCGCAGCGGCA---  
 ACAGCGCTGACGGTACGG---ACCCACACT---TTGATA---AAGGGTATAGTGCAACAGCAGGAC---  
 AACCTG---CTAAGA---GCAATACAGGCCAGCAGCACTTGTCTGAGGCTATCTGTATGGGGTATC  
 >AY169968  
 TTTTACTGCGATACTAGAAAAATGTTTAATGAAAGTGAACCTTTTCACGAGAAC-----  
 -----  
 -----  
 ATGACAATACCATGCAGAATTAGACAAATAGTGAATTCATGGATGAGAGTAGGAAGGGGAATCTATGCACCTC  
 CAATACCAGGACATATAACTTGTAACCTCTCTA---  
 ATTACTGGGCTCATATTGACACGAGACCATGTTAATAATACTAATAAT-----  
 -----  
 -----  
 ACATTTAGACCAATAGGAGGAGACATGAAAAACATTTGGAGGAGTGAACCTCTATAAAATACAAAGTGGTGCGCA  
 TAGAACCATTA---TCTGTGGCACCAACCAAAGCAAAAAGGCATACAGTAGGAGAA-----

-----AGGAGACAGAAGAGAGCAGCCTTTGGC---CTGGGAGCA-----  
CTGTTCTTGGGTTTCTGGGTGCA---GCAGGAAGCACAATG---GGCGCAGCGGCA---  
GTCACGCTGACGGTACAG---GCCCCAGAG---TTACTA---TCGGGAATAGTGCAACAACAGAAC---  
AACCTG---TTGAGA---GCAATAGAGGCCCAACAGCATCTATTGCAACTAACAGTCTGGGGAGTA  
>DQ373066  
TTCTACTGTAATACAAGTGAGATCATCAATATCACTAAGATAAACAAAAC-----  
-----  
-----  
GAGAATATGACAATAATCCCTTGTAGAATAAGACAAATAGTGAATTCCTGGATGCGTGTAGGGAAAGGAATTT  
TTGCACCACCAATTAGAGGTAACATTACCTGCACTTCTAAT---  
ATCACAGGTATGCTACTAGAGATACATAAGAACCGAGAAGATCAGGGAGAAGAT-----CAGGATCAG---  
AAT-----  
-----  
AACACATACGTTTGTCTAACAGGGGGTAACATGAAAGATATTTGGAGAAGTGAACCTATACAAATACAAAATAG  
TTGAGATACAACCACTA---GGAGTAGCACCTACTAAAAAGTAGAAGATATGCAGTAGAA---AAA-----  
-----CAACACCATAGAGAAAAGAGAGCC---CTTGGA---CTAGGAGCA-----  
CTGTTTCTTGGGTTCTGAGGCA---GCAGGAAGCACTATG---GGCGCAGCATCA---  
GTCGTGCTGACGGTACAA---GCCCCGCAA---TTGTTA---ACGGGCATAGTGACGAGCAGCAAT---  
AATCTG---CTAAGA---GCAATAGAAGCTCAACAACATCTGTTGCAGCTTTCTGTCTGGGGAATC  
>GQ217539  
TTTTACTGCAATACTACCCCTCTTTTTCACAGGCAATAAGACAAATATAACA-----  
-----  
-----  
ATAATACTGCCATGCAAAATTAGACAGATAGTTAATTCCTGGATGAGAGTTGGAAAGGGTATCTATGCTCCAC  
CCATTAGAGGAAATCTCTCCTGTAATTCTAAC---  
ATAACAGGGCTTCTATTAACAAGAGATGGACCAGACAAGAATATAAACGAGACT-----  
-----  
-----  
GAAACACTAAGGCCAGGAGGAGGAGACATGAAAGACATTTGGAGAAGTGAACCTTTATAAATATAAAGTAGTAA  
AAATTGAACCCCTG---GCAGTAGCTCCAACCTAAGGCAAGGAGATACACTATAAAT-----  
-----ATGGAAAAACACAGAGCAAAAAGAGCA---GCCTTT-----  
-----GCA---GCAGGAAGCACTATG---GGCGCAGCGGCA---GTTACGCTGACGGTACAG-  
--GCCCGAAAT---TTACTT---TCGGGAATAGTGCAACAACAGAAAT---AATCTG---CTAAGA---  
GCCATAGAAGCTCAGCAACATCTGCTGCAGCTGTCTGTATGGGGTGTC  
>X52154  
TTCTATTGTAATACTAGCCAAATATTTACTGACAACATTACAAATGGCATT-----  
-----  
-----  
ATAATACTGCCATGCAGAATTAGACAGATAGTTAGTTTCATGGATGAGGGTAGGAAGAGGAATATATGCACCCC  
CAATCAGAGGAAACATCACTTGCAATTCTAAC---  
ATTACTGGACTTCTCTTAACTTCAGACACTCCTGTGACTAACAACAGTGGTAAAC-----  
-----  
-----  
CTGACATTTAGACCTACAGGAGGAAACATGAAAGATATTTGGAGAAGTGAGCTCTATAAGTATAAAGTAGTTC  
GAATAGAGCCTTTA---TCAGTGGCACCAACAAAAGCAAGAAGGCATACAGTGGCA---AGA-----  
-----CAGAAAGACAGACAGAAAAGAGCAGCC---TTCGGT---CTGGGAGCA-----  
CTGTTCTTGGGTTCTGAGGCA---GCAGGAAGCACTATG---GGCGCAGCGGCA---  
GTAACGCTGACGGTACAG---GCCCCAGAG---TTGCTG---TCGGGTATAGTGACGCAACAGAAAT---  
AATCTG---TTGAAA---GCAATAGAGGCTCAACAGCACCTATTGCAACTATCAATCTGGGGAGTA  
>JQ768416  
TTCTACTGCAATCTAACAAAATGGATTAAACGAGACCTGGCTTAACGAGACG-----  
-----  
-----  
GACCAGACCAATCTTGTAGCACCTGTAGACTCAGACAAATAGTTAACCATTGGGGCATTGTGGCTAAAGCCA  
TCTACCTCCCTCCAAGAAGAGGAACAGTAAAATGTGTGTCAAAC---  
ATCACGGGTTTCTGATGACAAACGAGGAAACGGGTGCT-----  
-----  
-----  
ACCTTCTCCGGTAAAGTAGAGGATTATTGGAGGGTGGAAATTAGCAAAGTACAAAATTGTAGAAATTCAGCCCC  
TA---TCAGTGGCTCCTACCACAGGAAAAAGGCCAGAGATTAAG---GCC-----

-AATCATACAAGATCAAAAAGGGAC---GTTGGC---ATAGGGCTG-----  
TTGTTTCTGGGATTTCTCAGCGCA---GCAGGAAGTACAATG---GGCGCAGCGTCA---  
ATAGCGCTGGTGGCACAG---GCCAGAGGG---GTCCTC---TCTGGTATTGTACAGCAGCAGCAC---  
AACCTG---CTGCAG---GCAATAGAGGCGCAACAGCATTGTGTTGCAGCTTACTGTATGGGGCGTC  
>KU921778  
TTCTTTTGTAAATACATCAGAACTATTTAATAGCAGTTGGAATAATAGCAGTTGGAGTGACAATAGCAGTGAGA  
ATAGGACG-----  
-----  
TCAAATGACACCACCATAACTCTTAAATGCAGAATAAAGCAAATTATAAATATGTGGCAGAGAACGGGAAAAAG  
CAATGTATGCCCCCTCCCATTC AAGGAGTAATAAACTGTGTATCAAAC---  
ATTACAGGACTAATATTAACAAGAGATGGGGGTGGAGATGATAGC-----  
-----  
-----  
AGTACAAATGAACTTTT CAGACCTGGAGGAGGAGATATGAGGGACAATTGGAGAAAGTGAATTATATAAGTATA  
AAGTAGTAAAAATTGAACCAATA---GGAGTAGCACCCACCAAGGCAAAGAGAAGAGTGGTG-----  
-----GAGAGAGAAAAAAGAGCA---GTGGGA---ATAGGAGCT-----  
---GTATTCCTTGGGTTCTTAGGAGCA---GCAGGAAGCACGATG---GGCGCGGCGTCA---  
ATAACGCTGACGGTACAG---GCCAGACAA---TTGTTG---TCTGGCATAGTGCAACAGCAAAGC---  
AATTTG---CTGAGG---GCTATAGAGGCTCAACAACATCTGTTGAAACTCACAGTCTGGGGCATT  
>MF373124  
TTCTTTTGTGATACATCAGGCCTGTTTAATAGTACTTGGCCTTGGCAAAATGACACTGCCAGCCTATCAAATA  
ACACAGAG-----  
TTAAATGGTAATAGCACA-----  
GAGTTAACTGGTACTATAACTCGCCCATGCAGAATAAAGCAAATTGTAAATATGGGGCAAAGAGTAAGAAAAAG  
CAATGCATGCCCCCTCCCATCCAAGGGTTAATAAGGTGGGAATCAAAC---  
ATTACAGGACTACTATGGACGAGAGATGGTGGGGATAATAGCTAC-----  
-----  
-----  
AATGAAACCTTCCGACCTGGAGGAGAGGGAGATATGAGGGACAATTGGAGAAGTGAATTATATAAGTATAAAG  
TAGTAAAAATTGAACCACTA---GGAGTAGCACCTACCAGGGCGAAGAGAAGAGTGGTG-----  
-----GAGAGAGAAAAAAGAGCA---GTTGGA---ATAGGAGCT-----  
GTATTCATTGGGTTCTTAGGAGCA---GCAGGAAGCACTATG---GGCGCGGCGTCA---  
ATAACGCTGACGGTACAG---GCCAGACAA---CTATTG---TCTGGCATAGTGCAACAGCAAAGC---  
AATTTG---CTGAGG---GCTATAGAGGCTCAACAGCATCTGTTGAAACTCACAGTATGGGGCATT  
>GU201516  
TTCTTTTGC AATACAACAGGCTTGTTCAATAGCACATGGACGAAAGAGGGCAATAGCACATGGAAAAAGAACG  
ATAGTGTCTCT-----  
-----GAAAGG-----  
GAGTCAAATGACAATATAACACTCCAATGCAAAATAAAACAGATTATAAACATGTGGCAGAGAGTAGGACGAG  
CAATGTATGCCCCCTCCCATTCAGGAGTAATAAAGTGTATATCAAAT---  
ATCACAGGAATGATCTTGACAAGAGATGGTGGGAAGCGCAATGAT-----  
-----  
-----  
TCCAGTAGTGAGACCTTCAGGCCTGGAGGAGGAGATATGAGGGACAATTGGAGAAGTGAATTATATAAGTATA  
AAGTAGTAAAAATTGAACCACTA---GGAATAGCACCCACCAAGGCAAGGAGAAGAGTGGTG-----  
-----GAGAGAGAAAAAAGAGCA---GTTGGA---CTGGGAGCT-----  
---GCTTTCCTTGGGTTCTTGGGAGCT---GCAGGAAGCACTATG---GGCGCGGCGTCA---  
ATAACGCTGACGGTACAG---GCCAGACAA---TTATTG---TCTGGCATAGTGCAACAGCAAAGC---  
AATTTG---CTGAAG---GCTATAGAGGCTCAACAGCAGCTGTTGAAACTCACGGTCTGGGGCATT  
>MN486000  
TTCTTCTGTAATACATCAAAATTGTTTAATAATAATGAAACC-----  
-----  
-----  
ATTACAGAAAATATCACACTCCCATGCAGAATAAAACAAATTGTAAACATGTGGCAGGAAGTAGGAAAAGCAA  
TGTATGCCCCCTCCTATTAGAGGAATAATTAGATGTGTATCAAAT---  
ATTACAGGTCTACTATTAACAAGAGATGGTGGTATAAAACACCACC-----  
-----  
-----  
AACACAACACTGAAATCTTTAGACCTGGAGGAGGAGATATGAGGGACAATTGGAGAAGTGAATTATATAAAT  
ATAAAGTAGTAAAAATTGAACCGTTA---GGAATAGCACCCACCAAGGCAAAGAGAAGAGTGGTG-----

-----CAGAGAGAAAAAAGAGCA---GTAACA---TTTGGAGCT---  
 -----CTGTTTCCTTGGGTTCTTGGGAGCA---GCAGGAAGCACTATG---GGCGCAGCGTCA---  
 GTGACGCTGACGGTACAG---GCCAGACAA---TTGCTG---TCTGGTATAGTGCAACAGCAGAAC---  
 AACCTG---CTGAAG---GCTATTGAGGCGCAACAGCACCTGTTGCAACTCACAGTCTGGGGCATC  
 >KT427670  
 TTCTTTTGTAAACACAACAAAACCTGTTTAATAGTACCTGGCCTATTAATAGTACCTGGAATGCAACT-----  
 -----  
 -----  
 GGAGAGTCTATCATCACACTCCCATGCAGAATAAAACAAATTATAAACATGTGGCAGGAAGTAGGAAAAGCAA  
 TGTATGCCCCCTCCCATCAGCGGACCCATTAATTGTACATCAAAC---  
 ATTACAGGGCTACTATTAACAAGAGATGGTGGGGTTGCAAACGCC-----  
 -----  
 -----  
 ACCAACGAGACCTTCAGACCTGGAGGAGGAGATATGAGGGACAATTGGAGAAGTGAATTATATAAATATAAAG  
 TAGTAAAAGTTGAACCATTA---GGAGTAGCACCCACCAAGGCAAAGAGAAGAGTGGTG-----  
 -----CAGAGAGAAAAAAGAGCA---GTGGGA---TTCGGAGCT-----  
 CTGTTTCCTTGGGTTCTTGGGAGCA---GCAGGAAGCACTATG---GGCGCAGCGTCA---  
 GTAACGCTGACGGTACAG---GCCAGACAA---TTATTG---TCTGGTATAGTGCAACAGCAGAAC---  
 AATCTG---CTGAGA---GCTATTGAGGCGCAACAGCACCTGTTGCAACTCACAGTCTGGGGCATC  
 >KT427718  
 TTCTTCTGTAATACATCAGGACTGTTCAATAGTACTTGGTCATCTAATAGTACGTGGAATGATACTAACGAGT  
 CAGAAAAAT-----  
 -----  
 ATCACAGAAATTATCACACTCCCATGCAGAATAAAACAAATTATAAACATGTGGCAGAGAGTAGGAAGAGCAA  
 TGTATGCCCCCTCCCATCAGAGGAAAAATTAGTTGTTTCATCAAAT---  
 ATTACAGGTCTGCTATTAACAAGGGATGGTGGTGATGAGAGCAAC-----  
 -----  
 -----  
 AATGGGACTGAGATCTTCAGACCTGGAGGAGGAGATATGAGGGACAATTGGAGAAGTGAATTATATAAATATA  
 AAGTAGTAAAAATTCAACCATTA---GGGATAGCACCCAAACAAGGCAAAGAGAAGAGTGGTG-----  
 -----CAAAGAGAAAAAAGAGCA---GTAACA---TTTGGAGCT-----  
 ---ATGTTCCCTTGGGTTCTTGGGAGCA---GCAGGAAGCACTATG---GGCGCAGCGTCA---  
 ATAACGCTGACGGTACAG---GCCAGACAG---TTATTG---TCTGGTATAGTGCAACAGCAGAAC---  
 AATCTG---CTGAGA---GCTATTGAGGCGCAACAGCATATATTGCAACTCACAGTCTGGGGCATC  
 >KX181896  
 TTTTCTGCAATACAACACAGCTGTTTAATAGTACTTGGCTACTTAATGATACTTGGGATAGTACTGGGGAGT  
 CAAATAAC-----  
 -----  
 ACTGCAGAGAATATCACACTTCCATGCAGAATAAAACAAATTATAAACAGGTGGCAGGGGGTAGGAAAAGCAA  
 TGTATGCCCCCTCCCATCGAAGGACTAATTAGATGTTTCATCAAAT---  
 ATTACAGGGCTGATATTAACAAGAGATGGTGGTGGTGATAATAAC-----  
 -----  
 -----  
 AGGTCCAAAGAAACCTTCAGACCTGGGGGGGGGGGATGAGGGGCAATTGGGGAAGTGAATTATATAAATATA  
 AAGTAGTAAAAAATGAGCCCTTA---GGAATAGCCCCCCCCCGGCAAAAAGAAGGGGGG-----  
 -----CAGAGAGAAAAAAGAGCA---GTGGGAACGATAGGAGGT-----  
 ---ATGTTCCCTTGGGTTTTTGGGAACA---GCAGGAAGCACTATG---GGGCCAGCGTCA---  
 ATCAGCTGACGGTACAG---GCCAGACTA---GTATTG---TTTGGTATAGTGACAGCAGAGAAC---  
 AATTG---CTGAAG---GCTATTGAGGCGCAACAGCATTTGTTGCAACTCACAGTCTGGGGCATC  
 >JQ403021  
 TTCTTTTGTAAACACAACACCACTGTTTAATAGTACTCGGCTGTCTAATGGTACTTGGCTGTTTAATAGTACTG  
 AGAATAGT-----  
 -----AAT---  
 GACCCATAAGCCAACATTACACTCCAATGCAGAATAAAACAAATTATAAACATGTGGCAGGAAGTTGGAAAAG  
 CAATGTATGCCCCCTCCCATCAAGGACTAATTAGATGTAAGTCAAAT---  
 ATTACAGGGCTGCTATTAACAAGAGATGGTAGTACTAACAGCACT-----  
 -----  
 -----  
 GAGGAGATTTTCAGACCTGGAGGAGGAGATATGAGGGACAATTGGAGAAGTGAATTATATAAATATAAAGTAG  
 TAAAAATTGAACCATTA---GGAGTAGCACCCACCAAGGCAAAGAGAAGAGTGGTG-----

-----CAGAGAGAAAAAGAGCA---GTAGGGGTAATAGGAGCC-----  
 ATGTTCTTGGGTTCTTGGGAGCA---GCAGGAAGCACTATG---GGCGCAGCGTCA---  
 ATAACGCTGACGGTACAG---GCCAGACAA---TTGCTG---TCTGGTATAGTGCAACAGCAGAAC---  
 AATCTG---CTGAGG---GCTATTGAGGCGCAACAACATCTGTTGCAACTCACAGTCTGGGGCATC  
 >JQ403047  
 TTCTTCTGTAATACATCACAACCTGTTTAGTAGTACTTGGCTGTCTAATGGTACTTGGAAATGGTACTACAAGTA  
 AAAATGAT-----  
 -----  
 ACTACAGGAAATATCACACTCCCATGCAGAATAAAACAAATTATAAACATGTGGCAGGAAGTAGGAAAAGCAA  
 TGTATGCCCCCTCCCATCAAAGGACCAATCAAATGTTTCATCAAAT---  
 ATTACAGGGCTGATATTAACAAGAGATGGGGGTATCAACAATACGAGC-----  
 -----  
 -----  
 AATGATACAGAGGTCTTTTCGACCTACAGGAGGAAATATGAAGGATAATTGGAGAAGTGAACATATAAAATATA  
 AAGTAGTAAAAATTGAACCATTA---GGAGTAGCACCCAAACAAGGCGAAGAGAAGAGTGGTG-----  
 -----CAAAGAGAAAAAAGAGCAGTAGTGGA---CTAGGAGCT-----  
 ---GTGTTCTTGGGTTCTTGGGAGCA---GCAGGAAGCACTATG---GGCGCAGCGGCA---  
 GTAACGCTGACGGTACAG---GCCAGACAA---TTATTG---TCTGGTATAGTGCAACAGCAGAAC---  
 AATCTG---CTGAGG---GCTATTGAGGCGCAACAGCATATGTTGCAACTCACGGTCTGGGGCATC  
 >EU363825  
 TCTACTGTATACATCACACTGTTTACTAGTAACTGGAATGAGAGTGATACTAGA-----  
 -----  
 -----  
 GTAAATATCCACGCTCCTTGCGAGAATAAAACAAATTGTAAACATGTGGCAGGAAGTAGGGAAAGCAATGTATG  
 CCCCTCCCATTGCAGGACAAATTAGATGTTTCATCAAAT---  
 ATTACAGGATTGCTATTAACAAGAGATGGTGGTAATGAGACCACC-----  
 -----  
 -----  
 ACCGGGAACGAGACCTTCAGACCTGGAGGAGGAGATATGAGAGACAATTGGAGAAGTGAATTATATAAAATATA  
 AAGTAGTAAAAATTGAACCATTA---GGAGTAGCACCCACCAAGGCAAAGAGAAGAGTGGTG-----  
 -----CAAAGAGAAAAAAGAGCA---GTGGGAACGATAGGAGCT-----  
 ---ATGTTCTTGGGTTCTTGGGAGCA---GCAGGAAGCACTATG---GGCGCAGCGTCA---  
 ATAACGCTGACGGTACAG---GCCAGACAA---ATGTTG---TCCGGTATAGTGCAACAGCAGAGA---  
 AATCTG---CTGAGG---GCTATTGAGGCGCAACAGCATCTGTTGCAACTCACAGTCTGGGGCATC  
 >AY586543  
 TTCTGCTGTAATACAACACAGCTGTTTAATAGTACTTGGTTTGGTAATGGTACTAGCAGGTCAAATGAC----  
 -----  
 -----  
 ACTGGAGAAAATATCACACTCACATGTAAATAAAACAAATTGTAAACCTGTGGCAGGAAGTAGGAAAAGCAA  
 TGTATGCTCCTCCCATCAAAGGACAAATTAGATGTTTCATCAAAC---  
 ATTACAGGACTGCTATTAACAAGAGATGGTGGTGGTAACAGCAGT-----  
 -----  
 -----  
 AGTAGCAACGAGACCTTCAGACCTGGAGGAGGAGATATGAGGGACAATTGGAGAAGTGAATTATATAAAATATA  
 AAGTAGTAAAAATTGAACCATTA---GGAATAGCACCCACCAAGGCAAAGAGAAGAGTGGTG-----  
 -----CAGAGAGAAAAAAGAGCA---GTGGGA---ATAGGAGCT-----  
 ---GTGTTCTTGGGTTCTTGGGAGCA---GCAGGAAGCACTATG---GGCGCAGCGTCA---  
 GTGACGCTGACGGTACAG---GCCAGGCAA---TTATTG---TCTGGTATAGTGCAACAGCAGAAC---  
 AATTTG---CTGAGG---GCTATTGAGGCGCAACAACATATGTTGCAACTCACAGTCTGGGGCATC  
 >FJ388904  
 TTCTTCTGCTGTACTACAGGGCTGTTGAATTGGAATTTTACTGGGAATAAT-----  
 -----  
 -----  
 ACTAATCATACTACCACACTACCATGCAGAATAAGACAAATTGTAAATAGGTGGCAGGAAGTAGGAAAAGCAA  
 TGTATGCCCCCTCCCATCAGTGGACAGATTAACTGCTCATCAAAC---  
 ATTACAGGGCTACTATTAACAAGAGATGGTGGTGTATGAGAACGGG-----  
 -----  
 -----  
 ACCAACGAGATCTTTAGACCTGGAGGAGGAGATATGAGGGACAATTGGAGAAGTGAATTATATAAAATATAAAG  
 TAGTAAAAATTCAACCATTA---GGAATAGCACCCACCAAGGCAAAAAGAAGAGTGGTG-----

-----CAAAGAGAAAAAAGAGCA---GTGGGAACGCTAGGAGCT-----  
ATGTTCTTGGGTTCTTGGGAGCA---GCAGGAAGCACTATG---GGCGCAGCGTCA---  
CTGACGCTGACGGTACAG---GCCAGACAA---TTATTG---ACTGGTATAGTGCAACAGCAGAAC---  
AATCTG---CTGAGA---GCTATTGAGGCGCAACAGCATATGTTGCAACTCACAGTTTGGGGCATC  
>JF683750  
TTCTTTTGTAAACACAACAACACTGTTTAATAGTACTTGGAACAGTACTACTTGGAAATAGTACTGAGAATGAAG  
CTGGA-----  
-----  
GAGTCAAATGACAATATCACACTCCAGTGCAGAATAAAACAAATTATAAACATGTGGCAAGAAGTAGGAAAAG  
CAATGTATGCCCCCTCCCATTAGGGGACCAATTAAGTCTCGTCAAAT---  
ATCACAGGGCTGCTATTAACAAGAGATGGTGGTAACAGGAATGGGAGT-----  
-----  
-----  
AATGAGACCGAGATCTTCAGACCTGGAGGAGGAGATATGAGGGACAATTGGAGAAGTGAATTATATAAAATACA  
AAGTAGTGCAAATTGAACCAATA---GGATTAGCACCCACCAAGGCAAAGAGAAGAGTGGTG-----  
-----CAGAGAGAAAAAAGAGCA---GTGGGA---CTAGGAGCC-----  
---TTGTTCTTGGGTTCTTGGGAGCA---GCAGGAAGCACTATG---GGCGCAGCGTCG---  
ATATCGCTGACGGTACAA---GCCAGACAA---TTATTG---TCTGGTATAGTGCAACAGCAGAAC---  
AACCTG---CTGAGG---GCTATTGAGGCGCAACAGCACATGTTGCAACTCACAGTCTGGGGCATC  
>JF683797  
TTCTTCTGTAATTCATCACAACACTGTTTAATAGTACTTGGGCTGACGAAAATGGCACAATCACACAAGGAAATG  
ACACA-----  
-----  
CAAGGAAATGACACAATCATACTCCCATGTAGAATAAAACAAATTATAAACATGTGGCAGCAGGTAGGAAAAG  
CAATGTATGCCCCCTCCCATACGAGGACTAATTAAGTGTACATCAAAT---  
ATTACAGGAATACTATTAACAAGAGATGGTGGGCATAATGTGAAC-----  
-----  
-----  
AATACCACAGAGACCTTCAGACCAGCAGGAGGAGATATGAGGGACAATTGGAGAAGTGAATTATATAAAATATA  
AAGTAGTACAAATTGAGCCATTA---GGAATAGCACCCACCAGGGCAAAGAGAAGAGTGGTG-----  
-----CAGAGAGAAAAAAGAGCA---GTGGGA---ATAGGAGCT-----  
---TTGTTCTTGGGTTCTTGGGAGCA---GCAGGAAGCACTATG---GGCGCAGCGTCA---  
ATGACGTTGACGGTACAG---GCCAGACAA---CTATTG---TCTGGTATAGTGCAACAGCAGAAC---  
AACTTG---CTGAGA---GCTATTGAGGCGCAACAGCATCTGTTGCAACTCACAGTCTGGGGCATC  
>KT124808  
TTCTTCTGTAACACAACAAATCTGTTTAATAGCATTTGGGATATCAATAGTACTTGGAAATAGTACTGAAAGGA  
CAAACAAC-----  
-----  
ACAGACAACACTAACATCACACTCCAATGCAGAATAAAACAAATTATAAACATGTGGCAGGGAGTAGGAAGAG  
CAATGTATGCCCCCTCCCATCAGAGGGCTGATTAAATGTTCAATCAAAT---  
ATCACAGGGCTGCTATTAACAAGGGATGGTGGTAATAGTAATGACACC-----  
-----  
-----  
AACAACACAGAGACCTTTAGACCAGGAGGGGGAGATATGAAGGACAACACTGGAGAAGTGAATTATATAAAATATA  
AAGTAGTACAAATTAAACCATTA---GGAATAGCACCCACCAAGGCAAAGAGAAGAGTGGTG-----  
-----CAGAGAGAGAAAAAGAGCA---GTTACC---TTCGGAGCT-----  
---ATGTTCTTGGGTTCTTGGGAGCA---GCAGGAAGCACTATG---GGCGCAGCGTCA---  
CTGACGTTGACGGTACAG---GCCAGGCAA---TTATTG---TCTGGCATAGTGCAACAGCAGAAC---  
AATCTG---CTGAGA---GCTATTGAGGCACAACAACATCTGTTGCAGCTCACAGTCTGGGGCATT  
>KT200352  
TTCTTCTGCAATTCATCACAACACTGTTTAATAGTACTTGGCCAAGTAACAGTACTTGGAAATATTAGCACTAATA  
CTCAGGGGAAT-----  
-----  
AGCACTGAAGACATTATCACACTCCCATGTAGAATAAAGCAAATTATAAACATGTGGCAGGAGGTAGGAAAAG  
CAATGTATGCCCCCTCCCATCCAAGGACAAATTAGATGTTCAATCAAAT---  
ATTACAGGGCTGCTATTAACAAGAGATGGTGGTATAAAACAATACA-----  
-----  
-----  
AATAATACTGAAACCTTCAGACCAGGAGGAGGAAATATGAAGGATAATTGGAGAAGCGAATTGTATAAAATACA  
AAGTAGTACAAATTGAACCATTA---GGAGTAGCACCCACCAAGGCAAAGAGAAGAGCGGTG-----

-----CAGAGAGAAAAAAGAGCA---ATAGGA---CTAGGAACT-----  
 ---ATGTTCTTGGGTTCTTGGGAGCA---GCAGGAAGCACTATG---GGCGCAGCGTCA---  
 ATGACGCTGACGGTACAG---GCCAGACAA---TTATTG---TCTGGTATAGTGCAACAGCAGAAC---  
 AATCTG---CTGAGA---GCTATTGAGGCGCAACAGCATCTGTTGCAACTCACAGTCTGGGGCATT  
 >KC699022  
 TTCTTCTGTGATACAACAAAGCTGTTTAATAGTACTTGGCTGGCTAATGGTAGGAGGAATGATACTTCAAGTT  
 CA-----  
 -----  
 AATGACACTCTCATCATACTCCCATGCAGAATAAAACAAATTATAAACAGATGGCAAGAAGTAGGTAAAGCAA  
 TGTATGCCCCCTCCCATCAGTGGACTAATTAAATGTTTCATCAAAT---  
 ATTACAGGGCTGCTATTAACAAGAGATGGTGATGAGGATAATAGTAATAGCACG-----  
 -----  
 ----  
 AAAAACAACACCATAGAGACCTTCAGACCTGGAGGGGGAGATATGAGAGACAATTGGAGAAGTGAATTATACA  
 AATATAAAGTAGTAAGAATTGAGCCATTG---GGAGTAGCACCCACCAAGGCAAAGAGAAGAGTGGTG-----  
 -----CAGAGAGAAAAAAGAGCA---GTAACG---  
 CTCGGAGCT-----ATGTTCTTGGGTTCTTGGGTGCA---GCAGGAAGCACTATG---  
 GGCGCAGCGTCA---ATAACGCTGACGGTACAG---GCCAGACAA---TTATTG---  
 TCTGGTATAGTGACAGCAGCAAAAC---AATTTG---CTGAGA---  
 GCTATTGAGGCGCAACAACATCTGTTGCAACTCACGGTCTGGGGCATC  
 >KC699024  
 TTCTTCTGTAATTCATCACAACCTGTTTAATAGTACTTGGTATGGTAATGGTACTGGAAATGCCAAC-----  
 -----  
 -----  
 ACTACAGGCACAATCACACTCCCATGCAGAATAAAACAGATTATAAACATGTGGCAGGAGGTAGGAAAAGCAA  
 TGTATGCCCCCTCCCATCAAAGGACAAATTAGATGTTTCATCAAAT---  
 ATTACAGGGCTGCTATTAAC TAGAGATGGTGGAAGGATCAGACT-----  
 -----  
 -----  
 GAGAATGAAACCGAGACCTTCAGACCTGAAGGGGGAAATATGAAGGACAATTGGAGAAGCGAATTATATAAAT  
 AATAAGTAGTAAAAATTGAACCATTA---GGAATAGCACCCACCAAGGCAAAGAGAAGAGTGGTG-----  
 -----CAAAGAGAAAAAAGAGCA---GTGGGAGTGATAGGAGCT---  
 -----ATGTTCTTGGGTTCTTGGGAGCA---GCAGGAAGCACTATG---GGCGCAGCGTCA---  
 GTGACGCTGACGGTACAG---GCCAGACAA---TTATTG---TCTGGTATAGTGCAACAGCAGAAC---  
 AATTTG---CTGAGG---GCTATTGAGGCGCAACAGCATCTGTTGCAACTCACAGTCTGGGGCATT  
 >HQ595798  
 TTCTTCTGCAATACAACAGCACTGTTTAATAGTACTTGGAAATAATGAAAGGTCAAATGAC-----  
 -----  
 -----  
 ACTGGAGGAAATATCACACTCCCATGCAGAATAAAACAAATTATAAACATGTGGCAGGAAGTAGGAAAAGCAA  
 TGTATGCCCCCTCCCATCAGTGGACAAATTAGATGTTTCATCAAAT---  
 ATTACAGGGCTGCTATTAACAAGAGATGGTGGTGACAGTCCAAAT-----  
 -----  
 -----  
 GACACTGAGACCTTCAGACCTGGAGGAGGAGATATGAGGGACAATTGGAGAAGTGAATTATATAAATATAAAG  
 TAGTAAGAATTGAACCATTA---GGAGTAGCACCCACCAAGGCAAAAAGAAGAGTGGTG-----  
 -----CAGAGAGAAAAAAGAGCA---GTGGGA---ATAGGAGCT-----  
 CTGTTCTTGGGTTCTTGGGAGCA---GCGGGAAGCACTATG---GGCGCAGCGTCA---  
 ATGACGCTGACGGTACAG---GCCAGACTA---TTATTG---TCTGGTATAGTGCAACAGCAAAAC---  
 AATTTG---CTGAGG---GCTATTGAGGCGCAACAGCATCTGTTGCAACTCACAGTCTGGGGCATC  
 >HQ595777  
 TTTTCTGTGAATACAACACAACCTGTTTAATAGTAGTTGGAACAGTAACAGTAACAGTTCTGTAAATGAA-----  
 -----  
 -----  
 AGTTCTGTGAATATCACACTCCCATGTAGAATGAAACAAATTATAAACATGTGGCAGGAAGTAGGAAAAGCAA  
 TGTATGCCCCCTCCCATCAGAGGACCAATCCAATGCATATCAAAT---  
 ATCACAGGGCTATTATTAACAAGAGATGGTGGAATAATGGAACA-----  
 -----  
 -----  
 AATGAGAGCGAGATCTTCAGACCTGCAGGAGGCAATATGAGGGACAATTGGAGAAGTGAATTATATAAATATA

AAGTAGTAAAAATTGAACCATTA---GGAATAGCACCCACCAAGGCAAGGAGAAGAGTGGTG-----  
-----CAGAGAGAAAAAAGAGCA---GTGGGAACGCTAGGAGCT-----  
---ATGTTCCCTTGGTTTCTTGGGAGCA---GCAGGAAGCACTATG---GGCGCAGCGTCA---  
CTGACGCTGACGGTACAG---GCCAGACAA---CTGTTG---TCTGGTATAGTGCAACAACAGAAC---  
AATCTG---TTGAGG---GCTATTGATGCGCAACAGCATATGTTGCAACTCACAGTCTGGGGCATC  
>AB588226  
TTCTTCTGTAATTCAACACCACTGTTTAATAGTACTTGAATAGTACTGGATGGTTAAGTAACACAAATAAC-  
-----  
-----  
GCTACAGGAAATATCACACTCCAATGTAGAATAAAACAAATTATAAACATGTGGCAGGAAGTAGGAAAAGCAA  
TGTATGCCCCCTCCCATCAGAGGACAAATTAGATGTTTCATCAAAT---  
ATTACAGGGCTACTATTGACAAGAGATGGTGGTAATAGCACGAGC-----  
-----  
-----  
GGGCGAGAGATCTTCAGACCTGGAGGAGGAGATATGAGGGACAATTGGAGAAGTGAATTATATAAATATAAAG  
TAGTAAAAATTGAACCATTA---GGAGTAGCACCCACCACGGCAAAGAGAAGAGTGGTG-----  
-----CAGAGAGAAAAAAGAGCA---GTGGGAACAATAGGAGCT-----  
ATGTTCCCTTGGGTTCTTGGGAGCA---GCAGGAAGCACTATG---GGCGCAGCGTCA---  
ATGGCGCTGACGGTACAG---GCCAGACAA---CTATTG---TCTGGTATAGTGCAACAGCAGAAC---  
AATCTG---CTGAGG---GCTATTGAGGCGCAACAGCATATGTTGCAACTCACAGTCTGGGGCATC  
>AJ417428  
TTCCACTGTAATTCAACACAACCTGTTTAATAGTACCTGGAACGGTAATGATACTGATACTAAAGAAACAAATG  
AC-----  
-----  
ACTGAAGGAATATCATACTCCCATGCAGAATAAAACAAATTGTAAACCTGTGGCAGGAAGTAGGAAAAGCAA  
TGTATGCTCCTCCCATCAGGGGACAAATCAGATGTTTCATCAAAT---  
ATTACAGGGCTGCTATTAACAAGAGATGGTGGTAATATCACGAAT-----  
-----  
-----  
GAGACCGAGATCTTCAGACCTGGAGGAGGAGATATGAGGGACAATTGGAGGAGTGAATTATATAAATATAAAG  
TAGTAAAAATTGAACCATTA---GGAGTAGCACCCACCAAGGCAAAGAGAAGAGTGGTG-----  
-----CAGAGAGAAAAAAGAGCA---GTGGGA---CTAGGAGCT-----  
TTGTTCCCTTGGGTTCTTGGGAGCA---GCAGGAAGCACTATG---GGCGCAGCGTCA---  
ATGACGCTGACGGTACAG---GCCAGACAA---TTATTG---TCTGGTATAGTGCAACAGCAAAAC---  
AATTTG---CTGAGG---GCTATTGAGGCGCAACAGCATCTGTTGCAACTCACAGTCTGGGGCATC  
>MF373203  
TTC---TCCGGAACCCACCAGGACAATCCACCATACTGGAATCATGGGAACTCGAAAAATAACTAAGGGA-  
-----  
-----  
CCAATTAAGGCATTAATCCCCTTCCCTGGAAGAATAAAACAAATTATAAACCTGTGGCAAGAAGTAGGAAAAG  
CAATGTATGCCCCCTCCCATCAGGGGAAACATTAGTTGTTTCATCAAAT---  
ATTACAGGACTACTATTAACAAGGGATGGTGGTAATAATGAACT-----  
-----  
-----  
GAGACTGAGACCTTCAGACCTGGAGGAGGAGATATGAAGGACAATTGGAGAAGTGAATTATATAGATATAAAG  
TAGTAAAAATTGAACCATTA---GGAATAGCACCCACCAAGGCAAGGAGACGGGTGGTG-----  
-----CAGAGAGAAAAAAGAGCA---GTAACA---CTAGGAGCT-----  
ATGTTCCCTTGGGTTCTTGGGGGCA---GCAGGAAGCACTATG---GGCGCAGCGTCA---  
CTGACGCTGACGGTACAA---GCCAGACAA---TTATTG---TCTGGTATAGTGACAGCAGCAAAAC---  
AATTTG---CTGAGG---GCTATTGAGGCGCAACAACACCTGTTGCAACTCACAGTCTGGGGCATT  
>AY173951  
TTCTTCTGTAATTCAACAAAACCTGTTTAATAGTACTTGAATAGCACTGAAGGAAATGACGATGGA-----  
-----  
-----  
GAGGAAAGAAATATCACACTCCCATGCAGAATAAAACAAATTGTAAACATGTGGCAGGAAGTAGGAAAAGCAA  
TGTATGCCCCCTCCCATCGGAGGACAAATTAGATGCACCTCAAAT---  
ATTACAGGGCTGCTATTAACAAGAGATGGAGGTAACCAAAATGGGACC-----  
-----  
-----  
AACGAGACTGAAATCTTCAGACCTGGAGGAGGAAATATGAGGGACAATTGGAGAAGTGAACATATAAATATA

AAGTAGTAAAAATTGAACCATTA---GGAGTAGCACCCACTAAGGCCAAGAGAAGAGTGGTG-----  
-----CAGAGAGAAAAAAGAGCA---GTGGGA---ATAGGAGCT-----  
---GTGTTCTTGGGTTCTTGGGAGCA---GCAGGAAGCACTATG---GGCGCAGCGTCA---  
GTGACGCTGACGGTACAG---GCCAGACTA---TTATTG---TCTGGTATAGTGCAACAGCAGAAC---  
AATCTG---CTGAGG---GCTATTGAGGCGCAACAGCATCTGTTGCAACTCACAGTCTGGGGCATC  
>AF277068  
TTCTTCTGTAATACAACACAATTGTTTAAACAGTACTTGGAAATATTAATGGTACTTGGCATGGTACTACAGTG-  
-----  
-----  
TCAAATAAGACTATCATACTCCCATGCAGAATAAAACAAATTATAAACATGTGGCAGGAAGTAGGCAAAGCAA  
TGTATGTCCCTCCTATTAGAGGACAAGTTAGATGTTTCATCAAAT---  
ATTACAGGATTACTATTAACGAGAGACGGTGGTAATAATAACAGC-----  
-----  
-----  
ACCACCGAGATCTTCAGACCTGGAGGAGGAGATATGAGGGACAATTGGAGAAGTGAATTATATAAATATAAAG  
TAGTAAAAATTGAACCATTA---GGAATAGCACCCACCAAGGCGAGGAGAAGAGTGGTG-----  
-----CAAAGAGAAAGAAGAGCA---GTGGGAACAATAGGAGCT-----  
ATGTTCTTGGGTTCTTGGGAGCA---GCAGGAAGCACTATG---GGCGCAGCATCA---  
GTAACGCTGACGGTACAG---GCCAGACTA---TTATTG---TCTGGTATAGTGCAACAGCAGAAC---  
AATCTG---CTGAGG---GCTATTGAGGCGCAACAGCATCTGTTGCAACTCACAGTCTGGGGCATC  
>FJ469735  
TTGTA CTGTAATACATCACATCTGTTTAAATAGTACCTGGATGTGTAATAGTACTTGGAAATAGTACTAACACTG  
AA-----  
-----  
GGGAACAACACAATCACACTCCCATGCAGAATAAAACAAATTGTAAACATGTGGCAGGAAGTAGGAAAAGCAA  
TGTATGCCCCCTCCCATCAAAGGACAAATTAAATGCTTATCAAAT---  
ATTACAGGGCTGTTATTAACAAGAGATGGTGGTGTCTGGTGATGACAGT-----  
-----  
-----  
TCAAACGACACCGAGATCTTCAGACCTGGAGGAGGAGATATGAGGGACAATTGGAGAAGTGAATTATATAAAT  
ATAAAGTAGTAAGAATTGAACCATTA---GGAATAGCACCCACCAAGGCAAAGAGAAGAGTGGTG-----  
-----CAGAGAGAAAAAAGAGCA---GTGGGAACACTAGGAGCT---  
-----ATGTTCTTGGGTTCTTGGGAGCA---GCAGGAAGCACTATG---GGCGCAGCGTCA---  
GTGACGCTGACGGTACAG---GCCAGACAA---TTATTG---TCTGGTATAGTGCAACAGCAGAAC---  
AATCTG---CTGAGG---GCTATTGAGGCGCAACAGCATCTGTTGCAACTCACAGTCTGGGGCATC  
>JQ403106  
TTCTTCTGTAATACATCAAACTGTTTACTTGGAAAGAGTACTAACAGGTCACTTAGCATTTGGA-----  
-----  
-----  
GAAAATGACACAATCACACTCCCATGCAGAATAAAACAAATCATAAATATGTGGCAAAGTGTAGGAAAAGCAA  
TGTATGCCCCCTCCCATCAAGGGACAAATTAAATGTACATCAAAT---  
ATTACAGGGCTGCTAATAACAAGAGATGGTGGTCAGGGTAATGAAACA-----  
-----  
-----  
GATAATAGTACTGAGATCTTCAGACCTGGAGGAGGAGATATGAGGGACAATTGGAGAAGTGAATTATATAAAT  
ATAAAGTAGTAAAAATTGAACCATTA---GGAGTAGCACCCACCAAGGCAAAGAGAAGAGTGGTG-----  
-----CAGAGAGAAAAAAGAGCA---GTGGGA---CTGGGAGCT---  
-----TTGTTCTTGGGTTCTTGGGAGCA---GCAGGAAGCACTATG---GGCGCAGCGTCA---  
GTGACGCTGACGGTACAG---GCCAGACAA---TTATTG---TCTGGTATAGTGCAACAGCAGAAC---  
AATTTG---CTGAGG---GCTATTGAGGCGCAACAGCATATGTTGCAACTCACAGTCTGGGGCATC  
>FJ469759  
TTCTTCTGTAATACAACACAACCTGTTTAAATAGTACTTGGAAATAGTACTGGGTCAAATAACACAGAA-----  
-----  
-----  
GAAAATGATACAATCACCATCCCATGCAAAATAAGACAATTTATAAACATGTGGCAGAAAGTAGGAAAAGCAA  
TGTATGCCCCCTCCCATCAAAAAGAAACATTAGTTGTACATCAAAT---  
ATTACAGGGTTGCTATTAACAAGAGATGGTGGTAGTGAAGAGAGC-----  
-----  
-----  
AATACCACTGAGACCTTCAGACCTGGAGGAGGAGATATGAGGGACAATTGGAGAAGTGAATTATATAAATATA

AAGTAGTAAAACTTGAACCATTA---GGAGTAGCACCCACTAAGGCAAAGAGAAGAGTGGTG-----  
-----CAGAGAGAAAAAAGAGCA---TTGGGA---CTAGGAGCT-----  
---CTGTTCCCTTGGGTTCTTGGGAGCA---GCAGGAAGCACTATG---GGCGCAGCGTCA---  
GTGACGCTGACGGTACAG---GCCAGACTA---TTAATG---TCTGGTATAGTGCAACAGCAGAAC---  
AATTTG---CTGAAG---GCTATTGAGGCGCAACAGCATCTGTTGCGACTCACAGTCTGGGGCATC  
>FJ469722  
TTCTTCTGTAATACAACACAACCTGTTTAAATAGTACGTGGCCAGTTAATGGTAATAACACTGAAGGA-----  
-----  
-----  
GATAGCACAAACATCACGATCCCATGTAGAATAAAACAGATCATAAATATGTGGCAGGAAGTAGGAAAAGCAA  
TGTATGCCCCCTCCCATCAGAGGATCAATTAAATGTTTCATCTAAT---  
ATAACAGGGCTGCTATTAACAAGAGATGGTGGTAATATCACGAAC-----  
-----  
-----  
GAGACCACCGAAATCTTCAGACCTGGAGGAGGAGATATGAGGGACAATTGGAGAAGTGAATTATATAAATATA  
AAGTAGTAAAAATTGAACCCCTTA---GGAATAGCACCCACTAAGGCAAAGAGAAGAGTGGTG-----  
-----CAGAGAGAAAAAAGAGCA---GCA-----ATAGGGGCT-----  
---GTGTTCCCTTGGGTTCTTGGGAGCA---GCAGGAAGCACTATG---GGCGCAGCGTCA---  
CTGACGCTGACGGTACAG---GCCAGACTA---CTATTG---TCTGGTATAGTGCAACAGCAGAAC---  
AACTTG---CTGAGG---GCTATTGAGGCGCAACAGCATATGTTGCAACTCACAGTCTGGGGCATC  
>KF990605  
TTCTTCTGTAATACAACACAATTGTTTAGTAGCACTTGGAAATGATACTAATAAAAAATATCACAGGGTCA----  
-----  
-----  
ACTGACACTACTATCACACTCCCATGTAGAATAAAACAAATTGTAACTTGTGGCAGGAAGTAGGAAAAGCAA  
TGTATGCCCCCTCCCATCAAAGGACAAATTAACTGTGTATCAAAAT---  
ATTACAGGGCTGCTATTAACAAGAGATGGGGGTAAGGGGAACAACCACACTGAG-----  
-----  
-----  
AACATTGAGATCTTCAGACCTGGAGGAGGAGATATGAGGGACAATTGGAGAAGTGAATTATATAAATATAAAG  
TAGTAGCACTTGAACCATTA---GGAGTAGCACCCACCACGGCAAAGAGAAGAGTGGTG-----  
-----CAAAGAGAGAAAAGAGCA---ATAGGA---ATAGGAGCC-----  
TTGTTCCCTTGGGTTCTTGGGAGCA---GCCGGAAGCACTATG---GGCGCAGCGTCA---  
ATATCGCTGACGGTACAG---GCCAGACAA---TTATTG---TCTGGTATAGTGCAACAGCAGAAC---  
AATTTG---CTGAGG---GCTATTGAGGCGCAACAACATATGTTGCAACTCACAGTCTGGGGCATC  
>FJ653127  
TTCTTCTGTAATACAACACCACTATTTAATAGTACTTGGAAATATAACTGATGAAAGGGTAAATAACACTGAAG  
GA-----  
-----  
AATAGCACTATCATCACACTCCCATGCAGAATAAAACAAATTATAAACATGTGGCAAGAAGTAGGAAAAGCAA  
TGTATGCCCCCTCCCATTAGAGGACTAATTAACTGTGTATCAAAAT---  
ATTACAGGGATAATATTAACAAGGGATGGTGGGCAGGGAAATGACACA-----  
-----  
-----  
AGTGGAGCCGAGACCTTCAGACCTGGAGGAGGAGATATGAGGGACAATTGGAGGAGTGAATTATACAAATATA  
AAGTAGTACGAATTGAACCATTA---GGAATAGCACCCACCAAGGCAAGGAGAAGAGTGGTG-----  
-----CAAAGAGAAAAAAGAGCA---GTGGGAACGTTGGGAGCT-----  
---ATGTTCCCTTGGGTTCTTAGGAGCA---GCAGGAAGCACTATG---GGCGCAGCGTCA---  
CTGACGCTGACGGTACGG---GCCAGACTA---TTACTG---TCTGGTATAGTGCAACAGCAAAAT---  
AATTTG---CTGAGG---GCTATTGAGGCGCAGCAGCACCTGTTGCAACTCACAGTCTGGGGCATC  
>JF320329  
TTCTTCTGTAACACAACACAATTGTTTAAACAGTACTTGGGGGCTTAATGATACTTGGGAAAGTGATACTGCTA  
CTGAA-----  
-----GGA---  
TCAGATAACATCACAAATCACACTCCCATGCAAAATAAAGCAAATTATAAACATGTGGCAGGAAGTAGGAAAAG  
CAATGTATGCCCCCTCCTATCAGAGGACAAATTAAATGTTTATCAGAT---  
ATTACAGGGCTGCTATTAACAAGAGATGGTGGTACTAATAATGAGACT-----  
-----  
-----  
AATGGCACTGAGACCTTCAGACCTCAAGGAGGAAATATGAAGGACAATTGGAGGAGTGAATTATATAAATATA

AAGTAGTAAAAATTGAACCATTA---GGAGTAGCACCCACCAGGGCAAAGAGAAGAGTGGTG-----  
-----CAGAGAGAAAAAAGAGCA---GTGGGA---ATGGGAGCT-----  
---ATGTTTCATTGGGTTCTTGGGAGCA---GCAGGAAGCACTATG---GGCGCAGCATCA---  
ATAACGCTGACGGTACAG---GCCAGACAA---TTGTTG---TCTGGTATAGTGCAACAGCAGAAC---  
AATTTG---CTGAGA---GCTATTGAGGCGCAACAACATCTGTTGCAACTCACAGTCTGGGGCATC  
>FJ469710  
TTGTACTGTGATACATCAAACTGTTTAATAGTACTTGGTATAGGAATGGTACTATAGTAAAGTCAAACAACA  
CT-----  
-----  
AGTGGAAATGACACAATCGTACTCCCATGCAGAATAAAACAAATTATAAACATGTGGCAGGAAGTAGGAAAAG  
CAATGTATGCCCTCCCATCAGAGGACCAATCATCTGTTTATCAAAT---  
ATTACAGGGTTGCTATTAACAAGAGATGGTGGTAATGACAATAAAACA-----  
-----  
-----  
AATAACACTGAGACCTTCAGACCTGGAGGAGGAGATATGAGGGACAATTGGAGAAGTGAATTATATAAATATA  
AAGTAGTAAAAATTGAACCATTA---GGAGTAGCACCCACCAGGGCAAAGAGAAGAGTGGTG-----  
-----CAAAGAGAGAAAAAGAGCA---GTGGGA---CTAGGAGCT-----  
---TTGTTCCCTTGGGTTCTTGGGAGCA---GCAGGAAGCACTATG---GGCGCAGCGTCA---  
GTGACGCTGACGGTACAG---GCCAGACAA---TTATTG---TCTGGTATAGTGCAACAGCAGAAC---  
AATTTG---CTGAGG---GCTATTGAGGCGCAACAGCATATGTTGCAACTCACAGTCTGGGGCATC  
>KF990608  
TTCTTCTGTAATACATCAAAGCTGTTTAATAGTACTTGGCCATATAATAGTACTTGGAAATGAACTGTGCCCA  
AT-----  
-----  
AACAAATGACACTATCACACTCCCATGTAGAATAAAACAAATTGTAAACATGTGGCAGCAAGTAGGAAAAGCAA  
TGTATGCTCCTCCCAGCAGAGGACAAATTAGCTGTTTCATCAAAT---  
ATTACAGGGTTGCTACTAACAAGAGATGGTGGTATTAACATTACCACA-----  
-----  
-----  
AACAACTACTGAAACCTTCAGACCTGCAGGAGGAAATATGAAGGACAATTGGAGAAGTGAATTATATAAATATA  
AAGTAGTAAGAATTGAACCACTA---GGAGTAGCACCCACCAAGGCAAGGAGAAGAGTGGTG-----  
-----CAGAGAGAAAAAAGAGCA---GTAGGA---CTAGGAGCT-----  
---TTGTTCTGTTGGGTTCTTGGGAGCA---GCAGGAAGCACTATG---GGCGCAGCGTCA---  
ATAACGCTGACGGTACAG---GCCAGACAA---TTATTG---TCTGCTATAGTGCAACAGCAAAAC---  
AATTTG---CTGAGA---GCTATTGAGGCGCAACAGCATCTGTTGCAACTCACAGTCTGGGGCATT  
>JQ403066  
TTCTTCTGTAATACAACACAACCTGTTTAATAGTACTTGGAAATGGTACTGAAGGGTCAAATAGCACTAGAGAA-  
-----  
-----  
AAGAATGACACAATCATACTCCCATGCAGAATAAAACAAATTATAAACATGTGGCAGGAAGTAGGAAAAGCAA  
TGTATGCCCCCTCCCATCGCAGGGCAAATTAATTGTTTCATCAAAT---  
ATTACAGGGCTGCTATTAATAAGAGATGGTGGTGATAAGAACGAGACC-----  
-----  
-----  
ACCACCAACGAAACCTTCAGACCTATAGGAGGAAATATGAAAGACAATTGGAGGAGTGAATTATATAAATATA  
AAGTAGTAAAAATTGAACCATTA---GGAGTAGCACCCACCAAGGCAAAGAGAAGAGTGGTG-----  
-----CAGAGAGAAAAAAGAGCA---GTGGGA---TTAGGAGTC-----  
---ATGTTCCCTTGGGTTCTTGGGAGCA---GCAGGAAGCACTATG---GGCGCAGCGTCA---  
ATGGCGCTGACGGTACAG---GCCAGGCAA---TTATTG---TCTGGTATAGTGCAACAGCAGAAT---  
AATTTG---CTAAGA---GCTATTGAGGCGCAACAGCATATGTTGCAACTCACAGTCTGGGGCATC  
>JQ403075  
TTCTTCTGTAATACAACACAACCTGTTTAATAGTACTTGGAAATATTACTGGAGGGTCAAATAACACGGAA----  
-----  
-----  
GGAAATGATACAATCACACTCCCATGCAGAATAAAACAAAGTTATAAACATGTGGCAACAAGTAGGAAAAGCAA  
TGTATGCCCCCTCCCATCAGAGGACAAATTAGATGTTTCATCAAAT---  
ATTACAGGGCTGTTATTAACAAGAGATGGTGGCCATGGTGGCAACAACAGT-----  
-----  
-----  
AACGAGACCGAGACCTTCAGACCTGGAGGAGGAAATATGAGGGACAATTGGAGAAGTGAATTATATAAATATA

AAGTAGTAAAAATTGAACCATTA---GGAGTAGCACCCACCAGGGCAAAGAGAAGAGTGGTG-----  
-----CAGAGAGAAAAAAGAGCA---GTGGGA---ATAGGAGCT-----  
---CTGTTCCCTTGGGTTCTTGGGAACA---GCAGGAAGCACTATG---GGCGCAGCGTCA---  
ATAACGCTGACGGTACAG---GCCAGACAA---TTATTG---TCTGGTATAGTGCAACAGCAAAGC---  
AATTTG---CTGCAG---GCTATTGAGGCGCAACAGCATCTGTTGCAACTCACAGTCTGGGGCATC  
>JQ403074  
TTCTTCTGCAATACAACAAAACCTGTTTAATAGTACTTGGACAACCTAATGGTACTGAAACGACAAATAACACAA  
AA-----  
-----  
GGAAATGAGACAATCACACTCCCATGCAAAATAAAACAAATTATAAACATGTGGCAGGAAGTAGGAAAAGCAA  
TGTATGCCCCCTCCCATCAGAGGACAAATTAGGTGTGCATCAAAC---  
ATTACAGGGTTGTTATTAACAAGAGATGGTGGTAATAGTGGTAATAAC-----  
-----  
-----  
ACGAACAACAGCACTGAGACCTTCAGACCTGGAGGAGGGGATATGAGAGACAATTGGAGGAGTGAACCTATATA  
AATATAAAGTAGTAAAAATTGAACCATTA---GGAGTAGCACCCACCAAGGCAAAGAGAAGAGTGGTG-----  
-----CAGAGAGAAAAAAGAGCA---GTA-----  
CTCGGAGCT-----CTGATCCTTGGGTTCTTGGGAGCA---GCAGGAAGCACTATG---  
GGCGCAGCGTCA---ATGACGCTGACGGTACAG---GCCAGACTA---TTATTG---  
TCTGGTATAGTGCAACAGCAGAGC---AATTTG---CTGAGG---  
GCTATTGAGGCGCAACAGCATCTGTTGCAACTCACAGTCTGGGGCATC  
>KX587391  
TTCTTTTGTAATTCAACACAACCTGTTTAATAGTACTTGGGATAATGCTACTTTGAATAGTAATGCTAATGCTA  
CT-----  
-----  
GATAGTGGCAATATCACACTCCCATGCAGAATAAAACAAATTATAAACATGTGGCAACAAGTAGGAAAAGCAA  
TGTATGCCAATCCCATCAGAGGAGAAATTAAATGTACATCAAAT---  
ATTACAGGGCTGTTATTAACCAGAGATGGTGGTCTTAACAGTACT-----  
-----  
-----  
GCCAATGAGACCTTCAGACCTGGAGGAGGAAACATGAAGGACAATTGGAGGAGTGAATTATATAAATACAAAG  
TAGTAAAAATTGAACCATTA---GGAGTAGCACCCACCGCGCAAAGAGAAGAGTGGTG-----  
-----CAGAGAGAAAAAAGAGCA---GTGGGA---TTAGGAGCT-----  
ATGTTCCCTTGGGTTCTTGGGAGCA---GCAGGAAGCACTATG---GGCGCAGCGTCA---  
CTGACGCTGACGGTACAG---GCCAGGCAA---TTATTG---TCTGGTATAGTGCAAGCAGCAGAAC---  
AATTTG---CTGAGG---GCTATTGAGGCGCAACAACATCTGTTGCAACTCACAGTCTGGGGCATC  
>JF680917  
TTCTTTTGTAATACAACACAACCTGTTTGATAGTACATGGAATAAGACAGACAATAACACGGGAAGATCAGAT-  
-----  
-----  
AACAAATGAAACAATCACACTTCCATGCAGAATAAAACAATTTATAAACATGTGGCAGAGTGTAGGAAAAGCCA  
TGTATGCCCCCTCCCATTAGTGGACCAATTAACTGTTTCATCAAAT---  
ATCACAGGGCTGCTACTAACAAGAGATGGTGGTGAGACAAAAATAAATGAGACAGGGACAGAATTAAATGAGA  
CAGAG-----  
-----  
AAGACCGAGATCTTCAGACCTGCAGGAGGAGATATGAGGGACAATTGGAGAAGCGAGTTATATAAATATAAAG  
TAGTAAGAATTGAACCATTA---GGAGTAGCACCCACCAAGGCAAAGAGAAGAGTGGTG-----  
-----CAGAGAGAAAAAAGAGCA---GTAGGA---ATGGGAGCT-----  
TTGTTCCCTTGGGTTCTTGGGAGCA---GCAGGAAGCACTATG---GGCGCAGCGTCA---  
CTGACGCTGACGGTACAG---GCCAGACAA---TTATTG---TCTGGTATAGTGCAACAGCAAAC---  
AATTTG---CTGAGG---GCTATTGAGGCGCAACAGCATCTGTTGCAGCTCACGGTCTGGGGCATC  
>JQ182910  
TTCTTCTGTAACACATCACAACCTGTTTAATAGTACTTGGAGTAAGACTGATTGGAATAGTACTGGGACAAATA  
GCACT-----  
-----  
GAAGCAGAAAATATGACACTCCCCTGCAGAATAAAACAAATTATAAACATGTGGCAGAGTGTAGGAAAAGCAA  
TGTATGCCCCCTCCCATCAAGGGACGAATTGAGTGCTCGTCAATT---  
ATTACAGGGCTACTACTAACAAGAGATGGTGGTCATAAAAAATGAGAATGAG-----  
-----  
-----

ACAAACCAAACGAGACCTTCAGACCTGGAGGAGGAGATATGAGGGACAATTGGAGAAGTGAATTATATAAAT  
 ATAAAGTAGTCCAAATTGAACCATTA---GGAGTAGCACCCACCAGGGCAAAGAGAAGAGTGGTG-----  
 -----CAGAGAGAAAAAAGAGCA---GTAACA---ATAGGAGCT---  
 -----ATGTTTCCTTGGGTTCTTGGGAACA---GCAGGAAGCACTATG---GGCGCAGCGTCA---  
 ATAGCGCTGACGGCACAG---GCTAGACAA---TTATTG---TCTGGTATAGTGCAGCAGCAGAAC---  
 AATCTG---CTGAGG---GCTATTGAGGCGCAACAGCATCTGTTGCAACTCACGGTCTGGGGCATT  
 >KF384798  
 TTCTTCTGTAATACAACAAAACCTGTTTAATAGTATTTGGTTTAATAAAAATGGTACTGAAGGGTCAAAAAGC-  
 -----  
 -----  
 CCTGACAGAAATATCACACTCCCATGTAGAATAAGACAACCTTATAAATATGTGGCAGGAAGTAGGAAAAGCAA  
 TGTATGCCCCCTCCCATCGAAGGACAAATTAGATGTTTCATCAAAT---  
 ATTACAGGGCTGCTGTTAAACAAGAGATGGGGGTATCAACACAACCT-----  
 -----  
 -----  
 AATGGGACCGAGACCTTCAGACCTACAGGAGGAGATATGAGGGACAATTGGAGGAGTGAATTATATAAATATA  
 AGGTAGTAAAAATTGAACCATTA---GGAGTAGCACCCACCAAGGCAAAGAGAAGAGTGGTG-----  
 -----CAGAGAGAAAAAAGAGCA---GTTGGAATGCTGGGAGTT-----  
 ---ATGTTTCCTTGGGTTCTTGGGAGCA---GCAGGAAGCACTATG---GGCGCAGCGTCA---  
 GTGACGCTGACGGTACAG---GCTAGACAG---TTATTG---TCTGGTATAGTGCAACAGCAGAAC---  
 AATCTG---CTGAGA---GCTATTGAGGCGCAACAGCATCTGTTGCAACTCACAGTCTGGGGCATC  
 >KF384802  
 TTCTTCTGTGACACAACACAACCTGTTTAATAGTACTTGGGCGCCTAATGGTACTTGGATTAATGGAACACTAT  
 ATAAC-----  
 -----  
 TATACAGGAAATATTAAACTCCCATGCAGATTAAAACAAATTGTAAACATGTGGCAGGAAGTAGGGAAAGCCA  
 TGTATGCCCCCTCCCATCGAAGGACAAATTAGCTGTTTCATCAAAT---  
 ATTACGGGGCTGCTATTAAACAAGAGATGGGGGTAACAGTAATGAGACTGAG-----  
 -----  
 -----  
 AACAGGACCGAGATCTTCAGACCTGGAGGAGGAAATATGAAGGACAACCTGGAGAAGTGAATTATATAAATATA  
 AAGTAATAAGAGTTGAACCATTA---GGAGTAGCACCCACCAAGGCAAAGAGACGAGTGGTG-----  
 -----CAGAGAGAAAAAAGAGCA---GTGGGA---ATAGGAGCT-----  
 ---CTGCTCGTTGGGTTCTTGGGAGCA---GCAGGAAGCACTATG---GGCGCAGCGTCT---  
 GTGACGCTGACGGTACAG---GCCAGACAA---TTATTG---TCTGGTATAGTGCAACAGCAGAAC---  
 AATCTG---CTGAGA---GCTATTGAGGCGCAACAACATCTGTTGCAACTCACAGTCTGGGGCATC  
 >MH897915  
 TTCTTCTGTAATACCACACCATTGTTTAATAGTACTTGGGTAAATGGTACTTGGCAGAATGGTACTAGAGTG-  
 -----  
 -----  
 TCAGGTGACACAATCACACTCCAATGCAAAATAAAACAAATTATAAACATGTGGCAGAGTGTAGGAAAAGCAA  
 TGTATGCCCCCTCCCATCAATGGACGAATTAATTGTTTCATCAAAT---  
 ATTACAGGACTGCTACTAACAAGAGATGGGGGTGATAAGAATGCA-----  
 -----  
 -----  
 ACAAATGACACCTTCAGACCTGTAGGAGGAAACATGAAGGACAATTGGAGAAGTGAATTATATAAATATAAAG  
 TAGTAGAAATTGAACCATTA---GGAGTAGCACCCACCAAGGCAAAAAGAAGAGTGGTG-----  
 -----CAGAGAGAAAAAAGAGCA---GTAACA---TTTGGAGCT-----  
 CTGTTTCCTTGGGTTCTTGGGAGCA---GCAGGAAGCACTATG---GGCGCAGCGTCA---  
 GTGACGCTGACGGTACAG---GCCAGGCAA---TTATTG---TCTGGTATAGTGCAACAGCAGAAC---  
 AATCTG---CTGAGA---GCTATTGAGGCGCAACAACATATGTTGCAACTCACGGTCTGGGGCATC  
 >KU901997  
 TTCTTTTGTGATTCAACACAACCTGTTTAATAGTACTTGGGATAATGCTACTTTAAATAGTAATGCTAGTGCTA  
 CT-----  
 -----  
 AATAATGGCAATATCACACTCCCATGCAGAATAAAACAAATTATAAACATGTGGCAACAAGTAGGAAAAGCAA  
 TGTATGCCAATCCCATCAAAGGAGAAATTAAATGTACATCAAAT---  
 ATTACAGGGCTGTTATTAAACCAGAGATGGTGATCTTAACAATACT-----  
 -----  
 -----

GCCAATGAGACCTTCAGACCTGGAGGAGGAAACATGAAGGACAATTGGAGGAGTGAATTATATAAATACAAAG  
 TAGTAAAAATTGAACCATTA---GGAGTAGCACCCACCGCGGCAAAGAGAAGAGTGGTG-----  
 -----CAGAGAGAAAAAAGAGCA---GTGGGA---TTAGGAGCT-----  
 ATGTTCTTGGGTTCTTGGGAGCA---GCAGGAAGCACTATG---GGCGCAGCGTCA---  
 CTGACACTGACGGTACAG---GCCAGGCAA---TTATTG---TCTGGTATAGTGACAGCAGCAGAAC---  
 AATTTG---CTGAGG---GCTATTGAGGCGCAACAACATCTGTTGCAACTCACAGTCTGGGGCATC  
 >KU749387  
 TTCTTCTGTAATACAACAAAGCTGTTTGACAGTACTTGGCTGTCTGACGGTACTCGGAATGATACTAAAGGG-  
 -----  
 -----  
 TCAAAATGAAACTATCATACTCCCATGCAGAATCAAACAAATTATAAACAGGTGGCAGGAAGTAGGAAAAGCAA  
 TGTATGCCCCCTCCCATCAAAGGAATAATTAGATGTTTCATCAAAT---  
 ATTACAGGGCTGTTATTAACAAGAGATGGTGGGCAAACTAACGATACA-----  
 -----  
 -----  
 AACGACACAGAAATCTTCAGACCGGCAGGAGGAGATATGAGGGACAATTGGAGAAAGTGAATTATATAAATATA  
 AAGTAGTAAAAATTGAACCATTA---GGAGTAGCACCCACCAGGGCAAAGAGAAGAGTGGTG-----  
 -----CAGAGAGAAAAAAGAGCA---GTGGGA---ATAGGAGCT-----  
 ---CTGTTCTTGGGTTCTTAGGAGCA---GCAGGAAGCACTATG---GGCGCAGCGTCA---  
 TTGACGCTGACGGTACAG---GCCAGACAA---CTATTG---TCTGGTATAGTGCAACAGCAAAAC---  
 AATTTG---CTGAGA---GCTATTGAGGCGCAACAGCATATGTTGCAACTCACAGTCTGGGGCATC  
 >KU678125  
 TTCTTCTGTAATACAACACAACCTGTTTAATACAACATGGGGTAATGATACTGAAGTGACAAATAACACTAAA-  
 -----  
 -----  
 GGAAATGAAACTATCACACTCCAATGCAAAATAAAACAAATTATAAACATGTGGCAGGAGGTAGGAAAAGCAA  
 TGTATGCCCCCTCCCATCGAAGGACCAATTAGATGTTTCATCAAAT---  
 ATTACAGGGCTACTATTAACAAGAGATGGTGGTAATGATGGTAATAGT-----  
 -----  
 -----  
 AGCACAAACGAGACCTTCAGACCTGGGGGAGGAGATATGAGGGACAATTGGAGAAAGTGAATTGTATAAATATA  
 AAGTAGTAAAAATTGAACCATTG---GGAATAGCACCCACCAAGGCAAAGAGAAGAGTGGTG-----  
 -----CAGAGAGAAAGAAGAGCA---ATAGGA---CTAGGAGCG-----  
 ---ATGTTCAATTGGGTTCTTGGGAGCG---GCAGGAAGCACTATG---GGCGCAGCGTCA---  
 CTGACGCTGACGGTACAG---GCCAGACAA---TTATTG---TCTGGTATAGTGCAACAGCAGAAC---  
 AATCTG---CTGAGG---GCTATTGAGGCGCAACAACATATGTTGCAACTCACAGTCTGGGGCATC  
 >KY612720  
 TTCTTCTGTAATACAACACAACCTGTTTAATAGCACTTGAATAGCACTTGAATAGCAATGATACTAGAGGGT  
 CAAAT-----  
 -----  
 -----  
 GCACTGGAGTTATCACACTCCCATGCAGAATAAAACAAATTATAAACATGTGGCAGGAAGTAGGAAAGGCAA  
 TGTATGCCCCCTCCCATCAGGGGAAACATTAGCTGTTTCATCAGAT---  
 ATTACAGGGCTGCTATTAACAAGAGATGGTGGTAATAATAATAACACG-----  
 -----  
 -----  
 AACGGGACTGAGATCTTCAGACCTGCAGGAGGAGATATGAGGGACAATTGGAGAAAATGAATTATATAAATATA  
 AAGTAGTAAAAATTGAACCATTA---GGAGTAGCACCCACCAAGGCAAAAAGAAGAGTGGTG-----  
 -----CAGAGAGAAAAAAGAGCA---ATAGGA---ATAGGAGCT-----  
 ---TTGTTCTTGGGTTCTTGGGAGCA---GCAGGAAGCACTATG---GGCGCAGCGTCA---  
 GTGACGCTGACGGTACAG---GCCAGGCAA---TTATTG---TCTGGTATAGTGCAACAACAGAAC---  
 AATATG---TTGAGA---GCTATTGAGGCGCAACAGCATCTGTTGCAACTCACAGTCTGGGGCATC  
 >KX129293  
 TTCTTCTGTGATACAACACAACCTGTTTAATAGTACTTGAATAGTACTTGAATAGTACTGGAGGGTCAAAT-  
 -----  
 -----  
 -----  
 AACACTGACCCAATCATACTCCCATGCAGAATAAAACAAATTATAAACACGTGGCAGAGTGTAGGAAAAGCAA  
 TGTATGCCCCCTCCCATCAGGGGACAAATTAAATGTTTCATCAAAT---  
 ATTACAGGGCTGCTGCTAACAAGAGATGGTGGTAATAATAATAAT-----  
 -----  
 -----

ACAAACGAGACCTTCAGACCTGGAGGAGGAGATATGAGGGACAATTGGAGAAGTGAATTATATAAATATAAAG  
TAGTAAAAATTGAACCATTA---GGAGTAGCACCCACCAAGGCAAAGAGAAGAGTGGTG-----  
-----CAGAGAGAAAAAAGAGCA---GTGGGAACAATAGGAGCT-----  
ATGTTCTTGGGTTCTTGGGAGCA---GCAGGAAGCACTATG---GGCGCAGCGTCA---  
ATGACGCTGACGGTACAG---GCCAGACTG---TTATTG---TCTGGTATAGTGCAACAGCAGAAC---  
AATTTG---CTGAGG---GCTATTGAGGCGCAACAACATCTGTTGCAACTCACGGTCTGGGGCATC  
>U84819  
TTCTTCTGTAATACAACACAACCTGTTTAATAGTACTTGGACCCTGTTCAATAATACTTGAATAGTACTGAAG  
GG-----  
-----  
TCAAATAACACAATCACACTCCCATGCAGAATAAAACAAATTATAAACATGTGGCAGGAAGTAGGAAAAGCAA  
TGTATGCCCCCTCCCATCAGAGGGGAAATTAGATGCTCATCAAAT---  
ATTACAGGGTTGCTATTAACAAGAGATGGAGGTAATGATAATAACGCA-----  
-----  
-----  
AACAAACGGGACTGAGATCTTCAGACCTACAGGAGGAGATATGAGAGACAATTGGAGAAGTGAATTATATAAAT  
ATAAAGTAGTAAGAATTGAACCATTA---GGAGTAGCACCCACCAAGGCAAAGAGAAGAGTGGTG-----  
-----CAGAGAGAAAAAAGAGCA---GCA-----CTAGGAGCT---  
-----ATGTTCTTGGGTTCTTGGGAGCA---GCAGGAAGCACTATG---GGCGCAGCGTCA---  
ATGACGCTGACGGTACAG---GCCAGACTA---TTATTG---TCTGGTATAGTGCAAGCAGCAGAAC---  
AATTTG---CTGAGG---GCTATTGAAGCGCAACAGCATCTGTTGCAACTCACAGTCTGGGGCATC  
>EU576016  
TTCTTCTGTAATTCAACACCACTATTTAATAGTACTTGGAAATGTGACTGATAGTACTACTTGGATAAATGGTA  
CTGAA-----  
-----  
AGGTCAAATGACACGGTCACACTCCAATGCAGAATAAAACAAATTATAAACATGTGGCAGGAAGTAGGAAAAG  
CAATGTATGCCCCCTCCCATCAGAGGACAAATTAATTGCACATCAAAT---  
ATTACAGGGCTACTATTAACAAGAGATGGTGGTGGTAACGGTAGCTTG-----  
-----  
-----  
AGTGAGGACGAGACCTTCAGACCTGGGGGAGGAGATATGAGGGACAATTGGAGAAGTGAATTATATAAATATA  
AAGTAGTAAGAATTGAACCATTA---GGAATAGCACCCACCAAGGCAAAGAGAAGAGTGGTG-----  
-----CAAAGAGAAAAAAGAGCA---GTGGGA---ATAGGAGCT-----  
---GTGTTCTTGGGTTCTTGGGAGCA---GCAGGAAGCACTATG---GGCGCAGCGTCA---  
GTGGCGCTGACGGTACAG---GCCAGACAA---TTATTG---TCTGGTATAGTGCAACAGCAAAAC---  
AATTTG---CTGAGA---GCTATTGAGGCGCAACAACATCTGTTGCAACTCACAGTCTGGGGCATC  
>JQ085287  
TTCCACTGTAATACAACAAAACCTGTTTAATAGTACCTGGTATAGTCCTGAAAATTCAACACAACCTGAGTAATA  
ATGATACT-----  
-----  
GCTAATGGGACTATCACACTCCAATGCAGAATAAAACAAATTATAAACACGTGGCAGGAAGTAGGAAAAGCAA  
TGTATGCCCCCTCCCATCAGAGGACAAATTAGATGTTTCATCAAAT---  
ATTACAGGGCTGTTATTAACAAGAGATGGTGGTAATACCAATGCC-----  
-----  
-----  
ACGAATGAAACCTTCAGACCTGGAGGAGGAGATATGAGGGACAATTGGAGAAGTGAATTATATAAATATAAAG  
TAGTAAAAATTGAACCATTA---GGAGTAGCACCCACCACTGCAAGGAGAAGAGTGGTG-----  
-----CAGAGAGAAAAAAGAGGG---GTAGGA---CTAGGAGCT-----  
TTGTTCTTGGGTTCTTGGGAGCA---GCAGGAAGCACTATG---GGCGCAGCGTCA---  
GCGACGCTGACGGTACAG---GCCAGACAA---TTATTG---TCTGGTATAGTGCAACAGCAAAAC---  
AATTTG---CTGAGA---GCTATTGAGGCGCAACAGCATCTGTTGCAACTCACAGTCTGGGGCATC  
>KX984753  
TTCTTCTGTAATACAACACAACCTGTTTAATAGTAGTTGGAATAAGAATAATACTATAAATGGGAATGATACTG  
AAGAG-----  
-----  
TCAAATGACACTCTCACACTTCCGTGCAGAATAAAACAAATTGTAAACATGTGGCAAGAAGTAGGAAAAGCAA  
TGTATGCCCCCTCCCATCAGAGGACTAATTAGATGTTTCATCAAAT---  
ATTACAGGGCTGATATTAACAAGAGATGGTGGTAAAAATAACGGGACG-----  
-----  
-----

AATGAGACCGAGACCTTCAGACCTGGGGGAGGAGATATGAGGGACAATTGGAGAAGTGAATTATATAAATATA  
AAGTAGTAAAAATTGAACCATTA---GGAGTAGCACCCACCAAGGCAAAGAGAAGAGTGGTG-----  
-----CAGAGAGAAAAAAGAGCA---ATAGGA---ATAGGAGCT-----  
---TTGTTCCCTTGGGTTCTTGGGAGCA---GCAGGAAGCACTATG---GGCGCAGCGTCA---  
GTAGCGCTGACGGCACAG---GCCAGACAA---TTAATG---TCTGGTATAGTGCAACAGCAGAGC---  
AATCTG---CTGAGG---GCTATTGAGGCGCAACAGCATATGTTGCAACTCACAGTCTGGGGCATC  
>M21098  
TTCTTCTGTAATACAACACAACCTGTTTAATAGTACTTGGTATAGGAACACTACAGGAAATATCACTGAA----  
-----  
-----  
GGAAATAGCCCAATCACACTCCCATGCAGAATAAAACAAATTATAAACATGTGGCAGGAAGTAGGAAAAGCAA  
TGTATGCCCCCTCCCATCAGAGGACAAATTAAATGTTTCATCAAAT---  
ATTACAGGGCTGCTATTAAACAAGAGATGGTGGTAATAACAACGAGACC-----  
-----  
-----  
ACCGACACCGAGATCTTCAGACCTGGAGGAGGAAATATGAGGGACAATTGGAGAAGTGAATTATATAAATATA  
AAGTAGTAAAAATTGAACCATTA---GGAGTAGCACCCACCAAGGCAAAGAGAAGAGTGGTG-----  
-----CAGAGAGAAAAAAGAGCA---GTGGGA---CTAGGAGCT-----  
---TTGTTCCCTTGGGTTCTTAGGAGCA---GCAGGAAGCACTATG---GGCGCAGCGTCC---  
CTGACGCTGACGGTACAG---GCCAGACTA---TTATTG---TCTGGTATAGTGCAACAGCAGAAC---  
AACTTG---CTGATG---GCTATTGAGGCGCAACAGCATATGTTGGAACCTACAGTCTGGGGCATC  
>GU728014  
TTCTTCTGTAATACAACAAAGCTGTTTAATAGTACTTGGACAAAGGGTAATGAGTCTATTATTGATGAAGGG-  
-----  
-----  
ATAAATGGAACGATCACACTCCCATGCAGAATAAGACAAATTATAAACATGTGGCAGAGGGTAGGAAAAGCAA  
TGTATGCCCCCTCCCATCCAGGGAAAAATTCAATGTTTATCAAAC---  
ATTACAGGGCTACTGCTAACAAGAGATGGTGGCATTAAATGCAACC-----  
-----  
-----  
AACAAATGATATCTTCAGACCTGGAGGAGGAGATATGAGGGACAACCTGGAGAAGTGAATTATATAACTATAAAG  
TAGTAGAAATTGAACCATTA---GGAATAGCACCCACCAAGGCAATGAGAAGAGTGGTG-----  
-----CAGAGAGAAAAAAGAGCA---GTGACA---CTAGGAGCT-----  
ATGTTCCCTTGGGTTCTTGGGAGCA---GCAGGAAGCACTATG---GGCGCAGCGTCA---  
ATAACGCTGACGGCACAG---GCCAGACAA---TTATTG---TCTGGTATAGTGCAACAGCAGAGC---  
AATCTG---CTGAGA---GCTATTGAGGCGCAACAACATCTGTTGCAACTCACGGTCTGGGGCATC  
>EU604640  
TTCTTCTGTAATTCATCACAATTGTTTAATAGTACTTGGCCTTGGGAATGATACTGCAGAGTTAAATGGCAAGG  
ATACTGCA-----  
-----GAGTTA-----  
AATGGCAATGACACAATCATACTCCCATGCAGAATAAAACAAATTGTACACATGTGGCAGGAAGTAGGAAAAG  
CAATGTATGCCCCCTCCCATCAGTGGGCAAATTAGATGTTTCATCAAAT---  
ATTACAGGGCTGCTATTATCAAGAGATGGTGGTAAGAATAATGGA-----  
-----  
-----  
TCCCAGGAGACTTTTCAGACCTGGAGGAGGAAATATGAAGGACAATTGGAGAAGTGAATTATATAAATATAAAG  
TAGTAAAAATTGAACCATTA---GGAATAGCACCCACCAAGGCAAAGAGAAGAGTGGTG-----  
-----CATAGAGAAAGAAGAGCA---GTGGGA---TTAGGAGCT-----  
ATGTTCCCTTGGGTTCTTGGGAGCA---GCAGGAAGCACTATG---GGCGCAGCGTCA---  
ATAACGCTGACGGTACAG---GCCAGACAA---TTATTG---TCTGGTATAGTGCAACAGCAAAAC---  
AATTTG---CTGAGA---GCCATTGAGGCGCAACAACATCTGTTGCAACTCACAGTCTGGGGCATT  
>KT452465  
TTCTTCTGTAATACAACACGACTGTTTAACAGTACTTGGAACTACTGATACTTGGAAATGTTACTAAGATTG  
GGAATGAG-----  
-----ACGACAAAA-----  
GACGATAACAATACAATCACACTCCCATGCAGAATAAAACAAATTATAAATATGTGGCAGGAAGTAGGAAAAG  
CTATGTATGCCCCCTCCCATCAGTGGACCAATTAAGTGTACATCAAAT---  
ATTACAGGGCTGCTATTAAACAAGAGATGGGGGTAATGGCAGTCAA-----  
-----  
-----

GACACTGAAATCTTTAGACCTGCAGGAGGAGATATGAGGGACAATTGGAGAAGTGAATTATATAAATATAAAG  
TAGTAAAAATTGAACCATTA---GGACTAGCACCCACTAAGGCAAAGAGAAGAGTGGTG-----  
-----CAGAGAGAAAAAAGAGCA---GTGGGA---ATAGGAGCT-----  
GTGTTCTTGGATTCTTGGGAGCA---GCAGGAAGCACTATG---GGCGCAGCGTCA---  
ATAACGCTGACGGTACAG---GCCAGACAA---TTATTG---TCTGGTATAGTGCAACAGCAGAAC---  
AATCTG---CTGAGG---GCTATTGAGGCGCAACAACATCTGTTGCAACTCACAGTCTGGGGCATC  
>KU319528  
TTTTTATGCAATACATCAGGCCTGTTCAATAATTCAGTGTGGCTAATACGAGTAATATACCG-----  
-----  
-----  
GACAAATGACACCATCACACTTCCATGCAAAATAAAACAATATCTAAACATGTGGCAGCAGGTAGGACGAGCAA  
TGTATGCCCCCTCCCATTAGCGGAAGAATATCATGTAACCTCAAAT---  
ATCACAGGACTGCTATTGACACGTGATGGAGGAAAAAGGAAACAAC-----  
-----  
-----  
AAGCAAAATGAAACATTTCAGACCTATAGGAGGAGATATGAGGAACAATTGGAGAAGTGAATTATATAAATATA  
AAGTAGTAGAAATTAAGCCATTA---GGACTAGCACCCACTGGAGCAAAAAGGAGAGTGGTG-----  
-----GGAAGAGAAAAAAGAGCA---GCA-----CTAGGAGCT-----  
---ATGTTCTTGGGTTCTTGGGAGCA---GCTGGAAGCACTATG---GGCGCAGCATCA---  
ATAACGCTGACGGTACAG---GCCAGACAA---TTGTTG---TCTGGTATAGTGCAACAGCAAAGC---  
AATTTG---CTGAGG---GCTATAGAGGCGCAGCAGCATATGTTGCAACTCACGGTCTGGGGCATT  
>MF373128  
TCCCAAGGCAAATCATTAAGACTGTTTAATGGGTCCACGGGTAAAGGGACCAGGGGGAATGGAAGGTCA----  
-----  
-----AGGAACCCATCT-----AAGTCAGACGTCACTATCACTTTCCCATGCAGAATAATCCAATTT---  
-----TTGCCAGGAGCAGGGGTAGCAATCAACGCCCTTTCCCGTACCGGAAACATTACATGTATTCTACTG-  
--GTTACAGGATTACTGCTGGCAGGGGGTGGTGGTAACGATACTAAA-----  
-----  
-----  
GGGAAAGAGATCTTCAGACCTGGAGGAGGAGATATGAGGGACAATTGGAGAAGTGAATTATATAAATATAAAG  
TGGTGGAATTAACCATTG---GGAATAGCACCCACTACAGCAAAGAGGAGAGTGGTG-----  
-----GAGAGAGGAAAAAGAGCA---GTAGGA---ATAGGAGCT-----  
GTATTCCTTGGGTTCTTGGGAGCA---GCAGGAAGCACTATG---GGCGCGGCGTCA---  
ATAACGCTGACGGTACAG---GCCAGACAA---TTATTG---TCTGGTATAGTGCAACAGCAAAGC---  
AATTTG---CTGAGA---GCCATAGAGGCGCAACAACATATGTTGCAACTCACAGTCTGGGGCATT  
>MF373178  
TTTTTTTGAATACAACAAAACCTGTTTGATAATAATTCAACACGGGGTTCA-----  
-----  
-----  
GCCAATGGCACAATCACACTCCCATGCAGAATAAAACAGATTATAAACATGTGGCAGGAGGTAGGGCGAGCAA  
TGTATGCCCCCTCCCATTCAGGAAACATAACATGTAACCTCAAAT---  
ATCACAGGACTACTATTGACATATGATGGAGGAAAAAACAATAAC-----  
-----  
-----  
ACTAACAACGAAACATTTCAGACCTGGAGGAGGAAATATGAAGGACAATTGGAGAAGTGAATTATACAAATATA  
AAGTAGTAGAAATTAAGCCATTG---GGAATAGCACCCACTGGAGCAAGAAGGAGAGTGGTG-----  
-----GAGAAACAAAAAAGAGCA---GTAGGA---ATGGGAGCT-----  
---GTGATCCTTGGGTTCTTGGGAGCA---GCAGGAAGCACTATG---GGCGCGGCGTCA---  
ATAACGCTGACGGTACAG---GCCAGACAA---CTGCTG---TCTGGTATAGTGCAACAGCAAAGC---  
AATTTG---CTGAGA---GCTATAGAGGCGCAACAGCATATGTTGCAACTCACAGTCTGGGGCATT  
>HM623561  
TTCTTTTGAATACAACACAACCTGTTTAATGAACTAATGTT-----  
-----  
-----  
ACTGAAGATACCATTACAATCCCATGCAGAATAAAACAAATTGTAAACATGTGGCAGAGGGTAGGACGAGCAA  
TTTATGCCCCCTCCCATTCAGGAAACATAACATGTAATTCAAAT---  
ATCACAGGAATACTATTGCTACGTGATGGAGGCACAAACAATAAC-----  
-----  
-----  
ACAAGTAACGAAACATTTCAGACCTGGAGGGGGAAATATGAAGGACAATTGGAGAAGTGAATTATATAAATATA

AAGTAGTAGAGATTAAGCCATTG---GGAATAGCACCCACTAATGCAAGAAGGAGAGTGGTG-----  
 -----GAGAGAGAAAAAAGAGCA---GTGGGA---ATAGGAGCC-----  
 ---ATGATCTTTGGGTTCTTGGGAGCA---GCAGGAAGCACTATG---GGCGCGGCGTCA---  
 ATAACGCTGACGGTACAG---GCCAGACAA---CTGTTG---TCTGGTATAGTGCAACAGCAAAGC---  
 AATTTG---CTGAGA---GCTATTGAGGCGCAACAGCATATGTTGCAACTCACGGTCTGGGGCATT  
 >KU749417  
 TTCTTTTGCAATACATCAAACTGTTTAATAGCACATACTATCCTAATGGTACAGAAAGTTCAAATGGTACAG  
 AAGGT-----  
 -----  
 TCAAAATGCAACCATCACACTCCCATGCAGAATAAAAGCAAATTATAAATATGTGGCAGGGGGTAGGACAAGCAA  
 TGTATGCCCCCTCCCATTCAGGAAACATAACATGTAAATCAAAT---  
 ATCACAGGACTGCTACTGACACGTGATGGAGGAGGTAATGGTAAT-----  
 -----  
 GAAACAGAGAGTAAT---  
 AGGACTGAGATATTCAGACCTGCAGGAGGAGATATGAGGGACAATTGGAGAAGTGAATTATATAAATATAAAG  
 TGGTAGAAGTTCAGCCATTG---GGAGTAGCACCCACTAAGGCAAAAAGGAGAGTGGTG-----  
 -----GAGAGAGAAAAAAGAGCA---GTGGGA---ATAGGAGCT-----  
 GTGTTCTTGGGTTCTTGGGAGCA---GCAGGAAGCACTATG---GGCGCAGCATCA---  
 ATAACGCTGACGGTACAG---GCCAGACAA---CTGTTG---TCTGGTATAGTGCAACAGCAAAGC---  
 AATTTG---CTGAGG---GCTATAGAGGCGCAACAGCATATGTTGCAACTCACTGTCTGGGGCATT  
 >KF986074  
 TTCTTCTGTAACACATCAGAACTGTTTAACAGTACATGGAATAGAACTAGTACTAATAGTACT-----  
 -----ACA---  
 TGGGATAGTACTAGTACACCC-----  
 AATGAGACAGAGGATATTACACTCCAGTGCAGAATAAAACAAATTATAAACATGTGGCAGAAAGTAGGAAAAG  
 CAATGTATGCCCCCTCCCATTCGAAGGAAAAATCAGATGTTTCATCAAAT---  
 ATTACAGGACTATTGTTGACGAGAGATGGTGAT-----  
 -----  
 -  
 GCAAATAATACTAGTAATGAGACCTTCAGACCTGGAGGAGGAGATATGAGAGACAATTGGAGAAGTGAATTAT  
 AATAATATAAAGTAGTAAGAATTGAGCCAATA---GGCTTAGCACCCACCAAGGCAAAAAGAAGAGTGGTG--  
 -----GAAAGGGAGAAAAGAGCA---ATAGGA---  
 CTAGGAGCT-----ATGTTCTTGGGTTCTTGGGAGCA---GCCGGAAGCACGATG---  
 GGCGCAGCGTCA---CTGACGCTGACGGTACAG---GCCAGAAAT---TTATTG---  
 TCTGGCATAGTGCAACAGCAAAAC---AATCTG---CTGAGG---  
 GCTATTGAGGCGCAACAGCATCTGTTGCAACTCACAGTCTGGGGCATT  
 >AF484490  
 TTCTTCTGCAATACATCAGGACTGTTTAATAGTACATGGGAGAAAAATAATAATAATAGTAAATGGGAAAATA  
 ATAGTACC-----  
 -----AGGGGG-----  
 AATAATAATACACTTATCACACTCCAATGCAGAATAAAACAAATTATAAACATGTGGCAGAAAGTAGGAAAAG  
 CAATGTATGCCCCCTCCCATTCGAAGGACTAATCAGATGTTTCATCAAAT---  
 ATTACAGGACTATTGTTGACAAGAGATGGTGGTATAAATAGTACT-----  
 -----  
 -----  
 AATGGTAATCAGACCTTCAGACCTGGAGGAGGAGATATGAGAGACAATTGGAGAAGTGAATTATACAAATATA  
 AAGTAGTAAGAATTGAACCACTA---GGTCTAGCACCCACCAGGGCAAGAGAAGAGTGGTG-----  
 -----GAAAGAGAAAAAAGAGCA---ATAGGA---CTAGGAGCT-----  
 ---TTGTTCTTGGGTTCTTGGGAACA---GCAGGAAGCACGATG---GGCGCAGCGTCG---  
 CTGACGCTGACGGTACAG---GCCAGACAG---GTACTG---TCTGGTATAGTGCAACAGCAAAAC---  
 AATTTG---CTGAGG---GCTATAGAGGCGCAACAGCACCTGTTGCAACTCACAGTCTGGGGCATT  
 >KX181917  
 TTATCATTCAATACAAATAATTTATTTAATGACACAGTAATAAATGACACA-----  
 -----  
 -----  
 ACCACTGTCAATATCACTCTCCCATGTGCAATAAAAAAATACTAAACGTGAGGCAGGAAGTAGAAGGAGCAA  
 TGTATGCCAATCCCATTCAGGAGAAAGATAACCTGTACCTCTATT---  
 ATTACAGGTATAGTATTAACAAGAGAAGGAGGTAATAATAGGGGT-----  
 -----  
 -----

AATAATAATGAGACCTTCAGACCTGGGGGAGGAAATATGAAAGACAATTGGAGAAGTGAATTATATAAATATA  
AAGTAGTAGAAATTGAACCACTT---GGAGTAGCACCCACCAAAGCAAAAAGACAAGTGGTG-----  
-----AAGAGAGAAAAAAGAGCA---GTGGGA---ATGGGAGCT-----  
---TTGTTCCCTTGGGTTCTTGGGAGCA---GCAGGAAGCACTATG---GGCGCGGCGTCA---  
ATGACGCTGACGGTACAG---GCCAGACAA---TTATTG---TCTGGAATAGTGCAACAGCAGAAC---  
AATTTG---CTGAGG---GCTATTGAAGCGCAACAGCATCTGTTGCAGCTCACAGTCTGGGGCATT  
>JN248591  
TTCTTTTGTAAACACATCAGGACTGTTTAATGCATCAGAAAAAGTTAACGCATCA-----  
-----  
-----  
GAACAGGGAAATATCACACTCCCATGTAGAATAAAACAAATTGTGAGAATGTGGCAGAGAGTGGGACAAGCAA  
TGTATGCCCCCTCCCATCGCAGGAGATATTACATGTCACTCAAAC---  
ATTACAGGGCTTTTATTAACAAGAGATGGTGGGAATAATATTACT-----  
-----  
-----  
AATGAGACCTTCAGACCTGGAGGAGGAGATATGAGAGACAATTGGAGAAGTGAATTATATAAGTACAAAATAG  
TAAAAATTAAACCACTA---GGAATAGCACCCACCAAGGCAAGGAGAAGAGTGGTG-----  
-----CAGAGAGAAAAAAGGGCA---ATAGGTGGACTGGGAGCT-----  
GTCTTCCTTGGGTTCTTAGGAGCA---GCAGGAAGCACTATG---GGCGCGGCGTCA---  
ATAACGCTGACGGTACAG---GTCAGACAA---TTATTG---TCTGGCATAGTGCAACAGCAAGCT---  
AATTTG---CTGAGA---GCTATAGAGGCACAGCAACATCTGTTGCAACTCACAGTCTGGGGCATT  
>MH742769  
TTCTTTTGTCAATACATCAAACTGTTTGATAGCACTTGGGCACACAATACTACCAGCGCAAACCTACACAGGAT  
TAAAT-----  
-----AACACA-----  
GAATTAAATGACACTATGACTCTCCAATGCAAAATAAAGCAGTTTATAAACATGTGGCAGAAAGTAGGGCAAG  
CAATGTATGCCCCCTCCTATCCAAGGAGTAATAAGGTGTGAATCAAAC---  
ATTACAGGACTACTATTAACAAGAGATGGAGGAAATAATAGTAGT-----  
-----  
-----  
GACCAGGAGATCTTCAGGCCTGGAGGAGGAGATATGAGGGACAATTGGAGAAGTGAATTATATAAGTATAAAG  
TAGTAAAAATTGAACCACTA---GGTGTAGCACCCACCCATGCAAAAAGAAGAGTGGTG-----  
-----GAGAGAGAAAAAAGAGCA---GTTGGA---CTGGGAGCT-----  
TTATTCCTTGGGTTCTTAGGAGCA---GCAGGAAGCACTATG---GGCGCGGCGTCA---  
ATAACGCTGACGGTACAG---GCCAGACAA---TTGTTG---TCTGGTATAGTGCAACAGCAGAGC---  
AATTTG---CTGAGA---GCTATAGAGGCTCAACAACATATGTTGAGACTCACGGTCTGGGGCATT  
>KF561437  
TTCTCTTGTAAATACATCAATACTGGTTGACAACACTTTTAACAACACTTCGAACGAGAGCAGCTCAGGACACA  
CAGGGTGG-----  
-----  
TCAAATGAATCTCTAACTCTCCCATGCAGAATAAATCAAATTGTAAATATGTGGCAGAAGGTAGGACAAGCAA  
TATATGCCCCCTCCCATCAATGGAGTCATAAGGTGTGATTCAAAT---  
ATTACAGGACTTCTATTACAAGGGATGGAGGGAACAGTAGGAATGGAGGGGAC-----  
-----  
-----  
AGTGGTGGTGACAATGAGACCTTCAGGCCTGGAGGAGGAGATATGAGGGATAATTGGAGAAGTGTATTATATA  
GGTACAAGGTAGTAAAAATTGAACCGCTA---GGTGTAGCACCCACCCATGCAAAAAGGAGAGTGGTG-----  
-----GAAAGAGAAAAAAGAGCA---GTTGGA---  
CTAGGAGCT-----GTCTTCCTTGGGTTCTTAGGAGCA---GCAGGAAGCACTATG---  
GGCGCGGCGTCA---ATAACGCTGACGGTACAG---GCCAGACAA---TTATTG---  
TCTGGTATAGTGCAACAGCAGAGC---AATTTG---CTGAGA---  
GCTATAGAGGCTCAACAACACCTGTTGAACTCACGGTCTGGGGCATT  
>KX389633  
TTCTTTTGTCAATACATCAGGGCTGTTTAATAGCACTTGGTATGAGAATGACACTGAAACAAATAACACGGGTT  
CAGTAGAG-----  
-----  
GGCAATACAACCTATAACTCTCCCATGTAGAATAAAACAGATTGTACGTATGTGGCAGAATGTAGGACAAGCAA  
TGTATGCCCCCTCCCATCCCCGAGAAATAAGGTGTGACTCAAAC---  
ATTACAGGACTACTATTAACAAGAGATGGTGGGGCACCGAACAGG-----  
-----

-----  
 ACTAATGATACCTTCAGGCCTACAGGAGGAGATATGAAGGACAATTGGAGAAGTGAATTATATCAGTATAAAG  
 TAGTGGAGATTAGCCCTTTA---GGAGTAGCACCCACCAGGGCAAGAAGAAGAGTGGTG-----  
 -----GAGAGAGAAAAAAGAGCA---GTAGGA---ATGGGAGCT-----  
 GTACTCCTTGGGTTCTTGGGAGCA---GCAGGAAGCACTATG---GGCGCGGCGTCA---  
 ATAACGCTGACGGTACAG---GCCAGACAA---TTATTG---TCTGGCATAGTGCAACAGCAAAAC---  
 AACTTG---CTGAAG---GCTATTGAAGCGCAACAGCATCTGTTGCAGCTCACTGTCTGGGGCATT  
 >DQ085872  
 TTATACTGTAATACAACACAGCTGTTCAATGGTACTTGGGAATGGCAATGACACTTGGGAATGATACTTGGGAATA  
 GT-----  
 -----  
 ACTAATGGTATTATCACACTCCCATGCAGAATAAGACAAATTATAAACAGGTGGCAGGAAGTAGGAAAAGCAA  
 TGTATGCCCCCTCCCATCAAAGGACAACCTTAAGTGTTCATCAAAG---  
 ATTACAGGGCTGCTACTAACAAGAGATGGGGGTGGTAACGTGAATGGCACT-----  
 -----  
 -----  
 GAGAAATGACACTGAGACCTTCAGACCTGGAGGAGGAGATATGAGGGACAATTGGAGAAGTGAATTATATAAAT  
 ATAAAGTAGTAAGAATTGAACCATTA---GGAGTAGCACCCACCAAGGCAAAGAGAAGAGTGGTG-----  
 -----CAGAGAGAAAAAGAGAGCA---GTGGGAACGATGGGAGCT---  
 -----ATGTTTCCTTGGGTTCTTGGGAGCA---GCAGGAAGCACTATG---GGCGCAGCGTCA---  
 GTGACGCTGACGGTACAG---GCCAGACTA---TTATTG---TCTGGTATAGTGCAACAGCAAAAC---  
 AATTTG---CTGAGA---GCTATTGAGGCGCAACAGCATTTGTTGCAGCTCACAGTCTGGGGCATC  
 >AY536235  
 TTCTTCTGCAATACAACAAGACTGTTTAATGACACAGGATTCAATGACACAAAATCCAAT-----  
 -----  
 -----  
 GACACTGACACTATCACGCTCCCATGTCTGAATAAAACAAATTGTAAACATGTGGCAGCAAGTGGGAAGAGCAA  
 TGTATGCCGCTCCCATTCAGGAAAAATATCCTGTAGATCAAAT---  
 ATTACAGGTCTACTATTGACAAGAGATGGTGGTAATACTACTACAGATGGTAAT-----  
 -----  
 -----  
 AATAATACTACTACTGAAATCTTCAGACCAGGGGGAGGAAATATGAAAGACAATTGGAGAAGTGAATTATATA  
 AATATAAAGTGGTAGAACTTGAACCACTA---GGAGTAGCACCCACCAAGGCAAAAAGACAAGTGGTG-----  
 -----CAGAGAGAAAAAAGAGCA---GTGGGA---  
 ATAGGAGCT-----ATGTTTCCTTGGGTTCTTGGGAGCA---GCAGGAAGCACTATG---  
 GGCGCAGCGTCA---ATAACGCTGACGGTACAG---GCCAGACAA---TTATTG---  
 TCTGGAATAGTGCAACAGCAGAGA---AATTTG---CTGATG---  
 GCTATTGAAGCGCAACAGCATATGTTGCAGCTCACAGTCTGGGGCATT  
 >MH078537  
 TTCTTTTGCAATACATCAGCACTGTTTAATAGCACTTGGATTAAACAGCACTCTGTATAAAAATCAAATGATA  
 CA-----  
 -----  
 AATCAAATATAATAATTCTCAGTTGCAGAATAAAGCAAATTGTAAAGGATGTGGCAGAAAGTAGGACAAGCAA  
 TGTATGCCCCCTCCCATCGAAGGAGACATAAAATGTAACCTCAAGC---  
 ATTACAGGACTACTACTAACAAGAGATGGAGGACATGGTAATAATACTGGT-----  
 -----  
 -----  
 ACAAATGAGACCTTCAGGCCTGGAGGAGGAGATATGAGGGACAATTGGAGAAGTGAATTATATAAGTATAAGG  
 TAGTAAAAATGAACCACTA---GGTGTGGCACCCACCCATGCAAAAAGAAGAGTGGTG-----  
 -----GAGAGAGAAAAAAGAGCA---GTTGGA---CTGGGAGCT-----  
 GTCTTCCTTGGGTTCTTAGGAGCA---GCAGGAAGCACTATG---GGCGCAGCGTCA---  
 ATAACGCTGACGGTACAG---GCCAGACAA---TTATTG---TCCGGTATAGTGCAACAGCAAAAGC---  
 AATTTG---CTGAAG---GCTATAGAGGCTCAACAACAGCTGTTGAGACTCACAGTCTGGGGCATT  
 >AF411964  
 TTCTTTTGCAATACATCAGGTCTGTTTAATAGCACTTGGGGTAAAAATGACACTAACAGAACAATTGGCACGG  
 GA-----  
 -----  
 ACAAATGAAAATATAACTCTCCCATGCAGAATAAAGCAAATTGTAAATATGTGGCAGAGAGTAGGACAAGCAA  
 TATATGCCCCCCCCATCCAAGGAATAATAAGGTGTGAATCAAAC---  
 ATTACAGGAATACTACTAACAAGAGATGGTGGGAATAATAACAGTAGTAAC-----

-----  
 ----  
 AATAACAATGACACTGAGATCTTCAGACCTGGAGGAGGAGATATGAGAGACAATTGGAGAAGTGAATTATATA  
 AGTATAAAGTAGTACAAATTGAACCACTA---GGAGTAGCACCCACCAAGGCCAAAAGAAGAGTGGTG-----  
 -----GAAAGAGAAAAAAGAGCA---ATAGGA---  
 TTTGGAGCT-----ATGTTCTCTCGGGTTCTTGGGAGCA---GCAGGAAGCACTATG---  
 GGCGCGGCGTCA---GTGACGCTGACGGTACAA---GCCAGGCAA---TTATTG---  
 TCTGGTATAGTGCAACAGCAGAAC---AATCTG---CTGAGG---  
 GCTATAGAGGCTCAACAGCATATGTTGAAACTCACAGTCTGGGGCATT  
 >AF442569  
 TTCCATTGTAATACATCAGGCCTGTTTAATAGCACTTGGGAATCACAATACCAACATGACAGAGTCAAAT-----  
 -----  
 -----  
 AGCACGGACAATATAACTCTCCCATGCAGAATAAAGCAAATTATAAGGATGTGGCAGAGAGTAGGACAAGCAA  
 TGTATGCCCCCTCCCATCCAAGGAAAAATAGAGTGTGTATCAAAC---  
 ATTACAGGACTAATGTTAAACAAGAGATGGTGGAAGGATAACAGT-----  
 -----  
 -----  
 GAAAAATGAAACCTTCAGACCAGGAGGAGGAGACATGAGGGACAATTGGAGAAGTGAATTATATAAATATAAAG  
 TAGTAAAAAATTGAACCAATA---GGAGTAGCACCCACCAAGGCCAAGGAGAAGAGTGGTG-----  
 -----GGGAGAGAAAAAAGAGCA---GTTGGA---CTGGGAGCT-----  
 GTCTTCATTGGGTTCTTAGGAGCA---GCAGGAAGCACTATG---GGCGCGGCGTCA---  
 ATAACGCTGACGGTACAG---GCCAGGCAA---TTATTG---TCTGGCATAGTGCAACAGCAAAGC---  
 AATTTG---CTGAGG---GCTATAGAGGCTCAACAGCATCTGTTGAAACTCACTGTCTGGGGCATT  
 >KF716483  
 TTCTTCTGCAACACCTCAGGACTATTTAACAGTACATGGACACGGGATGGGGGTAATAAGACATGGAATAGTA  
 ATAGTACA-----  
 -----GAGAGT-----  
 GATAATATTACAGATATTACACTCCCATGCAGAATAAAACAATTTATAAACATGTGGCAGACAGTAGGAAGAG  
 CAATGTATGCCCCCTCCCATTTGAAGGAGTAATAAAATGTACATCAAAT---  
 ATTACAGGATTATTGTTGATGAGAGATGGTGGTTTAAATAGTACT-----  
 -----  
 -----  
 AATAATGAGACCTTCAGGCCTGGAGGAGGAGATATGAGAGACAATTGGAGAAGTGAGTTATATAAATATAAAG  
 TAGTAAAAAATTGAGCCAATA---GGTCTAGCACCCACCAAGGCCAAGAGAAGAGTGGTG-----  
 -----GAAAGAGAAAAAAGAGCA---ATAGGA---CTAGGAGCT-----  
 ATGTTCTTGGGTTCTTGGGAGCA---GCCGGAAGCACAATG---GGCGCAGCGTCA---  
 CTGACGCTGACGGTACAG---GCCAGAACT---TTGTTG---ACTGGCATAGTGCAACAGCAAAAC---  
 AATTTG---CTGAGG---GCTATTGAGGCGCAACAGCATATGTTGCAACTCACAGTCTGGGGCATT  
 >JN054263  
 TTATATTGCAATACATCAGGCCTGTTTAACAGTACTTGGACTTGGACAAATGGCACGTTGTCAAATAACACGG  
 GGTCAAAT-----  
 -----  
 -----  
 GAAAAATGAACTATAACTCTTCAATGCAGAATAAGGCCAAATCATAAGGATGTGGCAGAGAGTGGGACAAGCAA  
 TGTATGCTCCTCCCATCCAAGGAAAAATAGAGTGCAACTCAAGC---  
 ATTACAGGAATTCTATTAACAAGAGATGGTGGCCAGAACACCTCA-----  
 -----  
 -----  
 GGGACCGAGACCTTCAGACCTGGAGGAGGAGATATGAGGGACAATTGGAGAAGTGAATTATATAAGTATAAAG  
 TAGTAGAAATTGACCCAGTA---GGAGTAGCACCAACCACGGCAAAAAGGAGAGTGGTG-----  
 -----GAGAGAGAAAAAAGAGCA---ATTCCA---CTAGGAGCT-----  
 GTCTTCATTGGGTTCTTGGGAGCA---GCAGGAAGCGCTATG---GGCGCAGCGTCA---  
 TTGACGCTGACGGTACAG---GCCAGACAA---TTATTG---ACTGGCATAGTGCAACAACAGAGT---  
 AATCTG---CTGAGG---GCTATAGAGGCTCAACAGCATCTGTTGAAACTCACAGTCTGGGGCATT  
 >DQ886038  
 TTATACTGCAATACATCCAACCTGTTCAATAGCAATGGGTTGATAAAAGGCACAAATGCC-----  
 -----  
 -----  
 AACATTACCAACATGACTATCCCATGCAAAATAAAGCAAATTGTACGTATGTGGCAGAGAGTAGGACAAGCAA  
 TGTATGCCCCCTCCCCTCAGCGTAGTAATAATTTGTATATCAATC---

TTTACCGGGATAATATTAACAAGAGCTGGTGGAATCATAACAAGACA-----  
-----  
-----  
AATGATACTGAGATCTTCAGACCTACAGGAGGAAATATGAAAGACAATTGGAGAAGTGAATTATATAAGTATA  
AAGTAGTAAAAATTGAACCACTA---GGAATAGCACCCAACAAAGCAAGGAGAAGAGTGGTG-----  
-----GAGAGAGAAAAAAGAGCA---GTTGGA---CTGGGAGCT-----  
---TTCTTCCTTGGGTTCTTAGGAACA---GCAGGAAGCACTATG---GGCGCAGCGTCA---  
CTAGCGCTGACGGAACAG---GCCAGAAAA---TTATTG---TCTGGCATAGTGCAACAGCAGAGC---  
AATCTG---CTGAGG---GCTATAGAGGCTCAACAGCATATGTTGAAGCTCACAGTCTGGGGCATT  
>DQ383753  
TTCTTCTGCAATACATCAGGACTGTTTAATAACACACTGCTTAATGACACATTGTTTAACAGCACA-----  
-----  
-----  
GACAATAGCCCTATTACTCTCCCATGTAAAATAAAACAAATTATAAACATGTGGCAGGAAGTGGGAAGAGCAA  
TGTATGCCGCTCCCATTGCAGGGAACATTACCTGTAGATCAAAT---  
ATTACAGGTCTACTATTGACAAGGGATGGTGGTAATAAAAAATAATACT-----  
-----  
-----  
AATGAGACTGACGAGATCTTCAGACCTGGGGGAGGAGACATGAGAGACAATTGGAGAAGTGAATTATATAAAAT  
ATAAAGTAGTAGAAATTGAACCACTA---GGAGTAGCACCAACCAGGGCAAAAAGACAAGTGGTG-----  
-----ACGAGAGAAAAAAGAGCA---GCAGGA---CTGGGAGCC---  
-----TTGTTTCCTTGGGTTCTTGGGAGCA---GCAGGAAGCACTATG---GGCGCAGCATCA---  
ATAACGCTGACGGTACAG---GCCAGACAA---TTATTG---TCTGGAATAGTGCAACAGCAGAGC---  
AATCTG---CTGAGA---GCTATTGAAGCGCAACAGCATCTGTTGCAGCTAACAGTCTGGGGCATT  
>JN692437  
TTCTTTTGTAAATACATCACAATTGTTTAATAGTACTTGAATAATACTAATGATTGGAATAATACTAATGATA  
GGAAT-----  
-----  
AAGACTAACAAAAATATCATACTCCCATGCAGAATAAAACAAATTATAAACATGTGGCAGAAAGTGGGAAAAG  
CAATGTATGCTCCTCCCATCAGAGGACTAATTAAGTGTTCATCAAAT---  
ATAACAGGGCTGCTATTAAACAAGAGATGGGGGCAGTGGGAACAAGACT-----  
-----  
-----  
AACAAATAACAGAGATCTTCAGACCTGTAGGAGGAGATATGAAGGACAATTGGAGAAGTGAATTATATAAAAT  
ATAAAGTAGTAAGAGTTGAACCATTA---GGAGTAGCACCCACCAAGGCAAAGAGAAGAGTGGTG-----  
-----CAGAGAGAAAAAAGAGCA---ATAACA---CTAGGAGCT---  
-----ATGTTTCCTTGGGTTCTTGGGAGCA---GCAGGAAGCACTATG---GGCGCAGCGTCA---  
TTGACGCTGACGGTACAG---GCCAGACAA---TTATTG---TCTGGTATAGTGCAACAGCAGAAC---  
AATCTG---CTGAGA---GCTATTGAGGCGCAACAACATATATTGCAACTCACAGTCTGGGGCATC  
>JF804810  
TTCTTCTGCAATACATCAGGGCTGTTTAATGAAACAGTATCC-----  
-----  
-----  
AATGACACTATCATTCTCCCATGTGCAATAAAACAAATTGTAAATCTGTGGCAGGAAGTGGGGCGAGCAATGT  
ATGCCGCCCCCATTGAAGGAAACATTACTTGTAAATTCAAAT---  
ATTACAGGTCTACTATTGACAAGAGATGGTGGTAATATCAATAAT-----  
-----  
-----  
CAGACTCAGACCTTCAGACCTGGGGGAGGAAATATGAAAGACAACCTGGAGAAGTGAATTATATAAATATAAAG  
TAGTAAAAATTGAACCACTA---GGAATAGCACCTTCCAAGGCAAAGCGAAGAGTGGTG-----  
-----CAAAGAGAAAAAAGAGCA---GTGGGA---ATAGGAGCT-----  
TTGTTTCCTTGGGTTCTTAGGAGCA---GCAGGAAGCACTATG---GGCGCAGCGTCA---  
CTGGCGCTGACGGGACAG---ACCAGACAA---TTACTG---TCTGGTATAGTGCAACAGCAGAAC---  
AATCTG---CTGAGG---GCTATTGAGGCGCAACAGCATCTGTTGCAACTCACAGTCTGGGGCATC  
>DQ017382  
TTCTTTTGTAACTTCCAGATTATTTGATGAGAACGGGACTGTA-----  
-----  
-----  
AATGGGACTATTATTCTGCCCTGTAGAATAAAACAAATTGTAAATTTGTGGACAAGAGTAGGAAAAGGAATTT  
ATGCACCACCAATTCGGGGAAAATATTACCTGTAACTCCAGT---

ATTACTGGACTAATTCTAGAAGTTAGTGGAAATAGTACA-----  
-----  
-----  
GTATATCCTTCAGGAGGAAACATGGTTAATCTCTGGAGACAAGAGTTGTACAAGTACAAAGTAGTTAGCATAG  
AACCCATA---GGAGTAGCACCCAGGTAAAGCTAAAAGACGCACAGTG-----  
-----AATAGAGAAAAGAGAGCAGCCTTTGGA---CTAGGTGCG-----  
CTGTTTCTTGGGTTTCTTGGTGCA---GCAGGGAGCACTATG---GGCGCAGCGTCA---  
ATAACGCTGACGGTACAG---GCCCGGAAC---TTATTA---TCTGGGATAGTGCAACAGCAGAAT---  
AATCTG---TTGAGA---GCAATAGAGGCGCAACAACAATTGTTGCAACTCTCAATCTGGGGCATT  
>U36863  
TTCTTCTGTAATACAACAACAACTGTTTAATAGTACTTGGAAAAATGATACTGAAGTGTCAAATAACACTAAA-  
-----  
-----  
GGAAATGACACATTCACACTCCCATGCAGAATAAAACAAATTGTAAATATGTGGCAAAAAGTAGGAAAAGCAA  
TGTATGCCCCCTCCCATCAGAGGACTAATTAGATGTCCATCAAAC---  
ATTACAGGGATACTATTAACAAGAGATGGTGGTAAGAATGGTAAGAATGGG-----  
-----  
-----  
ACCAATGACACTGAGATCTTCAGACCTGGAGGAGGGGATATGAGGGACAATTGGAGAAGTGAATTATATAAAT  
ATAAAGTAGTAAAAATTGAGCCATTA---GGAGTAGCACCCACCAAGGCAAAGAGAAGAGTGGTG-----  
-----CAGAGAGAGAAAAGAGCA---GTGGGA---ATAGGAGCT---  
-----GTGTTTCCTTGGGTTCTTGGGAGCA---GCAGGAAGCACTATG---GGCGCAGCGTCA---  
ATGACGCTGACGGTACAG---GCCAGACTA---TTATTG---TCTGGTATAGTGCAACAGCAGAAC---  
AATTTG---CTGAGG---GCTATTGAGGCGCAACAGCATCTGTTGCAACTCACAGTCTGGGGCGTC  
>MH327757  
CTATACTGTAACCAACAACAACTGTTTAATTGGACTGAGACAAAACCTGAATAATGACACCAAT-----  
-----  
-----  
AATGACACCACAATCACACTCCCATGCAGAATAAAACAAATTATAAACAGGTGGCAGGAAGTAGGAAAAGCAA  
TGTATGCCCCCTCCCATGAAGGACCAATTAGCTGTTTATCAAAT---  
ATTACAGGATTGCTATTAACAAGAGATGGTGGTATCAATAATGAAACT-----  
-----  
-----  
AATGGCACTGAGACCTTCAGACCGGGAGGAGGAGACATGAGGGACAATTGGAGAAGTGAATTATATAAATATA  
AAGTAGTACAAATTGAACCAATA---GGAATAGCACCCACCAAGGCGAGGAGAAGAGTGGTG-----  
-----CAGAGAGAAAAAGAGCA---GTGGGA---ATAGGAGCT-----  
---GTGTTTCCTTGGGTTCTTGGGAGCA---GCAGGAAGTACTATG---GGCGCAGCGTCA---  
TTGACGCTGACGGTACAG---GCCAGACAA---TTATTG---TCTGGTATAGTACAACAGCAGAGC---  
AATCTG---CTGAGG---GCTATTGAGGCGCAACAACACCAGTTGCAACTCACAGTCTGGGGTATC  
>MG197210  
TTCTTCTGTAATTCAACACAATTGTTTAATAGTACTTGAATAGTACTTGAATTTGAATGATAATAATACTG  
GGGACAAT-----  
-----  
GGAAATGACACTATCACACTCCCATGCAGAATAAAACAAAGTCATAAACATGTGGCAGGAAGTAGGAAAAGCAA  
TGTATGCCCCCTCCCATCAAAGGACAAATTAGATGTTTATCAAAT---  
ATTACAGGGCTGTTATTAACAAGAGATGGTGGTATTGGTAAGAACAATACC-----  
-----  
-----  
GAGAACAATGATACCGAGATCTTCCGACCTGGAGGAGGAGATATGAGGGACAATTGGAGAAGTGAACCTATATA  
AATATAAAGTAGTAAAAATTGAACCATTA---GGAATAGCACCCACCAAGGCAAAGAGAAGAGTGGTG-----  
-----CAAAGAGAAAAAGAGCA---GTGACA---  
TTCGGAGCT-----TTGCTCGTTGGGTTCTTGGGAGCA---GCAGGAAGCACTATG---  
GGCGCAGCGTCA---GTGACGCTGACGGTACAA---GCCAGACTA---TTATTG---  
TCTGGTATAGTGACAGCAGCAGAAC---AATCTG---CTGAGG---  
GCTATTGAGGCGCAGCAGCACCTGTTGCAACTCACAGTCTGGGGCGTT  
>KR861319  
TTCTCTTGCAACACATCACAACCTGTTTAATGGTACACACTGGTTTAATACT-----  
-----  
-----AACAGT-----  
ACAGGTAATGGTACAATCATACTCCCATGCAGAATAAGACAAATTATAAATATGTGGCAGGAGGTAGGAAAAG

CAATATATGCCCCACCTATCGCAGGAAACATAACATGTAACCTCTACT---  
ATCACAGGACTACTATTGACACGTGATGGAGGATCACCAAATGAG-----  
-----  
-----  
ACAACAGAGACATTTCAGACCTGGAGGAGGAGATATGAGGGACAATTGGAGAAGTGAATTATATAAATATAAAG  
TGGTAGAAATTAGGCCATTG---GGAGTAGCGCCCACTAAGGCAAAAAGGAGAGTGGTG-----  
-----GAGAGAGAAAAAAGAGCA--GTGGGA--ATAGGAGCT-----  
GTGATCTTTGGTTTCTTGGGAGCT---GCAGGAAGCACTATG---GGCGCAGCGTCA---  
ATAACGCTGACGGTACAG---GCCAGACAA---TTGCTG---TCTGGAATAGTGCAACAGCAAAGC---  
AATTTG---CTGAGA---GCTATAGAGGCGCAACAGCATATGTTGCAACTCACAGTCTGGGGTATT  
>KP411844  
TTCTTCTGCACCACAACACCACCCACTTGCACCGGCAGTAGTAGTACTGGCAACAGCAACGGCAACAGGGACA  
AC-----  
-----AATAGC-----  
ACTAGCACCATAACCATAACCTTTCCGAATCAGGCTAAAGCAAATTATGTGGCAGAGGCTGGGACTAGGACAGT  
CAATGTATGCCCCCTCCCATTAACAAGAATAATACGGTGTGAGTCAAAC---  
ATTACAGGACTACTATTAACAAAAAATGGAAGGAGGGTTAATAAT-----  
-----  
-----  
ACAAAATGAAACATTTAAGCCTGGAGGAGGAGATATGAGGGACAATTGGAAAAGTGAATTATATAAATATAAAG  
TAGTACAAATTGAACCAATA---GGTGTGGCACCTACCCGTGCAAAAAGAAGAGTGGTG-----  
-----GAGAGAGAAAAAAGAGCA--GTTGGA--ATAGGAGCT-----  
GCCCTCATTGGGTTCTTAGGAGCT---GCAGGAAGCACTATG---GGCGCGGCGTCA---  
ATAACGCTGACGGTACAG---GCCAGAAAC---TTATTGTCTGGTATAGTGCAACAGCAAACAAT---  
TTGCTG---AGAGCT---ATAAAGGCTCACAACAGCTGTTGAAACTCACGATCTGGGGCAAATTA  
>MH705158  
TTCTATTGCAATACATCAGGCCTGTTTAATAGTAGTTGGAACGAAAGTGACACTGCAAATGACACTATAACGC  
TCCCGTGCAAAATAAAACAAATTGTAAGGATGTGGCAGAGAGTAGGACAAGCAATGTATGCCCCCTCCCATCCA  
AGGGGTAAATGAGGTGTGAATCTAACATTACAGGACTACTATTAACAAGAGATGGTGGGAATGAGGGCAATGAA  
AGTAGTGAGACGTGCAGACCTGGAGGAGGAGATATGAGGGATAATTGGAGAAGTGAACATATATAAATATAAAG  
TAGTAAAAATTGAACCACTAGGAGTAGCACCCACCAGGGCAAAGAGAAGAGTGGTGGAGAGAGAAAAAAGAGC  
AGTTGGACTGGGAGCTGTCTTCATTGGGTTCTTAGGAGCAGCAGGAAGCACTATGGGCGCGGCGTCAGTGACG  
CTGACGGTACAGGCCAGACAATTATTGTCTGGCATAGTGCAACAGCAAAACAATTGTCTGAGGGCTATAGAGG  
CTCAACAGCATCTGTTGAAACTCACGGTCTGGGGCATT  
>MH705151  
TTCTATTGCAATACATCAGACCTGTTTAATAGCACTTGGCGGAAACTGGCAAATGGCACTTGGAGCAACATAA  
ATAATGCAACGTCAAATGACACTATAACTCTCCAATGCAAAATAAAGCAAATTGTAAACATGTGGCAGAGAGT  
AGGACAAGCAATGTATGCCCCCTCCCATCCAAGGAGTAATACAGTGTGTATCAAACATTACAGGACTACTCTTA  
ACAAGAGATGGTGGGAGTAGTAACAGGGCAAATGAGACCTTCAGACCTGGAGGAGGAGATATGAGGGACAATT  
GGAGAAGTGAATTATATAAGTATAAAGTAGTAAAAATTGAACCACTAGGAGTAGCACCCACCAGGGCAAGGAG  
AAGAGTGGTGGAGAGAGAAAAAAGAGCAATTGGAATGGGAGCTCTTTCTTGGGTTCTTAGGAACAGCAGGA  
AGTACTATGGGCGCGGCGTCAATAACGCTGACGGTACAGGCCAGACAATTATTGTCTGGTATAGTACAACAGC  
AGAGCAATCTGCTGAGGGCTATAGAGGCTCAACAGCATCTGTTGAAACTCACAGTCTGGGGCATT  
>MH705157  
TTCTATTGTAATACATCAAGCCTGTTTAATAGCACTTGGAAAGAGGAGAATGGCACTGTCAGCATGCAGAATG  
ACACGAGTCAACTGACCCTATAACTCTCCAATGTAGAATAAAGCAAAGTTATAAACATGTGGCAGAGAGTAGG  
ACAAGCAATATATGCCCCCTCCCATCCAAGGAGTAATAAGATGTGTATCAAACATTACAGGACTACTATTAACA  
AGAGATGGTGGGAGTAATAATAATACTTCAAATGAAACCTTCAGACCTGGAGGAGGAGATATGAGGGACAATT  
GGAGAAGTGAATTATATAAGTATAAAGTAGTAAAAATTGAACCACTAGGAGTAGCACCCACCAGGGCAAAGAG  
AAGAGTGGTGGAGAGAGAAAAAAGAGCAGTTGGACTGGGAGCTGTCTTCTTGGGTTCTTAGGAGCAGCAGGA  
AGTACGATGGGCGCGGCGTCAATAACGCTGACGGTACAGGCCAGACAATTATTGTCTGGCATAGTGCAACAGC  
AGAGCAATCTGCTGAGGGCTATAGAGGCTCAACAGCAACTGTTGAGACTCACGGTCTGGGGCATT  
>MH705153  
TTCTATTGCGATACATCAGGCCTGTTTAATGGCACTTGGAGCAATACATCAGGCCTGATTAATAGCACTTGG  
GCGAGAATGACACTATAACTCTCCCATGTAGAATAAAGCAAATTGTAAATATGTGGCAGAGAGTAGGACAAGC  
AATGTATGCCCCCTCCCATCCAAGGAATAATAAATTGTACATCAAACATTACAGGACTACTGTTAAACAAGAGAT  
GGTGGGAATAATAACAGTATAAATGAGCCTGAGACCTTCAGACCTGGAGGAGGAGATATGAGGGACAATTGGA  
GAAGTGAACTATATAAGTATAAAGTAGTAAAAATTCAACCACTAGGAGTAGCACCCACCAGGGCAAAGAGAAG  
AGTGGTGGAGAGAGAAAAAAGAGCAGTTGGCATGGGAGCTCTTCTCCTTGGGTTCTTAGGAGCAGCAGGAAGC

ACGATGGGCGCGGCGTCAATAACGCTGACGGTACAGGCCAGACAATTATTGTCTGGTATAGTGCAACAGCAGAGCAATCTGCTGAGGGCTATAGAGGCTCAACAGCATCTGTTGAAACTCACGGTCTGGGGCATT  
>MH705133

TTCTATTGCAATACGTAGGCCTGTTTAAATAGCACTTGGAAGAATGGCACTAAAGAGGGAAATGACACTGCAAGTTAAGTGACACTATAACTCTCCCATGCAGAATAAAGCAAATTGTAAGGATGTGGCAGAGAACAGGACAAGCAATGTATGCCCCCTCCCATCCCAGGAGTAATAAATTGTGTCTCTAACATTACAGGGATACTATTAAACAAGGGATGGTGGGAATAGTAGTAATGCCAATGAAACCTTCAGACCTGGAGGAGGAAATATGAAGGACAATTGGAGAAGTGAACATATAAGTATAAAGTAGTAAAAATTGAACCAATAGGAGTAGCACCCACCAGGGCAAAGAAAAGAGTGGTGGAGAGAGAAAAAGAGCAGTTGGACTGGGAGCTGTCTTCCTTGGGTTCTTAGGAGCAGCAGGAAGTACTATGGCGCGGCGTCAATAACGCTGACGGTACAGGCCAGACAATTATTGTCTGGCATAGTACAACAGCAAAGCAATT

>JQ403028

TTCTACTGCAATACAACAGAACTGTTTAAATAGCACGTGGAATGACACGAGCAACACATCGCAGGGGACAAATAACAATAGTACTATTACTCTCCCATGCAGAATAAAGCAAATTTGTAAATATGTGGCAGAGAGTAGGACAAGCAATGTATGCCCCCTCCCATCAAAGGAAAAATACAGTGCATATCAAATATTACAGGTCTACTATTAAACAAGAGATGGGGGTAAGGTAAAAGCAATATTACAGAGATCTTCAGACCTGAAGGAGGAAATATGAAGGACAACCTGGAGAAGTGAATTATATAAATATAAAGTAGTAAAAATTGAACCACTAGGAGTAGCACCCACCAAGGCAAAGAGAAGAGTGGTGGAGAGAGAAAAAGAGCAGTTGGACTGGGAGCTGTGTTCCCTTGGGTTCTTAGGAGCAGCCGGAAGTACTATGGCGCGGCGTCAATAACGCTGACGGCACAGGCCAGGCAATTATTGTCTGGTATAGTACAACAGCAGAGCAATCTGCTGAGGGCTATAGAGGCTCAACAGCATCTGTTGAAACTCACAGTCTGGGGCATT

>KX389622

TTCTATTGCAATACATCAGACTTGTTTAAATAGCAATTGGACAAATGGGAATTGGACAAATGGGATAGGCAGCACGGAGACTAATGACACTATAACTCTTCCATGCAGAATAAAGCAGATTATAAGAATGTGGCAGAGAGTAGGACAAGCAATGTATGCCCCCTCCCATCAAAGGGGTAATAGAGTGTAATCAAATATTACAGGAATAATATTAGTAAGAGATGGTGGTAAGAATAACACAGACAAGGAGACATTTAGACCTGGAGGAGGAGATATGAGGGACAATTGGAGAAGTGAACTATACAAATATAAAGTAGTAAAAATTGAACCATTAGGAGTAGCACCCACCAGGGCAAAAAGAAGAGTGGTGGAGAGAGAAAAAGAGCAGTTGGAATAGGAGCTGTCTTCCTTGGGTTCTTAGGAGCGGCAGGAAGCACTATGGGCGCAGCGTCAATAACGCTGACGGTACAGGCCAGACAATTATTGTCTGGCATAGTGCAACAGCAGAGCAATCTGCTGAGGGCTATAGAGGCTCAACAACATCTGTTGAAACTCACAGTCTGGGGCATT

>DQ396400

TTCTATTGCAATACATCAGGCCTGTTTAAACAGAACTTGGAATGACACCGCTTGGAATGAAACAACTTGGAATAACATAAATTCAAATGGAAGTATAACTCTCCAATGTAGAATAAAGCAAATTTTAAATATGTGGCAGAGAGTAGGACAGGCGATGTATGCCCCCTCCCATCCCAGGAGAAATAAGGTGTGAATCAAACATTACAGGACTAATCTTAACAAGAGACGGGGGGCTTGAGCTTAACAATACGAATAATGAGACCTTCAGGCCTGGAGGAGGAGATATGAGGGACAATTGGAGAAGTGAATTGTATAAATACAAAGTAATAAAAAATTGAACCACTAGGAGTAGCACCCACCAGGGCAAAAAGAAGAGTGGTGGAGAGAGAAAAAGAGCAGTTGGACTGGGAGCTGTTTTCTTGGGTTCTTAGGGGCAGCAGGAAGCACTATGGGCGCAGCGTCAATAACGCTGACGGTACAGGCTAGGCAATTATTGTCTGGCATAGTGCAACAGCAAAGCAATTTGCTGAGGGCTATAGAGGCTCAACAACATTTGTTGAAACTCACAGTCTGGGGCATT

>FM165645

TTCTACTGTAACACATCAGGCCTGTTTAAATAGCAGTTGGGAAAATGACACTGGCAGCACGCAGGAGTCAAATGAACAAAGTCAAATGACACTATAACTCTCCCATGCAGAATAAAGCAAATTATAAATATGTGGCAGAGGGCAGGACAAGCAATATATGCCCCCTCCCATCCCAGGGGTAATACAGTGTCAAGTCAAACATTACAGGACTACTATTAAACAAGAGATGGTGGGAATAACAATACTAATGAAACCTTCAGACCTGGAGGAGGAAATATGAGGGATAATTGGAAGAGTGAACATATAAATATAAAGTAGTAAAAATTGAACCACTAGGAGTAGCACCCACCAGGGCAAGGAGAAGAGTGGTGGAGAGAGAAAAAGAGCAGTTGGGACTGGGAGCTGTGTTTCTTGGGTTCTTAGGAGCCGCAGGAAGCACTATGGGCGCGGCGTCAGTGACGCTGACGGTACAGGCCAGACAATTATTGTCTGGCATAGTGCAACAGCAAAACAATTTGCTGAGGGCTATTGAGGCTCAACAGCATCTGTTGAAACTCACAGTCTGGGGCATT

>FM165628

TTCTACTGCAACACATCAAGACTGTTTAAATAGCAGTTGGGAACCATTAGGCCAGTATGATGACAGTCAGAGCAATGACACAAATATAACTCTCCCATGCAGAATAAAGCAAATTATAAGGATGTGGCAGAGGACAGGACAAGCAATATATGCCCCCTCCCATCCAAGGGGAAATAACGTGTAGATCAAATATTACAGGACTACTATTAAACAAGAGATGGTGGAAATAAACTAATGAAACCTCCGAAACCTTCAGACCTGGAGGAGGAGATATGAGAGATAATTGGAGAAGTGAACATATAAATATAAAGTAGTAAAAATTGAACCACTAGGAGTAGCACCCACCAAGGCAAAAAGAAGAGTGGTGGAGAGAGAAAAAGAGCAGTTGGGACTGGGAGCTGTTCTCATTGGGTTCTTAGGAACAGCAGGAAGCACTATGGCGCGGCGTCAGTGACGCTGACGGTACAGGCCAGACAATTATTGTCTGGCATAGTGCAACAGCAAAACAATTGCTGAGGGCTATAGAGGCTCAACAGCATCTGTTGAAACTCACAGTCTGGGGCATT

>EU191615

TTCTACTGCAACACATCAACACTGTTTAAATAGCAGTTGGCCATTAAACCAGTCTAACAGTTGGAGCAATGGCGGAAATGACACAAATATAACTCTCCCATGCAGAATAAAGCAAATTATAAGGATGTGGCAGAGGACAGGACAAGCAATATATGCCCCCTCCCATCGAAGGGGTAATAATGTGTAGGTCAAATATTACAGGACTCCTATTAAACAAGAGAT

GGTGGAAATGAAGCTAATAAACTAATGAACTGCTGAAATCTTCAGACCTGGAGGAGGGGATATGAGAGATA  
ATTGGAGAAGTGAAGTATATAAATATAAAGTAGTAAAAATTGAACCACTAGGAGTAGCACCCACCAGGGCAAA  
AAGAAGAGTGGTGGAGAGAGAAAAAGAGCAGTGGGACTGGGAGCTGTTCTCATTGGGTTCCTTAGGAACAGCA  
GGAAGCACTATGGGCGCGGCGTCACTGACGCTGACGGTACAGGCCAGACAATTATTGTCTGGCATAGTGCAAC  
AGCAAAACAATTTGCTGAGGGCTATAGAGGCTCAACAGCATCTGTTGAAACTCACGGTCTGGGGCATT

>MH746258

TTCTATTGTAACACATCAGGCCTGTTTAATAGCACATGGTCTAAAAATGGCACACAGCAGGTAGACAACATAA  
CCAATCCTATAATTCTCCAATGCAGAATAAAGCAGATTATAAATATGTGGCAGAGAGCAGGACAAGCAATATA  
TGCCCCCTCCCATCCAAGGACTAATAAGGTGTGAATCAAACATTACAGGACTAATATTAACAAGAGATGGTGGA  
AATGGGAATACAACAAACAATGAAACCGAAACCTTCAGACCTGGAGGAGGAGATATGAGGGACAATTGGAGAA  
GTGAATTATATAAGTATAAGGTAGTACAAGTTGAACCACTAGGAGTAGCACCCACCAAGGCAAAAAGAAGAGT  
GGTGGAGAGAGAAAAAGAGCAGTTGGACTAGGAGCTGTATTTCATTGGATTCTTAGGAGCAGCAGGAAGCACT  
ATGGGCGCGGCGTCTGTGACGCTGACGGTACAGGCCAGGCAATTATTGTCTGGTATAGTGCAACAGCAAAAGCA  
ATTTGCTGAGGGCTATAGAGGCTCAACAGCATTTGTTGAAACTCACAGTCTGGGGCATT

>MH746253

TTCTATTGTAATACATCAGCCTTATTTAATAGCACTTGGAAATGATACCAATAATACGGGATCAAATACTGACA  
ATAACACCACGGGGTCAAATGAAGTTATAACTCTCCCTTGCGAGAATAAAACAAATTATACGTATGTGGCAGAG  
AACAGGACAAGCAATGTATGCCCCCTCCATTTTCAGGAATAATAAATTGTACATCAAACATTACAGGACTAATA  
TTGACAAGAGATGGTAGTAATGGTGATAATAACAGTGAAACCTTCAGACCTGGAGGAGGAGATATGAGGGACA  
ATTGGAGAAGTGAATTATATAAGTATAAAGTAGTAAAAATTGAACCATTAGGGGTAGCACCCACCAGGGCAAG  
GAGAAGAGTGGTGCAGAGAGAAAAAGAGCAGTTGGAATAGGAGCTGTCTTCCTTGGGTTCCTTAGGAGCAGCA  
GGAAGCACTATGGGCGCAGCGTCAATAACGCTGACGGTACAGGCCAGACAATTATTGTCTGGCATAGTGCAAC  
AGCAAAACAATTTGCTGAGGGCTATAGAGGCTCAACAACAGCTGTTGAAACTCACAGTCTGGGGCATT

>MH746251

TTCTATTGCAATACATCAGCCCTGTTCAATAGTACTTGGAAATGGCACTGTCACAAATGGCACACAAGCAAATG  
GAACTATAAATTCTACCATGCAGAATAAAGCAAATTATAAGAATGTGGCAGAGAGTAGGACAAGCAATGTATGC  
CCCTCCTATCAGAGGAGTGATAAGGTGTGAATCAAACATTACAGGACTAATACTAACAAGAGATGGTGGAGGT  
GGAAC TAATAGCAGCAATGAGACCTTCAGGCCTACAGGAGGAGATATGAGGGACAATTGGAGAAGTGAATAT  
ATAAGTATAAAGTAGTAAAAATTGAACCAATAGGATTAGCACCTACCGAGGCAAGGAGGAGAGTGGTGGAGAG  
AGAAAAAGAGCAATTGGACTGGGAGTTGCCTTCCTTGGGTTCCTTAGGAGCAGCAGGAAGTACTATGGGCGCG  
GCGTCATTGACGCTGACGGCACAAGCCAGACAATTATTGTCTGGTATAGTGCAACAGCAAAGCAATTTGCTGA  
GGGCTATAGAGGCTCAGCAGCATCTGCTGAAACTCACAGTCTGGGGCATT

>KU168256

TTCTATTGCAATACATCAGGCCTGTTTAATAGCACTTGGCATGTCAATAATACATCAAGCCTGGTTAATAGCA  
CTGGGAACATAACTCTCCCATGCAGAATAAAGCAAATTATAAATATGTGGCAGAGAGTAGGACAAGCAATGTA  
TGCCCCCTCCTATTCCAGGAATAATAAAGTGTGAGTCAAACATTACAGGACTACTATTGATAAGAGATGGTGGA  
ATTAATAATAACAGTATGAATGAGACCTTCAGACCTGGAGGAGGAGATATGAGAGACAATTGGAGAAGTGAAT  
TATATAAATATAAAGTAGTACAAATTGAACCACTAGGAGTAGCACCTACCAAGGCAAAGAGAAGAGTGGTGGA  
GAGAGAAAAAGAGCAGTTGGATTGGAGCTGTCTTCCTTGGGTTCCTTAGGAGCAGCAGGAAGCACTATGGGC  
GCGGCGTCAATAACGCTGACGGCACAGGCCAGACAATTATTGTTTGGCATAGTGCAACAGCAAAGCAATTTGC  
TGAGGGCTATAGAGGCTCAACAGCATCTGTTGAAACTCACAGTCTGGGGCATT

>KU168305

TTCTATTGTAATACATCAGGCCTGTTTAATAGCACTTGGAAAGACTAATGGCACTAGCACTTGGAAAGGAGACTA  
ATGGCACTGGGAGCCAGGAAAAATAGCAATAGCAATATAACTCTCCCATGCAGAATAAAGCAAATTATAAATAT  
GTGGCAGAGAGCAGGACAAGCAATGTATGCCCCCTCCCATCGCAGGAGTAATAAAGTGTAACCTCAAACATTACA  
GGACTACTATTAAACAAGAGATGGGGGAAGTAATAACAATAGCCAAGAGGAGACTTTCAGACCTGGAGGAGGAA  
ATATGAAGGATAACTGGAGAAGTGAATTATATAGGTACAAAGTAGTACAAATTGAACCCCTAGGAATAGCACC  
CACCAGGGCAAGGAGAAGAGTGGTGGGGAGAGAAAAAGAGCAGTTGGACTGGGAGCTGTCTTCATTGGGTTC  
TTAGGAGCAGCTGGAAGCACTATGGGCGCAGCGTCAATAACGCTGACGGCACAGGCCAGACAATTATTGTCTG  
GCATAGTGCAACAGCAAAGCAATTTGCTGAGGGCTATAGAGGCTCAACAGCATATGTTGAAACTCACGGTCTG  
GGCATT

>KP718918

TTCTATTGTAATACATCAGGCCTGTTTAATAGCACTTGGTTTAGTAATGGGAGCAGGGGCAATGAGAGCATGG  
AAGATGACACCAATATAAATCATATAACTCTCCCATGCAGAATAAGGCAAATTGTGAATATGTGGCAGAGAGC  
AGGACAAGCAATGTATGCCCCCTCCCATCCAAGGAGTAATAAAGTGTACATCAAATATTACAGGAATACTATTA  
ACAAGAGATGGTGGATATAATATTAGCAATAACGACACCGAGATTTTCAGACCTGGAGGAGGAAATATGAAGG  
ACAATTGGAGAAGTGAATTATATAAATATAAAGTAGTAAAAAGTTGAACCACTAGGAATAGCACCCACTAGGGC  
AAAGAGAAGAGTGGTGGAGAGAGAAAAAGAGCAGTTGGAATAGGAGCTGTGTTTCATTGGGTTCCTAGGAGCA  
GCAGGAAGCACTATGGGCGCAGCGTCAATAACGCTGACGGCACAGGCCAGACAGTTATTGTCTGGAATAGTG  
AACAGCAAAGCAATTTGCTGAGGGCTATAGAGGCTCAACAGCATTTGTTGAAACTCACGGTCTGGGGCATT

>KP718928

TTCTATTGTAATACATCAGGCCTGTTTAAATAGCACTTGGCATAGTAATGGCACTGCAAATGGCACTGAAAATG  
CCACTATAACTCTCCCATGCAGGATAAAGCAGATTATAAATCTATGGCAGAGAGTAGGGCAAGCAATGTATGC  
CCCTCCTATCCCAGGAATAATAAATTGTACATCAAACATTACAGGACTACTATTAACAAGAGATGGTGGGAAT  
GCTAGTGAGGAACTGAGACCTTCAGACCTGGAGGAGGAAAATATGAAGGACAATTGGAGGAGTGAATTATATA  
AATATAAAGTAGTAAAGATTGAACCACTAGGAGTAGCACCCACCAGGGCAAAGAGAAGAGTGGTGGAGAGAGA  
AAAAAGAGCAGTCGGAATAGGAGCTGTGTTTCATTGGGTTCTTAGGAGCAGCAGGAAGCACTATGGGCGCAGCG  
TCAATAACGCTGACGGCACAGGCCAGACAGTTACTGTCTGGTATAGTGCAACAGCAAAGCAATTTGCTGAGGG  
CTATAGAGGCTCAACAGCACATGTTGAAACTCACAGTCTGGGGCATT

>AM279343

TTCTATTGTAATACATCAGGCCTGTTTAAATAGCACTTGGTTTAAATAGCACTTGGAAATGACACTATCAGCAATA  
ATAACACAGGGTCAAATGACACCATATATCTCCCATGCAGAATAAAGCAAATTATAAATATGTGGCAAAGGAC  
AGGACAAGCAATGTATGCCCCCTCCCATCCGAGGAATAATACAGTGTAATTC AACATTACAGGACTACTATTA  
ACAAGAGATGGTGGGATTAACAACAACAGTACAAATGAAACCTTCAGACCTGGAGGAGGAAAATATGAGGGATA  
ATTGGAGAAGTGA ACTATATAAATATAAAGTAGTAAAAATTGAACCACTAGGAGTAGCACCCACCAAGGCAAG  
GAGAAGAGTGGTGGAGAGAGAAAAAAGAGCAGTTGGACTGGGAGCTGTATTTCATTGGGTTCTTAGGAGCAGCA  
GGAAGCACTATGGGCGCGGCGTCAATAACGCTGACGGTACAGGCCAGACAATTATTGTCTGGCATAGTGCAAC  
AGCAAAACAATTTGCTGAGGGCTATAGAGGCTCAACAGCATCTGTTGAAACTCACGGTCTGGGGCATT

>AM279348

TTCTATTGCAATACATCAGGCCTGTTTGCTCAGGAGTTAAAAAATGACACAAATGACAATAACACAATAATTC  
TCCTATGCAAAATAAAGCAAATTATAAATATGTGGCAGAGAGTAGGACAAGCAATGTATGCCCCCTCCAGAGC  
AGGAGTAATAAGGTGTGTATCAAACATTACAGGACTACTGTTAACAAGAGATGGTGGAAAAAATGACAATGGA  
ACTAATGGA ACTGAGATATTCAGGCCTGGAGGAGGAGATATGAGGGACAATTGGAGAAGTGAATTATATAAGT  
ATAAAGTAGTAAGAATTGAACCAGTAGGGGTAGCACCCACCAGGGCAAAGAGAAGAGTGGTGGAGAGAGAGAA  
AAGAGCAGTTGGACTGGGAGCTGTCTTCCTTGGGTTCTTAGGAGCAGCAGGAAGCACTATGGGCGCGGCGTCA  
CTGACGCTGACGGTACAGGCCAGGCAATTATTGTCTGGCATAGTGCAACAGCAGAGCAATTTGCTGAGGGCTA  
TAGAGGCTCAACAACATATGTTGAGACTCACAGTCTGGGGCATC

>FJ388894

TTCTATTGTAACACATCAAGCCTGTTTAAATAGCACCTGGAATATTAATACTATTTGGAATAACACTATGTCAA  
ACAGCACTGAGTCAAACGGCACTATAGTGCTCCCATGCAGAATAAAGCAAATTGTAAATGTGTGGCAGAGAGC  
AGGACAAGCAATATACGCCCCCTCCCATCCAAGGAATAATACAGTGTGTCTCAAACATTACAGGACTAATATTA  
ACAAGAGATGGTGGGAATAATAATAACACAAATAATACTGAAATCTTCAGACCTGGAGGAGGAGATATGAGGG  
ACAATTGGAGAAGTGAATTATATAAATATAAGGTAGTAAAAATTGAACCATTAGGAGTAGCACCCACCAAGGC  
AAGGAGAAGAGTGGTGGGGAGAGAAAAAAGAGCAGTTGGACTGGGAGCTGTCTTCCTTGGGTTCTTAGGAACA  
GCAGGAAGCACTATGGGCGCGGCGTCAATAACGCTGACGGTACAGGCCAGGCAATTATTGTCTGGCATAGTGC  
AACAGCAAAGCAATTTGCTGAGGGCTATAGAGGCTCAACAACATCTGTTGAAACTCACTGTCTGGGGCATT

>FJ388903

TTCTATTGTAACACATCGGGCCTGTTTAAATAGCCAATATAACACATCAGGCCTGGTTAATAACACGCAGGAGT  
CAGGAAGCACAGAGTCAAATGACACTGAGTCAATTGTACAGACAATATAACTCTCCAAATCAGAATAAAGCA  
AATTATAAATCAGTGGCAAAGAGTAGCTCAAGCAACATATGCCCCCTCCCATCCAGGAGTAATAAAATGTGTA  
TCAAACATTACAGGACTAATATTA ACTAGAGATGGTGGGAGTAGTAGCGGAAATGAAACCTTCAGACCTGGAG  
GAGGAGATATGAGGGACAATTGGAGAAGTGAATTATATAAGTATAAAGTAGTAAAAATTGAACCACTAGGAGT  
AGCACCCACCAGGGCAAAGAGAAGAGTGGTGGAGAGAGAAAAAAGAGCAGTTGGAATAGGAGCTGTCTTCATT  
GGGTTCTTAGGAGCAGCAGGAAGCACTATGGGCGCGGCGTCAATGACGCTGACGGTACAGGCCAGGCAATTAT  
TGTCTGGCATAGTGCAACAGCAAAGTAATTTGCTGAGGGCTATAGAGGCTCAACAGCATCTGTTGAAACTCAC  
GGTTTGGGGCATT

>FJ388909

TTCTATTGTAATACATCAGGCCTGTTTAAATAGCACTTGGAAATAATGACACCTGGAATGGCAATGACACACAAG  
AGTCAAATGAAACCTCGTCAAATGGCACCATAATTCCACCATGCAAAATAAAACAAATTGTAAATATGTGGCA  
GAGAGTACAACAAGCAATGTATCCCCCTCTCGTGAAGGAGTAATAAGGTGTGAATCCATCATTACAGGACTA  
CTATCAACAAGAGATGGTGGGATTAACAGCAGGACAAATGAAACCTTCAGACCTGGGGGAGGAGATATGAGGG  
ACAATTGGAGAAGTGA ACTATATAAATATAAAGGTAGTAAAAATTGAACCACTAGGAGTAGCACCCACCACGGC  
AAAGAGAAGAGTGGTGGAGAGAGAAAAAAGAGCAGCTGGACTGGGAGTTATGTTCTTGGGTTCTTAGGAGCA  
GCCGGAAGCACTATGGGCGCGGCGTCAATAACGCTGACGGTACAGGCCAGACAGTTATTATCTGGTATAGTGC  
AACAGCAAAGCAATTTGCTGAAGGCTATAGAGGCTCAACAGCACCTGTTGAGACTCACGGTCTGGGGCATT

>FJ388925

TTCTATTGTAACACATCAGGCCTGTTTAAATAGCACTTGGAAATGCCACTGCCAGCATGCAGGAGTCAAATAGCA  
CAGAGTCAAACGACACTACTATAACTCTCCCATGCAGAATAAAGCAAATTATAAATATGTGGCAGAGAGCAGG  
ACAAGCAATATATGCCCCCTCCCATCCGAGGAGTAATAAAGGTGTGAATCAAACATTACAGGACTAATATTAACA  
AGAGATGGAGGGAATAGTAACAGCACAAATGAAACCTTCAGACCTGGAGGAGGAGATATGAGGGATAATTGGA

GAAGTGAATTATATAAGTATAAAGTAGTAAAAATTGAACCACTAGGAGTAGCACCCACCAGGGCAAGGAGAAG  
AGTGGTGGAGAGAGAAAAAGAGCAGTTGGAATAGGAGCTGTCTTCATTGGGTTCTTAGGAGCAGCAGGAAGC  
ACTATGGGCGCGGCGTCAATAGCGCTGACGGTACAGGCCAGGCAATTATTGTCTGGCATAGTGCAACAGCAAA  
GCAATTTGCTGAGGGCTATAGAGGCTCAACAGCATATGTTGAAACTCACGGTCTGGGGCATT

>FJ388932

CTCTATTGTAACACATCAGGCCTGTTTAATAGCACTTGGCCTGCCAATAACAGTACGCAGGGGTCAAATAGCA  
CAGAGTCAAACGACACCGTAATTCTCCAATGCAGAATAAAGCAAATTATAAATATGTGGCAAAGAGTAGGACA  
AGCAATATATGCCCCCTCCCATACCAGGAGAAATAAAGTGTGTATCAAACATTACAGGACTAATATTAACAAGA  
GATGGTGGGAGTAGCAATAATACAGAAAATGAAACCTTCAGACCAGGAGGAGGAGATATGAGGGACAATTGGA  
GAAGTGAATTATATAAGTATAAAGTAGTAAAAATTGAACCACTAGGAGTAGCACCCACCAGGGCAAAGAGAAG  
AGTGGTGCAGAGAGAAAAAGAGCAGTATTAGGTGGACTGGGAGCTGTCTTCGTTGGGTTCTTGGGAGCAGCA  
GGAAGCACTATGGGCGCGGCGTCACTGACGCTGACGGTACAGGCCAGGAAATTATTGACTGGCATAGTGCAAC  
AGCAAAGTAATTTGCTGAGGGCTATCGAGGCTCAACAGCATCTGTTGAAACTCACGGTCTGGGGCATT

>FJ388938

TTCTATTGTAACACATCAGGCCTGTTTAATAGCACTTGGAAATGGCACTACCATGCAGGAGTCAAATAACACAG  
AGTCAAACGACACTGAGTCAAACGACATTATAACTCTCCGATGCAGAATAAGGCAAATTATAAGAATGTGGCA  
GAGAGCAGGACAAGCAATGTATGCCCCACCCATCCAAGGAATAATAAAGTGTGAATCAAACATTACAGGACTA  
ATATTAGCAAGAGATGGTGGGAATAGAAATGAAACTGAAACCTTCAGACCTGGAGGAGGAGACATGAGGGACA  
ATTGGAGAAGTGAATTATATAAGTATAAAGTAGTAAAAATTGAACCATTAGGAGTAGCACCCACCAAGGCAAG  
GAGAAGAGTGGTGCAGAGAGAAAAAGAGCAGTTGGAATAGGAGCTGTCTTCATTGGGTTCTTAGGAGCAGCA  
GGAAGCACTATGGGCGCGGCGTCAATAACGCTGACGGTACAGGCCAGGCAACTATTGTCTGGCATAGTGCAAC  
AGCAAAGTAATTTGCTGAAGGCTATAGAGGCTCAACAACATCTGTTGAAACTCACGGTTTGGGGCATT

>FJ388942

TTCTATTGTAACACATCAGGCCTGTTTAATAGCTCTTGGCTGAAGTCAAATAGAACAGGGCCTAGCACAGAGC  
CAAACAACACTGAGCCAAACAACACTATTATAACTCTCCCATGCAAAATAAAGCAAATTATAAATATGTGGCA  
GAGAACAGGACAAGCAATGTATGCCCCCTCCCATCCAGGAGTAATAAGGTGTGAATCAAACATTACAGGACTA  
ATATTAACAAGAGATGGTGGGAATAGTAGCAATAGCAATGAAACCTTCAGACCTGGAGGAGGAAATATGAGGG  
ACAATTGGAGAAGTGAATTATATAAGTATAAAGTAGTAAAAATTGAACCACTAGGAGTAGCACCCACCAGGGC  
AAGGAGAAGAGTGGTGGAGAGAGAAAAAGAGCAGTTGGAATAGGAGCTGTCTTCATTGGGTTCTTAGGAGCA  
GCAGGAAGCACTATGGGCGCGGCGTCAATGACGCTGACGGTACAGGCCAGGCAATTATTGTCTGGCATAGTGC  
AACAGCAAAGCAATTTGCTGAGGGCTATAGAGGCTCAACAGCATATGTTGAAACTCACGGTCTGGGGCATT

>FJ388946

TTTTATTGTAATACATCAGGCCTGTTTAATAGAACTTGGTCTACCAATACCAGCATGCAGGTGTCAAATAGCA  
CAGAGTTAAATGGCCCTATAATTCTCCAATGCAGAATAAAGCAAATTATAAATATGTGGCAAAGAGTAGGACA  
AGCAATATATGCCCCCTCCCATCCAGGAGTAATAAGGTGTGAATCAAACATTACAGGACTAATATTAACAAGA  
GATGGTGGAAATAATAATACCGGAAATCAAACCTTCAGACCTGTAGGAGGAGATATGAAGGACAATTGGAGAA  
GTGAATTATATAAGTATAAAGTAGTAAAAATTGAACCACTAGGAGTAGCACCTCCAAGGCAAAGAGAAGAGT  
GGTGGAGAGAGAAAAAGAGCAATTGGAATAGGAGCTGTCTTCATTGGGTTCTTAGGAGCAGCAGGAAGCACT  
ATGGGCGCGGCGTCACTGACGCTGACGGTACAGGCCAGGCAATTATTGTCTGGCATAGTGCAACAGCAAAGTA  
ATTTGCTGAGGGCTATAGAGGCTCAACAGCATCTGTTGAACTCACGGTCTGGGGCATT

>JF683737

TTCTATTGTAACACATCAGGCCTGTTTAATAGCACGTGGAATGCTAGTGACATCACGCAGGGGTAAATGACA  
CAATAACTCTCCAATGCAGAATAAAGCAAATTATAAATATGTGGCAGAGAGTAGGGCAGGCAATGTATGCCCC  
TCCCATCCAGGGAGAAATAAGGTGTGAATCAAACATTACAGGACTAATATTAACAAGAGATGGTGGGAATGGG  
AATGGAACAAATGAAACCTTCAGACCTGGAGGAGGAGATATGAGGGACAATTGGAGAAGTGAATTATATAAGT  
ATAAAGTAGTAAAAATTGAACCACTAGGAGTAGCACCCACCAGGGCAAAGAGAAGAGTGGTGGAGAGAGAAAA  
AAGAGCAGTTGGACTGGGAGCTGTATTTCATTGGGTTCTTAGGAGCAGCAGGAAGCACTATGGGCGCGGCGTCA  
GTGACGCTGACGGTACAGGCCAGGCAATTATTGTCTGGCATAGTGCAACAGCAAAGCAATTTGCTGAGGGCTA  
TAGAGGCTCAACAGCATTTGTTGAACTCACAGTCTGGGGCATT

>JF683759

TTCTATTGTGACACATCAGGCCTGTTTAATAGCACTTGGAAATACCACTGACACCATGCACGAGGAGACTAATA  
CAGAGGCAAATAGTACTATTACTCTCCCATGCAGAATAAAGCAAATTATAAATATGTGGCAGAGAGCAGGACA  
AGCAATATATGCCCCCTCCCATCCAGGAGTAATACAGTGTAAATCAAACATTACAGGACTAATATTAACAAGA  
GATGGTGGGAGTAATAGCAGCACAAATGAAACCTTCAGACCTGGAGGAGGAGATATGAGGGACAATTGGAGAA  
GTGAATTATATAAGTATAAAGTAGTAAAAATTGAACCACTAGGAGTAGCACCCACCAAGGCAAAGAGAAGAGT  
GGTGCAGAGAGAAAAAGAGCAGTAGGACTGGGAGCGGTATTTCATTGGGTTCTTAGGAGCAGCTGGAAGCACC  
ATGGGCGCGGCGTCAATAACGCTGACGGTACAGGCCAGGCAATTATTGTCTGGTATAGTGCAACAGCAAAGCA  
ATTTGCTGAGGGCTATAGAGGCTCAACAGCATCTGTTGAACTCACAGTCTGGGGCATT

>JF683760

TTCTATTGTAACACCTCAAAGTTGTTTAATAGCACTTGGGATCCTAATAATACCAGCACGCAGGAGTCAAATA  
GCACAAATGATAATATAAATCTCCCATGCAGAATAAAGCAAATTATAAATATGTGGCAGAGAGCAGGACAAGC  
AATATATGCCCCCTCCCATCCAAGGAATAATAAACTGTGTATCAAACATTACAGGATTAATATTAACAAGAGAT  
GGGGGTGTAGGTAACAACGCAAAGGAAGTCTTCAGACCTGGAGGAGGAGATATGAGGGACAATTGGAGAAGTG  
AATTATATAAGTATAAAGTAGTAAAAATTGAGCCACTAGGAGTAGCACCCACTGGGGCAAGGAGAAGAGTGGT  
GCAGAGAGAAAAAGAGCAGTTGGACTGGGAGCTGTTTTTCATTGGGTTCTTGGGAGCAGCAGGAAGCACTATG  
GGCGCGCGTCAATGACGCTGACGGTACAGGCCAGACAATTATTGTCTGGCATAGTGCAACAGCAAAGCAATT  
TGCTGAGGGCTATAGAGGCTCAACAGCATATGTTGAGACTCACGGTCTGGGGCATT

>JF683761

TTCTATTGTAACACCTCAAAGCTGTTTAATAGCACTTGGAAATAATACCAGCACGCAGGAGTCAAATAGCACTA  
ATCCAAATGATAATATAAATCTCCCATGCAGAATAAAGCAAATTATAAATATGTGGCAAAGAGCAGGACAAGC  
AATATATGCCCCCTCCCATCCAAGGAAAAATAAACTGTGTATCAAACATTACAGGATTAATATTAACAAGAGAT  
GGGGGGGGTAACAGCACAGAGGAAGTCTTCAGACCTGGAGGAGGAGATATGAGGGACAATTGGAGAAGTGAAT  
TATATAAGTATAAAGTAGTAAAAATTGAGCCAATAGGAGTAGCACCCACTGAGGCAAGGAGAAGAGTGGTGCA  
GAGAGAAAAAAGAGCGGTTGGACTGGGAGCTGTTTTTCATTGGGTTCTTGGGAGCAGCAGGAAGCACTATGGGC  
GGGGCGTCAATGACGCGGACGGTACAGGCCAGACAATTATTGTCTGGCATAGTGCAACAGCAAAGCAATTTGC  
TGAGGGCTATAGAGGCTCAACAGCATATGTTGAGACTCACGGTCTGGGGCATT

>JF683767

TTCTATTGTAATACATCAGGTCTGTTCAATAGCTCTTGGAAATATCAATGGCAGCAGGTCAAATAGCACAAAGGT  
CAAATGGCAATATAAATCTCCCATGCAGAATAAAGCAAATTATAAATATGTGGCAAAGAACAGGACAGGCAAT  
GTATGCCCCCTCCCATCCAAGGAGTAATAAGGTGTGTATCAAACATTACAGGACTACTGTTAACAAGAGATGGA  
GGGGGTAAACAATACAAATGAAACTGAAATTTTCAGACCTGGAGGAGGAGATATGAGGGGCAATTGGAGAAGTG  
AATTATATAAGTATAAAGTAGTAAAAATTGACCCACCAGGAGTAGCACCCAACACAGCAAGGAGAAGAGTGGT  
GGGGAGAGAAAAAAGAGCAGCTGGAATAATAGGAGCTGTCTTCCTTGGGTTCTTAGGAGCAGCAGGAAGCACT  
ATGGGCGCGCGTCAGTGACGCTGACGGTACAGGCCAGACAATTATTGTCTGGTATAGTGCAACAGCAAAGCA  
ATTTGCTGAGGGCTATAGAGGCTCAACAACACCTGTTGAAACTCACGGTCTGGGGCATT

>JF683779

TTCTACTGTAACACATCAGGCCTGTTTAATAGCACTTGGTATACCAATAACAGCATGCAGCCAAATTACACAA  
AAACTATAACTTTGCCATGCAGAATAAAGCAAAGTTATAAATATGTGGCAAAGAGTAGGACAAGCAATGTATGC  
CCCTCCCATCCCAGGAATAATACAATGTGTATCAAACATTACAGGACTAATATTAACAAGAGATGGTGGGCAT  
AATAATAGTGCAATGAGACCTTCAGACCTGGAGGAGGAGATATGAGGGACAATTGGAGAAGTGAATTATATA  
AGTATAAAGTAGTGAAAGTTGAACCATTAGGAGTAGCACCCACCAGGGCAAGGAGAAGAGTGGTGGAGAGAGA  
AAAAAGAGCAGTTGGAATAGGAGCTGTCTTCCTTGGGTTCTTAGGAGCAGCAGGAAGCACTATGGGCGCGGCG  
TCAGTGACGCTGACGGTACAGGCCAGGCAATTATTGTCTGGCATAGTGCAACAGCAAAGCAATTTGCTGAGGG  
CTATAGAGGCTCAACAACATATGTTGAAACTCACGGTCTGGGGCATT

>JF683782

TTCTATTGTAATACATCAAAATTGTTTAATACAACCTTGGAAATGCCAATGGCAGCGTACAGGAGTCAGTCAACA  
CTGCAGGCAACACTACTATATTCTCCCATGCAGAATAAAGCAAATTATAAAGGATGTGGCAGAGAGCAGGACA  
AGCAATATATGCCCCCTCCCATCCAGGGAAGAATAAGGTGTGAATCAAACATTACAGGACTACTGTTAACAAGA  
GATGGTGGAGGTAATGCAACAACACAGAAATCTTTAGACCTGGAGGAGGAGATATGAGGGACAATTGGAGAA  
GTGAATTATATAAGTACAAGGTAGTAAAAATTGAACCACTAGGAGTAGCACCCACCAAGGCAAGGAGAAGAGT  
GGTGCAGAGAGAAAAAAGAGCAGTTGGACTAGGAGCTGTCTTCCTTGGGTTCTTAGGAGCAGCAGGAAGCACT  
ATGGGCGCGGCGTCAATAACGCTGACGGTACAGGCCAGGCAATTATTGTCTGGCATAGTGCAACAGCAAAGCA  
ATTTGCTGAGGGCTATTGAGGCTCAACAGCAGATGTTGAGACTCACGGTCTGGGGCATT

>JF683783

TTCTATTGTAATACATCAAAATTGTTTAATACAACCTTGGAAATGTCACTGACAGCATAGAAGAGTCAGGCAACA  
CTATTATAGTCCTCCCATGCAAAATAAAGCAAATTATAAATATGTGGCAGAGAGCAGGACAAGCAATATATCC  
CCCTCCCATCCGGGGAATAATAAGGTGTGAATCCAACATTACAGGACTATTATTAACAAGAGATGGTGGAGAT  
ACTGAAAACACCAACAGAAATCTTTAGACCTGGAGGAGGAGATATGAGGGACAATTGGAGAAGTGAATTATATA  
AGTATAAAGTAGTAAAAATTGAACCACTAGGAGTAGCACCCACCAGGCAAGGAGAAGAGTGGTGCAGAGAGA  
AAAAAGAGCAGTTGGAATAGGAGCTGTCTTCCTTGGGTTCTTAGGAGCAGCAGGAAGCACTATGGGCGCGGCG  
TCAATAACGCTGACGGTACAGGCCAGGCAATTATTGTCTGGCATAGTGCAACAGCAAAGCAATTTGCTGAGGG  
CTATAGAGGCTCAACAGCAGATGTTGAGACTCACGGTCTGGGGCATT

>JF683789

TTCTATTGTAACACCTCAAAGCTGTTTAATAGCATTTGGCATCCTAATGATACCATGCAGGAGGAGACTAATA  
CAAATCCAAATGCTAATATAAATCTCCCATGCAGAATAAAGCAAATTATAAATCTGTGGCAAAGAGTAGGGAA  
AGCAATATATGCCCCCTCCCATCCGAGGAAGAATAGAGTGTGTATCAAACATTACAGGATTAATAATAACAAGA  
GATGGTGGAAATAACACAAATAACACTGAAATCTTCAGACCTGCAGGAGGAGACATGAGGGACAATTGGAGAA  
GTGAATTATATAAATATAAAGTAGTACAAATTGAGCCACTAGGAATAGCACCCACTGAGGCAAGGAGAAGAGT  
GGTGCAGAGAGAAAAAAGAGCAATTGGACTAGGAGCTATGTTTCATTGGGTTCTTAGGAGCAGCAGGAAGCACT

ATGGGCGCGGCGTCAGTGACGCTGACGGTACAGGCCAGGCAATTATTGTCTGGCATAGTGCAACAGCAAAGCA  
ATTTGCTGATGGCTATAGAGGCTCAACAGCATCTGTTGAAACTCACAGTCTGGGGCATT

>FJ670523

TTCTATTGTAACACATCAGGCCTGTTTAATAGCACTTGGCCTAATAGCACTTGGAAATGCCAATACCAGCATA  
AGGAGTCAAATAGCACAGACAATAAATCTCCAATGCAGAATAAAGCAAATTATAAATCTGTGGCAGAGAGC  
AGGAAAAGCAATATATGCCCCCTCCCATCCAAGGAGCAATACAGTGTATATCAAACATTACAGGACTAATATTA  
ACAAGAGATGGAGGTAATAATGGAACATAAACAACCTGAGATCTTCAGACCTGGAGGAGGAGATATGAGAGATA  
ATTGGAGAAGTGAATTATATAAGTATAAGGTAGTAAAAATTGAACCATTAGGAGTAGCACCCCTCCAGGGCAA  
GAGAAGAGTAGTGGGGAGAGAAAAAGAGCAGTTACAATAGGAGCTGTCTTCCTTGGGTTCCTTAGGAGCAGCA  
GGAAGCACTATGGGCGCGGCGTCACTGACGCTGACGGTACAGGCCAGGCAATTATTGTCTGGCATAGTGCAAC  
AGCAAAGCAATTTGCTGACAGGCTATAGAGGCTCAACAGCATCTGTTGAAACTCACGGTCTGGGGCATT

>AF219261

TTCTATTGTAATACATCAGGCCTGTTTAATAGCACTTGGGTGTCAAACAACACTGGGAAATATTATAGTAATA  
GCACTAGGGAAAATCCAAATATAAATCTCCCATGCAGAATAAAACAAATTATAAATATGTGGCAGAGAGCAGG  
ACAAGCAATATATGCCCCCTCCCATCGAAGGAGTAATAAGGTGTGAATCAAACATTACAGGACTACTATTAACA  
AGAGATGGTGGGGATAAGAACACAAGTGAATCTTCAGACCTGGAGGAGGAAATATGAAGGACAACCTGGA  
GAAGTGAATTATATAAGTATAAAGTAGTAAAAATTGAACCATTAGGAGTAGCACCCACCCCGGCAAGGAGAAG  
AGTGGTGCAGAGAGAAAAAGAGCAGTATTTGGGCTGGGAGCTGTCTTTCTTGGGTTCCTTAGGAGCAGCAGGA  
AGCACTATGGGCGCGGCGTCGATAACGCTGACGGTACAGGCCAGACAATTATTGTCTGGCATAGTGCAACAGC  
AAAGTAATTTGCTGAGGGCTATAGAGGCTCAACAGCATTTGTTGAAACTCACGGTCTGGGGCATT

>AF219265

TTCTATTGTAATACATCAGGCCTGTTTAATAGCACTTGGAGTAATAGCACTTGGAGTTCCAATGCCAGCACGC  
AGGGGTCAGAAAATGACACTATAAATCTCCCATGCAGAATAAAACAAATTATAAATATGTGGCAGAGAGCAGG  
ACAAGCAATGTATGCCCCCTCCCATCAAGGAGTAATAAGGTGTGATTCAAATATTACAGGACTAATATTAACA  
AGAGATGGTGGGGTTACAAATGAAACCGAAACCTCCAGACCTGGAGGAGGAGATATGGGGGACAATTGGAGAA  
GTGAATTATATAAATATAAAGTAGTGAAAATTGAACCACTAGGAGTAGCACCCACCAGGGCAAAAAGAGTAGT  
GGTGGGGAGAGAAAAAGAGCAATTGGAATAGGAGCTGTTTTCATTGGGTTCCTAGGAGCAGCAGGAAGCACT  
ATGGGCGCGGCGTCAATGACGCTGACGGTACAGGCCAGACAATTATTGTCTGGCATAGTGCAACAGCAAAGCA  
ATTTGCTGAGGGCTATAGAGGCTCAACAACATCTGTTGAAACTCACGGTCTGGGGCATT

>HM204635

TTCTATTGTAATACATCACACCTGTTTAATAGCGCTTGGTCTGTCAATGACACCGTGCAGGAGTCAAATAGCA  
CGGAGTCAAATGACACTATAAATCTCCAATGCAGAATAAAGCAAATTATAAATATGTGGCAGAGAACAGGACA  
AGCAATGTATGCCCCCTCCCATCCCAGGAGTAATAAGATGTAACCTCAAACATTACAGGACTAATATTAACA  
GATGGTGGGAATAATAATAGTTCAAATGAAAATGAAACCTTCAGACCTGGAGGAGGAGATATGAGAGACAATT  
GGAGAAGTGAATTATATAAGTATAAAGTAGTAAAAATTGAACCACTAGGAGTAGCACCCACCAAGGCAAGGAG  
AAGAGTGGTGCAGAGAGAAAAAGAGCAGTTGGACTGGGAGCTGTCTTCATTGGGTTCCTTAGGAGCAGCAGGA  
AGCACTATGGGCGCGGCGTCAGTGACGCTGACGGTACAGGCCAGACAATTATTGTCTGGCATAGTGCAACAGC  
AAAGCAATTTGCTGAGGGCTATAGAGGCTCAACAACATCTGTTGAAACTCACAGTCTGGGGCATT

>HM204648

TTTTATTGTAACACATCAGGCCTGTTTACTGGCACTTGGAAATCAGACTAATAGTACTTGGAAATAGTGGCACTT  
GGACTAACACTACTGGCAATATAAATCTCCAATGCAGAATAAAGCAGGTGATAAGAATGTGGCAGAGAGTAGG  
ACAAGCAATGTATGCCCCCTCCCATCCCAGGAGTAATAAGGTGTGAATCAAACATTACAGGACTAATATTAACA  
AGAGATGGGGAAGGTAAACAGTAGCATAAAAGATGAAACCTTCAGACCTGGAGGAGGGAATATGAAGGACAATT  
GGAGAAGTGAATTATATAAATATAAAGTAGTAAAAATTGAACCAATAGGAGTAGCACCCACCAGGGCAAAGAG  
AAGAGTGGTGGAGAGAGAAAAAGAGCAGTTGGACTAGGAGCTGTCTTCATTGGGTTCCTTAGGAGCAGCAGGA  
AGCACTATGGGCGCAGCGTCAATAACGCTGACGGTACAGGCCAGGCAATTGTTGTCTGGCATAGTGCAACAGC  
AAAGCAATTTGCTGAAGGCTATTGAGGCTCAACAACAGTTGTTGAGACTCACGGTCTGGGGCATT

>HQ595782

TTCTATTGCAATACGTCTAAACTGTTTAATAGCACGTGGAAAAATGAAAGCAGGCAGGGGTCAAATGACATTA  
TAATCTCCCATGCAGAATAAAGCAAATTATAAGGATGTGGCAAAGAGTAGGGCAAGCAATGTATGCCCCCTCC  
CATCCCAGGAGTAATAGAGTGTAAATCAAACATTACAGGGCTACTATTGACAAGAGATGGTGGTAATAGAACC  
GAAAAATGAGACCTTCAGACCTGAGGGAGGAGATATGAGAAACAATTGGAGAAGTGAATTATATAAGTATAAAG  
TAGTAAGAATTGAACCAATTGGGAGTAGCACCCACCAGGGCAAAAAGAAGAGTGGTGGAGAGAGAAAAAGAGC  
AGCTGGATTGGGAGCTGTCTTCCTTGGGTTCCTTAGCAGCAGCAGGAAGTACTATGGGCGCAGCGTCAATAACG  
CTGACGGCACAGGCCAGACAATTATTGTCTGGCATAGTACAACAGCAAAGCAATTTGCTGAGGGCTATAGAGG  
CTCAACAGCAACTGTTGAGGCTCACGGTCTGGGGCATT

>HQ595784

TTCTATTGCAACACAGCAGGTCTGTTTAATAGCAGCTGGGGGAACAATGACACTGACAGCAACCAGACAGCAA  
AGATAAATATAAATCTCCAATGCAGAATAAAGCAAATTGTAAGGATGTGGCAGAGAGTAGGACAAGCAATGTA  
TGCCCCCTCCCATCGCAGGAACGATAAATGTTTATCAAATATTACAGGACTACTATTAACAAGAGATGGGGGG

ACAAATAAGACGTGGTCTCACAATGAGACCTTCAGACCTGAAGGAGGAAATATGAAGGACAATTGGAGAAGTG  
AATTATATAGGTATAAAGTAGTAAAAATTGAACCACTAGGAGTAGCACCCACCGAGGCAAGGAGAAGAGTGGT  
GGAGAGAGGAAAAAGAGCAGTTGGAATAGGAGCTGTTCTCTTTGGGTTCTTAGGAGCAGCAGGAAGCACTATG  
GGCGCGGCGTCACTAACGCTGACGGTACAGGCCAGACAATTACTGTCTGGCATAGTGCAACAGCAGAGCAATC  
TGCTGAGGGCTATAGAGGCTCAACAGCATCTGTTGAAGCTCACAGTCTGGGGCATT

>Y13718

TTCTATTGTAACACATCAAGACTGTTTAATAGCACTTGGAATGACACTACCAGTATGCTAAATGACACGAAGC  
CAAACGACACTATAACTCTCCCATGCAGAATAAAGCAAATTATAAATATGTGGCAAAGAGCAGGACAAGCAAT  
ATATGCCCCCTCCCATCCAAGGAGTAATAAGGTGTGAATCAAACATTACAGGACTAATATTAACAAGAGATGGT  
GGGGGTAAATAGCAGTGTAAGTAGTGAACTTTTCAGACCTGGAGGAGGAGATATGAGAGACAATTGGAGAAGTG  
AATTATATAAGTATAAAGTAGTAAAAATTGAACCACTAGGAGTAGCACCCACCAAGGCAAAGAGAAGAGTGGT  
GGAGAGAGAAAAAAGAGCAGTTGGACTAGGAGCTGTTTTTCATTGGGTTCTTAGGAGCAGCAGGAAGCACTATG  
GGCGCGGCGTCAATAACGCTGACGGTACAGGCCAGACAATTATTGTCTGGCATAGTGCAACAGCAAAGCAATT  
TGCTGAGGGCTATAGAGGCTCAACAGCATCTGTTGAACTCACGGTCTGGGGCATT

>Y13717

TTCTATTGTAACACATCAGGCCTGTTTAATAGCACTTGGAATAGCAGTGCCAGCATGCAAGAGTCAAATAGCA  
CGGCCAATATAACTCTCCCATGCAGAATAAGGCAAATTATAAATCTGTGGCAGAGAACAGGACAAGCAATATA  
TGCCCCCTCCCATCCAAGGAGTAATAAGGTGTGTATCAGACATCACAGGACTAATATTAACAAGAGATGGTGGG  
GGTAATGGTACTGAAAGTAAAAAAGAACTTTTCAGACCTGGAGGAGGAGATATGAGGGACAATTGGAGAAGTG  
AATTATATAAGTATAAAGTAGTAAAAATTGAACCACTAGGAGTAGCACCCACCAAGGCAAAGAGAAGAGTGGT  
GGAGAGAGAAAAAAGAGCAGTTGGAATGGGAGCTGTCTCTGGGTTCTTAGGAGCAGCAGGAAGCACTATG  
GGCGCGGCGTCAATAACGCTGACGGTACAAGCCAGACAATTATTGTCTGGCATAGTGCAACAGCAAAGCAATT  
TGCTGAGGGCTATAGAGGCTCAACAGCAGGTGTTGAGACTCACGGTCTGGGGCATT

>HQ385459

TTCTATTGCGATACATCAGGCCTGTTTAATAGTATTTGGAATAGCACTGCCATCAGCCAGAATGTGAGGAGT  
CAAATGATACTATAACTCTCCCATGCAAAATAAGACAAATTGTAAATATGTGGCAGAGAGTAGGACAAGCAAT  
ATATGCCCCGTCCCATCAAGGAATAATAAAGTGTACATCAAACATTACAGGGCTACTGCTAACAAGAGATGGT  
GGGGATAATGATAATAAACTGAGACTTTTCAGACCTGGAGGAGGAAATATGAAGGACAATTGGAGAAGTGAGT  
TATATAGATATAAAGTAGTAAAAATTGAACCACTAGGAGTAGCACCCACCAAGGCAAAGAGAAGAGTGGTGGG  
GAGAGAAAAAAGAGCAGTTGGACTAGGAGCTGTCTCTTTGGGTTCTTGGGAGCAGCCGGAAGTACTATGGGC  
GCGGCGTCAATAACGCTGACGGCACAGGCCACACAATTATTGTCTGGTATAGTACAACAGCAAAGCAATCTGC  
TGAGGGCTATAGAGGCTCAACAGCACCTGTTGAACTCACGGTCTGGGGCATT

>HQ385452

TTCTATTGCAATACATCAGGCCTGTTTTCTGGCTCTTGGTATAATGGCACTTGGGCTAATGACTCTTGGAGTG  
CTGGTCTTGGGACCAATGATAATATAACTCTCCCATGCAAAATAAAGCAAATCATAAGAAATGTGGCAGAGAGT  
GGGACAAGCAATGTATGCCCCCTCCCATCCAAGGAGAAATAAATTGTGTATCAAACATCACAGGACTATTACTA  
ACAAGAGATGGTGGTAATAGTAGTGAAGAGATCTTCAGACCTGGAGGAGGAGATATAAGAGACAATTGGAGGA  
GTGAATTATATAAATATAAAGTGGTAAAAATTGAACCATTAGGAGTAGCGCCACCAGGGCAAGGAGAAGAGT  
GGTGGGAAGAGAAAAAAGAGCAGTTGGACTGGGAGCTGTCTTCTTGGGTTCTTAGGAGCAGCAGGAAGCACT  
ATGGGCGGCGTCAATCACGCTGACGGTACAGGCCAGGCAATTATTGTCTGGCATAGTGCAACAGCAGAGCA  
ATCTGCTGAGGGCTATAGAGGCTCAACACCATCTGTTGAACTCACGGTCTGGGGCATT

>HQ385453

TTCTACTGCGACACAACAGGCCTGTTTAATAACACAGAGAAAAATGACACTATAATGCTCCCATGCAAAATAA  
GACAAATTGTACGTATGTGGCAGAGAGTAGGACAAGCAATGTATGCCCCCTCCCATTCAGGAGTAATAAACTG  
TCTATCAAACATTACAGGGCTACTGCTGACAAGAGATGGTGGGGATAGTACTAATAATACTGAGAAATTGAGA  
CCAGGAGGAGGAGATATAAGGGACAATTGGAGAAGTGAATTATATAAATATAAAGTAGTAAAAATTGAACCAC  
TAGGAGTAGCACCTACCAAGGCAAAGAGAAGAGTGGTGGAGAGAAGAAAAAGAGCAGGACTAGCAGCTGTCTT  
CCTTGGGTTCTTAGGAGCAGCAGGAAGCACTATGGGCGCAGCGTCAATAACGCTGACGGTACAGGCCAGACAA  
TTATTGTCTGGTATAGTGCAACAGCAAAACAATTGCTGAAGGCTATAGAGGCTCAACAACAGATGTTGAGAC  
TCACGGTCTGGGGCATT

>KT152846

TTCTATTGTAATACATCAAACCTGTTTAATAGCACTTGGAATGACACTACCAGTATGCTAAATGACACGAAGC  
CGGAGTCAAATGACAATATAACTCTCCCATGCAGACTAAGGCAAATTATAAAAAATGTGGCAGAGAGTAGGACA  
AGCAATGTATGCCCCCTCCCATCCAAGGAATAATAAAGTGTGAATCAAACATTACAGGGCTAATATTAACAAGA  
GATGGTGGGAATAACAACAGTGCAAGGAAACCTTCAGACCTGGAGGAGGAGATATGAGGGACAATTGGAGAA  
GTGAATTATATAAGTATAAAGTAGTACAAATTGAACCACTAGGGGTAGCACCCACCAAGGCAAAGGAGAAGAAC  
GGTGGGGAGAGAAAAAAGAGCAGTTGGAATGGGAGCTGTTTTCTTGGGTTCTTAGGAGCAGCAGGAAGCACT  
ATGGGCGCAGCGTCAATAACGCTGACGGTACAGGCCTGGCAATTATTGTCTGGCATAGTGCAACAGCAAAGCA  
ATTTGCTGAGGGCTATAGAGGCTCAACAACATCTGTTGAACTCACGGTCTGGGGCATT

>KT152841

TTCTATTGTGATACATCAGCCCTGTTTAAATGGCACTTGGAATAATACCAGCATGAAGGAGTCAAATAGCACGG  
AATCAAATGACACTATAACTCTCCCATGCAGAATAAAGCAAATTATAAATATGTGGCAGAGAGTAGGACAAGC  
AATGTATGCCCCCTCCCATCCAAGGAATAATAAAGTGTGAATCAAACATTACAGGACTACTATTAACAAGAGAT  
GGTGGTGGGGATAACAGTACAAATGAGGAAACCTTCAGACCTGGAGGAGGAGATATGAGGGACAATTGGAGAA  
GTGAATTATATAGGTATAAAGTAGTAAAAATTGAACCACTAGGAGTAGCACCCACCAGGGCAAGGAGAAGAAC  
GGTGGGGAGAGAAAAAAGAGCAGTGGAAATAGGAGCTGTCTTCCTTGGGTTCTTAGGAGCAGCAGGAAGCACT  
ATGGGCGCAGCGTCAATAACGCTGACGGTACAGGCCAGACAATTATTGTCTGGCATAGTGCAACAGCAAAACA  
ATTTGCTGAGGGAAGAGGCTCAACAACATTTGTTGAAACTCACGGTCTGGGGCATA

>KT152842

TTCTATTGTAATACATCAGCTCTGTTTAAATGGCACTTGCGGGGCAAAATGCCAGCATGGAGTCAAATGGCACTA  
TAAATGACACTATAATTCTCCCATGCAGACTAAAGCAAATTGTAAGGATGTGGCAGAGAGTAGGACAAGCAAT  
GTATGCCCCCTCCCATCCAAGGAGAAAATAAATTGTGTATCAAACATTACAGGACTAATATTAACAAGAGATGGT  
GGGAATAATACAGAGGAAATCTTCAGACCTGGAGGAGGAGATATGAGGGACAATTGGAGAAGTGAATTATATA  
AGTATAAAGTAGTAAAAATTGAACCACTAGGAGTAGCACCCACCAGTGCAAGGAGAAGAACGGTGGGGAGAGA  
AAAAAGAGCAGTTGGAATAGGAGCTGTCTTCCTTGGGTTCTTAGGAGCAGCAGGAAGCACTATGGGCGCGGCG  
TCAATAACGCTGACGGTACAGGCCAGACAATTATTGTCTGGCATAGTGCAACAGCAAAGCAATTTGCTGAGGG  
CTATAGAGGCTCAACAACATCTGTTGAAACTCACAGTCTGGGGCATT

>KT152844

TTCTACTGTAATACATCAGCCCTGCTTAAATGGCACTTGCGAAAATGCCAGCATGCAGGAGTCAAATAGCACAG  
AGTCAAATGACACCATAACTCTCCCATGCAGAATAAAGCAAAGTTATAAATATGTGGCAGAGAGTAGGACAAGC  
AATGTATGCCCCCTCCCATCCAAGGAATAATAAAGTGCATCAAACATCACAGGACTAATATTAACAAGAGAT  
GGTGGGAATAGTAACAGTAGTACAGTTGAAACCTTCAGGCCCTGGAGGAGGAGATATGAGGGACAATTGGAGAA  
GTGAATTATATAAGTATAAAGTAGTAAAAATTGAACCACTAGGAGTAGCACCCACCAGGGCAAGGAGAAGAAC  
GGTGGAGAGAGAAAAAAGAGCAGTTGGAATAGGAGCTGTCTTCCTTGGGTTCTTAGGAGCAGCAGGAAGCACT  
ATGGGCGCAGCGTCAATAACGCTGACGGTACAGGCCAGACAATTATTGTCTGGCATAGTGCAACAGCAAAGTA  
ATTTGCTGAGGGAATAGAGGCTCAACAACATCTGTTGAAACTCACGGTCTGGGGCATT

>AY736809

TTCTATTGTAATACATCAGGCCTGTTCAATAGCACTTGCCCTGTCAATGCCAGTGAGCAGGAGTCAAATAGCA  
CAGAGTCAGATGGCATTATAACTCTCCGATGCAGAATAAAGCAAATCATAAATATGTGGCAGAGAACAGGACA  
AGCAATGTATGCCCCCTCCCATCAAGGAATAATAAAGTGTGTATCAAACATTACAGGACTACTGTTAACAAGA  
GATGGTGGGAATAGTACTGTCAATGAACTTTTCAGACCTGGAGGAGGAGATATGAGGGACAATTGGAGAAGTG  
AATTATATAAGTATAAAGTAGTAAAAATTGAACCACTAGGAGTAGCACCCACCAAGGCAAGGAGAAGAGTGGT  
GGGGAGAGAAAAAAGAGCAGTTGGAATAGGAGCTGTTTTCTTGGGTTCTTAGGAGCAGCTGGAAGCACTATG  
GGCGCGGCGTCAATAACGCTGACGGTACAGGCCAGACAATTACTGTCTGGCATAGTGCAACAGCAAAACAATT  
TGCTGAGGGCTATAGAGGCTCAACAACAACCTGTTGAAACTCACGGTCTGGGGCATT

>AY736810

TTTTATTGTAATACATCAGACCTGTTTAAATAGTACTTGGAACATTGAAGGCACTGCCAGCATAAATGGCACGG  
AGTCAAATGACAATATAACTCTCCCATGCAGAATAAAGCAAATTATAAATATGTGGCAGAGAGTAGGACAAGC  
AATGTATGCCCCCTCCCATCCAAGGAGTAATAAAGGTGTCAATCAAACATTACAGGAATACTATTAACAAGAGAT  
GGTGGGAATACTGGGAATAATAGCAGGACAAATGAAACCTTTAGACCTGGAGGAGGAGATATGAGGGACAATT  
GGAGAAGTGAATTATATAAGTATAAAGTAGTAAAAATTGAACCACTGGGAGTAGCACCCACCAAGGCAAAGAG  
AAGAGTGGTGGAGAGAGAAAAAAGAGCAGTTGGAATAGGAGCTGTATTATTGGGTTCTTAGGAGCAGCCGGA  
AGCACTATGGGCGCGGCGTCAATAACGCTGACGGTACAGGCCAGACAATTATTGTCTGGCATAGTGCAACAGC  
AAAGCAATTTGCTGAGGGCTATAGAGGCTCAACAGCATTTGTTGAAACTCACGGTCTGGGGCATT

>AY736812

TTCTATTGTAATACATCAGGTCTGTTTCAATAGCACCTGGAAGGCCAACAATGGCACCTGGAAGGCCAACATAT  
CAGAGTCAAATAACACGGAGATAACTCTCCAATGCAGAATAAAGCAAATTATAAATATGTGGCAGAGAACAGG  
ACAAGCAATATATGCCCCCTCCCATCCAGGGAGTGATAAGGTGTGAATCAAACATCACAGGACTACTGTTAACA  
AGAGATGGTGGGGAGGGGAACAATGAAAGTGAGATCTTCAGACCTGGAGGAGGAGATATGAGGGACAACCTGGA  
GAAGTGAATTATATAAGTATAAAGTAGTAAAAATTGAACCACTAGGAGTAGCACCCACCAGGGCAAGGAGAAG  
AGTGGTGGGAAGAGAAAAAAGAGCAGTTGGAATAGGAGCTGTTTTCTTGGGTTCTTAGGAGCAGCAGGAAGC  
ACTATGGGCGCGGCGTCAATAACGCTGACGGTACAGGCCAGGCAATTATTGTCTGGCATAGTGCAACAGCAAA  
GCAATTTGCTGAGGGCTATAGAGGCTCAACAACATATGTTGAAACTCACGGTCTGGGGCATT

>AY736815

TTCTATTGTAATACATCAGGTCTGTTTAAATAGCACCTGGGACAACAACACCGACCCAAACCAACACAACGTCAA  
ATGACACTATCACTCTCCAATGCAGAATAAAGCAAATTTATAAATATGTGGCAGAGAACAGGGCAAGCAATGTA  
TGCCCCCTCCCATCCAAGGGGTAAATAAGGTGTGATTCCAACATTACAGGACTACTATTAACAAGAGATGGTGG  
GTAGGTAAACAATACAACCTGAAACCTTCAGACCTGGAGGAGGAGATATGAGGGACAATTGGAGAAGTGAATTAT  
ATAAGTATAAAGTAGTAAAAATTGAACCACTAGGAGTAGCACCCACCGGGGCAAGGAGAAGAGTGGTGGAGAG  
AGAAAAAAGAGCAGTTGGAATAGGAGCTGTTTTATTGGGTTCTTAGGAGCAGCAGGAAGCACTATGGGCGCG

GCGTCAGTAACGCTGACGGTACAGGCCAGACAATTATTGTCTGGCATAGTGCAACAGCAAAGCAATTTGCTGA  
GGGCTATAGAGGCTCAACAGCATCTGTTGAAACTCACGGTCTGGGGCATT

>AY736813

TTCTATTGTGATACATCAGGCCTGTTTAAATAGCAGTTGGAATAATAACACTTGAAGGAGTCAAATAGCACGG  
GGTCAAATGACACTATAACTCTCCTATGCAGAATAAAACAAATTATAAATATGTGGCAGAGAACAGGACAAGC  
AATGTATGCCCCCTCCCATCCAGGGTTAATAAGCTGTAAATCAAACATTACAGGTATAATATTGACAAGAGAT  
GGTGGGAATGGTAACAGTACAAATGAAACCTTCAGACCTGGAGGAGGAGATATGAGGGACAATTGGAGAAGTG  
AACTATATAGGTATAAAGTAGTACAAATTGAACCACTAGGAGTAGCACCCACCAGGGCAAGGAGAAGAGTGGT  
GCAGAGAGAAAAAGAGCAGTAGGAATAGGAGCTGTCTTCCTTGGGTTCTTAGGAGCAGCAGGAAGCACTATG  
GGCGCAGCGTCAATAACGCTGACGGTACAGGCCAGACAATTATTGTCTGGCATAGTGCAACAGCAAAGCAATT  
TGCTGAGGGCTATAGAGGCTCAACAACATCTGTTGAAACTCACGGTCTGGGGCATT

>AY736816

TTCTATTGTGACACATCAGGCCTGTTTACTTGAATAGCACTTGAATGGCACTGAGTCAAACAACACAAAAGT  
CAAACGACACTATAACTCTCCAATGCAGAATAAAGCAAATTATAAATATGTGGCAGAGAGTAGGACAAGCAAT  
ATATGCCCTCCCATCAAAGGAGTAATAAGGTGTGAATCAGACATTACAGGACTTATACTAACAAGAGATGGT  
GGGAATACTAACAGTACAGAGGAAACCTTCAGACCTGGAGGAGGAGATATGAGGGACAATTGGAGAAGTGAAT  
TATATAAGTATAAAGTAGTAAAAATTGAACCACTAGGAGTAGCACCCACCAAGGCAAAGAGAAGAGTGGTGGG  
GAGAGGAAAAAGAGCAGTTGGAATAGGAGCTGTCTTCCTTGGGTTCTTAGGAGCAGCCGGAAGCACTATGGGC  
GCGGCGTCAATAACGCTGACGGTACAGGCCAGACAATTATTGTCTGGCATAGTGCAACAGCAAAGCAATTTGC  
TAAGGGCTATAGAGGCTCAACAGCATCTGTTGAAACTCACGGTCTGGGGCATT

>AF457053

TTCTATTGTAATACATCAGGCCTGTTTAAACAGCACCTGGCACTATAACAGCAATGGTACTTGGCACAATAACA  
GCACAAATAGCATGGACTCAAATGAAACTATAACTCTCATATGCAGAATAAAGCAAATTATAAATATGTGGCA  
GAGAGTAGGAAAAGCAATGTATGCTAATCCCATCCAAGGAATAATAAAGTGTGAATCAAACATTACAGGACTA  
CTCTTAACAAGAGATGGTGGGAATACTAGCAGTACAAATGAAACCTTCAGACCTGGAGGAGGAGATATGAGGG  
ACAATTGGAGAAGTGAATTATACAAATATAAAGTAGTAAAGATTGAGCCACTAGGAGTAGCACCCACCAGGGC  
ACAGAGAAGAGTGGTGGGGAGAGAAAAAGAGCAATTGGAATAGGAGCTGTCTTCCTTGGGTTCTTAGGAGCA  
GCAGGAAGCACTATGGGCGCGGCGTCAATGACGCTGACGGTACAGGCCAGACAATTATTGTCTGGCATAGTGC  
AACAGCAAAGCAATTTGCTGAGGGCTATAGAGGCTCAACAACAACCTGTTGAAACTCACGGTCTGGGGCATT

>AF457055

TTCTATTGTAATACAAACAACTGTTTAAATAGCACCTGGAGAGGAAATAAACTGTCAGCAATAGCACAGAGT  
TAGATGAAAATGGCACTATAACTCTCCCATGCAGAATAAAGCAAATTATAAATATGTGGCAGAGAACAGGACA  
AGCAATGTATGCCCTCCCATCCAAGGAGTAATAAAGTGTGTATCAAACATTACAGGACTACTATTAACAAGA  
GATGGTGGAAAGTGATAACAATATAAGTAGTGAAACCTTCAGACCAGGAGGAGGAGATATGAGGGACAATTGGA  
GAAGTGAATTATATAAGTATAAAGTAGTGAACTTGAACCACTAGGAGTAGCACCCACAAGGCAAGGAGAAG  
AGTGGTGGAGAGAGAAAAAGAGCAGTTGGAAGTGGGAGCTGTATTTCATTGGGTTCTTAGGAGCAGCAGGAAGC  
ACTATGGGCGCGGCGTCAATAACGCTGACGGCACAGGCCAGACAATTATTGTCTGGCATAGTGCAACAGCAAA  
GCAATTTGCTGAAGGCTATAGAGGCTCAACAGCATCTGTTGAAACTCACGGTCTGGGGCATT

>AF457070

TTCTATTGTAATACATCAGGCCTGTTTAAATAGCACTTGAATAGCACTGGGAATGACACTTGGAGTGGCAATG  
CCAGCACGCAGGAGTCAAATGACACTATAACTCTCCCATGCAGAATAAAGCAAATTGTAAATATGTGGCAGAG  
AATAGGACAAGCAATGTATGCCCCCTCCCATCCAAGGAGTAATAAGGTGTGAATCAAACATTACAGGACTACTA  
TTAACAAGAGATGGTGGGAACAATGAAAGTGAACCTTCAGACCTGGAGGAGGAAATATGAGGGACAATTGGA  
GAAGTGAATTATATAGGTACAAAGTAGTGAAATTGAACCACTAGGAGTAGCACCCACCAGGGCAAAAAGAAG  
AGTGGTGGGGAGAGAAAAAGAGCAGTTGGAATAGGAGCTGTGTTTCCTTGGGTTCTTAGGAGCAGCAGGAAGC  
ACTATGGGCGCGGCGTCAATAACGCTGACGGCACAGGCCAGACAATTATTGTCTGGCATAGTGCAACAGCAAA  
GCAACTTGCTGAGGGCTATAGAGGCTCAACAACATCTGTTGAAACTCACGGTCTGGGGCATT

>AF457077

TTCTATTGTAATACATCAGGCCTGTTTAAATAGCACTTGGTCTTGAATGACACTGCAAATGGCACTGCAATGG  
AGCCAAATAGCACTATAACTCTCCCATGCAGAATAAAGCAAATTATAAATATGTGGCAGAGAGTAGGACAAGC  
AATGTATGCCCCCTCCCATCCAGGAGTAATAAGTTGTGTATCAAACATTACAGGACTAATATTAGTAAGAGAT  
GGAGGGAATAATGTTACAAATGAAACCTTCAGACCTGGAGGAGGAGATATGAGGGACAATTGGAGAAGTGAAT  
TATATAAGTATAAGGTAGTAAAAATTGAACCACTAGGAGTAGCACCCACCAAGGCAAAGAGAAGAGTGGTGGG  
GAGAGAAAAAGAGCAGTTGGAATAGGAGCTGTCTTCCTTGGGTTCTTAGGAGCAGCAGGAAGCACTATGGGC  
GCGGCGTCAATAACGCTGACGGTACAGGCCAGACAATTATTGTCTGGTATAGTGCAACAGCAAAGCAATTTGC  
TGAGGGCTATAGAGGCTCAACAACATCTGTTGAAACTCACAGTCTGGGGCATT

>AF457080

TTCTATTGTAATACATCGGGCCTGTTTAAATAGCACCTACAATGGCACTGACATCGCTGAAAATAGCACGGAGT  
CAAATGACACTATAGTTCTCCCATGCAGAATAAAGCAAATTATAAGGATGTGGCAGCGAGTAGGACAAGCAAT  
GTATGCCCTCCCATCCAGGAATAATAAGATGTGACTCAAACATTACAGGATTACTATTAACAAGAGATGGT

GGGGATGATAATGAAACTGAAACCTTTAGACCTGGAGGAGGAGATATGAGGGATAATTGGAGAAGTGAATTAT  
ATAAGTATAAAGTAGTAAAAATTGAACCACTAGGAGTAGCACCCACCAGGGCAAAAAGAAGAGTGGTGGAGAG  
AGAAAAAAGAGCAGTTGGAATAGGGGCTTTTGTCTTGGGTTCTTAGGAGCAGCAGGAAGCACTATGGGCGCA  
GCATCAATAACGCTGACGGTACAGGCCAGACAATTATTGTCTGGCATAGTGCAACAGCAAAGCAATTTGCTGA  
GGGCTATAGAGGCTCAACAACAAATATTGAGACTCACGGTCTGGGGCATT

>AF457081

TTCTATTGTAATACATCAGGCCTGTTTAATAGCACTTGGACAAATGACAGTATCAGCACAAATAGCACAAAGT  
CAAATGACACTATAACTCTCCCATGCAGAATAAAGCAAATTATAAATATATGGCAGAGAGTGGGACAAGCAAT  
GTATGCCCTCCCATCCAAGGAGTAATACAGTGTGTATCAAACATTACAGGACTACTATTAAACAAGAGATGGT  
GGGGATAACAGTAGTACGAATGAAACCTTCAGACCTGGAGGAGGAGATATGAGGGACAATTGGAGAAGTGAAT  
TATATAAGTATAAAGTAGTAAAAATTGAACCACTAGGAGTAGCACCCACCAGGGCAAGGAGAAGAGTGGTGGGA  
GAGAGAGAAAAGAGCAGTTGGACTGGGAGCTGTTTTTCATTGGGTTCTTGGGAGCAGCAGGGAGCACTATGGGC  
GCAGCGTCAATAACGCTGACGGTACAGGCCAGACAATTATTGTCTGGCATAGTGCAACAGCAAAGCAATTTGC  
TGAGGGCTATAGAGGCTCAACAACATCTGTTGAAACTCACGGTCTGGGGCATT

>AF457083

TTCTATTGTAATACATCAAGTCTGTTTAATAGTACTTGGAAATAACAGTACTTGGAAATACCAGCAGGCAGGAGG  
CAAATAATAGCCCGGGTCAAAACGACACTATAACTCTCAAATGCAGAATAAAGCAAATTATAAATATGTGGCA  
GAGAGCGGGACAAGCAATATATGCCCTCCCATCCAAGGAGTAATAAGGTGTAACCTCAAACATTACAGGACTA  
ATATTAACAAGAGATGGTGGGGTAATAACAATACAAATGAAACCTTCAGACCTGGAGGAGGAGATATGAGGG  
ACAATTGGAGAAGTGAATTATATAAGTACAAAGTAGTAAAAATTGAACCACTAGGAGTAGCACCCACCAGGGC  
AAAGAGAAGAGTGGTGGAGAGAGGAAAAGAGCAGTTGGAATAGGAGCTGTCTTCATTGGGTTCTTAGGAGCA  
GCAGGAAGCACTATGGGCGCGGCGTCAATAACGCTGACGGCACAGGCCAGACAATTATTGTCTGGCATAGTGC  
AACAGCAAACAATTTGCTGAGGGCTATAGAGGCTCAACAACATCTGTTGAGACTCACGGTCTGGGGCATT

>AF457084

TTCTATTGTGACACATCAGGCCTGTTTAATAGCAGTTGGACTGCTAGCAATGATAGCATGCAGGAGGCACATA  
GCACAGAGTCAAATATAACTCTCCAATGCAGAATAAAGCAAATTATAAATATGTGGCAGAGAGCAGGACAAGC  
AATGTATGCCCTCCCATTCAGGAATAATAAGGTGTGAATCAAACATTACAGGACTAATATTAACAAGAGAT  
GGTGGTGAGGGTAATAACAGTACAAATGAAACCTTCAGACCAGTAGGAGGAAATATGAGGGACAATTGGAGAA  
GTGAATTATATAAGTATAAAGTAGTAAAAGTTGAACCACTAGGAGTAGCACCCACCAAGTCAAGGAGGAGAGT  
GGTGGAGAGAGAAAAAGAGCAGTTGGACTAGGAGCTGTGTTTCATTGGGTTCTTAGGAGCAGCAGGAAGCACT  
ATGGGCGGCGTCAATGACGCTGACGGTACAGGCCAGACAATTATTGTCTGGCATAGTGCAACAGCAAAGCA  
ATTTGCTGAGGGCTATAGAGGCTCAACAGCATCTGTTGAAACTCACGGTTTGGGGCATT

>AF457086

TTCTATTGTAATACAACAAAACCTGTTTAATAGCACTTGGAGTCATAATGACAGCACGCAAGAGTCAAATAGCA  
CAAAGTCAAATGACACTATAACTCTCCCATGCAGAATAAAGCAAATTATAAATATGTGGCAGAGAGTAGGACA  
AGCAATATATGCCCTCCCATACAAGGAATAATAAGGTGTGAATCAAATATTACAGGACTAATATTAACAAGA  
GATGGAGGTACCAATAGTACAAATGAAACCTTCAGACCTGGAGGAGGAGATATGAGGGACAATTGGAGAAGTG  
AATTATATCAGTATAAAGTAGTAAAAATTGAACCACTAGGAGTAGCACCTACCAGGGCAAAGAGAAGAGTGGT  
GGAGAGAGCAAAAAGAGCAGTTGGAATAGGAGCTGTCTTCCTTGGGTTCTTAGGAGCAGCAGGAAGCACTATG  
GGCGCGGCGTCAATAACGCTGACGGTACAGGCCAGACAATTATTGTCTGGCATAGTGCAACAGCAAAGTAATT  
TGCTGAGGGCTATAGAGGCTCAACAGCATCTGTTGAAACTCACGGTCTGGGGCATT

>AF457089

TTTTATTGCAATACATCAGATCTGTTTAATAGTACTTGGCCTGTCAATGCCAGCATGGAGTCAAATAGCACGG  
AGTCAAATGACAATATAACACTCCAATGCAGAATAAAGCAAATTATAAATATGTGGCAGAAAGTAGGACAAGC  
AATGTATGCCCTCCCATACAAGGAGTAATAAGGTGTGAATCAAACATTACAGGACTACTATTAACAAGAGAT  
GGTGGATCTAACAGTACAGAAGAAACCTTCAGACCTGGAGGAGGAGATATGAGGGACAATTGGAGAAGTGAAT  
TATATAAGTATAAAGTAGTAAAAATTGAGCCATTAGGGGTAGCACCCACCAGGGCAAAGAGAAGAGTGGTGGGA  
GAGAGAAAAAGAGCGGTTACACTAGGAGCTGTATTTCATTGGGTTCTTAGGAGCAGCAGGAAGCACTATGGGC  
GCAGCGTCAGTAACGCTGACGGTACAGGCCAGACAATTACTGTCTGGCATAGTGCAACAGCAAAGCAATTTGC  
TGAGGGCTATAGAGGCTCAACAGCATATGTTGAAACTCACGGTCTGGGGCATT

>EU110088

TTCTATTGTAACACATCACGCCTGTTTAATAGCACCTGGTGGGCAATGGCACCAGGACGGGCTACAACAGCA  
CTGATGGCAATATAACACTCCCATGCAGAATAAAGCAAATTATAAATATGTGGCAGAGAGTAGGACAAGCAAT  
GTATGCCCTCCCATCCCAGGAAGAATAAGTTGTGAATCAAACATTACAGGACTAATATTAACAAGAGATGGT  
GGGAGTGATAATACAACCTGAAACCTTCAGACCTGGAGGAGGAGATATGAGGGACAATTGGAGAAGTGAATTAT  
ATAAGTATAAAGTAGTAGAAGTTGAACCACTAGGAGTAGCACCCACAGAGGCAAGGAGAAGAGTGGTGCAGAG  
AGAAAAAAGAGCAGTCGGACTGGGAGCTGTCTTCATTGGGTTCTTGGGAGCAGCAGGAAGCACTATGGGCGCG  
GCGTCAGTGACGCTGACGGTACAGGCCAGACAATTATTGTCTGGTATAGTGCAACAGCAAAGCAATTTGCTGA  
GGGCTATAGAGGCTCAACAACATCTGTTGAAACTCACGGTCTGGGGCATT

>EU110092

TTCTATTGTGATACATCAGCTCTGTTCAATAGCACTTGGAATGCCACTGAGTCAAATGACACAAACTCCACAG  
AATCAAACCTCAAATGACACTATAACTCTCCCATGCAGAATAAAACAAATTATAAATATGTGGCAGAGAATAGG  
ACAAGCAATGTATAACCTCCCATCCAAGGAAAAATAAAGTGTGAATCAAACATTACAGGACTATTGTTAACA  
AGAGATGGTGGAGAAAAATAGAGAAAAATAATGACAGTAGTGAAATCTTCAGACCAGGAGGAGGAGATATGAAGG  
ACAATTGGAGAAGTGAATTGTATAAGTATAAAGTAGTAAAAATTGAACCACTAGGAGTAGCACCCACCAGGGC  
AAGGAGAAGAGTGGTGGGGAGAGAAAAAGAGCAGTTGGAATAGGAGCTGTCTTCCTTGGGTTCTTAGGAGCA  
GCAGGAAGCACTATGGGCGCGGCGTCAATAACGCTGACGGTACAGGCCAGACAATTATTGTCTGGCATAGTGC  
AACAGCAAAGCAATTTGCTGAGGGCTATAGAGGCTCAACAACATCTGTTGAAACTCACAGTCTGGGGCATT

>EU110094

TTCTATTGTAATACATCAGGCCTGTTTAGTAGCACTTGAGGTTGGAATGACACTACCAAAACAATGGAATCAA  
ATAGCACGGTGTGATGAGTGGCACTATAAATCTCCCATGCAGAATAAAGCAAATTATAAATATGTGGCAGAGAGT  
AGGGCAAGCAATGTATGCCCCCTCCCATCCAAGGAGCAATAAGGTGTACATCAAACATTACAGGACTAATATTA  
ACAAGAGATGGTGGGAAAGATGACAGGAATAATGAAACCTTCAGACCTGGAGGAGGAGATATGAGGGACAATT  
GGGAGAGTGAATTATATAAATATAAAGTAGTAAAAATTGAACCACTAGGAGTAGCACCCACCAGGGCAAAGAG  
AAGAGTGGTGGAGAGAGAAAAAGAGCAGTTGGAATAGGAGCTGTCTTCCTTGGGTTCTTAGGAGCAGCAGGA  
AGCACTATGGGCGCGGCGTCAATAACGCTGACGGTACAGGCCAGACAATTATTGGCTGGCATAGTGCAACAGC  
AAAGCAATTTGCTGAGGGCTATAGAGGCTCAACAACATCTGTTGAAACTCACGGTCTGGGGCATT

>KT022360

TTCTATTGTAACACATCAGGCCTGTTTAATAACACTTGGGTGTTTAATAGCATTTGGGATAATAGCACTCAGG  
AGTCCAATAGCACAGAGTCAAAATAAACTATAATTCTCCAATGCAGAATAAAGCAAATTATAAATATGTGGCA  
GAGAGCAGGACAAGCAATATATGCTCCTCCCATTCAGGAGTAATAAGGTGTGAATCAAACATTACAGGACTA  
ATATTAACAAGAGATGGTGGAAATAATAACACGATAAATGAAACATTTAGACCTGGAGGAGGAGACATGAGGG  
ACAATTGGAGAAGTGAATTATATAAGTACAAAGTAGTAAAAATTGAACCACTAGGAGTAGCACCTACCAAGGC  
ACGGAGAAGAGTGGTGGAGAGAGAAAAAGAGCAGTTACAATAGGAGCTATGTTCAATTGGGTTCTTAGGAGCA  
GCAGGAAGCACTATGGGCGCGGCGTCAATGACGCTGACGGTACAGGCCAGACAATTATTGTCTGGCATAGTGC  
AACAGCAAAGCAATTTGCTGAGGGCTATAGAGGCTCAACAGCATCTGTTGAAACTCACGGTCTGGGGCATT

>KT022361

TTCTATTGTAATACATCAGGCCTGTTTAATTACAGCTACAGCATGCAGGAGTCAAATGATACGGAGGCAAATG  
GCACTATAACTCTCCAATGCAAAATAAAACAAATTATAAATATGTGGCAGAGAGTAGGACAAGCAATGTACGC  
CCCTCCCATCCAAGGAGTAATACAGTGTAAATCAAACATTACAGGACTAATATTAACAAGAGATGGTGGAAAT  
AGTACTAATGGTACAGAAATCTTCAGACCTGGAGGAGGAGATATGAGAGACAATTGGAGAAGTGAGTTATATA  
AGTATAAAGTAGTACAACTTGAACCACTAGGAGTAGCACCCACCAAGGCAAAGAGAAGAGTGGTGGAAAGAGA  
AAAAAGAGCAGTTGGAATAGGAGCTGTCTTCCTTGGGTTCTTAGGAACAGCAGGAAGCACTATGGGCGCGGCG  
TCACTGACGCTGACGGTACAAGCCAGACTATTATTGTCTGGCATAGTGCAACAGCAAAGCAATTTGCTGAGGG  
CTATAGAGGCTCAACAATATCTGTTGAAACTCACGGTCTGGGGCATT

>KT022363

TTCTATTGTGACACCTCGAAGCTGTTTAATAGCTCTTGGAATGAGAGCACTTGGGATGAAAATAGCACGAAGC  
CTAACACAATGAACTATAATTCTCCCATGCAGAATAAAGCAAATCATAAATATGTGGCAGAGAACAGGACA  
AGCAATATATGCCCCCTCCCATGAAGGAATAATAAAGTGTGACTCAAACATTACAGGACTAATATTAACAAGA  
GATGGTGGGAGGATTAAACACAACCTAATGAAACCTTCAGACCTGGAGGAGGAGATATAAGGGACAATTGGAGAA  
GTGAATTATATAAATATAAAGTAGTAAAAATTGAGCCACTAGGAGTAGCACCCCTCCAGGGCAAAGGAGAAGAGT  
GGTGGGGAGAGAAAAAGAGCAGTTGGAATAGGAGCTGTCTTCCTTGGGTTCTTAGGAGCAGCAGGAAGCACT  
ATGGGCGCGGCGTCACTAACGCTGACGGTACAGGCCAGGCAATTATTGTCTGGCATAGTGCAACAGCAAAGCA  
ATTTGCTGAGGGCTATAGAGGCTCAACAGCATATGTTGAAACTCACGGTCTGGGGCATT

>KT022364

TTTTATTGTGATACCTCAGGCTTGTTTAATAGTACTTGGAATGAGAGCACTTGGGATGAAAATAGCACGAAGC  
ATAACACGGGGTTAAATATAACGCTCCCGTGCAGAATAAAGCAAATTATAAATATGTGGCAAAGGGTAGGACA  
AGCAATGTATGCCCCCTCCCATCAAAGGAGTAATAAGGTGTGATCAAACATCACAGGACTACTGCTAACAAGA  
GATGGTGGGAGTAATAAATAGAAAGTAATGAAACCTTCAGACCTGGAGGAGGAGATATGAGGGACAATTGGAGAA  
GTGAATTATATAAATATAAAGTAGTAAAAATTGAACCACTAGGAGTAGCACCCCTCCAGGGCAAAGAGGAGAGT  
GGTGGAGAGAGAGAAAAAGAGCAGTTGGAATAGGAGCTGTATTCCTTGGGTTCTTAGGAGCAGCAGGAAGCACT  
ATGGGCGCGGCGTCACTGACGCTGACGGTACAGGCCAGGCAATTATTGTCTGGCATAGTGCAACAGCAAAGCA  
ATTTGCTGAGGGCTATAGAAGCTCAACAGCATCTGTTGAAGCTTACAGTCTGGGGCATT

>KT022365

TTCTATTGTGATACGTCAGGCTTATTACAGTAGCACCTGGCAATTCAATGGGAGTACCTGGAACAACACAGATT  
CAAACAGCACAGGGTCAGATGACACTATAGAAGCTCCCATGCAGAATAAAGCAAATTATAAATATGTGGCAGAG  
AGTAGGACGAGCAATGTATGCCCCCTCCCATCCAAGGAGTAATAAGTTGTGTATCAAACATCACAGGACTAATA  
TTAACAAGAGATAGTAATAACAGAACCTAATGAAACCTTCAGACCTGGAGGAGGAGACATGAGAGACAATTGGA  
GAAAGTGAATTATATAAGTATAAAGTAGTAAAAATTGAACCACTAGGAGTAGCACCCACCAAGGCAAAAAGAG  
AGTGGTGGAGAGAGAAAAAGAGCAGTTGGAATAGGAGCTGTCTTCCTTGGGTTCTTAGGAGCAGCAGGAAGC

ACTATGGGCGGCGTCAATAACGCTGACGGTACAGGCCAGACAATTATTGTCTGGCATAGTGCAACAGCAAA  
GCAATTTGCTGAGGGCTATAGAGGCTCAACAACATCTGTTGAAACTCACAGTCTGGGGCATT

>KT022367

TTCTATTGTAATACATCAGGTCTATTTAATAGCAGTTGGAATGATACTGAAATCGGGCGGGAGATAAATAGGA  
CGGAGTCAAATGACACTATAATTCTCCCATGCAGAATAAAGCAAATTATAAATATGTGGCAGAGAGTAGGACA  
AGCAATATATGCCCCCTCCCATCCAAGGAGTAATAAGGTGTGAATCAAACATTACAGGACTAATATTAACAAGG  
GATGGTGGGGGTAATAACAGAAAAAATGAAACCTTCAGACCTGGAGGAGGAGATATGAGGGACAATTGGAGAA  
GTGAATTATATAAGTATAAAGTAGTAAAAATTGAACCAATAGGAATAGCACCCACCAGGGCAAAGAGAAGAGT  
GGTGGAGAGAGAAAAAGAGCAATTGGAATGGGAGCTGTATTCATTGGGTTCTTAGGAGCAGCAGGAAGCACT  
ATGGGCGGCGTCAATAACGCTGACGGTACAGGCCAGACAATTGTTGTCTGGCATAGTGCAACAGCAAAAAACA  
ATTTGCTGAGGGCTATAGAGGCTCAACAACATCTGTTGAAGCTCACGGTCTGGGGCATT

>KT022368

TTCTATTGTAATACAACAGACCTGTTTTGATAGCATTGTTGGCTTTACAATGCCAGCATGCATAATGCAAATAGCA  
CGATAACTCTCCAATGCAGAATAAAGCAAATTATCAATATGTGGCAGAGAGTAGGACAAGCAATGTATGCCCC  
TCCCGTCGAAGGAAAAATACAGTGCAAATCAAACATTACAGGACTAATATTAACAAGAGATGGTGGGGTTAAC  
GATACAAATGGAACCGAAATCTTCAGACCTGGAGGAGGGGATATGAGGGACAATTGGAGAAGTGAATTATATA  
AGTATAAAGTAGTAAAAATTGAACCACTAGGAGTAGCACCCACCAGGGCAAGGAGAAGAGTGGTGCAGAGAGA  
AAAAAGAGCAGTTGGAATAGGAGCTGTATTCCTTGGGTTCTTAGGAGCAGCAGGAAGCACTATGGGCGCAGCG  
TCAGTGACGCTGACGGTACAGGCCAGAAGATTATTGTCTGGCATAGTGCAACAGCAAAGCAATTTGCTGAAGG  
CTATAGAAGCTCAACAGCATCTGTTGAAGCTCACGGTCTGGGGCATT

>KT022369

TTCTATTGTAATACATCAGGCCTGTTTAAATAGCACTTGGAAATATACTAATAGCATGCAGCAGTCAAATAGCA  
CAGAGTCAAACGAACTATAACTCTCCAATGCAGAATAAAGCAAATTATAAATATGTGGCAGAGAGTGGGGCA  
AGCAATATATGCCCCCTCCCATCCCAGGGGTAATAAGGTGTGAATCAAACATTACAGGACTAATATTGACAAGA  
GATGGTGGGAGTAATAACAGTACAAATGAAACCTTCAGACCTGGAGGAGGGAATGTGAGGGACAATTGGAGAA  
GTGAATTATATAAGTATAAAGTAGTAAAAATTGAACCACTAGGAGTAGCACCCACCAGGGCAAAGAGAAGAGT  
GGTGGAGAGAGAAAAAGAGCAGTTGGACTAGGAGCTGTCTTCATTGGGTTCTTGGGAACAGCAGGAAGCACT  
ATGGGCGGCGTCAATAACGCTGACGGTACAGGCCAGACAATTATTGTCTGGTATAGTGCAACAGCAAGGCA  
ATTTGCTGAGAGCTATAGAAGCTCAACAACAACCTGTTGAGACTCACGGTCTGGGGCATT

>FJ866117

TTTTATTGTAATACATCAGGCCTGTTTAAATAGTACTTGGTCACCTGACAATAGTACTGGGACTAGTACTGGGA  
ATAATGACACTGCCAGCAATGGCACTATAACTCTCCCATGTAGAATAAAGCAGATTATAAATATGTGGCAGAG  
AGTAGGACAAGCAATGTATGCCCCCTCCCATCCAAGGAGTAATAAGGTGTGACTCAAACATTACAGGACTACTA  
TTAACAAGAGATGGTGGGAGTGGGAATAATACCACAGAGATCTTCAGACCTGGAGGAGGAGATATGAGGGACA  
ATTGGAGAAGTGAATTATATAAGTATAAAGTAGTAAAGTTCGAACCTCTAGGAGTAGCACCCACCAGGGCAAA  
GAGAAGAGTGGTGGAGAGAGAAAAAGAGCAGTTGGAATAGGAGCTGTATTTCATTGGGTTCTTAGGAGCAGCA  
GGAAGCACTATGGGCGCAGCGTCAATAACGCTGACGGTACAGGCCAGACAATTATTGTCTGGCATAGTGCAAC  
AGCAAAGCAATTTGCTGAGGGCTATAGAGGCTCAACAGCATTGTTGAAGCTCACAGTCTGGGGCATT

>KT022370

TTCTATTGTAATACATCAGGCCTGTTTAAATAGAGCTTACACTAACAGCACTTACAATAACAGCACGCAGGACA  
ATGACAATAACAGCACGCAGGACAATGCAACTATAACTCTCCCATGCAGAATAAAGCAAATTATAAATATGTG  
GCAGAGAGCAGGGAAAGCAATGTATGCCCCCTCCCATCCAAGGAGTAATAAAGTGTGTATCAAACATTACAGGA  
CTAATTTTAAACAAGAGATGGTGGAAAGAGTAACAGTACGGAGGGGGAAATCTTCAGACCTGGGGGAGGAGATA  
TGAGGGATAATTGGAGAAGTGAATTATATAAGTATAAAGTAGTAAAAATTGAACCACTAGGAGTAGCACCTAC  
CAAGGCAAGGAGAAGAGTGGTGGGGAGAGAGAAAAAGAGCAGTTGGACTAGGAGCTGTCTTCATTGGGTTCTTA  
GGAGCAGCCGGAAGCACTATGGGCGGCGGTGAGTGACGCTGACGGTACAGGCCAGGCAATTATTGTCTGGCA  
TAGTGCAACAGCAAAGCAATTTGCTGAGGGCTATAGAGGCTCAACAACATCTGTTGAAACTCACGGTCTGGGG  
CATT

>KT022372

TTCTATTGTGATACAGCAGGCCTGTTTAAATAGCACTTGGAGTCACAATGACAGCATACAGGGGACAAATAGCG  
CAGAGTCAAATGAACTATAACTCTCCCATGCAGAATAAAGCAAATTATAAATATGTGGCAGAGAGCAGGACA  
AGCAATGTATGCCCCCTCCCATCCCAGGAGTAATAAAGTGTGTATCAAACATTACAGGACTAATATTAACAAGA  
GATGGTGGGAAGAACAATACAGAGGAAGTCTTCAGACCTGGAGGAGGAGATATGAGGGATAATTGGAGAAGTG  
AATTATATAAGTATAAAGTAGTAAAAATTGAACCACTAGGAGTAGCACCCACCAAGGCAAGGAGAAGAGTGGT  
GGGGAGAGAGAAAAAGAGCAGTTGGAGTAGGAGCTGTCTTCATTGGGTTCTTAGGAGCAGCCGAAGCACTATG  
GGCGCGGCGTCAGTGACGCTGACGGTACAGGCCAGACGATTATTGTCTGGCATAGTGCAACAGCAAAGCAATT  
TGCTGAAGGCTATAGAGGCTCAACAACACCTGTTGAAACTCACGGTCTGGGGCATT

>KT022373

TTCTATTGTAACACATCAAGCTTGTGTTAGGGGCGCTTGGAAATAGTACAACCTGCAACACTTAATAGCACTGGGA  
ATAGCAATGACACTATAACTCTTCCATGCAGAATAAAGCAAATTATAAATATGTGGCAGAGAGCAGGACAAGC

AATATATGCCCCCTCCCATAAAAGGAGTAATAAGGTGTAACCTCAAATATTACAGGACTAATATTAACAAGAGAT  
GGTGGGGGTAGTGATAATAGAACTGAACTTTTAGACCTGGAGGAGGAGATATGAGAGACAATTGGAGAAGTG  
AATTATATAAGTATAAAGTAGTTAAAATTGAACCACTAGGAGTAGCACCCACCAGGGCAAAGAGAAGAGTGGT  
GGAGAGAGAAAAAAGAGCAGTTGGAATAGGAGCTGTCTTCATTGGGTTCTTAGGAGCAGCAGGAAGCACTATG  
GGCGCGGCGTCGATAACGCTGACGGTACAGGCCAGACAATTATTGTCTGGCATAGTGCAACAGCAAAGAAATT  
TGCTGAGGGCTATAGAGGGCTCAACAACATCTGTTGAAACTCACGGTCTGGGGCATT

>KT022374

TTCTATTGTAATACAACAAAGCTGTTCAATAGCTCTTGCTGCTGCCAATGCCAGTGAGTCAAATAGTACAGATG  
GCAATAGTACAGATGGCACTATAACTCTCCCATGCAAAATAAAGCAAATTATAAAATATGTGGCAGAGAGTAGG  
ACGAGCAATGTATGCCAATCCCATCCAAGGAAAAATAGAGTGTGCATCAAACATTACAGGACTAATATTAACA  
AGAGATGGTGGGAATGTGAGCAGGGAAAAATGAAACCTTCAGACCTGGAGGAGGAGATATGAGGGACAATTGGA  
GAAGTGAATTATATAAGTATAAAGTAGTAAAGATTGAACCACTAGGAGTAGCACCCCATACGGCAAGGAGAAG  
AGTGGTGGGGAGAGAAAAAAGAGCAGTTGGAATGGGAGCTGTCTTCCTTGGGTTCTTAGGAGCAGCAGGGAGC  
ACTATGGGCGCAGCGTCACTAACGCTGACGGTACAGGCCAGACAATTATTGTCTGGCATAGTGCAACAGCAAAA  
GCAATTTGCTGAGGGCTATAGAGGGCTCAACAACATCTGTTGAAACTCACAGTCTGGGGCATT

>KT022375

TTCTATTGTAATACATCAAACTGTTTAATAGCACTTGCCACAGTCAAACCACACGGAAGACAATGGAAATC  
TAACTCTCCCATGCAGAATAAAACAACTTATAAACCTGTGGCAAAGAGCAGGACAAGCAATGTATGCCCCCTCC  
CATACCAGGAAATATAAGTTGTGTATCAAACATTACAGGACTACTATTGACAAGAGATGGTGGGAACACTGGG  
AACATACAGAGGGAAATAAACTGAAATCTTCAGACCTGGAGGAGGAAATATGAGGGACAATTGGAGAAGTG  
AATTATATAAGTATAAAGTAGTGAAAATTGAACCAATAGGAATAGCACCCACCAAGGCAAAGAGAAGAGTGGT  
GGAGAGAGAAAAAAGAGCAGCACTTGCTGGAGCTTTCTTCTTGGGTTCTTAGGAACAGCAGGAAGCACTATG  
GGCGCGGCGTCAATAGCGCTGACGGTACAGGCCAGGCAATTATTGTCTGGCATAGTGCAACAGCAAAGCAATT  
TGCTGAGGGCTATAGAGGGCTCAACAACATCTGTTGAGACTCACAGTCTGGGGCATT

>KT022376

TTCTATTGTAATACATCAGGCCTGTTTGATAGCACTTGCTCGTTTAATAGCACACAGGAGTCAAATAACACGG  
GGGAAAATGATACTATAATTCTCCCATGCAGAATAAAGCAAATTATAAACATGTGGCAGAGAGTAGGACAAGC  
AATGTATGCCCCCTCCCATCCAGGAGTAATACAGTGTAACCTCAACCATTACAGGGCTAATATTAACAAGAGAT  
GGTGGGGAGGATAATAATAACACAGAAACCTTCAGACCTGCAGGAGGAGATATGAGGGACAATTGGAGAAGTG  
AATTATATAAATATAAAGTAGTAAACTTGAACCACTAGGAGTAGCGCCACCAAGGCAAAGAGAAGAGTGGT  
GGAGAGAGAAAAAAGAGCAGTTGGACTAGGAGCTGTCTTCCTTGGGTTCTTAGGAGCAGCAGGAAGCACTATG  
GGCGCGGCGTCAATAACGCTGACGGTACAGGCCAGGCAATTATTGTCTGGCATAGTGCAACAGCAAAGCAATT  
TGCTGAGGGCTATAGAGGGCTCAACAACATATGTTGAAACTCACAGTCTGGGGCATT

>KT022377

TTCTATTGTAATACATCAGGGCTGTTCAATAGTACTTGGAATACCACGAAGGTAAATAGCACAGAGTCAAATG  
GCACTATAACTCTCCCATGCAGAATAAAGCAAATTATAAAATATGTGGCAAAGAACAGGACAAGCAATGTATGC  
CCCTCCCATCAAAGGAATAATAAATTGTGCATCAAATATTACAGGACTACTATTAACAAGAGATGGTGGGGAT  
AATAACAGTACAAATGAAACCTTCAGACCTGGAGGAGGAGATATGAGGGACAATTGGAGAAGTGAATTATATA  
AGTATAAAGTAGTAAAAATTGAACCACTAGGGGTAGCACCCACCGAGGCAAGGAGAAGAGTGGTGGAGAGAGA  
AAAAAGAGCATTGTGTTGGAATAGGAGCTGTCTTCCTTGGGTTCTTAGGAGCAGCCGGCAGCACTATGGGCGCG  
GCGTCATTAACGCTGACGGTACAGGCCAGACAATTATTGTCTGGTATAGTGCAACAGCAAACAATTTGCTGA  
GGGCTATAGAGGGCTCAACAACATCTGTTGAAACTCACGGTCTGGGGCATT

>FJ866116

TTCTACTGTGATACATCAGGACTGTTTAATAGCTCTTGGAATAATACATCGGGCCAGTTTAATAGCACTTGGA  
CTGATGGCTACAATAGAAAGAGCGAGAATATAACTCTCCAATGCAGAATAAAGCAATTTATAAATATGTGGCA  
GAGAACAGGGCAAGCAATGTATGCCCCCTCCCATCCCAGGAATAATAAAATGTGAATCAAACATTACAGGACTA  
ATACTAACAAGAGATGGTGGGCAGGCTAACAAAACAGAGGAAACCTTCAGACCTGGAGGAGGAGATATGAGGG  
ACAATTGGAGAAGTGAATTATTTAGGTATAAAGTAGTAAAAATTGAACCACTAGGAGTAGCACCCACCAAGGC  
AAAGAGAAGAGTGGTGGAGAGAGAGAAAAGAGCAGTAATTGGCATGGGAGCTGTTTTCTTGGGTTCTTAGGA  
GCAGCAGGAAGCACTATGGGCGCGGCGTCACTGACGCTGACGGTACAGGCCAGACAATTATTGTCTGGCATAG  
TGCAACAGCAAGGCAATTTGCTGAGGGCTATAGAGGGCTCAACAACATCTGTTGAGACTCACGGTCTGGGGCAT  
T

>FJ866118

TTCTATTGTAATACAACAGGACTGTTCAATCTCACTTGGAATGGCACTGACAGCACAAATAGAAATGAGTCAG  
GCAATATAACTCTCCCATGCAGAATAAAGCAAATTATAAAATATGTGGCAAAGAGTAGGACGAGCAATATATGC  
CCCTCCCATCCCAGGAGTAGTAAAGTGTAATCAAATATTACAGGATTAATATTAACAAGGGATGGTGGAGAC  
GACGAGAATAACACTGAAACCTTCAGACCTGGAGGAGGAAATATGAGGGACAATTGGAGAAGTGAATTATATA  
AATATAAAGTAGTAAAAATTGAACCACTAGGGGTAGCACCCACCAAGGCAAGGAGGAGAACGGTGGAGAGAGA  
AAAAAGAGCAGTTGGAATAGGAGCTGTCTTCCTTGGGTTCTTAGGAGCAGCAGGAAGCACTATGGGCGCGGCG

TCAATAACGCTGACGGTACAGGCCAGACAATTATTGGCTGGCATAGTGCAACAGCAAAGCAATTTGCTGAGGG  
CTATAGAGGCTCAACAACAGATGTTGAGACTCACAGTCTGGGGCATT

>FJ866120

TTCTATTGTAATACATCACTCCTGTTTGAAAGCATTGTTGGTATGGCAATGAAAGCATAAATGCCACAGAAGAGG  
CAAATGACACTATAATAACTCTCCGATGCAGAATAAAGCAAATTTATAAAAATGTGGCAGAGAGTAGGACAAGC  
AATGTATGCCCCCTCCCATCCAGGAGCAATCAGGTGTAATTCAAACATTACAGGACTAATATTAACAAGAGAT  
GGAGGGCTTAATGACAATGGAGCTGATGGAAGAAATGAAACCTTCAGACCTGGAGGAGGAGATATGAGGGACA  
ATTGGAGAAGTGAATTATATAAGTATAAAGTGGTAGAAATTGAACCACTAGGAGTAGCCCCCACTCAGGCAAG  
AAGAAGAGTGGTGCAGAGAGAAAAAGAGCAGTTGGAATAGGAGCTGTCTTCATTGGGTTCCTAGGAGCAGCA  
GGAAGCACTATGGGCGCAGCGTCAATAGCGCTGACGGCACAGGCCAGACAATTATTGTCTGGCATAGTGCAAC  
AGCAAAGCAATTTGCTGAGGGCTATAGAGGTTCAACAACAGTTGTTGAAACTCACGGTCTGGGGCATT

>FJ866121

TTCTACTGTAACACATCAAACTGTTTAAATAGTACTTGGCATTACAATAACAGCACTGGGTATAATAATGGCA  
GCCTACAGGAGGAAAATAACACAGAGATAGTTCTCCTATGCAGAATAAAGCAAATTATAAATCTGTGGCAGAG  
GGTAGGAAAGGCAATGTATGCCCCCTCCCATCCAAGGAAGCATAAAGTGTAACTCAAACATTACAGGACTACTA  
TTAATCAGGGATGGTGGGGTTAATACTACTAATGAAACCTTCAGACCTGGAGGAGGAGATATGAGGGACAATT  
GGAGAAGTGAATTATATAAATATAAAGTAATAAAAAATTGAACCACTAGGAATAGCACCCACCAGGGCAAAGAG  
AAGAGTGGTGGAGAGAGAAAAAGAGCAGTTGGACTAGGAGCTGTTTTCGTTGGGTTCCTTAGGAGCAGCAGGA  
AGCACTATGGGCGCAGCGTCAGTGACGCTGACGGTACAGGCCAGACAGTTATTGTCTGGTATAGTGCAACAGC  
AAAGCAATTTGCTGAGGGCTATAGAGGCTCAACAACATATGTTGAAACTCACGGTCTGGGGCATT

>KT022380

TTCTATTGTAATACATCAGGCTTGTTTAAATAGGACTTGGAAAAAGGGGATAATCAAGGGCACTGCCAATAACA  
CGGAGTCAGACCCTATAGTGCTCCAATGCAGAATAAAGCAAATTATAAATATGTGGCAGAGAGTAGGACGAGC  
AATGTATGCCCCCTCCCATCCAGGAATAATAAATGTGTATCAAACATTACAGGACTAATATTAACAAGAGAT  
GGTGGGAATAGTAATGGAGATAATGAAACCTTCAGACCTGGAGGAGGAGATATGAGGGACAATTGGAGAAGTG  
AATTATATAAGTATAAAGTAGTAAAGTTGAGCCATTAGGAGTAGCACCCACCAGGGCAAGGAGGAGAGTGGT  
GGCGAGAGAAAAAGAGCAGTAGTTGGACTGGGAGCTGTTTTCATTTGGGTTCCTTAGGAGCAGCAGGAAGCACT  
ATGGGCGCGCGTCAATAACGCTGACGGTACAGGCCAGACAATTATTGTCTGGCATAGTGCAACAGCAAAGCA  
ATTTGCTGAGGGCTATAGAGGCTCAACAACATCTGTTGAAACTCACGGTCTGGGGCATT

>KT022381

TTCTATTGTAATACATCAGGCCTGTTTAAATTACACCTATCCATCAAATCACAGTGATAAGTCAAATAACACTA  
TAAATGAGACTATAACTCTCCCATGCAGAATAAAACAAATTATAAGAATGTGGCAGAGAACAGGACAAGCAAT  
GTATGCCCCCTCCCATCCAGGAATAATTAAAGTGTGAATCAAACATTACAGGACTAATATTAACAAGAGATGGT  
TTTAAATGGCACGAATGAAACCTTCAGGCCTGTAGGAGGAGATATGAGGGACAATTGGAGAAGTGAATTATATA  
AGTATAAAGTAGTAAGAATTGAACCACTAGGAGTAGCACCCACCAGGGCAAAGAGAAGAGTGGTGGGAAGAGA  
GAAAAGAGCAGTTGGAATGGGAGCTGTATTCTTTGGGTTCCTTAGGAGCAGCAGGAAGCACTATGGGCGCGGCG  
TCAATAACGCTGACGGTACAGGCCAGACAATTATTGTCTGGCATAGTGCAACAGCAAAGCAATTTGCTGAAGG  
CAATAGAGGCTCAACAACATCTGCTGAGACTCACGGTCTGGGGCATC

>KT022382

TTCTATTGTAATACATCAGGCCTGTTCAATAGTAGCTGGGGTCCAAATGACACGAAATCAGATAACTCAACTA  
CAAATTACACTCTCCCATGCAGAATAAAGCAAATTGTAAGGATGTGGCAGAAAAATAGGACAAGCAATGTATGC  
CCCTCCAATCGAGGGAGAAATAAATTGTGTATCAAACATTACAGGACTATTATTAACAAGAGATGGTGGGCAT  
AACAGTATTAACAATGAACTGAAACATTACAGACCTGGAGGAGGAGATATGAAGGACAATTGGAGAAGTGAAT  
TATATAAGTATAAAGTAGTAAAAATTGAACCACTAGGAGTAGCACCCACCAGGGCAAAGAGAAGAGTGGTGGG  
GAGAGAAAAAGAGCAGTTGGAATAGGAGCTGTTTTCTTTGGGTTCCTTAGGAGCAGCAGGAAGCACTATGGGC  
GCGGCGTCAATAACGCTGACGGTACAGGCCAGACAATTATTGTCTGGCATAGTGCAACAGCAAAGCAATTTGCT  
TGAGGGCTATAGAGGCTCAACAACATCTGTTGAAACTCACGGTCTGGGGCATT

>KT022383

TTCTATTGTAATACATCAGGCCTGTTTAAATAGCACTTGGAAACAGCCCTTGGAATAACACTGGGGGAACAAGAAG  
GCAATATAACTCTCCCATGCAGAATAAAGCAAATTATAAATATGTGGCAGAGAGTAGGACAAGCAATATATGC  
CCCTCCCATCCAGGAGTAATAAAGTGTGAATCGAACATTACAGGGCTACTATTAACAAGAGATGGTGGGAAC  
ACTAACAGTAGTACTGAAACCTTCAGACCTGGAGGAGGAGATATGAGGGACAATTGGAGAAGTGAATTATATA  
AATATAAAGTAGTAAAAGTTGAACCACTAGGAGTAGCACCCACCAGGGCAAAGAGAAGAGTGGTGGGGAGAGA  
AAAAAGAGCAGTTGGAATAGGAGCTGTCTTCTTTGGGTTCCTTAGGAGCAGCAGGAAGCACTATGGGCGCGGCG  
TCAATAACGCTGACGGTACAGGCCAGACAATTATTGTCTGGCATAGTGCAACAGCAAAGCAATTTGCTGAGGG  
CTATAGAGGCTCAACAACATATGTTGAAACTCACGGTCTGGGGCATT

>FJ623487

TTCTATTGTAATACATCAAGACTGTTTAAATAGCACTTGGAAACAATGGCACTTGGAAACAATACCAACATGCAGG  
AGTCAAATAGCACGAAGTCAGAAAATGGCACTATAACTCTCCCATGCAGAATAAAGCAAATTATAAATATGTG  
GCAGAGAACAGGACAAGCAATGTATGCCCCCTCCCATCCGAGGAGTAATAAGATGTGAATCAAACATTACAGGA

CTAATATTAACAAGAGATAGTGTGAATAATAGCAAAGACAATGAAACCTTCAGACCAGGAGGAGGAGATATGA  
GGGACAAATTGGAGAAGTGAATTATATAAGTATAAAGTAGTAAAAGTTGAACCACTAGGAGTAGCACCCACCAC  
GGCAAGGAGAAGAGTGGTGGGAAGAGAAAAAAGAGCAGTGGGAATAGGAGCTGTATTCCTTGGGTTCTTGGGA  
GCAGCAGGAAGCACGATGGGCGCGGCGTCAATGACGCTGACGGTACAGGCCAGACAATTATTGTCTGGTATAG  
TGCAACAGCAAAGCAATTTGCTGAGGGCTATAGAGGCTCAACAACACCTGTTGAAACTCACGGTCTGGGGCAT  
T

>FJ623481

TTTTATTGTAATACATCAGGCCTGTTTAATAGCACTTGGAATCACACTGACATAAAGGGGTCAAATAGCACGG  
AGTCAAGTGAAACTATAACTCTCACATGCAGAATAAAGCAAATTATAAATATGTGGCAGAGAGTAGGGCAAAGC  
AATGTATGCCCCCTCCCATACAGGAGCAATAAGGTGTGAATCAAACATTACAGGAATACTCTTAACAAGAGAT  
GGTGGGAATAGCAAGAACAGCACAAACAGAAATCTTCAGACCTGGAGGAGGAAACATGCGGGACAATTGGAGAA  
GTGAATTATATAAGTATAAAGTAGTACAAATTGAACCACTAGGAGTAGCACCTACCAGGGCAAAGAGAAGAGT  
GGTGGAGAGAGAAAAAAGAGCAATTGGAATAGGAGCTGTATTCATTGGGTTCTTAGGAGCAGCAGGAAGCACT  
ATGGGCGCGGCGTCAATAACGCTGACGGTACAGGCCAGACAATTATTGACTGGCATAGTGCGACAGCAAAGCA  
ATTTGCTGAGGGCTATAGAGGCTCAACAACATCTGTTGAAACTCACGGTCTGGGGCATT

>FJ623475

TTTTACTGTGATACATCAGGCCTGTTTAATAGCACTTGGGGAGCCACTGACAGCATGCATGGGGCAAATGACA  
CGGAGTCAAATGACACTATAACTCTCCCATGTAGGATAAAAACAAATTATAAATAGGTGGCAGAGAGTAGGACA  
AGCAATGTATGCCCCCTCCCATCCAAGGAGTAATAAAGTGCAAATCAGACATTACAGGAATAATATTAACAAGA  
GATGGTGGGAATAATAATGACAGTAGAAATGAAACCTTCAGACCTGGAGGAGGAGATATGAGGGACAATTGGA  
GAAGTGAATTGTATAAGTATAAGGTGGTAAAGATTGAACCACTAGGAGTAGCACCCACCAGGGCAAAGAGAAG  
AGTGGTGGAGAGAGGAAAAAGAGCAGTTGGGATAGGAGCTGTTTTCTTGGATTCTTAGGAGCAGCCGGAAGC  
ACTATGGGCGCGGCGTCAATAACGCTGACGGTACAGGCCAGGCAATTATTGTCTGGCATAGTGCAACAGCAAA  
GCAATTTGCTGAGGGCTATAGAGGCTCAACAACATATGTTGAAACTCACGGTCTGGGGCATA

>FJ623476

TTCTATTGTAATACATCAGGCCTGTTTAATAGCACTTGGAATATCACTGACAATCTCAACATAACTCAGTCAA  
ATGAGAACATAACTCTCCCATGCAAAATAAAGCAAATTATAAATATGTGGCAGAGAGTAGGACAAGCAATATA  
TGCCCCCTCCCATCCAGGAAGGGTAAGTTGTGTCTCAAACATTACAGGACTAATATTAACAAGAGATGGTGGG  
AACATAACAGTACAAATGAAACCTTCAGGCCTGGAGGAGGAGATATGAGGGACAATTGGAGAAGTGAATTAT  
ATAAGTATAAAGTAGTAAGAATTGAACCACTAGGAGTAGCACCTACCCAGGCAAAGAGAAGTGGTGGGAAG  
AGAAAAAAGAGCAATTGGAATAGGAGCTGTCTTCCTTGGGTTCTTAGGAGCAGCAGGAAGCACTATGGGCGCG  
GCGTCAATAACGCTGACGGTACAGGCCAGACAGTTATTGTCTGGCATAGTGCAACAGCAAAACAATTTGCTGA  
GGGCTATAGAGGCTCAACAACAACCTGTTGAAACTCACGGTCTGGGGCATT

>FJ623485

TTTTATTGTAATACATCAGGCCTGTTTAATAGCACTTGGTATCACAATAGCACTTGGAATGATCAAACCTGACG  
AGAGGTCAAATGACACTATAACTCTCCAATGCAGAATAAAGCAAATTATAAATATGTGGCAGAGAGTAGGACA  
AGCAATATATGCCCCCTCCTATCCAAGGAACAATAAGGTGTGAATCAAACATTACAGGACTAATATTAACAAGA  
GATGGTGGGGAGGATAGCAATACAACAACCTGAAACCTTCAGACCTAGCGGAGGAGATATGAAGGACAATTGGA  
GAAGTGAATTATATAAATATAAAGTAGTAAAAATTGAACCACTAGGAGTAGCACCTCCAGGGCAAGGAGAAG  
AGTGGTGGGAAGAGAAAAAAGAGCAGTTGGAATAGGAGCTGTCTTCCTTGGGTTCTTAGGAGCAGCAGGAAGC  
ACTATGGGCGCAGCGTCAATAACGCTGACGGTACAGGCCAGACAATTACTGTCTGGCATAGTGCAACAGCAAA  
GCAATTTGCTGAGGGCTATAGAGGCTCAACAACATATGTTGAGACTCACGGTCTGGGGCATT

>FJ623488

TTCTATTGTAACACATCAGGTCTGTTTAATAGCACTTGGGATAACAATACTGGCAATTGGTCTAGCAATAGCA  
GCAGCATGCAGGGGTCAAATAGCACAGATGATACTATAACTCTCCCATGCAGAATAAAGCAAATTATAAATAT  
GTGGCAGAGAACAGGACAAGCAATGTATGCCCCCCCCATCCAAGGGATAATAAGGTGTGAATCAAACATCACA  
GGGATAATATTAACAAGAGATGGTGGGGGTACTGAGGATAATACTACAGAAGTCTTCAGACCTGGAGGAGGAG  
ATATGAGGGACAATTGGAGAAGTGAATTATATAAATATAAAGTAGTACAAGTTGAACCACTAGGAATAGCACC  
CTCCAAGGCAAGGAGAAGAGTGGTGCAGAGAGAAAAAAGAGCAATTGGAATGGGAGCTGTCTTCCTTGGGTTCT  
TTAGGAGCAGCAGGAAGCACTATGGGCGCGGCGTCAATGACGCTGACGGTACAGGCCAGAAATTTATTGTCTG  
GCATAGTGCAACAGCAGAGTAATTTGCTGAGGGCTGTAGAGGCTCAACAACAACCTGTTGAGACTCACGGTCTG  
GGCATT

>FJ623478

TTCTATTGTAATACATCAGGCCTGTTTAATCACACTTACCTGCCTAAGAGCACTTACCTGCCTAATAGCACTT  
GGAATAACAGTACGGGATCAAATGACAGTATAACTCTTCCATGTAGAATAAAGCAAATTATAAATATGTGGCA  
GAGAGTAGGACAAGCAATGTATGCCCCCTCCTATCCAAGGAGTAATAAAGTGTAATCAGATATTACAGGACTA  
ATATTGACAAGAGATGGTGGGAATAGTAACAGTGATAATGAAACCTTCAGACCTGGAGGAGGAGATATGAGGG  
ACAATTGGAGAAGTGAATTATATAAGTATAAAGTAGTAAAAATTGAACCACTAGGAGTAGCACCCACCAGGGC  
AAAGAGAAGAGTGGTGGAGAGAGAAAAAAGAGCAGTTGGAATAGGAGCTGTTTTCTTGGGTTCTTAGGAGCA

GCAGGAAGCACTATGGGCGCGGCGTCAATAACGCTGACGGTACAGGCTAGACAATTATTGTCTGGCATAGTGC  
AACAGCAAAGCAATTTGCTGAGGGCTATAGAGGCTCAACAACATATGTTGAAACTCACGGTCTGGGGCATT  
>FJ623482

TTCTATTGTAATACATCAGACCTGTTTAATGGCAATAGCACTAGGAATGGCACTGGGAATAGCAACAGCACGC  
CGGTAACCTGGCAATATAACTCTCCCATGCAGAATAAAGCAAATTATAAATATGTGGCAGAGAGTAGGACAAGC  
AATGTATGCCCCGCCCATCCAAGGGGTAATAAGGTGTGTATCAAACATTACAGGATTAATATTGACAAGAGAT  
GGTGGGAAACAGAATAATAATAGTAATAGTAATAGTAGTGATATTGAAGTCTTCAGACCTGGAGGAGGAGATA  
TGAGGGACAATTGGAGAAGTGAATTATATAAGTATAAAGTAGTAAAAATTGAACCACTAGGAATAGCACCTAC  
CAAGGCAAAAAGAAGAGTGGTGGAGAGAGAAAAAGAGCAATTGGAATAGGAGCTGTCCTCCTTGGGTTCTTA  
GGAACAGCAGGAAGCACTATGGGCGCGGCGTCAATAGCGCTGACGGTACAGGCCAGACAATTAATGTCTGGCA  
TAGTGCAACAGCAAAGCAATTTGCTGAGGGCTATAGAGGCTCAACAGCATATGTTGAAACTCACAGTCTGGGG  
CATT

>FJ623477

TTCTATTGTGATACATCAGGCCTGTTTAATAGCACCTGGAATAATAGCACCTGGAATAATAATGACACTGCCC  
AGTCAAATGACACAATAACTCTCCCATGCAGAATAAAACAAATTGTAAATATGTGGCAGAGAACAGAACAAGC  
AATGTATGCCCCCTCCCATCCAAGGAGTAATAAGGTGTGAATCAAACATCACAGGACTACTATTAACAAGAGAT  
GGTGGGATTAATAACACAAATGAAACCTTCAGACCTGGAGGAGGAGATATGAGGGACAATTGGAGAAGTGAAC  
TATATAAGTATAAAGTAGTAAAAATTGAACCACTGGGAGTAGCACCTCCAGGGCAAGGAGAAGAGTGGTGGG  
GAGAGAAAAAGAGCAGTTGGAATAGGAGCTTTATTCTTGGATTCTTGGGCGCAGCAGGAAGCACTATGGGC  
GCGGCGTCAATGACGCTGACGGTACAGGCCAGACAATTATTGTCTGGCATAGTGCAACAGCAAAGCAATTTGC  
TGAAGGCTATAGAGGCTCAACAACATCTGTTGAGACTCACGGTCTGGGGCATT

>FJ623486

TTCTATTGTAATACATCAGAACTATTTAATAGCACTTGAATCTTAATAGCACTTGAATCACACTGGCAGCA  
TACCGGAGTCAAATAGCACGGAGTCAAATGGCACTATAACCTCAAATGCAGAATAAAGCAAATTATAAATAT  
GTGGCAGAGAGTAGGGCAAGCAATGTATGCCCCCTCCCATCAAAGGGACAATAAGGTGTAAATCAAACATCACA  
GGACTAATATTAACAAGAGATGGTGGGGATAATAACAGTACAAAGGAAACCTTCAGGCCTGGAGGAGGAGATA  
TGAGGGACAATTGGAGAAGTGAATTATATCAGTATAAAGTAGTAAACTTGAACCACTAGGAGTAGCACCCAC  
CAGGGCAAGGAGAAGAGTGGTGGGGAGAAAAAAGAGCAGTTGGACTAGGAGCTGTTTTTCATTGGGTTCTTG  
GGAGCAGCAGGAAGCACTATGGGCGCGGCGTCAATGACGCTGACGGTACAAGCTAGACAATTATTGTCTGGCA  
TAGTGCAACAGCAAAGCAATTTGCTGAGGGCTATAGAGGCTCAACAACATCTGTTGAAACTCACGGTCTGGGG  
CATT

>FJ623479

TTCTATTGTAATACATCAGACCTGTTTAATGGTACTTGAATAATAGCACTTTGAATGGCACTGCCAAGCAGG  
AGGTAAATGACAGCACTATAACGATCTCATGCAGGATAAAGCAATTTATAAATATGTGGCAGAGAACAGGACG  
AGCAATGTATGCCCCCTCCCATTCAGGAGTAATAAGTTGTAACCAAGCATTACAGGATTAATATTAACAAGA  
GATGGTGGGGATGATAACAATAATAATGAAACATTTCAGACCTGGAGGAGGAGATATGAGGGACAATTGGAGAA  
GTGAATTATATAAGTATAAAGTAGTAAAAATTGAACCACTAGGAGTAGCACCCACCAAGGCAAGGAGAAGAGT  
GGTGGAGAGAGAAAAAGAGCAGTTGGAATAGGAGCTGTACTCCTTGGGTTCTTAGGAGCAGCAGGAAGCACT  
ATGGGCGCGGCGTCAATAACGCTGACGGTACAGGCCAGACAATTATTGTCTGGCATAGTGCAACAGCAAAGCA  
ATTTGCTGAAGGCTATAGAGGCTCAACAACAACCTGTTGAAACTCACAGTCTGGGGCATT

>HM215275

TTCTATTGTAATACATCAGGTCTGTTCAATAGCACTTGGGAGGCCAATAGTACTGCCAATACCAGCACGACAA  
ATATAACTCTCCCATGCAAAATAAAGCAACTTGTAAGAATGTGGCAGAGGACAGGACAAGCATTGTATGCCCC  
TCCCATCGAAGGAGTAATAAAATGTGTATCAAACATTACAGGACTAATATTAACAAGAGATGGTGGGGTAAT  
AACAGTGCAACAAATGAAACCTTCAGACCTGGAGGAGGAGATATGAGGGACAATTGGAGAAGTGAATTATATA  
AGTATAAAGTAGTACAAATTGAACCACTAGGAGTTGCACCCACCGAGGCAAGGAGAAGAGTGGTGAAGAGAGA  
AAAAAGAGCAGTTCTTGACTGTTTTCTTGGGTTCTTAGCAGCAGCAGGAAGCACTATGGGCGCGGCGTCA  
ATAACGCTGACGGTACAGGCCAGACAATTATTGTCTGGCATAGTGCAACAGCAAAGCAATTTGCTGAGGGCTA  
TAGAGGCTCAACAGCATCTGTTGAAACTCACGGTCTGGGGCATT

>KT252544

TTCTATTGTAACACATCAGGCCTGTTTAATAGTACTTGGGATGGGAATAGCACTGAGGCAAACATTACGCAGT  
CAAATGAGACTATAACTCTCCCATGCAAAATAAAGCAAATTGTAAATATGTGGCAGAGAGTGGGACGAGCAAT  
GTATGCCCCCTCCTATCCAGGAGTAATAAAGTGTGAATCAAACATTACAGGGCTAATACTGACAAGAGATGGT  
GGGAATGAAACAAATGGAACAGAAATCTTCAGACCTGTAGGAGGAGACATGAGGGACAATTGGAGAAGTGAAT  
TATATAAGTATAAAGTAGTACAAATTAAACCACTAGGAGTAGCACCCACCAAGGCAAAGAGAAGAGTGGTGCA  
GAGAGAAAAAGAGCAGTTGGAATGGGAGCTGTTTTCTTGGGTTCTTAGGAGCAGCTGGAAGCACTATGGGC  
GCGGCGTCAATAACGCTGACGGTACAGGCCAGACAATTATTGACTGGCATAGTGCAACAGCAAAGCAATTTGC  
TGAGGGCTATAGAGGCTCAACAGCATCTGTTGAAACTCACTGTCTGGGGCATT

>HQ540689

TTCTACTGTAATACAACAAACCTGTTTAAATAGTAGCATTCCCTTCAACGCCAGCGAGAGGGCAAATAACACCA  
ATAGCACAGATGACATTATAACTCTCCAATGCAGAATAAAGCAAATTGTAAGGATGTGGCAAAGAGTAGGACA  
AGCAATGTATGCCCCCTCCCATCCCAGGAGTAATAAGGTGTGAATCAAACATTACAGGACTTATGTTAACATGG  
GATGGTGGGAGTAAAAATATTACTGAGGGCAATAGAACTGAAACCTTTAGACCTGGAGGAGGAGACATGAGGG  
ACAATTGGAGAAGTGAATTATATAAATATAAAGTAGTAAAAATTGAACCACTAGGAGTTGCACCCACCAAGGC  
AAGGAGAAGAGTGGTGGGAAGAGAAAAAGAGCAGTTGGAATAGGAGCTGTTTTCTTGGGTTCTTAGGAGCA  
GCAGGAAGCACTATGGGCGCGGCGTCAGTGACGCTGACGGTACAGGCCAGACAATTATTGTCTGGTATAGTGC  
AACAGCAAAGCAATTTGCTGAGAGCTATAGAGGCTCAACAACAGTTGTTGAAACTCACGGTCTGGGGCATT

>KU921708

TTCTATTGTAATACAGTAAATCTGTTCAATAGCTCTTGGGGTGCCAACGCCACTGAGTCAAATAGCACAGGGT  
TAAATAATCAAACCTATACATCTCCCATGCAGAATAAAGCAAATTATAAATATGTGGCAGAGAACAGGACAAGC  
AATGTATGCCCCCTCCCGTCGAAGGAATAATAAGTTGTGTATCAGACATTACAGGACTACTGTTAAACAAGAGAC  
GGAGGAGAAAAATACAACACATGAAATTTTCAGACCTGGAGGAGGAGATATGAGGGACAATTGGAGAAGTGAAT  
TATATAAGTATAAAGTAGTAAAAATTGAACCCCTAGGAGTAGCACCCACCAAGGCAAGGAGAAGAGTGGTGCA  
GAGAGAAAAAAGAGCAGTTGGAATGGGAGCTGTCTTCTTGGGTTCTTAGGAGCAGCAGGAAGCACTATGGGC  
GCAGCGTCAATAACGCTGACGGTACAGGCCAGACAATTATTGTCTGGTATAGTGCAACAGCAAAGCAATTTGC  
TGAGGGCTATAGAGGCTCAACAGCATCTGTTGAAACTCACTGTCTGGGGCATT

>KU921712

TTCTATTGTAATACATCAAAGCTGTCTAACAGCACATTTCCACTTAATAACACTCAGAATAACAGCACGCAGA  
CAAACAGTACTATAACTCTCCCATGCAGAATAAAGCAAATTATAAATATGTGGCAGAGAACAGGAAAAGCAAT  
ATATGCCCCCTCCCATCTCAGGACCAATAAAGTGTACATCAAACATTACAGGACTAATATTAACAAGAGATGGT  
GGAAATGATAATAATAATGATACCAATGGAAATGAAACCTTCAGACCTGGAGGAGGAGATATGAGGGACAATT  
GGAGAAGTGAATTATATAAGTATAAAGTAGTAAAACTTGAACCACTAGGAGTAGCACCCACCAGGGCAAGAAG  
AAGAGTGGTGCAGAGAGAGAAAAAGAGCAATTGGACTGGGAGCTGTATTCAATTGGGTTCTTAGGAGCAGCAGGG  
AGCACTATGGGCGCGGCGTCAGTGACGCTGACGGTACAGGCCAGAGCCTTATTGTCTGGCATAGTGCAACAGC  
AAAGCAATTTGCTGAGGGCTATAGAAGCTCAACAACATCTGTTGAAGCTCACGGTCTGGGGCATT

>KU921727

TTCTATTGTGACACATCAAGCCTGTTTAAATAGCACTTGGAATGAGAATGACAATGTCAGCAGAACAGAGTCAA  
ATAGTACAGAAGATATAACTCTCCAATGCAGAATAAAGCAAATTGTAAATATGTGGCAGAGAGTAGGACAAGC  
GATGTATGCCCCCTCCCATCCAAGGAATAATAAAGTGTGAATCAAACATAACAGGACTAATATTAACAAGAGAT  
GGTGGGAATCATAATAGTACAAATGAAACCTCCAGAAATGAAACCTTCAGACCTGGAGGAGGAGATATGAGGG  
ACAATTGGAGAAGTGAATTATATAAGTATAAAGTAGTAAAAATTGAACCTCTAGGAGTAGCACCCACCAAGGC  
AAAGAGAAGAGTGGTGGAGAGAGAAAAAGAGCAGTTGGAATAGGAGCTGTCTTCTTGGATTCTTGGGAGCA  
GCAGGAAGCACTATGGGCGCGGCGTCAATAACGCTGACGGCACAGGCCAGACAATTATTGTCTGGTATAGTGC  
AACAGCAAAGCAATTTGCTGAGGGCTATAGAGGCTCAACAGCATCTGTTGAGACTCACAGTCTGGGGCATT

>KU921732

TTCTATTGTAATACATCAGGCCTTTTTGATGACACTTGGAATGGCACGAAGTCAAATGACACTATAAACTCC  
CATGCAGAATAAAGCAAGTTATAAATATGTGGCAGAGGACAGGACAAGCAATGTATGCCCCCTCCCATCCAAGG  
AGTAATAAGGTGCGAATCAAACATCACAGGACTAATATTAACAAGAGATGGTGGGCATAACATTACAAATGAA  
ACCTTCAGACCTACAGGAGGAAATATGAGGGACAATTGGAGAAGTGAATTATATAAGTATAAAGTAGTAAGAA  
TTGAACCACTAGGAGTAGCACCCACCTCGGCAAAGAGAAGAGTGGTGGAGAGAGAAAAAGAGCAGTAGTTGG  
AATGGGAGCTGTCTTCATTGGGTTCTTGGGAGCAGCAGGAAGCACTATGGGCGCGGCGTCAATGACGCTGACG  
GTACAGGCCAGACAATTATTGTCTGGCATAGTGCAACAGCAAAGCAATTTGCTGAGGGCTATAGAGGCTCAAC  
AGCATTTGTTGAAGCTCACGGTCTGGGGCATT

>KU921734

TTCTATTGTAACACATCAGGTCTGTTTAAATAGCACGTGGAATAAGGATAATAACACCTTGAATGGCGCTGTAA  
ATAACATAACAGACAATATAACCTCCAATGCAGAATAAAGCAAATTATAAATATGTGGCAGAGAGCAGGACA  
AGCAATATATGCTCCTCCCATCCCAGGAGTAATAAGGTGCACCTCAAATATTACAGGATTAATATTAACAAGA  
GATGGTGGGAAAGATAGCAATGAAAGTGCTGAAACCTTCAGACCTGGAGGAGGAGATATGGGGGACAACCTGGA  
GAAGTGAATTATATAAGTATAAAGTAGTAAAAATTGAACCACTAGGAATAGCACCCACAGGGCAAGAGAGAAG  
AGTGGTGGAGAGAGAAAAAGAGCAATCTTGGGACTGGGAGCTGTTTTCGTTGGGTTCTTAGGAGCAGCAGGA  
AGCACTATGGGCGCGGCGTCACTGACGCTGACGGTACAGGCCAGAACTTATTGTCTGGCATAGTGCAACAGC  
AAAACAATTTGCTGAAGGCTATAGAGGCTCAACAGCATCTGTTGAAACTCACGGTCTGGGGCATT

>KU921738

TTCTATTGTAACACATCAGAGCTGTTTAAATAGCACTTGGAATAGGACTGACCCTGGCACTTGGAATAACACCA  
GCACGCAGGAGTCAAATAGCACAGATCAAAAAATAACTCTCCAATGCAGCATAAAGCAAATTATAAATATGTG  
GCAAAGGTAGGACGAGCAATGTATGCCCCCTCCCATCCCAGGACCAATACAGTGTAGATCAAACATTACAGGA  
CTAATATTAGTGAGAGATGGTGGGAATACGAATACTAGCAAGGAAACCTTTAGACCTGCAGGAGGGGATATGA  
GGGACAATTGGAGAAGTGAATTATATAAATATAAAGTAGTAAAAATTGAACCACTAGGAGTAGCACCCACCAA  
GGCAAAGAGAAGAGTGGTGGAGAGAGGAAAAAGAGCAGTTGGACTAGGAGCTGTCTTCATTGGGTTCTTAGGA

GCAGCAGGAAGCACTATGGGCGCAGCGTCAATAACGCTGACGGTACAGGTCAGACAATTATTGTCTGGCATAG  
TGCGACAGCAAAGCAATTTGCTGAGGGCTATAGAAGCTCAACAACATCTGTTGAAACTCACGGTCTGGGGCAT  
T

>KU921746

TTCTATTGTAACACATCAGGTCTGTTCAACAGCACTTGGGATGATACCGCCATACAGGAAAATATCACGGAGA  
TCACGGAGTCAAATGACACAATAACTCTCCAATGCAGAATAAGGCAATTTATAAGGATGTGGCAGAGGACAGG  
ACAGGCAATGTATGCCCCCTCCCATACCAGGAGTAATAAGGTGTGAATCAAACATTACAGGACTAATATTAACA  
AGAGATGGTGGGCATAGTAATAGTACTAGTAATGAAACCTTCAGACCTGGAGGAGGAGATATGAGGGACAATT  
GGAGAAGTGAATTATATAAGTATAAAGTAGTAAAAATTGAACCACTAGGAGTAGCACCCCTCCAGGGCAAGGAG  
AAGAGTGGTGGGAAGAGAAAAAAGAGCAGTTACAATAGGAGCCGTCTTCCTTGGGTTCTTAGGAGCAGCCGGA  
AGCACTATGGGCGCGGCGTCAATAACGCTGACGGTACAGGCCAGGCAATTATTGTCTGGTATAGTGCAACAGC  
AAAGCAATTTGCTGAAGGCTATAGAGGCTCAACAACATCTGTTGAGACTCACGGTCTGGGGCATT

>KU921752

TTCTATTGTAACACATCAGGCCTGTTTAATAGCACTTGGAAATGACACCAGCAATGGGAATGACACCAACATAT  
CAAATAGCACGGAGAAGAATGAGAATATAACTCTCCAATGCAGAATAAAGCAAATTATAAATATGTGGCAAAG  
AGTAGGAAAAGCAATGTATGCTCCTCCCATCCCAGGAATAATAAATGTGAATCAAACATTACAGGACTAATA  
TTAACAAGAGATGGGGGAAAAGGAGGAAAACGAAAGTGAAACCTTCAGACCTGGAGGAGGAGATATGAGGGACA  
ATTGGAGAAGTGAATTATATAAGTATAAAGTAGTAAAAATTGAACCACTAGGAGTAGCACCCACCAGGGCAAG  
GAGAAGAGTGGTGGAGAGAGAAAAAAGAGCAGTTGGAATGGGAGCTTTGTTTCATTGGGTTCTTAGGAGCAGCT  
GGAAGCACTATGGGCGCGGCGTCGATGACGCTGACGGTACAGGCTAGACAACATATTGTCTGGCATAGTGCAAC  
AGCAAAGCAATTTGCTGAGGGCTATAGAGGCTCAACAGCATCTGTTGAAACTCACAGTCTGGGGCATT

>KU921756

TTCTATTGTAACACATCAAACCTGTTTAATAGTACTTGGCTTAACAATGGCACATTAGGTAGTGACAATGGCA  
TATCAGATAGTAAAAACATAACTCTCCCATGCAAAATAAGGCAAATTATCAGAATGTGGCAGAGAGTAGGACA  
AGCAATATATGCCCCCTCCCATCCAAGGAGTAATAAGGTGTAAATCAGACATTACAGGACTAATATTAACAAGA  
GATGGTGGAGTTAATAACAATATAACTGAAACCTTCAGACCTGGAGGAGGAGATATGAGGGACAATTGGAGAA  
GTGAGTTATATAAATATAAAGTAGTAAAAATTGAACCACTAGGAGTAGCACCCACCAGGGCAAGGAGAAGAGT  
GGTGGGGAGAGAAAAAAGAGCAGTTGGAGTAGGAGCTGTATTCCTTGGGTTCTTAGGAGCAGCAGGAAGCACT  
ATGGGCGCGGCGTCAATAACGCTGACGGTACAGGCCAGACAATTATTGTCTGGCATAGTGCAACAGCAAAGCA  
ATTTGCTAAGGGCTATAGAGGCTCAACAGCATCTGTTGAAACTCACAGTCTGGGGCATT

>KU921759

TTCTATTGCAGTACAAAAGGCCTGTTTAATAGCACTTGGAAATGCTAATGGCACCAAGGAATGACTTAGGGAGCT  
CGGAATCAGATGGCACTATAACTCTCCAGTGCAGAATAAAACAAATTATAAATATGTGGCAGAGAACAGGACA  
AGCAATGTATGCCCCCTCCCATCGCAGGAGTAATAAGGTGTAAATCAACCATTACAGGACTACTATTAACAAGA  
GATGGTGGGAACAATAGTACAAGTGAACTGAAACCTTTAGACCTGGAGGAGGAGATATGAGGGACAATTGGA  
GAAGTGAATTATATAAGTATAAAGTAGTAAAAATTGAACCAATTAGGAGTAGCACCCACCAGGGCGCGGAGAAG  
AGCGGTGGGGAGAGAAAAAAGAGCAGTTGGACTGGGAGCTGTTTTCTTGGGTTCTTAGGAGCAGCAGGAAGC  
ACTATGGGCGCGGCGGCGAGTGACGCTGACGGTACAGGCCAGACAATTATTGTCTGGCATAGTGCAACAGCAAA  
GCAATTTGCTGAGAGCTATAGAGGCTCAACAACATCTGTTGAAACTCACTGTCTGGGGCATT

>KU921772

TTCTATTGTAACACATCAGGCTTGTTTAATAGCAGTTGGAATAGCACCAAGGAGCTAAATAGCACCAACA  
GGGAGCTAAATAACATGACTGTAACCTCTCCAATGTAGAATAAAACAAATTATAAATATGTGGCAGAGAGTGGG  
ACAAGCAATGTATGCCCCCTCCCATCCCAGGAGTAATAAAGTGTGTATCAAACATTACAGGATTAATATTAACA  
AGGGATGGTGGGCTTAATCCTACAGAGAACGAAACCGAAACCTTCAGACCTGGAGGAGGAGATATGAGAGACA  
ATTGGAGAAGTGAATTATATATGTATAAAGTAGTAAAAATTGAACCACTAGGAGTAGCACCCACCAGGGCAAA  
GAGAAGAGTGGTGGAGAGAGAAAAAAGAGCAGTTGGAATAGGAGCTGTTTTCTTGGGTTCTTGGGAGCAGCA  
GGAAGCACTATGGGCGCGGCGTCAATAACGCTGACGGTACAAGCCAGACAATTATTGTCTGGCATAGTGCAAC  
AGCAAAGCAATTTGCTGAGGGCTATAGAGGCTCAACAACATCTGTTGAAACTCACAGTCTGGGGCATT

>KU921780

TTCTATTGTAATAACATCAGGCTTATTTAATGGCACTTGGACCAATGCTAGCATACAAGAAAATAGCACGGAGT  
CAAATATAACTCTCCAATGCAGAATAAAACAAATTATAAATATGTGGCAGACAGTAGGACGAGCAATGTATGC  
TCCTCCCATTTGAAGGAGCAATAAGGTGTGTATCAAACATTACAGGACTAATATTAACCAGAGATGGTGGGGAT  
AACACAACCTACAACCTGAAATCTTCAGACCTGGAGGAGGAAATATGAAGGACAATTGGAGAAGTGAATTATATA  
AGTATAAAGTAGTAAAAATTGAACCAATTAGGAGTAGCACCCACCAAGGCAAAGAGAAGAGTGGTGGAGAGAGA  
AAAAAGAGCAGTTGGACTGGGAGCTGTCTTCCTTGGGTTCTTAGGAGCAGCAGGAAGCACTATGGGCGCGGCG  
TCAGTAACGCTGACGGTACAGGCCAGACAATTATTGTCTGGCATAGTGCAACAGCAAAACAATTTGCTGAGGG  
CTATCGAGGCTCAACAACATCTGTTGAAACTCACGGTCTGGGGCATT

>KU921783

TTCTATTGTAATACAACAGGCCTGTTTAATAGCACTTGGGGGAATGGCACTTGGAAATGCCAGCAGCCAGGGGG  
AGTCAAATGACACTATACTCCTCCAATGCAAAATAAAGCAAATTATAAATATGTGGCAGAGAGTAGGACAAGC

AATGTATGCTCCTCCCATCCCAGGAGTAATAAGGTGTGAATCAAACATTACAGGACTAATATTAACAAGAGAT  
GGTGGGGGGGATGACAATGGAACCGAAACCTTCAGACCTGGAGGAGGAGATATGAGGGATAATTGGAGAAGTG  
AATTATATAAGTATAAAGTAGTAAAAATTGAACCACTAGGAGTAGCACCCACCAGGGCAAGGAGAAGAGTGGT  
GGAGAGAGAGAAAAGAGCAGTTACAATAGGAGCTGTTTTTCTTGGGTTCTTAGGAACAGCAGGAAGCACTATG  
GGCGCGGCGTCAATAGCGCTGACGGCACAGGCTAGACAATTATTGTCTGGCATAGTGCAACAGCAAAGCAATT  
TGCTGAGGGCTATAGAGGCTCAACAACATATGTTGAGACTCACGGTCTGGGGCATT

>KU921785

TTCTATTGTAACACATCAGACCTGTTTAAATAGCACTTGGTATGGCAATAACACCATGCAGGGATTAAATGGCA  
CAAATGACACTATAATTCTCAAATGCAGAATAAAGCAAATTATAAATATGTGGCAGAGAACAGGACAAGCAAT  
ATATGCCCTCCCATCCCAGGAGTAATAGAGTGTGTATCAAACATAACAGGACTAATATTGACAAGAGATGGT  
GGGGGTAGTGAGAGCAGGACAGAGGAAACATTTAGACCTGGAGGAGGAGATACGAGGGACAATTGGAGAAGTG  
AATTATATAAGTATAAAGTAGTAAAAATTGAACCACTAGGAGTAGCACCCACCAGGGCAAAAAGAAGAGTGGT  
GGAGAGAGAAAAAGAGCAATTGGAATAGGAGCTGTCTTCATTGGGTTCTTAGGAGCAGCAGGAAGCACTATG  
GGCGCGGCGTCAATAACGCTGACGGTACAGGCCAGACAATTATTGTCTGGTATAGTGCAACAGCAAAGCAATT  
TGCTGAGGGCTATAGAGGCTCAACAGCATCTGTTGAAACTCACAGTCTGGGGCATT

>KU921788

TTCTATTGTGATACATCAAGCCTGTTTAAACAGCACTTGGGAACCAAACAATGTTAGTAGCAATTTAAATGGCA  
CTATAACTCTCCAATGCAGAATAAAGCAAAGTCATAAATATGTGGCAGAGAGTAGGACAAGCAATGTATGCCCC  
TCCCATCCCAGGAAACATAACATGTAGATCAAACATTACAGGAATAATATTAACAAAAGATAAGGATGGTATA  
AATAATTCAGATGAAACCTTGAGGCCAGGAGGAGGAGATATGAGGGACAATTGGAGAAGTGAATTATATAAGT  
ATAAAGTGGTAAAAATTGAACCACTAGGAGTAGCACCCACCAAGGCAAGGAGAAGAGTGGTGGAGAGAGAAAA  
AAGAGCAGTTGGACTAGGAGCTGTTTTCTTGGGTTCTTAGGAGCAGCAGGAAGCACTATGGGCGCAGCGCCA  
ATAACGCTGACGGTACAGGCCAGACAATTGTTGTCTGGCATAGTGCAACAGCAAAGCAATTTGCTGAGGGCTA  
TAGAGGCTCAACAACAGCTGTTGAAGCTCACGGTCTGGGGCATT

>KU921804

TTCTATTGTGATACATCAAGCCTGTTTACTGGTACTTGGGAATGGTACTACTTGGATGAATAGCACTGACACTG  
AAAATATAACTCTTCCATGCAGAATAAAGCAAATTATAAATATGTGGCAGAGGGTAGGGAGAGCAATGTATGC  
CCCTCCCATCCAAGGAAAAATAAATTGTACATCAAACATTACAGGACTACTATTAACAAGAGATGGTGGGAAA  
ACTAATAATTCATCTGAAACCTTCAGACCAGGAGGAGGAGATATGAGGGACAATTGGAGAAGTGAATTATATA  
AGTATAAAGTAGTAAAGATTGAACCACTAGGAGTAGCACCCACCAGGGCAAGAAGGAGAGTGGTGGAAAGAGA  
AAAAAGAGCAGTTGGACTGGGAGCTGTATTTCATTGGGTTCTTGGGAGCAGCAGGGAGCACTATGGGCGCGGCG  
TCAGTGACGCTGACGGTACAGGCCAGACGATTACTATCTGGCATAGTGACAGCAGCAAAGCAATTTGCTGAGGG  
CTATAGAGGCTCAACAGCATCTGTTGAAACTCACGGTCTGGGGCATC

>KU921831

TTCTATTGTAATACATCACGCCTGTTTGTAGTTACAGGTGCACGTTGAAAATGAGACTAATACTTACACCTGCA  
CTAACACCATGCATGAGTTCAATAGCACGGCAAATATAACTCTCCAATGCAGACTAAAGCAGATCATAAGGAT  
GTGGCAGAGGACAGGACAAGCAATGTATGCCCCCTCCCATCCCAGGGCAAATAATGTGTAGATCAAACATTACA  
GGGTAAATATTAACAAGAGATGGTGGGGTTGATAACAATACAGATGCTACCGAAATCTTCAGACCTGGAGGAG  
GAGATATGAAGGACAATTGGAGAAGTGAATTATATAAGTATAAAGTAGTAAAAATTGAACCACTAGGAGTAGC  
ACCCACCAGGGCAAGGAGAAGAGTGGTGGGGAGAGAAAAAGAGCAGTTGGACTGGGAGCTGTTTTTCATTGGG  
TTCTTAGGAGCAGCAGGAAGCACTATGGGCGCGGCGTCAGTGACGCTGACGGTACAGGCCAGACAATTATTGT  
CTGGTATAGTGCAACAGCAAAGCAATTTGCTGAAGGCTATTGAGGCTCAACAACATCTGTTGAGGCTCACGGT  
CTGGGGCATT

>KU921835

TTCTATTGTAACACATCAGAACTGTTTAAATAGCACTTGGAGTTGGAATAACACTTGGGAATAACACTCATGAGC  
CAAATGGCACTATAACTCTCCAATGCAGAATAAAGCAAATTATAAATATGTGGCAGAGAGTAGGACAAGCAAT  
GTATGCCCCCTCCCATACAAGGAGAAATAAAGTGTGAATCAAACATCACAGGACTAATATTAACAAGAGATGGT  
ATGGGTAAACAATGTATCAAATGAAACCTTCAGACCTGGAGGAGGAGATATGAGGGACAACCTGGAGAAGTGAGT  
TATATAAATATAAAGTAGTAAAAATTGAACCACTAGGAGTAGCACCCACTGGGGCAAGGAGAAGGGTGGTGCA  
GAGAGAAAAGAGAGCGTTGGAATAGGAGCTGTCTTCTTGGGTTCTTAGGAGCAGCAGGAAGCACTATGGGC  
GCAGCGTCATTAACGCTGACGGTACAGGCCAGACAATTACTGTCTGGCATAGTGACAGCAGCAAAGCAATTTGC  
TGAGGGCTATAGAGGCTCAACAACATATGTTGAAACTCACGGTCTGGGGCATT

>KU921841

TTCTATTGCAACACATCAGGCCTGTTTAAATAGCACTGACATGAGTTCAAATAACACAGAGTTAAATGACACTA  
TAAGACTCCCATGCAGAATAAAACAAATTATACGTATGTGGCAGAAAGTAGGACAAGCAATGTATGCCCCCTCC  
CATTCAAGGAGTGATAAGATGTAGCTCAAACATTACAGGAATACTATTAACAAGAGATGGTGGGATAGAAAAAT  
GAAACAGAAATCTTCAGACCTGGAGGAGGAAACATGAAGGACAATTGGAGAAGTGAATTATATAAGTATAAAG  
TAGTAAAAATTGAACCACTAGGAGTAGCACCCACCTCGGCAAGGAGAAGAGTGGTGGAGAGAGAAAAAGAGC  
AGTTGGACTGGGAGCTGTATTTCATTGGGTTCTTAGGAGCAGCAGGAAGCACTATGGGCGCGGCGTCAATGACG

CTGACGGTACAAGCCAGACAATTATTGTCTGGCATAGTGCAACAGCAAAGCAATTTGCTGAGGGCTATAGAGG  
CTCAACAGCATCTGTTGAAACTCACGGTCTGGGGCATC

>KU921852

TTCTATTGTAATACATCAGGCTTGTTTAATAGCACTTGGAATGACACTGTCATGTTTAATAGCACTGGGAATG  
ACACTGTGCGGCAGGGAGTCAAATGAACTATAACACTCCAATGCAGGATAAAAACAAATTATAAATATGTGGCA  
GAGAACAGGACAAGCAATATATGCCCCCTCTATCCCAGGAGTAATAAGGTGTGTATCAAACATTACAGGACTA  
ATATTAACAAGAGATGGTGGGAATACGGCAGGGACAGGTTCTGAAACCTTCAGACCTGGAGGAGGAGATATGA  
GGGACAATTGGAGAAGTGAATTATATAAGTATAAAGTAGTAAAAGTTGAACCACTAGGAGTAGCACCCACCAG  
GGCACAGAGAAGAGTGGTGCAGAGGGAAAAAAGAGCAGTTGGAATAGGAGCTGTCTTCATTGGGTTCTTAGGA  
GCAGCAGGAAGCACTATGGGCGCGCGTCAATAACGCTGACGGCACAGGCCAGACAATTATTGTCTGGTATAG  
TGCAACAGCAAAGCAATTTGCTGAGGGCTATAGAGGCTCAACAGCATCTGTTGAAACTCACAGTCTGGGGCAT  
C

>KF716474

TTCTATTGTGACACATCAGGCCTGTTTAATAGCACTTGGAATGGTACGGCCAGCAATGTCAGCATACCTGACA  
CGGTGACAAATGGCACTATAACACTCCCATGCAAAATAAAGCAAATTATAAATATGTGGCAGAGAGTAGGACA  
AGCAATGTATGCCCCCTCCCATTCAGGAGTAATAAGGTGTGATTCAAACATTACAGGGATGATATTAACAAGA  
GATGGTGGTGATAACAGGACAGAAACCTTCAGACCTGGAGGAGGAGATATGAGGGACAATTGGAGAAGTGAAT  
TATATAAATATAAAGTAGTAAAAGTTGAACCACTAGGAGTAGCACCTACCAGGGCAAGAAGAAGAGTGGTGGGA  
GAGAGAAAAAAGAGCAGTAGGAATAGGAGCTGTTTTCTTGGGTTCTTAGGAGCAGCAGGAAGCACTATGGGC  
GCAGCGTCAATAACGCTGACGGTACAGGCCAGACAATTATTGTCTGGTATAGTGCAACAGCAAAGTAATTTGC  
TGAGGGCTATAGAGGCTCAACAACAGCTGTTGAAACTCACAGTCTGGGGCATT

>KF716475

TTCTACTGTAATACATCAGGCCTGTTTAATAGCACTTGGTCCCTTAACAACACTTGGTCCCTTAACAGCACGC  
AGTCAAATGACACAGGGATAAAATGATACCATAACTCTCCCATGCAGAATAAAGCAAATTATAAATATGTGGCA  
GAGAGTAGGACAAGCAATGTATGCCCCCTCCCATCCAAGGAGTAATACAGTGTGTATCAAACATTACAGGACTA  
CTGTTAACAAGAGATGGGGGGAATGTGAATAGCAGTAATGGCAATGAAATCTTCAGACCTGGAGGAGGAGATA  
TGAGGGACAATTGGAGAAGTGAATTATATAAGTATAAAGTAGTAAAAATTGAACCACTAGGAGTAGCACCCAC  
CAGGGCAAAGAGAAGAGTGGTGGGGAGAGAAAAAAGAGCAATTGGTGGGCTAGGAGCTGTTTTCTTGGGTTCT  
TTAGGAATGGCAGGAAGCACTATGGGCGCGCGTCAATGACGCTGACGGTACAGGCCAGAACTTATTGTCTG  
GCATAGTGCAACAGCAAAGCAATTTGCTGAGGGCTATAGAGGCTCAACAACATCTGTTGAAACTCACAGTCTG  
GGGCATT

>AY322184

TTCTATTGTAACACATCAGATCTGTTTAATGAGTCAAATAGTACGGAGTTAAACGACACTATAACTCTCCAAT  
GCAGAATAAAGCAAATTATAAATATGTGGCAGAGAGCAGGACAAGCAATATATGCCCCCTCCCATCCCAGGAGT  
AATAAGGTGTGTATCAAACATTACAGGACTATTGTTAACAAGGGATGGTGGGATTAATACCAGTACAAGTGAA  
ACCTTCAGACCTGGAGGAGGAGATATGAGGGACAATTGGAGAAGTGAATTATATAGGTATAAAGTAGTAAAAA  
TTGAACCACTAGGAGTAGCACCCACCAGGGCAAAGAGAAGAGTGGTGGAGAGAGAAAAAAGAGCAGTTGGAAT  
AGGAGCTGTTTTCTTGGGTTCTTAGGAGCAGCAGGAAGCACTATGGGCGCGGCGTCAATAACGCTGACGGTA  
CAGGCCAGACAATTATTGTCTGGCATAGTGCAACAGCAAAGCAATTTGCTGAGGGCTATAGAGGCTCAACAAC  
ATCTGTTGAAACTCACGGTCTGGGGCATT

>AF539405

TTCTATTGTAACACATCAGGCCTGTTTAATAGCACTTGGAATGGCAGTGAGGCAAATAGCACGCCACACGAGA  
ATATAACTCTCCAATGCAGAATAAAGCAAATTATAAATATGTGGCAGAGAGCAGGACAAGCAATATATGCCCC  
TCCCATCCCAGGAGTAATAAAATGTAATTCAAACATTACAGGACTAATATTAAACAAGAGATGGTGGGGTTAAT  
AGCAGTGCAAATGAAACCTTCAGACCTGGAGGAGGAGATATGAGGGACAATTGGAGAAGTGAATTATATAAGT  
ATAAAGTAGTAAAAATTGAACCACTAGGAGTAGCACCCACCAGGGCAAAGAGAAGAGTGGTGGAGAGAGAAAA  
AAGAGCAGTTGGAATAGGAGCTGTCTTCATTGGGTTCTTAGGAGCAGCAGGAAGCACTATGGGCGCGGCGTCA  
ATAACGCTGACGGTACAGGCCAGACAATTATTGTCTGGCATAGTGCAACAGCAAAGCAATTTGCTGAGGGCTA  
TAGAGGCTCAACAACATCTGTTGAAACTCACGGTCTGGGGCATT

>L22943

TTCTATTGTAATTCATCAGGCCTGTTTAATAGCACTTGGAATGGCAGTGAGGCAAATAGCACGGAGTCAA  
ATGACACTATAACTCTCCCATGCAGAATAAAATATAAATATGTGGCAGAGAGCAGGACAAGCAATGTATGC  
CCCTCCCATCCAAGGAATAATAAAGTGTGTATCAAACATTACAGGACTAATATTAAACAAGAGATGGTGGGGAT  
AATAACAGTGAAAGTGAAACCTTCAGACCTGGAGGAGGAGATATGAGGGACAATTGGAGAAGTGAATTATATA  
AGTATAAAGTAGTAAAAATTGAACCACTAGGAGTAGCACCCACCAAGGCAAAGAGAAGAGTGGTGGAGAGAGA  
AAAAAGAGCAGTTGGAATAGGAGCTGTCTTCCTTGGGTTCTTAGGAGCAGCAGGAAGCACTATGGGCGCGGCG  
TCAATAACGCTGACGGTACAGGCCAGACAATTATTGTCTGGCATAGTGCAACAGCAAAGCAATTTGCTGAGGG  
CTATAGAGGCTCAACAACATCTGTTGAAACTCACGGTCTGGGGCATT

>KX168075

TTCTATTGTAACACATCAGGCCTGTTTAAATAGCACTTGGGAGTTTAAATAGCACTTGGGAGTTTAAATAGCACTT  
GGGAGTTTAAATAGCACTTGGAAATAATTCAAATAGCACAGAGAATAAATACTCTCCAATGCAGAATAAAGCAAAT  
TGTAATATATGTGGCAAAGAGCAGGACAAGCAATATATGCCCCCTCCCATACCAGGAGTAATAAGGTGTGAATCA  
AATATTACAGGACTAATATTAACAAGAGATGGTGGGGATAATAATAGTACAAATAATACAAGTGAAACCTTCA  
GACCTGGAGGAGGAGATATGAGGGACAATTGGAGAAGTGAATTATATAAGTATAAAGTAGTAAAAATTGAACC  
AATAGGAGTAGCACCCACCAGGGCAAAAAGAAGAGTGGTGGAGAGAGAAAAAGAGCAGTTGGAATAGGAGCT  
GTCTTCATTGGGTTCTTAGGAGCAGCAGGAAGCACTATGGGCGCAGCGTCAGTAACGCTGACGGTACAGGCCA  
GACAGTTATTGTCTGGTATAGTGCAACAGCAAAGCAATTTGCTGAGGGCTATAGAGGCTCAACAGCATCTGTT  
GAAACTCACGGTCTGGGGCATT

>AF004885

TTCTATTGTAATACATCAGGCCTGTTTAAATAGCACTTGGTATGTTAAATAGCACTTGGAAATGACACTGACAGCA  
CTCAGGAGTCAAATGACACTATAACTCTCCCATGCAGAATAAAGCAAATTATAAATATGTGGCAGAGAGCAGG  
ACAAGCAATGTATGCCCCCTCCCATCCCAGGAGTAATAAAGTGTGAATCAAACATTACAGGACTACTATTAACA  
AGGGATGGTGGAAAGGATAACAATGTAAATGAAACCTTCAGACCTGGAGGAGGAGATATGAGGGACAATTGGA  
GAAGTGAATTATATAAGTATAAAGTAGTAGAAATTGAACCACTAGGAGTAGCACCTACCAGGGCAAAGAGAAG  
AGTGGTGGAGAGAGAAAAAGAGCAGTTGGAATAGGAGCTGTCTTCCTTGGGTTCTTAGGAGCAGCAGGAAGC  
ACTATGGGCGCAACGTCAATAACGCTGACGGTACAGGCCAGACAATTATTGTCTGGCATAGTGCAACAGCAAAA  
ACAATTTGCTGAGGGCTATAGAGGCTCAACAACATCTGTTGAAACTCACGGTCTGGGGCATT

>AF407151

TTCTATTGTAACACATCAGGCCTGTTTAAACAGAGCTTATGGCAATGTCAGCAAGCAAGAGCCAAATAGCTCCG  
GCAATATAACACTCCAATGCAGAATAAAGCAAAGTTATAAATATGTGGCAGAGAGCAGGACAAGCAATATATGC  
CCCTCCCATACAAGGAGTAATAAGATGTGACTCAAATATTACAGGACTAATATTAACAAGAGATGGTGGGAAA  
GATAGTAATATAACTGAAACATTCAGACCTGGAGGAGGAGATATGAGGGACAATTGGAGAAGTGAATTATATA  
AGTATAAAGTAGTAAAAATTGAACCACTAGGAGTAGCACCCACCAGGGCAAAGAGAAGAGTGGTGGAGAGAGA  
AAAAAGAGCAGTTGGAATAGGAGCTGTCTTCATTGGGTTCTTAGGAGCAGCAGGAAGCACTATGGGCGCGGCG  
TCAATAACGCTGACGGCACAGGCCAGAAAATTATTGTCTGGCATAGTGCAACAGCAAAGCAATTTGCTGAGGG  
CTATAGAGGCTCAACAACATCTGTTGAAACTCACGGTCTGGGGCATT

>AF407162

TTCTATTGCAATACAACAAACCTGTTTAAATAGCACTTGGAAATCACACTGCCAGCATGAATAGCACAGAGTCAA  
ATGACACTATAATTCTCCCATGCAGAATAAAACAAATTATAAATATGTGGCAGAGAGTAGGACAAGCAATGTA  
TGCCCCCTCCCATTCGAGGAGTAATAAGGTGTGAATCAAACATTACAGGACTAATATTAACAAGAGATGGTGGG  
AATACTACCGGTACAAGTGAAATCTTCAGACCTGGAGGTGGAGATATGAGGGACAATTGGAGAAGTGAATTAT  
ATAAGTATAAAGTAGTAAAAATTGAACCACTAGGAGTAGCACCCACCAGGGCAAAGAGAAGAGTGGTGGAGAG  
AGAAAAAGAGCAGTTGGAATAGGAGCTGTCTTCATTGGGTTCTTAGGAGCAGCAGGAAGCACTATGGGCGCG  
GCGTCAATAACGCTGACGGTACAGGCCAGACAATTATTGTCTGGCATAGTGCAACAGCAAAGCAATTTGCTGA  
GGGCTATAGAGGCTCAACAGCATCTGTTGAAACTCACGGTCTGGGGCATT

>AF407156

TTCTATTGCAATACATCAAACTGTTTAAATAGCAGGTGGGAGAACAATGGCACCGCCAACATGTTGAAGAATG  
ACACAGGGTCAAATGAGACTACTCTGATTCTCCGATGCAGAATAAAACAAATTATAAATATGTGGCAGAGAGT  
AGGACAAGCGATGTATGCCCCCTCCCATCCAAGGAGTAATAAATTGTACATCAAACATCACAGGACTAATATTA  
ACAAGAGATGGTGGTGGTGAACGATACAGAGACCTTCAGACCTGGAGGAGGAGATATGAGGGACAATTGGA  
GAAGTGAATTATATAAGTATAAAGTAGTAAAACTTGAACCACTAGGAGTAGCACCCACCATGGCAAAGAGAAG  
AGTGGTGGAGAGGGAAAAAGAGCAGTTGGAATGGCAGCTGTCTTCCTTGGGTTCTTGGGAACAGCAGGGAGC  
ACTATGGGCGCGCGTCACTAACGCTGACGGTACAGGCCAGACAATTATTGTCTGGCATAGTGCAACAGCAAAA  
GCAATTTGCTGAAGGCTATAGAGGCTCAACAGCATCTGTTGAGACTCACGGTCTGGGGCATT

>KT008652

TTCTATTGTAACACATCAGGCCTGTTTAAATAGCACTTGGGGGCACAATGCCAGCAGGCAGGAGAATAGCACGG  
AGTCAAGTGACACTATAACTCTCCCATGCAAAATAAAGCAAATTATAAATATGTGGCAGAGAGCAGGGCAAGC  
AATATATGCCCCCTCCCATCCCAGGAGTAATAAGGTGTGAATCAAACATTACAGGACTAATATTAACAAGAGAT  
GGTGGGAACAACAACAGTACAAGTGAAACCTTCAGACCTGGAGGAGGAAATATGAGGGACAATTGGAGAAGCG  
AATTATATAAGTATAAAGTAGTAAAAATTGAACCACTAGGAGTAGCACCCACCAGGGCAAAGAGAAGAGTGGT  
GGGGAGAGAAAAAGAGCAGTTGGAATAGGAGCTGTTTTCTTCCTTGGGTTCTTAGGCGCAGCAGGAAGCACTATG  
GGCGCAGCGTCAGTAACGCTGACGGTACAGGCCAGACAATTATTGTCTGGCATAGTGCAACAGCAAAGCAATT  
TGCTGAGGGCTATAGAGGCTCAACAACATCTGTTGAAACTCACGGTCTGGGGCATT

>AF407157

TTCTATTGTAACACATCAGGCCTGTTTAAATGGCATTGGAATGGCACGCAGGAGCCAAATAGAACGGAGTCAA  
ACGATACTATAACACTCCAATGCAGAATAAAGCAAATTATAAATATGTGGCAAAGAGTAGGACAAGCAATATA  
TGCCCCCTCCCATTCAGGAGAAAAAAGGTGTGAGTCAAACATTACAGGACTAATATTAACAAGAGATGGTGGG  
ATAATTAACGGTACAGAGGAGACCTTCAGACCTGGAGGAGGAGATATGAGGGACAATTGGAGAAGTGAATTAT  
ATAAGTATAAAGTAGTAAAGATTGAACCATTAGGAGTAGCACCCACCAAGGCAAAGAGAAGAGTGGTGGAGAG

GGAAAAAAGAGCAGTTGGATTTCGGAGCTTTCTTCCTTGGGTTCTTAGGAGCAGCAGGAAGCACTATGGGCGCG  
GCGTCAATAACGCTGACGGTACAGGCTAGACAATTATTGTCTGGCATAGTGCAACAGCAAAACAATTTGCTGA  
GGGCTATAGAGGCTCAACAGCATCTGTTGAACTCACGGTCTGGGGCATT

>FJ866112

TTCTATTGTAATACATCAGAACTATTTAATAGCACTTGGACTTGGAAAGGCAATAATGACAGCATGCAGGGGT  
TAAATAGCACGGGGTTAAACAACACTATAACTCTCCACTGCAGCATAAAGCAAATTATAAATATGTGGCAGAG  
AGTAGGACAAGCAATGTATGCCCCCTCCCATCCAAGGAGTAATAAAGTGTGAATCAAACATTACTGGACTACTA  
TTAACAAGAGATGGTGGGAATAATAACATAAACGAGACCTCAGACCTGGAGGAGGAGATATGAGGGACAATT  
GGAGAAGTGAATTATATAAGTATAAAGTAGTAAAAATTGAACCACTAGGAGTAGCACCCACCAAGGCAAAGAG  
AAGAGTGGTGGAGAGAGAAAAAAGAGCAGTTGGAATAGGAGCTGTCTTCCTTGGGTTCTTAGGAGCAGCAGGA  
AGCACTATGGGCGCAGCGTCAATAACGCTGACGGCACAGGCCAGAATATTATTGTCTGGCATAGTGACAGCAGC  
AAAGCAATTTGCTGAAGGCTATAGAGGCTCAACAGCATCTGTTGAGGCTCACGGTCTGGGGCATT

>AY322190

TTCTATTGTAATACATCAGGCCTGTTTAAATAGCATTTGGAAATCACACTAATGGCACTTGGAAATAGCACGGAGT  
TAAATGGCAATATAACTCTCAATATAACTCTCCCATGCAGAATAAAACCAAATTATAAATATGTGGCAGAGAGT  
AGGACAAGCAATATTTGCCCCCTCCCATCCAAGGAGTAATACAGTGTGTATCAAACATTACAGGACTAATATTA  
ACAAGAGATGGAGGGAATAATAACACTACAAATGAAACCTTCAGACCTGGAGGAGGAGATATGAGGGACAATT  
GGAGAAGTGAATTATATAAGTATAAAGTAGTAAAAATTGAACCACTAGGAGTAGCACCCACCAGGGCACAGAG  
AAGAGTGGTGCAGAGAGAAAAAAGAGCAATTGGAATGGGAGCTGTCTTCATTGGGTTCTTAGGAGCAGCAGGA  
AGCACTATGGGCGCGGCGTCAATAACGCTGACGGTACAGGCCAGACAATTATTGTCTGGTATAGTGCAACAGC  
AAAGCAATTTGCTGAGGGCTATAGAGGCTCAACAGCATCTGTTGAACTCACGGTCTGGGGCATT

>AY322193

TTCTATTGTAACACATCAAGCCTATTTAATGGCACTTGGACGGGCAATGACAGCAGGCAGGAGTCAAATAGCA  
GCGACACTATAACTCTTCCATGCAGAATAAAACAAATTATAAATATGTGGCAGAGGGTAGGACAAGCAATATA  
TGCCCCCTCCCCTACAAGGAGTAATCAGATGTGATTCAAATATTACAGGACTAATCTTAACAAGAGATGGTGGG  
AGTCCGGATAATGAAACCTTCAGACCTGTTGGAGGAGATATGAGGGACAATTGGAGAAGTGAATTATATAAGT  
ATAAAGTAGTAAAAATTGAACCATTAGGAGTAGCACCCACCAGGGCAAAGAGAAGAGTGGTGGAGAGAGAAAA  
AAGAGCAGTTGGAATAGGAGCTGTCTTCATTGGGTTCTTAGGAGCAGCAGGAAGCACTATGGGCGCGGCGTCA  
ATAACGCTGACGGTACAGGCCAGACAATTATTGTCTGGCATAGTGCAACAGCAAAAGCAATTTGCTGAGGGCTA  
TAGAGGCTCAACAGCATCTGTTGAACTCACGGTCTGGGGCATT

>FJ396018

TTTTATTGTAATACATCAGGCCTGTTTAAATAGTACTTGGGATGACAATAATACTAGGAATAATGAGACTGCCA  
GAAATAACTATAACTCTCCCATGTAGAATAAAGCAAATTATAAATATGTGGCAGAGGGTAGGACAAGCAAT  
GTATGCCCCCTCCCATCAAAGGAGTAATAAGGTGTGAATCAAACATTACAGGACTAATATTAACAAGAGATGGT  
GGACTTAATAACAATACAGAGACCTTCAGACCTGGAGGAGGAGATATGAGGGACAATTGGAGAAGTGAATTAT  
ATAAGTATAAAGTAGTAAAAATTGAACCACTAGGAGTAGCACCCACCAGGGCAAAGAGAAGAGTGGTGGGAAG  
AGAAAAAAGAGCAGTTGGAATAGGAGCTGTCTTCCTTGGGTTCTTAGGAGCAGCAGGAAGCACTATGGGCGCG  
GCGTCAATAACGCTGACGGTACAGGCCAGACAATTATTGTCTGGCATAGTGCAACAGCAAAAGCAATTTGCTGA  
GGGCTATAGAGGCTCAACAGCATCTGTTGAACTCACGGTCTGGGGCATT

>AY736811

TTCTATTGTAATACATCAGGCCTGTTTAAATAGCACATATAGCGGGAACGAACTGTGAGCAATAGCACAGAGT  
ACAACATAACTCTCCCATGCAAAATAAAGCAAATTATAAATATGTGGCAGAGAACAGGACAAGCAATGTATGC  
CCCTCCCATCCAAGGAGTAATAAGCTGTGTGTCAAACATTACAGGACTACTATTAAACAAGAGATGGTGGTAAT  
GGTGGTAATAACAATACAACTGAGACCTTCAGACCTGGAGGAGGAAATATGAAGGACAATTGGAGAAGTGAAT  
TATATAAGTATAAAGTAGTAAAAATTGAACCACTAGGAGTAGCACCCACCAGGGCAAAGAGAAGAGTGGTGGGA  
GAGAGAAAAAAGAGCAGTTGGACTGGGAGCTGTATTCTTGGGTTCTTAGGAGCAGCAGGAAGCACTATGGGC  
GCGGCGTCCATAACGCTGACGGTACAGGCCAGACAATTACTGTCTGGCATAGTGCAACAGCAAAAGCAATTTGC  
TGAGGGCTATAGAGGCTCAACAGCATCTGTTGAACTCACGGTCTGGGGCATT

>AY736814

TTCTATTGCAACACATCAGGCCTGTTTAAATAGCACTTGGGATGATAACATTAAGAATGATACTAACAGCACAC  
AGGGGTCAAATAGCACGGAGATAATTCTCCCATGCAAAATAAAGCAAATTGTAAGGATGTGGCAGAGAACAGG  
ACAAGCAATGTATGCTCCTCCAATCCCAGGAGTAATAAGGTGTGTATCAAACATTACAGGACTAATACTAACA  
AGAGATGGTGGGAATACTAGCAGCATAAATGAAACCTTTAGACCTGGAGGAGGAGATATGAGGGACAACCTGGA  
GAAGTGAATTATATAAGTATAAAGTAGTAAAAATTGAACCACTAGGAGTGGCACCCACCAAGGCAAGGAGAAG  
AGTGGTGGAGAGAGAAAAAAGAGCAGTTGGAATAGGAGCTGTCTCTTTGGTTTCTTAGGAGCAGCCGGAAGC  
ACTATGGGCGCGGCGTCAATAACGCTGACGGTACAGGCCAGACAATTATTGGCTGGCATAGTGCAACAGCAAA  
GCAATTTGCTGAGGGCTATAGAGGCTCAACAGCAAATGTTGAGACTCACGGTCTGGGGCATT

>AF457075

TTCTATTGTGATACATCAAGCCTGTTTAAATGGCACTTTAGAGGCCAATGCCACCGTGCAAACTTCAATAGCA  
CAGAGCATATAATTCTCCCATGCAAAATAAAGCAAATTATAAATATGTGGCAGAGAGCAGGACAAGCAATGTA

TGCCCCCTCCCATCCAAGGAGTAATAAATTGTGTGTCAAACATTACAGGACTAATATTAACAAGAGATGGTGGG  
GATAATAATAATAGTACAAATGAAACATTAGACCTGGAGGAGGAGATATGAGGGACAATTGGAGAAGTGAAT  
TATATAAGTATAAAGTAGTAAAAATTGAACCACTAGGAGTAGCACCAACCAAGGCAAAAAGAAGAGTGGTGGG  
GAGAGAAAAAAGAGCAGTAATTGGACTGGGAGCTGTTTTTCATTGGGTTCTTAGGAGCAGCAGGAAGCACTATG  
GGCGCGGCGTCAATAACGCTGACGGTACAGGCCAGACAATTATTGTCTGGTATAGTGCAACAGCAAAGCAATT  
TGCTGAGGGCTATAGAGGCTCAACAACATCTGTTGAAACTCACGGTCTGGGGCATT

>DQ208458

TTCTATTGTAACACATCAGGCCTGTTCAATAGCACTTGGATTAGCAATACCAGCGTGCAGGGGTCAAATAGCA  
CGGGGTCAAATGACAGTATAACTCTCCCATGCAGAATAAAGCAAATTATAAATATGTGGCAGAGAATAGGACA  
AGCAATGTATGCCCCCTCCCATCCAAGGAGTAATAAGATGTGTATCAAACATTACAGGGCTAATATTAACAAGA  
GATGGTGGGAGTACTAATAGTACAACTGAAACCTTCAGACCTGGAGGAGGAGATATGAGGGACAATTGGAGAA  
GTGAATTATATAAGTATAAAGTAGTAAAAATTGAACCACTAGGAGTAGCACCCACCAGGGCAAAGAGAAGAGT  
GGTGGGGAGAGAAAAAAGAGCAGTTGGAATAGGAGCTGTCTTCCTTGGGTTCTTAGGAGCAGCAGGAAGCACT  
ATGGGCGCGGCGTCAATGACGCTGACGGTACAGGCCAGAAAATTTATTATCTGGCATAGTGCAACAGCAAAGCA  
ATTTGCTGAGGGCTATAGAGGCTCAACAACATCTGTTGAAACTCACGGTCTGGGGCATT

>DQ208467

TTCTATTGTAATACATCAGGCCTGTTTAATAGCAATTGGAATTACACTAACAGCACGCAGGAGTCAAATAGCA  
CGGAGTCAAATGGCACTATAACTCTCCAATGCAGAATAAAGCAAATTATAAATATGTGGCAGAGAGTAGGACA  
AGCAATGTATGCCCCCTCCTATCCCAGGAGTAATAAGGTGTGTATCAAACATTACAGGACTAATATTAACAAGA  
GATGGCGGGGACAACAACAGTATAACTGAAACCTTCAGACCTGGAGGAGGAGATATGAGGGACAATTGGAGAA  
GTGAATTATATAAGTATAAAGTAGTAAAAATTGAACCACTAGGAGTAGCACCCACCAGGGCAAAGAGAAGAGT  
GGTGGGAAGAGAAAAAAGAGCAGTTGGAATAGGAGCTGTCTTCATTGGGTTCTTAGGAGCAGCCGGAAGCACG  
ATGGGCGCGGCGTCAATAACGCTGACGGTACAGGCCAGACAATTATTGTCTGGCATAGTGCAACAGCAAAGCA  
ATTTGCTGAGGGCTATAGAGGCTCAACAACATCTGTTGAAACTCACGGTCTGGGGCATT

>DQ208448

TTCTATTGTAACACATCAGACTTGTTTAATAGCACTTGGTATGGGAATGGGACCAGCATGCGGGAGTCAAATA  
GCACGGAGTCAAACGACACTATAATTCTCCGATGCAGAATAAAGCAAATTATAAATATGTGGCAGAGAGTAGG  
ACAAGCAATATATGCCCCCTCCCATCCCAGGAGTAATAAACTGTGTATCAAACATCACAGGACTAATATTAACA  
AGAGATGGTGGGAATAATAAATGAACTGAAACCTTCAGACCTGGGGGAGGAGATATGAGGGACAATTGGA  
GAAGTGAATTATATAAGTATAAAGTAGTAAAAATTGAACCACTAGGAGTAGCACCCACCAGGGCAAAGGAGAAG  
AGTGGTGGAGAGAGAAAAAAGAGCAGTAGTTGGAATAGGAGCTGTCTTCCTTGGGTTCTTAGGAGCAGCAGGA  
AGCACTATGGGCGCGGCGTCAATAACGCTGACGGTACAGGCCAGACAATTATTGTCTGGCATAGTGCAACAGC  
AAAGCAATTTGCTGAGGGCTATAGAGGCTCAACAACATCTGTTGAAACTCACAGTCTGGGGCATT

>KU749411

TTCTATTGTAATACAACAGGCCTATTTAATAGTACTTGGATACAACAGGCCCATTTAATAATACTTGGCCTG  
ATGATGTCAATATAGTACTCCCATGCAAAATAAAGCAAATTATAAATGTATGGCAGAGAGTAGGACAAGCAAT  
ATATGCCCCCTCCCATCCAAGGACTAATACAATGTAACCTCAAATATTACGGGGCTACTATTAACAAGAGATGGT  
GGGAATAATGGCACACTTAATGAAACCTTCAGACCTGGAGGAGGAAATATGAAGGACAATTGGAGAAGTGAAC  
TGTATAAATATAAAGTAGTAAAAATTGAACCACTAGGAGTAGCACCCACCAGGGCAAAGAGAAGAGTGGTGGG  
GAGAGGAAAAAAGAGCAATTGGAATAGGAGCTGTGCTCATTGGGTTCTTGGGGCAGCCGGAAGCACTATGGGC  
GCGGCGTCTGTAACGCTGACGGTACAGGCCAGACAATTATTGTCTGGCATAGTGCAACAGCAAAGCAATTTGC  
TGAGGGCTATAGAGGCTCAGCAACAGATGCTGAAACTCACAGTCTGGGGCATT

>KX232594

TTCTATTGTAATACAACAGGACTGTTTAATAGTACTTGGTATAAAAATGGAACGACTGAGGGGAACAAATAGCA  
CGGGGTCAAATGACACTATAACACTCCCATGCAGAATAAAGCAAATTATAAATGTATGGCAGAGAGTAGGACA  
AGCAATATATGCCCCCTCCCATCCCAGGGATAATAAGGTGTGAATCAAATATTACGGGGCTACTATTAACAAGA  
GATGGTGGAAATAATAACAAGTAATGAAACCTTCAGACCTGGAGGAGGAAATATGAAGGACAATTGGAGAAGTG  
AACTGTATAAGTATAAAGTAGTAAAACTTGAACCACTAGGAGTAGCACCCACCAGGCAAAGAGAAGAGTGGT  
GGAGAGAGAAAAAAGAGCAATTGGATTTGGAGCTTTCTTCCTTGGGTTCTTGGGAGCAGCTGGAAGCACTATG  
GGCGCGGCGTCCGTAACGCTGACGGTACAGGCCAGACAATTATTGTCTGGCATAGTGCAACAGCAAAGCAATT  
TGCTGAGGGCTATAGAGGCTCAGCAGCATATGCTGAAACTCACGGTCTGGGGCATT

>KX232597

TTCTATTGTAATACAACAGGTCTGTTTAATAGTACTTGGCCTAGTAATGAGACTAAGGAAGTAAATAACACGG  
AGTCAAATGACATTATCACACTCCCATGCAGAATAAAGCAAATTGTAAATGTATGGCAAAGAGTAGGACAAGC  
AATATACGCCCCCTCCCATCAAAGGACTAGTACAGTGTAATTCAAGTATTACGGGGCTACTATTAACAAGAGAT  
GGTGGGAATAATAACACAGATGAAACCTTCAGACCTGGAGGAGGAAATATGAAGGACAATTGGAGAAGTGAAC  
TATATAAGTATAAAGTAGTAAAAATTGAACCACTAGGAGTAGCACCCACCAGGGCAAAGAGAAGAGTGGTGGG  
GAGAGAAAAAAGAGCAGCTGGACTAGGAGCTTTATTTCATTGGGTTCTTGGGAGCAGCCGGAAGCACTATGGGC  
GCAGCGTCTGTAACGCTGACGGTACAGGCCAGACAATTATTGTCTGGCATAGTGCAACAGCAAAGCAATTTGC  
TGAGGGCTATAGAGGCTCAGCAGCAGATGCTGAGACTCACAGTCTGGGGCATT

>KX232609

TTCTATTGTGATACAACAAACCTGTTTAAATAGTACTTGGTTTGATAATGGGACTACTGAAGCAAATAGCACGG  
GGTCAAGTGACATTATAACACTCCCATGCAGAATAAAACAAATTGTAAATGTATGGCAGAGAGTAGGACAAGC  
AATATATGCCCCCTCCCATCAGAGGACTAATAAAGTGTGAATCAAATATTACGGGGCTACTATTAACCAGAGAT  
GGTGGGCATAATAGCACAAATGCAAGTAGTGAAACCTTCAGACCTGGAGGAGGAAATATGAAGGACAATTGGA  
GAAGTGAACATATAAGTATAAAGTAGTAAAAATTGAACCACTAGGAGTAGCACCCACCAGAGCAAGGAGAAG  
AGTGGTGGAGAGAGAAAAAGAGCAATTGGAATAGGAGCTGTACTCTTTGGGTTCTTGGGAGCAGCCGGAAGC  
ACTATGGGCGCGGCGTCCATAACGCTGACGGTACAGGCCAGACAATTATTGTCTGGCATAAGTGCAACAGCAAA  
GCAATTTGCTGAGGGCTATAGAGGCTCAGCAGCATCTGCTGAAACTCACGGTCTGGGGCATT

>KX232613

TTCTATTGTAATACATCAGCCCTGTTTAAATAGCACTTGGAGAGACAACCAGACAGATAACCAAACACATACAA  
ATGACACTGACATTATAAATCTCCCATGCAGAATAAAGCAAAGTTATAAACATGTGGCAGAGGACAGGACAAGC  
AATGTATGCCCCCTCCTATCCAAGGAGTAATAAAGTGTACATCAAATATTACAGGACTATTATTAACAAGAGAT  
GGGGGTGCTAACACAACAAATGAAACCTTCAGACCTACAGGAGGAGATATGAAAAGACAATTGGAGAAGTGAAT  
TATACAAGTATAAAGTAGTAAAAATTGAACCACTAGGAGTAGCACCCACCAGGGCAAAGAGAAGAGTGGTGGA  
GAGAGAAAAAAGAGCAGTTGGACTGGGAGCTGTATTCAATTGGGTTCTTGGGAGCAGCAGGAAGCACTATGGGC  
GCGGCGTCAATCAGCTGACGGTACAGGCTAGACAATTATTGTCTGGCATAAGTGCAACAGCAAAGCAATTTGC  
TGAGGGCTATAGAGGCTCAACAACATATGTTGAAGCTCACAGTCTGGGGCATT

>KX232614

TTCTATTGTAATACAACAAACCTGTTTAAATAGTACTTGGCCTGAGAATAAAAAATAGCACAGGGTCAAATGACA  
CAGGGTCAAATGGCACTATAAATCTCCAGTGCAAAATAAAGCAAATTATAAATGTATGGCAGAGAGTAGGACA  
AGCAATATATGCCCCCTCCCATCCCAGGAGCAATAAGATGTAACCTCAAATATTACGGGGCTACTATTAACAAGA  
GATGGTGGGAATAATAACACAAATGAAACCTTCAGACCTGGAGGGGAAATATGAAGGACAATTGGAGAAGTG  
AACTGTATAAATATAAAGTAGTAAACCTTGAACCACTAGGAGTAGCACCCACCAAGGCAAAGAGAAGAGTGGT  
GGAGAGAGAAAAAAGAGCATTTCGGACTAGGAGCTGTATTCATTGGGTTCTTGGGAGCAGCCGGAAGCACTATG  
GGCGCGGCGTCTGTAAACGCTGACGGTACAGGCCAGACAATTATTGTTTGGCATAAGTGCAACAGCAAAGCAATT  
TGCTGAGGGCTATAGAGGCTCAGCAACACCTGCTGAAACTCACGGTCTGGGGCATT

>KX232618

TTCTATTGTAATACATCAGGCCTGTTTAAATAGTACTTGGTCTAATAATGAGACTGAGGGAGCGGGGTCAAATG  
ACACTATAACACTCCCATGCAGAATAAAGCAAATTGTAAATGTATGGCAGAGAGTAGGACAAGCAATATATGC  
CCCTCCCATCGAAGGACTAATAAAATGTAACCTCAAATATTACGGGGCTACTATTGACAAGAGATGGTGGGGAT  
TATAACACATCTACAAATAATGAAACCTTCAGACCTGGAGGAGGAAATATGAAGGACAATTGGAGAAGTGAAC  
TGTATAAGTATAAAGTAGTAAGACTTGAACCACTAGGAGTAGCACCCACCAAGCGAAGAGAAGAGTGGTGGA  
GAGACAAAAAAGAGCAATTGGAATAGGAGCTGTGTTCAATTGGGTTCTTGGGAGCAGCTGGAAGCACTATGGGC  
GCGGCGTCCGTAACGCTGACGGTACAGGCCAGACAATTATTGTCTGGCATAAGTGCAACAGCAAAGCAATTTGC  
TGCAGGCTATAGAGGCTCAGCAACATCTGCTGAAACTCACAGTCTGGGGCATT

>KX232620

TTCTATTGTAATACAACAAGCCTGTTTAAATAGTACTTGGCCTCATAATGAGACGAAAATAAATAGCACGGAAT  
CAAATGACAATGGCACTATAACACTCCCATGCAGAATAAAGCAAATTGTAAATATATGGCAGAGAGTAGGACA  
AGCAATGTATGCCCCCTCCCATCAAAGGACTAATAAGGTGTAATTCAACTATTACGGGGCTACTATTAAACAAGA  
GATGGGGGTGAGACTAATGGCACAATGAAACCTTTAGACCTGGAGGAGGAGATATGAGGGATAATTGGAGAA  
GTGAACCTGTATAAGTATAAAGTAGTAAAAATTGAACCACTAGGAATAGCACCCACCAAAGCAAGGAGAAGAGT  
GGTGGAGAGAGAAAAAAGAGCAATTGGACTAGGAGCTGTATTCATTGGGTTCTTGGGAGCAGCCGGAAGCACT  
ATGGGCGCGGCGTCTGTAAACGCTGACGGTACAGGCCAGACAATTATTGTCTGGCATAAGTGCAACAGCAAAGCA  
ATTTGCTGAAGGCTATAGAGGCTCAGCAGCAACTGCTGAAACTCACGGTCTGGGGCATT

>KX232624

TTCTATTGTAATACAACAGGCCTGTTTAAATAGTACTTGGTATAATAATGGAACCTGAGGAAGCAAATAACACGG  
GGTCAAATGACACTATAACACTCCCATGCAGAATAAAACAAATTATAAATGTATGGCAAAGAGTAGGACAAGC  
AATATATGCCCCCTCCCATCGAAGGACTAATAAGGTGTAATTCAACTATTACGGGGCTACTATTAACAAGAGAT  
GGGGGTAAATAACACAATGACACAAGTGAAACCTTCAGACCTGGAGGAGGAGATATGAGGGATAATTGGAGAA  
GTGAACCTGTATAAGTATAAAGTAGTAAAAATTGAACCACTAGGAATAGCACCCACCAAAGCAAGGAGAAGAGT  
GGTGGAGAGGGAAAAAAGAGCAGTTGGACTAGGAGCTGTATTCATTGGGTTCTTGGGAGCAGCCGGAAGCACT  
ATGGGCGCGGCGTCCGTGACGCTGACGGTACAGGCCAGGCAATTATTGTCTGGCATAAGTGCAACAGCAAAGCA  
ATTTGCTGAGGGCTATAGAGGCTCAGCAACATCTGCTGAAACTCACAGTCTGGGGCATT

>KX232626

TTCTATTGTGATACAACAGGCCTGTTTAAATAGTACTTGGCCTAACAATGAAACTGGGGAAAGTAAATAGCACGG  
GATCAAACGATATTATAACACTCCCATGCAGAATAAAGCAAAGTTGTAAATGTATGGCAGAGAGTGGGACAAGC  
AATATATGCCCCCTCCCATCCAAGGACTAATAAAATGTAACCTCAAATATTACGGGGATAATATTAACAAGAGAT  
GGTGGGAATCTTAATTCTACAAATGAAACCTTCAGACCTGGAGGAGGAAATATGAAGGACAATTGGAGAAGTG  
AACTGTATAAGTATAAAGTAGTAAACCTTGAACCACTAGGAGTAGCACCCACCAGAGCAAAGAGAAGAGTGGT

GGAGAGAGAAAAAGAGCAATTACCATAGGAGCTGTGCTCATTGGGTTCTTGGGAGCAGCCGGAAGCACTATG  
GGCGCGCGTCTGTAACGCTGACGGTACAGGCCAGACAATTATTGTCTGGCATAGTGCAACAGCAAAGCAATT  
TGCTAAGGGCTATAGAGGCTCAGCAACATCTGCTGAAACTCACAGTCTGGGGCATT

>KU749423

TTCTATTGTAATACATCAGGCCTGTTCAATAGCACCTGGTATCCCAATGGCACCAACATAACTAACCCAGGAC  
CAGAGAAATATAACCCCTCCCATGTCAGAATAAAGCAAATTGTAAATATGTGGCAGAGAGTAGGGAGAGCAATGTA  
TGCTCCTCCCATCAAAGGAGTAATACAATGTGTATCAAACATTACAGGACTACTATTAACAAGAGATGGTGGG  
AATAATAATAATACAACTGAAACCTTCAGACCAGGAGGAGGAGATATGAGGGACAATTGGAGAAGTGAATTAT  
ATAAGTATAAAGTAGTACAAGTTGAACCACTAGGAATAGCACCCACTAGGGCAAGGAGAAGAGTGGTGGAGAG  
AGAAAAAGAGCAGTTGGAATGGGAGCTCTTTTCATTGGGTTCCTAGGAGCAGCCGGAAGCACTATGGGCGCG  
GCATCAATGATGCTGACGGTACAGGCCAGACAATTATTGTCTGGCATAGTGCAACAGCAAAGCAATTTGCTGA  
GGGCTATTGAAGCTCAACAGCATATGTTGAAGCTCACGGTCTGGGGCATT

>KX983643

TTCTATTGTAATACATCAGAACTGTTTAATAGCACTTGGGGAGAGGAAGGGCGAAAAGGACAATATCACGAAGT  
CAAATGCCACTATAACTCTCCCATGTAGAATAAAGCAAATCATCAATATGTGGCAGAGAGCAGGACGAGCAAT  
GTATGCCCTCCCATCCAAGGAGTAATAAATTGTGCATCAAACATTACAGGACTACTACTAACAAGAGACGGT  
GGGAATACTAATACTAGCGATCTACCTGAAATCTTCAGACCAGGAGGAGGAGATATGAGGGACAATTGGAGAA  
GTGAATTATATAAGTATAAGGTAGTAAAAATTGAACCACTAGGAGTAGCACCCACCAAGGCAAGGAGAAGAGT  
GGTGGAGAGAGAAAAAGAGCAGTTGGACTGGGAGTTGTCTTCCTTGGGTTCTTAGGAGCAGCAGGAAGCACT  
ATGGGCGCGCGTCAATAACGCTGACGGTACAGGCCAGACAATTATTGTCTGGCATAGTGACAGCAGCAAAGCA  
ATTTGCTGAAGGCTATAGAGGCTCAACAGCATCTGTTGAAGCTCACAGTCTGGGGCATT

>KX983542

TTCTATTGTGATACAACAGGCCTGTTTAATAGCACTTGGGAAGAATGGCACTCTCAACATGCAGGAATTAAC  
TCACAGTCACAACTACACAAATCTCACAGACAGTATAAATATAACTCTTCCATGTAGAATAAAGCAAATTAT  
AAATATGTGGCAGAGAGTAGGACAGGCAATGTATGCTCCTCCCATCCAAGGAGTAATAAAATGTGTGTCAAAC  
ATTACGGGACTACTATTAACGAGAGATGGGGGAATAATGAGACAGAAACCTTCAGACCTGGAGGAGGAAATA  
TGAAGGACAATTGGAGAAGTGAATTATATAAGTATAAAGTAGTAAAAGTTGAGCCTATAGGAGTAGCACCCAC  
CAGGGCAAGGAGAAGAGTGGTGGAGAGAGAAAAAGAGCAGTTGGAATAGGAGCTGTTTTTCATTGGGTTCTTA  
GGAGCAGCAGGAAGCACTATGGGCGCGCGTCAATAACGCTGACGGTACAGGCCAAACAATTATTGTCTGGCA  
TAGTGCAACAGCAAAGCAATTTGCTGAGGGCTATAGAGGCTCAACAGCATCTGTTGAAACTCACGGTCTGGGG  
CATT

>KX983566

TTCTATTGTAATACATCAAGCCTGTTTAATAGCATTTGGGTAAATGGCACTAGGAATGACACTGTCAGCAATG  
GAACTTATATAACTCTCCCATGCAGAATAAAGCAAATTATAAATATGTGGCAGAGAGTAGGGCAAGCAATGTA  
TGCCCCCTCCCATTAGAGGAGTAATAAAGTGTGAATCAAACATTACAGGACTACTGTTAACAAGAGATGGTGGG  
GAGAATAATAGTACCAATGAAACCTTCAGACCTGGAGGAGGAGATATGAGGGACAATTGGAGAAGTGAATTAT  
ATAAGTACAAAGTAGTAAAAATTAAACCACTAGGAGTAGCACCCACCAAGGCAAAGAGAAGAGTGGTGGAGAG  
AGAAAAAGAGCAGTAGTTGGACTGGGAGCTGTCTTCTTGGGTTCTTAGGAGCAGCAGGAAGCACTATGGGC  
GCAGCGTCAATAACGCTGACGGTACAGGCCAGACAATTATTGTCTGGCATAGTGCAACAGCAAAGCAATTTGC  
TGAGGGCTATAGAGGCTCAACAACATCTGTTGAAACTCACGGTCTGGGGCATT

>JX236677

TTCTATTGTAATACATCAGCCCTGTTTGATAGCACTTGGCGGTTTAATGGCATTGGCAGTGGAATGACACTG  
TCAATGCCACTAGAAGCGAGAATGATACTATAAATCTCCCATGCAGGATAAAGCAAATTATAAATATGTGGCA  
GAGAGCAGGACAGGCAATGTATGCCCTCCCATCCAAGGAGTAATAAGGTGTGACTCAAACATTACAGGTCTA  
TTATTAAACAAGAGATGGTGGGAGGGGGAATGATAATAACACTGAGGTCTTCAGACCTGGAGGAGGAAATATGA  
AGGACAATTGGAGGAGTGAATTATATAAGTACAAAGTAGTAAAAATTGAACCATTAGGAGTAGCACCCACCAG  
GGCAAGGAGAAGAGTGGTGGAGAGAGGAAAAAGAGCAGTTGGAATAGGAGCTGTTTTTCATTGGGTTCTTAGGA  
GCAGCAGGAAGCACTATGGGCGCAGCGTCAATAACGCTGACGGTACAGGCCAGGCAATTATTGTCTGGCATAG  
TGCAACAGCAAAGCAATTTGCTGAGGGCTATAGAGGCTCAACAGCATCTGTTGAGACTCACAGTCTGGGGCAT  
T

>JX236678

TTCTATTGTAACACATCAACCTGTTTAGTAGCACTTGGGAGAACGGTACGGAACATAACAGCACGAAGTCAA  
ATGACACTATAACTCTCCCATGCAGAATAAAGCAAATTATAAATATGTGGCAGAGAGTAGGACAAGCAATATA  
TGCTCCTCCAATCGAAGGAGAAAAAAGGTGTCAATCAAATATTACAGGACTAATATTAACAAGAGATGGTGGT  
GAGGATATTAACAGTACAAGTGAAACCTTCAGACCTGGAGGAGGAGATATGAGGGACAATTGGAGAAGTGAAT  
TATATAAGTATAAGGTAGTAAAAATTGAACCACTAGGAGTAGCACCCACCAGGGCAAGAAGAAGAGTGGTGGGA  
GAGAGAAAAAGAGCAGTTGGAATAGGAGCTGTCTTCATTGGGTTCTTAGGAGCAGCAGGAAGCACTATGGGC  
GCGGCGTCAATAACGCTGACGGTACAGGCCAGACAATTATTGTCTGGCATAGTGCAACAGCAAAGCAATTTGC  
TGAGGGCTATAGAGGCTCAACAACATCTGTTGAAGCTCACGGTCTGGGGCATT

>KU749424

TTTTATTGTAATACATCAGAACTGTTTAAATAGCACTTGGGTATACAATGCATCAGAACTTAATGGCACTTGGG  
TAAACAATGCCAGCATGCCAGGATCAAATAGCACAAGTGAAAATATAACTCTCCACTGCAGAATAAAGCAAAT  
TATAAATATGTGGCAGAGAGCAGGAAAAGCAATGTACGCCCCCTCCCATCTCAGGAAACATAACGTGTGTTTCA  
AACATTACAGGACTCATATTAACAAGAGATGGTGGGAATACCAATACAACCTGAAATCTTCAGACCTGAAGGAG  
GAGATATGAGAGACAATTGGAGAAGTGAATTATATAAGTATAAAGTAGTAAAAATTGAACCACTAGGAGTAGC  
ACCCACCAAGGCAAGGAGGAGAGTGGTGGAGAGAGAAAAAGAGCAATTGGAATAGGAGCTGTCCTCTTTGGG  
TTCTTAGGAGCAGCAGGAAGCACTATGGGCGCGGCGTCAATAACGCTGACGGTACAGGCCAGACAATTATTGT  
CTGGCATAGTGCAACAGCAAAGCAATTTGCTGAGGGCTATAGAGGCTCAACAACATCTGTTGAAACTCACAGT  
CTGGGGCATT

>MF565934

TTCTATTGCAATACATCAAGCCTGTTTAAATAGTACTTGGGATGGGAATAGCACTACTAACAGCACGCAGAAGC  
CAAATGGAACATAACTCTCCCATGCAGGATAAAGCAAATTATAAATATGTGGCAGAGAACAGGGCAAGCAAT  
GTATGCCCCCTCCCATCCCAGGAAAAATAAGGTGTGACTCAAACATCACAGGACTAATATTAACAAGAGATGGT  
GAAAAATAAACACTGAAAGTGAAACCTTTAGACCTGAAGGAGGAGACATGAGGAACAATTGGAGAAGTGAGT  
TATATAAGTATAAAGTAGTAAAAGATTGACCCACTAGGAGTAGCACCCACCGGGGCAAAGAGAAGAGTGGTGGGA  
GAGAGAAAAAAGAGCAGTTGGAATAGGAGCTGTCCTCTTTGGGTTCTTAGGAGCAGCAGGAAGCACTATGGGC  
GCAGCGTCTCTAACGCTGACGGTACAGGCCAGACAATTATTGTCTGGCATAGTGCAACAGCAAAGCAATTTGC  
TGAGGGCTATAGAGGCTCAACAACATCTGTTGAGACTCACGGTCTGGGGCATT

>KX983624

TTCTACTGTAATACATCAGGCCTGTTTAAATAGCCTCTGGATAAATGGCACCATGCTGAATGGTACCCTGAAGA  
ATTCACCCAGCACAAATGACACCATAACTCTCCCATGCAGAATAAAGCAAATCATAAACATGTGGCAGAAAAGT  
AGGACAAGCAATGTATGCCCTCCCATCCCAGGAAGCATAACGTGTGTATCAAACATTACAGGACTAATATTA  
ACAAGAGATGGTGGGAATACTAACAGGACAGATGAAATCTTCAGACCTGAAGGGGGAAATATGAGGGACAATT  
GGAGAAGTGAATTATATAAGTATAAAGTAGTAAAAATTGAACCACTAGGAGTAGCACCCACTAGGGCAAAGAG  
AAGAGTGGTGGAGAGAGAAAAAAGAGCAGTTGGACTGGGAGCTGTCTTCATTGGGTTCTTAGGAGCAGCAGGA  
AGCACTATGGGCGCGGCGTCAATAACGCTGACGGTACAGGCCAGAACTTATTGTCTGGCATAGTGCAACAGC  
AAAGCAATTTGCTGAGGGCTATGAGGCTCAACAGCATCTGTTGAAACTCACAGTCTGGGGCATT

>KF716472

TTCTATTGTAACACAACAGGTCTGTTTAAATAGCACTTGGAGTCGGAACACAACAGATAATAACACTTGGTTTA  
GGAACAATGCTAGCAGTAGCACAGGGTTAAATGGCACAATAACTCTCCAATGCAAAATAAAGCAAATTATAAA  
TATGTGGCAGAGAACAGGACGAGCAATGTATGCCCTCCCATACCAGGAACAATAATGTGTAACCTCAAGCATC  
ACAGGACTGCTATTAACAAGAGATGGTGGGAATAGTGGGAACAACAGTAATGAAACCTTCAGGCCTGGAGGAG  
GAGATATGAAAGACAATTGGAGAAGTGAATTATATAAGTATAAAGTAGTAAAAATTGAACCACTAGGAGTAGC  
ACCCACCAGGGCAAAGAGAAGAGTGGTGGAGAGAGAAAAAAGAGCAGTTGGAATGGGAGCTCTTTTCATTGGG  
TTCTTGGGAGCAGCAGGAAGCACTATGGGCGCGGCGTCAGTGACGCTGACGGTACAGGCCAGACAATTATTGT  
CTGGTATAGTGCAACAGCAAAGCAATTTGCTGAAGGCTATAGAGGCTCAACAACATCTGTTGAGACTCACAGT  
CTGGGGCATT

>AB253421

TTTTATTGTGATTTCATCAGGCCTGTTTAAATAGCACTTGGGATAACACTAACATCACGCAGCCAAATAGCACAG  
GGTCAAATGACACCATAACTCTCCAATGCAGAATAAAGCAAATTATAAATATGTGGCAGAGAGCAGGACAGGC  
AATGTATGCCCCCTCCCATCCCAGGAGTAATAAGTTGTGTATCAAACATTACAGGATTACTATTAACAAGAGAT  
GGTGGGATTACCAGTGCAATGAAACCTTCAGACCTGGAGGAGGAGATATGAGGGACAATTGGAGAAGTGAAT  
TATATAAGTATAAAGTAGTAAAACCTTGAACCACTAGGAGTAGCACCCACCAGGGCAAGGAGAAGAGTGGTGGGA  
GAGAGAAAAAAGAGCAGTTGGAATAGGAGCTGTATTATTGTTTCTTAGGAGCAGCAGGAAGCACTATGGGC  
GCGGCGTCAATGACGCTGACGGTACAGGCCAGACAATTATTGTCTGGCATAGTGCAACAGCAAAGCAATTTGC  
TGAGGGCTATAGAGGCTCAACAACATCTGTTGAAACTCACGGTCTGGGGCATT

>AB287377

TTCTATTGTAATACATCAGGCCTGTTTAAATAGCACCTGGAATAATAATAATACCAGGGAGAAGATAAATGGTA  
CAGAGTCAAATAGCACTATAACTCTCCATTGCAGAATAAAGCAAATTATAAATAGGTGGCAGGAAGTAGGACA  
AGCAATGTATGCCCTCCCATCCCAGGAGTAATAAATTGTAGATCAAACATTACAGGACTAATATTAACAAGA  
GATGGTGGGGATGGGGATAACAATACGGAAATCTTCAGACCTGGAGGAGGAAATATGAAGGACAATTGGAGAA  
GTGAATTATATAAGTATAAAGTAGTAAAAATTGAACCACTGGGAGTAGCACCCACCAGGGCTAAGAGAAGAGT  
GGTGGAGAGAGCAAAAAGAGCAGTTGGAATAGGAGCTGTTTTCTTGGGTTCTTAGGAGCAGCAGGAAGCACT  
ATGGGCGCGGCGTCAATAACGCTGACGGTACAGGCCAGACAATTATTGTCTGGCATAGTGCAACAGCAAAGCA  
ATTTGCTGAGGGCTATAGAGGCTCAACAACATCTGTTGAAACTCACGGTCTGGGGCATT

>AB287379

TTCTATTGTAATACATCAGGCCTGTTTAAATAGCACTTGGACCAATGAAAGCATGCAAGTAAATAGCACAGAAT  
CAAATGACACTATAACTCTCCCATGCAGAATAAAGCAAATTATAAATATGTGGCAGAGGGCAGGACAAGCAAT  
ATATGCCCTCCCATCGAAGGAGTAATAAGGTGTAGCTCAAACATTACAGGACTACTATTAACAAGAGATGGT  
GGGGTTAACAATACAGTCAATGAAACCTTCAGACCTGGAGGAGGAAATATGAGGGATAATTGGAGAAGTGAAC

TATATAAATATAAAGTAGTAAAAATTGAACCACTAGGAGTAGCACCCACCAGGGCAAAAAGAAGAGTGGTGGAGAGAGAAAAAGAGCAGTTGGACTGGGAGCTGTCTTCATTGGGTTCTTAGGAGCAGCAGGAAGCACTATGGGCGCGCGTCAATAACGCTGACGGTACAGGCCAGACAATTATTGTCTGGCATAGTGCAACAGCAAAACAATTTGTGAGGGCTATAGAGGCTCAACAACATCTGTTGAAACTCACGGTCTGGGGCATT

>AY713406

TTCTATTGTAATACATCAAGCCTGTTTAATAGCACTTGGAATAACACTGCCAGCATGCAGAAGTCAAATAGCACGGGTCAAATGACACTATAACTCTCCAATGCAGAATAAAGCAAATTATAAGAATGTGGCAAAGAACAGGACAGCAATGTATGCCCCCTCCCATCAAAGGAGATATAAGGTGTGAATCAAACATTACAGGACTAATATTAACAAGATGATGGTGGGAATGATAGCAGTCCAGATGAAATCTTCAGACCTGGAGGAGGAGATATGAGGGACAATTGGAGAA GTGAATTATATAAGTATAAAGTAGTACAAATTGAACCTCTAGGAGTAGCACCCACCAAGGCAAGAAGAAGAGTGGTGCAGAGAGAGAAAAAGAGCAATTGGAATAGGAGCTGTCTTCCTTGGGTTCTTAGGAGCAGCAGGAAGCACTATGGGCGCGCGTCAATAACGCTGACGGTACAGGCCAGACAATTATTGTCTGGCATAGTGCAACAGCAAAAGCAATTTGCTGAGGGCTATAGAGGCTCAACAACATCTGTTGAAACTCACGGTCTGGGGCATT

>L07082

TTCTATTGTAATACAACAGGCCTGTTTAATAGCACCTGGAAAAATGTAAATGGCACCATGCAGGAGTCAAGCAGCACAAGTTAAATGACACTATAACTCACATGCAGAATAAAGCAAATTATAAATATGTGGCAGAGAGCAGGACAGGCAATGTATGCCCCCTCCCATCGAAGGAATAATAAGGTGTGACTCAAACATTACAGGACTACTATTAACAAGAGATGGTGGGGTTGGGGATAACAGTACAAATGGAACCTGAAACATTACAGACCTGGAGGAGGAAATATGAGGGACAATTGGAGAAGTGAATTATATAAGTATAAAGTAGTAAAAATTGAACCACTAGGAGTAGCACCCACCACGGCAAAAAAGAAAGTGGTGGAGAGAGAAAAAGAGCAATTGGAATAGGAGCTGTCTTCCTTGGGTTCTTAGGAGCAGCAGGAAGCACTATGGGCGCGCGTCAATAACGCTGACGGTACAGGCCAGACAATTATTGTCTGGCATAGTGCAACAGCAAAAGCAATTTGCTGAGGGCTATAGAGGCTCAACAGCATCTGTTGAAACTCACAGTCTGGGGCATT

>MF373167

TTCTATTGTAATACATCAGGCCTGTTTAATAGCACTTGGAATGAAACTACCATGCAGGAGTCAAATGGAACAGAGTCAAACGACAGCATAACTCTCCCATGCAGAATAAAGCAGATTGTAAATATGTGGCAGAGAACAGGACAAGCAATGTATGCCCCCTCCCATCCAAGGAGTAATACAGTGTGTATCAAATATTACAGGACTAATATTAATGAGAGATGGTGGGAATAGTAGTAGGGAAAAATGAAACCTTCAGACCTGGAGGAGGAGATATGAGGGACAATTGGAGAAGTGAATTATATAAGTATAAAGTAGTAAAAATTGAACCACTAGGAGTAGCACCCACCAGGGCAAGGAGAAGAGTGGTGCAGAGAGAAAAAGAGCGGTTGGACTGGGAGCTGTCTTCATTGGGTTCTTAGGAGCAGCAGGAAGCACTATGGGCGCAGGTCAAGTACGCTGACGGTACAGGCCAGGCAATTATTGTCTGGCATAGTGCAACAGCAAAAGCAATTTGCTGAGGGCTATAGAGGCTCAACAGCATCTGTTGAGACTCACGGTCTGGGGCATT

>MF373168

TTCTATTGTGATACATCAGACCTGTTTAATAGCATTTGGCCGTTTAATAGCACTCGGGGACACAATGAGACTGAAAGATCAAATAGCACAGAGACAAATAACACTATTATAAACTTCCATGTAGAATAAAACAAATTATAAATATGTGGCAGAGAGTAGGACAAGCAATATTTGCCCCCTCCCATCCAAGGAGTAATACAGTGTGTATCAAACATTACAGGACTAATATTAACAAGAGATGGAGGGAATAATAACACTACAAATGAAACCTTCAGACCTGGAGGAGGAGATATGAGGGACAATTGGAGAAGTGAATTATATAAGTATAAAGTAGTAAAAATTGAACCACTAGGAGTAGCACCCACAGGGCACAGAGAAGAGTGGTGCAGAGAGAAAAAGAGCAATTGGAATGGGAGCTGTCTTCATTGGGTTCTTAGGAGCAGCAGGAAGCACTATGGGCGCGCGTCAATAACGCTGACGGTACAGGCCAGACAATTATTGTCTGGTATAGTGCAACAGCAAAAGCAATTTGCTGAGGGCTATAGAGGCTCAACAGCATCTGTTGAAACTCACGGTCTGGGGCATT

>MF373181

TTCTACTGTAATACATCAGGCCTGTTTAACAGTAGTTGGGGAAATGGCACTAACAACAGCAGCACTGGGGGGCAAACTATAACTCTCCCATGCAAAATAAAGCAAATTGTAAATATGTGGCAGAGAGTAGGACAAGCAATGTATGCCCTCCTATCGAAGGAGTAATAAGGTGTGTATCAAACATTACAGGAATACTATTAACTAGAGATGGTGGGCCTAATAATAGTACAAATGAAACCTTCAGACCGGGAGGAGGAAATATGAAGGACAATTGGAGAAGTGAATTATATACTATAAAGTAGTACAAATTAACCCATTAGGAATAGCACCCACCAAGGCAAGAGAAGAGTGGTGGAGAGAGAAAAAGAGCAGTAGTTGGACTGGGAGCTTTGTTTCATTGGGTTCTTAGGAGCTGCAGGAAGCACTATGGGCGCGCGTCAATGACGCTGACGGTACAGGCCAGACAATTATTGTCTGGCATAGTGCAACAGCAAAAGCAATTTGCTGAGCTATAGAGGCTCAACAGCATGTGTTGAGACTCACGGTCTGGGGCATT

>MF373182

TTCTATTGTAATACATCAGGCCTGTTTAATAGCAGTTGGGGAGTAAACAACACTGATGGCAATATAACTAATGCGACGATAACTCTCCCCTGCAAAATAAACAATTTATAAATATGTGGCAGAGAGTAGGACAAGCAATGTATGCCCTCCCATCGAAGGGGCAATAAGTTGTAATTCAACCATCACAGGACTACTATTAACAAGAGATGGTGGGTACAACAACAGCACTAACCAAATCGACAAAATCTTCAGACCTGCAGGAGGAGATATGCAGGACAACCTGGAGAAGTGAATTATATAAGTATAAAGTAGTAAAAATTGAACCATTAGGAGTAGCACCCACCTGGGCAAGGAGAAGAGTGGTGCAGAGAGAAAAAGAGCAGTTGGACTGGGAGCTGTCTTTCTTGGGTTCTTAGGAGCAGCAGGAAGCACTATGGGCGCGCGTCAATGACGCTGACGGTACAGGCCAGACAATTATTGTCTGGCATAGTGCAACAGCAAAAGCAATTTGCTGATGGCTATAGAGGCTCAACAGCATTTGTTGAAACTCACAGTCTGGGGCATT

>AF069670

TTCTATTGTAATACATCAGGCCTGTTTAAATAGCACTTGGAGCCAAAATGACACTGGGGTATCAAATAGCACGG  
AGTCAAATGACACTATAATTCTTCCATGCAGAATAAAACAAATTATAAATATGTGGCAGAGAGCAGGACAAGC  
AATATATGCCCCCTCCCATCCAGGAATAATAAGGTGTGAATCAAACATTACAGGGCTACTGTTAACAAGAGAT  
GGTGGGGTTGTTAACAGTACAAATGAAACCTTCAGACCTGGAGGAGGAAATATGAAGGACAATTGGAGAAGTG  
AATTATATAAGTATAAAGTAGTAAAAATTGAACCACTAGGAGTAGCACCCACCAGGGCAAGGAGAAGAGTGGT  
GCAGAGAGAAAAAGAGCAGTTGGACTGGGAGCTTTATTTCATTGGGTTCTTAGGAGCAGCAGGAAGCACTATG  
GGCGCGGCGTCAATAACGCTGACGGTACAGGCCAGACAATTATTATCTGGCATAGTGCAACAGCAAAGTAATT  
TGCTGAGGGCTATAGAGGCTCAACAGCATCTGTTGAAACTCACTGTCTGGGGCATT

>AF069671

TTCTATTGTAATACATCAGGCCTGTTTAAATAGCACTATTTTGAATAGCACTAAGATGAATGACAATGCCAGCA  
GGGAGTCGTATGATGACACTATAACCCTCCAGTGCAGAATAAAGCAAATTATAAATATGTGGCAGAGAGTAGG  
ACAAGCAATGTATGCCCCCTCCCATCCGAGGAGCAATAAGATGTAAATCAAACATTACAGGACTATTATTAA  
AGAGATGGTGGAAATAGTAACAGTAGTACAAATGAAACCTTCAGACCTGGAGGAGGAGATATGAGAGATAATT  
GGAGAAGTGAATTATATAAATATAAAGTAGTAAAAATTGAACCACTAGGAGTAGCACCCACCAAGGCAAAGAG  
AAGAGTGGTGGAGAGAGAAAAAGAGCAGTTGGAATAGGAGCTGTCTTCCTTGGGTTCTTAGGAGCAGCAGGA  
AGCACTATGGGCGCGGCGTCAATAACGCTGACGGTACAGGCCAGACAATTATTGTCTGGCATAGTGCAACAGC  
AAAGCAATTTGCTGAGGGCTATAGAGGTTCAACAACATCTGTTGAAACTCACGGTCTGGGGCATT

>AF069673

TTCTATTGTAATACATCAGGCCTGTTTAAATAGTACTTGGAAATGGCACTGACAGCATGCAGAAGTTAAATAGCA  
CGGGCAATATAACTCTCCCATGCAGAATAAAACAAATTATAAATATGTGGCAGAGAGCAGGACAAGCAATATA  
TGCCCCCTCCCATCCAAGGAGTAATAAGGTGTGAATCAAACATTACAGGACTAATATTAACAAGAGATGGTGGG  
AATGATAACAATGAAAGTGAAATCTTCAGGCCTGGAGGAGGAGACATGAGGGACAATTGGAGAAGTGAATTAT  
ATAAGTATAAGGTAGTAAAAATTGAACCACTAGGAGTAGCACCCACCAAGGCAAAAAGAGTGGTGGAGAG  
AGAAAAAGAGCAATTGGAATAGGAGCTGTCTTCATTGGGTTCTTGGGAGCAGCAGGAAGCACTATGGGCGCA  
GCGTCAATAACGCTGACGGTACAGGCCAGGCAATTATTGTCTGGCATAGTGCAACAGCAAAGCAATTTGCTGA  
TGGCTATAGAGGCTCAACAGCATCTGTTGAAACTCACGGTCTGGGGCATT

>AF107771

TTCTATTGTAATACATCAGGTCTGTTTAAATAGTAGTTGGAATGAAAATGACACCAAAGTAAATTACAACACTG  
AGTCAAATGACACTATAACTCTCCAATGCAGAATAAAGCAAATTATAAATATGTGGCAGAGAACAGGACAAGC  
AACGTATGCCCCCTCCCATCCAGGGGTAATACAGTGTAGATCAAACATTACAGGACTACTATTAAACAAGGGAT  
GGTGGGGTAACTAACAATACAAATAATGAAACCTTCAGACCTGGAGGAGGAGATATGAGGGACAATTGGAGAA  
GTGAATTATACAAGTATAAAGTAGTAAAACTTGAACCACTAGGAGTAGCACCCACCAAGGCACAGAGAAGAGT  
GGTGAAGAGAGAAAAAGAGCAGTTGGACTGGCAGCTGTATTCTTTGGGTTCTTAGGAGCAGCAGGAAGCACT  
ATGGGCGGCGGCGTCAATAACGCTGACGGTACAGGCCAGACAATTATTGTCTGGTATAGTGCAACAGCAAAACA  
ATTTGCTGAGGGCTATAGAGGCTCAACAGCATATGTTGAGACTCACGGTCTGGGGCATT

>HQ659604

TTTTATTGTGATACATCAGGCCTGTTTAAATAGCACATGGGGGGGAAATAGCACTGACAGCATAACAGGAGTCAA  
ATAGCACAGAGTCAAATGACACTATAATTCTCCCATGCAGAATAAAGCAAATTATAAATATGTGGCAGAGAGT  
AGGACAAGCAATGTATGCCCCCTCCCATCCAAGGAGTAATAAAGTGTATATCAAATATTACAGGACTTCTATTA  
ACAAGAGATGGTGGGGATAATAACAGTGCAAATGAAACCTTCAGACCTACAGGAGGAAATATGAGGGACAATT  
GGAGAAGTGAATTATATAAGTATAAAGTAGTAAAAATTGAACCACTAGGAGTAGCACCCACCCCGGCAAAGAG  
AAGAGTGGTGCAGAGAGAAAAAGAGCAGTTGGAATAGGAGCTGTATTTCATTGGGTTCTTAGGAGCAGCCGGA  
AGCACTATGGGCGGCGGCGTCAATAACGCTGACGGTACAGGCTAGACAATTATTGTCTGGCATAGTGCAACAGC  
AAAGCAATTTGCTGAGGGCTATAGAGGCTCAACAACATCTGTTGAAACTCACGGTCTGGGGCATT

>HQ659597

TTCTATTGCAACACATCAGAATTGTTTAAATAGCACTTGGGATAATAGCACTTGGGATAATAGCACTTGGGATA  
ATAACATGCATGAGTCGAATAGCACGAGAATATAACTCTCCAATGTAGGATAAAGCAAATTATAAATATGTG  
GCAGAGAGCAGGACAAGCAATATATGCCCCCTCCCATCAAAGGAGTAATAGGGTGTAATCAAACATTACAGGA  
CTAATATTAAACAAGAGATGGTGGGAGAAGGGTAATAACAGTATCAATGAAACCTTCAGACCTGGAGGAGGAG  
ATATGAGGGACAATTGGAGAAGTGAATTATACAAGTATAAAGTAGTAAAAATTGAACCACTAGGAGTAGCACC  
CACCAAGGCAAAGAGAAGAGTGGTGGAGAGAGAAAAAGAGCAGTTGGAATAGGAGCTGTCTTCCTTGGATTCT  
TTAGGAACAGCAGGAAGCACTATGGGCGGCGGCGTCAGTAACGCTGACGGTACAGGCCAGACAATTATTGTCTG  
GCATAGTGCAACAGCAAAGCAATTTGCTGAGGGCTATAGAGGCTCAACAGCATCTGTTGAAACTCACAGTCTG  
GGGCATT

>HQ697994

TTCTATTGCTACACATCAGGCCTGTTTAAATTATACCTTTAATGATACCAGCACAAAATAGCACGGAGTCGAAGT  
CAAATGACACTATAACTCTCCAATGCAGAATAAAGCAAATTATAAATATGTGGCAGAGAGCAGGACAAGCAGT  
ATATGCCCCCTCCCATACCAGGGATAATAAGGTGTGAATCAAACATTACAGGACTAATATTAAACAAGAGATGGT  
GGGAATAATAATAGTAATACAAATGAAACCTTCAGACCTGGAGGAGGAGATATGAGGGACAATTGGAGAAGTG  
AATTATATCGGTATAAAGTAGTAAAAATTGAACCAATAGGAGTAGCACCTACCACGGCAAAGAGAAGAGTGGT

GGAGAGAGAAAAAGAGCAGTTGGAATAGGAGCTGTCTTCCTTGGGTTCTTAGGAGCAGCAGGAAGCACTATG  
GGCGCGGCGTCAATAACGCTGACGGTACAGGCCAGACAATTATTGTCTGGCATAGTGCAACAGCAAAGCAATT  
TGCTGAGGGCTATAGAGGCTCAACAGCATCTGTTGAAACTCACGGTCTGGGGCATT

>HQ698029

TTCTATTGCAACACGGCAGGCCTGTTTGATAGCATTGGAATGGTAGCATTGGGAATAACACTGACAATAGTA  
GCATGGAGTTAAATGACGATAATGACACTATAACTCTCCCATGCAGAATAAAGCAAATTATAAATATGTGGCA  
GAGAGTAGGACAAGCAATATATGCCCCCTCCCATCCAAGGAGTAATAAGGTGTGACTCAAATATTACAGGGTTA  
ATATTAACAAGAGATGGTGGGGATAATAATAGTGCAAATGAAACCTTCAGACCTGTAGGAGGAGATATGAGGG  
ACAATTGGAGAAGTGAATTATATAAGTATAAAGTAGTAAAAATTGAGCCACTAGGAGTAGCACCCACCAGGGC  
AAAGAGAAGAGTGGTGGGGAGAGAAAAAGAGCAGTTGGACTAGGAGCTGTCTTCATTGGGTTCTTAGGAGCA  
GCAGGAAGCACTATGGGCGCAGCGTCAGTAACGCTGACGGTACAGGCCAGACAATTATTGTCTGGCATAGTGC  
AACAGCAAAGCAATTTGCTGAAGGCTATAGAGGCTCAACAGCATCTGTTGAGACTCACAGTCTGGGGCATT

>AY253305

TTCTATTGTAACACATCAGGCCTGTTTAATGGCCTGTTTAATGGCACCTGGAATGGCAATCACACAAACAGCA  
CGGAGTTAAATAGCACTATAATTCTCCAATGCAAAATAAAGCAAATTATAAATATGTGGCAGAGAGCAGGACA  
AGCAATATATGCCCCCTCCCATCCAAGGAGTAATAAAGTGTGTATCAAATATTACAGGACTAATATTAACAAGA  
GATGGTGAGAGGAACAATAGTCTAAATGAAACCTTCAGACCTGGAGGAGGAGATATGAGGGACAATTGGAGAA  
GTGAATTATATAAGTATAAAGTAGTAAAAATTGAACCACTAGGAGTAGCACCTACCAGGGCAAAGAGAAGAGT  
GGTGGAGAGAGAAAAAGAGCAGTCGGACTGGGAGCTGTCTTCATTGGGTTCTTAGGAGCAGCAGGAAGCACT  
ATGGGCGGCGGCTCAGTAACGCTGACGGTACAGGCCAGACAATTATTGTCTGGCATAGTGCAACAGCAAAGCA  
ATTTGCTGAGGGCTATAGAGGCTCAACAGCATCTGTTGAAACTCACGGTCTGGGGCATT

>AY253314

TTCTATTGTAATACATCAGGCCTGTTTAATAGCACTTGGACTACCAACAACATGCAGGAGTCAAATGACACTA  
GCAATGGCACTATAACTCTCCCATGCAGAATAAAGCAAATTATAAGGATGTGGCAGAGAGTAGGACAAGCAAT  
GTATGCCCCCTCCCATTTGAAGGAGTAATAAGATGTGAATCAAACATTACAGGACTAATACTAACAAGAGATGGC  
GGGAATAATAACAGTGCAAATGAAACCTTTAGACCTGGAGGAGGAGATATAAGGGACAATTGGAGAAGTGAAT  
TATATAAGTATAAAGTAGTAAAAATTGAACCACTAGGAGTAGCACCCACCAGGGCAAAGAGAAGAGTGGTGGA  
GAGAGAGAAAAGAGCAGTTGGAATAGGAGCTGTCTTCCTTGGGTTCTTAGGAGCAGCAGGAAGCACTATGGGC  
GCGGCGTCAATAACGCTGACGGTACAAGCCAGACAATTATTGTCTGGCATAGTGCAACAGCAAAGCAATTTGC  
TGAGGGCTATAGAGGCTCAACAACAGCTGTTGAAACTCACGGTCTGGGGCATT

>KX907352

TTCTATTGTAATACATCAGGCCTGTTTAATAGCACTTGGCTATTTAACAAGTCAAATGAGAATAAGTCAAATG  
AGTCAGATGTCAATATAACACTCCCATGCAGAATAAAGCAAATTATAAATATGTGGCAGAGAGCAGGACAAGC  
AATGTATGCCCCCTCCCATCCAGGAGTAATAAAGTGTGAATCAAACATTACAGGACTACTATTAACAAGAGAT  
GGTGGGAATAACAACAATTCAAATGAGACCTTCAGACCTGGAGGAGGAGATATGAGGGACAATTGGAGAAGTG  
AATTATATAAGTATAAAGTAGTCAAATTTGAACCACTAGGAGTAGCACCCACCAGGGCAAGGAGAAGAGTGGT  
GGGAAGAGAAAAAGAGCAGTTGGAATAGGAGCTGTTTTCCTTGGGTTCTTAGGAGCAGCAGGAAGCACTATG  
GGCGCGGCGTCAATAACGCTGACGGTACAGGCCAGACAATTATTGTCTGGCATAGTGCAACAGCAAAGCAATT  
TGCTGAGGGCTATAGAGGCTCAACAACATCTGTTGAAACTCACAGTCTGGGGCATT

>KX907348

TTCTATTGTAACACATCAGGTCTGTTTAATAGCACTTGGTATGGCAATGGCAGCAAGCTGGAGTCAAATAGCA  
CGGGGTCAGACGACAATATAACTCTCCACTGTAGAATAAAGCAAATTATAAATATGTGGCAAAGAGCAGGACA  
AGCAATATATGCCCCCTCCCATCCAGGAGTAATAAAGTGTCTATCAAACATTACAGGACTAATATTAACAAGA  
GATGGTGGGGACAATAACAGTACAAATGAAACCTTCAGACCTGGAGGAGGAGATATGAGGGACAATTGGAGAA  
GTGAATTATATAAGTATAAAGTAGTAAAAATTGAACCACTAGGAGTAGCACCCACCAGGGCAAAGAGAAGAGT  
GGTGGAAAGAGAAAAAGAGCAGTTGGACTGGGAACCTGTTCTCTTTGGGTTCTTAGGAGCAGCAGGAAGCACT  
ATGGGCGGCGGCTCAGTAACGCTGACGGTACAGGCCAGAAAGTTACTATCTGGCATAGTGCAACAGCAAAGCA  
ATTTGCTGAGGGCTATAGAGGCTCAACAACATCTGTTGAAACTCACAGTCTGGGGCATT

>KX907336

TTCTATTGTAATACATCAGGCCTGTTTAATAGCACTTGGAAACAGCACTGGGTCAAGAAATGACAGTGGCAATA  
TAACTCTCCCATGCAGAATAAAGCAAATTGTAAATATGTGGCAGAGGACAGGACAAGCAATATACGCCCCCTCC  
CATCCAAGGAAGAATACAGTGTGTGTCAAATATTACAGGACTACTATTGACAAGAGATGGAGGGATTAAACAAC  
AGTGAGGAAACCTTCAGACCTGGAGGAGGAAATATGAGAGATAATTGGAGAAGTGAACTATATAAATATAAAG  
TAGTAAAAATTGAACCACTAGGAGTAGCACCCACCAGGGCAAAGAGAAGAGTGGTGGAGAGAGAAAAAGAGC  
AGTAGTTGGACTGGGAGCTGTCTTCCTTGGGTTCTTAGGAGCAGCAGGAAGCACTATGGGCGGCGGCTCACTG  
ACGCTGACGGTACAGGCCAGACATTTATTGTCTGGCATAGTGCAACAGCAAAACAATTGCTGAGGGCTATAG  
AGGCTCAACAGCATCTGTTGAAACTCACGGTCTGGGGCATT

>KX907372

TTCTATTGTAATACATCAGGCCTGTTTAATAGCAGTTGGAACATTAATGGCAGTCGGGAGTCAAATAAAACAC  
AGTCAAATGGCACTATAACTCTCCCATGCAGAATAAAGCAAATTATAAATATGTGGCAGAGAGCAGGACAAGC

AATATATGCTCCTCCCATCCAAGGAGTAATAAAGTGTGTATCAAACATTACAGGACTAATATTAACAAGAGAT  
GGTGGGAATAATAATAACAGTTCAAATGAAACTTTTCAGACCTGGAGGAGGAGATATGAGGGACAATTGGAGAA  
GTGAATTGTATAAGTATAAGGTAGTAAAAATTGAACCACTAGGGGTAGCACCCACCAGGGCAAAGAGAAGAGT  
GGTGGAGAGAGAAAAAAGAGCAGTTGGAATAGGAGCTGTTTTCTTGGGTTCTTAGGAGCAGCAGGAAGCACT  
ATGGGCGCGGCGTCAATAACGCTGACGGTACAGGCCAGACAATTACTGTCTGGCATAGTGCAACAGCAGAGCA  
ATTTGCTGAGGGCTATAGAGGCTCAACAACAGTTGTTGAAACTCACGGTCTGGGGCATT

>KX907383

TTCTATTGTGACACATCAAGCCTGTTTAATATCACTTGGGATAGAAGTAACGTCACGCAGGAGTTAAATAACA  
CAAAGTTAAATGACACTATAATTCTCCAATGCAGGATAAAGCAAATTATAAATATGTGGCAGAGAGCAGGACA  
AGCAATGTATGCCCCCTCCCATCCCAGGAATAATAAAGTGTGAATCAAACATTACAGGACTAATATTAACAAGA  
GATGGGAGTGAGAATGAAACTGAAACCTTCAGACCTGGAGGAGGAGACATGAGGGACAATTGGAGAAGTGAGT  
TATATAAGTATAAAGTGGTAAAAATTGAACCACTAGGAGTAGCACCCACCAAGGCAAGGAGAAGAGTGGTGGA  
GAGAGAGAAAAAGAGCAGTCGGACTAGGAGCTGTCTTCTTGGGTTCTTAGGAGCAGCAGGAAGCACTATGGGC  
GCAGCGTCAATAACGCTGACGGTACAGGTACAGACAATTGTTGTCTGGCATAGTGCAACAGCAAAACAATTTGC  
TGAGGGCTATAGAAGCTCAACAGCATCTGTTGAAGCTCACGGTCTGGGGCATT

>KX907389

TTCTATTGTAACACATCAATCCTGTTTAATAGCACTTGGAAATAGCACTAGCACTTGGAAATATCTCTGAGAGTG  
TAAATAGCAGCAGTCAGGAGTCAAATGACACTATAACTCTCCAATGCAGAATAAAGCAAATTATAAATATGTG  
GCAGAGAACAGGACAAGCAATGTATGCCCCCTCCCATCCAAGGAGTAATAAAGTGCATATCAAATATTACAGGA  
CTAATATTAACAAGAGATGGTGGGGGTGATGACAATACAACTGAAACCTTCAGACCTGGAGGAGGAGATATGA  
GGGACAATTGGAGAAGTGAATTATATAAGTATAAAGTAGTAAAAGTTGAACCACTAGGAATAGCACCCACCAG  
GGCAAGGAGAAGAGTGGTGGAGAGAGAAAAAAGAGCAGTTGGAATAGGAGCTGTTTTCTTGGGTTCTTAGGA  
GCAGCAGGAAGCACTATGGGCGGCGTCAATAACGCTGACGGCACAGGCCAGACAACCTATTGGCTGGCATAG  
TGCAACAGCAAAGCAATTTGCTGAGGGCTATAGAGGCTCAACAGCATCTGTTGAAACTCACAGTCTGGGGCAT  
T

>KX907341

TTCTATTGTAATACATCAGGCCTGTTTAATAGTACTTGGGATGACACCTCGAATCATAATACAAGTGGCACGG  
AGTCAAATGCCAATATAACTCTCCAGTGTAGAATAAAGCAAATTATAAATATGTGGCAGAGAGCAGGACAAGC  
AATATATGCCCCCTCCCATCCAAGGAATAATAAAGTGTGAATCAAACATTACAGGACTGATATTAACAAGAGAT  
GGTGGAGATAACAATAACACTACCACCGAAACCTTCAGACCTGGAGGAGGAGATATGAGGGACAATTGGAGAA  
GTGAATTATATAAGTATAAAGTAGTAAAAATTGAACCACTAGGAGTAGCACCCACCAAGGCAAGGAGACGAGT  
GGTGCAGAGAGAAAAAAGAGCAGTTGGAATGGCAGCTTTATTTCTTGGGTTCTTAGGAGCAGCAGGAAGCACT  
ATGGGCGGCGCTCCATAACGCTGACGGTACAGGCCAGACAATTATTGTCTGGCATAGTGCAACAGCAAAGCA  
ATTTGCTGAGGGCTATAGAGGCTCAACAGCATATGTTGAGACTCACGGTCTGGGGCATT

>KX907347

TTCTATTGTAATACATCAGGCCTGTTTAATAGCACTTGGCTGTCTAATAGTACTAACAGCACGGATAACACGG  
GGACAAATGACACTATAACTCTCCAATGCAGAATAAAGCAAATTATAAATATGTGGCAAAGAGTAGGACAAGC  
AATGTATGCCCCCTCCCATCCAAGGAGTAATAAGGTGTGAATCAAACATTACAGGACTAATGTTAACAAGAGAT  
GGTGGGAATAATGCTACCAATGAAACCTTTAGACCTGGAGGAGGAGATATGAGGGACAATTGGAGAAGTGAAT  
TATATAAGTATAAAGTAGTAAAAATTGAACCACTAGGAGTAGCACCCACCAAGGCAAAGAGAAGAGTGGTGGA  
GAGAGAAAAAAGAGCAGTTGGAATAGGAGCTGTCTTCTTGGGTTCTTAGGAGCAGCAGGAAGCACTATGGGC  
GCGGCGTCAATAACGCTGACGGTACAGGCCAGACAATTATTGTCTGGCATAGTGCAACAGCAAGGCAACTTGC  
TGAGGGCTATAGAGGCTCAACAACATCTGTTGAAACTCACAGTCTGGGGCATT

>KX907364

TTCTATTGTAACACATCAGCCCTGTTCAATAGCAGTTGGAGTAGTGTAATGACAGCGGGAACATTAGCCCAG  
AGCCAAACAAAAATATAACCTCCGATGCAGAATAAAGCAAATTATAAATATGTGGCAGAGAGTAGGACAAGC  
AATATATGCCCCCTCCCATCCAAGGAGTAATAAGGTGTGACTCAAACATTACGGGATTAATATTAACAAGCGAT  
TATGGAGGGACTAACAGTACACATGAAATCTTCAGACCTGCAGGAGGAAATATGAGGGACAATTGGAGAAGTG  
AATTATATAAGTATAAAGTAGTACAAATTGAACCAATAGGAGTAGCACCCATCAGGGCAAAGAGAAGAGTGGT  
GGAGAGAGAAAAAAGAGCAGTCGGACTGGGAGCTGTCTTCTTGGTCTTAGGAGCAGCAGGAAGCACTATG  
GGCGGCGCTCAATGACGCTGACGGTACAGGCCAGACAATTATTGTCTGGTATAGTGCAACAGCAAAGCAATT  
TGCTGAGGGCTATAGAGGCTCAACAGCATCTGTTGAAACTCACGGTCTGGGGCATT

>KX907412

TTCTATTGTAACACATCAGGCCTGTTTCATAGCACTTGGTTTAATAGCACTTGGTTTAATAGCACTTGGGAAG  
ACAATCAGGCAAATAGCACAAATGACACTATAGTACTCCCATGCAGAATAAAGCAAATTATTAATATGTGGCA  
GAGAGCAGGACAAGCAATATATGCCCCCTCCCATCCCAGGGGAAATAAGGTGTGAATCAAACATTACAGGGCTA  
ATGTTAACAAGAGATGGTGGGAATAATAACAATAACAGGACAAATGAAACCAAAAAATGAAACCTTCAGACCTG  
GAGGAGGAGATATGAGGGACAATTGGAGAAGTGAATTATATAAGTATAAAGTAGTAAAAATTGAACCACTAGG  
ACTAGCACCCACCGGGGCAAAGAGAAGAGTGGTGGAGAGAGAAAAAAGAGCAGTTGGAATAGGAGCTGTCTTC  
CTTGGGTTCTTAGGAGCAGCAGGAAGCACTATGGGCGGCGCTCAATAACGCTGACGGTACAGGCCAGACAAT

TATTGTCTGGCATAGTGCAACAGCAAAGCAATTTGCTGAAGGCTATAGAGGCTCAACAACATCTGTTGAAACT  
CACGGTCTGGGGCATT

>KX907414

TTCTATTGTAACACATCAGGCCTGTTTAAATAGCACTTGGAGTAACACTACCACTTGGGAAAACATTACCGAAA  
GGCAGGAACCAAGCAGCAACAAGACAAACGCAACTATAACTCTCCAATGCAGAATAAAGCAAATTATAAATAT  
GTGGCAGAGAACAGGACGAGCAATGTATGCCCCCTCCCATCCCAGGAATAATAAGTTGTAACCTCAAATATTACA  
GGACTAATATTAACAAGAGATGGTGGAAATAACAGTACAAATGAAACCTTCAGACCTGGAGGAGGAGACATGA  
GGGACAATTGGAGAAGTGAATTATATAGGTATAAAGTAGTAAAAAATTGAACCACTAGGAGTAGCACCCACTGA  
GGCAAAGAGAAGAGTGGTGGAGAGAGGAAAAAGAGCAATTGGAATAGGAGCTGTTTTTCATTGGGTTCTTAGGA  
GCAGCAGGAAGCACTATGGGCGCGCGTCAATAACGCTGACGGTACAGGCCAGACAATTATTGTCTGGCATAG  
TGCAACAGCAAACAATTTGCTGAGGGCTATAGAGGCTCAACAGCATCTGTTGAAACTCACGGTCTGGGGCAT  
T

>KX907423

TTCTATTGTAACACATCAGGCCTGTTTAAATAGCATTGTTGGGTTAAGGGCCAGGAAAAGCAATCAGTCAAATAGCG  
CAAATGACACTATAGTACTCCCATGCAGAATAAAGCAAATTATAAATATGTGGCAGAGAGCAGGACAAGCAAT  
ATATGCCCCCTCCCATCCCAGGGGAAATAAAGTGTGTATCAAACATTACAGGGCTAATATTAACAAGAGATGGT  
GGGAAATAACGGGATAAATGAAACCTTCAGACCTGGAGGAGGAGATATGAGGGACAATTGGAGAAGTGAATTAT  
ATAAGTATAAAGTAGTAAAAAATTGAACCACTAGGAGTAGCACCCACCAGGGCAAAGAGAAGAGTGGTGGAGAG  
AGAAAAAAGAGCAGTTGGAATAGGAGCTGTCTTCCTTGGGTTCTTAGGAGCAGCAGGAAGCACTATGGGCGCG  
GCGTCAATAACGCTGACGGTACAGGCCAGACAATTATTGTCTGGCATAGTGCAACAGCAAAGCAATTTGCTGA  
AGGCTATAGAGGCTCAACAACATCTGTTGAGACTCACGGTCTGGGGCATT

>KX907431

TTCTATTGTAACACAACAGACCTGTTTAAATAGCACCTGGAATGAGACCAGCATAACAGGAAAATAGCACAGAGA  
CAAACAACGAGACTATAACTCTCCAATGCAGAATAAAGCAAATTATAAATATGTGGCAGAGAGCAGGACAAGC  
AATATATGCCCCCTCCCGTACCAGGAGTAATAAGGTGTGACTCAAATATTACAGGGCTAATATTAACAAGAGAT  
GGTGGGACTAATAATACAAATGAAACATTTCAGGCCTGTAGGAGGAGATATGAAGGACAATTGGAGAAGTGAAT  
TATATAAGTATAAAGTAGTAAAAAATTGAACCACTAGGGGTAGCACCCACCAGGGCAAAGAGAAGAGTGGTGGGA  
GAGAGAAAAAAGAGCAGTTGGAATAGGAGCTGTCTTCCTTGGGTTCTTAGGAGCAGCAGGAAGCACTATGGGC  
GCAGCATCAATAACGCTGACGGTACAGGCCAGACAATTATTGTCTGGCATAGTGCAACAGCAAAGCAATTTGC  
TGAGGGCTATAGAGGCTCAACAACAACCTGTTGAAACTCACAGTCTGGGGCATT

>HQ615968

TTCTATTGCAACACATCAGACCTATTTAAATAGCACTTGGGAAAATAACCTGTTCAGCCAGGAGTCAAATAGCA  
CAAGGTCAAACGACACTATAACTCTCCAATGCAAAATAAGGCAAATTATAAGAATGTGGCAGAGAGTAGGACA  
AGCAATGTATGCCCCCTCCCATCCAAGGAGTAATAAACTGTACATCAAATATTACAGGACTAATATTAACAAGA  
GATGGTGGGAATAATAATAACAGTGGAAATGAAACCTTCAGACCTGCAGGAGGAGATATGAGGGACAATTGGA  
GAAGTGAATTATATAAGTATAAAGTAGTAAAAAATTGAACCACTAGGAGTAGCACCCACCAGGGCAAAGAGAAG  
AGTGGTGGAGAGAGAAAAAAGAGCAGTTGGAATAGGAGCTGTCTTCATTGGGTTCTTAGGAGCAGCAGGAAGC  
ACTATGGGCGCAGCGTCAATAACGCTGACGGTACAGGCCAGACAATTATTGTCTGGCATAGTGCAGGAGCAAAA  
GCAATTTGCTGCAGGCTATAGAGGCTCAACAGCATCTGTTGAAACTCACGGTCTGGGGCATT

>HQ615970

TTCTATTGTAATACATCAAGCCTGTTTAAATAGTACTTGGAAATTGGAATCACACAAACAGCTTGCAGGATTCAA  
ATAGCACAGAGACAAATGGCACTATAATTCTCAAATGCAGAATAAAGCAAATTATAAAGATGTGGCAGAGAGT  
AGGACAAGCAATGTATGCCCCCTCCTATCCCAGGAGTAATAAGGTGTGTATCAAACATTACAGGATTAATATTA  
ACAAGCGATGGCGGGAATAAGACCAGTACAACAGAGACCTTCAGACCTGGGGGAGGAGATATGAGGGACAATT  
GGAGAAGTGAATTATATAAGTATAAAGTAGTCAAATTTGAACCACTAGGAGTAGCACCCACCAGGGCAAAGAG  
AAGAGTGGTGGAGAGAGAAAAAAGAGCAGTTGGAATAGGAGCTGTCTTCCTTGGGTTCTTAGGAGCAGCAGGA  
AGCACTATGGGCGTGGCGTCAATGACGCTGACGGTACAGGCCAGGCAATTATTGTCTGGCATAGTGCAACAGC  
AAAGCAATTTGCTGAGGGCTATAGAGGCTCAACAGCATCTGTTGAAACTCACAGTCTGGGGCATT

>HQ615971

TTTTATTGTAATACATCAAAACTGTTTAAATAGCAGTATATCCTACAATGGCAGTACAAAGTCAGTAGAGTCAA  
TAAACAGTAACGAGACAATAAGTCTCCCATGCAGAATAAAGCAAATTATAAATATGTGGCAGAGAGCAGGACA  
AGCAATATATGCCCCCTCCCATCCGAGGAGTAATAAAGTGTAAGTCAGACATTACAGGACTACTATTAACAAGA  
GATGGTGGGGTTACCAACACAAATGAGACCTTTAGACCTGGAGGAGGAAATATGAGGGATAATTGGAAAAGTG  
AACTATATAAATATAAAGTAGTAAAAAATTGAACCAATTAGGAGTGGCACCTCTCCTGCAAAGAGAAGAGTGGT  
GCAGAGAGAAAAAAGAGCAGTAGGACTGGGAGCTGTTTTTCATTGGGTTCTTAGGAGCAGCAGGAACCACTATG  
GGCGCGGCGTCAATGACGCTGACGGTACAGGCCAGACAATTATTGTCTGGCATAGTGCAACAGCAAGGCAATT  
TGCTGAGGGCTATAGAGGCTCAACAGCATCTGTTGAAACTCACGGTCTGGGGCATT

>HM204620

TTCTATTGCAACACATCAGGATTGTTTAAATAGCAGATGGGAAAATGACACGCAACCAAATAACACGCAGCCAA  
ACGGCACTATAACTCTCCCATGCAGAATAAAGCAAATTATAAATATGTGGCAGAGAACAGGACAAGCAATATA

TGCCCCCTCCCATCAGAGGAGTAATAAGTTGTCAATCAAACATTACAGGACTACTACTAACAAGAGATGGGGGG  
GGGAAGAATACTAGTGATAATGAAACCTTCAGACCTGGAGGAGGAGATATGAGGGACAATTGGAGAAGTGAAT  
TATATAAGTATAAAGTAGTAAAAATTGAACCATTAGGAGTAGCACCCAACAGGGCAAGGAGAAGAGTGGTGGA  
GAGAGAAAAAAGAGCAGTTGGAATAGGAGCTGTGTTCTTGGGTTCTTGGGAGCAGCAGGAAGCACTATGGGC  
GCAGCGTCAATGACGCTGACGGTACAGGCTAGACAATTATTGTCTGGTATAGTGCAACAGCAAAGCAATTTGC  
TGAGGGCTATAGAGGCTCAACAGCATCTGTTGAAACTCACAGTCTGGGGCATT

>HM204621

TTCTATTGTAATACATCAAACCTGTTTAAATAGCACTTGGGGTAATGGCAGTTACAGCACCAATGACACAGGGG  
ACGCAAATTCAAATATAACTATCCAATGCAGAATAAAGCAAATTGTAAGGATGTGGCAGAGGACAGGACAAGC  
AATGTATGCCCCCTCCCATCAAAGGAATAATAAGATGTATGTCAAATATTACAGGCCCTACTATTAACAAGAGAT  
GGTGGGATTAATAGGACGAATGAAACCTTCAGACCTATAGGAGGAGATATGATGGATAATTGGAGAAGTGAGC  
TATATAAATATAAAGTAGTAAGAATTGAACCAATAGGAGTAGCACCCAACAGGGCAAAGAGAAGAGTGGTGGA  
GAGAGAAAAAAGAGCAGTCTTTGGAATGGGAGCTGTCTTCTTGGGTTCTTAGGAGCAGCCGGAAGCACTATG  
GGCGCAGCGTCGATAACGCTGACGTTACAGGCCAGACAATTGTTGTCTGGTATAGTGCAACAGCAAAGCAATT  
TGCTGAGGGCTATAGAGGCTCAACAGCATCTGTTGAAACTCACGGTCTGGGGCATT

>KY658695

TTCTATTGTAACACATCAAGTTTGTTTAAAGGCACTTGGAAATAATGGCACTTGGAAATGATAGCATGTCAGAGG  
TAAATAGCACAGAGTCAAATGACAACATAACTCTCCCATGCAGAATAAAGCAAATTATAAATATGTGGCAGAA  
AGTAGGGCAAGCAATGTATGCCCCACCCATCCAGGGAGTAATAAGGTGTGAATCAAACATTACTGGACTAATA  
TTAACAAGAGATGGTGGGAATAGTAGCGGTGAGAATGAAACCTTTAGACCTGGAGGAGGAGATATGAGGGACA  
ATTGGAGAAGTGAATTATATAAGTATAAAGTAGTAAAAATTGAACCACTAGGAGTAGCACCCACCAAGGCAAG  
AAGAAGAGTGGTGCAGAGAGAAAAAAGAGCAGTTGGAATGGGAGCACTTTTCATTGGGTTCTTAGGAGCAGCA  
GGAAGCACTATGGGCGCGGCGTCAATAACGCTGACGGTACAGGCCAGACAATTATTGTCTGGCATAGTGCAAC  
AGCAAAGCAATTTGCTGAAGGCTATAGAGGCTCAACAGCATCTGTTGAGACTCACTGTCTGGGGCATT

>KY658696

TTCTACTGTAATACATCAGGCCTGTTTAAATAGCAATAGCACAGCAAATAGCACAGCAAAGTTTAAATAGCAATA  
GCACAGCAAATAGCACAGCAAATATAACTCTCCCATGCAGAATAAACAATAATTGTAATATGTGGCAGAGGCC  
AGGACAAGCAATGTATGCCCCCTCCAATCCAAGGGCCAATAAGTTGTAGGTCAAACATTACAGGATTACTAATA  
ACAAGAGATGGTGGAGAAAAAATGGAACGAATGAAACCTTCAGACCTGGAGGAGGAGAGATGAGGGATATTT  
GGAGAAGTGAATATATAAATATAAAGTAGTGAAAAATTGAACCATTAGGAGTAGCACCCACCAGGGCAAGGAG  
AAGAGTGGTGGAGAGAGAAAAAAGAGCAGTTGGAATGGGAGCTGTCTTCATTGGGTTCTTAGGAGCAGCCGGA  
AGCACTATGGGCGTGGCGTCAATAACGCTGACGGTACAGGCCAGACAATTATTGTCTGGTATAGTGACAGCAGC  
AAAACAATTTGCTGAGGGCTATAGAGGCTCAACAGCATATGTTGAAACTCACAGTCTGGGGCATT

>AF361872

TTCTATTGTAATACAACAAGCCTGTTTAAATAGCACCTGGTATCACAAGAACAGCACGCAGGGGTCAAATGACA  
CGGGGTGAGATGACACTATAACTCTCCCATGCAAAATAAACAATAATTGTAAGGATGTGGCAGAGAGCAGGACA  
AGCAATGTATGCCCCCTCCCATTCAGGAGTAATAAGGTGTGAATCAAACATTACAGGACTAATATTAACAAGA  
GATGGGGGGAGTGAGGACAATACCACTGAAATCTTCAGACCTGGAGGAGGAAATATGAGGGACAATTGGAGAA  
GTGAATTATATAAGTATAAAGTAGTAAAAATTGAACCACTAGGAGTAGCACCCACCAAGGCAAAGAGAAGAGT  
GGTGGGAAGAGAAAAAAGAGCAGTTGGAATGGGAGCTGTCTTCTTGGGTTCTTAGGAGCAGCCGGAAGCACT  
ATGGGCGCGGCGTCAGTAAACGCTGACGGTACAGGCCAGACAATTATTGTCTGGCATAGTGCAACAGCAGAA  
ATTTGCTGAGGGCTATAGAGGCTCAACAACATCTGTTGAAACTCACAGTCTGGGGCATT

>AF361873

TTCTATTGTAACACATCAGGCCTGTTTAAACAGCACTTGGCATAGCAATGCCAGCATACAAGAGCCAAACAGCA  
CAGAGTCAAATGACACTATTATAACTCTCCAATGTAGAATAAACAATAATTATAAATATGTGGCAGAGAACAGG  
AAAAGCAATATATGCTCCTCCCATCCAAGGAATAATAAGGTGTGAATCAAACATTACAGGACTAATATTAACA  
AGAGATGGTGGGAGTAATAATAGCACCAATGAAACCTTCAGACCTGGAGGAGGAGATATGAGGGACAATTGGA  
GAAGTGAATTATATAAGTATAAAGTAGTAAAAATTGAACCACTAGGAGTAGCACCCCTCCTGGGCAAGGAGAAG  
AGTGGTGCAGAGAAAAAAGAGCAGTTGGAATAGGAGCTGTCTTCTTGGGTTCTTAGGAGCAGCTGGAAGC  
ACTATGGGCGCGGCGTCAATAACGCTGACGGTACAGGCCAGACAATTATTGTCTGGCATAGTGCAACAGCAAA  
GCAATTTGCTGAGGGCTATAGAGGCTCAACAGCATCTGTTGAAACTCACGGTCTGGGGCATT

>HM027846

TTCTATTGTAACACATCAGGTCTGTTTAAATAGCACGTGGAATACTACCAACATGTGGGAGCAAAATAGCACGG  
AGTCAAACAATAATACTATATATCTTCAATGCAGAATAAAGCAAATTATCAATATGTGGCAGAGAGTAGGACA  
AGCAATATATGCCCCCTCCCATCCCAGGAATGATAAGGTGTGTCTCAAATATTACAGGACTAATATTAACAAG  
GATGGTGGGAATATTAGTGAGAATAATGCCAGTGAAATCTTCAGACCAGGAGGAGGAGATATGAGGGACAATT  
GGAGAAGTGAATTATACAAGTATAAAGTAGTAAAAATTGAACCACTAGGAGTAGCACCAACCCCGGCAAGGAG  
AAGAGTGGTGGAGAGAGAAAAAAGAGCAGTCGGAATAGGAGCTGTCTTCTTGGGTTCTTAGGAGCAGCAGGA  
AGCACTATGGGCGCGGCGTCAATAACGCTGACGGCACAGGCCAGACAATTATTGTCTGGTATAGTGCAACAGC  
AAAGCAATTTGCTGAGGGCTATAGAGGCTCAACAGCATCTGTTGAAACTCACGGTCTGGGGCATT

>JX877522

TTCTATTGTGACACATCAGAACTATTTAATAGCACTTGGAATGACGCTGCCATTATGAGGGAATTAAATAGAA  
CGGAGTCAAACGACACCATAACTCTCCAATGCAAAATAAAGCAAATTATAAATATGTGGCAGAGAGCAGGACG  
AGCAATGTATGCCCCCTCCCATCCGAGGAGTAATAAGATGTGAGTCAAATATTACAGGACTAATATTAACAAGA  
GATGGTGGGAGGGATGATAACAATACAACCTTGAAACCTTCAGACCTGGAGGAGGAGATATGAGGGACAATTGGA  
GAAGTGAATTATATAAGTATAAAGTAGTAAACTTTGAGCCACTAGGAATAGCACCCACCAAGGCAAAGAGAAG  
AGTGGTGGAGAGAGAAAAAGAGCAGTTGGACTGGGAGCTGTTTTTCATTGGGTTCTTAGGAGCAGCAGGAAGC  
ACTATGGGCGCGGCGTCAATAACGCTGACGGTACAGGCCAGACAATTATTGTTTGGCATAGTGCAACAGCAAA  
GCAATTTGCTGAGGGCTATAGAGGCTCAACAGCATATGTTGAAACTCACAGTCTGGGGCATT

>HM215272

TTCTATTGTAATACATCAAGCCTATTTAATAGTACTTGGTGGAGCAACAACAGCAACAACACTGACAGTGAGG  
AGTCAAATAGCATGGGGTTAAATGACACTATAACTCTCCAATGCAGAATAAAGCAAATTATAAATATGTGGCA  
GAGAGTAGGACAAGCAATGTATGCCCCCTCCCATCCAAGGAGTAATAAGGTGTGAGTCAAACATCACAGGAATA  
CTATTAACAAGAGATGGTGGGGATAATAACAATGAAAGTGAACCTTCAGACCTGTAGGAGGAGATATGAGGG  
ACAATTGGAGAAGTGAATTATATAAATATAAAGTAGTAAAAATTGAACCATTAGGAGTAGCACCCACAGAGGC  
AAGGAGAAGAGTGGTGGGAAGAGGAAAAAGAGCAGTTGTTGGAATGGGAGCTATGTTCTTGGGTTTTTGGGA  
GCAGCTGGGAGCACTATGGGCGCGGCGTCAATAACGCTGACGGTACAGGCCAGACAATTATTGTCTGGCATAG  
TGCAACAGCAAAGCAATTTGCTGAGGGCTATAGAGGCTCAACAGCATCTGTTGAAACTCACTGTCTGGGGCAT  
T

>HM027824

TTCTATTGTAACACATCAGGTCTGTTTAATAGCACGTGGAATGGTACCCAAATGATGGAGCCAAATAGCACAG  
AAAACATTAATGATACTATAACTCTTAAATGCAGAATAAAGCAAATTATACATATGTGGCAGAGAGTAGGACA  
AGCAATATATGCCCCCTCCCATCAAAGGAGTGATAAGATGTAACCTCAAACATTACAGGACTAATATTAACAAGA  
GATGGTGGGACTGAAGGGAATAGCAGTGAAACCTTCAGACCGGGAGGAGGTGATATGAGGGACAATTGGAGAA  
GTGAATTATATAAGTATAAAGTAGTAAAAATTGAACCACTAGGAGTAGCACCTACCAAGGCAAGGAGAAGAGT  
GGTGGAGAGAGAAAAAGAGCAATCGGACTGGGAGCTGTCTTCTTGGGTTCTTAGGAGCAGCAGGAAGCACT  
ATGGGCGCGGCGTCAATAACGCTGACGGCACAGGCCAGACAATTATTGTCTGGCATAGTGCAACAGCAAAGCA  
ATTTGCTGCAGGCTATAGAGGCTCAACAGCATCTGTTGAAACTCACAGTCTGGGGCATT

>JX236669

TTCTACTGTAATACATCAGGCCTGTTTAATAGCACTTGGAACATTGCTGGGAACAGGACAAATGACACGAAGT  
CAAATGAACTATAACTCTCCCATGCAGAATAAAGCAAATTGTAAATGTGTGGCAGAGAGTAGGACAAGCAAT  
ATATGCCCCCTCCCATCGCAGGAGTAATAAGATGTAACCTCAAACATTACAGGATTACTATTAGTAAGAGATGGT  
GGAGCTACTAACAATACTGATGAAACCTTCAGGCCTGGAGGAGGAAATATGAGGGACAATTGGAGAAGTGAAT  
TATATAAGTATAAAGTAGTAAAAATTGAACCACTAGGAGTAGCACCCACCAGGGCAAGGAGAAGAGTGGTGGGA  
GAGAGAAAAAGAGCAGTTGGACTGGGAGCTGTATTTCATTGGGTTCTTAGGAGCAGCAGGAAGCACTATGGGC  
GCGGCGTCAGTGACGCTGACGGTACAGGCCAGACAATTATTGTCTGGCATAGTGCAACAGCAAAGCAATTTGC  
TGAGGGCTATAGAGGCTCAACAGCATCTGTTGAAGCTCACGGTCTGGGGCATT

>JX236671

TTCTATTGTAATACAGCAGGTCTGTTCAATAGAAATTGGACTTGAGTAAGGAGAATGGGACCAGAATGCAGA  
ATAAACCGGATTCAAATGGCACTATAACTCTCCAATGCAGAATAAAGCAAATTATAAATATGTGGCAGAGAAC  
AGGACAGGCAATGTATGCCCCCTCCCATCCAAGGAGTAATAAATGTGCATCAAACATTACAGGACTACTGTTA  
ACAAGGGATGGTGGAGATAACAAAAACAATAGTACCAATAGTACCAATCAAATAACACTGAAATCTTTAGAC  
CTATAGGAGGAGATATGAGGAATAATTGGAGAAGTGAATTATATAAGTATAAAGTAGTAAAAATTGAACCACT  
AGGAGTAGCACCTACCACGGCAAGGAGAAGAGTGGTGGGAAGAGAAAAAGAGCAGTACTAGGTGGACTAGGA  
GCTGTATTCTTGGGTTCTTAGGAGCAGCCGGAAGCACTATGGGCGCAGCGTCAATAACGCTGACGGTACAGG  
CCAGGCAATTATTGTCTGGCATAGTGCAACAGCAAAGCAATTTGCTGAGGGCTATAGAGGCTCAACAACATCT  
GTTGAAACTCACGGTCTGGGGCATT

>JX236676

TTCTATTGTAACACATCAAGCCTATTTAATAGCATTGGAATGGCAGTAATCAAATAACACGGAGCCAGATA  
GCACCATAACTCTCCAATGCAGAATAAAGCAAATTATAAATATGTGGCAGAGAGTAGGACAAGCAATGTATGC  
CCCTCCCATCCAAGGAGTAATAAGGTGTGAGTCAAACATTACAGGGCTAATATTAACAAGAGATGGTGGGAGT  
AATAGCAGTAGTACAAATGAAACCTTCAGACCTGGAGGAGGAGATATGAGAGACAATTGGAGAAGTGAATTAT  
ATAAGTACAAAGTAGTAAAAATTGAACCACTAGGAGTAGCACCCACCAAGGCAAAGAGAAGAGTGGTGGAAAG  
AGAAAAAGAGCAGTTGGAATAGGAGCTGTTTTCTTGGGTTCTTAGGAGCAGCAGGAAGCACTATGGGCGCA  
GCGTCAATAACGCTGACGGTACAGGCCAGACAATTATTGTTTGGCATAGTGCAACAGCAAAGTAATTTGCTGA  
GGGCTATAGAGGCTCAACAGCATCTGTTGAAACTCACGGTCTGGGGCATT

>KF716478

TTCTATTGTAATACATCAAGCCTGTTTAATAGTACTTGGGTATATGGTAATGGAAGCTGGGGGTCAAATAGCA  
CGGGGTAAATAGTACAATGATAAATAACTATTTTCAGTGATACCATAATTCTTCAATGCAGAATAAAGCA  
AATTATAAATATGTGGCAGAGAGCAGGACAAGCAATATATGCCCCCTCCCATCAAAGGAGTAATAAGCTGTAGA

TCAAACATCACAGGACTAATATTAACAAGAGATGGTGGGAGTAACAGCAATGCAAGTACAAATGGAAGTGAAA  
CCTTCAGACCTGGAGGAGGAGATATGAGGGACAATTGGAGAAGTGAATTATATAAGTATAAAGTAGTAAAAGT  
TGAACCACTAGGAATAGCACCCCTCCAAGGCAAGGAGAAGAGTGGTGGCGAGAGAAAAAAGAGCAGTTGGAATA  
GGAGCTGTACTCCTTGGGTTCTTAGGAACAGCAGGAAGCACTATGGGCGCAGCGTCAATAACGCTGACGGTAC  
AGGCCAGAAAATTATTGTCTGGCATAGTGCAACAGCAAAGCAATTTGCTGAGGGCTATAGAGGCTCAACAGCA  
TCTGTTGAAACTCACTGTCTGGGGCATT

>KP109490

TTCTACTGTAATACATCAGGCCTGTTCAATAGCACTTGGGAATAACACCTCGCAGGCAAATAGCTCGGAGTTAA  
AGGGCAATATAACTCTCCCATGCAAAATAAAACAAATTATCAGGATGTGGCAAAGAACAGGACAAGCAATGTA  
TGCCCCCTCCCATCCAAGGAGTAATAAATTGTGTATCAAAACATTACAGGACTACTATTAACAAGAGATGGTGGG  
GAGGAGGACAATAGTACTGAAACCTTCAGACCTGGAGGAGGAGATATGAGGGATAAATTGGAGAAGTGAATTAT  
ATAAGTATAAAGTAGTAAAAAATTGAACCAGTAGGAGTAGCACCCACCAAGGCAAGGAGAAGGGTGGTGGAGAG  
AGAAAAAAGAGCAGTTGGAATAGGAGCTGTCTCTCTTGGATTCTTAGGAGCAGCAGGAAGCACTATGGGCGCG  
GCGTCAATAACGCTGACGGTACAGGCCAGACAGTTATTGTCTGGTATAGTGACAGCAGCAAAGCAATTTGCTGA  
GGGCTATAGAGGCTCAACAACAACCTGTTGAAACTCACGGTCTGGGGCATT

>JF680921

TTCTATTGTAACACATCAGGCCTGTTTAATAGCACTTGGACTAAGAATAGCAGCACTAACACTTGGGAATAGTA  
CTGACATCATGTGGGGGGTAAATAACAGTGACCATAATATAACTCTCCAATGCAAAATAAAGCAAATTATAAC  
CATGTGGCAGAGGACAGGGCAGGCAATGTACGCCCCCTCCCATCCCAGGAATAATAAACTGTGTGTCAAACATT  
ACAGGACTACTATTAACAAGAGATGGTGGTGAGGAGAGTAACAGTAGAGATAATGAAACCTTCAGACCTATAG  
GAGGAAATATGAAGGATAATTGGAGAAGTGAACCTATATAAATATAAAGTAGTAAAAAATTGAACCACTAGGAGT  
AGCACCCACCAAGGCAAAGAGAAGAGTGGTGCAGAGAGAAAAAAGAGCAGTTGGACTGGGAGCTGTCTTCATT  
GGGTTCTTAGGAGCAGCCGGAAGCACTATGGGCGCGGCGTCAATAACGCTGACGGTACAGGCCAGACAATTAT  
TGTCTGGCATAGTGCAACAGCAAACAATTTGCTGAGGGCTATAGACGCTCAACAGCATCTGTTGAAGCTCAC  
GGTCTGGGGCATT

>KF859745

TTCTATTGTAACACATCAGGCCTGTTTAATAGCACTTGGACAATAGCACTCAAGAGTCTAATAGCACGGAGA  
CTATAACTCTCCCATGCCGAATAAAGCAAATTGTAAATATGTGGCAGAGAGCAGGACAAGCCATATATGCCCC  
TCCCATCAAAGGAATAATAAATGTAGATCAAACATTACAGGACTAATATTAACAAGAGATGGTGGACATAAT  
AATACAAATGAAACCTTCAGGCCTGGAGGAGGAGATATGAGGGACAATTGGAGAAGTGAATTATATAAGTATA  
AAGTAGTAAAAGTTGAACCACTAGGAGTAGCACCCACCACGGCAAGGAGAAGAGTGGTGCAGAGAGAAAAAAG  
AGCAGTATTTGGACTGGGAGCTGTCTTCATTGGGTTCTTAGGAGCAGCAGGAAGCACTATGGGCGCGGCGTCA  
ATAACGCTGACGGTACAGGCCAGACAATTATTGTCTGGCATAGTGCAACAGCAAAGCAATTTGCTGAGGGCTA  
TAGAGGCTCAACAGCATCTGTTGAAACTCACGGTCTGGGGCATT

>KF716486

TTCTATTGTAATACATCAAGTCTGTTTAATAGTACTTGGGACCTTAATGCTACTAGGGAAGATAGCACGGAGA  
ACATAACTCTCCCATGCAGAATAAAGCAAATCATAAATATGTGGCAAAGAGTAGGACAAGCAATGTATGCCCC  
TCCCATCGAAGGAATAATAAGATGTGACTCAAACATTACAGGACTACTCTTAACAAGAGATGGTGGGAATAGT  
AGTACAAATGAAACTCAGGAAATCTTCAGACCTATAGGAGGGGATATGAAAGATAAATTGGAGAAATGAATTAT  
ACAAGTATAAAGTAGTAAAAAATTGAACCTCTGGGAGTAGCACCCCTCCTGGGCAAGGAGAAGAGTGGTGGAGAG  
AGGAAAAAGAGCAGTTGGAATAGGAGCTGTATTCTTGGGTTCTTAGGAGCAGCAGGGAGCACTATGGGCGCA  
GCGTCAATAACGCTGACGGTACAGGCCAGGCAATTATTGTCTGGCATAGTGCAACAGCAAAGCAATTTGCTGA  
AGGCTATAGAAGCTCAACAACAACCTGTTGAGACTCACGGTCTGGGGCATT

>M62320

TTCTATTGCAACACATCAGGCCTGTTTAATAGCATTTGGAATGGCAGCATGTCAAATGACATGGGGCCAAATG  
GCACTATAACTCTCCAATGTAGAATAAAGCAAATTATAAATATGTGGCAGAGAGTAGGACAAGCAATGTATGC  
CCCTCCCATCCAAGGAGTAATAAGGTGTGAATCAAACATTACAGGACTACTATTAACAAGAGATGGGGGTACT  
AACAATACAAAAAATGAGACCTTCAGACCTGGAGGAGGAGATATGAGGGACAATTGGAAGAGTGAATTATATA  
AGTATAAAGTAGTAAAAAATTGAACCACTAGGAGTAGCACCCACCAGGGCAAAGAGAAGAGTGGTGGAGAGAGA  
AAAAAGAGCAGTTGGACTAGGAGCTATCTTCCTTGGGTTCTTAGGAGCAGCTGGAAGCACAAATGGGCGCGGCG  
TCAATAACGCTGACGGTACAGGCCAGACAATTATTGTCTGGTATAGTGCAACAGCAGAGCAATCTGCTGAGGG  
CTATAGAGGCTCAACAGCATCTGTTGAAACTCACTGTCTGGGGCATT

>L22957

TTCTATTGTAATACAGCAGGCCTGTTTAATAGTACTTGGGAATAAAAAATGACAGCATAAAGTCAAATGACACAA  
AGTCAAATGACATTATAACTCTTCAATGCAGAATAAAGCAAATTATAAATATGTGGCAGAGAGTAGGACGAGC  
AATGTATGCCCCCTCCCATCAAAGGAGTAATAAGGTGTGAATCAAACATTACAGGACTACTATTAACAAGAGAT  
GGTGGAAATGGGAGCAATACAAATGAAACCTTCAGACCAGGAGGAGGAGATATGAGGGACAATTGGAGAAATG  
AATTATATAAGTATAAAGTAGTACAAATTGAACCAATTAGGAGTAGCACCTACCCAGCAAAGAGAAGAGTGGT  
GCAGAGAGAAAAAAGAGCAGTTGGACTAGGAGCTGTATTCTTGGGTTCTTAGGAGCAGCAGGAAGCACTATG

GGCGCGGCGTCAATAACGCTGACGGTACAGGCCAGACAATTATTGTCTGGCATAGTGCAACAGCAAAGCAATT  
TGCTGAGAGCTATAGAGGCTCAACAGCATCTGTTGAAACTCACAGTCTGGGGCATT

>L22951

TTCTATTGTGACACATCAGGCCTGTTTAAATAGCACTTGGAATGGCAATACCAGCAAGCAGGAGTCAAGTAGCA  
CAGAGTCAAATGGCAATATAACTCTCCAATGCAGAATAAAGCAAATTATAAATATGTGGCAGAGAGCAGGAAA  
AGCAATATATGCCCCCTCTATCAAAGGAGTAATAAGGTGTGTATCAAACATTACAGGACTAATATTAACAAGA  
GATGGTGGGGGTAATAACAGTGAAAATGAAACCTTCAGACCTGGAGGAAGAGATATGAGGGACAATTGGAGAA  
GTGAATTATATAAGTATAAAGTAGTAAAAATTGAACCACTAGGAGTAGCACCCACCAGGGCAAGGAGGAGAGT  
GGTGGAGAGAGAAAAAAGAGCAGTTGGAGTAGGAGCTGTCTTCCTTGGGTTCTTAGGAGCAGCAGGAAGCACT  
ATGGGCGCGGCGTCAATAACGCTGACGGTACAGGCCAGACAATTATTGTCTGGCATAGTGCAACAGCAAAGCA  
ATTTGCTGAAGGCTATAGAGGCTCAACAGCATCTGTTGAAACTCACGGTCTGGGGCATT

>AB253429

TTCTATTGTAATACATCAGGCCTGTTTAAATAGTACTTGGGTAAATGGCACTACCAGCAGCATGTCAAATGGCA  
CTATAACTCTCCCATGCAGAATAAAGCAAATTATAAATATGTGGCAGAGAGTAGGACAAGCAATGTATGCCCC  
TCCCATCCAAGGAGTAATAAAGTGTGAATCAAACATTACAGGACTAATATTAACAAGAGATGGTGGGGTTAAT  
AGCAGTGACAGTGAAACCTTCAGACCTGGAGGAGGAGATATGAGGGATAATTGGAGAAGTGAATTATATAAGT  
ATAAGGTAGTAAAAATTGAACCACTAGGAGTAGCACCCACCAAGGCAAGGAGAAGAGTGGTGGAGAGAGAAAA  
AAGAGCAGTTACACTGGGAGCTGTATTCATTGGGTTCTTAGGAACAGCTGGAAGCAATGGGCGCGGCGTCA  
ATAACGCTGACGGTACAGGCCAGAAAAATTATTGTCTGGCATAGTGCAACAGCAAAGCAATTTGCTGAGGGCTA  
TAGAGGCTCAACAGCATCTGTTGAAACTCACTGTCTGGGGCATT

>AY494973

TTCTATTGTAATACATCAGGCCTGTTTAAATAGCACTTGGCCTTGGAATGAGACAAAATAGCGAGACAAATAACA  
CGAACGCTACTATAGTGCTCCCATGCAGAATAAAACAAAATTGTAAGAATGTGGCAGAGAGTAGGACAAGCAAT  
GTATGCCCCCTCCCATCCAAGGAGTAATAAAGTGTACATCAAACATTACAGGACTACTATTAATAAGAGATGGT  
GGGGTTGGTAACAATACAAATGGAACCTGAAACCTTCAGACCTGGAGGAGGAAAATATGAGGGACAATTGGAGAA  
GTGAATTATATAAGTATAAAGTAGTAAAAATTGAACCACTAGGAGTAGCACCCACCGGGGCAAAAAGAAGAGT  
GGTGGAGAGAGAAAAAAGAGCAGTTGGAATAGGAGCTGTGTTTCATTGGGTTCTTAGGAGCAGCTGGAAGCACT  
ATGGGCGCAGCATCAGTAACGCTGACGGTACAGGCCAGACAATTGTTGTCTGGCATAGTGCAACAGCAAAGCA  
ATTTGCTGAGGGCTATAGAGGCTCAACAGCATATGTTGAAACTCACGGTCTGGGGCATT

>EU853062

TTCTATTGTAATACATCAGACCTGTTTAAATAGCACTTGGTACTTAAATGGCACTAGCACTTGGTACAATGGCA  
CTGCAAATAACGCACCGTTAAATGGTAATATAACTCTCCCATGCAGAATAAAGCAAATCATAAGGATGTGGCA  
GAGAACAGGACAAGCAATGTATGCCCCCTCCCATTAAGGAAAAATAGAATGTGTATCAAACATTACAGGACTC  
CTATTAGTAAGAGATGGTGGGAATGATGAGAATAACAACACAAGAAATAACACCCTCAAAGATGAAAAATTCA  
GACCTGGAGGAGGAGATATGAAGGACAATTGGAGAAATGAATTATATAGGTATAAAGTAGTAAGAGTTGAACC  
ACTAGGAGTAGCACCCACCAAGGCAAGGAGAAGAGTGGTGGGGAGAGAAAAAAGAGCAGTTGGAATAGGAGCT  
GTGTTCTTGGGTTCTTAGGAGCAGCAGGAAGCACTATGGGCGCGGCGTCAATAACGCTGACGGAACAGGCCA  
GACAAATTATTGTCTGGTATAGTGCAACAGCAAAGCAATTTGCTGAGGGCTATAGAGGCTCAACAGCAACTGTT  
GAACTCACAGTCTGGGGCATT

>EU852958

TTCTATTGTAATACATCAGGCCTGTTTAAATAGCACCTGGGATAAAAATACCACCGTGCAGGAGTCAAATAGCA  
CGGGGTCAAATGACACTATAACTCTCCAATGTAGAATAAAGCAAATTATAAATATGTGGCAGGAAGTAGGACG  
AGCAATGTATGCTCCTCCCATCAAAGGAGTAATAAGGTGTGAATCAAACATTACAGGAATGATATTAACAAGA  
GATGGGGGTAATACTACCGGGAAAAATGAGATCTTTAGGCCTGGAGGAGGAGATATGAGGGATAATTGGAGAA  
GTGAATTGTATAAGTATAAAGTAGTAAAAATTGAACCACTAGGAGTAGCACCCACCGAGGCAAGAGAAGAGT  
GGTGGAGAGAGAAAAAAGAGCAATTGGTGGAAATAGGAGCTGTCTTCCTTGGGTTCTTAGGAGCAGCAGGAAGC  
ACTATGGGCGCAGCGTCAATAACGCTGACGGCACAGGCCAGACAATTATTGTCTGGTATAGTGCAACAGCAAA  
GCAATTTGCTGAGGGCTATAGAGGCTCAACAGCATCTGTTGAAACTCACGGTCTGGGGCATT

>EU852954

TTCTATTGTAACACATCAGGCCTGTTTAAATAGCACCTGGTATACAAATAATACCAGCGTGCAGGAGACAAATA  
GCACGGGGACAAATGACACTATAATTCTCCAATGTAGAATAAAGCAAATTATAAATATGTGGCAGGAAGTAGG  
ACGAGCCATGTATGCTCCTCCCATCAGGGGAGTAATAAGGTGTGAATCAAACATTACAGGAATGATATTAACA  
AGAGATGGGGGTGTGAGTGTTAACAAGACAACCTGAGACTGAGGTCTTCAGACCTGGAGGAGGAGATATGAGGG  
ATAATTGGAGAAGTGAATTGTATAAGTATAAAGTAGTAAAAATTGAACCACTAGGAGTAGCACCTACCAAGGC  
AAAGAGAAGAGTGGTGGAGAGAGAAAAAAGAGCAATTACTGGAATAGGAGCTGTCTTCCTTGGGCTCTTAGGA  
GCAGCAGGAAGCACTATGGGCGCAGCGTCAATAACGCTGACGGCACAGGCCAGACAATTATTGTCTGGTATAG  
TGCAACAGCAAAGCAATTTGCTGAGGGCTATAGAGGCTCAACAACATCTGTTGAAACTCACGGTCTGGGGCAT  
T

>AF484507

TTCTATTGTAATACATCACAATTGTTTAAATAGCATTTGGAATGTCACCTAACAGCACAGAGTCAGAGAATAGCA  
CGGGGTCAGATGACACTATAACTCTTCCATGCAGAATAAAGCAAATTATAAAGATGTGGCAGAGAACAGGACA  
AGCAATATATGCCCCCCCCATCCAAGGAGTAATAAGGTGTGAATCAAACATTACAGGACTATTATTAACAAGA  
GATGGTGGGAATAACAATACAGGTAATGAAACCTTCAGACCTGCAGGAGGAGATATGAAGGACAATTGGAGAA  
GTGAATTATATAAGTACAAAGTAGTAAAAATTGAACCACTAGGAGTAGCACCCACCAAGGCAAGAAGGAGAGT  
GGTGGAGAGAGAAAAAAGAGCAGTTGGAATAGGAGCTGTATTCCTTGGGTTCTTAGGAACAGCAGGAAGCACT  
ATGGGCGCGGCGTCAATAACGCTGACGGTACAGGTACAGCAATTATTGTCTGGCATAGTGCAACAGCAAGGCA  
ATTTGCTGAGGGCTATAGAGGCTCAACAACAGCTGTTGAACTCACGGTCTGGGGCATT

>AF484508

TTCTACTGTAACACATCAAGCCTGTTTAAATGGCACTTGGAAATGGCACTGAGAACATAACGGAGTCAAATAGCA  
TGAACGACTCTATAATACTCCAATGCAGAATAAAGCAAATTATAAATATGTGGCAGAGAGCAGGACAAGCAAT  
ATATGCCCTCCCATCCCAGGAGTAATAAGGTGTCAATCAAACATTACAGGACTAATATTAACAAGAGATGGT  
GGAAATAACAGTACAAATGAAACCTCCAGACCTGGAGGGGAGATATGAGGGACAACCTGGAGAAGTGAATTAT  
ATAAGTATAAAGTAGTAAAACTTGAACCACTAGGAGTAGCACCCACCAGGGCAAAGAGAAGAGTGGTGGAGAG  
AGAGAAAAGAGCAGTTGGACTAGGAGCTGTTTTCTTTGGGTTCTTAGGAGCAGCAGGAAGCACTATGGGCGCG  
GCGTCAATAACGCTGACGGTACAGGCCAGACAATTATTGTCTGGTATAGTGCAACAGCAAAGCAATTTGCTGA  
GGGCTATAGAGGCTCAACAGCATCTGTTGAACTCACGGTCTGGGGCATT

>AF484509

TTCTATTGTGACACATCAGGCCTGTTTAAATAGCACTTGGTATAATACTTGGAAATAGCACTGAATCAAAAAGCA  
CGGAGTCAAACGACATTACTCTCCAATGCAGAATAAAGCAAATTATAAATATGTGGCAGAGAGCAGGACAAGC  
AATATATGCCCTCCCATCCAAGGAGTAATAATGTGTAAATCAAATATTACAGGACTAATATTAACAAGAGAT  
GGTGGAGGTAATAGCAGTGAACCTGAAACCTTCAGACCTGGAGGAGGAGACATGAGGGACAATTGGAGAAGTG  
AATTGTATAAGTATAAAGTAGTAAAAATTGAACCACTAGGAGTAGCACCCACCAAGGCAAGGAGAAGAGTGGT  
GCAGAGAGAAAAAAGAACAGTTGGAATAGGAGCTGTGTTCTTGGGTTCTTAGGAGCAGCAGGAAGCACTATG  
GGCGCGGCGTCAATAACGCTGACGGTACAGGCCAGAGCATTACTGTCTGGCATAGTGCAACAGCAAAGCAATT  
TGCTGAGGGCTATAGAGGCTCAACAACATCTGTTGAGACTCACGGTCTGGGGCATT

>AF484512

TTCTATTGTGATACAAACAGGACTGTTTAAATAGCAATTGGACTTGGAAATGACACTGCCAGCATAATGGAGTCAA  
ATAGCATGGAGTCAACTCAAAATATAACACTCCAATGCAGAATAAAGCAGATTATAAATATGTGGCAGAGAGC  
AGGTAAAGCAATGTATGCCCTCCCATCCAAGGAACAATAAGGTGTGAATCAAACATTACAGGACTACTGTTA  
ACAAGAGATGGTGGGGATAATAGAGATAATAGAACTGAAACCTTCAGACCTGGAGGAGGAGATATGAGGGATA  
ATTGGAGAAGTGAATTATATAAGTATAAAGTAGTCAAAATTGAACCACTAGGAGTAGCACGCACCAGGGCAA  
GAGAAGAGTGGTGGAGAGAGAAAAAAGAGCAGTTGGAATAGGAGCTGTCTTCTTGGGTTCTTAGGAGCAGCA  
GGAAGCACTATGGGCGCGGCGTCAATAACGCTGACGGTACAGGCCAGACTATTATTGTCTGGTATAGTGCAAC  
AGCAAAGCAATTTGCTGAGGGCTATAGAGGCTCAACAACATTTGTTGAAGCTCACGGTCTGGGGCATT

>EU853030

CTCTATTGTAATACATCAGGCCTGTTTAAATAGCACTTGGAAATAACACTGTGACACGGAGTTAAATAGCAAGG  
AGGCAAATAACAATATAACTCTCCCATGCAAAATAAAGCAAATTATAAATATGTGGCAAAGAACAGGACAAGC  
AATGTATGCCCTCCCATCCGAGGAGTAATAAATTGTGTGTCAAACATTACAGGACTAATATTAACAAGAGAT  
GGTGGGCCTAACGATACACATGAAAATGAAACCTTCAGACCTGGAGGAGGAAATATGAGGGACAATTGGAGAA  
GTGAATTATATAAATATAAAGTAGTAAAAATTGAACCATTAGGAGTAGCACCCACCAGGGCAAAGAGAAGAGT  
GGTGGAAAGAGAAAAAAGAGCAGTTGGAATAGGAGCTGTCTTCTTGGGTTCTTAGGAGCAGCAGGAAGCACT  
ATGGGCGCGGCGTCAATAACGCTGACGGTACAGGCCAGACAATTGTTGTCTGGCATAGTGCAACAGCAAAGCA  
ATTTGCTGAGGGCTATAGAGGCTCAACAACATCTGTTGAACTCACGGTCTGGGGCATT

>AF484478

TTCTATTGTAACACAACAAACCTGTTTAAATAACATTTGGAGTAATGCCAGCATGCAGAAGGCAAATAGCATAA  
ACGACACTATAACTCTCCAATGCAGAATAAAGCAAATTATAAATATGTGGCAGAGAGTAGGACAAGCAATATA  
TGCCCTCCCATCCAAGGAGTGATAAAGTGTGAATCAAACATTACAGGACTAATATTAACAAGAGATGGTGGG  
GTAATAACAATACAAATGAAACCTTCAGACCTGGAGGAGGAGATATGAGGGACAATTGGAGAAGTGAATTAT  
ATAAGTATAAAGTAGTAAAAATTGAACCACTAGGAGTAGCACCTACCAGGGCAAAGAGAAGAGTGGTGGAGAG  
AGAAAAAAGAGCAGTTGGAATGGGAGCTGTCTTCTTGGGTTCTTAGGAGCAGCAGGAAGCACTATGGGCGCG  
GCGTCAATAACGCTGACGGTACAGGCCAGACAATTATTGTCTGGCATAGTGCAACAGCAAAGCAATTTGCTGA  
GGGCTATAGAGGCTCAACAGCATCTGTTGAACTCACGGTCTGGGGCATT

>AF484493

TTCTATTGTAATACATCAGGCCTGTTTAAATAATACTTACACTACTGACAGCATAGAGTCAAATGACACGGAGC  
CAGATGCAAATATAACTCTTCCATGCAGAATAAAGCAAATTATAAATATGTGGCAGAGAGTAGGACAAGCAAT  
ATATGCCCTCCCATCCAAGGAGTAATAAAGTGTGAGTCAAACATCACAGGACTACTATTAACAAGAGATGGT  
GGTACTAACAGTACTAAAAGTACTGAAACCTTCAGACCTGGAGGAGGAGATATGAGGGACAATTGGAGAAGTG  
AATTATATAAGTATAAAGTAGTACAAGTTGAACCAATAGGAGTAGCACCCACCAGGGCAAAGAGAAGAGTGGT  
GGAGAGAGAAAAAAGAGCAGTTGGAATAGGAGCTGTACTCCTTGGGTTCTTAGGAGCAGCTGGAAGCACAAATG

GGCGCGGCGTCAATAACGCTGACGGTACAGGCCAGACAGTTATTGTCTGGCATAGTGCAGCAGCAAAGCAATT  
TGCTGAGGGCTATAGAGGCTCAACAGCAACTGTTGAGACTCACTGTCTGGGGCATT

>AB098330

TTCTATTGTAATACATCAGGCCTGTTCAATGGCACCTGGAAGCCAAACAGCACAGAGTCAAACAACACAACGC  
CAAATGACACTATAACTCTTACATGCAGAATAAAGCAAATTATAAATATGTGGCAGAAAGTAGGACAAGCAAT  
GTATGCCCTCCCATTCAGGAGTAATAAGGTGTGAATCAAACATTACAGGACTACTATTAAACAAGAGATGGA  
GGGATTAACAGTATAAATGAAACCTTCAGACCTGGAGGAGGAAATATGAGGGACAATTGGAGAAGTGAATTAT  
ATAAGTATAAAGTAGTAAAAATTGAACCACTAGGAGTAGCACCTCCAGGGCAAAGAGAAGAGTGGTGGAGAG  
AGAAAAAAGAGCAGTTGGAATAGGAGCTGTCTTCCTTGGGTTCTTAGGAGCAGCTGGAAGCACTATGGGCGCG  
GCGTCAATAACGCTGACGGCACAGGCCAGACAATTATTGTCTGGTATAGTGCAACAGCAAAGCAATTTGCTGA  
GGGCTATAAAGGCTCAACAGCATATGTTGAAGCTCACGGTCTGGGGCATT

>GU367412

TTCTATTGTGATACATCAGGCCTGTTTAATAGTACTTGGAATGACACTGCCACCAATCAGACTTTTGATGCAA  
ATAGCAATATAACTCTTCAATGTAAAATAAGACAAATTGTACGTATGTGGCAGAGAATAGGACAAGCATTGTA  
TGCCCCCTCCCATTCAGGAGTAATAAGCTGTAAATCAAACATTACAGGGCTGCTACTAACAAGAGATGGTATG  
AATGAGAGTAGTGAGACGTTTACAGCCTCAAGGAGGAAATATGAAGGACAATTGGAGAAGTGAATTATATAAAT  
ATAAAGTAGTAAAAATTGAACCACTAGGAATAGCACCCACCAGGGCAAAGAGAAGAGTGGTGGAGAGAGAAAA  
AAGAGCAGTTGGACTGGGAGCTGTCTTCTTTGGGTTCTTGGGAGCAGCAGGAAGTACTATGGGCGCGGCGTCA  
ATAACGCTGACGGCACAGGCCAGACAATTATTGTCTGGTATAGTACAACAGCAGAGCAATCTGCTGAGGGCTA  
TAGAGGCTCAACAGCAACTGTTGAACTCACAGTCTGGGGCATT

>FJ647148

TTCTATTGTAATACATCAGGTCTGTTTAGTAGCAGGTGGTTCCTAATGGCACTAACAGCACGGAGTCAAATG  
GCACAGGCAATATAACTCTCCAATGCAGGATAAAGCAAATTATAAATATGTGGCAGAGAGTAGGACAAGCAAC  
GTACACCCCTCCCATCCAAGGAGAAATAAGGTGTAGATCAAACATTACAGGACTACTATTAAACAAGAGATGGT  
GGGATTAACACAACAGAGGAAATCTTCAGACCTGGAGGGGAAATATGAAGGACAATTGGAGAAGTGAATTAT  
ATAAGTATAAAGTAGTAAAAATTGAACCACTAGGAGTAGCACCATCCAAGGCAAAGAGAAGAGTGGTGGGAAG  
AGAAAAAAGAGCAGTTGGACTGGGAGCTGTATTCAATTGGGTTCTTGGGAGCAGCAGGAAGCACTATGGGCGCG  
GCGTCAGTGACGCTGACGGTACAGGCCAGACAATTATTGTCTGGCATAGTGACAGCAGCAAAGCAATTTGCTGA  
GGGCTATAGAGGCTCAACAGCATCTGTTGAACTCACAGTCTGGGGCATT

>KT183312

TTCTATTGTGACACATCAGGTCTGTTTAATGGCAGTTGGAGTGAAAATAGCACTTGGAATAGCACTATGGAGG  
CAAATAGCACAAATTATACTCCCATGTAGAATAAAGCAAATTATAAATATGTGGCAGAGAACAGGACGAGCAAT  
GTATGCCCTCCCATCCAAGGAACAATACAGTGTACATCAAACATCACAGGATTAATATTAACAAGAGATGGT  
GGTGAGAAAAACAATAGCACTGAAGAAATCTTCAGACCTGGAGGAGGAGATATGAGGGACAATTGGAGGAGTG  
AATTATATAAATATAAAGTAGTAAAAATTGAACCACTAGGAGTAGCACCCACCAGGGCAAAGAGAAGAGTGGT  
GGAGAGAGAAAAAAGAGCAGTTACACTAGGAGCTGTATTCAATTGGGTTCTTAGGAGCAGCAGGAAGCACTATG  
GGCGCGGCGTCAGTGACGCTGACGGTACAGGCCAGACAATTATTGTCTGGCATAGTGCAACAGCAAAGCAATT  
TGCTGAGGGCTATAGAGGCTCAACAGCATATGTTGAACTCACGGTCTGGGGCATT

>KC863311

TTCTATTGTAATACAACAGACCTGTTTAAGGGTACTTGGCATCCTGATAATAAACTTGAGGTGATCCTTGGA  
ATGCCAGCATGAAGTCAAATAACACATCAAATGTCAATATAACTATCCTATGCAAGATAAAGCAAATTGTAAG  
GATGTGGCAGAGAGTAGAACAAGCAATGTATGCCCTCCCATCCAAGGAGTAATAAGCTGTTTCATCAAACATT  
ACAGGACTACTATTAAACAAGCGATGGTGGTAGGGATAATAGCAATAATACTGGTAAGGATAATAGCAATAAAA  
ATAACTTGAAACCTTCAGACCTGGAGGAGGAAATATGAGGGACAATTGGAGAAGTGAATTATATAAGTATAA  
AGTAGTAAAAATTGAACCACTAGGAGTAGCACCTACCCCGCAAGGAGAAGAGTGGTGCAGAGAGAAAAAAGA  
GCAGTTGGCCTAGGAGCTGTCTTCATTGGGTTCTTAGGAGCAGCAGGAAGCACTATGGGCGCGGCGTCAGTGA  
CGCTGACGGTACAGGCCAGACAATTATTGACTGGTATAGTGCAGCAGCAAAGCAATTTGCTGAAGGCTATAGA  
GGCTCAACAACATCTGTTGAGACTCACAGTCTGGGGCATT

>HM623589

TTCTACTGCAACACATCAAGCTTGTTTAATAGGACATTTCCGGCCAACTACACGTATAATAGGACTGCTGACA  
GCACACAGGGGAATACAACATAACTATCCCATGCAGAATAAAACAAATTATAAACATGTGGCAGAGAGTAGG  
ACAAGCAATGTATGCCCTCCCATTTGAAGGAGTAATAAGATGTGAATCAAACATTACAGGAATACTATTGACA  
AGAGATGGTGGGAATGAGACAAATGTAGAAGTCTTCAGACCAGAGGGAGGAAATATGAGGGACAATTGGAGAA  
GTGAATTATATAATTACAAGGTAGTAAGAATTGAACCACTAGGAGTAGCACCCACCAGGGCAAGGAGGAGAGT  
GGTGGAGAGAGAAAAAAGAGCAGTTGGACTGGGAGCTGTCTTCCTTGGGTTCTTAGGAGCAGCAGGAAGCACT  
ATGGGCGCGGCGTCAATAACGCTGACGGTACAGGCCAGGCAATTATTGGCTGGCATAGTGCAACAGCAAAGCA  
ATTTGCTGCAAGCTATAGAGGCTCAACAGCATCTGTTGAACTCACTGTCTGGGGCATT

>MH705163

TTCTATTGCAATACAACAGCCCTGTTTAATAGCACGTGGGAGAATGAGAATGACACGGCCAACATACAGAAGA  
ATGGCACGGAGTCAAATGACACTATAACACTCCCATGCAGAATAAAACAAATTATAAACATGTGGCAGAGAGT

AGGACGAGCAATGTATGCCCCCTCCCATTTGCAGGAGTAATAAAGTGTACATCAACCATTACAGGAATAATATTG  
ACAAGAGATGGTGGGGATAGTGGGAACAATACCAGGGAGGAGATCTTCAGACCTGGAGGAGGAGATATGAGGG  
ACAATTGGAGAAGTGAATTATATAAGTATAAAGTAGTAAACCTTGAACCACTAGGAGTAGCACCCACCAAGGC  
AAGGAGAAGAGTGGTGGAGAGAGAAAAAAGAGCAGTTGGACTGGGAGCTGTCTTCTTGGGTTCTTGGGAGCA  
GCAGGAAGCACTATGGGCGCAGCGTCAATAACGCTGACGGTACAAGCCAGACAATTATTGTCTGGCATAGTGC  
AACAGCAAGGCAATTTGCTGAAGGCTATAGAGGCTCAACAGCATCTGTTGAAACTCACGGTCTGGGGCATT

>AF286241

TTCTATTGTAATACAACAAGCCTGTTTAATAGCACATGGAAGAATGGCGCCACCATACAGGAGAATAGCACGG  
AGACAAATGGAATTATGACTCTCCCATGCAGAATAAAACAAATTGTAGACATGTGGCAGGAAGTAGGACAAGC  
AATGTATGCCCCCTCCCATTTGCAGGAGTAATATATTGTACATCAAACATTACAGGAATAATATTGACAAGAGAT  
GGTGGGAGCAGTAACACCAATAGTGAGATCTTTAGGCCTGGAGGAGGAGATATGAGGGACAATTGGAGAAGTG  
AATTATATAAGTATAAAGTAGTAAAAATTGAACCACTAGGAGTAGCACCCCTCCAGGGCAAAGAGAAGAGTGGT  
GGAGAGAGAAAAAAGAGCAGTGGGAATAGGAGCTGTTTTCTTGGGTTCTTGGGAGCTGCAGGAAGCACTATG  
GGCGCGGCGTCAATAACGCTGACGGTACAGGCCAGACAGTTATTATCTGGCATAGTGCAACAGCAAAGCAATT  
TGCTGAAGGCTATAGAGGCTCAACAGCATCTGTTGAAACTCACAGTCTGGGGCATT

>AF286238

TTCTATTGCAATACAACAGGCCTGTTTAATAGCACATGGGAAAATGGCACTAACAAACAGAATTACACGGAGT  
CAAATGACACTATAACGCTCCAATGCAGAATAAAACAAATTATAAACATGTGGCAGAGAGTAGGCCGAGCAAT  
GTATGCCCCCTCCCATTTGCAGGAGTAATAAAGTGTACATCAAACATTACAGGAATGATATTGACAAGAGACGGT  
GGGAAGAACAGTATTAATGAGACCTTCAGACCTGGAGGAGGAGATATGAGGGACAATTGGAGAAGTGAATTAT  
ATAAGTATAAAGTAGTAAAAATTGAACCACTAGGAATAGCACCCACAGAGGCAAGGAGAAGAGTGGTGCAGAG  
AGAAAAAAGAGCAGTTGGATTGGGAGCTGTTTTCTTGGGTTCTTGGGAGCAGCAGGAAGCACTATGGGCGCG  
GCGTCAATAACGCTGACGGTACAGGCCAGACAATTATTGACTGGCATAGTGCAACAGCAAAGCAATTTGCTGA  
AGGCTATAGAGGCTCAACAACAGATGTTGAGGCTCACAGTCTGGGGCATT

>AF286237

TTCTATTGCAATACAACAGGCCTGTTTAATGGTACGTGGTGGAAACAATGGTACGTGGAACGGGCCCTACACAC  
CTAATAACACCAATGGAAGTATAATCCTCCCATGCAGAATAAAACAAATTATAAACATGTGGCAGAGAGTAGG  
AAGAGCAATGTATGCCCCCTCCCATTTGCAGGAATAATAAAGTGTACATCAAACATTACAGGAATAATATTGACA  
AGAGATGGTGGTAACAATGGGACTAATGAGACCTTCAGACCTGGAGGAGGAGATATGAGGGACAATTGGAGAA  
GTGAATTATATAAATATAAAGTAGTAAACCTTGAACCACTAGGAGTAGCACCTACCAGGGCAAAAAGAAGAGT  
GGTGGAGAGAGAAAAAAGAGCAGTTGGACTGGGAGCTGTCTTCTTGGGTTCTTGGGAGCAGCAGGAAGCACT  
ATGGGCGCGGCGTCACTAACGCTGACGGTACAGGCCAGACAATTATTGTCTGGTATAGTGCAACAGCAAAGCA  
ATTTGCTGCAGGCTATAGAAGCTCAACAGCATCTGTTGAAACTCACAGTCTGGGGCATT

>AY521629

TTCTATTGCAATACATCAGGTCTGTTTAATAGTACTTGGAATGACACGGCCATCAATGACACTATCAACGTGC  
AGAATTCAACTTACAATATAACTCTCCCATGCAGAATAAGACAAATTGTACATATGTGGCAGAGAGTAGGACA  
AGCAATGTATGCCCCCTCCCATTTCAAGGGGTAATAAACTGTACATCAAACATTACAGGGCTACTGTTAACAAGG  
GATGGTGGGGATAATAGTAGTACAAATGAGACATTTCAGACCTGGAGGAGGAAATATGAAGGACAATTGGAGAA  
GTGAATTATATAAATATAAAGTAGTAAAAATTGAACCACTAGGAGTAGCACCCACCAAGGCCAAAGAGGAGAGT  
GGTGGAGAGAGAAAAAAGAGCAGTTGGACTAGGAGCTGTCTTCTTGGGTTCTTAGGAGCAGCAGGAAGTACT  
ATGGGCGCGGCGTCAATGACGCTGACGGTACAGGCCAGACAATTATTGTCTGGCATAGTACAACAGCAGAGCA  
ATCTGCTGAGGGCTATAGAGGCTCAACAGCACATGTTGAAACTCACAGTCTGGGGCATT

>AY521631

TTCTATTGCAATACATCAGGCCTGTTTAATAGTACTTGGAATGACACGGCCATCAATGACACTATCAACGTGC  
AGAAATCAAATGGCACGGAGAAAAATACTCTCCCATGCAGAATAAAACAAGTTATAAAAAATGTGGCAAAGAGT  
AGGACAAGCAATGTATGCCCCCTCCCATTTCAAGGAGTAATAAAATGTGTATCAAACATTACAGGGATACTGCTA  
ACAAGAGATGGGGGGAACCTTAATAGCTCATTTGAGACGTTTCAGACCTGGAGGAGGAAATATGAAGGACAATT  
GGAGAAGTGAATTATATAAATATAAAGTAGTAAAAATTGAACCACTAGGAGTAGCACCCACCAAGGCCAAAGAG  
AAGAGTGGTGGAGAGAGAAAAAAGAGCAGTGGACTGGGAGCTGTCTTCTTGGGTTCTTAGGAGCAGCAGGA  
AGTACTATGGGCGCGGCGTCAATAACGCTGACGGCAGGCCAGACAATTATTGTCTGGCATAGTACAACAGCAGAGCA  
AGAGCAATCTGCTGAGGGCTATAGAGGCTCAACAGCAAATGTTGAAACTCACGGTCTGGGGCATT

>AY521630

TTCTATTGCAATACATCAGGTCTGTTTAATAGTACTTGGAATAGCACTACCATCAAGCAGAATTTAACTAACA  
ATGACACGGGGGTAATAAATCTCCCATGCAGAATAAGACAAATTGTACATATGTGGCAGAGAGTAGGACAAGC  
AATGTATGCCCCCTCCCATTTAAAGGGGTAATAAACTGTACATCAAACATTACAGGGCTACTGCTAACAAGGGAT  
GGTGGGGATAATAATAGTACAGATGAGAAGTTTCAGACCTGGAGGAGGAGATATGAGGGACAATTGGAGAAGTG  
AATTATATAAATATAAAGTAGTAAAAATTGAACCACTAGGAGTAGCACCCACCAGGGCAAAGAGAAGAGTGGT  
GCAGAGAGAAAAAAGAGCAGTTGGACTAGGAGCTGTCTTCTTTGGGTTCTTAGGAGCAGCAGGAAGTACTATG  
GGCGCGGCGTCAATAACGCTGACGGCAGGCCAGACAATTATTGTCTGGCATAGTACAACAGCAGAGCAATC  
TGCTGAGGGCTATAGAGGCTCAACAGCACTTGTGAAACTCACAGTCTGGGGCATT

>AM000053

TTCTATTGCAATACATCAGGCCTATTTAATAGCAGTTGGGCGCCCAACGGCAGTTGGATCAACAACATTGGCA  
GTAGGGAAAATGACACTATGACTCTGCCATGCAGAATAAAACAAATTATAAATATGTGGCAGAGAGTAGAACA  
AGCAATGTATGCCCCCTCCTATCAAAGGAAACATAACTTGTGTATCAAACATTACAGGACTACTGTTAACAAGA  
GATGGTGGAACTAATGAACTAGGGAGAATGAGACCTTCAGACCTATAGGAGGAGAGATGAGAGACAATTGGA  
GAAGTGAATTATATAAGTATAAAGTAGTAAAAATTGAACCACTAGGAGTAGCACCCACCAAGGCAAAGAGAAG  
AGTGGTGGAGGGGAGAGAAAAAGAGCAGTTGGAATGGGAGCTTTCTTCCTTGGGTTCCTTAGGAGCAGCAGGA  
AGCACTATGGGCGCGGCGTCAATAACGCTGACGGTACAGGCCAGACAATTATTGGCTGGTATAGTGCAACAGC  
AAAGCAATTTGCTGAAGGCTATAGAGGCTCAACAACATCTGTTGAGACTCACAGTCTGGGGCATT

>AM000054

TTCTATTGTAATACATCAAGCCTGTTTAAATAGCTCTTGGCCCATTAACAGCACTACCAGCAATAACAGCACTG  
CCAGTAATGAGACCATAAATCTGCCATGTAGAATAATACAAATTATAAATATGTGGCAGAGACTAGGACAGGC  
AATGTATGCCCCCTCCCATCAAAGGATTAATAAATTGTGTATCAAACATTACAGGACTACTGTTGACAAGGGAT  
GGTGGAGATAGGAACAGTAGTTATGAGACCTTCAGACCTATAGGAGGAAATATGAAGGACAATTGGAGAAGTG  
AACTGTATAAGTATAAAGTAGTAAAAATTGAACCACTAGGAGTAGCACCTACCAAGGCAAGGAGGAGAGTGGT  
GGAGAGAGAAAAAGAGCAGTTGGAATAGGAGCTTTCTTCCTTGGGATCTTAGGAGCAGCAGGAAGCACTATG  
GGCGCGGCGTCAATAACGCTGACGGTACAAGCCAGGCAAGTATTGTCTGGTATAGTGCAACAGCAGAGCAATT  
TGCTGAAGGCTATAGAGGCTCAACAACATTTGTTGAAACTCACAGTCTGGGGCATT

>FJ388892

TTCTATTGCAATACAACAGACCTGTTTAAATAGCACTTGGTACACTAATGACACTGGCACAAATAGCACAGGGG  
CCAATGAAAATGGGGCCAATGAAAATATAACTTTACCATGCAGAATAAAGCAAATTATAAATATGTGGCAGAG  
AGTAGGGCAAGCAATGTATGCCCCCTCCTATCAAAGGAAGTATAAGGTGTGAATCAAACATTACAGGACTACTA  
CTAACAGAGATGGTGGAAAGTGGAAATGATAGCTACAATGAGACCTTCAGACCTATAGGAGGAAATATGAGGG  
ATAATTGGAGAAGTGAACATATAAGTATAAAGTAGTAGAAATTGAACCAATAGGAGTAGCACCTACCAAGGC  
AAGGAGAAGAGTGGTGGGGAGAGAAAAAGAGCAATTGGACTGGGAGCTGCCTTCCTTGGGTTCCTTAGGAGCA  
GCAGGAAGCACTATGGGCGCGGCGTCAATAACGCTGACGGTACAGGCCAGACAATTATTGTCTGGCATAGTGC  
AACAGCAAAGCAATTTGCTGAGGGCTATAGAGGCTCAGCAGCATCTGCTGAAACTCACAGTCTGGGGCATT

>JF683763

TTCTATTGCAATACAACAGACCTGTTTCAAGTAGCACTTGGGACGAAGATGACACTGACATCACTCTCGCCCAGG  
ACAATGGAATATAACTCTGCCATGCAGAATAAAGCAAATTATAAATATGTGGCAGAGAGTAGGACAAGCAAT  
GTATGCCCCCTCCTATCAAAGGAAGTATAAGGTGTGAATCAAACATTACAGGACTACTACTAACAGAGATGGT  
GGAGCTAATAGCAGTAATGAGACCTTCAGACCTATAGGAGGAGATATGAGAGACAATTGGAGAAGTGAACAT  
ATAAATATAAAGTGGTACAAATTGAACCAATAGGAATAGCACCTACCAGGGCAAGGAGAAGAGTGGTGGAGAG  
AGAAAAAGAGCAATTGGACTGGGAGCTGCCTTCCTTGGGTTCCTTAGGAGCAGCAGGAAGTACTATGGGCGCG  
GCGTCACTGACGCTGACGGTACAGGCCAGAAAATTATTGTCTGGCATAGTGCAACAGCAAACAATTTGCTGA  
GGGCTATAGAGGCTCAGCAGCATCTGCTGAAACTCACGGTCTGGGGCATT

>JF683798

TTCTATTGCGATACAACAAACCTGTTCAATAGCACTTGGGACGGAAATAGCACTGTCACAAATATCACACAGA  
CCAATGAAAATATAACTTTACCATGCAAAATAAGGCAAATTATAAGGATGTGGCAGAGAGTAGGACAAGCAAT  
GTATGCCCCCTCCTATCAAAGGAATTATAAGGTGTGAATCAAACATTACAGGACTACTGCTAACAGAGATGGT  
GGAAATAAAACCAATAGCAACAATGAGACCTTCAGACCTATAGGAGGAGATATGAGGGACAATTGGAGAAGTG  
AACTATATAAGTATAAAGTAGTAAAAGTGAACCAATAGGAGTAGCACCTACCAGAGCAAGGAGAAGAGTGGT  
GGAGAGAGAAAAAGAGCAATAATTGGACTGGGAGCTGCCTTCATTGGGTTCCTTAGGAGCAGCAGGAAGCACT  
ATGGGCGCGGCGTCAATAACGCTGACGGTACAGGCCAGACAATTATTGTCTGGCATAGTGCAACAGCAAAGCA  
ATTTGCTGAGGGCTATAGAGGCTCAGCAGCATCTGCTGAAACTCACGGTCTGGGGCATT

>EF545108

TTCTATTGCAATACAACAGGCCTGTTCAATAATGCCAGCAACAATGGTACAAACCGCACAGACCCTATAATTC  
TCCCATGCAGAATAAAGCAGATTATAAATATGTGGCAAAGAGTAGGGCAGGCAATGTATGCTCCTCCTATCAA  
AGGAATCATAAGGTGTGAATCAAACATTACAGGACTACTATTAACAAGAGATGGTGGGAATAAAAATGGAAGC  
AACGGGACCGAGACCTTCAGACCTATAGGAGGAGATATGAGGGACAATTGGAGAAGTGAATTATATAAGTATA  
AAGTAGTAAAAATTGAACCAATAGGAGTAGCACCTACCAGGGCAAAGAGAAGAGTGGTGGAGAGAGAAAAAGAG  
AGCAATTGGACTGGGAGCTGCCTTCCTTGGGTTCCTTAGGAGCAGCAGGAAGTACTATGGGCGCGGCGTCAATA  
ACGCTGACGGTACAGGCCAGACAATTACTGTCTGGCATAGTACAACAGCAAAGCAATTTGCTGAGGGCTATAG  
AGGCTCAGCAGCATCTGCTGAAGCTCACGGTCTGGGGCATT

>GU481566

TTCTATTGCAATACAACAGCCCTGTTCAATAGCACTTGGGATGAAAATAGCACTGTCACAAATAGCACAAACGG  
CCAATGAAAATATAACTCTGCCATGCAGAATAAAGCAAATTATAAATATGTGGCAGAGAGTAGGACAAGCAAT  
GTATGCCCCCTCCTATCGCAGGAATTATAAGGTGTGAATCAAACATTACAGGACTACTAATAACAAGAGATGGT  
GGAACTAATAGCAGCAATGAGACTGAGACCTTCAGACCTACAGGAGGAAATATGAGGGACAATTGGAGAAGTG  
AACTATATAAGTATAAAGTAGTACAAATTGAACCAATAGGAGTAGCACCTACCAGGCAAAGAGAAGAGTGGT

GGAGAGAGAAAAAGAGCAATTGGACTGGGAGCCGCCTTCCTTGGGTTCTTAGGAGCAGCAGGAAGTACTATG  
GGCGCGGCGTCACTGACGCTGACGGTACAGGCCAGACAATTATTGTCTGGCATAGTACAACAGCAAAGCAATT  
TGCTGAGGGCTATAGAGGCTCAGCAGCATCTGCTGAAACTCACGGTCTGGGGCATT

>GU481615

TTCTATTGCAATACAACAGAACTGTTCAATAGCACTTGGAACACAAGCAGCACTGTCACAAATAGCACACAGG  
CCAATGAACTATAAGTCTACCATGCAAAATAAAGCAAATTATAAGGATGTGGCAGAGAGTAGGACAAGCAAT  
GTATGCCCTCCTATCAACGGAACATAAGGTGTGAATCAAACATTACAGGACTACTACTAACAAGAGATGGT  
GGAGGTGAAAATAATAGCAGCAATGAGACCTTCAGACCTGCAGGAGGAGATATGAAGGACAATTGGAGAAGTG  
AACTATATAAGTATAAAGTAGTAGAAATTGAACCAATAGGATTAGCACCTACCAAGGCAAGGAGAAGAGTGGT  
GGAGAGAGAAAAAGAGCAATTGGACTGGGAGCTGCCTTCCTTGGGTTCTTAGGAGCAGCAGGAAGTACTATG  
GGCGCGGCGTCAATTGACGCTGACGGTACAGGCCAGACAATTATTGTCTGGCATAGTGCAACAGCAAAGCAATT  
TGCTGAGGGCTATAGAGGCTCAGCAGCATCTGCTGAAACTCACAGTCTGGGGCATT

>HQ896489

TTCTATTGCAATACAACAGACCTGTTCACAAATAGCACTCTCACAGATAACACAGAGACCAATGAACTATAA  
CTCTGCCATGCAGAATAAAGCAAATCATAAATATGTGGCAGAGAGTAGGACAAGCAATGTATGCCCTCCTAT  
CAGAGGAAGTATAAGGTGTAATTCAAACATTACAGGACTACTGCTAATAAGAGATGGTGGAGCTAATAGCAGC  
AATGAGACCTTCAGACCTATAGGAGGAAATATGAGGGACAATTGGAGAAGTGAACCTATATAAGTATAAAGTAG  
TAAAAATTGAACCAATAGGAGTAGCACCTACCAAGGCAAAGAGAAGAGTGGTGGAGAGAGAAAAAGAGCAAT  
TGGACTGGGAGCCGCCTTCCTTGGGTTCTTAGGAACAGCAGGAAGCACTATGGGCGGCGTCACTGACGCTG  
ACGGTACAAGCCAGACAATTATTGTCTGGCATAGTGCAACAGCAAAGCAATTTGCTGAGGGCTATAGAGGCTC  
AGCAACATCTGCTGAAACTCACGGTCTGGGGCATT

>JQ292897

TTCTATTGCGATACAACAGCCCTGTTCAATAGCACTTGGGAAAATGGCACTGTTATAAATAGCACACAGGCCA  
ATGAGACTATAACTCTACCATGCAGAATAAAGCAAATTATAAATATGTGGCAGAGAGTAGGACGAGCAATGTA  
TGCCCCCTCCTATCAGAGGAATTATAAGGTGTGAATCAAACATTACAGGACTACTACTAACAAGAGATGGTGGGA  
GGTGGAAATAATAGCAGCAATGAGACCTTCAGACCTATAGGAGGAAATATGGAGGACAATTGGAGAAGTGAAC  
TATATAAGTATAAAGTAGTAGAAATTGAACCAATAGGAGTAGCACCTACCAAGGCAAAGAGAAGAGTGGTGGGA  
GAGGGAAAAAGAGCAATTGGACTGGGAGCTGCCTTCCTTGGGTTCTTGGGAGCAGCAGGAAGCACTATGGGC  
GCGGCGTCACTAACGCTGACGGTACAGGCCAGACAATTATTGTCTGGCATAGTGCAACAGCAAAGCAATTTGC  
TGAGGGCTATAGAGGCTCAGCAGCATCTGCTGAAACTCACGGTCTGGGGCATT

>JQ292899

TTCTATTGCAATACAACAGACCTGTTCAATTGGGACGGAAATGGCAATGTTACAAACAGCACACAGGCCGATG  
GAAATATAACTCTACCATGCAGAATAAAGCAAATTATAAATATGTGGCAGAGAGTAGGACAAGCAATGTATGC  
CCCTCCTATCAAAGGAAATATAACGTGTGTATCAAACATTACAGGACTACTATTAACAAGAGATGGTGGAGGT  
GGAATTAATAGTAGCAATGAGACCTTCAGACCTATAGGAGGAGATATGAGGGACAATTGGAGAAGTGAACCTAT  
ATAAGTATAAAGTAGTAAAAATTGAACCAATAGGAGTAGCACCTACCAAGGCAAAGAGAAGAGTGGTGGAGAG  
AGAAAAAGAGCAATTGGACTGGGAGCTGCCTTCCTTGGGTTCTTGGGAGCAGCAGGAAGTACTATGGGCGCG  
GCGTCAATAACGCTGACGGTACAGGCCAGACAATTATTGTCTGGCATAGTGCAACAGCAAAGCAATTTGCTGA  
GGGCTATAGAGGCTCAGCAGCATATGCTGAAACTCACGGTCTGGGGCATT

>HQ385841

TTCTATTGCTATACAACAAAACCTGTTCAATAGCACTTGGAACGGAAATGACACTGTTACAAATAGCACACAGG  
CCAATGAAAATATAACTTACCATGCAGAATAAAGCAAATTATAAATATGTGGCAGAGAGTAGGACAAGCAAT  
GTATGCCCTCCTATCAAAGGAAATATAAGCTGTACATCAAACATTACAGGACTACTACTAACAAGAGATGGT  
GGAATAATAGCAGTAATGAGACCTTCAGACCTATAGGAGGAGATATGAGGGACAATTGGAGAAGTGAACCTAT  
ATAAGTATAAAGTAGTACAAATTGAACCAATAGGAGTAGCACCTACCAAGGCAAAGAGAAGAGTGGTGGAGAG  
AGAAAAAGAGCAATTGGACTGGGAGCTGCCTTCCTTGGGTTCTTGGGAGCAGCAGGAAGTACTATGGGCGCG  
GCGTCAATAACGCTGACGGTACAGGCCAGACAATTATTGTCTGGCATAGTGCAACAGCAAAGCAATTTGCTGA  
GGGCTATAGAGGCTCAGCAGCATCTGCTGAAACTCACGGTCTGGGGCATT

>HQ385843

TTCTATTGCAATACAACAGCCCTGTTCAATAGTACTTGGCACGAAAATAGCACTGATACAAATAGCACACAGG  
ACAATGAACTATAACTCTACCATGCAGAATAAAGCAAATTATAAATATGTGGCAGAGAGTAGGACAAGCAAT  
GTATGCCCTCCTATCGAAGGAAATATAAGCTGTACATCAAACATTACAGGACTACTACTAACAAGGGATGGT  
GGAGCTAATAGCAGCAATGAGACCTTCAGACCTATAGGAGGAGATATGAGGGACAATTGGAGAAGTGAACCTAT  
ATAAGTATAAAGTAGTACAAATTGAACCAATAGGAGTAGCACCTACCAAGGCAAAGAGAAGAGTGGTGGAGAG  
AGAAAAAGAGCAATTGGACTGGGAGCTGCCTTCCTTGGGTTCTTGGGAGCAGCAGGAAGCACTATGGGCGCG  
GCGTCAATAACGCTGACGGTACAGGCCAGACAATTATTGTCTGGCATAGTGCAACAGCAAAGCAATTTGCTGA  
GGGCTATAGAGGCTCAGCAGCATCTGCTGAAACTCACGGTCTGGGGCATT

>HQ385846

TTCTATTGCAATACAACAGAACTGTTCAATAGCACTTGGGGCAATGGCACTGTCACAAATAGCACAGGGGACA  
ATGAAAATATAATTCTACCATGCAGAATAAAGCAAATCATAAGGATGTGGCAGAGAGTAGGACAAGCAATGTA

TGCCCCCTCCTATCAAAGGAATTATAAAGTGTAATCAAACATTACAGGACTACTACTAACAAGAGATGGTGGA  
GGTGGAATAGCAGCAATGAGACCAGTGAAACCTTCAGGCCTATAGGAGGAGATATGAGGGACAATTGGAGAA  
GTGAACTATACAAGTATAAAGTAGTACAAATTGAACCAATAGGAGTAGCACCTACCAGGGCAAAGAGAAGAGT  
GGTGGAGAGAGAAAAAAGAGCAATTGGACTGGGAGCTGCCTTCCTTGGGTTCTTAGGAGCAGCAGGAAGCACT  
ATGGGCGCGGCGTCAATAACGCTGACGGTACAGGCCAGACAATTATTGTCTGGCATAGTGCAACAGCAAAGCA  
ATTTGCTGAGAGCTATAGAGGCTCAGCAGCATCTGCTGAAACTCACGGTCTGGGGCATT

>GU481434

TTCTATTGCTATACAACAAACCTGTTCAATAGCACTTGGGGCGAAAATAGCACTGATATAAATAGCACACAGG  
CCAATGAAAATATAACTCTACCATGCAGAATAAAGCAAATTATAAATATGTGGCAGAGAGTAGGACAAGCAAT  
GTATGCCCCCTCCTATCAAAGGAAGTATAATGTGTACATCAAACATTACAGGGCTATTACTAACAAGAGATGGT  
GGAGGTGGAGCTAATAGCAGCAATGAGACCTTCAGACCTATAGGAGGAAAATATGAGGGACAATTGGAGAAGTG  
AACTATATAAGTATAAAGTAGTAAAAATTGAACCAATAGGAGTAGCACCTACCACGGCAAGGAGAAGAGTGGT  
GGAGAGAGAAAAAAGGGCAATTGGACTGGGAGCTGCCTTCCTTGGGTTCTTGGGAGCAGCAGGAAGCACTATG  
GGCGCGGCGTCACTAACGCTGACGGTACAGGCCAGACAATTATTGTCTGGCATAGTGACAGCAGCAAAGCAATT  
TGCTGAAGGCTATAGAGGCTCAGCAGCATCTGCTGAAACTCACGGTCTGGGGCATT

>GU481486

TTCTATTGCAATACAACAGACCTGTTCAATAGCACTTGGAACGAAACTGACATTGATGCACAGGCCAATGAAG  
TCAATGAACTATAACTCTACCATGCAGAATAAAGCAAATTATAAATATGTGGCAGAGAGTAGGGCAAGCAAT  
GTATGCCCCCTCCTATCAAAGGAAGTATAAGGTGTGAATCAAACATTACAGGACTACTACTAACAAGAGATGGT  
GGAAGACTTAATGGCAGCAATGAGACCTTTAGACCTATAGGAGGAGATATGAGGGACAATTGGAGAAGTGAAC  
TATATAAGTATAAAGTAGTACAAATTGAACCAATAGGAGTAGCACCTACCAAGGCAAAGAGAAGAGTGGTGGA  
GAGAGAAAAAAGAGCAATTGGACTGGGAGCTGCCTTCCTTGGGTTCTTGGGAGCAGCAGGAAGTACTATGGGC  
GCGGCGTCAATAACGCTGACGGTACAGGCCAGACAATTATTGTCTGGCATAGTGCAACAGCAAAGCAATTTGC  
TGAGGGCTATAGAGGCTCAGCAGCATCTGCTGAAACTCACGGTCTGGGGCATT

>GU481644

TTCTATTGCAATACAACAAACCTGTTCAATAGCACTTGGAAATGAAACAGACATTGTTACAAATATCACACAGG  
GCAATGGAATATAACTCTACCATGCAGAATAAAGCAAATTATAAATATGTGGCAGAGAGTAGGACAAGCAAT  
GTATGCCCCCTCCTATCAAAGGAATATAACGTGTACATCAAACATTACAGGACTACTACTAACAAGAGATGGT  
GGAACCTAATAGCAGCAATGAGACCTTCAGACCTATAGGAGGAGATATGAGGGACAATTGGAGAAGTGAAC  
TATAAATATAAAGTAGTACAAATTGAACCAATAGGAGTAGCACCTACCAGGGCAAAGAGAAGAGTGGTGGA  
GAGAGAAAAAAGAGCAATTGGACTGGGAGCTGCCTTCCTTGGGTTCTTGGGAGCAGCAGGAAGCACTATGGGCGCG  
GCGTCACTAACGCTGACGGTACAGGCCAGACAATTACTGTCTGGCATAGTGCAACAGCAAAGCAATTTGCTGA  
GGGCTATAGAGGCTCAGCAGCATCTGCTGAAACTCACGGTCTGGGGCATT

>JQ292891

TTCTATTGCAATACAACAGACCTGTTCAATAGCACTTGGGACAATAGCACTGTCACAAATAGCACAGGGACCA  
ATGAACTATAACTCTGCCATGTAGAATAAAGCAAATTATAAATATGCGGCAGAGAGTAGGACAAGCAATGTA  
TGCCCCCTCCTATTAGAGGAAGTATAAGGTGTGAATCAAACATTACAGGACTACTACTAATAAGAGATGGTGGA  
GCTAATAGCAGCAATGAGACCTTCAGACCTATAGGAGGAAAATATGAGGGACAATTGGAGAAGTGAACCTATATA  
AGTATAAAGTAGTAAAAATTGAACCAATAGGAGTAGCACCTACCAAGGCAAGGAGAAGAGTGGTGGAAGAGA  
AAAAAGAGCAATTGGACTGGGAGCCGCCTTCCTTGGGTTCTTAGGAGCAGCAGGAAGCACTATGGGCGCGCG  
TCAATGACGCTGACGGTACAGGCCAGACAATTATTGTCTGGCATAGTGCAACAGCAAAGCAATTTGCTGAGGG  
CTATAGAGGCTCAGCAGCATCTGCTGAAACTCACGGTCTGGGGCATT

>HQ385820

TTCTATTGCAATACAACAAACCTGTTCAATAGCACTTGGGACACAAATATCACAGAGGCCAATATCACAGAGG  
CCAATGAACTATAATTCTACCATGCAAAATAAAGCAAATTATAAATATGTGGCAGAGAGTAGGAAAAGCAAT  
GTATGCCCCCTCCTATCAAAGGAAGTATAAGGTGTGAATCAAACATTACAGGACTACTACTAACAAGAGATGGT  
GGAACCTAATAGCAGCAATAGCAATGAGACCTTCAGACCTATAGGAGGAAAATATGAGGGACAATTGGAGAAGTG  
AACTATATAAATATAAAGTAGTAAAAATTGAACCAATAGGAGTAGCACCTACCAAGGCAAAGAGAAGAGTGGT  
GGAGAGAGAAAAAAGAGCAATTGGGTTGGGAGCTGCCTTCCTTGGGTTCTTAGGAGCAGCAGGAAGCACTATG  
GCCGCGGGTCAATAACGCTGACGGTACAGGCCAGACAATTATTGTCTGGCATAGTGCAACAGCAAAGCAATT  
TGCTGAGGGCCATAGAGGCTCAGCAACATATGCTGAAACTCACGGTCTGGGGCATT

>JF952018

TTTTATTGCAATACAACAGCCCTGTTCAATAGCACTTGGGACAATAGTAGCATTGCCGAAAATAGCACAGAGG  
ACAATGCAACTATAACTCTACCATGCAGAATAAAGCAAATTATAAATATGTGGCAGAGAGTAGGGCAAGCAAT  
GTATGCCCCCTCCTATCAAAGGAAGTATAAGGTGTGAATCAAATATTACAGGACTATTACTAACAAGAGATGGT  
GGAGATGCCGATGGAAATGGAACTAATAGCAACAATGAAACCTTCAGACCTACAGGAGGAGATATGAGGAACA  
ATTGGAGAAGTGAACCTATATAAATATAAAGTAGTACAAATTGAACCAATAGGGGTAGCACCTACCACGGCAAA  
GAGAAGAGTGGTGGAGAGAGAAAAAAGAGCAATTGGACTGGGAGCTGCCTTCCTTGGGTTCTTAGGAGCAGCA  
GGAAGCACTATGGGCGCGGCGTCAATAACGCTGACGGTACAGGCCAGACAATTATTGTCTGGCATAGTGCAAC  
AGCAAAGCAATTTGCTGAGGGCTATAGAGGCTCAGCAGCATCTGCTGAAACTCACGGTCTGGGGCATT

>HQ338112

TTCTATTGCAATACAACAGAACTGTTCAATAGCACTTGGGACAATAGCACTTGGGACAAAAATGACACTAGCA  
CAAATATCACACAGGTCATAACTCTGCCATGCAGAATAAAACAAATTATAAATATGTGGCAGAGAGTAGGACA  
AGCAATGTATGCCCCCTCCTATTAAAGGAGTTATGAGGTGTGAATCAAACATTACAGGACTACTACTAACAAGA  
GATGGTGGAGCTAATAGCAGCAATGAGACCTTCAGACCTATAGGAGGAGATATGAGGGACAATTGGAGAAGTG  
AACTATATAAGTATAAAGTAGTAGAAATTGAACCAATAGGAGTAGCACCTACCAGGGCAAAGAGAAGAGTGGT  
GGAGAGAGAAAAAGAGCAATTACACTGGGAGCTGCCTTCCTTGGGTTCTTAGGAGCAGCAGGAAGCACTATG  
GGCGCGGCGTCATTGACGCTGACGGTACAGGCCAGACAATTATTGTCTGGCATAAGTGCAACAGCAAAGCAATT  
TGCTGAGGGCTATAGAGGCTCAGCAGCATCTGCTGAAACTCACGGTCTGGGGCATT

>GU481277

TTCTATTGCAATACAGCAGACCTGTTCAATAGCACTTGGGACACAAATAGCACACAGACCAATAGAAATATAA  
CTGCCAGTGAAAATATAACTCTACCATGCAGAATAAAGCAAATTATAAATATGTGGCAGAGAGTAGGACAAGC  
AATGTATGCCCCCTCCTATCAAAGGAATTATAATGTGTACATCAAACATTACAGGACTACTCCTAACAAGAGAT  
GGTGGAGGTGAACTAATAGCAGCAATGAGACCTTCAGACCTATAGGAGGAGACATGAGGGACAATTGGAGAA  
GTGAACTATATAAATATAAAGTAGTAAAAATTGAACCAATAGGGGTAGCACCTACCAGGGCAAAGAGAAGAGT  
GGTGGAGAGAGAAAAAGAGCAATTGGACTGGGAGCTGCCTTCCTTGGGTTCTTGGGAGCGGCAGGAAGTACT  
ATGGGCGGCGCTCAATAACGCTGACGGTACAGGCCAGACAATTATTGTCTGGCATAAGTACAACAGCAAAGCA  
ATTTGCTGAGGGCTATAGAGGCTCAGCAGCATCTGTTGAAGCTCACGGTCTGGGGCATT

>GU481544

TTCTATTGCAATACAACAAAACTGTTCAATAGCTCTTGGGGCGAAAATGGCACAAATAGCATCGAGACCAATG  
AAACTATAAATTCTACCATGCAGAATAAAGCAAATTATAAATATGTGGCAGAGAGTAGGACAAGCAATGTATGC  
CCCTCCTATCAAAGGAATTATAAAGTGTGAATCAAACATTACAGGACTACTACTAATCAGAGATGGTGGAACT  
AACAGCAGTAATGAGACCTTCAGACCTATAGGAGGAGATATGAGGGACAATTGGAGAAGTGAAGTATATAAGT  
ATAAAGTAGTAAAAATTGAACCAATAGGAGTAGCACCTACCAAGGCAAGGAGAAGAGTGGTGGAGAGAGAAAA  
AAGAGCAATTGGACTGGGAGCTGCCTTCCTTGGGTTCTTAGGAGCAGCAGGAAGCACTATGGGCGCGGCATCA  
ATAACGCTGACGGTACAGGCCAGACAATTATTGTCTGGCATAAGTGCAACAGCAAAGCAATTTGCTGAGGGCTA  
TAGAGGCTCAGCAACATCTGCTGAAACTCACGGTCTGGGGCATT

>GU481661

TTCTATTGCGATACAACAAACCTGTTCAATAGCACTTGGGAAGAAAAAGCACTGTTACAAATAGCACCAATG  
ACACTATAACTCTACCATGCAGAATAAAGCAAATTATAAATATGTGGCAGAGAGTAGGACAAGCAATGTATGC  
CCCTCCTATCCAAGGAATATAAGTTGTGAATCAAACATTACAGGACTACTACTAACAAGAGATGGTGGAACT  
GAAAAAATGAGACCTTCAGACCTATAGGAGGAGATATGAGGGACAATTGGAGAAGTGAATTATACAAGTATA  
AAGTAGTAAAAATTGAACCAATAGGAGTAGCACCTACCAGGGCAAGGAGAATAGTGGTGAAGAGAGAAAAAG  
AGCAATTGGACTGGGAGTTGCCTTCCTTGGGTTCTTAGGAGCAGCAGGAAGCACTATGGGCGCAGCGTCACTA  
ACGCTGACGGTACAGGCCAGACAATTATTGTCTGGCATAAGTGCAACAGCAAAGCAATTTGCTGAGGGCTATAG  
AGGCTCAGCAACATCTGCTGAAACTCACGGTCTGGGGCATT

>KF716491

TTCTATTGCAATACAACAAACCTGTTGATAGCACTTGGAAATGACACTGACACAAATAGCACTGACACAAATA  
GCACAGGGGGCCAATGAAATTATAACTCTACCATGCAGAATAAGGCAAATTATAAATATGTGGCAGAGAGTAGG  
ACAAGCAATGTATGCCCCCTCCTATCAAAGGAGTTATAAGGTGTGAATCAAACATTACAGGACTACTACTAACA  
AGAGATGGTGGAACTAATAGCAGCAATGAGAATGAGATCTTCAGACCTATAGGAGGAGATATGAGGGACAATT  
GGAGAAGTGAAGTATATAAGTATAAAGTAGTAGAAGTTGAACCAATAGGAGTAGCGCTACCAAGGCAAGGAG  
AAGAGTGGTGGAGAGAGAAAAAGAGCAATTGGACTGGGAGCTGCCTTCCTTGGGTTCTTAGGAGCAGCAGGA  
AGTACTATGGGCGCGGCGTCAATAACGCTGACGGTACAGGCCAGACAATTATTGTCTGGCATAAGTGCAACAGC  
AAAGCAATTTGCTGAAAGCTATAGAGGCTCAGCAGCATCTGCTGAAACTCACGGTCTGGGGCATT

>KF716492

TTCTATTGCAATACAACAGAACTGTTCAATAGCACTTGGAAAGAAAATAGCACTATCACAAATAACACAACAG  
CCAATGACACTATAACTCTACCATGCAGAATAAAGCAAATTATAAATATGTGGCAGAGAGTAGGACAAGCAAT  
GTATGCCCCCTCCTATCAAAGGAAGTATAAGGTGTAAATCAAACATTACAGGACTACTACTAACAAGAGATGGT  
GGAAGTGAACCTAATAGCAGTGAGGAAATCTTCAGACCTATAGGAGGAAATATGAGGGACAATTGGAGAAGTG  
AACTATATAAGTATAAAGTAGTAAAAATTGAACCAATAGGAGTAGCACCTACCAAGGCAAAGAGAAGAGTGGT  
GGAGAGAGAAAAAGAGCAATAAATTGGACTGGGAGCTGCCTTCCTTGGGTTCTTAGGAGCAGCAGGAAGCACT  
ATGGGCGCGGCGTCACTGACGCTGACGGTACAGGCCAGACAATTATTGTCTGGCATAAGTGCAACAGCAAAGCA  
ATTTGCTGAGGGCTATAGAGGCTCAGCAGCATCTGCTGAAACTCACGGTCTGGGGCATT

>FJ864679

TTCTATTGTAATACAACAGAACTGTTCAATAGCACTTGGTACAAAAATGGCACTAACACAACCTAGCACACAGA  
CCAGTGAAAACATAACTCTGCCATGCAGAATAAAGCAAATTGTAAGGATGTGGCAGAGAGTAGGACAAGCAAT  
GTATGCCCCCTCCTATCAGTGGAATTATAAAGTGTGAATCAAACATTACAGGATTAATACTAACAAGAGATGGT  
GGAGATAATAGTAGCAGCAATGAGACCTTCAGACCTGAAGGAGGAGACATAAGGGACAATTGGAGAAATGAAC  
TATATAAGTATAAAGTAGTAGAAATTGAACCAATAGGAGTAGCACCTACTGAGGCAAGGAGAAGAGTGGTGCA

GAGAGAAAAAAGAGCAATTGGACTGGGAGCTGCCTTCATTGGGTTCTTAGGAGCAGCAGGAAGCACTATGGGC  
GCAGCGTCACTGACGCTGACGGTACAGGCCAGAAAATTATTGTCTGGCATAGTGCAACAGCAAAGCAATTTGC  
TGAGGGCTATAGAGGCTCAGCAGCATCTGCTGAAACTCACGGTCTGGGGCATT

>JQ292893

TTCTATTGCAATACCACAGACCTGTTCAATAGCACTTGGGACAAAAATGACACTATCACAAATACCCAGAGG  
TCAATGGAACCTACTATAACTCTGCCATGCAGAATAAAGCAAATTGTAAATATGTGGCAGAGAGTAGGACAAAC  
AATGTATGCCCCCTCCTATCAAAGGAAGTATAAGGTGTGAATCAAACATTACAGGACTACTGCTAATAAGAGAT  
GGTGGAGAACTAATAGCAGCAGTGAGACCTTCAGACCTGTAGGAGGAGATATGAGGGATAATTGGAGAAGTG  
AACTATATAAGTATAAAGTAGTAAAAATTGAACCAATAGGAGTAGCACCTACCAGGGCAAAGAGAAGAGTGGT  
GGAGAGAGAAAAAAGAGCAATTGGACTGGGAGCCGCTTCCTTGGGTTCTTAGGAGCAGCAGGAAGTACTATG  
GGCGCGCGCTCACTGACGCTGACGGTACAGGCCAGACAATTATTGTCTGGCATAGTGCAACAGCAAAGCAATT  
TGCTGAGGGCTATAGAGGCTCAGCAGCATCTGCTGAAACTCACGGTCTGGGGCATT

>JF430898

TTCTATTGCAATACAACAGACCTGTTCAATAGCACTTGGAGGAATGACACTGTGCGCAAATATCACGGCCAATG  
GAACTATAACTCTGCCATGCAGAATAAAGCAAATTATAAATATGTGGCAGAGAGTAGGACAAGCAATGTATGC  
CCCTCCTATCGAAGGAAATATAAGTTGTGAATCAAACATTACAGGGCTACTACTAATAAGAGATGGTGGAACCT  
GATGACAGCAATGAGACTGAGTCCCTTCAGACCCATAGGAGGAGATATGAGGGACAATTGGAGAAGTGAACCTAT  
ATAAATATAAAGTGGTACAAATTGAACCAATAGGAGTAGCACCTACCAAGGCAAGGAGAAGAGTGGTGGAGAG  
AGAAAAAAGAGCAATTGGACTGGGAGCTGCCTTCCTTGGGTTCTTAGGAGCAGCAGGAAGCACTATGGGCGCG  
GCGTCATTGACGCTGACGGTACAGGCCAGACAATTATTGTCTGGCATAGTGCAACAGCAAACAATTTGCTGA  
GGGCTATAGAGGCTCAGCAGCATCTGCTGAAACTCACGGTCTGGGGCATT

>HQ834967

TTTTATTGCAATACAACAGGCCTGTTCAATAGCACTTGGGGCAATAGCACTGACGCAAATAGCAATGAAAAATA  
TAACTCTACCATGCAGAATAAAGCAAATTATAAATATGTGGCAGAGAGTAGGACAAGCAATGTATGCCCCCTCC  
TATCAGCGGAAATATAAGTTGTGTATCAAACGTTACAGGACTACTACTAGTAAGAGATGGTGGAGGTGGAAAT  
AGTAGCAACAATGAGACCTTCAGACCTATAGGAGGAGATATGAGGGACAATTGGAAAAGTGAACCTATATAAGT  
ATAAAGTAGTAGAAATTGAACCAATAGGAGTAGCACCTACCAAGGCAAAGAGAAGGGTGGTGCAGAGAGAAAA  
AAGAGCAATTGGAGGACTGGGAGCTGCCCTCCTTGGATTCTTAGGAGCAGCAGGAAGCACTATGGGCGCGGCG  
TCACTGACGCTGACGGTACAGGCCAGACAATTATTGTCTGGCATAGTGCAACAGCAAAGCAATTTGCTGAGGG  
CTATAGAGGCTCAGCAGCATCTGCTGAAACTCACCGTCTGGGGCATT

>JX500696

TTCTATTGTAATACAACAAAACTGTTCAATAGCACTTGGGACAAAAATAGTACTTGAATGAAAATAGCACTG  
CCAATGAAAATATAACTCTGCCATGCAGGATAAAGCAAATTATAAATATGTGGCAGAGAGTAGGACAAGCAAT  
GTATGCCCCCTCCTATCAAAGGAGTTATAATGTGTAAATCAAACATTACAGGTCTACTCCTAACAAAGAGATGGT  
GGAGGTGGAGCTAATAGCAGCAATGAGACTTTTCAGACCTATAGGAGGAAATATGAGGGACAATTGGAGAAGTG  
AACTATATAAGTATAAAGTAGTACAAATTGAACCAATAGGAGTAGCACCTACCAGGGCAAAGAGAAGAGTGGT  
GGAGAGAGAAAAAAGAGCAATTGGACTGGGAGCCGCTTCCTTGGGTTCTTAGGAGCAGCAGGAAGCACTATG  
GGCGCGCGCTCACTGACGCTGACGGTACAGGCCAGACAATTATTGTCTGGCATAGTGCAACAGCAAAGCAATT  
TGCTGAGGGCTATAGAGGCTCAGCAGCAGCTGCTGAAACTCACGGTCTGGGGCATT

>JX500695

TTCTATTGCAATACAACAGGCCTGTTCAATAGCACTTGGGACACAAATGGCACTGTCAAGTAGCACAAATG  
GAACAAATAAACTATAACTCTGCCATGCAGAATAAAGCAAATTATAAATATGTGGCAGAGAGTAGGACAAGC  
AATGTACGCCCCCTCCTATCAAAGGAAGTATAAGGTGTGAATCAAACATTACAGGTCTACTACTAATAAGAGAT  
GGTGAAAGGAATAGCAGCAATGAGACCTTTAGACCTATAGGAGGAAATATGAGGGACAATTGGAGGAGTGAAC  
TATATAAGTATAAAGTAGTACAAATTGAACCAATAGGACTAGCACCTACCAGGGCAAAGAGAAGAGTGGTGGA  
GAGAGAAAAAAGAGCAATTGGACTGGGAGCCGCCCTCCTTGGGTTCTTAGGAGCAGCAGGAAGCACTATGGGC  
GCGGCGTCAATGACGCTGACGGTACAGGCCAGACAATTATTGTCTGGCATAGTGCAACAGCAAAGCAATTTGC  
TGAGGGCTATAGAGGCTCAGCAGCATCTGCTGAAACTCACGGTCTGGGGCATT

>JX500694

TTCTATTGCAATACAACAGAACTGTTCAATAGCACTTGGGACGGAATGGCACTGCCACAAATAACACAGAGG  
ACAATGTAACTCTGCCATGCAGAATAAAGCAAATTATAAATATGTGGCAGAGAGTAGGACAAGCAATGTATGC  
CCCTCCTATCAGAGGAAGTATAAAGTGTGTATCAAACATTACAGGACTACTACTAATAAGAGATGGTGGAGGT  
GGAAATAATAGCAACAATGAGACCTTCAGACCTATAGGAGGAAATATGAGGGACAATTGGAGAAGTGAACCTAT  
ATAAGTATAAGGTAGTACAAATTGAACCAATAGGAATAGCACCTACCACAGCAAAAAAGAGAGTGGTGGAGAG  
AGAAAAAAGAGCAATTGGACTGGGAGCTGCCTTCCTTGGGTTCTTAGGAGCAGCAGGAAGTACTATGGGCGCG  
GCGTCAATAACGCTGACGGTACAGGCCAGACAATTATTGTCTGGTATAGTACAACAGCAAAGCAATTTGCTGA  
GGGCTATAGAGGCTCAGCAGCATCTGCTGAAACTCACGGTCTGGGGCATT

>MH603967

TTCTATTGCAATACAACACAACTGTTTCGATAGCACGTGGGAAGAGAATGCCAATATCACAAATACAAATAATA  
CACAGAATAATGAAAATATAACTCTACCATGCAGAATAAAGCAAATTATAAGGATGTGGCAGGGGGTAGGACA

AGCAATGTATGCCCCCTCCTATAAGAGGAGAAATAAGGTGTGAATCAAACATTACAGGATTACTACTAACAAGA  
GATGGTGGAGGTACAAATAGCAGCAACAATGAGACCTTCAGACCTATAGGAGGAGACATGAGGGACAATTGGA  
GAAGTGAACCTATATAAGTATAAAGTAGTACAAATTGAACCCATAGGAGTAGCACCTACCAAGGCAAAGAGAAG  
AGTGGTGGAGAGAGAAAAAGAGCAATTGGACTGGGAGCTGCCTTCCTTGGGTTCTTAGGAGCAGCAGGAAGC  
ACTATGGGCGCGGCGTCAATAACGCTGACGGTACAGGCCAGACAATTATTGTCTGGCATAGTGCAACAGCAAA  
GCAATTTGCTGAGGGCTATAGAGGCTCAGCAGCATCTGCTGAAACTCACGGTCTGGGGCATT

>MH604120

TTTTATTGTAATACAACAGACCTGTTCAATAGCGCTTGGGAAAATGGCAATGCTACAAATATCACACAGGCCA  
ATGACAATGAAACTATAATTCTACCATGCAGAATAAGGCAAATTATAAATATGTGGCAAAGAGTAGGACAGGC  
AATGTATGCCCCCTCCTATCAGAGGAAATATAACGTGTATATCAAATATTACAGGACTACTACTAACAAGAGAT  
GGTGGAGGTGGAAATAATAGCAACAATGAGACCTTCAGACCTATAGGAGGAGATATGAGGGACAATTGGAGAA  
GTGAACTATATAAATATAAAGTAGTACAAATTGAACCAATAGGAATAGCACCTAACAGGGCAAAGAGAAGAGT  
GGTGGAGAGAGAAAAAGAGCAATTGGACTGGGAGCTGCCTTCCTTGGGTTCTTGGGAGCAGCAGGAAGTACT  
ATGGGCGCGGCGTTCGCTAACGCTGACGGTACAGGCCAGAAAATTATTGTCTGGCATAGTGCAACAGCAAAAACA  
ATTTGCTGAAGGCTATAGAGGCTCAGCAGCATCTGCTGAGACTCACGGTCTGGGGCATT

>MH604308

TTCTATTGCAATACAACAGACCTGTTCAATAGCACTTGGGACGGAAATAGCACTAGAGATGAAAATGGCAATG  
ATACAGATAGCACACAGAACAAATAGACCTATAACTCTGCCATGCAGAATAAAGCAAATTATAAATATGTGGCA  
GAGAGTAGGACAAGCAATGTATGCCCCCTCCTATAAAGGAATTATAAGGTGTACATCAAACATTACGGGACTA  
CTACTAATAAGAGATGGTGGAGGCGGAGCTAATAGCAGCAATGAGACCTTCAGACCTATAGGAGGAGATATAA  
GGGACAATTGGAGAAGTGAACCTATTTAAGTATAAAGTAGTACAAATTGAACCAATAGGAGTAGCACCTACCAG  
GGCAAAGAGAAGAGTGGTGGAGAGAGAAAAAGAGCAATTGGACTGGGAGCTGCCTTCCTTGGGTTCTTGGGA  
GCAGCAGGAAGTACTATGGGCGCGGCGTCAATAACGCTGACGGTACAGGCCAGACAATTATTGTCTGGCATAG  
TACAACAGCAAAGCAATTTGCTGAGGGCTATAGAGGCTCAGCAGCATCTGCTGAAACTCACGGTCTGGGGCAT  
T

>MH604056

TTCTATTGCAATACAACAGCCCTGTTCAATTGGAACGGCAATGAAACTGTTACAAATAGCACACAGGCCAATG  
AAACTATAACTTTTACCATGCAGAATAAAGCAAATTATAAATATGTGGCAGAGAGTAGGACAAGCAATGTATGC  
CCCTCCTATCAAAGGAAGTATAAGGTGTACATCAAACATTACAGGACTGCTGCTAACAAGAGATGGTGGAACT  
AACAGCAGCAACAGCACTGAGATCTTCAGACCTATAGGAGGAAATATGAAGGACAATTGGAGAAGTGAACCTAT  
ATAAATATAAAGTAGTAAAAATGAACCAATAGGAGTAGCACCTACCAAGGCAAGGAGAAGAGTGGTGGAGAG  
AGAAAAAGAGCAATTGGACTGGGAGCTGCCTTCCTTGGGTTCTTGGGAGCAGCAGGAAGCACTATGGGCGCG  
GCGTCAATAACGCTGACGGTACAGGCCAGACAATTATTGTCCGGCATAGTGCAACAGCAAAGCAATTTGCTGA  
GGGCTATAGAGGCTCAGCAGCATCTGCTGAAACTCACGGTCTGGGGCATT

>MH604408

TTCTATTGCAATACAACAAACCTGTTCAATAGCACGTGGAACGAAACTGACAGTGTTACAAATAGCACACAGG  
CCAATAATGAAACTATAATTTTACCATGCAGGATAAAGCAAATTATAAGGACGTGGCAGAGAGTAGGACAAGC  
AATGTATGCCCCCTCCTATCAAAGGAAGGATAAGGTGTGAATCAAACATTACAGGACTACTACTAACAAGAGAT  
GGTGGAGGTAAAAGTAATAATGAGACAAGTAATAATGAGACCTTCAGACCTATAGGAGGAGATATGAGGGACA  
ATTGGAGAAGTGAACCTATATAAATATAAAGTAGTAGAAATTGAACCAATAGGAGTAGCACCTACCAAGGCAAA  
GAGAAGAGTGGTGGAGAGACAAAAAGAGCAATTGGACTGGGAGCTGCCTTCCTTGGGTTCTTAGGAGCAGCA  
GGAAGCACTATGGGCGCGGCGTCACTAACGCTGACGGTACAGGCCAGACAATTATTGTCTGGCATAGTGCAAC  
AGCAAAGCAATTTGCTGAGGGCTATAGAGGCTCAGCAGCATCTGCTGAAACTCACGGTCTGGGGCATT

>MH604109

TTCTACTGCAGTACAGCAGCCCTGTTCAATAGCACTTGGGACGGAAATACCACTATTGCAAATAACACACAGA  
ACAATGAAAATATAACTTATACCATGCAGGATAAAGCAAATTATCAATATGTGGCAGAGAGTAGGACAAGCAAT  
GTATGCCCCCTCCTATACAAGGAGTTATAAATTGTGAATCAAACATTACAGGACTACTACTAACAAGAGATGGT  
GGAGTTAATAGCAGCAATGAAACCTTCAGGCCTATAGGAGGAGATATGAGGGACAATTGGAGAAGTGAATTAT  
ATAAGTATAAAGTAGTAAAAGTTGAACCAATAGGAGTAGCACCTACCACGGAAGGAGAAGAGTGGTGGGGAG  
AGAAAAAGAGCAATTGGACTGGGAGCTGCCCTCCTTGGGTTCTTGGGAGCAGCAGGAAGCACTATGGGCGCG  
GCGTCAATAACGCTGACGGTACAGGCCAGACAATTATTGTCTGGCATAGTGCAACAGCAAAGCAATTTGCTAA  
GGGCCATAGAGGCTCAGCAGCATCTGCTGAAACTCACGGTCTGGGGCATT

>MH604508

TTCTATTGCTATACAACAGGGCTGTTCAATAGCACTTGGGACGAAAATAGCACTAGCACAAATATCACACAGA  
AAAATGAAAATATAACTTATACCATGCAGAATAAAGCAAATTATAAATATGTGGCAGAGAGTAGGACAAGCAAT  
GTATGCCCCCTCCTATCAGAGGAAATATAAGATGTGTATCAAACATTACAGGACTACTACTAACAAGAGATGGT  
GGAGATGGAGATAATAGCAGTGAGACCTTCAGACCTATAGGAGGAGATATGAGGGACAATTGGAGAAGTGAAC  
TATATAAATATAAAGTAGTACAAATTGAACCCATAGGAGTAGCACCTACCAAGGCAAGGAGAAGAGTGGTGGGA  
GAGAGAAAAAGAGCAATTGGACTGGGAGCTGCCTTCCTTGGGTTCTTAGGAGCGGCAGGAAGCACTATGGGC

GCGGCGTCAATAACGCTGACGGTACAGGCCAGACAATTATTGTCTGGCATAGTGCAACAGCAAAGCAATTTGC  
TGAGGGCTATAGAGGCTCAGCAGCATCTGCTGAAACTCACGGTCTGGGGCATT

>MH604524

TTCTATTGCAATACAACAAACCTGTTCAATAGTGCTTGAAAAATGGCAGTGCTACAAATAGCACACAAGCCA  
ATGGAACAACATAACTCTACCATGCAGAATAAAGCAAATTATAAATATGTGGCAGAGAGTAGGACAAGCAAT  
GTATGCCCCCTCCTATCAAAGGAAGTATAAGGTGTGAATCAAACATTACAGGACTACTACTAACAAGAGATGGT  
GGAGGTGAAACTAATAGCAGCGATGAAACCGAAACCTTCAGACCTATAGGAGGAGATATGAGGAATAATTGGA  
GAAGTGAATTATATAAGTATAAAGTAGTAAAAATTGAACCAATAGGAGTAGCACCTACCAGGGCAAGGAGAAG  
AGTGGTGGAGAGAGAAAAAGAGCAGTTGGACTGGGAGCTGCCTTCCTTGGGTTCTTGGGAGCAGCAGGAAGC  
ACTATGGGCGCGGCGTCAATGACGCTGACGGTACAGGCCAGAAAATTATTGTCTGGCATAGTGCAACAGCAAA  
GCAATTTGCTGAGGGCTATAGAGGCTCAGCAGCATCTGCTGAAACTCACGGTCTGGGGCATT

>MH604541

TTCTATTGCAATACAACAAAGCTGTTCAATAGCACTTGGGAAAATAGCACTTGGGAAAATGGCACTGTTGCAA  
ATAGCACAGGGGACAATGACACTATAACTATAACCATGCAGAATAAAGCAAATTATAAATATGTGGCAAAGAGT  
AGGACAAGCAATGTATGCCCCCTCCTATCAAAGGAATTATAAGGTGTGAATCAAACATTACAGGACTACTACTA  
ACAAGAGATGGTGGAGGTGGAACTAATAGCAGCAATGAGACCTTCAGACCTATAGGAGGAGACATGAGGGACA  
ATTGGAGAAGTGAACATATATAAGTATAAAGTAGTAAAAATTGAACCAATAGGAGTAGCACCTACCAGGGCAAA  
GAGAAGAGTGGTGGAGAGAGAAAAAGGGCATTGACTGGGAGCTGCCTTCCTTACGTTCTTGGGAGCAGCA  
GGAAGCACTATGGGCGCGGCGTCAATAACGCTGACGGTACAGGCCAGACAATTATTGTCTGGCATAGTGCAAC  
AGCAAAGCAATTTGCTGAGGGCTATAGAGGCTCAGCAGCATCTGCTGAAACTCACGGTCTGGGGCATT

>MH330347

TTCTATTGCAATACCACATACCTGTTCAATAGCACTTGGGATGGAAATAGCACTGTAAATAGCACAGGGGGCG  
ATAGAAATATAACTTTACCATGCAGAATAAAGCAAATTATAAATATGTGGCAGAGAGTAGGACAAGCAATGTA  
TGCCCCCTCCTATCCGAGGAAACATAAGTTGTGAATCAAACATCACAGGACTACTCCTAATAAGAGATGGTGGA  
GGTGGAAATAATAAGACTAATGAGACCTTCAGACCTATAGGAGGAGATATGAGGGACAATTGGAGAAGTGAAC  
TATATAAGTATAAAGTAGTAAAAATTGAACCAATAGGGGTAGCACCTACCCTGGCCAGGAGAAGAGTGGTGGA  
GAGAGAAAAAGAGCAATAATTGGACTGGGAGCTGCCTTCATTGGGTTCTTAGGAGCAGCAGGAAGCACTATG  
GGCGCGGCGTCACTGACGCTGACGGTACAGGCCAGACAATTATTGTCTGGCATAGTGCAACAGCAAAGCAATT  
TGCTGAGGGCTATAGAGGCTCAGCAGCATCTGCTGAAACTCACGGTCTGGGGCATT

>MH330348

TTCTATTGCAATACAACAAACCTGTTCAACATAAATAGCACTGACACAAATATCACACAGGACAATGAAACTA  
TAACTCTACCATGCAGAATAAAGCAAATTATAAATATGTGGCAGAGAGTAGGACAAGCAATGTATGCCCCCTCC  
TATCAAAGGAAGTATAATGTGTGAATCAAACATTACAGGACTACTACTAACAAGAGATGGTGGAGGTGACAGA  
AATGATACTAATAGTACTGAGACCTTCAGACCTATAGGAGGAGATATGAGGGACAATTGGAGAAGTGAACAT  
ATAAGTATAAAGTAGTAAAAATTGAACCAATAGGAGTAGCACCTACCAGGGCAAAGAGAAGAGTGGTGGGGAG  
AGAAAAAGAGCAATTGGACTGGGAGCCGCTTCCTTGGGTTCTTAGGAGCAGCAGGAAGCACTATGGGCGCG  
GCGTCACTGACGCTGACGGTACAGGCCAGACAATTATTGTCTGGCATAGTGCAACAGCAAAGCAATTTGCTGA  
GGGCTATAGAGGCTCAGCAGTATATGCTGAAACTCACGGTCTGGGGCATT

>MH330349

TTCTATTGCAATACAACAGCCCTGTTCAATAGCACTTGGAGTGAAAATGGCACTGCCATAAATAGCACAGAGG  
CCAATGGAACATAACTCTGCCATGCAGAATAAGGCAAATTATAAATATGTGGCAGAGAGTAGGACAAGCAAT  
GTATGCCCCCTCCTATCAGAGGAATTATAAGGTGTGAATCAAACATTACAGGACTACTGCTAACACGAGATGGT  
GTAGCTAATAGCAGCAATGAGACCTTCAGACCTATAGGAGGAGATATGAGGAACAATTGGAGAAGTGAACAT  
ATAAGTATAAAGTAGTAAAAATTGAACCAATAGGAGTAGCACCTACCAGGGCAAAGAGAAGAGTGGTGGAGAG  
AGAAAAAGAGCAATTGGACTGGGAGCCGCTTCCTTGGGTTCTTAGGAGCAGCAGGAAGCACTATGGGCGCG  
GCGTCACTGACGCTGACGGTACAGGCCAGACAATTATTGTCTGGCATAGTGCAACAGCAAAGCAATTTGCTGA  
GGGCTATAGAGGCTCAGCAGCATCTGCTGAAACTCACGGTCTGGGGCATT

>MH330350

TTTTATTGTAATACAACAGAACTGTTCAATAGTACTTGGGACGGAAATAACACTGTTACAAATAGCACACAGG  
ACAATGGCACTATAACTCTACCATGCAGAATAAGGCAAATTATAAATATGTGGCAGAGAGTAGGACAAGCAAT  
GTATGCCCCCTCCTATCAGAGGAAATATAAGGTGTGAATCAAACATTACAGGACTACTACTAACAAGAGATGGT  
GGAGTTAATACCAGCAATGAGACCTTCAGACCTACAGGAGGAGATATGAGGAACAATTGGAGAAGTGAACAT  
ATAAGTATAAAGTAGTACAAATTGAACCAATAGGAGTAGCACCTACCAAGGCAAAGAGAAGAGTGGTGGAGAG  
AGGAAAAAGGGCAATTGGACTGGGAGCTGCCTTCCTTGGGTTCTTGGGAGCAGCAGGAAGTACTATGGGCGCG  
GCGTCAATAACGCTGACGGTACAGGCCAGACAATTATTGTCTGGCATAGTACAACAGCAAAGCAATTTGCTGA  
TGGCTATAGAGGCTCAGCAGCATCTGCTGAAACTCACGGTCTGGGGCATT

>MH330351

TTCTATTGCAATACAACAAACCTGTTCAATAGCACTTGGGACAAAAATAGTACTGTACAAATAGCACAAACA  
GCACAGAACTATAACTCTACCATGCAGAATAAAGCAAATTATAAATATGTGGCAGAGAGTAGGACAAGCAAT  
GTATGCCCCCTCCTATCAAAGGAAGTATAAGGTGTGAATCAAACATTACAGGACTAATATTAATAAGAGATGGT

GGAAATAATAGCAGCAATGAGACCTTCAGACCTATAGGAGGAAATATGAGGGACAATTGGAGAAGTGAAGTAT  
ATAAATATAAAGTAGTAGAGATTGAACCAATAGGAATAGCACCTACCAAGGCAAGAAGGAGAGTGGTGGAGAG  
AGAAAAAAGAGCAATTGGACTGGGAGCTGCCTTCCTTGGGTTCTTAGGAGCAGCAGGAAGCACTATGGGCGCG  
GCGTCAATAACGCTGACGGTACAGGCCAGACAATTATTGTCTGGCATAGTGCAACAGCAAAGCAATTTGCTGA  
GGGCTATAGAAGCTCAGCAGCATCTGCTGAAGCTCACGGTCTGGGGCATT

>MH330352

TTCTATTGCAATACAACACAACCTGTTCAATAGCACTTGGCCTTGGAATGACACTGTCACAAATAGCACAGAGA  
CCAGTGAAAATATAACTCTACCATGCAGAATAAAGCAAATTATAAATATGTGGCAGAGAGTAGGACAAGCAAT  
GTATGCCCTCCTATCAGAGGAAGTATAAGGTGTGAATCAAACATTACAGGACTACTACTAATAAGAGATGGT  
GGAACATAATAGCACCAATGAGACCTTCAGACCTATAGGAGGAGATATGAGGGACAATTGGAGAAGTGAAGTAT  
ATAAGTATAAAGTAGTACAAATTGAACCAATAGGAGTAGCACCTACCAAGGCAAAGAGAAGAGTGGTGGAGAG  
AGAAAAAAGAGCAATTGGACTGGGAGCTGCCTTCCTTGGGTTCTTAGGAGCAGCAGGAAGCACTATGGGCGCG  
GCGTCAATAACGCTGACGGTACAGGCCAGACAATTATTGTCTGGCATAGTGCAACAGCAAAGCAATTTGCTGA  
GGGCTATAGAGGCTCAGCAGCATCTGCTGAAACTCACGGTCTGGGGCATT

>MH330353

TTCTATTGCAATACAACAGACCTGTTTCGATAGCACTTGGGATGGAAATAACACAGATAAAGCTGTCACAAATA  
TCACGGGCAATGGAAGTATGACTCTGCCATGCAGAATAAAGCAAATTGTAAGGATGTGGCAGAGAGTAGGACA  
AGCAATGTATGCCCTCCTATTGAAGGGAAAATAAGGTGTGAATCAAACATTACAGGACTACTACTACTAAGA  
GATGGTGGAATTAATAGCAGCAATGAGACCTTCAGACCTATAGGAGGAGATATGAGGGACAATTGGAGAAGTG  
AGCTATATAAGTATAAAGTAGTAAAAATTGAACCAATAGGAGTAGCACCTACCCAGGCAAGGAGAAGAGTGGT  
GGCGAGAGAAAAAAGAGCAATTGGATTAGGAGCTGCCTTCCTTGGGTTCTTAGGAGCAGCAGGAAGCACTATG  
GGCGCGGCGTCAATAACGCTGACGGTACAGGCCAGACAATTATTGTCTGGCATAGTGCAACAGCAAAGCAATT  
TGCTGAAGGCTATAGAGGCTCAGCAGCATCTGCTGAAACTCACAGTCTGGGGCATT

>MH330354

TTCTATTGCAATACAACAAGCCTGTTCAATAGCACTTGGGATGAAAATAGCACTGTCACAAACACAGAGGCCA  
ATGGAAGTATAATTCTGCCATGCAGAATAAAGCAAATTATAAATATGTGGCAAAGAGTAGGACAAGCAATGTA  
TGCCCTCCTATCAGAGGAAGGATAAGGTGTGAATCAAACATTACAGGACTACTAATAACAAGAGATGGTGGA  
GGTGGAATAATAGCACCAATGAAACCTTCAGACCTATAGGAGGAGATATGAGGGACAATTGGAGAAGTGAAC  
TATATAAGTATAAAGTAGTAAAAATTGAACCAATAGGAGTAGCACCTACCCAGGCAAAGAGAAGAGTGGTGGA  
GAGAGAAAAAAGAGCAATTGGACTGGGAGCCGCCTTCCTTGGGTTCTTAGGAGCAGCAGGAAGCACTATGGGC  
GCAGCGTCAATGACGCTGACGGTACAGGCCAGACAATTATTGTCTGGCATAGTGCAACAGCAAAGCAATTTGC  
TGAGGGCTATAGAGGCTCAGCAGCATCTGCTGAAACTCACGGTCTGGGGCATT

>MH330355

TTCTATTGCAATACAACAAGGCTGTTCAATAGCTCTTGGGGCGAAAATAGCACTGTCACAAATAGCACAGATG  
TCAATGGAAGTATAATTCTGCCATGCAGAATAAAGCAAATTATAAATATGTGGCAGAGAGTAGGACAAGCAAT  
GTATGCCCTCCTATCCCAGGAAATATAACATGTATATCAAACATTACAGGACTACTACTAGTAAGAGATGGT  
GGACAGAACAGTAGTAACACCAAGTGAACCTTCAGACCCATAGGAGGAGATATGAAGCACAATTGGAGAAGTG  
AACTATATAAGTATAAAGTAGTAGAAATTGAACCAATAGGAGTAGCACCTACCAAGGCAAAGAGAAGAGTGGT  
GGAGAGAGAAAAAAGAGCAATTATTGGACTGGGAGCTGCCTTCATTGGGTTCTTAGGAGCAGCAGGAAGCACT  
ATGGGCGCGGCGTCAATAACGCTGACGGTACAGGCCAGACAATTACTGTCTGGCATAGTGCAACAGCAAAGCA  
ATTTGCTGAGGGCTATAGAGGCTCAGCAGCATCTGCTGAAACTCACGGTCTGGGGCATT

>MH330356

TTCTATTGCAATACAACAGACCTGTTTAATAGCACTTGGGAGGAAAATAGCACTGTTACAAATAACACAAATG  
CCAATGAAAATATAACTCTGCCATGCAGGATAAAGCAAATTATAAATTTGTGGCAGAGAGTAGGGCGAGCAAT  
GTATGCCCTCCTATCAGAGGAATTATAAGGTGTAACTCAACTATTACAGGACTACTACTAACAAGAGATGGT  
GGAAATGGAAATAGTAGCAACAATGAGACTGAGACCTTCAGACCTATAGGAGGAAAATATGAGGGACAATTGGA  
GAAGTGAATATATAAGTATAAAGTAGTAGAAATTGAACCAATAGGAGTAGCACCTACCAAGGCAAAGAGAAG  
AGTGGTGACAGAGAGAAAAAAGAGCAGTTGGACTGGGAGCCGCCTTCCTTGGGTTCTTAGGAGCAGCAGGAAGC  
ACTATGGGCGGCGGCGTCACTGACGCTGACGGTACAGGCCAGACAATTATTGTCTGGCATAGTGCAACAGCAAA  
GTAATTTGCTGAGGGCTATAGAGGCTCAGCAGCATCTGCTGAAACTCACGGTCTGGGGCATT

>MG902950

TTCTATTGCAATACAACAAACCTGTTTCAGTAGCACTTGGAAACGACACTATCACAAATTTACAGAGACCAATG  
AAACTATAATTCTGCCATGCAGAATAAAGCAATTTATAAAGATGTGGCAGAGAGTAGGACAAGCAATGTATGC  
CCCTCCTATCAAAGGGAGCATAAGGTGTGAATCAAACATTACAGGACTACTACTAACAAGAGATGGTGGAAAT  
GGAACACTGACAGCAATGAGACCTTCAGACCTATAGGAGGAGATATGAGGGACAATTGGAGAAGTGAAGTAT  
ATAAGTATAAAGTAGTACAAATTGAACCAATAGGAATAGCACCTACCAAGGCAAAGAGAAGAGTGGTGGAGAG  
AGAAAAAAGAGCAATTGGACTGGGAGCCGCTTTCTTGGGTTCTTAGGAGCAGCAGGAAGTACTATGGGCGCG  
GCGTCAATAACGCTGACGGCACAGGCCAGACAATTATTGTCTGGTATAGTACAACAGCAAAGCAATTTGCTGA  
GGGCTATAGAGGCTCAGCAGCATCTGCTGAAACTCACGGTCTGGGGCATT

>MG902951

TTCTATTGCAATACAACAGACCTGTTCAATAGCACTTGGGGAAATAACACAAATAGCACAGGGACCAATGAAA  
CTATAACTCTGCCATGCAGAATAAAGCAAATTATAAATATGTGGCAGAGAGTAGGACAAGCAATGTATGCCCC  
TCCTATCCGAGGAATTATAAAGTGTGAATCAAACATTACAGGACTACTACTAACAAGAGATGGTGGAGGTGAA  
GCTAATAATAGCGAGAGCGAGACCTTCAGACCTATAGGAGGAGATATGAGGGACAATTGGAGAAGTGAAGTAT  
ATAAGTATAAAGTAGTAGAAAATTGAACCAATAGGAGTAGCACCTACCAGGGCAAAGAGAAGAGTGGTGCAGAG  
AGAAAAAGAGCAATTGGACTGGGAGCCGCCCTCCTTGGGTTCTTAGGAGCAGCAGGAAGCACTATGGGCGCG  
GCGTCAATAACGCTGACGGTACAGGCCAGACAATTATTGTCTGGTATAGTGCAACAGCAAAGCAATTTGCTGG  
ATGCTATAGAGGCTCAGCAGCATCTGCTGAGACTCACGGTCTGGGGCATT

>MH330337

TTCTATTGCAATACAACAGACCTGTTCAATAGCACTTGGGACGAAAATGACACTGTTACAAATAGCACACAGG  
CCAATGAACTATAATTCTACCATGCAGGATAAAGCAAATTATAAATATGTGGCAGAGAGTAGGACAAGCAAT  
GTATGCCCCCTCCTATCAAAGGAAGTATAAGGTGTGAATCAAACATTACAGGACTAATACTAACAAGAGATGGT  
GGAACTAATAGCAGCAATGAGACCTTCAGACCTATAGGAGGAAATATGAGGGACAATTGGAGAAGTGAAGTAT  
ATAAGTATAAAGTAGTAAAAATTGAACCAATAGGAGTAGCACCTACCAAGGCAAAGAGAAGAGTGGTGGAAAAG  
AGAAAAAGAGCAATTGGACTGGGAGCTGCCTTCCTTGGGTTCTTAGGAGCAGCAGGAAGTACTATGGGCGCG  
GCGTCAATAACGCTGACGGTACAGGTACAGGCAGACAATTATTGTCTGGCATAGTGCAACAGCAAAGCAATTTGCTGA  
GGGCTATAGAGGCTCAGCAGCATCTGCTGAAACTCACGGTCTGGGGCATT

>MH330338

TTCTATTGCGATACAACAAAACTGTTCAATAGCACTTGGAACGAAAATGGCACTAGGACAGATACAGATACCA  
CACAGGATGAAAATATAACTATACCATGCAGAATAAAGCAAATTATAAATATGTGGCAGAGAGTAGGACAAGC  
AATGTATGCCCCCTCCCATCAGAGGAACTATAATGTGTATATCAAACATTACAGGGCTACTCCTAACAAGAGAT  
GGTGGAGCTAATAACAGCAATGAAACCTTCAGACCTATAGGAGGAGATATGAGAGACAATTGGAGAAGTGAAC  
TATATAAGTATAAAGTAGTAGAAAATTGAACCAATAGGGGTAGCACCTACCAAGGCAAAGAGAAGAGTGGTGGGA  
GAGAGAAAAAGAGCAGTTGGACTGGGAGTTGCCTTCCTCGGGTTCTTAGGAGCAGCAGGAAGTACTATGGGC  
GCGGCGTCACTGACGCTGACGGTACAGGCCAGACAATTATTGTCTGGCATAGTGGAACAGCAAAGCAATTTGC  
TGAGGGCTATAGAGGCTCAGCAGCATCTGCTGAAACTCACGGTCTGGGGCATT

>MH330339

TTCTATTGCAATACAACAGCACTGTTCAATAGCACTTGGGGAGGAAATAACACACAGGGCAATGAAAGTATAA  
CTCTACCATGCAGAATAAAGCAAATTATAAGGATGTGGCAGAGAGTAGGACAAGCAATGTATGCCCCCTCCTAT  
CCAAGGAAGGATAAGGTGTGAATCAAATATTACAGGACTACTATTAACAAGAGATGGTGGAGTAATAATAGC  
AGCAATGGGACTGAGACCTTCAGACCTACAGGAGGAGATATGAGGGACAATTGGAGAAGTGAAGTATATAAGT  
ATAAAGTGGTAGAAAATTGAACCAATAGGAATAGCACCTACCAGGGCAAAGAGAAGAGTGGTGCAGAGAGAAAA  
AAGAGCAATTACACTGGGAGCTGCCTTCCTTGGGTTCTTAGGAGCAGCAGGAAGTACTATGGGCGCGGCGTCA  
ATAACGCTGACGGTACAGGCCAGGCAATTATTGTCTGGTATAGTACAACAGCAAAGCAATTTGCTAAAGGCTA  
TAGAGGCTCAGCAGCATCTGCTGAAACTCACGGTCTGGGGCATT

>MH330340

TTCTATTGCAATACAACAGACCTGTTCAATAGCATTTGGGAAAACGGCAATGTCACAAATAGCACAGAGACCA  
ATGAACTATAACTCTACAATGCAGAATAAAGCAAATTATAAATATGTGGCAAAGAGTAGGACAAGCAATGTA  
TGCCCCCTCCTATCAGTGGAAGCATAAGGTGTGAATCAAACATTACAGGACTAATACTAATAAGAGATGGTGGGA  
TATAATAGCAGCAATGAGACCTTCAGACCTATAGGAGGAAATATGAAGGACAATTGGAGAAGTGAAGTATATA  
AGTATAAAGTAGTAAAAATTGAACCAATAGGAGTAGCACCTACCAGGGCAAAGAGAAGAGTGGTGGAGAGAGA  
AAAAAGAGCAATCGGACTGGGAGCTGCCTTCCTTGGGTTCTTAGGAGCAGCAGGAAGTACTATGGGCGCGGCG  
TCACTGACGCTGACGGTACAAGCCAGACAATTATTGTCTGGCATAGTGCAACAGCAAAGCAATTTGCTGAGGG  
CTATAGAGGCTCAGCAACATCTGCTGAAACTCACGGTCTGGGGCATT

>MH330341

TTCTATTGCAATACAACAGCCCTGTTCAATAGCACTTGGCACGAAAATGACACTGTTACAAATAGCACACAGA  
ACAATGAACTATAATTCTACCATGCAGAATAAAGCAAATTATAAATATGTGGCAGAGAGTAGGACAAGCAAT  
GTATGCCCCCTCCGATCAGAGGAAGTATAAGGTGTGAATCAAACATTACAGGACTACTACTAACAAGAGATGGT  
GGGGCTAATAGCAGCAATGAGACCTTCAGACCTATAGGAGGAGATATGAGGGACAATTGGAGAAGTGAAGTAT  
ATAAGTATAAAGTAGTAAAAATTGAACCAATAGGAGTAGCACCTACCAGGGCAAAGAGAAGAGTGGTGGAAAAG  
AGAAAAAGAGCAATTGGACTGGGAGTTGCCTTCCTTGGGTTCTTAGGAGCAGCAGGAAGCACTATGGGCGCG  
GCGTCAATAACGCTGACGGTACAGGCCAGACAATTATTGTCTGGCATAGTGCAACAGCAAAGCAATTTGCTGA  
GGGCTATAGAGGCTCAGCAGCATCTGCTGAAACTCACGGTCTGGGGCATT

>MH330342

TTCTATTGCAATACAACAGCCCTGTTCAATAACACTGACACAAATAGCACAGAGACCAGTGGAATATAACTA  
TACCATGTAGAATAAAGCAAATTATAAGAATGTGGCAGAGAGTAGGACAAGCAATGTATGCCCCCTCCTATCGA  
AGGAAATATAACGTGTGTATCAAACATTACAGGTCTACTACTAACAAGAGATGGTGGGGTAAATAACACCAAT  
GAGACCTTCAGACCCATAGGAGGAGATATGAGGGACAATTGGAGAAGTGAAGTATATAAGTATAAAGTAGTAG  
AAATTGAACCAATAGGAGTAGCACCTACCAGGGCAAAGAGAAGAGTGGTGGAGAGAGAAAAAGAGCAATTGG  
ACTGGGAGCTGCCTTCCTTGGGTTCTTAGGAGCAGCAGGAAGCACTATGGGCGCGGCGTCAATGACGCTGACG

GTACAGGCCAGACAATTATTGTCTGGCATAGTGCAGCAGCAAAGCAATTTGCTGCAGGCTATAGAGGCTCAGC  
AGCATCTGCTGAGACTCACGGTCTGGGGCATT

>MH330344

TTCTATTGTAATACAACAAAACCTGTTCAATAGCACTTGGGACAAAATAGCACAAAGTACAAATATCACACAGA  
CAAATGGAAATATAACTCTACCATGCAGAATAAAGCAAATTATAAATATGTGGCAGAGAGTAGGACAAGCAAT  
ATATGCCCTCCTATCAAAGGAAATATAATGTGTGTATCAAACATTACAGGACTACTACTAATAAGAGATGGG  
GGAGGTGGAAATAATAGCATCAATGAACTTTTCAGACCTATAGGAGGAGATATGAGGGACAATTGGAGAAGTG  
AACTATATAAGTATAAAGTAGTACAAATTGAACCAATAGGGGTAGCACCTACCAGGGCAAGGAGAAGAGTGGT  
GCAGAGAGAAAAAGAGCAATTGGACTGGGAGCCGCCTTCCTCGGGTTCTTAGGAGCAGCAGGAAGCACTATG  
GGCGCAGCGTCACTGACGCTGACGGTACAGGCCAGACAATTATTGTCTGGCATAGTGCACAGCAAAGCAATT  
TGCTGAGGGCTATAGAGGCTCAGCAGCATCTGCTGAAACTCACGGTCTGGGGCATT

>MH330345

TTCTATTGCAATACAACAGCCCTGTTCAATAGCATTGGAACGGAAATGACAATGGCACAAATAGTACAGAGG  
ACACTGACCCCTATAATTCTACCATGCAGAATAAAGCAAATTGTAAATATGTGGCAGAGAGTAGGACAAGCAAT  
GTATGCCCTCCTATCCCAGGAAATATAAGTTGTACATCAAACATTACAGGACTACTACTAACAAGAGATGGA  
ATTAATGGCAGCAATGAGACCTTCCGACCTATAGGAGGAGACATGAGGGACAATTGGAGAAGTGAACCTATATA  
AGTATAAAGTAGTAAAAATTGAACCAATAGGAGTAGCACCTACCAAGGCAAAGAGAAGAGTGGTGGAGAGAGA  
AAAAAGAGCAATTGGACTGGGAGCTGCCTTCCTTGGGTTCTTAGGAGCAGCAGGAAGCACTATGGGCGCGGCG  
TCAATAACGCTGACGGTACAGGCCAGACAATTATTGTCTGGCATAGTGCACAGCAAAGCAATTGCTGAGGG  
CTATAGAGGCTCAGCAGCATCTGCTGAAACTCACGGTCTGGGGCATT

>MH330346

TTCTATTGCAATACATCAGACCTGTTTACACATAATATCACAGGGGCCAATGAAACAGGGGCCAATGGAACTA  
TAACTATAACCATGCAAAATAAAACAAATTATAAATATGTGGCAGAGAGTAGGACAAGCAATGTATGCCCTCC  
TATCAGAGGAATTATAAGGTGTGAATCAAACATTACAGGACTATTACTAACAAGAGATGGTGGAAAGAGCGAG  
AATGAGACCTTCAGACCTATAGGGGGAGATATGAGGGACAATTGGAGAAGTGAACCTATATAAGTATAAAGTAG  
TAGAAATTGGACCAATAGGAGTAGCACCTACCAGGGCACAGAGGAAAGTGGTGAAGAGAGAAAAAGAGCAAT  
TATTGGACTGGGAGCTGCCTTCCTTGGGTTCTTAGGAGCAGCAGGAAGCACTATGGGCGCGGCGTCATTGACG  
CTGACGGTACAGGCCAGACAATTATTGTCTGGCATAGTGCACAGCAAAGCAATTGCTGAGGGCTATAGAGG  
CTCAGCAGCATCTGCTGAAACTCACGGTCTGGGGCATT

>HQ616082

TTCTATTGCAATACAACAAACCTGTTCAATGGCACTTGGTCAAAAAGCACAAACGGCCAATGCAACTGCCAATG  
AACTATAACTCTACCGTGCAGAATAAAGCAAATTATAAATATGTGGCAGAGAGTAGGACAAGCAATGTATGC  
CCCTCCTATCATAGGCAATATAAGCTGTGAATCAAACATTACAGGACTGCTACTGACAAGAGATGGTGGAAACA  
ACTAATAGCAGCGATGAGACCTTCAGACCTATAGGAGGAAATATGAGGGACAATTGGAGAAGTGAACCTATATA  
AGTATAAAGTAGTAATAATTGATCCAATAGGAGTAGCACCTACCAGGGCAAAGAGAAGAGTGGTGGAGAGGGA  
AAAAAGAGCAATTGGACTGGGAGTTGCCTTCCTTGGGTTCTTAGGAGCAGCAGGAAGCACTATGGGCGCGGCG  
TCACTGACGCTGACGGTACAGGCCAGACAATTATTGTCTGGTATAGTGCACAGCAAAGCAATTGCTGAGGG  
CTATAGAGGCTCAGCAGCATCTGCTGAAACTCACGGTCTGGGGCATT

>DQ823357

TTCTATTGCAATACAACAGAACTGTTCAATAGCACTTGGGGCGAAAATGGCACTATCACAAATAGCACAGAGA  
CCAGTGAATATAACTCTACCATGCAGAATAAAGCAAATTATAAATATGTGGCAGAGAGTAGGACAAGCAAT  
GTATGCCCTCCTATCAGAGGAAATATAAGTTGTGTATCAAACATTACAGGACTACTACTAACAAGAGATGGT  
GGAACCTAATAGCAGCACTGAGACCTTCAGACCTACAGGAGGAGATATGAGGGACAATTGGAGAAGTGAACCTAT  
ATAAGTATAAAGTAGTAGAAATTGAACCAATAGGAGTAGCACCTACCAAGGCAAAGAGAAGAGTGGTGGAGAG  
AGAAAAAGAGCAATAATTGGACTGGGAGCTGCCTTCCTTGGGTTCTTAAGTGCAGCAGGAAGCACTATGGGC  
GCAGCGTCACTGACGCTGACGGTACAGGCCAGACAATTATTGTCTGGCATAGTGCACAGCAAAGCAATTGCTG  
TGAGGGCTATAGAGGCTCAGCAGCATTTGCTGAGACTCACGGTCTGGGGCATT

>KU749399

TTCTATTGCAATACAACAGGCCCTGTTCAATAGTACTTGGGACAATAGTACTTGGGACAAAATAGCACTGTCA  
CAAATGGCACCGAGGACAATATAACTCTACAATGCAAAATAAAGCAAATTATAAGGATGTGGCAGAGAGTAGG  
ACAAGCAATGTATGCCCTCCTATCAGAGGAAATATAAAGTGTACATCAAACATTACAGGACTACTACTAATA  
AGAGATGGTGGAAATGGAAATAATAGCAACAATGAGACCTTCAGACCGACAGGAGGAGATATGAGAAATAATT  
GGAGAAGTGAACCTATATAAGTATAAAGTAGTAGAAGTTGAACCAATAGGAATAGCACCTACCAAGGCAAAGAG  
AAGAGTGGTGGAGAGAGAAAAAGAGCAATAGTTGGACTGGGAGCTGCCTTCCTTGGGTTCTTAGGAGCAGCA  
GGAAGTACTATGGGCGCGGCGTCAATAACGCTGACGGTACAGGCCAGACAATTACTATCTGGCATAGTACAAC  
AGCAGAGCAATCTGCTGAGGGCTATAGAGGCTCAGCAGCATCTGCTGAAACTCACGGTCTGGGGCATT

>KU749401

TTCTATTGCAATACAACAGACCTGTTCAATAGCACTTGGAACGGCAGCAATAGCACTGCCATGAATAGCTCAG  
GCAATGAAATATAAACCATACTGCAGAATAAAGCAAATTATAAATATGTGGCAGAGAGTAGGACAAGCAAT  
GTATGCCCTCCTATCAGAGGAAATATAACATGTGTATCAAACATTACAGGGCTACTACTAATAAGAGATGGG

GGAAATGGAAATAATAGCAACAATGAGACCTTCAGACCTATAGGAGGAGATATGAGGGATAATTGGAGAAGTG  
AACTATATAAATATAAAGTAGTAAAAATTGAACCAATAGGAGTAGCACCTACCAAGGCAAGGAGAAGAGTGGT  
GGGGAGAGAAAAAAGAGCAATTGGACTGGGAGCTGCCTTCCTTGGGTTCTTAGGAGCAGCAGGAAGCACTATG  
GGCGCGGCGTCACTGACGCTGACGGTACAGGCCAGAAAAATTGCTATCTGGCATAGTGCAACAGCAAAGCAATT  
TGCTGAGGGCTATAGAGGCTCAGCAGCAACTGCTGAGACTCACAGTCTGGGGCATT

>KY658681

TTCTATTGCAATACAACAGCCCTGTTCAATAGCACTTGGAACACCCTTGGAACGAAAATAGCACTGTTGAAA  
GTAGTACAGGGGACAATGAAAATATAACTATACCATGCAGAATAAAGCAAATTATAAATATGTGGCAGAGAGT  
AGGACAAGCAATGTATGCCCCCTCTATCAAAGGAATTATAAAGTGTGAATCAAACATTACAGGACTACTACTG  
GTAAGAGATGGTGGAAACACTAATAGCAGCAATGAGACCTTCAGACCTATAGGAGGAGATATGAGGGACAATT  
GGAGAAGTGAACATATAAAGTATAAGGTAGTAAAAATTGAACCAATAGGAGTAGCACCAACCAAGGCACAGAG  
AAGAGTGGTGGGGAGAGAAAAAAGAGCAATTGGACTGGGAGTTGCCTTCCTTGGGTTCTTAGGAGCAGCAGGA  
AGCACTATGGGCGCAGCGTCAATAACGCTGACGGTACAGGCCAGACAATTACTGTCTGGCATAGTGCAACAGC  
AAAGCAATTTGCTGAAGGCTATAGAGGCTCAGCAGCATCTGCTGAAACTCACAGTCTGGGGCATT

>KU749402

TTCTATTGCAATACATCAAACTGTTCAATAGCACTTGGGACGAAAATAGCACTGCCATAAATAGTACAGAGG  
ACAGTGGAATTATAACTATACCATGCAGAATAAGGCAAGTTATAAATATGTGGCAGAGAGTAGGACAAGCAAT  
GTATGCCCCCTCTATCAGAGGAAGTATAAGGTGTGAATCAAACATTACAGGATTAATACTAACAAGAGATGGT  
GGAAATATTAGTAGCACCAATGAGACCTTCAGACCTACAGGAGGAGATATGAGGGACAATTGGAGAAGTGAAC  
TATACAAGTATAAAGTAGTAAGCATTGAACCAATAGGAGTAGCACCTACCAAGGCAAGGAGAAGAGTGGTGCA  
GAGAGAAAAAAGAGCAGTTGGACTGGGAGCTGCCTTCCTTGGGTTCTTAGGAGCAGCAGGAAGCACTATGGGC  
GCGGCGTCAATTGACGCTGACGGTACAGGCCAGAAAAATTATTGTCTGGCATAGTGCAACAGCAAAACAATTTGC  
TGAAGGCTATAGAGGCTCAGCAGCATCTGCTGAAACTCACAGTCTGGGGCATT

>KU749403

TTCTATTGTAATACAACAGACCTGTTCAATAGCACTTGGGACAGAAATGACACTGATGCAAATAGTACACAGG  
TTGATAGTACACAGGTTGATGTAACCTATAACTCTACCATGCAGAATAAAGCAAATTGTAAGGATGTGGCAGAG  
AGTAGGACAAGCAATGTATGCCCCCTCTATCGGAGGAGTTATAAGGTGTGAATCAAACATTACAGGACTACTA  
CTAACAAGGGATGGTGGAGCTAATAATAGCACTAATGAGACCTTTAGACCTCTAGGAGGAGATATGAGGGACA  
ATTGGAGAAGTGAACATATAAGTATAAAGTAATACAAGTTGAACCAATAGGAGTAGCACCTACCCCAGCAAA  
GAGAAGAGTGGTGGAGAGACAAAAAAGAGCAATTGGACTGGGAGCTGCCTTCCTTGGGTTCTTAGGAGCAGCA  
GGAAGTACTATGGGCGCGGCGTCAATAACGCTGACGGTACAGGCCAGACAATTATTGTCTGGCATAGTACAAC  
AGCAAAGTAATTTGCTGAGAGCTATAGAGGCTCAGCAGCATCTGCTGAAACTCACAGTCTGGGGCATT

>KU749404

TTCTATTGCAATACAACAGAGCTGTTCAATAGCACTGAGGACAAAAATGGCACTGTCACAAATAGCAATGAAA  
ATATAACTCTACCATGCAGGATAAAGCAAATTATAAATATGTGGCAGAGAGTAGGACAAGCAATGTATGCCCC  
TCCTATCAGAGGAAATATAACTTGTGAATCAAACATTACAGGACTACTACTAACAAGAGATGGAGATGATAAT  
AGCAGTGAGACCTTCAGACCTATAGGAGGAAATATGAGGGACAATTGGAGAAGTGAACATATAAATATAAAG  
TAGTCCAAATTGAACCAATAGGAGTAGCACCTACCAAGGCAAGGAGAAGAGTGGTGGGGAGAGAAAAAAGAGC  
AATTGGACTGGGAGCTGCCTTCCTTGGGTTCTTAGGAGCAGCAGGAAGCACTATGGGCGCGGCGTCACTGACG  
CTGACGGTACAGGCCAGACAATTATTGTCTGGTATAGTGCAACAGCAAAGCAATTTGTTGAGGGCTATAGAGG  
CTCAGCAGCATCTGCTGAAACTCACAGTCTGGGGCATT

>KU749405

TTCTATTGCAATACAACAGACTTGTTCAATTGGGATAGAAATAGCACTGTCCCAAATAACACAAGTAGCAATA  
TAACTCTGCCATGCAGAATAAAGCAAATTATAAATATGTGGCAGAGAGTAGGACAATCAATGTATGCCCCCTCC  
TATCAGCGGAAAGATAAGGTGTGAATCAAACATTACAGGACTACTACTAGTAAGAGATGGTGGAGATAATAAT  
AGCACCAATGAGACCTTCAGACCTATAGGAGGAGAAATGAGGCACAATTGGAGAAGTGAACATATAAAGTATA  
AAGTAGTAGAAATTGAACCAATAGGAGTAGCACCTACCAAGGCAAGGAGAAGAGTGGTGGGAAGAGAAAAAAG  
AGCAGCCTTTGGACTGGGAGCTGTCTTCCTTGGGTTCTTAGGAGCAGCAGGAAGCACTATGGGCGCGGCGTCA  
CTGACGCTGACGGTACAGGCCAGGCAATTATTGGCTGGCATAGTGCAACAGCAAAGCAATTTGCTGAGGGCTA  
TAGAGGCTCAGCAGCATCTGCTGAAACTCACAGTCTGGGGCATT

>KY658682

TTCTATTGCAATACAACAGAACTGTTCAATAGCACTTGGAATGGCACTGACACAAACAGCACAGAGGACAATA  
ATGTAAATATAACTATAACCATGCAGAATAAAGCAAATTATAAATATGTGGCAGAGAGTAGGACGAGCAATGTA  
TGCCCCCTCTATCAGAGGAAATATAACTTGTGAATCAAACATTACAGGACTACTACTAACAAGAGATGGTGGT  
AAAGAGAAAAATGACAACGAAACCTTTAGACCTATAGGAGGAAATATGAAGGACAATTGGAGAAGTGAACAT  
ATAAGTATAAAGTAGTAGAAATTAACCCAATAGGAGTAGCACCTACCCCGGCAAAAGAGAAGAGTGGTGGAGAG  
AGAAAAAAGAGCAGTTAGCCTAGGAGTTGCCTTCCTTGGGTTCTTAGGAGCAGCAGGAAGTACTATGGGCGCG  
GCGTCACTGACGCTGACGGTACAGGCCAGACAATTATTGTCTGGCATAGTACAACAGCAAAGCAATTTGCTGA  
GGGCTATAGAGGCTCAGCAGCAATTGCTGAAACTCACGGTCTGGGGCATT

>KU749407

TTCTATTGCAATACAACAGAACTGTTCAATAGCACTTGGGACGACAATAGCACTGTTGCAAATATCACAAAGACCAATGAAAATATAACTCTACCATGCAGACTAAGGCAAATCATAAAGATGTGGCAGAGAGTAGGACAAGCAATGTATGCCCTCCTATCCAAGGAGTTATAAAGTGTGAATCAAACATTACAGGACTACTACTAACAAGAGATGGTGGAGATGGAACATAATAACAGCAATAATGAGATTTTCAGACCTATAGGAGGAAATATGAGGGACAATTGGAGAA GTGAACTATATAAGTATAAAGTAGTAGAAATTGAACCAATAGGAGTAGCACCTACCAAGGCAAAGAGAAGAGT GGTGCAGAGAGAAAAAAGAGCAGTTATTGGACTGGGAGCTGCCTTCCTTGGGTTCTTAGGAGCAGCAGGAAGC ACTATGGGCGCGGCGTCAATAACGCTGACGGTACAGGCCAGACAATTACTGTCTGGCATAGTGCAACAGCAAA GCAATTTGCTGAGGGCTATAGAGGCTCAGCAGCATCTGCTGAAACTCACGGTCTGGGGCATT

>AF082486

TTCTATTGCAATACAACAGACCTGTTCAATAGCACTTGGGACGAACATGGCACTGTCCAAATAGCACAAATGGCCAATGGAACATAACTCTACCATGCAGAATAAAGCAAATTTATAAATATGTGGCAGAGAGTAGGACAAGCAATGTATGCCCTCCTATTAAAGGAAGTATAAGGTGTGAATCAAACATTACAGGACTACTATTAACAAGAGATGGTGGAAAGTGAACATAATAGCAGCAATGAGACCTTCAGACCTATAGGAGGAAATATGAGGGATAATTGGAGAAAGTGAACTATATAAGTATAAAGTAGTAAAAATTGAACCCATAGGATTAGCACGTACCAGGGCAAAGAGAAGAGTGGTGGAGAGAGAAAAAAGAGCCATTGGACTGGGAGCTGCCTTCCTTGGGTTCTTAGGAGCAGCAGGAAGTACTATGGCGCGGCGTCAATGACGCTGACGGTACAGGCCAGACAATTATTGTCTGGCATAGTGCAACAGCAAAGCAATT TGCTGAGGGCTATAAAGGCTCAGCAGCATCTGCTGAAACTCACGGTCTGGGGCATT

>KY968402

TTCTACTGTAACACAACAAAACTGTTTAAATAGTACTTGGTCTAATAATGATACTGGGGAGGGTACTGCAGATTCAAATAACGAAACTATCACAATCCCATGCAGAATAAAACAAATTATAAACATGTGGCAACAAGTAGGAAAAGCAATGTATGCCCTCCCATCAGTGGAACATTAGTTGCTCATCAAATATTACAGGGTTACTGTTAACAAGAGATGGTGGAGATAATGATGACCTAAACGGGACCGAGACCTTCAGACCTCAAGGAGGAAAACATGAAGGACAATTGGA GAAGTGAATTATATAAATATAAAGTAGTAAAAATTGAACCATTAGGAGTAGCACCCACCAAGGCAAAGAGAAGAGTGTGCAGAGAGACAAAAGAGCAGTGGGACTAGGAGCTATGTTTCCTTGGGTTCTTGGGAGCAGCAGGAAGC ACTATGGGCGCAGCGTCAATAGCGCTGACGGTACAGACCAGACAATTATTGTCTGGTATAGTGCAACAGCAGACAATATGCTGAGGGCTATTGAGGCGCAACAGCATATGTTGCAACTCACTGTCTGGGGCATC

>KY968404

TTCTACTGTAATACAACACAACCTGTTTTATAGTACTTGGTTGTCTAATGGTAGTAGTTTGACAAATAACACTGAAGGAAATGACACTATCACACTCCCATGCAGAATAAAACAGATTATAAATATGTGGCAGCAAGTAGGAAAAGCAATGTATGCCCTCCCATCAAAGGACTAATTAGATGCTCATCGAATATTACAGGACTGCTACTAACAAGAGATGGTGGTAGTCATAACGAGAGCAATGAGACTGAGACATTCAAGACCTGGGGGAGGAGATATGAGGGACAATTGGA GAAGTGAATTATACAAATATAAAGTAGTACAAATTGAACCATTAGGAATAGCACCCACCAAGGCAAAGAGAAGAGTGGTGCAGAGAGAAAAAAGAGCAGTGGGACTGGGAGCTTTGTTTCCTTGGGTTCTTGGGAACAGCAGGAAGC ACTATGGGCGCAGCGTCATTGACGCTGACGGTACAGGCCAGACAATTATTGTCTGGTATAGTGCAACAGCAGATAATCTGCTGAGAGCTATTGAGGCGCAACACATCTGTTGCAGCTCACAGTCTGGGGCATC

>KY968408

TTCTACTGTAATACAACAAAACTGTTTAAATAAGACTTGGAATGGTACTTGGCTTAATAATGAGAATACTACACAGAATATCACACTCCCATGCAGAATAAAACAAATTATAAACAGGTGGCAGGAAGTAGGAAAAGCAATGTATGCCCTCCCATCAAAGGACAAATTAGCTGCTCATCAAATATTACAGGGCTGCTATTAAACAAGAGATGGTGATAACGAGACTGGGTTCGGAGACCTTCAGACCTGGAGGAGGAGATATGAGGGACAATTGGAGAAGTGAATTATATAAATATAAAGTAGTAAAAATTAGCCATTAGGAGTAGCACCCACCAAGGCAAAGAGAAGAGTGGTGCAAAGAGAAAAAAGAGCAGTGGGAATAGGAGCTGTGTTCTTGGGTTCTTGGGAGCAGCAGGAAGCACTATGGGCGCAGCGTCA GTAACGCTGACGGTACAGGCCAGACAATTATTGTCTGGTATAGTGCAGCAGCAGACAATTTGCTGAGGGCTATTGAGGCGCAACAGCATCTGTTGCAACTCACAGTCTGGGGCATC

>DQ383749

TTCTACTGTAATACATCACAACCTGTTTAAATAGTACTTGGCCTTGGAATGGGAATGCGACTACAGATAATACTACAGGAGTAAATATCACACTCCCATGCAGAATAAAACAAATTATAAACAGGTGGCAGGAAGTAGGAAAAGCAATGTATGCCCTCCTATTAAAGGACAAATTAGATGTTTCATCAAATATTACAGGGCTGCTATTAAACAAGAGATGGTGGTCATAACGAGACCAACGACACTGAGACCTTCAGACCTGGAGGAGGAAATATGAAGGATAATTGGAGAAGTG AATTATATAAATATAAAGTAGTAAAAATTGAACCATTAGGAATAGCACCCACCACGCAAAGAGAAGAGTGGTGCAGAGAGAGAAAAGAGCAATAACAATAGGAGCTATGTTACTTGGTTTCTTGGGAACAGCAGGAAGCACTATGGCGCAGCGTCAATCACGCTGACGGTACAGGCCAGACAATTATTGTCTGGTATAGTGCAACAGCAGACAATCTGCTGAGGGCTATTGAGGCGCAACAGCATCTGTTGCAACTCACAGTCTGGGGCATC

>MH078532

TTCTACTGTAACACATCAAAGCTGTTTAAACAGTACTTGGCATAGGAATGGTACTTGGGAATGGTACTAGTACTGAGAATAATACAATCACAATCCCATGCAGAATAAAACAAATTATAAACAGGTGGCAGGAAGTAGGAAAAGCAATGTATGCCCTCCCATCAGAGGAAATATTACATGTACATCTAATATTACAGGACTGTTATTAAATAAGAGATGGTGGTAACATTAAACACCACGAATGAGACCGAGATCTTCAGACCTGGAGGAGGAGACATGAGGGATAATTGGAGAA GTGAATTATATAAATATAAAGTAGTAAGAATTAGCCATTAGGAATAGCACCCACCGAGGCAAAGAGAAGAGTGGTGCAGAGAGAGAAAAGAGAGCGGTGGGAACACTAGGAGCTGTGTTTCCTTGGGTTCTTGGGAGCAGCAGGAAGC

ACTATGGGCGCAGCGGCAACAACGCTGACGGTACAGGCCAGACAGTTACTGTCTGGCATAGTGCAACAGCAAA  
ACAATTTGCTGAGAGCTATTGAGGCGCAACAGCATACGTTGCAACTCACAGTCTGGGGCATT  
>AF042102

TTCTACTGTAATTCAACACAACCTGTTTAAATGGTACTTGGAATGGTACTTGGAATTAATGGTACTTGGAAGAGTA  
GTTATGGGAATGATACTACAAATATCACACTCCCATGCAGAATAAAGCAAATTATAAACATGTGGCAGGAAGT  
AGGAAAAGCAATGTATGCCCCCTCCCATCAGAGGACAAATTAAATGTACATCAAATATTACAGGGCTGTTATTA  
ACAAGAGATGGTGGTAACAGTAACACCACGGACAACAGCACAGAGACCTTCAGACCTGGAGGAGGAGATATGA  
GGGACAATTGGAGAAGTGAATTATATAGATATAAAGTAGTACAAGTTGAACCATTAGGAATAGCACCCACCAG  
GGCAAAGAGAAGAGTGGTGCAAAGAGAAAAAAGAGCAGTGGAATAGGAGCTATGTTCCCTTGGGTTCTTAGGA  
GCAGCAGGAAGCACTATGGGCGCAGCGTCAGTGACGCTGACGGTACAAGCCAGACAATTATTGTCTGGTATAG  
TGCAGCAGCAGAACAATCTGCTGAGGGCTATTGAGGCGCAACAGCATATGTTGCAACTCACAGTCTGGGGCAT  
C

>AF538307

TTCTACTGTGATTCAACACAACCTGTTTAAATAGTACTTGGCATAATAGTACTTGGAATAATAATAAAGAGTCAA  
ATAGCACTGATCCAATCACACTTCCATGCAGAATAAAACAAAATATAAACATGTGGCAGGAAGTAGGAAAAGC  
AATGTATGCCCCCTCCCATCAGAGGACAAATTAAATGTTTCATCAAACATTACAGGGCTAATATTAACAAGAGAT  
GGTGGTAATAACACAGACAATAACAACACCGAAACCTTCAGACCTGGAGGAGGAAAATATGAAGGACAATTGGA  
GAAGTGAATTATATAAAATATAAAGTAGTAAAAATTGAACCATTAGGAGTAGCACCCACCAAGGCAAGGAGAAG  
AGTGGTGCAGAGAGAGAAAAAGAGAAGTAGGACTAGGAGTTATGTTCCCTTGGGTTCTTGGGAGCAGCAGGAAGC  
ACTATGGGCGCAGCGTCACTGAGGCTGACGGTACAGGCCAGACAATTATTGTATGATATAGTGCAACAGCAAA  
ACAATTTGCTGAGAGCTATTGAGGCGCAACATCATCTGTTGCAACTCACAGTCTGGGGCATC

>GU367398

TTCTACTGTAATACAACACAACCTGTTTAAATAGTACTTGGTCCCTCTAATGATACTTTGAATGGTACTTGGTCCCT  
CTAATTATAATTTGAATGATACTGAAGGATCAGGGGACAACATCACACTCCCATGCAGAATAAAACAAATTAT  
AAACATGTGGCAGGGAGTAGGAAGAGCAATGTATGCCCCCTCCCATCAGAGGACAAATTAGTTGTTTCATCAAAT  
ATTACAGGGTTATTATTAGTGAGAGACGGGGTAATATCCAGAACAATGAGACCTTCAGACCTGCAGGAGGAA  
ATATGAAAGACAATTGGAGAAGTGAATTATATAAGTATAAAGTAGTAAGAATTGAACCATTAGGAATAGCACC  
CACCAAGGCAAAGAGAAGAGTGGTGCAGAGAGAGAAAAAGAGCAATAGGAACGCTAGGAGCTATGTTCCCTTGGG  
TTCTTGGGAGCAGCAGGAAGCACTATGGGCGCAGCGTCAGTGACGCTGACGGTACAGGCCAGACAATTATTGT  
CTGGTATAGTGCAACAGCAGAACAATCTGCTGAAGGCTATTGAGGCGCAACAGCATATGTTGCAACTCACAGT  
CTGGGGCATT

>GU367404

TTCTATTGTAATACAACACAACCTGTTTAAACAGTACTTGAGAAAGGAGTCAAATAACACTGGAGGAAATATCA  
CACGAAATATCACGCTCCCATGTAGAATAAGACAGATTGTAAACATGTGGCAGGAAGTAGGAAAAGCAATATA  
TGCCCCCTCCCATTTGAAGGACTAATTAGATGTTTATCAAATATTACAGGGCTGCTATTAACAAGAGACGGTGGT  
AATCAGAATGGGACTAATGACACTGAAATCTTCAGACCTGGAGGGGGAGATATGAGGGACAATTGGAGAAGTG  
AATTATATAAAATATAAAGTAGTAAAAATTGAACCCTTAGGAATAGCACCCACCAAGGCAAAGAGAAGAGTGGT  
GCAAAGAGAAAAAAGAGCAGTGGGAGCATTAGGAGCTATGTTCCCTTGGGTTCTTGGGAGCAGCAGGAAGCACT  
ATGGGCGCAGCGTCAGTAAACGCTGACGGTACAGGCCAGACAATTATTGTCTGGTATAGTGCAACAGCAGAATA  
ATCTGCTGAAGGCTATTGAGGCGCAACAGCATCTGTTGCAACTCACAGTCTGGGGCATC

>AF146728

TTCTACTGTAATTCAACACAACCTGTTTAAATAGTACTTGTTTAAATAGTACTGGGAATGATACTGAAAGGGCAA  
CTAACAATACAGAAAATATCACACTCCCATGTAGAATAAAACAAATTATAAACATGTGGCAGAAAGTAGGAAA  
AGCAATGTATGCCCCCTCCCATCAACGGACAGATTAGATGTTTCATCAAATATTACAGGGCTGATACTAACAAGA  
GATGGTGGTAATCAAGAGAACAAGACCGAGATCTTCAGACCTGGAGGAGGAGATATGAGGGACAATTGGAGAA  
GTGAATTATATAAAATATAAAGTAGTAAGAATTGAACCATTAGGAGTAGCACCCACCAAGGCAAAGAGAAGAGT  
GGTGCAGAGAGAAAAAAGAGCAGTGGGAATGATAGGGGCAATGATCCTTGGGTTCTTGGGAGCAGCAGGAAGC  
ACTATGGGCGCAGCGTCACTGGCGCTGACGGTACAGACCAGGCAATTGTTGTCTGGTATAGTGCAACAGCAGA  
ACAATCTGCTGAGGGCTATTGAGGCGCAACAGCATCTGTTGCAACTCACAGTCTGGGGCATC

>MN485974

TTCTATTGTAATACAACAAAACCTGTTTAAATGGTACTTGGAATGGTACTTGCTATCGGGGAACCTGGCCAAATG  
AAAATATCACACTCCCATGTAGAATAAAACAAATTGTAAACATGTGGCAAGAAGTAGGAAAAGCAATGTATGC  
CCCTCCCATCCAAGGACAGATTAGATGTGACTCAAATATTACAGGGCTGCTATTAACAAGAGATGGTGGTTCC  
GGGAATGGAACCTGAGAATAACACTGAGATCTTCAGACCTGGAGGAGGAAATATGAGAGACAATTGGAGAAGTG  
AATTATATAAAATATAAAGTAGTAAAAATTGCACCATTAGGAATAGCACCCACCAAGGCAAAGAGAAGAGTGGT  
GCAGAGAGAAAAAAGAATAGGAACGCTAGGAGCTGTGTTCCCTTGGGTTCTTGGGAACAGCAGGAAGCACTATG  
GGCGCAGCGTCACTGACGCTGACGGTACAGGCCAGACAATTATTGTCTGGTATAGTGCAACAGCAGAACAATT  
TGCTGAGGGCTATTGAGGCGCAACATCATCTGTTGCAACTCACAGTCTGGGGCATC

>MN485990

TTCTACTGTGATTCAACAGAACTATTTAATAGTACTTGGAATTTTAATAATAATACTTGGTATGAGAACTCAA  
ATAACACAAGTGACAAAGAAAACATCACACTCCCATGTAGAATAAAACAAATTAGAACTTGTGGCAGGAAGT  
AGGAAAAGCAATGTATGCCCCCTCCCATCCAAGGGCTAATTACATGTCAATCAAATATTACTGGGGTGCTACTA  
ACAAGAGATGGTGGTATTAATAACACCAGGAACGAGACCTTTAGACCTGGAGGAGGAAATATGAAAGACAATT  
GGAGAAGTGAAGTATACAAATATAAAGTAATAAAAAATTGAACCATTAGGAGTGGCACCCACCAAGGCAAAGAG  
AAGAGTGGTGCAGAGAGAAAAAAGAGCAGTGGGAACAATAGGAGCTGTGTTCCCTTGGTTTCTTGGGAACAGCA  
GGAAGCACTATGGGCGCAGCGTCAATAGCGCTGACGGCACAGGCCAGACAATTATTGTCTGGTATAGTGCAAC  
AGCAAAACAATTTGCTGAGAGCTATTGAGGCGCAACAACATCTGTTGCAACTCACAGTCTGGGGCATC

>MN485995

TTCTACTGTAATACAACACAACCTGTTTAAATAGTACTTGGTGGTCTAATAGTACTGGGAATATTACTGGACAGC  
CAGAAAATATCACTCTCCCATGCAGAATAAAACAAATCATAAACTTGTGGCAAGAGGTAGGAAAAGCAATGTA  
TGCCCCCTCCCATCCAAGGACTAATTAGATGTTTCATCAAAATATTACAGGGTTACTATTAACAAGAGATGGTGAT  
AATCAAACCTAAAGAGACTGAGATCTTTAGACCGGGAGGAGGAGATATGAGGGACAATTGGAGAAGTGAATTAT  
ATAAAATATAAAATAGTAAAAATTGAGCCATTGGGAATAGCACCCACCAGGGCAAAGAGAAGAGTGGTGC AAAAG  
AGAAAAAAGAGCAGTGGGAATAGGAGCTCTGTTCCCTTGGGTTCTTGGGAGCTGCAGGAAGCACTATGGGCGCA  
GCGTTCGGTGACGCTGACGGTACAGGCCAGACAATTATTGTCTGGTATAGTGCAACAGCAAAACAACCTTGCTGA  
GAGCTGTTGAGGCGCAACAACATATGTTGCAACTCACAGTCTGGGGCATC

>MN486028

TTCTACTGTAATACAACAGACCTGTTTTGGGGTATTTGGGACCCAAATAATAATACTTGGAAATGGTAGTACAG  
TGGATAACATTCAATGCAGAATAAAACAAATTATAAACAGGTGGCAGGAAGTAGGAAAAGCAATGTATGCCCC  
TCCCATTTGAAGGAAATATTAGCTGTACATCAAACATTACAGGACTACTATTGACAAGAGATGGTGGTGGTGGT  
GAAGGGCCTAATGATACCGAGATCTTCAGACCTACAGGAGGAGAGATGAGGGACAATTGGAGAAGTGAATTAT  
ATAAGTATAAAGTAGTACAAATTGAGCCAGTAGGGATAGCACCTACCAAGGCAAAGAGAAGAGTGGTGCAGAG  
AGAAAAAAGAGCAGTGGGAATGACAGCTGTGTTACTTGGGTTCTTGGGCACAGCAGGAAGCACTATGGGCGCA  
GCGTCTCTAACGCTGACGGTACAAGCCAGACAATTATTGTCTGGTATAGTGCAACAGCAGAACAACTCTGCTGA  
AGGCTATTGAAGCGCAACAGCATCTGTTGCAGCTCACAGTCTGGGGCATC

>MN486034

TTCTACTGTAATACAACAGAGCTATTTAATAGGAATATTACTGAAGAGTCAAACACTAATGGAAATAGCAGTA  
GCGCAGGAAATATCACACTCCAATGCAGAATAAAACAGATTATAAACATGTGGCAGGAAGTAGGAAAAGCAAT  
GTATGCCCCCTCCCATCAGAGGACAAATTCAATGTATATCAAATATTACAGGACTAATATTAACAAGAGATGGT  
GGTAAGACAAATAATGAGACAAATGGGACTGAGATTTTCAGACCTGGAGGAGGAAATATGAGAGACAATTGGA  
GAAGTGAATTATATAAATATAAGGTAGTAAAAATTGAACCATTAGGAGTAGCACCCACCAGGGCAAAGAGAAG  
AGTGGTGCAGAGAGAAAAAAGAGCAGTGGGAATAGGAGCTGTGTTCCCTTGGGTTCTTGGGAGCAGCAGGAAGC  
ACTATGGGCGCAGCGTCAATAACGCTGACGGTACAGGCCAGACAATTATTGTCTGGTATAGTGCAACAGCAAA  
ACAATTTGCTGAGAGCTATTGAGGCGCAACAGCATCTGTTGCAACTCACAGTCTGGGGCATC

>AY037270

TTCTACTGTAATACAACAGAACTGTTTAAATAGTACTTGGAATTTTACTAGTACCTGGAATATGACTAGTGGGT  
CAAATTACTCTGCAGAAAGAAATATCATCACACTCTCATGCAGAATAAAACAAATTATAAACATGTGGCAGGA  
AGTAGGAAAAGCAATGTATGCCCCCTCCTATCAGAGGACAAATTAAATGTTTCATCAAATATTACAGGGCTGCTA  
TTAACAAGAGATGGTGGGGATAATAACAGAAGCACCGAGACCTTTAGACCTGGAGGAGGAAATATGAGAGACA  
ATTGGAGAAGTGAATTATATAAATATAAAGTAGTAAAAATTGAACCATTAGGAGTAGCACCCACCAGGGCAAAG  
GAGAAGAGTGGTGC AAAGAGAAAAAAGAGCAGTGGGAACGATAGGAGCTATGTTCCCTTGGGTTCTTGGGAGCA  
GCAGGAAGCACTATGGGCGCAGCGTCAGTGACGCTGACGGTACAAGCCAGACAATTATTGTCTGGTATAGTGC  
AGCAGCAGAACAACTCTGCTGAGGGCTATTGAGGCGCAACAGCATATGTTGCAACTCACAGTCTGGGGCATC

>DQ358805

TTCTACTGTAATACAACGAAGCTGTTTACTGGTACTTTGAATAGCACTGGGACTTGGCATACAGAAAACCAGA  
CTGATACTATCACACTCCCATGCAAAATAAAACAAATTATAAACAGGTGGCAGGAAGTAGGAAAAGCAATGTA  
TGCCCCCTCCCATTAAGGACAAATTAGCTGTTTCATCAAATATTACAGGGATACTATTAACACGAGATGGTGGT  
GGGAATGGGTCCGACACCACCGCCTCCTTAACACAGGAGGAGGAGATATGAGGAACAGTTGGAGAAATGAAT  
TATATAATTATGAGGTGGTAAAAATTCCACCATTAGGAGTACCACCCACCGAGGCGAGGAGAAGAGTGGTGCA  
GAGAGAAAAAAGAGCAGTGGGGGCACCTAGGAGCTATGTTCCCTTGGGTTCTTGGGAACAGCAGGAAGCACTATG  
GGCGCAGCGTCACTGACGCTGACGGTACAGGCCAGACAATTATTGTCTGGTATAGTGCAACAGCAGAAATAATT  
TGCTGAGAGCTATTAAGGCGCAACAGCATATGTTGCAACTCACAGTCTGGGGCATC

>JN692432

TTCTACTGTAATACATCACAACTGTTTAAATAGAACTTTTAAATGGTACTGCAAAATAAAATTC AATACTACAAATG  
GAACTATCACACTTCAATGTAGAATAAAACAAATCATAAACAGATGGCAGGAAGTAGGAAAAGCAATATACAA  
CCCTCCCATCAGAGGAAAACATTAGTTGTTTCATCAAATATTACAGGACTACTATTAACAAGAGATGGTGGTAAC  
AATGGGAGCGAGCCCGAGACCTTCAGACCTGGAGGAGGAGAAATGAGGGACAATTGGAGAAGTGAATTATATA  
AATATAAAGTAGTAAAAATTGAGCCATTAGGAATAGCACCCACCAAGGCAAAAAAGAAGAGTGGTGC AAAGAGA  
AAAGAGAGCAGTGGGAGTGGTAGGAGCTATGTTCCCTTGGGTTCTTGGGAGCAGCAGGAAGCACTATGGGCGCA

GCGTCAGTAACGCTGACGGTACAGGCCAGACTATTATTGTCTGGTATAGTGCAACAGCAGAACAATTTGCTGA  
AGGCTATTGAGGCGCAACAACATCTGTTGCAACTCACAGTCTGGGGCATC

>JN692439

TTCTACTGTGATACCTCACAAATATTTAATAGTAATTGGAATAGTTCTTCAAATTTTAGTCATCATGAAAATT  
CAAATGAAAATATCACACTCCAATGCAGAATAAAACAAATTATAAACAGGTGGCAGGAAGTAGGAAGAGCAAT  
GTATGCCCTCCCATCCGAGGACTAATTAGATGTTTCATCAAATATTACAGGGCTGCTATTAACAAGAGATGGT  
GGTAAGAATGATAACAATGGGACTGAGAATGGGACTGAGACCTTCAGACCTGGAGGGGGAGATATGAGGGACA  
ATTGGAGAAGTGAATTATATAAAATATAAAGTAGTTCAAATTGAGCCAGTAGGAATAGCACCCACCAAGGCCAAA  
GAGAAGAGTGGTGCAAAGAGAAAAAAGAGCAGTAGGAGTAGGAGCTGTGTTCTTGGGTTCTTGGGAACAGCA  
GGAAGCACTATGGGCGCAGCGTCACTCACGCTGACGGTACAGGCCAGACAATTGTTGTCTGGTATAGTGCAAC  
AGCAGAACAATCTGCTGAAGGCTATTGATGCGCAACAGCATCTGTTGCAGCTCACAGTCTGGGGCATC

>JN692433

TTCTACTGTAATACAACACAGCTGTTTAAACAGTACTTGGTGGGTAAATGGTACTTGGAAATGATACTACAAAAGT  
CAAATGCAACTCAGGAACTCATCACACTCCCATGCAGAATAAAACAAATTATAAAACAAGTGGCAGGAAGTAGG  
AGTAGCAATGTATGCCCTCCCATCAGAGGAAACATTAGCTGTGTATCAAATATTACAGGGCTGCTATTAAACA  
AGAGATGGTGGTAAAAATGAGAGTAGAACAAACGAAACCTTCAGACCTGGAGGAGGAAATATGAAGGATAATT  
GGAGAAGTGAATTATATAAAATATAAGGTAGTAAAAATTGAACCATTAGGAATAGCACCCACCAAGGCCAAGGAG  
AAGAGTGGTGCAAGAGAGAAAAAAGAGCAGTGGGACTAGGAGCTATGTTCTTGGGTTCTTGGGAGCAGCAGGA  
AGCACTATGGGCGCAGCGTCAGTGACGCTGACGGTACAGGCCAGACAATTATTGTCTGGTATAGTGCAACAGC  
AGAACAATTTGCTGAGGGCTATTGAGGCGCAACAGCATATGTTGCAACTCACAGTCTGGGGCATC

>EF637049

TTCTACTGTAACACACACAGCTGTTTAAATAGTACTATGTTAAATGATACTAAAAGGCCAGATGACACAAATC  
AAAATATCACACTCCCATGCAGAATAAAACAAATTATAAACAGGTGGCAGGAAGTAGGAAAAGCAATGTATGC  
CCCTCCCATCAGTGGAAATAATTAGATGTATATCAAATATTACAGGGCTACTACTAACAAGAGATGGTGGTAAT  
GGTAATGGTACTGAGTGCGGTAAACAATACCGAGTGCTTCAGACCTGGAGGAGGAGATATGAGGGACAATTGGA  
GAAGTGAACATATATAAAATATAAAGTAGTAAGAATTGAGCCATTAGGAATAGCACCCACCAAGGCCAAGAGAAG  
AGTGGTGCAAAGAGAAAAAAGAGCAGTGGGAACAATAGGAGCTATGTTCTTGGGTTCTTGGGAGCAGCCGGA  
AGCACTATGGGCGCAGCGTCACTGACGCTGACGGTACAAGCCAGACAATTATTGTCTGGTATAGTGCAACAGC  
AGAACAATTTGCTGAGGGCTATTGAGGCGCAACAGCATATGTTGCAACTCACAGTCTGGGGCATT

>JN692462

TTCTACTGTAATACATCACCCTGTTTAAATAGTACTTGGAAAATTGGAACATAAAGTCTATAGAAAATGGAA  
CTATCACACTCCCATGCAGAATAAAACAAATTATAAACAGGTGGCAGGAAGTAGGAAAAGCAATGTATGCCCC  
TCCCATCGAAGGACCAATTAGATGTTTCATCAAATATTACAGGGCTGCTATTAAACAAGAGATGGTGGTGAAGAC  
AACAATGGGTCCGAGACCTCCAATGAGACCTACACCTCTGGACCAGGAGATATGAATATGAATTGCAATTGTG  
AATTATATTTATATAAAGATATGGAAATGGAGCCTGTACCATTAGCACCCACCCGACCAAGGCCAAGAGAAG  
AGTGGTGCAAGAGAGAAAAAAGAGCAGTGGGAGTAGGAGCTGTGTTCTTGGGTTCTTGGGAGCAGCAGGAAGC  
ACTATGGGCGCAGCGTCAGTGGCGCTGACGGCACAAGCCAGACAATTATTGTCTGGTATAGTGCAACAGCAGG  
ACAATCTGCTGAGGGCTATTGAGGCGCAACAGCATCTGTTGCAACTCACAGTCTGGGGCATC

>JN692465

TTCTATTGTAATACAACAGAGCTGTTTAAAGGGTACTTGGAAATGGTACTTGGAAATGGTACTACTTGGGCTAATA  
GTACTTGGGCTAATGGTACTGGGAATATGAACATCACACTCCCATGCAGAATAAGACAAATTATAAACATGTG  
GCAGGAGGTAGGAAAAGCAATGTATGCCCTCCCATCAGCGGACCCATTAACTGTACATCAAATATTACAGGG  
ATGATATTAACAAGAGATGGTGGTGTATGGTAACGGGAGTCAGGAGATCTTCAGACCTGGAGGAGGAGATATGA  
GGGACAATTGGAGAAGTGAATTATATAAAATATAAAGTAATAAAAATTGAACCATTAGGAGTAGCACCCACCAG  
GGCAAAGAGAAGAGTGGTGCAAGAGAGAAAAAAGAGCAGCTATAGGAGCTGTGCTCATTGGGTTCTTGGGAGCA  
GCAGGAAGCACTATGGGCGCAGCGTCAATAACGCTGACGGTACAAGCCAGGCAATTATTGTCTGGTATAGTGC  
AACAGCAGAGCAATCTGCTGAGAGCTATTGAGGCGCAACAACACCTGTTGCAACTCACTGTCTGGGGCATC

>JN692473

TTCTACTGTAATACATCAAAGCTGTTTAAATAGGAATTGGACTGATAATAGTAATAAATACTGGAAATGATACTG  
GGAATAATACTATCACACTCCCATGCAGAATAAAACAAATTATAAACAGATGGCAGGAAGTAGGAAAAGGCAAT  
GTATGCCCTCCCATTCGAGGACTAATTAGATGTTTCATCAAATATTACAGGGCTGATATTAACAAGAGATGGT  
GGTAATCATACAATAGTAACGGTAGTGAAATCTTCAGACCTGGGGGAGGAGATATGAGGGACAATTGGAGAA  
GTGAATTATATAAAATATAAAGTAATAAAAATTGAGCCATTAGGAATAGCACCCACCAAGGCCAAGAGAAGAGT  
GGTGCAGAGAGAGAAAAAAGAGCAGTGGGAACGATAGGAGCTATGTTCTTGGGTTCTTGGGAGCAGCAGGAAGC  
ACTATGGGCGCAGCGGAGTGACGCTGACGGTACAGGCCAGACAATTATTGTCTGGTATAGTGCAACAGCAGA  
ACAATCTGCTGAGAGCTATTGAGGCGCAACAGCATATGTTGCAACTCACAGTCTGGGGCATC

>JN692474

TTTTACTGTAATACAACACAGCTGTTTAAATAGCACTTGGCTGTTTAAACAGCACTTGGAAATCAAAGTGCTAATG  
ATGCAGACAATATCACACTCCCATGCAGAATAAAACAAATAGTAAACAGATGGCAGGAAGTAGGAAAAGCAAT  
GTATGCCCTCCCATCAAAGGACAAATTAGATGTTTCATCAAATATTACAGGGCTGCTCTTAACAAGAGATGGT

GATAATAACACCAACAACAACGAGACCTTTAGACCTGGAGGAGGAGATATGAGGGACAATTGGAGAAGTGAAT  
TATATAAATATAAAGTAGTAAAAATTGAGCCATTAGGAATAGCACCCACCAAGGCAAAAAGAAGAGTGGTGCA  
GAGAGAAAAAAGAGCAGTGGGAACAATAGGAGCTGTGTTCCCTTGGGTTCTTGGGAGCAGCAGGAAGCACTATG  
GGCGCAGCGTCAGTGACGCTGACGGTACAGGCCAGACTATTATTGTCTGGTATAGTGCAACAGCAGAACAATC  
TGCTGAAGGCTATTGAAGCGCAACATCATCTGTTGCAGCTCACAGTCTGGGGCATC

>JN692480

TTCTACTGTAACACAGCACAGCTGTTTAATAATACTTGGCTGTCCAATAATACCTGGCTACAGAATAATACTT  
GGATTAATGGCACTATCACACTCCCATGCAGAATAAGACAAATTGTAAACAGGTGGCAGGAAGTAGGGAGAGC  
GATGTATGCTCCTCCCATCGCAGGAATAATCAACTGTGTATCAAACATTACAGGGCTGATATTAACAAGAGAT  
GGAAACATAACAACAAATAGTACCTACTCTGAAAACAATACTGAAATCTTCAGACCTGGAGGAGGAGATATGA  
GGGACAATTGGAGAAGTGAATTATATAAATATAAAGTGGTAACAATTGAGCCAGTGGGAATAGCACCCACCGA  
GGCAAGGAGAAGAGTGGTGCAGAGAGAAAAAAGAGCAGTGGGAACGATAGGAGCTATGTTCCCTTGGGTTCTTG  
GGAGCAGCAGGAAGCACTATGGGCGCAGCGTCACTAACGCTGACGGTACAGGCCAGAATATTATTGTCTGGTA  
TAGTGCAACAGCAAAAACAATTTGCTGAGAGCTATTGAGGCGCAACAACATATGTTGCAACTCACAGTCTGGGG  
CATC

>HQ377423

TTCTACTGTGATACAAAACCACTGTTCAATAGTACTTGGAAATGATACTACAGGGTCAATTCACATTAATGGAA  
CTATCACACTCCGATGCAGAATAAAACAAATTATAAACATGTGGCAGGGAGTAGGAAAAGCAATGTATGCCCC  
TCCCATCAGAGGACTAATTAACGTACATCAAATATTACAGGGCTGCTATTAACAAGAGATGGTGGTAAAGAG  
AACAGGACCACCGAGACCTTTAGACCTCAAGGAGGAAATATGAAAGACAATTGGAGAAGTGAACATATAAAAT  
ATAAAGTAGTAAAAATTGAACCATTAGGAATAGCACCCACCAAGGCAAAGCGAAGAGTGGTACAAAGAGAAAA  
AAGAGCAATAGGGGTAAATAGGAGCTATGTTCCCTTGGGTTCTTGGGAACAGCAGGAAGCACTATGGGCGCAGCG  
TCACTGACGCTGACGGTACAGGCCAGACAATTATTGTCTGGTATAGTGCAACAGCAGAACAATTTGCTGAGAG  
CTATTGAGGCGCAACAACATCTGTTGCAACTCACAGTCTGGGGCATC

>HQ377459

TTCTACTGCAATACAACACGCCTGTTTGATAGCACTTGGAAATGGTACTGCAGGAAATTTGGACTGATATTACAG  
GGTCAAATTTACTGATGAAGATAATATTACTCCCATGCAGAATAAAACAAATTATAAACAGGTGGCAGGA  
AGTAGGAAAAGCAATGTATGCCCCCCCCATTGCAGGACAAATCAGATGTTTCAATCAATATTACAGGGCTGCTA  
TTAACAAGAGATGGTGGGGCCAATAGATCCGACACCAACGAGACCTTCAGACCTGGAGGAGGAAATATGAAGG  
ACAATTGGAGAAGTGAATTATACAAATATAAAGTAGTAAAAATTGAGCCATTAGGATTAGCACCCACCAAGGC  
AAAGAGAAGAGTGGTGCAGAGAGAAAAAAGAGCAGTAGGAACACTAGGAGCTATGTTCCCTTGGGTTCTTGGGA  
GCAGCAGGAAGCACTATGGGCGCAGCGTCAATGACGCTGACGGTACAGGCCAGACAATTATTGTCTGGTATAG  
TGCAACAGCAGAACAATTTGCTGAAGGCTATTGAGGCGCAACAGCATTGTGTTGCAACTCACAGTCTGGGGCAT  
T

>KT427681

TTCTACTGTAATACATCAACGCTGTTTAATTGGACTGAAAAATTCAAATAACAATGCAAGTGACAATATGACAA  
TCCCATGCAGAATAAGACAAATTGTAAACAGGTGGCAGGAAGTAGGAAAAGCAATGTATGCCCCCTCCCATCAG  
CGGACAGATTAGCTGTTTATCAAATATCACAGGGCTGATATTAACAAGAGATGGTGGTATCAACAGCAGCAGC  
AGCAATGAGACCTATGAGACCTTCAGACCTGCAGGAGGAAATATGAAAGATAATTGGAGAAGTGAATTATATA  
AATATAAAGTAGTAAAAGTTGAGCCATTAGGAGTAGCACCCACCAAGGCAAAGAGAAGAGTGGTGCAGAGAGA  
AAAAAGAGCAATAACACTAGGAGCCATGTTCCCTTGGGTTCTTGGGAGCAGCAGGAAGCACTATGGGCGCAGCG  
TCGATGACGCTGACGGTACAGGCCAGACTATTATTGTCTGGTATAGTGCAACAGCAGAACAACCTGCTGAGAG  
CTATTGAGGCGCAACAACATCTGTTGCAACTCACAGTCTGGGGCATT

>KT427673

TTCTACTGTAATACAACAAAGCTGTTTAATAGTACCTGGAATACAACAGAGTTGTTTAATAGTACCAGGTGGA  
CTAATCAAAC TAGGAATGATACTGACATCATACTCCCATGTAGAATAAAACAAATTGTAAACAGGTGGCAGGA  
AGTAGGAAAAGCAATGTATGCCCCCTCCCATCAGAGGACAAATTAAATGTACATCAAATATTACAGGGCTGCTA  
TTAACAAGAGATGGTAAGATAAGGAACGAGACGAAAAAGGAACGAGACCTTCAGACCTGGAGGAGGAGATATGA  
GGGACAATTGGAGAAGTGAATTATATAAATATAAAGTAGTAAAAATTGAGCCATTAGGAGTAGCACCCACCAC  
GGCAAAGAGAAGAGTGGTGCAGGAGAAAAAAGAGCAGTAGGAACAATAGGAGCTATGTTCCCTTAGGTTCTTG  
GGGCGCAGCAGGAAGCACTATGGGCGCAGCGTCAATAACGCTGACGGTACAGGCCAGACAATTATTGTCTGGTA  
TAGTGACGAGCAGAACAATCTGCTGAGGGCTATTGATGCGCAACAGCATCTGTTGCAACTCACAGTCTGGGG  
CATC

>KT427744

TTCTACTGTAATACAACACAGCTATTTAATCATACTTGGGATGGTACTAACTGGACTGATCCTAACTGGTTCGT  
CAAATACAAC TAACAATATCACACTTCAATGCAGAATAAGACAAATTATAAAACAAGTGGCAGGAAGTAGGAAG  
AGCAATATATGCCCCCTCCCATCAAAGGACAAATTAGATGCTCATCAAAAATTACAGGGCTGCTACTGACAAGG  
GATGGTGGCAAACGAATAGCTCTAACTCCTCTGAGGTCTTCAGACCTGGAGGAGGAGATATGAGAGATAATT  
GGAGAAGTGAAGCTATATAAATATAAGGTAGTAAAAATTGAGCCAGTAGGAATAGCACCCACCAAGGCAAAGAG  
AAGAGTGGTGCAGAGAGAAAAAAGAGCAGTGACACTAGGAGCTATGTTCCCTTGGGTTCTTGGGAGCAGCAGGA

AGCACTATGGGCGCAGCGTCAGTGACGCTGACGGTACAGGCCAGACTATTATTGTCTGGTATAGTGCAACAGC  
AAAACAATTTGCTGAGAGCTATTGAGGCGCAACAGCATATGTTGCAACTCACAGTCTGGGGCATC  
>KT427732

TTCTACTGTAAGACAACACAGCTGTTTAAATAGCACTTGGTTAAATACTAGTATTGAGTATAATAACTGAAG  
GGGCTGGAGTACCAAATATCACACTCCAATGCAGAATAAAACAAATTATAAACAGATGGCAGGGAGTAGAAAG  
AGCAATATATGCCCCCTCCCATCCCGGGACAAATTAGATGTACATCAAATATTACAGGGCTGATATTGACACGG  
GATGGTAATGGTAATCAAACAGATAGCACTAACGAAACCTTCAGACCAATAGGAGGAAATATGCAGGACAATT  
GGAGAAGTGAATTATATAAAATATAAAGTGGTAAAAATTGAGCCAGTAGGAATAGCACCCACCAAGGCAAAGAG  
AAGAGTGGTGCAGAGAGAAAAAAGAGCAGTGGGAACACTAGGAGCTATGTTCTTGGGTTCTTGGGAGCAGCA  
GGAAGCACTATGGGCGCAGCGTCAGTGACGCTGACGGTACAGGCCAGACTATTATTGTCTGGTATAGTGCAAC  
AGCAGAACAACTGCTGAAGGCTATTGAGGCGCAACAGCATTTTGTGCAACTCACAGTCTGGGGCATC  
>KT427721

TTCTACTGTAATACAACACAACCTGTTTAAATAGTACTTGGAAATGCAAATGAAAATAGTACTGGGGGAGAGTCAA  
ATAGAACTGAAGACTATGTACTCCCATGCAGAATAAAACAGTTTATAAACATGTGGCAGGAGGTAGGAAAAGC  
AATGTATGCCCCCTCCCATCAGTGGAATATTACTTGTTCATCAAATATTACAGGGCTGCTATTAAACAAGAGAT  
GGTGGTAGTAATGACACCGAGACCTTTAGACCTGGAGGAGGAGATATGAGGGACAATTGGAGAAGTGAATTAT  
ACAAATATAAAGTAGTAAAAATTGAACCAATAGGAATAGCACCCACCAAGGCAAAGAGAAGAGTGGTGCAGAG  
AGAAAAAAGAGCAGTGGGACTAGGAGCTCTGTTCTTGGGTTCTTGGGAGCAGCAGGAAGCACTATGGGCGCA  
GCGTCAACAGCGCTGACGGTACAGGCCAGACAAGTATTGTCTGGTATAGTGCAACAGCAAACAATTTGCTGA  
GGGCTATTGAGGCGCAACAGCATATGTTGCAACTCACAGTCTGGGGCATC  
>KT427717

TTCTACTGTAATTCAACACAACCTATTTAAATAGTACTTGGAAATAATACTGCTTGGAAATGAGACTATTGATAAAA  
ATGGAACATATCATACTTCAATGCAGAATAAAACAAATTATAAACAGTGGCAGGAAGTAGGAAAAGCAATATA  
TGCCCCCTCCTATTGCAGGAAATATTACATGTTCTTCAAACATTACAGGGATTTTGTTAACAAGAGATGGTGGG  
ATGAACGTAAGCGATACCACCGAGACCTTTAGACCTGCAGGAGGAGATATGAAAGACAATTGGAGAAGTGAAT  
TATATAAATATAAAGTAGTAAGACTTGAGCCATTAGGGATAGCACCCACCAAGTCAAGGAGAATAGTGGTGCA  
GAGAGAAAAAAGAGCAGTGGGGACATTAGGAGCTATGTTCTTGGGTTCTTGGGAGCAGCAGGAAGCACTATG  
GGCGCAGCGTCAATGACGCTGACGGTACAGGCCAGACGACTATTGTCTGGTATAGTGCAACAGCAGAACAAATA  
TGCTGAAGGCTATTGAGGCGCAACAACATATGTTGCAACTCACAGTCTGGGGCATC  
>KT427713

TTCTATTGTAATACAACAAACCTGTTCAACAGTACTTGGAAATGACACTACTGAAGGAAATAACACAGGAAATA  
TAGGAAATATCACACTCCCGTGCAGAATAAAACAAATTATAAACATGTGGCAGCAAGTAGGAAAAGCAATGTA  
TGCCCCCTCCCATCGCAGGACAAATTAGCTGTTTCATCAAATATTACAGGGTTGTTACTAACAAGAGATGGTGGT  
AATAATGATTCTAATAATTATGAAATCTTCAGGCCTGGAGGAGGAGATATGAGGGACAATTGGAGAAGTGAAT  
TATACAAATATAAAGTAGTAAAAATTGAACCATTAGGAGTAGCACCCACTAAGGCAAAGAGAAGAGTGGTGCA  
GAGAGAAAAAAGAGCGGCACTAGGAGCTTTGTTCTTGGGTTCTTGGGAGCAGCAGGGAGCACTATGGGCGCA  
GCGGCAGTAACGCTGACGGTACAGGCCAGAACATTATTGTCTGGTATAGTGACAGCAGCAAAGGAATTTGCTGA  
GAGCTATTGAGGCGCAACAACATCTGTTGCAACTCACAGTCTGGGGCATC  
>KT427870

TTCTACTGTAATACATCAGGACTGTTTAAATAGTACTTGGAAATAGGGATGGTAATTGGTCTCAGGATGATACTA  
ATGGGTCAAATGAAACAATCACACTCCCATGCAGAATAAAACAAAGTTATAAACAGGTGGCAGGAAGTAGGAAA  
AGCAATGTATGCCCCCTCCCATCAGCGGAAGGATTTTCTGTTTCATCAAACATTACAGGGCTACTCTTAGTAAGA  
GATGGTGGTAACCAGAGCCACGAGAGTGAGACCTTCCGACCTGGAGGAGGAGATATGAGGGACAATTGGAGAA  
GTGAATTATATAAATATAAAGTAGTAAAAATTGAGCCATTAGGAATAGCACCCACCAAGGCAAAGAGAAGAGT  
GGTGCAGAGAGAAAAAAGAGCAGTGGGAACGCTAGGAGCTATGTTCTTGGGTTCTTGGGAACAGCAGGAAGC  
ACTATGGGCGCAGCGTCACTGACGCTGACGGTACAGGCCAGACAATTATTGTCTGGTATAGTGCAACAGCAGCA  
ACAATCTGCTGAAGGCTATTGAGGCGCAACATCATCTGTTGCGACTCACAGTCTGGGGCATA  
>KT427707

TTCTACTGTAATACAACAGGGCTGTTTAAATAGTAATAATACTTGGAAATAATACTAATAATAATAGTAGGAATA  
ATGAAACATATACCATACCATGCAGAATAAAGCAAATTATAAACAGGTGGCAAGAAGTAGGAAAAGCAATGTA  
CGCCCCCTCCCATCAAAGGAATAATTCACTGTACATCAAATATTACAGGGCTGCTATTAAACAAGAGATGGTGGG  
AATAGTTTCAGAAAATGAAACTTTTCAGACCTGCAGGAGGAGATATGAGGGACAATTGGAGAAGCGAATTATATA  
AATATAAAGTAGTAAAAATTGAGCCAATAGGACTAGCACCTACCAAGGCACAGAGAAGAGTGGTGCAGAGAGA  
AAAAAGAGCAGTGACACTGGGAGCTATGTTCTTGGGTTCTTAGGAGCAGCAGGAAGCACTATGGGCGCAGCG  
TCAATAACGCTGACGGTACAGGCCAGACAATTGCTGTCTGGTATAGTGCAACAGCAGAGTAATCTGCTGAGGG  
CTATTGAGGCGCAACAGCATATGTTGCAACTCACAGTCTGGGGCATC  
>KT427706

TTCTACTGTAATACATCACTGATATTTAAATGATACTTGGCTTAACAGGTCTGAAGAGTCAAATAAAACTATCA  
CACTTCAATGCAGAATAAAACAAATTATAAACAGGTGGCAGGAAGTAGGAAAAGCAATGTATGCCCCCTCCTAT  
CAAAGGACAATTAGATGCTCATCAAATATTACAGGGCTATTATTAAACAAGAGATGGTGGTAACATAAACGAG

ACTGGCAATGAGACCTTCAGACCTGGAGGAGGAGATATGAGGGACAATTGGAGAAGTGAACCTATATAAAATATA  
AAGTAGTAAAAATTGAGCCATTAGGAATAGCACCCACCAAGGCAAAGAGAAGAGTGGTGCAGAGAGAAAAAAG  
AGCAGTGGGAACAATAGGAGCTATGTTCCCTTGGGTTCTTGGGAGCAGCAGGAAGCACTATGGGCGCAGCGTCA  
ATGACGCTGACGGTACAGGCCAGACTATTATTGTCTGGTATAGTGCAACAGCAGAACAATTTGCTGAGAGCTA  
TTGAGGCGCAACAGCATATGTTGCAACTCACAGTCTGGGGCATC

>KT427703

TTCTACTGTAATACAACAAAGCTATTTAATAGTATTTGGAATAATACACAGCTAGTTAATGGTACTTGGAATG  
ATACTTACTGGAAGTCTAAAGTGCCAAATGAACTATCACACTTCCATGCAGAATAAAACAAATTATAAACAC  
ATGGCAGGAAGTAGGAAAAGCAATATATGCCCCCTCCCATCAAAGGGGAAATTAAATGCTCATCAGATATTACA  
GGGTTGCTACTGACACGGGATGGTGGTAACATGAGCAACAGCTCTAACGACGGCTTTGAAGTCTTCAGACCTG  
GAGGAGGAGATATGAGAGACAATTGGAGAAGTGAACCTATATAAAATATAAGGTAGTGAGAATTGAGCCATTAGG  
AATAGCACCCACCAAGGCAAAGAGAAGGGCGGTGCAGAGAGAAAAAAGAGCAGTGGGGACAATAGGAGCTATG  
TTCCTTGGGTTCTTGGGAGCAGCAGGAAGCACTATGGGCGCAGCGTCAGTGACGCTGACGGTACAGGCCAGAC  
TATTATTGTCTGGTATAGTGCAACAGCAAAGCAATTTGCTGAGAGCTATTGAGGCGCAACAGCATATATTGCA  
ACTCACAGTCTGGGGCATC

>KT427873

TTCTACTGTAATTCAACACAACCTGTTTAATAGTACCTGGGATACTAATGCAACCTTGAATGCTACAGACAGCC  
AAGATGAACTTAACAAAACCTATCACACTCCCATGTAGAATAAAACAAATTATAAACATGTGGCAGGAAGTAGG  
AAAAGCAATGTATGCCCCCTCCCATTAGAGGGCTAATTAGATGTACAACAAATATTACAGGGCTACTATTAACA  
AGAGATGGTGGCACAGGCAATAAGACTCAAATAACACTGAGGTCTTCAGACCTGGAGGAGGAGATATGAAGG  
ATAATTGGAGGAGTGAGTTATATAAAATATAAAGTAGTAAAAATTGAACCATTAGGAGTAGCACCTACCAAGGC  
CAAGAGAAGAGTGGTGCAGAGAGAAAAAAGAGCAGTGGGAACAATAGGAGCTATGTTCCCTTGGGTTCTTGGGA  
GCAGCAGGAAGCACTATGGGCGCAGCGTCAATAACGCTGACGGCACAGGCCAGACAATTATTGTCTGGTATAG  
TGCAGCAGCAGAATAATCTGCTGAGGGCTATTGAGGCGCAACAACATCTGTTGCAACTCACAGTCTGGGGCAT  
C

>KT427695

TTCTACTGCAATACATCGGTGCTGTTTAATGATACTTGGCTGAATAATAATAAGACTGAACACCAAAATATCA  
CGCTCCCATGCAAAATAAAACAGATTATAAACATGTGGCAGGAAGTAGGAAAAGCAATGTATGCCCCCTCCCAT  
CAGTGGACCAATTAGGTGTTTCATCAAATATCACAGGGCTGCTATTAACAAGAGATGGTGGTAATAGCACAAAT  
AATAACGAGACCTTCAGACCTGGAGGAGGAGATATGAGGGACAATTGGAGAAGTGAATTATATAAAATATAAAG  
TAGTAAAACTTGAGCCATTAGGATTAGCACCCACCAAGGCAAAAAGGAGAGTGGTGCAGAGAGAAAAAAGAGC  
AGTGGGAACGCTAGGAGCTATGTTCCCTTGGGTTCTTGGGAACAGCAGGAAGCACTATGGGCGCAGCATCTACTA  
ACGCTGACGGTACAGGCCAGACTATTATTGTCTGGCATAGTGCAACAGCAGAGCAATTTGCTGAGGGCTATTG  
AGGCGCATCAGCATATGTTGCAACTCACAGTCTGGGGCATC

>KT427861

TTTTACTGTAATACAACACCGCTGTTTAATAGTACATGGTCGCTTAATGGTACTACTTGGCAGCTTAATGGTA  
CTCAGAATAATGAGTCAGGAAATATCACACTCCAATGTAGAATAAAACAAATCATAAACATGTGGCAGGGAGT  
AGGAAAAGCAATGTATGCCCCCTCCCATCAGCGGACTCATAAATGTTTCATCAAATATTACAGGGCTGATATTA  
ACAAGAGATGGTGGTAATAACAATGAAACGAAGAACAACCTCCGAAACCTTCAGACCTGGAGGGGGAGATATGA  
GGGACAATTGGAGGAGTGAATTATATAAAATATAAAGTAGTAAAAATTGAAGCCATTAGGAATAGCACCTACCAA  
GGCAAAGAGAAGAGTGGTGCAGAAAGAAAAAAGAGCAGTGGGAGCAATAGGAGCTATGTTCCCTTGGGTTCTTG  
GGAGCAGCAGGAAGCACTATGGGCGCAGCGGCAACGACGCTGACGGTACAGGCCAGACAATTATTGTCTGGTA  
TAGTGCAACAGCAGAACAATCTGCTGAGAGCTATTGAGGCGCAACAACATATGTTGCAACTCACAGTCTGGGG  
CATC

>KT427785

TTTTACTGTAATACAACACAACCTATTTAATAGTACTTGGGTAAATGATACTTTTACTACTTGGGTTAATAATA  
CTTGGGTTAATGGTACTGTAAAGTCAATTAGTAATAAAACAAATATTAATATTACACTTCCATGCAGAATAAA  
GCAAAATTATAAACATGTGGCAGGAAGTAGGAAAAGCAATGTATGCCCCCTCCCATCAAGGGACCAATTAGCTGT  
TCATCAAATATTACAGGACTGCTATTAAACAAGAGATGGGGGAAATAGTGATAATAGTAGCAAAAATGAGACAA  
ATGAGACCGAGACTTTTAGACCTGGAGGAGGAAATATGAAAGACAATTGGAGAAGTGAATTATATAAAATATAA  
AGTAGTGCAAATTGAACCATTAGGAATAGCACCCACGAGGCAAAAAGAAGAGTGGTGCAAAGAGAGAAAAAGA  
GCAGTGGGAATAGGAGCATTGTTCAATTGGGTTCTTGGGAGCAGCAGGAAGCACTATGGGCGCAGCGTCAATGA  
CGCTGACGGTACAGGCCAGACAATTATTGTCTGGTATAGTGCAACAGCAGAACAACCTGCTGAGGGCTATTCA  
GGCGCAACAGCATTTGTTGCAGCTCACAGTCTGGGGCATC

>KJ849814

TTCTACTGCAATACAACACAGCTATTTAATTGGACAATTGGCAAGTCAAATATAACCCAAAATGATAGTGAAA  
TTATTACAATCCAATGCAGAATAAAACAGATTATAAAATAAGTGGCAGGAAGTAGGAAAATCAATATATGCCCC  
TCCTATCAGAGGAAATATTAGCTGTTTCATCAAATATTACAGGACTGATATTAACAAGAGATGGTGGTAATCAC  
AATGAACTAAAAACAAGACTAAGACTGAGACTTTTCAGACCTGGAGGAGGAGATATGAGGGACAATTGGAGAA  
GTGAATTATATAAAATATAAGGTAGTGAAAATTCAGCCATTAGGAATAGCACCCACCAGGGCAAGGCGAAGAGT

GGTGCAGAGAGAAAAAGAGCAGTGGGAACACTAGGAGCTATGTTCTTGGGTTCTTGGGAGCAGCAGGAAGC  
ACTATGGGCGCAGCGTCAATAACGCTGACGGTACAGGCCAGACAATTGTTGTCTGGTATAGTGCAGCAGCAGA  
ACAATCTGCTGAAAGCTATTGAGGCGCAACAGCATCTGTTGCAACTCACAGTCTGGGGCATC

>KT427771

TTCTACTGTAATACAACACAACCTGTTTAATAGTACTTGGCAAAGTAATAGTACTGGAAATAGTACTGAGAATA  
ATAGCACATAATCACACTCCCCTGTAGGATAAAACAAGTTATAAACATGTGGCAGGAGGTAGGAAAAGCAAT  
GTATGCCCTCCCATCAGTGGACTAATTCAATGTACATCAAATATTACAGGGCTGCTGTTAACAAGAGATGGT  
GGGTCTGATGGTGAATCTAATAAAACAGAGAGTGAGATCTTCAGACCTGGAGGAGGAGATATGAGGGACAATT  
GGAGAAGTGAATTATATAAAATATAAAATAGTAAAAATTGAACCATTAGGAGTAGCGCCACCAAGGCAAAGAG  
AAGAGTGGTGCAGAGAGAAAAAGAGAGCACTAGGGGGACTAGGAGCTGTATTCTTGGGTTCTTGGGAGCAGCA  
GGAAGCACTATGGGCGCAGCGTCAATAACGCTGACGGTACAGGCCAGACAATTATTGTCTGGTATAGTGCAGC  
AGCAGAACAACTCTGCTGAGGGCTATTGATGCGCAACGGCACATGTTGCAACTCACAGTCTGGGGCATC

>KT427753

TTCTACTGTAATACAACAAAACTGTTCAATAGTACTTGGAAAGTGAATAATGGTACTTGGAAATAGGAATGATA  
CTGAAGGACAAGATAACACTGGAGAACTATTACACTTCCATGCAGAATAAAACAAATCATAAACATGTGGCA  
GGAAGTAGGAAAAGCAATGTATGCCCCCTCCCATCAGAGGACAAATTAATTGCACATCAAATATTACAGGACTG  
CTATTAACAAGGGATGGTGGTAATAATAATAGCAAGAATAACGAGACTTTCAGACCTGGAGGAGGAAAATA  
TGAAGGACAATTGGAGAAGTGAATTATATAAAATATAAAGTAGTACAAATTGAACCATTAGGAATAGCACCCAC  
CAAGGCAAAAAGGAGAACGGTGCAGAGAGAAAAAGAGCAGTGGGAATAGGAGCTGTGCTCTTTGGGTTCTTG  
GGAGCAGCAGGAAGCACTATGGGCGCAGCGTCAGTAACGCTGACGGTACAGGCCAGACAATTGTTGTCTGGTA  
TAGTGCAACAGCAGAGCAATCTGCTGAAGGCTATTTCAGGCGCAACAGCATCTGTTGCAGCTCACAGTCTGGGG  
CATC

>KT427749

TTCTACTGTAATACAACAGAACTGTTCTATAGTAATTGGACGTGGAATGGTACTTGGAAATAGGAATGATACTG  
AAGGATTACAAAATAAACTATTATACTTCCATGCAGAATAAAACAAATCATAAACATGTGGCAGGAAGTAGG  
AAAAGCAATGTATGCCCCCTCCCATCAGAGGACAAATTAATTGCACATCAAATATTACAGGACTGCTATTAATA  
AGAGATGGTGGTAATGATACTGGAAC TAGTGGGACTGAAATTTTCAGACCTCAAGGAGGAAACATGAAAGACA  
ATTGGAGAAGTGAATTATATAAAATATAAAGTAGTACAAATTGAACCATTAGGAATAGCACCCACCAAGGCAAA  
GAGAAGAACGGTGCAGAGAGAAAAAGAGCAGTGGGATTTGGAGCTGTGATCTTTGGGTTCTTGGGAGCAGCA  
GGAAGCACTATGGGCGCAGCGTCAATAACGCTGACGGTACAGGCCAGACAATTGTTGTCTGGTATAGTGCAAC  
AGCAGAGCAATTTGCTGAAGGCTATTCAAGCGCAACAGCATCTGTTGCAGCTCACAGTCTGGGGCATC

>KT427826

TTTTACTGTAATACAACAAAACTGTTTAATACTACGTGGAATATTACTGGAGAAGGAAACAACAATCTCACTA  
ATGAACTATCACACTCCCATGCAGAATAAAACAGTTCATAAACATGTGGCAGGAAGTAGGAAAAGCAATGTA  
TGCCCCCTCCTATCAGGGGACAAATTCAGTGTCTATCAAATATTACAGGGCTACTATTAACAAGAGATGGTGGT  
AATAGTAATAATGAGTCGGAGACCTTCAGACCGGGAGGAGGAGATATGAGGGACAATTGGAGGAGTGAATTAT  
ATAAATATAAAGTAGTAAAAATTGAACCATTAGGAATAGCACCCACCAAGGCAAGAAGGAGAGTGGTGCAAAG  
AGAAAAAGAGCAATAGGAGGAATAGGAGTTGTGATCCTTGGGTTCTTGGGAGCAGCAGGAAGCACTATGGGC  
GCAGCGTCGCTAACGCTGACGGTACAGGCCAGACAATTATTGTCTGGTATAGTGCAACAGCAAAGCAATTTGC  
TGAGAGCTATTGAGGCGCAACAGCGTTTGTGCAACTCACTGTCTGGGGCATC

>KJ849821

TTCTACTGTGATACAGCAAAGCTGTTTAACAGTACTTGGGAGAGGCGTAATGACACGAACACTTGGGAGTCGA  
ACAATACAATACCAATGAGAATATCACACTCCCATGCAGAATAAAACAAATTATAAACAGGTGGCAGGAAGT  
AGGAAAAGCAATGTATGCCCCCTCCCATTCAGGACGAATTGAATGTACATCAAATATTACAGGGCTACTATTA  
ACAAGAGATGGTGGTTCTAACAATAGTAGTAACGATACCTTCAGACCAGGAGGAGATATGAGGGACAATTGGAGGAGTGAATTAT  
GGAGAAGTGAATTATATAAAATATAAAGTAGTACAAATTGAGCCATTAGGAGTAGCACCCACCAGGTCAAGGAG  
AAGAGTGGTGCAGAGAGAAAAAGAGCAGTAACACTGGGAGCTATGTTCTTGGGTTCTTGGGAGCAGCAGGA  
AGCACTATGGGCGCAGCGTCAGTGACGCTGACGGTACAGGCCAGACAATTATTGTCTGGTATAGTGCAACAGCAAAGCAATTTGC  
AAAGCAATTTGCTGAGGGCTATTGATGCGCAACAGCACATGTTGCAACTCACAGTCTGGGGCATC

>KT427811

TTTTACTGTAATACATCAAGACTGTTTAACAGTATTTGGAACAGTACCTGGCAGGATAATACAGCTGAAGAGT  
CAAATAATACATGACATCATACTCCATTGCAGAATAAAACAAATTATAAACAGATGGCAGGAAGTAGGAAAAGC  
AATGTATGCCCCCTCCCATCAAGGGAAAAATTCAATGTTTCATCAAATATTACAGGGCTGCTATTAGTAAGAGAT  
GGTGGTAACGAGAACACTAGTAACACCGAGACCTTCAGACCTGGAGGAGGAGACATGAGGGACAATTGGAGAA  
GTGAATTATATAAAATATAAAGTAGTGCAAATTGAGCCAGTAGGAATAGCACCCACCAAGGCAAGAAGAAGAGT  
GGTGCAGAGAGAAAAAGAGCAGTAACAATAGGAGCTATGTTCTTGGGTTCTTGGGAGCAGCAGGAAGCACT  
ATGGGCGCAGCGTCAATCGCGCTGACGGGACAGGCCAGACAATTATTGTCTGGTATAGTGCAACAGCAGAAATA  
ATCTGCTGAAGGCTATTGAGGCGCAACAACATATGTTGCAACTCACAGTCTGGGGCATC

>KT427796

TTCTATTGTAATACATCACAGCTGTTCAATAGTACTTGGAATTTCACTAGTGCTAGGAATGAGACTGAAGAGT  
CAAATGACACTATCACACTCCCATGTAGGATAAAACAAATTATAAATAAGTGGCAAGAAGTAGGAAAAGCAAT  
ATATGCTCCTCCTATCCAAGGACGAATTTACTGTTTCATCAAACATTACAGGGTTGCTATTAACAAGAGATGGG  
GGTGA AAAACAACCTGACCAATGAGACTTTT TAGACCTGGAGGAGGAGATATGAGGGACAATTGGAGAAGTGAAC  
TGTATAAATATAAAGTAGTAAAAATTGAGCCATTAGGACTAGCACCCACCAAGGCAAAGAGAAGAGTGGTGCA  
GAGAGAAAAAAGAGCAGTGGGAACGCTGGGAGCAATGTTCTTGGGTTCTTGGGAACAGCAGGAAGCACTATG  
GGCGCAGCGTCGCTGACGCTGACGGTACAGGCCAGACAATTATTGTCTGGTATAGTGCAACAGCAAAACAATT  
TGCTGAAGGCTATTGAGGCGCAACAGCATCTGTTGCAACTCACAGTCTGGGGCATC

>KX181905

TTCTATTGTAATACAACAAAAATTGTTTGATTGGAATGATACAACAAAAGTGTTTAATTGGAATAAATCATGGA  
CGTTTACAGAAGGCAATGACACTATTTCATATCCCATGCAGAATAAAACAAATTATAAACAGGTGGCAGGAAGT  
AGGAAAAGCAATGTATGCCCCCTCCCATTGGAGGGCTGATTAGATGTTTCATCAAATATTACAGGGCTGCTATTA  
ACAAGAGATGGTGGTAATGAGACAAGGGATAACGACACTTTCAGACCTGGAGGAGGAGATATGAGGGACAATT  
GGAGAAGTGAATTATATAAATATAAAGTAGTAAGAATTGAACCATTAGGGGTAGCACCCACCAAGGCAAAGAG  
AAGAGTGGTACAAAGAGAAAAAAGAGCAGTGGGAGCAATAGGAGCTATGTTCTTGGGTTCTTGGGAGCAGCA  
GGAAGCACTATGGGCGCAGCGGCAGTGACGCTGACGGTACAGGCCAGACAATTGTTGTCTGGTATAGTGCAAC  
AGCAGAACAACTCTGCTGAGAGCTATTGAGGCGCAACAGCATTTTGTTCAGCTCACAGTCTGGGGCATC

>KX181909

TTCTACTGTAATACAGCAGAGCTGTTTAGTAATACTTGGTTAAATAAGAGTGGCAATAACGATGGAACATCA  
CACTTCCATGCAGAATAAAACAAATTATAAACAGATGGCAGGAAGTAGGAAAAGCAATGTATGCCCCCTCCCAT  
CAGGGGATTAATTGAATGTTTCATCAAATATTACAGGGCTGATACTAACAAGAGATGGTGGTAATAATAGTGCA  
AACAAATGCTAGTGAAACCTTCAGACCCGGAGGGGGAAATATGAAGGACAATTGGGGAAAGTGAATTATATAAAT  
ATAAAGTAGTAAAAATTGAGCCCTTAGGAATAGCACCCACCAGGGCAAAAAGAAGAGTGGTGCAAAGAGAAAA  
AAAAGCAGTAACGCTAGGAGCTATGTTCTTGGGTTCTTGGGAACAGCAGGAAGCACTATGGGCGCAGCGTCA  
GTGACGCTGACGGTACAGGCCAGACAGTTACTGTCTGGTATAGTGCAACAGCAGAGCAATCTGCTGAAGGCTA  
TTGAGGCGCAACAGCATCTGTTGCAACTCACAGTCTGGGGCATC

>KX181908

TTTTACTGTGATACAACAAAGCTGTTTAATAGTACTTGGAATAATACTGGAGAGTCAAATTACACGGAGGGAA  
ATGCCACTATCATACTTCCATGCAGAATAAAACAAATTATAAACAGATGGCAGGAAGTAGGAAAAGCAATGTA  
TGCCCCCTCCCCTCAGTGGAATATTAGCTGTTTATCAAATATTACAGGGGTACTATTAACAAGAGATGGGGGT  
AATGAAACAAATGCCCCCTGAGACCTTCAGACCTCAAGGGGGAAATATAAAGGATAATTGGGGAAAGTGAATTAT  
ATAAATATAAAGTAGTAAAAATTGAACCTTAGGAGTAGCCCCCCCCAAGGCAAAGAGAAGAGTGGGGCAAAG  
AGAAAAAAGAGCAGTGGGAATAGGAGCTATGTTCTTGGGTTCTTGGGAGCAGCAGGAAGCAATATGGGCGCA  
GCATCACTAACGCTGACGGTACAGGCCAGACTATTATTGTCTGGTATAGTGCAACAGCAAAACAATTTGCTGA  
GAGCTATTGAGGCGCAACAGCATCTGTTGCAACTCACAGTCTGGGGCATC

>KX181898

TTCTACTGTAATACATCACAGCTGTTTAATTGGACTGAAAGAAATAGAAATAGCTCAGATGGGACAGGGTCAA  
ATGAGACTGAGACCATTACACTCCCATGCAGAATAAAACAAATTATAAACAGATGGCAGGAAGTAGGAAAAGC  
AATGTATGCCCCCTCCCATCAAAGGAAATATTAGCTGTTTCATCAAATATTACTGGGCTGCTATTAACAAGAGAT  
GGTGGTACAAACCTGACTGGGTCTAACGGGACCGAGACCTTCAGACCTCAAGGAGGAAATATGAAGGATAATT  
GGAGAAGTGAATTATATAAATATAAAGTAGTAAGAATTGAGCCAGTAGGAATAGCACCCACCGAGGCAAAGAG  
AAGAGTGGTGCAAAGAGAAAAAAGAGCAGTGGGAACACTAGGAGCTATGTTCTTGGGTTCTTGGGAGCAGCA  
GGAAGCACTATGGGCGCAGCGTCAATGACGCTGACGGTACAGGCCAGACAATTATTGTCTGGTATAGTGCAAC  
AGCAAAACAATCTGCTGAAAGCTATTGAGGCGCAACATCATCTGTTGCAACTCACAGTCTGGGGCATC

>KX181899

TTCTACTGTAATACATCACAGCTGTTTAATAGTACTTGGAATGGTATTGAGAATATTTCGAATGATACTGAGA  
ATTATATCACACTCCCATGCAGAATAAAACAAATTATAAATAGGTGGCAGGAAGTAGGAAAAGCAATGTATGC  
CCCTCCCATTAAAGGAAATATTAGCTGCACATCAAACATTACAGGGCTGATACTAACAAGAGATGGTGGTAAC  
AATGAGAGCAACGAGACTGAGACTTTCAGACCTGGAGGAGGAGATATGAGGGACAATTGGAGAAGTGAATTAT  
ATAAATATAAGGTAGTAAAAATTGAGCCATTAGGAATAGCACCCACCAAGGCAAAGAGGAGAGTGGTGCAAG  
AGAAAAAAGAGCAGTGGGAACGCTGGGAGCCATGTTCTTGGGTTCTTGGGAGCAGCAGGAAGCACTATGGGC  
GCAGCGTCAATAACGCTGACGGTACAGGCCAGACAAGTATTGTCTGGTATAGTGCAACAGCAGACAATCTGC  
TGAGAGCTATTGAGATGCAACAGCATCTGTTGCAACTCACAGTCTGGGGCATC

>KX181913

TTTTACTGCAATACAACACCACTGTTTAATTGGACTGAAGGGTCAAATAACACTCAATGGCCAAAGGACAATA  
TTACACTTCAATGCAGAATAAAACAAATTGTAAACAGGTGGCAGGAAGTAGGAAAAGCAATGTATGCCCCCTCC  
TATCAGTGGACTGATTAACCTGTTTATCAAATATTACAGGGTTGCTATTAACAAGAGATGGTGGTAATAAGTCC  
GGGAAAGATACTGGTCCCGAAAATTTT TAGACCAGCAGGGGGAAATATGAAGGGCAATTGGGGAAAGTGAATTAT  
ATAAATACAAAGTAGTAAAAATTGAACCTTAGGAATAGCCCCCCCCAGGGCAAAAGAGAAGAGTGGTGCAAG  
AGAAAAAAGAGCAGTGGGAACGCTGGGAGCCATGTTCTTGGGTTCTTGGGAGCAGCAGGAAGCACTATGGGC  
GCAGCGTCAATAACGCTGACGGTACAGGCCAGACAAGTATTGTCTGGTATAGTGCAACAGCAGACAATCTGC  
TGAGAGCTATTGAGATGCAACAGCATCTGTTGCAACTCACAGTCTGGGGCATC

GCAGCGGCAATGACGCTGACGGTACAGACCAGACAATTATTGTCTGGTATAGTGCAGCAGCAGAACAAATTTGC  
TGAAAGCTATTGAGGCGCAACAGCATCTGTTGCAACTCACAGTCTGGGGCATC

>MK041573

TTCTACTGTAATACAACAAAACCTATTTTAATAGTACTTGGGATGGGTCAAACATCATAGGAAATGATACAAATG  
ACACAGTGATCACACTCCCATGCGAGAATAAAACAAATTATAAACATGTGGCAGCGAGTAGGAAAAGCAATGTA  
TGCCCCCTCCCATCAGAGGACAAATTAGATGTTTCATCAAATATTACAGGGCTGCTGTTAACAAGAGATGGTGGA  
AATCATACAAGTGGGAATGAGACCTTCAGACCAGGAGGAGGAGATATGAGGGACAATTGGAGAAGTGAATTAT  
ATAAATATAAAGTAGTAAAAATTGAACCATTGGGAGTAGCACCCACCAGGGCAAAGAGAAGGGTGGTGCAGAG  
AGAAAAAAGAGCAGTAGGACTAGGAGCTTTGTTCTTGGGTTCTTGGGAGCAGCAGGAAGCACTATGGGCGCA  
GCGTCACTAACGCTGACGGTACAGGCCAGACAGTTATTGTCTGGTATAGTGCAACAGCAGAACAACTTGCTGA  
GGGCTATTGAGGCGCAACAGCACATGTTGCAACTCACAGTCTGGGGCATC

>MK041575

TTCTACTGTAATACAACACAGCTGTTTAATAATACTTGGAAATGATACTGCTTGGAAATGATACTAGCTGGTCAA  
ATGGCACTATCACACTCCCATGCGAGAATAAAACAAATTATAAACAGGTGGCAGGAAGTAGGAAAAGCAATGTA  
TGCCCCCTCCCATCAGCGGACAAATTAATTGTTTCATCAAATATTACAGGACTGTTATTAACAAGAGATGGTGGT  
AATGACAATGACACGAATACGAATGAGACCGAGATCTTCAGACCTGCAGGAGGAGATATGAGGGACAATTGGA  
GAAGTGAATTATATAAATATAAAGTAGTAAAAATTGAACCATTAGGAATAGCACCCACCAGGGCAAAGAGAAG  
AGTGGTGCAGAGAGAAAAAAGAGCAGTGACATTAGGAGCTGTGTTCTTGGGTTCTTGGGAGCAGCAGGAAGC  
ACTATGGGCGCAGCGTCAGTGACGCTGACGGTACAGGCCAGACTATTATTGTCTGGTATAGTGCAACAGCAGA  
GCAATTTGCTGAGAGCCATTCAGGCGCAACAGCATCTGCTGCAACTCACAGTCTGGGGCATC

>MG571983

TTCTACGGTAATACATCAAACCTGTTTAATAATAATATTACAGGGATTATAAAGAATGGGACTATCATACTCC  
CATGCGAGAATAAAACAAATTATAAACAGGTGGCAGGAAGTAGGAAGAGCAATGTATGCCCCCTCCCATCAGAGG  
ACTAATCAACTGTACATCAAATATTACAGGGCTGCTATTAACAAGAGATGGTGGTGGTGGTAATGAGAGTCAT  
AACGAGACCTTCAGACCTGGAGGAGGAGATATGAGGGACAATTGGAGAAGTGAATTATATAAATATAAAGTAG  
TAAGAATTGAGCCATTAGGAATAGCACCCACCAAGGCACAGAGAAGAGTGGTGC AAAAGAGAAAAAAGAGCAGT  
GGGAGCACTAGGAGCTATGTTCTTGGGTTCTTGGGAGCAGCAGGAAGCACTATGGGCGCAGCGTCAATAACG  
CTGACGGCACAGGCCAGACAAGTATTGTCTGGTATAGTGCAACAGCAAAACAATTTGCTGAGGGCTATTGAGG  
CGCAACAGCATTTGTTGCAACTCACAGTCTGGGGCATC

>MG571987

TTCTACTGTAATACAACATCACTGTTTAATAGTACTTGGCTGCTTAATGATACTGGAAATGTTACTGTGCCAA  
ACAAAACGGACGAAATTATCATACTCCCATGCGAGAATAAAACAAATTATAAATATGTGGCAAAAAGTAGGAAG  
AGCAATGTATGCCCCCTCCCATCAGAGGTTATATTAACTGTTTCATCAAATATTACAGGGCTGCTATTAGTAAGG  
GATGGTGGTAATAATAATCAGTCTAATCAGGCTGAAACCTTCAGACCTGGAGGAGGAGATATGAGGGACAATT  
GGAGAAGTGAATTATATAAATATAAAGTAGTAAAAATTGAGCCATTAGGAATAGCACCCACCAAGGCAAAGAG  
AAGAGTGGTGCAGAGAGAAAAAAGAGCAGTGGGGACACTAGGAGCTGTGTTCTTGGGTTCTTGGGAGCAGCA  
GGGAGCACTATGGGCGCAGCGTCACTAACGCTGACGGTACAGGCTAGACTATTATTGTCTGGTATAGTGCAAC  
AGCAGAACAAATTTGCTGAGAGCTATTGAGGCGCAACAGCATATATTGCAACTCACAGTCTGGGGCATC

>MG571990

TTCTACTGTAATACAACAAAACCTATTTAATAGTACTTGGGATGGGTCAAACATCATAGGAAATGATACAAATG  
ACACAGTGATCACACTCCCATGCGAGAATAAAACAAATTATAAACATGTGGCAGCGAGTAGGAAAAGCAATGTA  
TGCCCCCTCCCATCAGAGGACAAATTAGATGTTTCATCAAATATTACAGGGCTGCTGTTAACAAGAGATGGTGGA  
AATCATACAAGTGGGAATGAGACCTTCAGACCAGGAGGAGGAGATATGAGGGACAATTGGAGAAGTGAATTAT  
ATAAATATAAAGTAGTAAAAATTGAACCATTGGGAGTAGCACCCACCAGGGCAAAGAGAAGGGTGGTGCAGAG  
AGAAAAAAGAGCAGTAGGACTAGGAGCTTTGTTCTTGGGTTCTTGGGAGCAGCAGGAAGCACTATGGGCGCA  
GCGTCACTAACGCTGACGGTACAGGCCAGACAGTTATTGTCTGGTATAGTGCAACAGCAGAACAACTTGCTGA  
GGGCTATTGAGGCGCAACAGCACATGTTGCAACTCACAGTCTGGGGCATC

>MG572002

TTCTATTGTAATTCATCACAGCTGTTTAATACAACCTTGGATAAATGGCACTACAGGAAATAGAACTAATGAAA  
ATGACACACTTATCACACTCCCATGCGAGAATAAAACAAATTATAAACAGATGGCAGGAAGTAGGAACAGCAAT  
ATATGCCCCCTCCCATGGAAGGCATGATTAAATGTTTCATCAAATATTACGGGGGTGCTATTAAACAAGAGATGGT  
GGTTATGATAACAATAGCACGCGCCAGAACGAGACCTTCAGACCTGGAGGGGGAAATATGAAGGACAATTGGA  
GAAGTGAATTATATAAATATAAAGTAGTAAAAGTTGAGCCATTAGGACTAGCACCCACCAAGGCAAAGAGAAG  
AGTGGTGC AAAAGAGAAAAAAGAGCGGTAA CATTAGGAGCTATGTTCTTGGGTTCTTGGGAGCAGCAGGAAGC  
ACTATGGGCGCAGCGTCAATGACGCTGACGGTACAGGCCAGACAATTGTTGTCTGGTATAGTGCAACAGCAGA  
ACAATCTGCTGAGAGCTATTGAGGCGCAACAGCATATGTTGCAACTCACAGTCTGGGGCATA

>JF320427

TTCTACTGCAATACAACAGCACTGTTTAATAGTACATGGAACGGTACAGAGGGGATAAGTAATGCTACAGGAA  
ATATCACACTCCCATGCGAGAATAAAACAAGTTATAAACAGATGGCAGGAAGTAGGAAAAGCAATGTATGCCCC  
TCCCATTAAGGAGTAATTAGATGTGTATCAAATATCACAGGGATACTATTAACGAGAGATGGGGGTAATAAT

AATAATACTAATCACACCGAGATATTCAGACCTGGAGGAGGAGATATGAGAGACAATTGGAGAGGTGAATTAT  
ATAAATATAAGGTAGTAAAAATTGAACCATTAGGAGTAGCACCCACCAAGGCAAAGAGAAGAGTGGTGCAGAG  
AGAAAAAGAGCAGTGGGAATAGGAGCTTTGTTCTTGGGTTCTTGGGAGCAGCAGGAAGCACGATGGGCGCA  
GCGTCAGTGACGCTGACGGTACAGGCCAGACAATTATTGTCTGGTATAGTGCAACAGCAGAGCAATTTGCTGA  
GGGCTATTGAGGCGCAACAACATATGTTGCAACTCACAGTCTGGGGCATC

>JF320424

TTTTACTGTAGTACAACATTATTGTTTAAATAGTACTTGGGGTCTAATGAGACTAGGAATGAGACTATAGACA  
ATAGCACTATCACAATTCAATGTAAAATAAAACAACCTTATAAACATGTGGCAGGGGGTAGGAAGGGCAATGTA  
TGCCCCCTCCCATCAGGGGAAACATTAGCTGTTTCATCAAATATTACAGGACTACTATTAACAAGAGATGGTGGA  
AACAAATGGGACAAATGGTACTGAGACCTTCAGACCTGAAGGAGGAAATATGAAGGATAATTGGAGAAATGAAT  
TATATAAATATAAAGTAGTAAAAATTGAACCATTAGGAATAGCACCCACCAAGGCAAGGAGAAGAGTGGTGCA  
GAGAGAAAGAAGAGCAGCAGGACTGGGAGCTTTGTTTCATTGGGTTCTTGTGTCAGCAGCAGGAAGCACTATGGGC  
GCAGCATCACTAACGCTGACGGTACAAGCCAGACAATTATTGTCTGGTATAGTGCAACAGCAGAACAATTTGC  
TGAGAGCTATTGAGGCGCAACAGCATATGTTGCAACTCACAGTCTGGGGCATC

>GU562236

TTCTACTGCAATACAACGCAGCTGTTTAAATAGTACTTGGTATAGTAATGGTACTTGGTCTTGGAATGGTACTA  
CTTGGAATGGTACTAGAGAGACAAATAGTACGGAAGGAAACGACACAATGATCACACTCCCATGCAGAATAAAA  
ACAATTTATAAACATGTGGCAGGCAGTAGGAAAAGCAATATATGCCCTCCCATCAGTGGACTAATCAAATGT  
ACATCAAATATTACAGGGCTGTTAATAACAAGAGATGGGGGTCATGAAAGTAATAAAAGTAACTATGGTTATG  
AAAGTAGTAAAAGTGAGAATGAGACCTTCAGACCTGGAGGAGGAAATATGAGGGATAATTGGAGAAGTGAATT  
GTATAAATATAAATAGTAAGAATTGAACCATTAGGACTAGCACCCACCAAGGCAAAGAGAAGAGTGGTGCAG  
AGAGAAAAGAGAGCCGCACTAGGAGCCATGTTCTTGGGTTCTTGGGAGCAGCAGGAAGCACTATGGGCGCAG  
CGTCACTGACGCTGACGGTACAGGCCAGACAATTATTGTCTGGTATAGTGCAACAGCAGAGCAATTTGCTGAG  
GGCTATTGAGGCGCAACAGCATATGTTGCAACTCACGGTCTGGGGCATC

>JQ403024

TTCTACTGTAATACAACACAACCTGTTTAAATAGAGATTGGAATGATACTAGTACTATTAACAGTACTGAAAAA  
GAAATATCACACTCCCATGTAGAATAAAACAAATTATAAACATGTGGCAGGAAGTAGGAAAAGCAATGTATGC  
CCCTCCCATCCAAGGACAAATTAGATGTTTCATCAAATATTACAGGGTTGCTATTAACAAGAGATGGTGGTAAT  
GACAATACCACTAACACCACTGAGATCTTCAGACCTGTAGGAGGAAATATGAGGGACAATTGGAGAAGTGAAT  
TATACAAATATAAAGTAGTACAAATTGAACCATTAGGATTAGCACCCACCAAGGCAAAGAGAAGAGTGGTGCA  
GAGAGAAAAAAGAGCAGTAACGTTAGGAGCTATGTTCTTGGGTTCTTGGGAGCAGCAGGAAGCACTATGGGC  
GCAGCGTCAATGACGCTGACGGTACAGGCCAGACAATTATTGTCTGGTATAGTGCAACAGCAGCAAAATAATTTGC  
TGAAGGCTATTGAGGCGCAACATCATCTGTTGCAACTCACAGTCTGGGGCATC

>JQ403041

TTCTACTGTAATACAACACGACTGTTTAAATAGTACTTGGAAATAGTACCGAATCAAATAATACTATAGGAAATG  
GCACAATCACACTCCCATGCAGAATAAAACAAATTGTAAACATGTGGCAGGAAGTAGGAAAAGCAATGTATGC  
CCCTCCCATCAGAGGACAAATTAGATGTTTCATCAAATATTACAGGGCTGATATTAACAAGAGATGGTGGTCAT  
GGTGGTCATAATAAGAATAACCAACACCACAGAGATCTTCAGACCTGGAGGAGGAGATATGAGGGACAATT  
GGAGAAGTGAATTATATAAATATAAAGTAGTAAACTTGAACCATTAGGAATAGCCCCACCTCGGCAAGGAG  
AAGAGTGGTGCAGAGAGAAAAAAGAGCAGTGGGAATAGGAGCTATGTTCTTGGGTTCTTGGGAGCAGCAGGA  
AGCACTATGGGCGCAGCGTCAGTGACGCTGACGGTACAAGCCAGACTATTATTGTCTGGTATAGTGCAACAGC  
AGAACAATTTGCTGAAGGCTATTGAGGCGCAACAGCATATGTTGCAACTCACAGTCTGGGGCATC

>KC797225

TTCTACTGTAATACATCACAATTGTTTAAATAGTACTTGGAAATGCTACTGGTACTCAGAATACTACTGGTACTC  
AGAATGAGACTAAAATAGGCAATATCACACTCCCATGTAAAATAAAACAAATTATAAACAGGTGGCAAGAAGT  
AGGAAAAGCAATGTATGCCCCCTCCCATCAAAGGACTAATTAACCTGTGTATCAAATATTACAGGGATACTATTA  
ACAAGAGATGGTGGTCATTCTAAGAATACAAATAGTACAGATAATGATACCGAGGTCTTCAGACCTGGAGGAG  
GAGATATGAGGGACAATTGGAGAAGTGAATTATATAAATATAAAGTGGTAAAAATTGAGCCATTAGGAGTAGC  
ACCCACCAAGGCAAAGAGAAGAGTGGTGCAGAGAGAAAAAAGAGCAGTGACGCTAGGAGCCATGTTCTTGGG  
TTCTTGGGAGCAGCAGGAAGCACTATGGGCGCAGCGTCGCTGACGCTGACGGTACAGGCCAGACAATTATTGT  
CTGGTATAGTGCAACAGCAGAACAACCTGCTGAGGGCTATTGAGGCGCAACAGCATATGTTGCAACTCACAGT  
CTGGGGCATC

>HQ699978

TTCTACTGTAATACATCACAACCTGTTTAAATAGTACTTATAATGGTACTTGGAGTGGTACTACAGGAAATGATA  
CTATCACGCTCCCTTGAGAAATAAAACAAATTGTAAACAGGTGGCAGGAAGTAGGGAAAGCAATGTATGCCCC  
TCCCATTCAGGAATAATTAGATGTTTCATCAAATATTACAGGGTTGCTATTAACAAGAGATGGTGGTAAGAAT  
GAGAGCGATAGCAATACCAACCGAGACCTTCAGACCTGGAGGAGGAAATATGAGAGACAATTGGAGGAGTGAAT  
TATATAAATATAAAGTAGTAAAAATTGAACCATTAGGAGTAGCACCCACCAAGGCAAAAAGAAGAGTGGTGCA  
GAGAGAAAAAAGAGCAGTGGGAACGATAGGAGCTATGTTCTTGGGTTCTTGGGAGCAGCAGGAAGCACTATG

GGCGCAGCGTCAATAACGCTGACGGTACAGGCCAGACAATTGTTGTCTGGTATAGTGCAACAGCAGAGAAATT  
TGCTGAGGGCTATTGAGGCGCAACAGCATCTGTTGCAACTCACAGTCTGGGGCATC

>EU131792

TTCTACTGTAATACATCAGAGCTGTTTAAAGTACTTGGAATAATACTAGTACTGGGAATGATCCTATCACGC  
TCCCTTGCAGAATAAAGCAAATTGTAAACATGTGGCAAGAAGTAGGGAAAGCAATGTATGCTCCTCCATTGA  
AGGACAAATTAGATGTTTATCAAATATTACAGGATTGCTATTAACAAGGGATGGTGGTCATAATGGGAGCGAG  
ACCAACGAGACCTTCAGACCTGCAGGAGGAAATATGAGAGACAATTGGAGAAGTGAATTATATAAATATAAAG  
TAGTAAAAAATTGAACCATTAGGAGTAGCACCCACCAAGGCAAAGAGAAGAGTGGTGCAGAGAGAAAAAAGAGC  
AGTGGGAACAATAGGAGCTATGTTCCCTTGGGTTCTTGGGAGCAGCAGGAAGCACTATGGGCGCAGCGTCAATG  
ACGCTGACGGTACAGGCCAGACAATGTTGTCTGGTACAGTGCAACAGCAAAGAAATTTGCTGAGGGCTATTG  
AGGCGCAACAGCATCTGTTGCAACTCACAGTCTGGGGCATC

>EU131803

TTCTACTGTAATACATCAAAATTATTTAATAGTACTTGGTATAATAATGGTACTTGGGAATAATGCTAGTACTG  
GGAATGATACTATCACGCTCCCTTGCAGAATAAAACAAATTGTAAACATGTGGCAGGAAGTAGGGAAAGCAAT  
GTATGCCCTCCCATTCAGGACAAATTAGATGTTTCATCAAAGATTACAGGGTTGCTATTAACAAGAGATGGT  
GGTAATGAGAACAAAGACTAAGGACAACAACACCGAGACTGAGACCTTTAGACCTGGGGGAGGAGATATGAGAG  
ACTATTGGAGAAGTGAATTATATAAATATAAAGTAGTAAAAATTGAACCATTAGGAGTAGCACCCACCAAGGC  
AAAGAGAAGAGTGGTGCAGAGAGAAAAAAGAGCAGTGGGAACAATAGGGGCTATGTTCCCTTGGGTTCTTGGGA  
GCAGCAGGAAGCACTATGGGCGCAGCGTCAATAACGCTGACGGTACAGGCCAGACAATTGTTGTCTGGTATAG  
TGCAACAGCAGAGAAATTTGCTGATGGCTATTGAGGCGCAACAACATTTGTTGCAACTCACAGTCTGGGGCAT  
C

>EU363829

TTCTACTGTAATACAAACAAAACCTGTTTAATAGTATTTGGTATAATAATGGTACTTCGAGTGGTACTACAGGAA  
ATGAAACTATCATACTCCCTTGCAGAATAAAACAAATTGTAAACATGTGGCAGAAAGTAGGGAGAGCAATGTA  
TGCCCCCTCCCATTCGAAGGAAAAATTAGCTGTGTATCAAATATCACAGGGTTGCTATTAACAAGAGATGGTGGT  
CAGAAATGAGAACAAATACCGAAACCTTCAGACCTGAAGGAGGAAATATGAAAGACAATTGGAGAAGTGAATTAT  
ATAAATATAAAGTAGTAAAAATTGAACCATTAGGAGTAGCACCCACCAAGGCAAAGAGAAGAGTGGTGCAAAG  
AGAAAAAAGAGCAGTGGGAGCAATAGGAGCTATGTTCCCTTGGGTTCTTAGGAGCAGCAGGAAGCACTATGGGC  
GCAGCGTCAATAACGCTGACGGTACAGGCCAGACAATTGTTGTCTGGCATTGTGCAACAGCAGAGAAATTTGC  
TAAGGGCTATTGAGGCGCAACAGCATCTGTTGCAACTCACAGTCTGGGGCATT

>HM215413

TTCTACTGTAATACAGCACAACTGTTTAATAGTACTTGGAACTACTACTAAGATTTGGGGGAATACTACAGAAG  
GTAACAATAGCACTATCATGCTCCCTTGCAAAATAAAGCAAATTATAAACCTGTGGCAGGAAGTAGGAAAAGC  
AATATATGCCCTCCCATCGCAGGGCGAATTAGATGTGTATCAAATATTACAGGGTTGCTATTAACAAGAGAT  
GGTGGTCATAATGGGAACGGGTCCAACGAGACCGAGACCTTCAGACCTGCAGGAGGAGATATGAGGGACAATT  
GGAGAAGTGAATTATATAAATATAAAGTAGTAAAAATTGAACCAATAGGATTAGCACCCACCAAGGCAAAGAG  
AAGAGTGGTGCAGAGAGAAAAAAGAGCAATGGGAATAGGAGCTATGTTCCCTTGGGTTCTTGGGAGCAGCAGGA  
AGCACTATGGGCGCAGCGTCAATAACGCTGACGGTGCAGGCCAGACGATTATTGTCTGGTATAGTGCAACAGC  
AAAGAAATTTGCTGAGGGCTATTGAGGCGCAACAACATCTGTTGCAACTCACCGTCTGGGGCATC

>EU131802

TTCTACTGTAATACATCACAACCTGTTTAATAGTACTTGGAAATGATACTAGTACTTGGAAATGGTAATACAGGAA  
CTACTGTACGCTCCCTTGCAGAATAAAACAAATTGTAAACATGTGGCAGAAAGTAGGGAAAGCCATGTACGC  
CCCTCCCATTCGAAGGACAAATTAGATGTTTCATCAAATATTACAGGGTTGCTATTAACAAGAGATGGTGGTAAT  
AATGAGAGCGAGAATACCGAGACCTTCAGACCTGCAGGAGGAAATATGAGAGATAATTGGAGAAGTGAATTAT  
ATAAATATAAAGTAGTAAAAATTGAACCATTAGGAGTAGCCCCACCAAGGCAAAGAGAAGAGTGGTGCAGAG  
AGAAAAAAGAGCAGTGGGATTGATAGGAGCTATGTTCCCTTGGGTTCTTGGGAGCAGCAGGAAGCACTATGGGC  
GCAGCGTCAATAACGCTGACGGTACAGGCCAGGCAATTATTGTCTGGTATAGTGCAACAGCAGAGAAATTTGC  
TGATGGCTATTGAGGCGCAACAGAATATGTTGCGACTCACAGTCTGGGGCATC

>EU131804

TTCTACTGTAACACATCACAACCTGTTTAATAGTACTTGGTATAGTAATGGTACTAGGAAGGATCCTACAGGAA  
ATGGCACTATCACGCTCCCTTGCAGAATAAAACAAATTATAAACATGTGGCAGCAAGTAGGGAAAGCAATGTA  
TGCACCTCCCATTAAGGACAAATTAGATGTTTCATCAAATATTACAGGGTCGCTATTAACAAGAGATGGTGGT  
TATAATGAGAGCAACACCACCGAGACCTTCAGACCTGGAGGAGGAGATATGAGAGACAATTGGAGAAGTGAAT  
TATAAATATAAAGTAGTAAAAATTGAACCATTAGGAGTAGCACCCACCAAGGCAAAGAGAAGAGTGGTGCA  
GAGAGAAAAAAGAGCAGTAGGACTAGGAGCTATGTTCCCTTGGGTTCTTGGGAGCAGCAGGAGGCACCATGGGC  
GCAGCGTCAATAACGCTGACGGTACAGGCCAGGCAATTATTGTCTGGTATAGTGCAACAGCAGAGAAATTTGC  
TGAGTGCTATTGAGGCGCAACAACGTTTGTGCAACTCACAGTCTGGGGCATC

>JF932472

TTCTACTGTAATACAGCACAACTGTTTAATAGTACTTGGACAGGAAATGATACTAGCATTGGAATGATACTA  
CAGGAAATGACACTATCACACTCCCTTGCAGAATAAAACAAATTATAAACATGTGGCAGGAAGTAGGGAAAGC

AATGTATGCCCCCTCCCATTTGCAGGACAAATTAGATGTTTCATCAAATATTACAGGGTTGCTATTAACAAGAGAT  
GGTGGTAATCATGAGAACAACTGAGACCTTCAGACCTGGAGGAGGAGATATGAGAGACAATTGGAGAAGTG  
AATTATATAGATATAAAGTAGTAAAAATTGAACCATTAGGAGTAGCACCCACCAAGGCAAAGAGAAGAGTGGT  
GCAGAGAGAAAAAGAGCAGTGGGAACGCTAGGAGCTATGTTCCCTTGGGTTCTTGGGAGCAGCAGGAAGCACT  
ATGGGCGCAGCGTCAATAACGCTGACGGTACAGGCCAGACAATTGTTGTCTGGTATAGTGCAACAGCAGAGAA  
ATTTGCTGAGGGCTATTGAGGCGCAACAGCATCTGTTGCAACTCACAGTCTGGGGCATC

>JF932474

TTCTACTGTAATACATCACAACCTGTTTAATAGTACTTTGGCCTTGAATAATGATACTAGTGTTTGGGATGATA  
CTACAGAAAATGACATTATCACGCTCCCTTGAGAATAAAACAAATTATAAACATGTGGCAGGAAGTAGGGAA  
AGCAATGTATGCCCCCTCCCATTTCAAGGACAACCTTAACGTTCATCAAATATTACAGGGTTGCTATTAACAAGA  
GATGGTGGTTATCATAATGAGAGCAATAACACCGAGACCTTCAGACCTGGAGGAGGAGATATGAGAGACAATT  
GGAGAAGTGAATTATATAAAATATAAAGTAGTAAAAATTGAACCATTAGGAGTAGCACCCACCAAGGCAAAGAG  
AAGAGTGGTGCAGAGAGAAAAAGAGCAGTGGGAGCGATAGGAGCTATGTTCCCTTGGGTTCTTGGGAGCAGCA  
GGAAGCACTATGGGCGCAGCGTCAATAACGCTGACGGTACAGGCCAGACAACCTGTTGTCTGGTATAGTGCAAC  
AGCAGAGAAAATTTGCTGAGGGCTATTGAGGCGCAACAGCATCTGTTGCAACTCACAGTCTGGGGCATT

>HQ215554

TTCTACTGTAATACAACAGGGCTGTTTAATAGTACTTTGACTAATGATACCTGGAATGATAATCGGTCAATATA  
ACAATGGAACAGGTAACATCACACTCCACTGCAGAATAAAACAAATTATAAACAGGTGGCAGGAAGTAGGAAA  
AGCAATGTATGCCCCCTCCCATCAGTGGACCAATTAGCTGTTTATCAAATATTACAGGACTGATATTAACAAGA  
GATGGAGGTAACAATACCGGGAATCAATCTGATACTGAAACCTTCAGACCTGGGGGAGGGGATATGAAGGACA  
ATTGGAGAAGTGAATTATATAAAATATAAAGTAGTACAAATTGAGCCAATAGGATTAGCACCCACCAGGGCAAG  
GAGAAGAGTGGTGCAGAGAGAAAAAGAGCAGTGGGAACATTAGGAGCTATGTTCCCTTGGGTTCTTGGGAGCA  
GCAGGAAGCACTATGGGCGCAGCGTCAGTCACGCTGACGGTACAGGCCAGACAATTACTGTCTGGTATAGTGC  
AACAGCAGAACAATTTGCTGAAAGCTATTGAGGCGCAACACATATGTTGCAACTCACAGTCTGGGGCATC

>JF346917

TTCTACTGTAATACATCACAACCTGTTTAATAGTACTTTGGGATATTAATAGTAATGGGACTAATAATACAAATA  
GCAATATCAATATCACACTCCCTTGCAAAATAAAACAAATTGTAAACATGTGGCAGGAAGTAGGGAAAGCAAT  
GTACGCCCCCTCCCATTAGAGGACAAATTAGATGTTTCATCACAATTTACAGGGTTGTTATTAACAAGAGATGGT  
GGTACTAATAATAATCATACCAACGAAACCTTCAGACCTGCAGGGGAGACATGAGAGACAATTGGAGAAGTG  
AATTATATAAATATAAAGTAGTAAAAATTGAACCATTAGGAATAGCACCCACCAAGGCAAAGAGAAGAGTGGT  
GCAGAGAGAAAAAGAGCAGTGGGAACAATAGGAGCTATGTTCCCTTGGGTTCTTAGGAGCAGCAGGAAGCACT  
ATGGGCGCAGCGTCAGTAAACGCTGACGGTACAGGCCAGACAATTATTGTCTGGTATAGTGCAACAGCAGAGAA  
ATCTGCTGAGGGCTATTGAGGCGCAACAGCGTGTGTTGCAACTCACAGTCTGGGGCATC

>JX960599

TTCTACTGCAATACAACACAACCTGTTTAATAGTACTTTGGAATACTTGGGATAATATTACTGGGAATAGTAATG  
AGAATAATACACAGAACAATATCACACTTCCATGTAGAATAAAACAAATTATAAACATGTGGCAGGGAGTAGG  
AAAAGCAATGTACGCCCCCTCCCATCGCAGGACGAATTAATGTTTCATCAGATATTACAGGACTATTATTAGTG  
AGAGATGGTAATAACAATAACAATACAGATAACAAGACAGAACTTTTCAGACCTCAGGGAGGAAACATGAAGG  
ACAATTGGAGAAGTGAATTATATAAATATAAAGTAGTAAAAATTGAACCAATAGGAATAGCACCCACTACGGC  
AAGGAGAAGAGTGGTGCAGAGAGAAAAAGAGCAGTGAACCTAGGAGCTATGTTCCCTTGGGTTCTTAGGAGCA  
GCAGGAAGCACAATGGGCGCAGCGTCAATAACGCTGACGGTACAGGCCAGACAATTACTGTCTGGTATAGTGC  
AACAGCAGAACAATTTGCTGAGGGCCATTGAGGCGCAACAGCATATGTTGCAACTCACAGTCTGGGGCATC

>JF932497

TTCTACTGTAATACATCACGACTGTTTATAGTAGTACATGGTATACTAATGATACTCAGAATGGTACTACAGGAA  
ATGACACTATCACACTCCCTTGAGAATAAAACAAATTGTAAACATGTGGCAGGAAGTAGGAAAAGCAATGTA  
TGCCCCCTCCCGTTGAAGGACTAATTAGATGTTTCATCAAATATTACAGGGTTGCTATTAACAAGAGATGGTGGT  
TATAATGTAAGCAACAACACCGAGATCTTCAGACCTGGAGGAGGAGATATGAGGGACAATTGGAGAAGTGAAT  
TATATAAATATAAAGTAATAAAAAATTGAACCATTAGGAGTAGCACCCACCAAGGCAAAGAGAAGAGTGGTGCA  
AAGAGAAAAAGAGCAGTGGGAATAGGAGCTATGTTCCCTTGGGTTCTTGGGAGCAGCAGGAACCACTATGGGC  
GCAGCGTCAATGACGCTGACGGTACAGGCCAGACAATTGTTGTCTGGTATAGTGCAACAGCAGGGAAATCTGC  
TGAGGGCTATTGAGGCGCAACAGCATATGTTGCAACTCACAGTCTGGGGCATT

>KX693642

TTCTACTGTAATACATCACAACCTGTTTAATAGTACTTTGGGATGTTAATGACACTAGTAATGATACTACAGGAA  
ATGAAACTATCACGCTCCCTTGAGAATAAAACAAATTATAAACATGTGGCAGGGAGTAGGGAAAGCAATGTA  
TGCCCCCTCCCATTAAGGAAAAATTAGATGTTTCATCAAATATTACAGGGTTGATATTAACAAGAGATGGTGGT  
GTAAATGAGAGCGAGTTCAATGAGACCTTCAGACCTCAAGGAGGAAATATGAAAGACAATTGGAGAAGTGAAT  
TGTATAAATATAAAGTAGTAAAAATTGAACCATTAGGAGTAGCACCCACCAAGGCAAAGAGAAGAGTGGTGCA  
GAGAGAAAAAGAGCAGGAATAGGAGCTCTGTTCCCTTGGGTTCTTGGGAGCAGCAGGAAGCACTATGGGCGCA  
GCGTCAATAACGCTGACGGTACAGGCCAGACAATTGATGTCTGGTATAGTGCAACAGCAGAGAAAATTTGCTGA  
GAGCTATTGAGGCGCAACAGCATCTGTTGCAACTCACAGTCTGGGGCATC

>KX693171

TTTTACTGTAATACATCACAACCTGTTTGACAGTATTTGGAATGCTACTACTGGTACTTGGAATGGTACTACAG  
GAGGTGACAATATCACGCTCCCTTGCAGGATAAAACAAATTGTAAACATGTGGCAGGAAGTAGGGAAAGCAAT  
GTATGCCCTCCCATTTAGAGGACAAATTTATTGTTTCATCAAGTATTACAGGGTTGCTATTAACAAGAGATGGT  
GGTACGAGTAAGAATGAGAGCAATACCACCGAGACCTTCAGACCTGGAGGAGGAGATATGAGGGACAATTGGA  
GAAGTGAATTATATAAATACAAAGTAGTAAAACTTGAACCACTAGGAGTAGCACCCACCGAGGCAAAGAGAAG  
AGTGGTGCAGAGAGAAAAAGAGCAGTGGGAGCGATAGGAGCTATGTTCCCTTGGGTTCTTGGGAGCAGCAGGA  
AGCACTATGGGCGCAGCGTCAATAACGCTGACGGTACAGGCCAGACAATTATTGTCTGGTATAGTGCAACAGC  
AAAGAAATTTGCTGAGGGCTATTGAGGCGCAACAGCATATGTTGCAACTCACAGTCTGGGGCATC

>KX693309

TTCTACTGTAATACATCAAAACCTGTTTAATAGTACTTGAGTAAGACTAGTACTTGGAATGATACTACAGGAA  
ATGACACTATCACGCTCCCTTGCAGAATAAAACAAATTGTAAACATGTGGCAGGAAGTAGGGAAAGCAATGTA  
TGCCCCCTCCCATTTCAAGGACTAATTAACCTGTTTCATCAAAATATTACCGGGTTGCTATTAACAAGAGATGGTGGT  
AATAAATACTGAGAGCAACACCACCGAGACCTTCAGACCTACAGGAGGAAATATGAGAGACAATTGGAGAAGTG  
AATTATATAAATATAAAGTAGTACAAATTGAACCATTAGGAGTAGCACCCACCAAGGCAAAGAGAAGAGTGGT  
GCAGAGAGAAAAAGAGCAGTGGGAACAATAGGAGCTATGTTCCCTTGGGTTCTTGGGAGCAGCAGGAAGCACT  
ATGGGCGCAGCGTCGGTAACGCTGACGGTACAGGCCAGACAATTGTTGTCTGGTATAGTGCAACAGCAGAGAA  
ATTTGCTGAGGGCTATTGAGGCGCAACAGCATCTGTTGCAACTCACAGTCTGGGGCATC

>KX693362

TTCTACTGTAATACATCAAAACCTGTTTAATAGTACTTGGAATGATAATAGTACTTGGAATGATAATGATAAGA  
CAGGAGATGACAATCTCACGCTCCCTTGTAGAATAAAACAAATTGTAAACATGTGGCAGGAAGTAGGGAAAGC  
AATGTATGCCCTCCCATTTAAAGGACAAATTAGATGTTTCATCAAAATATTACAGGGTTGCTATTAACAAGAGAT  
GGTGGTCAGAATGTGAGCAATACCACCGAGACCTTCAGACCTGCAGGAGGAGATATGAGAGACAATTGGAGAA  
GTGAATTATATAAATATAAAGTAGTAAAAATTGAACCATTAGGAGTAGCACCTACCAAGGCAAAGAGAAGAGT  
GGTGCAGAGAGAAAAAGAGCAGTGGGAACGATAGGAGCTATGTTCCCTTGGGTTCTTGGGAGCAGCAGGAAGC  
ACGATGGGCGCAGCGTCAATAACGCTGACGGTACAGGCCAGACAATTGTTGTCTGGTATAGTGCAACAGCAGAGA  
GAAATTTGCTGAGGGCTATTGAGGCGCAACAGCATCTGTTGCAACTCACAGTCTGGGGCATC

>KX693411

TTTTACTGTAATACATCAAAACCTGTTTAATAGTACTTGAGTAATAATAATCCTTGGAATACTACTAGTATTC  
AAAATGATACTATCACGCTCCCTTGCAGAATAAAACAAATTGTAAACATGTGGCAGGAAGTAGGGAAAGCAAT  
GTATGCCCTCCCATTTGCAGGACCAATTAATTGTTTCATCAAAATATTACGGGGTTGCTATTAACAAGAGATGGT  
GGTAAAGGTGGGGATGTGAGCAACTACACCGAGACCTTCAGACCTGCAGGGGGAAATATGAGAGACAATTGGA  
GAAGTGAATTATATAGATATAAAGTAGTAAAAATTGAACCATTAGGAGTAGCACCCACCAAGGCAAAGAGAAG  
AGTGGTGCAGAGAGAAAAAGAGCAGTGGGAGCAATAGGAGCTATGTTCCCTTGGGTTCTTGGGAGCAGCAGGA  
AGCACTATGGGCGCAGCGTCAATAACGCTGACGGTACAGGCCAGACAATTGTTGTCTGGTATAGTGCAACAGC  
AGAGAAATTTGCTGAGGGCTATTGAGGCGCAACAGCATCTGTTGCAACTCACAGTCTGGGGCATC

>AY561237

TTCTACTGTAATTCAACACAACCTGTTTAATAGTACCTGGCCTGCTAATGATACTTGGCATGATACTAACGGGA  
CAAGTTATACTAACGGGACAAGTGGAACCTATCACACTCCCATGCAAAATAAAACAAATTATAAACTTATGGCA  
GGAAGTAGGAAAAGCAATGTATGCCCTCCCATCGCAGGAGCACTTAATTGTTTCATCAAAATATTACAGGGCTG  
TTATTAACAAGAGATGGTGGTAATGACAAGAACAGCAACAATAGCAACAGCAACGAGACCTTCAGACCGGGAG  
GAGGAGATATGAGGGACAATTGGAGAAGTGAATTATATAGATATAAAGTAGTAAAAATTGAACCATTAGGAGT  
AGCACCCACCGAGGCAAGGAGAAGGGTGGTGCAAGAGAAAAAGAGCAGTGGGATTAGGAGCTGTGTTCCCTT  
GGGTTCTTGGGAGCAGCAGGAAGCACTATGGGCGCAGCATCAGTGATGCTGACGGTACAGGCCAGGCAATTAT  
TGTCTGGTATAGTGCAACAGCAGAACAATCTGCTGAGGGCTATTGAGGCGCAACAACATCTGTTGCAGCTCAC  
AGTCTGGGGCATC

>KR914676

TTCTACTGTAACACAACACCACTGTTTAATAGTAGTTGGTACAAGTCAAATTGGAAAAGTCAAAGGACAAAGG  
AGATTGGAGGAAGGGAGACAATCACACTCCAATGTAGAATAAAACAAATTGTAAACATGTGGCAGGAAGTAGG  
ACGAGCAATGTATGCCCTCCCATCAAAGGACAAATTAGATGTTTCATCAAAATATTACAGGGGTGCTATTAACA  
AGAGATGGTGGTAATACCACCAATCACTCCGAGATCTTCAGACCTGGAGGAGGAAATATGAAGGACAATTGGA  
GAAGTGAATTATATAAATATAAAGTAGTACAAATTGAACCATTAGGAATAGCACCCACCAAGGCAAAGAGAAG  
AGTGGTGCAGAGAGAAAAAGAGCAATAGGATTCGGAGCTGTGTTCCCTTGGGTTCTTGGGAGCAGCAGGAAGC  
ACTATGGGCGCAGCGTCAGTAACGCTGACGGTACAAGCCAGACAATTATTGTCTGGTATAGTGCAACAGCAGA  
GCAATTTGCTGAATGCTATTACAGGCGCAACAGCATCTGTTGCAACTCACAGTCTGGGGCATC

>FJ388899

TTCTACTGCAATACAACAGAACTGTTTAATAGTACTTGGAATAGTACTACTTGGAATAGTAATAGTACTACAA  
ATGCAAATGCAACAAATACAGCTAACCTAGTACTCCCATGCAGAATAAAACAGATTGTAAACATGTGGCAGAA  
AGTAGGAAAAGCAATGTATGCCCTCCCATCAAAGGAATAATTAGATGTTTCATCAAAATATTACAGGGATAATA  
TTAACAAGAGATGGTGGTAATAGTAATCAGACCAACACCACAGAGATTTTCAGACCTGTAGGAGGAAATATGA

AGGACAATTGGAGAAGTGAATTATATAAATATAAAGTAGTACAAATTGAACCATTAGGAGTAGCACCCACCAA  
GGCAAAAAGAAGAGTGGTGCAGAGAGAAAAAAGAGCAGTGACATTAGGAGCTATGTTCCCTTGGGTTCTTGGGA  
GCAGCAGGAAGCACTATGGGCGCAGCGTCAATAACGCTGACGGTACAGGCCAGACAATTACTGTCTGGTATAG  
TGCAACAGCAGAGCAATCTGCTGAGGGCTATTGAGGCGCAACAGCACCTGTTGCAACTCACAGTCTGGGGCAT  
C

>FJ388916

TTCTACTGTAATACAACAGGGCTGTATAATAGTACTTGGCAGTTTAAATAGTACTTGGAACTACTACTTGGAAATC  
ATACTGACCCTAATCATACTGACCCTATCACACTACCATGCAGAATAAGACAAATTGTAAACAGGTGGCAGGA  
AGTAGGAAAAGCAATGTATGCCCCCTCCCATCAGCGGACAAATTAGCTGTTTCATCAAACATTACAGGGCTACTA  
TTAACAAGAGATGGTGGTAGTAATGAGAGCAGAACCAACGAGACCTTTAGACCTGGAGGAGGAGATATGAGGG  
ACAATTGGAGAAGTGAATTATATAAATATAAAGTAGTAAGAATTCAACCATTAGGAATAGCACCCACCAAGGC  
AAAAAGAAGAGTGGTGCAGAGAGAAAAAAGAGCAGTGGGAACGCTGGGAGCTATGTTCCCTTGGGTTCTTGGGA  
GCAGCAGGAAGCACTATGGGCGCAGCGTCACTGACGCTGACGGTACAGGCCAGACAATTATTGACTGGTATAG  
TGCAACAGCAGACAATCTGCTGAGAGCTATTGAGGCGCAACAGCATATGTTGCAACTCACAGTCTGGGGCAT  
C

>JF683738

TTCTACTGTGATACTACAAAGCTGTTTAAATAGTACTTGGACTGGGAATGAAACTTGGACTGGGAATGAAACTG  
AAGAGTCAAATAATAGTACTATCACACTCCCATGCAGAATAAAACAAATTATAAACAGATGGCAGGAAGTAGG  
AAAAGCAATGTATGCCCCCTCCCATCAGAGGAGAAATTAAATGTACATCAAATATTACAGGGCTACTATTAACA  
AGAGATGGTGGTAATGGTAATGGGACTCAGAATCAGACCCGAGATCTTCAGACCTGGAGGAGGAGACATGAAGG  
ACAATTGGAGAAGTGAATTATATAAATATAAAGTAGTAAAAATTGAGCCATTAGGAATAGCACCTACCAAGGC  
AAAAAGAAGAGTGGTGCAGAGAGAAAAAAGAGCAATAGGACTGGGAGCTGTGTTTCATTGGGTTCTTGGGAGCA  
GCAGGAAGCACTATGGGCGCAGCGTCGGTGACGCTGACGGTACAGGCCAGACAGTTATTGTCTGGTATAGTGC  
AACAGCAAAACAATTTGCTAAAAGCTATTGAGGCGCAACAGCATCTGTTGCAACTCACAGTCTGGGGCATC

>JF683756

TTCTACTGTAATACATCAAAGCTGTTTAAATAGTACTTGGACTAATAGTAGTAGTACTTGGAAATAATACTGAAG  
AGTCAAATGACACTATCACACTCCCATGTAAAATAAAACAAATTATAAACATGTGGCAGGAAGTAGGAAGAGC  
AATGTATGCCCCCTCCCATCAGTGGGCAAATTAGGTGCTCATCAAATATTACAGGGCTACTATTAACAAGAGAT  
GGTGGTCATAACGGAACCAATAACGAGACCGAGATCTTCAGACCTGCAGGAGGAAATATGAAGGACAATTGGA  
GAAGTGAATTATATAAATATAAAGTAGTGAAAATTGAGCCATTAGGAGTAGCACCCACCAGGGCAAAAAGAAG  
AGTGGTGCAGAGAGAAAAAAGAGCAGTGGGAATGGGAGCTTTGCTCCTTGGGTTCTTGGGAGCAGCAGGAAGC  
ACTATGGGCGCAGCATCGGTGATGCTGACGGTACAGGCCAGACAATTATTGTCTGGTATAGTGCAACAGCAGA  
ACAATCTGCTGAGAGCTATTGAGGCGCAACAACATATGTTGCAACTCACAGTCTGGGGCATT

>JF683764

TTCTACTGTGATAACAACAACACTGTTTAAATAGTACTTGGTTTATGAATGGGACTAATACAACTACCCTTACCG  
CAAATGCCACAATCCCAAGCCGAATAAAACAAATTATACACAGGAGGCAGGAAGTAGGAAGAGCAATGTATGT  
CCCTGCCCTCAGAGGACCAATTACATGTATATCAAATATGACAGGGACGTTATTAACAAGAGATGGTGGTCAT  
AACAATGGCATTAAATGACATTGAGACCTTCAGACCAGGAGGAGGAGATATGAGGGACAATTGGAGAAGTGAAT  
TATATAAATATAAAGTAGTAAGAGTTGAACCATTAGGAATAGCACCCACCAGGGCAAGAGAAGAGTGGTGCA  
GAGAGAAAAAAGAGCAGCACTAGGAGCTATGTTCCCTTGGGTTCTTGGGAGCAGCAGGAAGCACTATGGGCGCA  
GCGTCAATAACGCTGACGGTACAGGCCAGACAATTGTTGTCTGGTATAGTGCAACAGCAAAACAATTTGCTGA  
GAGCTATTGAGGCGCAACAACACATGTTGCAACTCACAGTCTGGGGCATC

>JF683773

TTCTACTGTAATACATCACAACACTGTTTAAATAGTACTTGGACACCTAATGGTACTTGGACATTTAATGCTGCTA  
GTGGGGCTTCAGGATTCAAGGGCACTATCACACTCCCATGTAGAATAAAACAAATTATAAACATGTGGCAGGA  
AGTAGGAAAAGCAATGTATGCCCCCTCCCATCAGTGGACTAATTAGATGCTCATCAAATATTACAGGACTGCTA  
TTAACAAGAGATGGTGGTATAAACAATACCAATACCACCGAGATCTTCAGACCTGTAGGAGGAAATATGAAGG  
ACAATTGGAGAAGTGAATTATATAAATATAAAGTAGTACAAGTTGAACCAATAGGAATTGCACCCACCAAGGC  
AAAGAGAAGAGTGGTGCAGAGAGAAAAAAGAGCAGTTACACTAGGAGCTGTGTTCCCTTGGGTTCTTGGGAGCA  
GCAGGAAGCACTATGGGCGCAGCGTCAATGACGCTGACGGTACAGGCCAGGCAATTATTGTCTGGTATAGTGC  
AACAGCAGAACAATCTGCTGAGAGCTATTGAGGCGCAACAGCATCTGTTGCAACTCACAGTCTGGGGCATC

>JQ416158

TTCTACTGTAATACATCACAACACTGTTTAAATAGTATTTGGCCTTGGAAATAGTACTGCAAACAACACTGGAGGAA  
ATGACACAATCACACTCCCATGCAGGATAAGACAAATTGTAAATAGGTGGCAGGAAGTAGGAAAAGCAATGTA  
TGCCCCCTCCCATCAGTGGACAAATTAGATGTTTCATCAAATATTACAGGGCTGCTATTAACAAGAGATGGAGGT  
CAGACTAACAACCAGACTGGGAACCAGACCGAGATTTTCAGACCTGGAGGAGGAGATATAAAAGATAATTGGA  
GAAGTGAATTATACAAATATAAAGTAGTACAAATTGAACCATTAGGAGTAGCTCCCCTAAGGCAAGGAGAAG  
AGTGGTGCAGAGAGAAAAAAGAGCACTAACACTGGGAGCTGTGTTCCCTTGGGTTCTTGGGAACAGCAGGAAGC  
ACTATGGGCGCAGCGTCACTAACGCTGACGGTACAGGCCAGACAATTATTGTCTGGTATAGTGACAGCAGCAGA  
ACAATCTGCTGAGAGCTATTGAGGCGCAACAACATTTGTTGCAACTCACAGTCTGGGGCATC

>JQ403037

TTCTACTGTAATACAACACAGCTGTTTAAATAGTACTTGGAATAGTACTTGGACTTTGAATGATACTAGAGGGT  
CAAATAACACAAATGGAAGCTGGTTATATCATACTCCCATGCAGATTAAACAATTTATAAACATGTGGCAGAG  
AGTAGGAAAAGCAATGTATGCCCCCTCCCATCAGTGGACAAATTAAGTGTACATCACACATTACAGGGCTGCTA  
TTAACAAGAGATGGTGGTAATAACAATAGCGAACCCACCCAGATCTTCAGACCTGGAGGAGGAGATATGAGAG  
ACAATTGGAGAAGTGAATTATATAAAATATAAAGTAGTAAAAATTGAACCATTAGGAGTAGCACCCACAAAGGC  
AAAAAGAAGAGTGGTGCAGAGAGAAAAAAGAGCAGTAGGACTGGGAGCTATGTTCCCTTGGGTTCTTGGGAGCA  
GCAGGAAGCACTATGGGCGCAGCATCAGTGATGCTGACGGTACAGGCCAGACAGCTATTGTCTGGCATAGTGC  
AACAGCAAAACAATTTGCTGAGAGCTATTGAGGCGCAACAGCATCTGTTGCAACTCACAGTCTGGGGCATC

>KT124803

TTCTACTGTAATACAACAAGCCTGTTTAAATAGTACTTGGTATGCAAATGGTACAAATAGCACTTGGTCTGATG  
AGTCAGATGTTATCACACTTCCATGCAGAATAAGACAAAATTGTAAACATGTGGCAGGGGGTAGGAAAAGCAAT  
GTATGCCCCCTCCCATCAGAGGACAGATTAATTGTACATCAAATATTACAGGGCTAATATTAACAAGAGATGGT  
GGGAACAAGAATGGCACTAATGAGACCTATGAGACCTTCAGACCTGCAGGAGGAAAATATGAAGGACAATTGGA  
GAAGTGAATTATATAAAATATAAAGTAGTAAAGATTGAACCATTAGGAATAGCACCCACCAAGGCAAAGAGAAG  
AGTGGTGCAAAGAGAAAAAAGAGCAATAGGAATGGGAGCCTTGTTCCCTTGGGTTCTTGGGAGCAGCAGGAAGC  
ACTATGGGCGCAGCGTCAATGACGCTGACGGTACAGGCCAGACAGTTATTGTCTGGTATAGTGCAACAGCAAAA  
ACAATTTGCTGAGAGCTATTGAGGCGCAACAACACCTGTTGCAACTCACAGTCTGGGGCATC

>KT124751

TTCTACTGTAATACAACAACCACTGTTTAAATAGTACTTGCCGTTTAAATAGTACTTGGGATAGTACTGAAGGGT  
CAAATTACACTGTAGAAAATGAAAATATCACACTCCCATGCAGAATAAAACAAATTTGTAAACCTGTGGCAGGA  
AGTAGGAAAAGCAATGTATGCCCCCTCCCATCAAAGGACAAATTAGATGTTTCATCAAATATTACAGGGCTGCTA  
TTAACAAGAGATGGTGGCAATGCTGGCAATACTAGTAGCAAGAACGAGACCTTCAGACCTGGGGGAGGAAAATA  
TGAAGGACAATTGGAGAAGTGAATTATATAAAATATAAAGTAGTAAAAGTTGAACCATTAGGAATAGCACCCAC  
TAAGGCAAAAAGAAGAGTGGTGCAGAGAGAAAAAAGAGATTTGGGACTAGGAGCCTTGTTCCCTTGGGTTCTTG  
GGAGCAGCAGGAAGCACTATGGGCGCAGCGTCAGTAACGCTGACGGTACAGGCCAGACAATTATTGTCTGGTA  
TAGTGCAACAGCAGAACAAATTTGCTGAGGGCTATTGAGGCGCAACAGCATATGTTGCAACTCACAGTCTGGGG  
CATC

>KT124789

TTCTACTGTAATACAACAGAGCTGTTTAAACGGTACTTGGAATGGTACTTTCTTGAATGTTACTACAGGGCGAG  
AGAATATCACACTCCCATGCAGAATAAAACAGATTATAAACAGGTGGCAGGAAGTAGGAAAAGCAATGTACGC  
CCCTCCCATCAGAGGACCAATTAGATGCTCATCAAATATTACAGGGCTGATATTAACAAGAGATGGTGGTCAG  
AATGCGAGTGCAGACCAACGAAACCTTCAGACCGGGAGGAGGAGATATGAGGGACAATTGGAGAAGTGAATTAT  
ATAAATATAAAGTAGTAAAAATTGAGCCATTAGGAATAGCACCCACCAAGGCAAGGAGGAGAGTGGTGCAGAG  
AGAAAAAAGAGCAGTGACACTAGGAGCTATGTTCCCTTGGGTTCTTGGGAGCAGCAGGAAGCACTATGGGCGCA  
GCTTCATTGACGCTGACGGTACAGGCCAGACTATTATTGTCTGGTATAGTGCAACAGCAAAAACAATTGCTGA  
GGGCTATTGAGGCGCAGCAGCATCTGCTGCAACTCACAGTCTGGGGCATC

>KT124805

TTTTACTGTGATACAACACAACCTGTTCAACAGTACGTGGGATACAATAATACTGGGGGAGTGAATGATACTG  
ACGAGCCAATTACACTCCCATGCAGGATAAAACAATTTATAAACATGTGGCAGGAAGTAGGGAAAGCAATGTATG  
TGCCCCCTCCCATCCAAGGAATAATTCAGTGTTCATCAAATATTACAGGACTACTATTAACAAGAGATGGTGGT  
AAGACAGAGAACGGGACAGAGAATGTTACTGAGATCTTTAGACCTGGAGGAGGAGACATGAGGGACAATTGGA  
GAAGTGAATTATATAAAATATAAAGTAGTAAAAATTGAACCATTAGGAGTAGCACCCACCAGGGCAAAGAGAAG  
AGTGGTGCAGAGAGAAAAAAGAGCAGTGACACTGGGAGCTGTGTTCCCTTGGGTTCTTGGGAGCAGCCGGAAGC  
ACTATGGGCGCAGCGTCACTGACGCTGACGGTACAGGCCAGACAATTATTGTCTGGTATAGTGCAACAGCAGA  
ACAATTTGCTGAGAGCTATTGAGGCGCAACACCATCTGTTGCAACTCACAGTCTGGGGCATT

>KT124763

TTCTACTGTAATTTCATCGACACTGTTTAAATAGTACTTGGAATGAAACTATTGCAGGGATTACCAATGCAATG  
AAACTATCACACTCCCATGCAGAATAAGGCAATTATAAACATGTGGCAGGAAGTAGGAAAAGCAATGTATGC  
CCCTCCCATTAGTGGAATAATTAGATGTTTCATCAAATATTACAGGGCTGCTATTAACAAGAGATGGTGGTAAT  
AATGGTAAATCATAGCGAGAATAATACCATTGAGATCTTCAGACCTGGAGGAGGAGATATGAGGGATAATTGGA  
GAAGTGAATTATATAAAATATAAAGTAGTACAAATTGAACCAGTAGGAGTAGCACCTACCAAGGCAAAGAGAAG  
AGTGGTGCAGAGAGAAAAAAGAGCAGTGGGACTAGGAGCTTTGTTCCCTTGGGTTCTTGGGAGCAGCAGGAAGC  
ACTATGGGCGCAGCGTCAATAACGCTGACGGTACAGGCCAGACAATTATTGTCTGGTATAGTGCAACAGCAGA  
ACAATCTGCTGAGAGCTATTGAGGCGCAACAGCACCTGTTGCAACTCACAGTCTGGGGCATC

>KT124779

TTCTACTGTGATACAACACAACCTGTTTAAATAGTACTTGAGTAATGCTACTTGGAATGAGACTACAGGTTCAA  
ATGACACGATTACACTCCAATGTAAAATAAAACAAATTATAAACAGGTGGCAGGAAGTAGGAAAAGCAATGTATG  
TGCCCCCTCCCATCCGAGGACAAATAAAGTGTTTCATCAAATATTACAGGGTTGCTATTAACAAGAGATGGTGGT  
AACGAGACTAACGGGACCGAGGTCTTCAGACCTATAGGAGGAGATATGAAAGACAATTGGAGAAGTGAATTAT

ATAAATATAAAGTAGTTCAAATTGAACCATTAGGAATAGCACCCACCAAGGCCAAAGAGAAGAGTGGTGCAGAG  
AGAAAAAAGAGCGGTGACACTGGGAGCTATGTTCCCTTGGGTTCTTGGGAGCAGCGGGAAGCACTATGGGCGCA  
GCGTCAGTGGCGCTGACGGTACAGGCCAGACAATTATTGTCTGGTATAGTGCAACAGCAGAACAATATGCTGA  
GGGCTATTGAGGCACAACAGCATATGTTGCAACTCACAGTCTGGGGCATC

>KT124787

TTCTACTGTGATACAACACAGCTGTTTAATAGCAATAGCACTTGGCTGTTTAATAACACTTGGAAATAGTACTG  
AGAATAATAACTGAGAATAATAATATCACACTCCAGTGCAGAATAAGACAAATTGTAAACATGTGGCAGAA  
AGTAGGAAAAGCAATGTATGCCCCCTCCCATCAGAGGACAAATTTACTGTGCATCACAAATAACAGGGCTGCTA  
TTAACAAGAGATGGTGGTAGTAGTGATCAGAACAACACCGAGATCTTCAGACCTGCAGGAGGAAATATGAGGG  
ACAATTGGAGAAGTGAATTATATAAATATAAAGTAGTAAAAATTAAACCATTAGGAGTAGCACCCACCAAGGC  
AAAGAGAAGAGTGGTGCAGAGAGAAAAAAGAGCAGTAACGCTAGGAGCTATGTTCCCTTGGGTTCTTGGGAGCA  
GCGGGAAGCACTATGGGCGCAGCGGCAATGACGCTGACGGTACAGGCCAGACAATTATTGTCTGGTATAGTGC  
AACAGCAGAATAATCTGCTGAGAGCTATTGAGGCGCAACAGCATCTGTTGCAACTCACAGTCTGGGGCATC

>KC596067

TTCTACTGTAATACAACACAATTGTTTAAACAGTACTTGGAACTACTACTGAAGATTTAAATAAACTAGAACTG  
AAGTAAATGACACAATCACACTCCCATGTAGAATAAGACAAATTATAAACAGATGGCAGGAAGTGGGAAAAGC  
AATGTATGCCCCCTCCCATCAGCGGAAACATTAGTTGTTTCATCAAACATCACAGGGCTGCTATTAACAAGAGAT  
GGTGGTCAGAATAATGTGAGCAACACCACAGAGATCTTCAGACCTGGAGGAGGAGATATGAGGGACAATTGGA  
GAAGTGAATTATATAAATATAAAATAATAAAATCGAACCATTAGGAATAGCACCCACCAAGGCAAGGAGAAG  
AGTGGTGCAGAGAGAGAAAAAGAGCAGCACTAGGAGCTATGTTCCCTTGGGTTCTTAGGAGCAGCAGGAAGCACT  
ATGGGCGCAGCGTCAGTGACGCTGACGGTACAGGCCAGACAATTATTGTCTGGTATAGTGCAACAGCAAAGTA  
ACTTGCTGAAAGCTATTGAGGCGCAACAGCATCTGTTGCAACTCACAGTCTGGGGCATC

>EF514700

TTTTACTGTAATACGTCAAAACTGTTTGATAGTACCTGGAATGAACTAGTATTTGGAATTATACCACTACTA  
ATGATACCACAAAAATGACACACTCACACTCCCATGTAAAATAAAACAAATTATAAACATGTGGCAGGAAGT  
AGGAAAAGCAATGTATGCCCCCTCCCATCAGAGGACAAATCAGATGCTCATCAAATATTACAGGGCTGTTATTA  
ACAAGAGATGGTGGTCAGGGTAACGGGACCGATAACACCACCGAGATCTTCAGACCTGCAGGAGGAGATATGA  
GGGACAATTGGAGAAGTGAATTATATAAATATAAAGTAGTAAGAATTGAACCATTAGGAGTAGCACCCACCAA  
GGCAAAGAGAAGAGTGGTGCAGAGAGAAAAAAGAGCAGTGGGACTGGGAGCTTTGTTCCCTTGGGTTCTTGGGA  
ACAGCAGGAAGCACTATGGGCGCAGCATCTAACGCTGACGGTACAGGCCAGACAATTGTTGTCTGGTATAG  
TGCAACAGCAGAACAATCTGCTGAGAGCTATTGAGGCGCAACAACATCTGTTGCAACTCACAGTCTGGGGCAT  
T

>EU839598

TTCTACTGTAATACAACAAAACTGTTTAAACAATACTGGACAATTAGATAAAGAAGAAGATGAAGGAGAAGAAG  
GCAATATCACACTTCCATGCAGAATAAGGCAATTTCGTAAACAGGTGGCAAGAAGTAGGAAAAGCAATGTATGC  
CCCTCCCATCAGTGGACAAATTAGATGTTTCATCAAATATTACAGGGCTACTATTAACAAGAGATGGTGGTGGT  
AGTGGTAATAGTGAGAATGAGACCTTCAGACCTGGGGGAGGAGATATGAAAGACAATTGGAGAAGTGAGTTAT  
ATAAATATAAAGTAGTAAAAATTCAGCCATTAGGAATAGCACCCAGCAAGGCAAAGAGAAGAGTGGTGCAAAG  
AGAAAAAAGAGCAGTGACACTAGGAGCTATGTTCCCTTGGGTTCTTAGGAGCAGCAGGAAGCACTATGGGCGCA  
GCGTCAGTAACGCTGACGGTACAGGCCAGACTATTATTGTCTGGTATAGTGCAACAGCAGAACAATCTGCTGA  
GGGCTATTGAGGCGCAACAACATCTGTTGCAACTCACGGTCTGGGGCATC

>KC595164

TTCTACTGTAATTCAACAAAACTGTTTAAATAGTACTTGGAAATGGTACTGAAGGGTCAAATAACAGTGGCACAA  
GGGCAAATAACAGTCACATACTCACACTCCCATGCAGAATAAAACAAATTATAAACATGTGGCAGGAAGTAGG  
AAAAGCGATGTATGCCCCCTCCCATCAGAGGCCAAATTAGATGCTCATCAAATATTACAGGGTTGCTATTACA  
AGAGATGGTGGTAACAACAATAGCGGGACCGAGATCTTCAGACCTGGAGGAGGAGATATGAGGGACAATTGGA  
GAAGTGAATTATATAAATATAAAGTAGTAAAAATTGAACCATTAGGAGTAGCACCCACCAAGGCAAAGAGAAG  
AGTGGTGCAGAGAGAGAAAAAAGAGCAGTGGGAATAGGAGCTGTGTTCCCTTGGGTTCTTGGGAGCAGAGGGAGC  
ACTATGGGCGCAGCGTCAATGACGTTGACGGTACAGGCCAGACTATTATTGTCTGGTATAGTGCAACAGCAGA  
ACAATTTGCTGAGGGCTATTGAGGCGCAACAGCATCTGTTGCAACTCACAGTCTGGGGCATC

>KC595194

TTTTACTGTAATTCAACACAACCTGTTTAAACAGTGTGTTGGAAGGCTAACAGTACTTGGAAATAGTACTGAAGGGT  
CAAATAACAATGCAGGAAATATCACACTCCCATGCAGAATAAAACAAATTATAAACATGTGGCAGGAAGTAGG  
AAAAGCAATGTATGCCCCCTCCCATCAGAGGCCAAATTAGCTGTTTCATCAAATATTACAGGGCTACTATTAACA  
AGAGATGGTGGTAACATCACTAACGGGACCGAGATCTTCAGACCTGGAGGAGGAGATATGAGGGACAATTGGA  
GAAGTGAATTATATAAATATAAAGTAGTAAAAATTGAACCATTAGGAATAGCACCCACCAAGGCAAAGAGAAG  
AGTGGTGCAGAGAGAGAAAAAAGAGCAGTGGGAATAGGAGCTATGTTCCCTTGGGTTCTTGGGAGCAGCAGGAAGC  
ACTATGGGCGCGCGTCAATGACGTTGACGGTACAGGCCAGACTATTATTGTCTGGTATAGTGCAACAGCAGA  
ACAATTTGCTAAGGGCTATTGAGGCGCAACATCATCTGTTGCAACTCACAGTCTGGGGCATC

>KC595151

TTCTACTGTGATACAACAAAATTGTTTAAATAGTACTTGGGATATTAATGATACTTGGAATGGTACTAACGGGC  
CAGATAACACTATCATACTCCCATGCAGAATAAAACAAATTATAAACATGTGGCAGGAAGTAGGAAAAGCAAT  
GTATGCCCTCCCATCAGAGGACGAATTAGGTGTGAATCAAATATTACAGGGCTGCTATTAACAAGAGATGGT  
GGTGATGATAGCAGTAACCAGACCGAGATCTTCAGACCTGGAGGAGGAGATATGAGGGACAATTGGAGAAGTG  
AATTATATAAATATAAAGTAGTAAAAATTCAACCATTAGGAATAGCACCCAACAAGGCAAAGAGAAGAGTGGT  
GCAGAGAGAAAAAGAGCAGTGGGAATAGGAGCTTTGTTCCCTTGGGTTCTTGGGAGCAGCAGGAAGCACTATG  
GGCGCAGCGTCAATGACGTTGACGGTACAGGCCAGACAATTATTGTCTGGTATAGTGCAACAGCAGAACATC  
TGCTGAGGGCTATTGAGGCGCAACAGCATCTGTTGCAACTCACAGTCTGGGGCATC

>KT200350

TTCTACTGTAATTTAACAAAACCTGTTTAAATAGTACCTGGAATATGAATGCTACCACAGGGAACCTGGACTTATA  
TTAAAGGGACAGATTACACTGAAGGAAACATCACACTCCCATGCAAAATAAAACAGATTATAAACATGTGGCA  
GGAAGTAGGAAAAGCAATGTATGCCCTCCCATCAGTGGACAAATTAGATGTTTCATCAAATATTACAGGGCTG  
ATAATAACAAGAGATGGTGGTATTAATAATACTACCAACGAGACCATCGAGACCTTCAGACCTGGAGGAGGAG  
ATATGAGGGACAATTGGAGAAGTGAATTATATAAATATAAAGTAGTAAGAATTGAACCATTAGGAATAGCACC  
CACCAAGGCAAAGAGAAGAGTGGTGCAGAGAGAGAAAAAGAGCAATAGGATTTGGAGCTTTGTTCCCTTGGGTTT  
TTGGGAGCAGCAGGAAGCACTATGGGCGCAGCGTCACTGACGCTGACGGTACAGGCCAGACAATTATTGTCTG  
GTATAGTGCAACAGCAGAACAAATTGCTGAGGGCTATTGAGGCGCAGCAGCATATGTTGCAACTCACAGTCTG  
GGGCATC

>EU786679

TTCTACTGTAATACAACACAGCTGTTTAAATAGTACTTGGGGTATGAATACGACTAAAGGGACAAATACCACTG  
AAGGAGATATCATACTCCCATGCAGAATAAAACAAATTATAAACATGTGGCAGGAAGTAGGAAAAGCAATGTA  
TGCCCCCTCCCATCAGCGGGCCAATTACATGTACATCAAAATATTACAGGGCTGCTACTAACAAGAGATGGGGGT  
CAGAGCAAGAACGAAAGTAACGAGACAGAGATCTTCAGACCAGGAGGAGGAGACATGAAGGACAATTGGAGAA  
GTGAATTATATAAATATAAAGTAGTAAAAATTGAACCATTAGGAATAGCACCCACCAAGGCAAAAAGAAGAGT  
GGTGC AAAGAGAAAAAAGAGCAGTGGGACTAGGAGCTGTGTTCCCTTGGGTTCTTGGGAGCAGCAGGAAGCACT  
ATGGGCGCAGCGTCAATAACGCTGACGGTACAGGCCAGACAATTATTGTCTGGTATAGTGCAACAGCAGAACAA  
ACTTGCTGAGGGCTATTGATGCGCAACAGCATATGTTGCAGCTCACAGTCTGGGGCATC

>KC473841

TTCTACTGTAATACATCACAACCTGTTTAGTAGTACTTGGAAATAACTGTAGGGTTAAATACTACAGGAAATG  
ATACTATCACACTCCACTGCAGAATAAGACAAATTATAAACCTGTGGCAGAGAGTAGGAAAAGCAATGTATGC  
CCCTCCCATTAGAGGACAAATTAGTTGTTTCATCAAAATATTACAGGGTTGCTATTAACAAGAGATGGTGGTAAC  
AACAAATCAGAGCAATAACACCGAAATCTTCAGACCTGGAGGAGGAGATATGAGGGACAATTGGAGAAGTGAAT  
TATATAAATATAAAGTAGTAAGAATTGAACCACTAGGAGTAGCACCCACCAAGGCAAAGAGAAGAGTGGTGCA  
GAGAGAAAAAAGAGCAGTGGGACTAGGAGCTGTGCTCTTTGGGTTCTTGGGAGCAGCAGGAAGCACTATGGGC  
GCAGCGTCAGTGACGCTGACGGTACAGGCCAGACAATTATTGTCTGGTATAGTGCAACAGCAAAATAATTTGC  
TGAAAGCTATTGAGGCGCAACAGCATCTGTTGCAACTCACAGTCTGGGGCATC

>KT200357

TTCTACTGTAATACAACACAGCTGTTCAATAGTACTTGGGAGCCAGGGAAGAATACTACTACAGAGGGAAATG  
ACACTATCACGCTCCCATGCAGAATAAAACAGATTATAAACAGGTGGCAGGAAGTAGGAAAAGCAATGTATGC  
CCCTCCCATCAGAGGACGAATTAATTGTACATCAAATATTACAGGGCTGTTATTAACAAGAGATGGTGGTAAC  
AATAATAACCAGACAAATAGGACAGAGACCTTTAGACCTCAAGGAGGGAATATGAAGGACAATTGGAGAAGTG  
AATTATATAAATATAAAGTAGTACAAGTTGAGCCATTAGGAATAGCACCCACCAAGGCAAGGAGAAGAGTGGT  
GCAGAGAGAAAAAAGAGCAGTGGGACTAGGAGCTGTGTTCCCTTGGGTTCTTAGGAGCAGCAGGAAGCACTATG  
GGCGCAGCGTCAATAACGCTGACGGTACAGGCCAGACAATTGTTGTCTGGTATAGTGCAACAGCAGAACCAAC  
TGCTGAGGGCTATTGAAGCGCAACAACATATGTTGCAGCTCACAGTCTGGGGCATC

>KP109518

TTCTACTGTAATACAACACAACCTGTTTAAATAGTACCTGGAATGATACTAGTATTAGTGAAAGGTCAAATACTA  
CTAAAAACATCACGCTTCCATGCAGAATAAAACAAATTATAAACATGTGGCAAGAAGTAGGGAAAGCAATGTA  
TGCCCCCTCCCATCCAGGACCAATTCAATGTAGATCAAATATTACAGGGATATTATTAACAAGAGATGGTGGT  
AATACTAGTGATAGCCAGAATGAAACCTTCAGACCTGGAGGAGGAAATATGAAGGACAATTGGAGAAGTGAAT  
TATATAAATATAAAGTAGTAGAAATTGAACCATTAGGAGTGGCACCCACAGGGCAAGGAGAAGAGTGGTGCA  
GAGAGAAAAAAGAGCAGTGGGAGTAGTAGGAGCTATGTTCCCTTGGGTTCTTGGGAGCAGCAGGAAGCACTATG  
GGCGCAGCGTCAATGACGTTGACGGTACAGGCCAGACTATTACTGTCTGGTATAGTGCAACAGCAGCAGAACATC  
TGCTGAGAGCTATTGAAGCGCAACAGCATCTGTTGCAGCTCACAGTCTGGGGCATC

>KY465969

TTCTACTGTAATACAACACAGCTGTTTAAATAGCACTTGGAAATAAACTGTAGTTGAGAATAATAATTATGGTT  
CTGAGAATGGTACTATCACACTCCAGTGCAGAATAAGACAAATTGTAAACAGGTGGCAGGAAGTAGGAAAAGC  
AATGTATGCCCTCCCATCAGAGGAGTAATTAACCTGTTTCATCAAGTATTACAGGGCTGTTATTAACAAGGGAT  
GGTGGTAATAGTAAGAACACCAACAGGTCATCTGAGATCTTCAGACCTGGAGGAGGAGATATGAGGGACAATT  
GGAGAAGTGAATTATACAAATATAAAGTAGTAAAGATTGAACCATTAGGAGTAGCACCCACCAAGGCAAAGAG

GAGAGTGGTGCAGAGAGAAAAAGAGCAGTGGGAGCATTAGGAGCTATGTTCCCTTGGGTTCCTTGGGAACAGCA  
GGAAGCACTATGGGCGCAGCGTCACTGACGCTGACGGTACAAGCCAGACAACCTATTGTCTGGTATAGTGCAAC  
AGCAGAACAACTCTGCTGCAGGCTATCGAGGCGCAACATCATCTGTTGCAACTCACCGTCTGGGGCATC

>KC595204

TTCTACTGTAACCAACACAGCTGTTTAAATAGTACTTGGGAATAGTACTGGGAATCAGAATAATATTGAAGGGT  
TAAATGACACAATCACACTCCCATGCAGAATAAAACAAATTATAAACATGTGGCAGGAAGTAGGAAGAGCAAT  
GTATGCCCTCCCATTAGAGGACAAATTAGATGTTTCATCAAATATTACAGGGCTGTTATTAACAAGAGATGGT  
GGTCATAACACGACAGAGACCGAGATCTTCAGACCTGGAGGAGGAGATATGAGGGACAATTGGAGAAGTGAAT  
TATATAAATATAAAGTAGTAAAAATTGAACCATTAGGAGTAGCACCCACCAGAGCAAAGAGAAGAGTGGTGCA  
GAGAGAAAAAGAGCAGTGGGAATAGGAGCTGTGTTCCCTTGGGTTCCTTGGGAGCAGCAGGAAGCACTATGGGC  
GCAGCGTCAGTGACGCTGACGGTACAGGCCAGACTATTATTGTCTGGTATAGTGCAACAGCAGAATAATTTGC  
TGAAGGCTATTGAGGCGCAACAGCATCTGTTGCAACTCACAGTCTGGGGCATC

>DQ141342

TTCTACTGTAATACAACACAACCTGTTTAAATAGTACTTGGCCTAAGAATGGTACCAGCGAGTTAAATACCACTG  
ACCCATTTCATACTCCCATGTAAAAATAAAACAAATTATAAACATGTGGCAGAAAAGTAGGAAAAGCAATGTATGC  
CCCTCCCATCCGTGGACAGATTAGATGCTCATCAAATATTACAGGGCTGCTATTACCAAGAGATGGTGGTAAC  
AACAACAATGGTAGTAACAACCGCAGTCCTGAGATCTTCAGACCTGGAGGAGGAGATATGAGGGATAATTGGA  
GAAGTGAATTATACAAATATAAAGTAGTAAAAATTCAACCATTAGGAGTAGCACCCACCAAGGCAAAGAGAAG  
AGCGGTGCATAGAGACAAAAGAGCAGTGGGACTCGGAGCTGTGTTCCCTTGGATTCTTGGGAGCAGCAGGAAGC  
ACTATGGGCGCAGCGTCACTGACGTTGACGGTACAGGCCAGACAATTATTGTCTGGTATAGTGCAACAGCAAAA  
ACAACCTTGCTGAGGGCTATTGAGGCGCAACAGCATCTGTTGCAACTCACAGTCTGGGGCATC

>DQ141343

TTCTACTGTGATACATCACAACCTATTTAAATAGTACTTGGGAATAGTAGTACTTTGAATAATTTTACTAACGGGT  
CAAATATACTAATGAAACTTTTCACTCCCATGCAGAATAAAACAAATTATAAACATGTGGCAGGAAGTAGG  
AAAAGCAATGTATGCCCTCCTATCAGAGGAGTAATTAACCTGTTTATCAAATATTACAGGGCTGCTATTAAACA  
AGAGATGGTGGTAATAATCATAGTGACACCAATCAGGAGATCTTCAGGCCTGCAGGAGGAGATATGAGGGACA  
ATTGGAGAGGTGAATTATATAAGTATAAAGTAGTAAGAGTAGAACCATTAGGGATAGCACCCACCAAGGCAAAA  
GAGAAGAGTGGTGCAGAGAGAAAAAGAGCAGTGGGACTAGGAGCTTTGTTCCCTTGGGTTCCTTGGGAGCAGCA  
GGAAGCACTATGGGCGCAGCATCAATGACGCTGACGGTACAGGCCAGACAATTATTGTCTGGTATAGTGCAAC  
AGCAGAACAACTTGCTGAGGGCTATTGAGGCGCAACAGCATATGTTGCAACTCACAGTCTGGGGCATC

>DQ448819

TTCTACTGTAATACAACACAACCTGTTTAAATAGTACTTGGTATGCTAGTAATAATACTTGAAGGGTACTAACA  
TTACAGGCAATATCACACTCCCATGCAAAATAAAACAAATTATAAACATGTGGCAGGAAGTAGGAAAAGCAAT  
GTATGCCCTCCCATCAGAGGACAAATTAGATGCTCATCAAATATTACAGGGTTACTATTAACAAGAGATGGG  
GGTCAGGGAACAACACCGACAACGACACTGAGATCTTCAGACCTGGAGGAGGAAATATGAGGGACAATTGGA  
GAAGTGAATTATATAAATATAAAGTAGTAAGAATTGAACCATTAGGACTAGCACCCACCAGGGCAAAGAGAAG  
AGTGGTGCAGAGAGAGAAAAAGAGCAGTGGGACTAGGAGCGTTGTTTCATTGGGTTCCTTGGGAGCAGCAGGAAGC  
ACTATGGGCGCAGCGTCAGTGACGTTGACGGTACAGGCCAGACAATTACTGTCTGGTATAGTGCAACAGCAGA  
ATAATTTGCTGATGGCTATTGAGGCGCAACAGCATATGTTGAAACTCACGGTCTGGGGCATT

>EF531331

TTTTACTGTAATACAACACAACCTATTTAAATAGTACTTGGGAATATAACAAATCTGTTTAAATAGTACTTGGGAATA  
GTACTGAAGGGTCAAATAACACTAAAAGAAATGGCACAATCATACACCCATGCAGAATAAAACAGATTATAAAA  
CATGTGGCAGAAAGTAGGAAAAGCAATGTATGCCCTCCCATCGAAGGAATAATTAGATGTGAATCAAAAATT  
ACAGGGATGATACTAACAAGAGATGGTGGTCTTGGTCGTAACATTAGCAACGAGACCGAGATCTTCAGACCTG  
GAGGAGGAGATATGAGGGACAATTGGAGAAGTGAATTGTATAAATATAAAGTAGTAAAAATAGAACCCTTAGG  
AATAGCACCCCTCCAAGGCAAAGAGAAGAGTGGTGCAGAGAGAAAAAGAGCAATAGGATTCCGAGCTATGTTTC  
CTTGGGTTCCTTGGGAGCAGCAGGAAGCACTATGGGCGCAGCGTCACTAACGCTGACGGTACAGGCCAGACAAT  
TACTGTCTGGTATAGTGCAACAGCAGAACAAATTTGCTGAGGGCTATTGAGGCGCAACATCATCTGTTGCAACT  
CACAGTCTGGGGCATC

>MH000288

TTCTATTGTAATACAACACAACCTGTTTGATAGTACTTGGGAATGATACTACAGACACAATCACACTCCCATGCA  
AAATAAGACAAATTGTAACTTGTGGCAGGAAGTAGGAAAAGCAATGTATGCCCTCCCATCAGTGAATAAT  
TCAGTGATACATCAAATATTATAGGGTTGCTATTAAACAAGAGACGGTGGTACCGAAATCTTCAGACCAGGAGGA  
GGAGATATGAGGGACAATTGGAGAAGTGAATTATATAAATATAAAGTAGTACAAGTTGAACCATTAGGAATAG  
CACCCACCAAGGCAAAGAGAAGAGTGGTGCAGAGAGAAAAAGAGCAGTGGGAACGCTAGGAGCTGTATTTCCT  
CGGGTTCTTGGGAGCAGCAGGAAGCACTATGGGCGCAGCGTCAACAGCGCTGACGGTACAGGCCAGACAATTA  
TTGTCTGGTATAGTGCAACAGCAGAACAACTCTGCTGAAGGCTATTGAGGCGCAACAGCATTTGTTGCAGCTCA  
CAGTCTGGGGCATC

>KC699040

TTCTATTGTGATACAGCACAACTGTTTAAATAGTACTTGGCCTAAGAATAGCACCAGTAGCACCAATAGCACCG  
GTAAAGGGGGGCCAACAACTATCACACTCCCATGCAGAATAAGACAAATTGTAAACATGTGGCAGGAAGTAGG  
AAAAGCAATGTATGCTCCTCCCATCAGCGGAAACATCACATGTTTCATCAAATATTACAGGGCTGCTATTAACA  
AGAGATGGGGGTAATAAGAATGAGACGACCAACAGGACTCAGACCTTCAGACCTATAGGAGGAGATATGAGGG  
ACAATTGGAGAAGTGAATTATATAAATATAAAGTAGTAAAAATTGAACCATTAGGAATAGCACCCACCAAGGC  
AAAGAGAAGAGTGGTGCAGAGAGAAAAAAGAGCAGTGGGAGTAGGAGCTTTGTTCCCTTGGGTTCTTGGGAGCA  
GCAGGAAGCACTATGGGCGCAGCGTCAGTGACGTTGACGGTACAAGCCAGACAATTATTGTCTGGTATAGTGC  
AACAGCAGAACAATCTGCTGAGAGCTATTGAGGCGCAACAGCATATGTTGCAACTCACAGTCTGGGGCATC

>KC699032

TTTTACTGTAATACAACACAGCTGTTTAAATAGTACTTGGAAATGCTAATGGTACTAGTCGGGATGGTACTACAG  
GGAATGATACTATCACAAATCCAATGCAGAATAAAGCAAATTATAAACAGGTGGCAGGAGGTAGGAAAAGCAAT  
GTATGCCCTCCCATCCAAGGACAAATTTACTGTTTCATCAAATATTACAGGGCTTCTATTAACAAGAGATGGG  
GGTAATGACAATAACACTAGCACTAATGAGACCTTCAGACCTGCAGGAGGAAAATATGAAGGACAATTGGAGAA  
GTGAATTATATAAATATAAAGTAGTAAAAATTGAGCCATTAGGACTGGCACCCACCAGGGCAAGGAGAAGAGT  
GGTGCAGAGAGAAAAAAGAGCAGTGGGACTAGGAGCTATGTTCCCTTGGGTTCTTGGGAGCAGCAGGAAGCACT  
ATGGGCGCAGCGTCATTGACGCTGACGGTACAGGCCAGGCAATTATTGTCTGGTATAGTGCAACAGCAAAAAA  
ATTTGCTAAGAGCTATTGAGGCGCAACAGCATATGTTGCAACTCACAGTCTGGGGCATC

>KC699037

TTTTATTGTAATACATCACAACTGTTTAAATAGTAGTTGGACCAATTACACTAATGGTACTTGGGACAATGACA  
CCATAATAGATAACACTACCACTGGAGTAAATATCACACTCCCATGCAGAATAAAAACAAATTATAAACATGTG  
GCAGAAAGTAGGAAAAGCCATGTATGCCCTCCCATCAGAGGACTAATTCAATGTACATCAAATATTACAGGA  
ATACTATTAACAAGAGATGGAGGTAATAGGAATGAGAGCAATGGCAAAGCAATGAGACCTTCAGACCTGTAG  
GGGGAGATATGAGGGACAATTGGAGAAGTGAATTATATAAATATAAAGTAGTAAAAATTAAACCATTAGGAAT  
AGCACCCACCAGGGCAAAGAGAAGAGTGGTACAGAGAGAAAAAAGAGCAGTGGGAACGTTGGGAGCCATGTTT  
CTTGGGTTCTTGGGAGCAGCAGGAAGCACTATGGGCGCAGCGTCACTAACGCTGACGGTACAAGCCAGACAAT  
TATTGTCTGGTATAGTGCAACAGCAAAGCAATTTGCTGAGGGCTATTGAGGCGCAGCAGCACATGTTGCAACT  
CACAGTCTGGGGCATT

>MH000292

TTCTATTGTAACACAACACAGCTATTTAAATAGTACTTGGATGCCTAATGGTGGCACTATCACACTCCCATGCA  
GAATAAAACAAATTATAAACAGGTGGCAGGAAGTAGGAAAAGCAATGTATGCCCTCCCATTAGTGGACAAAT  
TAACTGCTCATCAAACATTACAGGGTTACTATTAATAAGAGATGGTGGTAACGAGACCTTCAGACCTGGAGGA  
GGAAATATGAAAGACAATTGGAGAAGTGAATTATATAAATATAAAGTAGTACAAATTCAGCCATTAGGAGTAG  
CACCCACCAAGGCAAAGAGAAGAGTGGTGCAGAGAGAAAAAAGAGCAGTGGGAACGCTAGGAGCTATGTTCCCT  
TGGGTTCTTGGGAGCAGCAGGAAGCACTATGGGCGCAGCGTCAGTGACGCTGACGGTACAGGCCAGACAATTA  
TTGTCTGGTATAGTGCAACAGCAAAACAACCTTGCTGAAAGCTATTGAGGCGCAACACCATCTGTTGCAACTCA  
CAGTCTGGGGCATT

>KC699006

TTCTACTGTAATACAACACAACCTGTTTAAATAGTACTTGGAAATAGTACTTGGGATATTAATAGTACTATAGAGT  
CAAATAACACTGGAGAATATATCACACTCCCATGTAGAATAAAACAAATTATAAACATGTGGCAGGAAGTAGG  
AAAAGCAATGTATGCCCCCTCCCATCAAAGGACAAATTAGATGTTTCATCAAACATTACAGGGCTGCTATTAACA  
AGAGATGGTGGTAATAACAATAGTAGCAACACCACCGAGACCTTCAGACCTGGAGGAGGAGATATGAGGGACA  
ATTGGAGAAGTGAATTATATAAATATAAAGTAGTAAAAATTGAACCATTAGGAGTAGCACCCACCAAGGCAAA  
GAGAAGAGTGGTGCAGAGAGAAAAAAGAGCAGTGGGAATAGGAGCCGTGTTCCCTTGGGTTCTTGGGAGCAGCA  
GGAAGCACTATGGGCGCAGCGTCAATAACGCTGACGGTACAAGCCAGACTATTATTGTCTGGTATAGTGCAAC  
AGCAGAACAATCTGCTGAGGGCCATTGAGGCGCAACATCATCTGTTGCAACTCACAGTCTGGGGCATC

>KC699007

TTCTACTGTAATTCAACACAACCTGTTTAAATAGTACTTGGAGTGAAGGGTCAAATAACACTGAAGGAAATAACA  
CTGAAGGAAATGACACAATCACACTCCCATGCAGAATAAAACAAATTATAAACATGTGGCAGAACGTAGGAAA  
AGCAATGTATGCCCCCTCCCATCAGCGGACAAATTAGATGTTTCATCAAATATTACAGGGCTGATATTAACAAGA  
GATGGTGGTAATAACCCAAACGGGACCGAGATCTTCAGACCTGGAGGAGGAGATATGAGGGACAATTGGAGAA  
GTGAATTATATAAATATAAAGTAGTAAAAATTGAACCATTAGGAGTAGCACCTACCAAGGCAAAGAGAAGAGT  
GGTGCAGAGAGAAAAAAGAGCAGCGGGACTAGGAGCTGTGTTCCCTTGGGTTCTTGGGAGCAGCAGGAAGCACT  
ATGGGCGCAGCGTCAATAACGCTGACGGTACAGGCCAGACGATTATTGTCTGGTATAGTGCAACAGCAGAACA  
ATTTGCTGAGGGCTATTGAGGCGCAACATCATCTATTGCAACTCACAGTCTGGGGCATC

>KC699025

TTCTACTGTAATACAACAAAACTGTTTAAATAGTACTTGGAAAGGAAAATGGCACCATTTGAAGACGATGGTACAA  
AGGATACTAACATCACACTCCCATGCAAAATAAAACAAATTATAAACAGGTGGCAGGCAGTAGGAAAAGCAAT  
GTATGCCCTCCCATCAGAGGACAAATTAAATGTACATCAAATATTACAGGGTTGCTGTTAGTAAGAGATGGT  
GGTCATAACACTGACAACGAGACCTTCAGACCTGGAGGGGGAGACATGAAGGACAATTGGAGAAGTGAAGTAT  
ATAAATATAAAGTAGTAAAAAGTTGAACCATTAGGAATAGCACCCACCAAGGCAAAGAGAAGAGTGGTGCAGAG

AGACAAAAGAGCAGTGGGAACACTAGGAGCAATGTTCTTGGGTTCTTGGGAACAGCAGGAAGCACTATGGGC  
GCAGCGTCAGTGGCGCTGACGGTACAGGCCAGACAATTACTGTCTGGTATAGTGCAACAGCAAAACAATTTGC  
TGAAGGCTATTGAGGCGCAACAGCATCTGTTGCAACTCACAGTCTGGGGCATC

>JF706474

TTCTACTGTAATTCAGCACCACTGTTTAATAGTACTTGGAATAGTATTGAGGGTAGTACTGAGGGTAAGAATG  
AAAGCAGTGGAGGAAATATCACACTCCCTATGTAGAATAAAACAAATTATAAACATGTGGCAGGAAGTAGGAAA  
AGCAATGTATGCCCCCTCTATCAGAGGAGTAATTCATGCTCATCAAATATTACAGGGCTGCTATTAACAAGA  
GATGGTGGTAGTGGTAATAGTAGCAATGAGAACGAGACCGAGACCTTCAGACCTGGGGGGGGAAATATGAAGG  
ACAATTGGAGAAGTGAATTATATAAAATATAAAGTAGTACAAATTGAACCATTAGGAATAGCACCCACCAAGGC  
AAAGAGAAGAGTGGTGCAGAGAGAAAAAAGAGCGGTGGGAACACTAGGAGCTGTGTTCTTGGGTTCTTGGGA  
GCAGCAGGAAGCACTATGGGCGCAGCGTCGGTAACGCTGACGGTACAGGCCAGACAATTATTGTCTGGTATAG  
TGCAACAGCAGAACAATTTGCTGAAGGCTATTGAGGCGCAACAGCATCTGTTGCAACTCACAGTCTGGGGCAT  
C

>HM204630

TTCTACTGTAATACAACAAAACTGTTTAATAGTACTTGGGGGAATAATACTGCAGGACAAGGTAATAACACTA  
TCACACTCCCATGCAGAATAAAACAAATTATAAACTTGTGGCAGGAAGTAGGAAAAGCAATGTATGCCCCCTCC  
CATTAGTGGACACATTTACTGTTTCATCAAATATTACAGGGCTACTATTAACAAGAGATGGTGGTACTACCAAC  
ATAACCAATGAACTGAGATCTTCAGACCTGGAGGGGGAGATATGAGGGACAATTGGAGAAGTGAATTATATA  
AATATAAAGTAGTAAAAGTTGAACCATTAGGAATAGCACCCACCAAGGCGAAGAGAAGAGTGGTGCAGAGAGA  
AAAAAGAGCAGTGGGAATAGGAGCTGTGTTCTTGGGTTCTTGGGAGCAGCAGGAAGCACTATGGGCGCAGCG  
TCACTGACGCTGACGGTACAGGCCAGACAATTATTGTCTGGTATAGTGCAACAGCAGAACAATTTGCTGAGAG  
CTATTGAGGCGCAACAGCATCTGTTGCAACTCACAGTCTGGGGCATC

>HM204631

TTTTACTGTAATTCATCACAACCTGTTTAATAGTACTTGGAATGCCACTAGTACTGGGAATAACAGTATAGGGT  
TAAATGGCACTATCACACTCCCATGTAAAATAAAACAGATTATAAACAGGTGGCAGGAAGTAGGAAGAGCAAT  
GTATGCCCCCTCCCATTCAGGAATAATTAGATGTGAATCAAATATTACAGGGCTACTGTTAACAAGAGATGGT  
GGTAATATAACTAGTAATGGGAACGAGACCTTCAGACCCATAGGAGGAAATATGAAGGACAATTGGAGAAGTG  
AACTCTATAAATATAAAGTAGTACAAATTGAACCCTTAGGAATAGCACCCACCAAGGCAAAGAGAAGAGTGGT  
GCAGAGAGAAAAAAGAGCAGTGGGAACAATAGGAGCTATGTTCTTGGGTTCTTGGGAGCAGCAGGAAGCACT  
ATGGGCGCAGCGTCGGTGGCGCTGACGGTACAGGCCAGACAATTATTGTCTGGTATAGTGACGAGCAGCAGAACA  
ACCTGCTGAGGGCTATTGAGGCGCAACAGCACATGTTGCAACTCACAGTCTGGGGCATC

>HM204636

TTCTATTGTAAAACAACAGAGCTGTTTAATAGTACTTGCCAGGGAATAGTACTGTGAATAATGCTACAGAAT  
CAAATGACAATGACACTATCACACTCCCATGCAGAATAAAACAAATTATAAACAGGTGGCAGGAAGTAGGAAA  
AGCAATGTATGCCCCCTCCCATCCAAGGAACATTAGCTGTTTCATCAAACATTACAGGACTGCTATTAACAAGA  
GATGGTGGTAAAGATCATAACTCCACCGAGACCTTTAGACCTGGAGGAGGAGATATGAGAGACAATTGGAGAA  
GTGAATTATACAAATATAAAGTAGTAAGAATTGAGCCATTAGGAGTAGCACCCACCAAGGCAAGGAGAAGAGT  
GGTGCAGAGAGAAAAAAGAGCAGCACTGGGAGCTGTGTTCTTGGATTCTTGGGAGCAGCAGGAAGCACTATG  
GGCGCAGCGTCAGTGGCGCTGACGGTACAGGCCAGACAATTATTGTCTGGTATAGTGCAACAGCAAAACAATT  
TGCTGAGGGCTATTGAGGCGCAACAACATCTGTTGCAACTCACAGTCTGGGGCATC

>HM204637

TTCTACTGTAATACAACACAGTTGTTTAATAATACACAGTGGGTTAATAGTAATAGTACAAATAGCAATGACA  
CCATCACACTCCCATGCAGAATAAAACAAATTATAAACAGATGGCAGGAAGTAGGAAAAGCAATGTATGCCCC  
TCCCATCGCGGGACAAATTCAGTGTTCATCAAATATTACAGGGCTAATATTAAACAAGAGATGGTGGTAATAAA  
AATGACACCAACGGGACTGAGACTTTCAGGCCTGGAGGAGGAGATATGAGGGACAATTGGAGAAGTGAATTAT  
ATAAATATAAAGTAGTAAAAATTGAACCATTAGGAATAGCACCCACCAAGGCAAGGAGAAGAGTGGTGCAGAG  
AGAAAAAAGAGCAGTAACCTTAGGAGCTATGTTCTTGGGTTCTTGGGAGCAGCAGGAAGCACTATGGGCGCA  
GCGTCAATGACGCTGACGGTACAAGCCAGACAATTATTGTCTGGTATAGTGCAACAGCAAAACAATTTGCTGA  
GAGCTATTGAGGCGCAACAGCACCTGTTGCAACTCACAGTCTGGGGCATC

>HM204644

TTCTACTGCAACACATCAAACTGTTTAATAGTAGTTGGAGTACTAATGGAACATTGTTAAATGGAACGTGGG  
TAAATGAGACTAGAATAAATGACACAATCATACTCCCATGCAAAATAAAACAAATTATAAACATGTGGCAGAA  
AGTAGGAAAAGCAATGTATGCTCCCCCATCCAAGGAATAATTAACTGCTCATCAAATATTACAGGACTGCTA  
TTAACAAGAGATGGTGGTCATAATCAAAATAGCACCAATGACACAGAGACCTTCAGACCAGGAGGAGGAGATA  
TGAGGGACAATTGGAGAAGTGAATTATATAAATATAAAGTAGTAAGAATTGAACCATTAGGAATAGCACCCAC  
CAAGGCAAAGAGAAGAGTGGTGCAGAGAGAAAAAAGAGCAGTGGGATTTCGAGCTATGTTCTTGGGTTCTTG  
GGAGCAGCAGGAAGCACTATGGGCGCAGCGTCAATAACGCTGACGGTACAGGCCAGACAATTGCTGTCTGGTA  
TAGTGCAACAGCAAAACAATTTGCTGAGGGCTATTGAGGCGCAACAGCATATGTTGCAACTCACAGTCTGGGG  
CATC

>JF680923

TTCTACTGTAACACAACAAAACACTGTTTAAATAGTACCTGGGAGAATAATAGTACTTGGGGGAATAATACTACAG  
GTACTATCACACTCCCATGCAGAATAAAACAAATTGTAAACATGTGGCAAGAAGTAGGAAAAGCAATGTATGC  
CCCTCCCATCCAAGGACAAATTAGATGCTCATCAAATATTACAGGACTGTTATTAACAAGAGATGGTGGTAAT  
AATAATAGCACAAATCAGAGCGAGACCTTCAGACCTGGAGGAGGAAATATGAAGGACAATTGGAGAAGTGAAT  
TATATAAATATAAAGTAGTAAAAATTGAGCCATTAGGAATAGCACCCACCAGGGCAAAAAGAAGAGTGGTGCA  
GAGAGAAAAAAGAGCAGCCATAGGAGCTGTGTTCTTGGGTTCTTGGGAGCAGCAGGAAGCACTATGGGCGCA  
GCGTCAGTGACGCTGACGGTACAGGCCAGACAATTATTGTCTGGTATAGTGCAACAGCAGAACAAATTTGCTGA  
AGGCTATTGATGCGCAACAGCATCTGTTGCAGCTCACAGTCTGGGGCATC

>JF680924

TTCTACTGCAATACAACATTACTGTTCAATAGTGATTGGTATCCTAATGATACTAGCACAGGTACTCCAGGGT  
CAGATGGGAATGACTCACTCATACTCCCATGCAGAATAAGACAAATTGTAAACATGTGGCAGGAAGTAGGAAA  
AGCAATGTATGCTCCTCCCATCAAAGGACAAATTAGGTGTCATTCAAATATTACAGGGATACTACTAACAAGA  
GATGGTGGGATTGACAACAACAGGACTAATGAGACCTTTAGACCTGGAGGAGGAGATATGAGGGACAATTGGA  
GAAGTGAATTATATAAATATAAAGTAGTAAAACTTGAACCATTAGGATTAGCACCCACCAAGGCAAAGAGAAG  
AGTGGTGCAGAGAGAAAAAAGAGCAGTGGGACTAGGAGCTATGTTCTTGGGTTCTTGGGAGCAGCAGGAAGC  
ACTATGGGCGCAGCGTCAATGACGCTGACGGTACAGGCCAGACAATTATTGTCTGGTATAGTGCAACAGCAGA  
ACAATCTGCTGAAGGCTATTGAGGCGCAACAGCATATGTTGCAACTCACAGTCTGGGGCATC

>JF680933

TTCTATTGCAATACAACACAACACTGTTTAACTACTTGGAAATATTACTAATAATATTAATGTTACTAGGAATG  
ATAGTGACAACAGCATTATCACACTCCCATGCAGAATAAAACAAATTATAAACATGTGGCAGGAAGTAGGAAA  
AGCAATGTACGCCCTCCCATCAGAGGACAGATTAGATGTTTCATCAAAAATTACAGGGCTACTATTAACAAGA  
GATGGTGGTAATACAAGCATTGCGAACGGGTCTGAGATCTTCAGACCTGGAGGAGGAAATATGAAGGACAATT  
GGAGAAGTGAATTATACAAATATAAAGTAGTAAAGTTCAACCATTAGGAATAGCACCCACCAAGGCAAAAAG  
AAGAGTGGTCCAGAGAGAAAAAAGAGCAATAACACTAGGAGCTGTTTCTTGGGTTCTTGGGAGCAGCAGGA  
AGCACTATGGGCGCAGCGTCAATAACGCTGACGGTACAGGCCAGACAATTATTGTCTGGTATAGTGACAGCAGC  
AGAGCAACTTGCTGAGGGCTATTGAGGCGCAACAACATATGTTGCAACTCACAGTCTGGGGCATC

>HQ595797

TTCTACTGTAATTCAACACAACACTGTTTATAGTAGTACTTGGATGGCTAATGGTACTTCAAATGGTACCGTAGGGA  
ATGACACTATCATACTCCCATGTAAAATAAAACAATTTGTAAACATGTGGCAGCGAATAGGACAAGCAGTGTA  
TGCCCCCTCCCATTAGAGGATACATTAATTGTTTCATCAAATATTACAGGACTGCTATTAACAATAGATGGTGAC  
AGGAATGACACCCAGAGTGAGACCTTCAGACCTGGAGGAGGAGATATGAGGGACAATTGGAGAAGTGAATTAT  
ATAAATATAAAGTAGTAAAAATTGAACCATTAGGAATAGCACCCACTAAGGCAAAGAGAAGAGTGGTGCAGAG  
AGAAAAAAGAGCAGTAACGCTGGGAGCTATGTTCTTGGATTCTTGGGAGCAGCAGGAAGCACTATGGGCGCA  
GCGTCAATGACGCTGACGGTACAGGCCAGACTATTACTGTCTGGTATAGTGCAACAGCAGAGCAATCTGCTGA  
GGGCTATTGAGGCGCAACAGCATCTGTTGCAACTTACAGTCTGGGGCATC

>AJ535611

TTCTACTGTAATACAACACAGCTGTTTAAATAGTACTTGGAAATATTACACAGCTGTTGAATAGTACTGAGTCAA  
ATAACACTGGCAATATCACACTCCCATGCAGAATAAGACAAATTGTAAACAGGTGGCAGGAAGTAGGAAAAGC  
AATGTATGCCCCCTCCCATCAGCGGACAAATTAGTTGTTTCATCAAATATTACAGGGTTGCTATTAACAAGAGAT  
GGAGGTAACAGTAGCTACAATGAGACCGAGACCTTCAGACCAGGAGGAGGAAATATGAGGGACAATTGGAGAA  
GTGAATTATATAAATATAAAGTAGTAAGAATTGAACCAATAGGAGTAGCACCCACCAGGGCAAAGAGAAGAGT  
GGTACAGAGAGAAAAAAGAGCAATAACGCTGGGAGCTGTGCTCCTTGGGTTCTTGGGAGCAGCAGGAAGCACT  
ATGGGCGCAGCGTCAATAACGCTGACGGTACAGGCCAGACAGTTATTGTCTGGTATAGTGACAGCAGCAGAAC  
ATCTGCTGAGGGCTATTGAGGCGCAACAGCACCTGTTGCAACTCACAGTCTGGGGCATC

>AJ286339

TTCTACTGTAGTACAACAGAACTGTTTAAATGACACTTGGGATAAGACTAGGAATAATACTGGAGAGGCAGATA  
ACAGCACAATCACACTCCCCTGCAGAATAAAACAAATTATAACAAGTGGCAAGAAGTAGGAAAAGCAATGTA  
TGCCCCCTCCCATCAGAGGACAAATTAAGTGTACATCAAATATTACAGGGCTAGTCTTAACAAGAGATGGTGGT  
AATGAGACTCATAATGAGACTGAGATCTTCAGACCTGGAGGAGGAGATATGAGGGACAATTGGAGAAGTGAAT  
TATACAAATATAAAGTAGTAAAAATTGAGCCATTAGGAGTAGCACCCACCAAGGCAAAGAGAAGAGTGGTGCA  
GAGAGAAAAAAGAGCAGTGGGAACAATAGGAGCTATGTTCTTGGGTTCTTGGGAGCAGCAGGAAGCACTATG  
GGCGCAGCGCAATGACGCTGACGGTACAGGCCAGACAATTATTGTCTGGTATAGTGACAGCAGCAGAACATC  
TGCTGAAGGCTATTGAGGCGCAACAGCATCTGTTGCAACTCACAGTCTGGGGCATC

>DQ207942

TTCTATTGTAATACAACACAGCTGTTTAAATAACTTGGCTGAATAATGATACTGGGAATAGCACTAAGAATA  
ATGCTACAATCACACTCCCGTGCAGAATAAAACAAATTATAAACAGATGGCAGGAAGTAGGAAAAGCAATGTA  
TGCCCCCTCCCATCAGAGGACTAATTAGATGTTCTCAAATATTACAGGGCTACTATTAGTAAGAGATGGTGGT  
AATAGTAGTGCTGATCAGGAGATCTTCAGACCTGGGGGAGGAAATATAAAGGACAATTGGAGAAGTGAATAT  
ATAAATATAAAGTAGTAAAACTTGAAGCATTAGGAGTAGCACCCACCAAGGCAAAGAGAAGAGTGGTGCAGAG  
AGAAAAAAGAGCAGTGGGAGTGTGTTGGAGCCATGTTCTTGGGTTCTTGGGAGCAGCAGGAAGCACTATGGGC

GCAGCGTCAATAACGCTGACGGTACAGGCCAGACAATTATTGTCTGGTATAGTGCAACAGCAGAGCAATTTGC  
TGAGAGCTATTGAGGCGCAACAGCATCTGTTGCAACTCACAGTCTGGGGCATT

>MH078546

TTCTACTGTGATTCAACACAACCTGTTCAATAGTACTTGGTGGACTAATGGTACTGAGAACGGTACTAGAGGGGA  
CAATTGGCACCATCACACTCCAATGCAGAATAAAACAAATTATAAACATGTGGCAGAAAATAGGAAAAGCAAT  
GTATGCCCTCCCATCAAAGGACAAATTTATTGTTTCATCAAATATTACAGGGATAATATTAACAAGAGATGGT  
GGTAGGGACAATAATACTAATGGCACTGAGACCTTCAGACCTGGAGGAGGAAATATGAAAGACAATTGGAGAA  
ATGAATTATATAAATATAAAGTAGTAAACTTAAGCCATTAGGAATAGCACCCACCAAGGCACGGAGAAGAGT  
GGTGCAAAGAGAAAAAAGAGCAGTGGGAATAGGAGCTCTGTTCCCTTGGGTTCTTGGGAGCAGCAGGAAGCACT  
ATGGGCGCAGCGTCAGTGACGTTGACGGTACAGGCCAGACAATTGTTGTCTGGTATAGTGCAACAGCAACACA  
ACTTGCTGAATGCTATTGAGGCGCAACAACACCTGTTGCAACTCACAGTCTGGGGCATC

>EU839600

TTCTACTGTAATACATCAAAGCTATTTAACAATACTTGAATACTACTAATACTAAGAATTGGACTGGTTTTTA  
TCATACTCCCATGCAGAATAAAACAAATTATAAATATGTGGCAAAAAGTAGGCAAAAGCAATGTATGCCCTCC  
CATCAGGGGACAAATCAAATGTATATCAGCTATTACAGGGATGCTATTAACAAGAGATGGTGGGAACAACAAC  
GAGAAATAAGACTGTAGGGAATAGGACCGAGATCTTCAGACCTACAGGAGGAAATATGAAAGATAATTGGAGAA  
GTGAATTATACAGCTATAAAGTAGTAAAAATTGAACCATTAGGATTAGCACCCACCAGGGCGAAAAGAAGAGT  
GGTGCAAGAGAGAAAAAAGAGCAGTGGGAGCACTGGGAGCTATGTTCCCTTGGGTTCTTGGGAGCAGCAGGAAGC  
ACTATGGGCGCAGCGTCATTGACGCTGACGGTACAGGCCAGACAATTACTGTCTGGTATAGTGCAACAGCAAAA  
ATAATTTGCTAAGGGCTATTGAGGCGCAACAGCATCTGTTGCAACTCACAGTCTGGGGCATC

>MK303349

TTCTACTGTGATACAACAGAACTGTTTAATAGTACTTGAATAATAGTGTGGAGGGTTAAATAACAGTAACA  
GTAATACTATCACACTCCCATGTAGAATAAAACAAATGGTAAACATGTGGCAGAGAGTAGGAAGAGCAATGTA  
TGCCCCCTCCCATCAAAGGACTAATTAGCTGTTTCATCAGATATTACAGGGCTGCTATTAACAAGAGATGGTGGT  
AACTATAGTGATAACAGTAATAACACTGAGACCTTCAGACCAGGAGGAGGAGATATGAAAGACAATTGGAGAA  
GTGAATTATATAAATATAAAGTAGTAGAAATTAAACCACTAGGAGTAGCGCCACCAAGGCAAAAAGAAGAGT  
GGTGCAAAGAGAGAAAAAAGAGCAGTGGGAATAGGAGCCTTGTTCCCTTGGGTTCTTGGGAGCAGCAGGAAGCACT  
ATGGGCGCAGCGTCAATAACGCTGACGGCACAGGCCAGACAATTATTGTCTGGTATAGTGCAACAGCAGAAACA  
ATCTGCTGAGGGCTATTGAGGCGCAACAGCAGCTATTGCAACTCACAGTCTGGGGCATC

>EF694037

TTCTACTGTATTACAACACAACCTGTTTAATAGTACTTGGTGGAAATGATACTGAAAGGATAAATAACATTGAAG  
AAAACACAGAAAATATCACACTCCCATGCAGAATAAGGCAGATTGTAAACCTGTGGCAGACAGTAGGAAAAGC  
AATGTATGCCCTCCCATCAGAGGACAAATTAGATGTTTCATCAAATATTACGGGGCTGCTATTAACAAGAGAT  
GGTGGTAATCCCAATACCACGGAAGAGAGCTTCAGACCTGGAGGAGGAGATATGAGGGACTATTGGAGAAGTG  
AATTATATAAATATAAAGTAGTAAAAATTGAACCATTAGGAGTAGCACCCACCAAGGCAAAGAGAAGAGTGGT  
GCAAAGAGAGAAAAAAGAGCAGTAGGAATAGGAGCTGTGTTCCCTTGGGTTCTTGGGAGTAGCAGGAAGCACTATG  
GGCGCAGCGTCAATGACGCTGACGGTACAGGCCAGACTATTATTGTCTGGTATAGTGCAACAGCAGAAATAACC  
TGCTGAGGGCTATTGAGGCGCAACAGCATCTGTTGCAACTCACAGCCTGGGGCATC

>JF680930

TTCTATTGTAATACAACGAACTGTTTAGCAGTAGTTGGAATGAACTACAAATAGCACTGAAAATGGCACTG  
AAAATGACACAATCACACTTCAATGCAGAATAAAACAAATTATAAACATGTGGCAGGAAGTAGGAAAAGCAAT  
GTATGCCCTCCCATCAAAGGTCCAATTAGATGCTCATCAAATATTACAGGGCTAATATTAACAAGAGATGGT  
GGTCATAACAATAACACGAACGAGACTGAGATATTACAGACCTGGAGGAGGAGATATGAGGGACAATTGGAGAA  
GTGAATTATACAAATATAAAGTAGTAAGAATTGAACCTTGGGAGTAGCACCCACCAAGGCAAAGAGAAGAGT  
GGTGCAAGAGAGATAAAAGAGCAGTGGGAGTATTCGGAGCTATGTTCCCTTGGGTTCTTGGGAGCAGCAGGAAGC  
ACTATGGGCGCAGCGTCAGTGGCGTTGACGGTACAGGCCAGACAATTATTGTCTGGTATAGTGCAACAGCAGAA  
ATAATCTGCTGAGAGCTATTGAGGCGCAACAACATCTGTTGCAACTCACAGTCTGGGGCATC

>AB287372

TTCTACTGTAATTCAACACCACTGTTTAGTAGTAATTGGACTAAGAATACTACTACCGGGTCTTGGATTGGCA  
GATATGGATCAAATGAGACTGATGCAAATATTACACTCATATGCAGAATAAAACAAATTATAAACATGTGGCA  
GGGGGTAGGAAAAGCAATGTATGCCCTCCCATCAGTGGACCAATCAGATGTTTCATCAAATATTACAGGGCTG  
CTATTAACAAGAGATGGTGGTGAGGATAAGAACAGCACTAAAGAGACCTTCAGACCCCTAGGAGGAAATATGA  
AAGACAATTGGAGAAGTGAATTATATCAATATAAAGTAGTAGGAATTGAACCATTAGGAGTAGCACCCACCAA  
GGCAAGGAGAAGAGTGGTGCAGAGAGAAAAAAGAGCAGTGGGAACGCTGGGAGCTATGTTCCCTTGGGTTCTTGG  
GAGCAGCAGGAAGCACTATGGGCGCAGCGTCAATGGCGCTGACGGTACAGGCCAGACAATTATTGTCTGGTA  
TAGTGCAACAGCAGAAACAATTTGCTGAGGGCTATTGAGGCGCAACAACATTTGTTGCAACTCACAGTCTGGGG  
CATC

>AB480693

TTCTACTGCAATACATCACAACCTGTTTAATAGTATTTGGATTAAATGGTACTGGGAATAATACTTGAATAGTA  
CTAAGGGTCATGAAAGGTCAGATAACATTACCACACTCCAATGTAGAATAAAACAAATTATAAACATGTGGCA

GACAGTAGGAAAAGCAATGTATGCCCCCTCCCATTTGAAGGACGAATTAGATGTTTCATCAAAAATTACAGGGGCTC  
TTATTAGTGAGAGATGGTGGTACGAATAGGACGGCCAACAACGAAACCTTCAGACCTGGAGGAGGAAATATGA  
GGGACAAATTGGAGAAGTGAATTATATAAATATAAAGTAGTAAAAATTGAACCAATAGGAGTAGCACCCACCGA  
GGCAAAGAGAAGAGTGGTGCAGAGAGAGAAAAGAGCAGTAGGAATAGGAGCTGTGTTCCCTTGGGTTCTTGGA  
GCAGCAGGAAGCACTATGGGCGCAGCGTCAGTGACGCTGACGGTACAGGCCAGACAATTATTGTCTGGTATAG  
TGCAACAGCAAAACAATTTGCTGAGAGCCATTGAGGCGCAACAGCATATGTTGCAACTCACAGTCTGGGGCAT  
C

>AB588264

TTCTACTGCAATACATCACAACTGTTTAATAGTACTTGGAATAGTACTGGGAATAGTAGTACTGAGAATAGTA  
TGTCAAATGACACTATCACACTCCCATGTAGGATAAAAACAAATTATAAATATGTGGCAGGAAGTAGGAAAAAGC  
AATGTATGCCCCCTCCCATCGCAGGACTAATTAGATGTTTCATCAAATATTACAGGGCTATTATTAGTGAGAGAT  
GGTGGTGGTAATCAGACTAACGGGACAGAAATCTTCAGACCTGGGGGAGGAAATATGAAGGACAATTGGAGAA  
GTGAATTATATAAATATAAAGTAGTAAAAATTGAACCAGTAGGAATAGCACCCGACAGGGCAAAGAGAAGAGT  
GGTGCAGAGAGAAAAAAGGGCAGTGGGAATAGGAGCTGTGTTCCCTTGGGTTCTTGAGGAGCAGCAGGAAGCACT  
ATGGGCGCAGCGTCAATAACGCTGACGGCACAGGCCAGACAATTATTGTCTGGTATAGTGCAACAGCAGAACAA  
ATCTGCTGAGGGCCATTGAGGCGCAACAGCATATGTTGCAACTCACAGTCTGGGGCATC

>AB731669

TTCTACTGTAATACATCAGCACTGTTTAATTGGAGTATTACTGGGTCAAATATTACAAAAGACATTAATAGGT  
CAAATACTATCCCATGCAGAATAAAACAAATTATCAACATGTGGCAGAAAGTAGGAAAAGCAATATATGCCCC  
TCCCATCAGCGGGCAAATTAATTGTTTCATCAAATATTACAGGGTTGCTATTAACAAGAGATGGTGGTAAAAAGT  
AATCAGACTAATAACACTGAGGTTTTTCAGACCTACAGGAGGAAATATGAGAGATAATTGGAGGAGTGAATTAT  
ATAAATATAAAGTAGTAAGGATTGAACCATTAGGAGTAGCACCCACCAAGGCAAGGAGAAGAGTGGTGCAAAG  
AGAAAAAAGAGCAGTGGGAACAATAGGAGCTATGTTCCCTTGGGTTCTTGAGGAGCAGCAGGAAGCACTATGGGC  
GCAGCGTCAATAACGCTGACGGTACAAGCCAGACTATTATTGTCTGGTATAGTGCAACAGCAAAACAATTTGC  
TGAGAGCTATTGAGGCGCAACAACATCTGTTGCAACTCACAGTCTGGGGCATC

>AB565496

TTCTACTGCAATACAAGACAACCTGTTTAATAGTACTTGGAATGATAGTACTAGGAATA  
GTATTCATGACGAGAATATCACACTCCCATGTAGAATAAAACAAATTATAAACATGTGGCAAACAGTGGGAAA  
AGCAATGTATGCCCCCTCCCATCAAAGGACAAATTAGATGTTTCATCAAATATTACAGGGCTATTATTAGAGAGA  
GATGGTGGTAACAATACGGACACCGAAACCTTCAGACCTGGAGGAGGAAATATGAAGGACAATTGGAGAAGTG  
AATTATATAAATATAAAGTAGTAAAAATTGAACCAGTAGGAATAGCACCCACCAGGGCAAAGAGAAGAGTGGT  
GCAGAGAGAAAAAAGAGCAGTGGGAATAGGAGCTGTGTTCCCTTGGGTTCTTGAGGAGCAGCAGGAAGCACTATG  
GGCGCAGCGTCAATAACGCTGACGGTACAGGCCAGACAATTATTGTCTGGTATAGTGCAACAGCAGAACAAAT  
TGCTGAGAGCTATTGAGGCGCAACAACATATGTTGCAACTCACAGTCTGGGGCATC

>AB565478

TTCTACTGTAATACAACAAAGCTGTTTAATAGTACTTGGTATACTAATGGGAATAAGACTGAAGAATCAAATA  
ACAATGACACTATTACACTCCCATGCAGAATAAAACAAATTATAAACAGATGGCAGGAAGTAGGAAAAGCAAT  
GTATGCCCCCTCCCATCCAAGGACGAATTTACTGCTCATCAAATATTACAGGACTGTTATTAATAAGAGATGGT  
GGTAACAGTACTGATAACGAGTCTGAGATCTTCAGACCTGGAGGAGGAGATATGAGGGACAATTGGAGAAGTG  
AATTATATAAATATAAAGTAGTACAAATTGAGCCATTAGGAGTAGCACCCACCAAGGCAAAGAGAAGGGTGGT  
GCAGAGAGAAAAAAGAGCAGTGGGAATAGGAGCTATGTTCCCTTGGGTTCTTGAGGAGCAGCAGGAAGCACTATG  
GGCGCAGCGTCACTAACGCTGACGGTACAGGCCAGACGATTATTGTCTGGTATAGTGCAACAGCAGAACAAATC  
TGCTGAGAGCTATTGAGGCGCAACAGCATATGTTGCAACTCACAGTCTGGGGCATC

>JQ316131

TTCTACTGTAATACATCAAAGCTGTTTAATAGTACTTGCGTGTGAATATGACTAACGGGTCAAATATAACTA  
AAGAAGGAAATACCACAACAATCCCATGCAGAATAAAACAAATTATAAACAGGTGGCAGGAAGTAGGAAAAGC  
AATGTATGCCCCCTCCCATCGAGGGACAAATTAGATGTACATCAAATATTACAGGGCTACTATTAAACAAGAGAT  
GGGGGGACTCAGAAAAATGGGAGTAACAATGGGACTCACACAACACTGAGATCTTCAGACCTGGGGGAGGAA  
ATATGAAGGACAATTGGAGAAGTGAATTATATAAATATAAAGTAGTAAAAATTGAGCCATTAGGAATAGCACC  
CACCAAGGCAAGGAGAAGAGTGGTGCAGAGAGAAAAAAGAGCAGTGGGAACAATAGGAGCTATGTTCCCTTGGG  
TTCTTGGGAACAGCAGGAAGCACTATGGGCGCAGCGTCACTGACGGTACAGGCCAGACTATTATTGT  
CTGGTATAGTGCAACAGCAAAATAATTTGCTGAGAGCTATTGAGGCGCAACAGCATCTGTTGCAACTCACAGT  
CTGGGGCATC

>JQ316133

TTCTACTGTAATACAACAAAACCTGTTTGATAGTACTTGGAATGGTACTAAAGAGTGGGAATGATACTAAAGAGT  
CAGATAAAAACATTACACTCCAATGCAGAATAAAACAAATTATAAACAGGTGGCAGGAAGTAGGACAAGCAAT  
GTATGCCCCCTCCCATCAGCGGACTAATTAGATGTTTCGTCAAATATTACAGGGCTAATATTAAACAAGAGACGGG  
GGGGCTAACGAGACTCACACCAACACTGAAACCTTCAGACCTGCAGGAGGAGATATGAAGGACAATTGGAGAA  
GTGAATTATATAAATATAAAGTAGTAAGAATTGAGCCATTAGGGATAGCACCCACCAAGGCAAGGAGAAGAGT  
GGTGCAGAGAGAAAAAAGAGCAGTGGGAATATTAGGAGCTATGTTCCCTTGGGTTCTTGAGGAGCAGCAGGAAGC

ACTATGGGCGCAGCGTCAATGACGCTGACGGTACAGGCCAGACAATTATTGTCTGGTATAGTGCAACAGCAGA  
ATAATTTGCTGAGAGCTATTGATGCGCAACAACATCTGTTGCGACTCACAGTCTGGGGCATT

>DQ295192

TTCTACTGTGATACAACACAACACTATTTAATAGCACTTGGACATGGAATGGTACTTGGATTAACGGGTCAACTA  
AAGCTGAGAATGACACAATTGTCTCTCCCATGCAGAATAAAACAAATTATAAACAGATGGCAGGAAGTAGGAAA  
AGCAATGTATGCCCCCTCCCATCAGCGGACACATTAATTGCTCATCAAAGATTACAGGACTGCTATTAACAAGA  
GATGGGGGGATTAAAAACAGCACGAACGGGACTCAGACTGAGATCTTCAGACCTGGGGGAGGAGATATGAGGG  
ACAATTGGAGAAGTGAATTATATAAATATAAAGTAGTAAAAATTGAGCCATTAGGGATAGCACCCACCAAGGC  
AAGGAGAAGAGTGGTGCAGAGAGAAAAAGAGCAGTGGGAACAATAGGAGCTATGTTCTTGGGTTCTTGGGA  
GCAGCAGGAAGCACTATGGGCGCAGCGTCACTGACGCTGACGGTACAGGCCAGACTACTATTGTCTGGTATAG  
TGCAACAGCAGAATAATTTGCTGAGAGCTATTGAGGCGCAACAGCATCTGTTGCAACTCACAGTCTGGGGCAT  
C

>KT878039

TTCTACTGTAATACAACAAAACTGTTTAATAGTACTTGGTATAGTAATGGTACTAGGAAAGATCAAAATGAAG  
GAGATGACACAATTACACTCCAGTGCAGGATAAAACAAAATTATAAACAGGTGGCAAGAAGTAGGAAGGGCAAT  
GTACGCCCCCTCCCATCAGAGGAATAATTAAATGTTTCATCAAACATTACAGGGCTGCTATTAACAAGAGATGGG  
GGGAACGGGACTAATGGGACTGAGACCTTCAGACCTGGGGGAGGAAATATGAAAGACAATTGGAGAAGCGAAT  
TATATAAATATAAAGTAGTAAAAATTGAGCCATTAGGGATAGCACCCACCAAGGCAAGGAGAAGAGTGGTGCA  
GAGAGAAAAAAGAGCAGTGGGGACGCTAGGAGCTGTGTTCTTGGGTTCTTGGGAGCAGCAGGAAGCACTATG  
GGCGCAGCGTCAGTGGCGCTGACGGGACAGGCCAGACAATTATTGTCTGGTATAGTGCAACAGCAGAATAATT  
TGCTGAGAGCTATTGAGGCGCAACAGCATCTGTTTCAACTCACAGTCTGGGGCATC

>KT878021

TTCTACTGTAATACAACACAGTTGTTCAATAGTACTTGGTTTCATAATGGTACTTGGAGTGGTGCTAATGGGG  
ATGAGACTATGACACTCCCATGCAGAATAAAACAAATTATAAACAGATGGCAAGAAGTAGGAAAAGCAATGTA  
TGCCCCCTCCCATCGCAGGATCAATTAATTGCTCATCAAATATTACAGGACTGTTATTAACAAGAGATGGTGGT  
ATTACCAGCAACAAGACTAAGAACAGCACCGAGACTGAGACCTTTAGACCGGGGGGAGGAGATATGAGGGACA  
ATTGGAGAAGTGAATTATACAAATATAAAGTAGTAAAAATTGAACCACTAGGAGTAGCACCAACCAAGGCAAA  
GAGAAGAGTGGTGCGGAGAGAAAAAAGAGCAGTAACACTGGGAGCTGTGTTCTTGGGTTCTTGGGAGCAGCA  
GGAAGCACTATGGGCGCAGCGTCAGTGACGCTGACGGTACAGGCCAGACTATTATTGTCTGGTATAGTGCAAGC  
AGCAGAACAATCTGCTGAGGGCTATTTCAGGCGCAACAGCATCTGTTGCAGCTCACAGTCTGGGGCATT

>KT878029

TTCTACTGTAATACAACAAGACTGTTTAATAGTACTTGGCATACTAATACTACAGGGTTAAATGAAACTGAAG  
GAAATAGCACAACTATCACACTCCCATGCAGAATAAAACAAATTATAAACAGATGGCAGGAAGTAGGAACAGC  
AATGTATGCCCCCTCCCATCAGCGGACAAATTAGATGTTTCATCAAATATTACAGGGCTGCTATTAACAAGAGAT  
GGGGGGAATAACACTCATGGGAATGGGACTGAGATCTTCAGACCTCTGGGAGGAGATATGAAGGACAATTGGA  
GAAGTGAATTATATAAATATAAAGTAGTGAGAATTGAGCCATTAGGGATAGCACCCACCAGGGCAAGGAGAAG  
AGTGGTGACAGAGAGAAAAAAGAGCAGTGGGAACGATAGGAGCTATGTTCTTGGGTTCTTGGGAGCAGCAGGA  
AGCACTATGGGCGCAGCGTCATTGACGCTGACGGTACAGGCCAGACTATTATTGTCTGGTATAGTGCAACAGC  
AGAATAATTTGCTGAGAGCTATTGAGGCGCAACAGCATCTGTTGCAACTCACAGTCTGGGGCATC

>KF561441

TTCTACTGTAATACAACACCACTGTTTAATAGTATTTGGTATAGTAATAATACTGAAAAGTCATATAATACTG  
CAGAAAATGACACAATTACCTCCAATGCAGAATAAAGACAAATTATAAAAAGGTGGCAGGAGGTAGGAAAAGC  
AAGGTATGCCCCCTCTCATCACCTGCCTAATTAGATGCTATTCAAATATTACAGGGCTGTTATTGGCAGGTGAT  
GGAGGTGAGGCAGGGAAGGATAACGGGAATAAGAATGAGACCTTCAGGCCTGGGGGAGGAGATATGAGGGACA  
ATTGGAGAAGTGAATTGTATAAATATAAAGTAGTAGAAATTGAACCATTAAAGGATAGCACCCACCAGGGCAAG  
GAGAATAGTGGTGACAGAGAGAAAAAAGAGCAGTGGGAACATTAGGAGCCATGTTCTTGGGTTCTTGGGAGCA  
GCAGGAAGCACTATGGGCGCAGCGTCACTGACGCTGACGGTACAGGCCAAGCAAGTATTGTCTGGTATAGTGC  
GACAGCAGAATAATTTGCTGAGAGCTATTGAGGCGCAACAGCGTCTGTTGCAACTCACAGTCTGGGGCATC

>MN043577

TTCTACTGTAATACAACACAACACTGTTTAATAGTACTTGGTATAGTCCTTGGGAATAGTACTAACGGGTCAATA  
TAACTGAAAGAAATATCAACAACCTCCCATGCAGAATAAAACAAATTATAAACAGATGGCAGGAAGTAGGAAA  
AGCAATGTATGCCCCCTCCCATCAGTGGACAAATTAGATGTTTCATCAAATATTACAGGGCTGCTATTAACAAGA  
GATGGGGGGACTCAGAACATGGGACTGAGATCTTCAGACCTGGGGGAGGAAATATGAAGGACAATTGGAGAA  
GTGAATTATATAAATATAAAGTAGTAAAAATTGAGCCATTAGGGATAGCACCCACCGGGGCAAAGAGAAGAGT  
GGTGCAGAGAGAAAAAAGAGTGGGAACGATAGGAGCTATGTTCTTGGGTTCTTGGGAGCAGCAGGAAGCACT  
ATGGGCGTAGCGTCAATGACGCTGACGGTACAGGCCAGACTATTATTGTCTGGTATAGTGCAACAGCAGAATA  
ATTTGCTGAGAGCTATTGAGGCGCAACAGCATCTGTTGCAACTCACAGTCTGGGGCATC

>MN043581

TTCTACTGTAATACAACACAACACTGTTTAATAGTACTTGGATGATTACTAATAAATTGCAATAGTACTGAAGGAT  
ACAATAACACTGCACGAAATAGCACAAATTACCTCCCATGCAGAATAAAACAAATTATAAACAGGTGGCAGGA

AGTAGGAAAAGCAATGTATGCCCCCTCCCATCAGAGGACAAATTAGATGTTTCATCAAATATTACAGGGCTACTA  
TCAACAAGAGATGGGGGGACTGGGAACAACGAGACTGAGATCTTCAGACCTGGGGGAAGAAATATGAGGGACA  
ATTGGAGAAGTGAATTATATATATATAAAGTAGTAACAATTGAGCCATTAGGGATAGCACCCACCGGGGCAAA  
GAGAAGAATGGTGC AAAGAGAAAAAAGAGCAGTGGGAACGATGGGAGCTATGTTCTTGGGTTCTTGGGAGCA  
GCAGGAAGCACTATGGGCGCGACATCAATGACGCTGACGGTACAGGCCAGACTATTATTGTCTGGTATACTGC  
ATCATCAGAATAATCTGCTGAAAGCTATTGAGGCGCAACAGCATCTGTTGCAACTCACAGTCTGGGGCATC

>HQ386180

TTCTATTGTAACACAGCACAACTGTTTAATAGTACTTGGGAATGCAACAGAAATGCTTAATAGTACAGAATCAA  
ATGACACAAATAGCAACATCAACATCACACTCCAATGCAGAATAAGACAAATTATAAACATGTGGCAGGAAGT  
AGGAAAAGCAATGTATGCCCCCTCCCATCGAAGGACAAATTAGATGTTTCATCAAATATTACAGGGATACTATTA  
ACAAGAGATGGTGGTCATAGCACGAACGGGACTGAGAACGGGAACGAGACCTTCAGACCTGGAGGAGGAAACA  
TGAGGGGACAATTGGAGAAGTGAATTATATAAATATAAAGTAGTAAAACCTTGAACCATTAGGAATAGCACCCAC  
CAAGGCAAAGAGAAGAGTGGTGCAGAGAGAAAAAAGAGCGGTGGGAATGCTAGGAGCTATGTTCTTGGGTTCT  
TTGGGAGCAGCAGGAAGCACTATGGGCGCAGCGTCACTAACGCTGACGGTACAGACCAGACATTTATTGGCTG  
ATATAGTGCAACAGCAGAACAAATTGCTGAGAGCTATTGAGGCGCAGCAGCATCTGTTGCAACTCACAGTCTG  
GGGCATC

>EU744081

TTCTACTGTAATACAACACAACCTGTTTAATAGTACTTGGATGTTTAATGGTACTTGGGAGTCAAATAGCACTG  
AGGGAAATCCACAGAAAATATCACACTCCCATGCAGAATAAAACAAATTATAAACCTGTGGCAGGAAGTAGG  
AAAGGCAATGTATGCCCCCTCCTATCAGGGGACTAATTC AATGTGTATCAAATATTACAGGGTTGCTATTAACA  
AGAGATGGTGGGAACAACACGACTGAGAATGGGACCGAGATTTTCAGACCTGGAGGAGGAGATATGAGGGACA  
ATTGGAGAAGTGAATTATATAAATATAAAGTAGTAAAAATTGAACCATTAGGGGTAGCACCCACCAGGGCAAA  
GAGAAGAGTGGTGCAGAGAGAAAAAAGAGCAGTGGGAGTGATAGGAGCTATGTTCTTGGGTTCTTGGGAGCA  
GCAGGAAGCACTATGGGCGCAGCGTCAATGACGCTGACGGTACAGGCCAGACAATTACTGTCTGGTATAGTGC  
AGCAGCAGAACAATCTGCTGAGGGCTATTGAGGCGCAACAGCATCTGTTGCAACTCACAGTCTGGGGCATC

>JF320244

TTCTACTGTAATACATCACAACCTGTTTAATGGAAGTTGGCAACCACCGCTTAATGAACTATATTTCAATACA  
ATGCTACATGGGCAAAAAATGACACTAATATCACACTCCCATGCAGAATAAAACAAATTGTAAACATGTGGCA  
GGAAGTAGGAAAAGCAATGTATGCCCCCTCCCATCAGCGGACCAATCAAATGTGTATCAAATATTACAGGGTTG  
CTAATAACAAGAGATGGGGGTTACAACAGTAGTAGCAATGAGACCAATGAGACCTTCAGACCTGCAGGAGGAG  
AAATGAGGGACAATTGGAGAAGTGAATTATATAAATATAAAGTAGTACAAGTTGAACCATTAGGATTAGCACC  
CACCAAGGCAAAGAGAAGAGTGGTGCAGAGAGAAAAAAGAGCAGTGACGCTGGGAGCTATGTTCTTGGGTTCT  
TTGGGAGCAGCAGGAAGCACTATGGGCGCAGCGTCAATAACGCTGACGGTACAGGCCAGACAGTTATTGTCTG  
GTATAGTGCAACAGCAGAACAACTCTGCTGAGGGCTATTGAGGCGCAACATCATCTGTTGCAACTCACAGTCTG  
GGGCATA

>JF320226

TTCTACTGTAATACCACACCACTGTTTAATAGTACCTGGAATGCCACACAACCTGGTTAATATTACTGGGAATA  
TCACAGGGCTTAGTAATAGAACTGAAAATATTACACTCCCATGTAGAATAAAACAAATTATAAACATGTGGCA  
GGAAGTAGGAAAAGCAATGTATGCTCCTCCCATCGCAGGACGAATTAATGTTTATCAAATATTACAGGTTTA  
CTATTAGTAAGAGATGGTGGCAATAGCAATGACACGGAGACCTTCAGACCTCAAGGAGGAAATATGAAGGACA  
ATTGGAGAAGTGAATTATATAAATATAAAGTAGTAAAAATTGAACCATTAGGAGTAGCACCCACCAAGGCAAA  
GAGAAGAGTGGTGCAGAGAGAAAAAAGAGCAGTGGGAGTACTGGGAGCTATGTTCTTGGGTTCTTGGGAGCA  
GCAGGAAGCACTATGGGCGCAGCGTCAATAACGCTGACGGCACAGGCCAGACAATTATTGTCTGGTATAGTGC  
AACAGCAGAACAATCTGCTGAGGGCTATTGAGGCGCAACAGCACCTGTTGCAACTCACAGTCTGGGGCATC

>JF320189

TTCTACTGTAATTCATCAGAACTGTTTAATAGTACCTGGACCTGGAATGAGACTGAAGGGTCTATTACTGAAG  
GGTCAATTACTAATGGGACAATCACACTCCCATGTAGAATAAGACAAATTATAAACATGTGGCAGAGAGTAGG  
AAAAGCAATGTATGCCCCCTCCCATCCAAGGACAAATTAGATGTTTCATCAAATATTACGGGGCTGCTATTAACA  
AGAGATGGTGGTGAAGGTAACACCACCAATAACAACGAAACCTTCAGACCTGGAGGAGGTGATATGAGGGACA  
ATTGGAGAAATGAATTATATAAATATAAAGTAGTACAAATTGAACCATTAGGAATAGCACCCACCAAGGCAAG  
GAGAAGAGTGGTGCAGAGAGAAAAACGAGCAGTGGGACTAGGAGCTGTGTTCTTGGGTTCTTGGGAGCAGCA  
GGAAGCACTATGGGCGCAGCGTCAGTGACGCTGACGGTACAGGCCAGACAATTATTGTCTGGTATAGTGCAAC  
AGCAGAACAACTCTGCTAAAGGCTATTGAGGCGCAACATCATCTGTTGCAACTCACAGTCTGGGGCATC

>EF210727

TTCTACTGTAACCTACACAGCTGTTTAATAGTACTTGGAACAGCAGCAATTGGAATTGGAATGATACTGAAA  
AGACAAATAAAAGTATCACACTCCCATGCAGAATAAAACAAATTATAAACATGTGGCAGGAAGTAGGAAAAAGC  
AATGTATGCCCCCTCCCATCAGAGGACAAATTAGATGTTTCATCAAATATTACAGGGCTGATGCTAACAAAGGGAT  
GGTAGTAATGAGAGTCACAGTGAGATCTTCAGACCAGGAGGAGGAAATATGAGGGATAATTGGAGAAGTGAAT  
TATATAAATATAAAGTAGTAAAAATTGAACCATTAGGAGTAGCACCCACCAAGGCAAAGAGAAGAGTGGTGC  
AGAGAGAAAAAAGAGCAGTAGTGGGGATAGGAGCTGTGTTCTTGGGTTCTTGGGAGCAGCAGGAAGCACTATG

GGCGCAGCGTCAATGATGCTGACGGTACAGGCCAGACAATTATTGTCTGGTATAGTGCAACAGCAGAACAATT  
TGCTGAGGGCTATTGAGGCGCAACAGCATATGTTGCAACTCACAGTCTGGGGCATC

>EF210729

TTTTATTGTAATACAACACGGCTGTTTAATAGTACTTGGAAGAATAATACTTGGACTAAGAATCATATTGAGA  
ACGAGACTGAAACAATCACACTCCCATGCAAAATAAAACAAATTATAAACAGGTGGCAGGAAGTAGGACAAGC  
AATGTATGCCCCCTCCCATCCAGGATGGATTAAGTGTTCATCAAATATTACAGGGCTACTATTAAACAAGAGAT  
GGTGGTGAACGGAACACCGAGACCGAGACCTTCAGACCTGGAGGAGGAGATATGAGGGACAATTGGAGAA  
GTGAATTATATAAATATAAAGTAGTTGAAATTCAACCATTAGGAGTAGCACCCACCACAGCAAAGAGAAGAGT  
GGTGCAGAGAGAAAAAAGGGCAGTAACACTAGGAGCTATGTTCCCTTGGGTTCTTGGAACAGCAGGAAGCACT  
ATGGGCGCAGCGTCGCTGACGCTGACGGTACAGGCCAGACAATTATTGACTGGTATAGTGCAACAGCAGAACA  
ATCTGCTGAGGGCTATTGAGGCGCAACAGCATATGTTGCAACTCACAGTCTGGGGCATT

>EF210731

TTCTACTGTAATCTATCAAAAATTGTTTAATAGTACATGGAATGATACTACTTGGAACACGACTGATGAGTCAA  
ATGACACTTACATCCTGCTCCCATGTAGGATAAAACAAATTATAAACATGTGGCAGACAGTAGGAAAAGCAAT  
GTACGCCCCCTCCCATCAAAGGAAAAATTAGTTGTTTCATCAAATATTACAGGGCTGCTATTAAACAAGAGATGGA  
GGGAATGACAACAGGACTCAGGGGGTTCGAGATCTTCAGACCTGGAGGAGGAGATATGAGAGATAATTGGAGAA  
GTGAATTATATAAATATAAAGTAGTAAAAATTGAACCATTAGGAATAGCACCCACCGAGGCAAAAAGAAGAGT  
GGTGCAGAGAGAAAAAAGAGCAGTGGGAATAGGAGCTGTGTTCCCTTGGGTTCTTGGAAGCAGCAGGAAGCACT  
ATGGGCGCAGCGGCAGTGACGCTGACGGTACAGGCCAGACAATTATTGTCTGGTATAGTGCAACAGCAGAACA  
ATCTGCTAAAGGCCATTGAGGCGCAACAGCATCTGTTGCAACTCACAGTCTGGGGCATC

>EF210735

TTCTACTGTAACACATCACACCTATTTAATAGTACTTGGAATGATACTAGTAGTTGGGATAATAGCACTGAAG  
GAAATATCACACTCCAATGTAGAATAAAACAAATCATAAACAGGTGGCAGGAAGTAGGAAAAGCAATGTATGC  
CCCTCCCATTTGCAGGACAAATTAGATGCTCATCAAATATTACAGGGCTGCTATTAAACAAGAGATGGTGGTCAG  
GGCAGTAACGAGACCGAGGTCTTTAGACCTGGAGGAGGAAAATATGAAGGACAATTGGAGAAGTGAAGTATATA  
AATATAAAGTAGTAAAAGTTGAACCATTAGGAATAGCACCCACCAAGGCAAGGAGAAGAGTGGTGCAGAAAGA  
AAAAAGAGCAATAACACTAGGAGCTATGTTCCCTTGGTTTCTTGGGAGCAGCAGGAAGCACTATGGGCGCAGCG  
TCGATAACGCTGACGGTACAGGCCAGACAATTATTGTCTGGTATAGTGCAAGCAGCAGAATAATTTGCTGAGGG  
CTATTGAGGCGCAACAGCATATGTTGCAACTCACAGTCTGGGGCATC

>MH327746

TTCTACTGCAATACAACAAAACTGTTTAACAGTAGTTGGCCAAATAGTACTAGGAATAATACTGAAGAGTCAA  
ATAGCACTGTTATCACACTCCCATGTAGAATAAAACAAATTATAAACATGTGGCAGGAAGTAGGAAAAGCAAT  
GTATGCCCCCTCCCATCAGGGGACGAATTAATTGTACATCAAACATTACAGGGCTACTATTAAACAAGAGATGGG  
GGCAATGGAATAGCACGAATGAAACCTTCAGACCTCAAGGAGGAAATATAAGGGACAATTGGAGAAGTGAAC  
TATATAAATATAAAGTAGTAAAAATTGAACCATTAGGAGTAGCACCTACCAAGGCAAAGAGAAGAGTGGTGCA  
AAGAGAAAAGAGAGCAGTGGGAATGGGAGCTTGGTTCCCTTGGGTTCTTGGCAGCAGCAGGAAGCACTATGGGC  
GCAGCGTCAGTGACGTTGACGGTACAGGCCAGACAATTATTGTCTGGTATAGTGCAAGCAGCAGCAAAATAATTTGC  
TGCAAGCTATTGAGGCGCAACAGCATTTGTTGCAACTCACAGTCTGGGGCATC

>KY658690

TTCTACTGCAATACAACAAAACTGTTTAACAGTAGTTGGCCAAATAGTACTAGGAATAATACTGAAGAGTCAA  
ATAGCACTGTTATCACACTCCCATGTAGAATAAAACAAATTATAAACATGTGGCAGGAAGTAGGAAAAGCAAT  
GTATGCCCCCTCCCATCAGGGGACGAATTAATTGTACATCAAACATTACAGGGCTACTATTAAACAAGAGATGGG  
GGCAATGGAATAGCACGAATGAAACCTTCAGACCTCAAGGAGGAAATATAAGGGACAATTGGAGAAGTGAAC  
TATATAAATATAAAGTAGTAAAAATTGAACCATTAGGAGTAGCACCTACCAAGGCAAAGAGAAGAGTGGTGCA  
AAGAGAAAAGAGAGCAGTGGGAATGGGAGCTTGGTTCCCTTGGGTTCTTGGCAGCAGCAGGAAGCACTATGGGC  
GCAGCGTCAGTGACGTTGACGGTACAGGCCAGACAATTATTGTCTGGTATAGTGCAAGCAGCAGCAAAATAATTTGC  
TGCAAGCTATTGAGGCGCAACAGCATTTGTTGCAACTCACAGTCTGGGGCATC

>MF373127

TTCTACTGTAATACAACAAGACTGTTTAATACTACTTGGAATAACACTGAGAAATCAAATCCCACTGAAGGAA  
ATGGCACAATCACACTCCAATGCAGAATAAAACAAATTATAAACCTGTGGCAGGAAGTAGGAAAAGCAATGTA  
TGCCCCCTCCCATCAGAGGACAAATTAACTGTTTCATCCAACATTACAGGACTGCTATTAAACAACAGATGGTGGT  
ATGAACACCAGTAATAACAAGACCTTTATACCTGCAGGAGGAGATATGAGAGACTATTGGAGGAGTGGAGTAT  
TGAAATATGATGTAGTAATAGTTGAGCCATTAGGAATAGCACCAACCACGGATATGAGAAGAGTGGTGCAGAT  
ACAAAAAAGAGCAGAGCTACTACGAGCTCTGTTGCTTGTGTTCTTGGGAGCAGCAGGAAGGACGATGAGCGCA  
GCGTCGATGACGCTGACGGTACAGGCCAGACAATTATTGTCTGGTATAGTGCAACAGCAAAATAATTTGCTGC  
AGGCTATTGAGGCGCAACAGCATATGTTGAAACTCACAGTCTGGGGCATC

>MF373129

TTCTACTGTAATACAGCAGAACTGTTTAACAGTACTTGAGGGAATGACACTGAAAGGTCAAATACCACTACAG  
GAAATGACACAATCACACTTCAATGCACAATAAAACGAATTGTAAACATGTGGCAGGAAGTAGGAAAAGCAAT  
GTATGCCCCCTCCCATCACAGGACAAATTAAATTGTTTCATCAAAAATTACAGGGCTACTGTTAAACAAGAGATGGT

GGTGGGAACCAGAACACCAGCGAGACTTTTCAGACCTGGAGGGGGAAATATGAAAGACAATTGGAGAAGTGAAT  
TATATAAATATAAAGTAATAAAAAATTGAACCATTAGGAGTAGCACCCACCAAGGCAAAGAGAAGAGTGGTGCA  
GAGAGAAAAAAGAGCAGTGGGAATAGGAGCTGTGTTCTTGGGTTCTTGGGAGCAGCAGGAAGCACTATGGGC  
GCAACGTCGATGACGCTGACGGTACAGGCCAGACAATTATTGTCTGGTATAGTGCAACAGCAGAATAATTTGC  
TGAAGGCTATTGAGGCGCATCAGCATATGTTGCAACTCACAGTCTGGGGCATC

>KP411829

TGCTATTGCAAACCATCACTTCTGTTTACTGGCACATACAAGAGTAACATTAATATTTCAAATATCACCCAAT  
CCTCACAATCCGATGAAAGGTATATTTTTAATTCTGGCTTGTATGACGATCAATGTGTGGCAGGTAGTAGGAAA  
AGCGATCTATTCCCCTCCCATCAGTGGACAAATTAGATGTTTCATCAAATATTACAGGGCTGCTATTAACAAGA  
GATGGTGGTAGCAACAGCAGTAACGAGACCGAGACTGAAATCTTCAGACCTGTGGGAGGAAATATGAGGGACA  
ATTGGAGAAGTGAATTATATAAATATAAAGTAGTACAAATTGAACCATTAGGAGTAGCACCCACCAAGGCAAA  
GAGAAGAGTGGTGCAAAGAGAAAAAAGAGCAGTGGGATTAGGAGCAATGTTCTTGGGTTCTTGGGAGCAGCA  
GGAAAGCACTATGGGCGCAGCGTCAATAACGCTGACGGTACAGGCCAGACAATTATTGTCTGGTATAGTGCAAC  
AGCAGAATAATTTGCTGAGAGCTATTGAGGCGCAACAGCATCTGTTGCAACTCACAGTCTGGGGCATC

>MF373151

CTCTACTGTAATTCACACAACCTATTTAATAGTACTTGGAATGGTACTGAAAGATCAAACCTATTCCACTGAGA  
CTAATGAACTATCACACTCCCATGCAGAATAAAACAAATTATAAACATGTGGCAGAGAGTAGGAAGAGCAAT  
GTATGCCCCCTCCCATCCAAGGACTAATTAGATGTTTCATCAAATATTACAGGGCTGCTGCTAACAAGAGATGGA  
GGTCAGAATAGTAGTAATAGCACTGAGACCTTCAGACCGGGAGGAGGAAACATGAAGGATAATTGGAGAAGTG  
AATTATATAAATATAAAGTAATAAAGATTGAACCATTAGGAGTAGCACCCACCAAGGCAAAGAGAAGAGTGGT  
GCAAAGAGAAAAAAGAGCAATAACAGTAGGAGCTATGTTCTTGGGTTCTTGGGAGCAGCAGGAAGCACTATG  
GGCGCAGCGTCAATGGCGCTGACGGTACAGGCCAGACAATTGTTGTCTGGTATAGTGCAACAGCAGAACAATC  
TGCTGAGGGCTATTGAGGCGCAACAGCATCTGTTGCAACTCACAGTCTGGGGCATC

>KP411823

TTCTACTGTAATACAACACAACCTGTTTAAATAGTACTTGGAATATCACTGGAGGGTTAAATAACACTGAAGGAA  
ATGGCACAAATCACACTCCAATGCAAAATAAAACAATTTATAAACATGTGGCATGAAGTAGGGAAAGCAATGTA  
TGCCCCCTCCCATCAGAGGACAGATTACATGTTTCATCAAACATTACAGGGCTGCTATTAACAAGAGATGGTGGT  
GAGAACC CGGGCAACGACACTGATACTTTCACACCTGGAGGGGGAGATATGAAAGACAATTGGAGTAGTGAAT  
TAGATAAATATAGAGTAATAGGAATAGCACCCTACCAGTAGCACCCACCAAGGCAAAGACAAGATTGTTGCA  
GAGAGATAAAAGAGCAGTTGGAATAGGATCTGTGTTCTTGTCTTCTGGTAGCGGCAGGAAGCACTATGTCT  
GCAATGTCAATGACGATGACGCTACAAGCTCAAGAATTACTGTATGTGACCGAGCGAATGCAAAAAAATTTGC  
TGAAGGCTATTGAGGCGCAACAGCATCTGTTGCAACTCACAGTCTGGGGCATC

>MF373162

TTCTATTGTAATACAACACAGTTATTTAATAGTACTTGAGGGCTCATCAGCTTAATCAGACTTGGAATGAGC  
CCCTAGGGCCAAATGTTACTAATATCACACTCCCATGCAGAATAAAACAAATTATAAACAGGTGGCAGGAAGT  
GGGAAAAGCAATGTTTGCCGCTCCCATCAGCGGACGAATTCAATGCAAATCAAATATTACAGGGTTGTTATTA  
ACAAGAGATGGTGGTACTAACACCAGCGACCCCAACAGAACTGAGACCTTCAGACCTGGAGGAGGAGATATGA  
GAGACAATTGGAGAAGTGAATTATATAAGTATAAAGTAGTACAAATTGAGCCATTAGGAATAGCACCCACCAA  
GGCAAAGAGAGTAGTGGTAAAGAGAGAAAAAAGAGCAGTGGGAGTGCTAGGAGCTATGTTCTTGGGTTCTTG  
GGAACAGCAGGAAGCGTTATGGGCGCAGCGTCAATGACGCTGACGGTACAGGCCAGACAATTATTGTCTGGTA  
TAGTGCAACAGCAGAACAATCTGCTGAGAGCTATTGAGGCGCAACAACATATGTTGCAACTCACAGTCTGGGG  
CATC

>KP411824

TTCTACTGCAATTCAACACCACTGTTTAAATAGCACCTGGGATACTAATGGGACTTGCAAGGGCTCTAATAGTG  
CTGATTGGAATGTTACTGTCCCATGCATTAGCATCCCAATTACTACAATGGGGCAGAACTAGAACAAGCAAT  
GGACGTGCGTCCCATTTGCAGGAAAAGCAATATGTTTCATCAAGTTTGTCCAAAGGTATCCTTTTAGCCAATTCC  
CATAATAGCATTATTGTGCCCCGGCTGGTTATGCCTAAAGGTAAAGATAAGAAGTTCAATTGGAACAGGAAAA  
TGATATCAATGTCAAGTACAATGTCAAATTGAACCATTAGGAGTAGCACCCACCATGGCAAAGAGAAGAGTGGT  
GCAAAGAGAGAAAAGAGATTGAGGACTAGGAGCTCTGTTCTTGGGTTCTTGGGAGCAGCAGGAAGCACTATG  
GGCGCAGCGTCAATAACGCTGACGGTACAGGCCAGACAATTATTGTCTGGTATAGTGCAACAGCAGAACAAT  
TGCTGAGGGCTATTGAGGCGCAACAGCATCTGTTGCAACTCACAGTCTGGGGCATC

>MF373185

TTCTACTGTAATTCACACCACTGTTTAAATAGTACTTGGTATGTTAATGGAAGTGGAAATAGGAAATGATACTGATA  
TTGGAAAGATAAACATCACACTCTCATGTAGAATAAAACAAATTATAAACATGTGGCAGGAAGTAGGAAAAGC  
AATGTATGCCCTCCCATCCAGGAAAAATTCAATGTATATCAAATATTACAGGGCTGCTATTAACAAGAGAT  
GGAGGTAAATACCAGTGAGACCAGGAACGGGACCGAGATTTTCAGACCTGGAGGAGGAAATATGAGGGACAATT  
GGAGAAGTGAATTATATAAATACAAAGTAGTACAAGTTGAACCATTAGGAATAGCACCCACCAAGGCAAGGAG  
AAGAGTGGTGAGAGAGAAAAAAGAGCTCTGGGACTAGGAGCTTTGTTTCTTGGGTTCTTGGGAGCAGCAGGA  
AGCACTATGGGCGCAGCGTCAGTGACGCTGACGGTACAGGCCAGACAATTATTGTCTGGTATAGTGACGAGCAGC  
AGAACAATCTGCTGAGAGCTATTGAGGCGCAACAACACATGTTGCAACTCACAGTCTGGGGCATC

>MF373186

TTCTACTGCAACACAACAACACTGTTTAAATAGTACTTGGAATGATACACAACCTGTCTGATAGCACTTGGAATA  
ATACAAGAGGGATAAATGACACTATCACACTCCAATGTAGAATAAGACAAATCATAAACATGTGGCAGAAGGT  
AGGAAAAGCAATGTATGCCCCCTCCCATCAGTGGACAAATTAGATGTACATCAAATATTACAGGGCTGATATTA  
ACAAGAGATGGTGGTAATAGTGACAACAACACCACCCAGCCGAGATCTTCAGACCTCAAGGAGGAAATATGA  
AAGACAATTGGAGAAGTGAATTATATAAAATATAAGGTAGTAGCAATTGAACCATTAGGACTAGCACCCACCAA  
GGCAAAGAGAAGAGTGGTGCAGAGAGACAAAAGAGCAGTAGGACTGGGAGCTCTGTTCCCTTGGGTTCTTGGA  
GCAGCAGGAAGCACTATGGGCGCAGCGTCAATGGCGCTGACGGTACAAGCCAGACAATTATTGTCTGGTATAG  
TGCAACAGCAGAACAATTTGCTGAGGGCTATTGAGGCGCAACAGCATCTGTTGCAGCTCACAGTCTGGGGCAT  
T

>KY213743

TTTTACTGTAATACATCAAACTGTTTAAATAGTACTTGCGTGAATAATAATACAGGGTCAAATGCCACTGAAC  
CTATCATACTCCCATGCAGGATAAAACAAATTGTAAACATGTGGCAGGAAGTAGGAAAAGCAATGTATGCCCC  
TCCCATCAGAGGACAAATTAGATGCATATCAAATATTACAGGGCTCCTATTAACAAGAGATGGTGGTCAAGAG  
AACAAAACCGAGAACCACACCGAGGTCTTTAGACCCACGGGAGGAAATATGAAGGACAATTGGAGAAGTGAAT  
TATATAAATATAAAGTAGTAAAAATTGAACCATTAGGAATAGCACCCACCAAGGCAAAAAGAAGAGTGGTGCA  
GAGAGAAAAAAGAGCAGTGGGAATAGGAGCGATGTTCCCTTGGGTTCTTGAGCGCAGCAGGAAGCACTATGGGC  
GCAGCGTCAATAACGCTGACGGTACAGGCCAGACAGTTACTGTCTGGTATAGTGCAACAGCAAAACAATTTGC  
TGAGAGCTATTGAGGCGCAACAACATATGTTGCAACTCACAGTCTGGGGCATC

>KY213745

TTCTACTGCAATACAACAACACTATTTAAATAGTTCTTGGAATAATAGTAGTTTGAATAGTACTGAGGGTAATG  
GAGGGTCAAATGACACTATCACACTCCCGTGTAGAATAAAACAAATTATAAACATGTGGCAGGAAGTAGGAAA  
AGCAATGTATGCCCCCTCCCATTCAGGACAAATTAGATGCTCCTCAAATATTACAGGACTATTATTAGTAAGA  
GATGGTGGTAATAACAGGACGGGCGGCAGTGAGACCTTCAGACCTGGAGGAGGAAATATGAAGGACAATTGGA  
GAAGTGAATTATATAAATATAAAGTAGTAAAAATTGAACCATTAGGAATAGCACCCACCAGGGCAAGGAGAAG  
AGTGGTGCAGAGAGAAAAAGAGCAGTGGGACTAGGAGCTTTGTTCCCTTGGGTTCTTGGGAGCAGCAGGAAGC  
ACTATGGGCGCAGCGTCAATGACGCTGACGGTACAGGCCAGACAATTATTGTCTGGTATAGTGCAACAGCAGA  
ACAATCTGCTGAAGGCCATTGAGGCGCAACAGCATATGTTGCAACTCACAGTCTGGGGCATC

>JN248346

TTCTACTGTGATTCAACACAACACTGTTTAAATAGTAGTTGGAATAGTAATTGGTCTAATAATACTGAAGGGTCAG  
ACAACATTACACTTCAATGCAGAATAAAACAAATTATAAACATGTGGCAGCAAACAGGAAAGGCAATGTATGC  
CCCTCCCATCAGTGAATAAATTAGCTGTTTCATCAAATATTACAGGGCTGTTATTAACAAGAGATGGTGGTAAC  
AATCAGACTAATAAATAGAGACCTTCAGACCTGGAGGAGGAAATATGAAGGACAATTGGAGAAGTGAATTAT  
ATAGATATAAAGTAGTACAAATTGAACCATTAGGAGTAGCACCCACCATGGCAAAGAGAAGAGTGGTGCAGAG  
AGAAAAAAGAGCAGTGGGAATAGGAGCTCTATTCCCTTGGGTTCTTGGGAGCAGCAGGAAGCACTATGGGCGCA  
GCATCAATAACGCTGACGGTACAGGCCAGACAATTATTGTCTGGTATAGTGCAACAGCAGAACAATTTGCTGA  
GAGCTATTGAGGCGCAACAGCATATGTTGCAACTCACAGTCTGGGGCATA

>KJ769147

TTCTACTGTAACACATCACAACACTGTTTAAATAGTACTTGGTATAGTAATGGTACTCGAAATGATACTGTAGGAA  
ATGGCAATATCACGCTCCCTTGCGAATAAAACAAATTGTAAACATGTGGCAGGAAGTAGGAAAAGCAATGTA  
TGCCCCCTCCCATTTGGAGGACAAATTAGATGTTTCATCAAATATTACAGGGTTGCTATTAACAAGAGATGGTGGT  
AACAAATCAGAGCAACATCACACCAGAGACCTTCAGACCAGGAGGAGGAGATATGAGGGACAATTGGAGAAGTG  
AACTATATAAATATAAAGTGGTAAAAATTGAACCATTAGGAATAGCACCCACCAAGGCAAAGAGAAGAGTGGT  
GCAGAGAGAAAAAAGAGCAGTGGGAATGATAGGAGCTATGTTCCCTTGGGTTCTTGGGAGCAGCAGGAAGCACT  
ATGGGCGCAGCGTCAATAACGCTGACGGTACAGGCCAGGCAATTGTTGTCTGGTATAGTGCAACAGCAGAGTA  
ATCTGCTGAGAGCTATTGAGGCGCAACAGCATATGTTGCAACTCACAGTCTGGGGCATC

>KP109514

TTCTACTGTAATACAACACAGCTATTTAAATAATACTTGCGTTACTTGGAAGGCCAATGCAAGTGATCCTGAAA  
AAAATAACACAAAAAATATCACACTCCCATGCAGAATAAAACAAATTATAAACATGTGGCAGGAAGTAGGAAA  
AGCAATGTATGCCCCCTCCCATCGCAGGACAAATTAAATGTGTATCAAATATTACAGGGTTACTATTAACAAGA  
GATGGGGGTGAGGACAATAACACTAACGGTAACGAGACCTTCAGACCTGGAGGAGGAGATATGAGGGACAATT  
GGAGGAGTGAATTATATAAATATAAAGTAGTAAAAATTGAACCATTAGGAATAGCACCCACTAAGGCAAAGAG  
AAGAGTGGTGCAGAGAGAAAAAAGAGCAGCACTAGGAGCTATGTTCCCTTGGGTTCTTGGGAATGGCAGGAAGC  
ACTATGGGCGCAGCGTCAATAACGCTGACGGCACAGGCCAGACAATTGTTGTCTGGTATAGTGCAACAGCAGA  
ACAATCTGCTGAGGGCTATTGAGGCGCAACAACATTTGTTGCAACTCACAGTCTGGGGCATC

>EU578539

TTCTACTGTAATGCAACACAACACTGTTTAAATAGTACTTGGCCATTAAACGGTACTTGGGAAGGATCAAATAATA  
CTAATGTCACACTACCATGCAGAATAAAACAAATTATAAACATGTGGCAGAGAGTAGGCAAAGCAATGTATGC  
CCCTCCCATCAGAGGACAAATTAGATGTTTCATCAAATATCACAGGGCTGCTATTAACAAGAGATGGTGGTGGT  
AGTAACCAAAGCAACGAGACCTTTAGACCTGGAGGAGGAGACATGAAAGACAATTGGAGAAGTGAATTATATA

AGTATAAAGTAGTAAGAATTAAACCATTAGGAGTAGCCCCACCAAGGCAAAGAGAAGAGTGGTGCAGAGAGA  
AAAAAGAGCAGTGGGAACAATAGGAGCTATGTTCTTGGGTTCTTGGGAGCAGCAGGAAGCACTATGGGCGCA  
GCGTCAGTGACGCTGACGGTACAGGCCAGACAATTATTGTCTGGTATAGTGCAACAGCAGAACAATTTGCTGA  
GGGCTATTTCAGGCGCAACAGCATCTGTTGCAACTTACGGTCTGGGGCATC

>HQ217760

TTCTATTGTAATACAACAGAGCTGTTTAATAGTACTTGGGATGTTAATAGTACTTTGAATGTTAATAATACTT  
GGAATAATACTGAAGGAGCAAGTGGCAATATCACACTCCCATGCAGAATAAAACAAATTATAAATATGTGGCA  
GAAAGTAGGCAAGGCAATGTATGCCCCCTCCCATCAGAGGACAAATTAGATGTACATCAAAGATCACAGGGCTG  
CTATTAACAAGAGATGGTTATAATAATAACAACACCCGAGACTTTCAGACCTGGAGGAGGAAATATGAAGG  
ACAATTGGAGAAGTGAGTTATATAAGTATAAAGTAGTAAAAATTGAACCATTAGGAGTAGCACCCACCATGGC  
AAGGAGGAGAGTGGTGCAGAGAGAAAAAGAGCAGTGGGAACAATAGGAGCTATGTTCTTGGGTTCTTGGGA  
GCAGCAGGAAGCACTATGGGCGCAGCGTCACTGACGCTGACGGTACAGGCCAGACTATTATTGTCTGGTATAG  
TGCAACAGCAGAACAATCTGCTGAGGGCTATTGAGGCGCAACAGCATCTGTTGCAACTCACGGTCTGGGGCAT  
C

>AF277071

TTCTACTGTAATTCAACACAGCTGTTTAATAGTACTTGGAAATATTAATGATACTAGGAATGATACTACAGGGA  
ATATCACACTCCCATGCAGAATAAGACAAATTGTGAACAGGTGGCAGGAAGTAGGCAAAGCAATGTATGCCCC  
TCCCATCAGAGGACAAATTAGCTGTTTCATCAAATATTACAGGGGTGCTATTAACAAGAGATGGTGGTAATCAC  
ACGAGCGAAACTGAGATCTTCAGACCTGGAGGAGGAGATATGAGGGACAATTGGAGAAGTGAATTATATAAAT  
ATAAAGTAGTAAAAATTGAACCATTAGGAAAAGCACCCACCAAGGCAAGGAGAAGAGTGGTGCAAAGAGAAAA  
AAGAGCAGTGACAATGGGAGCTATGTTCTTGGGTTCTTAGGAGCAGCAGGAAGCACTATGGGCGCAGCATCC  
ATGACGCTGACGGTACAGGCCAGGCTATTATTGCCTGGTATAGTGCAACAGCAGAGCAATCTGCTGAGGGCTA  
TCGAGGCGCAACAACATCTGTTGCAACTCACAGTCTGGGGCATC

>EF593267

TTCTACTGTAATACAACAAAGCTGTTTAATAGTACTTGGCATGCTAATGGCACTCGGAATGATACTGGAGGGT  
CAAATGACACTATCATACTACCATGCAGAATAAAACAAATTATAAACATGTGGCAGAAAGTAGGCAAAGCAAT  
CTATGCCCCCTCCCATCAGAGGACAAATTAGATGTGAATCAAAGATCACAGGGCTGCTATTAACAAGAGATGGT  
GGTGATGATAACAGAACCACCGAGATCTTCAGACCTGGAGGAGGAGATATGAGGGACAATTGGAGAAGTGAAT  
TATATAAATATAAAGTAGTAAAAATTGAACCATTAGGAATAGCACCCACCAAGGCAAGGAGAAGAGTGGTGCA  
GAGAGAAAAAAGAGCAGTGGGAATAGGAGCTGTGTTCTTGGGTTCTTGGGAGCAGCAGGAAGCACTATGGGC  
GCAGCGTCAATGACGCTGACGGTACAGGCCAGACTATTATTGTCTGGTATAGTGCAACAGCAGAACAATTTGC  
TGCAGGCTATTGAGGCGCAACAGCATCTGTTGCAACTCACGGTCTGGGGCATC

>DQ853436

TTCTACTGTAATTCAACACGATTGTTTAGTAGTAAGTGGCATGCTAATGATAGTTGGAGTAGTAGTACTTGGGA  
ACGATACTGGAGAGTCAAATGACACTATCACACTCCCATGTAGAATAAAACAAATTATAAACATGTGGCAGGA  
AGTAGGAAAAGCAATGTATGCCCCCTCCCATCAAAGGACAAATTCAATGTTTCATCAAATATTACAGGGCTAATA  
TTAACAAGAGATGGTGGTGCAAAACACGAACACGAGCGAGGAGTCTTCAGACCTGCAGGAGGAAATATGGGGG  
ACAATTGGAGAAGTGAATTATATAAATATAAAGTAGTAAAAATTGAACCAATAGGAATAGCACCCACCAAGGC  
AAAAAGAAGAGTGGTGCAGAGAGAAAAAGAGCAGTGACACTGGGAGCTGTGTTCTTGGGTTCTTGGGAGCA  
GCAGGAAGCACTATGGGCGCAGCGTCAATAACGCTGACGGTACAGGCCAGACAATTATTGTCTGGTATAGTGC  
AGCAGCAGAACAATCTGCTGAGGGCTATTGAGGCGCAACAACATCTGTTGCAACTCACAGTCTGGGGCATC

>KT124806

TTCTACTGTGATACAACAGAACTGTTTAATAGTACTTGGAGTATTAATGGTACTAGGAATACTACTGAAGGGT  
CAAATAGCACAGACATCACACTCCAATGTAGAATAAAACAAATTATAAACATGTGGCAGGAAGTAGGGAAAGC  
AATGTATGCCCCCTCCCATTAGAGGACAAATTAGATGTTTCATCAAATATTACAGGGCTGCTATTAACAAGAGAT  
GGTGGTAGCGGGAGTGAGACTAAAAACGAGACTGAAACCTTCAGACCTGGAGGAGGAAATATGAAGGATAATT  
GGAGAAGTGAATTATATCAATATAAAGTAGTAAAAATTGAACCATTAGGAGTAGCACCCACCAAGGCAAGAG  
AAGAGTGGTGCAGAGAGAAAAAGAGCAGTCACTAGGAGCTGTGTTCTTGGGTTCTTGGGAGCAGCAGGA  
AGCACTATGGGCGCAGCGTCAATAACGCTGACGGTACAGGCCAGACAATTATTGTCTGGAATAGTGCAACAGC  
AAAGCAATCTGCTGAGAGCTATTGAGGCGCAACAGCATCTGTTGCAACTCACAGTCTGGGGCATC

>EF593290

TTTTACTGTGATACAACAGAGCTGTTTAATAGTACTTGGAAATAATACTGATAGTACTCGGAATGATACTGAGT  
CAGACAAAATCACCCCTCCAATGTAGAATAAAACAAATTATAAACATGTGGCAGGAAGTAGGAAAAGCAATGTA  
TGCCCCCTCCCATCCAAGGACAAATTCAATGTAACCTCAAGTATTACAGGGCTACTATTAACAAGAGATGGTGGG  
AACAACTCCACTAATTCCACCGAGATATTTCAGACCTGGAGGAGGAGACATGAGGGATAATTGGAGAAGTGAAT  
TATATAAATATAAAGTAGTAAAAATTGAACCATTAGGAGTGGCACCCACCAAGGCAAAGCAGAGAGTGGTACA  
GAGAGAAAAAAGAGCAATAACGATGGGAGCTATGTTCTTGGGTTCTTGGGAGCAGCAGGAAGCACTATGGGC  
GCAGCGTCAATAGCGCTGACGGCACAGGCCAGACTATTATTGTCTGGTATAGTGCAACAGCAGAACAATCTGC  
TGAGAGCTATTGAGGCGCAACAGCATATGTTGCAACTCACAGTCTGGGGCATC

>EU577629

TTTCTACTGTAATACAACACAACACTGTTTAAATAGTACCTGGTGGAGGAATGGTACTGAAGTGTTTAAATAGTACCT  
GGTGGAGGAATGGTACTGAAGTGTCAAATAACACTCAAGGGATTGACACAATCACCTCCCATGCAGAATAAA  
ACAATTTGTAAATATGTGGCAGTCAGTAGGAAAAGCAATGTATGCCCTCCCATCAGGGGACGAATTAATTGT  
ACATCAAATATTACAGGGCTGTTATTAACAAGTGATAGAGTGGGCTTAATAATGCTACAAATGAGACCTTCA  
GACCTGGAGGAGGAGATATGAGGGACAATTGGAGAAGTGAATTATATAAATATAAGGTAGTAAGAATTGAACC  
ATTAGGAATAGCACCCACTAGTGCAAAGAGAAGAGTGGTGCAAAGAGAAAAAAGAGCAGTGGGAACAATAGGA  
GCTATGTTCCCTTGGGTTCTTGGGAGCAGCAGGAAGCACTATGGGCGCAGCGTCAATGACGCTGACGGTACAGG  
CCAGACTATTATTGTCTGGTATAGTGCAACAGCAAAACAATTTGCTGAAGGCTATTGATGCGCAACAGCATAT  
GTTGCAGCTCAGGTTGTGGGGCATC

>JX863967

TTCTACTGTAATACAACACCACTGTTTAAATAGCACTTGGAAATGAACTCAACTGTTTAAATAGTACTTGGAAATG  
AAACTGAGGCAAATGGAACAATTACACTCCCATGCAGAATAAAACAAATTATAAACATGTGGCAGGAAGTAGG  
AAAAGCAATGTATGCCCTCCCATCGAAGGACAAATTTACTGTTCTTCAAACATTACAGGGCTACTGTTATTA  
AGGGATGGTGGTAATACCACAAAACGGGACTGAGATCTTCAGACCTGGAGGAGGAGACATGAGGGACAATTGGA  
GAAGTGAATTATATAAATATAAAGTAGTAAAAATTGAACCATTAGGAGTAGCACCCACTAGGGCAAAGAGAAG  
AGTGGTGCAGAGAGAAAAAGAGCAGTGGGAATAGGAGCTATGTTCCCTTGGGTTCTTGGGAATGGCAGGAAGC  
ACTATGGGCGCAGCGTCACTAACGCTGACGGTACAGGCCAGACAATTGTTGTCTGGTATAGTGCAACAGCAGA  
ATAATTTGCTGAGAGCTATTGAGGCGCAACAGCACCTGTTGCAACTCACAGTCTGGGGCATC

>KT124764

TTCTACTGTAATACCACACAACACTGTTTAAATAGTACTTGGTATGCAAACAATACAAAATAGTACTGAAGGGGGAA  
ACAGTGGGAATATCACACTCCCATGCAGAATAAAACAATTTATAAACATGTGGCAGGAAGTAGGAAAAGCAAT  
GTATGCCCTCCCATCAGTGGACAGATTAAATGTACATCAAATATTACAGGGCTGCTATTAAACAAGAGATGGT  
GGTCAAGGCAATCAGACCAACAACCAGACTGAGATCTTCAGACCTGTAGGAGGAGATATGAAGGACAATTGGA  
GAAGTGAATTATATAAATATAAAGTAGTAAGAATTGAACCATTAGGAATAGCACCCACCAGGGCAAAAAGGAG  
AGTGGTGCAGAGAGAAAAAGAGCAGTGGGAATAGGAGCGTTGTTCCCTTGGTTCCTTGGGAGCAGCAGGAAGC  
ACTATGGGCGCAGCGTCAATGACGCTGACGGTACAGGCCAGACTATTATTGTCTGGTATAGTGCAACAGCAGA  
ACAATCTGCTGAGAGCTATTGAGGCGCAACAGCATCTGTTGCAACTCACAGTCTGGGGCATC

>KT124814

TTCTACTGTAATACAACACCATTTATTTAAATAGTACTTGGAAATAATACTAGAAATATCAGTGGTCTTGAAGGGT  
CAAAGGACAATGGAAATATCACCTCCCATGCAGAATAAAACAATTATAAACATGTGGCAGGAAGTAGGAAA  
AGCAATGTATGCCCTCCCATCAGAGGACAAATTCAATGCTCATCAAATATTACAGGACTCCTATTAAACAAGA  
GATGGTGGTACTAATGTTACTGATAACACCACTGAGATCTTCAGACCTGGAGGAGAAGATATGAGGGACAATT  
GGAGAAGTGAATTATATAAATATAAAGTAGTACAAATTGAACCATTAGGAGTAGCACCCACCAAGGCAAGGAG  
AAGAGTGGTGCAGAGAGAAAAAGAGCAGTGGGAATAGGAGCTTTGTTCCCTTGGGTTCTTGGGAGCAGCAGGA  
AGCACTATGGGCGCAGCGTCAATGACGCTGACGGTACAAGCCAGACAATTATTGTCTGGTATAGTGCAACAGC  
AGAACAATCTGCTGAGGGCTATTGAGGCGCAACAGCATATGTTGCAACTCACAGTCTGGGGCATC

>GU331497

TTCTACTGTAATACATCACAACCTGTTTAAATAGTACTTGGGAGTTTAAATAGTACTGGGAATGCTACTACTAAAG  
AGTTAAATAGCACTTATACACTCCCATGCAGAATAAAACAATTATAAACATGTGGCAGGAAGTAGGAAAAGC  
AATGTATGCCCTCCCATCAGTGGACAAATTAGATGTTTCATCAAATATTACAGGGCTGCTCTTAATGAGAGAT  
GGTGGTAATGAGACTGATAAAAAATAACACTGAGATCTTCAGACCTGGAGGAGGAGATATGAGGGACAATTGGA  
GAAGTGAATTATACAAATATAAAGTAGTAAGAATTGAACCATTAGGAGTAGCACCCACCAAGGCAAAAAGAAG  
AGTGGTGCAAAGAGAAAAAGAGCAGTGGGAACGTTAGGAGCTATGTTCCCTTGGGTTCTTGGGAGCAGCAGGA  
AGCACTATGGGCGCAGCGTCAATGGCGCTGACGGTACAGGCCAGACTATTATTGTCTGGTATAGTGCAACAGC  
AGAACAATTTGCTGAGAGCTATTGAGGCGCAACAGCATATGTTGCAACTCACAGTCTGGGGCATC

>DQ869023

TTCTACTGTAATACATCAAACTGTTTAAATAGTACTTGGCATGCTAATGGTACTCGGATTAATGGTACTAATG  
TTTATGCTAATGGTACTAATGCAACCAACACAATTATCACACTCCCATGCAGAATAAGACAAATTATAAACAT  
GTGGCAGGAAGTAGGAAAAGCAATGTATGCCCTCCCATCAAAGGACAAATTAATGCTTATCAAACATTACA  
GGGCTACTATTAGTAAGAGATGGTGGAAATAACACAAATGGGAGCGAGATCTTCAGACCTGGAGGAGGGGATA  
TGAGGGACAATTGGAGAAGTGAACCTGTATAAATATAAAGTAGTAAAAATTGAACCATTAGGAGTAGCACCCAC  
TAAGGCAAAAAGAAGAGTGGTGCAGAGAGAAAAAGAGCAGTGGGATTTCGAGCTTTGTTCCCTTGGGTTCTTG  
GGAGCAGCAGGAAGCACTATGGGCGCAGCGTCAATGACGCTGACGGTACAGGCCAGACAATTGTTGTCTGGTA  
TAGTGCAACAGCAGAACCAACCTGCTGAGGGCTATTGAGGCGCAACAGCGTATGTTGCAACTCACAGTCTGGGG  
CATC

>EU578104

TTCTACTGTAACACAGCACAACTGTTTAAATACTATTTGGAATAATACTTGGAAATAGTAATGGGAATGATACTG  
AAGGGGATAATAAAACAATCATACTCCCGTGCAGAATAAAACAATTGTAAACAGGTGGCAGGAAGTAGGAAA  
AGCAATGTATGCCCTCCCATCAGCGGAATCATTAACCTGTTTATCAAACATTACGGGGCTGCTATTAAACAAGA  
GATGGTGGAAATAACAGTAGTACCAACGAGACCTTCAGACCTGGAGGAGGAGATATGAGGGACAATTGGAGAA

GTGAACTCTATAAATATAAAAGTAGTAAAAATTGAGCCATTAGGAGTAGCACCCACCAAGGCCAAAAGAAGAGT  
GGTGCAGAGAGAAAAAGAGCAGTGGGAACGTTAGGAGCGATGTTTCCTTGGGTTCTTGGGAGCAGCAGGAAGC  
ACTATGGGCGCAGCGTCAGTGACGCTGACGGTACAGGCCAGACAATTATTGTCTGGTATAGTGCAACAGCAGA  
ATAATCTGTTGAAGGCTATTGAGGCGCAACAGCATCTGTTGCAGCTCACAGTCTGGGGCATC

>EU578122

TTCTACTGTAATACAACAACCACTGTTTAAATAGTACGTGGAACGGTACTGATAGTAGTCCCGGGAATAATACTG  
ATCACAATATCACACTCCCATGTCAGAATAAAACAAATTGTAAACATGTGGCAAGAAGTAGGAAAAGCAATGTA  
TGCCCCCTCCCATCCAAGGAAAAATTGTATGTAGATCAAATATTACAGGACTGTTATTAACAAGAGATGGTGGT  
AATGGGACAGGGACAGAGAAAAGAAACCTTCAGACCTGGAGGAGGAAATATGAGGGACAATTGGAGAAGTGAAT  
TATATAAATATAAAAGTAGTAAGAGTTGAACCATTAGGAGTAGCACCCACCGAGGCAAGGAGAAGAGTGGTGCA  
GAGAGAAAAAAGGGCAGCAGTGACACTGGGAGCTATGTTTCCTTGGGTTCTTGGGAGCAGCAGGAAGCACTATG  
GGCGCAGCGTCACTGACGCTGACGGTACAGGCCAGACTATTATTGTCTGGTATAGTGCAACAGCAGAACAACCT  
TGCTGAGAGCTATTGAGGCGCAACAGCATATGTTGCAACTCACAGTCTGGGGCATC

>JQ403105

TTCTACTGTAATACAACAAAACTGTTTAAATAGTACTTGGTATGAAAATGGTACAAATAGTACTTGGTATGCAA  
ATGGTACAAATAGTACTGGAGAGGGAAACAGTGATATTATCACAATCCCATGTCAGAATAAAACAATTTATAAA  
CATGTGGCAGGAAGTAGGAAAAGCAATGTATGCCCCCTCCCATCAGTGGACAGATTAGATGTTTCATCAAACATT  
ACAGGGCTGCTATTAACAAGAGATGGTGGTGAGGGCAATCAAACCAACAACCAGGAGATCTTCAGACCTGTAG  
GAGGAGATATGAAAAACAATTGGAGAAGTGAATTATATAAATATAAAAGTAGTAAGAATTGAACCATTAGGAAT  
AGCACCCACCAAGGCAAAAAGGAGAGTGGTGCAGAGAGAAAAAAGAGCAGTGGGAATAGGAGCGTTGTTTCCTT  
GGGTTCTTGGGAGCAGCAGGAAGCACTATGGGCGCAGCGTCAATGACGCTGACGGTACAGGCCAGACTATTAT  
TGTCTGGTATAGTGCAACAGCAGAACAATCTGCTGAGAGCTATTGAGGCGCAACAGCATCTGTTGCAACTCAC  
AGTCTGGGGCATC

>FJ469749

TTCTACTGTAATACAACAAAGTTGTTTAAATAGTACTTGGCATGCGAATGGTACTATTAAAGGGACAGATAATA  
CTGGAGGGAATGACACTCACACACTCCCCTTGCGAGAATAAAACAAATTGTAAACATGTGGCAAGAAGTACGAAA  
AGCAATGTATGCCCCCTCCCATCAGAGGACAAATTATGGGCGTATCAAATATTACAGGGATACTATTAACAAGA  
GATGCTGGTAATAGCGGGAACAAGACCAAGAACGAGACCGAGATTTTCAGACCTGGAGGAGGAGATATGAGGG  
ATAATTGGAGAAGTGAATTATATAAATATAAAAGTAGTAAAAATTGAACCATTAGGAGTAGCACCTACCAAGGC  
AAAGAGAAGAGTGGTGCAGAGAGAAAAAAGAGCAGTGGGAATAGGAGCTATGTTTCATTGGGTTCTTGGGAGCA  
GCAGGAAGCACTATGGGCGCAGCGTCAATAACGCTGACGGTACAGGCCAGACAATTATTGTCTGGTATAGTGC  
AACAGCAGAACAATCTGCTGAGAGCTATTGAGGCGCAACAGCATCTGTTGCAACTCACAGTCTGGGGCATC

>EU578230

TTCTACTGTAATACATCAGGACTGTTTAAATGGTACTTGGAAATGGTACTAGCACTTGGAAATGATACTGCAAATT  
ATACTGCAAATGAGAATATCACACTCCCATGTCAGAATAAAACAAATTATAAACATGTGGCAGGAAGTAGGAAA  
AGCAATGTATGCCCCCTCCCATCAGAGGACAAATTAACTGTTTCATCAAAAATTACAGGGCTGCTATTAACAAGA  
GATGGTGGCCATCACAACGGCAGCAACAACGACACAGAAATCTTCAGACCTGGAGGAGGAGATATGAGGGACA  
ATTGGAGAAGTGAATTATATAAATATAAAAGTAGTAAAAATTGAACCATTAGGAGTAGCACCCACCAGGGCAAA  
AAGAAGAGTGGTGCAGAGAGAAAAAAGAGCAGTGGGAATGGGAGCTTTGTTTCCTTGGGTTCTTGGGAGCAGCA  
GGAAGCACTATGGGCGCAGCGTCACTAACGCTGACGGTACAGGCCAGACAATTATTGTCTGGTATAGTGCAAC  
AGCAGAACAATCTGCTGAGGGCTATTGATGCGCAACAACATCTGTTGCAACTCACAGTCTGGGGCATT

>FJ469754

TTCTACTGTAATACAACAAGACTGTTTAAATAGTAATTGGAATAGCAGTACTTGAATAACACTGAAGGGTTAA  
ATACCACTAACCTTGGAGAAAAATGACACAATCATACTCCCATGTCAGAATAAAACAGATTATAAACACGTGGCA  
GAAAGTAGGAAAAGCAATATATGCCCCCTCCCATCGAAGGACAAATTAAATGTATATCAAATATTACAGGGCTG  
CTATTATTAAGAGATGGTGGTATAAATGTGAGTGAGACCAACGAAACCTTCAGACCTGGAGGAGGAGATATGA  
AGGATATTTGGAGAAGTGAATTATATAAATATAAAAGTAGTAAAAATTGAACCATTAGGAATAGCACCCAACAA  
GGCAAAGAGAAGAGTGGTGCAGAGAGAAAAAAGAGCAGTGGGAATAGGAGCTGTGTTTCCTTGGGTTCTTGGGA  
GCAGCCGGAAGCACTATGGGCGCAGCGTCAATGACGCTGACGGTACAGGCCAGACAATTATTGTCTGGTATAGTGC  
TGCAACAGCAAAGCAATTTGCTGAGGGCTATTGAGGCTCAACAACATCTGTTGAAACTCACAGTCTGGGGCAT  
C

>FJ469757

TTCTACTGTAATTCCTCACAACTGTTTCAGTAGTACTTGGAAATAGGACTAACGGGACTTGGAAATGATGTTGAAG  
GGTTAAATTACACTAATGGAAATGACACAATCACACTCCCATGTCAGAATAAAACAATATATAAACATGTGGCA  
GGAAGTAGGAAAAGCAATGTATGCCCCCTCCCATCAGAGGGCAACTTAATTGTTTCATCAAAGATTACAGGGTTG  
CTATTAACAAGAGATGGTGTGAACGACACCGACAAAAATGAGACTTTTCAGACCTCAAGGAGGGGATATGAAGG  
ACAATTGGAGAAGTGAATTATATAAATATAAAAGTAGTAAAAATTGAACCGTTAGGGATAGCACCCACCAGGGC  
AAAGAGAAGAGTGGTGCAAAAGAGAAAAAAGAGCAGTGGGATTAGGAGCTATGTTTCCTTGGGTTCTTGGGAGCA  
GCAGGAAGCACTATGGGCGCAGCATCAATAACGCTGACGGTACAGGCCAGACAATTACTGTCTGGTATAGTGC  
AACAGCAGAACAATCTGCTGAGGGCTATTGAGGCGCAACACCATCTGTTGCAACTCACAGTCTGGGGCATC

>GU330538

TTCTACTGTAATACAACAAAACCTGTTTTATAGTAATTGGACTATTAATGGGACTATTGTGAGTAATTGGACAT  
ATGAAAATGACACTGGAACAAATGACACTATCATACTCCCATGTAGAATAAAACAAATTATAAACATGTGGCA  
GGAAGTAGGAAAAGCAATGTATGCCCCCTCCCATCAAAGGACCAATTACATGTAACCTCAAGTATTACAGGGTTG  
CTATTAACAAGAGATGGTGGTATTAACAGGACCAATAATGAGACCGAGATCTTCAGACCTGTAGGGGGAGATA  
TGAGGGACAATTGGAGAAGTGAATTATATAAATATAAAGTAGTAGAAATTCAACCATTAGGAATAGCACCCAC  
CAAGGCAAAGAGAAGAGTGGTGCAGAGAGAAAAGAGAGCGGTAACACTAGGAGCTATGTTCCCTTGGGTTCTTG  
GGAGCAGCAGGAAGCACTATGGGCGCAGCGTCAATGGCGCTGACGGTACAGGCCAGACAATTATTGTCTGGTA  
TAGTGCAACAGCAGAACAATCTGCTGAGGGCTATTGAGGCGCAACAGCACATGTTGCAACTCACAGTCTGGGG  
CATT

>GU330550

TTCTACTGTAATTTAACACAACCTGTTTAATAGTACTTGGAATATTACTGACAGATTAAATAATAATGAAACTC  
AAGGAAATGACACAACAATTCACCTCCCGTGCAGAATAAAACAAATTATAAACATGTGGCAAGAAGTAGGAAA  
AGCAATGTATGCCCCCTCCCATCAGGGGGATAATTAGATGTTTCATCAAATATTACAGGGCTGCTATTAACAAGA  
GATGGTGGTACAAATACCACTGACAATGACACTGAGGTCTTCAGACCTGGAGGAGGAGACATGAGGGACAATT  
GGAGAAGTGAATTGTATAAAATACAAAGTAATACAAATTGAACCATTAGGAGTAGCACCCACTAAGGCAAAGAG  
AAGAGTGGTGCAGAGAGAAAAAAGAGCAGTGGGAATAGGAGCTGTGTTCCCTTGGGTTCTTGGGAGCAGCAGGA  
AGCACTATGGGCGCAGCGTCAGTGACGCTGACGGTACAGGCCAGACAATTATTGTCTGGTATAGTGCAGCAGC  
AGAGCAATCTGCTGAGGGCTATTGAGGCGCATCAACATCTGTTGCAACTCACAGTCTGGGGCATC

>KT124781

TTCTACTGTAATTCACACCACTGTTTAATAGTGAATGGTCAGATAATAATACTTGGAATAGTGCTGAAGAAG  
GAAATGCCACAATCACACTCCAATGCAGAATAAAACAAATTGTAAACATGTGGCAGGAAGTAGGAAGAGCAAT  
GTATGCACCTCCCATCAAAGGAGTAATTAGCTGTACATCAAATATTACAGGACTGATATTAACAAGAGATCAT  
AGTAAGGATAATGTAACCTTCACCTTCAGACCTGGAGGAGGAAATATGAAGGACAATTGGAGAAGTGAATTAT  
ATAAAATATAAAGTAGTAAAAATGAACCATTAGGAGTAGCACCCACTACAGCCAAGAGAAGAGTGGTGCAGAG  
AGAAAAGAAGAGCAGTGGGAATAGGAGCTGTGTTCCCTTGGGTTCTTGGGAGCAGCAGGAAGCACTATGGGCGCA  
GCGTCAATAACGCTGACGGTACAGGCCAGACTATTATTGTCTGGTATAGTGCAACAGCAGAACAATCTGCTGA  
GAGCTATTGAGGCGCAACAGCACCTGTTGCAACTCACAGTCTGGGGCATC

>MH060766

TTCTACTGTAATACAACACAGCTGTTTAATAGTACTTGCCAGCTAATAATACTGAAAATGAGACTAATGAGG  
CAGATAGCAATATTACACTTCAGTGCAGAATAAAACAAATTATAAACAGGTGGCAGGAAGTAGGAAAAGCAAT  
GTATGCCCCCTCCCATCAAAGGACAAATTAGCTGTTTCATCAAATATTACAGGGCTACTATTAACAAGAGATGGA  
GGTAGTAGCAGTAATGGGACAGAGAATGGGACAGAGATCTTCAGACCTGGAGGAGGAGATATGAGGGACAATT  
GGAGAAGTGAATTATATAAAATATAAAATAGTAAAAATTACACCATTAGGAGTAGCACCCACCAAGGCAAAGAG  
AAGAGTGGTGC AAAGAGAAAAAAGAGCAGTGACACTAGGAGCTATGTTCCCTTGGGTTCTTGGGAGCAGCAGGA  
AGCACTATGGGCGCAGCGTCGATAACGCTGACGGTACAGGCCAGACAATTATTGTCTGGTATAGTGCAACAGC  
AGAGCAATCTGCTGAGGGCTATTGAAGCGCAACAGCATATGTTGCAACTCACAGTCTGGGGCATC

>MH060965

TTCTACTGTAATTCACACAACCTGTTTAATAGTACTTGTTTACTGAGGATAATGCGACCGGCACTACCGGAA  
ATGAAACAATCATACTCCCATGCAGAATAAAACAAATTATAAACATGTGGCAGGAAGTAGGAAGAGCAATGTA  
TGCCCCCTCCCATCAGAGGACAAATTAAGTGTACATCAAATATTACAGGACTGATATTAACAAGAGATGGTGGT  
AATAACAATCACACTAATGAGAACGAAACCTTCAGACCTGGAGGAGGAGATATGAGGGACAATTGGAGAAGTG  
AATTATATAAAATATAAAGTAGTAAAAGTTGAACCATTAGGAATAGCACCCCTCTAAGGCAAGGAGAAGAGTGGT  
GCAGAGAGAAAAAAGAGCAGCAGGACTAGGAGCTTTGCTCCTTGGGTTCTTGAGCGCAGCAGGAAGCACTATG  
GGCGCAGCGTCACTGACGCTGACGGTACAGGCCAGGCAATTATTGTCTGGTATAGTGCAACAGCAAAACAATT  
TGCTGAGGGCTATTGAGGCGCAACAGCATATGTTGCAACTCACAGTCTGGGGCATT

>FJ469686

TTCTACTGTAATTCACAGCACTGTTTAATAGCAGTTGGAATAAGACTGGAGGGGGTTGGACTAAGGAGACAA  
ATCACACAAACAGAACTATCACACTCCCATGCAGAATAAAACAAATTATAAACATGTGGCAGCAAGTAGGAAA  
AGCAATGTATGCCCCCTCCCATCAGAGGACCAATTAAGTGTACATCAAGTATTACAGGGCTGCTATTAACAAGA  
GATGGTGGGAGTAATAGCAGCGCTACAGAGATCTTCAGACCTGGAGGAGGAAATATGAGAGACAATTGGAGAA  
ATGAATTATACAAATATAAAGTAGTAAAAATTGAGCCATTAGGAGTAGCACCCACCAAGGCAAAGAGGAGAGT  
GGTGCAGAGAGAAAAAAGAGCAATAGGGGCAATAGGAGCTATGTTCCCTTGGGTTCTTGGGAGCAGCAGGAAGC  
ACTATGGGCGCAGCATCAGTGACGCTGACGGTACAAGCCAGGCAATTATTGTCTGGTATAGTGCAACAGCAGA  
ACAATCTGCTGAGGGCTATTGAGGCGCAACAGCATCTGTTGCAACTCACAGTCTGGGGCATC

>FJ469731

TTCTACTGCAATTCACACCACTGTTTAATAAGACTTGGAATAAGAATGATATTAGGAATAATACTACTGGGA  
ATGATAATGACACTATCACACTCCAATGCAGAATAAAACAAATTATAAACATGTGGCAGGAAGTAGGAAAAGC  
AATGTATGCCCCCTCCCATTAGAGGACTAATCAGCTGTTTCATCAAATATTACAGGGCTACTATTAACAAGAGAT  
GGAGGTCATAACACAAGTAGGGCAAATGAGACCTTCAGGCCTGGAGGAGGAAATATGAAGGACAATTGGAGAA

GTGAATTATATAAATATAAAAGTAGTAAAAATTGAACCATTAGGAGTAGCACCCACCAGGGCAAAGAGAAGAGT  
GGTGCAGAGAGAAAAAAGAGCAGTGGGACTAGGAGCTTTATTCCTTGGGTTCTTGGGAGCAGCAGGAAGCACT  
ATGGGCGCAGCGTCGATAACGCTGACGGTACAGGCCAGACAATTATTGTCTGGTATAGTGCAACAGCAGAACAA  
ATTTGCTGAGAGCTATTGAGGCGCAACAGCATCTGTTGCAGCTCACAGTCTGGGGCATC

>HQ216397

TTCTACTGTAATTCAACACTGCTGTTTAATAGTAGTTGGAAGAATGAGACCAATGCTGACGGGACAGAGGGCA  
ATGATACTATTACACTCCAATGCAGAATAAAACAAATCATAAACAGATGGCAGGAAGTAGGAAAAGCAATGTA  
TGCCCCCTCCCATCGCAGGACAAATTAACCTGTTTCATCAAAAATTACAGGATTGCTATTAACAAGAGATGGTGGT  
AATCATACCGCCAACACCGAGACCTTCAGACCTGGAGGAGGAGATATGAGAGACAATTGGAGAAGTGAATTAT  
ATAAATACAAAGTAGTAAAAATTGAGCCATTAGGAATAGCGCCACCAAGGCAAGGAGAAGAGTGGTGCAAAAG  
AGAAAAGAAGAGCAGTGGGAACATTTGGAGCTTTGTTCCCTTGGGTTCTTGGGAGCAGCAGGAAGCACTATGGGC  
GCAGCATCAGTGACGCTGACGGTACAAGCCAGACAATTATTGTCTGGTATAGTGCAACAGCAGAACAAATCTGC  
TGAAGGCTATTGAGGCGCAACACAGCTGTTGCAACTCACAGTCTGGGGCATC

>DQ410636

TTCTATTGTAATTCAACACAACCTGTTTAATAGTACTTGGGCTAAGAATGGTAGTAGGTTAAATAACAATGGTA  
GTGAGTTTAATCACACCGAAGAAAAAGGAAATGACACAATCATACTCCCATGCAGAATAAAACAAATTATAAA  
CATGTGGCAGGGAGTAGGAAAAGCAATGTATGCCCCCTCCTATCAAAGGACTAATTAGATGTTTCATCAAATATC  
ACAGGGCTGCTAATAACAAGAGATGGGGGTACGGGAAAACAAGAGCGAGGAGAACAGGAACGAGACCTTCAGAC  
CTGTAGGAGGAAATATGAGGGACAATTGGAGAAGTGAATTATATAAATATAAAAGTAGTAAAAATTGAACCATT  
AGGAGTAGCACCCACCAAGGCAAGAGAAGAGTGGTGAGAGAGAAAAAGAGCAGTGGGACTCGGAGCTATG  
TTCATTGGGTTCTTGGGAGCAGCAGGAAGCACTATGGGCGCAGCGTCAGTGACGCTGACGGTACAGGCCAGAC  
AATTATTGTCTGGTATAGTGCAACAGCAAAACAATTTGCTGAGAGCTATTGAGGCGCAACAGCATCTGTTGCA  
ACTCACAGTCTGGGGCATC

>KT124758

TTCTACTGCAACACAACACAACCTGTTTAATAGTACTTGGGAATGATACACAACCTGTCTAATAGCACTTGGAAAT  
ATACAAGAGGGATAAATGACACTATCACACTCCAATGTAAAATAAAACAAATCATAAACATGTGGCAGAAGGT  
AGGAAAAGCAATGTATGCCCCCTCCCATCAGTGGACAAATTAGATGTTTCATCAAATATTACAGGGCTGATATTA  
ACAAGAGATGGTGGTAATACTGACAACACCACCCAGCCCCGAGATCTTCAGACCTCAAGGGGGAAATATGAAGG  
ACAATTGGAGAAGTGAATTATATAAATATAAGGTAGTAGCAATTGAACCATTAGGAATAGCACCCACCAAGGC  
AAAGAGAAGAGTGGTGAGAGAGACAAAAGAGCAGTGGGAATGGGAGCTCTGTTCCCTTGGGTTCTTGGGAGCA  
GCAGGAAGCACTATGGGCGCAGCGTCAATAACGCTGACGGCACAGGCCAGACAATTATTGTCTGGTATAGTGC  
AACAGCAGAACAATTTGCTGAGGGCTATTGAGGCGCAACAGCATCTGTTGCAGCTCACAGTCTGGGGCATT

>JX863968

TTCTATTGTAATTCAACATCACTGTTTAATAGTACTTGGAGGACAAATGAAACTGCAGACTTAAATACTACAG  
AAATTATCACACTCCCATGCAGAATAAAACAAATTATAAACATGTGGCAAGAAGTAGGAAAAGCAATATATGC  
CCCTCCCATCGAAGGAAACATTACATGTGTATCAAATATTACAGGGCTGCTATTAACAAGAGATGGTGGTAAC  
AATAATCAGAGTAATGAGACGACTGAGATCTTTAGACCTGGAGGAGGAGATATGAGGGACAATTGGAGAAGTG  
AATTATATAAATATAAAGTAGTAAAAATTGAACCACTAGGAGTAGCACCCACCAAGGCAAAGAGAAGAGTGGT  
GCAGAGAGAAAAAAGAGCAGCGGGACTAGGAGCTGTGTTTCTTGGGTTCTTGGGAGCAGCAGGAAGCACTATG  
GGCGCAGCGTCAATAACGCTGACGGCACAGGCCAGGCAATTATTGTCTGGTATAGTGCAACAGCAAAATAACT  
TGCTGAGAGCTATTGAGGCGCAACACATCTGTTGCAACTCACAGTCTGGGGCATC

>EU577792

TTCTACTGTGATTCAACACAACCTGTTTAATAGTACTTGGGAATAGTACTAAGTTAAATAGTACTGAGTTAAGTA  
GGACTGAGTCAAATAACACTGCAGGCACAAATGGCACTCAAGACCTATCATGCTCCCATGCAGAATAAAACA  
AATTATAACATGTGGCAGAAAGTAGGAAAAGCAATGTATGCCCCCTCCCATCAGCGACAAATTAGATGTTCA  
TCAAGTATTACAGGTCTGCTATTAAACAAGAGATGGTGGTACTAATAATACCAACGAGACCTTCAGACCTGGAG  
GAGGAGATATGAGGGACAACCTGGAGAAGTGAATTATATAAATATAAAGTAGTAAAAATTAAACCATTAGGAGT  
AGCACCCACCAGGGCAAAGAGAAGAGTGGTGAGAGAGAAAAAAGGGGATTAGGAGCTGTGTTCCCTTGGGTTCT  
TTGGGAGCAGCAGGAAGCACTATGGGCGCAGCGTCAGTGACGCTGACGGTACAGGCCAGACTATTATTGTCTG  
GTATAGTGCAACAGCAAAGCAATTTGCTGAGAGCTATTGAGGCGCAACAGCATCTGTTGCGACTCACAGTCTG  
GGCATC

>EF593190

TTCTACTGTAATACAACACGATTGTTTAATAGTACTTGGGAGGCTAATGGTAATTGGACTGGAAGTGAAGGAA  
ATGATAATGGCAGTCACTTCCATGCAGAATAAAACAAATTATAAACATGTGGCAACAAGTAGGAAAAGC  
AATGTATGCCCCCTCCATTGCAGGAAAGATTACATGTAACCTCAAGTATTACAGGAATACTATTAAACAAGAGAT  
GGAGGTATCACTAACAACACCGAGACCCACACCGAGACCTTCAGACCTGGAGGAGGAGATATGAGGGACAATT  
GGAGAAGTGAATTATATAAATATAAAGTAGTAAAAATTCAACCATTAGGAGTAGCACCCACCAAGGCAAGAAAG  
AAGAGTGGTGAGAGAGAAAAAAGAGCAGTGGGATTAGGAGCTATGTTCCCTTGGGTTCTTGGGAGCAGCAGGA  
AGCACTATGGGCGCAGCGTCAGTAACGCTGACGGTACAGGCCAGACAATTATTGTCTGGTATAGTGCAACAGC  
AGAACAACCTGCTGAGGGCTATTGAGGCGCAACAGCATCTGTTGCAACTCACAGTCTGGGGCATC

>MH060681

TTCTACTGTAATTCAACACCACTATTTTAATAGTACACACAACAGTACTACTACAAGGTCAAATGAAACTGAAC  
CAATCATACTCCAATGTAGAATAAAACAAATTGTAAACATGTGGCAGGAGGTAGGAAAAGCAATGTATGCCCC  
TCCCATTCGAGGACAAATTAACGTGTACATCAAATATTACAGGGCTACTGTTAACAAGAGATGGTGGCAATAAT  
CAGAGTAGAGAAAATAATACCGAGATCTTCAGACCTGGAGGAGGAAATATGAAGGACAATTGGAGAAGTGAAT  
TATATAAATATAAAGTAGTAAAAGTTGAACCATTAGGAGTAGCACCCACCAAGGCCAAAAGAAGAGTGGTGCA  
AAGAGAAAAAAGAGCAGTGGGATTTCGGAGCTTTGTTCTTGGGTTCTTAGGAGCAGCAGGAAGCACTATGGGC  
GCAGCGTCAATGACGCTGACGGTACAGGCCAGACAATTATTGTCTGGTATAGTGCAACAGCAGAACAAATCTGC  
TGAGGGCTATTGAGGCGCAACAACATCTGTTGCAACTCACAGTCTGGGGCATC

>MH060990

TTCTACTGTAATACAACAAAACTGTTTAATAGTACTTGGAATAGTACTGAGAATTTTGAGGGAGGGTCAGATA  
ACAATATCACACTCCCATGCAGGATAAAGCAAATTATAAACATGTGGCAGGAAGTAGGAAAAGCAATGTATGC  
CCCTCCCATCGCAGGACAAATTAGATGTTTCATCAAAACATTACAGGGCTGATATTAACAAGAGATGGTGGTAGT  
CATAATGGTAGTAATAATAGTGAGACCTTCAGACCTGGAGGAGGAGATATGAGGGACAATTGGAGAAGTGAAC  
TTTATAAATATAAAGTAGTAAAAATTGAACCATTAGGAGTAGCACCCACTAAGGCCAAAAGAAGAGTGGTGCA  
GAGAGAAAAAAGAGCAGCAATAGGAGCTTTGTTCTTGGGTTCTTGGGAGCAGCAGGAAGCACTATGGGCGCA  
GCGTCAGTAACGCTGACGGTACAGGCCAGACTATTGTTGTCTGGTATAGTGCAACAGCAGAGCAATCTGCTGA  
AAGCTATTGAGGCGCAACAGCATCTGTTGCAACTCACAGTCTGGGGCATC

>DQ410526

TTCTATTGTAATACAACACCACTGTTTAATAATACTTGGTTTAATAGTACTAATAATTTAAATGAAACAAAGG  
ACAACAACAACAACAATCATACTCCAATGCAGAATAAAACAAATTATAAACATGTGGCAGGAAGTAGGAAA  
AGCAATGTATGCCCCCTCCCATCAGGGGAAACATTAGCTGTTTCATCAAATATTACAGGACTATTATTAACAAGA  
GACGGTGGTCATAATGTGAGCAACACGAACGAGACTTTCAGACCTGGAGGAGGAGATATGAGGGACAATTGGA  
GAAGTGAATTATATAAATATAAAGTAGTAAGAATTGAACCATTAGGAATAGCACCCACCAAGCAAAGAGAAG  
AGTGGTGCAAAGAGAAAAAAGAGCAGTGGGATTAGGAGCTGTGTTTCATTGGGTTTCTGGGAGCAGCAGGAAGC  
ACTATGGGCGCAGCGTCAATGACGCTGACGGTACAGGCCAGACAATTATTGTCTGGTATAGTGACAGCAGCAGA  
ACAATCTGCTGAGAGCTATTGAGGCGCAACAGCATCTGTTGCAACTCACAGTCTGGGGCATT

>EF363127

TTCTACTGTAATACAACAGACTTGTTTACTTGGAAATGGTACTTGGAAATGGTACTGCAGGGGCAGATAACAATA  
CAATCACACTCCAATGCAGAATAAGACAAATTATAAACATGTGGCAGGAAGTAGGAAAAGCAATGTATGCCCC  
TCCCATCCCAGGATACCTTAACTGTTTCATCAAATATTACAGGACTGCTATTAACAAGGGATGGTGGTCATAAC  
ACGAATACTACTGAGATCTTCAGACCTGGAGGAGGAGATATGAGGGACAATTGGAGAAGTGAATTATATAAAT  
ATAAAGTAGTAAAAATTGAACCATTAGGAATAGCACCCACCAAGGCAAGGAGAAGAGTGGTGCAGAGAGAAAA  
AAGAGCAGTGGGAATAGGAGCTGTGTTCTTGGGTTCTTGGGAGCAGCAGGAAGCACTATGGGCGCAGCGTCA  
ATAACGCTGACGGTACAGGCCAGGCTATTATTGTCTGGTATAGTGCAACAGCAAAACAACCTTGCTGAGAGCTA  
TTGAGGCGCAACAGCATCTGTTGCAACTCACAGTCTGGGGCATC

>DQ410205

TTCTACTGTAATACATCACAACCTGTTTAATAGTAATTGGACTTGGCCTGATACTGAAGGGTCAAATGACACTA  
ACACTAACGAAAATATCACACTCCCATGCAGAATAAAACAAATTATAAACATGTGGCAGGAGGTAGGAAAAGC  
AATGTATGCCCCCTCCCATCAGAGGACAAATTAGCTGTAAATCAAATATTACAGGACTGCTATTGACAAGAGAT  
GGTGGTCAGGACGAGAACGGGACCGAGACCTTCAGACCTGGAGGAGGAGATATGAGGGACAATTGGAGAAGTG  
AATTATATAAATATAAAGTAGTAAAAATTGAACCATTAGGAGTAGCACCCACCAAGGCAAAGAGAAGAGTGGT  
GCAGAGAGAAAAAAGAGCATTAGGAATAGGAGCCGTGTTCCTTGGGTTCTTGGGAGCAGCAGGAAGCACTATG  
GGCGCAGCGTCAATGACGCTGACGGTACAAGCCAGACTGCTATTGTCTGGTATAGTGCAACAGCAGAACAAAT  
TGCTGAGGGCTATTGAGGCGCAACAGCATCTGTTGCAACTCACAGTCTGGGGCATC

>FJ469733

TTCTACTGTAATTCAACACAACCTGTTTAATAGTACTTGGTATACTAATAATACTATGGAGGGGTACATGGTA  
ATGAGACAAATGGCACTATCACTCTCCCATGCAAAATAAGACAAATTGTAAACAAGTGGCAAGAAGTAGGAAA  
AGCAATGTATGCCCCCTCCCATTAGAGGACTAATTAGATGTTTCATCAAATATTACAGGGCTGCTATTAACAAGA  
GATGGTGGTCATAATAATAATAATAATACTAATGAGACCTTCAGACCTGGAGGAGGAGATATGAGGGACAATT  
GGAGAAGTGAATTATATAAATACAAAGTAGTAAGAATTGAGCCATTAGGAGTAGCACCCACCAAGGCACAGAG  
AAGAGTGGTGCAAAGAGAAAAAAGAGCAGTGGGACTAGGAGCTGTGTTCTTGGGTTCTTGGGAGCAGCAGGA  
AGCACTATGGGCGCAGCGTCAATAACGCTGACGGCACAGGCCAGACAATTATTGTCTGGTATAGTGCAACAGC  
AGAACAACCTGCTGAGAGCTATTGAGGCGCAACAGCATATGTTGCAACTCACAGTCTGGGGCATA

>JQ403107

TTCTACTGTGATACAACACAACCTGTTTAATAGCAGCTGGGAGGGGAATGGTACTAAAGATACTATAGAGTCAA  
ATGACACTGGAGGAAATATCACACTCCCATGTAGAATAAAACAGATTATAAACATGTGGCAGGAAGTAGGAAA  
AGCAATGTATGCCCCCTCCCATCAGTGGACCAATTAGCTGTTTCATCAAACATTACAGGGCTACTATTAACAAGA  
GATGGGGGTACATAACAATGACACTAACGGGAACGAGACCTTCAGACCTGGAGGAGGAAATATGAAGGACAATT  
GGAGAAATGAATTATATAAATATAAAGTAGTAAAAATTGAACCCTAGGAGTAGCACCCACCAAGGCCAAAGAG

AAGAGTGGTGCAGAGAGAAAAAGAGCAATGGGACTAGGAGCTATGTTTATTGGGTTCTTGGGAGCAGCAGGA  
AGCACTATGGGCGCAGCGTCAGTGACGCTGACGGTACAGGCCAGACAATTACTGTCTGGTATAGTGCGCCAGC  
AGAACAATCTGCTGAGAGCTATTGAGGCGCAACAGCATATGTTGCAACTCACAGTCTGGGGCATC

>KM259452

TTCTACTGTAATACAACAAAACCTGTTTAAACAGTACGTGGAATAATACTAGTACTTGGAAATTATACAGATGAAC  
CCGAAAATATCACCCCTCCCATGCAGAATAAAGCAAATTATAAACATGTGGCAGGAAGTAGGAAAAGCAATGTA  
TGCCCCCTCCCATCAGTGAATAATTAGATGCACATCAAAGATTACTGGGCTGCTATTAACAAGAGATGGTGGT  
AATCGTAATGACAGCAATACGACCGAGGTCTTCAGACCTGGAGGAGGAGATATGAGGGACAACCTGGAGAAGTG  
AATTGTATAAATATAAAGTAGTAAAAATTGAACCAGTAGGACTAGCACCCACCAAGGCAAAGAGAAGAGCGGT  
GCAGAGAGAAAAAGAGCAGTGGGAATAGGAGCTGTGTTCTTGGGTTCTTGGGAGCAGCAGGAAGCACTATG  
GGCGCAGCGTCATTAAACGCTGACGGTACAGGCCAGACTGTTATTGTCTGGAATAGTGCAACAGCAGAACAATC  
TGCTGAGAGCTATTGAGGCGCAACAGCATATGTTGCAACTCACAGTCTGGGGCATC

>EF593275

TTCTACTGTAATTCAACACCACTGTTTAAATAGTACTTGGTATAGTAATGGTACTGGGAGTGTGGGAATAACA  
CTCAAGCAAATGGCACTATCATACTCCCATGCAGAATAAAGCAAATCATAAACATGTGGCAGCAAGTAGGAAA  
AGCAATGTATGCCCTCCCATCCAAGGAATAATTAATTGTTTATCAAATATTACAGGGCTGTTACTAACAAGA  
GATGGAGGTAGTGGTAATAATACAGACAATAACACCGAGACCTTCAGACCTGGAGGAGGAGATATGAGGGACA  
ATTGGAGAAGTGAATTATATAAATATAAAGTAGTAGAACTTAAACCATTAGGAGTAGCACCCACCAAGGCAAA  
GAGGAGAGTGGTGCAGAGAAAAAGAGCAGTGGGAATAGGAGCTCTTCTCCTTGGGTTCTTGGGAACAGCA  
GGAAGCGCTATGGGCGCAGCGTCACTGACGCTGACGGTACAGGCCAGACATTTATTGTCTGGTATAGTGCAAC  
AGCAAAATAAATTGCTGAGGGCTATTGAGGCGCAACAGCATATGTTGCAACTCACAGTCTGGGGCATC

>JN024100

TTCTACTGTAATACAACAAAACCTGTTTAAATAGTACTTGGAAATAGTACTGAGAATGTGGAGGAAGGGCCAGATA  
ACAATATCACACTCCCATGCAGGATAAAGCAAATTATAAACATGTGGCAGGAAGTAGGAAAAGCAATGTATGC  
CCCTCCCATCGCAGGACAAATTAGATGTTTCATCAAATATTACAGGGCTGATATTAACAAGAGATGGTGGTGAG  
AATAACAACGAGACCGAGACCTTCAGACCTGGAGGAGGAGATATGAGGGACAATTGGAGAAGTGAACCTTTATA  
AATATAAAGTAGTAAAAATTGAACCATTAGGAGTAGCACCCACTAAGGCAAAAGAGAGTGGTGCAGAGAGA  
AAAAAGAGCAGCAATAGGAGCTTTGTTCTTGGTCTTGGGAGCAGCAGGAAGCACTATGGGCGCAGCGTCA  
ATAACGCTGACGGTACAGGCCAGACTATTGTTGTCTGGTATAGTGCAACAGCAGAGCAATCTGCTGAAAGCTA  
TTGAGGCGCAACAGCATCTGTTGCAACTCACAGTCTGGGGCATC

>HQ216601

TTCTACTGTGATACAACACAGCTGTTTAAATAGTACTTGGAAATATTGAGAATGATACGAACAGGTCAAATGAAA  
GTGAAACAATTATACTTCCATGCAAAATAAAGCAAATTATAAACCTGTGGCAGGAAGTAGGAAAAGCAATGTA  
TGCCCCCTCCCATCAGAGATCAAATTAGATGCTCATCAAATATTACAGGGCTGCTATTAACAAGAGATGGTGGT  
AATAATACAACCTGAGAACATAACGAGACCTTCAGACCTGGAGGAGGAGATATGAGGGACAATTGGAGAAGTG  
AACTTTATAAATATAAAGTAGTAAAAATTGAACCATTAGGAATAGCACCCACTACTGCAAAAAGAAGAGTGGT  
GCAGAGAGAAAAAGAGCGGCACTAGGAGCCTTGTTCTTGGGTTCTTGGGAGCAGCAGGAAGCACTATGGGC  
GCAGCGTCAATAACGCTGACGGTACAGGCCAGACTATTGTTGTCTGGTATAGTGCAACAGCAGAACAATCTGC  
TGAAGGCTATTGAGGCGCAACAGCATCTGTTGCAACTCACAGTCTGGGGCATC

>HQ216795

TTCTACTGTAACACATCACAGCTGTTTGATAGTACTTGGCTGTTTAAATAAGACTGGGGATAATAATACTGAAG  
GGTCAAATGACACTATCATACTCCATGCAGAATAAACAATTTATAAACAGGTGGCAGGAAGTAGGAAAAGGC  
AATGTATGCCCCCTCCCATCGCAGGACAAATTAGATGTCAATCAAATATTACAGGGGTGCTACTAACAAGAGAT  
GGGGGTAAAGAGTGGGAACGGTACTAATGAGACCGAAACATTCAGACCTGTTGGAGGAAATATGAAGGACAATT  
GGAGAAGTGAATTGTATAAATATAAGGTAGTAAAGATTGAACCATTAGGAGTAGCACCCACCAAGGCAAAGAG  
GCTAGTGGTGCAGAGAGAAAAAGAGCAGTGACGCTGGGAGCTATGTTTATTGGGTTCTTGGGAGCAGCAGGA  
AGCACTATGGGCGCAGCGTCACTGACGCTGACGGTACAGGCCAGACAATTACTGTCTGGTATAGTGCAACAGC  
AGAACAATCTGCTGAGAGCTATTGAGGCGCAACAGCATCTGTTGCAACTCACAGTCTGGGGCATT

>JX863965

TTCTACTGTAATTACAGCAACCTGTTTAAATAGTACTTGGGATAATACTGCTGGGAATAATACAGCTGGAGAAA  
ATGACACAATCACACTCCCATGCAGAATAAACAATTTGTAATAGGTGGCAAGAAGTAGGAAAAGCAATGTA  
CGCCCCCTCCCATCAGCGGACCAATTAAATGTTTCATCAAATATTACAGGACTGCTATTAACAAGAGATGGTGGT  
CAAAATACAACATAAACACCGAAATTTTCAGACCAGGAGGAGGAGATATGAGGGACAATTGGAGAAGTGAAT  
TATATAAATATAAAGTAGTAAAAATTGAACCATTAGGAGTAGCACCCACTAAGGCAAAGAGAAGAGTGGTGCA  
GAGAGAAAAAGAGCAGTGGGAATAGGAGCTATGTTCTTGGGTTCTTGGGAGCAGCAGGAAGCACTATGGGC  
GCAGCATCAATAACGCTGACGGTACAGGCCAGACAATTATTGTCTGGTATAGTGCAACAGCAGAACAATCTGC  
TGAGAGCTATTGAGGCGCAACAGCATCTGTTGCAACTCACAGTCTGGGGCATT

>JF320043

TTTTACTGTAATACAACAAAACCTATTTAAATAGCACTTGGGAGCCTAATAATGTAACTGTCACTGGTGATAATG  
ACACAATCACACTCCCATGCAGAATAAACAATTTGTAACCTGTGGCAGGAAGTAGGAAGAGCAATGTATGC

CGCTCCCATCAGAGGACTGATCAGATGTTTCATCAAATATTACAGGGCTACTATTAACAAGAGATGGTGGTGT  
GATAACAATCAGACCAATGTGACTAATAACACAGAAACCTTCAGACCAGGAGGAGAGATATGAGGGACAATT  
GGAGAAGTGAATTATATAAAATATAAAGTAGTAAAAATTGAACCATTAGGAGTAGCACCCACCAAGGCAAAGAG  
AAGAGTGGTGCAGAGAGAAAAAGAGCAATGGGATTTCGAGCTTTTTTCTTGGGTCTTGGGAGCAGCAGGA  
AGCACTATGGGCGCAGCGTCAATAACGCTGACGGCAGGCGCAGACAATTATTGTCTGGTATAGTGCAACAGC  
AAAACAATTTGCTGAGGGCTATTGAGGCGCAACAACACCTGTTGCAACTCACAGTCTGGGGCATC

>JF320484

TTCTACTGTAATTTATCAAACTGTTTAATAGTACTTGGACTAGTAATAGTACTTGGAAATGATACTGGTACTT  
GGAATGAGACTGGAGAAAATGATACTATAACACTTCAATGTAGAATAAAACAAATTATAAACATGTGGCAGGA  
AGTAGGAAGAGCAATGTATGCCCTCCCATCCAGGGACAAATTAAATGTATATCAAAATATCACAGGGCTGCTA  
TTAACAAGAGATGGTGGTAATAGTAATGACACAAAAGATACAGAAATCTTCAGACCTGCAGGAGGAGATATGA  
GGGACAATTGGAGAAGTGAATTATATAAAATATAAAGTAGTAAAAATTGAACCATTAGGAATAGCACCTCCAA  
GGCAAAGAGAAGAGTGGTGCAGAGAGAAAGAAGAGCAGTAACGCTGGGAGCAATGTTCTTGGGTTCTTGGGA  
ACAGCAGGAAGCACTATGGGCGCAGCGTCGATGGCGCTGACGGTACAGGCCAGACAATTATTGTCTGGTATAG  
TGCAGCAGCAGAGCAATCTGCTGAGGGCTATTGAGGCGCAACAGCATCTGTTGCAACTCACAGTCTGGGGCAT  
C

>EU577873

TTCTACTGTAATACAACAAAACCTGTTTAATAGTACTTGGAACTACTACTAGTATTTGGAATAACTGCAGAGA  
ATAATACTACAGGGTCAAATGAACTGAACCAATCACACTCCCATGCAGAATAAAACAAATTATAAATATGTG  
GCAGGAAGTAGGAAAAGCAATGTATGCCCTCCCATTAAGGAAACATTAGCTGTTTCATCAAATATTACAGGA  
TTGATATTAACAAGAGATGGTGGTAACGTTAACGGGACCAATGGAACCTGAAATCTTTAGACCTGCAGGAGGAA  
ATATGAAGGACAATTGGAGGAGTGAATTATATAAAATATAAAGTAGTAAAAATTGAGCCATTAGGAGTAGCACC  
CACCAAGGCAAAGAGAAGAGTGGTGCAGAGAGAAAAAGAGCAGTGGGATTTCGGAGCTGTGTTCTTGGGTTCT  
TTGGGAGCAGCAGGAAGCACTATGGGCGCAGCGTCGGTGACGCTGACGGTACAGGCCAGACAATTATTGTCTG  
GTATAGTGCAACAGCAAAACAATTGCTGAGAGCTATTGAGGCGCAACATCATCTGTTGCAACTCACCGTTTG  
GGGCATC

>KT124778

TTCTACTGTAATACGTCACAACCTGTTTAATAGTACTTGGCTGGGGAATGACACTGAAAGGTTAAACAGAACTG  
AAGGGTCAGACAGCACTGAAGTAATCACACTCCAGTGTAGAATAAAACAAATTATAAACATGTGGCAGGAAGT  
AGGAAAAGCAATGTATGCCCTCCCATCGCAGGACAAATTAACCTGTTTCATCAAATATTACGGGGCTACTATTA  
ACAAGAGATGGTGGTTACAATGATACTAGCCAGAACGAGACCTTCAGACCTGGGGGAGGAGATATGAGGGACA  
ATTGGAGAAGTGAATTATATAAAATATAAAGTAGTAAGAATTGAACCATTAGGAGTAGCCCCACCAAGGCAAA  
GAGAAGAGTGGTGCAAAGAGAAAGAAGAGCAGTGGGATTAGGAGCTGTGTTCTTGGGTTCTTGGGAGCAGCA  
GGAAGCACTATGGGCGCAGCGTCAGTGACGCTGACGGTACAGGCCAGACAATTATTGTCTGGTATAGTGCAAGC  
AGCAAAACAATTTGCTGAAGGCTATTGAGGCGCAACACCATCTGTTGCAACTCACAGTCTGGGGCATC

>DQ410562

TTCTACTGTAATACAACACTGCTGTTTGATAGTACTTGGGATGATAATAATAGAAGTTTGAATTTGAATAATA  
CTAATAGAAACATCACACTCCCATGCAAGATAAAACAAATTATAAACAGGTGGCAGGAAGTGGGAAAAGCAAT  
GTATGCCCTCCCATTCAGGAGTAATTCAATGTTTCATCAAATATTACAGGGCTGTTATTAGTAAGAGATGGT  
GGCAACACTGCTAACAATACTGCTAACAAAACCTGAGACCTTCAGACCTGGAGGAGGAAATATGAAGGACAATT  
GGAGAAGTGAATTATATAAAATATAAAGTAGTAAAAATTGAACCATTAGGAGTGGCACCCACCAAGGCAAAGAG  
GAGAGTGGTGCAGAGGGAAAAAGAGCAGTGGGAATAGGAGCTATGTTCTTGGATTCTTAGGAGCAGCAGGA  
AGCACTATGGGCGCAGCGTCAATAACGCTGACGGTACAGGCCAGGCAATTATTGTCTGGTATAGTGCAACAGC  
AGAACAACTGCTGAGAGCTATTGAGGCGCAACAGCATCTGTTGCAACTCACAGTCTGGGGCATC

>FJ469717

TTCTACTGTAATACAACACAGCTGTTTAATAGTACTTGGTTTACTAATGGCACTTGGATTAATGGTACTGTGT  
TAAATACAAATGATACTGACAAGGGAAACATCACACTCCCATGTAAATATAAAACAAATTATAAACATGTGGCA  
GGAAGTAGGAAAAGCAATATATGCCCTCCCATCAAAGGACCAATTAACCTGTACATCAAATATTACAGGGATA  
ATAATAACAAGAGATGGTGGTAATAACACGGGCGAAAAATAAAACTTTCACTGAAACTTTTCAGACCTG  
GAGGAGGAAATATGAGGGATAATTGGAAGTGAACATATATAAATATAAAGTAGTACAGATTCAACCAATAGA  
AATAGCACCCACCAGGGCAAAGAGAAGAGTGGTGCAGAGAGAAAAAGAGCAGTGGGAGCGCTGGGAGCTGTG  
TTCTTGGGTTCTTGGGAGCAGCAGGAAGCACTATGGGCGCAGCGTCAATAACGCTGACGGTACAGGCCAGAC  
AATTATTGTCTGGTATAGTGCAACAGCAGAACAACTCTGCTGAAGGCTATTGAGGCGCAACAGCATCTGTTGCA  
ACTCACAGTCTGGGGCATC

>FJ469724

TTCTACTGTAATACAACACAACCTGTTTAATAGTACTTGGAAATATGATACTTGGAAATGATAATAAAACTGAAG  
GAAATGGCACAATTACACTCCAATGCAGAATAAAACAAATTTATAAACCTGTGGCAGAAAGTAGGAAAAGCAAT  
ATATGCCCTCCCATCCAAGGAAATATTAGCTGTTTCATCAAATATTACAGGGCTGCTATTAACAAGGGATGGT  
GGTGTTAACGGGAGCGAGCACAAACGAGACACTCAGACCTGGAGGAGGAGATATAAAAGACAATTGGAGAAGTG  
AATTATATCAATATAAAGTAGTAAAAATTGAACCATTAGGAATAGCACCCACTGCAGCAAAGAGAAGAGTGGT

GCAGAGAGAAAAAGAGCAGCAGGAATAGGAGCTCTGCTCCTTGGGTTCTTGTCAGCAGCAGGAAGCACTATG  
GGCGCAGTGTCTAGTGACGCTGACGGTACAGGCCAGACAATTATTGTCTGGTATAGTGCAACAGCAAAACAATT  
TGCTGAGAGCTATTGAGGCGCAACAGCATCTGTTGCAACTCACGGTCTGGGGCATT

>FJ469747

TTCTACTGTAACCAACACCACTGTTTAATAGTACTTGGATTGATGAATCATCAGGTATCGCTGAAGGAGATG  
AGAACATCACACTTCAATGCAGAATAAAACAAATTATAAACATGTGGCAGGAAGTAGGAAAAGCAATGTATGC  
CCCTCCCATCAGAGGACAAATTAGATGTTTCAATCAATATTACAGGGCTGCTATTAACAAGAGATGGTGGTCCT  
AGTAGTAATGAAACCAACAGGAACGAGACCTTCAGACCGGGAGGAGAGATATGAGGGACAATTGGAGAAGTG  
AATTATATAAATATAAAGTAGTAAAAGTTGAACCATTAGGAGTAGCACCCACCAGGGCAAAGAGAAGAGTGGT  
GCAGAGAGAAAAAGAGCAGTGGGACTAGGAGCTGTGTTCTTGGGTTCTTGGGAGCAGCAGGAAGCACTATG  
GGCGCAGCGTCACTGACGCTGACGGTACAGGCCAGACAATTATTGTCTGGGATAGTGCAACAGCAGAATAATC  
TGCTGAGAGCTGTTGAGGCGCAACAGCATCTGTTGCAACTCACAGTCTGGGGCATC

>FJ653159

TTCTATTGTAATACAACACAACCTGTTTAATAGTAATTGGAATGAGAGTAGTATTAATAGTACTTGGAAATAGTA  
CTTGGAAGTCAAATGACCCAAAATGACACCATCACACTCCCATGCAGAATAAAACAAATTATAAACATGTGGCA  
AGAAGTGGGAAAAGCAATGTATGCCCCCTCCCATCAAAGGTGTAATTCAGTGTTTCAATATTTACAGGGCTG  
CTATTAACAAGAGATGGTGGGAGTAATGAGACTAATACCACCGAGACTTTTTCAGACCTGGGGGAGGAGATATGA  
GGGACAATTGGAGAAGTGAACATATAAAGTAGTAAAAATTGAACCATTAGGAGTAGCACCCACCAA  
GGCAAAAAGAAGAGTGGTGC AAAAGAGAAAAAGAGCAGTGGGAACAATAGGAGCTATGTTCTTGGGTTCTTG  
GGAGCAGCAGGAAGCACTATGGGCGCAGCGTCAGTGACGCTGACGGTACAAGCCAGACAATTATTGTCTGGTA  
TAGTG CAGCAGCAGAGCAATTTGCTGCAGGCTATTAATGCACAACAACATTTGCTGCAACTAACAGTCTGGGG  
CATC

>FJ653573

TTTTACTGTAATACAACACAACCTGTTTAATAGTACTTGGAAATATGACTGGTACCTGGAATGATACCTGGAATG  
GTACTAAAAGGTCAAATGAACTGACAATATCACACTCCCATGCAGAATAAAACAAATAGTAAACAGGTGGCA  
GGAAGTAGGCAAAGCAATGTATGCCCCCTCCCATCAGAGGAAGCATTAGATGTTTCAATATTTACAGGGCTG  
CTATTAACAAGAGATGGGGGGATTCTAATAGCACTGAGGCAAATAACACTGAGATTTTCAGACCTGGAGGAG  
GAGACATGAGGGACAATTGGAGAAGTGAATTATATAAGTATAAAGTAGTGAAAATTGAACCATTAGGAGTAGC  
ACCCACCAAGGCAAGGAGAAGAGTGGTGCAGAGAGAAAAAGAGCAGTGGGAGCACTAGGAGCTATGTTCTT  
GGGTTCTTGGGAGCAGCAGGAAGCACTATGGGCGCAGCGTCACTGACGCTGACGGTACAGGCCAGACAATTGT  
TGTCTGGTATAGTGCAACAGCAGAACAACCTGCTGAGAGCTATTGAGGCGCAACAGCATCTGTTGCAACTCAC  
AGTCTGGGGCATC

>FJ653360

TTCTACTGTAATACAACAGCATTGTTTAATAGTACTTGGAAATAATGCTGGAGTATCAAATAGTACTTGGAAATA  
ATGCTGGAGTATCAAATCACAGTACAGGAAATGAAACAATCACACTCCAATGCAGAATAAAACAAATTATAAA  
TATGTGGCAGGAAGTAGGAAAAGCAATGTATGCCCCCTCCCATTAGTGGACAAATTAAATGTTTCAATATTT  
ACAGGGCTGCTATTAACAAGGGATGGTGGTATTGATAATACAGGGAGCAACGAAACCGAGGTCTTCAGACCTG  
GAGGAGGAAATATGAAGGACAATTGGAGAAGTGAATTATATAAATATAAAGTAATAAAATTGAACCAGTAGG  
AATAGCACCCACCAAGGCAAGGAGAAGAGTGGTGCAGAGAGAAAAAGAGCAGCGCTAGGAGCTCTGTTCTT  
GGGTTCTTGGGAATGGCAGGAAGCACTATGGGCGCAGCGTCAGTGACGCTGACGGTACAGGCCAGGCTATTAC  
TGTCTGGTATAGTGCAACAGCAGAACAATCTGCTGAGGGCTATTGAGGCGCAACAGCATCTGTTGCAACTCAC  
AGTCTGGGGCATC

>FJ653426

TTCTACTGTAATACATCACCACTGTTTAATAGTACTTGGAAATATTACTGAAGAGACAGATAATATTACTGGAA  
AGACAGATGACAATAATAAAAAATGACACAATAATCACACTTCAATGCAGAATAAAACAAATTGTAAACATGTG  
GCAAAAAGTAGGAAGAGCAATGTATGCCCCCTCCCATCAAGGGACAAATTAGGTGTGCATCAAACATTACAGGG  
CTGCTATTAACAAGAGATGGTGGTAGTAACAAGAACGATAGTGACACCGAGATCTTCAGACCTGGAGGTGGAG  
ATATGAGGGATAATTGGAGAAGTGAATTATATAAATATAAAGTAGTAGAGATTAAACCATTAGGAATAGCACC  
CACCAAGGCAAAGAGAAGAGTGGTGC AAAAGAGAAAAAGAGCAGTGGGACTAGGAGCTATGTTCTTGGGTTCT  
TTAGGAGCAGCAGGAAGCACTATGGGCGCAGCGTCAGTGACGCTGACGGTACAGGCCAGGAAATTTATTGTCTG  
GTATAGTGCAACAGCAGAACAATTTGCTGAAGGCTATTGAGGCGCAACAACACCTGTTGCAACTCACAGTCTG  
GGGCATC

>EU578629

TTCTACTGCAATACAACAAAACTGTTTCACTAGTACTTGGAAATAGTACTACTTGGGATAGTTGGAATAGTACTG  
AAACAAATAGCACTGACAGAAATATCACACTCCCATGCAGAATAAAACAAATTATAAACATGTGGCAGGAAGT  
AGGAAGAGCAATGTATGCCCCCTCCCATCAGAGGACAAATTAGATGCTCATCAAATATTACAGGGCTGATATTA  
ACAAGAGATGGTGGTAACAATACAAATACAAACGAGACCTTCAGACCTCAAGGAGGAAACATGAAGGACAATT  
GGAGAAGTGAATTATATAAATATAAAGTAGTAAAAATTGAACCCTAGGAATAGCACCCACCAAGGCAAAGAG  
AAGAGTGGTGCAGAGAGAAAAAGAGCAGTGGGAATGGGAGCTTTGTTCTTGGGTTCTTGGGAGCAGCAGGA

AGCACTATGGGCGCAGTGTGATGACGCTGACGGTACAGGCCAGACAATTATTGTCTGGTATAGTGCAACAGC  
AGAATAATCTGCTGAGAGCTATTGAGGCGCAACAGCATCTGTTGCAACTCACAGTCTGGGGCATC  
>HQ217860

TTCTACTGTAATACAACAAAACCTATTTAATAGTACTTGGGATATAGAAACAATACTTAAGCATACTAAAAATA  
GTAATGACACAACTCAACTATTACACTCCAATGCAGAATAAAACAAATTGTAAACATGTGGCAGGAAGTAGG  
AAAAGCAATGTACGCCCCCTCCCATCAGAGGAATAATTAAGTGTACATCAAATATTACAGGGCTGCTATTAAACA  
AGAGATGGGGGTCTATAACAACAGCACCAACGAGACCTTCAGACCGGGAGGAGGAGATATGAGAGACAATTGGA  
GAAGTGAATTATACAAATATAAAGTAGTAAAAGTTGAACCATTAGGAATAGCACCCACCAAGGCAAAAAGAAG  
AGTGGTGCAAAGAGAGAAAAAGAGCAGTGGGAATAGGAGCTGTGTTCCCTTGGGTTCTTGGGAGCAGCAGGAAGC  
ACTATGGGCGCAGCGCAGAGTGACGCTGACGGTACAGGCCAGACAATTATTGTCTGGTATAGTGCAACAGCAGAGA  
GCAATTTGCTGAGAGCTATTGAGGCGCAACAGCATCTGTTGCAGCTCACAGTCTGGGGCATC  
>JF689865

TTCTACTGTAATACAACAAAACCTGTTTAAATAGTACTTGGCCTTGGAATGTTACTGGGTCAAATGTTACTGGGT  
TAAATGACACAATCACAATTCATGCAGAATAAAACAAATTATAAACATGTGGCAGGAAGTAGGAAAAGCAAT  
GTATGCCCTCCCATCCAAGGACAAATTAGATGTTTCATCAAATATTACAGGGCTACTATTAACCAGAGATGGT  
GGTAATACAAATGAGAGCAATACCACCGAGACCTTCAGACCTGGAGGAGGAGATATGAGGGACAATTGGAGAA  
GTGAATTATATAAATATAAAGTAGTAAAATTGAACCATTAGGAGTAGCACCCACCAAGGCAAAGAGAAGAGT  
GGTGCAGAGAGAAAAAAGAGCAGTGGGACTAGGAGCTCTGTTCCCTTGGGTTCTTGGGAGCAGCAGGAAGCACT  
ATGGGCGCAGCGTCAATGACGCTGACGGTACAAGCCAGGCAATTATTGTCTGGTATAGTGCAACAGCAAAAACA  
ATTTGCTGAGGGCTATTGAAGCGCAACATCACCTGTTGCAACTCACAGTCTGGGGCATT  
>JF689874

TTCTACTGTAATACAACAAAGCTGTTTACAAAGCGGTTTGATTGGAATAGGACTGAAGGGTTAAATGACACTG  
CAGGAAATAACACTGGAGGAAAACATCATAATCCCATGCAGAATAAAACAAATTATAAACATGTGGCAAGA  
AGTAGGAAAAGCAATATATGCCCTCCCATCAGTGGACGAATTAAGTGTACATCAAACATTACTGGGCTGCTA  
TTAATAAGAGATGGTGGGATAGGCCCGGGACAGACAATACTAGTGAAACCTTCAGACCTCAAGGAGGGAATA  
TAAGAGATAATTGGAGAAGTGAATTATATAAATATAAAGTAGTAAAATTGAACCATTAGGACTAGCGCCAC  
CAAGGCAAGGAGAAGAGTGGTGCAGAGAGAAAAAAGAGCAATGGGACTAGGAGCTTTGTTCCCTTGGGTTCTTG  
GGAGCAGCAGGAAGCACTATGGGCGCAGCGTCACTGACGCTGACGGTACAGGCCAGACAATTATTGTCTGGTA  
TAGTGCAACAGCAGAACAAATTTGCTGAGAGCTATTGAGGCGCAACAGCATATGTTGCAACTCACAGTCTGGGG  
CATC  
>JF689875

TTCTACTGTAATACAACACAACCTGTTTAAATAGTACTTGGAAATGAGAATAGTACTAAAGAAGGAAATGGAAATG  
ACACAATAACCACACTCCCATGCAGAATAAAACAAATTATAAACATGTGGCAAGAAGTAGGAAAAGCAATGTA  
TGCCCCCTCCCATCAGAGGAAACATTAGCTGTACATCAAATATTACAGGGCTGCTATTAAACAAGAGATGGTGGG  
AATAATGAGACCGAGACCTTCAGACCTGGAGGAGGAAATATGAAGGATAATTGGAGAAGTGAATTATATAAAT  
ATAAAGTAGTAAAATTCAACCATTAGGAGTAGCACCCACCAAGGCAAAGAGAAGAGTGGTGCAGAGAGAAAA  
AAGAGCAGTGGGACTAGGAGCTGTGTTCCCTTGGGTTCTTGGGAGCAGCAGGAAGCACTATGGGCGCAGCGTCA  
ATAACGCTGACGGTACAGGCCAGACAATTATTGTCTGGTATAGTGCAACAGCAGAACAAATTTGCTGAGGGCTA  
TTGAGGCGCAACAGCATCTGTTGCAACTCACAGTCTGGGGCATT  
>JX863990

TTCTACTGTAATACAACACAACCTGTTTAAATAGTACTTGGAAATCTACTACTTTGAATTCTACTAGTACTGGGA  
ATGGGACCATCACACTCTCATGTAGAATAAAACAAATTATAAACAGGTGGCAGGAAGTAGGAAAAGCAATGTA  
TGCTCCTCCCATCAGAGGACAAATTAAGTGTTTCATCAAATATTACAGGGCTACTGTTAAACAAGAGATGGTGGT  
CACACAAACAACACCAACAAAACCTGAGACCTTTAGACCTGGAGGAGGAGACATGAGGGACAATTGGAGAAGTG  
AATTATACAAATATAAAGTAGTAAAATTGAACCATTAGGAATAGCACCCACCAAGGCAAAGGAGAAGAGTGGT  
GCAGAGAGAAAAAAGAGCAATAGGAATAGGAGCTGTGTTCCCTTGGGTTCTTGGGAACAGCAGGAAGCACTATG  
GGCGCAGCGGCAGTGACGCTGACGGTACAAGCCAGACAATTACTGTCTGGTATAGTGCAACAGCAGAACAAATTTGCTGAGGGCTA  
TGCTGAGGGCTATTGAGGCGCAGCAGCATCTGTTGCAACTCACAGTCTGGGGCATC  
>JF320363

TTCTACTGTAACACAGCAAAACCTGTTTGATACATCACAACCTACAACCTGTCTAATAGCAGCACTGAAGAAAATG  
ACACTACTACAATTCCATGCAGAATAAAACAAGTTATAAACAGGTGGCAGGAAGTAGGAAAAGCAATGTATGC  
CCCTCCCATCAGAGGACAAATTAATGTGTATCAAACATTACAGGGCTGCTATTAAACAAGAGATGGTGGAAAG  
ACTGAGGATAATACTACTAATACTACTGAGGTCTTCAGACCTCAAGGAGGAAATATGAAAGATAATTGGAGAA  
GTGAATTATATAAATATAAGGTAGTAAGAACTGAACCATTAGGAGTAGCACCCACCAAGGCAAAGAGAAGAGT  
GGTGCAGAGAGAAAAAAGAGCAATAGGGGGATTAGGAGCGTTGTTCCCTTGGGTTCTTGGGAGCAGCAGGAAGC  
ACTATGGGCGCAGCGTCAATAACGCTGACGGCACAGGCCAGACAATATTGTCTGGTATAGTGCAACAGCAGAGA  
ATAATTTGCTGAGAGCTATTGAGGCGCAACAACATCTGTTGCAACTCACAGTCTGGGGCATC  
>JF320036

TTCTACTGTAATACAACACAGCTGTTTAAATATTAGTAGTACACAACCTGTTTAAATAGTACTTGGAAATAGTACCG  
AAGGGCTAAACACAAAAAATATCACACTCCAATGCAGAATAAAACAAATTATAAACATGTGGCAGCAAGTAGG

AAAAGCAATGTATGCCCCCTCCCATCAGAGGACCAATTAAATGTATATCAAATATTACAGGGCTGCTGTTAACA  
AGAGATGGTGGGAAGATAAAATGAGAGTAGGGCAAATGAGACTGAGACCTTCAGACCTGGAGGAGGAGATATGA  
GGGACAAATTGGAGAAGTGAACCTCTATAAAATATAAAGTAGTAAAAATTAAACCATTAGGAGTAGCACCCACTAA  
GGCAAAAAGAAGAGTGGTGCAGAGAGAAAAAAGAGCAGTGGGACTAGGAGCATTGTTCCCTTGGGTTCTTGGGA  
GCAGCAGGAAGCACTATGGGCGCAGCGTCAATAACGCTGACGGTACAGGCCAGACAATTATTGTCTGGTATAG  
TGCAACAGCAGAACAACTCTGCTGAGGGCTATTGAGGCGCAACAGCACCTGTTGCAACTCACAGTCTGGGGCAT  
C

>JF320502

TTCTACTGTAATACAACAAAACCTGTTTAATAGCATTGGAATGAAACACAACCTGTTTAATAGTACTTGGAATG  
AGACTGAAAGAGGAGTCAATATCACACTCCCATGTAGAATAAAACAAATTATAAAATATGTGGCAGGAAGTAGG  
AAAAGCAATGTATGCCCCCTCCCATCAGAGGAATAATTCAATGTACATCAAACATTACAGGACTGATATTAACA  
AGAGATGGTGGTAAAAAAAATAATGGGAGTGAAACCTCCAATGGGAATGAAACCTTCAGACCTGGAGGAGGAG  
ATATGAGAGACAATTGGAGAAGTGAATTATATAAAATATAAAGTAGTAAAAGTTGAACCATTAGGAATAGCACC  
CACTAGGGCAAGGAGAAGAGTGGTGCAGAGAGAGAAAAAGAGCAGTGGGAATAGGAGCTGTGTTCCCTTGGGTTT  
TTGGGAGCAGCAGGAAGCACTATGGGCGCAGCGTCAATAACGCTGACGGTACAGGCCAGACAATTATTGTCTG  
GTATAGTGCAACAGCAGAACAACTCTGCTGAAAGCTATTGATGCGCAACAGCATCTGTTGCAACTCACAGTCTG  
GGGCATC

>JF320151

TTCTACTGTAATACAACAGAGCTGTTTAATGATACTTGGCTGAGTAATAATACTTGGCTGTCAAATTATACTG  
AGAGTAATAATAACTGCTAAAAATATCGTACTCCCATGCAGAATAAAACAAATTATAAACAGATGGCAGGA  
AGTAGGAAAAGCAATGTATGCCCCCTCCCATCAGTGGACTAATTAGATGCTCATCAAATATTACAGGGCTGCTC  
TTAACAAGAGATGGTGGTAATCATAACACTAGTAATGACACCGAGACTTTTCAGACCAGGAGGAGGAGATATGA  
GGGATAATTGGAGAAGTGAATTATATAAAATATAAAGTAGTAAAAATTGAGCCATTAGGAGTAGCACCCACCAA  
GGCAAGGAGAAGAGTGGTGCAGAGAGAGAAAAAAGAGCAGTGGGACTAGGAGCTTTGTTCCCTTGGGTTCTTGGGA  
GCAGCAGGAAGCACTATGGGCGCAGCATCAGTGACGCTGACGGTACAAGCCAGACAATTATTGTCTGGTATAG  
TGCAACAGCAAAACAATTTGCTGAGGGCTATTGAGGCGCAACAGCATATGTTGCAACTCACAGTCTGGGGCAT  
T

>JF320145

TTCTACTGTAATTCAACAAAACCTGTTTAGCAGTGCTTGGTATACTAATAATACTAATAGTAGTAATACTGAAG  
GGTCAAATGACACTGTTATCATACTTCCATGCAAAATAAAACAAATTATAAACATGTGGCAGGAAGTAGGAAG  
AGCAATGTATGCCCCCTCCCATCGCAGGAAACATTAGCTGTTTCATCAAATATTACAGGACTGCTGTTAACAAGA  
GATGGTGGTCACACGGAACCTGCCAACACCACAGAAATCTTCAGACCTGGAGGAGGAGATATGAGGGACAATT  
GGAGAAGTGAATTATATAAAATATAAAGTAGTAAAAATTGAACCATTAGGAGTAGCACCCACCAAGGCAAGGAG  
AAGAGTGGTGCAGAGAGAGAAAAAAGAGCAGTAACAGTGGGAGCTGTGTTCCCTTGGGTTCTTGAGTGCAGCAGGA  
AGCACTATGGGCGCAGCGTCACTGACGCTGACGGTACAGGCCAGACTACTGTTGTCTGGTATAGTGCAGCAGC  
AGAGCAATCTGCTGAGGGCTATTGAGGCGCAACAACAACTGTTGCAACTCACAGTCTGGGGCATC

>HQ908232

TTCTACTGTAATACAACAAGGCTGTTTAATAGTACTTGGCAGTCCAATAGTACGGGGAATGATACTGGAGGGT  
CAAATAACACTGAACCTATCACACTCCTATGCAGAATAAAACAAATTGTAAACAGGTGGCAAGAAGTAGGAAA  
AGCAATGTATGCCCCCTCCCATCAGAGGACAAATTTACTGTAGATCAAATATTACAGGGCTGCTATTAAACAAGG  
GATGGTGGTAATGTCCAGAACAAATGACTGAGACCTTCAGACCAGGAGGAGGAGATATGAGGGACAATTGGA  
GAAGTGAATTATATAAAATATAAAGTAGTAAAAATTGAGCCATTAGGAATAGCACCCACCGGGGCAAAGAGAAG  
AGTGGTGCAGAGAGAGAAAAAAGAGCGGTGACACTGGGAGCTATGTTCCCTTGGGTTCTTGGGAGCAGCAGGAAGC  
ACTATGGGCGCAGCGTCAATAACGCTGACGGTACAGGCCAGACAATTACTGTCTGGTATAGTGCAACAGCAGGA  
ACAATCTGCTGAAGGCTATTGATGCGCAGCAGCATATGTTGCAACTCACCGTCTGGGGCATC

>KM353665

TTCTACTGTAATACAACAAAATGTTTAATAGTACTTGGTATAATAATAGTACTTGAATAATACTGGAGGAA  
ATGACACATTCACACTCCCATGTAGAATAAAACAAATTATAAACATGTGGCAGACAGTAGGAAGAGCAATGTA  
TACCCCTCCCATCAGAGGATTAATTAAGTGTACATCAAATATTACAGGGCTGATATTAAACAAGAGATGGTGGG  
GGTGGTAACGAGAGTAATCATACCACAGAGGTCTTCAGACCTGCAGGAGGAGATATGAGGGACAATTGGAGGA  
GTGAATTATATAAAATACAAAGTAGTAAAAATTGAACCATTAGGAATAGCACCCACCGGGCAAAGAAGAGT  
GGTGCAGAGAGAGAAAAAAGAGCAGTGGGGATGGGAGCTCTGTTCCCTTGGGTTCTTAGGAGCAGCAGGAAGCACT  
ATGGGCGCAGCGTCAATAACGCTGACGGTACAGGCCAGACAATTATTGTCTGGTATAGTGCAACAGCAGAGCA  
ATTTGCTGAAGGCTATTGAGGCGCAACAGCATCTGTTGCAACTCACAGTCTGGGGCATC

>JN687750

TTCTACTGTGATACAAAAAGCTGTTTAATAGTACTTGGTGGGTTAATAATACTTGGAAAGGCACTAAAGGGG  
ATGAGACTAGGAATGGCACAATCGAACTCCCATGCAGAATAAAACAAATTATAAACATGTGGCAGGAAGTAGG  
AAAAGCAATGTATGCCCCCTCCCATCAGAGGACAAATTCAGTGTTCATCAAATATTACAGGGCTGCTATTAAACA  
AGAGATGGGGGTAATAATGAAACGAACGGAACAGAAACCTTCAGACCTGGAGGAGGAGATATGAGGGACAATT  
GGAGAAGTGAATTATATAAAATATAAAGTAGTAAAAATTGAGCCATTAGGAATAGCACCCGGCAGGGCAAAGAG

AAGAGTGGTGCAGAGAGAAAAAGAGCAGTGGGACTAGGAGCTATGTTCCCTTGGGTTCTTGGGAGCAGCAGGA  
AGCACTATGGGCGCAGCGTCAATAACGCTGACGGTACAGGCCAGACAATTACTGTCTGGTATAGTGCAACAGC  
AGAACAACCTTGCTGAGAGCTATTGAGGCGCAGCAGCATATGTTGCAACTCACAGTCTGGGGCATC

>HM204582

TTTTATTGTAATACATCAGAACTGTTTAAAGTACCTGGAATAGTACTGATACCTTCAACAGTACTGGAGAGA  
GAGGAATGACACAATCATTCTCCCATGCAAAATAAGGCAAGTTGTAAACATGTGGCAGGAAGTAGGAAAAGC  
AATGTATGCCCCCTCCTATCAGAGGTCAAATTAAGTGTTCATCAAATATTACAGGGCTGCTATTAACAAGAGAT  
GGTGGTGATAAAAAATAGTACAAACGAGACCTTCAGACCTGGAGGAGGAGATATGAGGGACAATTGGAGAAGTG  
AATTATATAAATATAAGGTAGTAAAAATTGAACCATTAGGAATAGCACCCACCAAGGCAAAGAGAAGAGTGGT  
GCAAGAGAAAAAGAGCAGTGGGAATAGGAGCTTTGTTCCCTTGGGTTCTTGGGAGCAGCAGGAAGCACTATG  
GGCGCAGCGTCACTGACGCTGACGGTACAAGCCAGACTATTATTGTCTGGTATAGTGCAACAGCAGAACAATT  
TGCTGAGGGCTATTGAGGCGCAACAGCATCTGTTGCAACTCACGGTCTGGGGCATC

>HM204589

TTCTACTGTAATTCAACACAATTGTTTAAATAGTACTTGGGATAAGAATGGTAGTAGAATAAATGGAAGTGAAG  
GAGAAAGTGGTACCATCACACTCCCATGCAGAATAAAACAAATTATAAACATGTGGCAGGAAGTAGGAAAAGC  
AATGTATGCCCCCTCCCATCAGAGGACAAATTTATTGTTTCATCAAATATTACAGGGATGCTATTAACAAGAGAT  
GGTGGTACTAATGATACTGACAAAAACGACACCGAGACCTTCAGACCTGGAGGAGGAGATATGAGGGATAATT  
GGAGAAGTGAATTATATAAATATAAAGTAGTAAAAATTGAGCCATTAGGAGTAGCACCCACCAAGGCAAAGAG  
AAGAGTGGTGCAGAGAGAAAAAGAGCAGTGGGATTGGGAGCTCTGTTCCCTTGGGTTCTTGGGAGCAGCAGGA  
AGCACTATGGGCGCAGCGTCAGTGACGCTGACGGTACAGGCCAGACAATTATTGTCTGGTATAGTGCAACAGC  
AGAACAATCTGCTGAGGGCTATTGAGGCGCAACAGCATCTGTTGCAACTCACAGTCTGGGGCATC

>KY112061

TTCTACTGTAATTCAACACAGCTGTTTAAATAGTGCTTGGCCTTGGGAATGATACTGAAGGGTCAAATGACGCTA  
AAAAAGATAATATCACACTCCCATGCAAAATAAAACAAATTATAAACATGTGGCAGGGAGTAGGAAAAGCAAT  
GTATGCCCCCTCCCATCGAAGGAAAAATTAAATGCTCATCAAATATTACAGGACTGCTATTAACAAGAGATGGT  
GGTTATGAGAACAAATGAGACCAAGCCCGAGATCTTCAGACCTGGAGGAGGAGATATGAGGGACAATTGGAGGA  
GTGAATTATATAAATATAAAGTAGTAAAAATTGAACCATTGGGAGTAGCACCTACCAAGGCAAAGAGAAGAGT  
GGTGCAGAGAGAAAAAGAGCATTTGGACTAGGAGCTGTGTTCCCTTGGGTTCTTGGGAGCAGCAGGAAGCACT  
ATGGGCGCAGCATCAATAACGCTGACGGTACAGGCCAGACAATTATTGTCTGGTATAGTGCAACAGCAGAACA  
ATTTGCTGAGGGCTATTGAGGCGCAACAGCATCTGTTGCAACTCACAGTCTGGGGCATC

>EU576345

TTCTACTGTGATACAACAAAACCTGTTTAAATAGTACTTGGGGGAATAGTACTTGGGGGTATAAAATGACAAATG  
ACACTGCAAAAGACAACATCACACTCCCATGTAGAATAAAACAAATTATAAACATGTGGCAGGAAGTAGGAAA  
AGCAATGTATGCCCCCTCCCATCAAAGGACAAATTAGATGTACATCAAATATTACAGGGTTGGTGTAAACAAGA  
GATGGTGGTGGTGGTAGTGGTACAAATAACACCACAGAGATCTTCAGACCTGGAGGAGGAGATATGAGGGACA  
ATTGGAGAAGTGAATTATATAAATATAAAGTAGTAAAGATTGAACCATTAGGAATAGCACCCACCAAGGCAAA  
GAGAAGAGTGGTGCAGAGAGAAAAAGAGCAGCAATAGGAGCTATGTTCCCTTGGGTTCTTGGGAGCAGCAGGA  
AGCACTATGGGCGCAGCGTCAATAACGCTGACGGTACAGGCCAGACTATTATTGTCTGGTATAGTGCAACAGC  
AGAACAATCTGCTGAGGGCTATTGAGGCGCAACATCAACTGTTGCAACTCACAGTCTGGGGCATC

>EU576383

TTCTACTGTAATTCAACACAACCTGTTTAAACAGTACTTGGCATAGTAACAGTACTTGAATGATACTGGAAAGT  
CAGAAAATAATACAAAATCATCACACTCCCATGCAGAATAAAACAAATTATAAACATGTGGCAGGAAGTAGG  
AAAAGCAATGTATGCCCCCTCCTATCAGAGGACAAATTAGATGTTTCATCAAATATTACAGGGCTGATACTAACA  
AGGGATGGAGGTATGGAGGTAATGACAATAACCAGACCACCGAGACCTTCAGACCTGGAGGAGGAAATATGA  
AGGACAATTGGAGAAGTGAATTATATAAATATAAAGTAGTAAAAATTGAACCATTAGGAGTAGCACCCACCCC  
GGCAAAAAGAAGAGTGGTGCAGAGAGAAAAAGAGCATTAGTGGGATTTCGAGCTCTGTTCCCTTGGGTTCTTG  
GGAGCAGCAGGAAGCACTATGGGCGCAGCGTCAATAACGCTGACGGTACAGGCCAGACAATTACTGTCTGGTA  
TAGTGCAACAGCAAAACAATTGCTGAAGGCTATTGAGGCGCAACAGCATCTGCTGCAACTCACAGTCTGGGG  
CATC

>KX129209

TTCTACTGTAATTCAACACAACCTGTTTAAACAGTACTTGGCATAGTAACAGTACTTGAATGATACTGGAAAGT  
CAGAAAATAATACAAAATCATCACACTCCCATGCAGAATAAAACAAATTATAAACATGTGGCAGGAAGTAGG  
AAAAGCAATGTATGCCCCCTCCTATCAGAGGACAAATTAGATGTTTCATCAAATATTACAGGGCTGATACTAACA  
AGGGATGGAGGTATGGAGGTAATGACAATAACCAGACCACCGAGACCTTCAGACCTGGAGGAGGAAATATGA  
AGGACAATTGGAGAAGTGAATTATATAAATATAAAGTAGTAAAAATTGAACCATTAGGAGTAGCACCCACCCC  
GGCAAAAAGAAGAGTGGTGCAGAGAGAAAAAGAGCATTAGTGGGATTTCGAGCTCTGTTCCCTTGGGTTCTTG  
GGAGCAGCAGGAAGCACTATGGGCGCAGCGTCAATAACGCTGACGGTACAGGCCAGACAATTACTGTCTGGTA  
TAGTGCAACAGCAAAACAATTGCTGAAGGCTATTGAGGCGCAACAGCATCTGCTGCAACTCACAGTCTGGGG  
CATC

>KM259534

TTCTACTGTAATACAACAAAACCTGTTTAAATAGTACTTGGAATGGGACTAATATTGATATTGGAAACAGTACGA  
AAGATGACAATATCACACTCCCATGCAGAATAAAACAAATTATAAATAGGTGGCAAGAGGTAGGAAAAGCAAT  
GTATGCCCCCTCCCATCAGAGGACAAATTAGATGTTTCATCAAACATTACAGGGCTGCTATTAACAAGAGATGGT  
GGTAATAGCAATAACACCAACGAGACCACCGAGACCTTCAGACCTACAGGAGGAAATATGGAGGACAATTGGA  
GAAGTGAATTATATAAATATAAAGTAGTGCAAATTC AACCATTAGGAGTAGCACCCACCGAGGCAAAGAGAAG  
AGTGGTGCAGAGAGAAAAAGAGCAGTGGGATTAGGAGCTATGTTCCCTTGGGTTCTTGGGAGCAGCAGGTAGC  
ACTATGGGCGCAGCGTCAATAACGCTGACGGTACAGGCCAGACAATTACTGTCTGGTATAGTGCAACAGCAGA  
ACAATTTGCTGAGGGCTATTGAGGCGCAACAGCATATGTTGCAACTCACAGTCTGGGGCATC

>HQ217957

TTCTACTGTAATACATCAGAACTGTTTAAATAGTACCTGGAATATAACACACTTTAATAGTACCTGGAATGATA  
CTGAAGGATCAAATAACATCACACTCCCATGCAGAATAAAACAAATTATAAATATGTGGCAACAAGTAGGAAA  
AGCAATGTATGCCCCCTCCCATCCAAGGATTAATTCAATGTTTCATCAAATATTACAGGGCTGCTATTAACAAGA  
GATGGAGGTAATAATAGTACTAACGAGATCTTCAGACCTGGAGGAGGGGATATGAGGGACAATTGGAGAAGTG  
AATTATATAGATATAAAGTAGTAAGAATTGAACCATTAGGAGTAGCACCCACCAAGGCAAGGAGAAGAGTGGT  
GCAAGAGAAAAAGAGCAGTGGGAACAATAGGAGCTATGTTCCCTTGGGTTCTTGGGAGCAGCAGGAAGCACT  
ATGGGCGCAGCGTCAGTGACGCTGACGGTACAGGCCAGACAATTATTGTCTGGAATAGTGCAACAGCAAAAA  
ATTTGCTGAAGGCTATTGAGGCGCAACAACACCTGTTGCAACTCACAGTCTGGGGCATC

>HQ217984

TTCTACTGTAATTCAACACAACCTGTTTAAATAGTACTTGGAAGTGGGAAAATGGTAGTTGGACTAGGAATGATA  
CCGCTGCAAATGAGACTGAGATTATCACACTCCCATGCAGAATAAAACAAATTATAAACATGTGGCAGGAAGT  
AGGAAAAGCAATGTATGCCCCCTCCCATCAAAGGACTTATTCATGTTTCATCAAATATTACAGGATTGTTATTA  
ACAAGAGATGGTGGTAATAATAGCAACATCAATGAGATCTTTAGACCTGGAGGAGGAGATATGAGGGACAATT  
GGAGAAGTGAATTGTACAAATATAAGGTAGTAAAAATTGAACCATTAGGAGTAGCACCCACCAAGGCAAGGAG  
GAGAGTGGTGCAAGAGAGAAAAAGAGCAGTGGGACTAGGAGCTCTGTTCCCTTGGGTTCTTGGGAGCAGCAGGA  
AGCACTATGGGCGCAGCGTCATTGACGCTGACGGTACAGGCCAGACAATTATTGTCTGGTATAGTGCAACAGC  
AGAACAATATGCTGAGGGCTATTGAGGCGCAGCAGCACCTGTTGCAACTCACAGTCTGGGGCATC

>JF689886

TTCTACTGTAATTCAACACAACCTGTTTAAATAGTACTTGGAAGTAAATATGATAATGGAAGTGGGTTAAGAAGA  
ATGGCACTGAATGGGTGAATGATACAATCACACTCCCATGCAGAATAAAACAAATTATAAACATGTGGCAGGA  
AGTAGGAAAAGCAATGTATGCCCCCTCCCATCAGGGGACTAATTAATTGTATATCAAATATTACAGGGATACTG  
CTAACAAGAGATGGTGGTCAGGTTAATGGTACCAATGAGACCTTCAGACCAGGAGGAGGAGATATAAAGGATA  
ATTGGAGAAGTGAATTATATAAATATAAAGTAGTAAAAATTGAACCATTAGGAGTAGCACCCACCAAGGCAAG  
GAGAAGAGTGGTGCAGAGGGAAAAAGAGCAATTGGAATAGGAGCTTTGTTCCCTTGGGTTCTTGGGAGCAGCA  
GGAAGCACTATGGGCGCAGCGTCAGTGACGCTGACGGTACAAGCCAGACAATTATTGTCTGGTATAGTGCAAC  
AGCAGAACAAATTTGCTGAGGGCTATTGAGGCGCAACAACATCTGTTGCAACTCACAGTCTGGGGCATC

>JF320385

TTCTACTGTAATACAACACAACCTGTTTAAATAGTACTTGGAATTCGGAATGATACTAAATGGTCAAGTAACTCTA  
CAGGAAATGGCACCATTATACTCCCATGCAGAATAAAACAAATTATAAACATGTGGCAGGAAGTAGGAAAAGC  
AATGTATGCCCCCTCCTATCAGAGGAAACATTAGCTGTTTCATCAAATATTACAGGGCTGCTATTAACAAGAGAT  
GGGGGCAATAGTAATCAAACGACCCAGACCAAAGAAACAGAAACCTTCAGACCTGGAGGAGGAGATATGAGGG  
ACAATTGGAGAAGTGAATTATATAAATATAAAGTAGTAAAAATTGAACCATTAGGAGTAGCACCCACCAAGGC  
AAAGAGAAGAGTGGTGCAGAGAGAAAAAGAGCAGTGGGAATAGGAGCAATGTTCCCTTGGATTCTTGGGAGCA  
GCAGGAAGCACTATGGGCGCAGCGTCACTAACGCTGACGGTACAGGCCAGACAATTATTGTCTGGTATAGTGCA  
AGCAGCAGAACAAATCTGCTGAGAGCTATTGAGGCGCAACAGCATCTGTTGCAACTCACAGTCTGGGGCATC

>JF320150

TTCTACTGTAATACAACACAACCTGTTTAAATAGTACTTGGAATACTACTGGGAGTGTGACTAATGGGTCAAATA  
ACAGTCAGGGAGAAAATGGTACTATCACACTCCCGTGCAGAATAAAACAAATTATAAACATGTGGCAGGAAGT  
AGGAAAAGCAATGTATGCCCCCTCCAATCAGTGGAGAAAATTAAATGTACATCAAATATTACAGGACTGCTATTA  
ACAAGAGATGGTGGTAATAGTAGCGACAACGAGACCTTCAGACCTGGAGGAGGAGATATGAGGGACAATTGGA  
GAAGTGAATTATATAGATATAAAGTAGTAAAAATTGAACCATTAGGAATAGCACCCACCAAGGCACAAAGAAG  
AGTGGTGCAGAGAGAAAAAGAGCAGCGGGACTAGGAGCGTTGTTCCCTTGGGTTCTTGGGAGCAGCAGGAAGC  
ACTATGGGCGCAGCATCAATAATGCTGACGGTACAGGCCAGACAATTGTTGTCTGGTATAGTGCAACAGCAGA  
ACAATCTGCTGAGGGCTATTGAGGCGCAACAGCATCTGTTGCAACTCACAGTCTGGGGCATC

>JF320539

TTCTACTGTAATACAACACAATTTGTTCAATAATACTTGGAAGGTACTGAAGAAGAGAATAGTACTAGGAATA  
GTAATGACACCATCACACTCCCATGCAGAATAAAACAAATTGTAAACATGTGGCAGGAAGTAGGAAAAGCAAT  
GTATGCCCCCTCCCATCAGAGGACTAATTCAATGTACATCAAACATTACAGGGATAATATTAACAAGAGATGGT  
GGTAATAACACGAATACCACTGAGATCTTCAGACCAGGAGGAGGAGACATGAGGGACAATTGGAGAAGTGAAT  
TATATAAATATAAAGTAGTAAAAATTGAACCATTAGGAATAGCACCCACTAGGGCAAAGAGAAGAGTGGTGCA  
GAGAGAAAAAGAGCAGTGGGAATAGGAGCTTTGTTCCCTTGGGTTCTTGGGAGCAGCAGGAAGCACTATGGGC

GCAGCGTCAATGACGCTGACGGTACAGGCCAGACTATTATTGTCTGGTATAGTGCAACAGCAGAACAAATCTGC  
TGCAGGCTATTGAGGCGCAACAGCGTCTGTTGCAACTCACAGTCTGGGGCATC

>JF320131

TTCTATTGTAATACAACACAACCTGTTCAATAGTACTTGGGAGAGCAATATTACTACTGGGAATTGGAGCAAAA  
CTGAAGGATCAAATAACACTAACATCACACTCCCATGTAGAATAAGACAAATTGTAAACATGTGGCAGAAAGT  
AGGAAAAGCAATGTATGCCCCCTCCCATCAGGGGACCAATTCAATGTATATCAGATATCACAGGGCTGCTATTA  
ACAAGAGATGGAGGTAATAACGGGGACAATAACAACACAGAGACCTTCAGACCTGGAGGAGGAGATATGAGGG  
ACAATTGGAGAAGTGAATTATATAAATATAAAGTAGTACAAATTGAACCAATAGGAATAGCACCCACCAAGGC  
GCAGAGAAGAGTGGTGCAGAGAGAAAAAGAGCAGTGGGAGTAGGAGCTTTTCTCTTTGGGTTCTTGGCAACA  
GCAGGAAGCACTATGGGCGCAGCGTCAATAACGCTGACGGTACAAGCCAGACAATTATTGTCTGGTATAGTGC  
AACAGCAGAGCAATTTGCTGAGGGCTATTGAGGCGCAACAGCATATGTTGCAACTCACAGTCTGGGGCATC

>HM638503

TTCTACTGTAATACAACAGGGCTGTTTAGTAGTACTTGGAAATGAGAGTACTACTTGGGAAAGGTCAAATGACA  
CTGAAATAATCACTCTCCCATGCAGAATAAAACAAATTATAAACATGTGGCAGGCAGTAGGAAAAGCAATATA  
TGCCCCCTCCCATCAGTGGACAAATTAATTGTTTCATCAAAATATTACAGGGCTGCTATTAACAAGAGATGGTGGT  
TACAAATGGTACGAATGACACCCAGACCGAGACCTTCAGACCTCAGGGAGGAAATATGAAAGACAATTGGAGAA  
GTGAATTATATAAATATAAAGTAGTAAAAATTGAACCATTAGGACTAGCACCCACCAAGGCAAAGAGAAGAGT  
GGTGCAGAGAGAAAAAGAGCAGTGGGAATAGGAGCTATGTTCTTTGGGCTCTTGGGAGCAGCAGGAAGCACC  
ATGGGCGCAGCGTCAGTGACGCTGACGGTACAGGCCAGAAAGTTGTTGTCTGGTATAGTGCAACAGCAGAAC  
ATCTGCTGAGGGCTATTGAGGCGCAACAGCATATGTTGCAACTCACAGTCTGGGGCATC

>KT124801

TTCTACTGTAATACAACCGAACTGTTTAATAGTACTTGGACTAGGAATAATGGTACCGGGTATGATGGGTCTA  
ATGGCACTGAAGGAAATGACACAATCACACTCCCATGCAGAATAAAACAAATTATAAACATGTGGCAGGAAGT  
AGGAAAAGCAATGTATGCCCCCTCCTATTAGAGGACAAATTAGATGCTCATCAAAATATTACAGGACTGATATTA  
ACAAGAGATGGGGGTCAAAGAAACGGGAGTACTAATGAGACCTTCAGACCAGGAGGAGGAAATATGAGGGACA  
ATTGGAGAAGTGAATTATATAAGTATAAAGTAATAAAAAATTGAACCACTAGGAGTAGCACCCACCAGGGCAAA  
GAGAAGAGTGGTGCAGAGAGAAAAAGAGCAGTGGGAATAGGAGCTGTGTTCTTGGGTTCTTGGGAGCAGCA  
GGAAGCACTATGGGCGCAGCGTCACTAACGCTGACGGTACAGGCCAGACAATTATTGTCTGGTATAGTGCAAC  
AGCAAAACAATTTGCTGAGAGCTATTGAGGCGCAACAACATATGTTGCAACTCACAGTCTGGGGCATC

>KM354092

TTCTACTGTGATACAACACAACCTATTTAATAGTACTTGGAAAAATGGTAGCACTGGGAATGATCATGAAGAGT  
CAAATGGAAATATCACACTCCCATGCAGAATAAAACAAATTATAAACATGTGGCAGGAAGTAGGAAAGGCAAT  
GTATGCCCCCTCCCATTAGAGGATACATTAATTGTTTCATCAAAATATTACAGGGCTGCTATTAACAAGAGATGGT  
GGTGATAATAGCACAAATGGGACCGAGATATTAGACCTCTAGGAGGAGATATGAAGGACAATTGGAGAAGTG  
AATTATATAAATATAAAGTTGTGAGAATTGAACCATTAGGAATAGCACCCACCAAGGCAAAGAGAAGAGTGGT  
GCAAAGAGAAAAAGAGCAGTGGGATTTGGAGCTCTGTTCTTGGGTTCTTGGGAGCAGCAGGAAGCACTATG  
GGCGCAGCGTCAATAACGCTGACGGTACAGGCCAGACAATTATTGACTGGTATAGTGAGCAGCAGGAACAATC  
TGCTGAGAGCTATTGAGGCGCAACAACATCTGTTGCAACTCACAGTCTGGGGCATC

>JN687763

TTCTACTGCAATACAACACAACCTGTTTAATAGTACTTGGAACTACTAATGGTACTTGGACAGGAAGTAATACTA  
ATAGCAGTAACATTACACTCCCATGCAGAATAAAACAAATTGTAAACATGTGGCAGGAAGTAGGAAAAGCAAT  
GTATGCCCCCTCCCATCAGCGGACTAATTCAGTGTTCATCAAAATATTACAGGGCTGATATTAACAAGGGATGGT  
GGTAGTGGTAATGACACCAACAACAACACTGAGACCTTCAGACCTGCAGGAGGAGATATGAGGGACAATTGGA  
GAAGTGAATTATACAAATATAAAGTAGTAAAAATTGAACCATTAGGAGTAGCACCCACCAGGGCAAAGAGAAG  
AGTGGTGCAAAGAGAGAAAAAGAGCAGTGGGAATGGGAGCTCTGTTCTTGGGTTCTTGGGAGCAGCAGGAAGC  
ACTATGGGCGCAGCGTCAATGACGCTGACGGTACAGGCCAGACAATTATTGTCTGGTATAGTGCAACAGCAGA  
GCAATTTGCTGAGGGCTATTGAGGCGCAACAGCATCTGTTGCAACTCACAGTCTGGGGCATC

>KM258901

TTCTACTGTAATACAACACAGTTATTTAATGGTACTTGGAAATGGTACTTGGAAATGGTACTTGGACTGATACTT  
GGAATGATACTTGGAAATGAGACTCACCCAACCTAGCAACGACACTATCACACTCCCATGTAGGATAAAGCAAAT  
TATAAAGCAGATGGCAGGAAGTAGGAAAAGCAATGTATGCCCCCTCCCATCAGAGGAAACATTACCTGTTCTTCA  
AATATTACAGGGCTGCTATTAACAAGAGATGGTGGTAACCGGAATGAGACCAATAGCACAGAGACCTTCAGAC  
CTGGAGGAGGAGATATGAGGGACAATTGGAGAAGTGAATTATATAAATATAAAGTAGTAAAAATTGAGCCACT  
AGGAGTAGCACCCACCAAGGCAAAAAGAAGAGTGGTGCAGAGAGAAAAAGAGCGGTGGGAATGCTAGGAGCT  
ATGTTCTTGGGTTCTTAGGAGCAGCAGGAAGCACTATGGGCGCAGCGTCAATAACGCTGACGGTACAGGCCA  
GACAATTATTGTCTGGTATAGTGCAACAGCAAAACAATTTGCTGAGAGCTATTGAGGCGCAACAGCATATGTT  
GCAACTCACAGTCTGGGGCATC

>JQ403073

TTCTACTGTAATACAACACAACCTGTTTGATGATAATTGGCCTAATGGAACTTGGATGTATAATAGCACTAGAA  
ATGACACTATCATACTCCCATGCAGGATAAAACAAATTGTAAACATGTGGCAGGAAGTAGGAAAAGCAATGTA

TGCCCCCTCCCATCAAAGGACTAATTCACTGTAATTTCAAGTATTACAGGGCTGCTATTAACAAGAGATGGTGGC  
ACTAATAACACCAACGAGACCTTCAGACCGGGAGGAGGAGACATGAGGGACAATTGGAGAAGTGAATTATATA  
AATATAAAGTAGTAAAAATTGAACCATTAGGAGTAGCACCCACCAAGGCAAAGAGAAGAGTGGTGCAGAGAGA  
GAAAAGAGCAGTGGGACTAGGAGCTCTGTTTCCTTGGGTTCTTGGGAGCAGCAGGAAGCACTATGGGCGCAGCG  
TCAATGGCGCTGACGGTACAGACCAGACAATTATTGTCTGGTATAGTGCAACAGCAGAACAATTTGCTGAGGG  
CTATTGAGGCGCAACAGCATCTGTTGCAACTCACAGTCTGGGGCATC

>JQ403078

TTCTATTGTAATACAACACAGCTGTTTAAATAGTACTTGGAATGGTACTGAGACTGAGAATAATACTACAGGGT  
CAAATAACACTGATAATATCAGACTCCCATGCAGAATAAAACAAATTGTAAACAGGTGGCAGGAAGTAGGAAA  
AGCAATGTATGCCCCCTCCCATCGAGGGCATAATTAGTTGTTTCATCAAATATTACAGGGCTTTTATTAACCAGA  
GATGGTGGTAACGGGAGCAGTAACGCCGAGATCTTCAGACCTCAAGGAGGAGATATAAGGGACAATTGGAGAA  
GTGAATTATATAAATATAAAAGTAGTAAAAATTGAGCCACTAGGAGTAGCACCCACCAAGGCAAAGAGAAGAGT  
GGTGCAGAGAGAAAAAAGAGCAGTGGGAATAGGAGCTGTGTTCCCTTGGGTTCTTGGGAGCAGCAGGAAGCACT  
ATGGGCGCAGCGTCAATAACGCTGACGGTACAGGCCAGACAATTATTGTCTGGTATAGTGCAACAGCAGAACA  
ATCTGCTGAGGGCTATTGAGGCGCAACAACATCTGTTGCAACTCACAGTCTGGGGCATC

>JQ610064

TTCTATTGCAATACAACAGAACTGTTTACTTGGAATTTAACACAACCTGTCTGAGAATTTCAACTGGGAATGATG  
CTAATATCACACTCCCATGTAGAATAAAACAAATTATAAACATGTGGCAGGAAGTAGGAAAAGCAATGTATGC  
CCCTCCCATCAGCGGACCAATTAATTGCACATCAAATATTACAGGACTACTATTAACAAGAGATGGTGGTAAT  
AACAAATGACAGGACTAACAAATGGCAGTGATAGTAATAACAGTACTCAGACTGAGATCTTCAGACCTGGAGGAG  
GAGATATGAAGGACAATTGGAGAAGTGAATTATATAAAATATAAAGTAGTAAGAATTGAACCATTAGGAGTAGC  
ACCCACCAAGGCAAAGAGAAGAGTGGTGCAAAGAGAAAAAAGAGCGGTGGGAACGCTAGGAGCTTTGTTCCCTT  
GGGTTCTTGGGAGCAGCAGGAAGCACTATGGGCGCAGCGTCAATAACGCTGACGGTACAAGCCAGACAATTAT  
TGTCTGGTATAGTGCAACAGCAAAGCAATTTGCTGAGAGCTATTGAGGCGCAACAGCATCTGTTGCAACTCAC  
AGTCTGGGGCATC

>KM259406

TTCTACTGTAATACAACAAAACTGTTTAAATAGTACTTGGGATAAAAAATGGCACTTTGAGTGAAAATGGCACTC  
AGAATGAACTGAACCAATCACACTCCCATGCAGAATAAAACAAATTATAAACATGTGGCAGGAAGTAGGGAG  
AGCAATGTATGCCCCCTCCCATCAGAGGAAACATTAGCTGTTTCATCAAATATTACAGGACTGTTGTTAACAAGA  
GATGGTGTTAACAAGACCTGGGGCAACGACACCTTCAGGCCATAGGAGGAAATATGAAAGACAATTGGAGGA  
GTGAATTATATAAATATAAAGTAGTAAAAATTGAACCATTAGGAATAGCACCCAACACGGCAAAGAGAAGAGT  
GGTGCAGAGAGAAAAAAGAGCAGTGGGCATAGGAGCTCTGTTCCCTTGGGTTCTTGGGAGCAGCAGGAAGCACT  
ATGGGCGCAGCGTCAATGACGCTGACGGTACAGGCCAGACAATTATTGTCTGGTATAGTGCAACAGCAGAACA  
ATTTGCTGAGGGCTATTGAGGCGCAACAGCATCTGTTGCAACTCACAGTCTGGGGCATT

>HQ217713

TTCTACTGTGATTCAACACCACTGTTTAAATAGGACCTGGATGGCTAATGAGACTTTGAATAGTACTACTTTGA  
ATAGTACTGGAGAGTCAAATAAAAAATATCACACTCGCATGCAGAATAAAACAAATTATAAACATGTGGCAGCG  
AGTAGGGAAAGCAATGTATGCCCCCTCCTATCAGAGGACAAATTAGATGTTTCATCAAATATTACAGGGCTGCTG  
TTAACAAGAGATGGGGGTCAACAACGAGACTGGAGATAACAGGACTGAGATCTTCAGACCGGGAGGAGGAG  
ATATGAGGGACAATTGGAGAAGTAAATTATATAAATATAAAGTAGTAAAAATTGAACCATTAGGAGTAGCACC  
CACCAAGGCAAAGAGAAGAGTGGTGCAGAGAGAAAAAAGAGTAGCGGGATTTCGGAGCTTTGTTCCCTTGGGTTT  
TTGGGAGCAGCAGGAAGCACTATGGGCGCAGCGTCAGTGACGCTGACGGTACAGGCCAGACAATTACTGTCTG  
GTATAGTGCAGCAGCAGAAACAATTTGCTGAGGGCTATTGAGGCGCAACAGCATCTGTTGCAACTCACAGTCTG  
GGGCATC

>MK383397

TTCTACTGTAATTTCAACACCACTGTTTAAATAGTACTTGGAATGGTACTGACGAGTCAAATCACCATGGAGAAA  
ATGACACAATCATCACACTCCGCTGCAGAATAAAACAAATTATAAACATGTGGCAGGAAGTAGGAAGAGCGAT  
GTATGCCCCCTCCCATTAAGGAAACATTAGCTGTTTCATCAAATATTACAGGGCTGCTATTAACAAGAGATGGT  
GGTAATGGTAACCGACTGACAACAACACCGAGATCTTCAGACCTCAGGGAGGAAATATGAAAGATAATTGGA  
GAAGTGAATTATATAAATATAAAGTAGTAAGAATTGAACCATTAGGAATAGCACCCACCAAGGCAAAGGAGAAG  
AGTGGTGCAGAGAGAAAAGAGTAGTGGGAATGGGAGCTTTGTTCCCTTGGGTTCTTGGGAGCAGCAGGAAGC  
ACTATGGGCGCAGCGTCAGTGACGCTGACGGTACAAGCCAGACTATTACTGTCTGGTATAGTGACGAGCAGAGA  
ACAATTTGCTGAGGGCTATTGAGGCGCAACAGCGTCTGTTGCAACTCACAGTCTGGGGCATC

>KT124761

TTCTACTGTAATACAACAAAAGCTATTTAAATAGTACTTGGGATCGGAATGGAACACAGATAAATGACACTATCA  
CAAATGACACTATCATACTCCCATGTAGAATAAAACAAATTCATAAACAGGTGGCAAGAAGTAGGAAAAGCAAT  
GTATGCCCCCTCCCATTAGAGGAGACATTAACCTGTTTCATCACAGATTACAGGGCTGCTATTAACAAGAGATGGT  
GGTCAGAGCAATGACAGCAGTATGAATGAGATCTTCAGACCTGGAGGAGGAGATATGAGGGACAATTGGAGAA  
GTGAATTATATAAATATAAAGTAGTAAGAATTGAGCCATTAGGAGTAGCACCCACCAAGGCAAAGAGAGGGT  
GGTGCAGAGAGAAAAAAGAGCAGTAACACTAGGAGCTGTGTTCCCTTGGGTTCTTGGGAGCAGCAGGAAGCACT

ATGGGCGCAGCGTCAATAACGCTGACGGCACAGGCCAGACAATTATTGTCTGGTATAGTGCAACAGCAGAGCA  
ATCTGCTGAAAGCTATTGAGGCGCAACAGCGTCTGTTGCAACTCACAGTCTGGGGCATT

>KM353846

TTCTACTGTAATACATCAAAGTTGTTTAAACAGTACTTGGAATGGCACTAAGGAATACCAGGGAGTGAATGGCA  
CACTCACACTCCCATGCGAGAATAAAACAAATCATAAACATGTGGCAGAAAGTAGGAAAAGCAATGTATGCCCC  
TCCCATCCAGGGAAATATTAATTGCTCATCAAATATTACAGGGCTGCTATTAATGAGAGATGGTGGTAACAAG  
GGGAACGAAACCGATAATACTACCGAGATCTTTAGACCTGGAGGAGGAAATATGAGGGACAATTGGAGAAGTG  
AATTATATAAATATAAAGTAGTGAGAATTGAACCATTAGGAGTAGCACCCACCAAGGC AAAAAGAAGAGTGGT  
GCAGAGAGAAAAAGAGCGGTAACAGTGGGAGCTATGTTCTTGGGTTCTTGGGAGCAGCAGGAACCACTATG  
GGCGCAGCATCATTGACGCTGACGGTACAGGCCAGACAATTATTGTCTGGTATAGTGCAACAGCAAAGCAATT  
TGCTGAGGGCTATTTCAGGCGCAACAGCATCTGTTGCAGCTCACAGTCTGGGGCATC

>KY112135

TTCTACTGTAATACAACAGAACTGTTTAAATAGTACTTGGGATAAGGATGGGACAAGGCTTAATGACACTGGAG  
GAGATGGCAACATCACACTCCCATGTAGAATAAAACAAATTATAAACATGTGGCAGGAAGTAGGAAAAGCAAT  
GTATGCCCCCTCCCATCAGAGGACAAATTAGCTGTGTATCAAATATCACAGGGCTACTATTAACAAGAGATGGG  
GGTGTAGACGATACTCAAAACGAAACCTTCAGACCTGGAGGAGGAGATATGAGGGACAATTGGAGAAGTGAAT  
TATATAAATATAAGGTAGTAAAAATTGAACCATTAGGAGTAGCACCTAGCAAGGC AAAAGAGAAGAGTGGTGCA  
AAGAGAAAAAGAGCAGTGGGAACGTTAGGAGCCATGTTCTTGGGTTCTTGGGAGCAGCAGGAAGCACTATG  
GGCGCAGCGTCACTGACGCTGACGGTACAGGCCAGACAATTATTGTCTGGTATAGTGCAACAGCAGAAACAATC  
TGCTGAGAGCTATTGAGGCGCAACAGCATCTGTTGCAACTCACAGTCTGGGGCATC

>JQ403070

TTCTACTGTAATACAACACAACCTGTTTAAATAGTACTTGCGTGTTTAATGATACTTTGAATGATACTCAAGAGG  
AGTATGGTGAGAATAACGGGACTATCACACTCCCATGCGAGAATAAAACAAATTATAAACAGATGGCAGGAAGT  
AGGAAAAGCAACATATGCCCCCTCCCATCAGAGGACAAATTAAATGTTTCATCAAATATTACAGGGATACTATTA  
ACAAGAGATGGTAGTCAAGGCAACGGGAGTGAGACCTTCAGACCAGGAGGAGGAGATATGAGGGACAATTGGA  
GAAGTGAATTATATAAATATAAAGTAGTAAAAATTGAGCCATTAGGAGTAGCACCCACCAAGGCAAGGAGAAG  
AGTGGTGCAAAGGGAAAAAGAGCAGTGGGAACGCTAGGAGCCATGTTCTTGGGTTCTTGGGAGCAGCAGGA  
AGCACTATGGGCGCAGCGTCAGTGACGCTGACGGTACAGGCCAGACAATTATTGTCTGGTATAGTGCAACAGC  
AGAACAACCTGCTGAGAGCTATTGAGGCGCAACAGCATCTGTTGCAACTCACAGTCTGGGGCATC

>JQ403031

TTCTACTGCAATACAACAAAACTATTTAAATAGTACTTGGAATAGTAGTAGTAGTAGTTGGGTATTGAGGGTC  
AGGAAGAGTCAAATGACAATATCACACTCCCATGTAGAATAAAACAAATTATAAACATGTGGCAGGGAGTAGG  
AAAAGCAATGTATGCCCCCTCCCATCCAAGGAAAAATTAGATGTTTCATCAAACATTACAGGGCTATTATTAGTG  
AGAGATGGTGGTATTAAACAAGACGAATGACACTGAAACCTTCAGACCTCAAGGAGGAAATATGATGGACAATT  
GGAGAAGTGAATTATATAAATATAAAGTAGTAAAAATTGAACCATTAGGAATAGCACCCACCAAGGCAAAGAG  
AAGAGTGGTGCAGAGAGAAAAAGAGCAGTGGGAATGGGAGCTTTGTTCTTGGGTTCTTGGGAGCAGCAGGA  
AGCACTATGGGCGCAGCGTCAATGGCGCTGACGGTACAGGCCAGACAATTATTGTCTGGTATAGTGCAACAGC  
AGAACAATCTGCTGAGAGCCATTGAGGCGCAACAGCATATGTTGCAACTCACAGTCTGGGGCATC

>JQ403085

TTCTACTGTAATACATCACAACCTGTTTAAAGGGTACCTGGTTGACTAATGATACCTGGGCTAATGGTACCTGGA  
CAAATGACACTAGCAAAAATGACAACATCACACTCCCATGCCGAATAAAACAAATTGTAAACTTGTGGCAGGA  
AGTAGGAAGAGCAATGTATGCCCCCTCCCATCAGAGGAGAAATTCATTGTATATCAAATATTACAGGGCTGTTA  
TTAACAAGAGATGGTGGCCAGAATGCAACCAACGAGACCTTCAGACCTGTAGGAGGAGATATGAGGGACAATT  
GGAGAAGTGAATTATATAAATATAAAGTAGTAAAAATTGAACCATTAGGAGTAGCACCCACCAAGGCAAAGAG  
AAGAGTGGTGCAGAGAGAAAAAGAGCAGTGGGACTAGGAGCTGTGTTCTTGGGTTCTTGGGAGCAGCAGGA  
AGCACTATGGGCGCAGCGTCAATGGCGCTGACGGTACAGGCCAGGAATTATTGTCTGGTATAGTGCAACAGC  
AAAACAACCTGCTGAGAGCTATTGAGGCGCAACAGCACCTGTTGCAACTCACAGTCTGGGGCATC

>JQ403094

TTCTACTGTAATACATCACGACTATTTAAATAGTACTTGGAATACTAGTAGTATTTGGAATACTACTGGAAGGC  
CAAATATTACAGGGAGCACTGACATTATCATACTCCCATGCGAATAAGACAAATTATAAACATGTGGCAGGA  
AGTAGGAAAAGCAATGTATGCCCCCTCCCATCAGAGGACGAATTCAGTGTAGCTCAAATATTACAGGGCTGCTA  
TTAACAAGAGATGGTGGTAATACTAATAACTCAGACGCACATGAGATCTTCAGACCTGGAGGAGGAGATATGA  
GGGACAATTGGAGAAGTGAATTATATAAATATAAAGTAGTAAAAATTGAACCATTAGGAATAGCGCCACCAA  
GGCAAAGAGAAGAGTGGTGCAGAGAGAAAAAGAGCAGTGGGAATGGGAGCTCTGTTCTTGGGTTCTTGGGA  
ACAGCAGGAAGCACTATGGGCGCAGCGTCACTGACGCTGACGGTACAGGCCAGACAATTATTGTCTGGTATAG  
TGCAACAGCAGAGCAATCTGCTGAGGGCTATTGATGCGCAACAGCATCTGTTGCAGCTCACAGTCTGGGGCAT  
C

>MH666195

TTCTACTGTAATACAACAAAACTGTTTAAATAGTACTTGGTGTTGGGAATAGTACTGATAATACTCACAATATTA  
CTCAGAAATGGTAATGGTACTATCACACTTCCATGCGAATAAAGCAAATTATAAACATGTGGCAGGAAGTAGG

AAAAGCAATGTATGCCCCCTCCCATCAGTGGAATAATTAGATGTAACCTCAAATATTACAGGGCTGTTATTAACA  
AGAGATGGTGGTAATAACAATGGCAGCAACACTACTGAGGAGATTTTTAGACCTACAGGAGGAAATATGAAAG  
ACAATTGGAGAAGCGAATTATATAAATATAAAGTAGTAGAAATTGAACCAATAGGATTAGCCCCCACCAGGC  
AAAGAGAAGAGTGGTGCAGAGAGAAAAAAGAGCAGTGGGAATAGGAGCTATGTTCTTGGGTTCTTGGGAGCA  
GCAGGAAGCACTATGGGCGCAGCGTCAATAACGCTGACGGTACAAGCCAGACAATTATTGACTGGTATAGTGC  
AACAGCAAAGCAATTTGCTGAAGGCTATTGAGGCGCAACAACATCTGTTGCAACTCACAGTCTGGGGCATC

>KR423482

TTCTACTGTAATACAACGAAACTGTTTAATAGTAGTTGGAATCAGAATGCTACTAATCAGAATGCTACTAACA  
ATGGAGGAAATGACACAATTACACTCCCATGTAGAATAAAACAGATTATAAACATGTGGCAGGAAGTAGGAAA  
GGCAATGTATGCCCCCTCCCATAAAAGGATTAATTAGATGTTTCATCAAATATTACAGGGCTGATATTAACAAGA  
GATGGTGGTAATGACAATAGCACAAACAACAACACTGAAATCTTCAGACCGGGAGGAGGAGATATGAGGGACA  
ATTGGAGAAGTGAATTATATAAATACAAAGTAGTAAGAGTTGAACCATTAGGGATAGCACCCAACAAGGCAAA  
GAGGAGAGTGGTGCAGAGAGAAAAAAGAGCAGTGGGGATAGGAGCTTTGTTCTTGGGTTCTTGGGAGCAGCA  
GGAAGCACTATGGGCGCAGCGTCAGTGACGCTGACGGTACAAGCCAGACAATTATTGTCTGGTATAGTGCAGC  
AGCAGAACAACTCTGCTGAGGGCTATTTCAGGCGCAACAGCAACTGTTGCAGCTCACAGTCTGGGGCATC

>HM638568

TTCTACTGTAATACATCACAACCTATTTAATAGTACTTGGTATGGTAATGAGACTAAAAATGGGACTGAAAAATG  
GAACTGACACAATAATTCAACTCCCATGCAGAATAAAACAAATTATAAACATGTGGCAGCAAGTAGGAAAAAGC  
AATGTATGCCCCCTCCCATCGAAGGACTAATTAGCTGCTCGTCAAACATTACAGGACTGCTGTTAACAAGAGAT  
GGTGGTGATAATAATAGCATGAACGAGATTTTCAGACCTGAAGGAGGAAATATGAAGGACAATTGGAGAAGTG  
AATTATATAAATATAAAGTAGTAAAAGTTGAACCATTAGGAATAGCACCCACCAAGGCAAGGAGAAGAGTGGT  
GCAGAGAGAAAAAAGAGCAGTAGGAATAGGAGCTTTGTTCTTGGGTTCTTGGGAGCAGCAGGAAGCACTATG  
GGCGCAGCGTCACTGACGCTGACGGTACAGGCCAGACAATTATTGTCTGGTATAGTGC AACAGCAGAACAAATT  
TGCTGAGGGCTATTGAGGCGCAACAGCATTGTGTTGCAACTCACAGTCTGGGGCATC

>GU733713

TTCTACTGTAATACAACCTAGACTGTTCAATAGTACTTGGAAATGTTAGTACTTGGAAATATTAGTCAGACTGAAG  
GGTCATACAACACTGAAGAAAAATATCACACTCCCATGCAGAATAAAACAGATTGTAAACATGTGGCAGGAAGT  
AGGAAAAGCAATGTATGCCCCCTCCCATCAGAGGAATAATTAGATGTTTCATCAAATATTACAGGGATAATGTTA  
ACAAGAGATGGTGGTAAGAATAGGACAGAGAACACCACTGAGACTTTCAGACCGGGAGGAGGAAATATGATGG  
ACAATTGGAGAAGTGAACATATAACTATAAAGTAGTAAAAATTGAACCATTAGGGGTAGCACCCACCAAGGC  
AAAGAGAAGAGTGGTGCAGAGAGAAAAAAGAGCAGCGGGACTAGGAGCTTTGTTCTTGGGTTCTTGGGAGCA  
GCAGGAAGCACTATGGGCGCAGCGTCACTGACGCTGACGGTACAGGCCAGACAATTATTGTCTGGTATAGTGC  
AACAGCAGAACAAATTTGCTGAGAGCTATTGAGGCGCAACAGCACCTGTTGCAACTCACAGTCTGGGGCATC

>JX140657

TTCTACTGTAATACAACACCACTGTTTAATAGTACTTGGGGGAATGACACTTTGACTAATGGAGGATCAAATA  
GCACTGAAAATATCACACTTCAATGCAGAATAAAACAAATTATAAACATGTGGCAGGAAGTAGGAAAAGCAAT  
GTATGCCCCCTCCCATCGCAGGAAACATTAGCTGTTTCATCAAATATTACAGGGCTGCTATTAACAAGAGATGGT  
GGTAATGGCACAAACGAGACAGAGATCTTCAGACCCGAAGGAGGGGAATATGAAGGACAATTGGAGAAGTGAAT  
TATATAAATATAAAGTAGTACAAATTGAACCAGTAGGAATAGCACCCACAAAGGC AAAAGAGAAGAGTGGTGCA  
GAGAGAAAAAAGAGCAGTGGGACTAGGAGCTGTGCTCTTTGGGTTCTTGGGAGCAGCAGGAAGCACTATGGGC  
GCAGCGTCACTGACGCTGACGGTACAAGCCAGGCAATTATTGTCTGGTATAGTGC AACAGCAGAACAAATTTGC  
TGAGGGCTATTGAGGCGCAACAGCACCTGTTGCAACTCACAGTCTGGGGCATC

>MK164668

TTCTACTGTAATACAACAGAACTGTTTAATAGTACTTGGGGTAATAGTAATAATACTAACAATAATACTGGAG  
GGGAAGAACTATCACTCTCCCATGCAGAATCAAACAAATTATAAACATGTGGCAGGAAGTAGGAAAAGCAAT  
GTATGCCCCCTCCCATCAGAGGACAAATTAGGTGTTTCATCAAAGATTACAGGGCTAATATTAACAAGAGATGGT  
GGCAACGAGAACAAACGACAGTGAGATCTTCGAGATCTTCAGACCTACAGGAGGAAATATGAGGGACAATTGGA  
GAAGTGAATTATACAAATATAAAGTAGTAAAAATTGAACCATTAGGAATAGCACCCACCAAGGCAAAAAGAAG  
AGTGGTGCAGAGAGAAAAAAGAGCAGTGGGAATACTAGGAGCTATGTTCTTGGGTTCTTGGGCGCAGCAGGA  
AGCACTATGGGCGCAGCGTCACTGACGCTGACGGTACAGGCCAGACAACCTCTGTCTGGTATAGTGC AACAGC  
AGAACAACCTGCTGAGGGCTATTGAGGCGCAACATCATCTGTTGCAACTCACAGTCTGGGGCATC

>KC935959

TTCTACTGTAATACAACAAAACCTGTTTAGTAGTACTTGGAAAGTGGGATAATGGTACTTGGAAATATTAGTGGGT  
TAGATAACAGTACAGAACAAAATATCACACTCCCATGCAGAATAAAACAAATCATAAATATGTGGCAGACAGT  
AGGAAAAGCAATGTATGCCCCCTCCCATTAAGGGACAAATTCAATGTATATCAAATATTACAGGGCTGCTATTA  
ACAAGAGATGGTGGTAATGAAAAGTGATACAACCAGGAACAACGAGACCTTCAGACCGGGAGGAGGAGATATGA  
GGGACAATTGGAGAAGTGAATTATATAAATATAAAGTAGTAGAAGTTGAACCATTAGGAATAGCACCCACCAA  
GGCAAAGAGAAGAGTGGTGCAGAGAGAAAAAAGAGCAGTGACACTAGGAGCTCTGTTCTTGGGTTCTTGGGA  
GCAGCAGGAAGCACTATGGGCGCAGCATCAATGACGCTGACGGTACAGGCCAGACAATTATTGTCTGGTATAG

TGCAACAGCAGAATAATCTGCTGAGGGCTATTGAGGCGCAACAGCATCTGTTGCAGCTCACAGTCTGGGGCAT  
C

>KM082006

TTCTACTATAACACAACCCAGCTGTTTGATAGTACGTGGTTAACTAATGGTACTAGGATAAGACCAAATACTA  
CTGATGGAAC TAATGGAAATATCACACTTCCATGCAGAATAAAACAAATTATAAACAGGTGGCAAGAAGTAGG  
AAAAGCAATGTATGCCCCCTCCCATCAGAGGACAAATTAGATGTACATCAAATATTACAGGGTTAATATTAACA  
AGAGATGGTGGTCATGACGGGAACGAGACAAATGAGAAGGAGACCTTCAGACCTGGAGGAGGAGATATGAGGG  
ACAATTGGAGAAGTGAATTATATAAATATAAAGTAGTAAAAATTGAGCCAATAGGAATAGCACCCACCATGGC  
AAAGAGAAGGGTGGTGCAGAGAGAAAAAGAGCAGTAACGCTGGGAGCTATGTTCCCTGGGTTCTTGGGAGCA  
GCAGGAAGCACTATGGGCGCAGCGTCGATGACGCTGACGGTACAGGCCAGACTATTATTGTCTGGTATAGTGC  
AACAGCAGAGCAATCTGCTGAGAGCTATTGAGGCGCAACAGCAACTGTTGCAACTCACAGTCTGGGGCATC

>MG196775

TTCTATTGTAATACATCAGAACTGTTTAAATAGTGAGTGGCATACTAATTATACATGGAATAGTACTTACAGTA  
CAATAAATGGTACTTGGGAATAGTACTGACATTGAGGGTGTAACGCTACTGAAAAGATCACACTCCCATGTAG  
AATAAAACAAATTATAAACAGGTGGCAGGAAGTAGGAAAAGCAATGTATGCCCCCTCCCATCGCAGGAACAATT  
AAATGTGTATCAAATATTACGGGGCTGCTGTTAACCAGAGACGGTGGCAACAATGAAACCAAAGCCACTGAGG  
TCTTCAGACCTCAAGGAGGAAAATATGAAGGACAATTGGAGAAGCGAATTATATAAAATATAAAGTAGTACAAAT  
TGAACCATTAGGAGTAGCACCCACAAGGCAAAGAGAAGAGTGGTGCAGAGAGAAAAAGAGCAATAACAATA  
GGAGCTATGTTCCCTGGGTTCTTGGGAGCAGCAGGAAGCACTATGGGCGCAGCGTCAATGACGCTGACGGTAC  
AGGCCAGACAATTACTGTCTGGTATAGTGCAACAGCAGAGCAATTTGCTGAGAGCTATTGAGGCGCAACAGCA  
TCTGTTGCAACTCACAGTCTGGGGCATC

>JQ182826

TTCTACTGCAATACATCAGCACTGTTTAAATAGTACTTGGAGTACTAAGAATGGTACTCAGGTGTTGAATATAA  
CTAATGACACCAGCACCAACATCACACTCCCATGCAGAATAAAACAAATTATAAACATGTGGCAGGAAGTAGG  
AAAAGCAATGTATGCCCCCTCCCATCAGAGGACTAATTAGGTGTACATCAAACATTACAGGACTACTATTAACA  
AGAGATGGTGGTAATGGTAATGGCAATACCACGAATGGGACAGAGACCTTCAGACCTGTAGGAGGAGATATGA  
AGAATAATTGGAGAAGTGAATTATATAAATATAAAGTAGTACAAATTCAACCATTAGGAGTAGCACCCACCAA  
GGCAAAGAGAAGAGTGGTGCAGAGAGAGAAAAGGGATTGTTGGGACTAGGAGCTTTGTTTCATTGGGTTCTTGGGA  
GCAGCAGGAAGCACTATGGGCGCAGCGTCAATAACGCTGACGGCACAGGCCAGACAATTGCTGTCTGGTATAG  
TGCAACAGCAGAGCGATCTGATGAAGGCTATTGAGGCGCAGCAGCATCTGTTGCAACTCACAGTCTGGGGCAT  
C

>MK385523

TTCTACTGTAATTCAACACCACTGTTTAAATAGTACTTGGTATGGTAATAGTACTTGGAAATGGTACTGAAGGGT  
CAAATTACACTGAAAAAATATCATACTCTCATGCAGAATAAAACAGATTATAAACATGTGGCAGGAAGTAGG  
AAAAGCAATGTATGCCCCCTCCCATTAGAGGAAACATTAGCTGTTTCATCAAATATTACAGGGCTGCTATTAACA  
AGAGATGGTAGTAGTAATAACGAGAGCCAGCCCGAGATCTTCAGACCTGGAGGAGGAAATATGAAGGATAATT  
GGAGAAGTGAATTATATAAATATAAAGTAGTAAGAATTGAACCATTAGGAGTAGCACCCACCAAGGCAAGGAG  
AAGAGTGGTGCAGAGAGAGAAAAGAGAGCAGTGGGAATAGGAGCTGTGTTCCCTGGGTTCTTGGGAGCAGCAGGA  
AGCACTATGGGCGCAGCGTCAATGACGCTGACGGTACAGGCCAGACTATTACTGTCTGGTATAGTGCAACAGC  
AGAACAATTTGCTGAGGGCTATTGAGGCGCAACAGCGTCTGTTGCAACTCACAGTCTGGGGCATC

>KM353922

TTCTATTGCGATACAACACAACCTGTTTAAATAGTAGTTGGCCTTGGAAATGGTACAGAAGAGTCAAATAACACTG  
AAGGAAATGACACAATCACCTTCCCATGCAAAATAAAACAAATTATAAACCTGTGGCAGGAAGTAGGAAAAGC  
AATGTATGCCCCCTCCCATCAGAGGACAAATTAATTGCACATCAAATATTACAGGGTTACTATTAACAAGAGAT  
GGTGGTAGTACCAGCAATGAGACCGAGATCTTTAGACCTGCAGGAGGAGACATGAGAGATAATTGGAGAAGTG  
AATTATATAAATACAAAGTAGTAAAAATTGAACCAATAGGAGTAGCACCCACCAGGGCAAAGAGAAGAGTGGT  
GCAGAGAGAAAAAGAGCAGTGGGATTAGGAGCTATGTTCCCTTGGGTTCTTGGGAGCAGCAGGAAGCACTATG  
GGCGCAGCGTCAGTGACGCTGACGGTACAGGCCAGACAATTACTGTCTGGTATAGTGCAACAGCAGAACAAATT  
TGCTGAGGGCTATTGAGGCGCAACATCATCTGTTGCAACTCACAGTCTGGGGCATC

>KM354862

TTCTACTGTAATACAACACAACCTATTTAAATAGTAATTGGACTGCTACTGGAAATACAAATAACACTGGAGGAA  
ATGCCACAATCACACTCCCTTGCAAGAATAAAACAACTTATAAACATGTGGCAGGGAGTAGGAAAAGCAATGTA  
TGCCCCCTCCAATAAGAGGACTAATTAGATGTTTCATCAAACATTACAGGGCTACTGTTAACAAGAGATGGTGGT  
GGTAGCAATGGAAC TAATGGAAC TGAGGTCTTCAGACCTCATGGAGGGGATATAAGGGACAATTGGAGAAGTG  
AATTATATAAATACAAAGTAGTAAAAATTGAACCATTAGGAGTAGCACCCAACAAGGCAGAGAGAAGAGTGGT  
GCAGAGAGAAAAAGAGCAGTGACAATAGGAGCTGTGTTCCCTTGGGTTCTTGGGAGCAGCAGGAAGCACTATG  
GGCGCAGCGTCAATGACGCTGACGGTACAGGCCAGACAATTACTGTCTGGTATAGTGCAACAGCAAAGCAATT  
TGCTGAGGGCTATTGAGGCGCAACAGCACCTGTTGCAACTCACAGTCTGGGGCATC

>KX587037

TTCTACTGTAATACAACACCACTGTTTAAATAATAGTCTGCTTGGCAATGGTATCAATGGGACAAATAACACAG  
AACCAATCGTACTTCATTGTCAGAATAAAACAAATTATAAACATGTGGCAGAAAGTAGGAAAAGCAATGTATGC  
CCCTCCTATCAAAGGACCGATTACATGCTCATCAAATATAACAGGACTGATATTAACAAGAGATGGTGGTACA  
AATAGGACCAATGAGACCTTCAGACCTGGAGGAGGAGATATGAGGGACAATTGGAGAAGTGAATTATATAAAT  
ATAAAGTAGTAAAAATTGAACCATTAGGAGTAGCACCCACTAAGGCAAAGAGAAGAGTGGTGCAGAGAGAAAA  
AAGAGCAGTGGGACTTGGAGCTTTGTTCCCTTGGGTTCTTAGGAGCAGCAGGAAGCACTATGGGCGCAGCGTCA  
ATGACGCTGACGGTACAAGCCAGACAATTATTGTCTGGTATAGTGCAACAGCAGAACAATCTGCTGAGGGCTA  
TTGAGGCGCAACAACATTTGTTGCAACTCACAGTCTGGGGCATC

>KX587241

TTCTACTGTAATACGACACAACCTGTTTAAATAACTTGGAAATGGTACTTGGGGTGAGAATATTACCGGGAATA  
TTATCACACTCCCATGCAGAATAAAACAAATTATAAACATGTGGCAGGAAGTAGGAAAAGCAATGTATGCCCC  
TCCCATCAGAGGAAATATTAGCTGTTTCATCAGATATTACAGGGCTAATATTAACAAGAGATGGTGGTCATGAC  
AATGAGACCAACAACACAGCGATCTTCAGACCAGGAGGAGGAAATATGAAGGACAATTGGAGAAGTGAATTAT  
ATAAATATAAAGTAGTAAAAATTGAACCAATAGGAGTAGCACCCACCAAGGCAAAGAGAAGAGTGGTGCAGAG  
AGAAAAAAGAGCAGTGGGAGTAGGAGCTGTGCTCCTTGGGTTCTTGTTCAGCAGCAGGAAGCACTATGGGCGCA  
GCGTCAATAACGCTGACGGCACAGGCCAGACAATTACTGTCTGGTATAGTGCAACAGCAAAACAATTTGCTGA  
GAGCTATTGAGGCGCAACAACATATGTTGCAACTCACAGTCTGGGGCATC

>KX587299

TTCTACTGTAATACAACAAAGCTGTTTAAATAGTACTTGGGATAATACAACCTGCAGGGTTAAATACCACTGAAA  
AAATTATCACACTCCCATGCAGAATAAGACAAATTATAAATATGTGGCAGCAGGTAGGAAAAGCAATGTATGC  
CCCTCCTATCAGAGGAAAAATCCAATGCACATCAAACATTACAGGGTTATTATTAACAAGAGATGGTGGTAAC  
GAGAACGAGACCTATAACAATGAGACTTTTCAGACCTGGAGGAGGAGATATGAAGGACAATTGGAGAAGTGAAT  
TATATAAATATAAAGTAGTAAAGATTGAACCATTAGGAATAGCACCCACCAAGGCAAAAAGAAGAGTGGTGCA  
GAGAGAAAAAAGAGCAATAGGAATGGGAGCCTTCTTCCCTTGGGTTCTTGGGAGCGGCCGGAAGCACTATGGGC  
GCAGCGTCAATGGCGCTGACGGTACAGGCCAGACAATTATTGTCTGGTATAGTGCAACAGCAGCAAAACAACCTTGC  
TGAGGGCTATTGAGGCGCAACAGCATCTGTTGCAACTCACAGTCTGGGGCATC

>MG900412

TTCTACTGTAATTCAACAAAGCTGTTTAAATAGTACTTGGCCTTGGAAATGATACTCAAGGGTCACATGACACTA  
ATGGCACACTCACACTCCCATGCAGAATAAAACAAATTATAAACATGTGGCAGGAAGTAGGAAAAGCAATGTA  
TGCCCCCTCCCATCGAAGGAATAATTAAATGCTCATCAAACATTACAGGACTGTTATTAACAAGAGATGGTGGT  
TACGAGAGCAATAAGACTGATGAGATCTTCAGACCTGGAGGAGGAGATATGAGGGACAATTGGAGGAGTGAAT  
TATATAAATATAAAGTAGTAAAAATTGAACCATTGGGAGTAGCACCTACCAAGGCAAAAGAGGAGAGTGGTGCA  
GAGGGAAAAAAGAGCATTTGGACTAGGAGCTGTGTTCCCTTGGGTTCTTGGGAGCAGCAGGAAGCACTATGGGC  
GCAGCATCAATAACGCTGACGGTACAGGCCAGACAATTATTGTCTGGTATAGTGCAACAGCAGAACAATTTGC  
TGAGGGCTATTGAGGCGCAACAGCATCTGTTGCAACTCACAGTCTGGGGCATT

>KC473826

TTCTACTGTAATTCAACACAGCTGTTTAGTAGTAATTGGACTAGGGATAATACGTCTAGTAATTGGACTAGGA  
AGGATAACGATACAGAGCCTAATAAGACTGTGATCACACTCCCATGCAGAATAAAACAAATTATAAACATGTG  
GCAGGAAGTAGGAAAAGCAATGTATGCCCCCTCCTATCAAAGGACTTATTCAATGTTTCATCAAATATTACAGGA  
TTGTTATTAACAAGAGATGGTGGCGACAACAATAGCAACACTGAAATCTTTAGACCTGGAGGAGGAGATATGA  
GGGACAATTGGAGAAGTGAATTATACAAATATAAAGTAGTAAAAATTGAACCATTAGGAGTAGCACCCACCAA  
GGCAAGGAGGAGAGTGGTGCAAAGAGAGAGAAAAGAGCATTTGGGAATGGGAGCTCTGTTCCCTTGGGTTCTTGGGA  
GCAGCAGGAAGCACTATGGGCGCAGCGTCATTGATGCTGACGGTACAGGCCAGACAATTATTGTCTGGTATAG  
TGCAACAGCAGAACAATATGCTGAGGGCTATTGAGGCGCAGCAGCATCTGCTGCAACTCACAGTCTGGGGCAT  
C

>KC473828

TTCTACTGTAATACAACAAAGCTGTTTAAATAGCACTCTTAATGACACTTGGAAATTTTGGAAATGAAACTGGGG  
ATATCATACTCCCGTGCAGAATAAAACAAATTATAAATCTGTGGCAGAAAGTAGGAAAAGCAATGTATGCCCC  
TCCCATTAAGGACAGATTAACCTGCACATCAAATATTACAGGGCTACTCTTAATAAGAGATGGCGGTGATAAC  
GGGACTGCCAGTGAGACCTTCAGACCTCAAGGAGGAAATATGAAGGACAATTGGAGAAGTGAATTATATAAAT  
ATAAAGTAGCACAAAGTTGAGCCAATAGGAATAGCACCCACCAAGGCAAAGAGAAGAGTGGTGCAGAGAGAAAA  
AAGAGCAGTGACTATGGGAGCTTTGTTCCCTTGGGTTCTTGGGAACAGCAGGAAGCACTATGGGCGCAGCGTCG  
ATAACGCTGACGGTACAGGCCAGACAATTACTGTCTGGTATAGTGCAACAGCAGAGCAATCTGCTGAGAGCTA  
TTGAGGCGCAACAGCATCTGTTGCAACTCACAGTCTGGGGCATC

>KC473829

TTCTACTGTAATACGACAGAACCTGTTTAAATAGTTCTTGGTATTGGAATGATACGAATGATACTTTAAAGAGCA  
ATGAAGAAAATATCACACTTCTGTGCAGAATAAAACAAATTGTAAACATGTGGCAGGAAGTAGGAAAAGCAAT  
GTATGCCCCCTCCATTAGAGGACCAATTAGCTGTACATCAAATATTACAGGGATACTCTTAACAAGAGATGGA  
GGTCAGGGTAATAATACTAATGATACTGAAATCTTCAGACCAGGAGGAGGAGATATGAGGGACAATTGGAGAA  
GTGAATTATATAAATATAAAGTAGTAAAAATTGAACCATTAGGAGTAGCACCCACCAGGGCAAAAAGAAGAGT

GGTACAGAGAGAAAAAAGAGCAATAGGGGGATTAGGAGCGTTGTTTCCTTGGGTTCTTGGGAGCAGCAGGAAGC  
ACTATGGGCGCAGCGTCAATGACGCTGACGGTACAAGCCAGGCTATTATTGACTGGTATAGTGCAACAGCAAA  
ATAATTTGCTGAAGGCTATTGAGGCGCAACAACATCTGTTGCAACTCACAGTCTGGGGCATT

>KC473830

TTCTACTGTGATTCAACACAACCTGTTTGTAGTAGTAATTGGACTAGGAATGATAGTAGTAGTAATTGGACTAGGA  
GTGATAATGATACAGAGTCTAACAATACTGTGATCACACTCCCATGCAGAATAAGACAAATTATAAACATGTG  
GCAGGAAGTAGGAAAAGCAATGTATGCCCCCTCTATCAAAGGACTTATTCAATGTACATCAAATATTACAGGA  
TTATTATTAAACAAGAGATGGTGGTAATGGTAATAAAACGAACGACACTCTGGAGATCTTTAGACCTGGAGGAG  
GAGATATGAGGGACAATTGGAGAAGTGAATTGTACAAATATAAAGTAGTAAAAATTGAACCATTAGGAGTAGC  
ACCCACCAAGGCAAGGAGGAGAGTGGTGCAAAGAGAGAAAAAGAGCAGTGGGACTAGGAGCTCTGTTTCCTTGGG  
TTCTTGTCAGCAGCAGGAAGCACTATGGGCGCAGCATCATTGACGCTGACGGTACAGGCCAGACAATTACTGT  
CTGGTATAGTGCAACAGCAGAACAAATATGCTGAGGGCTATTGAGGCGCAACAGCATCTGTTGCAACTCACAGT  
CTGGGGGCATC

>KU677990

TTCTACTGTAATACATCAAGACTGTTTAAATAGTACTTTGTATAGTAATAATACTTGGAGTAGTAATATTACAG  
AATTAAATGGCATTATCACACTCCCATGCAGAATAAAACAAATTGTAAACATGTGGCAGGAAGTAGGAAAAGC  
AATGTATGCCCCCTCCCATCAGTGGACAAATTAACCTGTTTCATCAAACATTACAGGACTATTATTAAACAAGAGAT  
GGTGGTGATGAGGAGAAACAAGACTGATGAGATTTTCAGACCTGGAGGAGGAGATATGAGGGACAATTGGAGAA  
GTGAACTATATAAATATAAAGTAGTAAAAATTGAACCATTAGGAGTAGCACCTCCAGGGCAAAGAGAAGAGT  
GGTGCAGAGAGAAAAAAGAGCAGTGGGACTAGGAGCTTTGTTTCATTGGGTTCTTGGGAGCAGCAGGAAGCACT  
ATGGGCGCAGCGTCAGTGACGCTGACGGTACAGGCCAGACAATTATTGTCTGGTATAGTGCAACAGCAGAACAA  
ATTTGCTGAGGGCTATTGAGGCGCAACATCATCTGTTGCAACTCACAGTCTGGGGGCATC

>MG196672

TTCTACTGTAATTCATCATCACTGTTTAAACAGTACTTGGAAATAATACTAGTTTAAATGGAAGTATAAGTTGGA  
ATGGAAGTATCACACTTCAATGCAGAATAAAACAAATTATAAACATGTGGCAGGAAGTAGGAAAAGCAATGTA
[truncated: 969,349 more chars]
