# Supplementary material for: Extending the Coding Potential of Viral Genomes with Overlapping Antisense ORFs: A Case for the De Novo Creation of the Gene Encoding the Antisense Protein ASP of HIV-1
Source: Viruses. 2022 Jan 14;14(1):146. doi: 10.3390/v14010146 (PMC8781085; doi:10.3390/v14010146)
Supplement: Supplementary file 1 [file viruses-14-00146-s001.zip › Supplementary File S5.pdf]

## Supplementary File S5.

Sample set of 124 *env* sequences assembled by selecting the coding region of *env* from multiple primate lentiviruses that is homologous to the *env/asp* overlap in the reference genome sequence HIV-1 (ac. number K03455, nucleotides 7371-7943; see Materials and Methods section 2.6 *Assembly of a dataset of env sequences covering a wide phylogenetic range of primate lentiviruses*). The dataset was assembled by selecting the coding region of *env* from multiple primate lentiviruses that covers a wide range of primate lentiviruses, including the four subgroups of HIV-1 (M, N,O, and P), HIV-2, and several SIV species infecting African apes and Old-World monkeys.

>HIV-1-M-B-HXB2

```
TTCTACTGTAATTCAACACAACCTGTTTAAATAGTACTTGGTTTAAATAGTAC
TTGGAGTACTGAAGGGTCAAATAACACTGAAGGAAGTGACACAATCACCC
TCCCATGCAGAATAAAACAAATTATAAACATGTGGCAGAAAGTAGGAAAA
GCAATGTATGCCCCCTCCCATCAGTGGACAAATTAGATGTTTCATCAAATAT
TACAGGGCTGCTATTAACAAGAGATGGTGGTAATAGCAACAATGAGTCCG
AGATCTTCAGACCTGGAGGAGGAGATATGAGGGACAATTGGAGAAGTGAA
TTATATAAATATAAAGTAGTAAAAATTGAACCATTAGGAGTAGCACCCAC
CAAGGCAAAGAGAAGAGTGGTGCAGAGAGAAAAAAGAGCAGTGGGAATAG
GAGCTTTGTTCTTGGGTTCTTGGGAGCAGCAGGAAGCACTATGGGCGCA
GCCCTCAATGACGCTGACGGTACAGGCCAGACAATTATTGTCTGGTATAGT
GCAGCAGCAGAACAATTTGCTGAGGGCTATTGAGGCGCAACAGCATCTGT
TGCAACTCACAGTCTGGGGCATC
```

>HIV-1-M-B-VH

```
TTCTACTGTAATTCAACACAACCTGTTTAAATAGTACTTGGTTTAAATAGTAC
TGGGAATGATACTGAAAGGGCAACTAACAATACAGAAAATATCACACTCC
CATGTAGAATAAAACAAATTATAAACATGTGGCAGAAAGTAGGAAAAGCA
ATGTATGCCCCCTCCCATCAACGGACAGATTAGATGTTTCATCAAATATTAC
AGGGCTGATACTAACAAGAGATGGTGGTAATCAAGAGAACAAGACCGAGA
TCTTCAGACCTGGAGGAGGAGATATGAGGGACAATTGGAGAAGTGAATTA
TATAAATATAAAGTAGTAAGAATTGAACCATTAGGAGTAGCACCCACCAA
GGCAAAGAGAAGAGTGGTGCAGAGAGAAAAAAGAGCAGTGGGAATGATAG
GGGCAATGATCCTTGGGTTCTTGGGAGCAGCAGGAAGCACTATGGGCGCA
GCGTCACTGGCGCTGACGGTACAGACCAGGCAATTGTTGTCTGGTATAGT
GCAACAGCAGAACAATCTGCTGAGGGCTATTGAGGCGCAACAGCATCTGT
TGCAACTCACAGTCTGGGGCATC
```

>HIV-1-M-B-BK132

```
TTCTTCTGTAATTCAACAAAACTGTTTAAATAGTACTTGGAAATAGCACTGA
AGGAAATGACGATGGAGAGGAAAGAAATATCACACTCCCATGCAGAATAA
AACAAATTGTAAACATGTGGCAGGAAGTAGGAAAAGCAATGTATGCCCCCT
CCCATCGGAGGACAAATTAGATGCACCTCAAATATTACAGGGCTGCTATT
AACAAAGAGATGGAGGTAACCAAAATGGGACCAACGAGACTGAAATCTTCA
GACCTGGAGGAGGAAATATGAGGGACAATTGGAGAAGTGAAGTATATAAA
TATAAAGTAGTAAAAATTGAACCATTAGGAGTAGCACCCACTAAGGCAA
GAGAAGAGTGGTGCAGAGAGAAAAAAGAGCAGTGGGAATAGGAGCTGTGT
TCCTTGGGTTCTTGGGAGCAGCAGGAAGCACTATGGGCGCAGCGTCAGTG
ACGCTGACGGTACAGGCCAGACTATTATTGTCTGGTATAGTGCAACAGCA
GAACAATCTGCTGAGGGCTATTGAGGCGCAACAGCATCTGTTGCAACTCA
CAGTCTGGGGCATC
```

>HIV-1-M-B-1058-11

```
TTCTATTGCAACTCAACCAAACTATTTAAATAGCATTTGGGATAATAATAA
AGATAGCACTAAAACAAATGAACCAATGATGGAAAAATATCACACTCC
CATGCAGAATAAAACAAATTATAAACATGTGGCAGGGAGTAGGAAAAGCA
ATGTATGCCCCCTCCCATCAGAGGACAAATTAGATGTACATCAAATATTAC
AGGGCTACTATTAACAAGAGATGGTGGCAAGAACAATGGCACTAATGGGA
CCGAGGTCTTCAGACCTGGAGGAGGAAATATGAAGGACAATTGGAGAAGT
GAATTATATAAATATAAAGTAGTAAAAATTGAACCATTAGGAGTAGCACC
CACCACGGCAAAGAGACGAGTGGTGCAGAGAGAAAAAAGAGCAGTGACAC
```

TAGGAGCTCTGTTTCCTTGGGTTCTTGGGAGCAGCAGGAAGCACTATGGGC  
GCAGCGTCAATGACGCTGACGGTACAGGCCAGACTATTATTGTCTGGTAT  
AGTGCAACAGCAGAACAACCTTGCTGAGGGCTATTGAGGCGCAACAACATC  
TGTTGCAACTCACGGTCTGGGGCATC

>HIV-1-M-B-671-00T36

TTCTACTGTAATACAACACAGCTGTTTAATAGTACTTGGGATGTGAATGC  
TACTGGGAATGGTACTACAGAACCAAATAGTACTATAACACTCCCATGCA  
GAATAAAACAAATTATAAACAGATGGCAGGAAGTAGGAAAAGCAATGTAT  
GCCCCCTCCCATTCAGGACAAATTAGCTGTTTCATCAAACATCACAGGGCT  
GCTATTAACAAGGGATGGTGGTGGTGGTGAGAACAATAGCACCGAGATCT  
TTAGACCTGGAGGAGGAGATATGAGAGACAATTGGAGAAGTGAATTATAT  
AAATATAAAGTAGTAAAAATTGAGCCATTGGGAGTAGCACCCACCAAGGC  
AAAGAGAAGAGTGGTGCAGAGAGAAAAAAGAGCAATAACGCTAGGAGCTA  
TGTTTCCTTGGGTTCTTGGGAGCAGCAGGAAGCACTATGGGCGCAGCGTCA  
ATGGCGCTGACGGTACAGGCCAGACAATTATTGTCTGGTATAGTGCAACA  
GCAAAACAATTTGCTGAGGGCTATTGAGGCGCAACAGCATCTGCTGCAAC  
TCACAGTCTGGGGCATT

>HIV-1-M-D-94UG114

TTCTACTGCAATACAACAAGACTGTTTAATAGTACATGGAAAAGGAATAA  
TAGTGAATGGAGGAGTGATAATACACCAGATGAGACAATCACACTCCAAT  
GCAGAATAAAACAAATTATAAACATGTGGCAGGAAGTAGGAAAAGCAATG  
TATGCCCCCTCCCATTTGAAGGATTCATCAACTGTTTCATCAATATTACAGG  
ACTATTGTTGACAAGAGATGGTGGTGCAATTAATAGTAGCCAGAATGAGA  
CCTTCAGACCTGGAGGAGGAGATATGAGAAACAATTGGAGAAGTGAATTA  
TACAAATATAAAGTAGTAAAACTTGAACCAATAGGTCTAGCGCCACC GC  
GGCAAAGAGAAGAGTGGTAGAAAAGAGAAAAAAGAGCAATAGGACTGGGAG  
CTCTGTTTCCTTGGGTTCTTGGGAACAGCAGGAAGCACGATGGGCGCAGTG  
TCACTGACGCTGACGGTACAGGCCAGACAGGTATTGTCTGGTATAGTGCA  
ACAGCAAAACAATTTGCTGAGGGCTATAGAGGCGCAACAGCATCTGTTGC  
AACTCACAGTCTGGGGCATT

>HIV-1-M-D-A08483M1.vrc9

TTCTACTGCAATACATCAGGACTGTTTAATGGTGTATGGAAGAATAATAC  
ATCAGATAATGAAACGGTAAATGGAAGTGAGACAATAACAATCCCATGCA  
GAATAAAACAAATTATAAACACGTGGCAAGGAGTAGGAAGAGCAATGTAT  
GCCCCCTCCCATTAGAGGACTAATCCGATGTTTCATCAAACATTACAGGACT  
ATTGTTAACAAGAGATGGTGGTACCAATGGTATTAGTCAGAATGAGATCT  
TCAGACCTGGAGGAGGAGATATGAGAGACAATTGGAGAAGTGAATTATAC  
AAATATAAAGTAGTAAAAATTGAACCATTAGGTCTAGCACCCACCAGGGC  
TAAAGAAGAGTGGTGGAAAGAGAAAAAAGAGCAATAGGACTAGGAGCTA  
TGTTTCCTTGGGTTCTTGGGAACAGCAGGAAGCACGATGGGCGCAGTGTCA  
CTGACGCTGACGGTACAGGCCAGACAGGTACTGTCTGGTATAGTGCAACA  
GCAAAACAATTTGCTGAGGGCCATAGAGGCGCAACAGCATCTGTTGCAAC  
TCACAGTCTGGGGCATT

>HIV-1

TTCTATTGTGACACATCAGGCCTGTTTAATAGCACTTGGTATAATACTTG  
GAATAGCACTGAATCAAAAAGCACGGAGTCAAACGACATTACTCTCCAAT  
GCAGAATAAAGCAAATTATAAATATGTGGCAGAGAGCAGGACAAGCAATA  
TATGCCCCCTCCCATCCAAGGAGTAATAATGTGTAAATCAAATATTACAGG  
ACTAATATTAACAAGAGATGGTGGAGGTAATAGCAGTGAACCTGAAACCT  
TCAGACCTGGAGGAGGAGACATGAGGGACAATTGGAGAAGTGAATTGTAT  
AAGTATAAAGTAGTAAAAATTGAACCCTAGGAGTAGCACCCACCAAGGC  
AAGGAGAAGAGTGGTGCAGAGAGAAAAAAGAACAGTTGGAATAGGAGCTG  
TGTTTCCTTGGGTTCTTAGGAGCAGCAGGAAGCACTATGGGCGCGGCGTCA  
ATAACGCTGACGGCACAGGCCAGAGCATTACTGTCTGGCATAGTGCAACA  
GCAAAGCAATTTGCTGAGGGCTATAGAGGCTCAACAACATCTGTTGAGAC  
TCACGGTCTGGGGCATT

>HIV-1-M-A-92UG037

TTCTATTGTAATACATCAGGCCTGTTTAATAGTACTTGGGTAAATGGCAC  
TACCAGCAGCACGTCAAATGGCACTATAACTCTCCCATGCAGAATAAAGC  
AAATTATAAATATGTGGCAGAGAGTAGGACAAGCAATGTATGCCCCCTCCC

ATCCAAGGAGTAATAAAGTGTGAATCAAACATTACAGGACTAATATTAAC  
AAGAGATGGTGGGGTTAATAGCAGTGACAGTGAAACCTTCAGACCTGGAG  
GAGGAGATATGAGGGATAATTGGAGAAGTGAATTATATAAGTATAAGGTA  
GTAATAAATTGAACCACTAGGAGTAGCACCCACCAAGGCAAGGAGAAGAGT  
GGTGGAGAGAGAAAAAAGAGCAGTTACACTGGGAGCTGTATTCATTGGGT  
TCTTAGGAACAGCTGGAAGCACAATGGGCGCGGCGTCAATAACGCTGACG  
GTACAGGCCAGAAAATTATTGTCTGGCATAGTGCAACAGCAAAGCAATTT  
GCTGAGGGCTATAGAGGCTCAACAGCATCTGTTGAAACTCACTGTCTGGG  
GCATT

>HIV-1-M-A-SE7253

TTCTATTGTAATACATCAGGCCTGTTTAATAGCACTTGGAGCCAAAATGA  
CACTGGGGTATCAAATAGCACGGAGTCAAATGACACTATAATTCTTCCAT  
GCAGAATAAAACAAATTATAAATATGTGGCAGAGAGCAGGACAAGCAATA  
TATGCCCCCTCCCATCCCAGGAATAATAAGGTGTGAATCAAACATTACAGG  
GCTACTGTTAACAAGAGATGGTGGGGTTGTTAACAGTACAAATGAAACCT  
TCAGACCTGGAGGAGGAAATATGAAGGACAATTGGAGAAGTGAATTATAT  
AAGTATAAAGTAGTAAAAATTGAACCACTAGGAGTAGCACCCACCAGGGC  
AAGGAGAAGAGTGGTGCAGAGAGAAAAAAGAGCAGTTGGACTGGGAGCTT  
TATTCATTGGGTTCTTAGGAGCAGCAGGAAGCACTATGGGCGCGGCGTCA  
ATAACGCTGACGGTACAGGCCAGACAATTATTATCTGGCATAGTGCAACA  
GCAAAGTAATTTGCTGAGGGCTATAGAGGCTCAACAGCATCTGTTGAAAC  
TCACTGTCTGGGGCATT

>HIV-1-M-A-97CDKB48

TTCTATTGCAATACAACAGGCCTGTTTAATAGCACATGGGAAAATGGCAC  
TAACAAACAGAATTACACGGAGTCAAATGACACTATAACGCTCCAATGCA  
GAATAAAACAAATTATAAACATGTGGCAGAGAGTAGGCCGAGCAATGTAT  
GCCCCCTCCCATTCAGGAGTAATAAAGTGTACATCAAACATTACAGGAAT  
GATATTGACAAGAGACGGTGGGAAGAACAGTATTAATGAGACCTTCAGAC  
CTGGAGGAGGAGATATGAGGGACAATTGGAGAAGTGAATTATATAAGTAT  
AAAGTAGTAAAAATTGAACCACTAGGAATAGCACCCACAGAGGCAAGGAG  
AAGAGTGGTGCAGAGAGAAAAAAGAGCAGTTGGATTGGGAGCTGTTTTCC  
TTGGGTTCTTGGGAGCAGCAGGAAGCACTATGGGCGCGGCGTCAATAACG  
CTGACGGTACAGGCCAGACAATTATTGACTGGCATAGTGCAACAGCAAAG  
CAATTTGCTGAAGGCTATAGAGGCTCAACAACAGATGTTGAGGCTCACAG  
TCTGGGGCATT

>HIV-1-M-A-94CY017.41

TTCTATTGCAATACAACAGGCCTGTTTAATGGTACGTGGTGAACAATGG  
TACGTGGAACGGGGCCCTACACACCTAATAACACCAATGGAAGTATAATCC  
TCCCATGCAGAATAAAACAAATTATAAACATGTGGCAGAGAGTAGGAAGA  
GCAATGTATGCCCCCTCCCATTCAGGAATAATAAAGTGTACATCAAACAT  
TACAGGAATAATATTGACAAGAGATGGTGGTAACAATGGGACTAATGAGA  
CCTTCAGACCTGGAGGAGGAGATATGAGGGACAATTGGAGAAGTGAATTA  
TATAAATATAAAGTAGTAAACTTGAACCACTAGGAGTAGCACCTACCAG  
GGCAAAAAGAGAGTGGTGGAGAGAGAAAAAAGAGCAGTTGGACTGGGAG  
CTGTCTTCCTTGGGTTCTTGGGAGCAGCAGGAAGCACTATGGGCGCGGCG  
TCACTAACGCTGACGGTACAGGCCAGACAATTATTGTCTGGTATAGTGCA  
ACAGCAAAGCAATTTGCTGCAGGCTATAGAAGCTCAACAGCATCTGTTGA  
AACTCACAGTCTGGGGCATT

>HIV-1-M-G-DRCBL

TTCTATTGTAATACATCAGGACTATTTAATAATAGTATATTAAAGAGTAA  
TATATCAGAAAATAATGATACTATCACACTTAATTGTAAGATAAAACAAA  
TTGTGAGAATGTGGCAGAGAGTGGGACAAGCAATGTATGCCCCCTCCATT  
GCAGGAAACATTACATGTAGATCAAACATTACAGGACTAATATTAACAAG  
AGATGGTGGGGATAACAATAGCACTAGTGAGATCTTCAGACCTGGAGGAG  
GAGATATGAAAAACAATTGGAGAAGTGAATTATATAAGTATAAAACAGTA  
AAAATCAAATCACTAGGAATAGCACCCACCAGGGCAAGGAGAAGAGTGGT  
GGAGAGAGAAAAAAGAGCAGTTGGAGTAGGAGCTATCTTCCTTGGGTTCT  
TAGGAACAGCAGGAAGCACTATGGGCGCAGCGTCAATAACGCTGACGGTA  
CAGGTCAGACAATTATTGTCTGGCATAGTGCAACAGCAAAGCAATTTGCT  
GAGAGCTATAGAGGCGCAGCAGCATCTGTTGCAACTCACAGTCTGGGGCA

TT

>HIV-1-M-G-PBS1191

TTCTATTGTAATACATCAAAACTATTTTAATAATAGTTGGCTTAATAATAG  
TAGTAATGAAGCCAATATCACACTCCCATGTAAGATAAAACAAATTGTGA  
GAATGTGGCAGAGAGTGGGACAAGCAATATATGCCCCCTCCCATCGCAGGA  
AACATTGTGTGTAGATCAAACATTACAGGACTAATATTAACAAGAGATGG  
TGGGAATAACAATACAAATGAGACCTTCAGACCTGGAGGAGGAGATATGA  
GGGACAATTGGAGAAGTGAATTATATAAGTATAAAGTAGTAAAGATCAAA  
TCACTAGGAGTAGCACCCACCAGGGCAAGGAGAAGAGTGGTGGGGAGAGA  
AAAAAGAGCAGTAGTTGGACTAGGAGCTTTCTTCCTTGGGTTCTTAGGAG  
CAGCAGGAAGCACTATGGGCGCGCGTCAATAGCGCTGACGGTACAGGCC  
AGACAATTATTGTCTGGCATAGTGCAACAGCAAAGCAATTTGCTGAGGGC  
TATAGAGGCGCAACAGCATCTGTTGCAACTCACAGTCTGGGGCAT

>HIV-1-M-H-90CR056

TTCTATTGCAATACATCAGGGCTGTTTAATAGTAGTTGGGAAATGCATAC  
TAATTACACATCAAATGACACAAAGGGAAACGAAAACATTACACTGCCAT  
GCAGAATAAAACAAATTGTAAACATGTGGCAGAGAGTAGGACGAGCAATG  
TATGCCCCCTCCCATCCAAGGAAACATTATGTGTGTATCAAATATTACAGG  
ACTAATATTGACAATTGACGAGGGTAACGCGTCTGCAGAAAATTATACCT  
TCAGACCTGGAGGAGGAGATATGAGGGACAATTGGAGAAGTGAATTGTAT  
AAATATAAAGTAGTAAAAATTGAACCACTGGGAATAGCACCCACCAAGAC  
AAGGAGAAGAGTGGTGGAGAGAGAAAAAGAGCAGTGGGAATGGGAGCTT  
CTTTCCTTGGGTTCTTGGGAGCAGCAGGAAGCACTATGGGCGCGGCGTCA  
ATAACGCTGACGGTACAGGCCAGGCAATTATTGTCTGGTATAGTGCAGCA  
GCAAAGCAATTTGCTGAGAGCTATACAGGCGCGACAGCATATGTTGCAGC  
TCACGGTCTGGGGCATT

>HIV-1-M-C-B002865-A11-12

TTCTATTGCAATACATCAAACTGTTTAATGAAACATACCTTAATGATAC  
AAAGAGTGAACAATCATACTCCCATGCAGAATAAAACAGATTATAAACA  
TGTGGCAGGAGGTAGGACGAGCAATGTATGCCCCCTCCCATTCAGGAAAC  
ATAACATGTAACCTCAAGTATCACAGGACTACTGTTGACACGGGATGGAGG  
AGAGACAAATGGCACAAATGGCACAGAAACGTTTCAGACCTGGAGGAGGAG  
ATATGAGGGACAATTGGAGAAGTGAATTATATAAATATAAAGTGGTAGAA  
ATTAATCCATTGGGAATAGCACCCACTAAGGCAAAAAGGAGAGTGGTGGG  
GAGAGAAAAAGAGCAGTGGGAATGGGAGCTGTGTTTCCTTGGGTTCTTGG  
GAGCAGCAGGAAGCACTATGGGCGCAGCGTCACTAACGCTGACGGCACAG  
GCCAGACAATTGTTGTCTGGAATAGTGCAACAGCAAAGCAATTTGCTGAG  
GGCTATAGAGGCGCAACAGCATATGTTGCAACTCACGGTCTGGGGCATA

>HIV-1-M-C-NIRT005

TTCTATTGCAATACATCAAGACTGTTTAATGGAACATATGATGGAACATA  
TAATGGTACAGCAAGTAACAATACAGGAAACATCACCTCCCATGCAGAA  
TAAACAAATTATAAACATGTGGCAGGGGGTAGGACGAGCAATATATGCC  
CCTCCCATTCAGGAAACATAACATGTGTATCAAATATCACAGGACTATT  
ATTGGTACGTGATGGAGGAACAGAGAATGGCACAAATGGCACAGAAACAT  
TCAGACCTACAGGAGGAAATATGAGGGACAATTGGAGAAGTGAATTATAT  
AAATATAAAGTGGTAGAAATTAAGCCATTGGGAATAGCACCCACTGCAGC  
AAGAAGGAGAGTGGTGGAGAGAGGAAAAAGAGCAGTGGGAATAGGAGCTG  
TGTTTCCTTGGGTTCTTGGGAGCAGCAGGAAGCACTATGGGCGCGGCGTCA  
ATAACGCTGACGGTACAGGCCAGACAATTGTTGTCTGGTATAGTGCAGCA  
GCAAAGCAATTTGCTGAGAGCTATAGAGGCGCAACAGCATCTGTTGCAAC  
TCACGGTCTGGGGCATT

>HIV-1-M-C-DEMC08MW004

TTCTATTGTAATACATCAAGATTGTTTACATACAATGGTACAGAAAGTAA  
GAATTCAACAAACAAAAGTAAGAATTCAACAGACATCATACTCCCATGCA  
GAATAAAGCAGATTATAAACATGTGGCAAGAGGTAGGACGAGCAATGTAT  
GCTCCTCCCATTCAGGAAACATAACATGTACGTCAAATATCACAGGACT  
ACTATTGACACGAGATGGAGGAGGTAAAAATAACACAAAAGAGAGATAT  
TCAGACCTGGAGGAGGAGATATGAGGGACAATTGGAGAAGTGAATTATAC  
AAGTATAAAGTGATAGAAATTAAGCCATTAGGAATAGCTCCAACCTACGGC  
AAAAAGGAGAGTGGTGGAGAGAGAAAAAGAGCAGTGGGAATAGGAGCTG

TGCTCCTTGGGTTCTTGGGAGCAGCCGGAAGCACTATGGGCGCAGCATCA  
ATAACGCTGACGGTACAGGCCAGACAATTGCTGTCTGGTATAGTGCAACA  
GCAAAGCAATTTGTTGAGGGCTATAGAGGCGCAACAGCATATGTTGCAAC  
TCACAGTCTGGGGCATT

>HIV-1-M-C-097SO

TTCTATTGCAATACGTCTAGACTGATTAATAGTACATACAGGTCTAATAG  
TACTAATAGTACTTCAGATACATCCATCATACTCCCATGCAGAATAAAAC  
AAATTATAAACATGTGGCAGGGGGTAGGACGAGCAATGTATGCCCCCTCCC  
ATTGAAGGAAACATAACATGTAAATCAAATATTACAGGACTACTATTGAC  
ACGTGATGGAGGAACGGACAATGAAACAATAGAGACATTCAGACCTGGAG  
GAGGAGATATGAGGGACAATTGGAGAAGTGAATTATATAAAATATAAAGTG  
GTAGAAATTAAACCATTAGGAATAGCACCCACTAAGGCCAAAAGGAGAGT  
GGTGGAGAGAGAAAAAAGAGCAGTGGGAATAGGAGCTGTGTTCCCTTGGGT  
TCTTGGGAGCAGCAGGAAGCACTATGGGCGCAGCATCACTGACGCTGACG  
GTACAGGCCAGGCAATTGCTGTCTGGTATAGTGCAACAGCAAAGCAATTT  
GCTGAGGGCTATAGAGGCGCAACAGCATATGTTGCAACTCACGGTCTGGG  
GCATT

>HIV-1-M-C-PWJ-0513.39

TTCTATTGCAATACATCAAACTGTTTAATAGTACATACAATCCTAATGG  
AACAAAAAATGATACAACTCAAGTGCATACATCATCCTTCCATGCAGAA  
TAAACAGATTATAAACATGTGGCAGGAGGTAGGACGAGCAATGTATGCC  
AATCCCATTTGAAGGATACATAACATGTAGATCAAATATCACAGGACTACT  
ATTAGTACGTGATGGAAGCACAAATAGTAGTAACGAGACATTCAGACCTG  
GAGGAGGAAATATGAAGGATAATTGGAGAAGTGAATTATATAAATATAAA  
GTGGTAGAAATTAAAGCCATTGGGAATAGCACCCACTGAAGCAAAAAGGAG  
AGTGGTGGAGAGAGAAAAAAGAGCAGTGGGAATAGGAGCTGTGTTCCCTTG  
GGTTCCTTGGGAGCAGCAGGAAGCACTATGGGCGCGGCGTCAATGACGCTG  
ACGGTACAGGCCAGACAATTGTTGTCTGGTATAGTGCAACAGCAAAGCAA  
TTTGCTGAGGGCTATAGAGGCGCAACAGCATTTGTTGCAACTCACGGTCT  
GGGGCATT

>HIV-1-M-C-03ZAPS021MB1

TTCTATTGCAATACAACACCACTGTTTAATATGTCTGCTGACAATAACAG  
CACCAATAATGGCACCATCACACTCCAATGCAAGATAAAACAAATTATAA  
ACATGTGGCAGGGGGTAGGACGAGCAATGTATGCCCCCTCCCATTCAGGA  
AACATAACATGTGCGTCAAATATCACAGGACTACTATTGACACATGACGG  
AGGCATAAAAAATGACACAGTCCCAGAGGTATTTAGACCTGGAGGAGGAA  
ATATGAAGGACAATTGGAGAAGTGAATTATATGAATATAAAGTGGTAGAA  
ATTAAGCCATTGGGAATAGCCCCCACTGAGTCAAGAAGGATAGTGGTGGA  
GAGAGAAAAAAGAGCAGTGGGAATGGGAGCTGTGATCTTTGGGTTCTTAG  
GAGCAGCAGGAAGCACTATGGGCGCGGCGTCAACGGCGCTGACGGTACAG  
GCCAGACAACCTGTTGTCTGGTATAGTGCAACAGCAAAGCAATTTGCTGAG  
AGCTATAGAGGCGCAACAGCATATGTTGCAACTCACAGTCTGGGGCATT

>HIV-1-M-C-C.ZA.x.Du246-B3

TTCTATTGCAATACATCAAACTGTTTAATAAGAATGGTACAGAAAAGAA  
TACAACCATCACACTCCCATGCAGAATAAAACAAATTATAAACATGTGGC  
AGGAGGTAGGACGAGCAATATATGCCCCCTCCCATTTAAAGGAAACATAACA  
TGTAAGCTCAAACATCACAGGACTACTATTGACACGGGATGGAGGAGAAAC  
AAACATAAAAAACACAGAGACAGACAATAACCACAGAGACATTCAGACCTG  
AAGGAGGAGATATGAGAAATAATTGGAGAAGTGAATTGTATAAATATAAA  
GTGGTAGAAGTTAAGCCACTAGGAGTAGCACCTACTGAGGCAAAAAGGAG  
AGTGGTGGAGAGAGAAAAAAGAGCAGTGGGAATAGGAGCTGTGTTCCCTTG  
GGTTCCTTGGGAGCAGCAGGAAGCACTATGGGCGCGGCGTCAATAACGCTG  
ACGGTACAGGCCAGACAATTGTTGTCTGGAATAGTGCAACAGCAAAGCAA  
TTTGCTGAAGGCTATAGAGGCGCAACAGCATATGTTGCAACTCACGGTCT  
GGGGCATTAAAGCAACTCCAGGCAAGAGTCCTGGCTATAGAAAGATACCTA  
AAGGATCAACAGCTCCTAGGGTTGTGGGGCTGCTCTGGAAAACCTCATCTG  
CACCCTGCTGTGCCTTGAACATCAGTTGGAGTAATAAATCTTATGAAG  
ACATTTGGAATAACATG

>HIV-1-M-C-05ZASK247B1

TTCTATTGCAATACATCAAGACTGTTTACATCAAACCTGTCTAGTAATAC

AGAAGACATCATCACAATCCCATGCGAGAATAAAACAGGTTATAAACATGT  
GGCAGAAGGTAGGACGAGCAATGTATGCCCCTCCCATTGCAGGAAACATA  
ACATGTAGATCCAACATCACAGGACTACTATTGACACGTGATGGAGGATC  
AGATAACCATAACCAATAACACAGAGACTTTCAGACCTGGAGGAGGAGACA  
TGAGGGATAAATTGGAGAAGTGAATTATATAAATATAAAGTAGTAGAAATT  
AAGCCATTGGGAATAGCACCCACCAAGGCAAAAAGGAGAGTGGTGGAGAG  
AGAAAAAGAGCAGCGGGAATAGGAGCTGTGTTCCCTTGGGTTCTTGGGAG  
CAGCAGGAAGCACTATGGGCGCGGCGTCAATAACGCTGACGGTACAGGCC  
AGACAATTGTTGTCTGGTATAGTGCAACAGCAAAGCAATTTGCTGAAGGC  
TATAGAGGCGCAACAGCATCTGTTGCAACTCACGGTCTGGGGCATT

>HIV-1-M-C-704MC024F

TTCTATTGCAATACATCAAGACTGTTTAAATAGAAATAGTACAGACCTGTC  
AACTAATACAGGAAATAAATTC AACCATCACACTCCCATGCGAGAATAAAAC  
AAATTATAAACATGTGGCAGGGGGTAGGACGAGCAATGTATGCCCCTCCC  
ATTGAAGGAAACATAACATGTAAGTCAATTATCACAGGACTACTATTGGT  
GCGTGATGGAGGCCCAAATAATAGCACAGAAACATCAGACCGGAACCTGG  
GAGGGAGGGAAAATATGAAAGGGAACAAATTTGGAAGGAAAAGTGAAATT  
ATTATTAATATAAAGTGATAGAAAATTTAAGCCCATTGGGGGAAATAAG  
CACCCCACTAAGGCAAAAGAGGAGAGCGGTGGAGAGAGAGAAAAGAGCAG  
TGGTGGGAATAGGAGCTATGATCCTTGGGTTCTTGGGAGCAGCAGGAAGC  
ACTATGGGCGCGGCGTCAATAACGCTGACGGTACACGCTAGACAATTGTT  
GTCTGGTATAGTGCAACAGCAAAGTAATTTGCTGAGGGCTATAGAGGCGC  
AACAGCATATGTTGCAACTCACGGTCTGGGGCATT

>HIV-1-M-C-DEMC11ZM006

TTCTATTGTGATACATCAGGACTGTTTGAGAATAGGACATACACGCTTAA  
TGATACAGGAAGCACTTCAAACAACACTAATTCAACCATCACAATACAAT  
GCAGAATAAAACAAATTATAAACATGTGGCAGAGGGTAGGACAAGCAATG  
TATGCCCCTCCCATTGCAGGAAACATAACATGTAAATCAAATATCACAGG  
ACTGCTATTGACACGTGATGGAGGAGCAAAAAAGAATGAGAGTGACCCCC  
CAGAGACATTTCAGACCTGGAGGAGGAGATATGAGGGACAACCTGGAGAAGT  
GAATTATATAAATATAAAGTGGTAGAAGTTAAACCATTGGGATTAGCACC  
CACCAAGGCACAAAGAAGAGTGGTGGGAAGAGAAAAAAGAGCAGTGGGAA  
TAGGAGCTGTGTTCCCTTGGGTTCTTGGGAGCAGCAGGAAGCACTATGGGC  
GCGGCGTCAATCACGCTGACGGTACAGGCCAGACAATTGCTATCTGGCAT  
AGTGCAACAGCAAAGCAATTTGCTGAGGGCTATAGAGGCGCAACAGCATC  
TGTTGCAACTCACAGTCTGGGGCATT

>HIV-1-M-C-503-06310-30

ACTTATAATGATACAAAGCATAATGGAACC AAAGTCATCACACTCCCATG  
CAGAATAAAACAAATTATAAACATGTGGCAGGAGGTAGGACGAGCAATGT  
ATGCTCCTCCCATTGCAGGCAACATAACATGTACGTCAAATATCACAGGA  
CTACTATTGACAAGGGATGGAGGGAATAATAGCACAGAGACAGAGACATT  
CAGACCTGGAGGAGGAGATATGAGGGACAATTGGAGAAGTGAATTATATA  
AATACAAAGTAGTAGAAATTAAGCCATTGGGAATAGCACCCACTGGAGCA  
AAAAGGAGAGTGGTGGAGAGAGAAAAAAGAGCAGTGGGAATAGGAGCTGT  
GTTCTTGGGTTCTTGGGAGCAGCAGGAAGCACTATGGGCGCGGCGTCAA  
TAACGCTGACGGTACAGGCCAGACAACCTGTTGTCTGGTATAGTGCAACAG  
CAAAGCAATTTGCTGAAGGCTATAGAGGCGCAACAACACCTGTTGCAACT  
CACAGTCTGGGGCATT

>HIV-1-M-C-00BW-1921.13

TTCTATTGCAATACATCACAACCTGTTCAATGGTACATACAATGATACATA  
CAATGGTACAGAAAGTAATTGAGTAATTCAACTATCACACTCCCATGCA  
GAATAAAACAAATTATAAACATGTGGCAGGGGGTAGGACGAGCAATATAT  
GCCCCTCCCATTGAAGGAAACATAACATGTAAATCAAATATCACAGGACT  
ACTATTGACGCGGGATGGAGGGAAAGGGAATGATACCGCAGAGATATTCA  
GACCTGAAGGAGGAGATATGAAGAACAATTGGAGAAGTGAATTATATAAA  
TATAAAGTAGTAGAAATTAGGCCATTGGGAGTAGCACCCACTAAAGCAAA  
AAGGAGAGTGGTGGAGAGAGAAAAAAGAGCAGCACTAGGAGCTGTGCTCC  
TTGGGTTCTTGGGAGCAGCAGGAAGCACTATGGGCGCAGCATCAATAACG  
CTGACGGTACAGGCCAGACAATTGCTGTCTGGAATAGTGCAACAGCAAAG  
CAATTTGCTGAAGGCTATAGAGGCGCAACAGCATCTGTTGCAACTCACGG

TCTGGGGCATT

>HIV-1-M-C-CNE88.U

TTCTATTGTAATACATCAGGCCTGTTTAAATAGTACATACATGACTAATGG  
TACATACATGTTTAAATGGTACATACAGGCTTAATAATATAACAAGTAATT  
CAAACATCACAATTCATGCAGAATAAAGCAAATTATAAACACGTGGCAG  
GAGGTAGGGCGAGCAATGTATGCCAATCCCATTCAGGAAACATAACATG  
TAAATCAAATATCACAGGACTACTATTGGTACGTGATGGAGGAACAAATA  
ATGCTACAACAGAGACATTTCAGACCTGGAGGAGGAAATATGAGGGACAAT  
TGGAGAAGTGAATTATATAAAATATAAGGTGGTAGAAATTAAGCCATTGGG  
AATAGCACCCACTGAAGCAAAAAGGCGAGTGGTGGAGAGAGAAAAAGAG  
CAGTGGGAATAGGAGCTGTGTTCTTGGGTTCTTGGGTGCAGCCGGAAGC  
ACTATGGGCGCAGCGTCAATAACGCTGACGGTACAGGCCAGACAATTGCT  
GTCTGGTATAGTGCAACAGCAAAGCAATTTGCTGAGGGCTATAGAGGCGC  
AACAGCATATGTTGCAACTCACGGTCTGGGGCATT

>HIV-1-M-C-C113\_E6\_2S

TTCTATTGCAATACATCAGGACTGTTTAAATGAGACATACAATCCTAATGG  
TACAGAAAGTAATTCAAGCGCAGTCATCACACTCCCATGCAGAATAAAAC  
AAATTATAAACATGTGGCAGGAAGTAGGAAAAGCAATATATGCCCCCTCCC  
ATTCAAGGAAACATAACATGTAAATCAAATATCACAGGACTACTATTGGT  
ACGTGATGGAGGAACTCAAATGGCACAAATAACACAGAGATATTTCAGAC  
CTGGAGGAGGAGATATGAGGGACAATTGGAGAAGTGAATTATATAAATAT  
AAAGTGGTAGAAATTAAACCATTGGGAATAGCACCCACTAGTGCAAAAAG  
GAGAGTGGTGGAGAGAGAAAAAGAGCAGTTGGAATAGGAGCTGTGTTCC  
TTGGGTTCTTGGGAGCAGCAGGAAGCACTATGGGCGCGGCGTCAATAACG  
CTGACGGTACAGGCCAGACAACCTGTTGTCTGGTATAGTGCAACAGCAAAG  
CAATTTGCTGAGAGCTATAGAGGCGCAACAGCATATGTTGCAACTCACGG  
TTTGGGGCATT

>HIV-1-M-C-04ZASK146B1

TTCTATTGCAATACATCAAATCTGTTTAAATATAACTGCAAGTAATGCAAG  
TGATGCAACAACAACACCATCACACTCCCATGCAAAAATAAACAAATTA  
TAAACATGTGGCAGGAGGTAGGACGAGCAATGTATGCCCCCTCCCATTGCA  
GGAAACATAACATGTAACTCAAGTATCACAGGACTACTATTGACACGTGA  
TGGAGGCAATAACAATGACACAGGCAATAACAATGACACAGAGATATTCA  
GACCTGGAGGAGGAAATATGAAGGACAATTGGAGAAGTGAGTTATATAAA  
TATAAAGTGGTAGAAATTAAGCCATTAGGAATAGCACCCACTAAGGCAA  
AAGGAGAGTGGTGGAGAGAGAGAAAAGAGCAGTGGGACTAGGAGCTGTAC  
TCCTTGGGTTCTTAGGAACAGCAGGAAGCACTATGGGCGCGGCGTCAATA  
ACGCTGACGGTACAGGCCAGGCAACTGTTGTCTGGTATAGTGCAACAGCA  
AAGCAATTTGCTGAGGGCTATAGAGGCGCAACAGCACATGTTGCAACTCA  
CGGTCTGGGGCATT

>HIV-1-M-C-21068

TTCTATTGCAATACATCAGGCCTGTTTAAATAGGACATACATGCCTAATGA  
TACAAAGAGTAATTCAAGCAGTAATCCAAACGCAAAACATCACAATCCCAT  
GCAGAATAAAGCAAATTATAAACATGTGGCAGGAGGTAGGACGAGCAATG  
TATGCCCCCTCCCATTTGAAGGAAAAATAACATGTAGATCAAATATCACAGG  
ACTACTATTGGTACGTGATGGAGGAGAAGACAAAAATAATACAGAGACAA  
ATAAGACGGAGACATTCAGACCTGGAGGAGGAGATATGAGGGACAATTGG  
AGAAGTGAATTATATAAAATACAAAGTGGTAGAAGTTAAGCCATTGGGAGT  
AGCACCCACTACAGCAAAAAGGAGAGTGGTGGAGAGAGAAAAAGAGCAG  
TGGGAATAGGAGCTGTGTTCTTGGGTTCTTGGGAGCAGCAGGAAGCACT  
ATGGGCGCGGCGTCAATAACGCTGACGGTACAGGCCAGACAATTGTTGTC  
TGGTATAGTGCAACAGCAAAGCAATTTGCTGAGGGCTATAGAGGCGCAAC  
AGCATCTGTTGCAACTCACGGTCTGGGGCATT

>HIV-1-M-C-92BR025

TTCTATTGCAATACATCAAGCCTGTTTAAATAGTACATACACACCTAATAG  
TACAGAAAACATTACTGGAACAGAAAATTCAATCATCACAATCCCATGCA  
GAATAAAACAAATTATAAATATGTGGCAGGGGGTTCGGACGAGCAATGTAT  
GCCCCCTCCCATTTGAAGGAATATTAACATGTAGATCAAATATCACAGGATT  
ACTACTGACACGGGATGGAGGTACAGGTATGCATGACACAGAGATATTCA  
GGCCTGAAGGAGGAGATATGAGGGACAATTGGAGAAGTGAATTATATAAA

TATAAAGTGGTAGAAATTAAACCATTAGGAATAGCACCCACTAAGGCGAA  
AAGGAGAGTGGTGGAGAGAGAAAAAGAGCAGTGGGAATAGGAGCTGTGT  
TCCTTGGGTTCTTGGGAGCAGCAGGAAGCACTATGGGCGCAGCATCAATA  
ACGCTGACGGTACAGGTACAGACAATTATTGTCTGGGATAGTGCAACAGCA  
AAGCAATTTGCTGAGAGCTATAGAGGCGCAACAGCATATGTTGCAACTCA  
CGGTCTGGGGCATT

>HIV-1-M-C-C2220

TTCTATTGCAATACATCAAACCTGTTTAATAGCACAAAAGTAGAACTGTT  
TAATAGCAGTACAAATTTAAACATCACACTCCAATGCAGAATAAAACAAA  
TTATAAACATGTGGCAGGGAGTAGGACGAGCAATGTATGCCCCCTCCATT  
GAAGGAATAATAATGTGTAGATCAAATATCACAGGACTACTACTGACACG  
TGATGGAGCCAAAGAGCCACATAGCACAAAAGAGATATTCAGACCTGAAG  
GAGGAGATATGAGGGACAATTGGAGAAGTGAATTATATAAATATAAAGTG  
GTAGAAATTAAGCCACTAGGAGTAGCACCCACTAAGCCAAAAAGGAGAGT  
GGTGGAGAGAGAAAAAGAGCAGCACTAGGAGCTTTGTTCTTGGGTTCT  
TGGGAGCAGCAGGAAGCACTATGGGCGCAGCATCAATAACGCTGACGGTA  
CAGGCCAGACAATTATTGTCTGGGTATAGTGCAACAGCAAAGCAATTTGCT  
GAAAGCTATAGAGGCGCAACAGCATATGTTGCAGCTCACGGTCTGGGGCA  
TT

>HIV-1-M-K-97ZR-EQTB11

TCCTACTGTGATACTACAGACACGGTTGATGACACAGAGGAGGAAGAGGA  
TACCACAATCACAATCCCATGTAGGATAAAACAGATAATAAACATGTGGC  
AGAAAAGTGGGGCAAGCAATATATGCCCCCTCCCACCGCAGGAAACATTACC  
TGTAGATCAAATATTACAGGAATGATATTGACAAGAGATGGTGGTAATGA  
CAATAATACTAGGACTGAGGAGACCTTCAGACCTGGAGGAGGAGACATGA  
GAGACAATTGGAGAAGTGAAGTATATAAATATAAAGTAGTACAGATTGAA  
CCACTAGGAATAGCACCCACCAGGGCAAGGAGAAGAGTGGTGCAGAGAGA  
AAAGAGAGCAGTAGGAATAGGAGCGTTGTTCTTGGGTTCTTGGGAGCAG  
CAGGAAGCACTATGGGCGCGGCGTCAATAACGCTGACGGTACAGGCCAGA  
CAATTATTGTCTGGTATAGTGCAACAGCAAAACAATTTGCTGAGAGCTAT  
AGAAGCGCAACAACAAATGTTACAGCTTACGGTCTGGGGCATT

>HIV-1-M-F-CM53657

TTCTACTGCAACACAGTAGCTCTGTTTAATGCAACTAACATGACTAATGC  
AATGAACAGGTCCAATGGCATTATCACTCTTCCATGTAGAATAAGACAAA  
TTGTAAACATGTGGCAAAGAGTAGGACGAGCAATGTATGCCGCTCCATT  
GCTGGACAAATTCAGTGTAACCTCAAGCATCACAGGTCTAATATTGACAAG  
AGATGGTGGGAAAAATAATACCAATAATGACACCCTCAGACCTGGAGGGG  
GAGATATGAGAGACAATTGGAGAAGTGAAGTGTATAAATATAAGGTAGTA  
AAAATGAACCACTAGGAGTAGCACCCACCAAGGCAAAAAGACAAGTGGT  
GAAGAGAGAAAAGAGAAAAAGAGCAGTGGGAATAGGAGCTGTGCTCCTTG  
GGTCTTGGGAGCAGCAGGAAGCACTATGGGCGCGGCGTCAATGACGCTG  
ACGGTACAGGCCAGACAATTATTGTCTGGTATAGTGCAACAGCAAAACAA  
TTTGCTGAAGGCTATAGAAGCGCAACAGCATCTGTTGCAGCTCACAGTCT  
GGGGCATT

>HIV-1-M-J-97DC.KTB147

TTCTACTGTAATACATCAATACTGTTCAATAGTAGTTGGGATGAGAATAG  
CACTGTGACTATAAATGAAACAGTCACACTCCCATGTAAAATAAGACAAA  
TTGTGAGAATGTGGCAGAGAGTAGGACAAGCAATATATGCCCCCTCCATC  
GCAGGAAACATCACATGCACATCAAATATTACAGGGTTACTATTGACACG  
TGATGGGGGAAATACCAAGGAGAGTAATAGTAGTGAGACCTTCAGACCTA  
CAGGAGGAGATATGAAGGACAATTGGAGAAATGAGTTATATAAATATAAA  
ATAGTGAAGGTTGAGCCATTAGGAGTAGCACCCACCAGGGCAAAAAGAAG  
AGTGGTGGAGAGAGAAAAAGAGCAATAGTGGGAATGGGAGCTGTGTTCC  
TTGGGTTCTTGGGAACAGCAGGAAGCACTATGGGCGCAGCGTCAATAGCG  
CTGACGGTACAGGCCAGACAGTTGTTGTCTGGCATAGTGCAACAGCAAAG  
CAATTTGCTGAAGGCTATAGAGGCGCAACAGCATCTGTTGAGACTCACTG  
TCTGGGGCATT

>HIV-1-M-CRF01-AG-CAM1970-LE.EC6

TTCTATTGCAATACATCAAACCTGTTCAAGCACACTTGGGAGAATGGCAA  
TTTGACTAATCATAGCACAGAAAATGGAAATGACACTATAACTCTCCAAT

GCAGAATAAAGCAAATTATAAATATGTGGCAGAGAGTAGGACAAGCAATG  
TATGCCCCCTCCCATCCCAGGAGAAATAAGGTGTGAATCAAACATTACAGG  
GCTACTATTAACAAGAGATGGAGGGAATAATGGTGGTGCAAATGAGACCT  
TCAGGCCTGGAGGAGGAGATATGAGAGACAATTGGAGAAGTGAATTATAT  
AAGTATAAAGTGGTGAAGATTAACCCACTAGGAGTAGCACCCACCAATGC  
AAAAAGAAGAGTGGTGGGGAGGGAGAAAAGAGCAGTTGGACTGGGAGCTG  
TCTTCCTTGGGTTCTTAGGAGCAGCAGGAAGCACTATGGGCGCGGCGTCA  
ATAACGCTGACGGTACAGGCCAGACTATTATTGTCTGGTATAGTGCAACA  
GCAAAACAATTTGCTGAAGGCCATAGAGGCTCAACAACATCTGTTGAGAC  
TCACGGTCTGGGGCATT

>HIV-1-M-CRF01-AG-DJ263 . EC3

TTCTATTGCAATACATCAAAACTGTTCAAGCACACTTGGGAGAATGGCAA  
TTTGACTAATCATAGCACAGAAAATGGAAATGACACTATAACTCTCCAAT  
GCAGAATAAAGCAAATTATAAATATGTGGCAGAGAGTAGGACAAGCAATG  
TATGCCCCCTCCCATCCCAGGAGAAATAAGGTGTGAATCAAACATTACAGG  
GCTACTATTAACAAGAGATGGAGGGAATAATGGTGGTGCAAATGAGACCT  
TCAGGCCTGGAGGAGGAGATATGAGAGACAATTGGAGAAGTGAATTATAT  
AAGTATAAAGTGGTGAAGATTAACCCACTAGGAGTAGCACCCACCAATGC  
AAAAAGAAGAGTGGTGGGGAGGGAGAAAAGAGCAGTTGGACTGGGAGCTG  
TCTTCCTTGGGTTCTTAGGAGCAGCAGGAAGCACTATGGGCGCGGCGTCA  
ATAACGCTGACGGTACAGGCCAGACTATTATTGTCTGGTATAGTGCAACA  
GCAAAACAATTTGCTGAAGGCCATAGAGGCTCAACAACATCTGTTGAGAC  
TCACGGTCTGGGGCATT

>HIV-1-M-CRF01-AE-JS2011001

TTCTATTGCAATACAACAGGACTGTTTAATAGTACTTACAGAGAAAATGG  
AACCATGGAAGGGAGTAATGGCACTATCATACTTCCATGCAAAATAAAGC  
AAATAATAAACATGTGGCAGGGAGTAGGACAAGCAATGTATGCTCCTCCC  
GTCAGTGGAACAATTAATTGTGTATCAAATATTACAGGAATACTATTAAC  
AAGAGATGGTGGTGGTAGTACCAATGCGACTAACGAGACCGAGATCTTCA  
GACCTGGAGGAGGAAATATAAAGGACAATTGGAGAAGTGAATTATATAAA  
TATAAAGTAGTAGAACTTGAACCACTAGGAATAGCACCCACCAGGGCAA  
GAGAAGAGTGGTGGCGAGAGAAAAAGAGCAGTGGGAATAGGAGCTATGA  
TCTTTGGGTTCTTAGGAGCAGCAGGAAGCACTATGGGCGCAGCGTCCATA  
ACGCTGACGGTACAGGCCAGACAATTATTGTCTGGTATAGTGCAACAGCA  
AAGCAATTTGCTGAGGGCTATAGATGCGCAGCAGCATCTGTTGCAACTCA  
CAGTCTGGGGCATT

>HIV-1-M-CRF01-AE-620435 . c1

TCTATTGTGATACAGCACAACTGTTTAATAGTACTTGGAGAGGAAATGAA  
ACCAAGGAGGAAAGAAATGGCACTAGTAATGACATTATCATACTTCCATG  
CAGGATAAAGCAAATTGTAAGAATGTGGCAGGGAGTAGGACAATCAATGT  
ATGCTCCTCCCATCAGTGAATAATTAATTGTGTATCAAATATTACAGGA  
ATACTATTGACAAGTGATGGTGATGGTGGTCTACTGCAGATAACGAGAC  
CTTCAGACCTGCAGGAGGAGATATGAGGGACAATTGGAGAAGTGAATTAT  
ATAAATATAAAGTAGTACAAATTGAACCACTAGGAATAGCACCCACCAGG  
GCAAAGAGAAAGTGGTGGACAGAGAAAAAGAGCAGTGGGAATAGGAGC  
TATGATCTTTGGGTTCTTGGGAGCAGCAGGAAGCACTATGGGCGCAGCGT  
CAATAACGCTGACGGTACAGGCCAGACAATTATTGTCTGGTATAGTGCAA  
CAGCAAAGCAATTTGCTGAGAGCTATAGAGGTGCAACAG

>SIVcpz-LB715

TTTTATTGTGAGACATCTTCATTGTTTAATGCTACAATAGATATTACACC  
AAATACTACACTGAATGAGACGACCTGGGATTATCCAGCTGAGAACAATA  
TTAACCAAGAAATGATAATCCATTGTAGAATAAAACAAATTGTATCAATG  
TGGCAGAGAGTGGGAAAAGGAATATTTTCTCCTCTATTAGAGGAACCAT  
TCAATGTAACCTCCACTATTACAGGACTACTGCTAACTCGCGATGGTAATA  
ACAAAAGCAGATAGTGAGAAACAAAACAAGGATTGAAACAGGACAGAACAAA  
GCAGAAGAGATTAATAGGACTGACATTTTTAGACCTGCAGGAGGAGAAAT  
GAGAGACAATTGGAGAAGTGAATTATATAGATACAAGGTGGTGAAAATTG  
AACCCTAGGACTAGCACCCACCAAGGCAAAAAGAAGGACTGTAAATAGA  
GAAAAAAGAGCACCAGGACTAGGACTGATGTTCTTGGGTTCTTGGGAGC  
AGCAGGGAGCACTATGGGCGCAGCATCATTAACGCTGACGGTACAGGCCA

GGCAATTATTGACTGGCATAGTGCAACAGCAAAGCAATTTGCTGAGAGCT  
ATAGAGGCGCAACAGCACTTGTGCAACTCTCAGTCTGGGGCATT

>SIVcpz-LB7

TTTTATTGTAACACCTCGGCCTTGTTCATGACACCTTGTACGCAATAA  
AACCTTGCTCAATGAAACCTTGCACAATAACTTGACACTACCTTGTAGGA  
TTAGACAAATTGTAAACCTATGGCTAAGAGTAGGAAAGGGAATATTTGCT  
CCACCTATTAGAGGTAAACATCCGCTGTAATCCACTATTACTGGGTTGAT  
CCTAGAAAAACACACAAACACAGACAATATCACCTTCCGTCCAATAGGAG  
GGGATATGACAGACATCTGGAGAAGTGAATTATATAACTATAAAATAGTA  
AAAATTGAACCATTAGGAGTAGCGCCTACCAGGGCGAGAAGGAGGACTGT  
GGATAGAGAAAAAAGAGCAGCAGGGCTGGGAGTGTTCCTTGGGTTCT  
TGGGAGCAGCAGGGAGCACTATGGGCGCAGCATCATTAACGCTGACGGTA  
CAGGCCAGACAATTATTGACTGGCATAGTGCAACAGCAGAGTAATTTGCT  
GAGAGCTATAGAGGCGCAGCAACACTTGCTGCAACTCTCAGTCTGGGGCA  
TC

>SIVcpz-MB66

TTTTATTGCAATACCTCCATACTCTTTAATACCTCCATCATCTTTAATGA  
GACTAAGGATGATAATATCACTATTCCTTGCAGAATAAGGCAAATTGTAA  
GGCTATGGCAAAGAGTAGGAAGAGGAATATTTCTTCCCCCATTAGAGGA  
ACAATAAACTGTATCTCGAATATCACAGGGATATTGTTTGCGCAGCAAAA  
AACAGACAGGATGAACAAATCAGCCATGTTTCACACCTGTTGGGGGAGAAA  
TGAGAAATAATTGGAGAAGTGAATTATACAAATATAAAGTAGTAAGAATT  
GAACCTTAGGAGTAGCACCCCAAGGCAAAAAGAAGAACGGTGCATAG  
GGAAAAAAGAGCAGCCGTAGGATTGGGAGCTTTGTTTCCTTGGGTTCTTGG  
GAGCAGCAGGAAGCACTATGGGCGCAGCGTCACTGACGCTGACGGTACAG  
GCCAGACAACCTGCTGTCTGGTATAGTGCAGCAGCAGAGCAATCTGCTGAG  
AGCCATAGAGGCGCAACAGCATCTGTTGCAACTCTCAGTCTGGGGCATT

>SIVcpz-MB897

TTTTACTGTAATACATCAAACTTATTCAATCAATCCACTATTAACAATAT  
TACACACATTCCTGTCAGAATAAGACAAATTGTAAATCAGTGGCAAGGAG  
TAGGAAAAGGAATCTTTGCACCTCCTATTAGAGGAACAATTCAATGTAAT  
TCCACAATCACAGGCCTACTCTTAACAAGAGATGGTAAAAATGAGACTGA  
AACTTTTAGACCTACAGGAGGAGACATGAGAAATAATTGGAGAAGTGAAT  
TATACAAATACAAGGTAGTAAAAATTGAACCCCTAGGATTAGCACCAACC  
AAGGCAAAAAGGAGAACAGTGCAAAGAGAAAAGAGGGCAGTAGGACTGGG  
AGTGATGTTTCCTTGGATTTCATGGGAGCAGCAGGAAGCACTATGGGCGCAG  
CGGCACTGACGCTGACGGTACAGGCCAGAAATCTACTCTCTGGTATAGTG  
CAACAGCAAAGCAATTTGCTGAAAGCTATAGAGGCGCAACAGCATCTGTT  
GCAACTCTCAGTCTGGGGCATT

>SIVcpz-GAB2

TTTTATTGTAATACATCAAGATTAATTACCTGTAACAGTAGTGACACAAG  
TGAGTACATTCTCCCATGCAAAATTAGGCAAGTAGTAAATTCTTGGATGA  
GAGTGGGGAAAGGTATCTTTGCCCCGCCTAGAAGAGGAACTATAACCTGT  
AATTCACCATTACAGGACTCCTCTTAGAAGTACAGAAATGGCACGGGGAA  
CAACACAGAAGTTTACCTGTGAGGGGAGATATGAGAGATATTTGGAGGA  
GTGAATTATATAAATATAAAATAGTAAAAATTGAGCCACTGGGGGTGGCA  
CCAACAAAAGCAAAGAGGTACACAGTGGCAAAAGCACTTGATAGATCCAA  
AAGAGCAGCCTTTGGACTGGGGGCGCTGTTTCTTGGATTCTTGGAGCAG  
CAGGAAGCACTATGGGCGCAGCATCTGTGATGCTGACGGTACAAGCTCGA  
AACCTGCTTTTCGGGAATAGTGCAGCAGCAAAATAACTTGCTGCGAGCCAT  
AGAAGCTCAGCAACACCTGCTGCAGCTATCAGTCTGGGGCATA

>SIVcpz-CAM13

TTTTACTGCGATACTAGAAAAATGTTTAATGAAAGTGAACTTTTTCACGA  
GAACATGACAATACCATGCAGAATTAGACAAATAGTGAATTCATGGATGA  
GAGTAGGAAGGGGAATCTATGCACCTCCAATACCAGGACATATAACTTGT  
AACTCTCTAATTACTGGGCTCATATTGACACGAGACCATGTTAATAATAC  
TAATAATACATTTAGACCAATAGGAGGAGACATGAAAAACATTTGGAGGA  
GTGAACTCTATAAATACAAAAGTGGTGCGCATAGAACCATTATCTGTGGCA  
CCAACCAAAGCAAAAAGGCATACAGTAGGAGAAAGGAGACAGAAGAGAGC  
AGCCTTTGGCCTGGGAGCACTGTTTCCTTGGGTTTCTGGGTGCAGCAGGAA

GCACAATGGGCGCAGCGGCAGTCACGCTGACGGTACAGGCCCGACAGTTA  
CTATCGGGAATAGTGCAACAACAGAACCAACCTGTTGAGAGCAATAGAGGC  
CCAACAGCATCTATTGCAACTAACAGTCTGGGGAGTA

>SIVcpz-DP943

TTTTATTGTAACACCACCCCATTTGTTCAATAACAGTTGGACAAATACAAC  
TAGCTCAGATATAAATAGCTCAAATATAATAATAAACTGTAGAATAAGGC  
AAATTGTAAACTCCTGGATGAGAGTGGGCAAGGGAATTTACGCCCCACCA  
ATTAGAGGAACATAAGTTGCACATCAAATATTACTGGGCTCCTGCTCGA  
GTTAGACAGAGGACTCCCCGAGAAATGGGACTAATACCAATAACAAGTTAA  
CACTATACCCTACAGGAGGAGAGATGAGAGATTTGTGGAGGCTGGAATTA  
CATAAATACAAAGTAGTCAGCATAGAACCCTATAGGAGTGGCACCAAGTAA  
AGCTAAAAGGCACACAGTGACAAGAGAAAAAAGAGCAGCCTTTGGACTAG  
GTGCGCTGTTTCTTGGGTTTCTAGGAGCAGCAGGAAGCACTATGGGCGCA  
GCATCACTAACGCTGACGGTACAGGCCCGGCAATTATTGTCAGGGATAGT  
GCAACAGCAGAACAACCTGCTGAGAGCAATAGAGGCGCAACAGCATTTGT  
TGCAACTCTCAGTATGGGGCATT

>SIVcpz-US.85.CPZUS

TTTTATTGTAATACAATTCCTTATTTAACATGACCTACAACAATACCGA  
CAACACCACTATCACACTTAAGTGTAGAATAAGACAAATTGTAAATCAGT  
GGATGAGAGTAGGAAAAGGAATCTTTGCCCCACCAATCAAAGGTGTGCTA  
AGTTGTAACTCAAATATAACGGGAATGATTCTTGACATAAGCATAAGCGC  
AGTCAATAACGATAGTAGGAATATAACAGTGATGCCTACAGGAGGAGATA  
TGACGGCTTTATGGAAAAATGAATTACATAAGTATAAGGTGGTCAGCATA  
GAACCTATAGGAGTGGCACCAGGTAAGGCCAAAAGGCATACAGTGAAAAG  
AGAAAAAAGAGCAGCCTTCGGACTAGGTGCACTGTTCTCTGGGGTTTCTTG  
GAGCAGCAGGAAGCACTATGGGCGCAGCATCAGTAGTGCTGACGGTACAG  
GCCCCGACAATTATTGTCAGGGATAGTGCAACAGCAGAATAATCTGCTAAG  
AGCAATAGAGGCCAACAGCATTTATTGCAACTATCAGTTTGGGGCATT

>SIVcpz-EK505

TTTTACTGTAATACCAGTCAATTGTTTACAAATCAAAATGGCAACACAAC  
TGGCAATATCACCTTACAATGCAGAATAAGACAAATTGTAAATTTATGGA  
CAAGAGTAGGAAAAGGAATTTATGCTCCGCCAATTAAAGGACCTATTAAC  
TGTCTCTCTAACATCACTGGGATAATACTTGACTATACAAAGTCTGGAAC  
TGAGAAGTACACCATATATCCACAGGGGGAGACATGACTAACCTCTGGA  
GGCAGGAGTTGTATAAGTATAAGGTGGTCAGCATAGAACCCTATAGGAGTA  
GCACCAGGAAAAGCTAAAAGACACACAGTGACTAGACAAAAAAGAGCAGC  
CTTTGGACTAGGTGCGCTGTTTCTTGGGTTTCTTGGAGCAGCAGGGAGCA  
CTATGGGCGCAGCGTCAATAACGCTGACGGTACAGGCCCGGAAATTATTA  
TCTGGGATAGTGAGCAGCAGAGAATAATCTGCTGAGAGCAATAGAGGCGCA  
ACAACACTTGCTGCAACTCTCAGTTTGGGGCATT

>HIV-1-N-YBF30

TTCTATTGTAACACTTCCAAATTATTTAATGAGGAATTACTTAACGAGAC  
AGGTGAGCCTATTACTCTGCCTGTAGAATAAGACAGATTGTAAATTTGT  
GGACAAGGGTAGGAAAAGGAATTTATGCACCACCAATTCGGGGAGTTCTT  
AACTGTACCTCCAATATTACTGGACTGGTTCTAGAATATAGTGGTGGGCC  
TGACACCAAGGAAACAATAGTATATCCCTCAGGAGGAAACATGGTTAATC  
TCTGGAGACAAGAGTTGTATAAGTACAAAGTAGTTAGCATAGAACCCTA  
GGAGTAGCACCAGGTAAAGCTAAAAGACGCACAGTGAGTAGAGAAAAAAG  
AGCAGCCTTTGGACTAGGTGCGCTGTTTCTTGGGTTTCTTGGAGCAGCAG  
GGAGCACTATGGGCGCAGCGTCAATAACGCTGACGGTACAGGCCCGGACA  
TTATTATCTGGGATAGTGCAACAGCAGAATATTCTGTTGAGAGCAATAGA  
GGCGCAACAACATTTGTTGCAACTCTCAATCTGGGGCATT

>HIV-1-N-02CM-DJ00131

ATCTATTGTAATACTTCCAGATTATTCAATGAGAGCATGAATACAAATGG  
GACTAATGGGACTATTACTCTGCCCTGTAGAATAAGACAAATTGTAAATT  
TGTGGACAAGAGTAGGAAAAGGAATTTATGCACCGCCAATTCGGGGAAAT  
CTTACCTGTAACCTCACTATTACTGGACTGATTCTAGAACATAGTGGTGG  
CAGTAATGGCACAGTATATCCACAGGAGGAAACATGGTCAATCTCTGGA  
GACAAGAGTTGTATAAGTACAAAACAGTCAGTATAGAACCCTATAGGAGTA  
GCACCAGGTAAAGCTAAAAGACGCACAGTGAGTAGAGAAAAAAGAGCAGC

CTTTGGACTAGGTGCGCTGTTTCTGGGGTTTCTTGGAGCAGCAGGGAGCA  
CTATGGGCGCAGCGTCAATAACGCTGACGGTACAGGCCCGACATTGTTA  
TCTGGGATAGTGCAACAGCAGAATAATCTGGTGAGAGCAATAGAGGCGCA  
ACAACATTTGTTGCAACTCTCAATCTGGGGCATT

>HIV-1-N-04CM-1015-04

TTCCTTTGTAACTTCCAGATTATTTGATGAGAACGGGACTGTAAATGG  
GACTATTATTCTGCCCTGTAGAATAAAACAAATTGTAAATTTGTGGACAA  
GAGTAGGAAAAGGAATTTATGCACCACCAATTCGGGGAAATATTACCTGT  
AACTCCAGTATTACTGGACTAATCTAGAAGTTAGTGGAATAGTACAGT  
ATATCCTTCAGGAGGAAACATGGTTAATCTCTGGAGACAAGAGTTGTACA  
AGTACAAAGTAGTTAGCATAGAACCCATAGGAGTAGCACCAGGTAAAGCT  
AAAAGACGCACAGTGAATAGAGAAAAGAGAGCAGCCTTTGGACTAGGTGC  
GCTGTTTCTTGGGTTTCTTGGTGCAGCAGGGAGCACTATGGGCGCAGCGT  
CAATAACGCTGACGGTACAGGCCCGGAACCTTATTATCTGGGATAGTGCAA  
CAGCAGAATAATCTGTTGAGAGCAATAGAGGCGCAACAACAATTGTTGCA  
ACTCTCAATCTGGGGCATT

>HIV-1-P-U14788

TTTTATTGTAACACCAGCAGCCTGTTTAACTTTAGTTTATACTTGAATGA  
CACCACCTGGCGGGCTGCAGGCAATCATAATACAAGTGAATATAACAC  
TGTCTTGTAGACTGAAGCAAGTAGTTAATTCATGGATGAGAGTGGGATCA  
GGCTTGTTTGCACACCTATTGAGGGGGAATTAAAGTGTCAATCCAACAT  
TACAGGTTTAAATGTTAGAAAAGAACTACCTTACAATGACAGCAGCAAGA  
ACACCACTTTAAAGTCCTATAGGGGGAGACATGACAAATATCTGGAGAAGT  
GAGTTATATCCCTACAAAGTAGTTCAAGTAAAAGCTCTGGCCGTGGCACC  
TACAAAAATTTCCAGACCTACAATTATGGCTCATGATGGACATAGGAAGA  
AAAGGGCAGCAGGCCTAGGAATGCTATTCCTTGGGTTTCTGAGCGCAGCA  
GGAAGCACTATGGGCGCAGCGGGAATCACGCTGACGGTACAGGCCAAGCA  
ATTATGTCATGGTATAGTGCAGCAGCAGAACAAATATGCTAAGAGCTATAG  
AGGCACAGCAAGAATTGCTGAGACTCTCTGTGTGGGGCATA

>SIVgor-BPID15

TTTTATTGTAATACCTCTAAACTCTTCAACTATACCTATGTCTGTAATCA  
GACAGATCAAGGTAATGCTAATTATTCCTGTCATAGTACTAGTACATTAG  
AAAATGGAACCTTAGTAATACCCTGCAAATTAAGGCAGGTAGTTAATTCA  
TGGATGAGAGTGGGATCAGGACTTTTTGCACCACCTGTCCCGGAAGCCT  
AACGTGCCACTCCAATATCACAGGTCTAATCCTTCAAAGGGACTGGCCAC  
TAAACAATAATACGACTACTATTTGAGGCCTGAAGGAGGAGACATGAAA  
GACATCTGGAGAAGTGAGCTATATCCATATAAGGTAGTCCAAGTAAAAGC  
TTTGGCTGTGGCACCTACAAAAATCTCCAGACCAACAATTATGGCACAGA  
CTCATCAGAGGGAAAAAGAGGAGCAGGCCTCGGAATGCTATTCCTTGGG  
TTCATGAGTGCAGCAGGAAGCACGATGGGCGCAGCGGCAGTAACGCTGAC  
GGTACAAGCCAAGCAATTATGTCATGGTATAGTGCAACAGCAGAATAATC  
TGCTCAGAGCGATAGAGGCACAGCAAGAATTGCTGAGGCTCTCTGTGTGG  
GGCATA

>SIVgor-CP2139.287

TTCTACTGTAATACCACTAAAAATGTTTAGCTACAATTGCACAACAGAGGG  
TTGCAATACCACTGAAACAAGCAATACCACTGAAACAATAAATATATTC  
CCTGCCATCTAAACAGGTAGTCAGGTCCTGGATGAGAGTAGGCTCAGGC  
CTATTTGCTCCGCCTATTAGGGGAACCTCTAAGATGTATATCTAACATTAC  
AGGAATAATATTACAAAGGGATGCACCCCTAAAACTGATGAGAACAGCA  
CCTTAAGACCAATAGGAGGTGACATGACAAACATTTGGAGGAGTGAAGT  
TACCCCTACAAGGTGGTGAGGGTCAAGGCATTGACTGTGGCACCACAAA  
AGCAAAGAGGCCTGTTATTGGCCATAACAGGGAAAAACGTGCAGCAGGCC  
TGGGAATGCTGTTTCTTGGGTTTCTGAGTGCAGCAGGAAGCACGATGGGC  
GCAGCGCAGTAACGCTGACGGTACAGGCCAGGCAAGTCTTGTCATGGTAT  
CGTGCAGCAGCAAAACAACATGCTGAGAGCTATAGCAGCTCAGCAAGAAT  
TGCTGAGACTCTCTGTTTGGGGCATA

>SIVgor-BQID2

TTTTATTGCAACACCACGACAATGTTTAAATTATACTTACAATTGTAGCCA  
CCATAGCTGTAAAGCTCAATCAAAGAACATTTTCAGAGGGCAGCGGGGACT  
CGTATATTCCTGTAAATTGAAACAAGTAGTAAATTCATGGATGAGAGTA

GGATCAGGTCTTTTTGCCCCACCTATACGGGGAACTCTCAAATGTATGTC  
AAATATAACAGGTTTACTACTAGAAAGAGATGTCCCATTTGAACATAACTG  
CCACTAACAGAAATATAACTCTCAGACCAACGGGGGGAGAAATGAAAGAT  
ATATGGAGAAGTGAAGTATACCCATACAAGGTGGTGCAAGTCAAAGCATT  
ATCTGTGGCACCCACAAAGATAAAAAGACCCATAATTGGTCTGAACAGAG  
AAAAAAGAGGAGCAGGACTAGGAATGCTATTCTTGGATTTCATGAGTGCA  
GCAGGAAGCACTATGGGCGCAGCATCTCTGACGCTGACGGTACAGGCCAA  
GCAATTATTGCATGGTATAGTGCAACAGCAAAATAACATGCTGAGAGCTA  
TAGCAGCCCAGCAGGAATTGCTGAGGCTCTCTGTATGGGGCATT

>HIV-1-O-MVP-5180

TTTTATTGTAACACATCTGGGATGTTTAACTATACTTTTATCAACTGTAC  
AAAGTCCGGATGCCAGGAGATCAAAGGGAGCAATGAGACCAATAAAAATG  
GTACTATACCTTGCAAGTTAAGACAGCTAGTAAGATCATGGATGAAGGGA  
GAGTCGAGAATCTATGCACCTCCCATCCCCGGCAACTTAACATGTCATT  
CAACATAACTGGAATGATTCTACAGTTAGATCAACCATGGAATTCACAG  
GTGAAAATACACTTAGACCAGTAGGGGGAGATATGAAAGATATATGGAGA  
ACTAAATTGTACAACTACAAAGTAGTACAGATAAAAACCTTTTAGTGTAGC  
ACCTACAAAAATGTCAAGACCAATAATAAACATTACACCCCTCACAGGG  
AAAAAAGAGCAGTAGGATTGGGAATGCTATTCTTGGGGGTGCTAAGTGCA  
GCAGGTAGCACTATGGGCGCAGCGGCAACAGCGCTGACGGTACGGACCCA  
CAGTGTACTGAAGGGTATAGTGCAACAGCAGGACAACCTGCTGAGAGCGA  
TACAGGCCCAGCAACACTTGCTGAGGTTATCTGTATGGGGTATT

>HIV-1-O-9CMA105

TTTTATTGTAACACATCTAATTTATTTAATTATACCTTTTCATGTAATGG  
AACCACCTGTAATGATAGCCAAAGTACCACCAATGACACACAGATACCTT  
GCAAACTGAGACAGGTAGTAAGGTCATGGATAAAAGGACAGTCAGGATT  
TATGCACCTCCCATCAAGGGTAACCTGACATGTACATCAAAACATAACAGG  
AATGATTCTACAAATGGATGCACCATGGAACAGCACCAGAAACAACAGCG  
AAAACCAAAGTCAACATTTAGACCAACAGGGGGAGAAATGAAAGATATA  
TGGAGAACTGAGTTGTTCAACTACAAAGTAGTAAGAGTAAAACCTTTTAG  
TGTGGCACCCACATCAATTGCAAGGCCAGTTGTAGGCACTAGCACTCATA  
GAGAAAAAAGAGCAATAGGATTAGGAATGCTATTCTTGGGGGTTCTAAGT  
GCAGCAGGTAGCACTATGGGCGCAGCGGCAACAGCGCTGACGGTACAGAC  
CCACACTTTGATAAAGGGTATAGCGCAACAGCAGGACAACCTGCTAAGAG  
CAATACAGGCCCAGCAGCAATTGCTGAGGCTATCTGTATGGGGTATC

>HIV-1-O-98CMU2901

TTCTATTGTAACACATCTGGGATGTTTAAATTATACCTTTTATGTAATGG  
GACCAACTGTAAAAACCAAAGTACCCATAGCAATAATGGCACGATACCTT  
GCAAGTTGAAACAGGTGGTAAGATCATGGATGAGGGGAGGGTCGGGACTC  
TATGCACCTCCCATCCCAGGTAACCTAACATGCATGTCACACATAACTGG  
AATGATTCTACAAATAGATGGGCCATGGAACAACAACACCACAAACAATA  
CATTTAGACCAATAGGGGGAGATATGAAAGATATATGGAGAAATGAATTG  
TTCAACTACAAAGTAGTGAGGGTAAAACCTTTTAGTGTGGCACCTACATC  
AATTGCAAGGCCAGTCATAGGCACTGGCACTCATAGAGAGAAAAGAGCAG  
TAGGATTGGGAATGCTATTCTTGGGGGTTCTAAGTGCAGCAGGTAGCACT  
ATGGGCGCAGCGGCAACAGCGCTGACGGTACAGACCCACTCTCTGATAAA  
GGGTATAGTGCAACAGCAGGACAACCTGCTAAGAGCAATACAGGCCCAGC  
AGGAATTGCTGAGGCTATCTGTATGGGGTATC

>HIV-1-O-99SE-MP1299

TTCTATTGTAACACATCTAAGATGTTTAAATTATACCTTTTCATGTATAGG  
AACCAACTGTACTAGTAACCAAAATAGCAGCAACAGTAATGACACTCGGA  
TATATTGCAGGATAAAACAGGTGGTAAGGTCATGGATACAGGGAGGGTCA  
GGACTCTATGCACCTCCCAGGAAAGGTAACCTAACATGCAGCTCACTCAT  
AACTGGAATGATTCTACAATTGGATATGCCATGGAACAGCACCAACAACA  
GCAACGCCACATTTAGACCAACAGGGGGAGATATGAAAGATATATGGAGA  
ACTGAATTGTTCAAATACAAAGTAGTAAAGGTAAAACCTTTTAGTGTGGC  
ACCTACAAAAATGCAAGGCCAGTCATAGGCACTGGCACTCAAAGAGAAA  
AAAGAGCAGTAGGATTGGGAATGCTATTCTTAGGGGTTCTAAGTGCAGCA  
GGAAGCACTATGGGCGCAGCGGCAACAGCGCTGGCGGTACAGACCCAATC  
TTTGATGAAGGGTATAGTGCAACAGCAGGACAACCTGCTAAGAGCAATAC

AGGCCCAGCAGCAATTGCTGAGGCTATCTGTATGGGGTATC  
>HIV-1-O-99SE-MP1300  
TTCTATTGTAACACATCTCAGATGTTTAATTATACCTTTTCATGTACAAG  
AACCAACTGTATTAGACAAAGTAACAGTAGCATTAAATGGCACAATATCTT  
GCAGGATAAAACAGGTGGTAAGGTCATGGATACAGGGAGGGTCGGGACTT  
TATGCACCTCCCAGGCCAGGTTACCTAACATGCAACTCATCCATAACTGG  
AATGATTCTACAATTGGATAAGACATGGAACCGCACCAACAACAGCGAAT  
CCACATTTAGACCAATAGGGGGAGATATGAAAGATATATGGAGAACTGAA  
TTGTTCAAATACAAAGTAGTAAAGATAAAACCTTTTAGTGTGGCACCTAC  
AAAAATTGCAAGACCAGTCATAGGCACTGGCACTCGAAGAGAAAAAGAG  
CAGTAGGATTGGGAATGCTGTTCTTGGGGGTTCTAAGTGCAGCAGGAAGC  
ACTATGGGCGCAGCGGCAACAACGCTGGCGGTACAGACCCACACTTTGAT  
GAAGGGTATAGTGCAACAGCAGGACAACCTGCTAAGAGCAATACAGGCC  
AGCAGCAATTGCTGAGGCTATCTGTATGGGGTATC  
>SIVcpz-BF1167  
TTCTATTGTGACCTCAAAAATTGGACAAACAATGGCATCGAGATCGATGG  
AATGCTGATAGCACCATGTGCACTTAGACAGATAGTAAATCATTTGGGGAA  
TAGTATCCAGGGGAATTTATCTCCCTCCCAGGGAGGGACAGGTCAAATGT  
GTATCTAGTATTACAGGATTCATAATGACAGCTGAGACGAATGACACTGA  
TGGCACTATCACACCCACCTTCTCTGCAAAGGTGGAAGACTACTGGAAG  
TAGAAATGAGTAGATACAAAGTAGTGGAGATACAGCCATTATCAGTGGCA  
CCCCTAAAGGAAAAAGACCAGTAGTTGGTGACCCAGAAGCAAAAAGTAG  
AAGTAAAAGAGAAATAGGAATGGGAATGATCTTTATGGGATTTCTCAGTG  
CAGCAGGAAGTACTATGGGCGCAGCGTCAATAGCGCTGACGGTACAAGCC  
AGAGGATTGCTCTCTGGTATAGTACAGCAGCAAGCAAATTTGCTGCAGGC  
AATAGAGGCTCAACAACATTTGTTGCAGCTCTCGGTGTGGGGCATA  
>SIVcpz-TAN13  
TTCTACTGCAATCTAACAAAATGGATTAACGAGACCTGGCTTAACGAGAC  
GGACCAGACCAATCTTGTAGCACCTGTAGACTCAGACAAATAGTTAACC  
ATTGGGGCATTGTGGCTAAAGCCATCTACCTCCCTCCAAGAAGAGGAACA  
GTAAAATGTGTGTCAAACATCACGGGTTTCTCTGATGACAAACGAGGAAAC  
GGGTGCTACCTTCTCCGGTAAAGTAGAGGATTATTGGAGGGTGGAATTAG  
CAAAGTACAAAATTGTAGAAATTCAGCCCCCTATCAGTGGCTCCTACCACA  
GGAAAAAGGCCAGAGATTAAGGCCAATCATACAAGATCAAAAAGGGACGT  
TGGCATAGGGCTGTTGTTTCTGGGATTTCTCAGCGCAGCAGGAAGTACAA  
TGGGCGCAGCGTCAATAGCGCTGGTGGCACAGGCCAGAGGGTCTCTCTCT  
GGTATTGTACAGCAGCAGCACAAACCTGCTGCAGGCAATAGAGGCGCAACA  
GCATTTGTTGCAGCTTACTGTATGGGGCGTC  
>SIVcpz-TAN1  
TTTTACTGTAATCTCACAAATTTGGACTAATACCTGGACAGCTAATAGAAC  
CAATAATACTCATGGTACTCTTGTGTCACCATGCAGACTGAGGCAGATAG  
TAAATCATTTGGGGTATAGTGTCAAAGGGGTTTACCTTCCCCCAAGGAGG  
GGAACAGTAAAATGTCACTCAAACATCACAGGACTTATCATGACAGCAGA  
AAAAGACAACAATAATAGTTATACCCCCCAATTTTCTGCTGTAGTAGAAG  
ACTATTGGAAAGTAGAATTAGCAAGATATAAAGTGGTGGAATTCAGCCC  
TTGTCACTGGCTCCAAGGCCAGGAAAAAGGCCTGAAATTAAGGCCAATCA  
TACTAGGTCAAGAAGAGATGTGGGCATAGGACTGTTGTTTCTTGGATTTC  
TTAGTGCAGCAGGAAGTACAATGGGCGCAGCGTCAATAGCGCTGACGGCA  
CAGGCCAGAGGATTACTCTCTGGTATTGTACAGCAGCAACAAAACCTGCT  
TCAGGCCATAGAAGCGCAACAACACTTGTTCAGCTCTCTGTATGGGGCA  
TT  
>SIVcpz-UG38  
TTCTATTGCAACCTCACTAACTGGACAAATATAACGTGGCTAGAGACGTG  
GCTAAAGACTAACAAATAGTTCCCGTCCCCTTGTAGCACCATGTAACTTA  
GGCAGATAGTAAACCATTTGGGGTATAGTATCTAAAGGTATCTACCTACCT  
CCTAGAAGGGGAAATTTAACATGCAGATCTAACATTACAGGGTTTCATTAC  
GACATGGGATAATGACACGGAGAACGTGCTTGTACCTTTTCAGCCAAAG  
TAGAAGACTATTGGAAGGTAGAAATGTCACGATACAAAGTAGTGGAAATT  
CAGCCCTTGGCCATAGCTCCTACTACAGGAAAAAGGCCGGAGATTAGAGC  
CAATCACACAAGGTCAAAAAGAGATGTTGGCATAGGACTGTTGTTCTCTGG

GATTTCTCAGTGCAGCAGGAAGTACAATGGGCGCAGCGTCAATAGCGCTG  
ACGGCACAGGCCAGAGGATTGCTCTCTGGTATTGTACAGCAGCAGCACAA  
CCTGCTGCAGGCCATAGAAGCTCAACAGCACTTGTTACAGCTTTCTGTGT  
GGGGCATT

>SIVdeb-04CMPF3061

TTTTATTGCAATGTCTAGTAAGGCCTATCAACTTTTCACCAATGACACCAT  
AACATGGAGTAACAACACTTTGATGCCCTGCAAAATTAATCAATTGGTAA  
ACACCTGGTACAAGATAGGGCAGCATATATACTTGCCACCAAGAGAAGGG  
GAGTTGAGGTGTGACTCACATGTTTCTGCAATAATTTTGTATGTGGCTCA  
CTATGGACACATGTTGAATTTGACCCCATCATCAGATATTAAGGCAGTGT  
GGAGAGCAGATCTGTATAAGTACAAAATCATAGAAGTGCAGCCAATAGGC  
TTTGCACCTACTGCTGTCTAGACGCTACGAGGGACCAGAGTCTGTGAGACA  
AAAAAGAGCAGTGGGAATGGCTTTAGGTCTAGTGGCATTCTCTCAGCACAG  
CAGGTGCTGCTATGGGCGCGGCGTCCACAGCGCTGACGGTACAGTCTCGC  
TCTTTGCTGAGCGGGATAGTGCAGCAGCAACAAGAGTTGCTGAAGGCTGT  
TGAGGCTCACGGGCACCTGTTAACATTGACAGCGTGGGGAGTG

>SIVdeb-CM5

TTTTATTGTAATGTTTCCAAAGCATTTAATCTGCTCATGAATAAACTAA  
TAACATAACCTGGAGTAATAACACTTTGATGCCTTGTAAGATTAATCAAT  
TGGTAAACACATGGTTCAAGGTAGGACAACATGTATATTTGCCTCCAAAG  
GAAGGAGAATTGAAGTGTCAATCTTCTGTTTCTGCACTTGTTTTTGAGGT  
AGCTCATTATGGGCAAAACATGAACATAACACCCCTCCTCAGATATTAAGG  
CAGTTTGGAGGGCAGATCTATACAAGTATAAGATCATAGAAGTTAAACCC  
ATCGGGATGGCCCTACAAGTATAAGAAGGTACGAGGGACCGGAGTCTGC  
AAGACAAAAAAGGGCGGCGGAATTGCTTTTGGTCTAGTGGCTTTTCTGA  
GTACAGCAGGTGCTGCTATGGGCGCAGCGTCAACAGCGCTGACGGTACAG  
TCCCGCTCTTTGCTGAGTGGGATAGTGCAGCAACAGCAAGAGCTGTTGAA  
GGCTGTGGAGGCTCACGGGCATCTGTTGTCACTAACAGCATGGGGAGTG

>SIVdeb-CM40

TTCTATTGTAACATTTCCAAAGCCCTAGATCTCCTACTCCTACAAAATAA  
CACTAGAAATAGCACTTGGTCTGACAAGTGGTTGATGCCTTGTTAGGATAA  
ATCAGTTAGTAAACACTTGGTATACGGTAGGGCAACATATCTATCTACCT  
CCGAAAGAAGGAGAGTTGAAGTGCAGCTCACACATTTCTGCATTTGTTTT  
TGATGTAGATCACTATAATGGGAGTATAACCCCTTACACCATCAGCAGACA  
TCAGGGCAGTATGGAGAGCAGACCTATTTAAATATAAAATCATAGAAGTA  
AAACCTATAGGATTCTGCTCCCTCCGCAGTGAGAAGGTACGAGGGACCGGA  
GTCCGTAAGACACAAGAGGGCAGCAGGAATTGCTTTTGGTCTGGTAGCAT  
TTCTCAGTACAGCAGGTGCTGCTATGGGCGCAGCGTCAACAGCGCTGACG  
GTACAGTCTCGCTCTTTGCTGAGTGGGATAGTGCAGCAACAGCAAGAGCT  
GTTGAAGGCTGTGGAGGCTCACGGGCAGCTGTTAACATTAAACAGCCTGGG  
GAGTG

>SIVtal-00CM266

TTCTATTGCAACATAAGTTCTATGTTCCCTGAATACTTCCTATGAGTATAA  
CTACACATCAAACCAAGGCAAATTACACCAAGGGGTATAGGAAAGAAGC  
CGAGGTCGAGTGATAGGACCAAGTTCTACATGTCTATGCCAACTGAGGCAA  
ATGATCAACAGGTGGAGCAGGGTGGAGAAGTTAATGTACCTCCCACCCAG  
GGAAGGACACCTGCAGTGCAAAAGTAACATCACAGGATTGTTGGTGGATA  
TCAACCACCACCGCGGCTCTAGTGACATAACAGTAGAGCCCTCGTCACAG  
ATACGTGACTCGTGGCGAGCAGCAGTTTACCGGTACAAGGTGATAGAGAT  
CGTGCCTTTTTGGGTATGCGCCGACAAATATCAGAAGGTACGATGGGCCCG  
CTAACAAAGCAAAAACGAGCGGCCCGCTAGCCTTAGGCTTCATAGGATTT  
CTCAGCACAGCAGGCACTGCCATGGGCGCAGTGGCGACAGCCCTGACGGT  
GCAGTCTCGCTCTTTGCTGAGTGGGATAGTGCAGCAGCAGGAACACCTGC  
TGAGGGCAATTGAGCATCAGCAACACCTGTTACAATTAACAGTGTGGGGC  
ATC

>SIVtal-01CM8023

TTCTATTGTAATATTTCTAGCATGTTTCATGAAAACCAACTATACATACAA  
TTACACAGCAGAAAAAGGAGTACTGCACCAGGAGAAGATAGGCCGACAAG  
AGCACAGGTATAGTGACAGAAACCAAATTTTTTCATGTCCTGCCAGTTAAGG  
CAAATGATCAATAGGTGGAGCAAAGTAGAGAAGCTAATGTATCTGCCGCC

AAGAGAGGGACACCTGAGTTGCAAAAGCAACGTCACAGGTATCCTGGTGG  
ACATCAACCCTATAAGGGGAATGACATCATAAGTGTGGAACCCTCTTCA  
CAAATCAGAGATGCTTGGCGAGCAGCGGTAGCACGGTACAAGGTGATAGA  
GATCACACCAATTGGCTTTGCACCAACGAATATCAGAAGGTATGATGGGC  
CGGCAACAAAAGAGAAAAGAGCCGCGCCTCTGGCTTTGGGATTTCATAGGA  
TTTCTCAGCACAGCAGGCACTGCCATGGGCGCAGTGGCGACAGCCCTGAC  
GGTGCAGTCTCGTTCTTTGCTGAGCGGGATAGTGCAGCAGCAGGAGCACC  
TGCTGAGGGCAATTGAGCATCAGCAACACCTGTTACAATTAACAGTGTGG  
GGCATC

>SIVsyk-KE51

TTTTACTGCAATGTTTTCAAAGATTTTTTGCAAATGTGTCAAATGGCTATGC  
TAATCCAAGCAATTATGCAAAAAATTTATATCTCTCGTGTGCCATACGAC  
AGATTATAAACTATTGGGGGTATGTAACCAAGCTAATGTATTTGCCACCT  
ACAGAAGGGCACATTAAGTGCACCTTCTAATATTACTGCTGTATTAACAGA  
TATAGAGTACTATCCAAATTCACAGTTGAATTTTGACCTACTGCTAATG  
TGGAAGATGTGTGGAGAGCTGATTTATTCAATTATAAAATTGATTTCGGATT  
AAACCTATTGGCTTTGCGCCTACAAGTCAAAGGCGCTATGAGCTGCCTAC  
GAAACAGAAAAGAGCAGCACCATTGGCACTTGGGTTCTTGGGATTACTCT  
CGGCAGCGGTACTGCAATGGGGAGCGCTGCGACAGCGCTTACACTCCAG  
TCCCAGACTTTGTTGGCTGGGATAGTGCAGCAGCAGCAAAAAGTTGCTGGA  
GGCTGTAGAGGCACAACAGCACCTCTTAGGCTTAACGGTCTGGGGTGTG

>SIVsyk-173-1-2

TTCTACTGTAATGTATCTAAGCTCTTTGCTAACATTACGAATGGAAACGC  
AAGTAAGAATAATTATGCCAGTAACCTTCGTCTGTCTATGTGCCATTTCGCC  
AAATAATTAATGATTGGAGATATGTAAGAAAATTGATATACCTGCCCCCT  
ACGGCAGGGCATATTAAATGTACTTCCAATGTCACTGCAGTATTGACGGA  
CATAGAATACTACCCAGGATCTACGTTGAACCTTTACTCCAACAGCAAATG  
TGGAGGATGTTTGGAGAGCAGATCTGTTCAATTATAAAATTGATTCAAATT  
AAACCAATTGGCTTTGCGCCCACTGATCAACGTCGGTATGAGTTGCCTAA  
TACCAGGGAAAAAAGGGCAGCACCATTGGCACTTGGGTTCTTGGGATTAC  
TCTCGCTGCGGGCACTGCAATGGGGGGCGCTGCGACAGCGCTAACACTC  
CAGTCTCAGACTTTGTTGGCTGGGATAGTGCAGCAGCAGCAAAAAGTTGCT  
GGAGGCAGTTGAGGCACAGCAACACCTCTTAGGCTTAACTGTCTGGGGTG  
TC

>SIVlhoest-485

TTTTTCTGCAATATAACAAGAATACTCCAAGAATGGAATAATAAAAACTC  
AGATAAATGGTATCCCTGGGCCAATTGCCACATAAAATCAGTCATAGATG  
ATTGGGCAACTGTAGGGAAGAAAAATCTATATCCCTCCAACATCAGGCTTT  
AATAACAGAATAAGATGTACTCATAGAGTAACAGAAATGTGGTTTGAAC  
GGAAAAGTGGGAGCCAGAGGAAAACCTGGGGGGAAATTTGTCTGTCTCAGAT  
TCTTGCTCCCTCATGGGAGACAAATCAATTTGTGGCAACGGGAGCTCAT  
TATAAATTAATAAGGATTAGACCAATTGGCTTTGCTCCAACAGCTGAGCA  
CCAGTACGCACCCAGTAGTAAGCAGAAGAGAGCAGCACCGCTGGCTCTAG  
GTGCTTGGGACTTCTCAGTGCTGCAGGTAAGTCAATGGGCTTAGTATCG  
ACGATACTAACTGTCCAGGCCCAAGTAGTAATACAAGGGATATTGCAGCA  
GCAGAAGCAGTTGCTGGTGCTTGTGAGAAACAGCAAGAGCTCTTAAGAC  
TCACCATATGGGGAGTG

>SIVlhoest-524

TTCTTTTGTAAATGTACAAGAATCTTCCAGGAATGGAACAATAAAAACTC  
AGATAAATGGTATCCCTGGGCCAATTGCCACATAAAATCAATTATAGATG  
ATTGGGCAACTGTTGGGAAGAAAAATTTATCTTCCTCCAACATCAGGATTT  
AACAAATAGAATAAGATGTACTCACAGAGTGACAGAAATGTGGTTTGAAT  
GGAAAAATGGGAACCACATGAAGACTTAGGAGGAAATCTGTCTATTAAAGT  
TTTTGCCTCCCTCATGGGAGACAAATCAATTTGTGGCAACAGGAGCTCAT  
TACAAATTGATCAGACTGAGACCAATTGGCTTTGCTCCAACATCAGAGCA  
TCGGTACGCACCCAGGGGAAGGCAAACAAGAGCAGCTCCACTAGCTCTAG  
GTGCTTGGGACTTCTCAGTGCTGCAGGTAAGTCAATGGGCTTAGTATCG  
ACGATACTAACTGTCCAGGCCCAAGTAGTAATACAAGGGATATTGCAGCA  
GCAGAAGCAGTTGCTGGTGCTTGTGAGAAACAGCAAGAGCTGCTAAGAC  
TCACCATCTGGGGAGTG

>SIVlhoest-7

TTCTTTTGTAACTAGGATATTTCCAAGAATGGAACAATAAAAATTC  
AGATAAATGGTATCCTTGGGCCAACTGCCACATAAAAAGCATCATTGATG  
ATTGGGCTACAATAGGAAAGAAGATTTATCTACCACCTACTTCAGGTTTC  
AACAAATAGAATCAGATGTACTCATAGAGTAACAGAAATGTTCTTTGAGAT  
GGAAAAATGGGAACCACATGAGGACTTAGGAGGCAACCTAAGTATAAAGT  
TCTTGCCTCCATCATGGGAACTAATCAATTTGTGGCAGAAGGGTCTAAA  
TATAAATTGATAAAATTGAATCCAATTGGGTTTGCTCCTACAGATGAGCA  
CAGGTACGCACCCAGGGGAAGGCAAACCAGAGCAGCGCTCTGGCTTTAG  
GAGCCTTGGGACTTCTCAGTGCTGCAGGCACTGCAATGGGCTTAGTATCG  
ACGATACTAAGTGTCCAGGCCCAAGCAGTCTTGCAAGGGATATTGCAGCA  
GCAGAAGCAGTTGCTGGTGCTTGTGAGAAACAGCAAGAACTGTTAAGAC  
TCACCATATGGGGAGTG

>SIVsun-L14-S2

TTCTTTTGTAAATTTAACAAGAAATTTTCAAAGTATGGAATGACACAACCTC  
CAATAAATGGTATCCTTGGGCCAATTGCCACATAAAAAGTGTGATAGATG  
ATTGGGCGTCAGTGGGCAAGAAGATTTACTTGCCCCCAACATCAGGGTTT  
AATAACAGAATAAGATGTGCAAAACAGAGTGACAGAAGCATGGTTCACACT  
GGAAAGGGTGAAGACTGGAAGGTAAATGGATCAAAACATCTCAGTTGTAG  
CCTTCCAGCCACCTACCAACACCTTAAATCAATTTGTGAGCACAGGAGCA  
CATTACAACTAGTAAGAATTAGGCCAATTGGGTTTGCTCCAACAGATGA  
GCACCGGTACGCACCCAGGAAGGAAAAGAGGGCAGCACCTGTTGCCCTAG  
GAGCTTTGGCACTTCTCAGTGCTGCGGGTACTGCAATGGGCTTAGTATCG  
ACGATACTAAGTGTCCAGGCCCAAGCAGTCTTGCAAGGGATATTGCAGCA  
GCAGAAGCAGTTGCTGGTGCTTGTGAGAAGCAGCAAGAGCTACTAAGAC  
TCACCATATGGGGAGTG

>SIVolc-12CI97

TGGTTTGTAAATATCACTAAAAATCTTAAACATGGAATAATGCGTCTGA  
TCCTAAGTGGTATCCATGGTCAAGTGTAGACTGAGACAAAATGTAGATG  
ATTGGATGAAAGTAGGAAGAAGAAATTTATCTTCCCTCCACAACCAGGATTC  
AATAATAGAATCCGATGTACACAAAGAGTAACTGAAATGTTTTTGAAAT  
ACAAAAAGTAGAGAACGGAACGCAAGTGTATTGCTTCCACCATCAGACA  
ACGTGAATCAATTTGTCTCAGTGGCAAGTGATTATAAATTGGTAGAGTTG  
GAATTGATTGGCTTTGCTCCTACAGAGACACAAAGGTATCAGCCTAGAAA  
TAAAAGAGGAGCATTGGTGCTGGGGTTATTGGGGGTCTCGGCCTAGCAG  
GATCCGCAATGGGCACAGTATCAACGATACTGACTGTCCAGTCTTCGCAT  
TTGCTTGCGGGGATAGTGCAGCAGCAGAAGCACATGCTGGAGATGATTGA  
GAAGCAGCAAGAATTGCTGAAGCTCACTATCTGGGGAGTG

>SIVwrc-98CI04

TTCTTTTGTCAATATTACTAAGATTGCTGATGCATGGAACAACAAGAATGA  
GAGCAATGGTACCCTTGGAGTCCATGCACGATTAGAAATATAGTGGATG  
ATTGGGCACATGTAGGAGTAAAAGTATATTTGCCTCCAGTATCAGGATTC  
AGGAATCATATAAGATGTACACAAAGAGTGACTGAAATCTATTCAATTG  
GGAAAAAAGCAAGTGAATTCGAAGCTCCTTCCACATACAGAATTCAT  
TTGTGGCAGTGGGACAAAAGTATAAACTGGTGAGACTAAAAATGATAGGG  
CTGGCTCCTGGTGATGGGAGAAGAGTGACACCAAAGAACATCATAGAGA  
AAAAAGAGGAGCTATTGCTCTTAGGAATTCTAGGATTCTCGGGCTGGCAG  
GATCTGCAATGGGCACAGTATCAACAGTACTGACGATCCAGTCTCAGCAT  
TTGCTTGCTGGGATATTGCAGCAGCAAAAGAACCTGCTGGAGCTTGTTGA  
GAAGCAACAAGAATTGTTGCGACTCACCATCTGGGGGGTG

>SIVwrc-05GM-X02

TTCTTTTGTAAACATTACAAAAATAGCAGATTGGTGGAATAATAAACAGA  
AAAGAGATGGTATCCTTGGGCACCTTGCACTATCAGATCAATAGTGGATG  
ATTGGGCATCTATAGGGAAGAAAATATACTTGCTCCTCGGTGTCTGGATTT  
AACAAATCATTAGATGTACCCAAAGGGTATCAGAAGTACTCTTTAATTG  
GGAAAACGGGCAGGTGGAGTTCCAAGCTCCTTCCCACATGCAAACTCCT  
TTGTGGCAGTAGGACAAAAATATAAACTGGTAAAACTAAAAATTGATAGGA  
GTAGCTCCCACTGATGGAAAAGAGGTGACACCTCCTGACCATCATAGAGA  
AAAACGAGGAGCAATTGTTTTAGGACTTCTAGGCTTCTCGGCCTGGCAG  
GATCTGCAATGGGCACGGTATCAACAGTACTGACGATCCAGTCTCAGCAT

TTGCTTGCTGGGATAGTGCAGCAGCAGAAGAACTTGCTGGAGCTTGTAGA  
GAAGCAACAAGAGCTGTTGCGACTCACCATCTGGGGGGTT

>SIVmnd1-GB1

TTCTTCTGTAATGTAACAAGAATCATGAGGGCATGGAATGATCCTAATGA  
GAAGAAAGTGGTATCCTTATGCCTCATGTCAAATTAGGCAAATAGTAGATG  
ACTGGATGCAAGTAGGAAGAAAGATATATTTACCACCTACATCAGGATTT  
AATAATCACATAAGGTGTACACATAGGGTAACAGAAATGTACTTTGAAAT  
GCAAAAGATAGATAGTAATGAAACAAAAATGCAAATTAAATTCCTGCCTC  
CCAGTGAAACCTCCAATCAATTTGTTGCTTATGGAGCTCATTATAAATTA  
GTCAAAATAATGCCAATTGGCATAGCACCTACAGATGTGAAAAGACACAC  
TTTACCTGAACATCATAAAGAGAAGAGAGGAGCAGTAATACTTGGTATCC  
TTGGTCTGCTCTCGCTGGCAGGATCCGCGATGGGCTCAGTGTGCGTGGCA  
CTGACTGTCCAATCTCAGTCTTTGGTGAAGTGGGATAGTGGAACAACAAA  
ACAGTTGTTGAAGCTCATAGAGCAACAGTCTGAACTCTTAAAACTCACCA  
TATGGGGAGTA

>SIVdr1-D3

TTCTTCTGTAATATCTCTAAAAATATGGAGAACATGGAATAATAGATCAAG  
TAATGTGTGGTATCCATATGCATCCTGCCACATAAAACAAATAGTAGATG  
ATTGGGCAAGAGTGGGCAGGAAAAATTTATATGCCTCCTGTATCAGGATTT  
AATAATGAAATAAGATGTACACAAGATGTACAGAAATGTTCTTTGAGAT  
CCAAAAATTTGGAGACAAATGAAATCAATGATTCCAATATCAGATTAAAT  
TTGTGCCACAAGATGAAGTGCAAAATCAGTTCACAGCAATAGGAGCGCAT  
TACAAATTTGGTCAAGGTGGAGCCAATTGGCTTTGCTCCAATGATGTACA  
TAGATACAACCTGCCGGAACACAGGCAGAAGAGAGGTGCAGTCGTGCTTG  
GGATCCTTGGCCTCTTGAGCTTGGCAGGTTCCACAATGGGCTCGGTGGCG  
ACAGCCATGACTGTCCAGTCTCAGGCTTTGTTGTCTGGGATAGTGGAGCA  
GCAAAAGCAACTGCTGCGCCTGGTGGAACAGCAACAGGAGTTACTCAAGC  
TAACTATCTGGGGCGTA

>SIVdr1-D4

TTCTTCTGCAATGTTACTAAAAATATGGAAAACATGGAATAATAGATCAAG  
TAGTGTGTGGTATCCATATGCATCCTGCCACATAAAACAAATAATAGATG  
ATTGGGCAAAAGTTGGCAGGAAAAATTTATATGCCTCCTGTATCAGGATTT  
AATAATGAGATAAGATGTACACAAGAAGTCACAGAAATGTTCTTTGAGGT  
TCACCGTTTGGACACAAATGTAACCGATGATTCTCATTATCAGATTAAAT  
TTATACCACAAGATGAAGTGCAAAATCAGTCCACAGCAGTAGGAGCACAT  
TACAAATTTGGTCAAGGTGGAGCCAATTGGCTTTGCTCCAATGACGTGCA  
TAGATACAACCTGCCGGAACACAGGCAGAAAAGAGGTGCAGTCGTGCTTG  
GAATCCTTGGCCTCTTGAGCTTGGCAGGTTCCACAATGGGCTCAGTGGCG  
ACGGCCATGACTGTCCAGTCCCAGGCTTTGTTGAATGGGATAGTGGAGCA  
GCAAAAGCAACTGCTGCGCCTGGTGGAACAGCAACAGGAGTTACTTAAGT  
TAACTATCTGGGGCGTA

>SIVmnd2-M14

TTCTTTTGTAAATTGGACAAGAATTTGGAAAACCTGGAATAACCAAACTC  
AAATGTTTGGTATCCATATATGTCAATAATCAGACAGATAGTGGATG  
ATTGGCATAAAGTGGGAAGGAAGATTTATATGCCTCCTGTGTCTGGATTT  
AATAATCATATAAGATGCACTAATGATGTACAGAGATGTTTTTTGAGGT  
CCAAGTAGTTGAAGGAAAAAGATACCTAATAAAGTTTCTGCCACAAGATG  
AGGTACAAAATCAATTCACAGCAGTGGGAGCACATTATAAATTGGTAAAA  
GTGGATCCGATAGGATTCGCCCCCTACTGATGTACACAGATATCATCTACC  
AGATGCAAAGCAGAAGAGAGGAGCAGTCTTGCTTGGAAATGCTCGGCCTCT  
TGGGCTTGGCAGGTTCCGCGATGGGCTCAGTGGCGGTGGCCCTGACTGTC  
CAGTCCCAGGCTTTGTTGAATGGGATTGTGGAGCAGCAGAAGATTCTGCT  
GAGCCTGATAGATCAGCACTCCGAGTTATTAAAACTAACTATCTGGGGTG  
TA

>SIVmnd2-CM-98-CM14

TTCTTTTGTAAATTGGACAAAAATTTGGAGAACATGGAATGATCAAAATTC  
ATCAGTATGGTATCCATGGATGTATGTAATATTAGACAAATAATAGATG  
ATTGGCATAAAGTAGGAAAGAAAGATTTATATGCCTCCTGTATCTGGATTT  
AATAATGAGATAAGATGTTCTAATGATGTAACAGAAATGTTCTTTGAGGT  
TCAAAAGACAGAAGAGGGATACATCATCAAATTTGTGCCACAAGATGAGG

TACAAAACCGATTTACAGCGGTAGGAGCACACTATCAACTAGTAAAAGTG  
GACCCAATTGGCTTTGCTCCTACAGAAGTGGCAAGATATCATCTGCCAGA  
AGCTAGGCAGAAGAGGGGAGCGGTCTTGCTTGGGATGTTTCGGCCTCCTAG  
GTTTGGCAGGTTCCACGATGGGCTCAGTGGCGGTGGCCCTGACTGTCCAG  
TCTCAGGCTTTGTTGAATGGGATTGTGGAGCAGCAGAAGGTTCTGCTGAG  
CCTGATAGATCAGCACTCCGAGTTATTAAAACTAACTATCTGGGGTGTA

>SIVmnd2 - 5440

TTCTTTTGTAAATTGGACTAAAAATATGGAAGGCATGGAATAGCAAACAAAG  
TTCAGTTTGGTACCCTTACATGTCTCGCAATATTAGACAAATAGTAGGTG  
ATTGGCATAAAGTAGGCAAGAAAAATTTATATGCCTCCTGTGTCTGGGTTT  
AATAATGAAATAAGATGTACTAATGATGTGACAGAAATGTTCTTTGAGGT  
CCAAAAAAGCTGATGATGACAATGGATATATCATAAAATTTATACCACAAG  
ATTGGATTCAAATCAATACACAGCAGTGGGGGCTCATTACAAATTGGTG  
AAGGTGGATCCGATAGGTTTTGCCCCACAGACATACACAGACATCATTT  
GCCTAATACAAGGCAAAAAAGAGGAGCGGTCTTACTTGGAATGCTCGGCC  
TCCTAGGTTTGGCAGGTTCCGCGATGGGCTCAGTGGCGGTGGCCCTGACT  
GTCCAGTCCCAGACTTTACTGAATGGGATTGTGGAGCAGCAGAAGGTTCT  
GCTGAGCCTGATAGATCAGCACTCCGAGTTATTAAAACTAACTATCTGGG  
GTGTA

>SIVcol - BMC07

CTCTATTGCAATGCTAGTTCCTTGTGGAGTGGTACCACCACAGTAATGAA  
CTGCACTATAAGAAAATTGGTGAATAGTTGGGTGACCCATGCAAAGATAT  
TGTATGGGCCACCTCTAAAAGGAACTCTGCAGACTTATTGGGAGAAACAA  
CCAGTTTGGCCTTTATGGGTTCAGTAGAAAAAGGGGAGAATAAACTGG  
ATGTGCATACCCGGCAGCAGTGAATTGGAAGCATGCTGCCAGTACATTGG  
AGTTAGGAAATTACAAATTGGTGAAAATAACTCCTACAGCATTGTGTTCCC  
ACTGATCACAGAAGGGGAGGAACAGCTGTGGTACGAGAGAAACGGGGAAT  
CTTTGCTTTCTCCTTGATAGCTCTCTTGAGTGGGGCCGGCGCTGCAATGG  
GCTCAGCGTCTGTGGCGCTGACGATCCAGGCTCAGTCTTATTGGATGGG  
CTAGTGC GG CAGCAGCGGCAGCTGCTGAAGCTGGTTGAAACACAGTCTGC  
ACTGTTACAACCTACGGTATGGGGGGTT

>SIVcol - CGU1

TTTTACTGTAATGCATCTAGTTTATGGAAACATGATTCCCCAGTCATGAA  
CTGTACCATTAGAAAAGCTGGTGAATAGTTGGGTCACTCATGCCAGGATCC  
TGTATGGGCCCGCCTCCAGGAGGTCATCTACAATGTAACCTGGGAGAAACAG  
CCAGTTATTGCGTTCATGGGCACCATAGAAGGAGACAATGATGGTAATGG  
GTGTGCTTATCCAGCAGCACCAAATTTTAAGCATGCATTAAGTACTTTGG  
AATTGGGAAGATACAAATTGGTAAAAATGAGGACAACTACTTATGTCCCA  
ACAGATATAAAAAGATCAGTGAATGTAAATTGGCATCATGGGAGACAAAA  
GAGAGGCATCTTTGCATTCTCCATCTTAGCCCTCTTGAGTGGGGCCGGTG  
CTGCAATGGGCTCAGCGTCTGTGGCGCTGACGATCCAGGCTCAATCCCTT  
AATGGAAGGGCTAGTGCCAGCAGCAACCGAATGTTGCTGAAACTGGTCTGA  
GACGCAGTCTGCACCTGCTACAGCTCACGGTCTGGGGGGTT

>SIVcol - BMC01

TTTTATTGTGATGCTTCATCATTTGTGGGCAAAAAATTCATCAGTAATGAA  
TTGTACCATTAGAAAATTGGTAAATAGTTGGGTGTACATGCCAGGCTGC  
TATATGGCCCTCCGCCTGATGGACATTTGCAATGTAACCTGGGAAAAGCAA  
CCAGTAATTGCTTTTATGGGCACAGTAGAAAAAGGGGGAAATGAGACAGG  
ATGTGCTTATCCTGCAGCTCCAAATTTTAAGCATGCACTGAGTACACTTG  
AATTGGGCAGATATAAATTGGTAAAGATGAGAACAACAGTGATGCTCCT  
ACAGATGTAAAAAGGCAAGTGGCTATTAATTGGCATCATGGGAGGCAAAA  
AAGAGGCATTTTTGCATTCTCCATCTTAGCTCTCTTAAGTGGGGCCGGTG  
CTGCAATGGGCTCAGCGTCAGTGGCGTTGACGATCCAGGCTCAATCCTTA  
TTGGAAGGGCTAGTGACGCAACAGCGGATGCTGTTGAAACTGGTCTGAAAC  
GCAGTCAGCACTGCTCCAACCTCACGGTATGGGGGGTT

>SIVagmVer - 155

TTCTACTGTAAAATGGACTGGTTTTTTAAATTATCTGAATAATTTAACAGT  
GGATGCTGATCATAATCATTGTAAAAACAACGCAGGGAAAGGTCGAAGTC  
CAGGTCCCTGTGTACAGAGAACTTATGTTGCCTGCCATATCCGATCTGTC  
ATAAATGATTGGTATACTATATCAAAGAAAACATATGCTCCACCAAGAGA

AGGACATTTGCAGTGCACGTCCACAGTTACTGGGATGACAGTAGAGCTAA  
ACTATAATAACCAGAACAGGACAAATGTAACATTGAGTCCCAGATAGAA  
ACCATCTGGGCGGCAGAATTGGGCAGATACAAATTGGTAGAGATTACACC  
AATTGGATTTGCACCCACAGAAGTCAGGCGATACACGGGAGGCCAAGAGA  
GGCAAAAACGAGTCCCGTTTCGTGCTAGGGTTCTTAGGCTTCTTGGGAGCT  
GCTGGGACTGCAATGGGAGCAGCGGCGACAGCCCTGACGGTCCAGTCTCA  
GCATTTACTTGCTGGGATATTGCAGCAGCAGAAGAATCTGCTGGCGGCTG  
TGGGAGCTCAACAGCAGATGTTGAAGCTGACCATTTGGGGTGTG

>SIVagmVer-VSAG1003

TTCTATTGTAAGATGGATTGGTTTCCTAAACTACCTTAATAACCTTACAGT  
AGATGCAAATCACAATAAATGCACAAACAGCACCAAGAAGGGACACGCAC  
CAGGACCTTGTGTACAGAGGACCTATGTTGCTTGCCATATCCGAACAGTT  
ATTAATGATTGGTACACAGTATCAAAGAGAACATATGCCCCACCAAGAGA  
AGGACACTTGGAGTGTTTATCTACAGTCACAGGGATGACAGTGGAATTGA  
ATTATAATTCAAAGAACAGAACTAATGTGACATTGAGTCCCCAAATAGAA  
GGCATTGTTGGGCAGCAGAATTGGGCAGATATAAATTAGTGGAATAACACC  
AATTGGCTTTGCACCCACGGATGTCAGGCGATATACGGGAGGACACGAAA  
GACAAAACGTTGTGCCTTTTCGTGCTAGGGTTCTTAGGATTCTTGGGAGCT  
GCTGGTACTGCAATGGGAGCAGCGGCGACAGCCCTGACGGTCCAGTCTCA  
GCATTTACTTGCTGGGATATTGCAGCAGCAGAAGAACTTGCTGGCGGCAG  
TGGAGGCTCAACAGCAAATGTTGAAGCTGACCATTTGGGGAGTA

>SIVagmVer-VSAM0022

TTTTATTGTAAGATGGATTGGTTTCTTAATTATCTAAACAACCTAACAGT  
AGATGCAGATCATAATAAGTGCAACAATTCGCCAAAAGGAAAAGCACCAG  
GACCTGTGTTTCAGAGAACATACGTTGCCTGCCATATCCGATCTGTCATA  
AACGATTGGTATACCATCTCTAAAAGGACTTATGCTCCTCCAAGAGAAGG  
TCACTTGGAGTGTCTTTCACGGTCACTGGTATGACAGTAGAACTTAATT  
ATATATCCAACAATAGAACAAATGTTACCCTATCCCCCAGATAGGGGGT  
ATATGGGCAGCCGAATTGGGGAGATACAAATTAGTTGAAATTACGCCAAT  
TGGTTTTCACCCACGGACGTCAGGCGGTATACAGGAGGGCACGACAGAG  
CAAAACGTGTACCTTTTCGTGCTAGGATTCTTAGGCTTCTTAGGGGCTGCT  
GGAAC TGCAATGGGAGCAGCGGCGACAGCCCTGACGGTCCAGTCTCAGCA  
TTTACTTGCTGGGATATTGCAGCAGCAGAAGAACTTGCTGGCGGCAGTGG  
AGGCTCAACAGCAGATGTTGAAGCTGACCATTTGGGGTGTG

>SIVagmVer-VSAC4004

TTCTATTGTAAAATGGATTGGTTTCCTTAATTACATCAACAATCAGACAGT  
TACCTTTGATGGAAATACGTGTAATAACTAAGACTAGACCGAGAAAGG  
GAGCGCTGGACCTTGTGTGCAAAGAACATATGTTGCCTGCCACATTCTGA  
TCTGTCGTAAATGATTGGTACAAAGTGGCAAAATTAACCTATGCTCCACC  
AAGAGAAGGTCATTTGCAATGTACCTCCACGGTGACGGGTATGACAGTAG  
AACTGAATTACAATTACAGAAATCGGACAAATGTGACACTCAGCCCTCAA  
ATAAGAGGCATATGGGCAGCAGAATTGGGTAGGTATAAATTAGTGGAAT  
TACTCCAATTGGCTTTGCACCAACAGATGTCAGGCGATATGAAGGACCCC  
AAAGACAGAAACGGGTGCCTTTTCGTGCTAGGATTCTTAGGATTCTTGGGA  
GCAGCAGGAAC TCAATGGGAGCAGCGGCGACAGCCCTGACGGTCCAGTC  
CCAGCATTTACTTGCGGGGATATTGCAGCAGCAGAAAAATCTGCTGGCGG  
CTGTGGAGCAGCAACAACAAATGTTGAAGCTGACCATTTGGGGTGTG

>SIVagmMal-ZMB

TTCTATTGTAAAATGGATTGGTTTCTAAATTACATAAAACAATGCCACAAC  
TACGTTTGATGGAAACAAGTGTGGTAATAAAACAAGAAAGGAAATGCTC  
CAGGACCCTGTGTTCAAAGGACATATGTTGCCTGCCACATAAGATCAGTT  
GTAAATGATTGGTATACAGTAAGCAAATTAACCTATGCCCCGCCAAGAGA  
AGGGCACTTACAATGTACTTCCACGGTAACGGGTATGACAGTAGAGCTAA  
ATTACAACAATAAGAACGTAACAAATGTGACCCTAAGTCCCCAAATAGAA  
GGGATTTGGGCAGCAGAATTGGGTGATACAAATTGGTGGAGATTACCCC  
AATTGGCTTTGCACCCACAGAGGTCAGAAGATACACAGGGGGACATGAGA  
GACAAAAAAGAGTCCCTTTTCGTGCTAGGGTTCTTAGGCTTCTTAGGAGCT  
GCTGGAAC TGCAATGGGAGCAGCGGCGACAGCCCTGACGGTCCAGTCTCA  
GCATTTACTTGCTGGGATATTGCAGCAGCAAAAGAACTTGCTGGCGGCTG  
TGGAGCAGCAACAACAGATGTTGAAGCTGACCATTTGGGGTGTG

>SIVgri-677

TTCTATTGTAAGATGGACTGGTTTATCAATTATCTAAACAATCGAACAGA  
AGATGCAGAAGGTACTAATAGGACCTGTGACAAAGGGAAGCCAGGACCAG  
GACCATGTGTTTCAGAGAACTTATGTTGCCTGCCATATACGACAAGTAGTA  
AATGATTGGTACACTGTCTCTAAAAAGGTATATGCTCCACCAAGGGAAGG  
TCATTTGGAGTGTAACCTCATCAGTCACGGCACTATACGTGGCAATAGATT  
ATAACAACAAGTCTGGCCCAATAAATGTGACCCTAAGTCCTCAGGTACGC  
AGCATATGGGCGTACGAACTGGGAGACTATAAATTAGTAGAGATAACACC  
AATTGGCTTTGCTCCTACAGATGTAAGAAGATATACTGGCCCCACAAGAG  
AAAAAAGGGTGCCATTTCGTGCTAGGGTTTCTAGGCTTCTTGGGAGCTGCT  
GGAACCTGCAATGGGCGCAGCGGCAACAACGCTGACAGTCCAGTCTCGGCA  
TTTGCTTGCTGGGATATTGCAGCAGCAGAAGAACTTGCTGGCGGCTGTGG  
AACAGCAACAACAGTTGTTGAAGCTGACCATTTGGGGTGTG

>SIVagmSab-SAB1

TTCTATTGTAAATGGATTGGTTCCTCAACTATTTGAATAATAAGTCAGT  
AGACCCAGACCATAACAACCTGTGCAAAAAATAATACAAAGCCATGTTGGC  
AGAGAACCTATGTTCCCTGCCACATAAGGCAAGTAGTAAATGATTGGTAC  
ACCTTGTCTAAAAAGACATACGCCCTCCCAGAGAAGGCCACTTGGAGTG  
TAACTCGACAGCCACAGCGCTGTATGTAGAATTGAACTATAACAGTAAAA  
ACAGGACCAATGTGACGTTATCACCTCAGATTGAAAGCATTGGGGCTAAT  
GAATTGGGAGATTACAAATTAGTGGAATCAAGCCAATTGGATTGTGCTCC  
AACCAAAGTAAGAAGATACACTGGCCCCGAAAGACAAAAAAGGGTGCCAT  
TCGTGCTAGGGTTCTAGGTTTCTTGGGAGCAGCTGGAGCTGCAATGGGT  
GCAGCGGCGACAGCCCTGACGGTCCAGTCTCAGCAGTTACTCGCTGGGAT  
ACTGCAGCAGCAGAAAAATCTGCTTGCGGCTGTAGAGCAGCAGCAAAA  
TGCTAAAGCTCACTATTTGGGGTGTG

>SIVagmTan-TAN1

TTCTATTGTACTCCTGATTGGTTTGTTAATTGGCTGAATAATGAGTCTAA  
TAGTGGAAGAAATGTAGATGTAGAAGGTAATAATTGCACCACTGGAAAGG  
ATAAACGCTGCTACAAAAGGACATATGTCCCCTGCCATATTAGGTCAATT  
GTCAATGACTGGTACACGCTCAGTAAGAAAACCTATGCACCACCAAGGGA  
AGGACACTTAGAATGCACATCAACAGTGACATCTATGATGGTATCACTGG  
ATTATAACAGCAAAGAAAGGACTAATGTGACATTGACAGCTAATTTGGAG  
AACATATGGGCTTATGAATTGGGAAGATATAAGCTCATAGAAATTGAACC  
AATCGGTTTTCGCGCCAACAGAGATAAGAAGATATGTTGGGCCAACTCGAG  
AAAAGAGGGTGCCCTTCGTGTTGGGGTTCTAGGCTTTTGGGGGCAGCT  
GGAGCTGCAATGGGTGCAACAGCGACAGCGTTGACGGTCCAGTCCCAGCA  
ATTACTTGACAGGGATATTGCAGCAGCAGAAGAATCTGCTGGCGGCAGTTG  
AGCAGCAGCAGCAGATGCTAAAGCTCACCATTTGGGGTGTG

>SIVrcm-GAB1

TTATATTGCAAGTTAAATTGGTTTTTTAAATTTGTTAAATAATGAGACAGT  
AGGGACAACAAATGAGAAGAGAAAAGCACCTTTTGTACCATGCATCACAA  
AAATGATAGTCAATGATTGGTATACAGTATCGAGGAAGGTATACACGCCA  
CCGAGGCCAGATGCGTTAAAGTGCAAGTGACAGGTATCCTATCTGTTGGC  
AGACATAGACTATATTAATGACAGTGAGACAAACATCACCTCTCAGCGG  
AAGTGGGTGATTATTGGGCAGCAGAATTGGGGAGATATAAGGCAATAGAA  
ATCAGACCAATTGGCTTTGCACCAACAGAAATAAAAAGGTACCAGACGAA  
ACAGAAAAGGGTACCTTTGGTGCTGGGTTTCTAGGTTTCTCTCAGCAG  
CAGGTACTGCAATGGGCGCAGCGGCGACAGCCCTGACTGTCCAGTCCCGG  
CATTTGCTTGACAGGGATATTGCAGCAGCAAAAGAACCTGCTGGACATAGT  
TAAGCGGCAGCAGAATCTGCTAAAGCTCACCGTCTGGGGAACCT

>SIVagi-00CM312

CTCTATTGTAACTCAATTGGTTTGTGAATTATTTGAACAATAAGACAGA  
GGGTAATGAGAAGGAAAGAAGGCAAGCCATGTTTGTTCCTTGCGTCACGA  
AAATGATTGTTAATGATTGGTACACGGTGTCAAGGAAAGTTTATACACCG  
CCAAGGCAAGATGCGTTAACATGTAATGCTACAGTAAGCTATTTGTTAGC  
AGACATAGAGTATGTGAATCAAAATGAGACTAATGTGACACTGTCTGCAG  
AAGTAGGAGACCTATGGGCAGCAGAATTGGGAAGATACAAAGTAGTGGA  
ATTAAACCAATTGGATATGCACCAACAGCTATAAAAAAGGTACGAGACAAA  
ACAGAAAAGAGTACCTTTGGTGCTGGGTTTCTAGGTTTCTCTCAGCAG

CAGGTACTGCAATGGGCGCAGCGGCGACAGCCCTGACAGTCCAGTCCCGG  
CATTTGCTTGCTGGGATATTGCAGCAGCAGAAGCAGTTGCTGGACATAGT  
TGAGCAGCAGCAACACTTGCTAAAGCTCACCGTCTGGGGGACT

>SIVrcm-02CM8081

TTATATTGCAAATTGAATTGGTTTCTCAACCTATTAAATAATAGAACTGA  
TGGAAACATAAATGAGCGAAGACAAGCCATGTTTGTGCCTTGTATCACAA  
AAATGGTGGTTAATGATTGGTATACAGTGTCAAAAAAGGTATACACACCA  
CCAAGACCTGATGCATTGAAATGCAGGGCCACGGTCACTTACTTGTGGC  
AGACATAGATTATATACATACCAATGAAACAAATGTTACTCTGACTGCAG  
AGGTAGGAGATCTATGGGCAGCAGAGTTAGGAAGATACAAAGTAGTAGAA  
ATTAAACCAATTGGCTATGCACCTACAGATGTTAAAAAGGTACGAGACAAG  
ACAGAAAAGAGTACCTTTGGTGCTGGGTTTTCTAGGTTTCCTCTCGGCAG  
CAGGTACTGCAATGGGCGCAGCGGCGACAGCCCTGACAGTCCAGTCCCGG  
CATTTGCTTGCTGGGATATTGCAGCAGCAGAAGAAGTTGCTGGACATAGT  
TGAGCAGCAGCAGCACTTGCTGAGGCTCACCGTCTGGGGGACT

>HIV-2-EHO

CTCTACTGTAATATGACTTTTTTCTTAAACTGGGTAGAAAAATAGAACTGG  
GCTCAAGAGAAATTATGCGTCATGCCACATCAGACAGATAGTCAACACGT  
GGCACAAGATTGGAAGAAATGTGTATTTGCCTCCAAGAGAGGGTGAACCTC  
TCCTGTAATTCCTACTGTTACCAGCCTCATAGCCAACATTGACTGGATAGA  
TAAGAACCTTACTAATATTACTGTGAGTGCAGAAGTGTGAGAACTGTATA  
AATTGGAACCTGGGGGACTACAAATTAGTAGAGATAACACCAATTGGCTTT  
GCACCTACAAGTATAAAAAGATATTCCTCAGTGACACCGAGGAATAAAAG  
AGGTGTACTTGTGCTAGGGTTTTTGGGATTTCCTTGCGACGGCAGGTTCTG  
CAATGGGCGCGGCGTCTTGACGTTGTGCGCTCAGTCCCGGACTTTACTG  
GCTGGGATAGTGCAGCAGCAGCAACAGCTCGTGGACGTGGTCAAAAGACA  
ACAAGAACTGTTGCGGCTGACCGTCTGGGGGACG

>HIV-2-D205

TTTACTGTAATATGACCTGGTTCTTAAACTGGGTAGAGAACAAAACAAA  
TACAACCTCGGAGAAATTATGCGCCATGTCATATCAGACAGATAATCAACA  
CGTGGCACAAGGTTGGGAAAAATATATATTTGCCTCCAAGAGAAGGTGAG  
CTCTCATGTAATTCCTACTGTGACTAGCCTCATAGCCAACATCAACTCAGA  
CAACAGTACCACCAATATTTCTGTGAGTGCAGAAGTGTGAGAACTGTATA  
GATTGGAACCTGGGGGACTATAAATTAGTAGAAATAACACCAATTGGCTTC  
GCACCTACAGATGTAAGAAGATACTCCTCAGTAAAACCGAGGAATAAAAG  
AGGTGTAATGGTGCTAGGATTCTTGGGATTCTTGCAATGGCAGGTTCTG  
CAATGGGCGCAACGTCTTTGACGCTGTCAGCTCAGTCCCGGACTTTACTG  
GCCGGGATAGTGCAGCAGCAGCAACAGCCTGTGGACGTGGTCAAAAGACA  
ACAGGAACCTGTTGCGGCTGACCGTCTGGGGGACG

>HIV-2-ALI

CTCCATTGCAACATGACTTGGTTCCTCAATTGGGTGGAAAAACAAAACGGG  
TCAGGAACAGCACAAATTATGCACCGTGCCATATAAAGCAAATAATTAATA  
TCTGGCACAAAGCAGGGAAAAATGTATATTTGCCTCCTAGGGAAGGAGAG  
TTGACCTGCAACTCAACAGTAACCAGCTTGATTGCTAACATTGACACGGA  
TGGCAACCAGACAAATATTACCTTTAGTGCAGAGGTGGCAGAACTATACC  
GATTAGAATTGGGGGATTATAAATTAGTAGAGATAACACCAATTGGCTTC  
GCACCTACATCAGAAAGGAGATACTCCTCTACTCCAAGGAGGAATAAAAG  
AGGTGTGTTCTGTGCTAGGGTTCTTAGGTTTTCTCGCGACAGCAGGTTCTG  
CAATGGGCACGGCAGCTTTAACGCTGTCTGCTCAGTCTCGGACTTTATTG  
GCCGGGATAGTGCAGCAACAGCAACAGCTGTTGGACGTGGTCAAGAGACA  
ACAGGAAATGTTGCGACTGACCGTCTGGGGAACG

>HIV-2-ST

CTCTACTGCAATATGACTTGGTTCCTCAATTGGGTAGAAAAACAGAACGAA  
TCAGACACAGCACAAATTATGTGCCATGCCATATAAAGCAAATAATTAATA  
CCTGGCACAAAGGTAGGGAAAAATGTATATTTGCCTCCTAGGGAAGGACAG  
TTAACCTGCAACTCTACAGTGACCAGCATAATTGCTAACATTGACGGAGG  
AGAGAACCAGACAAATATTACCTTTAGTGCAGAGGTGGCAGAACTATACC  
GATTAGAATTGGGGGATTATAAATTGATAGAAGTAACACCAATTGGCTTT  
GCACCTACACCAGTAAAAAGATACTCCTCTGCTCCAGTGAGGAATAAAAG  
AGGTGTATTCTGTGCTAGGGTTCTTAGGTTTTCTCACGACAGCAGGAGCTG

CAATGGGCGCGGCGTCCTTGACGCTGTCGGCTCAGTCTCGGAC'TTTATTG  
GCCGGGATAGTGCAGCAACAGCAACAGCTGTTGGACGTGGTCAAGAGACA  
ACAAGAAATGTTGCGACTGACCGTCTGGGGAACA

>HIV-2-BEN

CTCTACTGTAACATGACTTGGTTCCTCAATTGGGTAGAAAGACAAGAACCA  
AACACGGCGCAACTATTGCCATATAAAGCAGATAATTAATACCTGGCATA  
AAGTAGGGAAAAATGTATATTTGCCTCCTAGGGAAGGGGAGTTGGCCTGT  
GAATCAACAGTAACCAGCATAAATTGCTAACATTGACATAGATAAAAATCG  
GACTCATACCAACATTACCTTTAGTGCAGAAGTGGCAGAACTGTACCGAT  
TAGAACTGGGAGACTACAAATTAATAGAAATAACACCAATTGGCTTCGCA  
CCTACAGATCAGAGAAGGTACTCCTCAACTCCAGTGAGGAACAAAAGAGG  
TGTGTTTCGTGCTAGGGTTCTTGGGTTTTCTCGCGACAGCAGGTTCTGCAA  
TGGGCGCGCGGTCCCTGACGCTGTCAGCCCAGTCCCGGACTTTACTGGCC  
GGGATAGTGCAGCAACAGCAACAGCTGTTGGACGTAGTCAAGAGACAACA  
AGAAATGTTGCGACTGACCGTCTGGGGAACG

>HIV-2-Abt96

TTGTATTGTAAAATGACTTGGT'TTCTAAATTGGATAGAGGACAGAAATAT  
GACTCTCCTAAAGCCCCAGGAACGACAAAGACGCAATTATGTACCCTGCC  
ATATTAGGCAGATAATTAACACATGGCACAAAGTAGGAAAAAATGTGTAC  
TTGCCCCCAGAGAAGGTGATCTGACGTGTAATTCAACAGTCACCAGCCT  
AATAGCGAATATAGAAGAGAATAGGTCTAACAACCATACAAATATCATT  
TCAGTGCAGAGGTGGCAGAACTGTATCGATTAGAATTGGGGGATTATAAA  
TTAGTAGAAATAACTCCAATTGGCTTTGCACCCACAAATGTAAAGAGATA  
TTCCTCTGTGACACCGAAAAATAAAAGAGGTGTATTTGTGCTAGGGTTT  
TGGGATTTCTTGCAATGGCAGGTTCTGCAATGGGCACAGCGTCGTTGACG  
CTGTCGGCTCAGTCCCGGACTTTGTTGGCTGGGATAGTGCAGCAACAGCA  
ACAGCTGTTGGATGTGGTCAAGAGACAACAGGAAATGTTGCGACTGACCG  
TCTGGGGGACG

>HIV-2-07IC-TNP3

TTGTATTGTAAGATGAATTGGT'TTCTGAATTGGGTAGAAAGACAGAGGTGA  
AAACGACACGAAAGACCAAAACATTAGAGAGCGACACAAAAGAAACTATG  
TACCTTGTACATTAGACAGGTAATTAATACATGGAATAGAGTAGGAAAG  
AATGTATATTTGCCTCCAAGGGAAGGAGATCTCACTTGTAATTCCACAGT  
GACAAGTCTGATAGCCAACATAGATTGGACTGATACAAATCGAACTAATA  
TCACCATGAGTGCAGAGGTGGCAGAACTGTATCGATTGGAAGTGGGTGAT  
TACAAACTAGTAGAGATAACACCAATTGGCTTTGCTCCCAAGTGTGAA  
AAGATATTCCTCAGCAACACCGAGGAATAAAAGGGGAGTGTTTGTGCTTG  
GGTCTTGGGTTTTCTCGCTACGGCAGGTACTGCAATGGGCACGGCGTCT  
TTGACGCTGTCTGCTCAGTCTCGGACTTTATTGGCTGGGATAGTGCAGCA  
ACAACAACAGTTGTTGGACGTGGTCAAAAGACAACAAGAGCTGTTGCGGC  
TGACCGTCTGGGGGACT

>HIV-2-96FR12034

CTCTACTGTAAGATGACATGGTTCCTCAATTGGGTAGAAAACAGGAGCAT  
GGAGGGACAAACGTCAAGGGAGAGACATAAAAGGAACTATGTGCCTTGCC  
ATATTAGGCAGGTAATTAACACATGGCATAAAGTAGGGAGAAATGTGTAT  
TTGCCTCCAAGAGAAGGAGATCTCACCTGCAATTCTACAGTAACTAGCAT  
GATTGCAAATATTGATCGGATTAACAAAAATCAAACAAATATCTCCATGA  
GCGCAGAAGTGGCAGAACTGTATAGATTAGAGTTGGGGGATTATAAATTG  
GTAGAAATAAGACCAATTGGCTTTGCTCCACACCAGTGAAAAGATATTC  
CTCAGTGACACCGAGGAATAAAAGGGGAGTATTTGTGCTTGGGTTCTTGG  
GTTTTCTCGCCACGGCAGGTTCTGCAATGGGTGCGGCGTCGTTGACGCTG  
TCAGTCTAGTCCCGGACTTTACTGGCTGGGATAGTGCAGCAACAGCAACA  
GCTGTTGGACGTGGTCAAAAGACAACAAGAAATGTTGCGGCTGACCGTCT  
GGGGAAT

>SIVsmm-CI2

CTCTACTGCAAGATGACATGGTTCCTCAATTGGGTAGAGGAAAGGAACAT  
GACAGAACAAAACCCGGAGGAAAAAAGAGACATAATTATGCACCCTGTC  
ATATTAGACAAATAATAAAATACTTGGCATAAAGTAGGTAAAAACGTATAT  
TTGCCTCCAGAGAAGGTGATCTGACATGCAATTCAACAGTAACCAGTCT  
TATAGCCAATATCAACTGGAATGACGGAAATGGCACAAATATCACCTTTA

GTGCCGAGGTGGCAGAGTTGTACAGATTGGAGTTGGGGGACTACAAATTG  
GTAGAAATTACACCAATTGGCTTTGCACCCACAAATGTGAAAAGATACTC  
CTCGGCAACGCCTGCCAGGAATAAAAGAGGTGTATTTGTGCTAGGGTTCT  
TGGGATTTCTTGCACGCGCAGGTTCTGCAATGGGCGCAGCGTCCTTGACG  
CTGTCTGCTCAGTCTCGGACTTTATTGGCTGGGATAGTGCAGCAACAGCA  
ACAGCTGTTGGACGTGGTCACGAGACAACAAGAACTGTTGCGACTGGCCG  
TCTGGGGAAC

>SIVsmm-FTq

CTCTATTGTAAAATGACTTGGTTCCTCAATTGGGTTGAAGACAGAAACAT  
GTCTTCACAAAACAAGGCAGAACAAAAAGACGTAACATATGTGCCTTGCC  
ACATTCGGCAGATAATTAACACTTGGCACAAGGTAGGGAAAAATGTATAT  
TTGCCCTCTAGGGAAGGAGAACTGACATGTAATTCAACAGTAACCAGTCT  
TATTGCTAACATATATTGGATTGATGGAAACAGAACAAATATCACCTTCA  
GTGCAGAGGTGGCAGAACTGTACAGATTGGAGTTGGGGGATTACAAATTA  
GTAGAAATTACTCCAATTGGCTTTGCACCTACCGATGTAAAAAGATATTC  
CTCTGTAAACGACACCGAGGAATAAAAGAGGTGTGTTTCGTGCTTGGGTTCT  
TGGGATTTCTCGCAACGGCAGGTTCTGCAATGGGCGCAGCGTCGTTGACG  
CTGTCCGCTCAGTCCCGGACTTTGTTGGCTGGGATAGTGCAGCAACAGCA  
ACAGCTGTTGGACGTGGTCAAAAGACAACAAGAACTGTTGCGGCTGACCG  
TCTGGGGGACT

>SIVsmm-SL92B

CTTTACTGTAAAATGAATTGGTTCCTCAATTGGGTAGAGGATAGGAATAC  
GAGCAGCCCAAGGTGGACAACCTCAAACCAAAAGGAACAGCACAAAAGAA  
ATTATGTACCTTGCCACATCAGGCAAATAATTAATACGTGGCACAGGGTA  
GGAAAAAATGTCTATTTGCCTCCAAGGGAAGGAGACTTAACTTGTAACCTC  
CACAGTGACCAGCCTAATAGCAAAATATTGATTGGATTGACAACAAATGAGA  
CCAATATTACCATGAGTGCAGAAAGTGGCAGAATTGTATCGATTGGAATTG  
GGGGATTATAAATTGGTAGAGATCACTCCAATTGGCATGGCTCCACACA  
TGTGAAAAGGTACACCACAAGTACCTCAAAGAATAAAAGAGGAGTCTTTG  
TGCTAGGGTTCTTGGGTTTTCTCGCGACGGCAGGTTCTGCAATGGGCGCA  
GCGTCGCTAACGCTGACTGCTCAGTCCCGGACTTTATTGGCTGGGATAGT  
GCAACAACAGCAACAGCTGTTGGACGTGGTCAAGAGACAACAAGAATTGT  
TGCGACTGACCGTCTGGGGAAC

>SIVsmm-E660-FL8

TTTACTGCAAAATGAATTGGTTTTCTTAATTGGGTAGAGGACAGAGACCA  
AAAGAGTAGCAGATGGAGACAACAAAATACGAGAGAGCGACAGAAGAAAA  
ATTATGTGCCATGTCTATTAGACAAATAATCAACACGTGGCACAAAGTA  
GGCAAAAATGTATATTTGCCTCCTAGGGAAGGAGACCTGACATGTAATTC  
CACTGTAACCTAGTCTCATAGCAGAGATAGATTGGACCAATAGCAATGAGA  
CCAATATCACCATGAGTGCAGAGGTGGCAGAACTGTATCGATTGGAGTTG  
GGAGATTACAAATTAGTAGAGATTACTCCAATTGGCTTGCCCCCACAAG  
TGTAAGAAGGTACACCACAACCTGGTGCCTCAAGAAATAAGAGAGGGGTCT  
TTGTGCTAGGGTTCTTGGGTTTTCTCGCGACAGCAGGTTCTGCAATGGGC  
GCGGCGTCGCTGACGCTGTGCGCTCAGTCCCGGACTTTGTTGGCTGGGAT  
AGTGCAGCAACAGCAACAGCTGTTGGATGTGGTCAAGAGACAACAAGAAT  
TGTTGCGACTGACCGTCTGGGGAAC

>SIVmac-239

CTCTACTGTAAAATGAATTGGTTTTCTAAATTGGGTAGAAGATAGGAATAC  
AGCTAACCAGAAGCCAAAGGAACAGCATAAAAGGAATTACGTGCCATGTC  
ATATTAGACAAATAATCAACACTTGGCATAAAGTAGGCAAAAATGTTTAT  
TTGCCTCCAAGAGAGGGAGACCTCACGTGTAACCTCACAGTGACCAGTCT  
CATAGCAAACATAGATTGGATTGATGGAAACCAAATAATATCACCATGA  
GTGCAGAGGTGGCAGAACTGTATCGATTGGAATTGGGAGATTATAAATTA  
GTAGAGATCACTCCAATTGGCTTGCCCCCAGAGATGTGAAGAGGTACAC  
TACTGGTGGCACCTCAAGAAATAAAAGAGGGGTCTTTGTGCTAGGGTTCT  
TGGGTTTTCTCGCAACGGCAGGTTCTGCAATGGGCGCGGCGTCGTTGACG  
CTGACCGCTCAGTCCCGAAGCTTTATTGGCTGGGATAGTGCAGCAACAGCA  
ACAGCTGTTGGACGTGGTCAAGAGACAACAAGAATTGTTGCGACTGACCG  
TCTGGGGAACA

>SIVmne-027

CTCTACTGTAAAATGAATTGGTTTCTAAATTGGGTAGAAAGATAAGAATCT  
GACTGGAAC TACCCAGAAGCCACAGGAACAGCATAAAAGGAATTACGTGC  
CATGTCATATTAGACAAATAATCAACACTTGGCATAAAGTAGGCAAAAAT  
GTTTATTTTGCCTCCAAGAGAGGGAGACCTCACGTGTAACCCACAGTAAC  
CAGTCTCATAGCAAACATAGATTGGATTGATGGAAACCAAATAATATCA  
CCATGAGTGCAGAGGTGGCAGAACTGTATCGATTGGAATTGGGAGATTAT  
AAATTAGTAGAGATCACTCCAATTGGCTTGGCCCCACAAATGTGAAGAG  
GTACACTACTGGTGGCACCCCAAGAAATAAAAGAGGGGTCTTTGTGCTAG  
GGTTCTTAGGTTTTCTCGCAACGGCAGGTTCTGCAATGGGCGCGGCGTCTG  
TTGACGCTGACCGCTCAGTCCCGACTTTATTGGCTGGGATAGTGCAGCA  
ACAGCAACAGCTGTTGGACGTGGTCAAGAGACAACAAGAATTGTTGCGAC  
TGACCGTCTGGGGAACA

>SIVsmm-SL92A

CTCTATTGTAAAATGAATTGGTTTCTGAATTGGGTAGAAAGACAGAAATTT  
GACACTCCCAAGATGGAAAAACCAAAGCCAGAGGAAAAAGCTAAAAGGA  
ATTATGTACCTTGTACATCAGACAAGTGATTAATACTTGGCATAGAGTA  
GGCAAAAATGTTTATTTGCCTCCAAGAGAAGGAGACCTGCAATGTAAC TC  
CACGGTAACAAGTTTAATAGCAGATATAGATTGGATTAATGAAAATGAGA  
CCAATATCACCATGAGTGCAGAAAGTGGCAGAACTGTATCGATTGGAATTG  
GGAGATTACAAATTGGTAGAAATCACTCCAATTGGTTTGGCCCCTACAAA  
TGTGAAAAGGTACACCACCAGTACCTCAAGAAATAAGAGAGGGGTCTTTG  
TGCTGGGGTTCTTGGGTTTTCTTGCGACGGCAGGTTCTGCAATGGGCGCA  
GCGTCGTTGACGCTGACTGCTCAGTCCCGACTTTATTGGCTGGGATAGT  
GCAGCAACAGCGACAGCTGTTGGACGTGGTCAAGAGACAACAAGA ACTGT  
TGCGACTGACCGTCTGGGGA ACT

>SIVsmm-CFU212

CTCTATTGTAAAATGAATTGGTTCCTAAATTGGGTAGAAAGATAGAAACAG  
AACGCAGATGGAGGCGAGAAACAACAACGATAAAGAGAGGAGAAAGAGGA  
ACTATGTGCCATGTACATTAGACAGGTGATCAATACATGGCACAGAGTA  
GGTAAAAATGTATATTTGCCGCCTAGAGAAGGAGACCTGACATGTAAC TC  
CACTGTGACCAGTCTAATAGCAGAAATAGACTGGTATGATAAAAACCAA  
CTAATATCACCATGAGTGCAGAGGTGGCAGAACTGTATCGATTGGAATTG  
GGGGATTACAAATTAGTAGAAATCACTCCAATTGGCATAGCCCCAACAAA  
TGTAAGAGGTACACCACTACTACTACCTCAAGAGCTAAAAGAGGGGTCT  
TTGTGCTAGGGTTCTTGGGATTTCTCGCAACGGCAGGTTCTGCAATGGGC  
GCGGCGTCGTTGACGCTGACTGCTCAGTCTCGGACTTTACTGGCTGGGAT  
AGTGCAGCAACAGCAACAGCTGTTGGACGTGGTCAAGAGACAACAAGA AT  
TGTTGCGACTGACCGTCTGGGGA ACT

>SIVasc-RT08

TTTTATTGTAAATTTATCTAGGATCTTTCAGAAAACCAATCTTACAAATAA  
CACCTTTTACCCACAAAACATAACACAGGAAGGGGAAGCGTTGAGCAACA  
TATGGTTCACATGTACCATCAGGCAAGTAGTGAACAGATGGTCACATGTA  
GAAAAGTTGATGTACCTACCACCGAGAAGGGGACATGTTCAGTGTACATC  
CAACATCACAGGAATCTTGGTGGAGTCAGAATACTATCCAGGAAGCCCAT  
TTAACATGACCCCATCAGCCAATATCAAGGACCTGTGGAAAATAGATTTA  
AGAAGATATAAGGTGGTGGAAATAGACCCAATTGGCCTAGCACCCACTCC  
ACTAAAAGGTATGAACCACCACCAAGCAAAAGCAATTGTCAAAGAGCAG  
CCGCATTGACCCTGGGATTCTTGGGATTTCTCAGTACGGCAGGGGCGACA  
ATGGGCTCGGTAGCGACCGCCTTGACAGTCCAGTCGCGTTCCCTCTTAGA  
AGGCATAGTAGCCAGCAAAAGGCGCTACTTGAGGCAGTTGAGCACCAAC  
AACAGCTTCTACAGCTGTCTGTGTGGGGGATC

>SIVasc-RT11

TTTTATTGTAACTTATCTAGGATCTTTCAGCAAACCAATTTTACCAATGA  
CACCTTCTATCCAAGAAACATAACAGAGGAAGGGGAAAGGTTGAGCAGAA  
CATGGTTCACATGTACCATCAGGCAAGTAGTGAATAGGTGGTCACATGTA  
GAAAAGTTGATGTACTTACCACCAAGAAGGGGACATGTTCAGTGTACATC  
TAATATCACAGGAGTCTTGGTGGAAATCAGAATACTATCCAGGGAGTCCAT  
TTAATATGACCCCATCAGCCAACATCAAGGACCTGTGGAAAATAGATTTA  
AGAAGATATAAGGTGGTGGAAATAGATCCAATTGGCTTAGCACCCACTCC  
AATTTAAAGGTATGAACCACCATCAAACACCAAAAGTGTTGTCAAAGAG

CAGCCGCATTGACCCTGGGATTCTTGGGATTTCTCAGTACGGCAGGGGCG  
ACAATGGGCTCGGTGGCAACCGCCTTGACAGTCCAGTCGCGTTCCCTCTT  
AGAAGGCATAGTAGCCAGCAAAAGGCGCTACTTGAGGCAGTTGAGCACC  
AACACAGCTTCTACAGCTGTCTGTGTGGGGGATC

>SIVasc-RT03

TTTTACTGTAATTTATCTAGGATCTTTTCAGAAAACCAATTTACAAATGA  
TACCTTCTATCCACGAAACATAACAAAGGAAGGGGCAGAGTTGAGCAACA  
TATGGTTCACATGTACCATCAGGCAAGTAGTGAACAGATGGTCACATGTA  
GAAAAGTTGATGTACTTACCACCAAGAAGGGGACATGTTCAAGTGTACATC  
TAATGTTCACAGGAATCTTGGTGGAATCTGAATACTATCCAGGAAGTCCAT  
TTAACATGACCCCATCAGCCAATATCAAGGACTTGTGGAAAATAGATTTA  
AGAAGATATAAGGTGGTGGAAAATAGATCCAATTGGCCTAGCACCCACTCC  
AATAAAAAGATATGAACCACCACCAAGCAAAAGCGTTGTCAAAAGAGCAG  
CCGCATTGACTCTGGGATTCTTGGGATTTCTCAGTACGGCAGGGGCGACA  
ATGGGCTCGGTGGCAACCGCCTTGACAGTCCAGTCGCGTTCCCTCTTAGA  
AGGCATAGTAGCCAGCAAAAGGCGCTACTTGAGGCAGTTGAGCACCAAC  
AACAGCTTCTACAGCTGTCTGTGTGGGGGATC

>SIVmon-99CMCML1

TTTTATTGTAATGTCTCAGCTTTATTCAATTAATAGAAGAACCAACAAAAC  
GGACGGGATATCTCCATTCGACGTGAATAACAAGCCCAACACCACGTATC  
ATGGTGGGTGGCTAGCATGTACCATAAGACAAATGGTGACACAATGGGGA  
TATGTGTCAAAGAGTATCTACCTACCTCCACGGAAAGGCCATGTGCAGTG  
TACATCTAATATCACTGCCCTCCTGATTACAGGGGAGTTGTATCAAAACA  
ACGTGACCCCTTGTTCCCTCGGCACAGGTGAGTGAAGTCAATGGAGATCAGAG  
CTCAGTCGATATAAGGTGGTGGAAATTGACCCCTTATCTATGGCACCTAC  
AACAGCGCAGAGAAGGACTGGGGTACACAGGGAAAAGAGAGCAATTACTT  
TGGGTATGGCCTTTCTGGGCTTCCTCAGCACGGCAGGAGGCACAATGGGC  
GCAGCGGCACAGCCCTGACGGTACAGTCTCGGTCACTTACTGGCTGGGAT  
AGTGCAGCAGCAGGAGAACCTGCTGAGGGCCGTAAACAGCCCAACAGAGCT  
TACTACAGCTTACTGTTTTGGGGAGTC

>SIVmus-01CM1239

TTTTACTGCAATCTATCAGTGCTGTTTTCAATTTAACAACAATATCACACA  
AATTAACGAGAGCAATATACATAATGTGACAACCAATACCACCAAGATC  
AATGGATGGTCTGTAGGATTAGACAGTTTGTACGCAATGGGGCTATGTG  
TCAAAATCCATCTACTTGCCTCCACGACGGGGACATGTGCAGTGTACTTC  
TAATGTGACTGGGCTCCTTATTGATGGAGCTATGTATAAAGACACAGTCA  
ACATGACTCCATCCGCGAATGTGATGGACGCCTGGCGAATGGAACAAAA  
AATTACAAGGTAGTGGAATAGACCCGCTTTCCATGGCTCCACAGAGGT  
GCAGAGGAGGCCTGTTCCCATGTAAAAGCAAGAGCAATATCTCTAGGCA  
TAACCTTTCTGGGATTTCTCAGCGCGCAGGAGGCACGATGGGCGCAGCG  
GCGACAGCCCTGACGGTACAGTCTCGGTCACTTACTGGCCGGGATAGTGCA  
GCAGCAGGCAAATCTGCTGAGGGCCGTAGAAGCCCAGCAACATCTGTTAC  
AGTTGTCTGTCTGGGGTATA

>SIVmus-01CM1246

TTCTACTGCAACTTGTCTAGTATTATTCCAATTTGAGAATAACACCAGAGA  
AATTAATGACTCAAATATACATACAGTAAAAACCAATATCGCCATGACC  
AATGGATGGTCTGCAGAATAAGGCAGTTTGTAAACCCAGTGGGGTTACGTA  
TCAAAGTCCATATACCTGCCCTCGAAAAGGTCATGTTCAATGTACATC  
CCATGTAAACAGGGCTATTAATAGATGGGGCCATGTACGGCAATACAATAA  
ACATGACCCCTCAGCCAATGTCTGGACGCGTGCCTTAGACTGAGAGAT  
ACAGTGGTAGAGATAGACCTCTTTCCGTGGCACCAGAGAAGTGCGCAG  
GAGACCTGTGCCCCACGTCAAGGCTAGGGCAATCAGCTTGGGAATAACCT  
TCTTAGGATTCCTCAGTGCTGCGGGAGGCACAATGGGCGCAGCGGCGACA  
GCCCTGACGGTACAGTCTCGGTCTTTGTTGGCTGGGATAGTGACGCAACA  
GGCTAATCTGTTGAGAGCCGTAGAAGCCCAACAACATCTACTACAGTTGT  
CTGTTTGGGGCATA

>SIVmus-09GabOI81

TTCTATTGTAATCTCTCAGCCCTTTTCCAATTTGAGAATAATGTAACAGA  
AATTAATTCAGGCAATATTGATAATGTGACGTCAAAGTATAAAGAAAATC  
AATGGATGACTTGCAAAATAAAGCAATTTGTCAACCAATGGGGCTTTACC

TCTAAGTCAATATATCTCCCACCAAAACGAGGGCATATTCAATGCACCTC  
CAATATTACTGGTTTATTGATAGAAGGGGCAATGTATCGCGACAGTATCA  
ATATGACCCCCCTCAGCAAATGTAATGGATGCTTGGAGAGCAGAATTGAGT  
AGATACAAAGTGGTGGAGATAGACCCGCTCTCCGTGGCCCCAACGAGAGT  
TCCAAGGCGAGAGGCGCCTAGACTGCATACCCGTGCGATATCACTGGGGA  
TAACGTTTCTCACGTTTCTCTCAGCTGCTGGAGGCACGATGGGCTCAGCG  
GCGATAGCCCTGACGGTACAGTCTCGGTCATTATTGGCTGGGATAGTGCA  
GCAGCAGCAAAACCTGTTGCGAGCAGTACAGACGCAGCAACACCTGCTGC  
AGTTATCTGTATGGGGTATT

>SIVgsm-99CM166

TTCTATTGCAATTTGTCAATACTCTTTCAACTTAATAATAACACCATTAA  
CAGCAGCAATATTGGGAACATCACAAGCAAATACAAAGGACAATGGCTGG  
CTTGCAAAATTAGGCAATTTGTCAACCAATGGGGATATGTGTCTAAATCA  
ATCTACTTACCTCCACGGCAGGGTCATATAAATTGCACATCCAACATTAC  
AGGTCTGTTGATAGATGGCGCTATGTATGAAAGCTCTATCAACATGACCC  
CGTCGGCCGATGTGGCTGATGCGTGGAATATGAATTGTCCAGGTACAAA  
GTGGTGGAGATAGATCCGCTCTCGATGGCCCCAACTCCGGCTAAAAGGAA  
AGAACACCCCGCTGTGGAGAAAAGAGCCCTTTCATTGGGAATATCCTTCT  
TGACGTTTCTCAGTGCGGCAGGTACACGATGGGCGCAGCGGCAACAGCG  
CTGACGGAACAGTCCCGGTCTTTGTTGGCTGGGATAATGCAGCAGCAGGA  
GAACCTGCTGAGGGCTGTAGAGGCCCAACAGAGCTTATTACAGCCATCTG  
TATGGGGCATA

>SIVgsm-99CM71

TTCTATTGTAATTTGTGAGTACTCTTTCAATTCAACAACAATATTACGGC  
AGTGGATGACACAAACATTAACAATGTACAAAGCAAATACAAAGGACAAT  
GGATGGCTTGCAGAATTAGGCAATTTGTACACAATGGGGATATGTGTCT  
AGGTGATCTACTTACCTCCACGGCAAGGTATATAAATTGTACATCTAA  
CATCACTGGCCTCCTAATAGACGGAGCGATGTATGGACATTCATCAATA  
TGACCCCATCGGCCGATGTAGCCGATGCATGGAAGTATGAGTTATCCAGG  
TACAAGGTGGTGGAGATAGATCCACTTTGCTGGCCCCAACCTCGGCTCA  
AAGGAGACCACATCCAGGGGTGCATGTGAAAAAGAGGGCCATTTATTGG  
GCATATCCTTCTTGACGTTTCTCAGTGCGGCAGGTGCCACGATGGGCGCA  
GCGGCAACAGCGCTGACGGTACAATCCCGGTCATTGTTGGCTGGGATAGT  
GCAGCAGCAGGAGAACCTGCTGAGGGCTGTAGAGGCCCAACAGAGCTTAT  
TACAGCTATCTGTATGGGGCATA
