# Supplementary material for: Extending the Coding Potential of Viral Genomes with Overlapping Antisense ORFs: A Case for the De Novo Creation of the Gene Encoding the Antisense Protein ASP of HIV-1
Source: Viruses. 2022 Jan 14;14(1):146. doi: 10.3390/v14010146 (PMC8781085; doi:10.3390/v14010146)
Supplement: Supplementary file 1 [file viruses-14-00146-s001.zip › Supplementary Table S1.pdf]

| Position | Hydrophobic |            | Polar       |            | Basic       |            | Acidic      |            |
|----------|-------------|------------|-------------|------------|-------------|------------|-------------|------------|
|          | % variation | Amino acid |
| 7        | -39.2       | Leu, Phe   | 39.2        | Cys        |             |            |             |            |
| 9        | 12.0        | Ile        | -5.6        |            | -6.3        |            |             |            |
| 12       |             |            | 40.6        | Cys        |             |            |             |            |
| 54       | -9.2        | Met        |             |            | 9.7         | Lys        |             |            |
| 55       | 11.1        | Ile        | 18.0        | Asn        | -26.6       | Lys        |             |            |
| 56       | 14.3        | Ile        | -13.1       | Thr        |             |            |             |            |
| 59       | 16.9        | Ile        | -16.6       | Ser        |             |            |             |            |
| 61       | -7.4        | Ile        | 7.1         | Thr        |             |            |             |            |
| 67       | -10.3       | Pro        | 10.3        | Cys        |             |            |             |            |
| 70       | 5.7         | Leu        | -5.2        |            |             |            |             |            |
| 78       | 18.4        | Ile        | -15.5       | Thr        |             |            |             |            |
| 80       | -6.8        | Ile        | 9.5         | Asn        |             |            |             |            |
| 82       | 17.9        | Leu        | -12.6       | Ser        |             |            |             |            |
| 84       | -17.2       | Phe        | 17.4        | Ser        |             |            |             |            |
| 100      | 10.1        | Phe        | -10.1       | Ser        |             |            |             |            |
| 106      |             |            | 9.7         | Asn        | -9.0        | Lys        |             |            |
| 110      | 5.6         |            |             |            |             |            |             |            |
| 114      | 9.2         | Leu        |             |            |             |            |             |            |
| 118      | -13.6       | Leu        |             |            | 14.8        | Arg        |             |            |
| 121      | -10.1       | Ile        | 10.8        | Ser        |             |            |             |            |
| 122      | 7.2         | Ile        |             |            |             |            |             |            |
| 128      |             |            | -17.1       | Ser        |             |            | 13.2        | Glu        |
| 129      |             |            | 6.3         | Gln        | -6.1        | His        |             |            |
| 130      | 8.5         | Val, Leu   |             |            |             |            |             |            |
| 132      | 7.1         | Phe        | -6.7        | Thr, Ser   |             |            |             |            |
| 134      | 16.4        | Ala, Leu   | -10.0       | Gly        |             |            |             |            |
| 142      | 14.2        | Phe        | -20.8       | Cys        | 8.8         | Arg        |             |            |
| 144      | -7.9        |            | 7.9         | Thr        |             |            |             |            |
| 145      | -20.8       | Leu        | 21.3        | Ser        |             |            |             |            |
| 150      | 7.6         | Ile        | -7.5        | Thr        |             |            |             |            |
| 157      | -8.3        | Trp        | 13.6        | Gly        |             |            |             |            |
| 158      |             |            | 31.0        | Ser        | -32.6       | Arg        |             |            |
| 162      |             |            | -7.6        | Ser        |             |            | 5.3         | Glu        |
| 166      | -5.7        |            |             |            |             |            |             |            |
| 167      | -7.5        |            |             |            |             |            |             |            |
| 168      | -6.7        |            |             |            |             |            |             |            |
| 169      | -7.7        |            |             |            |             |            |             |            |
| 171      | -5.1        |            |             |            |             |            |             |            |
| 173      | -5.4        |            |             |            |             |            |             |            |
| 175      | -8.9        |            | 7.1         |            |             |            |             |            |
| 177      |             |            | 5.3         |            |             |            |             |            |
| 178      | 7.3         |            | -6.3        |            |             |            |             |            |
| 184      |             |            | 17.3        | Ser        | -15.8       | Arg        |             |            |
| 185      | -9.9        | Pro        | 9.2         | Cys        |             |            |             |            |
| 186      | 16.7        | Val        |             |            |             |            | -16.5       | Asp        |
| 187      | -5.0        | Val        |             |            |             |            | 5.2         | Glu        |

**Supplementary Table S1.** Evolution of the intact and interrupted *asp* ORFs. We assembled a set of 4362 sequences containing an intact *asp* ORF able to express a protein >150 aa, and a set of 2260 control sequences where the *asp* ORF is interrupted by internal *stops*. The *asp* ORFs in both datasets were translated into proteins, and then we compared the amino acid content in accordance with four functional classes: hydrophobic (Ala, Ile, Leu, Met, Phe, Pro, Trp, Val), polar (Asn, Cys, Gln, Gly, Ser, Thr, Tyr), basic (Arg, His, Lys), and acidic (Asp, Glu) using the contingency-table  $\chi^2$  test. We selected only the amino acid positions where functional amino acids showed an enrichment higher than 5% or depletion lower than -5%. At positions with significant enrichment/depletion of a given class of amino acids, we used again the  $\chi^2$  test to identify the specific amino acid(s) of that class with enrichment above 5% or depletion below -5% in ASP encoded by intact ORFs. The table reports the variation (enrichment >5% and depletion <-5%) of the four classes of amino acids, and the specific differentially represented amino acid at each position within ASP encoded by intact ORFs compared to interrupted ORFs.
