# Supplementary material for: Extending the Coding Potential of Viral Genomes with Overlapping Antisense ORFs: A Case for the De Novo Creation of the Gene Encoding the Antisense Protein ASP of HIV-1
Source: Viruses. 2022 Jan 14;14(1):146. doi: 10.3390/v14010146 (PMC8781085; doi:10.3390/v14010146)
Supplement: Supplementary file 1 [file viruses-14-00146-s001.zip › Supplementary Table S2.pdf]

| Virus species (group-clade-isolate) | NCBI acc. num. | Genome coordinates <sup>#</sup> | Length of ASP ORF (bp) | Codons from ATG to nearest stop | Internal stop co-dons | Canonical ATG and stop? <sup>a</sup> |
|-------------------------------------|----------------|---------------------------------|------------------------|---------------------------------|-----------------------|--------------------------------------|
| HIV-1 (M-B-HXB2)                    | K03455         | 7371-7943                       | 570                    | 190                             | 0                     | YY                                   |
| HIV-1 (M-B-VH)                      | AF146728       | 6723-7295                       | 570                    | 114                             | 1                     | YY                                   |
| HIV-1 (M-B-BK132)                   | AY173951       | 6709-7272                       | 561                    | >187 <sup>§</sup>               | 0                     | YN                                   |
| HIV-1 (M-B-1058-11)                 | AY331295       | 6557-7132                       | 573                    | 191                             | 0                     | YY                                   |
| HIV-1 (M-B-671-00T36)               | AY423387       | 6938-7504                       | 564                    | 188                             | 0                     | YY                                   |
| HIV-1 (M-D-94UG114)                 | U88824         | 6692-7261                       | 567                    | 189                             | 0                     | YY                                   |
| HIV-1 (M-D-A08483M1.vrc9)           | HM215358       | 1162-1728 <sup>¶</sup>          | 564                    | 110                             | 1                     | YY                                   |
| HIV-1 (M-A-98UG57136)               | AF484509       | 6567-7133                       | 564                    | 163                             | 0 <sup>†</sup>        | YY                                   |
| HIV-1 (M-A-92UG037)                 | U51190         | 6750-7304                       | 552                    | 159                             | 0 <sup>†</sup>        | YY                                   |
| HIV-1 (M-A-SE7253)                  | AF069670       | 6572-7138                       | 564                    | 163                             | 0 <sup>†</sup>        | YY                                   |
| HIV-1 (M-A-97CDKTB48)               | AF286238       | 6693-7253                       | 558                    | 141                             | 1 <sup>†</sup>        | YY                                   |
| HIV-1 (M-A-94CY017.41)              | AF286237       | 6746-7315                       | 567                    | 45                              | 2                     | YY                                   |
| HIV-1 (M-G-DRCBL)                   | AF084936       | 7331-7882                       | 549                    | 183                             | 0                     | YY                                   |
| HIV-1 (M-G-PBS1191)                 | MH705134       | 7421-7966                       | 543                    | 181                             | 0                     | YY                                   |
| HIV-1 (M-H-90CR056)                 | AF005496       | 6696-7262                       | 564                    | 108                             | 2                     | NY                                   |
| HIV-1 (M-C-03ZAPS021MB1)            | DQ369978       | 6775-7323                       | 546                    | 182                             | 0                     | YY                                   |
| HIV-1 (M-C-503-06310-30)            | KT183169       | 6638-7204                       | 564                    | 171                             | 0 <sup>@</sup>        | YY                                   |
| HIV-1 (M-C-B002865-A11-12)          | KC154013       | 1144-1692 <sup>¶</sup>          | 546                    | 182                             | 0                     | YY                                   |
| HIV-1 (M-C-04ZASK146B1)             | AY772699       | 6750-7313                       | 561                    | 187                             | 0                     | YY                                   |
| HIV-1 (M-C-21068)                   | AF067155       | 6733-7314                       | 579                    | 193                             | 0                     | YY                                   |
| HIV-1 (M-C-92BR025)                 | U52953         | 6717-7280                       | 561                    | 187                             | 0                     | YY                                   |
| HIV-1 (M-C-C2220)                   | U46016         | 6768-7319                       | 549                    | 183                             | 0                     | YY                                   |
| HIV-1 (M-C-DEMC08MW004)             | KP109522       | 6698-7264                       | 564                    | 188                             | 0                     | YY                                   |
| HIV-1 (M-C-05ZASK247B1)             | DQ369994       | 6823-7368                       | 543                    | 181                             | 0                     | YY                                   |
| HIV-1 (M-C-C.ZA.x.Du246-B3)         | KC863229       | 1150-1707 <sup>¶</sup>          | 555                    | 185                             | 0                     | YY                                   |
| HIV-1 (M-C-00BW-1921.13)            | AF443101       | 6713-7273                       | 558                    | 186                             | 0                     | YY                                   |
| HIV-1 (M-C-PWJ-0513.39)             | HM215433       | 1159-1716 <sup>¶</sup>          | 555                    | 185                             | 0                     | YY                                   |
| HIV-1 (M-C-704MC024F)               | GU080186       | 1141-1725 <sup>¶</sup>          | 582                    | 195                             | 0                     | YY                                   |
| HIV-1 (M-C-NIRT005)                 | KX069223       | 6497-7063                       | 564                    | 188                             | 0                     | YY                                   |
| HIV-1 (M-C-C113-E6-2S)              | HM639260       | 1183-1743 <sup>¶</sup>          | 558                    | 136                             | 1                     | YY                                   |
| HIV-1 (M-C-CNE88.U)                 | HQ699992       | 1195-1779 <sup>¶</sup>          | 582                    | 194                             | 0                     | YY                                   |
| HIV-1 (M-C-097SO)                   | MF373199       | 6588-7142                       | 552                    | 184                             | 0                     | YY                                   |
| HIV-1 (M-C-DEMC11ZM006)             | KF716467       | 6738-7313                       | 573                    | 191                             | 0                     | YY                                   |
| HIV-1 (M-K-97ZR-EQTB11)             | AJ249235       | 6584-7126                       | 540                    | 180                             | 0                     | YY                                   |
| HIV-1 (M-J-97DC.KTB147)             | EF614151       | 6586-7146                       | 558                    | 186                             | 0                     | YY                                   |
| HIV-1 (M-CRF01-AG-91DJ 263)         | JQ715398       | 1162-1749 <sup>¶</sup>          | 585                    | 67                              | 3                     | YY                                   |
| HIV-1 (M-CRF01-AG-CAM1970 LE.EC6)   | JQ715394       | 1105-1671 <sup>¶</sup>          | 564                    | 155                             | 0 <sup>†‡</sup>       | YY                                   |
| HIV-1 (M-F-CM53657)                 | AF377956       | 6557-7114                       | 555                    | 132                             | 1                     | YY                                   |
| HIV-1 (M-CRF01-AE-JS2011001)        | KM111555       | 6594-7157                       | 561                    | 176                             | 0 <sup>†</sup>        | YY                                   |
| HIV-1 (M-CRF01-AE-620435 c01)       | JX512900       | 1141-1710 <sup>¶</sup>          | 567                    | 189                             | 0                     | YY                                   |
| SIVcpz (LB715)                      | KP861923       | 7464-8108                       | 642                    | 148                             | 2                     | YY                                   |
| SIVcpz (LB7)                        | DQ373064       | 6903-7454                       | 549                    | 88                              | 1                     | YY                                   |
| SIVcpz (MB66)                       | DQ373063       | 7019-7567                       | 546                    | 182                             | 0                     | YY                                   |
| SIVcpz (MB897)                      | EF535994       | 6930-7451                       | 519                    | 127                             | 3                     | YY                                   |
| SIVcpz (GAB2)                       | AF382828       | 6785-7327                       | 540                    | 96                              | 2                     | YY                                   |
| SIVcpz (CAM13)                      | AY169968       | 6991-7527                       | 534                    | 42                              | 3                     | YY                                   |
| SIVcpz (DP943)                      | EF535993       | 6934-7506                       | 570                    | 145                             | 1                     | NY                                   |
| SIVcpz (US.85.CPZUS)                | AF103818       | 7400-7948                       | 546                    | 151                             | 2                     | YY                                   |
| SIVcpz (EK505)                      | DQ373065       | 6893-7426                       | 531                    | 117                             | 4                     | YY                                   |
| HIV-1 (N-YBF30)                     | AJ006022       | 6952-7491                       | 537                    | 139                             | 1                     | YY                                   |
| HIV-1 (N-02CM-DJO0131)              | AY532635       | 6834-7367                       | 531                    | 136                             | 1                     | YY                                   |
| HIV-1 (N-04CM-1015-04)              | DQ017382       | 6827-7345                       | 516                    | 134                             | 1                     | YN                                   |
| HIV-1 (P-U14788)                    | HQ179987       | 6902-7492                       | 588                    | 70                              | 7                     | YY                                   |
| SIVgor (BPID15)                     | KP004990       | 6770-7375                       | 603                    | 67                              | 9                     | YY                                   |
| SIVgor (CP2139.287)                 | FJ424866       | 6926-7501                       | 573                    | 85                              | 3                     | YY                                   |
| SIVgor (BQID2)                      | KP004991       | 6891-7484                       | 591                    | 176                             | 3                     | YY                                   |
| HIV-1 (N-04CM-1015-04)              | DQ017382       | 6827-7345                       | 591                    | 23                              | 7                     | NY                                   |
| HIV-1 (O-9CMA105)                   | AY169816       | 6862-7458                       | 594                    | 15                              | 4                     | NY                                   |
| HIV-1 (O-98CMU2901)                 | AY169812       | 6851-7432                       | 579                    | 21                              | 4                     | NY                                   |
| HIV-1 (O-99SE-MP1299)               | AJ302646       | 7457-8047                       | 588                    | 74                              | 3                     | NY                                   |
| HIV-1 (O-99SE-MP1300)               | AJ302647       | 7436-8020                       | 582                    | 67                              | 4                     | NY                                   |
| SIVcpz (BF1167)                     | JQ866001       | 7529-8074                       | 543                    | 19                              | 4                     | YY                                   |
| SIVcpz (TAN13)                      | JQ768416       | 7033-7563                       | 528                    | 41                              | 4                     | NY                                   |

|                              |          |           |     |     |   |    |
|------------------------------|----------|-----------|-----|-----|---|----|
| SIVcpz (TAN1)                | AF447763 | 7018-7569 | 549 | 17  | 9 | YY |
| SIVcpz (UG38)                | JN91690  | 6962-7519 | 555 | 54  | 5 | YY |
| SIVdeb (04CMPF3061)          | FJ919724 | 7235-7777 | 540 | 27  | 7 | NY |
| SIVdeb (CM5)                 | AY523866 | 7056-7604 | 546 | 32  | 5 | NY |
| SIVdeb (CM40)                | AY523865 | 7129-7683 | 552 | 27  | 5 | NY |
| SIVtal (00CM266)             | AY655744 | 7171-7773 | 600 | 116 | 4 | YY |
| SIVtal (01CM8023)            | AM182197 | 6718-7323 | 603 | 72  | 4 | YY |
| SIVsyk (KE51)                | AY523867 | 7055-7603 | 546 | 18  | 7 | NY |
| SIVsyk (173/1.2)             | L06042   | 7359-7910 | 549 | 47  | 6 | NY |
| SIVlhoest (485)              | AF188115 | 6554-7120 | 564 | 86  | 5 | NN |
| SIVlhoest (524)              | AF188116 | 6560-7126 | 564 | 86  | 5 | NN |
| SIVlhoest (7)                | AF075269 | 7632-8198 | 564 | 94  | 3 | NN |
| SIVsun ( $\lambda$ 20L14/S2) | AF131870 | 7700-8266 | 564 | 85  | 3 | NN |
| SIVolc (12CI97)              | FM165200 | 7031-7570 | 537 | 49  | 4 | NN |
| SIVwrc (98CI04)              | AM713177 | 7580-8119 | 537 | 29  | 3 | NN |
| SIVwrc (05GM-X02)            | AM937062 | 6476-7015 | 537 | 29  | 3 | NN |
| SIVmnd1 (GB1)                | M27470   | 6990-7550 | 558 | 29  | 9 | NN |
| SIVdrl (D3)                  | KM378563 | 7134-7700 | 564 | 53  | 6 | NN |
| SIVdrl (D4)                  | KM378564 | 7090-7656 | 564 | 53  | 7 | NN |
| SIVmnd2 (M14)                | AF328295 | 7471-8022 | 549 | 0   | 6 | NN |
| SIVmnd2 (CM.98.CM14)         | AF367411 | 7545-8093 | 546 | 9   | 8 | NN |
| SIVmnd2 (5440)               | AY159322 | 7172-7726 | 552 | 36  | 8 | NN |
| SIVcol (BMC07)               | KF214241 | 6832-7359 | 525 | 0   | 4 | NY |
| SIVcol (CGU1)                | AF301156 | 6814-7353 | 537 | 19  | 6 | NY |
| SIVcol (BMC01)               | KF214240 | 6640-7176 | 534 | 19  | 3 | NY |
| SIVagmVer (155)              | M29975   | 7478-8071 | 591 | 18  | 7 | NY |
| SIVagmVer (VSAG1003)         | KR862363 | 6933-7526 | 591 | 18  | 6 | NY |
| SIVagmVer (VSAM0022)         | KR862356 | 6964-7554 | 588 | 19  | 9 | NY |
| SIVagmVer (VSAC4004)         | KR862336 | 6973-7569 | 594 | 97  | 6 | NY |
| SIVagmMal (ZMB)              | LC114462 | 7467-8060 | 591 | 29  | 5 | NY |
| SIVgri (677)                 | M58410   | 7360-7950 | 588 | 85  | 7 | NY |
| SIVagmSab (SAB1)             | U04005   | 7669-8244 | 573 | 6   | 6 | NY |
| SIVagmTan (TAN1)             | U58991   | 7458-8048 | 588 | 90  | 4 | NY |
| SIVrcm (GAB1)                | AF382829 | 7088-7630 | 540 | 79  | 3 | NN |
| SIVagi (00CM312)             | HM803690 | 6872-7414 | 540 | 93  | 4 | NY |
| SIVrcm (02CM8081)            | HM803689 | 6950-7492 | 540 | 61  | 3 | NN |
| HIV-2 (EHO)                  | U27200   | 7845-8378 | 531 | 42  | 3 | NY |
| HIV-2 (D205)                 | X61240   | 7859-8392 | 531 | 38  | 4 | NN |
| HIV-2 (ALI)                  | AF082339 | 7867-8400 | 531 | 42  | 4 | NN |
| HIV-2 (ST)                   | M31113   | 7313-7846 | 531 | 42  | 4 | NY |
| HIV-2 (BEN)                  | M30502   | 7886-8416 | 528 | 42  | 4 | NY |
| HIV-2 (Abt96)                | AF208027 | 7217-7777 | 558 | 54  | 3 | NN |
| HIV-2 (07IC-TNP3)            | KC693505 | 7319-7885 | 564 | 50  | 4 | NN |
| HIV-2 (96FR12034)            | AY530889 | 7343-7900 | 555 | 38  | 4 | NY |
| SIVsmm (CI2)                 | JX860430 | 6954-7514 | 558 | 16  | 4 | NY |
| SIVsmm (FTq)                 | JX860414 | 7086-7646 | 558 | 42  | 3 | NY |
| SIVsmm (SL92b)               | AF334679 | 7237-7809 | 570 | 34  | 5 | NY |
| SIVsmm (E660-FL8)            | JQ864086 | 7795-8370 | 573 | 50  | 4 | NN |
| SIVmac (239)                 | M33262   | 8057-8617 | 558 | 34  | 5 | NY |
| SIVmne (027)                 | U79412   | 7272-7838 | 564 | 34  | 5 | NY |
| SIVsmm (SL92A)               | JX860432 | 6886-7458 | 570 | 34  | 5 | NY |
| SIVsmm (CFU212)              | JX860407 | 7053-7628 | 573 | 50  | 4 | NY |
| SIVasc (RT08)                | KJ461715 | 6844-7425 | 579 | 91  | 4 | NY |
| SIVasc (RT11)                | KJ461714 | 6802-7386 | 582 | 92  | 4 | NY |
| SIVasc (RT03)                | KJ461716 | 6814-7395 | 579 | 91  | 4 | NY |
| SIVmon (99CMCML1)            | AY340701 | 7331-7906 | 573 | 9   | 3 | NY |
| SIVmus (01CM1239)            | EF070330 | 7277-7846 | 567 | 33  | 5 | NY |
| SIVmus (01CM1246)            | EF070329 | 7412-7975 | 561 | 125 | 3 | YY |
| SIVmus (09GabOI81)           | KF304707 | 6906-7475 | 567 | 0   | 2 | NY |
| SIVgsn (99CM166)             | AF468659 | 7320-7880 | 558 | 94  | 4 | YY |
| SIVgsn (99CM71)              | AF468658 | 7320-7892 | 570 | 75  | 4 | YY |

**Supplementary Table S2.** List of viral strains utilized for the generation of the cladogram in Figure XYZ. The cladogram was generated using the portion of the *env* sequence of each viral strain comprised between the canonical *start* and *stop* codons in the *asp* ORF of HIV-1<sub>HXB2</sub>.

#, coordinates comprise the minimal number of whole *env* codons spanning from the canonical *start* to the canonical *stop* of the *asp* gene. Thus, the first coordinate corresponds to the nucleotide residue located 2 bp upstream of the third base in the ASP canonical *stop* codon, and the second coordinate corresponds to the nucleotide residue located 1 bp downstream of the first base in the ASP canonical *start* codon.

¤, the presence of *start* and *stop* codons at or near ( $\pm 10$  positions) the canonical position is indicated by the first and second letter, respectively. Y, yes; N, no.

§, viral strain in which the ASP ORF contains a *start* codon at the canonical position, but it lacks a *stop* codon at the canonical position. The first *stop* codon is located at position 253 from the canonical *start*, thus expressing an ASP protein of 252 residues.

†, viral strains in which the premature *stop* codon at position 12 from the canonical *start* codon is followed by a new in-frame *start* codon after the premature *stop*. The new *start* codon re-opens the ASP reading frame, essentially nullifying the premature *stop* codon. In the case of these sequences, only premature *stop* codons downstream of the new *start* codon are counted.

¶, viral strains for which complete genomic sequence is not available. Coordinates provided in the table are relative to the *env* gene.

‡, viral strain in which the ASP ORF contains an early *stop* codon in proximity of the canonical *stop*. Despite the early *stop* codon, the ASP ORF still encodes a protein of >150 aa with intact functional domains, and therefore this sequence is classified as having zero internal *stop* codons.
